# Supplementary material for: Transcriptional Variation of Diverse Enteropathogenic Escherichia coli Isolates under Virulence-Inducing Conditions
Source: PubMed Central journal article supplement (PMC5527300; doi:10.1128/msystems.00024-17), 2017-07-25
Supplement: sys004172117sd1.pdf [file sys004172117sd1.pdf]

>Cluster\_57190  
ATGGCCAATGTTGAAATCTATACCAAAGAAACCTGCCCGTATTGCCATCGTGCAAAAGCACTGCTGAGCAGCAAGGGCGT  
GAGTTTTCAGGAGTTGCCGATCGATGGCAATGCCGCCAAGCGTGAAGAGATGATCAAACGCAGCGGTCCGACCACGGTTC  
CCCAGATTTTATTTGACGCACAGCACATTTGGCGCTGTGATGACTTGTATGCATTTGGATGCACGTTGGTGGACTGGATCCC  
CTGCTGAAATAA  
>Cluster\_13112  
ATGAACGGGCGCGGTGTGGCCGAATTTCGGTTTATCCCCGCTGGCGCGGGGAACACGCGGGGGATTCAATCTGGCCAA  
TATCGACGACGGTTTATCCCCGCTGGCGCGGGGAACACCGCTGCACGCGACATCAAAATAGTGTGCTCGGTTTATCC  
CCGCTGGCGCGGGGAACACGGGTAAAGGCATTTGTTTACGCCCTGAACCCGCGGTTTATCCCCGCTGGCGCGGGGAACAC  
ACTAAGCATACATAA  
>Cluster\_46088  
ATGGCCAGAACGATGACGGTTGATCTCGGCGATGAGTTGCGTGAATTTATCGAGTCCCTTAATTGAATCCGGCGACTATCG  
CACCCAAAGCGCAAGTGTATCCGTTGAGTCACTGCGATTACTTCGAGAAAAGCAAGCAGAGTCTCGCTGCAGCGTTACGTG  
ACATGCTCGCAGAAGGGTTGAGTAGTGGTGAAGCTCAGCCGTGGGAAAAGGACCGGTTCTTACGGAAGGTGAAAGCAGGG  
ATAAGGAAATAA  
>Cluster\_17765  
ATGAGCAGATTGCTGTTCCAAAGTGAGAGCAAAACCATGTTGTGGGAGCCAGTGTATATCGCGTTGACTGGCTTAATTC  
GTGCGAACACTGCCAGTGCAGCAAGGGGATTGAAGTTATCAGTCGCTCATTGGCAGGGACATACCTTTACGGCGGTGACC  
TGGTTAAGTGTCCGAGTGTGGCAATCAGGGTGTATCGAGGCTGATGGTGAAGGCGCTTGGGTTGAATGGGATACAGAG  
TGGGAGGACTAA  
>Cluster\_43434  
ATGAAAGAGTATCTGTTTTTATTTCACTCCACGGTCCGGCTCATAACAAACCCGAAGGCGTTGCAGGCAGCGGGCATGAC  
TTTTCCGCTCAGCGATATTTCCCGTGATTTACGCGCGGCTGCGGGTTATGCATTTGGCTGACCTGTCCGCTGGCGAGG  
AAATTCATGGGTGATCCCTGGGCATACGGAATCAGTTTATTGTCAGCAGGATGGTGGCTGGCGCTGCATTGCACATTAC  
GGGATTTCTCCGCGTTAA  
>Cluster\_48410  
ATGCATGATATTTCTGTTCTGCGCCAGCTCCGGCTGCGCCATTATTTCTGTGCTGAACCAGCATGAGCGATTTTTACG  
CTTTCCCGAGGTGATGCATTTATGCGGCTGTGCCGCTCAACTATATACGACCTGATAAGCCGCGATGCTTTCCCGAAGC  
AGATCCCCTTGGTGGTAAAAATGTTGCTGGGCACAGTCAGAGGTAAGCGCATGGATGGCGGAGCGTATAAGTGCCCGC  
GGACGGGGATGTGATGCATAA  
>Cluster\_20779  
ATGGAACAAATTAACCTGAGTGTCTGTGGGGTTGATATGTTTTTGAACCTAATCAGACTGCTTATAATAAACGATTAA  
TGAAATGGCAATGGATAATAAAGTTGCCCTGCAATAATATCTGATGCGTATTGTTACCCAGAAACGAAAGAAGCAC  
TGATTGACCTATTAACCTCCGGGTGCAGCACGCAACTGGTCAGTAAGGTTAATGATATTTACGCGCGGAACTGGAG  
ATTAAGTAAAAAACTGA  
>Cluster\_27439  
ATGTTCCAGCAAGAAGTTACCATTACCGCTCCGAACGGTCTGCACACCCGCCCTGCTGCCAGTTTGTAAAAGAAGCTAA  
GGGCTTCACTTCTGAAATTAAGTGTGACTTCCAACGGCAAAAGCGCCAGCGCGAAAAGCTGTTTAAACTGCAGACTCTGG  
GCCTGACTCAAGGTACCGTTGTGACTATCTCCGAGAAGGCGAAGCAGCAGCAGAAAAGCGTTGAACATCTGGTTAACTG  
ATGGCGGAACCTCGAGTAA  
>Cluster\_59048  
ATGCTTCAAATGTTAACTCTTGAAGAATGGGCTGCTGAAAAATACAGAAGTAATCCTCCAAGTGTGCTCCACATTTGCGTCC  
TTATGCTAAGCAGATTTTATTTGTCACCGGCGCATGAAACAAGGCGGTTATGGCGAGTGGCTGAGGACGCCGAGTTAG  
TTGGGGAGTTGGTAAACCTGTAATCAAGAAAAATGACTCATTACTTTTGAACCGGATTTGAGTAATGGCAGCCAGACC  
GCGTAA  
>Cluster\_11841  
ATGAAATCAAAGACACCCATAAAGTGGTTCCCTGCGCAGCTTCTGAAGTAAGAATTAATCCTAGGGGATGCTGTAGTGG  
AGTAGCAAAAACAGGGAAGACCTATCAATACCAGAACATTTGCTTGAATTACATTTGAAGGAAACATAAAGAAAAATCATGGC  
TGGATAACAAAGAATTTATCAAAACAGCGATATCAGTTCTTAAAGACAACCAAAATTTAAATGGTAAATGTA  
>Cluster\_40484  
ATGAAAGCTACTAAACTGGTACTGGGCGCGGTAATCCTGGGTTTACTCTGCTGGCAGGTTGCTCCAGCAACGCTAAAAAT  
CGATCAGCTGTCTTCTGACGTTCCAGACTCTGAACGCTAAAGTTGACCAGCTGAGCAACGACGTTAACGCAATGCGTTCCG  
ACGTTCCAGCTGCTAAAGATGACGACGCTCGTGTAAACAGCGCTGGACAACATGGCTACTAAATACCGCAAGTAA  
>Cluster\_27754  
ATGGTACAGAAATACCGAGGCAATATCGGAGATACTCAGAGCAGCATACTGGCGAAGAAAAATATTGTAGGAAGACAGTA  
TTCTGAACACAAAATCACCATAAACAGAGGCATTTATCTCAGAAATAAATAAATAAATGAAGAAAAATCGGGTCAGGAAA  
GAATGCCCGGGGCTGACAGTCCACAGGAAGTATGAAAAGAGCAAGGAGTATCAGGATAAGCACAAGCAATAA  
>Cluster\_64301  
ATGTGTAATAACCATTTATTCAGATACCCTGTTACGGTAATTAACCTCTGATGGATGCGCTTATTGACATCTCTGTTAT  
TGCAGACAGGGCGATAAGCACGCCACAGTGAACAGAAATATGCCGGGACTTTGCTTCTCATTCATGCGCTGTCTATGC  
AAATTAGCGCCGACAGGCGCTGAAAACAGCCAGTAAATGCTCATGGCTGATGTGCAGGAGGTACATCCATGA  
>Cluster\_24669  
ATGACTATCGAAAATACACCGGAAAAACATAAAGAAATACGTAAAAAAATGGCCTTACCAGACAGAGTGGCGGTGAGAT  
TTTTGGCGTAGGCTTAAGTACATGGCAGAAAAAAGAAGCTAAACCCACAACAGCTTAAATTTATCGAAAGGTGAATTTG  
AGTACCTGTTATTTACTTGCAGGGGAGCACCCCTGAATACGCTCTGCATAAAAAAGCTGAATCCCGCTCACCGGAGGACCG  
TGA  
>Cluster\_22100  
ATGATTGATGAATTTTCATGTGATGTATATGTATAAAAAATCCAGCAGAAGCCGCAACCACTGACCTCAAAACACTTGA  
ACAGCTTTTAAAAAGTTTCAAGGCGGTGTTAACGAACGTCGGGAAGAATACTATCAGGAGATTGGTGATAAAAAAGCGC  
GTAAGTTGAAAAATGAAAAGAGCACAAAAGATTACTTGTAGAAAAATGGCATGTGACCGGTTTCGCCAGAAGATCTCATTGAC  
TGA  
>Cluster\_60047  
ATGGATGTACAGCAGTTTTTTGTCGTTGCCGTTTTTTTCTTATCCCGATTTTTGTTTTCCGGAAGCATGGAAGGCGT  
GCGCGCAGGCGGATTTGATAAACGGGTTAAAAATGCACCGGAACCGGTTGATGTTGCGGAGCAAAAAATCCCGACTCT  
TTTTGCTTATATGGTGGCATATATCGGCTTCGGAATTTTATCTATCGGCATGATTTGTTATCTTATTTCTATCGTTAA  
>Cluster\_19629  
ATGAGCAAAACTATCGTATTGCTGCCGCCCGCAAGAATACAGACTGGGCTGCACAATAAAGCTGATTTCTGAATCGCT  
TGAGGTGAGTCAGGCAGACCTCGCCACGCTATCAGGTTGATCGTGGGATATGGGTAAGGCGTATCACGGTGTGCGCA  
AATCGCGGAGCGTGTGTGCTTTCATATGCTGTTGTTAGCGCAGGTACACGACTTTAGAGCATTATCAGGAGAATAA

>Cluster\_66848  
ATGATCACAGGAAATGGAATAAACACTGTAACGTCAATGGAAAAGTGA AACACATCACAGA ACTGGATTATATAACT  
TTGTTTAGAGTGGACAAAAC TACGAGAGAAAACAATCGTCTTTATGAAATTAATAACCAGGCAACAGAGGGTGGCGG  
GTTTCATCCTAAGATTGATAGGGGTTAACCTGCAGATAAAAAGGACTGAGTTTACACAACGTCTTTATGACGCGCAAT  
ATTCGGGTTTCGGTCATGAAAAAGTAA  
>Cluster\_36452  
ATGGAATGGCTGGTCAAAAAATCGTGTGCAATAAACAAAGATAACAGACATGTACTTATGCTCTGCGATGCTGGCGGCGC  
GATAAAAAATGATCGCCGAAGTGAAGAGTACTTCGCGGTGAAAGTGGGGGATTACTCTCGCCTTGCAGAATGCGCTTT  
ATTGTATTAAATCGTGA AAAAGCTGCATACGGTGAAGTCTCTCGGCAAGCAGTTATAGCCCCGATGAGTGGGAACGGCAG  
TGTAAGTGGCAGGAAAACTCAGTAA  
>Cluster\_62938  
ATGAAAACCAAACCTAACGAACTGCTTGAATTCCTACTCTTTTACTTACAAAGTTATGGGGCAGGCGTTACCTGAGCT  
GGTGTGATCAGGTGGTTGAAGTGGTACAGCGCCATGCGCCAGGTGACTACACCCCAACGGTAAAACCAAGCAGCAAAGGCA  
ACTACCAC TCGGTATCTATCACTATCAACGCCACTCATATCGAGCAGGTTGAAACACTGTATGAAGAACTGGGCAAAATC  
GATATTGTCCGCATGGTTCTGTAA  
>Cluster\_24862  
ATGTTTGTGGGCTGTTTATGGATCAGCGAGAAAAGGCCAAATGTTGGCTTATGTATAAAAACCGAGTGAACGCAAA  
GCAAAAACACATCGCTTTAGTACTACAGGTATCAGAAGAACTATCTCTTTGTGGGTGAAAGAGATGTCTTTAAACATC  
AGATTTATAAACTTAGTCAAGAAATACAAGAGGTTAGGGCTTTAGCTCAGGGGCTGGTAA GTTCTGGGCAGATTGAGCAA  
AACCTGGTTTTTTACCTAGTTTCTAA  
>Cluster\_11165  
ATGAGCGAACAGTACCTGATAACGCTCGATGAGTGAAGCCAAAACGGTTCAGTCTCCCAATAACAAACACTACCTGGT  
GAAATACGGAAAAC TAGGATACATCGTTCCAAGACCACAAAAATTCGTGGGCGTTGGCTGATAGATCGCCGAGCAGTAT  
TTGTTGACCTGGTGA AACAGGAATTGCGCCGAAATTCATCTGCGGATGATGATGCACTGAAGGAGATTTTAACTCAT  
GTCACCGAGGCCACGAAAAAACAGCACTGA  
>Cluster\_14900  
ATGGTACATGACCGCATAGCGGAAGA ACTCGAAGCGAAAGGATTTTACCGGAGGGCGGCGCGCGATGGGGTGAAGTCAT  
GATGCTGGTGGGAGACAGACAAGGAACGGCATCACATCACGATGCGACGGCTGGAATGTTCCAGGAAGGCACAGAGGCCAC  
CGGAGCCGCGGATAATTACGGAGACCTGAAAAGGGCGTGCATCGCACTTATGCCGAAATGGGTATGGATGGTGTGCTGGT  
GATGAAATATGGCGAAAT TACCAGGACAGATAA  
>Cluster\_62533  
GTGGTAACGAGCAATCAACCACCAGCTCAGGATATCCACACTGGAAGACAGCATCATGACAAAAATATTTCTTTACT  
TGATAACCAACTGGTGGATATGCGCTTTATCACAAAGCTAACGGGGCTGACGGATAAATGGTTCTATAAGTTGATAAAAG  
ACGAACTGTTCCGAAACCAATTAAGCTGGGCCGAGCTCCCGCTGGAAGAAAAGTGAAGTCAATATGTTTACAGCAA  
CGGATTGCCGATTCACGGGTCATTGA  
>Cluster\_12373  
ATGCAAACTATATGCTTTTCCGGCAACAAGCAGGAATCTCAGCGCTGAGGCAGGAATTAGAGGTAAAAACGCCCTACCG  
GGCATGAATCACCCGGTCA TTGGAGTAGTAACCAAAGCAGATTTAGCCAGCATGGAACACATATCTTTGGTGAATGTT  
GGTTACGGGAAGCTGGAGCGCACACGTTTAGTAACCAAGTGCCTTAATAACAATGGAGTTACAGAACTTTTTGCCTTG  
CTGCATACAGAAGAAGGCTGTTGTCTAA  
>Cluster\_66865  
ATGGATCAGGAAATGACGTTTTCTACTCAGCTATGAACA ACTGACCCGGTTTGCAGAAAAACGCATCCGGGAATGCAATCT  
GGACAGCCAGGGCGGATTTATCTCTGCGAGTCAAGCAAAGCCAAAGCCGAGCGGTGCTGATCTTCTGGCATGAACGG  
CCATAAATGGCTATGCTCAATGAATGCCATAAAGAGACAGGAGCTCATGACGCCGACTTTCAGCGCTCAGAAACCTC  
ATCTGGCCGGAGGATGACAGGTAA  
>Cluster\_10127  
ATGTCAATGAATGATACGTATCAACCAATCAATGTGATGATTACGATAATCTTGAGCTCGCCTGCCAGCATCATTTAAT  
GCTGACACTTGAGCTGAAAGATGGCGAAAAATGCAAGGCAAAAGCCAGCGATTTAGTCTCCCGCAAAAATGTGGAGTATC  
TGGTCTGTCGAGGCCGCTGCGCAAAACCCGTGAGCTACGCTGGAATAAAAT TACCAGCTTTAGCCACCCGAAATCGGTACG  
GTGGTGGTGAAGGATGCTCTGA  
>Cluster\_21055  
ATGTTTATAGTTCTGAATACTATGGTGTTTTACACGTTCAATTCGTTTATATACGTAGAAAAGAATTTATCGGGCAACG  
CCGAGATGACCGGCCCGCTTAAACCGTGTAGTGGTAGATGATGAGATCAGATACAGGGATCAACTGACGGGTGAGCGCAG  
TCCCACATTTTATCCGGAGTTTACCCTATTTCCCGGCTGCCATTCGTTAGCACAGGCCCGCAAGTACCCTGATTTGCCG  
CTGTTTTGCTTTCCCATTGA  
>Cluster\_44  
ATGACAACGTTTACCAGCAAAAGA ACTGATTAAGAAAATCAAAGAGCGCATCGGAGCCTGGACGTTCCAGACAATATTGA  
ACGCCGTGCTTATGAAATGCACTGGCATCGCTGGAAGCAGAGCCAGTAGCATGGATGATGTAATAACGGCATCGGAA  
TACCAGCAATAACAAGGAGTAAAGATGTTGAGAGAGTTGGTTATCAAAGGCTGGTATGTCCAACCCCTTACATCTAGCC  
CAGCTGCATCAAAGCTATAG  
>Cluster\_14930  
ATGGACGATATTGTTTTTGGGGGAATAGGGCGCTGTATCTGATTTTAGTTATGTCTGCAGGACCTATGTCAGTTGCGAC  
ATTTGTTGGTTTTATTGGTAGGGCTTTTTCAAACGGTAACGCAGTTGCAAGAACAGACGTTGCCATTTGGCGTGA AATTTAT  
TGTGCGTAAGTATTTGCTTTTTTTAATGAGCGGGTGGTATGGTGA AAAATTAATTTATTTGTTATCGAAATGCTGAAT  
TTAGCATTCGCGAGAGGATAG  
>Cluster\_1534  
ATGGCAACTTTGACAAAAAAGAACGGGCATGGTTGAACGAATTAACAGGAAGTTCTTGATCGCTGCCATCACCGAAAAA  
AATGGCTTTTACACCATTTGGCGATAAAAGCATTTACCTGTATGACCTACGCCGATGGATGAAATCATGGAGGCTCTTG  
ATAATCGTTCGTCGATGGATTGGTGTGTGCTGTTTATGATATGAATGACGGGTTTGAATGAAAAGATTTTGTTCCTCA  
TCAGTTGAAAGCACTGCGGGTTAA  
>Cluster\_34175  
ATGGGCCATGGCTTTCGGCGCGGCTGTCGGGAAGTGTGTTGGCCGACGGATACTGTGAACTACGTTGTCTGGGGCAA  
CGGAAGTGTTCGGCCGACTCTGGAACCGGATCCGACCGCAGACTGGGCAATTCGCACGTTGGCTGAGCAGCCTCG  
GGAAATCGTCTGCTGCGGCGCCAGAGGATTTCCGCAAGGAACATGCGAGACAAGCAAGGGGCTGCGGGCCTCGGC  
TACAACGTGAGGATCGGTGTTTGA  
>Cluster\_63891  
GTGTCGGAAGTCGAGGCTGAGGCTTTCTGAAACTCGTAACCACTGCTGCGGTAGTCTGAATCAGCCATTGCGCCTGTT  
CTTCACTGATGATGATGTTGGTATTGTGCGCCATCGTTTTCTCTGCTGGCGCAGCAGGTGCCAGTTGTTCAAGCTGCGCTG  
TCAGAATTTGATGTTTGGTATTGTGCGCCATCGTTTTCTCTGCTGGCGCAGCAGGTGCCAGTTGTTCAAGCTGCGCTG

TGGATTGTAAACCAGAATACGTAA  
>Cluster\_57169  
ATGAGCGGAAAACCGGCAGCGCTCAGGGCGACATGACGCAGTATGGCGGTAGCATTGTTCAGGGTTCAGCCGGGGTGGC  
CATTTGGTGCCCCACCGGCGTGGCTGTTCGGTGTGCCCGGCGGAGTGACGTCGGCCATCCGGTCAATCCCTGCTCG  
GTGCAAAGTCTTCCCGTGAAACCGACTTCCCTGCCCGCCCGCTGCCGTCATCTCTCCGCACCTACAGCAGT  
TATGGCGAGCTGAACGGGACCTGA  
>Cluster\_46970  
ATGGTACCCAGTTTACTGATGGATGACAGATGGTGCACATGGCATTATCACTCAACTGACCGGCTGACAGATAA  
GTGGTTTTACAGGCTCATCAGGGATGGGGCCTTTCGGCTCCCATCAAGCTGGGCCAGCTCCCGCTGGCTGAAAAGTG  
AAGTGAAGCCTGGCTGCAGGCGGTATTGCACAGCCCCGCCGTAA  
>Cluster\_43643  
ATGGCTAAATTACCTCAAGAAAAGCCGAAAGAAGTCAATCAAGCCGATTTGATGATGTTAAAAAGCCATATAAAAAAGG  
CGCTAAGACTGTAACGATACCTATGCTGAGCAAGCAGTCTGACTTACAATCAGGCATGGTGAACTAATGGCTACCT  
ATCGGCGCAATAAAAAAGCGATAGACAAGTTAGATGCTGAAGTTGA  
>Cluster\_41473  
ATGGACTGGCTGGCTAAATATTGGTGGATTCTGGTGTATGCTTTTTGGTAGGCGTCTGCTGAACGTGATTAAGATCT  
CAAGCGCTCGACCATATAAGAAATTTCTCGCAACAAGCCGAGCTTCCCCGCATCGTATTTCAACGATAAGTGGGACG  
ATGACGAGCTGGCCGAAAAGGATCAACCGAAGAAGTAA  
>Cluster\_44655  
ATGACTACGACTATGTATAAAAAATCAATGGTGTGGACAATTCAGCGATGCAATGGATGCAAGCTGCAATCGGAATGCAT  
GGTTAAGCCTGAAGAAATGTTTCTGTAATGGAAGATGGGAAATATGTCGATAAATGGCAATACGAACGACGGCAATGA  
TTGCCAGAGAACTTGGTAAACAGAACAAAGCTGCCGTA  
>Cluster\_52021  
ATGAAACAAGAAATATCTGAAATATGGCAATGAAAAGTTAACACTAAGTGAAGATGTTGAAATGCTACAGCTACGC  
GCTTGGCATCACTCCACAGAAATAAAGAAACAGTGTGAACGCTTTTATAAGGCTGAAAGCAATAAACCATCTCACCAAG  
ATTTGATTAATGCTAAAGCTCAACAAATCAACAATCTAAGGAAAAATA  
>Cluster\_48599  
ATGAAACACCACTAATTTCCAGCCTAATAGCTCTTGGATCGGACACGTACAAAAATAGCTGATGAGTGTGTAGCTGACAT  
CCTCACCGAGCTACCGAATGAGCAGATTGAGGTTGGTGTGAATGACACAACCTGGCTTTATATTCGAACTTAACAAACAAC  
GCTTCACGCTTATCAATACCGGCTCCGGTCTTTAGCCGTCAGAACCTGTTAA  
>Cluster\_43592  
ATGAACGGCATAAAAAATGGGGCTGGGGATCACGCGGGTGAGCACATTATCAGTGCCAACTCTGCGCTCAGCAGAAATAT  
CCGGCATTGTTTCTGCCTTCTCTGCTGGCCGGTGTATTTGACAGACAGATGCTCAAGGGCGTGGTTTGGAGCATGATT  
TACATGCCCTGAGTGCAGAACAGAGGCGGCTTGCAGCCCTGGATTAA  
>Cluster\_45264  
ATGTGGATGGAGTTCGACAGGGTATCCCGCTGGGTGATGAGCGGGGATATCCGTAATGCACAGATCGTGAAGCGGT  
TTTCCGGGCACAGGGGATGAATGTTGACTGAAGGACGCCATGCTCTGCTGGGCGGAGATGAGGATAAGCCGGAGGTGG  
ATCCGTTTCCGGGCTGGAGACGCGCTGAGCCTTGCAGCAATGTCATAA  
>Cluster\_64074  
ATGAAAGTGAAGGCACTGGAAGGCGACACCGTGGATTCTGCTCTGTTTCCGGTACTACGGCAGCAGCAGGGCGTCACCGA  
AAAGGTGCTGGATGCCAACCCCGACTCTGTGACAGGATTTTCTGGACCGGGCAGGACGTTGGAGATGCCGGAGCCGG  
AGAAGAAGAAACGAGAAATGATTGAGTTGTGGGGGAGTAG  
>Cluster\_62117  
ATGCCTGAAATCCAGTGTATCTATCTTTCCCGCTATATTAACCTCTCAAGGTCAACCGATATCAACGTACATCTACC  
AACATATGTTGGTACAGATGATGATTTCCGGTTCGATAATGTTGTACCAACAGGGAGGAATACGATGGCATTAAACA  
GATATCAAGTCAGAGCAGCCAAGCCAACGGATAA  
>Cluster\_48782  
ATGAACAAGCAGCAGCAAACTGTACTCAACATGGCGGGATTCTATAAAAAGCCAGAGCCTGACGCTGCTCGAAAACTGGA  
CGCACTCGATGCTGACGAGCAGGCCACCATGTTGAGAAGCTGCACGAACTCGCAGAAGAACTCCAGAACAGCATAACAGA  
CACGCTTTGAAGTAGAAAAATAGCACAGAGATATAA  
>Cluster\_22597  
GTGAACACTCGCCAGCTACTGAGCGTGGTATCGATATCGGCACCACCACCAGGTAATTTTCTCCACCTGGAGCT  
GGTTAACCGTGGCGGGTGTGCGAGGTGCGCGCTACGAATTCATCAAACGCGAAATAGCTGGCAAAGCCCGGTGTTCT  
TTACCCCTGTCGATAAACCTGCTCTTGA  
>Cluster\_6275  
ATGAAAAACGCCACCTGCGCGGCTTTGTCCCTGCCTTCGGCTTTTGTCTCATGTTCTTTCCGGCTTATCCCTGA  
TTCTGTGGATAACCGTATTACCGCTTTGAGTGCCTGACACCCTCGCCGAGTCAAGCAGCAGGCTAGCGAGTCAAG  
TGAGCGAGGAAGCGGAAGAGCGCCTTATGTGA  
>Cluster\_1683  
ATGCTATGCGTTACCTTTGAATACCACAGGATAAAATGATTCGCTACATCTCCGACCTCCTGATTGAAGGAAACGGATT  
CGGTGACATCCATAACTCAAAGATATCTTCAATCAGCCACCAGCCAAAGCGAAACATTAAAAAACAGCAGTTACAACGG  
AATGGTTGAACGAAATAAAGTAGAATTAGGCTATTGGTAG  
>Cluster\_3005  
ATGAGCGAGAAACCGGACGATTTACTCACCCGGATGAAGTATGCCAAAAGTTAGGTATTACACAGAAAACGCTATGTGA  
GTGGAATATTAAGCATCGTCATCGGGCTATCTTGGCACCATTCTGTTTCAAGTGAAGTAGTTTCTGTTATGAGCGCGAA  
ATATCGACGCTTTTATTCAAAAATGTCGAGCCAGTATTAA  
>Cluster\_20334  
ATGAATAACTCAATTAATGCCCCGACTTACGTCGCGACTTCAATTAATCGAGCAAGCAGCGCTGTCTGGTTGCTGT  
CAGTCTTTCCGGCTGAAGAAATGGACGCTGCTGATGCTGGATGCGATTAAAGCGTGCATCTTTGGTTAACGATGCC  
GTGCAGAGCTGGTAATTTTGGGGGTGAAAAATGA  
>Cluster\_4762  
ATGGTGATACGCAAAAAGAGTGCAGGGACTGTGGTAACCGGATTACTCATAATACGGTGTGTGTCCGACTGTGGTTT  
TGTCGACCCCTTCGGCTATTACCGGAATACGGACAGGATCTTACAGCCCTGCTGGCGCTGCTGGTTGTTGTTTGTGTT  
TGACATCTGCTGTCAGCATGTATGCTGTGGTAG  
>Cluster\_2898  
ATCGGCGTGAACGCTTATCCGAACTACTCCGACAAACAAATTTCTGTGCGAATTACCGCTAAAAATCGGTTTTCTGC  
CGACGCACGTTTTCGTTATCATATCAGAAAAAGGGCCGGATGATTCAGCCCTGATTTTTACTTGTAAACGCAGCC  
TGGAAGACAGCTACCAGCGCTGCTTCTGACTCTGAGTCAAGTATGACCTTTCCGGATCGATGAACTGTAG  
>Cluster\_51317

ATGCGTGATGATCGTTTTAATGCCCTGAAACAGGAATTTGATGGCGCACCGGAACACGAAGCAGACGCATTTGGGCGT  
TGCTGACATGATAAAAGCCGCATTTTTTCTTATCAATACCAGTGGCTACAGGTGAGAGGTGCGGAGATTCTCAATATTG  
CGTCGGACTATGCGGAATATGTTGACAGAGCGCTTACAGAAGAAAATCCCGGAGGTGGTGACCATGAATGA  
>Cluster\_53540  
ATGAGGGATGATGACCTGGAGCACTTAAGTGCCAACTACTGGATAACACAGTCTCTGCGGCTCTTTTTGGGGATATT  
CCTGTTTCATGCTGCAACAGCATACGCGTGGTTAGCTCTGTATTTGATTTGCGGCTCTTTCACCTATTTGCGCTTTTTT  
CTTTACGCTTTCCGACAATTGCAACACATGAAAAGGAACGGGAAATATTCGACCTCATTGA  
>Cluster\_59480  
ATGCTTAAACTGACGCTTTTTGTATTTCGGTTCAAAAACAAAACCTGCACAAGCAGCAGGTATTTCGTTGGCTTCGCT  
TTATAGCTGGAAAGGGGATTTAGTTCGCCAAGGTGCGCGATGCGCTACAGGAGGCATCTGGCGGGGAGCTTCAGTATG  
ATCCCAAAGTTTATGATGAATATCGTAAGCAGGAGCGGCGGGTGAACAAATGAAAATCACTCCTGA  
>Cluster\_17630  
ATGCATCAGGATATCAAAGAGTACAGGGCTGGGAACCGTTGCGCAGCGTATTCTGCTGGGCGCTCCAGAGCAGAAACCG  
CGGCGATTATGCGGAAGCTGAAAACTGTGGCGTAAGGCAGCACAAGCCCGTGTAGTACCCTGCGCCGCATCTGGGCGG  
AACACCGGCAGAGTTCTGTGCCAATGCTCACCTGAAAGGATGGAAGCCGCTCATGAACGCGAAACGCTTTAA  
>Cluster\_29447  
ATGAGCGAATATTTTCAGATACTTCAGGACTGCGGACGGTCTTTTTACCAGCAACAGGCCGAAAGCGTTGCGCACA  
GTACCGAATGCTTTTATCGAGGATGATCAGGGAACGCATTTTCGCTGGTTGTCCTGAGGATGGCAGCTTGATCTGGC  
GCTCCTGGAAATTTGAGGACTGTGCCGGTACTGGATGAACCGGTACATCAGGATTTTCGGGATTTCTTAAGTAA  
>Cluster\_64472  
ATGTCAGAGCTTGAACAACCTTAAAGATGAACTGGCTTTACTTAAAAAGGAGCTAAAGTCTCACCAGGTAATACTGTCTGC  
GTTGGTTGGTCTATGAGCTACGAGGAGAAATCCGACCTATCAAAGCATGTTGCAAAAGCTAAATCAGAGCTTTATCCGG  
GTGATGATTTTCAGCTGGGAATATTTCAATAAGTTGCTTCTAGTAACTGATTACAAACCGATTCCAGAAAGTAA  
>Cluster\_2971  
ATGCCGCATCCGGCATCTTCTTAACGCGGATCGAGAGAAATCGCCCCGGTCCGGTAATGCCAAACAGCAGGAATGCCG  
CAGCGATACGACATTTCTCCAGAAATTAATCATATTTGGCCCAACCGCATCGCCGTCATATCCTAGTAATGGTGACCA  
ATCACCGCGTACCAGCGGTGTAGAAAAATAACAGCACCGCCAGCGGACGGGTGAAAAAGCCAAGCAGCATTA  
>Cluster\_58211  
ATGAGCGCATTCAAACCTCCCGGATACATCTCAATCACAGCTCATTTCACAGCTGAGTTAGCTAAAATCATTAGCTACAA  
ATCTCAAACCATTCGTAATGGCTTTGTGAGGACAAATGCGCTGAGGGGCTACCTCGCCAAAACAAATCAATGGCCGCC  
ATTACTGGTTACGTAAGATGCTCCTCGATTTTATAGATACATTTCTGTACGAGAAAGTCTGTAA  
>Cluster\_26136  
ATGTTCAAAGATGATGTTCTGCGCTATTTCAAAAAAAGCGACTAGTAGCTGAGGCTCTTGGAAATTCACATGTGGCTGT  
TGTGCGGTGGAAAGCAGTTATTTCCAAACTTCGCGCAATGGAAGTGGATGAAATTAACCGTGAATGAAATACAACC  
CAGAACTTTACAAGAAGCAGGATAGCACCTCGAACGAAGGAAAGAAATGATTTCATGA  
>Cluster\_58475  
ATGTTGGGGAGGCAACGCTCCCGCAACATATCTTTTTCGTAATCAGATTAGAAGTGGTAAACAGACCTACAGCAACGA  
TGTCATCAGTGTTCACCGAGTCTTTAGGGAAGGTGCGAATGAAAGTGGATGAAATTAACCGTGAATGAAATACAACC  
CAGAACTTTACAAGAAGCAGGATAGCACCTCGAACGAAGGAAAGAAATGATTTCATGA  
>Cluster\_11887  
TTGTCCCGTAAAAATGACAGGAATGTCAAACCTTTGACGGCAAAAGCGGCAAGGGTCTTATCACCCATCCGATGGTGC  
TATCGATGTCAGCTTATGTTTTCAGCGCTCAATCTCCCGATGCAGAAAGAAATACCACCGGATTACCGGTGGAATTTT  
GCCGATAAATGGTCTGCGTGGCCCTTCAGCTGCCAATGTTTACCTTTTCATGA  
>Cluster\_9194  
ATGAAAAAGATATTCACCCGAAATACGAAGAAATTAATGCTAGCTGCTTTGCGGTAACGTAATGAAAAATCCGCTCCAC  
CGTTGGTCATGACCTGAACCTCGACGTGTGACGCAAGTGCACCCGTTCTTCACTGGCAAAACAGCGTGATGTTGCTACCG  
GTGGCCGTGTGACCGCTTCAACAAGCGTTTCAACATCCGGGCGAGCAATAA  
>Cluster\_24756  
ATGAACTATGCGCGACATGAAAACTTCGCGCCGAAAGTGGCGGAGGTGGCCAATGCCATGTGCGACCTGCGTACAACCAT  
GAATGAGATGGAGCGCGGTACAGCTTTAATGCTGACACCTGCGCGAACGCTGGTGGCTCAGACGTTGTTTCGCGCAA  
ACCGCTCCTGATGGAGCATATACCGAAATTCGGAAGTGGATTCCTGCTTCAAAGATTGA  
>Cluster\_10566  
GTGAAAAACTGATGGTACGATTTGGTCCGTTTCGAAACAGAAGTTAGTTTTCGTTGTTTTCAGGGGAGAGTGTACTTGT  
TGAAGATGATTTTATGAAAATCAACAGGTCCTTATGTAAGAATAATCTTATCGACGCCACGGATGAAAATATTGAGG  
TGGTGTACGATTCGTCATACCTGATTTGATCATTAAAGCAAAAATGAAGCCACTTTATTGA  
>Cluster\_26970  
ATGGTTAAAGAGAAATAAAAGCAAAAGCAACGTTTATCCGTTTACCAGAAATATAAAACGCACCGGATTTGGAAAAAC  
GTGGATTTACGAACTGATTAAGCCGACGGTTTCCATCGCAGGTGAAAACAGGGATAAGAGCGGTGGCATTCAATGAAA  
GTGAGATTGATGAATGGATTGACGCGACTATTCGAAACTCACGCCAGAACGCTGCATAA  
>Cluster\_59903  
ATGAAAAATATCACCCGTTGTAAGCCATGCGTATTCACCAACAACATCCGACATCCCGTCTTTTTCCGTTCTGTACCGG  
TAAATACCGTGGCAGCGAGTGTGAAGCGTATACCGGTCGTGAAGTGCAGGATATTCGCGTGTGCGGCTGTTTGG  
CTGAACCGGTAAGGACAGTTTTGGTCCGATGTCGCGCTGATGAGCGTACCCCTGAAGTGA  
>Cluster\_17521  
ATGCGAAAACAAAGCTTTAATCCACCTGATACACACAAGAAGCTAAGCGTTTGGCTTCCCTTCGTTCCATTGATGAAAG  
AATCAAATCTCTTTTGTGAAAGTTGCCAGAATGAGCTTCTGAAAGCTGAGGCGAGGCGTTGCTTCCGCTCTACCAA  
AAGAGGAGGGATATACGTTCAATCCAAACGCATTTCTGAAAAGCTGCTCAAAGAAGACATATCCGTAAGTCAAGTTAAC  
AATGTTCTTAAGTCTTTTCGTCAGGCAAGGAGTGA  
>Cluster\_34960  
ATGGATTATTCACAGTTAAGTGAATTTGAAATTAACAGAAATGGTAGGAGACATAATTTTTAAAGCCCTTTGGGCAAGTAA  
ACCGGAAACATCAGGGAATAACACCAACAATGGTATTTACGAAATGCTGATACAACCTTTGAGCCATTAAATCAATTTGC  
CTGACTACTGCAATGATCCGAGCGCTTCATGGCCGATTTAGGAAAATACAGGATTTCTATCTTAGACCAGTTAACTGAA  
TGGTGTGTTGATGCAAAAGGCGTAAGCCAAATATTTGATACCAGACCTCTCCGCGCCGATGATGTTCTTCTCCTGAT  
GCAGGAGGCCAATAATGCTTAG  
>Cluster\_24992  
ATGAGCATTACCACAATCAACAGCACCATGCGAGGCGAAATCATGAGGACGTGCAGCGGATGCAGGCCAACGCCAGGC  
GCCGTTGCTTCCCGCATGACCTTCAGTTCCACCGACCGGACGTTTTCGTTTAAACCGCATTATGAGCGGTGCGCTCGGT  
ACGTTGACAGGTTCCAGCAGGTGGCGGAGCAGCAGCAACGGCTGTGACACGGGCAAAAGTGTGATGACCTCGCCGGGCG  
ATGATCGCCAGCCAGCAGGCTGCTCTCGTTCCGCGCTGGTGCAGGTGCGCAACAAAATTTGCCACCGGATTTAACGA

TCTGATGAGCATGTCGATCTAA

>Cluster\_67098

ATGAAAGGTGGAGCAATGGAGAACAGATTATCCGGACAGAAGGGGGTGTTTTTTTCTCAAAGAATAAAGGACATAAGCT  
TTTTGCCGGCAGAGTTGCCCGGAAGAAAAATCTGGCTGCTTGCAGAGATATCGCCGATTTCGAGTGAAAAAGTGCATTTATG  
CGCTGAGAGATTATCTGGTCTGGGATACGAGCGCAAGAGGTTTGTGCGCGATACGATGTGTGCTCAAGTTATTTTTCT  
ATAGCGCTGGGGCGGATATCGCACGTAACAGAGTTGTGTATTTCGCTGGCACCTTATTATGCAGATCCGGGCAATGATTT  
TTTTGACAGACCGTATTA

>Cluster\_14937

ATGAAACATAGGGCGACTGCGTGACAGGGTAACGATTACAGCCCTGAAACAGACCAGGGATATAACCGCGAAATACTCGA  
AACGTGGGTGGACGGTCACACACTCTGGGCAAGCGTGAACATGATCAGCAGCAAGGAGGCCATTTTCATCGGGTGCAGAAC  
TGGCGACTGGAACGGTAAGGATATGGATACGCTACAGGAAGGACATCAACGCCACCAGCCGGATAAAGGTCAATACGGGG  
CCGCTGGCGGGCGGTACTGAATATCATCGGGCAGCCGCTGCCGGATGCCCGCAGGACACGCCCTGAAATTCCTTTGTGCG  
TGAGGGCGCGAAAAATGA

>Cluster\_42802

ATGAAAATTTCCCGCCTCGGAGAAGCGCCGATACCGCTTCTCGCTGGCTAATGAGCGTACTTTTCTGGCGTGGATCCG  
TACTGCAC TAGGATTTCTGGCGCGGGGTTGGGCTTGATCAACTTGCGCCAGATTTGCCACGCCCGTCAATCCGCGAAC  
TGCTGGCGTGTGTTGTTGCTGTTTTCCGGCGGGTTAGCGATGTATGGCTACTTGGCGTGGTACGCAATGAAAAAGCG  
ATGCGCCTGAAAGAGGACCTGCCCTATACCAACAGCTTATTAATCATTAGCTTAAATATGATGGTCTGGCAGTATCGT  
CATGGGACTGGTGTGTTGATGCCGGATAG

>Cluster\_55598

ATGATCTCACTCCCATCAGGTACCCGATCTGGCTCGTTGCCGGCGTTACCGATATGCGTAAATCCTTCAACGGACTGGG  
AGAACAGGTACAACATGTGCTGAATGATAATCCCTTCTCCGGTCACTGTTTATCTTCCGTGGCCGACGGGGTGACCCG  
TCAAAATTTCTTTGGGCTGATGCTGATGGTCTGTGCTGTTTACCAAACGCCCTGGAGGAAGGCCAGTTTATCTGGCCTGCG  
GTACGTGACGGCAAGGATCCATTACCCGCTCGCAACTGGCAATGCTCCTCGATAAGTGGACTGGCGTCAGCAAAAAAC  
ATCCAGCCGTAACACTACTGACAATGTTGTAA

>Cluster\_51325

ATGATTGAAAAGAGATAGTACGCTACGAGAGCTATTAGATATCGATGACAAAATGAGTTAAGCGAGCGCCTTGTGATAT  
GGATCAGGTAGTGGAGCTTACAACCTTAGCCGTCGCACATGCTAAACCTTGAGGCTCGCGGAGAGTTCCCGAACCGG  
TACAGGTTACGAAAGGGCGCAAGGCATGGTATTTAAGCGAGGTTGTTGCGTGGATTAACAACATTTCCGCGCGCATCAAT  
TATGCTTGTGTTCCACCCCGAAAAACCTGATGCGGCGTTATGCCTCAAGATGAAACGCGCCAGGCGTAATGCCTGAA  
AGGACGCAATAAGTTGATTGGTTGA

>Cluster\_2735

ATGAAACGATGGATATTTTCATTGCTGGCATTAGTGTCTGTTGGTGTAAGTGCAAAACACCATAACGATGCAATGCGGCAA  
CTTTCGATGATGCGATCCCTGATTCATTATTTAAAAATCAATGGCGAAAACAGTAACGTCCTCAAAAAGTAAAAATGTTGG  
GTAAGACGGTACAGGCATGACAGATCAAAATGGACCTGATGCTGCCAAAAGATGGCAACAATTTATGGGTTGAGTATATC  
CATGACCTGGCACTAAAACGCGTTTCCGAACTCCAGTTGTTGCGAAGCAGCATGGATGCTCCGAAAAATTTATGGCTC  
TTTCCCGTGAAGAAAGTTGTTGGTTGA

>Cluster\_3554

GTGTTTTTAGGAACAAAATCCGTAGGTGAATATGCTCTTAATATTTCTGGTCAAATGTTTCAAGAGTCACAACAGGGAA  
AAAACCTTATGATATATTTATCCGACGAAAGCTACAAAACAAGATTTTGATAAAAAGAAAACAGAGTTTACCTTTCCCTG  
GTGCAACAGAAAGTTATCTACAATCAAGTAACACCGATGTTGCTGCCGAGCAGCTATAAGTATTTGCCGCAACAGAGATG  
AAAATATCTTACAAAAGGATTTAACACCAGAAAAATACAATAAAATTTATCTGCCAGGGGATGGTTCTGCTGGCCTACT  
GATCTACCCACGTAA

>Cluster\_614

ATGAGTCATTCTACCGATCACAGCGGCGGTCCCATGGCAGCGTAAAAACCTACATGACAGGCTTTATCTGTGATCAT  
TCTGACGGTATTCGGTCTGGATGGTATGACAGGGGCTGCCCTCCGGCGGTAATTTGGGAAACAATCCTGGCAATGG  
CAGTGGTACAGGTTCTGGTGCATCTGGTGTGCTTCTGACATGAATACCAAAATCAGATGAAGGCTGGAACATGAAAGCGG  
TTTGTCTTACCGTGCTAATCATCGCTATCTGGTGTGAGGCTCCATCTGGATTAATGTTGAACCTCAACTACAACATGAT  
GATGCACTAA

>Cluster\_39185

ATGCAACGCTGCAACGGATTTTTGATTTCTGGCATCGCCCTTACGGCAGGAGCGCCACTGTGTATTAGCTGGTTCGGTCT  
TGTCGGCTTCTATTTGGCGCATGTCACTGGTAGCTGCGGCGGTCATTTCTGGATAGTCTATTTCTGGCTCATTTATT  
TAGTACTCACCCGCCCCATAACCAACGTTTTGTTAGAAAGATTTATATGATTGCTCGGATTTTCTTTTCCATGGAGC  
ATTTGTTGATATGGGCATCTTTGCGAGTTACGCCAGAGCGCATAATCAACACGCAACAAATAAAAACTCAACAAC  
TGACGGTTAA

>Cluster\_48707

ATGGGTTTCTGTGACGCTCCATCAGCAAAAGGGGATGATAAGTTTATCACCCACCGACTATTTGCAACAGTGCCATATGGG  
GCAATGGTGGTCAACCATCTGCGCTGTGGCACAGGTGAACGCCGGAGGATCCTAGAACGCACGAATGAGGGCCGAC  
AGGAAGCAAAGCTGAAAGGAATCAAAATTTGGCCGAGGCGTACCGTGGACAGGAACGTCGTGCTGACGCTTCAACAGAAG  
GGCACTGGTGAACGAAATTTGCTCATCAGCTCAGTATTGCCCGCTCCACGGTTATAAAAATTTTGAAGACGAAAGGGC  
CTCGTGA

>Cluster\_14889

ATGCCATATGCCAGCAATATAAGTATTGCGGTATTAGATGATAATGATTTGGAAAGTCAGGCTATTGAAACGTTGTCAGC  
GATAGGCTTTCTTATGAAAAATATAAACAGCTAACCAATGTGTATTTCAATATCATTGGTACGTTAAGTGACAGTGAAT  
TAAATAAAATTAATAACTATGTTGACGAATATTTATAACAATGGGGTAAACAATAATGTAAGATTTAATGTGAATTTGAAA  
AATCAGGACACAATAATAGTTTCAATTTAGCTACGGAGATAACCGATTTCGAGAAGTCTCAAGGTAGCAACTGGACATTTCA  
GGAATAA

>Cluster\_32369

ATGGAGTTACTGGAAGCTCTGGCTGAAGCTGGTGTAGCTATTGGCAACTTCTTCAAGTATGACCTGATGACCGCTATGG  
TCGCCCGCAGCTTAAACAACGAGCTGAGGCTGAGCGTATCGCTAAAGAGCAGCGGCTTCAAGGCTGAGCGTATGCGTGAAG  
AGAACATGACCGATGACAGGTGGCAGAAAGAGCTACAGCGTCGCGAACAGGTCAAAGCTGACCGCCGACCTACGGTGAG  
AACCTCCGAGTGTACCCATTTCCGCTGGTTCGCTCCCGTCTTATGGTTCGCTGACATTTGAGTCCACGGACAACCTGGAT  
GGACAGCCTGTA

>Cluster\_51050

ATGAACCTTATATTTATCTTGGTGGCGCAATACTTGCAGAGGTCATTGGTACACCTTAAATGAAGTTTTTCAGAGGGGTT  
TACACGGTTATGGCCCTCTGTTGGCACAATTTGCTATTGTGCATCTTCTGGTTATGACTCAGACGCTGGCCTTATA  
TACCTACAGGGATTGCTTATGCTATCTGGTACAGGATCGGATCTGTTGATTTAGTTTGGCTTTCTGGGATTTTGTGTT  
CAACGACTGGACCTGCCAGTATCATAGGCATGATGTTGATTTGTGCCGGTGTGTTAGTCAATTAACCTGTTGTGCAGAA  
TGCACCGCATTA

>Cluster\_60542  
ATGAACACTCTACCTGCTACAATTTTCGCGAGCGCGGAAGCCCTGCCTGTCGCCAGTGGCTGTCTGGCAAAATGCTACTGAC  
ACGCTGCTGGAACAACACTATGGCCTGACACTGAACGACACGCCGTTCACTGATGAAACTGTTATTAAGGAACATATCG  
ATGCTGGTATACCTCTGGCCGATGCAGTCAATTTCTGCTGGAAGAACTACGAACTGGTACGATTCGATCACAGAGGATTT  
TCGTGGCAACAACAGTCTCCATATATTTCCGTAGTAGATATTCGCGAGCAAGCGCTCTACCGGCTTGCTAAAACTAA  
TGTGAAATAA  
>Cluster\_28184  
ATGTACGAAAGCTCTTTTAGTAGTTTCCCTTATTGTGGCAATGGCCTTGTGGTCTGATCATGCTGCAGCAAGGTAAAGG  
CGCTGATATGGGAGCCCTTCCGAGCAGGCGCTTCCGCTACGCTGTTTGGTTCAAGTGGTTCGGTAACTTCATGACCC  
GCATGACGGCGCTGCTGGCAACGTTATTCTTATCATCAGTCTGGTGTGGTAAACATCAATAGCAACAAAACCAATAAA  
GGTAGCGAATGGGAAAACCTGAGTGCAGCGCCAAAACCGAACAACTCAGCCAGCTGCTCCGGCTAAGCCGACAGCGA  
TATCCCGAACTAA  
>Cluster\_16388  
ATGGCTGAGCTTCGTACACTCCAGAGCAGAATCAAACACTGAATACCCGACGGGTGAATATTTGAAGGGGGAGCAGCG  
TCGTGTCAGTGGCAGTGCACGTGTTCCCTCAAGCGTCAATATCTGGCTGAGGGACGCCGGCAGTGTATCTGTGGTC  
GTGTGGTTGACCTCTGTGACAGTGAACCTGATCACCGAATTCGACTTCAGTTCGGTGGTGAATGAGGAGACGAATCTT  
TGGACGCTCTGTGCCGAATGCCATCGACAAAAGTCTGCTGTAAGCGCGGAGTGGTATGCCCGACCCGACGCTGCCGGA  
GGTGTCCGGAGGTAGTGGCAGAGAGGACGACATCATCGGACTGTAA  
>Cluster\_60934  
ATGGATATTGTATTTATAGAGCAACTTTCCGGTAATCACCCTATTTGGTGTTCAGACTGGGAACAGACCATCGAACAGAA  
GTTAGTGTTCGATATCGAAATGGCGTGGGATAACCGTAAAGCGCGGAAAAGTGTATGATGTGGCGGATTGCCTCAGTTACG  
CTGACATTGCAGAAACGGTGGTCAGCCAGCTCGAGGGGGCGCTTTTGGCTGTTGGAACCGCTGGCTGAAGAGGTGGCG  
GAGCTGCTGTAGCAGCTTCAACTCGCGTGGGTGCGTATCAAACCTCAGCAAGCCAGGCGCAGTGGCCGGGGCGCGAA  
TGTGGCGTAATCATGAGCGTGGCAATAATCTGAAAGAAAATAATTA  
>Cluster\_48901  
ATGGCTACAGTCCCAACTTCCCATTTAAATCGAAGTCGTCACGGCAAAGCTGTTATTTCTCCCTGCATGTTGC  
CTGCCACTTTAAGCGCATGCACCAGAACATCGTCGACAAAATCAGATATCTGAACTGCTCGCGCAATTTTTTACCCGCA  
ACTTCATACCCGGTACTTACCACATCTATGGTACTCCCTGCGTGGTTATTACATCACCTTGATGGCCTGATGATGCTT  
CAGCTTGGGTTAAGTCTACGCACAATGCCGTACTACGAGAGCTGCATTGAAGCATTCATGAGGCTGAAACCAGCCTGAA  
TCACACTGCTTTTCGCCGTAATCAATGGGAGGTACGCCATGA  
>Cluster\_179  
ATGATTCTCGCCAACGACTTTCCTGAATACCTGCTCAACACAGAACGTGATCTGCGCGCTCGCGTGCCTGATCGTTATGA  
CATGTACCTGAAATCCCTGCCTGTACCCGAGCTCGCTGACGGAAAGATTGTTATTTGATGGTGCCTACATGATTGACAGCC  
ACGAGGAAATACAGGCTTTACCGCATGGAAGGTGGCACCCCGTCCGTTATTGGCATTTACCAGCGCCCATCTCTGCA  
ATCGTCGATGTGATTGCCGACAGCATCCGCATCACACATCGCCATGCCGACACAGAAGACACCGTGTGGAAATTCAGCG  
GCTGGCTACAGTCTGCCCGCACCCCTGAATGGCATGACGAAGTAA  
>Cluster\_28670  
ATGAAGGATATCTCTGTAAAAAGTTATTCACCCGGCTTTCCGGTACCCTGGTGTATCAGAGCGCGCTGCCGCAATAACAT  
TACTGGCTGGCATGTTGCAATATCTTTATCCCTCGCCCGATACAGCGCTCAGCTGCATATTAAGAGCTGTATGTTT  
CTCAGTGGCATCGAAATAAGGGCACGGGTAAAGCGATAATGCGCTTTATAGCCCGCTTTCGCTGTAACAGGAATGCCTT  
AGCCTTAGCTGGAACGCTGAAAAATCCAACCCGGCGTAAACGTTTTTATCAGGCTCTGGGAGGAGCAATAAATGATCA  
TATCGTCAATATACCTCCACGGGAGAGCCTGAGCAAACTGGCCTCAGGCATTTGA  
>Cluster\_51798  
ATGAAAAAGAAAGTAATCAGCGGGCTGTTTCTGATGTTATGGATAGCGCTGTTAATCGCCGCAATGGTGTATCCGAGGG  
GATTTTTCCGGTACTGGCAGCATCTGGTGTCTGGGTAGCTGTCTGCTGACATGGGCAGTAATCCCGTATCACTGGCTG  
CGTTAATTAAGAACGGCCCGCTCTGGCAGGAGTTGAGGGCATCTTTGCTGAAGACAATACCCGAAAAGAAAACGTATTT  
ATCAGCTGATGATGGTAAATGCTGATTGTCGTCAGTCTCGCTGGACGGGGTGGCTCTTACCCTGGTCTTTTATCTACT  
GACCGTTATTGCCCTTGGAAACACCCGTAATCAGATGGCGCAACAGGTAGCAGCATGA  
>Cluster\_13002  
ATGAAAAAGGATCTGAAAACGCTGGCGCTGGCCAGACTGTCAGGGTTTCGTCATAAAAACGGTGAAGGTGCCGGAAATGGGG  
TAATGTACGCGTGGTGTCTGCCGGAGCCTTCGGCAGAGGCTGGTATCTGTGGCAGGAAGTGTCAATGGTGTGGAGAGG  
ATGACGATACCTGTCCGGTGGTGGCGAAAACCCGCCGTAACCTGGAAGCGGATGTGACGCTGTTCTGCGATGTCCTGTGT  
GATACGGATCTGCAGCGGGTGTTCGCTCCGGACGACCGTGAGCAGGTGCTGGCCGTCTATGGTCCGGTACATGCCCGGT  
GCTGGCTCAGGCACTGAAACTGATCGCTGATGCAGAGTCCGCCAGAAAAAGTAA  
>Cluster\_20596  
GTGATTGATTTGGGTAATTTAACTTACTGGATATTCGCCGCCACACAATGTCGAAAACATTCAGTATCAAGACAACAAA  
ATCCGAAAATGACAGTGTACCGACGGATTTAAGGTACGCTCCGTTTTATACCGGAAAACGTTGGTTGAAGAAGATA  
AAGCATTTGTTGATTGGTAAATGGTCTGAAGCTACGTATACCTGATGAACTGACATGCTGACGCTATATCTTCAACAAATACAGC  
GAATATGCCGATTTCAACAGTGGCATGTTGATCTACGAAAAACCTATACTGCTGAACTTTCGTCCATTCAGGCGCCCC  
CATCGAGGCTGGGCCCTTCGATACAGTGGTGTCTTTTAAAGATTAACATAACTGA  
>Cluster\_25074  
ATGATTATTGATTAGAGCTCTTTTCCAAAGTCGAAAGAGCTTTACAGATCTGGTGGCTTATTGTACTGATCCGTTTGC  
CTCTGTAGAAAGCAAGGTTTTTGGCTCTCTCTCTGCTGATGTTGAATGCGGAGACTTGATCACAGCACTGGCGCTAAAT  
ATGAATCAGGAGATGATATCTATGTTGTTATGAGTGAATTTGTAAACGGCTGGAGACAACAAGCTGTAGATGTCTACGT  
AGCAATGCTGGGCTGTATGCATCAAAGCTGATGCCCTGAATGCTGTAAGTGAAGCAGCAAAAACAGCATTAATTAATAA  
AGGCTTCCAGCTTGAAGGCTTTAATACGGTTTTTCACTTCTTAA  
>Cluster\_42530  
ATGATCAAACTGAAGACGCCAAACTCTATGGAGATTGCCGGGCAACCTGCTGTATCACTTACCTGACGAGCACTGAAATGC  
ATTTCTGGCAAAATTCCTGGGCTGTGACAGTTATTGTGATTTTGTCTCTGACAGCATTCAGGGGCTGCAAAAAGAAGGGG  
AGCTTTCCCTGCGAGATATCTTGGAGATTGTAAGCTCGGGTATTGAGCCGTATGCGCGTACAGAAAAGATTAAAGACC  
TTTACATTACGCTATCCAGAATCGCTGAGTGAACGCTTAATAATGCGGCTGCCGAGCAACAAGTCTCTGTAAATACTTA  
TATTATTGAAACGCTAAATGAGCCTTTGAAATCAATTTATAA  
>Cluster\_38608  
ATGAATTTATCTTATCTGAAGGCGGTGCCCGCGCTGTAAAAAACCGTGCATGGCATTATTGCCAGATGGCATGGCG  
TGGAGTGTGACCCCAAAAGCACGTCCCGTCTGGCTGCGTTCCTCCGCTGCTGTTACTGGGATGGGGCAGATGGCTC  
ATGCCACTGACCTGCTGGCCGGGGCAAGAACGATGTAAGAGCAGCTTTGGTGGCGACTCATTCGCTCATATGTGTATT  
TATATCGCTGAAATCGTTATCGGTGTTGCGAGTATATCCGAACCAAGAACCTGCTGATTCGCTGGGACTCGTGTGGT  
TATTGTCTTACCACCGTTGGCTGACATTCGTCAACTGA  
>Cluster\_20043

ATGAAAAAAAAACGCTAATAATCCATACTCCAAATTTTCGTAATGGCGTAGAACGCCATGTACACCACGTCGCTACCAGTGC  
ATCACGTAGTAACAGTCGCTATAACCTGAACGAGACGCACGCAACACCGGATGGCCACGCTGTAAAACAAATCGCGGAGC  
ATGCTGGCTGATTGAGAAAGCTGGAATCGTGGTCCACAAATGCCACGCAATCCATTTACCGGAAACCGCATTTTTCGA  
TTGAACTGGCGGACAATCACTTCGGGCAGGATTTACATTTACGAAGCACTTCGCACGGTTGATCGTCTGCTTCGCGG  
GCAAAGTTTATTAACAGGCTGATTTATAA

>Cluster\_28721

ATGAATCTTTTAGTTAAAAGAAACGTTGAAGAGTTTTTAAGATTTGGGAAATGATTTTCATTTATTTGATAATCGTGT  
TGAATTTGATTTTAACTGCTTTCTTTTATTTGAAATAATGATAATAATGTTTTGTTACGTTTGGCTTTAGAGTATA  
ATGAAAACGCATTTTCTCTTTCTTTAGTGCCTTGCTCCTGAGCGTACGCAGGGAGTATTGAACATATTTTGTCTAC  
GATAATAAATTTGTGCTTAAGTTGTTGTTAACCATAATCGATGTTTTTTTTCTAATGAATACTTTTCAACAGCATGTGCA  
GATTTATTGAGCGCTTCGCAGGATGACATCATGA

>Cluster\_53897

ATGAACGAATATCAGTTTGTGCTTCCATACCCGCGCTCGGTGAACACCTACTGGCGAAGACGGGGAAGCCAATACTACAT  
CAGCGCTAAAGGCCAGAAATACCGAAAAGATGTACAGCAAATAATCCGCCAACCAAGTTAGACATTTTACCAAATCAA  
GACTCCGCATCAAAGTCATCGCAGACGTTCAGACTCCCGCGCGCGACCTCGACAACATCCGAAAGGTTTACTCGAC  
TCCCTTATCCACGCCGATTTGCGGAAGACGACGAGCAATTCGATGACATTCGCGTAAATTCGTGGCGTGAAGTACCAG  
CGGAAGCTTGGAAATAAAAATCACCGAACTGGAGAACGCATGA

>Cluster\_30056

ATGAATGAATTTGAGAAGATTTTAAATGAAATGAATCTGGACCGGCATTTGCTACCGATCCTTTTTCGTTGCAACCGGTC  
AACAGTGTGGAAGTATTTAAGCGCGATAGTACGGCTCCTGCCCTCAGCTATGTCACTGATTTATGCTGTTGAGTAAATCC  
AGAAAACGAAACCCCGATCTATTAGCCGAATGGTTAACGCTTTCGATTTACCATTTCCGCCAGAAAGTTTACTGGACCAG  
CCTGATTACTGGAAGGGTGGGTGTATACCCAACACAAGTCAATAAAAACGCTCCTGGATATCTAAAAAACATTATCC  
GGATGAAGACCAAAAAGTATGGGTAAAGGCCGGGAAGAGTAA

>Cluster\_48616

ATGTCCATGAAAATGGGTGACCTAGCAAAGCGCAAAGAGCCTGATGCACCGGCTAAGAACACAACCTCCTTTGCGCCAACC  
AGTCAGACCACAGGGACGCCGACTCGTGGCAAAGAGAAAATTTAAAAGCCGCAATGTCACCTGGAAGACGAATACTTCG  
AATGCTGGAGATGATGAAGTTCATCCCTCGTTCGAGAAAGTTCACTCGTTCGACGTGATTCGAGCAGCCATTTTCCAT  
CTGGCAGAGAAGTCAACCGAGGAATCGAGGACATCGTGAAGCTTAAACGAGGCGATCAAGCTGCCGACGTTACGATGCG  
TACCGATGAAATTAACGAGAGTTGATGAAGAAAGTTGA

>Cluster\_58603

ATGTATTATGGCGCGCTATCCATCCGGGCAGAGGCTGGCTGATGTTTTCCCGAAGTCACCAAGATCATGGCCAAAGA  
ACAAACGGACCGTACGACATTAGATCTGTTCGCGCACGAGCGTCGACCGGGACGACCGAAAACTAATCCGCTTTTCGCGCG  
ATGAACAGCTGCGTATTAATAAACGCAACCAGCTAAAACGCGACAAGTACGTGGCCTTAAGCGTGTGCAACTGAAGCTG  
AACCGGAAAGCTGCGAGGCGCTGAACGAGCTGGCGGAGCTCGCCAATATGAGCCGTAGCGAACTGATCGAAGAGATGTT  
AATGCAGCAACTGGCGGCGCTGCGTAGTCAGGGCATCGTTTAA

>Cluster\_11134

GTGCGTAATAAAAAGCCCTCAGACCGTCTCAGCGGCTCATGACGCCGTGAACACCTCAGCATTTGAGGCTTACCATAA  
GCTCAACCGCGCCAGCGCGTATCCAGTTTGTGGGGGTGATTTGATTCACCGTGAACCTCTCCGGCTGCATCAGCTCT  
ACATTCGCATATTTTTCAGCTACTCGAATGAAGATATTGATTTTGTGCGTAATGAGCTGAAAGCCAAAGGCTGTGCCG  
GATTTTCTCGCCAGCAGAAAAGACCGGAGAGCAGGACGATGTTTGA

>Cluster\_35772

ATGATTAACGATATTTCTGACCGAAGACCGTCTGGTTCATCCTGCGTTCCCTGATGGACTGCAATAACGAAGCAAAACGA  
ATCCATTCCTCAGGACTGCTGGATGCATACGGACACAACGTTTCCCGCGATGTTGGTTCGCGGCCAGATTTGACTGGCTGG  
CAGAGCAGCAACTGGTCAACCGTGGAAAACCTGCGCGGCTTTTATGTCGTAACGCTGACCTCCCGAGGTGAGGATGTGGCA  
GAAGGTGCTGCCCGGCTTCCCGGTGTCAGCGTCTCGTCCCGTGCATGA

>Cluster\_16050

ATGTCAAATCAAACCGGACAGCTTGACACACCTTCACGCTATCCTGCGTATGGTGAACCTTACCCGGCTGCTGGGTATATC  
CAGGTCCACGATTTACGTGAAAATAAATCCGGCTCGAAATACCAGACCTTACCTTTCCCAAACCGATAAGGCTTGGAA  
GTGCATCCGTTGGCTGGCGGGCATCTGCCATCGATGAGTGGCTGACGTACATATGGCACCGCTGCTGAACTGAA  
AACAAACAAAAGGAATTAATGATGACGACAAAACATCACTCCCTGA

>Cluster\_5026

ATGCCAATGGAGTTTGAATGGGATGAAAACAAGGCCAAAAGTAATCGGGTGAACATGGCATCCGCTTTGAAGATGCGGT  
GTTATTGTTTATGATCCACAACATTTGTACAGCAAGAACGCATAGAAAACGGTGGTATCGCTGGCAGACAATCCGGC  
TGGTTTACGGCATCGTGGTTATTTCTGTTGCGCATACCATCCGTTTCGAAAGCGGAAATGAAATATTTCGAATCATCAGT  
GCACGAAAAGCAGATCGTAAAGAGAGGAATCGCTATGAGCATGTTTAA

>Cluster\_44992

ATGTTTTGTGATTTATCGAAGCAGCAAGCGTACCGACCTATTTATATGTCGAAAAAAGACGATTTTTTCGCGTGT  
TCTGAGGAACGATGAAAAGTTTTGGTACGCTCAGTTAGCATGATTTCTGCCGTTGGATGGCGGAAAGAACTGGTCA  
ATGCTGATATTGAAAAGGTTAAACTGGCATTTAACCGAGCAAGGTTACTATTTGAGTTACCGCCACCACCGAAGATTTG  
CTGAAGCAACATCTTTCCGTCATGGGCGAGAAAACAGACGACACTAACAAATAA

>Cluster\_28744

ATGAAGCCAAACGATGCTACTCATGATTACCGTATTCCTGATTTTTTCAGCCATTTCTCAGGCGAGTCCGATTCAGTTC  
TCTACAGTCGGCAAAAAGAGAAAACACCGGATTTGCAAGATTTACGTAAAATTTGCACGCCACAGGCGTCATTTACCGATG  
AAGCGTGGGAAAAGTTAATGTTGTCAGATGAAAACAATAACAACATATACGCGAGGCGATCGTGGCGATGGAACGTAAT  
AATCAGAGCAATTTGGAAGCGTTGGGTAAGGTAGAATGCCCGGATATGTAA

>Cluster\_63638

ATGGTGAATTTACGTAAGCGGCTAAAGGCCAGATGTGCCAGATCAGAATCCCTGGCTACTGCAATCACAATCCCGAAAC  
CTCTGTGCTGGCGCATTTACAGGCTGGCGGGGACGTGCGGAAACGCGACAAAACACACGATATGCAGGCGGCGATAGCCT  
GTAGTCTATGCCACGATCTAATCGACGGGCGGGTAAAACACAGGATTTACACCAAGAAGAATTCGCGCTGATGCATGCT  
GAAGGGGTTTTTTCGCACACAAGAAATCTCGAGAAAAGAAAGGTCATTTTATGA

>Cluster\_2094

ATGGCCAGTGGCGATCTTTGTCGGTTATGTACATAACCGTCAATGTCATGAGGATACATTTGACTGAAATTAACGAGTTGAA  
TAATTACCTGACTCGGACCGGTTTTTGTCTACCATGACGATGATGAGGAAATATCCATGAGCTGGGGACTAACACTT  
TTGGACTTATCAGTACCCAAAGTGAAGAAGAAATTAGAAGAACTGGTTTTTCGGGGCTTACCCAAAGTGCACCGGCAAGAT  
CCTGAAATCACCATCAGACCTGGGAGGATGGAATAGCAACAGAAAATAA

>Cluster\_35316

ATGGAAGAATTAAGAATATTTCTCAATTTCTTTCTGCTCAGATGAACAGCGTATGTTGATGCGAGTGTGGTACCAGCAT  
CGGTTATCTAAGAAGGCATTTGAGTAAAGGTCAAGTGTAGGGGCATCGTTATGTTCTTATTTGAGCGAGCCAGTAATG  
GTGAAGTTACACGTCAGCAACTAAGGCTTTTGTATTGGATGAATATTTGGCCGAGCTGGAAGATACCAAAACGTTAACA

CAACCACTTTCTAGGAGCTTGATTCATGAAAATCAAGCATGA

>Cluster\_4503

ATGTCATTTGAGAAAAAGAGCAGAATGAGGTAATAATCTTTGGCTGTGTATTCAGTCTGGTAATCATCCAAGGAAAGCT  
TATCAGAAAGGGTGTATGACTCCAAATAGTAGAACAATATATTTTCGATAAAAAGCACCAGTACTTTTTCATGAAAGTTCTACA  
GAACGCGAAGAACAGATGGTTCTCGCGGCCAGACGTTGATTCGGGTTCTCAGGGTCAGATTTGTTACGCTCAATGTGCTG  
AGTAAAAATCTTACCAGTCAGATGCTTCTCCTTCGGTAA

>Cluster\_66857

ATGAGCGGCTCATTCTTATCTGAGTTACAACAGTCCGCACCCTGCGGTTAGCTATTGACTATCCGGCTGCACTAGC  
CCTGCGTCAGATGGCTCTGATCCAAGGCAAACTGCCAAAATATCTGCTGGCACCGGAAGTCAGCGCCCTGCACCATTATG  
TTCCGGATCTGCATCGCAGGATGCTGCTGGCTACCCTGTGGAACACCTACATCTGTATTAACGAAGCGCTGGCATTGACC  
CTGAGTGATTTTTCTCTGTTGCCCTTATCATTGTTGA

>Cluster\_4606

ATGAACACCTTGTTTTACTGATGGCTGAATTCATACCCCAAACATTGAGCTGTGAGCTGTATGCCAAAAGTATTTCCG  
TATGAGCCCTAACACAGCAGAAGCGAAAGCAAATGCATGCCAGTTGCCGACTTATCGTGTGGTACATCACAGA  
AAGCAAAGCGCTGCATCAACATTGAGGATCTTGTCTGAATATATAGATAAACCGCGTGAAGAAGCAGAATTGAATGGGAG  
AGGGTAAGAACAATAAGGAAAATAAATAACTAA

>Cluster\_17895

ATGGATAAACTAACGAAAATATCGTCACTCTGATTAACCATTAAAGCGGGTGTGAGCAGGTTATTACTGACGTCACCT  
GTTAAAACCGTGTGCCGGAACCTTCGCGGTGTGAGCTGCGCAATCAGTCTGCAAACTCTGACGTCGATGCGCTGATTAAG  
TGCTGCCGCGCATGACCATGCCGTCGCTGACCGAGCAGGAAGCCGCGCACTGGAGCTGCCGACCTGCTGCTGTTGCC  
GGTAAAGTGGTCGGTTTTTTGTCCACCGAGTTAG

>Cluster\_29453

ATGAATTACGATGAAATAACGAAAATCACTGCAGAACGTTATTAGCGACTACATGACTGAAGCGGTTAATACAGACTCTAA  
ATCTGTTGGCGAATGTTTCATAACGCTGCATGGGAGTGTCTATCATTGTGGTTGAACTCGTCACAAAATAGATCTGG  
ATATACATAAAAAGAACAGGATGCAAGTTATGATTTTGAAGAAAAATCGAAATGCAGCATGAAGAGTTTCAGAAAATG  
ACAGAGCGTGAGCAAGTGCCCTTTATTGAAATGCTGAATAA

>Cluster\_7335

ATGAATAAGTATTGGCTGTGAGGAAATATTTTTCTTGCTATGGATTGGCTTCTCCCGGTTCTTTCAGAGACTGCAAC  
ATTAACCATCAATGGCAGAAATAGTTCCCTACATGCAGTATGGATGTTGTTAATAATCATCTTCAGCAACGTTGTGGGC  
AGTGTGTTACAACGAGTTGAAACCACTATCGTGTCTTCTTCTACTGCAAAAGCGTTACGACAGAGTGTAACTGTGGGT  
AATAACGACAAACGCAAAATCGTGTAAATCGCTACGATTA

>Cluster\_15960

ATGAGTATCAATGAGTTAGAGTCTGAGCAAAAAGATTGGCGTTATCAATGTTGTGCAGATCCGGTGTCTTGCTCCATG  
CAGACATCAGGAAGTGTATTATGTAGATGAAGGTATAGATATAGAGTCCGCATACAAAATATCCATGAAGGTTATAAGT  
CTAATGAAGACAAATCCCATTTCTGCAATGTGCGAGAAATGACTGATACCGTGCAAAAATATTATCACGAGTACGGTGG  
AACGATACTTGCCCTCTCTGTACAAAACATATAGATGATTA

>Cluster\_34291

TTGCTGCAAAAGTCCCAATGATCATTACGCCAAACGGCATTTGCGCAACGCACATACCCCGCGTGTGTTGTTAACGACATT  
GACTGAGCCTCAGGATCCGTCGCTGGCTATTAATAATCCACAGCTGGCTGCCGATGTGAAAACGGCGTGGTTAAAAGAGG  
ATCCATCATTTACTCTTATTTGTGCAACAACCGATCTTTTCGCTGTTACGTGATTTAGTGAAAAACCGGGCAACCGGAAA  
ATTCGAGTGAAGCGCTCACCGGCTTGAGGAAAAACAATGA

>Cluster\_23066

ATGCAGCCAAACGACATCACTTTTTTCAACGTTTCCAGGATGACATTCTGGCTGGGCGTAAAACCATCACCATCCGCGA  
CGAGTCTGAATCGCACTTCAAAAACGGGTGATGTGCTTCTGCTGCGGACGGTTTGAAGATGACGGTTATTTTGCACGATTG  
AAGTCACCACAACCTCAACCGTAACGCTGGATACGCTGACGGAAAAACATGCAAAAGCAGGAAAATATGACCTGACTGAA  
CTGAAAAGGTCATTGCGCAGATCTATCCCGACAGACAGTTTTATGTGATGAATTTAAATGCCTTTAA

>Cluster\_24436

ATGACCAACCGTCTGGTGTGTCCGGCACCGTGTGAGGACTCCCTTCGAAAGGTGAGTCCATCAGGAATTCCTCACTG  
CCAGTTCGTGCTTGTGATCAGTCTGCTGTGTCAGGAGGAAAGCCGGCTTTCACCGGCAGGCGTGGTGCAAAATGCCCTTATG  
TTAGCGGACAGAAAACCGGCAATTAATCACAGTATAACGGTCGGCAGTCCGATAACCGTTCAGGGGTTCAATTCATGC  
CATAAGGCAAAAGAACGAGTGTGCAAAAATGGTTTTGTCATGCCAGCAGATTGAATTTGATAGATTTCTGGAGACTAG

>Cluster\_64470

GTGAGCGTTTTTAAATGGGAAAGCGGACAAAATGAACAAAAGGTCAGAACTTCTGGCTTTGGCCAATGCATCTAAGTG  
TCTGCCACATGGCTGCTTTTGGTGACGAAAGCAGCGCCAACTCCGGTAGACGAATTACCAACAGAGCTGGATTAC  
TGCAAAAAGAGATTGTTAGAGTTATTTGATTTCAATCCGAGTCAGAAAAGAAAAGCAACTAAATGAAATGAAATGATAAA  
GTTGAAAACTTAATCGTTTATTTGAAGAGTTACTGTTACCAGAAAAGAACTAACCCCATCAAAAATAA

>Cluster\_3230

ATGGGTAAACTAACGCTGCTGTTGCTGGCTATTCTGCTGCTGCTACAGTATTCGCTGTGGTTCGGTAAGAAGGTTATACA  
TGACTATACCCCGCTCAATGATGATGTGGCGCACAGCAAGCTACAAAACGCGAAAATTAAGCGCGAAAACGATCAACTTT  
TTGCCGAAATGAGGATCTCAATGGCGGCCAGGAGCGCTCGAAGAGCGTGCCTGTAATGAATCAGCATGACCAGGCCG  
GGCGAAAATTTTTATCGTCTGGTGCCTGACCGCTCGAAGCGCGCACAGTCTGCGGGGCAAAAACAAATCGATAA

>Cluster\_41625

ATGCTTCTGACAATGGAAGAGATTAAGCCAACTCCGGCTGGATGAGGATTTGATGCTGATGACCGCCATCTGCAACT  
GCTGGCCTGTGCGGCACAAAAGCGGACGAAACGATATCTGAACCGGAAGCTCTATGCACCGGATGAAAACATTCCGGACA  
CGCATCCGGACGGCTGCACCTGCCGATGATAATTCGCTGCGGGATGCTGATGCTTATCAGCCATTTTACGAAAACCGC  
TCGTCGGTTACGGAAGTGAGAAAACCGACATGCCGAGAGTTTGGCTGGCTTGTGCGCCGTACAGGTACTTTCCGCA  
ATGA

>Cluster\_38480

ATGAAAAGCGAACAAAAGAGATCAAAATCCGGCTCACCGAACTGAGCATCAGCGACTGCTTGTATCGCTGTGACCGGAC  
TCATCTGCAGAGTGGCTGCGCTGCTGGTCTGGGAGAACACCTCACGCAAGCGCGTGTGCTGATGTGGCGCCCG  
AACTTCTGCGACAGGTACGCGGATTTGTAACAACCTGAACAGATCGCCCGTGCCTGAACAGACTGATCCCTGACG  
CCTTCTGAACGTGCTGCTGCTGCTACTAACCAGCCTTGACCGTCACTTGGCGACCTGCTGGAGCAGAACCGTGA  
TCGTTAA

>Cluster\_6634

ATGTTTAAAAAGGCTTACTTGTCTGGCACTGGTGTTTTCTACTGCCGTTTTTCGCGCTGAACACTGGATCGATGTTTCG  
TGTTCAGAGCAGTATCAGCAAGAGCAGTTCAGGGGGCCATCAATATTCCTGAAAGGAAAGTGAAGAGCGCATTTGCCA  
CCGCGCTCCGGATAAAAACGACACCGTGAAGTGTATTTGCAATGCGGACCGCAGTACGGGCAAGCAAAAAGAGATCCCTT  
AGCGAGATGGGATATACCACGTTGAGAACCGGTTGGCTGAAAGACATCGCAATGCCGAAGGTTCAAAGGTTAA

>Cluster\_7925



ATGAAAACACCCCTTACCGCCGCTTACGCGCTGCCCTTTACCGTCCGCTGTGCGCTGTGCCGCTGACCGGTGCGGA  
ACGTCAGCACCGCTACCCGCATCTCACCTTGGAGTCACTGGAGCGGCCATCGCCGCTGAGCTGGAAGCTTTTATCTGC  
GCCAGCACGGTGAGGAAAAGGGCGTCAGATAGCCTGTGCCCTGCTGGAAGATTTAATGGAATCCGGCCCCCTGAAGGCC  
GCGCGCTCGCTGTCTTTCTCGGGCTGGTTGTGTATGGATGAACCTGTGCCGTCACATAAAAAGCGCCGGTACTGCACTG  
A

>Cluster\_63881

GTGCGGCGACGGGCTTCGATATCAGGAGACGATGATGGAACACAGAAAACAAACCGATTGTAATTGGTGCTGATGCTGC  
TCCGTTAAGTTTGGAGTTGTCTCAACTGGTGGAGATGCCATCAGTGAATGGGGTGGAGTTAAAGCCCGTGCAGT  
ATGCGGATGGCGAAAACAGTACTTGTATCCACTACAAAAGCAGCTGACCGTCCGCCACGACGGAGTGGTTGGTGAGTCA  
ATGCTGGAAGCAACAGAAGATGCTCGTATCCGGGCTGTCCGGTATTTGCCTTCATGAAATTACCGTAA

>Cluster\_17529

ATGGGATTTAAAGTACTGAAGGTAAGTGGGAAATAATGATGGATGGGGATGAGATTAAAATCATCCAGGCAGACTCTCT  
TGAAAATGGCACAGGCTGGCGTTCTGATATATGCAATCTGTGAGGAAAGTCAATGTATTGAAAGATGCCAATCTAATAGCGG  
CAGCACCTGACCTTCTCGAAGCACTTCACTTATTAATCAATCAAAAATAGAACAACGACAACATATCCAGAATGG  
TATGGAGCTGTTAATAAAGGCTTGCAGCAATCAGAAAAGCTCTGGGGATAAGTAA

>Cluster\_17648

ATGGAAAGTAGCCTTGGCCGATCGTGAACGCTGGCTGTGTCTGCCATTGTGCTGGGGTTGTTGTGTATCGCCGCCA  
CGGTGGCGGCATAAACCGATGATTACCTGGCTGGCGTACTGGCTGATGCTCGGCTACATCATATCCCGTCCGCTGGC  
TGTCGGGTACATACAGCACTCCAGCTGGCTGGTTGTGGCGCTGAATCTGGTTTCTGTGCGCTTATCGTGTGGCGCAC  
GGGATTTGTCAAAAATCCTTTCCGTTACTGAGGCATCCACATGAAATCAAAAGATGA

>Cluster\_24798

GTGATCGGCTTCCGCAATGTTGATATGGCGGAAGTCTTATCCACACCTGACTGAGCGCGTAGCTATAACTGAAGGCCA  
TCTTTTCCGGGTGGCTTTTTCGATATTTTTCAGCTCAGTCAAGCTGCTGAATTCAGGACGCTCCACTCTTCCCGGTG  
TTTTTTTCTTCCCGGCAACAAGAAGCGTGTACGACGCGGTGTTAACGTGGATATTTCCGGTACTCATCTGCTTCTCCT  
CTCTCTGGTTTTTCCAGCCCCATCATCTGTTGAGTTTCCGGAGCCGCGTTTTGA

>Cluster\_58158

ATGCATCGAATTCGCTGAAAAATCGGTCAATATCACTGAGTTACGTAAAAACCCAGCTAAAATACTTTATTGATCAACC  
GGTTCGGGTTCTTTCTAATAATCGCCCGCAGGATATCTCTTAAAGTCCAGCGCATTCGAAGCGTTAATGGACATGCTTG  
CTGAACAAGAGGAGAAAAAGCCATAAAGGCGCGCTCCGTCCTCAAGTGTGCAAGATTAGAGGAAATTACACGCGCGCT  
GAACAATATCTTAATGATATGACGGATGATGATTTCAATGACTTTAAGGAATAA

>Cluster\_10482

ATGAGTGTGGCAAGGGAGTGTGCTCGTCATCTGTCTGTTATTTCTGCGGTTGAAGTCTGCGCTTGCCTGAACTGCTA  
CTTTGGTTATCCCGTGGCTCGGTAGAAAAATCAGAAGCGATTCAACCTTTTGTGTACCAGGCAATGCCAACTCGGCG  
ATAAGATTTGGGAATCTGACGATATTAATAATCCCGTCTATTGTGACAACAATACCAACGGCAATTTTGAAGTGAGCAT  
GTTTATGCTGGTAAACCCCTACCCGGGGTGCAGGATCGTATTATCAACTCGGCGTAA

>Cluster\_17754

ATGATGGATATCGACGACGAAGGACGCAAGCAGAGCTTGACGCCAACAGCAACTTCTGGCTCAGCGTGATATCGACGA  
CATCAAGTTCGTTATGGGTAGCGAGCAAGGCGCGCGTATCTGGTTCGATGCTGGAGAGGGGAAAGGTTTCTCACCAT  
GCTTCGCTGGTGATTCGCATTAACGCAATCAACGAAGGCGCAGCAACTGGCATTGTTTTCAGCGCGTATG  
GCGCATGTCTGAAACAGTATCTGAAAATGGCCCTGAGTCTCAGGAGAAAACAAATGA

>Cluster\_40610

ATGCCTGCTGTAATAGATAAAGCCCTGGATTTTCATTTGGTGCATGGATGATATCAGCGCCAAACCAAGTTCGATGAATGA  
AAGTACGGCGAAGGAAATCTTAAATATTAAGAAGACTGGGAGTACCAGCGAGTGCCTGATATTACGGCGCGAGCTG  
ACCAGGAAGGCTGGAACCCCTGGTTTACGGAAAAAATGGTGGATGGGCAAAAAAATGGAGTCTGGTGAACGCTCTGTG  
ATTAATAATCCTGAATATCTTTCAACATATATGACGGAAGAATCAAAAGCACTGGTTTTGA

>Cluster\_14896

ATGAGAACATATTTATCTGGCTTACTGCGAGCGGTTATGACACACCCCAAATATCCCGCGGCTATTTATCTGGATAA  
GAACGGTAACAGAGTAACGGTAAAAGAACTGATGTTTGACCGTGTGATTTTATCCGCTGATGGCTATTCATTTCTTAGTT  
CGCTGAACGCTGGAGATCTTATTAGCAGATTACGGCGGAAATCCCGCTTCCAGAAAATAACCATGTGTCATGTATGGAT  
GTTGATAAAAAACTACAGGAACTAAAAACATGATTGCCGCGTGGAGAGAGCAGAAATGA

>Cluster\_24627

GTGGCTCAATTCGTTTATACCATGCATCGTGTCCGCAAGTGTTCGCGCAACGCTCATATTTGAAAAACATCTCTCT  
GAGTTTCTCCCTGGGGCAAAAATGGTGTCTGGGTCTGAACGGCGCGGTAAGTCCACCCTGCTGCCATTATGGCGG  
GCATTGATAAAGACATCGAAGGTGAAGCGGCTCCGACGACAGCATCAAGATTGGTTATCTGCCGAGAACCCGACGCTG  
AACCAGGACACACCGTGGCTGAGTCCATTGAAGAAGCGGTTTCTGAAGTGGTTAACGCCCTGAAACCGCTGGATGAAGT  
GTATGCGCTGTACGCCGATCCGGATGCCGATTTTGACAAGCTGGCGCTGAACAAGGCGCTGGAAGAGATCATTCAGG  
CTCACGACGGTCAACAACCTGAACGTTTCACTGGAGCGTCCGCGGATGCGCTGCGTCTGCCGGACTGGGACGCGAAAAATC  
GCTAACCTTCCGCTGGTGAAGCTGCGTCCGCTGGCTGGTGGCTGGGAAACCGACTGCTGGAAAAACAGACATGCTGCTCGA  
CGAACCGAACCAACCGTGGATGCCGAATCCGTTGGCGTGGCTGGAAACGCTTCCGACGACTTCAAGGACCCGCTGGTGG  
CGATTACCCACAGCCGTTACTTCTCGATAACGTTGCGGGCTGGATCTCGAAGTGGACCGCGGTGAAGGTATTCGCTGG  
GAAGGTAACCTCTCTGCTGGAGCAGAAAGATCAGCGCTGCGCGCAGGAAGCTTCAAGAAGCTGCGCGCTCGTAA  
GTCGATTTGAAAAGAGCTGGAGTGGGTACGTCAAGGTACTAAAGGCGTCAAGTGGAAAGGTAAGCAGCTCTGGCGCGCT  
TTGAAGAAGTGAACAGCACCAATATCAGAAAACGTAACGAAACCAACGAACTGTTTATTCACCTGGACCGGCTTGGGC  
GACAAAGTGTGGAGTCAAGCAATCTGCGTAAATCCTATGGCGATCGTCTGCTGATGACTCCCTGAGTTTCTCGATCCC  
GAAAGGGCGATCGTGGGATCATCGGTCGAAACGGTGGGTAATCGACGCTGTTCCGATGATCTCTGGTCAAGAAC  
AGCCGACAGCGGACCACTCACTTTGGGTGAAACGGTGAACCTGGCATCGGTTGATCAGTTCCTGACTCAATGGATAAC  
AGCAAAACCGTTTGGGAAGAAGTTTCCGGCGGGCTGGATATCATGAAAATCGGCAACACCGAGATGCCAAGCCGCGCTA  
CGTTGGCCGCTTTAACTTTAAAGGGGTTGATCAGGGTAAACGCGTTGGCGAACCTCCGGCGGTGAGCGCGGTGCTGCTG  
ATCTGGCGAAGCTGCTGCAGGTTGGCGGCAACATGCTGCTGCTCGACGAACCAACCAACGACTGGATATCGAAACCTG  
CGCGCGCTGGAAAAACCGCTGCTGGAGTTCACCGGCTGCGCATGTTTATCTCGCACGACCGTGGTTCTCGACCGTAT  
CGCCACGCACATTTGATTTACCAGGATGAGGGTAAAGTTGAGTTCTTCAAGGTAACTTTACCAGTACGAAGAGTACA  
AGAAACGCACGCTGGCGCAGACCGCTGGAGCGAAGCGTATCAAGTACAAGCGTATTCGGAAGTAA

>Cluster\_42037

ATGGTTACCTGGACCCAAATGATATATGCCGATGGGAGGACTGGGGCTATCCGCTCTGGTCCGCTGATCCCGATAAATAT  
CTTCTTCGTTGCACTCGCGGATTAAGTCTGAAAGGACATGTCGCGGAGCAATAACCTTATATATCTATTTCTGATTG  
CGATATTCCGCTTTAAAATGCCGATGATATGGCATTTGCTGCTGCGGGCTATGGCTTTATTTATGGTTTATGGCCCTATT  
GCGTGGATTTATTTGCGCGCGGATTTCTGATATAAATTAACCTTGGCAGCGGCGAGTTCGATATTTATCCGACGCTCGGT  
TATCTCCATCACAGCAGATCAGCGTTTGCAGGTTTACTGATTGGTTTTCTCTTTGGTGGCTGCTGGAAGGGCGCGCTG  
GCTTTGGCGCACCGGTGGCGATTACCGTGTCTACTGTTGGGCTGGGCTTCAACCCGCTATACGCGCGGGGCTGTGT

CTGATTGCCAACACTGCGCCGGTGGCGTTTGGTGCCTGGGTGTGCCAATCTGGTCGCCGGTCAAGTAAACGGGAATCGA  
TCCGTTCCACATTGGCGCAATGGCGGGACGTACGTTACCGTTCTGTCCGTTCTGTACCCTTGGCTGGTAGCAATGA  
TGGACGGTGGAAAGGGTGAAGAGACGTGGCCAGCGCGCTGGTGTGGGGGAAGCTTCGCTGTCACGCAGTCTCTTT  
ACCTCTAATATATTTGGTCCGGAATGCCGGATATTACTTCCGGCGCTGGTGTAGTATCGTCTCACTCGCTTTATCTCTTAA  
AGTCTGGCGCGCGAAAAATACCGAAACGGCAATCAGCATGGGCAACAATCCGACAGGACGATGGTGGTGAATAAACCTCACT  
CTGGCGGTCCCGTGCCTTCAGAAATATAGTCTGGGGCAAATCATTCGTGCGTGGTCACCGTTTTTAATCTTAACGGTGTG  
GTCACCATCTGGACCATGAAGCCGTTTAAAGCGTTATTGCTCCGGGGCGCGCTTTTATTCACTGGTGAATTTTCCA  
GATCCCTCATTTGCATCAACAAGTGTGAAAGCGGCACCCATTGTCGCCAACCAACGCCAATGGATGCGGGTGTAAAT  
TCGACCCCTCTCTGCTGGTGGCACCGCTATTTTATTGGCGGATTAFTCTCGATCTTCACTCCFCGGCTGGGGATCAAG  
AAAGGTATTGGTGTCTTTGGCGAAACGCTAATTAGTCTGAAGTGGCCGATACTGTGATTTGGCATGGTGTGGCATTGTC  
CTTCGTGACCAACTATTCGGGCATGTCCACCACGTTGGCGCTGGTACTGGCTGTACAGGCGTGTATTCCTCGTCTTCT  
CACCGTCTCTGGCTGGTGGCGTATTCCTTACCGGCTGGACACTTCTTCAAACGCCCTGTTTGGTTCACGTCAATCG  
ACCACGGCGCAGCAAAATCAACGCTCTCTGACACCTGCTGACACCCAGCTGCGCAGCAAAACACAGCGCGCGGCTAAC  
CTCCCGCAATCTATCGCGTGGCTGCGCCGCGACGGGCATGGTGGTTCGAGAACTGAACTGTTCCGCTACACCGTGA  
AGCACAGTCTGATTTTTGCCAGCGTTATCGGCATTATCAGCTGTTGCAGGCGTATGTGTTTACCGGGATGTTAGTTTCG  
TAA

>Cluster\_42570

ATGCTCAATCAGAAAATTCAAAACCTAATCCAGACGAACTGATGATCGAGGTCGATCTCTGCTATGAGCTGGACCCGTA  
TGAATTAATAACTGGATGAGATTCGAGGCAGAACCCGGAACCCGAGATGATTGAAGGGCTGCCCGCTCTGATGCGCTGA  
CGCTTCCGATCGCTATCTGAACTGTTTCGAGCATGTTTCAGTCGGCGAAAATTTTCCCGACAGTAAAACCTTCCCGAC  
TGGCACCCCAAAATGGACCCGCTGATATTTTAATCCGCTACCGTAAAGTGGCGCTCATCGTATTGTTGACTTGGCGAA  
GTTTGTGAAACCACTTCTGGCTGCCGAGGCTACTCCAGCAGTATGTATCGGACCCGAAAATTCCTGAAAGAGC  
ATATCGACAGCTGTGGCCGGTGTAAACCGTGAACACAGGATCACATTCCTGGTCTTCTCTGTGGCGCTGCCCGAG  
TCATATATGCTCCTGGCGGATGTCAGGACCGTTCAGTACTTGGGATTCCTATTTACCATGTCGGGCTGGCGTGAAG  
TGGTGGGAAGATTGCTGAAATGCATGGCCGATAACTTCGCTGGATGATCGAAAACACGGCCACATCCCCAACGGCA  
ACCGCACCTATTAATTTGAGCCGCTCGCAACCACCGTTTTTGGCTGATGGTGGAGTTGTTGAAAGAAGTGGTGTACCG  
GGCGCGCGCGCTATCTCGACCACTGAAAATGGAATATGCCTTCTGGATGGACGGTGCAGAACTCGTTGATCCCTAATCA  
GGCTATTCGCTATGTTGTGGGATGTCAGGACCGTCCGCTAACCGTACTGGGACGATCGCGACCGCGGCGTGAAG  
AATCTGGCTTGAGGACGTTGAAACCGCGAAACATTCTGGTCCGCGCCCAACGAGGTGTACCGCATTTACGTGGGGG  
GCGCCTCCGCTGGGATTACTCTCCGCTGGCTGCGTGATACTGGTCTGTCGGCAGCATTGTCACACCCAGTTCAT  
CCCCATCGATCTGAAATGCCCTTCTGTTTAACTGGAGAGCGCCATCGCAACATCTCGGCGTGAAGGCGGAGAAAGAGA  
CAGAAGCACTGTTCCGCGAGAAGCCAGTCCCGTCCGATCGGTAACCGTTACCTCTGGGATGATGAAAACCGCATC  
TACCGCATTACGACTGGCGACGCGAGCAACTGGCGCTGTTTTCCGCTGCCGCAATTGTGCCCTCTATGTCCGATGTC  
GAACCATGAACAGCCGATCGTCTGGCAACCGCGTGGCAGCGGTTACTGACACCTGGCGGATTCGGCAAGCGAGT  
ACGAAACCGTGAACAGTGGGATAAACCCACCGCTGGCGACCGTTACAATGGATGGCAATTCAGGATTTAGATGTA  
GGCATGACCTTCTGGGTGATGAAATCGCGCGCACTGGCTGAAGACCGGTGAATCAGTTCATCTGGAACAGCAAACT  
GATCGAGAAATACCATATTTGCCGATGGTGTCTCCGCGAAGCGCGGTGGCGAGTATCCGTTGACGATGGGTTGGCT  
GGACTAACGGTGTGGTACCGCTTTAATTTGGTTGTACGGCGAACATAA

>Cluster\_21620

ATGACGAAGACTTCACATTCAAAGATCTATTCAACTGAGAGCGGTATCACCGGGATGTTTTTTTTAAAACCCATCCCT  
TCACTTTACAAAAGAACAGCTTGAATGGATTGAAAATATTCAGCTCCCTAAACGATGTTTTTAAAGTGAACAGAAAT  
TTGATGACCGATATTTATATCTACATGATGTTGGCGATACAGATTTCCCGTAATAATTTGGCTATATTAATCTCTACT  
GGTAAATCTTTTTGTGATTTATCACAGTTTCACTCAAGCTTTGAAATGCTTAAACGATCGCGTACCTAATGAGAACCT  
GGCAAGTGTGTGATAAAATTTGCTCAGTTTGTGCAACAACGTTCAAACAAATGAGGTTATCACTCGCGAAAGCCTTA  
TTGAAAAATGCAAAATGCTAGTTGCGAAGACTGAGCGAAATCACTCAGACAGCAGTCACTTATACACCTCTATGGC  
TTACGAAAACCTTGATCGTAATGGATTCTTCGAAAGTAAGGATGACAGTGTAGCTGGAAGATCTATTGCTGGAAGTGGC  
ACGCCCTAGGAACAATAACTGGGCTCGCTACCAAAACCTAGACTCCTGTTATACAGAAAGAAAGTATGCCATAAGAAA  
ATGGCATTCACCGTTGGGCATCTAAGCTATGTCCAAAATTTGATGTTGAAAGAAAATAAGACATTCATCTGGAACCTGTA  
AGGAAAACCATTAATAATGATACATTACGGGACTGCATTTATTTGGCATAGTTTATTACATTTGGGGCAGACCTGTACA  
GATCGGTAACCTTCCGGAGGCGATTTTATCGTTGATACCGAGAATAAGTACGGGATGCGTTATTCAGTACGTGTGCCAT  
ATGCCAAAAGTCAAAACTAATCTATCGATCGAGTTTCAGTTGCAATTCGGAAGAAGTGGAAAGTTAATCTTACTGTAT  
AAGTACCTAGTTGGAATTTGGTATACCGACCAATGTTTTCCATCATAGTATCTTCAATGAAGATGGTGAAGCGTCATT  
AAAGAAAATGCTTTTTCAGATTTTACCACAAGAGATTCAGGAGCAGTAAAAACGATGATTATCAACTACCTGTATATA  
CCGCAAGCTCTTTTCGTCACAACGTTGGTCACTCAATGGCAATGAGTGGTGGCAGTGCCTCGATAGCTATATATTTG  
GGCAATCTCTTTATGTTTGGAGATCATACATTTGACCCACCTGAGCTGGCTGATATTCTGTGAGCGATTGTTGGG  
TCGCAACCTGTGTTAAGAACATGATGGCACTCATGTTGACTGGGAATTTAGTTCACAGCAGCGAATGGGAAGTTCGCA  
ATGTTGACGGGTCATTTGGTGGGCAACTTCATTTACCATCTCGTGGATGTAATTTATGAAGAAGACATTTGCCCTTTGCA  
CAGGTCGTGGATGTTACGGTTGGCTGTATTTCAAACATTTATAGATGGAACCAAAAAAGTATTTCTTTCCGCTGAA  
TGATGAAATCCAAAATGCTCCGATGTTGCGCATGTTGCGCATTTGAAATCACTTCTCAAGGAAATTTAGTGGCG  
GAAACAGCATGTAATCAGGTTATGGCTCGCATGAAATGGCAACGCTCCGAAGAGCTATTTAA

>Cluster\_49155

GTGGCGATATTGTTTACCTGAGAAATAACGGTGAAGAAGCGGTGATATTTCTTACGGCTGTGGACGATGCGTCCGT  
TGGTAATCGCTGGCAGGTTGGCCATGAAGATGAAATTTTTGCTTTGCACTCACCAACGCCATTACCAGTACTGGTAAAG  
GCGTTAATCTACAGGGGTACAATTTTGCAAACTCATTGATAAAAGCTCACCGTACTGTCTAATGCCATCAATCAGAAT  
GAGCGGTTATTTATGAAATCGATTTGTATCGTATAAAATAAAGCGGGCGCTGGGAACGGTATTTATATATTCAGTAA  
AAATGCTTCAATTAAGCTTATTCATGTAACATTTCTGCAAAATATCTTCCACCGAATGTGTAAATGTTAATATGACT  
ACATATTTAGCAACATCTAATAGCCAATACGGAATTTGACTGGTGGCTTTCTGCTGGCTATAATAGCTTATTTATT  
CCACCTAAAAGCCACCTGCCAGTAATCTTAAACCTGACCGCTACCAGTTGTTAACCTTCCACTCTCTCCACAGCGGT  
TAAACCGTCTATGCCAAATCTGTCTGAAGGAGAAGGATGTACAGATGCCGGAACGGCAGAGAACCCTGAAAACCT  
TCGGCAAGTACGCAATTTTGTCTGCGAGTGGTGTGATGACTGCTGTGGATAACCACTCCGGAGGCTAACGATTTGGG  
CAACCCGCAAGACTCAAACCATGCTACTGTTTCCGGTAGTGTGTTGGCGGCTCAAATATGGGGAAAATGGTCCGCTCAG  
TGGCATACTCAGTCAACCCGCGCTCTTACATCGTGGTGGCATCTGCTTTGTATATTTCCCTCTGCGGGCGAGGGCA  
GTGCTCCGCTGCCCGGCTGATGAGTTCTGGTATGAGGAAGAACTGCCGCAAGAACTAGCAGGCAAGCCAGTACCGCCAC  
ACCCGGTACGTTTTTTTGGGAACTGACATTTACCGCAAGCCTCAGGTGATAGGTTGTTTATACGGGTTGAAAGTACGCC  
GTATGAAAACGTCGCGTGGCGAATGCACTGGAACGAGCAGACGCGGTTATGAAATTTACCCCGCTCACGATGTCCG  
ATGGCCCTGATTTACCTGGACCGCGAAAATCCGGAACATGGGAATGTTCCGGGCCATACCGGTAACGACAGCCCGCG  
CTGGATCAGCCACCATTTCTGGTACCGGATTTCCGGACGGCAGGATACCTATACCGCGCGCATTTCCCGTTCTGTA  
TCCGAAAGAAATCAACGATTTATATTTCTGGTTTTTCCGGCGGGATCCGGTATTAAGCCATCTATGTTTACCTGAAGGAG  
ATCCGCGAAAGCTGCCTGGTGTGTAACAGGGCGGGCTCCGCTTTACCAGGACTGCTGGCTGGATATGTCGGTA

TCCAATAACGGCAACGGCGCACCAATCCCGGCGCATATGCTGATAAAATGCGCGGACGGGAGTTAAAAACCTTTGATGA  
GTTTCGCGAGGCGTGTGGCTGGAGGTAGATAAAGACTCAGTGTATTGGCGCAGTTTATAAAAAGTAATCAGATAAAGC  
TTAGTCAAGGATATTCCTCCATGTCCTGAGGAGGGTATTATACGGACCAATGAGATAGTAAAGAAATCCAGATA  
CATCATGTAGTTGCTATAGAACATGGTGGTGGAGTGATGATATGATAATTTAGGATGTTACGCCCGACTACATGA  
TGAATTCACTACAGGAGATAA

>Cluster\_57530

ATGATATAAAAAGCTTCGCTGCTGACGGCGTGTCTGTGACAGCCTTTTCCGCTTGGGCACAGGATACAGCCCGGATAC  
TCTCGTCTTACTGCTAACCGTTTGAACAGCCGCGCAGCAGCTGTGCTGCACCAACCACCGTTGTGACCCGTGAGGATA  
TCGACCCGTGGCAGTGCACCTCGTCAATGATGTGCTGCGCGTCTTCCGGGCGTCGATATCACCCAAAACGGCGTTCA  
GGTCAGCTCTCATCTATTTTTATTCGCGGTACAAATGCCAGTCATGTGTTGGTGTAAATGATGGCGTACGCCTGATCT  
GGCGGGGTGAGTGGTTCGCGACCTTAGCCAGTTCCTATTGCGCTTGTCCAGCGTGTGAATATAFCCGTGGGCCG  
GCTCCGCTGTTTATGGTCCGATGCAATAGGCGGGGTGGTGAATATCATCACGACGCGCGATGAACCCGGAACGGAAAT  
TCAGCAGGTGGGAAGCAATAGTTATCAGAACATATGATGTCTACGCGCAACAACATGGGGGATAAGAACCGGGTAAC  
GCTGTTGGGCGATTATGCCATACTCATGGTTATGATGTTGTTGCTATGGTAATACCGAACGCAAGCGCAGACAGATA  
ACGATGGTTTTTAAAGTAAAACGCTTTATGGCGCGCTGGAGCATAACTTTACTGATGCCTGGAGCGGCTTTGTGCGCGC  
TATGGCTATGATAACCCATTAATGACGCGTATTTCTCCCGGTTACCCTGCTGATACCCGTAACCTCTATAG  
CCAAAGTTGGGACCCGGCTCGCTATAACCGGGAACGTATTAAATCACAACTCATTACCAGCTAATGCCATAGCAAAG  
ATTACAACACGATCCCCATTTTGGTCTGTTATGATTCGTCGGCGACGCTCGATGAGATGAAGCAATACACCGTCCAGTGG  
GCAACAATGTCTCGTTGGTACGCTAGTATTGGTGGGGTGTGCTGACGAGAAACAGACTACGACCCGGGTACAGG  
TTATGTTGAGAATGGATATGATCAACGTAATACCGGCATCTATCTGACCGGGCTGCAACAAGTCGCGGCTTTACCTTTG  
AAGCGCAGCACGAGTACGATAACTCACAGTTTGGTCTGATGGAACCTGGCAAACAGCGCGGTTGGGAATTCATC  
GAAGTTATCGCTTCATTGCTTCTACGGGACATCTTATAAGGCACAAATCTGGGGCACTGTATGGCTTCTACGGAAA  
TCCGAATCTGGACCCGGAGAAAAGCAAACAGTGGGAAGCGCGTTTGAAGGCTTAACCGCTGGGGTGAATGGCGTATTT  
CCGGATCTGTAGCTTGGTACGACTTGTGATGATGATGATGATGATGATGATGATGATGATGATGATGATGATGATGATG  
ATTAAGGGCGTCGAGGCGACCGCAATTTGATACCGGACACTGACGCATCTGTGAGTTATGATTTATGTCGATGCGCG  
CAATGCGATTACCGACACCGCTTGTACGCGGTGCTAAACAGCAGGTGAAATACCAGCTCGACTGGCAGTTGTATGACT  
TCGACTGGGGTACTTATCAGTATTTAGGCACTCGCTATGATAAGGATTACTCATCTTATCCTTATCAAACCGTTAAA  
ATGGCGGTGTAGCTTGGGATCTTGGGCTTGGGTGCGTATGCGGTACCTCTCACCTGACAGTTGCTGGTAAATAGCCAA  
CCTGTTGACAAAAGATTATGAGACAGCTATGGCTACCAAACGACGAGCGGAAATACACCTTGTCTGGCAGCTACACCT  
TCTGA

>Cluster\_22072

GTGCAGCACGAGACAAAATGGAACCAGAGCTGGTTGAAAAAAGCTCGCACGCGCCGTTGGGCTGGTCATGCTGTTAA  
TCTCTGCTTATCGTGGTATGCTTTTTTCCACCTTGCCTACCCTGGCGTGAAGTGGTGGTGGTGGTGGTGGTGGTGGTGGT  
CCAGCCAGCGTAAATCATCTGGAAAACGTAAGCAACGCGCTCGATAAGCATTGTCAGTATAACGTCGACAACTGATCTTT  
TTGCGTAATGGCATGGCGAAGCTCTCGTGGCGCACTGGATTTTATCTCTGCGTAATGCCGTAACCGATTGAGTTCGAACA  
GCATCGCGCAGCAGCAGCTGGCAAACTCAACCGCAGCGCCAGCTGCAACCTGCGCAGTCAATGGCGTATCGGATTCATTAG  
TCAGCGAGGGGAATCTCCTGCTCGCGAAAATGAAATCCTCGACAATGAAATTTACCGTGCACGGAAGTTGGTACTTGT  
CTGCGCATGGCGACAACCTCCTCGTCTGATGGTTGAAACAGCGCATGTATGCTCTGCGTGTGGAATTTTACGTTTCGACGCA  
GCCACCTTGTTTACCGCAATGTACCAACCGCTTATACGGCTATGTCACCAACCTGGTTTATCGGTCATTGCGCAAC  
GAGAAAATCGTCCCGCGGCTACGCTGGTTTCACTTCGCAACCGGAACAGCCAGCAATACTGAACCCGAGTTTACCGTCT  
AGCGTTCCGGTAGACAGTAATAACTACTGGTATGGCGTCTGGGGATGAGTATCCCGTGCCTACTATGACGCAATTTTT  
AAGAAAACCGCATCGATAAAAACCTCGATGGTGGTATGATGATGATGATGATGATGATGATGATGATGATGATGATGATG  
CTGACCACTCAACAGGGAATTTTTGATCCTCGTGAACCTGGCCTTGTGCGCAGGCAATGGAACATGACACCGGGGCG  
GGCATTCTGATGGACAGTCGCTATGTTAGCTGGGAACGCTGGACATTTGACGCGGTGTGCTGGTGGCGCTCCATACGCT  
AAGCGAAGCGGTGCGCGGCGATTTCGGCAGTATCAGCATGCAATTAACCTGCTGTGGCGCTCTTTACCAACATGTTAC  
TCTCTCCTGGTATGATGATTCGCGGATGGTCAGCAACATGATGTTCTGCAAAAGCTGCTGCAAGTGGCAGTGGCAGGCGTGGC  
GACCTTTAACCGGTTTATATAAACCGTGGCGCATGTTTCGAAAAGCCCGTCCGCTCGCTAAATTTGTGTCAGACCGCAACA  
ACATCCATTTTCTGTCATTCAGGTCGATCTTGACCATTTTAAAGCGATTAATGACCGCTTGGTCTATCAGGTGGGCGACC  
GTGTTCTTCTCATGCTGCGGATTAATTAGCAGTTCCTTACGTGCGCAGGACGTTGCGGGCGGGTCCGTGGTGGAGGAG  
TTTTGTGTGATTCGCCAGGCGGAATTCGACGAGGCTGGGAGGTCGCAAGCAGTATTCGCTGAAGTTAAATGAAA  
AGAGATGCTGATCGCAAGAGTACAACGATACGATCAGCTGCTGCTGGGGTAAAGCAGCAGGAGGAAACCGGTAAT  
ATGATTTTGAACAACCTCCAGTCAATGGCCGACCGTGGCTTTACCTCGCAAAACAGCCGGGCGCAATCGGTTATTCGCG  
AGCGATAACGCTTAA

>Cluster\_20507

GTGCGATTATTTGCTCAATTAAGCTGGTATTTCCGTCGGGAATGGCGTGCCTATCTCGGGGCTGTGCGCTTGGCTGTGCTAT  
TATCGGATGCTGCAACTGGTTCGCGCAAAAGTGGTGGTATTGTTGTTGATGGCGTGACAGAAACAACACTTTACTACCG  
GGCAGATCTGATGTTGATCGCCACCATGGTGTGATTGCCGTTGTGGTTTATCTCCTGCGTTACGCTGCGCGGATTTG  
CTGTTGGTGGCTTATCAACTGGCTGTGAATGCGTGAAGATTATACCGCCAGCTAAGCGGCAGCATCTGAGTT  
TTACTTGGCTCATCGCACGGGTGACCTCATGGCTCGTGGGACCAATGACGTCGATCGCGTCTGTTTGGCCCGGAGAA  
GGTGTGCTGACGCTGGTGGATTACTGGTAAATGGGCTGCGCTGTGTTGATGATGATGATGATGATGATGATGATGATGATG  
ACCTTATTTGCCCTGTTGGCGATGCCAGTATGGCGATCATGATCAAGCGCAACGGCGATGCCCTGATGAAACGCTTTAA  
GCTGGCACAGCGGCATTTTCCAGTCTTAAATGACCGCACCCAGGAAAGCCCTCACAGATATCCGATGATCAAAAGCCTTT  
GTCTGGAAGATCGTCAGTCGCGGTTATTTGCGCGGATGCCGAAGATACCGGCAAAAAAATGCGGGTGGCGGCTATT  
GATGCTCGTTTCGACCCGACCTATATAFCGCGATTGGTATGGCGAATGCTGGCGATTGGCGCGGTAGTTGGATGGT  
GGTACAGGGCAGTTAACGCTGGGCCAGCTCACAGTTTATGATGATGATGATGATGATGATGATGATGATGATGATGATGATG  
TGGCATGGATGTTTAAACATGTTGGAACGTTGGCAGCGCGGCTATAGCCGAATTCGATCATGCTGGCCGAGGAAACCGG  
GTTATGATGGTAGTGATAAGGTGCCAGAAGGTCGTTGGAATGGAATGGAATGGAATGGAATGGAATGGAATGGAATGGAAT  
TGACCATCTGCGCTGGAACAGCTCAATTTGCGCCTGAAACCCGGTCAAGTGGTAGGTTATTTGGGGCGACTGGTCCG  
GCAAAAGTACCCTGTTGCTGCTCATTACGCTCATTTCCAGCTCAGCGAGGGGATATCCGCTTTCATGATATCTCTCTG  
ACGAAGTTACAACCTGATAGCTGGCGTACCGCTGCGCGCTGCGCAGCACACCTTCTTTTTTCCGACACCTGACG  
GAACAACATCGCGTTGGGTTGCCGAATGCCACCCAGCAAGAGATTGAGCATGCTGCGCGGTTAGCCAGCGTGCATGACG  
ATATTTTGGCTTTTACCGAAGTTACGATACAGAAGTGGGCGAGCGCGGCTGATGCTTTCCGGTGGGCAAAAACAGGCT  
ATCTCATTGCTCGTGGTTATTTAGTCAACGCGAAATCCTCATCTTGTGATGATGCGCTTTCGGCAGTAGACGGACGCA  
AGAGACCAAGATCCTGCATAAACCTGCTCAGTGGGGGCGGGAAGAAGCAAGTAAATCATAGTGCCTTTCGCTTTCGAC  
TGACGGAAGCCAGTGAATATTTGATGATGATGATGATGATGATGATGATGATGATGATGATGATGATGATGATGATGATG  
AGTGGCTGGTATCCGATATGATGCTATCAACAACCTGGAGGCGGCGCTCGACGACGCTCCGAAAATTCGCGAGGAGGC  
CATCATGCTGATG

>Cluster\_60083

ATGACGCAAACTCTGTTAGCGATTGAAAATTTGTCGGTGGGTTTTCGCCATCAGCAAAACCGTACGTACAGTAGTCAATGA

TGTTTACTACAGATTGAGGCTGGCGAAACCGTGGCGTGGTGGGTGAGTCAGGTTACGGCAAAGCGTTACCGCGTGT  
CAATTTTACGCCCTCTCCCTTCCCGCCGGTTGAATATCTCTCCGGCGATATTGTTTTTCATGGCGAAATCGCTGCTTAC  
GCCAGCGATCAAACGTTGGCGGTGTACCGGTAATAAGATCGCCATGATTTTTACAGGAACCGATGGTGTGTTAAATCC  
ATTCATACCTCGGAAACAGCTTTATGAAAGTCTTTCACTCCACCGCGGATGCGTTCGGGAAGCGGTTCGTGGCGAAA  
TTCTTAACCTGCTTGTGATCGGTTGGTATCCGCGACCGGAAACCGGCTGACAGATTAATCCGCATCAGCTCTCCGCGCG  
GAACGGCAGCGGGTGTGATTTGCGATGGCGCTGTTAACCGGACCGGAATTATTAATGCGCATGAACCGACCCGCACT  
GGAGCTCTGTCCAGGCGCAGATTTTACAGCTGTTGCGGAACTGCAAGCGGAGCTGAATATGGGCATGCTGTTTATTA  
CTCATAACCTCAGCATTTGCAGAAAACCTGGCCACCGCGTGGCGGTAATGCAAAACCGTTCGTGTGTCGAGCAAAATTA  
GCCGCTACGCTATTTGCATACCCCACTCATCTTACACGCAAAAAGCTACTCAACAGTGAACCGTTCAGGCGATCCAGTGC  
GTTGCCAGAACCTGCCTCAACGTTGCTGGATGTTGAACAGCTTACAGTTGCCCTTCCCATTCGCAAAGGGATTTTGAAGC  
GCATGTGGATCATAATGTGGTGTGAAAAACATCAGTTTACGCTACGAGCGGGTGAACACATGGGTTTAGTGGGCGAG  
TCCGGTTCGGGAAAAGTACGACGGGACTGGCGCTGCTGCGACTGATTAATTCAGGGCAGCATCATCTTTGACGGTCA  
GCCACTGCAAAAATTTAAATCGCCCGCAGCTGTTACCTATTCGTATCGCATTCAGTGGTATTTTACAGGATCCAACTCC  
CGCTCAACCCACGACTCAACGTTTTCAGATTTATGAGGAAGGCTTACGGGTTACCAGCCGACGCTTTTCGCGCACAA  
CGCGAAACAAGTGTATAGCCGTGATGCATGAAGTGGGATTAGATCCTGAAACACGCCACCGTTATCCGGCGGAGTTCT  
TGGTGGTCAGGCAACAGTATTCGATTTGCCAGGGCATTAATCTTAAAGCCCTCGTGTATCATACTTGATGAACCGCAT  
CATCACTGCAAAAACCGTTCAGGCGCAAAATTTAGCAGTATTGAAATCATTGCAACAAAAGCATCAACTGCCATTTT  
TTTATCAGCCAGATTTGCAGTTGTCGCGCTTATGTATCAGGTTATCATACTGCGACAAGGGGAAGTAGTGAACA  
AGGACCGTGGCGCGCTGTTTGCACACCCGACGAGGATATACCGTACGCTACTGGCGTTGAGCTGA

>Cluster\_6480

ATGGAGATCTCTGGGGCCGCGCTATGGCGCAATTTTTTGGGCCAGTCCCCGACTGGTACAACTCGCCCTCATCAT  
TTTTTAATCGTAAACCCGTTAAATTTCTCATACAGCCCTTTCGTCGCGGGTGGTGTGGTAGCGGAATTTATTTTCA  
CTCTGGCGATGGCCCTGAAATGCTACCCGCTGCTCCCGGTGGTCTGTTGGCTATCGAAGCGGTATTCATCGGCATGACC  
AGCGCGAACAGCTTCGGAACAGTGGCGGCAAACTTTGAGCTTGTGCTGTTACTGATGTTTTATGGTGGCGGTATGCTA  
TTTTATGAAACAGCTGTTGCTGTTTACATTTTACCCGTTTGGCTGTTAAGCATTCGCTCCAAAATGCTGCTGTCGCTCTCT  
TTTTGGTGGCGGCTGCGTTCCTTCCGCGTTCCTGATGCTTAAACCGTGGTGGCGGTGGTATCAGCGTTCAGTTCGCT  
TTTTATGGTATTTTACCCGCTAGCCTCTTCCCGTACCGAAGACACCACCTGCAAGACGATAGTCAATCGACAAGCA  
TTACAAAGTGGTTCTGGAACAGTTCGCTGGCTTTCGCTGAGCTGATGATGCATGCGGTGTGGCGACCCGATGAGCG  
GCGTAATGACCATGGTGGGCAACCACAGAACCATGATCATCGCTAAAGCGGCTGGCTGGCATTTTGGCGATTTCTTCTG  
CGCATGTCCCGGTGACCGTTCGCTGATTTGTGGCTGTAAACCTGCTGCTGGTAGAGAACTGCGTTGGTTTGG  
CTACGGTGAACCGTTCGGGAGAAAGTCCGCGAAGTGTGCAACAGTTGACGATCAAAGCCGCCACCGCTACCCGTC  
AGGATAAAATCCGCTGATTTGCTCAGGCGATTTATGGCGTCTGGCTGGTGGTGGTGGTGGTGGTGGTGGTGGTGGT  
GGCTTGGTGGTGGTGGTGGTGGTGGTGGTGGTGGTGGTGGTGGTGGTGGTGGTGGTGGTGGTGGTGGTGGTGGTGGT  
CACCGAATCTCTGCCATTACCGCACTGTTGACGGTGTTTTTCTCGGTAGTGGCGGTGATTTATCGACCAACAACCTGTTTT  
CGCAATTTAGTTGTTGTTGTCAGGCATCGGAACATGCTCAGCTGTGCTGTTCTATATTTTCAACGGTCTGCTGTCA  
TCCATTTCCGATAACCTCTTCCGCGGACGATTTATATCAACGAAAGCGAAAGCGCAATGGAAAGTGGCGCTGATCACT  
GAAGCAATACGAGCTGCTGGCGTCCGCAATTAATACCGGTACCAATCTGCCCTCCGTCGCTACGCCGAACGGTACGGCTG  
CGTTCTGTTCTGCTGACCTCTGCACTCGCGCATTTGATTTCCGCTCTCTTATGGCCGATGGTGTGGATGGCCCTGCT  
TACACCTCGTCTGACACTGCTCGGCTGCTGCGTGGTGGTGGTGGTGGTGGTGGTGGTGGTGGTGGTGGTGGTGGTGGT  
GGGCTGGATAGCAACGCTTTGA

>Cluster\_38717

ATGGATATCATTTGGCGGACAACATCTACGTCAAATGTGGGACGATCTGGCGGACGTTTACGGTCAATAAACCGCGCTGAT  
TTGTGAATCCAGCGCGGAGTCTGTTAACCGTATAGTTATCTTGAAGTTAAATCAGGAGATTAACCGCACGGCAACCTGT  
TTTTATACGCTGGGGATTCGCAAAGGCGACAAGGTTGCTCTACATCTCGACAACGCGGGAATTTATCTTTTGTGGTTC  
GGGCTGGCAAAAATTTGGTGGGATTTATGGTGGCGATTAACCGCCGCTGTTACGCGAGGAAAGCGGTGATCCGCAAAA  
TAGCCAGGCGTGCCTGCTGGTGACCACTGCGCAATTTATCTATGATCAACAGATTCAGCAGGAAGATGCCACTCAGT  
TGGCGCACATTTGCTGACAGATGTGGCACTTCCGCTGATGATGGCGGTGAGTTCGTTTACTCAACTGAAATCAACA  
CCTGCCACCTTGTGCTATGCACCCGCTATCGACTGACGATACGGCGGAAATTTCTTACCCTCCGGCACCACTCCCG  
ACCGAAAGTGTGGTGTATACCCATTACAACTGCGCCCTCGCTGGATATTAACCGCCGCGAGTGTGCACTGCGTGGC  
ATGACGCTCACTGACGGTAATGCTGCGTTTTCATATCGATTTGCCAGTGTACTGCGGCGATGGCGGCTTTTCTGCGGG  
GCCACCTTTGTGCTGCTGAGAGAAATACGCGCCGCGCTTCTGGGACAGGTGCAGAAAGTACCGCGCACCTTACCGA  
ATGATTTCCGATGATGATCCGACGTTGATGGTACAGCCGCTTACGCAACGATCGGCAACCCGCTGCGGGAAGTGA  
TGTTTTATCTCAACTTGTGCGAGCAGGAAAAGACGATTTTGTGAACGCTTCCGCGTTCGCTGCTGACGCTTATGGG  
ATGACGAAACCATTTGTTGGGATTTATCGCGATCGCCCTGGCGATAAACGACGCTGGCGTTCGATTTGGTGGGCGGGT  
TTGCTACGAAAGCGGATCCGCGACATCAAACTCGCCGCTCCGCGAGGTGAGATCGGTGAAATCTGATTTAAAGGCG  
TACCAGGAAAACATCTTCAAAGAGTATTTTCAACCCGAAAGCCACTGCGAAAGTACTGGAAGCCGATGGCTGGCTA  
CATACCGCGATACCGGATACCGCGACGAGAGGGCTTTTTTTTATTTCTGATCGCCGCTGCAATATGATCAAAACCGG  
GGCGGAAATGTCTCCGTTGGAGCTGGAATAATCATCTCCGCGCACCCGAAATTCAGACATCGTGGTGTGGGTA  
TTAAAGATTCGATACCGGATGAAGCCATCAAAGCATTTTGGTGTGATGAAGGTGAAACATTTGAGCGAAGAGGAAATTT  
TTCCGCTTCTGCGAACAATAATGGGAAATTTAAAGTGCCTTATCTGGAGATCAGAAAAGATCTGCCACGTAATG  
CTCGGGGAAAATAATTAGAAAGATCTGAAATAA

>Cluster\_104

ATGGGCGTATTCTGGATATTTCCGGGACGCGTTTGGATTTTGGAGATGAAATGCAGACCCGACGCGATGAGCTGGCAAT  
GGTATGAAGCTACGACGAGGATCTTCCAGTGGTGTGACGCGGAAACCGGGCCGCGAGATGCTGCGTGTGCGCAAC  
CGGCTGATCTGACAGCACAGGCTGACCTGGCTTTGATATGGAAGAAAAGGACACCCACCTTTTTTCCGAACTGAGCAAA  
CCGCGCTTGGCAATTTAGCGCTGGAATGGCGCATCGCTCCGCGACGTTGATGCGAGCGACAGGAGAAAAGACGCTGA  
CATGCTGAATGAATATCTGCATGATGGCGGTGGTTTGAAGATGCCCTGTTTGGATGCCGCTGATGCCATTTCTCAAGGGCT  
ATTCATGACGAGATGAAATGGGCTGGCTGGGAAAATGCGCGTGGCGGTGGCGCTGCATCATCGCGATCCGGCGCTG  
TTCTGGCGAACCAGCAATCTGAACGAATTAACCTGCGTGTGCTTATCAGGGCTGGAGCTGCAACCGTTCGG  
CTGTTTTATGACCCCGGCAAACTCCGCGACCGGATGTCGCGCAACAAATGGCCCTTGTGCGCACGCTTATCTGAGGTTT  
TTTTTAAAACTATTTCCGTCGCTGATTTTGCAGAGTTTCTGGAATTTACGACTCCCATGCGCGTCCGTAATATCCG  
ACCGGCTCCACGAAACCGGAGAAAGCCAGCTGATGACGCGGTGATGGATATCGGGGACGCTGCCGTTGGCATTTATCC  
GATGGGATGACGCTGGATTTTACAGACGCGCGAGATGGTCACTCAGACCCCTTATGGCGATGATGGCTGGGCGAGAA  
AAGCGATTTCAAAGCCATTTTGGCGGCACTTGAACACAGAGGCTGGCGATAAAGGCGCACGGTTCGTTGGTGAAGTG  
CATGATGAGGTTCCGCGGAAATCCGTAACCGGATGTGGCCAGCTTCCCGCAGTATTAACCGTATCTGATTTATCC  
CCTGCTGGCACTGAACAGTACAGCACCATTTGATTTAACCCTGCGGGCATTTGTTTGAATACAGTGAAGCGGGT  
ATATTACGCACTGTCTGACGCTTCCGAACTGGCGGGGATGCGTATTTCCGCTCTCTGGATACAGGAAAACATC  
CATATTCCACAGCGGCTGGTGCAGGAGCGGTTTACTGCTCAACCGGTTGTTCCCGGATAACGGTCCCGAGAAAGAGC  
CGCATTTCCGCTGATGATATCCCGAGGAGTATGTCGACCGGATGGCGGTTTACCGGAAAGACTGGCAGGCTTCGG

TTGATCCCTGCTGAAACCCGTCATTTTTCTGTGCTGAAAGATGGCCCGGAAGCCGCCATGAACAAAGCCGCTTCATTA  
TATCCGCAGATGGATGATCGAGAACTTATCGACATGCTGACCCGTGCCATTTTTGTTGCCGATATATGGGGGGCTCTGGA  
TGCCGCAGCAGACCATTGA

>Cluster\_10080

ATGTGCAGGAAATATGCGCATGTTGTGGACGCCCTGCAAGGGAATTCGCCGTATGCAACAGACCCGGCGGAAACCGGCT  
GCCGGACCCGGAACCTGCATCCGGACAGCAGCTCACGGCGTGGCCGGATAACCGCATCGCGGAAGATGCGCACTATGTCT  
ATCGCTACGATGAATACGGCAGGCTGGCCGGAGAAGACGGACCGTATCCCGGAAGGGTTATCCGGATGACAGCAGGCGC  
ACCCACCCTATCACTACGACAGCCAGCACCCTGGTGTCTACACGGGATACAGCAGCGGAAACACAGGTGGAGAG  
CCGGTACCTCTATGACCCCTGGCCCGCCGGACGGGAAACGGGTATGGCCGGGGAGCGTGACCTGACCGGGTGGATGT  
CGCTGTGCGTAAACCGGAGGTGACATGGTACGGGTGGGACGGTGACAGGCTGACGACGATACAGACCCGGCACCACGCGT  
ATCCAGACGGTATACCAGCCGGGAGCTTCGCGCCGCTCATCCGCATCGAAACAGACAACGGTGAACGGGAGAAAGCGCA  
GTGCCCGACCTGGCCGGAGAAGTTACAGCAGGAAGGGAGCAAGACGGTACGGTGTGGTGTCCCGGCTGAACCTGGTGG  
GGCTGCTGACAGCTGGAGGGGAAATCCGGGCAAACTGCGTGAGCAGTGAAGCCGACAGTGAAGCCGACCTGACGCGGG  
CTGACGGTGGAGCGGCTGGCCGACAGATAGAGCCGGTTTATTTGCCCTGAGCGAAAAATACATCTTTACTGTGACCA  
CCGGGGCCTGCCGCTGGCCCTTATCAGTGAAGACGGCAATACGGCGTGGAGCGCGGAATATGATGAATGGGGCAACCAGC  
TTAATGAGGAGAACCCGCATCACTGCACCAGCCGTACCGGCTGCCGGGGCAGCAGTATGATAAGGATCGGGGCTGTGTAC  
TATAACCCGTCACCCGCTACGATCCGTTGACGGGGCGGTATATACCCCGGACCCGATTTGGGTTGAGAGTGGATGAA  
TATGTATCAGTATCCGTTGAATCCCATACAAGTATAGACCAATGGGGTTAGATGCGATTGAGAATATGACATCAGGTG  
GACTAATTTATGCCGATCTGGTGTACCTGGATTGATTGCTGCAACAGCATTACTAACAGTGTACCAAGTTCGGTTAT  
GATATGGATGCTATGTTGGCGGAGCTATAAATGGGGCCGCGATGCAATGAGACATTTGTTACTGTGATGTGCAATGAC  
TAAGACATTTGGATTAACAAATAGCTGACGTGATAGGTAATAATCATGAGGCGGAGGGGATAGACAAGTTCAGCAGCTA  
AAGAAAGAAATCATGGATCTTAAAAATAACACTGTCCGTTATGCTGTGGCGATTTTTCGCCAAATGTAGCGATGCATGT  
ATTTAAAAATATAACACTGGGCAACTCTCCGGTTAGATGGTATAAAGCAGATAATCCAATAAAGCAAGCAAGGGAG  
TTCAGATGCTTCAAATTTATAG

>Cluster\_6257

ATGAGTCAGAAATACCTCATTCGCATCGCAGAGCTGGAAGGTTGCTCTCTGAGCAGGCTGAAGCCCTCCGTCAGAAAGA  
CCAACAACCTGAGTCTGGTTGAAGAGACGGAGGCCTTCTGCGTCTGTGCTGGCAGCTGCCGAAGAAAAGATCGAAGAAG  
ATGAACGGGAAATAGAACATCTCGCGGCTCAGATAGAAAACCTGCGCCGGATGCTGTTCCGTAACCGTCTGAAAAAC  
CGTCTGAAAGTTGAACAGGCTGAGGCCCTGCTGAAGCAACCGCAACAGGACAGCGATCGTTACAGTGGCGGAGAGGATGA  
CCCGCAGGTTCCCGCCAGTTGCGACAGTACAGCCATCGTCTGCTCCGTTACCGGAGCATCTGCCCGCGAAATAAACCGCC  
TGGAGCCTGAAGAAAGCTGTTGCCCGGAGTGTGGCGGTGAGCTGGATTATCTGGGGAAAGTCAAGTGCAGAACAACTGGAA  
CTGCTGAGCAGCCCTGAAAGTATCCGCACAGAACGGGTAATAAAGCCCTGTACAAAATGTGACTGCATCGTTGAAGC  
ACCGGCACCATCCCGTCCGATAGAGCGTGGTATCGGGGCCCGGAGTTACTTGCCCGCTGTTAACGGGAAAAACTGCG  
AACATCTGCCACTGTATCGTCAGAGTGAATCTTTGCCCGCAGGGTGTGCAACTGAGCCGTGCCCTACTCTCCAACCTGG  
GTTGATGCGTGTCCAGTTAATGACTCCGCTGAATGATGCCCTGTACAGTTATGTGATGAACACCCGCAAGGTTACAC  
TGATGACACACCTGATAAAGTACTGGCACCGGGCAGGAAGGGCAAAAACAGGATATTTGGCAGTATGCTCCGGATG  
ACCGAAATGCCGTTCCGCAAGACCTCCGGCGGTCTGGTTCGCTACTCACCGGACCATCAGGTTAAACATCCGGAGCAA  
CACCTTCGTCCTTCCGGGGTATCCTGCAGGCAGATGCTTCGCAAGTTACGATCGGCTGTTTCAAGTGCAGAACTGAAG  
CGCGCGGTTGAGGAAAGCAGGATGCTGGGTTCTATGACCGGCAAAATCCACGATGATATATCAGTACCAAAAAGCGCGA  
CGCGGAAAGAAGCACTGAAACTAATCGGTGAACCTGTACGCCATTGAGCAGAAATACGCGGGTTGCCGCTGTGAAACCC  
CTGGCGGTGAGGCAATGACAGTAAACCGCTACTGACTTCCCTGTATAAGCTGATGCAGGAGAAAGAACACAGTATC  
GAAAAATGCCCTCTGAGAGATGCGTTCGGGTTATCAGGAAGCACTGGGTTGCGTTGTGCAACTTCTGTGATGACCGCT  
TGGCGGAGGCAATAAACACAGCGGAAAGAGCGCTTGGCTGAGTCTGTCTCGGAAAGAAAAATCTTATGACTTTTGT  
CAAATATTAAGCCAAAAAGACCTTACGACAGTCCGGGAGCTTCGTTATATCGCGGATTAAGAACCTGATACAGTCAGA  
CTGTATCTTGGATTTTACAACCTTATTCGGGGATTTTACGCCCATGA

>Cluster\_51983

ATGAAACAAAAGAAAGCCGAGGTTTTTTTTCAGAGCCTGGGGAAGGCATTTATGTATCCCATTTGCTCTGCTAAGTGTATG  
TGGCATGATGCTAGGGCTGGGAAGTGGTTTAGCCAGTGTATGATATGGCAAAGTTAATCCATTTCTGGCTATTTCAATAA  
TTAAAACCATACTTGATTTCAATTGTTAGTCTTGGTTTGGTTTGCCTTTGTTAATTTACCTGTATGTTTGGCATAGCGATT  
CCCTTAGGATTTAAAAGATAAAGAGGATAAAGCCCTATGGTCTTTTTCTGGCTTAATTTGGTTTTATGGCGATGCATCT  
GGGAACGAACTTTTATCTTAAACAGCAGCACTTATTGGTCTGTTTGTGACCAAAATGTCGACACATGGGCAAAACCATATC  
TGGGGATCCAGTCTTACAATACCAGCGTGTGGGGGAATTTGTTGCTGGGTTATAGTCCGACATGATAAAAAGATC  
GTTAATTTACGATCTCTGAATCGTTAGTTTTATAGCGGCCACGCTGTTGCTTATCATTACACTGATTTGATGAG  
TGGATTTGGTTGATCATTTCTTTATCTGGCCCGCTTTTCAATCTTTCTATGCTCATTTGGCCACTGGATTTCAACTT  
CCGCTCTTGGTTGTTTCTTCTTATGCAAGTTCGCAAGCCGTCAGCATTCCTTTTGGCTTAAACCATCTGGTGCAGTCA  
GTTTTCCGCTTTACGCCAATCGGGGTTCCGCTGTGATTTGGCGGCAAGAATAATACGGCACCTGAACATGTTTTATGGC  
ATACGTCAAAAGAAATGCGGTCATTCGCTGGAATTTGGCGGGGAAAAATGGAGCAGGGCAAACTGATGATTCAGTATGGT  
TGGCTGGTCTGCGCTGGCGATGTATCGCACTGCTCATGCTCAAAAAGGAGCTATCAAAGCATTGCTTATTTCCGGG  
GTGCTTACGGTGTATTTGGCGGCTCAGCGAACCCGATTTGAGTTTCTGTTTCTTATTTGTCAGTCCACTGCTTTGTCTT  
CCATGCCTTTATGAATGGATTGCTAATGTTCTGCATATATGGGGTGAAGATGGGATTTACTGGTGTATGATTC  
AATTTATAGCTTTGGCGTATTGCGTGGCACAAGAACAGGTTGGCCGATCGCGGTGTGTGCGAAGTGGCCTATTTCTTCT  
ATTTATTACTTTGTTCCGTTGGACCATCTTAAATTTAACCTGATGACCGTAGCCGTTGAGAGTCCAGTCCGCTGTTAC  
GCTGAACGCTCACGAAGATACGGCTATAGCGGATATCCCAACTCTGATAAATCAGAGCTGCAAGCGGCGGAGCAGATGG  
TTAAGGCACCTGGTGGTAAAGAGAAATTAAGTCACTGGATAATGCGTAACTCGTTTAAACAATCGCAGATATG  
AGATTGATGACGAAGTTGCAATAAAAAGAGCTGGCGGGATTTGCGGTTGTAATAACTTGATCAAAAATACCTACAAGTCAT  
TATCGGCATAAAGTCACTGCCCTGCGCTCGGGATATGGATAACTATATGGGGATATATCTGA

>Cluster\_3243

ATGAACTCGTTTTCACTTCTGACAACCCCGTGGTTGCCCGTTCGTTTTAAAGACGGAACGACAGGCAAACTGGCACCAGT  
CGATCTGGCTGATGAAAATGTTGTCGATATCGTGGCCCGGGCAGATCTCCAGGGGGCGGCTGGCAGTTTTTGTGG  
GGCTATACAAACAGCTTCGCGCCAAAAGATCAACGTCGTTGGGATGATATCGGGAAGACGGGAAAGCTGAAGCTGA  
CTAAGGGAAGCATTTGCTGTCTTTAGAACATGCTTTTCACTTTGGGCCAGATTTCCCTTCAATTTATGCAGGATTTTGTATGA  
ATTTAAAGTTAAGGCAACTTCTATTTGCTTCGCTTCTTCTGACGACCCAGGAAAAACAAAAGAAAGCAAAATACAGACC  
ATTTTATTAAGCGAGACACAACCTCAGCATCTGTGCTGCATTTGTGCTTTAGCGCTTTTTCAATCCAGTTGAATGCA  
CCTATAGTTGGACCGGTTACTATCTGGCTACGTGGCGGGAGGGCTCTGACGACACTTATAGAATGCTGGAGTATCA  
GGCAATCAACAAACCCCTTTGTGGCGAAAGCTGTGGCTAAACGTAATGCCGCAAGATGAAGCCGATTTACCTTTACCAA  
AAACCTTTGATGACTTGGTCTTTCCATGGCTTGCACCGACCGTACCAGCGAACTGGACGGTGTGTGGTAAACGGATGAA  
CAAGTCAATAAATCACTGGGCACTGGGAAAGTGCACAGCTATACGATTTGATTTAAGCAACCTCAATAGCTAACGTG  
CGACATTTGCGGTAGGCAGAGCGATGCTTTTTGGGCTTGTATGCTCAAAAATATGGTGTCAATACGTCATGTGGC  
GCCATCTCTAACACCTTACCGTCTGCCGCTTAAAGAGGGTGGAGATTTTACTCAGTTAAACCAACCTGGTGGTTTTA

ATCTGGCGGACTGGTTAGGCTCATAGAGGTAGGTAAC TCAAAAAACAATCTGAAC TCCCCGCACAGGTCGTGAACT  
TTTTAATGCCAGCAATCTAAAGCAGACAAGGGTGGGCTTATGGGGATTGGTTTTGATTTGAAGATA GAAGGTTCCGTT  
GTTGGTATGAACACCATTCCCGCTGTTGTTAAACAAAAAGAAGACCTAATACCTAAGTTGCGTCTGGCAGCGCAAGCG  
GCATCACACATTTAAGCTTGTACACCCGAGCGTTGAAAGAAGCATGGTTCTCTGAGAAGAAAACCAAGGCTTGATTTT  
CGGTTTTGGTATGATTTGACTTCTGGAAACAAAAC TACAGATCGATTCTCTGAGATTAGTGCACAAAATGAAGAAGGTCAG  
ATCCGTACGAATTAAGTAAATGGCAAAAAGGAAATGTTGTTATTCGCGCGTCAGGATTTTGACGATCGTGTCTTTACC  
AATCCATATGAGCCCGTTGATTTGGAACGCGTCATGACCGCACGAAGAAATATTTTACAACATCAGCGGAGAAGCAAAA  
TGCTAACGCCGCCAGGGAGAAAAAGCAGGAGGCTGCTGAATGA

>Cluster\_34583

ATGTTAGATATAGTCGAAC TGTGCGGCTTACAGTTG CCGCTTGACCGGATGTACC ACTTCCTTTTTGTGCCACTGACGCT  
CGGTATGGCGTTCCTGCTGGCCATATGGA AACGGTCTACGTCCTCTCCGGCAACAGATTTATAAAGATATGACCAAGT  
TCTGGGGCAAGTTTGGTATCAACTTCGCTCGGTTGGGTGTCGCTACCGGCTGACCATGGAGTTCAGTTCCGGGACTAAC  
TGGTCTTACTATTTCCACTATGTAGGGATATCTTCGGTGGCCGCTGGCAATCGAAGGCTCTGATGGCCTCTCTCTCGA  
ATCCACCTTTGTAGGCTGTTCTTCTTCGGTTGGGATCGTCTGGGTAAAGTTCAGCATATGTGTGTCACCTGGCTGGTGG  
CGCTCGGTTCAAACCTGTCCGCACTGTGGATTCTGGTTGCGAACGGCTGGATGCAAAACCCAATCGCGTCCGATTTCAAC  
TTTTGAAACTATGCGTATGGAGTGGTGAAGCTTCTCCGAGCTGGTGTCTAACCCGGTTGCTCAGGTGAAATTCGTTACAC  
TGTAGCGTCTGGTATGCTGACTGGCGGATGTTTCACTCCGTTATCAGCGCATGGTATATGCTGAAAGGCTCTGCTTCTCG  
CCTTCGCTAAACGCTCCTTTGCTATCGCTGCCAGCTTCGGTATGGCTGCTGTTCTGTCTGTTATTTGTTCTGGGTGATGAA  
TCCGGCTACGAAATGGGGCAGCTGCAGAAAACCAACTGGCTGCTATTGAAGCCGAGTGGGAAACGCAACCTCGCCCTGC  
TGCTTTACTCTGTTCCGATCTCTGATCAGGAAGAGGAGACGAACAAATTTGCGATTTCAGATCCCTTACGCACTGGCA  
TCATTTCAAACGCGTTCCGGGATACCCCGTTATCGGCTGAAAGAGCTGATGGTGCAGCATGAAGAAGCGCATTCGTAAC  
GGGATGAAGGCGTACTCTCTGCTCGAACACTGCGTTCGGTTCTACCGACCAGGCGGTTCTGTGACCAAGTTCATAGCAT  
GAAGAAGACCTCGGTTACGGTCTGCTGCTGAAACGCTATACGCCAAACGTTGGCTGATGCGACTGAAGCGCAGATTTCAAC  
AGGCAACCAAGACTCCATCCCGGCTGAGCGCGCTGTTACTTTGCGTTCGGTATCATGGTGGCGTGGCTTCTCTGCTT  
CTGGCAATCATCGCGCTCTCTTTCTGGAGTGTCTCCGCAACCGCATTGGCGAGAAAAAATGGCTTCTGCGCGCCGCGCT  
GTACGGTATTCGCTGCGGTGGATTGCTGTAGAAGCGGCTGGTTCGTGGCTGAATATGGCCGCAACCGTGGGCTATCG  
GTGAAGTGTCTGCCAGAGCTGTGGCGAACTCGTCACTGACCGCAGGCGATCTCATCTTCTCAATGGTGTGATTTGCGGC  
CTGTATACCTGTTCTTGGTGGCAGAATGTTCTTAATGTTCAAGTTTGCACGCTCGGCCAAGCAGCCTGAAAACCGG  
TCGCTATCACTTTGAGCAGTCTTCCACGACTACTCAGCCGGCACGCTAA

>Cluster\_29184

ATGAGCGCGCTCAACTCCCTGCCATTACCGGTGGT CAGACTGCTGGCGTTCTTTCATGAAGAGTTAAGCGAGCGGGACC  
AGGCGCGTGCACAGACGATGCAACTCTGGGTAGGTTGCCTGCTGGTATTCGATCTCGATGACTTTTGGATCCCTT  
TTGTGGGCTTATCACTGGCAGTGTGTTTTACGGTATTCAGTCGAACCGGTTTTACACCAATTTGTGGCAATCTGTTT  
GTGCTCGCCACGGTGTGGAGATCGCCAGCCTGTTTTGATCTACAAATGGTCAATATGGCGAACCGTTGATCCGATTGAT  
CATTTGCCGGGCGGATCTGATAGGCTGTATGTTTTGATGCGCACCACTCGGTTGGGGCTGGTCTTTTTCGCCGTCGCCA  
TTTGGCTATTTTACGGGCAAAACCTTCCCGCATGCTGCACTATCCGGAAGCGGTCGTGCGCTTAACGCTTGTGTATC  
GTTGTTGGCTCTATCAACCTTGTGATGACGTTAATCGCGTGTGTGTTTTCCAGTCTGTCATACCGCAGATGCA  
TCAGGCGCTTAATGATCGGCTTGATGATGCCATTAGCCACTGACCGGACAGCCTCGCAACCGTACCCGAAACCGGATTTG  
AAAGAGAGCGCTGGCGCTGCAAAAACCTCAATGCTTTTGGCTTCGCGGACGATGCCAACTGGCAACAGCGCATGG  
TGGCAAGCTCGCTGGCAACGGTAAACCTACTTACTCGACACTGAATCGCTACGATCCACCTTTTTGCTGATTTCTCA  
GGCAATTTGAAATTCGACAAAAATTAGCTTCAAGAAATCAACAGATACAGCATTCCATTACCGAAGGTCAGTGTGCTGGC  
AAAGCGACTGGCGGATCAGTGAAGTGAAGCAATGGCGCGCAGGGAATGTAACCTGGAGAATATTTGCCAGACGCTATTA  
CAGCTTGGTCAGATGGACCAAACTACCGCGCAACCGGACGCAACCGCCATCAATGGTCGCCGATTTTACCAA  
TCCAGACTATATGCGCTACGCGTAAAAACGCTGCTCGCTGTTGATCTGTTACACCTTCTACAGCGCGCTGGACTGGG  
AAGGCATTACACCTGTATGCTGACCTGCGTGTGCTGCTAAATCCAAATGTCGGTTCTGCTACCAGAAAGATGGTGTG  
CGTTTTGGTGGGGCTTTTTGGCGCGGATTTGGCGCTGTTATTCAGCTACTGGTCAATGCCCTGGCTGGACAATATTTG  
CGAATTTGCTTTTTGCTGGCACCGATTTTCTGTTGGCGCATGGATTGCCACCAGCTTGAACGCTTCTTATATACG  
GCACACAGATGGTGGTCACTTCCGCGCTCGCCACGCTCGAAAACGTTTTTGGCCCGGTGACGACCTGGTGGAAATTCGC  
GATCGCGCTCTGGTATCATCATTTGGTACCGTGTGTCCGCGGTGATTACACCTTTGCTGGCTGAAAGCGAAGCGCG  
CAGCTGCGCCAAAAACTGGCTGGCGCGTGGGATGTTGAGTAAAGTAAATGCCGATCCACGCCAGCAGGAAGTACCGG  
CTCTGCGCACTTATCTGCAAAATTCGCATAGGCTTGCATGCGCGCTTTAATGCTGTAAGAGATGTGCCAACCGTGGTG  
CTGGAGGCTCACTGGACAGCGAAGAACCGCATTAAGTATTGAACGTTTCGCAAAACGGTTATTCGTCAGGGCCCGGATAT  
TCTTCACGCTGGGATGCCACCTGGAACCTCGGCGCAGGCGCTGGATAACGCATACAGCCGGACAGAGAGGTCAGTTTG  
CCGACGCCCTGGAGAATAACGCCCGGCTGGCAACCGCATCAGCCGTTCTCTCAAAATACGCTTGAAGAAAACCC  
CGCTCGCAGCCATTCTGCCCACCTTATTA AAAACAGGACCAACACGCTTCCAGCTTTTCCGCCGCTTCCAGACTGGAC  
AGCCCGGCATTAACGCCCGCCACGGAACAGGCACAAGGACACGCAATGA

>Cluster\_53941

ATGCAAACCCATCATGATTTACCTGTTTACGGCTATCGCAGGGGAAATGCTCCGAGGTTACGATCTGGACGCCCT  
GCTGAACCAAGCATTTTGGTGGTCTGTTGGTGGCTAAAGATCTCAACCAAGCAACTCAAGGAAGGGGCAACCTCCCGGTT  
ATGTGCTGGAGTATCTGCTCGGCATGTACTGCGCTCTGACGATGACGACGTTGGTCGAGCAAGGGTTGCAAAACGTTAAG  
CGTATTTCTGGCTGATAACTATGTGCGCCGGATGAAGCAGAGAAAGTGAAGTCTGATCCGCGAGCGTGGTTCTGTACAA  
AATCATCGATAAAGTGTGCTGGTGAAGCTAAACAGAAAAAGAGCTTTACGAAGCCAGCTTTTCAACCTCGGCATCAAG  
ACGCGCTGGTGCCATCGCAGATGGTTAAAGACAACGAGAAGCTACTAACGGGCGGATCTGGTGCATGATTACCGTCAAC  
TATTTCTTTGAAGAAGGGCAGAAGACTTCGCCCTTCTCATTGATGACGCTTAAGCCTATCCAGATGCCGAATATGGATAT  
GGAAGAAGTGTTCGATCGCGGTAACACTTTAACCGTGTATGATGGATCGATGTGCTGCTGCGCTCAGTGGGTATGGAGC  
CCGCAATATTGAGCAACCGCACCAAAATGGCACCTTATCACCGCTATGATCCCGTTCTGGGAGAACAACATAAAGCTTTG  
GAGCTGGGGCCGCTGGCACCGGTAAGACCATGTGTATAAAGAGTGTCTCTCAACTCTGTTAGTTTCTGGCGGGCA  
AACGACCGTTGCCAACTTGTCTACAACATGGCCAGTCCGCGATCGGCTGGTGGCATGTGGGATGTGGTAGCGTTCC  
ACGAAGTCCGCGGGATCACTTTCAAAGATAAAGACGGCGTCAAAATCATGAAAGATTACATGGCGTCAAGGATCTTCTCT  
CGCGCAGAGATTCGATTAAGGTTAAAGCTCGATGTTTTTCTGTCGGCAACATCAATCAAAAGCCTAGAGACTCTGTTAA  
AACAGCCATTTGCTGGCGCATTTCCGGCTGCGATGATTGATACTGCATTTTTTCCAGCGCTTTCATGCCATATATCCCG  
GTTGGGAAATCCCAAAATGCGCGCCGGAATTTTTTACC AACCGTTACGGGCTGATTACGGATTATCTGCTGAATATATG  
CGGAAATCGCAACCGCAGTTTCTCTGATGCGATTGATAAATCTTTAAGCTGGGTAACAACCTCAACCGCTGACGCT  
TATTTCCGCTTTCGACTACCGTGTGCGGTTGTTAAACCTCAATGCATCCGATGGCGCGTACAGCAAAAGAAAGATGTGCGAG  
TCTGCTGACCTATGCGATGGAAGTTCGTCGCCCGGTGAAGAGCAACTTAAAAAAGTGGCGGCTGGAGTTCTTCGAT  
GTGAACTTTAGCTACATCGACAACGAAACGCTGGAAGAGTTTTTTGTTGAGCGTACCGGAAACAGGGCGGACGCAACTTAT  
TCTGCGGAAATCGCAAGCGGTTGTTGTGCACTGGTCACTCAGGCAGAAAGCGGCATGACCGGGTGTATGTTTGG  
AAACACAGATGACTGCGGTAATGGTAAGCATAGTGTATCGGGTCTGGGTTCAAATACCTCCGCGAAAGAAAGCTATCCCG  
GTCGGTTTTCGATTACTTCAAAGCAATTTGAATCGGGTAAAGCGCGCCGCAAAATCTCCGATCATGAATATCACCTTCA



CCGACCGCTGAACAGCTGGCAGAAATCGCGATTAGTCCGCTGATCCGCTGCGGCCCTTCGGTATCGAACCGCGCGTTGC  
TATGCTCTCTACTCCACCGGTACTTCTGGTGCAGGTAGCGACGTAGAAAAAGTTTCGGAAGCAACTCGTCTGGCGCAGG  
AAAAACGTCTGACCTGATGATCGACGGTCCGCTGCAGTACGACGCTGCGGTAATGGCTGACGTTGCGAAATCCAAGCG  
CCGAACCTCCCGTTGCGAGTCCGCTACCGTGTTCATCTCCCGGATCTGAACACCGGTAACACCACCTACAAAAGCGGT  
ACAGCGTTCTGCGGATCTCCATCTCCATCGGCGATGCTGACGGGTATGCGCAAGCGGTTAACGACCTGTCCCGTGGCG  
CACTGGTTGACGATATCGTCTACACCATCGCGCTGACTGCGATTAGTCTGCACAGCAGCAGTAA

>Cluster\_38818

GTGACTATTAATCCACTAATCATCTTACCACATCGCCACGTTTTCGCGCTCTGCTGTATAGCAATAGTGGTTTATGCGC  
TGAACCTCGTCAAAATGACCATACATTTCTGATGGGAAACGATGCTTCAAATATCGACCTTAGTTCGGTATACAGAAGGCA  
ACCCGACACGACCAGGCATTTACGATGTGAGTGTATATTAACGATCAACCCATCATGAGCCAAAGCATTGCTTTTACT  
GTTATTGAAGGTAAGAACGCTCAGGCTGCATTACGCAGAAAAATTTATTGCAATTTTATATCAGTTCACAGACAA  
GAATAGCGGAAAGCCATTTTGCCTAAGCGAGACGACGATCTTGGTGAATGCTCAATCTGGCTGAAATGATCTCTCAAT  
CATCCATTCGTTACGATGTAAACGATCAACGCCGATGATCGACGCTCCCGCAGGCATGGATTATGAAGAATTTATCAAAC  
TATGTTGATCCCTCTTTGTTGGGAAATGGCATTAAATGCAGCCATGCTTTCCTACAACCTCAACGGATATCACAGTGAAG  
TCCAGGCAGAAACAAATGACAGTATCTACGCGGCAATTCAACGGTGGGATAAACTTAGGTGCCTGCGGTTACGTCCTCG  
GTAACATAACTGGATGACCAATGTCCATAGCGATTACGATTTTTCAGAAATCGTATTTTACAACCGGATCTTGCCTCATA  
CGTTCAACAATCGTTATTGTTGAAATCTTACACGACCCGCGAGACCTTCGATTTCAGTCAAGTTCGCGGTTTTCGCTTATA  
CAGTGACAGTCAATGCTGCCTCCGGTATTAGCCAGTTTTCGCGCAATCATTCATGGCGTAGCGAATACCAATGCCAAG  
TAACCGTTATGCAAAATGGTTATAAAATCTATGAAACGACGGTCCCGCAGGGGCTTTGCCATTGACGATCTTAGCCCG  
TCAGGTTATGGCAGCGATCTCATTTGTGACTATCGAAGAAGTATGATGGCACAAAAACGGACGTTTCGCCATTTTCATC  
TGTTGTGCAAAATGCTGCCTCCGGTTCGCTGGGATATTAGCGCGGTCAGGTTTAAAAGACAGTATCCAGGATG  
AGCCTAATTTATTTCAAGCCAGCTACTACTATGTTTGAATAACTACCTGACAGGATATACCGGATTTACGTAAGTAT  
AATAACTATACCGCGGATTTGCTGGGCTTGGTATGAATACCCCGTGGGGCTTTTCTGTGATGTTACTACTCAA  
TGTGACGATTTCCGACGATAAAACCTATCAAGGACAAAGTACACGATTTCTGGAACAGTTATTTGAAATACCGATA  
CATCATTAATAATCGCGGCTATCGCTACTCCACCCAGCATTAATCTGGGCTCAATGATGCGCTGACGCTGATTGATGAA  
GTAGAACATCTGAGCAAGATCTTGAGCCTAAATCCATGCGCAATTACGCGCATGAAAAATCAGGTCACGGTCAGTAT  
CAACCAACCGCTGAAATTTGAGAAAAAGGAAATCGCCGTGGGAAACGCTGTGAGTTACGCTCAGCAAGCAGTATAATA  
GTCGCAATTTCCACTCAATGATGTTGGTATTTGTTGATGATAGCGCGGCTGACGTTTCAAGTATTTGAAATACCGATA  
GATTCCGACACTGCGTGTCAATCAGGCGCCAGGAGCAAAAGGCGCTCGTATTAACGAAACAGCACCCTAGACCG  
CTGGAGTTATGGTGTGACACGCGCTTTTCGCCATACCATGAAATCGTATCGCACTGACATTAACGATCTGAAAAACG  
ATGTTGAATGAAAAAGCACCAGTACTGTGCCATCCCGCGCAGGAGCGCTGCTTTGCTGATTTTGAACAGTTTTCAG  
GGACAATCCGCAATTTATGAATATCGTCCGAAAGCAGTGGTAAATAATTTCCATTTGCGGAGGATATTTATGATGAACAAA  
CAATATCATCGGCAACGTTAGGTCAGGTTGGTCAAGCCTTTGTTACGGCATCGAACAGGAAGAAAAATATACGAATACCT  
GGATTTGAAGAGGGCAAACAGTCAAGTTGTTTGTCTATACCAACAAAACACGGCATCGAAAAAATAGCACAAATCTATT  
ATTTTAAACCGGCTTCGTTGTGATACAGTAA

>Cluster\_58859

ATGAATTTCTGTTTGCAGTACGGCCCTGGGCTGGAAGAGCTGTTAAAAACGAACTGGAAAACTGGGGCCGTTGA  
ATGCCAGGTGGTTTCAAGGTTGGGTTCCATTTCAAGGGCGACACCGGCTTGTTTTACCAGAGCCTGATGTGGAGCCGCTGG  
CCTCGCGTATTATGTTGCCGCTGGGCGAGTGAAGTTTACAGCGATTAGACCTCTATCTCGGTGTTTCAGGCGCATCAAC  
TGGACAGAGATGTTTAACTTCCGCGCGACCTTCCGCTGCTCACCTTCAAGTGGTTTGAATGACACCATCCGCAACAGTCAGTA  
CGCGCGATGAAAGTGAAAGACGCGATCGTCTGATGCTTTCACGCGGAAAAATTCGCCGCTCCAAATGTTGATCGCGATG  
CGCGGATATCCCGCTTAAAGCTGCGCTGCATAAAAGAAACCCGAGTATCGCTCTTGATCTGAGTGGTGTGTTTACAT  
CTCGGTGGCTATCCGCGATCGTGTGTTGCGCGCATCAAAGAAACCTGGCAGCCGCTATTGTGATGCGATCCGCGTGC  
GCAGCCAGGAACACCGCTGCTCGATCGGATGTTGTTTCCGGTACGTTGCTGATTTGAAGCAGCGATGCTGGCGACCGATC  
GCGCACCAGGCTTGCACCGTGGGCTTGGGCTTTAGCGGCTGGGCGCAGCATGATGAAGCTATCTGGCAGGAAGTGAA  
CGGGAAGCGCAAACTCGCGCCGTAAGGCTGGCTGAGTATAGCTCTCATTTTACGGTTTCGGACAGCGACGCAACGGGT  
GATTCACCTGACAGCAGTCAACCGCTTTCGCGGATTTGGTGAACCTGATCACCTTTGAGGTGAAAGATGTCGCGCAAC  
TGACCAATCCGCTGCGGAAAGGCGCTACGGCACAGTGTGAGCAACCCGCCATACGGGGAACGCTGGACAGCGAACCG  
GCGTGTATGCGCTGCATAGCCTGCTGGTCCGATCATGAAAAACAGTTTGGTGGCTGGAATCTCTCTTTGTTTGTAGTGC  
CTCGCCGATCTTCAAGTGTCTGAGCTGCGTGCAGACAAACAGTACAAGGCGAAAAACGGCCCGCTGGACTGCGTAC  
AGAAAAATTACCGTTCGCGAAAGCACTCCAGCAGCAAAACCCGCGATGGTAGCGGAAGACTACACCAACCGCTGCT  
AAGAACCCTAAAAAATTCGAGAAGTGGGCTCGCCAGGAAGGATGAAATGTTACCGCTGTATGACCGCGATCTGCCAGA  
ATATAACGTTGCCGTTGACCGTTATGCCACTGGTGGTGGTGCAGGATGATGCGCGCAAAAACTATTGATGCTCACA  
AAGCGCTCAGCCTGTTTCGATATATCGTGCACCAATTTCCGTTACGCGGATGCGCCAAACAACTGGTGTGAAA  
ACCCGTGAACCGCAAGAGGCGAAAAACCAATACCAAGAACTGGGCGAGAAAGCGGATTTCTTGAAGTTACCGAATAA  
CGTCACTTGTGGTGAACCTGACGGATATCTCGATACTGGTCTGTTCTCGATCACCGCATCGCCGCTGATGCTCG  
GTCAGATGAGCAAGGCAAGATTTCTCAACCTGTTCTTTATACGGCAGCGCCACCGTGCATGCGGGATTAGGCGGT  
GCACGACGACCAACCGTGGATATGTCGCTACTTATGGAATGGGCAAGCAACCTGCGTCTGAATGGCTGAC  
CGGCGTGCATCGCTGATTACGGCCGATTGCTGGCTGGCTGCGTGAGGCAAAATGAACAGTTCGATCTGATCTTTA  
TCGATCCGCCAACCTTCTTAACCAAAAGAAATGGAAGATGCGTTGATGTTAGCGCGATCATCTGGCGCTGATGAAA  
GATTTGAACGCTGCTGCGTGCAGGTGGGACGATCATGTTCTCGAACAAACAGTGGCTTCCGATGGATCTCGACGG  
CCTGGCAAAACTGGGACTGAAAGCACAAGAAATACGCAAAAAACGCTCTCCAGGATTTTCGCCGTAACCGCAGATCC  
ACAACCTGCTGGCTGATTACCGCAGCCTGA

>Cluster\_2507

ATGGCAGCAAAATGTAATCTTACCAGGAGGTTTGTGCTCGATGAACAACCTGATAACTCAGATTTCCTGATAGTTTACA  
GCTTCCTGATGGTTTGTGCTTGTATGCCCAACAGAACAGCAGCAATCACTTTGGTTTCACCAAGAGGAAAAATCCAGAC  
AGGAAAAATGTTGTTAATAATGCTAACGGTTTCGACCGTTTATGATGGCGTTCTCAGTGGATTGATGGATGTTGGTAAA  
GGTGTGGCCTGTTTCAGGATATGACACCAGAAGGCAAGCGCAATTCAGTCTTACAGCAGAAAGTTAGCGGCAAAACC  
ATCAACCGCACAAAGATGTTGGTGGTTCGTTGGACAAGCAGCGCCATTTGTTAGTGGTGGTGGGATTAATTTCTCAGGTT  
CCAAAGGGCGGCAAGACTGGCTGCCCGCAGGCTGGGCTGGAGAAAGGGCTATTGTAGCAAAATGGAACAAATAGC  
GATGTTGCTTCCGGCGTGTATGGCGCTGTTGGCTGGCCCTGTAGCCGAACTGCTGGCCCTGCAATTAATAAAATAGC  
TGGGAAATTAACCAAGAAGAAATGTTTCTCGATTCCAGATATTGAGGGGATTACTCTGCCGAAAGAGAAAAATCGTAAGT  
TATCTGACCAAGCAACCAAACTTTCCTCTTCGCTTGAAGGCTAGATCTAAAACCTCAGAAAGAAATGTTGGGCT  
GCAAAATAGCCTTCAATGTTGATTTCGTTCTTCTTCAATTTATCAGGAAATGAGCAATACCAAGCTGTAGAGCAAGCCCT  
AAGTACCGGACAGGATCAGCTTAAAAGCTCAAGAAGATAAAGCAATTAAGCAATTAAGCCTTAGTGTGGCAAGATAA  
TCGATGATGTTGCTGGCGCCAGATGCGTATGAGCAGAAAAATATATTATCAGATAAATAGTAGAATGGAAGCA  
CTAAAAACCGTAGTGTAGTTATATAACGTTGTTGTTGCTTATCACCAGAAACAAAGTCTGAAGCAATAACAC  
AAGCACTATGCTGAAAAAATCGCTGATGATTTAGGAGGGTGGGATAATCTTACCCAAATAGAAAAGCGAGTTTTCAG  
CAATAAACCCCGCCAGATAGAATCTAACGATGCAAAATTTAACAGGCAAGGCGTTTAGTGGTGTGCGCTAAAT



AAAAAGCAGGGGCCATACAAAGATGCTGATAAAGAAGCGCTATCAAGACTATATGGAGCTTTAGCTGAAGACCAAAAATC  
TGCTTATCAACTACTGGTACTTTGCGAGATTTGCGAAGTCGCACAACCGCTTGTAGCTATGAGAAAAAAGCTTAGAAAAGGC  
AAATGGTAAATCTTCGCGGGAAAAACACTTAAATGGGGATATAGCGTATAAAGTAACGAATCTCTTCAATCTATGGCAAAA  
GGTATGCGAGAGGGTTTCTGTGAGATTAAGCAAAATCTCCATCAAGAAGCTTGCAGAGGGAGCTAGTAGGAACAGCATTT  
AAGAGATAATGCTTTCCTCTGGGAAGCGTGGGCGCAGTTTAAATCCATCTGGCTTTGCGAGATTTGGTGGCAAAATCTGCAAC  
ACAGTGGACAGCTAAAGACTTTGGCTGAACATTTGCCAAAAGAAAACAATGAGCGGACTATATGATGTATACAAAGTTGCC  
AGAGCAATAAAAAATGCTAAAGCGCATGAAATACTACTGGTAAGCTGAATGAGTTTGTAAACAGATTAAATCGGGTAAC  
AGCTCCATACGAAGTACGAGCAAAACACATTAACAAAAATAGGCACGATGGTAGGCGCTCATTTTGGATCGCTTGGAGCCA  
TTGCTGGGGCTGATTTGGGCAAGATTGGCGAGTAAAGCTCGATTAGCTGGTGGAGCAGGGCGGCTGATGCTGCGGAT  
AAATTAATTCCTCGCCAGCCTTCCAGAGCGCAGTAAAAAATCTACACGGAAAAGCGCTGGGCACATTTGTTGATTCACG  
TATCAGGCGCTCCCTCAATGGAAGAGTTTAAAACTCTCTTCTGAAACAGGAAAAACGGACCATCGCCAGACTGGGCA  
TCATTACTTGGCTATCTAATGATCCAGATAATGACTAG

>Cluster\_24628

GTGAAAAAGCCAAACACGTTACCTGGCGGTTGTTGGCTGCCGGTGTCTGTCTGCTGACGGTCAGCAGCTGGCGGAGC  
CGACTCACGATGAGCAGCGTAGCCGTACGCGCAAAATTAAGCAGGCTGGGATAATCGACAATGGATGTGGTCTGAAC  
AAATGATGCTGGACTGAAAGATTACCCACTTTATCCCTACCTGGAATACCGCCAGATCACTGATGACCTGATGAATCAA  
CCGCGGTTACCGTCACTACTTTGTTCCGCGTAAACCCACGCTTCTCCCGCTCGCAGCTGCAATCTGCTTCGTC  
TGAAGTGGCGGGCTGAAGACTGGCGTGGCTTGTAGCTTTAGCCCGAAAAACCCGGAACACCGAAGCGCAATGTA  
ATTACTACTATGCGAAATGGAACACCGGCGAGAGTGAAGAAGCTGGCAAGGGGCGAAAGAGCTGTGGCTAACCGGCAAG  
AGCCAGCTAACCGCTGACAAAGTTATTTAGCTGTGGCTGCGTCAGGTAACAAGATCCGCTGGCTATTTAGAGCG  
TATCCGCTGGCGATGAAAGCGGGTAAACCGGCTGGTAAACAGTGTCTGGCAGGGCAGATGCTGCGGATACCGACTA  
TCGCTTCGGCAATCATTTACTGGCGAACATCTAATACGGTACTGACCTTCGCGCTACAACCGGCGGACCGATTTT  
ACCGCTCAAAATGGCGGGCTGGCGTTTGGCATTGTGGCGCGCAGGATGCTGAAAAATGACCGGCTGATGATCCCGTCACT  
TGCTCAGGCACGCTTAAATGAAGATCAGATTACAGGATCGCGGATATCGTCCGCTGGCGTTTGAAGGCAACGATG  
TCACCGAGCAGCAGGCGAAATGGCGGATGACGCGATTATGCGCTCGCAATCTACTTCGCTTATTGAACGCGGTGTCGA  
ATGGCGTTGGCACCGGCGATCGTCCGCGCTGAATACCTGGCTGGCGGCTGCTGCTATGGAAGCGAAAGAGAAAGATGA  
ATGGCGTTACTGGCAGGCGGATTTACTGCTGGAACCGGACGCTGAAGCTGAAGCAAAAGAGATTTTGCATCAACTCATGC  
AACAGCGTGGTTTTCTACCGGATTTGCTGCACACCGCATCGCGGAAGAGTATGAGCTGAAGATTTGATGGGCAACGATG  
AATGTTGACAGCGCCTGACTCAGGGGCGGAGATGGCGCGGTCGCGGAGTTGATGTACTGGAATCTCGATAACCGCG  
CGCTAGCGAGTGGCCAACTGTTGAAGAGCAAGTCAAAAAACAGAGCAGGCTCAACTGGCTCGTATGCTTTCATAAACC  
AATGGTGGGATCTTAGCGTTACGCAACGATCGCCGGGAAGCTGTGGGATCATCTGGAAGAGCGATTTCCCGCTGGCCTAC  
AAAGATCTTTTCAACCGCTACACAGTGGTAAGGAGATCCCGCAAGCTATGCGATGGCGGATTGCCCTCAGGAGAGTGC  
CTGGAATCCGAAAGTGAATCACCGGTAGGGGCCAGCGGCTGATGCAGATTAATGCTGGTACCGCGACCCATACGGTGA  
AGATGTTCTCTATTCGCGTTATAGCAGCCTGGGCAATTGCTGGATCCGGAACGAACATCAACATTTGGCACCAGTTAC  
CTGCAATATGTTTATCAGCAGTTTGGCAATAATCGTATTTCTCTCAGCAGCTTATAACCGCGGACCGAGGCGGGT  
AACTTGGCTTGGCAACAGCGCAGGCGTATCGACGCGATTTGGCATTTGCTCGAGAGTATTCCATTTCTCCGAGCGCGGTT  
ATGTGAAAAACGCTGCTGGCTTATGACGCTTACTACCGCTATTTTATGGGGATAAACCAGCTTATGAGCGCCACGGAA  
TGGGACGCTGTTACTGA

>Cluster\_38386

ATGTCGATTAACGTTATGATGTGGTCAGGGCAGCCTCGCCGTGATCTGGCGGAAAAACTGACACACAAAATGAAAGA  
GGGCTGGCAGCCATACGGCGGACCGGTTGCCATTACGCGTACACACTTATGACAGGCGGTGGCCATTGAGGCGAGCCAC  
AGGTAGGTCCTTTTACTGAGCGGACTGGTATTACGTGGTGTGCTTGGCGGACAGTCCAACGGCATGGCTTACGGTGA  
GGGCTTCCGTTACCGGATTTCTACGATGCTCCGGATCCGGCATTAAACAACCTGGCAGCCGACGCGTAAACCCCGG  
TGGCGAGAGTTGTGCGTATAACGACATCATCCGGCTGACCATTGCTGCTGATGATGTGACAGGATATGAGTACGCTGAATC  
ATCCGAAGGCAGACTGAGCAAAAGGCGAGTACGCGTGTGTCGGACAGGCTTACATATGCGCAAAAAAAGCTGCTTCCGAT  
ATCCCGAATAACCGGGGATCCTGCTGGTACCATGCTGCTGGTGGTTCGGCATTACCCAGGGCGGAGGGGACATT  
CAGTGGGACGCGGGGCGCAGCCAGGATTCGCGCGCTGGGCTGGGTAAGCTTATATCAGGACTGATGACAGCGGTAAC  
CTAAAGCTGCATTACAGAAGAACCCGAAAAATGTTGCTGGCGGTGTGCTGGATGACAGGAGAGTTTACATGAGCGCC  
GCCACCCACGCACAGCAACCTGCGCTGTTTACAGCCATGCTGAAGCAGTTTCTGCTGACCTCACTGTGTTTAAACGCGCA  
GTGTCATGGTGGCAGTGTGTAATGTGCCGTTGGATTTGTTGGTACACGACGATTTACTGAAAAATACATACGCTACCC  
AGTACAAACCACTTTACCGGGGCTACAAAAACAGGGAGAGTGAAGGCGTTTATTTTGTGCCCTTCATGACAGAGCGTAA  
GGCGTCAATACCGCCACTAACCGCGCGGAGAGAATCCGGATATTCGGCATCAGGATATACGGTGGCGCATCGAGAAC  
GAATGGAACACAGTATCATCAAAACCGCCGACACATTTACGTTTATGGCGCGCAGGAGCATTTATCCGGATCGTCTGG  
CAACCGCTATTTGAAAGCAGCGCGGGCGCACCTCCGCTTATCAGTGGTAAGGACCGGAAATCAAAACCTTCGCCCGG  
GGCAACACGCTTCCGGTCCGCTGTCAGATACGTTCCGTCGCAACAATCTCCCTGCTGGCGGACGCGAGGAGGCTGCTG  
GCAGGCTGGAGCATTAAGGATGGCGGAATTCAGTTGTGATGATGGTGTATTTAAGATCCAAGCAGAGCAATAAAACCT  
GGTCCCTGACGCTACCGGTTGGATGACGCGTCTCCCTGCTGACACGGGTTGGCAGACTGAGCTGTAAGTTTCCGACTGTCA  
GGCGCATGACAAACAATCAGTTCCGGTCTGGGAATTTATCTGATACCGATGTAGCGTTACCTGACGCTGGCGGATGAC  
GGTACCGGTAACCGTTTCTGATGTTCTTCCACCCAGACACAGCAGCGGCAAACTGAATCTGATGATCACAGGAAAG  
CCGAAACACGAAGCTGGGGAGTTCCGGGATACGGTAACGACTGGCAGACGCTGGAGCTGGTGTTCACCGCGGCGAGT  
GCCACGGTTACTCCGAAACTGAATGGAGTGGCTGGCCGGCATTCAGGTTATAAAAGACAGTCTGACACTGGGACTGAA  
TGGCTGACGCTGACGGATGTTACAAAAATGCAGCGTATGGCGTTGATAGAAAGTCTGGTCTGGAGATAAATGCAC  
CGGCAGCATAA

>Cluster\_39086

ATGAGTTTGTGATTTGCCAAATACCCGACCTGGCACTGGTGCATCCACCCAGGAGTTACGACTGTTGCCGAAAGAGAG  
TTTACCGAAACTCTGCGACGAACGCGCGCTATTTACTGACAGCGTGGCGGTTCCAGCGGCACTTCGCTCCGGG  
TGGCACGGTCAAGTACCGTGGCGCTGCACTATGCTACAATAACCCGTTTGGACAGTTAATCTGGGATGTGGGGCAT  
CAGGCTTATCCGCATAAAATTTTACCGGGCGCGGACAAAAATCGGCACCATCCGTCAGAAAGGTGGCTGACCCGTT  
CCCGTGGCGCGGCAAGGCAATATGACGTAATTAAGCGTCCGGCATTCATCAACCTCCATCAGTGGCGAATTTGGGATCG  
CAGTTGCTCCGAGAAAGGCAAGGCAAAAAATGCGCCACCGCTGTTGTCATTTGGCGGATGGCGGATTAACCTGCTGGC  
TTTGAAGCGATGAATCACCGGGCGGATATCCGCTCTGATATGCTGGTGGTCTCAACGACAATGAAATGTCGATTTCCGA  
AAATGTTGGCGCGCTCAACAACCTTGGCGCAGCTGCTTTCCGGTAAGCTTTACTCTTCACTGCGGAAAGGCGGAAAA  
AAGTTTCTCTGCGGCTGCCACCCATTAAGAGCTGCTCAACACTCCGAAGAACAATTAAGGATGTTAGCTGCTGGC  
ACGTTGTTTGAAGAGTGGGCTTTAACTACACTCGGCCGGTGGAGGTCACGATGTTGCTGGGGCTTATCACAGCTTAA  
GAACATGCGCGACCTGAAAGGCCCGCAGTTCCTGCATATCATGACAAAAAAGGTCGTTGGTATGAAACCGGCAAAAA  
ACCCAATCACTTCCACCGCGTGCCTAAATTTGATCCCTCCAGCGGTTGCTGCGGAAAGTACGCGGGTTTACCAAGC  
TATTCAAAAATCTTTGGGACTGGTTGTGCGAAACCGCAGCAAGATAACAAGCTGATGGCGATTACTCCCGGATGCG  
TGAAGGTTCCGGCATGGTGCAGTTTTCAGTAAATTCGCGTACTTCCGACTGGCAATTTCCGAGCAACACGCGAG  
TGACCTTTGCTGCGGCTGCGGATTTGAGGCTACAAACCCATTTGTTGCGATCTACTCCACTTCTGCAACGCGCTAT

GATCAGGTGCTGCATGACGTGGCGATTCAAAGCTTCCGGTCTGTTCCGCATCGACCGTGGGGCATTTGTTGGTGTCTGA  
CGGTCAAACCACCAGGGCGCTTTTATGATCTCTCTTACCTGCGCTGCATACCGGAAATGGTCATTATGACCCCGAGCGATG  
AAAACGAATGTCGCCAGATGCTCTATACCGCTATCATAACGATGGCCCGTCCGGGTGCGCTACCCGCGGGCAAC  
GCAGTTGGCGTGGAACTGACGCCACTGGAAAACTGCCAATGGCAAAGGCATTTGTGAAGCGTCTGGTGGAAAACTGGC  
GATCTAAACTTTGGTACGCTGATGCCAGAAGCGGCAAGTCCGTGAATCGCTGAACGCTACCGTGGTGCATATGCGTT  
TCGTGAAACCGCTTGATGAAGCGTTAATCTGGAAATGGCCCGCAGCCATGAAGCGCTGGTTACCGTAGAAGAAAAACGCC  
ATATAGGGTGGTGCAGCGAGCGGTGAACGAAGTGTGATGGCCCATCGTAAACCAGTACCCGTGCTGAACATTTGGTCT  
GCCGGACTTCTTTATCCACAAGGAACCTCAGGAAGAAATGGCGCCGAACCTCGGCCTCGATGCCACCGGTATGGAAGCCA  
AAATCAAAGCCTGGCTGGCATAA

>Cluster\_19623

ATGCCAACAAACCTACGCCCGCTGCTTGGCAGGCTGCCGACGCTGACCCGCTCAATACTGCGGACGCAGATGTACAGCA  
AATGATCGCTGACGGGATTTATTTCGACGTTCCAAGATATGCCCTGTAAAGCGTAAACCCGTTAAGGCGGCATAACA  
CAAAGCCGAAGATTTTATTACAATGCAGATGGCTCCGCGATGACCTTGCGGGAGTGGCGAACGCTGCACGGTGTTCAA  
CCGAAGAAACAAAAACAGCGCTCTGACACTGGGTTGGCGCAAGTATCCAGCCCGGGCAGCGGATTAAGTCCGCGAGCGC  
TGAGATGGAGCAATGGCTTAATAAGAAGCCCGCTCGTTATGTTGACCCGCTGCCGCGAGATTTCCCGGTGTTCCGCTAG  
ACGATGGCCGATTTGAAACCGCGGAGCAGCCGTCGGGAAGCAGCAACCCGACAGAAATGCTTTTCTCAAAGCCTGCCG  
GAGTTCCTGATTTGCGATGAGAAGCAATGCGCGGTATCAGTCCGGGCGATGAACCAAAATGGAAGCTATGCGCAACGAGA  
TTTCAAACGCTACGGAGACTCAGGGGAGTTTCGTCAATTTGGTGTGGAGAGTCAAGCCTACCGAAGATAGATTTAATA  
GTTCTAATCATATTGTGACCCGAAACGGCTTGGCTGCTTCGCGCTCTGTGCCGCGACTGAATACTGCACCGTATGAGTTC  
CGCCGCTGGCTCGCTGACGAAACCGCACGCGTTAGCCTGTCGCCACCTGATGGGCTGGAGTGGAGTGGGCGCGGATTT  
GTCTGTTGGTGTATGCGATCTTTTCCCCTGGCAGTGTGTTGCTTCCGCTACTGCCGACCGGGTATGGCAAAAGCCCGCT  
TCACTTATCCATTTGATTTAGTTCGCGGCTGGCATTGGCCTGTCTGTAATCGTGGTTCCTACTAATACCCTTAAGCGT  
CAGATTTCCCGCAGTTGCGGGAGGCTGGCATTACGCTGTGGCTTTGGCGATAAGCTACCGAGGCACCGCAACGCACA  
ACAACTGGCGGACTAGCCAGCCGGGCTTCGGGTTGCTGTTGTTGCTTGCCTGAACATCTGGTTCCTCGTCAAGTTC  
TCGCGCGCTGATGGCTTATGGCGTTGATCGTTTATTATCGATGAGGCACACACGGTCAAAGACTGGGATTTCCGCCCA  
GCTTACGACGCAATGACGACACACTACAGAATGCTTTCCCTCGGCTCAGCGTGCCTGTTTACGGCTACTCTACTAGC  
AGAAAAAGCGCGGTTTAAATGGAGGCGCTGGGATGCCGTGGCGATTACGTTACATTTCCGTGCTGATGTTGCTCGCGAGA  
ATATCCAGTTGATTTCCGGTTCAGGCTGCGCCAGCAGTACCGCGCGGCTGTTGGTCTGGTTCGAGCTCTGCCAGAGGAA  
GAGAAGACGCTCATTTAGTCAATGACCTTAAGACGTTGCGGGGCTACCTGAAACTCTTCGGCGACCGGGCGCGCCATA  
TCACTCGAAGACGATGCACCTGAGCAACGAGGAACGCCACGCAACGCTGAGTGGTTCCTCGCTGCGCGGGCGCGATTC  
TGATTGCTACTAAAGCCTTCGGGCTGGGCTGATGTTCTGATATCCGTAACGTTGTCGTGACATACGTTCCCGATGAC  
TTGCCGTGATCTCGTTAGATGATTTGACGAGCCGGGCGGATGGGGAACCTGCCCGCGCTTTTCTGCTGTGGTATCGCT  
GGCGTGGATGTTGCTCTGATGAGCTTGTACTTCTACCGCCCTGAAACTGTAACGGCAGTACATCGCTAAATACC  
TCTGA

>Cluster\_23994

ATGCCAAGTACCCTTCCGCCACCACCCTCATGGTCGTAATATGGCGGGTGCCTGTCGCTGTGGCGGCCACCAGGAAT  
GACCGACGCCGATTTCCGTAAGCCGATTATCGCGGTTGTGAACCGTTACCCAAATTTGTACCGGGTACGTCCTACTG  
CGCATCTCGTAAACTGGTTCGCCGAAACAAATGGAAGCGCTGGCGGCTTGCCTAAAGAGTTCAACACCATTGGCGGGAT  
GATGGGATTTGCCATGGGCAACGGGGGATGCTTTATCTACTGCCATCTCGGCAACTGATCGCTGATTCGTTAGTATAT  
GGTCAACGCTCACTGCGCCGACGCCATGGTCTGATCTCTAACTGCGCAAAAAATCACCCCGGGGATGCTGATGGCTTCCC  
TGCGCTGAATATTCGGTGTGATCTTTGTTCCGGCGCCGATGGAGGCGGGGAAACCAAACGTCCGATCAGATCATC  
AAGCTCGATCTGGTTGATGCGATGATCCAGGGCGCAGCCGAAAGTTTCTGACTCCAGAGCGATCAGGTTGAAAGCTTC  
CGCTTCCCAACCTGGGATCTTCTCCCGGATGTTTACCCTAACTATGAATTCCTGACCGAAGCTGGGCTGGGCTGT  
CGCAGCCGGGCAACGGCTCGCTGCTGGCGACCCACGCCGATCGCAAGCAACTGTTCTCAATGCCGGTAAACGCATTGTT  
GAATGACCAAACGTTACTACGAGCAAAACGACGAAAGTGCATGCGCGCAATATTGATAGCAAGCGGCTTTGAAAA  
CGCCATGACGCTGGATATCGCGATGGGCGGATCGACTAACCCGTAATTCACCTGCTGGCGGGGACAGGAAGCGGAA  
TCCGATTCACCATGAGTGTATATCGATAAGCTCTCCCGAAAGTACCGCAGCTGTGTAAGTTCGCGCGGACCCAGAA  
TACCATATGGAAGATGTTACCGTGTGGTGGTGTATCGGATTTCTCGCGCAACTGGATCGCGCGGGTTACTGAAACG  
TGATGTGAAAAACGTACTTTGGCTGACGTTGCCGCAAAACACTGGAACAATACGACATCGTCTGACCCAGGATGATGCGG  
TAAAAAATATGTTCCGCGTGGCCCTGCGGGCATTCGTAACACAGGCATTCGCGAGGATTCGCGTTGGGATTTCTCTC  
GATGACGCTGCGCGCAATGGCTGTATCCGCTCGTGAACACCGCTACAGCAAAAGACGCTGGTCTGGCGGCTGTACCG  
TAATTTGCGAAGAACGGCTGCATCGTTAAAACCGGGCGCTCGATGACAGCATCTCAAAATTCACCGCCCGGCGAAAG  
TGTACGAAAGCAGGATGACCGGCTAGAAGCGATTCTCGCGGCAAGTGTGCTGCGGCGATGTAGTGGTGTACCGGTAC  
GAAGGCCGAAAGCGGCTCCGGGATGCAGGAAATGCTTACCAACAGCTTCTGAAATCAATGGTCTCGGCAAGC  
CTGTGCGCTGATCCAGCAGCTGCTTTCTTGGCGGCACTTCCGCTTCTATCGCGCACGCTCACCGGAAGCGAA  
GCGGCGGACGATTTGGCTGATTGAAGACGGCGACCTGATCGCATCGACATTCGGAACCGTGGTATTAGTTACAGGTA  
AGCGATGCCGAACTGGCGGCGCTGCTGAAAGCGCAGGAAGCTCGTGGCGCAAAAGCCTGGACGCCGAAAAACCGTGAACG  
CCAGGTTTCTTTGGCTGCGTGCTACGCCAGCTGGCAACAGCGCCGCAAAAGGTGCGGTGCGCGATAAATCGAAAC  
TGGGGGTTAA

>Cluster\_29445

ATGCTGCCTGATGAACTTGAGAAAAAGATTAGATGGAATTGAGGATGCTTCAAAAAAGGGTATCCAGTACGTAATCTATA  
CAAAATTTGGCTGTGAGCCCGACTGTGGCTGCAAGCCTACGTGAATATACGGGCAATGCAGGTGCACTCAAGGTG  
TATCAACAGATACCATTGATGGCTTCTCTATCGAAAGAGCAGAGAAGCTGGCAAAAACATGCGGAGTAGAGAATACGTA  
GCGAAACCTGTACGAGAGTTAGATCCCAAAAAGGACGGA AAAACAGACCGCTGGGGATTCCAGGTGGAGACGATAA  
ACTGGCGCAAGTAGCAAGAAATTTCTGAAAAGGGTTTATGAACAGTATCTCTGAACACTCTCATGGATTTAGAC  
CAAAACGTTTCGTGTGTAACCTGCGCTCAGATCTATTCGTCAGTCTGGAACGAGTAAATGGATCGGTGATATC  
AAAGGTTTCTTTGACAATATCCCCCAAACTATTGCTGAATACACTGGCAGAGAAAAATTAAGGATAAGAATTTCTGAA  
ATTAATCGAACAGTGGCTGAAGGAGGATATGTGGACAATGGAATAACCATCGCTCATATTCGCGACGCCACAAGGTG  
GGATAATTTCTCCCTTACTGGCAATATATACCTCGACAAACTGGACCGTTTTGTAGAACAGAACTTAATTCCTGCATAT  
ACAAGCGGTACAAAACGAAGAGCAATCCAGATATGAACAGGCTGGCCCAATAAGATTCATAAACTACGAAAGAAAGATA  
CGGTATGGCAACTGATTTGATCAGAAAAAGGCCATAAAGAAAGAAATGAAACGACTGCTTGAAGAAAAACGTTCTA  
TACCATCTCAGGTCATGAACGATCCAAACTTCAGCGGATGATGATGTTGATGATGCTGATGACTTCGTAATTTGGTGT  
ATCGGCTCGAAGAAAGATGCTGAACATATATCAAGCAGGTCAGAAACTTTATTACTACTTCACTGGGATGGAAGTTAA  
TGAAGCAAAAGCAGGATCCGCCATATCTCAGAAGGAGTTAATTTTTAGGCTATGAAATCAGACAGGAGCAGATGCAAGA  
AATGCTGAGCAGAAAAATGCAAGGGCGCACGCTCTCCGGAGATCCACCACAGGAATGTGCAGCTCTCGTTCTGAC  
AATATAGCCGCTAAATTTGTCACCAAAAAGAAATGATGGCTGTTATGAGAAATGTGAAGGCTGTACATCGTTCAAGTCTACA  
AAATCTCAGTGAAGCTGAAATTTGTTGACTTTCAACCGGAAATGCGGGATTTGGGAACTACTACAGTCTGGCGCTGG  
ACATGAAATATAAATTTCAAAATTTATATTTTATATGGAATAAAGCCTTTTTAAGACCTAGCGAATAAACGACGATG  
TCAGTGAATAAAGTGCCTAACCTGACGCAAAATTAATGGAGATCTGGCTATTACCGTTACAGCCAAAATGGATCCCG

AAAGATTGAGGTTTTCAAACCTCAAACATGTCAATCGAACCGAACACGATTGTGATACGGAACCGAGAACCGCACATA  
TCACAACCCGCACACAGAGATCATGCGTGCATTAGGGGCAAGGATCTGCGAGTATTGTGCGAAGACTGGGCGTGCAGAA  
GTACATCATGTGCAGAAAGCTAAAAGACCTGAAGAAAGGTCGTAAGGCCGATATAAACCCAGCTGTGGCAACTAATGAT  
GATCGCACGCCCGGAAACAGATGATTTTTGTGCGCAAGTTGCCACGACAAGTTACATAGCGGAAAACACCCGATCTGA  
GACAGAAAAGGGAAGAACTCCTGCAACCACCTGTCTCAAGTGGGGATTCTGCTAAATGA

>Cluster\_16391

GTGACTCTTAAACGGGCTGTTCCTGTGACGGTGAAATCCTTCAGTGGAGTGAACGAGTATCACCGGATTGCGTC  
AACGCCTTCTCCGATCGGGATGGTGACATCTTGGAGCCGAGGGGCGGGAGTTTGGCAGTGCATCCCGTTTCTGTGGC  
AGCATGACCATTTCCCGTGGGCGAGTGTACGGTGCAGCGGGTGCAGGAGGGCTGGAAATCACGCAACTACACTGGTG  
AAGCCCGTACCGGATATGCCGTGCAACTGGCTGCCGGTGGATGAGGTCTGGGCGGCCATTAAGACCGGGTGGTTCAG  
GGGCTGTCCGTGGGCTTCCGTCCCATGAATACACCTTCTGGACGGAGCGGACTGCATTTCTGCGCTGGGAACCTGA  
TGGAGGTGTCTGCCGTACCGTGCAGGTCGGGATGCGGAAATGCACCATCCGGACATTAATCTTACGACCGCCGTTTCT  
GCCCGTCCGCAACCGGAAACCGGTGGTGAATAATCGCATCTTCTGCCGGCTGCGGACAGTCAACACCGCTTTTCA  
TAAGGAAAAGACCATAATGAATATTGGCGAACAGATTAAGTTTGAATAAAGCGTGCAGCGCTGGCAGCTCCCTTG  
AGGAGGTGCATGACCAAAGCCGACAGGAAAGGGCGACCGTGGATGTGGAGGAGGAAAGCATTACGACAAACCCGACGG  
GAAATCCGTGAGTGGATGCGCACCTGAAGCCCTGCGTGAACCTGGAAGCCGTAAGCCCGCACGGCGCAGCCGTTGAA  
ACAGCCCGTAAACGGAAATGTGGCCGCGTGGCTTACGCGCGGTGATCCGTGAGGACAGAAACTGGATAAGGGGATTG  
GCTTCCCGCTTTGCCAAATCGCTGGCTGGGCTAAAGCGTCCGATCTGAAGCCCTGGAAGTGGCCGTCGTCAGTAT  
CCGGATGACAGTCTGTGCATCATGTCCGAAATCGGCAGTGGGCGGGGACCACCAGGATCCGCGAGTGGGACGGCAG  
CCTGTCTGAATATCAGGAAATCGCACAGGACTTTATTGATTAACCTGCGTCCGACAGACTTATCGGGCTTTTGGTCAAG  
CGGGATCCCTGCATTTCTGTCAGGTGCCGTTCAATATCCGTGTGCAGCCAGGTGTCCGGCGGTGCTCCCGTGGGTG  
GGTGAGGTAAGGCAAAACCCCTGACGAAAGTTGATTTGAATCCATCACCTTACGTCATGCGAAGGTGTCGGCCATTGC  
GGTACTGACGGAAGAATTGATCCGTTTTTCCAGTCCGGTGTGATGCAGTGGTCCGTAATGCCTGGCGGAAGCCGTTG  
TGGCTGGTCTGGATACAGACTTTGTGGACCCGAAAGCCGAGTGGCAGATGTCCTCCCGCGTCCATCACCATTGAT  
GTGAAGGGCACGGCATCAACCGGTAACCGGATGCGGATGCGAGGCTGCGTTTGGACAGTTTGTGGCAGCAAACCTGCA  
GCCACCGGTGCGGTCTGGCTGATGTCCAGCACCAATGCCTGCGACTGTCCATGCGTAAAAATGCGCTGGGTGAGAAG  
AATACCCGGACATGACCTGCTGGTGGCTCCTTCCAGGGCTGCCGGTGAATTGTCTCCAGTACGTGGGTGACAGCTG  
GTGCTGGTCTGGATACAGACTTTGTGGACCCGAAAGCCGAGTGGCAGTGGCAGTGGATATGTCGCGCAGGACCTGGA  
AATGCAGTCTGAGCCGACCGCGACAGTACCACCGCTCCCGGTGGAGCTGGTTCCATGTTCCAGACAGGCAGCGTGG  
CCATCCGTGCGGAGCGTGGATCAACTGCGCTGCTGCGCTACCGCGGCGGTGCGGTGATCACCGGAGTGAACCTACGGC  
AGTGGCTCCGGCGCTGA

>Cluster\_38031

ATGATTA AAAAAGCTTCGCTGCTGACGGCGTGTCTGTACAGCCTTTTCCGCTTGGGCACAGGATACCAGCCGGATAC  
TCTCGTCTTACTGCTAACCGTTTTTCAGCAGCCAGTAAATACTGCTTGCACCTACTGATATGTTACCCGTGAGGATA  
TTCAACGCTGGCAGTCAAGAACCTCAACGATGTTATGAGTCACTCCTCCCGGTGTAATAATCTCTCAAACCTGGTGAATG  
GGGACGAGTCTTCTCTTTATGTTTCGTGGCAGTGAATCCGCGCATGTTTTAGTGTGATTGACGGAGTCCGATGCTG  
TGCCGGTATCGACAATGCAATTGATATTAGCCAGTTCCCGGTATCACTTGTACAGCGTGTGAATATAATTCGTGGCCGC  
GTTCTGCCGTTTTGTTCTGTTGCCATCGGAGGTGTGGTGAACATTAATACAATGAGTAATGATGAGAAAGCTCAGATC  
AACGCAGGAATGGGTACAATAAGGTTATCAAGCTATGATGGGGTAATAATAAAGCTTTTGGCGATACGATGGTAAACAG  
AGCAGTGTCTTACAGACGACCAAAGGTTTTAACATTCAGCTTCCGCTCACCATACAGTGGTGTAGCAGTCCGATGGAT  
ATCGCAACAACTTTTCTGGGGGGGCTGCAGCATAAGTTTAAAGGATAACTTCCGGGTTCTTCCGTGGTTACAGCTAC  
ACAGCTAATAATGATTACGACACGGGCTCGATGATGGTTCTGTACTGGCAACGAAAGCTCAGAAATTAACAACAGCT  
CTGGGATACTGGCTACGCTATAACTCCGCGATCTATTCTGCTCAGTTAATTGCTAACATCAACGATAAAGGAAATATA  
ACTACACAATAATCTTGGTCTGTTATGCGGGAGATGCCACCCTGGATGACATGGAACAGCGTTATATTAGTGGGTAAT  
AGCATTGAGGTAGGGCATGGTGCATTAGCGCGGGATCGATTGGAAACAGGAAAACCTGACGCTCCAGCAGCATTAACAA  
ATCAGATGATTACGAAACCGGATACACCCGGTTATACCTGACTGGACGCAACAGATTTCAAATGTGACTTTGGAAGCTT  
CTGGCCGAGAAGATCATGATGAACAGTTTGGCTGGCAGTGGTACCTGGCAGCAGCTGCTGGCTGGGAGTTAATGATGGC  
TACCAGGCAACACTTTCTTACGGTACCAGTTTTCTTTCGCTTCTTCTTGGACAGCAATACGGGGTGCCTGCTTTGCTTC  
AATTTATGTTCTGGTATGTCAGCAACCCAAATTTGAAGCCGAAAGATCTAAACAGTGGGAGATTGGAATTGAGGGGG  
TAACTGGGACTCTGGATTGGCGGCTCTCAGGATATCGTTATGAAATTCAGAACCTGATTGATTATAAAAAATATAAAT  
GTCAACCGATCACTTAATGTGAAATCAGCCAGATTAAAGGGCTGGAATGGACGGGAAATATTACAACCTGTTTGA  
ACATCGCTTGACGTTACAATATGTTGACCCGCGGATGATGAAACAGATAAAGTGTCTGATCCGCTGGGCAAAACAGCAGG  
TTAAGTACAGATTGACTGGACAAGCTTATGGTTTCGAATGGGACGTTTCTTACCAATATATAGGTCAACGATACGACAAC  
GCTTATGACGAGACCTCTGGCTCATACATACAGTTAAATAGCGGCTGTGAGCTTGTGGGATCTTCCGGTTGCATATCC  
GGTCACTCTCATCTGACAGTTCTGTAATAATAGCCAACTGTTCGACAAAAGATTATGAGACAGTCTATGGCTACCAAA  
CTGCAGGACGGGAATACACCTTGTCTGGCAGTACACCTTCTGA

>Cluster\_43754

ATGGCTATCGAAATCAAAGTACCGGACATCGGGGCTGATGAAGTTGAAATCACCGAGATCCTGCTCAAAGTGGGCGCAA  
AGTTGAAGCCGAACAGTCTGATCACCGTAGAAGGCGACAAAGCCTCTATGGAAGTTCCGCTCCTCCGAGCGGGTATCG  
TTAAAGAGATCAAAGTCTCTGTTGGCGATAAAACCCAGACCGGCGACTGATTATGATTTTCGATCCGCCAGCGGTGCA  
GCAGACGCTGCACCTGCTCAGGCAAGAGAAGAAAGAGCAGCTCCGGCAGCAGCACCAGCGGCTGCAGCGGCAAAAGA  
CGTTAACGTTCCGGATATCGGCAGCAGCAAGTTGAAGTGAAGTGAAGTCCGTTGAAAGTTGGCAGATAAAGTTGAAGCTG  
AACAGTCTGATCACCGTAGAAGGCGATAAAGCGTCTATGGAAGTTCCGGCTCCGTTTGGCTGGCACCCTGAAAGAGATC  
AAAGTGAACGTTGGTGCAGAAAGTGTCTACCGGCTGCTGATTATGGTCTTCAAGTCCGGGTGAAGCAGGCGCGGACG  
TCCGGCGGCTAAACAGGAAGCGGCTCCGGCAGCGGCCCCGTCACCAGCGGCTGGCGTGAAGAAAGTTAACGTTCCGGATA  
TCCGCGGTTGACGAAAGTTGAAGTGAAGTGAAGTGAAGTGAAGTGGGCGACAAAGTTGCCGCTGAACAGTCACTGATTACC  
GTAGAAGGCGACAAAGCTTCTATGGAAGTTCCGGCTCCGTTTGCAGGCGTCTGGAAGGAACTGAAAGTCAACGTTGGCGA  
TAAAGTGAAGTGGCTCCGCTGATTATGATCTTCAAGTGAAGGCGCAGCGCTGCGGACGCTCCTGCGAAACAGGAAAG  
CGGACGCGCGGCTCCGGCAGCAAAAGCTGAAGCTCCGGCAGCAGCACCAGGCTGCGAAAGCGGAAAGGCAAACTGAATTT  
GCAGAAAACGACGCTTACGTTACCGGCTCCGCTGATCCGCGCTTGGCAGCGGAGTTGGCGTTAACTCCGCGGCAAGG  
GAAGGCACTGGCCGTAAGGTCGATCTTCCGCGAAGACGTTACGCTTACGTTGAAGAAGCTATCAACCTGCAGAAAG  
CAGCTCCGGCGGCGACTGGCGGCGGATCCAGGCATGCTGCCGTGGCGAAGGTTGACTTACGCAAGTTTGGTGAATTC  
GAAGAAGTGAAGTGGCCGATCCAGAAAATTTCTGGTGCAGAACCTGAGCCGTAACCTGGGTGATGATCCCGGATGTTAC  
TCACTTCGACAAAACCGATATCACCGGCTGGAAGCTTCCGTTAAACAGCAGAAACGAAAGCGGCAACCGTAAGCTGG  
ATGTGAAGATCACCCGGTGTCTTCTCATGAAAGCGGTTGCTGACGCTTTCGAGCAGTCTTTCGAGCAGTGCCTTCGCTTCAACAGTTCTG  
TTGTCGGAAGCGGTCAGGCTGCTGACCTGAAGAAATACATCAACATCCGTTGGTGGGTTGATACCCGCAACCGTCTGTT  
GTTCCGGTATTCAGAGCTCAACAAGGATCACTGAGCTGCTCAGGCTGCTCAGGCTGATGATTTCTTAAGAAAGCGG  
GTGACGTTAAGCTGACTGCGGGGAAATGACAGGCGGTTGCTTACCATCTCCAGCATCGGCGGCTGGGTACTACCCAC  
TTCGCGCGGATTGTGACGCGCCGAAAGTGGCTATCCTCGGCTTTCCAGTCCGCGATGGAGCGGCTGGAATGGTAA



ATGAAAACCTGATACTCCCTCTTTAGAAACACCGCAGGCCGCGCCCTGCGACGCAGACAACCTGATTCGCCAACCTCTTGA  
GCGCGATAAAACCCCGTTAGCCATTTTGTATTATGGCGGAGTCGTCGGCACGCTTGTGCGGCTGGCTGCGGTTCTTTTG  
ACAAAGGTGTCGCTTGGTTCGAGAACCAACGTATGGGGGCACTGGTACATACTGCTGATAATATCCGCTTCTGTTAAC  
GTCGCTTTCTCTGTTCCGGCGGTGCTGGCGATGTTCCGGTACTTTTGGTGGCGAAATACGCGCCGGAAGCAGGTGGTTT  
GGGATCCGCGAAATTAAGGGGCGCTGGAAGATCAACCTCCGTTTCGCTGGTGGCGTGTGTTGCCGGTGAATTTG  
GCGGGCTGGGAACACTCGCGGAGGCGATGTTGGGGCGCAAGGGCAACCGTGCAGATAGCGGCAATATCGGGCGG  
ATGGTACTCGATGTTTCCGCTGAAAGGTGACGAAGCTGCTACACGCTGTTGGCAACCGGTGCTGTCGCGGGCTGGC  
TGGCCCTTAACCGCGCCGCTGGCGGATTTTGTATTATATCGAAGAGATGCGTCCGCGATTTCCGCTATACGTTAATTT  
CGATTAACCGCGTATTTATTTGGCTCATATATGTCGACCATATATGACCCGGATTTTAACTCATGAAGTTGCGTTGATGAC  
GTCGGTAAACTTTCTGATGCGCCGCTTAATACGCTGTGGCTTTATCTGATCCTCGGTATTTATTTTGGCATTTTCCGGCC  
TATTTTAAATAAATGGGTGCTGGGGATGACAGGATTTGCTGACCGTGTGCACGGTGGCAATATACCAAAATGGTACTGA  
TGGGTGGTGGCATTTGGCGGTCTGTGTGGATTTGCTGGGGTTTGGTGGCACCAGCAACGTCGGGCGGGTTTTAACCTGATT  
CCTATCGCTACCGCGGGAATTTGAGCATGGGAATGCTGGTGTATCTTCGTCGCGCGGGTCAATTACCCATTTG  
CTTCTCTTCCGGCGCCCGGGCGGTATTTTGCACCGATGCTGGCGTGGTACTGTGCTGGGAACCGCTTCCGGAATGG  
TTGCCGTTGAGTTGTTCCGCAATATCACTTGAAGCGGGACGTTTGTATTGCCGGAATGGGGCGTTACTGGCGGCA  
TCTATTCCGCGCCGTTAACCGGGATCACTTGGTTCTGGAATGACCGATAACTACCAGTCAATTTTCCCAATGATTAT  
TACCGTCTTGGCCCAACACTATTAGCAAACTTACCGTGGGAACCGCTATACTCGCGGATTTCTTGGCGCGCACCTGG  
CAAAACAGGAAGCTGAGCAACTGGCGGAAGCAAGGCCGATCAGCCCGGAGAAATCTGA

>Cluster\_27052

ATGATGAATGACGGTAAAGCAACAATCTACCTTTTGTTCACGATTACGAAACCTTTGGAACGCACCCCGGTTAGATCG  
CCCTGCACAGTTTCGAGCCATTTCGCACTGATAACGAATCAATGTCATCGGCGAACCCGAAAGTCTTTTACTGCAAGCCCG  
CGGATGACTATTTACCCAGCCTGGAGCAGTATTAATTACCGGATTACCCCGCAGGAGGCACGGGCGAAAGGAGAAAAC  
GAAGCCGCGTTTCCGCGCCGATTTCACTCGCTTTTACCGTACCGAAGACCTGATTTCTGGGCTACAACAATGTCGCTTT  
CGACGACGAATGATCGCGTGGTGGTATGTTCCGCGAGATGAACCCCTGGTTCACGTTTCCGGAATGTTTGGGCGCAT  
GCTGGGATTTACTGGATGTTATGCGTGCCTGTTATGCCCTACGCGGGAAGGAATAAACTGGCCTGAAAATGATGACGGT  
CTACCGAGCTTTCCGCTTGAAGCATTTAACCAAAAGCGAATGGTATTTGAACATAGCAACGCCACGATGCGATGGCTGATGT  
GTACGCCACTATTTGGCATGGCGAAACTGGTAAAAACGCGTCAGCCACGCTGTTTGGTATATCTCTTTACCCATCGTAATA  
AACCAAACTGATCGCGTGGTGGTATGTTCCGCGAGATGAACCCCTGGTTCACGTTTCCGGAATGTTTGGGCGCATGGCG  
GGCAATACAGCTGGGTGGCACCCTGGCGTGGCATCTGAAAATCGCAATGCCGTAATTTATGGTGGATTTGGCAGGAAA  
CATTTCCGCAATTTACTGGAGCTGGATAGCGACACATTGCGCGAGCGTTTATATACCGCAAAAGCCGATCTTGGCGATAACG  
CCGCGCTTCCGGTTAAGCTGGTGCATATCAATAAATGTCGGTACTGGCCAGGCGAATACGCTACGCCCGGAAGATGCC  
GACCGACTGGGAATTAATCGTCAGCATTGCCTCGATAAACCCTAAAAATTTCTGCTGAAAATCCGCAAGTGGTGAATAAGT  
GGTAGCGATATTCGCGGAAGCCGAACCGTTTACACCTTACGATAACGTTGGATGCACAGCTTTATAATGGCTTTTTAGTG  
ACGCCGATCGTGCAGCAATGAAAATTTGCTGCGAAACCGAGCCGCTAATTTACCGGCACTGGATATCACTTTTGTGTTGAT  
AAACGAATGAAAACCTGTTGTTCAATTTATCGAGCGCGCAACTTCCGGGGAGCGTGGATTTATGCCGAGCAGCAACGCTG  
GCTGGGACCCGCGGAGGCTTTACCGCGAGGTTTTTTCAGGGCTACGCTGATGAATTTGAGATGCTGGCACAACAGT  
ATGCTGATGACAAAAGAGAAAGTGGCGCTTTAAAAGCGCTTTGGCAGTACGCGGAAGAGATCGCTGA

>Cluster\_39352

ATGCGTGCCTTTAGTGGCAACCTAGTACGCTGGCGTGGCTATCGCCGGTGTACAGCTATGTCGGGCTTTATGGCAAT  
TCCGGAGGTCGCGCCGAAGGATTCATCGACGATTCAACCTTAAACCGCGGATCTATTTACTGGCAGCGTGAACGCGACC  
GTAAAGATGTTACCGACGGGATAAATACAAAACCAACCTTTCTCACTCCACCCTGGAACGCCAACCTCGATTTTCAAGTCT  
GGTTATGCTGCTGATATGTTCCGGCTTATGATTTGCCGTTTACCGCGGATTTGAAATGGCGGAAAACCGCGACGCTCTCA  
CCGGAACGAAATCGCGTTTCAAAAAGTAAATAAGCTATGACGAAGACTGGTCCGCGATAAAAAGCGGATAAAGCTGTT  
ATAAAGCAGCGGCAAAATTTAAATACGGTCCGGTTTGGGCGAGGGCAGGTTATATTCAGCCAAACCGGTGAGCAGCTGTTA  
GCGCCACACTGGAGCTTTATGCCGGTACTTATCAGGGGGCGGAGGCCGGGGCAATTTTGTATACCGCGATGCTGGTGC  
GTTGAGTTTCTCTACATGTTGGACCAACGAATACAAAGCACCGTGGCATCTGGAATGGATGAGTTTATCAGAACGATA  
AAACCAACCAAGTTGATTTATCTACACTCCTTGGGGCGAAGTACGACTTCAAAAATAAATCTCACTGGAAGCGGCTTT  
GGTACGGCCGAAGGATATATCGATCAATATTTTGCAAAAGCCAGCTACAAATTTGATATCGCCGGTAGCCGTTAACCAC  
CAGTACCAAGTTCATGTTACGCGGATAAAGTTGACGATCGCAGCGTCAACGATCTTTATGACGGCACCGCCTGGCTGC  
AGGCGTTGACCTTTGGTTACCGGGCGCTGACGTTAGTGGATTTGCGCTCGAAGGTACCTGGGTTAAGGCTGACGGTCA  
CAAGGATACCTTCCGCAACGATGACTCCAACCTACGCTTCTCGAACCGTCCGCTGGATATCTGGTGGGATAACCGTTT  
CGACTTCAACGCCAACCGGCAAAAAGCGGTTCTTCTCGGTGCGATGATGACCTGAAAACCTGGAATCTTCCAGGCTTCG  
CCATCGGGCTTCTCACTTTACGATGGGATGCTAAACCCGCTACCTGGCAGAGCAATCCGGATGCGTACTACGACAAA  
AACCGACTATTGAAGAGTCTGCCTACAGCTGGATGCGGTTACACCAATTCAGGACGGTCCGCGCAAAAGGCACGATGTT  
CAAATGCACTTCCAGGAATACGACAACCACTCCGACATCCCAAGCTGGGGCGGTGGTACGGCAACATCTTCCAGGATG  
AGCGTGACGTGAAATTTATGGTAATCGCACCATTCACCATCTTCTGA

>Cluster\_55643

ATGTTACTTCTGTAATTAATGGCTGGCGTACCGCAGTCTGCTCTGGCCGATGCTCAGGAGCTTTACCCGAAACAGTT  
CCTCCGCTCTGTTCCGGCAGAACTCCATGCTGCAGGAAACCATTTATCCGACTCTCGGGCCTTGAATCCATGAACCGATGG  
TCATCTGTAACGAAGAGCATCTGTTCTGGTGGTGAACAGCTGCGCCAGCTCAATAAGCTGTGGAATAACATTTATACCT  
GAGCCGGTCCGGGCGCAACACCGCGCCGGCCATCGCCCTGGCGGCCCTTACGGCCACCCGCTACGGTACGACCCCGCTGAT  
GCTGGTCCCTCGCGCCGACCATATCATCAACAATCAGTCGGCTTCCACGACGCCATCCGCTGCGCCGAGCAGTATGCGG  
ATGAAGGCCATCTGGTACCTTCCGATCGTGCAGAACGCCCGGAAACCGGCTACGGTACATCCAGCGCGCGTGGCG  
CTCACCGACAGCGCCACGCCCGTACCGGTTGGCCGCTTCCGTTGGAGAGCCGGACCGGAGCGCGCGAGGTTCTACT  
CGCTCCGGGGAGTACTACTGGAACAGCGGATGTTTATGTTCCGTTGCCAAAAATACCTCTCTGAGCTGGCCAAATACC  
GTCCCGATATCTTGAACACTTCCAGGCTGCGGTTGAATGCCCGGATAATGGCAGCGATTTCACTCAATATCCCATGAT  
ATTTTCTGCGAGTCCCGGACGAGTCCGTTGACTACGCGTTATGGAGAAAACCGCTGATGCGGTGGTGGTGGTCTCGA  
TGCCTGACTGGAGCGAGCTTGGCTCCTGGTCCGCACTATGGGAGTTCAGCCGAAAGACGGGACGGGTAACGTTCTCAGG  
GTGACCGTGGTGCACAACAGCGAAAATGCTACATCAACAGCGACGAGAAGCTGGTGGCGCCATCGGTGTGGAGAAC  
CTGGTATTTGTCAGCACCAAGGACGCGTGTGATGTAACCCGAGCGCTCCAGGACTGAAAGAGCTGAAAGCGGTCGAGTT  
CCTCAAGCAGAACCAGCGCAGGAGTACAAGCGCCACCGTGGATTTACCGTCCCTGGGGCGCTGCGACGTTGGTGGTCC  
AGACCCCGCGCTTCAACGTCACCGCATCACGGTGAACCTGGCGGTGCCCTTCCGATGACAGTGCACCAATTCGCGCT  
GAGCATGGGTTATCTCGCCGGCACCGGTCAGGTGACCGTCAACCGTAAAGAGTTCCTGTTGTCGAGAACACGATCCAC  
CTTTATTTCCGATTTGGCGGAGCAGCTGCTGGAAAACCTGGCTGATTTCCGCTGATTTCCGCTGATTTCCGCTGAGTCCGAGTCCAGTCCGGGT  
CGTACCTCGCGGAGGACGACATTTATCGTATTAAGACAGTATGGTCTGCTAA

>Cluster\_42977

ATGCTGTACAGCAAACTGACTGGGATCTGGCCCTGATCCAGAAATATAACTATTTCCGGGCCACGATACACCTCGTACCC  
GACCGCGTGGAGTTTTCAGAAGACTTCCGCGAACAGGCGTTTTTACAAGCCGTGGCGGCTATCCTGAGCGCCCATTTAT  
CTCTACGTACATATTCGTTCTGCCATAAGCTTTGTTACTTCTGCGGTTGCAATAAGATTGTTACTCGCCAGCAGCAC

AAGGCCGATCAGTATCTGGATGCGCTGGAGCAAGAAATCGTCCATCGTGCACCCTGTTCCGCGGGCGTACGTCAGCCA  
ATTGCACTGGGGCGCGAACCGCGACGTATCTGAATAAAGCGCAAAATCAGCCGCTGTGATGAAGCTGTCGCGGAAAACT  
TCCAGTTCAATGCCGATGCGGAGATCTCGATCGAAGTCGATCCGCGGGAAATCGAACTGGATGTACTCGATCATTTACGC  
GCCGAAGGCTTTAATCGCCTGAGCATGGGCGTGCAGGACTTCAACAAAGAAAGTCAACGCTCTGGTTAACCGCGAGCAGGA  
TGAAGAGTTCATCTTTGCGACTGCTTAACCATGCGCGTGAGATTGGCTTTACCTCCACCAACATCGACCTGATTTACGGT  
TGCCGAAACAGACGCCGGAAGTTTTCGCTTTACCTGAAACGCTGTGGCAGAGCTGAAACCCGATCGTCTGAGCGTCTTT  
AATACGCGCATCTGCGCAACTATTTTTCGCGCCCAACGCAAAATCAAAGATGCTGACTGCGGAGTCCGCAACAAAACT  
CGATATCTTGCAGGAAACCATCGCCTTCTGACACAATCGGGCTATCAGTTTATCGGTATGGATCATTGCTCGCCCTG  
ATGACGAGTGGCAGTGGCCAGCGCGAAGGCGTGTTCATCGTAACTTCCAGGGCTATACCCTCAGGGCGATACCCGAT  
TTGCTGGGGATGGGCGTTTTCGCGCATCAGCATGATTGGCGACTGCTACGCGCAGAACAGAAAGATTGAAGCAGTACTA  
TCAGCAAGTGGATGAACAAGGCAATGCGCTGTGGCGTGTATTGCGCTAACGCGTGTACTGATTTCCGCGCGATGTGA  
TTAAGTCGCTCATCTGCAACTCCGCTGCTGGATTACGCTCCCATTTAGCAACAGTGGGATTTGCACTTCGCTGATTACTTT  
GCGGAAGATCTCAAGCTTCGCCCCGTAGCAAAAAGATGGGCTGGTGGATGTAGATGAGAAGGGGATTCAGGATCAAGCGC  
GAAAGGTCGCTTGTGATCCGCAACATTTGCATGTGCTTTGATACCTATCTGCGCCAGAAAGCGGGATGCAGCAGTTCT  
CACGGGTGATTTAA

>Cluster\_47347

ATGGCTAAACAACCGGGATTAGATTTTCAAAGTGCCAAAGGTGGCTTAGGCGAGCTGAAACGCAGACTGCTGTTGTTAT  
CGGTGCGCTGATTTGTTCCGATTTGGCTCTTTTATTCGATCCCTGGTATTGATGCCGCTGTACTTGCCAACTGCTTG  
AGCAACAGCGAGGACCATCATTGAGATGTTTAAACATGTTCTCTGGTGGTGTCTCAGCCGCTGCTTCTATCTTTGCTCTG  
GGATCATGCCCTATTTTCGGCTCGATCATTATTCAGCTGACGCTGACGTTGGTTCACCCACGTTGGCAGAAATTAAGAA  
AGAAGGGGAGTCTGGTCTGTAAGATCAGCAGTACACCCGTTACGGTACTCTGGTGGTGGCAATATTCAGTCTGATCG  
GTATGCTACCGGCTGCGCAATATGCCGGTATGCAAGGCTGGTGAATAACCCAGGCTTTGCACTTACTTACCAGCT  
GTTGTAAGTCTGGTCACAGGAACGATGTTCTGATGTTGGTGGGCGAACAGATTACTGAAACAGGATCGGCAACGGTAT  
TTCAATCATTTCTTCCCGGATTTGTCGCGGACTCCCGCAGCCATGCGCCATACTATCGACGCAAGCGCAAGCGG  
ACCTGCACTTCTCGTGTGCTGTTGGTTCAGTATTAGTATTGTCAGTGACGTTCTTTGTTGTTATTTGTTGAGCGTGGT  
CAACGCGCATTTGGTAAACTACGCGAAACGTCAGCAAGGTCGCTGCTATGCTGACAGAGCACACATTTACCGCT  
GAAAGTGAATATGGCGGGGTAATCCCGCAATCTTCGCTTCCAGTATTATTTCTGTTCCCGGCGACCATCGCGTCATGGT  
TCCGGGGCGGTACTGGTTGGAACGCTGACAAACAATTTGCTGATTTGTCAGCTGGGCAACCGCTTTATGTTGTTACTC  
TATGCGCTGCAATCATCTTCTTCTGTTCTTACACGGCGTGGTTTTCAACCCGCGTGAACAGCAGATAACCTGAA  
GAAGTCCGCTGCAATTTGACCAGGAATTCGTCGGGAGAGCAACGCGGAAAGTATATCGATAAAGTAATGACCCGCTGA  
CCCTGGTGGTGGCTGTATATTACCTTTATCTGCCTGATCCCGAGTTTATGCGTGTATGCAATGAAAGTACCGTTCTAC  
TTCGGTGGGACTCTACTGCTTATCGTTGTCGCTGATATGACTTTATGGCTCAAAGTCAAACTCTGATGATGTCAG  
TCAGTATGAGTCTGCATTGAAGAAGGCGAACCTGAAAGGCTACGGCCGATAA

>Cluster\_55951

ATGCACTCTCAAATCTGGGTTGTGAGCAGCTGCTTATCAGCATCGTGTAAATGTACTGACCATCGTGAAGTTCAAAT  
CCACCCGTTTCTGGCGCTTTGCTGGCCAGCTTCTTCGGGAAACGATGATGGGCATGGGGCCACTGGATATGTAATAATG  
CTATTGAAAGTGAATTTGGCGAACGCTGGGTTCTTCGACGCGTTATCGGCCCTGGCAGGATACTGGGAAAAATGATG  
GAAGTATCCGGGGCCGAGAAAGAAATGGTCTGACACTCAACGCTGCGCTGGCTTTTCACTTGTATGTCATTATGTTGCT  
GGTTGGCTGATTTGTGCGATCAGCTGTTTGTGAAGTGGGCGTGTGCTATTTGATCTCTGGCTTTTCAATTTGCAATG  
AAAAAACCAATCTCAATTTATTAAGCTTGGCAATTCGCTATGTACCGATTGATGGCAGTGCAGTGCCTGCTTCTTCA  
CATCCGGCTGCTTTATATGTTGCAATAAGCTGGGCGCAGATATCGGTTCCGTTGATCGTCTACGGTTTCTGTTGGGCT  
GATGGCATCACTGATCGGTTGGCCACTTTTCTTAAATTTCTGGTCAACGACTGCCCTTTAAACCTGTACCCACAGAT  
TTGCAAGATCTCAAAGTTCGGGATGAAAAACACTACCGTCAATTTAGCGCAACGTTATTACCATACTACCATTCTGGC  
CTGATGTTGGTTAAAAAGGATGCGCAATGAATATGGCGCGTGGAGTGGTTTGTATATCTTGGTTGAGTTTATTTGGCAA  
CCCTATCACTGCCATGTTTATCGCGGTGTTGTCGCTTATATGTTGGGTATACCGCAGCATATGAGCATGGGGACGA  
TGCTCACACATACGGAATAAGGCTTCGGTTCTATTGCTAAATTTTGTGATTATCGGGGCGGAGGCGCATTCAACGCC  
ATTTTAAAAAGCAGCAGTCTCGCTGATACGCTGGCAGTTATTTCTCCAAATATGCAATATGCACCCGATTTCTTGGCCT  
GTTAGTGGCTCTTATTTGCTATGCGGCAAGTGGCTCCGCTACCGTGGCAATGATGGGGCAACGGCAATTTGTTGACCCA  
TGCTGCGGCTTTATCCCGCATCAGCCCGAAATATTGCGATGCTATCGGTTACAGTGAATTTGGCTGCACGATCGTT  
ACGGACTCGCTTTTCTGGCTAGTGAAGCAATATTGGCGGCTACGCTCAATGAAACATTTAAATACTATACGACAGCGAC  
ATTTATCGCTTCAAGTCTGCTGCTGCGCGGCACATTTCTGCTGCTATTATCATCTAA

>Cluster\_29086

ATGACGCACGATAATATCGATATTTCTGGTGGTGGATGATGACATTAGCCACTGCACTATTTTGCAGGCTTTGCTGCGCG  
TGGGGCTATAACGTCGCGCTGGCGAACAGCGGGCGCAGCGGCTGGAGCAGGTGCGGGAACAGGTTTGGTATCTGTGC  
TTTGGCGATGTCGGAATGGCAGAGATGGACGGCATCGCCACGCTCAAAGAGATCAATGCGTTAAATCCGCGCAATCCGGA  
CTGATTATGACCGGCTACTCCAGGCTCGAGACAGCGGTAGAGGCTTGAACCGGGGCGCTGGATTTATCTCATCAAGCC  
GCTGGATTTGATAACTTCAGGCGAGCTGGAAGGCGCTCGCACATACGCACAGTGTGACGCTGAAACCGCTGCGG  
TGTCTGCCAGCGTTCAGTATGGTTCGGTAAAGCCCGGCTGCAACACTGCTCAGTGAATTCGCTTCCGCTGCGGCA  
TCGGAAGCCAGGTTGCTGATCCAGCGGATTCGCGCACCGGTAAGAGCTGGTTCGCGAGGCGATTCACGCCATAGCCG  
ACGGAGTGAACCACTGGTAAAGCTCAACTGTGCGGCACTCAACGAATCTTGGTGAATTCGAATTTGCTCGGTCAG  
AAAAAGGGGCGTTTACCGGAGCCGACAAACGGCGGAAAGGCGCTTTGTTGAGGCGGACGGCGCACGCTGTTTCTCGAT  
GAAATTTGGGATATCTCGCGATGATGCAAGTTCGCTGCTGCTGCGATTACAGGAGCGGAAGTTACGCGTGTGCGCAG  
CAACCAGACCATCTCGGTTGATGTCGGCTGATTGCGGCGACTCATCGCGATCTTGGCGAGAGGTTGATGCGGGCGTT  
TTGCGCAGGATCTACTATCGCTGAACGTTGGCGATTGAAGTTCGCTGCTGCGTACGCGGCGGAAAGATATTCCT  
CTGCTGGCTGGCCATTTCTTACGCGCTTTGCGCAACGTAATCGCAAGGCGGTAAGGCTTTACGCCCCAGGCGATGGA  
TCTGCTGATTTCAATFACGACTGGCCGGGAAATATTCGTGAACCTGGAACCGCGGTTGGAACCGGGGCTGGTCTGCTGAC  
GGGAATATATTTCCGAACCGGAGCTGCGCTGGCGATTGCCAGTACGCGGATCCCGCGGTACAAAGTCAAGGATATTCAG  
CCGCTGGTGAAGTCGAAAAAGAGTATTCTGCGGCACTGGAGAAACGGGCGGCAACAAAACCGAAGCCGCGCTCA  
GTTAGGATCACGCGTAAACGCTATTGGCAAACTGTGCGGTTAG

>Cluster\_60763

ATGTTGATTTGAAAGATGTCACGCGGTACAGCTACACCCGGCAAAAGTGCAGGAAGGCGTTGATATCGCCATCGAAAA  
CGATGTGATTTGCTGCTATCGCGGATGCCCTGACGCAACGCTACCCGACGCGCAGCTTCAAAGAGATGCATGGCGGATTTG  
TGATGCCAGGATTTGCTGCTCGCAACACTTTTACTCGGGCTTTCCCGGCAATTAAGGCAACATCGCCCTTTGCG  
CCGATTTTCACTCAACGCTGAAAAATCTTGGTGGCGGCTGATCGCGCTTGGATGAGAGTTCGCTATTACAGCGG  
ACTGATTTGTTCCCTGGAAGCGATTAAGAGCGGATGTACATCGGTTATCGATCACCATGCCTTCCGGGCTATATCGGG  
GGTCTGCTTCCACATGGCGCAGCATTTTTAAAGGTTGGCTTCCGCGGATGACCTGTTTGTAAACTACTGACCGTAA  
AACCGCATCAAAGAGTTGACGAAAGGTTGAAAGAAACATCCGTTTCCCGGCTTTGATGATGAGCGAAGAAAGCGAC  
AAGCGAGCGTATCTGGTGAAGCACATATCGGTGCTCACGCGGCTTTACCGTGGCGGATGCGGCTGAGGATGCTGC  
GTGAAGCCGTGAAAGCCACAGGCGTGGTTGCATATTCAGCTGCGGAGACCTTTACGACGTTTCTTACAGTACCAC

TGGTACGGCAAAGACCTGCTGGCAGACTGGCGCAATTCGATCTCATCGACAGAAAACGCTGGTCCGTCATGGGCTGTA  
CTTGTGCGAAAGATGACATCACCCCTACTCAATCAGCGCGATGCGTTCTCGGTGCATAACGCCCGTTCAAACATGAACAACC  
ATGTGCGGTACAACCATCACCTTAGCGACATCCGCAATCTGGCGTTGGGAACGGACGGCATTGGTTCGGACATGTTTGAA  
GAGATGAAATTTGGCTTCTTTAAACATCGCGATGCGGGTGGTCCGCTGTTGGCCGACAGTTCCTGCAAAGCCCTGACTAA  
CGGTAACGAACTGATGAGCCGCAACTTTGGCGGAAATTTGGGCTTCTGGAAGCCGGTTACAAAGCTGATTTAACACTTT  
GCGATTACAACCTCGCCGACGCGCTGCTGGCAGCAATATCGCCGGGCATATCGCTTTTCGGTATGGGCTCAGGCGCGTT  
CACAGCGTATGGTCAATGGTGTATGGTCTATGAAGCCGTCAGTTAACTTCGATTGGGATCCATTTATGCACAAGC  
CAGAAAAGCCGCTGCCAGTATGTGGCGTGGATGGATGCGCTGGCATAA

>Cluster\_22161

ATGTGCGATAACGTTACTCCAAACACCTCTCGCGTGGAAATGCGTAAAACGTTACGTTAGTTCGGTGTAAATGATGGG  
TCTAGCCTATATGACGCGGATGACGCTGTTGATACATTTGGTATCGTTTCAGGCCTCACGGATGGTCAATGTGCCGACAG  
CCTATGCGTTTCGATGTTGCGATCCTGTTTACGGCTCTGAGCTACGGGAAGCTGGTTCGCCGCTATCCTTCGCTGGC  
TCTGCATACACTTTAGCCAGAAATCCATTAGCCGACTGTGCGCTTTATGGTGGGTTGGTCTTCTCTGCTGCTGACTATCT  
GTTCCGGCCGATGATCAACATTCGCTGGCGAAATCTATTTGAAGCTCTGGTGCCTCCATTCATCGTGGATGTTTG  
TGGTGGCGCTGGTGGCTTTATGACCGCTTTAACCTGCGTAGTCTGAAATCCGTAGCGAACTCAACACTGTAATCGCT  
GTGTTGCAGATGCGTGTATCGCGGTGATTTGGGATGTTGTTTATGGCGTATTTGAAGGTGAAGCGCTGGTACGCT  
GGCGACACTCGTCCGTTCTGGTGGCGATGCGCATGTTATCCGATGATTACCGGGCGACAACTCGTGTCTTCTCT  
TTACCGCTTTGACGGCATCAGCAACCTGTGGAAGAAACCAAGATGCAGAGCGGCTGATCCCGGTCGATTTTCCTG  
ACCGCGCTGATCGCGCGCATGATCTTCACTTTTGAACCTTACTTTCCTGACGCTGACTTCCCGGATATCTCTCGCTTAA  
AGATCCGGATGCGTACAGCCTGAAATCATGCTGACGTTGCGGTAAGCGTCCAGTGGCGCGCTGATCTTCTCA  
CCATTACCGTACTGGCGTCCGGTATGGCGCGCACGCGCGTACGCGCTGATGTAGCTAATGGGTGCTGACGGCGTG  
TTCCGAAAAGCTTCTTCGGTTATGTACACCCGAAATGGCGTACTCCGGCGATGAACATCATCTGGTGGCGGATTC  
CCTGCTGGCAATCAACTTCGACCTGGTAATGGCTACGGCGCTGATTAACCTTTGGTGGCTGGTGGCGTTCACCTTCGTTA  
ACCTGTGCGTACTCTGCGAGTTCGGATCCGTGAGAAGCGTAACAAGACGCTGAAAGATCACTTCAGTATCTGTTCCTG  
CCGATGTGTGGTGGCTGACCGTGGTGGCTGTTGGTAAACCTGGAAGAAAGCTCAATGGTTCGGTCTGATCTGGGC  
TGCTATCGCTGATTTACTGGCTTGGTAAACCAAGAGTTTCGTAACCCGGTTCGGAGTACGAAGACGTAGCGTAA

>Cluster\_25196

ATGAACGATTATAAAATGACGCCAGGTGAGCGCGCGCACCTGGGGTTAGGGACCGTATTTTCATTACGCATGCTGGG  
CATGTTTACGTTCTGCGGTTCTGACCAGTACGGCATGGCTCTGCAAGGTGCCAGCGAAGCATTAAATCGGTATGGCA  
TTGGTATTTATGGTCTGACTCAGGCCGTTTTCAGATTCGTTTGGCCGCTTTCAGACCGCATTTGGTCGCAACCATTA  
ATTGTGCGTGGGCTGGCGGTGTTTGGCGCGGTAGCGTTATCGCTGCGCTCTCTGACTCCATCCTGGGAAATTTCTGGG  
CCGGCGCTACAAGGCTCCGGTGGCATTGCTGCTGCCGTTATGGCGTACTGGCGCTGCTTTCCGATCTCACGCGCA  
CCAAAGCGATGGCGTTTATCGCGGTGAGCTTTGGCATTACCTTTGCCATTGCGATGGTCTGGCCCGATCATCACTCAC  
AAACTTGGGCTGCACGCGCTGTTCTGGATGATCGCTATCTGGCAACAACCGGATTCGCTGGACATTTGGGTTGTGCC  
CAACAGTAGCACTACGTTAATCGTGGTAAAGGCAAGTGGTAAAGGCAAGTTCAGTAAAGTCTGGCGGAACCGCGG  
TTCGAAACTCAACTTTGGCATTATGTGTCTGCATATTTGCTGATGTGCGACTTTGTTGGCTTCGCGGACAGATGGG  
GATGGGGTTACC GGCGTGAACACTGGAAGTCTACCTGGCAACGATGTTAATCGCTTTGGCTCGGTGCGCTTT  
CATTTATCTACGCTGAAGTTAAGCGCAAAATGAAGCAAGCTTTTGTCTTTTGGCTGGGTTGATCGTGGTTGGGAAAT  
TGTTGTGGAACGCACAACCGAGTCTTGGCAACTGGTGGTGGCGCTGAGCTTTCTTTGTTGGGTTTAAATTTGATGGAA  
GCCCTTCTGCTTCACTTATCAGTAAAGAGTCCGACGAGTTTACAAAGGTACGGCGATGGGTTTACTCCACCGCA  
GTTTCTTGGCGTGGCGATTTGGCGTTTGGTGGTGGCTGGATTGACGGCATGTTTGGCGTACGGCGTATTTCTCGCTG  
GCGCAATGCTGGCGCAGTGTGGCTGGCAGTCCGACGTAACGAAAGCCGCTATGTCAGCAGCTTGGCGATTGAA  
ATCCCGCGCAACTTGGCCGCAACGAGGCGTTAAAGTGGTGGTTCGTTGGTAAAGTGAAGGCATCAAGAAGTGTGATTC  
AGAAGAAGAACATTACGCTTATGTGAAATCGACAGCAAGTACGAAATCGCTTTGAGGTTGAACAGGCAATTCGCCAG  
CATAA

>Cluster\_43346

ATGTTAAACAGTATTTTAGTCACTCTGTTGATCGCTGTAAGTGGCTTCTTCTCGATGTCGAGATCTCGCTTGGCGC  
CTCACGAAAATCAAACCTAAACTGCTGGCTGATGAAGCAATATAAATGCCCAACCGCTTCTGAATATGCAGGAAAATC  
CCGGCATGTTCTTTACCGTGGTCCAAATCGGTCGAAACCGAGTGGCGATTCCTCGCGGATATCGTCGGTATGCGGCATTT  
TCTCCAGCTTTTACAGCCTGTTCTCCGCTATATGTCGGCAGAACTCTCTGAGCACTGAGCTTTATCTCTCTTCTC  
GTTAGTGACTGGCATGTTTATCTGTTTGGGATTTAACCCGAAACGATCGGTATGATTGCCCGAGAACTGGGCTT  
TGGTATCATCAACCCGATGGCTTCTGCTGTACGTTTGCACCCGCTGGTGGTGGTCTTCAACGGACTGGCGAACATA  
ATCTTCCGATTTTCAAACCTGCCAATGGTACGTAAGATGACATCACTTCTGATGACATCTACCGGATGTTGGAAGCCGG  
TGGCTTGGCGGCGGCTGTTACGTAACAGGAACACGAGCTGATTTGAAACGCTTTTGGCTGAAATCCCCTACCGTCCG  
CTTCAATGACACCCGCTGCAAAACGCTGATTTGGTTGATCTCCAGAAAGATGAGCAAAAGTCTGAAAGAAATAGGTCGGGAA  
CATCCGCACTCTAAGTCTCTGCTGTAATGAAGATATGACCACATCATCGGATATGTCGATCTAAAGACCTGCTGAA  
CCGGTGTGGCTAACCAAAGCTGGCACTGAACAGCGCGCTACAAATTCGCAATACGCTGATTTGTCGGGATACGTTAA  
CCCTTTCAGAGGCTTGGAAAGTTTTAAACCGCAGTGAAGACTTCGGGATGATCAATGATGATGATGATGATGATGATG  
GGGATCATCACCCCTCAACGACGCTGATGACACCGCTGATGGCGGATCTGGTGGTTCAGGGGCTGGAAGACGAGATTTGTCG  
CCGTGATGAGAACTCATGGCTGATAGATGGCGGCACTCCGATTGACGAGCTCATGCGGCTGCTGGATATTTGACGAGTTC  
CGCAGTCCGGCAACTACGAAACCTCGCGGCTTTATGATGTTTATGCTGCGTAAAGTCCGAAACCGACCGATTCGGTG  
AAATTCGCGGCTACAATTTGAAGTGGTGGATATCGATAACTCCGATCAGCCAGCTGTTGTTGACCCGAAATCGACAG  
CAAAGCCACCGCCTTTTCGCAAAACTGCCTGACGCTAAAGATAAAGAAGAAAGCTGCGATAA

>Cluster\_27998

TTGGCGGGTTAAACATCAAACATTGGTTTGCAGATGGCGGCTTTCGCACCATTAATTCGCAATAGCGCTGGTTAGGCTC  
CAGTAATGTCGTGAGCGCTTTGCTGGGCTGTTGGCGCTCTCGTATGCGGTAAGGGATGACGCCCGCATGTTTGGCG  
TACTGGTAATTTGCAATCGTACACCAAGTCGATCAGCGATTTTATTAAGTTTCAGACATGGCAGCTGGTGGTTTACGTAC  
GGAACCGCGGCTTGGACCAAAATATCCGAGCAATTCGCAATGTTGCTCTCATTTCCTTCGCTGGATATCGTACG  
CGGCGGGTGGCGATTTCGGCGGCATTTGCCTTACTGCCATTCCTTCCCATTCATTAGGCTGGATGACCAAGCTTTT  
GGCTGGCGGCTCTATTTCACGCTATTCCTTCAATGGCTTCTCCACGCGACCGGATTCGCGTGGGATGCTGCT  
TTCGATCTAATGCTGTACAGCAGGCGACGAAACCTTTTTCGCGCAGCGGGGAGCGTCTGAGCTGGTATTTTACTT  
TGGTTTTGCGGGTTTGTATTGCTGGTACGTTGCAATCTGATTTGGCGGACCATGTAAGTGGTGGTTTGGCGCGCGG  
AATTACCGCGCAGAAATATCCATAACGCTTCAAATGAACTGTTGAGTCTGCCGACACATTAAGGGCGGCTGGAGT  
TTTGTCTGGCTCAACCAACTTGGCCACTCCACTTGGTGGCGCGTAACCTGTCGAGCACAGTGTGGTGGGATCGGT  
AGGACCGCTGCGCGGGTTATTTAAATCGCATGACATTCCTGATGCGCGGAAACCGCAGCGGTTTACTGGGCA  
AAAGTTTTTACCCAGAGGTGATGCTTTTATGATCCAGCACCAGACCGTGGTGTGGTGGGCTGAAAGTCCGTTTACTG  
CGCGCGGAAATCGGTATTTGTTGGTGGCGCTGCGGTTGTTGATCGTGGCAAGCGCTCAATTCGCTGGTGTGGGCTTAA  
GTATCTCGAAGCGTATGACCTGATTCAGGTGATGCTGGCGCAATTTGATTTGATGCTGGGCTTCCACAGGAGTCAAT  
TGCTATTGATGGCGGAAACAGCGCGCTTTCTGTTGGCGCAACCATCGCTCAATCGGCTACATCGTATTGTTGTTT

ATGTTCTGTCTATCTGTTTGGCGTCTGGGGCTGCATTTGCTTACTTCGGTGGGCAATGTCTGGATGTGGTGTCTCGCT  
AATTCCGACCTTAAAGGCATTTTTTTCAGCGCCATTCCTTGCTTTATAACTCAACCGGAGAGAAATCCTGA

>Cluster\_62596

ATGGAAACTTTCCCTTCCTTCATATCAACAAAACTTTTCATGCCACGCGAGCGCTGCGCGATGTTTCTCTCGACTT  
TATGTCCGGGTGAAGTGCCTGCTGCGTTCGCCGGCAAAACGGCTGTGGTAAATCGACGTTGATTAATAATATGTCCGGTGT  
ATCGCCCGGATGAGGGAGCGGAAATACGCTTGGTGGGAAAACTGGTCAAAGCTGACACCCGCGCTTCGGTGGCGCAG  
GGGATTCAGGTGATTTATCAGGACTCTCTTTATTTCCFAACCTGAGTGTCTGGGAGAATATCGCCGTGAATCACTATCA  
CCACGGTCTGTTTGTAAACCGCGCTGCTGCGTGGAGTGGCGCAGGCGGCAATGACCAGTATTAACGTCACATTTGCCAC  
TGGATACACTCGTTTCTGAGCTTCAATFGCCCGTGTCAAGTGGTGGCTATTTGCGCGTGCACGGCGCAGGACGACCG  
TTGATCGTGTGATGAACCAACCGCTTCGCTGACCCATCAGGAAGTGAAGGTTATTAACAGGTGGTGCATCAATTTGCG  
TGAACCGCGGATTCGCTGGTCTTCGCTCAGTCACTGCTGGAAGAAGTATGGAAGTTTCCGACCGTATTTCACTGCTGA  
TTTGAATATCAGTTCGCGGAGGTTTGGCAGGAAAACTCAGCACCCCGTGGTGGAGTGCCTAATTTAAGTCTCATGG  
GGAATATCTAAATATTAACCTGCGGGTGAAGCGGGGAAAGTGGTATCGATTTGTTGGCTGCTTGGTGGCGGGCGCACGG  
AATATATGCTGAGTCTGTTGGTATGACCCGACCGGATGCTGGCGAGATCCTCATCAACGGCCAGCCGTTACTACTGCAT  
AGTAACAGGACGCTATCCGCGACGGTATTTGGTATGTTTGGGAAGATCGCATGCTCGCGCGTTGGTGTGATGGCGCAAT  
TATTTGAAGCAACATCATTTAGCACTGTTTTTACAAGGTAATAAGATCGCTTCGGCTTTCTGAGTGAACCTAAGCTTCG  
ACCTGGTGGACAGGCTAATCAAGGCATTGACCATCAAAGTCTCTGATCCTCATCTTCCGGTGAATACGCTTTCTGGTGGT  
AACCGCGACGGATATCGATCGCCAAATGGCTGGCGATTTGGGCGACGACTGTTGATTCGATAGCCCGACAGTCCGGTGT  
TGATATCGCAACAAGCAGGAATATACGGCATATCAGGACTCTGGCGCTCATGGCATTGCGGTATTTGATGATCTGCG  
ATGAAATGAAGAAGCGTGGTATCAAGCCACCGGATTTTGGTAAATGCAAAAAGGTGAGATCACCCATAGCTTCTTCCCT  
GACAGCAGTCTCAGGCCAGGATTCGGGAGGTGTAATGGCTGA

>Cluster\_42175

ATGCAATACATCAAGATCCATGCGCTGGATAACGTCGCGGTGCTTTAGCGGATTTGGTGAAGGCACAGAAGTCAGTGT  
CGATAACCAGACTGTTACGCTGCGCCAGGATGTTGCTCGTGGACATAAATTTGCGTTAACGGATATCGCAAAAGGGGCCA  
ACGTCATTAATAATGCGCTGCGGATTTGGTATGATGCTGGCGGATTTGGCGCGGGGAACACGTTACGCCCAATACG  
CGCACGAATCTGAGCGATCTGGATCAGTATCGTATCAACCTGATTTTTCAGGATCTGCTGCGCAAGCGGCGAGATCGTGA  
AGTGCAGATCTATCGTCCGCGCAACGGCAGTGTGGGGTGGCTAATGAGCTGTGGATCTGCCAACCGTGGGCTGTGTCA  
ACGGCATCGCGCGCAGATCCAAAATCGTTTCTGAAAGAGACCAACAACGCTGAAGGTACCGACGGCGTGTCTCTTTC  
AGCCACACCTACGGCTGCTCACAACCTGGCGCAGCATCATCAATACTCGCACCATGCTGCAAAAATGGTGGCCACCC  
GAACGCGGGCGCAGTGTGGTATTTGGTCTGGGCTGTGAAAACAACAGGTTGGCGCATTCGGTGAACGTTGGGCGATA  
TCGATCCTGAACGCTTCATTTTCATGATCTGCCAACAGCAGGATGATGAAATCGAGCCCGGGATCGCGCATTTGCAATCAG  
TTGTATAACGCTGATGCGCAACGACAAGCGCGAGCCGGGCAACCTAGCGAAGTGAAGTTGGTCTGGAGTGGCGCGGTTT  
TGACGGTCTTTCCGGTATTTACCGCAACCCAATGCTCGGTGCTTCTGACTACGTTGCTAACGGTGGTACTACCG  
TACTGACCGAAGTCCGGAGATGTTGGTGCAGAGCAGTTGCTGATGGACCATTTCCGTTGACGAAGCAACGTTGAAAA  
TTGGTCACTTGGCCGCAAAATTTTCAACAGTACTTTATTTGGCTTACGACCGCATCTACGAAAACCCATCACCGGGGAA  
CAAAGCGGGCGGTATCATTACGTTGGAAGCAAAATCCCTCGGCTGTACCCAGAAAGCGGGTTCAGTGTCTGGTGTGACG  
TGCTGCGTTACGGCGAGGCTCTGAAAACGCCGGGGTGAACCTGTTAAGTGGCGGGGTAACGATGCCGTAGCCAGCACG  
GCCCTGGCGGGTGGCGGATGCAATATGGTGTCTGTTAGTGGTGTGGCAGCCGATGTTGGTGGATTTGTGCCGAGGTT  
GAAAATCGCCACCAACAGTGAACCTGGCGCGCAAGAAAAACAACCTGGATCGACTTTGACGCGGGTCAAGTACACGGTA  
AAGCGATGCGCGAGTTGCTGGAAGAATTTATCGACACCATCGTTGAGTTGGCAATGGTAAACAACCTGCAACGAGCGT  
AACGACTTCCGCGAAGTGGCGATCTTCAAAGCGGGCTAACGCTATAA

>Cluster\_22196

ATGAGCCTACGTAAGAAAAACCATCAGCGCGCGAAGTGGTGGCGGATTTGCTACGGTATCATCATCGGCCCTGGGCTGGT  
GCAGATTACTGTGCTGGCGCGGATATCGACAACCATCAGTTCGGTTTGTACCGGTGCTGGTGGTATATCGCGCTGG  
CAGATACGCTTTCTGACTTCGGTATCGTAACTCCATTTATCAGCGAAAAAAGAAATCAGTACCTTGAACCTACCCACGTTG  
TACTGGCTGAACGCTGGGCTGGGATCGTGGTGTGGTGGCGGTTTGGTGGTGGTGGTGGTGGTGGTGGTGGTGGTGGT  
TAACCCGGACCTGGCACCCTGATTAATAACATTTGCTGCTGGCGTTTGGTGGTATCCCCACGGGCAGCAGTTCGCGCGGT  
TGATGCAAAAGGAGCTGGAGTTCACAAAATTTGCAATGATCGAAACACGCGCGGTGCTGGCGGCTTTACTTTTACGGT  
GTTAGCGCCATTTCTGGCCGCTGGCAGTACCGCGGATCCTCGGTTATCTGGTCAATAGTGGCGGTAAGAACGCTGCTGTT  
TGGCTACTTTGGCCGCAAAATTTATCGCCCGCTCGCATTTCTCGTGGCGTGGTGGCAGCCGAACTTACGCTTTGGT  
CCTGGCTGACGGCGGACAGCATCACTATCTCAACACCAACCTTTCAACGCTGGTGTGGCAGTATTTCTCGGCGG  
GGCGTGGCTGGGGATACAACTGGCGTACAACGTTGGCGTGTGGCCACCGATGAAGCTGAACCCAATCATCACCCGCT  
GTTGTTCCGGCATTTCCGCAAAATTCAGGACGACCCGAAAAGCTGGCGTTAACTTCTACAAGCTGTTGTGGTGTAGTGG  
GATTAATCAACTTTCCGGCGCTGCTCGGCTAAATGGTGGTGTGCAATAACTTTGTACCCTGGTATTTGGCGAAAAGTGG  
AACAGCATTAATCCGGTGTGCAATTTGCTGTGTGGTGGGCTGCTGCGTTCCGGTGGGTAACCCGATTTGGTTCGCTGCT  
GATGGCGAAGCGCGGGTGCATACGCTTTAAATTTCAACGATTTCAAAAACCTTTCTGTTTATTTCCGGCGATTGTTATTT  
GTGGCGAGTGGCGGGCAATCGGCTCACGCTTCCTGCTGGTGCAGATTAACAACCATTTCTGAGTACTTCTGAGTACTTCT  
GTGATGATTAACCGGTTCTTGGTTCCAGTTATCGCCAGTACATCCTGAGTTTATGGCTGGCGTTTCTCTCGCTGCC  
GACGCTGGTGGTCAAGTATGCGCTGGGCATTTGCTGAAAGGGCAACTGGCGTGGGGATGCTGCTGGCGGTGCAAAATAG  
CCACGGGTGCTGGCGTTTGTGGTGTGATTTGCTGTGCTGCGGCCATCCGCTGGTGGTGAAGTGAAGCGTCAAGTTTGT  
CGCAGCGAAAAAATGAAATGCTTTTACGGCGGGGTGA

>Cluster\_6015

ATGAGCACAAAATTTTATACCCTGCTGACGGATATTGGCGCGCGAAACTTGCAGCGCGCGCGCTCGGTGTCCTTT  
AAAAATACCCTATGGCGGTGGCGGATGGCGGAGGACATGGCAACGCCGGACGCAAAAGCAGACTGCATGGTAAAT  
AGAAACCGCGGGCTGCGCTGAAATATGCTTATATCGACCCGCAAGAACGACGAGCAGATATTGCTGAACAGGTGATCCCT  
GAAAACGAGGGCGGTTGGTGGATACGTGAAGTGGGCTGTTTGTGATGAGTCCGGAGCATTTGATTCGGTGGGCAACTGCC  
GAAAAGCTATAAGCCGCAACTGGCTGAAGGCAGCGGGCGACCCAGACCGTGGCATGTTGCTGATTACAGCAGCAGCGG  
ACAATATCACCTGAAAATCGACCTGCGCTAGTGTGGCAACCCGCAAGTATGTTGATGACAAGGTACTGGAGCTGAAA  
GTGTACGTCGAGTGGCTGATGGCAAAACATCTTGGCCGACAGGACCCACATTCACAGATGAGCCGCAAAAGCGCCGAC  
ATTTACCGGAACCCCAAGCGCAACGCCAGCGGAGGAAATACACCACGCGAGTTGCGACCAGCGTTTGTTCAGG  
CGGCACTGACGGCCCTTATTAATGGTGGCCAGCCAGCTGGACACGCTAAAAGAAAATAGCCGAGCCATTAACAATGAT  
CCGAATTTCACTACCACATTAACAATGCGCTGGCACTGAAAGCGCGTTGTCGAGTCCGGCACTCACCGAACGCAAC  
AGCACTTACTGCGCACAGTGGTCAACAATACACAGATTTGCCACCGCTTTTGTGAAATCGCGGATTTGCGGCAATGG  
TGGTCTGCACTGCTGCACTGGATACACTGAACGAACTGGCGGGCGACTGGGGAATGATCCGAACTTGCCACGACA  
ATGCTTAATGCGCTGGCAGGTAACAACCGCTGGCAATACGCTGACTAATTTGAGTGGAAAGGATGATGAGTGTCTTCT  
CGCATACCTCAATTTGGGAGAAGCGGCAAAACGGGATGTCGGAACCGGTAATAATCAACTCCGGCAGTGTCCGATTTG  
GTATGTCGCGAAACGACAACTGCCTGGGATATTTCTCCAAATGGTATGATTCGACAGGCTGGCAGTGTGACACTGACA  
CCAGTTGGTAACTTCAACGCGCAGGTGCTTGGTGGGGTACGTAACCCATTAACAGGTTAATTTCCCGAGACA





GTGAAGAAGCGAACGGTCTGTAACAACCTGGCGGCAACGCTGGCGGCGATGCCGGAGATGACGGTGGAAAAAGCCCGCCC  
ATCCTGGCTGCTTACCAGGCGGATGCCGACCCTACTCCGTGATCAGATCATGGCACTGGATGAGGCAAAAAGGGGC  
TGAGGCGCAGGCTGAACAGCTGGCTGCCGCGGGAATGACTGTGGAGAGCGCCGGGCTGTGCTGGCTGCGGGATCAG  
GTAAGGCAGAACCGGCTCTGCAACCAACCGCCCTGTTTGAACGCATCATGGCAACCATTCACCGCAGCGGTACAG  
GGTGGCGTCCACAGACGTACGACAGCGGTGATGCGGACGTGAAAATGCTCATGGCCATGCCATGA

>Cluster\_36956

ATGGAACCTCAGTGGACAAGGATGACCGCAATGAAGCGGCAGAAATATCCAGCATAACGACATGGTGGCATTAGCGG  
CTTTACCCCGCGGGTTCGCCGAAAGCCCTACCACCGCGATTGCCCGCAGAGCTAACGAACGATGAGGCCAAAAAGC  
CGTATCAAAATTCGCTTCTGACGGGTCCGTCAATCAGCGCCGCGCTGACGATGTACTTTCTGACGCGGATGCTGTTCC  
TGGCGTGGCCATATCAACATCGTCCGGTTTACGTAAAAAGATCAATCAGGGCGGGTGGTTCGTTGACCTGCATTT  
GAGCGAAGTGGCGCAAAATGGTCAATTACGGTTTCTCGCGGACATTGATGTTGCCGCTATTGAAGCATCGGCACTGGC  
CGATGGTCCAGTCTGGTTAACAGCGGGATCGGTAATGCGCCGACCTGGCTGCTGCGGGCGAAGAAAGTGCATTTGAA  
CTCAATCAGTATCAGCATCCGCGGCTTGACAGAAATGCGCAATATGTTGATTCTGCGCGCCACCCGCGCAATAGCGT  
GTCGATCTTCCATGCAATGGATCGCGTCCGTACCCGCTATGTGCAAAATCGATCCGAAAAAGATTGTCGCGCTGCGT  
CCAACTTGGCCGACGCGGTAATATGCTGGATAAGCAAAATCCCATGTGCCAGCAGATTGCCGATAACGTTGGTCACTG  
TTATTGCGAGGAAATGGCGGTAATTCGCGCGGAAATTTCTGCGCTGCAAAAGTGGCGGGCAATATCAATAATGC  
GGTAATGGCGGCTTGGGGAAAAACCGGTAATTCCTCGTTCGTTTATGATGTATTTCGAAAGTGTACAGGCAATCGGT  
ATTTACTGGAACCGGCAAAATCAGCGGGCCAGCGCTCCAGCTGACAATCTCGGCGGATTCCTGCGCAAGATTTAC  
GACAAATAGGATTTCTTCCAGCGCATTTGTGTTGCGTCCGAGGAGATTTCCAATAACCCGGAAATCATCCGTCGCT  
GGCGCTCATCGCTGAACTGCGGCTGGAGTTTGTATTTACGGGCATGCAACACAGTACGCGGGTGGTGGTGGT  
TGATGAACGGCATCGGCGCAGCGGTGATTTTGAACGCAGCGTATCTGTGATCTTTATGGCCCCGTCGATTTGCTAAA  
GAAGCAAGATCTCAACCGTCTGCAATGTGACGCAATGTTGATCACAGCAACACAGCGTCAAGTGCATCACCGA  
ACAAGGGATCGCGGATCTGCGCGGCTTTTCCCGCTTCAACGCGCCGCACTATCATTGATAAATGTTGACATCCTATGT  
ATCGGGATTATCTGCATCGCTATCTGAAAATGCGCTGCGGACATATTCACCACGATCTTAGCCAGCTCTTCGACTTA  
CACCGTAATTTAATTGCAACCGGCTCGATGCTGGGTTAA

>Cluster\_14531

ATGTCAAACAACATTCGTATCGAAGAAGATCTGTTGGGTACCAGGGAAGTTCAGCTGATGCCACTATGGTGTTCACAC  
TCTGAGAGCGATTGAAAACCTTCTATATCAGCAACAACAAATCAGTGATTTCCCTGAATTTGTTTCGCGGTATGGTAATGG  
TTAAAAAGCCGAGCTATGGCAAAACAAGAGCTGCAAAACATTCCTAAAAGTGTAGCGAATGCCATCATTCGCCGATGT  
GATGAAGTCTGAAACAACGGAAATGCAATGGATCAGTTCCCGGTAGACGCTTACCAGGCGGCGCAGGTTACTTCCGTAAA  
CATGAACACCAACGAAGTGTGGCAATATCGGTCTGGAATGATGGTTCACCAGAAAGGTGAATATCAGTACCTGAACC  
CGAACGACCATGTTAACAATGTGACGCTCACTAACGACGCTTACCAGCGGTTCCGTTATCGCAGTTACTCTTCCCTG  
ATTAAGCTGGTAGATGCGATTAACCAACTGCGTGAAGGCTTTGAACGTAAGCTGTCGAAATTCAGGACATCTGAAAT  
GGTTCGATCCAGCTGACGAGCGAGTACCGATGACCCTCGGTTCAGGAATTCGCGCTTTCAGCATCCGCTGAAAGAAG  
AAGTGA AAAATATCAACGCTACCCTGAACTGCTGCTGGAAGTTAACCTTGGCGCAACAGCAATCGGTACTGGTCTGAA  
ACGCGAAAAGAGTACTCTCCGCTGGCAGTGAAGAAAACTGGTGAAGTCTACTGGCTTCCCATGCGTACCGGCTGAAGACCT  
GATCGAAGCGACCTCTGACTGCGGCGCTTATGTTATGGTTCACGGCGGCTGAAACGCTTGGCTGTGAAGATGTCAAAA  
TCTGTAAACGACCTTCGCTCTTCTTCTGGTCCAGCTGCGCGGCTGAAACGAGATCAACCTGCGGAACTGACGCGGCG  
TCTTCCATCATGCCAGCTAAAAGTAAACCGGTTGTTCCGGAAGTGGTTAACAGGTGCTTCAAAGTATCGGTAACGCA  
CACCACTGTTACCATGGCAGCAGAAGCAGGTGACGCTGCAAGTTGAACGTTATGGAGCCGGTCAATGGCCAGGCCATGTTTCG  
AATCCGTTACATTTCTGACCAACGCTTGTACAACTGCTGGA AAAATGCATTAACGGATCACTGCTAACAAAGAAGTG  
TGCGAAGGTTACGTTTACAACCTATCGGTATCGTTACTTACCTGAACCCGTTTATCGGTACCCACAACGGTGCATCGT  
GGTAAAATCTGTGCGGAAACCGGTAAGAGTGTACGTAAGTCTTTCGGAACGCGGCTGTTGACTGAAGCGCAACTG  
ACGATATTTTCTCCGTACAGAACTGATGCACCCGCTTACAAAGCAAAACGCTATACTGATGAAAGCGAACGATA

>Cluster\_25192

ATGAAGTTTATCATTAATTTGTTCCCGGAAATCACCATCAAAGCCAACTCTGTGCGCTTTCGCTTTATAAAAATCCTTAC  
CGGGAACATTCGTAACGTTTAAAGCACATGATGAGACGCTCCTGCTGCTCCGCCACTGGGATAACATCGAAGTTCGCG  
CAAAAGATGAAAACAGCGTCTGGCTATTCGCGACGCCCTGACCCGATTTCCGGGTATCCACCATATTTCTCGAAGTCGAA  
GACGTGCCGTTTACCGACATGCACGATATTTTCGAGAAAGCGTGGTTTCAATGATCGCGATCAGCTGGAAGGAAAAACCT  
CTGCGTACCGGTTGAAGCGCGTGGCAACATGATTTTAGCTCGATTGATGTTGAACGTTACGTCGGCGCGGTTTAAATC  
AGCATATTTAGTCCGCGCGCGTGAAGCTGACCAATCGGATGTGACTGTCCATCTGGAAGTGGAAAGACATCGCTCAACCTG  
CTAATTAAGGCCGCTACGAAGGTATTTGGCGGTTTCCGATCGGCACCAGGAAGATGCTGCTGCTCATTTCTGGTGG  
TTTCGACTCCGGCTTTCAGCTATATGTTGATGCGTCCGCGCTGCGCGGTCGCGGTCGCTTCTTTAACCTTGGCGGCG  
CGGCGCATGAAATTTGGCGTCCGTCAGTGGCGCATTTCTGTGGAACCGTTTGGCAGCTCCCACCGCTCGGTTTGGT  
GCCATTAATTTTCGAAACCGTTCGCGGAAATCTCGGAAATTCGACGACGCTCAGATGGGGCTTATCTCAACCTGAT  
GATGGTGGTGGCGCATTAAGTGGCTGAACGTTACGGCGTACAGGCGTGGTTCACCGCGAAGCGCTCGGCCAGGTGT  
CCAGCCAGACGCTGACCAACCTACGCTGATGATAACGCTTCCGATACGCTGATCTTCCGCTCCGCTGATCTCTTACGAC  
AAAGAGCACATCAACCTGGCTCGCCAGATTGGCAGCGAAGACTTTGCCCGACGATGCGCGGAATATGTCGGCGGAT  
TTCCAAAAGCCCGACCGTGAAGCGGTTAAATCGAAGATTGAAGCGGAAGAGAAAGTTCGACTTACGACTTCTCGATA  
AAGTGGTGGAGGAAGCGAATAACGTTGATATCCGGAATTCGCCAGCAGACCAGCAGGAAGTGGTGAAGTGGAAACC  
GTCAATGGCTTCCGCCGAAACGAGCTGATCCTCGATATCCGTTCTATCGATGAACAGGAAGATAAGCCACTGAAAGTTCGA  
AGGATTTGATGTTGTTTCTGCGGTTCTATAAATGAGCACCATAATTTGGCGATCTCGACAGAGCAAAACCTGGCTGT  
TGTGGTGTGAGCGCGGGTGTGATGAGCGGCTGACGCGCTTACTGCGCGAGCAGGGCTTAAACAATGTGAAGGTGAT  
CGCCGATA

>Cluster\_65203

ATGGCATTGATGATTTTACGAGCTTTTACAGGAGCTTGATGACCACGGCCAGTTACTGAAAATCAGCGAAGAGTGA  
CGCCGAGCCGGATCTGGCAGCAGCAGCTAACGCCACCGGGCGTATCGGCGACGGCGCGCCGCTGTGGTTTGATAATA  
TTCCGGGCTTTACCGATGCCCGGCTGGCGATGAACACCATCGGTTCTTGGCAGAACCGCGATTTCCCTCGGCTGCGC  
CCAAATGCCCGGTTAAAAAGCAGATTGATGAGTTTATCCGCGCTGGGATAACTTCCCGATTGCCCGGAGCGCCGCGC  
CAATCCAGCTGGGCGCAGAACACCGTTGATGGCGACGAGATCAACCTGTTGATATCCTGCCGCTGTTTCTGTTAAACG  
ATGGCGATGGCGGTTTCTATCTCGACAAAGCGTGGTGGTTTCCCGGATCCGCTCGACCCGGATAACTTCGGCAAGCAG  
AACGTCGGCATCTACCGCATGGAAGTGAAGGGCAAGCGTAAGCTCGGCTGCAACCGGTGCCGATGCAGATATCGCCCT  
GCATCTGCATAAAGCAGAAGAGCGCGTGAAGATCTGCCGATTCGGATCACGCTCGGTAAACGATCCGATCATCACGCTGA  
TGGGGCCACCGCTGAAATATGATCAGCTCCGAGTACGAAATGGCAGGCGCGCTGCGTGAAGGCGTACCCGATCGCC  
ACCGCCCGTTGACCGGTTTGTATGTCGCTGGGTTTCAAGTGTATCTCGAAGGGTTCATCGAAGCGGTAACCGGA  
AATCGAAGGGCGTTCGGTGGTTCACCGGCTACTCTCGGCGGCGTAACATGACCGTGGTGGCAGTCAATAAAGTCT  
CTTACCGCACAGGCGGATTTTCAATCGCTGTACTCCGATGCGGTTGACCGGAAATCGACTACTGTGGGCGAGC  
ACCTGCGTGGCGTGTATCAGCAGCTGAAAGCGGATTCCTGAAAGTGCAGGCGGTAACGCCATGTACACCCATGGCCT  
GCTGGCGATTATCTCCACAAAAACGCTACGGCGGCTTTCGCGCGCGGTTGGCCTGCGCGCAATGACCACGCGCATG

GTCTGGGCTACGTGAAGATGGTGAATTATGGTCGATGAAGACGTTGACCCGTTCAACCTGCCGAGGTGATGTGGGCGCTC  
TCCTCGAAAGTGAACCCGCGCAGGGGATTTGGTGCAGTTGCCGAATATGTCGCTGGAACCTCGATCCAGGCTCAAGCC  
TGGGGGATCACCACAAGCTGATATCGACGCCACTACGCTGTGCCCGGACACCGTGGTCACTACAGCAACCGG  
TGGTGAATTTACCGGAAACAAAGCCTGGGCTGAAAACTGACCGCTATGCTGGCTGCACGTAATAA

>Cluster\_32589

ATGAAAGTAAACGCTGCCAGAGTTTGAACGTGCAGGAGTATGGTGGTTGGTGAATGATGCTGGATCGTTACTGGTACGG  
TCCACCAGCCGATCTCCGCGGAAAGCGCGGTGCCCGTGGTTAAAGTGAATACCATCGAAGAAGCTCCGGGCGGCGG  
CTAACGTGGCGATGAATATCGTCTCTCGGTGCTAATGCACGCTGGTCCGGTTGACGGGATTTGACGATGCGGCGCGC  
GCGCTCAGTAAATCTCTGGCCGACGTCAACGTCAATGCGACTTTGGTTTCTGTACCGACGCATCCGACCATACCAAAAT  
ACGGGTACTTTCCCGCAACCAACTGATCCGCTCGGATTTGGAAGAAGTTTGAAGGGTGTATCCGAGCCGCTGC  
ACGAGCGGATTAATCAGGCACTGAGTTCGATTGGCGCGTGGTCTTTCTGACTACGCAAGGTGCGCTGGCAGCGTA  
CAGCAGATGATCCAATGGCGCGTAAAGCGGGTTCGCGTGTGATTGATCCAAAAGGTACCGATTTTGGAGCGCTACCG  
CGCGCTACGCTGTTAAACCGCAATCTCTCGAAATTTGAAGCTGTTGTGCGTAAATGTAAGACCGAAGAAGAGATTGTTG  
AGCGCGCATGAAACTGATTGCCGATTACGAACCTCGGCTCTGTTAGTGACCCGTTCCGAACAGGGTATGTCGCTGCTG  
CAACCGGGTAAAGCGCGCTGCATATGCCAACCAGGCGCAGGAAGTGTATGACGTTACCGGTGCGGGCGACAGGTTGAT  
TGGCGCTCGGCGCAACGCTGGCAGCGGGTAAATTCGCTGGAAGAAGCCTGCTTCTTTGCCAATGGCGCGCTGGCGTAG  
TGGTCCGCAACTGGGACATCCACGGTTTCGCGGATCCGACTGGAAAACGCTGTACGTGGACGTGCAGATACCGGCTTT  
GGTGTGATGACCGAAGAGGAAGTGAAGCTTGTCTGAGCGCGAGCGGTAACCGGGTAAAAAGTGGTGAAGCAACCG  
TGTCTTTGACATCTGCACGCGGGCAGCTCTCTTATCTGGCAATGCCCGTAAACTGGGTGACCGTTTGGATTGCTGCTG  
TGAACAGCGATGCTTCCACCAACGGCTGAAAGGGATTCGCCCGCTTAAACCGCTGCAACAGCGTATGATTGCTGCTG  
GGCGCATGGAAGCGGTGACTGGGTGGTGTCTGTTGAAGAGGACACGCGCAGCGCTTGTATCCCGGGATCTTGCAG  
TCTGCTGGTGAAGGCGGCGACTATAAACAGAGAGATTGCCGGGAGTAAAGAGTCTGGGCCAACGGCGGCAAGTGC  
TGGTCTCAACTTTGAAGACGGTTGCTCGACGACCAACATCATCAAGAAGATCCAACCTGGATAAAAAAGGCTAA

>Cluster\_43010

ATGACCTTTCGCAATTGTGTGCGCGTCGATCTCGGCGCATCCAGTGGGCGGTGATGCTGGCGGTTACGAGCGTGAATG  
CCGAGCCTGACGCTGCGCGAAATCCATCGTTTAAACAATGGCCTGCATAGCCAGAAGCGTTATGTCACCTGGAAATGTGG  
ATAGCCTGGAAAGTGCATTTGCGCTTGGATTAACAAGGTGTGCGAGGAAGGGATTCGATCGATAGCATTGGGATTTGAT  
ACTTGGGGCGTGGACTTTGTGCTGCTCGCAACAGGGTTCAGCGTGTGGGCTGCCCGTTGCTTATCGCGATAGCCGCGC  
CAATGGCTAATGGCGCAGGCACAACAGCAACTCGGCAACCGGATATTTATCAACGTAGCGGCATCCAGTTTCTGCCCT  
TCAATACGATCTATCAGCTACGTCACCTGACAGAGCAGCAACAGAACTTATTCCACACATTTGCTCACGCTTTGCTGATA  
CCGGATTAAGTATGTTATCGCTGACCGGCAAGATGAAGTGGGAATATACCAACGCCACGACCAGCAACTGGTCAATAT  
CAATAGCGACACTGGGACGAGTCTACTGGCGTGGAGCGGTGCCAACAAAGCTGGTGGTGGTGGTGGTGGTGGTGGTGGT  
GTAATGTCATAGGTCACCTGGATTTGCCCGCAGGGTAATGAGATTCCGGTGGTCCGCTTGCAGCCATGATACCGCCAGC  
GCGGTTATCGCTCGCGTTAAACGGTTTACGCGCCGCTTATCTCTCTTGGCACCTGGTCAATGATGGGCTTCGAAAG  
CCAGACGCCATTTACCAATGACACGGCGCTGGCAGCCTAATACCAACGAAAGCGGGCGGAAGGTGCTATCGGGTGC  
TGAAAAATATTTAGGCTTATGGCTGCTTACGAGGATGCTTACAGGAGCGGCAATCAACGATCTTCCGCGCTTATCGCC  
GCAACACAGGCACCTCCGCGCTGCCGCTTATCATCAATCCCAATGACGATCGCTTTATTAATCCTGACGAGATGTGCAG  
CGAAATTAAGCTGCGTGTGCGGAAACGGCGCAACCGATCCCGGAAAGTATGCTGAACTGGCGCGTATTTTCGACA  
GTCGTGGCGTCTGCTGATCCGATGTGTTGCATGAGCTGGCGAGCTGCTGGTGAAGATTTCTCGCACTCATATTTGCTG  
GGCGGGCTGCCAAGACAGCTGCTCAACAGCTGTGTGCGGATGCTGCGGTTATTCGGGTGATCGCGGGCTGTTGA  
AGCTCGAGCTCGGCAATATCGGCATCCAGTTAATGAGCTGGATGAACTCAACAATGTGGATGATTTCCTGAGGTCG  
TCAGCCTACCGCAATCTGACCACTTTACCCCTAATCCTGACAGTGAATTTGCCACTATGTGGCGAGATTCACCTCT  
ACACGACAGACAAAGGAGCTTTGGCGATGA

>Cluster\_61187

ATGCTACGAGAAGAGAAGTTATCTTTCTGGTGTGTGAGAAACGTCAAACCTGGCGTCTATGCTATTTGTTGGGTGA  
GGCTGGAAGTGGAAAAACCTGGCTGGCGCAGCAACTGCAAAAAGATAAACATCGCCGTGTGATTAAGCTCGGTTG  
TTTCTGGCAAGGTAAAGGCGCATGGATCGTTACCAGCAGATAACCGCGGTGAACAGGGCTGCCGTGACAGCGGAGC  
CGAGATGAGATGGCGGGCAATTAAGTGCATGCGCTTACGAACTGATAGTGCCTCTTATTAATATTGAAAAATGC  
TCACCTGAATCACCAGCGCATATGATGATCTCAACCGCAATATCTCTTATCTGACGTTCAATTTTGTGATGCG  
GCAGACCCGATCGAAAAGTCAACGCTGATTTAAAAAAGCAGGGCATTGAACTTGTCTCGATAGGACGCTTGCAGGAC  
GAACCTAAAGCAAGCATCTTGAAGCTCAGAATATTGACCAACCGGATCTCTTTTAAACCGAGAGTCTGAAACGGAT  
AGCTTTATTAATGTCGGGGCATCGCAGAAAGTGGCGCTGGCGGCAAAACAATTCGCTTATTACAGCAAGCCGAGCAGA  
CCAGCGTTTTACAGCAAAACAATGGCGAATGATTTACCGCATATTTGGGTGATAACCGCCCCGAAAAATGCAGCTTGC  
GTGGTGTGATGAGTGAACCATATCGCTCTTACCCTGTGGTGGCTACTGCTGCTCTTTTACAGCTACGTTACCCGTTCC  
TGGCTGATGATACCCCTAACCGCATGATTTAAACAAGATATGACTAAAGGATATGCTCATGTTGGTGTGCGCGATG  
AGGCGCTAAGCGTGTATACGGCTATGGGGTACGAGTCCAGCTGATTCGGCCTGGTGGCATCAGGCAGTAAAGCG  
GGCTGGCATGTAAGGTTGGAAATGCTTCTTTACAACAATTTGGTAGATCAGAAATTTGCCCTGGATCGCATCGCTTAAAGT  
CGGGACAAAAAATGCTGTTGTTGGCTTTCGCTCGGTGAGGCTAGCGTTGATGCTCTCGTAGGTCAGCAACGTTGA  
CGCTGACACATAAAATGTTGAGTGGTATGGACGGGTGATTAATCTTCTGTTGTAAGAAATGTCGCGGAAAGGGAGAGT  
ACCATACCGGTGATAGCAGCAGGAAGAGATTCTGCTGGTGGAAACGATGTTAAACCGCGCATGATATTTGACAGCA  
ACCTTCGGCGGAGTGGCGTCCCTTGTGGTAGAAAAAATAAGCAATTTCAAAAAAGCCACCCTGAAAACTGACGGTG  
TTGTTGGCTTTTCAACGTTAGTACATCTTGGCAGGTGGCAGGGAGAGTGCCACTTATATCGGGATGAAGCAAAATAT  
TCCCCGAAACAACAGTGAAGGGGAAATGA

>Cluster\_55878

ATGACAATAACTCCAAAAACCTGATCGCACTGCTACCCTTGTGATCGTGGCTTGACGGTGGTGGTGTGATGCTCTC  
CATFGCGTGGCGAGCAATCATTTTCCCTACACGCTACGCTCTCGGTTATTTGGGCTTAAACGCGGCGCTGGTTTCGCTCTGGT  
TTGTTGGCCAGGCGGGCGCTATGGACGTTACGCGCTGATGCGCGTGGTGGTTTCGCCATGCTTTACACCGGGCTGGTA  
TTGTTGGCGAGCTCGCCACCTGACTTTTCGCTTACCGTGGCTTGAAGGCTATAACGACAACAGGATGAGTCTACCT  
GTTGGTGTAAATGCGCGCTGGCGGGATCCTGCTGGCAATGCCAACCATCTGGCGTCTCTGTTCCCTCGGTATCGAAC  
TGAATCTTTTGGCGGCTTGGCGCTGGTGGTACGTTTTCGCGGAGAAACGTTTCAACGAGCAAGTATCAAAATACAC  
ATCCTTTCTGCCGACGCTTCTTCTTCTGCTGTTGGTATGGCGCTGGTGTATGGCGAGTCTGGCGACCTGTCTGTTGT  
CGGCTGGGTAAAAACCTTGGCGAGGATGCTCAACGAGCGCTGTTGCTGGCAGGTTTTCGGCTGATGATTGTTGGC  
TCGGCTCAAACTCTCTGTTGGCTTCCACTGTGGAGCCAGACGTAACAGGGCGGCTGGCGGCTGGCGGTTCCACT  
TTCTTGGCGAGCGGAGCAAAATCGCTATCTTTCGTTGGTGGTATGCGTCTGTTCTCTACGCAACGGTGGTGGTGGCAGCA  
AGCGATTCCGCTGGTGTGCGGATATCGCTTTTCGCTCCATCATCTTCCGTAACCTGATGGCGCTGAGCCAGACCAATA  
TCAACGATCTGCTCGGTTACTCATCTATCTTCACTCGGCTGATGCTGGTGGTGGTGGTGGTGGTGGTGGTGGTGGTGGT  
ATGTCGATGGAAGCGGTAGGGGTTTACCTGGCGGTATCTGTTAGCAGCCTCGCGGCTTCCGCGCTGGCGCTGGTGGT  
GTCCAGCCGATCGTGGCGGATGCTGATTCCCTGTTCTCTTACCGCGGCTGTTCTGGCATGCTCCGATCTCGCGG  
CAGTATGACGGTGTGATGCTGCTCTGGCGGATCCCGATGACGCTGGGCTTTATCGGTAAGTTTACGTTGCTGGC

GTCGGTGTCCAGGCACACTTGTGGTGGCTGGTGGGTGCGGTGGTGTGTCGGTTCGGCAATCGGCCCTCTACTACTACCTGCG  
CGTGGCGGTGAGCCTGTATCTTACGCCCCCGGAACAACCGGGTCGCGATGCACCATCAAACCTGGCAGTACAGCGCGGGCG  
GTATCGTTGTGCTGATCTCTGCACTGTTGGTACTGGTGTGGTGTATGGCCACAACCGCTGATAGCATTGTGCGTTTG  
GCAATGCCCTGATGTAA  
>Cluster\_24547  
ATGACTACTATTGTTGACAGCAATCTGCCGGTTGCCGCCCGTCATGGGATCATTTCTCGTCTGGAATCACGCATTGTGCA  
TCTCGGTTGCCGGGGCGTTTACCAGCGCGCACCAGGCGCTGTATACCCATCATCTGCTGAAAAGTACCGACAGCGACTGGG  
GTATCTGCGAAGTTAACTGTATGCCAGGCAACGACCGCGTGTGTATCGAAAACCTGAAAAACAGCAACTGCTGTACACC  
GTGGCGGAAAAGCGCGGAAAAGCACCGAGCTGAAAAATTATCGGTTTCGATGAAAAGAAGCGCTGCATCCGGAAAATCGACGG  
TTGCGAAGGTATTCTCAACGCGATGGCGCGTCCGACAGCGCGATTGTCTCTCTGACGGTACGGAAGGCTACTGCG  
CTGATGCGGCAAGCGGTACGCTGGATCTCAATAACCGCTGATCAAGCAGCATCTCGAAAACCGACTGCGCCGAAGTCC  
GCGATTGGTTACATCGTAGAAGCCCTGCGTCTGCGTCTGAAAAGGGCTGAAAAGCATTTACGGTGTATGCTCTGCGACAA  
CGTGGCTGAAAAGCGTCAATGTGGCGAAGTTGCCGTTCTTGGGCTGGCTCAGGCGCGTACCCGCAACTGGCGCGCATGGA  
TTGAAGAAAACGTCACCTTTCCGTGCACCATGGTTGACCGCATCGTCCGCGCGGACGCCAGAAAACCTTACAGGAAAT  
GCTGACCGCTGGGTGTTTACGACCCGTCGCGCATTTGCTGCGAACCGTCCGTCAGTGGGTAATTGAAGATAACTTCTGT  
TAATGGTCTGCGGACTGGGATAAAGTCCGGTGGCGAGTTTGTGCGGATGTTGACCGTTCGAAAATGATGAAGCTGCGTA  
TGCTGAACGGTACCGCACTTTCTTCCGTGGCTACCTCGGTTACTTCCGCGGCTATGAAAATATTGCGGACACCATGACTAAC  
CCGGCTTATCGAAAAGCGGCTTTGCCCTGATGATGCAGGAACAAGCGCAACCGCTGTGATGCGGAAAGGTACGGACCT  
GAACGCTTATGCGACGCTGCTGATCGAGCGTTTACGCAACCGCTCTCTGCGTACCGTACCTGGCAGATTGCAATGGACG  
GCAGCCAGAAGTTACCGACGCTCTGCTGGACCGGTCGCTGCACCTGCAAAACCGCGGTAGTGGCGTACCTGGCG  
CTGGCGTGGCGGCTGGATGCGCTACACCCAGGGCGTGGATGAGCAGGGTAAATGCTATTGACGTGGTTGACCGCATGCT  
GGCGGAGTCCAGAAGATCAACGCGCAGTATCAGGGTGCAGACCGCTGAAAGCACTGCTGGGCTGAGCGGTATCTTTG  
CCGATGATCTGCCGAGAACCGCACTTTGTTGGCGGGTGCAGCGGATATCAGCAGCTGTGTGAGCGGGTGCAGCG  
GAGTGTGGCTGCGCTGTAA  
>Cluster\_11031  
ATGATGCGCAAAAAGTATATGCCCGGGCTCTTGGTCCGCTGCTTCTTGTGCTGTGTACCAGCTGTGCGCCAGCAAAA  
CGATGATAATGAGATCATAGTGTCTGCCAGCGCAGCAATCGAAGTGTAGCGGAGATGGCGCAAAACCGTGGGTTATCG  
AAAATGCCGAACCTGGAGCAGCAGATTACGGGCGGTAAGAGACTGAAAAGACGCACTGGCTCAGTAAATCCCGGCTTGT  
GTCAGCAGCCAGAGCCGAACCAACTACGGTATGAACATGCGTGGCGGCGCGCTGGTTGCTGATTGACGGTGTGCGCCT  
CAACTCTTACGTTCCGACAGCCGACAACCTGGACTCTGTGCGATCTTTTAATACTGACCATATGAAAGTATCTCCGGG  
CGACGGCCCTGTACGGTGGCGGGAGTACCGGAGGGTTGATCAACATCGTGACCAAAAAGGCCAGCCGAAACCATGATG  
GAGTTTGAAGCTGGCACAAAAGTGGCTTTAACAGCAGTAAAGATCAGCATGAGCGCATGCGCGGCTGTCTCCGGCGG  
AAATGACCATATCTCCGGACGCTTTCCGTGGCATATCAGAAATTTGGCGGCTGGTTTACGGTAACGGCGATGCCACCC  
TGCTTGATAACACCCAGACCGGCTGCAGCACTCCAATCGGCTGGACATCATGGGAACCGGTACGCTGAACATCGATGAA  
TCCCGGACGCTTCAACTGATAACGCAGTACTATAAAGTACGGGGACGCAATACGGGCTTAACTCTCGGAAAGGCTT  
TTCCGCCATCAGCGGGAGCAGCACACCATACGTCAGTAAGGGGCTGAAATCTGACCGCATTTCCCGGCACTGAGCGCAT  
TGATCAGCTGCAGTACTCTGACAGTATTTCCGTGAGACAGGAACCTGGTGGTCAAGTTACTACCGCATGAGTCTGTTG  
CGGTTCTACCCGTTCCCGACGGTAAATGCGAATAAACAGGCGACGGCTTTCTCTCTGACAGCAGGATACCGACCAAGTA  
GGCATGAAAACGACTCTGAACAGCAACTTATGGACGGTGGCAACTCACCTGGGGGCTGGATGCTGAGCATGAGCGCT  
TTACCTCCAACAGATGTTCTTTCGATCTGGCTCAGGCAAGTGGCTTCCGGAGGGTGAACAACATAAGATTTACACCA  
GGCGCTATCCGTCATATGACATCACCAATCTGGCGGCTTCCGCAATCCAGCTATGACATTAATGATATTTTACCGT  
CAGCGGTGGCGTACGCTATCAGTATACTGAGAACAGGGTAGATGATTTATCGACTACACGACGCAACAGAAGATTGCTG  
CCGGGAAGGCGATATCTGCCAGCCATTTCCGTGGTGGTTCGGTAGATTACGATAACTTCTGTGTTCAATGCTGGTGTG  
ATGCACATCACCGAACGTCAGCAGGATGGTTCAATTTTCCAGGGGTTGGCATGCGGATCCGGGAAATATATG  
TCCGGCATCTATGGTGCAGCAGTGAACGGCCATCTTCCCTGACAAAAGCGTGAACGTCAGCGACAGTAAGCTGGAAG  
CGGTGAAAGTCGATTTCTTGAAGTGGGCTGGCGCTTTACCGGTGACAACCTGCGGACTCAAAATCGCAGCATATTTACTCG  
CTTTCCAATAAGAGCGTGGAAAAGGAATAAAGATCTGACCATCAGTGTGAAGGACGACAGGCGCGTATTTACGGCGTGA  
AGGTGGGTTGACTACCTGATCCCGGATACTGACTGGAGTACCGGTGTGAACTCAATGTGCTGAAAACCGAGTGAAG  
TGAACGGTCAATGCAAAAATATGACGTGAAGGAATCAAGTCCATGAAAAGCGACAGCTTACATAGCTGGGCGCCGAA  
CCGTGGAGTCTGCGTGTGACAGCACCCTTCTTTCGACGTAAGCGATGCAGAGGGTAACGATATTAATGGTTACACTAC  
CGTGCATTTTATACAGTGTGGCTTCCGTTCCGGTGGGAACACTCAGCTTCCGCTGAGAACCTCTTCCGACCGTACTATA  
CCACTGTCTGGGACAGCGTGCACCTCTGTACTACAGCCCGGTTACGGCCCTGCTTACTGTACGACTACAAAGGCCG  
GGCGAACCTTTGGTCTGAACTACTCAGTGTCTGTCTGA  
>Cluster\_44668  
ATGCAGTTATTTTCGCCATCTTGGTATTGTGAAAATACCGACATCCATAGCTTTGGTGTGAGCTCTGTTACAGGTGGCCAAAT  
TCAGAAAACCATTACGGAGGAAGAAGGCGATGGCTAA  
>Cluster\_60490  
ATGGAGCTGAAATCAGTCAAGATACCAGCTGGCTGCAACTGTTTATTAACACAGCAGCTGTGCAAAACACGAAAGTGG  
ACGTATACGGTGTGACGCTGCCCGGTGCCGGAAGGTTAA  
>Cluster\_35159  
ATGTCCGATGATATATCACTGGCAATGGAAGGTGCGCTGGCTGTTGTTGCTGTGTGGGGCTTACTGCTGGTTGTGTT  
TTTGATGGATCGACTAGGAAGTAA  
>Cluster\_57449  
ATGGTTGCCAATATAATCTCATTAACAAAGAAAGTTATCTGTGTTTAAATTTAGAAAAACAACCTTCCCGAACTGTTAC  
CAACAAAATTATAACGATGAGCAAGTAA  
>Cluster\_30807  
ATGCCCTTACCGGCTACAAAGTATCGCAAAATTAATACATTTGCAAAAAAACACGTAGGCTGATAAGCGTAGCGCATC  
AGGCAATTAACGTTTGTGATCCGCTGGAAGGATTATCGCCCTGAAATGGCTAA  
>Cluster\_9815  
ATGAGGGTATCAATCTCCAACCTTGCCTGGGAAGTTACCGAAGATGTAGAAGTTGCTAATCTATTGCTGCATTTAACAT  
TGACGCGATTGATATCGCTCCCGAAAGTATTTCCGGAGCTACTAACGCGACTAGGTAG  
>Cluster\_39335  
ATGGTATTTACAAAATTAACCGGAAAGGACGCTGATGCAATACCGCAAGATATCGCTGGCTGACCGTTTTGTATATGGGC  
CAGCGCTAATACTACACTGATTTTATATATCTAGCCTTATTTAATTAA  
>Cluster\_8040  
ATGATACCGGAGTTAATCATTTCCAGGGGAAGGCAACCGCGAGTTCTTGTGCTGGTTCCGGGAAAGATGCTGTTTTG  
CAGTTTTGGCGTGTGCTTATGAAGCAAGTACGCAAAATGATATCGGTTGGCTAA  
>Cluster\_17214  
ATGCTGGAGAAGGTGCTGAGATTATAGATTCCGGTGCACACCGGTTGGCGCATGAGATCTACCGGAATTGATCCC

CAGTCTGAATGTGGTTGCTTGA

>Cluster\_57182

ATGAACAAAATATTTAAAGTTATCTGGAACCCCTGCCACAGGGAATTATACTGTTACCAGCGAAACGGCAAAAAGCCGTGG  
CAAGAAATCTGGGCGCAGTAAGCTGTTAATTTCTGCGCTGGTTGCGGGTGGGTTGTTGTCATCGTTTGGGGCGCTGGCTG  
ATAAATTACGACGGCTAGGCGGTTGATTACGGCGATGGCTCAGCTAGTGACGGCTGGGTTGCTATCGGCTAAGGCGGCAAA  
GCAAATATTTTTTTTAAACACCGCTGGTGCCAGTACCGCTTTAGGTTATGACGCTATAGCTGAAGGCCAATATAGCTCTGC  
CATCGGCTCAAAAACCCATGCTATTTGGTGGTGCATCAATGGCCCTTTGGGGTTAGTGCAATCTCTGAAGGTGACAGGAGTA  
TCGCGCTGGGTGCATCGTCGTATTCATTCGGCCAACTCAATGGCCCTTTGGTGGTATTTCCAAAAGCGCTGGGTAGATTG  
TCTATAGCTATGGGGATAGCTCCAAAAGCGGATGGAGCAAGCCATTGCGCTGGGAAATGCCGCTAAGCCGGCTGGTAT  
TATGAGCATCGGTTCTCGGTGATAATGCCAATGCGTACAAAGATTATGCTATGGCGCTGGGAGCAGAAAGCGAAGCCGCTG  
AAAATGCGACCGCTATCGGCAATAAAGCGCATGCAAAAAGGAGTGAATAGCATCGCTTGGGTAATGGCAGCCAGGCTCTG  
GCAGATAGTCAATTGCTATTTGGCCAGGGCAACAAGGCTAACGGCGCTGATGCTATCGCTCTGGGTAATGGTAGCCAGTC  
GAGTGGCTTAAAGCTTATGGCTTAGTTAGGTAAGCCAGTGTGTAAGTGGCGATAATAGTCTTGGCTTGGGAGCAATACCA  
ATGCCAACGGTATTAACCTGTGCGCGCTGGGCGCAGGTTCTATTGGGATCAAGACGATAGCGTTTCTGTGCGCAGTGAC  
TCATTACAACGCAAGATCGTTAATGTAAAAAATGGCACGATCAAGGCTGATAGCCACGACGCCAATAATGGCTCACAGCT  
TTATGCCATCAGCGACTCGGTGGCAAAACGGCTTGGCGGGGTTTATCGGTAACGTTGACGACGGTACTGTTAAAGCAC  
CAACCTACAAATTTAAAAAATGGTAAACAAAAAATACCTTGGCGATGCGCTCACTGTACTCGATCAATTCCTGCAATTG  
GATCAAAACAGAGACAAATACAGCGCCGCTCATGGTAGCTCAACTGCCAGCGTAATCACCGATGTGGCGGATGGCGCAGT  
TTCAGATTCCAGTAAAGACGCGGTTAACGGTTCACAACGAAAGCCACCAATGATGATGTTGAGACCAATACCAATA  
TCGCTACCAATACCGGAAATTTGCAACTAACACTGCAAAATATGCTACCAACACCACCAATATCAATTTGACAGAT  
ACTGTTGGCGACTTAAAGATGATGCCCTGCTCTGGAATGGCACTGCAATCAACGCGCTCATGGTACGGAAACCCAG  
CACCATCACCAACGTGAAAGCTGGTACCTTTCCGGATGACAGTACTGACGCGGTTAATGGCTCGCAACTGAAAGACACTA  
ACGATAACGTGGCGCAACACCACCAATATCGCTAGCAACACGGCTAACATTTGCCACTAACACCAGTAAATATGGCCGAT  
AACCTGGCAACCAATTTGCTACCAACACAGTAATATTGGCCAGTAACACTGCCAACATTTGGGACCAACACCAAGTATTGC  
AGGTAACACTGCCAACATTTGCTACCAATACCACATAATTCGCGGCTAACACCACAAGCATAAATAGCTGAAACAGTCTG  
TGGATGCTCTGAAACAGGATGCTATGCTCTGGAACGGCCTGCAATCAACGCGCTCATGGTACGGAAACCCAGCACC  
ATCACTAATGTGAAAGCTGGCACCTTTCCGGATGACAGTACTGACGCGGTTAATGGCTCGCAACTGAAAGCTACTAACA  
TAACGTGGCAACCAACACCACCAATATCGCGAGTAACCTAACATTTGCCAGCAACACCGCAATATAATTAATCTCA  
ATACGTCGATCGATACCCCTTGGAGCAGGATGCAATACTCTGGAACGGAACAGCGTATAGCGCGCGCACGGTACAGAA  
GCCAGCACTATTACAACGTTAAAGCAGGTACTTTATCTGAAATAGTACGGACGCGTAAACGGTGCAGCTGAACCC  
GACTAACCGCAATGTGGCGACCAACACCACCAATATTGCTACTAACCCGCGCAGCATTAATACCTGAAATACATCCATTG  
ACGCTCTGGAACAGGATGCGCTGCTTTGGGATGGCACTGCACTGATTCACCGCAGCGTAATCACTAACCTCGCAGACG  
ATCACCAATGTCCTGGCAGGACTGTATCATCCGCCAGTACTGATGCCAATTAATGGCAGCCAGCTTCATGGGTTGAGCAG  
TTCGATCGCCACCTATCTTGGTGGTGGTCCACTGTGAGCGATTTGCGGATTTAGCGGCCCTACCTATAACATTTGATG  
GTAATGATTACCAATGTTGGTGTGCTGCACTTGACGCCATTAACACTCACTTAGCGACTCACTCGGCGATGCCCTCCTT  
TGGCATAGCAGCACTGGCGCATTTAGTGCCAAACACGGTTCTACCGCCAGCGTAATCACTAACCTCGCAGACGCTGCAGT  
CTCTGACTCTAGCTCTGATGCTGTAATGGTTCACAACGTACGATGTAAGCAACTCTGTTGTCGATGTTCTGGGTTGGT  
GTGCTGGCGTGAATACGGATGGCAGCATCAGTGACCAACGTACACCAATTTGCTAACACTGATTACGATAATGTGCGGAT  
GCCCTAACCGCGCTTGATAACACTCTTGGATGCGATGCTATGGGATGCTACCGCAGGTGAAATGGTGCCTTCAGTGC  
CAGCCACGATGGCAGTGGCAGCAAAAATAACTAACGTCGCGCGCAGGAACAAATTTCTGACACCAGCACCGATGCGGTTAATG  
GGGCTCAACTCCACGGCGTTAGCAGTTCCTGCTGCTGAGGCTCTTGGTGGTGGTGGCGGCTGAATTTCTGACGGAGCATC  
AGCGCACCGACTTACACCAATTTGCTGATACCGACTATACCAACGTCGCGGATGCGATGAATGCAATTTGACTCAACCTGGA  
TAACGCTTTGCTTTGGGAGCGTACCGCAGGTGAAAACGGTGGCTTAAACGCAAGCCATGATGGCAAGCCAGTGCATCA  
CCAACGTAGCCAATGGTCAAGTAAACGAAACAGCACCAGCGGTTAACGGTTCACAGTAAATGCCACGAATATGTTG  
ATCCAGAATATTGCGGTTGATACAGCGAAAGCTATATCACAGAGAAGGTTAAGGTTAACAATATGTCGCTACTAACGA  
CAGCGGCTTAGTCTTTGAGGATGCCAGTGTACGGGTTGGGCGCTACAGTGTAGGTTATAACTCCGTCGATCAGGCG  
ATAGCAGTGTGGCAATTTGACAGAACAGCAGCAGTACTATTGAATCTGGAATTTGCTCTGGGAGCAGTTCGCTTAAC  
CGTGTCACTCTCAGGGCTCCCGTGATACAGCGTAACCGAAGATGGCGTAGTCAATGGTTATAACACCAGTGTGCGGA  
ACTGCTTGGCGCGTGTCAATTTGGTGTGACCGTAAATATCGTCAAATCATCAACGCTGCCGATGGTTCCGAAGCCCATG  
ACGCGGTTACGGTTCGCCAGTTGCGAATGGATTGGTGTGTAGCAACGACACCGCTCCAAACTTCTCATGCTAATTTCA  
ACGGAAGAAGACTTACGCTGTGCGGTGAAGACTCACTGGCAATGGGTTGCGAAAACCAATGTTAATGGTGTACCGGGAT  
CGGTATTGGCCTGAAACACTCTGGTGTAACTGATGCAATCAACGGTATTGCTATCGGTAGCAACGCGAGTGCAAAATCATG  
CAAACAGTATTGGCATGGTGTAGTGGTTCACAGACACCCGTTGGTGCAGACTGACTACACCGCTACAAATGACGCGG  
CCGCAAAATTTCTGCTGGTGAATTTCTGTGCGCAGCGAAGCAGGTTCAACGTCAGATCACCAACGTCGCGGCTGGTTGAG  
GGATACCGATCGGTTTAAAGTCACTGAGTTGAAAGTCACTGATGAGCGCGTAGCGCAAAATAACCCAGACATTACTAAC  
TGAACAATCAGGTCATACTGGATATCGCGTTACTAATATCGAAAACGGTATTGGCGACATGTCACCACCGGTTAGC  
ACCAAGTACTTCAAGATCAACACCGATGGCGTAGATGCCAACGCCAGGGTAAAGATAGCGTTGCTATTTGGTTCTGGTTCT  
CAATGCTCCGCTGACAAACAGCTGCGACTGGGTACCGGTTCCGTTGCGAGATGAAGAAAATACAATCTCTGTAGGTTCTT  
CCACTAACCAACCGCTATTTACTAACGTTGCCGAGGTAATAATGCTACCGATGCTTAAACGTTGCGCAGTTGAAAGTCT  
TCTGAGGCGGGCGGCTGCGTTACGACACCAAGCTGATGGTCTATCGACTATAGCAATATCACCCCTCGGTGGCGGCA  
CGGTGGTACGACTCGTATCAGCAACGCTCCTCGTGGCGTCAACAACAACGACGCGGTTAACTACGCGCAGTTGAAAGCAA  
GCGTGCAGGAAACGAAGCAATACACCGATCAGCGGATGGTTGAGATGGATAACAAACTGTCTAAAACCCGAAAGCAAGTTG  
AGTGGTGGTATCGCTTCTGCAATGGCAATGACCGGCTGCGCGAGGCTTATACACCGGTTGCCAGCATGGCTTCTATTGG  
TGGCGGTTACTTAAACGTTGAATCGGCAGTGTCTTTAGGTGATCGATGGTGAAGCCAAATGGTGGTGGGTTACAAAT  
TACAAGGTAGTACCAATAGCCAGGGTGAATACTCCGCCACTCGGTGCGGTTATTAGTGGTAA

>Cluster\_38585

ATGCTCTCCATTTCTTCCATTAAGGTGATGCGGGCTACTACAGTCAATGAAGACAACACTACTACGCCAGCGGTTCACTGGA  
CTCCCGCTGGATGGGGAGGGGTGCGGAGAACTGGGACTGGAAGGGGGAAGTCGCCAGCGCCGATATGGATGCTGTGCGT  
AGGGTAAACTTCCGAGCGGTTAGATCTCTCCGATAGTAAATGGTGAATAAGCACCGCAGCGGCTACGACCTGACG  
TTTTCTAGCCCCAAAAGTGTCTCCGCTATGGCGTGGTGGGAAAGACCGACTTTTATTGAGGCGCAATAACCGGCTGT  
AGCGGTGGTATGACAGGAGTTGAGAAGCTGGTACGCGCGGCTTACAGAAGAGGGGAAAACGGAACAGTACTGACCG  
GCAACATGGTGGCGCACTCTATAACCATGATACGTCCTGACTCGATCGGAGTTGCATACCCACGCTCTGGTCTTT  
AACGCCACGTTTGGCGTAAAAATGGCGGTCGCTGGCAGTGATACGCGCATGAAAACGGGTTTCTCCGAAATCTGTA  
TGCACCAAGATAGCGCTGGGAAACCTGTATCGTTCTGCTTTACGTGAAAGACTTTGAGTGGATGGGATTTGAAACTGTTG  
CGGCCGAAAGAAATGGTCTGTGGGAGCTGAAGGATGTCCTGTGATGTTTTTCTCTACGATGCTAGACTATCCGGGAG  
GCCGCGGCGCCGAGCGCTTGCACAAATCCCGCAGCTTGGCGCGCTCGATACCCGTCAGGCCAAAGCTGGGCGGACCC  
GGAGCTGTAAGAGCTGACTGGCGCGGCTGGCAAAAATTTGATATCGATGGCTACATCAGACGCGCAGG  
CGCGCGTGGAGGTTCTGGTGTGTTGCAAGGTGACATAGCGGTATACATGACCGGACTGTGCGGAGGCGGCTTTCC  
GGCGAGATTGCTGACGAGCAGGTGCGGAAAGCTGTCAGCGACACGATTTGCGGCTGTGCGGAGAAAAGGTTCCAGTTAC

CTGGTTCGGAGATGCTGGCCGGTACGGTCAACCGTCTGCCTTCCGCACCCGGTCTGTTTGGAGCAGGCCCGGGCCGGCATCG  
ATGCCCGGATTGAAGGGCAGCGTCTTATCCCTCTGGACCGTGAGAAGGGGATATTCACCTCTGATATCCACCTGCTGAAT  
GAACCTAGCGTCCATCAGCTGGCGCGCACGGCCATTCCAGGAACAGACCGTGTCTCTTCTTCTGAACGGGCACAGGAACG  
CGATATACCGCGAGTGATGCTGTCTCTGTCTTCTGACGCAGGACAAAAGCCCGGTGGCCATTCTCAGTGGTTCGGGGAGGGC  
CTGAAGAAGCCGGTATTCAGCAGTACCGGTTTATAGACACCCAACTACCGGAGGTGCCACTGGTTCAGCGAGGGCGGACAA  
GACGGTCCGAGTGGCCAGTTTATGTCAGAAAAGTCCGCATCTGGCAGGCCATGTGATGCTGCGCTCGCAGATGAACCGTGA  
CACCGTATTCGGGTGACAGGAAACGGTCACTGTTGACCGCGCGGAGCGGTGTGCTGAAAGAGACGGTGTGCTGTCAGG  
AAAAGCGCTCAGCGCCGGGGCGCAGCTGATTTTATGGATACGGAGAACCAGGGGAAACGGGGAATGCCCTGTCTGTG  
CTGAAAAGAACCGGTTATCCGAGTACCGGTTTATAGACACCCAACTACCGGAGGTGCCACTGGTTCAGCGAGGGCGGACAA  
GCGAAGCCGTTACAGCCAGCTGGCACAGGACTATGTGCGCCTGTGCGCGGAAGGGCGGGATGTGGTGGCCAGGTGACCG  
GTGCCCGGAGCAGCAGCAACTGACGGATATCATCTGCGAGTCAACGGCGTGGAGCCGAGAACGGGGCGGGAGCAGATG  
ACACTGACGGTACTGGAGCCTGTGTGGCTGGACAGCAAAACCCGCCATCAGCGTGATAACTACCGGGCGGGATGGTGTGAT  
GGAGCTATGGGACCTGAGAAAGAAAACGATGACACGGCACACCACTTGAACGGGTGGCGAAGCCACCAATAGCTGGTAT  
TGCAGGGAGAAGACGGCAGTCCCTGACGCTGAAGGTCGCGAGCTTGACGGCAGCTGGAGCCTGTACCGCAGCCGGACG  
CTGGCAGTTTTCAGAGGGGACCGCGTCAAGGCGCTGGGGCGTGAAGTGAAGGGGGCCATCAAAGCGAAGGAGCAGTTCAC  
GGTGTGCTCTGAAAACGGTGCATACGATTGCGCAGTGGCGACCGGGAGTGCCTGTGCCACTGAGCGGGCCGTGA  
AGCTGGCCGCAATATGTGGAGGGACCGGTGCCGAAAGTGTCTTCCCGGACAGTGTGCTGGCCGCGGTGCGGGCACCA  
AGTCTGAATAAACAGGCTCTGAACCGCTGGCGCAGAGTGGCGGTGACATCCGGATTTATACGCCACTGGAGGCCGGCA  
GGCCGCGGTAAGTAGAAGATGTGTCTTCTGTCCGGCTTGCAGTGACAGGTCGCGCAGTCCCGCAGTGCAGTGGCAGACAAATC  
TGGATACGCCCATACAGCCAGCCGGGAGCGGTGATGTGCGATGACAGCAGCGGTGAATCTGGCCATCCCGCGGCA  
CAGCAGGGACAGTGTATCTCAGCGAAATGTCCTGTCTGTCAGAAAGCGTAAATCTGGCCAGCCGCTGGTGTATGTCG  
GACAGCAATGCCCGGCGAGTGAACAGCGGGGAGTGTATCAGCTGGATTCGGTTTCCGGGGTGGGAAACAGGGTGTCTG  
TTCCCGCTGTGGCGTATGAGATGAAAAGAGCATCATCCGCCATATTGCCGAGGGTAAGGATGCCGTTTCCAGCCCTGTGAT  
GCGGTGACACTGGCTGTGCTGTCGGCGGTTTACCGCACAGCGGAGCCAGCGGAGCCACCGGACAGTGTGCGGAAACCGCA  
CCGCTTTATGGCCATTACAGGCTACGCCGGGTGGGAAAACACCAGTTCGGGGCGGTGATGGGTGCCCTGAACACCC  
TGTCTGAATCCGTGCGTCCGCGAGTTCATCGCCGAGGACCCAGCCGCGGTGCATGAGATGCGTGGAGCCGGGGTGG  
GAGGCACGAACGCTCGCCAGTTTCTGAGTGAACCCCGCCAGGCCATTTCAGGCGGGGAAACTCCTGACTTTCGCAACGCT  
CCTGTTCCTGACTGGCTGAGAGCTCGATGGTGGCAACCGTATGTCGGGAGCTTACACAGCTGGTGGTGGCGGGG  
GGCGAATGGTCTCCAGCGGGGACACCGCGCAGTTCAGGCTGTCTCCACCGGGCAGCCGTTCCGCTGGTACAAACAGCGC  
AGCGCCATCGATACGGTGGTGTGATGACAGGAGATTGTCCGTCAGACCCCGCGCTGCGCCCGGCAATTGAAAGCATTTATCCG  
CGTACAGGTGGAGACATCCCTTCCGCGAGTGGGTGACGTCAGCCCGTACAGGTACCAGTCCAGGAAGGAGCCTGGGTGC  
CGAAAAGTCCGTTATGGAAATCCGTCGCCGAAAAGGGCCAGGAGCAGGACACCGCTGCCCGCGGTGAACAGACGCTG  
ACACCAGAGCAGTGTACTGGTCCGACCGACATCATGAAGCCATCCGGGATGACTGGATGGGGGAAACCCCGGAGGC  
GCAGCAGCAGACGCTGGTGTGGCAGAATCAACCGCGATCGTTCATGCCATCAATGCTGCCATTCATGCCCGCCGGCATG  
AGAAAAGCGGATACAGGTGCTGAAGAACGCAGTTCACCGTTCGAGGCGCTCCGGGTGCCCTGACACCGCCCTGCGTGC  
GCTGAAACTTTTGGGAAATACACCGCGCTGGCCATGATGAACGAGCGCTACTGGACGCTGGCGGAGTGAATCTCA  
GGACGCTGTGGTCAAGCTGCGGAAATGCTGACGGGGAGTGGTGTCTCTCTCTCAGCAGAACACCGCTCAGGATATTT  
CCCTATTACACCCCGGAACTGACGGTCAAGTCAAGGGGACCGGGTGCCTTTACCGCTCGGACACCGACCGCGCTAT  
GTGGCCCAACAGTCTGTGGAGGTGGCGGGTTCAGTACAGCAGGGGCAATCCGTTCCGCCAGGGAGCAGGAGAAAAT  
CGTCGACCCGCGAGCCATGACGGAGGACCGTCAATTTGACCTCGCCTACGCCCTGACGGTGTATGGCGTGCAGGGGGCA  
GTGAACGTTTTCGCAATGGCCTGACCGGTACCGAAGGTGGCAGAAAAGAAATGGCGTCCCTGGAGTCCACTTATGTGAGC  
CTGTACCGTGCAAAAGAGCATGTCCAGTCTACACGGAAACCTGGAGGACTGGCAGCAACAGGTCGGCAGTCTGACGG  
CGGAAAACCTGCTCGGTGACCGCAGCCGTAACCGGAAAGTGAACCGGAGTCCGACACCGGTAACCGTCTGCTGGCTACCGCAT  
CGCGGCTGGATAAAAACCGCGCTGGGCGCGGGTGTGGCGGAAAACGGTCTGGAGGGTGAACAGATGGCCCGCTTTATC  
GCGGCAGGCAAAAAGTATCCGGCACCGTATGTGGCTCTTCCGTTGTGGAAACCGACACGAAAAGAACCGGGCGCTGT  
GACGGAATTCGTTATGAGGATGATGGAATGCGCGTGGTGTCTAGCGAAGAGTCCCGGTACCGCTGGTGAAGATGCGC  
AGTTCCCGCGCTGACCGCAGCCGTAACGGACAGACATCTGCTGATGATGACACAGCAGCGCGCTGGCAGGACG  
GAGAACCCGGAGAGTGGGGTGGTGTATACGCTGCACGGTGAAGAACGGTTGCTCAATGCAGCCCGCTGACCGGGGACG  
AATCACGGAGCCTGATGAGGTGGCACGGACGGTGCAGTGTGGCGGAGGCTGAATCGGTGGCGAAAGCGGAAGACCCCA  
TTACGCTGCCCTCCGATGAGCAGCAGAAGTGGCGGAGGCGCAGGAGAAAAGCCCGCTGAGCTGGCGGAGCAGGCCCCG  
CGTGAACCTGTTGCTCGGTGACACCGCAGAAAAGATGAAGGCAACCTGACCCGCTGTTATCTGCCGATGATGAACCTCGCT  
CGGTGACAATTCAGAACGGGAAATCCGGGAGCTGGACGAGGCTGTCCGGGAGGCGGTTGCCGATGGTCTGGTGCCTGCC  
AACAGGCAGTGAACAGATACTGCGTACTGAACCTGAGTGGGTGGTGAATATGCCGAAAAGAAATAGAGATGAAAAG  
ACACTCGGTGGCGACTGA

>Cluster\_22691

ATGATGGAATTTCTGCGTGGTTCGCGTGCATTTGTCGGCATTCGAATCAACAACTGCTGGCAGGTTTTTCAGGCTGCCAG  
GCTCCCGGTTACACTATTTACGCCGAGTATGTCCATTTTGTGACTCAATGCGCGGTTAAACGATGATGAGCAGCAGC  
AATTTGAACGCCTGCTGAAATATGGCCCGCAGTCCGACCGCCGCAAGGCAACTCTGCTGGTGAACCCCGCT  
CCTGGACCATCTCTCCCTGGTCTTCGAAAAGCGACCGATATTGCCATAACTGCGGGCTGCAACAGGTTAACCCCTTGA  
GCGCGGCGTGTCTTACTATATAGAAGCCGGTACGCTGACCAATGAACAATGGCAGCAGGTTACCGCTGAACTGCACGACC  
GCATGATGGAACCGGCTTTTTTGTCTTAGATGATGACAGCAGCTGTTTGCACACCATCAACCGACTCCGGTACCAGC  
GTTGATTTGCTGGGGCAGGGCCGTCAGGCGCTAATCGAGCTAACCTGGCTTTGGCCGTCGACTGGCGGAGATGAAAT  
CGACTATCTGCAGGATGCTTTCACAAAGCTTGGGCGTAACCCGAAACGACATCGAGCTGTATATGTTGCTCAGGCGAACT  
CTGAGCACTGCCCGCCACAAAATTTTAAACGCGGACTGGATATCGACGGTGAACAGCAGCCGAAATCGCTGTTTAAAGAT  
ATCAAAAACACCTTCGAAACACGCCGATCACGTTCTCTGCTTATAAAGATAACGCCCGCTCATGGAAGGGTCTGA  
AGTGGCCCGCTACTTTTGTGACACGAAACGGGCGCTACGATTTTCATCAGGAACCGCGCATATTTGATGAAAGTGA  
AAACCCACAACACCCGACGGGATTTCTCCGTGGCGGGCGCGGACCGGTTCCGGCGGTGAAATCCGCGATGAGGTT  
GCCACCGGACGTGGCGCAAGCCGAAAGCTGGTCTGGTGTGTTTCTCCGATATCAACCTGCAGAAATCCGCTTCGAACA  
GCCGTGGGAAGAAGATTTCCGTAACCTGAGCGCATTTGTTACCGCGCTGACATCATGACCGAAGCCCGCTGGGCGGTG  
CGCGGTTTAAACAACGAAATTTGGTCGCCCGGCACTGACCTACTTCCGTACATGAAGAAAAGTGAACGCAACAT  
GGCGAAGAGCTGCCGCGTATACAAAACCGATCATGCTGGCGGGTGGGATCGGCAACATTCGCCCGATCACGTACAAAA  
AGCGGAGATCAACGTTGGTGCAGGCTGGTCTTCCGCGCCCGGCAATGAACATCGGCTTTGGCGCGCGGGCGCT  
TTCCTAGGATCTGCTCAGTCTGATGCCGACTCGACTTCGCTTCCGTACAGCGCGACAACCCGAGATGGAGCGCTCGC  
CTCCAGGAAATGATCGACCGTGTGTCGGCAGTTTGGTGTGTCGCAACCAATCTGTTTATCCACGACGCTGGCGCTGGCGG  
TCTTTCTAACGCCATGCCGGAACGGTGTGAGCAGCGGGCGCGGCGTAAATTCGAACTGCGCGATATCTGAGCGACG  
AACCGGGCTAGCCCGCTGGAATCTGGTGTAAACGAAATCCAGGAACGCTACGCTGCTGGCGGTTGCTGCCGATCAGTTA  
CCGTGCTTTGAGCAACTGTGTAAGCGTGAAGCGCCGATCAGCGGTGATGGCGAGGGCCACCGAAGAACTGCATCTTTC  
TTTGCAGGATCGTCAATTTGATAATCAGCCGATCGATCTGCCGCTGGACGCTACTGCTTGGTAAACCGCGAAGATGACCC  
GCGAAGTACAACGCTGAAAGCGAAGGGTGTGCGCTGGTTCGTAAGGGATTACCATGCTGACGCGGTGAAACCGGCTG

CTGCACCTGCCGACCGTGGCGGAGAAAACCTTCTCGTGGTGACCATTGGTGACCGCAGCGTAACCGGCATGGTAGCGCGGA  
TCAGATGGTGGGTCCTGGCAGGTGCCGCTCGCTAACTGCGCGGTCACTACCGCCAGCCTCGACAGTTACTACGGTGAAG  
CGATGGCAATTGGCGAACGTGCGCCAGTTGCGCTGCTGGATTTGCGCCGTTCTGCCCCGCTGGCGGTGCGTGAAGCGTTA  
ACCAACATCGCCGCAACACAAAATGGCGATATCAAAACGCAATTAACCTTTCCCGCAACTGGATGGCGGGCAGGCCACCC  
TGGTGAAGATGTCGCGATGTCGCGCAACTGAAAGGCTTTATGACGCGAATTCAGGCGCTGGTTCACAGCGTAAGCTGCTC  
TGGTAAAGACTCTATGTCGATGAAAACCCGCTGGCAGGAAGTAAACGAGAGCGGAAATGACGTCGCCACTGTCGCTG  
GTGATTTCTGCATTTGCCCGCTGGAAGATGTACGTACACCATACCGCCGAGCTTTCTACCGAAGATAACGCACTGTT  
GCTGATTGATTTGGGCAAAGGCAATAACCGCTTGGCGCAACGGCGCTGGCGCAGGTTTATCGTCAGCTTGGCGACAAC  
CGGCAGATGACCGGATGTCGCGCAACTGAAAGGCTTTATGACGCGAATTCAGGCGCTGGTTCACAGCGTAAGCTGCTC  
CGGTACCACGACCGCTCGGATGGCGGCTGCTGGTAAACGCTGGCGGAAATGGCGTTTGGTGGTCAATGTTGGCATTGACGC  
AGATATCGCTCTCTGGTGGACGATCGCTGGCGGCTGTTTTAACGAAGAACGGGTGCGGTGATTCAGGTTCTGGTGGC  
CTGACCGTGAAGCGGTGAGTCCGTACTGGCGCAGCATGGACTTGGGATGCGTCCATTATGTAGGGCAGGCGGTTTCC  
GGTACCGTTTGTGATTACCGCCAACGGGCGAGCTGTATTGACGAAAGCCGCACTACGTTGCGTGTCTGGTGGGCGAGA  
AACTACTTGGCAGATGCAGCGCTGCGTGACAACCCGGAGTGTGCCGACAGGAGCACCAGGCGAAATCAAACGACGCCG  
ATCCGGGCTGAATGTGAAACTGTCGTTGATATCAACGAAGATGTGGCAGCACCCTATATTGCCACTGGTGGCGCTCCG  
AAAGTGGCGTGCCTGCGTGAGCAGGGGGTGAACTCGCATGCTTGAATGGCGGCGAGCTTCCACCGTGCAGGCTTCGATG  
AATCGATGTCATATGAGCGACCTGCTGGCTGGACCGGCGGCTGGAGGATTTCCACGCTCTGGTAGCGTGGCGGAT  
TCTCTACGGTGACGTGCTGGTGTGGAAGGCTGGGCGAAGTCTATCTGTTCAATGACCGTGTACGCGATGAGTTT  
GCAACCTTCTCCACCGTCCGAAACGCTGGCGCTGGGGTATGTAACGGTTGCCAGATGATGCTAACTGGCGCAACT  
GATCCAGGTAGTGTGTCGACGTTTGTGCGCAATACCTCCGATCGCTTGAAGCGGCTTTCAGCGGTTTCAAGG  
TAAACCAAAGCTGCTGCTATTTGACGGGATGGTGGGCTCGCAAAATGCCGATTGCTGCTCTCATGGTGAAGGCGC  
GTGAAGTGGTGTGTCGGCGCATCTGGCGGCACTGGAAGCAAGGGTGTGGTGGCACGCGCTATGTCGATAACTTCGG  
CAAAGTCACTGAAACCTACCCGGTAAACCGCAACGGGCTTCTCGAATGGTATTACGGCGGTACGACTGAAAGTGGTCGAG  
TCATATTTATGATGCGCGCACCGGAACGTGTTTCCGTAAGCTGTCAGCAACTCTGGCATCCGGAACCTGGGGCGAGGAT  
GGGCGTGGATGCGTATTTTCCGCAATGACCGTAAGCAATTGGGATAA

>Cluster\_5375

ATGAGCGGAAAACCGCGGCGGCGAGGGTGCATGACCCGCAAGGGACTGGATATTGTGAGGGTTACGAGGTTGCTGCT  
GATAGGTGCGCCGACGGAGTGGCTGCTCGGTATGTCCAAACAGCCGATAGAGGAGCAGAAGGGCCACCCGTTGAACC  
CGGTGCTGGGTGCGAAGGTGCTGCCGGGCGAGACGGACTTGGCTGCCCCGCGGTTGCCGTTTATTTCTTCCCGCGCT  
TACAGCAGTACCGGACAGGACGCCGCGCGGTGGGGTGTTCGGTCCCGGTGGAAGCGCCCTTCGATATCCGCTT  
ACAGATACCGGATGAAGGACTGATACTCAACGACAGCGGCGGAGGAGCATTACTTTGAGCCGCTGTTTCCCGCGAGA  
TAAGCTACAGCCGAGCGAGTCTTCTGGCTGGCGGGGCTGGGCGAGCAGCAGCTCGCAGCCGTTAAGCGCG  
CTCTGGCAGGTGCTGCCGAAGATGTTCCGCTGAGTCCGCATGCTGACCTGGCAGCAACAGCCTTCAGGGGCGTGGT  
GATACTCAGCTGGCGGAGCGGGTGCAGGAGTGGACGAGTGTGCCCGGAGCCGCGCATACCGGTTGCTGACCG  
CGTGGTGGACGGCTTCCGGGCGGAGCTGGCTTCCACCGGAGGCGGCGAGGCAACTGGTGGCGCAATCACAGGGTG  
ACGGACGGCGGGTCCGCTTCCACTGGCGTGGCACACAGCGGCGAGCGGGCGGAAGCCCTCCGTAACACGGCGA  
GTCCTCTTATCTTCTCCGGCGGTTCCCGTTCGTTTCTCTTCTTCTCAGCTTCCCGGACAGCTGCCCGCGGTA  
CAGAATACCGTGGCGATAACCGTATCCGCTGGAGGCGGTATGGCTGACACACAGCCGGCATACCCGGATGACAGCGC  
ACTGCCCGCTGGCGGCTACACGTACCGGCGAGGAGAACATGCGGGCGGTGATGACCCGAGCGGACGAGTTCG  
CGGTTTACTTATGATGCGGAGCACCGGGCGGATGGTGGCGCACCATTTATGCGGGAGGCCGAGAGCCCGTACC  
ATGATGATACCGTGGGTGACGGAGCAGGTCAACCCGAGGGGCTGGACTACCGCTTGGAGTACGGAGAGCGCGGTA  
ATCATCACGGACAGTCTGAACCGCGGGAGGTGCTGTACACGGAGGGCGAAGGTGGCTGAAGCGGGTGGTGA  
GCATGGACCGGAGCATACCCGACGAGTATGATGAGCGGGAGGCTGAAGCGCAGAGGATGCGCGGGCGGCG  
GGACGGAGTACAGCTGCATATGGCGTGGGTGCGGTGACGGCGGTGACGGGCGGAGCGGACAGGACGGTACGGTATGGC  
TATAACAGCCAGCGGCGAGTGCAGTCCGTTGACGTACCCGGACGGGCTTCGAGCAGCCGGGATGATGAGAAAGGAA  
GCTGGCGGCGGAGACCTCAGCAGCGGTGAGACGACGAGTTACAGTATGATGACCCGGCGAGTGGTGGCAGACGGGA  
TAGAGATGCGAGCGGCGAGTACAACAGATGGCATGGACCGGTTACGGTCAACTGCTGGCTTACCGGATGCTCGG  
TACACGACCGGTATGAGTACGACTGGTACGGTCAACAAATCGCGTTACCGGGAGGAGGATCAGCACTTACAGCAG  
TTATAACCCGCGTGGGCAACTGTCAGTCAAGAGGATGCGCAGGGCGGAGACCCGTTATGAGTACAGTACCCGAGGCG  
ACCTACCCGCTATCATGCCCCGAGCGTAGCCGAGTGGACACAGTATGATGCGTGGGGTAAAGCCATCAGCACCAG  
CAGGGCGGTTGACCGCAGCATGCGGTATGAGCTGCGCGGCATACCGTGTGACCAACGAGAGACCGGACGCTC  
CACGTTCCGGTATGACCCGGTGGACAGGCTGACTGAACAGCGCGGCTTTGACGGGCGGACGCAACGTTACCATTATGACC  
TGACCGGAAAACCTACGCAGAGTGAAGACGAGGGGCTTATCACCTCTGGCATTACGATGCGTTCAGACCGTATCACCCG  
CGCACGGTGAACGGTGAACCGCGGAGCAGTGGCAGTATGACGACCCGGCTGGCTGACAGAAATCAGCCACTGAGTGA  
AGGCCACCGTGGCGGTTCCACTACGGTATGACGATAAAGGCGCTGACGGGCGAACCGGACGAGCGGTGAGAAACCCG  
AGACGGGGAGATGCTGTGGGAGCATGAGACGGGCGATGCGTACAGCGAACAGGGGCTGGCGACCCGTCAGGAGCCGGAC  
GGTCTGCCCGCGGTGGAGTGGCTGACGATGAGCAGCGGTTATCTTGGCGGGATGAAGCTGGGCGGAAACCCGCTGGTCA  
GTACACGGGGACCGCTGCACCTGAGACGGCCGCGACTTCCGCGGGGAGGATATGAACTTGCACCCGCTGGAATA  
CCAGCGCCGAGCTCCGGACAGGACCTGAACCTTCCGCGAGTTGACCGTACGACTGGAACGACAAACGAGCAGTA  
ATCCGATCAGCGCCCGCAGGAGACCGGGATACCGTTACAGCGACAGGGAGGCTGACGGGCGTCCACACCACGGC  
GGCGAACCTGGATATCGATATCCGATGCGACGGACCCGCGAGGAAACCGGCTGCCGAGCCCGGAACTGCACCCGGACA  
GCAGCTCAGCGCATGGCGGATAACCGCATCGCGGAAGATGCCACTATGCTTACCGCCAGTGAATACGGCAGGCTG  
CGGAGAAGACGGACCGCATCCCGAAGGGGTGATACGGATGCACGACGAGCGGACCCACCCTACCCTACGACAGCCA  
GCACCGCTGGTGTCTACACGCGGATACAGCAGCGCAACACAGGTGGAGAGCCGTTACTTATGACCCGCTGGGCG  
GCCGACGGGAAAACGGGTATGGCGGCGGGAGCGTACCTGACGGGGTGGATGTCGCTGTGCGTAAACCGGAGGTGACA  
TGGTACGGTGGGACGGTACAGGCTACGACGATACAGCAGCGCAACCGGATCCAGACGATATACCCAGCGGATACCCG  
CTTACCGCGCTCTGAGAAATCGAAACAGAAATGGCGAACAGGCGAAGGCGGCGACCGGAGCTGGCGGAGGTGTTGC  
AGGAGGACACGGTGTGACGCTACCGCGGAGCTGGCGGTGATGCTGGGAAGGCTGGAGCGGAGCTGCGTGGCGGAGCG  
GTGAGTGGGAGAGTGGGATGGCTTGGCAGTGGCGGCTGACGGCGAACAGATGGCCGCGAGATGGAGGATGCATA  
CATCCCGGAGCGGAGCTGCATCTTACCCACTGTGACACCGTGGACTGCCGAGGCGCTCATACCCCGGAGGCGAAA  
CGGCGTGGTGGGGGAGTATGACGAGTGGGGAAACAGCTTAAATGAGGAGAACCCGATCACCCTGACAGCCGTTACCGT  
TTGCCGGGCGAGCATGATGAGGAGTGGGACTGTATTACAACCGTACCGGTAACGATCCGTTGACGGGCGGTA  
TATCACCCAGGATCCGATAGGTTGAAGGGGGAATAAATCTATACGATATCCACTGGTACCAATACGTTACTGATC  
CACTGGGTTAGAACAGTATAAGTGTATATGGCCCTCCCGTCCAGACCGGAGGTTGTAAGAACTCCTCTTGTCTT  
ACTGATATGACTGGAGGAGTACTATTTATGATCTGAAACAGGTGATTCATGACTTTTGTAGTAGCAATAGAAT  
TGATCGTCTTCAACGTTGGTGTGGTATCCATATACAGTGAAGTGGTGGTGTGAGACAAATGAATCAGGAATAT  
CGGACCATATGATGGCAACGAAGATCTATACAGATACAGCAAGATGGCTACATGGTGGGGATCATCGTTGCCG  
GATCCTTATGCTCTCGACAAGGCTGGAACCAACTATGGGATGTACCGTGCACAGAATGAAGATGTAGATGAGTTGTG  
TAAAGAAAGTGACAAGTTGGATGTATTCGCATCTGGAGAGAGAATTAGATATGACGTTTAAAGCACGTTAA

>Cluster\_11468

ATGAAATGATAAAAAACGGACTGGAAATTTTTGCTGGTCTGGCTGATTCCGTTTTTATGGGTGGTTGCCCGGTTAATTAC  
TGCTATTAAGGGGTAA

>Cluster\_25105

ATGAGTGAACAAATCAACAGGATATCGATCTGATTGAGATTTTATTTTATCTGAAGAAAAGGTAGATGAATACCAACA  
AAACTCTGGGCAGTAA

>Cluster\_51096

ATGATTTCTGGCGCACCATCTCAGGATTCGCTGTTACCGGACAACCGCCACGCGGCTGATTACCAACAATTACGCGAGCG  
GCTCATACAGGAACTGAAATTAACGCGCAGCAGTTACATGAAGAGAGCAACCTGATCCAGGCCGGCTGGATTCCATAA  
GATTGATGAGATGGTTACTGTTTCGTAATAATGGCTACCGCTTACCCTTCGCGAGCTGTATGCCGCCCCACGCTG  
GCGCATGGAACAGTTAATGCTCAGCCGGTCGCGGAGAACGCGGAAGAAGAACGCGCCGACGAATCATCTGGCC  
GAACATGACCGAAAGTACCCCTTCCCATTTGACGCCAGTACAGCAGCCTACCTGACGGGCGCATGCCGGGGCAGACGC  
TTGGCGCGGTGGTTGCCACCTGTATCAGGAGTTGAAGGCCATTTGCTGACGGCGTGCAGCTGGAGCAGGCCATCAG  
ACCTTGCTGCAACGCCACCAATGCTGCATATCGCTTTCCGCCCCGACGGGACGAGGCTGGCTACCACAACCTTACTG  
GAACGGCGTACCCTTATGATTACGCATACAGCAGCTGAAAGCGCCAGGCTATCTGGACGCATGCGCCAGCGCC  
TGAGCCACCGTCTTTACCGGTGAAATCGGCGAAACCTTTGATTTTTCAGTTCAGCTCTTGGCCGACAATGCCACCGC  
CTACATGTCAATATGACTGCTGATTAATGATGCTTACGCTTACGCTTTTCTTCGATGAGCTTAAACGCCCTGGC  
CGGAGAATCGTGCCTGATCGACACCCGCTATGATTTCCGCTCGTATTTGCTGACACAGCAGAATCAATCAACCAC  
TGAGAGACGACGCGCGCTTACTGGCTGGCGAAAGCATCGACGCTTCCCGCCGCGCCGCTTGGCCGCTGGCTGCGAA  
CCCGCCAGCTACGTGAAGTCCGTAATACCCGACGCGCATGATGTTCCCGCAACAGCTGGCAGCCTTTAGCAACCG  
GGCCGGCAGTATGGCTGACGCGACAATGGCACTGGCGACTGTTTTTCTGCGTGTGGCTGCGTGGGGCCCTGA  
CGGCTGCTGCTTAAACATCACCTTATTCGACCGCCAGCGCTGCACCCAGCGGTTGGCGGATGCTTGGCGACTTACC  
AATATTTCTGCTGGATACCGCTGCGATGGCGATACCGTACGCAACCTGGCGGTAATAAACAGCTCACGTTTACGGA  
GGACTGGGAGCATACCGCTGCTCGCGCTCAGATTAACCTGAACTCAAACGCCAGCAGCGCTACCCCGCCGCGCC  
CGGTGGTATTTACAGCAATCTGGGCGCTTCCCTTACAGCAGCGCGCAGAATCGCCGTTGGGCGAGCCGGAATGGGGC  
ATCTCGCAACGCGCAGGCTGTGATAGATCATCTGGCTTCGAGCATCACGGCGAGGCTGGCTACAATGGGACAGCAA  
CGACGCGCTGTTCCCTCCGGCTTAGTCAAAACATTTGTCGACGCTTACTGCCAGTTGATTAACCAACTCTGGCATGACG  
AAAGCCCTGGCAAAACCGTTCGAGATATGTCGCGCAGCCGCGGATACGCGAACGGGTCAACGCCAGCGGTCACGCC  
GCCCCATTTCCGAAGGCTTGTGTCATGAAGGCATTTTCCGATCGCTTGCACAGCCGAGCGCTGGCGGTAACGGA  
CATGCGTTATCAGTGAATATCATGAGCTGACAGACTATGCCCGCGTTCGCGGGCAGGTTAATCGAGTGGCGGGTTC  
AGCCCGCGATAATGTGGCTATCAGATGTCGAAAGGCGCAGGACAACCTGTTGCGGTTCTGGCCGCTCTGCTGGCCGG  
GCGTTTTACGTTCCGGTTTCGCTGGATCAGCTTCCCGCAGCGCGAGAAAATCTACGCTGACGCCAGCGTCCGGCTGG  
GCTCATTTGTCAGCAGCAGCCAGCGCCGGTTCAGACGATTTCCCGCTTGGCTGGCAGCAGGCCATTGAGGCGGAGC  
CGATCGCCAACCCGGTAGTACGCCCCCCACGCAACCGGCTTACATTAATCTACACCTCCGGCTTACCCTGACCCGAAA  
GGGTAGTCAATTTCTACCGGGGAGCGTTAACACCTGTTGCGATATCAATACCCGCTATCAGGTTGGCCCGCATGACAG  
GGTCTGGCCCTTCCGCTTACATTTTATCGTTTACGATTTTACGATTTTGGCGTACTGCGCGCGCGCGGCTGG  
TGATGGTGAATGAAAATCAACGGCGCATCCTCACGATGGTGTGAGCTGATCCAGCGCCATCAGGTCAGCTCTGGAAC  
AGGCTCCCGCGCTGTTCCGATATGCTGCTGACCTGGTGTGAAGTTTTCGCGCAGCCACGCGGAAACACTGGCGCAGT  
GATGCTTTCCCGCAGGATCGATCGGCTTGACCTCCCGCCCTTATCGGGCTTCCGGCCACAAGCAATTTATTCGCGA  
TGGCGGTCGCCAGGCGCTTACTGTTTAAACGCTTACGCAATTCACGCTTCCGCAAAATTCACGCTTCCCGCCACTGGC  
TACGGTTTCCGCTAACCAACCGCTACCGGTTGGTGGATGAACAGGGCGGGACTGCCCTGACTGGTGGCGGGTGA  
ATTTAGGATTTGGCGCATTTGGGTCGCGGAAGGCTATTTCAACGATCCCTGCGTAGCAGCAGCAATTTTTCAGCTCC  
CGAGCAGGCTGGTATCGCACCGCGATCTCGCTGCTACTGGCAGATGGCACAATCGAGTTCTCGGCTGTCGCGAC  
AAGCAGGTCAAAGTCGGAGGATATCGCATCGAGCTGGCGGAAATCGAAAGCGGCTCAGCCAGCTGGCGGGGTGAAACA  
AGCAACCGTTCGCGCATCGCGGAAAAAGAAAAACGCTGGCGCATACTGTTTCTCAGGGCGAGGCTTTTTCGCTTA  
CCGATCATCGGAACCCGGCACTGCCGACGGCTGGCACAGCTTGGCGGAAACGTTGCCCTGTTGCGCCATCTCGCCAGAG  
ATCTCCGAGAACAGGTAGCCGATTTCCCTTACGATCGCTTAAACTGCAAACTGAAAGCCGGTCAACCGCTGGCACCATC  
TCTCCCTGATGAACTCACTCGCTATCCAGCCGCGTGGCAGGCGTGGTGGAAACGCTGGTTAGCATTTCTGGTGCAC  
AACGGCGACTGAAGCCCGCTGCTGAAGTTATCAGGTCGCGCTGGTGAAGAACGCGAGGATGAGCACCCGCACTTACG  
GGCATGATTTAAGTTATCGCAATTTCTGCGGTCGCGCTAACGAACTGCTGTTACTGAACGACCGCAGTGGTCGCG  
GAAAGCCCTGGCTTTAACCATCGGCGCAGCGCCGATATTTACGAACTGGCGGCAATTTGCAACAGCTTGCACAGC  
GCTTACAGCGCCCGTACGCTGCTTGGTGGAAACCGCACGCTGGCCGCGCCGAGAATCGCTGTTAGCACAGCTCAAC  
GCCGACAGATTGAGTATGCTGGCTTGGCAGAGCAGGAGATGCTGCTGAGCGCCCGCAGAGGCTCGCCCTGGCC  
TGGCGCCGCTGCTCCTTGAATGCAGACAGCTGGCGGCGCACGCTCACTCGGCGGACATTTACTGGCTTAATAACG  
CCCTGCTGCTGCTGCGGAAAGATCCCGGCTTCCGCTGCTTACAGCAATTAACAGCTTGGCGTTCCCGGCGCTCTAC  
GTGATGGAGTTTCGCGAGTTAACGCGTCCGCTTACTAGCAGGCTCTGTTAACCAATGGGACGCGGAGGCTTGGT  
GCATAACGCGCCGACTGGCGGATTTTTCAGCGCGCGCTTCAACTGTCAGCATGGCGATGAGGTCGCGGGGTTAC  
AACGCTTCTCTCAATGCTCAGAGCAGGTCGCGCGCATCCCGTCAACTCAGGCGCCCTAGCCCGGCTTACCTACCCG  
CCGGGTTGATGTTGCGCAACCGATCGTCTTCTCGACGCTTACCCTGACGCTAACGGGAAAAATGACTACCCAGGC  
GCTGAAGGCTGCTATACCTGAAGCGGAAACCCGGCGAAGCGGATTTACCCAGGCGACATTTGAAAAACAGGTTG  
CCGCCCTTGGCAGCAACTCTTATCAACTGGCAATGTCACAGAGAAACCGACTTCTTCCAGCAAGGCGGCGATAGCTG  
CTGGCAGCCGCTGACCGGGCACTTATCAGGAGGTTATGAAGCGCAATTAAGCGACTGTTAATCATCCCGGCT  
GGCGGATTTTGGCCACCGTGGCGAAAACCGACTCCCGGTAGAACAAACATTCGCTCCACTCCCTGAAGATCGCTACC  
AGCCCTTTGCGCTTACCGAGCTGACGAGGCTTACCTGGTGGGCGTCAAGCCGGCTTGGCCGCGGCGTGGCTCA  
CATTTCTTTGTAATTTGAAATGCGGATCTGGATCTCACCCGGTGGAGACGGTCTGGAACCGATTAATCGCCGCCA  
CGATATGCTACGCGCGTCTGCTGCTGATGACAGCAACAGGCTGCTGAACAGACGCTTCCGCTGGTAAATACCCGACA  
TCTCCATACGCTGAAGAGGCTTGCAGGTCGCGGAAAAACTGGCCATCAGGTACTCAACCCGAAGTCTGGCGGTA  
TTGATCTCCAGGTCGGTTACGTTGACGGGATGCCCGCCGCTGTGGCTGTGCTGGATAACCTGTTACTTACGGGCT  
GAGCATGCAGATCTGTTGGCGGAGTGAACATGGCTACCAATATCCGCAACAGTTGCTCCGCGCTACCCGTCACCT  
ACAGGATTAACCTGAACAAACCCGATCCAGTCCATTAACGAGATTTCTTGGCATGGTGGCAGGCGCAATGGATGAT  
ATCTCCCGCTCTGCTATTTGCCGCTGCGCTGCTTGCCTCAGGAGGTTGAAACACCGGCTTCCGCTCGCTGAACGAGT  
ACTCGACAGCACGCTGGCATCGGCTGAAAAACGGGCGGCTGACGCCATCTCACCCGCTAGCCGCTGCTGTTGCTCG  
TGTGGTCAACCGTCTCTGCTGATGGAGCGCGCAGCTGAGTTACGCTTAATCTTACGCTTTTTCGACAGGCGACACTG  
CACCCGAAATCAACAGATTTTGGCGATTTTCACTCCGCTGATGCTGCTGAGCTGGCATCCCGGCAAAAGCTGGTGA  
CAGCGCAGTCACTACAGCAGCGGCTGAGCCAGAACCTCAACACCGGATGTTGTCAGCCATCCGCTGATGCTCAAC  
TGGCGCAACCGGAAAAACGTTGCCAGCCGTTCCGATGCCCCGCTTTTACCAGCGCGTGGGCTTTGAGCAGGATAACT  
CTCGCCGGGTAATCTGCTCAAAACCGGCTGGGCTCTCCAGCAGCGCGAGGCTGGCTGATCAGCAGATTTATGA  
ATCCGAAGGCAACTGCGCTTAACTGGGATTTTGTGCGCGGCTGTTTCTGCGGGCAGGTTGAGGCGCCAGTTTGAAC  
AGTATTGGCATTGCTAAACCAATGGCGAGGATGAAAGCGGCTGGCACTGCGCTCGCCGCGCTGGTGCCTCCGCT



AAACACGCAGGGCAATGCGCAGAGCGCTCACCGCGGTATGCCCTGAGCACTCTCAGCCACACATGCGGCGGACGAGAG  
CACCGTCAGCCTGATTTGCGACGCTTCCGCGAGGTGGTTGGCGAGTCTGTACGCCCCGAGAAAACCTTTTGGAGGCGG  
GCGCAACGTCGCTGAATCTGGTGAACGCAGCTTTTGTACAAAGCTCAGAAATTTCCACCCGACGTTGCTTGACCTC  
TTCACCCACCTTCTCCTGCTGCCCTGGCCGATATCTGGCCGCGCTGCCACGGTGGAGAAAACAAAACGACCTCGCCC  
TGTTGCGCGTCTCAGCGGGATATCGCGGAAAGCAAAGCTGA  
>Cluster\_7244  
ATGACTGGTGGAAATGCGACTAGACCAATAACCAAATCTCTAAATTAGAACAATGGTTATTAATGAGGAGTTCGATAC  
AAAAGAATAA  
>Cluster\_64450  
ATGAATATTCAGAATCTATAGGCGAATACCGGAAACATGCCGGGCTGTATCAAGCGTAAGGACGGACACATCGTTGG  
TGTGCGTGTCTGACTGATGATGAACGGATTGCCAGCCTGATGGCGTTTCTCGAGTTGGCAGAAATAGCTGGATATACCTA  
TTACACCCCTGACGCGTAA  
>Cluster\_41194  
ATGGCAACGAAAGCAGTTAATGGAAAATCCAAAAAATTTGAGGCACGAGTCCCCATGCAATAGCTGACGCTGTAGAAAA  
TTTAAAGGAAGAGGCGAAAAGCACTGGGCAATTTATCGTTTCCGCACTGAAGGCGAGATCAAACGCCGCCAGCGCCGA  
AGGCCAAAGAACCAGAGTAA  
>Cluster\_40330  
ATGAAATATACACCGGTTGGCGTTGATATCGCAAAACATGTCAATTCAGGTTCACTTCATCAATGAGCACACAGGTAAAGT  
GGTAGTTAAGCAGATTCCCGCTCAGGATTTTCTGACATTTTTCAGTAACCGGGAGCCTTGCCCTGATTGGCATGGAGGCT  
GTGGGGCTCTCAGCACTGA  
>Cluster\_14905  
ATGAATATAATGAAACGTTTTTTTTATGTGATGTCCCTGAACGGATACTGACGTTTGTGTATAAACATATCACCTCCGG  
ATGGAGCAGGAAGAGAAAGCTAATAACCCAGCTTATTATTTAATCACGGAAATACCTTATTTAAGGCTTAGGTGGAA  
TCAGTCAGAGCTGGTTGTGA  
>Cluster\_6260  
ATGTTAACTGGGGCTTTTCTCTATCTGCCGTTGGTGTCCATGCCCGAGGCAGATAGCCTCAAGCACCCGAGTCATTCTA  
CTTAACTAAGATTTCCCGCAAACCGTTTTTGTCCAGCACAGTAAATATCCAACCTAAACCAATGGAGTTCGCTGTATTTA  
CCGCCAGTATTCAATGCACATGA  
>Cluster\_44649  
ATGTACAAGAAAGATGTTATCGACCCTTCGGAACCCAGCGTGGGTAGCTAAAGCGTTAGGCATTAGCGATGCAGCAGT  
CTCTCAGTGAAGGAAGTATCCAGAGAAAGACGCCCTATCGACTGGAAGTCTGTTACAGCTGGCGCCCTGAAGTATCAAG  
AAAGTCTTATCGCAAAGCGGCATAA  
>Cluster\_49823  
ATGGATCATCGTCTGCTTGAATCATTTGCCCTGCCCGGTTTGAACGGAAAACCTTTGGTATAACCAGGAAAAACAAGAGCT  
TATTTGCAAACCTGGCAACCTGGCTTTCCCGCTGCCGATGGCATTCCAGTGTGTGCTGAAAACGGAAGCCCGCTGTGA  
CTGCTGATGAGAGTAAATCATGA  
>Cluster\_21917  
ATGGGCAAGCAACGTATACCGTACCGTCAACCAATAACAGCAATGGCGTTTCTGTGATTATGAAACAGAGACGCCGAT  
GACTTTGCTGGTCCAGAAAGTGGCGCTGAAGTATAAAAGATCTGGTGAATACCGTGGCTTCTATGACACGGAAAAACG  
AACATGATGTTTTGTTGGTTGGTAA  
>Cluster\_7611  
ATGTCTTGTCCAAAATGCGGTTCTGAAAATATTGCAAAAAGAAAAACAATGCGTGGATGGTCTGATGATTATGTGTGCTG  
CGATTTGCGGATACAACGACTCTAAAGACGCATTTGGAGAGCGTGGTAAAAACGATTTTGTCAAATTAATAAAGAACGCG  
AAGGCAACGAAAAAAGCTAA  
>Cluster\_17773  
ATGCAGTGGAAAATCATCAACGGTTGGTACTGCGTTACAGCTTGGCGGCTGATGAGCTGGAAGTTCGGCACGCTGGGTGA  
AGCAATGAACTGGGTATTCTGTCAGCAAGCTGGCGGTAAAAACGAAATGGATATGGGGGTGAGCAAGTGA  
>Cluster\_38820  
ATGTTTTTTAATACTAAACATACCGCAGCATTTGTGCTTAGCGAGCTGTATGGCTTTTAGCTCATCAGCTATTGCGACAT  
CGTAATTTTACAGTACACAGTAGTTTATAAAAGCGAACAAAAAGCTTCAATGTACGTTTGGAAAATAA  
>Cluster\_33812  
ATGAGTTTAGTTATCGCAGATAAGATCTCTTATTCGGTTGATGATTTATTAATAAATAAATCATTAATTTGGCTGCGGTC  
ATTTTTAATTGTCAATACAGATAAAAACCAAGTGTGACGCAGAAATGGTGGTATCCATTA  
>Cluster\_29478  
ATGGCTGATTTTTGTTCACTAAATACAACGCTGGTTTTGAAGAAATGGCATGAACTGTAAATGGGTAATGACTCCAACCT  
ATTGATAGTGTTTATGTTTCAAGATAATGCCGATGACTTTGTCTATGCAGCTCCACCGATTTTGA  
>Cluster\_50035  
ATGTCACCTGCAACCCAGTGAAGGAAAGCAAGTTACAGAGACGCATGTACAGCAGCAGGCGTTAATGTATCGCCAGAA  
GGGAGATCGTGAAGGTGTTCCGCTATTTTAAATGCGGCAAAGACTGAAGTATTAATCAGCGTTATTTCCCTTGGGCCGT  
GTCCATTCTGA  
>Cluster\_15656  
ATGAATCACAAACAATTCGTACTTATAGTTCTTGATAACATCGAACTGTTAGTTTATTATCACCATCAGCAGGACGC  
TGGCAGCCAAACGGAAACAGATTGGCAGGCTCTTTAACTTCGATGGTGGCTGCAAAAGCGCAACAGATACCAAACGAGA  
TGGGTTTGGGGTGA  
>Cluster\_34968  
ATGCCTTCGATGATAGCGATAATTTACTCATCTCCTTCACATCTGGCTCTGTAGACAGGGTGGTATCACTTCTGGAG  
TAAATCCAGATTAACATCTCATTTGCTGATGCTTGATATTGAGCATCTGGCGCAGTAAGGGGCTGCGTTGA  
>Cluster\_37337  
ATGACAATGCTACTGCCGCTCTTCAATCTGGTTGGTTTTATTGCAAGTTATTTGTTAATGCCATCGCCTATCACCTCTC  
GCCGTTGGAGGATAAAAACGGCGTTAACGTTTCGCCAGTATTGGTTCACTTCAGGCAAAAAAATATGCCCTGGCATGATAC  
AGTGCCCCCTGA  
>Cluster\_47107  
GTGGAACAGATGATAAAAAATTAATAAATTAACCACAATAAGCGAATTGATTAATAAATTTATTTGTTTATATCCGTTCT  
CATCATTGGTTGTGCGCTAGCTTATGCCGTTGAATTCACAAAGATTTAATCGAAGCCGAAGATCGTGAACCGTTAACC  
TTTCCCAATTTGAACTGATGGCAATTAACCGTAGGTAATACTCATTAACGCTCTTATTAATAATAAAGGACGCCA  
ATCCATCTGGACCTGCAATGGGTATTAATTGATAACCAAACTGCAGTTTGTCTGACTCCAGAGCAATTAACATTAATTAGG  
CTTTACTGATGAGATTATTGAAGTGGCTCAGCAAAACCTGATCGATGGTTGTTACCTTATCGAAAAAGAAAAACAATTA  
CAACTTATCTCGATAAAGGAAAAATGCAATTAATCCATATCTGCACCTCAGGCATGGTTAAAAATACAAAGATGCAAACTGG  
ACGCTCCTGAACTTTGGGATCATGGTATGCTGGGGCATTCTTGACTACAAATTTATGCTCTCATTTATGCACCACA

TCAGGGCGATAAATTCACAAAATATAAGTTCCTATGGGCAGGCTGGGGTTAATCTTGGGCCTGGCGCTGCGTACTGATT  
ACCCAGTACGATCAGTCAATTTAACAAATGGCAAAAGCCAGCGCAACAACCTGGATTTCCTCGCTATTTATTTGTTTCGCCCA  
ATCCAGCAATTAATGCAAACTAACTATAGGTCAATACGATACTGAATCCTCTATTTTCGACTCTTCCATTTTCTCGG  
CGTTTCGTTGAAAGCGATGAGAATATGTTGCCCGCTGATCTACGTGGTTACGCACCGCAAAATCACGGGTGTTGCACAAA  
CGAATGCAAGGTAAGTCTCACAGAAACCGTATTTATTAATCAAGAAAATGTTCCCTCGCCATTTACTATCTACT  
AATTTATTTCAATACATTACAGGGCAACTGGACGTCAGGTTGAAGAAGAGGACGGGCAAGTACGCAATGGCAAGTTTC  
ATCTAATAGTATTTCCCTTACTGACGCGTAAAGGGCAGATTTCGCTACACACTGCTATGGGTAAACCGACCGCTGGT  
GTGATTCCTTACAACAACCCCTTCTTCTGGACTGGTGAATTTCTCATGGGGTGGCTGAACAATGTATCCCTGTATGGTGGT  
TCAGTTTTAAACAACCGTGTATCAATCTCTGGCTGGCGGCTGGCTTTAACTTAACCTCATGGGTTCATTATCTTT  
TGATGTCACAGTCTGATGCTCAGTTGCATAATCAGGATAAAGAAACGGGTTATAGCTACCGCGTAACATTTCAAAC  
GTTTTGAATCTACCGGTAGCCAGCTCATTTCGCTGGTTACCGTTCTCTGATAAAAACTTTGTGACAATGAATGAATAT  
ATCAATGACACTAACCATACAGAAATATCAGAATGAAAAAGAGATTATATGTCACGTTTAAACAGTATCTTGAATC  
ATTAAGTTAAATACATAGTAAAGTTGGCTTAACTACTTACGGGACGCCAGCAGTAAATGTGAATTTACTTATCTATC  
TTAGCCGCGATTTTGATATCGGGCCATTAATAAACGCTCCACTTCTTAACATTTAGCCGAATAAACGGGAAGAGAC  
AACCGAGTCAACTGTACCTAAATATTTGATTCCCTGGGGAACCGAGTGAACATTGAGCTATGGTATGCAACGAAATCA  
GGATAACAAGATTCCGATCTGCTTCGTTGATGACTCTCCGATCGAAATAATCTCGAGCGTTTCTGCTTCAGCGG  
ACAATGATCAAAATTCAGAGATGAAAGCTCACTACGCCCGATTATCAGCATAAATACCGAGAACGGCTCTATCTC  
TCCGGGACATCACAGCGAGACAGTTATTTCTCTGAATGCCAGTTGGAATGGTTCATTCACGGCGACTCGTCACGGAGC  
CGCTTCCATGACTATAGTGGTAGTGTGACTCGCTTTTATGATCGACGAGATGGTGCAGAGATAATCCGTTGAACA  
ATAAACCGCGGTAACATAATCGGATCGGATCGGATTTCCATCAGTCAGCAGTTACATAACAACATCATTAAGCGTT  
GATACCCGAAATCTTCAGAAAAATGGGATATCGAAAACTCGGTTATCACACCACCTTAAACCGAAGGTGCTATTGGCTA  
CGCAAACTTGATACCCGAAGGGCTATCAATCATGGGGTTATTCGCTGGCAGATGGTAGTACCCACCCTGGGGA  
TTAGCGTAAAAGATAAAACCGAGCATAAAGAAATAGGACTGGTTGCTGATGGCGGCTTTGTATACCTCAACGGCATTG  
GATGACAGCAAACTTACTTTACGCTGGGATGATAAATCCTGTTTATTCAACCACCAATAGCAGCAACTTAAACCCGG  
AACGGTTATTTTACCGTGTATTAGCCAAAATTA

>Cluster\_24023

TTGTACCTCTATATTGAGACTCTGAAACAGAGACTGGATGCCATAAATCAATTGCGTGTGGATCGCGCGCTTGTGCTAT  
GGGCCTGCAATTCCAACAGGCTTACAGTCTACTGCCGACATTTGTGCACTATCACCATCCGCTAATGCCGGTTACCTTG  
ATGGTAACGTTCCCAAGGCATTTGCCCTTACACGCTGATGAACTCAACGCCACTACCTGAACGAGCTTGAATGTAT  
CGTGAATGTCAGTACAGGACCCACCGAAAGGTGAGCTTCCAATTACTGGTGTATACACCATGGGCAGCAGCTCGTCCGT  
AGGGCAAAGTTGTTCTCTGACCTGGATATCTGGGCTGTGATCAATCCTGGCTCGATAGCGAAGAGCGCCAGTTGCTAC  
AACCTAAATGTAGTCTGCTGGAAGCTGGCCGCTCGTGGTGGTGAAGTCAAGTATCCATACCAAGCGGCTGCTGAAAC  
TTCCGTCATAATGAAAGCGGACGCTGGGGGGCAAGATTGTGGTCCACCAGCATAACTGCTGCTTGACGAATTTTA  
TCGTACCGCGCTGCGTCTCGCCGTAAGCGTATTTCTGTGAATATGGTCCCGTCCGACGAAAGAGAGCATTACGACGACT  
ATGTGATGACGCTTACCGCGAGGGCTGCTGACGCCAAATGAATGGCTGGATCTTGGTGGCTTAAGCTCGCTTTCTGCT  
GAAGACTACTTTTGGTCCAGCCTTTGGAGCTTACAAGAGTATCGATTTCCCATACAAAGCGGCTGCTGAAACGACTGCT  
GCTGGAAGCTATTTCTGGGAATACCCGAACCCAGCTGCTGGCGAAAGATAACAACAGCGTTTGCACGACGGCGAGA  
TTGTATCGTTTGGCCTCGATCCATACTGATGATGCTGGAGCGTGTACTGAAATATCTGACGGCGATTGAAGATTTACC  
CGTCTGGATTTAGTGGCTGCTTCTATTTAAAAGTGTGCGAAAGCTCAGCCGTGAACCGCGCTGTGAGGCTGGCG  
TCGCGCAGTGTAGCCAGTTAGTGGAGGAGTGGGTTGGGACGAAGCTCGTTTGGCAATGCTCGATAACCGCGCAACT  
GGAAGATTGATCAGGTGCGTGGAGCGCACACAGCTGCTCGACGCGATGATGACAGAGTACCGTAATCTGATCCGCTTT  
CGCGTCGCAATAAATCTAGCGTCTCGCCAGTCCGAGGATATCGCGCTGCTGACGCGTAACTGTACGCTCGCTTTTGA  
AGCTATACCGGGTAAAGTACGCTGGTAAACCGCGAGATTTCCGCCATCTCGGAACCGAACTGACTTTTATTAATG  
TACCGCGGGCGCGCAACCGTTACGGTTGGTATCTGTATAACCGCGCGCAAAATTTAGTCAATCATCAGCCATCAG  
CCGCTGGAATATAATCGCTACCTGAATAAACTAGTGGCGTGGGATGGTTTAAACGGCTGCTGACCTCTCGCACCCGTTT  
GTATATAAAGGTAACGGCATTTGCGATTTGCCTAAGTTGCAGGAGATGGTCCGAGACGCTGTCGCACCATTTCCCGTTGC  
CCCTGCCCTGCACCGACGCAAAAGCGCTCTACAGCCGCTGCTGAGTGCAGCACTGGTTCTGAGTGTATTGACTTAACTT  
GACCCGACGGCAGCCTTCCGCAATCAGGTGGTGCATTTTGAATTTCCGTAAGCTGGATGCTTTCAGCTTTGGCGAGAATCA  
AAATGCTCGTGGTGGTAGCGTTGACCTGCTGTATCGCAACTCGTGAACGAAGTGCCTACGCTGCACCTCAACCGGTGAC  
AGTCGATGATTGAAGCCCTGAAACCATTTCTCGGCAAAATGATCAGGACGGCACCACCAGATAGTGTGGAAGTCTTCT  
TGTATAGCCAGCATCTGCGCGGGTTAACTCCGTACTCGCTGCGAGCACTGGTTCTGAGTGTATTGACTTAACTTCTTC  
CAGCACCCGCCAGGAAACCGGGCGCTTCAAGGCGCTGCGGCTCCTCGTCAAACTGGGGCTTGTCTTCAACGGCTGA  
ATGCTCGGTACAGAACTGGAACCGCATCGAGTTTATGGCGTATTTCCGATAAACAACCTGCACGGCCTGTGATG  
CAGGTTGAAACCAATCAGTCAAATACCGCGGTTGGTGGACGGCTTTGCCAGCGAAGGGATCATCAGTTTCTTCCGA  
AGAAACCGCAAGGAGGATAAGTGGCTTAAATCTACATTTCTGACGAAAGCAACCGGGTTGAGGTGATCACCTACCGAAG  
GCAGCAAAGAGGAATTTGGTGGTACGCTAGTCTGCTTACTGCTTTCGACGACCGCTTTCACCTACGGCTCAAGCTTT  
ATCAACTTTAACTTGGCGGAGTTTATCAGATTGTGAAGGTTGATGGTGTGAAACAGGTGATTCCGTTTCCGACCAAAATC  
TATCGGTAACATGCCACCTGCCAATCAGGAGCATGACGCGCGCTGTTGCAGCAGTATTTTCTTGA

>Cluster\_29036

ATGGCCCTGATTGTGGAATTTATTTGTGAGCTACCTAACGGCGTCCATGCGCGTCCGGCAAGCCACGTTGAAACGCTGTG  
TAATACTTTTTCATCACAAATGAGTGGCATAAATGCGCACTGACCGCAAGGGCAACGCCAAAAGCGCCCTTGGCTGTA  
TTGGCACCAGTACGCTGGTGGGCGATAAATGCGAGTTACTGATTTCCGGGGCCGACGAACAGGAAGCGCAGCGTTT  
AGCCAATGGCTGCGCGATGAATTTCCCCACTGCGACGCACCGCTGGCGGAAAGTAAAATCTGACGAACTGGAACCACTGCC  
GGTTTCACTGACCAATCTGAATCCGCAAAATATCCGTGCCCGACCGTGTGACGCGGTAGCGCAGGCGCATTCTGACGC  
CGATCTCTTCTTAGATCTCAATGCGCTGGGTAATCTTCCGCTGCAAAAGCGGTTGACGCGGAGCAATCCGCGCTGAA  
AACGGCTGACGCTGGTACTGAAAAACATTTGAGTTTCCGTTGATAGCGAAGCGGTGCTAACCGCGATTCTGGAAG  
GCACCGATCCCTGGCTGGCGATACTTCCCTGCGCGAACATTTACTGGCAGGCGTACGCGCGGATTAAGCTGCGCGAAG  
CAATGCTGCCAGTGAATACCTTTTGGCAAGAGTTCCGCCGTTCCAGCAGCAGCTACCTGCAAGAACGTTGCGCTGGAC  
GTACGCGAGCTGCTTCCAGTTACTCCAGCAATCTACGGTGGCAACGCTTCCCGGACCGGGCAAACTGACGCGAGCC  
GCCATTTGATGGCTGATGAACTGACCCCGCAGTCTTCCGTAACATCTGCTCACTCCGTGGAAGCGCAGGCGCATTTCCGCA  
AAGCGCGCGCACCACTCACATACGGTATCCTTGGCCGTTCCGTTCAACATTTCCGACGCTGGTTGGTGTGGATATTGAT  
GCCCTCACTCCGTTGGCAGCATCAACGATTTATATCGACGGCAACGCTGGGGCGATTGTTGGTTGAGCCAGGGGAAGCCCT  
AGCTCGTTATATCAGCAGGAAGCCCGCTACAGGACGCCCTGCGTGAACAGCGGTTCTGGCTGACCCAAACAGCC  
GTACTGCTGACGGTATCCGCAATTTGAAATTTGCTGCTAATCTGCTCACTCCGTGGAAGCGCAGGCGCATTTCCGCAATG  
GCGGAAGGCGTTGGTTTATTCGCACTGAAATGCTCTATATGGATCGCACAGTGCACCGGGCAAGCGAGCTGTACAA  
CATTTTTTGTGACGGCTGGAGTCCGCCAACGGACGACGATTTATTTGCTGCACTATGGATATTGGCGGTGACAAACCCG  
TTGATATCTGAACATTTCCCGAGAATAACCCGTTCTCTGCTTATCGCGGCTGCTATTTATGAAGAGTACGCGCTG  
TTATTTACACACAACTACGGTCTGATTTCCGTTGCTTCCGCTCAGGCGAGCTGAAAAATCATGATCCCGATGATCTCTC  
AATGGAAGAGATCTTATGGTAAAAGAAAACCTGGCAGAAGCCAAACAGCACTACGTACGAACACATTTCCGTTTGTATG

AGAAGATCCAGCTCGGCATTATGCTGGAAGTGCCTCGGTGATGTTTCATCATCGATCAATGCTGCGAAGAGATTGATTTCTTTAGTATCGGTAGTAATGACCTGACGCATATCTGCTGGCAGTGGATCGCGATAACGCTAAGGTTACTCGTCTACTATAACAGCTGAAATCCAGCATTTCTGGCGGCGCTCGATTACGCCGTGCAGGCGGTGCATCGCCAGGGCAATGGATTGGTCTGTGCGGTGAATCGGGAGCGAAAGGTTCCGTGCTGCCGTTGCTGGTTCGTTAGGGCTGGATGAACTCAGCATGAGCGCACCA TCAATTCGGCGCAGTAAATCGGAACACATTTGAGCAATCCACCATCAGCTAGCGCGCTCTGCAAGCCAGTGGCGCTGGGGCCGCTACTTTCGCTGGAAGTGAACACCTGCTGGCGCAATTCGCCATGACCCAAACAGGACGCACCCTGGTCACCGCCGAGTGCATCACACTGGAAGCGACTGGCGCAGCAAAGAAAGTGTCAAAGGCATGACCGATAACCTGCTGCTGGCGGGCCCGTGCCGCTATCCGCGTAACTGGAAGCCGACTTGTGGGCGCGGAGGCCGTTTTCTCTACCGGACTGGGCTTTAGTTTCGCAATTCGCCACAGTAAATCGGAACACATTTGAGCAATCCACCATCAGCTAGCGCGCTCTGCAAGCCAGTGGCGCTGGGGCCATGATGAAGCGCAATTCATCATTATGTTAAACCTGAACAAACATGCTGCGGGCGATCAGCACATGGCATTTTTCTCGCGCCTCGCTCGTCGCATGACGCAAGAATTCGGTAAACGCCGCTGGTTAACGCCGCTCTGCGGACGCTATCGCCAGCCTGCTGCAACATGAACTGGAACGTAA

>Cluster\_66962

ATGAAGTATTCTAAGCTGTTCTGTCCGTTGGGTTGGCTTTGGTTACATTATCTGGTTGGGGCGAACCTATACGTTTGA TCCTTCGTTAGTTGAAAGCAGTGGAGGTGATAGTGTAGATGTTTCATTATTTAATCAGGGTCTTCAATTCGCCGGGAGAAT ACTTTGTTAGTATTTTCGTTAATGGTGAAAAGTAGGCTCTGACAAATTAATTTTCGTTATAGAAAATCATAATGGCGAA GATACATTTATCACCTGTTTGAACGCAGACCAGCTAACTAAGTATGGGATTGATATCCATAAAATACTAGCTTTTAA TGCTGGTCCAGAGCAATGTGCTAATTTATGGGCGATCCCGCAGGCTGATATTCAGTTTGAATTAATCAGCAAAAACCTT CATTGCTTCTGCCAACGCAGGCTCTTTTACCAGAAATTAATGGAAATGCTCCTGAGCAATTTGGGATGATGGTATTCTC GCATGTTTATGAATTAACAACGAATATGCAGCAAAGAAATACCAGGGAGCTATAAGTCGCAATGACGAGTCATATTA TGCCAGTTTACAACCCAGGACTGAATATTGGCCCTGGCCTTTTCTGAGCGCGCTCATGGCAAAAAGAACAGGGCTGGC AACGTTTCATATATCTATGCTGAGCGCGGGCTAAATACTATAAAAAGGCCGTTTGACATTAGGGGAGTCATATTCGATGGC AGTATCTTTGACAGTATTTCCGTTTACTGGCGGAAAGCTGGCTTTCAGATGAAACGATGCTCCCTTATGACCAATGGAGTTT TTCCGTGGAACTTCAGTGGTGTGGCGCTACACAGGCGGTTAGGTTTTCAGCAGAATGGTTACACCCTGAGTAAATGACC TTATTCATCAGGTCCTTTTGAATTAACAACCTTCTCTGGGAGGTGGAAGCGGTGACCTGAAAGTCATGTTTCATGAG AGTGACGGAACTCAACAAGTATTTACTGTTCCATATGACACGCTGCGGTTGCATTACGACAGGGATATTTGCAATATTC GGTTCATGGGAGGAGATGTCGCCCTGCTAATGATGCGGTGCAACACGACCTGTAGGTGCTCTGAAATGAGTACGGGT TACCCTGGAACTTCACACTATATGGAGGGCTTCAAGGGCGGTAATTAACCAAGCTGCTGCTTTAGGAATCGTTCTTTA TTAGGTGATTTTGGTGTCTTATCTGCTGATGTTGTTCAATCAATAGCAAAAAGGATAATCAGCAAAAAGGAAAGCGGTCA GCGTTGGCGTGTGATACAAATAAATCGCTGGATAGTGTACGTCGGTCAACATCGCAAGTGAAGAAATATGCGACCGAAG GATTAACACTTGTCTGATACGTTAAATACGTTAATGTAAGCCTGATGCGGAAACATTTGTTACTCTGATTATAAGAAA CCCAAGAACAAGGTCAATCTTAGTATCAGTCAGACAACAGACGCTTGGGAACTTTCAATTTCAATGGTACCACAAAAA CTACTGGAATGATAAATCAACAACAACGCTTTTACTGCTGGATAAGTCGGATGTTTATGATAGCGGGATTTCTTTAAATG TTAATTTATCGAAAACCCAAAATATCGATAAAAACGGGAAAGAAAACAATGATCGGCTAACTAGCCTTTGGCTGAGTTTC CTTCTGAGTCGCTGGTTAAGTAAATAGTTTCGGTAAATGCAAACTATCAATGACATCAGATACCCGAGGCGATTTCCATGCA TGAGTTTGGGGTATACGGTGCAGCATTTAATCGTCAACTACATTTGGGATCTCCGGGAGCGTTATAGAGATAATGCTTCAG ATAATAAAGCATCCAGCGCTTAAAGTCTGAACATCTGTTGTTACGGAGAATTACGAGGCAATTAATAGTTATGATAAAA AAACAACCGCAGCTTGGTATAGGAATTAATGGAATAATTTGTCGCTACTCAGTATGGAATAACAGCAGGACAAAAGCTCGGG AGACACCATGGCATTAGTTTTCAGGCTCCGGGAGTAGATGTTGCTTCTTCTAGGTTACTGGCCCGTATGAAAACCTGATTTCA GGGGATATAACAGTTATGATATAATTAACACCTTACCAGGAAAATAATATTTGACATTAACCCGGTGCATTTGCCAAAAGAA TGCAGAGATATCGCAGACATCTACGGGTGTTGTTTCTACAAAAGGAGCGGTTGTTTGTAGTAAATTTGATACAGCTATCGG TGGGCGACTGTTTATACAATTTGAAACGTTCTGATAAATAAGCCAGTACCTTTTGGCTCTGTTGCTACTGTTGAAAGCCAG CACTCCAGTTCTCGGATTTGTTGGGATAACAGTCAAGTATATTTAACAGGCGTTCCAAAAGAAGCTACTGTAAGAAATCAA TGGGGTAAAGATAAAAACAGCTCATGTCATGCCAGAGTATTATACCTGAAGATGTTAATACGACGGGAAATATATAATTT AACAGCAGTATGTAATCTTAAATGTTAA

>Cluster\_43066

ATGAACGAACAATATTCGCGATTGCGTAGTAATGTCAGTATGCTCGGCAAAAGTCTGGGAGAAAACCATCAAGGATGCGTT GGGAGAACACATTTCTGAACGCGTAGAAACTATCCGTAAGTTGTTCCAAATCTTACAGCGCTGGCAATGATGCTAACCGCC AGGAGTTGCTCACCACCTTACAAAATTTGTCGAAACGACGAGCTGCTGCCGCTTGCAGCTGCGTTAGTCAAGTTCCTGAAC CTGGCCAAACACCGCTGAGCAATACCACAGCATTTCGCCGAAAGGCGAAGCTGCCAGCAACCCGGAAGTATCGCCCGCAC CCTCGTAAACTGAAAACCCAGCCGGAACCTGAGCGAAGACACCATCAAAAAGAGCAGTGGAAATCGCTGCTGCGTGAACCTGG TCCTCAGGCTCACCCAACCGAAATTAACCCGCTGCTACACTGATCCAAAATGGTGGAAAGTGAACGCCGTTTTAAACAG CTCGATAACAAAGATATCGCCGACTACGAAACACAAACGCTGATGCGCCGCTGCGCCAGTTGATCGCCAGTATGGCA TACCAGTGAATCCGTAACCTGCGCCAAAGCCCGGTAGATGAAGCCAAATGGGCTTTTGGCTAGTAGAAAACAGCCTGT GGCAGGCTTACCAGAAATTAACCTGCGCAACTGAACGAACAACCTGGAAGAGAACCTCGGCTACAAAACCTGCGGCTGAAATTT GTTCCGGTCCGTTTTTACCTGCTGGATGGGCGGTGACCCGACGGCAACCCGAAGCTCACTGCCGATATCACCCGCCACGT CCTGCTACTCAGCCGCTGGAAGCCACCATTGTTTCTGAAAGATATTCAGGTTCTGTTTCTGAACTGTGCTGATGTTG AGGCCACCCCTGAACTGCTGGCGTGGTTGGCGAAGAGGTTGCCGAGAACCTATCGCTATCTGATGAAAACCTGCGT TCTCGCCTGATGGCGACACAGGCAATGGCTGGAAGCGCGCTGAAAGGCCGAAAGAAATGCCCCAAAACAGAAAGGCTGCTGAC ACAAACGAAGAAGTGTGGGAACCGCTTACGCTTGTACCAGTCACTTCAGGCGTGTGGCATGGGTATATCGCAATG CCGATCTGCTCGACACCCTGCGCGCGTGAATGTTTCGGCGTACCCTGGTGGTATGATATCCGTCAGGAGAGCACG CGTCATACCGAAGCATTAGGCGAACTGACCCGCTACCTCGGTATCGGCGATTATGAAAGCTGGTCAGAAAGCCGACAAAACA GGGCTTCTGATCCGCGAACTGAACTCCAAACGCTCCGCTTCTACCACGCAACTGGCAACCAAGCGCGGAAACGCGGAA GTCGCGATACCTGCCAGGTGATTGCCGAAGCGCGCAAGGCTCCATTGCGCCCTACGTCATCTGATGCGGAAACGCGC TCCGACGTGCTGGCTGTCCACCTGCTGCTGAAAGAAGCGGGTATCGGGTTTGGCATGCGGGTGTCTCCGCTGTTTGAAC CCTCGATGACCTGAAACCGCAACGATGTCATGACCCAGCTGCTGAAATATCGACTGGTATCGCGGCTGATTCAGGGCA AACAGATGGTGTGATTTGGCTATTCGACTCAGCAAAAGATGCGGGCGTGTGGCAGCTTCTGGGCGCAATATCAGGCA CAGGATGCATTAATAAAAACCTGCGAAAAGCGGGTATGAGCTGACGTTGTTCCAGGCTGCGGGCGTTCCATTGGTGC GCGGCGGCACCTGCCATGCGGCGCTGCTGTCAACCCGCAAGGAGCTGAAAGGCTGCGGCTGCGCGTGCAGCAACG CCGAGATGATCCGCTTTAAATATGGTCTGCCAGAAATCAACCTCAGCAGCCTGTCGCTGATACCCGGGCGATTTCTGGA GCCAACTGCTGCCACCGCTGAGCCGAAAGAGAGCTGGCGTCTGATTTATGGATGAACGTCTGTTATCTCTTGGCATGT CTACCGCGGCTACGTCAGTGAACAAAGATTTTGTGCTTACTTCCGCTCCGCTACGCGGAAACAAGAAATGGGTAAC TGCCGTTGGGTTACGCTCGGCGAAACGTCGCCCGACGGCGGCTCAGTCACTGCGCGCTATTCGCTGGATTTTCGCC TGGACGCAAAAACCCGCTGATGCTCCCGCTGGTGGTGCAGGATACGGCGCTGCAAAAAGTGGTCAAGATGGCAACAA GAGCGAGCTGGAAGCCATGTGCCGCTTGGCCATTCTTCTGACGCGCTCAGGATGCTGGAGATGGTCTTCCGCAAG CAGACTGTGGCTGGCGGAAATCTATGACCAACGCTGTTAGCAAAAGCACTGTGGCCGTTAGGTAAGAGTTACGCAAT TCTCAAGAAGAAGACATCAAAGTGGTGTGGCGATTGCCAAGCTTCACTCAGTATGGCCGATGCTCCGCTGGATTGCA GATCTATTACGCTACGGAATATTTACACCGACCCGCTGAAAGTATGACAGGCGAGTTGCTGACCGCTCCCGCCAGGCA GAAAAAGAAGCCAGGACCGGATCCTCGCTGAGCAGGCTTAAATGGTCACTATTGCCGGATTTGGCGAGGTATGCGT

AATACCGGCTAA

>Cluster\_58096

ATGAATACCCCTCCAGAACAGTACGCAAAACACCGCTCTCCCCACCTGCCCGTCAACCGCAAAATCCATGCGTCTGGCC  
CCGTGATGAATTAACCGTCCGGTGGGATAAAAGCCATAATCGATACTTTCCAGCGTGGCTGGGTGATGCTTTGACAATG  
GGATCTCTCGAACAACAGTGTGATTGAGCGCGCAGGTTTATCGACCAGCTCTCGAACGATTTATGGATTGAGCGGGA  
TTCAGCCAGATTGCCGACCTGGCATTGGTCGCCGTCCGGTGGCTACGGTTCGTTGGCGAGCTGCATCCACTTTTCAGACGTCGA  
TTTACTGATTTTAAAGCCGTA AAAAGCTCCGGAGCATAGGCGCAAAAAGTGGCGAGCTGTTAACGCTGCTCTGGGATG  
TAAAGCTGGAAGTCCGTCATAGCGTGGCCAGCTTGAAGAGTGCATGCTGGAAGGGTTATCGGATTTAACCGTCCGCCACC  
AATTTAATCGAATCCCGCTTATTAAATGGCGATGTTGCCGTGTTCTCTCGAACTGCAAAAACATATTTTCAGCGAAGGAT  
CTGGCCTTCCGACAAGTTCACGCGCGAAAAGTTGAAGAACAGAACAGCGCCATCAGCGTTACCATGGCACCAGCTACA  
ACCTTGAACCAGACATCAAAAGCAGCCCTGGCGGCTTGGCGATATCCACACTCTGCAATGGTGGCCCGCCGTCATTTT  
GGCGCAACATCGCTGGATGAAATGGTGGGTTTGGCTTCTAACCTCAGCGGAGCGGGCGGAATTAACAGAAATGTCTGCA  
TATATTTGGCGTATTTCGCTTGGCCCTGCATCTGGTCGTCAGCCGTTACGATAATCGCTGTTATTCGATCGCCAGCTTA  
GCGTCGCCACGCTCTGAATTACAGTGGTGAAGGTAACGAACCGGTCGAGCGGATGATGAAGGATTACTTCCGCTTACA  
CGCCGCGTCAGTGAACCTCAACAGATGCTGCTGCAACTGTTTCGATGAAGCCATCTCGCCCTTCCCGCGACGAAAAACC  
ACGTCCAATCGCAGATGACTTTCAGTACGCGGTACGCTAATCGACTGCGTGAACACTATTTATGCGCCAGCCCGG  
AAGCCACTCTGCGTATGTTACACCATGGTGGCAACAGTCCGATCACCAGGCAATTTACTCCACCACCGCTGCGCAGTTA  
CGCCATGCCCGTCCGCATCTGCAACAACCGCTGTGTAATTTCCGGAAGCAGCAAAAACGTTTTTGGCATTTCTGCGTCA  
CCCGGAGCGGTGCGCGCGGGCTATTGGCAATGCATGCCATAGCGTCTCGCGCGTATATGCCGCAATGGTCCGATA  
TCGTCCGGCAGATGCAGTTGATCTGTTCCACGCTACAGGTTGGATGAACATACTATCCGCTGATGAACTGGAG  
AGTTTTGGCAGTGAAGAAAACGCGCCAGCCACTCCGTTTGTGTGGACGCTTGGCGCGCCTGCGCTCAACTGAGCTGAT  
TTTATCGCCGCGCTGTTTACGATATCGCCAAAAGGACGCGCGGCGGACCACTCCATTCTCGGTGCTCAGGATGATGTC  
ATTTTGGCGAACTCCACGGGCTGAACTACGCGAAAACAGCTGGTCCGCTGGCTGGTTCGCCAGCACCTGTTGATGTCG  
GTGACCCCAACCGCGGATATTCAGGACCCGGAAGTCAAGCAGTTTGGCGAAGAGTGAACACGGAAATCGTCT  
GCGTATCTGGTATGCTGACTGTGGCTGACATTTGCGCCACCAACGAAACGCTGTGGAATAGCTGGAAGCAAAGTCTGT  
TGGGTGAGCTTACTTTGCCACC GAAAAGCAGCTACGAGCGGAAATGCAAAAACGCGGATATGCGGAAACGGGTTCCG  
CATCACCAACTCCAGGCACTGGCACTACTGGCATGGATAACATCGACGAAGAGGCGCTGCACCAAATTTGGTCCAGCTG  
TCGTGCTAACTATTTGTCCGCAATAGCCCAAAATCAACTGGCCGTCAGCCGCAATTTATTCAGCATGATTTAAGCA  
AACCGCTGGTATTGCTTAGCCCGCAGGCTACGCGTGGAGGACCGAGATTTTTATCTGGAGCCCGGACCGCCCTATCTG  
TTTTGCCGCGTCTGTGCCGAATTAGACC GCGCAATTTAAGTGTTCACGACGCACAAATTTTCCACCACTCGCGACGGTAT  
GGCGATGGATAACCTTTATCGTGC TGAACCCGATGGCAACCCGCTGTCCGAGATCGTCATGAGGTTATTCGGTTTGGTC  
TGGAGCAAGTACTGACGCAAAAGTACTGGCAGCCACCGCAGCCCGCTCGCCAACCCGCAAAATACGCCATTTTACTGTT  
GAAACCGAAGTACGTTTTTGGCAGCCATACCGACCGCAATCGTTCCTCGAACTGATCGCCCTCGACCAACCTGGACT  
GCTGGCGGAGTCCGGAAAATTTTGGCCATCTGGAAATTTGCTTTCATGGTGC CCGAATACAACTATGGCGAGCGAG  
TAGAAGATTTATTCATAAATGGCACCGCTGACCGCGTGGCTTAATAACGAGTTGCAGCAGGAAGTGCATCAGCGGTTG  
ACAGAGGCCCTCAATCCAAACGATAAAAGGGTGA

>Cluster\_150

ATGTCACGCGCGTGGTGTATCTGTTATTGACCTTAGTCTGGATGCGGTCCGTTTCGATGAGCAGATGAGCGGGTAAG  
GCTCATTTTTTCAGGACTGGATACTGACGCCGAAAAACCGCAGTGC TGTGAACAGGGCCTGAGCCGCGAGCGCTGG  
CTGCACAAAAAGCCGGGATTTCCGTCGGGCAGTATAAAGCGGCCATGCGAACCCCTGCCCGCACAGTTTACGGATATCGCC  
ACGAGCTTGGCGGTGGTGAATCCCTGGCGGATCTGCTGCAACAGGGCGGTGAGGTAAGGACTCTTCCGCGGGAT  
GATCCCATGCTCAGGGGGCTTGGCGGTGCGATCACCCCTGGCGATGGTTCGGGGTCACTCGCTGGCGGTGGCGACAGTG  
CTGCGCGTACGCTTGGTACAGGGGATTCACGCTTTCAGCGTTTAATAAAAACCTGGTTCTTCCGGTAATCAGTCC  
GGACTGACTGCCGATCGTATGCTGACTCTCTCAAGAGCCGGCAGGACAGCAGGGCTGACGTTTAAACAGGCGAGAGATC  
ACTGGCAGCCCTGGTGAATGCGCGTGTGCGTGGTGAACAGTTTGAATGCCATCAACAGAGTGTGCGCGCTTTGCGT  
CTGCATCCGGTGGAGGTTGGATAAAGTCTGCTGAAGCCTTCGGGAAGCTGACCACTGACCCGACGTCGGGACTGATGGCG  
ATGGCGCGCAGTTCCTGTAACGTGACGGCAGAGCAGATTCGCTATGTTGCGCAGCTGACGCTTCCGGTGAAGCCGCGG  
GGCCTTACAGGCGGCAACGAGGCGCAACGAAAGGTTTGTATGACCAGACCCGCGCTGAAAGAGAACATGGGCACGC  
TGGAGACCTGGGAGACAGGACTGCACGGGCAATCAAAATCCATGTGGGATGCGGTGCTGGATATTTGGTCTCTGATACC  
CGCAGGAGATGCTGATTAAGGCAGAGGCTGCGTTTAAAGAAAGCAGACGATCTGGAATCTGCGCAAGGATGATTTAT  
TGTAAACGATGAAGCGCGGCGCTTACTGGGATGATCTGAAAAGCCCGCTCTGCGCTTGAAGCCGCGGAAAGG  
CTGAGCAGCAGACTCAACAGGACAAAAATGGCAGCAGCAGAGGATAACCGAAGCTCACGGCTGAAATATACCGAAGAG  
GCGCAGAAGGCTTACGAACGGCTGCAGACGCGCTGGAGAAATATACCCCGCTCAGGAAGAATGAAACAAGGCACTGAA  
AGACGGGAAAACTCTGACGGCGGATTAACAACCGCTGATGGCGGGCGGAAAAAGGATTAAGAAGCAGCTGAAAAAGC  
CGAAAACAGTCCGGCTGAAAGTGTCTGGCGGCGATCTGAGAAAGCAGTGCATGCTGCGCTGACCTGACGGCT  
GAACTCCGGACGCTGGAGAAGCATGCGCGAGCAATGAGAAAAATCAGCAGCAGCGCCGGATTTGTGGAAGCGGAGAG  
TCAGTTCCGCGTACTGGAGGAGGCGGCAACCGTCCGCACTGTCGCGCACAGGAGAAATCCCTGCTGGCGCATAAAGATG  
AGACGCTGGAGTACAACCGCAGTGGCTGCATTTGGGATAAGGTCAGTATCAGGAGCGTCTGAATGCTGGCGCAG  
CAGGCGGATAAAATTCGCACAGCAGCAACCGGCAAAAACGGGCGCCATTTGATGCGAAAAGCCGGGGGCTGACTGACTGCGGCA  
GGCAGAAGCGGAAGCCACAGAACAGCGCTGAAGGAACAGTATGGCGATAATCCGCTGGCGCTGAATAACGCTCATGTCAG  
AGCAGAAAAAGACCTGGGCGGCTGAAGACCAGCTTCGCGGGAAGTGGATGGCAGGCGCTGAAGTCCGGCTGGAGTGGTGG  
GCGGAAAGTGCAGCGGACAGTTTTTCGCAAGGTA AAAAGCGTGGCCACGCAAGCTTTGACGGTATTGCACAGAATATGGC  
AGCGATGCTGACCGGAGTGAAGCAAGTGGCGCAGCTTACCCGTTCCGTCGCTGCTCATGATGACAGAAATTTCTGCTTA  
AGCAGGCAATGGTGGGATTTGTCGGGATTCGCTAGCGCCATTTGGCGGGGCTGTTGGTGGCGGCGCATCCGCTCAGG  
GGTACAGCAATTCAGGAGCTGCGGGCAAAATCCATTTTGAACCCGAGGATTTACGGGAACCGGGCGCAAAATGCGCC  
AGCGGAAATTTTCAACCGGTTGAATTCGTTTCAAGAAAGGCAACAGACGGATTGGCTGGGGAATCTTACCGGCT  
TGATGCGCGGCTATGCCACCGCGGTTATGTCGGTACACCGGGCAGCATGGCGGACAGCCGCTGCGAGGCTCCGGGACG  
TTTGGAGCAGAAATACCATGTTGATTAACAACGACGGCAGCAACCGTTCAGTATGGGCGCAGGCACTGAAGGCTGTTTA  
TGACGTAGCCCGTAAGGCGGCAATGGATGTTGTGACCGGGCAGATGCGCGATGGTGGTCTGTTCTCCGGAGGTGGACGAT  
GA

>Cluster\_63232

ATGTATAGAACTCATCGACAACACAGCCGTGTTAAGCTCTGGTGGAGTGCATCGTTTATTTGGTGGGCTGGTGGTGGTGGT  
GTCGGCAGCGTTCATGACAACAGCTGAAACCTGGTTCGATCTGCTTTTTTCAAAGATGATCCCTCAATGGTGGCCGAT  
TGCTCTGTTTCGAAAAGGACAAAAAATACCGCAGGGGTTTATCGTGTGATATTTGTTCTGAATCAGACAATTTGTAGAT  
ACGCGCAACGTCAAATTTTGTGAGATAACGCCAGAGAAGGGATGCGCCCTGTTTGGAGACTGAAAGCCTGGATGCAAT  
GGGTGTTAACTGATGCTTTCCGGCTTTTAAACAACCTGGCAAAAACAGCGTGTGTCATTTGGCGGAGATTTCCCG  
ATGCCAGCTAACGTTAATGTGAATAAATCCGCTGGAATAATTCAGTACCGCAATCCGCAACAAAAGTAAAGCCGCT  
GGTTATGTC CCCCCGTAACGTTGGGATGAAGGGATCAACCGCTATTACTGGGATATTCGTTTACGGGGGTAACAGTAT  
TCATAGCAGCGCAGACAGTATTCTGGCAGAGCTATTTCTGAAATTTAACAGTGGCGTTAATTTAGGCCCATGGAGAT

TGCGCAACAATTCAACATGGAGTCGAGTAGTGGCCAAACCCGAGAATGGAAGAATCTCAGCAGCTATTTGCAGCGGGCG  
GTTATTTCCACTAAAAGGCCAACTGACCGTTGGTGATGATTATACTGCAGGCGATTTTTTCGATAGTGTGAGCTTTTCGTGG  
TGTGCAGCTGGCGTCAGATGACAACATGCTGCCAGACAGCCTGAAAGGTTTGGCCCTGTGGTGGTGGTATCGCCAAAA  
GCAATGCCAGATAACAGTAAAGCAAAATGGTTACACCAATTTACCAAACTTATGTATCGCCTGGTGTCTTTGAAATTAGT  
GATCTTACTTCCAGTACAGTACGCTGGCAGCAAAAGCGAACAATAAAGGTCAGTCAATCGTTTTCTGTATGCCAAACGC  
ACCGTTTTCCAGCGTCCATTACTCCAGCGTCAGGGGCGAATCAAATACGCGGTGACACTGGCGAAAATACAGAACCAATA  
GTAATGAACAGCAGGAGAGCAAAATTTGCCAGGCCACGTTGCAGTGGGGCGGACCGTGGGGAACGACATGGTATGGTGGT  
GGCAATATGCTGAATATTACCGTGGCCGATGTTGGTCTGGGATTTAACCTTGGCGATTTCCGGAGCAATTTCCGTTCCGA  
TGGGACCCAGCGCAAGAGTACGCTGGCAGCAAAAGCGAACAATAAAGGTCAGTCAATCGTTTTCTGTATGCCAAACGC  
TCAACCAATTGGGCACTAATTTTCAATTGATGGGCTATCGCTATTCGACGTCGGGTTTTCTACACCCTTTCCGACACCATG  
TATAAACATATGGATGGCTACGAATTTAATGACGGTGTATGATGAAGATACGCCGATGTGGTCCGCTTATACAATTTGTT  
TTACACCAAACTGGCAACTGCAGGTCAATATCTCCAGCAATTAGGCGAGTACGGTTCGTTTTATTTAAGTGGTAGCC  
AGCAAACTTACTGCTACCGATCAACAGGATCGGCTAATGTCAGTTTGGCTACAACACGCAAAATAAAGATCTCTCGCTG  
GGGTTTTCTGGAACACAGTAAGTCCCGTGGTCAACCTGATGCTGATCAGGTGTTTGCCTAAATTTTTCTCCGCGCT  
CAATCTGTGTCTCCAGAGTAATGATAGCTATACAGGAAAAAAATACGCTGGATGACCTCTAACACCAAGTATCG  
ATAACGAAGGGCATTACCAAAAACCTGGTTTAAACGGAGACTACTCGATGACGGTAACCTGAGCTACAGCTGCA  
CAGGGATAATAACAGCGAGGAAAAACCGTAAATGGTAGCGCAGCAGTACGACTACAAGGGGCGTTTTGCGATGCCGAGT  
GGGCTACAACACAGGATAACGGCAGTCAACAACAACGTAACACGCTTTTTCAGGCGTTTAGTTGCCATTCACAGG  
GCATTAACCTGGGCAATCGCTGGGGAAAACTAACGTGCTGATGTCAGCACCAGGCGCAGAGAATACTCGTGTGGCGAAC  
ACACCGGGTGAACACTGACTGGCGGATATACCGTTGTCCCTTATGCCACTTCTTATCGGGAAAACTGCAATCGCACT  
TGATGCGGCTCGTTAAAACGTAACGTTGATCTTGAATAAGTACAGTGTCAACGTTGGTTCCACCAAAAGGGGCGTTGGTT  
TGGGGAGTTCAATGCCATGCGGGAGCAAGGTTAATAAGAAACATCAAGCAGGGTATACCGCTCGGTTTTGGCGG  
ATAGCGACCTGGACGGCATAACAGCTAATAGCGGCTATTTGATGATGATGGCTCGCTTATATGTCGCGTTTTGCCCG  
TCAGGGAGGATAACTGTACGCTGGGGGAAGCTCCCGATCAAAATTTGTCATATCAGTTACCAGTTACCAGCAACAAA  
TTAACTCTGCGATTACCGCAATGGATGCCATATGAGATA

>Cluster\_54540

ATGAAAACGAAAATCCCTGATGCGGTATTGGCTGTGAGGTGAGTCGCGTGGTTTTGGTAAAAACGACAGCGATCGGCGG  
CCTGGCAATGGCCAGCAGCGCATTAACATTAACCTTTTGTGCGATTGCGCACGCTGTGCATAGCGCCATCCAACAAAAT  
CAGACGAAAAGGTTATCTGGAGCGCTGTACAGTTAAGTGTGGTAGTCTGCGCCGCTACGATGACGCTCGTGGACGGT  
GAAATCAAAATATGTCGAAAACGGCAATACCGGCGATGCAATACGACGGCTGCACCAGGTTGCGCGCTGCCGTCGCTGG  
CGTTCCATGCGTCCGCTGTCTACAATCCGACCGCTGAAATATCCGATGAAACGAGTCCGGGGCGCGGTTGAAGGCA  
AATTCGAGCGCATTAGCTGGGAAGAAGCTACGACATCATCGGACCAATATGACGCGCTGATCAAAAGAGTACCGCAAC  
GAGTCTATCTATCTGAACATGACACCGGTACGCTGGGCGCACCATGACCCGCTCCTGGCCCGGGAAATACCCCTGGT  
CGCGCGGCTGATGAACCTGCTGCGCGGCTATCTGAACATACGGCGACTACTCCTCCGCGCAAAATGGCGAAGGTTTGA  
ACTATACCTACGGCGGCTGGGAGATGGCAACAGCCCGTCGGAATACGAAAACAGTAAAGTGGTAGTGTGTTGGTAAAT  
AACCTGGCGAAACCGCAATGAGTGGCGTGGGTTACTACTATCTTGAACAGCGCACCGCAGAAATCTAATGCCCGCAT  
GATCATCATCGATCCGCGCTATACCGACACCGGTGCGGGCGCAAGATGAGTGGATCCCTATTCGTCGGGAACAGATG  
CCGCACTGGTTAACCGTTGCGGCTACGTCATGATCACTGAAAACCTGGTGGATCAGGCATTCCTCGATAAATATTGGCGT  
GGCTACGATGAAAACCTTCCAGCCAGTGGCCGCAAAATGGCCACTATAAAGCTTATATTTCTGGGTGAAGGCGGATA  
TGGCGTGGCTAAAACCGCGAATGGGCTCGCAAACTCACTGGTGTTCGCGCAGACAAAATCAAAATTTGGCTCGTGA  
TCGGTAGTACAAACCGCGTTTTATCAGCCAGGATGGGGCCGAGCGTACGCTAACGGTGAATCGAACCCGCTGCT  
ATCTCGATGCTGGCGATTCTGACCGGTAACGTTGGTATTAACGGAGGCAACAGCGCGCGCGTGAAGGTTTCATACAGCT  
ACCGTTTTGTTCCGATTCGCGACTTTGGAAAACCCGATCGACACAGCATTTTCGATGTTTTATGTGGACCGATGGAAC  
GTGGCCCGGAAATGACGGCGCTGCGTGTGAGTACGCGGAAAGATAAGCTGGATGTCCGATCAAAATGATCTGGAAC  
TATGCCGTTAACTGCTGATTAACAGCATTCTGAAATCAACCGTACCATGAAATCCTTCAGGATGATAAAGAGTGGCA  
GCTGATTTGGTTTACTGACTGCCACATGACCTCATCGGCAAAATATGCTGACATCCTGCTGCCGACTGCACCGCTTCCG  
AACGATGGACTTTGCGCTGGATGCATCTGCGGGAATAGCTTACGTTGATTTTTCAACGATCAGGTGATTAACCCGCG  
TTTTGAATGTAAGACCATCTATGAAATGACAGCGAACTGGCAAAACGCTTGGCGTTGAGCAACAGTTTACTGAAGGCCG  
TACCAGGAAAGTGGATGCGGCATCTGTATGCCAGTCCGCGGAAGCATTCCTGAACTGCCAACGTTTGAAGAGTTCC  
GCAAGCGGGGATCTTAAAAAGCGCGACCCACAAGGGCATCAGTTGCTTATAAAGCTTCCGTTGAAGATCCCGCAGGCA  
AACCCACTGACTACGCACTCGGCAAAATGAGATTTATTCGACGGCGCTGGCTGACATGCCCCTACCTGGGATTTGCC  
TGAAGGCGATGTGATCGATCCACTGCCGATCTACACCGCGGCTTTGAAAGTTATCAGGATCCGCTGAACAAACAGTATC  
CGCTGCAGCTACAGGTTTCCACTATAAATCTCGCGTTCACTCACTTACGGCAACGTTGATGTGCTGAAAGCGGCTTCC  
CGTCAGGAAATGTGATCAACCCGCTTGGTGCACAAAACCGGTTCCACAACAGCGGATAAAGTCAAGATCTTTAACGA  
TCGTGGTGAAGTTTCAATTTGAGGGCAAGTACGCGGTTTCCACATTTAAAATTTTCGCTGCCGACGCAATCATGTCG  
ATGACCCGGATGCAAAACGTTGCTGATAAGGGTGGTTGTATTAACGTACTGACCACTCAACGTCCTCTCTCGCTAAG  
GGGAATCCGTCACATACAAACCTTGTTCAGGTTGAAAAGGTTGTA

>Cluster\_31841

ATGAATCAGAATCTGCTGGTGACAAAGCGGACGCTAGCACAGAGCGCATCAATCTCGACAAAATCCATCGCGTTCTGGA  
TTGGGCGGAGAAAGGACTGCATAAGCTTTCCGATTTCCAGGTCGAGCTGCGCTCCACATTCAGTTTTATGACGGTATCA  
AGACCTCTGACATCCACGAAACTATTATCAAGGCTGCCGACAGCTGATCTCCCGTATGCGCGGATATCAGTATCTC  
GCCGACGTTGCGCATCTTCCACCTGCGTAAAAAGCTACCGTCAAGTTTGGCCGCTGCGCTGACGACCATGTGGT  
GAAAATGGTCGAGATGGGCAAAATACGATAATCATCTGCTGGAAGACTACACGGAAGAAGGTTCAAGCAGATGGACCGT  
TTATCGATCACGACCGTATGATGACCTTCTTTATGCTGCCGTTAAGCAGCTGGAAGGCAAAATCTGTTACGAAACCG  
GTGACCGCGGAAATCTACGAAAGCGCCAGTCCCTTTATATTCGTTTGGCGGCTGCTGTTCTCGAACTACCCGCGTGA  
AACCGCCTGCAATACGTTGAAGCTTTTTTACGACCGGTTTTCCACATTTAAAATTTTCGCTGCCGACGCAATCATGTCG  
CGCTGCGTACCCGACTCGTCACTCAGCTCATGCGTGTGATGAGTGGCGCAGCCTGGATTCATTAACGCCACC  
TCCAGCGGATTTGTAATACGTTTCCAGCGTCCGCGGATCGGCATCAACCGCGGCTATTGCTGCGCTGGTAGCC  
GATTCGCGGTGGCGAAGCGTTCCATACCGGTTGATTCGTTCTACAACATTTCCAGACAGCGGTGAAATCTGCTCTC  
AGGCGGCTGCGCGCGGCTGCGCAACCGCTGTTACCCGATGTGGAAGTGGAAAGCGCTGCTGCTGAAA  
AACAAACCGTGGTGTGGAAGGCAACCGGCTGCGTATGACTACGGGTTCAAATCAACAACTGATGTATACCCGCTC  
GCTGAAAGGTTGAAGATATCACTCTGTTTACGCGCTCCGACGTTACGGGCTGTACGACGCGTTCTTCGCGGATCAGGA  
AGTTTGAACGCTGTATACCAAAATATGAGAAGACGACAGCATCCGCAAGCAGCGTGTGAAAGCGCTGTGAGCTGTCTCG  
CTGATGATCGAGGAACTGCATCTACCGTCTATCTATATTCAGAAGCTGTGATCACTGCAATACCCATGACCCGTTTGA  
TCCGCGCATGCGCCAGTGGCCAGTCTAACCTGTGCTGGAATTCGCTGCGGACCAACCGCTGAACGACGTCAACG  
ACGAGAACCGTGAATCGCGCTGTGTACGCTGTCTGTTTCAACCTGGGCGCAATTAACAGCTGGATGAACGGGAAG  
CTGGCAATTCGCGAGTACGCGCACTCGACCGCTGTGGATTTACGATTAACCGATTCGCCGCGCAACCGTGGAGC  
GATGGGTCGTCGTCAGCTGGGATTTGGTGTGATCAACTTCGCTTACTACTGGCGAAGCAGGTAACCGTACTCCGACG  
GCAGCGCAACAACTGACGCATAAAACCTTCGAGCCATTCACTATAACCTGCTGAAAGCGTCAATGAGCTGGCGAAA

GAGCAAGGCGGTGCCCCGTTTAAACGAAACCCTTACGCGAAAGGGATCCTGCCGATCGATACCTATAAGAAAGATCT  
GGATGCCATCGCTAATGAGCCGCTGCATACGACTGGGAGCACTGCGTGAGTCAATCAAACGCACGCGCTGCGTAACT  
CCACGCTTTCGCGCTGATGCGCTCCGAGACTTCTTCGCGAGTCTCTAACGCCACTAACGGTATGAAACCGCCGCGCGGT  
TACGTGACGATCAAAGCGTCGAAAGACGGTATTCTGCGCCAGGTGGTGCCGACTACGAGCATCTGCACGACGCCATGA  
GCTGCTGTGGGAAATCCGGGTAAACGATGGCTAACCTGCAACTGGTGGGTATCATGCAGAAATTTATCGATCAGTCTGATCT  
CTGCTAACACCAACTACGATCCGTCACGTTTCCCGTCAGGAAAGTGCCGATGCAGCAGTTGTGAAAGACCTGCTCACC  
GCCTACAAATTCGGGGTCAAACGCTGTATTATCAGAACCCGTCAGCGTGTGAAAGACGCACAAGACGATCTGGTGC  
GTCAATCCAGGACGATGGCTGCGAAAGCGCGCATGTAAGATCTGA

>Cluster\_32885

ATGATGAAATGATTCTGCTTTCGCGCATTTATTCGGGGTAAAATTCAGGCGCGCCCGAACAGGTTGACGCTGCCGTTTCGCT  
GCTTGACGAAAGGAAATACCGTGCCTTTATCGCACGTTTATCGTAAGGAAATCACCGCGGCTTGGATGACACCGAGCTGC  
GTAATCTGGAACCGCGCTGAGCTATCTGCGCGAGCTGGAAGAGAGACGTCAGGCGATCCTCAAGTCCATTTCCGAGCAA  
GGCAAACCTACCGATGATCTGGCGAATGCCATCACCGCACCCCTAAGCAAACCGAACCTCGAAGACCTTACCGCTTCCCTA  
CAAACCTAAACCGCCGACCCGTTGGGCAAATCGCCATTGAAGCAGGGCTTGAGCCGTTGGCCGATCTGCTGTGGAGCGATC  
CGTCACACACGCGCAGAGTGCCTGCAACAATATATTGATGCGGATAAAGGCGTGCCAGATACCAAAGCCGCGCTGGAC  
GGCGCGCTATATCTGATGGAACGGTTTGGCGAAGATGCGCGCTGCTGGCGAAAGTGCCTGATTATCTGTGGAAGAA  
CGCCGATTTGGTTTCTACGGTGGCGAGCGGTAAGAAGAGGAAGGCGGAAAATTCGCGACTATTTCCGATCATACGAAAC  
CGCTGTCCACGCTGCTTCTCACCGCGCTGGCGATGTTCCGTGGTCTAACGAAGGCATCTCAGCTTTCGCTGAAT  
GCCGATCCCGAGTTGCAAGAACCGCCGAAAGAGAGCTATTGCGAGCAAATCATCATGGATCACCTTGGCTTGCCTGAA  
CAATGCCCGCAGGATAGTGGCGCAAAGGTTGGTGGTGGAGCTGGCGCATCAAGGTGTTGATGATCTGGAAGATG  
AACTGATGGGACGCTGCGCGAAGCGCGGAAAGATGAACCAATCAACGCTTTTCCCGTAACCTGCATGATCTGCTGATG  
GCGGCCCTGCGGGCTGCGTGCACGATGGGCTCGATCCGGTCTGCGTACGCGGTAAGTGGCGGTAGTGCATGATG  
AACTGGCAAACGTTGGCGACCGATACCATTTTATCCGCATACCGGCGAGCCGCAAAAGCAGCGATGACCGTTCTGCTGCC  
TGTGTGAAAAGCTAATAAGTTGAAGTGGTGGCGTAAACCGCACTGGCGTGCATCTCAACACCGCTTCTGTTCTGTTCGAC  
GTGCAGAACGAGTTCCGAAAAGTACCGCGCAGAAAAGTATCGTACGCGAAGCTGGCGCGTGGTTCGCTGCGCTTCCGA  
GCTGGCAGCACAGGAATCCCGGATCTCGACGTTTCGCTGCGTGGCGGGTGTCTATGCCCGTGGTTCGAGGATCCGC  
TGGCGGAGCTGGTAAAATCGATCCGAAATCTATCGGCTAGGTCAGTATCAGCATGACGTCAGCCAGACCGAGCTGGCA  
CCAAACTGGATGAGTGTAGAAGCTGCGTAAACCGCTGGCGTGCATCTCAACACCGCTTCTGTTCTGTTCGCTTAC  
CCGCGTGGCGGGCTGACGCGCATGATGGCGCAAAACATCGTAGCCTGGCGCGATGAGAACGGCCAGTTCCAGAACCGTC  
AGCAACTGTTAAAAGTGACCGCTGTTGGGCCGAAAGCCCTTCGAGCAGTGCAGCGGTTTCTTGCATTAAACCGGTGAT  
AACCCTGAGCAGCTTCTACCGTTCACCGGAAGCCTATCCGGTGGTGAAGCGATTCGCGAGCAACACAGCAGGCACT  
GAAAGATCTGATGGGTAACAGCAGCAACTGCGTAACTGAAAGCATCTGACTTTACTGATGAGAAATTCGGGTGCGCT  
CGGTAACCGCATCATCAAAGAGCTGGAAAAACCGGTGCGATCCGCTCCGGAATTTAAAACCGCTCAGTTTGCGGAT  
GGCCTCGAGACAAATGAACGACCTGCAACCGGATGATGCTCGAAGGTCAGTACCAACGTCACCAACTTTGGCGCGT  
TGTCGATATTGGCGTGCATCAGGACGGCTGGTTACATCTCTTCAATTTGTCGAACAAGTTTGTGGAAGATCCGCATCCG  
TGGTGAAGCGGGCGCATTGTTGAAGTGGTGAAGTGGTGAAGTGGTGAAGTGGTGAAGTGGTGAAGTGGTGAAGTGGT  
CTGGACGAGCAGCTTGGCGAAACCAACGCGCTCGCGGGCGGTAATGAACGCCGCAAAACAAACCGCCGCGCAGCCAA  
AACGCTGGCGGTGAAGCCAGCCTGCGGTAACAGCGCATGATGGATGCGCTGGCGCGGCATGGCAAAAACGTT  
AA

>Cluster\_42082

ATGAGCTCTATCTCCCTGATCCAACCGGATCGCGACCTGTTCTCTGGCGCAGTACTGGGCCGCTGTTTTGGACCGGC  
ACCGTTTTTCGCGATGTCACGTGAAGAGATGGATCAACTTGGCTGGGATAGCTGCGACATCATTTTGGTTACTGGCGACG  
CGTATGTTGATACCCACGCTTCGGGATGGCGATTTGGCGTATGCTGGAAGCGCAGGCTTTCGCTCGGGATCATC  
GCTCAGCCAGACTGGAGCAGTAAGGACGATTTTCATGCGCTGGGTAAACCGAATCTGTTTTTCGGCGTACTGCTGGCAA  
CATGGACTCGATGATCAACCGCTATACCGCCGATCGCCGTTTACGTCATGACGATGCCACACGCCAGATAATGTCCGG  
GTAAGCGTCCGGATCGCGCCACACTGGTTTATACCCAAGTTGTAAGAGGCGTGGAAAGATGTGCGGTGATCCTCGGC  
GGTATTGAGGCCAGCCCTGCGCCGTTACCGCGCACATGATGATGACTGTTGCGGATACCGTGGCGCAGGCTTCCGTTGGATT  
GAAAGCCGACATGCTGATGTTTGGCAATGGCGAGCGTCCGCTGGTGAAGTGGCGCACCGTCTGGCGATGGCGAGCCGA  
TTAGTGAATCCCGGATGTCGTAATACCGGATATTCGTAAGAGAGGCGTGGCTGGTGGAGCGGTGGATTCCACC  
CGTCTTGATACCCAGGAAAATCGACCAATCCCGCATCCGATGCGGAAGATTTGGCGTGGCGGATAAACAACCGGT  
AGCTTCGAAAAGCAGGAAGCCAAAGCTGTAACCGTGCACCCAGCCGCGGCGGCGGCGGCGGCGGCGGCGGCGGCGG  
TGCCCTTCTTCGAGAAAGTGAAGGGCGATAAAGTGTGTACGCCCATGCTTCGCGCATCTGACCCACGAAACTAACCA  
GGCTGCGCCCGCGCATGATGCAAAAACATGGCGACCGTATGATGGATCAACCCGCTGCTATTCCGCTTCTACCGA  
AGAGATGGATAGCGTCTTTGGCGTGCCTACAAGCGGTGCGCATCCGGTTACGGTAAATGCCCGAATTCGGCTTACG  
AAATGATTCGTTTTCTCGGTCACATATATGCGTGGCTGTTTGGCGCTGCTCTTCTGTTCTATACCGGACGCAAGG  
CGCATTTATCAGAGCCGTTCCGAAGATTGATTTAATGAGATCGAAGCGATCCGCGACACTGTTCCAGTTTTACGGG  
CGTGGTTTTCCGATCTCGGTGGGCTACTGCCAACATGATATGTTGCGTTCGAAATCGCCACGCGCTGAGCAAACTGCG  
GTGCTTTGTCGTGCTTTATCCGATATTTGTCGCATATGACACTAACCCAGCACGATCAACTCTATGCGCT  
GCGCGGATCTGAAAGGCAATTAAGAAAGATCCCTGATGCTGCTGTTGTTGTTGTTGTTGTTGTTGTTGTTGTTGTTG  
TATCAAAGAGCTGGCGACCCATCAGCTGCGCGTATCTGAAGATTGCCCGGAACATACCGAAGAGGCGGTTATCGA  
AGATGATGAAGCCGGCATGGGACGATGACCGCTTTAAAGAGCTGTTCGATACTTACTCGAAAACAGGAGGTAAGAA  
CAGTATCTGATCCGATTTTCTATCTCCGCGCACCCGGTACCGGATGATGAAGATATGGTGAATCTGGCGCTATGGCTGAA  
AAAGCATCGCTTCCGCCCTCGACAGGTTGAGAACTTCTATCCGTCGCGCTGGCTAACCGACCCATGATTTACCCG  
GCAAAAACCGCTGGCGAAGATTGGTTATAAGAGTGAAGACGCTTTCGTACCGAAGGGCGACAAGCAGCGTCCGCTGCAT  
AAAGCGTTGTTGCGTTACCAGATCCGGCAAACCTGGCCGTTAAATCCGCGAGCGCTGGAAGCAATGGGTAAAAGCATCT  
GATGGCGACCGCTCGCATGCTTGTAGTGCCTGCGCCAACTTGAAGAGATGCGTGAAGGCTCGTCGCGCAACGCAATA  
CCCTTCCGGCTTGACTAAACATACCGGATGGCGACCCAGCGTCAGACGCTGCTACGGCAAAAAGCGTCTGCTACG  
CAATCTCGTCCGGTGAATGCTGGTGCAGAAACGCGCTAAAGCGCGGTTGGACGTTAA

>Cluster\_22609

ATGGATGACCAAGTAAAACAAGTGCACCTGATTTCCATGAATTTCCAGTCCAGGAAAATCCAGGTTTCTCCAACCAA  
GCCTTGGCAACGCAGCGCATCTGGCGTGGCCTACTCACAGGCGTTGCCGCACCTTGCTTGAATCGAAAAGACC  
CGTTAAAAGCCTACAATAATACCGCGCGGTAACCTGGTAGCGGTGATCTCTAACGGTACGGCGGTTGGGGTTAGGC  
AACATGGCGCGCTGGCAGGCAAACCGGTGATGGAAGCAAGGCGCTTCTGTTAAGAAATTCGCCGGATGGATGATGAT  
TGACATGAAGTTGATGAACTCGAACCGGACAAATTTATGAAGTCTGCTGCGCTGCGCTGCAACCGACTTTGGCGCATCA  
ACCTCGAAGACATTAAGCGCCAGAATGTTCTATATTGAACGAAACGCGCGAGCGGATGAATATTCGGGTATTCAC  
GAGTATCAGCAGCGCAGCAATTTATCAGCATAGCCGCACTCAACGGCTTGGCGGTTGGTGGAGAAAACATCTCCGA  
CTGGCGGATGGTGGTTTTCTGGCGGGGTTGCCGAGCAATGCTGATGAACCTGCTGGTAGCGCTGGGTTGCTGCAAAAC  
ATAACATCGTGGTTTGGCATTAACAGGCGTTATCTATCAGGGCGGTAGCCAAAACATGGCGGAAACAAAGCGCATAC  
GCGGTGGTGGATGACGGTAACGTCACCTCGATGATGATGATTGAAGCGCGGATATTTCTCCGCTGTTCCGCGCCGAA

AGTGTGACCCAGGAAATGGTGAAGAAAATGGCCCGTGGCCCAATGATCTGGCGCTGGCGAACCCGGAACCCGGAATTC  
TGCCGCCGTGGCGAAAGAGTGCCTCCGGATGCCATCATCTGTACCGCCGTTCGACTACCCGAACAGGTGAACAAC  
GTCCTTTGCTCCCGTTTATCTTCCGTGGCGCGTGGACGTTGGCGCAACCCGCATCAACGAAGAGATGAACTGGCGGC  
GGTACGCGCAATTCAGAACTGGCCATCGCGAAACAGAGTGAAGTGGTGGCTTTCAGCTTATGGCGATCAGGATCTGAGCT  
TTGGCTCGGAATACATCTCAAACCCGTTGATCCCGCGTTGATCGTTAAGATCGTCTCCGCTGCGGTAAAGCCGCT  
ATGGAGTGGCGGTGGCGACCGCTCCGATTGCTGATTTTCGACGCTACATCGACAAGCTGACGGAGTTCGTTTACAAAAC  
CAACTGTTTATGAGCCGATTTTCTCCAGGCTCGCAAGCGCGGAAGCGCGTGGTTCGCCGGAAGGGGAAGAGCGCC  
CGCTTCTGCATGCCACTCAGAACTGGTAAACGCTGGGGCTGGCGAAACCGATCCTTATCGGTCGTCGGAATGTGATCGAA  
ATGCGCAATTCAGAACTGGGCTTGCAGATCAAAGCGGGTGTGATTTTGAAGATCGTCAATAACGAATCCGATCCGCGCTT  
TAAAGAGTACTGGACCGAATACTTCCAGATCATGAAGCGTGGCGGTGTCACTCAGGAGCAGGCGAGCGTGGCGTGTATCA  
GTAACCCGCAGTGTATCGCGCGATCATGGTTCAGCGTGGCGAAGCCGATGCAATGATTTGCGGTACGGTGGCGGATTAT  
CATGAACACTTTAGCGTGGTGA AAAATGCTTTGGTTATCGCGATGGCGTTCACACCGCAGGTGCAATGAACGCGTGTCT  
GTTGCGAGTGGTAAACCTTTATTTGCCGATACCTACGTTCAATGATGAGCCTGATGCAAGAGCTGGCGGAGATCACCT  
TTATGGCGGCAGAACTGTTCTGCTGTTTTGGTATTGAGCCGCTGTGGCTCTGTTGTCGCACTCCAACTTTGGTTCTTCT  
GACTGCCCGTCTGTCGAGCAAAATGCGTCAAGCGCTGGAAGTGGTCAAGGAACTGCACAGAACTGATGATGATGGTGA  
AATGCACGGCGATGCAGCGTGGTGAAGCGATTCGCAACGACCGTATGCCGGACAGCCCTTTGAAAGGTTCCGCTAATA  
TTCTGGTGTATGCCGCAATGGAAGCTGCCCGCATTAGTTACAACCTTACTGCGCGTTTCCAGCTCGGAAGGTGATGCTC  
GGTCCGCTGCTGATGGCGTGGCGAAACCGGTTACGTTTAAACCGCATCGCATCTGTACGTCGATCGTCAACATGGT  
GGCGTGGCGTGGTTGAAGCGCAACCCCAACCGCTGTAA

>Cluster\_21574

ATGACCAACCACTGGGTGGATCAAAAACGCTAACGTCGTAATGGTGTATGGCGGTAACGCTGCTGAAGCGCATCCCGT  
CGGTTTCCGCTGGCGGATGGAAGCGAAAACAACAGATGCAACCTTGTATCGTTGTCGATCCCGGTTTACGCGTACCG  
CTTCTGTGGCGGATATTTACGCACCTATTCGTTCCGGTACCGGACATTACGTTCTCTGTCGGCGTTTTCGCGTACTCTGAT  
GAAAACAACAAAATCAACCGTAAACGTAAGCATTTACACCAAGCCAGCTGCTGGTGGTATGATGATTTTTCGTTTCGA  
AGACGGTCTGTTACGCGCTACGACGCTGAAAAACGCTCAATACGATAAGTCTCTGGAACATACAGTTTCGATGAAAACG  
GCTATGCGAAACCGGATGACACGCTGACCTACCGCGTGTGTATGGAACCTGCTGAAAGCGCACGTTTCCCGCTACACG  
CCGGACGTAGTAGAAAACATTTGCGGTACGCCAAAAGCGACTTCTGAAAAGTGTGTGAAGTGTGGCCTCCACACGCGC  
ACCGGATCGCAACCAACCTTCCGTACCGGCTGGGCTGAGCGCAGCACACCGTGGGTGCGCAACATCCGACGATGAT  
CGATGATCCAGTTGCTGCTCGGTAACATGGGTATGGCCGGTGGCGCGTGAACGCATTGCGTGGTCACTCCAACATTCAG  
GGCTGACTGACTTAGGCTGCTCTTACCAGCCTGCCAGGTTATCTGACGCTGCCGTGAGAAAACAGGTTGATTTGCA  
GTCGTATCTGGAAGCGAACACCGCGAAGCGACGCTGGTGTATCAGGTGAACTACTGGAGCAACTATCCGAAGTTTTTCG  
TTAGCCTGATGAAATCTTTCTACCGCGATGCCGCGCAGAAAAGAGAACAACTGGGGCTACGACTGGCTGCCGAAGTGGAC  
CAGACCTACGACGTCATCAAGTATTTCAACATGATGGATGAAGTAAAGTACCGGTTATTTCTGCCAGGGCTTTAACCC  
GGTTCGCTCCTTCCCGGCAAAAACAAGTGGTGGTGGTGGTGGTGGTGGTGGTGGTGGTGGTGGTGGTGGTGGTGGTGGT  
TGACTGAAACCTTACTTCTTGGCAGAACCCGGCGAGTCAAGCATGTCGATCCGGCATCTATTAGACTGAAGTATTC  
CGCTGCCCTTCCGACTGCTTTGCTGGAAGAGATGGTTCTATCGCTAACCTCCGCTGCTGGTTGGTGGTGGTGGTGGTGGT  
TCAGGACGCGCCGGCGAAGCACGTAACGACGGCGAAATCTGGCGGGTATCTACCATCATCTGCGGAGCTGTACCAGG  
CCGAGGGTGGTAAAGCCGTAGAACCCTGATGAAGATGAGTGAACCTACAAGCAGCCGACGAAACCGGAGCTGTACGAA  
GTGGCAAAAGAGAACCAACCGCTATGCGCTGGAAGATCTCTATGACGCTAATGGCGTGTGATTCGGAAGAAAGTCACT  
GCTGAGTAGCTTTGCGCATCTGCGTGTATGACGGTACAACCGCATCTTCTTGTGCTGATCTACACCGTACTGGACGAGC  
AGGGCAACAGATGGCTAACCGGATAACTCCGACCGTCCGGTCTGGGGAATACGCTGGGATGGGCCGCGGCGTGGCG  
CTCAACCGTCCGCTACTCTACAACCGTGTCTCGCGGATCAACCGTAAACCGTGGGATCCGAAACCGGATGCTGATCCA  
GTGGAACCTGAGCAACCGGTAACGATATTCGGACTTCGGCAATGCGCACCGGGTACGCCAACCGCGGCTTTTA  
TCATGACGCGGAAGGATGGGACGCTGTTTGGCATCAACAAAATGGCGGAAGTCCGTTCCCGGAACACTACGAGCCA  
ATTGAAACGCCGCTGGGCACTAACCCGTGTCATCCGAAAGTGGTGTCTAACCCGGTTGTTCTGTCGTGATGAAACAGACGC  
GCTGGCGATGGTAAAAAAGAGCAGTTCCCGTATGTGGGTACGACCTATGCTGACGGAGCACTTCCACACCTGGACCA  
AGCACGATTTGCTCAACCGCAATTTGCTACCGCGAACAGTTTGTGGAATCAGCGAAACGCTGGCGCGCGGCAAGCATT  
AATAATGGCGATCGTGTCACTGTCTCCAGCAAGCGTGGCTTTATCCGCGCGTGGTGTGGTAAACCGCGCTGAAACC  
GCTGAATGTAACCGTCAAGCAGTTGAAACGGTGGGATTTCAATCACTGGGCTTTGAGGGTGTGCGCGTAAAGGTT  
ATATCGCTAACACTCTGACGCGCAATGTCCGGTGTGCAAACTCGCAACCGCGGAATAAAGCGTTCTTAGTCAACATC  
GAGAAGGCGTAA

>Cluster\_25629

ATGACCACACTAAAACCTGGATACGCTCAGCGACCGCATTAAAGCGCACAAAATGCGCTGGTGCATATTTGTAACCCGCC  
GGTCTGTACCGAACGAGCACAACACTATACCGAGATGTATCAACAACATCTCGATAAGCCGATCCCGGTACGCTCGCGCC  
TGCCACTGGCGCATCACTGGCGAATCGCACCACTGGGATCAAGCAGATGATGATTTGATGATTTGCAACCGGCAAGCGAA  
GTTCCGCGCGCGCGGATCTTCCGGAATATACCGTCTCTGATGCAAAAAGAGATTGATGATCTGGCAGATCGTCCCGG  
TGCTGGTTTTGCGGTGAGCGAAGAGAACAACGTTTCTGCAATGAAAGTGTGCCGTTGGTGGCGCGGTACAGCCGTACAGG  
ATCGCTGTACGGCATGTTTACCGATGAGCAAAAAGGTTCTGCTGGCGACCGGCATCATTAAGCGGAAGCAATATGACC  
TCCGGCGATGGCGCACTGGCGGTCAATTTCCCGCTACTCTGGAAAAAGGTTTGTGATGTTGCTGCTGCGTGGCGGAAAGTGGCGGA  
ACGTCGCTCGCGCATCAATCTGACGGTGTGGAAGATCTGCACGGCAGCAGTTCTTGAAGCGATTGATATCGTGTCTGG  
TGGCAGTCACTGAACACATTTGAACGTTTCCGCTGCCCTGGCGCGTGAATGGCCGCGACCGAACCCCGGAAAGCCGTCG  
GATGAAGTCTGGCGATAGCAGAAAACCTGCGATCTTATCGCCACAGCCGCGCAGACTTCTGCGAGGCGCTGCAACT  
GTGTTACTTCACTCAGTTGATATTTGAGATCGAATCTAACGGTCACTCGGTATCGTTTGGTGTGATGGACAGTATCTCT  
ATCCATATCTCGCGTACGTTGAACTGAACAGACACTGGATCGCGAACACGCCATCGAGATGCTGATAGTGTCTGG  
TTGAAATTTGCTGGAAGTGAACAAAATCCGCTCCGGTCACTCAAAAAGCCTCTGCGGGAAGTCCGCTGTATCAGAACGT  
CACCAATGGCGGGCAAAAATCTGGTTGATGGTCAACCTGAGCAGCGGTAATCACTCTTTATGCGATCTCCGAATCTT  
CGGGTCCGCTGCGTTTCACTCAGCTAACCTCAGCGTGGCTACACGCGGGAATGAGCAACGATTTCTCGATGCTGT  
GTTGAGGTGATCCGCTGTGGTTTCCGGATGCGCGGCTTCAACAACGATGAAATCGTCACTCCCGGAATTTATTAACCTCG  
TATTGAACCGCAGGACCTTACGACTACGACGCGATGGTGTGATGAAACCGCGCTGGTGGCAATGGGCGATTCGCT  
GTACCGCATGAGCTTTTATCAACTTCCCGCGGTGATGCTGCGCGCGTGAAGCGGCTGATGATGCCACGCGCAAA  
GTGTTCTTCCACAAGAAAAGCGTTGTCAGCGGGTAACTTCAACAACCTCGATGAAGTAAAGGCGCGCAAAATGACTGGGTTCT  
GGCTGCAAGTGGTAACTTCTCAACTCCGCAACAGCTGGCGGAGTGAAGAACTGGTATTTGAAACGCGCGGATTTG  
TCAGCAACAGCTGGCTGCCGACGTCGGGATGACTTCCAGCGCTGACTCAGCAGCAGCTGCGTCAAGCGGCTGATTAACG  
GTGCGCTTAAGTACCGCAACGAGATGATCTGCTGATACGCTGCTGGCTCGCGCTTATCAGACCTATATCGACAACTA  
AAACAGTACCAATAACCGCGTATGGTCTGGTCCGGTGGCGCAATTTATACGCGGGTACGTCATCTATCTCCGCTAA  
CGTACCTTTTGGCGCGCAGCAGATGGCAACCGCGGACGCTAAAGCGCATAACCCGCTGGCAGAAAGCGCTAGTCCGG  
CCTCCGGTACTGACCATCTCGGCCAACGGCGTCAATGGCTCAGTGGTAAACTGCCACGCGCGGATTTCTCGCGCGC

GTGCTGCTCAACCGAAACTGAATCCAGCAACGCTGGAGAACGAATCTGACAAGCAGAAACTGATGATACTGCTACGCAC  
CTTCTTTGAAAGTGCATAAAGGCTGGCATATTCAGTACAACATCGTTTCCCGGAAACGCTGCTGGAAGCGAAAAACATC  
CGGATCAGTACCGGATCTGGTAGTGCCTGCGGGCTATTCGCCCTTCTTACCAGCGCTCTCTCCAGACGCTCAGGAC  
GATATCATCGCCCTACTGAACATATGCTGTAA

>Cluster\_50962

ATGCTCCCCACGACAAAATATCCCTGTAAATCTTGAATAATATCTTTTGAAGTCCTGTAGATTACCATTCTAACGAGGA  
TATCAAAGTTCGACTCGAAAAGTGGTGTACTGAGGGTGTATTCAGCGAATCTCGTCATGAGGTTGCATCAAAAATCTTG  
ATGTTATAAGTACTGATGGAGAGACTTTATCAATCAGTGTGATCAATAACAACATTACCAGACTTGCTTCTGGTTCTCTG  
AAAGAGCTGGTTTTGAATGGATGTACAGAGCTTAAATCGATAAACTATCTACCACCGACTTACTTTCATTAAGTATGGT  
TGGATGCTCATCATTAGAGGCTATAAATGCAACATACCTGGCTCTGTTGATAAATTTGTCCTTATGCCATTGTCGTTCTT  
TGAACATATAGAAGGAACCTTTCTGAGGCGCTCAGGAATTCCTGTATATTTAAATGGCTGTAATTCATTAATGAATCG  
CAACGCTCAATTCCTGAATATGATGTCAAGGCGGCTGCCTGCCTGAGCAAAGCTGAGCTTACTGCTGACTTAATGTG  
TTTTGCTGTCTAACAGAGGGTGAAGAGCTGCTGAACAATTAATTAATTTCTGGATGTGACTTGTCTAGCTTAAGCTTGT  
CAGGGCTGAATTTATCATCAGTAATTTTTTCTGATTCCAGATTTGATAAATACTGATCTTAGTGGCTGTAACTGTCAAGT  
GCTTCTCTGAAAAACACATCTTTCAAGAGCTCTGTTCTGGAGGAGAGTATTTATCTTTCGCTGATTTGGCAAACAGCAC  
AATCAGCGCAGCGTTGATAGCGCTAATTTTAGTGGTCCAACTTAAACAATCGCTGCTTTAAAGGATCTTCATATATAC  
AAAATCTCCAATTTTGAAGATGCTGACTTAAACAGGAACCATATAAATTCCTGGAATGGTTTTAAGTGGCTATCTTATA  
GGTGATGTAAAGGAGTCTTTGGTGAAAAAATAACAGTATTCATTTAGGAGGGTGTATATAGATCTGTCTGGCATAACA  
GGAAGATGCTTAATGCATTTGGATAATATACACAATTAATAAATCAATTTTATGACCATAAATACATCTGATGAGA  
AGTATAACCATCAAAAAGTAAATGGCAGCTGAGGAACCTTATCAAAAAATACCTTTGATGAATAGCGGCTTCAACCC  
TATGTTAAGATGCTTTTGGCTGATTTCAATTTAGTATTCCTTTAATTTGAATAACACATATATACAACAATGGCTAGAGCC  
TATATGTGATAAATCTTTTGATAATGTAATCTCTTGGTTAATAATTCATAAATGATGTATATGGAGAATGGTAGTTTAT  
TGCAGGCAGGAATGATTTTGGAGCGGATCCTAGTGCATGTTATCTTATAGTAGTTCATTTATACAAATCGTAATGAAT  
GGTTCTGAACTGATTTGCAATTTAGAGTATTTAGGAGCTATGAAATCTATTTAAAAAATGAAAAAGTTCACCTGAT  
CACACAGCAGAGTGTATTTGGGTTGTGCGATGGATCTGGGAAACCTGACTGGGATGATGACTCAGATTTAGCTTATAACT  
GGGTTTTGTTATCATCAAAAGGATGATGGTATGGCAATGATGTGTTCTTTAAGTCATATGGTTGATATGTTATCTCTTAAT  
ACATCAACTAACTGGATGTCATTTTTTTTATATAAGGATGGAGAAATTCAGAATACATTTGGGTATTCATTGAGTAATCT  
ATTTCTGAACTGATTTCCAAATTTTCAATTTATCATCAATAAATCTGTTTCAAGAAATTCGTTTCTGTTGATTTGGTAT  
TACTCATTTCTGATAATGATCTCAAGAGAAAGTTTATTGTAGTACTTAATTCAAAATAAATCAGATTTGTAACCTTATTGCT  
GATGACCAGCAAAGGAACTTGCCTCATGTTTGGGCGCCATTTCTTGATGGCTGGGAATTAAGTGCACAGCATATAAATAT  
GATTATGGGGAGTCAATGTTGAAGGATATGCTCCAAGAAAACAGGCTGAGATATTTTGGTTTAGGCGGTGTTTTCT  
GTAATACTCATCGAGCGATATGTTTGGTACAGAGATGACTCTCCTGAGATTCTACGTCGATATGCAAAATGGATTGAT  
GAGCAAGCTTATAAATAGATTCGAAGGATTTTGGCTCACTTCAATTTATAAATGATAATTTTAGACAGGTTACAGGGAAG  
GGACAATGCTTTTTCTTGTACCTCTGTGTTAACTGATACTAACAGAAACATGCAAGAAAATATTTTCTGAAATATTTT  
CATTGTATTACCCTGTTCATGGCGTTAA

>Cluster\_42463

ATGTCACAACCTATTTTTAACGATAAGCAATTTCCAGGAAGCGCTTTCACGTCAGTGGCAGCGTTATGGCTTAAATCTGCG  
GGCTGAAATGACTCCTCGCCAGTGGTGGCTGGCAGTGAAGCACTGGCCGAAATGCTGCGTCTAGCCATTCGCCA  
AACCGGTGGCAATCAGCGACATGTTAACTACATCTCAATGAGGTTTTTGTATGGTCTGCTGACGGGCAACACTGTTG  
AATCTCGGCTGGTATCAGGATGTACAGGATTCGTTGAAGGCTTATGACATCAATCTGACTGACCTGCTGGAAGAGAGAT  
CGACCCGGCGCTGGGTAACGGTGGTCTGGGCGGCTGGCGGCTGCTTCTCGATCAATGGCAACTGTTGGTCACTG  
CGACGGGTTACGGTCTGAACTATCAATATGTTTGTTCGCGAGTCTTTTGTGGATGGCAAACAGGTTGAAGCGCCGGAT  
GACTGGCATFCGAGTAACTTACCCTGGTTCGCGCAAAAGCACTGGATGTGCAAGTGGGATTTGGCGGTAAGTGAAGTAC  
GAAAGACGGAGCTGGGAGCCGAGTTTACCATTACCGGTCAAGCGTGGGATCTCCCCGTTGTGCGCTATCGTAATGGCG  
TGGCGCAGCCGCTGCGTCTGTGGCAGGCGACGCATGCGCATCCGTTGATCTGACTAAATTTAACGATGGTATTTCTG  
CGTGCCGAACAGCAGGGCATCAACCGGAAAAACTGACCAAGTTCTCTATCCAACGACAACCATATGCGGGTAAAAA  
GCTGCGCCCTGATGCGCAATAACTTCCAGTGTGCTGCTGCTGAGGAGGATTTTGGCTGCGCATCATCTGGCGGGCGGTA  
AACTGCACGAACTGGCGGATTTAAGGTTATTCAGTGAACGATACCCACCAACTATCGGATTTCCAGAACTGCTGCGC  
GTGCTGATCGATGAGCACCAGATGAGCTGGGATGACGCCTGGGCCATCACCAGTAAAACCTTTTCTTACACCAACCATAC  
CCTGATGCCAGAAGCGCTGGAACGCTGGGATGTGAAACTGGTGAAGGCTTACTGCGCGCCACATGCAGATTTAATACG  
AAATTAATACACGCTTTTAAAACGCTGGTGGAAAAAACCTGGCCGGCGATGAAAAAGTGTGGGCAAACTGGCGGTGTA  
CACGACAAACAAGTGCATATGGCGAACCTGTGTGTTGGCGGTTTTCGCGGTAACCGTGTTCGCGGCTACACTCGGA  
TCTGGTAGTGAAGATCTGTTCCCGAATATCACCAGCTATGGCCGAACAAATTCATACAGTCAACACGGTATTAACC  
CACGTCGCTGGATCAAACTGCAACCCGGACTGGCGGCTGTTGGATAAATCACTGAAAAAAGAGTGGGCTAACGAT  
CTCGATCAACTGATCAATCTGGAATAAATTCGCTGATGATGCGAAATTCGTCAGCAATATCGGAGATCAAGCAGCGAA  
TAAAGTCCGCTGCGCAGGTTTGTGAAAGTTCGTACCGGATTTGAGATCAATCCACAGGCGATTTTCGATATTCAGATCA  
AACGCTGTGATGAGTACAACCGCAGCACCCTGAATCTGCTGCAATTTCTGGCGTTGTACAAGAAATTCGTGAAAAACCCG  
CAGGCTGATCGCTACCGCGCTTCTCTTTTGGCGGAAAGCGGCAACCGGCTACTCTGGCGAAAAACATATATCTT  
TGGATCAACAAAGTGGTGGCTGACGTGATCAACAACGATCCGAGGTTGGCGACAAATTTAAGGTTGGTGTCTTCTGCGGAT  
ATTGGCTTTTGGCGGCGGAAAAACTGATCCCGGCGGCGATATCTCGAACAATTTGACGGCAGGTAAGAAAGCTTCC  
GGTACCAGCAATATGAAACTGGCGCTCAGTGGTGGCTTACTGTGCGGTACGCTGGATGGTGGCAACGTTGAAATCGCCGA  
GAAAGTTGGTGAAGAAATATCTTTATTTTGGTATACCCGTTGAACAAGTGAAGGCAATTTCTGGCCAAAGGCTACAGCC  
CGGTGAAATGGCGGAAAGAAAGATAAGGTTGCTGGACGAGTATTGAAAGAGCTGGAAGCGGCAAAATACAGCGACGGCGAT  
AAGCATGCTTCCAGCAGATGCTGCACAGTATCGGCAACAGGCGGCGATCCGATCTGGTGTAGGGGATTTTCGCAGC  
CTATGTAGAGGCACAAAAGCAGGTTGATGTGCTGTACCAGCAGGAGGCTGGACTCGCGCGGCGATCTCAATAACCG  
CCGCTGCGGATGTTTACTGCTGATCGCTCTAATTCGCGATTAACAGGCTCGTATCTGGCAGGCAAAACGCTAA

>Cluster\_44686

ATGGCAGTAAAGATTTTCAAGTGTACTGAAAGACGGCACAGGAAACCGGTACAGAATGCACAATCCAGCTGAAAGCAAA  
ACGTAACAGCACCACGGTGGTGGTGAACACGCTGGCCTCAGAAAATCCGGATGAAGCCGGGCGTTACAGCATGGACGTTG  
AGTACGGGCACTACAGCGTTATTTCTGTTGGTGGAGGATTTCCCGCTCACATGCCGGGACCATCACCTGTATGAAGAT  
TCCCGACCCGGTACGCTGAATGATTTTCTCGGTGCCATGACGGAGGATGATGCCCGCTCTGAGGCACTGCGCCGTTTTGA  
ACTGATGGTGAAGAGGTTGGCGCTAACCGCTCCCGGTTGGCAGAAACAGGCGAGCCGCAAGAAAGTCAAGCAGCGATG  
CCAGCACATCAGCCCTGAGGCGGCAACCCATCGCATGATGCTGACGGCTCAGCAGCCGAGCCAGCAGCTCAGCCGCA  
CCGCGCGCTGCTCGGCTCAGTCAAGCATCTTCCAGCAGCAACCGGCACTAACAAAGGCGAGTGAAGCATGAAAGTGC  
TGCTGCTGACAGTCTTCAAAAAGCGCGGAGCTACCAGTGGCGGTGCGGCAAAACGTCAGAACAATGCGGCGAGGCT  
CACAAACATCAGCAGCCACTTCTGATCTCCCGCGACACAGGCGCTCAGAAGCAGCCACTCAGCCCGGGATTCGCGG  
GCCTCAAAAAGAGGCGAGGAAATCATCAGAAACGAAACGATCATCAAGCCAGTGTAGTCCGCTTCTTCCGCAACCGCGG  
AGGCAATTCGCGGAGGCGGCAAGACGCTGTGAGACAAACGCGAGGCTTCTGAAACGGCAGCGGGACAGAGCCCTCGG  
CTGCGGCGAGGCTCAAAAACAGCGGCTGCGTCTGCTGCGAGTGGCGGTCACAAAGTGGCGGCGAGGCTCAGCCAGTGGC



ACCGCCGCGGAAAAATCGGCAGAAAGCGCCGATCGTCTGCTTCAACAGCCACAACGAAGGCTGGCGAAGCCACTGAACA  
GGCCAGCGCAGCAGCAAGTCTGCTTCCGAGCGAAGACATCCGAGACGAACGCGAAAGCGTCCGAAACCAGCCAGAAAT  
CCTCAAAAACGGTCCGCGATCGTCCGCGAGTTCGGCGCGCTCATCGGCATCATCGGCGTCTGCTTCAAAGATGAGGGC  
ACAGACAAAGCGTCCGAGCGAAGGGCAGCGCCACGCGCATCCACGAAGGCAGAGAGGCGAGTGGCAGTGGCAGCGC  
GGCAGACAGAGAAAAGTACGGCGGAATCCGCGGCAACGCGCCGAGACAGCGGCAAAACGGCGAGGATATTGCAT  
CCGCGTGGCGCTTGAGGATGCAAGTACGACGAAAAAGGGATAGTACAGCTCAGCAGTGCAGCAACAGTACGCTGAA  
ACGCTGGCGGCAACGCCAAAGGCAGTAAATCAGCCTATGACAATGCAGAGAAAGCTGCGAGAAAGACCAGAACGGCC  
TGATATACCCGATAAGGGACGCTTCCCTGAACAACATTAACGCGGTGAGTAAACAGACTTTGCTGATAAGCGTGGTATGC  
GTTATGTGGCGGTTAACGCTCCTGCAGGTGCAACATCTGGAAATATTACCTGTTGTTGTTATGCGTCTGCTGGCTCA  
GTAAGCGAACTGGCATCAAGGTCATTAACACCGCAACGCGAACCAGGCGATCCGATGAATAACTGCGAGTTTAA  
CGGATTTGTTATGCTGGTGGCTGGACTGACAGGGGGCTTATGCTTATGGAATGTTTCGGCAATATCAAACATGAAC  
GAGCCATCCACTCAATAATGATGAGTAATAAGGGCGATGATTTGGCTCTGTGTTCTATGTTGATGGCGTGCCTTCCCT  
GTTTGTGCTTTTACGAGATGGCTGTCAATAATCCGCACTGGTGTGCTGATCTCGTTGTTAATGATACGACATCAAGGTT  
TGGGGCAACAAATCCGGCGACTGAATGTATCGCGGGGACGTTATCCTGATTTAAGAGTGGGCGTGGTTTTTATGAGT  
CTCATTGCTTAATCGTTAACGATAACTTGTCTGTCGCAAAAACCTTTTGGCCACAGACGAAATGTTAGCGCGTGGTGAAT  
CAGATTGGAATGATAGTGGGAGTATGGGCAATTAAGGCGTAAATGATGGCGTAAACCTTACCTGCTGTACCAATCA  
AGGTGATGTTTATGTTGGCTGGAATACATAAGACGTTTGTCTATTGATAACGCAACCGCGAAGTGGTTATTGGAACCA  
AATGTCCGCAAGTCTGAACGGTAAATGCATTAACAGCAACAAAGCTGCAACGCCAAGACGGGTTTCTGGTGTGAGTTT  
GATGGTTCCAAAGATATTACTTTAACCGCGCGCATGTGGCTGCTTTTCCAGAGGGCAACGGATACATATCCCGATAC  
GGATGGTGGCGTTCCCTGGAATGCCGAATCAGGCGTTAATATGTCACCGCTCTGGGACAGCTATATCTGGTTAAC  
TCTATACCGGAGTCCGAAGTTGCGGCACTTGCAGATGAAGGCGCATTAACAGAAATGGTGGTCTGTTTACCGTTCTTCA  
AGAGACGGTTATGGTTTTGAGGATGACTGGGCAGAAAGTTTATACCTCGAAAAATCTTCCACCAGAAAGCTACCCAGTCCG  
CGCAAAATCCCGTGGCCATCAGATACCGTTCGCTGTGTTATGCCCTGATGCAGGGGCGAGACTTTTGACAAATCTGCT  
ACCCGAAACTTGCAGCGTTCAGGCTGACCGGTGATCCGTTGATGATGCGTGGTGGACGATTAAGGGCAACCTCCAGT  
GGTCCGGCGTATTGCTCAGGAACAGGACGGCATTAATCGCATACCCACAGCGCCAGCGCATCCAGTACAGATTTGGG  
GACGAAACCACATCGTCTGTTGATTACGGCACAAATCCAGCAATAACTGTTGCGCATACCCATAGTTTAAAGTGGCA  
GCAGAAATGCAGTGGTAATCAGCAGCATAGAGATGGCGTGCATTAACCCAGTGTTTTAAAGATACTTATCAATAT  
GGTTATAACAGTCTCAGGCTCAAATACCTGGGGTACAAAGCTCAGTAGGTATGCTACGGGGTGGTACCAATACAG  
TACAGATGGTAATCATAGCCATTCAGTCCGGCAGCAGCATCTGCAGGTGCACACGCGCATACTGTCGGTATTGGTG  
CTCATACGCACTCCGTTGCGATTGGTTCACATGACACACCATCACCGTTAACGCTGCTGGTAACGCGGAAAAACCGCT  
AAAAATCGCATTTAATATATTGTGAGGCTTGCATAA

>Cluster\_27459

ATGGCGATCCAGACTTATGGACTGAGTTGGTGGGGTCAGCAGTGGTTAAACGCGCTGATGCATATTGATGCCGACAACCG  
CTTACCAGCGCGGTGCTACCTACGCGAATAAAGGGCGGTGCAAAAGCTTGATATCAAGGACGGTCCACATCCGTCGCGAAG  
TGGCGGGATCGTACATTTATACGGTTGAAATACCCTTCCAGCTTTTCCGGGCGAGAAAAAGAACCGCTGCTGGATCGC  
CTGCTCAACGATCCGCTGATTTATCTCGCAGTTTATAAATCGCGAACTTTCCGCCAACGGTCTGGATCTGGCGAATGAGAC  
GAAATCAAGATTTTCCCGCGAGCTGGAAAGATCTTCATATGGATTGCAACTGCCCGACTGGGCGGTGCCCTGTAAC  
ATCTGGCCCGAGTATTTATCTGATCAGTCGCCAGATGACAGCGATCCGTTTCTGGTTTTCGCTACATGGTCTGGAT  
TTGCCAACCGCATTTGGCCAGCTGGAAATGGACATCGCAAAAAGATCTTATCACTCCCCCTCGCTCAGCGCTTAT  
CGCAAAATCAACTTTTGTTCATGAGGAAAAAGCAATCAGGGGCTGGATTTTACCTGATCCCTGCTTTACACAGCATC  
TGTTCGACTGTTGCCCGATAAATCCGGTTTTTTATCCCTTTGGTGATTTTCATCAGGTTTACAGCCAAACACTGGCAGC  
CTTGTTCGTTATGCGGGAGCAATTCGAAAAAATGTTCTGTAATCAGAGAGCCAGATGCAGTGGGCGCTGGGAGCAACCGCA  
ATCCCGATGCTCAGAAATGACGGGATACCGCTGTTGGCTGAGGGTATTACGATCTTAAAGATCTTCCACGCTG  
TGGGGGAGCTGAAAAATTTGACCCCGCGAGCTTGCAGATGTTGCAACCTTCCGTCGAGGTTTACACCTGGCTGGCAA  
TTCGCTGTTTCATCTGCTGGCGAAAGCGCAGTTATGCCACAGGTTTTTTCCTGTGAAAGTGGAGCGCTGGTTCGCTGGCT  
TCCAGTACGCTGGATGTAACGGTCGATAAATTTGCTGGAACAGGTCGCCCGCAATTTGCCGGACGGGTTGATCTCTTTA  
ACGATTGGGCGCTTACCAGCAAGCGGAGCTATAAACCCTGCTGCTGCTGATGCTGATGCTGATGCTGGTGGTACAGCTTCC  
CTGAAGAAAGCGGATACGCCATATGACAAGCTCTTTTTCTCACCGGGGGGAGCATTTGACTCGCGACGGGAAAGCGC  
CAGCGCCGCGATATCGACAATGGCTGTCGCGCTGACGCTGGTGCATCGCGAGCAGCGCCAGTGAATATGCTGGATG  
AAGCCGGGAAGACTTTGCGCTGCATCTGGCGGTGAAAATACCGACAGCCCGCGCAGTGAATGCTGGCGGATAATCTG  
TGGCAAAAATGCTACGAAAAATACCGGATGGCGCTCTGCAAAAGCTGGCGATGTTGGCGGAAATTTACCTCCGTTG  
TGATATCTGCGTGGGAGGGCGGAGGCGCTGCGCTCACCGCACAAACGTTGCCGGATTTTCTCTTACCAGCTTGC  
CCGTTATTCGATGCTGGCATTAGGCGTTCGCGAAAGCGCTGGATAAAATATTACGCCAGACTCAGCATGCAG  
GTGAAATCATCTCCGGCGGGAGGAGCAGCAGCGGTTCAACTGGGAAATCTGTTGATTTGACTGGCGCATTTGCGT  
GGGACAGCGCAACTGACGTTACTGAAATTTGAAACGCTCATTTGACAGTGGCGAAGGATTTGCTCCGTTCAAAGAACG  
TTATCTATCTTGACCTGACGAAATCGCCGACTGCGCAATAAGCTGTTAAATCCACCGGACATTAAGGATGGCGCTA  
ACGACAGCGCGTGTTCGGTGGTACGAGGACGCGGATTTGCTGGATAGCGCGCGCTGAGCAACTTTGGCAATTT  
GACCTCGGTTGGTATGCCCTCAGCCGTTTCTTAAAGCAGCTGCGCGCTTACAGCAACGGGTTTGGCTGGC  
TGACGCATAAACCCTGGCGTGGGATCGCGGCACTCCTGGCCGATGATAGGGCCCTCGGAAAAACGCTTACGTTATCGCT  
GTCATTACGATCAAAAAGAGACAGGCGGCTGGCGGAGCGTAAGGTGCTGATATCATGCGGACACCTGTTGACTAA  
CTGGCAACGAGAAATCGCTGTTTCCGCCAACGTTAACGACGGGATATACCAGGGCGCAAGCGCGGCTGTTCCGATG  
AGATCCGGATATCCTGCTCAACCTTACGGCGTGGTGGTACGATGCGCAACGTTAAAGAAACAGCATGGCGCTG  
GTGGCGGGGATGAGGCACAAAATCAAAAAATCCGGCTCGGCACAGACGAAGGCTGCAAAAATCAATCCTGCCGATG  
GTTTATGCTCTAAGCGGTACGCGGTTGAAAAACCGCTTGCAGAAATCTGGAGCATTATGGACTTTGCTCTGCGTGGT  
ATCTGGGGCGCTAAAAACGTTTATTTGCGAGATTGAGAAACCGATCCAGATGGATCGTAATCAACAGGTTGCTGACG  
TTTTCGCGCATAAACCGCCATTTTGTGCTGCGTGGTGAATCGGACAAAACATCATCAGCATCTGCCGAAAAAAT  
TGAAACCGACGTTTCTGTGAACGGAACATAACAGGCGCAATTTATGCGTCCGCTGCGCGAAGGGATGCAGGTGA  
TCCGTGGGAGTCTGATGCTTCCAGCGTCAGGGGCTGGTGTGCAAAATGATTATGGCGTTGAAGCAGGCTCTGTAACCA  
CCGGCGACTATCTGAAAAATAAGCAGATGGATGCGCGCTTTCTGGCAAGGCGCAACTGTTTATGGATCTTCTGGACAG  
CATTTAAGAGACAACAGAAAAAGGTGCTGATTTTTTACCAGTTTCAAAGAGATGGGCGCAACTACTGCAAAAGCTTACC  
CGGTTATGGCAACACCCCTGTTTTTACAGCGCGCTTAAAGCGCAAAAAGCGGATGAGCAGGTCGAACGTTTTCAA  
AATGACCGTCTGTACGCCACTTTATTTCTGTCGCTGAAAGCTGGTGGTACGGGCTGAATCTGACCGCGCCAGCCAGT  
GATTCATTACGATTTATGTTGGAACCGCGGTTGGAAGCGAGCCACCGACCGCTATCTGATACGGCCAGCAGGTA  
ATGTGCAGTGCATCGCTGTTGACCCGTTGAGACGTTTTGAAAGCGGATCAACGACATGATCAGAAATAAAAAACCGCTG  
CGGAGATGACTGTCCGACGGCGAGCAGTGGTGGTAAAGTACGGATGATGACTGGAAGAGCTGTTACGGGCGAG  
CCAGGATTAG

>Cluster\_34426

ATGGCAGTAAAGATTTACAGTGTACTGAAAGACGGCACAGGAAACCGGTACAGAACTGCACAATCCAGCTGAAAGCAAA  
ACGTAACAGCACCGCGTGGTGGTGAACAGCTGGCCTCAGAAAAATCCGGATGAAGCCGGGCTTACAGCATGGACGTTG

AGTACGGTCAGTACAGCGTTATTCTGTTGGTGAAGGATTCCCGCGTCACATGCCGGGACCATCACCGTGTATGAAGAT  
TCCCGACCCGGTACGCTGAATGATTTTTCTCGGTGCCATGACGGAGGATGATGCCCGTCCGGAGGCACTGCGCCGTTTTGA  
ACTGATGGTGAAGAGGTGGCGCTAACCGCTCCGGTGGCACAGAACCGGACGCCGGAAGAAGTACGCCAGTGTATG  
CCAGCACATCTGCCAGTGAAGCGGCAACCCATCGCACTGATGCTGCAGGCTCAGCACGGCAGCCAGCAGCTACGCCGA  
CAGGCCGCTCGCTCGGTACGCTACGCTTCCAGCGCAACCGCCAGGCTCAGCAAAAGGCCACTGAAGCATCAAAAAGTGC  
TGCCGCTGCGAGTCTCAAAAAGCGCGGCGAGTACCAGTGCAGTGCAGGCAAAAACGTCAGAAAACGAATGCTGCAGCGT  
CACAACAATCAGCAGCCACTTCTGCATCCACCGGACACGAAAGCGTCAGAAAGTGCACCTCAGCCGGGATGCGTGC  
GCTTCAAAAAGAGGCGGCAAAATCATCAGAAAACGACGATCCTCGAGCGCCAGTAGCGCAGCTTCTCCGGCAACAGCGGC  
AGGAAATTCGCGAAGCGGCAAAAGACGCTCCGAGACGAACCGCCAGGCTTCTGAAAACGGCAGCGGACAGAGTGCCTCAG  
CTGCGGCGAGGCTCAAAAACAGCGGCTGCATCATCTGCCAGTGCAGGTCACAAAGTGCAGGCGGAGCCCTCAGCCAGTGC  
ACCGCTGCCGGAAGTCCGCGAAGTGTGCATCGCTGCTTCAACAGCCACACGAATGCTGGCGAAGCCGCTGTACA  
GGCCAGCGCAGCAGCGAGGCTGCTTCCGCGAGGACATCCGAAACGAAACGCGAAGCGTCCGAAACAGCGCAGAAAT  
CCTCAAAAACCGCTCGCGCATCGTCCCGAGTTCGGCGGCTCATCGGCATCATCTGCTGCTGCTTCAAAAGATGAGGGC  
ACCAGACAGGCGTACAGCAGGAAGGCGAGCCGCGACGGCATCCAGGAAAGCAACAGAGGCGGCGAGGAGTGCAGCGC  
AGCATCTCAGAGCAAACTGCTGTGAATCCCGTGCAGCCCGTGCAGAAAGTGTGCTGATCGTGTGAGAGATGGCCG  
GTGCAGTTCGATGGAAGACGCAAGCCTTACAACCTAAAGGTGTTGTGAAACTTAGCAGTGTGTTGATAGCACCAGTGAA  
TCGCTGGCCGAGGCAAAAGCATTAAGACCAATGCAAAATGCGAATAGCAGGTTGCCATCTAACCGGAAAAAGTTAA  
CGGAAAAGCACTGACTGCGGATAAACAATTACGCCGAAAGATATGGTACTTTAAATTCAGTAACGATGTCTTTCTCTG  
GCGGGGCTGGGTGATCAAACTGGCTACGGTTACCATGCCAAGCGAGTTCATCGTTTACATCGCATTGATTTGGTGGC  
GCTGGTTACACAGCTCGTTCGCCACATCAGGAGGCAATTCAGAACTGTTCTACGAGCAGGCAATGGAAACCCCAAGG  
AATTACCGGGCTTTGTGGAAGCTACAGCCGTGCGAATTAACGAATTTGCGCTGGATCAACACATCCGCGCATACATG  
ATATTTACGTTGAGATTGGCAATTAATGCGACTCGTGTAAATATCCATTGGGATGTACTGCAAAATGCGTCAGTTTCTGT  
TATACTCGCCAACATATTCAGCGAGTAAGCCTTCCAGCGTTACCTATGGTGTGTTTTATACGATGTAAGCTCAGATCA  
GAAACCTCAGCAAGGGCAACGGATACATAATGCCGATGCCGATGGGGCGTTCCATGGAAATGCCGAATCAGGCGTCAAT  
TAACTGGTTCATTGAATGGTAATGCAAGTACAGCCAGAAATTCAGAGCGCAAGATCTATCGGTGGAGTGTGTTTTCGAC  
GGTTCGCAAAATATAACCTTCCAGGTGTAACACTACGGGTAATCAGAACACCACTGGTAATGCTGCAACTGTACAAA  
ACTTCAGACTGCAAGAAAAATATCCGGTGTCCATTGATGGTTTACTGATATCACTTAAACCGCGCGCATGTGGCTG  
CTTTTCCAGAGAGGGCAACGGATACATAATGCCGATGCCGATGGGGCGTTCCATGGAAATGCCGAATCAGGCGTCAAT  
GTCACCCGCTCTGGCGACAGCTATAATCTGGTTAACTTCTATACCGGAGTCCGAAAGTTGCCGGACCTTCAGATGAAGGC  
GCATTACAGAAATGGTGGTCTGTCTACCGTTCCTCAAGAGACGGTATGGTTTGGAAAGTGGTGGGCGCAGCTTTACA  
CCTCGGCTCATCTCTCGCAGAGTTTATCCAGTCCGTCACCAATCCCGTGGCCATCAGATACCGTTCCGCTCGTGTAT  
GCCCTGATGCAGGGCAGACTTTTGACAAATCTGCCATCCCGAAACTTCAGCCGATTTCAAATCTAAGCGCGGGGATATG  
TATGCGTGGCTGGACGATTAAGGGCAACCTGCCAGTGGTCCGCGCTATGCTCAGGAACAGGACGGCATTAAATCGC  
ACACCCACAGCGCCAGCGCATCCAGTACGGATTGGGGACGAAACACCATCGTCTGTTGATTACGGAACCAATCCAGC  
AATAAACCCGGGCGCATAACCAATAGTATTAGCGGGACTGCAAAATAGTCCCGTGGCACCACAGGAGATTCGGGTGC  
ATTTGGTGGCAGAAACAGGACATTTTCCATAAGTTGATGTTGATGTTGATGTTGATGTTGATGTTGATGTTGATGTT  
CAAGCGGTAGTGGCCAGACTCGTAATGCAGGGAAGACATCATCAGATGGTGTCTATACCCACTCGCTGCTCGGCACTGCT  
GCAAGCGCAGGCGCATGCACATACTGTCGGTATTGGTGTCTATACGCACTCCGTTGGATTGGCTCACATGGACACAC  
CATACCGTTAACGCTGCGGGTAACGCGGAAAAACCGTCAAAAACATCGCATTAACATATATGTTGAGGCTTGCAATA

>Cluster\_3308

GTGGTTCCGGGATTAACCGTCTCCGGCCCCGTTCTGTTTTCAGGGCTGCCATCGTCATGACCGTGGCTGTGTTGGTTCG  
GCTTTCAGCTGTTTATTCACCGTAAACCGGCATTGCTGGGCGTTGAACCGGGTAGCTCAGCAAAATGACTGGATGGCTG  
CGGTGATTGCGCGCAGGCGTGGTCTTTTTGATTAATCATGGGGTTTATCATCTGCTGAAACCGCCACGCTCCGCTCAAAA  
TTTGAACCTCCGACAGAACTTGCAGCGGAGATGACTATCGTGGCGTACGACAAAGAAAGCCGACAGCCGCTCATCCGGC  
AATGGTGGAACTCAGCGCTTCCGCGCGACCGCTACGGTCCGTTCTGCGCGGTAACGTCAGCGCTGCTGGTGGACCG  
CGGAGCCTGAACAGGCGAAGCCATCGCGCCGGGGTGCACCGGCAACACTGGCTGGAGGGCGACACACGGTGTGATA  
TATGGCGGACAGGCTCAGCGGAGCTGATGTCACACTGCTGACCGCTTAAAAAAAACGTCGCGCGAGCCGCTGCGTGA  
CGGCATCATCTGGGCGTACAGAGAAGAACAGAGCCGACAGCGCAACTCGACAAAGGCTGGCGGAACTGATAAACG  
GCGTAAGCGACTCGGTTTTAGGCCCACTCTATTTGTTGGCAGGTCTGTGACACCGTGATTATCAGCCGACGCCCC  
CTGCAAGCGTCCGCTGCTGCTGCCGGAACGCTGCACCCCGAACTGACCGCCTGCTGGAAGCTCACACCTTGC  
GCTGACGGAACAGGCTATGCGCAACTGCTGGCTGATAACCGCATGATTTTCTGCTGCGTCTGGCCCATACCTTGCAG  
AGCGGGGTATCGCTCACTGGCAAGCGTCTGAAACCGCTGCTGGCAGGCGGCGATTCTCTTCCCTGCGCTGCGTGGT  
CTGATGTTTACGCCCCGCTTACCGCGTACCGGAGGCGCACCTCATGCGTGGCTGCCGTCAGAGTCTGGCGGGCGCT  
GACCGCGATAACGCAAGGGGCGTGCAGTGGGCTTTCCGTGGCTACGCGCGCGTGTATGCTCGCTGCTGCTGCTGCTG  
CAATATGGGGGGCGGAAATGACGACCTCTTTTCCGCAACTGCGCTGTTGTTCAAGAAACCGGTATCAGACGGCGCG  
GCGCTCGATAACCGCTGCGCTGGCAGAACAACTGGTGGCGTGCATACCTGCAGGGCGAACTGGAACGCTGCAATA  
TCGTATCCCGGAAGGTGCGCCGTTGGTATCAGCGTTTTGGCCTTGAACGTAACCAACTGCTCGCGCGCCCTTTCCCG  
GCTATGGCCAGGCAACCGGTTGGTGGCGAGCTGGCCGTTGACCATCTGCAACAGCAACTGAACGCTTTGTTGCC  
CTGCGCCCAACAGTCTCAGCGTACCGCCACCGTGAACACGCTATAAGCAGCTTAAGGCATTGCTGATGACTTCCCG  
CCGGGAAAAGCGCAGCTGCGTTTTTTCAGTACACGCTGATGGCAGACAGCTGCGCTACGAGAATATCCCGGAAGGTG  
TGCAGCAGAGCGTGTTCGCTCACTGCTGACCTTCTGGATGGCGAACCTGCAGGAAACCCGAGTGGAAAACCTCGCCG  
CCACCGAACTGACCGCGCGGCTGCGTAAATCCTGCTGCGCCAGATTGGTGTGCGTAATGCTGAAAACACTCTCAACA  
GAACGTACTGCAACAGGTGCTCCGCAACTACGCGGATATGACGCTGGCGGACATGACCGGGGATACCTCACCGAATCTC  
TTTTCAGTACGGAACAGAGCGGTGCCGGGATGTTACCCGCTCAGGCGTGGGAAGGACAGGTCAGGGAAGCCATCGAGCAG  
GTGGTGCAGGCGCGCGGAGGAAATCGACTGGGTGCTCAGCGACCGCCAGCAGGATACTCTGCGGATATATCGCGGGA  
TACGCTGCGTAACCGTCTCACCTACGCTACTTTACCGACTTCCCGGAAGCTGGCTGGCGTCTTCTCAACAGCATTCGCT  
GGAAAAGGAAGACTCGCTCTCCGGCATTCTCGACAGCTGACACTGATGGCCGATGCCGCTCAGTCCGCGTGTATTGCC  
CTGACCGATACCTCGCTGCGCAGGCGGCGGACAGGCAAAACCGTGGCCTGTGAGCTCGCTGGCGAAATCGGCACA  
GAACTGTTTAAACGGCAAGGAGAAAACCGCCGACGAATCCCGTGAAGGCGACGTGCCTGTGCGGCGCTGGATAAAACCT  
TCCGCTCGCTGCTCGGTTGCTGGCGATAAAGCCGAGGCGGACAGCCAGCTGAGTCTGACAGACTTACCTCACCCCG  
GTTACCCGTGTCGCTCTCAAACTGCAACAGGTGACCAACGCCCCGACCCGAGGAAATGACGCAACAGCTGGCACAGAC  
GGTACTGCAGGGCAAAACCGTTGACCTCACCGACACCCGCGACTACGGACGGTTAATCGCCGCGATCTGGGCGAGGAA  
GGAGTGGCTTCGCTCAGGCGCTGTTCCGTCGCGCGTGGAGCAGTCTGGCGGCGAGTGTGACGCTCGCGCGGACAGC  
CTGAACCGCTAGCTGGCAGCGGGGATTTGACGCACTGCAAGTCCGCTGCTGCTGCTGCTGCTGCTGCTGCTGCTGCTGCT  
GAACGATGCCCTCCCTCCCTGCTGGCGAGTATCTGCGGATGACGGCGCATCAACAGTTTATTGCCGCAACCTTT  
CCGCGCTTCAAAAGCTGAAGGCGCTACTGGTGGCGGACCGCATGAACACCGCAGGGGCTGACGGTCAACCCGGACTTT  
ATCCGCGCTGAAACCGCTGCGGACGCTGCTGACACGCTTTGCGGAGGCGGATGCGGAAATCAATTTGAACACTGCA  
GGCAAAACCGGCGGAGAGCTGATGAAGACACATCTGGTGTATTGACGGCAGGAACTGGAGTATTTCAACAGAAAGAAC  
GCTGGCAGGCTTTCACTGGCGGATGAACAGTGGCAACCCGGCGCATCGCTGAGCTGGACAGTACGACAGGCGATGGA

CGCATACTGGCGGATTACCGGGGGAGCTGGAGCCTTATTTCGCTGCTGGAACAGGCGCAGGTGACACCGGTGGACAGCAG  
CACCTTTAAAGTGGTGTGAAAGCGCAGGACGGCTGCGCTGAATTACTGCTGCGGGTTGAACAGGTTAAAGGCCCGC  
TGGCGCTGCTGGAACGAAAACCTCCGCTGCGGGACAGGTATTTCTGACCGCAGGAGTATGAAAGATGCGGAAGAA  
TACGGGGAAGACCGCATGAGTGA

>Cluster\_44095

GTGCGGGTGTGCTGAGGACGTACTGCCAGCGCGCTGCCCGGTACCGGGTGTACCGGGCTGGCAGACCGTTTCGGGGC  
GACGCTGAGCTACCGCGTGGAGCCGAGGCGACTGGCCGGGAAATCACCGCGTACCGGACGGTGGCGGGCTGAGT  
TCCGCTGGTACTGACCACACAGGCACAGCGGGCGGAAGAGCCCGCACCTCTTCGCTATCTTCTTACAGTTCGCCG  
CCTCTCAGCCTCACCGTTCCCGGACACTGCCGGTACCGAATACGGCCCGACAGGGGCATCCGTTCTTCGGCGGT  
GTGGCTGATGCACGACCCGGCATAACCGGAAAGCTGCCCGGTGCGCCACTGGCGCGGTACACGTATACGGAAGCCGGT  
AATGCTGGCGGTATATGACCGCAGCAATACGCAGGTGCGCGCTTTCAGTATGACGCGCAGCACCGGGCCGGATGGT  
GCGCACCGTTACCGGGGAAGCCGGAGATGCGCTACCGTACGACGATACCGGGCGGGTGGTGGAGCAGTGAACCCGGC  
AGGCTGAGTTACCGTACCAGTATGAGCAGGACCGCATACCGTACCGGACAGCCTGAACCGCGTGGAGTGCATA  
CAGAAGCCGGGGCCGGCTGAAGCGGTGGTGAAGAAAGAACTGGCGGACGGCAGCGTACGCGACAGCGGGTATGACCG  
GCAGGAAGCTCAGCGCGCAGACGGACCGCGGGACGGCGGACAGAGTACGGTCTGAATGTGGTGTCCGGCGATATCAC  
GGACATCACACCCGGACGGCGGGGAGACGAAATTTACTATAACGACGGGAACAGCTGACGGCGGTGGTGTCCCCG  
ACGGCTGGAGACCGCCGGGAATATGATGAACCGGGCAGCTGGTATCGGAGACATCGCGCAGCGGGGAGACAGTACCG  
TACCGCTACGATGACCGCACAGTGAAGTACCGCGCAGCAACGGATGCGACGGGACGACCCGGCAGATGACGTGGAG  
CCGCTACGGGCACTGCTGGCGTTCAGTACTGCTCGGGCTACAGACCCGCTATGAATACGACCGCTTCGGCCAGATGA  
CGCGGTTACCGCGGAGGAGTATCAGCCTTTACCGCTACTATGACAACCGTGGCGGTTAACCTCGGTGAAAGACGCA  
CAGGGCCGTGAAACCGCAGTATGAGTACAACCGCCGAGGCGACTGACTGCCGTTATCACCCCGGACGGCAACCGGAGCGA  
GACACAGTACGATGCGTGGGAAAGCGGTGACACACCGCAGGGCGGGTACGCGCAGTATGGAGTACGATGCTGCCG  
GACGTGCTACAGTCTGACTAACGAGAAGCGGACCGCACAGGACTTCAGTACGATGCGCTGGACCGGTTGGTACAGCAG  
GGCGGCTTTGACGGGGCGGACGCAACCGCTCAGCCGGACCGCTGCCCGGTGGAGTGGCTGACTGACCGCAGCGGTT  
ATCTGGCGGGCATGAAGCTTGGCGACACCGCGTGTGGAGTACAGCGCGACCGCATGACCGGGGAGACGGTGGCGAGC  
TTTGGCAGCATGGCAGGAGTAAAGCCGATATAAAGTACGACGACATACACCCCGCAGGCGAGTTACAGAGCCAGCA  
CCTGAACAGCCTGGTGTATGACCGTACGAGGTTGAAATGACAACGGCGACCTGGTGGCGATCAGCGGCCCGCAGCA  
CGCGGAAATACGGTACAGCGCCACGGCGAGGCTGGAGAGCGTGCCTACCTCCGACCGGCAATGGACATCCCGATCCCG  
TATGCCACCGACCCGGGGAAACCGCTGCCGGACCCGGAGTGCACCCGGACAGTACCCCTACGGCGTGGCCGGATAA  
CCGCATCGCAGAGGATGCCCACTATGTTTACCCTATGATGAATACGGCAGACTGACGGAGAAGACGGACCTTATCCCG  
CGGGTGTATCCGACGGACGACGAGCGGACCCACCATTACACTACGACAGCAGCAGCCGCTGGTGTCTACACCGCG  
ATACAGCATGGCGGACCTGGTTCGAGAGCCCTACTCTACGACCCGCTGGGACGGCAATGGCGAAACCGGTATGGCG  
GCGGGAGCGTACCTGACCGGGTGGATGTCGCTGTCGCTAAACCGGAGATGACGTGGTACGGTGGGACGGCAGCCGGC  
TGACAGCGTACAGACCGACACCAGCGTATCCAGACGGTATATCAGCGGGGAGCTTCGCGCGCTCATCCGATCGAA  
ACAGACAACGGCGAGCGGAGAAAGCGCAGCGCGGAGCTGCGGAGAAAGTGCAGCAGGAAGGGGACGAGGACGGCA  
CGCGTGGTATTTCCGGCTGAACTGGTGGCGCTGGAGGAGGCTGGAGGAAGAAATCCGGGACAGCCGCTGAGCAGT  
AAAGCCGGCGTGGCTTGGCGAGTGGCGGCTGACGGTGGAGCAACTGGCCAGACAGGTGGAGCCGAAATACACCCGGC  
CGAAAAGTTACTTTTACCCTGCGACCCCGGGCCCTGCGGCTGGCGCTCATCAGCGAAGACGGCAATACCGGCTGGCG  
CGGGGAGTATGATGAATGGGGCAACAGCTTAAAGAGAGCAACCGTATTAACCTGACAGCAATACCGTCTCCGGGGC  
AGCAGCATGATGAGGAATCAGGGCTGACTATAACCGGAAACCGGCTATGACCCGCTACAGGGGAGGTATATACACAA  
GACCCATTTGGGCTGGAGGGGGATGGAGTCTGTATGCGTATCCGCTGAATCCGGTGAATGGTATTGATCCATTAGGGTT  
AAGTCCCGCAGATGTAGCGCTAAAGAAAGAAAGATCAACTAAACATCAAAGAGCATGGGATATATATCTGATACCT  
ATGAAGATATGAAGAGATTAATTTAGGTGGACTGATCAATTTTCCATTGATGGCATTTTGTCTGCTAAATTA  
AATGACGCTGGTGTAGCCGATCGCGGAAAGGGCTGGGTTATGAAAAGAGATGAGGATACGGGTTAAATCTGTTCCG  
TATGTACGCGAAGAAAGTAAAGCTATCCATTCGAAATGATTGAAGATAATAAAAAAGACTTGGCTGTAATGACCATG  
GGTTGACATGTCCATCAACAACAGATTGCTCAGATAGATGTAGTATTATTAATCCAGAGCATAAAAAACGATAAAG  
GCTTTACAAGATGCTGGCTATCTCAAGTAA

>Cluster\_29327

ATGAGTTTATGAAAAAATCAGCCTCAGCGTGGTTATCGTTACTTACTGTTGCTGGGATCGGTGGCGTTTCGTTGGG  
CACCACAGCGCCCTGCATCTGGTATTTAAAGCGGGCGATCGTGGTACCAGGACTGGATATTTGGCAAAGTCAACCGCG  
CTGGCGCGATCTCCTTGTCTGACGTTCTGTTATGAGCAGCCAGGCGTGGCGGTAAGCGGGCAATCTGCATCTGGCG  
GTCGGGCTTGGTGCCTGTGGAACAGTAGCGTTTGTATTAATGACCTGGCGCTGAAAGACATTCAGTCAACATCGACAG  
TAAAAAATGCTCCTTCTGAAACAGGTTGAAGAAGAGGAAAGATAGCGGCCCGTGGATCTCTACCGGATATCCCATCA  
CCCTGACACGGGTGGCGTGGACACAGTCAACATCAAGATTGATGACACCCAGGATTCGGTATGGACTTCACCTCCGG  
CTGAACTGGCAGGAGAAAACCTGACCCCTGAAAACCGACGCTGCGTGAAGAGCCCTGTGATTTGCTTTGCCGAAAGTGGCGGA  
AGTGGCGCAGGAAGAGTGGTGAACCGGAAATGAAAATCCGCGACCGGATGAAAAGCCGCTCAGCGAAACGCTGAAAG  
ATCTCTTTTCTCGCCGGTATTGCCGAAATGACCGACGCTGATCTGCGCTCAACCTGAACATTTAAGAGTTAAGGGC  
GAGCAACTGCGCGTACCGGGCAGCAGGACATCACCCTGCGCACCATGCTGTAAGTGGAGCAGTATCGACGGCAATAC  
CAAACCTGGACCGCTGGATATCGACTCCAACAGGGGATTTGTCACCGCAGCGGACGGCGCAGCTATCAGACAACTGGC  
CGTGGATATCACCTCAACAGCACACTGAACGTTGGAGCGGTTGAAAGGTGAAAAGGTGAAGCTGAAAAGTGGCGGGC  
CTGCGGAAACAGCTGGAGATTGGCGTTAACCTTTCCGGTCCGGTGGATATGGATTTACGCGCCAGACGCGATCGGGGA  
AGCTGGATTGCCACTCAACCGTGGAGTGAACAGCAACAGCTTTACTGGCCCTCAGTGGTGAAGAGCAGTATCAGCGG  
ATGATCTGAAACTGAAACTTACCAGGAAATGACCGATTACACGCTCTATGCGTACGGCAGTGAAGGGACAGGAGATC  
CCGCCCGGACTATTAACCTCGACGCGAAAGGTAAAGAACAGCAGGTCATCTCGACAACTCACCGTCCGCGGCTGGA  
AGGGAAAACGAACTCAAGGCGTTGCTCGACTGGCAGCAGGCAATAGTTGGCGGGTGGCTAACGCTAACCGGTATTA  
ACACGCCAAAGAGATCCCGGAGTGGCCCTGAAAACCTCAATAGGCTTGATTAAGAACCCGGGTAGCTGTACCGCGG  
TGGCAGATGGAGTGGCAGAACTGAAGCTGACCGGTAACGTCAAAACAGAAACAAAGTGAACGTTGACGGCACGCTGAAAG  
CAACAGTTATATGACAGTGGATGATCCCTGGGCTGCATCTGGAACCTGGGCAACAGTCCGAAAGTGAAGGGCAGCTGG  
GGTAAAAGATCTCAACTTGTATGCCACATCAACCGCCGGGGCTGGATAACCGGCTGCCGGGCTGGCGGTTGGCGTACAGCG  
AAAGGGCTGGTGAAGTACCGGGCAGCGGCGGAGGAGGCGCAACTACTGGCAGATATCACCGCGCGGCTGCGGCTGGCA  
GAACTTTCCGTTGGCGCAGGTTCCGCTGGAAGGGCAGATTAATCCACCGATCAGATCAGCGGAAACCTGACGTACCGG  
TTGAGCAATTTCCGAAACCGGATGATAATCAACTCTGCTCACCTGAAATGCCAAAGGAGTGAAGAGCAGCAGGATTA  
CAGTTCCGGATTCAGGGGAGCTGCTCCGGGAGCTTAACTTGGCAGGAAGTTTGGATCGCAAGAAAGAACCTGGAA  
GGAACTCTTAGCAATACCGCTTCCAGACCGCGGTCGGCCGCTGGTGCCTGACCCGCGATATGCGCTGGATTACCGCA  
ATAAGGAGCAAAAAATCAGCATCGGGCCACTGCTGGCTTAAACCGAATGCGGAACTGTGCTGCCGCAACTATCGAT

GCGGGTGCCGAAGGGCGTGGTGGTGAATCTCAACCGCTTCGACCTGGCCATGCTGAAACCATTATGCCGAAACCAC  
TCAGGCCAGCGGTATCTTACGGGTAAAGCGGACGTTGCTGGGACACCAGAAAGAGGGGCTGCCGAGGGCAGTATCA  
CCCTTTCGGGGCTAATGTGACGTTGACGCAAACCGTCAATGATGCGGGCTGCCCGTGGCGTTTCAGACGCTGAATCTG  
ACGGCGGAGTTGGCTAAACACCGTGCAGAAATGGGGTGGACCAATCCGCTGACCAATAACGGCCAGTTTGTATGCTCAGGT  
CGAGTGCAGCAGTCCGCAAGCCGCGTAACTCTTGGTGGCAACCTCAATATCCGTAACCTTCCGATGATAAAACC  
CCATCTTTACCCTGGGGAAAAAGCAGCGGGGATGGTGGTGGCAACTTGGCTCTGGGTGGTGTGTCGAAAGCCGCGAG  
TTGTTTGGTTCAGCTTTCAGGTTACGGGGTGGATATCGACGGCAACTTTATGCCGTTTGTATATGCAACCAGCCAGCTTGC  
GGTCAACTTTAACGGTATGCGCTCGACGCTTGCAGGTACCGTGGGACCCAGCAGGGTGAATCTACCTGAACGGTGTATG  
CCGACTGGAGCCAGTTGAAAACCTGGCGGGCGGGTAAACAGCAGCGAAAGGGCAGTAAAGTCCGATACCCCTGCCCGGATG  
GTACGAATGGATGTATCACCAGATGTTGTATTCGAGGCTACACCAAACCTGTTTACCCTCGATGGTGGCGTGGATGTTCC  
GTGGGCGGCATCGTGGTGCACGATCTGCCGAAAGCGCAGTAGGGCTTCCAGCGATGTTGGTGTATGCTTAAACGATAACC  
TGCAACCGGAAGAGCCGAAACCGGGCTCGATTCGATTAACAGTAACCTGACTGTCCAGCTGGCAACAATGTGCGCATT  
GACGCTTTGGCTGAAAGCGCGCTGACGGGCGATCTCAACGCTGTTTTCAGGACAAACAGGGCTGGCGCTGAAACCGGA  
GATCAACATCCCTGAAGGGCGCTTCCATGCCTATGGTCCAGATCTGATTTGCGTAAGGGTGGAGCTATTGTTCTCTGGTC  
CGCCAGATCAACCGTATCTTAATATCGAAGCTATTCGTAAACCGGATGCTACAGAAGACGACGTCATCGCCGGAGTCCG  
GTCAGTGGTCTGGCGGACCAACGAAAGCGGAGATCTTCTGACCCGGCGATGTCGCAACAAGCTGCATTTGCTTATTT  
GCTACGTTGCAAGGGCTGGAGGCGATCAGAGCGACGCTGGCGCAATGACCTCGATGCTGATTTGGCTTGGCTTGGCC  
AAAGTGGCCAGATTGTTGGTAAAATCGGCGAGACGTTTGGCGTAAAGCAATTTAGCGCTCGACCCGAGGGAGTTGGCGAC  
TCCTCCAGGTGGTGGTACGCGCTATGTTATTCAGCGCTGCAAGTGAATACGGCGTGGGTATATTTGACTCTATAGC  
AACACTCAGCTTACGTTATCGCTGATGCTAAGCTATATCTGGAAGCCGTGTCTGGTGTAGACCAGGCACTGGATTTGC  
TCTATCAGTTTCGAGTTTATG

>Cluster\_34992

ATGGGTAAAGCGCAGTAAAGGGCATAACCCGCGGAAGCGAAGGACAACCTGAAAGTCCACGAGCTGCTGAGTGTGAT  
CGATGCCATCAGCGAAGGGCCGGTGAAGGTCCGGTGGATGGATTAATAAGCGTGTGCTGTAACAGTACGCCGCTGCTGG  
ACAGTGAGGGGAATACCAATATATCCGGCGTACGGTGGTGTTCGGGGCGGTGAGCAGGAGCAGACCCGCCGAGGGA  
TTTGAAATCTCCGGCTCCGAGACGGTGCCTGGTACAGAAGTGAATATGACACGCCGATCACCAGCGCATCAGTCCGGC  
AAACATCGACCGCTGCGCTGACCTTCCGGTGTGACGGCAGCTGGTGGAAACCACTCAAAGGGGGACCGGAATCCGCTCGG  
AAGTTCGCTGCTGGTTCAGATACAGCGTAATGGTGGCTGGTGGTGGTGGTGGTGGTGGTGGTGGTGGTGGTGGTGGTGGT  
TCGCGAGTATCTGGCTCGGTGGTGGTGGTGGTGGTGGTGGTGGTGGTGGTGGTGGTGGTGGTGGTGGTGGTGGTGGTGGT  
CAGCACCAGACAGCTGCAGAACAAACGCTCTGGTGTGCTATACACGAAATCATGATGTAAACAGGGCTACCCGA  
ACACGGCACTGGTGGCGTAAAGGTGGATTTCGGAGCAGTTCGGCAGCCAGCAGGTGAGCCGTAATATCATCTTCGGGG  
CGTATTTCTGCAGGTGCCCTGCAACTATAACCCGACAGCCGGCAATAACAGCGGTATCTGGGACGGAACGTTAAAACCGC  
ATACAGCAACAACCCGGCTGGTGTCTGTGGGATATGCTGACCCACCCGCGTACGGCATGGGAAACGCTTGTGGTGGCG  
CGGATGTGGATAAATGGGCGCTGTATGTATCGGCCAGTACTGCGACAGTCCGTTGCCGACGCTTTCGGCGCACGGAG  
CCGCGCATTACCTGTAATGCGTACTGACCACACAGCGTAAGCGTGGGATGTGCTCAGTGTATTTGCTCGCGATGCTG  
CTGTATGCCGCTGTAAGAACCGGCGAGACGCTGACCTTCTGGTGGAGCCGACCATCGGATTAAGGTGGACCTATAACCGCA  
GTAATGTGGTGTATGCCGATGATGGTGGCGCTTCCGCTACAGCTTTAGCGCCCTGAAGGACCGCCATAATGCCGTTGAG  
GTGAAGTGGATTGACCCGAATAACCGCTGGGAGACGGCAGCAGAGCTTGTGGAGATACGACGCCATTTGCCGTTACCG  
TCGTAATGTACGAAGATGGATGCTTTTGGTGTACCACTCGGGGCGAGCACACCCGCGGGCTGTGGCTGATTAATA  
CGGAAGTGTGGAAACCGACAGCCGTGGACTTCTGCGTGGGCGAGAAGGGCTTCGCCATGTGCCGGGCGATGTTTGA  
ATCTGTGATGATGATATGCCGGTATCAGCATCGGTGGTGGTGGTGGTGGTGGTGGTGGTGGTGGTGGTGGTGGTGGTGGT  
CGACCGTGAATACAGCTGCCATCTCCGGTACACGCTGATAAGCTGGTGGTGGTGGTGGTGGTGGTGGTGGTGGTGGTGGTGGT  
AGGTCAGTCCGCTACCCGACGGCGTGAAGGTGAAAGTGAAGCGGTGTTCTGCTGACGGCGTTGCTGAATACAGCGTGTGGGG  
CTGAAGTTGGCGACGCTGCGCCAGCGCTTTCGCTGCGTGGTGGTGGTGGTGGTGGTGGTGGTGGTGGTGGTGGTGGTGGTGGT  
TGCCGTGCAGCATGTACCGGAAAGAACGCTATCGTGGATAACGGGGCGACTTTGACGGCGACAGAGCGGCACGGTGA  
ATGGTGTACGCGCCAGCGGTGACGACCTGACCCGAAAGTACCCGACAGCGGGGAATATCAGGTGTGGCGCGC  
TGGGACAGCCGAAAGGTGGTGAAGGGCGTGGCTTCTGCTGCTGCTGCTGCTGCTGCTGCTGCTGCTGCTGCTGCTGCTGCTGCT  
GGTACGACAGCGCCGACGAGCGGAAACACATAACCGCTTACGGCAACTGGCGTGGGGCGTTACACGCTGACAGTCCGGG  
CGGTAAATGCGTGGGGGACGAGGGCGATCCGGCGTGGTATCGTTCCGGATTGCCGACCCGGCAGCGCTGTCACTATT  
GAACTGATACCGGGGATTTTTCAGATAACAGCGGTCCGAAACTGGCTGTATATGACCCGACGCTGACGTTTGGTGTCTG  
GTTCTCGGAAAGCGGATTCGCGATATCAGGATTCGAAACACAGCCCGCTATCTTGGCACGGCGCTGTATGATGATG  
CTGCCAGTATCAATATCAAGCCGGGCAATGATTATATTTTACATCCGAGTGTGAACACCGTTGGCAAATCGGCATTT  
GTGGAGGCTGTGGCCAGCCGATGATGATGATCCGGCTATCTGGATTTTTCAAAGGAGAGATAGGGAAAAACCCATCT  
GGCTCAGGAGTTGGGACGAGATGATAACGGTACGTTGGCTGACCTGGCTGAAATCAGGACGCTCCATACGGATG  
TCAGCAATGAAATCACACAGCCGCTCAATAAGAAACTGAAAGACAGAGTGCAGCGATCCAGCAGATACAGAAAGTTTACG  
GTTGATACAAATAAATACCTGAACAGCATGTGGCTGTGAAGTGCAGCAGATGCAGGACGGACGCTTTATATCGCGGG  
TATTTGGTGGCGGATTTGAAAAACCCCTGACGGCATGCAGAGTCAAGTGTGCTGGCGCAGACAGGATTTGCGATGATTA  
ATCTCGGAATGGCAACCAAGCCGATGTTTGTGGGAGGGCGATAGATAATACATGAATGAAGTGTTCCTGAAATAT  
CTGACGGCTCCACCACTTACCAGCGCGGTAATCTCCGGCATTTTCCCTGACACCCGACGGGCGACTGACCGGAAAAA  
TGCGGATATCAGTGGCAGTGTGAATGCGAACTCGGGAGCGCTCAATAACGTCAGGATAAATGAGAAGTGTGATTAAGG  
GAAACTGTCCGCAACAGATTGAAGGGGATATGTTCAAAACGGTACGCAAGTCTTTCCCGCAGCAGCACTTATGCC  
AGCGCACCAATTACGGTACGATTAGTGTGATGATCAGAAGTTGACCGACAGGTGATGATCCGGCTCTGCTGTTTAAAGG  
AAGCAGGAAGGAAAAATATGGCAGTAATAATCAACAGTCTTATGTTTATCTGTATGCGGTTTGCAGGTAACGAAAAACG  
GGACAGAAATTTTAAATCAGTCAACAACGGATGCTCCGGCGGTTTTTTCTCCGTTATTTGATATGCTCGGGGACGGGA  
ACGTTGACGTTAAAGTTTACGGTCTCTTCTTCAATGGTCAATAACTGGACACCACAACAGTATCAGCGATTTGCTTGT  
TGTGGTGTGAAGAAATCCACCGAGGATACACGATTAGCTGA

>Cluster\_41379

ATGAAGTTTTTACCTATATTTTTCTTCTGTTGTGGTCTTTGGTGGACCATAAAGTTTCGCGACGGAATACATCGA  
ATATCGTGGCATCAGTAGTAACAACCGTGCACACTGATCCACTGCTGAGCAACAAGGAATTACGTTGGCTAGCGA  
GCAAAAATAATCTGTGATTTGCAGTACAAAGCTCCCAACAGCTACGTTGTTGATACCGGATTCGCAACCGGATCCG  
GGTATTAATGCTGATTTTAAATCTTTTAAAAAGAGCGTTAAATATCAAATTAACACTCCGGGAATACGCGATCATCA  
AAAAGCAATGGACCGCTGGAAGCGGTGAAGTTGATATAGTGTATACATTTAGTTGCTTCCCGGCTCTTAAATGATG  
ACATGCTGCAACTAATCTCTGATAATTACCTTCCGGCGCTGGTCACTACCTTACAGATTCAATGCGACCGCTTACC  
TCATCAAAACAGTAAATATTTGCTCGAGTAGCAAAATTAACCCGACAGGTAATTCATCAATTTCAAAGAAC  
AATATCTCTTTTACAAATTTATATCAGGCATTAGCATCCGCTCAGCGGACAGAATGATTACTTTATGTTAGTAA  
TCATTACCAGCAGTATGATTTCCGTTATTTTACTCACTCTTAAATGATGTAAGTATTTATAACTCACCGGCTCAAT  
AATTTTTTAAATACAGAAAGATTTCAATCGTTCTTAAAGTACTCAATCGATTGTTGATGCTTTAAACAATGAAGT  
TCGCTATGAAGTATCAAAAATTTGGCTTGTATACAGAAACCTGGCCTTCTGAAACAAACCTTGAACACTCACTGAACATG  
AAAAACAGTGGATTAAAGCAGATCCCGATTTAAAGGTGCTGGAATACTTACTCGCCACCTATTCTATGACAGATGAA

ACTGGCTCAGTTCGGGGCGTGATGGGTGATATTCTTAATATTATTACCTTGCAAAACAGGTTAAATTTTTCTCCGATCAC  
CGTTTACACAATATTTCATGCGGGGACACAGCTTAACCCCGGTTGGATGGGATATATTGCCCGCGCTATTTATAGTGAAG  
ATCGAAGAAAATAATGTTTCAATTTGCTGAAGTCTTCATAAACACGCCTTACGTTTTTGTGATGCAAAAAGCGCTGACAGT  
GAACAAACATTAAGAAAAGGAATGAAAGTTGCCATTCCATATTTATGAGCTTCATTGCAATTAAGAGAGATGTATCC  
GGAGTTAGTGGATAAAAGTCGATAACGCCAGCGTGCATTTCAAGGTCGAAGGAAAGTGAACCTGTGATGCTTGGTGC  
CGACACAGTTAAATTCGCGTTACATGATCGACCATTACTATCCAAATGAACTTTATCATTTTTCTTATTTCCGCGCTTCAG  
AATGCATCACTTTTCGTTCCGTTTTCCTCGGGGAGAACCGGAACCTAAGGATATTTAATAAAGCACTGAATGCAATTC  
CCCAAGCGAAGTTCTCGCGCTGACCGAAAATGGATTAAAATGCCCAATGTGACCATTGACACATGGGACCTCTATAGCG  
AGCAGTTTTATATGTTTACGACATTTACCGTTTTATTAGTTGGCAGTAGCCTTTTATGGGGATCTACCTGTTACGCTCA  
GTTCTGCTCGTAAAGTCATTCAGGGTGTATTAGAAAACCAATATCATTCGGGAAAGCACTCTCGGACTCCTTACCGAA  
TCCAACTTATGTTTAACTGGCAAGGTAAATGTGATGATGATGATGATGATGATGATGATGATGATGATGATGATGATGAT  
ACAAAATGCAATGTTGCCATTAGAAAACAGTGAATCCCCCTTAAAGATGTTTTTCTAATACGCATGAAGTACACAGCA  
GAAACGAAAAGAAAACCAATATACACACAGGTATTTGAAAATGATGATGATGATGATGATGATGATGATGATGATGATGAT  
GCATACCTTATGTAATCTGCCAGCAAGCAACATGCTGTTTATATTTGTTGGTGGCAAGATATTACCGAGACGCGTGATT  
TAATTCATGCACCTCGAAGTAGAGAGAAAATAAGCGATCAATGCAACTGTCGCAAAAAGCCAGTTCTGCGCAACATGAGT  
CACGAAATAAGAACCAATAGCTCCATTATGGGCTTCTCGGAACTACTGTCGGGTTCTGGTCTTAGCAAGGAACAACG  
GGTGGAGGCTTTCACCTGTCCTACGCCACCGCAACTCACTCCTCGGCTTAATGGTAAATCCTTGTGAAATCCTTGTGCAAAA  
TTGAATCGGGTAACTATCAACTTCAACCACAATGGGTCGATATCCCTACTTTAGTCCAGAACACTTGTCACTCTTTCGCT  
GCGATTGCTGCAAGCAATTCGATCGCATTAAGTTGCGAGCAGTACGCTTCTGAAAGCTACCTGGTTAAGATCGACCTCA  
CCCTGGGTCACATTTAATCAACACCGCTGTTTATCAAAATGACGATTAATGGAATTCGGAAGTGGATTATCGCAGGAAGAA  
CAACAACAACCTGTTTAAACGCTATAGCCAAACAAGTGCAGGTCGTCAGCAACAGGTTCTGGTTTAGGCTTAATGATCTG  
CAAAGAAATTAATTAACAACATGCAGGGGCTTTGTCATTAGAAAAGTCACTCCAGGCATAGGAACGATATTACGATCACAA  
TCCCGGTAGCAAACTTACCAACAAGTGGCGCTGTCGAGCAAAAGCAGAACACCTATCACACTACCTGAAAGATTGAGC  
ATATTAATCGCGGATGATCATCCGACCAACAGGCTATTACTCAACCGCAGCTAAATCTATTAGGATATGATGTTGATGA  
AGCCTGATGTTGTCGAAGCGCTACACAAGTCAATGCAACATTAATGATCTGCTTATACGACGTTAATATGCCGA  
ATATGGATGGTTTTGAGTTGACTCGAACTCCGTGAGCAAAATTTCTTCTTACCCATCTGGGGGCTTACAGCCAAACGCA  
CAGGCTAACGAACTTACCAACAAGTGGCGCTTAAATGCGCATGAACTTATGTTTGGTTCAAACCGTTGACTCGAAAGTGA  
AACACATTTAAGTCAGTTACACCAGGTTGCGCATATTGCACCTCAGTATCGCCACCTGATATCGAGGCCCTGAAGAATA  
ATACGGCGAATGATCTACAACTGATGCAAGGATTTCTCATGACTTTCCAGCATGAAACGCATAAAGATCTACCGCTGCG  
TTTTCATGCACTAGAAGCTGGCGATAACAGAACTTTCCATCAGTGTATTATCGCATCCACGGTGGCGCTAACATCTGAA  
TTTTCAAAAGTTGATTAATATTAGCCACCAAGTTAGAAAATAACACCTAATTTGATGATGACAGTAAGCCTGAAATCTTCA  
TGCTGAACCTGTAAAAGAACACATTGCAGAGCTGGACCAGGAGATTACTGTTTTCTGTCAGCAAAATGACTAA

>cluster\_51780

ATGAGTGATAAACACCTGCTGCTGCAGGTCATTCTTAATGCGGTTGCAAACTCACCCGCCCATTCGGTGTGCACAGGC  
CAGTTGAAAGAGCTGGCTGGCGCAATTGAAATACCAGAAACAGCCTCAAAGAACTGAATAAGCAGGCTGGCAGAAATG  
ATGAGTTTCGCAAGACGCGCTCGCAACTAGCCATAACAGCCAACACCTGAACGCAGCCCGGAGAGGGCGGCAAACTC  
GCCACACAATTTGCTGCCACTAACAGGCCAACCGCCGCGCAGGCAAGTTATTCAAGTCAAGCCAAAACAGGATACAGGA  
ACTTCAGCAGCACTATAACGGCTTGGTGGGGCGGTCAGAGCAACAGTCAAGGCACTTAAAGAAATCAGGATGATACCA  
GGCAACTCAGTAGTTCGCCAGCGAGAATTTAAGAAAATCTGTAAGAAAACAAGGCAAGGCATGGAGGGCGCAGCAAAAGCA  
CTTAAACGCTTGGGTGAACAACAGGCACGGATGAACGCTGCCAGAGAACTAATCAAGACGGCTTGAAGTGGCGGATCG  
TATCGCAGGAGCGGACCCACCACCGGCTGCAGGGCTGGCAATGGGCGCCAGTGTGGCGGGCTGAAAAGTCTATA  
CCGATGGAAGATGGCTCAATGAAAGGTGTGGCAAGCAGTGAATGCTGCGTGAACATTAATGGCAACCGCAGCTGGCGCT  
TTTTACGAAATGCAGGATGCCATCAAGGCTGCCAGCAACAGTTGCGGATGAAAACGGTGGCGTGGACTTCCGCTGCACT  
GGTTGAAGTGGTGGCGCATGAACGTGGCAAAACCTGACGACAGCTGGGAAGACCAGAAACGCTGACCTGCTGGCCTTCG  
CCAGTACGGCAGCAAAAGCGGCAACAGCCTTTGAGCTGCCAGCGGATGAACTGTCAGAAAAGTCTGGGAAAATCGCCAG  
CTCTACAAAATACCTACCAGCAATATTGAACAGCTCGGCGATGCGTGAACATACTGGATGATAACGCATGTCGAAAG  
GGCGGACATCATTTGATGATGCAACGCTTGGGCGGTGTGGCTGACCGCTGGATTATCGTAAAGCGGCGGCACTGGGTT  
CCACCTTTCTGACACTGGCGCTGCGCCGAGGTTGACGCCAGTGCAGCAACCGGATGGTGCCTGAATGTCCATTGCC  
ACCATGCAAGCAAGATTTCTTTGAAGGGATGAATCTGCTGAAACTCAATCTGAAAGTGAATGAAAAGCAGATGACGAA  
GGATGCGATGGGAACCATTCAGCGTGTACTGGAGAAGGTGAACGCACCTGCCGACAGGACAAAGCCTGTGCTGCCATGCA  
TGTTGTTTTGGTAAAGAGTTTGGCGATGACGCGGCAAACTGGCAAAACAACCTGCCGAACTACAGCGCCAGCTAAAACCTG  
ACAGCGGCAATGATGCGCTCGGTTGATGCAAGAAAGATCCGACATCAACAAGACTCACTTTCTGCTCAGTGGTTGCT  
GGTCAAACCGGAGCGCAGAACACCTTTCAGCAGCTGGGCGAAACGCTGCCAGCCGCTGATGGATATCTGTACACGG  
TGAAAAGCTGACGGGGCGTGGCGGCTGGGTAAGCTAACCCGGAACCTGACAGGACACTGATGAAAGTAGTGGCT  
GTTGTGGCTGCGGTTACCGTAGGCTCGGCACCTTAGCGGTGGCGCTGGCTGCAGTGCAGGCGGCTGGCAGTATCCG  
TCTGGGATTTCTGCTGCTGGGATCAAAAACGTTTACCTTCCGTTACGGCAGCAGTAACTCGAACAGCAGCGCGTGTCTCT  
GGCTGGCTGGCCACACTGGCACTGCTGCGACGCGGCTTGCCTTACTCGGGCAACGCAGCGGTTTACTTACTGCTCCG  
TTGTCGCTTTGCACTCGCACGGTATCACTGAGGGAATGCTTCAAAAACCTGAGCAGGTCGCGCGGTTGCACTTTTGGC  
GTCGGAATATCCGGTTTACGTGCTGTTGCTGTGATGTTTATGAATCCACTGGCAGCACTACGCGGTTGGCTGGCTGCCG  
CAGGCGCGGCTGCTGCTGCTGCTGCTGCTGCTGCTGCTGCTGCTGCTGCTGCTGCTGCTGCTGCTGCTGCTGCTGCTGCT  
GGTGCCTGCTCAGTCCGATAGGTTCTTGGTTACTGCACTGGCGGGCTGGCCTGGTTGCTGGAATATCGCAACCAAC  
CATCACCGCATTTCTCGGTGGCGTGGTGAAGGATTAAGCGGCGGCAAGTCCATCAGTGCAGCGTTCGAACCGCTTA  
AGCCCGTGTTCAGTGGATTTGGCGACAAAGTGCAGGCGCTGTGGGGCTGGTTTACTGATCTGCTGACGCGCGTTAAGTGC  
ACCTCTGCCGAACCTGACAGCGCAGCGCAATGGGGCGCGGATTCGGGGAGGCACTGGCGGAAGGGCTGAATATGGTCAT  
GCATCCGCTGGACTCCCTGAAATCCGGCTTTCTGGTTGCTGGAGAAGCTCGCATTTGTGATGAAAGAGGCAAAAGG  
CAAACTGCCGAAAGCGTGACGCTGACCACTGCGACGGTGAATGCAGACGGTAAAGTGAATGATGCCATCGGGTGGT  
TTTTCCATCATGGGATATGGCTTTCGCGGGATGATGACAGCGCGGGTATATCCCGCGCGGCGAGTTGGCATCGTCCG  
TGAAAAGGGGCGGAAATGTTAACGGCCCGCAAGTGTGACCAGCCGGAATAACAGCTGCAGTGGCTGCCGTTGTTG  
CCGGAATGATGGGCTTGTGTCGCGCAGAGCTTCCACCTTGGCACTTGGCACTTCCCGGAAAGGTTGAGAA  
GCAATTTGAGTTCGCGCAGCCACTGTGCCGCTCGTTCAACGGATTGAGGCACCGCAGATCATCATTCAGACCGAGCC  
AGGACAAAGTGGCAGGATATTGCGCGGAGGTTGCACGCCAGCTTGAAGCAGTGAACCGCAGGCTGAAGGCAAAAGCCA  
GGAGTAACACAGCATCAGGGGGGATACGACGCATGA

>cluster\_37925

ATGGTTTCAGATCCCAAAATCCACTTATCTTGTAGATGGTTTACTTATCTTTATCGGCAATACAGCGTTTCCCCC  
CTGACTAACAGCGCAGGCGAGCCGACCGGTCGATGATGGTCTCTCAACATGCTGCGCAGTCTGATCATGCAATATA  
AACCAGCGATGCAAGCGGTTGCTTTGACGCAAGGAAAACCTTTCGATGATGAACTTTGAAACATTAACAATCACAT  
CGCCCGCAATGCCGACGATCTGCGTGCAAAATGCAACCTTGCACCGGATGGTTAAAGCGATGGGACTGCGCGTGT  
GGCGGTTTTGCGGTAGAAGCGGACGACTTATCGGTACTCTGGCGCGGAGCCGAAAAGCGGGCTCGGTTGCTGA

TCAGCACTGGCGATAAAGATATGGCGCAGCTGGTGACGCCAAATATTACGCTTATCAATACCATGACGAATACCATCCTC  
GGACCGGAAGAGGTTGGTGAATAAGTACGGCGTGCCGCCAGAACGATCATCGATTTCCGGCGCTGATGGGTGACTCCTC  
TGATAACATCTCTGGCGTACCGGGCGTCCGTTGAAAAACCGCGCAGGCATTCGTCGAAGTCTTGGCGGACTGGATACGC  
TGATGCGCGAGCCAGAAAAAATTGCTGGGTTGAGCTTCCGTTGGCGCGAAAAACAATGGCAGCGAAGCTCGAGCAAAAA  
GAAGTTGCTTACTCTCATACACAGCTGGCGACGATTAACACCGACGTTGAACCTGGAGCTGACCTGTGAACAACCTGAAGT  
GCAGCAACCGCGCAGCGGAAGAGTTGTTGGGGCTGTTCAAAAAGTATGAGTTCAAACGCTGGACTGCTGATGTCGAAGCGG  
GCAAAATGGTTACAGGCCAAAGGGGCAAAACCAGCCGCGAAGCCACAGGAAACAGTGTTCGAGACGAAGCACCAGAAAGTG  
ACGGCAACGGTGTATTTCTTATGACAACTACGTCACCATCCTTGATGAAGAAACTGAAAGCGTGGATTGCGAAGCTGGA  
AAAAGCGCCGGTATTTGCTATTTGATACCGAAACCGACGCTTGAATAACATCTGCTAACCTGGTCGGGCTTTCTTTTG  
CTATCGAGCCAGGCGTAGCGGCATATATTCGGTTGCTCATGATTATCTTGTATGCGCCGATCAAATCTCTCGCGAGCGT  
GCACCTCGAGTTGCTAAAACCGCTGCTGGAAAGATGAAAAGGCGCTGAAGGTCGGGCAAAACCTGAAATACGATCGCGGTAT  
TCTGGCCAGACTACGGCATTGAACGCGTGGGATTGCGTTTGTATACCATGCTGGAGTCCATCATCTCAATAGCGTTGCCG  
GGGTCACGATATGGACAGCCTCGCGGAACGTTGGTTGGAAGCACAACCAACATCACTTTTGAAGAGATTGCTGGTGAAGGC  
AAAAATCAACTGACCTTTAAACCAGATTGCCCTCGAAGAAGCCGGACGTTACGCGCGGAAAGATGCAGATGTCACCTTGCA  
GTTGCATCTGAAAATGTGGCCGGATCTGCAAAAACACAAGGGCCGTTGAACGCTTTCGAGAAATCGAAATGCGCGCTGG  
TGCCGGTGGCTTACGCATTAACGCTAACGGTGAAGATCGATCCGAAAGTGTGCACAATCATCTGAAGAGCTCAC  
CTTCCGCTGCTGACGTGGAAGAAAGCGCATGAAATGTCAGGTGAGGAATTAACCTTTCTCCACCAAGCAGTTTACA  
AACCATTTCTTTGAAAAACAGGGCATTAAACCGCTGAAGAAACCGCCGGTGGCGCGCGTCAACGTCGGAAGAGGTAC  
TGGAAAGACTGGCCCTGGACTATCCGTTGCCAAAAGTGTATCTGGAGTATCGTGGTCTGGCGAAGCTGAAATCGACCTAC  
ACCGACAAGCTGCCGCTGATGATCAACCGAAGCCGGGCGGTGCATACCTCTTATCACAGGCAGTAACTGCACCGGG  
ACGTTTATCGTCAACCGATCCTAACCTGCAAAACATCTCCGGTGCCTAACGAAGAGGTCGTCGTATCCCGCAGCGTTTA  
TTGGCCAGAGGATATGTGATTGCTCAGCGGACTACTCGAGATTGAACTGCGCATATAGGCGCATTTTCGCGGTGAC  
AAAGGCTTCTGACCGCATTCGCGGAAGGAAAAGATATCCACCGGCAACGGCGGCGAAGTGTTTGGTTTGGCACTGGA  
AACCGTACCACCGGAGCAACCGCTGAGCGAAAGCGATCAACCTTTGGTCTGATTTATGGCATGAGTGTCTTCGCTGG  
CGCGGCAATTGAACATTTCCAGTAAAGAAGCGCAGAAGTACATGGACCTTTACTTCGAACGCTACCTGGCGTCTGGAG  
TATATGGAACGCACCCGCTGCTCAGCGAAAGAGCAGGGTACGTTGAAACGCTGGACGCGACCGCTGTATCTGCGCGGA  
TATCAAAATCCAGCAATGGTGTCTGCTGTCAGCGGGTGAACGTCAGCCATTAACGCGCAATGCAGGGAACCGCCGCG  
ACATATCAAAACCGGCGATGATTGCCGTTGATGCGTGGTTTACAGGCTGAGCAACCGCGTGTACGTATGATCATCGGTA  
CACGATGAACTGGTATTTGAAGTTCATAAAGATGATGTTGATGCCGTCGGAAGCAGATTATCAACTGATGGAAGCTG  
TACCCTGCTGGATGTCGCGTTGCTGGTGAAGTGGGGAGTGGCGAAAACTGGGATCAGCGCACTAA

>Cluster\_12050

ATGGATAACATTCATAGCTGACGTTCAATAGTCAAAATCATACCGGAACAGGCCATAATGTTGCTGGTAACTTAATTA  
ATACAATAGTGATAATGTTGATTATGCGACTGAGTTAGCGATTGCTGTTTTAGTCGGTTGCTGGGATGAAAAAATAATG  
GTGATATTTGATATAATTACAAGCCTTATTTGGCGAGTCATATGACAGTTGGATTGCAAAATTAAGAATAATTGAAGGGATG  
CAAGATAGTCTTTGATCATGAGAGGTTCTTTGGAGTTTAAAGATAGAATAACAATCAATTTCAAACGGTATCTGTCAG  
ATTTATTCGATGATCAATTTGGATTGTTTTGTTCCGACAGCTGTTGATCCGTTTTTAAAACTATCGACCCACAAATTTGA  
CACCTGAAGAGCGTTATGCAGCAGTAATTTATGGGAAGTTTTACCACACAGCCGATTAAAGGAAGGACTATCCGAA  
GGTTTGGCATTAGTTGCAACAAAGCAAGAGTTACTTACTAATTTGCTCAAAATAAAGGGCAATATTTGGCCCTCAAGTGT  
GGTTAAAGAGGTTTTTTTCGGCTTCTAGCTGGCAATTTAGGCTAGTACGCAAGATATTCAGTTATGCTTTCGGGAAAGT  
CTCCTGACTGTTTTTATCGACGAAGTGGAAAATGCTGCACTCACCAAGACAAGCCATTTGATTCACTTTTTGACAGGAA  
GGTATCGGTGGTATTTACGTCGGAATTTATATGACAGGACTGCTATGGGCTATTTGAAGGATTAGCTTTGGCGCCTAAC  
TTTATCTCGCTCTTTAGTAAATATAGGGGAGCTGGATAGCCATGATCCTGGTGCAATTTGGGCTAACAGGCCACTTAACT  
CGATAATCAACATATGTTTACCATGGCTTCCCTACTACAGCTGATATAGATAGACGTTATGCTGCTTTCACAGCTATG  
GCAAGGGAGTGGCCCGATACAGCATGGCGTGTTTTAGTTACGTTGCTACCCAAACAACAGCAAGTAAACATCTGGCACACA  
TATTTCAAACCTTTTAGAACTTTATTTCTAACGGTTTTAATAAAGGCCATCGGGTGTGAGTACCGTACTCAGATTGAAA  
TATACACTCAATTAACAATTTGAATTTGGCAAGTAAATCATCATTAAGACTTGTGATTTAGTTGAAAATATTTGGTAGATTA  
CGCCATTTTAAATTCGATGATGCATTAACACTATTTGATGATTTTCTAAAAAACAAGATGCTGATGCTGAATTTGAGTTAGC  
GGTGTGGGAAAAATGTTTAGAAGTTTATAACAAAAACAAGATTTCTCAGGTGCTTATTTGGGCAATGCAACCAGAACAAA  
ATGAAAAAATCAAGATGTTTCTACAGTCTTGAAGCCGAAAAATCCTATGCTTTATAGCAAGCGACTTTTTCACAAAA  
AATTACTTCTATTTGATGAAAAAGAACTGGCGGACCAAGAAGAAAGGTTGACAAAAGAACGAGGGCAATCAATATA  
CGAAATATATGCTATTAATGTTATGATGGATTGATGGAGTCTTAGAATCTCTCTATCTATTTGAAAGGCCGTTGATTTGTTGGTAG  
GCCTGGTCGCAAGATCTAGAAATCTTTAGATATACTGAAAAAATTTATTTGTTAGTGATATTAAGAAAGAAAATTTCT  
CTTGCTTCTGGTTATGATACAGGCTAAAAACTACAGAGAAGGAAAATCATGGGTGTTGACAGTTATTAATGACTGGAGTGC  
TCAAGAAAAGATTTGCTTTTTTTCTTTGTTACCCTTTAAAAAAGAAACATGGGATGCATTAACCGCTTCAATTTGATGAT  
TTCTTTTTGAGTATTTGAAAAAATCTCTTTGTTAATGCAACAGCTGTGATTTACCGGAAAGAAAATTTATTTGTTGATAG  
TGCTTGATTAAGTAGACCGTCCCTTGTAGGCAATAGATGTTTATCTAAAATTTGCAATATCGATAATTCAGTTGATAG  
CAGTAAGGTTGTGCTTGCTCTATTTGCAATCAATTAGAACCCACAGAAAAATTTGAGCGATTTGATATTCATCTATTAATG  
AATTTGTAATTAATTAACAAATGATAACACTGTTTCAGATGACGACTTAGTAAGATTGAATGGGCACTACCTACTGTA  
ATTAACAGGGGGGCTAATGATTCGTTGCTATCCTCAAGTATTAGAGAAAAAATTTGCAAGTGAACCCAGTTTTTTTTTGTGA  
AGTCAATCAATATGCGTATCGATCAGAAATTTCAAAAAGCAAGTAAAGAACTATCTGAAAGTGAATAAATATTGCCAAAA  
ACTCACTCTATTTACTTGATGATTTGAAAAAGATTTCCGGGTGTTGATGCTGAAGGCAAGTTGATGTCATGCGTTTAA  
AATGGTTTTGATTTGTTCCAAACAGAAATGCGAAAAGTCAAGCATTAGATTTTGTCTTATCATAGAATTTGGAAGCATATT  
AATTTTTAGCCCTGCAAAATGACGAGCATTGGATACTTCCAGAAGTGGCCGAGTTTTTGAATAGACGTGAACCTTGATAAG  
TGGTACTGGTTATAAGAAATGCGATAAATAAATTCGCGTGGTGTACATTTGTTGACCCAGAAGTAAACCGGAATTTGGAG  
TTGGCCCAACAATATCACACTAAGTCTGATGCAATGGAATCTTAGGCTTTTATCGATTTGCCCGAATTTCTCGAGAGTT  
AGCTCATGAATACCAAGCGGAAGCTGAGTTGATTAATAGAACAGCACAGTAAAAAAAAGATTGCTGAGATTTAG

>Cluster\_56755

ATGACAGATGTAACGATTAAAACGCTGGCCGACAGCGACAGACCTCCGTTGGAACGCCGGTACAGCAATTTGCTGATGC  
AGGATATCCGGAAGTCTGCTGACGACTCTGTGCTGCACAAGAGAAAACAGACTTTGATTTGACCCTGAAATCAGAAAAAT  
CAGGCCGCAAAATTTGACGCTGCAACCTGAAAAACGCAACCCCTTAACATTTCTGGTACCGGTGAAAAAAGCAAACTG  
GTACAATCGAAGTCCGCAAGAAACGCACCTTTTGTGAACCGGATCCGCAAGAGGCTGAAACGCTTGCAGCGGAAGAGCA  
AGCGCAGCGTGAAGCGGAAGAGCAAGCCGCTGAGGCGAAGAATCGGCTAAACCGCGAGGCGCAACAAAAAGCTGAAC  
GTGAGGCCGACAGTAAGCTAAGCGTGAAGTGTGTAACAAGCAACGTAAGCTGAAGTGAAGTGAAGGAAAAAGCAAGTGAAG  
CAACAGACGATATGACTAAAAACGCCAGCTGAAAAAGCCCGCTGAGCAGGAAGCTGCAGAGCTCAAGCTCAAGCTAAAGC  
TGAAGAAGAGCGCTGCTAACTCGAAGAAGAAGCACGTCGCGTTGCTGAAGAGCACGCTGATGCGGGAAGAAAAACA  
AATGGACTGATAACCGGAAACCGACTGAAGATTTCCAGCAGATTACGCTCACTACTTCTCAACATGCTCGCCAGCGAGA  
GAGCAAGCGATCTGTAAGTCAAGGCGGCTGGCCGTTGCTGTAACGCGAAGCAGCGCTCCGGAAGAAAGCAACAA  
ACACGCTGAATCAAAAGCTGATCGTGAAGAAGCACGCGCAGCAGTACGTTGGCGGTTAAAGGCGGAAAACTAAAGGTTCTT  
CGTGCAGCAAGGCTTCCAGAAGCTGCTCAGGCGGTTAACCGTGCAGCTTGTGATCGGCGAACTATCACCGTTGGCGAA

CTGGCGAACAGATGGCGGTTAAAGGCTCTCAGGTCATCAAAGCGATGATGAAACTGGGCGCAATGGCAACCATCAACCA  
GGTTATCGATCAGAAACCGCACAGCTGGTTGCTGAAGAGATGGGCCATAAAGTTATCCTGCGTCGTGAAAACGAGCTGG  
AAGAGCGGTAATGAGCGACCGTGACACGGGTGCTGCGGCTGAACCGCGCGCGCGGTTGTGACCATCATGGGTCACGTT  
GACCACGGTAAAACCTCTCTGCTGGACTACATTCGTTCAACGAAAGTGGCCCTGCGCGAAGCGGGCGGATTACCAGCA  
CATTTGGTGCATACCCTTGAAACTGAAAACGGCATGATCACTTCTGACACCCCGGGGACCGCGGCTTACTTCAA  
TGCGTGCTGCTGGTGGCAGGCAACGGACATCGTAGTCTGGTTGTTGCTGCCGACGACGGGTGTGATGCCGACAGCATC  
GAAGCAATCCAGCAGCGAAAGCGGCGCAGGTACCGGTTGGTGGTGCAGTGAAACAAGATCGATAAACCAGAAGCTGATCC  
GGATCGCGTTAAGAACGAACTCTCCAGTACGGCATCTGCCGGAAGAGTGGGGCGGTGAAAGCCAGTTCTGTACACGAT  
CTGCGAAAGCGGGTACCGGTATCGATGAACTGCTGGACGCTATCTGCTGACAGCGGAAAGTTCTGGAGCTGAAAGCGGTA  
CGTAAAGGTATGGCGAGCGGTGCGGTTATCGAATCCTTCTCGATAAAGGTGCTGGTCCGTTGCTACCGTTCTGGTACG  
TGAAGGTACTCTGCAACAAGGGCGATATCGTTCTGTGTGGCTTCGAATACGGTCTGTTCTGTCGATGCGTAACGAACTGG  
GTCAGGAAGTGTGGAAGCGGGTCCGTCATTCGGGTGAAATCCTCGGCTGTCGGCGTACCGGTCGGGGTGTATGAA  
GTTTACCGTTGTACGTGACGAGAAGAAAGCGCTGAAAGTGCATCTATCGTCAGGGTAAATTCGCGAAGTTAAAGCGGC  
GCGTCAGCAGAAATCTAAACTCGAGAACATGTTTCGCCAATGACCGAAGCGGAAAGTTACGAAGTGAATATCGTCTGA  
AGGCAGACGTACAGGGTTCTGTGCAAGCGATCTCCGACTCCTTCTGTAACGCTGCTACGACGAGTTAAAGTGAAGATC  
ATCGGTTCTGGCGTAGGTGATCACCAGAACCGGACCGCCCTGGCTGCCGCGTCCAACGCCATCCTGGTTGGCTTTAA  
CTACCGTGTGATGCTCTGCACGTAAGTGTGTAAGCGGAAAGCTGGATCTGCGTTACTACTCCTCATCTCAAACCC  
TGATTGACGAAGTGAAGCGGGCATGAGCGGTATGCTGCTCCGGAACGAAACAGCAGATTATCGGTTGGCGGAAGTT  
CGTGACGTTTCAAATCGCCGAAATTTGGTGCCATCGCAGGCTGTATGGTTACCGAAGGTGTGGTTAAACGTCACAACCC  
GATCCGCTTCTGCGTGACAACGTGGTTATCTACGAAGCGGAGTGGAGTCCCTGCCGCGTTCAAAGATGACGTTAACG  
AAGTCCGTAACGGTATGGAAATGTGGTATCGCGGTTAAGAACTACAACGACGCTCCGACGTCGGCATGTGATCGAAGTATTC  
GAAATCATCGAGATCCAACGTACCATTGCTTAA

>Cluster\_51540

ATGACAACACAGACGGTTACGCAGATTTAGCCGACGCGGGGAAAAATGGCCCGTCATTTCTGCAGATGCTGCGTATTGA  
TGTACCTGAAAACGGCAGGCACGGTCCCTGCCGAAATGTGGGGCAAGGATCGCTTCCGCTCGATGACCTCGACGGGC  
GCGGGACGTGGATTTGCAGCCAGTGCAGCAATGGTGTGGTCTGGATCTGGTTAAGCTCATAACCGGTTACGGCATCAGA  
AAGGCAGCGCAGGAGGTGGCGCAGGTGCTTAATGTGCCGGATGTGCAGGAACTGCCCGTTAAGCCCGCAGGAAAAAGC  
CCCTAAACCGGATATGAGCCTTACCGTGGCGGCCCTGATGAAAGAGAGTACACCGGGGAAAGCCCTATCTGACCGGAA  
AAGGGTTCGCGGATACCCGGCTCCCTGACCGGGAGCGTGCAGCATACTAGTGGTAAGGATTTCCCTGCCGTTCCCTG  
CTGTTACCCTCAGCAGCAACCGCGGAGCGGTGACCGTGCACAGCTTATCGCCCGACGGGTGAAAAAGCATACTGCC  
CGGCAGCAGATGAAAGCGCGTGTGGCGCTCAGCCGTTACCGTCTGAACCGCGGTACAGGTGGTGTATTACCGAAG  
GTTACGCCACGGCCTGACGGTAAGCCAGCTCACCGCCGATGCGTAGTGGCGCCATATCGGGGGCAACCTGCCAAC  
GTCGCACAGGCGCTGCCGCGACGCTGGCTGAGGTAATAATATCATCGCGGTGATAACGATTTTACGACGGGGCGA  
GAAATCCCGCAGATCTTTGCTGAAACGGCGGCAAAATCAGTCCGTGGTGGTGGTACGCTGCCACCGGAGAAATTAAG  
CTGACTGGAATGACTTCCACCGTGAGCAGGTAATTACACGTCGCCCGTGAAGCTTTTCGTAACGGTCTTGTACTGTGCGGA  
AAGGCGCAGCGAGTTGCGCACGGGTTCCGCTTACCAGGAAATATCTGGTATGAAAAACAGGTTACAGCGCAACCG  
TGAGACGGAGATCCAGAACGTCAAATAATGCAACCCGTTGCCGCTGACGGCAATCACC TGCGATGCTGATGGCGGTAAT  
TCGGGCGACTGCTGAGGTTGGGAAGATACATGGGAGAGCGCCGCGCTGGGCGATGCCGATGGAATGCTCAGTGTGAC  
GGTAGGAACTACCGCGGTTACTGCTGGTTAAGGGCTGTCCTATATCAGCACACCGGTGAGGCCCGCCCTGAT  
GGAATATATCTCGCTGTGTAAACCGGAACCGCGTGCCTGCGTACCGCAGTGGTGGCATGGTTCAGGTTTACGTTCC  
TGCAGGATGAGGTGAGCGGTGAAGGTGCAGAGGGTGTCTATCTCCAGACCCTTCCGTCGAGGGGCGGATTTCCGTGTF  
TCAGGTACAACGGAGAAATGGCGGGAGCAGTTTCCCGTTACTGCACCGGTAACCTCCCGCTGGCGTTTGGCTCAGT  
GGCCTTTGCTGCACCCCTGTTACGGCTGGTTGGATGAGCAGCGCGGCTACCACCTCAAGGGGAAATCGCTGACGGTA  
AGACCACCACCATGAAAGCGGCAACCTCCGTTTGTGGCGGCTGATTACTGGCAGACGTGGCGGCAACCGGCAACCGC  
CTGGAGGGATGCGCCAGCCGCGCAACGATGCCGCCATGATGCTCGATGAGATCCGGGAGGTGACGCGACCGAGCGGG  
TAATATCGCTCATGCTGGCAACCGTTCAGGGCAAGGGCCGTGCCGTTACGGACGGTGGCTGCGCACCCGTAAGCAGT  
GGCGCTGCTGTTCTTTCAACCGCGAGCTGTCTACCTGACCGAAACATGCGGCAAAAGCCGTTGAGCTGACGGTA  
ATGGAAGTCAGGATGATCCAGATCCCAGCGATTCGGGAAATTTGGCGTATTTGAGGAGCTGCACGGCTTCGACAGCGG  
CAAGGCTCTGGCGGAACATCTGGAGTGGCCACGCTCAGCTACTACGTTTCGCGTTCAGGGAGTGGCTGAAAGCCCTGA  
CCGCTGACCTTAACGGGCTGACGGCACAGGCAAAAGTCACTGATGAAGGAATATACAGCCGCCCTGACCCCGAAAGATCGG  
GGTAATCAGGTAGCGGCTGTGAACCGCTTTGCACTGGTGGCGATGGCGGGCGAGCTGGCAACCCGCTGGGTTATTAC  
CGGCTGGCTGAGGGTGAAGCGCTGCCGGCAACCCGCTGCTGCTGAAACGATGGTGAAGATCGCGGGCACACCGCCA  
ATCAGGAAGATATTCGCGCACTGGAGCAGGTACGACGCTTCTTTACCGGAAATCAGTACAGCCGCTTTGCTGACTGGCAC  
GACGACGTTACCGCCCGGCAATATGGTGGCTGGCGCAGGTTGGAGAAAGGAGTACCAGCGCAGGGCAGGACCGGAGGCGG  
CACCAGTTTACGCTCAGCTATCCGCTCCGGTGGAAAGAAATCTGCCGGGATTTGACCCGCAAGGTGGCGCGCTGTGCG  
CGGATCTGGATACCTGCTGCCCTCCACCGATGGCAAGCTGCAGACAACCATTCGCCCGCAGAGATGAATCCCGCAGA  
CTCTATGCTTCAACAGCGAGGTGCCGGTTAA

>Cluster\_748

ATGGCAGTAAAGATTTACAGTGTACTGAAAGACGGCACAGGAAAACCGGTACAGAACTGCACAATCCAGCTGAAAGCAAA  
ACGTAACAGCACCGGTTGGTGGTGAACAGCTGGCCTCAGAAAATCCGGATGAAGCCGGGCTTACAGCATGGACGTTG  
AGTACGGGCGAGTACAGCGTTATTTCTGTTGGTGGAAAGGATTTCCGCCGTACATGCCGGGACCATCACCCTGTATGAGAT  
TCTCAACCGGTACGCTGAATGATTTCTCGGTGCCATGACGGAGGATGATGCCCGTCCGAGGCACTGCGCGCTTTTGA  
ACAGATGGTGAAGAGGTGGCGGTAACCGCTCCGTTGGTGGCACAGAACACGGCAGCCGCAAGAAAGTACGCCAGTGTG  
CCGGCACATCTGCCCGTAGGCGGCAACCCATGCGACTGATGCTGCAGATTACGACAGTGCAGCCAGCAGTACGCCGGA  
CAGGCGCTTCTGTCGGCTCAGTCAAGCTTCTCCAGCGAGGAAACGGCAATCAACAAAGGCCACTGAAGCGGAAAAAGTGC  
TGCCGCTGCAGAGTCTCAAAAAGCGCGGACGCTACCACTGCGCTGCCGCGGAAACGTCAGAAACGAATGCTGCAGCT  
CACAACAATCAGCCGCCACTTCTGCATCCACCGGACACGAAAGCGTCAAGAGTGCACCTCAGCCCGGATGCGTCCG  
GCTTCAAAAAGAGGCGGCAAAATCATCAGAAACGAAACGATCCTCGAGCGCCAGTAGCGCAGTTCTCTCGGCAACGGCGG  
AGCAAAATCCCGGAAGCGGCAAAAACGTCGAGACGAAACCGAGGCTTCTGAGACGGCAGCGGGACAGAGCGCTCAG  
CTGCGGCGGCTCAAAAACAGCGGCTGCTGCTGCCAGTGGCGGCTCAACAAGTGGCGGCGAGGCTTCCGCAAGGCTGAC  
ACCGCTGCCGGAATAACGGCAGAAAGCGCCGATGCTCCGCTTCAACAGCCACAACGAAAGGCTGGCGAAGCCACTGAACA  
GGCCAGCGCAGCAGCGAGGTTGCTTCCGACGGAAGACATCCGAGACGAAACGGCGTCCGAAACAGCGCAGAAAT  
CCTCAAAAACGGCTGCGCATCGTCCGCACTTCGGCGGCTCATCGGCATCATCTGCGTCTGCTTCAAAGATGAGGCG  
ACCAGACGGCTGACGCAAAAGGCGAGCGCCACGCGGATCCACGAAAGGCGACAGAGGAGTGGCAGGCGGCGGCG  
GGCAGCTCAGAGCAAAAGTACGGCGGAAATCCCGGCAACCGCGCCGAGACAGCGGCAAAACGGGCGAGGATATGCGAT  
CCGCTGGCGCTTGGAGGATGCGAGCACGACGAAAAAGGGGATAGTACAGCTCAGCAGTGGCGACTAACGACATTTCCGAG  
TCACTGGCGGCAACCGCAAAAGCGTAAAGCCGCTTAAAGCTGGCTTAAAGGAAATACACCGCAGGATGCAACGAC  
AGCACAGAAAGGATAGTTTACGCTCAGCAGCGGACCAACAGCACATCTGAAATGCTGGCGGCAACCGCAAAAGTCCGTTAA  
AGGACGCTATGACCTTGTACGGGAAATATACTGCTCAGGACGCTACGACAGCAGCAAAAAGGAATTTGCTCAGCTCAGT

AGTGCAACCAACAGCGCATCTGAAACGCTTGCCGCGACACCGAAAGCAGTGAAAGCAGCTAATGATAATGCGAATGGTCG  
GGTACCTTTCGCCGTAAGGTGAATGGTAAAGGCCCTTTCAGCGGATATAACACTGACGCCGAAAGATATTGGTACGCTTA  
ACTCAACAACAATGTCATTCAGCGGTGGTGCTGGTTGGTTCAAATTAGCAACGGTAACCATGCCACAGCGGAGTTCTGTT  
GTTTCAAATFACGTTGATTTGGTGGCGGGGATTTAACGTTGGGTCACTCAACAGCGAGGTATACTGAACTTGTTTTGGC  
TGCAGGTAATGGTATCCGAAGGGGATTAATGGTGGTTCATAGGAGCGACATCGACAGGGTTTACAATTTTTCAGCGGTGATC  
TCAATACATCTGGTGATACTTACGATATTTACGTTGCAATCGGAAATTTATGCGACTGGTGAAATATTCAATGGGATTTAT  
ACAGTAATGCGCAGCGTACTATTCATACGTCCAGCATATTTCTGCTAATAAGCCGGAAGGGTTAACGGACGGTACAGT  
TTATTTACTCTATACACCATCAGAGCAGTTTATCCGCTGGCGACCAATCCCGTGGCCATCAGATACCGTTCCGCTCTG  
GTTATGCCCTGATGCAGGGGACAGCTTTTGACAAATCCGCTTACCCGAAACTTGCAACCGCTTATCCGTCAGGCGGTGATC  
CCTGATATGCGTGGTGGACGATTAAGGGCAAACTGCCAGTGGTGGGCGCTATTTGCTCAGGAAACAGGACGGCATTAA  
ATCGCACACCCACAGCGCAGTGCATCCAGTACGGATTGGGGACGAAACCACATCGTCTGTTGATTACGGCACTAAAT  
CCAGCAATAACACCGGGCGCATACGCACAGTGTAGCGGTACAGCCGCAAGTCCCGGAAACCATACTCATAGTGTACACA  
GGCCATCAGCAGTGCAGCAGTGTACAAAATGGCTTACACATAAGGTAGTGTCTGCGGCCAGTGTGATAACAAGTGTG  
TGCAGGAGCGCACACTCATAGTGTACGGCACAGCTGCATCTGCAGGTGCTCAGCACATACTGTGCGTATTGGTGTCT  
ATACGCACCTCTGTGCGATTGGCTCACATGGACACACCATCACCGTTAACGCTGCTGGTAAACCGGAAACACGTCAA  
AACATCGCATTAACTACATTTGTGAGGCTTGCATAA

>Cluster\_64261

ATGGCAGTAAAGATTTACAGGTGACTGAAAGACGGCACAGGAAACCGGTACAGAAGTGCACAATCCAGCTGAAAGCAA  
ACGTAACAGCACACCGGTGGTGGTGAACACGCTGGCCCTCAGAAATCCGGATGAAGCCGGGCGTTACAGCATGGACGGTTG  
AGTACGGGCAGTACAGCTTATTTCTGTTGGTGGAGGATTCGCCGCTCACATGCCGGGACCATCACCTGTATGAAGT  
TCCCGACCCGCTAGCTGAATGATTTTCTCGGTCCATGACGGAGGATGATGCCGCTCTGAGGCACCTCGCCGTTTGA  
ACTGATGGTGAAGAGGTGGCGCTAACCGCTCCGCGTGGCACAGAACCGGACGCCGGAAGAAGTACGCCAGCGATG  
CCAGCACATCAGCCCGTGGAGGGCAACCCATCGGACTGATGCTGCAGATTACAGCAGTGCAGCCAGCAGCTCAGCCGGA  
CAGGCCGCTTCGCGAAGGGCGCAAAAACGTCGAGCAGCAAGGCAATCAACAAAGGCCACTGAAGCCTCAAAGTGC  
TGCCGCTGCGAGTCTCAAAGCGTGGCAGCTACCAGTCCCGTGGCGGAAACGTCAGAAACGAATGCCGACGCT  
CAGAAACATCAGCCGCTCTTCTGCATCCACCGGACACGAAAGCTCAGAAAGTGCACCTCAGCCCGGATGCGGGC  
GCCTCAAAGAGGGCAGGAAATCATCAGAAACGAAAGCATCTTGGAGCCAGTAGCGCAGCTTCTCGGCAACGGCGGC  
AGGAAATTCGCGAAGGGCGCAAAAACGTCGAGCAGCAAGGCAAGTCTTCTGAGAGCGCAGCGGCAAGCCTCAG  
CTGCGGCAGGCTCAAACAGCGGCTGCGTCTGTCAGTGGCGCTCAACAAGTGGCGGCGAGCCCTCAGCCAGTGGC  
ACCGCCGCGGAAATCGGCAGAAAGCGCGCATCATCCGCTTCAACAGCCACACGAAAGCTGGCGAAGCCACTGAGCA  
GGCCACGGCAGCAGCGGTCAGCTTCCGCGAGGACATCCGAAACGAAAGCGAAAGCGTGGAAACCCGTCAGAAAT  
CCTCAAACAGCGCAGCGCATCTCCGCAAGTTCCGCGCGCTCATCGGCATCATCGGCTCTGCTTCAAAGATGAGGGC  
ACCAGACAGGCGTACGACGGAAGGGCAGCGCCACGACGGCATCCAGAAAGGGCAGAGGCTGCTGGTAGTGCAGAGGC  
AGCAGCTCAGAGCAAAAGTACGGCGGAAATCTGCAGCAACGCGCGCTGAGCAGCGGCAAAACGGGCGAGGATATTGCAT  
CCGCGTGGCGCTTAGGATGCGAGCAGCAGCAAAAAGGGGATAGTACAGCTCAGTAGTGCAGTAAACAGCATTCCGAG  
TCACTGGCGCAACCAAAAGCGTTAAAGCCGCTTAGGCTAGCGGAAATACACCCGACAGGATGCAACAGC  
AGCACAGAAAGGATAATCCAGCTAAGCAGCGCACCAACAGCAGCTGAAACGCTGGCGGCAACGCCAAAGGCAGTAA  
AAGCAGCAATGACAATGCTGAGAAACGCTGCGAGAAAGATCAGAAAGCTGGCGGATATCCCTGGCAAAGACACTTTACG  
AAAATATTTGGTGCCTCGCTTCCGTTGCTGAGTCAAGCAACAACAGGAACTGGACGATGCAAGTTCATCGA  
GTGGCTGGATTTTCAGGGACATTTAACCATCCATCTGGATGTGCAAGGGTTCTGGTCTTATGGCAATAATAAATCA  
TTACTGATACTGGCTGCGGTAATATTCATCTCGCGGAGCTGTATTGAAGTAAATGGGATAAAGTACGGATGACGATC  
CGCATTACCCTCCGACACATCCAGCGGTGGCGGAAACCAACCGCCAGTTTACCTATATTAATCAGGAAACAGATTA  
TTCACTGGCTGGCGAAGGGACTATAACTCCAGAAATAAGCAACCGCATCAGAGATCGGGGCGCTACCGTCAAGTGGAA  
CAGCAGTATCATAGTAACTGCTTCAAAGGTGCGGTAGCCGCGCTGACAGACAAACAGCAGGGGCGCAGGCTCT  
GAGTTATACGAGGTGATATAACAACGGATATCAACAACGATGAAATATCATTCACCTGAAAGGGATGACAGCGCTGG  
CGAAGGTGAGTTACTCATCGGCTGGAGTGGTACAAGCGGTGCTCATGCTCCGGCATTTATTCGTTACGACGGGATACGA  
CCGACGCAAACTGCTGACCGGTGGCGCAGCTTTACACCTTCGCTCATCTCCTGCAGAGTTTTATCCAGCTCGGTGACCA  
ATCCCGTGGCCATCAGATACCGTTCGCTGCTGTTATGTCTGATGACAGGGCAGACTTTTGACAAATCTGCATACCCGAA  
ACTTGCAGCGCTTATCCGTCAGCGGTGATCCCTGATATGCGTGGCTGACAGATTAAGGGCAACCTGCCAGTGGTCCGG  
CCGATTTGCTCAGGAACAGGACGGCATTAATTCGCACACCCACAGCGCCAGCGCATCCAGTACGGATTTGGGTACGAAA  
ACCATCCTGCTGTTGATTTACGGCACTAAATCCAGAAATAAGCAACTGGGCGCATACCCATAGTGTAGCGGACTGCAAA  
TAGTGCCGTTGCGCACCAACAAGAGTTCCGGTGCATTTGGTGGCACGAACACGAGCATTTTCCCTAATGGTTATACCG  
CGATTTCAAATCTAAGCGCGGGGATATGAGCACAACAAGCGGTAGTGCCAGACTCGTAATGACGGGAAGACATCATCA  
GATGGTGTATACCCACTCGCTGTCCGGCAGTGTGCAAGCGCAGGGCACATGCACATACTGTGCGTATTGGTGTCTCA  
TAGCAGCTCCGTTGCGATTGGCTCACATGGACACACCATCACCGTTAACGCTGCTGGTAAACCGGAAACACCGCTCAA  
ACATCGCATTTAACTATATTTGTGAGGCTTGCATAA

>Cluster\_26900

ATGAAGACTTTGATATCCGGTTCGCTTTCAGCGCGTTGACAGGCTGACCCGGCCTGCCGAAACCGCCGCGCTGAT  
GGGCAGTTTGGTACTCCATCCAGCGAACGCAGGGGGGATCAAATACTCGAGCGTCAGGCGCATATTTGAGCGCG  
CCCGGACGCTGTAGTAAAGCGGATGCGGGTATCGTGAAGACAGACGCCAGCTTAAACGCCCTTAAATCAGTTACAACGC  
ACGGGTACAGTGTACAGGAAAAACAACAAAAGCTGATGCAGCAGTAAAGCACCCGGCTTGAACGCCCTGAATGAATCGCG  
CACACGGGAAATTCAGAAATGCGGGAGCTTGGCGGAGAGCTGAAACGCCACCGCATTTCCCTGACAGGCGCATAAACA  
CCATCCAGCAGGCCATCAGACGCACCGAACAGTACAACAACAGCTTGAACCGCAACGGCAGGCGCTTGCCTGTAACG  
CGGGCGCTGAGCGGATTTCCGCGCGCAGGAAACCGCGGAAACTGAAACAGGTGGTGGCTGGCAATTTGGTGGCGC  
AGCGGGGGGCGCTATGCTGCGGGGCTTTTTTGACGCTGCGATGCGGTTCCGGCAAAGAGATGTCGCGCTTACGGCAC  
TGACGGAAATCGACAAACAGCCCGCAGTTTAAAGCGCTGCGTGAAGAGGCTTAAACTTGCTCTGAAACAGGATTT  
ACTGCGAGTATGCGCCAGTGGCAGAGCTTCTGGCAATGGCTGGTTTACTCCGACGGCCATTCAGGCGCATTTGCC  
CGGTGTTCTTAATATGGCGCTGGCAGGTGGCGTGAACTCGGCGAGACGGCGGATATAGGCTCCAATATCCTCACACAGT  
TCAACTGACAGCCGATCAAATGGACGGGTGGGCGATACGCTGACAGCAGATTTACCCGACCAATACTGATTTACGC  
CGCTGGCGGAAACCATGAAAGTATACCGGTTGCCGCGCTGGTTCCAGGAGAGCTGCAAAAACCTGACAGAGAAATTC  
CGGGATGCTTGCATAATAGGCTTTCGCGAAGCGATGCTGGCACGGCCATGCCGCAAGTCTGTCCCGCTTGCATCAC  
CGCCAAAAGCTGGCGTGTACTGAAAGAGCTGGGGGTGTCAGTTGCTGACGCCAGAGGCAAAATGCGCCGATGGAG  
GATGTGCTGCTTACTCTATAAGGCGACACAAAATAACGACAGGTTGACAGGCTCTCTTTTCAAGGACATCGCCG  
AGAAGAGGCGTTCGTTGGTTTTCAGAGCGCTTGTTCGCGCGCTGGTTCCAGGAGAGCTGCAAAAACCTGACAGAGAAATTC  
AGGGGCAAGGGGAGAGGCCGATCGCTTGCAAAAGTAAATGGCCGATAATCTTGTATGGGGACTGAAAAAATCTCGACAGC  
GCATGGGAAGGCTTCTGATTTCCGATCAGTGTACTGGTTGACGCTCCGCTGCGTTCTGTACAGCAGTGGCTCAGCGGGT  
GCTTGA AAAAATCACTCGCTGGCGCAGGCCCATCCGGTACTGACAGCCAGCTACTGATAGCAGGCGGTGCTGCTGG  
CAATGACTGCAACGATTTGCTGCTGCTGCTGCTGCTGCTGCTGCTGCTGCTGCTGCTGCTGCTGCTGCTGCTGCTGCT  
GACATTTACCCGGTCAATGAATGCTGCTCAGGTTGCTGCTGCTGCTGCTGCTGCTGCTGCTGCTGCTGCTGCTGCTGCT



GGGAGGCGCTATCGGGGCGCTGTTTCAGTCCGGTTGGTCTTATCGTGGCTGCGCTTGCCGGAGCTGCCGTTCTTATCTGGA  
AATACTGGGATCCCATCAGGGCATTTTTTTCGCGGGTGTTCAGCGGATATGAAAGGCTGAACCCGTTGCGTGAAACC  
TTTGAACGGTTTGGCCCTGTTTTTGACGCAATCGGAAGCGGGATCAGCAGGTGTTAACTGGTTAAATCGCTGCTGTC  
ACCAGTGGAGTCCAGAAAGGAAACGCTGGATAAATGTACACAGTCTGGCGAGATATTCGGTAACGTTCTTGGTGGCGCT  
TACAGTGTGTTCTGACGCTGCAAAAATGTTGCTGGATACTGGCTGGGATGATACTTGAAAAACTCGGGTCTTCCGGAT  
GAAGCGAAAAGGGCGAGAAAAGAAAATCGAAGACGCACAGCGTGGCGCCATTCTTCAGGACAAGGTTGCTTGGCTCAGGG  
GGACTGGCGAAAATCAATCCGCGAAGCCTGTGGAAAATGGCAATGGCACCGGAGGTATAACCCCAAAGACAAACAAC  
CGCTCACAGACAGCAATACCGGTACGCTACGCAGACTCAGCAAAATGCTGATAACACAGGTAAGCTGGTGTGATGTGACG  
AAAAACGCAATTTGGCCCGCGCATATTTGCTTTAAGAACTGCCCGCGCACTTGTGTTCTGGGGGATGGCAGGAGCG  
GAAGATTGCGCAGGTGAGTAAGCCTGCCCGCAATTAATATCACACCCGTTGGTTCGGCTCCGCTGCCGCGCTGG  
TCCCTGTTGTTGGCGGACGCTCCCGCCGGTGGCGGAGCCATACGATCGCCAGTGGCATCAGTTCCTGCAACTTCCCGT  
AACCGTGAGCCTGTTGCCCTCCGATTTGGCGGTGAAATTCATGTTTCATCTGCATAACGTTGTTACACAGAATCCCGCGA  
ACTGGCGAAAACCTGTCGGTGAATGGTCAAGGCAGAAAATGGAACGGCGCGCCCTGCCGGGCGTGGCAGTTTTTACGATA  
AAGATTGA

>Cluster\_41964

ATGACACAGAGCTTAAGCCAGCTTGAACACAGCGCGCTTTTTATTGAACGCCATATCGGACCGGACCGCGCAACAGCA  
AGAAATGCTAAGTCCGTTGGTGCACAATCGTTAAACGCGCTGACCGCCAGATTGTGCCGAAAGATATTAGCTTGCGA  
CACCACCGCAGGTTGGCGCACCGCGACCGAATACCGCGACTGGCAGAACTCAAGGCTATTGCCAGTCGCAATAAACGC  
TTCACGCTTACATCGGCATGGGTTACACCGCGCTGACGCTACCGCGGTTATCTGCGTAACATGCTGGAAAATCCCGG  
CTGGTATACCGCTATACCTCCGATCAACCTGAAGTCTCCAGGGCGCCTTGAAGCACTGCTCAACTTCCAGCAGGTA  
CGCTGGATTAAACCGGCTGGATATGGCCTGCTTCTTCTTCTTTCAGGAGAACCCGCTGCCGCGAAGCAATGGCGATG  
GCGAAACGGTCCAGCAAACTGAAAATGCCAACCGCTTTTGTGTTGCTTCTGACGTTTCACTCCGCAACGCTGGATGTGGT  
CCGTTACTCGTGCCGAAACCTTTGGTTTTGAAAGTATTGTCGATGACGCGCAAAAAGTGTCTGACCATCAGGACGCTTTCG  
CGCTGCTGTATACGACGCTGCGACTACCTGGTGAATTCACGACTACACTGCGGTTATTAGCGAAATTCAGCAAA  
ATTGTTGGTTCAGCGTTGCCCGCATATTTAGCGCTGGTGTGTTAACTGCGCCAGGTAACAGGGCGCGGATATTGTTTT  
TGGTTCCGGCGCAACGCTTCCGCGTGCAGTGGGCTATGTTGGCCACACGCGGATTCCTTGGCGGAAAGATGAATACA  
AACGCTCAATGCCGGGCGTATTATCGGTTGATCGAAAAGATGCAGCTGGCAACACCGCTTCCGCGATGGCGATGCAGACT  
CGCGGCAACATATTCGTCGTGAGAAAGTCCGACTACCTTTGTAATTCAGGTAACCTGCGGTAACCTGCGCAAA  
GTATGCGGTTTATCACGGTCCGGTTGGCCTGAAACGTAACGCTAACCGCATCCACCGTCTGACCGGATATCCTGGCGCGG  
GCCTGCAACAAAAGGCTGGAAGCTGCGCCATGCGCACATTTTCGATACTTTGTTGTGGAAGTGGCCGACAAAGCGGGC  
GTGCTGGCGCGTCCGAAGCGGCTGAAATCAACCTGCGTAGCGATATTTGAAACGCGGTTGGGATCACCTTGTGAAAC  
AACACCGCGCAAAACGCTGATGCAGCTTTTCAGCGTGTGTTGGCGGATAACACCGGCTGGACATCGACACACTGGACA  
AAGACGTGGCTCACGACAGTCCGCTTATTCAGGCTGCGATGCTGCGCGACGACGAAATCCTCACCCATCCGGTGTAAAT  
CGCTACCACAGCGAAACGAAATGATGCCTATATGCACTCGCTGGAGCGTAAAGATCTGGCGCTGAATCAGGCGATGAT  
CCCGCTGGTTCCTGCACCATGAAACTGAAACGCGCGCGGAGATGATCCCGATCACCTGGCCGGAATTTGCGCAACTGC  
ACCCGTTCTGCCCCAGAAACAGGCTGAAAGTTTACAGAGATGATCGCGCAGCTGGCTGACTGGTGGTGAACCTGACC  
GGTTACGACGCGCTTTGATGACGCGAACTCTGGCGCACAGGGCGAATACCGGGCTGCTGGCGATTCGTCATTATCA  
TGAAGCCGCAACGAAGGCGATCGCGATATCTGCTGATCCCGCTTCTGCGCACGGGCTAACCCGCTTCCGCGGATA  
TGGCAGGAAATGCAAGTGGTGTGTTGGCTGTGATAAAAATGGCAACTCGATCTGACTGATCTGCGCGCAAGCGGAA  
CAGCGGGCGATAAACCCTCTCCTGTATCATGTTGACCTTCTTCTACCCACCGGCTGTATGAAGAAACACTCCGTAAGT  
GTGTGAAGTCTGATCATGTTCCGCGGTGAGTTTACCTTGTATGGCGCAACATGAACGCTCAGGTTGGCATCACCTCCG  
CGGGCTTTATGTTGCGGACGTTTCCACCTTAACTGCAATAAACTTCTGCAATCCGCGATGGCGGTTGGTGGTCCGGT  
ATGGACCGATCGGATGTTGAAGCGCATCTGGCTCCGTTGTCACCGGTCATAGCTGGTGAATTCGAGGCGGTTAAAC  
CCGTCAGGCGCGGTTTCTGCGGACCGTTCGGTAGTGCCTCTATCTGCCAATCAGCTGGATGTACATCCGCGATGATGG  
GCGCAGAAGGGCTGAAAAGCAAGCCAGGTGGCAATTTCTAACGCGCAACTATATGCGAGCGCTGTCAGGATGCCCTC  
CCGGTGTGATACCGGTCGCGACGGTCCGCTGGCGCACGAATGATTTCTCGATATTCGCCCGCTGAAAGAAGAAACCGG  
CATCAGCGAGCTCGGATATGCAAGCGCTGATCGACTACGGTTTCACGCGCGCACCATGTCGTTCCGGTGGCGGGTA  
CGCTGATGGTTGAACCGACTGAACTGAAAGCAAAAGTGGAACTGGATCGCTTTATCGATGCGATGCTGGCTATCCGCGCA  
GAAATTGACCAAGTGAAGCCGCTGCTGGCGCTGGAAGATAACCCGCTGGTGAATGCGCGCACATTCAAAGCGAACT  
GGTCGCGGAGTGGCGCATCCGTTACAGCCGTTGAAGTTGCACTATTCGCCGCGGTTGGCAGACAAAATCTGGCCGACCG  
TGAACGCTCGGATGATGTTACCGCGACCGCTAACCTGTTCTGCTCCTGCGTACCGATAGCGAATACCGATAA

>Cluster\_9096

ATGTTTGTATCGCGGTTAAATTTGACAGGTTCCGAATTTGCGAAAAGCCGATGATGTTGTAGCGTGGCGTTTTGACGC  
GGGAGTTAATGGGCTACTCATCACCAGCACTAACCTGCGTGAAGGCGAGCGGCGAAAAGCTGGCGGTCAGTATTCGTT  
CCTGTTGGTCAACGGCGGCGTACATCCTCACGACAGCAAGCTGGCAAGCTGCGACTGAAGAAAGCGATTTATGGAGT  
GCCGCGCAGCCAGAAGTGGTGGCGATTTGGTGAATGTTGCTCGACTTTAACCGCAACTTTTCGACGCGGAAGAGCAGGA  
ACGCGCTTTTGTGCCAGCTACGCAATTCGCCGAGATTTAAACATGCGCGTATTTATGCACTGTCGCGATGCCACGAGC  
GGTTTATGACATTTGCTGGAGCGTGGCTGGATAAACTGCTGGTGGTCTTTCATTGCTTTACCGGACACCGGAAGAG  
ATGCAAGCGTGGCTGGCGCATGGAATTTATATCGGCATTCAGGTTCCGCGTGGGTTTGGCGATGAAACGCGGACTGGAGTGC  
GAACTTTTGGCGTTGATTCGGCGGAAAATTAAGTATGATGCAAACTGATGCGCGTATCTGCTCCCTCGGATCTCACGC  
CAAAGCCATCATCCCGGCGCAACGAGCCAGCCATCTGCCCATATTTTGAACGATTTGCGCACTGGCGTGGAGAAAGAT  
GCCGATGGCTGGTGCACCACGGATGCTAATGTCAAACACTGTTTGGGATTCGCTTTTAG

>Cluster\_1728

ATGGGTTTTCTTTCCGGTAAAGCGCATTCGTTAACCCTGTTGCCAGCAAACTATCCATCGCCTACGGTATCGCTCAGGC  
GATGCACCGCGAAGGAGCTGAATGGCATTCACCTACCAGAAGCAAACTGAAAGGCGCGTAGAAGAAATTTGCCGCTC  
AATGGGTTCTGATGACATCGTTCTGACGTGCGATGTTGCAAGATGCCAGCATGACACCATGTTCTGCTGAATGGGAAA  
GTTTGGCCGAAATTTGACGGTTTCTGACTACTTATTTGGTTTTGCACTGGCGATCAGCTGGATGGTACTATGTTAACGC  
CGTTACCCGTTGAAGGCTTCAAAAATGCCCACGACATCAGCTCCACAGCTTCTGCAATGGCAAAAAGCTTGGCGCTCA  
TGCTGAATCCGGTTCGCTGCTGACCTTTCTACCTTGGCGCTGAGCGCGCTATCCGAACTACAACGTTATGGGT  
TTGGCAAAAAGCTCTCTGGAAGCGAACGTCGCTATATGGCAACCGGATGGTCCGGAAGGTTGCGTTTAAACGCT  
CTCTGCTGGTCCGATCCGTACTCTGGCGGCTCCGGTATCAAAGACTTCCGAAAATGCTGGCTATTGCGAAGCCGTTA  
CCCGATTCCCGTACCGTTACTATTGAAGATGTTGGTAACTCCGCGGATTCCTGTGCTCCGATCTCTGCGGATATC  
TCCGGTGAAGTGGTCCAGCTTACCGCGGTTTACGATCGTGAATGAACGAACTCGAATTTGAATAA

>Cluster\_8832

ATGATTGTTTTACCAGACGCTGTCAGACGAGTTGCCGATCGTGTGGGGCGCTGATGATGAAAAAACCTGGAAGC  
GGGATGAAAGTTGCCCGTGAAGCGCAACTGGCGATCAACTCGGCTATCAGTAATTCACCTGCGGAGGCGCTGGCAA  
AATGGTGAAGTGAAGCGGCTGCTGCTCAGTGCACGCGCGCGGACGTTTATTTCGCTGGCGTCAAGACATGCTGGAG  
CAAAACATCGTCCAGCGCTAAAACACTGATGGCCGATGATCCGGATTACAGTTTCGATATTCTGGAAGCCCGCTACGC  
CATTTGAAGCCAGCACCGCATGGCATGCGGCAATGCGCGCCACCTGGCGCAAAAGAAAAGATTGAGCTTTGCTTTGAAG

CAACGCTAAGTGAAGACCCGGATATCGCCTCACAAGCGGACGTTCTGTTTTTCATCTGGCGATTGCCGAAGCCTCACATAAC  
ATCGTGCTGCTGCAAAACCATGCGCGGTTTTCTTCGATGTCTGCAATCCAGTGAAGCATAGCCGTCAGCGGATGTATCT  
GGTGCCACCGGTTTTTTTCAACATGACCGAACAACATCAGGCTGTCATTGACGCCATTTTTGCGGGTGATGCTGACGGGG  
CGCGTAAAGCAATGATGGCGCACCTTAGTTTTGTTTACACCACCATGAAACGATTCGATGAAGATCAGGCTCGCCACGCA  
CGGATTACCCGCTGCCCCGTGAGCATAATGAGCATTCGAGGGAGAAAAACGCATGA

>Cluster\_60591

ATGAATCAGGTTGCCGTTGTCATCGGTGGTGGGCAAACCTTAGCGCGTTCCTGTGCCACGGTCTGGCTGCCGAGGGGTA  
TCGCGTCCGCGTTGTCGATATTCAGAGCGACAAAGCCGCAAAATGTGGCACAAGAAATTAACGCCGAATATGGTGAAGTA  
TGGCGTACGGTTTTGGTGGCTGACGCCACTAGCGAGCAAAGCGTTCTGGCGCTCTCTCGTGGGGTAGATGAAATCTTTGGT  
CGCGTGGATTGCTGCTACAGCGCCGGAATAGCAAAGCAGCCTTTATCAGCGACTTCAGCTCGGCGATTTTGACCG  
TTCGCTACAGGTGAATCTGGTGGGTTATTTCCGTGTGTCGCGTGAATTTTCGCGTTTGATGATCCGCGACGGGATTCAGG  
GGCGCATATTAGTCAACTCGAAATCCGGCAAAGTGGGCGAGCAAACACAACCTTGGCTACAGCGCAGCGAAATTTGGT  
GGCGTCGGCTGACTCAATCACTGGCGTGGATCTGGCGGAGTACGGCATTACGGTGCATTCACTGATGCAATCGTAACTG  
GCTGAAATCGCCGATGTTCCAGTCACTGTTGCCACAATACGCGACCAAGCTGGGTATCAAACCGGATCAAGTCGAGCAGT  
ATTACATCGCAAAGTACCGCTCAAACGCGGCTGCGATATCAAGATGTGCTGAATATGCTGCTGTTCTACGCCAGTCCCT  
AAGGCGTCTACTGACCCGGACAGTCAATGTACCCGGCGTCAAGTGTGATGTTCTGA

>Cluster\_41028

ATGATAATCGATGAAGCTGAATCTGCCGAATCAAGTCACTCTGTTGTTTTCTGTTATTCGCCAGTTAATAAAAAAACCC  
TTTTCTTGATGAGCAATAAATAGTATTTTTATCGCAAACATTTTCGCTATTTCGAGATAATAATAGTTGCAAAATGTTGTA  
CGGATGATTTTTATAATGAGTTGAAACACAAGTTAATGACAAAATTAAGTTGATTGCTACAGATATTTGCTTATTTACCG  
TACTCATTAAATAAAGCCATCGATTTGTCCAAATGGTGGTTTTATGCAAGGATGGATTCCGATGATATTTCTCATCTCTGA  
TAGATTCATAAACAAGTTGATTTTTTAAAAAATAATCCTTATGTGGATGTCGTCGGTACTAATGCAATATTTATGATG  
ATAAAGGTCGAGAAATAAACAACAAAGCTACCTGAAGAAAAATTTGGATATTTGTAAAAAACTTACCGTATAAATGTTTCG  
ATTTGTTCACTCATCTGTAATGTTTAGGAAGAAAGTAATCGCTTCAATGGCGGTTATATGTTTTCAAACTATTTCTGAGGA  
TTATGAGTTATGGAATAGATTAAGTTTAGCAAAAAATAAATTTCAAAATTTACCGGATATTTATCTATTACAGGTTTCG  
ATGAAGGTCAGTCAACTGCTAAAAAAATTTGTATATGTTTATGGTAAATGATTTGGTAAATAAAGATGAAATGCTTTTTT  
TTGACAGGTAATATACTATCTCTTCGAGGGATTAGAACTATGCTTCTTTTATATACTGTAATAACATAAAGTGA

>Cluster\_39775

ATGAACAAAACGCTAATCGCCGCAACTGTGGCAGGGATAGTTTTACTCGCTTCAAATGCTCAGGCACAAAACCGTACCGGA  
AGGCTATCAGCTACAGCAAGTGCATGATGAGCCGCAATAACTTACGTGCGCGCTGGCGAAACATGTCAGTGTGCTGG  
AACAGTCGACCCGAATAAATGGCCTGAATGGGACGTCCTCCCGTGGGCGAGTCAACACTAAAGGGGCGTGTGCAAGTG  
TATATGGCCATTATATGCGTGAATGGCTGGCAGAACAGGGGATGGTGAATCAGGGGAATGCCCGCCACCGGACCCCT  
TTATGCCTATGCCAATAGTCTGCAACGCACCGTTCGCGACCGCGCAGTTCTTTATTTACTGGCGCATTCCTGGGTGTGATA  
TTCTGTTCATCACCAGGAAAAAATGGGCACTATGGACCCACCTTTAACCCAGTGTATCCCGATGATTCGCGCGCATTC  
AGTGAACAGGCGGTGGCGCAATGGAGAAAGAGCTCAGCAAACTCCAGCTTACCGACAGCTACAAGCTACTGGAACAAAT  
CGTTAACTATAAAGATTTCTCTCGCTAAAGAGAAAGCAAAATGTTTCGTTAGATGGCAAAAAATACCTTTAGCGCGGA  
AGTATCAACAAGAACCGGGCGTTTTCCGGGCCGCTGAAAGTCCGCAACTCGCTGGTAGATGCGTTTACTTTGCAATACTAC  
GAAGGTTTTCCGATGGATCAGGTGGCTGGGGAGAAATCAAATCTGACCAGCAGTGAAGGTTGTGTCGAAGCTGAAAAA  
CGTTACTAG

>Cluster\_45182

ATGATGGAATTCATCCTCAGTCACTGTAGAAAAGGGCGTATGACACTAACCGCTCAACCGCCGGAACGCTGAACAGTTT  
TAATGATGAGATGCACGCACAACCTGGCAGAGTGCCTGAAACAGGTCGAGCGCGACACTATCCGTTGCCTGTTACTTTA  
CAGGTGCCGGCGCGGATTTTGTGCTGGTCAGGATCTTAAACGATCGTAACGTTGATCCACAGGCCCCGACCGGATTTA  
GGGATGTCAGTTGAACGTTTCTATAACCCTGGTACGTCGCTGGCAAAACTGCCAAAACCGGTGATCTGTGCAGTCAA  
TGGCGTGGCGGACGGGGCTGGCGCAACACTGGCCTGGGATGCGACATCGTTATGCTGCCCGTTTCAGCAAAATTCGTC  
TGGCGTTTAGTAAGTTAGTTTAGTACCAGATTGGCGTGAACCTGGTTACTGCCACGCGTGGTGGGCGAGCGCGCGCC  
ATGGGCTGGCAGCTGCTGGGAACTCAACTGAGTGTGACAGGCGCACGAATGGGGATGATCTGGCAGGTTGTTGATG  
TGAAACGCTGGCAGATACCGCGCAACAGCTGGCAGGCGATCTGGCGACACAACCGACATTTGGTCTTGGACTTATCAAGC  
AAGCGATAAATAGCGCTGAACCAATACGCTCGATACGCAACTGGATCTGGAACGTTGATATCAGCGACTTGGCGGACCG  
AGCGCAGATATCCTGGAAGGTGTGATGCGTTCTGGCTAAACGCTCACCAGTTCACGGGGAAATG

>Cluster\_61500

ATGGTTGAATTAAGAGCCGCTTGCCCACTTTGGCGTGGTAAAGATGCTTTTTGCAGAGGTCAAAAACTGAACGGCGA  
GGTCTTTCTGTAACCTGGAGACTCGCTGATACATTACGCTTTGAACTGTCCGGGAAAAGCTATTTTCTTAATAGGCACAAG  
GGCAGCATAAAGAGATTTATAAAAAATCTACTCTCATTTGGCGATGCCCGTTTTGGGCGCAGACAGAGATGGCAGCT  
ATTCATCGCTGAGTGTATTTGGCTTGTATACAAATGAAGGGCATTTGGGTTGGCGAAAAGGGTTAAATCCATTAACCTG  
CGCATCATTTATTTATCCGAAGATCTCACTCCACAATAGCTTGAAGATTTATGTCGGATTTGGGCGTCAACCCGC  
CTGATATACGTTTAAAGCTATGCTGATCGCACGTTGATGACAACTATGGTGGCTAAAATGCATACTGCAGGGATAAATCAC  
CGGACTGTTACATTTGCCACTTTTGTCTTACTTTGCAATTTACTGGCGGGAAGATGATTAATAAATTTTCACTTATCGA  
TCTGATCGGGCACAGATACGTCGCAAAAGTACCGCGCCGCTGGCGCGATAAAGACCTGATTTGGTTTATATTTCTCATCAA  
TGAATATTGGCCTGACGCAAAAGATATCTGGCGATTTATGAAGGTTTATTTGGGATGCTTTACGCAAAATATGTTCT  
CTTGAACAGAATTTATTTGAACATGGCAAGCGTTTAAAGCCGAGCGTATTAAGAGCGCAACACAGCAAAAGGATTATAA

>Cluster\_1688

ATGATTTACTCTAATCAGATTTCGTTACAGTGGCAAAGATGGCGTTTACTTCCACTTAAGAGATAATGTAGATGCCCTTCTT  
AACTTTATCAGCAACTGAAAATAATGGAATTTGATAGCCCTATGTCAGGTGACTACACAGAACATGCAATCAGGGCAAACCG  
TCACAGATAATGTACAAAGAGCACCAGAACAATCACTATCAGTGGTGTGCTTGTAGTTGGCTATGAAGGAAGCCATTA  
TTAACTCGTCAGGCTCAATTTAGTAGAAAACCTTCAATGACACTTTGAAAAGCTGGCGTACCAGAAAGCAAAATTTCTCTG  
CATCTGTAAGACGGTATTAATAATGATGATTTCAATTTACGAGTTTTAAAGCCTCTAAAGATGTTGGTATTTCAAATG  
GTCATAAGAAATCAGCTAACTTTTTCAGGAAATTAATTCAAAGCTATTTGATGGGCAAACGATGTTTCTGCTACTGGA  
AAGACCGTACCACAATGATGGTGGCGTACTTCTAAGAAGATGGGGTAACTGACTACTGAAACGCAATACCGCAC  
TATGCTGATGTGTCAGGAAGTACTACAGTACTCAGCATCTGAGCTATCTGATGAAGCGCTAAGGGTCCGCTAGCAATGCT  
CTAAAAATGTCACGGTGAAGATGGTGTAAAGCCTTACAGCCTCAGCTAATGAGCAGGCTTCAAAGTGTCTTAAGTCCG  
GGTAAATGCTTTACGGAAGTTTTCTGTGAATCCGAATAAGAAGGCACTTATTGA

>Cluster\_10143

ATGTTGCTGCTACTCAACCCTTAGCGAAAAATGGCAGCGCATGGCTGCCGTCATGTTGCGATCATTTATGGACGGCAA  
TGGTTCGCTGGGCAAAAAGCAAGGAAGATTCGTGCTTTGGGCAATAAAGCCGGGCAAAATCCGTCGCCCGGGCTGTCT  
CTTTTGGCGCAACAACCGTATTTGAGGCTTAAACGCTGTATGCTTTAGTAGTGAAGAACTGGAACCTACCGCGCAGGAA  
GTCAGTCGTTAAAGAACTGTTTGTGTTGGCGCTCGATGACGAAGTAAAGAACTGTCACCGGATAACGCTGCTGTGG  
TATTTATGGCGATACAGTGCCTTTAACTCGCGTTTGAAGAAGCTATTCGTAATCTGAAGCGCTAACAGCCGGGAATA  
CCGGTCTGACGCTGAATATGCGCGCAACTACGGTGGACGTTGGGATATAGTCCAGGGAGTCAGGCAACTGGCTGAAAAG

GTGCAGCAAGGAAACCTGCAACCAGATCAGATAGATGAAGAGATGCTAAACCAGCATGTCTGTATGCATGAAC TGGCCCC  
TGTAGATTTAGTAATTAGGACTGGGGGGAGCATCGCATTAGTAAC TTTTGGCTTTGGCAAATGCGCTATGCCGAAC TTT  
ACTTTACAGATGTTCTCTGGCCGATTTTCGATGAACAAGACTTTGAAGGGGCGTTAAATGCCTTTGCTAATCGAGAGCGT  
CGTTTCGGCGGCACCGAGCCCGGTGATGAAACAGCCTGA  
>Cluster\_7947  
ATGGCAACCCCGCACAGCGTACGCGATGCGGGTCTCGGCTGTGAGGCATCGCAGCGGGATAACGCCCCCGTGCCTCA  
TGCCTCACCTTACGAGCAATGCTCGTCAAGCTGGCCGAGACCGCAGGACGCTATCAGCCATTCGGTTCTAAAGAGCGCA  
AAGCGGATAAAAAACCGGAATTACTCCCGCTGTACCTGCGGTGGGTGCGTGGCGTACTGGAAAGCGGCACCGCGCACAG  
GATGACATTTCTGATGACCGGTGATGCTCTGGCGCTGAGTGGGGGATATCACCGGCGCTGTTGAGATTTGCGCGCTATGC  
CCTGCGTTTTGGCTGTGATGCGGAAACCATTCCCGCCCCGCGCTTACATGCTGGCCGAAGAGGTCGCGCTCGCGG  
CTCTCCCGCCCGTATCGCGGTGAGCCGGTGCACACTGCTCGAGGTCATCGGGTGCACCGGATGCGCGCGAT  
ATGCTGACGAGTGGCGCCCGACTGCATAAGGTCACCGGCTGACCTGCGGTGATGCGGGTCAGCTTCTGTGATGACT  
GGCCACCGTCAACCGCCTTACAGCTCGACCCACCGCGGGTAAGAAAAGACATTGAGACCCTCACTCGTGA  
ACCCGAAACCGGTGCGCTCAAAAAACGGCGCGAAAGCGCGGAAAAGGCACCCGCGGAAAAACAAGATTCACCGGTG  
AAACGAGGGCGGGGACGCCCGAAGAAAGTCGCCGTTAA  
>Cluster\_48618  
ATGGCACCTACACTAGAACGCACATACTCTAAAAATCTTTATGAGTTTCTCACCGTGGGGAAACTCGCGTTTACGTTT  
TGGCTACCTCATCAACGAAGCATCGTTTTCAAATATCCGAAATAACCATTAATCGAGCCTGATGATGATATCTGTCTGT  
ATATCCTGATGGAGAAAGTTGGAGCAGGATCAGGGTGAACGATGGACTTCATTTCCGACAGAGCGGAAGATGGAATG  
TCTGATTCGGACATTAATCAAGCAATTCGCTTCCGACATGCTCGATCAGAGCAGAAACAGATAGCAGGCAGATTTGC  
ATTTGCGTGAATACACATTCATCGAGGATGGGTAGAGATTGACTGCTATCAGATTGCGAGTGTGAGAGCAGAAAGC  
TAAGGCAAAGGGGACTGTGCAACCTCACGATCGCTTCTCTCATTGGTACGAACATCTTGTCTGTGATTACATCAG  
ACCATTTCTGGCGCAAAAATCTGGGCGGTCCATTAATGCGAACAGGTTGATGTAAGAAATTTACACGCAAAAATCGAGC  
GTTTCGAGGATGTTGTTAGGGCAATATGGGATGGGAAAGAAACCGGTTTTTGGCGTGGAAACAGAGGATTTGTTACTGATC  
CAGAAATTAAGCTCTTGGTTTCAAATAAGGTGCAAGTTAACGTTGAGAAATTTATCGTACTTATCATCTCCCGCAAAACA  
AGAACCCAGTTGTTTTATATCTAAAAGATTAA  
>Cluster\_24063  
ATGGTGGATAAGTCAACAAGAACGACGCACTTTGGTTTTGAGACCGTGCAGAAAGAACAAAAAGCGGATATGGTCGCCCA  
CGTTTTCCATTCCGTGGCATCAAAATACGATGTCATGAATGATTTGATGTCATTCGGTATTTCATCGTTTTGTTGGAAAGCGAT  
TCACGATTTGATTTGAGCGCGGTACGCGGTGGGACAGCCGCTGCTGGATCAGGCTGGTGGCAGCCGCGACCTGACAGCGAAA  
TTCTCTCGCTGGTCGGAGAAACGCAAAAGTGGTCTTGTGATATCAATGAATCCATGCTCAAAATGGGCGCGAGAA  
CTGCGTAATATCCGTTGATTTGCAACGTTGAGTATGTTGACGGCAACGCTGAGGCGCTGCCGTTCCCGGATAACACCT  
TTGATTTGCATCACCATTTCTGTTTGGTCTGCGTAACGTCACCGCAAGATAAAGCACTGCGTTCAATGATTCGCGTGTG  
AAACCCGGCGCCCGCTGCTGGTCTTGGTTCTCGAAGCCAATTATCGAGCCGCTGAGCAAAAGCCTATGATGATACATCT  
CTTCCATGCTGCGCGTATTGGTCTACTGGTGCAGAACGACCGCAGCCTACCGTTATCTGGCAGAAATCCATCCGTA  
TGCATCCCGATCAGGATACCCGTAAGCCATGATGAGGATGCGGATTCGAAAGTGTGACTACTACAATCTGACGGCA  
GGGTTTGTGGCTGTCATCGTGGTTATAAGTTCTGA  
>Cluster\_22560  
ATGAAAAACATCTTTTTACTCTGACACTCTTCTGTATTTGGGATACCAGCAGTATCCCATGCAGAAATTTAAAGCGG  
TTTTGCTGATATAGGATTTCAATATCTTACTGGACTAGCAGAACCTGAGAAATCGTCGACCAAAATCACACAAAGATG  
ATTTTGGATATCTGGAACGGAAGCGCGCTAACTTTAGTTGGGAGAAATGTACGGGTTCTTCGACGAGGAAACCTTT  
TATAATGATCGTCAATAAACCAGGATAGCAGCAGCTTATACATTTAAAAATACCAACCGTATTTACTGGGTGACAC  
CGATTTAATCTCTACTTGCATGCGTATGGCACTACCGTTCTGCGAATCGTGTGAATTTCCATGACGATATGTTCTTT  
ACGGGATCGGCTACAATTTACCAGGCGGTTGGTGGTTCAAACCGTTCTTTGCAAAAACGCTATACAGACCAAACTTAT  
TATACCGCGATAACGGTTATGTCGCGGTTGGGTTGCAAGTTACAGCTTTATGCTGGGAGTGAAGAAATCACCCCTCAC  
CAACTGGAACGAGTACGAGTTTGTGATGTCGATGCCACCTACGCGGCAAGTAAAGGCGGCAAGAAAGGTCGAAACGGTGC  
TCGCACTTTGGTGAATGCAACTTCACACATCACACAGGATTCAGTATCGTTATGCGGATGACAAACTGGGCGAAGAT  
TTTTACCAGGATGCGATAATCTACTCCATCAAAATTTAATTTCTGA  
>Cluster\_62113  
ATGAACGATCTATTTTACTGCGAGGAAAAATATCTTGATTACCGGTTACGACAGGCGATTGGCTTTTTTACTGGCAAC  
CGGCTGGGTAATAATGCGCACAAATAATTAATGATATTACTGCGCAACGCGCAGAACTGCTGTAGAAAAACTCC  
ACCAGGAGGATTCAGGCGGTTGCCGACCTTTAATGTTACTCATAAAACATGAAATGATGCGCGGTTGAACATATC  
GAAAGGACATCGCCCATGATGTCGTTGTAATAACGCGGATCCAGCGCGCTCATCTTTACTGAGTTCCCTGA  
ACAAGATGGAATGATGATCGCAGTAAACAGACCGCGGTTCTTGGTATCGCAAGCGGTAACCTGCATCATCTGCGGTA  
AACGCAAGCGAGGTAAGTTAATAATTTGCTCGATGCAAGCGAACTGGGACGTGACACCAATCACCCCTTATGCGGCA  
TCGAAAGGGCGGTAATAATGCTCACCCGCGCATGTCGCTGAGCTGGCGCGCCACAATATTCAGGTCAACGGTATTGC  
GCCGGCTATTTCAAACAGAAATGACTAAAGCACTGGTTGAGGACGAAGCCTTACCAGCCTGTTGTGCAAAACGGACCC  
CCGCGCACGCTGGGAGATCCGAGGAACTGATGCTGCGGTTCTCTTTCAAAGCCTCTGATTTTCGTAAC  
GGCCACTTGTGTTGTTGATGGCGCATGTTAGTGGCTTTAA  
>Cluster\_40077  
GTGACTTTGCTTGGCTCCGTCATGCGTCTCTGGGTTACTCCCGCATCCGGTGTACGCGACGTCCTTACCCTGTG  
GCAAGGAACAATTTGTTGCTGTTAGGAGCCAAATGGTTGCGGCAAAACACACTCATTGCGCTCCATTTGCGGTTATAC  
CGTTATTTAAAGGCGAGATCTTACTGGATAGCCTCCCTGTGACAGACTCAGCCATCGCCAGCGCGCGAGGCTATTGCC  
TGGGTGCCGAGGCGCACGCGGATTTTGTCTTTAGTGTGCTGGATATGGTGTGATGGGCTGGCCCCACCATAGG  
CGCTTTTCCGTTCCCGGTAAGCAAGAACGCTGAAAGCAACGGAGCAACTGGAAAAGCTGGGCATTTTGCATCTGGCGA  
CACGACGCTGGAATACGCTTAGCGCGGTTGAACGTCAGCTCAGCTGTTAATCGCCGCTGACTCGTCCAAACACCGCGT  
TTATTTACTGGATGAGCCTGCCTCCAGCCTCGATTTGCGTATCAGATCCAACCTTCTGGACACGCTGGCGCAGCTCAAAAA  
TAACGGCATGACAATGTTAATGTCGACTCATATCCGCTCCATGCTAACGCCATTCGCCGACAGATTTACAGGTAGAGC  
CAGATGGACGAGTAAACAAGGCTTACCAGCCGAACTTAAACGAAAAAACTGGCTGCCCTGTACCGGTTTCTGCC  
GACCAGATTCACCATCACCTCTCTGAAATTAAGCACTAA  
>Cluster\_60167  
ATGATCCTGCACGCGCAGGCAAAACACGGAAACCAGGTTTACCCTGGCTGGTGTGTTTTGACAGGTTTTTCCGGCGATTG  
CCACGAATGGCAAGAAGTGGGCGAGGCGTTTGCAGCACTACTCAGGTTGATGTTGATCTCCAGGTCACGGTGGTTCGG  
CGCGATTAGCGTCAAGTATGATGATGTCACCGACTTACTCGGTAACAACTTGGTTAGTTACAACATCTTACTGACTTC  
TGGCTGTTGGGTTACTCGCTTGGTGGACGGGTGGCGATGATGGCGCTTGGCAGGGGCTGGCGGGGCTTGTGGGTTAT  
TGTGCAAGCGGGGATCCGGGGCTGCAAAAATGCTGAACAACGCTGCGGAACGCTAGCGTTCCGATGCGCAATGGGTGCAGC  
GTTTTCTCACGAACCGTTAAGCGGCTATTGGCGGATGATCAACAGCCTGTTTTGCTTACTCACTAATGACGATCAA  
CGCCGGGAGCTGGTGGCGTGGCGAGCAACAATAATGGCGCAACGCTTGGCGCATGCTGGAGGCGACTTCTCTCGCCGT  
CCAGCCTGATTTACTGCTAACCTTAGCGCCCGCACATTTGCGTTTTATTTATTTATGTTGTTGAGCTGACAGCAAAATTC

GCGCCCTGGCGGGCGAACTGGCTGCCGACTGCCATGTCAATCCTCGCGCCGGACATAACGCGCATCGGGAAAATCCCGCT  
GGCGTAATCGCAAGTCTGGCGCAGATCTGCGTTCTGTA

>Cluster\_8602

ATGAAAACAGGTTATGTTTACCTGCGGCCACCAGCGGCTGCCTATTTGAACACGCATTTCTGATGCAAGCGAGCTGGGTTA  
CGACGGCATCGAAATTTGGGGCGGTCGCCCGCAGCGTTTCGCGCCGACTTAAAGCGGGCGGCATCAAAACAAATCAAGG  
CGTGGCGCAGACGTATCAGATGCCGATATCGGCTATACGCCAGAAACCAACGGCTATCCGTATAACATGATGCTGGGC  
GATGAACATATGCGTCCGAAAGCCTCGACATGATCAAGCTGGCGATGGATATGGCAAAGAGATGAACGCGGGTTATAC  
GCTGATTTCCGCGGCCACGCGGGCTATCTCACGCCACCTAATGTTATCTGGGACGGCTGGCAGAGAACCTAAGCGAAC  
TGTGTGAGTACGCGGAAACATCGGCATGGATCTAATCCTCGAACCGTTAACGCGGTATGAATCGAACGTCGTGTGTAAT  
GCTAATGATGTGCTTCATGCGCTGGCGTGGTGCCTTCGCGCGCCTGTTTACGATGGTCGACATTTGCGCGCCGTATGT  
CCAGGCGGAACCGGTGATGAGTTATTTGCAAAAACCTGGCGGATAAATTACGTCATCTGCATATTTGTCGACAGCGACGGG  
CCAGCGACACGCATTACATTTCTGGAGAAGGCAAAATGCCGCTGCGGGAACTGATGCGCGATATTTAGCGGGGGCTAT  
GAGGGTTACTGTACGGTGGAGCTGGTGACGATGTATATGAACGAGCCAGACTCTATGCCCGCAGGCGCTGGAACGCTT  
TCGCGCGCTGCTGCCGAGGATGAGAGATGA

>Cluster\_10740

ATGAGAAGAGTCTTCTGGCTGATCGCTGCCGCTCTGTTACTGGCAGGGTGTGTCAGGGCAAAAAGGCATTTGTCGAGAAAGA  
GGGATATCAGCTTGATACCCGACGCCAGGCGCAGGCGGCGTATCCGCGCATTAAGTGCTGGTATCCACTACCCGCGAG  
ATGATTTTGTAGCTCGCTGGCGACACTGACCGATAAGCAGGTCAGCTCGCATTTACTGGTCCCTGCGGTACCACCGCGA  
TACAAACGTTAAACCGCGCATCTGGCAACTGGTTCGCGGAAACAAAGAACTGGCCTGGCATGCGGGGATTAGCGCTGGCGGG  
GGCAACGCGCTTAAACGACACTTATTTGGCATTTGAGCTGGAAAACCGTGGCAGAAAATCGGCGGAGTGAATATTT  
TTGCCCGTTTGAACCGGCACAGATTTAGGCGCTTATTTCCACTGGCGAAAAGATATTTATTTGCCCGTTTACATCAAGCGG  
GAAAACGTAGTGGCACATGCGGATATCGCACCGCAGCGCAAGACGATCCGGGGCCATTTATTTCCCTGGCAGCAACTGGC  
GCAGCAGGGGATTTGGTGCCTGGCCGGATGCGCAGCGGGTTAACTTTTACCTTGGCGGGCGCGCCCGCACACCGGTTAG  
ATACCGCGCTTATGCTGGAGCTTTTGGCGGCTACGGTTATGACGTTAAACCTGATGACACCGCGCAGCAGCGGGCGG  
GTGATTTAGGCATTTCCAGATGCATTTCCGCCGACGTTATATAACGGCGAAGCGGATGCAAAAACCTAGGCGATTTGCCGA  
AGCATTTGCTGGAGAAATACGGGCAGGATTTAG

>Cluster\_13603

TTGACATCATTATTTCAATCGGTTAACGGGAAAAGCGGTTAGCCGGACAGCTTTTCGTCGAACACCTTGGTCAGGAAGTTGT  
ACAACATCATCAAACCTGGAAAGTCATGATTTGACTGACCACAAATTTGATGCGCATTTGATACGGGTACCAAACCGTGG  
AAATCACCTTGTATGATGCTTACAAACGTTATCAAGCCGCACCAGACCCGCTGCAAGAAGTGGTGCAGATATGCTGAAA  
CAGCTTGCAGAAATGCTGCCGACAGGCGCTGTATTGTTCCGGTGATTAAGAAAAGCCTGGCTGGATACCGTTTCGCCA  
ACAGCTTAGCCAGTATGAGTCTGATCCAGAGGTCCTCAACGCCCTCGCTGGATTTTGCCCTGGGAAGACTTTAACGATGAGT  
TAATTTATCTTGTGTTGCTGAAGATGGTAGCGAAACCATGCGCTATCTGATGCGCTACGAAGTACCATTTGACCGCAACAA  
GCCATCAGTAATTTGAAGCAAATATTGCCGGAAGTTACGGCTGAAATCGTTGATACAGCGCAACCGATGGAAAAGTTGC  
CGTTATCTCCGAGGGGTACTTATGAGCCAGTCTGATGCTCATTGACGATCTTTGGGTGCAATCACCCGATCTTGAAT  
CGCGGCACTGTTAGTACCGTTCCCTCCAGAGGAAAACCTGTTTTTACCACCAATGATCAGCCGCAAACTCAGCGCA  
TTACGACAGCTAACAGAACATGCTTCCGTGAGGATGACCATCTCTGACAACACAGATATTCATTTGCCCGCAACCGTCA  
CTTTTATCCTGGGTAGAAAACCTTGCATTA

>Cluster\_61287

ATGTTGATGATTACCTCTTTTGGTAACCCCGCGTGGCGCAGGCGTTTGTGATTACATGGCGACGCAGGGTGTATCTCT  
CACGATTTCAACAATAACCAAAGCGATGCTGGCTGGCGGATGAGTCCAGGCGGAGCGGTACGGGCGGAGCTGGCGC  
GTTTTCTCGAAAACCCCGCAGATCCGCGTTATCTGGCGCGGAGCTGGCAGGCAAGCCATACCGGCAGTGGCTGCATTT  
CGCGTTAFCCTTTCTTTTGGCGCTTGGTGAACGCGCAGGTCGCTCGGTAACCTGGGTGATGATGATCGCTCGCTGGT  
GTTTTATTGCCATGCAAAATCTCGCGCATCAGGAAGTGTATTGCTGGCTGGCCATTCGATCCAACACTGAAATTTG  
AGTTCTGGCGTTACTTACCCACGCGTTAATGCCTTCTCGCTGATGCATATCTCTTTAACCTGCTCTGGTGGTGGTAT  
CTCGGGCGTGGGTTGAAAACCGCTCGGTAGCGGTAAGCTAATTTGCTATTACGCTTATCAGCGCCCTGTTAAGCGGTA  
TGTGCAGCAAAAATTTAGCGGGCGCTGGTTTGGCGGGCTTTCTGGCTGGTGTATGCGCTGATGGGCTACGCTGGCTAC  
GTGGCGAACGCGATCCGCAAAAGTGGCATTTACCTGCAACGCTGGGTTAATTTATCTTTGCGCTGATCTGGATTGTCGCGGA  
TGGTTTGTATTTGTTGGGATGTCGATGGCGAACGGAGCACACATCGCCGGGTTAGCCGTGGGTTAGCGATGGCTTTTTGT  
TGATTCGCTCAATGCGCGAAAACGAAAATA

>Cluster\_9153

GTGAAAAAACACAGCGAAAAGAAATCGAAAATGTGACAAAATATCACAGGTGTTCTGCAAAATGAGTTATGGCGGCGTGA  
TGATTTACAAACCCACGGTTAGATGAGTTCGCGGAAGAAATTTCCCGTTGCGCTGGTCTACAACGGCATTTCCGATGTTG  
TGATGATGGCTCGCCAAAGACCTTGAGTACTTTGCGCTCGGTTTTTTCGCTTTCCGAGGGGATTAACGAAAGTCCGCGC  
GATATCTTCCGATGGATGCTGTTCTTCTGTAAATGGTCTTTGAAAGTACAAATGAGCTTTCCAGCCGCGCTTATGGG  
GTTGAAGGAGCGCCGCGGGCGCTGGCGGGACGTACGGGCTGTGGCTATGCGCGCTGGAGCAACTTAATGACATCGGAA  
AACCGGTGACGCGCTACCGTTCCACCCAGACGTTTGTATCTCAACAAACTGGATGATGCATTTACGTCATCTCAACGATTTT  
CAGCCAGTGGGGCACTGACTGGTTGTACTACGCCGTCGCTGGATGTTGCCATCTGGCGAACTGGTGGCGGGCATGA  
AGACCTGGGTCCGATGTTGGCGCTGGACAAAACCTTTAGCCCGCGGTCACAAGAAAGGGAAAAGCTGGCAGCAAGGTCCGG  
TACTGGTTTTCCAGTCTGTCAGTTATGAAATGGTGCAAAAGTCCGCGATGTCGCGGCTAGAGATTTTGTGTTGGGTGTCT  
GCCCGACACGCTTGTGTAGAAGTGGCTGAGCGCTGTAATCTGACACTGGTAGGTTTTTGTAAACCGGGTCCGGCAAC  
GGTTTATACCCATCCGACGCTTTGAGCAATTA

>Cluster\_25451

GTGCGGATAACGGAACCCAGTTTGGCCAGCGATCCGAAAACCCCGGATTTAGAGCGCCCTAATTTGCGGACATCATCCGGTT  
GCAGACGGCCATTTCAATGCCAGCCGTTACGGTTTCTCAGCTCAGCAATTTGTCTTATGAGCAACCGTGGATTAGCGTGA  
TAGATGCGCAGACCGACGCGACCTGGATCGCATCGCTCGCCGCTGTGATGCAAGGCTAAACAACCGCTGCTGGTCCGCG  
TCCGCTGGTATTTGTGATGCCGTTGCCCGGCGCTCCGCGATTAAGCCGCCACCCAGCTGCTGGCCATTTATGGTTCAAT  
GAGCGAAATCGCTCAACGCGAGATCGCCACACTTCATTTACACCCAGCTATCACACAGATATACGTCGATGTTGAACACA  
TTCTGGCAGGCAATGCCAGTGACTATGACGCGCGTATTTGTCAGGCGCTTGCAGAAAGGCGACCACTGCATTTGCCACAC  
TGTAAACGATTTCTGTAGCAAGGCAATCAGATCGACACCTTTTGGCAGGCTTGGCAGATGAGTCCGCTGCATTTGGGAAAA  
AATTTGTCGGTTTTCTTGGCGAATTTACCCGCAAGTTCTGCTTCCGCAATGCCCGATGCGCTTTATCTCTCTGGTGGT  
ATGTCGCAATGGCAACAGCCAGTCCGTTAGGCGCGACCGGATTTGCTATTTACGGGGAAGGTGGCGCAATGCGTTCCATAC  
GGTCACTTTCTGGCGGTGCTGTTGCCGTTCCGTTGCTGATGACGAAAGCCGGTGGGTTTGGCGATGAGACCAGTTGCATCA  
GGTTCTGAATTTTTATCGAGGAGAAGTGTAGTAATA

>Cluster\_39852

ATGACGCGCTTATTTCTTTTGGTTGGCTCATGTTACTGAGCGGATGCTTAAACCGCCCGCTTAAAGAAGCCGCGCAGACC  
GACATTAAGCTCTGTCGTCAGAGCTACAAAGATTTGACCATCTGCCAGCGCGAGGGTAAGATCTTTGTTTCGGTAT  
ACAACATTTAGGACGAAACCGGGCAATTTAAACCTTACCCGGCAAGTAATTTCCACTGCTGTTCCGCAAGCGCCACG  
GCAATGCTGGTACGGCATTTGAAAGATTTCTGCTGGTTTTATACCGCTGGAGCGCCAGGCTTACAAAATCTGCTTACGA

GCGCAAGATTATTCGTGCGGCACAAGAAAACGGCAGACTTGCATTAATAACCGAATCCCGCTGCAATCTTTAACGGCGG  
CAAATATCATGGTTGAAGGTTTCGATTATCGGTTATGAAAGCAACGTCAAATCGGGCGGGGTTGGGGCAAGATATTTTGGG  
ATCGGTGCGGACACGCAATACCAGCTCGATCAGATTGCCGTGAACCTGCGCGTGTCAATGTGAGTACCGGTGAGATCCT  
CTCCTCGGTGAACACCAGTAAGACGATACCTTTCTTATGAAGTTTTCAGGCGGGGTTTTCGCTTTATTGACTACCGAGCGT  
TGCTGGAAGGGGAAGTGGTTACACCTCGAACGAACCTTTATGCTGTGCTGATGTCGGCTATCGAACAGGGGTCAATT  
TTCCTGATTAATGATGGTATCGACCGTGTCTGTGGGATTTGCAAAAATAAAGCAGAACGGCAGAATGACATTCGTGGAA  
ATACCGCATATGTCGGTTCACCGGAATCCTGA

>Cluster\_14917

ATGGCATGGGGAGGCGCAGGGTAAAGTAAGGGCGCGGTTATCTATATCGCTGCGAAGGCAGTATGGGCGTAAAACGCCG  
CGTTAAGGCGTGGGAGATAACCCACGACAAGGTGGTTACGGATTTGTGCATCGTTAACGCGCCTGTCTTCCCTGCATCGC  
CTGACTATGTGGAGCAGGTTATCAGGACTGCGGACTTGTAAAGAGCAGAACGGGCGAAAATGTGCGGCTGATTTGTGATC  
GACACGCTGGCCCGTTGCTTTGGTGGGAATGATGAAAATGATTTCCCGTGATATGGGCGCATTTATCCAGGGGTGTGACGC  
GATAAAGCAGGCCACGGGTCACGGTACTGGTGGTTCCACCATTCGGCAAGGATGAAACAAAAGGGGGCGCAGGGTTCCA  
GCGCATTCGCGCTGACTGGATGCAGAGTACCGAATCAGCCGGGAAAATTCAGACGTTACAGCACTGGTGGCGGCGTGT  
ACGAAGATGAAAGACGCAGAGGACCAAAAGAGAGCGCATACGACCTTAAAAGCGTGGAGGTGTTTACCGATACCGATGG  
CGAAGAGATTGTCTCCATGGTGGTGTGACGTTCCCGCGCCCTGCTGAACGTTGAGCGCATAGAGGAGGGCGGGAACA  
AGCGGAAAATCACACGGCTTTATGGGGTGTATCCCGTACGTTACAGCATGTTGATAAATGCACGATCCCGCTGCTA  
CGTGATGACATGAAAAGCTGGGATATGACACAAAACACCTTAAACGATGGTTAGCCAACTGAAAAAGACGGCGTGT  
TTGCGTCGATGGGATGATGTTCCACCCACTGTAA

>Cluster\_27636

ATGTCCTCAGAACTTAGACGCAACCGCAATTAATCAAATCCATGCCCTTATTTCTGCTCAGGGTGTAAATGAAATATCAG  
TAAGATTGGTGGCAGTGTGTGGCATTGCTGAGAAATTCGCGATTTCATGATCGGAAAATTTAATTTAAATCGTTTCC  
GTTTCCCGTGGTGCCTTTCCACTGCCAGCATCGATGACTTTACCCGTTATTTCAAAGATCTTTCAGATGAAGGCAACCCG  
TGCTTTATGATGCGGATGATGATGCGTGGTCCAGTGTGCTTAACTGGGTACTATTGATGAACCGAGTTCAGCAGATA  
CACCGCCACTCTCAAACGAAAAAGACAGCACCCTTCTGCTGCTGTTGTTGTTAATGGCGAGCGTAACCTCCAGAAAT  
CACTGGCAGAATGGATTGAAGACTGGGCGACTACCTTGTGGGCTTTGATGCTAATGGTGACACCATTAGGCAACAAAA  
CGGGCTGGGGCGTCCGTAATAACAGATTGAAGCAAAACAGACTGCTGATTTTGAAGATAATGACTTCAGCGGCAACG  
CTCCTGATGGAGTCTGTGGAAGCAAGACCAAGACATTTAGCCAGTGGCATTGAGTTTAAATGCGTTCCGTTTGAAG  
GTCGAAAGAACGTCGTTTAAATACGCTCAGCATTATCACGCGATCGTCCGGTACTGGTCTGCGCATTTATTCAG  
CTGGAAGCGGTGCAGGAAGATATGGCTAACGAATTTCTGTGATCTGCTTGTGAAAATTCAGGACAGCAAAGTAGAAAC  
CTTTATTGGGACTTTACCCGCTGA

>Cluster\_2968

ATGAGCGATCTGCATAACGAGTCCATTTTTATTACCGGCGGGATCGGGATTAGGGCTGGCGTGGTTCGAGCGATTTAT  
CGAAGAAGCGCGCAGGTTGCCACGCTGGAACGTGCGGGCAAAAAGTCCGCGTCTGCGTCAGCGATTTCGCGAACATA  
TTCTGGCGGTGGAAGGTAACTGACCTGTTATGCCGATTTCAACCGCGGTCGATCAGATCCGTCGTTCCGCGAAG  
CTGGATTGTTTTTATCGGCAATGCGGACTCTGGGATCACAATGCCCTCACTGGTTAATACTCCCGCAGACGCTCGAAAC  
CGGCTTCCACGAGCTGTTTAACTCAACGTAACGTAACGTTACCTGCTGGGCGAAAAGCTGCGCTCCGCGTAAATCGCCA  
GTGAAGGCAGCATGATTTTCACTGTCAAATGCCGCTGGTATCCTGGCGGGTGGCCCGTGTACACCGCCAGTAA  
CATGCGCAACCGGACTTATTCGCAACTGGCTTATGAACCTGGCACCGAAAGTGGCGGTTGAATGGCTCGGCGGCTGTGG  
TATGGCCAGCGACTGCGCGGCCACAGCGCTCGGGCAAAAGTGAACCTCGATAATGCACTCTGACGCGCGGAAAA  
TTGCGCCATTTTACCGCTGCAATTTTTCCCGCAACCGCGGATTTTACGGGTCGATGTTGATGTTGGCATCGCGGCGC  
AATAATCGCGCATTAAGCGGTGTGATGATCAACGCTGATGCGGGTTTAGCGATTTCGCGCATTCGCCAGTAGCGGCTGG  
GCTGGATCTTAA

>Cluster\_27354

ATGTCGACAGCAACAACCGCCAGTTTTATAAAATTCGCTGGGCATTGAGTACGACGGCAGTAGGTATTACGGCTGGCA  
ACGGCAGAAATGAAGTCCGAGTGTGACGAGAAAGTGGAAAAGGCGCTCTCCAGGTGGCGAACGAAACCCATCACCGTCT  
TCTGCGCGGGCGTACTGACGCTGTTGACACGGTACCGGCAGGTTGTCATTTCGAAACGACCGCGCAGCAGCAAGAC  
GCTGCGTGGACGTTGGGCGTAAATGCGAATTTACCTGGTGACATCGCCGTGCGTTGGGTTAAAGCTGTACCTGATGATTT  
TCATGCCGATTTAGCGCCACGGCTCGCGTATTCGCTACATCATCTACAATCATCGGCTGCGCCCGCGGTACTGAGTA  
AAGGGTAAACCAATTTTACGAACCGCTGGACGCTGAACGGATGCATCGGGCTGCGCAATGCTTGTGGGCGAGAATGAT  
TTCACTCGTTCCGTGCGGTGACGTGTCAGTCCCGGACCCGTTGGCGCAACGTTATGATATTAATGTCACGCGTCAAG  
TCCTTATGTTGGTGTAGATATCAAAGCAATGCCTTTGTACATCATATGGTCAGGAATATGTCGGCAGCCTGATGGAAG  
TCGGTGCCCAACACCGCGGAGAGCTGGATAGCAGAGTTGCTGGCGGCAAGGACAGAACGCTGGCGGCGAGCAACGGCA  
AAAGCGAAGGGCTATATCTGCTGCGGTGGATTACCTGACCGATATGATCTTCAAACCGCAATGGGCGGCTATT  
TCTGGCGGACTAA

>Cluster\_28924

ATGGCAACAACAACAATCTGGATTTGCACCTGCTGCATCGCCTCTCGCTTCGACCATCGTTTACAGCTCCGGACGACGC  
GATTTGGCGGGCTTACCTCTATCCCTCACAAGGGGATAACATGCTTACCATGCCAGACAAAGCAAGCGATG  
GCCACTGCGAGTGGTCAATGATGACAGGAAATTTTTGGCGTGCATGAACATATCCGCGACATTTGTCGCGCTGCGG  
CTGGAGGGTATCTGGCTATCGCACCTGAACTTTACTTCCGCGAAGGCGATCCGAATGATTTTCCGATATCCCCACGTT  
GCTTAGCGGTCTGGTAGCAAAAGTGCCTGACTCGAGGTGCTGGCCGATCTCGATCATGTGCGCAGTTGGGCTTCCCGCA  
ACGGCGCGGATGTTCACTGTTAATGATCACCGGATTTCTGCTGGGTGGACGTTACCTGGCTGTATGCCCGCATAAT  
CCACAGCTAAAAGCCGAGTGGCGTGGTACGGCAAACTGACGGGCGATAAGTCTGTAATTCACCGAAACAACCTGTTGA  
TATCGCAACCGATCTTAAAGCTCCGGTCTCGGCTTATATGGCGGCAAGGATAACAGCATTCGCAAGAGAGCGTGGAAA  
CGATGCGCCAGGCGTGGCGGACGAAACCGGAAAGCAGAGATATCTGTTACCGGATGACGGGATGCGTTCAACGCC  
GATATCTGCTGCGGACTATCATGCCGAGTCTGCGAAAGCAGGCTGGCAGCGAATGTTGGAATGGTTTACACAGTATGGTGT  
TAAAAAGTAA

>Cluster\_60349

ATGAGTTACGAAATCAAATTTGCGACATCCTCAAAGGCGCTGCGATGGAAGGACAATATAAGGGCGCTCAACGTGGGGC  
CAAATGCGAGGAGATCGCAAAACGAGTTAACTCGCGGGGAGTTAAAAACAACAAGGGAGAGGTTATTACTAAGGGCGGGC  
TTAGCCATTGGCTGGAAGGTAGACGGGAGCCAAATTTTCGACACTCTGGCTGAACTGTGCGACATGTTCCGGCTTTATGCC  
CTGATGCCGATGCGTGGCGGTAATGGATTTCGAGTTTCAACCGAAGACCGTGGAGAAATGGAATACCGGAGGCTGTAGC  
TGAACGAGATGCTATTATCGACGACCTGAAGGCCGCTATCGCTGAGCTTGAAGGCGCACTAGCAATAAACAAGTCCCAG  
CAGAAGCGGAAAGAGATGGGAGGTTGAAAAAGTGGAAAGTGGCAGCAGAGCAAGCGCCCAACGATGAAAAAAGAGATGGGA  
GCTAAGGAGTGGGTTAACCCGAACCCGAAAAAATACAGCGTGGCATGTTGTGTCAGGTAAGTGGCTGCAATGGGCGGCGA  
ATACCTGGGCAACAACGAGGTTACAGCAGAAGATCACTGTTGTAACGACGGCAACCGGAAAGCAATCAGTAACG  
GCGGTTTTTATCGATGATTTGAGCAGGCAAGGGAGAGGATTTAGCGTTGAACAGGAAATCAAACAAGCAAGAAC  
GAAAACGGCAACAGATCGGCAAAAGGCAAGAAAGGTGACAAGCTGATAACTTTGCTTCCAACTGGATTGATAAGCTGGG  
AGCGAATAA

>Cluster\_21216

ATGCTGTCCGCTCGGGTTCATCGGTTAAGTCGTTTTTCGTAATAAATAAACGCCCGCTGCGCGAGCGTTTTGCGTCAGCGTAT  
TTTTTTCAGAGATAAAGTGGTGCAGCAATGGAAAACCAAGAGTACTCGTACTGACAGGGGCTGGGATTTTCGCGG  
AATCAGGTATTCGTACCTTTTCGCGCCGAGATGGCCTGTGGGAAGAACATCGGGTTGAAGATGTGGCAACGCCGGAAGGT  
TTTTGATCGCGTAACTGCAACCTGGTGCAACGTTTTATAACGCCCGTCTGTCGACAGTTGCAGCAGCCAGAATATCAGCCTAA  
CGCTGCACATCTTTCGCGTGGCGAAACTGCAAGATGCTCTCGGCGATCGCTTTTTGCTGGTGACGCAGAATATCGACAACC  
TTCATGAGCGTGCAGTAACACCAATGTTATTCATATGATGCGGGAACGTCTGAAAGTACGTTGTTTCGCAAAGTGGCCAG  
GTCCTCGACTGGACCGGAGACGTTACGCCAGAAGATAAATGCCATTGTTGCCAGTTCGCCGACCCCTTTCGCGCCGACGTT  
AGTGTGGTTTTGGCGAAATGCCACTCGGCATGGATGAAATTTATATGGCGTGTGTCGATGGCCGATATTTTCATTGCCATTG  
GTACTTCGGGGCATGTTTTATCGCGCGCTGGGTTTTGTTACGAAGCGAAACTGCATGGCGCGCACACCGTGGAACTGAAT  
CTTGAACCGAGTCAAGTTGGTAATGAATTTGCCGAGAAATATTACGGTCCGGCAGCCAGGTGTTGCCAGAGTTTGTGTA  
AAAGTTGCTGAAGGATTATAA

>Cluster\_9067

ATGCAGTTCTCGAAAATGCATGGCCTTGGCAACGATTTTTATGGTCGTGACGCGGTAACGCAGAATGTCTTTTTTTCACC  
GGAGCTGATTCGTGCGCTGGCTGATCGGCACCTGGGGTAGGGTTTGACCAACGTCTGGTGGTGGAGCCGCGTATGATC  
CTGAATGGATTTCTACTATCGCATTTCATGCTGATGGCAGTGAAGTGGCGCAGTGGCGCAACGGTTCGCGCTGCTTT  
CCCGTTTTGTCGCTGAAAGGACTGACCAATAGCGTGAATATCCGCTGACGACCGCAACGGCGCGATGGTTCTGAC  
CGTACCAGATGATGATCTGGTCCGCGTAAATATGGCGAACCAACTTCGAACCTTCCGCGTCCGTTTCGCGCTAAC  
AAGCGGAAAAGACATATATGTCGCGCCGCGGAGCAGACAATCTTATCGCGCTGGTGTGATGGGAAATCCGCATTCG  
GTGATTCAGTCGATGATGTCGATACCGCGCGGTAGAACCGCTGGTCTGTTTCGGAAGCACGAGCGTTTTTCGCGA  
GCGCGCAATATCGTTTTATGCAAGTGGTTAAGCGCGAGCATATTCGTTTACGCGTTTTATGAGCGTGGGGCAGGAGAAA  
CCCAGGCTTCGCGCAGCGCGCTGTGCGCGGTTGCAGTAGGATTCAGCAAGTTTTGCTGGCCGAAAGTACGCGTG  
GAACCTCCCGCGCTGCTTTGATATCGCTGGAAGGTCGGGTACCCGTTATATATGACTGGCCGCGGTACATGT  
CTACGACGATTTATTCATCTATGA

>Cluster\_9842

ATGCATGATGCAACATCCGCGTTGCCATCGCGGGAGCCGGGGGCGTATGGGCGCCAGTTGATTCAGGCGCGCTGGC  
ATTAGAAGCGCTGACGCTGGCGCGCGCTGGAGCGGAAAGGATCTTCTTTACTGGGCAGCGACGCGGTTGAGCTGGCTG  
GTGCAGGAAAACAGGCGTTACCGTGCAAAGCAGCCTTCCGCGTAAAGATGATTTTTGATGTTGTTTTATCGATTTACC  
CGTCCGGAAGGTACGCTGAACCATCTCGCTTTTTGTCGCCAGCATGGCAAAGGATGGTATCGGCACACGCGGTTTGA  
CGAAGCGGTAAACAGGCGATTCGTGACGCCGCGCGATATTGCGATGTCCTTTCGCCCAATTTTACGCTTGGCGTTA  
ACGTCATGCTTAAGTGTGAGAAAGCAGCCAAAGTATGGGTGACTACACCGATATCGAAATTTATGAAGCACATCAT  
AGCATAAAGTTGATGCGCCGTCAGGCACCGCATGGCAATGGGAGAGCGGATCGCCACGCCCTTGATAAAGATCTGAA  
AGATTGCGCGGTCTACAGTGTGAAGGCCACACCGGTGAACGTGTGCCGGCACCATTGGTTTTGCCACCGTGGTGCAG  
GTGACATCGTTGGCGAACATACCGCATGTTTGCAGATATTGGCGAGCGTCTGGAGATCACCCATAAGCGCTCCAGCCG  
ATGACATTTGCTAACGGCGCGTAAGATCGGCTTTGTTGGTTGAGTGGTAAGGAAAGTGGTCTTTTTGATATGCGAGATGT  
GCTTGATCTCAATAGTTTTGTA

>Cluster\_60237

ATGAAAATACTACATGGTGTTCGCTCTGGTCTATGCTTATTGCTACTACAGAAGCTATGGCTGCCGGGATAGCGTTGA  
CGTTTTACTACGTTTACAACGGTATTCGCGTAAATTTGGACTTTTAAATTTAAAATAATGATGCCATCCGAGTGTACG  
TTGGTGAATATAAAGTGTCAATGGCTCATGACTGGGAAAATATGCAAAATGTGAGTGGAGTGGTCTCTCCTGCGC  
CCTTCGGTTAAGCTGATTGGCTACCATCAAAATATCAACAAGCAAGTTGTCTGGATACCGTCTGGGTGGAAGTCCGG  
GTATTTATACATTTAGGTTATTGTCCTGTCAGAGATTGAATCTTACTTTTCTTGTCCATGGTTGGTTATTTAATGACT  
CTGAAGCCTCTCCAGGGCGGTGACGTATCAGGGGCTCATGATGTCACGACACGATTTGTCATCCGTTGTTCTCAACT  
TATGACGTTTTCATGGAATGAGAAATATGTCAGTAAAGTCAAACTGCTCACCTGCAGTGCAGGGCGGTGGTTGAGAA  
AACGCTTTCAACGTATTTGATGAAAGATGGGAAGTTGTGCGACAGTACGCAGATGAATGAAACAGGTGGTTACTGCGCT  
GGGTTGCACAGATGATAACTTTTACCGCTCGGGATGTGACAAGGCGGAAATCAGGTCAGGTCAGCCAAATCGACACCTATA  
ACGGACAAACAGTTACACGATATGGTGTGCTGTTGATACCAGCAGTATGCAGCCAAATCGATTTCTACTTGGCGGTTCCA  
GTACATACTGAATGAGTTGTAG

>Cluster\_58573

ATGGACATGGAGTCGCAAAAATATGTTTGCACCTTCCACTCCGATGGAAATACGCAATGAATGCTGTTTACCTTCGCA  
TTCATCACCAAAATGATTTAGTACATGCTTTTTTGGACTTTCTTCTCATGGGAAATGATGACCCTGATGACCTGC  
TGGCACAATTCACCGAATGATCGATAACGGTCAATGCCCTCGGTTGGCAGGGTTTTATCACCGCTGGTTTCGTTATTTCG  
CCATGTGAATGGCGTACTATCTGCTGAACATAAATGACCAAGGTGAGCTTATGCGCAATTTGTCGCGACACCGCCGA  
ATGCTGTGGCGAAGGGGAATCAAAGCTGGGATATGTCGGATGGTTTTTAAAGCAGTGGGCTACTTAATAACT  
GTTGAGCGAAGAAAGTATGAACAGCGAGCAAGCGCAAAACATGACACGCTTACTACGGCTCTACGTTATTTATAGTAACTGGCGCAA  
TACTTTGCGGTTATACCTTTGGTGGCAATATGGCAGTCTCCCGAAGATGATCATCTGCCTTTATTTACGCGAATTCCTT  
AGCGCGTAAAGAAATACGACGATTCGGCAATGATGTTTTATCAATTTTGGCAGTGTATGCGTATTTACCTTACCT  
TGCTTGGCAACCATGGCTTACTATTCGATGCCGGAACGCTTAAGGATATGAGCGACCTATGA

>Cluster\_12327

ATGTCAACATGGGTCACATAACGGAAGCAGTTGAGATCACTACCAAGCCATAAAACAAAAAATTAATCCTAGCGATAT  
TTATCGTCAATGCTTGGTGGCAACATCTACTATCGGCTATTTCCAGTCTCCTGTGATACTAAGAAGATAACAACTT  
TTAATGGAAAAATAAAATTCAGGCAGTTTGTGGGAGACCTACTTGATAAACTATGCATGCTTGACAGGACGGTTTTAT  
TATGGTCAAAAATTAAGACTCTGTACAGAAGCTAGATATATTTGCTCTGTGCAACAAATATAGATACCCCTGTTACG  
CAAATCAACAGTTTCTGACGTTTGTTCGTAATGTCCGCCGGGTGATGAACGGATGTCGCGCACAGTTAGTGAAA  
AAAATTTAACCCCGCGCGGTAACAGCAGTGGCAACCTTGAGCAACAGATAGCCAGTACTTACAGCTAATTTGGATCT  
CTGCTCGCCGAAAGATATGAACAGCGAGCAAGCGCAAAACATGACACGCTGGATGGGCTTCTCTCAGGCTTCAGGGTAA  
GACAGACTGGTTAAGCCGTTCCGTTACCGCAAGAAATCACGCTGGGCGTGGATGAAGATTTACGCTGAAGAACCCCGT  
ACGGCAACCTCGAAAATGGCGATTCGATGCAACAAACAGTGAACATATGTGCCAACGTCACGAATGCTGA

>Cluster\_52594

ATGAAATCAATTTATCTAATTTATCCGAGTATTACTGGCATCAGGTATGCTGATGCTACTGCGGTAACCGCAGCACC  
CGCGATGCAACACAATTTGGTGGGGCGGATACTGACTGGAGCACCCTGATTTATCCAGGCTACTGATATGGATGACA  
ACGTTGATTCAAATGGGGGGGAAAATCCGCTTTACTGGCGTGTAGTGAAGCTACCTGTAAGGTCGCAACCGATTCAAAA  
CAGATGAAGTTGCTCGCCGTTGTGCTTCAACCTTTTCTACTGGTATCGAGTGAAGCACAGGGGGGAGCAACCA  
GACCGATTTCAATATTAATCTGACCGAATGTGCAAACTACAGATGATCAGAAAAATGAGTTCCGTTTTTACCGGATGCGAG  
ATAGCGCTAATAAAACGCTCGCTAACGAAGTAGAAGGATCAACGGATGCTGACACAGCGGCAATGCGGGGGGACTGGT  
GTAGGGATTCGAATTTACTCAAAGGTACGACGAATAATGGTCTGATTAACCTGAATACTACTGCGGACAGGGGTAGCC  
CTCCACCGCGCTTATACAAATTCAGGAAATGCTACGACCATGATTTACGCGCGGCTTTACTGCGAGTTATGCTCAA  
ACGGTAGCACTGTTGACCTGGTGTAGTTAAGTCAACACCAAGTTTTGTTGTGCTGTACGAGTAA

>Cluster\_43605

ATGACGAGTTTCGACGCCCGCCGGATGGACGGCGCCGAGTTGGCGCAGCGCGCGCGCGCGGACAGCTTGACCTGCATTA  
CCAGCCGCTGGTTCATCTCGCGCATCACCGGATCGCTGGCGCGGAAGCGTTGATGCGCTGGCGGCATCCGAGGCTTGGCC  
TGTTGCCGCCCGCCAGTTCCTGCCGCTGGCCGAGTCTGCTCGGCTGATGCCGAAATAGGCGCGTGGTGTCTGGGCGAG  
GCCTGTGCGCAGATGCACAAGTGGCAAGGACCGGCATGGCAACCGCTTCGCTCTTGCCATCAATGTCTCCGCCAGCCAGGT  
TGGGCCAACGTTTCGACGACGAGGTAAGCGGGTGTGGCCGATATGGCCCTGCCCGCCGAGCTTCTGGAGATCGAACTGA  
CCGAATCGGTGCGCATTCGGCAATCCAGCCCTGTTCGCCAGTTTCGACGCCCTTGGCGCCATCGGCGTGGCTTCGCCGCC  
GACGACTTCGGCACCGGCTATTCTGCCCTGCAACATCTGAAATGCTGCCCATCACCACATTTGAAAATCGACCAATCCTT  
TGTCGCCAGGCTCCCGGATGATGCCCTGACCAAACTATCGTGGCGCGGTGATCCAGCTCGCGCACGGGCTGGGCATGG  
ATGTCATTTTCAGAAAGACGACTGCACCAGTTGATTGGGCGTAATGGCTGTTGTGCAGCCAGCTCCTGA

>Cluster\_60077

ATGATTAATAAATTTGCCGCAAAATAGTGTGTTGTAATATTTGTCGGCCTCGCGCTGTTTCTTTCCCTGGTATATCCCGTTAA  
TCATGGATTTCTGGTTGCCGATTTGATGCGGATATTTTTTATTTCTTTAATCAGAAACTGGTCGAAAAGTAAGGCCTTTTTGT  
GGCTGGTTGCATTTGACCAACAATCGCGCTTCGACGGTGTTCACCTGCTGGCGATGGGTATGTTGATGCTGATGCTTCTGG  
CTGAAAGAAAACGCCCTGGCAGACGATCGTGTATTATGGTCTGGTCTGCTATTAACCTGCAGTGGTATTAACCA  
GCTGGGTCAAGCATTAAATTCCTGTAAAACGGGCGAGCCCAACATTGACTTTTACCAGATTAACCCGCGTCAGCGAACTGC  
TCTCTGTTCCACGAAAGATGCTCAGGATGACTTTCCCGGCGATCAGGCATGATGCTGCTTATTTTTTCCGGCATTC  
ATGTGGCGTTATTTTCGGCAAAAGTTCAGGCCTTATCGCCCTTATTTATTTTTTGTGGTTTTTCGATTTCCGAGAGTAATGAT  
TGGCGCACACTGGTTACTGACATCATTTGTCGGTTCGATGACCGTGTATTTGATCGGTTTGCCTGGGTGTTGCTGACGC  
CATTAAGTGTATCGATTAATCACCTTTTTTGACAAATCACTACCAGGAAAAAACAAACATTTCCAAAACAAATAA

>Cluster\_40969

GTGGGACGTAAATGGCCAAATATGTTGCTAAAAAACGGCTAAAGACGGTGCACGCTATAAAATTTATGCAAAATTCGG  
TGTAAGAAATCTATGCTGTCGCAACAAGGTGAACCCGATCCAGAATTAACACATCTTAAATTCGTTATTTGACCGT  
CAAAGCAGGCACAAGTTCCAAAGCACGTTATTGATAAAGCAATTTGATAAAGCCAAAGGCGGCGAGATGAAACCTTCGTA  
CAGGACGTTATGATAGGCTTTGGTCTAATGGCTCAATGATTTATGCTGAGACATTGACTTCAAATGTTAACCTACGAT  
TGCTAACGTTTCGCACAATTTTCAATAAAAAAGGCGCAATATCGGAGCGGAGGTTCTGTCAGCTATATGTTTGACAATA  
CGGTTGTGATTTGATTTAAAGGAACAGACCCCTGACCATATTTTGAATTTTGTCTGAAAGCTGAAAGTTGATGTTGCTGAT  
GTAACGAAAGAAAGGTAATATTTGTTATTTACTGAACCTACTGACCTTCAATAAGGAATCGCGGCGCTAAAAAGCGGC  
TGGAACTCAGTGAAGTTCTCAACAACAGAAATGAAATGATTTGCTCAAACGAAAGTTGAGCTTTCCCGAAGATTTAGAAA  
TCTTTGAAGGCTTGTGATGCCCTTGAAGATGACGACGATGTACAAAAAGTTTATCATAACGTCGCAAAATCTCTAA

>Cluster\_24995

ATGACCATTTGAAACACTGCGCGGGCGCTATCGCCTGCATCGATTTCCGCGCGCCAGCGTGGGTTGACCGGAGAACCGCT  
CACCGCCAGCATTTAGCGCCCGGATTACCAGCGTCAGTTGATGACCGTTTTTCAGGAAGGGCTGCAAAAAGGGTTTGCTC  
AGGGAATGACCGAAGGTCAAGGACGAGGCTTTAGCGAAGGTCAACAAGGTTTTCGCGAGGGGCGACGTCAGGGCTAC  
ACCGAAGGCGACCTCGCCGGGCGAGGAGGCGCAACAGTTTGTGAGGCGGCGAGCCGCTGGAAGCCATCAGCGG  
AAAAGTGAACGACTTTCTCGCCCATATCGAACGCAACAGCGGGAAGATTGCTGCAACTGGTGGAAAAAGTCAACCGCC  
AGGTGATCCGCTGCAACTTGGCGCTGCAACCGACGAGTTACTGGCGCTGGTGGAAAGAGGCGCTGGCGCCCTTCCCGACG  
ATGCCGAGACCTGCAAGTGTGCTGAGTACGGAAGAGTTTAAACCGCTGCGCGACGCGGTGCCGAAAAAGTCAAGCA  
ATGGGGGCTGACGCTTCCCGGATCTGCCCGGGGAAATGCCGAGTATTACCAGCAAAATCGAACGGAATATCGGCT  
GTGAGCATCGCTTGAACAATGCATGACCGCGCTGCAAGAGACGCTGACGCGGAGTCAACAGGTTGAGTGA

>Cluster\_21117

ATGCGTCTGAAGGACTGGCCTCCCTGGTGCCTTGGAAAAATATCCTGGATCGCGGCGAGTGAACGCGCATGTTTATT  
TTCCTGGTATCTGTGATGACGTTTATCCAGAAATAACAGCAGCAAAAAAATAGCGCAGACTTGTCTCAAAGAATAAACTGT  
ATCTTAAAGAAAGATATTTAGAAGGAAATGCTTCCCGTTCGACTCATCGACAGTTTCAAGCAAAATCTCAGAGTTCTC  
GATATTTCTTCTGATAAGAAATTTGCGGGATGAGTGGATAATCCAGACCAAAGACAGATGGATAACGGGCTTTAAATCAA  
GAGTCTTTTTCAGTTACCTCCTCCCGGAGAACGAACATGATGATGATGCAATGAAATTTTGAAGGAAAAAATATTTG  
CACTGAAAAAAGTGGCCAGTTTCTGATTTCTGCTGATTTTACCACGCAATTCACCTTTTCAATTTGACATATGGGTTACC  
TGTCACCTCACCCTCAGCTGACGATATAAAAAATTTTCAGAAACAGTTTCAATAAGGCCAAGGCGCAGCGCAAGTACAAAA  
AATGCAGGAAGATAAAGTCAATGTACAGTTTTTTCTTACGCGAGAAACAGGGCGCAGCTCAAAGAATATTCGAGGGTCA  
GAAGACTCAGTACCGGCAAAATGCTGCATGACCTGATTGTTGAAGAGTATAAAAGGTACCGACATTCCAGATAA

>Cluster\_28678

ATGAACCCATTCAAAGGCCGCGCATTTTACGCGTGCATCATTTCTGTGGCCGTCAGCTGGTACGCAAAATACGGCATCAG  
TTACCGTGAGCTGCAGGAGATGCTGGCTGAACGCGGAGTGAATGTCGATCACTCCACGATTTACCGCTGGGTTACGCGTT  
ATGCGCCTGAAATGGAAAAACGGCTGCGCTGGTACTGGCGTAACCTTCCGATCTTTGCCCGTGGCACATGGATGAAACC  
TACGTTGAAGTCAATGGCCGCTGGGCGTATCTGTACCGGGCGTGCACAGCGGGGCGCACTGTCGATTTTTTATCTCTC  
CTCCGCTTAAACAGCAAAAGTGCATACCGGTTTCTGGGTAAATCCTCAACAACGTAAGAAGTGGCAGATCCCGCAT  
TCATCAACACGGATAAAGCGCCCGCTATGGTTCGCGCTTGTCTGCTCAAACGCGAAGGCCGTTGCCGCTGACGTT  
GAACACCGACAGATTAAGTACCGGAACAACGTTGATGAAATGCGATCATGGCAACTGAAACGGATAATCGGCGCCACGCT  
GGGATTTAAATCCTAAGAGACGGTTTACGCCACATCAAAAGTATTGAGTGTGCTGACCTAGCGCAAGGCCAGGCGCT  
CAGCATTTTATTATGGTATCCCTGGGCGAAATGCGCCTGGTAAAGCAGAGTTTTTTGAAATGTAA

>Cluster\_20967

ATGCCACATCACATTTGTTATTGTTGAAGATGAGCCGGTTACCCAGGCGGATTAACAATCTTACTTCACTCAGGAGGGGTA  
TACCGTTTCCGTTACGGGAGCGGTGCGGGGAAATATGCAAGATCAGCCGGTGGATTTGATTTGATTTCTGCTGGATA  
TCAATTTGCCCGATGAAATGGCCTGATGTTAACCCGCGCCCTGCGAGAACGCTCAACGGTGGGGATTATTTGGTTACC  
GGACGCGAGGATCGGATTGACCGTATTGTTGGGCTGGAATGGGCGCAGACGATACGTCACCAACCGCTGGAACTGGC  
CGAACTGGTGGTACGAGTGA AAAAAGTGTCTGGCGAATCGACCTCGCGCGACAGGCGCAACCGCACACTCAGGACAACT  
GCTATCGCTTTGGCGTTATTGCTGAAATGCTGCGCGCATACAGCTGGAGCGGATGGCGAGCCGATTAACCTGACCCG  
GCAGAGTATGAAATGCTGGTGGCATTGTTGACTAATCCGGGCGAAATTTCTCAGCCGTGAACGCTGCTGCGTATGCTCTC  
TGGCGCTCGGGTGGAAAAACCTGACCTGCGCACCGTGTGTTAATTCGCTGTTTACGCCATAAACCTCAGTGGGATT  
TACTGGTGACACAACATGGCGAAGGTTATTTCTTAGCCGCTGATGTTGCTGA

>Cluster\_40055

ATGTCAAACACGCCAATCGAGCTTAAAGGCAGTAGCTTCACTTTATCTGTGGTTATCTGATGAGGCAGAACCTAAGGT  
TATCCATCAGGCGCTGGAAGACAAAATCGCTCAGGCCCCCGCATTTTTTAAACATGCCCCGTTGTACTCAACGTCAGTG  
CACTGGAAGACCCGGTAACTGGTCAAGGATGCAATAAGCGGTTTCGGCAACTGGTTTGGGGTTATTGGCGTAAGTGGC  
TGCAAAAGATTCGCGCAACTTAAAGCGGAAATGAAAAAGTGGGCTGCCATCTTACGCGAAGGAAAGGAAAAAGCCCGCG  
TCCAGCCCGCACCGCAGGCTCCAGCGCAAAAATCAACGCGGTTCAAAAAACGCTTAAATGATACCCAGTGGCTT  
CCGCTCAGCGTATTTATGCTCCACAATGTGATCTGATTGTTTCAAGCCAGTTAGCGCTGGGGCCGAAATGATTTGCCGAT  
GGTAACATTCATGCTATGGCATGATGCGGCTGCTGCTGGCAGGCGAAGTGGTGGACCGGAAAGTAAATTTG  
TACGAACCTGATGGCGAACTGGTGTCCATGCGAGGTGAATACTGGCTGAGTGTCAAAATCCAGCAGAAATTTATGGCA  
AAGCGGCACGACTGCAGTTAGTCGAAAAAGCTTTGACCGTTCAACCGTTAAATTTGA

>Cluster\_39484

ATGTTATATGCAATTTAAGCTGGGCAGAAAACCTGCGCGGCGAGGAACCTTATTGCCCTGAAAAAGGCGGAAAGGTGGTAG  
CTCTGATAAAAAGCGCAAAGTATGCCGCAAGCTCAGAAGTATGCAGCAGACCTGCAAAATCAGCAGTGGCAGACGATCA  
TGAAAAACCTTGGCTCCGTTACAGCCTCTTGGCGGAGCAGTATGTTAAACAGCTTTCAGAACCTTTCCAGTTTAGAAGGCTCAG  
GGGAGGCACTTAATCAGATTAACAACCTCAGCAGTATAAAGACCTTGCAGGTCAGGCTCGTTACCAGAGCTTGTCTGC  
TGGGAGGCTACGGGAGGACTTGGTTCGACAGCCACAAGCAATCAACTGGCTACGATCGCGCCGACTCTCGGTGAGTCTT  
GGTTATCAAACAGATGAGCAATTAACAACATCTGGCAAACCTTGGGCTTGGTCTCTGCAAGGTCAGGCAAAACGCGGG  
CAGACGTACGCCAACAACATGAGCAGCATTGCACAGCAAAGCGCAGCTTTCGCGCTGCTAATGCCAACAACCATCAAG  
TCTTCAGACAGCAATAGTGGCGGAACGCTTGGTGGATTTGGCGGTGCAGGCTTGGCCAGCCTTTTGGGAACATCAACAC  
CTTGGGGCGCTGGCATTGGTGTGGTATCGGATTGCTTGGCTCGTTGTTTTAA

>Cluster\_23269

ATGCTGCGCTTATTGGCCACCTTCTTCTCCGATTTTGTTTTTCTCGCCGACTCTTAAAATTGGCTGTTTTATTGTTGCT  
TATAGCAGGAGCGACCATTTTTATTGCCGATCGCGTTATGGTCAACGCCAGCAAGCAGCTGACCTGGAGTGATGTCAACG  
CCGTTCCGGCGCGGAACCTGGGTTTTATTGCTGGGGCGAGGCCGGTAATCGTACTTTACCCGACGTATTGATAGCGCC  
GCAGAGTTGTACACGCCGAAAAGTGAATGGTATTGGTGAAGCGGATAAATGGACGTAATAATACGATGAAGCGTTC  
AGGAATGCAAGCAAGCTTGTATCGCTAAAGGCTACCGGCAAAAGTGTATCTTCTGCGACTATGCCGGATTCTCAACGCTT  
ATTCGGTGGTCCGTCGCAACAAGGTGTTTGTAGTGAACCATATCACCATTTATTTCGCAAGAATTTCAAAACCAACGCGC  
ATCTGGCTGGCAAAACAGTACGGCATCGACGCTATCGGCTTTAACGCGCCAGACCTCAATATGAAGCAGCGTTTTTATAC  
TCAGTTACGGGAGAACTCGCCAGAGTCAAGCGGTTGATTGACGCAAAAATCCTTCATCGCCAGCCGAAAATATCTCGGGC  
CATCGGTCATGATTGGGCGTTTTAGTGAGCATGGCTGTCCGGCGAAAGAATAA

>Cluster\_22623

ATGAAACATGACCATTTTGTGTGTTCAAAGCCGGATAAACAGCACAAAGTTGTACTGCTTTTCCAGGTTGTCGGGGA  
TAACCCGGTGGCAATGGGGGAAATAGGCAGCTGGTTTGGCGCGTGTTCCTGATGCGCTGGTGGTGAGTGTCCGTGGCG  
CGGAGCCGAGCGGTAATCCGGCGGGCGTCAGTGGTTTTTCGGTGCAGGTTTACGGAAGATAATCGCCAGGCGCGTGTG  
GATGCCATCATGCCGACGTTTATTGAAACGGTACGCTACTGGCAGAAACAAAGCGGAGTAGGTGCTAACGCCACGCGGCT  
AATTGGTTTTCTACAAGGCGGATTTATGGCGCTGGAGAGCATTAAAGCCGAACCGGGCCTGCTTCGCGGCTCATGCGCT  
TTAACGGACGCTACGGGAGCCTGCGGAAACCGCGTCTACAGCCACGACAATTCACCTGATTCATGGCGGTGAAGATCCT  
GTTATCGATCTGGCGTACCGGTTGGCGCGCAGGAAGCTTAACTAGTGCAGGTTGGTGACGTGACGTGGATCTGGATGGA  
GGATTTAGCCATGCGATCGACAATCGCAGTATGCAATTTGCCCTGGATCACTTGGCTTATACCATTCCGAAACATTATT  
TCGACGAAGCGCTAAGTGGCGGTAAAGCTGGCGATGATGATGTTGAAATGATGTA

>Cluster\_24128

ATGCAGATAAAAACGCTCGATTGAGAAAATCCCGGGGGGATGATGCTCGTCCGCTATTCCTTGGCGCACTGTGCCACAC  
CTTCTCGCCGGGGCGGGGAAATATTTGGATCATTACCAACGGGATGATTACCGGTACGGTGCCCATTTCTGGCGGTGT  
GGTTTTTTTGCATGGGGCGTCAATAAAATTAAGCGCGACGGGAACGGTACTGCGTAAATCCGGTACGCTGGTGGTAAC  
AAAATTGCCGTCGCGTGGTGGTGGCGCAATTCCTCGCGCATTTATTCGGAACATGGTGTGAAGTTGGATTCTTTGCG  
CGGACTTCAACGCTGGCGCTGGTGGCGGATGATGACCAACGGCGGACTTTACGCTTCCATCATGTCAGCAGTACG  
GCACAAAAGAAGAAGCTGGGGCATTTGTGTTGATGTCGTTGGAGTCCGGGCGCTCATGACGATGATTATTCTGGGCACT  
GCCGGAATTCGCGCTTCCAGTTCGCGAGGGCGCGGTAGCGACACCTGTGCTGATTGCAAAAATGGTGCCTGCGTTTTAA  
ACCTATGGTCCGGCAGCAACTTCGCTGGTAGCAGCGCGCTCATTTGTGACTTCGATTCTGGTCCCAATCTTACCTCTA  
TCTGGTCACTGATAAGTCAAAGCCAGAGCGGAAATTTAGGTACGGTGAATAA

>Cluster\_10574

ATGAAAGAGATGATTTCTGTCGATCATGAAATAATCCATGAGTAGTCTGGATTTTCTGAATAACATTATTAATCCAGCCCG  
GGCAGAAGCGGGAAGTCCCTCATGAACCGCGTAAGTTTCTTGAACAAAATGAGGATGAGCTAGAGCTTAGAGTGAACCG  
GAAAAAATTCGGTTAAACAATAACCAGACAAGAACGGCATACTATGATCTGGATTTTGACCAGATGATGCTCGTTGGC  
ATGAGGGAGTCAAAGCCGTTCTGCTGTTCTGTCGTTGGCAGACCAAAGCGATGATGATGATCCCGGGACTTT  
ACCTGAGGCGTTGGCATTTCGGGAAAACCTGGCTGAACAGAAAGCAGTGTGGAAAATCAACTGGCAATAGCAGCGCCGA  
AGGTGAATTTGTTGATAACTATGTTGAAGCATCTGGTCTGATGGGATTCGGGGAAGTTGCTAAGTTACTCGGTATCAA  
GAAACCGATTTCCGGCTGTTTTTTGTTGGAGAACGGAATAATGTATCGCTCGTGGAAAATGACGCCTTACTCGCATCA  
CCTGGATGCGGGCGGTTTTAGCGTGAACCGGGCGAGGCGGGCAATGGTCACTGTTTTACGCGAGTTAAATTCACCCAA  
AAGGTGTTCACTGATGATGCTGGTCTGCTGCTGATGGAGAGCTACCGCAGCATGA

>Cluster\_21169

ATGTCCATTGCGGTAACCACCACCGATCCGACGAATACCGCGCTCAGTACCACCAGCAGTAGTTGCTCACGGGCAGCAA  
CGCCGACGATTTACAAGCAGTTTTCTGACTTTTGTGGTGGCGCAGCTGAAAAACAGGACCCGACCAATCCAATGAAAA  
ACAACGAGCTGACGTCGCAATTTGGCACAATCAGCAGGTCAGTGGGATGAAAAACTCAATACCACGCTCGGATCTATT  
TCCGGACAGATTTGATAACAGCCAGTCTGTTACAGGCTAGTAACCTGATTTGGTTCAGCGGATGATGATCCCGGTACCAT  
TCTTGGCGGAACCGGAGTGAAGAAGGGCTGTGACCAGCAGCCAGCCGTTTGGTGTGAGTTGCAACAGGCAGCAGACA  
AAGTGACGGCCACCATCCGATAAAAAACGGCGCGGTCGCTCGTACCATTTGATATCGGTGAACCTGACTGCCGGAGTCCAC  
AGTTTCACTGGGACGGTACGTTGACTGACGGCAGCAGTGGCGGAAAGCTTCAAAATGATAGGATAGCCGAGTAA  
CGGTGGTACACAACCTGGTTGCCAACCGCTGCAGTTTGTCTGCTGGTGCAGGGGATGATCCCGGCAACACCGGTAATACG  
TGGATCTTGGCATTACGGCACCACTACCTCGACGAAGTACGGCAGATAATTTAA

>Cluster\_8813

ATGTTAATTAATCGCAATATGTTGGCGTTATTTGCGTTGCCTTTTATGGCAAGCGCAACTGCTTCTGAATTATCCATTGG  
TGCTGGTGGCGCTTATAATGAATCGCCTTATCGCGTTTATAATGAAAAACGAAAGGCAATCCGCTGATTAGTTATGAAG  
GTGATACTTTTTATGTTCTGTCAGACCAGTGTAGGTTTTATCTGTCGCAAGTGAACAAAATGAACTTAGCCTGACCCGCA  
TCTTGGATGCCGCTGGAATTTGACCTACCAGATAATGACGATTTATGCCATGCAACAGCTTGAAGCGTATAGTACGGC  
TATGGCGGGGTTGCGTGTATCACACAGCGTTCAGGCAACCTGAAAGCTTCTGCACTGCGGAGCTTCTGGATAACA  
GCAACGGCTGGTGGGGAGCTATCGGTATCCACAAAATGCAGATAGGTCGCTGTCGCTGACACCTGCGCTGGGCGTT  
CTCTATTTATGACGAGAAATTCAGTACTATTATGTCATTTGAGAGTGTAGTCCGCTGATGCGGCTGCGCAAGTTA  
TTCCGGCAGGATGCCTGGTGCCTATGTCAGCTGACGGCAAAAATACCCGATAGGAGAGCAGCTCGTATTGATGGCGA  
GCGCAGGATACAGCGAGCTGCCGGAAGAGATTACCAGCAGCCGATGATTGATCGTAATGAGAGTTTTACCTTTGTCAAC  
GGGTGAGCTGGCGTTTTTAA

>Cluster\_1286

ATGACCACACCAATTCACCTGGCAAAGACGAAAGTGGCGGGACGACGTTCTGGATGTATACCGCAACGGCGAGCATT  
TGCGAACCTTTTGGCAGACTGACTGGCTGCGTCTTGGATGTTGAAGGATCTGCAACCTGGCGAAATGACCGCTGATG  
CAGAAGATGATACCTATCTCGATGATGAAGATGCAGACTGGAAAACGACAACCCAGGGGCGAATAACAGTCCGTTGATACT  
TCCGCGACGCTGGCGTGGCGTCCGGTGCAGCGGGCAGAAAAACTGGTTCAGTTGTTGACTCCCGTGGAGTGTCCGCT  
GTTTCGATCAAAATATCCAAACGGTACTGTTGATGTTTTTCGCTGGCTGGCTGAGTTCACTGGTAAACCATTCGCTCAA  
AAGACGTGATGACCCGACTGTGAAAATCAGCGGTGTGGGCGTCCGTTCTGGCAGAGGAAGGCACCTGAAACAGTGAGC  
GTTACCGGCTGACGGTGGCACCAGCATCTGCCAGTGTAAAGTGGGAGCAACACCAGCTGACCTTTACAGTAAAC



TGACGGAGCCAGTGACAAAAGCGATCAGTGTGCATTCGTCAGATCCACAGACTGCCACGGTGACCTGAACGGGCTTGTAG  
CCACGGTGAAAGCGTGAAGCAGGGCAGTGTACGATTTGTGGCATGACCGCTGACGGGAATTTTGTGGCTGTGGCTGCG  
GTGACTGTCAGCGCCGAGGTTAA  
>Cluster\_7813  
ATGTCACAGTCTACATCCGTCGTTTCGTCGTAATGGATTTACTTTTAAACAGTTTTTTGTGTGTCACGATCGCTGTGCGAT  
GAAAGTGGGAACGGATGGTATTTTATTGGGCGCATGGGCACCGGTGGGTGGGGTAAAACGTTGCTTGATATCGGCGCGG  
GTAGCGGGTGTGTCGGCATTAAATGCTGGCGCAGCGAACCGATGACAGCGTGATGATTGATGACAGTTGAACTGGAAGTGA  
GCTGCGCGCAGGCGCAGGAAAAATCAACCAGTCCCGTGGGCGAGCGGATTAACGTCACATACGGCGGATATTCAGCA  
GTGGATCACACAGCAGACAGTACGCTTCGATTTAATCATCAGTAACCCACCTTACTATCAGCAGGGAGTAGAGTGTCTGA  
CACCTCAACGGGAACAGGCTCGCTATACCCTACGCTTGTATCACCCATCGTTGCTGACCTGTGCGGCGGAGTGCATTACC  
GAAGAGGGATTTTCTGCGTAGTGTGCTGCGAGAGCAGATTGGTAATGGTTTACGGAGCTGGCATTAAAGCATGGGCTGGCA  
TTTACGTTTGGGACGGATGTGGCGGAAAAAGCAGCGGACTGCCGATCGGGTGCTGCTGGCATTCTCCCGCAGGCGG  
GAGAATGCTTTAGCGATCGCTTAGTCAATCGTGGCCAGACCAGAACTATTCCGAAGCTATACGGCGCTGACCCAGGCT  
TTTTATCTGTTTATGTAA  
>Cluster\_24980  
ATGCGTAAAATCGCATTAAATCTTTCGATGTTGTTGATCCCATGCGTTTCGTTTGGCGTTTGTGTCGGCAGCAGTAGCTC  
GACCACCGCAGTGAACAAAGAGTATAAGCAGCAGTTGATGGGATCCCTGTCTACATCCAGATCTTCAAGGAAGAACGTA  
CGCTCGATCTCTACGTCAAAATGGGCGAGCAATATCAACTGCTCGACAGCTATAAAATCTGTAATATTCGGCGGCTTA  
GGGCCAAAACAGGCTCAGGGCGATTTCAAAGCCCGGAAAGGGTTTATAGCGTCCAGCGTAATCAGTTAAAACAGACAG  
CCGTACTACAAAGCGATTAATATCGGTTTCCCAATGCCTATGACCGTGCATGGTTATGAAGGGAATACCTGATGA  
TTCACGGCGATTGTTGTTTCCATCGGCTGCTACGCGATGACCAATCAGGGTATTGATGAGATCTTCCAGTTCTGTTACTGGT  
GCGCTGGTGTGTTGGTTCAGCCGAGCGTCAAGTGAAGTATTTATCGTTCCGCTGACCGACGCCAATATGAAGCGCCATA  
ATATTCCAACCTTTAAGGACTTCTGGGAGCAACTGAAGCGGGCTACGACTACTTTGAGCAAACCGTAAGCCACCGGACCG  
TTTCTGTGGTCAATGGCCGTTACGTGGTCAGCAAGCCGTTAAGCCAGAGTTGTGACGCCAACCTGGCATCAAACCTAC  
ACGCTCCCGAGGCAAAAATA  
>Cluster\_63630  
ATGAAAAATATTGCGACAGGCGATGTTCTTGAACGATCCCGAGACTGGCCCCGTACATGTAACCGGCCATTCAAGAC  
GGTAGCGGAGTGGCGGAGTGGCAACTTTCGGAAGGCCAGAAACGTTGTGAGGAGATCAACCGTCAGAATCGTCAGTTGC  
GGGTGGAATAAATCTGAATCGCTCTGGCATCCAGCCATTGCACCGCAAATGCTCGTTTTGCAATTACCAGGTGCAGAAC  
GAAGGGCAGCGATACCGCTTGTAGTACAGGCGAAATCCATCGCTGATGAACTGATGACCGGGTGTACAAATTTTGGCTTCAG  
CGGAAAACTGGTACCGGGAAGAACCCTTAGCGGCAGCTATCGGAAATCGCTGTGAAAGACGGTCAAGCAGTGTGATG  
TGGTTACCGTGGCTGATGTTATGAGTGCCTGCACGCCAGCTATGACGATGGGCGAGTCAAGCCGAAAAATTTTTCGGGAA  
CTGTGCGAAGTGGATCTGCTGGTTCTTGTGTAATGGCATTACAGCGGAGACGAAAAACGAGCAGGTGGTACTGCACCA  
GATTTGTTGATCGCCGACAGCGTGCATGCGCAGCGTGGGGATGCTGACAAACCTGAACATATGAGGTCAAGAAACATTGC  
TCGGCAGCGGATATTGGATCGCATGAACGGCGGGCGATGGGTGAATTTAACTGGGAGAGCTGGCGTCCGAAT  
GTCGTCCAGCCAGGAATTGCGAAGTAA  
>Cluster\_41486  
GTGGTAAACTTCTCGCATTTTGTGAAATCCTGGTTGAGGTATCTCTGAACACACCGGCCACAACCTCTCTTTGCCACTTTA  
TCTTCTGACGACGAAACCTTTGCAAGTTTCTGGCCGGGGATAAECTCTTCTTACTGGCCGCGCTGCAAACCTGTCTGC  
GTCAGGAACATAGCGGTTACATCTATCTCTGGGACGCGAAGGCGCGGGGCGCAGCCATCTGCTGCACCGCGCTTGC  
GAAATGTCACAGCGTGGCGATGCGGTGGGCTATGTCGCCGTGGATAAACCGCACCTGGTTGTTCCGGAAAGTGCCTGACCG  
TATGGAGCAATTTGCTGCTGCTGATTTGACAACATTTAGTGTATTTGCGCGGATGAGTTGTGGGAGATGGCGATTTTCG  
ATCTCTACAATCGAATCTGGAATTCGGGCAAAACAGGTTGTTGATCACCGCGGATCGTCCACCGCGGAGTTGAATCTG  
GGATTACCGGATCTCGCTGCGCTCTCGACTGGGGCAGATCTACAAATTCAGCCACTTCTGATGAAGATAAGTTGCA  
GGCGCTACAGTTACGCGCGCTTTCGCTGGTTTGAACCTGCGGAAAGATGTGGGGCTTCTTCTGCTGAAGCGGCTCGACA  
GAGAAATGCGCACGTTGTTTATGACGCTGGATCAGCTGGATCGTGCCTGATTTACCGCGCACGCAAGCTGACCATTCGG  
TTTTGTGAAAGAAATCTGAAGTTGTAG  
>Cluster\_5259  
ATGCAGACCCAGGTCCTTTTGAACATCCACTAAATGAAAAATGCGTACATGGCTGCGCATTGAGTTTTTGGATTGACGA  
ACTCACCGTTAATTTACCATCGTTGACCACCGTGGCGCGTGCATTTCTCCGTAATGTGATGAAATTAAGTTGATGTT  
TCGAGCGCGCGGAAATCCGCACTGAGCTGTTGAAAGAACTTGAACCGGCAAGCAAGTAAACTCCAGCAATGATGGCGGGT  
CCTGGCGTGGACCAGAGCGTATTGAAGCATTAAATCAGCAGTTAAAAGCGCGGGGAGCGTATTAATTTCCGCGCCGCG  
TATCGGGCAATTTCTGCTGAAAGATCGTTTGTGCTCTGGTGGCTGACGACTGAGCATCCAGCGCGCTGTTGACGCT  
TTGATTTACCTACATGACATTTGGCTGCATCTACCCAGGCGCAGCGGACAGCCAGGTAGAAACCTGGATTGCGCAGC  
CTGAACCCGCTCACCCAGGCACTTACCATGTTGCTGATTTAATTCGCGCAGTTCGGCCCTTCCGTAACAAACAGGCT  
GAATGGTTTTTATCAGGATAACGGTGGCGATGCGGACTTGTGCGCTGAATCTGCTGCTGATTCACAGCTTTATCCGC  
AAATTTCCGGACATAAGAGCCGTTTTCGCAATTCGTTTTATGCCCTGGACACTGAAAAAGGACAGGTACCGGAACGCTCTG  
GATTTGAACTGGCTGTTGCTAA  
>Cluster\_52586  
ATGGAATTAGTTGATACGTTATTTGCAAGCCTCTCCGGTACTGAACCATTCACCTGCGCTGGATATTACGATTGCAACTG  
CAAATCGACATACTGGGATGAAGGCATTGTTGACGAACTCATTAAACAGGTCCTGGATGAAGGGGAAAAGTTCCGCGGGT  
CTGCCGCTTGGGGATTAATCTCGATATGATGTCACATTAATATTGGTTTAAAGTCCAGCAATGATGGCGGGGATTT  
TCCCTCGATACCGCCACCATTAGCCGCTTGTGCTGCTGCTGCTGACTTTGGATTGACCTCTATATCAGTGTGATGAC  
AGATGTTCAATGTGATCTGAACACGACAAATGACTTACCCTGACAAATTTACGGCGATGCTCAACCCGGATGAGCGGGTGA  
TCATAGCAAAGCGTCCGCTTAAAAATGTGACGCTGGATTGAGGATGTTTATATCTTTCAGGTGTTTTAAAGAAAGCCTGG  
CAATTTCAAACCGTAACAGTTTTACGCGGATTTCCGATTAAGCAGGCTGAACCTGAAACTTACGCGGCTCATTACTCAGT  
GGAAAATGACAGAGGAAAGCTGTTGGGACTGTAATTTATGCAATTCGGCCAGCTTTTCCCTCTCTCGTGTGCTGATTA  
TTCGCTGAAATGCGCGAATGCTCGTTTTGTTTTATCAACCGTTTACACGCGATCAGCGGGCGAGGGGTAATATGCAACC  
CAGCCCGCTATGACGGCATTAAATTGA  
>Cluster\_24249  
ATGATTAACAACTATTGTCGCGTTGCTTTTGTGAGTGGGGGGGCTCATCAGTCTTCCGCGGGGAAACCGTCAAGGTGTT  
CAGCAATGGCAGCAGTGAAGGCTAAAACGCTGACGGGCGCAGAGCATTAAATCGATCTGGTAGGCCAACCGCAGCTGGCA  
ACAGCTGGTGGCCTGGTGGGTTGATAGCGAAGAGCTGGCCAGCGGCGAGCATTTGATGATGATGATGATGATGATGATGAT  
CGCTGGCAGAACTGGTTCAGACTCCAGCGGACGATGGCCGCGGATTAACGCTTACGCCAGCAAAATTCAGCGGTT  
GAAAGTGACGGGAGGCAAAAATCAATCTTGATCCTGATATCGTCCGCTTGGCGAACGCGGTAACCGCGCTTGCAGG  
GCAACTACACTCTGTGGTTCGGAACGCCCGCTCCAGCTCAGCTTGTTCGGGCTTATCAGTCTCTTGGCAAGCAGTCA  
TTCTCCAGGCTGGGAGCTGGCGAGCTATCTCTGTGACAGGCTGCTCAGCGGTGGGATTCAGCTCAGCTGCTGGG  
GGTTTACCCGACGGACGACGCAAAAAGCGCCGTTGCTTACTGGAACAAGCTCAGTGTAGAGCCGATGCCCGGAGCA  
TTATTTATGTTGGCTCGCGGACTCCGCTGAGTGTGACACCTGATGCCCTTACCGCGACATCTTTCAGACTCTGACG



AAAAGCCAATGGCGCTGGAAGAAACCTGGATGCCGCTTGGCTTGTCCCGGATCTCACCTGGCAGGTCATGGAAAATTCG  
AAATATCACTTTTATTGAAGAAGTGAAGAAAATGGTTATCGATCGTAGCGAACAGGAAATCATTCTCTGATGCCAACCGA  
AGAAATGAGCCGCTGCTTAATATCAGCCAGACTAAGCCGATTTCTGAAAAGTATCGCGTGGATATTTAGTTGATGGCC  
GGGTGTTTGAATATAGCCGCAACGCTTTTAAATACCGATGACTATAAATTTACCTGATAGCGCAGCGAAAATCATCGCGA  
TAA

>Cluster\_23968

GTGGATACGGAAATGTTAAAACCTTCCGGAAGTTAGCCGAACGCGTCACTTTGGTCTGAGCGGCTGAATCGCTCTATCT  
GACCAATCAGCCGTGAGCTTTCGAATCAGACAACCTGGAAAATCAACTGGGTGTAATCTTTTACCCGCCACAGAAACA  
ATATCCGTTTAAACCGCTGCCGAGAAAAGCTTCTTCCCTATGCGAAGAACGCTCATGAGCACCTGGCAGCGCCCGCCGAAG  
GAGGTGGCGCATACTCAGACATAATGAGTTTTCTATCGGTGCCAGCGCCTCGTGTGGGAGTGTATGCTTAATCAGTG  
GCTGGGACGTTTGTATCAAAATCAGGATGTCCATACAGGCTTACAGTTTGAAGCGCGAATGGCCAACGGCAGTCTCTGG  
TAAAACAGTTACATGAACGCCAGCTTGATCTTCTTATTACAACGAAGCCCCAAAATGGACGAATTTTGTAGTCAGTTG  
CTGGGTATTTTCACTTTAGCGCTTATATACCGCTTATACCGCTTCCCTTAAACTAAAGGGAGATCTTAACTATCTCGCATGAGT  
GGGGCCAGATTTTCAACAGCATGAGGCAGGTTTGTATCGGTGCTGACGAAGTTCCTATTTGACAACAGTCTTCTGCTGAAC  
TGGCAGCAACAGATGGCGATGCTTAATGGTTGCACCTGGCTACCCGTCAGTTGGGCACGTAAAAAGGCGCGCTGCAT  
ACCGTTGTGATAGCACAACTTTCACGGCCGCTTATGCCATATGGCTACAAAATAGCGATAAAAATGCGTTGATTCG  
CGATCTATTGAAAATTAACGTGCTGGATGAAGTGTATTAA

>Cluster\_56223

ATGAATGCACTGACCGCCGTACACAATAACGCTGTGATTCAGGCCAGGACTATAGCGGATTCACCTCTCATCCCGTCGGC  
GCAATCCCGCGTCTGCTGGAACCTCACCTTCACCGAACAGACGACCAAAAGTTCCTCGAACAGGTTGCCGAATGGCCCG  
TGCAGGCGCTGGAGTACAAATCGTTTCTGCGTTTTCGGGTAGGCAAAATCTTGTACGATCTGTGTGCGAATCAGCTGCAA  
CCATGTCTGTTGAAGACCTGCTAAACCGTGTGAAGTGCCTGTTGATCAATGCGGTGGGTATCGATGATGTGGCGCA  
GGCAGATGAGATGGTGAAGCTGGCAACGGCGGTAGCGCATCTGATTTGGTTCGCTCAAAATTCGATGCGATGAGCGGTGAGT  
ATTCGCGCGCTTTCGTTGTTGAAAATGTGATAACTCAGACGACTATCTGCGTCAAGCCGACCCGCTGATGGAATGCA  
AACGACGGCAGTATGTCGAAGAGATCACCGATTACGCTGCTGATGATAAAAATCGATGAGCAAAACATGCAGGTTGAAA  
TTGCTGTGCTGCTGATCTCGATGACTGGGAACATCTGGACCATATTTCCGCCACCCGCTGGCGGCTGCCCAATGCGCT  
TTGCCGCGCCGCGAGTAAAACGTCAGCAAAGATGTTTCCATCCGGTGTTCGACGTTGATCAACAGGTTGCGCCGTTG  
ATGCGTTAATATCGACAGTTCTGCTCCAGCCAAAGACTTCGCAAGAGCGTGTGGTTGAGCGAGCTTTCCGACGCTATTGA  
AACAGCAAAGGCATTTCTTCTGTGCCGCTTCCGTTGGCAAATCTCTGTTGATTAACAACCTGTTCTGGCTGCACGGT  
GCGACCGCTTACTCCGCACCCGATCTGCGCCGTGAACCTGATGCGTCAAGCGTGGCTATTTCCGCTTACGCCACTACCCAC  
TACCAGACGCATCAGTAG

>Cluster\_16878

ATGAAAAGATACCTTTAGGCACAACGGATATAACGCTTTCGCGAATGGGGTTGGGGACATGGGCCATTGGCGCGGCTCC  
TGCAATGGAATGGCGATCTCGATCGCAAAATATGCATTTGATACGATTTCTGAAGCCCATCGTTGCGGCATTAACCTGATTTG  
ATACTGCGCCAGGATAATAACTTTGGCAATAGTGAAGTTATCGTTGGTCAAGCGCTTAAAAAAC TGCCCGTGAACAGGTT  
GTAGTGAAAAACCAATGGCCATTTGCTTGGGAACGAAAAGGAGTTTATTTCAACAAAAGTTGGCGATCGCAGCTGATA  
AAACCTTTCTCCGAATCTATCCGCGAAGAGGTAGAAGCCAGCTTGAACGCTTGGGTATTGATTACATCGATATCTACA  
TGACGCACTGGCAGTCCGTTGCCGCCATTTTTCAGCCGATGAACTGTGCGAGTCTTAATGCGTTAAAGGCCGAA  
GGGAAAATTCGCGTATAGGCGCTGCTAACGTCGATGACCATATCCGCGAGTATGCAACATGGAATGGAATGGAAT  
TATTCAGGCGAAATACAGTATCCCTCGACCGGGCAATGGAACGAACTGCTGCGCTATGTGCTGATAATGGCATTTGTTG  
TACAGGCTTACTCTCCGCTAGAGCAGGGATTGTGACCGGACCATCAGCGTGTATTACGTTCCGGCGGCGCTCGGGCA  
AATAAAGTCTGGTTCCAGCGTGAAAACATGCTGAAAGTGTATGATGCTTGAACAGTGGCAGCCACTCTGTGCTGCTTA  
TCAGTGCACAATTTCCACTCTGGCAGTGGCGTGGATATTAACACAGAGTGAATTAATCTCCATTTCTAGTGGGGTACTG  
CGCCGAAACAGGTACGTGAAAATGTCGCGGCCTGAATATCAACTTATCGGATGCAGACGCAACATTTGATGAGGGAAATG  
GCAGAGGCCCTGGAGCGTTAA

>Cluster\_62639

ATGACAGACTTAACTCCAACGCCCTCGTTCGCTGCGCAATCTCTGCGTTCGCGCTATGTTTGAAGAGACAACACTTAG  
CCTTAAACGACCTGGTGTGGCGATCTTTGTTGAAGAAGAAATGACGACTACAAAGCCGTTGAAGCCATGCCAGGCGTGA  
TGCCGATTCAGAGAAAACATCTGGCAGCGAAAATGAAACGCACTCGCAACGCCGATCCGTTCCGTAATGACTTTTGGC  
ATCTCTACCATAACCGATGAAACCGGACGCGCCTGGCGGGAAGATGGACTGGTGGCGGCTATGTCGCGCATCTGCAA  
GCAGACTGTGCGCAGAAATGATCGTATGTCAGACACTTGTTCGTGAATACACTTCTCACGGTCACTGCGGCTGTCTG  
GCGAGCATGGCGTGCACAACGACGCGACTCTGGAAAATTTAGGCAAGCAAGCCGTTGGTTCAGCTGCTGCAGGCGCAGAC  
TTCATCGCCCTTCCGCCGCGATGGACGGCCAGGTACAGGCGATTCGTCAGGCGCTGGACGCTGCAGGCTTTAAAGATAC  
GGCGATTATGCTGATTCGACCAAGTTCGCCCTTCTTTTATGGCCGTTCCGTTGAAGCTGCCGGAAGCATTAAAAAG  
GCGACCGCAAAAGCTATCAGATGAAACCCAACTGCGCAGGCGAATTCGTTGAGTCACTGCTGGAATGGAAGCCAGGCG  
GCAGACTGCTGATGGTTAAACCTGCTGGAGCGTACCTCGACATCGTGGCTGAGCTGCGTGAACGTACTGAATGCGCAT  
TGGCGCGTATCAGGTGAGCGGTGAGTACCGCATGATTAAGTTCCGCCGCTGGCGGTTGCTATAGATGAAGAGAAAGTCTG  
TGCTGAAAAGCTTAGGTTCAATTAAGCGTGGCGGTGCGGATCTGATTTTACGCTACTTTGCGCTGGATTGGCTGAGAAG  
AAGATTCTGCGTTAA

>Cluster\_10317

ATGGCATGTGGCGAGTTCTCCCTGATTGCCGTTATTTTGACCGTGAAGAAGTTCTCGTCTTGTATGTCGAACTGGGCAT  
CGGCGAGATTGGCGCTTCTCAATATCCCGAGAAAACAGACCTGGCGATCAGCACTGATACGCTGGTGGCGGCAACC  
ACTTCTCCATGATATCGATCTGCTGATCTGGCGTATAAAGCACTGGCGGTGAACCTAAGCGATCTGGCAGCGATGGGG  
GCCGATCCGGCTGGCTGACGCTGGCATTAACCTTACCGGACGTAGACGAAGCGTGGCTTGGTTCCTTCAAGCAGCTTT  
GTTTGTATCTTCAATATACGATATGCAACTCATTTGGCGGCGATACACGCGTGGGCCATTATCAATGACGTTGGGTA  
TCCACGGCTTTGTTCCGATGGGACGAGCCTTAAACGCGCTTGGAGCGAAACCGGCTGACTGGATCTATGTCAGCGGATA  
CCGGGCGATAGCGCCCGGGCTGGCGATTTTGCAAAACCGTTTGCAGGTTGCCGATGCTAAAGATGCGGACTACTTGAT  
CAAACGTCATCTCCGTCATCGCGCGTATTTTACAGGACAGGCACTGCGCGATCTGGCAAAATTCAGCTATCGATCTCT  
CTGACGGTCTGATTTCCGATCTCGGCAATATCGTGAAGCCAGGCACTGCGGCGCAGCTATTTGACCTGGCATTTGCTCC  
TTTTCTGATGCGCTTTTCTCGCCATGTTGAACCGCAACCGGCGCTGCGCTGGCGGCTCTCTGCGGCTGAAGATTACGAGTT  
GTGTTTCACTGTGCCGAACTGAACCGTGGCGGCTGGATGTGGCTCTCGGACACTGGGCGTACCCTTACCTGTATCG  
GGCAAATGACCGCGATATCGAAGGGCTTTGTTTTATTCTGTCAGCGCAACCTGTCACCTTTGACTGGAAGGATATGAC  
CATTTTGCACGCCATAA

>Cluster\_32459

ATGAAAATGAGGTCATTTACCCGCTCATATTAGCTGCGCATCTTGTGCTGGCTCTGGTTAGCACTGGCGTAAACGCCACAGA  
AAAAGTGAAGCTTAAAGTTAGCACACAACCTGGAAGAAGTCAATGTTGATCATCAGAGTTTGAAGAGCTGGCAGAAAGG  
TAAAACAGCTGTCAAAAAGTAAATATGGTATCCGTTATTTTCCAGCAGCCAGATGGGTAATGCGCGAGAAATATGGAA  
TTGTTGCAAAATGGCGCACTGGATATGACCAAAGGTTCCGCCAGTGTGAGTCTTTTGTATAATATTTATGCTATCTA  
TAAATTTGCCGTTCTTATTTAAAGATCAGGCTCACTTCAACAAAAGTTGTTTTGGTGAAGTTGGTAAAGAAATTTAGGACT

CAACAAAAGACAAAGGCTTTTTTGTCTTTATCAGCTTATGTAGCGGTACACGCAGTTTCTATGCGAAAAACCGATTACT  
AAGCCAGAAGATCTTAAAGGGCTGAAAAATTCGTGTTTCAGCCAAGCCCGACCACCATCAAATGATTGAACTGATGGGTGG  
CTCACCCTCAATTTTCAATTTGGCGAAGTTTATACTGCGATGCAGCAAGGTGTAGTAGATGGCGCAGAAAAACAGTGC  
CTTCTGGGTGCAGACTGCAGATATCGAAATGGCCAAAGTCTTTTCTGAAAGATGAACATGCCTCAATTCCTGCATTTTTG  
GTTATCTCCACCAAACATGGAATAAAATTAACCCGAAACAGCAACAAATCCTCGAAACAGCGGCAAAAAACCGAAGC  
TTATCAACAAAAATTTGTGGGAAAAAATTTGACGCTGACACACGTCTCAGCGGAAAGCTATGGGTGGTGAATCGTTAAGG  
TTGATAAAGCCCCATTCCGTGCCGAGTTCAACCTCTGTTGACGACTCAAAAAAGATCCAAAAACAGCTGCTTTGTTA  
GAGAAATTCGATAACGCTGCTCAATAA

>Cluster\_28259

ATGACAGAGAAAACCTTTGCCAGTCCGAAACCTTCGGAAATTCCCATTGCAAAATAATTTAAAAAAGTCTTCAGGCAATA  
TGGTGGTATCCTCAGTGGAAATGGTGGTGTAAATCATTCCTGTTTCAGTTTATTAATGACAGTTTTCCTACGCCAATAACA  
TTACTAATATATTTCTTCAGGTTTCGATAAATGCAATTACCGCTATGGAATGACTTATGTGCTTTTGGCTGGCGATATT  
GATTTATCCGGTCCGTTCAACCATGTCATGATTTGGCACATTTGCTGCGCTTGGGGCTTCATGGGAAATTCATTTGTTTT  
ATTGGTCCCATTTATCCATTTATGACGACTGGCTCTGGGGATGATAAATGGTGGCTTGACGGCTATAGCGGGATCCCTT  
CGTTTATTGTCACCGTTGCTACTATGGGGATCTCCCGTGGTATCGCTTATATAGTGACGTATGTTATGCCCATCATGAT  
AAAGATGATGCCTTTCTGGCGTGGGAAATGGAGAATTTCTCTATATACCTATTCCTATATGGATATTAATCATCTTATT  
ACTGATAAACCTTCATTTCTTACTAAAAACAACCTTTGGACGAAAAATTTATATCACTGGTGGTAATAAAGAAGCGGCAA  
TTTTATTACAGGATAAATGTCACCGCTTAAAAATTAAGTCTTTATGATTACAGCCGTGCTGGCAGGTATCAGCGGGATG  
ATCCTTGGCTCAGCCTCTATTCGCGGCAACCGAATTCGCGTTGAGCTACGAACTGGATGCTATTGCCGCGAGCTGTACT  
GGGAGCCACAGCTGAACGGCGGCTATGGAACCGTGGTGGGACGGTATCGGCGCATTAACCATCGCGCTTATTAATA  
ATGGCATGAACTTAATGAAATGTTCTTTATTTTTACAGATGGTGGTAAAGGATTAGTCACTTCTGTAGCCGTTATTTTT  
GACGTAAGAAATAAAGAAAAACGACGCTAA

>Cluster\_4390

ATGCAGATAAAACGCTCGATTGAGAAAAATCCGGGGGGATGATGCTCGTCCGCTATTCCTTGGCGACTGTGCCACAC  
CTTCTCGCCGGGGGGGGGAAATATTTGGATCATTACCAACGGGATGATTACCGGTACGGTGCCCATTTCTGGCGGTGT  
GGTTTTTTTGCATGGGGCGTCAATAAAATTAAGCGCGACGGGAACGGTATTGCGTAAATCCGGTACGCTGGTGGTAACA  
AAAATTTGCCGTCGCGTGGGTGGTTGGCGCAATTCCTCGGCATTATTTCCGGAACATGGTGTGAAGTTGGATTCTTTGC  
CGGACTTTCAACGCTGGCCTGGTGGCGGCGATGACCAATGGCGGACTTTACGCTTCCATGTCAGACGATCAG  
GCACAAAAGAAGAAGCTGGGGCATTTGTGTTGATGTCGTTGGAGTCCGGGCGCTCATGACGATGATTATTTGGGCACT  
GCAGGGATTCGCTTGTGAAACGCATGTTTTCGCTCGGCGCAGTATTACCGTTCTGGTGGGCTTTGCCTGGGGAACCT  
TGACCCTGAATTACGAGAATTTTTACGCAAAAGCGGTGCAACCGCTGATTCATTCCTTTGCCTTCGCGCTGGGCAATACA  
TTGATTTGACTGTGATTGCCAGACTGGTTTGCCTGGGATCCTGTTGGGTGTGGCAGTAATTAATCGTGACCGTATTCCG  
TTGATTATCGCCGATAAATTTGATTGGCGGTGGCGATGGCACTGCCGGAATGGCGCTTCCAGTCCCGAGGGGCGCGGT  
AGCGACACCTGTGCTGATTCGAGAAATGGTGCCTGCGTTTAAACCGATGGCTCCGGCAGCAACTTCGCTGGTAGCGACGG  
CGTCAATTTGACTTCGATTCGTTGTCGCAATTCCTACCTCTATCTGGTACGTAAGTCAAAGCCAGACGCGAAAAATC  
GAAATTTAGGTACGGTGAATAA

>Cluster\_37921

ATGAATAACAGCGCTTTTTACTTTCCAGACACTACACCCGGATACCATCATGGACGCTCTGTTTTGAGCATGGGATCCGGGT  
GGATTCGGTCTTACCCCTTAACAGCTATGAAAACCGTGTCTATCAATTTACAGCAGAAAGATCGTCGACTTTTGTGCG  
TCAAATTTTATCGCCCTGAACTTTGGACAGCCGATCAAATCCTCGAAGAACATCAATTTGCGTTGCAGCTGGTAAATGAT  
GAAGTTCCGGTCCGAGCAGCTGTGGCTTTAACGGTCAAGCTTTATGAAATCATCAGGGATTTTATTTTCGCTGTTTTTCC  
AAGCGTCCGTGGTCCGAGTTCGAAGCTGATAAATATCGATCAGATGGAAGCGTTGGGCGTTATTTAGGGCGTATGCACC  
AGACGGGGCGCAAAACAGCTTTTTATCCATCGCCGACCATCGGTTTGAACGAATATCTATTGAGCCACGCAAGCTGTTT  
GAGGACGCTACACTGATACTTCCGGTTGAAAGCGGCATTCTGAAAGCGACAGATGAGCTGATTGCCGCGTTACAGC  
ACACTGGCGGGAAGATTTACCGTTCTGCGGCTACATGGAGACTGCCACGCGGGAATATCTCTGGCGGATGGTCCAA  
TGTTTGTGATCTGGATGATGCACGTAATGGTCCAGCCGTTTCCAGGATTTGTTGGATGTTGCTCAATGGCGATAAAGCCGAG  
CAGCGGATGCAACTGGAACCTATTTAAGCTTATGAAAGATTTAGCGAGTTGACACCGCTGAAATCGGACTGGATTGA  
ACCTTTACCGCCATGCGTTTGGTTTATATCTTGCCTGGCTAATGGCGGCTTGGGCTGATCCCGGTTCCCGAAAAAT  
TCCCGTGGTTAACCGGGGAAGATTAAGTCTGCGACAGACGGGACTTTTATAGAACAGGCAAAAGTTTCAACAAGAACC  
CCTTTGCAATTAACACTATGATTTAA

>Cluster\_40159

ATGAAATTAACAACACTTCGCTATATTGTTGAGGTGGTCAATCATAACCTGAATGTCTCATCAACAGCGGAAGGACTTTA  
CACATCACAAACCCGGGATCAGTAAACAAGTCAAGATGCTGGAAGACGAGCTAGGCATTCAAATTTTTTCCGAAAGCGGCA  
AGCACCTGACGAGTAAACGCCAGCAGGACAAGAAATAATTCGTATCGCTCGCGAAGTCTGTGCAAAAGTCCGATGCCATA  
AAATCGGTCGCGGAGAGACACCTGGCGGATAAAGGCTTCGCTGATATCGCCACACGCAACGCAACGCTGCAAGCTGAT  
GTTACAAACGTCATCAAAGGCTTTATTTGAGCGTTATCCTCGCTTTCCTTTGCATATGCACCAGGGCTCGCCGACACAAA  
TTGCTGATGCCGTCTTAAAGGCAATGCCGATTTCCGATTTGCCACAGAGCGTGCATCTGTATGAAGATTTAGTATG  
TTACCGTCTACCACTGGAATCGGGCTATTTGATGTCACCTCGGATCACCCTGGCAGGCAAAAAAGCATTTACCATTTGA  
AGAACTGGCGCAATATCCGTTGGTGACATATACCTTCGGCTTTACCGGACGCTCAGAAGTGGATGCTGCTTTAACCGCG  
CAGGGTTAACCGCGGATTCGCTTTCACGGCAACGGATGCTGAGCTCATTAAGTACCTGCGGTTAGGGTTGGGGGTA  
GGGGTTATTGCCAGCATGGCGGTGGATCCGGTCCGGATCCCGACCTGGTGGCGGTTGATGCTCACGATATCTTCAGCCA  
CAGTACAACCAAAATTTGGTTTTCGCGGTAGTACTTTTTGCGCAGTTATATGATGATTTCAATTCAGCGTTTTGCAACCCG  
ATTTAACGCGTGTGCTGTTGATGCGGCTGTCGCTCAATGAAGAAATTTAGGGCATGTTTAAAGATATAAAAA  
CTGCCGAAAAATAA

>Cluster\_44468

ATGAATACACTTGAACCTGCTGCCAGTCAAAACCGCGGGCGGATTTAAGCTGTGGTGTGCGCAGTGCATAAAGCA  
TGGGCGCAAACTGGTCAATGGCTTGGCATAATCTGGTTGATCTGCTGTTTCGCTGCCATTTCTGATTGCTTTAAAA  
TAAGCCTGGCGGAGATGGCGCGCCTATTCACCTTATACCGAAGTATGAGTGGGCTGACGGGCAACTGTCCATCACT  
CTTAATCTCGGTAATTTCTGCAACTACCCGACGATCCGCTTATTTTCGATGCTTATCTCCAGTCCGTACAGGTGGCTGC  
GATTTGCACATTTTGTCTTACTGATCGCTATCCGCTGGCGTGGCGGTCGCGCACAGTAAGCCTTCCAGCCTGCAATAA  
TTTTATTACTACTGGTATCTTCCGCTGCTGGACCTCGTTCTGATCCCGGTTTATGCCCTGGATGGGAATTTAAAAAAC  
AACGGTGTCTGAATAATTTCTGCTGTGGCTGGGGTTATCGATCAACCGCTGACCATTTCTTATACCAATCTGGCAGT  
TTATATTGGCATTTGTTTACGCTACGTCGCTTATGTTACTGCGGATTTATACCGGCTGATTCGTTGATTTGATTTCCG  
TGGTGAAGCAGCGCTGGATCTCGGTGACGACCGCTGAAAAACGTTCTTTACTGTGATCGTGGCGCTGACTGAAAGTGGG  
ATTTATGCCGGATCGATGCTGGTGTATCCCGCTGTGGGCGAGTTTGTGATCCCGAAGTGTCTGGTGGCCGGACAG  
CATCATGATCGGGCGCTGCTATGGCAAGATTTTCAATAACCGGACTGGCGGTTGGCTCGCGGTAGCGATCATCA  
TGTGCTGCTGCTAATTTGCGGATAATGTGGTCCACAAACAGCAGCAAAAGCGTGGGAGAACACGGATGA

>Cluster\_35086

ATGTATACGAAGATTTATGGTACTGGCAGCTATCTGCCGACAAAGTGGGACAAACCGGATTTGAAAAAATGGTGG

CACCTCTGACGAGTGGATTGTCACTCGTACCGGTATCCGCGAACGCCACATTGCCGCGCCAAACGAAACCGTTTCAACCA  
TGGGCTTTGAAGCGCGCACGCGCAATGAGATGGCGGGCATTGAGAAAGACCAGATTGGCCGTATCGTTTGGCAACG  
ACTTCTGTACGCACGCTTTCGCCGAGCGAGCTTGTGAGATTCAAAGCATGTTGGGCATTAAGGTTGCCCGGCAATTTGA  
CGTTGACGAGCCTGCGCAGGTTTACCTATGCATTAAGCGTAGCCGATCAATACGTGAAATCTGGGGCGGTGAAGATG  
CTCGTTCCGATACGGCTAACCTGCGTATTTATCAGTGCACCGTCAACCGATCGTGGGACTATTATATTTTGGCGGTGG  
CGGGCGGTGCGGTGCTGGTGCCTCTGAGAGCGGGGAATCATTTCCACCCATCTGCATGCCGACGGTAGTTATGGTGA  
ATTGCTGACGCTGCCAAACGCGACCGCGTGAATCCAGAGAATCAATTCATCTGACGATGGCGGGCAACGAAGTCTTCA  
AGTTGCGGTAACGGAACCTGGCGCACATCGTTGATGAGACGCTGGCGGCAATAATCTTGACCCTTCAACTGGACTGG  
CTGGTTCCGATACGGCTAACCTGCGTATTTATCAGTGCACCGTCAACCGGCAAAAAAATCGGTATGTCATGGATAATGTCGTT  
GACGCTGGATCGCCACGGTAATACCTCTGCGGCTCTGTCCGCTGCGGCTGGATGAAGCTGTACGCGACGGGCGCATTA  
AGCCGGGCGAGTTGGTTCTGCTTGAAGCCTTTGCGGCTGGATTACCTGGGGCTCCGCGCTGGTTCGTTCTAG

>Cluster\_39194

ATGCGGGCGAAACTTCTGGGAATAGTCCTGACAACCCCTATTGCGATCAGCTCTTTTGGTCTTACCGAGACTTTATCGTT  
TACTCTTGACAACATAAATGCGGACATTAGTCTTGAACCTCTGAGCGGAAAAAACAAGAGCGTGTATCTAGCCGAAG  
AAGGAGGCGGAAAAGTCACTCAACTTGAAGTTCATAAAGCGCTGCAATTAATAAGGGGCAATTAATGGGATTG  
ATGCCCCAGATATCTATCGGGGCTGCTGGCTGGACAACCTCGGTAGCCGAGGTGGCAATATGGTCGATCGGGACTGGAT  
GGATTCCAGTAACCCGGAACCTGGACGGATGAAGTGAACACCCCTGATACACAACCTCAATTAATGCGCAACGATTTGATC  
TGAATATCAAAGGCTGGCTCTCAACGAACCCAAATACCGCTGGGACTCATGGCCGGATATCAGGAAAGCCGTTATAGC  
TTTACAGCCAGAGGTGGTTCTTATCTACAGTCTGAGGAGGATTCAGAGATGATATCGGCTCCTTCCCGAATGGAGA  
AAGAGCAATCGCTCAAAAACAGCTTTTAAATGCCCTACATTTGGCTTACTGGAAGTTATCGTTATGAAGATTTTGAGC  
TAGTTGGCACATTTAAATACAGCGGCTGGTGGAAAGCATGTGATGAAACGATGAGCACTAGACCCAGGAAAAGAACTACT  
TATCGCAGTAAAGTCAAAGACAAAATTAATCTGTTGAGTCAATGCAGGTTATTAAGTAAACCTAACGCAAAAGT  
TTATGTTGAGGCGCATGGAATCGGTTACGAAATAAAAAGGTAATACTTCACTTTATGATCACAATGATAACACTTCAG  
ACTACAGCAAAAATGGTGCAGGCATAGAAAACATAACTTCATCACTACTGCTGGTCTTAAGTACACCTTTTAA

>Cluster\_34497

GTGGATAGTAATAATCAAAATGAACCCCTGTTTAAAGCAGAAAGTCTGAGAAAGTAAACCAAAATATTTACAACCTTACG  
AAATATGATCTTAACTTCTGACTATTTTGAAGCTGTATATGTACATAAAGGGATCGTAAATGCAGCGAAAGTGTCTTA  
ATCTGACCCCTCGGCAATCAGTCAGTCTATTTCAGAACTGCGCGTTATATTCCCTGACCCATGTTTATTCGCAAGGC  
CAGGGTGTCACTCTACCGCATTTGCGATGCATCTACATGAGTATATCAGTCAGGGCCCTGAGTCCATCTTGGCGCGCT  
GGATATCGAAGGAAGCTATGATAAGCAACGATAACTATTGCGACCACTCCTCGGTCCGAGCACGTTGCTCTCCCTG  
TCATCTATCGGGCGATTAACACTCACTATCCGAGCTTTTACTGCGCAACCCGCCCATCAGCGACGCGGAAAACCACTC  
AGTCAGTTTCAAACCGATCTCATCATCGATAACATGTTTTCACCAATCGTACGGTGC AACATCATGTTCTGTTCAACGA  
CAATATGGTGTAAATTTGCCGCGAGGGAATCCACTACTCTCTTTAGAAGATGACAGAGAGACTATCGACAACGCTGCGC  
ATGTAATCTCTGTTACCGGAGAGCAAAATTTACGCGGCTGCGGCAGAGAGTTCAAGAAATGTTTCCGACCGGCAAAATC  
AATTTACCAGCTACAACATTTGACAATCGCTGCAGTGGTGCACACAGTGCATGTTAGCGATTAATCCAGCCGTTT  
TTAATACCTGTTTAAACCGTCTGCGGCTGGA AAAACTGCTTTTCCGCTCTTAAATGAGGAGCAAAATAGATTTCTCTTA  
TCCACTACAACAAATTCAGCCTGCGTGATCCCATCTGACCGGAGTAATAGATGTTATCCGTAATGCATTTTGA

>Cluster\_54956

ATGAGAACCCTTAAAGGTATTCGAGGAAGCTGGCCCTTACATACCCGCTTTGTGATTGCCCGGGGAAGTCGCAGTGAAGC  
GCGCGTGGTGGTGGTTGAACTGGAAGAAGAGGGTATTAAGAGCACCGGCGAATGCACGCGCTATCCGCGTTATGGGAAA  
GTGATGCCCTCGGTAATGGCGCAAAATATGAGCGTGGTCCGCAACTAGAGAAAGGGCTGACACGGGAGGAGTTGCAAAA  
ATTTCTCCCTGCCGCGCAGCACGTAATGCGCTGGATTGTGCATTTGTTGGGATCTGGCCGCGCGAAGACAGCAGCAATCGCT  
GGCTGATTTGATTCGGCATAACGCTTCCGAGACAGTTAATCACTGCACAGACGGTTGTATCGGTACGCTGATCAGATGG  
CCAATAGTGCATCAACACTCTGGCAGGCAAGCGGAAATTAAGTAAAGTGAAGCTGGATAACCATCTTATCAGTGAGCGG  
ATGGTGGCAATTCGCACAGCTGTGCCGATGCGACGCTGATCGTTGATGCAAAATGAATCCTGGCGTGCAGAAGGGTTGGC  
GGCGGCTTGCAGCTAATGGCGGATTTAGCGGTTGCGATGCTTGAACAACCGCTTCTTGCAGGACGATGCGCGCTGG  
AGAATTTTATCTACCTGTTGCGGATTTGCTGATGAAAGTGGTGCATACTCGTAGCAATTTGAAGCGCTGAAAGGGCGC  
TATGAGATGGTTAATATTAAGCTCGATAAAAACCGGGGCTGACGGAAGCGCTGGCGCTGGCGACTGAAGCGCTGCACA  
AGGTTTCACTGATGCTGGGCTGCATGTTGTGTACCTCTCGTCCATTAGCGCGCTTACCCTGTTGCGCGAGGTC  
GTTTCCCGCATCTTGACGGACCGACCTGGCTGGCGGTAGATGTGGAACCGGCGCTTCACTTACGACGGGCGAATGCA  
CTTTAG

>Cluster\_39447

ATGAGTGAAGTAAACAGATTTAGTGTATTGAAAAAGCAATGCAATGACTGTATTTCACTGCTCCGACCCAGATTGAAGA  
AATCCTTCAAAGGTTGAACGTGAAGTTATGCTCTTGTGCTGATATCACAACGGCAAGGGCAGAAAGGAGATCGCTT  
CTCTGGCGTATAAAGTTGCGCAGACGAAACATATCTGCTGGTCTTGGCAAGACCTTGTGCTGAACTGAAAGGAAAT  
CCAAAGCTAATGATGCCAACCGCAAGACAGTGGCGATGCGCTTGTGATGAGCTGAAAGCAAGGCGCGCCAGCTCTTAC  
TGATATGAGGAAGAACAGGCGCGGATTAAGCGAAGAAGAAGCTAAGGCAGAAAGCTGAAAGCTCTCGCAAGCAAAATG  
AGTCTGACCATGAAATAGCTATTTGATGGATCGGAAATTTGACCGCAAGAGAAGAGGCAAGACTCAAGCGGAGCAG  
GAAAAGCAGAGCATGAAGAACCGTTAAAAAGAGAAGCTGAAGAGAAGCCAGAGCAGAAAGCCGAAAGCAAGGCAAAAGC  
CGAAATTTGAAGCAGCAGCAAGGCGAGAAGCAGAAAGCTAAGGCCGAGCAGAACGTCAGAGCGTGAACGCATTGAAGCG  
AGCAACGAGCACAGCGCAAGCAAAAGAGGCGAGCAACGAGCTGAAAGAGAAGAGGCGAGCAATGAAGCAGAACCG  
AGAAAAGCAGAGGAGGCTGAACGAATCCGTGCGGAGGCTGAAGCAAAAGAGCAAGCCAGAAATAGCAGAAGAAAAAG  
AATCAAGGACGAAGAAGAGCGTAGAGCAAAAGGCTACCGGAAAGAAGTGAATAACAAAATACCTGCTGACCTTA  
TCAAGTTGGTGCATCAGAAGATGTTGCTAAAAATATCATAACAGCCATCGTAAAGGCGAAGTATTCGCAACAAAAATA  
ACCTACTAA

>Cluster\_42319

ATGAGTAAAGTCTTCAAAATGGAGAAATCTGGTTGAAATATGCGGAGTAAATCGGCCAGCCATTTGATCAACCAGG  
TATCTGGAACGGCCCTTATCCAGTGGTGGCGCCGCTATTTTTATCGACCGAGTGACAGCTTGGCGTCCCGTGGCGGA  
TCATTAAGTGGCGGGAATGATGGCTTTGGTATATTAATATACATCGTCTGGCTGCTGACGGTGTGGACATCAGGGG  
ATTTCACTTACTTACCTTGAAGCCACCGGTAGTCTTTGTTACTTATCATAACTCTGGCGATCCGCAATTTTAA  
TATCAAGAAATGCCGCTTGGCGTAAATATCGGCACAGCATGTTGATGAAAATAATCTGAAGGATGTACCATTTTCATA  
TTATGGGTTTCACTCTGTTTCACTTATGTTAGACGAGTAAAAAAGCAGTAACCATCGTTAAAGCAAAATGGTGGC  
GTTATTTCTTTCGACCCGAATATCTGTAAGAGATGCTCGATATTCAGAAATGCGCGATGCCCTCCACTTTGTTCTGA  
GTTAACAGATATCTACATGCCAGCGGCGAAGTGTGCTCTTGTGCGCACACTGCACACCGGAGCGTGAATCTGCTG  
GTTTTCTTGAAGAAGGTTTAAAGAGTGTGTAAGCGCGCAATCAAGGAGCCAGTACTACTCCGCAATGAGCAG  
TTTCTATGTTGAGAGCTATCCGTTGGAAGAAGTTGACCCGACCGGTGCGGGAGACTGTTTGGTGGCGCATGGATTTGCTG  
CCGCGAGCTAGGGTTGACGCCCATCGGCATTAACAATGCTGCGGTGACTGGCGTGAACCCGAGTAAACCCGAGTGGC  
CAATGAGGGAACGTTCTGCTTATGGAATCGAAACGTTTCACTCCAGCGCCATGACATGTTCACTTCCGGAAGCAGCAA  
TGA

>Cluster\_25583

ATGGACTATCGCAAAATCATTAAGAGATCGGGCGCGGAAAAACACGCGCGGATTTAGACCGGGATACTGCGCGCGG  
TCTGTATGCCCATATGCTCAATGGTGAAGTCCCTGACCTTGAGTTGGGCGCGTATTGATTGCGCTACGTATCAAAGGGG  
AAGGGGAAGCAGAGATGCTCGGCTTTTACGAAGCCATCGAAAATCACACCATCAAGCTGACCGCGCTGCAGGCAAGCCG  
ATGCGGCAATTTGCCGAAGGTGAGGCACTGCGTCTTTCCAGCGTTTCGCATCCGGAATACATTTGGACGCGTGCAGAA  
ACTCGGTTTTCTGTGGTGGTTACGGGTTAGCGAAGATCCAACCGCGTGTGACCGAAACCAATTTTTCGAAGTGTGG  
GTATTACGCCAACGTTGACGGCGGGCAGGCGCAGGCGAACTCGACGAACATCAACCTGTCTTTATGCGCTGTGCGCGG  
TTTTGCCCGCGCTGAAAAACAACCTGGCGATGCGCTGGCGGATGGGCGTGCCTAACAGTGCACATACCTGGCGAACT  
GGCAGCGCAATTTGCCGAAGGTGAGGCACTGCGTCTTTCCAGCGTTTCGCATCCGGAATACATTTGGACGCGTGCAGAA  
TCTTTAGTGATATCGCGGGCGGGCGCTACTAATGCATGGTACTGAAGGTGAAGTGTATGCTAATCCGCGAGCGTGC  
CAGATCAATCTCATTTGACCGTGAAGGGATGCGGCTACTGTATGAAAAACAGGGCACTGCTGGTAGCGAGTTACTGCCACA  
AGCAAAAGATCCGGAACACGGCGCAGTGGATTGAGCGTTGCTTGGTGGCAGCGAACCGATTCCCGAATCGCTGAAAA  
TCCAGATGCTTGTGCTGATGGCTACGGGTGAAGCGCAACTATCAGCGACGGCTTGGCGCGGTTAATCAGGCATTT  
TAA

>Cluster\_43230

ATGAACGCTAAGATAATTGCTCGCTGGCTTACCAGCATGTTACGCTCAGCACCTGTTAAATCCGGCATACGCCGA  
AGAGCAGGAAAAGCGCTGAATTTCCGGCATTATTTCAACGGAATCACAGCAAAACCTGAAACCGCAATGGACGCGTCT  
TACAGGATATGGAGAAGAAGCTGGGCGTAAAGGTCAACGCTTCTTTGCCCGGACTACGCGGGCATTATCCAGGGGATG  
CGCTTCAATAAAGTGGATATCGCTGGTACGGCAACCTGCTGGCGATGGAAGCGGTGGATCGCGCCAACGGTCAAGTCT  
CGCCAGACGGTCCGCGGGATGGATCGCGGGTACTGGAGCGTGTGATCGTCAACAAGATAGCCCGATCAACAAC  
TGAACGATCTGTGCGGAAGCGGAAAGATCTCACCTTCGCAATGGCGATCCTAACTTACCTCCGGCTTCTCGTCC  
GGTACTACGCTTTCGCTAAAAACAATATCTCCGCCAGGACTTAAAGCGCACCGTCAACGCCGGCATGAAACCAACGC  
CCTCGCGTTCGCTAACAAGCAAGTGGATGCTCGCCACCAACAACCCGAAACCTCGACAGCTGAAAACCTCCGCGCGG  
AGAAGCTGAAGAATAAGGTGATCTGGAATCACCCTGACTCCTGGCGATCCGATCGTCTGGCGCAAAAATCTTTCC  
GAAACCACTAAAGACAAGATCTACGACTTCTTTATGAATTACGGCAAAACGCCGGAAGAGAAAGCGGTGCTGGAGCGCT  
GGGCTGGGCGCGCTTCCGCGCTCCAGCGACTTGAACCTGGTGGCGATTCGCTCAGCTCGCACTGTTTAAAGAGATGCAAA  
CGCTGAAGGACAACAAGGGCTGAACGAACAGGACAACCTGGCAAAACCCACCGCATTCAGGCGCAACTGGATGATTTG  
GACCGCTGAACAACCGCTAAGCGCAATGAGTTCCGGTGAAGCGGTGCAAGTAA

>Cluster\_49922

ATGGCGCTGCGCGATTTGAAAAACCGAACGTGATAATGCTACAACGGGATGACCCGCGTGAATATGCCCGTATGTC  
ACTGACTGAACGGGATTTGGGGTTTCCAGTTATAACCCGATGCGAGTGGTGGTGGCGGTTACACACAGTACGCTG  
ACTTCGGTAATATCTGCTGGATTTGCGAACAAGCCATTTCTGCAGGCTGGGAAGATGCTCCTGAAACCTATGAACAG  
TGGACCGGAAAGGTGAGTGTGCTGATTTTAAATTTGCCATCGTGTGGGATGGGGGCTTCCAGTGTCTGCGTCAAGT  
GCGTGAAGGGCGGAATAAATAACGTCACCACCGGAGATAAACAGGCCACTATGCACTGGCGACCTATGGCGAGCTGT  
TCAGTATCACCCGTCAGGCCATTATCAATGATGATCTGAATATGCTGACCGATGTCGCGATGAAGCTGGGCGTGGCGG  
AAATCCACTATTGGCTGATTTATGCCATTGACCTTAACCCGAAAAATCTCCACAGATAAATGAAGTCTGTTTCA  
TAAAGCGAAACATGCAACGCTACTGGAGAGCGTGAATGGACGTGGCATCGTGGATAAAGCCCGCCAGTTGATGCGCG  
TTCAGAAAGAGGGGGAGCGTCACTGAATATTCGCTCCTGCGTTCGACTGGTACCGACGGCGATGGAGTCTGTTGCTAAC  
CAGGTCAATTCGCTCCTCAAGTGTCAAGGGGCTGACATTAACCGCGTATTTAACCCTGGAAGATTTTTCGCGCGT  
TATTGCGAGAGCTTCGCTTTGATGATAACAGCCAGCACCTTCTACCTGGCTGCGTCAAAAAGCTCCGATACGATGAAG  
TGGCTTATCTCAACGGTGTGGATACGCCATATATGATCAGATGGAGGCTTCAAGTGTGGATGGCGTGACACGAAAGT  
CGTATTGACGCGGCTGTCGCGCCAGTTGATCACCGCGTCTGGTGAATGTACGGCGTAA

>Cluster\_41427

ATGGCCGTTAACTTACTGAAAAAGAACTCACTCGTCTGGTTGCTTCTGCTACTGGCGGGCCATGTACAGGCAACGG  
ACTGCTGAACAGTCTTATGACGCTCTCCCGGAGCTGTTTGGCCCTTGAACCGCGCTTTGAGCAACATGGGCAAAAG  
ATAACGGTGGCGCAAACTGACGATTAACAATCTCATGCCGATCATCAAAACAGGCGCTGGCAATTTTGCAGGGTTTA  
AAAGCCGACGTTGTCACTTATAACCAGGTGACCGACTCAAAAATCTTGACGATAAAAGGCAAGCTGATCCAGCGGACTG  
GCAGTCCGCGCTGCCGAATAATAGCTCGCGTCTACTCCACCATGGGCTTCTGGTGGCTAAGGGCAACCCGAAAGATA  
TCCACGACTGGAACGACTTGGTGGCTCCGATGTAAGCTGATTTTCCGAAACCCGAAACCTGCGGTAATGCCGCTTAC  
ACCTACCTTGGCGCATGGGGCGCAGCGGCAAAAGCCGCGTGGTGAATAAGCCAAACCGAACAGTTTATGACCCAGTT  
CCTGAAAAACGTTGAAGTGTTCGATACCGCGGCTGCTGGCGGACCACTTTTGGCGAGCGCGGGTGGGCGATGTAC  
TGATTAGCTTTGAATCGGAAGTGAACAACATTCGCAACAGTATGAAGCGCAAGGCTTTGAAGTGGTGTATCCGAAAAC  
AATATTCTGGCGGAATTTCCCGGTGGCTGGTTCGATAAAAACTGACAGCCAAACGGTACGGAAGGCAAGCAAAAGCTTA  
CCTGAACCTGGCTCTACAGCCCGCAGGCGCAACCATCATCCAGCTATTACTACCGCTAAATAACCGGAAGTCAATGG  
ACAAACTGAAAGACAATAATTTCCCGCAGACCGAATGTTCCGCTGGAAGACAAAATTTGGCTCCTGGCGGAAAGTATGAAA  
ACCCACTTACCAGCGCGCGGAGTTAGACAAGCTGTTAGCGCGGGGCGTAAATTA

>Cluster\_54794

GTGAATGAGGAGGATAACAGCTCAGAGGAAATTCAGAATCAACAGAAACGCTTACCCCGTCTGCGCCCCGAAGCTGG  
AAGTTACGTCGCTAACCTGGCAGCTGCTAACACTCTTTTTGTTATGCGCTGAAACGACCGTGGCGGTAACCGCGCTACA  
TCGATCCTGTAACGAAAGGAGCTTCAAGCCGACTTTGGCTACGCTAAATGGCGGGCATAATGCCGCGGTGACAGC  
AACGGACAGTTGAGAAGCAGCTCGCATCGCTACGCTCTCGAGTTAGGGGGCGATCTGTTAACCGGTGGTTTTACCGATAG  
TGACAGTTGGCGTTTGGAGTGTGGTGGTATGCCCCGCGACTACAACCTAACTCATTCAGCGTGTGGGATTAATCGTT  
CGAAAGGGAGTGTGAGGCTATAGCGCAGGCTGTATGCCACCTGGTTTGGCGATGACATCAGTAAAAAAGGCGCATAC  
ATTGACTCCTGGCGCAATATAGCTGGTTTAAAAACTCGGTGAAAGGGGATGAATAGCTTATGAATCTATAGCGCGAA  
AGGTGAACCGCTCGCTGGAAGCGGTTACGGTTTTGCCCTGAATAAATCTTTGGTCTGGAAGCGCGGAAATAATACGT  
GGATTTCCAGCCACAGGCAAGCTATCTGGATGGCGCTGATCATAATGCGCACACGGAAGCAATGGCTCAGTATT  
GAGAATGACGCAAAATAACAACATCCAGACCCGACTCGGCTTCCGCACTTTATTCGTAAGTACGAGGAAAAACAGCGGTCC  
GCAGGTTGACGACTTTGAACCTTTGTTGAAATGAACCTGGATCCATAACAGTAAAGATTTTGGCTGTCTCAATGAACGGTG  
TGAAGTCAACAAGATGGGGCGAGTAAATTTGGGGAAATTAACCTGGCGTAAATGGCAACCTGAATCCAGCGGCGCAGC  
GTCTGGGGAATGCGCGTGGCTGATGATGCTCAATGACACCGCACTGA

>Cluster\_48467

ATGCTGCTGATTTACCCCGCAAGTGAAGTCTTGTGCTACGCTACAGTGATGATTTGAAACAAAGCCGATTTCTGTTGCGG  
AGACTTACAGGATGACTTCCCGCGCTTTAGATACCGCGGCGAGCGTGTCTATACCCAGCAATCCACCCTGGCAGG  
TATTAAGCCGCGCAGATGGGGATAACCGCCGTTTTCAGTCTGGTCCGACGCGGATGACGCTCGCAGATTGGCATACGCTG  
ATTTACTACTGGCCGAAGAACAACCCGGAAGCCAGTTCAGTTGATGAATTTACTTTCTGCTGCGGTTGGGGACGGA  
TATTTTGTGCTTGGCGGAAACCGCAGCGGCTGCGCAGCGCGGAGCAGATGCTGGCAGATTAAGCGCGCTTGAATAAAG  
TCGACCGCTCGTCTGCTGCTGCTTATTTGGTGTCTGGAAGAAACAGCGGATTTGGATGCGGATAAATTTGGGCG  
GAATACAGCGTGGCTGACGGTCAAAACGCTGCTGGCGGTTTGGCGGAGGCTGGATGTCGGTAGCCAGTT  
GCTGCTCTCGAGCTTAACCTCCGACACGAAAGTAAAGTGTGGTGTGCGCTGTGGCGGGGGTGTCTTTCAGTTGCT

TTGGCGCCATTGCGCGAAAATTCGTCTCACCTTGTGCGATGTCTCTGCGCCAGCGGTAGAAGCCAGCGCGCAACACTT  
GCGGCCAACTGTGTGAAGGTGAAGTCTTTGCCAGCAACGTCCTTTCCGAGGTGAAAGGTCGTTTTGATATGATCATCTC  
CAACCCGCGGTTCCACGATGGGATGCAAACAGCCTGGATGCGCGCAAAACGCTGATTGCGCGCGGGTGCCTCATCTTA  
ATAGCGGGCGGAGCTGCGAATTTAGCGAAGCCCTTCTGCTTACCCGAGCTGCTGGATGAGACATTTGGCTTCCAT  
GAAGTTATCGCGCAAAACCGGCGCTTCAAGGTGATCGCGCAATTATGACCCGCCAGGGAAGAAAGGTTAA

>Cluster\_40409

ATGGCAAAGCCGATCATCAGCTCAATGGCCTAAAAATCGTCATTATGTTGGGAATGCTGGTCATTATCTCTGCGGTAT  
CCGTTTTGCGCGCGAGATCATCGTGCCTTTATTTCTCGCATTATTTATGCTGTTATTTCTTAACCCGCTGGTGAACACA  
TGGTCCGCTGGCGGTGTCCGCGTACTGGCAGTGTCAATTTTGGATGACCATCATCGTATGGCGGATGGTGTGCTGTTA  
GCTTATCTGGGTTCCGCGCTCAATGAGTTGACGCGGACGTTACCGCAATATCGCAACTTATTTATGACGCCACTGCAAGC  
GATFGAACCGTTGTGCAACGCTAGGGATGATGCTCAGTTGACCAACTGGCGCATTACATTTGATCCGAACGCGGCGA  
TGACGTTGCTCACCACTTATTGACGCGAGTTATCTAATGCCATGTCATCAATATTTTATGCTGCTGACGGTGTGTTTT  
ATGTTCTGAAAGTGCACAATTTGCCCGAAAATTTGACAAAATGATGGCGCTCCGGTTGAAGGGATGGCGCGGATTTCA  
GCGTGGGATTGACTGTGTGCTCATTATCTGGTGTGAAAACAGCCATCAGCATCATCACCGGCTGGTGCCTGGGCGA  
TGCTCGCCGCACTCGATGTTTCGCTTCGCTTTTGGTCTGGGGATTGCTGGCCTTTGCGCTTAATACATCCCGAATATTGTT  
TCAGTTCTCGCGCAATCCCTTATCGCTCAGTACTGGTGTAAATGGCTTCTACGAAGCGTTGCTGGTGTGGCGG  
ATATCTGCTGATTAATCTCCCTTCGGCAATATCTGGCAATATCTGGAGCACGCGATCATGGGGCTGGGCTGGGCTTCCACATTTG  
TGGTATTTTTGCTGTTGATTTTTTGGGGATGGTGTAGGACCGGTGGTATGCTGCTTTCCGTGCGGTTGACAAATATT  
GTCAAAATGCGCTTGAACAACAGCGGGAGGTCAAAGCATCGCGTTCTGTTAAGCGATCTCAATAAAGAGTGA

>Cluster\_4767

ATGGTCACTTTTGGAGACAGTTATGGAAATTAATACTCTGCACAAGCAGGGAATGAGTAGCCGGGCGATTGCCAGAGA  
GGGATCTCCCGCAATACCGTTAAACGTTATTTGCAGGCAAAATCTGAGCCGCAAAATATACGCCGCGACTGCTGTTG  
CTTCACTCTCGGATGAATACCGGATTAATTTCTCAACGCTACCGGATGCTCATCTTACAAAATCCCGCAACGGTA  
ATCGCTCGGAGATCTCAGAGACCGGATATCTGGCGGATGACCACTTCTCAGGGCATTCAATTCGTTCTCGGTAAGC  
TCAGGAGCAGGAGCTGCGGTTCCGGTTCGAACTGAACCCGAGCAGATGCAGGTTGACTGGGGCACTATGCGTAATG  
GCCGCTCACCGCTTACAGTGTTCGTTGCTGTTCTCGGATACAGCGAATGCTGTACATCGAATTCACTGACAATATGCGT  
TATGACACGCTGGAGACCTGCCATCGTAATGCGTTCCGCTTCTTGGTGGTGTGCCGCGGAAGTGTGTATGACAATAT  
GAAAATCTGGGTTCTGCAACGCTGACGCAATCAGCCGCTGACCGGATGACCGGTTCCATCTTCGCTGTGGCAGTTCGGCAAGC  
AGATGGGCTTCTCTCCCGACTGTGTGCGCCCTTACGGGCACAGACTAAAGGTAAGGTGGAACGGATGGTGCAGTACACC  
CGTAACAGTTTTTACATCCCACTAATGACTCGCTGCGCCGATGGGGATCACGTGCGATGTTGAAACAGCCAACCGCCA  
CGGTCTGCGCTGGCTGCAGATGCTGCTAACCAACGAAAGCATGAAACAATCCAGGCAGCTCCCTGCGATCGATGGCTCG  
AAGAGCAGCAGTCCATGCTGGCACTGCCCTCCGGAGAAAAGAGTATGACGCTGCATCTGATGAAAATCTGGTGAACCTC  
GACAAACACCCCTGCATCATCCACTCTCCATCTACGACTCATCTGCAGAGGAGTGGCGTGA

>Cluster\_15798

ATGGGAAAGAGTAAAAAACCAGCTAGCGCGGATGAATCAGATCCAGCATAAAAGCCAGACTTACGCGAAGCATTAG  
CTTCGCGCATCCGTTCTGTTCTGGACCGCGTGAACGCTGGACTATGTTGGAATGCGTACAGACAGATCGATGGTATG  
AGCCGCCAGTGAGTTTTGACGGGCTGGCGCGCACCTTTCCGCGCGCGTGCATCACAGCTCACCGATTGCGGTGAAATGC  
AATATTTGACCCAGTACCTACATCCCTCACCCGCTGCTCAGCCAGCAGGCTTTTTTACGTTTTTGCAGGACTATCTGTT  
ATTTGGTAAACGCTTACCTGGGAAACGCACGACCGCTTCCGTTGAGTTATCGCCCTTGAGCCTGCTGCGCAAAATACA  
CCCGACGCGGGTTAGACCTGGATACCTAGTGTGTTGTAACACCGGATGACAAACCCAGCCGATCAGTTTACGAAAGGC  
AGCATTTTTTATCTGATGGAACCGGACATCAACAGGAGATCTACGGCTGCCAGGTTATCTTTCTGCAATTCGCTCAG  
CCTGCTCAACGAGTCCCGCCAGCTGTTCCGCGGAAAGTATTAACACGGCAGTGCATGCAGGCTTCACTGATGATGATGA  
CCGATGCGCGGAGCAGAACAGGAGATGTGAACAACCTCCGCAATGCGATGAAAAGCCCAAAGGCCCTGGCACTCCCG  
AACCTGTTTATGTACTCGCTAACCGCAAAAAGGACGGGCTTACAGATCATCCCGTGTGCAAGTGCAGGCGAAGGATGA  
ATTTCTTAACATCAAGAAGCTGAGTCCGGATGACATGATGGCAGCGCATCGTGTGCCCGCCACAATGATGGGGATAATGC  
CTAATAATGTTGGGGGATTTGGGGATGTAGAAAAGCTAGTAAGGTATTTGTGAAAAATGAATATTACCATTACAAAA  
AGAATGAAAAGAAATTAATCATTTGAGCGGTGAAGAAATTAATAATTCGAGAGATATCAAAATTTAG

>Cluster\_29355

ATGTCCGGGTTTTATCATAAGCATTTCCGAAATTAAGTACTCGATTTCACGCCAGCTGAACCTAACAGCCTGCTGCAGTTAGC  
CGCGAAGCTGAAAGCTGATAAGAAAAGCGGTAAGAAGAAGCCAACTCACTGGTAAAAACATCGCGCTCATCTTCGAAA  
AAGACTCGACCCGTTACCGGATGCTCTTTTGAAGTTGCCGCATATGACAGGCTGCTCGCGTTACTTATCTCGCCCAAGC  
GGTAGTCAGATTGGTCATAAAGAGTCGATTAAGACACATGCTCGCGTGTGTTGGTGCATGATGACGGTATTCAGTATCG  
CGGCTATGGTCAGGAGATTTGTCGAAACACTGGCGGAATACGCTGGCGTCCCGTATGGAACGGTCTGACCAATGAGTTTC  
ACCCACGCGAGTTGCTGGCGGATCTCTCACATGCAAGGAGTATTTACCCGTTAAAGCATTCAACGAAATGACGCTGGTCT  
TATGCAAGGTGACGCGCAACATAACATGCGCAATTCGATGCTCGAAGCTGCGCGCTTACCGCTGGATTGCGCTGGT  
CGCGCCACAGGATGCTGGCCGGAAGCTGCGCTGGTTACGGAATGCCGCGCTTGGCACAGCAAAATGGCGGGAATATTA  
CGCTAACGGAAGATGAGCAAGGGAGTGAAGGTGCTGACTTTATCTATACCGATGTGTGGTGTGATGGGGGAAGCA  
AAAGAGAAATGGGACAGACGGATTTGATTTACTGCGTATGATCAGTTGACAGCAAGATGATGACGTTGACCGGTAACCC  
GGAGGTCAAATTTCTCCACTGCTGCCCCCTTTTCATGACAGCAGCAGCTGGTAAAGAAAATGGCGGAAGAGTTTG  
GCCTACATGGAGGATGGAAGTACTGATGAGGTCTTCAATCTGCCGCGCAGCATTTGTTTTGATCAGCGGAAAACCGC  
ATGCATACCATCAAAGCGGTGATGGTCCGCGAGCTCAGTAAATTAATAATTA

>Cluster\_22192

ATGAACGATAACGTTTTGCTCATAGGAGCTTCCGGATTGCTAGGAACCCGACTACTTGAACCGCAATGCTGACTTTAA  
TATCAAGAACCTGGCAAAACAGCAGAGCCTTTTATCCAGAAATACACAGATTGGCGATGTTCCGCGATCAACAGGCAC  
TCGACAAGGCGTTAGCCGGTTTTGACACTGTTGTGCTACTGGCAGCGGAAACACCGCGATGACGTCAGCCCTACTTCTCTC  
TATATGATGTTCAACGTTTCAAGGTACCCGCAATGCTGCTGGCGGCAATGGAATAAATGGCGTTAAAAATATCATCTTTAC  
CAGTTCCGTTGCTGTTTATGTTTGAACAACAACCAACCTGACGAAAACCATCCACAGATCTTTTCAACCCTACGGCA  
AAAGTAAGTGGCAGGAGGAGTGTGCTGCGTGAATGTTATAACAAGCACCAACAGAACGTTTATTAACCATCATCCGT  
CCTACCGTTATCTTCGTTGAACGCAACCGCGGTAACGCTTATAACTGCTGAAACAGATTTGCTGGCGGCAAGTTTATGAT  
GGTAGCGCAGGACTAATATAAGTCCATGGCTTATGTTGGAACAATGTTGAGTTTATCAAGTACAACATGAAGATG  
TTGCCGAGGTTATGAGGTTTATAATTACGTTGATAAGCCAGACCTGAACATGAACAGTTGGTTGCTGAGTTGACAA  
AGCCTGAACAAAAAGATCCCTTCTATGCACTTGGCTTACCCACTAGGAATGCTGGGTGGATATGCTTTGATATCCTGAG  
CAAAATACGGGAAAAAATACGCTGTCAGCTCTGTGCGGTGAAAAATCTCCGCAACAACAGTTTACGCGAACCA  
AAGTGCATTTCTCAGGTTTTGTTGGCAGCTATACGCTGTCGCAAGGTTGGATCGAACCTGCTGCATATGAATTCGTTTCA  
GCCAAAAAGACGACATAACGTTTTGTTTCTGAGTAA

>Cluster\_57826

ATGCGCAATCACAGAATTTCTTTACAGGATATCGCTACGCTGGCTGGCGTAACAAAAATGACCGTGGTGTATATCCG  
CTCCGCAAAAAGGTGGCAAAAGGAAACAGCGAGCGCATCGCCAAAATATGGAAGAGATCAATTTATATCCCTAATCCG  
CTCCGCGCATGTTGTTGAATGCACAAGTTATACCCCTTGGTATCTTGATTCGGTCAATTTCAAATCAACTCTTCGCTGAC

ATTCTCGCGGAATAGAATCCGTCACCTCTGAGCATAATTATCAGACCCCTTATTGCTAATTACAATTACGATCGCGATT  
CGAAGAAGAGTCGGTGATTAACCTGCTCTCTTAATAACATTGACGGGATTATACCTTCGGAAAAATATCACACCATCAGGA  
CGGTGAAATTTCTGCGTTACGCCACCATTCGGTCTGGAATTGATGGATGTACAGGGAGAACGGCTGGATATGGAGGTC  
GGTTTTGATAAATCGGCAGGCCGCTTTTGACATGGTGTGTACCAATGCTGGAGAAGCGAGTCAGGCACAAAATTTGTATCT  
CGGTTCCAAAGTACACCCGATGAACAGCGTTATCAGGGGTTATGCGATGCGATGATGCTCAATAATCTTCCCAT  
TACGCATGAATCCACCGCCATCTCATCCATTCATTTAGGAATGCAGTTAATGCGTGATGCCCTTAGCGCAAACCCGGAT  
TTAGACGGTGTATTTGACCAATGACGATATTGCGATGGGTGCGCTTCTGCTGTGCCGCGAGCGAAACCTCGCGGTGCC  
AGAACAAATTTCCATTGCGGGTTTTCATGGGCTGGAGATTGGCAGGCAAAATGATCCCAAGCCTCGCCAGCGTAATTACTC  
CCGTTTTGATATFGGTCGGATGGCCGCCAAAATGTTGCTGAGCAAAATAAAAATAACGATCACAAACCAACACTGTT  
GACCTCGGGTATCAGATTTATCAAGGCAACACGCTTAG

>Cluster\_42872

TTGGCTACAATGAAAGATGTTGCCCGCTGGCGGGGCTTTCTACCTCAACAGTTTCTCACGTTATCAATAAAGATCGCTT  
CGTCAGTGAAGCGATTACAGCCAAAGTTGAAGCGCGATTAAAGAACTCAATTACGCGCCATCAGCTCGGCGGTAGCC  
TCAAACCTCAATCAAAACATACCATTTGGCATGTTGATCACTGCCAGTACCAATCCTTTCTATTACAGAACTGGTGGTGGC  
GTTGAACGCGAGTCTTCGAAACGCGTTATAGTCTTGTCTTTGCAATACCGAAGCGATGAACAGCGGATGAATCGTAA  
TCTGGAACCGTGCATGCAAAAACGCGTTGATGGCTTGTCTTACTGTGCACCGAAACGCATCAGCCTTCGCGTGAATCA  
TGCACGTTATCCGACAGTGCCTACCGTATGATGGACTGGGCTCCGTTTCGATGGCGACAGCGATCTTATTCAGGATAAC  
TCGTTGCTGGGCGGAGACTTAGCAACGCAATATCTGATCGATAAAGGTCATACCCGATTTGCCGTATTTACCGGTCCGCT  
GGATAAACTCGCGCGCGCTGCGGTTGGAAGGTTATCGGGCGCGATGAAACGTCGGGGTCTCAACATCTCTGATGGCT  
ATGAAGTCACTGGTGATTTGAAATTAACGGCGGTTGACGCCATGCGCCAACTGTTATCACATCCGTCGCTCCTCAG  
GCTGCTTTTACGGAATGACGCTATGGCTGTTGGCGTTTACCAGCGTTATATACAGGACAGTTACAGGTTCCGCGAGGA  
TATCGGGTGTATGGCTATGACGATATCGAACTGGCAAGCTTTATGACGCCACATTAACAACATCCACCAACCGAAAG  
ATGAAGTGGGGGAGCTGGCGATTGATGACTCATCCATCGGATAACCCAGCCGACCTTCAGCAACAACGATTACAACCT  
ACTCCGATTCTGATGGAACGTTGCTCGGCTTAG

>Cluster\_62521

ATGAAATGCTGGCAATTGCCGATCTTTTATCAACAAAGCGATGATGGATGCAGGCTTAATGCGCTCAGGGATAAAGG  
TATCGACGTTGAAGTTCGTGAATGGTCCGATGATTCGATCGAAAAATGCAGGAGGATAATCTGCGGGTCGAGCAGGAAG  
GCGCAAGCGCGTTACGTTACCCGACCTACTTTGAGGGTGTGACGAGCTTGAATCCTGATAACCCAGTTTGGTCCG  
GTCAATACGGCAGTGTGGATAAATGCAAAAGCTCAATACATCGGGGTTATGCGAGGGGGTGTGAAAACGTCACCA  
GCAGGTCGCACTGGCCCGGGGAATTGAGTAATGAACAGCGCGGGCGCAATGCCCGAGCGTGGCGGAATTTACGGTAG  
GGATGATGCTGGCCGAAATGCGCAATATGCCCGTTCTCATGATGCGTTACCGGATAAGTTCTGGCGTAAAGACAGCCCG  
AATCATACGGCTATTCAGAGCTTGGCGGTAAGTTTTCGCTTGGTGGCTGGGTCATATTGCTCACTCGTCGCGGG  
TTTTCTTAGCGCTTCGGCACGGAAATATCTTTTATGATAAGTACGTCCTCGGCCACGAAACGCTATGAGAAAGTCGATA  
CCCTTGACGAGCTGGTAACACGGGCTGACGTTGCTCACTCCATGCCCGTATGACGCCGAAACCGAAACCTGATCAAC  
GCACACCATTTCCGGTTAATGAAAAGCAGCGCCATTTGTTAACACCGCGGCTCCGGGCTAATCAATGAACGCGATCT  
GATTGACGCTCTACAGACCGGAAAAATCATGGGGCGGCGTGGATACTTTGACAGATGAGCGTTACTCGACGACGG  
CGTTTTATTTACTGAATAATGTCACCATCACCCCGCATATTGCGGGCAGTACGCTCGACGCCCTCAGTAATTCACCCAAA  
CTATTTGCTGAGATCTTGTGTAAGAACTCAGTTAA

>Cluster\_54182

ATGAAGATAAATCTCAGATTAATTTATGGCGATGGCATGTTTGTGGTTAACAACATATCTGGGCTACTGTTTGTGCAAA  
TAGTACTGGCGTAGCAGAAAGATGAACATATGATCTCTCAAATGCTTTAATAGCACCAATAACAGCCAGGGCAGATTF  
TTGTTTTACCGGAAAAATCCGGCTGGGTAGGTGTGTACGCAATTTGTCCACCCGGCAGCTGGTGAATATACATACCGT  
AGTTTACTCAACCTTATTTGTTACGAAACTATCGATAATATAAATATATGCAATATATGATATATGATTTAGTTAGGTC  
GATGAGTCTGGTTGATAGTGTATGATATTCAGTTCCCCCGCAAAATATATTCGGATGGGAACAGATCTTAACGTTT  
CGCAAAACCTTCCATTCCGGGTGATGGATTCTCGTTTAAATATTTTCGTTTAAAGGTTATTCGTCCTTTTATTAACATAGTG  
GAGATCCCGACAGGATGATGTTTACCGTGTATGTGACATCAACGCCCTACGATCCGTTGGTTACACCTGTTTATACCAT  
TAGTTTTGTTGGCCGGTTGAAGTACCGCAAACTGCGAATTAATGCGGGCAGATTTGTAATTTGATTTTGGTGATA  
TCGGCGCATCGTTATTTAGTGGCGCAGGGCCGGTAATCGACCTGCTGGTGTATGCCGAAACCAAGAGCATTTGGGTC  
AAATGTACGAATGTTGCTCGCAGGCTTATTTAACAATGCGTCTGGAAGCCAGTGCCTTTCTGGTCAGGCGATGGTGT  
GGACAATCAGGATTTAGGTTTTATTGTCGCGCATCAGAACGATACCGGATTTACGCCCTAACGATCTCAATAGCGTTATTC  
CTTTCCGCTCGGATGCGAGCTGCGCAGCAATGTCACACTTCGCGCTGGCCTATCAGTATTACCGGTCAAAAACCGAC  
GAGGGCCGTTTAGCGCTGGGTTATTTACCGCTCGATTATCAATGA

>Cluster\_33358

ATGGATAAAATACCCAGGTTTTATTTTTCAGATATTTGGAAAGTACCACCTCAATATGTTGAAGTACCACACCAGCAACT  
TAAACCGCACGAAGTACGATTCGCCCCGTTCTACGGGATATGCGGTTTCGGATCTGCATGTTCTGAAAGGCGGTCATC  
CGTTTGCCAAACCGCTGTCGTCGCCGTCATGAAATGTCAGCGCGGTTACGGAAGTGGGCAGCGACGTTAAAATGTA  
CAGCCGGGCGATCATGTTTGGTTCGATCCATCATGGCTTGCATGGAATGCGGAGCCTGCAAAGCAGGACGTTTAAATCT  
TTGTGAACACCGCAGTTGCTGTTTTGCGCACCCGGCTTTGCTCGTCCACACACATTTGTTCTCGCGCAATTTGCG  
ATGTCGACCCAGCCTTTTACCGCTAAAAGTGTGGCTTTGCGCAACCGCGCTTTGCTCGTCACTGCGTTAACCGA  
ATGCCGAAAGCTTCTGGAAGCGTACTGGTGTATGGTGCAGCAACGATAGGCTTATCCATCGTGCAGGCATGCGCAT  
TATGGGGCAGGTAAGATTACCGTGAATGAACTGACGCTGCCAAACGCGCGCTGGCGTTAAAGCTGGGCGCAGCAGAA  
TTTGGGCACCGAGTGGCTGGCCGAGATGTGAGATTTACGGGGCGATGATGTCGTTGACGCGCAGCCACGCTTAA  
GATGCATGTACCGTGTATATGCGGAGGACCGCTGCTGTGATGGGCTACCAAGTGGGCGCGTGAATAACCATTACC  
GATGATGCAACGTTTCGAGCGTACTTGTCAACTCTGGCATGTACATCCCTGAAGATTTGATGCTGTTATCGAATGGC  
TGGCGGATGGGCGTTTGTATACAGTGAAGTACCAGTTTATTTGCCATTGAGGATGACGCGGGCATTCGACCGC  
GCGACGAAAAATGACTCCATAAAGGTCATGCTGCAATTTGCGCCGGAATGA

>Cluster\_21092

ATGACCGGATAAAAACCCGATGCTGCTGTTGGGGCTTCCCGTTCGACGACTTATTATTATTTCTGGCTGAGTCTGTT  
TTGCTACTCGCCATCTCTGTTTCCGGAGCAGATGCAACCCCGCCCTGCTGCCTGGACACACGCCAACGCTACCAGAAG  
CGCTGGTGCAAAACCTTCTGTTTGGCCAGAGCCGTGCTCCCGTTCTGATCGCGCAAGCCTGGCGCTCCGGGACCGCTG  
CTGCAACCCCTGACCCACAACCAATGGCTCTCTTCACTGCTCGGCATTAACAGCGCGCGGCGCTGGCTATGGCGCT  
TACCAGCGCGTGTAGTCCGACGCGGATTCAGGCTATTTCTGCTGCTTATCGCGGATGCGGGGGCGCGCTGAGCTGCG  
TGCTGGTCAATGACCGCAGGAGCGGATTTCTGTCATACCATGACAGAAACAACTGATCCTCGGGGATCGCGCTGTCG  
GCCTTTTGTATGGCCGTTTACCGCATCACCTGCTGCTGCGCGAAGATCATGCTTACGGCATCTTTTACTGCTGGCAGG  
CGGAGTGTCCACCGCCGTTGGCAGGATGCTGGCAGCTTGGCGGTTGGTGGTCACTGCAGTCCCTGCTGTTACTGCT  
TGGCAATCAACTGAACCTGCTCAACTCAGCGACAGCACCAGCCATACGCTGGGAGTGAACCTGACGAGGCTACGTTTG  
GTCAATATGTTAGTGTGCTTCTGGTTGGTGGTGGTCACTGCGTGGCAGGTCGGTGGCGTTTATCGGCTGCTGGT  
GCCACATCTGGCGGCTTCTGGGAGGCTTCGATCAGCGCAACGATCTGCCAGTGAAGTGTGCTGGGGGCCAGCTGA  
TGCTGCTGGCAGATGACTCGCACGCGGCTGGCTTCCCGGAGATTCGCCGAGGCGAGTGTGCTGGCGCTGATTGGC



AGCCCTTGCTTTGTCTGGCTTGTGAGGAGCCGAGGATGA

>Cluster\_37569

ATGAGTACGCAAGAGGCCACCTGCAACAACCGCTGTTGACGCTATCGACCTGAAAAACATTTATCCGGTGAAGAAAGG  
CATGTTCCGCGCCGGAACGCTGTTAAAGCGCTGGATGGCGCTTCGTTTAAACCTTGAACGTGGCAAAACGCTGGCAGTATG  
TGGCGAAATCTGGTTCGGTAAATCGACCTCCGTTGCTGACGATGATTGAAATGCCACCGGTCGGGAGCTGAT  
TACCAGGGGCAGGATCTGCTTAAAGCAGATCCGAGGGCAGAAAGCTGCGTCGGCAGAAAATCCAGATCGCTTCCAGAA  
CCCTTACGGTTCCGTTGAAATCCGCTAAAAAGTCGGGCAAAATCTTGAAGAGCCGCTGCTGATCAACACCAGCTTAAGCA  
AAGAACAGCGTCGGGAAAAAGCCCTGTCGATGATGGCGAAAAGTCGGCCTGAAAACCGAGCATTATGACCGCTATCCGCT  
ATGTTCTCCGCGGTCAGGCTCAGCGTATCGCCATCCGCCGTGGTGTGATGCTCGACCCGATGTGGTATTGGCGGATGA  
ACCGGTTTCCGCGCTGGATGTTTCAGTGCAGCGCAGGTGCTGAATCTGATGATGGATTTGCAGCAGGAGTTGGGGCTGT  
CTTATGTCTTTATCTCCACGACCTGTCGGTGGTGGAGCACATGCTGATGAAGTATGGTATGTACCTGGGCGCTGCG  
GTGGAGAAAGGGAACGAAAGCAAAATCTTCAATAAACCAGCCATCCGTACACTCAGGCGCTACTTCCGCGACGCGCG  
CCTGAACCCGGACGATCCGCGGAGCGCATCAAGCTCAGCGTGAACCTACCAAGCCACTGAATCCACCAGCGGGTTGGC  
CCTTCAACGCCGCTGTCGTCGGCGCTTCCGCCCTGCACCCAGTTGACGCGCAGCTAAAAGACTACGGCGGTCAACTG  
GTAGCTTGTTTGTGCTGTTGATCAGGATGAAAATCCGCGAGCTTAA

>Cluster\_3555

ATGAAGTATGCTTTATTGAAAAACATCAGGCTGAGTTCAGCATCAAAGCAATGTGCCGCTGCTCCGGTGGCCCGCAG  
CGGCTGGTATACGTTGGTGTACGCGGGGACAAGGATAAGCAGCGTACGAGTTCGCCAACACTGCGACAGCGTTGTC  
TCGCGGCTTTTACCCTGGTCAAAACAGCGTTACGGTCCCGCCAGCGCTGACGGATGAACCTGCGTGTCCAGGTTACCCCTTT  
AACGTAAAAACCGTGGCGCAAGCTGCGCCCTCAGGGACTGAGGCAAAAGCCCTCCGGAAGTTCAGCCGGTACGTA  
CCGCGCACACCGCTGCTGTTGTCAGAAAATCTGTTGGAGCAGGATTTTACGCCAGTGGCCGAACAGAAAGTGGCAG  
GAGACATCAGTACTTACGTACAGATGAAGGCTGGCTGTATCTGGCAGTGGTCATTGACCTGTGGTACGTGCGCTTATT  
GGCTGGTCAATGTCGCCACGCTGACGGCGCAACTGGCTGCGATGCCCTGCAGATGGCGCTGTGGCGCGTAAGAGGCG  
CCGGAACGTTATCCGTTACACGGACCTGGAGGCCAGTCTGTTACAGCAGATTATCAGGCGCAACTGAAGCGGATAAT  
TGCGTGGAAAGTATGAGCGCAAAAGTGTGCTGCTACGATAATGCTGCGTGGAAAAGCTTCTTTCATTCGCTGAAAGTGGAA  
TGTATCCATGGAGAACCTTTATCAGCCGGGAAATAATGCGGGCAACGGTGTTAATTAATATCGAATGTGATTACAATCG  
GTGGCGGGCAGACTTGGTGTGGCGGCTCAGTCCGGAACAATTTGAAAACAGAACCTCGCTTAA

>Cluster\_41593

ATGCAACGGTTGGAGCAGCGTTCACCTGACGCTATACTGCTTCTCTTTCTTATTGCTCAAACCTGTCGACATTACTATGCC  
CGTTTTGCTCTGCTCGCGCTTGTGCGCTACTCCGTCAGTCTTTCGCGCTGATGTTCCCGGCTGCTGCAAAAAACCGGG  
GCTGGCGGCGCATGGCTATTATTTCTGCGGTCATCGCGCTGGTCTGCCACGCAATCGCTCTGGAAGCCCGCATCCTGCC  
GACGGTGATAGCGGCAAAAACCTCAGCCCTGCTGAACGTTGGTTTATTGGTCACTTTGATGATCTGTACGGTAAAGACAT  
TGTGGCTTCTCGCAATCGTGGCTGGTGTGCTACCCATTGCTATGCTTTCGCGCTTATCAACCTGGCGCTGGCGACCT  
TTATGCCCAATGAATACATCACCCTGGAAGCAACCGCGGGGATGCTGGTGCACATGGCTTATCGCTTTTTTCTCTAT  
GCCACGCTAATTAATCGCTGCCCTGTACGCGCTGCAACTGGCGTGGATTGATTACCAACTGAAGAACAAGAAGCTGGCGTT  
TAAACAGGAAATGCCCTTATGATGATGATGATCGAGCGTAAAATGTTCCATATCACGCGAGATTGGCGTGGTGTCTGCTAACGC  
TCACTCTTTCGACTGGCTGTTCTACATGCACAACCTTATTGATGAAAATATCGACAAGGCCGCTGCTCTCTATCGTG  
CGGTGGTTTGTCTATATTGTGCTGCTGTGGGACATTAATCATGAGGATGGCGTGGACCCCGCTGCTGCTGGTTAAACGT  
TGCGGTTGCGGTCATCTGACACTGGCTACTTCCGTTAGCCGAATTTGCCAGCAGTTAATCAGCTAA

>Cluster\_58182

ATGAATAATCTGAAGTTTGAAGTCGTTTTCAGCAATCGCTTGTGATCTGCCCAATGGGTATCAGAGCGGCTTCTGCA  
GCAAAATAACAGTTAATACTACGAGCCAGTATCGGCATTTATGGGTAACCCGCTGTGGGAAGACAGCTGTGTCGA  
ATGCCCTGTTTGGCGGAGATATATCACCCTGAGGATGTCGGCGCTGTACACGTGAGCCACTGCGCTTTCGCTGCAA  
GTCGGCGACCGCTATATAACCGTGTGATGCTGCCCCGGCGTGGGCGAAAAGTGGCGCTCGCGATACCGAGTATGCTGCGCT  
GTACCGCGAACAGCTTCCGCGCTGACCTGGTACTGTGGCTGATTAAGCCGATGACCGGCGCTGACGGTGGATGAAC  
ATTTTTATCATCAGGTGATTTGGAGAGGTATACCGGCATAAGGTGCTGTTGTTATCAGCCAGTCGGATAAGGCCGAACCT  
ACCAGCGTGGGCGAGTGTGTCACGGCGCAGAAAGCAATATCAGCCGCAAAATCTGCTGTGCTGAGCTGTGTTCCA  
GCCCGTCCATCCGGTGTGCTGCTGCTGCGTCCGCTTACAATGGGGCTTAAGGTGATGGCCGAGCGGATGATTAAGTGCC  
TGCCACGTGAGGCCACCAGCCCGTGGTGTGCGAACTCCATCCCTTTCGACGACGGTAGTCCGGGAACAGGCTCGT  
AGCGATTTTGGTGAACCCGTCGGGGCGTACTCGATAGCATCAGTGCCTTTCCCTGATACCCCGCCCGTGGCGGCCGT  
CATTCAGCCGTCGCGCACCCAGGTGTGCTGAGTGGCCGCGCGCTGAGGATTTCTTCTCTGA

>Cluster\_7945

ATGGCTAAAAAATTTTCAAAATGGTTTCGCATCGCGCTCGAGGGTGACACCTGCGACGGTTCGCGTCATCAGTGGCACCGA  
TATTCAGGAAATGGCCGACCGCTTTGACCCGCGCTTACGGCTGTGCAATTAACCTCGAGCATAATCCGACGCTTATTC  
CCGACAGCCCTTTTGGCGCTATGGCGAGCTCAGCGAAGTGAAGCAGAAAGTATGACGACGATTTCCGCGCTCAACGCG  
AAGCTGGCGCTGTTCCGCAAAATTCGCCGCTCGACAACCTGTCGCGATGCTGGCGAAAGGCCAGAAAGTTTACACCTC  
GATGGAATTTCCGCCGAACCTTTGCCAACCCGCAAAATGTCACCTCATCGGGTGGCGGTAACCGACGACCCGCGGACCT  
TCGGTACCGAGTACCTGCAATTCCTCCGCGCACAAACCCACTGCGCCGGAAGAAAGACCCGCGGACCTGT  
TTCTCAGTGGCAACCCCTTCCGAGCTGGAATTCGAAAGCTGCGCCGACACCCTGCTGACCAAACTCAGCAGCAGCTGAA  
AGGATCTTCAGCGTAAACAGACTGACGACGATGCGGCTTTCGGTGTGATGATGAAAGCCTGACCGCATTTGCCGAAC  
GGGTGACAGCCGCGCGGAAAGCGCTGAGGTGCGTTTCACTGCAATGAAACCGAACTCGCCGACGTCAAAAAGCGCTG  
GCTGAACAGGCCGACCCACTCGCAGCAATTCAGCACTCAAACCCAGCTGGAGCACCCGAAAGCAAAACGACGCG  
CGCGCGAAGTTAAGCGCGGTGGCGACGGTATCTGCTGGCTCCACGCTGACCGACTGCTAA

>Cluster\_21944

ATGATGCGAATCGCGCTTCTCCTGCTAACGAACCTGGCCGTAATGGTCTGTTTTCCGGCTGGTACTGAGCCTGACAGGGAT  
ACAGTCGAGCAGCTTCCAGGGCTGATGATCATGGCTTGTGCTGTTTGGTGGTTCCTTCTGTTTTCTGCTTCTGATGT  
CCAAATGGATGGCATTACGATCTGTTGGCGGGGAGTATCGAGCAACCGGTAACGAAAGGAAAGTGGCTGGTCAAT  
ACGGTAGCAACCCAGGCTCGTACGGCGGGGATCCTATGCCGCAAGTGCTATCTACCATGCGCCGGACATCAACGCTTT  
TGCAACCGGTGCGCGCTGATGCTCTCTGTTGCTGTCAGCACCGGTTTGTGTCAGAACATGAGCCCGGATGAAGCCG  
AGCGGTAATGCTTGCATGAAATCAGCCATGCAATGGTATGTTGTTACCTGACCTGATTCAGGCGCTGAGTGAAC  
ACCTTCGTTATCTTTATTTCCGCTATTCTGGCGCAGTTGCTGCGGGTTTTATGGCGGAAATCGTATGAAAGTGAAGA  
GAGCAACGGCAACCCGCTGATCTACTTTGCGGTTGCAACGTTTCTGGAACCTGGTGGTGGTATCTGGCGAGCATATCA  
CCATGTGGTTCTCGGCTCATCGTGAATTCACCGCGGATCGGGTTCAGCAAACTGTTGGTGGCGGAAATGATTTGCC  
CGCTGCGAGCCGTAAGAACAGCTATGAAACCGCAAGAAAGCAACCGATGATGGCTTCTGCAATTAACGGTAAAGTGA  
ATCGCTCAGTGTGTTATGACTACCCGCGCTGGATAAACGATTTGAAGCTCTGCTACGGGTGAATACCTGAAGT  
AA

>Cluster\_67121

ATGCTTCAGACTATGATTAATCAATGATATCCTCATATGGATTGAGAAATCAGATAGAAGATGGGATTAATAATTGAAGATGT  
CGTGAATCTTCTGGTTACAGCAGAAGTATATCCAGTATTTAATTAAGAAAGAGACCGGCTTCTCTGGGAGGATTAAT

TAAAACGGAGGCGTCTGTGCAGAGGTGCAATGTATGTTAGATTAACAACAATGCGAATGTTAGATATTGCTGTCCGACTT  
CGCTTTGATTACAGCAATCTTTTGTAGTCTGAAATTTAAAAAGTGTTCAACTGCCCTCTTATATTTACAGAACGAGAGA  
TTACTGGGACCTGTCTGTCTGTCTCCATGGGAATAAATATGACAGGTATCCCGAAAGTGTGATTTTGTTCGACTCC  
CTCAATTTACATATTCGGTTCATATGTTCTCATATAATGAGAAATATCCCTGGGGACAAGGGGGAGGCTTAAAGAGAAAAG  
AATATACAAAATGACATGAGATTAATTTCTGAAAATTTTCTCTACATTACTACTACTCTCCCTCAATAAAAAATAGCGA  
AAATGTTTTTATCAAAAATTTTTCTGTCCGCAAGAAAATGAAGAAAAGAAAATGCAACAACCAAAAATATCAATTTCCCG  
CAGGAGAGTACCTTAAAACTTACTTTAAAGGGAACATTGCATCGCTTCAAAAATCATCAGGCAAGTGTATTTTGTATA  
TTACCAGAAATATAAAATGGCCCGTAGAAGGGGGGGCGATATAGAATATTTTGTATATGTGAATACAGAAAATGATAA  
AAAACCTTACGTTAATTTGCAATTTTTTGTCCCTGTTATACCGCTCAGCGATATAATGGCAAAAAATGATGGTGTGGCCA  
CTTGA

>Cluster\_20761

ATGGCAGTAAAACTCCGCTTAAAGTGGGTGGGCAGCAAGCCCGCTTATGCCGAGTTGCTTCCCCATCGCCGGAGGG  
TAAGCGCCTGATAGAACCTTTTGCCTGCTGTCTGTCATGATGAATACGGATTATGACGAGTATCTGATAGCTGATG  
TGAATCCTGACCTTGTAACTGTATAAGACGATGGCTTATCACACTGATGCATTGCTCATGAGCTGGAGGCTTTATTT  
TCTGCCGCTCATAGGTTGATGAAGAAAACCGGCAATTTTCTATTACCGGTCAGTGTGCTTCAACCCTCCGGCAA  
ATCCTTTGGTCTGAATCTGTGGAAGCTGCGGCGCTTTTCTTATCTGAACCGTCACTGCTTCAATGGCTGTGCGGAT  
ACAATCGCCGTGGCCAGTCAATGTTCCGTTTGGTAAGTACAAAAAAACCTACTTTCTGCTGATGAAATCCGCGCTTTT  
GCAGAAAAGCGAAACGTCACCTTACTGCCCCTATTGAGAACGCTTGTATTTGGTAAGGGACGGGCATGACGT  
TGTTTATTGTGATCCGCTTACCTGACTGATACGACAATTTCCCGGTCACCATGAGCGCGGTTTTTCTCACATGGATC  
AGGGCGGCTGGCGCTAAGCTGCGCGCTGGCTGAGCTGGGATTAAGGTTGTCGCTCAAACGAGTCTGGAAATG  
TGCAATTAACCTGTATGACGATTTGACGCTGTGCGGTAAGTACCCACGCGTGTGGTGCAGCAGCTGCAAGCGAGAA  
AGTTGCCGAGAGCTGATTTTAAAGTCACTGCAAAACCGGCGATCGGCTTAGGGCGGTGGTGGCATGA

>Cluster\_42209

ATGGCATCTAATCAAAACCCTTCCGCAAGCTCAGCAAAAATGAAGAACACTGCTGACTGGCGTCAATGAAAACGTGTA  
TGAAGATCAGAGTATTGGCGGGAGCTGACGAAAAAGATATCAACCGCTCGCTGGCGTCCATGCTGTTACAAGCGT  
CTTTTAACTACGAACGATGACAGGCTTCCGGCTGGCTGTACGGCTGCTGCCAGCTCTGAAAAAGATCCACACTAATAAA  
CGCGACCTGGCGCGCCATGAAGGGGCATATGGGTTTCTTCAATACCCATCCGTTTCTGGTGACGTTTGTATCGGCAT  
TATCCTTGGCATGACGCTTCAAGCAGGACGTTAACAGTATTAGAGCACCAAAATTTGCCGTGGTGGCGCTCGGCTCGG  
GGATTGGCGATGCGATGTTCTGGCTAACGCTACTGCGGATTTGTTGGCGGGATAGGTGCAAGCTCGCGCTACAAGGCTCT  
ATTTCTGGCGCTGCTGCTTTATTTGTGCTGTTCAACGTTGACACCTGGGCTGCGTTTGGTCTGGCGCATTATGCTTA  
TCGCATGGGCGTGGCGCGGATCCACTCATTAAGCGAATACCAAAAAGTCCGGCATGCGGCATCTATCGTTGGGATGA  
CGTAATCGCGCGCTGGTGGCAACCTATGTTCCGTTTAAAGCACCGCTGGAATACCCGCGGCGACCCAGCTGGTTAAG  
TTACAGGCTGATGTTATCGACAACCTGATGCCAGCCTTCTTACCGCTGGTCTACACCTGACCATGTTCTGGCTGGTACG  
CCGCGGCTGGAGTCCGCTCGCCTGATTGACAGTACAGTGGTTCTCGGCATCGTCGGTAAATCTGCCATTTCTCTTAA

>Cluster\_41845

ATGAATATCGCAATTGTGACAATAAATCAGGAACATGCCGCAATGGCGGGCTGGTGGCGGCGCAGGATTTACAGCGGCAG  
CACACTAACGCATTGGCAAAATAGAACACAGCCGATGGTTGCGGAACAGGTGCTGGATCGCTGGTGGAACAGTGGCAAC  
GAACGCTTCCGGAGGTTGCTTTTCCCTCCGGCGCGCTTTGGCGATGAACTGGCTACCCGGCTGGCGTTGGCGTTTACAT  
GGTGCAAGCATCTGCCAGTGTACTTCTGTAGATATTTCAACCGTAAGCGTGGCAGAAATCCACCTGGGGAAATCCGCTAAC  
GGCGACGTTGCAAAACGAAAAACGCCGCTATGCTTTTCCGCTGGCAGCTCAGGCGGGAGCAGATAAAAAACGCCAGTTTCC  
CCTCTGGGATGACGCAACTGAACTTGTCCCGCGCGCTTCCAGACTGGCTTATCAGCGTCGAAAACCTGAAAATGTT  
ACCCGTGACCCATTAACCGAGGCGAGCAGTGTGCTGGTGGGACAGGGCGGAGAGGAGGATTAACAGGAAATCGCTAT  
GCTGGCAGAAAAGATGGGAGCCGAAGTGGGCTACAGTCCGGCAGGATGATGAACGTTGGCGTTGATGAGGAAAGTGA  
TTGGTATTTCCGGACATCTGCTGGCACCTGAGGTGTGATTTGTTGTTGGCGCTTCCGGCGCAGCAGGTTAATGGCGGGC  
GTACGCAATAGCAAGTTTGTGGTGGCGATTAATCATGACGCCAGTGCAGCGGATTTTTCACAGGCAGATGTTGGCGTGGT  
TGATGACTGGAAAGTGGTGTGGAGGCACTGGTGACAAACATTCACGCAGATTGCCAATAA

>Cluster\_50000

ATGGCTGATTGCAATCTCAACACCCCTGTTATTGTGACAGGCGACGCGGCTCGATACATCAATCCTTCCACGCAATATCTT  
CTCGCAGTCTGATCTGCTTACGTTATCGCACAGAGCACTGATGTTGGTAACGTTGGCTAACAGGCGCAACGAGCCGGAC  
AGGGCGCTTATGATGCACAGGTCAGGAACGATGAGCAGGATGTTCTCGCTGACCATGAGCAGGAAATTTCTGTCTCGG  
GAAGCAACGCTTGTAAATCATGAGGAGCAATCAGCCAGGCAAGTCAACTCTTACGAAACATGAAACGCGAAATCGCTCA  
GAATGAAAGCGATATGCGTCTGATACCAGAGTTCAGTCTGGAGTGGCAGGTTTTCAGACCATGAAATCGCGCATCG  
ATTTCTGTGAGTATGCCACTACTCGAAGAAGTCAAGAGTGTGTTACTCTGGCCTATCAGTAAACCATCCGACAGCGCCG  
ACCAACCTTGTAGCTGCTGAAAACGCTCAGCCGCTCATCGGCTCGTTGGCACCATTCTTCCGACCCGTTAAACAACA  
GATGGTTGTGTTTCAACGAGAAACAAAACCTTGTCTTCAAGCTGTGATCGTGGGAGGAGGCGGCAACCGGCAACCA  
GGTCAATGCAGCTAACCTTTTCCGGCTCTGTTCTGACACACTGGTAAGCAGTGCAGTCTGGGACAAACCGGCAAC  
ATCTCTGTTAGTACGTTCTTACGCTGGATAAAGACGGATTTCTTGCACAAAATGGCAGTACGTTAACCATCCAGTCAAA  
TGGTGGCGGCTTACTGCCACAAACATCAAGATAATCGCGGAGCAGTAA

>Cluster\_25095

ATGCAAAAAGTAAACTGAACAACGGTATTGAAATGCCCTGTTGGGCTTGGTGTATTTAGATGACCGATGCGGCTGA  
ATGCGAAAGAGCGGTCATTGACGCTATTAAACACCGGTTATCGACTGATTGACACCGCCGCTCTATCAAAATGAAACCC  
AGGTCGGGAACGCATGAAACGAAGCGGATCGCCGTAACGAACCTTTGTCACCACAAAACCTGGTTGACGAGTACC  
AGTTACGAAGGGCCAAAGCCAGTTCGAACGCTCTCTGAATCGACTGCAACTTGATTACGTTGACCTGTATTTGATTCA  
CCAGCCATACGGCGATGTCACGAGGCTGGCGTGCATGGAAGAGTGCACAGGCGGTAATAATCGCGCTATGGCG  
TCAGTAACTTCCACTGACCGACTGGCTGACCTTATCGCTTTTAAATACGCTGTTCCGGCGGTAACAGGTTGAGTT  
AACCTTTCAATCAGCAGCTACAGGCGGTTCCCTGGATGCAAAAGTCTGGCATTCAGCAGAAAGCCCTGGGACCGTTTTC  
GGAAGGAAAAATGGTCTGTTCCAGCATCTGTTCTCACGGCAATGGCGGAGAAGTATGGCAAAAGCGTGGGCCAGGTTG  
TTCGCGCTGGATCTACCAACGAGGCGTGTGTTCACTGCAAAAATAGTGCAGAAAAGAACGATGGAAGAGAATCAAC  
ATTTCTGATTTGAACTAGCCCTGAAGATATGCTGCAAAATACCGCCTGGATACCGCAACAGCGGCTTCTTCTCTCA  
CCGCGATCCCGCAATGGTGAATGGCTGACTGCCCAAACTGATGTTAA

>Cluster\_61363

ATGCTCAGTTATCCGCACAGCTTTCACGCTGGCAACACCGCCAGCTCCTTAAACATACCGTTTACAGAGCTGATCATCGA  
GTCGCTGAAAGAGAAAAGATAAACCGTTTCTCTATCTCGACACCCAGCCAGGGGCGGGGCTTATCAGTTAGGCAGCGAAC  
ATGCCGAGCGTACCAGGCAATATCTCGAAGGCATCGCCGATCTGGCAGCAGGACGATTTGCCGCAAGAACGAGGCG  
TACATCAATGTGGTAAAACACTTCAACCGTAGCGGTGAGTTGCGTTACTACCCGCTTCCGCTGATTTGCTCGCCTGCT  
ACTGCGTGAACAGGACAGCTGCAACTGACCGAAGTGCACCGAGGATTAACCGTTGTTGCGTTCTGAAATTTCAAGAA  
ATAGCCGTGGCGGCTGTCGAAAAGCCAGGCTTTCAGGACGCTTAAAGGCCAAACTGCCCGGTTTCCGCGGTTTCA  
ATCCTTATCGACCCGCGGATGAAATGAAAATGACTATCAAGCGGTGGTTCAGCGGATAGCAGAAAGTTACAACGTTT  
CGCCACTGATTTTACGCACTGTGGTATCCGGTGGTGTGCTGAGCAAAATTAAGCGCATGATCCACGATCTGGAAGCGA

C CGGTATTTCGCAAAATCTGCAAAATGAACTGGCGGTACTGCCAGACAGCGATCGCCGTGGCATGACCGCTTCCGGCATG  
ATTGTGATTAACCCCGCGTGGAACTGGAAACAAGATGAATAACGTGCTGCCGTGGTGCACAGCAAACTGGTTCCGGC  
AGGCACCGGGCAGCCACCGTAAGCTGGATCGTGCCGGAGTAA  
>Cluster\_45853  
ATGCATCATATTAACACAGCCGAGATCTTAATGTTTTTAAATCAATGGTTGCCGTTTCGACGCCAACTGTTGATAA  
AATCATTTTTGGTCTGAAGCGACAGTATTAATAAAATGGTACCTGCTGGATTGCCCAATGGATGTTTTAAGAAAAG  
CTGTTTTTGAAGGTGTAATATCTACTCATGAACCTACATTTTATCTTATGCTGATCTGGAGGGAGAAATCTT  
GAGTTTTTCATGGGCCAGAAAAGTAAATGGGTTACTCAGGTTAACTCAGTTATTTAAAAATAATGAGCAAAAAAAGGA  
GTTTTATGCATAAAAATAAATAGTAATCATTCGTTGCCATGATGTCATGGATCGAGAACCACGTTCCGGAATGTTCAAGG  
CTTTGGCTCATCAGTTAGAATGGATGTTACAAATATTTGTTGCTTCTGATGATATGTACCATGTTTATGCTATAGAACCT  
GACAGTGCATTAATATTACCAACGTTTGGCCAAAATTTGAAAATTTATAAATCTTCCCGGATTCATTTTTATGGAGA  
TAAAGCCAGAGTAGTCAGAATCTGGGATAGGGGCTGGCTGTTTTGTTGATCCAATACAGTATATGGAATATCAGGCTG  
ATTTATATATTACGATTAACGATCAATCAAAACATGGGTGCGAGACACAATACTCAAAAAGATAGTGGATTACCGATGGCA  
GTTATTGGACATAGTGTTCAGAGGAAGCGGTATGCGACGCTTTCGAAAGCTATTTAGATCTCCATTCAGGCTATCCCTG  
CATTCATTTACAGGGGGCTGTGATTATGATTGGATTGAATGA  
>Cluster\_10984  
ATGGATATCTCGCTTCTCAGTACCACAGTACCCCTGAACAGCTTCGCGCTCTGGCAATTGCCATGGTGC AAAAAGTCAT  
GGCTGAGAATGCAGAACTTCAAGCCGATCCGCATCTTGAAGAGCAGATGAAGCTCGCACGCCAGCAGCGTTTCGGTA  
AAAAATGCCAATCCCTGGCCGGGATGCAGCGTTCCCTGTTTCAAGAGGATGTTGACCGGGATACTGCAGAAAATCTCGGGC  
CATCTGGACAACACTGCTTCCAGACCGGGACGAGAAAACAACAACACGTTCTGTTCTGTAAGCCCTTGCCTTCC  
TCTTCCCGCTGCTGAAAAGGTTTCCCGCCAGCTGAGGAACGTTGCTCTGACTGTGATGCCCCCTGCACCTTCATTCGGC  
ATGAAGTCAGCGAGAAGCTGGAATATATTCGGCACAGGTCGTTGGTCAACCGCTATATCCGCCGAGTACAGCTGTCCC  
TGCTGTGAGAAAAGTGTTCAGCGGAAAAATGCGGCACATATCTTCCGAAAAGTGTGTTGAGCCATCGGTCATCGCACA  
GTTGTCTACGCAAAATATACCGACCATGCTCCCTGTATCGCCAGCAGCACATTTTCCCGAATGGGGGTGAGCTCC  
CCGTCAGTACAATGGCGGATATGGTGGTGTGCTGGCGCTGCACTGGCCCGCTGGCAAAATGTTACGCCACGAGCTT  
CTGACACGGGATGTTATTCATGCAGATGAAACGTTCCCTGAGGCTCCTTGATACCCGAAAGCGGTAAATCCTGCTCCGG  
CTGGCTGTGGGCTTACGTCAGCGGAGAAAGAGTAAAGCTCAACGGAGCACCGTATTGA  
>Cluster\_28654  
ATGTTAGTTTCGATGAAAGAATTACTGCAACCTACCCGCCAGCAGCGCTTTGCCATTGGCGCATTTAATGTGGCGGATAA  
CTGTTTCCCTTCGCGCAGTCTGGATGAAGCAGAAAGCAAAATCTCCGGCGATTATTGCCATCCATCCAGCGAACATG  
ATTTTGTGGGGCATGCTTTTTCGCTCAGTTCGCGAAATACCAGCGTAGTCCGGTCCCGTTTGTACTGCACCTCGAT  
CATGGTCCCTCTGTAGAGCATGTTTTGCGTGCATTCCGCGGATTTACCTCAGTAATGATCGACCGTTCCGCTGCC  
GTATGAGAAAACGTTGGTGTGACCGCAGAAAGTGGTTCACCTCGCTCAGCGGTTGGCGTGTCCGGTTGAGGGTGAAGTGG  
GAACCATCGGACAAAACAGGAACGTCGGTGAAGGTTGGTGTTCACAAGTGACCTACACAGATCCGCGCGAGGCGCCGAT  
TTTTATTGCTCGTACAGGTGCCGACACATGGCTGTGGCGATTGGTACAGCGCATGGCATCTATCCAAAAGGGATGCAGCC  
GAAGCTGCAAAATGACATTTTTGCGCGACATTGCGGACATTTGATATTCGCGTGGTGTACACGGTGGTTCCGCAAAAC  
CGGACCGGAGATTGCTGAATCAGTTACGCTCGGCGTCCGCAAAATCAATATCTCCAGCGATATGAAATACGCCATTTTC  
CAGAAAGTCCGTGAAATTCCTGCTAAAGAGAGCTGGTGGGACCGAAGCTCATCTATCCGGATGCGATTAACGCGCGCG  
GAAAGTCATTCGCCACAAAATGAAACTGTTCCGTTCCGTTCCGTTAAAGCATCACGTACTAA  
>Cluster\_53956  
ATGGATGCCCTTAGCCGTTTGTGTGATGCTTAACGCTCCACAAGAACGATCGATAAGAATTGCGTGTAGGAAGTGACTG  
GCAGCTTCCACATGGTGC CGGGAAATATCGGTTATTCTGTTGGCATGCGTTAACGCAAGGAGCGCGAAGCTGAAAATGC  
CGACGGGAGAGATTTTTTACATTAACGCTCCGGGAAATGTGGCTCTGCTACACAAAATTCAGCTCATCGCTGAGTCTGTC  
GATAATGAATCGACCTGTATTGTCTGCGGCACCTCTCGGTTGCAACATTCGCGCGGTTATTTTTTAACGCTTTTCCGGGA  
AACGCTGTTTTTAGCACCGGTTAACACAGCGTGAATATAACTGGCTGAGGGAGGCGATCCCGTTTTTACAACAGGAAT  
CCAGATCGGCGATGCGGGAGTGGATGCACTGTGAGCCAGATCTGCGCTACATTTCTTACCCTCGCGGTGCGTGAAGTGG  
ATTCACAGGTTAATACAGAGAAAACATTTCTCAGTTTGGCTTCTGCAATCCAGTCTTGGTGGCGGTAATACAGCAAACTG  
GGAAATGCCAGGACACGCTGACCGCTGCAATCGCTGGCCAGCATCGCCACATGCTCTCGGGCAAGTTTTGCCAGCTTT  
TCCGTGATGTTTTCCGGAACACGCGCTGGCTGTATTAACAAAGTTGCGTCTACAAAATAGCGGCCAGATGTTTTCCCGG  
GAAATGCTCCCTGTTGGTGTGATCGTGAAGTACGTTAGGCTATGCCAGTGAATCATTTTTTACAAGCGGTTTGTCCCGGA  
GTTTGGTTTACTCCGGGAGAAATATCCGGTTCGTTCCGTTAAAGCATCACGTACTAA  
>Cluster\_54462  
ATGAGCACCATCTGAAATGGGCGGAAATAAAACCCGCAATATGTTCCGAACTGAAAAAATCTTCCCTGCTGGCCCGG  
ACTGGTTGAACCTTTCGCGGGTCTGTGCTGTGATGATGGAGACGATTAATCCAGCTATCTGGTTGCGGATATTAAT  
CTGATTTTAACTCAACCTCTATAAAAAGGTTGCGCTGATTTGTAATCGTTTATATCTCGCCAGAGTTTTATTTGAGATC  
GCAACAGGGAGGTGGCTTATTACAACATAAGGCAGGATTTAATTACTCAACTGAAATTAATGATTTTCAAGAGCGGT  
ATATTTCCCTGTATCTCAATCGTACCGTTACCGTGGTTTATGCTGCTATAACAAGAGCGGGCATTTCAACATTTCCCTACG  
GTAATTTAAAAATCCGTTATTTCCCTGAAAAGAAATTCGCGCATTTGAGAAAAGGCCAGCAGCAACGTTTATCTGC  
GCCAGCTTTGATGAAACGCTGGCGATGTTGAAGCGGGAGATGTTGTTGATTTGCGATCCGCGGATGACCGGATGCTTTTC  
CGGCTATCACACTGATGGTTTCACTGAAGATGACAGTATCACCTGGCATCCGTTCTTGAACATCGGTCATCAGAAGGAC  
ATCCGGTCATGTTTCTAACAGTACACATCCCTGATCCGTTCCGCTGTATCGCAATTTTACTACCACATATCAAGGTA  
AAACGCGCATCGCGGATGTCAGCTGCGGAGGTAATACAGCAAGAAATCATTTGCTGTTTCCGGGCCGCTGCTGGAT  
GGGATTTGATTATTCGCTGGCGTGGATAGTTCTGCGGTGACGGAGTACGTGCATGA  
>Cluster\_27832  
ATGCTAAACGATTAACCCGCTAAATGCCTTACGAGTTTTGATGCCGAGCAGCCATTTAAGTTTCACTCGCGCAGC  
AGAAGAGCTTTTTTGTGACCAGGCGCAGTAAGTCATCAAAATCAAGTCTTTGAGGATTTTCTGGGGTAAAACCTGTTCC  
GCCCGGTAATCGTTACCTCCTGCTGACCGAGGAAGGGCAAAGCTATTTCTCGATATCAAAGAGATATTTTCGCAATTA  
ACCGAAGCGACGCTAAACTCCAGGCCGATAGCGCTAAGGGGGCGTTGACGGTCACTTACTCCCAGTTTCGCCATTCA  
TTGGTTGGTTCCGCGACTTTCCAGCTTTAATTCAGTTTATCCGGAAATGACGTTTCAATCCAGGCGGTTGATCGTCAG  
AAGATAAGCTGGCGGATGATGTTGATGTTGCGGATATTTTATGTTGCGGGCAACTGCGGGGGCTACCGGTTCAAAACTG  
TACGCCGAATATTTATTGCGGTTGCTGCTGCGGCTACTGCTGACTGGCGAAAACCTTGAAGACCCCGAAGATCTGGC  
TAAACATACGTTATACATGATGCTCAGCCGCTGACTGGCAGACATATACCCGACAGTTGGGTTAAATCATATCAACG  
TTCAGCAAGGGCAATTTTTAGCCATAGCGCATGGTGTGCAAGCGGCTATCCAGGGCAGGAGTGGCGCTGGCAAAAT  
AACGTGATGGCGCAATCTGAAATCGAGGCGGAGCTTTTGGTCCCGTTTAAATGATGTTCTGGTCACTAAACCGCTTT  
TTATCTGGTTTGTATGACAGCCAGGCAAGCTGGGTAATAAGCCGCTTTCCGCAATGGATCCTGGCGAAAGCCGCTG  
CTGAACAAGAAAATTCGCTTTTCTGTTATGAACAATAA  
>Cluster\_7031  
ATGAATAATTACCGCTGCTGAATGATTGCGCGTCTTTATGCTGGTGGCTCGCCGGGCTGGTTTGGCCCGCTGGCGGA  
AGAAGTGGCGTTTACCAGCGTTCGCTCAGCAAGCGCATCGCTTGTGGAGCAACGCTAAACGTTGGTGTGTTTACACC

GCACCACCCGCCGCTCACCATTACCGAAGAAGGAGAGCGGATTTATGAATGGGCGCAGCGGATTTTGCAGGATGTCGGT  
CAGATGATGGACGAATTTCTGACGTGCGTCAGGTGCCAGGGGATGCTGCGTATTATCAGCAGCTTTGGTTTTGGACG  
ACAGGTGGTGGCTCCGGCGTTATCAGCGTGGCGAAGGCGTATCCGCACTGGAAATTACGTTTTGATGTGGAAGACCGAC  
TGGTCGATTTGGTCAATGAAGGTGTGATCTCGATATTCGCAATGGCGATGACATCGCCCTAATTTAATCGCCCGCAA  
CTGGCGCAACATTAACGTATCTCTGCGGTGCGCGGAATTTATGCGCAACATGGCGCGCGGAAACATTTAACCGCAT  
TTCTGCATGCGCGTGGTCAATTAAGAGCGCGATCATCTTTTGGTGTCTGGCAATTACGCAATAAAGAGGCCCC  
ATGCGATTAAAGTACCAGCCACTGTCTGCTAATCATGGAGAAATGGTCCATCAGTGGTGTCTCGATGGGCGGGGAT  
GCTCTGCGTTCTGGTGGGATGTAGCGAAAACATTGCCAGTGGTCAATTTAGTGAAGTGTCTACCGGAATATTACCAGCC  
AGCGAAGTCTGGGCGTTTATGTTTCAAGGCTGGCAGCTCAGCGAAAGTGGGATAACGGTAGAATTTTACGCCAGT  
ATTTTGGCAGCACTACCGAATTTTCTACTGGAGCATGCCTGA

>Cluster\_43420

ATGAAACGAGTATTACCCTGTTTGTGTACTGCTGATGGGCTGGTGGTAAATGCCTGGTCAATTCGCTGTAAAACCGC  
CAATGGTACCAGCAATCCCTATTGGCGGTGGCAGCGCAATGTTTATGTAAACCTGCGCCTGCGTGAATGTGGGGCAA  
ACCTGGTGTGGATCTTTTCAGCGCAATCTTTTGCATAACGATTACCGGAAACCATACAGATTATGTACACTGCAA  
CGAGGCTCGGCTTATGGCGCGTGTATCTAATTTTCCGGGACCGTAAAATATAGTGGCAGTAGCTATCCATTTCTAC  
CACCAGTGAACCGCGGTTGTTTATAATTCGAGAACGGATAAGCCGTGGCCGGTGGCGCTTTATTTGACGCTGTGA  
GCAGTGGCGCGGGTGGCGATTAAAGCTGGCTCATTAATGGCATGCTTATTTTGGACAGACCAACACTATAACAGC  
GATGATTTCCAGTTTGTGTGGAATATTTACGCCAATAATGATGTGGTGGTGCCTACTGGCGGTGCGATGTTTCTGCTCG  
TGATGTACCCTTACTCTGCGGACTACCTGGTTCAGTGGCGATTCCTTACCCTTATTGTCGAAAAGCCAAAAC  
TGGGGTATTACCTCTCCGACAAACCGCAGATGGGGCACTCGATTTTACCAATACCGCGTCTGTTTACCAGCGCAG  
GGCGTGGCGTACAGTTGACGCGCAACGGTACGATTATTTCCAGCAATAACACGGTATCGTTAGGAGCAGTAGGGACTTC  
GGCGTAAGTCTGGGATTACGGCAAAATACGCACGTACCGAGGGCAGGTGACTGCAGGGAATGTCAATCGATTATTG  
CGGTGACATTTGTTTATCAATAA

>Cluster\_803

ATGGCAAATCTCTACGACTTGAAAAAGTTCGACTTAAACCTTCTGTGCATATTTGAGTGTATTTACCAGCATTTAAGCAT  
TAGCAAAGCTGCTGAATCACTATATATACCCCATCAGCCGTGAGCCAGTCTGTTACAACGCTTACGTGGCGCAATTTAATG  
ACCTTTTATTCATTCGCTCAGGAAAAGGTATCGCGCGACGACAACAGGGTTGAATCTGCATCACCATCTTGAAAAAC  
CTAAAGGCTTTGAACAAACAAATTAATAATAGTCAATAAGCTCCGAACTAAAGAAAAACTTTATTTTACGGCCCTCAGCT  
CATTTCTGTCTAATAATAGTATGTGTATCGCTGCTACGGCAAGATGCCTCTGTGCGATGAGTGCATGATATCC  
TCATGTGACGAGAAATGCTGAAGAACTGTTGGTTCACCGCAAGCCGATCTGGTGTATCACCATAATGCCAGTATCAGC  
CGTTCGCTCATTTGCATGCCATTGCATACAATTCGCAATACTTAATTTGTAGTAATAAGCATCCGCAATTACTGACAA  
TAGCACTTATGAACAAATATGGCAGAAGAGTTACCCAAATTAATATCCAAATCAGCAGGAGTGTATGATATTTCAAATGG  
AAATAGACGAGAAGTTTATGAATCGCAAAATTTCAATTTCTGTTCTCTTTGCTGACAATCATTAATAGCATTGCAGTT  
ACAGATTTACTGGGAATAGTCCCTATGAACCTTTATAATTCCTACCGTACTTCTTAATTTAAAGAGATAAAAACCTAGA  
ACATCCGTTACCTCAATAAAGCTTTACATTTCTATAATAAATCTTCTTTAAATAATTTGGTGTCTCCCGATTTATTG  
ACCGTCAAAATGAGAGTTTTTGA

>Cluster\_20680

ATGAAGAATATCGAGACAAAATGGTTATACGATTTCTGACACTGGAAGCCTGTCGCCATTTTCTCAGCGCGCAAAAAGA  
GCTAATCTTTGCAACCCGATTCAGCGACGAATTAAGCGCTGGAGGCGAGCAGTCCGCGTGTGTTTTATTCGATCGCA  
CGACCACCCCTTTCAAAATTAACCGAAGAGGGCAAGCTCTTTTCAATTCAGACTCGCAGCTTATTCAGCAGCTTGAATGC  
AATTTGGGGGAGTTAAACGGCCAGAGTTTACTCGCGTTCACCAACATTTAAATTCAGCGCGCAGCTACTATCCCTGAC  
CGTATTACCAAACTGGTGCATTTCACTTACCAGCCTATGGCGGAGAAATTTGCTTATCATGTTGAAGCAATTTGATGTTGTC  
AGGCGTAAATACCTTACCGAAGGCAAGAGTACTTTATTTCTGTTTTCGCGATGAAGATCTTATGCAATCCGCTTTT  
TGCTGCTGAAACTGTTTGAATCTGAGTTGTACCCGCTATGTGCGCCGACGCACAGGGGACCCCTGTATTCGATATCAC  
TCAGCCCCAGGTTCTTTGCTCACTATACCGCACATCTTATATGGGAGGTTGGTCAATCGTATCTGGCAGAGGTTG  
GAGGTATTACCGGGCGCAGGATATTTATCTCTTCGATGAGCGAGTTATTAAGAAATATGGCGCTCAACGGATACGGCAAT  
GCTTGGTTACCGATCTGGTTCGATCGTTCGATGAACTCAGACCAACCGTCTGATATGCCCTGATGCTGCTAAATGACAA  
CCCCATTCAGGCTTATATTTACCGAATGAACACCGACTGAATAGAACCGCGGAGAACCTCTGGCGTATTTTACAGAAAC  
ATATGCCAGAGATTTAATCCAGCAGATATCAATGGAAGAGCCAGCACCCGCAATTTGA

>Cluster\_21492

ATGGCTATGTATCAGAACATGCTCGTTGTTATCGATCCTAACCAGGACGACCAACCAGCATTCGCGCGAGCTGTTTATTT  
ACATCAACGGATTGGTGGCAAAATTAAGCCTTTTGGCGATCTATGACTTCTCATACGAAATGACCACCTGCTCTCTC  
CGGACGAACGTACCGCTATGCGTCAAGGCGTATCAGCGAGCGTACAGCCTGGATCCAGGAGCAGGCAAAATATTTATCTC  
AATGCTGGCGTTCCCATTTGAATTAAGTGGTCTGGCATAACCGTCTTTCGAAGCCATCATTACGAAAGTGTATCAGCGG  
CGGCGACGATTTGGTGTCAAAAATGGCGCACCAACATGACCGTCTGGAAGCGGTGATTTTACGCCAACGCAATGCGCAT  
TGTTACGCAATGCCAAGCCCGTGTGGATGGTGAAGACCAGCCGTGGCCGGAAGGGGTAAGGCGTGGTGGCGGTG  
AATCTCGCCAGTGAAGAGCCGTACCATAATGCGCTCAATGAAAACCTGGTCAAAGAGACGATCGAACTGGCAGAACAAGT  
CAACCATACCGAAGTTCATCTGGTGGCGCTTATCCGGTACCGCAATTAATACTCGCGATTGAACTGGCGAAATTTGACC  
CGAGCGTTTATAACGATGCCATTCGTGGCCAACTTTGCTGGCAATGAAAGCTCTGCGGACAGAAATTCGGCAATTAATGAA  
AACATGACGACGTAGAAAAGGTTCTGCCGAAGAGGTGATTCCTGATTTGGCGGAGCACTTACAGGCGGGGATTTGTTG  
TCTGGGACCGGTCGGACGACCGGATTTTACGACGATTCCTTGGCAACACGGCGGAACAGGTGATGATCATCTTCGCT  
GCGACCTGCTGGTCAATTAACCTGACCAGTATCAGACACCCGTTGAACCTGGATGACGAAGAAGACGATTTAA

>Cluster\_47269

ATGCAAGTTACAGAAATAGTCAATATGTTTGGTGGTGTCTACCCGTCGTTATGGGCAAAAGGTGCATAAGCTGACGCT  
ACACGGCGGTTTTAGCTGCCCTAACCGTGACGGTACCATCGGGCGTGGTGGTGCACATTTCTGTAATGTTGCCCTGCTTTG  
CGATGAAGCGCAGCAGCATCTGTTCCATTCGCGAGCAACTGGCGCACACAGGCGAATTTAGTTAACCGCCTACCGCTAT  
CTGGCCTACTTTACGGGATATACCAGCACCTTTGCGGAAGTTCAGGTGCTGCGTTCTATGTATCAGCAGGCGGTGAGCCA  
GGCAATATTTGCTGGTTTTGTGTGTTGGTACCAGCCCGGACTGCGTCCGGATGCGGTGCTGGATCTGCTTTGCGAATATA  
AGGACAGGGTTACGAAGTGTGGCTGAGCTGGGGTACAACCCGCCACGACAAAACACTGCATCGCATCAACCGCGGC  
CATGATTTTGCCTGTTTACGCTACAGCTGACACCCAGCTGACAGCGGGCTGAAGGTGTGTTTCCCACTTAATTTGCGG  
CCTGCTGGCGAAGGGCAGGCTGAATGTTTGAACCGTGGAGCGAGTGGTTGAAACCGCGTGGACGGCATAAAGCTGC  
ATCCGCTGCATATTTGTAAGGACGATTTATGGCGAAAGCTTGGGAAGCGGGGCTTTGAACGGTATTGAACCTGGAGGAT  
TACACGCTCACTGCCGAGAAATGATTCGCCATACGCCACCGGAAGTGTATCCACCGCATTTCCGCGAGCGCCCGTGC  
CCGACGCTGCTTCTCTCTGTGTGGCGAAATTCGATGGCAGGGAATGGTGGAGTGGATGCTGATCTGTAATGAACATG  
GCTACAGGGATCGGCGTGAACGCTCCGTGGATACCTCCACGGAGTAG

>Cluster\_41137

ATGCCGAAATTCGAGTTTCTTTATTTAGCCTGGCCCTGATGCTGGCTGTGCTTTTGCACCGCAGGCGGTTGCGAAAAC  
GGCAGCGCTACCCGCGTACAAACCGGAAATTCGCTCCGCTAGCGGATGATTTGTTGATCTGAATACCAACAAAGTGA  
TCTATTGCAACACCCGATCTGTTGCGTCCGATTCGCTTATCAGCAATTAATGACCGGATGTTGTTGCTGGATGCA

CGACTGCCGCTGGATGAAAACTAAAAGTGGATATCAGCCAGACGCCGGAGATGAAAGGGTCTATTCCGGCTACGACT  
GAACAGCGAAATCAGCCGTAAGATATGCTGTTGCTGGCGCTGATGTCCTCAGAAAACCGCGCGCGCAAGCCTTGCC  
ACCATTATCCCGTGGTTACAAAGCCTTTATTAAGGCGATGAAATGCGAAAGCGAAATCGCTCGGAATGAACAACAGCGC  
TTTTTTGAACCAACCGGATTTGTCGGTGCATAACGTTTCAACCGCCCGTACTTAACCAAACTACTTATGCGCAAAACA  
ATATCCGTTGACCCGAGTTAAGTACTACCCGGGAAGATATGGCAACCTTCTCTAACCCGACGTATACGGCTTCC  
GCAATACTAACCATCTGGTGTATCGTGATAACTGGAATATTAGTTAACCAAAACCGGTTTTTACCAATGCGGCGGGCCAT  
TGTCGGTGTATGCGCACGGTTATCAATAAACCAGCGTGGCGCTGGTAGTGATGGACGCGTTTGGCAAATATACCCATTT  
TGCCGATGCCAGCCGCTGCGTACTGGATTGAAACCGGTAAGTGTATGCCTGTTCCGGCAGCAGCGTTGAGCTATAAAA  
AACAAAAGCCGCCAAATGGCGCGCGGGGCAGACGGCACAGAACGATTAA

>Cluster\_30581

ATGGCAATGATATCTTTTTCAGTCACTTAAAAATGCGTATTTCGACCTTCAGCGCGCTGACGTTTCAAGCAATATCAGCAACC  
TCTTAAGCAATTTGGCCCGGCTCTTGAACTCAGAGAATTCGAGTCAGTTAATGCACATCTGACCCGCAATGTTGAACCTTG  
ATACCTTTTGGCCAGGATGAAGATACTGAATCCAGCATGGCTGGTTCCGCTGTTCTACAGTGGCTGATGAGCCTGCT  
GATATTTTGGCCGTAAGTTGCTGCTGATCGAGAAAATGGCAGACGATAACAATTTTTTCTTTAATTTCTGTACATACATT  
TTTTCTATGATCGAAAATTTATTGAATCCATTGAAAATTCACGTCGTCATTAGTTGCCCGGTTTCTGCGCGATTACCAGT  
TGTATGTGAAAACCAACAGCATCTGAGCCTGACAGTTCGCGCGGTTCCCGAAAATTTTTATTGTTTCAATGCGCAT  
GATAATGATGCCCTTCAGTCTGTTGCCCCTTTTATATCCGGATAGGTTCTTGGAGAAATCATTCTTTTCAAGCCTGTA  
CGGCTCCAGGACGATTATCGAGAAAATTTGAAGCGGAGTCAGGGGATGTCAGTTTTGCCATCGTCTGATGACGCCCGACG  
ATAGCGGCAGTGTCTGGCATCTGAAAGCACACGCTCTCCGCGCAGCCAGAATGCTCTGATGAGCTCGGATATTTCCG  
GGGAGCTTGGACGCGGGAAGTACTTGTACTCAGGAAGGGAGATATCGAAATCCCTTCAGATCTTCCCGGGTCTCTTA  
TACCAGCTTGATGAGCATGGTGGATGAAAACGCAAACTGTAGTGTAGCTTGGCTTATGCCGGTCTTCTTTTGACAAGG  
ATAAAGCATTAAAGCCCTGA

>Cluster\_2683

ATGACAATATCGACAACCTCCACGCCGATGATGCGGTATTTAAATCTTTTTACGCCATCCAGACACCGCGCGGATTT  
TATTGATATTCATCTTCCCGCGCGCTGCGCAACTGTGTGATTTAACGACGCTTAAACTGGAACCAACAGTTTTATTG  
ATGACGACCTGCGCAATATATTTCCGACCTCTTGTGGTCTGTGAAAACGCGAGGGAGTGGGTATATTTATGTAGTG  
ATAGAGCACCAAGTAAGCCGGAAGAATTAATGGCTTTTCGCATGATGCGTTATTTCCATTGCGCAATGCAAAACCATCT  
TGATGCGGGCTATAAAGAGCTTCCATTGGTGTATCCGATCCGATGTTTATCATGTTGCGAGAAGTCTTATCCTTATTC  
TCTGCTGGCTTGTGAAATTTGCCGAGCTGCTATAGCCCGAAAATATATTCATCAGCGTTTCCGTTGGTGGATATTACC  
GTGTTGCCGGATGACGAGATTATGCAACACCGCAAAATGGCGCTGTTGGAGTTAATTCAGAAAATATTCGTCAGCGCA  
TCTGTTGGGATAGTCGACCAAAATGTTTTCGCTGCTAGTTACAGGGAACACTAATGACAGACAGCTAAAAGCCCTGTTTA  
ATTACGTTATCAAAACAGGGGATGCCACGCGTTTCTGTCATTTATTGGTGGATAGCGGAACGCGCAGCCACAAGAAAAG  
GAGAACTGATGACCATTTGCTGACGATTAAGTGAAGAAGGCGCAATGCAGGGCAACACGAAGAAGCCCTGCGTATTGC  
TCAGGAGATGCTGGATAGAGTTTAGACAGAGGTTAGTTATGATGGTACCCGACTTTCACAGACGATCTTATCGCGC  
AAGCCACTAA

>Cluster\_50005

ATGGACCAGATGGCAGAAAACACACCAGAAGTTGAAATCGAAACCGACCGCTCAGAGCAGATTCTGTATGATGTCGAAC  
GGCTGAAGAAGTCAAAACAGCAGATGGCAGTGGCTCAGGAAATGATGAGAGGAAGTACTGACACTGATGACGACG  
AATCAGAACAGGAATTTACTTTGGTGACGAAAAGCTGGATTCCGCAACCGAAGATGGCGCAGAGCATGGACTGGTA  
AAACACTCGCGCAAGCAGATTAAAGAGAAAAGACCGTGAAGTGAAGAGCTGATGCGCTCAGAAAACCGTGGTA  
GCAGCCGGTAATCACTCAACCACCGCAATGCCAAAATGGATGATGAGGACATCGGTTTCGATGAAAGAAATCTATCAG  
AACGCAATGGCTAAGTGGGAGAGGATAACCGCAAAATACAGGAGCAAGTACGAGAGCGGAAACGAGAGGAAAGGCGCT  
ACCGCAACCGTTCAGCAGAAAAGCAGCAATTACATGATGATAAAGCACTGAAAGTGGCTGTTTACCAGGATGCGA  
GCAGGCTGTACGGGAAGATGTTCTGTTTACATTCAGGACATGATCCTTCTTGGTGCAGAGAAGCCGGAATCGTTGTT  
TGGCACTCGGTCGCAACGCTGAACTGCGCAAGCAACTGGCAGAAAGCTACCAACCTCCGATGCAATTTGGTCTGCTG  
CGTATCGAATCGAAGGCCAGAATCATGCCAAAAGCAAAAACACGGCAGCCACAACCCGACAGTTAAGGGGAGCAACGG  
CGCAGTAATCAATTAACCTCGACAATTTGAAAGCAGGCGCTGAAACCTGGTGACTGGACGCCGATTTTCGCCCTAAAA  
AGGCAAAAAATAA

>Cluster\_34166

ATGAATGAGCAAAACACCCAAATCCCAATGCGACGAAAGGAATAAACGAAACAGGCGCGGTAAGCAGCCTTCTGTGCT  
TCCAGAGTCCAAGCCTGAAGTCTCAGGAGGTACAGCCTGAGGTTTCAAAAAGAAACGACTCGCAGGCGGCAGACAAA  
GTAAACAAGTCTTCGATGAGGAGTCTCGGCTTGTGCTGACCAAAATCAGCGCTGGCCGACCTGACGGCAAGGACT  
GCACGCGCATTGGCAACGCTGGCCGAAGTACGGGAAAGCTGGAGTGTATGCTGCGCGCGCAACCCACGCTCGCCTG  
CGGCTTGTATGTCGCCACCATCGTGCACGACTTGTTCGCCAACCGGAAACCATTTGAGCGGATGACCCAGGCGCTG  
ATGCCCTCAAACATGGCCGAGGTGCAACAGGCTGCCACGCTGCTGGCTTTGCTGGCCAGTGAATACTGTATCAGGTC  
AACATCCCTTTGGCGTCTATCCCGCAGCGTGAAGGACCGCTGCCGCTGATCGATCAGGGCAAGATCGAAGAAGCCAA  
AGCCGCGTGCAGTCAGCGCTCAGCAGCTGTTGCGAGGAGCGCAGCGTCTTCCGCTGCCGCTTCTGCTGCGAAGCTG  
TCTGAGCGCGCCGAGCTCTGTTGAGAAGATGGTCAAGCGCAAGCATCCAAATGAGCGCTGGAGACATTTGTAAC  
GAAGCCCGCAGCAGTTGGAATGGCAGAACTGCTGGCTATGAAAAAGGAAGGACTTTGAGCCCCGTACGCTGAACT  
CAAGAAAATCAAGAAAAGACGGGAGGGGAGGCTTCGAAAAGGCTGGCTGATGAAGTCAAGGCAAAACTGTCCAAGT  
TGTCTGA

>Cluster\_42069

ATGCCGCTTTAACCGCCAAAAGATTTCCACAAGAGTTGCTGGATTACTACGACTATTACGCTCAGCGGAAAAATCTCGAA  
ACGTGAGTTCCTCAACCTTGGCGGCAAGTATGCGGTGGCGGGATGACGGCATTAGCGCTGTTTGGATTGCTCAAGCCAA  
ATTATGCGCTGGCGACTCAGGTAGAGTTTACCAGCCGGAATTTGTTGCTGAGTACATCAGTATCCCTCGCCAAATGGT  
CAGCGGAGGTCAGGGTTATCTGTTGAAAGCCGCAAAAATGAGCGCAAAAACGCCGCGTGGTGGATGAGAA  
TCGTGGACTGAATCCGTATATCGAAGATGTGGCACGGCAGTGGCGAAGGCGGGTATATCGCCCTGGCACCTGACGGCT  
TAAGTTCCTGTTGAGGTTATCCGGGAAATGATGATAAAGGTCGTGAGCTGCAACAGCAGGTTGATCCAAACCAACTGATG  
AATGATTTCTTGGCCAAATGAGTTTATGCAACGCTATCCGCAAGCGACAGGCAAAAGTGGGTTATAGCGGATTTGCTA  
TGGCGGGGCGTATCGAAGCGCGGACGCTGCGTATCCGAACTGGCCTGCGGCTGCTGCTTTTATGGCGCTGAGGCAC  
CCACTGCCGATGTGGCAAGATTGAAGCGCCTTACTGCTCCACTACGCTGAACTGGAATAGCCGAATCAACGAGGGCTGG  
CCCCTTACGAGGCGCGTTGAAAGCCAAATAAAGGCTATGAGGCGTATATATATCCGGGGTTAATCACGGATTCCA  
TAATGATTCACGCCCCGTTATGACAAAATCTGCCCGGATCTTGCCTGGCAAAGGACGCTGAAATGGTTGATATAATATC  
TCTCTGA

>Cluster\_23080

ATGAAACGCCCGGACTACAGAACATTACAGGCACTGGATGCGGTGATACGTGAAACGAGGATTTGAGCGCGCGGCACAAAA  
GCTGTGCATTAACAATCAGCCGCTCAGAGCGATTAAGCAACTGGAAAATAATGTTCCGGCAGCCGCTGTTAGTGCGTA  
CCGTACCGCGCGCCGACGGAACAAGGCAAAAACGTTGGCGCTACTACGCGAGTGGAGCTGCTGGAAGAAGAGTGG  
CTGGCGATGACAAAACCGGTTCCACTCGCTGCTGCTTTCATGCGCGTCAACGCCGACAGTCTGGCAGCTGGTTGCT

TCCGGCGCTGGCTCCTGTGTGGCTGATTGCGCTATCCGCTCAACTTGCAGGTAGAAGATGAAACCCGCACTCAGGAAC  
GTCTGCGCGCGGGGAAAGTGGTTCGGCGCGGTGAGTATTCAACATCAGGCGCTGCCGAGTTGCTTGTGCGATAAGCTCGGT  
GCGCTCGACTATCTGTTGCTGAGCTCAAACCGTTTGGCGAAAAATATTTCCCTAACGGCGTAACGCGTTCGGCATTATT  
GAAAGCACTGTGTTGCTGCGCTTTGACCATCTTGACGATATGCACCAAGCCTTTTTGTCAGCAAACTTCGATCTGCCCCAG  
GCAGCGTACCGTGGCATACTGTTAATTTCTTCAGAAGCGTTGTTGATACACATTTGCTCGCAGGGCACCACTGCTGTATGATC  
CCGCACTGCAAAATCGAGAAAGAATGGCCAGCGGTGAACTGATTGACTTAACGCCGGGGCTATTTCAACGCCGGATGCT  
CTACTGGCATCGCTTTGCTCCTGAAAGCCGATGATGCGTAAAGTCACTGATGCGTTGCTCGATTATGGCCACAAAGTCC  
TTCGTCAGGATTA

>Cluster\_27452

ATGTCCTCAGGTTTCAGAGTGGCATTGTCGAGAACATTGCGCGCGGGGATTGGATCGAAGCCAACGTGAAAGGGGAAGT  
TGACGCCCTGCGTGGCGCAGTAAACATTTGCGGACAACTGGCAACTTTTGAAGCGAAATCCCGGACGCGCATCTTG  
GTGCGGTGGTTGCTTTGGTAACAATACCTGGCGCGCTCTGAGCGGGCGGTTGGGGCCGAGAGCTGAAAGATTTTCCG  
GGCTACCGTAAAGTCTTTCACCGACGACCCAGTTCGATGTGTTGATCCACATTTCTTCTCTGCGTCACGACGTGAACCT  
CTCTGTGCTCAGGCGCGGATGGAAGCCTTTGGTGAAGTGAAGTGAAGAGATCCACGGCTTCCGTTGGGTTG  
AAGAGCGTGACCTGAGCGCTTTGTTGACGGTACAGAAAACCCGGCGGTGAAGAGACGCGCCGCAAGTGGCTGTATC  
AAAGACGGCTGGATCGGGGCGGAGCTATGTGTTGTCAGCGTTGGGAGCACAACTGAAGCAGCTCAATCGGATGAG  
CGTTACCGATCAAGAGATGATGATCGGGCGCAACAAAGAGGCCAACGAAGAGATTGACGGCGACGAACCTCCGAAACCT  
CTCACCTGACCCGCTTGTATCTGAAAGAAGATGGCAAAGGGCTGAAGATTGTTCTGTCAGAGCTGCCGTACGGCACCGCC  
AGTGGCACTCACGCTCTGACTTCTGCGCTACTGCGCGCTGTCATTAACATTGAGCAGCAACTGCTGAGCATGTTTGG  
CGATACCGATGGTAAGCGTATGCGATGCTGCGTTTACCAAACCGGTAACCGCGGCTATTACTTCCGACCGTCTGCTGG  
ACAAGCTGATGGCGCTGTAA

>Cluster\_21566

ATGAAACCGCAGGTTTACCACGTCGATGCTTTTACCTCTCAACCGTTTTCGGGCAATTCTGCCGGTGTGTTTTTCCCGC  
CGATAATCTCAGCGAAGCGCAAAATGACGCTTATGCGCCGCGAGTTAGGTCATTTCGAAACTGCTTTTCTGCTGCACAGG  
ACGACAGCGATGTGCGCATCCGCTACTTTACGCAACCGGTTGAAGTTCGATTGTTGGTTCACGCGACAGTAGCTGCGCAC  
TATGTACGTGCAAAAGGTGTAGGTTTAGGAAATGACAGGCTGGCAACATCGCTGGCAGGAAACATCGTGTGACTAT  
AGAAAAGCAAAATGATGATTATCGTATTTGCTGGAACAAGGTTACTCCAGGCTTTGAGCCACCGCTGGAAGGTGAAACAC  
GTGACCGGATATCAACCGCTTTCATCTCACTGAGGACGATATTTGCTCAGGCTTGGCAATTCAGTCAACACAGGA  
CACTCAAAGTGTATGATCCCGTTGAAACCAGAAGTGGATATCGACGCCCTTTCGCTGATCTTGTGCGCTGACCGCTAT  
CAGCAAACAGATTGGCTGCAATGTTTCTTCCGCTTCCAGATCCGCCCAGGCAAAAGCGAAACCGACGCTCGCATGTTCT  
CGCCTGCGATTGGTATTGTTGAAGAGCCGGTGAACGGGAATGCCAATGGTCCGATGGGAGCATGGTTAGTACATCACAA  
GATTTATCCACCGATGGCAACGTTGCGTGTAAAGGCCATCAGGGGCGCGCATTTGGGCGTATGGTGAATGATGT  
GACGGTGACAATTCGAGATAACCAACCGGAGAAAGTTACCATTTCGGCACGCGGGTATTTCTATCCATGCTGAATGG  
CCATTGATTTTTGA

>Cluster\_1246

ATGATAAATAGCATTAATCTTTTTTTTTCCAGCATTCTCGCAGTATATCAAGTGTACGCGTAACAGTAGCTTCACTGC  
CTCACAGCACAAAAGCACACCTAACACGGTAAAAACAGCTCACCTCTTCTCCAGCAACAGTCTGCCAGTGAACAA  
CTATTTTTAAGGTAATAAATTTCTATACGGAATCAGGACTTCAACGTTCCACATCTTATACTAGTCAAGTATAGAAAA  
AACGCTTTACATCGGCTCTACCTGATGTGGCCAAACGCTATGTCAGCATCTTCGAGAGCATGGCATTCAACAGCCG  
GAATATGGTGAACATATTTCTCCAGCACCTAATGCGCTGCGCAACGCCGCGGTACAAAAATGAACAAATCAAGACCTC  
TGCCTGATGTGGCTCAGGCTCTGATGACGATCTTGCAGAGCATGGCATTCAACAGCCGGAATATGGCTGAACATATT  
CCTCCGGCCTAATCGGCTGCGCAACGCGCCAGTACAAAATGAACAATCAAGACCTCTGCTGATGTGGCTCAGCG  
TCTGGTGCAGCATCTTGCAGAGCATGGCATTCAACAGCCGGAATATGGCTGAACATATCTCCCGGACCTAAGTGGC  
CTGCGCAACGCCGCGAGTACAAAATGAACAATCAAGACCTCTGCTGATGTGGCTCAGCGCTGGTGCAGCATCTTGCA  
GAGCATGGCATTCACACGCCCGGAATATGGCTGAACATATCTCTCGGCACCTAAGTGGCTGCGCCAACGCCGCGAGT  
ACAAAATGAACAATCAAGACCTCTGCTGATGTGGCTCAGCGTCTGGTGCAGCATCTTCGAGAGCATGGCATTAAATCAT  
CTAAGCGCTCGTGA

>Cluster\_66717

ATGGCTAAACCCGTTTCACTAACGAACAATGCTGAAATTTTACAGCAGTCAAAAGAGGGGGCGTCAATAAGGAGCT  
ATGTGAACACTATCAATTTAGCGTTAGCAGCGTGGCGCGTGGCAAGAACAGCAGCGTGACGGCATCAGAAGCGAATTA  
AAAAACAGAAATCCAAAGCACAAATCGTCTTTCGGTTTCTTTGCTATCGCTATTCTACTGACTCTTATATTGACAAA  
CCTACAGGTGGATGGTAATCCGCTTTATTAATCTATTGTGTTTATATATCCGCCAGTATCGCAACTCTCTGGCAG  
ACATATTAAGAAAGAGATATCTATCTCTCGTTTCAATTAACAGCTATAGCGCCCTTTATAATTTGAGTGGACGT  
TTATTTGTTTTTTATTTTTCGAGTAATTTATTTTTTTTATTACAGGTGTTTTTCGTAA

>Cluster\_44936

GTGAACCTCCACAAGACGGTATCAAAATGCATCGCGTAACTTACCCTATCGGTCAGCAGATCCAGCCTTATCTGGA  
GGACGGAAATGCTTTCCGATGGTGTAAACCGTGGCGCGAGAGACGAGTCTTTCCAGAAATGCATCAGCCACATGT  
GGTACAGCGAAATCAGTGAATACCTCATCAGCAGGGTAAAACGTTGCGCACTCCAGCTGGGTAAGATGCTCTCAA  
CACATATCTCGGTTATGAAACCAAGACCTGGTTGATGTCGTAACCGGTGATATCACCACTATCCAGTCTGTACGCCA  
TACCTCCGATCTTGATACCGGAGAGATGATGCTTCCGTGTAAGGTTGAAGCCTGGGCGGTGAATATGGCTGCCACC  
TGACTATTTCCGAGAGCTGCGAGTTCAGCTGCTCCGCGACAAGCAGGAGGCGTAA

>Cluster\_17488

ATGGAATTCGAAATCAAAGCGGTGAAATATCGCGCGGCAAACTCAGCGTTTTTGTATCAGCTGAAAGTACCCGCAAACT  
TCTGCGGTGCTGGCAGGAATGATGTCAGATTTGCGGAGCATTCGCTCCGTTTGGCTGCCGACGGCAAAATCGACACCG  
TGAATTCGAGCAGTAAAACCGGTGTTTGAAGCCATGCTCCCGGATCGCTGAGGAACTGTCTTCCCTGACTGAAGAA  
ATACCAACGCGATTTATTCATCTTCCCTGCGCTGAGTGTACAGTAAAGCACATGGACGGATGGACGGATTTCAACAG  
CGGTCAGCTGATGTTGATGATATCGACCTGCTAACCATGCTGCAGCTGGTGGCGGGTGGTTCGCCGATTGCTGGGAA  
ATTTTTGCTTACACCCCTTACCAGCACGACGACAGGCTGCAACAGGCTGA

>Cluster\_20775

ATGAGTAAACGATTTTCGGGTATGTCGTTGATACCTATCTTGTATGGCGATCTGATCCATATCGAGAAAAATCACACTCGA  
TATCACGGATAACAGCGCCGCGCCAGACCGTGGTGTGCGGATGGCCATGTTGATGGTATGTTGGCCGACAGGGAG  
AAATTTGAAGTCAAGTTCAAAAGTGTGGGCGTACTGACGCTAAAGCCGCGCCGAGGTTCTGGCGTGGTATTCGCGCC  
CTGGATTTTCTTTCTATGCCAAAGCGGGCAGCGAAGAAATGAAAGTGAATCGTTCCGTAACAAACTCCAGCTGAGTAA  
TCTGCTGGATATCGATCAAAAGGCGGGTGGCGACGACCAAAATCAAAATTTTTGTGACCAGTCCCAAGTTCAGTGA  
ACATCAACGGTGTGCGTATCTGGAAGCGGAAGCCAGGAAACCTGATCGGATAA

>Cluster\_64861

ATGAAACGATCTCGCTTATTTTGTGTTGGGCTTTGCTCGATGGCACTCTCAAACGCTCTTTTTCAGGTTATTTAGT  
GCAGCGCTTAACTGCACGATTAGCAACGCTCAAACCATTTGAAATAACTTTTTCAGGATGTTGTTATTTGATGACATTAATG  
GCAGCAATATGAGCAACCGTGGCGTATTCATTACCTGCGATACGGCGGTTCCGCGACCCATTAATGAAATGACCTTG

AGCTGGAGTGGCACACCAAGCGATTTTGATAATGCTGCAGTAAGCAGCAATATCACTGGTTTAGGCATTCAGCTCAAACA  
GGCAGGGCAGAGTTTTACGATCAATACGCCACTTGTGGTGAATGAAACCGATTTACCGGTGTTAACGGCTGTGCCAGTAA  
AAAAGAGTGGTGTCTTCTGCCAGAGCGGACTTTGAGCCTGGGCCACGTTACAGGTAGATTACCAATGA  
>Cluster\_106  
GTGAGTCTTGATATGAACGTTGCCGTGGATGTGCGACGTATTCAGCTTGCACCTGGATGAACTGGGAACCGTTACACGTGA  
CCGCGCCATTTCCCGTGTGATGGCTGCGCGCTGCTGTATCCACGGAACAGGCATTTGAACGGCAGGAGACCCGGATA  
CAGGGAAAGGCTGGGAAGCGTGGAGCGATTCTGGCAGGCATGGCGTCAAGGATCATGGTTTGTTCGGGCAGTATCCTT  
ACCTGCATGGCGATCTGGCAGCAGCATTACCACCGATTATGGACAGGATTAAGCCCTGATTGGTTCGCCAAAAATTTA  
TGCTGCCATCCATCAGTGGGGCGGTACACCCGATATGGCACCCCGCCGGCAGGCGTTCTGCGCGTCTTATATGGGGC  
TGGATAAGACCGGGAACAGGAAATTTTGTATGCCATCAGAAAACGCGTCAGCGCCGCTCTGAGGCAATAA  
>Cluster\_21832  
ATGCGTTTTCTGCCTTATTTTGTATCACAGCACTGTTTTCTGGCCGGGTGTAGCCACCATAAAGCACCGCCAAATGCCAG  
ACTTTCTGATTCGATTACCGTTATTTGCCGTTTTGAACGACCAGCTACAAAGCTGGCATGGCACGCCGTATCGTTATGGTG  
GCATGACGCGCGCGGTGTGGACTGTTCCGGATTTGTGGTTGTGACGATGCGCGATCGTTTCGATTTGCAGCTGCCCGT  
GAAACCAAGCAACAGCCTCTATTTGGCAGCAGAAATGATAAAGACGAGTTGCTGCCAGGTGACCTGGTCTTTTCAAAC  
GGTTCCGGACAAATGGTTTGCATGTAGGTATTTACGATACCAACAACCAATTTATCCACGCCTTACCAGCAAGGGAG  
TGATGCGTTCTCTCATTTGATAATGTCTATTTGGCAGAAAAATTTCTGGCAGGCGAGACGAATCTAG  
>Cluster\_34242  
ATGATTCAGTCACAAATTAACCGCAATATTCGTCTTGATCTTGGCGATGCCATTTTGCACAGCAAGCTAAAAAGATCT  
CTCATTTGCCGAGATTGCCGACGACCCGCTCTGGCAGAGCCCTTTGTAACCGCGCTTGGTGGGTGACGAGCGCTTC  
CTGCCAGACCGCGCCCTGGTTCGGGGGAAGCTGGATCTCGACGAAAGACTCCATTTCTACTGTTGCAGATGATTTCCACTG  
CGTGGCTGCATTGATGACCGTATTTCAACTGACCAACGATGTATCGTTTCTATGAAATGTTGCAGGTACGGTACAAC  
CCTGAAAGCGTTGGTTTATGAGAAATTTGGCGATGGCATTATTTAGCGCGATTAACCTTCAAACCTGACGCTTAAGAAAGTGG  
CGGACCCGGAAGGTGGCGAACGTGCGGTATCACCTTAGATGGTAAATATCTGCCGACCAACCGTTCTGA  
>Cluster\_2752  
GTGGGCCAGGTGATGCAATCCATCATCGCGAACAGGTCAAGTACATCAAATCGTCCCCCTCAGGGCGGCTGACAGGGT  
GTACGACATCCAGAATCGGGCGACAGAAGCTGTTGTGACCGGTGGGAGAGCAGAATATTTGCTAAAGAAATAGCCGCT  
CGGTGATATAGCAAAAGTCCAGAGCTGACCTGATTTGCGTACTGAACTTGGACGTGCACCCGCGCGGTGGATCGAGCG  
CGTGGCTGTCAATTGGTTTCAATAGTTATATCTGGCGTACAGCCGAAGATGGTGACGTCAGGCATTCATCGGAAAT  
GGAAGGTAATTTTGTGCAATGGGCAAACTCCAACGCTTGGACGCGATGACAGGTCACGCTGGCGAGTCCCGAATTTGTC  
GCTGTTATAAAGAAATCGTTTTTCCACCTCCAATCTTATCCCGCTGA  
>Cluster\_22813  
ATGAGTACCGTTTTATACCGTCCGGCTGACCCCTTACGGCGATGACAGTTACGTGCGACCGTTGTTGCCGATCGTTGCCA  
GGCCGTTTTCTTCGCTGCCACTGATATGCTGAGCAGGAAGTGGATCTGAACAGCTATTGCATCAGCAGACTGCCAG  
CCACTTCTTTCGCGCCAGCGGTGAATCGATGAACAGGCTGGCGTGCAGAAATGGTGATCTGCTGGTAGTGGACAGG  
CGGAAACACCAACCGGGGACATCGTTATCGCTGAGATCGACGCGTGAAGTTACCGTCAAACAGCACTGTTGGCGCC  
ACGCCCGCACTGGAGCCGTTTTACAGACGCCCCGAGTTCCGCACACTGTATCCGAAACATCTGTATTTTTGGTGTG  
TCACTCACGTGATACACAGGACGCGGGAGTTACGCTGA  
>Cluster\_17750  
ATGATCCTCGACAAACTGTTGATGTTCTCCGAAGCGCAGGCGGTTACGGCTTCCGAGCTTCTACTGATGTAATCGATCT  
CGGTCCAATTGACGGTACCGTCTGATATCGGAGTTGGTTACCGCTGGAGTTCTGGGCAACGTTGAATACCACTGCAA  
CCGAGGAGGTGCTGCAACCTGAACTGACGTTGACGAGCAGCCCGGATAAATCCACCTGGACCCAGCTGATCAGTACG  
GGCAGTTGGCGCTTACCGCGTTGACTGCTGGAAGCGCTGTTTTCCGCAAGTTCGGCAGGTGTCAGGCTTATCT  
CGGTGTTAACTATGTTGGTGGTACTGGTCCGCTGACGGCGGTTGCTTTCACTCGGAAATTAACCTGGATGTTGATAACA  
ACAGCCCTACTACCGGATTCGTTCAAAGTGAATGGCTAA  
>Cluster\_19  
GTGGTCTCAAAAAAGGTTTATATCTTAAGTTTAAACCCAGAGATAGTAGACCAGCCTATAGTATATAGGCTGGTAAAGGA  
TTATGATTTAGTTTTTAACATTTTAGGGCGGTAATCACTCCTGGTAAAGAAGGTATCATGATCTTAGAGTTAGAAGGCA  
CCCTGAAAAACTAAGAGAGGATTAACCTATCTTAGAGAGGTAGGGGTTGAAGTCAAGCTCTTAGAACAACAGATCATC  
AAAAATGAGGAAAAATGATTTCAATTTGTGAAACTGTACTGCTGCATGTCCAACAGGGGCTCTTTATGTAGAAAAAGATAC  
CTTTTATAAAGGTTTAAACCTGAAAAATGCACTGCTTGTGATTTTGTGGCAGTTTGTATCACCAAAGCTATGGAGG  
TTCACGTAGAAGTGAGGTAGAAAGTTTTACTAA  
>Cluster\_5695  
ATGCGCGCAACGGATAAGCAACCGGTTTTACATTTACTGGAATTTATGGTGGTATCGTCAATTTACGGCTACTTGGCAG  
CCTGGTGGTTCTTAACCTAATGGCAATAAAGAAAAGCGGATAAGCAAAAAGCCGTCAGCGATATTGTTGGCGCTGGAAA  
ACGCCCTTGATATGTACAACTCGACAATCATCACTATCCAACCAAAATCAGGGGCTTGAATCCTTAGTAGAAGCGCCG  
ACACTGCCACCGCTGGCCGCAAACTATAACAAGGAAGTTATATCAAGCGTCTGCCTGCCGATCCCTGGGGCAATGATTA  
TGCTCTCGTTAATCCTGGTGAACATGGTGCATACGATCTGCTTTCAGCAGGCCCCGATGGTGAATGGGAACCGAGGACG  
ACATCAACCAACTGGGGTTTGAGCAAGAAGAAAAAGTAA  
>Cluster\_46837  
ATGGGGTCCGAACCTGTAATAAGGTTAAATCGCATAAGATAGATGCTCATATTTATTACATTTGTAGCAAAAGATGCCGTA  
TATTGATTCATAAAAATTTGCTTGAAGCAGGTGCGAAAGGATGCGTATGGAACCAAGCTCACCCGGCGAACTAAATCGTG  
CTATTGATTCGATTAGTAATGGTTACACTTATTTTGTATAGTGTACATATGGATTGTGAAAAAATATCTTCCAGGTATTCC  
TCTGATAATCAACTTACAAATCGTGAGTCAGAAATATTACAACCTCATAGCTGATGGTAAACAAACAAAGAAATCGCTAA  
TTTTCTGCAGTTAAGCAGAAAAACAGTCGAAACTCATAGACTCAATATCATGAAGAAATAGATGTTTACAGTGGTATCG  
AGTTGATCAAAACAGCTTTACGATGGGTGTTTTGCACATATAA  
>Cluster\_22090  
ATGAGTAACTGGACTGGTTCAATAACGTAGAAAAATCGCCACATCCTTGGGAAGGTATGGGGCTGACATGGTTGACAAC  
AGCACTAAATGTCCTGATGTAAAGCAGCTAATTAATTTTACACTGAAGTAATGAAGATGGTGGTAAATTTCTGAACTTG  
AGGTGATGGTGGTGGTATGATGATTTATTTTGGTCTGATCCGTTACCGTGGCACAACCTTACCATAAATAAGGAAGGATGGGAT  
TCCGACCTGAAAAGCCAAATACCTCGGAGCTATGCCCTCCTTATTTTATATGATGTAGATGATATGATCACTCT  
GGTAAATGAAATGATTTGAAGCTGGCTCGACTGTTCTAAATGAACCTGTGAAATGTTCTGGGGTGAATTTAAAGCCCGT  
TGAAGACCCATTTGGTTTTATCTGGGATATCGCACAGAACTGTAA  
>Cluster\_17891  
ATGAATACATATATTCGGCAGTACAAACTCTTTCTATCCGCTGGAGATGAAAGAGGATTACACTCAAGCTGACTCATG  
GCCAGATGATGCTGTTGAAGTTGATGAGCAAGTGTATATTTGAGTTTTCCGATTACCGCCGAAAGGAAAAATCCGTATCG  
CTGGAAAAATAGTTTTCTCGCATGGACTGAAATTCACCACCAACACATGAGGAACAGATTGCTGCAGCCGAACTGAA  
AAGCAGCAACTGATTAATCAGGCCAACGATTTATATGAACAGTAAACAATGGCCGGTAAAGCGGCTATTTGGTCTGTGAA  
AGGTGAGGAACTGGCGCAATATAATTTGTGGCTGGATTATCTGGACGCACTGGAACTGGTGCATCTCCGGTGGCCAG

ATATTGAATGGCCTACGCCTCCGGCAGTTCAGGCCAGATGA

>Cluster\_49007

ATGAACGAATATGTTTATAGCGCAAGGCATAATGCTTTTTTCCCTGTGGATATGATTGATAAATAAAATCAGAGGGATG  
GGATTTATCAGACCTAAGGAAGTAAATCAAAAATATTTACAGTGTGTTATGGCTGAACCGCCACAAGGAAAAATCCGTA  
TTGCCGGAGATGATGGGCTGCCCTGGCTGGCGAGATTTCTCTACCCAGTATGAAGAATTTATGAAATACATGAATCA  
GAAAGACAGCTGTAATTAACAGGCCAACGAATACATGAACAGTAAGCAATGCCCGGTAAAGCCGCTATTGGTGTCT  
GAAAGATGATGAACCTGGCCCAATAAATTTGTGGCTGGATTATCTGGACGCACCTGAAATGGTGGATATCTCCGGTGGC  
CAGATATTGAATGGCCTACGCCTCCGGCAGTTCAGGCCAGATGA

>Cluster\_50965

ATGTCATCGTATATGGGGTTACCAACAAATCAGCACGATGCTCTTGAGAATATTCAGCTCTTAGTCTGGGGCTGGTGCAC  
ACTGTATAGCAGCAATAACCTGAGTTAATGAACTTGCACGCTCCATCTGGCTGTAACCAAAAATATAGCCTCACAG  
CGTCGCGTTTATGCAACAAAATTTAGCTATTAATCCAGAAATCGGATTTAGCACCAACCGGAAGCCCTGGGCTTAACA  
ACAGCCGAACCTCCGGAAGATATCGATCTCGATGAAGAAATTAATCATCCAGTGGGAGAGCGGAGAGTATGAACCAACTAT  
CAGTATGCTTATCCACTGGCAATATTTCTGGCTGCGATCCGATGTGCTGTAACTGGTGGGTTACTCTCCGGAGC  
AACCAAAAAGTGAAGGAGCAGCAACCAATGACGCATCTCAACAAGTTTCCCTTATCTCGCGAAGCTCTTCTGCGGAAG  
AACCAATACCAATGGTGA

>Cluster\_24872

GTGACGCGAGGTAAGGATGGCAGCGCACATCCGCATTTTCTACTGTCTGCTGATGGTGCACCTTCTTGGTTTAAAGGGAA  
GAACCTACGTTAAGCAGCAACCTTGGGTAGAATCTGGCCGATTTGCTTCCGGGTGAACATGAGCCGAATATCGATATTC  
GGCAGTAAAAAATAGACAGGTGAGTTGTGGCAACCTTGGCCGAGCAACTGCAAGCGCGGTTGCTGAAACGCTGAAA  
TACTCCGTTAAACCGGAAGATATGGCAACGATCTCTGAGTGGTTTCTTGGCTGACGCGGAGCTTCAACGCGCGTTT  
TATCTGACCGGTTGGGGCTAAAAACGCTCTCCAGTTGGATCGAGAAACCAATGAGGATCTTGTCAATGCGGACGATG  
TAGGGGATGGCACTGATGACGGGAAGCGGACGGGCTTTGTCTGGGATTCAGGTAACGCGGTTACAAAACGCGCCCTGAG  
AAGGATAAATCGGATTA

>Cluster\_18185

ATGCTGCAACAACAGCGATGAAAAACCTGAAAAACCGCCAGCGCGGCAAGATTTGGCTACTGTTTTCAGGAAGCGGA  
AAATCAGCTTTTTACAGCACCGTTGCTGACGAAATCGCATTTGGTTTGTACTGCAAAAATGCCCAGCGGATGAAATCA  
CTCAACGTACCAATGCTGCCCTGCAATGCTGACGTTAGCAGACACTGCCAGCGCACTCCGTTAGATCTCAGATGCG  
CAGCGACGGATGGTCCCGTCCCTGCAAGCACTCTCTCCGCACTATTGCTACTGGACGAGCCGAGTCCGGATTT  
TGACGAAAATTTGGTTGAGCGTGTGTTGAAAGCTGCTGGAAAAGTGCAGCCAGCGAGGCACGAGCGTCCGATGCAATCAGTC  
ATGACGCGCATTTACCCGGCGTCAATTTCTCTGCTGGTGGGACTGGAAGATGGTGTAAATCAGGAACGTTAATCCATCA  
GACGATATTCACCCGATG

>Cluster\_11730

ATGTGTTACTGGACAGTAGTTGTCTTTAGATAGCCACATGAGAATGATAATTCGTAGGGAGTTCAGCCGAATGTTGG  
GAAGGATTTGACCGATGAAGAGAAGAAGTGCCTGGCCGGCGGAGTACGGGAAGCCCGGGAGGATGGGGACCAAGAATG  
AGAAATAGCCCAAGGATCGTATGACGATGAACGATTAAGATGAATTTGCGCAGAAAATGGGAAAACCCCGAGTTACA  
GATTCAAAATTTGAAAATAATATAGACGATCTTTATCGCCAAAATGCAAAAAGTAGGAAGTGAAGCACAGCAGATGCTGT  
TCGTTATGAAATTTGCCACAGGTGAAAAGTTGGTGGTAGAGGACATGTTTGAAGACAGAGGATATACAAGGGCTTTTAC  
AGGATTTGGTTGGATAAGAAATCCAACAGCATCTCCAGGGGATCGAGCAGCAGCAGAAAACGTTCTTTCAGGATTTACAGAA  
TCTTTGGGAGGCAAGTAA

>Cluster\_16058

ATGATTAATCCTGTACTAATACTCAGGGTGTGTCCCTATAAATACTAAACATGCTGAACATGTGGTGAAAAATATTTA  
CCCGAAAATTAACATGATTTACTTTAATGAATCACCAATATAGATGATAAGAAGTATATATCCGAAAACCGCAATGG  
GGCAGTTTTCTGTAGATAGTTTATACAATCCTGATTTACATGCATTATGTGAGCTTCCGGACATTTGTTGTAAGATCTTC  
CCTAAAGAAAATAATGATTTTATACATGGTTGTTGTACAGAAAATGACAGCCCTTAGGAGAACAACGGACAAAATAG  
ATTTATAGAATTAATAATAAAAAAGAGATATCATGCAGGAATTAATTTATGAGTTACCAGATTTAAAGGCAGTAAAT  
CTGAAATGATTAATTCACAGTGAATGGGAGAAAATCTTTAGCTACATGCCTGTGAAAATAAACAGTTATATGAAATACATA  
AATAATAAATTTGCTAAAATAGAGTAG

>Cluster\_39442

ATGGCAAGCAGAGGCGTAATAAGGTGATCATTATTTGGTCCCTTGGCATGATCCAGAAATCAGATATTCACCATGCG  
AACGGCATTTTGCAACCTTACAGTTGCTACGTCAGAACAATGGCGTGATAAGCAAACTGGAGAGCAAAAAGGAGCAGACGG  
AGTGGCACCGTGTGGTAATGAGCGGAAACTGGCAGAAATGGCAGCGAATATCTGCGAAAAGGCTCAGAGGTTTATCTT  
GAAGGCAAAATGCGGACAAGAAAATGGCAGGATCAAAGCGGACAGGATCGGTTCACTACAGAAGTTATCGTGGCGTTGG  
TGGAGCATTGCAAAATGCTTTGGTGGCAAGCAAGGAAGCAATGAACAGTCTTACCTCAGCGAAAACGCGCCAGCAACAAA  
GACAGCAATCTCAGCAGCATGGAAATTCAGCGCAACCACTATGAATTCGACAGATGAAATCCCTTTTCACCCAGTAAC  
CTCCCTTCCCTCGTACGCTATTCACGCAATTTAA

>Cluster\_35768

ATGGCGGGGATACCAAAAACCTGAAAGCCGACTGCTGCGGCAACGATTTGCCGGTGGCGGTGTGGTGGTTATCAGGA  
AATGACCCGTCAGTCTCTGATCCATCTGAAAAATATCGCTTATATGCCCTTACCAGCATATTTGCCGGTGTGCTTACGGTCT  
GTGTTGGGACATACCGGGCGGATATCGAAATGCGCCGTTACAGCCATGCGGAGTGTATGGCTCTCTCAGCGGTGATTTA  
AAACCGGTTTATGCGGCAATCGATCGTCTTGTGAGGTTGCCGCTGACGCCATATCAGAAAACGCGCTGGCAACGTTTAT  
TTTTCAACACCGGTGTTACCGCATTCAGTAAATCAACGCTGTGAAAAAATCAATGCCGGTGTATACCGCGGAGCGCGTG  
ACCAGATGGCCCGTGGGTGTTTGGCGAGGCCATAAATGAAAAGGACTGATGAACCGTCCGGAAGTGGAAATGGCTATC  
TGGAATATCAGGGGGGGCGGATGA

>Cluster\_52126

ATGATATTTAACCCTGAAACTTGCCTGAGACCGCTCATTCGCGGTTTTCTGTGCGCGTAATGCTTGCTCTGGTTGT  
ATGCGTAGTCTGGCAAGTATTTAGCCGCTACATACTTAACAGCAAGTACATTAACCGATGAGCTGGCAGCTTTTTGA  
TGATTTGGTAGGATTAATAGGTTGCTGCATATACCGTCCGGCGCAGCGACATCTCTCTATTGATTTATTTGCTCTCGCC  
CTGAATAAGCGAAAACAACTACTTCTTAGTATAGTCATTAACCTTCTCATTTTAGGCTTTGCCGGTTCGGTCAATGCTGAC  
TGGTGGCCGTGAAAATTTGATAAAAACGCTGGCAACATCACAAGTATCTGCGCGATGCAAAATACCGATGGGATCGGAT  
ATATCATTTCTGCCATTAAGTGGAGTGGTAATGATGTTTTATGCTTTGTGTTTTATTAACAAGCATTTCAACAACGAAA  
CAACCTGCGCAGGAGGCCAGTTAA

>Cluster\_57845

ATGTTTGTCTTGGCCGGAATAAATGGAATACCAGCTGCCGGCGGAAATATGCAATTTTCAGGGCGTCAATTTGCGGA  
AATTTGCCGATTTAAGCCGGTGATAAACAATGACGGTCAATATGGGGCAATCAGCAGTAACCGGTTTCATGCGGTAG  
GGGAAGATAGCGCACCGGTGCTTTTGTATTATTTACGGGAATGTAGCACGGTGGTGGTGAACGTTGGGTTGGCG  
TTTTCAACCGGTGTTACCGCATTCAGTAAATCAACGCTGTGAAAAAATCAATGCCGGTGTATACCGCGGAGCGCGTG  
AGCGTTGTTTGTATGATGAAGAAAACCTCGTACCATTAAATCGTCTCCAGCAAACTGGAACCGCTTTTACTCAGGCTCTA  
CTTCGCTACATTTTATCGCAAAATATCGTGTCTACCGGGCTCGGGTACTGGCGCATCGCAATGCCAGGCGTGGTTT



TCTTTAACCTATCAGTAA  
>Cluster\_22158  
ATGAACACTACGAGATTAAGCAGGAAGATAAACGTACCGTTGCAGGTTTCCATCTTGTGGCCCGTGGGAGCAGACGGTAA  
GAAAGGTTTTGAGCAGTTGATGATGTGGATAGATAGCAAAAATTTGTGCCGAAGGAGTGGGTTGCTGCTATACGACA  
ATCCAGATGAAACACCCGCGCAAAAATTACGCTGCGACACCGTCTGACGGTACCGAATAACCTTACCGTCCCGGTAAC  
AGTGAAGGCGCTCATTTCTGACAGAAAATTTAGGTTGGTCACTATGCGGTGGCGGTGGCTCGTGTAGTTCGGTGTATTTTGC  
TAAACCCCTGGTATCAGTTCTTTAATAGCCTCTTGCAGGACAGTCTTATGAAAATGTTACCAAGCCCTGCTTCGAGGTTT  
ACTTGAACAATGGCGCGGAAGATGGGTACTGGGATATCGAAATGTATGTTGCGGTGCAGCCAAAACATCACTAA  
>Cluster\_52746  
ATGAACCGGTTTATTATTGCGGATGCGACGAAATGTATCGGTTGCCGTACCTGTGAAGTGGCTTGGCAGTGTGCGATCA  
GGAGAATCAGGATTCGCGTGCCTGTCACCAGACGAGTTTATTTCCTGATTCGTCATTAAGACCACAGCTGGACCA  
CGGCAGTAGCCCTGTCATCAGTGTGAAGATGCACCGTGCAGCAATGCTTGCCTGTTGACGCGATAAGCCGCGAACATGGG  
CATATTTTTCGTTGAACAATCAGCTGTCATTTGGCTGTAAGCTGTATGCTGGCTTGCCTGTTTGGTGCATGGAGGTCGT  
TTCTTCGCGCAAAAAGGCGAGGCGGATTAAGTGCAGTCTGTGCTGGCATCGGGCGACGGGGCCGCTGTGTTGAAGCCT  
GCCCGACAAGGCGTTGACGTGCATGGATGTCGAGAAAGTGCAGCGGCATCGGCTACGGCAGCAGCCTGTTTGA  
>Cluster\_8002  
ATGGTGCATCCGGGAGGATTACTCGCCTTGCGGCTCGCCCTTCGGGCCGTTGCTAAAGCAACGTTATCATCCCTAGTGCC  
TGGGTTAATTCGCTACCTCTTCGATACCTTCATGCTGAAGATTCGGAGAATATGGTGCATCCGGGAGGATTTCGAAC  
CTCCGACCCTCGGTTCCGTAGCCGAGTACTCTATCCAGCTGAGTACGGATGCATCGGAAAATTTATTTTACTGCTGATA  
TTGATACCGCTACTAAGCCATATCAAGTAAGAGATGGTGCATCCGGGAGGATTCGAACCTCCGACCCTCGGTTTCGTAG  
CCGAGTACTCTATCCAGCTGAGCTACGGATCGGGAACCTTACTTTACTGCAGATTTTTTATGATACCGTACTAAAGC  
CGTATCAAGTAAGAGATGGTGCATCCGGGAGGATTACTCGCCTTGCGGCTCGCCCTTCGGGCCGTTGCTAA  
>Cluster\_13222  
ATGTTTGGGCTTTTTAAGAAAAGGCAAAAGCGGAAAGGTTTATGATGTAACACGCATTCATACGAGCTGGTGTGTAAT  
GTCATCTAAGCTGATAAAAAAACAGACCATATGTTCAAAGTAATAAAAGGGGAGCGAGAGGAGGCTTTAGGAGACCCCT  
TATATCAGCAGGATATATAACGCCATGGGTGATGATGATGACTGCTCCTCGGATGCAGTGCAGTGCAGACGGAGGCT  
AACAGGATGGCATTACATCAGAAAATGCTTGGGCTTCTTTTGTGCTGAGTTCGCGGTGATGATAAGTCTCTTGGAGCCAT  
GGAACTTATATAGCCTGTAACGAAAGCCCTCCTCACCAGCATTGGATTCATGTTACGTTATGAGCTTTATATCGGTC  
TAGCGAAAGCGTTAATGAGGATGTGAGGATAAACCTGCGATAGGACTTCTGAACTATTTAATGCAGGATTGA  
>Cluster\_53824  
ATGGCAAAATATAAGTTATTTATCTTTGAGTGGAGAGACACAAGGGCTGATTTTCAGCAGGTTGCTCAACGCTTGATTCTGT  
CGGAAACAAGCGCAGCCAGAACAATAAAGATCAGATCATGGTTTATGCGTTAATGCATTCATCTCAAGAAGTCAAAATG  
TCAATCATCATGAATTAATATCACCAAAACCGGTTGATAAATCCTCACCATGCTGGCAAAAGCACTTAGTGACAATGAA  
AAAATGGCAATATGTGAATTTATACTCTACCGAACAGTAAAGCGGGTATTTACCAGCCTTATATAAAAATAAATCTGTC  
AAAAGCCGAATATCAAGTATTGATTTTGTACACCCGATGCTGCTCGGAAAAGAACTGGAACCACAGGAGAGAATTG  
CCTTTATTTATGAAGATATTTCTGGGAGCATACGTTAGCCGGTACGAATGCAATGAGTAAATGGCAGGATCGTGTACAG  
TAA  
>Cluster\_10955  
ATGGTGATACTTACAGCAACTCGCTCGGGCGAAGCCAGGGAAATGCGCTGGGCTGAAATGATTTTCATAAGCGGGTATG  
GACTATACCTGCAGAAAAGATGAAAGCCAGGATACAGCATCGTGTTCCTTTATCCCGGAGGCTATTTTACATTCGAAAA  
ATATACGTTGGCCTGCATGATGAAGTGGTTCCTTACCCAGAAAGCAGCAGATCCTTTCCGATATGTTGTTGACAAGT  
TTTTCTGCTAAAAGAAAGCCGTCAGTGCATTCGGGGCGAGTTGCCACGGCACATGGTTTTTCGCTCAACATTCAGGGA  
CTGGTGTAGCGAACAGGGTATTTCGCGGATCTGGCGGAAAGGGCTCGCTCATACGCTGAAAAAATAGGTTGAGGCGG  
CATATCATCGTACTGATCTACTGGAGCAGCGTGTACCGATGATGCAGGCATGGGCGGATATGTGATGCTCAAAATTTGT  
AATAAATAA  
>Cluster\_1569  
ATGGACGGCGAGCTGAAAAATATGAAGTTAAATATTAATCAACTGGCAGCCCTTTTCAGGCTGCACCGGCAGACTGTTGC  
CGCCAGAATGGCGGATGTTTCCTTTCACCAGGCAAGTAAAGAAAGAAAAATGATCTCCTGACGGATTGATATTTT  
CGTTGCTGAAAAACCACCGGCTTCCGAAGATGAAGAGATGAACCCACATGATCGGAAGGCATGGTATCAGTCCGAGGCC  
GAGCGTCTAAATTTTCAGCATGAAACTGTTTCAGCTTGTGCGAGTGCAGTGCAGGCGGCTCTTTCTGTGCTGGTGA  
AGCGATAGTTTCAGTACTGGAACCTTCGGCTGACCGGCTGGAAGGGGACAGGGGGTGGACCGCATCAACAATGAAG  
TACAGATTTGTTGATGAGATCCGCGATACACTGGAAGGCAGTCAATTGACGTTGATGAGGCGGATATGTTGA  
>Cluster\_17462  
ATGAAACGACTCTCGTTAATTTTATATCCGCTTTTTTGCACCATAACGCATGCCGCACCGGAAGATATCACCTTCACGGG  
TACGCTGATCGAACTCCGGTCTGCACCGTCAAGTGGTATGATATGAGATCCAGTTTATCGACGTCATTTATCGACA  
ATATGACGGGGTTAATTTACCGCAAGATGTTCCGTACAGATAACGTTGACCTGATATTACCGATGACGCTGGGTA  
ATGACGCTAACCTGGACCGGTACACAGCAACATAACAGATGCGGCGATTCAGACGGATGTCACGGGATTAGGGATTGA  
ACTCCAGCAAAACGGTACGCCCTTAAAGTGAATACCCGCTTAACTGACACCGCCAACCTGCCAAGTTGAAGCGC  
CACCTGTAAGGCTTCCGATGCCAGCTGACTGACCGTAACTTTTCCGCTTACGCCACATGACGGTGGATTACAAATGA  
>Cluster\_19535  
ATGCATATACTGGATTCACTTCTTGCCCTTAGCGCTTATTTTTTATTTGGCGTGGCGATGGTGTATTTTCTGTTTAT  
CTACTCCAAAATTAACCCGACCAACGAATGGCAGTTAATCAAAAACAATAACACCGCGCGGCTGCGGTTACGCGGAA  
CATTTGTTGGGGTACGTGATCCCTTATCCAGTGCGGCAATCAATGCGGTGAGTATCCAGACTATTTCCGATGGGGCGGG  
ATTGCTCTGGTGAATCAATTACTCGTTTTTGTGGCGTCAAGCTTTATATGCCCGCATTAAGCGAAAAAATTAATAATCA  
CAATACCGCAGCAGGAATGTTTATGGGAACCGCGCGCTGGCTGGCGGATTTTTAACGCAGCTTGTATGACATGGTAA  
>Cluster\_63267  
ATGAGCAACGACACGCCATTTGATGCGTTGTGGCAACGAATGCTGGCGCGGGCTGGACGCCAGTCAATCCCGTCT  
TGACGACTGGCTTACGCAAGCGCCAGACGGCGTGGTGTATTAAGCAGTGACCGAAACGCACGCCAGAGGTACGCGATA  
ATCCGGTAATGATGGCGAATTACTGCGCGAATTTCCGACTATACATGGCAGGTGGCGATTGCTGACCTTGAGCAGAGC  
GAAGCCATCGGCGGATCGTTTTGGCGCTTTTCGTTTCCGCTTACGACTTTAGTGTTTACCGCGGAAACTATCGCGCGTGT  
GAATGGTATTTACCCGTTGGGCGGAACTGATAAACCTGATGCGCGGGCTTGTGCAACCGCAGCAGGAGCGTGCCTCATGA  
>Cluster\_23320  
ATGGCTACAGTACCAACAAGGTCAGGTAGTCCCGCCAGTTAACACCAAAACAGACCGCGGATGCGTGGGAAGCACAAGC  
GCGTGCCTGGTGAAGGCAAGGACTACGGTTTTATCGCCGCTAACGTTGAACGAGCGTGGCGGCGAGATCGATCTGATAA  
TGCGTGAAGGCGGACACCATTTTTATCGAGGTGCGTTACCGCGCTTGCCTTTATGCGGCGCGGCGAGCAGTGTG  
ACCCGAGCAAAACACAAATTTATACAGACTGCCCGCTTGTGGCTCGCGGCTCATAATGGGAGTTTTGATACTGTGGA  
TTGCCGGTTCGATGTGGTAGCCTTACCCGGGAATGAGGTTGAGTGGATTAAGGATGCCTTTAAATGACCACTCATAA  
>Cluster\_54345  
GTGAATACACGCTGTTTCGATGCGCGGTTGCGCTTACTATGAAGATACCGATGCCGGTGGTGTGGTGTACCACGCCAG

TTACGTCGCTTTTTATGAAAGAGCAGCCACAGAGATGCTGCGTCATCATCACTTACGTCAGCAGGCGCTGATGGCTGAAC  
GCGTTGCCTTTTGGTACGTAAATGACGGTGGAAATATTACGCACCTGCGCGGCTCGACGATATGCTCGAAATACAGACT  
GAAATAACATCAATGCGTGGCACCTCTTTGGTTTTACGCAACGTATTGTCAACGCCGAGAATACTTTGCTGAATGAAGC  
AGAGTTCTGGTTGTTGCGTTGACCCACTCAAATGAAGCCTCGTGCCTTCCCAAGTCTATGTGCGGGAGTTAAGC  
AGTGA

>Cluster\_24960

ATGCGTGCCTTACCGATCTGTTTAGTAGCACTCATGCTAAGCGGCTGTCCATGTTAAGCAGATCCCCGTGCGAACCCGT  
TCAAAGCACTGCACCCAGCCGAAAGCGGAGCCTGCAAAACCGAAAGCGCCGCGCCACGCCGGTCCGAATTTATACCA  
ATGCAGAAGAATTAGTCGGCAAAACCGTTCCGCGATCTCGGTGAAGTCAGTGGCGACTCTTGCCAGGCCCTTAATCAGGAC  
TCTCCGCCGAGCATTTCAACCGCACGTAAGCGGATGCAAAATCAACGCCGCAAAATGAAAGCCAATGCGGTATTACTGCA  
TAGCTGCGAAGTACCAGCGGTACGCCAGGTTGCTATCTGTCAGGCTGTATGTAATCGGTTCTGCGCTTAACATCACGGCGA  
AATGA

>Cluster\_20996

ATGACGAAAGATGAACTGATTGCCCGTCTCCGCTCCCTGGGTGAACAACGTAACCGTGTATGTCAGCCTGACGGGGACGAA  
AGAAGAATCGCGCTCCGTGTGGCAGAGCTGGAAGAGGAGCTTGTATGACACGGATGACGCTGCGGGTCAAGGATACCCCTC  
CCGGCCCGGAAATGTGCTGACCGGGCATGAAATGAGTGGTATCAGCGCAGCCGGACACCGTATTGAGGATACCGGCT  
GAACCTGGCCACGGTGGTCAGCTGCATCTGATGCACTTACGCCACCGGGATGAACCTGGGATTTGCTGCGGGAAACGGC  
ATTTCTGCTCTCTGCGGTGTTGGCAGCCGAAATGACAGAACGTTGGCTGGCCAGAATGCAATAA

>Cluster\_41606

ATGCCATTTGCTCGTTATTTCTGCATTTTCATAAACGTTGGTTTTGGGAGAAGCGGCAAAACGGAAATGTAGGTAACGAGCA  
AAACCAAATTCGGATATGGCGGCTTTGCCAGTTCACTTTCAACCGGGTTTCAAACCTCCCTTTCAGGTTGATTA  
TTCAGTGGGTATTGTGTCAGTGGAGCATCAACTATACGGTACATACCGGTAACATCCCAAATCGTTCACCTGCGCTG  
TTGGCTGTGCCACATACAACGTCGGTGGTGGTATATCTGCAATGGGCATAGCGAACTGTTCTGATATCAGCAAAATCACA  
GTTCTATATAATTGTTGGCGGTATATCTCAGGGAGAAATGTCAAATGAAAGGTCCTGTTTTGGGTAGCAATCGGTG  
TATAG

>Cluster\_10618

ATGATCGACAACCGCACCAGCACCATTGACCAGGCATTACAGAAACATGATACACCCGTCGGCCCGTTATTTTTTGT  
AACACGCCACGGAAAGAACAAAAATGCTCACCCGAAACCGCAATTCGTTACCTGCGATTCTTTATGACCACCCGCG  
CTTTTGAACGTTTCCAGGATCCGACAACGCTATCTGACAAGCGTTTTATCTTCAACAGGAATGAGATATGGAACCGTGA  
GAATCAACACAGAGTATACCCGCGCACACCAGCGAACATCAGACGACTGCGCAGACTCATCGCCAGGAAACAGTATAC  
AGAAAAATGGTTCAAGAAATATGACACATGGAGCGCCGATATTACGAACTGATGGCAACAAAACCATTTCTGA

>Cluster\_63658

ATGGGGCTTCGTGAAGAGATTACGTCAGAGGTTGCCGCTGCTTTTGTGATGAGGATTTAGCGGACGCCGTGAGTGTATTTTC  
TGGTCTTACGTTACGCACCGGCTGCGGATCCGTGACGGAACGCGGCAATCCACCGCAATCTATACCGGCGGAG  
CGCTGTTGACAGCTTATAAGCTGGGAGAAATGATGGGATTAATTTTTGTCATGGTACCTTAAATTAACCGCTCTGGTA  
TGGGAGGTTACGGATAAACCGAGCTGTCGACCATATTATTGAGATTTATGATCCTGTATCAAGGCAAGTTACAACGATACGA  
GGTAATTACAGCAAGTGTAGATCCTTCCGCATCAGTTTACTCTATCCAGTTAAGGAGAGCGTAA

>Cluster\_30371

ATGTTCTGTTGACAGACAGCAATCGATCTGCTGAACCGGTTGATCGACGCACGCGTTGACCTCGCCGCATACGTTGCAACT  
GAGGAAGGCAAAAGGATACATGTCGCTCAGCGAAAGCAATCATCTACGAGATAACTTTTTTAACTGAAATCGCGAACTGC  
ACGATAAATCGCTGCGGTTGAATCTTACTCTGGATCAGAAAGAGTGGAGTGTCTTTCATCATGCTGAAGAAGCATTAGCG  
ACAGCCGACGATGTTTGTGATGAGTGGGCACCATGATTGCCGACTGTTTATTACCGTCAACGCCGATAAGCTTGAAATG  
TCTGATGAGCTTAAACGCTGAGTATCCAGAGCCTGCAGAAGCAGCCATGCTTGAGAAGGCTGA

>Cluster\_63659

ATGGCAAAGGCATGGGATATAGAACCCTCAATATTTGCCGGGATGATTGAGGAAGATGTAGGGCTGAAGATTCGCTACAT  
CGTATTACAGATCTTACTGCTATTGATATTGCTGCTCCGGTTGATACCGGACGTTTCAGAAATAACAACCTGGGTGCTG  
TACAGCATCCCGATTTTGGTATACTGATAACGTTGGATCCGAAACGTTACGATTTGCTGTTTACGCTGGGATCGGGTTATT  
TCGAAAGCTGCAAAATACCGAGTTATTTATATCCAGAATAACCTTCTTATGTCAGAGGCTCTTGAAACCGGTCATTCACA  
ACAAGCGCAACTGGCGTGTATGCCAACGCTTTTCATGTTGTTTTACAGGCTTACAAATGA

>Cluster\_4466

ATGTTCTGACAGTTCATGGTAATATGTAAAAAAATATTGTTTAGGAACGTGTGTCATTGTATCTTTGTTTGTTTTTACATA  
CAACATGCGGCGAGTGAATAATAATATTAATAATGCGCAAGTATGAAAGTGAAGGTAATAATACCGTTAGAAAT  
TGGTTAAAAATAAAGCTATAGCATTTGGAATTAGCTGAGATATATGTTAAGAATCGTTATGGACAGGATGCCCGAGAAGAA  
GAAAAACCATACGAAATCACTGAGTTAACAACAAGTTGGGTTGTTGAAGGTACCATCACTCAGACCAAAATGCTGGTGG  
GGTTTTTATATAGAAATAGGCAAAAAATGATGGGAGAATTCTGAATTTTGGCCACGGAAATAA

>Cluster\_61209

ATGCGTTTTGCCATCGTGGTGCACCGGCCAGCATACGGTACGCAACAGGCGAGTAGTGCTTTTTCAGTTTGCAGGCGCT  
GATAGCAGATGGCCATGAGTTAAGCAGCTCTTTTCTATCGGGAAGGGTCTATAACGCTAACCAATGACCTTCCCG  
CAAGTGACGAATTTGACCTCGTACGGGCTGGCAACAACGTAATGCGCAACATGGTGTGGCGCTGAATATCTGCTAGCG  
GCAGCATTACCGCTGGCGTTGTTGATGAAACGGAGGCGGAAGACTGGGGCTGGCTCGTCAAACCTTACGACGGGATT  
TACCTAAGCGGACTTGGGGCGCTGGCGGAAGCCTCGCTGACCTGTGACAGGGTGGTACAGTTCTGA

>Cluster\_24878

ATGAAGCTGATCTGCCTTTTCCGCCAGCGTGAACACGTAAGTGGCGACACCCCAACAAAGGGGCGTTTGGCTGGTAAAG  
CCTGATAAGCGCGCGGGGCGAAATTCAGAGCGCGGCTGCGCAGCAATAGTTGAGCAGTTACGCTGCTGCGCGAAAC  
CAACGTCGGCACCTGCTTACAGTGGAGATCGTGTGTTTCTCCGGATAACCGGATCCGCGATCTGGACAATAAACAAG  
CGCTGTTTGGACGCGCTGACCCACGCGGTTGTGGGAAGACGACAGTCAAGTGAAGAAGTGTGCTGGTGGGAGGCGGAC  
GGTTATCCCGGAAGGGAAGTTCGAGATCGTATCAGTAAGTACGAGAAGCAGGCGGGTGCAGCCGCTGA

>Cluster\_48977

ATGTCCGATCCGATTTCCGGTACTGGGCTGGCTGGTGGTGGCTGACGGGTGCCAGTGTATTGACTGCTGACCGGAAC  
TGATTACGGCGTTGTATTTGGCGCATTTGCAGGGGCTGTATTCTACATAGCAACAGCTGCAGATCTGAGTGCATCGCGCC  
GACTGGCATAATTTATCGTGTATATATGCGGGGATTTCTTGTCTGGGTTGGTTGGCTCCAAGCTGGCGAACTTGACC  
GGATACAGTGATAAACCCTGATGCTATTGGTCCCGTAAATCGTCTCTGCTTTAGCCGTTAAATCCTGACGTTCTGTAA  
TAATCAGGATATCGGCTCGTGGTGGCGCTCATAACCGCCGGGGAGGTTCAAGTGGAGCTAAATGA

>Cluster\_53512

ATGACCATGAATACCAGCGACAAGCCTGGAAACAACATTAATCTCAGCAACAGCAACTCCAGAGCGCGCGGCTTGT  
ATTTAATGAGAACCACCCCTCTGGCAACACTTGGCTTTAGCCAGTCTCAAGTTTCGCTATGGCTTGGCTCATTTGCCCTC  
AAAGTAATCATCTAAAAGGCCCAACAGGCAACGTCAGGTTATACCTGATATCGCGGCACATTTGGTATCATTTGTG  
CATCAAGCTGGTGGGCGCATGCCCTTGCACAAGTACTGAAAAAGCTCCCTGCTGGTATTACGACCAGTGAACAGCAGAT  
ACGCAACTGGCACAGAAGCAGCGCAGATAGAGATTAAGGCCCTTCTGTTACTGATAAATGAG

>Cluster\_57081

ATGAGCAACATTACCATTTATCACAAACCCGGCTGCGGCACGTCGCGTAAATACGCTGGAGATGATCCGCAACAGCGGCAC  
AGAACCAGCATTATCCATTATCTGAAACTCCGCCAACGCGCGATGAACTGGTCAAATCATGCGCATATGGGGATTT  
CCGTACGCGCGCTGCTGCGTAAAAACGTCGAACCGTATGAGGAGCTGGGCTTTCGCGAAAGATAAAATTTACTGACGATCCG  
TTAATCGACTTTATGCTTCAGCACCCGATTTGATTAATCGCCGATTTGTTGACGCCGCTGGGAACTCGCCCTGTGCCG  
CCCTTCAGAAAGTGGTGTGAAAATTTCTGCCAGATGCGCAAAAAGGCGCATTTCTCAAGGAAGTGGCGAGAAAGTGGTTG  
ATGAAGCGGGTAAGCGCTGAAATAA

>Cluster\_38553

ATGCCGGCTTTGAAATGGGTTTCATGTGCAGCTCCATCAGCAAAAAGGGGATGATAAGTTTATCACACCAGCTATTTGCCA  
CAGTGCAGCGCATATGATCCAACGATAAAGGAATTTGACGCTCAGGGCGTGGCAGTCCGGTTCATTGATGACGGGATCA  
GTACCAGCGGTGATATGGGGCAAATGGTGGTCACCATCCTGTCCGGCTGTTGGCAGAGCTGAACGCCGGAGGATCCTAGAA  
CGCAGCAATGAGGGCCGACAGGAAGCAAAGCTGAAAGGAATCAAATTTGGCCGAGGCGTACCCTGGACAGGAACGTCGT  
GCTGACGCTTCATCAGAAGGGCACTGGTCAACGGAAATGCTCATCAGCTCAGTATTGCCCGCTCCACGGTTTATAAAAA  
TTCTTGAAGACGAAAGGGCTCGTGA

>Cluster\_40988

GTGAAGCAATCACTGGGATTACTTGAAGTCACTGGCTGCGCATCAGTTGCGCAGATGCTATGGCAAAAAGCCGC  
GTCCATCAGCTGTTGGCTTGAAGAAGACCAATGGCTCAGGCTGGACGCTCATCAAAATCACCGGTGACGTCGCTCGG  
TTAATGCGCGCATCGCACGGGAGCCAGTTTCGCCGGGACGCAAAATGGCTTGTGCGCACAAAAGTATTGCCCGTCCG  
GGAGACGGGATTTGCCCCACACAACTGAAGCATGACGTGTGACGGTTGAAACAGCGAAAACACAGCAACAACCGTCAAT  
CTCAGAGATTATCAGTTGTAATTTGTGTCTTGACCCGGCATGTGACGGCAAAAAGGTGAGCCCGCTCACTTTGCCCTGT  
ACGCCAATAAGCGAGGGGAGTAG

>Cluster\_37293

ATGTATCGCATTGGTGAGCTGGCAAAAATGGCGGAAAGTAAACCCGACACGATTCGTTATTACGAAAAACAGCAGATGAT  
GGAGCATGAAGTGGCTACGGAAGTGGGTTTCGCTATATACCGAAAGCGATCTCCAGCGATTGAAATTTATCCGCCATG  
CCAGACAACCTAGGTTTTCAGTCTGGAGTCCGCGAGTTGCTGTCGATCCGCATCGATCCTGAACACCATACTGTGAG  
GAGTCAAAAAGGCATTTGTGACGAAAGATGTCAGGAAAGTGAAGCACGGATAGCCGAGTTGACAGATATGACGCTTCCCT  
GCAACGCCTTAACGATGCTGTTGTGGGACTGCTCATAGCAGTGTATTGTTGCTGATTCTGAAGCTCTTGAACAAGGGG  
CGAGTGGCGTTAAGAGTGGTTGTTGA

>Cluster\_12059

GTGAGTCTGAGAGAAGCTCTGGGAAAGCAGAAGAAGCCGGAGTAGACTTAGTTCGAGATCAGCCCTAACGCCGAGCCGCC  
GGTTTGTGCTATAATGGATTACGGCAAATTCCTCTATGAAAAGAGCAAGTCTTCTAAGGAACAGAAAGAAAAGCAAAAAG  
TTATCCAGGTTAAGGAAATTAATTCCTGCTGGTACAGATGAAGCGACTATCAGGTAACCTCCGCGAGCTGATTCGC  
TTTCTCGAAGAGGGTGATAAAGCCAAAATCACGCTGCGTTTCCCGGCTGAGATGGCGCACCAAGTATCGGATGGA  
AGTCTTAATCGCGTGAAGACGATTTGCAAGAAGTGGCAGTGGTCAATCCTCCCAACGAAGATCGAAGGCCGCCAGA  
TGATCATGGTGTCTCCTAAGAAGAAACAGTAA

>Cluster\_24997

ATGCGACAAATCATCGACACCCTGGCGCAGTTGCAGCGCTGCGGGATAAATCGGTCAAAGACAAAACCGTCGAGCTGGC  
AAAGCAAAAACAGATTTGTCGGGTTATGACAACAATATCAAAGCATTAGGCTACCTGGTGAATAAAACATCTCGGGGCG  
CGGCAGCGTCCGTAGATCGTGA AAAACGCTCAGCGACTACAAAAGCCACCTTGGCAAGGTGATCGCCTGGCAGGACAG  
GAAAAAACCTGGCTAACATCAAAGCCACCGCAATGCAAAAAACCTGACGGCGCGGCTGCGAAAGAGAAAGTAGTGGC  
CCTGACGCTGGACGACAAAAGCCACGAGCAGCAGGAAAGGCCACGGCAAAAGCGCAAAAAGCGGTGATGACATCGCCG  
TCCAGTGTGGCTGCGGCATAAGTTAGCGGAGTAG

>Cluster\_9525

ATGGCTCAAGTTATTAATGAAATGGATGTTCCGTCCCATTCGTTGTTTTTTCATGGTACAGGTGAGAGATATTTTCTTAT  
TTGTTGGTGAATGTGTTGTTAACGATTATAACGCTAGGTATCTATTTACCATGGGCATTAATGAAATGTAAGCGTTATC  
TCTATGCTAATATGGAGGTTAACGGACAACGATTTTCTTATGGGATTACCGGTGGGAATGTTTTTGTAGTTGCTTGTGTT  
TTTTTTTTTTCTATTTCCGAATCTTAATGACAGTGTGACAGATATGCCGCTTATTGGCTGTGTTTTGACTTTGTCACT  
GTTGGTTTTGCTTATATTTATGCGCAGAAAAGGACTGCGTTATCAGGCCTTGATGACTAGTCTCAACGGCGTAAGATTTA  
GTTTTAATGCTCTATGAAAGGGTTCTGGTGA

>Cluster\_62122

ATGTCAGTGTATGACTATCCCGTACCAACCACACCGTGGCTGAATACGGCACCCGGTTTATTTATTGACGATTATACCTC  
GACAGCCTCCAGTACAGTGTCTTCCCTGAGCCGGACACTGATTTATGACTATGAGCAGAACCCGATTCGGCAACAATG  
TGGTGGCGCTGGCAGCAAAAGCAGGATACAGCAGCATGGTGGATATCAATCAAGGAAAACCTGGGGGAGCATGACACACCC  
ATCTCTGTTATTGCTTCTGATGCGGAGCATGCCACTTTCTCAAGAAAGGCAGCTTCGCTTCCCGTAAAACAGATGACAA  
ACTGTTGTTACAGGAAACAGAACGTCGCTGGCGGATACATCCTCCGAAGATAATTTCTGCACATGATGGGTTCTC  
ATCCAAATCCGTGTGACAGCCTTAACCTCTAG

>Cluster\_22989

ATGCTGAAAACAATTTCCCGTTAATTTCTCCGAACATTTGAAAGTGTGCGAGAGATGGGGCATGGAGATGAAATTAAT  
TTTTTCCGATGCTCACTTTCCCGCCCATTCGATGGGACCGCAGGTGATCCGCGCTGATGGCTGTTGGTGAGCGACTTGC  
TCCAGGCGATTATCCCGTTATTTGAGCTGGACAGTTATGCACCACCGCTGGTGTATGATGGCGGGGTAGAAGGTGACACT  
CTCGATCTGAAGTAGAACGAGCTTATCGTAATGCGCTTTCACTACAAGCCCCCTGCTCCTGACATCATCCGCATCAATCG  
TTTTGCGTTTTATGAAACGGGCGCAAAAAGCCTTTGCGATCGTTATCACAGGCGAACGAGCGAAGTACGGGAATATCTTT  
TAAAAAAGGGGTAACCCGTAA

>Cluster\_1556

ATGGCTCAGGTTGCCATTTTAAACAAATATTCGATAAAGTGCAGAAATAATTTAAACTATCAGTGGTTTTATTCTGAACT  
AAAACGTCACAATGCTCACATTACATTTACTATTTAGCCACAGAGAATATTCATCTTGTCTTGAAAACGATAAATACGG  
TTTTAATAAAAAGGACAGGGTAAGGTTGTAATGTAAGATTTTCAAAAAATAAATGCCTTATAGAAGCCACCTTAAAGGA  
TTCAAATCAGGAGAGTTATCATTACGAAATACAGGAAAAATCTTGCTACAGCAGGGGTTTTCAGATGGATTACAAATAT  
CCACGAAAACAAAAGGATTAATACTATACCTTTGATAATTCATTACTCTTTACTGAGAACATTGAGAACACTACACAATAT  
TTCCGCACTAA

>Cluster\_38519

ATGTTTTTTTATTGAGAATGAAGGTCAGGCTGTCGCCAGAACGGATTACTGGCAGTCTGTACAGGCGCAGGCCGGATATGT  
CTACCTCAGCTGGAATGCCGGCGCAGCCAGGCTGCTTGTCCCGATGCGGCAAAAACATTTACTCAGGGAGATCGCGGGAG  
CTGAGTACGCTCATCATCAGTAAGGGAACGGTGCATGGCCGCGATGCGCTGGAACCTGGTATTTGAAAGCGCAGCGATCGC  
CCGTTCTGATCCACATGCTGAGTGAAGTGCATCGCTGCTCCCCGAAAACACCTGGGAGGGGTTTTGTTGTCTCAC  
CGTCTGGACGCGTGGCGGTAACAGCTCCGTTATCCGGGAAAGTACCGGGTTGTGAAAACCTGCCCGACGTTTCCCGCT  
GGAGTGAACACTGA

>Cluster\_64810

ATGACAAATCAGCAGGATTTATTTGACATGATCCGGCTGTAAGCCAGTTAATGGATCATATCGACAATATACCGGCTCC

TGAGCAGGAGGCCCGCTGGCCCCGCGCTGGTTGAGCTGGTTGACGTTCTGGAACAGAAGTGAACCTCAGGGCGTGG  
ATGATGCACGGAGCATAGCCCGTAAACAGGTGATGTCTTATCATGGTTCTGGGGGGCGGCGAGTATTACATCCCCCGG  
GGTATGCACTTCTGGCAGCGTTGCGGGATGATCTGATTTACTGCCAGTTAACGGTCGGAACATAGAGGAGCTGCGGGC  
TGAACATCGTCTGTACAAACCGCAGATTTACAAGATTATGCCCAGCAGAGAAAACCTTCAATTCACGGCGACATCAGCCCC  
ATTTATTCTGA

>Cluster\_20360

ATGGCAAAAAGAAAAAACAATGTTGTTAAGAAGATCGGTGATTGACGTTCTCTTAAGTAAACCTAAATCTATTCTAAG  
ACGTAAGAGCTTTAAAGAGCTAGTTACGCTCACCAAGCATAATAGCGCCCTGGCGAATGGAAAAACAGAGATCATAGAAC  
ATTTCCCTCTGTGCTTGTGGAGATGAATATATCGCATTACAAGAAATCTTATCTTCAACACCTGGCGTATTCTGGAAA  
CCTAGAAAAAGAAAAGATATATGTTGATAGCTCTGATTTACGCAAAATACCAGATTTTAGGATTTGAAGATTATAATCA  
CTACGTTGGTTATCTCGCCACCAATGGCTAAATAATTTAGTTCTGAAATCCAGATTTCTGGATAATGTTGATCACTATG  
GAGACTTTTAA

>Cluster\_29871

ATGAAGAGGATTATTGGCGTCGTTGCTGGCGCTATATTGTTATCTGGGTGCGCAACTATTGTTGGTGACGAAACGCGCT  
TGTGCAAGTGAACAGCAATCCTTCCGGTCCGAGCTTTAAGGTAAGAGCAATCAGGCGTGATGTTGGCGCAAGGTAAGA  
CCCCGCAAGGAGTAACTTGGCAAGTCAGATGGTAGTTATTTGGCAAAAAGAGTACCAGATCACTATGGAGAAGGAT  
GGGTACGAACCTAGTTACCCTACCAATCAAGCCAAATGCTAATGGTTGGTATATTTGGTGAAATCTTGTGTTGGTGGGT  
AATTGGTTGGCTTGTCTAGATCCATTTAATGGTGGATGTATACCTGAAGCTTAAAGAGGCAATGCATCCCTTATAC  
CGTCAACAAAGCAAGACTAA

>Cluster\_992

ATGAACGTCAAAAATCCGAAATGAAATTCAGGCATTAATCCGAAATTCAGGAAACGCAATAACAACGGTGGTGAATTACGCGA  
GTTTATTGGCGCCGAAAGTTGATGATGTTGGTGAAGACTTACCTGATTGCTTTCGACCATTACAGCATCTGTGCAC  
GTTTATGGCGGCAAGCATATCCCGCGCATTTGCATTTGGCGGTGCGTTCAACGTTGATTTATGGGAGTACGTCATGGAC  
CGGAATACATCTGGCATCGACCCCTGAAGCCGTTAAGCTGAGCAATGTGGCAGCGTATCTGGCGGATTAACCGTTAATGGCAA  
AGGCTGGCGCGCTGCTGTTATTTCTCGCTTGCCTGAAAGCGGTTACGTTATCGCTGCGGCATATTCGGCATCACTGC  
GCGAGCCTCTGCTGACTGA

>Cluster\_25760

ATGAAAGAAACCCGATATTGACAGGATTTTAACTCCACTCACACCATTGCGCTGGTGGGGCAAGCGCAAAACCCGATCG  
TCCAGCTATCGCGTGATGAAATATCTACTCGACCAGGGGTATCACGTCATTCCTGTTTCGCCAAAAGTTGCCGGCAAAA  
CACTGCTGGGCCAGCAGGGGTATGGCACGCTGGCAGACTTCCAGAAAAGTCGATATGGTCGATGTTTTCGGAAATTC  
GAAGCGCGTGGGGCGTAGCGCAGGAAGCGATCGCCATCGGCGGAAACCCCTCGGATGCAACTGGGGGTGATTAATGA  
GCAAGCGCAGTACTGGCTCGGATGCGCGATTAAATGTAGTGATGGATCGCTGCCCGCTATGAGATCCCTCGCCTGG  
GCCTGGCCAAATAA

>Cluster\_9738

ATGACGGATTATCAGCCATACAGGAAAGGAACTGTGCTTGCCTCACTGGACCATGCAATCATCTTCATGTGATTTGTAA  
TGATCCTGTTTATACCCTGTTAACGATGTTTATGTTGTTTATGTTTATGTTTATGTTTATGTTTATGTTTATGTTTATGTTT  
ACGATCCGCTTGGCTCTTGAATCTGGTGATCATCGCTTTATCAAGCATCCAAGTTATGTTGTTTACGCTGAAGCTATA  
ATTTGGCGAGTGGATAACATGGTTAGAAAGCAGCGATCGGGTGAAGTTTCTGTTTCATGATGATATGCCAGAAGCTACATT  
CAATAGAATCTGGACGGTTTGTATATCTCTGATGAAGTTACGCCAAAGAACCCTAAATTTAAAAATAAATATTGCGTAT  
CATCTATTGATGATGAGTAA

>Cluster\_58726

ATGAAAAAATGATGCTTTTTCAGCACTGGCCGAGTCTGGCTTTTACCAGGACTTCCGTTAGCTGCGACTTCTAC  
TGTAATGGCGGTTTACGCAAGAGCGACGCTCAGGGCCAAATGAACAAAATGGGCGGTTTCAACCTGAAATACGCTATG  
AAGAAGACAACAGCCCGTGGGTGTGATCGGTTCTTCACTTACACCGAGAAAAGCCGTACTGCAAGCTCTGGTGACTAC  
AACAAAAACAGTACTACGGCATCACTGCTGGTCCGGCTTACCACATTACGACTGGGCAAGCATCTACGGGTGATGTTGG  
TGTGGGTTATGGTAAATTCAGACCCTGAATACCCGACTACAAACAGCACACCAGCGACTACGGTTTCTCTACGGTG  
CGGCTCTGCAGTTTCAACCCGATGGAACCGTGGTCTGACTTCTTACGAGCAGAGCCGATTCGTTAGCGTTGACGTTA  
GGCACCTGGATTGCGGTTGTTGGTTACCCTTCTAA

>Cluster\_42555

ATGACACCGTGGCTACTCTTTGGCGCAGGCGGAAAGGTTGGGTTGCCAGAACGCTTGAAGTGGCGCTGGCGGAAACAAC  
TCCGCTCGTTGCTCATTCGTCATGCCGATGCCGCGCACGAAACTGGCGCAACAGGCGTACAGGTTTTTACAGGCGACG  
CCTGTGATGCCAGCTAGTCCGGCTGCTTGGCCGCGAGCTGGCCGGATGCGCTTATCATCTCAACAATGGGCGGAGCT  
CAGGATTTATCTGGCGCACAGAAGCTGATGACGAGGCGGAGAAAGCAGGCATCACACGATGATTTCTGGTACGCTACT  
GGGATCGCGGATAGCTGGCCGTTTATATCAGAGCGGCAAGGCTGCTTGGTTCAGGCGGTACGGGAAAAACCGCTGG  
CGGAAAGCTGGTTGCAACCCGATGGAACCGTGGTCTGACTTCTTACGAGCAGAGCCGATTCGTTAGCGTTGACGTTA  
AAGCACAAACGGATACAAAATCAGGAGTGTATGGTTTTGTTAACCGTGTGATGTCGCGCACATATCCATGAACTGGC  
AAATGCGCCAGCACTTAAACAGCAGGCTACAGTCTGATTGAACCGGACCTGAAACCGGCGTGA

>Cluster\_59060

ATGCATCGTATAGACACGAAAACCGCGCAGAAGGATAAGTTCCGGCGGGTAAGAACGGTTTTTACCCGTGGTAACCCCA  
GACCGGCAGCCTGCCACCGATCTGGATGATGACTACTTTGACATGTTGCAGGAGGAACTTTGAGCGTGGTGGAGGCAT  
CCGGTGCAGCCTGGAGAAGGGGCGGCACGACCAGTTACTTACCACCTTCCGCGCTGCTGTTAAGCCGCAAGAATCCG  
TTTGGCGATATCAATCAGGATGGCACTGTGCAACCGCTCTCGAAAACCTTGGTTGGGAGAAGGAGCAAACTCAATGC  
AGCAACGGCTACATTAGGACGCACCGGTTTTCATAGCTATACCGGTTATGATTGGTGGTATTGAGCAATCAGTAATCATTC  
AGTGGGGTGGAAATGCCGCAAAAGCATCTGCCCTCTGGGGGGATGGAATAACAGTTGATTTCCCGGTTGCGTTTAAATAAT  
GCCTGTGTTGCGGTTGTTGCAAAATATGACAATGTCAGCGCACCTATCAATGCAGTGGCAACGGGGGATATACAACCC  
TTCGTTTTTATTACGGTGCAGCTCAAACGGGTAGTTATTACTATAACTGGAATGCTATTGGGTATTAA

>Cluster\_66923

ATGTGTACAAATTCATATACCCCCAGCTGCCGGAGACCTGCCAGAGGGCAGGATTTCTTAAAAAACTTGAGGTAAAAGG  
TGACAGTTTCTCATTTACTTGGCGTACGTTGTTTTCAGGTTACATCCGGCCCCAATCCAGAGTGATATACGCCTCGG  
ATGCCAGAAACAGGGAAGGTTACAGGATCGCGCTGTTGTTGCTCCAGCACAGATGAGCTGATAACAACCGCAATA  
TGGCAGGTTTCTGTCCGGATGAAGACCATTCCAGCTTCCAGCATGTCATCCAGTGGATACTCCCTTCCACCGCTGGCTTC  
GCTGATGTCGATGACACCTGGTTATGGCCATCCGTTCCCGGAACCGGCGACTGAGTCCCGGTGACTGGCCTGTTATGG  
ATACTGACCTTCCACTTACGGCGCTCAGACGCTGTTCTTTTTCAGCATCATCGATAACCGGAAACGGAAGGTTATATC  
ACCAGGCGATATCAGTGTTTCCCTACTGGCCACTACCTGGAAGACAGAAAATACGACAGCCTTCCCTGACCTTGTGCTTCC  
CCCCGAGCAGGAGACAATAAATGCAAGAAAAAACAATTACTCGCAGCCTTATAG

>Cluster\_43880

ATGATCTTGTCTACAACCTCTCTCAGCGCAGGGGCGGAAAGATGTTGTTCTCGCAGTGAAGGCGCTGGAGCGATTAAT  
TAAAGAAGCTGCCGACAAGACGTCGCGGTAACGGTGTGGAAACAGAAACGGGCGCTACTCTGACACGCTGCGTTCCAG  
CTCTGGTTTTCTCTGGATGGCGATAACGCATGGGATTAAGCGAAAGCTGGTGGCGCATATTCAGTGGATTTGTTCCGAGT

CCGTATCGGCCTCATCATGGGCGCAAAAACCTGGTTTCTGGGCATTTGGGCGTTTTACCGCTGATGAGCAGGAACAATCGGA  
TGCATCCGTTATGAGACCTTGCCTTCCGTCGGGGCCGGGCGTCAACATGTCAATAAAACCGACTCGGCGGTACGCGCA  
CGCATTTGGCATCCGGTATTAGCGTGAAGGTTCACTCAGAGCGTAGTCAGCATGCTAACAGCGGCTGGCAGGATTGCTG  
ATTCGCTGGAAGCTGGAGCAGCAGCAACAGGAAAATAGCGCGGTGCTGAAATCGCAGCGGCGAATGTTCCATCACCAGAT  
TGAACGTGGCAACCCGAGACGGACATTTACAGGGATGGCTTTTATCGAAGGATAA

>Cluster\_15640

ATGACCATTATTACCAGAGAACAGGCACAGAAAATTATTGAAGCAGCCGATGAGGTTATTAGTGGCTTGGCCGAACATA  
CGAGGATGTTACCCCTGGTAGCGATAACATGCTACGCCGTGGGATGACCTGAATGACCGTTACGCGCCCCCTGAAGTTG  
TGGGTGAGCTGGCACGAAATGCACTGGCATCACTGGAAGCAGAGCCCTGTAAGCCAAACTTACAACCTGGCCAGAATTAATC  
GAAGGATGGAAGTTCCATTGATGTAAGCACTTGTGATGCTGATTTAGGTAATCGCTATTTCCGTTACCGTCACCGAGGC  
GTTAGAATTGATACAGCCAAAGAAATGGTTACATCTCCAGTTTCAAGCAGCAGAGCCAACTTCGATGTAATGGCAACT  
CTCCGGTAATTCGGGCGGTTGGATAAGCTGTAGTGAGCGAATGCCGGATAGCAAAAACAGCCGTTCTTGTGGCAGGGAG  
TTTGACAGGAAAGTGTACTGGCGAATGAAATGGCGGACTTACATCCCGGGGCACTCTGACGCTAATGATGGTGGGTAAT  
ACCTGGTGCCTGCTGGATACCATCACACTGGATGCCGTACCAGAACCCGCGCAGGAGTTAACCATGGCTAA

>Cluster\_4144

TTGACTAATTTGAATTATCAACAGACGCATTTTGTGATGAGTGGCCCTGATATTCGCCACCTACCTCCGATACCCGAAT  
TGAAGTGGCTTTTTCAGGCCGTTTCAACGCAGGTAAATCCAGCGCGCTGAACACGCTGACTAACCCAGAAAAGCCTGGCTC  
GTACCTCAAAAACCCAGGGCGCACCCAGCTTATCAACCTGTTTGAAGTGGCTGACGGCAAGCGTCTGGTTGACTTGCCCT  
GGGTACCGTTATGCGGAAGTCCCGGAAGAGATGAAGCGCAAAATGGCAGCGTGCCTCGCGCAATACCTCGAAAACCGTCA  
GAGCCTGCAAGGTCTGGTGGTGCATATGGATATTCGCCATCCGCTGAAAGATTGGATCAGCAGATGATGATGGTGGGCGG  
TAGACAGCAATATCGCCGTTCTGGTGTCTGCTGACCAAAGCGGACAAAACGGCAAGCGGCGCACGTAAGCGCAATTTGAAT  
ATGGTGCCTGAAGCTGTACTGGCGTTTAAACGGTGTATGTCAGGTTGAAACGTTTCTTCTCGTTGAAGAAAACAGGCGTGA  
CAAGCTGCGGCAGAAAACGGATACCTGGTTTAGCGAGATGCAGCCTGTAGAAGAAAACGAGCAGCGCGCAATAA

>Cluster\_47111

ATGATTTTATTCGCCGACTATAATAACCCCTTATCTTTTCGCTATTTCCCTTGTACTGTTGATCGGCCCTTTTAGAAATTTT  
AGCGCTTATCTGCGGTACATGCTCTCCGGTGCCTTGTATGCACATCTTGACCATTATGATTCATAAACACAGGTCATA  
TTAGCCAGGCACCTCATTATCTCAATATCGGAAGATTGCCAGCTCTCGTCTGTTCTGCTGCTGGCTGGTTTTTTTGGT  
CTTATTGGCATCCCTGTTGCAGCATGCGTATGCTATGGTCTGGCAATCACCACCTGTCGAACCTGTTCTGTTCTGCTGCA  
TTTACTGTTTACGATTATTGGCGTGCATATACCGGTAATAAGTTGCGCCCTGGATTCCACGCGACCATAGTTACAGTA  
TTACAGAAGAAGATATATTTGGTAGCATGGCATTAATTAACCGTCAATCAAGCCACTTCAGGTAATCCCTGCGAAGGAAAA  
CTCACCGATCAATTTGGCCAAATACATTTACTACTGGAGCCTGAAGAAGGAAAATTTTCACTAAAGGAGACAAAAGT  
GTTAATTTATTTGCCGACTTTCTGCAACGCAGATATTTGGCGGAAAACAATCCCTGGCCAAAATATTGTAA

>Cluster\_5667

ATGAAACCACGTCGGTGTATCATATGGATACTCATCCATCATCAGAATGCTATTGAAGTTCTGTTGCAAAAAAACAG  
TGAATGTCAGATTGCTTCAAACCGGATGATTAATCGCAATAACCATCGATTATCTCCGAACCCGTCCTGTTGATTTAATCA  
TTATGGATATAGACTTTCGCGGAACAGCGGTTTTACTTCTTCAAAGGATCAAAACAAATCCAGAGCACAGTGAAGGTC  
TTATTTTTATCATCGAAATCAGAATGCTTTTATGCTGGCAGAGCGATAACAAGCTGGTGTACCGTTTTTGTACGTAATG  
CAATGATCAGAATGATATTTTTCATGCCGTTCCAGATGATCTCTCCGGATACACGTTTTTCCAGCGAAACCGTTAACT  
ATATAAAAAGCAATAAATAGTACGAAATAGTTCAACCGTCACTGCTATCTAATCGTGAAGTACCATATTAAGTTAT  
CTGGTTAGCGGATTTATCTAATAAAGAAAATTTGCCGATAAGTTATTTAGCTTAGCAATAAAAACAGTTAGTGGCATAAATCTAA  
TATTTATGGCAAGCTAGGTTTGCATTCAATTTAGAGCTTATCGACTACGCCAAATTAACGAATTAATATAA

>Cluster\_6070

ATGAAAAAAATGGCCATCAGCTGTGCATTACTCTCAAGCTTAGTAGCAAGCAGCGTTTGGGCTGATGCCGCAAGCGATCT  
GAAAAGCCGCTGGATAAAGTACAGCAGCTTCCACGCCAGCTTACACAAAAAGTGACTGACGGTAGCGGCGGGCGGTGC  
AGGAAGGTGAGGGCGATCTGTGGGTGAAACGCTCAAACCTTATTCAACTGGCATATGACACAACCTGATGAAAGCATTCG  
GTTTCTGACGGTAAAAACTGTGGTTCTATAACCCGTTCTGTTGAGCAAGCTACGGCAACCTGGGCTGAAAGATGCCACCGG  
TAATACCGCTTTTATGCTGATTGCCCCAACCCAGTCCAGCAGTGGCAGCAGTACAATATCAAACAGAATGGCGATGACT  
TTGTCTGACGCCGAAAGCCAGCAATGGCAATCTGAAGCAGTTCAACCTAACGTTGGGACGTTGATGGCACAATCCATCAG  
TTTAGCGCGGTGGAGCAGGACGATCAGCGCAGCAGTTATCAACTGAAATCCCAGCAAAATGGGGCTGTGGATGACGCGAA  
ATTTACCTTACCCCGCCGCAAGGCGTACGGTAGATGATCAACGTAAGTAG

>Cluster\_10993

ATGGTTTCATTAGTTAAGAACAGCAGGATCACTCAGCAAAGAAATCATCTGCATTAAGCCAGCTTCAATTCGGTCTCGG  
TTGGGATCCGGTTAAGAAAAAGGTTCTTCTTGGAGGATTTGTTTGGAGGCAACGACTCAATCGATCTCGATGCTGGCTGTG  
TATTAATGGACAGCACAGGTAACAATGACACCATCTGGTTCCGCAAACTGAAATCCACCTGCGGCGCTGTTGTGCAC  
AGTGGCGATAACCTGACCCGTTGAGGGTACCGTACAGTGAAGTGAATTAAGTCAACCTCTCCCGCTGCAAACTG  
TGAATACCTGGCGTTTACGGTAAACAGCTTCCGTTGGTCACTGCTCAATGACGTCGAAAACGCTTCTGCGCGGTTGTG  
ATCAAACCCGCAAGAGCTGGCTCGCTACAAGCTGACTGAGCAGGGCTCACATACCGGATCGTTATTTCTTCCGCTGCC  
CGTAATAACGGCAACTGGGACTTTACCGCCCTTGGCCATGCCTGTGCGGGCCGACAAATGACGATATGCACTCCGATAT  
CGTTTACGCGGTTATTCGCTAA

>Cluster\_66940

ATGATGAAACCACGTTCTTCTTATTTAAAAACAGCATTCAATCTTTTATTTTCTGTTTTCTGTTTTCTGTTAGCGGCAGTGACAAA  
AGCAAAAAGCTCGCTTCCGATATCACACTGGAACAGGCAAAAAGAAATTAATGCTGATAACACATGTTATTTTCTGTTTTCC  
GCCATGGAGAACGTTGCGACCGTTTACAGATATGCCCTGCTATTCGGATAAGAGCGGAATCACTATTACCGGTACAGAGAAA  
GCACAGCAGGAAGGATTAAGTTTCGCAACAATCTTCAAGTGAATATGATATTTACTCCAGCAATGCGGTAAAGAACCATACA  
AACTGCAAAATCTTCTCCGGTAAAGAACCCGTCGTTATGGACAGTTTATCAAACTGCAATAATGATCTTTATAAGACGC  
TTGAATCAATCGCAAGAAAATCTATAAAGGAACATAGTAAATGACACATAATCAATGTTTATCATTTCTGCGCAGACA  
GATAGGCTCGGCAAGAAATCAAACCGGCTACCTTGTATGCCCTGATCATGCATTACGATGGTACCCGGCTCATACTTGA  
CGGAAAATACAACAAAGAGGCATAG

>Cluster\_10595

GTGAACACGGCAGCGGAAGCCATCCGTTGCCCTGTGCATGCAGATGCCTGGATTCCGCCGTCAGATGAACGAAGGCTGGTA  
CCAGATACGTTATTCGGGTGAGGACACGGCACCCGGAGGCGGTGTACGCCCGCTTACGAAACAGCTGGGTGAGGGAACGA  
TCATCCACATTTGCCGCGACTGGCCGGGGCGGAAAAGGTGGACTGCAGATTGCTGTTGGGGCGGCACCCATCGTGGGC  
TCTTTCTTCACTGCCGAGGCTCGATGGCGTTATGGGGTACAGCCCTGAGTGGCCGGTGGTTTTTCTGCCACCACGATGCT  
GTTTTCACTGGGTGCCAGTATGATTTTGGCGGTTGGGGCCAGATGCTGGCCCCGAAAGGCAAAAACCCGATTAACCGG  
CAACGGATAACGGCAGACAGAACAGTATTTTTCTGCTACTGGACAACATGATTTGCCAGGGTAACCCGATGCCGGTGCCT  
TACGGTGAATGCTGGTTGGCTCCCGGCAATCTCCAGGACATCAGCACCCGTTGATGAAGGCGGGGGCGGAAAGGTCGT  
GGTTATCGGGCGGCAGGGTAA

>Cluster\_17663

ATGGTGGCGGAAGTCCGCACCTATGCCGTTGAACTGGATGAAGACCCGGGCGGATTTGTCGACGCTTCCGGCAGCCTG

GGTGACGTTGCGCGCATCGCGAAAACCGAACGCTATTCCACGTCACGCCAGAAATACATTGCCACCGGACGCTTTGTGG  
TTGTGGTGGGTGATTACAACACCCCGCAGCGAACAGAGCCAGACAGGGAGGCACCGTCCGGGATGAAGTCGGGACAAAAC  
CAGCTGGTTGAATCCGTCGCTGCTGACCGGTCCAGGATTTGGGGCTGGAGATTGATTATTTTCGAAACCCGGGCGCT  
CAGGACGCTGTTTTAACCCCGGCTGGCAGAGCGGGCAATGTCCTGTTTGCCTGTGAGTTGATACCCGCTGGGTGGAC  
ACGCGTGGAGAAGCAGCAATGGCCGAGCGCGGTGAGAGCGGATATGGTTTCAACCGTTACCAGGCTGTCTGCA  
GACCCGACCCGGATTTACTGCGAATTGGTACGCAATACGGCGCAGATATCTGTGGTCTGGATGAATTAAGAGAGCAACA  
GCATGAACAAAATGAAGTTAA

>Cluster\_2405

ATGCCTTTTCTCTACGGATGATTCGGTTGATCACCCGATCTCTGTATGCGGCAACCAAAAAAGCCAACGAACTGATGGC  
CCATACTTATTTCCATTTGTACGGATTGCCCGCAACCGGGTTGCGTTTCTTTACCGTGTACGGCCCCGGGGTCTGCCG  
ATATGGCACTGTTTAAAGTTCACCAAGCAATGCTGGAAGGAAAAGTATGACGCTATAAATACGGCAAAAATGAAGCGT  
GACTTTACCTATATCGATGATATCGCAGAAGCAATCTCCGCTGCAGGATGTCATTCACACGCAGACACAAATGGAC  
CGTTGAAAACAGGCACCGCAAGCAGCAGCATTGCCCTTATCGCGCTACAATATCGGCAATAGTTCCACGGTTGAGCTCA  
TGGACTATATCCAGGCTTTGGAAGATGCGCTGGGTATTGAAGCAAAAGAAAACATGCTACCGCTACAGCTGGTGTATG  
CTGGAAAACAGCGCGGACACTAAAGCACTGTATGAGGTAAATGGTTTTACGCCGAAACACCGGTCAAAGATGGGGTAA  
GAACTTTGTTAACTGGTACCGTGATTTCTACAAAGTTGA

>Cluster\_46582

ATGATAAGTAAAGCTGTATTAATAATGAACCTCATCGCCACAAGGCCGGAGACATTACCGTTTTATAATTATGATGGTGA  
AACACGGGAATATATTTCCACATCAACTGAATACTTGTGTGGGTGTTGGTATCCCGGCATGTTCTCTTTAGATGCTC  
CTGGCTCATATAAAGCTGGTTATGCAATTTGCCGTTCTGCAGATTTTAACTCATGGGAATATGTGCCAGACCATCGGGT  
GAAATCGTCTATAGCACCAGCAAGAGAAATCAAAAAGAAATCACAGTTCCGGGTGATTACCCGAAAATAACAACCACTAT  
CGCCCGTTAACGTCATACGATAAATGGGATGGTGAGAAATGGGTGACCGATACTGAGGCACAGCATAACCGCCGAGTAG  
ACGCGGCAGAAAGTACGGCCAGTCACTGATTGATGCTGCTATGGCTTCCATTAGTCTGATTCAGTGAATTCAGGGC  
GGCGGAAAGCTGACGCAGGCAGAAACAACCCGGCTTAACGCTGTGCTGGATTACATTGACGCGGTGACTGCAACAGATAC  
CAGCACCGCGCGGATGTCATCTGGCTGAACACCGGAGCGTAG

>Cluster\_10602

GTGCGTCAATGTAGCAAGACACAATAAACCTGAAACAATCATTGCCGGGAGCGTCACCTAAGGGTCCATCATATCCCTGG  
GTTAGATGGTTTTCAAGTGGAGGCGATTCCAGGTAGTCTTCTTTGACCGTTTTGGTGTATAGAAGAAAGACGCATCGTGAAC  
TCGCTTTAGCGCTGGAACACAGCTTAACGGAGGAAGAACTTTCTGCAGGCAGTCTCTGCTTATATAGCAGAGGCCCGT  
GCCAATCCGCAAGTTCAGAAAGACCAGAGCATCCGATGATATAGCCGAATTAGCTCTTGTTCATTCACCGTTAACCTGA  
CGATTTGAAATGCGGTGAGTTACATCTGACTTGTCCGATAACATTATGTTGCCCTGGAAAAGGTATTTTTGTGAGAAATG  
CGAGTATCTGATATCTCTCTATATAGCCAGATGCACCTGAAGGAAATGGTCCATCACACAGCTAGCCATCCCTTC  
AGCCGTGAGCCCTTACTCCAAGATGATTGTCCAAAAATGATTGCTATTTTTAATGAGGAAAAACAACAGTTCTGCGT  
AAAATCTTCTCCGGTGAGGATACGTATCTTTAA

>Cluster\_33168

ATGACAAATTTTTAATAAATAAGACTATAACTATATAAATTAATTAATATCCAAATCATGATGGTTTCATGATGAATGGCT  
AGGTGATTTAACCGGTGTCATCAGGTCAGTTTTCGGCTTTAAGAGAACTAGTTCTACTCGTAATCAACTCAATAAGA  
TATTTGCGTCAGGAAATACAGATAAAATTTCTGGTGTGGAATTAATCTGCATATAAAGGAAGGTTTTTTATATCAGTCA  
ATTTGGGAAAATAAGATTAGCTTGTCTAAGTAGTGCATTAATTTGACATTTCAATGCCCTGATTATATTTTTCTCACGATTA  
TCGAGAAACTCTGATTAGAGAGATAGGATACAAAATGGAAGCAGTTATCATTTCTATTTGGCAGGGAGGGCAATGTAAC  
CAGAAATATGGTGAAGACGGTTTTGTGCTGAGTTAATAAATACGGTGAGGAAATTTGGAGTGGCTATTTGCTGATAAT  
CCTTTATGGACCATAGTCAAATATCTTTTACCGAAAAGTGGAGAAATAAAACCACTCATATTAATGATTTATTTCTTAA  
CAGACTTAATAAATTTTATTGCCTTATGAACTTTATGA

>Cluster\_43016

ATGCGATAATCCGGTTGATGATATACAGGCAAGATTCAGGCTTATCCGAAAGGCAAACCCAGCGCAATGCAAAAATCCA  
GGTTGATGGTGAGTTGATGCTGACGGACCTGGGGCTGGAAGGTGACGAACAGGCGGAGAAAAGATCCACGGCGGGCCAG  
ACAGAGCGCTGTGTCATTATCTCTGAGCATTATCTCTACTGGCGCGGGAAATTTCCGGAACAGCGGAGCTGTTGTT  
GCGCTGCGTTTTGGCGAAAATCTCTCAACCGACGGTCTGACGGAAAGTAATGTTTATAATGGTGTATTTTCCGCTGGGG  
AGAGGCATTAATTCAGGTGAGCCAGCCAGCCTCACCTTCTATAACTCAATTAACCATTTGATATCAGCGATATAGCC  
AGTTGATGCAAAAACAGGGTAAAGTGGGGTGGTTGTATAGCGTAATGCAACAGGGTGGTATCTGCTGATGCGCCGCTG  
GAGTTGGTTTTCCCGTGTACGCGATGTGACCGTGCAGGAGGCTGCCGCCATCGCATGGCATATGCGCTTTGATGACGATCA  
GTATCACCGTTTACTCTCCGCCGAGGTTATCGAAAAGCTGGACGCGAACGATGCAAAAAGCGCCGACTTAGCGGCAAGA  
TCGAAGATTTTTCCCGCCGTTTTGTGGGAAAATAA

>Cluster\_27151

ATGAAAGGATTAATGACTTACTCATTTCTTCTATGGTCTTCTGACATGCGGATTTGTTATCTACGGGACGCGTAT  
TATTTACCGGCAGAAAATAAAGAAGTGTGTTGTCAGTTGATGAATCAGGAAAACCGTTCTTCTGCTGTCAGGCGTGG  
TTGATGATGGCGTACGTCGTTACCACAGAAAATTCAGGTTCTTTCATGTTAACGCCACCAGTGCAAAAATAGGG  
GCAAAATCCCGGCAGCAAGTAAAATCAAAATATGCGGAATAAATACCCACTAATAAAGAGAGATTTTTTTGTCTGAA  
TGTCTGGATATTTCCACCAAAATAGTCCAGAACAAAGAGGTAAGAATGCACCTGAAAGTTTGGCATGCAAAAACAGAAATTAAGT  
TGTTTTACCGCCAGCGGTATTGCTCCGGTAAATAAAGAGACCTTAAAAGTTACTGGTAAATCGCAGTGGCAATGGA  
TTGGTGATAAAAAATGACTCAGCTAATTTGGGTGACGATTTCCGGATGTCAAAAGTAAATAATGTTAAAGTCAATTTGAAC  
TATATGATTTGCCCTTAGAAAAGTCAAGTGTAAATGTCAAAAAGTAAATGCAAAATAACTGGCATCTGACCATTTATCG  
ATGACCATGGCAACTATATAGTGACAAAATTTAA

>Cluster\_48673

ATGATGCATAAATCAGTAGCCGGTGAAGTTTTCAGAAAGGATCGATAAATACTACCGTTCTATTGGACGATATTTTAAGCAT  
TCTCGCGCTTCTTGGGCTGGCGATTGGTTCAGAACATTGCACATAAACCGAGTTAGGCGTGGCTTGAAGAGAGATTA  
CACGACTTATTTGGTGTGCGCAGGAAGTACAGTCACTAGTTATGAGTTAATCGCTGAAGCCTGGCGTTTGTGATGGATGGA  
CAAGATCCAAAACAGCGATTGGCATAGCAAGGCTTCCGAAGTATTTAAATTCGATAGGGTAGAAAAAGTTGATGATGT  
GAAACCGAAGCCAGTAGATCACGGTTTTCCCGGATAAATGCGAATGCTCTAGTTGCCAGACCACGGCCCGTATTTGTTCCG  
AATTCAGACAGATAAGCTCAGCCTAATCTACGAAGTTAATGTAGGCGGTAATAATGCGCTGCAATGCACAAGAGCTGCATAC  
GTAAGAGCAAAAGACAAGGGTGAATTAACCAGAGTTGTTGCCCATACCCAAATAATGAGCTTAAAGATCACAGATTTAG  
AGAATGGTGAATGAGTTCCGGGATATTGCGGTTCAAGTACCACGGAACCGAGCAATTCGGGGAGAAAAATGCCAGAGCAG  
TGAACAACTCAATTAGATCAGAAAGTATGTAG

>Cluster\_10267

GTGGATAAGGTTTTAGATTACGCCCTCTTCTTCCGCAATAAAGAAAGGGTATCTTGTCTATTGGCGCACATCTCTGA  
CGATATAGAATTAGGCTGTGGCGCATCGCTGCTGCTTTCGCAAAAAGGAAATTTATATCGCAGCAGTGGGTGATGACTA  
CCGGCAACTCTGGTACAGATGGAATAATCGATCGCCATGAAGAAATCGCGCAACGCCCTAAAGATATTTAGGCTGCCACCA  
ACTATTCTCTTAATTTTTGCTGACACCCGCTCATTTACAGCTCAATGATATGATTTCCGCCCTGGAAGACATCATTTAA  
AAATCAAATCTCTCTGATGTTGAAATCATGCGGGTATATACCATGCATGATGCGGACCGCCATCAGGATCATCTCGCTG

TTTATCAAGCTTCAATGGTTGCCCTGCCGCACTATTTCCACAAATTTCTCGGCTACGAAACCCCAAGTACCTGGCTTTTCATTT  
ATGCCCTCAGGTTTTTGAATCCGTTAAAGAAATATTTTACAGTCAAACCTTGCTGCATTAACAAAAACATAAAAGCCAGGA  
ACGACGTGATATATGCGTCATGATCGCTGCGTGCAGTTGCACAATTTCCGGGGCAACAGGTCAATAGCGATCTGGGTG  
AAGGCTTTGTAAATTCATAAAATGATTTCTTTGA  
>Cluster\_956  
ATGACACCGGACATTATCTGACAGCTACCGGGATCGAGCTGAGAGCTGTCGAACAGGGGGATGATGCGTGGCACAAAT  
ACGGCTCGGGCTCATACAGCTTCCAGAGTTTCAACGTAATAGCAAAACCCCGCTCCGGAAAAAGTGGCCTGACATGA  
AAATGTCTACTTCCACACCCCTGCTTGTGAGGTTTGCACCGGTGTTGGCTCCGGAAAGTTAACGCTAAAGCGCTGGCCTGG  
GAAAAACAGTACGAGAACGACGCGAGCCCTGTTGAGTTCACTTCCGGCGTGAATGTTACTGAATCACCGATCATCTA  
TCGCGACGAAAGTATGCGTACCGCTGCTTCCAGATGGTTTATGAGTACGCGCAACGGCTTGAACGAAATGCCCGT  
TTACTCCCGGATTTATGAAAGTTCCGGCTCGGTGGTTTCGAGGCCATAAAGTCAGCTTACATGGCCAGGTGCAGTAC  
AGCATGTGGGTGACGCGAAAAAGTGCCTGGTACTTTGCCCAATATGACCCGCTATGAAGCGTGAAGGACTGCATTATGT  
CGTGGTTGAGCGGGATGAAAAAGTACATGGCGGGTTTGGACGAGATGGTCCCGGAGTTTCAACAAAAATGGACGAGGCAC  
TGGCTGAAATTTGTTTGTATTTGGGGAGCAATGGCGATGA  
>Cluster\_58855  
TTGGCGCTTTGATTTTCCGCGTTTTATCGCTGCTGGTGGCGGGTGAATTCAGGCAGGAGTGGTGGTGGCGGAAACCGG  
ATTTATCTTTCCGCGACAGAGAAATCGATATCTATTTTACTGACTAATACCAGTCAGGAATCCTGGCTTATTAACAGTA  
AAATCAACCGCCCAACCGCTTGGCCCGGGGGGAAAGCGTCGACAGTGCACAGCACCATTACTGGCCGCTCCGCCACTTAT  
CTCCTGAAGCCCGTACGACAGGCAGCTTGGCTTGGTGGTGGTGGTGGTGGTGGTGGTGGTGGTGGTGGTGGTGGTGGT  
ATTTGAGTTAAGCATTCCAGCGTGCATCCGGCAAAGTTGAAAATCAGAGCTAAAAGTGGCGATGGCCTCGGTATTTA  
AACTGTTCTGGCGACCCGAAAGTTTGGCCGGGACCCGCTGGAAGCTTATCAACAATTAACGCTGGACACGGAATTCGAG  
GGTGTAACTACTAACCACACGCTTATTACATTAACCTGATTCAGGTGAGTGAATGGTAAAGCGTTAAGTAAATGT  
GGGAGTTGTGCCGCTAAAAGCCAGCGTCAGACAGCTGGTGTGAGGCAATCGCACCGTGTATGTCGCTGGCGGGCGA  
TAAATGATTACGGCGGGTTGAGTGCAAGAAGGAGCAAAATCTGCCCTGA  
>Cluster\_40110  
ATGCAATTCCTGAATATGTTCTTCTTGTATATCTACCCGTACATAGCCGGGGCGGTCTTCCTGATTGGTTGCTGGCTGCG  
TTATGACTACGGGCGAGTACACATGGCGTCCGCGCTCCAGCCAGATGCTGGATCGCAAAGGGATGAACCTCGCGTCAAC  
TGTTCCATATCGGTATTTCCGGGATTTTGGTGGTGGTGGTGGTGGTGGTGGTGGTGGTGGTGGTGGTGGTGGTGGTGG  
CTGCCGATTAAGTGAACAGAAAATGGCGATGTTGCTGGTGGTGGTGGTGGTGGTGGTGGTGGTGGTGGTGGTGGTGGT  
GTTGTTGAAACGTCGCTGTTTCCAGCCACGCGTGCCTGCAACGACTACCGGAGCGGATATCCTGATCCGTGCTACTCG  
TTATCCAGTGGCGCTGGCCCTGCTGACCATTCGCTTCTGCTCAGCATATGGACGGTAGCGAGATGATGAAACTGGTT  
GGCTGGGCCAGTCGCTAGTACCTTCCAGCGTGGCGCTTCTCAACATCTTGAATGGCGTGGCTTTTATCTCCGCTGCA  
CCTGGTGTGGGGATGACGTTATTCCTGCTGTTCCCGTCTCGCGTCTGGTACACATCTGGAGCGTCCCGGTGGAGTATC  
TGACCGTAAGTATCAGCTGGTGGCGCTCGTCACTAA  
>Cluster\_10403  
ATGACAGCTCCATTAACCTTATTGATCGTTGAGGACGAAACCGCGCTGGCAGAGATGCATGCGGAATATATTCGTACAT  
TCCCAGATTAGTCAGATATTTAGCGGGAAACCTGGCGCAGGCCGAATGATGATCGAGCGTTTTAAAGCCGGGGCTAA  
TCTTGTGCTGATAACTATCTTCTGACGGCAGAGGGATTAATTTATGCTGAACTGGTGCAGGCGCATTTATCCCGCGCAG  
GTGGTGTTTACCAGTCCAGCCAGCGATATGAAAACCGTGTCAAGCCGTACGTTGGTGTATTTGATATTTCTCATTTAA  
GCCATTGGCTATGAACCGCTGGGGCAAACGCTAACCCGTTTCCGCCAGCGTAAACATATGCTGAAAGTATTCATGAGCG  
CCAGCCAGAAAGCAATGATGAGATGTTTAAATGCTATGCTCGCGGTGAACCTAAAGACGACGTCGCCACCGGATGAT  
CCCTTGACGCTAAACCGGTTGCGAAAATGTTTAAAGACGCTGGTGTGCAACATACGGCAGAAAACGGTGGCGCAGGCACT  
GACCATCAGTCGCACCACTGCGCAGCGTATCTTGAATATTGCGCCAGCCGCACTGATTATGCTGAAATTTGTTTACG  
GCAAAGTTGGCAGACCGCAACGCATATACCACAGTGGGTGA  
>Cluster\_58239  
ATGCGTGAACAAATCAACAGGATATCGATCTGATTGAGATTTTATTTTATCTGAAGAAAAAGATTCGTTGTTATCCTTTT  
TATTTAGGCTATATGCTATGGCTATGGTGTGTTGTTTCTGTATATCAATAAAGACAATATAAAAGTGAATTTACAGCCTAA  
AAATAAACAGACAACCGCCAGGTATACTTGTAGCTGTGATAGCAATAATAATTTGCTGTGACTACAATGACTGAA  
GATGTTATTCAGCGAATTAATACATTTTTCACACCAGCCAGATGTCAGAAACAGAGAAATAAGGCTGGAATGGTCAGG  
AGATAAGAGAGCTTTACCAACTGCTGAAGAGGAAATATCTCGCGTGCAGGCCCTTATTTATCAATGGTATGCGTCAGAA  
ATCATAAATGGCAGGCAAGTTCTCGATGAGATACAAACCGCTTACGCAATTAACAGTGAAGCTTTATACAAAAATGATATAC  
CTGACCAGAACTGGTCAATGATCCGAACCGTGTGCTGTGTAACATAAGCTCACCAGAAATAAAAAATAAATACCC  
TGCTGCCATTTGCTGCTGGCTGCTGGGATTTTCTAAGCATTTGTAATTTCTGTAATGTTTTCCTTGTCAAAAAAATGGTAG  
ATGAATACCAAAAACTCTGGGCGATGA  
>Cluster\_29224  
ATGACCCGACACTCAAGCCGTTAATCTTAAACACCGGCGACTGGCGTAACTGATTAATCCTGATTTATACCGGCATTTT  
GGCCATGACAACTCACTGGCTGATGGAAGTACACCGGTGATTTATGTCGTGCGCTACTGCTTGGCCACCGCTAAAC  
GTTATCCGTTAACCGCGTGTCTATACGCTCATTTTCTTTCACGCAATCATCTGATGGTTCGCGCGCAATACACCTAC  
GCGAAAGTCCCGTTGGTTTTGAGGTACAGGAATGGCTGGGGTTGAGCCGTAATCCGATGACAACTGGGGCATTTTTT  
CCAGGGGCTGGTGCCTGCACTGGTGGCAGGAGATCCTTGTACGCGGGATGTACGTTGCGGGCGTAAAATGGTGGCGT  
TTTTGGTCTGTTGTGCTGGCGTGGCGATAAGCGCGATGATGAGTTAATCAGTGGTGGGCGAGCGTGGCAATGGGCCAG  
GGCGCAGATGATTTTCTCGGTACTCAAGGCGACCCGTTGGGATAGCAGCAATCCGATATGTTCTGCGCACTACTGGGCGAAT  
AACGACGGTATATTCCTGCGCCGCTTTTCAATGGCCAGCTACGGCGCTTTGGCTTAATCACCAGAGCGCGGAAGCGA  
TTACCCCTTAA  
>Cluster\_50168  
ATGTTTAAAGTGCATAGTATTCATGGTCATACATTATTGTGATCACTAAACCTTCTTTCAGGCGACAGCTCTCTTT  
GCAGCACCTTAAACAATCGCTGGCAATTACAGGAAAATACATAAATTTCAACGTTCTCTGGACGATATATCTTACGGCT  
CTATTTATCTTCTGGATATGATGGAAGCGGATAAAAAGCTTATCCATTTATGGCAGGATACTTTGAGCAGGAAAAACA  
AATATCAAAATATTGTTGCTAAATACGCTTGAAGATTACCCGTACCGGACATTTGAAACTGGCCTCATATCAACGGCGT  
TTTTTATGCGATGAGGATCAAGAACGTTTGTCAATGGTTGCAAGGCGTCCGCGCGCGAATGCTTACGCAAAA  
AGCTTGGCAGTTACTGATTACGCATTCAGGTAACATCGTTAATAACAGCACGGAATCAGCCCTCCTTACTCATCGGGAA  
AAAGAGATCCTGAAATAAGCTGCGTATCGCGCGCTAAATAACGAGATCGCTCGTTCGTTGTTTATCAGCGAAAATACGGT  
TAAAACGCATCTTTATAATCTTTTCAAGAAGATAGCCGTAAAAAACCGGACACAAGCGGTTTCTTGGGCAACGATAACC  
TCAGGCGATAA  
>Cluster\_11021  
ATGGGGGATTTCTGTGACACCGGAGATAATTGGCAACATGATTCTGCTAGTACTTACGCCAGGAAACGAGCAGAGAAGAGAC  
CATACAGGCCCTTAACTACCTGCGCAGAGTCTTCATGAAAGTCACTCCCTTTGACATGAGCCAGTGGCTGTGTGCTGT  
GGGTAAAAGCAGATGAGGTGGTGGCCAAATGATTACAATCCTAATGTCTAGCGCGGGTGAGAAGAACTGCTGAAGCAG  
TCACTGGAGAAAGATGGTTTACACACACCGGTGGTGGTGTCTGAGGAAAAGAACCATTTACTGGTGGTGGATGGTTTTCA

TCGCCAGGTGCTGGGCAGGGAAGCAGGTACGGGAAAACGCTCTGAAGGGCTGGCTGCCGGTGGTCTGTATTAATCCGGAGA  
GAAAGGGACAGGCCCTCACGTATTGCTGCGACCAATCCGACATAAACCAGGGCCAGGGGCAAACATCAGATAACCTCAATGTCT  
GATATTGTCAGGGACCTGTCGCGCTGGGCTGGACGAATGAACGCATTGGTACGGAGCTGGGTATGGACCAGGATGAAGT  
TCTCAGATTGAAACAGATTAGCGGGCTGACGGAGCTGTTTCAGGAAAGAGGATTCAGCCCGGCATGGACGGTTTCGCTGA  
>Cluster\_53873  
GTGAATAACCGCTTTTACATGATGTGCTTGGCTGAAACTGTGGGTAATAACGCCTCATTCATGGCCATAACGGCAATGG  
TTACAGTTCTGATATCGATGCGGCTCATGTTTACACGCTGGAAGAAGCCAAAAAGCCTGGAATTGTGGACGAGATATCG  
ATCAGCCTGTTTGGCTGATAGCTGGATGCAATGGCTGTGTGGCAGCTTGTATGGCAGTACATCCCCACAGAAAGCCTG  
ATTGAGTACAGATTGCACTGCTATGTTGGCTACAAAAAGGTAGCTGGAACGGCAACGATGTTTACTGGCTTCAACACGG  
TGGATTGCCAACAGATGACTTCACTAAAGCGACCATCTTAGCGTGCACAAAAACGAACCAGGAATAGTTTGGTTGC  
CATTTCCATTGCTGATGACGAAAGCGCCGAGCTTCAATATCAATAACTTTAACCCGAGAAACATGGTTACAGGGCGCA  
GGTTTGGTTCATGCTGACTGGTTGAAAGAGCAGAACAGAAAGAAAGTCCGGAAGCGGGAAGGTGCGTTGGAATTGTCC  
GCATTGCGGAAAAATCACCTGGCAGTACAGCCATATGATTTTTGAAGGCTGTAGTGATTACAACCTGTGAGGGATGGCGAG  
TATGA  
>Cluster\_55917  
GTGGCAAGTAAGTTTTCAGAATCGGTTAGTGGCCAGCATCGTGTGGTGGCGCTGGGGGTGATTGTACTTCCAGGGCTGCT  
GGACGGGCAAAAAACATTATCAGGATGAGTTTCGCGGCTATCCCGCTGGTGCAGAAAGCGGGCGATCGTGATGAGCCTG  
ATATGATGCCAGCCGCCACCCAGGCGTTACCGACGCGAGCCCGGAAGGCGCAGCGGAAGAGGTGCGGGCAGGTGATGCC  
GCAGCACCCTGCTGATCCGGCCACTATGACGCAATAACACCGAGTTTGAACCGGAACCTGCACCGGTGCGCCACC  
GAAGCCGAAACCGGTGGAGCCGCTAAACCAAGGTTGAAGCACCACCTGCGCCGAGCCGAGAACCGGTCGGTCTGTTG  
AAGAAAAAGCTGCACCGGTAAGCCTATGTTGTGCAACTGGGTGCGCTGAAAAATGCCGATAAAGTGAATGAGATT  
GTCGGTAAGTGCAGGCTGCGGTTATCGGGTTTATACGTCGCATCCAGCCAGTGCAGGGTAAAATACCCGATTTCT  
GGTTGGGCGGATGCTTCAAGGATAAGCTGAAAGGTTTCGCTGGGTGAGTTGAAGCAACTTTCGCTTAAAGTGGCGTGG  
TAAATGGGCTATACCGCAATTA  
>Cluster\_26926  
ATGTTGGAGCGCTTTCGCCAATCCCAAACGCGTGAAGATTACCTTGGCGTTCCTCGCGAAGATATTGAACGCGATATTC  
CTATGATCCCGAACCCATTGGCAGATACAACGTCGCGCCGGAACCAAGTCCCTTCTGCTCAGTGAACGCTGATGAACACC  
TTCATCTGGATCCGGTTTTCTGGGATATGCTCCCGGATGGTGGGATAAACCGCCGCTGATTAACGCGCCGTAGAAACT  
GCCGCAACAGTCTGATGTTTAAACCGCTCTGGCAACATGGTCCGGCAATCTGTTTGGCGATGGCTGGTTGAGTGGAA  
AAAAGAAGCGCACAAAAACAGCCTTATTTTATCTATCCGCTGACGGACAACCTGTTTATGGCCGATAGGTAGCA  
CACCCTTGGAGCGTGGTACGAAGCCGAAGGATTTTGTATGCTCACTGCGCGGCAGATCAAGGTCTGGTAGATATTCAT  
GACCGCCCGCTGGTTCTGTCGCCGAAAGCTGTACGGAAATGGATGCGGCAAGAGGTTGGCGGTAAGAAGCCTCAGA  
AATCGCGCCAGTGGCTGTGTTACAGCAAAACAGTTACCTGGCACCTGTGTGCGCGCGGTGGGTAATGTCAAAAACC  
AGGGCGCGGATTAATCAACATGTTTGA  
>Cluster\_20252  
ATGCTGAGCCGATGATGTGGCTGCTGGTTCGTGGCGTATGGGAAACGCTGGCAATGACCTTCGTATCCGGTTTTTTTGG  
CTTTGTGATGGTCTGCCGTTGGCGTTCTGCTTTATGTCACGCGTCCGGGGCAAATTAATGCTAACGCGAAGCTGTATC  
GTACCGTTTTCTGCGATTGGAACATTTTCCGTTCCATCCGTTTATTATCTTGTGTTGATGGAATGATTCCGTTTTACCCG  
GTTATTGTGCTGATACATGATGGTTTTCAGGACGCGATCGTTTCCATTAACCGTTGGTGCAGCACCGCTTATTGCGCAT  
GCTCGAGAACGCTGCTGCTGAGATCCCAACCGGTTAATTGAAGCTTCCCGCAATGGGTGCGCACCGCCGATGATG  
TCCGTAAGGTGCTGTTACCGGAAGCGCTGCCGGTCTGTTAAATGCGGCAACTATCACCTGATTAACCTGGTTGGTTAT  
TCCGCGATGGGTGGTGCAGTCCGTTGCCGTTGGTTTAGGTACAGATTGGCTATCAGTATGGCTACATCCGCTACAACCGCAG  
GGTATGAATACGGTACTGGTATTGCTGGTCACTCTGGTTTATTTAATCAGTTCGCAGGCGACCGCATCGTCCGGCTG  
TCACTCGCAAGTAA  
>Cluster\_23909  
ATGAAGTTGAATTTAAGGGATTTTTAAGGCTGCCGTTTTGTGTTCTTTGGCATTGCGTTGACCGGATGTATCACCTG  
GGGATTGGTTTTCCAAATCTGCAAGCCGTCACATGCCGAGCAATGGCGGTGAGACACGATTAAGGTTTTATCGCTGGCAG  
AAGATAGTAACGGTACGAAAGGCTATGTTTTTGTGGTGAATCGTTGGACTATCTGTTGACCACCGCGCGGTTGAGGTG  
GTTAAAATGCTGAACGATCCGGCAATTCATGGTGAAGAAATCACCGTTTTCTGATAACCGGAAATTTATTTAAGCAGCAG  
TAATAAGAAATCTCTGGTGCTATTACGCTCTATTACGACTGGAACAACGAGAAGATAAGGCCTGGCAACACAATATG  
GTTTTATTGCGATATCCGGCGTTGTACATGGATACTGGACGGCTGAAAAGGCTCTATCCACCAGAAAAATAAAAAAGCG  
GATTACTCAAACGTGATGGTTTTCCATCAACCTTTACGGTGGGATTTTTATGAGTACAAAACAACAGATGGCATCCCGAG  
CGGCTCGCTAACCGCTGCTGCCAATCACTCTACGCTGGATATAGTAACCTCACCCTGCAGTTCCGATTTTATGCA  
CTACAAAAAATGTTAA  
>Cluster\_29150  
ATGGCCAGCAGAGGCGTAAACAAGGTTATCTCGTTGGTAATCTGGGTACGACCCGGAAGTACGCTACATGCCAAATGG  
TGGCGCAGTTGCCAACATACGCTGGCTACTTCCGAATCCTGGCGTATAAAGCGACCGGCGAGATGAAAGAGCAGACTG  
AATGGCACCGCTGTGCTGTTCCGGCAACTGGCAGAAAGTGGCAGCAATATCTGCTAAAGGTTCTCAGTTTATATATC  
GAAGGCCAGCTGCGTACCCGCAAAATGGACCGATCAATCCGGCCAGGATCGCTACACCACAGAAAGTCTGGTGAACGTTG  
CGGCACATGCGATGCTGGGTGGTCTGAGGGTGGTGGCGCTCCGGCAGGTGTAATATCGGTGGTGGTGCAGCCGAGG  
CGGTTGGGGTACGCTCAGCAGCCGACGGGTGGAATCAGTTGAGCGGCGGCGCAGTCTCGCCCGCAGCAGTCCGGC  
CCGGCAGCGCCGTTACAGAGCCGCGATGATTTTGTGACGACATTCGGTTCTAA  
>Cluster\_3659  
GTGCAACGGACAAAGCCTGAAATAACAAAAGGAGGATTTTTTCATAGCATTTATAAATCGCATATCAAATATAAATATGA  
TGTTCGATAGAAAGATATTTCTCATGAAAGCACCAGAAATGCTATGGGAGTTGCAGAGAAAAAGGAAATTAAGAGA  
ATGCGACCTTAATCTGGAAATATATAAAGTTGAGAAGGCAATTTGTATTTACACGAAACAGAAAAGTTTCCCATCA  
AATCGTGCAGGAGGTTTTATAAAACCATTTCTGATTAAAAACAGTGTTTTTGGGGATTTTTTTTTGACTTTTGAATTC  
AGTTTGCCTGCGATAGATGAGTTGATTGAGTATGGTACGAAAGAAACAGTGAAGCGACATCAGATTCTAGTACAGGAT  
TTTTGACTTTTCAATTTCCGATTTTTTATATCAATAATAAGGCTGTAATAGTCCGCTTCTGAGAACAGAGGAAGTTTCA  
CAAAGTTCCAGAACAGGTGAGATGTTATTTAATTAACCAATTTGAAGATGAATGA  
>Cluster\_17086  
ATGAAGAAGATTTTACTCGTTGCTGGCGCAGCTCTGGCAGTGGCGGATGTGGTGAGAAAGGTGAGTTTGAAGAAAGCGAT  
TAATGCCAAGATTTGGGACGGGCAAAATACGCTTCTCGTGGATAACAATAACACCAGCTTCCCATCCGCTTTGCCAAGC  
CACTACGTTAATTCAGTGCACAGGCAACCAATTCAGTATCTTCGACGTTTATTTAGCAGGGCCTGATGGTTTTTGA  
CAGGGCTATGACTCGAACGATTTAGGGATAACAGAGGAAGGCAAAAAAGCCTGAGCAGCAGCAGCGGTGCCCTG  
TGTGGTCTGCTGCTGTTGATGAGATTAAGGAATGGACGGAGCCGGGAAACCGTAAATCAGAAAGTAGTTTCGCGTGA  
ATACATGGAAGTTGGTTGACGTTCCGGGCTGATTTGACAAAAAGCCTTCGCGAGGTTAAAGGAATGAATGATCTGCT  
GATGGTGCATGAATCTTGTAAACCAGCAATGGCTGGAGAGCAATTA  
>Cluster\_64085



ATGATGCACTTAAAAACATTAAGTCTGCTGGCAACCCATAAACAAAAGCAATACCAGCTAACAAAGCAATTTAACATCAA  
ATGGCTTTTATTCAGATGATGGAAAAAAGTGGTATGAGGAACAAAAGAAATTTCCAGCCAGACACTTTGAAAATGGTCTATG  
ACCATAACGGCGTTATTATTTGTATTGAAAAGGATGGTTCAGCAATTAATCCGGAAGGCGCAAGCGCTGTTGAATTACCT  
GATATTACAGCAATCGCCGGGCTGATATTTCCGGGAAATGGTGTTCAAAGATGGCGTAGTGATAAAGCCGAACCTATAC  
CAGGAAAGCAGAGGCAAGCAAGCGGAAAATGAAAAGCAAGCCCTGTTGCAACTTGTACAGGATAAAAACCCAGCTATGGG  
ACTCACAGCTACGGCTGGGCATCATTTCCGACGAGAATAAACAAAAATTAACCAGTGGATGCTCTATGCGCAGAAAAGTC  
GAATCTACAGACCTCCAGCCTGCCAGTAACGTTTCCGGAACAACAGAATGA

>Cluster\_11080

ATGAGACGTGGCATTTCCTACATCCGGTTCCTCAAGTGAACGACAACTAAAAGGGGACTCTGTACGCAGACAATCTAAGCT  
GGTTACTGACTGGCTTGATAAGAACCCTGAGTTTACTTTGATTCATCCTTGAGCTTTAAAGATTTGGGGAAAAGTGCTT  
TTAGTGGTAAACCTGAAAGGTGGTCTAGGTGACTTTTAACCGCTATCGAGAAAGGCTTGTAAAGCTGGTGATACG  
CTACTAATCGAGAGTTTAGACCGTTTGTACCGTCAGGATATTGATATTGCTTCGAGCTATTACGCGGTATCTTAAGGGC  
TGGTGTAGATGATGATTAACCTGTCCGATGGTGAACATTACACAAAGGAATCTCTTAAAGACCCGCAATCCCTGATTA  
GCATTCTGATAATGCAACGAGCGCATGAGGAATCATACGTAATCAGAGCGTGTACAGGCTGCATGGAACCGTAAAAAA  
GAACCTCATCTCTGAGGGTATCAAGATTTCTAGGCGTTGCTCTGCATGGCTTAAGCTTAATGATGACTGA

>Cluster\_2997

ATGAAACTGAAGCTGAACAATGTTCGTCTGGCCTCCCGTCTCTGTTTGAAGCTAAAAGTGAACCGGCGAAGGCGATCC  
GCGTTTCTCCGAGTATTTTTAATGTCTCCAAACACCCACAACCTGGAAGAAATCCGTAAGCTATGAAGCAGGTAGCGA  
AGGAAAAATGGGGAGAGAAGTGGGAGCCATTTATAACAGCTGGAGAAAAAATCAATCTGTGCTGCATGATGGTGTAT  
GAAAAGCAGAGATGAAGGCTTCCCGGTAATTTCTTCTGAAATGCTGCTAACAAAGCGCGCCAGCTGTTCTTGATCG  
CGATCGTTCCGCACTTATTCAGGCTGACGAGCCTCCCTATGACGGGTGCTATGTAACGCCGTTATCGATATCTGGGCA  
AGGACAATAATTTCCGTAACGCATTAATGCCTCACTCGCGGAGTCCAGTTCCTGCGAGACGGCGATGCATTGCTGGC  
GGCGGAGTGGCAAGCGCTGACGATTTCCGACGATATCAGCGAAGGTGCTGATGCTGAAGCACTAATTTAA

>Cluster\_4604

ATGAATCCGTTTAAAGCCATTACTTTTGTGCTGATTTGTCGGGCTCTGGCTTGTCTGCTGCTATGGCGCAGGAGTTCAT  
CATCCAGCCAGCCCTGTGATGCTAAACCTTTTGAGTACTCTCTTCTGTTGAGGAATCTCACGCAAAATGGAAGAGG  
GTAAGGAGATCTTGCAAAAGTAAACAATTCAGCAGATGACTACTATATCTGTTTGTATGATCTTAATAGCCAAGATGCT  
CGCGAGTTTGTTCAAAACGGGACAGATACGACAGAGGCATCGGAAATGTTCTGCGTGCCTTTTGAAGAAGAGTGA  
GCGTACAATGAAATCGCCTCTGCCTGAAATTTATCAGGTCAGAACTGAAGGTTTACTGGCGTCATATTGCTAAAGCTCGCT  
CATCTGTCACTCGCTTAAACAATACATAAAGAGCATAATTAAGAAACTGTTACTTTTAGCGGGCGCGGATCTTGTCT  
GGAATTCAGCACTAGCTAGTCACACATCAAATAAGCTAAAATCGATGCAATTTCACTAA

>Cluster\_62156

ATGACAGTACACCCTTCACTTTTTCATATCACAGATAAAAGTGTGCCAGTGATATCCGGGAAGTCGAAACCCGCGCATT  
TGGCTTACGAAAGAAGCCGATTTAGTGGCCTCTTACTTGGAGGATGAAAGCGCGCGCCCGCTTATCGCTGCTAGCCC  
GGTATGAAGGCAAGCGCTCGGCATATTTATTTACCGGGCAACCTTCAAAGGAGAAATGGATTACCGGTTGATGCAC  
ATCTCGCTCCCTCGCGGTATACCGGAATACCAAGGATGGGCTGGGAGGACGGTTGATACGCACTGCGCATCGGACGA  
CCTGAGGTTGATGGGCTGCCAGACGGTTTTTGTCTCGGCCACGCCACTATTACCCCGACATGGGTTGCAACCCCTGTG  
CCGGAGACAAGGCTATCCGGCACCTTATCCCATCCCGGAGGAGCACAAGCCGCTGGATGATGCAATCACTCACCGCT  
CAGCCATGACCCTGACCGGCCACATCCGGTGGCAGACCCCTGATGAAACCGGAGCACTGACGTTGA

>Cluster\_86

ATGGTTGATGCAAAAATTTGAATGGTGTGACGACATTATTACGGGCTTACGGAGCCTGACCTGCGGAGTTCGCGTGA  
AAAAATGAATATGCTCCCTCGTCAATGGTGTATTTCTGCGTGTATGCGGTTGATGCCGGAGTGTCCAGGAATGCAACG  
GATTTTATGACGTTTCGCGCCCGCTCCGACGCGCTGTAAAGACGAAACGCAACTGAGCAGCCTGCTGTGATGAGG  
GTGTTGTTGCAACTGGCGTCGCTCATTACCTGGGTGGAAGGTAATACCATCCCGCGCTGGCAAAAGAGTTTGGCAGGG  
CGTGTGACCTGTGAGTCACTTACATTTGCTGAGGTTGATTAACAGAAATGTGCGAAACAGGAAATGCCCGTTTGTGA  
TGGCTTATATCGATATCCGGCTGGGGCGTTTTATTTGCACTTCCAGCGCTGGAATATCACCGACCATGTACTGCGTTAT  
CTCATTCTTGATTTCTCCGGCTCCCGCAGCGGTGACAGGAGTGGCGTTGA

>Cluster\_62871

ATGAACGAAACATATGTAATTTGAACCAC TAGAATTTATATTTACAGATTCCTTCTTTAGAGGGTTCATATACTACTGG  
GTTGAAATGCATTTGTTATTAAGATATAAATGATGCATGGAATACCGCTTTTGAACAAAACCTCTCATCAGGTTTAAAG  
TTTGGAAACGATATTTAGAAATGGAGCGTTCCGCACTAAGGAGCAATGATGAAATTTGAGGAGCATAATAAATTTGATG  
GATTTATTTAAAGACATTTGCAAGTTAATCACTCTTCAAATTTTCTGAGTATAGAAAGAAAAAATAAAAAAACAATAA  
TAAACTTGATGACTTTATTTTTCCGATGCTAGAGATGATCTTTTTTTGATTAAGTACTATTTGCAATAAATAGATATT  
TAAATAATTTAATTAAGATTCATTCCTTGAGGATGCTTTAAGCTTTATAAACTTGGGGGTGGCCGTGTTGGCTAAAG  
GGACATGATATTTCTGCTCTTTGATCCGATGGTGTCTTAATTA

>Cluster\_58995

ATGCAAAAGGTAAAATTACCCCTGACTCTCGATCCGGTTCGTACGGCTCAAAAACGCCCTTGATACCAAGGATCTATAC  
CCCTGACTAGTTGAGCGCTCGCGAATCCGTAGTCAGTGTGGACAGTGTGGAATGCTCCTGCTGCTGCTATCGTATCG  
ATAACCAACGCTTCGACGTTTAAACGGCGATGCGAAGGTGACGGTAAACGCTCGAGTGTACGCTTGGCGGAAGCCGTTT  
ACTCATCAGGCTACACAAGCTATGTTTTAGTCTGTGCGTTCAGACGAACAGGCTGAAGCACTGCCGGAAGCGTATGA  
ACCGATTGAGGTTAACGAATTCGGTGAATCGATCTGCTGCAATGGTTGAAGATGAAATCATCTCGCTTGGCGGTAG  
TTCCGGTGCATGATTTCTGAAACACTGTGAAGTGTCCGAAAGGACAGTGGTCTTTGGTGAAGTGCCTGAAAGAGCGCAAAAG  
CCAAACCCATTTGCCGATTTAGCCAGCTTAAAGCGTAAGTAA

>Cluster\_56082

ATGAAATTTAAAAATGCTCTTCTGCTGTGGCAATGTTAGCGTCACTTCACTCTGGCAGGATGCCAGTCAAATGCTGACGA  
TCATGCTGCCGATGTTTATCAAACCGATCAACTGAATACCAAAACAAAGAACTAAAACCTTAATATTATTTCCATTTCTC  
CCGCAAAAGTTGCCGTAGACAACCCAAAATAAACGGAAACGCAAGCCTTCCGGCGCTTATTTGGCGCAGTCTGCTGGC  
GGTGTATCGGCCACAACGCTCGGGTCTGGCAGCAATTCGGAACGACGCGAGGTGCACTTGGCGCGGAGCTGTAGGCC  
GGCAGCGGTTCTATGGTGAATGATAAAACCTTAGTGAAGGTTTCTTTAACCTATAAGGAAGGCACCAAGTGTATA  
CCTTACCCAGGTGGGTAAGAGTGCAGTTTACGACAGGTTTACCGCTTGTATTACCACGAGCTATAACGAAACCGCT  
ATTCAGCCAAATACCAATGCTCTGAAAAGAGCTAA

>Cluster\_60501

ATGCGTTTTTCTCACCGACTGTTCTTACTTCTGATTTCTCTGCTGACGGGAGCACAATACTCGCTCAGGAGCTTCTGA  
CGTTGCGAAAAACGTCGCTATGATGGTTTTCCGGTATTGTCAGTTACACCCGCTGGCCTGCGCTATCAGGGCCACCAAGT  
TATGATCTTTTCACTTTCAGTTTTAGTACCGCCCTACAAGAGAATGCCGCGACATCTTGCCTTATCTGCTGTCATC  
ATTCACACTCAACAGAGCGGATGATTTGAGCTGCAATGGTTTTTATTTTGGCAACGAGTCAACGATCTCCAGATGGA  
ATTAACCGAAATATCCGTCAAAGCGTTTATTAATTTGCGCAAAATAACGAGTCAATTTATTTGATGAGGCTTTT  
GTCTGATCATCCACAATAATGACGTCAGATTTGCCGTAACCTGGATGCTTATCGCGTAGCGGTGTAAGGTTCAACCCG  
GATGCTTAAATGCTGCGCAGGAAAGAAAATGATGGATAA

>Cluster\_60574

ATGGATAGTTCGTTTACGCCATGAAACAAATGCTAAAATTTTCGCGCCAGCCGCCACGAAGATTTTCCTTATCAGGAGAT  
CCTTCTGACTCGTCTTTGTCATGCACATGCAAAGCAAGCTGCTGGAGAACCAGCAATAAAATGCTGAAGGCTCAGGGGATTA  
ACGAGACGTTGTTTATGGCGTTGATTACGCTGGAGTCTCAGGAAAACACAGTATTCAGCCTTCTGAAATTAAGTTGTGTCT  
CTTGGATCATCCCGTACCAACGCGACGCGTATTGCCGATGAACCTGGAAAACGCGGTTGGATCGAACGTCGTGAAAGCGGA  
TAACGATCGCCGCTGCCTGCATCTGCAATTAACGGAAAAGGTCACGAGTTTTTGGCGGAGGTTTTTACCACCGCAGCATA  
ACTGCCTGCATCAACTCTGGTCCGCGCTCAGCACAACGAAAAAGATCAGCTCGAGCAATCACCCGCAATTTGCTCTCC  
CGTCTCGACAGATGGAACAAGACGGTGTGGTTCTCGAAGCGATGAGCTAA

>Cluster\_177

ATGATGGATAAAGTTGTGGTATTAGGGATAGGGAAATGTTTACTTGCAGACGAAGGGATAGGAGTTTTAGCAGTTAAGGT  
TTTTGGAAGAGTTTTTTGAAGTTCCTTCTGAAAAGGTGGAGCTTGTGACGGAGGAGTAGGGAGTTTTCACTACTTCCTT  
ACATAGAAAAAGCCAAAAGACTTTTGGTAAATAGATGCCATCGCAAAAGGAAGTCTCCTGGCACCCCTTCAAAAATTTACT  
AAAGACACCCCTAACACAGATCTTGA AAAACTCTCCATCCACGAGGTAAGTTTTTTAGACATACTCACCTTAGCTGA  
GATGAGAGGTTTTTCTCCTGAGGAGCTTGTGGTGTAGGGTTAGAACCAGCAAGCCTTGAGATGAGGTATGAACCTTCTC  
CTTCAGTAAAGGCTAATTTTATCCCTTTGATGAAAGCGGTGGTTCTCAACTTAAAGATTGGGATATAGAGCTTGTCCCA  
AAGAAAGACCTCCGTCGTTGGGAGGAACTTTCTTTGTAGATAGACCTTAA

>Cluster\_34010

ATGATTATGGCTTTTTTACTCTTAAAAATCAATCACTCAGCGCAATTGCACAAAATAATTTGCAATTTTGTCTGACTCG  
CTTTTTTTCATGGCGTATCGTTTGGCCGACCTCATAAAGCGGGTGGCGGGTTAGCAGCCTGATTTGAAGAGCGGGTA  
GCCGCTATATTTCCGTAATGCGGTTTTTTTGTGCGCCGTAATCCACCCCTACCCGATTTATGGCGGGCGTAAATGGGGA  
GCCTTTGTGCTCGTGGTTTTCTCTTACGCCAGTCTGCTAACCCCTGTTACGTCGCCACCCTGTTTAGCAGCGGTGCTGGC  
GAGACTCCGTAATCAGTAAGAGGAGCCGCAAAAATGGCTATATCAACAGCCCTGATTTTATCTGGCGCTTTATGCAGT  
GCCACGGTAAAAATATCCGCTTTCATACGTTACCGCTGCCAGTGAGCGCGAAGCGCGCCATGCTTCCGGCATCCCGT  
CTGGTCTTTGTGCGGCTATCCGTCGCGGGAGCGGTGCCATGTTAA

>Cluster\_83

ATGATGCACCTAAAAAATATTACTGCTGGCAACCTAAAAAAGAAACAATACCAGCTAACTGAAAAAGCGGGCGTGGT  
ATGGCTCTTTTGGCAAGATGGCAAAAACCTGGTATGAGGAAACAAAAGAATTTTCAGCCAGACCCATAAAAAATGCTTACG  
ATGAGAACAACATCATCGTTGCTGTGTAAGACGTTTCAACTATTAATCCTGAAGGGCTAAGCATAAGTTGAAGTTCTC  
GATATTACGGCAAAATCGTCGCGCAGACAATAACGGAAAATGGATGTTTTCTGTATGGTAAAGTAGTAAAGAGGGAAATATAC  
AGAACAGGAACTGCAACAACAGGCGCAATCACAAAAGGCGCGTTGCTTCTGAAAGCAGAAAGCGTTATTCAGCCACTGG  
AACCGCTGTGTCAGGCTGAACATGGCAACAGATGAGGAGCGTAGCCGACTGGAAGCATGGGAGCGCTACAGTGTCTGGTC  
AGCCGTGTGGATACGGCAAAATCCGAAATGGCCACAAAAGCCTGAATAA

>Cluster\_45956

GTGCTGTCTTACTTAATGGCAATCACTTTGTTTTATTGGGGACTCTACTAATTTAAAAAATCTCTGGAAATATGAAGT  
AATTCGGCGGAAACGATATGGATATCTGGAGGCTTTAAGAGAGAAAAAACCGGTAACCGGAATTTCTTTTCTGGTGGC  
AGCTGGCTAAACGAAATGATATTAATGGTAAATAAATGATAAAGAAAGCAGCAAAAAGTTAAACAGATAAATTAAC  
AAATTTGGTTGTGAAATTTGGATTGGCGCAAAATTTGGAAAAGGGTTAAACAATCCCCATCATGCTGGAATTTGTGTTCA  
TTTTGCTGTGATGCTGGTGAATCTGGTGTACGACAGAATACTACCATGGACAGATAGATGGTGCATGCTGGT  
CAAGAGTAAAAATTTGGTAGTAACGTTGATATCGGAGCTAATTTGTTGCAATCATTTGGATTATCACGTAATAATGGGGATAAT  
GTAAAAATAGGTGCAATGCTTTTTATAAATAAAGATATACCATCGAATCGACATATAAATAAAAAGAGCGGTGTTGT  
ATTGTATAAATAG

>Cluster\_67032

ATGTGGAAGCAGGCCCTGACGGGCGTGTGCTGATTTGCCACCAGTGTACAGGCGTCCACGCTGGAAGAGCTGCGCCAGCT  
TGAAGCGCACAAAACAACGCCGGGTAAGGCCAGCCAGATACAGGCAGTTGCCACTTCTTCATCACCTGTGGCTCCTGCAG  
CCCCTGAACGCGGGGATTACCGTCTGCCGGACGCGGCTAGTCAATCTGAAGAACTACAACCTGGTGTGTTTATGCAG  
TCACGCTGTGGTTACTGCCAGCAGTTTGGACCGTTACTGAAGCGGTGAACCGCACAGTTGGGGCTGGATGTTTTCCCGTA  
TACCCTGGACGGTATGGCGGATGTGTCTTTTCCGGATGCCATTTCCGGCAACAGAAAGCTGTGATTCGTGATATGTGGAGCA  
ATATGCGACCGGTGACCCCGCAGCGTTCTGGTGGAAAGTGAATACCTGAAAACACTGCCATTTGCTGTATGGCATTTGTG  
GATGAGCAGACGCTCAGGCTGCGTATTGATGAGGGGCTGGGATTTGCGAATGCTCCCGGAACGGGAGTAAAGATAAAAC  
AGGAAGTGAATAATGA

>Cluster\_25496

ATGGAACCTCGAAATAAGAAATTAACCCATGACGAATTCATGACCAGCGGCAACAGGTAAGTAAACCTGGGAAACCGG  
CAAGGATGTTGAAAACCTTTGAAGATGGCGTTAAATACCAACAACCATTCCTGAGCATAAACGCTTCTCTCTTCCCTGCG  
TGAAGCAGACAAGGAAGGTA AAAACTCTTAGCCAACCGCGCGGCGTGGCGCTGATGGACGACACATCGAACTACTG  
AAAACACTACAAGAAAGAGTGCATCTGCTGCCGAGCACCATCGATGCATATACCCGCTGAATCGGTGCAAGAAAGCGGC  
TGTAGGGATTA AAAAATCCATCGAAGCCGGAACCTCTAAACTGAACGGTTTACCGGCTGTTAACCATGGCGTCCGAGCTT  
GCCGTCGCTCACCAGAACTCTGCAAAAACCGCTACAGATCCGCCACGGCAGCCAGATGCGCGCTGCTGTGGCTGAAATC  
TCGATGTTATACATGAATATACCTAAATAAGTCAAGTTGCAAGGAAGGAACAATAATGAATTTCCAGAAGCTTACAT  
AAGTAAGTGA

>Cluster\_52590

ATGCCGGGCAAGCAATGCTCTGTTGTATTTTGTATATCGATTATCAGTGAGGGAGATATGAAGATATTCATTAGTTTATT  
TTTTGTTTATAATATCAACAAGTTCTTTTTGCTGATGATATACCCATGCGGAGTAGTTGCTATTTGAAGGGTTAATACC  
AAAAACCTGCATTATTTCTGATGAGTCAAAAAATTTTACAGTTAATATGCCAGACGTACCCAGTAGTTCCGTAAGGAGT  
GCAGGAGACGTTACTGAAAAGGTTTATTTTCCATAACGTTAACCCGCTGTGGTAGTGTGTTGGCAACGCTTATATAAA  
GTTTACCGGTAATACAGTTTTCAGAAGATGCCAGTTTATATAAGCTGGAAGAAGGCTCGGTAGAGGGGCTTGACTCACGA  
TTTTTTGATAAGAAATAAAGTAGTATTAGTAATGATGTTAAAAGCATCGGTTTTTCACTTACACCATCAGTTGATAATA  
TTACATTTTTTTGCGGCTTACAAAGCATAAAAAATAATGTCCAACAGGGGATGCCAATGCGTCAGTATCGTTTATTGT  
CACCTATGATTAA

>Cluster\_45808

GTGGAATACCGTAGCCTGACGCTTGATGATTTTTTATCTCGCTTTCAACTTTTTCGCGCCGCAAAATTAACCGGAAACCT  
AAATCATCGTCAGGCTGCCGTGTTAATCCCATCGTCCGTCGACCGCAACCGGGTGTGCTGACTCAGCGTTCAATTC  
ATCTGCGTAAACACGCTGGACAAGTGGCATTCCCTGGAGGCTGAGTCGATGACACGGACGATCAGTTATCGCGCCGCGG  
CTGCGCGAAGCTGAAGAAGAGGTCGCTATACCGCTTCCGCGCTGAAAGTTATCGCGCTGCTGCCCGCTCGATAGCGT  
AACTGGCTATCAGTAACCCAGTGGTCCGCAATATCCCGCCGATCTGCCGATCGCCGCTGCGCCAGTGAAGATGAAGTCTCG  
CGTGTGTTGAAATGCCGCTGCCAGGCATTACATCTGGTCTGTTATCACCTTTAGATATCTACCGCGTGGCGATTCA  
CATCGGGTATGGCTGTCTGGTACGAACAGTATTTTGTATGGGGAATGACCGCAGGCATAATTCGTGACTGCGGCTGCA  
AATGGTGTGAAACCCCTGA

>Cluster\_48757

ATGCAATACGATGAATTCAGGCTGAAGCAACAGCCCATGGTATACGAACTGGCAGTATGACGATTGATTATCACGACCG

CATACGTCGCTGGATGCCGGAGAATTCGATACCTCTAATGTGCGAGGTTTACGTATCCTTCAGTGTCTGGCGCAAGCCG  
ACGAAGCAGGATTAAGGTAACCTCCCGTTGAGATGAGGTTGCTCAGTGGCGATGGTTGTATGTGACGACATTCATC  
AACGAAGAAGAAGACAAGAACGGCACAAATGATATCCTGAATGAACACGGAACAACGACACGCCGTGGTATATAACGG  
GATGTATGGGTTTATGACGATATATCCCGCCCATTCGATTTGCCTTACAACAGTATATGAAATGGAATTTAATTTCAA  
AATACGGCAAGCTGAGGAATGGGAAGAGCGCTGTTCTTTATCAGAAAATGCTCAGTACTTCCCTGATAAAGGTTTC  
ATTTCTTTCAGATATGGGTCGAGAAGGGCTTGAATCTTCTGGATGAAATTTAACGAAATGAATACGATGGCATGCA  
ATCCGAAACAGATATTAAGTAA

>Cluster\_10997

ATGAGTGTCTCTCTTTCCAAAGCGGGAACGTCFCCCTGAGTAAAGCAGCTCCGTCATGAAAAATGTCTGGTGGGCC  
TGGCTGGGATGCGCGTTCAACAGACGGTCAGGACTTTGACCTGGATGCTTACGATTCCTGCTGGCCTCAAACGGCAAAG  
TGCGCGGCGATTCAGATTCATCTTCTATAACAACCTGACGTCATCCGACGGTTCGTAACGCACACCGGCGATAACCGC  
ACCGGTGAGGGCGATGGTGTATGAAATCGCTGAAAATTAACGTTGACGCGCTCCGTCGTAAGTTGACAAGATCATCTT  
CGTTGTGACCATCCAGTGTCTAGGCTCGTCGCGCAGAGCTTTGGTCAGGTATCCGGTGCCTTTATTCGTCTGGTTAATG  
ACGATAACCAGACTGAAGTCGCTACGATCTGACCGAAGATGCGTCCACTGAGACTGCCATGCTGTTCCGGCAGCTG  
TATCGCCCAATGGTGTGAGTGGAAATTCGCGCAGTAGGCCAGGTTATGCTGGTGGTCTGGCATCTGTATGTCTCAGTA  
CGGCATTAACGCGCTCTGA

>Cluster\_48975

ATGATTAATCCTTCTGAAGTTGGCAAATCAGGTGAAATGGTTCGCTTCTGACTCTGGAAAGTATCTGGATACAAGGCAA  
GTTGCGCATGTGGGGCCGCTGGTCTTATATCGGCGGTGGTAGTGGTGGAAACATGTTTAAACAGCTTTCGGCATCCGGGA  
AAATCACAAGACAGTATCAATGAAGCGCTACGCCGATGAAGATAGCGGGTATCAACAAGCTGAACCTGAAGCGTAC  
CTGCGTGAATTCACAACGCAAAAATAAAAGCGGCTTGGCGTTCTGTTTTCAGATGAAAGAGGGTTGTTAGTGGACGGTGT  
CATTGCTTACGACTGTATGATGATGACTACCGATCGCTCTATAGCGTATTGTTGACCGGTATCGTCTTCGTAAGAGCA  
AGTTGCGATGGCAATGAACTGACGGCTAAACATCTGACTGGCCGCTGATCACCTGCTGACGCATGACACTTGG  
CTAAGTCTTGCAGATCGATCCTGTACGCTCCAGTTTGTGACGATTCGGCACAAATAGCGACAGATTAAGTTGCGAG  
TGAGCAAGAAAGTCTTAA

>Cluster\_28681

ATGACACACGAGTACAACCCCTTCTGGCAACAACGATCCGTCGAGACGGTGTGCGCGCACTGGATGTTTATCCCGCCT  
GACGGCATTTGCGGGTTGACTGCGTCTCCCGATGTACCGGACGCAACGGACGAGCTGTGATATCCCGCTTCATCAATG  
CCCTGAAAGCCGAAATCAACGCTTACCAGAAGCGTAAGCGCGTGAAGGTAACGCGTACATCCACGACCCCTGCATTAC  
GCCTGGGCGCGGAAATTCGGGAGCTTAAAGGCAAAAACACTATCACCTCTGCTGCTGGTCAACCGGATACCTGGTG  
TCGTGCGCGGATACCGCGCTCCGAGATCACTGGCCGGATGATTAACAGGCTGGTGCAGTGCCTGGGGGTGGATG  
CCGGCCCTTATGCCACGTTGGCGCATTTTCTGACACGTCGCGCGTGTGGCTGGAACGCGATGATGACACTGGCTTTCAG  
CAGGTGCTGGAACGTCGACTATCTGGCGAAGGAACATACCAAAGCTCACGCCACTGGTGGAGCGCAACTTTGGCTGCAG  
TCGTAGCTGA

>Cluster\_64816

GTGAATCGCACATCGCTTATTAATTAATCCATGTGCGCCGTCGGGAGCTACAACCTCGACGACACACTACCGTGCCTT  
TCTGATGCAGAACCGGGCAAAATCAGTTGCCGTGAGCTGACCGTCCGCAACTGGAGCTGGTCTCGATGCCATGAAAG  
AACCGGGTTTTAAGAAGCAGAATAAACACCCACGCCGTCGCTTAAATGGGATGTAACGCCCCACGAAAGGTTATAAAA  
ATCTGCGACGAAATGCGAGAACAGCGGTTTTATGCGGATGCGAGTATACAGCACTGGATAAAATACGTCGAACGACTGAC  
AGCCAGACGTAATGGCGGACAGGTTGTTTCCACGCTGGCGTGGTGTACCGGAGAAATCGTTACAATAATTTGCTTGAACCC  
TGAAACAGTGGCAGATCCGCTGTATCCGTAAGCCTTTTCCATTATGGGCTCCGCTGCGGTCAGCCGCTCCGGGCGT  
GAACTGCGTGGCTATGATGCCATGACAGCAGCTTATGCCCCGTGAAGAAAAACCGGAGACTGGCACAATGA

>Cluster\_61216

ATGTCTCAGCCAGCGAAAGTTTTGCTGCTGTATGCCATCCGGAATCTCAGGACTCGGTGGCAAACCGGGTACTGCTTAA  
ACCGGCCACGCGCTCAGCAATGTTACCGTGCAGACCTTTACGCGCACTATCCCGATTTTTTTATTGATATCCCCCGTG  
AGCAGGCAATTAAGCGGACGACGAGGTTGTTCTTTTACGATCCTCTTTTATACCTATAGCTGCCCGGCGCTACTGAAA  
GAGTGGCTGGACCGGGTATAAGTCTGTTGTTTTGCCAGCGGGCCGGGAGGAAACCACTGGCGGGAAAGTACTGGCGTAG  
CGTGATTACCACCGGCGAGCCGGAAGTGTACCGTTATGACGCGCTGAATCGCTACCCGATGAGCGATGTGCTGCGCC  
CCTTTGAACTGGCGGCGGCATGTGCCGATGCTTGGTTAAGTCCCATCATTATTTACTGGGCGAGCGGCAAGCGCA  
CAGGAGCTGGCGAGCCACGCCAGAGCCTACGGTACTGGCTGGCAAATCCGCTGTCTCCAGGAGGCGCGTGA

>Cluster\_40007

ATGAACGTCATAAAGAAAAAAGTGGCCGATATTTTTGGCGTTGATGTGAGGACATCACCGCTGGCAGAGTCAGGGGTT  
ACCACTAGTTTCTGGTGGAGGAAAGGGACTGAATCAGTTTTTATGATACAACTGCTGCCATTCAGTGGTATGCGCAGAGGG  
AATCTGATATGAAAACGAAAACTCCGTAAGAGATCGAGGATTTGAGGGTGCAGCGAATCAGACTTTCAGCCCGGC  
ACCATTTGATACGAACTTACCGACTGACGAAAGCAGGCGGATGACAGGAGCTGAAAAATGCTGAGGAGGCGCT  
TGCTCTGAGACGGAGTTATTTACCTACATCTTTCAGCGAGTGGCACAGAATATATCAGGGATCCTTGTCCGTCTCCCTC  
AGACACTGACGCTAAATACCTGATATATCACCGCACATCTTGATGCTGTGAAAACTGAAATCGCGAAAGCATCCGAT  
GTGGCTCTGAAGCGGCTGAGAAATGTGCGCAGGTGATGATGATTTACAGACGAACTGAGGGCGGCTAA

>Cluster\_64857

ATGAAAAAGAAAAACAACACTTAGCGAGGAGGACAGGCTCTGTTTCGCCAGTTGATGGCGGGGACTCGCAAGATTAAGCA  
GGACACGATTTGTCACCGACCGCAGCGTAAAAAATCAGCGAAGTCCCGGTGAAACGCTTGATCCAGGAGCAGGCTGATG  
CCAGCCATTAATTTCTCCGATGAGTTTACCGCTTATTAATAACCGAAGTCCCGGTGAAATATGTTCCCGGATGTCAGC  
CATTTTGGAGGCAAGAACTGCGCCGCGGCTTATTTACCGGAAATGTTTTTGGATTACACGGTCTGACGCGAGCTGCA  
GGCAAGCAGGAACTGGGCGGCTGATTGCCGCTGTGCGCGCAACATGTTGTTTGTGCTGCGTGTGATGCGATGGGCAG  
GGAAGCATATTTGAAGCAACAACACCGCTGTGGTGGCACAAACATCCGATGATGATGATTTACAGGACCGGCAAGG  
GAGTACGGCGGTTGATGCGGCTTTTGGTGGTTGATTGAAGTGGAAAGTGGTTGCCCGCGAGTTGCCCTGA

>Cluster\_94

ATGCCTGAGTTTTCCCTGCATTCTTCAATTCGCTGAATTTCTGTTATACGCCCTGATGTTGAAGGTGGCTATGTTAATGA  
TCTTGCAGCCGTTGGCGGCAACGAAATACGGTATTTCTGACCGTCGCGACGGCGTTATGATGGCAAAACCGATGTTA  
ACGGTACCGGAAACATACCCGATTAAGGATTTAACCAGGAGGCGGCGCAGATCTACTGGCGTACTGCTG  
CTGGCGGCAAGTGTAAAGAAATGGCCTGATGGCGTTTCTTATTCGTTTTTGTGCTGCGGTTACGACGGTGTAAACG  
CGGATTCAGATCTTCCAGCGGCGAGCAGGTTGATGATGATGGCATCGTCGGTAAAAACACACGCGCAGCCGCTTCTC  
GTGCCGATACTGCTGCTGTTGCTGCTGCTTCTGCTGCTTCCGCTATTTACGAGGATATCAAAATCCAGTGCCT  
TCGAGGGGAAATATCGAATGGCTGGTTAACCGTATCGATCTGCTCCAGCGCTCTCGGAGGTTCTGCTGAGGTA  
A

>Cluster\_53636

ATGCATGAACTTAACGAGCAAAACATCCAGTATTTGACTGCCCTTAATATTAATATACATAAAATGTTGCTATCAAAAT  
AACAAATAGAAAAGAGCGACCTTTTATATGGGTTATTTTGGTTGTGTTATATCAATATATTTATGTTTTGAAAGCGACT  
TATCAACACCATCTTTTCAATGGAGAAATTAATAATCTCTTATTAATAAAAGCAACATATTTGGAGCATCATTCACT

AATACCAGAATAAAAAATTTGCTCTGTGAAGATATTTATGCCTGGTTCGATGGACCACTCAACTTGTCAATAAGCACTTAGG  
TTACAGATACACAGGAGTATTCAAACCCCTGGCAGTATTTGATGACAAAACCGTCCCGTTTCGAAATTTTGATACCATTGG  
TACAACTTTAGTTTCGCGACAATGTAAGCTAAATAATGATGTGTATAAAGAAGCTTAATAAGTTTATGCACGATTACGAC  
AAAAATCATCAGAAATGAGAAAATACCTTAAAAGCATCAACGAGTGTATGTTCCTTATGAAAAACATAGCTCATAAAA  
TTAA

>Cluster\_11240

ATGGTGAATAACATCACGGAGATGCTGAACGGAATAAAGTGGAAATGGCGCAGCTGGGCTCATCAGTGTGCAGGAAAT  
ATCAAAAGTTCTTATGAATGCCGCGATTGTCAACGGAATTAAGACGGCGGCAACCGGTATGTCGGGTGCGGGAGGATTTT  
TCGGCAGCATTTGGTACTGGCTGGCGGGGGGGTGGCCAATGCAAAAGCGGGCGGTATACCTCGGCAAACTGAGTGCG  
TACAGCAACAGTATTTGGGATACGCCACGTACTTTGCCTTTGCAAAAAGGGCGGGCTGATGGGGGAGGCGGACCTGA  
AGCATTATGCTCTGACCCGGCGGGGATGGCTCGCTGGGTGTGCGAGCGTGGGTAGTATGACGGCAGTGCAGGCGC  
TGGTGTATTTCCCGGTCTACCATATCGCCATTCAGAATGACGGGACTAATGGCCAGATAGGGCCGGAGGCGGACGAGC  
CTTGTGCAGCTGATTTGACAGCGGGTGCAGGCGGTGATGCTGTCCATGCGACGTGACGGAGGAATGCTGAGTGGCTGA

>Cluster\_64457

ATGAACGGAAATATCAAAAATCATCTTAGCACTGACCGCTGGATTTACGCTGTCCGGATGTGTAAGCCATACCCAAAAA  
TTCACAACCGATCCGGTGCATTCGAGCGGCAAACTTCCGCGAGTACACCGATTTCACAGCTTTGCCAGGCGAGAAGATA  
ATATGACGCAATTTGACTCAACTTAAATCCATCTCATCTGAATTTAATGAAAATTAATCGCCCGCCAGCTGATTTAA  
AAGGTGATCGCTCTCGTAATTTAAGCTGCTACCGCTGAAAATGGAGAGGGCAGAACAGGCCACACCAGCACGCCCGTT  
AAGCCACGACAAAAACAAGCGAGGGCATCCCGTGTTCGCGAGCTTACGCCAGCGTACCCGATTTGCGGATCCGACAG  
TCACATTTTCAGATGTCGGGAAAGGATTCAGTCTACTTCGGCAAAATGTAAGGAAGATTTGGCGAGTTTGAACGTGAG  
TCTCAGAACTTAGAGTTAGCGGACAGGCGGAATATGTTGAAAATTAGCAGTGCATTTCCGGCAGGCTGACTTTAAAAATA  
A

>Cluster\_32006

GTGAAGAAAATCAATTTGCTTGTGCTTACGCTGTAATGACACTCCCGCTTATGCGAAGTAAACGGCCCATGAAGAAGC  
CCGTATCAACGCCATGCTGGAGGATTAGCACAGAAAAAGGATTTGATATTTGTGCGTAAACGGTGTGAACATACCTGCG  
ATGAAGCGTTTCTCATCTGCGACTGAAGCTGGCAATACCCGTAATGCGATTGATACCGCCGAGCAGTTTATGACAAAG  
GTGGCCTCGTCTCATCGATTACCGGAAAGCCGTATATCGTGAAGATGCCCGTAAGAGCGATGAGAACCGCACAGCCTTT  
TTTACATGCGTTAATTTGCGCAGACGGATAAAACGGTGCCTGCGCAATAA

>Cluster\_3358

ATGTTTCAGAAATCGAACCAAAATTTAATTAAGCTATCGCTCTTGTGTAAGCAATCTAAAAAGGATAGCATAGGCAAGAA  
CAGAGATAAGAATAACAATATAAAGAGTTTAGATTATTTGGTAAATGCAGATAAACAGATGCATATTTCCCTGTTAAAAA  
AACCTGGAATAATAAAGATGAACGAGATTTGTTAGATAACCCCTGTGCTGAACATTAATAAGAACCGAGATTTTATAT  
AACCATTTTTTACGTTGTGGAGTAACGTGGCAATGCCTGGGACTTATAATGCGGGTTTTGCAATGGATAACCAAAAAA  
GAGACAGCAATATGCCCCAAAATATATATTTGTATATACAGGCTTAATGAACTAG

>Cluster\_8825

ATGTTTCTAAACTATTTTCGCGTTGGGAGTGCTGATCTTCTGCTTTCTGGTGTATTTTTATGGAATCATCGGATACATGA  
CATCCCTTATCTGATTGCCAAAAAGCGCAACCATCCCCATGCCGACGCTATTCATACGGCGGGCTGGGTGAGCCTGTTTA  
CTCTGCATGTTATCTGGCGTTTTCTGTGGATCTGGCGACGCTCATATCAACCGGAGCGTGGCTGGGGTATGCAGTCAAT  
GTTGCGTGCAGGAGAAAGCGACTGACCCGAAATCGCCGACTTTCTGACCGAATTTCCCGGCTGGAGCATCAACTCGC  
CGCCGAGAAAAAGACTGACTATTTCCACGTTCCCGGAGACTAA

>Cluster\_62369

ATGGATTACGAATTTCTGCGCGATATTACCGGAGTGGTAAAGGTGCGTATGTCATGGGGCATGAAGTGGTCCGGGCACTG  
GTTTAAATGAAGAGGTGAAAAGAAAACCTGGCCTTGTGATGAAGTGAACAAGCAGCGCACGCACTGAAAGGTAGCGAAC  
GGTCTGGCAACGGGCGAGGGCATGAATACACCTGTGGATGGACGGTGAAGAGGTGATGGTTCGCGCCAACTCACTGGAA  
TTCGCTGGCGATGAAATGGAAGAGGGGATGAACACTACGACGAGAAAGCCTGTCGCTATGCGGCGTTGAGGATTTTCT  
GCAGGTGCTGGCGGCTTACCGCAATTTCTGTCAGCAGAAAGTAA

>Cluster\_64432

ATGAGCTACTACGACGACCTCCGGGCGGGCAGGAGAGCAGATTGCTGAGTGGGGACGGCCAGTCAAATACCGGGTAA  
AGCTGACCCCATTTATCGCTATTTCAACGAGCCTTACGCGCGCTTACGCTTCCCTCACGCTGGTTTTATACCGGCACAG  
TAACGAGCCTGACGGCGCTCTCTGACGACGTTGCTGGCGTGTGCGCGTGCAGTCCAGGTCCCAAAGCAGCGCAGT  
ATCGCTGCTGACCGGCTCTGTTACCTGGTCTGGCTGGACCGATTACGTTGGTTAAAGAGCCTCAACCGGATGGCATCGGTCT  
CACGAATATTTTTTAGAGCCTCACACGTCACGCGAAAACAGCGAGTATTCAAAATACATA

>Cluster\_48681

ATGTTTGGCATTTGACGCACAGCGTATAGCCGTTTTTGCAAAAAGCCCTCTTGATAATCCCTTGTCTCGTAGTGAGCAAA  
GGAGCTGGCAAGGCTTTTTCTTACATTTCAAAAACAGGCGAGACATTTTCAATAACATGCCATAACCTATTTCTGGATG  
GTCACATCCAGATGGTCAATAACAGTCAATGAGAAAGGCTGGGCTGCAATCGTCCCTGCACAAATACATACAAGTTGGCG  
AAAGAGGTTCAAGAGTTTCGAAAAGCCAGTGTGCAATCGGAGTCTACCAAAGCCGCAATAAACACTCTTATTGCGATGGG  
GTTACATGGACCGGTGGAGCCTACTGGCAAGCACCTACCCCATTTTATCCGGCAATTAG

>Cluster\_45215

ATGGAATTTAAAGATTTACCAGTACCATTCCAGGAAATGGCATCGAATGTGGTTGCGTCTCAACTGGGCACTCTTGACCT  
GAGTACCGTAGAAAAAGAAACATCGATACTATATCCGGTAACGTCGCTGCTGCTTTTATCCGGTCTGTACGAAGAGAAGC  
AGCTCTCTGATAACCGAGGATTTACATGAAAAATCTTCTGGAATTAATGGACATCATTAATAAAGGATTTGGTCTGTTA  
ATGAAAAAGAAAGGGATTGCAATAGCTCCCTTGAATAATTTTACAGCGAGCAGTATTAATCTCTGTGATTTAAAGCA  
TCACACATCCGATGGGAAAGTTGAATCAACAACAATAATCAATTAATCATTAA

>Cluster\_35511

ATGAAAACATATCGTTTATAACGTCATGACGACTCTGGATGGCAACGACACCATTTGTTTCCGTGGGCTCATGCACCAC  
TAACTGCTTTCGCGCGATGGCCAAAGCCTTGCATGACAGTTTCGGGATAGAAGTCGGCAGCATGACGACCATTCATGCCT  
ATACTGGCACCCAGTCACTGGTGGATGGCCCGCTGGTAAAGATTTACGTTCTACGCGCAGCGGCGAAAAATATCATT  
CCCCACTACGGGGGCGGCAAAAGCATTGGTCTGGTGTATCCCGAACTGAGCGGCAAACTGAAAGGTATGCGCAACG  
CGTCCCGGTGAAAACAGGTTCCGTCATCAACTGGTATCGATTCTCGGAAAAAAGTGA

>Cluster\_1467

ATGCGTATAGAGTTGTTTTGCTTACCCGCCAACGGTGAACACCTACTGGCGACGTCGTGACAAACATATTTTGTATC  
AAAAGCCGGTGGAGCTTATCGCCGGATGTGGCGCTAATTTGTTCCGAGCAGCGGCTGAAATTAACCTGTCGGGACGGC  
TGGCGATAAAGATTTATTGACAGCCACCGGATAAGCGTCTGTTGACCTGACCAATATCCTGAAAAGCACCACCTGATGCG  
CTGACGATGCGGACTTCTCATAGACGACGAGCAGTTTGTGAAATTAATATTTGTCGCGGTGACGCTGTTCTGGGG  
CGGCTGGGCGTGAAGATTTACAAAATTTAGAGTGGAGTGA

>Cluster\_40638

ATGATGAAAAAAGTATTTCTGGCGTTCTGTTACTCACAGTTCTGACGCGGCGTGGCTTACCCGAGGTGATTACCGT  
CAGCCGTTTTGAAGTGGTAAAGACAAATGGGCGTTTTAATCGGAAGAGGTGATGCTGACTTCCGACAGGTAAATGCTT

TGTATGTCATTAACCCAAGTACCTCGTGCAGTATCCTTTAAACGATATCGCACAAAAGGAAGTTGCCAGTGGGAAGACT  
AAAGCCCAACCCATTTTCGGTGATTCAGATTGATGATCCTAACAATCCCGCGAATAAATGAGTCTGGCACCGTTTATAGA  
GCGAGCTGAAAACTCTGTAA  
>Cluster\_18414  
ATGACGGGATAAACCATATTTTATGGCGATAACATCATTCGTTATGTGGTTAATACAAAAAGGGCTGAGACTATATTT  
CAAGCAATACCGGATAATTACAGGCAAAATTTGAGTTAAATTTAATGAGTAAGTTCTCAAAATTTTATATAAAACAAAC  
CATTTTCAGCGATAAATAATGCGGCACGTCACATTTTTTCACGCTATTTGTTGGAGAACAAACATTTATTTTATCAATAT  
CTTAAATTTTGAATACAGGTATGATCATCTCGAAACAATGATTAACGTCAACCTTTTCTCTCTGACAGAATGTCATT  
TTGTGAATGCAATCGTTTTCCATAA  
>Cluster\_51324  
ATGGCTACTCATTACACTGAACTCATGGCTGGCCTGAAAGCACTGGTTACTACGTTGGGGATATTTTCAGCTAATAAAGG  
GGTAATTCCTGCATTTACGCCACTGATGCAAGAAGATGCAACTGGTGCCTGGTGGTATGGGATGGAACGAGCGCAGGCA  
AAGCTGTTTATGTTTCGGCTGTACAAATCGATACAGCGACAAAAACGCAGGCTCAGGTTTATAAAACCGGCTTAAAT  
GTTGATGCTCTGAACTGGCTGAGTCTGTAACACAACATATCAGCAAAAGTTGCTGCGTTTGTGGCTCAGGTATTTCTGT  
TCAGCCGCTGGCAGCTGTGTGA  
>Cluster\_55985  
ATGGCCACTATCTCTTCAACTTCAATTCCTTCCATACAAAACAGAGTAGTAACAGGGCATCACAAAGTGGCGATGTTGC  
TTCACAAATCGCGGGATAAGTACAGCAATCATCAAACCTCAACAAATTAAGAGATTGTAGACTAGCGGCAGTG  
CTGAAGACAAAGCAAAACAGGCCGAATGATTCACAGCAAAATCACCTACTGAAACACAACGGCGCAGTTGCAGAGA  
CAGCAGGCAGAAAAGGCGCAGGAAAGAGCAGGCTTTGCTCTGAATGTATCCCTTCAAATCCTGTTGAAAAACGAC  
TCATATCGATATCTATATCTGA  
>Cluster\_22620  
ATGGTTACACTTTTACGGCATCAAAAATTTGACACAATTA AAAAGGCTCGCCGTTGGCTGGAAGCCAAATAACATCGACTA  
TCGTTTTTCATGATTTACCGGCTCGATGGATTGGACAGCGAATTTAAGACGTTTATCAACGAATTAGGCTGGGACGCT  
TACTCAACACCCGTTGTTACAACTGGCGTAAACTGGACGAAACCCCGCAATAAAATCACCTATGCGGCCTCTGCGGCG  
ACATTAATGACTGAAATGCTGCAATTAACAACGTCATTGCTCTGCGGCCCTGGTAAGCCTATGCTGCTGGTTTCAG  
TGAATCCAGTTATCAGCAATTTTCCATGAGGTGTAG  
>Cluster\_10620  
ATGACACATGAACCCATTAATACATATCGTCGCGTATAGCTGTTGCGGCACTCCATCGAATAAAACGTA AAACAGGTGG  
TAATCTGCTTATTTGTTGACTTCCGGATGGGAACATTAACGACATAGAAATAACTGAACAGTTTATAAAACAGTTGCTGT  
TACGCTTCGAAGGTATTACCCGTTGGTGAATTTGGCCGGGTGGAGGGTGAACCCGAAATCCACTGCATACCAGAATGCT  
ATCCGGATTAATCAACATCTGAATACCTGACTGAAACCGGAAAGTTAATATAGACAACCTTTTCAAGAGTTATTGA  
TTACGCGAAAGAAAATATATCAGCGGAGGAATTAACCTGA  
>Cluster\_49655  
ATGCAAAACAGTGGAGATACTCAACTGGCAAGAAAATATAATCGCGAAGGTGAAGCTGTTTATAAAACCGGTCAACTTGA  
GCAAGCCATTCACCTTCCAAACAGGCAACAGAATTAGACGGCAATTACGGACAGGCATTTAGTAACCTGGGGCTGGCGT  
ATCAGAAAATGGCAACATCGCGGAAGCAATTTGGGCAATCGTAAAGCGATCTCGTTGGCCAGTGGAGCAAAATGCGGCG  
ACAACGCGCGCTAATCCTATTATAACATTTGCCAAAATTTATGAAACTGCTGGACAGGACGCTGATGCATTGCAGCATTA  
TCAACTCGCTTTCACGATGCCATTTTATAA  
>Cluster\_11178  
ATGAGCGAGATTAATATCAGGAGCTGCGTGTGTGAGCTGGGAGCAGCAAAAAACGCATAGAAAGAGCTGGAGGCTAATCG  
TGTGGTGTCTGAGTTGAAAAATGAGAGGTTGAAACACGCAATGGCCGTAGCCCTTGGAGCATATATCCGTCACAGATGCAG  
GACAGGCGAGTGTGCTGCAATGATATCTATGATGCCATGTACCACAGTGA AAAAACGACCCTACGCTTTTTCGGCA  
GAATTGCGGGCGCAGGGTGTGGAGATGTTGCGGCAACATCCAGCAATCAAACCTTGTCTTTGACGCACATATGTGACGA  
GTTAGTCCGAGAGCTTCGCAAGGAGGCAACAAGTGA  
>Cluster\_19930  
ATGAAAATTAAGGGCATCAGTAAGGCTGTATTGTTGCTTGCACGCTA ACTTCCACGAGCTTTGCTGCGGGTAAGAATGT  
CAATGTTGAGTTTCAAAAAGGCCATAGCAGCGCTCAGTACTCCGGCGAAATAAAGGGATACGATTACGATACATATACCT  
TCTATGCCAAAAAGGTCAGAAAGTGCATGTGAGTATCTCTAATGAAGCGCTGATACCTACCTTCCGGCCAGGAATC  
GATGATTCGTTGATTTATCCAGATATTTCCAGAACTCGATAGTACGGACAATACTCACTCCCTGCTTCTGGCAATA  
TGAGCTGCGAGTGTGCAAAACCGGAAACGACGCCGTA AAAAACAAAAATTAACGTCGATATTTCAAATTAAGT  
AA  
>Cluster\_32200  
ATGTCCGTAATGTTACAAAGTTTAAATAACATTCGCACCTCCGTCGATGGCTCGGAATTCCTCATTTGACGTTCTTGA  
AGAAATGCTCGAAAAATTCAGGGTTGCTACTAAAAGAAAGAGCTGAAGAAGAAGAAACAACAGCAGCGTGA ACTGGCAGAGC  
GCCAGGAAAAATTAGCACCTGGCTGGAGCTGATGAAAGCTGACGGAATTAACCCGGAAGAGTTATTGGGTAATAGCTCT  
GCTGCGGCCACCACGCGCTGGTAAAAAACGCCAGCCGCTCCGGCGAAATATAAATTCATCGATGTTAACGGTGA AAACATA  
AACCTGGACCGGTACGGCCGTACCCGAAGCAATCGCTCAGGCGTGGCAGAAAGTAAATCTCTGACGATTTCTCTGA  
TCTAA  
>Cluster\_11723  
ATGGAAATGCTTGGGAAGATATTAGTGATAAATTTTCCATGATAAATATATCTTGGGATTTATAAATGCTGGCATGGA  
CTATCAAGATAAATATAGCCCTCGAGCAAGTCTAACATGGGATTTCTGATAAATATATTCACACCTAATATCTTTGAACATA  
ATGGAAAGATGTTTTATGAAGAAAAATGAAACATGGATGTTATTTAAATGGAGATGCAACACCAAACATTAGAACATGAGC  
AATAAGAAAAATGAAATGCTGGAGAAGAGTGAAGTAGAATGGGCTAGTAGGGTTTGGCAGATACACAGACAAGGAAAG  
GGAAAATCTGAAGGCATTAATATGTAGCAAAACAGCTAAATCAGTTAATACAGGCAAAAGACCAGGCTTAGGATATTGA  
>Cluster\_35313  
ATGGAATTTAAAGATTTACCAGTACCATTCCAGGAAATGGCATCGAATGTGGTTGCTCTCAACTGGCGACTCTTGACCT  
GAGTACCGTAGAAAAAGAAACCTCGATACTATATCCGGTAACGTCGCTCGTCTTTATAGGTTCTGTATGAAGAGAAGC  
GCCTATTCCGGCGGACAGAAATTCGCTGAAAACAAGAATCAAGCAAAATGATGAGAAGCTGAAACACATTTATCGCTTACTT  
TTGGAAGACGCAAAACGCTACAGCAACTGGAACCAATGCAAGGCACAGAGCCCGCAATTTGGATTGCCATGAAATCACT  
CAAATGTGAAAGCAGTGAATTTCAAACAACAATTA AAACCTCAACTTTTCCGGAGAGCTACTGAAGAAATGGCCAT  
AA  
>Cluster\_46067  
ATGATAGCTATGCATGACTGGTGGTTAGCCGTGACTGCAAAACTTTTTGGTCAATCCATTTTGATAAATACTCAAACGAT  
TCTTTATCGACAACATCAGGCAATGTATTAGGTGCAAAATCATCAGGTATGATGCGTTTATTCGATTAGGATTA AATG  
GGCAAGGGATTTTCGCTGTAGTATCTTTTAGAAAAAAGTTTGTGCGCAAAATAGCTCTTTTACATGCTATGATAAA  
GATTTAAATTTGACGCAAAAATACTATCAGGCTTGTAAATGAGGCGCTTAAAGAGAACTCTTCAATTTCTGACCTTTT  
AAAATGTTTCTATATGCTAGCTATATGCAAGGTTTTAAACGTAATCTTGCTTAAATATATTCAGTTCTTTACACAAAA  
AAAGAAGATAG

>Cluster\_19631

ATGAGTACCTGTAATTTCCATGCGGTGGTGCCTGTCGCTGACGTGCGCCCGGATTTCCGCTTGCCGCTGGGTAGATGCGA  
CCACATTTACCCGAGCGTGTGCAGCACGTTTTCAATCCAGACGAAGCGGTTTATATCGTTGCCCGGTCTGCCACATCCG  
GCACCCGCACATCTGGCGTTAGCCGTTGGGCTTTCCCTGTGCTGCCCGGAAGATGGCCGAGCGGATGCGCGAAGCTGAA  
CGGCACGAGAAAACAGGTCAGACCCGCAAGGTGATCACTGAGCGGATACGCGCTGACATTTATCGATCGCTGCAAA  
AGGTCAGAGAATCGTTACATTTGCAAGCAAGGTTGGTGTGCTGAAACCTCTGTGCGGAAGGTTTGAACATGGCGCGTA  
TGAGTGGCCTACTG

>Cluster\_11788

ATGATATTTAGCAGTACGAAGAATCTGGAACCAACATAAAGCGAACCTACATACCTTCGATAATCGTGACGATGTTGC  
AGGATTCATTGAGGCGTCTGTAGACGATGGATTATTGGAAGACATAGCCGCTGCGTTCGAAGATATCAGTAAAAATGAAG  
GGCCATCGCAAGCGACTGAAATGGTGCATAGGCACGCGTGTGCATCCATTGAAATTTGGGCTCCTGCATGAGAGACGTA  
AATTTGTGGGGATGCCCTTATCGAATGAAGTGTGAGGCATTGAAGCCCTGTGAGCATTTCACGTTAACAGGTCGTATTGA  
TGAATACTCCACAATTTGAAGCCAAAGGTCGTGCATTAACGAGGCTACGTTTGGCTTTTGAACAGTATACTGTAGTGGTCA  
AGTAA

>Cluster\_14965

ATGAAAGATAACATCGTGGATTTTCAACGTATCAGGAGAGACCTGGGCGCTCATTCAACAGATGTTGCAAAATGATGCCGT  
TTATTTCTGACAAAAGAAAACATCCAGGTTCTTTTATCTGCTGACACCTGTGAGATACCTTCTGGCTGCTTCCCTTTATC  
TGGTTGTTGTTATTCATTTGGGATTTCTGCGGATTTCTGTTTCTGTTGAGTTTTATAGCGGTATCGCAGTATGGGG  
TTAACTATCGCCTGGTACATGGGTGCAGATGTCAGTGGTTACATTTGTTCTGCTGCATGGATCGCCTTAACTGTTTGTGG  
TTGCGCAGAGCAGATTTTGAATGGTGGATCGAAAGCCGTTTTGCGTTCGGTCTTTTGGTATCGGGAGAAGCCGGAAG  
AATGA

>Cluster\_46439

ATGCTGAAATTCATGCTGGATACCAATATCTGTATTTTCACTATTAAGAATAAACAGTACATGTCAGAGAGCGGTTTAA  
CCTGAATTTGCGCGGATGTGATAAGTTCTGTAACTGATGAGGCTTATCTATGGGGCAGAAAAAGTCAGATGCCAG  
AACGCAATTTGGCGGTTATTGAAGGTTTCGTATCTGTTGGTGTGCTTGTATTGATGATAGTGTGCTGCGACGCATAACC  
GGGCAAAATCAGGGCCGAGCTTGGCCGGCAGGGAAGCCCTGTTGGACCTTTTACCAGATGATAGCGGGACATGCTCGCAG  
TCGCGGTTTGTATTGTTGGTTACCAACAATACCCGAGAGTTTGGAGGAGTGGCGGGAATCAGACTAGAAGACTGGAGCTAA

>Cluster\_16081

ATGGGATTCATGACCAGCCAAAAACCTGAAAAATCCATTAACGATAAATAAACAGAAGGTTAAAGTCACTTTCTCG  
GCATCTCGAGGATTTTATTTATCATGACGAAATGAAACCTGGACGAATCTATTTCTGGAAGGATTTATCGCAGAAGCGAGA  
TTGAGTCAATTTGAGAAAAGTAAAAGAATTGATGGCTATCTTCCGGCTTCAGATGAACCTCCTTCAATTAATTTTGAT  
ATTTCTGAAATCATTTGAGAAATGCAACGAAAGAACTCAGCGCATTTTATCAGAAGGACAAAAATTTCTTCGACAACTCTC  
TCCTGAAGAATTGGCAGAAATGATATCAACATTTCAACAAAATAAAAAGATAGTGAATCTGAGTGA

>Cluster\_26875

ATGATTGACGCTCATGACTTCAACAAGATGGGTGCGCACACAGGACACCCGCTGCGCTCCCGTTCTTCAGGGGTTATTTGA  
TCTCTACATCCCGTGGTCTGTGACAACAGAGCACGACCACAAAACCGGAGAATGCAGACACCTTTATTTACAGTAGACG  
ACTGCTACCGGTTGGATTTACACCACACGGACTGGCGTTACTGCTGACACCCGACGCGGAATCACTGCTGGCGTAT  
TAGACTCCCGGCTCCGTTATTTGACGCAATGCTGGCCATCGCACTGCTGGCGGGTGTGCCGCTGAGTGAATACAC  
CGCTGAATTTAACCGCTTTCCGCTCTTCTCGCAGGAGTGGCAGCGGCTGACGGGATACCAGCCATGA

>Cluster\_44941

ATGCGTGATATTCAGATGGTCTTTGAGCGTTGGGGAGCGTGGGCGGCTAATAATCATGAAGATGTGACCTGGTCTCCAT  
TGCCGCGGTTTTAAGGGATTAATTACTTCAAAAGTAAAACTCGCCCGCAATGTTGTGACGATGACGCGATGATATTT  
CGGGTGCAATGGCCCGTCTGAAAAAGAACACAGCGATTTGACAGATTTATTAGTAGATTTATGATGATGATGATGACA  
TTTATGCTACTGGCAGGTAAGCATTTGCTGCTCTGATGGTTATATCGGGAAAAGGTTACAGAAGGCTGAGGGCATAATTGA  
AGGATGTTAATGCAATAGATATCCGGTTAGAGATGGATATCTGTTGTTAATAACTCTAATTA

>Cluster\_126

TTGGTTAAAAAAGGATTAACCTCAGATAGAAAAGCATTAGTTTTATTGATAGGCACCAACCTCTGGCAAACTATGTAAT  
TCCTCTTTATTTAAGACATTTTATAATATAGAAATTTGCTTTTTATTTTTTCTGAAGATAACCAAGTACAAAAAGGTA  
CCCAAATTTATGCTGAAAGGGTAAAAATCTTCTCATCTACCCCGACAGGATTTTTAGTTCCGCTAAAGGACATA  
GGTAATGTTACAGCATTCTTGAAGACCTTGATACGGTAGGTATATGGGAACAATTTGATGAAGTCCATCTAAACTATAA  
ACCTGGGACCAAAACCATGGTAGTTGGGGCTATAACTTTTTAAAGAATTTTTATCAGACCTAA

>Cluster\_35641

ATGTTCTGAACCTTATCCGGTCCGGTACGGCTGCGGCGCTCGGCGGGGCGACGGTATTCGGGCTGTTTACCAGAACGGA  
TTTCGGGATTTGTTTGGTGCATTCGCGGGGCGTGTGTTGTCGACGATGCGCGAGCGGTTTTCAGGCTGGCGAGTGG  
GACGACATTTTCTGCTCATTTATTGTTGGCGTGTGGTGCAGTGTGCTGCTGTTGACGCTGGGTTGCATCAAAAAAGG  
TATGACGGTACATCGGCGGATGCACTGTGTGCGGTGCTGGTGTGAGTGTGCTGGTAAAGATTTGCGCATTCATCCACA  
GCAGGATATTCAGCGCTGATATCCGGTTGTTCTCCCGCTGCGGAGTGGAGGTTGGTGGCAATGCCAGATAA

>Cluster\_56607

ATGAAATGTCCGGTTTGCCACCAGGAGAAATGGTTTCTGGCATTAAAGATATTCATACACCTTCCGTGGACGAAAAAC  
AGTATTGAAAGGATACACGGTTTATATTTGTGTCCATTGCGAAGAGAGCATCATGAATAAAGAAGAGTCAAGTCTTTCA  
TGGCGCAAGTAAAGGCATTTCCGGCTTCCGGTGAATGCCGAAACAGTGGCACCTGAATTTATAGTGAAGGTTGAAAAAAG  
CTCTCTTTACCCTAAAGAGGCAAGGAAATTTTGGGGAGGTTAAATGCGTTTTCGCGTTACGAAAAAGGCAATGCG  
CCAACCTCATCTTCCACAATCAAACCTTTTACGTGTTCTGGATAAGCATCCAGAACTATTGAATGAAATCCGTTAA

>Cluster\_39854

ATGAAACGTTATTTACGCTGGATTGTGGCGGAGAAATTTCTGTTTCGCGCAGGGAATCTTACGCGGTTGAGGTAGAAGT  
CCCGGATTTGTTAACTGACCATACTGTTTCATCTATTGGCCATGATTTTACCAGGCTTTAGTGATAAATGGGAAAGTG  
ACTATACGGGTAACCTAACGATTAATGAAAGGCCAGTGCACGATGGGGAAGCTGGATCAATAACGGTGAATCAGGAC  
GTTATTTTCCAGACTTTTATTCCGTTGAAAAGAGACTTCGAGAAAACCTGCTGCTTTGCACTGATTCAAACTGAAGA  
AGCAATAATCGTCCGAGATAAATCAGGCGTTATTAAGTACGGGCGAATTTGGCGCATGATGAATTTTAA

>Cluster\_63660

ATGACGTTTACTGAAATCAGAAATACGGTTATTTCCAGAATGACGGCACAGACGATTTATGATGGAAAAGACGATTTGTA  
TCCGAACGCGCAACGTTTCGATCTTCCGGTAAGTTAATCTGGGCGCGGTTAAGTAATATTTCCCGGCGAGGCTGGAGTTA  
ATGAAATTTGGCGGGGCGGATTTGTTATCGCACGGGATAATCATTATTCAGTTATTTGTCCTCCCGCAGGTTCTGGTTCA  
AAACTCATTTACTGAGACAGCCGATAAATTTGGGGAACCTGTTGAGTTTTCAGGATGACGATCTGCTCAGTTACCAGGCTGT  
TTCTCAATAGCGTTGGCGAAAAGAAATGGCTGGTTCCAGCTTAACTTCAAATTCATATCGCGCGCTCTAG

>Cluster\_28122

ATGTCGAAAGAACACACTACGGAACATCTGCGTGTGAGTTGAAATCCCTTTCGATACGCTGGAAGAGGTGCTTAGCTC  
ATCTGGCGGAGAAGTCAAAAAGAGAGTTGAGTAAGATTCTGAGCAAAGCGGAGCAGGCACTGAAACAGAGCCGTTATCGCC  
TGGGTGAAACCGGTGATGCCATTGCCAAAACAAACCCGTTACGCGCGGCGTCCGATGAGTATGTGCGTGAATCCG

TGGACGGGCGTGGGCATTGGCGCAGCAATCGGTGTAGTGCTCGGCGTTCTGCTGTCCGCTCGTTAA  
>Cluster\_20010  
ATGAAGAATCTTTTTGAGCTGATAAGTACCGATCCAGTCAAGTTCAACACATGGTCGATAAAGTCAAACTCATAATCAT  
AATCAGAAAGCTGATGATTTGATAACAAATGGTCTCAATCTGAAGCTGCAGAAAACCTGGGTATCAGCCAAACCCAGAGTGA  
GTAACATGCTCAACGGGAAGTTGGACAATTTCTCGGTGCACACACTATTAGAAAATAGTTCAAGATGGGATACAACTG  
GACATGGATTTACCCCCACTAAACACCGAGTCAACACTGACAAATGGTTGTAATAAAGGCGATGGTGTA  
>Cluster\_54489  
ATGAGCGATAAGCAGACTGAAAAGACTATTTAACTGGATACTCCCATCATGCGCGGTAATAACAGAAATACCGAAATTTGT  
GCTGCGTAAACCGCAGTCCGGTGCCTGCGCGGCACACGCTGCAGGCCATTATGGATATGGATGTGAACCGCATGATGA  
CCGTGATCCCCCGCATCTCCAGTCCGGCAGTACTGCACAGGAAATCGCAGAGATGGACCCGGCAGATCTCACTGCCATG  
TCGGTTGAGGTTGTCACTTTTTTTGTGAAGAAGTCCGGTCTGCGCGTTTACCAGCAGCTGA  
>Cluster\_35760  
ATGAACAATGAAGATAAAATTTACTCCCTTAATATTGATAACGTCATGGCTGAAAAGGGATGCTGGAACGTGTTCCGCGC  
TATCGTTGAATATGGTATTAAGCATAATCTCACCGCCAGAGAAGTCCGTGACATTATCAACCGCGAAATGAATCGTCTGG  
AAACAGTAGTGGCACTGCAAAATGAAACAGCCCGCAGAGAGTACATCCGCCGAGGCTGGGGTATCAGACCAGGATATT  
GTTACTGACGCTCATGTGTTGAGGCTTTTGTAGATCCGTCAGCATCTGGGTCTAACGAACTGA  
>Cluster\_9948  
ATGAAAAAGAAGATTCAATTTCCCAACCGCTCTGGCAATCGTCCGCTATTTCCGAAGGCTATGTCACCACTTACCG  
TGATGTGGCGAAACTGGCGGGATCGCCCCGCGCCGCGCCAGGTGGCGGGTGTGTTAAAGCGTCTCCCTGAAGGCAGCA  
CCTTACCCTGGCACCGGGTGGTTAATCGCCACGGCAAAATTCGCTAACCGCACCGGATTTACAGCTCAGCGACAGGCA  
TTACTGGCAGAAGTGTGATGGTATCGGGAAGCGGGCAAAATCGACTTGCAGCGTTATCGCTGGAACACTACTAA  
>Cluster\_60541  
ATGAGCAACACCACATGGGGCTGCAGCGAGATATCACGCCGCGCTGGGAGCAGCTCTGGTGCAGGAGGGCAACCAGCT  
GCATATCTGGCTGACCGGGCAGTATCACCGGTAAGTTTGTAGTGACGCGAATGTCTTAAGCTGGATGTGGTATTTCCAC  
ATTTTATCAGCCAGATAGAGTTCGATGCTGACCACTGGTGAATGAAATCCCGCATGCCCCAATCGCTCACCTGTACCAC  
AACGGTTTTACCTGCGAAGCCGATACTCTTGGTAGTTGCGGCTACGTATACATCGCTGTTTACCCCACTCAACGCTAA  
>Cluster\_52367  
ATGTACGCGGTTTTCCAAAGTGGTGGTAAACAACCCAGTAAGCGAAGTGCAGCCGTTCCGCTGAAAAGCTGGACAT  
CGCAACTGGCGAAACTGTTGAGTTCGCTGAAGTGTGATGATCGCAACCGGTGAAGAAGTCAAAATCGCGCTTCTTTTCG  
TTGATGGCGGCTAATCAAAGCTGAAGTGTGCTCACGGTCTGGCGAGAAAGTAAATCGTTAAGTTTCGTCGTCGT  
AAACACTATCGTAAGCAGCAGGGCCATCGTCAGTGGTCACTGATGTGAAAATTACTGGCATCAGCGCCTAA  
>Cluster\_44026  
ATGCCGAAAAACAGCCACTCTACCCGATGTCGATAAAACGCTGAAAAATGCGCGGGTGAACCTCAAACTAGTCCCGA  
CGCCAAAAACAACTTCCGTAAGCTGCGCAAGCCGTTGGGGTAGATTTAAGCGCTTTTTATTTTGTAGCGCTGCTATGGAAC  
GCGCCGAAAGTGTCTTGATAACCAACGTCGCCGTCGAGCTTTCGAATCAAAGCTGGGAAGTGAACCAACTCATCGCT  
GAACCTGCTCAACCGCAGCTCGCCCTCAAGCGGTTAATGAAAAGGAAAAACAGCGATGGTCGACAAGCATGA  
>Cluster\_35771  
ATGGATTTGATTTTCAAGTTTTAGCGTTATGGCCTTACCTGTTGCTGTTGTGGCCGGTGGGGCCGCTGGGCAATGCGTGC  
TAGTTTGGCAGCACTGAGCGTGTGGAGCGCTTGAACCCGATGACCGAATGGAACCCGCTACGCCAGCATCCCTG  
GCACAGAAGATGTACACGAAATGCGCCTGCGAATGTCAGAGCTTCCGCGGATATCCGGGTGCTGCCAGCGGTTGCAG  
TCATTTTCCCATCAACTGGAGCTGCTGCTTGAAAACGCAAGTAAACCGGAGTAAATTCATGA  
>Cluster\_4801  
ATGAATATTCGCTCATGTCATGATCGCGTATCGTCAAGCGTAAAGAAGTGAACCTAAATCTGCTGGCGGCATCGTTCT  
GACCGGCTCTGCAGCGGCTAAATCCACCCGCGGCGAAGTGTGCTGGCTGTGCGCAATGGCCGATCCTTGAAAATGGCGAAG  
TGAAGCCGCTGGATGTGAAAGTTGGCGACATCGTTATTTTCAACGATGCTACGGTGTGAAATCTGAGAAGATCGACAAT  
GAAGAAGTGTGATCATGTCGGAAGCGACATTTCTGGCAATGTTGAAGCGTAA  
>Cluster\_44946  
ATGAAAAAATGTTGTTTTCTGCGCTCTGGCAATGCTTATTACAGGATGTGCTCAACAGACGTTTACTGTTGGAAACAA  
ACCGACAGCAGTAACACCAAGGAAACCATCACCCATCATTTCTTCGTTTCCGGAATGGACAGGAGAAAACCTGTTGATG  
CAGCCAAAATTTGCGGCGCAGAAAAATGTTGTTAAACAGAAACCCAGCAACATTCGTAATGGATTTCTCGGTTTTT  
ATTACTTTAGGCATTTTATACTCCGCTGGAAGCGCGTGTGATTGCTCAACAATA  
>Cluster\_36001  
ATGAACGAAGTTGTAATTCAGGCGTATGAACATTGCGCTTTTGGTTGATCGGTGGTGGTTCTTCTATCGGGCTCAT  
CTTGTGGTTTTTATCAATCGTGCCAGTTCTCGGACTAACGAACAGATTGAACGTCTGAGGCGTTGCTGGATCAGCAAA  
AACGTCAAAATGCATCTGTTACGTCGTTTTGTGCGAAGCAACAGCAACTGAGAAAAGCAGATAAAAAGACCGTTGAGAGCAA  
AAATCGGTTGAAGACGAAGATATTATTCGTCGCTGCGCAACGATAA  
>Cluster\_49156  
ATGCGTGATTTAAAAGATAAAAATATATTTTTTACACAGAAGGTGAATTTCTTGAATGCTTGGAGATAGTAAATGCAAC  
TAGCAAAAGATAAAATCCCTAAAAGGAAAAAATAGAAAAATATCTCGATACCTTAGTGGATCATTTTCAATAAAATTAATG  
AACATCTAAAAGGGGAGATCTCATTTTTCTATCTAATTTCCCAAGAAGATGGTGAACCTGAAAACATCTGAAAATCGTC  
AAAGAATGGCGGCTTACAGGGGCTACCCTTGTTTAAAGACTCTAAATAA  
>Cluster\_41652  
ATGTTAAAGCAGGTGATGAAATGAAAGTCCAGATTTTAAACAATAACTGTGAAGTCTGTTGGTCATACGACATAGCCGC  
CCCTGTAGATCAGAGCGGATAGCTGGACCAATGGGAAACATCAGATTATGGCTGGAGTTGTGTTCTTTTACGCCGTG  
CTTTGGAACAGGCTGAAGTATTTCCATCAGACCTGAAATGGAATGGCCTTTTTCTATTTGTCCAAATTCGGAGAGCACA  
TTTCAGAAAATTTGTCAGAAAGTGCACTCGAAAGAGCATCAGCAACTGTTTCCCTGA  
>Cluster\_43253  
ATGGAAGGTAAAAACAAGTTCAATACTTATGTTGTTCTTTTGTATTATCCATCATCTTATTCCCTCAGTGTCTTAAGGTT  
AAGATCATGTATGATGATGAATTTCTCCTATCGTGGCTGATGAATATGGGATACCACGACAATGAATGAAAACCT  
CCTTCGCAATAACGACATCGTTAGCCGCAAGTGAATGAAATGAAAGATTTAATCAGGCTCAAATGCTTAGACTTACCGGATATT  
GATTTGACCTCAGCATTATGACAGTTGATGACTATTTCCGTCAGTTTTACAAGTAG  
>Cluster\_49157  
ATGTTTAAAGAAAAGCTCGAAGATTATACCGAGGAGAAATTTCTTAATTTTTTAGGCGGATTGAGATCAACTATGAAAGA  
TGGAAAAGCCCTTAAAGGTAAGGAGCTAGAAAATGACTGGGATTCATTAGTAGATCATTTTATGAAAATTACACAGCATC  
CGTCAGGAGCGATCAATTTTCTACCTAAAAGTCAAGGAGATGATAAGCCTGAAAACATCTGAAAATTTGCAAGAA  
TGGCGGCTTACAGGGGCTACCCTTGTTTAAAGACTTAAACAAAGTAGATAA  
>Cluster\_40255  
ATGTGCACTATTGTTGATGCGCTGCGAGTGTACACATATCATGCAGAAAATCGCCACCGCTCGGATGAACAAAGTGC  
AGGCATAACGAGGTTAGCCAGGCGATTTCTGAAATGGATAAGGTGACGCAACAGAATGCTTCTGTTGAGAAGGCGCT

CAACGGCAGCGGTGTCCCTTGAAGAACAGGCGGCACGATTAACCTGAGGCGGTGGACGTATCCGTCTGAACAAACATTCT  
GTGTCCGGCAGAACCTCGCGGAGCTTGTGAACAGTTAGTTTTGCTACGGTGTGA  
>Cluster\_14499  
ATGTCATTACCACACTGCCAAAATGCAACTCCGAATACACTTACGAAGATAACGGCATGTACATCTGCCCGGAATGTGC  
CTACGAATGGAACTGACGACAGAACCTGCACAGGAAAGCGACGAGCTGATCGTTAAAGATGCTAACGGCAATCTGTGGCTG  
ACGGCGACAGCGTTACCATCATTAAAGATCTGAAGGTGAAAGGTAGCTCTTCGATGCTGAAAAATTGGCACAAAGTGAAA  
AACATCCGCCTGGTTGAAGGCGACCATAACATCGATTGCAAAATCGACGGTTTTGGTCCGATGAAACTGAAATCTGAGTT  
TGTGAAAAAGAACTGA  
>Cluster\_13148  
ATGGTAAGCCGATACGTACCCGATATGGGGCATCTGATTTGGGTGATTTTGACCCGACAAAAGGTAGCGAGCAAGCTGG  
ACATCGTCCAGCTGTGTCTGAGTCCCTTTCATGTACAACAACAAAACAGGTATGTGTCTGTGTCTTCTGTACAACGC  
AATCAAAAGGATATCCGTTCCGAAGTGTGTTTATCCGGTCAGGAACGTGATGGCGTAGCGTTAGCTGATCAGGTAAAAAGT  
ATCCGCTGGCGGGCAAGAGGAGCAACGAAGAAAGGAACAGTTGCCCCAGAGGAATTACAACTCATTAAAGCCAAAATTA  
CGTACTGATTGGGTAG  
>Cluster\_9829  
ATGTCCTGAGCGTCATATAACAACCCAGGCGGTGTGCACAATGGCTACCATTATCCAAGAAGTATTTTGACGGCTTTACG  
TTCACGTATCTCTTCCCGCTTTTGTGATGAATTCGTGATGCGTGTGATTGACACTTTGATAAGTATTATTTAATTA  
GCGAAATACTGGGAAAGTTTCGGCCAGCCAATTCGCATGTTCTGTGACCGAATGGTGCAGACTGTGATTTATGCTCCA  
GCGAAAATACAGAACATGGTTAATCCAAAATGATTAATGCATGTTTTACGGTTAAAGAGTTTGCCTTTGATGCCCTTTAA  
GTTGCGCGGGTGA  
>Cluster\_24716  
ATGAAAAAGTTATCTTTTAAAGAAAAC TGAAATAGTGAGAAACATCATAAGAGAGTCAATTATCAGGTAATGCGGCTTT  
TGCTTTACTGGGTGATTCATTAATGACACTCCCTCCCAATTAACCTTTGCTGATTTATTTGTGACGACTGTTATTTA  
TAGCGATTATCGCTGTTGTGATATGGCTATTTCTAATCATCTATGTTTATTTTGTGAGTATTCAGAAGTCACTGGATA  
GCAGTCTGGTTTTATCCTCTGGTCTGTGGTAATCAACCTCACTATTTGGATTGGCATTATGACAAATAGCACAGTCA  
TTCATAATGAAATAA  
>Cluster\_24565  
ATGACTGACACGCATCTTATGACAACCGTTCGAAGCAGAAGTCTCCCGGCAATAACCGTCAATTAAACCGTGAGTTA  
TGCGAGCCGCTACCCGATTACAGCCGATTCCCGCCATCACCTGAAAGGTCAAGTGGCTGGAAACCGCCGTTTGCCA  
CCGGCAGCGCGGTAGATGTCAAAGTGTGGAAGCTGTATTGTCTCACCGCCCAACCCCGCCGCGGAAAGAGAGCGAA  
CTGATGCAGTCACTGCGCCAGGTGTGCAAGCTGTGCGCGGTAAACAAAAGCAGGTGCAGGAGTTTATTTGGGTGATTAG  
TAGCAAAAACGCCACGCTAA  
>Cluster\_32530  
ATGCATGAGTTGTGCTTTGCCAGAGCGCGGTTGAAATATCCAACGGCAGGCGGAGCAGCACGATGTTAAGCGCGTCAC  
CGCGGTGTGGTGGAAATGGCGCACTCTCTGCGTTGAGGAGAGCGCCGTCCTTTTGTGAAATTTGCTGTCACG  
GAACGGTAGCGCAAGGTTGCGATTACATATCGTCTATAAACCCCGCCAGGCTGTTGGGATGCGACCGGTTGGTG  
GAGATTATCAGCAGATGCGCAGTGTCCGATCTGTACGCGGAGCGGTTGCGTGTGATACCGGCGATTTCGTAATCGT  
CAAAAGTATTGAAGTTGAATAA  
>Cluster\_11929  
ATGGGGCTGGTAATCAAAGCCGCTCGGTGCGCTGGTAGTGTGTTGATTTGGTGTGTTTAGCAAAAACGAAAAATTTA  
TATCGCCGGGCTGATTTCCACTTTTCCCGACTTTGCGCTTATCGCGCATTATATGTTGCCAGCGAACGCGGCTTGAAG  
CCTTACGCGCAACCATCATTTTTAGTATGTGGTTCGATTATCCCTATTTTGTTTACCTGGTGTGCTGTGGTATTTACC  
GAAATGATGGCTTGGCCGCGCTTTTGTGTTCTGTTGCGTGTGGGGATAAGCGCATGGGTGTTGATTATATGCTG  
GATAAAGCTGCATTAA  
>Cluster\_48941  
ATGAGTTTATGTTTTGACAGAAAAACTGGAAGCTATCAGAGACATTATCCGGGAAACAATGTTAGGCAATGTTGCCAT  
TGCTTTACTGATAAAACATTTTACCAGACTACATGGTACAAAAGAACTGTCATCAATTTATCATACTCTCTGTTTTTATAT  
TAACAATAATATGCATTGAACTCTGGATGTTCCCTCTCTGTGATAAATTTACTTGTCCGCTTACGAATAAGAAAAGCAAAA  
CTTGCACTTATAATATTTTCTCTGGATGTGTCTTATCTCGCATTAACATATTCGTTATTTTATTATATTTTCTGATGC  
ATGGAGCAACAGTAG  
>Cluster\_20994  
ATGACGAGCAAAGAAACCTTTACCCATTACCAGCCGCTGGGCAACAGTGACCCGGCTCATACCGCAACCGCGCCCGGGG  
ATTGAGTGGGAAAACGCTGCAATGACCCCGCTGATGCCGATACCTCCACCCGTAAGCTGGTTCGCTGGGATGGCACC  
CTGACGGTGTGCTGTTGGCATTCTGGCGGTTGCTGCTGACAGACAGCACCACGCTGACGTTCTACAAGTCCGGCAGC  
TTCCGTTATGAGGATGTGCTCTGGCCGGATGCTGCCAGCGACGAGACGAAAAAACGGACCGGCTTTGCCGGAACGGCAAT  
CAGCATCGTTTAA  
>Cluster\_2700  
ATGGCATCTTTGTCAAGCATGGGTGAAAAATTTGCGCTGATTCGTGAAGCAGAAGGTATGACCCGCCAGGAGTTTGGCGA  
TTGTGTTGGGCTGCCCTTATGGGACGGTAACCTAATGAGGTGAGGGGAAAGCAAGTAACAGAGGGTGGCTTACTTAAAG  
TTACGAAACACCCTAAATTTAAGAAAGTATGCTTATGGTTATCAACAGATGAAACGATGCCGGAGGTGCGGCAAAATTTCT  
CCGGCTCTCTCTTGTATGGTCTCTGCAATTCGGAGGGAGATCGGTTTTCAACCGAAACAATCAAAAATTTATCCCGCTG  
A  
>Cluster\_42595  
ATGATCTGCTCAGGACCACAAAACTGGGCTCAAGAGTTGAAAGCGATCGGCGACCAGCTCCAGGAGTTGCAGAAGAACT  
TATTCAGGGGCGAATATTAGTCAACACGCCCCCTCTGACCATTGAGACTCCCCGTCATTTGGGGGAACTGCAACG  
CACGTCGCAAGAAATTGGGCATTGATTTATACACACTTGAACCTACAAAACGGGGATCTCAACGTCACGTTAAAGCGCAT  
TTTAAAGATCCTGAAACAGGTTAAATTCGGCAGTGTGTTGCGGTTGGCGAATGTTCTTGGAGTGAACCTATGCATCGACGA  
GTGA  
>Cluster\_12666  
ATGATCCATAAATCAAGCCTTGGAGAAAACTTGCCTGATTCGAGAGGCAGAGGATGTCACGTAGAGAGATGGAAGA  
GGTGACAGGGGTATCTCAATACAATCTCAAAAATTTGAAATATTTGGGAAGAAATGATACCTGGAGAACGTTACTCTGA  
TTTTGAAATCATCTCGTTTTTCGGAAGTATTCGGATTGGGTGATGTTTAAATCAAACATAATGCTGCGACGGGGCAGATTGCT  
CCGCCCTCTCTCTTGTATGGTCTCTCGATTTCGGAGGGGATCAGGTTTTCAACCGAAACAACCAAAAATTTACCCCGCTA  
A  
>Cluster\_16234  
GTGAGACGTAATCTTTCACACATTTATGCGCAGCATTCAATGAACCGCTGCTTCTGGAGCCCGCTATGCGCGGGTTTT  
CTTTTGGCGCTCGGGCGGAGATGGGGCAGCAAGCTTTTCGTTACACAGCAGCAGGATACAGTTGATGCTCCCGGAA  
TGCTGGCTGAAACGGACGAGTACATGGCCGAGGTAACACGACCGCCCGTGGAGCACAACGGGGGATGTGCTGCTGTGCT  
GTTTTGGTTTCATCGGTGCCGAATCATGCCGCCATTTACTGTGGTGACGGCGAGCTGCTGCACCATATTTCTGAACACTG



A

>Cluster\_43311

ATGGTTAGCAGGAAACGTAATAGCGTTATTTACCGGTTTGCCAGTTTATTTATTTGGTGTGATGTTAAGTGCCGTGACGCG  
ACTGCAAGGTACGCCACAGCCAGCACCGCCAGTAACGGACCATCCGCAAGAGATTTCGCCCGCAGCCAGACGCAAGGGTTAC  
AGCGAATAGGTAGCAGCAGATGGTTCGGGGTTCTCCGGATGACGCATTAGCAGAAATCAGAGCGAAAGCTGTCCGT  
GCAAAAGCTGATTATTACGTTGTCGTATCGGTGACGAAACCATCGTGACAGGACAGTGGTATTCACAAGCCATTTTGTGTA  
CCGTAATAA

>Cluster\_26546

ATGGCGCAGTTTGAATGGGTTACGCGCCCTGGCTGGCATTGGCAATCGTGCTGGAAATCGTTGCTAACGCTCTTTTGTAA  
ATTTTCTGACGGCTTTCGTCGAAAATAATTTGGCTTGCCTCTCTGCGGGCGGTGCTGGCTGCCTTTAGTGGCTTTCTC  
AGGCCGTTAAAGGGATCGACTTGTCTGCTGCTTATGCATTTGTGGGGCGGGTTTGGTATTCGCCCCACGTTAGCCCGAGGT  
TGGATCTTGTTTGGTCAAAGGTTAAATCGTAAAGGCTGGATTGGCCTGGTGTCTGTTGGCTGGAATGATCATGGTGA  
ACTTGCCTGA

>Cluster\_49936

ATGCCTACCGCAATCTGCGACGAAAAACAAAAGCGTTATCCCGCAAGCGCAACCCTGAAAAAGCCAGAAATCCGCTCTGGC  
AGACTTACACGAACGGGTAGCAGATGCTCGTGTGATTTTTCAGCATAAACTTTCTCGTACAATTTGTGACGAAAAACCAAG  
CGGTAATTTGTTGAGACGCTGAAAAACAGCAATGATGATAAAAAACCAATCTAGCAAGAGCGATAGGTTGATGCGAGCTGG  
CATAGCGTATCACACGCTGGAGTACAAAGCTGCGGGAAGAGGCATTACCTAGTAAAACTCGACCAATGGTTTGATAA  
ATAA

>Cluster\_24676

ATGGAAAACCTACGTAATAATTTGTTGCTACTGAAATACTGAAACAACCTCGTGGAAATCGTTTCATAGCGATGACAGGGGC  
AACAAAATTTGCTTATTTTCGATGAAAATGGTGAGTGTGGCCTTTCTTTTCGTTTGCCTTCAAACCTTTGCAATGAAGGGCA  
TTAATTTAGTTAAAATCAAATTAACATTTTCTGTATACATACCTGGTGACATTTTTCGGTATCCGTGGAACCAAAAAA  
GAAATATCAAATTTGATAACATTTATTTGTGATCAGCTTGAAAGTTTGTTTAGCGAAGAAACCGGACTTGAACCCAGATT  
TTAA

>Cluster\_51670

ATGAAGCAGGATAAAAAGACGCGGTCTGACCCGGATCGCATTAGCGCTGGCAGGTTATTTGTGTGGCACCTGTGGC  
GCTGGCTGAAGACAGTGCCTGGTTCGACAGCGCGAAACCAATATTTTCCAGGGGACCATTCCGTGGCTTATTCGGAAG  
GGGGAAGTGTACGACAGATGCCGACCGTGAACGTTGACTTCTGATCTAAAAGGCGCTCGCCCGCAAGGCAGTGAACG  
GACAAAGCTCTTTACTCGGGTGAATAATTAACCGTAAGTTGGGAAATTTGGTGTACCGAAGGCAGCTGGATCTTTGGAGG  
ATTTGGGCGATAACCGAAAACTATCGATACTATCCGCTGGATGAGCTACAAGGATGCGCAGGGGGGATCCAAAAGAGCT  
GGCAACGAAGGTGA

>Cluster\_66998

TTGACGTTTTCGCGGGACCTGCCGTTTGTTCCTCCGGTATTAACCATCACCCGTTTGAAGAACCTTCGCCGCATGGGGCA  
TCACTGCCACGGCGGAACAGCATGTCCGGGGGACAGCCGCAAAAAGTTTTCGCTGCTTTTGGGCAAAAAGTTTTCGCGG  
ATGTGCAATTTCCCTGGACTGGCGGAGACGGTGTGCTGTCTTTGCCCCGGCGACAGGGGCTTAAACAGGTGATG  
GCACCGGACACAACACGGGCGAGGACCCGCGCAACGACGAAGAGCGGTGCGCGAAACGGCGTTGCCCTTACATCCC  
GGCGGCTTTTTCGCGGATGCCAGGAGCGAGGCCAGCGCGACAGAGGCGCGACCCGGAACGGTTCGCTGCAAGCCG  
GGGTTTTCGACGATCGGACCGTAGCGACCCGAAACCGCGCCAGCGGTTTCGCGGAGACTGGCAGGTGCGCCAGCA  
GCTGCCTGTCCGAGTTCGGGCTGA

>Cluster\_55476

ATGACCGGTATGACGAATGTAACAAGCTGGCCAGCGAGCCGTCAGGCCAGGAATTTCTGGTATTTACCTTGGTGATGA  
AGAGTACGGTATTGATATCCTGAAAGTGCAGGAGATCCGTGGCTACGATCAGGTAACACGGATTGCGAACACGCCAGCGT  
TTATCAAAGGCGTACGAATCTGCGCGGCGTTATTTGTGCGGATTTGTTGACTTACGAATTAAGTTCAGCCAGGTGGATGTG  
GACTATAACGACAACACCGTAGTTATCGTCCGTAATCTCGGACAGCGGGTGGTCCGGCATCGTGGTTGACGGCGCTCAGA  
CGTGCTTTTCAATTGACGGCGGAGCAAAATTCGTCGGCACCAGGAAATTTGCGGTGACGCTTTCAACAGAATATCTACTGGAC  
TGGGCGCACTGGGCGACCGGATGTTGATTTCTGGTGAACATCGAAAAATGCTGAACAGCGAAGAGATGGCGCTGTTAGAT  
AGCGCGCGCTCAGAAGTGGCGTAA

>Cluster\_39648

ATGACAGTGATGACGCTCAATCTCGTTGAAAAACAGCCAGCAACTATGCGCCGGATAATTTGGTAAAGCATCTGGCCGCTCC  
TCGCTGGCAGGAGATGATCGATTATTATAATCAGATGATGGAACGCGAACGGCTAACGGTTTTCATGCGCAGTTAA  
AACAGCGTACGCAACGATGCGTTTGAAGAAATGAACGACGTCGAACGTAACGACTGGTATGTGAATTTGATGAAATG  
CGCGGGGCAATTTCAAACCGCGTCAGGTTGGCGCAAGTGAGTATGCATATATTAGTTTAAAAACAGTCAAGTCAAGCGT  
CACTTTATTTATGACGCGCAGCTGACAGAAAAAGAAATTAACAGCCATACTGGCGAATTAATGAAGAGTCAATGTTACT  
GGCGTATGCTTTTATTCGGTGCATTTACGTGAATTTATTCAGCCTGTTTGTAGTATGCACCGCAAAATTTGACGCTGGTAAAA  
CCAGAGCAATATCTGCATTA

>Cluster\_48678

ATGAGAGAGAAAAATCAAGAACCCTGCTGCTGATTTGATAAAGCGGAAACAGCGATTCTTATGCGGTATCCATCACTGA  
TGGAAAGCCAGAACATGACGATGGTCTGCTAATGGCCTCCGTAATCTCCTGATGATTTGACTACCCCTTTCGCCACTTTTCG  
CTATGGTTGGTTACTACATGGCTGCCGAAATTTGAGAAGTTGCGAGCGCAGAGAGACGCATTAGCGCGGAGAAATGCAGCC  
CTGAAAGAATCTGAGCGAGCATTCGATGCGATGTTGTCGAGGAAACAGGAGATAATTTGGGTTAGCGAATTAACGGAGAC  
TCCAGCCACCGATGCTTTTCTGGCTGAAGTACGTGCGCAGGGCGTGGATATGGCTCGTAACCGCATGATTTGATTTGTTG  
ATGGTGAAGTTGGGCCAAACAAGAACGTTCCGGGGCTGATTAGAGGCGCAGAGATATGCGTAAGTATTGCTGAACAGCTT  
CGTAAAGGAGTCAATCCAGTGA

>Cluster\_3526

ATGTCGTCATCGTTATCAGGAATAATACTCAATACTTCGCTGACAAGTACCATATGTCATGGGGCAAGTTTAGCAGAAC  
TCTTCATGATTTGAATGAAGATATCGTAGATGAAATTCAGCTTAAAGCCCGAACACAACACGCCACCATCGAGTATATT  
CAGAAATGGCGGATTAATCCGTTGCTCTCTTTCGGGGCAAGAAATATTCTGTTGTTTTATTAAGATTAACAACAGAT  
AATTTATGTTACAAGTACAAGATGACTCAGGAAAGTGGGTGCTCTCAAGATTTTATGCTTTCTTTCTGGCGGTGT  
GACTAAGGCTTTGGAAGTAAACTAAATGACAGGCATATCACTCCACTTTCTCCAAGCTGGTTTCTCCAAGCTCACTGG  
AGGGGGCTTAAACGGAAGAGGATTAATCTTTGTTACGTCGCGTACAGTCTACTGAAAACCTTGATTAATGATGATGCT  
ATGATATCAAACCTTTTCTAATCCGTTAGTGTGA

>Cluster\_51245

ATGGCGTTAAACACACCAAGCACTCTGTCAGATTGCGTACAAGTTCCCTTAAAGCGCAACGGGTTCAAGGTTGCTTTTCATGA  
CCGCTTTGTTGCTGTAACAGTACCGGAGAACAGCCAGATGCTATGGGATTCAGAAATTCAGCATCATGCCTGATAGAGG  
CGAAGTGTTCCTGCTGACTTGTGTCGAGATGAAAAAAGCGTTTCCGTAATAAATCCCTCACTTGGCATGGGCGACTGG  
CGATTTCTTTATGATGAGCCGGAATTAATTTAGTTGAGGATTTACCTCCCGGCTGGGATTAATCTACGTTGTTAACGG  
AAGAGTACGGAAGTACATGGATGGCCAGGGGTAATTTGCTGTTGGGGTAATCTGACGATAAAGCCATTTACTGGGAATA  
AGCAGGTTGAATGCGATTACATGTTATCTGCATTAAGGCGCATGGAGTTGAGAGGGCACCTTAATGAAATATATGACGGT

GTGATTGTTAATAAGAAAGAAGGAAACGCGGCATGA

>Cluster\_12132

ATGACTGAAATGGCTAAAGGAAGCGTGACGCATCAGCGGTTAATCGCTTATTATATCACAGAAGTGCCTAACCTCCGCGT  
CGTTACCCATGAAGCGGTAGGTAATGTGAAGCGGTGTGAGAAATTCGTGGCACCCTTTAGGCCAGGGAGCTAAGGCAC  
TGGTATGTAAGTCAAAGCAATGGCGTAAATCAACATCTTCGGCGATCCTCGCTGCCGATCAACAGGCCGATCTGAGC  
CAACTCGCCAGCCATATAGGCGGATTACCGCTTCGTTGGCCAGCCCGCGGAAGTTCGATGAACCTCACAGGCTGTGTCTT  
CGGCCGATCCCCCTTTTTCAGCTTCCATCCAAAACCTCAAACTGGTTGCCGACCCTCTACTCTTCGACGATTTGATGAAA  
TCGCCCTTCAATGCAGGGATGCTGGATAAATCCGTTATTTTAAAAACCGGATTTATTTGCGCATTCGCGCAACCAGAAGCTG  
CTCAATTTCCGCCGCACTGCGTAA

>Cluster\_64092

ATGGCTGTACAAAACATCTTCGCTTTTTTACGTTGTTTGTGGATGGTAAAAACGAAGTGGGTAAAGTACATCCGTCAC  
GCCGCCAAACTGACGCGCAAAACCGACAGTATCGTGGTGGTGGCATGATGGGGGCGTAAGTATTGATCTCGGCTCGG  
ACGACTCCGCGCTTGATGCGAGTTTTGTATGGGGGAGCTGTTCGTGCGCTGTTCCCTAAAATATGGCGGCACGATTGAC  
GGCAGCTGCTGCGTTTTTGGGGTGAATACTACACCGATGCAGAAAAGCGATCTGTATGAAATCGAGATGCGCGGACGTTG  
GACGGAAATGATATGGGGGAAGCCAAACAGGGCGAAGCCACATCACACACTTACGCTGTCAAAAACCTACTACAAGC  
TGAGCGTTAACGATCGCCCGCTGTGGGAAATCGACCTGTTGAACCACATCTACCGGAAGGACGGCAAGGACATTTGTCCT  
GACCGTATCCGTTCCGCGCTTGGGCTTGGCTGA

>Cluster\_66901

ATGCTGTGTTGACCTGCTGTATACGTTGGAACCTGGCACAATAACAACCTGGAAGCATCGCCGGACGCTGGTTTGA  
CCTGACACGTTTGTATGATGAGCGGCATTTTTTCGCGCCTGCCGTGCTTTCACAGGATGAAGCCGATCCTGACTGA  
TGTTTCAGGATTTAGAGGATTCCCGGGGAATATGGCCCTGTAATGCCATATCAACTGGGCTGGGTTGAAGGCTTCCGC  
CAGGCACGGGATGAAGGCTGCGAAGAGGCTTATCGTCTCTGGTGGAGATACCGGTGAGACGATTTTGACACCTTCCG  
CGATGCCCTGGTGGGGCAGGCTGACAGTGGAGGCTTTTTCGCGTTGAGTTCGCCAGTGATACCGGCTGCTGGCTGACG  
TGCCGGAGACGGTGGCGCTTATTTGACTATGAGGCGTATGCGCGGATTTATTCCTGGACTCCTTACCTTTATTGAC  
GGTCATGTGTTCCGTCGGTGA

>Cluster\_14211

ATGAAAAGCAAATCCAGAAAATATATATGTTTATTTCTTCTATGCTGCATCTATAATTTATGGACATTCGCTCCTGT  
ACAGATTTTGTATACATATCTGTATGCTGGCAATTCAGTCTTTTCTGGTGGTGGATCATCTGCCATGGACTGACAGCGATA  
AAATAAATTTGGTATCTGAAGCATCAGAAATGAAATTAATAAATCAACATCCCTACCAGAAGGTAGTTGGCATACCTGGTAT  
GTCATTGATATCGGTAATGGCTTCACTGACTATAAAAAATATATCGAAGGGCCGATGAAAGATCTCTACTGTTTCCCGAC  
AATTAAGAGCAATGATAATTCATCGTGAATAATTAATGAAATACCTTATCGTAACACTCATATTTG  
GTATTAACGATTTTACTGAGTATCAATTAACACAGAAAATAAAAATAGAGCGAGTTTTCAATCCGCGATGACTTTAAATAA

>Cluster\_4148

ATGCAAAAACGGGCGATTATCCGGTACTTTTCGATCCCATACCAATGGTCAATATCGATATCGTGACGCGGCCACGCA  
AATGTTTCGATACGTTATTTTCGGGATTTGCCCGCAGCCCAAGTAAAAAACCGATGTTTACCCTGGAAGAGCGTGTGGCGC  
TGGCACAGCAGGCAACCGCGCATCTGGGGAACGTGGAAGCTGGTTCGGGTTAGTGATTTGATGGCGAATCTCGCCGTAAT  
CAACACGCTACGGTGTGATTCGTTGGCTGCGTGGGTTGGCGGATTTTGAATATGAAATGCAGCTGGCGCATATGAATCG  
CCACTTAATGCGGAACTGGAAAGTGTGTTTTCGATGCCGTCGAAAGAGTGGTGGTTTATCTCTTCATCGTTGGTGAAG  
AGTGGCGCGCATCAGGGCGATGTCACCCATTTCTCGCGGAGAAATGTCATCAGGCGCTGATGGCGAAGTTAGCGTAG

>Cluster\_39826

ATGCAACAGCTTTCTTTTCGCCGGAGAGATGACGCCCGCGAGCGCAGCCTCATTAACGGGCCCTGAAAACCTGGA  
CCGCCATCTTCATGAACCCGCGTGGCTTTCACCTCCACCCGTCGCGCACGGGAATGGCTGATTCGAACATGGCGGGAC  
TGGAGCGTGAAGAGTTCCGGGTGCTGTATCTGAACAACAGAATCAGCTGATTTGCCGGTGAACCCCTTTCACGCCGACC  
ATCAACCGCACGGAAGTCCATCCCGGGAAAGTGAATAAACCGCCCTGTATCACAATGCCGCTGCTGTGGTGTGGCACA  
CAATCACCATCCAAAACCTCACCGCTCAAAAACATTAACCCCAACGCATGGGAGAGTTTTCGGCCCTGATAAGCACAT  
CAGCCCATCCGAAACCTGGTTCAGGCCCTCACCTTCGGTTGATGGCGCAAAACCGAACGCCGCAAGCAGATGCTTTTT  
TTCGATTTTGCATCAATGATGACGGGGAACGTCGGGAGCTGACGAAAATAATGAGCAGACTATTTTCGCAAGCCTTAA

>Cluster\_30051

GTGAACAGGGAGCCCGGTTTTTGTCTGCTCAGAAAACCTGGAATCGCCCGCGCTCTGGCTGGTATCTCCCTGATTC  
CTATCTCTGCGTTCTGCTCGACGGACACATAAGGCTACTGCCCGCGCTGGAAGGGGACCGCTCAAAAACCTGGTGC  
TCAGCACGGCAACCCATTTAATGATGAGCAACAACCCCTGGTATTTCTTGGCGGGAAATGCTGCACAAAACAGAGCTG  
CAATCACCATCCAAAACCTCACCGCTCAAAAACATTAACCCCAACGCATGGGAGAGTTTTCGGCCCTGATAAGCACAT  
CAGCCCATCCGAAACCTGGTTCAGGCCCTCACCTTCGGTTGATGGCGCAAAACCGAACGCCGCAAGCAGATGCTTTTT  
TTCGATTTTGCATCAATGATGACGGGGAACGTCGGGAGCTGACGAAAATAATGAGCAGACTATTTTCGCAAGCCTTAA

>Cluster\_35178

ATGGCTGAGATTGTTGAAGGAGTGCATTACCTTACGGTTGATGATCTTGTGAAATCAATCATTCCTTAATTGAATTACA  
GACGCCAGATGAGCCGTTGGTGTCTGAGTCCAGATAACTTAAGTTCCTCAGGCCGTCCAGCATGGTTCGATGGT  
ATGAACAGACTAATGACATGTTTGTACTGGCATCGGATTTGATGAAAGTCTGATTCAGAATCATCCGTTTGTGTAATGCG  
AACAACGAACAGCTATGATGGCTGGTTACGCTTCTTGTGTTGATGAAAGTTCGATTAACAGCACCAGGCGATGAAAT  
CGTGGAAATGGCAGAGGGACTGGCTGCAAAAACATACTCGGAAAGTCTCGAAGACTGGTTGTGTTATTTGGTCTCGCG  
CGTATGACAGCCGGAAATATGTAACAACAGCGCAACTATTGTTTGTATGAAACTATCAAGCTTAAAATAGAACAGCAA  
AACTAA

>Cluster\_27331

ATGGAATGACCAACGCGCAACGCTTATTTTGTCTAACCAAGTACAAGATGATGACTATGCTCGATCCGGCAAAATGCTGA  
ACGTTACCGTCCGCTGCAAAACAATCATTGAGCGTGGTTATGGATTACAGATGCGTGAACCTGGATCGCGAGTTTGGCGAGC  
TGAAAGAAAGAAACCTGCGGCATATCATCGACATTAAGGAGATGATCATGCGTTGATGTTTCTGGTCTAATTTGCAAT  
GACCAAGCAATCCATCGATGAACGTCGTTGACCTTCTCGGCTTTCGAGCCGCACTGAAGCAGCTTACCTCGGTTATGT  
CCGCTTTATGGTTAATGTTGAAGGGCGCTATACCCATTTTACGCTGGAACCTACGGTTTAAACGCCAGACGCAATGT  
GGGAAAAATATCAGCGCATGCTTAAATGTGTGGCATGCCGCGGCTCAGTACCATTTGAGCGCAACGAAATTAATCAA  
ATTATTAACGCCTGA

>Cluster\_32373

ATGCTCAACAAGAATACACTATCCATATCTTCGGTACAGGACCTACCAGTCAAGACGGATTGTTCCGATTGGATGAAAT  
TCGCCGGTTCGGTATTCAGATTGGTAAGGTAGAAGACCCGAGAAAGCAATGGTTAAGCGTTTCGCTCAGACCAAGTTCG  
GGCGTATCTTATGGGGCAGAAAACCGCCGCAATAAGAAAGTTGATATGGGTGCGCTCGGTACGTCATGGCTTGTGCTGAC  
CCCACCTCCCGCTCAAGTTTGGCGAGTGGCTGGACTTTGAGTACGGAATAGCTGTAGCGGATGCCTTTGTGCTATGAC  
CTCCAGTGCAGCGTACAGGCGCTGTAGCATCTTCGGAGCAGATCACGCCGACTCTAAGGCATTCATTAAGAGCAC  
CGTATCGCACTACAGGCTGGCAACTCGTCTCGAAAGAGGAGTTTGGAGGACTACGTGTCGGTTCGCTGTGAGTGGAGA  
CTTAA

>Cluster\_22297

GTGAGCGAAATTAATTACCAGGCACTGCGTGGGAGTGGCGGACGTCGAATTCAGCAATGGAACGCGCTGTTAATGTTGCC

AGCTGATGATGACTTGTAAAGTGAACAGGAACCTTAAAGATTACGGTGTGGATATTTGATGCGCTCAACGCCCTTCAAATTTCTGACCGGACCAGAAACCGTGTGCTGGCACTGCTGGATGAACGGGAAAGAAACCTGCAATACATCAAAAGCCGCGATCAGGAGAACGAGGATATTGCGCTAACGGTAGGGAAGCTGCGGCTTGAGCTTGAAGCAGAAAACAGCGGGCAAAAGTTCTATTTATGGAAAATGCTCGGCTTAAAGTACGGCATAGCCGGTCTGATACACCTCGGTATTGATATGCAGATGTTGAGGTCATGAAAAATGCTGGAGATGCCAGCTTTCTACCCATGCACTGACAGCATATAAACAGCATTGCAACAGGCATTGCGATCAAAGGAGTGTA

>Cluster\_39032

ATGGCAAACTTACCTTACAAGAGCAGTTGCTCAAAGCGGGACTAGTCACCAGCAAAAAAGCGGCAAGGTGCGAGAGAAGCCAAAAAATCGCGTGTTCAGGCGCGTGAAGCTCGGGCGGCGGTAGAAAAGAAAATAAAAAGGCACAGCTTGAGCGTGATAAACAGCTTAGCGAGCAACAAAAACAAGCGGCGTTGGCGAAAAGATAAAAAGCCAGGTGAAGCAGCTCATGAAATGAACCGAATTACCATTTGCCAATGGCGATATTGGTTTTAACTTCACTGACGGCAATCTGATTAAGAAGATTTTGTGATGAAGCTCACGCAAACCGCAGTTGATTAATGGTCGCTGCGGATTTGCTGCGTTGTTGGTCGATAACAATAGCGAAGGTGAATACGCCAATTAATCCCGGTCAGTATAAAATGCTCAGCTGATGCCAGCAGTATTGTTGTCACGCGCGCTCAGCGCCGAAAGCAGAAATGAAGATGATCCGATGCGGACTTCAAAGTGCCTGATGATTTGATGTGGTAA

>Cluster\_46747

ATGAGTATTGTAAGAGAGGAGCACAAAGCCAGCTGCGTAAATGGCGGCAAGAGTTGCAGGCTAAACCGGCAATCGTGC AAGTCTCGCGCGTAGACACACCGTTAATGATGTTGCTGTGTCAGAAGGTTTTCTTCTGCTGATGCAGACCCACACTT TGTGGAAAATGAAGCACAAAGAGTGGCGTTTTACCAGCTGGCGTGGTCGCCGAGTTAGCGCAATGTAAGGCTATT GATGAACGGCAGCCTTTTCCCGCAGCTGGCGCGGTAATGTCAAAGGGGCGTTTTACTCGTCTGTCGGCAGTAAAAAC ACCGGATGAATTAAGTTCGCGCAGTTACGCGCGCAGTCAGATTAATAACGGTTCGTCATCTTGACTCTCTGGCAGAGG GGGTCTTCCGTTGGTGCAGGAGAGCGACCGTCTGCTCAATCACCAGCGCAGCAGCGGCAACCGAATTTATCCGTT ATCCGCTGGGCGCTGGAATATTACCAGGCTGGCGACCGGATAACGAACAAAATCAATAA

>Cluster\_2258

GTGAGCGAAATTAATTACCAGGCACTGCGTGGAGTGGCGGAACGTGCAATTCAGCAATGGAACGCCCTGTTAATGTTGCC AGCTGATGATGATTTGTTAAGTGAACAGGAACCTAAAGATTACGGTGTGGATATTTGATGCGCTCAATGCCTTCAAATTTCTGACCGGACCAGAAACCGTGTGCTGGCACTACTGGATGAACGGGAAAGAAACAGCAATACATCAAAAGCCGCGACCGAGGAG AACGAGGATATTGCGCTTACGGTTGGGAAGCTGCGCGTTGAGCTTGAAGCAGCAAAATCAAACTCAACGAGCAGCGCGA GTATTACGAGGAGCTTATCTGATGGGTGCAAGCGTATTGCTGAACGGAAGCAGCGGAGTTCAATTAACCGACTCGCT ACGACCTTCGATATGGACACCCGATAAAATGCAGATGAGCGACAAGTCATGATACCTAAAGAAAATGGCAGTTGGCTTTAC CTGATTGACCTAGAACACGCATTACGCGTGCCTGACATTCGATATAAAGGAGAGTGA

>Cluster\_55936

ATGAAAACAGCACACATTTATTCACCGGTTATGCGCTGTTAGCAGGCTGCTGCTGACCGCCAGCACGGGGGACGGGC AGTCGATAACAACCTGCATTTTTACGGCAACCTGCTGAGTAAATCCTGCACCGTGGTGGTGGATGGTGCCAACTGGCAG AAATCCATTTTCCACCGTCAGCAACCGGGATTGATAGCTCGCCGACAGTCTGTGCACTGCGGTTGTTGTTAAGCTG AAAGACTGCAAAAGGGCCAGCGGGCTACAACGTCAAAGTCAGCTGAGCGGCACCGAAGACAGCGGTCAGCCGGTTTTCT GGCATCGATGACACTCCACCGCGCAGGGCGTGGGATAGGGATGGAACCGCTCGACGGCAAGCGGGTGGATATAACA AACTACCAGGGGCGACTTTTGGCTTACCAACGGCAACAATGATTAATTTCCGGGCTGGATCCAGGCGAAAAGCGGT CGCGATGTGACGATCGGTTGAATTAAGTTCAGCTGCGCTGACATTCGATATAAAGGAGAGTGA

>Cluster\_17753

ATGATCCGTAACGCATGATCAGGCTGAGAAACGATGGTAACTCGACCATTCAGACTTTTATGCAAGTGGATGAAGAGCC GCAGACATTTAGATGGACATATTTAAGTGGACTGGATCTCAGGTTGTGGCTGATGCCGCTTTTCAGAACTTCTTTTCAC TTTCCGGGATCGTTAAAGCTGCTGACGGTAACCGCAATCTCAGCATCAATTCGGGAAATCTTATATTCCTGCTCAGGAA GCGCCAGGACAGGTTCTTTTTCAGTACCCTTAAACGGTACCGTTGGTGGTGGTGGTGGTGGTGGTGGTGGTGGTGGTGGTGCAGGAACGGCAAGGAGGATGATGAT TCAGACCAGGCGCCAAATGGCGACATCGTGGATCCGAGTCAAGCGTGAAGGTGAACGGAAACAGCATCAGTAAACCGTG ACGATGTACTTGGCAGTTTACCATGAATGAACCTTGGATCCGTTACCGTCAGCGGAAATTCAGGTCGGCTTTCAAATGAA TCAGGCCAGACATCAGCTTGCCTCTGTATCTGTGAGGGTTCAACCGCTCATCAGCATTTGATTA

>Cluster\_20787

ATGACTTCGATCCCAACCGTGGCGCTTAATGGTGGAGCTATCCAGCTGAAAAATAATGCGCGTGACCGTCTCGCAGCAGTT TCAGGATAAAGACAGTCCCGCCAGACAAGTGCACAACCAAAATCAGAACAGGGGGCAAAAGGAAAGAGCTGCGTATCA GTGGCGAAATTCCTTTAAAGCCCGGAGATCCTGAAGCGTATTTTCGAACTGGCCAGCGCCAGGATGCCGGAGGCAAC CGCCAGAAATACCGCGTGGCGCATGAAGTGGCCAGAGCGTGAATTTTTCGTGAGGCGACATTCAGCGAATGCTTGATGC CCCGACGAGGACGGGAAATGGCTGGCTGGTACGTTTACGCTGGCAGAACATATCAGCGTGCAGGAAAAGCGGGAAG CCAGGGCAACAGGCAAAACGCTGCTGCAAAAAACAGACGCGGTAATGCGGGCAATCCGGTGGCCAGAGTGCCTGGGAA GATGAAGAAAACCTGACGTGGTTGAAAAACGGTACTGAAACCGTCAATGATGCTTTGGGTTAA

>Cluster\_24671

ATGAACCTTTTTTTGAACAATATCACCTGCTTTTGAAGTTGCTGCGTATCCTGGGGAACGGCTGGCGGTGAACAC ACTTGATGATTTGCTCGTCTGTAATAAACTGACGCTCACCGCAGTTAAAAAATTAATCTGTCATATTCGGATGAAAAAG ACCGATTTTCTGTTGGGAGTGTGGATAGTCTGTTCCGGAGTAGTCCGATCATGTTGACAGTTATCCAGGAGCGG AATCCCGTTGATATAGCAGGCAATATCGAGCGAAAAATTTGCTAAATGCTTCGAGGAGGTTACAGGCGATTTGAGTA TGAGAAACGCCAGGCGGCAAAAGGACGAAATTTGATCCTGAAAGGTATGTTATCGCAACTTGTCCAGCTTGAAGCT GGTATGGGGCATTGACAGGCTTTAAAGCTGAAAATGGATTGAACGGTAAAGTCAACGAGCAGGCGGAGCGTTATGATTTG CAGATTAGGGGTTTGAGTATAGATCAACTGTTAAAATTAACAGGATATTTGAAACAGTTATGA

>Cluster\_6128

ATGCGAATTAACAGACGATAACTGGCGTTGGTATTACGATGAAGAGCACGATCGAATGATGCTCGATTTAGCCAATGG TATGCTATTTGCTCAGCTTTTGGCGCAAGATGTTGACTCCAGATGCCTTTTCTCCCGCAGGCTTTTGGCTGACGACG CCGCGCTCATTCTTTTGAAGAAAAGTGGCGGATGCTTAAATTTATCTAAAGAACAAAAAGCCGAACTGCTGCTGAAT GCACTGGTAGCAATTCGCTATCTCAAACCGCAAAATGCCGAAAAGTGGCAATTTGTTTCCCATGGTGAATGTGGGTGCC CATGCCGGCGATGCGGCTGCGTTTGGTTGAGCGATACTCACGAGCAGGTCATTTGCTGGTGGTGAATCTGGCGAAA ATGCCGCACTATGCTGCTGGCACAACCTGCGTTGTTATTGCGGGTCGCGGATGCAAGTTGGCGGACCCATTAATAATC ATGAACGACAGGCTGAAACCGCAGGTTAATGTTGACAGCTTACGCTTCAACGAGCAGTCTAA

>Cluster\_41656

ATGTCATTTATTAACCTTTTCCGGGAAGCATTTTTATTATGACAGGATAAAATAAGACAACATCGATATTAACGATAT CGCGGTTTCCCTTCAAATATCTGTCGCTTTGCCGGCATCTTTCACACTTCTACAGCGTCGCCCAACATGGCGGTGCTTT GCAGCCAGCTGGTACCGAGGAAATTTGCTTTTGAAGCGTTAATGCATGATGCAACAGAAAGCGTATTGCGAGCATCCCG GCTCCACTGAAACGCTTCTTCCGACTATAAACGGATGGAAGAAAAATAGACGCCGTAATCCGTGAGAAAATACGGGTT ACCCCCGTTATGAGTACACCCGTGAAATATGCCGATCCTATCATGCTGGCAACCGCAACCGCGATCTCGGGCTTGAATG ATGGCTCTTCTGGCTGTTGCTGGAAGGATCCCGGCAACAGAGATGTTCAACGTGATTCACGTGCTCCAGGCTCCAGGCAATGCC TACGGGATGTTTATGAAACGCTTTAACGAATTAACGGAGTTACGCAAAATGCGCATAA

>Cluster\_430

ATGAACAGGAAGGCGTTTCTGGCCTGCGTGCTGATGTGCGTCATATTAACCGGCTGCGAAACGGCGAAAAAATCAGTGA  
GGTGATCAAAAACCCGGATATCCAGGTGCGGAGCCTGAAGGAGCAACCTTCGGAATAACCGTCACCCGCTGCTGACCGAAC  
CGGACACCAATACCAATGCGGAAGGTGAATCAGCCGCGTGGATGTGCAACTGGTGTACTGACTGACGACTCAAATTTG  
CTGGCAGCCGACTATGACCAGATAGCCAGTACGCCGCTACCGGATGTGCTGGGTAAAAACTATATCGACCACAGGATTT  
CAACCTGTTGCGCGACACCATCAAACCTGCGCGGTTAAAGCTGGATGAGAAAACGAGTTTATTTGGTGTGCTGGCCT  
ATTTCTCCGATGACCAGGCCACTGAATGAAAACAAATCGAGACGGTGAAGGAACCGGCCACCATACCGCTGCTGGTG  
CATGTACGTCAAAGCAGCATCGAAATGAAAAAGAGGATGAATAA

>Cluster\_14964

ATGATATTTAACCGTAATAAAAAACGAGATGAACAACAGAATTTCTTCTGTTGTTTTGCCATCAACTGAAAATGTATTCTC  
TGATTTTTATTAAGAACAATCCAGCTTTGACAACCAATGCTTTTACAGCCATTGGGGAGGTGATTTGTTTTACTAAAGTAC  
CCTTACTCTCAAATAAGGAATCAGAGTTTTAGGCATTCTTTCACGTAATATTATACCTGATTATCCGTTTTTCCCAA  
ATACGACTCATTAATTTGTTCTCCTCATGGTAGCGAGGAGCTGTAAAAGAATTAATCCGTGAAGTGCAGATAATAAC  
CTGTGATTTGTCTGAAATCATATGATGAAACAGTCCCTGCTGTTATCCAGTTGGTGAACCTGCAACCGCTCAGACGC  
AAAAGAAAAACTGATTATCCAGCGTGTGTGCTATGACAGAAATTTCTTTTTTCGAATTTAAAAACTGTGCGATATG  
ATGGGGAGCGAAGACTTTTGTGCTGCTGCGAGATGATGAAGAGTAA

>Cluster\_14047

ATGATAATGAATACTTTTCAGAAAAGGACTTGATTACTTCTCGCAGCGTTTTGTTGTTAATGCTGGCTATTATGGTCCG  
TATTGCTTGTGCGCAAGTTATTAGCCGTTACATCCTGGATGTACCTAGTACCCCTACAGAAGAAATGCTGCGATTCTCAC  
TGGTATGGGTATCTATGCTAGGAATGGCTTTCTGTTGTTGGGAAAAACAGCATATTAGTTTAAACAATAATTACTGGATAAA  
GCTCCCAACAATACGACAGTGGTGGGAGATTATCTACAGATTAATTTTATGCGCTTTCTGTTGGGTATTATTAAT  
CGGAGGTTAAGGATTAACGTTGTTCCGATTAACAGGTATCTCTGCGCTAGGCATTCAATGTCCAAGATTTATTACG  
CACTCCCTGTTTCTGGAGTGCTAATTTATATCTATAGTTGTTAATAATATTAGAGTCACTAAAAGATAAAGTCAACA  
ACGGATGCTACTTTACATCTTTTAGAGAAATCAGATGACTGA

>Cluster\_55579

GTGGCACTGGGGGAAAACTGGAATCGCCGACGCGTTCCACCGTCAACTCAGTGGGCTCTGCTGGCGCCAGAAAGAACA  
CCTCCGCGCAAAAGTCTTTGTGCGGATGTCGCGCTGAAATATCTGAAACCTTTGAAATTTGGTGGTGAACATAAACTGA  
ACAGCCAGGCGTCTCAATCAAAGAACATCAAAGTGAACAATACGGCAACATGCCGCAAAATAAGCTGTGCGAGTTG  
AAAGCGAAGCCGAATGTGTTCTGAGTGGGTCAATGGTGTGATGCTGTGCGCAGAGGCGTAAACCGAAGAAGCGCAA  
AAAGAAACGAGCCCGCGCTCAGCGAATGGTACGCGCAGACAAAGCGGAAACAGCGTCTCCTAAGCTGCTGGTGGG  
TTGGTGTGCTCTACCTGTTACGCTACGCTTGACTACATGAACCGCTCACGGTCAATGGCAGCCGGCTTAATGCCCGC  
CGCTGAGTAGGGCGATTGAGGAAGCGATTGCAACGGCAAAATGA

>Cluster\_22912

ATGCCATCTACCGCTATCAAAAATCAATGCCATCACTATCGCCATATATGGGCCGTTGGTGAATTCATGGTACTA  
TCAATTTTACAATCCCGCTTACATCAACTCTCTTTTTGCCCTGAAACCGACTTACTTATTTCTGTCGCGGATAAATATTG  
ATCGTGGGCGGAGAGTCTTAACGTGCTGCGCTGCTAAACGACCCCTGGTTTACATCGGCTAAAGGCAACCAGGAGCG  
ATGGCGCTTGGAGCATTCGAAACTGGCGATGAAATATGTTGGTGTGCTGCGAGCGGTTGGTACTGGTTTTTCAATTTAAATGA  
TTCAGAGCAACAAGCGCAATAGATCTGTGCTGAAATTTCACTACCTTCCACATATTATTGAAATCACTAACGACA  
TAAAATATGTCATCGCATGAGATTAACGGGGAAGAGATACAGTTTGGCAAGAAATAGCGGAGAGCGAATTACT  
TGGCTGTTGATCGTGTGCGAATACTTAATAGCGAATTACAAAAATAA

>Cluster\_24907

ATGTCTGAACCGCAACGGCTGTTCTTTGCTATCGACTTACCTGCGAATAACCGCAACAGATTATCCACTGGCGGCCAC  
ACAGTTCCACCTGAGGCGGGACGTCGGGTGCGCGCGGATAATTTGCATCTGACTCTGGCATTTTTAGGCGAAGTGAGCG  
CCGAGAAGAGAAAGGCGCTTTCTTTTTAGCCGGCGGATTCGTCACACCGGTTTACACTCACACTTACACTGAGCGGCT  
CAATGGCTGCGTTGCGGTGTGGTGTGGTTAGGGATACGTCAGCCACCACGCGGCTTAATCCAGCTGGCGAATATGCTCCG  
TTCACAGGCTGCCCGCAGCGGTTTTTTCAAAGCAATGCTCGTTTCACTCCACATATTACCTTATTGCGCGACGCCAGCG  
AGGCGGTGACAATCCCGCCAGGTTTTAACTGGTGTATACGGTGACGGAGTTACCCCTTTACGCCCTCTCGTTGGC  
CGTGGACGCACACGCTACACGCCCTAAACGCTGGGCGCTAACGCAATAA

>Cluster\_9190

GTGACAACATATAGTAAGCGTACGCGGTAACGGCCATGTGGTCACTGCTGGTGTGATGGTCAAGGCCACGTTGGGCAATACCGT  
AATGAAAGGCAACGTGAAAAAGGTCCGCGCTGTACAACGACAAAGTCACTCGCGGCTTTGCGGGCGGTTACTGCGGATG  
CTTTTACGCTGTTTCGAACCTGTTTGAACGTAAACGTAACGTAACGATCAGGCGCCATCTGGTCAAAGCCGCTTGGCTGGCA  
AAAGACTGGCGTACCGATCGATGCTGCGCAAACTGAAGCACGCTGGCAGTGGGATGAAACTGCATCGCTTATCAT  
CACCGGTAACGGTACGTTGTCAGCCAGAAAACGATCTTATTGCTATCGGCTCCGGCGGCCCTTACGCCAGGCTGCGG  
CGCGCGCTGTTAGAAAACACTGAACTTAGCGCCGTTGAAATGCTGAAAAGGCGTTGGATATGACAGGCGACATTTGC  
ATCTATACCAACCAATTTCCACCATCGAAGAAATTAAGCTACAAAGCGTAA

>Cluster\_21599

ATGAAATACAATAACGTTATTTTCTCGGTTTATGTCTGGGTTAACCACCTATTCTGCTTTATCCCGCAGATAGCGTTAT  
TAAATTAGCGGGCGCTTCTCGATTATGGCTGCACAGTCTCATCGGATTCGCTTAATTTTACCGTAGACTCTCAAAAA  
ACAGTCCAGACAATTTCCAACGACCGGTAGCACAAAGTCCAGCCGCTCCCTTTTTCAGATTACGTTAAGTGAATGCAGCAA  
GGGCAACGGGGTTCGGGTTGCATTTAACGGTATTGAGGATGCGAATAATACTCTGTTGAAACTGGATGAAGGAAG  
CAATACGGCTCCGGTTGGGATAGAAAATCTGGACGAAATATGCGTCCGGTGAAATGAAATGACCTTATGCGGGGA  
TGCAAGTGGATCCCATTTGGTACCAGAACGAAATATTTGCTTACTCCGCTTTGAAAGTCAACTCAGAAGTCCGCTC  
AATCCAGGACTGGTGAGCGCTTCGGCAACCTTTACCCTTGAATTTCAATAA

>Cluster\_17757

ATGAGTAAAGACCTGTTTCGACATGAAGCGCTTCCGGTTGACCGGTTGCTGCGAGAGTTGTTGGTAAAGGCGTGTGATTG  
GACGCCAAATAAAGTTATCAAACCTGGTACAGCGATCTCCGTTGCCAGTATTTCTGCATATAACATTAATAAACCCGC  
AACACGACGCGAAGTGAAGCAATGATCGGAAGAAAGAGCGGAGATTGACAATAATGGTCTCGCGGTCACACAGGGA  
GCAAAAAATAAAGGGCTCGCTATGTTGCTGTTGTTGCGGGATTATACGATATCGCAGAGCAAAAAATTTCAAGAA  
TAATTTGATGATTTTGCAGGATGCGAGCGCTGCAGAGAACTGTTGTTCTCAAAGGGAAGAAGTTAAACGACAGACCG  
GAAAATGGTTGACTGGAAGAGCTGATGATAA

>Cluster\_24805

ATGAAAATGAACTGACCTGAAATGCCCTGCAGTCCATGAACGACAGGAATAAGAATATCCGTGCTGCGGGAAGCGA  
TATGCGCCGTAATCTCACTACGAGGTGATGCGTGAAGTGGACGACCGGCTAATCGGATGATGAATGGCGAGTATGGCA  
GTGATTTGGGGGCTTTTTCCCGCTCAGGTTCTGTTTACGCCAGCCACGAAACGTTTTCCACCTTATGTTTCGCGG  
GGAGACGCTCTCAGGTTGCGGTTCTGGTGAATGCGGTTGGTGAAGCTTTGCGGTTGCTGAGCTTTGCGGTTGCTCAGG  
GTTTTCACCGGAAGCTGTGAGCCATCACTGGCAGTGGCGGCTCACTGGATGCGCAGGGGTACAGCGTTAACGACATCA  
TTCATATCTGATGGCGGAAGGAGTCAAGCATGA

>Cluster\_8247

ATGCCGCGAGCAGCGGTTGCTGACGTCAGCGAAAACGAAACCGCTGTTGAAATCCCTGGAAGCTGGTTGCGTGA

AAAGATGAAGACCCGTGTCGCGCACACTCAGAGTTGGCGAAGGGCTTCCGCTACGCACTTAAACCAGTGGCCGGCACTGACGT  
ACTATGCGAACGATGGCTGGGTGAAAAATCGACAACAACATCGCTGAAAAATGCCCTGCGGGCGGTCAGTCTGGGTCGTAAA  
AACTTCCTGTTCTTCGGCTCTGACCATGGTGGTGAGCGGGGAGCGCTACTGTACAGCCTGATCGGGACGTGCAAACCTGAA  
TGACGTGGATCCAGAAAGTACCTTTCGCATGTGCTGGCGTCAATAGCAGACTGGCCGGTCAACCGGGTCAGCGAACTGC  
TTCCGTGGCGCATAGCACTGCCAGCTGAATAA  
>Cluster\_48594  
ATGAACACCGATATTTACGAGAAAAATAATGTCTGATCTCGAGTTTGACAGAGACAATCTGGAAGACGTCTGGCGTAAACA  
ACCTCGCCTGTTGATGGAGTATGGTTCAAAGCTCGCCCATGCAAGAAAGAGTGTGCGCAGAGGCAAACTTAACTTGAAG  
CTGTTGAAGCAAAAGCTATACGACACAGAGCGTAAAAACTTGAGTATGAACGGCATTAAAGTTAACGAACTGTACTAGAC  
GCTAAGGTTAAAAACAACCCACAGTATCTGTCTAAACGGCAGAAAGTTGGATGAAGCACGGCACATCGCAGACATATACAA  
ACATGCTGTGCGCCGCTTTTCGCATCGCCGAGACATGATCGTTTCAAGGCTCGAAGATGGCTATCGTTGAATTAGAGCGAT  
TAGGCTCTGAACGCTTTATTACTCCCGTTGA  
>Cluster\_48829  
ATGGCATGGCACACAGTTCAAGAGACACTGAAATTAACAGGAAAGTTCGCGCTCGCAATTAATCGTGACATGGCTAAAGG  
CCTTGTGACGTATCGCACAGGAAAAATGATCGCCGGGAGTTCGAGACAGTGAACCTGATTCGGCCCTATGGCGAGCTGC  
GCACTTCTGAGACACAAAAAGGCACAAGGAGGACACTCCAATCTGCTGTTAGCCAGGCGGAAAATGCTCAGCTAGAC  
GTCAATTCAGCAAAAAGTGGACGCTGTGCACGACTGTTACCCCTAATGCTTGAAGACAAGATGGCGCGGAAAGCAGAAAA  
CCGCTGCGAAATGAGGAGAGGGAACAACACTACAGGCCGAAATTAGCCGCTGCGTACGCGCTGGCACAGGAAAAAAGC  
GGGATTCGTGGTCCGGCTGTTTCGCTCCGGTTAGAGTAA  
>Cluster\_45623  
ATGACCACCACAACGCCACAACGTATTGGAGGCTGGTTGCTTGGCCCGTTGGCTGGCTTTTAGTTCGCTCTGTTGAGTAC  
GACGCTGGCGTTGTGCTGTATACCGCTGCGTTATCTTTCGCCAAACATTTCAAACGCTCGGCGGACAGCACTGACGA  
CACAAATCTATGGGGCGTTTCTTTTATACCGCTATCGCCATGTTGGTATACACACTGTTGGTACCATCGCTTTCTTTT  
AAACGTCGGCGTTGTGTTCCCTAACACTATATTTATCTGGCTGCTTATTTCCGTATTGCTGGCAGTAAAGCATTCGCTTT  
TTCACCCGTGGAAGATGGCATAGCCGTTTCGCCAGTTGCTGTTTACTTTTGTGGCAACCGCATTGATCGTCCCTATTTCA  
AACGCTCGTCGCGGGTAAAAGCGAGCTTTGTGAATCCGTAA  
>Cluster\_55036  
ATGCGAGGGACAGTTCGAAATATGCGTTATCCCGTACTCTTACACCCGCGCCGGAAGCGGTTATATGGTTCTTTTGT  
GGATATCCCTGAAGCGTTGACGCAGGGCGAAACTGTGCTGAAGCGATGGAAGCGGCAAAAGATGCTTTACTGACCGCAT  
TTGATTTTTTATTTGAAGATAACGAGCTTATCCCTTACCTTCGCCATTAATAGTCAATGATCACTTTTATGAAGTGCCT  
TTGAGCGTCGCTTAAGGTATTGCTGTTAAATGCTTTTTTACAGTCAGAAATCACTCAGCAAGGTTAGCCAGGCGAAT  
TGGCAAACTAAACAGGAGATTACTCGCCATTTAACTTGCATCATGCGCAAAAATCGACCGCTCCAGCTCGCGGCAA  
AGGCGCTTGGCAAGAGTTATCGCTGGTATGGTTTAA  
>Cluster\_19624  
ATGCCTGTTACCGAACATGCGCAGCGTCTGCTGCGCGTGGGATGCGCTCATCACCGCACAACTAGCCTTTGCCCTGAA  
TGGGTACAACCTGGGATGAACTGGCCGAACCTCATCGCAAGACCTTAACTCGTAGGCCATCATTCGCGAGGTATCTACAC  
CGCTGGAGCGATATGCTGCTGAATGATGCGAGCCGTTGGAGTGTCTGGCCGCTGACTGAACCGCATGAAAAGGCCG  
GATGGCTCGCGTCTGGAAGCGCTCCGTTGTCGACCGGGTTTTCAATGGCCGGTGCATCCAGTCCGCAAGACTCC  
TGATGAAGTTTACGCCCATTTGCCCGCTTGTTCCTGCGCAAGCTGTGCATCAAGAAGTATACAGCACATCCGTG  
CGCTTGGCTTGTACCAGTTGGAGATAACCACTAA  
>Cluster\_20758  
ATGGCGATTAGCCAGGAACAACAAAAGCGCGACTGGAACATTTAAAACAGATCCGCCGCAAACTTTCAGTGAAGCAG  
CGAGGCGCTGAAATGGTGGGCAACCTGACACCGGAGTGGCGCGGCTGGTGCCTCATGCCGCTGCGGTTACTTCTGGCG  
CCAGGGCATTTAAAGCCACTTAAAGCAAGTGTCTGCTGGCGTGAGCTTTATGAACCGCTGGGCTATCGGGACATGATTGTG  
CTGCGCCAGGGCATTTACAGGGCGCGTTAACGTTTGAATGGTTTCGGCAGTTTACGTGACAGCGATTTTTCGAAGCGCAC  
CGCGAACCGTCCGATCAAGAAGGTACATCCAATTTATAGCAGTACGCGGGTGCAGATGGTAATCGCGCTCATATCGTCC  
AAAAGTTGCAGCAACAGGGGAATCACTAA  
>Cluster\_37733  
ATGAAACTGGCCCTGACGCTGGAAGCCGACAGCATTAATGCGCAGGCGCTGAACATGGGGCGCATTGTGTTGACGTCGA  
TGGTATTAAGCTCGTGAACGATTAACAAGTCTGTAACCGGTTATTCACCTCCGCTGGTGGATGAACATGACGCTA  
CCGAAACACCGGCGACTTCTGCCAGCCCTCATCAGTTGCCGGAAGACAATACAGTATACAGAGCGTGTATGCCATTAACC  
ACTGAAACAGCGCTGGATATCTCATTTGCGTGGCTGCAGGACAATATTGACTGCGAATCGGAAATTTATCTTGGACAACGA  
TGAGGACAAAACGGATTCCGGCAGCACTGTTGCCCTGTATTGAACAGGCCAGGGAGGATATCCGTACCCGCGCAACTGC  
AGCTTCTGTACCAGAACCGGTGA  
>Cluster\_63887  
ATGTTTGGTATTTTCAAAAAGAAAACCCGCAAGGCCATTACCGAAGTGAAGAAGATGGAGAACCGGATGACGTTGGAGGC  
GACCGTCTGGGGTGCATTTCCATAGCATTCGCGCAGCGCACCTGTGATGCGAAAAGAAATCGCTGTGCTGGAGAAAACCA  
TTGCAGCACTTCTGCTTTGCGCGCTTCTCGGTGAGATGCAAAAATGAGTGCAAAATCCCGCCCGTTATGTAAGCG  
TCACCGCTTCTGCCAATGCCGAAGCCCTTCGTGAGTGGCTGATGTTGCCGCTACTGATGATGACGTTAACGTGCTGTG  
TCTGTGCTGGATATTGCTGACAGGACGGCATCGGCTCTGATGAAGAAGTGCAGCTCAAGAAAATGACAGGCGTTGC  
AGTTGCCGCTGGAGCAGTACCTGTGA  
>Cluster\_35315  
ATGGACAAATATGAATTTAGACGACAGCAACTCATAAAATTCGTGATGAGAAATGCGATGGTAAAGCGGTTAACGTGGC  
CAGAAAGATCGGGCGCGAGCCTTCTATGTATCAAGAATGTTGATCCAGAGGGGAAAAAGGGAAAAAACCGGATCGCTG  
ATGATATGGTGGAGATTAATCAAGAGTCTTTGGGTTACCCCGGGGATGGATGGATGGTATCGTTTATCATCAACGAAC  
ACAGCCTCCAGTTATGAACAAGGGTTCTAACCGCACGCAACCTATTTTATGATCTTACAGCAACTGCGCAAGAAAG  
TGAAGCGGATAAATTTAAAAAATCTTGAAGAGAAAAAAGTATTACAATATGATCTACGAAGAAATCCGTAAAAAGA  
AAGCACAACCGCATCATAG  
>Cluster\_63626  
ATGGTTTATGAAGATAAAGCGCTAAAGAGTTCGCCAGTAGGCTTGGCTAGCCTGTGAAAACGCTGGTTATGAACAACA  
TGGAAAGCAGGCAGAAATGCCCCGCGAATGAAATTAACACAAAAGCGGTTAGCAAATGGTTTAAATGGTGAACAATTC  
CTGCCGAGAGAAATTAAGGGAAATAGCAACATCATTTGGAACAAACCAACCTATCTTTTGGGAGAGGATACAGAAGAA  
AGTGGACAGATACGTTTCTATCAGGAGTTAAATCCAAGACAAAAATCATCATTGACCTTCTGGACGAGCTCCCTGACAG  
TGAGACAGATGAACTTTTAAAAAATCTTGGAGGAGAAAAACAGAAATCAATGCAATTTACGAAGAGTTGACACGAAAGA  
AAAAACAAAAGCTCTTAA  
>Cluster\_3459  
TTGACCACAACTGTACCTATTCATCCGTTACCTGAAATTTCTGCTGCTAACTCACGGCGCTGGGGCTGCAGCTCTGCAA  
CAGTCTGCCCATGGTATGGCGGAAATCGAAGGCGTACGGAATCGCGCTGATGCCGCTGATACGCTGGGCGAGTTT  
ACCAGCGCTCGAAGCCGTTGGTGAACCATGCCGGAAGTTGCTTATCGTGACCGATTTTATCGCGGCGCACCACTCT

AACGTGGCGGCGCGGCTGAGCGCCGATTATCCGGTGGCGGTGATCTCCGGGCTTAATGCCTCGCTGCTGCTGGAGGCGCT  
GGACAAGCGCGAACATGGCCACTGACCCCTGCGTGGCCGATCTGGTGAAGCTGGGCGCAACAGTTGCCTGGACGCTCG  
TCTCCCATATTCGTCAATTACAACAGTAA  
>Cluster\_3315  
ATGTCGACACCTTCCCTTATATGAAATGCTGACGTTTCACTTTCAGCGGCGAGTTACCACCTGGAACAGGTGAGCGAGCGGGA  
TCAGCTTATCCTTTCCCGTATGGACAATATGCAACGCATTATCAACTGTCGGGCGAGGCACACTGGCGCATTTGCCGGATT  
ACGGTCTGCGGATCTCAGTCTGATCCATCAGGGTATGGTTGCCGGTATTCATGGCCTGATGCGTCAGATTGAAGAAACG  
CTGCTGCGTTATGAACCACGCTGAGTCAGATACAGGTGGAGTTACTCCCCAGCCCCGTCGGGGTATCTTAATTACCT  
GATCCACGCGCAGCTTCCGATACCGCTGGATACGCTTGTGATGGCGTGTTCCTCCGGAAGGACGAATGTTCTGCGTC  
ATCTCAAACAGCAGGAGCGGGCTACTGA  
>Cluster\_54478  
ATGAACCGGTTGCTGCTGGTGTGCTGGCGTTATTACTGGCGGCGTGGGCTGGCAGACGTGGCGGCTGGCTGATGCCAG  
CCAGACCATACGACGCGAGCAGACGAGCTGCAGAGCAAAAGCAGGCCTGGCAAAGAGCAACAGCCAGCTTATCAGCC  
TGTCATTCTGACTGAAACCAATAACCGGGAGCAGGCGCGCTCTATGCCGAAGCAGAACAGACCAGCGCACAGCTGAGA  
CAACGACAACCGGATCGAGGAACTGAAACGTGAGAACGAGGATTTACGCCGCTGGGCTGATACTCCCTTGCCTGCTGA  
CATTATCCGGCTGCGGAACTCCGGCACTCACCGGAGGTGACGCTTACCCTGAGTGGTGTCCGCGAGTGACGCCGTGT  
CGGCTGGAGCAGGCAGCACCGCGCACTAA  
>Cluster\_34620  
ATGAAATAGACAGCAATATCTAAAAGATCTACTTATCGCATTCGAAAAACTTATGGCCCTGACACGATGCTTAGTGA  
ACTAGAGGATAATGGCTTAAATAGATATGACAAAATTTATTTCCATATGCGATTATATGTCGACTACGAATTAATAG  
TTAGGGTTGATGGAAAACCTGGGTTCCGTCATATAATGTCCAACGAGTTAGGGGAAGGTGTTGAATATAGTTGGATCGAA  
GTACCACCTGAGGTTGACAGCAAGAGGGCATGATTTTATGCTGACTTACGTCAAAGGAGGTCGGAAGCTATAAAAA  
AACTTTAAGGATGAGGGGATTAGTACTCTTATGAGTGTTCAAAATCACTAGCAAAGGCTTTGCAAGAAAAAATAA  
AAGATATTACAGGAATAGATATTGAATAA  
>Cluster\_54473  
ATGAAGTTTGTTCGCTAGAACAGGCACCGGAACGGGAAATCATCAGAAATACGCCGTTCTGGCCTGATGTGGACCT  
GTCGGAGTTTCGACAGCTGATGCCACTGACGGCAGGTGACGCGAGCCGCTTAAAGCAGGTTGCGCTGTGCGCAATTT  
CGGAGTCAACGACAGCTGTATGAGTTTCGACAGCTGACGAGATGCCTGGGGTATGTGTGCTGCTGCGTGGGTT  
GAACAGCTGGACGGCAAAAGTGAGCGCATTCAGCACTATTTCAACGCGGTTACTGCTGGGCACGCGCCATGCTCAACGA  
ACGTTACCAGGACTATGACGCCACGGCATCCGGTGTGAAGCGGGCGAAGAACGGCAGAAAGCAGCGGTGATTTGTGCG  
GTGACGCCGCTGGGCCATCAGCCGGGTGACAGGATGCGCCGACTGCACAGTGGAGCTTATCTGA  
>Cluster\_14970  
ATGAGCGAAGTACTAAAGAAGATGAATACGGCATTATCAGCCGACTATGATGAATATTCGTTTATTGCGTGTTCCTG  
CCGTGAGATTGATTTTGGACAGTGTCTCGAAATGCAGGAAAAGCTCAACGTTGTTATTGAAGAAGCTCGTGAAGATGCTG  
AACGTGAAGCGGCTGAAGCCAGAACTGAAGCCAAACGCTCAGCAGCCATTTGAATACATCATATCTTTAGGCTTTGAT  
CCGGAATCACTCTGCTCCTGTAAACAGCTGATACAGTGAAGAACTAGGCGGAAAGCCAAAGGCGGAGTAAAGAAAGCTAA  
ATACCCTTTAAGGATGAAAATGGCGAGATCAGAGAATGGTCTGGTAATGGCAAGCGTCCGCTTGTCTTACAGAAGCTGC  
TTGATGAGGGCCATTTTCAAGGATTTCTTATGACAACTGCAACCTGGGCGAGTTGAATAA  
>Cluster\_34150  
ATGATAACACAGACGCGACGACGACCTCGCACCCGCTAACCAACCCGAAATTTGAACTGACCGTCAAGCCGGTCCCGATGA  
ACAGCGTATCGATTCTTGGCCACAGTACTTTGGCGCTATCCCGAGTGGCTACCTCGGAGCCGATATCTTCGCTGGA  
TGGACCGCTTCTGTGAGGCTACAGCGGTGGTATCTGGTCTGTTTACACCCCTCAGCAATGGCGGCGCATTTATGTCCCG  
GAGCTGACAACGATGAGACATGGCGTCTGTTTAACTGCTGAAGCTAACGATGCCCCAAATGAGTGCAGGAGTAAAGAAAGCTG  
TATTGCTGTCTGCTGATTTGCGTATAGCCACATGCTTCCGTACAGAATGTGACGCGATGACCGCACACTATTACCGCC  
TGGGGAGTATGCCATGCAACATCCAGAGGCTCAGCCATTCTGCGTATTTACGACTGA  
>Cluster\_17745  
ATGATTAAGCTCAGATCGTACCCGCTACAGCAGAGCATATCGAAGCCATTATTCGCTTGTTCGCCAGGCTGATATCGA  
TGAGTTTCTGGCAACCAACGGTTGGAGTCCGCGCCGCTGCTGGAGACCGGCTACGACAGTCAACATTTGCTGTGCCG  
GATGATTAAACGTTGAAGTAGTACTGTCTTTGGCGTAGCACCCGCTCGATGATCGGCGGCGAGTGGTATCCCATGGCTG  
GTGGGCACTGACCGCTGGAGAAATACCAGCTACTTTCTGCGTCCGTTGGGAAAAGTGGTCAATGCAATGCTGACTGT  
TTACCCGTTATCTTGAATAATGTTGATGACGCAACCAACGACGCGCATCTGGCTTCACTGGCTGGGATTCACCATCG  
ATGAACCTCAGCCATACGGCATTAAAAAACCCTACCGTTTCCACATGGAGAGAAAATAA  
>Cluster\_29599  
ATGCATAAATCAGAAGCTGAAAAAATAGATTCTATTTCTGAATGAACATCAACAGATATATCGCAGACATAACCGAATAGA  
TAACATCCTGGCGTTTTGTCGTATTTGCATGGGTTCCCTGTATTATGCTGCGTTCCGCGTTGATGTTATATATCTGA  
AAATCCTGTTTGCAGTCTTGTCTGCTGTGGTGGGATGCTTTTATTTTCTTCTTCCCTCCTGCCGAATCACTC  
ATGTTCTCAGCCCTCAGAGCTGCTTACGTTATGCGTCTGACTGAAGACGTACCGGATGCGAGACGAGAACTGCTTAA  
CCGTGCTGCTGCTGCTGCTGCTGCTGCTGCTGCTGCTGCTGCTGCTGCTGCTGCTGCTGCTGCTGCTGCTGCTGCTGCTGCT  
TGCAAGAGTCTGCCACCCGTCAGCGTGAACAGGATACTATTCCGAAAGTTACTGAAAGGATTAATCCGAATGA  
>Cluster\_33854  
ATGAAATACAGCATTTAATCCTGTCTTAAGCCTGATAATGCTGGGGCCATTGGCTCATGCAGAAGAGATTGGTTCCGGT  
CGACCCGTTATTTAAAATGATCGGCGGATCACAATAATGTTGTTGAAGCCTTTGACGATCCCGATGTGAAAAATGTCA  
CCTGTTATGTGAGCCGGCGAAAACCGGTGGTATTAAGGGGGATTTGGCCTGGCAGAAAGATACCTCCGATGCGGCCATT  
TCTTGTCAACAAGTCCGGCCGATGAACTGTGCGGATCGTATTAATAACGGCAAGCTCAGGCGGAGGTAGTATCAAAAA  
ACGCAGCTCCCTGGTCTTAAAGTCTGTACAGTCTGCTGCTTTTATGACGCTAAACGCAACGCGCTCGCTTATCTGGCTT  
ACTCCGACAAAGTTGTAGAAGTTTCGCCAAAAACCGGATTTAGCGCGGTTCTTGTCTATGCCGTGGCGGCAATAA  
>Cluster\_17054  
ATGGCCGAGCTTACAGATAAGGCCACCCGACGCAAAAATATGCGCGGATTTGCCACGCGTATACGGTATGAGAAGCG  
CCTCGCAGTCTGTTAACCGGGCAGGCGCTGGCATTTCCGCTTACGACGCGAGTCTGCCCGGACGCCGGATTTGTGCG  
TTGATGAATATCGCTGCGTATTTACCACCGCTGCTTCTGGCATCATCATCACTGCTATCTGTTTAAAGTCCGCTGT  
ACTCGAACCGAGTTCTGGCTGGAGAAGTAGGTAATAATGTTGAGCGGGATCGCCGATATCAATCGCTTGCAGGCACT  
CGGCTGGCGTGTACTGATTTGCTGGGAGTGTGCGTTACTGTTGGCGGAGAAAGTACGGATGAAGCGCTTACCAGCGCT  
TGGAAGAGTGGATCTGGCGGAAGGTGCCAGCGCGAGATCGACACGCGAGGGATTCAATTACTCGCTTGA  
>Cluster\_39825  
ATGAAACATTTGCTCAGAACACCAGCTTCCGCTGTGCACCGGAGACTGGCTGCAACAACCTGTTGCCACCATTGT  
CCCTGATGAACAGCAGCTCAGCTTCTGGCCGACGATTTTGGCTCATTTCCACAGTGGGTACCCCTGGAACCCCGTGTCT  
TCGGCTGGATGGAGCTCTTTCCGAAAACCTACTGGGTTGTTCTGGAATCTGTACACCTGAACACCGCGGCGGATTT  
ATGGCACCCGAACCGGATGACGATGATGACGAAACATGGGTACTGTTCAATGCCATGAACGGTAAACCGCGCTGAAATGAG  
CCCGAAGCGCCGCGATTGCTGCTGTCTGATGACGTACAGTCACTGCTGTCTGACGGAGTGTATGCCATGACGG

TCCATTATTACGGCTGCGGGATTACGCCCTGCAGCATCCGGAATGCAGCGCCATTATGCGCATCATCGACTGA  
>Cluster\_22974  
ATGGCGGAAATTTGGTATTTTTTGTGCGCACCATGTACGGGAATTCAGTGTAGTGGCCGAAGAAGCGGAAGCGATCTGCAC  
CGCGCAGGGCCACAAAGCAACCGGTATTTGAAAGATCCTGAAATTAAGCGACTGGCTGCCCTATCAGGATAAGTATGTTCTGG  
TGGTTACGTCACAGCCGGGACCGCTTCTGTATAGCATTTGTGCCACTCTTCAGGGAATCAAAGATAGTCTGGGC  
TTCCAGCCGAATCTGCGTATGCGGTGATTGCGCTCGGCGACAGTAGTTATGTGAATTTCTGCAATGGCGGCAACAGTT  
CGATGCCCTGTGAGCAAGACAGAGCGCTCAGCGGGTGGGAGAAATGCTGTTGATGACGCCAGTGAGAACCCGGAACCGG  
AAACGGAATCAAATCCGTGGGTTGAACATTTGGGACAGATGTTGCTCTGA  
>Cluster\_6733  
ATGGGCAACAATGAGCATGAAGTTATGGCGGACAAACAGAGAGCAGAAGCTATAAAAAAGGCAATTCGGAACACTCGAC  
TTATGAAGAACTGGCCGAGAAAGACTGGCATTAGCGTAAGTACGCTGGTCAAGGATAGCGTCCCGCAAACTGAACCTAAAT  
TCAGCGATATAATTCAGATAGCTAAAATTAAGCGCAGATTTGAACACCTTAGCTTATGGCTATGCTCTTGTATGTTAAA  
GAAGAAGCTACTGAGCGAAAGCTGATAAATCTGCGGACGGATATACATGATGAAGAAACCACGAAACCGCATAAATTTCA  
CGTGTGAACATCAGAACACTGGAGAAGCAAGATATTCGGCACTTGCAAGGCAAGTTCTGCAATTAAGTTTATATACCT  
ACAGTACAAAAATGTTTATGAAAAAAGCATTGTGAGCGAAGAGTAA  
>Cluster\_10958  
ATGTATAATGCTAATCCCAATTACGAAATGGACTTCATGATTCGAAAGACGTGAATGAACACATGGAAGGTCTGTTTCA  
ACGTTTTTCTAACTGTTACCTTTTCCAGAAATGATTTTGGCTACAGGAAAGACACGCCAGTTTTGGTCAATCTCTGTAGGC  
ACAGTATGTGATGAAATGCACCGCTTACTTAGTGAAACCCAAACGATGCTGGCGGGATATTACTGGGTAATGGAATAT  
ACGTCAAACAAGGACTTCATATTCATTTTATCGGCTACCTGGATGGCAACCTCACAAACAACTTTATCGGATATCCAG  
GCAACTGGGAGATATCTGGAGGGGACTACGGAAGGGGTTATTTTCACTGTGACGGGTAAGAACAAATACCCGG  
TGGTATCGATCAGTAAATTCATATAGTGATAAATCTGCGGTATGA  
>Cluster\_6491  
GTGATTACGAAAAATAAATTTTTAGACAGTAGCCAGTACAGCGTTAAAAATGGGGCGGATAGTGAGGCGGTTTTGGCTGC  
GCTTATTGAACATTTAGAAATGATCAATCTTCTGGCAGATTAAGCCAAATACCCGTTCCGCAATGCTTCAGTTACGCG  
AAGAGAAATGGTCTGAATTCCTTTTGGTGTGCTAAATTCCTGGAGTGTCTGGATTATGTGATTATTAAATTTAACTCCA  
GAAAGCAAAAAACGTTGATGAGTGAACACCGTAAACAATATCAGGTAGCAATGTATGCTTTATATAGCCAACGTCGGCG  
TAAATCGCCGGGTGATGAAAGTGAACACTTACCCGTAGAAATGACGCTATCTTCGGCAACACGATGGCAACATTTG  
CGCAATACTTCCCGCAGGACTTGA AAAACCGTCTGTGTAG  
>Cluster\_11531  
ATGTTACCATTAGCTCATCTAATAGTGTTCACGGCCTCAGAATGAGGCCACTCCACCTCAGCACAAACAGTGTGTGT  
GCAAAAAACAACAGAACTATAAAAAATAACACAACCATACAGAGACC AAAACTGACTTTAAATTTTGTATATAAACCCCT  
CCCCCTGCATCGGTAGGGGGCTTGCAGGAGAAGTATTTAAGGATCCAGATAATCCTGGATATGTTATCAAACGTTATAAT  
AAAGCGAATTCAGTGTGCGCAAAAAGAAATGTCATTTATTAACACATATTATGGTGAAGGCAGTGCAGTATTTTAC  
TGAAAAAGGACGTACCTGTTACGATGCTGGAGGTTCCCTGGTGTACCATTACGAGAATGAGTCAGTTTCTGAAAAATG  
CCAACAAATGTTTCTTGTATGATCATTGACATGGGGAGAGAGTAA  
>Cluster\_63662  
ATGTTTATCTTAATCAGAAAAATATCATTTGGTGGAGAAGCGTGGTTTTACGCCAATGAAGGACTTAAAACCTGTAGACGG  
GTTAAAACCTGTTGGTGGCAAGCAGCGATAACGATCAGTATCGCTCCCGTAATGCATTAATCCGTCGCCACATTGAGAAAA  
TGGATGCCAGTTTCTCCGACGTCGGAACGAAGGAGTTTGATATTTCAAAGGTTTCCGAGGTGGATTCTGTTGATGATTTACT  
ATTGATAATGCGCTCGTTATCTGCTGAAAGACTGGAAAGGGTGGTGAACCTGTTAATGGTGTGAGGTTGCACTGGA  
ATATACGGCAGAACGAGGATCGCGCTGCTTAAAGCAGAATCCAGAGTTGACTGGCAGATCTTCGAGAAGCAGCCAGCA  
TCGCCAGGGTAAAGAGCAGCAGAAGCAGGATACGATAAAAAAGCCATAG  
>Cluster\_54400  
ATGCAAGACACCATCATAAATTTTACAGCACCAGCGATGACTACGGTGAATTTTCTAACTTTGCCGCTGGCCCATCAA  
GGTTGACGGGAAACCTGGCCCACTCAGAACACTATTTTACGGCACAAAAATTCCTTGATGAAAAATACCGCGAAGAGA  
TCCGTCGGGTTTCTTCCCTATGGTCCGCGCACGATGGGGCGGATCGTTCCTAAGCCCTTCGCTGTA AAAACTGGGAGTGC  
GTCAAAGAACAGGTGATGCGAAAAGCACCTCGCGCTAAATTCGAACAGCATGCAGAATGCGTGGCTCTTGTGCGAAC  
CGCGCCCGCAAACTGGTTGAGCATACGGAAAACGATGCTTACGGGGAGACGGTGGTCAATGTAAGGCAAGAAATCGAC  
TGGGTACCTTTTAAATGGAGTTGCGCGAACAATGGCTATAGAGAAGTAA  
>Cluster\_43462  
ATGAACACGATTTCTTCCCTCGAAACGACTGATTTACCAGCGGCTTTCCACATGAACAACCGGCCACACCTTTCCGTG  
GAGTGAAAAAACCTTTGCCAGCAACCAGGGCGAGCGCTATCTCAACTTTCAGTTAACGCAAAACCGGCAAAATGGCGGCT  
TTGCGATTACGCAAGTGGTGTGGATGAAGCTACATGTTTCAATATTCGGTGCATCTGACTATCAGCGTCAGGGACTG  
GAAAGGGCTGCTGGAACACTGATGACGAACTGGAAAAACCGCGGCTGGCAGCGTATGGCTGGAAGCTGCTGCTC  
AAATGCTGCGCCATTTGCCCTGTACGAAAGTTTAGGCTTTAACGAGGCGACGATTCGCGCAATTAATACCCACCACCG  
ACGGTCGCGAAGACGCCATCATCATGCGGTTACCAATCAGTATGTAA  
>Cluster\_40849  
ATGCAGAAAAAACGCTGATACAGCTTATCCATATTGCCCGTAATGAACTGGGTATGGATGAAGACACCTACCGCCAGAT  
GTTACAGGGGCTGACCGGTAAAGCCTCAACCAAAGGAATGGATACCACACAATAAATGCGTGTGGAATCCATGAAAA  
AGAAAGGCTTTCGCGTTAAACAGCCAGAAAAGCCAGCTCCGGTTTACCGCTGGATAACCATCCGAGTCCAGGAAAAAT  
CGTGGCTATGGCTTGAATGGCTGCTGCTGGCATTTGTTGCTGACCGTTTCAGAAAAATGCAATGACGAGGTGGATCAAGCG  
GGAACCGGCATCAGCGCCCTGCGCTGCTGACTGAACAGGCAAGCAGTGTATTGAGAACTGAAGAAGTGGCAGC  
GCAGAGCTGCGGGAGTCAAACATGAGCGACCTGAATCAGTTTTCGAAGTAA  
>Cluster\_42307  
GTGAGGCGATTGCCGGGATTTTACTGCTTACTGGAGCGCGCTCGTTGTGATCGCTGCCCTGCTGGTTAGCGGCTGCG  
TATTGCTTTACCGCATCTTGACGCTGGCGTCCGGAATCCTCAACAAAAATAGAATCCGCGACTGGCATGCGGTTAGAAG  
CCAGTCAGCTCTCAGCCAGCTGGCAGAAATTTGGTCCGACGCTTGAAGCGCACGACATCCGTGAGAAATTAAGATGGC  
GGCAATTTTTCGGTTAAACCGGTTACTCTGGCGCTGGATGCTTGGCAGAGCTGTTACATATGCGCTGGCAGTTTTCGCGA  
CCTCAATTTCTGGCAGCTGCGTTTTCTGCACTAACACTGTCTACCCAGCGCGGTTGATGATGATGATGATGATGATGATG  
ACATCAGCGATCTGTTCTTCTGCAATTTGACCATTTGCTATCTCCGCGACAGTGAAGTCAAGTTTCTGACGCCATCCGGT  
CAGCGCGCGAGCTGGCGATCCACAGCTACCTGGCTGAACGATCCAGTTCGACACCGTGGCGAAGGCTGGTAAGCT  
CTCCAGCTTACCGGACAGCACGGCTGATGCAAGTGGCTATGATTTGCGGATGATGAGGGGTTGTTAAGCAATGGTCT  
CGCTTGGCTCAGCGGATGACATCGACTGAAAGCGTGGCTCGGTAATGATGACAGGCAATATTGCGTGAACACCG  
GCACAGTTCTCCCTTGAAGGCTGGATGACGATCGACAAAGGCGATGTAACCGCGGTTGACGCTGGCTGAAACAGGGCGG  
TGCCAGCTGGTTGGCGGAGAAGGAAACACATACGCTGTCGGTGATAAATCTGACTGCGCATATTACCGCTGAAAAATCCGG  
GATGGCAGTTCTTATTCCGATACCGGATCAGGATGACGCGCAACCTGGCGGAGCGGAGCATTTGACGCTGGCTGGC  
ATACCGGAACAGGAGCTGGCGGCAAGACAATAAACCGAGTGAACGAACTCCGGATTCCGCGCCAGTAATCTGGAGCTGGC  
AGGCTGGAGGGCTACGCCGCTGGTCCGAAACTTTCACTGCACTGGGTGATGTTTGGCGCTCCACACAACCGAGCG

GCAAGATTAACACTCTGGCGCTGGATATCCCGCTTACGGCGGCAGACAAGACCCGTTTTTCAGGCATCGTGGAGCGATCTG  
GCCTGGAAGCAATGGAAATTAATTACCGGCTGCGGAACACTTCTCCGGGACGCTTTCCGGCAGCGTAGAAAATGGTTTGGT  
TACTGCGTCGATGAAGCAGGCAAGATGCCCTTACGAAACGGTATTCCTGCGCCACTGGAATCGCCGACGGCCAGGCAA  
CGATAAGCTGGCTGAACAATGACAAAGGTTTCCAGCTGGATGGCGTAATATTTGACGTTAAAGCCAAAGCCCTCATGGC  
CGCGCGGTTTTCGTTTACCTGCAACCTGCTAACGATGAACCTGGCTGGGTATTTCTGGCTGGCATCAGTACCCGATGATGG  
TTCACAAGCTGGCGCTATTTCCCGGAAAACCTTGATGGGTAAAGACTGGTTGATTACTTAAGTGGCGCGATTTCAGGGCG  
GTGAAGCGATAACCGCAGCGCTGGTTTATGGTGGCAATCCGCAACTCTCCCTATAAAACACAACGAAGTCAAGTTTGA  
GTGCTGGTGGCGCTGGCAACCGCAAGTTTGCCTTCCAGCCGGACTGGCTGCATTAACCTAACCTTGATATTGAAGTGA  
CTTTATTAACGACCGGTTTATGGATGAAAACCGATGGCGTTAATCTGGGCGGCGTGGCGCGAGTAATCTACCCGCAAGTGA  
TCCCTGACTACTCAAAGAAAACTGCTGATTGACGCTGACATTAAGGTCCGGGTAAAGCCGTTGGCCCTTACTTTGAT  
GAGACACCCTGAAAGATTTCCCTGGGTGCGACCTGCAAGAATCCAGCTCGACGGCGATGTGAATGCTCGCTTACATCT  
TGATATCCCGCTGAACGGCGAGTTGGTAACCGCAAGGTGAAGTGAAGTGAAGTGAAGTGAAGTGAAGTGAAGTGAAGTGAAGT  
TCGACAGCACCTTGA AAAATTTGAGCGGTAATACTCAGCTTTATCAATGGCGATCTGCAAAGTGAACCACTGACAGCAAGC  
TGGTTAATCAGCCGTTGAACGTGGATTTTCCACCAAGGAAGGGGCAAAAGCCTACCAGGTAGCGGTAAACCTAACCGG  
TAACTGGCAACCGCGCAAAAACCGCGCTTCTGCCGTGAGCGGTGAACGAAGCATGAGTGGCAGCGTGGCGTGGGATGGTA  
AAGTGGCATTGATCTGCCCTTATCATGCTGGCGCAGCTATAACCTAGAGCTGAACGGCGATTGAAGAATGTGAGCAGT  
CACTTACCTTACCGTTAGCTGAAACCTGCGGTTGAACCACTACCGGTAACCGTTAAGGTTGATGGCAATCTTACAGCTT  
TGAATTAACCGGACAGGCTGGTGGGATAACCAATTTCAATAGCCGCTGGTTGCTCGGTCAAAGCTGACGCTCGATCGTG  
CTATTTGGGCGGACAGCAGTAAAACGCTCCCGCGTTGGCGGAACAAAGTGGCGTTGAACCTAATATCGCCCGGATGAAT  
GGTGGCAGTGGCTGGCCGTTCCGAAAGCGCGGCGGAGAGTGTGGTGGTGGTGGTGGTGGTGGTGGTGGTGGTGGTGGTGGT  
GTTACGTACGCCATGTTTCTCGCTGGGAAATCAGCAATCGAATAACCTGAGTATGTTTTTCGCAACCGCAGGCAAAATGGCA  
CCCTGGTTGAGGCGCAAGGGCGTGAATCAACGCCAGCTGGCGATGCGTAATAACGCACCGTGGCTGGCGAATATCAA  
TATCTTTATACAACCAAGCGTGGCGAAAACCTCGTGGTGAATCAACAGCTCATACCTTTCCCGCACACGGAACCGCAT  
TAACTTCGCTGGCTGGCAGCGACGACGCAAAATACGATGCGCAGAGTGTGGTTCTGGGGGCAAAAATTCGTTGATGACA  
GTGATATCACATTTCTGGCGATACGTTAACGCTGACTAATGGACTGATTGATACTGGTTTTTTCGCGGCTCACTGCCGAT  
GGTGAATGGGTTAACAATCCGGGGAATGAACGTACCTCCTGAAAGGAAAACCTGCGCGGCGAGAAAATGATGCGCGCCG  
AGAATTTTTTGGTGTACGACGCCATACGCCAGTGTGATTTAATGTGGATTACGATTTACTGCGCAAGCACCCCT  
GCGACCGATGAGGCGCAGCTGTAATGGCATCATTTACATGCTCACTGGGTAAGGCGAAAATTAACGAAATCAATCCGGA  
CATGCCGGCAATGCTGCGCTTATTGAGCGTAGATGCCCTGATGCGTAAAGCTGCGTTTTGATTTAGAGACACTTTTGG  
CGAAGGTTCTATTTGACTCCATTCGACGACCGCGTGGATTAAAGACGGCGTTATGACACCGACGACCGCTGGTGG  
ATGGCTGGAAAGCGGACATCGCCATGAAAGGCTCGGTAATCTGGTACGTGCGGACCTGAATAATGGAAGCAGTTGTGCGCA  
CCAGAGATTTCTGCGACCGTGGCGTGGCTGCGGCTTTGCGGTTAACCCCATGTTGGCGCGCAGTGTTTGGCCCGAG  
TAAAGTGTGGTCCGCTGTGGAGCAAAGTCTCCATTTTGGCGTATCACATTTTCGGTCCGCTGGACGATCCGCAATCA  
ACGAAGTGTGCGCAACCGCGTAAAGAAAAAGCGCAATGA

>Cluster\_21521

ATGACAGAACAACAAAAATTGACCTTTACTGCCCTGACGACGCGGCTGGATTTCGCTGATGCTGCGTGCAGACTGCGTTTT  
TTCGCGCTGTCACCGGCTGAAGAAGGTTAAAAATCCTGATGCACAACAGGCCATTTTCAGGAGATGGCGAAAGAGA  
TTGACCATCGCGGAGGAAAGTCTGCTGCGTGAAGCGGCACGACCGGAAATTAACCTACCGGACAATTTGCGGTTAGT  
CAGAAAAGCAGCATTTCTCAAGCGATTCGTGACCAAGTGGTGAATGCTGCGCGGGGAAACCGGTTCCGTTAAAAAC  
GACTCAGCTACGAAAATCTGATGGAGCTGGGCGCGGGATTAAAGGCTGATCGGCATACCCAGCGCGTGGCTGG  
CGCGCGAACCGTGGCGAACCTGATTGCGGAAGAGCTAAAACGGAGCGGGCGGTTGATCGGTTACAAAGTGGTTTT  
AGCGATCAGCTCAGTGAATAACAGATGGTCAAGCTGATGACCGCAGGTATCTGCTGGCAGAGATCCAGCAAGACCCCT  
GCTGATGCAATGACGACCATCATTTATTGACGAAGCGCACGAACCGCAGCTGAATATCGATTTTCTCCTGGCTTTTGA  
AAGAGTTGCTGCGCGGCTCTGACCTAAAAATCATTTACCTTCGCGACTATCGACCCGGAACGCTTTTCGCGCCAC  
TTTAATAATGCGCGGATTTATCGAAGTCTCCGGTGGACCTATCCGGTGAAGTGGCTATCGCCGATTTGTTGAAGAAGC  
CGATGATACCGAGCGCATCAGTTGACGGCGATTTTGGAGCCGATGATGAACTGAGCCAGGAAAGCCCTGGCGACATTC  
TGATCTTTATGAGCGCGGAGCGGAGAAAATTCGCGATACCCGCGATGCGCTGAACAAAGCTGAACCTTACGCCATCGAAATC  
TTGCGGCTTTATGCGCGGCTTTCCAACAGCGAACGAAACCGCGTGTCCAGTGCACAGCGGGCGACGATTTGACTGGC  
GACCAACGTCGCGGAAACCTCGCTGACCGTACCGGATTAATAACGTTATCGACCCAGGTACAGCGCTATCAGCCGCT  
ACAGCTATCGACCAAAGTGCAGCGTTTGGCGATTGAGCCAATTCGCGAGCTTCAGCTAATCAGCGTAAAGCCCGCTGC  
GGCGTGTGTCAGAAAGGATCTGTATTCCTCTCTATTCGGAAGACGATTTCTCTCGCCCGGAGTTTACCGACCCAGA  
AATTCGCGTACTAACCTGGCCTCGGTTATTTGACAGTAGCCGACTGGGCTTGGCGGATATCGCCGATTTCCGTTTG  
TCGAAGCACCGGATAAACGCAATATCAGGATGGCGTGGCTGCTCGAAGAGCTGGGCGGATCACCACTGATGAACAG  
GCCAGCGCTATAAACTGACCGCGCTGGTCCGCAACTCTCGCAGTTGCTGTGACCCACGCTTGGCGGATGTTGGTGT  
GAAAGCGCAAGAACATGGCTGGTGGTGGTGGTGGTGGTGGTGGTGGTGGTGGTGGTGGTGGTGGTGGTGGTGGTGGTGGT  
CGATGGATAAACAGCAGGATCTGACGAAAACATCTGCTGCTCCAGCAAAAGAGTCTGACTTCTCCTGCGTTTGTGAAT  
CTGTGGAATTTATCTGGCGAGCAGCAAAAGCGCTTTCTTCAAACGCCCTTCGCTGCGCTGTGTGATGATTATCTCAA  
CTATCTGCGGCTGGCGAATGGCAGGATATCTACACCACTGCGCAGGTGGTGGTGAAGAAGTGGCATTCGGTTTAA  
CGAAACCGCGGATTTATCGCGAAATTCACATTTGCTGCTGACCGGTTTGGCTTTCGCAATATCGGATGAAAGATCCGAT  
AAACAAGATATACCGGCGCACGTAACGCGGTTTCTCCATCTTCCCGGTTCTGGTTTATTCAAAAGCCGCGGAAATG  
GGTAATGGTGGCGGAACTGGTAGAAACAGCCGCTGTGGGACGCGATTTGCTGCGCGGATCGACCCGGAATGGGTGGAGC  
CAGTTGCTCAGCAATTTGATTAACGCACTACAGCGAACCGCACTGGGAACGGGCGAGGCGCGGTTGATGGCAACGGAA  
AAAGTCACTGTTTATGGTTTGGCGATTGTTGCGCGCGCAAGTCAACTACAGCCAGATCGATCCGGCTTATGTCTGA  
ACTCTTTATTCGCGCACGCGCTGGTGAAGGTGACTGGCAGACGCGTACGCAATTTCTCCGTGAAAACCTGAAACTACGG  
CGGAAGTAGAAGAGCTGGAACACAAATCAGCTCGCCGATATTTGGTTGATGACGAAAATGCTGTTTGGTTTACGAC  
CAGCGCATCAGCCACGATGTGATTTCCGACGCTCACTTCGACAGCTGGTGGAAAAAAGTTCAGCCGCGAAACCGCTGATTT  
GCTCAACTTTGAAAAGAGCATGTTGATCAAAGAAGGGGCGGAAAAAATCAGCAAGCTGGATTATCCGAACTTCTGGCATC  
AGGGCAATCTCAAGCTGCGTTTGAAGTATCAGTTTGGAGCGGGGCGAGATGCTGACGGAGTGACCGTACATATTCGCTG  
CCGCTGCTTAAACAGGTTGAGGAGAGTGGGTTTTGAGTGGCAGATCCCCGGTCTGCGTCTGAGTGTGATCATCCGCTGAT  
TAAATCGCTGCGCGAAGCCGATACCCGTAATTTTGGTCAACTTCGGAAGTTACGAGCAGAAGCGTGGCAACTACAAAGGCG  
CGCTGGAATTTGCGTTGCTGACAGCCTTGAACGAGAGTTACGGCGGATGACTGGCGTACCGTTGACCGGAAAGACTGG  
CACTGGGATCAGGTGCCCGATCACTGAAAATCACTTTCCGCTGGTGGATGACAAAAACAAGAGCTAAAAGAAAGGGCG  
CTCATACAGGACTGAAAAGCAGCCCTGAAAAGCAAAGTGCAGGAAACGCTGTCTGCCGTTGGCGGATGACGGTATCGAGC  
AGAGCGGTTTACATTTGATTTGAGTTTGGTCAACTTCGGAAGTTACGAGCAGAAGCGTGGCAACTACAAAGGAAAGCG  
TGGCCAGCGCTGGTGGATGAGCTGACAGCGTAGCGATCAACTGTTTATAACCCGCTGGAACAGAAGCAGGCAATGTG  
GAACGGTCTTCGCGCTTTACTGCTGCTAAATATTTCCATCGCCGATCAAGTACTTGCAGAAAAGCTGGCAAACAAAGCCA  
AGCTGGGGCTGTACTTTAAACCCGATGGCAAGTGTGAGCTGATCGATGACTGATCTCTCGGTTGGTGGTGGTGGTGGTGGT  
ATCGACGCCAATGTTGGCCCGTCTGGACGGAAGAAGGCTTGGTGGCGTGCATGAAAAGTCCGCGTGAACGTAACGCA  
CACGGTGGTGGATTTGCGAAGCAGGTCAGGAAATCTCACTGCGGTTTCAATATCAACAACGCTGAAAGGGCGGG



TGGATATGACCATGGCGCTGGGGCTTTCTGACATTAAGCGCAGATGGCGGGCTGGTGTATCGCGGTTTTGTCACCTGGT  
AATGGCTTCAAACCGCTGGGCGACACGCTGCGTTATTTTCAGGCGATTGAAAAGCGACTGGAAAACTGGCGATTGATCC  
ACATCGCGACCGTGTCTCAGATGCTGAAAGTCAAAAACGCTCCAGCAGGCGTGGCAGCAATGGATCAACAACTACCGCCTG  
CACGTCGTGAGGATGAAGACGTGAAAGAGATCCGCTGGATGATAGAAGAACTGCGCGTTAGTTACTTCGCTCAACAACTT  
GGCAGCCTTATCCGATTTCGGATAAGCGTATTTTCAGGCGATGGAGCAGATTAGCGGTTAA

>Cluster\_33660

ATGAAACGACATCTGAACACCAGCTACAGGCTGGTATGGAATCACATTACGGGCGCTTTCGTGGTTGCCTCCGAACTGGC  
CCGCGCACGGGGTAAACCTGGCGGTGTGGCGGTTGACTGTCTCTTGCCTGGTACCGTCACTCCCGGTGCTGGCTGCTG  
ACATCGTTGTGCACCCGGGTGAAACAGTGAATGGCGGAACACTGGTAAACCATGACAACAGTTTGTATCCGGAAACAGCT  
GATGGCGTACTGTCTCAGTACCGGGCTTGAGCTGGGGCCGGACAGTGACGAAAACACCGGGGGCAATGGATAAAAAGCGGG  
TGGCACAGGCAGAAACACCACTGTCAACGCAAAATGGTCTGATGATGTCAGGAGGAGGAACTGCCAGTGATACGGTTA  
TTCGTGATGGCGAGGAGGACAGCCTTAACGGACTGGCGGTGAACACCAGCTGGATAACAGAGGTGAGCAGTGGGTACAC  
GGGGAGGAAAGCTGACCGTACAAATTAATAACAGAGGGTTACCAGACCATAAAAACATGGCGGACTGGCAACCGGAAC  
CATCGTCAACACCGGTGCAGAAGTGGTCCGGAGTCTGAAAATGTGTCCAGCGGTGATGGTCCGAGGGACGGCTGAAT  
CCACCACCATCAACAAAAATGGCGCGCAGGTATCTGGTCTTCGGGGATGGCAGCGGACCCCTCATTACCGCGGTGTT  
GACCAGCGGTACACGGAGGCACATAACACCGGCTGGAGGGGGTAAACAGTATGATACACAACGGTGGCAGCGCAAC  
AGAAACCGCGATAAACCGGTGATGGCTGGCAGGTGATTAAGGAAGGAGGAACTGCCGCGCATACCACCATCAACCGGAAG  
GAAAGCTGCAGGTGAATGCCGGCGGTAAGCGTCTGATGTCAACCCAGAACACGGGCGGTGCACCTGGTTACCAGTACAGCT  
GCAACCGTCAACCGGCACAAACCGCTGGGAGCATTTCTCGTTGGCGGGTAAAGCTGATAATGTCTGACTGGAAAATGG  
CGGACTGTGATGTCTGAGCGGACACAGCAGCTAATACCCGTTGGATGATGGCGGAACGCTGGATGTCCGCAACG  
GTGGTGGCCACCACCGTATCCATGGGAATGGCGGTGTTACTGCTGGCCGATTCCCGTGGCGCTGCTAGTGGTACC  
AGCGACGGAAAGGCATTCGCTATCGGAGGCGGTGACGGGATGCCCTGATGCTGGAAAAGGCAGTTCATTACGCTGAA  
CGCCGGTGTATCGGCCACGGATACACCGTAAATGGCGGACTGTTCACCGCCAGGGGGCGCACACTGGCGGGCACCACA  
CGCTGAATACCGGCGCATACTTACCCTTTCGGGAAACCGTGAATAACGATACCCCTGACCATCCGTGAAGGTGATGCA  
CTCTGCAGGGAGGCGCTTCTTACCCTAACGGCAGGGTGGAAAATCAGGAAGTGGCACACTACTGTGACGAAACACCAC  
ACTCACCCAGAAAACCGTCAACCTGAATGAAGGCAGCTGACGCTGAACGACAGTACCCTCACACGGATGTCATCGCTC  
AGCGCGCACGGCCCTGAAGCTGACCGGCGAGCAGTGTGTAACGGTGCCTTACCCACGAAATGTCACTGACATCC  
GGTGCACCTGGGAATACCCCGATAACGCCACGGTTCAGTCCGGTGGTGAATGACCTGACCCATGCCGACAGATTCATTT  
CACCTCCGCCCGCACAGGGAAGTTCGTTCCGACAACCCGTCAGGTGAAAAACCTGAACGGGCAGAAATGGCACCATCAGCC  
TGGCTGTACGCCCGGATATGGCACAGAAACATGTGACAGACTGGTCAATGACGGTGGCAGGGCAACCGGAAAAACCATC  
CTTAACCTGGTGAACCGCGCAACAGTGGTACGGGGCTGGCGACCACCGGTAAGGGTATTCAGGTGGTTGAGGCCATTA  
CGGTGCCACACGGAGGAAAGGGCGCTTTTTCAGGGGAATATGCTGCAGGCGGGGCCCTTAACTACTCCCTCAACCGGG  
ACAGTGTAGAGCTGGTATCTGCGCAGTGAAGAACGTTATCGTGTGAAAGTCCCGCTGACGCTCCATGCTGACACAG  
GCAATGGACTATGACCGGATTTCTGGCAGGCTCCCGCAGCCATCAGACCGGTGTAACCGGTGAAAAAACAACGCTCCGCT  
CAGCATTCAGGTTGGCCATCTCGGTACGATAACAACGGCGTATTCGCGTGGGGCACCGCGGAAAGCAGCGGCGAGCT  
ATGGCTTCGCTCCGCTGGAGGGTACCTGCTGAGAAACAGGTTGCGGCGGATGCTGTGACCGCAGGGGTATATGGTCT  
GCAGGCCATTTCTCCGTTGATGTTAAGGATGATGACGGCTCCCGCGCCGGCACGGTCCGGGATGATGCCGGCAGCCTGGG  
CGGATATATGAACCTGACACACACCTCCCTCCGGCTGTGGGTGACATTTGTGGCACAGGGAACCCGCCACAGTATGAAAG  
CGTACCTGGCAATAACGACTTCCACGACCGGGCCGGGCTGGCTGGGCTCACTGGAACCGGTCTGCCCTTCAGTATC  
ACTGATAACCTGATGTGGAGCCACGGCTGCAGTACACTTGGCAGGGGCTTTCGCTGGATGACGGTAAGGACAACCGCGG  
TTATGTGAAGTTCGGCATGGCAGTGCACAGCATGTGCGTGGCGTTCCGCTGCGGAGCCACAACGATATGACCTTTG  
GTGAAGGCACCTCATCCCGTCCCGCCCTGCGTGCAGTGCAAAACACAGTGTGCGTGAACCTGCCGGTGAACCTGGTGGGTA  
GACCTTCCGTTATCCGCACTTACGCTCCCGGGTGAATGCTGCTGGGGACTCCACCGCAGGCAGCGGATGACGTT  
CTCTCCCTCACAGAAATGGCACTTCACTGGATCTGCAGGCGGACTGGAAGCCCGTGTCCGGGAAAAATACACCTGGCGG  
TTCAGGCCGTTATGCCACAGCATCAACGGCAGCAGCGCTGAAGGTTATAGCAGTCAAGCCACGCTGAATGTGACCTTC  
TGA

>Cluster\_22683

ATGACTCCAGTAAAAGTGTGGCAAGAGCGGTTGAGATCCCGACCTATGAAACCGGGCCGAGGATATACATCCCATGTT  
CCTGGAAAATCGCGTTTATCAGGGATCGTCCGGCGCGGTTTATCCCTACGGCGTGACCATACGCTGAGCGAGCAGAAAA  
CCCTGAAATCCTGGCAGACGGTGTGGCTGGAAAACGACTACATCAAAGTATGATCCTGCCGGAACCTGGGCGGTCCGGTG  
CATCGCGCATGGGATAAAGTGAACAGCAGCGGATTTTGTCTATCAACAATGAAGTCAATTAACCTGCGCTGGTGGGCTGCT  
GGGACCGTGGATCTCCGGCGGATTTAGTTTAACTGGCCGCAACACCATCGCCCGACCACCTTTATGCCCGTTGATTTCA  
CCCTCGAAGCCATGAAGACGGCGCACAGACGGTGTGGTATAGGCGAAACGGAGCCGATGCATGGTTTACAGGTGATGACA  
GGTTTACCCTGCGCCCTGACCGGGCGGCTGGAAATCGCCAGCGCGTCTATAACGGCAACGCCACGCCGCGTCAATTT  
CTTGTGGTGGCCAAACCGGCAAGTGAAGGGGGTGAAGGGCATCAGAGCGCTTCCCGCGGATGTAACCGCGGCTTTTGG  
ATCAGGGCAACCGGGCGCTTCCGCTTTCCCATCGCCACCGGCACTTACTACAAAGTGGACTACTCCCGGGAGTGGAC  
ATCTCTCGTATAAAAATGTGCCAGTGCAGCTTTCGTTATATGGCCGAAAAATCGCAGTACGATTTTGTGGCGCATGGT  
TCAGATGAAGATGGCGGTTTGTACAGCTTGCACCAACACATCGCCAGGTAAAAAACAGTGGAGTGGGGACACA  
GTGAATTCGGCCAGGCGTGGATAAAGAGCTGACCCGCAACATAACCGCCATATATCGAAGTATGACCGGATTTTGGC  
GATAACAGCCTGATTTTACCTGGCTTGTGCTGACGAAAGAGAGCGTTTCGAGCAGTATTTCTGCCTTACCATCTCT  
GGGCATGGTCAAAAATGCCTCCCGCATGCGGTGATAAAAATCCAGCGTAGTGAGCGGGGGATGAGTGGGGGCTGTATG  
CCATCTCCGTTGAACGGATACCGCTGGCGAATCCGCAAAATGCAACCGTTACTTGTGATGATCCGCTGGCA  
CTGATGCCAGCGACCGCATCCAGGCGGTGTTGCACGGTATCAATCTGACAGACTAACCATTTGAGCTCTCCGATGCCGA  
CGGCAATATCATACTGAGTTATCAGGAACATCAGCCGCAAGAGTTGCCGTTGCCGAGCTCGCCAAAGCGCCACTGTGAC  
CACAAGACATACCAGTACAGATGAAGCTGGTTTATCGGTGACGCTGAGCAATAATCATCAGCCAGCGGTTACCCG  
TTCCGATTAACCTGCGCGGCGTGGCGTGGATCCGTTGATTTGCTGTAACCTGGCGCTGGCGATGCTGGGAATATA  
CCGCGCGGATTTCCCGCAAGCGGTGGCGTATGCCACTCAGGCGTGAACCGGCACATGCGCTGAACAAAAATCCGAGT  
GCGGACAGGCCAGTTTGTATCGCGCAGTGTCTACGAACGCTCAGGACAAATATCAACAAGCCGAGAGGATTTCTGGCGG  
CGGCTGTGGAGGGCAATAGTAAAGCAGGCGGCTATTAATGGTCTGGCAGCAGCTGGCGGCGGTAATGGTCACTTGCATG  
TGGTCTGGATTTTTCGCAACAAAGTCTTTCGCGCTTGTCAACCAACAGGAAAGTGTCTTTCGCTCAATAATCTGCTGCTG  
TGTTAAGTGGTCTCAGGACAACCGCGTTCGAGCGCGAAGAACTGCTGCGCGATTAATCCGCTGACCGCCACTTTGTGG  
TGGCTGAAATGGTTCGATGGTCTGAGCAATCAGCCCTCGCGAGTGGCGAGGCTTTTGTGAGGGACGCGACGTTAACCG  
CCTGATGACCGCGGGCAACTGATTAACCTGGGGAATGCCAACCTTGGCGGAGAGATGCTGAACGCACTGGACTGCGACG  
GCACACTGCGCTTTTACCTGCAAGCGACTTGTGCTGGCGAAAGCTGAACCGCGGCAACTGGTGCAGAAAACGCAATGATG  
TTCCACAGTTTGTCCGTTTCCGAAATACGCTGGAAGAAGTAGCGGCGTGGAGAGTATCGAAGAGTGTGGTTTGGCCG  
GCATTTACTGGCCTGCTTCTACTACAACAAGCGTAGCTACGTTAAAGCATTGCTTATGGCAGCGTTGCTGATAGATG  
CGCCGAGTTTGGCGAGCGCTGGCGGTTGGGATCATGCTGGAATAAGCAGCAGCATTTATGAGTGGCGGCGCT  
TATCTTGATAATGCTTATCAGCTTGGCGCGCAGGATGCACGCTGCTTTTTCGAACGGGATTTGCTGGATAAGTTAAGCGG  
TGTCACACCGGAGAACGACTGGCGGCTTGGAGAATAATCTGGAATTTGCGTGAACCGGACGACATGACCGCAGAAC

TGCTCAATTTGTGGCATCTCACTGGTCAGGCAGACAAAGCGGGACATTTCTCGCCACGCGCAAATTCACCCCGTGGGAA  
GGTGGGGAAGGGAAGGTCCACAGCCAGTTTATCCTCAACCAGTTATTACGCGCCTGGCAGCATCTTGATGCCAGACAGCC  
GCAGCAGGCCAGCGAAGTCTTTCATGCCCGCTGCATTATCCGGAGAATTTAAGCGAAGGCCGTTTACCGGGGCAAACCTG  
ACAACGACATCTGGTTCTGGCAGCAGTATGCGCCAACCGCTGGGCGATGAAACTGAAGCGAGCGGTTGTTTTACGTCTG  
CGCGGACCGCGGATCGCACCATTAACATCCACAGTTATTAACAACGATCAGCCGGTTGATTATCTCTTGGCAAGGAAT  
GGCGCTGCCACTGCTGGGCGAACAACAACTGCACAGCAACTGTTTAGTGAATGAAACAGTGGGCACAAAGAGATGGCGA  
AAACCAGTATCGAAGCGGATTTCTTTGCCGTCTCGCAGCTGACTTGTGTGCGTGTATGGCGATTTACAACAGCAGCAT  
AAAGAAAAATGCCTGATGGTGGCGATGCTGGCGGCCGGGATTAGGGGAGGTTGGCGACTATGAATCTGCTCGCGCTGA  
ATTGATGGCGATTAAATCCAGCCTGGCCGAAAGCGCATTTATCCACCACCGTGTGCCTTTTATTTTAGCTACGTTACT  
AA

>Cluster\_55583

GTGAAACAAACGTTAATTGTCTAGTTTTGTTCGGCGACTCGAGTACCGCGCAGGTTGATCTGCAGAAGTCGAAAAATGAAGT  
GGTCGCTGACGGCAATGATAGCGCCACAATGACCGCGACAGTCCGGGATGCAAAAGGCAACCTGCTCAATGACGTCAAGG  
TCACTTTTCAATGTTAATTCAGCAGAGGCCGAACTGAGCCAAACCGAAGTGAATAGCCACGACGGGATCGCCACAGCTACG  
CTGACCAGTTTAAAAAATGGTGATTATAGGGTTACGGCCTCTGTGAGCTCTGGTTCCAGGCTAATCAACAGGTGAATTT  
TATCGGTGATCAAAAGTCTGACGCCCTGACCCTCAGTGTGCCTCAGGTGATATCACCTCACCACACAGCTCCGCTAC  
ATATGACCTCAACCTTGCAGGATAAAAAATGGCAACCTAATAGATAAAAGAAATCACTTCTCTGTGCCAAACGACGTC  
GCAAGTCACTTCTCAATTAGCAACGGAGGAAAAGGCATGACGGATAGTAACGGGGTTGCAATCGCCTCCCTGACCGGCAC  
GTTAGCGGGCAGCATATGATCAGCGCTCGTCTGGCTAACAGCAATGTGAGCGATACACAGCCAAATGACGTTTTGTGGCG  
ATAAAGCAGTACAGCGGTTGCTGTTCTGCAAAACATCGAAAGCGAAATCATGCGGATGGCGTGGATGAGACAACCTGACA  
GCAACAGTGAAGATCCGTCGAATCATCGGTGGCGGAAATAACGGTGACCTTACCATGCCACAGGACGTTGGCGGAAA  
CTTTACCCTCGAAAAAATACGGCATTGCCATCACCAAGCAATGGGGAAGCGCATGTACGCTGAAAGTTAAAAAGCGG  
GTACGCATACGGTTACCGCAACGCTGGGTAATAACAATACCAGTGAATTCGACGCGGTAACGTTTGTGGCGGACAAAAAC  
TCGGCTCAGGTTGTCGAGATGTCAAAGATGATGACAGTAACAGGTAACGGCTGATAACGCAACGCTAAGTCAACGCT  
TAAAGATCAGTTCGACAATGAGGTGAATAATCTTCCGGTAAACATTCAGCTCAGCCTCTCAGGACTCACCTGACCCCGG  
GAGTAAGTAATACCAATGAGTCTGGCATCGCGCAGGCCACTCTCGCAGCGGTTGCCTTGGTGAAGCAGACGGTCACTGCA  
TCACTGGCTAATAATGGTCCAGCGACAACAACTGTGCATTTATTGGCGACACAGCAGCGGCAAAAAATATCGAGTT  
GACCGCTGTGCCAGACAGCATAATCGCCGTACCCCGTACCCGACGCTCATCACCGCAAGCTAATCGCAGCTGATA  
ATAATGGCTTTCGGTGAAGGTGTGACTGTGAACCTCACAGCAGAACAACTCTGCCGAAATGACGAATGGCGGCCAA  
GCCGTAACGAACGACAGGGTAAGGCTACCGTCACTTATACCAATACCGCTCCTCGATAGAAATCAGGAGCGAGACCGGA  
TACCGTTGAGGCCAGTGGAAAAATGGTAGCTCCAGCTTAGCACATCAATTAATGTCAACGCTGATGCGTCTACGGCAC  
ATCTCACCTTGCTACAGGACTTTTGTATACAGTCTCCGACGGGACACTACCAATCTGTATATGAGGTGAAGGATAAT  
TACGGCAACGGTGTACCCAGCAGGAGGTAACCTCAGAGTATACCAAGTGAAGGGTGACCCCAAGTAATAACGCTAT  
ATATACTACCAACACGACGGCAATTTTACGCAAGCTTTACCCTACAAAAGCGGGGTTTATCAAGTGACGGCAACCC  
TCGAAAAATGGCGATTTCGATGCAACAAACAGTGAACCTATGTGCGGAACGTCGCGAATGCCGAAATCAGCTGGCAGCCTCG  
AAGGATCCGGTGATTTCGCGACAATAACGATCTCACAGACTAACAGCAACAGTCAAGTCAAGTGAAGGATAATG  
CAACTGAAGTAACATTTACTCTGCCGGAAGATGTGAAGGCGAACTTACGCTGAGCGATGGCGGTAAGCGATTACTG  
ATGCTGAAGGCAAAGCGAAAGTCAAGCTGAAAGGTACAAAAGCAGGCGCTCATACTGTTACAGCATCGATGACGTCGGCT  
AAGATGAGCAGTGGTGGTGAACCTTTATGGGATACGCTCAGTGTGACTGTTAATGTTAAGTTAACGGAGCAACTT  
TATCGCCAAATACCTTGGGATGACCACTTACGGCAACAGTGAATGGAACGGCAACCCGTTAGCCAAATGAGGCGG  
TGACATTCAGCTACCGGAGACGTTGAGCGCAAGCTTCACTCTCGGACAGGCGGTTCCGCCATTACTGATATCAACGGC  
AAGGCTGAAGTTACACTGAGCGGTACAAAATCCGGCACTACCCCGTGAACGTTAGCGTGAACAAATTTGGTGTCACTGA  
TACGAAACAGGTGACTTTGATGGCGATGCTGGTACCGCAACACTAGCTCCTTAACTCTGTATACTTCTGCTGCTCA  
GCACGACCGAGGGCGCAACCATGACGGCAAGCGTCACTGACGCTAACGGCAACCCGGTGAAGGCATAAAAATGTAATTC  
CGCGGAACCTCGTACCGTAAAGCAGCACCAGCATTGAACCGGATGATCGGGGTTTCGCTGAAATCTTGTGACAAGCAC  
CGAGGTCGGACTGAAAACAGTTCAGCCTCTCTGGCAGATAAACCCTACTGAAGTCATCTCGGATTAATGACGCTCAGG  
CAGATGTTAATTCGCGACGATTACCAAGTCTGGAGATACCGGAAGGTCAAGTAAATGGTGCACAGACGCTAGCAGTTAAA  
GCTCAGTTAACGACAGTTCGGCAACCCGGTTCGCGATCAACCCGTCAGCTTACGTCAGGACGATCCTCGCAATGAT  
CATCAGCCAGAATACGGTCTCTACTAATACGCGAGGTTAGCCGAGGTACCATGACGCCCAGAAAGAAACGGTTCGTATA  
TGGTGAAGCATCCCTGCCGAATGGAGCCTCACTTGAGAAACAACTGGAGGCTATTGATGAAAAATGACACTCACGGCG  
TCCAGTCCGCTTATCGGTTCTATGCCCCACAGGCGCTACTCTGACGGCAACGCTAACCTCTGCAAAATGGCACTCCAGT  
GGAGGTCAGGTCATCACTTTAGCGTAACGCCAGAAGGGCGCAGTTAAGTGGCGGAAAAGTGAAGTAACCTTTCAG  
GTCAGGCTCCAGTCTTTGACAGCAATAAAGTCGGTACATATACGGTGACTGCATCTTCCATAACGGCGTAACAATA  
CAGACACAGCAACCGTGAAGTCACTGGCAACTCAAGCACCGCCCATGTTGCTAGCTTTATCGCTGATCCATCGACTAT  
CGCCGCCAACCAACTGATTAAAGTCTTAAAGGCAACCGTTGAGGATGGCAGTGGTAACCTGATCGAAGGTTCACTG  
TGTACTTCGCTTAAAAAGCGGCTCTGCCACATTAACGTCATTAACAGCGGTGACCGATCAAAAAGGAAATCGCGACAACA  
AGCTGAAAGGAGCGATGACAGGTAGCGTCAAGGTAAGCGCAGTCAAGACCGCTGGTGAAGTCAAAACAGTAGATATAAAC  
GCTGGTGGTGGCCGGCAGACCTCGCAGTCCGCTTAAAGAGCAATCGGTCATCACTGAAAGGGGACTATACCGATA  
GTGCTGAATTACGCTTTGTTCTGACGATATATCAGGCAATCCGATCAAAGTTTCTGAAGGGATGGAAATTTGTGCAATCA  
GGTACTAACGTGCCCTATATAAAAATTAGCGCAATTGATTACAGTCTAAATATCAACGGTGATTACAAAGCCACTGTTAC  
AGCGCGGGGAGAGGGTATCGCAACGCTGATCCCTGTATTGAATGGTGTTCATCAAGCTGGTCTGAGTACCACAATACAAT  
TCACTCGACGAGAAGACAAAATAATGACGGGTACAGTACAGTCAATGGTACTGACCTACCGACAACATCACTCCCTTCG  
CAGGGGTTCCAGGGGCGTATTTAGTGAATAATGACAACCTTGCACCAGGAAAAACGGCGGCTGATTATGAGTTTTTC  
AAGCTCTGCTCCTGGGTCGATGTTGATGCTACCGGTAAGTGAACATTTAAAAATGTCGGCAGCAATGGGAAAGGATTA  
CGCGCAGCCAAAAATGAGGAGCCCTAGCTATGTATACGAAATCCGTGTAAGAGTGGTGGGTGAACGCCGCGATGCT  
TTCATGATATACAGCTTCTGAAAATTTTGGCAGTGAAGTAAAGTGGCTACACACTTCCCGCTGACAGCACTTTAAACATAG  
TCGTTCCCGAGGCATCGGGTCACTGTACAGTGAATGGGGAGATATGGGGCATTACAGGACTGACGCTGGTTTTCAATCAA  
ATATGATTTGGTCACTAGTCCCGCAAACTCAAGCGAACAAATACGTAGTTCCCTGGCAACAGGTGATCAAAGCGTATTT  
GAAAAGCTTGGTGTGCTTATGCGACATGTTATAAAAACATCTGA

>Cluster\_6882

ATGGCAGATAATCCAGACCCTTCATCGCTCTGCCGACGCTGTTTTACCGGGCAGCCCGGACTGGTTTTCTCGCGCCTT  
TAAACAGCCGACCCTGTCCAGCCGCAACCTGGCATGTGGCGGCGGAAAGCGAACAATCGCTGGTGTATGACCGGACCG  
GCTCCGGGAAAACGCTGGCAGCATTTCTCTACGCCCTCGATCGGCTCTCCCGGAAGGCGGCAAGATAACCCGAGGCG  
CATAAGCGTAAAAACCTCAGCATCTCTATATTTACCAGGATAAAAGCCTGGGCAACGCTTACAGCGCAACTTGCAGAT  
CCCGTTGAAGGTTATGGCGATGAACGGCGGCGCGCGGCAAAAGGAAAGTCAATCTTCCGCTAGGGATCCGTAAGCGG  
ATACGCTGCACAGGACGCAAGCAACTCACCGTAATCCGCGGATAATCTGATCACCACACCCGAACTCAGCTATCTG  
ATGCTGACCTCCCGCGCGGCAACGCTACCGCGGCGAAACGCTAATTTATGATGAAGTGGGTCAGCGCTAGCCGCGAG  
TAAACGTTGGTGGCATCTGGCGTTAAGTCTGGAGCGGCTCGATGCGTCTCCACACCTCAGCAGCAGCAATGGCCTTT  
CTGCCACTGTGCGCTCAGCCAGCGATGTGGCAGATTTCTGGTGGCGATCGCCGGTTACGGTAGTCAACCCGCGCGCA

ATGGCCATCCGAGATACGAATTGTCGTACCGGTGCGCAATATGGATGATGTCTCATCGGTCCGACGGCACCGGCGA  
AGACAGCCATGCCGGCGGGAAAGCTCCATCTGGCCATATATTGAAACGGGTATCCTTGTAGTGAAGTGTGGCCATCGCT  
CGACCATTGCTTTACTAATTCGGGGGGTGGCGGAAAACTGACGGCACGATATAAATGAGCTTTACGCCGACGCTTA  
CAGCGTTCCCGCTTACTGCGCGTGTAGTCGGGCCATTTCCGAGTCGACCTCCGGCGCAACCTCTAACCGTGTACAAAGTAG  
CGACCGCTTTTATTGTCGGCTCACACCAGGCTCCGTCTCTAAAGAACCAACGAGCAATCACCGAACGGCGTGAATACAGGTAGAC  
GTGAATTACGCTGCGTGGTGCACACCTCCAGTCTTAACTGGGGATTGATATGGGCGCGGTGGATCTGGTGTATCAGGTG  
GCAACGGCGCTTTCTGTTGCCAGTGGGTACAAACGATTTGGTCCGCCGGACATCAGGTTGGCGGTGTATCTAAAGGGCT  
GTTTTTCCCGCTACCCGGCGTATTTAGTCGATTCGCGAGTCATTTAGAGTGTATGTTCCGAGGACGGCTGGAAAAAC  
TGACACCCCGCATAACTCTCGACGCTCTTGGCGAGCAAAACCGTTGGCGCGGGATGGATGCATTTACAGGTAGAC  
GAATGGTACTCCCGGTACGCGTGGCGCACCGTGGAAAGATCTGCCAAGACGTGTTTTGACGCCACGCTGGATATGCT  
TTCCGGGGCTATCCCTCGCGATTTTTCTGCTTTCCGCCAAACTGGTCTGGAACAGGGAGACCGGGATATTTAGCCG  
CCCGACCTGGCGCTCAATTTGGCGGTACCAGCGCGGCACCATTCGGGATCGTGGCATGTATAGCGTGTATTACCC  
GAAGGTGAAGAAAAGCGGTTCCGCGGGTGGTGAACCTGGATGAGGAGATGGTATATGAGTCCGCGGTGAACGACAT  
TATCACTCTCGCGCTACCTCATGGCGGATCCAGCAAATCACCCGCGATCAGGTGATTTGTGACTCCTGCTCCGGGTCGTT  
CTGCCCGGCTCCCTTCTGGCGTGGTGAAGGTAACGGAGCTCCGGCTGAATTAGCGGAGATGATCGCGGATTTCTTCTAT  
TTGCTGGCGGATGGCGCTTTTTTCCGGACTATTTCCCGGTGGTGGCAGAAGAAAATACGATCGCCAAATTTACGGG  
GTTGATGAGGAGACCGCAACGGGATCGGTCGTTCCGGGAGTCCGCAATCGTCTGTTCCGCGGCTGCAACGGCTGAA  
TTGGTGTACTGGCGTATTTTGTGACTCTCCCTATGGAAGACGGGTGCATGAACCTGGGCGGTGGCGATTGCCGGGCGA  
ATACATGGCCTATGGGGCGCTGACGCGTGGTGGTGGCAGTGTATGACGGCATTTGTTGACGATTTCCGACACCGATGG  
TAAATTTCCCGCTGCGGATTTTTTTGTTGAAACAGAAATGTTGCTGCAAAATGTTCCGCGAGGCGGTAGGCAGCTCGG  
CACTTTTCCCGCGTCTTTCGCGAATCGCGCGCGGCAATTTAATGCGGGGCGCACTCCGGCCATCGCACCCCG  
CTTTGGCAACACGGCTGCGCGCAGTCACTGTTGTTGAAATCGCTCAGGGATAATCCGGATTTTCCGGTCAATTCGAAAC  
CCTACGCGAATGCTGCAAGATGTTTATGATCTTCCCGCACTGGAACGTTTGTATGCGTCCGCTGAACGGTGGGAAATTC  
AAATATCCGATGAAGAGGTTGCGTCTGATCTGGAAAATTTCTTGCAGTAAACGAAATTTATGTTCCGGTATGTCGCGAATG  
CAGAGCGACGCGCTGGCAGAGCGCGGGCATCCGTAAGTGTGCTGGACAGCGAGTTACTGCGCAATCTACTCGGACA  
GGTCGATCCGGGGAAATTAATCGACCCGAGGTCATTCGCCAGGTGGAAGAAGAGTTGCAACGACTGGCTCCTGGCAGAA  
GAGCGAAAGGTGAAGAAGGATTTGTTGACCTGCTGCGCGAACTGGGGCAATGACCGTTGAAGACCTGGCGCAACGGCAT  
ACAGGACGAGTGAAGAGGTTGCGTCTGATCTGGAAAATTTCTTGCAGTAAACGAAATTTCCAGGATGATTAAGCGG  
ACAGGAGCGTCTGCGTGTATGGATGATGCCGCCAGGCTGCGTGTATGCCCTCGGCGTACGACTACCAGAGTCAATGGCAG  
AGATTTATTTACATAGAGTCACTACCCGCTTCCGCGACTCTTCTGCGCTATCTCCGGGCTCATGCTCTGGTCAAGGCT  
GAACAACCTGGTCAAGTTTAGTCTCGGATTTGCCATTTGTCGAAGAGCAGCTTCAGCAACTGCGTGAACAGGGTCTGGT  
GATGAATCTGCAACAAGCATCTGGGTGAGCGATGAAGTATTTGCTGCTGCGTGTGGCTGCGCTGCGCTGCGCTGCGCTG  
AAGCGACGCTCCGTTGACGCCACGACCTATGCGCGATTTGCTGCTGGAACGTCAGGGCGTATTACCCGCCACCGATGGT  
AGCCCGGCGCTCTTTGCCATCAACATCGCCAGGCGTTTATGAGGGCGTAGATGGCGTATGCGGGTGTGCAACAGCTTCC  
CGGAGTGGTTTACCCGCTCACTCTGGGAAAGCCAGATCTTCCGCTGCCCGGTACCGGACTATTCGTCAGAAATGCTCG  
ATGAATTAATGCGCAACCGGTTGCGGTTATCTGGTCCGGGCAAAAAAAGTGGGTGAAGATGACCGCTGTTGGCAGT  
CTACAGGAATATGCTGCAGAACTGTTCACTCCCGCGAAGCGGATCAGCGAATCGTTCCGGCGTGCACAACGCGATAGT  
CGCTGTTCTGGCTGACGGAGGAGCTGGTTTGCACAACAACTAGCCAAACGATACCGGACAAATCGCGCAATCGCGTTG  
ATCTCTCTGCCCTGCAAGAGCGTATGGGCGCTGGTCTGGCAAGCGCTCATCACACGCGACATTTGGGCAACCGTTACGC  
GCCCTCACCCGACGAGTTCCAACGCACACCTCAACTCGCCGCACTCACCGGGCTCGTGGACGTTCTGTCTATCG  
GCAACCCGCTCGCGCGGGTATCTTACAAACACCAAACTCGGCTGGACGCTGGTCTGTTTGGAGGTGGAGCCACTAA  
ACGATACCGAAAGGATGCTGGCGTGGCGGAAAATATGCTGACCGCTACGGCATCATCAGTCCGAGCGGTGATAGCC  
GAAAATATCCCTGGCGGGTTCCATCGATGCAACGCTTTGTCGAAATATGGAAGACTCCGGGCGAATATGCGAGGTGCG  
TTTTGTAGAAGGTCTGGGTGGCGCGCAATTCGCTGAACGCTGACTATTTGACCGATTGCGCGATCTGGCGACACAAGCCA  
CGCAACCGCGCCACTATACACAGTGGCGCTCTCTGCCAACGATCCGGCTAATGTGTGGGAAATCTTCTGCCCTGGCT  
GCACATCCGGCAACGCTGGTTCCAACGCGTGGGGCGGTGGCTGGTGGTCTGTTCTGGCGGCAAAATGTTACTCTATCT  
TGGCAAGGTGGCAAAAAATGCTGGTCTGGCAGGAAAAGGAAATTAATCTCGCCCGAGGTTTTCACCGCTGACTA  
CCGCACTGCGTGGCAACACGGCTGGCTTTACGCTAACAGAAGTGAATGATCTACCGGTCGGGCAACCGCGATGTTT  
ACGCTGCTGCGTGGAGCGGGATTTCAAGTTCGCCACAAGGGCTGGATTTGGGGATAG

>Cluster\_50614

ATGGAAGAGGCATTTCTGGCGGCAAGACAGGGTATGCGCTGTCATACGTCGTTTATGGCAGATGTACTGGGGCGGT  
GCTGGAGGTGGCCGAAATGTCGTTATTGATGCCCTCATTTGTCGGCACAACTCGTTACTGGCGGCGTCACTGGGGATCA  
CGATGGGGTGCACAGCGTCTGCTGACCGGTTTTGTGGCGGGTGGCGATGGTGTACACCGCGTGCAGAAAAGGTC  
AGCGAAGCCTGTTACGCCCTCGCAGATATGCTTTTCCCGCTCAGACTGAAGTTACATCTCACCGGCTCTGGTGCAC  
ATGGATTAACAGCAAACTGCCCGCGGGCAGCGGCACTCGGCATCGCGGAGGCAATTTGAGGCGCGAGGAAGCGCAGG  
CGAAGGCGAACAGGAAGAAGCACAGCGTCAAGGAGGCGCAGAACGTTCCGGGATGTGGCGGGGAATATCTGGAATG  
GCGGGGGCATAGCCCGGCAAGTTAACCCGTTGACAGGGCTGTGCTGATGTTCCGGGCGCTGCACGGCCAGCTCAGTAC  
GGAAGAAGGGCTTTCTGAAATGGTGGATGGCTGACACATTTTGTGTTGGAATGTTGGAGCCACGGTGGCGGGTGGG  
CTCTGCTCCACCTGACTCTGACGATAAAAATCGACTGCCATAAACATCCCTCCTCTGACGAGTTACTCGCACAA  
AAAAAAGCGCCTTTCTGGATGACCCCTCGGGAAGCTCCTTAATCTGTTGAGTCCGGACGGTATGCTGGAAACCGCCTT  
TCAGGGAGTGAATGCGGTTATTGGCAGCATCAGTAATCTGTTCAAAGGCGATGACGAACCGCCCGCGGCGGAATATATCG  
CGAAGGCGCGGGATGTCGATCAACAGCCAGCCGGCAGCACGCGGGGACCGTGTACCTGCGAGGCGGAGGGT  
GTGAATGCGCGGGGAACGGGGCTTTGTGTCACCGGATGTGGCATTGGCGGTCGTTACTGGTGGTCAAGGATATCAG  
AAGCGGCAAGTGCAGATAACCCGTTGTCACCGTGGCGCTGATGTTTCTTCCCGGGTAAATGCTTTCTGAAATCG  
CCTGTTTTGCTGCGGCTACGGGATGAGCATTTGACGCGAAGGCGCCACAGCCCTTCCGCTCCGGTCACTGGCGGCG  
ACCGGGCCAAATACCTGCGCGGTGATGATGACTTCAATTTAGTCTGCGCGGCACTTTCCGCTGCGGCGGCTGCGG  
GTACAGCAGTCTGACGAACGCACGGAAGGATGTTTGGTCAAGGCTGGAGTGAATGTAAGAAGTCAAGCCTCGTGGCA  
CACCGGGTAGCGCAGACGAAAATGTCATGACCTTTGTTGTCGGGTATGGGACGACGCTGGAGATGGAAGCCGTTACTGCGC  
GGGGGGGTTTTACAGCCCGGCAAGGACTGGCGTACGGCGGGTGGAGAGGGGCTGAGCAGGGGCACTGGCTTATCAGACGCTGA  
TGGACAGTTTTTCTGTTTGGAGCCGACCCGCAACCGCAGCGCCAGCGGCTGAAAATGTTGGGCGGCAACGCA  
ACAGTCTGAATCTGACTACGACGACCGGGGACGATCACTGAAATCAGCGGCGAGCAGCGCTCCGTCATCCGCTG  
TATTACGAACTGGCGGCGATCCCGGGGGTGCACAGATTTATCAGATTTCCCTGATACGACGCTTTACTGCTGGC  
TCGTTACCGCTATGACGGGGCGGCACTGAACGGCGTGCACGACGACCGGGCACCTGCTGCTGAGTGTGTTGCTTACG  
ACGAAAACCACTGATGACGCTGCACCGCCAGCGGGGCGAAGGGTATTATTAACAGTGGGGCTGGTATGAAGGGCGG  
GATGACGCGGATGGCGGGTACGGGGCATCACAGGACAGCGGTGAACAGTACCGGCTGGCGTGGAGCTGGCGGCACG  
CAGGCTGTGCTGACGGACGGGCTGGGGCGCACCGTTATCATCAGTGGGACGCGCAGAAATCAGGTGACGGCTGACCGG  
ACGAAGCCGAGGTCAGCAGCTTCCGCTGGAGGACGAAAGCGGCTGCTGCTGGGAATGACGATGCGCAGGCGGCGG  
AAATGGCGTATGTTGATGACCGGCAAGGGCATACCGAGAGCAGCAGCCGCTGGGACGGGTGGAGCAGGCGCAGTG  
GCACCGGCTGTCGATCAGCGGAAACGGAGGTGGACGCGCGGGAACAGCTGGCGTGTGTACGATGAACGCGGCA

ACCTTCTTGGCCGTGACCGACCCGCTGCAGCAGAACACCCGGTATCAGTATGACCGCCACGGTCAGGTGGTGCAGATAACG  
GATGCGCGCGGGGGAATAAATACTCCAGTGGAAATGAAGACGGGCAGCTCATCGGGCACCGGACTGCTCCGGCTCGCA  
GACGGCGTGGTTCACGACGAACGCACGGGCTCATCAGAATGACGGATGCGGAGAGCCACAGCACGGCTACGGGTATG  
ACGACAGCGGCCACTGACGGAGGTGATACTGGCGGACGGCCGCACGGTGAATACCAGTCCGGACCGCGCGGAGGGTGC  
GTGAAGTACACGACCCGATGGGAGGATAACCGCTGACGGAAATATGTCATGATGCGGCAGACCAGCTACTGGAATCCGCG  
GACGGGACCGAGGACGGCGTTCGGGTACGACGCTTACGGGCGTCTGGTACGCTGACAAAACGAGAACGGAGAAAGCTACC  
GGTTCGGCATGACGTGCTGGACCGTCTGGCGGAGCAGATAAACCCGGACGGCTGCCGCCAGGGCTACCGCTACAACGGC  
CTGAACCGGGTACGGAAGTGGTGTACCCGGGGACCGGGGCGGTGAAATCCGTCACCGGCTGGCGGTGACCGCGGGG  
CCGGCTCACGGCAAAGGACAGCCGGTAGCCGTACGGAAATATGTCATGATGCGGCAGACCAGCTACTGGAATCCGCG  
GCCGGAGGCGGATGCCGGGAAACGGACGCCCGGAGATTATCCGTTTACGTTACGACAGACTGGGGCGGATGCTGAGC  
GAGGAGACGGCGCAGGGCATCCTGACCCATCAGTACGATGAACTCAGTAAACCGGACTGCCACCACCTTCCGGACGGCAG  
AACGCAGCGCCATCTGTACTACGGCAGCGGCCATCTCCAGCAGATAAACTGGACCGGGAGGTCATCAGCGAGTTCACGC  
CGCACCTGCGCCAGCGTGAAGTGTGCAAGTCAAGGACAGGACGACTGAGCAGCGCGCAGCTTACGACCCCGGAGGACTG  
AAGCGCAGGGAGACATACAGCGGGATGCGCGGGTGGTCCCGGAGACGTTACGGACCGGAGTACAGCTACAGCGGCGA  
GGATGAACCTGCTGAAGACCGCGCACAGCCGGCGGGGGAACGGACTACTTCTATGACACCACGGGGCAGTACAGGGCCT  
GTCGCTCGGAGGATGAGGGGTATCTGGCAAGCTGGGATACGACGCGGGCGGCAACCTGCTGGACAGGCGCGGGGGGA  
AGGGCTACCGGAAACAGCGTGGTCCGTTCAACCGCTGATGTCCTTACCGTGGTGTGCACTACCCGTTATGACAAAT  
TGGCGTGGCGTGGAAAAGGAGGGGCCCAAGGAACCGTTGTACAGTTAAATCAAACAGGAAGCCATGATTTATTGA  
TGGAGGCTTTCCGTGATGCTCAAAAAGTAAAGAGGATCCGTTCCGAGGATGCCGCCGTTATTAGAAAAAACATAAGATG  
GAACAATTAAGAAAAGAGATGGTACTGTCGTTATAGGAAAGATTACCTATGATTCTAATACTGGTCTGTATATGG  
TCATGATGACCTAAAGGCACAGGGCATGGTCTTTCGGCTCATATAAAATATTAACAGTTCGTGATGGCAATGGTGGGA  
TAGATATAGATGGTTGA

>Cluster\_48634

ATGTCACAAAACGTAGAGTTTATCCTGTCGCTGGAAGACAAAACAGTTTACAGCGTCAATCGATCGTGGGGAAACTGCT  
TACTCGATTTGGTGGAGCAGGTAACAAAGCCTGCTCAAAAAATCAAAACCTTTGAACGCTCTTTGGGTTCCGGTCCGCCGTA  
TCATTCGCGTTCGGAAAGCAAGCTCGATTCACGGCAGATAAACTACAGGATGATGCTGCCGGTTTTGAGCTTGCTTCA  
GATGCTACCGGTAATAATGCGTGGTAAATCACCAGCCTCAATTTCTGGTCTTAAAGCCCTGATTGAGCGCGTGCATACGAC  
AATCTTTCAGTAGATAAACTCACCAGCTCATTACGTAAGGTCAATCAGAGCTAAATGATTTCTCTGATTTGGTGCACCT  
ATGCAAGCAAAGCGCAAGCCGCTTTGGTACGGAGGTCAAAGAGGCCCTCTGCTCCGTGAGTGGCATGAATACGCGCCTT  
AATACCACGACGAAGCGACTCAGTAATTTGGGTGTACAAACGACCGGCTGCCGAGGACTGAAAAGGTTCTGTGAGCA  
GATGGACGAAGTTATCGGACGTCAGCAACTGATAGCAAGCCGGTACGCGTTCGTACATCTGGCAGTGGCGATGGTGGCA  
GCGGGCGCGCTAGCGGCTCTGGCCATAGCGGTAAGGTAAGTAAACGAAGGAGTATGTTCTCTGGCCCTCGTGGCAACATTTT  
CTGCTTGGCGAGATCGGAGATGCAGCCAGAACGGTTACTGACATCATGTTGGATGGCAGAAGCCTATTGTTGAAGCTGC  
GGCCGAAATGGAACGATATCGGGTGTGCTTCTGGGTTGAATAAGGAGAAGTCTAACCTGGCCAGGCTGCCGCCGAT  
ACATGAAGTACATCGTAGACATGGCTCAAAATGCGCCGTTCCGGATGCAGGCGTTAACAGATTCCTTCTGTAAGTTCGCT  
TCTGCTGGCTTAGATCCAAACCGATGGCTCTCTGAAAGGCCCTGGTGGACTCCGTTGCTCTGTTTGGTGGTGGTGGT  
GTTGAAACGTTGCGGCTGTGGCCGTTACGACAGTGTCCGGTAAGGGCGTCTGTCAATGGAAGAGCTACGTCAGCAATTAG  
GTGAAGCCGTTCCTAACCGGATGCAGGCATGGCAGACGCCGAGGCAATCAGTATGGGGAACTGACTAAAGCCGTTAAGCA  
AGCGGTACCGTTGAGGCAAACAGGCGTTGTCTCTGATGTTGTTGGTCTGCTGCGGAGAAATGAGAAGCAGCGGAAAGCA  
CATGATGCAAACTTACACAGGTTGCGCTGGCGCAATTCAGAGCTCATTACGTTATTTGCTGATCGGGTTGGTCAAGGCCG  
GATATCTGGATTCCTATCGAAGGGGATGAAAGAACTGGCTTCAATCATGAATAGCGCGAAGGGATTTCGTTTGGCTAAT  
TCTTTAGGTTCCGGGTTAACGACGGCAATCGATGGGTTGCGCTCAGCTTGTCTCAATGGTTAGCAAAAGAACAGAGCTGGT  
AATTAATCTCGGTAAGGTGCTGGCCGCGATGGTTGCGTTCAAACACTGATGCGTCAAGGGATTATGGGCTAGTGGTGGT  
GCGGCCAGATGGTTAGTACCTTCCGACGATGGCAACCGCCATACAGACTCCATTTAACTCGGGCTACAGCAGTAACT  
CGATTCATCGTGGCGCAGTATGGGTTGGCTCCGATCCCTCTCTCATTTCGCCATCCGTTGGGGGATTACGGGGGT  
GAAAGGCGCTTTGACAGGATTAACGGCGTTCATTCAGCAAAACCTATAGGGGAGCATTACAGTTGCCACTGTAGCTG  
TTGCTGGCCTAATCAGCTACATGACCATGCTCCGACGCAAACTTCAAAGGTTGCTGACGAGATAGGAAATACAGAA  
GCGATGACAGCGGCCAAACGTGCACAAATGGCCGACCGCGCAGAAAAGCTCGAAAAGCAGATTCTGCTGATCAACGAGC  
ATTAAAAACCTGGTGGGTTGTTAATTACGATATCTAACTCTGCCGTTGTTATTACTCACAAAGAGTCAAGGCTGACATCG  
AAGCAGCCTGAAAAAAATCAGGAAGAGTATCAAAGATAACCGGCACGATAGCTCTGGTGGCGGCTGTAGCAAAAG  
CGTTTGGCTAAAGAGGCTGCCGAATCTCAGATTGAGAAAATTCGAGCGGAAAACAGATTTTCGCGGCAACATTCGCTGAA  
AGCCCGCAGGAGGCTCTGGATAAGATCCAGAAAATCAATGATGACGGTTCACTTTACAGTACGAAAAGAACAGCTAT  
TGGCACCGTTACGTGAAACGGTAAACAAAAGCTATCTGGAGCCCTGCCGCAAAACCTGGTTGATTCACTTTCTTCTCGTAAG  
AATGCTACCGAAGCAATAGCGACTCTTAATGATCAGCTTGAAAAGCCAAAAGATGGCAATACCGAGCAATCCCA  
GAACTGCAAGGCAATTCGTTGTTATCAGGAGCATTGGAAGCCGTTGCTAGGAACTGACACGGCAAGTTCGAGA  
GAGATAACCGGGCAAACCTGGTAAAGGCGTAATGTCAAACAGGGGACGGTTCCTGGGTTAGGTACAACGATAAAGCT  
GCTCAGAAGGCGCTGGCGCAATATATGCGAAACAGATGGATTCTGCGACTTATCAGCGTACTTTGCTGATGGCACTCC  
CATGAAAGGACTTCGAAGTAAAGCGATTAATGGGCCAAACACTCAAGACGACGTTAATTTGCAAGAAAGCAGTCCAGTG  
CCAGCTCTCTGGAGAAAATGAGCGATGAAGAGCGTGGCCGACCCATTGCCGACTGACTAAAGCTCGTGAACAGGATGCC  
GCAGCCGCGGAGAAAGCAGCCAAACGATCAGCTAATGCCTGCGAGCGTGGCGCAAGAAAGAACAGGCAGCGCAACAGAA  
ACTGGCGGCGGATATCAGAAGGCTCTGGATAAAGCCGATCAGCTTATGGGGCAAAATGGGTGAAAAGCTAAGGCTACGG  
TATCGTTTGGATGAGTCTCTTCGCGATACACGAAATCACTAGTATTGGCTAATGCGGTTCCCTAACGAGTTCATCACT  
CAAGAGATGATCGACAAGGCGAAAAACGCTCTTGAAGACTCAAAAATGCGACACCTGAATATCGCGAGATGTTAATCG  
CCGCAATGTTGAGCAGATGATCTCCACTTGGGCACCGGAGCGGATTCATTATAGTGTGGTATACGCGGCTCTCGTG  
AAGAGAAAGTTGCTGATTTTCAAGACCTTCAACCGCAATCTCAAAGCGTTGATGAGAACTTCGTGATAAGGCGTCTGAT  
CCTAAAAGTCTGGCGCTTTTATACAAAAGAAAATCAATCACTTATGCTGCTGGCAATACCGCGCTTATTAAGAGACGGG  
GACTGCGACGCAAGTGGCACGGAATACGAAAACCTGGCAGAGCAGATTGAAAAGCACCTGGACTGATTTGTTTATG  
GCTTAACTGATGCTGACTGATTTCTGTTATTAACGGGAAAGATGAGCTTCTCCAGCCTATCTCAGTCCATTTTGAAGAT  
ATCACCAATATGGTCTGTAAGTGCAAAATCAGCTGCCCTTAATGAACATGTTGGGATGGGAACACCGCAGCTGGTATG  
TTCACAGATGGCAATTTGCTGACCGGGTGGTCTGCTCCGTTTCCAATCAAGGTGTACGAATGGGCAACACTGTTAATG  
GCGACAAGTGGTAGGAGAAGCCACGAAGGAGACGCTCCAGTTCGGTAACTGGATTGGGGCAAAACACAGCAGACCACC  
AGGCCAATTTGGCAGCAACAAATGCGATTGGTAGCTGGGATTCGGGGCTATTTGATAGCACCGAAGCCAAAGATGCTGA  
GACAAAAGCAGTGAAGGACTCCATCTTCTCGATGACAGAACTCAGCTCTGTTACCAGGCGCTCTGTCAGCCGCTTTGCA  
TGGTGGAGCTAATGTTCCGGCTCTGGTAAATAAGTGGTTGAAATTTCCGGCGCAGACTTGCATCTGGTTTGGTTTCA  
TGGGCTGGTGGTGGATTTCGATGGATTGATGTCGGTTCCTTCTGGCTCAACTTCCGGCTTCAACAACTGACAGTTCCTGC  
TGCCGATGGCAGAAATGTTTCTGCAATCCGAAATTTGCAAAATGGTGGCAATTTTGGAAAAGACGGCGTGTATCCCG  
TCCGGCATACGAAAAGGCGGATTCGCCAATCACCCTCAATTTGGCTTGGTTGGGGAAGCGGATATGAAATGAGGCGTAT  
GTTCCATTGCTGATGGTCAACAAATCCCTGTAACCGTCACTACCGATGGTATGAGTGGAGGAGGAAATGTTCTTCTCC  
GGTATCAATGAGATCAACGTCATAGTACGGTAGCACAACTGAATCCGGCGATACGAAAAGCATATGGACAAATGCCG

CTCAACGGATGAAAGCAATCGCGCTTGAGACTATCGCTCAAGAGAAACGCCCTGGCGGATCACTCAACCCAAACTCAA  
CGTAACTAA

>Cluster\_4985

ATGACTCATCACACACACCATTGCTGAATCCAATAACTTTATCGTCTTGATAAGTATATCAAAGCTGAGCAAAACAGG  
CGACAGCTATCAGAGCGAATCGGACCTGGAACGTGAACGTGATTGAGACCTACAAAATCAGGGCTATGAATTTATAGCCG  
TAAATCTCAGTCGGCGATGCTGGCCAATGTTCCGACACAGCTTCAGAACCTCAATGGTGTGGTATTTAATGACAGTGAG  
TGGCGGCGTTTCAGGAGAGTATCTGGATAACCGAGCGATGTCATTCTGGATAAGACCCGTAATAATCCATATCGACTA  
TATTTGCGACTTTATTTTGTAGACGAACGCCTTGAGAATCTATTTGATAGATAAAAAAATCTCATGCGCAATAAGG  
TGCAGATTATCCAGCAGTTTGAACAGCGCGGTTCTCATGCTAACCGTTATGACGTCACGATCCGTTTAAATGGCTGGCA  
CTGGTGCAAACTGAACTGAAAAAGCGCGGCTGGCGATTCGTGAGGCCTTAACCCAGATACATCGTTACAGCAAAAGAGAG  
TTTTAACAGCGAAAAATCTCTGTAAAGTATCTGCAACTGTTTGTCAATTTCCAACGGCACCGTATCCCGTTATTTTGCCA  
ACACGCAAAAGCGGATAAAAAACAGTTTGACTTCACCATGAATTTGGGCGAAATCAGACAAACAGCTGATTAAGACCTC  
AAAGACTTACCGCTACCTTTTCCGAGAACATACTCTGCTTAATGTCCTTAGTGAACACAGCGTGTTCAGATATAGCCA  
AACGCTACTGGTGTGACGACCGTACCAGATTGCCGCCACTGAGCGTATCTTATGGAAAATCAACAGCTCCTATAAAGCGA  
AAAAGTGGTCTACCCCGAAAGCGGTGGCTTTATCTGGCACACACCGGTTCTGGTAAAAACCTGACCAGCTTTAAAGCC  
GCACGCTGGCAACGAGACTGGACTTTATGATAAAGTTTCTTTGTTGGTTCGACAGGAAAGACCTCGATTACCAGACCAT  
GAAGCAATACCGACTTTTTCGCGACAGCGTCAACGCTCGGAAAAATACCGCAGGTTCTTAAACGAAATCTGGATAAAG  
ATGATAACAAAATCATCGTCAACACTATTCAGAAAATTAATAACCTGATGAAAGCAGAAAGCGACCTGCCTGTATACAA  
CAGCAAGTGGTGTATATATTTGATGAATGTCACCGCAGCCAGTTTGGAGAAGCGCAGAAAAACCTGAAGAAGAAATTCAA  
ACGCTATTTATCAGTTTGGTTTACCCTGTTTCCGAAAAACGCTTTAGGTTGAGAAACGCGCCAGCTTAAAGCCGAT  
TTGGTCTGTAATTCATATCATATGTTATACCGATGCGATTCGTGATGAAAAAGTGTCTCAAAATCAAGGTGGACTATAAC  
GATGTGCGGCCACAGTTTAAAGTCTTTAGAGACAGAAACCGACGAGAAAAAAGTGTGCGGCTGAAAAATCAGCAGGCGTT  
TCTTTCATCCCATCGGTATACAGGAAATACGCAATATACTGTAATAACTTCCGCCAGAAAGACCCACCGTACTTTCCCGAG  
GTTTCCAAAGGCTTTAAATCGCATGCTGGCAGTGAAGTGGATGCGCGGAAAGCCTATACCGCGACTTTAAACGGTTA  
CAAGAGGAAGCAGCTAATAAATCGGCCACTATAAACCGCTGCGTGTTCGACAACTTCTCCTTTGCCGCAATGAAGA  
ACAAAATGCCATTGGTGAATTTCCGATGAAACTTTTGTATACCAGCGCAATGGACAGCAGTGTAAAGAGTTTCTTGACG  
CTGCAATTCGTGAGTATAACAGCTATTTTAAACTAATTCAGCACCGACAGTAAACGGTTTTCAGAACTACTACTCGTGAT  
TTAGCCCAACGGGTTTAAATCAGGATAFCATGTTAATGTTTTCGTTGGGATGTTTTAACCGCTTCGACGCTTCCAA  
ATTGAACACGCTATTCGTGATAAAAACTTGGCTTTTCCAGGCTGATGCAGGCATTCCTCCGCAACCGCATTTATG  
ACGCTACTAAAACCTTCCGTAAACATCGTCACTTTCGGGATCTGGAACGCTCAACCATGATGCCATAACGCTGTTGGT  
GATAAAAAATACAAAATGTGGTGTAGAAAAGAGTTATGCAGAGTATATGGAAGGCTTTACAGATGCTGCCACTGGTGA  
AGCTAAACCGCGCTTTATGGCAGTAGTTTCAGAACTGGAACAACCGGTTCCCTGACCTGCCAGTATTGAAAGTGA AAAAG  
AGAAGAAAGACTTCGTA AAACTGTTGGTGAATACCTGCGTGCCGAGAACATCTGCAAAAATATGATGAATTTGCCACG  
CTGAAAGCCCTGCAACAAATCGATCTTAGCGATCCTGTGCGGTAGAAAAATCAAAGCAGAACATTATGTTGGATGATGA  
AAAGTTCGCTGAATTCGAAATGATTCGTCTCCCTGCTGAACGCAAGATTCAGGATATCGTTCGCCTATAACGATATTC  
GTAGCTGGCAGCGCTTATGAGCAAGTGTGCAAAAAAGAAATCAACCCACTGACTGGGATGACTGTTTGGAAATC  
GATTTGCTGAAGTCTCAGGAAATAACTGGATATATCTTGGACTGATTTTCAACACAACAGACAAAACAAGGTAA  
GGGCGAAATGACCGAAGAGGTCAAACGCTTAATTCGTTCAAGCTTGGGAAACCGTGTAAAGAAGGATTTGGTGGCTGAT  
TTATTCAGCAACGCACTGGATGATTTGCCGATAAAGCCAGCATCATGACGCGTTTTTTTACCTTTCGCAACGCGAA  
CAGCAACGTTGAAGCAGCAGCATTCAGTCAAAGAAAGAAATCTCAATGAAGAGCGCGCAACCGCTATATTCGCAAGCTTTT  
AAAACCGCAATACGCAACCGAAATGGCAGGAAATTAACGAGACATTGCCAAAACCTAGTCCGTTAAATCCGCAATATA  
AGCAGAAAAACAGACGGTTTTCCAGAAGATCGTCGCTTTATTTGAGAAGTTTAAAGGTGTAGCGGGCAGATATAA

>Cluster\_61202

ATGAAATTAATATATTTACTAAATCTATGATTGGTATGGGGCTGGTGTTCCTCGCTCGCCAGCATTGGCAATGGAAGC  
ATGGAATAACCAACAGGTGGTAATAAATATCAGGTTATTTTCGATGGCAAAATTTATGAAAAATGCTGGTGGGTTTCTT  
CTACAAATTTGCCGGGAAAGCGAAAGCAATGATGCAACTAACCCGTGGCGTTTAAAGCGTACCGCAACAGCTGTGAA  
ATTTAGCTGATTTGGCAATACACTTTCTGCGAAAAGAGCGGACGCTCATCTTCTCAAATCAAATACGCTGCTCCAA  
TACGCCGGCTAATGGCGGTTCCGGCTACACCAGCACAGGGCACTGTTCCGTTCTAATTTCTGTAGTTGCCGGAATAAC  
AGCAGGGCGGTGACAGCTGGTATGTCGTCTTAAATGGTGGGATATAAAAAATGCCTGGTGGGTAGCCCTTCTAACTGT  
CCGGGTGATGCGAAAACCAATGATGCCAGCAACCCATGGCGTTATGTTGTCGCGCTACGGCAACGGAATCTCAGAAAC  
CAGTAAATCCACAGTCTGACTTTCAGCACACAGCCTTCCAGGATGTGAAACCGGCACCGGAGCTTAAACCGGCTCCTG  
ATGTTACGCCAGCCAGCTGATAAGTCAAACGACAATATGCTGTAGTAGCCGGAAGGTCAGGAAGGTTCTTCTACA  
TGGTACGTTATCTATAACGGCGGATTTATAAGAACGCTGTTGGGTAGCGCGGCAAAATGCCCAGGCGATGCGAAAGA  
AAACGATGCCAGTAAACCATGGCGTTATGTTGCGCGGCAACGGCAACAGAAATCAGCCAGTATGGTAAACCTGGCTCCT  
GTTCCGTTAAAGCGGATAAATGGCGGTTGACTGCTGACTCCGTTGATCAACTCCGGAACACCGGTTAAACCGGCTCCG  
GATAACAGCGAGCATCAACACCAGCGGATAGCGTTAACGATTACTCATGCAAGCTGGAGCGGCCAGGAAGGTAGCGA  
AATTTACCATGTTATTTTCAATGGTAATGTTTACAAGAAGCCTGGTGGGTTGGGTTCAAAGATTTGCCACGGGGTACCA  
CGCTGAAAATGATAACCGCGGCTCATTTGTTGCGGATGTTTCCAGGCCAGCAAGCGTACAGCGCGGACAGCATCGT  
AGATTATAACGATGCACATATAAAACTTCTGTGATCAAGACGATGGGGCTTTGTCCGGGCGGCGATAACCGGTGGA  
AGAAATACGAACCGGCGAAAGCATGGTCCGCATCCACTGTGATGAGGATGATCGCGTTGTTGTTGATGGGCAAGGCT  
TATGAAGCGCTGTTCTGGACGCAAGTGAACCTGCTCTGGTGGCGAAACCAAAACCGCACCGGTAGCAATAGCCGCC  
GTGGAAGCCGTTAGGTAAGGCTCAGAGCTATAGCAACGAGAGCTGAATAATGCGCGCAGTTTAAATCCAGAAACGCTTT  
ATGCCAGCGATACGCTGATTCGCTTTAACGGGTGAACATATTTCTCAGAGTAAAGTGCAGAAAGTTTCTCCTTCTGAC  
AGCAACCGTGGCGTGTTTTGTGACTGGACCGGAACCAAAAGCGCGTAGGTACGCGAAGAAAGCGTGGCCGAAACA  
CGTTTATGCAACCGTATGTCAGCTTTACGCTGAATACGATCCCGGATCTGGCTGCGCTGGCTAAGAATCAATCAACGTC  
ACTTCACGCTGGCGTTTGTGGTGAAGATGCGAACACCTGCTGCGGACATGGGGTACCGCTTACGGTATGCAGAA  
TACGCTCAGTACGCAAAATCAAAGCTCTGCGTGGGCTGGCGCGGATGATGATGCTGTCTATCCGTTGGTGTAAACCC  
TCCGCTGGCTGCTTCTGTAAGAACGTAGACGATCTGATGACGATTTATGACATCGTTGATAACCTGAACCTCAAAG  
TCTGGACTTCGATATCGAAGGCCACTGGGTTGCGGATCAGGCATCTATTTGAACGCTCGTAACCTTGGCTGGAAGAAAGT  
CAGGATAAATGGAAGTCAAGAGCAAGATATTTGCTATCTGGTACACCTTGCCAAATTCGCGACTGGCTGACGCGGA  
AGGGATGAATGTCCTGAGCGATGCCAAAGCGAAAGGTGTTGAGCTGGCGGGTGTGAACGCTGATGACAAATGGACTACGGTA  
ACGCGATTTGTGACTGCAAAATACCGAAGGCCAGAACATCACGGTAAAGTGTGCAACGCTCTGCGATTTGCCAACCTGCAT  
TCACAAATGAAAGCCCTCCATCCCAATAAGAGCGATGCGAATAATGACGCTATGATGGGTACCACGCCGATGGTGGCT  
GAACGAGCTTCAGGGCAGGTGTTCTATCTCTGATGCTGCTGTTGATGCAAGGATGCGCAGAAAGCTAATCTCGGTA  
TGGTTGGTATCTGGTCAATCGCGCGGACCTGCGGGCGGCACTAACCTGCTCTCCGAAATTCACGGCTGACTAAAGAA  
CAGGCACGAAGTACGCATTTAGCGAAATCTTCGCGCGTTTACTAAGCAATAA

>Cluster\_30548

ATGCCCCGCGAGGTGGAGAAACCGCCAGCGATGGAGGCGCTGAGCCAGAAAAATGCGCGAGGAACAGGCGCAGGCCAT

GGCTCTGGCGGAGGCTCAGGATAAAGCGGCTGCTGCGTTTTATCGTCAGATTGACAGTGTGAAACAGGCCAGTGGGGGG  
TGCAGGAATTACAGCGTATTTCAGCAGCAGATCCGACAGGCCAGAAACAGTGGCGGGATTGGTTCAGCAGGATTAATCTGGCG  
CTGATTTCTGAGGTTACGGCGAAAACCCGTGTTCTTACACAGGCTGAGGAAGAGGCTACCCGACAGAAAGTGGCGTTTTAT  
CCGTGAGCTTAAAGAGCAGGCAACCCCGCAGAAATCTTTCTTCTGAGTGTGCTTCTGCTAAGGCTGCCAGCTGGGGG  
TAAGTAGTCTGCTGGAGTGTATATCCGCAAAATGGAGCAGGAGAAAAGCCACGCAATTCGCTGGGGATGGTATCGCAACA  
GCGGCCCGCAGGAGATAGGCGTTCTGATAGGTGAACCTGGCTCGCGGCAATTTAGGTGCGCTGAGGGGATCCGGGATAAC  
GCTGGCTAACCGTGCCGGATGGATAGACACACTGATGTACCGAAAGGATGATGCTGGCGGGGTTATTTGGCGGTATTTG  
CCGCGGCCGTCTATGGTCTGGTAAAGCCTGGTATGACGGTCAAGAGGAGGGGGAAGAATTTAACCCGAGTTGTGCGCTG  
ACGGGGCATTTAGCTGGAGTCACTGCGGGGAGCTGTGGACGCTTAGTCTGCTGCTATTTCCGGGAATGGTATCGCAACA  
TGCTGACGCGGTGCGCTGGCTCAGGTGGTGGGAGTGGTGCATTTCTGTAAGACGATATCGGTATGGTGGCGAGAGCTG  
CCGCACAGATGGAGCGATCGGTTGGCCAGTCCGTCAGCGATACATAAATCAGTTAAGCGGCTGAAGGATGATCCTGTA  
AATGCCCGGAAGGCTCTGGACAATGAGCTGCATTTTCTTACTGCCACTCAGCTTGAGCAGATACGTGTCTTGGGGATCA  
GGGATGGCTCAGTGCATGCTGCACGGATAGCCATGTCTGACTGGCAGAGGAAAACCGGTCGGGCTACGCGGATTTGATA  
ATAACCTCAATGCGCTTGGCAGTACGCTGAAGTATCTGTCTGATTTGTGGAGTCTTTCTGGGATGCGGCCATGAATATT  
GGTCTGAAAGACTCGCTGGATGAACAGATTTGCCCTTTACAGGAGAAAGTGTCTGCGGGGCAAAAGACTCCCTGAGCGC  
ATCATTTCTCAGTTGAATCAGATCAGCAGCGCTTAAACGACTTTCAGGAGAAAAACGCCAGAAGGATTTGCAGGATG  
CAAAAGAGCAGGAGAGCGGAATTTATCAGGAGCAACAGAAAACGACGTAATGCTGAAAAATGCTGCACTGAACCGGATGAAT  
GAAACGGAAGCAGCAGCATCAGCGTGAATTTGCGGTATTAATGCCATGCAGTACGCCGACCAGGCTGTACGGGATGC  
GGCGATACACGTAAGAAATGAACGTTACGAGAAAGCCCTGGCATCCGGTAAGAAAAAACACCGGAAACCCGTAATGATG  
AGGCCACCCGTTATTGCTGCAGTACAGTACGCAACAGGACAGGTGGAAGGACAGATTTGCTGCTGCCAGCAGTCAAG  
GGCATTTGCCAGTGAAGGATGACAGAAGCGCATAAACAGACTTCTGGCTCTGCAGCAGCGCATCAGCGACTGGACCGGAA  
AAAATGACGGAAGATGAAAAGAGTGTGCTGGCCCGTAAAGATGAATTCAGGACTGACGCTGCTGGATGTA AAAAC  
AGCAGGAGCTTTCAGAAAACAGACGGCACTCAACGAGCTGAAGAAAAAAACAATTCAGCTGACCACTCACTGGCTGAAGAA  
GAGCTCGCTCAGCAGCAACAGGTGTTCTGCTCAGCCTTCAGCAACATGGGAAATGGCTGGCAACTTTTGTCACTACCGG  
AACTCAACTTCAAACTCTCACCCTTCCGCTGCTGTCAGATATGGGAAAAATCCTGGCGCAGGCAACCATGATGAAATCG  
ATAAAAGGATTTGCCAGTGTACTGGGATTTGATCTCAGCAGCCTTCCCTGAATGCCAATGGGGGATTTATCAGTCTGC  
TGATTTGAGTCTGTTACAGTGGCAGGTTAACCCTCCGACGTTTTTTGCTTTTGCAAAAGGCGGGGTGTGATGGGGG  
AAGCTGGACTGAAGCAATTTCTGCCACTGCGCTGCTGGTCTGACGCTAAGCTGGGGGTTGTGGCGGATATTGGTGGTTCA  
GGTATGGCGATGTTTGGCCCGCAGTACAACATCGAGATCAATAACGATGGCACGAACGGGAGATAGGTCGGCTGCCCT  
GAAGGTGTTTATGACCTTGGGAAAAAAGCGGCAGCGGACTTTATGCAACAGCAGGCCCGTGTGTTGGTGGTAAAGT  
GAGCATATCGGTAA

>Cluster\_3303

ATGACCGGAAATCACCCCGCGCTGCTGCGCTTAAACCGTACTGTGCACGGGCGCTGGACGCTGCCGCTCACT  
GTGTCAGACTCCCGCCCATGCGGAGATAACCAATGAACACTGGCTGCTGAAACTGCTGGAGCAGGGAGAAAGCGGATATCA  
CGGTGATTTCCCGCGCTATGAATGGGATATCGACACGCTTGGCAGTCTCTGCTGGCACATTCGGACACTTACCCGCT  
TCGGTCCGCGAACCTCCGAGCTTTCTGAAACCCCTGACGGCGCTTATCAGGACGGCGTGGCTGATTTGCTCGCTGGAAGG  
CGACGACCCGCAATCCGAGTCAAGCCTGCTGATGGCGCTGACAGAAAACCGATGCTGCCGCGCTGAATGACCTGT  
GGTATTGCTGAGCCTGAGCCCGCTGACGCTTGAAGCGGCTGCGCCCTGCTGGATGCGCAGTCCGGATGAATGTCGGGA  
CAACTGAAACCGGCAACCGCTGACATCCGCGCAACGACAGTGGCAACGACGGACCGCGCAAAAACCGCTGAC  
GGGAAAACAGGATGACGCCCTGCTGGCGGTACTTAAACCGCTTTACCGAAGACGTGACGGAAAAAGCCGACGGCGGAA  
TCCGACCCGCTATTCCGGGCGGACACCGAAATTCGCCAGATGGTCGATATCCCTCCCGTCGCCGCAAAAACAACCCGAT  
CTGGTGGGAGAACCGGGCGTGGGCAAAACCGCGCTGGTGAAGGGCTGGCGCTGCGTATCACCGAAGGCAACGTCGGGA  
AGCTGAAACCGGTCATATCCGACACTGGACTCGCTGCTGTTACAGGCTGGCGGGCGTTAAAGTGAATTTGAGC  
AGCGACTGAAAAACGTGATTTGATGACGATACAGAAATCACCGGAGCCGCTACTGCTGTTTTATTGATGAAGCCATAACAT  
ATCGGCGCGGTAATCAGCGCGGCGCGCGGATGCGGGCAACCTGCTGAAACCGCGCTGGCAAGGGGCGAGCTGCGCAC  
CATCGCCGCCACAACGTGGAGCGAATACAACAGTATTTTGAAGCGCAGCCGCGCTGGAAACCGGCTTCCAGATGGTGA  
AAGTCGACAGCCGGATGATGACACCCGACCTGATGCTGCGGGGACTCAAGGCCGCTATGCAACAGCAGCAGCGGCTA  
CATATGCTGGACAGCGCCATTCAGACCGCGCTGCGCTGTCGCGCCGCTATCTGACCGGACGCCAGTTGCCGGACAAGGC  
GGTTGATTTGCTGGATACCGCGGGGCAAGAGTCCGATGAGCCTCAGACCCCTGCCGGAACCGTTGACGCACTTCCAG  
CGCGCTGACCGCGCTGGATATTGAGCGGGAAGCGATTGAGCAGGACAGCGCTGTTTTATCCGAAACAGCAGCCGGAGCG  
TTGGCGGAACTGACCCCTTTCGGTATGAGCTACAGGCAAGAGCGGCACTGGAAGCGCAGTATCAGCAGGAAAAAGC  
GCTTGGCAGCAGATTATGGCTGCGTCAAGAAAGGGGACAGCAGCAGTATTGCAACAGCAACTGCGAACGCATCAGG  
GCTTTGACCGCTGCTGGCGCTGGATGTGGACGCCCGCGCTGCGCACTGTGGTGGCGGACTGGACGGGATCCCGCT  
TCTTCCCTGCTCAGGACGAGCAGAGCAGCTGCTCAGTATGGAACAAAGCCTTGA AAAACCGGCTTGTGGGCAAGCC  
GGCGCTCTGCCCATCGCACAGCGGCTGCGGGCGCTAAAACCGGCTCACGCGGAGAACCGCCGAGGGGATTTCC  
TGCTGACCGCCAGCGGCACCGGTAAAACCGAAACTGCGCTCACACTGGCCGACACCTGTTGGCGGTGAAAATCC  
CTTATCACCATCAACCTCTCCGAATATCAGGAGCCGATACCGCTCCAGCTTAAAGGGTCTCCTCCGGGCTACGTTGG  
CTACGGTACGGGCGGCTACTCACGAAAGCCGTTTCGCAAAACGCCCTACAGCGTGGTGTGCTGCAAGAAATGGAAAAGG  
CGCATCGGACGAGATGAACCTGTTCTATCAGGTATTTGATCGGGGCTTTATGCGCGACGGCGAAGGCCGGAAAATTGAC  
TTCCGCAACACCGTGAATCTGATGACGGCTAATCTGGGAGTACCACATCATGCAGCTGCTGGAGGAAAAACCGGACGC  
CACGGACGACAGCTGCAATGAACTGCTGATACCCCTGCTGCGGAGCAGCTTCCAGCTGCACTGATGGCGGCTTTTCAGA  
CGGTGATTTTACCGCCCTTCGGACAGGAAAGCGATGCGCGCAATTTGTGGAAATGAAACTGGCGAGGTGCTGCTGCT  
CGTACGACTATGGGCTGGAAACGGAAATCAACGACAGCCTGTATGACGCGCTGACCGCGCTGCTGCTGCGGACAC  
CGGGGCGGTAATATCGACAGCCTGCTGAACAGCAAAATCCTGCGGCTTAAAGCCAGCAGTTGCTGGCGCAACAGGCCG  
CGCACCGTAAAACAGCCAGCTACGGCTTGGCTGGGATGAGGAAGACGGGATTTACTGGAGTTGCTACGGAAGAGATG  
CAATAA

>Cluster\_60486

ATGAGTCAGCGAGGACTGGAAGCACTACTGCGACCAAAATAGCGGTAATTTGGCGCGTTCGATGAAACCAATCGCGC  
AGTTACTGTATGATGCTAACCTGCTGGCGGGAGGCTTTAACGGACCGGTACTCCCGGTGACGCCAGCTGGAAGACGG  
TGTTGGGTGTTGGCTTGGCCGGATATTGCCAGCTTGGCCCTTTACACCCGACCTTGGCGTTTTATGTAACCAATGCCAGC  
CGTAATCTTGCTCTTCTGGAAGAGCTCGCGGAGAAAGGCTGTAAAACCTGCATTTATCTTCCGCCCGGATCGCAACA  
CGAAGATCTCCGCGCCTGCGCCCTGCGCCATAACATGCGCCTGCTTGGACCAACAGTCTGGGTTTACTGGCTCCCTGCG  
AAGTCTGAATGCTGCTTTTCCGCTGTGCCGATTAACCGCGGCAAGCTGGCGTTTTATTTCCGAATCGGCTGCGCTCC  
AACACCATCTCGACTGGGCGCAACAGCAGTAAAGATGGGCTTTTCTACTTTATTTGCGCTGCGGACAGCCTGGATATCGA  
CGTTGATGAATGCTTACTATCTGGCACGACAGTAAACAGCGCATCTGCTCTATCTCGACAGTAAAGCGACG

CGCGACGCTTTGTTTCGGCGGCCGCTAGTGCCTCGCGTAATAAACCGATTCTGGTGATTAAGCGGACGTAGCCCGGGC  
GCACAGCGACTGCTCAACACGACGCGCAGGAATGGACCCGGCATGGGATGCGGGTATTCAGCGTCCCGGTTTGTTCGGGT  
ACAGGACACCCACGAGCTGTTTTTCGGCGGTGGAACCCCTTAGCCATATGCGCCGCTACGTGGCGACCGGCTGATGATTA  
TCAGCAACGGTGTGCGCCTGCCCGCTGGCGCTGGATGCTTATGGTACGCAATGGCAAGCTGGCAACGCTAAGCGAA  
GAAACCTGGAAAGAACCATCACTGCTTTTTATGCATATGGTGGAGTACCGCGTAATCAGAAGCAACTACGCGAAACGCCG  
CAGTGAGCACTATATTAACCGCTGGATATCTGCTCCACAGCAGGATTTTGACGCGTGTGTTATTCATTCGCCCA  
GCGCGCTGCTCCCGCAACAGAAAGCGCGCAAGTATTAATTGAAGCGTAAAGCATATCCCCGACGAAATATGTCTCT  
TTGCTGACGAACTGGTGGCGGAGCAGCTCCTCGCAAGAGGACGACGCTTATTCAGCGAAGCCGGGCTGCCGACCTACCG  
TACCCTGGAAAGAACCATCACTGCTTTTTATGCATATGGTGGAGTACCGCGTAATCAGAAGCAACTACGCGAAACGCCG  
CGTTGCCAGCAATCTGACTTCCAATACCGCAGAAGCGCATCTTCTGTTGCAACAGGCGATTGCCGAAGGGGTACGTGC  
CTCGATACCCATGAAGTTCAGCCATCCGCAAGCGTATGGCATGAACACGCTCCCTACTGGATTGCCAGCGATAGCAC  
CGAAGCGGTGCATATTCGCGAACAGATTTGGTTATCCGGTGGCGTGAATTTGCGTTCGCGGATATTCACATATAATCGG  
AAGTTTCAGGCGTATGCTTACTGCTGCTACAGCCAAATGAAGTCCAGCAAGCGCGAAGCGTATTTTCCGATCGCGTAAAA  
ATGGCCTGGCCACAGGCGCGGTCCACGGCCTGTTGGTGCAAAGTATGGCTAACCGTGTGGCGCTCAGGAGTTGGGGT  
TGTGGTTGAGCACGATCCGGTTTTTCGGGCGGTTGATCATGCTGGTGAAGGCGGTGTGGAGTGGCGCTCTGAAGATCAAG  
CCGTCGTCGCACTGCCCGCTGAACATGAACCTGGCCGCTATCTGGTTATTCAGGGGATCAAAAGTAAAAAGATTCGT  
GCGCGAGTGGCTACGCCCTTGGATGTTGACGGCTTGGACCGCTTCTGCTGCAAGGTTTCCAACCTTGTGATGTTG  
CCCCGAAATTCAGCGTCTGGATATTCATCTTTGCTGGCTTCTGGCAGTGAATTTACCAGCGTGGATGTCACGCTGGATA  
TCTCGCGCTTTGAAGGCGATAACAGAGTTCGGCTGGCAGTGGCCCTTATCCGATCAGCTGGAAAGATGGGTAGAATTG  
AAAAACGGTGAACGCTGCTGTTCCGCGGATTTGGCCAGAGATGAGCCAACTTCAGCAATTCATTCGCGAGTCA  
CAAAGAAGATCTTTATTACCGCTACTTTTAGCGAGATCAACGAATTTACCATGAAGATTTAGCCAAACATGACACAGATCG  
ACTACGATCGGAAATGGCGTTTGTAGCGGTACGACGATTTGATCAAACGGAAGAGATCCTCGCGCTCAGCGTGGGATT  
TCCGATCTGATAACATCGATGCCGAATTTGCTGTACTGGTTCGCTCGGATCTCAAAGGGTTAGGCTTAGCTCAGCGCT  
AATGGAAGAAAGTTGATTTACCTATACGCGAGATCAGGACTCAACGCTCAAGTGTGAATGGTATTACGATGCCAAACATCGTGGCA  
TGGTGGCGTAGCCCGCAAGCTCGGTTTAACTGTTGATATCCAGCTCGAAGAGGGGATCGTTGGGCTTACGCTAAATCTT  
GCCAGCGCGAGGAATCATGA

>Cluster\_67035

ATGAGTATGGTGGATACCGTTTATGTATGAGTGGCGGTGAGTCTTCCAGCGGCATTTAATGGCGTGGCCACGCTTAT  
CGGCACATCCACATGGGACTCCTTGTTCATATAGTGGGATTTCTTCCGCGATGGCACTTTTCTTCGTTTATATCCGGG  
GGCATGACCCGAAGGAGTGTGCTGAAGTTTATGCGGTGTTCAATCTGATAACAGTGTCTGGTTATTCGAAACGTACC  
GTGCATATCATGATATGACGAATCCCACACTGGTGTGCGGGTGGATAATGTGCCGACCGGGTGTGGTACCGTTCGG  
GTTTATCACCAGTATTGGTGGCTCCCTGACGAAAATTTATGACTCCGTTTCCATACCGCGGATTTCCGTCGATACAGCA  
AAACCGGTATGTTGTTGGTGCCACCCTGATGGCAACACCACGGATGTTGGTGGCACAGAACGGTGCCTGGCCATGCTG  
CTGAGCGAATATGTACAGAGTGTGTTATCGGCGACATTTATGCTGACACACAAATACAGCATGGCTGAACTGATGCACT  
ATCTGACCTTATGAAATCATCTTCCGCAAAACCCAGCCACTGCTGGCGTGAATGTTCTCTCGTGGCAACAGGCTGGCGC  
AGGCAGGATTTCCAGACTCCGAGGCGCTGGCCAAACAACTGCTGAAGCGTGAAGTGAAGTGGATACGCAACAGGCGGCA  
AAGACCTGGGATTTATGTTAACCGCTTCAATGGCCCCGTCGACGCGCCGATACGCTGTTCCGGTCTGATGATGGCGGA  
CAGCTATGGCTTCTACTATCAGGCGCGGACGGGATGCCAGTGAATCCTGCGCCAGAATGTGGTGTGATGATGCCATAAAA  
AGGATATCACCCACATCCGCGAGCCAGCGCAACGCTGCCAGTCTGGTGAATATGGCGGACCACTGCAACAGCAAAA  
ATGCGCCTCAGCTGGGCGCGCTCAGGCTGGTGGTGGCAGCCATTTGTTGCGGTGATGCATACTGCTCCTGATGGCATGCT  
GGTGGGATGTTTCCGATAATCATCTGCTGGCCACCATTACGGTTTACACGCTGACGCGTACTGAAAGCTATGTTTCT  
CCCTGTTTATCTGCAGAGCTGGCCACCCTGATGCCATTTGAACTACGCGATGGCGTTTTTATCTGAAAGGCGAAACG  
AAGGGGATGAATTTCTCCCTGTCGAATCTGAACACCATCCAGCAGACTCAGAGTGAATATCGGGTTGATGGCAGCTGGCT  
GTCAAACCAATTCGGTTTATTGCTGCCGGTCTGGTGTGGTGGTGGTGGTGGTGGTGGTGGTGGTGGTGGTGGTGGTGGT  
GCTCATCCATTAACAGCAGCAGCCCTGCTGCTGCTCAGGCTGCAGACGGTACGTTGGCGTTTAAACAAATGCAGATG  
GAGAATGTCTCCGGCTTTAAATGGGACACCAACAGTCCGTCGCTGACGGTGCAGATGCTGACCCAGCATGCCAGCGGTGC  
GACAAACAAACAAACAGCGGGTGGTGGCATTCTGCATGATGGTAAATCGGCGATTTCCAGTCTGGCAGCGATTTCACT  
TTGGTTCGATGCTCAGCAGCAGCTACCAGGCGCAACAGCGTGAAGCGGAAAGCCAGGTGCAGAGTCTCAGTAACAGCATC  
AGTCATGGCAGCCAGCTGGTCCGAGTCAAGTGGCAGCTGGGCGCAGCAGCGGGCAACAGCGATACAGTGGTAAGCGG  
TGGCGACAGCAGCCGGCCACCACACTGACGCGAGGCAATCAACAACTGAACAGCGTGGCTGATTCCTGCGCAAAACGCTG  
CCGCTATCAGTACTTCCGAAGCGTTACGGAGGTTACGGAAATTAACACAGAGCGGTTGATTTTACTGCGAGCGATTCGC  
GAAGCCGGTATTGATACCAGGAAAATAATCTCGGAAAAGCTGTTGAGTTAAACACCGGGGCCAGTGCAGTGGAAAGCT  
GTATACCGACATTAAGCTATAAAGGTTCCGATCGGTCATCGCATGGTATTAATTCAGATATCAGCTCAAAAACAGGGCATG  
ACCGTAGCTGACAGCGCAGGAAACAAAGATGTGCGTATGCCATGGATGTCATTAATAACCATCGCAGCAGCGGATAAC  
AGCAGTCACTAGTACATAACCTCTTCCCTGCTGCTGAGCAGTGGCCAGCAACCTGAGCGGATTTGAGCGAGTAAAG  
GCAGTATAATGATGCATTAACCGCAGCCATGAATATGCTCAGATGGCAGTTATGCGGAAAACACAGTGAAGTATTA  
ACAGCAACTACAGTACAGGAGTTTGTAACTATGTCATCAGTCTGCTCCGGGACGCTGCCACAGCCGCTGCTGACCGATGCC  
GAAATCCGCTACTGCGCGGAGCGGGAAACAACTGGCGAGGATTTGTTGATGAGAACTGAAACCCAGCTGGAGCA  
GGAATTCAGGAAAACCGGTTGCGGGCTTCAGAAAAGTATGGGACGCTCGGGCAGCTCGTGGATATGACAGAGTACCTG  
AGCGAGCTGATGACAGAGAAATTTGCTGACATGACAGCAAGGGCTTCCGGCGCATCGGTTACAGGTTGACAGCAGATCCAG  
AAACAGGTTGCTGATACCCGTCAGACTGTGAAATCACAGGTGCTGAAAATGAGCAGGAAATGGCATCATCCAAACAGGA  
ACTGAAGACAAACGGAACACGCTTGCAGAGCAGCATAAAGAGAGTGAAGAGCATATAACGAAGCATTTGAAGCAGGGC  
GCTCAGAACAGAAATTTGGATGGAACCTCAGATAAAGATGAAGAGAATATGCAACGCTCTGAGGGATGCTGCAAGTGAAG  
GATAAATAA

>Cluster\_9811

ATGCCGCTCGCTTGATCTCTCGGCCACGGAGCGGGACACCCGCTTGGCTGCCGAAAGCAGGATGACCTGATCCG  
CTACTACACCTTCAACGACTCCGACCTGTCGCTGATCCGCCAGCGACGCGCGCAGCCAAACCGCTCGGCTTCCGCGTGC  
AGCTCTGCTGCTGCGCTACCCCGTTACGCGCTGGGAACCGACAGCGAGCTGCCGAGCCGCTCATCTGTGGGTGGCG  
AAGCAAGTCCAGGCGAGCCGGCGAGCTGGGCAAGTACGGCGAGCGCGGCTGACCCGTCGCGAGCATGCCAGGAACT  
CGCACCCTACTGCAACTGGCCCGCTGGCCCTCGGCTTCCGCTTCCGCGCTTCCGCGCTTCCGCGCTTCCGCGCTTCCGCG  
AGACCACAAAGGCTTGTGCTGGCCGGTACGGCCCTGGAGAGCTACGGCAGAAACGACGCATCTTCCGCGCGCTGAGC  
GTGATGACCGGGCTGCTCGGAAGCCATTGCGCGAGCAATCGCGGGTCTACCGCGCTTGGTGAACCATCACGGA  
CTCGCATCGGCAAGCTGGACGAGCTGTTGAAGTCAAGCCCGCAGCAGCATCACCCTGGTTGACCTGGCTGGCAGCAG  
CACCGCTGAAACCAACTCTCGGCACATGCTGGAACACATCGAGCGCTGAAGACATTTCAAGTTGGTGGACTTCCCGGAA  
GGCTGGGCGGCACATCCACCAGAACCGCTGCTCAAGCTGGCCCGGAGGGTGGGAGATGACGCCAAAGACCTCGG  
TAAGTTCCAGCGCGCAGCGCCGCTACGCGACCCCTGGCGCGCTGGTGTGGAGAGCACCAGCGCTGATGATGAGTCT  
TCGATCTGCATGACCGCATCTTGGTCAAGTGTTCAGCGCGCGAAAGCACAAGCATACGAGCATTTCCAGAAAGCGGGC  
AAGGCGATCAACGACAAGGTGCGCTGTACTCCAGGATCGGCCAGGCGCTGCTGGAAGCGAAGGAAAGCGGACGACCC  
CTATCGCCCATCGAGGCGGTGATTCCTGGGACGAGTTCACCGAGAGCGTACGCGAGCCGAGCTGCTGGCCGGCCGG

AAGGCTTCGACCACCTGCACCTGGTTCGGCGAGAAGCTTCGCCACCTGCGCCGTTACACGCCGGCCTTGTGGAGGTGCTG  
GAACTGCGCGCGCGCGCGCGCAAGGCGTGTGGCAGCCGTCAGACCCCTGCGTGAGATGAACGCGGACAACCTGCG  
CAAGGTGCGCGGCGATGCACCCACGGCCTTCATCAAGCCGCGCTGGAAGCCGCTGGTGATACCCCGAAGGCCCTCGACC  
GGAATTTCTACGAAATCTCGCCCTGTCTCGAGCTGAAGAACGCCCTGCGCTCCGGCGACATCTGGGTCAAGGGCTCGCGG  
CAGTTCCGGGCTTCAGCGCCACTTCACCCACTTGAAGGACGGGGCCGAGGCCAAAAGACAGGACGTTGCTGCTGCTCGCAA  
GATCAACCCGAACAGCGACAGTACCTGGAAGAGCGTTTTCAGCTGCTGGACGAGCAGTTGGCCACCGTCACCCGCTGG  
CCAAGGACAAAGAGCTGCCGATGCCATCCTCAGCGAGTACAGGCTGAAAATCACCCGCTGGATGCGCGGTTGCCGAT  
CGGGCGCAGGGCGTATCGACAAACAGCCAGTTACTGCCGCGCATCAAGATCACCGAACTGCTGATGGACGTTGGACGA  
CTGGACGGGCTTCAGCGCCACTTCACCCACTTGAAGGACGGGGCCGAGGCCAAAAGACAGGACGTTGCTGCTGCTCGCAA  
TCCTCGGTGATGCGATCAACCTCGGGCTGACCAAGATGGCCGAGTGCAGCCCCGGCCTGACCTACGCCAAGCTGTCTGG  
CTGCAAGCCTGGCACATCCGCGAGAAACCTATTCGGCGGCCCTTGGCCGAGCTGGTCAACCACAGTATCGCCACGCCTT  
TGCCGCCACTGGGGCAGCCAGCACCCTCATCCTCCGATGGCCAGCGCTTCCGCGCGGGTGGCCGGGGCAGAGCACC  
GGCACCTCAACGAGTACGCTAGCGAGCCGGGACGGCTGTTCTATACCATATCTCCGACAGTACGCGCGCTTCAGC  
ACCCGCGTGGTGAATGTTCGGCTCCGCGATTCCACCTATGTGCTCGACGGCCTGCTGTACCACGAGTCCGACCTGGGAT  
CGAGGAGCACTACCCGACAGCGCGGCTTACCGATCACGCTCTTGCCTGATGCACCTGCTAGGCTTCCGCTTCGCGC  
CGCGCATCCGCGACCTCGCGAAACCAAGCTGTACGTGCGCGCAGGGCGTGAAGCCTACCCGACGTTGCGCCGCTGATC  
GGCGCACCTGAACCTCAAGCAGCTGCGTGCCTGCCACTCCGCGACGATCCTGCGCTGGCCAGCTCGATCAAGCAGGGCAC  
CGTCAACCGCTCGTGTGCTGCGCAAGCTCGGACGCTACCCGCGCCAGAACGACTGGCCGTGGCCCTGCGCGAGCTGG  
GCCGATCGAGCGCAGCTGTTTCTATCCTGGACTGGCTGAAAAGTGTGAACTGCGCCGCGCGTGCATGCCGCGCTGAAC  
AAAGTGAGGCGCAACTCGCTGGCCAGGGCGTGTCTTCAACCGCTTGGGAAATCAGGGATCGGAGCTCGGAGCA  
GCAGCGCTACCCGCGCAGCGCCCAACCTGGTGCAGCGCGCTATCGTCTGTGGAACAGCGTGTACCTGGAACGCGCA  
CCCAGGGTGTGTCGAGGCCGCAAGCCGTTGACGGCGAGCTGCTGCATTCCTGTGCGCGCTGGGCTGGGAGCACATC  
AACCTAACCGCGGATTACGCTGCGCGCAGAGCCGAGACTGGAAGACGGAAAGTTTCGGCCCTACGGATGCCCGGAAA  
ACCTTAG

>Cluster\_31473

ATGACGGCAGAGTACATCAGGGACTGGCAACAACCGCGCCACGAGTGGGGCGTGAAGGAACGGGGATCCCGCTCCTGA  
ATCCGCGCTTTCCTCTGGCTGGATGCCACCGGGCAGAGAAGCAGCGCCGCGCAGGAAATGGCTGATGCGCGCTTCTCCG  
CCACGCGCTGGGCAACCTGATTATAAAAAGCTTAGACGCACAGGAAAACAGGACAAAACAATCACACTGGCAGGAGAC  
GCCAGAAAACAGGCACGCGGGCGGTTAGATGAGGCCATGGCCTCACTGCGCTGCTGCGCTTCTATCTGCGCGATCCGCT  
TATTCGCCACCTCTCCTTCTGCGCAAAAACAGGAAGCCGATCGTCAGCAAGGAAAACCGCAGGCAGGCAGAACGCT  
ATGCGCGTGGGACCTGCGCAAAATATTGAACGCTTGGAGCGCACCGATCACCGCTGGCTGACATCGGGTTATCGCTCC  
CTTCCCGGACGTGAACCGCTGGACGATTGATTACCTCGCCAACTCAACAACACCCAGATACAGACGCTGGCCACCT  
GACGGCGGATGTTTCAGCAGCACCTTCGAAAACCTCTGCGATGTTTTGGCGGACTGATGGCGAGCTGACCATGGATG  
TAACGCTGAAGGGTATCAGATGCTGGCCCGCATGGCGTTACACTTACAGCCATGCCCTCCGCTTATGACGCACTGACA  
ACAGCAAAAGACCGGACGACGAAACCGGACAGAACTGCTGCGGGCGCAATCCTTCGCTGACCTGTGCGGAATGGTG  
GAAACGCAAACTGGGCTTACGTTGCGAGTGGAGAGAAGAACAACCTCCGCGCGCTGTCTAGTTTCCGAGAAAACAT  
CGCCCTATCTGAGCCAGGACGCGTTAAGCGAGTTTCGCGCACAGCGCGAGAAAACACGCGATTTCTGAAAAGTTTCATG  
CTGAAAATGAAGACGGGTTACGATGATCTCGAGACGGTGTATTACCGGGAGTAAGTAACCCGGTTACCGTAAGGC  
AGAAATGATGGCCACCATGAAGGGGCTGAAACTTCTGGCCGAGCCGTTGGCGACAAGCGGTTTCTGACTGTCCACT  
GCCGCTCAAAAATACCCAGCCACAACCGGAGAACGGTTCATCCGAAATCCCAAATGGAACGGGGCCACAATGCGCGACTCACG  
GATTACCTGGTTAACACGTTTTTTGCGGGCGGTCGCAAAAACGAAACCGCGAGCCTGCGCTGGTATGGCATCCGCA  
GGTGGAGCCTCATCATGACGGCACCGGTGCACTGGCATATGATGGTCTTTGACATCCGGAAGAAATCGACACCTATGTT  
CCCATACCCGCGATATGGCCATTAGGAAGACCCGACAGCTGGGCAATGATTAATCTCCGCGCTTAAAGTTAGGAT  
GTCGACGGCTCAAAAAGCAGCCAACAGCTACATCGCCACTACATCGGAAAGAACCTGGACAGCCGCGCGTGGATGG  
CATCGACCCGAAAACGGACAAGCCAGCGTGGACACGAAACCGAAAATCAATGGCCGAGAGCGTGGAACGCGCCATCG  
CTTGGCGCGCTTTCACCCGCTCCCGCAGTTCAGTTCTTTGGTATCCCTCCCGTCAAGTATGGCGTGAACCTCCGCGC  
GTTGCACTCAGATGGCCCGCAACCCGAGGTTCCACAACCTTGGAAAATGACGCAATGGATGCGGCTACGCTGCCCG  
TGATGCGGGTGTTTTGGCCACTACATTTAGAAAACAGGGTGGCGTACTTGTTCACGCAAAAGACTACCTGATTCGACCG  
CCTACGACCTCGCAGAAGAGCTGAACGATTACGCGGAGCAAGCGTACAGATTACGGGATCTGGTCGCCACAATCGGG  
GAATCTTCCCGCTGTGTCAGCAGCACCCGGATAACTGGAAGCTGGTAAGACGTAACCGGAAGCGGAAGACAGCGCCCGGA  
AAATGGTTTTGACTTTCAGGGCGCCCTTCCGCGCCCTTGGACTCGTGGCAATAACTGTCCCGTGTACAGGAAACGGACA  
ACAACGGGACAGAACAGCCGGAAGAACGGCCAGCACCGTGGCCGAGCTCCCTGACGGCGTTGAAGTGAACGAATGGATG  
CGCTCACTGAAACGGCACGAACCGCGGGCGCTGATGCGTTTCGCTTCTGACAAACAGGCAAAAACAGCAGTGAAT  
CGAGACTGGACACAGAGCCGCAAAACAGCAGCGCCCTTTCCTGATAACCAGAACTACTCGCTAAAGATGGCGGGAGT  
CTGCTGAATCTCTCGCCCTGCATATCGGTGGAACAGAGATCGACACCTGTTACGCGGGCGCGAGCTGTACGTTGACGCG  
AGCATCATTCGACCCGAGGATTTGAAATGTACGCAAAACGGATACCCGACCGGACAGCCGGATCACGAGCTCTGGCA  
GCGCTGAGCCGTAAACACGGCGTAAGCAGCAGGAGATCCGCATAACCCGGTCCGCGACTATCTGGAACAGCTGGGG  
CATCAGACCCGAAAGCCGCGCACGCTGGCATCCACTTCAGCAAGACAGAACACATGAAAACCCCGTTACCGT  
CTTCTGACATGCTGCGCCCATCCGCGACGAGCACAGGAAATCAGTGAAAACCACTGAACCGCCCGCCGCA  
AGCAGACCTGCTGCGAGGTGGCTGACCAGTGGAAAACAAAACAGACAGAAACGGGATTCACAAATCCCGTAATGAGC  
AAAAACCGCGCGGATATATGA

>Cluster\_23235

ATGAAGCCGCTCTCTTACCCTTACAGCAGTACTGGCAGACCGTGTGTTGAGCGGCTGCCAGAGCCTTTAGCCGAGGAATC  
ACTTAGCGCACAGGCGAAGTCACTACTTTTCACTGATTTTGTGCGAGGACAGCGTGTATGCGCATCCAGAGTGGCTGA  
CGGAACTGGAAGCAACCGCGCAGGCGCAGCAATGGCAGTATACGCTGCATGGTTGCAGGAGCGCTCAGTAATGTG  
AGTGACGAAAGCCGGTTAATGCGCGAGCTGCGGCTATTCCGCGCGCATTTATGGTGCATCCGCTGGGTGCAACCGCT  
GGCACTGGTTACTGAAGAGAGCATATTGCAGCAGCTCAGCCATCTGGCGGAGACGCTGATGTTGCGGGCGGTTACTGGC  
TGTATGACGCTGCTGCCGCAATGGGGAACGCGTGCATGCGCAGGGCGAAGCGCAACCGCTGCTGATTTTAGGCAT  
GGTAAGCTGGGGGTTGGGAACTGAATTTCTCCTCAGATATCGATCTGATTTTTCCTGGCCGGAACATGGTTGTACCCA  
GGCGGACCGCGGGAACCTGGATAACGCACAGTTTTCCTACCGCATGGGGCAGCGGCTGATTAAGTGTGCTGCAACCAA  
CGCAGGATGGTTTCTATCGCTTGAATGCGGCTGCGTCCGTTTGGTGAAGTGGCCCGTGGTGTGAGTTTGGC  
GCGCTGGAAGATTTATACAGGAGCAGGGGCGGACTGGGAGCGTTACCGGATGGTCAAGCGCGGATTTATGGGGATAG  
CGACGCGCTATGCTAACGAGTTGCGTGCATGCTGCTCGTTTGTTCCTGCTTACATCGATTTTACGCTGATTCAGCTGATTC  
AGTCTGCTGCAACATGAAAGGAATGATTGCCCGTGAAGTGGCTGCGACGCGGTTTTCAGCGCAACATCAAACTTGGCGG  
GGTGGCATTCGTGAATTTAATTCGTCAGGATTTCCAGCTTATTCGCGGGGGCGGAGCCGCTGCTGCAATCGCG  
CTCTTTACTACCAACGCTCAGCGTATTTGCCGAGCTGCATCTGCTTTCGAAAACGATGCTGAACAATTCGCGAGTGGCT  
ATCTGTTCTGCGCGCTTGGAAAACCTGCTGCAAGCATTAACGACGAAACAAACCCGACGCTTCTTCTGATGAGCTT  
AACCGTGGCGGGTGGCGTGGGGATGGACTTTTCTGACTGGCAGCAACTGACCGGGTGGTACCGCACATATGACCAA  
TGTGCGCGGGTGTAAATGAATGATTGGCGACGACGAAAGTGAACCTCAGGAAGAGTGCCTGTCGGAACAGTGGCGT



AGCTGTGGCAGGACGCGTTGCGAGGAAGATGACACTACACCAGTGTGGCGCATCTTAGCGAGGACGATCGCAAAACAGGTG  
CTGACCGTGATTGCCGATTTCCGCAAAGAGCTGGATAAAGCGACAATCGGGCCACGCGGACGTCAGGTGCTCGACCATCT  
GATGCCACATCTGCTAAGTGATGCTGTGCGCGTGAAGACGCTGCTGTACGCTGTCGCGCATACCGCCTTGTGGTGG  
GGATTGTTACTCGCACCCTTATCTTGAGCTGCTTAGTGAATTCCTGCGGCGCTTAAACATTTGATTTCTCTGTGTGT  
GCATCGCGGATGATTGCCAGCCAGCTAGCGCTTATCCATTATTGCTGGATGAATGCTCGATCCAAATCCCTCTACCA  
ACCAACGGCGACGGATGCCTACCCTGATGAACCTGCGCCAGTATTGCTGCGCGTGGCGGAAGATGACAAAGAACACAGC  
TTGAGGCGTGCCTCAGTTCAAACAGGCGCAGCTGTTACGCATTCGCGGAGCGGATATCGCCGTACGCTACCGGTAATG  
AAAGTGAGCGATCACTTAACCTGGCTGGCAGAAGCCATGATTTGATGCCGTATTCAGCAGGCGTGGGTCAAATGGTTGC  
CCGCTACGGTAAGCCAAATCACCTGAACGAACCGGAAGGGCGTGGTTTTGCGGTGGTCCGCTACGGCAAGCTGGGTGGCT  
GGGAGTTAGGCTACAGTTCCGATCTTGACCTGATCTTCTCCATGATTTGCCCAATGGATGCGATGACTGACGGCGAGCGG  
GAAATCGACGGGCGACAGTTTATCTGCGTCTGGCGCAACGCATATGATCCTGTTACGTCAGCGAACCTCTTCCGGCAT  
TTTGTATGAAGTGGATGCACGACTGCGTCCGTCGGGGCAGCGGGAATGCTGGTGACATCCGCAAGCATTTGCTGATT  
ATCAGAAAAACGGCCCTGGACCTGGGAGCATCAGGCGTGGTGGCTGCGCGTGTAGTGTACGCGATCCGCAAGCTCAC  
GCGCACTTTGACGAGTACGCGGGAGATTATGACGCTGCCGCGGAAGGCAAAACCTGCAACAGAAAGTGGGGAAT  
GCGCGAGAAAATCGGTGCCCATCTCGGCAATAAACATCGCGATCGCTTTGATATCAAAGCCGATGAAGCGGGAATTACCG  
ATATCGAATTTATTAACAATCTGGTGTGGCTACGCTCATGAAAAACCGAAGTTAACCGCTGGTCAGACAACGCTG  
CGCATCTGGAACTACTGGCGCAAAACGACATTTGGAAGAGCAGGAAGCGATGGCGCTGACCCGCTTACACAACGCT  
GCGCGATGAACCTCATCTGCGATTACAGGAATTGCCGGCCATGTGTGGAGGATGCTTACCAGAGCGTGAAC  
TGGTGGCGCAAGCTGGCAGAAGTGGCTGGTGAAGAATGA

>Cluster\_12157

ATGTTTGCAGGTTTACCTTCACTCACCCATGAACAGCAGCAAAAAGCTGTGAGCGGATCCAGGAACGATGGCACAAGG  
GATGAGCAGCGGCCAGGCAATCGCGCTGGTGGCAGAAGAGCTGCTGCCAACCCTCCGGCGAGCGAATCGTGGCGGCTT  
TTGAGGATGAAGACGAGTAA

>Cluster\_35973

ATGCTTCAAATCCACAGAAATTATATTCATACGCGCTCAACGCCTTTCTGGAATAAACAACTGCACCTGCCGGAATATT  
CGAACGCTATCTTGATAAAGGAACGCGCCGGGGTTTACCCATAAGCGCTAACTTAAAGGTTGAACCATCTGAAGAAT  
GCGAGCCTCGGTGCCTCGTTAA

>Cluster\_16052

ATGACTCCGTTACAGTTTATAGGTATAGGTAATATGATCTTTCTGTATGGAACAATCTTCTTATGGTGTGGGTATG  
TTCTGTATACCATTTATCTTTTATGCTACTGATTAATACCCGTGGTCTCTCTCGGCTTACTTAATGTTTCGACAATAT  
TAATAGCGATGTAG

>Cluster\_14925

GTGTCAATACAAAAACGAAAGGCGTGGTAATCTCCGTTCCAGTTCGCTTTAGATCTGACTTACGGGAAAAGATGGA  
AAAGGCACAACAACAGGACGCGGATGATCTCTGCTGGATAAAGCGAATAATCGCAAGAAATACAGCAACGCG  
GCATAGAACCACAAAGGATAA

>Cluster\_38479

ATGTCAAACCAATTAACCGTTATAGACGGGTATCGGAAAGAGAGGCGACTAACGATAACAATGCCGAAAATCTCAACAT  
TTCTTATATATGTGGCAATGTAGTGGATTTTTTGTAAACTTTCAAGAAAAAGAAACAATAAATTCATTTGATAAAATAC  
TAAAGAAAGAAATAATACTTGATTAG

>Cluster\_1835

ATGAAAAATATATATTTTTAGTTTTATTTTTATTTGTGTGGTGTCTCCAGTGGACATAGAGCCAGCTAGACAAGAAGT  
TAATATCTTTCTGGTTTTATATCAGACAGGAAATACAGTGTATATATAAAAAACACTCAAGTGATTTTTCAGACTGCCA  
CATCTGAAAAAAATTTATCGACATAA

>Cluster\_43560

GTGAGCAAGATTGACTATCAGGCACTGCGCGAGGCGGCAACAGGCAACGCAAGATGAATGGGTAGCATATATTTTGGC  
GGGTACATAACGGCATTATCTCTGCGCGCAGCTGAGGGTAGGCATTTGCGGATACTTTATTGACTGGCCTGGCGTCTG  
TCAGGGGCGGGAGACATCAACATGA

>Cluster\_60147

ATGACTATGCTGAACGGCTGCGCGCAGGAAGGACATCAAATGGCTGGCAGGAAGGTAATTAAGAAGTTTGCATGAACA  
AGCCATTAATAATGCTTTGCGCATGCTGGAACAGGGCTTTGATCGTGACCAGGTGCTCGCGGCCACCCAGCTAAGCGAAG  
CCGATCTGGCAGCGAATAACCACTAA

>Cluster\_5625

ATGAAACGTTGTAATGTCGGCGCTGGTATTGCGGAAATCAGCCCTGTCCTGGTGTGGCGACATTACCGTTCATCTT  
CCTGCTGACCCCTCCGGTCAGCCAGCAGATTGTAGCTTTTCTGACTGATTGCTCATTCATTCACATTTGTTTATAA

>Cluster\_28397

ATGACAGATGCAGAAAGAGAATATCTTATAGTTACCTGATTGGTTATTTATTGGGTCGACGCTGGAAGCCCTGGATAT  
CGCCAAAAGAATGCTGTAA

>Cluster\_30110

ATGCGGAAGTTCTGGAATGTTCTTTTTTGGTGTGGAGAAGTGGTGGTACTTTTGGCAATG  
TGACAAGTTATGGCAGAGCTGGTGGTGGCAAGAATTTTGACGATTGA

>Cluster\_4779

ATGAGACTGCCAGAGAAAGTTCTTTTTCTCTGTCACCTAGTGGCCTGTCAGGCGAGGAAAAACAAAAAACCGAAGAG  
CATTACCGGATTTTCAGGAAAATTTCAACGCAATATCAGGCAATCAAACAGCATCAGAAGCCCGACTACGCTTCTTTG  
ATAAAATGGTTTTCGAAAGAAAATCTCTGGAAGATGTTGTTCTTTAGGTGAAATGATTCAGAAGGAAATTTATGGGCAT  
GAACAAAGAACATTTTACCAGTTTATCATAACAGGTAACCTGGAATCATCATTTGTTACACAACGCGCTCCTGGTCTGGC  
AAATGTTTTATAATGGCTTACGGGAAACAGAATAACCTAACACTTTCAAACAGAGATGGTATAAAAAAGTACTAACCTTTTA  
GAGATAACTTATTGACAAAAACAAGAACCTCCAGAGATAATTTGAGGAAGGAATAAAACATCTGAACATGCAACAATA  
CCATATGACAACGCAATGAAAGTAATAAATGCTAAAAGCAGGAAAGATAGCTGGTAACAATAACGAGCTGTGATGGA  
AATAAAAAAGGAATCCCAAAGCGACCATCAAATCCCCCTGTGAGATAAGTTCCGAAAAGGAAAAACGATCTCCTGTAG  
CTGAAGATAAAGTTCAAACCTCGTTAACACCGAAAAATTTGTTTCAGAAAAATTTCACTTAGTGATGAGCTAAAAACAAA  
TATGCAAAATGAAATATAGAGATAAAAAGAATAATGGGAGAATACAATCTTTTACCGGATAAAAAACAGTCGTAATGGTCT  
AAAATCTTACAGAAAGCTGATTTACTAAAAATAATCATGGAGGATACCTCTGTTACAGAAAAATACCTTTAAAAACA  
TAGAGATGGCTATAACAGATAAAAAAGGAGTACTATTCGCATACAGTTGATATGAGAAAAATTTTATGCCATATGG  
GTTGCGGGTTCCACCTGAAAGCATTTTCGGACTATATTAAGACTTTTTCTCAAACCTACAAAGAGTTTACTTTACTTACT  
TTGGGTTGATGAAAAAGCATTTGGAGCCGCAAAATTTACCAGTGTCTTAAACAAATTTGATTTGATTTAGCATGCGAA  
CTATACAGCAGAATACTCCACAAAAAATATTGATTTTATTAATCTATATAAATGAAATGAGGAAGAAATCAACAACAAC  
CCATCGGGACAAACAGAGTACTTAAACAAACTCAGAGACTTTATGCTACTTATCAAAAAATATCCACCCCTGAAACA  
CATGTTTAAATTCATTTTTTTTAGAAAACATGATTAACCTTACAGATAAATTTCTTCAACTATTGCAATTTGCAAGGTGTTA  
CAGAGATTAATGATGAGTTACGAATAAACTACCTTAAAAATGTAATAAACTGTGACAGCATGACATTTGGTAATTTACG

AAAAAATTAACGACAATAAAGATAGAGTAAAAAACTAATTCCTGATTTACAGAAACAATTTGGTGAAAACCGCATTTCA  
AATTAAGAGATGTTAACTCTTTAACTCTCTTTTCAAATCAGAAAATAATCACAATATCAAACTGAAAATGTTGCTTCGAT  
GGAATATCTCTGCCGCTCAGACCTGCTCAGGATGTATATCCTTAAAGAGCATGGTGGTATTTATACAGACACAGATATG  
ATGCTTGCATACTTAAACAAGTAATTTTAAATATATGATGCAGACAAACGGAGATAATCGTTTCTTGGAAAGATTTGAA  
ACTACGCTCGTCAATATCTGATGGTGTATAAGATATCTGTAATTAACCAAATAATGATGAAGTTAACTATAAGAAATCA  
GTGATGCAGATAAAAAACATTATCAAGAAGATATTAACAGAAATATCTAAAATGCCAGAAGATAGTATTTTACTAAAGATC  
AATACAAGGATTCCTCGAGACACATGCCATCCTCTCGTCTGTTATCACCTATGGCCTGATGGATGGAATATTCGTGGGCT  
CAATGGATTCATGCTATACATAAAGGTAGTGAAGTGTGATGCTGTATCGCAGGCCAGAATCAGGCTTACAGGGAACT  
TAAGAAGATAAAGAGATAATATTATAGTGAATAATCTTCAAACTGATGAATTTGCTCACTCCAGATACAGAC  
AAAATTTGGAGGGATTTCTGGTAAAAAAATACCTTTCAGGAAGTCTTTTTCAAATTCAGACAAGATACATTTATCCGGGA  
GGCATTGAGCACCCCTCCAGATATCAGGTCCTGACTTGATTCAAAGAAAGATGTGCAATTTTTAGGAGTAGAGGGGTGT  
TAGGTGAAGGATTCATTAATGAAGAAACTGAGTGTAAAGCTTATATTTGGTGTCTACAAAACAACCTGGCACAGGGAAA  
TATGACTGTTAAACCCCTGAATCGATCGGCTTAAATGATGTCACGCCCGCAGATGAAAATACCCTGGTGTATAGGAAAAG  
CCGGTGTGTTGATGACTTCTGTCAAAGATGTTTCAACACTAAAAACAGAAAATCTTCCAGAATTTATCTTAAACAAAA  
TAGATACTGATACGTTTTTCTCTCAGTGGTCAACCAAAACCAAGAAAGATCTGCAAAAAAAATACAAGACCTTACTGTA  
CGTTATAATGAGCTAATGACTCGTCTGACTATCGACTTTAAAAATCTATATGAAATAGATCAATGCTCCATATGATTTAT  
GCTAGAGATGAATGATGATATAGCCAAAAGGCTATTGTTTTTCAATGCAAGTTCAAATAGCCGAAAAAATTCGGAGATGA  
CCATTCCTGTAGACAATAAATTAACATCTATCTGATCTACATAAAAAAATGACAATGATCTGAGTATGTCCATAAAA  
GGCTTTCTTGGCAGTAATCCACATACAAAAATAAATATCTTTTATAGCAATAAGACTGAGCATAATATTTTATAAAGGA  
TTTTATTCCTCTCGCAGTTATGGAAAATGAGTTAAGAGACATTAACAATAACATGAGCAAGATAAGACTCCTGAAAACCT  
GGGAAGGGAGGTTAATTTACAAAGATACTCGAATTAATAAAGATAAGATCATCTTAGTTTGCATCTTCTCGAGGAAGCA  
AATGAGTTTCTTGAATATCTACTTTTATTTATGAGAATGATTTCTTGAGAGAAAAGATGGAAGCAGTAAAAACAAAAT  
GAATTTCTCAGCACTTTTATTTGAAAAATAAAAAAAGAACAAAACACATGGCAGGATCTGTCCACAAAAGAACAAAAT  
TACAGCTTATTAAGCATTTGAAAGAAATTCAGGAAATCAGAGAAGGACTCTCATTACGATAGACTTCTGATGCTTTT  
TTTTAAAAACATAATGAAAATATTCATAATAAAAATACAAAGAATAAAGACGAGTCAAGGAATACTCCCGTGTAGCCAT  
TCATAATATAGATAAAGTTATATTTAAAGGGCAACACATGGATCGTCTTATCATGAAGGATATGTATTTTCTGATATCA  
ATACCTTGTCTCGTTATACACTACACGGACTAGGAATAACTGGTGTACATACTGAAGAAAACCTGCTACCAGCTCTCTCA  
TCGCTCTTAAATTAATATTTGAAAGAACATTAATGAAGATGAAATAGTGGCAAAATACCACAGCATATGATTTACT  
TTTTAAATAAAAAAGAATCAAGCTCTATTTCTGTGAAATTTTGAACAACTTTTCAAGGTTACCACCACATGAACACTCA  
CACCTGTTCTTGGCCAGAGTGTAAATCCCTCTGGGCATGGGCTACTCATCCGATAATGGAAAAATCACAGAGCAAGTAATA  
GTCAGTGGAGCTGATGGATTTGATAATCCCATATCTGGACTTATATATACCTATCTTGAAGATCTATATAACATCCATGT  
AAGGATGCCGAGAAGGTACACTAAATTCACAGAATCTTCCGACTTCTGGAAAACCTCTGTTCTTCTGATGCTTTTGAAG  
AGCAAAGTATTAATAAATTAATTTAGTGAGGCAGAAAAAGGCCTTATCAGTCTTAAACAGAAATACATCAGCATCTCACA  
GGATTACCAACTATTTGCCGATGCACCCCTTTCATTAATTTCTGTTGGATTACCTGGTACGGGAAAACCTATGGCCAGGGA  
CAGGACTATGGGCTCCACCAGTTACAGCAATTCAGGATTCACATTTGTACTCCCTATAAATTTCAAAGGTATTTGGTT  
TTAACGATAAATATATATCTCTGACCTGCTAGCTTCCATTTACATTTTATCGTGAACATGCGAAAATATACTTTATTG  
TCATGGCTGAGTTTATCGTCACTATGCACAGCGATGGTTCGAAATGGCTAAAGGATATGGAAGCCAGAATATTTGATTT  
TCACCTCAGTCTCTATTTGGTAAACCAAGAAGGAGCGTGTATGGGATTTAGCCTTACTTTATTTACAGACTGAAGATAC  
CTCATTTATAGACTTCTCCAGAAAACCTAATGACTGTGAGTGCATTCATCAGACCAGTAATCCGCGATTAAGTCCACTG  
TCCAAAAGATGATAATTTCTTGTGACAAAGAACTTATAGTCTGATTTGAAATGCTACAGTATCAGGGAAAACAAAATATATT  
CAACGAATCGCTACTACATAAGACCGCATGGAACCAAGAAAGAATAACTTTATTTAATGAAAAGGAGTTAAGCGAG  
CCCTGATAAGCACGCTAATCATACTCTGGTTCGCAACAACCTGGAGGATATTTACCGGCTCACTGATCCAAAATTTTGGG  
CATCAGATTTCTCTTCCCTATAGATGCTCTGAAGTTTATTGAGCTATGATACAATTAACCTCAACACTTCAGGAATA  
TTATGGCTTATTAACAAAGACATTAATAAACATATACAGTACATTTAGCCGAATCAGATATGGTCTGGAATAAGCTTC  
TGCCAGAAAATGATGCTGGACTGAGCACAGAAATTCAGCACACCACCACCGCTCTGGCAGATCTGGCTGAACAGTCT  
GCTGTTGACAGGATCTCCCTGCCAGTAAAAACCTTTATGATATCGGAGCCACCTTGGACGGTCCGGCGCATCACCTCTCC  
TCCAACTCGGAGCAAACTCTCTGCTCTCAACCGTGATGTTCTGAATGATATCTGTCCCGCACAGTTCTGACACTC  
CAGAACAGGCTGATAACATAAGAAAAACTGACACTCAGGGAATACGCAGCGGTACCCGCTCCATAGATCCGGAGATG  
ATTCGTGGGACGAGGATGACCTAGTTTCTGTCACAGACTCGTCTGCAAGGCAAGCAACCGGTTAAACAGCAACTCCG  
CGGTGACTTGTACTGCAACAGCCTTCCAGAACATTCACAGTTCATCCGGTCTGATCTTTCTGTAGAGAAATTTG  
AGCTGGCTGATATCGGAAGTGGGCGTTTCAACCTTCAAATTCAGATGAGGAAACATTCATACACTTCTGAGGAAATG  
CCGGAAGTTGTGTCGCTTTTCAAGAACCTTCTACCATGCTTTTCAAGCTTCTGCTGCAAGTATGATGATGATGATG  
CGGCATGAGTGTGGTGGAGTCTCCAGTATGCCCGCTGCTACAGCAGGGGACGAAGACAGTACCCTAGCCAAAGATAA  
ATCTAGCTATGGATATCAAGCAACTTCCGAAGCACTCTCGGAGCATGATTTAGATTTGCCGGAATAAGTTTCTCAAT  
ACAGAAGGAATCCAGGGTTTCAAGCTTCCAGCTGCTGAGGATGCTGAGGATGCTGAGGATGCTGAGGATGCTGAGG  
AATGGGAAAGCCCTTTCTGCCAGTGGCCGTGTTCTTGAAGTCTGCTGACTGGAACAGTCTTGGGGACATGGAACCTGT  
ACAACAGCTCAATTCAGCTCCAGCAAGCTACATCTTATTTCTGAGACAAATGGCTGCCCGGGTACAGATTCGCTTTGATTC  
GGGAGCTTCCAGTATTTGACGTAATGTGGCAGGAAAGAAAGCAACGGCATACACAAATGGCTGGAATATAAAAAAATTCCTGA  
CTGATGGCAGTAAACACATTTGTTGTGGCTCTCCGAAAGAGGCTGCTGAGGATTTCTCCGAAACAAAGTTTTTGGAAAA  
ATGGTGTGGATCTGGCTCAGTCTCTCTCTCTTGCATGGGAAAGCTCTTTTAAACGCTGACCGCAAAATCGGTCATCG  
TCCGATCTGGGGACTGGCAAAATTCGTGAGAAGGTGGGGTATGCCAACAGTATCAGTCCCTACTCTTCTGCGGCACG  
GTTACGCCAACAGTAAATGGCCAGAACAAATACCGAAAATTCCTCGGAGATAGACTGGCCCTTGA

>Cluster\_3495

ATGATCCCCTTACCTTCCGGGACCAAAATTTGGCTGGTTGCGGGTATCACCGATATGAGAATGGCTTCAACGTAAGCGG  
CTCGCCAGAACCCTATTGA

>Cluster\_66851

ATGAGCTGGAAGCGGAGCCTGAAGGTGCGCGATCTCGACGACGCCAGAACTGGAAATGACCTGCGTGCCTGCTGCCA  
TGTCCTACTACCTGACCGCGTGTGTTGATGGCTTCCGCGAGCGGAAATTTCCGACATGTTGCAAAATAG

>Cluster\_11023

ATGAAAGTGAATGGTGTACTACATCAAAATATGAAGGATGGCGAGGACGTTTCACTATATAGATAAAAACGGTACT  
TCTGGTGCACCCAAAGGATATCTGGCAGGGAAATGATTCATCGCCAGGCCCTAACGCTGCTTGTCTAAGATTAA

>Cluster\_48785

ATGGAAGCCGATAAATATATAATGATAATCAAACTATTATCAGACAACCTCACAAAATAACCCCGCTTGTCTTGGCGGT  
TTCGGTCTTGTGCGCTTTCTATCAATCTGTTTATTGCAATGCGCATGGGGTAA

>Cluster\_44940

ATGTTTGAATTTTATGCGAGAACTTCTTCCGCCACCGTGGGGGCTGCGCTTATATCGTTTCCCGGTTCTGTTTT  
GACCGATTACCGAATACGAAAGATTACGCCAAAACCTGACAGGAGCAGGATGTA

>Cluster\_10564

TTGCAGAATGCATCACTTAAACGGAGAGATCGATAACGCACTGGACGCTTATTTTTCGAAAAATGGCGGCGCAGCGGTAA  
TCGTCGCCGACGTAATAACTCTTGTAAAGGACAAATACGCCAAGCAGTATCCCGTTCTCATCGAGTATAAAGGCTACAAGG  
ACAGGCTTATCAGACTTGGCAGCAACGGTATTTATGAGAACAAGATGCCAGAAAAGAAATGGAATTTTAAAAATATTAAT  
GGATACGCGGTGAAATGGCGCAGTCCATTTAGCCAACGCCTTCTCAGTTTACCAATTTACCTGATATTTATTTGATTTGG  
TATCAGCTTGGGGATTCGCGGAAAGTTAGCACCGCTGGATAAAAAAGAACFGACCCTTTCACGGAGGAGGACTTGGCGTAT  
GAGCCGACAGAAGGTTGGTGAATTCACCGACTTATCGTTCCCTGCTGACAAAAATGTTGATGGATTTCTCAACAAGATA  
AAGTGTCTTAACTTCTCCCGAAGAACFGAAAAAATCAAGGCCAGCAAGAGGAGAGATAGACACGCGACTTTCGCG  
TCTGAATAACGATATTTACAGAATGAAAAGGGGCTTGGTGAAGCGATCGTGTTTACCTTGTGTGGCTACCGTTATTG  
CAACGTTGGGGATTCGCGGAAAGTTAGCACCGCTGGATAAAAAAGAACFGACCCTTTCACGGAGGAGGACTTGGCGTAT  
GGTGAATATTTTTCAGGAAAAAAGGAATTTTAAAGGCTGAAAGCTGTTCCTGAAACAAAAAGAGAAATGATTTTGGC  
CTCGTTGCAAAAATACGCTGTGGACTGAAAACATTAACAACCAGTCAACGGGTGAAAGCAGTTAAAGCGCGTGTGTTA  
AAGTTGTTGATGATCTTGGGGAGTATTACAAAATTTGGACTGACCACCGATTTTACGGGCAAACGTTTAAATGAGATGAT  
CGCTGGCTTGGATTTACGAGCAGCAAGCTCAATGACGTCGTTCGACACCACCTTATGTTGCCACATTGCTGGCAGACT  
CGCCAGAGTAAACAAGATTTCTATGTGTGGGATTTTGTACAGGTTCTGCGGGATTGCTTGTGGCTGCAATGAATGAAA  
TGCTCATTGACGCGCAGAGAAAATATTCACTCACGGAACGAACACAACCTAAGGAAGCCAAAATCAAGGCTGAACAGCTT  
CTTGGCCTTGGAGTGTATCCAGTATTTATGCTGGCCATCCTGAATATGATTTTGAATGGGGATGGTAGCTCGAATAT  
CCTCAATAAAGACTCGCTGCGCGATTTTTCAGCGCAAGTATTTGGGAAAAACAGGAGAAAAAATTCCTCGCGGACGAT  
TTATTTCTCAATCTCCGTATTCAGCTAAAGGTAACGGCATGATTTTCTGTCAGAAAGGCGCTGTGATGATGATAAAGGC  
TATGCTGCAGTGTATTCAGAGTTTCACTGGCAGGAAAGGCTACGGAGTACAACAATAAATACTCAAGGAAAAATAC  
CTTGTGGCAAGCATAAAATGCTGCGGATCTGTTTATGTTAAATCAAGCTTCAGACGTAATTTTACGTTTTCAGG  
TAAAAATTCGCGATAACGCGAAACAGGCTGTTAAGTTTTATCGACTTTTCCAATGACGGCTACGCTCGCTCTAATCGCAAA  
AAGGAAGAACAATCTTGTGATGCGGATCTGCAAAAAGAGCTTATCAGGAGGTTGTGGATCTGGTTCACTTCGGGAA  
AGGTTGCTTAAATCTTTTACGGAGGATGAATATTTTGGAGGAACAATCGATCCTGATAGTGGTGGAGGACTGGAATCAGA  
CCAGGCGAGTAGATGCTAGGCCAACGCTGGAGGATTTCAAAAAACGCGTAGGTGATTACCTTGCATGGGAGGCTCGCAA  
TTACTGAAAAACAAGGTGAAAAAATTTTTCGGGAAAGTAA

>Cluster\_21771

ATGAGTACCACAACAGAAAAATTTAAACCATTATCACCGATACGGGTGCCAAAAAATAGCGCAGGCAGCCGACCAGA  
TGGTAAACCCTGTCGCTGACACATATGGCCGTGGGTGACGGCGGGTACTTTACCCACGCCAGACGTAAGCAGACCC  
GTCCTGTGCGTGAGGTGTGGCGACATACCGTTAATCGCGTCTTCTGGACGCAACACATCAGAACCAGCATTATTCGGGAG  
CTGGCTATTCCTCCAGAAACGGGCGGATTCCTGGATCCGGGAAATGGTGTGTTGATGAGCACGGCGATTTAATCGCGGT  
AGGCAATACTGCGGAAAGTTACAAGCCAGCCGTTGCGGAAAGGTTCCGGTCGTGACAGACATTTTCGACCATTTCTGACCG  
TATCCAGCACTGCCACCGTGGCACTTACCGTGGATAAACACCATGGTGTGATGGCCACAGTGGATTACGTTGATGACAACTG  
AAAGAGCATGAACAGTACGACGTCACCCGGACGCTCGCTGACCGCAAAAGGCTTTGTTCAACTCAGTAGCGCCACTAA  
CAGCGTGTCTGAAACACAAGCTGCAACGCGGAAAGCAGTAAAGGACGCGTATGACCTTCTAAGCGGAAATATACTGCGC  
AGGATGCCAGCAGCAGCGGAAAGGCTTGTTCAGCTCAGTAGCCCAACATAGCGATTCTGAAACGCTGGCGGCAACG  
CCAAAGCGGTAAAGGACGACATATGACCTTGTCAACGGGAAATATACCGCACAGGACGCTACACAGCGTGGAAAGGCT  
TGTCACGTAAGTAGTGCACCAACAGCGATTCGAAACGCTGGCGGCAACGCAAAAGGCGGTAAGGCAGCATATGACC  
TTGCTAATGGCAATACACCGCACAGGATGCAACAACAGCACAAAAAGGGATAGTCCAGCTTACTAGTGAACCAACACAGC  
ACGTTGAAACGCTTGGCGGACTTCCGAAAGGCTGAAAGCTGCTAATGACAAATGCAAAACGGGCGTGTGCCCTTGGACG  
TAAGGTTAATGGCAAAACCATGACCAATGATGTCAATGTTTACATCAGAGGATATTTTAACGATCAGATATTGAGATTG  
GTGCAAACAGAAATCTGGATAATTAACAACGCGGGGTGTACCATCAGCCTGCGAATGCCAATACAAGTGCAGCGCTG  
AAATACCCAGAGAAATCTTGGCGGTACACTGGTTGTGCTTAAAAGTGGCGGGATAACACAGATTACTATGTGTATAACAC  
ATCCAGAAAGCTATACCGGACGCTACTCAACGGGTGACTGGACAGATGGACGCGGAGGATTTCTTCTGTAGGCT  
CGGCGATTCCGTTGGCCTTCTGATTCAGTGCCTACAGGCTATGCGGTTATGACGGGCGAGACTTTTGATAAAACAACTTAT  
CCCTGCTTGCAGCAGCTTATCCCTCTGGTGTACTCCCGATATGCGTGGCTGGCAATCAAGGGCAAGCCCGCAAGTGG  
TCGAGCCGATTTGCTCAGGAACAGGATGGCATTAAATCGCACACCACAGTGCAGCGCATCCAGTACGGATTGGGTA  
CGAAAACCACTATCCGCTGTTTGTATTACGGTACTAAATCAACAGAGGTGCACATACCCACAATGCGGAAAGGCTG  
GCAATAGTGTGGCGCACATATCATAACCGTTCCATTAAGGAGACCAAAACAGTGGAGGTATGAATTTGACTGGCTTGA  
TGGTGCATCAAGTGGCAGGCTCGTGGGGAATGGAACAGTGCCTTCTTCTGGGTGCACACACCCTCAGTATCAGGCACG  
CTGCAAGTGCAGGGGCGCATGCACATACAGTGGTATTGGCGCTCATAACGCACTCTGTTGCGATTGGTTACATGGACAT  
ACCATCACGTTAACGCTGCTGGTAAACGCGGAAAAACATCGGTTAAAAACATCGCATTTAATATATTGTGAGGCTTGCATA  
A

>Cluster\_20823

ATGACGCCCTTGCTCGAATTAAGGATATTCGTCGACGATATCCTGCCGGTGATGAGCAGGTTGAGGTGCTGAAGGGCAT  
CAGCTCGATATTTATGCCGGTGAGATGGTGGCGATTGTCGGGCTTCCGGTAAATCGACCCGATGAATATTC  
TCGGCTGCTGATAAAGGCCACCAGCGCACCTATCGCGTTCGCGGTCAGGATGTTGCCACGCTGGACGCCGATGCGCTG  
GCGCAACTGCGCCGCGAGCATTTCCGGCTTATTTTTCACGCGTTACCATTTGCTTTCGCAATTAACCGCGAGCAGAACG  
TGAAGTACCAGGCTTATGCGGCTTTGAGCGGAAACAGCGGCTGCTTCCGCGCCAGGATTTACTGCAACGATGGGGC  
TGGAAAGCCTACAGAGTATTACCCGCGACAGCTTTCGGGTGGCCAGCAACAGCGCTCAGCATCGCGCGGGCATTTGATG  
AACGGCGGTGAGGTAATTTGTCGATGAACCGACCGGCGACTGGACAGCCATTCGCGGAAGAGGTGATGGCGATCCT  
GCATCAGTGCAGGATCGCGGCGATACGGGTATTCGCTACCCAGATCCGCAAGGTTGCTGCTCAGGCGGAGCGGGTGA  
TCGAAATTCGCGACGCGGCAATTTGTCGCAATCCTCCGCGCTTGA AAAAGTGAATGCTACTGGCGAACGGAACCTGTT  
GTCAACACGGCGTCTGGCTGGCGGAGTTTGTACGCGGTTTAAACGAGGCGTGCAGATGGCATGGCGGGCGTGGCAGC  
GAATAAAATGCGTACTTTTCTGACCATGCTGGGGATTTATTCGCTGATTTGCGTGGTGGTTTCCATTGCTGCTGGGGC  
ACGCGCTAAACAATGGTGTGGCGGATATTCGTTCTATTGGTACGAATACTATTGATGCTATCCCGGAAAGAAATTT  
GGCGATGACGATCCGCAATATCAGCAGGCGCTGAAGTACAGCAGCTTAATCGCATCAAAAAACAACCGTGGTTGCTC  
TGCCACGCGCCGCTCTCGCAAAACCTGCGCTGCGTTATAACAATGTTGATGTTGGCTGCCAGTGCCAATGGCGTGGAGC  
GCGATTATTTAATGCTATGGCATGACCTTCACTGAAGGGAACACTTAAATCAGGAGCAGCTGAACGGTCTGCGCAG  
GTCGTGGTTCTCGACAGTAATACGCGCCAGCTTTTCCCCATAAAGCAGATGTTGGTGGCGAGGTTGATTTCTGCTGG  
CAATATCCCGCCAGAGCTATTGGTGTGGCGGAAAGAACAGTTCGATGTTTGGTGAAGCAGTAAAGTGGCTGCTGGC  
TGCCATACAGCAGATGTCGGGCGAGTTATGGGGCAGTCTGGCTGAACCTTACCTGTCAGGTTGAAAGAAGGCTTT  
GACAGCGCTGAGGCGGAACAGCACTACGCGTTTACTTTTCACTGCGCCACGGTAAGAAGGATTTCTTTACCTGGAACAT  
GGATGGCGTCTGAAAACCGTTGAAAAGACCACGCTACTTTTACAACGTTTTCGACGCTGGTTGGCGGTGATTTCTGCTGG  
TGGTGGGGGATTTGGTGTAAATGAATAATTATGCTGGTGTGCTGACCGAGCGGACGCGGAAATTTGGCATTCGATGGCT  
GTAGGTGGCGGAGCAAGCGATGTTTTCACAGTTCCTGATCGAAGCGTACTGGTTTGGCTGGTGGTGGCGCTTTGGG  
AATAACACTGTCATGTTAATGCTTTTCCACTTTCAGCTTTTCTTACCCGCTGGGAGATGGTTTTTTACCGTTGGCAC  
TGCTGTGGGCTTTCTTTGCTCGACGCTACCCGGATTTATTTGGCTGGTTACCCGCACGAAATGCGGCACGACTGGAT  
CCAGTAGATGCTCTGGCAGGAGTAA

>Cluster\_57832

ATGTCCAGCGTTATAACCTCTATCGTGAACAGCGGCAATTTATGTTGTCCGATTAGCGTTCCCCAACGTTTTTCGTG  
ATACGACAGCAGTGTGAGATTCACACTCAACAGGCACTCATGATCTTCATGAAGCAAAGCAGAAGTCCGCGCTCCTGT  
TGGTGTCTGGTATCAGACCTTACAAGAGTATGAACAATTTGGATTACCGAATTTAAGTACTGCGCCCGCTGCTTGT  
GGTGGAGGGATGATCTCGCTTTCTAACTTTGCTCAGTCAATCGAGTTGGCTATATCGCAATTTGATTCGAGAGGTGATTA  
TCGTAACCTGCTGATAGCCTTTGGCTGGCGACTGGTCACTGTTGCTGAAAGGCTTCGACTTACATGGCTGGTTAAGACCAGCCA  
CCGGTGCAAAACGAGAAAAACAGTCTGATGATGAAAAGGATCAACCTAAAAGAAGTCAATTCATTCGAATAGCGCTTTGAG  
CTGGGTATCGAGAGCTTCGCAAAATGGTTATCTCCGCCCTTCAATCCCGGCATCTTTAGATGTCTGTTGAGCGCTGG  
AGTATCCGAAGGAGAGGCTGCATTTGCAACTAGTGGTGAACCAAAGTGGAGGTTGGTTCTTCGATTTACCCGGCGTAG  
ATATAACTGCTGATAGCCTTTGGATTTAGCAAAGTTCATGCTGAAAGGCTTCGACTTACATGGCTGGTTAAGACCAGCCA  
CCAGCAGTTAGCATTACCCCTGCCGTGCCTCTTTGTCGCCCTGTTATCGCTAACGAATATGTTTACCGCAAACATTACAA  
TGAAAACTTGTCATGGCTTCGCTGAAGAGTATTTGAAACATCGCGGTAAGGGCAAGGATCAGAAGCGCGCTCCCGGATA  
TTCGCTATTACTTCGATTTGATGATCGAAGTGTGAGGGGATATTCAGTTGGAAGATTTGACCGTGATTTCTCCGGGCT  
TATGAGCACTAATGTCGCAAAATTCCTGCTAACCGTAACTTTGATGAAAAGGTAAGCAGCGGGTTAAGACCAGGATGAT  
AATCGCAAAGCGGCAGAAATGTGGCGATAAAGTATGACAGAAGAGTCTGCAAAAAGTATATCAACGGCCTTTATGGTG  
CAATGGAGTGGGCTGTGATGACGGTAAGTTTTCGAAATCGCCATGCGACAACTTTTTCCCTCCCGATGACAAAGGTGAG  
CGAGAGCAGGATCACACTGACATTTGAACCCGATGAAATTAAGGCAATTTTTTCGCAACCGTGGTTTGTGGCTGGAAC  
TGTTGAACTAATGTCGCAAGGGCGATTTCCATCAATATTTCCCGCTTTCACATTTGGCGCCGCTTGTGGCTGATGACCG  
GGCAAGGTTAACGAGATTGCACAGTTAATGCTGGACGATGTTCTGGCAGATGACGGGCTTTATTACCTGAACCTTGAA  
AGCGATAGCGAAAACGAAAAGAACTAAAAACGCCAATCCCGCCGCAAGATTCCCGGTTCACTTACCTGATTTGAACT  
CGTTTTTATCGAGTATGTTGATGCGTTGAAAGCTGCGGGTATGACCGTCTTTTTCCGAGCTTAAACACATAAAAAC  
AAGCTATGGTATGGTGGTTCGCGATGGTCAATGAAATGAACTGCTTTCGCGGTCGATTAAAACTTGAAGAGACAGAAGC  
AAATCTTTCCACTCTTTCCGGCATCTGTTTCAACTTTGCTTAAAGAGAGGGTGTAGTTCCGAACTCGGTGGGCGAGCT  
ACTTTGGGCTATGTCGCGGGCAAAACAGAACTGAAAGTGCATACAGCAAAGATTTAAAAACCGGTTACATGGTTGAGGTTG  
TCGAAAAGATTGATTTTTTTTGGCCGAGATGCGAGATTCACATTCCTGATGGGCTGGATGCTGTAAGTATGCGCTG  
CGAAGAAAGCTGGCAAAACAAACAGTTGA

>Cluster\_61362

ATGACGAATCCGTTACTGACTCCCTTTGAATTTGCCCTCCGTTTTCTAAAAATTTCCCGGAACATGTCGTTCCAGCCGTGAC  
TAAGGCATTTGAACGACTGCGCGAAAACCTGGAGCGCTAGTAGCGCAAGGGGACCGTACACCTGGGAAAATCTCTGCC  
AGCCGCTGGCGGAAGTGGACGATGTTTGGGGCTATCTTCCCGGTCAGCCACTGAACTCGGTGAAAAATAGCCCG  
GAACCTGCGTGAAGCTACGAACAACCCCTGCCGCTGCTGTGCGAATACAGCACCTGGGTAGGGCAACATGAAGGGCTGTA  
TAAAGCGTATCGCGACCTGCGCGATGGCGATCATTACGCCACGCTGAACACGGCGCAGAAGAAAGCGGTTGATAACGCA  
TGGCGACTTTTGAACCTCTCGCATAGGTTGCGCAAAAGAGAAACAGCAGCGTTACGGCGAAAATTTGCCACCCCTTTCT  
GAACTGGCAACCCAGTACAGCAACAACCTCCTCGATGCGACAATGGGCTGGACCAACCTGTTACCGACGAGCGGAGCT  
GGCGGGATGCGCAAGAGCGCGCTGGCTGCGGCAAAAGCCAGCCGAAAGCAGAAGAGCTGGAAGGTTATTTGCTGACCC  
TGGATATCCCAAGCTACTTGGCGTAATGACCTACTGCGCAACACAGGCTCTGCGTGAAGAGATGATCGCGCTTACAGC  
ACCCGCGACTTTGAACTCTGCGCATAGGTTGCGCAAAAGAGAAACAGCAGCGTAAATGGGATAACAGCAAGGTGATGGAAGAGATCTCCGCGTCA  
CGAACTGGCGCAACTGCTGGGCTTTGAAAACCTACGCCCTTAAATCCCTTGGCACTAAAATGGCAGAAAACCCGACGAGG  
TGCTGGATTTCTTAAACCGATCTGGCAAAACGCGCGCTCCACAGGCGAAAAGAGCTGGCGCAATTCGCTGCTTTGGC  
AAGCGCAATTTGGCGCTGATGAGTTGACGCGTGGGATATCGCTTACTACAGCGAAAACAAAAACAGCACCCTCTACAG  
CACTAGTACGAACAGCTGCGCTCGTACTTCCCGGAAAACAAAGCGGTTAACGCGCTGTTTGAAGTGGTTAAGCGTATTT  
ACGGCATCACCGCTAAAGAGCGTAAAGATGTTGATGTCGGCATCCGGATGTACGTTTCTTCGAACTGTATGACGAAAAT  
AACGAACTGCGCGGTAGCTTCTACTCTGATCTGTATGCCCGGTGAAAACAAAGCGCGGGCGGCGTGGATGGATGACTGCGCT  
AGCCAGATGCGTAAAGCTGATGGTCTTTGCAAAAACCGCTGCGTCAATTTGACTTGTAACTTCAACCCCGCTGTTGATTAAGT  
GTAACCCGCGCTGTTCACTCACGACGAAGTATCACCCTCTTCCAGAGTTCGGTCAAGCGCTGACCATATGCTGACC  
CGCATCGAAACCGCTGGTGTTCGCGTATCAGCGGTGTCGGTGGGATGCGGTGCAACTGCGGAGTCACTTATGAAAA  
CTGGTGTGGGAGCGGAGGCGCTGGCGTTTATCTGTTGCTACTATGAAAACCGCGCAACCGCTGCCGAAAAGAGTTGCTGG  
ATAAAAATGCTGGCGGGAAGAATACAGCGCGGCTGTTTATCTGCGTCACTGAGTTCGCGCTGTTGATTTGATTTCCG  
CTTCACTGCGAGTTCCGCGCGATCAGGGGGCAAAAACCTCGAACTCTGGCAGAAATCAAGAACTGGTTGCGGTGGT  
GCCATCTCCGCTCCTGGGGCGGTTTCCCGCACGCTTTACGCCATATTTTCCCGGCTGGTATGCGCGAGTTACTACAGCT  
ACCTGTGGGCTGACGACTGGCGGCAAGTCTTCTCGCGCTTTGAGGAAGAGGGCATTTTCAACCGTGAACCCGGGCA  
TCGTTCTCGACAACATTTGAGCGGTGGCGGTTCAAGAGAGGCTGATGCTTCAACCGCTTCCGCTGGTCTGTAACC  
GCAGCTGGATGCGATGCTGGAGCATTACGGCATTAAAGGCTGA

>Cluster\_33769

ATGGTTCAGGATTCATCAGCATTAGCCCTTCTTTCGTGCTCAAATTTGAAAAAATAATCAATACAATTCAGTTGGGG  
CAAACACTACCGCAGCTTTGTAGAACAGATTCAGGCGGAAAACCAAACCTTTTCTGAAGCCACGATTCGCGAGTATGGT  
ATGACAGTCAAAATGGTGTCTCCAGCCTGATGCAAGGAGGATGTCATTTGGTTGAATTTGAAAATGCACAAAAGACCTT  
CTAACGCTCACCCGTCAGATAGCAGAAGAGTGTACACAAGAAAATTAATTCGGGTCAATTTGAACGCCCTTATCAAACTTAA  
AGCGGACGGAGTATAAATAAGGTATATAGGGCTTTTGTAACTCGTCTTTTTCAGCAATATACCCATCAAAAATTAGCA  
GTGTCGTGAATGTTAATAATTTTTTTAGTTGCTACAATTTATGCAACAACCAATTTCCAGCTAGGCTTTTCCGAGAACGG  
GAGTGGCTGGCTCGCAATGTTGATCTTAAAGAAAACGCTAAATCGTGGCTGGGTGATGATATCGACCTTATTGAGCTGAA  
TATGTCATTTGGCATCTCTATGCGTATGAAATTCAGGATAAAAATGCTATCGGTTTAGTTGGAAGCGAAAAGTCTTTAC  
AAGAAAATGAGCAAAGAAGATGATGTTATAAGTTGCGCATTTGCCATAAAAACCAATTTCTATAGGCCCGCGAGTACAGT  
AAAACATATCGTACTATTGAGATTGCTGTACAAAATTTGTGATCCGATCGCTTACTCCCTGACGAGGGTAAGGATGAGAG  
TGAAAACGCTGCGGAGTTGAAAAGATTATAATCAGCTTATCAAAAGATAATCGAGTGGTTTTATCACTTTTATCAGAT  
GCTTTGGTTATGAAGAGTTTATTTGAAGTTTAAAGAGCTGAGACTACTGATGACGGTAAATGTAATAACGAAATTAAGGCA  
GGTATTTTTTAAACAGAGATGCGAGGATGCGCCCTTTGGTTCATGCTGGTGTGCGAGGAAATGTTGGATAGCGCACTTCG  
CCTACAAGAACGTTTATCTGAAGGTGAAAATATCACGCTGGAACACAACAGGGTAAGGCCTTCCAGCTGACGTAATAAA  
GTCAAAACCACTTTGGAATTTTCCCGTCACAATCGAAAAGAGGATTTAGGACAGGGTTACAATGCCATTTTGAAGGAT  
ATTCGGCAAGTTTATCAGGATCCACGACAAAAGTACATAATCCATCTTATGTACGAGTATCCTTAACTATTTAATTAATA  
TCAACGTTATCTGCTCTGAATACTCAGAGCTCAGAGCTTTCAGAAAAAAGGAAAACATATGTTCTCAATTTATGAAATAA  
ATCGGGGTAATATTTCAAAAATTTTTGGTGAACATAATACCCTTATTGAGCCATCTAAACGGGCTGGTGGCCAGATCG  
CTTAGCGTATTGCTGCCATCTCTTCCACTCATTATGATGATACGAAATTAACCTTTATTTAATTTGGTACCATGAACACTGC  
TGATCATTCGTTACTGCACTTGATACCTACGCTACGCTGAGATTTGATTTGAAAGCAGTGTGCCAGATTTACTGTTCT  
TGAAGATACTGCTACTTAAAGGATTTGATCTGCTCTGCTTATTGACAGACGCTTAAACGATCGCATCCAGGTTTTATACGAT  
AGAGAACATATGCTGGGGATGCTTTTTTATCCCTGTTGTCAGGCAAAAGAACGAGAGCTCTGGCATTGAAAGATT  
CAACCGGATTTATGCGAAAATAAGATACTACCATGCTGGAAGATAATTTTTTACAATGACTGGCAAAAATTTCCGATGGTAC  
TGGCTGATAACCAAAGAGGAAGTACCAGATTTCAATTTGATGAGGTTGAAATACCGAAAAGTAAAGTATGCGCATCTC  
TTTTGGTGAATAACGGAACAGATGACTTGGGAACAGTTTTTCACTGGCAGCAGAGGATGACAACGTTTGGGCAATCAAT  
CGCTGGCAGCAATTTATGCACCTCAAAAAGAAAACGAGGAGTGGGAATGA

>Cluster\_25606

ATGAAAACGGAATCAGCCATCCTTACAGCGTATAACGCCATCGACGCGGCATCCGTTGCCCTTGGTCGTCCTGCCTGAC  
GCTGCCCGAACGTGAGCATTTTCGGACTGAGCGGATGTTGCCACCCGTAACCTGACCAGCTTCCCGCCAGTATCGTG  
ATGAGGTCGGGACCTTATCTGCACAGCTCGCATTGCCACGTAACACACAGGTTGACCGTGTGATTTACGGAAATTAACCTC  
ACGGATTTATCTCTGCTGACAGGGCAGGGCTGCCGAGTGGTATCACAGTTGGCTCGTTTTTCGTTTACCCTGCGTCA  
TGCTTTCTGCCGTCTGGTTTACCAGCTCGGTGTGAAAAATGCGTGTATGGCGCTTGGTCCGCGCACCCTTTTGTCTTCT  
TCAATCAGACGGAGACCCTTATGAATTCCTGCTTTTCTGACATGATGAGCAGATTGCTGAGGTGGCTGATTCGGTTGTT  
CGTGACTGCCTTGTCTCGGGCATTATAGTGTATGACCAGAGCATCACCTTCTCAATGTGATGGCCTATTTTCAGGC  
CATCTCCGGCTTTGATTTCCGCCCTTTATGCCACTTATCATGAGCGTTACGGCGATGAGGGATTGCTTAAAGCGTCTGA  
CTGATTTGGCTTTTGTACCCGTTTCTGCGGGTTATCCGTGACCAGCGGGTCAATGAGGTCTGTGCGATGCTCGGCATA  
CTGAACCGCAACGCGCTTATATTTCTGACTGGCATCGTGACCTGTTTGTGTCCGCAGTAAACGCGTAAAAAGTATCT  
CCGGTCTCCGGTGTCTTTGATGCGTAAATGAGCTGGTCTGTACGCTGGAAGATGCGCATAACGCCCTCTGTTTTCGAATC  
CGAAAAACCGGATGTCTGAACTCTGCTTTCGTTGAAAGGCCCTCTGTGAACTGTCCGAAGATATGGGGCTGTCCGGCTAC  
TTCATCGTCTCACACGCCGTACGTTTTTACCCGACGACAGTTTTTAAAGTTGCCGAAAAATGGCATTCTCGTCCGAA  
TAAAAAATGGTGGGAAGCAGGTTGCCCGACCTTAAGGATTCGCACGCTGGCTGAATACCGTCTGGCCTCGGGTCTGCC  
CGAGACTGGATAAAGCGGTTATCAGATACCCGGCTGCGCAGCGTTCGACCTCATGCTGACGGTACAACGCAGTGAAT  
TTCCTGATTTTGAACAATCCCATGAGAGCGCAACGGTCTGCGCAATTTTCCGTGAAGAGCGCATGCGCTATAGCCGGA  
TGAAGGGGGCGAAAGAGCACCGTATTCGATTTGAGGCTATTGACCTGAAAAGGGTATGGTTTCCGTTACATCGTGA  
AGTACATCACAAAATGGCGGGTGTATGCTGAGTGGGATGTTATACCGCCTGAATGACCGTTATCTGCCGTTTCAATC  
TGTGATGCGCTGACGCTGCGCCTGCTGGCAGAAAGCAACGCGCTTCCGCTGTTCCAGTTCCTTGGCGTTCCCTCCGT  
TACGGCTTACCGCAGATGCGCAGCTTCCGCGCACCGCTGAGGCGCATATAAATATGACGAGTTCACGCGCTACGCGCAG  
AGGTGCGCAACTGGAAGCCATCCGATGGCTGTGATGACGGGATTTCCGGACCTATATCTGCTGACAGCGGGTTTCT  
TTCTGTTCTGAACGCTGTCTTCCGTTTACGTTTACGCTGACCGCAGGAAGTGGTAAACCCCGTTTAAACCGTTACGGTGA  
ACCTGCGCAGCCGTTGATTTCCGTTTCAATGTTTGGCTTGTTCGGCTCATAACCCGTTTATGGCTTTTGTCTCCGCG  
GTATGACCCCGCAGAAAAAATCCGCGCAGAGGAAGTCAAGAGCGCAGCAGTATGAATCTGTGTTTATTTCTGCTCGGCT  
TCACGACCCGACGACGCGCTCCGCGCGGGTGGGGCGCGGAAGCCGACCTTGGACTGTGACATAAATCTGTCC

>Cluster\_41462

ATGTCGCGAAAAGACCTTGCCAATGCGATTGCGCAGTATGATGCGGTACAAAAAGCCAAATTCGGTTCATCCCGG  
CGCGCCGATGGGCATGGCTGATATGCGGAAAGTCTGTGGAATGATTTCTTAAACATAAACCCACCGACCAACCTGCT  
ATGACCGTGACCGCTTATTTCTTCCAACGGTCAAGCGTGTGCTGCTTACAGTTTGTGCTGATCTGACCGGTTACGAC  
CTGCCGCTGGAAGAGCTGAAGAATCTCCGTGAGTGCATTCGAAAAACCCCTGGTACCCGGAATCCGGTATACGCCAGG  
TGTGAAACCACCGGCTCTTGGACAAGTTTGGCAACCGCTGCGGCTGGCGATAGCAGAGCTACGCTGGCGG  
CGCAATTTAATCAGCCGGATCATGAAATGTGATGATCTTACCTATGTTTTATGGGCGACGGCTGCTGATGGAAGT  
ATCTCTCAGGAGTCTGTTGCTGGCAGGACGCTGGGCTGGGAAGTGTGGTTTTTACGATCACAAAGGATTTTCT  
TATTTGATGGGAAAACCGAAGGCTGTTTTACCGCAGTACCCGCAAAACCGATTGGAAGCTATCACTGGATGTGATCCAG  
AGATCGACGGTACGATCCACAGCGGTGAAGGAAGCGATCTTGAAGCGCAAAGCGTGAAGATAAGCCGCTCGCTGAT  
ATCTGCGGTACGGTGTATGGCTTTGGTTTCGCGAATAAAGCAGGTAAGGAAGAGGCGCACGGCCACCACTGGGGGAAGA  
AGAAGTGGCGCTGGCAGCGCAAAAACCTGGCTGGCACCCTCGCCATTTGAGATCCCTAAAGAGATTTATCACGCTGGG  
ATGCCCCGAAAAAAGCGCAAAAAGCGCAGCAGACTGGAATGAGAAAGTTTGGCCCTATAAAAAGGCTCATCCGCAACTG  
GCAGAAGAGTTTACCCGTCGGATGAGCGCGGTTTGGCGAAGGACTGGGAGAAAACGACTCAGAAATATATCAATGAGTT  
GCAGCGAATCCGCGCAAAAATCGTACCCGTAAGGCTTTCGCAAAAATACGCTTAAACGCTTACGGCCGATGCTGCTGAGT  
TGCTCGGCGGTTCCGGGATCTGGCTCCAGCAACTCCACTCATGGAAGGTTCTGTTTCCGCTGAAGGAAGATTCGGCGG  
GGCAACTACATTTACTACGGGTTGCTGAAATTTGGTATGACCGCCATCGCAACGGCATCGCGCACCACGGTGGCTTTGT  
GCCGTATACCGCGAGCTTCTGATGTTTTGTTGAATACGCCCTAACGCGCGCGGATGGCGGCACTGATGAAAGCGCGG  
AGATTTAGGTTTTATACCCAGGCTCAATTTGGTCTGGGCGAAGTGGTCCGACGACCAGGCTGTTGAGCAACTGGCTAGT  
CTGCGCTTAAACCGCAAAATTTACGACCTTGGCGAGTCCGCTGAGTACAGTGGGAGGCGGTTGGCTGGAAGCTGGGTTGA  
GCGCCACAACCGACCGACAGCAGTATCTTCCAGGCAAGTCTGGCACAGGTAGAACAACACCGGATCAGGTTAAAG  
AGATTTGCTGCTGGCGGTTATGTTGCTGAAAGACAGCGCGGTAAGCCAGATATTATTTCTGATGTCACCGGTTACAGAGATG  
GAAATCACCTGCAAGCGGCGAGAAATTAGCGGGAGAAGTTCGCAATGTTCCGCTGTTTCCCTGCCCTCGACCGATAT  
TTTCGATGCGCAGGATGAGAAATATCCGGAGTCCGCTGCTTCAAAATGTTTTCTGCCCGCTGGCAGTGAAGCGGGTA  
TTGCCGATTTACTGGTACAAATATGTTGGCTGAAAGGGCAATTTGCTGGGATGACAGGTTATGGGGAATCAGCTCCGGCG  
GATAAGCTGTTCCCGTCTTTGGCTTTACGCCGAGAAATTTGGCAAAAAGCGCATAAAGTACTGGGAGTGAAGGTTGC  
CTGA

>Cluster\_27236

ATGATGCCAGAAATGGTAAACGGGCTGCTGTGTGTCGGCTAGGAATGCGCTGCTGCTGTGATTCGCTATGGGG  
CGTGGCGCGGGGACGCGCGCATGATGGCGCTTCCCGCTTGTGTCCTGGCTGCTGTTTATGCTGTGGCTGGCGCAT  
TTCTGTTGCTGTCAATGCTTTCGTGGTCAACGACTTTACCGTACCTATGTTGCCAGCAACTCCAATCCAGCTTCCG  
GTGTTGGTATCCGCTGGCGCTACCTGGGCGCGCATGAAGGCTCGCTCCTGCTGTGGGTGCTACTGATGAGCGGCTGGAC  
CTTTGCGGTAGCGATTTTATGCTAGCGTATTCGCTGGATATTGTTGCCCGCTACTGGCGATAATGGGGATGGTCAGTG  
TCGGCTTTTTGCTGTTTCTTCTTTTACCTTAACCCGTTCTCAGCAGCTGCGCAATTTCCCGATTGAAGGGCGTGT  
CTTAAACCACTGTTGAGGATCCGGGCTGATCTTCCATCCGCTCTGCTTTATATGGGGTACGTGGGTTTCTCGGTGGC  
GTTTGGCTTTTGCATTTCTTTGCTGAGTGGGCTGAGACAGCATTATGCGCGTTTACTCGTCCGTTGGACGCTGG  
CTGCGTGGATCTTCTGACGCTCGGCATTTGTGCTCGGTTCCCGATGGGCTATTAACGAACTCGGCTGGGGCGGCTGGTGG  
TTCTGGGATCCGGTAGAAAACGCTCGTTTATGCGGTGGCTGGTGGGACTGCGCTGATGACCTACTGGCGGCTACTGA  
ACAACCGCGCAGCTTCAAAAGCGTGGACATTTACTGCTGGCAATCAGTGCCTTCTCGTTGTTCTACTGGGCTTTCTCG  
TGCGTTCCGGGCTGCTGGTACAGCGCTTTGCGTCTGATCCGGCGCGCGGATGTTTATCTCGCTTTATGTTG  
CTGGTGTATGGCGGTTCCGCTGCTGCTGTTGCCGCGCTGGACACAAAGTTCCGCTCACGCGTAAACAATGCGCTGTGGT  
CGGGGAATCTTTGCTGTTAGCAACAACGTTTTGCTGGTCCGCGCATGCTGGTGGTGTGCTGGGACGTTGCTGGCG  
TGGTGCACAAGCAACTGGGACTGGGAGTATTTGATTTGCGCAACCGTTCTTCAACACCATGTTTACCTGGTGGTGG  
CCGTTTGGCTACTGCTTGGTGTGGCCCTGCTGCTGGCTGGGACCGCATCGCCACGTAATAATCCGCAATTTGTTGAT  
TATCGCTTCACTCTACGCTGGTGTGCTGCTGCTGTTGCCGTTGCTGTTCCGAAAGCAAGTTGTTGGCGATGACAGTGC  
TCGGCTGGCAATGGCCTGCTGGATGCGGCTGGCAATTCGGAAGCTGCGCTGCTGATTTTACCGCGCAGAAAAC  
ACCTTCAGTTATTTGGGGATGGTGGCGCTCACCTGGGCTGGCAGTGAACAATTTGGTGGCAATTTTACTGAGAACTA  
TAGCGTTGAGCTGATGTCGCAATGAAGTCCGGCGATAGCGTCAATTCATGAATATCGCTTACCTTCCGTTGATGTC  
AAGAGGTGACCGTCCGAACTGGCGTGGCGGTTGGCGACTACCGGCTAACCGGAGATGGCAAGCCGGAAACAGTGGCT  
TATGCAGAAAACCTTATTAACAACACTGCCGGTGCATGATACCGGAAGCGGATTTAGCGTGGCATCACCGTGGCT  
GTACGCGGCACTCGGTGAAGAGCTGGAACCGCGCTGGGCGTGGCTTTTACTACAAACATTTGTTGCTGGATTT  
GGGCGGGCGGCTGATGATGGCTTGGCGGACTGCTGTGCTGTTTGTATCTCGCTATCGTAAGCGGCTGAACCGCAG

AAAATGCGCCGGAGGCTGCATGA

>Cluster\_29379

ATGTTAGAGCTAAACGTGGCAGCCTCTCGAACGTTGTACCTTCGAAGTTAACCGACCATCATAGAGAAAGCAAAGC  
AGAAGTAGAAAAATCTCGTAAACAAATGGCGCGGTGAAAGATATAGAAATGGCGTGTAAAGACACATAAAACAATCAACCG  
CTAAAGCAAAGAGACGTAGACGATATTGCTAAAAAGCAAGCACAGGCAGATAAAGCCAATGCTAAAGCACAATAGCC  
GCTCAACGTGTAGTTGCAAGAGAAACAAAAGCCCTGGCAGCACGAAAGAGAAAGGCTGAATTAAGCTTTTAGACGTTGG  
AGCAAGCATTAGCCGATTGCACCGTCTTCTGTAGCGGAACAATATAAAGCTATTGCACAGGCTAGAGAAATGGCCCTCC  
AATATGAAAGAGGCGCTATTAGTCTGGCAGCTATGAATAGCCTAAATGAAACGCTACACAGCAACAACGTAAGATTAAT  
GGCAATCGTAACGCTACGCTAAAGCCTATGCACCTGTGACCTGTGTAAGGTTAGCGGGAGTATTGGCGCGGTGCTGCGCTTAT  
GCTGGCGGCTTAGGCGCTGGCGCTGCATATATGGCTATGAGCAAAGCCTCTGAATTTGTACTAACAGCTTTTGCGAATG  
CTGAAACGCTGGGTGAATTTGTATAGCCGTGCCAAGCTGGCGGTGTAGACGTTAACCCAGATGAACAATATTGAGCAATGG  
CGGTATAAAACAGCGGCTTGAATCAATGATGGGCGAACAAGGTAACGTAAGTATCTCGATCAGATGAAAGATGTGCGTGA  
ACGTGCAACCAAACTTTATGATGAAGCTGAATATGTAAGTATGATAAGAAAACCTGTAAGGAGAAATGGAAGGGCGCGATA  
GCGGCATCAATACTTTAATGAATGAAGGATTCCTAACAAAAGGATCTAAAAGACTTTGCTGATAATCCGGCTGGTCTG  
GTTAGTAAAGCAGTTTCAGGGAATGGTAGCTAAAGGCTATTTCAGATGCACAAATCGGTAGTCTGCTGGAAGATCTGGCTGA  
TGATTTGATGCTCACCTCTAAATACTGGACAGCTCCGCTAAAGAAGTGAACAATCAGCAGGAGAACAACGAGAATCAG  
GGCCTGGCTAACACAGGCACAACAGGAAAGCCTTATTAAATTCGCTGAACTGAATAATGCACCTTAGTGGGCTTTCTGAC  
TCACAAGGATCGCCTTTGTTGATGGCTTTATGAAATCTTTGATCCGAAAGTATTGAAGAGTTAAAAAGAGCATGGT  
TGCAATGCTGCCAATGTTTACCAAAATAGGCGAGGCTGTAGGTGGTCTGCTTAATGCGATCATGAAAACCTATCAACTGGC  
TGATGAAAACAGCAGAAAGACGGCAGCTATTCAGAAGAATTTAGGTGATGCACCGCCTATCTAACGAAGGAAATGAAG  
CAGAATCTTTCTAATCTCACTCCGATCAATAATAAGGCGCTGGCACCAGCAATTAAGCCAGATAACAGCAATCCCT  
GGTTAACACTATTTAAAGCTGGTATTATGCCAGAAGAAACGGTAGGTGGGGCGCAGGCTGTAATCAATACAGTCTCGAAG  
GACAAAACATTTGAAATCTGAAACAGAGTGCAGCACAACAAGCTTTCAAGGCTCCTTCTTACACCTTTTGCACCTGTTTAT  
AACTTCAATCCAGAAATTAACAAGTAAATGCAGAAGTGCCTCAACTATCGAATAGACACCGGACGATTTAGCGAATTTAT  
CGACTTCAATCAAGGCATCTTCCGCTGAGTTTAGCAAGCTATTAACGCTTGGTGTATGTCAGGCGGTCAACCTATT  
AA

>Cluster\_20906

ATGTTGCTTAATAATGATGTGTGGTCTGGCTGTCGGCAATCAGTTTGTGCTGGCCGTAACATTCGCTCCACTGTTCAA  
TGCGCAGGCGCATGAGCCTGAAGTAATCCCTGGCGACAGCCCGTGGCTGTGAGTGAACAGGGCGAGGCACTGCCGAGG  
CGCAAGCCACGGCAATAATGGCGGGGATCCAGCCATTTGCTGAAAGGTGCGGCTGAAAAAGCCGCACGCAAAATCGAATCT  
CAATTACCCGAGGTTATAAGCCGGTTTATCTTAAACAGCTTCAATGTTGTATGCCGACCGGATATGCAACCCATGTG  
GGAAAACCTGATGCTGTTAAAGCCTTCCAGCAACAGCTGGCAGAGGTGGCGATTGCCGTTTCCAGGCTTTTAAATA  
AATGGGTAGAGTTACTGACCGATCCTGGTGTAAACGGGATGGCAGCGACGTTGGTCTCTGATGCGATGATGGGCTAT  
CTCCATTTTCAATGCAAAATTTCCGGTCAAGGCACTCGCTGGCTATATAGCAGTAAACCTTATGCGCTTTCAACGCGGCC  
GCTTTGCGTGAATTAACCAATGGCAGTGGCGCTGGATAAAGGCTCAATTTGCTTACGTTTGTGTCAGGACTGGCACCAGC  
ATCCGCAATATGCCGCGATGCAATGAATCTTACTGGCCTTACTCAGTGCACCAACCCGTTGGCCCAATTTGACCGGCAAA  
GCAACGTTGCGCCAGGACAGTGAATAACGACGTACCGGCTTGGCGAAATATTGCAACGCACAGGCATGTTGGATGG  
GGGGCCGAAAATTTACTCTACCTGGCGATGACACGCCAATCAGCGGTTAGTACGCCATCCCGTGTACTGTTGAAACAG  
CAGAAACTAAGCCGATGGACAAGCAACTACGCTCTGCTAGTAAACCTGCGCCTGTCTGTTGCTGCGCCGCTACGATAATGAA  
CTGGTGGAAAGCCTTTAAACGTTTTTCAAGCATGGCAAGGATTTGGGGCAGATGGTGTCTATTGGCCCGGCAACCGCTGACTG  
GTTAAACGTAACGCCCGCCCAACGTGCTGGCGTGTGGCACTCAACATCCAGCGATTGCGCTTCTGCAACAGAGCTTT  
CTACCGGGATCATGTTTAACTTCCGGCCTATTGCTGCTTACTATCAGAACGGCAATCAGGTGCTGGATTCGCGAGTC  
ATTTGCTGGTTCGCCCGATCGCAAAACCGATGATGATGTTGCTTAAACACGTTGGTGGTAAACCCGCTGGAGACT  
CCCACCAACTCTGGCAGCAGAAAGATATTCTGCCGAAAGTGGCAATGATCCTGGGTATCTCGAAAGCCATGGCTATACAT  
TGATGCGCGGCTGGAACAGCAGAGAAGCATTGACCAATGGCAGGTTGACTGGTCTACAAATCAGGCTCGAATTTACCG  
TTCCGCTTCCAGCAGGCTCCAGGCCACGGAATCACTGGGGCTATAAATCAATATGCCGAGTTCAGAGGCCATTTA  
TTTTGCATGACACGCAACCAATCTGTTCAAGCGTGAATACAGTGCATTTAGCTCAGGCTGTGATGAGTGAATAAAG  
CTTCCGATCTGGCGAATATGCTGTTGCAAGGATGCAGGATGGAATGACAAACGTTATTTCTGATGCGCTGAAGCAGGGCGAT  
ACGCGTTACGCTCAATATTCCGCGCTGATTCGGTGAATCTCTACTATCTGACGGCCTTTGTTGGTGCAGATGCTGATC  
CCAGTATCGTACAGATATTTACAATATGATCTGCCTGCGGATCCAGCTCGCAATCGTATCGAAAGCGGAACAATTA  
TCAGGTAA

>Cluster\_20767

ATGGCTAAATACTCAGAAGAACTAAAAGCGTGTGTCGGCACCTTTATTGCGCGCTATACGCCAAAAGAAATGTCATC  
AGAATTAATTCGCCAATGCGCGGATCGTTTACTACTGGCTGAGAAATACAGCTGGGCGGATTTACTCAGCTTTGAAA  
GTACAGAGGAGGCAATTTGAACCGGCTACCAGCTGCTGGCCAGCCGATAATAAACCAGATCTGCACCTGAAAGAAATG  
GACATGCTGATTGCCATGCGACAAGCTGCGTGTCTCAAAGCAATAAGCATAAAGAAAAAATGGCCAGCGGCCAGAGTAA  
CAGTACAGGAGCTGCGCGGGACAGCAACAGCGATGAACCGCGCCCAACGCAAAAACAGGAAAAACGATATTTCTTCTC  
TGACTCAGGCGGATTTTGACACCTGGGCGGAAGAATCTTTTGAATACCAGAAACCTGCGCCGAAATTTGGCCAG  
CAGGTAGGAACATCCTTTAAAAGCCGCCAGATCGGTGCCACCTGGTACTTTGCAATTTGAAAGCCTTTGAAAACCGGCTCAT  
GACAGGCGATCCGCAAACTTCTGCTGCTCCTCAAAGTCCAGGCGGAATACTTCCGGTCTTACATCGTCAACATTGCAG  
AACAGTATTTGGCATCACGCTGACCGGCAACCCGATCCGCTCAGCAACGGCGCTGAACTGCGTTTTCTCTCAACCAAC  
AAAAACAGGCGCCAGTCTTACAGTGGCCACCTGTACTGTGACGAATATTTCTGGGTGCCAATCTGCCAGGCTTAACGA  
AGTGGCCAGCGCAATGGCCACCCATGACAAATGGCGCACCCACTTTTCAACGCCATCGGCCAAAACGCACCAGGCT  
ACCCGTTCTGGACGGGTGAGAAATGGAACAGGCGCAGCAAAAACCGCGGCGCTCAGTTCGCCGCTTTTGTGAAATG  
CGCAACGGCGGACGGCTTTGCCCGGATGGTCACTGGCGCTATGTCATCAGATGGAGGATGCCATGCGGGCGGCTTCAA  
CCTGGCCAAACATCGAGAAGCTGCGCAACCGCTACAACCCGCTCAACATGCTTTATATGTGCGTGTCTGTTGAGCA  
GCAAGGATTTCTGATTTAGTTTTCAGACCTGGAAGCCTGGCGGTGGAGGTGGACACCTGGCAGGATCAACCCGGAC  
GCTGCGCGCCATTTGGTGCAGGCGGTTATGGGGAGGATTTGACCTGCACGCGAGCGGCTTTGTCGCTGTTTGTGAT  
TATTGCCCGCGGATGACGCGCGAGAGAAATCCGCGTTCTGAAGGTCATTAACGGAAGGCGATGAACTTCCGCTATC  
AGGCCAGGCAATCGAACTCCTGTTTAAAAAATACAACCTTACCTATCTGGGAGTGGACGTTACCGGATTTGGCGGTT  
GTTTTTGACAACATCCAGCATTTTGGCATGCGCGTGGCCGTCGCCATTTGTTACGACATGAACACGAAAAATCAGCTGGT  
ACTGAAAGCGGCGGACGCTGGTGGAAAGCAGCGTATCGAATGGGACAAAACCTGAAAGAGATCCCGGCCAGCTTTATGG  
CTGTACGCGCACCAACAGCAAGCGGTAACGCCATGACATTTGTCGCTGACCGCAGCCAGGACACGGCCAGCGGAG  
GCTTTCTGGCGGATTAACCCAGCCTGCATAACGAACCACTCACTACGAAAAAATAAACCGAAATCCCGCTGGGGGTAAAG  
GAAAGAGGCTGCATGA

>Cluster\_63957

ATGTTACGTCCTGTAGAAACCCCAACCCGTGAAATCAAAAACCTGACGGCCTGTGGGCAATCAGTCTGGATCGGAAAA  
CTGTGGAATTTGATCAGCGTTGGTGGAAAGCGGTTACAGAAAGCGGGCAATTTGCTGTGCCAGGCACTTTTAAACGATC  
AGTTGCGCGATGACAGATATTCGTAATTTATGCGGGCACGCTGTGATACAGCGCAAGTCTTTATACCGAAAGGTTGGCA

GGCCAGCGTATCGTGTGCGTTTCGATGCGGTCACCTATTACGGCAAAGTGTGGGTCAATAATCAGGAAGTGATGGAGCA  
TCAGGGCGCTATACGCCATTTGAAGCCGATGTACGCGGTATGTTATTCGCGGAAAAGTGTACGTAACACCGTTTGTG  
TGAACAACGAACTGAACGGCAGACTATCCCGCGGGAATGGTGATTACCGACGAAAACGGCAAGAAAAGCAGTCTTAC  
TTCCATGATTTCTTAATCTATGCGGGATCCATCGCAGCGTAATGCTCTACACCACCGCGAACACCTGGGTGGACGATAT  
CACCGTGGTGGCAGTATCGCGCAAGACTGTAAACCACGCGTCTGTTGACTGGCAGGTGGTGGCAATGGTGGACTGG  
TTGAACTGCGTGATGCGGATCAACAGGTGGTTGCAACTGGACAAGGCACTAGCGGGACTTTGCAAGTGGTGAATCCGCAC  
CTCTGGCAACCGGGTGAAGGTATCTCTATGAACTGTGCGTACAGCCAAAAGCCAGACAGAGTGTGATATCTACCCGCT  
TCGCGTGGCATTCCGGTCACTGGCAGTGAAGGGCGAACAGTTCCTGATTAACCACAAACCGTTTACTTTACTGGCTTTG  
GTCGTCATGAAGATGGCGACTTGGCTGGCAAAGGATTCGATAAAGTGTGATGGTGCACGACCACGCAATTAATGGACTGG  
ATTGGGGCAACTCTACCGTACCTCGCATTACCTTACGCTGAAGAGATGCTCGACTGGGCAGATGAACATGGCATCGT  
GGTGATGATGAAACTGCTGCTGTCGGCTTTAACTCTCTTTAGGCATTTGGTTTCGAAGCGGGCAACAAGCCGAAAGAAC  
AACCACCAAGCGTGGTGTGAGTATTTGCCAACGACCCGATACCCGTCGCAAGGTGCACGGGGAATATTTTCGCGCC  
ACTGGCGGAAGCAACCGTAAACTCGACCCGACGCGTCCGATCACCTGCGTCAATGTAATGTTCTGCGACGCTCACCCG  
ATACCATCAGCGATCTCTTTGATGTGCTGTGCCGTAACCGTATTACGGATGGTATGTCCAAAGCGGGGATTTGGAAACG  
GCAGAGAAGGTGAGGAAAAGAACTCTGGCCTGGCAGGAGAACTGCATCAGCCGATTATCATCACCGAATACGGCGT  
GGATACGTTTACCGGGCTCACTCAATGTACACCGACATGTGGAGTGAAGAGTATCAGTGTGCATGGCTGAATGATATC  
ACCGGCTCTTTGATCGCGTACGCGCGTGTGCGTGAACAGGTATGGAATTTGCGCGATTTTGGCAGCTCGCAAGGCATA  
TTGCGCGTTGGCGGTAACAGAAAGGGATCTTACTCGCGACCACAAACCGAAGTTCGCGCGCTTTTCTGCTGCAAAAACG  
CTGGACTGGCATGAACCTCGGTGAAAACCGCAGCAGGGAGGCAACAATGA

>Cluster\_28593

ATGTCATCCGATATTAAGATCAAAGTGCAAAGCTTTGGTCTTTCTCAGCAACATGGTGATGCCAAATATCGGCGCGTT  
TATCGCGTGGGATATCATCACCGGTTATTTATTTCCAACAGGGTGGTTACCGAAGCAACCGTACGCAAGCTGGTTCGGC  
CGATCGCTTACTTACTCTGCGCTGCTGATCGGTTATACCGTGGTAAAGTGGTAGGCGGCAACCTGGCGGTAGTCT  
GGTGCCATCACACCATGGGCGTTATCGTCGGCGCAGACATGCCGATGTTCTCGGTTCTATGATGCAAGTCCGCTGGG  
CGGCTGGTGCATTAAGCACTTCGACCGTGGGTAGACGGTAAGATCAAATCCGGTTTTGAAATGCTGGTGAATAACTTCT  
CCGAGGCATCATCGGGATGATCCTCGCTATTTCTGGCATTCTCGGCATTGGCCCGGTTGTTGAAGCCCTGTCTAAAAATG  
CTGGCGCCGGCGTTAACTTCACTGGTTGCTTCCATGACATGCTCCGCTGGCGTCTATCTTTGTTGAACCCGCGTCCCT  
GTTCTCAACAACGCTATTAACCAGGTATCTTCTCGCGCTGGGTATTCAGCAGTCCCATGAACTGGGTAATCCATCT  
TCTTCCTGATTAAGCTAACCCAGGTCCAGGTATGGGCGTGTCTGCTGGCGTACATGTTCTTTGGTCTGGTAGCGCTAAA  
CAGTCTGCGGGCGGTGGCGCAATCATCCACTTCTGGGGGTATCCACGAAATCTACTTCCCCTATGTCTGATGATCC  
CGCTGATTTCTGGCCGTTATCCCTGGCGGATGACTGGCGTTCACGCTGACTATCCTGGCGGTGGGCTGGTTCTC  
CGGCATCTCCGGTTCTATCCTTGTGTACTGGCGATGACGCCAAAAGGTGCTTACTTCCGTAACATCGCGGGTGTGTGT  
GCGCGATGGCAGTCTCCTTCTGTCTGCTGCAATCTGCTGAAAACAGCAAGTGAAGAAGAAGATGATATTAAGC  
TGAGCCACGTACGTAATAATCATCGTTGCTGTGATGCGGTTTCCAGTCCGATGGGTGCAGGCTGCTCTGTAAG  
AAAATTCAGGATGCAAGTCTGTGCGAGATTTCCGTCATTAACAGCGCATCAACAACCTGCCGCCAGATGTGGACCTGGT  
CATCACTCCCTGACCTGACCGAGCGCGCTATGCGCCAGGTTCCGCAAGCACAGCATATTTCTGCTGACCAACTTCTC  
ACAGCGCGGTTACACACCGCTGACCGAACGCTGCTGGTGTGCTGCCAGCCATACTGAAAACGAAAGTAAAAGTAAAAG  
AGTCTGAAAAGACAGCTTTTACGATTTCCAGTGTCTAACCTGTTCAAGCTAGGCGCGGAGAACATCTTCTCGGTGCAAGC  
GGCCACAAAGAAGAAGCATTCGTTTTGCTGGCGAGCAACTGGTGAAGGCGGTTACGTTGAGCCGGAATACGTTCCAG  
CGATGCTGGATCGTGAAAAACGACCCGACTTATCTGGGTGAGTCTATCGCGGTGCCACACGGTACGGTGAAGCGAAA  
ATCGCGTACTGAAAACGGCGTGGTGTCTGCGAGTATCCGGAAGCGTGGCTTCGGTGAAGAAGAAGATGACATTTCC  
CCGCTGGTATTTGGTATTTGCTGCGCGTAAACAACGAGCACATTCAGGTTATCACAGCCTGACCAATGCACTGGATGATG  
AGTCCGTCATCGAGCGTCTGGCACACACCAGCGTGGATGAAGTGTGGAATGCTGGCAGTCTGTAAGTAA

>Cluster\_28187

TTGAGTGACATGGCGAAAACCTAATACTCTGGTGGTCAATTGCGGTTGTGCTGATGTGAGTATTCAGAGCTTTGGGC  
CAGCGAGTCTAATGGCCGTAAGGTGGATTACTCTACCTTCTTACAAGAGGTCAATAACGACCAGGTTCTGTAAGCGCGTA  
TCAACGGACGTGAAATCAACGTTTACCAAGAAAGATAGTAACCGTTATACCACTTACATTCGCGTTACAGATCCGAAATTA  
CTGGATAACCTGTTGACCAAGAAGCTCAAGGTTGTCGGTGAACCGCTGAAGAACCAAGCCTGCTGGCTTCTATCTTCT  
CTCCGTTCCCGATGCTGTTGCTGATTGGTGTCTGGAATCTTCTCATGCGTCAAAATGCAGGGCGGCTGGCAAGGTG  
CCATGTCGTTTGGTAAGAGCAAAGCGCGCATGCTGACGGAAGATCAGATCAAAAACGACCTTTGCTGACGTTGCGGGCTGC  
GACGAAGCAAAAAGAAAGTGTGCTGAACGTTGAGTATCTGCGCGAGCCGAGCCGCTTCCAGAAACTCGCGGTAAGAT  
CAGCAAGGCGCTCTGATGGTGGTCTCCTCCGGTACCGGTAACCGTGTGCGGAAAGCGATTCAGGCGAAGCGAAAG  
TTCCGTTCTTACTATCTCCGTTCTGACTTCCGCAAAATGTTCTGCTGGTGTGGTGCATCCGTTGTTCTGACATGTT  
GAACAGGCGAAGAAGCGGCACCTGTATCATCTTTATCGATGAAATCGACGCGTAGGCCCGCAGCTGGCGCAGGCTT  
GGGCGGTGGTACGATGAACGTTGAACAGACTCTGAACAGATGCTGGTTGAGATGGATGGTTTTGAAGTAAACGAAGGTA  
TCATGCTTATCGCTGCACTAACCGTCCGACGTTCTGACCCAGCCAGCTGCTGCTGCTGCGCTTTGACCGTCAAGTT  
GTGGTTGGCTTGGCAGATGTTTCGCGGCTGAGCAGATCCGTAAGGTTACATGCGCTGCGTACCATTGGCACCCGATAT  
CGAGCGGCAATCATTTGCCGTTGGTACTCCTGGTTCTCCGCTGCTGACTGGCGAACCTGGTGAACGAAGCGGCACCTGT  
TCGCTGCTGTTGGCAACAACCGCTAGTTTCGATGGTTGAGTTCGAGAAAAGCGAAAAGCAAAAATCATGATGGGTGGGAA  
CGTCCGCTCCATGGTGTGATGACGGAAGCGCAGAAAGAAATCGACGGCTTACACAGGCGGGTCAATGCAATATTCGCGCT  
GGTGGCGGAACACGATCCGGTGCACAAAGTAAAGTATTCGCGCGGCTGCTGCGCTGGGTGTGACCTTCTTCTGCTG  
AAGGTGATGCAATCAGCGCCAGCGTCAAGAACTGGAAGTCAAGTCTCCAGCTGTACGGTGGTCTGCTGGCGGAAGAG  
ATCATCTACGGGCGGCAACATGTTTCTACCGGGCGTCCAACGATATTAAGTTGCGACCAACCTGGCGCGTAAACATGGT  
TACCAGTGGGCTTCTCTGAGAAACTCGTCCGCTGCTGATGCGGAAGAAGGTAAGTGAAGTGTCTCTCGCGCGTACGG  
TAGCGAAAGCGAAACATATGCTGATGAACTGCACGATCATCGACCAGGAAGTGAAGCACGATTTAGCGGTAACATAT  
AATCGTGGCGCTCAGCTTCTGACCGACAATATGGATATCTGATGCGATGAAAGATGCTCTCATGAAATATGAGACTAT  
CGACGACCGCAGATGATGACCTGATGGCAGCTCGGATGTACGCTCCGCGAGCGGGCTGGGAAGAACCGGCGCTTCTA  
ACAATTTGCGCAACAATGGTATGTAAGGCTCCAGCTGGGTTGATGAACCGCTACCCGCAACCGGGTAAACACCATG  
TCAGAGCAGTTAGCGCAAGTAA

>Cluster\_26709

ATCGAACCTTTGGCGATTTATTTGCGGATTTTTTAAATGGACGTGGCGTCTGCTGAATTTCTGCTGGTGAATGGTACT  
TAACCTGTTCTTTATTTTTCTGCTGCTGGTGGTGGGATCTGGATGCAAGTCAAGTGGTGGTATTGAAAGAAACCG  
CCAGTCTGGCGCACTGCTGCTGGACATTTCTGGTGTGATGCTCGATAAACCCGACAGTCTCAGCGGTTTAGTAAATTA  
AGCCGCCAGCTGCTTGGTGGCAGTTCCGATGCTGTCAGGAAACTCACTGTTTGGATATCGTCAACACCATTCGCCAGGC  
GAAGGAGGACCGCAATATCACCGGATTTGATGAGGATCTGAAAACCTTCGACGGCGGCAGCCAGGCTATGAGGATACA  
TCGGCAAAGCTCTGAAAGAGTTTCTGACAGCGGGAACCGGTTTATGCGGTTGGCGAAGTACAGCCAGGGCAATAT  
TATCTCGCAGTTTTCGCAATAAAAATTTGGCTGCTCCGCAAGCGTGGTTGATGTCACGGCTTTGCCACCAACGGTCT

GTACTACAAATCGTTACTGGATAAGCTGAAAGTTTCCACCCATGTGTTCCGCGTGGGTACGTATAAATCTGCCGTGTAAC  
CGTTTATTTCGTGATGATATGTCGCCGAGCCCGCAAGCTGACAGCCCTGGATTGGTGAGCTGTGGCAAAACTATCTG  
AATACTGTTGCCGTAACCGCCAGATCCCTGCTCAGCAGGTATTCCTGGCGCGCAAGGGTTGCTTGAGGGTTTAAACAA  
AACCGGTGGCGATACCGCGAAATATGCGCTGGAACAAAGCTGGTGCATGCATGGCACTCGAGTGCAGAAATCGAAAAA  
CTCTGACCAAAAGAGTTCCGCTGGAGTAAACTGATAAAATTTACCGCCATCAGTTATTACGATTACCGCAACCCAGCAC  
CCGGCAGATACCGGTGACAGTATCGGTGTCGCTTTCGTAATGGCGCAATTTATGGATGGCGAGGAAACTCAGGGGAATGT  
TGGCGGTGATACCACTGCCGCACAAATCCGCGACGCTCGCTTACCCGAAAGTGAAAGCGATGTCTCGCGTGTAAFTA  
GCCAGGGCGCAGCGTTACCGCTGTAAGTGAATTCGCGCTGAACTGGCAGCAGCCCGGGCAGCGGGTAAAGCCTGTGGTT  
GTATCGATGGGTGGCATGGCGGCATCTGGTGGTTACTGGATTTCCACACCAGCTAATTACATTGTGGCTAACCCAGCAC  
CCTGACCGGTTCTATCGGTATCTTCGGCGTATCACCACCGTAGAAAAATAGTCTGGATTGATTTGGTGTTCATACTGATG  
GTGTTCAACTTACCCTGGCAGATGTTCTATCACCAGGGCCTGCGCGGAAAGCGCAGCAGATGATGCAGTTAAGC  
ATTGAGAATGGCTATAAAGCTTTATCAGCTGGTGTGATGTCGCGCTCATTTCAACCGCGGAGCAGATGATAAAATCCG  
CCAGGGTACGGTTCGAAAGCTGAGGATCGAAAGCTAACGGGCTGGTGCATAGTCTCGGGGATTTTCGATGATCGCGTGC  
CCAAAGCAGCAGAGCTGGCAAAAGTGAACAGTGGCATCTGGAATACTACGTTGATGAACCGACCTTCTTCGACAAAGTG  
ATGGACAACATGTCTGGTCTGTCCGGGCAATGTTGCCAGATGCGTTCAGGGCATGTACCTGCACCCTGGCTCGGT  
AGCCTTACCCTTAAAGTGAAAGCGACAAGCTGGCGCGTTTAAACGACCCACAAAACCGTTATGCGTTTTGCTGTATCT  
GCGCAACGTGCGTTAA

>Cluster\_57551

ATGTCTGCAACAAAATGACCCGCGCAACACCGCGCCGGGCCAACATTTTATCGACACCCTGGAAGGCACCGCCTT  
TCCCACTCAAACGCATTTATATCACTGGCACACCCCGCGTGGCGTGGCGATGCGTGAGATCCAGCTTAGCCCGA  
CGCTAATTGCGGTTAGCAAAGAACAGCCGAGTACGAAGAAAAGCAAGCGATTCCGGTCTACGACACCTCCGGCCGAT  
GGTATCCGAGATGCCATTAACGTGCAGCAAGGGCTGGCAAACTACGCCAGCCGTGGATCGATGCGCGCGCGATAC  
CGAAGAACTTACCGTGGCGAGTTCCGATTAACATAAAGCGCGCTGGCAGATGATGGCTCGACGAACTGGCTTTTAGCG  
GTGTAACCAACCGCGTACCCTTTCATCGAAGAAAGTGGAAAGCTGGTATGGTTCACGCGTGGGGAGCGGATACCGCT  
GAAATGGAATTCATCGCCATCCGCGAGAATATGGGCGCGAGCGCATCCGTAGCGAGGTTTACGCCACCAGCATCCGGG  
AATGAGCTTTGGCGCACATCTGCCGGAATAATCACTGCGGAATTTGTCCGTGATGAAGTGTGCGCGACGTGCGATTA  
TCCCGGCAACATTAATCATCCGGAATCGGAGCCGATGATTTGGTGCATTTCTTGGTAAAGTTAACGCCAATATC  
GGCAACTCGGCGGTACCCTTTCATCGAAGAAAGTGGAAAGCTGGTATGGTTCACGCGTGGGGAGCGGATACCGCT  
GATGGATCTTCCACCGTGCATATTTACGAAACCCGCGAGTGGATTTGCGTAACAGCCCGTGGCGATCGGTACAG  
TGCCGATCTACAGGGCGTGGAGAAAGTTAACGGGATCGCCGAAGATCTTACCTGGGAAGCGTTCGCGACACGCTGCTG  
GAACAGGGCAGCAAGGTGTGGATTACTTCACTATCCATGCGGGCGTACTGCTGCGCTATGTGCGGATGACCGGAAACG  
CCTGACCGTATCGTCTCTCGCGCGGTTTCGATATGCGGAAATGGTGCCTCTCCCATCATCAGGAAAATTTCCCTATC  
AACACTTCCGCAAAATTTGTGAATCTGTGCGCTTATGACGTTTTCGCTGTCGCTGGGCGACGGTCTGCGCCCGGTTCT  
ATTCAGGACGCCAACGATGAAGCGCAGTTTTCGCGAGCTGCATACGCTGGCGAACTGACCAAAATTTGCTGGGAATATGA  
CGTGACGGTATGATGAAGGCCAGGTACGCTGCCATGACGATGATCCGCGCAATATGACCGAGGAGTTAGAGCACT  
GCCACGAAGCGCGCTTTTACACTCTGGGCGCTAACCTACCGAATATGTCGCGCGGCTATGACCACTTACGCGGGATT  
GGTGGCGGATGATTTGGTGGTTTGGTTCGCGGATGCTCTGTTACGTAACGCCAAAAGAGCATCTGGGCTGCGTAATAA  
AGAAGATGTTAAGCAGGGGCTTATCACTATAAGATTTGCCCGCCAGCGCTGACCTGGCGAAAGGGCATCCGGGCGCGC  
AAATTCGCGATAACGCGCATGTGCAAGCCGCTTCGAATTTTCGCTGGGAAGACAGTTTAACTGCGCCTGACCCGTTT  
ACCGCCGCGCTTATACAGTGAACCCCTGCGCGAAGAGTTCAGTAAAGTTCGCCATTTTGTCCATGTGTGGCGGAA  
ATTTCTGTTGATGAAATCAGCCAGGAAGTGCCTGATTAACGCCACGCAAACTATTGAAATGGGAATGGCGGATATGT  
CGGAGAACTTCGTCGAGAGCGGAGAAATCTACCTGCGTAAGGAGGAAAGCGTGA

>Cluster\_24414

ATGTCACAAGATCCTTTCCAGGAACGCGAAGCTGAAAAATACGCGAATCCCATCCCTAGTCGGGAATTTATCCTGAAACA  
TTTAAACCAACGTAAGAAACCGCGCAGCGTATGAGCTGGCGGTAGAACTGCACATTGAAGGCGAAGAGCAGCTTGAAG  
GCCTGCGTCCGCGCTGCGCGGATGGAGCGGATGGTCAACTGGTCTTCACTCGCGTCAGTGTATGCGCTGCCGGAA  
CGCCTGCACCTGGTGAAGGTACCCTTATTTGGCCACCGTGGTATGGCTACGGCTTTCTGCGAGTTGAAGGCGTAAAGATGA  
TTTGTATCTCTCCAGCGAGCAGATGAAACCTGCATTCATGGCGATCAGGTGCTGGCTCAGCCGCTGGGCGCTGACCGTA  
AAGTTCGTGTAAGCGCGTATTGTCCGCGTACGGTGCACAAAACAGCCAGATTTGTTGGTCTGCTACTTACCGAAGCG  
GGCGTCCGCTTTGTTGTTCTGACGATAGCCGCTGAGCTTCGATATTAATCCCGCCGATCAGATCATGGGCGCGCG  
GATGGCTTTGTTGGTGGTGGTGAAGTGAAGTGAAGTGAAGTGAAGTGAAGTGAAGTGAAGTGAAGTGAAGTGAAGTGAAGT  
TGGCGGATAATATGGCACCGGATGGCGGTTGATTTGCTCTGCGTACCATGAAATCCGTACATCTGGCCGAGGCT  
GTTGAGCAACAGGTTGCCGGCTGAAAGAAAGTGCAGGAAAGCAAAAGCGGGCGTGTGATCTGCGCGATTTACC  
GCTGGTCAACATTTGATGGCGAAGATGCCCGTACTTTGACGATGCAGTTTACTGTGAGAAAAACCGCGCGTGGCTGGC  
GTTTGGTGGCTGCATTTGCGCAGCTGACCTATGCTGCTCCGCAACCGCGCTGGACAGAGAAGCGGTAATCTGTGT  
ACGTCGGTACTTCCCTTCGCGAGTTATCCCGATGCTGCCGAAAGTGTCTCTAACGGCCTGTGCTCGCTCAACCCGCA  
GGTAGACCCCTGTGATGGTGTGCGAGATGACGGTTTTCGTCGAAAGGCGCGCTGACTGGCTACAAAATTTACGAAGCGG  
TGATGAGCTCTCACGCGCTGCTGACCTACACAAAGTTCGCAATATATGCAAGGCGATCAGGATCTCGCGCAGCAGTAT  
GCGCGCTGGTTAAGCATCTGAAAGGTTACATAAACCCTGATAAAGTGTGGATAAAGCCCTGAAAGAACCGGTTAGGGAT  
CTCATTTGAGAGCGAAGAAAGCGAAGTTCATTTCAACGCTGAACGCGGATTTGAACGATATCGAACAGACTCAGCGTAAGC  
ACGCCACAAGTTAATTGAAGAAATGCATGATTTGCGGAATATCTCGCGCGCGGTTTTCGTTGAGAAAGCCAAAGAACCG  
GCACGTTCCGTAATCACGACAAGCCAGCAGCAGCAAGGATTAACCTTCTTCCGTTTCACTGCTGGCGAGCTGGGCTGGAA  
ATTGCGGGCGGTAACAAGCCGGAACCGCGGACTATGCAAGTACTTGAATCAGTTGCCGATCGTCTGATGCAGAAA  
TGCTGCAAAACATGCTTTTGGCTGCGATGAAACAGCGGATTTACGATCCGAAACCGTGGTCACTTCCGCTGGCATTTG  
CAGTCTATGGCAGCTTACTTCCGCGATTCGTCGTTATCTGACCTGACCTGCACCGCGCCATTAATATCTGTGGC  
GAAAGAGCAGGGGATCAAGGCAACACCACTGAAACCGCGCGTACCATTATTTCGATGGAAGAGATGCTGACACTGGGT  
AGCACTGTTGATGGCGAAGCTGTCGCGGATGAAGCAACCGCGGATGTCGCTGACTGGCTGAAGTGTGACTTCAATGCTC  
GACCAGGTAGGTAACGCTTTAAAGCGTAATTTCCAGCGTCACTGGCTTTGGCTTCTTCGCTCCGCTGGACGACTTGT  
CATTTGATGGTCTGGTCCATGCTCTCTCGCTGGACAATGACTATCTGCTTTGACCGGATAGGGCAACCGCTGATGGGTG  
AATCCAGCGCGCAGACTTATCCGCTGGCGGATCGCGTGGAAAGTTCGCGTTGAAGCGGTTAATATGACAGCGCAAAAT  
GACTTTAGCTGATCTCCAGCGAACCGCACCGCGCAACGCTCGGTAACCGCGCGGAGAAAGCGAAAAAGCGGATGC  
AGGTAAGAAAGCGGCAAGCGTCTGAGTTCGCGAAAGGTTAACTTTGAGCGAGCAGCGCTTCCGCGCGGAGAAAA  
AACCGAAGCGAAGCGAAGAAAGACGCGGAAAGCGAAAAAGCCATCGCGGAAACCGCAGAAAAATAGCCCGAGCG  
ACCAAAGCGAAGCGTGGCGCAAGAAAAAGTGCAGAGTGA

>Cluster\_58636

GTGAATATTTATGACTCTTTTTGTATCTTGCCTGGTTCGGGATGCGCTTGGCGAATGGCGGTGCAATTAATCTGAA  
TGTTCTCGATAAATCAATGGCGACCGCATTTGATATTTCAATTAATAAGGAAAAAGGAGTCAATGCTCCGCTGAATATT  
TTGTTAGCGTTGGGTTGAATAACAACAAATCAGTAATGGGCAAAAAATTAACCTGGCAAAAAAGGGTGAACAAACCAT  
CCATGCATCAATGATCACTGGTGCATAAATTTGGTTTAAACAGATATCCGTCAGTCTTCCACAGATAGATCGGTG



TATTGATTTTCAGTTCGCCAGCTGAAATGCTCTTCAATTTTCGATCAAGCCAATCAGCAACTGAATATTAGTATTCCGCAAG  
CCTGGCTGGCGTGGCACTCAGAAAAGTGGCTCCCCCTCTACATGGAAGAAGGTGTTGCCGGTGTCTGATGGATTAC  
AATTTGTTTGGCCAGCAGTACCGCCACAGGACGGCAGCAGCAGCTAACCTGAATGCTTACGGTACCGCCGAATTA  
CGCCGGGGATGGCGTTTACGCAGTGTATACAGCTTAAAGACCGTAGCGAAGATAACCATGACAGTACAGCGGAA  
TATCGCGTGAACAATTTCCAGGTTTCGGCAGCATCGACGCCCTTCTGACTCGCCAGGACAGGTTTCGCTATAAATGGC  
ATTTTCGATGGTTTTTCTTATACCGCGCGCACTGGCGAGTGACGATCGAATGTTACCGTGGGAGCTGCGTGGCTACGC  
CCCACAAATAGCGGTATTGCACAGACCAATGCCACGGTGCAGCATCAGTCAATCAGGCCGCGTCAATTTACCAGAAAAAG  
TCCCGCCAGGCGGTTTATTATTGATGACCTCAATCAGTCTGTTTACGGGCAGCGTGGATGTCAAAGTGACGGAAGAAGAT  
GGTCGGGTGAACAATTTCCAGGTTTCGGCAGCATCGACGCCCTTCTGACTCGCCAGGACAGGTTTCGCTATAAATGGC  
CGCGGGTCAGCCACGGCTTCCATGTACATCAAATGAAAATGAAACCTTTTTTAGCAATGAAGTTTCTGGGGGATGC  
TCTCAAACCTCGTGTACGGCGGCTGCTGATTTCTGATGATGACTACCATTCTGCCGCAATGGGTATCGGGCAAAAT  
ATGCTGTGGCTGGCGCACTGCTCTTGTGATGTACCTGGGCCAGTAGCCATTTTGATACTCAGCAGGACGAGCGGGGCTT  
AAGCTACCGTTTTAATTACAGCAACAAGTGGATGCGCACCAACAGCAGCAGATTTCGCTCGCCGCTTATCGCTTCTCAGATC  
GTCATTTTACAGCTACGCCAATATCTGGATCAAAATACAACGACAGCGATGCGCAGGACGAAAAACAGACGATCAGC  
TTATCCCGTGGGCCAACCGATTACCCACATAACCTCAATCTTTACGCCAACCTGCTACATCAAACCTGGTGAATGCAGA  
CGCCTCCACGACGCCCAACATCAGCAGGTTTTAATGTTGATATTGGTGACTGGAGAGATATCTCGATTTTCGACGTCA  
TCAATACCCACCTCAAGAGATAAAGATCGCGACAACCAAGTTTATCTGTCGATTTTCGCTCCCTTCGCTAACCCTGGT  
CGGGTTGGCTATGACATGCAAAACAGTAGCCACAGCACCATACCCGCATGCTGGAACGATACGCTGGATGAACGTAA  
TAGCTGGGGCATGCTGCCGACTGCAATCCGATCGTCCGGACAAATGGAGCCAGGTGAGCGGTAACATCAGCACCTGA  
GTTACAGCGGTGAGTGGGATTTTCTGGTACTATGCCGCCAGTGATTTACAGTTCCGTAGCAGCAGCTGGAGCGGTTCT  
TTCACCGCAACCAATATGGTGCAGCAATTTTCATCGCGCAGCTCCACCATGAACCACGCTGATGGTTCAGCAGCGATGG  
CGTGGCAGATATTCGGTTCAGGGCAATCTCGACTACCAACCAATTTTGGCATGCGGTGGTGGCTGGATTTCCAGTT  
ACCAGCTTCCACCGTGGCGGTGAACATGAATGACTTACCAGCGCGTAAACAGTTGCAGAAAACGCTCATCAAGGAAACA  
TGGATTGAAGCGGATAGGTTACAATCACTGGCTTCCGTTCCGTTAAAGACGTTAACGTCATCATACGCCAACGCCAG  
CGGTCAGTTCCCTCCCTCGGTGCGGATATCCGCCAGGATGACAGCGCATTAGCGTGGGTATGGTTGGCGAGGAAGGAC  
ATGCTGGTTAAGCGGTGTCGCTGAAAATCAACTGTTTACCCTGGTCTGGGGTGGAGCAAGCTGCATTATTCATCTGCCA  
GAACGCTTGAAGACACGACCAAAACGCTGATTTTACCTTGTCTATTA

>Cluster\_28776

ATGTGCAATTTCTTATGACTCTCCAGTATCAAAGTCTGAAAGGGCTGGATGCGGTGCGTAAGCGCCCGGGTATGTATAT  
CGCGGACACGGATGACGGCACCCTGCTGCACCACATGGTATTCGAGGTGGTAGATAACGCTATCGACGAAAGCGTTCGCGG  
GTCAGTGTAAAGAAATATCGTCACTTACAGCCGATAAATCTGCTCTCCGTACAGGATGACGGGCGCGCATTCGACCC  
GGTATTCACCCGGAAGAGGGCGTATCGCGCGGGAAGTATCATGACGCTTCTGCACGAGCGGTAATTTGACGATAA  
CTCCTATAAAGTGTCCGGCGTCTGCACGGCGTTGGTGTTCGGTAGTAAACGCCCTGTCGCAAAAACGAGCTGGTTA  
TCCAGCGCGAGGTTAAATTCACCGTCAAGTACGAAACAGGTTACCGCAGGCCCGCTGGCGGTTACCGCGAGACT  
GAAAAACCTGCACTGGTGGCTTTCTGGCAAGCCTTGAACCTTCAACATGTGACCGGATTCGAATATGAAATTTCT  
GGGAAACCTGCTGCGTGGTTCGTTCTCACTCCGCGCTTCCATTCGCTGCGCGACAAGCGCGATGGCAAGAAG  
ACCACTTCCACTATGAAGCGGCATCAAGGCGTTCGTTGAATATCTGAACAAGAACAACCGCGATCCACCCGAATATC  
TTCTACTTCTCCACGAAAAGACGGTATTTGGCGTCAAGTGGCGGTTGCAAGTGAACGATGGCTTCCAGGAAAACATCTA  
CTGCTTTACCAACAACATTCGCGACGCTGACGGCGTACTCACCTGGCAGGCTTCCGTGCGCGGATGACCCGACTCTGA  
ACGCTACATGGACAAGAAGGCTACAGCAAAAAGCCAAAGTCAAGCGCCACCGGTGACGATGCGCGTGAAGGCTGATTT  
GCGGTCTGTTTCCGTGAAAGTGCAGGACCGAAATCTCTCACAGACCAAGCAACGTTTCTTTCGAGGTGAAATC  
GGCGTTGAACAGCAGATGAACGAACTGCTGGCGGAATACCTGCTGAAAACCAACCGACGCAAAAACGCGTGGTTCGGCA  
AAATTTATCGATGCTGCCGTGCGTGAAGCTGCGCGTCCGCGTGAATGACCCGCGTAAAGTCCGCTGGATTTTA  
GCTGGCTGCGCGGCAAACTGGCAGACTGCCAGGAACGCGATCCGCGCTTCCGAACGTACCTTGTGGAAGGGGACTC  
CGCGGGCGCTCTGCGAAGCAGGGCGTAAACCGCAAGAACCAGCGATTTCTACCGCTGAAGGGTAAATTCCTCAACGTCG  
AGAAAGCGCGCTTCGATAAGATGCTCTCTTCTCAGGAAGTGGCGACGCTTATCACCGCGCTGGTGTGGTATCGGTCGT  
GACGATACAACCCGGACAACCTGCGTTATCACAGCATCATCATACCGATGCGGACGCTGACGGCTCGCAGCTTACG  
TACGCTGCTGTTGACCTTCTTCTATCTGTCAGATGCCGGAATCGTTGAACGTGGTACGCTTACATCGCTCAGCCGCGC  
TGTACAAAGTGAAGAAAGTAAAGCAGGAACAGTACATTAAGAGCAGCAGGCGATGGATCAGTACCAGATCTCTATCGCG  
CTGGATGGCGCAACGCTGCACCAACGCCAGTGCACCGCGCTGGCTGGCGAAGCGTTAGAGAACTGGTGTCTGAGTA  
CAACGCGACGCAAGAAATGATCAACCGCATGGAAGCGTCTGATTTCCGAAAAGCAATGCTGAAAAGACTTATCTATCGCA  
CGCTGACGGAAGCCGATCTCTGATGAGCAGACCGTTACCCGCTGGGTGAATGCGCTGGTCAGGCAACTGAACAACAAA  
GAACAGCAGCGGACCGCAGTGAAGTTTGTATGTCACCAACCAATGCCGAACAAACCTGTTCCGAGCGGATTTGTCGCGTGGC  
TACCACGGTGTGGATGACTATCTCGCTGGATCAGGATTTATCACCGTGGTGAATATCGTCTGATCTGCAGCTGG  
GTGAAACCTGCTGGCTTGTGGAAGAAAGATGATTTTATCGAACCTGGCGAAGCGTCAAGCGGCTAGCCGCTCGAG  
CAGGCGCTGGACTGGCTGGTGAAGAGTCCCGTCCGCGCTCTCCATCAGCGTTATAAAGGTCTGGGCGAGATGAACCC  
GGAACAGCTGTGGGAAACTACCATGGACCCGAAAAGCGTCTGATGTTGCGCGTTACCGTTAAAGATGCGATTGCTGCCG  
ACCAGTTGTTACACCGCTGATGGGCGACGCGTTGAACCGCGCGTGGCTTATTGAAGAGAAGCTCTGAAAGCGGGC  
AATATCGATATTTAA

>Cluster\_5328

ATGGCGATGAAAAAGTTGCTCATAGCGTGCCTGCTGTTTAGCAGCGCCACCGTATACGGTGTGAAGGGTTCGTAGTGAA  
AGATATTCATTTGGAAGGCTTCAGCGTGTGCGGCTTGGTGGCGCCCTCCTCAGTATGCGGGTGGCAGAGCGCACCGG  
TTAATGATGAAGATATCAGTAATACCATTTCGCGCTCTGTTTGTACCGGCAACTTTGAGGATGTTTCGCGTCTTCTGAT  
GGTATACCTTCTGGTTACAGTAAAAGAACGTCGACCATTTGCCAGCATTACTTTCTCCGGTAAACAAATCGGTGAAAGA  
TGACATGCTGAAGCAAAACCTCGAGGCTTCTGGTGTGCGTGTGGGCAATCCCTCGATCGCACCACCAATTTGCCGATTCG  
AGAAAGGCTCTGGAAGACTTCTACTACAGCGTCCGTAATAATAGCGCCAGCGTAAAGGTTGTCGTTGACCCCGCTCGCGC  
AACCGTGTGACCTAAAACCTGGTGTTCAGGAAGGTGTGTCAGTGAATCCAGCAAAATTAACATTTGTTGGTAACCATGC  
TTTACCACCGGACGACTGATCTCTATTTCCAACTGCGTGCAGAAAGTCCCGTGGTGAACGTTGGTAGCGGATCGTAAAT  
ACCAGAAACAGAACTGGCGGGCAGCTTGAACCCCTGCGCAGCTACTATCTGGATCGCGGTTATGCCGTTTCAACATC  
GACTCTAACCCAGTTCAGTTCAGCCGAGATAAAAAAGGTTATTTACGTCACGTTGAACATCAACGGAAGGCGATGACAA  
GCTTTCTGGCGTTGAAGTGAAGGCAACCTTGGCGGGCCTCCGCTGAAATGAGCAGCTGACTAAGATCGAGCCGGGTG  
AGCTGTATAACCGCACAAAGTGAACAGATGGAAGATGACATCAAAAAGCTTCTCGGTCGCTATGGTTATGCTATCCG  
CGCTGACGCTGAAGTCCGTTTGAAGTAACTGATACCTCGAAAGATGCGCGTTCGCGTCCGCAAAATGCGTATGGAAG  
GTGATGGCTGGGAGCGATCTGGTCTGATCAGGTAAGGAGCGTCTGAATCGTCTGGCTTCTTTGAACTGTGATAC  
GATACCAACGCTGTTCCGGTAGCCCGGACAGGTTGATGTCGCTACAGGTTAAAGAGCGCAACCGGTAAGCTTCA  
CTTTGGTATTTGGTTACGGTACTGAAAGTGGCGGCTGAGCTTCCAGGCTGGTGTGACGAGGATAACTGGTACAGGTT  
ATGCTGTTGGTATCAACGGGACCAAAACGATTTACAGACCTATGCTGAACTGTCGGTAAACCAACCGCTACTTACCAGGTA  
GATGGCGTAAAGCTCGGTGGTCTCTCTTATATGACTTCCAGGAGATGACGCGGACCTGTCGACTATACCAACA

GAGTTATGGTACAGACGTGACGTTGGGCTTCCCGATTAACGAATATAACTCGCTGCGTGCAGGTCGGGTTATGTACATA  
ACTCCCTGTCACACATGCAGCCTCAGGTTGCGATGTGGCGTTACTGTACTCTATGGGGAACATCCGAGCACCTCTGAT  
CAGGATAACAGCTTCAAACCGGACGACTTACAGTTCACCTATGTTGGACCTATAACAAGCTTGACCGTGGTTACTTCCC  
GACAGATGGTTACAGTGTCAACCTGACCCGTAAGTGCACCTTCTGGATCCGATAACGAATACTACAAAAGTGACGTTAG  
ACACGCGGCTTATGTGCGGATCGATGACGATCACAAATGGTGTGTTCTTGGGGCGTACCCGCTGGGTTATGGTGGT  
TTAGGCGGCAAAGAGATGCCGTTTACGAGAATCTTATGCGGTTGGTTCAGCACCCGTCGCTGGCTTCCAGTCCAATAC  
CATTTGGTCCGAAAGCAGTTTACTTCCCAGTACAGGCCAGTAATATGATCCGACTATGATTACGAATGTGCGACTCAGG  
ACGGCGGAAAGACCTGTGTAATCGGATGATGCTGTAGGCGGTAACGCCATGGCGGTTGCCAGCCTCAGATTATCACC  
CCGACCGGCTTATGTAGCGATAAGTATGCTAACFCGGTTCGTACTTCTTCTTGGGATATGGGTACCGTGGGATAC  
AAACTGGGATCCAGCCAATATTTCTGGATATCCGGACTATAGTATCCAAGCAATATCCGATGTCTGCGGGTATCGCAT  
TACATGGATGTCCCATTTGGGGCGGTTGGTGTCTCTACGCCAGCCGTTCAAAGTACGATGGAGACAAGGCAGAA  
CAGTTCAGTTTAAACATCGGTAACACCTGGTAA

>Cluster\_53940

TTGCAAAATCAGGACTTTATTTGCTGGCCTTAAAGCTAAATTTGCCGAACATCGCATCGTTTTCTGGCAGCATCCCGATAA  
ACGTTTTATTTAGGAACTGGAACAGCTCAAGCTTGAACAGCTCAGCTAATCAACATGACCCACGCGTACAGCTGGCGG  
TGAAAAACGCATCGAGATGAGCTGAGCCAGAAGCAGTTCCTGCTGTGGTTCCCCATGATGCGCGCCTCATGAACAA  
GACTGGCTCGGATATCCGCCCTTACAGCAGCAATTCATGCGGATTTTGGCCCATCACCTGAACACGCTGGGCAT  
TCCCAGCTTGGCTGCGCGAGCATATTCAGCGACGCAAGGCTTCTTACGACTAACGTACGAGGCGCTGAAAAACC  
TGGTGACGGAAACGGAAGATGAAACCTCGCTGGATAAGAAAATGATTGCGGTGATCGCTGGCGCAAAGACCGGAAACC  
GAAGACATTTTGTAACTGATTACCCAGTACGTTAACCAACAACAGAAGACGACGCGAATGGAACACGCGAGCG  
GATGTTGAAACGCGCAGGTTGACCCGCTGATTTGTTGGGAAATGCTCAACCAGCAATGGGCTACCAGGACAGAGCCAT  
CGCTGGAACCTGCTCTGAACTGTTTTGTACCGATCTCTGCCCCAGGCCACAGACAGCAGCGCCTGGCTGGAA  
AAAAATGCTCTGCTGACGCCATCCGGCAGAGCATCCGCCCTGGCATTTATGGTACCTGGCGTCCCGATCGCTGCTATAA  
AGAGGCTTATGACTGCGCTCAGCAATGACGGCGCCTGCGCCGGAAGATCATTACCGACTAGTTCGCTATG  
ATTTGACGAATGCGAAACACCCTCAGCATCGAACAACCATTTATCATGCGCTGGTAAACGCAACTGCTGGAAGAGAGC  
ACCAGCTCGATCGGGAAGCCTTAAAAAACTGCTCTCTGACGCCAGAGCAATACTGGTGCAGACACAACAGAGTA  
TTACGCCATCTATGACGCGCTGCGCCAGGCTGAGCGTTTGTGTAATCTGCGCAATCGCCACATCGATGGTTTCCACTACC  
AGGACGCGCCACTCTCTGGAAAGCCTACTGCGAAGAATGTTTCCGCTFCGACAGGCTTATCGCCTGTTTAACTGAATAT  
GCCCTGCTGGTTACAGCAAAGGGCGATGATCCTCAAGAGCCTGGATGATTATATCGAGGCGCTTACAGCAACTGGTA  
TCTGGCAGAAATTAAGCCGTAACGGAACGAAGTCTGGAAGCGGAAAAATCGTATGCGAGCGTGCAAAATCCCGCGCTGC  
CGCGTCAGAAGAACTTTTCAATGAGGTGGTGAAGCCGAGTTCAAAAATCCGCAAAATCAAACGCGTGTTCGTGATAATT  
TCCGATCGCCTCGGTTATGAAGTGGCGGAGGAGCTGGGAATCAAAATCAATACCGAGAACCGCTTACCGCAGAACTGCG  
CTCGCAGCTCGCGTGTCTCCCAGCTACACCAACTGGGAATGGCGGCATGCTGCCCCATGAACAACTTTGTATCAAC  
CAAGTAACGGCGACATCGTTTATGCTGATGGGCTGTGCGACTCGGGTATTCCTAACCGGATACCATTTCTGAAGAATAT  
AAGGAATGGCGATAAAATCGAAGGACCTTCTGGAGTTAAAAAATCAGGAAGGGCGGACCTTATTCGCGATTACGAAGT  
GGTGTATATCTGGCATAAACACGATTTGATGCCACCGTGACACGCGATCCACGGAAGATAAAACCTTCGAAAGCTGGCGA  
CGCGGTGACTGAACTGAAAGATTTAGTCAACAAGGTAATCAACCGTCTCCACGGCACACGATTTTTGTTACGGCGGAT  
CACGGTTTTCTGTTCCAGCAACAGGCGCTTTCGGTTCCAGGATAAAACACTCTGCAAAATTAAGCCGGAACACCATCAA  
GAACCAAAACGCTTTATTTATCGGCCATCAGTTCGCCGATGATTTTTGCTGGAAGGAAGGTGGCGGATACCCGAG  
GCGTGAGCGACAACGAGGATTTCTTATTTCCGAAAGGATTCAGCGCTTCCATTTCTCTGGCGCGCGCTTCTGTTTCTAT  
GGCGGCACCATGTTGACGAGGTTTTCGCTTCCGTTATTCAGATAAAAGCCCTGCAAAAACCGCCGAGAAAAACAGCC  
GCAGCGCCCGCGGTGGATATTGTCGCTTACCATCCCATGATTAAGCTGGTGAACAATATCGATAAAGTGAGCCTGTTG  
AGACGATCCCGTGGCGAACTTTATGAACCGGATCTGTAACATTTACATTTGCTGATAACGCCAACAAATCTGCTG  
GGCAAAGAGCGCATCAGCTTTGACAGCGATAACAGCACCATGGAAAAACGCGTACGCGAAGTTACGCTGAAGCTGATTGG  
CGCTAACTTCAACCGTCCGAATGAGTACTGGTTGATATGGAAGACGCACAAACGGAACGGGTTATCAGAAGTACCCGG  
TCATTTATCGATCTGGCGTCCAGGATGATTTCTTCTAA

>Cluster\_67020

GTGACAGAGAACGTACCCATGAACAATCTGAAGTGAAGGCTGGCAGGTTGTTATCGCAACTCATGGCGGCTGGAA  
AAAACCGGACGGCAGCCAGCAGGACAGCAAAATCCTGGATGAGATGACTATCCCTCTTTCGCGAGCCTGCTTCCGTACC  
GTCAGTACGACCCGACAGCGAGCTGTTTATCAATGAAAAACCGCGGTTTTGTCCTGGAATGCCGGCCCTGTCCGGG  
GCCAACGAAGCTATCAGTAAGTCACTGGATTATTTTTGCGGGACAAAATCCCGCAAAATCCCGTACGCTTACCCCT  
CGTGGGCTCACCGTGTGTCGCCGATGCTGGAGCACGGGCTGGCAGACTTCCGCTGGCAGGGGAAGCGGGCGGATGAAT  
TCAATGCCATTACCCGTGCCCTTACAGAGCGGGCGCGCTGACACAGTTCGCCAACAGAAAGGATACCCACTGACCTTG  
CGTCAATTACCGTCTTTGTCCTATGCGGAAGAAGTAGGCAGCTGACGGAGCAGAAAAAGACGGAATGAACGAGT  
GGCCAACCGGCTGTGCGCGCTGCGCGGGCTGGTGGTTCGAGCGGGTGGATAAAAAGGGGCTGTTTCCCTCG  
TGCGGAACTGGCGAATTTTTCGCCACGGCAATATGAGCCACCGAATGGCAGTGTGCGGAGTTGAGCCGCTGAACACC  
GAATGTGTCGACCCCTCCTGCGGCTGATGCTGATCCGGACCGGATTGAGCAGAGTCTGCAGTCCGCTGCGCGCGGCA  
ACGTGAGCGCACACGCAATTTTAAATTCATGCTGGAAAAAATCCCGAAGACCGTATGCCCTGCGAGATGGGGACA  
ATATCAGCAACGTCACGGACCGCTGTGACCAATTTCTGCTTGTGATGACGCTGGCGCTGGAAGTGGAAGAGCAG  
GCCGGTACCAGCGGGAGGCCAACCGCAAAATTTATCCAGCTGGACAAAAGGCGAATCGCCCTTTCGGAAGTTGTACC  
GTCGGTGA AAAAGCAGGCTGCGGAGTGGGGCGGCTGCGGGAATCCCTCAGCACAACAGGATTTACTGGCGGCTTTTT  
ACTTTAACGTCACGCTGTTCTGTGAAGACAGGGATGAAGTGGCGCTGGAACCGGATGACGGTGTGAACGAGGATG  
CGTAACGGGCTGTCAATGTACATGCCGGAGTTTATGACGCTGCGTAATTACCTCTCCGCTTTTCCGTTTATGATG  
AGGGCTGTGGAGTATATCTGCCGTACAATGCCATCCAGCGGGCGGGCCAGCAATGTGGCAATATTTCTGCCGTTG  
TGGCGGATAAACAGGCTGCGCTGACGGGCTGCCATACCCGCTTACCACAACCACTTTCTTTTTGAACCTGTTTCGAC  
CGCAATGCCGGGCTGGATACGGATAACAACAACTCTCTCCGTCACCGGTAACCTCCGGGGCGGCTAAATCATTTCTG  
GGGATCATTTCCGAGGTTGCTGGACAGCGGTTGGCAGGGCTGGGTTTGGATATGGGGGACTCTACAAGGGGCTTGC  
GTAATGTGGCGGGGTTATCTGAACGCGCTCGACCTGCGCTTCAACCCCTTTGCCAACATCAAGGATATACGGCGTCT  
GCCGAAAGTATCCGTAACCTGCTGGTCTGCTGGCTAACCCGCTCCGTAACCTGCGACGACACCTTTATGTCTGTTGCT  
GAAAGCGGTCATGAAGTCTGGTTCGCAAAAAGAAAGCAGCGACGAGTTGACGATATGCTGCACTACATGCGGAAGCCG  
TGGAGCAGCCGAATACCCGATACACCACCGTGGCTTACGCAATGGATGAGATATCGTCCGCTGGAAGTACTGCT  
TCTGGGGACTTTATGGCGAGTACTTCAACAGTGA AAAAGCCTGCTGGATGACAACGTCGTTTCTCCGTTGAGAT  
GGCGAGCTGAAGGACAAGCCTGACCTGCTGGCTGCTGATGTTCTATGATGATTACGTTGAGCAGGATGATATC  
TCTCCGACCGTCAGCAACAAGGCTGTCTGATTTGATGAGGCTGGAAGCTGCTGCAAGGACAACAGCGGGCGGAG  
GACTTTATCGAGAACGGGTACCGCACGGCGCTAAATACAACGGGCTTATATCACCATCACCCAGGGGATTGAAGACTT  
CGACGGGCAAAAAGCAGTGGCGCGGCAAGGCGGCTGGCGCAACTCTCTTCAAATATCATCTGCTCAGAACCGG  
ATGCGTTCCGTAATACTGCTGATAACCCGACAGTTTAAACCGGTTTGAACGGGAGGTCATTGAGGGCTTTCCGGG  
GCAGCTGAGGCGCATTTCAAGTCTTATGCTGCTGCTTACGGGCGAGGTTTCTTCCATCGTCTGCTGCTGACCCCAT  
CAGCCGGTGTGTTCTGCTGACGGTGAAGATTTTACTACCGTGAAGCCGACTCCGTCGGTAAGATATCCAG

ACATCATCGGAGAATTGGCTGGCGTAAAGTTCGCCGAGGAAATGGAGACTGACGGAATGGATAAAACAATCACTGA  
>Cluster\_24909  
ATGGCCGGGAATGACCCGAGCCAAATTGGACGCAAAAGGAAACCGACGCTCCGGTCAAACAAAAGGTAGCCGTCGTGC  
TTACGAAGATGACCATGATATACGACGATATGATGACTATGAGGATGAAGAACCAGATGCCGCGCAAAGGTAAAGGGCAAAG  
GCAAAGGGCGTAAGCTCTGGCAAAACCGCGCTGGCTATGAGCTGCTGCTAAAACTGGCTATCGTTTTTCCCGCTGATC  
GCCATTTACGGCGTTTATCTCGATCAAAAAATTCGTAGCCGATTTGATGGCAAGGTCTGGCAATTGCCCGCGGAGTTTA  
TGGCCGAATGGTCAACCTTGAGCCAGACATGACCATCAGCAAGAACGAGATGGTGAAGCTGCTGGAGGCGACCCAGTATC  
GCCAGGTGTCGAAAATGACCCGCTCTGGCGAGTTTACCCTACAGGCCAACAGCATTGAGATGATCCGCGCTCCGTTTGGAT  
TTCCCGGACAGCAAAAGGAGGCGAGTGGCGCGCTGACTGACCTTTGATGGCGATCATCTGGCGACGATCGTCAATATGGA  
GAACAACCGTCAGTTCGGTTTCTTCCGCTTGTATCCGCGCCTGATCACCATGATTTCTTCGCCAAACGGTGAGCAGCGTC  
TGTTTGTGCCGCGCAGTGGTTTCCCGGATTTGCTGGTGGATACCTTGGCGACAGAAAGACCGTCATTTCTACGAGCAT  
GATGGGATCAGTCTTACTCAATCGGACGTCGGGTGCTGGCAACCTGACTGCCGACGACACTGTGCAGGGGGCGAGTAC  
GCTGACGCAACAGTTGGTTAAAAACCTGTTCCCTCCAGCGAGCGTCTTACTGGCTAAAGGCAACGAAACCTACATGG  
CGCTGATCATGGACGCGGTTACAGCAAAAGACCGTATTTCTGAGCTGTATATGAACGAGGTGTATCTCGGTACAGCGGC  
GACAACGAAATCCGCGGCTTCCGCTGGCGAGCTTGTATTACTTTGGTCCGCGGTAGAAAGAAATTGAGCCTCGATCAGCA  
GGCGCTGTTGGTGGTATGGTGAAGGGGCGTCCATCTACAACCCGTCGGCTAACCCGAAACTGGCGCTGGAGCGACGTA  
ACCTGGTACTACGTTTGGTGAACAACAGCAAAATTTGATCAAGAACACTACGACATGCTGAGTGCAGGCTCCGCTGGGT  
GTTACGCCGCGGCTGGGTGATCTCTCCTCAGCCAGCCTTTATGAGCTGGTGCCTCAGGAGCTGCAGGCGAAATTAGG  
CGATAAGGTAAAAGATCTCTCCGCGTGAAGATCTTACTACCTTTGACTCGGTGGCCAGGACGCGGCGAGAAAAGCCG  
CCGTGGAAGGCATTCGGCACTGAAGAAACAGCAGTAACTGAGCGATCTGAAACCGGATTTGGTGTGTTGACCCGCTT  
AGCGGTGAAGTTCTGCGATGGTTCGGTCTGAGCCGAGTTTGGGGTACAACCGTGCATGACGCGCTCCGCTGGTTC  
GATTTGGTCTCTTGAACAAACAGCGACTTATCTAACGGCTTAAAGCCAGCCGAAATCTATCGTTTGAATACGTGGATTG  
CCGATGCGCAATCGCGTGCCTCAGCCGAATGGCCAGGCTGGTTCACCGCAGAACGATGATCGTCTTATAGCGAAAGT  
GGCAGGTGATGCTGGTATGATGCTTACCCGTTGATGACGTCGACGTCGCGAGGTAATCTGGGCATGGCTTGGGGCTGCC  
TGCGGTTACGGAGACCTGGATTAACCTGGGTGTGCCGAAAGATCAACTGAATCTGTTCCAGCAATGTTGTTGGGGCGT  
TGAACCTAACGCCAATCGAAGTGGCGCAGGCCCTTCCAGACTATCGCCAGCGGTGGTAATCGTGTCCGCTTCCCGCCTA  
CGTTCAGTTCATCGAGAAGACGGCAAGGTGTTGTATCAGAGCTTCCCGCAGGCGGAACCGCTGTTCCAGCGCAGGCGGC  
GTATCTGACACTTGGACCATGCGACGATGCTTGTACAAACCGGTCACGGGTCGTCAGCTTGGGGCGAAATACCCGAACTGC  
ATCTGGCAGGAAAAACAGGGACTACCAACAATAACGTAGATACCTGGTTCGGGGCATTGATGGGAGCAGGTCAGCATC  
ACCTGGGTCCGCGCTGATAACAACAGCCGACCAAACTGTATGAGCCAGCGGGCAATGTCGATTTATCAGCGTATCT  
GGCTAACAGACGCCAACGCCGCTAAATCTTGTCCGCGAGAAGATATGAGATATGGGCGTGGACTACGACGGCAACT  
TTGTTTGCAGCGGTGGTATGCGTCTTCCGCGTCTGGACCAGCGATCCGCAATCGTGTGCCAGCAGAGTGAAGATGACG  
CAGCAACCGTCAGGCAATCCGTTTGTATCAGTCTTCTCAGCCGACGCAACAGCCGCAACAGCAACTGCTCAACAGGAGCA  
GAAAGACAGCGACGCGTGGCTGGCTGGATCAAGGAGATGTTTGGTAGTAATTA

>Cluster\_28545  
ATGTCATGGATGGTTCGTTTCGCGCACTTACACTTCTTTTTTCCCTTTTCTTTATCTGTATTGGCGCTTACGGTTGCAGG  
CTCTTTTTCTGCGACAGCTGGAAAATTTAATCCGCGTTTTCTGGAAGATACCCGAGGATCAACCAGCATGTTGACCTTT  
CCATGTACGAAACTGACCATGGCGCGCAGTTGCTGGAACATATCGCGTTTCTTAAATCGTCAATGAACAAAAAATGGAA  
ACCGCACTCTGGAGTTAAGCGGCTACAGAAATCCCAACGAAAGGAGATGGGGGATTTCTCATACCTGTTTAAAGCCG  
GACCAACTGGCGGATATGGGCGTTCGTGTAGACAGTTTCTCAGCACTTAACTTATACCAGCAGAAAGCTGTGTGGCGT  
TTAATGAATATATCCCTCAGCGCAGCAGTCAATTTTGTATTTAGCGAACAAAACTGGTGTATGAGTTTTCTCAGCGGCA  
ATGCGCAGGTTGCTCGCGGTACAGTACCTGAATCTCGCTGGGACGATGGTGTGCCCGGTTGCTTCTGATTTACAGTTT  
CAGCGGTGATTAACCTTCTCATGATACAAAAGTTATAACTGCTACATTTGATGAAAATGGTAATCATACCCAGGATAAAA  
ACGAAACTAGCCAGACTAACGATAGCTACTACTTAAAGTATGCGAAGCGGCTTAACTTGGGGCATGGCGTCTCGAAAT  
TACAGTAACTGGAGCTATAGTAAACGCGGAGAAGCAGTGGGACAATATTTGGCACCTATGTAACAGGGCCATTGTTCCGCT  
GAAAGCGCAACTGACATTTGGGTGATACAGCAACACCTTTCAGATATTTTGGACAGTGTGCAGATGCGCGGGGATTTACTGG  
CCTCTGATGAAGAAATGTTGCCAGACAGCCAAACGTTGGTTCGCTCCGGTAGTTTCGAGGATAGCGAAAGTAACCGGAA  
GTCAGTATTGAACAAAATGGTTACGTGATTTATCGAGCATTTGTCAGCCAGGTCGTTTGAATTAACGATTTATACCC  
CACAGCGAACAGCGGTGATTTAACCGTAATTTGTTAAAGAGGCTGATGGTAGTGAACAAAAGATTTATTCAGCCATTTCTCT  
CAGTCGCTGTTTTTCAACGTTGAAGGGCATCTCAAAATATAGCCTTTCTGCTGGTGAATACCGTGTGGTAAATTACGATAGC  
GCCAACCCACGCTTTGGTCACTTTAATGCGATGTTAGTTTACCGTTTGGTATGACCACCTATGGTGGCGCATTAATTTT  
TAAGGATTACAATGCATTTGCTCTGGGATTGGGAAAAAATTTGGCTCTATTGGTGAATATCGGTTGATATTACTCAGG  
CAAAAAGTACATTAATAATAATGCAACCGATCAGGGAACAATCGTACCCTTTCTTTATTTCAAAAAGCTTTGCCAGCGGC  
ACAGATTTCCGTTTATTTGGGTTACAAGTATTTTACCAGTGGTTTTTATACCTTCCAGGAAGCAACAGATGTGCCTAGCGG  
TGCTGACAGCAGTATTCAGCGCTTACCATAAGCGTAAAGTAACTCAGGGTAAATTTGACACAGCAATTTGGGATGGGT  
CGGTTTATTTCAATATGACCCAGCAGGATTAAGTATGATGACGGTAAAGCGCTTTCTTTGGCTACCGGGTACAACGGC  
CGTATTGGACGTTGTTAATACAGTATTGCTTACAGTTGGAATAAAAGCCCTGAATGGGATGAAAACGACCAAGTTATGGTC  
ATTTAATATTTCTATTCGTTTGGTTCGGCATGGAGCAACTACCGCTGACAAACCGATCAGGATGGCGCACGATACAAC  
AGCTCGCGCTCAATGGCACTCTGTTAGAAGATCGCAACTTAGCTATAACGTTTACGGAAGGGTATTCAGAAATGGTGT  
GGTAAATAGCGGTAATGCCAGTTTGGCGTACCAGGGCGGCGCGGTAATATCAGCGTGGGTACAGCTATGGTAAAGACTA  
CCAGCAGACTAACACAGCTGCGTGGTGGCATTTGAGCGCACAGTGAAGGGATCTCGCTTCCCAACCTTTGGGTGAAA  
CAATGCTATAGTTTACAGCAACAGGTCGCGGGGGCGAAAGTATAAATAATAGTGGTGTGAGTGTGACTGGCAAGGT  
AATGCGGTCGTTCTTATCTGATTTTACCCTGAAAAATGATGTGCTCATTTCGAGTGAACCGTTGAATGACAGTGTGGA  
TATGAACAGCGCATTTCCAGCAAAATGTCGCAACTCAGGAGCTGCTGACGGGCGCATTTTCGATACCCGTGTGGGTTATC  
GAGTTCTTATGACATTAATTCGGCAAAATGGAGTGAAGCTCCCTTTGGTGAACCTGCAACCGCTGGTTTCAGATAACA  
GAAACAGTATAGCGGATTTGTTGGTGAAGATGGTCACTTATATACAGTGGGATGCTTAAACAGGGAATGTAAGATCT  
ATGGGGTAAAGATACGTCACAACAATGCGTTCGAAATATGAACTACCGGTTGAGGAAAAAATTCGGGTATTATTTCCG  
TGACAGCAAAATTTCAATAA

>Cluster\_15792  
ATGAGTCATGATGATAGCAACTCTAGCGGCTTAAACGAGGCGCTGCAGCATTTTTCATGGAACGGCCGAAAAAGGC  
CATTAACCTTATCTGGATCCGGCGGAAGTTGCCCGGAGTCTGCACTTTCAAACATGATCACCTGTACGCTGCCGATA  
ACGAGCAGGAACAGCTGGCCCGGATGCACTGAGTGAAGAGTCTGGGAGCGTTATTTCTTAAATGAATCCCGTGATCTC  
GTCAGCGCAAAATGGAGCAGGATAATCTCATTAGTCGGGCAAGCTGGCGCATGATCAGCAGCGTTTAAACCCGACAT  
GGTCAATTCGGCGGAGCTCAGCGCCAGCCACCACTCAGCAAGCCGCTGATGCAACGATATCGAATCACTTACAGCGC  
TGGCAGGCAAAAGGCTTATTTCCGCTATTTGCGTGTAGACGATTAAGTCAATGCTGAGCGACTGGAGTATGTACCGGAC  
AGTCAGCTATCCGCTTCTTTCCGTTTATGGCAAGCCATCAAGGGCTTGGGGCTGCTGATCTGCTGAAATGAGTCA  
GGATCAGGTAACAGCCTGTCCACTTGGTAGCAGCCATATGACATATGACATGCTGCTTGGGCGCTTGGTGTGATG  
CCTCCGATGACGTTAAGCCAGAAGAAATCCGCAAGACATGGGAAAAGGTGGCAGCGGAAACCCGCTGCTGGATGTTATC  
CCGCTGCGTTTGGAAACTCCGTCGAAAAGAAACCGCGCAACCCGCTGCTTATGAACTCATACCGGTTCCGCTGGC

ACGTATGCTTTGCGCCGACTGGTGGTATCGAAAAATGTGGAAGATACGTTGCGAATGGCGGGAAGAGCAGTTGCGTGCTG  
TCTGCCTGGTCAGCAAAAAGCATCTCCCTATGTGACGTATGAAGCAGTGACGCATAAACGTGAGCAGCGCCGCAAGTCG  
CTGGAGTTTTTCCGTTCTCATGAACTGGTGAACGAAGACGGCGACACGCTGGATATGGAAGACGTGGTAAACGCCAGCAG  
CAGCAACCCCGCGCCAGCCGCGCAATGAGATGATGGCTGTGTTAAAGGTCTGGAGCTTATCGCGGAAATGCCGTGGTACT  
GCGCGTTTTAGTCTGAGCTGATAAAACCGCGCAAGGAACCGCGACAAGCTACGCTCAATAACGGCAGACCAAACCCAGTAAGACAT  
AATGCGACGGTAAAGCAAAAGCAGCGATTATCTGGTCCGGATGTTTGTGTCATTTTCGTAAGGCTATGCACAAAGCCGGGTT  
GCGCTGGTATGGCGTGGCGGTGGCTGAGCCGACCATGACGGTACTGTGCACTGGCATCTCATGTGTTTCATGCGCAAAA  
AAGACCGCCGCGCATTAATGCAATTGTTGCGTAAGTTTGCATCCGTTGAAGACCGCGAGGAACGGGCAATAACACGGGT  
CCACGCTTTAAGTCTGAGCTGATAAAACCGCGCAAGGAACCGCGACAAGCTACATCGCGAATAACCCAGTAAGACAT  
TGACGGACGTGGTCTGGCTGGGAGATCAGCAAGGAACGGGTAATCCCTGCGTGATAACGCCGAATACGTTAATGCCT  
GGCGTCTCTGCATCGTGTTCAGCAGTTCGCTTCTTTGGTATFCCGGGGCGTCAGGCGTACCGTGAACCTTCGCTGTG  
GCTGGTCAAGGCGCAAGCAACAGGGTGACAAAAAAGCAGGTGCGCGGCTACTGGATGACCCGCGCTTGTATGCCATCTCT  
GGCTGCGCTGATGCTGGCTGTTTTGCCACCTACATCATGAAGCAGGGCGGCTACTGGTTCCCGCAAAATACCTTFA  
TCAGAACAGCTTATGAAATTAACGAAGACCGCACCCTTATGGCGATCAGGTTATCGTATTTATGGCATCTGGTCAACC  
ATTTGACAGGGCAAGATCTGCATCATGCAATGAAATGAAAAATGGTTTCGTAAGGTCGTTGACGTTTACGAGGCGGCGC  
CGACCAAGGCGCTGGCCCTTGGACTCGTGGCAATAACTGTCCCTTGTGAAAATTTGAACCGACAGGAAAGATA  
AATCAGCTGATGGTGGCCCCAGAACGGACATTAACCCGATGAGTACAGGAGTTACACGATTACCTGCACAGTAAAC  
AAAAAGGAGCGCCGGAACCTGGCTGCAAGGTTACGCTCTGGTGAACCGAAACGGCGTAGAGACTACAACAGCGAATTAC  
AGACCATCAACGACAGCAGCTCGTCTATGAACTGAAATCCAGAGGATTTGATGCGAGCGAGAAAGAGGTCGATTTACTCC  
TTGCGGCGGCGAGTATCCGTCAGGAGCTGGCTGCGTATCTTATCGGAACAGCGTTTGCAGGAAGATGATAAGTGG  
CGAACCTGTATTTAA

>Cluster\_53511

ATGGCAAAAGAAGCAAAAAACAAGACCCGCAACAGCAGCTAGAAGCACTGTTCAATAAACTGGTTAAACAGCCTCCGA  
GTTTACTCAGCCATTTGGTCGAATTACCCGAGCATGAAATTCGCGAAGCGGGTCTCATTCAAGGCTGGTTGAAGGCAACT  
TAACGCCACCAGTCATGTTGATTGCGCTGACAGAAGGCCATTGGGAATACGCCGCTGACACTGCAAAAGTTTGTATGATTTA  
GCCTATCAGCTGTTAAGTATATCGAAGGTGACTGGCCAGTATATGCCGTTGTGGACGATGGCTTGAACCAACGTATTTT  
GGCCTTGTTCGGTGGCGATGGTTCTGACGGTACCACGGTGCAGATACCTGCGAGGCTGGAAGAATTACGTAGCTTTG  
ATCGCATGGAACCGTGAACCACTTTTCGCTGGTGCAGTGGTGTATATACACGCTTAATGCAGCGATTGATGCCTTTTCAT  
GAAAATGTTTATCGGTTACCAAGACAAGGTAACGACAAGAAGCATTATGAGGAAGTGGCTAAACTTCTGTTTTT  
AGAACTTTCCGCTTGCATCAGATGAAGACTTACTTTTAAAGATGATGAGGAAATACCTTGCCTTTCGTTGATGTC  
TTGATTGGCAATATGTGGAGAGCCAGCGGATAAAAGCCGTCGCCCAATCAAAGCCGCTTTGAGGAATTTAAAAACCA  
GAAAACACTGCTTGTGATCTCAGATGATGGCTCAGTAACCCCATCTTTTATGTAAGAAACACACCTGCGGCTGCTGTTG  
GAAAACTATCAGGATTTGCTGGAAGCAATACAAAACCTGGGGCGGTAAAAACAACGATGGCAAAATCGCTAAAGAAC  
ACGGCACGTTGGCTGATGTCAGGAGATTTACTCGGCAGAGTGTGATGATTTCTACGCGTAACCTTGAATCCAAA  
GGTGGCCTTGGCGTTTATTTAACCAAAACCCAGTAAACAGCCCATGCTGAAATGCTATGCACGACATCGACGATGA  
CGATGAAATGCGATCGCGCTTAGCCATAGCCGATTTTCGTTTTCTGCGACCCACCTGTGGCTCCTTTGTTGCTCGG  
TGGCTTAAAGCCAGATTGATAAATGGATCGATTTTAAAGCTGGTCTGGCCGACGATAAAAAAGATCATTTGAAACAAAA  
TTACGCGACTGTGATTTACCGGTGCGGATGCTGCACCACGATGGTAATGCTGGCCCGCTGAATATGGCATTTGCAAGG  
TGCCCCCAACAGCGAGATTTCTATACCGGACACTACTACTAACGCCCTGAAGCCGAATAGTTTGTGACTTATTT  
GCACCAACCCGCTTCGCTACGCCATAATTTGATAAAGGCAAAAAATGGTCAAAACTCAAAAGCCAAATACGAAACCAAT  
ATGGAGCAAGTGCCTGGTGGTTTTTCGCCGACCAAAAAAGTCTGATGACTACAACGCTGGTATGACCACGTTGAAAT  
GAAGTGGCAGGATATCGGTGATTTAGAGCTGGATGAAAACCGCGGACCTAAATGGGCGGGCTATCGTACCGAATTTGCGCA  
GAACGGCGGCTACTGTATAAAGCCGTTTTACAGCCTGACGCTACAACCGCAGGCTCGCGCTGGGTAGCAAGCCGAT  
AGCAAGGGCAACTGGCAACCGGTAGGTGCCACTATTGACCCCTGCAGTACTTTTTATCGACCGCTGCCTGCAACTGCTTAA  
ACCCGAGGTCGCTGTTAATAGTGTCTGCTGATGGTATTTTATGTAACCTCCGCGACCGTTATGTCGCTGAGTACATTA  
TGGGAAAAAAGACGAAAAAACCGGCGAGTTTGTGGCGGTAAGCTATTTGATAAAGCAGTAATTTCAATTGCCGAGCGAC  
TGCTTTAACTCTCCGGCACGGGCGCAAAACCTCGATTTTGTATTTTACAACCAACGCTATGCTAACCCACGCTTGA  
GCAATTTTTTACCCGAGCCACAACCGACGATTTTATGGCAGTGGCTGAAACCTTGGGCTACGTTGGTAAAAATAATTTG  
AAGACTATAACGCTGGTTCGCAACAGTCTGGATAAGATTGTATCGGCTTATAAGCGGGGTGTGTA

>Cluster\_49989

ATGACAGATTTCGATAAATGCCAATGTTGTAGTGTGATGCTTTCGCAACTCTTCACTATGGCGCGTTCCTTTTAAAGCCGT  
AGCCAATGGTAAATTTATATCGGTAATTTGACACTGACCCGGTAAACCCCTGAAAACAGATTACAGGTTTATATAGAGA  
ACGAAGACGGCTCTCACGTTCTCTGTTTCGCAACCAATCATATTAACGCTGCTGGTTATCCGGTATATACGGACAAAT  
GCCAAATTCGTTACTGTACAGGGCATTCTATGGCTGTTATGATGCATACGGTGGCAGCAGTTTATTTCCCTAATGT  
TGTGAAGTATGAGCCGATCAATTAAGGTTGGAGCTGAAATCATCTGGTGGAGCAGGATGATAGTGTGTTTCGAAGC  
CTATTAATTTTTTGGTGTATTTGGTGTGATTAACAACAATACCGAGGCAATTAACGATGCAGAGATATTAGAATTC  
AATGACATCTACATCTCTGATGGTGTATAATGTAATAATTAACCTTAAATAAGAGATATTGGGGCCCTGGCATACT  
AGTGAATTAATACAGATGAATATTCTGGCTCTGGTGTAAACGACATGACCGTGTGAGGATATACAATGGCAGCAG  
ATCTAAATGCAATTTGTAAGAATAAAAAGAGCTTCAAACTCTGATAAGCTTGAATTCAGTACAGATAATGGAGTTACATGG  
CATGACACGATAGACGTGTAACAATCCATCGATGACAGTGTATCTCCGCAACCAATCGTAATACTTGCAGGCGGGGTGGA  
TTTTTTCGAGTGGATTGAAGATAAATTTCTTCAACCACTGGACATACAGTAAATGACTCATGGTCATTTTTTCATTC  
CTTCCAATCCATCAGTAATAAACAACCGGAAGTGGCAGCATCGTTAAATCAGGAAGCGTTATTTTAAATGTAGCGGAAAC  
AATGATACTAATACTTCCGCTGGAAAAGACTCATTAGCGGGTGGAAACGTTAGGAGCTAACAATACCGCATATGGGTGGAA  
GAGTTTGCCTCAAACTACAGGATACGAAATACCGGCTCTGGGATTCAGTCTATGAAAAACAATAAGACTGGTAAAA  
ACAATTTGCATACGGTGTGATTTCTTAAGAGCTAACGATATCTGGTCTGATAACGTTAGCGGTTGGGGTCTTTGCGTCC  
GAGCAAAACACAACCGGTTACGGTAACACTGGACTTGGTAAACGATGCGCAATAGGTACAATGAAACAGGATTCGGAATAC  
CGCAGCGGGTGTGACGGCACTGTACCACAACAAGCGGTAATGAGAACAACGCTTTCGTTGAAATACGCATTACCGGGAG  
GAAATTCAGCCTACCTACGGGAACATCCATTCAGTATTCGCTCGCTGAGGAGCTAAAGCCGTTTCAACGCGTTAGT  
AATAATAATACAGCTATAGGTTACGAGCGCTATATTCTGCATCAGGATCTGATAATGTTGGTATTGGATTTCAGATGCAGG  
GTTTAAAGTAAACGCTGGTGTCTTCAATATTAGTTTCTAATTTGGTAAACGCTGAGTAAACGCTGAGGATGAGTGTGA  
CAAACTGCGTCTTATCGGAGATAATACAAAATCAACCGAAGTAACGAGTATCGGTTAGTGGGTAATTCGCCCT  
CAGAATACTGTAGCTATAGGTAATAGTGAAGTAAATTTCTTGCATTTATGGGAAATTTATACCACAATTTGATAATGC  
TTTTGATATTGGTGGGCGGATGCGAGATATAAACAATAATGCAACTACAGGAATGATAAATACATCAATGAAATGTT  
TGAAAAAACAACACAGACATTTGATTTGCTGAAAAAAGCTGACATAGAAATAAAGATAAATATTAAGGTTTAAAG  
ATGCTGGATCTGTTGAGGTAAGGGATTTGATGGTGTAGGTGGCATTTTGGTGTGGAGCTCAACGTTGGTAAATAT  
AATGAGGAAGCAGGACTTGTATCTAGTAAAGTATGGGTTTGGTGTACAGATAAAGCGATCGCGAACACATGACTGGAA  
ATATAGATACTTTTGTGAAAGTTATGGTATAAGATATGACGAACCTGCAATGTTTATATTGGCATCAATATCTTTATGT  
GAATAA

>Cluster\_61390

ATGAGCAAGGCAGGCAAAAATAACCGCTGCGATTTTCAGGGGCTTCTTGTGTGTTGATTGTCGTGGCGATCATTTTGATTGC  
AACTTTTGTACTGGAAATCGACTCAAACCGACTATCAACCAGAAAGTCTCTGCGGAGTTGAATCGTCCGTTTCGCTATCCGGT  
GCGATCTGGGCGTGGTGTGGGAGCGGCAAAAACAAGAACTGGCTGGCGCAGCTGGGTGCCGTGGCCCATGTACACGCG  
GAAGACATCATTTCTGGCAATCCACCGGATATTTCCGGAAGTACAGATGGTGCAATTTGCCACGCGTAGAGGCAACGCTGCG  
CCCGTGGCGTGTCTGAAAGCGCAGGGACGATATAACGGTGAACCGCTCACGGGTACGGGAAAAATAGGCGGTATGCTG  
CTGAAAAGAACAATAACTGGACGTTTAATCTTGCCAACGATGATAACAAAGACGCAATGCAAAGCCGTCGGCATGGTCTG  
TTTCGGCTGGATAATATTTCTTTTCGATCAAGGGCGGATCGCCATTGATGACAAAGTAAGCAAAGCGGATCTGGAGATTTT  
TGTTGATCCCTTAGGCAAGCCGCTGCGGTTTACGCGAAGTTACTGGATCGAAAGGTAAGCGGATAAAGAAAAGGTGGGCG  
ATTACGTTTGGCTGAAAGCGCAGGGACGATATAACGGTGAACCGCTCACGGGTACGGGAAAAATAGGCGGTATGCTG  
GCGCTGCGTGGCAAGGGACGCGTTCGCGTACAGGCTGATTTCCGCTCTGGTAACACCCGTTGTGCTTTTGTATGGCGT  
CGTGAATGACCCAATGAAGATGGGCGGTGTCGATTTACGGCTTAAATTTCTGCGGATTCACCTGGGTGATCTCTATGAAC  
TGACGGGCGTTCGCTGCCCGGATACCCCGCGTTTGAACCGATGGTGGCTGGTAGCGAAAAATCGACACTGAAAAATCG  
TCGGTCTTTGATTATCGCGGTTTAAATGGCGAATTGCTGATAGCGATATCCACGGTCTCTGCTCTACACCCGAA  
GCCACGACAAAACCTGGAAGGTGATGTCGAGTCGCGGCAATTCGCGCTGGCGGACCTGGGACCGTTGATTGGCGTTGATT  
CCGGGAAAGGGGCAAAAAGTCAAAACGGTCTGAAACAGAAAGGGCGAAAAAGCGTTCAGCCTGCGGGCAAAAGTGTG  
CCTTATGACCGCTTCAAAACCGATAAATGGGACGTTATGGATGCCGATGTTGCTTCAAAGGGCGGCGCATGGAGCATGG  
CAGTAGCCCTGCGGATAGCGATTTCTACTCATATCACTCTCAAAAATGCTGACCTGCGCCTGCAACCGCTGAAATTTG  
GCATGGCGGGCGGACGATTCGCGGCAATATTCATCTGGAAGGCGATAAAAAGCCGATGCAGGGGCGGCGAGATATTCAG  
GCTCGTGCAGTAAACTGAAAGAAGTATGCCCCGATGTGGAACGATGCAAGAAGACGCTGGGGGAAATGAACGGTGCAC  
GAACTACGCGGTAGCGGTAACCTGGTGGCGGCACTTTTAGGCAACAGTAACGGCAACTGAACTGTTGATGAATGACG  
GGCTGGTGGCGGCAACCTGATGGAGATTGTTGGGCTGAAATGTCGGCAACTACATTTGCTGGTGCATATTTGGTGCATG  
GAGGTGCGGGTGAACGCGCGGCGGCAATCTGAATATGCAACGGCTGGCGCGCCGAGATTTTGTCTTCGATAC  
TGAGAACGCGTTGATTAATGTTACCGGCGAGGCAAGTTTGTCTTCGGAACAGCTGGATTGACTATTTGATCCGGAGAGTA  
AAGGAATTCGGATTATCACACTGCGTTCGCCGCTGATGTCGGGGGACGTTTAAAAATCCGCGAGCTGGGTGAAAGCG  
GGACCGCTGATTGCCGTTGCTGTTGCTGCGGCACTGGCAACGCTGGTAACACCGGCGGCGGCTTACTGGCACTGAT  
CTCACCTTCCGAAGGGGAGGCTAATCAGTGTGCGACGATTTTGTGCGAGATGAAGAAGTGA

>Cluster\_9400

ATGGATGAAAATGCTTTAGGTTTGCCTCATACTGGCGCAACTCGCTTGGCGATGCTGAGTCAGGAAAGGGCAGTTTTAA  
ACGGAAAGACGCCAAAATTTCACTCAGTGGCATGGGATAGCGGGGACGCTTTCAGCAAGCGATTGTCAGTAAATTTT  
TTGAGGGAGAAAAGACGATGTCGAAACGGTCGATGTCATCTTTCGCCCAAAGTTTATTTCCGGTACTGCAGCATGTT  
AAGGACCGTTCCGAGGCGCGCTGATATTTGTTACCCGATAGTGACGCCAGCCTTGCAGCCGTTAGGGGTTTTTATA  
TCCGACGCCAGCGACTCCATTTCCAGAGACCTTGAACCTTGGCCAAAAGGAGCATTTTCGATTGTTGAGATTGGCG  
AGTATGACAAAATACAAGACGACCCATACCAGTCTCTATCAACTTTGATGACAGCGTTGATAAGACTGCCGAAACGGAT  
GAAGAACGGGAAGCAGATATGCCGCTTGCAGCAGGAGTGGCGTCAATATCTGTATGACTCAGAGAGGCTACTGAAGAG  
CGTTGCCGCGCATGGATTGAAAACCTGAGCAATATGAACCTCGTGCAGCAGGTTATATTTGTTAAAACGGCTCAATCTG  
GCGGTGCCAGTTCCCATCTTTCTCTTATGATCACCTGCTTGTGTTTGAATAAAGGATGTGCGCGCTTCTCAATCGCTT  
GCCTCGGAGAGGTTATGCTGCAGAGTCTTTGCTGGCCCCAGGAGCAAAATTCAGCGACAGGCTTGGCACTCCGGAGA  
TAAGTTTCCGCTGGCAAAGGCTCAGCGCATGCCTTAAGCCATTTTCTGGATGCAAGACATGGCGATATCTTCTGCTGTTA  
ATGGCCCTCCGGAAACCGGAAAACACCGCTGGTCTTCTATCATCGCCACGAGTGGGCGAGAGCGCTTCGCAAAAA  
TCTGAGCCTCCGGTTATTTATCTCGGACTTCAACGAAATAACAGGCTGTAACGAAACATTAATGAGGACTTCGGGAAAGACTT  
TTCGCAAGGTTCAAGTGCATGGCGGGCGATGTTGCGAGAGCTGAAAAGCTTCCGTTGCTTATTTCCCTCAAGCAGTC  
GTAAGCTGAGGACGCAAAAAATATCAAACTGAAGATTTCTTCAACAGGTTGAGTCAAAAAGATATGTAGAGGATGCA  
CTGCTGTTTTATCTGCAAAAAGGCTAAGGACGCTTTCCTGGAAGAGTGTTCATCCCTGAAAAGGCTATGAACTCTT  
GCATGGTCAAGTGGCAGCAAAATCTGAGCAACTGATAAGACTGAAACGCAACATGGCAAACGTTAAGCCAGATTCCGGGCTG  
CGGCTGAGCTTATGCTAATGATATGAGCAATATCTCGATAATTAATAAAATTAATTTCCGACAAAGCAAAAAAGTCT  
ACTTACTGAAGAGTGTAAAACGGAATGGAAAAATACTGCGCGCGTGAATCACTGATCTATTCATTTATTTCTTGGCT  
CCCGCGGTTTCGCAATAAGCGCAGTACCAAAATACAGCTTCTTCTGAAAGATAAATAGGCGCGCTGATTGCGGAAATC  
AGTGGTCTGATCTGAAACTATCGAACGTAATAATGATGGGCTGCTCAATTCGCTGAGCGGAGCAAAACATACCGG  
CAGCAGATTGACTCCGCCATGAAATCGTTCTTAAAGAACAGCAGGCGGTTCCAGGAGTGGCAGAGGCTGGCATTTGATTT  
AGGGTATGAGGGCGACGAGGAACGAGCTTCTCACAGGCGGATGAACTGGCTGATACGAGATTGCTTCCCTGCATTTT  
TACTGACGACTCACTGCGGAAAGGCTGGCTGATGGCTGAGCAGCATTGATGATCTGCGAGGACGAGAAGGAAAA  
AAAGGTGCTAAAGGGGTAACCGCCGCTTGGCAACGTCGAATGAAACTCACGCCATGTGTTGGTATGACATGCTATATGCT  
GCCCGTAATATGAGATAGTGAACGCAAAAGGCAACGTAATAATTCAGAAAAAGTTATTTGATGATTTTGGGTAG

>Cluster\_27696

ATGGCAAAAAACACATCTTGGGTTGCCAATCGCTATTCGTGGCAAAGTGCAGGCGCTGGGTTTTGCTCCGTTTGTCTG  
GCAACTGGCAGCAATTAATCTTACGGCGATGCTGTAATGACAGCGATGGCGTAGAAGTCCGGCTGCTGGAAGAGC  
CGGAAACGTTTCTTGTTCATTTGATCAGCATTTGCTCGCGCTGGCGGATTTGATAGCGTGCAGGCTGAGCCGTTTATC  
TGGTCAACAACCTGCCACTGAGTTCACATCCGCGAGCGCGGTTGGCTCATGAATACGCAAAATGTTCCCGATCCCGC  
CACTTGCCTGCTTGCCTTGGCGAAATGAATACCCAGCGCAACGAGCTGGCGTTATCCGTTTATCAACTGTACCCACT  
GTGGCCCGGTTTACCATTATTCGCGCATGCCTTACGACCGCCGTTTACCCTGATGGCGGCTTCCGCTGTGTCCG  
GCTTGTGCAAAAGTACTGTGACCCGCTCGATCGTCTGCTTCCAGCCAGCGGTTGGCTGCGCGGAGTGTGGCCCCCA  
TCTTGAATGGGTAAGTCAATGGTGAACATGCAGAAACAGAGCGGCAATTACAGGCACTATCGCACAGTTAAAAATGGGCA  
ACATTTGCTCGCATCAAAGGGATTGGCGGATTTTCATCTTGCCTGCGATGACGTAACAGTAACGCGGTTGGGACACTTCGG  
GCGCGCAAACTGCGCCGGCAAAACGCTGGCGGTCATGTTGCGAGTGGCTGACGTTTACCAGACGCTGCGCGCCAGTT  
GCTTACCACGCGCCCGCGCGGATTTGCTGCTGGTGGATAAAAAATATGTACCTGAGCTTTGATGATATCGCCCTGACC  
TTAACGAAGTCCGGGTAATGTTGCTTCCGAAACCGCTCAGCATTTGCTGTTTACAGGAACTGCAATGCCGCTGGTGA  
ACCTCCGGCAACCTGAGCGGTAACACCGGCTATCAGCAACGAAACAGGCGCTGGCGGATTTGCAGGGCATTCGCCACGG  
ATTTCTGATACATAACCGCGACATCGTGCAGCGGATGGATGATTCGGTGGTGCAGGAAAGCGGCAAAATGCTGCGCGGTT  
CGCGGGGATGTTGCCGATGCGCTGGCTTGGCTTCCGCTCCGGGCTTAAAAATGTTCCGCTGTGCTGTGCTGCGTGGGAT  
CTGAAAAATACCTTCTGCTGCTGGTGGCGGCGCAACAGCGGTTGAGTCAAGCACTGCGGATTTAAAGTGCAGGATGGCAT  
CCAGATGCAAGTGGCGGAAGGTTACGCTGATGCAAAACATCTACGATTTCACTCCGCAATACGTTGTCATGACGCGC  
ATCCGGGCTATGCTTCCAGCCAGTGGGCGCGGAAATGAATCTGCCAGCAGCAACGGTCTGCTATCATGCCCCAGCA  
GCGGCTGTCTGGCAACACTCTGGCTTGGATGGCGGAGATGTCATGCTTGCAGCTGACGCTGACGCTGATTTGGTATGGG  
GAAGAACCGCGCTTTGTTGGGCGGCGAGTGGCTGAGGTTGAACTATCCGAAATGCCAGCACCTGGGCGGCTTCCCGCAG  
TGGCGCTTCCGGGGGCGATTTGGCTGCAAAAGCAGCGTGGCGAAACCTGCTGACGCACTGCTTGGCTTTTGTGCGGAG  
TGGCAGATTATCCGAAACGGTAAAGTGTGCAACAGCAAACTGGAGCTGCTGGCGCGGCTTGGAGCTGGAATCAA  
TGCACCAGTGGCGTCACTGTGTTGGGCGGTTGTTGATGAGCCGTTAGCGCGGCGGCTGGGCTGTGCGCAGCCAGTAAAGT  
ATGAAGGTGAAGCGGCTTGTGCTCTGGAGGCGCTGGCGACTTCTGCCAGGCGTGCAGCATCCGGTGCAGATGCCGCTG  
GTGGAACATCACTGGATCTGCGCACTTCTGCGACAGTGGCTGACTGGCAGGCTCCGTTAATCAACGCGGCTGGG

GTTTCATGATGCGCTGGCGCAGGGTTTTGCCGCTTGATGCGTGAGCAGGCCACGATGCGTGGTATCACTACGCTGGTAT  
TTAGCGGGGAGTTATTCTATAACCGTTTTGCTGCGTGACGCTCTGGCGATTATCTTGCTGATTTTACGTTGCTCTCCCG  
CAGAGTTTACCGCGGGCGATGGTGGATTGTCTCTGGGCAGGGGTTATTGCTGCGCGCGCTGGGGGGCGGGAAAGT  
CCAGAACGGATAA

>Cluster\_26472

ATGAAGCGAGTTCTTATTCTCGCGCTCATTTTTATGTGGCGCTGATGTGGCGCAGGCCGTCGATGACAAAAATATGTACAT  
GCATGTTTTTGAAGAGATGACGGTCTATGCTCCGTGTCACCGTAAACGGCAACACGCATTACACCAGTAAAGCA  
TCGAGCGTTTACCACCGGGAATGGCAATATCAGCGATCTGCTGAGAACAACCGTGCAGTACGCATGGATTCAACGCAA  
AGTACCTCATTTGAACCGGAGAGATTTCCCGGAGAAAATCTTATTACGGTGCCTCGCCATCCAGAATGCCATTTT  
GATTGACGGTATTAGTGAACGAATAACCTGAACCCAGCGAATGAGTCCGATGCCAGTAGTGAACCAATATTAGCGGGA  
TGTCACAGGGGTATATCTTGTATGTCAGCTTACGACAAATGTGACGCTTTATGACAGTTTGTGCGCGTTGAATTCGGT  
CGCTTCAATGGCGGGTAAATGATGCAAAAGATCAACCGCTTCAACGCTGATGATAGCAGCGTAAACTGGGTTATCGCAC  
TACCGGTTCCGACTGGTTAAACATCGCATATCGATGAGAATAACAAGAGCGCATTTAATCAAGGTTCTTACGGAAGTACTT  
ATTACTCTCCAGATTTTAAAAAGAACTTTTATACCTTGTGCTTTAATCAGGAACCTCGTGATAACTTTGGCGTTACCGCT  
GGTTTATCGCGCCCGCAGTCTGATATCACCCGCGCGGATATGTTTCAATGACGGCATTTGTCGCCGCGAGGGCACAGTA  
TAAAAACGTTATCGATATGCAATGAGCAAAATTTACCTGGTTTCCAGCGACCGCTTTACCCAGATTTAACTTAAAAAT  
ATACTGGCTCCAGCGTGAATTAATAACCGACACCTTCCCGGAGTCTGATCGCGAAAATGGGTAATAAACTATGGCTG  
GCATGGGATATGGATACCGAGCTCGCATGGCCAAACTGCGTACCACCGTTGGTTGGGATCATATTAGTATTATACCCG  
TCACGATCATGACATCTGTTACACCGAATTTTATGATACATATGGTGAATTTTCAAGGGCTTGCACCGCTGGCGGATTAG  
GACCAATTTCCAGGCTAGATAATTACACTTCAAAAACACCGCTGGACTGGCAAAAATTCACCGTGGGTAATGTTTTCG  
CATCAACCTTACTTTCGGCGCGGAATACATCTATTCCGATGCAATGGACTGAACGCCATAACAGTCTGAATCCTATGAT  
TAATGCTGCCGGAAGAAAATAAACCATACCATTTACCATAAAGCTAAAGGCAGCCTGGGAATGACAACCTACACGCTGT  
ATATGGCGGATCGCATTAGCTGGCGTAAATGTGTCGTTAATGCCCGCGTGGGTTATGACTATGATAACTATCTGTCAAAC  
CACAATATCTCCCGCTTTTATGACGGAATGGGATATTTTGTGATCAAACCTCAATGATTACCCGAGTTAACCAGC  
TTACTATGGCGGGAATATTTGATATGGGATTACGTGATATCCGCAATAGCTGGACGGAATCGGATCAGGCAATAAAA  
CCCTGACGCGTTATCAGGATTTGAAAACGCTTATAACGATGAACTGGCAATGGGATTGCAGCAAAAAATCGGTAAGAAC  
GTTATTGGCGCGCAAACTATGTTTACCCTGAAGCGCATGATCAAATCAGCAAAAGCAGTCTGACCGACGCGCGATAA  
AACCCAACTTACTGAATTAACAACGACGCGCAAAACCAAAACCGCATTCCTCAACCTCAGTTTGAACCTGGCCGAAACC  
TGCAATCAGCCAGGTAGATATTAACCCGCAAAATGTCCTTAGCTATAACAAGAGCAAGGGCAACTTGTCAATTAACAAT  
GGTTATGAGGAGCAATACCGGTGATAACCGGTGGTTTATAACGGTAACTTGGTCTCTTACGATAGCGTTCAGTGGC  
GGATTTAATAATCCACTAAAGATCTCCTTAAACATGGATTTACGCAATCAACCGAGCGGGTGGTGTGGCGGAATACGC  
TGACCTGGCAAGAAAGCGGTAAGCTCGCATTTAATCCGTTGGTAAAGACGAATGCGCAATACATCAGCGAATATTCAGATT  
AAGCAGTATGTTGACGAGAACTGGATAACAGCCTGACCTGGGACACCGCTTGTCTTGGACGCCACAATTTCTGAAACA  
ACAAAACCTGACGATCAGTGCAGATATTCTCAATGTACTGGATAGCAAAACCGCTGTTGATACACGAATACCGCGTGG  
CGACTACGCCAGTGGCCGACTTTCTGGCTTGATGTCAGCATGAAATTTTAA

>Cluster\_25464

ATGTCAAAATAAAAATGGCGTTAGTGATTTCTGCCCGACTGTTTTACCACGACGAGAAATGATCTATATTAATGA  
AAACAGTAAATTCATGATGGCGGCAATAGTTTTATCGCTCAACAGATGTTACACGCGGAAAACCTCGATGAAATCGATGCCA  
CGGGTATTGATCCCGGATTTTATTGCTACTGAAAATCAAGAAGCTGTACCCGACAGATTTTGCCTGATTTTCGGGT  
GTCCTTGAAGAAATTCGAAATCGCGACGAGAAATTTATGGTCTGCTAGTTAGAAAACCGCAGCCAGCATTATGAAACTCAACT  
GCGCCCGCCTTCTTCGCGCACGTTGTCGATTAATGTCATCAGGGTAAACGCGCTTGTATGCCCCGCTCATCAGGGCG  
CGAAATTTTCCGTCGCCATCCGCGGGGAATCAGTTTGTGGAATACTTTGGTGAAGGCTGTTCCTGCTGACTTGTGC  
AACCGGGATGTGGCAATGGCGCATCTGCTGATTACGAAAGCGCGCATGCAATGCAACAGCAACATGCGGCAAAAAGTGT  
TAATGCCGATAAAAACATACTCTGTTCTAAATGGCACTTTCATCTTCAACAAAAGTGGTTTTAAACGCCCTGTTAACCCGG  
GGGATCTGGTGTCTTTGACCGTAAATAACCATAAATCTAATCACCCAGGAGCGTGTGCTACAGGCTGGCGCAACACCAGTT  
TATCTGAAAACCGCAGCAACCCGATGGCTTTATCGGTGGTATTGATGCCACTGCTTCGAAGAAAATACCTGCGCGA  
ACTGATTAACAAGGTCGCACCGCGACGCGGCAAAAGAGGCGCTCTTTCGCGCTGCGCTTATTCAGCTTAGGCATACG  
ACGGTACGATTTATAACGCCCTGACGTTGGTGGATAAAAATGGTCACTGCTGACTACATCTTGTGACTCCCTTTGACTCCGATGG  
GTCGGCTATGAGCAGTTTATCCCGATGATGGCGGACTGTTACCACTGTTGCTGGATCTAATGAGAACGATCCCGGAT  
TCTGGTTACGCAATCTGTGCATAAACAGCAGGCTGGTTTTTCCAGACTTACAAAATCCATAAAAAAGACCGCATATCA  
AAGGCAACAGCGTTATGTTACCGCACAAAACGATGAACACCGCTTTATGATGATGCTCCACCGCCGCTTCTATCCG  
CTGTTTGGCCGACTGGATATCAACGCCAAAATGCATGAAGGTGTCAGCGGTCGTAATAATGTTGGATGGATTGTGATGATAA  
TGGCATTAATGCCCCGCAAACTGATCCTCGATAACTGTCAGCATATTCGTCATTCGTAACCTGACTGAGTGGTGGTAAAC  
CTGGCAGTCTGATGAAAACAGCGCAAAATGGCGTTGATCTGCGCTTCTTCCAGTTTGTACCAGGTGAGCACTGGCATCT  
TTTGAAGGCTATGCAAGAAATCAATACCTTTGTCGATCCGTCGAAACTGTTGCTGACAACCCAGGTAATGATGACGTTAA  
CGGCAATATGAAGGTTCCGGTGTACCCGCGACGATTTCTGCTAATCTTCCGCGGAAAATGGCGTAGTGCAGGAAAAAT  
GCGATCTTAACTCCATCTCTTTCTGCTGACTCCGCGAGAAGATATGGCCAACTTCAGCAACTTGTGCTCTGCTGGTA  
CGCTTCGAAAACCTTGTAGTCCGACGCGCATATACAGAAGTACTGCTTCACTACAAAACAGACTGATGAGCGCTA  
CACCGTTTATACCTGCGTCAGTTGTGTCAGGAAATGCATGATTTGATGCCCCGTACACAGCTGAAAACAACTGCAAAAAG  
AGATGTTTCGTAAGGAACACTTCCACGCTGTCAGCATGAATCCACAAGAGCCAACTACGCCCTACTTACCGGTTGAAGTG  
GAGCTGGTTCGCTGCGGGATGCAGAAAGCGTATCGCTGCGGAAAGTGGCTTCTTATCTCCGGGTGTGCTGTGTGT  
TGTTCCTGGTGAATCTGGGGTGGTGTCTGCTGCTTACTTACGCGCTTGGAAAGAGGCATCAACCTGACCGAGGTT  
TTGACCGGAGCTGCAGGGTGTCTATATCGAAGAACATGATGGTCTGAAGCAAGTTTGGTGTATGTCATCAAGCCTCGT  
GATGCGCAAGCGCCTGTTGAAAGGGGAAAAATATGA

>Cluster\_8128

ATGCTCACTCGCCTGCGCGAAAATAGTCGAAAAGGTAGCCAGCGCACCCAGCCTGAATGAGGCGTTAAATATTCGGTTAC  
CGACATCTGTCTTGGCATGGATACCGAGGTCTGTTCCGCTACCTGGCCGATCATGATCGACGTTGTTACTACCTGATGG  
CGACCCGGGGCTGAAAAAACACCGCGTGCACCTGTAACGCTCGCGTTGATGAAGGATCGTCGGCCTGGTTGGCAGG  
CTGGCGGAACCGATAAACCTTGCAGATGCGCAAAAAGCACCCAGCTTCAAATACATCCCTCCGTAAGAAGAACGTTT  
CCGCGGTTTTAGCGGTACCAATTTTCAACGTCGCCAGTTGCTTGGTGTATGTTGGTGAACGAGAGTTGCGCC  
AGTATGACGAAAGTGAAGAAATCTTCTGGTACGCTTGGCACCCAGATGGCAGCTATTTTCTCAGTCGAGTTGACT  
GCCTGTTTGGGCAATATCGCCAGACGCAATCCGCGCATACCGGCAGCACCTGGTGTGGCGATTGGCGAAGGCTGGCA  
GGATGCCAGTTACCTTAAATGGAACAGGTGTATCAGGACTCAACGCTGGATCCGGCTTGGAAACGCAACGACTGACC  
GGCGCTGGAAGAAAGCGGCAACAGGTTTTCGCGCTACAGCAAAACGCTTTTGGCGGTCACAAAAAGAAACGCGGCT  
ATTTTCGATCTTTACTCGCACCTGCTTTCCGACACCCGCTGCGTCCGAAATTTGTTGCCGAGTTGATAAAGGCTCGGT  
GGCAGAGTGGGCGTAAAAACGTTCAATGAAAAATTTGCCGCAAGTTTGGCGCGTAAGTGAATACTATCTAAAGAG  
GGCTGGCATTACGCTGCGCTGGGTGAGGTCAGGATGCTGTTTCACTTGTGATGAGCTAAATCAAGGGCCGACCTCGCCG  
GAACGTTTCAATCTGGTGGCAGATGAACTGTCAGCGACAAACGCTTGTGAGCTGCCCCAGGATCGCTTGTGCGGTTGT  
CGTGGAGATGGCGACGCAACTCCCATGCTGCATCATGGTACGTGCGCTGGGATCCCTACCGTATGGGCGGGATA

TTACAGCCTTCGGTGCATCGTAGGACGCTGATCGTTGATGGCTATCGCGGTGAATTGCTGGTCGATCCGGAGCCGGTA  
CTGCTGCAAGAATATCAGCGGCTAATTAGTGAAGAGATTGAGCTTAGCCGCTCGCGGGAAGATGACGTC AATTTACCCCGC  
GCAGTTAAAAAGCGGTGAGCGTATAAAAGTCATGCTCAATGCTGGTTTAAAGCCGGAACATGAAGAAAACTGGGCAGCC  
GTATTGATGGCATCGGTCCTTATCGCACTGAAAATCCCATTCATGCTGCAAAAGTGGTTTCCCGTCGGAAGAAGAACAGGTG  
GCCGAGTATCAGGGGATGCTGCAATGTTCAATGATAAACCCGTCACCTTGCGTACGCTGGATGTCGGAGCAGATAAGCA  
GCTGCCTTACATGCCGATCAGCGAAGAGAATCCATGCCTGGGTTGGCGTGGGATTCGCATTACGCTCGATCAGCCGGA  
TCTTCTTGATCCAGGTGCGGGCGATGCTGCGTGTAAATGCCGCTACGGGCAACCTGAATATTCGTTGCGGATGGTCACA  
AGCCTCGATGAAGTTGATGAAGCAGCCGCCTGATTGAACGTGCCGGACGTGAAGTCGAGGAGATGATCGGTTACGAAAT  
TCCCAAACACCGTATCGGCATCATGCTGGAAGTCCCTCAATGGTATTTATGCTGCCGCATCTGGCAAAGCGGTTCGATT  
TCATCTCTGTTGGCACCAACGATCTGACTCAATACATTTGCGCGTGGATCGCAACAATACCCGGGTGGCGAACATTTAT  
GACAGTCTTCATCTGCAATGTTACGAGCTCTGGCGATGATCGCCGGGAAGCGGAAATACATGGAATCGATCTCCGTTT  
GTGCGGTGAAATGGCGGGCGATCCCATGTGCGTGGCAATCCTCATTTGGGCTGGGTATCGCCATCTGTCTATGAACGGAC  
GTTCTGTAGCGCGGGCAAATACTGCTGCGGCGCATTGATTATGCGGAAGCAGAAAACTTTCGCGCAGCGTAGTCTGGAA  
GCGCAACTGGCGACCGAAGTTGCCATCAGGTTGCAGCCTTTATGGAGCGTCGCGCATGGCGGGGCTGATTCGCGGAGG  
GTTATAG

>Cluster\_43405

ATGGCCCTAACGGTACTAAAGTTCGCTCTGCGAAACCTGAGGAGAAAGAGTATTCACCTGTTGACGGCGACGGCATGTG  
TAGTGGTCAACAAAACTGGCCACCGCTTTAGAGTTTTTCCAGTATCGGTTTTCCGATTCATTTGGTGGCAACCCACCGT  
TATATTCGTGCGGCTGAGCGCGTTGTAA

>Cluster\_25465

ATGCAGAAACCTTATCAGTCCGGTGGCTGATAATACAAGGTTAAACAGAGAATGAGCACTGCGGAATACAGGCATATGC  
CTGTAATACAGAGAGTCAGGAAGACCTGTACGCTGAAGTGCCCTTAGTCGGTAGACTAACGGGCAATTGAAGAAGTGAAG  
TCGAAGCTATTGGCATGAGCAAACCTTCAATAATAGAGTTGTCCGCTTATATGGGGCATAGTGGCGCTGTATTTCCAT  
TTAATTTACCTTTCCCTGA

>Cluster\_49935

ATGGTTCGCTATCCATGAAGCACTGGCGAAATGCAGTGCAGAAAACCCCGTGTTTTACGATGATGAAGTGGATATTCACCT  
CAATCCAAAAATTTGGCGCAGACTGGCAGTTACGTGGGCAGAAAAGCGCGTTGTGACGCCGGCCAGAATGAAAAGTACT  
ATCTTGCCGTTGCCGTGCACAGCGGTACGGGAAAAGTGAGTACGTTGGTGGAACAGTAAAGGTTCCGCTTATTTATC  
ATTCTGTTAAAAATCTGA

>Cluster\_23967

ATGACGTCAGTCAATCATGAGCCCTTACGACCAGGGCTACACACGTGCTACAATGGCGCATACAAAGAGAAGCGACCTCGC  
GAGAGCAAGCGGACCTCATAAAGTGCCTGCTAGTCCGGATTGGAGTCTGCAACTCGACTCCATGAAGTCGGAATCGCTAG  
TAATCGTGGATCAGAATGCCACGGTGAATACGTTCCCGGGCCTGTACACACCAGCCGTCACACCATGGGAGTGGGTTGC  
AAAAGAAGTAGGTAG

>Cluster\_41173

ATGGAATGCCGTCGGGTTGCGGGGCGTGTGCACTGCCCTTCAATTTCCAGCCCTATTCGGGTATGCCAGATGGCAA  
GCCCGCAATACGCCCTGCATTCAGCTTGATGAACAGCAACGCTGTAAAATTTTACCCTCGCCACTGCGACCGAAAGTCT  
GTGACGGCTTACAAGCCAGCGCTGAAATGTGCGGTAACTCGCGTCAGCAGGCAATGACCTGGCTTATCGATCTGGAAATG  
CTGACCGCGCCTTAA

>Cluster\_11780

ATGCGTAAAGCCGATTCACCGACCACCAGATCATTGCCGTTCTGAAGTCCGTCGAAGCCGGACGTACCGTCAAGGATGT  
CTGCCGGAAGCCGGGATCTCTGAGGCCCTGATTTACAACCTGGAAGCGAAAGTTCGGCGGATGGAAGCCTCTGATATCA  
AAAAGATGAAAGACTGGAAGATGAGAACCAGCGGCTTAAAGCAGATGTTGCGGACCTGAGCCTGGAATGCCGGGCACGT  
AAAGACGTCATAGAAAAAAGCTTAA

>Cluster\_44978

ATGCTTGAAGATACTACAATTCATAATGCAATAACTGATAAAGCGTTAGCAAGTTACTTTCCGAGTTCGGGTAATTTGTT  
AGAAGAAGAGTCAGCAGTGTAGGGCAGGCTGTACCAATTTAATGCTTTTCAGGCGATAATGTTAATAATAAAAAATTTA  
TCTTAAGTCTGATACACTCCCTGGAACAACAAGTGATATTCTCAAAGCTGATGTGATAGAAAAACTGGAATTCGTG  
TTGCGATACACAGCTGATGATATGTAA

>Cluster\_67076

ATGATTACTCATAACCTGAAAAATGTCGGATATCTGATTAATATATTTATCAGCCTACTCTTACCAGAAATGGTGGTACC  
CGTAATGCTAGATATCCTCCAGATCCTGACTGGCTTTAGGTGTGAGTTAACGGTTTTTACCAGGACCCCTCGCGCCAGC  
TTTCACTTTTTTTCAGAAACGCATTTTTTTCCACAGACACAGGTTACCCTGCTCAAGCCTTCGCCAGTAAATCCCGCA  
GGACACCTGGATACGTGA

>Cluster\_39435

ATGATGGATGTAAGAGAAAGGTTTTGCAGGTGATGCGTTCCCGTCTGCCCTGCAAGAGAAAGCTCTCGCGGGGAATA  
TCCATTACAGATAGCAACCTGGAATCTGCGGTTGGCAATGGAGAAGGAATTTCTGATGAAGAATGGCGTTCGGCAGATT  
TGGCAAAAATCTTATGGAGCTGGCTAAAGACGGAGCAGTATCCAAAGATACCTATGCCAGCCGGATTGGTCAGGCGGTA  
TGGAGACTGGAGGTGCGGTAA

>Cluster\_40073

ATGGGAATTTATGCTGGATTATTTTTGGCCTGATAGCCGGTATTATCGCCAAGCTAATCATGCCGGGGCGTGGTGGTGG  
TGGATTTTCCCTGACCTGTATTTCTGGGATAGTCCGTTGGGTTGGCAATGGAGAAGGAATTTCTGATGAAGAATGGCGTTCGGCAGATT  
GCTCCATCAGCGGTTTTAATTTGCACAGCTTCTGTTGGCGGTTGGTGGCGCTATCTTGGTGTGGGCGTATTCGCTGCTGGGCGTATTCGCTC  
CTGCGAAGAGAATAA

>Cluster\_14003

ATGGTTTTTAAACAGCATCTTTGTATACAGGGGGCATGAGGATATCAGGAAAAATCATAAATCGGTGCGGACAGGAA  
ACTACGTGGGCAGCAAAAACGATGGTAACGCCGGGAAATGCAACGCCACCAGTCCGGCTAATCCACCCTCAATCGT  
GGTTCGCACTACTGCACACAGATTACCGGGCTATACAGGAGCGGTTGGTCTGAAAAATCCATGCCGCGTAA

>Cluster\_9146

ATGAACTCTCTGGCAGGTATAGATATGGCAGAAATTTTACTCGATTTATCGAATGAGGTGATTAAGCAACTTGATGATCT  
CGAGGTGCAGCGTAATCTTCTCTGTCGGACCTATTAAGGGAAGCGGTAGATCAATACCTGATAAATCAATCGCAACAG  
CAAGAACCAGTGTTCCTGCACTGCGAAGGTTGTGAGGAAGTGGTGTGCAATATCAGCGTAAGCTGCGCGAGGAATGG  
TAA

>Cluster\_40738

ATGGCAGACCGCAACAGCACCGGCTATCGCGGAGCGTGTACATCCAGACTGAAATCAACCGCAGACTTTCCCGCGC  
ATCACCGCTCGCGCAAAATCATGCACATCAATATGCTGCATGAGCGCAGCCACGCACTAATAAATTTATCCGCTCTG  
TTTTACGCTATCTGGCGGATGATCTGCACGAGCTTCAACAGCTCATCCAGCAGCAAAAACAATCCATTA

>Cluster\_24665

ATGAGTTCAGAAGTAATTAAGCAAAATTCAGAAAATTAAGATCGCGCATTATCATCTATTCAAAGTTTAGAGCGGCAGA

ATTTGATCAGGATGACGTTTACAGAGAGTCATATTTTCTGGTCGTAGAGTTTAAACGAGTTAATAGCAGAAAACATCATTC  
ATGACGAAAAAATGGTAGATCAAACGGCTTGTATTTCTCATGAGCTTAGAAGAATCGCTATAGAAGGGAATAA  
>Cluster\_29600  
ATGAATAAGCTGGTTTCTGATGGCAGCGTCAAAAAATAAATATCCGGTGCTGTATGAGTCCGGAATAACACCTCCGTT  
ATGTGAAGTCAGTGCACAGAACCTGATGCGGGGGAAAACGCATTGTGGCATATGTTTATAAATCTTACGGAATACGG  
TTTTTGAAAAATCTGACATTTGTA AAAACCTGTACGGTCAAGGATTTGAAGAATGATTTTGTGAACTGCGATGAGAAAGGT  
GAGGAACAATGA  
>Cluster\_40815  
ATGAAAGCATACCGCTATFCCGGCCCGGACGCGCTCACGCTGTGCGACGGAACCGAAATCCTGCTCTGGCCGGGAA  
GGCGGTTTCCCTGCCGGAGGAGCATGACTACGTGAAGTACTGGTGGCGCTGAAGCATCTGACGCCGTACCAGAAGATA  
CTAAACCCGCGTACACCGGCTGTGCAGTCACCAAAGCGCAGAAGCAGCAGTACAGCGAAGTGAAAACGGAGGACGCC  
CATGGCAGCTAA  
>Cluster\_63854  
ATGTCCCATATATGCCCCAAAGGTGCTCCATGCAAAATATCTGGCGTAGTCTTCTTTCTTCCAGTAGTTTTAGAGCTTT  
CACAAATCCAGTCTCTCCGCTAAAATGATCACGGAAGACCTTATATAGAACTTGCATATCAAAAAGCTAAAAGCCC  
GACTGTTGACGCGACCCGGCTTTTCAATTTTTCAGATACAAAAAACCGCTCATGGCGGCTTATTCATTACTCAACGTCAAG  
CGCTCGAATTGA  
>Cluster\_10962  
ATGGAATCGTTTTGTACAGGATTCACCATTTTATAGTGAAGAGATCTTTATTGGTTACGCTCTAAAGTTGAACTGACTCT  
GGAAGAGAAATTTACTACTGCTCTTGTATAAGAAGAAAACAGACACAAATACAGCTACGGGCGTACGGCAAACCGAACGC  
TGAAGAAATTTACTGGTACCCTCATTAGATTTCTGTTCGCGCATGGGTATATGGTGTGACAGGAAAATAATATCTGAATTG  
TCTGAACGTTGA  
>Cluster\_11071  
ATGAGCAAACACACTTTAAACAGAGTTACAAGACAGCCTTTGATGAACTGAACCGAATCAAAAACATACAGGTCTGCC  
ACACTCAGCAGTGAAGCTTGCATTAACCGTGATATTAACGAACAAGATTTGCTTAAATAGTCGCTTAGAGGCTGCAA  
GACACCATATCAGGATTAAGCAAGATGACCTTGATAGTCTGAAATCCTTAAATGCTTTTGGACTGGATTTAGCAAGGTTA  
CTAAGTATCAAAATTCACAAGCTGTCTCTGGAGGCTGA  
>Cluster\_20521  
ATGAACAAACGATTAACCTGTTTAAAGGACTATTGATCGCCGCGATTGTGGCGGTGGATGGTTGGGCGCTGTTTCAATGT  
GGTCACTATACCTGCATAACTGCCATGATGGCTGGCGCAACTTTGATGATGGTGTGGGCGAGCGTTGGTACTCTGT  
TGCTGACCGCACTGGCAGGCTGGTTATTTAGCCCGCCATTTCCCTGCTGGCTTCTGTTCCGCTTGTGCGCCCTTGTGCGCAGCATC  
ACCGAATGGGTACTCAACCGCCGCTTCTCACGCTTAA  
>Cluster\_38490  
ATGAACAGATTACGCTTTGAAGTGAAGAATAATCAGGGCTGCTTCATTTTCCCGAAACCTGGTATGAATCACTACTGGA  
GAAGTTTGACGAAGTCTTGCAGCCTTTGACGAGGATGAGTCCAGCGACAGGCTTATATCAATGCCCTGAAGCATATCA  
CACAAACGGAACCGGATTTTATTGATGCGTATGCATACATGGCATATGCTTTTCTGGAGCAGGAGACACCCGGAAGAGCG  
CTGAATATTGCACCTAAAGGACTGGCGGCAAGTATATGA  
>Cluster\_23839  
ATGGTTAATGATATTTCTGCTAATAAGATACTGGTGTGGGCGGCTGTAGCTGCGGCAAAACATAAGCTTCCCAAATATGC  
GGAAGCTATCCTGAAATGATTTCCACAAATATACCTGATAAAAAAGATATCGCACATTTAGAATTTATATCTTATTTG  
GATTAATAAGAAAAATGATGCGATAAAGGCTTTGGAGGGCTGTATGGATGATGAGTCGAGTCACTTATGTACAGTTTG  
GTCCATGAGAATGTAGTGGTTGGGTACGAGGATTTTAA  
>Cluster\_41354  
ATGAGTAAATGTAGTGTGATGAAACCCCGGTTTGTGCTGTATGGATGTTGGCACCATTATGGACAACCTCCGACTGCAC  
CGCGCTTACAGCCGCTGTGTTTGCAAAACCGCGCAGAAGCAGAAACCGCTGGCGGCGTACGTAAGAAAGCCCGTAGCG  
TGGAATCCGAACCGTGA AAAATCACCCGACTTTCACCTGAAGAGTCTGACGGTGTGCGCTGGATATCGATTTCACTTTT  
GCCTGCGAAGCTGAAATGCTGATCTTCCAGCTGGGTCTGCGTTAA  
>Cluster\_10531  
ATGACCAGTCAACCTCATCCCGTATTCAACGGCCTATCGCCAACGAAACCTCTTCTCGTTAATGCTCGCGATTTACA  
TACTTTTCTTGGGTAGGTAAACGCTTTGCATCGTGGAATTACAGAACGCATGCTGAATATGGTTTCTGTTGAAAATCAGG  
ACTATATTTTGGTTTCCCAAATCGGAAATCAAAGGTCGAGGAGGCGATCGCCGTAGCAAAATCTATCACCTCACCCCTC  
GACACAGCCAAGAGCTTGCATGGTTGACGACTGCGTCCAATACTGA  
>Cluster\_28861  
ATGGCAAAAACAGCAGCAGCAGTGCATATCCTTGTAAAAGAAGAGAAACTGGCTCTGGATCTTCTCGAGCAGATCAAAA  
CGGTGCGGATTTCCGCAAGCTGGCGAAGAAACCTCCTATTTGCCGCTCAGGCAACCGCGGCTGATTTGGGTGAATTC  
GCCAGGTCAAATGGTTCCGGCTTCGATAAAGTGGTTTCTCTTGTCCGGTACTGGAGCCAACCGGCCCGCTGCATACC  
CAGTTCGGTTACCACATCAATTAAGGTGCTGTACCGTAACTAA  
>Cluster\_1579  
ATGTCTGATCTGTTTACGCGAATGTGTTGCCGGATGGACGGGGCGACCGTTCCGGTGTGGGCAAAACAGGCGGAGATTA  
CGCGCTCGTGTATGACGTGATGCCGGAGGAGTCCCGGAGATGGGGGCGCTTCCGGCAGCCAGTTGTCCTGTTGGTGG  
TGTTTTACGCCCGGTACCCTCGGCCCGTCATGATGTTGTTGTTGTTGCGGGGCGCACACTGACGGGTGACCCGTTATGAC  
ACGTACAACGGTAAACCCGATTTTGTGCAACAGGAATGA  
>Cluster\_51560  
ATGAAAGTAACTAATGCTTTTGTAGCTTATTTTATTTTGTCTCTATTATGGCATGCAATGTTTTTGCATTTTCTATTTT  
TGGTGGTGGTAGTGAGGCGAGCTATAAAGAGACAGAAAAACGTCAGTGTGACGACAACGCATTTCTACAAAACCTCAGC  
CATCACAGGCGATTTTGTTTAAGATGAGAGAAGATGCACCACCTTAAACCTCACAGAAGACATCACGCCCTACTTATCCG  
ACAAAGGCGAATTTCTCATTATCCTTTTGGGATG  
>Cluster\_10087  
GTGTTGACGCTGAACAACCTGGGTCATGGAAGAAGAGGAGCAGCTTAGAAAGAGAGCTTAATACCTGGATCCGTCAGTA  
TGTTGCCGACAGGAAAACCCGCTGCAGCAGTGCAGCCGCAAACTCTGCGCGCTGCCAAAAGTTGAGTTTATGGATG  
TAGAAGGCGAACC CGCTGGTACCAGGTTGCGCTAAGCGTGAGACCTCATTTTAAATTTATGGGGCAAAATTTTGGAGCTT  
TCCCTGGTTGGCCGGTTAGACAGGGAGTAA  
>Cluster\_14848  
ATGGCACAGGTTAATATGAGTTTAAAGATCGACGCTGAACTGAAGGATGCTTTTATGGCCGCTGCAAAAAGCATGGACCG  
TAATGGCTCTCAGTTAATTCGGGATTTTATGCGCCAGACCGTTGAACGGCAGCATAAATCTGGTTCCGTTGACAGGTTG  
CGGACGAGCTCAGCAACTCGAACCGCGGATGTGCTTCCCATGACATGGTTCGAATCCTCTGCTGCTCATGGCGGGAT  
GAAATGAGCAGGAAGGTCGCGGTAATGA  
>Cluster\_7872  
ATGAAATAAGAGATAAAAAGGCGAAGTACTTGAAGAAAAGGGTTTTATAGACGAGCTGCAGATCGCTGGCGAGAGAT



AATGGTGTCTTTTATCTAGTGACGCTGAGAGAAAATGGCAGCTCAAAGCGTGCATTTCTGCATTAATAAATCTCTACGTA  
ATAATCTGCAAGCAGATACTATAGCGACATAAAAACAAGGAGTTATAAAGCATATAAGAAAAATGGGGCTTGTAAATGAA  
AAAATTTTAGAAACTACAAGGAAAATTA  
>Cluster\_64825  
ATGGCAAAAAGTAACTTTAGTTTTAAACAATACAGAAAATATTAGTTCAGGAAAATGGAGGTTTTCGCGTAAATATGAA  
TGTGCGACTGGAAGAATCCTCACCTGAGGACCAGACCGGGCCACATGACGTAATGGCAGGCATCATCAAGAGTATGGCTC  
CTGAAATCATAAAAAGCGACCAGGAGTTGTTGAAATCAGCCAGGGAGCTTGGGCTGGAAGCTGAGGGGAACTATTC  
AGCTATAACCCAAATGCAGCCAGACATTA  
>Cluster\_20412  
ATGAAAATAATCTCTAAAATGTTAGTTCGGTTCGCTTACCAATGTCTATGCCGAGAATTAATGACCAA  
AGCGGAATTTGAAAAGGTTGCATCGCAATATGAAAAATAGGTGATATTTCAACCAGTAAATGAAATGTCGACCAGATG  
CGAAAAGAGATTTGATCAAAAAGCCGATGAAAAGGGGCTGATGTGTGGTACTGACCTCTGGTCAAACCTGACAATAAG  
ATCCACGGCACGGCAAATATTTATAAGAAGAAGTAA  
>Cluster\_39681  
ATGAACAAAAGAAAATGTGATTACCTGGACAATCCGGTCAAACGTGGTGCAGGTTATCGAACAAGTACGCTGATGAA  
ACCCAGTCCGGGACGCTGCGCGGTGTCTGCTGGTTCGGTTCGCGAACTCCGAAGTCGATGCACTGATTAAGGTGCTGC  
CGGCATGACGGCACCGATGCTGACCGAGCAAGTCCGCCACTGGAAGTGCCTGACCTTGTGGCGCTGGCCGGTAAAG  
GTGGTTCGGTTTTTTGTCGCCAACTCGGTGCAGTGA  
>Cluster\_67031  
ATGACACGGCAACGTTTTACTGAAAATCTGCTGATGTAATCCGGGAATGGCGTGTGGTTCGCTCCGTTATCTGGTTTTA  
TCTGGCCGCTTCTGTCTCCCTGCTGACAGGCTGTCTGATGAACTGGCATACGCTTGTACCAGATGACGCTGGCTC  
GTGATGCACTGGCGATATTTGTTATCGGGGCGACGATGGGATATCCGGTCTGGGCTGGCTGTTTTATGCTGGAAG  
AAATGGCACGACCGCCAGGAGAGCAGTGA  
>Cluster\_7836  
ATGGCCAGAGTAAATATTCATTGTCCCGTGTGTCAGTCACTAGGTTTACCGCCATGGTTCAGAACCCATAAGGCCGTGA  
CAGACTTCGCTGCGGTGACTGCCACCGTGTGTTTCAGCTCACTTATACCTTATCAAGCAGTAAAGCCGGTATGAAAGAGC  
TGATCACTGAAATGGCCTTAAATGGTGCAGGGGTTGCGGATACCGCCAGGACACTGAAAATGGTAGTAAACCCGTCATC  
CGGACTTTAAAAAATCGCGCCAAAGCGAATAA  
>Cluster\_23987  
ATGAGAAATATACCCAGACACCCGCAAGGGCGGACTCTGACAACTGAAATAACATCTGGCGTTTTATCGCCCTGAG  
CACGGCACAACCGCGCTGATTACCATTTAGGCCACCAGCAAGCGGTCAGCAATCTCCTGATGGCTGCGTGA  
TGGTATTCGCTGCCGTATTCGCCAGGGGAAACCTATGCACAATAA  
>Cluster\_34623  
ATGAAAAATCAACACTAATTTTTAGGGCTTACGTTAATGTCTCATCTCAAATACCATCGGCAATGGCAAAAAATGAATC  
AAAATTTGGGTTGTTGTTGATCGAACGGAAAGACATACCTGCCCTTCAAGTAAATGTGGAGTGGCTGGGAACTATTTT  
TCAGGGAAGCGTAGATTTCTAGAAAAAAGGTAATGGGTTCTGATATAA  
>Cluster\_36429  
ATGAAATTTTATTCGACAGGGATTAGGCATCGCCTTACAACCAGAGTTAACCGTGAAGCATTGCAGGTGAATTTGTTTC  
CGTTCTCTCGAACCAACTTCTATCGACAGATTTCTGTTGCTGGCTAAAGAAAAAGCCGGTAGAAGGCAGTCCACTGTTTT  
TACTACAAATGTGCATGGAAACAATTAGTGGCGATTGGAAAAATTTGA  
>Cluster\_44968  
ATGAACGTGAATACTGAGATTTTGAACCTGCGCAATCAGGGGCGAAAATGAGCGCACCGGATTCGATGCGGAGAGGGT  
TGCAGATATTTGATCACGATGCTGAGGACTTAGGGTTAATCACTCTGAGTGCAGGTTTTCTGGCTACCGCTGGTAGCAGCCG  
TACTTGTGGCCTTCTGATTTGATTTCTGGCGCAGTGGGTTAACCGTGGATGA  
>Cluster\_17788  
ATGGAAGTACAGTGTCCGACCTGTCTCAGTTCATTGAATATACCGTGCATACATATTTGAGCATTGCCAACAGAA  
TGTGGTATTTGATCACGATGCTGAGGACTTAGGGTTAATCACTCTGAGTGCAGGTTTTCTGGCTACCGCTGGTAGCAGCCG  
GCCAGCATGGCCACGGTTTGTATCTTAAAAGCGTGTGGAATTTGTGCCGTTTTAG  
>Cluster\_30150  
ATGTCTAAGATTAAGGTAACGTTAAGTGGTTAATGAGTCCAAAGGATTCGGTTTCACTACTCCGGAAGACGGCAGCAA  
AGACGTGTTGATCACTTCTGCAATCCAGACTAATGGTTTTAAAACCTTGTGTAAGGTCAGCGCTAGAGTTCGAAA  
TCACTAACGGTGCCAAAGGCCCTTCTGCTGCAACGTAATCGCTCTGTAA  
>Cluster\_26498  
ATGATAACGTTTTCTATGGATGAAAGTGGCTATACGGTTATGACTTACTCCACAAGAGCAAAAATCCAAGCGCGCT  
ATCAATATTAATAAACCATGATGACGCCAGTCTGATAAAAAGAAATTTCCCAAACTTCAAGCCGATGAATGAAGT  
ACAGCTCGCTGAAAAGAAGAGATTCCAACCGCAAGCGTTTTGCAACGGCTAA  
>Cluster\_21529  
ATGGAGCGCTTCTCAGGAGTCTGAAAAACGAGTGGATACCGGTGACGGTTACATGAACTTACGCGATGCTGCCATGA  
AATAACGGACTATATCGTTGGGTATTACAACGGCTCAGGCGCACGAATATAACGGTGGGTTGCCACCAATGAATCGG  
AAAACCGATACTGAAAAAATCTAAAGCGGTGGCCAGTTTTTTGTTGA  
>Cluster\_47  
ATGGCAACCAACAACCGTAAAGCAAAAGATTCTGTTAGTTCGCAGAAACGATCCAGGCGTATGGCAGTGGGTGAGACTCAG  
CAACCGACGAATGGGGTTGATGAAATATTACGGGATGATGGATTGCGGTTTTTGCAAAAGCCAGCGCGGCAAAACC  
GCTGGAAAACCACTTTCGCATTAAAGGAGAGTGA  
>Cluster\_25044  
ATGCTGGCTACTACCCCTACCAAAAACCGCAATTTATCTGGATTATCGCCGAGTTCGCCGCGATTGCCCGACAATTAC  
CGCAAAAATTCATCATATTTGCTGCCGAGTCTGAACCGGATGCTCGCGTTCTGTTGCGGATCACATCTGCTTTTTT  
CTGGTCTGATCCGATGGAGGTGACACATGATTAA  
>Cluster\_66926  
ATGTCTGCTGGAGTCCGGAGCACATAACGTTACGACGATCAGAAAACGGCAATGTGATTGCCACGACAGTCCGGACGA  
TCAGGAATTCATTTTCGCAAGTCTGTTCCGATGAAATCGCAACATCATTCGGAAGCCGTGAAACGTTACACCAGTA  
CGGAGCCTGCTCATGCAACACAGCATTA  
>Cluster\_10621  
ATGAAAATCCATTAATAATTTCTGAGGAAAGTGGCAGCACAAAATAAAAAGAAATACATCAATGCTTGAATTTATATTTAA  
GAATTCGCCGACTCAGGAGAGACAGCATTAATTTATGTTGCTCATTCGCTCCATGAATAAACCTGTGAAATGGCTT

ACGCGTATATCGACACACTGCGCAACGAATAA

>Cluster\_4768

GTGTGGATCACTATATGCACCGTTTCGTGACACCAGGGGGCTGCATGTTCATTTCCCTGCTAATGGACGTGACATCCTGGA  
TATTAACGATCCTGATTTCCCTGAGCAGTATCAGCGCTTATTGGCAGCTCTGGATTATCTGACGAAGCTCGACACTAAAG  
CATCAGGCCAGCGTAACTCTGGCTACAGCGGTTTTTGA

>Cluster\_32098

ATGGGACTTAAGTGGACCGATAGCCGCGAAATTTGGCGAAGCAGTGTACGATGCGTATCCTGATATTGATCCGAAAACGGT  
TCGATTCACCGATATGCATCAGTGGATTTCGCGCTCTGGAAAGATTTTCGACGACGACCCGAGGCATCGAACGAGAAAATCC  
TCGAAGCGATTTTGTGGTCTGGCTGGACGAAGCCGAGTGA

>Cluster\_59412

ATGCATGCGACCACAGTGA AAAACA AAAATCACGCAAAGAGACA ACTATAAAGAAATCATGCTGCAATTTGTGGTTGTCTT  
ATTACTGACACTTACGTTGATAGCCATTTTTCGGCAATTTGATCAGCTGAGTATTTTCAGAAATGGGTCGATTTGCAAGAG  
ATCTTACACATTTTATTATCAATAGTTTTCGCAAGGCTGA

>Cluster\_1548

ATGCTAAAACAGCAGGATATGACCGAAAACCGCCAGAGTGGTGTAAATGAATTAAGCGTCACCGAACCGGCGACCGCCGG  
GAAAATTCGCGCAGAACCTTATCTTTCACGCGAACCGTCCAGTAAATACTGACCCAGCTTGTATGGCGGGTCTGGCAG  
ATTATCAGTTCGGTGTTCACAGACGCCCTCCTCAGTGA

>Cluster\_20757

ATGAAAGCGTTTTGTACTTACCTGAAAAAAGAAATCACAGCCATGCAACGACCAAGCGGTTCAACGGGCTGGATAGAACT  
GCCGAACGGTCAGCGTGAATCTGCGCACACGTATAAATTCATGCGCATGAGTCTGTTTCGAAATGAAAGGCGAGGTGG  
TTTTACGTTTCTTCCCTACAAAAGTCCGCTCGCCTGGTTGGGTGTATAGGGGGGCGCTATGGCGATTAG

>Cluster\_51318

ATGAATGAAATCCCTTTCGATGTCTTATTTTCATTTCTGAAAACGCATTAATCCGCGCAAAGGAAATGGAGGCATTTACT  
TAAGTTAATGGAAGTTCGCGGAAAATGGCGATGAATCATATCCATGATGTTTTCTGCGGTGCACACATTTAAACGCCAG  
TAATTAACGAATTAATAACGGTGTATGGCAATTCACGAGAATAATAAAACGCATCACACCGGAGAAATAA

>Cluster\_39651

ATGCCGGACAACGTAGATTTTATTTCAGGAACAACAGGCTGAATTTACTGGAGCGCCAGATTAACGCGGCAAGGGTAAAACA  
TTGCGGTGCTTCTGCGCTGGTTTTGCGAAGAGTGTGACGCGCAATAACCTGCTGCGCGTTCGCGGCTTATCCGTCAGCCA  
CGCGTTGTGTTTTCTGTGTCAGTCACTTTGAAGCAAAAACAACATTTACCGGAGAACGGCATGA

>Cluster\_2249

ATGACCCCTTATGAAATATTA AAAATTTCAATTTAAAACCAATGCCGCTATTGGTTCGAGGTTCCCAAAGAAAGGAAGGCC  
TCGTGGCAGTCAAGGTGTGGAAAAGTGGAAAACCGCAGGTGTTCCGGAGGATGTTGCCATTCTTTGTCATCTGGATCCGA  
GCATTCATATACACACCCAAGTCTAGCGAATACAGAAGATGACAAGCCACAGGAGACCAACAATGA

>Cluster\_44930

ATGAAACCCAGCTATCAAAAACAGCGATCAATATCGTTGGTTACAAAAGAAACTGGGCGTGCCTGCGAAGTTTCACAGCA  
GGCCGCTATTAAGTGGCTTTCACAACAAAGCAAAGGTATCCCTGAACATGTCGCGCAGCATTTGTTACGGCTACTGGTGGAA  
TAGTGAAGGCATACAGATTCGCCCGGATCTTCCGAAGTGTTTCCACATACCGAAAAGAACGCAGCTTAA

>Cluster\_41975

ATGCATTTTCGCTCAGCGAGTTCGCGCCCTGGTTGTGTTGAATGGTGTGGCGTTATTGCTCAGTTTGCCTGTAACAGGG  
GCTTGCTAACCGGGAACCTGGTGCCTGTTCGACCCGTGGAGCAGCATCCCCAGACCGTTGATGCTTTATTTTCGGGGC  
GAAAGGGATGCCCGCCATTCGCGGATATTTTATGGATGAGTTAACACCCGGCTTGCCAACGGGCTCTGA

>Cluster\_12379

ATGGCGATTAAAAAGCTGGATGTGGTGACGAGGCTGTCCGTTTTCCACTCATAGAAGCAAAGCAGCACTGGCAGAAAT  
GGCCAGCGCGATGAGTTGGTAATTGAGTTGATTGCACCCAGGCAACTGAAGCAATCCACAGTGGCGCGCAGAAAG  
GACATGCCATCACGATTTATCAGCAGATTGGCGATGCAGCGTGGAGCATCACCGTTCAAAAAGCCTGA

>Cluster\_35751

ATGTGTATTAAAGCTGAAAAATATATTGAATGGGTTAAACACTGTGCTGAGTGCACCGGGTGCCTGACGACATATAAATG  
CCCCGGATGTGGTGAACAGATTATGACGCAATGCTCACCCGAAAAGGAAATTCGGGATTCATGACATGTTGTCGGTGGT  
GCAGCGCAGTTTTCTTTAAACAGGTA AAAAGCGCGAAGGTA AAAAGCCAGCGCGGTTATTCAGAATCAATAA

>Cluster\_59824

ATGAGTACGCCTGATTTTTCTACTGCGGAGAATAATCAAGAACGCGCAATGAAGTCTCCTGCCTGAAAGCGATGCTGAC  
GCTGATGCTGCAGCGATGGGACAAGCTGACGCGGGCCGCGTGTGTTAAAGATGGAAAACAGCTTGCCTGATCGAAG  
ACGAAACCCAGGCTGCAGTATTTTCCAAAACGGTTAAGCAAATTAACAAAGCCTACCGTCAGTAA

>Cluster\_26238

ATGAGCAATAACCTTAATGAATGTGACGATACATTTCTGGAATGGCAGTATTCTCGGCTATTGGCTGAAGTATACCCATAC  
CCGAAAGAGTTACTCCTTATTTGCGGTGTGGTTAGTCGCTTTACATCGGTAAGGTTAGGATTTTACAGCACCGTGAAA  
AATCTCATAATTTTATGAAATCACTGTACTACTATGGATAATGATAAATATCAATGA

>Cluster\_35850

ATGAGCAGGAGAAGAATCACTCGCAGACATCACCGCACACCTGAATTCCTCAGCAACGCTAAAAGGCACTTATTCAAAG  
CGAGATCGGTGATTTCTTCGCGGAGTTGGCTCACTAGGTGAACCAGAAAACAGAAAGGATGCAGCGTGCAGTCAATGA  
TACGCATAGATAACACTTTTGTATTTCTTCTACAGCATGCACGGAATTAACAGAAATGA

>Cluster\_7607

ATGACACCTCAGCAAGAAAACGCCCTTCGCGATTTGCCCGTCAGGCTAATTTCTGAAATCAAAAAGCCAGACAGCAGTT  
TCCGGATAAAAACGCTGATGACATTTGCCGTAGCGTACTGAAGAACCCGCGAAACGGTAACGCTGATGGGATTCACAC  
CGACTCATTTAAGCCTGGCGATCGGCATGTTAAACGGCGTCTTTAAGGAACGGTGA

>Cluster\_61212

ATGCAGGATTTATCATTGGAAGCAGCCCTGGCAGAGCTGGAGAGCCGACTGGCTTTTCAGGAAATCACCATTTGAAGA  
AAGCTCAGCGTACCGCTCATGAAATGGAGATGGCGAAACTGCGCATCATCTGCGTCTGCTGACCGAGAAGTTAAAAG  
CCAGCCAGCCGTCAACATCGCGTGCAGGCTGAAGAAACGCCACCGCCACATTTATGA

>Cluster\_11783

ATGTATAAGAATAGATTTCCGAAAAGAGATAATAACACATCATAGAACTTTTTTCGTACAAGTTTTTGTAGTAACCTCGAT  
CCCTAATCAATGGATAATAAGAGATTTAACTAAACGAGACTATGGGACAGATGTTTTAATTGAGTACGTCACAGATAGTG  
GTGATGTAACCGGCTATAGTGGATGTAACAGGCAGCACAAATCTGCTGCCCTCGGAAATAA

>Cluster\_20755

ATGAATCAACACATTTCAATCGCAATTACAACCTCCACATGTAACCTATTGAACGCTATAGTGAACCTTACGTTTGTGGT  
GGAGACTATCAACGACATGTTGGCCGATGGACGGCTCA TAAGGCATCGACTACGCAAGATAAAAAGCGTGA AAAAGTGA  
TGATTAACATCGCAGCCATGACAATAGATGCATTTCTAACAGCAACGTAATCATTAGTTAG

>Cluster\_32083

ATGTTTCTCTGCTGCTTGTATTACATATTTCTTACAGCAGGTAGCAAGATGTGACGGTGAAGGCTCAGCGTTTCAGGCTGTG

TTTTACTACTTAGCAGAAAAATGTTCCGCAAAAAAGTTGCGATGAAGAAGATGGCATTATAAGATCACAGAAATCGAGC  
AAATGATTAAGCAATGGCATCAGTTACTGCCGCGTTTATTACTACTATATCAATAA

>Cluster\_59913

ATGCAGCGTGGGCGTTTTTGCCTGACAGGTGGTTTTCCGCGATATGTATATCGTGAAAAATAATCGCATGTTTTACGCCCTT  
GCTGATTTGCAATTTTCGTTACAAAGCGTGGGGTTTTTGGCTTAATTCAGGCGGCCCTACTGACTTACGAAAGCCGGGGCGT  
TCCCGTGGCTTGGTACTGTTATAGGTGGGTATATCTTCCGGCTGGGAATTGTTCTGGCGGGTGGATGTGCCACCGGGACC  
TGGTATCGCGCGGGTGGAGGATTGATCGGCAGTTGGATCGCGCTTTTACTTATATGGTGATGAGTGGGTGATGCGTTC  
TCCACATGCCAGTGGTTTTAAATCAAACCTTGCAGCCTACAGTACTGAACATAACTCTATTGCTGAGACTTTTTAATTTGT  
CTGTGGCGCTTGGTTGCCGTTTTGCTGGTGATAACGCTCTGGGTGGTGATGAAAGAGTTGAAGAAGCCAAAATCAA  
GTCGCGACCTTACCGCGCGCGAACCGGGATCGCTCATATTTCTGTTTAAAAACGCTGGCATCCCTTTGTCACAGCTGT  
ACTCATCGTTTTGATTGCGCTTTTAGCCCTGGCCCTGAGTGAAGCAACCGGACGCATGTTGGGTAGGAATCACTTCCC  
CAACGGCAATATTTGCAATTTCTGGTCCGGGTGACATGAATAACCTTACGGGGCTTTTCTGGTGTAGGGATC  
TTCTGGGGCTTATTGTCAGCCAAAGCGAGCCGTGATGTTCCGCTTCCGCGAGCTGATGCACAAACACATACGTAG  
CGGGTTAGGTGGTACTGATGGCTTCCGGTCCAGTATTGCAGGTGGTTGCTCTATCGGTAATGGACTGGTTATGACTG  
CAATGATGACCTGGCAGGCTGGATTGGCTTGTATTTATGATTTCTCGGAGTCTGGACTGCGTCTGGCTTGTGTATGTT  
CGACCGCAGCGTAAGCGCGACTGGCAACTGCTGCGGCAATTA

>Cluster\_19392

ATGAAGCCTTTTGAACGGGCTGGTGGTTGGTAAATTCGCGCTTTGCATTGTGGTCATGAAAAGTTGATCAATACCGC  
ACTGGCGCAATGTGAAGAACTGTTCAATCATCAGTTATTCCTGCGCGAAATGCCTGACTGTGAACCTGAAAAGCGCCTGA  
CGTGGCTGCAAGTGGCTTCCCGCAAGCGACGATTTTGGTACTGAGCCAGAGCTTGTTCGCGCTTATAACTTACCTGCC  
ATACCGCATAAACGATGCCGATGCCGACATCCACGCTCATTTATGTTGGCGAGCTGTGCCGAGATATTACGCTTCGTTCC  
ACATGCTGATTTACTGCAGAAGACTATGGCGATGGCTTTGCTAACGCTGCTGGCGCGGCTTTTGCCCAACCGTTGAAC  
ACGTTTCGAATGGCGCGCCAGTTGGCGATGAAGCGCTTCCGGGAACGCTTATTTCGTTCCGATGTTTACCGCTATCGCTAC  
ATGTTGGCGAATGATGTTTTATTACAGTTTTCGTTTCGCGCTGCTGTGCTTGGTGGCGAATCTACCGGTAAGCAGCGT  
TTCAAAGCGCTGGCGGATGGGCTTGATACGGTGTATGCTGCTGAATTTGGCCGCGACTATTGGGAAGAAAAAACGGAA  
TCTTAACCGCGGATGATTTGTTGCATATCGCCTGCGAAGAGTACGCCGGGAACAACAAGCAGAACTAATCACTATCTT  
ATATGTGACACGTCGCCACTCACGACCTTGTTCATGCGCTTGCATCAATATGGTCATGCTCCGCAAGAAGTTCATCAACT  
TGGCGAGCGGAAATGACTCTGGTGGTGGTTCGCGCGCAGAAATTCCTTCGTCAGGATGGCACCAGCGGACAGG  
TATTTCCGCGCAGGCAACAGGTGTTGATGAACAGAAATGTCGCGCAGGAACATTCCTTATCTTTCGGTTTCGGGGCA  
CTGCAAGAGCGAGTGGAGCAAATTTCTTCCCAACTTCCCGACTGA

>Cluster\_59535

ATGATTGATACCCACTGCCATTAAGTATATCCATCGCCACCTTGATGGCAACATTCGTTCCCGAGACCATTCCTTGAAC  
TGGCGCCAGTATAATATCTCGCTTCTGCACAATCCCTGGAACACTGATTCCCACGTTTCCAGGTCATTGCCAACGAAC  
CCGATCTGGTGGCTTTCTGACCAACTTGACTGGGGCTTAAAGTTCGCGCTCTCTGATGCTGTGCGCGGCTGGCA  
TTTTGAAAACATTAAGATGCAGCCCGTCCAGGCTGCATATGTCGAGCTGCGTTTTTACCAGGCTACATGGCAATGGC  
ACATCAGCTGCCCTAGCGGGTGTGTCGAAGCGGTGATTCGATGGCTACGTTGAAGGTTGCGCGCACTTTGGTGGCAGG  
CGAAGCTTATCGGCATTATGAGCCGGACTTCCGGCAAGCCGCTGTCAGCAAGAGCTGGAGGCTTTTTAGCCACCGT  
GACCAGATTAACCGCACTTGAATTTAGCCGGTGTGAACCTTGGTTTTCCCGGGAAGTCTGTTCTTCTCACTTCAACCGCC  
GCTGATGCGGGCTGGCATATTACCGTCCATGCGAGCGGAAGCTGCGGGCCGGAAGCATCTGGCAGCGGATTCGTGAAC  
TGGTGGCGGAGCGTATTGGACATGGCGTAAAGCCATTGAAGATCGGGCGCTGATGGATTTTCTCGCCGAGCAAAAT  
GGTATTGAATCTCTGCTGACCTCCAATATTCAGACCAGCACCGTAGCAGAGCTGGCTGCACATCCGCTGAAAACGTTCT  
TGAGCATGGCATTCGTCGCGCATTAACACTGACGATCCCGGCTACAGGGAGTGGATATCATTCACGAATATACCGTTG  
CCGCGCAGCTGCTGGGTTATCCCGCAGCAAAATCCCGCAGGCAAGTAAATGGTCTGGAATGGCTTTCCTCAGCGCT  
GAGAAAAACCGCACTGCGAGAAAAAGTCCCGCGAAGTAA

>Cluster\_48107

ATGTTGAATACGCTGATTTGGGTGCCAGCGGCTACGCTGGCGCAGAGCTAGTGACCTATGTAATCGCCATCCGCATAT  
GAACATAACCGCTTTGACTGTTTTAGCGCAAAGCAATGATGCGGAAAGTTAACTCCGATTTGCATCCGAGCTAAAAG  
GCATCGTTGATCTGCCGTTGACCGGATGTCGGATATCAGCGAGTTTAGCCAGGGGTGGACGTAGTGTTCCTCGCCACC  
GCCCATGAAGTTAGCCACGATTTAGCGCGCAGTTTTCTGAAGCGGGCTGCGTGGTGTTCGACCTTTCCGCGCGGTTTTCG  
TGTTAACGACGCCACCTTCTATGAAAAATATTACGGCTTTACCCATCAATACCCGGAAGTGTGGAACAGGCAGCCTACG  
GTCCTGGCGAGTGGTGGCTTAATAAATTAAGAGAGCGAATTTGATTGCGGTGCGGGGCTGTTATCCGACGGCGGCACAG  
CTGGCGCTGAAACCGTTGATTGATGCGCATTTCTTACCTCAATCAGTGGCCGGTATCAACGCCACCAGCGCGGTGAG  
CGGTGACGGCGTAAAGCGGCAATTTCAAACAGCTTTTGTGAAGTTAGCTGCAACCGTATGGCGTCTTACTCATCGCC  
ATCAACAGAGATCGCCACACACCTCGGTGCTGACGTTATCTTACCCACATCTGGCAATTTCCCGCGCGGCAATTC  
GAAACCATTAACCTGCCGCTGAAATCGGTTGACCCAGCGCAAGTTCGCGCAAGTGTACAGCAGGCTATGCCATAA  
ACCGCTGGTGGGCTGATGACAAAGCGTTCGCGCGTGA AAAATGTCGTTGGGCTGCCATTTTGCATATCGGGTTG  
CCGTTACGGCGAGCATCTGATTTATGTTGGCGACCGAAGCAACTTACTGAAAGGCGCGCGGCACAAGCGGTACAGTGC  
GCCAATATTCGTTTCGGCTATGCGGAAACGAGTCTCTTATTTAA

>Cluster\_5922

ATGTCTGAAGGCTGGAACATTGCCGTCCTGGGCGCAACTGGCGCTGTGGGCGAAGCCCTGCTTGAACGCTGGCTGAACG  
TCAGTTCGCCGTTGGGGAATTTATGCACTGGCAGTAAAGCGAAGCGCAGGCGAACAACCTGCGCTTTGGTGGTAAAGCAA  
TCACCGTGCAGGATGCCGCTGAATTCGACTGGACGCGAGCTAGCTGGCATTTTTGTGCGAGGCAAGAAGCTACCGCT  
GCCTGGGTTGAAGAAGCGACCAACTCAGGTTGCCGTTGATCGACAGCAGTGGATGTTTGTCTCGAACCCGACGTACC  
GCTGGTGGTGGCGGAAGTAAACCGTTTTGACTGACAGATACCGGAAACCGGAATGTCATCGCGTACAGACAGTCTCA  
CCAGCCAGCTGCTGGCGCACTGAAACCGTTAAATCGATCAGGCGGTTTTATCAGTATCAGCGTTACCAGCTGATTTCA  
GCCCTCCGCGAGGCAAAAAGCGGTGATGCGTTAGCGGGGAGAGTGCAGAAATGCTCAACGGCATTCCGATTTGACGA  
AGAAGATTTCTCGGGCTCAGCTGGCGTTCAACATGCTGCGTTACTGCGGATAGCGAAGGTAGCGTGGTGAAGAAC  
GTCGATCTGTTGACGAAGTACGCAAAATCCTGCAAGGACGAAAGGCTGATGATTTCCGCTAGCGTCCAGGCAACCGGTA  
TTCTACGGTCAATGCCAGATGGTCAACTTTGAAGCTCTGCGTCCACTGGCAGCAGAAGAAGCGGCTGATGCGTTGTTCA  
AGCGCAAGATATTGCTCTCTGAAAGAGCAAAATCCCAACTCAGTAGGTAGTGTGCTGCGGTTCCGCGTCCGCGCTTCT  
TTGGCTGCGTGGTAATGACTACGGTATGCCGAGCAAGTCCAGTCTTGGTGGTGGCGGATAACGTTTCGCTTTGGCGG  
CGCTGATGGCAGTAAAAATCGCGGAGAACTGGTGCAGGAGTATCTGTACTAA

>Cluster\_17162

ATGAAAAATGTTGGTTTTTATTGTTACAAAAATCAGAAATGGTGGTGCACAAAACATGGGTAAATGAAATATCTAACCTTAT  
TAAAGAGGAATGTAATATATTTCTTATTACATCTGAAGAAGGATGGCTCACACATAAAGATGTCTTTCGGGAGTTTTTG  
TCATACCGAGTATAAAAAATATTTGACTTCTTACATTTGTTTAAATGAGAAAAATTTTAAAGAAAAAATCAACTTCA  
ACGTTAATAGCAAGTTCTGCTAATGCGCGGATTTATGCGAGTTAGTTAGTACTAGTCGACTTAAATGATTTATGTT  
TTCCGATGGATGGCTTTTATATAATGGTGGTGGCTTAAATCAATTTTTTGCATTTGGAAAAATACCTTTCTTTTAT  
TAACTGATGTTATATGGTGTGTTTTCCAAAAGTGTGAAAAAAGCAATTTGAGATATTTGGTATAAAGAACCAAGATA

ATCACAGTATCGAATTCAGTGCCTCAGATGCCGAGATGTAATAATAACAACCTCCAGTATAAGGTTCTGTTTGGTGGTAG  
GTTAACACACCCCTAAGCGCCCGAGTTGTTAGCGAATGTAATAATCGAAAAAGCCAGTATAGCTCCATATCGTAGGAG  
GGGGGAAAGGTTAGAATCATTGAAGAAACAATTCAGTGAATGTGAAAAATATTCATTTTGGGTGAGGTCAATAATTTT  
TATAACTATCATAGTATGATTTATTTTCACTGATATCCGATAGTGAAGGTTTGCCTATGTCAGGCCCTGAGGCTCACAC  
AGCTGCAATACCCTCTGTTAAGTGTAGTGGCGGATGTTTGAATTAATGAGGGTAAATGGTTACTTTGTGAAAAATA  
CTGAAGACGACATTTGGATATAAATTTGGATAAAAATATTCGATGACTATGAAAAATATCGGGAACAGGCAATTCGTCTCC  
GGAAATTTGTTATCGAGAACTATGCTTCAGCATATAAAAAGCATTTATTTTAGGTTGA

>Cluster\_40111

GTGGCTCGACCTAATCAACCAGCATCTCCGCGCGTTAAAAATAATCGCCACGGGGATCGCCTTACCCCTGATCAAA  
CACTTCTCAACAACCTGGATGTTTCAAGTAAGCCAGTTGGCTATGTTGAGCGACGTTCCGGTATTTGCTGGCGCTATT  
TTGCCCGCAATGACGCCAGCCAGCCGAACTGGCGGCAGAGCCTTACATAAATGCGTTAGTAGCGGCAGCCTTAAATCCT  
TCTGATATTAATCTGCTAATTTGTCATCGGCCATTGCCGTACAGGCATTACCTGTAGCGCAATTCATATTCCTAAAGC  
CGCAGCCATGCCCGCAGGCGTTGCGGGTTGATATCAACAGTAGCTGTGTAGCTTTATTTCCGCTCTTGAAGTCGCTG  
CCGGATTATTAACCTGTGGAGCATATCGGCGCATTGCCATCGTTTCGGCAGATATGCTTCACGCGGTATCGACTGGGAT  
CATGAAGAGTCTTCAATTAATTTTGGTGTAGGCCGCGGCTGCGCGATTGTTGAGCGGGCGATGGGCGCAGCGGGATTAT  
CGCTAGCTGATCGAAATGTATCCCGAAGGCAGCAACTGTGTGAAATACGCGCCGGGTACGCGCGTAATCCTCCTGTT  
CTGGTGTGATGACAGCAGCTTTCTTTTTCATATGACGGGAAACCGCTGTTTTCTGTTTCTTCTTGTGAAAGAT  
TATTTTCTCGGTTGCTGCAAAAAAGCAGTCTGCAACTGGATGATATCGGCACGGTCTGTTCCACATCAGGCCAGTCTCT  
TTCCCTTGAACATATGCGTAAACGGCTGCGAGTCCCGGAACTCTGCGCTCATCGATGTGTATCGTTTTTACGGCAATCAGG  
TCGGCGCTCTATCCCAAGCGCTGCAATGAAGCGGTGATTAGCGGCTGTTTTCACAGCGGATAAACCTGTAATGTTGATT  
GGCACGGCTCGGGGTTAACGCTGGCTGGCATGTTTACCGGTGA

>Cluster\_59773

ATGATTGAAGCAGACCGTCTGATTTCTGCCGGTACCCTTTGCCGGAAGATGTAGCAGATCGCGCCATTCGCCCAAAT  
ACTGGAAGATATGTTGGTCAGCGCAGGTTCCGTTACAGATGGAGATTTTCATCAAAGCAGCGAAACGCGCGCGATG  
CCCTCGATCATTTGTTGATTTTTGGTCTCCGGGGTTGGGTAACACTACGCTTGCACCAATTTGTCGCAATGAAATGGGC  
GTTAATTTACGCAGACTTCTGGTCCGGTGTGGAAGGCGGGCGATTGGCTGCGATGCTACTAACCTTGAACCGCA  
TGACGTGCTGTTTATGATGAGATCCACCGTCTATCGCCAGTTGTTGAAGAAGTGTGTACCCGGCAATGGAAGACTACC  
AATCGGATATCATGATTTGGTGAAGGTCGGCGCAGCCTCCATTAATAATGATTTGCCCGCTTACCCTGATTTGGTGA  
ACCACGCGCGCAGGTTTCGCTGACATCACCGTTGCGCGACCGTTTTGGTATTGTGCAACGCTGGAGTTTTATCAGGTGCC  
GGATCTGCAATATATCGTCACTGCGAGCGCAGCTTTATGGGGCTTGAGATGAGTGTGACGGCGCGTGAAGTGTGCT  
GTCGCGCTCGCGGTACGCGCGCATTTGCCAACCGTCTGCTGCGTCGAGTGCCTGATTTCCGCGAAGTGAAGCAGATGGC  
ACCATCTCGGAGATATCTGCTGCTCAGGCGCTGGATATGTTAATGTCGATGCTGAAGGTTTCGATTATATGGACCGAA  
ATTTGTTGCTGGCGTAATCGATAAGTCTTTGGTGGACCTGTAGGCTGGATAACCTGGCGCAGCCATTTGGCGAAGAAC  
GTGAAACCATGAGGATGTGCTGGAACCTTATTTGATTGAGCAAGGCTTTTTGACGCGTACACCGCGTGGCGCTATGGC  
ACGACGCGGGCGTGAATCACTTTGGCATAACCGCCAGAAATGCCGTAA

>Cluster\_53606

ATGAGCCTGTTAATGACATCCCAGCCCATTTGTGATAAATCGTGATCTTGCATGCCGATTTGGTCTGAATGAGGCAATTT  
GTTGCAGAGCTTCACTTACTGGCTGAATGAAACGAATTCAGGCCTGAGCATGGCGGAATTCGCTGGGTTTATAACACGA  
CAGAACAGTGGCTGGAGCAGTTCCGTTCTGCTCAGATGCTCACCTGAAACGCACATTTGCAAGCCTGAACTACTTTGGG  
GTTTTGCGTCCGCAACCTCAATAAATCGAAGCGTGACATGACCAATTTCTACACGATCAACTATGAAAGTGAAGCTTTT  
AGAAGAGGTCAAAGTGAACGAATCCATCAGGTCAAAATGCACCTTCTCCATCGGGTCAAAGTGACTGATGGATGGCGCA  
AAATGACACGATCCATTTGGTTCAAAACGACAGCTGTCTCGGTCAAAATGGCCCAATGATCTTACAGAGATAACA  
GAGATTACTACAGAGAAATAAACCTCTTTCTGTCGGGACCTTCGCAACCGGACACGCAGGTGGCTGAACAGGATTTTT  
AACTCGCCATCTGATGCGGTTGATTTAGCCCTAAAAAGCGCAGTGGGAAACGAGGATGATTTGACCTGCGCACAGT  
GGCTCTGGAATAAATCATCGCCCTGTACGAGCAGGCCGCCGAATGTGACGGCGAGGTGGTTCGCTCCAAAGAACCGAAC  
TGGACAGCCTGGGCAACGAAATTCGCCGTGATGTGTGTCAGGATGGTGTGTAATCATAAAACAATCTGCGAGATGTACAG  
CCGGTCACTGCGGATCCGTTCTGTTGCGTAACGTGCTCAGCCCGTCAAGCTGCGGGAAAAATGGGATGAGCTTTCC  
TGCGCTTATCGCCGTCGCTCAGCAGTACACCGAAAAACGCGAAGACCGTACTTCAAATCCAGTTACGACAACCTGGAC  
TACAGCCAGATCCCGCAGGATTAGGGGGTGA

>Cluster\_47884

ATGGCTGCAACCAAGCCTGCTTTAACCACCGGGTAAAAAGGCGACATAATTTTACGCGTGTGGTAAAACTGGCGGC  
GCTGATTTGCTATTTGATGTTGGTGGCATTATTTGCTCTGATCATCTCCTCTGGCCGAGCATTCAGAAATTTGGTCT  
TGGCTTTCTATGACCAAGAGTGGGATGACCGAAGCATATACGGGGCGCTGGTCCGATCTACGGTACGTTGGTGT  
ACTTCCGTTTATCGCGCTGCTGATCGCGTCCGGTGGTTCGTTATCGGATTCGCGCTGTTCTGACTGAGCTTGGCCTGGCTG  
GCTGAAACCGCCGCTGGGTTATCGCCATTGAGCTGCTGGCAGCCATTCCAAAGTATCGGTTACGGCATGTTGGGCGCTGTTA  
TCTTTGCGCGCTGTTCCGCGTTTACTTTACAGGAGCGGTCGGCAATATCATGTGGAATATCCCGATTGTTGGCGCGCTG  
TTCTCTGGCCCGCATTTGGTATCGGATCTCTCGCGCAGGCGTGATCTCGCCATCATGATTATCCGTACATTTGCGGC  
GGTAATGCGTGATGTTTGAACAACCCCGGTGATGATGAAAGAGTGGCCTACGGTATTTGGTTCACCCAGTGGGAAG  
TTATCTGGCGTATCGTTCTTCCGTTACCAAAAAATGGTGTATTCGGCGCATCATGCTGGGGTGGGCGCGCTCGGT  
GAAACCATGGCGGTGACCTTTATCATCGGTAACACCTACCAGCTCGACAGCGCTCGCTGTATATGCCGGCAACAGTAT  
CACCTCTGCGCTGGCGAAGCAATTTGCGGAAGCGAATCCGGTCTGCAGCTTGGCGCACTGATGGAACCTGGGCTGATCC  
GTTTGTGATTACCTTTCATGCTCCTCGCGCATCGAAGTTTATGATTATGCGCCTGGCTAAGAATGAGGGGACGCTAA

>Cluster\_24022

ATGATAATGACGGTAAACAAGCATGTTAGACAATGTTTTAAGAATTGCCACAGCCAAAGCCACTTGCCTCTGGCAGGC  
ACACTATGTCAAAGACAAGTTGATGGCGAGCCATCCGGGCGTGGTCTGAACTGGTACCAGCGTGACCGCGGCGATG  
TGATTTCTGATACCGCGCTGGCGAAAGTAGCGGGAAGGCTTATTTGTAAGAGCTGGAAGTCCGCGCTCTCGGAAAT  
CGCGCGGATATTGCCGTTCAATCAATGAAAGATGTGCCGTTGAATTTCCCGAAGGTCGCGGCTGGTACCATTGCGGA  
GCGCGAAGATCCCGCGATGCTTTGATTTCAACACCTATGACAGTCTGGATGCGCTACCGGCAGGCAATGCTCGGGA  
CGTCCAGTTTACGTCGCCAGTGCACCTGGTGAACGCGCCCGGATCTGATTATCCGCTCCCCTGGCGGCAACGCTCGGC  
ACTCGCTGAGCAAACTGGATAACCGTGAATATGATGCCATCATTTCTGCGCTAGCCGACTAAAACGTTTATGCTGGA  
GTCGCCATTTGCGCGCGGTTGCCACCCGAGATTTCTCTTCCGGCGTAGGACAAGGTGCGGTGGGCAATGAAATGCGGCC  
TTGATGATACCGCACTCGCGAGCTGCTTGGCGCGTGAATCACCACGAAACTGCACCTGCGGTTACCGCAGAACGCGCC  
ATGAATACCCGCTCGAAGGCGGATGTCAGGTGCCAATTTGGTAGCTACGCCAGCTTATTTGATGGCGAAATCTGGCTCGG  
TGGCTGGTGGTGGTGGCGGAGCGTTGCGAGATTTATTCGCGGTGAACGCGCGGTCGCGCGCAAGATGCGCAAAATGG  
GGATTTGCTGCGAGAAGAGCTACTGAATAACGGCGCGCGGAGATCTCGCTGAAGTCTATAACGGAGACGCCCCGGCA  
TGA

>Cluster\_43352

ATGTGAAAACGCTTACTTGTAGTCTCTGCAGTCTCGGCAGCCATGTCGCTATGGCGTTGGCGCTCCATTAACCGTAGG  
ATTTTCGAGGTCGGATCGGAATCCGGTGGCGCGCCGAGAAACCAATGTTGGCGAAAGTGAAGCCGAAACCGCGGTA

TCACACTGAAAATTGCCGATGGTCAGCAAAGCAGGAAAACAGATTAAGCGGTACGTTCTTCGTCGCAAGGGGTG  
GATGCGATCTTTATCGCTCCGGTGGTGGCGACGGTTGGGAACCGGTATTAAGAGAGGCGAAAGATGCCGAAAATCCCGGT  
CTTCTTGCTTGACCGTTCCATCGATGTGAAAGACAATCTCTCTATATGACCACTGTCACCGCGACAACATCTCGAAG  
GCAAGTTGATTTGGTACGTTGGTGTAAAAGAAGTGAATGGCAAAACATGCAACCTGGTGGAGCTGCAGGGCACCCTGGG  
GCCCGCTCGCATTTGACCGTAAGAAAGCGTTTGGCCAGCAATTAAGAAATGCCCAAATATAAAAATATCCCGTCGCA  
GTCAGGTGACTTACCCCGCAGCAAAGGCAAGAAAGTGTGAGAGCTTTATCAAAGCGGAAAAACAACGGCAAAAACATCT  
GCATGGTTTACGCCCATAACGATGACATGGTGTGTTGGTGAATTCAGGCAATTAAGAAAGCGGGCCTGAAACCGGGTAAA  
GATATTTGACAGGCTCTATCGACGGCGTGCAGGACATCTACAAAGCGATGATTTGATGGCGAAGCGAACGCCAGCGTTGA  
ACTGACGCCGAAATGGCAGGTCTGCTTTCGATGCGCTGGAGAAATACAAAAAAGACGGCACCATGCTGAAAGCTGA  
CGTTAACCAAATCCACCTTTACCTGCCTGATACCGCAAAGAAGAGTTAGAGAAGAAGAAAAATATGGGGTATTGA

>Cluster\_21209

ATGATCAAACCGCGTTTTTCTCGTGGCTAACGTTTTTTTACGTTTCGCGCTGCGGTGGCGCTGGCGCTACAGGCAAAAGC  
CAACACCTGGCCGCTGCCGCCAGCGGCAGTCTGCTGGTTGGCGAAAACAAATTTTCATGTTGGTGGAAAATGACGGTGGTT  
CTCTGGAAGCCATCGCAAAAAATATAACGTCGGCTTTCTCGCTCTGTTACAGGCTAACCCCGCGCTTGATCTTACGTA  
CCGCGCGCGGGCAGCGTGTAAACGATCCCGTTGCAAACCTACTTCCAGATGCGCCGCGCAAGGCATTTGTGATCAATAT  
TGCGGAACCTGCGTCTTATTACTACCCCGGGTAAAAATTCGGTAACCGTGTATCCCATCGGCATTTGGTTCAGTTAGGTG  
GTGACACCGTGACACCACTGACCAACCGTTTACGACAAACGTTGCAAAACCTGCAAAACCAACCTGGACGCAACGCAACATC  
CGCGCCGTTATAAAGCACAGGGAATTGAGTTGCCGCGGTAGTGCAGGCTGGACCGGATAATCCAATGGGCCATCATGC  
GATTCGTTGCGCGCTATGCGCGCTTTATTTGCTTCATGGTACGAACGCGGATTTCCGCAATGGCATGCGGGTAAAGTT  
CTGGCTGTTATTCGTTGCGGGATGACGATATCAAACACTCTTTAGCCAGTCAACCCAGTCAACCAAGTAAATATCATC  
AACACCCGATTAAGTCTCTGCGCAACAAACCGTGCCTGCTGGTTGAAAGTACATCAGCCGCTGTCAGAGAAAGATTGA  
TGACGATCCGCGCTGCTGCCAATACGCTGAATAGCGCAATGAATCATTTAAAGATGCAGCACAACTGACGCTGAAG  
TGATGCAACATGTGATGGATGTCCTTCGGGATGCCGCTGATGTCGCCCTCATCAAGTGAGCCCAAACTCTGTAA

>Cluster\_66931

ATGCAATCAGTTATTTACTGAGCACACTGCTCCTGGTGTGACGCGCCGACGCTGTCAGATAACGCAGGATGGCAGAA  
CGCAGCACACCACAAACGACAAATTTCTGCCAGCGATCAGTTTCAAGATGCCCTCCCAAATACCGGAGGTGTTCCAGCAA  
CACTGGTAAAAGGTGAGCTGCTTCCCGCGGAGGCGAGCCGCTGGTACAGGATGCGGCAAGACTTGATTTGAGCTC  
TCCGCGCATGAAAATTCGCTCACTACGCACTCATGCGGGATAACGAGCGGGCATCAATGCGCCATCACCAGTGGTTGT  
ACCCCGTATCAGCTCTGACAGTTAATCTGCTCCCGGTGCCAGCTTCTCTTGTTCGCACAGCCATGAACAACCTGA  
GCGTGGTGACATTTACCGATATCAACGGTTCACCATGGCCACAATCCGATCCTCCTTATAACGCGGCACCAAACTCTTT  
GATGTGACGTACAACGGGAACATGGTACAGTCAACCATGCGGCCATGGGCATCCGAAACATTTCTGTCTACCTGAA  
AGGTCGTGCGGTACCGGTATCCCTGAACCTAACAGTGGCGAAACAGATACGCCGTCATCCAGTCAAGAAATGGACAGTC  
GTCGATGTCGGAATACCAGGCGAGGACCAACAGCCCGGTTGCTCCATCCGACGGATAAAATCGCCCTGCATGAT  
GCAACATTAACAGGATTTCTTGTGATGTTCTTCCCGGGACCTTCAAGTAAAGAGGCTGAAATTCACAGGTAATGTCCC  
GGATACAACGATCGCAACACGGCGATGACCTTCTGGTTCGTTCCCGGGCGATGTTGCGCGATGAATTTGAACAGACCT  
TGTCTCCCGCAGCGAACTCATCTCTGGAAGTTCCTCCGCTACCCCACTACTGACTTTCTCTGTAATGGCCAGTCCGTT  
CACGTCACACCAGAATGGAGTAA

>Cluster\_48854

ATGAACCGTTATGTAACAGGACTGGCGCTGATGTTGTTATGCTGACCGGGACGGCCAGGGCCGCTTCGGCTGAATGTGA  
AGGCAATTTTGTCAATCCAAACCGGATATCTGCTGGGAGTGTATTTTCCCGTAACCATGGCAATGTTCCCGTCGCCA  
AAGGACGTGACCGGATACGCCGAATCTTCCATGCGCATCCAGTTTTCGCCGATGGGCAATTTATACCGGGTGGGGCTG  
GCCATTTGTTACTGGGAGCCGATGGCGTACGGATGTGACACGCTCCCTTACTGATGGTGAATCTGGGGGGCTTTAA  
TATCAATATTTGGTAAATGTGGGTAGCGGCAATGGTGGTACGAAAGCGCGCAAACCGGGGCGCTTCACTATGTTCACT  
GGTACAAATACCCGTTGACCTACTGGCTGAACATTTATCAGCTGATGGCTGCTGACGGGTGGCGACCTGGATATTGGT  
TATCTGTGCGAATTTGATCCCATGTTGGGACAGCAGCTCTCTCAGCATGATATCCAGCCGGAAGCGATTTCTCTTTGGCAA  
CATCATCGCCAGGGAGCCTGTGCGGCTGATGCGGTGGCCAGTCTGGTGGTAAACCCATCGACGCGCTTTCTGTTGTTG  
CCGGCAGTCAAGGCAATGTTGACCTGTTAACGGCTATGTTTCTAACGAAATTCAGTCCGTTACAGAGCTGATGTTACTC  
AGTGAGCGCATGGCGTTCAAGCTTACCAGGCGGATGATCATGAACAGCATCGGTGAAACAGGGCTGCTGCTTTGA  
ATATCCATCCCGATCATCCCAAAGCGCTGCGGATATCACATGGTCAACAAGTATCCCGATGCGCGACAGTGTATC  
CGCTGGGGCTAGCGTAACCCGCTGGGAAGCGGGCAAGAAATGCCAAATGACCGGCGTAACTTTGGGTATCTCTTCTGG  
CGTAAGCGCAACTGCGTCTTTCTGTAA

>Cluster\_10410

ATGAGTAAACCCATTGTGATGGAACCGGTTTAAATACCGCGATGCCGATAAGATGGCCCTTATCCCGGTTAAAAACGT  
GGCAACAGAGCGCGAAGCCCTGCTGCGCAAGCCGGAATGGATGAAAATCAAGCTTCCAGCGGACTCTACACGATCCAGG  
GCATCAAAGCCCGCAATGCGCAAAAATGGCTGCTATCTGCTGCGAGGAAGCCCTGCTGCCCTAACCTGGCGAATCTTC  
AACACGGCACAGCAACGTTTATGATCTCGGCGCTATTTGTACCCGCGTGTGCTGTTCTGTGATGTTGCCACGGTCCG  
CCCGGTAGCTCTGATGCCAATGAACAGTGAACCTGGCGCAGACCATGCGGATATGGCGCTGCGTTATGTTGGTTATCA  
CCTCCGTTGACCGTATGACCTGCGCGATGGCGGTGCCAGACTTTGCGGATGTCATCTACTGCCATTCGGGAAAAAGC  
CCGCAAAATCAAAAATGAAACTCTGGTGCAGGATTTCCGTTGGTCTGATGATCGTCTGGATATTTGACTGCAACGGC  
ACCAGATGTTTCAACATAACCTGGAAACGTAACCGGATTTTACCGTCAAGTACGGCTGGTGCAGATTACAACTGGT  
CGTGAAGCTGCTGGAACGCTTTAAAGAAGCGCATCCGAAATCCCGACCAAGTCTGGTCTGATGGTGGGACTGGGTGAA  
ACCAATGAAGAAATTTTGGAGTAAATGCGGCACTGCGCGCTATGGTGTGACGATGTTAACGCTGGGGCAATATTTGCA  
GCCAAGCCGCATCACTGCGGTTCAACGTTACGTTAGCCCGGATGAGTTCGACGAAATGAAAGCGGAAAGCGCTGGCGA  
TGGGCTTTACCATGCTGATGCGGTCCGTTTGTCCGCTCTTCTTACCAGCCGATTTGCAGGCGAAAGGGATGGAAGTT  
AAGTAA

>Cluster\_61453

ATGACAAAATTACAACCTTAAGTACCGGGAGTTAAAAATATCTCGGTAATCGCTGCCAGTGAATAATCAGCCATGCCGC  
GACTGTACTTGGCATCGCACAGGCCAACGTCAGCAAATATCTTCTGATTTTGAATCAAAAGTGGGTTAAAAGTCTTTG  
ACCGAACCAACCGGACGCTGATGCTCACACCTTTTGGCACCGGCTGTTACCGTACATCAACGACATGCTGGACGAAAC  
GAGCAACTTAATAATTTTATGCAAGTATAAGCATGAGAAACGTTGCGGGTCAACATCAACGCAACCTTACCGGATAAT  
TACCTATTTATCCAAACATGTAATCGATAAAATTAAGATATCGGTGATATCACCTTATCGCTAAAACCTGCAATCTTG  
AGCGTAATGCTTTTATGAAAGCGCTGCAATTTCTGATGATTTGATGTTTAAATCAGCTACGCTCCACCAAAAAGATGAA  
TCGCTGGTTGCGAGTTTATACCAATATGCCGTAACCGCTTATGCCAGCAGCGCTTCTTGAAGAAATCCCATTTAG  
CCGTCCTGCAAGCTGCAACATCACTCTGTATTTTGTGATGCTGATGATGATGACGACGCGCAATATCTGGCGCTTCA  
ACGTCGCGGGGATGAAAGAGGTGCGGGATATCGCGTGAAGGAAATTTAGCTTTGCGACAACACGCAATCTGCGCTGGAG  
CTGGCACGAAATCACTGGGGATTTGTTTGGCGCCAGCAAAAGTGTGCGAGCGCAGTGAAGACGGCAGCTGGTGGC  
TGGTTTTCAGCAACCTTGAATGGTGGCTGGATCTGGTGGCTATCTTCCGTAACAGGGAAATACCGCCTGGCGGCTCC  
AGTATGTTGCTGATGAAATGCTGCGTGAATTCGCCACCAGCTTGTCTAGTTCGAGCAACTGCGGCTGAAACAAGCGGCG  
GAAAGCGAAGATTA

>Cluster\_35940

ATGAAAAAAGTTTTATTACAAAACCATCTGGGAGCGAGAAGTATTCTTTAATGGCTGGGAAATATTTAATAGTAATTT  
TGAACGGATGATTAAGAAAATAAGGCCATGCTGCTTTGTAAGTGGGGTTTTATTTAACATGTTGTCGCTGTAATGT  
TTGTGTTCCGAGCATAACATCCAACGGTTTGAATGAAAGAGGCTGATACCAGCGGGATGCTCTTTCTTTATATTA  
ATTTATGTCGGCCATGTTGTTTGGGCGGTTTTAAAGCAAAAAAAGAACAACTGCATTTATATCAGGCTAAAGCTATTGA  
GCCGCTCAGTATCGAGAAGTTACAGGCGCTACAATTGATCGCACCTTATCGATCTATCATAAGCAATGGTCTGAAACCC  
TGGAGTTCFGCCCGGAAAGCCTGAACCTGGCAAAGATACCTTCCAATATCATGCTTCCTTTTGACFCGATCGATATC  
ATAAGTAAAGACCGGAGTCTTTAGAGGATCAATGGGGTATCGAAGATAGCGAAAGTTATGTGCCTTAATGGAGCATTT  
TCTTTCTGGCGACATGGAGCCAATACCTTTAAAGCAAACATGGAGGAAGCCAGAGCAGGTTATCGCCTTGTGTAATA  
AATTTGCTGTTTTTCCCTCAGACTATATCTCTGATGCGCTAATCATAGCTCCGGTAAATCCTCGGCGAAGCTAATATGG  
GCGCGGAATATCATGGATGATCTCGATATCAAGCACAGCTTTTCAAACCGGACAATGAAGAAGAACTGGCTGGCA  
TTATATAATGCTTGTCTCGAAAGGCGCAGAGTTGTTGCAAGCGAAGAAGATTATCAAAAAATAGTCAAAATGGGAT  
TCTTTACTGGCCATATCTGCTGCTATCGCAGAAAAGTTAACGGATGCTGAACTTGAAGCGTGTATCGTTACGACAAGCAG  
TTTTGGGAGCACTACAGTAAGAAATGCCGTTGGCCATAAGAAATGTTCCGTTGGGAGCATCATCCGTTAAATACTCATA  
A

>Cluster\_42678

ATGAAAAAATGTTGGTATCGGCCCTCTTGGGTTGGCGACATGATGATGTCGCAAAGCTCTATCGCACGCTCCAGGCGCG  
CTATCCCCAGGCGATAATCGACGTGATGGCACCAGGCTGGTGCCTCCGTTATATCGCGGATGCCGGAAGTTAACGAAG  
CCATCCCTATGCCCTCGGTACAGGGGCGCTGGAAATCGCGCAAGCCCAAGCTGGGTCATAGTCTGCGCGAAAAACCC  
TACGACCGTGCCTACGCTTACCCAATCCTTCAAATCGCGTGTAGTGCTTTCTCGCGGGGATCCCTCATCGCACCGG  
CTGGCGCGGTGAAATGCGCTACGGTTTACTCAACGATGTCGCGCTGCTCGATAAAGAAGCCTGGCCGCTAATGTTGAAAC  
GCTATGTTGCGCTGGCCTATGACAAAGGCGTAAATGCGTACCGCACAAAGATCTACAAAACCGCTGTTATGGCCGAGTTG  
CAGGTGAGCGAAGGTGAAAAATCATATACTGTAATCAATTTTCCGCTTTCATCAGAACCTCCGATGATTTGGTTTTGGCC  
GGGGCGGAGTTTGGTCCGCAAAACGCTGGCCACACTACCATATGCTGAGCTGGCAAAGCAGCTGATGATGAAGGTT  
ATCAGGTGGTCTGTTGGCTCGGCGAAAGATCATGAAGCGGGCAATGAGATTCTGCGCTTGAATACCGAGCAGCAG  
GCATGGTGTGCGAATCTGGCGGGAGAAACACAGCTTGAATCAAGCGGTTATCCTGATGTCAGCCGTAAAGCCATTGTTAC  
TAACGATTTGGTCTGATGCACGTTGCGGCGGCGCTCAATCGTCCGCTGGTTGCCCTGTATGGACCAAGCAGCCCGGACT  
TCACACCACCGCTATCCATAAAGCAGCGGTGATCCCGCTGATACCGCTATCACAAGTGCCTAAAGGTGAGCGTAAGG  
GAGGTTATCACCAGAGCTTGTATCGACATTACTCCCAGCGCTACTGGAAGAAGCTCAACGCGCTATTGTTACAAGAGGA  
AGCCTGA

>Cluster\_40553

ATGATGGTCACTCCGTTCCGTTGAATGCACTGATGTCTCAGCGTAAATGCACTGTCGCAAAAACGGCGCGGCGCTGAC  
GTCGCTTCCCGCAATGAAGCCACGCTTTCGGCGCGTATCGAAAGGGCAATCAAACCTGGCAAGGCGAACTGCCAAAA  
GTGAGCAGGGCTATGTTGCTGCTGGAAGATAGCGAGATAGGCACAGTGGCGGGGATTTGTGCCATTGAGGTGGCAGTT  
GGGCTGAACGATCCCTGTTACAATATCGCGTCCGCGACGTTGGTTCACGCCTCAAAGAGCTGAATGTCTATAACGCATT  
CGCCAGCGTGTTCGTAACGATCACACCGGACGCAAGCTGTGACGCTGTTTTCTCGACCCGCGGCAAG  
AGGCAACGGCTATTTGCTGTCGAAATCGCGCTTATGTTTATGGCGCTTTTCGCGACAAGTTAATGACAAAGTGGTT  
GCTGAAATCGCGGGGTGATGACGAACACGGCTATTCACCGTTCGGCAAAGCCTCGGTAACCGCTTCTTTTCGATGGA  
TTTTAGCCGCGCCGATTTCTCTGCGGCAACGGGCAAAAGGCGTTTATGCGAAGTATGCGCAAAACCTCCGATCTATA  
CCCATTTTTATCCAGGAAGCCAGGACGCTACGCTCAGGTACATCCGCAAAACCGCCTGCCCTGCGGTGCTGGAG  
AAGAAGGTTTTGCTACCGTAATATATCGACATCTTTGACGCGGGCGGACACTTGAATGTGATATCGACCGGCTGGC  
CGCATCCGTAAGAGTCCGCTGGTGAAGTGGCAGAAGGGCAGCGCTGCGCAGGGCGATTTCGCGCTGCCTGGTTCGCCA  
ATGAAATATCACCATTTCGCGTGGTGGTGGTCCGATACCGTACCGCAGCAGCGGTTGATTTTAAACCGCCGACAA  
CTGGATGCCCTCAAATGCCACGCGGGGAGCGGTTGCTGCTGGTGGCCTGTGCGCAGAGGAGAAAACAGCATGA

>Cluster\_64434

ATGAGCGATTCTGTTACTACGTCAGAAGTATTACCGCAACGCGAGGATTTAAGTTCAATCCGTTGTTTTAAGATT  
GTTTTTCCGTGAGACCTACAGTTTACGAGCGAAGAGGTTTTTTCTGGATAAAAAACCGGGCAAAGTCAATATGGCGGTAT  
ATTGCGCCCCGATGATCACCGGCAAAAGTTGACCGCACTCGCGGCTATTTCAACGAACCACTTTAAACCGGGTTACAGGAA  
CCGAAACACAGATCAATCCGAATATGAGCATCAAGCGCGCGCGGTTGAGCAATTTGCCAGCCAGAAACCGCGGTCCGA  
ACGTCGTGCAAAAAATCATATGCAGAATTTGCTCGACGAGGAGCTCAGCATCAGCCAGCTCGAAGAGTTCCAGGCACTGC  
AGGCGGTTCTGTACGGTAAATACACCGTTTCGCGCAGCAATATCGAGACCTATGAGATCGACATGAGCCGCGCAGCAGC  
AATAACGTCACCTCAGTCCGGTTCGACCGCCTGGTTCGACTCAGGACGCGGAAACGATGACCCGAGCGAGATATTGAATC  
CTATGACAGCTCCGCTCCGCTGCGGTTAACGTTGATCATGATGACGCTAAAGCCTGGAAAGCAGCTTAAACGCTTTAAAA  
AATTTGGAGGCACTGGATACGCGCGCGCTCAAACAGTCACTGCAAGTCCGCTGAAAAACCTGGGGCATGTCGTT  
AGCTTTAAGGGCTACTACCGGCAACCGCGCTGTTGCTCAAAAGGGCAATACATCGACCCGTTAACAGGCACTGAAC  
GCGTTATATGCGGATAACAGATGATCTTTGGCAACAAAAACCGCGGGTCCGCACTTATGGCGCAATTCAGGACG  
AAGACGCGTGAAGAGGCTATTTGCGAAGCGACGCGCTATCCAAAAGTCTGGACCACTACCGGTGATCCGGCAGTGACG  
CAAAATGACGCAATCCGCGCCAGCAATGGTCTCACGGACGCGGACGCTTCTGTTGCGTAAAAATCGCGTAA

>Cluster\_26577

ATGGTATTGAGAATAGCTAGCTCCCTTATACCCATAACAGCGCCAGAGCTCGGCATTATGCTGTTGGTATTGCTCGC  
AGCCGTGCCAGGAATCGCAGCGCAACTGTGTTTTTGGTTGGGGTACTCTCGTTAGATCCTGTTGGCGTCCGTCAGTG  
CTCTTTCGGCCGAAGCTCTGCTCTCAAACACGCAAGCAGCTGCTGAGTCAACGTTGAAAGATAAATCAGCATTTGCTG  
ACAGGCTTATGCTGGCGGTAAGTATCCCCCTCGCGCATGTTGGATGTTGCTGCTGGGTACGGTGTGTTGCGGTGAT  
CATCGCTAAACAGTTGATGCGCGTCTGGGGCAAAACCGTTTTAATCCGGCAATGATTGGTTATGTTGCTTACTGATCT  
CCTTCCCGGTGAGATGACCAAGTTGGTTACCGCCACATGAAATTTGGGTCACATCCCTGGTTTTATCGACCACTACAG  
GTTATTTTCACTGCTCATACCGCGAGTGGTGGTATGATGAAACAGCTACGCTTATGATGATGATGATGATGATGATGATG  
ACCGCTGGATACATTTAAACCTCTGTCGCTGCGGCTCATTGGTTGAAGAGATTATGCAATAATCCGATCTACAGCGGTA  
TTCGCGCGGCGCTGGTTGGCAATGGGTAATTCGCTGCGCTGGCTGGCTGGCGGCTGTGGTTGCTATGGCAGAAAGCGATT  
CGCTGGCATATCCCCCTCAGCTTCTTAGCAACGCTGGCGTTATCGGCAACGTTGGGCTGGTTGGTTCTCACCAGATACTCT  
GGCAGCCGCAAAATCATCTGTTGTCGCTGCGGCGCAGCAATGCTCGCGCATTCTTTATTTGACTGACCGGTTACCGCTT  
CTACGACCAATCGTGGTCTTATTTTTCGCGCGCTGGCGGCTTATAGTCTGGTTGATCCGCAAGTTTCGCGGCTAT  
CCTGACGGCGTGGCTTTTCCGCTCTGCTGGCGAACATCACGGTCTCTGATGATGATGATGATGATGATGATGATGATGAT  
CGCCATCGCAAAGGTTAA

>Cluster\_11228

ATGACAGAGCGTGAAGTGTCTTATCCGTTGCGTGGGTAAGAAATTCACCGGTGCTGGCGGATTTACAGCGCACATT  
TGAGGGGAAGATGGCCTCGCAGGCAACAGCGTTTTGAAGAGAAACTGACTTCCCTGTCGCGGTTATACAGAAGCATGTGA  
CGTGGATGAGTGGCTCCGTTCTGAGGCGATGGTGGATGACGCTGTTGGGGCCATTTCGTTGATCCGCTGATGGTCTG  
GATTTATGATCCGGATGACTGACAGCAGCGGTAATGATGCGGTCGGGAAAAATCCCGTACCGACGCGGCAAAAGTAT  
CACCCCGATGATGTCGCTCCGATGCTTGAACAGATGGTGAAGGAGCGGTAAGCCATATCCCTGTTCCGCTGACGCTC

GTGACTACGATCCGGAAGTACTGCAGAAGCGGTGAATGATGCGGTGCGCAAAATATCCACAGCCGGCGGACGGTAAAAAGT  
CTCACCCCGGATGATGTGCGTCCGATGCTTGAACAGATGGTGAAGGAGCGGTAAAGCCATATTCCTGTTCGCGGTGATGG  
TCGTGACTACGATCCGGATGTTCTGCAGAAGCGGTTCGGATGCGGTGAGTGCCCTGCCGGTCCGACAGGACGGGCGTG  
ATGCCACGGCCTGGAAATACTCCCGCATTTGACGATCAAAAATCCTTTCCCGGGGACGATGCCACACACCGAGGC  
GGACTCTGGCGGGTATGAAAAACGCACAGGATGCGGGGATGGAAATGCTTGGTACGGGGTGGCGGATATTGACCT  
CAGTATGACGGGGGAGCGGTGTTCTCTGTGGTATCCGGCAGAGCAGTGGCCAGCGTACGGAAAAAACATTTTCCCTGC  
CGGTGATGCTTACCGCGGTGTGTTTACAGAGCCGGTGAACCTACCACCAGGCATACGGTGACATGGGGGGGTTCGCTG  
TGGCACTGCAACAGTATGACCGGTGATAAACCCGGAGAAGCTCATTCATCAGGCTGGACCTGGCTGCCAAACGGGGACG  
GGATGCTGGAGCGGAAAAATGA

>Cluster\_34945

ATGTCAGCGATTGATCAACCTGCGCAATATGTTATCAAGTCAGAAGACGACTTTGTATCTTTTGTAAACAGAAATGCTCGG  
AAGGAAGGATATCGACTCAAGCGACTTCACATTCCTCAACGTAGTTTTCAGTGGATGGCCAAAGATCAATATTAATGTAA  
AAGCGCATCAAAATAGATATAAATCTTTCATTGACTGCGTCAATGCTTTTGGTATGGCAGAGCTTACGATGAAATACAA  
AAAGCATTACGGTAGTCAGTCACAGCCTCATAATCGGCAGAAGCTAAAAGATGCAGAGAAAGGTTTGTGGATATTGT  
CTACCGAATAAGCGAAGGCTCAAGCCAAAGCGGATGGTACTCAGATCCGATTTAAACGGAGTGGTGACAGTGTTTACTC  
AAGCGATAGGCAAAATGACAGGAAGGCAAGCATAATGCGCCGTCGCGCTATCGTCTTAGTGGCAGCAGCGTAGGCTAT  
AAGTGGATCAATAGTACTACGAAACACAGCAGCATGCAAGATTTCTCAGGTGCAATTTGGTGGAAAAAGCCAAACG  
GGTAAACGAAGCACAAGACAATGTGCTCAAGTTGTTGATTAGCGGTCAAAACAAACATTAGCAGAGAGGTTCTGGCTCACG  
GCGAGGATGGTAAAGCAAGTGTCTTAAAGGCTTGTCTCAAGACTCGTCAAGTGTGAGAGGGTAAACAATTTGGTCAGAGAGTG  
GTAATAGAGAACAGTTGAATACCTTAAACCAAGACAATCAATGATCGAAAAAGGAACTAGAAGAGATAACTTTTA  
TGTACAGGCGCTTCTGCTCGTTCGGGAGAAACAAATCAGGACATAAATAATTTGACGTCATAAGGGTTTCAATGGTGAATCTT  
TCACCATAAAAACCTCAGCCGACATAACATCTACTGATGAGCTTCTTGAGTTTTTGAATGCTGTAGCCAAAGAATCAACT  
GTTGAAATTTTCACTAGAGTTGTAGAAAATGGGCACATTTCAACAGGGCAATTTGATAAATATATTTCCCGCAGCAAC  
AGAGTGA

>Cluster\_7582

ATGCTACCATCTATTTCAATCAACAATACCAGCGCAGCTTACCAGAATCCATCAATGAAAAAACAATGATGAAGTTAA  
TGGATTAGTACAAGAGTTCAAAAACCTTTTAAATGGTAAGGAAGGAATAAGCACCTGTATTAACATCTACTTGAGCTTA  
TAAAAACGCCATACCGATTAAACGACGATCCTTATAGATTTAAATTAATAAATTCCTCAGTTACTATATATTGATTTGAC  
TCCAATGATACAGACCATATTACTATTGGTATCGACAACCAAGAACCAATAGAATTACCTGCGAACTATAAAGACAAAGA  
ACTCGTCCGTACTATCAATTAATGACAACATAGTTGAGAAGACTCATGATATCAATAACAGGAAATGATCTTACGCGCAT  
TAAAAGAAATATATGATGGAGATCTGGTTTTATCTTCGATAAGATATCACAAAACTCAGACATACGGTAACGGAAATTT  
GATGAGAGCGGGAAGGCAACCAACCGACTTATTTACCTGGTACGGTAAAGATAAAAAAGGCGACTCTCTCGTATTGT  
AATTAATAAATAAAAACGGAAATGATTACTTATCTCTCGGTTACTACGATCAGGACGACTACCACATTCAAAGAGGAATTC  
GTATTAATGGTATAGTCTCACCCAATATTTGATGTAAGAACCGCAGGAGTGCCTCAGCGTGGTTTGAAGCAGTAAAGCT  
ATCATGGCAGAATCTTTGCAACTGGTCCGATCATCAGTTGTAACGAGCTCAACGGGGAAAGACTGAGAGAACCAAAA  
CGACGTTTTTAAACGTTTGGTTCGAGCAATAAGATATGATTTTTCAAGTGGACGATGCAAAAATAAATAAGCAGCATCAA  
AAGAAATAGTTTTCTACTTTAGTCGGTAACAAAATTAACGTTGGCCATTTCTCAAAAATAATATAAGCATTTTAAAGATCTC  
GAAGGTAATAATGAAGAAAGGTTCAAAAATCGCCAGGCTGAATATCAAAAATGAAATTAATCAACCATCTGCGCGAGGTG  
TAATTTTGGATGATATTTAA

>Cluster\_39325

ATGCCAGCAAATGAACCTGCAATGCAATCGTTGTAATCATGTGTTATTCACCTTTTAGATAAAGAGCCGATGGGGT  
GACATCTTACAGCTTAGCCAGCAGAGAGTGGCGTACCCGACGATCAACAACGCTTAATAGATGATATCTGTGGGAAAT  
ATGCAAGGGCGAATGGGAAAGGTTATGGCCATTTTGAAGATGACCTGACAATTACCCGATGCAAAACATCTGATCAGAC  
TATTTAGCTCAAGAGCATCTGATGATTTTACCGTAGCTCTGCCGATGATTCGTCATCTGGAACTCCTGGATTCAAAC  
AACACCACCTCGCTACTGGTGGCTATGTTCTATTGCGCCACATTCAGATGAATCAACACGAGCATATTTTAGTTGCCATGT  
TAAGCCCCACGACGGGAAGTGGCGTTAACGATGCTTTTGTATCCAGGAAAGTGTCTACCTTGATATCGACAAGCTACGT  
GTGGCGGGCGTATTTGACATTTACGCTCTGGCAATCAGGTGCGCAACGTTATATAAGTTTCTGAAAGGGAGCAATGCTGT  
ATCTGTTACTTTAAGCAGTTCCTGGGCTGTAACGATGTTTTGATCGCAAGCGTGAACAGAGAAATGGCGGATGCGT  
TGAAGAGTTTGGCAGTGAAGAGGCTTGACCCCGCAGTTCGAGAGGCTTTTCTGCAAACCGCCATGACCATTTGAAG  
CAACTGAGCAAGATGGTGAAGCTGTAGATCTGACAACCTTTTGAACGAGTCTGGCCACAAGAACCAGAATCTGCTATC  
GACTAAGCTGGCCAAACCAAGAACTGGAACCTGTCGGATGTTTTGTCAGATGAGCAGCTACTAAAAGGAATCAATTTCTC  
TTAAAGGAAAGTCCAATCATTTGGAGCTAAAGTTTGTATGCTGCTGTTCAAGATGGTTCAATGAGTATAATCGTGAT  
CAGGATGTAATCATTTAAGGAATATTCCTGATAGCTTCAGAGAAGAGATACTGGATGAGGTTGAGGAGTGA

>Cluster\_40387

ATGAAAAGCATTTTAAATGAAAAACCGAATCAACTGGCAATTAATCGAACCGGAAATACCCACCCGCTACGCGGGTGAAGT  
ACGAGTAAAAGTGAACCTTGGCGAATTTGTGGTTCAGATAGCCATATTTATCGTGGGATAATCCTTTTGGCAAAATATC  
CGCGCGTCAATGGTCAATGAATCTTTGGCGTCAATGATGCAAGTGGTGAAGGCGTGGAAAGCGCCAGAGTCCGGTGAACGT  
GTTGCTGTCGATCCGGTGCAGTGTGGGCATTTGCTATCCGCTCTATAGGTAACCGAACGTTTGTACGACACTGGC  
TGTATTAGGTGTGACCGTGCAGCGTGGTTTTCAGTGAATATGCTGTTTCTGCAAAAATGCGTGGAAAAATCCTGAAG  
CAGTGGCCGATCAATATGCGGTAATGATCGAACCTTTTACCATTGCGGCTAACGTAACCGGACATGGTCAACCGACTGAA  
AATGATACCGTCTGTTTATGGTGCAGGCTCAATCGGCTGACGATCGTTACAGTATTAAGGCGTCTATAACGTTAA  
AAATGTGATTTTGGCGATCGCATTTGATGAACGACTGGAAAAAGCGAAAGAGAGCGGGCAGACTGGGGATTAATAACA  
GCCAGACACCGCTTGGCGAGAGTTTTCGTTGAAAAAGGCATCAAGCCGACTTTAATATCGATGCGCTTGTCTATCTTCT  
ATCTTGAAGAGGCGGTAACGCTGGCTTCTCCAGCGGCAGTATTTGATTTGATGGGCTTCTCCAGTGAACCGTCTGAAGT  
GATTCAGCAAGGAATACCGGAAAAAGAACTCTCTATTTTCTCTCAGCTTAAATGCAAAATAAATCCCGGCTGTTATCG  
ACTGGTTAAGTAAAGGTTAATTAACCAAGAAAACTAATTTACCATACTGTTTGTATTGATTTCCAGCATGTTGCGGATGCCATT  
AGTTTATTTGAACAGGATCAAAAACATTTGCTGCAAGTCTTACTCACTTTTCTGAATAA

>Cluster\_1864

GTGACCTTCTGGAGTATTTTACGCCAACGCTGCTGGGGCTGGTGTCTGCTGGTGGCGGGCTGCTGCGTATACGTTTTAT  
TATCTCGCATCTGATCCCTGGCGATCCGCGCGGTACTGCGGGTGACCGCGCCAGCGATGCTATCGTGGAAAAATATTC  
GCCAGCAACTGGGACTGGACAGCCACTGTATGTACAGTTTTTACCCTACGTCAGCGACTGTTTTCATGGTGACTGGGA  
ACATCCATTCGTACCGGGCGTCCGGTGTGGAAGAGTTGCGTATATTTTCCGGCGACGCTGGAGCTGGCTTTTGGTGC  
CTGCTGCTGGCACTCTGATTTGGCATCCCGCTGGGCACTACTCTGCAAGTCTGGCAGAAATCGCTGGTGGATCATCTGG  
TGGCAATAATGGCAATCCCGAATCTCCACACTGCGTTCTGCGTTGGCTGGGCGTCAATTTGTTGTTATGTTGTCAT  
CTGCAAAATCTTCCCGCGCGGGAAGGCTTGTACTGGCTGGATCCCAACGCACGTTACCGGCTTTTATCTGCTCGA  
TGGCTGCTTGAAGGCAACCGGTGAAGTCTTCTTCAATCGGTTGAACAATCTCACTTACCGGCAATTAACGCTGGCTTTC  
TTACCTGGAAATTTGCTCGTCCGAGATCCGCTGAGCAATTTGAGTGAAGACTACATTCGTACCGCCCGG  
GCCAGCGGCTGGCCGGTGGTATCGTTTTATGTTATGCGCTACCCAAATGCGTTGATCCCATCGATTAACGTTATGGG  
TTTGGCGTGGCGATTTGTTGATGGCGAGTGTCAACGAAACGTTTGGCTGGCCGGATGGGTGCATGGGTAG

TAACATCAATACAGGCGCTCGACTTCCCGCAGTGATGGGCTTTGCCGTCGTGGTTTCATTTGCTTATGTGCTGGTCAAC  
CTGGTGGTGGATTGCTCTATTTGGATTGATCCGCGTATCGGACGTGGAGGTGGTGAATGA

>Cluster\_13282

ATGACCGTACGCGTAGCGATAAATGGCTTCGGTTCGCATCGGGCGTAATGTGGTTCGTGCTTTGTATGAATCCGGACGCCG  
GGCGGAAATTAACCTGGTGGCAATCAACGAACCTGGCGGATGCTGGCGCATGGCGCATTTGTTGAAATATGACACCAGCC  
ATGGCCGTTTTCATGGGAAGTACGACAGGAACCGCATCAACTTTTGTGGTGTGATGACGCCATCCGCGTATTGCATGAA  
CGTTCACCTGCAATCGCTCCCTGGCGTGAACCTGGCGTGTGATGTAGTCTCGACTGCACCGCGGTATATGGCTCCCGCGA  
GCATGGCGAAGCGCATATTGCCGCGGGGCCAAAAAAGTGTCTTTTACATCCTGGCAGTAACGATCTCGACGCGACCG  
TTGTTTACGGCGTCAATCAGGATCAACTTCGTGCGGAACACCGCATCGTTTCTAACCGTTCCTGTACCACGAATGCATA  
ATTCCCGTCAATAATTTAGATGATGCGTACGGTATTGAGTCCGGCAGTGTGACCACAATTCACCTCCGCCATGCACGA  
TCAACAGGTTATTGATGCATACCATCCTGACCTGCGTGCACCCGGGAGCCAGCCAGTCGATCATTCGGGTGCATACATA  
AATGGCCGCGGATACACAGATTTTTCCGCAATTAACGATCGCTTTGAAGCGATTGGGTACGTTGTGCCAACCCATA  
AATGTACGGCAATCGATTAAAGCGTGAAGCGTGAAGAAACCTGTAAAGCCAAATGAAGTCAACCTGTTGTGCAAAAAAG  
AGCACAAGGTGCATTTTATGGTATAGTTGACTATACGGAATGGCGTGGTCTCTGTAGATTTTAAACCAGATCCGCACA  
GTGCCATTTGTCGATGGCACCCAAACCGGGTCACTGGCCACACCTGATCAAAACGTTGGTCTGGTGCATAACGAATGG  
GGCTTTGCTAACCGAATGCTCGACACGAGTGTAGCTATGGTACTGTTGCTTTTCAGGTAA

>Cluster\_51155

ATGCTATCGAATTTAAAAATAAGGTTTTAATGATTACGGGCGGAACAGGATCTTTCGGAATACGGTTCCTCAAACGATT  
TCTAGAGACGGATATTAAGAAATGTCATTTTTCTCAAGAGATGAAAAAAACAGGAAGATATCGGAATCGCTTTGAATA  
ATAAAAACTAAAATTTGTTATTGGTGAATCTCGCTGTATGAAGATAAAATGAAGTATGAGAGGCTAGATATGTT  
TTTTATGCTGCAGCCGTAAACCAAGTGCATCGTGCATCAATTCATCAATGGAGGCCCTAAAGACAAATGGGAC  
AGAAAACGATTGATGCTGCAATTAATAATGAAGTAAAAAAGTGTGTTTGTAAAGTACAGACAAGGCTGTATATCCTA  
TTAATGCAATGGGAATATCGAAAGCAATGGCGGAAAAGATTTTTAGTTGCTAAATCAGGATCGTTGGAAGTAGTGGACCA  
ATTAAGTAGGCTAGCAATATGGTAATGTAATGGCGTCAAGAGGCTCGGTATTTCTCTTTTGTGCAAAAAATTAAGCA  
AGGCAACCATTAACCATACAGATCCTAATATGACTCGGTTTTAATGTCTTTAGAGGATTCGTGACTGGTCTCTCC  
ATGCTTTTGCCTATGGACAGCAAGGTGACATTTTTGTTCAAAAAGCTCCTGCAAGTACCGTTAATGAATATCTGTTGGC  
CTATGTGATATTTTAAATTCGCAAGTGAATATAAAATAATCGGGACCAGACCGGAGAAAAACTTTATGAAACACTAGT  
ATCAAGAGAGGAAATGGCAAAAGCACAAGATATGGGCGCTACTTTAGAAATACCGGACGATAAATAGGGATTTAAATTA  
ATAAGTATATAATATCAGGAAAGCCGAAACTAATAATATAGATGATTATACATCGCACAAATACAACAAGATTAATGTG  
GAAGAAATTAAGATCTATGTTGACTTTAGATTACATAAAATATGAGATGAGTTATTGA

>Cluster\_54453

ATGGCTGTACGAAAACCTACCACAGGAAATGGCTTTGCGAATGTTACCCCGCGGACGTAGTGGGCGTCGTGTCGTAA  
ACAATTCGCCACCAAGCGAAGCACTGGCTTTTGAGCGTACACGATGGAAGAAACCGAAGCAAGCCCTGGCTGGGTG  
AATCAGTGGATCGTCAACACTGAAAGCGTGGTTGAGCTATGTTCAAACACTACATGTTAAATCACTGACTGCTGGGCG  
CATGCTATGACAAAATGCTGCTGATGGTTGACGCTCTGGGCAATCCCTTGCAACTGATCTCACATCAAAAATGTTTGC  
CCACTATCGAATAAACCGCTGACAGGTGAGTACTTTCAGCGAGAAATGGAAGAAAGGAGCAGCCCGCTACCAATTA  
ACCTGGAGCAAAGCTATCTAAGTAGTGTTTTTAGCGAATATCCCGCTGGGCAATGGTCTGATCCGAACCCACTGGAG  
AACATCGGAAAATTCACCATCGCAGAAAAGAGATGGCATGGCTTACCCATGAGCAGATTTGTTGAATGCTGGCTGATTG  
CAAACGCTCAGGACCAATTCCTGGCACTGGTAAAGTATGCTTAAAGCACAGGCGCAGTGGGCTGAAAGTAAATC  
TTACCCGCTCACAGGTGACCAAAATCCGAAATTAACCTTTGTAAGAACGAAAGGGGAAAGAAAAACAGAAGCATCCCTATCAGT  
AAAGAGCTTTACGAAGAGATCATGGCGCTTGGTCAATTTCTTTACAGACTGCTATTTCAATTTTATCCGTGAT  
GGAAAAACGCTCTATCGTCTCCCTCGCGGTCAACTGACACAGTTCCTGCGCCATACGTTTGGCGGCGCATCATGATGT  
GGGTCGAAATATCCTGGCTTACAAAAAATCTCGGGCATACGATAAATAAGTACATGCTATGCTTACGACCATCTGGCA  
CCGGATCACCTGGAACTGCATTACGGTTAATCCGCTGGCAACACTACCAACATCAATAGCAAGTTTTTTGA

>Cluster\_45374

ATGATCGCTGAAGTTTTACAAAATAATGCGCTTAATCTGGTCAATATTTTCCGGTAGCTGCGCAGCATTTGATCTGATGAG  
CTTTTGGTTTCGCGCGGAAATCGTAAAAAGAAAAGTTTTTTATTCATGCGGTGCAATTTTTTAATCTACACCATAATTA  
TCAGTGTGTTGGTAGCATTTAATTAATATGTTATAGAAAACATAAACTCAAATTTATCACCCAGGCGTTATCGATTTT  
ATCTGTACGTCCTGATTGCGGTATTTCTGACGATTAAGCTATTTTGTCTGATTAATCAGTTTGA AAAACAGCAGATTA  
AAAAGGTGCGGATATCACAGTGCAGGATTTATGTCGCGCATTAATAATCAACATTAATGTTGGTGTGTTGTTCTGCTTT  
ATGGCGAACATTTTCGCGCATGAGCCTTTCTGGCTTGCTGACCTTTTGGTGGTATTGGTGGTCTGGCTGCGGATGGCCGGT  
AAAGATATCTGAGTAATTTCTTTTCCGGGATCATGCTCTATTTGACCGTCTTTTCAATTTGAGTATTGGCGACTGGATCCGTT  
ACCGGACAGAAATATCGAAGGTACAGTAGCGGAAATGGCTGGCGAATTAACAAAATACGACCTTTGATAATCGTCCAT  
TGTACGTACCGAATCGCTGTTTTGCTGATCAGCGTAGAAAACCCAGGACGAATGACCAACCGCGCATTAACACGACC  
ATTTGGTTTACGTTATGAGATGCGGCAAAAGTGGCGTTATTGTCGAAGCCGTACGTGAGATGCTGAAAAATACCCGCG  
CATCGACAGCGACAACCTTACTGGTTTTATTTCAACAGTTTGGCGACTCGTCAATTGATATATGTTTATGCTTTA  
CCAAAACCGGATATGGGCTGAATGGCTTGGCTGACAGCAAGAGCTTTATTTGAAGATTTATCGATATTGTGACGTACAC  
GGCGGCACTTTGCCCTTCCCGAGCAGCGCTGATATGGATAACATTAACCCGAGGAACAGGGGCGCTAA

>Cluster\_19907

ATGTCACCTAACGACAGGAGTTTACACAGATTCTGCGTGCATATTGTTCTGCATCATCTGCGCTCCTTTGCACAATC  
AGTCAAATTCGGGCTCAGGACGCTTCCCGAAGCCAAAACATTAACGATCATGTCAGCGAGGCGCGCCCGCGGATT  
TACTATTGCTGGCTGTCGCGCCAGAAAAATGGTCCGTTTTTCTCTTTTGGATTTTGGCCGTCAGGCATTAATTCATTTG  
CCAGAGCACATTCGCGAGTTCCCGAGGCTGGGACGACTCGCGGGCGCCAGCACACTCTCGCTGGAAGGGCTTATGGC  
GTTACATCCCGATTTGGTCTGTTGATGCGGCAATACGGATGAAACCTGGATCTCCAGGACAGGCGAGTTAGCGAACAGA  
CACAAATACCTGGTTATTGCTTAAACGGGAAACGGAACAATCAGCAGAACAGTTAAACAGCTTGGCAAAAACGTTAGGC  
GAAGACCCCGCCGCGCAAGCAAGCAATCTCGCAGCCGTTTCGTTGGTGAAGCTCAGGCATTCGCACTTCCGCACTCCG  
CGTAATCTCAGCTTTTATGCTGCGCGCGGTTCTCGAGGGCTGGAACGGGCTTACAGGGTTCGTTGCATACCGAGGCGG  
CGGAATTTATAGTTTGCACAACGCTGCGCAAAATAGCCGATCGCCAGGCTGACACAGGTTTCCATGAAAAATCTCCTG  
CGCTGGCAGCCGATATTAATCTGGTTTCAAGAGGCGGTTACTGCAATTTTATTCGTCGTGATCCTCTCTGGCAGGCGG  
GAAAGCGGTTGCGGAACAACGCACTTTATTTTAAAGTGCCTGCCCTTTGGCTGGCTGGATGCCCCCGGCAACACC  
GTCCTCTGGGATTAACGACACTTACGCTTGGTGGATCCCGCATCAATCGCCAGTTTAAAAGTGACATACAGCATTAC  
GCCAATCTTCTGGCATTTGTTACTCAGTACGCGCACTATCAAAAATTTGGTGGCGAGCTAA

>Cluster\_20966

ATGCGGTAAGTCTATTTTACTTCTTTCCCTTTTCTGTTATCGGCATTTTCGGCTGATAACCTGTTGCGCTGGCATGA  
TGCGCAGCATTAACAGGTGCAAGCCTCTACGCGCTTAAAGCCAAACGCGCATGGAACCTGTGCGCGCTTTATCCAGCC  
TGAAGATTCATACCTGTTTATCGTTGAATATGATGACAGGAGGCTGCTCGCCGCTACGGTGTGGAATTTAAAAGTGTG  
GAGGACGGCGCTACAGCCAGTTGGCTACGCAAGCAAGCAAACTGACAGTGTAAACAGTGGGCGCAGAGCCATTTT  
GCTCGGTTAGTACGACGCTATTTCCCGATCTGCAAAAGCAGGTAGCAAGTCTGCGGTTGATGAACTGGTGAATGCTA  
TTGATGCTCCCAGGTGAAAGCGCGTGGTGTGCCCTGGTTTCAGATGGGCTATCAACAGGGCGATATCTGGTGC





GTGCGCAGCAGATGACGCGACAGACCTTCTGGCACCGCATTAACATTATGCCGTGCTGGCGGTATCGACAGCGAAAAG  
CTGTCACCCGATGTTGCGTACGCTTTTGCCTACTTATTAATCATGGTGGGATTTGCGCGTGGTGCAGATGCT  
ACTGGGCCACAGCATCTCTCCACCAGCAAATTTATACGCATGTCGTACCGAGCGTCTGCGCACTTCATCAACAGC  
ATCACCCGCGGGCGTGA

>Cluster\_8928

ATGTGCGATATCATTGATAACTGGTTTTTCAGATCGCTTTGCGAAGGCGCCACGACCAAAAATGTTAATACTATGGCTCC  
ATTTCTAACCCCTGGCTTATCGCTACGAAGACACGCGCAGACCGGAGTATTTGCCCTGGCTTGATAGTTGGGCTGAGTGGG  
CTATGCATACTATGCCCGGTACCAACCATAACGGTATGACGATATTACCTGGCGGAAGAGAACGATCAGCAAAATGTGG  
GATGACACGTTGATGATGACCGCTCTGCCGCTGGCGAAAATAGGAAAATGCTGAACCGTAATGAATATGTTGAAGAAGC  
TGTTTATCAGTTTTCTGCTACACGTGCAAAAATTTACAGGATAGAACAACGGGCTGTGGTTTCATGGCTGGAGTTACGATG  
GATGCCATAACTTTGCCAATGCCAGATGGGCTCGTGGTAAACAGCTGGCTGACGATTTGATCCCTGACTTTTTAGAAATG  
CTTAATTTGCCGGAACCAACTCGGTACGTGGTATCTTGTTCAGGATTTACATAACGCAAAATAGAGGCGCTGGCAAAAATG  
CCAGGATGAGAGCGGTTATGGCATACGTTGCTGACGATCCAAATTCATATCTGGAATCATCGGCTACCGCAGGTTTTG  
ACTATGGCATCTGAAGGCGGTACGCAAGCATTATGTTGCCCCCTGTATGCCGAGGTAGCCGAGAAGGCAATTCGCGGG  
ATCGTGAAAAATATTTCTCCGGAGGGGAGCTTTGACAGACATCTTCCGTTACCGGATGGGAGCAAAATCTTGATTTTTA  
TCGCGAGATCCCGCTGACATCCATGCCCTACGGTCAGGCAATGGCAGTGTGTGTCTGACAGAATATCTGCGTAAATATT  
TTTTAA

>Cluster\_8271

ATGTCTCATTTAAAAGACCCGACACCGCAGTATTACACTGGTGAATATCCCAAACAGAAAACACCGACGCCAGGCATCCA  
GGCGAAGATGACACCGGTACCGGATTCGCGCGAGAAAACCTATGTTGGTAGCGGTGCGCTGAAAGATCGTAAAGACTGG  
TGACAGGGGGCGATTCCGGAATAGGTGCGCTGCCCATCGCTTACGCGCGTGAAGGGGCTGACGTGGCGATCAGTTAT  
CTTCCCGTGAAGAAGAAGACGCTCAGGATGTGAAAAGATCATGGAAGAATGCGGACGCAAAAGCCGTTCTGCTGCCAGG  
CGATTTAAGCGATGAGAAAATTTGCCCGTTTCGCTGGTTCACGAAGCGCAAAAGCGTTAGGCGGGCTGGATATTTAGCCG  
TGGCGCCCGGAGAAACAGTTGCCATTCCGGATATTGCAACACTCACGAGCAAGTTTCAAAGACCTTTGCCATTAAC  
GTTTTTCGCGCTGTTCTGGCTAACCCAGGAAGCGATCCCCCTGCTACCGAAAGGTGCAAGTATCATCACCACTTCGTCAAT  
CCAGGCATACCAGCAAGTCCGCTTACTGACTATGCGGCTACGAAGGCGGATTTGAACTACAGCCGTTGGCTTGG  
CAAAAACAGGTCGCGGAGAAAGGTTATTCGGGTGAATATTGTCGCGCCAGGCCGATCTGGACAGCACTGCAAAATTTCCGGC  
GGCAAAACAGGATAAGATCCCGCATTTGGTTCAGCAACCGCGATGAAACCGTGGAGGCAACCGCGGCAACCGCCG  
TGATATGTTTATCTGGCAAGTCAGGAGTCGAGTACGTCACCGCAGAAGTGCACGGCGTGTGCGCGGCGAGCATTTAG  
GTTAA

>Cluster\_4787

ATGGCTAAGTTTCGCGGACATCTGCCGCTGTACCGTCACTCGGAAATCTATGCCCGCCAGGGCGTGGAGCTGCACCGCAA  
TACGATGGGGCGCTGGGTTGACATCATGGGAGAGCAGCTTCGCCCGCTGTATGATGAACTGAAGCACTATGTGCTGATGC  
CGGTAAGTGCATGCGGATGACACGCGGTAATGTACTGGAGCCGGTTCAGGGTAAAACCCGTACCGGACGCGCTGTGG  
GTCATGTTCTGACGATCGCAACGCGGTTCCGACCTGCGGACGCGGTTGGTTCATATCTCCCGACCGCAAGG  
CATCCACCCACAGCAACATCTGGCGGACTACAGAGGTATCTGCGGCGGATCATATCGGGTTACAATGCTTTCACG  
AAAGCGGTCAGGCAACCGAAGCGGCTTGTATGGCAGTACCGCGCAGCAAGATCCACGATGTACATGTCCGCCATCCAACG  
ACAGTAACGGGAGAACCGCTCCGTCGTATCGGGGAACCTGACGATTCGAGGCTGAGATCCCGGCGAGTCCCGGAGAA  
GCGACTGGCGGTCGAAAAGCCAGAACCGTACCCTAATGCAAGTCTGTTGATGAGTGGCTCCAGGGCGAGTGAACACG  
TGTGCGGCACTCCGATACAGCGAAAGCCTTACCCTATCTGCTGAAGCAATGGGACGCTTGAACGAATACTGCCGAAT  
GGTGGGTGGAGATGACAACTGTTGAAACGCGCTCCGGTGTGACTGGGCGGCTAATACCGGACGCTG  
GTTTCTGCCAGGTAAGGCAACGGAACAAAAGAATCATGGTTTTTCCGGAAACCGCCACACCATGAATGA

>Cluster\_30752

ATGAAAAAAGAAATGTTTGGACGTTGCCGTTTGTATCTTGACGAAGATGTAAGAAAAATAGCCGCGATAAAATAAATATAT  
CCATGCAAAATTTGAGGAGCATAAAATAAAATAGACAACCTAAAGGGTGTGGAAACAAAATTTGATGGTCTTACAGTACT  
TTAATGTACTGAATGAACCTAGTAAATCAGGCTATCTCTTCTTTGAATATAGGAGCCTTTTCAGCATCGGAAGTATAGCT  
AGGTTATAAATAGAACAGGCTGCCAATCAATTTATATAGCAATAGATGATGGCGAAAATGCAAAAGCATTACTCAAGGC  
TAGTAAGAAATAGTTTATAGTAATGGAACCGGTGGCTGGAGTGTTTAAAATCCAAAGGAATGACTAATCCAGCAGCAA  
ATGAAAGGATTCGATGGGAAAAGAACTAATGATCTATTTAATAGATGTGGCCAAATACACCTGAATATCCAGGAACC  
AGAAAACCTTTTGAATTAATTTGGCTGGGAAACACACTATCATGCCATTACGTTCCCTTTGTGATTCATACATACAT  
CTCTGATGATATGGTAAATATAGTATCTCTATATAAATGCAATCCAAAGTGTGAAAATACTGCTATCGAATTTCTTG  
CAGTTAAACAAGAAAATAAACCGCTGGCAATTTATAATTTGTAATTGCTACGGCCCTTCGGTGTGAGGCCTTAGTAAAT  
GTATTTAACTCTTTAGGTTATCAGGATATTTATAACAGAATGACACCAACAATAGATACAGTCAACAGACTATAATTCG  
ATATGATGATTTTATCATCTCCAGAATTGATGATTTGCAATAA

>Cluster\_39603

ATGAATAATTTACCGGTGGTTTCGCTTCGCCCTGGCGGATGTGATTTTGTGTTGGGCTTACCTTTCTCTACGGCCAAAT  
GCTGATGCTTGTATCTATCTGTTTAAACAGCTCGAAGTTAGTGACGGTGTGGGCGGCTGGTCAACACGCTGGTATGGGG  
AATTTATACGCGATGACCAATGATGAGTGGGTTGTTAAGTCTGACAAATGCGGCTGTGCGGCGACGGCGCGGG  
ATCCTCGGACTATGCGCGGCTGCTGCTGGTGGCTTTGGCAGGTTTCGCGGATCAAATGGTTTTGCTTTCATGATCAC  
CGCACCGCTGGTAAATGCCAGATGTCATCAGGGTTTGTGCTGTTGTTGTTATTCGCTGCGGCTTGCTCATGCTATTGGCT  
GGCTGCGGACCGGATGCTCACCATCTGGCTGGCGCATGCTACTTCTGTACGGCTTATGTTGGCAGTCTGTTATTTCCG  
TCGGCTGCGGGAATGGATCGCTCGATAGAAGAAGCCGATGGATCTCGGTGCGAGCAGCGCTGAAAGTGTTTTTTT  
CATTACGCTACCGATGATCATGCCCGGATCATTTCTGGCTGGTACTGGCTTTTACTTTGCTGCTTGTGATGATCTGGTGA  
TCGCCAGCTTTGTTTCCGGGCGGGAGCCACGTTACCGATGCTGGTCTTTTCCAGGCTGGGATGGGGTGAATCCG  
GAAATCAACGCCCTGGCAACATTTGATCCCGGCGGCTCGAAATGTCGGATTTATCGCTGGTATCTGATGGCGCGCGC  
AGAAAACAGCGGATACGCGACATCCAGCGTGCAGACGTGGCTGA

>Cluster\_25042

ATGAACATCGAAAAAGCAGATTAATTTCTGAGCCGCCCTCATCTGAAACGCTCTCTGGGCAAAATTAACGGTAAATGA  
ATTTGCCGCAATTTGCCGGTTATTTCTGGTACATCGGTGGGCGTGAACCAATATTTGTTAGCGCAAAAGCGTTACACA  
AAGCGTTGGCGGTGGGAAAAGACTTCTCATATGAAAGACTACTGATCGCATCTCTGAATATGACTTCAACCTATGGGACGAT  
TACTCAGTCCATAAAAACAAATTTCCCAAAATTTGGGAAAAGCCGAATGGCACGGCTTACAGCAAGATTAAGCAGTCTGG  
CAGACCGGCAAGACTATCTGTTAAGTGTGGAATGGCGAAAGAGCTGGCAATGATCGAACGCAATGATCAGGGTCCGG  
CTATCCGCTGTTATTTCTACATCCAGTGCAGGAAGAATTAACAGCTAGCGTGCCTGAAATCGCCCGGCTATCAGTCCGCG  
CTAAAAGCCGTTACAGTCCGCAAAACAACTTTAAGCCAAATGTCGATGCGTGAATATGGCCCGTGGCGGAGCGGAA  
AACGACGCAACACCCTACACAACGAGAGCAATATGATTTCTGCTATCGTCTTTGGAGGGCTAACTGCTAAGCAGT  
GGGCGGGATAAATGGCTATTTCTGGCAACCTCCGACCATATGAACGCAAGACGTTGAGCACCTCTCATATCTCGAA  
AGCAACATACGCTTAATTTGATGGCAATGAAATATGAGCAGCGCAAGGAGAACTACCCGCTGTGCAACGCTG  
GCTCGCAAGCGTCTGGAGCGGTCATGTTTAA

>Cluster\_12684

ATGGCTAATGAAAAAAGACATCCCGCAAAAAGTTTCGGTGGCTGTCTCCGGATCAACTGTTGATGGCCGTGAAATCAG  
TCCGGTGCATCTCGGTGAAGCCGCGGAGAACTTCAACCCGGATGTTTACGCTGCCCGCTGAACGTTGAGCACTATCTCT  
CGCCATGCCCGTCAAGCGAATTTTCCGCAATGGGCGATGTCACCGCAGTACGGAAGACATACGGAAGGTCGCGT  
GCCGGACGTACTCGCTGTATGCAGAAATCGAAACCGCAGGCGCATGAAGCAGCTTGTGCGGGACGGCAAGAAAATCTA  
TTCCAGTATCGAATGCACCCGCGAATTTCCGTTAACGGGCGCCCTATCTGGTGGGGTGGCGATGACCCGACACCCCG  
CAAGCCTGGGCACTGAGCGCTGAAATTCACGGCACAGCAACGTCAGGCGGTGATGACGTTCAACAGTGTCCAGGGTGA  
GCACCGCTCATTTCCGAAGCCATCGAGTCTGAAATCATCGAAATGGCAGAAACAACGCCAGGAAGAGGACCCAGTGGTT  
TAACCGCTAATGGGGATTATTGGTCTGGCCGCAAAGCGGATGACGCCAGTTTCTCCCGTATTCAGGAAGCGGTGGAAG  
GCGTCGCAACGTCACAGGCGGACATATCGACCGTTTAAATGTGTGGAAACCCGCCATCAGCAGGACCCGCAAGAAATC  
ACGTCAGTACCACAGAGCTGACAGCACTGAGGAAAAAAGTGCACGCGAGGACGGCGATCCGCAAGACCCGTTACCCG  
AACGGGCGCAGCTCCGACCGAGTGGCTGACTTCTGA

>Cluster\_38390

ATGAAAGACATTAGCCTTCTCCCCCGACGTCGCGCTCTGTCTGACGGGGCCATATCTGTAATACTGAAGCTGT  
ATTATCTCCCATGCAACACACTTACGCTTACATGTAAGATATTTGCTTCCCTGTGCTCACAGAATCTCAAAGCTAATG  
TACTGCTAAATAGTGATGACCACGAAGTACCTATACATCAGAAAAATCCTGCTGCAATATGCAAAATATCGACTCTAAC  
ATCAAAACAGATGCCAACAGACTGGGGATGTCGATGAGGAGTTGAGTTATATAGGGCGAGAGAAAGCCATTGTGGA  
ACCCTCCTCGGGAGTTACCGCTAATGCCATTATGAAACTATTTCTGGACAAGGATGGCTTCACTTACTCTTGAATAATG  
AACAGACACTATCGCTCGAGCAGCTTACGAGCGCTGTCTGTATGCCGTAATGTAAGAGCTTGTATTACGTGTTAAT  
GATGGTGCCTTGGTTCATCTTACATTTGCGATATCCCAAAGGAGAAAACTCTGTGCTTTCGACTTCTGTATCAGTC  
AGATTTAGGAGAGGGCTCACAGAAAGTAAAGATTTGAGGACTGGATGACGCATAAAGCAATGACTCCGATTTGCTGG  
ATGATATTTGCAATTACTTCTCCTGTATGTATCTCAAAAATAGACAGATTTGGAGCAGATTGCAACGTTATTTGATATTGAT  
GAAATGTTAAAAATGTTACGAAAGGAAAAATATCAATATCAAAAATATGATAATTTTAGTTTCCAGTTGTTGAGTATGA  
CACCGATAACATTTGAAAAAATATTTAGATAATAAAATCACTATGTGGTTAG

>Cluster\_22242

ATGTACGTGGTATCGACAAAGCAGATGCTGAACAACCGCGAGCGGGGTTATGCGGTTCCGGCATTCAATATTCACAA  
TCTCGAAACGATGCAAGTGGTGGTGAACCCGCTGCCAGCATGATGCGCCGGTCACTATCGCCGGAACGCCCGGCACAT  
TTACTCTAGCCGGTACAGAAAAATCTGATGGCGTGGTCAAGCGGATGGCGAAGCAATATCACCATGACTGGCGATTCA  
TCTGACCATCACACGAAATTTGACGATACTGCAAGCTTCTGCTGGCGTGGCTCAGTCATGATGCAAGCTTCCGCA  
TTTGCCCTTTTGGCCAAAATATTTACGGGTCAAAGAGGTGGTGGATTTTGGCCATCGCTTGTATGTCAGCGTCAAGCGG  
AGCTGGGGCAACTTGGCGGCCAGGAAGTATGTCGCAAGTCAATGAAGCCGATGCTTTTATACCAACCCCGTTCAGGGC  
CGTGAATTTGGCGAGGCAACCGGGATTGATCCCTGGCGGTGCGCATCGGCACGGCTCACGGTATGTATGCCAGAGCACC  
GGCGTTGATTTTCTCGACTGGGAACATTTCCGAGTGGGTGAATTTACCGCTGGTGGTGCATGGCGCGTCAAGATTAT  
CGACTAAGGATATTCAGCAAAACATCAAACTGGGGATATGCAAAAATCAACGTTGCAACGGAGCTGAAAAATGCCTTCTCG  
CAGCGTTAAAAATACCTGACCGAGCACCAGGACCGGATCCCGTGTATTTGAGTGGCTGAAATCTGCAAT  
GCGCGATGTTGAGCAAAAGTATTGCCGATTGTTGGCTGCGAGGGCAGGGCATAA

>Cluster\_56155

ATGAACGGCTTACTTCGTATCCGTCAGCGTTACCAGGGCTTGCCAGAGTGATAAAAAACTGGCGGATTATCTGCTGCT  
ACAACCTGATACGGCGCGCCATTTAAGCTCTCAGCAACTGGCCAACGAAGCCGGAGTCACTAGTCCAGCGCTCGTGAAGT  
TCGCGCAAAAACCTGGCTATAAAGGTTTCCGGCGTTAAGTTGGCGTTGAGTGAAGCGTGGCAAGCGCCGGAATCA  
CCCTCCGTGCCCATTTATAACCAAATCCCGGTGATGATCCGTTACGGCTGGTGGCGGAAAAACTGATTAAGAAAAATAC  
TGCCGCTATGTACGCAACGCTAAACGTTAATAGTGAAGAGAACTGCAATGAATGCGTAACAATGTTGCGCTCTGCGCGG  
GGATAATTTGACCGGTATTTGGCGCTTCCGGTCTGGTGGCGCAAAAATTTGCCGTAAGCTGATGAAGATTGGCTTCAAT  
GCTGCCAGTGGCGGATATGCAATGCGCTACTCGCAACAGTACAGGCGTGGTGGTGGTGGTGGTGGTGGTGGTGGTGGT  
CTACACCGGTGTACGACGCGAGTTAAACCTGGCGGAGATGAGATGCTGCGAGTGGGGGAAAAAGTGTGGCGATTACCG  
GCTTTACTCCGAATGCCCTGCAACAGCGTGTCTCATTTGCCGTATATACCATTGCCGAAGAACAGCGCAAAACAGTGT  
TCAATCTCTGCTTGTACGCTCAGGGAATGTTAACGGATTGCTGTTTCAATGGCGTGAATCAGCAGGATCTGGAACCTGGC  
ACCAGAACGATTTCTCATAGTGAAGCGTGGTGAAAAACCTGGTCTGA

>Cluster\_26956

ATGACTGTCAAACAAGTAAAAACCCGAGGTCGATATGCTGAAGATAATGCATTCTCCCTCAGAAATATTCGCTTAG  
CCAATATACGAGTCCCGTCTCTGATCTTGTATGGCGTGGACTATCCAAAACCGTATCGCGGTAACATAAAAATCTGGTGA  
TCGCCGCGGACGAACGTTAATTTGCCGACCGATAACGGAAACCTGTTCTCGACCGGTAACCATCCGATTGAAACGTTGCTG  
CCGTTGTATCATCTCCATGCTGCAGGTTTCCGAATTCGAAGTGGCGACCATTTCCGGTCTGATGACCAAGTTTGAATCTG  
GGCTATGCCGACAAAGATGAAAAAGTAAATGCCATTCTTTGAACAGCATAAATCGTTATTTCCGCAATCCGAAGAACTCT  
CGGAGTTGTCGCCAACCTCAACGCTGATAGCGAATATGCAGCAATCTTTGTTCTGGTGGCATGGCGCATTTATTTGGT  
TTACCCAGAAAGCCAGACTGGCTGGCTGGCTTTACAGTGGCGCAATCAAAAATGACCGTTTGTATTCCTTCCAACTGGC  
TCCGGCGGCTTTTCTGGCACTTCCGGCAGCGATAACCACCTGAATGGTATTCTATTTGGCGATTCCAGACGCCGCGAG  
ACAAAACAACGCCAGATAATTTGGCTATATGCCGGTCTATCTCACTGGTACTTCCGGCAAGAGCTGAAGAAAAATGGGCATG  
AACATCATTAATGACGACATCACGGGCGAGTACATAAGGACCGTAAACTTCTCACCGCGGACAGTCTTTCGACGCGAA  
TGGCTGGGTAACCTGGCGGCGGTAAGGAAATGCTGCGGCTTACCGAGTTAA

>Cluster\_8426

ATGAGTCTCTCGTCTGCGGTCGCGACATTAACGGCTTTTGTGCTGGATAAACCTCAGGGTATGTCCAGCAACGA  
TGGCTGCAAAAAGTGAACGTTATATAAACGCCAACCGTGGCGGCAATCCGGTGGCTGGACCCCGTGGCGACCGGCA  
TGTTGCGGATTGGCTCGGGGAAGCGACGAAGTTTCCAGTATCTGCTGGACTCCGACAAACGCTATCGGGTCAATTGCG  
CGTCTGGACAGCGTACCATACTTCTGATGCCGACGGACAGATCGTTGAAGAAGCTCCGGTAACCTTTAGCGCAGAGCA  
GCTGGCAGCGCACTGGATACTTTCCGTGGCGATATCGAAACAGATCCCTTCGATGTATTCAGCACTGAAATATCAGGGCA  
AAAACTGTACGAATATGCGCGTCAAGGCAATGAAATTTCCGCTGAAGCGCGTCCGATTACCGTTTATGAATGCTGTT  
ATTCGCCATGAAGCAATGAGCTGGAGCTGGAATTCAGTCTCAAAGGCATTTATATCCGCACCATCATTTGATGACCT  
GGTGAAAAACCTCGGCTGGCGCGCATGTTATTTACCTGCGCGTCTGGCGTAAAGTAAATATCCGGTTGAACGGATGG  
TGACCTGGAGCACCTGCGTGAACCTTGTGAGCAAGCTGAACAGCAGGATATTCAGCCGCGGAGTTACTTGTATCCATTA  
CTGATGCCAATGGACAGTCCAGCTTCCGACTACCGGTTGAGTGAATCTTCCGTTAACGCTCTCTGTTTACTTCAAAAATGG  
TAACCCGGTTCGTACATCTGGTGGCCACTGGAAGGACTGGTTCGCGTACGGAGGTTGAGAACGGCAAAATTTATCGGTA  
TGGCGAAATGACGATGAAGGCGCGTTCGCGCTCTGCTGCTGTTGAAATCCCGCGTAA

>Cluster\_25500

ATGAGTCTGATAATATCGGTTCCGCTGTAATCGCTTCTCAGGTTGGCCATCTAATGATCTCTAAAAACAGATAACGA  
ATCAATGACATCACCCGTGACTGTGCGAGTAATAAAGATGATTGCCGCCATCTTGACCCATATCGGATAGTCTGTTGAA  
TCGATACACTTTTATAACAGCAGCGCAAAACATTTACCTCAGAGAGTCAACAGCTCATTTGAATCAGCATTTGCAAAACCTT  
CATGTGATAAATTTAAATAACCTGGAAACAAATCTCGATGAGGAGGCTACTATCTGGCTTTTGGATATAACCGTTGAC  
TCCTGACAGAATAACCGTTTCTGCTTATAAATGAAAAAAGCCTGACTGCTATGGCCAAATGCTCTTTAATAACAGGATGACG  
AAACAGACTTATTTAACCTGATAAAGTTAAAAATTTTGAAGCAGGCATAATATGTGCTCAATTTGATGAGCGATCCG

GAATTTATGTTCAAATTTAGTTATAGCGCTCAACAAAATAGATTAGAACCCTCATCTTCTGGTCCACCTATTTCCCTCT  
AAAAACAAACGAACCGGTTACGCAAGAGGATGACTGTTACTTTATCGTTCTTTAAAATGGATGGTGGATTTTAAATATAT  
TAACATCAGATGAATACATGAGTATCATGACACCTCTGATGAAGTGTGAGCGCAGCATCCACGACCACAACAGGTATGTG  
ACGGGCAAAGATACCTTTCTTCTGGACTATCCTCCTTCTGGTAACAGATATATTTCCATATTTTCCGACGAAATCAGC  
AACACTAGTCTTTATTTTCAAACAATGACATGAATGTTTCTGCTTTTGAAGAGATATTTCCGAGCCAGTATCGCTTTT  
TCAAAATGTTTACCAATCTGGCACTGGTATTGATCAGTTAACCGATGCCAATCAAATACTTTTAA

>Cluster\_33138

ATGAATACTATTGATAATACTCAAGTAACGATGGTTAATTTCCGCTTCGGAGAGTACGACCGGGCTTCCAGTGCAGTTGC  
CGCATCTGCTTTTAACTGATTTCATCTCTGCTTACTGATGGTAAGGTTGATATTTGTAAGCTGATGCTGGAAATCAA  
AACTCCTCGGCAAGATGGTGACTTATTGCAAGGATTACCAACAAAACAATTTGGCGCAAAGCTATCAGATTCAGCAGGCC  
GTTTTTGGAGGCCAGAATAAAGCTATTGAGGAAAAAAGCCGGCAACCGCTGCTTTGGTTGGCGGATTATTTTCATC  
AGCATTTGGGGATCTTAGTCTTTTTCGAGCAATGAACAACCGGCTAAAGGGCTGGTGAAGTGTGTAAGAACGACAGCT  
CTGCATCTTCAAAGGCTGCTGGTGCAGCTTCTGAGGTTTCAAGTAAAGCTCTGGTCAAGGCTACGGAAGGTTGCTGAT  
GTCGCAGAGGAGGCATCCAGTGCAGTGCAGAAAGCGATGGCCACAACAAGCAAGCAGCCAGCCGTCATCTGGCGTTGC  
AGATGATGTTGCGAAAGCCTCTGACGTTGCTGAAGATCTTGCAGACGCCGCGAGAAGACAAGCAGAATCAATAAGTTGT  
TGAATGCCGTAGATAAATGACCAATACCACAGCATTTGTTGCCGTGACCAGTCTTGC TGAAGTACGAAAACGTTGCCA  
ACAACAATATCTGATCCGCTCAAACTGACTCATAGGTTAATGAACAACGTCGGAAGTGCCTGGAAACCTTCCAGCAGG  
GAATCTGGAGCTGTATAAACAAGACGTTGCGAGAACGAGGATGATATCACGACCCGCTGCGTGATATAACGTCGCTG  
TCCGCGATCTCCTGAGGTCAGAAATCGTATGGGGCAATCGGGTGCCTTAGCTGGGTAA

>Cluster\_27207

ATGCGCGAAAAGGATTATGTCGTAATTAAGGCTCAGCGAATATGATGTCGCGGATATTCACATGAATCATTAATA  
TGCGGATTCAAATCCAGTAAAAATAAATTTACGCTGGTGGGTAGGGCGCAATATTGCACAAAACCTGGCGTTGCTGG  
GTAATAGAGCTTGGCTACTGAGCGCCGATGGCAGTGTATTTTATGGCCAAATCGCTGCTAACGCAAAACCAATCAATCTGGC  
GTTTTATGAGCTAAATGCTGATTTGTCGGGAGAAAATACGTCGAGCTATTTATCATTACTCAGATAAATCCGGTGAAT  
GCTGGTTGCTATAAATGACATGAATATTAGCAACGCTATTACAGCTGAATATCTCGCACAGCACCGTGAATTTATTCAGA  
GGGCAAAGGTCATTTGTCGGGACTGTAATATCAGTGAAGAGGCACTGGCATGGATTCTGGATAATGCTGCCAAGTACCC  
GTATTTGTCGATCCGGTTTTCAGCGTGGAAATGTGTCAAAGTGGCGGACCGTCTAAATCAAATCCACACTCTCAAGCCAAA  
CCGCTTGAAGCGAAACCCCTGAGTGGGATTGCGCTGAGTCAAGGCGTGAAGATGTGGCAAAGTGTGTCGAAAGTGTGCT  
AACATGGCCTGAACCGACTGGTATTGAGCATGGGCGCGATGGCGTTTATTACAGCGATATCAGCGGTGAAAGTGGCTGG  
TCTGCGCCGATCAAAACCAATGTTATTAATGTTACCGGAGCGGCGATGCCATGATGGCGGGCTTGCCTCGTGTGGGT  
AGACGGAATGCCGTTTGGCGAATCTGTTGTTTTCGACAGGATGTTGCTCAATGGCGCTCTCCTGTGAATACACCAATA  
ACCCGATTTATCGATTGCGCAACCTTATATCGTGTAGTGGAGAACCGAGAATGCTGTAATTA

>Cluster\_6676

ATGAATCCTTTGTTAACCATTCCCGCCGTCAGCGCTGCGTTTCCACTGGTATGCCGCTGCTAAGCGGCGAGCG  
CGTCAGCCCAACAGGAAGCGCGCTGGCAACAGTGGTATGAACAGGATCAGGATAACAGTGGGCTGGCAGCAGGTTG  
AAAACCTGCGCAACCCAGCTTGGCGGTGCTGCGGACGTTGCCAGCCGGCGGTTGCACGATACCCGCTCACCCGCT  
CACGTGATGAAAGGATTACTGCTGTTGCTCGGCGTGGCGGAGGCTGGCAGCTTGGCAGTCCGGAACCGGCGAAGGCT  
GCGGGCAGATTACCGCACCCAAAGGCAACAGTCAAGCCTCAGCAACTGGAAGATGGCTCCCTGCTCAGCTGAATACCC  
AAAGCGGGCGGATGTCGTTTGTGATGCGCATCAGCGACCCGCTCGGCTGTTGTTACGTTGAAATCGCCATTACTACCGG  
AAAGATGCCCTGCAACGCCCTTCCGTTGCTGACCCGTCAGGGCAGCTCACTGCTTTAGGGACAGAATTTACCGTCCG  
CCAGCAGGATAAATTTACGCGAGCTTACGCTTACGAGCAGCTGTGGAAGTGTCTTCCGCGTGCCTCCGCGCAAAAAC  
GCATCGTGAACGCTGGTGAAGCCTGACGTTACGCGCTGAGTTTGGCGCAGTGAACCCGCTGGATGACGAGATACA  
AGCTGACGAAGGACCTGAGCTTACGCGATAAACCCGCTGGGTGAGGTGATAGCCAGCTAACCCGTTACCGCAACCG  
CGTGTGCGCTGCGATCCCGCGTTGCCGGCTGCGCTGAGCGGGACGTTCCCGCTGAAAAATACCGATGCGATCTTGA  
ACGTTATCGCGCAACCGCTTCCGTTAAAATTCAGTCTATTACGCGGACTGGATAAACATTTACCACCTGTAA

>Cluster\_10988

ATGAAAAATCGTCTTTCTCCCTGGAATCTGGGAGCCACGCTATACATGCTGCAACACGGGAAGATATGCTGATGCCGT  
CCTGCACGGGAAAAATCCCGGCTTGGCTCTCTGGTATTGCTGGAGGATGCTGTGCTGAGTGAAGCAGACATCCCGTGC  
CCCTCAAAAATCTGGAGCACCTGCTGCACGAGCTCAGTAAACAGCATGATGAGCTGGTAAAAATGACTGGCCCTCTGGTG  
TTCATTCGCCCCCGGCATGCCAAATGGGCAGATGGTTAAAAGCGCATTATGATCTTTCCGCTGTGACGGGTTTGTGCT  
GCCTAAATTTACCCCTCAGTTGCTTAGCTGAATGGTGGGATATCATGTTGCGGACTCACCTGTGATGATGCTGCAACGCTG  
AAACAGAAGATGCTTTGACGTTGTTTACAGTGCAGGCTGGCTACCCGCTGGAGGAACATCCCTGCCACGACCCGAT  
ATTGCGCTTCCGAATCGGGCGCAACGATCTTATGAACGTTGTGCTGCTTCCCGTCCCGGGACCTGACCTGTATGACAG  
CCCGATGGGCTACGTCATCAAAATGCTCCTTCCGCTTCCGCGCGGCTGATTTGCTTCCCTGACCGGCTGTATGTTGAGC  
ATATTGACGATCAGTCCGTTATGGCCAGAGAGCTGGCTCTTGAATGGCACACGGGCTTGTGGGAAACCGCATTAC  
CCGGTCCAGATAGAGTCAATCAAAACGCGCTGATGGTCACTCAGGTTGAGCATCTGACGCTTCCGCGATCTGAGACT  
TACCAGGCGCTGTTAAGTCCGAGGAGCAATGTTGTAACCCGCCACATCCCGCTGGGCGGCTGGCATTCTGGACA  
GGCTCGTTTTTATGGGTTACAGAACGAGCAAGCGCTGATGGAATCAGATTACTTACCCTGACCCAGCATCATTA

>Cluster\_29690

ATGCCAGAGGTACAACAGATCATCCAGAGACGGGAGTTAAGCAAGCCACAGCTACGCATGGTTCGATCTCAACTTATT  
AACCGTTTTGATGCCGTGATGCAGGAGCAAAACATCACCCGTCGCGCTCATGCTCTGGGAATGTCGCAACCTGCGGTCA  
GTAACGCTGTGCAAGCCCTGAAGGTGATGTTAATGACGAGCTTTTGTTCGTTATGGCCGTTGATTTCAACCCGATGCT  
CGCGCATTTCAACTTTTTGGCTCAGTTCGTCAGGCATTGCAACTAGTACAAAAATGAATGCTGGTTCAGGTTTTGAACC  
CGCGAGCAGTGAACGCTGATTTTCATCTTTGTTGTTGACGCCGTTAGACAGCATCTGACCTCGCAGATTTATAATCACA  
TTGAGCAGATTGCCCAAATATACATGTTATGTTCAAGTCTTCAATTAATCAGAACATGACATCAGCTGCGTTATCAG  
GAAACGAGTTTGTTGATTAGTTATGAAGACTTCCATCGCCCTGAATTTACCAGTGTGCTATTATTTAAAGATGAATGTT  
GTTGGTAGCCAGCAAAAATCATCAACAATTAAGGCCGTTACTGAAACATGATGTTTATAACGAAACATGCGGCGG  
TTTTGCTCGATCGTTTCGATCATTTAGTCAAACCTGGTATGACACGGTAGATAAGCAAGCCAGTATCCGCTATCAGGGC  
ATGGCAATGATGAGCGTACTTAGCGTGGTGTGCAACAGCATCTGGTGCCTATGCGCCGCTGGTGGTGGTGAAGAGTT  
CGCTGAATCTTAGAGTTACAGGATTAACCGTCCGCTTAAAACAAAACAGCAACCTGTTATCTCTCCTGGCATGAAG  
CTGCCGGGCGGATAAAGGCCATCAGTGGATGGAAGAGCAATTAGTCTCAATTTGCAACCGCTAA

>Cluster\_56215

ATGATAACTGACATTTCAACAAAGACTGATTTTTATACAATGGCTGACCACATGGTAAATGAGGCTTGGGAAAAAATTCG  
CGATTTAGCTTATGATTACAGATATAAACCCTTGGAAATAGTTATTGTAACCGTCTGAATTTATACAGAAATCAGATA  
TTAAAATTTAGAGCATTATTTGGTTATTTGCTAGACAAAATGATTACATCTTTTAAATTTGATACTTCAATCTATTGAA  
TTCAGACTAAAAGGACTTATCTGTCGAAATATCACCTTATCTACTTATCAGAAATGCAACTCGCAATACACCTAAACCTGA  
TAGTGAAGGTAACATTTCAATTTTTCAGACTTCCACACATTTAGACGCCAAGATTTAATTAAGATATATAACTTTTCGCT  
CTAAATCACTGCCTGATGACTTTTACTTGGTTTAAATAGTATGCGCATTTCTAAGAAATCGTTTTATGATACCGTTGAT  
AAAAAACAGATATAATGCCAGAGCTAATTTTACATCAGTTGTACGCTCACAACTATCTAAATACTGATCAGCACA

CTGGATATGGCATAGGTATAAATAAAGCAATACATTCTCTGGCGGCATTAATATAGGATTAGATGAAGACGAGGATG  
AAGAAATTTTCAGGTATTGTATGGCTATGCTTCAAACCTATTATGAGTTCACCTGCAGCCATTTCCGCATGTTCAAAGGAA  
TCAGCAAAAAAATTTCTTTGGCTACACTAAAATGATTCAGGAGATACTAACTCAAAGAAAGTTCTATATGCAGAAAATG  
TGTTTCTGTATGAAAAAAGCTGGAACCTTTGATAGTAAACATCTTGACTCTGCTTTAGAAAACGGTTTCAGTACAACCGAA  
GTAAGGGGCTTACATCTGTGCAATTTGTTTAGATGAGCAGAAAACAAAACCCATAGATATATGGTAA

>Cluster\_64054

ATGCGCCCTGAGGGGGCTAAAGGCAAACGCATTGCAAAAAATTTAAAACGAAATCGGATGCAAGTTTATATGAGCGGTG  
GGTGTGGCGCAACAGCATAACAATGAGTGGAAAGGAACTCTATTGATCGCCGCTCTGTCTGAGTGTATTGACTTGT  
GGTGGAAATACCACGGCCAGCTAATGAAGTCAGGGCATAACACCGCCCTTAAATGCTGCGCTTGAGTGAAGCAATGGAT  
GACCCGTGCGTGCATAAACTTAATAACAACGATGCTCACCGAGCTACGTGTGTCCAGGATAGAGCAGGGGATACAGCCAG  
CACCATAAATCGAGAGATTGGGGCGTTAAGCGCGATGTTTACCACCTCATCTCATCCGGCCATTTCTTAACGATAACC  
CCGTTCAAGGCCCTTAAAGGAATGAAGTTAACGAGCGCGAAATGGGATATCTGAGTAAGTCTGAATGTGTTCAAGTGTGCTG  
ATGCACTGGCTGAAAATCCCGATGAACGACTGCTGTGCAAAATCTTCTGTGCACCGGGCGCGATGGGGCAGGTAGC  
GGCACTGGAGCAGCGCGGTGTTCTTATTGTGCAATCACTTTTCAAACGAAAGAACAGCAAAAACCGTACCCTTCCCTA  
TTTCTGAAAAGCCTGTTTGAAGATCAAAAACGGGGCGGAACTGGTGTTCGACGCTGGATTATTCATTGGTTCGC  
GATGTATCAAACCGGTCGACCTGATGTTCTGACGGCCAGGCTGTTTATGCGCTGCGCCACACCTTCGCCAGTCAAT  
CATGATGAACCGCGCAATATCTGACGCTCAGAAAATTTCTGGGGCAGCAAAAGATTAGACACACGATGATTTATGCC  
ATCTTGCAGCGGATTACCTGCAGGATGCGGTGAGGTTTAACTCACTAGGAGGTGCTTAA

>Cluster\_28997

ATGAATCAATCTTATGGACGGCTGGTCACTGCGGGCGGATGCTGCGACGGCGATGGCTTCGCTGCTATTGCTGATTAA  
AATTTTGGATGGTGGTATACCGGGTGGTATCTCGCCGCGTGGTGGATTGCTGGTGGATACTGGCGCGTCTGT  
TGACGAATTTACTGGTGGTGCATATCCCTGCAACCTGCCGACGATAATCACCTGTTGGTCAAGGTAAGCTGAGTCT  
CTCGCGGCTGGCGCAAAGTATGTTTATCTCCGGTTCGGCATACTTCTGTTTGGACGGGATTTCAACATCTGGTATC  
TCCAAACCGATGACAGATCCAGGCGTGGGGTTATCGTGACAATTTGGCGCTAATTTGTACGATTTACTTCTTCTGCT  
TTCAGCGTTGGTGGTGGCGCGGACGCAAGCCAGGCGGTGCGGGCTGATATGCTACATTACCAGTCTGATGTTATGATG  
AACGGCGCAATTTGCTGCGCTGGGGTGTCTGGTACGGCTGGCATCGCGCGATGCTGTTTGCATTGGGGATCGG  
CATCTATATTTATATAGCGGTTACGCATGGGATATGAGGCGGTACAGTCTACTGGATCGCGCATTCGCTGATGAGG  
AACGGCAAGAAAATTTATTGATATCTGGCTTCTTGGCGGGTGTAGCGCGCTCACGATCTTCGCACCGCGCATGG  
CCGACCCGCTTTATTCAGATTCAATTTGAAAATGGAAGACTCTCTGCTTTGGTTCAGGCACATATGGTGGCGGATCAGGT  
AGAGCAGGCTATTTTACGGCGTTTTCGGGATCGGATGATTATCCATCAGGACCCCTGTTCCGTCGTACCCAGGGAGG  
GTAACCGGCTATGCTTTCAATA

>Cluster\_45471

ATGTTGGCATTATACCGTTTTCTTTTGCAGGCTGCTGCTGGTATCAGCCACGCTTTGCCGCATGGTTCAGGACGA  
ACACGGCAGCTTTACACTCGAAAAACGCCACAACGGATTGTGGTGTGGAACCTCTGCTTCGCGATGCGCTGGCCGCGC  
TGGACGTCAAGCCGATCGGTATTGCCGACGATAACGATGCAAAACGCATCTTCCCGAAGTGGCTGGCACCTGAAACCG  
TGGCAGTCCGTCGAAACCGCGCGCAGCCGAGCTTGAAGCCATTGCGCTCGAAACCGACCTGATCATTTGCCGACAG  
CAGTCCCATGCGGGGTTTACATCGCTTGCAGCAAACTCGCGCGGTACTGCTGCTTAAAGTCCCGCAACGAAACCTACG  
CTGAAAATTTGCAATCTGCGGCTATCATCGCGAAATGGTGGGTA AAAAGCGAGAGATCGAGGACGCTTGGAAACAT  
AAAGAGAGGATGGCGCAGTGGCCAGCCAGCTTCCCAAAGGCAACCGCTGGCTTTGGCACATCACGCGAACAGCAAT  
CAACCTGCATACTCAGGAGACTTGGACCGCAGCGTCTGGCTCTCTGGGGTGAACGTTCCCGCTGGCATGGCGGTT  
CGTCCATGCGCTTCCATCGGCTGGAGCAACTGCTGGCGGTCAATCTGCTGGTGTGTTGGCCATTCGCGAAGAG  
AGCATTTGTTAAACGCTGGCAACAAGATCCGCTCTGGCAGATGTTAACCGCCGCGCAGAAAGCAGAGGTTGCTTCGGT  
CAGTAAACCTGGCGCGGATGCGGGTATTTTGTGTCAGAGCGTATGCGCGTGACACGGTAAAAATCTTCCACCATC  
AGCCGCTTACCCTTGTGAAATGA

>Cluster\_60242

ATGCCGTGGGGCGACAACAGTACCCTTAGCTATAACGGCAACTATGGCAGTGGGACGGACAGCAGCCAGGTGCGTTATTT  
TAGCCGTGTCGATGACCGGACTCCTACTCAGTTGAACATCGGCAACAGTGAACAACACACAGCGTTGATGGCTACTACA  
GCCATGATGGTTCGCTGGCGCAGGTTGACCTCAGTGGCAACTACCATGAAGGGCAATACACCTCTGCGGGCTTGTGTTA  
CAGGGCGCGCAACGCTTACTACCACGGCGGCGCACTTACCCTACCAGAAATATGGCGGGACACGCTGCTGATTGA  
TGCCGATGGCGTTGCCGATGTTCCGGTGAAGGTAACGGGGCTGCTGTTTATACCAATATGTTGGTAAAGCCCTGTT  
CTGACGTTAAACAATTTATTTATCGCAATCAGGCGTATATCGCACTCAACAAATTTGCCGAAACCGCAAGCAACCGC  
GTGGTGAAGCCACGCTAACTGAAGGAGCCATTGGCTACCAGAAATTTGCCGTCATCAGTGGTCAAAAAGCGATGGCGGT  
GCTGCGTTTACAAGATGGCAGCCATCCACCGTTTGGCGCAGAAGTAAAAAATGATAACGAGCAGACAGTGGGCTTGTG  
ATGATGACCGTAGTGTCTATCTGGCTGGGGTGAACCTGGCGAACATATGAGTGTGTTCTGGAGTGGTGTGCGCATTC  
GATATCAACCTGGCGGACCCGCTGCTGCTGCTGTTTAAACGGCTTGTACTGCGCATGCCAGCATAAAGCAACTCC  
GCCGTTGTTCTGATGACATAAAGCCTGCTATCAGGAGCAGACGCAACAGGTGACACCCACCGATCCCCCTGTTTCTG  
TTTCAGCTAACCAATAA

>Cluster\_46092

ATGGCAGAAATTTCCCGCAGCTTACTGATTTCTTAATGGCAAAAGTACTGACAACTACCCCTTGCAGCAAGCAATATGCT  
GTTGGCTGAGGAAGGAATGACGATCCATGTCGGGTCACTGGGAGAAAGGCGATGCCGCACGATATGTAGAGGAGGCC  
GGAAGTTGGGCGTCGCAACGGTGTATGCGGGTGGTGGCGATGGCACCATTAATGAAGTTTCTACGGCGTTGATTCAGTGT  
GAGGGGATGACATACCGCGCTGGGAATTTGGCATTAGGAACCGCAATGATTTGGCAACAGTGTAGGGATTCCTGA  
GGCACTGGATAAGGCGTGAACCTGGCAATTTGCCGTAACGCCATTGGCAGATAGATATGGCGCAGGTCAACAACAAACCT  
GTTTTATTAAATATGGCGACAGCGGATTTGGGACGCGTATTACACAGAAACCGCGGAAAAATTAAGCCGCGCTGGGT  
GGCGTCTTACATCATTCATGGCTTAAATGGCATGGATCTGCAACCGGACCGTTGTGAAATCCGCGGTGAAACCT  
TCACTGGCAAGGTGACGCCCTGGTCAATTTGGTATGGTAAACGGCGCTCAGGCGGTTGGCGGTGAGCAATTTGTGTCG  
CGTAAATTAACGATGGCTTGTGCAACTGCGCATTTTTACCAGGATGAAATTTCTCCGGCTCCTGATACACCTTAAAA  
TCTGACGAAGATAACCCGAATATATCGAAGGCGCTTCTGCTGCTGTTGATATACAAGCCCAACGAAATCACTTTTAA  
TCTTATGAGGCAACCGTTGAGCGGCAAAAATTTTCAATTTGAATACTTCCGGCGGCTTGGCTTGTGATACACCCAG  
ATTGTCATTTATTCGTTAA

>Cluster\_42303

GTGAAAACACTAATAAGAAAATTTCTCCCGTACGGCCATCAGGTCGATATTAGTCAATTCGGCTTTCATCGCAATTTTTAA  
TGCTTGGCTTATTTACACCGAATCCCGTGGACGCTGACGCGCGCTTTAGCGCTGACGCTGTTGGCATCGCGCGGACG  
TTTTCTGGACTCATTTACCGAGTGAATGTTATGATAAACAGCTGGTGA AAAAAGGACAGGTAAGTCTACCTACCACTG  
CCGCTTATCAAAGGCGTTGAGGAAGCGCAAGCCGATGTTGCTTATATCAGGTACTGGCACAGGAGAACGCCAGGA  
GGCGGACGCTGTAACCGTCTCGGTGTGACGGCGATGCTCGCGAAGAGATCGACAGGCCAACACGCTACTACAACAG  
TTCTGATCAGTTAGCGAAAGCGAGGACCCGCTTGGCAAAACCTGAGTCTTGAACGTACGATCTTGAACGTACATCCGCGC  
GCAGATGGCTGGGTGACCAACCTCAACGCTATACCGGTGAGTTTATTACTCGAGGATCAACGGCGTTGGCTGTTGAA  
ACAGAACTCTTCTATGACTGGCTATATGGAAGAACTAAGCTGGAAGGGTGGCGCTGGGTATCTGTGCGGAGATCA

CGCCGCTTGGCAGTAACAAAGTGTGAAAGGGACTGTTGATAGTGTGGCCGAGGGGTACCAATGCCAGCAGCACGGCT  
GACGACAAAGGGATGGCGACCATCGACTTAACCTTGAATGGGTACGTTTGGCGCAACGTGTTCCGGTACGTATTCGTCT  
CGACAACCAGCAAGAGAATCTGGCCTCGGGCACCCTGCTACGGTGGTAGTCACTGGCAAACAAGATCGGCAGGAAA  
GTCAGGATTCGTTCTCCGTAATAATGGCTCATCGCCTGGGTGAGTTTGGTTAA

>Cluster\_40219

ATGCAAGAAAATCAACAAATTAACAAGAAAACAATAACAACCTGAACAAATTAACAAAACGTCTGCGTCGTAACGTGGG  
CGAAGCCATTGCTGACTTCAATATGATTGAAGAAGGCGATCGCATCATGGTTTGCCTCFCGGGGGTAAGACAGCTATA  
CCATGCTGGAGATTCTGCGCAATTTGCAGCAAAGCGCGCAATCAATTTTTCGCTGGTGGCTTAACTCGATCAAAAG  
CAACCGGGCTTCCGGAAACAGTTCGCCCGAGTATCTTGAACCGCTGGGCGTTGAGTACAAGATTGTTGAAGAGAACAC  
TTACGGTATCGTGAAGAGAAGATTCCGGAGGGCAAACCCTTGCTCACTGTGTTCTCGTCTTCGTCGGGTATCCTTT  
ATCGCACCCGAACGGAACCTGGGGGCGACGAAGATCGCGCTGGGTCACCATCGTGACGATATCCGCAACCGCTGTTCTTA  
AATATGTTCTACGGTGGCAAGATGAAAGGTATGCCCTCCGAACTGATGAGCGATGATGGCAACATATCGTGATTTCGTC  
GCTGGCCTACTTCCGCGCAAGAGATATTAGCGCTTTGCGGATGCAAAAAGCGTTCGCCGATTATTCGCTGCACTGTGGC  
GTTCTCAGCCTAACCTGCAACGTCAGGTAATTGCTGACATGTTGCGTGACTGGGATAAACGTTATCCGGGGCGTATCGAG  
ACGATGTTTCAAGGCAATGAGAAATGTTGGTGCCTGCGATCTGTGCGATACCAACCTGTTCGATTTCAAAGGCATTACCCA  
CGGTTCTGAAGTGGTTAACGGGGGTGATCTGGCGTTGATCGCGCAGAGATCCCACTACAACCAGCGGGCTGGCAGCCTG  
AAGAAGATGAAAATCAGTTGGATGAGTTACGGCTGAATGTGGTTGAAGTGAATAA

>Cluster\_28914

ATGTTTCATCTCAGACGAAACGCTTCGTTTATTTCATCTGGTCGCCAGACACCAGAGCATTACCACCGCAGCCGAGCAGTT  
AAATAAAGTCCCTCCGCCATCAGTTACACTATCAAGAAAGCGGAAGAGACCTGGGCGTTGAACTGTTCAATTCGTAAG  
GACGCTATATTGAAATTAATCGCCAGCGGGAAGTTACTTTCATCGAACATAGCAAACTATTCCTGGCGATCGGAACATTA  
AAGCGCAACACAGTGTGATTACAGATGTTTGAAGCGTGAACGACAATTGCGGTAAACAATATTTCTGTTGTAATTT  
GCTGGTGGCATTATTCAGATTTTGAACGGCAATTCACATCAACAACACTGACGGTAGATCTTGAGGTATACAAACGGCT  
GCTGGGATCGCCTGCAGTAAGCGTGTGATCTGGTCTACGGTGCCTCATGACGATACCAAGCAGTGAAGGCATCATT  
AGCGAACCGGTCGGACAAATGGAATGGGATTTTGTGCTCAGCCACTCCACCCACTGGCAGCGAAGCGGCATCCATTAGA  
AAACAGTGAATTGCGTCAATATCCAGCGGTTTGTATCCGCGATACCTCCGTTAACTCCCGCGATGCAAGCCTGGTTGT  
TGGAAAGGCAAAAACCCATTTTGTCTGACTTCGCTACGGCAATCGCCTTAATAGAACAAAACGTCGGTATTTGGTTAT  
ATTCACATCATCTGACATTTGCCGTTATGTAACAGCGGTAATGCTTAAAAAGCCAAATGCGCGAACATAAACCGCCAC  
CAAGTTATTTCTTCCGCTCGTTCGATGTTGGGCAAGCCTGTGAGTGGTGCATAGAAATTTAAGAAACCCGCAAT  
TAATGACACGATTGTTATTTAATGA

>Cluster\_39674

ATGCCGATATCGACCTGAACGACTACCCGACCCGGATGTGGTTCGAGGAGCTGGACTTTGAAACCATTTCTTCCGCAACG  
CAAGGCGACACTGATTTCCCTTTACCCGGAAGACCAGCAGGAGGCGGTTGCCGTACCTGACGCTGGAATCCGAGCCTC  
TCCTCAAACCTGCTGGAGGAAAATGCTTATCGTGTAGCTTATCTGGCGTCAAGCGTGTGAATGAGGCCGACGCGGCGTAATG  
CTGGCCTGTGCGCGGTAATGACCTTGATGTGATGGTGCCTTACAACACCACGCGCCTGATTTACCCCGGCGAGA  
TGATTCGACCATCCCGCGACACCGCGAGTGTGAGATTGACACCGATTATCGTCTGCGTATTCAGAGCGGCTTGAGG  
GTTAAGCGTCCGCGGTCGGTGGTGCCTATCAGTATCATGGTGCAGTGCACGCGGCGGTCGGGATATCTCTGTC  
ACAGTCCGCTCCGCGCTGCGTACCATTCTCTGCTGCTCAGTGAAAATAACGCGCTGCAATCCGAAGACCTGTGCG  
CGTGGTTCGTAACGCCCTTAATGGCGAGGACCTCAGACCGGTGGCCGACCGCGTGACCTGCGCTGCGGCTCCGCTGTTG  
AATACAGATAAAACCGCCAGCTTTACCTTTACCTTGGTCCGAAAGCGAACCCATCCGCGCGGCGGCTGAAAAAATG  
GAAGCATATATCAGGCGACAGCAGCGGCTGGGGCGGACATCCGCTGCTGCTGCAATTTATGCCGCTTTCATGTGGAAG  
TGTGACGCGTGTCAACTGGCTGCACCACTGGCCGACATCGTGTCAACAGTACGCGGCTCTTCTGTACCGAATACC  
CGTCTGTACCGGAGGCTCGGATGAGTGA

>Cluster\_46066

ATGAAAAAATTTGCTATTATCGGTAAGTGTGGCATAACCAGCATCATATGGCGGATTTGAAACATTAGTTGAAAATTTAAC  
AAGATACAATTTCCCGGAGTTGAATATAATGTTTTTTGTTTCACTACAAATCCCCCAAAAAAACAATAATG  
GGCTCGTTTAAATTTATATTTCCGCTTAAAGCCAAATGGATGGCAGAGCATTTGCGTATGACATAAATTCGTTAGCATATTTCT  
ATTTTTTTGAAGCCTGATGTGATTTCTGATATTAGGGGTTTCTGGTGTTCATTTTTGCTTTCTTCAAACCTTTAACACG  
CGCTAAGTTTATTAATAATATGATGGCTTGAATGGCGAAGAGATAAATGGAATCAAAGTGAACGATTTTAAAT  
TTTTCAAAAAATCGCAGTTCAATATTCGGATGCTGTTTATACGGATAATGAGGCAATTTCTGAGTACGTTTTTAAACGAG  
TATAATAAGATAGCCGAGTTATTCGCTATGGAGGGGATCATGATGTTAAATTAAGTATGAGGATGATTTTACAACAAGAAA  
TTATAAAAGCGATTACTACCTTTCTGTATGTCGTATCGAACCCGAAACAATGTAGAATTAATTTAAAAACATTTTCAA  
AGCTAAAAATATAAAATAAAATTTTATGGAATTTGAATGGCAGCGAGTTCGGAAGAAACTTAGGCTGCATTTTCTAAC  
TATCCAAATATTGAAATGATTGATCCGATTTATGATCTTCAACAATTAATTTCACTTACGAAATAATGATGAGGATATA  
ACATGGCTCATTCGCTGAGGAAACAACCTTTCTTATGTCAGGCAATGCATTTTAAACCTATATTTTATGATGATGAT  
GTAAGTTTAAATAGGTACTACTGAAAATGAAGCATGTTATTTTCTAATGAATCTGACCTCGCAGAGAAAATCATAATG  
CATTTGTGAGCTATCATTAGGTGCTCTGCGCAGAAAATGAAAGAAATGCTAACAGAAAATACCTTGGAGACGAAATGAG  
AGAAATGTATGAGGATTTGCTATTA

>Cluster\_49106

ATGTATCGGGATACCCGTCGTGAACATATGTCGCGTTACTTCGCAACAAGGATGAGTGTAGTGTAGCGATTAGCTAA  
CTATTTTTCTGTTACCAAAGAGACGATTCGGACAGATTTAGCGTGGTTGCAAAAGCGTGGTGTAGTGTGATGATGATGATG  
GAGGCGTCTCATTTGAAAAAACAATTAATGCAAAATGCGCTTTGCAACAAGAGTATGTCGATATGAGTTTGCCTTATCAAG  
CAACAACAGCAGGGTATTGGCTATTTAACTCGCTGATGATAAAGGACGCGAATGGTAGGTAAAGTTTGTGTGTTAGG  
ATCATTTAACGTCGATATTTGTGGCGAAAGTGTATCGCTTCCGCAATGAAGCGAAACGTTAGTGGCCAGGGAACATACCA  
TGGGGCGGGGGTAAAGGCGGAATCAGGCACATAGCCGCTCATCGGGCAGGTGCGCAAAATCACTTCGCTGTAAGATT  
GGTCGCGATCAGTTTAAATCATTTTGCCTGCAATCATATTTGAGTCCATATTTGGTATTTGATTCAATTTACTTTTATGAGCTGA  
ACTATCTACCACCGGTTGTGCGGTCATTTATGTAATGATGAAGGTGAAAACATGATTGCTATGTCCTCCAGGGGCAATC  
ATGAATTAAGTGAACGATATTTTCACTTTCTACCTTATAGCCGAGTCCGATGATTTTATGATGATGATGATGATGATGATG  
AATCTTGGCGTACTCAACTGGCATTAAATGTGCTCAAAAATGCAAGGTGACAACGATTTTGAATCCTGCACCGTGGTC  
CAGTGTGTCGCCCATTTACTTTTTTGTGATATTTGACGCAAAATGAAACCGAAGCATCGGCGATGTCAGGATG  
TAATTTGACAAATTTCTGATGCTGTGAAGGCTGCGAAGCATATTTATAATGCCGGCAATGTTTCAAGTATTTATACGATG  
GAAAAACGAGGTGATTAATTTATGACGGGCAACAATGTGCGCATATTTCCGGCATTTTCCGCGAGTGTGATGATGATG  
CCAGCGCTTTCGCTTCGCTGCGAGTGAAGAAAGGAGGCGCAGCAATAATGCTGATATCTCTGAGTGGATGCCAGAAAT  
CAGCAGCAGAAATGTTGCCATTACACTTTCTGA

>Cluster\_60519

ATGGCAAGAAAAACCAAGCGTTAACTGATACGAAAATCAAGACCGCCAAACCTAAAGATGCCGATTACCAGCTTTATGA  
CGGTGACGGGCTTACTCTGTTAATCAAGTCCAGTGGCAGTAAGCTTTGGCAATTCGCTTACTATCGGCTTTGACCAAGC  
AGCGAACCAACAGAGCTTCGGTGCCTATCCTGCGCTCTGCTTTCTGATGACGTAACCTCAGAGCCGAATCTAAGTT

TTATTTGGCGAAAGACATTGATCCTCAGGAACATCAGAAAAGCAGGTGAGGAATTTCTCAAGAGGCCAAAACCAATACCTT  
CTTTGTTAGTTGCCGAGCGTTGGTGGAAATGTGAAGAAAACAGCGTAACAGAGGACTATGCCGACGATATCTGGCGCTCCG  
TTGAGAGAGATATTTCCCGGCAATCGGTGATATCAGTATCAGTATGAGATTAAGGCTCATACTCTGGTTAAAGCAGTTCAG  
CCGGTTCAGGCGCAGAGGTCATTAAGAGACTGTTTCGCGCGCTTTTGTACGCGTATTAACGAAAGTCAATGATTTATGCGCAGAA  
CACAGGCGCTCTCAGTGGTGGCCGAGAAATTAATCTTTCCAGCGGTAATCGGAAAAGCTTTTCGAGAAAACCGCAAAAAGAAAACATGCCAAGCA  
TCCGGCCGGATCAACTTCCGAGCTAATGCACACCATCGGTACGGCAAGTATCAGCATGTCCACAAGATGCCTGTTTCATG  
TGGCAACTTCTAACCCATCACCCGCCCTGCCGAAAGTGCAGGCTCGATGGGATGAGATCGATTTCAATGCTAGCGAATG  
GAAAATTCCTGCAGCTCGAATGAAGATGAACCGGGACCATACGGTTCCTACTATCTGATGGGGCTCTTGTCTATTCTGGAAA  
TGATGAAGCTCTCAGTGGTGGCCGAGAAATTAATCTTTCCAGCGGTAATCAAGCCCAACCAACCAATGAATGACCAAAACA  
GTGAATGCAGCACTCAAGCGTGCAGCTTAGGAGGTGACTTGTTCACACGGCTTGCCTTCTATCGCCAGTACGGCACT  
CAATGAGGAAAGGATTTCCACCTGATGTCATTGAAGCAGCGCTTGTCTATGTAGACAAAATGAGGTGCGTCCGCTTATA  
ACCGCAGTGATTAATCTTGGAGCAACGTCGTCGATGATGCAATGGTGGGCTGATCTCGTAAAAGCAGCAGATAGTGGTAGC  
ATCGTTTTAACTCAATTTGAGCAAAAATTCGCTTTGTCGGATAA

>Cluster\_64135

ATGTTCTCAGCCAATTACGCGTGAACCTTTGATGAATGGATGATACCTGTTTACGCTCCGGCACCCCTTTATACCGGTACG  
TGGCGAAGGTTCCGCTTGTGGGATCAGCAGGGGAAAGAGTATATCGACTTCGCGGGTGGCATTGGCGTGAACCGCTGG  
GCCATGGCATCCGGAACCTGCGTGAAGCCTGAACGAACAGCCAGTAAAGTTCTGGCATAACCGCAACGATGACCAAC  
GAGCCGGTACTGCGACTGGCGAAAAAATGATCGACGCCACGTTTCCGATCGCGTCTCTTTTGTAACTCCGGTGGCGA  
AGCCAACGAAAGCGCGCTAAAACCTGGCGCGTAAATTCGCTCAGACCGCTACGGCAGCCATAAGAGCGGCATCGTGGCCT  
TCAAAAATGCGTTTATCGTGCACGCTTTTACTGTCTAGTCCGGTGGGCGAGCCAGCTATTCAAGATTTTGGCCCA  
CTGCCGGGATATTCGTCTATGCTGCATATAACGATATTAACCTTCCAGCGCGCTGATGACCACTTACCTGTGCGGT  
GATTGTCGAACCCATCCAGGGGAAGCGGTGTGGTGCAGCCAGCAACGCTTTTACAGGCTGCGTGAATGTGTGA  
ACCGCCAATGCGCTGTTGATTTTGTAGTAAAGTACAAACCGCGTCCGGCGCACCGGGGAACGTATGCCTATATGCA  
TACGGCGTACGCGTATCTGTTAACTACCGCAAGCGCTGGCGCGGTTTCCCGTGGTGGCTTTTGGCAACCGA  
AGAGTGGCGCCGCTGATGACCGTTGGCACTCATGGCACCACCTATGGCGGTAATCCGCTGGCCTCGCGGTTGGCAGGCA  
AAGTGTGAGCTCATCAACACACCAGAGATGCTTAATGGCGTTAAACAGCGTACGACTGGTGTGTTGAGCGCTTAAAT  
ACTATTAATCACCGCTATGGTTTGTTCAGTGAAGTTCGCGGCTTAGGTTTGTGATGGCTGTGACTGAATGCCGATTA  
CCCGGGCAAGCCAAACGATCTCTCAGGAAGCGCGCAAGCAGCGCTGATGGTACTGATTTGGGGTGGCAACGTGGTGC  
GTTTTGCGCTGCGCTCAATGTGAGCAAGAAGAGGTGACGACCGGACTGGATCGCTTTCAGCTGCTTGCAGCAACTTT  
GTTAGCCGAGGTTTATCATGA

>Cluster\_11207

ATGAATGAACGTGAACCTGCCATATCCGTGCGTGGTGAAGAAATTTCCCGAGTGC TGGCGGATTTACAGCGCACATT  
TGAGGGGAAAATAGCTGCGCAGGCACAAACGTTTGAAGAAAACCTGGCGTCCCCTGTCTGTGGTATTACAGAAGTGGTGA  
CGGGCGATGATATGCGTCCGATGCTTGAAGAGGCGGTAAGCCATATCCCTGTTCCGCGTACGCGTCCGT  
GACTACGATCCGGAAGTACTGCAGAAGCGGTGAATGATGCGGTGCGAAAATATCCACAGCCGGCGGACGGTAAAAGCT  
CACCCGGATGATGTCGCTCCGATGCTTGAACAGATGGTGAAGGAGCGGTAACCATATTCCTGTTCCGCGTACGCGT  
GTGACTACGATCCGATGTTCTGCAGAAGCGGTGAATGATGCGGTGCGAAAATATCCACAGCCGGCGGATGGTAAAAGT  
CTCACCCCGGATGATGTCGCTCCGATGCTTGAAGAGGCGGTAAGCCATATCCCTGCTCCGCTGACCG  
TCTGATTAACGATCCGGAAGTACTGAAGCTGGCGGTGAATGATGCGGTGCGGAGAAATCCGCTACCGCGCACGGCAAAA  
GTATCACCCCGATGATGTCGCTCCGATGCTTGAAGAGGCTGTAAGCCATATCCCTGCTCCGCGTGT  
GGTGTGACTACGATCCGATGTTCTGCGGAAGCGGTTCCTGGAGCGGTGAATGCCCTGCGCGCTCCGAGGACGGGG  
TGATGCCACCGCTCTGGAAGTGC TCCCGCCATGACGATCAAAAATCCTTTCCCGGGGACGATGCCACACACCTGG  
GAGGATTTCTGGCGGCTATGAAAACGCACGGGATGCGGGATGGGAATGCGTGGTTGACGGGGTGGCGGATATTGAC  
GTCAGTATGACGGGGAGCGGTTGTTCTCTGTGGTATCCGGCACAGCAGTGGCCAGCGTACGGAAAAACATTTTCCCT  
GCCGGTGTGCTCTACCGCGGTGTTTACAGAGCGGTGAAACCTACCACCCCGCGATACGGTACGTTGGGGGGCTCGC  
TGTGGCACTGCAACGATGACCGGTGATAAACCCGGAGAAGCTCATTCAGGCTGGACCTGGCTGCAAAACGTGGA  
CGGATGCAAGGAGCGGAAAATGA

>Cluster\_48404

ATGAAGCTCAACGCCAGACAGGTCGAGACTGCAAAAGCCAAAAGACAAAACCTACAAAATGGCCGATGGCGCGGTTTGT  
TCTCGAGGTTTCGACCAAGGGTCTAAATACTGGCGCATGAAATACAGACGGCCCTCTGACAAAAAGAGGATCGCTCG  
CTTTTGGTGTGTTGGCTACCGGTGACGCTTGTCTCAGGCAAGAGCTAAGCCGATGAAGCTAAAAGACTATAGTACAGGC  
ATTGACCCAAAAGCCGAACGAAAAGAGCTCAAGCCGAGAATTCAGGGCGGTAATACTTTGAAACTATGCTCGGAATG  
GCACGCCAGCAACAGCGATGAGTGAAGACCATCGATCGCGCTTCTTCGCTATCTTGAAGCTTTATATCTTTCTCATA  
TCGGTTCGTCGACACTTCGCGAGCTCAAAAACAGTCACTGTTAGCCCGATTAAAAAGTTGATGCAAGTGGTAAACAC  
GATGTTGCTCAGCATTCCGCAACAGCGCTCACGGCCATAAATGCGTTCAGCCGTACAAAACGATTAACACTGATCAATCC  
AGCCAGTGAATGGCCGGTGCCTATCTACAACCAAAGCGGACATTAACCCGCTTTACCCCTAGCCGCTTCCCTGAGT  
TTCTTGTCTGCTTGTGCTGATATCGTGGCCGATAATGACACGGATCGCGGTGAGCTTCTCTACTGACCTTTGTGCGC  
TCTAGTAACTACGTTTTCGCGCTGGATGAATTCGACTTCGATAAATCTCTTGGGTATACCTGCAAGCTGGAAGA  
AATTAAGGCGTTTCTTACTCGTATCGTGGCATGAAGTGAAGAGGAGCATAAGTTCCTCTTAGTCGACAGCGCATGA  
TTTTGTTAGAGCAGCTTAAAGCAGATTAGTGGTGAATAAGAGCTACTTTTCCAGGGGATCATGACGCAACAAAGGTTATG  
AGTGAACACAGTGAACAGCGCTTACGTCGAATGGGCTATGACACGAAAACCGAAGTCTGTGGGATGGGTTTAGGAC  
GATGGCGGTGGTGCATTTGGGTGAGTCAAGGTTATGGAGCATGACGCGATAGAAAGGAGCAGTGCATTTGACAGCAGAA  
ATAGTGTGCGTGGCGATATATTCATACGCTTGAACACTTGGATGAACGTCGATTGATGGTTCAATGGTGGTCTGATTAT  
ATAGATGCAACTAAGAAAACAAATGATTACTCTTATGAGTTTGTGTA AAAAACCTAA

>Cluster\_24122

ATGACCACTCAACTGGAACAGGCTGGGAGCTTGCAAAACAGCGTTTCCGCGCAGTAGGGATTGATGTCGAGGAGGCACT  
GCGCAACTTGATCGTTTACCCGTTTCAATGCACTGCTGGCAGGGCGATGATGTTCCGGTTTTGAAAACCCGGAAGGTT  
CGCTGACCGGTGGTATTCAGGCTACTGGTAAATATCCGGGCAAGCGCTAATGCCAGCGAGCTGCGTCCGATCTGGAA  
CAGGCTATGCGGCTGATTTCCGGGCGCAAAACGGCTTAATTTACATGCCATCTATCTGGAATCAGACACGCCAGTCTCACG  
TGACCAAAATCACACACAGCACTTCAAAAACCTGGGTTGAATGGGCAAAAGCAATCGCTCGTCTGGATTTTAAACCTC  
CTGTTTTTTCGCATCCGCTAAGCGCCGATGGCTTTACGCTTTCCCATGCCGACCGCATTCGCCAGTCTGGATTGAC  
CACTGTAAGCCAGCCGCGTGTTCAGCCTATTTTGGTGAAGCACTGGCACACCGTTCGATGATGAACATCTGGATCCC  
GGATGGCATGAAAGATTAACCTTACCGCTTCCGCTTCCGCGCAGCTTGTGTCGAGCACTGGATGAAGTGAATCAGCG  
AGAAGCTAAACCTTCCGCAACATATCGACGCGGTTGAGAGCAAAATGTTTGGCATTTGGCGCGGAGAGCTACACGTTGGC  
TCCAAATGAGTTTTTACCTGGGATATGCCACCAGCGCCAGACGGCGCTGTGCTGGACCGCGGCAATTTCCACCGACTGA  
AGTGAATTTCCGACAAGATTTCCGCGCCATGCTGATGTTGCGCGAGTTGCTGCTGACGCTCAGCCGCTCGGTTCTGCTGG  
ACAGCGATCAGGTAGTACTGCTGGATGATGAAACCCAGCGGATGCGAGTGAAGATTGTTGCTGTCAGATCTGTTCCAGCCG  
GTGCATATCGCCCTGACTTCTTTCGATGCTCTATCAACCGCATTTGCCGCGTGGGTCATTTGGTACACGCAATATGAAAA  
AGCCCTGCTACGTGCGTTACTGGAACCTACCGTGAACCTACGCAAGCTGGAATCGCGGGCGATTACACTGCGCGTCTGG

CGCTACTGGAAGAGCAGAAATCGTTGCCGTGGCAGGCGGTATGGGAAATGTATTGTCAGCGTACCGATACGCCAGCGGGT  
AGCGAATGGCTGGAGAACGTGCGGGCTTATGAGAAAGAAATTTGAGTCGCCGCGGGTAA

>Cluster\_36272

ATGAACATTCACCGATCGTACAATCCGGAAATACCACACAAAACAATCAACATCATCACACAGAACAAAATCCCCAAC  
ACAAATACCGCAATCCGAATTACCTCATGGATGCGAAACGGGATTTGTTGTTAATATCCAGAGGATATACAGCAACACA  
TTCCGGAATGCGGTGAAACAAACAGCTCTGTTGGGTTTAATAAGAGATAAAGGTCTACTCTCAGGGTTAGACGCATATCTT  
GCTCCTCACCCTTGAGAAAGGCTCGGCAGAAAAAAGCATTGGATATGTTGGTTTATCAATGTTACTCAGATGGCATT  
AGAAATACCAGCACCGTTCTGTTGTAATATGGTGTTCAGATGAACATCGTAAACCAGATATTCACCCCA  
CAACCAGGAAATTAATTTTACAGTTATTTCCCTTACATGATGAGTGGGAATAAACTTCGGTGGCTCCAGGACACTC  
CAGAAGTTTCTCTCAAAATCCCAATCCATGGTTGGAGTAACAGCTCAAGTTGTTTCGTAACCACGGCATAGAACTACC  
TATAGTCAAAACAGATAATGGATGGAACTAGTTGGAGAAACACCACCTTACACCTGAAGGGCCATAAGCAAATATACGG  
AAGAATGGGTATCAGACCTGGTGGTGGTAAAGTATGGCAGCACTCCGTTGCAGAGCACTTTAGGTTTAGAATTT  
GGAGCTCAATTTAAATGGGATTTAGATAATCCTAATACAAATATGCCATTCCTTACCAATGCACCTGGCAATGGCAGTGG  
TGCTGCAGGGGATATATCTATCTCAATATACAGGAACAGACGCAATGCTGAGCCCCATGTTGGCTCGATGGCCGGAC  
AGGCTTTGGGGCATGCTGTACAATGCTACACTCCAAAGTAAAGCCAGACACTATTTTATGGTGGGCAGGTACGACTCG  
GGGCTGGCAGATTTAAACAAAGCCGAGACAGGTGAAGGCAGATTCAGTACTATCCTCGTATATGGTGGCAGCAGAGA  
AGGTGCCATCTTCCCTAATAAAGAGATATTGCCCTGCAACAGGGGCTGATATACGAGCTATGGAAGAAGGATCCCTG  
TTGGACAGCGCATCCAAATCCAGAGGATGTGGTAATCGATATCGAAAGCAATGGCTTACCACATCATAATCCATCAAT  
CATGTTGATATCTTTGATATAATCCAAGAAACAAGAGTCTAA

>Cluster\_48647

ATGGCAATCCCGTCCCTCGCTCAGTCTTGTGCAACTGCATTCCTGGACAGATGAAAGTCTTCCAGTCTCCGCATCGATTTAA  
AGTTGTTTGTGCTGGTCGACGCTGGGAAAATCCCGTTGTCGATCTCCACTATATTCGTCGGCGGCAAGGAAAAAA  
AGCAAAGGCTCTGGTATGTCGCTCCTACTTACCAGATGGCTCGCCAGATTTTGTGGGACGATCTACAGGAAGTTCTGCCT  
CGTAAGTCCGGTTAGGAAAAGAACGACACCAGATGACATCGTGTGAAGAACGGTTCCGAGATCGCCCTCAAGGTCG  
TGATAAGCCTGACACTCTGCGCGCGGTAGCGTTGCATTTTGTAGTGTGATGAATTTCCAGGATATGAAGGCTGACACCT  
GGTACAAGGTGTTACGACCTACTCTTTCATCGACACGGCGGTCACCTTATCATTGGTACGCCAAAAGGTTTCTCGGAA  
TTTCAAACTGTGGACTATAGGCCAGAACGTAGAGCTGCAAGAAAGGGACAGTGAAGAGCTGGCAGTTTGTAACTGC  
CGATTCCTCGGTTTGGTCCCTACGGCGGAAATTTGAAGCTGTAAGAACGATATGGACCCGAAATCGTTCGCTCAGGACTC  
TGGCGAGCTTTGAGAACATGTCCGGCGCGTTTACTACCCGTTTCGATCGTAACGTGCATGTAAAACCGCTTCAGTTCAAC  
CCTCGGTTGCCTATATGGTAGGACAGGACTTCAACATGACCCGATGCTTTCAGTAATTTTGCACCTCAGCCAAATGG  
TGAGCTATGGCAATGATGAATGGTGTCTTTTCTTAAACAGGCAGAGGTTTGTGATGAGCTTGAGAGACGCTTCT  
GGCCTGGAAATCACAGATAACCGTATTTCAGATCCGCGAGGTGCTTATCCCAACATGCTCGCGGGGAGCTGACGTC  
GACATATTCAAAGAGAAGGGATTCTTACGTGTCGATTTTCGAAAAGCACCCGCAATTCGGGATCGTGTAAATGCTGT  
TAACCGAATGCTGATGACCGCATCTGGAGATATCCGGTTGTATATCGATCCGAAGTGCAGCAATTTGATTGATTCAGTGG  
AAAAAGTCACTACAAGCCTGGAACACAGATATGGATAAGACAGGTGGCATTGAGCATAGTGCAGACGCATTTGGGCTAT  
CCAGTACATCGTAGGTATCCAGTCAAAAACCGTGTATCTTGGTGGTTCTAGATAG

>Cluster\_17498

ATGAAATATTTTTCAATACCCGGCTGGGGAAACCCGCTATCAGCTGGCTGACGGCTCGCTGCTGTGCAAGACGCTGCC  
GATAGGTCGAACGGTAAAGCAGCTTACGGCGTCCGATTCGCCAAACCTCAAACCCGACAGCTCGGTGAGATAGTCCG  
TAACCGGTTCTCCTGAGCAGGTAATTCATCCGGCCACGCTCGCCCTCATTCGAAGGGATGAGCATCACGATCTGCATCCT  
GAAGATGAAAACGGGAATGTGCGGCTGGTAAATCCCGAAGCTGGAAAGAGCTTGGCTGTCGGGATCTTCAGAATGTGGG  
CGCGGGATGTTAACAGTCTGATTTGATGCTGGCTGACCTTATCGTCAAAGACGAAAGCGCTATTACAGTTTATCGAAG  
ATGGCTCGGTTGAAGTGTGCTGTTGCTATGACGCGGAGTACGAGCAGACCGGACAGGTAAGCCGAGGATGATGATGAT  
ACCGGAAACCATGTGGCTCTTGTCCCTAAAGGCAGAGCCGAAATCGTTGTGCAATTTGGAGACAGAGACACAATGGCAA  
TCAAAGAAAAGCTGGTGGACCCGATGCGCACGGCCATCAAACGGGTGACGCTGACACCATGAACGAACTGGTGGAGT  
CGGCTCCCGCATCGTTACAGGAGATGAGGGGGATTTGGCCGAAAGGCTTAACTCAACATCAACCTGTCCCCGAGCAA  
CCGCTACCGGACAAAGCACAGAGATGGCGGAGGTTCCAAACCGGACAGTGAATGACCTCAAACCTAAAGCTACTGACGTC  
CCTGCTGGCTAAGCTGGAAGGAAATGCGACGGGCGATAACGACAATAAGCCTGACGATAATCCGACCGGTGACGGCGAGG  
ACGATGAAGAGGAAACACGATTACTGGTGAAGTTCAGCCGCGCTGCGGAAAGTTATCGTCCGGGTATCGATCTGAGCCGT  
AAGATGAAACCGACCGCTTCAAACGTGAGGTTCTGGCTTCTGCTGACAAAACGCTGGTTCCGAGATAGTCCGGTGTG  
GGATATCCGCAAAATACCGAAACAAATCGCTGACATGGCTTAAATGCGGTTGCTGAAATGCAAAGGCGAAACCC  
CGCCACCACCGGATGCACAGCGCTAAACATGGGCATGACAGTATCGCTTCCCTGAACAAAACAAACCGTGAATTC  
TGGCAAACCGTAAAGGGTAA

>Cluster\_28374

ATGCTGATACCCGGCTACAGGCGCAAAGCCGCAAAAAGTGACGCTGATGGTGGATGACGTTCCGGTAGCTCAGGTGTT  
GCAGGCGTGGCTGAACAGGAGAAGTTGAACCTGGTGGTTTCGCCAGACGTCAGCGGTACGGTGTCTGTTACATTTAAGT  
ACGTTCCCTGGAAGCAGGCACTACAACCTGTAGTGAAGAGCGCGGATTTGATAACCGCCAGGAGGGCAACATTTCTCTCG  
GTGATTCCTGCTGGCAGAAATGACAATATCGCCCGCAGGAGCGGACGACGCGGGCAGGCAATCTGCGCT  
GGAAAATCGCAATATTACTTGCATAACGCGGACGCGGAGGCTGGCGAAAGCGGGGAGAAGCTACTGAGTCCAAAG  
GGAGTATGACCGTCGATAAACGCACCAATCGCTTTTGTGCGAGATAACAAAACGGCGTTAAGCACGCTTGAACAGTGG  
GTATCGCAAAATGATCTGCGGTCGGGCAAGGTTGAGCTGTGCGGCGATATGTCACCATTAATGAAAAAGTTTGGCTGA  
GTTAGGTTGAAATGGACGCTGGCCGATGCGCAACAGCTGGTGGCTTGGGCAAGTCCACCGCTTGGCAGGCACTCT  
CCGTAGCGACGGGACAACGCATATCGGTTTAAACATTTGACGCATCAACGGACGTTTACTGGATCTTGGCTTCCGCG  
CTCGAACAAAACAGCAGTGGACATTAATCGCCAGTCCGCTCTGTTGGCTCACATCTCAGCTTGCAGCATTAACA  
GGGAGCGAAATTCATATCAGGTTTCCAGCGGGGAAAGTGGCGGACGCTGGTGGAAATTTAAAGAGGCGCTCTGGGGA  
TGGAAATTCAGCCACGGTGTACAAAAGGTTCTGATCCGCTGAAATTACACATCAGCCAGAACGTTCCGGGACGGTG  
CTACAGCAGGAGATGGCGAAGTGTGGCGATTGATAAGCAGGAGATCGAAACGAGGTCAGGTTCAAAGCGGAGAAAC  
GTTGGCGTGGGCGCATTTTACCCTGAAATAAATCGGGTCAAGATAGCGTACCGTTGCTTGGCGACATTCCTGGT  
TCGGGCAATTAATTTGCTCATGACGGAAGAAGATGAACGACGCGAGTTAGTGGTGTATATCACGCCACGACTGGTTCC  
AGTGAATTA

>Cluster\_53930

ATGAACTTAATGCGCGACAGGTAGACGACGCTAAACCCAGAGAGAAAGCCTATAAGCTGGCAGATGGTGTGGTTGTA  
TCTTGAGGTTGTTCCCTCTGGTTCCAGATACTGGCGGATGAAATATCGCTTCAATGAAAAGAGAAGCGTATGGCTTTG  
GTGCTATCCGGCAGGTGCTCCTTTCACAAAGCGAGGGGCACTGTGACGACGCGAAGAAAAGCTTGGCAAGGATTCGAT  
CCATCGTTGCCAAGAAAGAAAAGCTGGTTGAGATGTGCAGCTAAATAATAGTTTCCAGGCTGTGGCATTGAATG  
GCATGGAACGAAGGTGAGCCGATGGTCAAGAGTTATGCTCCGACATTAATCGAAGCCTTAAATAAAGATATTTTCCCT  
ATATTTGGCAACAAACCGGTTGAATGAAATCAAACCGTGGTTCTGCTTAATGTGCTGGTCAAGTGAAGGCGGCGG  
ACAGAGAAGGCCAAGAAGGTTCCGACGCTTGCAGCGAAGTCTTCTGTTACGCCATCGTAACCGGTCGTGGGAAATCAA  
TCTTCAGCGGATCTTACCAGCGGATGTGAGGCGATGAATCGAAGCATTATCCCTTCCCTTACTGTTGAGGAGTTACCAG



ACTTTTTTAAAGCTCTCGCAGGCTACACAGGAAGCCCGTTAGTTGTTCTTGCGGCACGCTGCTGATCCTCACGGGAGTT  
CGCACTGGCGAACTCCGAGGTGCTTTCTGGAGTGAGTTTGATCTTGAAAAAGCGGTGTGGGAGATACCTGCGGAGCGTAT  
GAAGATGAAACGGCTCACCTTGTCCCTCTCTACCCAAGCGTGGAAATCGTACAGCAACTCAAAGTGATGTCAGGGC  
AATATCCACTGGTGTTCGGGGACGTAATGATCCCCGAAAGCATGAGTGAAGCGAGTATTAATCAGGTTTTTAAAGCGG  
ATTGGATATACGGGGAGGTAACGGGCATGGTTCCGTCACACAGATGAGTACGATTTTTGCATGAGGAAGTTTCAATAC  
AGCGTGGATTGAAACCCAGCTGGCTCACGTTGATAAAAAATGCGATTTCGTGGGACGTATAACCATGCGTTGATTTGGAAG  
GACGTAGGGAGATGATGCAGTGGTATGCGGACTATATAAACGCTAATCATAATTCATGATTTTCTTTGCTGGTGAACGCT  
ACAAAGTAG

>Cluster\_21170

ATGGCCTTTTCTCAAGCGGTTAGCGGATTAACGCTGCCGCCACCAACCTCGATGTTATTGGCAACAATATCGCCAACTC  
CGCCACCTACGGCTTTAAATCAGGCACGGCCTCTTTGCGGATATGTTTGCGGCTCGAAAGTGGGACTGGGGGTAAG  
TTGCTGGTATCCTCAGGACTTTACCGATGGCAGCACCACCAACCGGGCTGGTCTGGACGTTGCTATCAGCCAGAAC  
GGTTTTTTCCGTCGTGTAGACAGCAACGCTTCGTTGTTCTACAGCCGTAAACGGACAATTTAAGCTGGATGAAAACCTAA  
CCTGGTGAATATGCAAGGTTTACAGCTGACGGGTTACCCGGCAACCGGTACGCGCGGACTATTACAGCAAGGGGCGAATC  
CGACCAATATTTCCGATTTCCGAATACCCTGATGGCAGCGAAAATACCACCCAGCGCTGATGCAAGATCAACCTGAATTC  
AGTGATCCGCTTCCCTCTGTTTAAACGCTTTGATGCCAGCAATGCCGATAGCTATAACAAAAAGTTCCGGTACTGTTTT  
CGATAGTCAAGGTAATGCTCATGACATGACGCTGACTTTGTGGAAGACCGGGGATAAATACTGGCAGGCTACACCCAGG  
ATAGCAGTATCCAACAGGTACAGCTGAGCCTGCAATGACGCTGGTGTAAATGCCAATGGCGTTCTGACCTCAGATCCA  
ACAGCGAATATTTCCACCGGGCGCAATTAACGGGCGCAGATCCCGCCACGTTAGCTGAGTTTCTCAACTCCAATGCAGCA  
AAATACCGGTGCTAACCAATTTGGCAACCACCAAGCGCTACAAACCGGGGATCTGGTGAATCAAAATCAATG  
ATGACGGTACCGTTGTGCGCAACTATTCCAACGAAACCAACCAACTGCTGGGGCAGATTGTACTGGCGAATTTGCAAC  
AACGAAGGCTGCGATCCGAAGGGGACAACGCTGGTCCGCTACGCAATCTTCGGCGTGGCGCTGTTAGGGACAGCCGG  
GACGGGCAACTTTGGCACCTGACCAACGGTGCCTGGAAGCGCTAACGTCGATCTCAGTAAAGAACTGGTCAATATGA  
TCGTTGCTCAGCGTAACTATCAGTCTAACGCCAGACCATCAAACCCAGGACAGATCCTCAATACGCTGGTTAACTTA  
CGCTAA

>Cluster\_28649

ATGTTTCACTCTCGATACTTTAGCAACGCTTGTGGCCGCAACGCTGACGTTGCTGCTCGGGCGCAAGTTGGTCCATTCCTG  
CTCCTTTTTGAAAAATACACCATACCGGAACCTGTTGCGGGTGGTTTTATTAGTGGCGCTGGCGCTGCTGATACGAAAA  
AAAGCATGGGCTGGGAAGTCAACTTTGATATGTCCTGCGCGATCCGTTGATGCTGGCTTTCTTCGCCACCATTTGGCCTG  
AACGCCAACCTTGCCAGTCTGCGAGCTGGTGGGCGTGGTGGGGGTTTTCTTCTGATTTGGTTGTTGGCTGTTGGTGTAT  
GCAAAATGCCATTGGCATTTGGTATGGCTAGCCTGTTAGGGCTTGATCCGCTGATGGGGCTGCTGGCCGGTCTATTACGC  
TTTTCCGGCGGTACCGGTACGGGCTGCTGCATGGAGTAAATGTTTTCATTGAACGTTATGGCTTACCAACCGCGACAGAA  
GCGATGGCCTGTGCAACGTTTCGGTTTGGTGTGGGCGGCTGATTGGCGGTCGGTGGCGCGCTATCTGGTGAACACTC  
CACCACACCGAACGTTATTCGGGATGACCAGGAAGTTCGACTGCGTTGCAAAAGCCGGATGTTGGCCCATGATCACCT  
CGCTGGTGTGATTGAAACTATCGCGCTGATTTGCTATCTGCCTGACAGTGGGGAAAATTTGTCGCAACTTTTGGCTGGT  
ACTGCTTTTTGAACTACCGACTTCTGCTGTTACTATTTGTTGGCTGATTTCTGAGCAACGGTCTGTCAATGATGGGCTT  
TTACCGCTCTTTGAGCGAGCGGTATCCGTTGCTGGTAACGTAAGCCTGCTGTTCTTGGCGATGGCGCTGATGGGGC  
TGAAACTTGGGAGCTGGCTTCGCTGGCCTGGCGATGCTGGCGATTCGGTGGTACAGACCACTTCTTACGGCTTGTAT  
GCCATCTTCGTTACTTACCGCGCATGATGGGCAAAAATACGATGCGGCGAGTCTGGCTGGCGGCTACTGTGTTTTGGCCT  
CGGTGCAACGCCAACAGCAATCGCAACATGACGGCGACTACTGAACGCTTTGGCCGCTGCGCATGGCGTTCTGGTGTG  
TGCCGATGGTGGTGGTCTTTATCGATATCGTCAATGCGCTGGTGAATTAAGCTGATTTGATGTTGCCGATTTTACG  
GGTAA

>Cluster\_23977

ATGTGGTGGCCTTTTAGTCGTAATAAAGCGATCTGCGTAACCTGTCCATTGATGATTTTCTGGCGTTGCTGGTGTACC  
AAATACCGGATCCGGAGATATGTTTCTGCCGGGACGGTGAATCATTGCCTGCTGTGATGAACGCGGTTTCTGTCTATCG  
CTGAGGCGGTGGCCACGATGCGGTGTTACCTGTATCTGGTACGCAATGATAAGGGCAGAGAGGCGGGGAATGGCTGGAC  
AGTCAACCGGTAGATATTTCTGCTGAATGACAGCCTAAATTCGTGCTGACACCTTACCAGTTTAAACGCACAATGATGGC  
TCACTGCCGTGTAACCGGTAACGCTATGCGGTTATTGAGTGGGGGCGGGACGGGCGAGCCAAAATCACCTTATCCTTATG  
CGCCGGGTTGTGTTGACCGGAACGCACAGGCACACAAATACCGCTATACCATCACCGAACCTGTACAGGAACCGGTG  
CGCAGCTATTTACAGGAAGAAGTTCTGCATCTCCGCTATGCCTCGGATGATGGCTTTCGGGGCTTCCCCCGTACGAT  
TTCCCGTGGGCGCTGGGCTTGGCCTTCTCAACAGCCTCACGGAGCCAGCATTATGAAAGATGGCATGGCGGCGAG  
GGATTATCAGCTCAGGTGAATGGCTGGACGGCTGAAAGGTAACAGGCATTAGACGCCTGGAACGCTACAAGGGGGCG  
AAAAATGCCGGAACCGCAATCCTTGAAGGGGGCATGGATTACAGGCGAGTGGGGATGAGTAAACAGGATGCGGAATG  
GCTGGCCTCCCGCTCTCATTGAAGACATCGCCAGGATGTTCAACGTTGCTGCGGATTTTTCTTACAGGAATACAGCA  
ACAGCACTTACAGCAATTTCAAGTGGGCGAGCCGCGCATTTCTGACCATGACAATGCGCCGCTGGCTGGCGAATTCGAA  
CAGCAATCAAGGCGCTTGTGCTGGTACTTCTCCGTTACCTGGTACCGTTATCTGTTGAGTTTGAATCAGCCGATTT  
ACTGCGGCCACACCCACCGAAGCTTATGCCAGTATGAGAAAGGGATTAAGAGCGGGATCATGAATCCGAACGAAGCTC  
CGAACCGGAGGGTATGCCCGCGGTGAAGTGGTGTGATGAGTTACGCCAGGATGGAACAGACTGTGAAATTAAGGG  
AGAAAAGATGAGTGA

>Cluster\_41303

ATGTCCCCATTGAAAAATCCAGCAAAATAGAGAATGTCTGTTATGACATCCGTGGTCCGGTGTGAAAGAAGCAAAAACG  
CCTGGAAGAAGAAGGTAACAAGGTACTGAAACTGAACATCGGCAACCTGCCCGTTCCGTTTTGACCGCCAGATGAAA  
TTCTCGTTGACGTGATACGCAACCTGCCACCGCTCAAGGGTATTGCGATTCCAAAGGCTTTTACTCCGCGCTAAAGCC  
ATCATGCAGCACTATCAGGCTCGTGGCATGCGTGTATTTACCGTGAAGATATTTACATCGGCAATGGTGTATCGGAGCT  
TATCGTTACAGCAATGACAGGATTTGCTGAACAGCGGGGACGAAATGTTGGTTCTTGCACCTGATTTACCACATGAGCCG  
CGCGGTTTTTCGCTCTCCAGCGGTAAGCGGTTGATATCTTTGCGATGAATCCTGACTGGTTCCCGGACTCGATGAT  
ATTCGCGCTAAAATACGCTCGTACGCGTGGGATCGTTATTAACAACCAATAACCAACCGGGCGGTTATATCCAA  
AGAGCTTTTAAATGGAGATTTGTGGAGATTGCACGTCAGCATAATCTCATATCTTCGCCGATGAAATTTATGACAAAATTC  
TCTACGACGACGCTGAGCATCACTCCATTGCACCGCTGGCACCCTGACCTGCTGACCATTACCTTTAACGGACTGTGAA  
ACGTACCGGCTGCGCTTCCGTCAGGGTGGATGGTGTGAACGGGCCGAAAAAACACGCCAAAGGTTACATCGAAGG  
TCTGGAATGCTGGCTTCAATGCGCCTGTGTGCTAACGTTCTGCACAACACGCCATTACAGCCGCTGGTGGTTATC  
AGAGCATCAGTGAATTTATACCCCTGGCGGTTGCTTTATGAGCAGCGTAACCGCGCTGGGAAATGATCAACGATAT  
CCGGGCGTTTTCTGCGTGAACCTCGTGGTGGCTGTATATGTTCCCGAAAATCGACGCCAAACGCTTTAACATTCACGA  
CGATCAGAAAATGGTGTGATTTCTGTTGACAGGAAAAGCTCTGTTGGTGCAGGGACGGCATTTCAACTGGCCGCTGGC  
CGGATCATTCCGATTTGTCAGCTACCGGCTGCTGATGATATCGAGCTGCTTTGAGCAAGTTCCGCGGTTTTCTTTCT  
GGTTATCATCAGCTGTA

>Cluster\_34185

ATGACGACCGTACTCCGCATCTTACCCTGACGTTGACCGTTGGGCTTTGCTTTTTAGTTGCCCTGATGGAAGGGCT  
GGATTTACAGGCCGCGGTATCGCTGCCGCTGGTATCGCCACCGGTTTGGCTGGATAAAATGCAGATGGGCTGGATCT

TCAGTGGGGCATTCTCGGGCTGCTGCCGGCGCGCTGGTGGGGCCATGCTGGCCGACCGCTATGGCCGAAGCGTATT  
CTCATTGGCTCTGTGGCGCTGTTTCGGCCGTTTCGCTGGCGACGGCGATTTCTGGGATTTCTCATCGCTGGTGTTC  
CCGTCTGATGACCGGCTCGGGCTGGGGCGGGCTTGCAGATCTGATCGCGTACTTCCGAGGCGGGGGCCCGCTT  
TTCGGGTACGGCGGTGAGCCTGATGTACTGCGGTGTGCCGATTTGGCGCGGGCGTGGCGGCAGCGCTCGGGTTAGCGGC  
CTGGCTCCGCTGGCAACCGTGTCTGGGTAGGCGGGTATCCCGTGTCTGCTGGTGGCGCTGATGGCTTACGCTTACGCT  
GCCGAATCTCAGGTTTATACCCAAACAAACGAGGTGGCCGCGCACCCTTGGCGCCCTGTTTGGCCAGCGACGGCGA  
GTGCCACGCTGCTGCTGTGGTGTGCTATTTCTTCATCTGCTGGTGGTGTATATGCTGATCAACTGGCTGCCGATGCTG  
CTGGTGGAGCAGGGCTTTCCGCCATCGCAGGCGGCGAGGCGTAATGTTTCTGCTGCAAAATTGGCGGGCCAGCGGCACGTT  
AATTTCTCGGGCGCTTAATGGATAAACTGCGCCCGGTGGTGTGATGTCGCTGATCTACACCGGGATGTTGGCTTACGCTG  
TGGCGCTGGGTACGGTGTCTGCTATTGAGCGCATGCTAATGGCGGGATTGTGGCGGGGATGTTGCCACCGCGGGCAA  
AGTGTGTTGATGCTGCTGGCGCCGCTGTTTACAGCACGAGATCCCGCCACAGGCGTGGGAACCGCGTCCGAGTCCG  
GCGTCTGGGGGCGATGAGCGGCTCCGCTGCTGGCAGGAAAAATGTTAGCGCTCGGTACCGGAACGGTAGGGGTGATGGCGG  
CTTCTGGCGCGGGCATTGCTGGCAGGCGTGGCGGTATTTATCTGATGAGCGCAAATCACAGATGCCGATCCCGGGC  
AGCGGTGCTTAA

>Cluster\_36172

ATGAAAAGAAAAGTTCTGGCAATGCTGGTCCCAGCGTTATTAGTTGCTGGCGCAGCAAAATGGCGCTGAAATCTATAATAA  
AGATGGTAATAAATCGGATTTGTACGAAAAAGTAGCGGCGCTGCACTACTTCTGATGATGCCGCGACGGATGGCGACA  
AGTCATATGCCCGTATCGGTTTCAAAGGTGAAACTCAGATCGTGACCAGTTCAGTGGTATGGTCACTGGGAATAACA  
CTGCAAGCAAAATGGCACAGAAGGCGATGGAGATAAATCTGCTACCCGCTGGCTTTCGAGGTTTAGGTTTGGTCAGAA  
TGGTACTTTCGATTAATGGTGTGTAACACTACGGTGTGCTATATGACATCGAAGCATGGACCGATATGCTGCCAGAAATTTGGTG  
GCGATACCTATGCTGGTGGCGACAATTTTATGAAACGGTGTGACCAACGGTGTGCAACCTACCGTAACAAATGGCTTCTTT  
GGTCAAGTTGATGGCTTGAACCTTTCGCGTCAATATCAGAGTAATAATGAAAGTGGCAGTGACAGTCTCTTTGGCCAAGA  
AGGATCTGGCAGCGGAGATGGCCGTAGCCTTGCATAAAGAAAATGGCGATGGTTTTCGGTATGCTTACTTCTTACAGCTTCC  
ACTTCGATTTAGTCTGCTGCTTACTCTAATTTGACCGTTCGAATAACCAAGCTGCTGCTGATGGATGGAGTGGC  
AATCATTTCTATGGTAATAGCTATGACAGGTTGGTGTGCTGAGAGCGTGGACTGTTGGTGTAAATACGATGCCAACAA  
TGTATATTTAGCAGCAATGATGACAGACTCGCAATATGACCGCTTATGGTAGCAGCGACTCTCATTAGCCGATGGGA  
AACTTGGCGGGCGTGGTATCGTAAACAAACTCAGAACTTGAAGTTGTTGCTCAGTACCAATTTGATTTCCGGCTGCGT  
CCTTCAATTTAGCTTACTTCACTTAAAGTAAAGGATTTAGTGGTCAAGAAATGTACAACAATGGTAATATCATATATA  
CAATAAAGATCTGGTAAATACGTTGAGGTTGGTGCAACCTATTACTTTAAACAAAACATGTCCACCTATGTTGATTACA  
AAATCAACCTGCTGGACAACGACGATGACTTCTACGAAAACACGGCATCGCTACCGATGACATCGTTGCTGTGGGCTTA  
GTCTACCAGTTCTAA

>Cluster\_34406

ATGTTCAATTTTGCAGTCAGCCGGAAGCCTGTTATCAGGATTTAGTGGTTTTTCTTTATTTTGGCAACACGGTTGT  
GGTTCCTCTACGCTACTTCTGCTTTTTCAGTTGCCGCAAGTAGCCTGCTTACGCTCACGCAATATGCTTTTCTTGCTA  
CCGCACTGGCCTGCTTCCGCTCAGGCGTTTGGCGTCACTCGTCCGCTATTTATGGAAGGGCCAGGTGGCCTGTGGTGGGA  
ACCATCTTACTTACCTTGGTGAAGCATCGCGCGGACCCGATCAACGATATCGCCACCGAGCCGTCGGCAGTGGGGAT  
TGCACCTCCGGCGTGTGACGATGTTGATGGTTTTAGCGGATTAGGCCATCGCTGGCAGGTTATTTACGCCGTCGG  
TGATGGTCTGTTTATGTTGATGCTGGGCGCGAGTGACCATATCTTTTCAAAGGTATGCTCGGGCTGCCGTTTGGC  
ATAGCCGACCCGAAATTTAAAATTCAGTTACCGCGTTCGCGCTCTCGGTTGGCGGTGATGTCCTGCTGCTGCGATGAT  
TATCTTCTCGCGCAACGTTTGGCCGTTATGGCGTGTGGTGGCACCATAACCGGGCTGGTTGTGTTGGTATTTTGGT  
TTCTTCTTTCGCACTCGCTTCCGGTGAAGTGGACTGGCAGTGGTTCGCTCGGCTGGCAGTGGCGGTGCTTTGTGCGCGGA  
ATTTATTTGACGGCGGTGATTACAGGCTGGTAAATATCAGCAATACCTACGGTGGCATTCGGGGCACGGATGTTTTTTA  
TCCGACGACGAGGCGGGAATAACGCGTTATCGTGTGACTTGTGGCGACCGATTTATGACGCTGATAACCGTACCCG  
TGGCGGTAATTCATTTTACCGCTTGTTCATCCATTGGTTTTATTAACCCAGACTGGCGATTACACGCGCGCTTCGTTT  
ATTTATGGCAGCGTATTTGCGCTGCTGGTGGCGTGGTTCCTGCACTACGCGACTGTTTTCAGTATCCCTTACCCGT  
GAGTAGTGGCGTCACTGGTTCCTTATCTGCCCTTACTCTTTTCCGCGCTGGTGTGTTAGCCAGCAATAACGTTTACCG  
CTCGCAATATTTTACGACTCGCATGCGTATTTTTCGCTGCAATTTTTAATGGCATTTACCGCTGCTGCAAGAC  
CTTCCATTAACGCTTCGCTCTGCTCAGTAACGGCTTATGGTGGGATTTTACTGGCTGTTCTTATGGATAACCTTAT  
TCCGTGGGAACGCATCGAATAA

>Cluster\_39925

TTGACTACGCCATTGAAAAAATGTTGATTGCTGGCGCGGCTGCTGGTGGGCTGGAAATGGCAACACAGCTGGGGCATAA  
GCTGGGACGCAAGAAAAAGCCAAAATCAGCTGGTGCATCGTAACCACAGCCACCTGTGAAACCACGCTGCACGAAG  
TGGCGACTGGCTCGCTTGAATGAAGCGCTCGATGCGTGGAGTATCTGGCCATCGCGCAATCATGTTTCCAGTTCCAA  
CTGGGTTCCGCTCATATGATATGATCGTGAAGCGAAAACAATCACTATTGCAAGACTGGCGGACGAAAAGGTGAATGGCT  
GGTTCGGGAACTTAAATCGCCTATGACACCTGGTAAATGGCGCTGGGTAGCACCTCCAACGATTTCAATACGCGAGGTTG  
TCAAAGAGAACTGCATTTTCTCGATAACCCGACAGGCGCTGCTTCCACCAGGAGATGCTGAATCTGTTCTGAAA  
TACTCCGCCAACCTGGGCGCAATGGCAAAAGTGAACATTTGCGATGATCGGCGGCGGCGGACGGGTGTAAGAACTCTCCG  
TGAATGCAACGCGCTCAAGCAACTGCACAGTACGGCTATAAAGTCTGACCAACGAAGCCTGAACGTAACGCTGG  
TAGAAGCGGGCGAAGCTATTTTGGCTGCTTACCGCCAGCTATCTGCTGCGGCCATAATGAGTTAACGAAACTTGGC  
GTTCCGCTGCTGACGCAACCATGGTACCAGTGTGATGAAGGCGGCTACATACTAAAGATGGCGAATATATTTGAGGC  
TGATCTGATGGTGTGGGACGCGGGATCAAAGCGCAGACTTCTGAAAGATATCGGTGGTCTTGAACCAACCGTATCA  
ACCAGTGGTGGTGAACCGGACGCTGCAAACTCGGATCCAGACATATACGCTATTGGCGACTGGCGCTATGCGCG  
CGTCCGGAAGGGGCTTTGTTCCGCGCGCGCTCAGGCGCACATCAGATGGCAACCTGCGCAATGAACAACATTTCTGGC  
GCAGATGAACGTTAAGCCGCTGAAAAATATCAGTATAAAGATCACGGTTCGCTGGTATCGCTGCTGCAACTTTTCCACAG  
TCGGTAGCCTGATGGTAACCTGACGCGCGCTCAATGATGATTGAAGGACGAATGCGCGCTTTGTATACATCTCGCTG  
TACCGAATGCACCAAGATTGCGCTGATGTTTAAACCGGATTAATGATGCTGGTGGGGAGTATTAACCGGCTTAT  
CCGCCACGTTTGAAGTTGCATTA

>Cluster\_55640

ATGAGTATCAAAGTTACGACGCTCGGCAAGGCGTATAAATATTATCATCTAAATGGAACCGGGTCATTGAGAACTACT  
GCCGGCGATAAAGCCGCGCACAGCAAGAAATGGGTATGAAAGATATCAATTTACGATTTGAACCTGGGGAAGCGGTCG  
GCATTTGTTGGGTGAACGGCGCAGGTAAGTACGTTACTGAAGTGTGACTGGCACCCTCAGCCACCAAGGTAGC  
ATTTGAAATCCAGGGCGGCTCGCGCGCTGCTGGAGTGGGATGGGCTTCCATCTGACTTTTACCGCGCGGAGAACCT  
GTATATGTCGGGCTGATGATGGGCTGGGCGGGAAGAGATCGAGCGTTAATGCGGAGATCGAAGCTTCCGCCGATA  
TCGGCGACTACATTTGAAGAGCCGCTACGCTATTTTCAAGCGGGATGCAAAATGCGCTTGGCGTGTCCGCGCGG  
TCCGCGCGGATATCTGATCTGATGAAGCGCTTTCGTTGGTGTATCCCGTTTTCAGCGAAGTGTATGCCGCTAT  
TGGCGACTTTAAAAGCAGGGCACCGCTGCTGCTGGTCTCACACGCGCGGGGATATCGTCAAACACTGCGACCGCG  
CAATTTCTCAAAAATGGTGTATCTGTATGGAGCGCACCGCTGACGTTACCAACCGTTATCTGATGAGTGTCTTT  
GAAAAGCCGACAAAACAGCGCGCAAAAAGCGAAACGGCAACCTCGTACGCGAGGCGGAAAGTCAAGTGTCTCTCGA  
TGAGATTGAAGATGTTTACCACACGCGCCAGGCTATCTGCTGAAGAATACCGTTGGGGCAGGGGGCGCAAAAATCA

TTGATTATACATCCAGAGCGCCGGGTTGATTTTCTCCCTCACTGACGGGCAATCAGCAGACCGATTTTCTGATGAAG  
GTCGTGTTTGAATACGATTTTGGATTGCGTGGTGCAGGATCCGATTAAACCCCTCGATGGCTTATTCTCTACGGAAC  
CAACTCTTCTCGCCTCGAAGGGCGGAAAAATTTTCGGTTTCCCGGGCGATGTTCCGGTCTTTAAATTTAGCCTTC  
CGGTTGATTTAAATAGTGGCGATTACCTGCTGTCAATTTGGTATCTCTGCGGGCAACCCGAGACGGATATGACCCCGT  
GACAGACGTTACGACTCCATTATTTTACATGTGACCAAGAGCATGGATTTCTGGGTGTCATCGATCTTAAGTCGTCTT  
TACTAGCTACCAATGA

>Cluster\_40067

ATGCGGATTTGTCATACTGGGAAGTGGTGTGGTAGGCGTTGCCAGCGCCTGGTACTTAAATCAGGCAGGACATGAGGTCAC  
CGTCATTGATCGGGAGCCGGGGCCGCCCTGGAACACGATGCCCAGAAATGCGGGCAAATCTCCCGGATATGCAGCAC  
CGTGGGCGGACCAGGTGTGCTTTAAAGCGATTAAATGGATGTTCCAGCGCATGCGCCGCTGGCGGTTGCTCTCGAC  
GGTACGCAGTTCAGTTGAAATGGATGTGGCAAATGTTACGTAACGACACAGCCACTACATGGAACAAAGGGCG  
GATGGTGGCTTGGCGGAATACAGCCGTGATTGCTGAAAGCATTGCGCGCCGAAACCAATATTCAGTATGAAGGGCGT  
AGGGTGGACGCTCAACTGTTCGCTACCGAACACAGTATGAAAAATGCGACCCGCGATATCGCCGTGGAAGATGCC  
GGCGTACCGTACCAGCTGCTGGAATCCAGCCGTCTGGCGGAAGTGGAGCCCGCTGGCAGAAGTGGCGCACAACTGAC  
GGGGGGTCCAGCTGCCAATGATGAAACCGGAGACTGCCAGCTGTTTACCCAGAATCTGGCGCGGATGGCGGAGCAGG  
CGGGGGTTAAATCCGCTTTAATACGCCGTTGACCACTTGGCTTTGCGACGGCGAGCAAACTACGGCGTGAAGTGTGGT  
GATGAAGTGAATTAAGCCGATGCGTATGTGATGGCTTTGGTTCTTACTCGACGGCGATGCTCAAAGGCAATGTTGAT  
TCCGGTGTATCCGCTGAAAGGCTACTCGCTGACCATTCCAATTTGCGCAGGAAGATGGTGGCCGGTATCCACTATCTTG  
ATGAAACCTACAAATCGCCATTACCCGTTTCGATAACCGCATTCGTTGCGGGGAATGGCGGAAATGTTGGCTTTAAC  
ACCGAGCTGTGCAACCGCTCGTGAACCGCTGGAGATGGTGGTTCGCGATCTTATCCACGGCGGCTCATGTTGAC  
GGCGACTTTCTGGACTGGCTGCGCCGATGACCCGAGACGGCAGCCGGTTGCGGGCTACACGCTTTAAATACTCT  
GGCTGAATACCGGTCACGGCACGCTCGGCTGGACGATGGCTTGGCGTTCCGGTCAAGTGTAAAGCATCTGCTCTCGGG  
CGCACGCCAGCATCCCGTATGAAGATCAAGCGTAGCCGCTACAGCCGTGGATTTACGCCATCACGCCCGGCCATTT  
ACATGGCGCACACAGCTAA

>Cluster\_39795

GTGACAGCAGAGCTGCGTAACTCCCGCATATTGCCAGCATGGCCTTTAATGAGCCGCTGATGCTTGAACCCGCTATGC  
CGGGGTTTCTTTTGTGCGCTTGCGAGCCAGCTTGGGATCAGCCGCTGACAGATGCGGTGTCGCGGTGACAGCCTGACTG  
CCGGAGAGGCACCCCGCGCAGCTGGCGTTTATCCGGTATGATGACGGACACGACAGGCCCGCAGTTATCAGGTATGAAC  
GGCATCGCCGTGCTGCGGTTTCCGGCACGCTGGTTCAGCCGACGCGGGCGCTGCAGCCGATTCGGGGATGACCGGTTA  
CAACGGCATATTCGCCCTGCTGCAACAGGCTGCAGCGATCCGATGGTGGACGGCATTCTGCTCGATATGGACACGCCG  
CGGGATGGTGGCGGGGCAATTTGACTGCGCTGACATCATCGCCGCTGCGTGGATGACATAAAACCGGTATGGCGCTGGCC  
AACGACATGAACCTGAGTCAGTCAGTTCGCTTCCAGTGCAGCCCTCCCGCGCTCTGGTCAAGCAGACCCCGGACAGG  
CTCCATCGCGCTCATGATGGCTCACAGTAAATACGGCGCTGCGTGGAGAAACAGGGTGTGGAATCACGCTGATTTACA  
GCGGCAGCCATAAAGTGGATGGCAACCCCTACAGCCATCTCCGGATGATGTCGGGAAACATGCACTCCCGGATGGAT  
GCAACCCCGCGGATGTTTGGCAGAAGTGTCCGCATATACCGCCCTGTCCTGTCAGGCCGCTGCTGGATACCGAGGCTGC  
AGTATACAGCCGCTAGGAGCCATTTGATCCCGGACTGGCTGATGAACCTGTTAACAGCAGCCGATGCGATCACCGTATGC  
GTGATGCACTGGATGCACGTAATCCCGTCTCTCAGGAGGGCGAATGACCAAAGAGACTCAATCAACAACGTTTCTGCC  
ACTGCTTCCGAGGCTGACGTTACTGACGTTGTTCCAGCCAGGAGGGGAAACCGCCAGCGCGGCGCAGCCGAGCTGAA  
CGCGCAGATCACCGCAGGTTGGCGCAGAAACAGCCGATTTATGGGATCTCAACTGTGAGGAGCCACCGGAGTGA  
AAGAACAGCAGCCGCTGCTGGCAGAAACCCCGAATGACCGTGGAAACCGCCCGCATTCTGGCCCGAGCACACAG  
AGTGCACAGCGCGCAGTACACGCTGCGTGGATCGTCTGATGCAGGGGACCCGGCACCGCTGGCTGCAGGTAACCCGGC  
ATCCGATGCGCTTAAACGATTTGCTGAACACACCAGTGTAA

>Cluster\_58213

ATGGCGCTTTCAAGCAAAAAATTTACCTTCGAAAGACTTCGCAGATTCACCTTACCGGAGGGAAAAACAACTTTTCT  
TTGGGATGAGATGTAACACCCCTGGCATGCGGAGCACTAGCCGGAGCAAAAGCCTTTGTATTCCAAAGCGTATATGCCG  
GAAAAACCTTCGCATGACTATTGGCAACATTAACGACTGGAAGATTGATGATGCGGAGAGCCGAGGCAAGACGGTTACAA  
ACATTTGATCAGATACAGGGATAGATCCACGAATTTGCTAAGCTGTAAAAATCGCAGAAGCAGAAATCCCTGCAGGAGAACT  
ACGTAAAAACAAAGTGCATTTCTCCGTCGCTGGGAAGACTATCTTCAAGAATTGAGAACCGGTATCAGTGCAAAACTA  
AACGCCATATTTACTCGATACATTGCCGATCACATTAACCTTGTCCAGTCTGGAGGCGAAAGTAAAAAAGAGGCCAA  
GGCCGACTTCGGCTGGACCATTTGGCTAGTTGCTCAACCTGCCGTTATCGGAGCTAACCCAGATTACATAGCAGCGTG  
GCTGAGTACAGAAAGGCAAAATAGACCTACCGTCACTGCTAAGCTGTGACCGTTATCGCCACTACGTTGCTTTTCACTAAGGAT  
ATTATCAGAAAAATATCAAGGATCATCTCGCGATCTGGCACAAGATTACAACGTAAGAAAAATGGTTCCCGTGTCA  
GCGAGTAAAGCTGATGATTTGCCCTGCAAAAGGAACAATAAAAGCTGGTTAGTGCCTGCGTACGCTCAATAATCTTAT  
TGCACTGGCTTCTCAAGTACTTTGCTCACTGGTGTCTGGCGTGAAGAAATGCGTGGCTTCCGTTGCTGAGCAGCTAG  
ATTTCAAATGGTCTAAGCTAAGCAATTAAGCAAGATCAGAGGTAAGGTAAGCACTATCCCTCACTCTTATGTTTCTGAA  
TTGTTAAATGTACTAGCGCAATCCCAAATTTCTGACGTAATAAGGAGGTTGGGTTTTCAGAAGTAACAGTAAAGTGG  
CAAAATTTATGAGCCGCTTACGCGCACACAGAGCATTAGTGTGGCTGAGTTACCACATATCAGCCTTACCGTTTTAC  
GTCGTAGTTTGGTACTTTGGCCGAGTGGTTGAAGTCCCAGTGGTATGTTGCTCAAAATTAAGGACACAAACCCAGC  
GCTCTTGGCGAAAAACACTATCGCCGCTCGTCCGTTAGATCTGTGTACGAAAAATGACAGAAAAATGAGACATGGATCTT  
AAATGAAGCAGGATATACCATAAAAAACACGTTGATATGCGTTGA

>Cluster\_36596

ATGAAACGGACAATGCTCTATCTTTCTCTGCTGGCTGTAGTTGTAGCGTCAGCGCCGAAAAATACCTGTTCTGACAGA  
AAGTTCGCGCAGAGAAAGCAGGGTTCAACGTCGAACGGCTTAACAGATGGATCGCTGGATTAGCCAGCAAGTGGACGCCG  
GTTATCCCGGCGTAAACCTGCTGATCATTAAGATAATCAGATTGTGTATCGCAAGCCTGGGAGCGCGCAAAAGTAC  
GATGGCAGCGTGTGATGGAACAGCCGTGCAAGGCCACCACCGGGACGCTGTATGACCTGGCTCAAAACCAAAAATGTA  
CGCCAGAACTTCGCCCTGCAAAAGCTGATGAGCGAAGGCAAACTGCATCTGACGATCGGATGCGGAAATATATCCG  
GGTTTGGCGATAGTCCAAATGACACCATTAAGGCAAAAAACCCCTGCCGATTTCTGACCTGCTGCATCACAGCGCGGT  
TTCCCGGAGATCCGCAATACCCGAATAAAGCGGTGCGGGCGGTTATATTTCCAGGATAAAGGCCAGACGCTGGAGAT  
GATCAAGCGCACGCCCTAGAGTATCAGCCCGCAGCAAGCATATTTACAGTGTGCTGATTAATATGCTGCTTTGGATTTA  
TCGTGAGTGCAGCTCAGCCGCTGACCGCTTACCGCTATGTTTGAAGAGTCGATTTATCGCCCGCTCGGCTGACACATCG  
GTATTTAACCCGCTGCTGAAAGGCTTTAAACCGCAACAATAAGCCGCAAGTGAACGGCAATACCCGCGATGGCGT  
GATCCATTTCCGCAATATCCGCACTCCACTCTTGGGTCAGGTGACGATGAAAAAGCCTTTTATTCGATGGCGGGC  
TTTCCGGGACGCGAGTTTGTTCCTCAATACCGGCGATATGCGGTGTTAATGCAACGATGCTGAACGGCGGGGCTAT  
GGCGATGTCAGCTGTTTACGTCGGAACCGGTGAAGATGTTTACCACAGCTTAAGGAAGATGCCACTTTTGGCTCGG  
CTGGCGGTGAATGGTAATGCCACCATGACCGCCAGCTTTGGCAGCTGGCAAGCCCGCAACCTACGGTCCACTGGCT  
GGACCGGAACCGTACCGTTATCGATCCGGTGAATCATATGGCGATTGTGATGTTAAGCAACAAGCCACATTCGCCGGTT  
GCCGATCCGCAAAAGAAATCCAAATGTTTCGAAAGCGGTGACGTCGCGATTGCAACGATGTTGTTGGTGTGATCAGGT  
GTATGCGCGTTAAAGCAAAAGTAA

>Cluster\_22264

ATGGACAAGGAATTACCGTGGCTGGCGGATAACCGCGAACTGGAAGTAAATATAAAAAAGGGTAAAACACCCTAGCCA  
TCGCAATTGGCCGGGTGAACCGGTGCCTGTTTACTGAAAGCATCATCCAGACACTGGGTGATGAATGCTACAAAAAG  
CTGAGAAGAAAAAACATGTCTGGCGTTATGATAATTTTCTACTGGAGTGGCAGTCCGCCATCACGAGGCCATCAAC  
TTGATCGCGGAACACAAACCCCTCAATCCCGGCCGGAATGGCGGCGTAGCCTGTATCGCGCAAAAATGATAGCCAACA  
ATTTGCTCGACGAAATCGTCAACAAGAGGGACAGGAATATGCGACTGAGGTGGTGAATGCACGCCAGTATTTGGCGGT  
GTTATGAGAGTATCCTCTGGTAGTGACATTGCAGTATCAGAACGAGGACTATGGCTATGGTTATCGCTCAGAAACCTAT  
AACGAATTCGATCTCCGATTGCGTAAGCATCTCTCTGGCAGAGGAAAGCTGCTGGCAGCGTTCGCCGACAAAACCTAT  
TGCCGAGTGCAAAAGATACCGAAAGTTTCGCCGTCCTTTTATTGCACTGCTCCTCCCGAAAAACCCGAAATCGCAACG  
AGCTGGTAAGCCCTTGAATGTTTCGCAAACTCATTTTCACTCAAAAAGAGTGGTTAAAAGTTGTTGCTGATGATCCTTAAAGCG  
GTGAAAGAACTCGCAGCTTACTGGAGTCAAGATATATTTAGCGATCGAGAAGCCAGCTACATGTCGCATGAAAACCGCTT  
CGGCTACGCGGCCCTGCGCCGCCCTTTTGGCGGAACAAGGACTGGCATCCATTCACGCCCTGGCAATGTATGCCATAAAG  
AAGATTGTGGCAGCTGCTGGTACAATAAACCATCCGAGTCCATCCGCACCTTGTGTTAGTTGCTGATAAAAAACAAA  
CCCAAGCTGCAACTGTGGCTAAATACAGTAAAAAATTTCCCATGCGACGCTCGCCGCACTGGCAGAACTGGCGGT  
AAAAGCCCCCTGCGCGCCCTGGTTATCCAATCATCGAAGACAAAAGCTGCCTGCACAGCAAAAAACAGTGTATGAAT  
ACTGGCATAAGCTGTTACAAACGCTGATGGCATCGCAGCCACAACCTGGCAGAAAGAGGTGATGCCGTGCTTAAAGTACACAA  
GCCAGGCAGTGGTGAATGGTTATTTATCGGCATCGCCAAAACCGGTTATGATAGCACCGATAACAGCAGTCTGCCTGA  
AATCCTCGTTTACCAACCGTGGCTAGTAAAGAAAAAATGA

>Cluster\_66950

ATGGCTGATGAAGATATCAACCCGGTAGTGCTTCTCGCAGATCTAAAGTAAATCATCGCGTGTGGGCTGCCTGTCTTAA  
ATGGACTCCTGTGTAATAAACACAGCGCTCCCTCACATCAATAAACACAAGTCTCATGTAATAAACCCAGCGGTTACCT  
CCCTGAAAGTGACTGTAGGCAGCAGAAATTCCTGGGAAAGATCAGCCGCTTACCAGCAGAGAACTGACCAGGCCA  
GAACGCAATCATTATTTTCCCTGGCACGGCTTCTGCTCATGGGTCAGAAATGGATACGGTGTCTTCCGGTACAGCGA  
TAAGGAGCTCTTATTCCTTGCTTCCATTAATGGCCAGCCTGCCGTTATGGCTGACTTATCAGGAAATGATGCTGATGTTG  
CTCAAAGGATCAGTCTTTTCTGACGATGAACGAAGAGCCCTCCGAAAATGGCAGGTCGTATCTCTCTGGAACCTCT  
GATAACTGGGAAAGTATTATACCCGGTATCATCAGCAGATCTCCGCGTGGCAAACCTACTGTCGGCAATCGCAGCAA  
ATTCACACTGCTGCCGTACTGTTTATGATAGCAGCCGCGCAGGCATGTAATCTGGATGACTCAGCCAGAGCCGGATG  
TCGTACCGACGCCCGAGGAGATAGTGCACGGGCAAGATTGCAGTTTAAAAGCCCGATCCACCGCCAGAACTCCCGCAT  
CCATGGGCATCACAACTTGTAAATCAGTGATTTTCTGAAAGCTTCCGCGGACCTTCGAAAACCACTACCAGGTCGCACTGGA  
AGGCTGGAACCTTACCGGTGGAACATGTACTCCGAGACATTCACACTGATTTACGAACGACAGCCAGGAGGAACATTTG  
AAGCTTTCTGGCAAGAAGTAAAGAAATCTTAAATGTTATTCCTGACTTAAACCTTAAAGATGTTGCACGCCCTGGCTTCT  
GTAACCCGGCCACTGCTTCCCTGCCCGCAGGGATGAGGCGAGTCCCTACCCTCAGAACTGATGCGGGTGTTCAC  
GTGTTTTAGAAAAACAGTTAACGCCCGCCATTAATGAAATAGCCATACCCGAAACCAATACCAGTAAACGATGGTGAAG  
CAGCCCTGTTAGAAATGGAAGAATAATCAGTTCAGTTTATCAACGCCGTGTAATCCGATGAGTTGTTCCCTTATTT  
CAGGATACCGGCTTCTGCTGAGCAATATCCATTTTGAATTAACGGCGGTACTTTCAGTTATTCCTCAGAAAGGTCATAT  
TTATGCGTCCAGGTA

>Cluster\_22653

GTGGCAAAAACATTCAGCCATTTCGGCGCATGAACGATTACCTGCCTGGCGAAACGGCCATCTGGCAGCGCATTGAAGG  
CACACTGAAAACCTGCTCGGCAGCTACGGTTACAGTGAATCCGCTTCCCGATGTTAGAGCAGACCCCGCTATTTCAAC  
GTGGCATTTGGTGAAGTACCCGACTGGTTGAAAAGAGATGTACACCTTTGAGGATCGCAATGGCGACAGCCTGACTCTG  
CGCCCTGAAAGGACCGCGGCTGTGTACCGCCGCGATCGAGCATGGTCTTCTGTACAATCAGGAACAGCGCTGTGGTA  
TATCGGGCTATGTTCCGTCACGAGCGTCCGCGAAGGGCTTATCGTCAGTTCATCAGTTGGGCTCGGAAGTTTTCG  
GTCGCAAGTCCGGATATCGACGCCGAAGTATGTCATGCTCAGTCCCGCTGGTGGCGCGCGTGGGTATTTCCGAGCAC  
GTAACCTTTGAGCTGAACCTATCGGTTTCGTTGGAAGCTCGTGGCAATTACCAGGATGCGCTGGTGGCTTCTTTGAGCA  
GCATAAAGAAAAGCTGGACGAAGACTGCAACCGCCGATGTACACTAACCCGTTGCGGCTACTCGATTCAAAAAATCCGG  
AAGTGCAGTGTCTTCAACGACGCTCCGGCATTAGGGCATTATCTGGACGAGGAATCTCGTGAACCTTTGCGGCTG  
TGCAAACTGCTTGAAGCGCGGGGATCGCTTACACCGTAAACAGCGTCTGGTGGCGGCTGGGATTAATAACCGTAC  
GTTTTTCGAGTGGGTGACTAACAGCCTCGGTTCCAGGCGACCGTGTGTGCAAGTGGTGGTATGACGCTGCTGGTGAAG  
AACTGGGTGGTGTGCAACACCGGCAGTGGTTTTGCGATGGGCTCGAACGCTTGTATTTAGTTACAGCCGTTAAT  
CCGGAATTTAAAGCCGATCCTGTTGTGATATATACCTGGTGGCTTCCAGTGCAGACACAACTTCCGCGCTATGGCATT  
AGCAGAGCGTCTCGTGTGATGAATACCGGGCTAAAACCTGATGACCAACACCGCGCGGCACTTAAAGAAACAGTTTG  
CCCGTGTGATAAATGGGTGCCCGCTGCTGTGGTGGTGGTGGTGGTGGTGGTGGTGGTGGTGGTGGTGGTGGTGGTGGT  
GATTTGCGCTCTGGTGAACAACTGCAGTTGCGCAGGATAGCGTAGCCGCGCATTTGCGCAGCTTACTGGGTTAA

>Cluster\_21071

ATGATTTACCGTGGAAATGGATGCTGAAGCAGACAATTAAAAACTATGGTTACAGGCAACGTTATTCGCAATGTGCG  
GATAATAACCGCCCTTTTATCAATCTTTTAAATCAATGATACTGAGTCCGTTCCGTTGAAGGTTGGTGGCAAGCAG  
TCGATAACATTTGAACATACTGGCATCGAGTATGCTGGCAGTGACCACATTTTCCGCTGAGTATCATGGTTCACAGCCTAC  
GGTTTCAGCCACTACTAATGTGACTCCAGAGCTACCGGTTTATGTTGTTGAAAGCAGTCCACACAAAAATGTACTGGCCAC  
CTTCACTCGGTTCTTTCTCTTCACTGCTGGTAGGATTAATGCCCCCAATATGGGAGCTTATGGAGAAAGGGGAGAGTCA  
TTTTATTCAATGCTCACTGGTTGTCTAATTCCTCATCACATTTGCTTCCGCTGATACAGCAATTTGACCTCTCTG  
GGGAGGTTGGTGAACAAACCGGCAAGTAGAACAGGCGGCCATCGAAACATTTATGCGAGAGCAAGAAATCCCTGTCT  
CGGTGGATATCCATGGCTTGAAGAACAATGAACAGCCGAAAGGAACGGTTGCAGTTTATCCGAAGAAGATTGGCTATGTTG  
AATATATTGATGATGGTGAACCTTAGCAAGCTGTCGACCAATGATCCCGTCAATGATACCTCGTGGCGCAGCAGGCAAT  
TTCATACATCCGTCATGCCAGTTTGTACCTGAGTCAAGGCGAGGAGTCTCAATCAACACCATTACTTGGAGCAGT  
TATGCTCGGATGCACGTTCAATGCTCAGGATCCTCGATTTGCTTACGCTCATGGCCGAAATAGCCTGCGGGGCC  
TTTCCCTGCAGTGAACGATCCTGGAACCCGATTTGATGTCATTTGGCAGAGGTTGCTGATATCTTCCACTTACGGCAG  
AATAAATCTGATGAAATGAAGTGAATATCTTTCAGTCAATTTGCAACCATTCAGAAATAACGATCTACTGGAAGACT  
TTTCTCACTGTCGCGCGGATGGTGGCAGTATGAGGGAGATTAGATAAGAGTCTTAAAGGACTGTGATGCTGAGTA  
ACGTTGGCTGAGATATTTGCTGAAGCCGACATACCCTGGCATTGAAACATTAGAGCATGCAACTCGTGTGACCAT  
ATAGATTTGATAGATATCTAATAAATCAACCTATTAATAATTTATTTAGTGGCAATATCTAATAAAAAACATAG

>Cluster\_22418

ATGCGCTTTGATACTGTCTATATGGGCGGCGCTCGCCGATTACTCTGTGGCTGCAACTGCAAAAACACGGCCTGCG  
CTGTGCCATTTGCTACTCGTGGTCAAGCGCGCTGCATTTCTCATCTGGATCGTGGATTGCTGAGCCATCTGCCGATG  
GTCACCCGTTGACAGACATTCACAGTGGACTGGAATCTTTGCTCAGCAGGCACTGCCATCCTTACACTCTCTCGGG  
CCACAACCGCTGCTCGATTCGCTTGCAGGCGCAGGATTAATTCGCTGAAAGCGGTCGCAATTTGACGGGCTGAGTA  
TCTGGCTCACAGCGGATTAACCGCTCGGCATCTGCGCTCAACCTGGCTAAGTTCCGCAAGTCCCTGCTGGCCG  
TGCCCGGAAAGAAATATGTTAGTGGGAAATAGCGGCTGATGGATTTTCAGGCGCATCTTGGCGGCTTCAATGGCC  
GAATGGACCTTAAAGTTGAAACCGCTGAAATTAAGACTGCCGAACTGGATGCTGCTGCGCAATAACCGCACCGAGTCCG  
GGCGTGAATATTGCCCGCTTCCCTGATAATGAAGAAAACCTGGCGGTTGTTACTTGTGTCGCTTATTCGGCTCGCAATA  
CCTGGAAATGATCCTGATGCCGCTGCTTGGCCTGGCCGATGACAACTGTGGCATTTGGTGAATGAAAACCTACT

TGTTCAATGATGCTTTTGCCAAACGCTGCCGCCCTTCGGTGTGGGCATTGCTCTGCAAAACAGTTACAGCGCCAGTTTGT  
GCGCCAGGTGGCGTGTGGATGCCGGGGCATGAAGTGA AAAAAGTGACCTGTAAAAATGGTGTAGTGAATGAAATCTGGA  
CGGCAATCACGCCGATATCCCGTGGCCACGATTTGGCGTGTGGAGCGGCAGTTCTTTAGCGGGCGGACTGGTG  
GCAGAACGTGACGCCATTCCGCGACCGATTTCCGGCCTTGATGTGCTACAAACCGCTACCGGGGTGAATGGTATAAGGG  
CGATTTTGGCGCGCAGCGTGGCAGGATTCGGTGTAAACCTGATGAGGCGCTACGCCCGTCCGAGGGGGCAAA  
CCATTGAGAACCTGTTTGCATCGGTTCCGTGCTGGGCGGATTTGATCCCATCGCCAGGGATCGGGCGCGGTGTTTGT  
GCCGTCAGTGCTTACATGTCGCTCAACAGATTGCCCAACGCGCAGGAGGCCAACATGA

>Cluster\_4287

ATGAGCAAAAACACATTTAACAGAACAGAAGTTTCCGACTTCGCCCTGCATCCGAAGGTGTAGAAGCCCTTGAAAAAA  
AGGGTTTCATAACTGTACGCCCATTCAGGCACCTGGCCCTTCGGCTGACGCTGGCGGGTGTGACGTAGCCGGGCGAGCGC  
AAACCGGTACCGGAAAAACGATGGCGTTTCTTACGTCAACGTTTCATTATCTTCTCTCATCTGCGATTGCCGATCGC  
AAGGTGAATCAACCAACGCTGCCTTAATTAAGCACCGACGCGTGAACCTTCCGCTGCAGATCCATGCCAGCAGAGAACCCT  
GCGGGAAGCTACCCGCCGTGAAGCTGGGTCTGGCTTACGGTGTGATGGCTACGACAAAAAGCTGAAAGTGTGGAAAGCG  
GCGTTGACATTCTGATTGGCACTACGGGGCGTTAATTGACTACGCCAAGCAGAACACATTAACCTCGGTGCCATTAG  
GTGGTGGTACTGGACGAAGCCGATCGCATGTACGATCTGGCCTTATTAAAGATATCCGCTGGCTGTTCCGCCGATGCC  
GCCTGCAAAACAGCCCTCAACATGCTGTTCGCCACGCTTTCGTACCGGGTACGTGAACCTGGCGTTCGAGCAGATGA  
ACAAATGCCAATATATTGAAGTGAACCGGAACAGAAAAACGGGCCACCGTATTAAAGAAAGAGCTTTTCTACCTTCTAAC  
GAAGAAAAATGCGTTTGTGCAAAACGCTGATCGAAGAAGAGTGGCCAGACAGAGCGATTATTTTCGCCAATACCAAACA  
CCGTTGTGAAGAGATCTGGGGCCACCTGGCGGCAGATGCTCATGTCGTTTGTGACAGGCGATGTCGCGCAGAAAA  
AACGTCGCGTATTCTTGTGATGAATTTACCGTGGCGATCTGGATATTCGTTGGTTCACCGACGCTGTCGCGCGGTTGTG  
CATATTCGGCAGTGCAGCAGCTTTAACTACGATTTAACCGATGACTGTGAAGATTACGTTTACCGTATTGGTCTGTAC  
AGGTGCGCAGGCGCAAGCGGTCACTCTATCAGCTGGCGTGTGAAGAGTATGCATTGAATTTGCTGTATTGAGACCT  
ATATTTGGTCACTCAATTCGGGTAAGCAATAACAATCGGACGCAATGATGACCGATCTGCCAAAAACCGCTGCGCCTCAGC  
CGCCACGTACAGGCAATGGTCCGCGTCTACTGGCGCTCCGCGTAATCGTCTGCTTCAAGTTAA

>Cluster\_48211

ATGCGCTATAATGGTTTAAATAATATGTTTCTCTCTTTGCCAGATTACGATAACCACTCTTTCACAAGTTTATCACA  
TACAAAGAAAAACAAATCATATAATTACAGCAAAACATCAAAAAACACGTTAATTGACAATAAAGCCCTCTCTCTTTTCA  
AGATGGATGATCATGAAAAAGTATAGGTTTGAATTCAGAAAAATGAAAAAGAAATTTATGATAGTTTACCATCAGGAAAAATC  
ACGAAGGAAACCGACAGGAAAAATACATAAAACATTTTATAGATATAGCTTTATATGCAAAATAATAAATGTGACGATAGAAT  
TACGAGAAGAGTTTACCCTTAGTAAAGAAAAGGAAAGTATCCATTAAAGTGGTATATTTTATAAATAATGTCGCCCTCCATA  
ATAACTATCGAAATCCACAGACAGTAAATGGTGGTTACGATTTTTCACACCTTAGCCTGAAAGGTATCGTGATTAATA  
GATGAAGATTTTAAAGCCGCTTAGTTCCTAAACTCGATTTAATAAATTAACCTTTGAACATGCTGATGCTGCTGCTCAATC  
GAATTTTTTATTACGCCATAATGGAAAAATACTTTTTGATGATGTTATTCGATGACTCAAATTTGCTCAGATAAAAA  
TGGCCGACGGAACCTAAATGATGCTCCGCTATGCAATTTCAATCTACAATGCAGCAATGAATAGAGCCAATATATAA  
AATACCTTTCTGACTATCAAATTTTTATATGGCGTACATGGCTGAGGTAATCTTTATAAAGTAATAGCCCATATGTT  
TAATTTTATTAAAGCCGCTTAGTTCCTAAACTCGATTTAATAAATTAACCTTTGAACATGCTGATGCTGCTCAATC  
TGAACAAAGCAATCTCCAGAATAAACAATAATGATAGCAAACTCTTTGTACGTGGCTAACAAATACATTCCTCGAA  
ATGGTTATATGATCCGACTCTAATATGGCTAATGTTAATTTAATAATGCCAATTTAAGCAACTGCCAATTTCAACTGTTTC  
TATTTTAAACAAAGCCTGATGTTAATAACCCGCTCTATCGGGTAAATTTGATGAGGTAGCGTCCAGGGAATGGCA  
TTTTCCATACTCCGTTGGGAGGAAAAATATCCCAATGATAGTATACCTGGTAACACGACAGAAATTTCTTTGAAGAAGAT  
TGTACCTCTCATACTGGCATGTCACAAACTGAGGATAAATAAATGACAGTGCCTATGAAGATTACTGCAGATATATGCA  
ACACGAGATTGA

>Cluster\_45352

ATGATTAATCAAAAAATCGTGCTGTTATCAGCACTGGTTTCTGCGCCCTGATTTAGGCTGTAAAGAAGAAAAATAAAC  
GAATGTATCCATCGAATTTATGCATTTCTCGGTGGAGCAGGAGCGCCAGGCGGTTATCAGTAAATGATTTGCCCGTTTTG  
AAAAAGAAAAACCTGGCATCACCGTTAAGCAAGTGCCTGGAAGAAGATGCCATAAACACTAAAGTCATTACTCTTTTCA  
CGTAGCGGTTGCTGCGCGGAAGTGTACGAAACCAGCCATGACTACGCCAAAGTGTGACAAAAGAGCAGCTTATCGATCG  
CAAAGCGGTTGCCACAGTATCAGTAACGTTGGTGAAGGCGGTTTTACGATGGCGTACTGCGTATTGTCGTTACCGAAG  
ATGGTAGCCATGACCGGCTGTTCTGTGAGCGCTGGATTGGCGGTATCTGTTATCGCAAAGATGTGCTGGCAAAAGCG  
GGGCTTGAGGAGCCGAAAAACTGGCAACAGCTGCTGGACGTTGACAGAACTGAATGACCCGGCGAATAAAAAATACGG  
CATTCGCTGCTCAGCAGGAAAGCGTGTGACGGAACAATCTTCTCCAGTTTGGCTTATCCCAACCGGCTAACGCTCT  
TTAACCGCGAAGGCAAAATCACCTTGTATACACAGAGATGATGCAGGCACTGACCTATTACCGGACCTTGTGCCAAC  
ACTATGCCGGTTCTAACGACATCATGGAAGTGAAGAGCGCTTTATGAAACGGCACCGCGCGGATGGCGATTTACTCCAC  
CTATATCTTCCGGCTGTGATTAAGAAGGCGACCCGAAAAACGTCGGTTTCGTGGTCCAACCGAGAAAAACTCTGCGG  
TCTACCGCATGTTGACTGCTGACCATTACCGCGGGCAAAAGACGGAAGAGACGGAAGCAGCTGAAAAATTTGTCAAC  
TTTTATGGAGCAGGACAGAACATTCGCCACTGGGTGATGATGTCGCCAGGTGCTGCGCTGCCGTTGAATAAAGCGGTTGT  
CACTACCGCCACCTGGAAGACAACGAGCTTATTAAGGCGTGGGTGAACTACCGAATCAGCTAATCGGTGAACCTGCCAA  
ATATTCAGTCTTTTGGTGCAGTAGGGATAAAAACTTTACCCGATGGGTGATGTGACGGGTTCTGGCTGTGGTGCATC  
ATGGTGCATAACCTACCTGCGTAAAGCCGATCTCCCTGGCAGCTGCAAGCGAGCCAGAAAAAGCTGATGAACCTGAT  
CGAACAGCACTAA

>Cluster\_29674

ATGAAGAAGCTGGAACCGCTGCTTCTCGGTATCGCCATGATCGGAATACCAGTTTCGCTGCCCCAGGTAGTCGATAA  
AGTCGCAGCCGTCGTAATAACGGCGTCTGCTGGAAAGCGACGTTGATGGATTAAATGCAGTCGGTAAAACTGAACGCTG  
CTCAGGCAAGGCAACACTTCTGATGACGCGACGCTGCGCACCAAAATCATGGAGCGTTTATGATGATGATCAATCATC  
CTGCAGATGGGGCAGAAAAATGGGAGTGAATAATCCTCGATGAGCAGCTGGATCAGGCGATTGTAAACATCGGAAACAGAA  
CAACATGACGCTGATCAGATGCGCAGCGCTGCGTTACGATGGTCTGAACCTACAACACCTATCGTAACAGAGTCCGCA  
AAGAGATGATTATCTTGAAGTGCCTAACACAGGTTGCTGCTGCTGATCACCATCTGCCGAGGAAGTGAATCCCTG  
GCGCAGCAAGTGGTAAACAAAACGACGCCAGCAGCTGAGCTGAACCTGAGCCACATCTGATCCGCTGCCGAAAACCC  
GACCTCTGATCAGGTGAACGAAGCGGAAGCGGACGGCGCGGATGTCGATCAGGCGGTAACGGCGCTGATTTGCGTA  
AGCTGCGGATTTGCTCAATTTGCCGACAGCAGGCGTGAACGGCGGACAGATGGGCTGGGGCCGTTATTGAGGTTGCCG  
GGGATCTTCCGCCAGGCAATTAAGCACCGGAAGAAAGCGACATTTGTTGGCCGATTCGTTCCGGCGTTGGCTTCCATAT  
TCTGAAAGTTAACGACCTGCGCGCGGAAAGCAAAATACTCGGTGACCGAAGTTTATGCTCGCCATATTTCTGCTGAAAC  
CGTCGCCGATCATGACTGACGAACAGCCCGCGTGAACCTGGAACAGATGCTGCCGATATCAAGAGTGGTAAAAACGACT  
TTTTGCTGCCGAGCGAAAGAGTTCTCTCAGGATCCAGGCTGCTGAACCGGCGGATCTCGCTGGCTGGCTTACACAGCA  
TATTTTCGATCCGGCTTCCGTTAGCCCTGACCCGCTGAACAAAGTCAAATGAGTGCACCGGTTCACTCTTCAATTCG  
GCTGGCATTTAATCGAATGCTGGATACCGTAATGTCGATAAAACCGACGCGGCACAGAAAGATCGTGCATACCGCATG  
CTGATGAACCGTAAGTTCTCGGAAGAAGCAGCAAGCTGGATCGAGGAACACGTCGCCAGCGCTACGTTAAAAATCTGAG  
CAACTAA

>Cluster\_5609





>Cluster\_3313

ATGGACAGAGCATCACAGCCAGCGCTACCGGGGTGACCGACCGGCTGGCCCCGATATTGCGCGGATCAATTTTTACCG  
TTTTTGCCAGTTTCTGGAACAGAGCCAGCAGAACGCGCGCTGGGCAGTACCGACAACCCCGCACCGATGCGGTGCGCT  
TTCGTCGCCATCCCGGAATGGGCTTTCCGGTCAGCGAGTTAAAGAACGTTGAACGTGACCGGGCAATCCCAACGTGACA  
CCACCGCCAGCGCCACCCTTCTCGCCGTGACCGGTGATTTCGCGGTGACCGGCTATCTGCGCTACATTTACATCCCA  
CGTCATGACGGACATGACGACGATGATGGCGTTTCTCGATATTTTTAACCATCGCTTTATCACCCAGTATTACCGCATCT  
GGCGCAAATATAACTACCGCGCTGCTTTGAAGCAGGTGCTATGGATGACATTTCCCGTGTGCTGCTGGGACTCATCGGG  
CTGGGTATTTCCCGCAGCGAGAACCATACTGCCACGCCGATCCCGTTTTCTGGCCCTGCTAGCGGTGATGCGCCTGCC  
GACGCGCACGGCGGAAGGCTCACGGCACTGGTGGGACTGCTTCCCGCTGACGAAAAGCAGCGGTGGTCCCTACGATC  
CGCAGCCTGTTATTTCTCCCGGCCCTGCGGGTCTGTCAAAAAATTCACGCATCAGCCTGAAAACGCGAACGCTGCTGGGG  
CGTACCGGCACCGACGTCACAGCCAGTTGCTGCTGAAACTGTATACCGAAGATGCCGAGAACGACGCTGGCTGGCTACC  
TGGCGGGCAGCTGCACAGCGATTTGCTGGTGTGCTGCGCGTTTATCTGGGCTGGCGCTGTCAGGCCCTGCTGCAACTGA  
CGCTGAAAGGTAAAGCCTTGGCTGCTGCCCGCTGGGAAAACAGCGCGTACAGATTAGCCGTACCGGCATCCTTCGCGCC  
TCCTTTGCCGCGCCCGGACCGGAACAGTGACGGTCACTGCGGGCTTATCAGGGATTAATACCGCTTTATCCATTTCG  
TAACAGGGAGAGTATGACTCATGTTTCCATTTCGTTTTAA

>Cluster\_64294

ATGAAAAAATTAACAGTGGCAATCTCTGCTGTAGCAGCATCAGTATTGATAGTATGTCGCTCAGGCAGCTGAGATTTA  
TAACAAGACAGCAATAAATAGATCTGTACGGAAAAGTTAATGCCGGGCACTACTTCTCCTTAACGATAAACACGATG  
GTGACAAAATTTAGCTCGTCTGGGATTCAAAGGTGAAACCCAAATCAACGATAAACTGACTGGTTTCGGTCACTGGGAA  
TATGAATTCAAAGGCAACCATGCTGAATCTCAAGGTTCTCCGACAAAACCCGCTTGCGTTTGGTGGTGAATTCGAAAT  
CGCGACTACGGCTCCATCGATTATGGTCTGTAACACTACGGTGTAGCATAACGATACTCGGTGCATGGACTAACGTTCTGCCAG  
AATTCGGTGGCGATACCTGGACTCAAACAGATGATTCATGACTGATCGCACACAGGTGTTGCAACTTATCGTAACAAC  
GACTTATTTGGTCTGGTTGATGGTCTGAACTTTGCTGCTCAGTATCAGGGTAAAAATGACCGCACTGACGTAACCTCAAGC  
TAATGAGGTGATGGTTTCGGTTCTCCACTTATGAGTATGAAGGATTCGGCGTAGGTGCAACCTATGCTAAATCTGACC  
GCACTAATAATCAGGTTATCTACGGTAACAACAGCCTGAATGCATCTGGTCAAAATGCTGAAGTATGGCAGCTGGTCTG  
AAATATGATGCGAGCAACATCTATCTGGTACTACCTATTTCTGAAACCCAAACATGACTGTTTGGTAAAAACCATAT  
TGCCAAACAAAGCACAACACTTCGAAGTAGTTGCACAATATCAGTTCGACTTCGGTCTGCGTCCGCTCCGTTGCTTACCTGC  
AATCTAAAGGTAAAGCCTTGGCTTTTGGTGCACCAAGATTTAGTCAAAATATGTTGATGATGAGTGCACCACTATATTTTC  
AACAAAAATATGTCAACTTTTGTGATTACAAAAATCAACCTACTTGACAAAAATGATTTACCAGAAATCTTGATATAAA  
CGCCGACGATATTTGCTGTCGATGTTTACCAGTTCTAA

>Cluster\_43225

ATGTACGTTGCCGTGAAAGGGGGCGAAAAGGCGATCGACGCGCCACGCCCTGCAAGAGAGCCGACGCGGGGGCGATAC  
TGATTTGCCGTAAGTACGCGTCCGCGAGATTGAACAGCAGCTTAACCTCGCGGTAGATCGCGTATGACCGAAGGCGGTA  
TTGCCGACCGCGAGCTGGCCGCGTGGCCGCTGAAACAGCCAGCGCGGATAACGTCGAAGCGATTTTCTGTTGCGCGCC  
TACCGCACCGCTGGCGAAGCTGGCGGTCAGTGAGCCGCTCGACACCACCGGATGCGTCTAGAACGCGGATTTTCAGC  
AATTTATAAAGACATTTCCCGCGCCAACTGCTTGGCCCACTACGACTACCCATCGCCCTCGATTCGATTTCCCTG  
TGGCAAACGGCGAAACGCCAACGCTGACCACCGCTGACAGCGAACAGCAACCGTCGCCACACGCTTTCAGCCTGCTGGCG  
CGTCAGGGGCTGGCGAAGTTTGAAGAAGATAGCGGCGCAACAACCGGACGACATCACCCGACGCGCGCGGTTTATCCCTG  
TTCCGCTTCTCCGCTACAACAATTAATGCGGGTACGAAAGGCTATTTGTTGGCGTGGCTACTCCACCCCAACCGG  
GTTACGGGCGCAATCACCCGTTTCGACGGCGAAAATTCGCGATGGCTATATCGATATATTTATTTGTCGGGAAAGCTGGGA  
TTTGGGTGAACGTCGGCGAATTTGTTGATGACCGAGTGTGAAATGGTCAACGGTTTATCGACCCACCGGATGAGCCGCC  
GCACCTCACGCGCGGCTACGGGCTGGTGTTCGGCATGAGCGAGCGCAAAGCGATGGCAATGGCGCTGGTTGACCGCGCTC  
TGCAAGCCCGGAGTACGGCGAGCAGCAGCCGCGGAGGATGAAGAGTTCGCTGCGCGCATGCGGACCGCAACAGCTC  
GAAGCCGAGGCTTTGCTCTGCACCTTAAACTCCGCACTACGTCGATTTCCAGGCGAACTGGAGCTACTCAAAACGCTCT  
GCAACAGGAGCAGAACCATGGCTAA

>Cluster\_64520

ATGCAAAAAGTTTCAATTTGATGCGCATATTACTTGTGTAGGTGGCATAGAACGCGTGATTTGCTTATTAGCCAACGC  
GTTAGCTAATTTAGGTTTAAAGGTGAAATTTATATCCTTGTACCGTACTAATGCTAACATCAATFACGCTTTAACTAAAG  
ATATAAAGTTACTTTTATAAATAAACTAAAATATTACGGGAAGCCTGGGGGATATTTTCGATATTTTAAACATATTTCTG  
AGTGTGTGAACTCAATAAACAATCTATGGCTAATAAAAAATTCATTTTTCATAAATAATACATTTCCAATGGCTTTTAT  
TTCAATGCCCTTTTATTTTTCGAAAAATACGTGTGTCGTTGAACATGTCATCATTCATACTATTCAAAGCCTATAC  
AATATATACGACAGTTTATTTATAAGTTTATCACTACAATTTGTGGCGTTACGGATACGGATGCGGAAAAATAAAGCGT  
GGGCATCGTCATGTAGTTAAAATCCCAATCATTAAAGTTTGTAGAAATGTTGGGAAAGTACTCTGAGAAATCATAAAGAT  
AATGTCAGTTGGTAGGCTGGAATATCAAAAAGGTTTGTATTTGCTAATTCAGGCTTTTGCACGAGCATCAAAAGATACAG  
ATTTGGCTATTAGATTTTATTTGCGATGGTACATTAAGAAGGAAATGAAAGAGATTTATTCAGTTTAAAGGATTTCTAAT  
ATAAATTTATTTAGGAATGTAAGTAATATGATGAAATTTATAAGGATTTATTCATTTGTTGATTTTCTTCAAGGTTTGA  
AGGTTTGGAAATGTTGCTACTGGAGGCCATGAGGGCTGGTTTGCATGCAATTTCTTCAACTGCCACAGGACCCGCGAG  
AGATATTTGATAATGAGAAATATGGTATCTGCTAGATAATGGCAATATGACGAGTTATCTAATGTAATGAAAATGTTT  
ATGGATAGTTTGTAGTTGCGTTCAAAGTTTCTTAAACTATCTAATAATCGAACAGAGAACTATACACTAGATAAAAATATT  
GCCATTGTTGGTGGATTTAATAAATAAAGATTTAA

>Cluster\_55564

ATGCTTGGCCTAATAAGGTTTTTTTTGGCATCGTGCCTATTGCTTTTCACTTAAACGGCTCGCATACCTGCACCTGGCAA  
CTTTGCAGTGAATGCTTCTATGTTATTTAGTGGTTTTTAAATAACATACATTTTGCATGAAACATACAAGTTCAACTTCT  
CTATGTTTTGGAAAAATAGAATACTGAGGTTATTTCCCGCATATATATTTTTCTCGTATGGGCTTTCTTATATAAAA  
TTAATTTCCATCCGAAAGGAATTCACCTCAAACGAGGCAATTTCTTACCTGGAGATTTATAGGAAACCTCTTAAT  
CTTCCCTGGGCTTTCTTCTGATAATGCTGTAGCAAACTCATTCGGTGCCTTTTCACTTATATCACTTTGCTATG  
ATGGTAATAGATTCAGAATAGTCACATCATGCTGAGTGGGTTGAGATAACATGTTATTTTTTATTTGTTGGCTTTTC  
ATAGCCCGAAATAAATTTACAGCCATTACGTCGATTCTGCTTTCACTGCTTTATCATGCTTACGTATATGATGACACCA  
TTCTTTGATATGGCGTATTTCCCATTCCTTGTGCAACACTTCTTTTAGCATGGGTTCTCTGGGTTATTTTGCCATA  
GAAAGTTCAAAGCTATGATATCTTTCTCCACAAAGTTTTTTTTAAATAACATTTATTTGCATCGGATTTTATTAACCAAT  
TGGCATTTATATACAATTAATCCATTAGGTCAGTACAACATAACTTTACTACACCAATAATGTAATAGCATGTTTAC  
AACCCTGGTATTTAATAAATAAAGACAAACATACATCTTGGAAAAATCTCAAGTGGTTTGGTGACCTGGCCTATCCAA  
TTTTTCTTTGCTCAATTTTTGGTGGATTTCTAGCATGGCTGCTATTTGGTGGTAAAAATCGTGGCTTATCCATCTTTTA  
TTAGCTACCCAAATCAATTTGCACCTGGGATCTTTGTTGTAATTAATGACAAAGCACTAATTAATAAATTAGAGCAAAA  
AATAAGGGCGGACGCTCAAAGCAAAAATAATCAGGAAAACCTTCAAGGTAA

>Cluster\_23070

ATGGCACAAACAGACTCCTTTGTACGAACAACACAGCTTTTGGCGGCTCGCATGGTGGATTTCCACGGCTGGATGATGCC  
GCTGCATTTACGGTTTCGAAATCGACGAACATCATGCGGTACGTACCGATGCCGGAATGTTGATGTTGTCACATATGACCA  
TCGTCGATCTTCGCGGACGCGCACCCGGGAGTTTCTACGTTATCTGCTGGCGAACGATGTTGGGAGCTCACAAAAGC



GGCAAAGCCCTTTACTCGGGGATGTTGAATGCCCTTGGCGGTGTGATAGATGATCTCATCGTCTACTACTTTACTGAAGA  
TTTTCTTCCGCTCGTTGTTAACTCCGCCACCCGCGAAAAAGACCTCTCCTGGATTACCCAACACGCTGAACCTTTTCGGCA  
TCGAAATTACTGTTTCGTGATGACCTTTCCATGATCGCCGTACAAGGGCGAATGCGCAGGCAAAAGCTGCCACACTGTTT  
AATGACGCCACAGCGTCAGCGGTGGAAGGGATGAAACCTTCTTTGGCGTGCAGGCGGGCGATCTGTTTATTGCAACCA  
CGGTTACCCCGTGAAGCGGGCTACGAAATTGCGCTGCCAATGAAAAAGCGGGCGATTCTGGCGCGCGTGGTGAAG  
CTGGCGTTAAGCCATGTGGCCTGGGCGCGCTGACACGCTGCGTCTGGAAGCGGGCATGAATTTGTATAGCCAGGAGATG  
GACGAACTATTTCTCCTTTAGCCGCAATATGGGCTGACTATCGCCGTTGGAAACCGGAGATCGTGACTTTATCGGTCG  
TGAAGCTCTGGAAGCGCAGCGTGAACATGGCACAGAAAACTGGTGGTCTGGTGATGACCGAAAAAGCGGTGCTGCGTA  
ATGAACTGCCCGTACGTTTACTGATGCGCAGGGCAACCAAGCATGAAGGCATTATCACCAGCGTACTTTCTCCCAACG  
CTGGGTTATAGCATTTGCGCTGGCGCGCTGCCGGAAGGTATTGGTGAACGGCGATTGTGCAAAATTCGCAACCGTGAAT  
GCCGTTAAAGTGACGAAACCTGTTTTTGTGCGTAACGGCAAAGCGGTGCGGTGA

>Cluster\_11125

TTGCTTATCAATCCCGATGGCTCGAAAGGCTGGCGTTTTCCGTTTCCGTTTTCAGGGAAGCGCGGTTAATGTCATTTGG  
CAGCTACGATTTAGTAAGCCTCGCAGAAGCAGCTGAAAAGCGTGATATCGCCCGTAAGCAGGTTGCTAATGGCATTGACC  
CGGTAGAGGAACGCAAAGCTTTAAGACTCGCCAAAAGTTATCAACAGAAAATCTTTTTCGAAGCAATATGTCGAGAATGG  
CATACCAACAAGCTGACCGCTGGACTGTGGCCTATCGAGAAGAAATCATTAGACTTTTGGCAAGATGTGTTCCCGTT  
CATTTGGTAAACCCCATATCAGTGAATCAAAACCTAGAACTACTTGAAGTATTCGCGCAATAGAGAACAAGTGGAGCAC  
TAGAGAAAACACGTAAGGTACGTACAGATGCGGTGAGGTTTATCGTTACGCAATCATAACTGGTCCGCGGAATACAAT  
CCTGCTCCTGATTTAGCCATCGCTTGGCGGTTCTTAAGCCAAAACATCATCCATTTCTATCTGCCGAAGAAATACCTCA  
TTTTATTCCGGATCTCGAAGCGTATACCGGTAGCATTATACCAAAAATGCTACGAAGATAGTTATGCTAATCGGTTGTA  
GAACCGCAGGAGATCGCTTTTGTACTGTTGAAAGAAAGTAGACCTCGAAAAGGTTATATGGGAGATACACGAGAAGCTATG  
AAAATGCGTAGGCCGACATTTGTTCCCTTATCGACTCAGGTAGTTGACTTTTTTAAACAGCTCAAACCTATTACCGGAAA  
TTATCTTTACATTTTTCGCGGTAGGAACAACCGCAGCAACCGATCTCGAAAAGAAAGCGTATCGCAAGTGAATGAGTTAC  
TTGGTTATAAAGGACGTACAGGTACCGGTTTATAGCAATATGTCGCAATCTGCACGAGCAAGGTTGATGATG  
GCATGATTGAGATACAGCTAGCCCATGTAGATAAAAAATACTATTCGAGGCACATATAATCATGCTATATACTTGAAAA  
TAGGGCAATATGCTACAGTGGTATTCTGATAAAATTAATGAACCTGA

>Cluster\_55570

ATGAGTACGGATAATGATCAGGATATTGCTCCCTGACAGTGGGCGAAAAATCATTTAAGGATGGGACTCTGTGCGGGT  
GACCCGTGGCATTGAGCGTTTTCCCTCCGATTTTGACTGGGACTGATGGATTATTTCCGGGAAGTGACCAGAAGCAGC  
TGGTAAAGGAAGGATGCTTGTGAGGTAAAGCTTGGTAAACGACTGGTAGTGACGGGTATGTTGATGACTGCTGCGCT  
GCTATTTCCCGTTTCGCGCATGAAGTCAGAGCTCAGGCGCAGTAAGTGGCAGATCTCGTTGATTGCTCTGCTGAATG  
GCCAAATAACGTCATCAATAACAGTAATGCGCTTGATATAGCCTCCCGCTCGCATCCATTACAACATTTGGCGTAAGTA  
CAGACGTTGATGATCTGGTGAAGTTCCGCAATTTCCCTGAACTGGGGGAAATCGCCACAGGAAATACTTGATCGTGT  
TCCCGCTGGTCCGCAATTGCTTTATACGATCAGCCTGACGGTAACCTTATTTCTGACCCGGGTGGGGACAAAGCGCGCG  
CAGCGGTATCGCAGAAGGGGTAATAACGAAAGGCTTATACCGCGTTTCGATGGCTGACCGCTTTTCTGATTACGTCG  
CGGTATCGATGAGCATTTCCCGGATTCAGGATTCGCGCAGATACGGCTTATGATTCCGTTGACGCTGGCGACCGCCCG  
GATCTGAGGCGGCCAGTATGCGTTACCGAAAACGGATCATTATGTTGAAAGTACACTGATGGCTTCCACAACAGGCTCA  
GCGAGCATTGACTGGGAGATGAACCGCGATACGGCCGTTCCCGTCACTTAACGGTGAAGTATTGATTCTGGCGCGATA  
AATCCGGGAAATTAATGGGAGCGAATACGCTTATCCCGCTCAACATCCCGAGTCTGCAGCTGACACCGAATTTGCTT  
ATCCGAGGTTGACTTATATCAGAGACAGTACGGCACCCCTGACGCGCTTTATCTGATGCCCCGGAGGCTTTTCGCTGT  
CCAGCTTATGCTTTCTACCAGCAAATACCCGGACTAAACCAATGA

>Cluster\_21060

ATGTTTGATTTTCGCAAAAATCATTTGAGCGTCAAAGTGATAAGTGCCGTAATGGGACCATACCTTTGTTGCTCGCGTTT  
CGGTGACGTTCCCGGAGTCTTTATCCCCCTATGGATAGCCGATATGGATTTACCTCACCACTGCGGTGATTGACGGTT  
TCCGGCGCATCGTGGAGCAGGCACTTTGGTTATACCTGGTGTCTTGACGAATCTACGACGCGGTCATTGCTTCCAG  
CGCAAAACGTCATCAGGTTGAGGTGGAAGTTCGTTGATCAGCTGACCTACGGCACCGTATCCACGCTGCACCTACACGGT  
TCAGGCATTTCTGCAAAACCGGGTACAGGCTGATGATGAACACCGCGGTCTACGATCCTTTTGGCATGGCGCACGCGC  
AGGGCGTGCAGGTAAGTGGCTAACCCGCTGCGCGTGGAGAAAACCGCTATCAGCTGATTTTAACTGATAGAAGAACAG  
CTCAAAACCCACCGTCAACCGCTGTGGTCTTCTGCTGCCACATAACCCGCTCCGGCAGGATCTGGCGCGAGGAAAGAA  
ACGCCAGGTGTCGATCTCTGTCAACGCTACGGCAGATTTGTTGGTTCGATGAGGTTACGCTGAACACATTTCTGGATG  
GCAAAATTCGCCAGTGTGCTCACCTCTGGCTGTGCGCCAGGACAACCTGATCTGCTCACATCGCCCAACAAAGCGTTC  
AATTTGGCGGGCTGAAAACCTCTACTCCATGATTCAGACGACTCGCTGCGCCAGCGCTTCCGCCAGCAGCTCGAGAA  
GAACCTCATTACCTCGCCCAATTTGTTCCGGGTATGGGAATCATTCTGGCCTATCAACACGGTCTGCCCTGGCTCGACG  
CGCTGAACGGTTATTCGAAGGCAACGCCCGGTATTCGGCGGATGCCCTCCAGACCACTTCCCGGCTGGAAGATGATG  
AACCAGGATCTGCTGTTGCGGTGATGATGATGATGATGATGATGATGATGATGATGATGATGATGATGATGATGATGATG  
ACGGCAGGACGGCTGCTATAGAAGACGGCAGCCACTATGTACAAAACGGCGAAAACCTACCTGCGGATTAATTTTGGA  
CCCAGCGTACTGCTGGAGCAGTCCATTAACGAATGCTGAAAAATGACAAATAA

>Cluster\_6813

ATGACGCTTGATGAGTTTATGGCGCTGGCCGGCACATCGAACACGGGGGCGGGTGAGTACGATCATCGGGGACAGCGGA  
ATCACTGCCCGCGTCATGAACGTCGTGACGGTCACTCTGAGGCGGTGGCTACCATGCGGTGTTACCTGTACTGTTGATC  
GCAATGAGAAGGGGAAGGAGGCCCGGAGTGGCTTGTATCTCATCCGGTCGATCACATCCTCAACGAGCGCCGAAACGCG  
TGGCAAAACCCCTACAGTTTAAAGCAATGATGATCGCCACTGCTGTTAAACGGTAATGCTTATGGGTGATTTCCGGT  
GGGGCGTGTGGTTTTCCGGTGGCTTTACATCCTTACC CGCGCAGTCCGTTGAACGTTGGAGCAGACAGGTTGAGCATACT  
GGCGTACTGCATCACTGACGCCACACCGGAAACACCGCAACTATTTACCGTGGGAGGTTCTCCACCTTCTGTTACTCC  
ACAGATGACGGTTTTATGGGGCGCTCACCTGTAACCATCTGCCCGGAAATCGCTGGGGCTGGGCTGGCCCAACAACGCCA  
CGCGCGAGCGTGTATGCGTGTGATGATGATGATGATGATGATGATGATGATGATGATGATGATGATGATGATGATGATG  
AACAGGCATTAGCCGACTGGAACGCTACAAGGGGCCAGAAACCGCGGAAAAACGCCCATCTTGAAGGGGGTATGAGC  
TATCAGCAGCTGGGCATGATGATGATGATGATGATGATGATGATGATGATGATGATGATGATGATGATGATGATGATG  
GTTCAACGCTCTCGCGGATTTTTTGTGAGGAATACAGCAACAGCACCTACAGCAATTTACGCGAGGCAAGCCGCGCATTT  
TCACCATGACGATGCGCCCGTGGCGAATTTGAGCGACGATAAAAAACGCCCTGCTGGTGGGCTGACCGCTGATGATG  
GGTATCCGGTATCAGGTGGAGTTTACAGCGCGGACCTGTTACGGGCCACCTGGCGAACGCTTTGCCACCTATGAACG  
CGGCATCAAAATCCGGCTTATGTGCCGAAACGAAACCGCGAAGGCGTGAAGGGCTGCCCGCGTATGTTGGTGTGATGAT  
TCAGCCAGGCATGGAACAGGAAGTAAAAATCAGCGAGGGGAGAAAAACCGGAATGA

>Cluster\_55645

ATGAAAATTAATTTCCGGTACAGGTTATGTTGGTTTATCGAACGGTGTCTGATTGCGCAAAACCGAAGTGGTTGC  
TCTGGATATCGTACAGGCCAAAGTGGATATGCTTAAACAGAAGATCTCCTCCGATTTGGTGAATAAGAGATTCAGGAATATC  
TGGCAGAAAACCGTTAAATTTCCGTGCCACAGGACAAAGCAGCGCTATCGTAATGCGCGACTACGTGATCATTTGCG  
ACGCCGACGATTAACGATCCAAAACCACTACTTCAACACCTTACAGTGAAGCGGTTATTTCCGATGTCACAGAGAT  
CAACCGAACCGGTTGATGATCAATAATGACCATCCCGTGGGTTTACCCGCGACATCAAAGACGTTTAGGGATTG

ATAATGTTATTTTCTCTCCTGAGTTCCTCGGTGAAGCCGTGCGCTGTACGACAACCTGCACCCATCGCGCATTTGTTATT  
GGTGAGCGCTCTGCGCGTCCGAGCGTTTCGCGAGACCTGCTGAAAGAAGGCGGATTAAGCAGGATATCCCGACCTGTT  
TACCGACTCCACTGAAGCGGAAGCGATCAAACCTGTTTCGCGAACACCTATCTGGCGCTGCGTGTGCCTATTTCAATGAGC  
TCGACAGCTATGCTGAAAGCCAGGGGCTGAACGACAGCAGATATCGAAGGGGTATGCTTGGATCCGCGTATCGGCAAC  
CACTACAACAACCGTCCCTTTGGCTATGGCGCTACTGCTCGGAAAGATACCAAGCAGCTGCTGGCGAACACGAATC  
GGTCCCGAACATATCATCGCGGTATCGTGGATGCTAACCGTACCCGTAAGACTTTTATCGCGGATTCTATTCTCGCCC  
GTAAGCCGAAAGTGGTGGGTGTGTATCGCTGATCATGAAGAGTGGTTCGGACAACCTCCGCTGCTTCTTATTCAGGGC  
ATTATGAAGCGCATCAAGGCCAAAGGTATTCGGTATATCTATGAACCGGTGATGCAGGAAGATGAGTCTTTAACTC  
CCGCTCGTGGCGGACCTGGATACCTTCAAACAAGAGCGGATGTGATCATCTTAACCGTATGGCGGAAGAGCTGGCGG  
ATGTGGCGGACAAGGTATACACCCGCGATCTGTTTGGTAACGATTA

>Cluster\_21452

ATGCTGGAGTTGTTGTTCTGCTTTTGCCTGTAGCCGCTGCCTATGGCTGGTATATGGGCCCGCAGAAGTGGCAACAAAA  
CAAGCAAGATGAAGCCAAACCGCTTGTGCGGTGATTACGTAGCGGGGTAACTTCCTGCTTAGTAATCAACAGGATAAAG  
CGGTAGACCTGTTTCTCGATATGCTTAAAGAGGATACAGGTACCGTTGAAGCCCACCTTACGCTCGGAAACCTGTTCCGT  
TCGCGTGGCGAAGTTGATCGCGCTATTCGCATCCATCAGACCCTAATGAAAGCGCCTCGCTGACCTATGAACAGCGGT  
TTTGGCGATTCAACAACCTGGGCGGTGATTACATGGCTCGCGGTTATACGACCCGCGGAAGACATGTTCAATCAGCTGA  
CAGATGAACTGACTTCCGATTTGGCGCTGCAACAGTTGCTACAAAATCTACCAGGCTACCAGCGAGTGGCAGAAAGCA  
ATTGATGTTGCCGAACCGCTGGTGAAGCTGGTAAAGATAAACAGCGCTCGAAATGGCCATTTCTACTGTGAGTTAGC  
TCTGCAGCATATGGCCAGGACGATCTCGATCGTGCCATGACTTTGCTAAAAAAGGTGCGGGCGCAGATAAAAAACAGCG  
CCCGCTATCCATCATGATGGGACGCGTGTATGCGGAAAGGAGAATACGCCAAAGCGTGAAGTTGCAACGTTGTC  
ATATCCAGGACAGAGAAGTGGTCAGCGAAACGCTGGAATATGCTGCAAAACATGCTATCAGCAGTTGGGTAAAACCTGCCGA  
ATGGGCGAATTCCTGCGAGCGCGGTGGAAGAGAACACCGGTGCGGATGCTGAATTGATGCTGCGGATATTTATCGAAG  
CGCGCGAGGTAGTGAGGCGCAGGCTATATATACGCGTACGCTTACGCGTATCCGACCTGCGTGTGTTCCATAAG  
CTAATGGATTACCACTTAAATGAAGCGGAAGGCGGTGCAAAAGAGAGTCTGATGGTGTGCTGCGTGGATTGGCGGA  
GAAGGTGCGTAGTAAGCCTGTTATCGTGCAGAAATGTGGTTTACCGCATACACCCCTACTGCGATTGTCGCTCT  
GTCGGCCTGGTCAACCATTAAACCGATTGCGGCTTGTGATGGCTGTAA

>Cluster\_22402

ATGAAAAATTTGTTGTCATCGTFCAGTGCCTGACTGCTATCGGTAGTTTTAAACGGTTCACTGCTTCCACCAGCGCCAT  
CGACCTGGGGGCGACAGTAATTAAGCCGCCATTGAACGTGCAAAAATCGATTCACTACACGTTGATGAAGTATTATGG  
GTAACGTTTGAAGCCGACTGGGGCAAAATCCGCGCAGTCAAGCGCTGCTAAAAAGCGGACTGGCTGAAACGGTGTGC  
GGATTACGGTCAATAAAGTGTGTGGTTCGGGCTTAAAGTGTGGCGCTTGGCCGCCAGGCAATTCAGGCGAGTCCAGC  
GCAGAGCATTTGGCGGGGGATGGAATAATGAGTTTAGCGCCCTACTTACFCGATGCAAAAAGCAGCCTCTGGTTATC  
GCTTGGAGACGGACAGGTTTATGACGTAATCCGCGGATGGTCTGATGTGCCCCACCCATGGTTATCATATGGGATT  
ACCGCCGAAAACGTTGGCTAAAGAGTACGGAATTAACCGTGAATGCAAGGATGAAGTGGCGCTACATTCACAGCGTAAAGC  
GGCAGCGCAATGAGTCCGGTGTCTTACAGCCGAAATCGTCCCGGTAATGTTGCTCACTCGGAAGAAAACCTTCGCTCT  
TCAGTCAAGCAATTCGCGAAAGCGGATTCACGCGCTTAAAGCGGATTTGGCGCGCTTGGCCGCGCTTCGATAAAGAGGA  
ACAGTCCAGCGGGGAACCGCTGCGCATTAACGACGGTGTGCGCTCTGGTGAATATGGATGAATCTGCGGCGCTGGC  
AGCAGGCTTCCCGCTGCGCTGCAATTAAGTTATGCCAGCGGTGGCATGCCCCCGCATTGATGGTATGGGGCCAG  
TACCTGCCACGCAAAAAGCGTTACAACCTGGCGGGCTGCAACTGGCGGATATGATCTCATTTAGGCTAATGAAGCATTT  
GCTGCACAGTTCTTGGCGTTGGGAAAACCTTGGGCTTTGATCTGAGAAAAGTGAATGTCAACGGCGGGGCTATCGCGCT  
CGGACATCTATCGGTGCGAGTGTGCGGCTATTTGCTGACACTATTTACATGAATGCAAGGACGCGGATAAAACGCTGG  
GGCTGGCAACACTATGATGCTGTTGGCGGCGAGGAATTCGATGTTGAGCGGTTGAATTA

>Cluster\_11026

ATGTCACCTGGGATCGAAGATACGCCCAAAAACCACTGCTCTGCTGGCCACTTGGCTTCAAGTCCGGGCTTCTCGGTAT  
CGGGCAGAACGGTCTGCTGGTGTGCTCCTGTTCTGGTTCATACAGACAAATCGAGTCTGCTGTATGGGCTGCCCTGC  
TGATGCTTGGCTCAATGCTGTTTCTGCCATCGTCCCGTGGTGGGAAAGCAATTTCCCGTACTGGCAGTAAACCTGTG  
GTGTTGGGCTCTGGGAGGATATGGCATAAGCTTTACCTTGGGCTGGGAAAGCGTGTGATGGCTACCAGCGCCAT  
AACAACAGCGGTGGGACTGGGAATATTAATCATCGCCGGATCGCTACGGGCTGACCGTGTGCGCAATGGTGCAGCCT  
GTCAGGCTTGGGCAATGCAAGAGAGCAGGAGAAGGAATCGCATGGCGCTCTGCAACCATCAGCTCCGGCCTGAGTTGC  
GGCAGGCTATTCGGGCGCTGTGCGCGGAGCAATGCTGGCAATTCATCTCTGGCGCACTGGGGCTGCTGATGGCAGC  
CCGATGCTGGCGCTGCTGATGCTGCTGCGGTTGCCGCGCACACCACCCAGCCACACCGGAGCGCAGAGCGTCACTC  
TGAAGCGGATTTGCTGCTTATCTGCTTTGCGCAATATTAATGCTGCGGCGGTGAGCATGATGAGCTTGGACTTTTCG  
CCTGCCCTTACTCGCCAGTTCCGCCAGGATACCCGCAATAGCCAAACAGGTTGGCTGGCTGTTGGGCTGTGCGCAGT  
AGCTGGCTTACTCGCGAGTTCGGGTTACTCCGTCGCGAGCCTGACTCCGGTGGCCCTGCTCCTGAGTGGCGGAGTGT  
TGATGAGTGGTGGTCTGGCTATCATGCTCTCCGAAACAGTATGTTGTTTACCCGGCTGTGCAAGTGTCTATTTGGA  
GCAGCTCTGGCAACACCCGCTTATCAACTTCTACTGAATGATAAGCTGGCTGATGGCGAGGCGGGGCTGGCTGCTAC  
CAGTCAACACTTGGCTATGGACTGTGCGCTTTGCTGGTGGCGTGGTATCGAAAACAGGTTGCGCAATCGCGCTGATTA  
TGGCGCATATTTGCAACTATATATTTACCATTGTGCTGTATTTACTGGCATTACCGTGTATCAATAA

>Cluster\_23169

ATGAGTCATGATCCACAACCGCTGGGCGGCAAAATCATCAGTAAACCGGTCATGATTTTTGGACCGTTAATCGTCATCTG  
TATGCTCCTGATTGTGAAGCGTCTGGTGTTCGGTCTGGGCTCTGTCTCCGACCTGAACGGCGGCTTCCCGTGGGGCGTGT  
GGATCGGTTTACCTGCTGATCGGTACCGCTTTGCTGTCGGCGCTGGCGCTGGCGTGGGAGTATACGTTCTTAAAC  
CGTGGGCAATACCATCCGCTGGTGGCTCCGCGCTGTTGGCGAGTCTGTTTGGTTATTTCACTGGGTGGCTGTGCGATCAC  
TATCGACGTGGGTCGCTACTGGAACCTGCGTACTTCTACATTTCCGGTCACTTCAACGTGAACCTCGGTTACTGTTGCGA  
CGGCGGCTGATGACCATCTACATCGGTGTGATGGCACTGGAGTTGCTCCGGCATTGTTGAAACGTTGGGCTGGAAG  
GTGTCATCAACCTGTAACAAGGTGATGTTCTTCTCATCGCGCTTGGTGGCTGCTGCAACTATGCAACAGCTCTTC  
AATGGGCTCGTGTGATCTCGGCGGCTACAAGGTGCATCCGCTGTGGCAAAGCTATGAAATGTTGCGGCTGTTCTCGC  
TGTGACGGCGTTTATCATGGGCTTCTCGATGTCATCTTTGAAGGTTGTTGGTGCAGGCGGGTCTGCGTGGCAACGCT  
CCGGATGAAAAGATCTGTTGTTAAGCTGACCAACACCATCAGTGTGTTGCTGGCGATTTTCACTGCTGCTGCGCTTTGG  
CGAGCTTATCTATCGCGACAAGCTGTGTTAGCGTTTGGCGGCTACTTCACTCCGCTGATGTTCTGGATTGAAGCTTTCG  
TGATGCTCTTCCGCTGGTCTGTTGCTGCTGGCGAAGTTGCGTAATGATTTCCGCTGCTGTTCTGCTGAGCTGAGT  
GCACTGTTAGGTTGTCGAACCTGGCGTCTGACCTATTCGCTGGTGGCAATCAACCCGGGTGGCGGTTACCGCTACTTCCC  
GACCTGGGAAGAACTGTTGATTTCTATTTGGTTTTGTGGCTATGAGATTTGGCTTATATCGTACTCATTCGTTACTGCT  
CGATACTTCCCTCTTAAAAACAAACGATCAATACTGCTATGAGGCGAGCAAAAGCATGA

>Cluster\_24556

ATGCTTCTGTCACGCACTCCCGTAGAACGCTTTTCTTTTTCAGCACCGCGCTTTTTCGGGATGCTGGTTCGACCTTAGGTAT  
GGGTTTAGCCCGCTTCTTTATACGCTATGTTGCGGCTATGATGGCGGAAGGATCGTTTTCATTTAGCCAGCTCTCGT  
GGATTGCCAGCGCAACTATGCGGGGATCTGGCTGGCAGTCTGCTATTTCTTTTGGCGCATTTACACAGCCATCGCCG  
CTGCGCCATTTCTGTTGGCTTCTGCCCTGGCGAGCGGTTGTTGATCTCGCAATGGCATGGTTGCCGCATTTATTTCT

GGTGTATTGATTCGCGTCTCGGGGTGTGCCAGCGCCGGAATGCTGATTTTTGGTTCGACGCTGATTATGCAGCACA  
CGGCCATCCTTTTGTGCTGGCAGCTTTTCTGGCGTTGGCATTGGCATCGCACTGGGCAATGAAATATGTTCTGGCA  
GGCTGCATTTTGCCTCTCTCGCAAACGTTATGGCAAGGTGCCGGGGCGCTTCTGGCATGATGCTGATTGCACTTAC  
GCTTTTAAATGCCCTCGAAAAACACGCCATCACACCAATGGCAATTTGGCAAAAACGGAGCAACAGATAATGAGCTGGTGGT  
TACTGGCTATTCTGTACGGCTGGTGGATTGGTTATATCATCTGCGGACTTACCTGCCGCTCATGGCGAAAGATGCA  
GGCTACCATTGTTAACCGCCCTCTCTGGACGTTAGTCCGGTTATCAATTGTGCCTGGTGGCTTTGGCTGGCTATGGGC  
AGCAAAACGTTGGGGGGCTTTGCCTGCCTGACGGCGAATTTGCTGGTGCAGGCTATTAGTGTGTGCTTACTCTGCCA  
CGACTCGCTCTTGTCTTATCATCAGCAGTATTGGTTTGGCAGTACCTTTATGGGCACGACATCTGGTGTGACT  
ATCGCCGCGCACTGACGGTACCGGAAATCTCAATCTTTAGGCTTTGTGACGCTCATTTACGGCATTTGGGCAAAATCT  
TGGCCCGGCTGACCAGTATGCTTGGCAATGGAACATCGCGCTTGGCAGCGCACTCTCTGGCGCGGGCGGCTTGT  
TTATGCTGCACTTATCAGCACAGCGCAATTTAAGCTGCAAGTGGTCACTTCATGA

>Cluster\_41024

ATGATTAACCTACCATTAGCAAGTAGCACTTGGGATGATTTAGAATATAAAGCAATCCAATCAGTTTTAGACTCTAAAAT  
GTTCCAGATGGGGAGTATGTAACAGATACGAAACCAATTTGCAAAGACTTTTGAAGTAAATATGCCGTGATGGTGA  
GTTCCAGGCTACAGCAAATTTATAATGATGCTGCATTATTTTTCACAAAAAACCGAGATAAAAAAGGGGGATGAA  
ATAATAGTCTCTGCTGTTTCTGGTCACTACTTATTTAATCCGTTGCAACAATATGGATTGAGGGTGAAGTTCTTGTGATA  
CGATTAATACTCTAAATATTGATATTGAAAGTTTGAAGAAGCTTAAACAGATAGTACAAAAGCAATTAAGCAAGTAA  
ATTTATTAGGTAATCCTAATAACTTCGATGAAATTAATAAAATATTGGAGGTAGAGATTTATCTTATTGGAAGATAAC  
TGTGAGTCTATGGGAGCAACCTTTAATAATAAATGCGCGGCACTTTTGGTCTGATGGGAACATTTAGCTCTTCTATTC  
TCATCATATAGCTACCATTGAAGGGGATGCATTTGCTACTGATGATGAAGAAATTTATCATATCTTGTGTCATTCGAG  
CTCATGGTTGGACCGTAATTTACCGAAAAAATAAAGTTTACAGGTGTAAGAGTGAATGATCAATTTGAAGAGTCAATTC  
AAATTCGTTTTACCCGGCTATAATGTTAGGCCATTTGAAATGAGTGGTGAATAGGCATAGAACAATTAATAAAATTTGCC  
AGGATTTATTTCTTAGAAGAAAAATGCAGAGTATTTTCTTGGAAATTCAGGACCATCCATACCTGGACGTTGCAAC  
AGGAACTGGCGAGGTAGCTGGTTGGTTTCTCATTTATCATAAAAAAGATTCTGGTGTGATAGGAAACAATCTGGT  
GAAAAATTAATTTCTGCTGGTATTGAGTGTAGACCAATTTGCTACTGGTAACTTTCTGAAAAATACAGATGTTCTTAAATA  
TTTCGACTATACCTTCAATAAATGATAGATAACGCTGAGTATTAGATAAAAAATGGTCTTTTGTGGAAATCATCAGA  
TAGAACTATTTGATGAGATTGATATCTCAGAGAGTTTTGAAATGA

>Cluster\_6815

ATGCCGAGAATAATCGAATTACGCCAGCAGAAAAACCGCCATTAATAATCAGATGCGCGACATGCTGGAGAACCGGAAAA  
AGAAAACCGCAGTCTTAACGATGCTGAGGGCGCAAAATTTGACGAATACGCGCTAAAGCTGAATCCCTCGATAAAGACA  
TTTCCCGCTTGAAGCCATTGCAGACGAAGAGCGCAGCAAGCCAGGTAAGAGCAGTCAGACCACTGACCCCGCAGAACTA  
CGCAACTCATCCGTACAGAGGTGAAACCCGCGCATTAAGTACAGCGCTTCCCGCTGATGGTGGTATACCCGTTATCCCGGA  
GCTGAACACCGAAATCATGCGAATGCTGGCGGATGAATCCACCATGCGCCGCTCTGTACCGTGAAGAAAATCAGCAGCA  
ACGAGTTTAAAGCAGCTTGTTCGCTGGCGGTGCGACCTTAAACACCGTGAAGAGGTAAGGCACGCGAACAGACCAGC  
ACCCCGCAGATTAACGAGGTGAGCATTAACTGTATCCGGTATGCTGACCCGCGCACACAGGAAATCGTGGATTT  
TTCCGATGTTGACATCCTTTTACGCTGACGGGTGAGATTGGCGACACTTACCGGAAACCGAAGAAACCGTCTGGTTG  
TGGCGCAGGTTGACAAAAAGCAAAGGTTTTTTATCCGTTACCCGTCAGAGAAAGACGACAAAAGAGCGTATTTGGT  
ACGTTGACAGTAATTAACCTTCCGAATCTTGGCGTGGACATCTGCGGACCCGCTGATCGACCTGAAATTTGCATTACG  
TAAAAATACCGCAAAAACGCGGCTGGTGGTTAACTCCACGACGCGGCAAAACTCAGAAGGTGAAGAACGCGAAGC  
GCGATTACATCTGGCGCGACTTTACAGCGGGTGTATCTGATACGTTTGGGGCTTCCGGTGGAGTATCTGGAAATTT  
ATGCCGATAACGTTATCGCCCTGGGTGACTTCAACCGGTTTATACATCGTTGATCATGAAACGGCGTGGCACCAG  
ACCGGACAACCTGACAGACCGGGCTTTATCAAAATTTTACCGCAGAAATATTTAGGCGGTGGCGTGGTGGATTGCAACG  
CTATAAAGATTCTGGAACCTGCCGAGCAGCAGATTAA

>Cluster\_22309

GTGACTTATTTCCGATTAATCCGTTCTGCGCTGCTGCTGTGCTGACGGCAATCGCAGCGCGCTGCCGTTTATCAG  
TTACGCACCTAATCGTTTGTGTTTGGGTGAGGGCGCTCATCTTGGCAGCTGTGGCGCAAATCTCTGGATGCTGGTGG  
CGTTGGTTGCGCCTGGCTGACAGCTGTTTTATTTCCCGTAAAAAAGGCAGCATTTTTGCACTTCTGGCCTTGGCAATTC  
GCTTCTGATTTGCTGGTGTGGGAGCTGGAAAGCGCGCAGACAACCTGGCGCAAAATGGTAGTGGCTGGCGGTACCAG  
CCTCGAAGTGGTTTCTGCTGGCTGCGCGCTGGCACGCTGGCCTGTAGCGATGCCATCCGCCGAATCTCCACGCATC  
CGCTGTGGCGTGGTGTGTCATATGCAGATTGCCATTTGCTCCGCTGTGGTGTGCTACTCCGGCAGCTTAACGATCTC  
TCGTTAATGAAAGATAACGCCAACCTGAGGATGTTGTTGACGACGCGCTGGCACAACATCTGACGTTGCTGTTGGTGC  
GGTGTGCTGCTGCTTAGTATTGGTGTGCGGTTGGGCACTGTTGCTACTTTTCCACCAGCGGCGAGGGGACGATTTTTT  
CTCTGCTGAATGTCATTCAGACCTGCTTCCGTTAGCGCTTCTTGGCTGTTGATGCGCCGCTTGGCCGCTGGTTACG  
GCTTTCCGTTGGTGGGAACGCTCGGCATAGCAGGAACCGAATGACACCCGCACTGATGCACTGGTGCCTATGCCCT  
GTTACCGCTGGTGGCGCGGCTGGTGTGCTGCAACCGATCCCGCGGATGCTGGAGAGCGCAGAGCATGGGGA  
TGAGCGGGGCGCAGCTTTCTGATGTTTACGTTACCGCTTGGCTTACCGGTAATTTCTGCGCAGCTTGGGGTGGTATG  
GTGCAAAACGTTGGCATGGCGGTGATTTGCGCGTTAATCGCGCAGGCGGTTTTGGTGGCTGGTTTTCCAGGGGCTGCT  
AAGCAGTGGCATTGATTTAGTGTGCTGGGGTATTCCGGTAATGTTCTGGCGGTGCTTACCGACGCGCTGTTGAT  
TGCTTATCGCACTGCTGAAAGGTGAAACGTAATGATTGA

>Cluster\_55637

ATGAAAAATATTTTGTACTGAGCAATTAATACCCATTAACGGGCATCGGTGGTATTTCCCTGGAGCTGGTTAAGCG  
GCTGGCGGTTGCCGTTGAAATCGAAGAGCTGAAGCTGTTTACGCGCGCTCGTTTATCGACAGATCCCCAGGTGGAGA  
ATAAAAGCGATAGCAAAGCCAGCAATCATGGTCTGTGCGGCTTCTGCGCCGCCAGCGCTGCTGATTGAGGCGTAT  
CGCTGCTGCATCCGCGCGCCAGGCGTGGGCATTTGCGCGATTACAAAGACTACATTTACCATGGTCCCAATTTCTATCT  
GCCGATCGCTGGAACGCGCGTGACCAGTTTTCATGACATCTCCATTTTTACCTGCCCGGAATATCATCCAAAAGATC  
GGTTCGCTATATGGGAAGTCCCTGACAGAGGCTGGATTCCGCGAAGCTGATCCTGACCGTCTCCGATCTCGCGC  
AGTGAAATCATCCGCTGTTCAACTATCCGGCGGATCGGATCGTACCACCAAGCTGGCTGCAGCAGCGACTATATTC  
GCGAGCCCGCGGAGTGCCTGCGGCTCTGACAGAAATATCAGCTGGCGTGGCAGGGGTATGCGTTATATATCGGCACCA  
TGGAGCCCGGTAATAATTCGCGGCTGCTGACGGCTATCAGCTGCTGCGGATGGAGACCCGATGCGCTACCCGCTG  
ATCTCAGCGGTTATCGCGGATGGGAAGACATGCTGCTGGCAGTTAGTGCAGCGCGGATCGCGTGAAGGTTGATCCG  
TTACCTGGGCTATGTTCCGGATGAAGACCTGCCTTATCTGTACCGCGGCGCAGAACCTTTGTTTATCCCTCCTTCTATG  
AGGGATTCCGTTTACCTATATTGAAGCGATGCTTGGCGTGTGCCGTTAGTATGTTCCAATGTCATCTTTTGCCTGAG  
GTGGTTGGCGATGCCGCTCGTTGCCGATCCTAATGATGTAGACGCGATTAGCGCACATTTTGCAGAGCTGCAGGA  
TGATAGCTGGCGGGAATCGCCACCGCGCGGCTTTGGCAGCGCAACGTTTTCTGGGAGAATCTACGACCCAGCA  
CCATTAACGCTATAAATTACTCTAA

>Cluster\_51148

ATGAACATGATTCAAAAAAACGCTATTGTCAATAGCGATACCTACAAAGAAGACATAAAACGCTACTAATTACTCT  
TGATAATATGCTTCGCCGAATGGATGACTCTGTGGAATTTGTCAATTTGTGATAACTCTGATGAGGAGCTTCTTCTGCTC  
TACCTTTATTTTTGGATAAACGCATTAATACTTTTATCTCATAAAACTATGTCAATGTCGATAATACAGAAAATGCA

TTAAGTCATTGTACAGGGGAATTTGTATGTTTTATCGGAGATGATGATTTTGTATCACCATATATAATAAATTAATCTTAA  
AGAGATTCCTCCATACTAATATAGATGCTGTATCATACCAAGCGGTTATTTGGTGGAGGATATTGACTTTTAAATCGGA  
AAAGCTATATGAACAGGCTGGCGGTTTGGTATCCTTCTGCTACGTTTGGAGCTCGGTTAATTCGTGCTGATGAATCA  
CTTCGTGCTCTGCTAGCGGAGGTGGGCTTTCAGTTGGTCTACACCAAGGTTATACCAAGGATCGTGAGAAGGTTTGT  
TTTAGATAAATTTGAAAAGAAAACCTGGTAGATGTTTCACGGAGCTTCGCTGATATATCGTTGGCGGTAAGCCTTGT  
TGTAGGTGTTAACACATTTTATATAAGTACACCATTAACAATTTTGGCGCTCAAAGAAAAGTGGTGGTGGATGGACT  
GCCGAAAACAAGCACTATGGTAGTATAAGAGAACAGCAGCATATACCTCAATATACTAAGGATAATTGGTCTAGTTTCTT  
GCCTGATGTATGGTCTGAGCACACCATATATCCTCAGTCTATTATTGAGGCTATGATAGTTTAAATAAGGAATGCATAC  
TAAATCTTGATATGTTTTATGCTTCTCTATATATAAATGAACCTCATCTTCGTAAAATGTAACTCCTTTTATTATTAAG  
TATTATAAACGGCATCCCAATAAATTTCTTTTTTATACCAGCTCTAATCAGAAAAAATGTGGAGATATTAAGCGTAA  
ATTTGAATCAAAATCAAGTGCAGAAAGTTTTATGTTTTATCATCTCTTGAAGTAAGTATGTTATGGATAAATTAGAAC  
AATTGCAAAACAAGAGAGATACTTTATGA

>Cluster\_17656

ATGCCGACAACTGACGATGTTGACCTGGGTTATGCGTACACCTGAAGCCGGAAGAAGCGATTAAGTATTTCCGAAAGCAA  
GGGATACGTCATCGGCTTCCGTTGGCACGATGTGAAGGACATCGCACACGCCCGGGCGTTACGGTGGCGGGCGTCTGCA  
AATGGATGTTCTGAAGGATACTCGGTGATGGCTGACGGCGGCACCTGGCTGACGGCGGACGTTCCGGGAGTTTGTGCA  
CAACTGGAACCTACTGGTGAATCAAAAGCTGGCTGGTGGTAAAAAATGATTGTGGACGAGGATACCGGCGAATCGCACCG  
CAGACAGCTGACGCCGCGCGGTTGGCCAGCATATTTGATACCAATATTCAGTCTCTTACAACGCCGGGCGTTATCAGC  
AACAGATGGCGAAGCTGGCTGACCGGCTTATTTTGGAGCGGTTGGCGGTGATGGACCTTCACACCCGCCGGAACACGCC  
GCCGTGAACGGCTTACCGCCCGGGCGGATGACCGGTTGGGAGTATTTCTACGCCCTGACGGATAACGGATGCCGCTG  
CCGTATCCGGGCGGCTTCCGCGTCAAGTGTGGAGAAATATGGCCTGACGGTGCAGAGCAGCGAGGGGCGACTGTTGAGG  
TTGAACAGGAATATGGCCAGCCGGCCAGACCATCAGAAACAATGGGCTGAAGATGCCGGACGTTCCGTGTATACCGCC  
GACCCGGCTTCGGATTTAATCCCGGTTGGGTTGGCATGGCAGCCGGAACCTGAAAAAATACGATTACCGCAGCGCCGCCA  
GTATGTCACCGGACCTGACCGGCGGATTTTGCACGGGGCTGGCAACGTCAGCGAATGGATGGCGCCAGCGAT  
ATCCGCTGGCCATCCGTTTACCAGAACAGGTCGCGCCACGGGCGCTGACCGCAGACGGTAAACCTTACGGCTGACGTC  
ATGAAGCGCTCAGTGCAGCAAAACAGCCCGACTGCCGCGACTATGCGCTGATGCAGCAGACCATCGAACGGGCGGA  
GCATGTCACGACGAGCGTAAACGCGTGGCGGATGCGTTACAGTACAGCGACCGCTGGTGGTGGTGCAGGTTGAGGATG  
ACGTGCTGACAGACTGGGTTATGACAGCACCCCGGAGGCATCATGA

>Cluster\_2412

ATGATTACATACCACCTTGTCTAGTAATACTTGGGATGAATATGAGTATGCAGCAATACAGTCAGTAATGACTCAAAAAT  
GTTTACCATGGGTAAGGTTGAGTTATATGAGAAAAATTTTGTGATTTGTTTGGTAGCAAAATATGCCGTAATGGTTA  
GCTCTGGTCTACAGCTAATCTGTTAATGATTTGCTGCCCTTTTCTTCTCACTAATAAACCAAAACCTAAAAGAGGTTGATGAA  
ATAATAGTACCTGCAGTGTCTAGGCTACGACATATTACCCTTGCAACAGTATGGCTTAAAGGTGAAGTTTGTGATAT  
CAATAAAGAACTTTAAATATTGATATCGATAGTTGAAAAATGCTATTTTCAAGATAAAACAAAAGCAATATTGACAGTAA  
ATTTATTAGTAATCTTAATGATTTTGCAAAAATAAATGAGATAAATAAATAGGATATTAATCTTACTAGAAGATAAC  
TGTGAGTCCGATGGGCGGCTTTTCAAAAATAAGCAGGACACATTCGGAGTTATGGGTACCTTTAGTTTCTTTTACTC  
TCATCATAATAGTACAATGGAAGGGGCTGCGTAGTTACTGATGATGAAGAGCTGATCATGTATTGTTGTGCTTCGAG  
CTCATGGTTGGACAGAATAATTTACAAAAGAGAATATGGTTACAGGCACTAAGAGTATGATATTTTCCGAAGAGTCTGTT  
AAGTTTGTTTTACCAGGATACAATGTTCCGCCACTTGAATGAGTGGTGTCTATGGGATAGAGCACTTAAAAGTTACC  
AGGTTTTATATCCACAGACGTTCCAATGCACAATATTTTGTAGATAAATTTAAAGATCATCCATTTTGTATATACAAA  
AAGAGTTGGTGAAGTAGCTGGTTTGGTTTTTCTTCTGTTATAAAGGAGGAGCTGCTATTGAGAGGAAAGAGTTTAGTA  
AATAATCTGATCTCAGCAGGCATGAATGCCGACCAATTTGTTACTGGGAATTTTCTCAAAAATGAACGTTGTTTTGAGTTA  
TTTTGATTACTCTGTACATGATACGGTAGCAAAATGCGCAATATATAGATAAAGAAATGGTTTTTTTGTGCGAAACCACAGA  
TACCTTTGTTAATGAAATAGATTATCTACGAAAAGTATTTAAAATA

>Cluster\_61197

ATGCCCTGAATCGTTGATGGTCTATACGTTCTTCTTCGACGCTGCGTAAGCATTTGGGAATGGATGACGTTCTCCGCAGATAG  
CGTATCTTCCGTTACATACGCTCACGGACGATCTTCCGCTGGAGTGCCTGGCCGATCAGCCCGGTGCCGGAATGTTCAATC  
TTTTGATCCACCAGAGGGCCTTTTATATCGTTCCCTCAGCTGCCAACGCCAAATACAAACCTACCCGCACAAAATTA  
CAATGGCTGGCAGAGGAGACGTTTACCAGCAACACCCAGGACTGGCACGAGCGGTTGTCGATAAACAAAACGAAAGTGT  
CGAGGTGATAGGCATTCAGTCGGAGAACTCAGTCGCTATCTTGAGCGTTTACATACTGCCGGACTCAACGTGACCGGG  
TTTTGCCAGATGGCTGCTATCTTCCCTGGGAAGTAGATGCTGGACTCCTGGTTAACGACAAAACAAGCTGGCTCATTCGC  
AGTGCCGCACATGCCCTTCAACGAACTGGATGAACACTGGTTACAGCATCTTGTGCCCCAGTTTCCGCTGAGAATATGCT  
TTGTTATGGTGTAGTACCTCACGGCGTTGCAGCGGCAATCCTTATCCAGCATCTTGAATACCATCACTGAGTTTGT  
ATCTGCCGATATTGCATTCAGCGCTATGACATGCTGATGTTTTCGTAACAGAAAACCTGTAAGCAATCGGGA  
AAATGGCTGCCCGGCTGGCAGTAAAGCTGTCTGTTCTGCTCCGCAATCTTTCTTTTGTGGCAGCGGAGGACTCGGCTCG  
GCATACGCTTAAAGATTGAAGATCAACTCAGCAACAACAGCAAGAACTGGCAACGTTATTTCCCGCAGATCAACGCA  
CCCACAATTTTCTGTTTTTACTTTTAAAGCAGCAACTCGCTCAGCAATATCTTGAAGCTGTGCCGTTGCTCTATCATTTACAA  
ACACTTCTGCTGGAACACCTGAACTGCAATTAATGGAGGCAACTATAGCCAGAAGCAAAAGTCGCTGACCTTAAAAAT  
GAGTGTAAAGAGTGAAGCTAATAATCGATCGTTTCTGTGAGGTTAACACAGTCTTGGCTCCGATGGAAAAACGAAAAAG  
ATCCGGTCACTGGTGTATGGACAGTAAGGAACTCAGGGAATGA

>Cluster\_26348

ATGGCTAGAGTCTCTTTTTCATGGGCATGATTCTTGGTCTTTTACCGGATCGGCCGATGTTGACCGATCTTTATTT  
GCCGGCTTTGCGGAGATGCTGAGCAACTGGCGGCAACCAGACCATAACGCAATTAACCTGACCGCATCACTGATTG  
GTCCTTGGCGTGGACAACCTGTTATTTGGCCCTCGAGCGACAAAATAGGGCGTAAACGTCCTGTTAATCTTGTGCTGTTA  
TTGTTTATGTTTCTTCCATTTTGTGCGCGACAACGAACAATTTTACTGGCTGGTGGTCTGGCGTTTATTTCAAGGGAT  
CGCGGGGCGGGTGGTTCCGTTCTCTCTGTTCTATTGCTCTGTTGACAAATATCAGGAGTAACCTTGAACCTTTTGG  
CGCTGTTAATGACGGTGAATGGCTGGCACCAGGTTGTTGTCACCAGTGCAGGCGGGTACATTTGTTAGCACTTTTACTGG  
CGCACTTTTATCTGGGTAATGGCTGAAATTAGCACCGTACTGTTGCTGGGCTGCCTGTTATTTTAAATGAGACCTTGGC  
AGAAAAATAAAGGGGCTCATCTGCTATTAACCGGACGAAGCGTGGTGCAGAACCGGCTTTTATGCGCTTTTGGCTGA  
TTCAAAGTTTTTATGCTGGCCGGTTGTTTGCATATATCGGCTCTTCTGCTGTTGCTGCAAGAAAGTATTTGGCTTTAGT  
CCAATGCAATTTAGCCTGGTGTTTGGCTTAAACGGCATCGGACTTATCATTTGCTTTCATGGATCTTCTCGGCCGTCGGCG  
ACGGATTAACCGGATGACATTTGTCGAGGTGGCTGATAGCGCAATTTTGTGTCATGCTCACGGTCTTATGGCAT  
GGGTACAATTTGCCATTCGGCACTGGTGGCATTTTTCACCATCGCATTTTGTAGCGGCATCGGCACCTTTGGCGGG  
CGAGAGGCTATGAGTGCAGTAGGAGCGCAGAAATCTGGAAACGGCGCTGCGTTGATGGGGATGAGCATTTTGTCTCCG  
CGGTATAGCCGCGCATTTGTCGGGAATTTGGCGGAGAAACACTGTTAAAAATGAGTCTGGCAATACCGTGTGTTATACCG  
TGGCATTGCTGGTTGCTCTACCCAGAATCGACAATCAAAAGTAA

>Cluster\_15644

GTGAGCAAAATGACCATCAGGCACTGCGTGGAGCGGACAGCAGGCAATGATGACGACTGGGGATTTGACGCGGACCT  
TTTCCATGAGCTGGTAAACCATCGATTGCTGGAACGCTGGATGAACAGGAAAGAAACAGCAATACATCAACGCC

GCGACCAGGAGAACGAGGAGATTGCGCTTACGGTTGGGAAGCTGCGTGTGAGCTTGAAGCAGCAGAGAACAACCTTATT  
GATAGTGAATGCCATGTTGCTGAACTGGAAAGCTCTACGCGATAAGCAGGCGTTACTTGAAGCCTCAGAAAAGCGCAA  
CGCAAATACAAAGCGAGAATGCATACATCCGCAACCGGTACAAAGAACTGGACCTATTAATCGGGAAAAACATTCTGG  
TCATGCGAGCTGCCATTAATCGAAATGGCAGGCACTGGCGACGCTAAGAGCGGACTAGCATGGATTTATAACACACTGTTT  
GGCCCTGGCGAATACCGGACGAATCTGAGAAAGATGCTCAGGCTACTTTAATCGCAAATATGCACCGATTGACGAAAA  
GCTTATGGCGCTTACAAGTGGTTTGGGAACAAAGTGAAGCCGAGCGCGCGCTGGCATTCCGCATCAAAGGAGAGTGA

>Cluster\_7956

ATGACAACATTATCACGTATACAAGAAATTCACGCTCCTTCGCAACCTGATACGCACCGGCGTGTGCTCGAAGTGA  
CCTCGATGACGGGCGCTGTCGCGTCCAGACTGGCGGCATTGTTACCGACTGGCTTCAGTGGCTGACTACGCGCGCGGTC  
GCTCACGTGTCTGGTGGGCTCCGCTGCGGGTGGAGAGGTTTTACTGCTGGCCGTCGGTGGTGGAGCTCGACACCGCTTTT  
GTGTTGCCCGGTATTTTCCTCCGATGACCACCGCGGCGTCCGCTGATGCGCTGATGCAATTCACATCACCTTTCCTGATGG  
GGCTGTTATCGAGTACGAGCCGGAGACCGGCGCACTGACTGTGAGCGGCATTAACACCGCAGATGTTACGGCGTCGGATT  
CCATCACCGGAGTACCGCTGGTGGTGAAGCCGAGACCGGCATCACCTCGAAACCCCGGAAGTGGTCTGCACC  
AACAACTGACGACGGCGAGCTTGGAGTGCAACAAGCGGCACCATGCGCGGAAACATCGAACACATCGACGGTACGTT  
TAAATCAAACGGCGTTACGGTTCGACAACACGGTACGCGCGTGTGCAAAAGGGTGGAGCCTGGACGGAGGGCACGAAAT  
GA

>Cluster\_28201

ATGTTTAAACGTTTAAATGATGGTGCCTTTGCTGGTGTATGACCGCTGAGTGGCGCAACCGGCGAGACCAGACCAATCC  
GTATAAGCTGATGGACGAGGCGCGCAGAAAACGTTCCGATCGCTGAAAGAAATGAGCAACCGCAAATTCGGGCTAACCCGG  
ATTATCTGCGTACCATTGTTGATCAGAACTGTTGCCATACGTTGAAATACCGCGGTGCGTGGTGGCCAG  
TATTACAAGAGTCAATCCAGCTCAACGCTGATGCTTACTTTGCGCTTTCGCTGAGTACCTGAAGCAGGCTTACGGTCA  
GGCGTGGCGATGTATCACGGTCAACCTATCAGATTGCGCCAGAACAGCCGCTGGGTGATAAAACCATGTTGTCGGATT  
CGCTTACCATTATGACCGAATGGCGCGCGCGGTCGCTGGACTTCCAGTGGCGTAAAACTCCAGACGGGCAAC  
TGGCAGGCTTACGACGATTTGCTGAAGCGCTAGTATCACCAACAAACAGAGTGGGGAACCTGCTGCTGATC  
CAAAGGTATCGACGGCTGACTGCACAACGAAATCGATTTCTCAACGAAAACTACTCTGGAAGAGAAAAATAA

>Cluster\_5130

ATGTACCGACGTCTGCTCATACTGCTTGCCTGTCCGGCATGGTACAGGCAAAAAACCTGGGCACATGGGGGAGATGTA  
CCCATTTGCCGAGCAGGACATGCTGACCACCATTCAGACCCCGCTGAAAGCAATGGAGGCCAGTGGTGGATGGCCCGG  
AGCAGGAAGCATTCAAACAGCGTGTATAGAAAACACCTGCGTCTTAAGCCGTTGGAAGGGCTGACGTTGGCGCAGGAA  
AACACCACGCATATATCGATCCATCGCTGACGGTCAAGATCTGAAAGACCATCAGGGGCGGGTGTTCGCCGTA  
GGGACAGGTGATTAATCCGCTTGATACGGTGCCTTTACCGCACGCTGTATTTTATGATGCGGATAATCCGCGACG  
TGGCGTGGATGAAGAAGCAGAAATCCCGCACGCTGACGTTACCGCTCACTGGTCAATGGGGATGTTTCGAGAAAGCAGC  
AATGCCCTGAATACAGCATTTACTTTCGATCAGGATGGCTCGCTCAGCCGGAAGTTTGAACCTCAAACCATCCAGCCG  
TGTGACGCTGGCTGAAGATCGTCCGCTCTGCGGGTGGATTCTGCTTGCCTGGATGTGCGGGAGGTGAAGCCATGA

>Cluster\_48571

ATGGATTACCGGATTGGGATCACTGGTGTCTAGGGCAGTGGGAAAAACAACCTGGCAAAATATATCGACAACATTACGG  
AATCCCTTACGTGGATGCTGGTGTGCGAAGTTTGTAGAGCCGACTCGGTGTTGAGTAGGTGAGTCTATGCTCTATATG  
AGCGGCTTCAGATTCAAATGGAAATAGCAAGCATATAGAGCTACTTACCGCTGGTGTGAAAGCTTTGTTATCGATCC  
ACACTGCTGATGTTTATGGCTACACGTTGGATTGGTGGCCATACCAATGAAGATCGATGTTAGTTAGTCCCGA  
TATCGAAAAAGTTTTGCCCAAAAACGCTATTTTAACTTTAACGCCATTGCTGCGCTACGCGGGGGTGCCTCTCAG  
AGCGAGATTACTTGGCGTCAACAGGACATCATTAGACGCTGTATGTCGCTGATTTGATGCGTGGTGGTGGGAA  
CTGACAAAAATTCACCTGCATCCGCAAGGGGGGATCTGCAAACTTCTGCTGTTTCAACCGATATCGCACGGTTGAAGC  
AAGAGCCAGATCAGTGTAGAAATGCTAGATAACGCTGTAGAAAAGATAGAAAACCGGTTCTGTGGCCGAGTGACCGTTC  
ATTAG

>Cluster\_54120

ATGGCACGAAAAACCAAGAAGCGCAAGAAACCGGCCAACACATCCTCGATGTGGCTCTACGCTTTTCTCACAGCA  
GGGGTATCATCCACTCCTGCTGGCGGAGATTGCAAAAGCAGCTGGCGTTACGCGCGGTGCAATCTACTGGCATTTTAAAG  
ACAAGTGGATTGTTTTCAGTGTAGATCTGGGAACGTGCAAGATCCAATATTGGTGAAGTGTAGAGTGTAGTATCAGGCAAAA  
TTCCCTGGCGATCCACTCTCAGTATTAAGAGAGATATTAAATTCATGTTCTTGAATCCAGGTTGACAGAGAAGCGGCTG  
ATTATGATGGAGATTATATCCACAAATGCGAATTTGTCGGAGAAATGGCTGTTGTGCAACAGGCACAAACGTAATCTCT  
GCTGGAAGATTATGACCGTATAGAACAAACGTTAAACATTTGATTGAAAGCGAAAATGTTGCTGCGGATTTAATGACG  
CGTCCGCGAGCAATTTATGCGCGCTATATTTCCGGCTGATGGAAAACGCTGCTTTTGCCTGCAATCTTTTGTATCT  
TAAAAAGAAAGCCGCGATTACGTTGCCATCTTACTGGAGATGTATCTCTGTGCCACGCTTCGTAATCTTCCACTA  
ACGAATAA

>Cluster\_28638

ATGAAACCATATCAGCGCCAGTTTATTGAATTTGCGCTTAGCAAGCAGGTGTTAAAGTTTGGCGAGTTCACGCTGAAATC  
CGGGCGCAAAAGCCCTATTTCTCAACGCCGGCTGTTTAAATACCGGCGCGATCTGGCACTGTAGGCCGTTTTCAG  
CTGAAGCATTTGGTGGATTCGGCATTTGAGTTCGATCTGCTGTTTGGCTTACAAAGGGATCCCGATTGCCACACT  
ACCGCGTGGCGTGGCGGAGCATCATGACCTTGACCTGCGCTACTGCTTAAACCGCAAGAGGCAAAAGACCCGTTGA  
AGCGGTAATCTGGTGGTAGCGGTTACAAGGACGCTAATGCTGGTAGATGATGATGATCACCGCAGGAACGGCGATT  
CGGAGTGGATGGAGATTATTCAGGCTAATGGCGCGACGCTGGCTGGCTATTGATTTGCTGTTGATCGTTCAGGAACCGGG  
CGCGCGAGATTTCCGGCATTCAGGAAGTTGAGCGTGAATCAACTGCAAGAGTATCTATCATCACCTGAAAGACCT  
GATAGCTTACCTGGAAGAGAAGCCAGAAATGGCGGAACATCTGGCGCGGTTAAGGCTATCGCGAAGAGTTTGGCGTTT  
AA

>Cluster\_48680

ATGCTAGTATTTCCGAAGCTCATATGTCGCCGCTGGCGCTCATGGTGGCGTTGGTCAAGAAAGAAAATATACCGGCGA  
AGACTACATCAACCACCGGTTGCTGTCCGAGAGATTGTTGCATTGCATGACGGAACCGTGGAGATGCAAAATCGCGGCGC  
TTCGTCATGATGGTTCGAGACACCATGTAACCATAGAGATGGTTCGCTGATCACTTCGGTGGAGCGCTAGCTGAAATG  
GTTACGGCTCTGACCAACATGCAAGGCGAGAAGCGCAATCGAATACAGCGTTTTCATCATCAATGTCTGGAGCTGGA  
GCAAAATCTCGACTGACGACGCGCATGATCAAGCTGGCTGACCTGCTCGACAATACTTCTTATCGTGAAGTCCGATC  
CCGAGTTTTCAGCTGTCTACCTCGCAGAGAAAGAACTGATGCTGGACGTACTCTTTCACGGCAAGAGATTGGTGCAAC  
GCTGATGTTGTCGAGTACATGGAGAGGATAGGAATAGAACACCGCTTGTATTAAGCGCAATGGCGAAAGTCACTGAAGG  
TATTGGCTTCTGAAACCGGTACACATCAAACGTTATGAAAAACAAATCGCTGATCTGGAGCGCGTGGGAGGCTGCAT  
GA

>Cluster\_1570

GTGAATCAGGTGAACGAGGACCATAGCCGCGCATCCGATATCTGGCGGAAAGTGGCTCGCTGTTTCGCCCAACCCAGCCG  
GTTACAGTAGCGGAAGCATCAGCGGTTATATGCGGGTACCAGGGGAGCAATACTTCCGGTCCGTTGGGAGTCACTG  
TGACGCCCTATATGATTGACCCCATTAATACATATATCAGCCGTAATATGACCGGTTGGTGTGTTGTTGGGACCTGCGCGA  
ACCGGAAAAACCGAAGGCTGATTGATGGCTGGATTGTGTACGGCATCATCTGTGATCAGCGGATATGCTGGTGGTGA

GATGACTGAGACGAAGGCGCGTGAGCATTCAGAACGCGTCTTTCCAGAACGTTTCGCCACAGTCCGGAGGTGACGAAGC  
GCCTCAGTCTTCCCGTAAATGACAAACAGTCCACGATAAAATGTTTCTTACGGCTCCTTCCGAAAGATTGGCTGGCCG  
TCGATCACTGATTTTCTTCTTCGGATTACCGTAAAGCGTGCAGCAAGAACCCTATTGACGGGGATGTGTTATTCAGTCGG  
CAGTGCTACGCGCCAGGGGAGCAGTTCGCGGACCCGGTTTATCGGCCAGTCCGGCTATGACGTCAAGGACATAG  
>Cluster\_58994  
ATGGCTATCATCAATACGCTATATCTGATGGAAAAAATATGCCTAAACTTATTTAGCCTCCACCTCGCCATGGCGTCCG  
CGCTCTTCCGAAAACTGCAAACTCTTTGAAATGTGACGACCAGAGGTGACGAAACCCACGCAGCGACGAATCAC  
CGCGACAGTTGGTGTCTCGACTGGCACAAGAAAAAGCGCAATCTTGGCGTACGTTATCCGGATCATTTAATTTATTGGT  
TCAGACCAGGTATGTGTTCTTGTATGGCGAAATCACCGGTTAAACCGTTAACGGAAGAAAAATGCCCGTCTGCAATTCAGCAA  
AGCCAGCGCAATATCGTCACTTCTATACTGGACTGGCGTTGTTAATTCGGCGAATGGGCATCTGCAAAACAGAAGTGG  
AGCCTTTTACGCTCCATTTCCTGACCTGAGCGAGGCGGAGATGATAATTACGTGCGTAAAGAGCATCCCTGCACCTGC  
CGGGTAGCTTAAAGATGAAGGATTGGCATTACGCTGTTTGGAGCGTTAGAGGGGCGTGATCCTAACCGCTGGTTGG  
TTTACCGCTAATCGCGCTGTGTACAGATGTACGTTCGGGAAGGGAAAAACCCGCTGATGGGATAG  
>Cluster\_20435  
ATGTTATCTGTAGTTAAACCTCTTCAGGAATTTGGTAAGCTCGATAAATGTTTGTCCAGATACGGTACGCGCTTCGAGTT  
TAATAATGAAAGCAAGTTATATTTCCAGTGTATGTAATGCAAGCAAGATACTTTTCGTTATTTAGAGGGCGTTATCTCTT  
TGGCTAGAGAAAGAAACCGTACTTATCGGTTAACAACCGTCTCTATATATTAGGGCTGGCTGATGGTTAATGAAAAAC  
GATATACCATACAAATTAATATCAGAAGGAACTGTACGGGATATCATTTGCCAGCAAACAAACCATTACTCTTATTGA  
ACAAAATCAACTCTGGCGAGACGCTTTTACTGGTTAGCTGGCAAAATAGAAATCTGGAATTCGCGACGTTTCAGCTCA  
TTGGGCATAAATCTACGAACAAATCCGCGGACGTTATATCAATGATGATGACTGGAATGAAGAAATTCGGATCAGCTATT  
GGCGTATGAATTTATCATCAACGTACAGTATATCAACGCTTTCGCTGTTGCGGAAAGTTCTCGCTGTTGGCTAAAGG  
CGCTATATCGAAATGAATAAAGGCAAACTGGTCGCTATCAACCGTTTGCCTTCAGAGTATTA  
>Cluster\_9166  
ATGAGCTATACCTGCCATCCCTGCCGTATGCTTACGATGCCCTGGAACCGCACTTCGATAAGCAGACCATGGAATCCA  
CCACACCAACACCATCAGACCTACGTAACAACCGCAACGCGCGCTGGAAAGCCTGCCAGAATTTGCCAACCTGCCGG  
TTGAAGAGCTGATCACCAACTGGACCGCTGCCAGCAGACAAGAAAAACCGTACTGCGCAACAACGCTGGCGGTACGCT  
AACACAGCTGTCTGGAAAGGTCTGAAAAAAGGCAACCCCTGCAGGGTACCTGAAAGCGGCTATCGAACGTTGACTT  
CGGCTCCGTTGATAAATTCAAAGCAGAAATTTGAAAAAGCGGACGCTTCCCGCTTTGGTTCCCGCTGGGATGGCTGGTGC  
TGAAAGGCGATAAATCGCGGTGGTTTCTACTGCTAACAGGATTTCTCCGCTGATGGGTGAAGCTATTTCTGGCGCTTCC  
GGCTTCCGATTAATGGGCTGGATGTGTGGGAACATGCTTACTACCTGAAATTCAGAACCGCTCCGGACTACATTA  
AGAGTTCTGGAACGTGGTGAACCTGGGACGAAGCAGCGGACGTTTTCGCGGCAAAAAATA  
>Cluster\_47973  
ATGTTGATGTTATTTCTCACCGTCGCCATGGTGCACATTTGGCGCTTATGAGCCCGGTCCCGATTTCTTTTTTGTCTC  
TCAGACCGCTGTCAAGTCTTCCGTAAGAAGCGATGATGGGCGTGTGGGCATTAACGCGCGTAATGGTTTGGGCTG  
GGATTCGCGCTGTGGCTGCATTTGATTTACGAAAAAATGGCCTGGCTGCATACGCTGATTAATGGTGGGCGGTGGCTG  
TATCTGTCTGATGGGTTTACAGATGCTACGCGGTGCCTGCAAAAAAGAGGCGGTTTCTGACCTGCCCCAGCTGCA  
GCTGGCGAAAAGTGGGCGAGTTTCTGAAAGGTTTACTGACCAATCTCGCTAATCCGAAAGCATTATCTACTTTGGCT  
CGGTGTTCTCATTGTTTTCGGTGATAACGTTGGCACTACCGCGCGCTGGGCAATTTTTCGCTGATCATTGTGAAACG  
CTGGCTGGTTTACCCTGTTGCCAGCCTGTTTGCCTGCCCAAATGCGCGTGGTTATCAACGCTTGGCGAAGTGGAT  
TGATGGTTTTTCCCGGGCTTATTTGCCGATTTGGCATTTGATTTATTTTCGCGTGA  
>Cluster\_10825  
ATGAAAAGCCTCTCCTATAAGCGGATCTATAAATCACAAGAATACCTGGCAACGTTGGGCACAATGAATACCGATCATT  
GTTTGGCAGTTACAGCTTACCGTTGACGACACGCTGTTTGCATGGTTTCTGATGGTGAAGTTGTATCTTCGGGCTTGG  
AGCAAAGTGCACAGTACTGTGTAACAACTCCGCTGTCTGGCTGACATATAAAAAAGTGGCCGATCCGTTACCTCAAT  
TACTATCGGGTTGATGAAAGTCTATGGCGAAATCAACTGAAGCTGGTGCCTGTCGAAATATCTCTCGATGACGCGT  
GAAAGAGAAAAGCAGCGCAATACCCGGGAAAGACTGAAAGATTTGCCAATATGCTCTTTTCACTGGAAGCGATTCTCG  
GGGAGTTGGGATTAAGGATGTAACGGCTTACGCGGCTTACGATACTTGGGGCAAAAATGTTTGGTGGCAGTCCGCAAAAC  
AGTCTGGTGACAGAAAAGATTCTGTTTATGCTTGAAGGTGCCATTATCGGCATTCATGAAGCTGCGCTCCCGTGGCAGC  
CCGCCAGGAGCTTGCAGAATGGGCTGACTCTTACCGCGAAACAGAGTTTCTGCGGAACCTGAGTAA  
>Cluster\_65789  
ATGATTGGTTTAGTTCGGTAAAAAGTGGGTATGACCCGCTATCTCACAGAAGACGCGCTTCTATCCAGTAACCGTAAT  
CGAAGTTGAAGCAAACCGCTTACTCAGGTTAAAGACCTGGCTAACGATGGCTACCGTCTATTCAGGTGACCACCGGTG  
CTAAAAAGCTAACCGTGTGACCAAGCTGAAAGCTGGCCACTTCGCTAAAGCTGGCGTGAAGCTGGCCGTGGTCTGTGG  
GAATTCGCGCTGGCTGAAGGCGAAGGTTTACTGTAGTGCAGACATTAAGCTGAACTGTTTGTGACGTTAAAAAAGT  
TGACGTAACCTGGCACTTAAAGGTAAGGTTTTCGAGTACCGTAAAGCGCTGGAACCTCCGTAACCAAGGACCTACTC  
ACGGTAACCTTGTCTCACCGCTTCCGGGTTTATCGGTGCAAGCAGACTCCGGGCAAGTGTTCAAAGGCAAGAAA  
ATGGCAGGTGAGTGGGTAACGAACGTTAACCGTTGACAGCTTGCAGTGTGACGCTGAGCGCTGACGCTGAGCGCAACCTGCT  
GCTGGTAAAGGTGCTGTCCGGGTGCAACCGGTAGCGACCTGATCGTTAAACAGCTGTGAAGGCGTAA  
>Cluster\_17045  
ATGTCAACGATTATATGATGATTTATGATGTACACCCGACTAGGTTTAAACCGGTATCTGTTGAGTAGAGGGGTTAAAA  
AAGAGAAATCAACGACATTGAAACCGTTGATGACCTTGGCATAGCTTGTGATTACAGCGCCCTTCAAGTGGTGTATTA  
ATGAGGACTGTTTCACTCCAGATGCTTCTAACAGTCAAGCATCAAGCACATCATAATCAACATCCCAATACGTTATTT  
ATCGTTTTTATGGCAATTCGAATGTTTATTTGATGAATATCTATTGGTTCAGAAAAAATTTATTTGATCAGTTCTAAATC  
GATTAACCGGAATCTCTCGACGATATCTTGGCGATATCTGAAAAAAGAGACAACGATAACCTCGTTTAAATATGC  
CGACGTTATCATTGAGCCGAACCGAATCGAGTATGTTGCGAATGTTGATGGCAGGTCAGGGAACCATCAAACTCCGAC  
CAATGAATATCAAAAGCAAGACCGTTTTCATCGATAAAGGTAATATTTAAACGTAAGATCAAAACGCTAATAAAGAGGT  
TATCTACCATGCTGTTCCGACTGACGGATAATGTGACTAATGGTATTTTGTCAACATGCGCTAA  
>Cluster\_11997  
ATGAACCCGTTGATCGTCCACTATTAGATATTGGCTTAAACCGGATTAGAATTTTTCGCTATATCAGGAAAAGCCCTTGC  
TGGTCAACAATTTGCCCTGCGTACTGTCACTTTTGGGTTGCAAAACAGGAAGATATTGATAGCGGCACAGTAGGGTTGA  
TAAATACACCAAAGGGGTGCTGGTACCCAGCGAGCGGATGCACGGGTTGCCACCGCTGTGAAATCTCTTGTACCAAC  
TTCACGATGGCTCAGTAGGGACATTTCTTCCGATCAAAAATCCACCGCAATTTATTTCTTTGGCGACAACGGGGTTGG  
CTCTGGCGCGGCTGTATGGCGATCTCAACTATACCGCGGACCTGCCGCTCAATGCAAGAGCCGCAATGCAATGAACG  
TCTGCCCCGATTGGTGCAGTACCTGGCAGCAGAAAGGAGCTGTATTACCGCTGATCAAAAACGCTGTATTTGGTGTAGC  
GCCTGTACTACGGATGCCCCGTGGATGATGGCCACCGTAAATACCGAAAGTAAAAATCCTCGAATGTGTGTTATGCGG  
TGAATGCGCAACCGCTGCCAACAGGGGCGTTAAAAATTTATCGAGTGGAAAGATATTACTGTGTGA  
>Cluster\_59051  
ATGAAAACAAATCCATGACATCCGGCGGTCTAACGCCAGAAAACGAGAGATGGTGTGGCGGGAATTTCTCTTGGCAC  
TATGATTGATCGCGAGCCAAACCCAGACCAGGTTTATGGGAGATGGTGTACTAAAAATATCGGTGACAGCATGGCAC

GACACATCGAAAAATGTTTCGACCTGCCTGTAGGATGGCTCGATCAAGAACCAGACAACGACATCAAAAAAACCT  
GATGTTTTCAATCACTAATAAACAATACATTAGTCCCTGTCAATCATGGGTACAGGCCGAGCATGAAAAGAGTTGG  
ATATCTGAGGTTGATTTGAGCACAGCAGAAACGTATCCCTGCCCTGTACCCTGTGGGAAATGACTTATATCTTGGGG  
TAATAGGTTGATTCATGATGATGAGTACCGCCCGGAGACATGATTTTTGTGTCATCCGAAAGTACCTGCCTGCCACGGT  
GACGACGTTATTGATGATGACGATACAGTGAACACCTTCAAAGGTTGATAGAAGATGGGACACAGCCTTATCT  
CAAAGCGTTAAACCCAACTGGCCTGAGCCTTACATTAAGATCAACGGTAATTGCTCTATAATTGGTACTGTGTTTTCT  
CAGAAAAACAAGAGATACAAAATCAAAGCCTAA

>Cluster\_25377

ATGTACGAGTTTGACTGGAGTCCATTGTCCCTTCCCTGCCATATCTGTGGATGGGCTGGTATCACCTGAAAATCAC  
CGTCACGGCAGTGGTGGTATTTTGTGGGGCACCATGTGGGGTGGTATGCGCTTGTCCAGCTTTCGCCCCGTAGCGT  
GGTTTGGCCAAAGCCTACGTAAACGTATTCGCTCGATTCTTTAGTTATGGTTTTGTGCTGGTTTTACCTGATCGTACCG  
GGTTTTCTGCAAAACGTGCTGGGATTATCACCAAAAATGATATCCGTTAATTTTCGGCGATGGTGGCGTTTTTCGATGTT  
TGAAGCGGCTACTATTACAGAGATTATCCGTGCTGGTATTCAAAGTATTTCTCGTGGTCACTGAGCGCCGCTGGCCT  
TGGGAATGACTACTGGCAGTGCATGAAACTGATTATTTCCGCGAGGCGTTCGCGCGATGGTGCCGCTGTTGCTCACT  
CAGGGCATCGTACTGTTTTAGGATACCTCACTGGTGTATGTGTATCTCTGGCCGATTCTTCCGTACCGCCTCAACCAT  
TGGTGAGCGTGTGGTACGACGGTTGAGATGATCTGTTTCCGCGATTGTTTTATTTCGTTATTAGCCTTAGCCGTCGCT  
TGTGGTCACTACTTGAAGAAGGACAGCATAA

>Cluster\_43191

ATGACCTGGTCTCGTCGCCAGTTTCTCACCGGCGTGGCGTGTGGCAGCCGTGAGCGCACCGCAGGACGCGTGGTGGC  
GAAAACGTTGAATATCAATGGGGTGCCTTACGGCATGGTGCATGACGAGTCTGTTATGCATCGGCTGTACCGCCTGTATGG  
ATGCTTGTGCGGAAATGAAACAAGGTGCCGGAAGCGCTTCGCGCTGACGATTATTCGTAGCGAGCCGAGGGCGAATTT  
CCTGATGTGAAATATCGCTTCTTCCGTAAGTCTTGCCAGCACTGCGATCATGCGCCGTGCGTTGACGTTTGGCCGACCGG  
TGGCTTTTTTCGCGACGCTGCCAGTGGGATTGTGATGTTAATCCGGATCTCTGCGTGGTTGTCAGTACTGCATCGCCG  
CCTGTCGGTACCGGCTGCGCTTTATCCTCCGGTACGAAAGACGGCGGACAAATGCGATTCTGCCGTAAGCCATTTG  
CAGGCCGTAAGCTGCCCCGCTGCGTTGAGGCTTCCCGACGAAGCGCTGACGTTTGGCAATCTGGACGATCCAGCAG  
TGAGATTTGCAACTGCTGCGCCAGAAGCCACTTACCCTACAAGCTGGCGTGGGAACCAAACCGAAGCTGTACCGCG  
TACCGTTAAATACGGGGAGGTGAGCCAATGA

>Cluster\_41857

ATGCAGTACCAGTAAACGAGATGTTCCAGACCCTGCAAGGTGAGGGTACTTTTACCAGCGTCCCGCCATTTTTATTCCG  
TTTTACAGGGATGTCGGTGGCTGTGCCGTGGTGCAGACCAAAACACACCTGGGAAAAGCTTGAGGATCGGGAAGTCTCCC  
TTTTACGATCTTGGCGAAGACCAAGAGAGTATAAGTGGGGGGCGGAGCAGTGAAGATTTGCTGGCTGTATTGGC  
CGTCAGGGATACCCGCGCTCACGTGGTATTACGGGTGGTGGTGGCTTGCATTTCATGATTTGCTGCCACTGACTGACCT  
GCTCGAAAAGAACGGTTTTAGTGCAGATCGAAACAGTGGTACTCATGAGGTACGCTGCACACCGAATACCTGGGTTA  
CCGTATCGCCAAAGCTGAACATGCGCGCGGCTATGAAGTATTGTCGCAAGCCCTGGAGCGAGTAACGAAATCAAACAC  
CCAGTTGGACGCGTACGTGATATCGAAGCACTGGATGAATTGCTTGGACGCTGACCGATGATAAACCGCGAGTCAATTGC  
ACTTCAGCCAATTAGCCAGAAGGAAGATGCTACCGCTTATGTATCGATACCTGCATTGCGCGCAACTGGCGTTGTGCGA  
TGCAGACACATAAATTTTTGAATATTGCTGA

>Cluster\_3443

ATGGTTACGTTTGAACAGTTCGGTATTGCCCCGACACACTCAACGCATCCTCCGTTCTGTTATGACTTTCACTATGTCAA  
ACCGGGATGGTCCCATCTTTGGTGCACACGGCAGTGGCAAAAGTACGCTGGCACAGCTGATGGCGGCTGGTATCCGG  
ACTTCTGCGCAGGAGAGATAACAGGCACGGGACGCTCCTCGGTACGCCATTGGGCATCTCCGCTTAAATGAACAATCC  
GCCACCATCCAGCTCGTCCAGCAATCGCCCTATTGTCAGCTCTCCGGCTGTACCTTTAGCGTGGAAAGAAGAAGTTGCCTT  
TGGCCAGAAAATCTGTGCTTGTGTAAGCAGAGATTATGGCGGGATTGATGCGCCCTGACTGTCGACGAGTGGCAGG  
CGTTGGCCATCGTCAACCGGCAACACTCTCCGGTGGAGAGACACAGCGCGTGGTTCATCGCCTGCGCCATCGCGATGCAG  
CCAAAGCTCTTAATCTTGTATGAAGCCTTTAGCCGCTGACTCCGCGAGCCAGCGAAATGCTGTTGCAGCGCTTACAACA  
CTGGGCGTTTGAACGTGGTTCGCTGATTATCTTTTGAACGTATCGCACACCTTTCCTGAACTACTGCCAGCAAGCGT  
GGCAATTGCAAAACGGAGCGCTCCAGCCACTATGTTAA

>Cluster\_53872

ATGACAATTGACTATCAGGCACTACGTGAGCGCGGGAACGTGCAATTCCAGCAATGGAACGCCTGTTAATGTGCCAGC  
TGATGATGATTTGTTAAGTGAACAGGAATTAAGATTACGGTGGTATTTGATGCGCTCAACGCCTCAAATTTCTGG  
CCGGACGAAACCGTGCCTGGCACTACTGGATGAAACGGGAAAGAACAGCAATACATCAAACGCCGTCAGCAGGAGAAC  
GAGGATATTGCTCTTACGGTTGGGAAGCTGAGAGTTGAGCTGGAAGGCAAGACAGCAAAATAGCCAACTTACCGCCGA  
ACCGGATGCTTCTCGTGAAGGTGAGATGGCGCAGCTAGGCATAGCAACACAGCGCCGAGCTGATATCTACTTCCAAC  
TGGTCGAGGAGTGCAGAAATCTCTGCTGGCGGATCTTGGTTCGAGTACGTTGACGATATGCGCGAGAAGTTGGAAGCCGCA  
GAGAAGCCGATAGCAGTGTAGAAAGTATTCTCAGCCAAAAGTTAGTTGAAGCAATCAATTTGCGATGAGAAAACGA  
ACAGGAACGCTTTTTGATGAAGATTACCTAATGGATTGCAAGAATGCATTGACGTAATTCGTGAAGAAGTAAAGCGAT  
GGAATGATTTCCCGCAGCGTGGCATTCCGATCAAAGGAGAGTGA

>Cluster\_18226

ATGAATTTCCAGACAAAAAAGATATCCCTGCTTCCGTTCTTATTTGCTGATGCTCTGCGTTTAAAGATTTGAAGATAA  
ACTGACCATCCGGGCCATCGCTCAGCGTCTAGGTTCTAGTCAATCCACAATACATACGCTTTTTTCAGCGATTTTATGCA  
CCGGTATCGCATGGCCATTGCCGATTCACTTTTCAATAGCTCAGCTTACGCCATCTTTATGCCAACAGAAAGAAAGGAA  
TTAACAGAGCCTCAAATCAGCAAGGCACATAGCGGAAAAGACGGCAGCCAGCTACAGCCGTAATTTAAGGTCCTGCT  
GGTAAGCAGGCATTACAGCCCGGTGCTGTTGTTGCCCGGATCGCCAGAGAGCAGGATCAATGATAACCTGCTGTTTA  
AATGGAAAAGCCAGTACGAGGACGGCTTACTGAGCGATGATGACATACAGGAATGCATGCCTGTCCCGGTGGCTCTGACT  
GATACGCCAGAGCCAGACAGCAGTTACAAATCCCTTCTGGCGTAACAAGCCTGATGAGTGCCTGAGAGTGTATCCCGG  
AAACGTCACCGGTGCGAGCTGCATCTTAAATCAGGTGTTGTAACCTGTTTACCCTCTCACCTCCGGAATGTTACGGG  
CGCTAATCCGCAAAATGAAAGGAGGTACCCGATGA

>Cluster\_24529

ATGGCAATGGTCCGTTAACCATTTGGTCCCGGACTGAGGCGAAAATCAAACAGCACAAGCAACGATAGCAACGGTGAAC  
AACTAAAGGGGTAAACGGCTTTGCGATCATTACTCTAATCTCGCAGTGGTGCAAAATGCTGCTTACAATGACTACCAGG  
CATTTATCATTTGATAGCGTGAATCAGCAGAGTTAGCAGAAATGCAGACGTTACAAGCTATGCTGTGCAATCAGGATCA  
GAAGTTAGTATCATGTTCAAATACGGAATAACAGTTTCAATTACAAGGGCGTATCTCTGAAACCGTATTGAAGCTCAA  
TCTTGATATGATTAAGAATGCTGGAATTAACGGCAATCGAGTATGCTTATGCTTGAATACCTAAATCAGTTGATGGACA  
GTCCGCAACCTTTCTACTGAGTTAAAAAATATGACAACCTTGTGTTAGTTGGCATGCTTACGCAAGAAAGAA  
GCAAGCGAAAGCCTATTGTTTACTCTTGTATTTGAGCAATCCGCTTGTCTTAAAGCAACTACAAGCGCAATTCGGGT  
AAAAACAGCACCATAAATCTGTAGGGGGACAGGTTAAATGCAAGTAAATACAACAGAAACGAAAAATCAAAAAAGCC  
CAGGCAAGACGTTGTAACGCCAGTATTTAAACAATAG

>Cluster\_26913

ATGCAAGAAAGTATACAACCTGGTATTGATTTCCCTTGGCGTTCTGTTGAAAGGGGCTGGGTATACCCTGCAACTCAGTAT

CGGCGCATGTTTTTTGGCTTACTGCTAGGGTTTATCTCGCGCTGATGCGCCTGTCGCCAATCTGGCCCGTGGCCTGGC  
TGGCGCGTTTTTATATCTATTTTTTCGTGGTACGCCGCTCATCGCACAACTGTTTATGATCTATTACGGCTTCCCGCAG  
TTTTGGCATCGAAGTATAGTCCCATTCCTGACGAAATGATGGTCTGTCGCTAAACACTGCCGCTATGTCGCCGAAACGCT  
GCGTGGCCGCATTTCTTCTATTGATAAAGGTCAGTGGGAAGCTGCTGCCAGTATTTGGTATGACGCCGTGGCAGACCATCG  
GTCCGCGCATTTTTGCCACAGCGCGCGGGTGGCTGGCCGCTGTGCGAAGCTGTTATCGAGCTTTATCGAGCTTGAAGATAGC  
TCGCTGGCCGCGACAATCCAGGTGCCGGAGCTGTTCCGTCAGGCGCAGTTGATTACCTCGCGCACGCTGGAGGTGTTTAC  
CATGTATCTGGCGCTTCGCTCATCTACTGATTATGGCGACTGTGTTATCGAGCTTGCAGAACCATTTTGGAGATCAAC  
TTAATCGCCAGGAGGGAAACCCAAATGA

>Cluster\_25308

ATGGATATCATTTCTGTCGCTTAAAGCGTCATTCACATAAGGCATTTGATGCCAGCAAAAACTTACCCCGGAACAGGC  
CGAGCAGATCAAAACTCTACTGCAATACAGCCATCCAGCACCACCTCCAGCCGTGGCATTTTATTGTTGCCAGCACGG  
AAGAAGGTAAGCGCGTGTTCGCAAAATCCGCTGCCGATAATTACGTGTTCAACGAGCGTAAAAATGCTTGTATGCTCGCAC  
GCTGGTGTCTGTGTCAAAAACCGCGATGGACATGCTGGCTGAAGCTGGTGTGTTGACCAGGAAGATGCCGATGGCCG  
CTTTGCCACGCCGAAGCGAAAGCCGGAACGATAAAGGTCGCAAGTTCTTCGCCGATATGCACCGTAAAGATCTGCATG  
ATGATGCAGAGTGGATGGCAAAACAGGTTTATCTCAACGCTCGGTAACCTCCTGCTGGGCGTGGCGGCGTGGGCTGGAC  
CGGTTGCCATCGAAGGTTTTGACGCCGCCATCCTCGATGAAGAATTTGGTCTGAAAGAGAAAGGCTACACCAGTCTGGT  
AGTTGTTCCGGTGGGTGATCACAGCGTTGAAGATTTTAAACGCTACGCTGCCGAAATCTCGTCTGCCGCAAAACATCACCT  
TAACCGAAGTGTA

>Cluster\_50029

ATGAAATGGTATGAAGTGGCTAGATCCAGAATGAAAGAACTCGGCATAACTCAAGAGAAGTTAGCTGAAGAGCTTGGTAT  
GACGACGGTGGAAATGGTCACTGGTTGCGCGGATCTCGTCCATCCATCTCTTGACGAGATTGGTGTGGTGTAAAAATACC  
TTGGTATTGATAACGCTCATTCACACCAGCAGGTAACATTTTCACTGTTGGGAATACTCATCTGCCCCGTTAAAAAA  
CAATATGAGTACCTGTTTTTCTCATGTTTCAGCCGGGATGTTCTCGCTGAGCTTAGAACCTTTACCAAAGCGCATGC  
GGAGAGATGGTACGACACAACAAAAAGCCAGTGTATTGTCGTTTGGCTTGAAGTTGAAGGTAATCCATGACCCGCAC  
CAACAGGATCCAAGCAAGCTTTCTGACGGGATGTTAATCTCGTTGACCTGAGCAGGCTGTTGAGCCAGGTGATTTT  
TGATAGCCAGACTTGGTGGTGACGAGTTTACCTTCAAGAACTGATCAGGATAGCGGTGAGGTTTCTACAAACACT  
AAACCCGCAATATCCAATGATCCCATGCAATGATAGCTGTTCCGTAAGGAAAGTTATCGCCAGCCAGTGGCTGAAG  
AGACATTTAGTTAA

>Cluster\_64986

ATGACCGGTTCTATGATCGTAAATAATCTGGCGGACTGATGATGCTGACATCGCTGTTGTGATTAGCGTCAAAAGCTA  
TCGCCTGTATGCGGATTTTACGCCTGCCAGTCCGCTGGTGTGCTATTTTCGCCACTCTCTCGTGCCTGTTCCGCG  
CAGAGCAACTGCTGATCTGGTCCGCGAGCCCTTATCATCCAAAGTGCCTGCTGGTACCGTTAATCATGACTTACGCTGCA  
CGAAATATTTCCCAAGACATCCCGGAAAAAGCGTTATTCGGTCCGCAATGATGGCACGCTCGCGGCGTTAATTGTCTT  
GCTTTGCGCATTTTGTCTGATGAGCTACCGGCTGAAACCGGCGCTGGCGGTAGCGTTAGGTC  
ATTTTCTGCTTGGCTGCTGTGCATTGTGACGCGCAATATCTGCGGCAAAATTTTGGTTACTGCCTGATGGAAAC  
GGCTCCCATCTGGTGGTCCGCTTCTTGGCTGGCGAGCCTGGAACTGGTGGAAATAGGTATCGTACCGCATCCATCTT  
CGCGTCAATGTGATGGTGTACTGGCAAGAAAAATATGGCGTACCCACGGCACGCTGGACGTGAACAACCTTGACCGCGC  
TGAAGGGATA

>Cluster\_204

ATGGCTGCTGCACTCCTCTTAAACGCTCTCATGAAAAAGAAAGAGAAATATTCCTTAGAGATAGTATTGATAATAAAGC  
TAATGGTTACTATGAAAGACAACCTGGCTGTTTTCTTAGGTAATCTCGGTATCTCTGTCCCAAGAGATAGAAAACTGAA  
TCAGACTTCTATCTTCTCTGAAATGGCAAAAAGCTGATGAATCTTCCAGGACTTATCTTAACTCTCGTTCTCCAA  
AGCTACTCCCTAAATAAATCAAAAGCCCTTGTGCAATCTATGAAACTCCCTACTCCCAAGAAATAGAAGAAATTA  
AGAAGAATTGTATAACCAAGCCAAAGAAATTAATAACCAAAAGAAATGGCAGAAAATTTGTTGCTATGTTATAGACGCTT  
ATCATACTCAGATAAAGATACCGAAGCAACAGAATCAGAAAAGCAGTTATTTATAAATATCATCGGAATAGATATGGAG  
GGAAGAAAAAATTTACTTTCTTATTACATTTATTTGGTTTCCAGAGACGAAAGGAGGACTGGCTTCAAGTACTTAAATGATTT  
GATAAAGAGGGGAGTTAAGAGGGTTATGTAATAGGGAGTGTATGATTTTCTGCTTACTCAAGCCATAAAAGCCCTTT  
TTTTTTCTCTGA

>Cluster\_66919

ATGAAAGCTAAAAAGAAACAACAGACAGATTTCCAACCTGGTGGCTATTTTTATGATATTAAGAAAAGCTTATTTCTT  
TCTTGGAAATACCTTTTTTCTGTCTGCGCATTAGGCTTTACCGAAATGCTATGTTCTGATCGTTATTTCCGAAATAAGG  
TCGAAGATATGTTGTCACTTTTGGTAGTTGGTCTTATTACTTGGCCAGGCATATGGATGTACTCACGTGCAAAAACA  
AGGAGAGAAAAAATAAGAAAAGTTGTACAAACAATAAAAGAGTCAAGGCTTCTACTCTCCAGAGAAAGGGTATGAAGGATT  
ATCTTTAACTCAGGAGCTTATTTCCGTTATGACCTTAAAAATGGCACAATGTTGTATGTCGGTATTTATCCAGGCAACA  
TTATGGATGTTATCGGTTTTGACATTCATAATTTCACTCGTACTGTAACAGACGACAAAAACCTGGAAATTCATACGAAA  
TACATCAACCTGCCAATGGTTCCATTTCCATCATGGTGTACTCATCCAGAAACCGCATCAACACCATGCACGGATGGC  
AAGTCCGAGGATATGATTACCTGTCGACTTTCCGCGCTGATTGAGAAAAGCSTAAGGAGTGGGAGCAGATTGCAGGCA  
TACCTGTAGCTGAAGTATTTAA

>Cluster\_34753

ATGGAACGTATCTGGATACTTCAGACGTTGTTGCGGTGAAGCGCTGTCACGTAATTTTCCGCTGGCGGGTGTGACCAC  
TAACCCAAGCATTTATCGCCGCGGGTAAAAAACCGCTGGATGTTGTGCTTCCGCAACTTCATGAAGCGATGGGCGGTGAGG  
GGCGTCTGTTTGGCCAGGTAATGGCTACCCTGCTGAAGGATGGTGAATGACGCACGTAATTTGCGTTCTATTATTGGG  
GATATCGTGGTGAAGTTCCGGTGACCGCCGAGGGCTGGCAGCTATTAAGATGTTAAAAGCGGAAGGATTTCCAACGCT  
GGGAACCGCGTATATGGCGCAGCAAGGGCTGCTGTGCGCGCTGGCAGGTGCGGAATATGTTGCGCTTACGTTAATC  
GTATTGATGCTCAGGCGGTAGCGGCATTCAGACTGTGACCGACTTACACCAGTTATTGAAAAATGCATGCGCCGACGGC  
AAAGTGTGGCAGCGAGTTTCAAAACCCCGCTCAGGCGCTGGACTGCTTACTGGCAGGATGTAATCAATACGCTGCC  
ACTGGATGTGGCACAACAGATGATTAGCTATCCGGCGGTGAAGCGCTGTGGCGAAGTTGAACAGGACTGGCTGGGAG  
CGTTTGGCAGAACGTCGATTTAA

>Cluster\_32375

ATGGCTGAGTATTTATCCGCGGTTTGTGATGGTAAAGCTTTTAAATGCCCCACTGTGGTGTATTCCAAGCAAAAGCTG  
GCGGTCATGGTGGGAGTTGGCCCTCATTTACTTATAAGAACTGATTTCCACTTATCATAATTGTCAACATTTGCTATG  
AAAATGCTTATTGGTATAAAGGCAATATGATGATTTCTGCGGCTGGTAGTGTGAGCTGCCTAATCTTGCATGCCAGAA  
CACTGTAAGTCCGACTACATGGAAGCCAGAAGCATTAATCTGTCACTAAGGGCGCTGCCGCACTCTGCGCTTAAAG  
TCTTTCAAAAGCTGATGGTCCATCTCGGTTGAGCCGGGAGCATATCGACACGGACATTAAGTCCCTTGTAGCTAAAGGGC  
TGCTCCACTGGTCCAGCAGCTGCTGACATCTGCTGATTTGTTGGCAATCAGGCGGTACATCCGGGTGAAATTAACATT  
GATGACGACCTCAGTTGGCGCATGGTCTCTTTAAGCTGCTGAACATTTATGTTCACTGAGCAGATTACTCGACCGAAAGA  
AGTCAAGCCATGTTTAAACAGTATGCCGGAACGGGCGTTAAGGGCATTAAGACCGGGACCGGAAAGCGAGGGAACAGC  
AACAGCCGCTAACGAGTAG

>Cluster\_55889



ATGGATTATACGCTCACCGCATAGATCCCAACGGTGAGAACGACCGTTACCCCTGCAAAGCAGGAGATCGTAACCGA  
CCCTCTGGAGCAAGAAGTTAACAAAAACGTTTATGGCAAGCTCAATGACATGGTTAACTGGGGTCTGAAAACTCAA  
TTTGGCCGTATAACTTCGGTCTTTCCTGCTGTTACGTTGAGATGGTGACTTCGTTTACCGCGTGCATGACGTGGCGCGT  
TTTGGCGCAGAAGTATTGGCTGCTTCGCGCGCTCAGGCTGACCTGATGGTGGTTGCAGGAACCTGCTTTACCAAAATGCG  
ACCGTTATTTCAGGCTCTGATGACCAGATGCGAACAAAATGGGTTATCTCAATGGGTGCCTGTGCCAACCTGTGGTG  
GTATGTACGATATTTATTCGGTTGTGCAGGGCGTCGATAAAATTCATCCCGGTTGATGTGTATATCCCGGGCTGCCCGCG  
CGTCTGAAAGCTACATGAGGCACTGATGCTGTGTCAGGAATCTATCGCAAAGACGTCGTCGGCTCTCTGGGTGGT  
TGGCGATCAGGGCGTTTATCGCGCCAATATGCAATCAGAGCGCGAACGCAAGCGCGGTGAACGCATTGCCGTAACCAAC  
TGCGTACACCTGACGAGATTTAA

>Cluster\_6224

ATGGTCATTTGTCGCCGATTGTTAATGTTTCCGGGCTTTCCGGAGTACATTTTACTATCATGTCAGACGGCTTGCTGCTCC  
TGACCGGTATCAGTCTGCCAGAGCGCTTGCTGTAATAATTTATCACCAGCACAAAGCCGCTATGGTTACAGACGCATCA  
GGCTGGCATGTCGTAACCGGGGTTTTACTTAATGGTAAAACCGTCAGAAAACCTGATGAAGGAACCTGGGTATTAGCAGC  
CTGATCCGCGTTAAAAAATACCGTTCATATAAAGGAGAACAAGGACGAATTTGCGATAATCTCTGAAACGCAATTTTGA  
TGCAAAACGCCCTAACGAGAAGTGGGTTACAGATGCTACTGAATTTAAAGTCAATGGCAAGAGCTGTATTTATCGCCCA  
TCATGGATCTTTAATGGGAAATAATTTCTTATAACCTCGCTACTCGTCTCAACCTCAATGGTGCAGACTATGCTT  
ACGGATGCGCTGAAAACAGCTGTGCAAAAGATGAACACCCCATAGTCACAGCGATCAAGGTGGCAATATCAGATGTCCCG  
GTGCCAACGATGA

>Cluster\_17674

ATGAATACGGTTGATTTTATTTCTGTCATGTTACCACCGTCACTATGACCCGAACGGGAAATATATTTACGAGA  
GAACGCAGAAAGCAGCCATTTATGGATGAAGTAAAAGCGTCACTGCACAGTGTGTCATCTGTACACCATTTTACGCAT  
CCATGACGCTGCTGACTGGGAACGAGTGTATGGAGTAATACCCCGCAGCGTGCACACAGCAGGAACGCCGAGAAAA  
ATTTCTATAAAGATGGCTGCAACTGGTGGGTTATCTATCCCTTATTTTAAACAACCTTGAGCCAGCCCTCGGGTACACCA  
AACAAATTAATGAACTTCACTCCATTCAGAGCGGGGATAAACCGATGTGGTGTGCTCTATATAACAGATGCCCGATGGA  
TTTGGCAGGTTAATGTACAGGAAGCAGAACCGCAGCTACAGATTCAGAACCGGAGTATCTGCTGCCGGGAGCCGTTA  
CTTTCCTTTGGTGCCCTGTACTGGAAGAAACATTTAAAGACCTTAAACCCGCTTTTACTTATTTGCCATTTACATATAA  
GGAGGAGCAGTAA

>Cluster\_37577

ATGGAACGTTGCGGCTGGGTGAGTCAGGACCCGCTTTATATTGCTACCATGATAATGAGTGGGGCGTGCCTGAAACTGA  
CAGTAAAAAACTGTTTCAAAATGATCTGCCTTGAAGGCGAGCAGCTGGATTATCGTGGATCACCGTCCCAAAAAACGCG  
AAAACATCGCGCTGCTTTCATCAGTTCGATCCGGTGAAGGTCGAGCAATGCAGGAAGAGGATGTCGAAAGACTGGTA  
CAGGACGCCGGGATTTATCCGCCATTCGAGGGAATAATCAGGCAATTTTGGTAATGCGCGGGCTTACCTGCAAAATGGAACA  
GAACGGCAACCGTTTGTGACTTTGTCGCTTTGTAATCATCAGCCACAGGTGACACAAGCCACAACGTTGAGCG  
AAATTTCCACATCTACGTCGCCCTCCGACGCCCTATCTAAGGCACTGAAAAACGTTGGTTTTAAAGTTTGTGCGCACCA  
ATCTGTTACTCTTTATGACGGCATGTGGGCTGGTGAATGATCATGTGGTGGCTGCTGTGCTATCCGGGAAATAAAC  
ATGA

>Cluster\_51243

ATGCCATTAACTCAGATATTGGATCACGTTTCATTTAATCTTGGGCTGGAGGTTGTTCTGTCGCCGAATTTGATGCCAATGA  
GCGCGGAGATATTACAGTCGGTGGTGAACCTGTCAGTATGTTGATGATCTATATAATGGGCGCTTTTCATCCAGTGGCG  
GTAATGGCGGATTTCTTTCTGAGTTATTGCTTTTGGGATTTAACTACTGGTCTCGAGCCCTTGGTGAGAGAATGCTAAGT  
ATGTTTTCAGACTCAGGTGAAGCACAATCGCAAGAGATATTCAGGACAAAATATCTCAATGTAAGTTTCTGTTAGTTC  
AGGAAATTTCCAGTGCCTGCTTGGGCTTATTTCAATGTCCTAATACACTGGAGCAGCTGAAAAAGGTAATTTTGTGAAGA  
ATTCAGATGGTTCAGATGATGTAATTTATTTGATGCGCTGCATTTTCTGTTGACTGGTGAAGGCTTACCCCAACCA  
CTGACCCGGGAGCAATAACGTCATCAATGATTGTAAGTCAAGAACAATGATTTATGATCAAGCCAAAGGAACTTTGT  
TATAAAATAA

>Cluster\_40803

ATGACTGAGCCATTACAACCTCCGCCACCGCTTGGGGTGATATCAGTCTCAGGACGCTGGGAAGACTGGCAGGACGGCT  
GGATAACATCGACCTGAGCGTACTGATGGTCTTCTCGTCGATATCGTCGACAGTTCCGCGCTGCCATGGCTGGGCGAGC  
AGTTCCTACTGCTGCGCGATGGCTGGGAGCTGGCGGAATCGGACGATGTTTCGCGCATGCTTATAAAAGCAGCCATCGAA  
CTGCACCGGTATAAAGGACGCGCTGGTCAATCCGGGAAGTTAATCCGCGCTTTTGGCTTTGGTGAAGTGGATCTGATTGA  
AGGCACAGTCTGCTCAGTTACGACGGCAATCGCAGCTATAACCGGACTGTTTGTTCATGGAGATGACGCGCCCTGGGCG  
TTTATCGCGTTATTTGAAACAGCCATTTACTAACGATCAGGCCGCGATGCTGCGTCAGACGCTGGCTGCATTTGACCCG  
GCCGCTGCCATCTGGCCAGCCTGGAGTATCAGTCTGTGGCAATTCGCTATAACAATACCGCCATCCATGATGTCAGTTA  
TAACCACGGGAGCAGTTGA

>Cluster\_11556

ATGCCAGGAACAGTAACTCCTGTGGTTTTGGATTAGCATTACAAAAGCCCTATTTCTTCTGGACAAAACCAGTTAT  
AGATGGTTTTCTTTTAGGCGCGAGGAGAATCTCATTTCTTATCCTCGACTGGAAGCGAGTTAATACAGTGCATTAACC  
TAAAAAATGAAGGAAAAAAGAATGAGTGGATGAAGGAGAGATTTTGTGTTGTCGCGGGATGTCATAAACTCCTG  
GATAATGTTTGTCAAAAACAACAGCAAAACATACCTAAGGGGGTCCGGGAGCGGGTTTTTCAGCTCGCAAGTTTTTATTG  
CGTTTTCTCGTTGGATGCAAGATGCGCCAGGCATCCACTCATCACATGATTTTAAATAGTCAGTATTTTCAGAAAAAA  
TGGATACTCTTTGACTTCAGTAGATATAAATGTCAGAAATCAGTGTGTTCTGACAGCGCTAAGCAGTCTTGGCGATACT  
TTTTTTGAGAATAATGTTAACAATATAGATATGAATAAATTACGTGACAGGGTTCCATAATACTATTGTGCAGGAGTTCA  
GAGAAATTTAAAATATGTTTAA

>Cluster\_38443

ATGAATATAAATTCGCGGATAAAAGATATATTTATTTATGCGGGAAACATAGTTTTTAGCGTTTTATACAATGAACATCT  
TGATTTCCATGCGCTGCAATTAATACTTCAAAATCTGAAAGTTATGCAAGAGTTATATATGAAAAAGAGTTATTTA  
TTAAACGCACTACGGAATAATGATGTCGCTTTAGTGTAAAGAGGAACATTTGGAATACTTATTTGATGAAATATTGCT  
GGCGAGTGTGCATTTGGCTTATTTACAAAAGAAATAAAAAGATTAATCCAATATGTAGAACGGGACAATACCCATCTTT  
TAACAATGAACCTCGTAATTTTTATCTTAGAAAATAATGCTACATTTATATGAGGTATATCATGAGGTAAAAATGTTAACA  
AGGAGTTGCGCTGCGGAGATAATGTTATCGTCTGTTAATAAGTGTAGAAAGTTCCAAATTCAAAATAACACTTGAGGAATTT  
CATGAATTTCTTGGAAACTTCAACCTAATAATTAACAGCTCGAGTTGAAGTATTGATCAATCCGTTTTAGAACCTTT  
TTGGAGATTTTAA

>Cluster\_59804

ATGAGTGA AAAAAGCATTGTTTCAGGAAGCGGGATATTCAGCTGGCAATGGAATGATCACCTGGGCGCTCGTTTGCA  
GATGCTGGAAGCGAAACACAGTTAAGTCGCGGACGCTGATAAACTTTATAAAGAACTGCGCGGAAGCCACCGCCGA  
AAGGCATGCTGCCATTTCAACCGACTGGTTTTATGACCTGGGAAACAAACGTTTCATGCTTCGATGTTCTGTAATGCAATG  
CAGTTTTTACTGAAAACCGGTTTGTGTAATGGCGTCAATGGGTTGATCAAGGCTACCGTTTATACCTTTGAAACAGTGCC  
ACAAGCAGAAAGAGGACCTGCTGGCATTAACCCGCTGCTGGACATTTGGTGGGTTTTGTTGAAAGTGGATTACTGCAAC  
TTTCCAGTGAACCTGCTGCGCGGCAATTTTATTAACCGCTCACCAGCCTGTTGGCAGCTTTGCCGTCAGCTTATGT

CAACCGCCATCCCGGGCAGTAAAAAGACGTAACCTTTCCAGAAATCTGCCGATATTATCCCACAACGCTGGATGAACA  
GAGAGTACAGGCTGTTTTAA  
>Cluster\_26987  
ATGCTGTATAGACTGGGATGGCCTAAGGGAGAGATACCAGAAAAATGAGGCTATGCTGAATTCATCGACAGTGGAC  
GACTATAGAAAAGAGGACTGTTCTGTTTTCGAAACAGACCTGATTTACCTCCAGTGGATTATGCGCAGCCGGAGTTACCGCCAG  
CGGATTATACTCAGTCAAGCTGTTGCTGAGGCTTAGCAACAACAAATCACCCGCTGCTAGGTAACGTTATTGGTAAAGGTGGT  
AATGCTGTGCTGATGAAGATATGAAAAATACAACAAAAGTGTGAAGATGTTTACTATATCTCAAAGCCATGAAGAGGT  
GACAAGCGAAGTTCGTTGTTTCAACCAGTATTATGGTGCAGGAGTGCAGAGAAAAATATATGGCGATAATAGAGATATTA  
TTGGTATTAGAAATGGATAAAAATAAATGGAGAATCGCTTTTAAATATTTTCTGCTCCTTGCCAGCACAGGCTGAGCATGCTATT  
TATGATATGTTTGGAGACTGAAAAAAAAGGAATCTTTTGTGATACAACAGAAACAAATGTTTATATGATCGTGTG  
A  
>Cluster\_54238  
ATGCACCTGCTTCCCTGAACCTCGCCAGCCACCATGCGGTATCAATTCGCCAGCTGCTCGTCAGCCGGGATGAAAGGCAAGC  
ACGGCAACACGCTCGGCTCAAGCGCCATCCTGTTCCACTGGTCTCCTTTACCGTGGTTGCGCCTGGGCCGATTAAAGACT  
GCGAGGTCACACGCCAATTTTTTAAATCATGGCGTGACAGCCTTTCGCTGCTTAGCCGCAAAAACAGGGCTGGCAAAATTCAG  
GAGCAGGCTGACTGGTTCCGCGAGCGGGCGGAGGGCATGTTGAGCATTGCCGCCCGGCTCGGACCTCAAGCTCGC  
CACCATTTGAGCTTGAACATAGTCACTCCTCTCGGCGGTTATGGATATCGATGTCCTGACGCCCGAAGCGAATTTCTCT  
CCCGCCGCGACTATTCTGCGCCCTCGCCGCTGCTGTTGTGCGAGCAAAGCGCAGCCGCTGCTGCGCGCTGGAAAAACC  
CATCAACTGACCGATTTACTCAACCGCATGGAGGCACTGCTGAACGATGTCGATGCCCTGCAACGCTCAACTAA  
>Cluster\_42000  
ATGGAGGAAGCCACCTCTTGCAGTCATCTTTTCTTCGCTCTATCCTCTGCCGCTATGAAAAATCCCGCTCCTTATCGC  
CATCCAACAGGCGTTATGCGTTCGCTGCGGAAAAATCGCCAGGCCAACCTGAAGCTAGGGCGTAACTACCCGGAGC  
CAAACTCTCTTACACCCAGCGCGGAACCTCTGCGCGAACAGCCTGGCTGGAAAGCTATGAAATTCGCTCAATCCCGTT  
TTGGTGTGGGAAAACAGTGAAGCCTTTATTTGAAGAAGTGGCTGCGCAGAACTGGCACATTTGCTGTGATGAAACTTT  
CGGGCGCTAGCGCCACATGGCAAAAGAGTGAAGTGGATGATGAAAGCGTGTGGGCGTCCCGCCGCTGCTACGCATC  
AGTTGCAACTGCAATCCGTCGCGCAACACCTTCCCTTACCGCTGCAAGTGCAGGAGCATCAGCTTACCGTACGCCGT  
CATAATCGCATAGTTCGTGGCGAAGCCGCTATCGCTGTGTTCACTGCGGCGAACAGCTGGTTGCGAAATAA  
>Cluster\_50273  
ATGAAGGTTAATAAAAAGAGGCTTGCCGAAATTTTCAACGTGGACCCGCGGACGATTGAACGCTGGCAGTCTCAGGGACT  
CCCTTGCGCCTCCAAGGTAGTAAGGGCATTGAATCTGTATTTGATATGCCATGGCAATTCAGTGGTATGCGCAGAGGG  
AACTGATATCGAAAACGAAAAGCTCCGCAAAAGAACTGGACGATTTGCGTGGCGCAGCGGAGTCAAGTTTACAACCCGGC  
ACCATTGACTATGAACGCTACCGGCTCACAAAAGCGCAGGCGAGATGCGCAGAACTGAAAAATGCCCGTGAAGACGGAGT  
AGTGCTGGAACTGAACGTTTACCTTCACTTCAACGCTGTGGCACAGGAGATTTCCGGGATACTTGTGCGTGTGCCGT  
TGACATTACAGCGTAAATATCCGGACATTTACCATCACACCTTGATGTTGGTGAAGCTGAAATCGCGAAAGCCTCCAAT  
GTTGCAGCTAAGGCGGTTGAAACGTTGGCGGGTGGATCGATGATTTCAAGCGCGCAGAAAGGCAGCTAA  
>Cluster\_41613  
ATGAGGACGATTGAAGCCATGCAGCGACAACCTCCTCGGCTGATTTGGCGGGCAGTGGTGAAGCATCAGTGCCGCCAC  
GAAATGTCAGACCGTGGATGTGTCCCTGATTTGCCGTTGAACCCAAAGCGGGGTTGAACATCTGAACCTTACCGTTTAA  
CCGCAAGGGCAACACAGCGGTGCGGAAGCGGTTGTTGTTTCCGATGGCGACCGTTCATATGCGGTTGTTTACGGTG  
TCGGACCGCGCTTACCGCTGAAAGGGCTGCAGACGGGTGAGGTGGCTGTCTATGACGATCAGGGGAGTCCGTTGACGCT  
GGCCGGGAGGGGATCTGGTGGACGTTGACAGTAAAACGATCAGTTTTCGCAATGCGCTAAGGCACGTTTTGAAATGG  
ACCTAGAAGTGACCGGACAGGTGAAAGACCTGTGCGACTCCACCGCACACCATGTCAGCGATGCGGCTTGCCTATAAC  
GGCATCGTACAGAGAGAACGGTCAGGGCAGTAAACCGGCAAACTGATAAAGCGATGGAGGCATGA  
>Cluster\_11452  
ATGACAAATACAGCAAAAATACTCAACTTCGGCAGAGGTAACCTTTGCCAACAGGAGCGTAATGTGGCAGATCTCGATGA  
TGGTTACGCCAGACTATCAAAATATGCTGATTTGAGGCTTATTCAGGCGCAGATCTGACCAAGCGACAGTTAAAGTGTCTG  
TTGCCATTTCCGTTAAACCTATGGGTGGAATAAACCAATGGACAGAAATCACCGATTCTCAACTTAGCGAGATTTCAAAAG  
TTACCTGTCAACCGGTGCAATGAAGCCAAGTTAGAATCGTCAAGATGAATATATCAAGCAGCAAGGCGGCATGTTTGG  
ACCAAATAAAAACATCTCAGAATGGTGCATCCCTCAAAAACGAGGGAGGTTCCCTAAAATGAGGGACATCCCTCAAAAACA  
GGGGGACACAAAAGACATATTACAAAAGAAAAAGAAAGATTTTCGTCGAGAAATCTGGCGAATCCTCTGACCAGC  
CAGAAAACGATCTTTCTGTGGTTAAACCCGATGCTCAATTTAGAGCGCGCAGCAAGTGGGGAACAGCAGAAAGACCTGA  
>Cluster\_24047  
ATGGACGCAAAAGCTGTACATCACTGAGATCATCAATGAATTAACCTTCGTTAAGGACTCTATCCGTGAGGATGACTGCAC  
CAAATGATCGACGCTATTCAGCAAAAGCAGCGGTTTTCTGCTATGGCCTGGGACCGCCCGGCTTTTCCATGAAAGCCT  
TCACCATTCGCTGATGATGATATGGGAAAAGAGGTTTACTTCTGACGGAACCAATACGCCGAACTTTGGCCGATGCGGAT  
CTGTTTATCGTTTCTCCGCTTCCGGTGGAGACAGCACAACCTGGTGGCACTGGGAAAAAAGCAGCTCAGCTTGGCGGCGC  
TGTGGCGGTGTTAACCAAGCAATCGACACGCCACTATCACCGAGTTTGTGCGACGTCATGTCGAAATCAATGCCCTTCCA  
AAAATCAAAAAGATCTGTTTTCGCTCGGCACAGCCGATGCGCTGTTGATGAGCAAGCTTTGCTGGTGTGTTCCGAT  
GCATTAGTGTAGTGAAGATGGCTGCTGAAAGTGGTGCAGGAAAGTGAAGTGTGTTAAGCGCCACGCCAATCTGGAATAG  
>Cluster\_47326  
ATGCTGTATGTTTTACGCCCATACCGCGATCTTTTCCACAAAATCGGTGAGCGGTAATGATCGACGATAGCAGTGTCTGT  
GATGGTGCAGTTCCGCTCGGCTGATGATGTGGGATCTGGCCGCTCGTTGTGATTCGTGGAGATGTACATTTATGTACAGA  
TCGGAGCAGCCACCAATATCCAGGATGGCAGTATGTTGATGTCACCTATAAATCCTCGTACAACCCAGATGGCAACCCA  
TTAACCATTTGGCGAAGATGTCATGTTGGTTCACAGGTGATGCTCCACGGCTGCACCAATGGCAATCGAGTTTGGTGG  
GATGGGCTCAATTTACTTTGATGGCGCAATAGTAGAAGATGATGATGATGATGATGGTGGGGTAGTCTGGTCCCACAAAATA  
AACGGCTGAGAGCGGATATCTGTATCTCGGTAGCCCGCTCAACAGATCCCGCCGTTAAGTGTGATGAAGAGGCTGGG  
TTACGCTATTCGCGAATAAATACGTGAAATGGAAGGACGAATATCTGGATCAGGGTAACAGACCCAGCCTTGA  
>Cluster\_28982  
GTGGCGTTAACGCTGCGCTGCAACCTATTGATGGCGTGGCGGTGAGTTATATTGATGCTGCCGTAGCGTTGTTAATAC  
CATTAACGAAAATGGATAAATAATTACACCCAGGAAAATTAAGAGACGATGCGTTTGGCAAAAGGAAAAACATTCACACTACT  
ACTCTCTGGCAGTCAATTTACAGCAAAACAAATTAATAACCTGATATCGCAAGATAAGTTAGATGCAGAAAGCGGCAATG  
AAGAAAGTGTCTGAACTGAAACGCTGGTGGCGCAAGCCAAAGAGCGGATAAAAAGCGGCATGAGTTTCTCGTTTATTTAA  
TTCCGCGAGCCAGTATCAACTCGAGGCTAAAAAATACGTTTCGCCGATCAGAGATAAAGTCCCCTACTCTGACTGGGATA  
AAGAGCAACTTCAGGACGCAAACTCAAGCTGGAATGGCGGAAAGACTCATTTCCAGGAGCGTTATGCGATTCAACCGAAATG  
GTCGATGAAATATTTAGTTAATGTAATCGCGGGGCGGTTTGTGATGAGCAGGATATGTCACGAAGTCTGTA  
>Cluster\_48987  
ATGAATGACCGTGAATAACCGTGTGTACAGCGGTGAGGTGCTGAGCGGCATGACGATAACCCGGCCACATTATCGG  
TTATGGATCGGTGTTGACTGTCGTTCTGAGCTGATATTCGGTTCATTCGCGGAAATCATCCGGCCCGGCGCTTTTGGC  
ATGTCCTGGTGTGATGATGACGCGCACTGTTTAAACACGATCCATTTTATTTCTGGCGTAGTGCAGCAGGACGCTG



TTTAGGTGATAACGAGTATGGCAAGCCTATGTTTCAAACGATCGCACGGAGGTTGGAGAAGCCGTATACCAGTTAAAAAT  
ATCAAATGACATGGACCAAGTTGATGCGCTTGCCAGTGCCTATTAGTTAATGCTGTGCCTCTTTTTCAAACATACAA  
TTAATCATCCCAATGGCAGCTTCAAATGTTGCAAAAATCAACCCGTGACAGCAATTACTGACGCTCTGGCATCAAAAAT  
GGGAAAATAACATGTTTAGCTTCAATGAGTTATTAATCAAAGCACTGGTGGCGTGTCTTTGAAAAATCTGAACACTAAAG  
AAGAGAAAAGACGTGTGCTGACGCTTTTTCTTATAAAAACAAATGTCGGGGATGGCCCTTTAATGCCCCTCATC  
GTTGATGATCTCTCCATACAGGAGCATCCATGGAAAGTGCAGTTACAGCGTTACGCGGTTATAATAAAAATCAATAAAAAT  
TTATGTAGCAGCTAACCTGGAGATAA

>Cluster\_235

ATGAGTCTCCTTGAACCTTTTAAACATGACAACGATGGTTTCCCTTCTTATAAGTGCCTCAGCTTTGATAAGAGAAAAAGA  
ATATGGTACCATCGAACAACTTTTGATAACCCCTGTA AAAACCTGGGAGGTTTTTTTAGCCAAGATTAATCTACGGTAG  
TCGTAATCGGTGTTTTATCTTGGCTTAGCTTATTTATCATGGTAAAAGCGTTTTTTAAGGTCCCGATAAAAGGAAACATC  
ATCTTATTTTTTTGGTCACTGCTTTTATGTGTTTGCATGTCTTCCCTTGGGATAGCCATCGCAACGATAGTAAACAA  
CCTCTCTCAGGCGATGATGGTAATCATAGTGTATCTCGTACCGATGCTTATGATTTTCAAGGAGCTGGACTCCCCAGAAG  
CTATGCACCTGTGATCAGGCTCTAAGCCTTTTTTCTCCGATGAGGTATTATTTAGAGTTTGGCTACGGGTTTTACTT  
AAAGGGGTTGGGATAGAGTATCTCTGAAAAGACATCTTAGGGATTACAGCCGTAGGAGGGGTAATCTTTCTTTTATCAGC  
CTTAAGATTTAGGAAAAGTTTTGCTAAATAA

>Cluster\_44951

ATGCCGATAGTATCATATATATCATCGACTTCATTGCGGAATGAGATGGCGGAAATGCGTCAGCAGGTAATGGAAGG  
GCAGATGGAGGATTTCTCCTGGGAGGGGAGAGAGTTAGAGTTTCTTATATGCCAGATACAGGCCGTTTTTTAGCAGAAA  
GTGAAGGCTGGGACTGTTTTATGCAGAAATTTGAATATTGGTTTTAATGATGGAGTTGATGCGCTCAGAAACAGGCTG  
TTAAGCGCTTCTCGAATGGTGGCGCAGCAAGAGAAGCTTTTGCAGGCCAAAATATCGGAATGTACTTTACTGT  
TGATATTGAAAACTTCACTGTCTGGTGAAGTGTCTCAATGTCCAATTACACGAGCAGCTGAAAAAGGTATTTTTG  
TGAAGAAATCAGATGGTTTCAAGTATGTACTTTATTTGATGCGCTGCATTTTCTCGTTTACTGTTGAGTGGTGAAGGCTTACCC  
CACCCACTGACCCGGGAACCAATAACCGCATCAATAATTGTA AAAACATGAAGAATGCAATTTATGACGATACAGAGGAAA  
CTTCTGTTATAAAGGGTAATTGA

>Cluster\_14840

ATGTTCAAATCGATCATGACCGTATCACTGTGGCCACCCTATTGCCTCTACCAGCGCAGTGGCCGAGACAATTCGGC  
GGTGGTATCATTAACTTTACCGCGCTATTAGCGATAACAACCTGTACCATTAACGGCGTAAAAGCGCAGACTTTACCG  
TTGCGCTTTCCCTATTTCGGTAAAAGATGGCGGCAACACGGTTGGCTGATCAATAAGAATAAAAAATCTATTGCGCTG  
ACTTTCTCAGGTTGTTACCCAGCAGCCGGAACGACCGGTACCCCGCTGAAAAGTGTATTTCTCCAGCGCAATAATATTTCT  
CACTGACGGTAAATACCTGTGAATAACAGCGTAAACGAAAGCGATACAGCGTGGCAGCTAATGTGCGTTTTGCGTTAG  
TGAAGCCAGGTTCTCTCAGCCCAATTACCTGAAACGCTTACACACCGGATATTATGGGTACAGCGACCCGCGAGT  
TCCGAGACGCTGACGCTGGATGTTTTATTATATAAAAACGAACACCGCTGCCGCCACCGTGGCGAGTTAAGCTCCACGT  
AACGTATACCATTTCTTACTCTGTAA

>Cluster\_21539

ATGATCATTCTGTGATGAAAACTATTTTACTGATAAAATGAATTAACCCGCACACACTCTGAAGTGTGGAAGCGGTGAA  
AGTGGTTAAACCGGGTAAAACGCTGGATCTGGGCTGTGGCAATGGTCGTAACAGTCTTTACTTGGCAGCAATGGTTATG  
ATGTTGACGCATGGGATAAAAAATGCCATGAGTATCGCCAACGTCGAGCGCATTAAAGTCCATTGAAAATCTGGATAATTTA  
CACACCCGGTCTGTGATGAAATACCTCACATTTGATGGCAGTACGATTTTATTTCTTTCGACTGTGGTCTGTATGTT  
CCTTGGAGGTA AAAACATCCAGGCTGATTGCAATAATGCAACGTTGCACTAAACCTGGCGGTTACAACCTGATTTGTTG  
CGGCGATGGATACCGCTGATATCCATGTACCGTGGCTTCCGTTTGGCTTCAAAGAGGGGGAAATACGTCGATATTAC  
GAAGGCTGGGAGATGGTGAATAACAATGAAGACGTGGCGGAGCTGCACCGCACCGCAACGGTAAATCGTATTA AAAC  
GCGTTTCCGCCACGATGCTGGCACGTA AAAAATGA

>Cluster\_66900

ATGATGAAATCAGACGAACAATATCAGGTTCCCGTGTGGATGCGACCTCTGTTGCCGTTGCTCTGCAATACCGGTGGTAA  
TGATCCGGAGGAAGTCTGAAATGATACAGAAACACCGCCAGTGCAGATAATGTTCCGTTATGTACTGATAGTTGCAGTGC  
GGTCGCAGATTGATCTGCTGACGCTACTGTACAGGAAAGGACTGTTGCCACAGAGATACCAGTGGCTTTTCCACGGAA  
GAAGCGCAGGAACCTCTGGATAAATCTGGTGGCAGCCATATCAGCAAGGCGCTGTGGGTTGAGCGAATGGCAGCCGTTGA  
CAGAAATGCCGATCTGACCTGGATTCGCGCAGCAACTGGTGCATGCCGCTGGTTTGTCCGTGCCACACTGGAAGCGCATG  
GGATGGGCGTGGGAAATGAGAGTCCCTCTGCTCCGCGGAGACAATGCCGGACATACAGACACGGGAACTGGTTATGTTG  
ATCAAGCGACTGGCATCATCGCTGAAAGCGGTGAAACCTGCACAGTACGCTGGTGCCTGAAGCGCAGGAGTGGCTGTGCGCA  
CAGAAAACCTGTGGATATCAGATATTTCTCCGGTGA

>Cluster\_6775

ATGTCGAAATTTTGTACTGTGCGATATCAACGCTGGATCAGACCACCGAAAATCAACCGCGGAAATCGAAAGTGC  
AGGTTTTAAAATCAAACCTCAGCAATAATCGAAGAACACATTAGCGGCTCAGCAGCAACAGTGAAGCTCCTGGTTTTTA  
ACCGGTTGCTTGTCTGCTGAAATGTGGTGTATCAATTGATTTGTGACAAAACCTGGATCGCTTGGTTGTAATGCAATGGAT  
ATCAGGAAAACAGTGAACAACCTGACCGAAAACAGGTATCAGAGTGCATTGCTTACGATTTGGGGGGCATTTGACCTGACCCAG  
TCCAACAGGAAAAATGATGATGACGTAATTTACAGCAGTGAATTTGAAGAGACTTTTACTTTGACGCACTCATTT  
CCGGGATAGTAAGAGACCCGCGCAGGGAAAACGTTTTGGTTCGACACCTGTGTTAAATGAAGAACGAAAACAGGTGGTA  
TTCAACGAATTAAGTCAAGTGTAAAGTATAGTGCATTTGCCCGGAAATCAAACCTCGCGGCAACCATTTTAAGAGC  
CAAAGCAAACTTCAGACACCTGACATATAA

>Cluster\_54908

ATGCAGCTTAAACGTTGGCAGAAGCCAAACTGCCAACCCATGGGGGATTTCTGATGGTGGGATTTGAAGAACTGGC  
AACCGGACAGATCATGTGCGCTAGTCTATGGCGATAATTTCCGGGCATCCCGGTAATGCGCGCTCCATTTCCGAAT  
GTCTGACCGGTGACGCCCTGTTCAGTTCGCGTGCATTTGGCTTCCAGTTCGAAGCGGATTTGACGCAAAATGGCCGAG  
GAAGCCCGTGGTATTTTGTGATACCTTACAGGAGGTCGTAACATTTGGTCTGCTGAATAAAAATCCCGCTTACGCACT  
GCAGGATCAAGGTTACGATACCGTAGAGGCTAACCCAGTTAGGCTTCCGCGCTGATGAGCGGACTTCACTCTTTGCG  
CTGATATGTTCAAACCTCTTGGCTCAATGAAGTCCGCTTGTAAACCAATAACCCGAAAAAAGTGAAGATTTCTGACCGAA  
GCAGGGATTAATATTTGTTGAACGCTACCATTTGATTTAGTTCGTAACCCCAATAACGAACATTTATCTCGATACCAAAGC  
CGA AAAATGGGCCATTTTCTGTAACAAATAA

>Cluster\_58421

ATGCCAGCGGAAAACATTTGTTGAAGTTCATCATCTTAAGAAGTCCGTCGGTCAAGGGGAGCATGAACTCTCCATCCTCAC  
CGGAGTTGAGCTGGTTGTTCAAACGTTGGCGAGACCATCGCACTGGTGGGCGAGTGGGTAAGTCAACCTTCTGCG  
CGATCTCTCCCGGCTTGTATGACGCGCAGAGTGGCGAAGTGTGTTGGTGGGCAACCCGCTACATAAATGAGCAAGAA  
GCGCGGGCAAAGTTGCGCGCAAGCACGCTGGCTTTGTTTTTCACTCATTTATGTTAATCTTACCCTTAAACGCGCTGGA  
AAACGTCGAGCTTCCGGCTCTGCTGCGCGGTGAGAGTAGCGCGGAAAAGTGCATAACGGGGGCAAGAGCTTGTCTGCAACGAT  
TAGGCTGGGTAACAGCTGGATCATCTTCCGGCACAGCTTCCCGCGGTGAACAGCAACGAGTGGCGCTGGCAGGCGC  
TTTTAATGGTGCACCTGATGTGCTGTTTGGCGACGAACCCACCGCAACCTTGAACCGCAGACGGGCGATAAAAATGCGCA  
CCTGCTGTTTTCCCTCAACCGTGAACATGGCACACGTTGATTTAGTGTACCCACGACTGCAACTGGCGGCAGCTGGC



ATGTTTTTCAGCGATCTATCGCTACCGTGGCTTTATTTATTGACAGCGTTAAACGGGACTTTCAGTCCCGTTACCAAACCG  
CTTCTTAGCGCGGCATGGCTGATTTTACAGCCGATCGCCATGATTTCCGTCTATACATTAATTTTTCTGAATAATGC  
GTGCCCGCTGGCTGGCATGGATGGTCCTTTTGCATACAGTATCTACTGTGTCTGGGGTGTAACTTGGGGGTGTTTC  
ACGGAAATGCTCAACAGTCTGGTCAACGTTTTCTGACCAACGCCAATATCTTAAAGAAGCTCAGCTTTCGGCGGATCTG  
TTTACCGATTATGCTACGTCTGGCATTATTAACCTCTGATCATTTTTGGTCTGTCTGTCTGTCTGTCTGTCTGTCTG  
CGGCAATTTCCCTGGCATGATTTCTTTGAAATCATTCCGGTGTGATCGTCCAGATGCTGTTACCCTCGGCCCTGGG  
ATCATCTCGGGTACTGAACGTTTTTGGCCGATGTGGGAGTTCGTTAAATATCCGTCTCAGTTTTGGTCTGGTT  
TACGCCAATTGTCTACGTATCCAAAACGCTGCCGGAATGGGTTTTCTGGTCTGTGGCGTATAACCCAGATGGCGACCATTA  
TCGGTTCCCTACCGAAGCTGATGCTCTATCACCCAGAGCCCTAACTGGATGGCGCTGCTTCCGGTCAAGTGGTGTCCGGT  
ATTCTGTTTTTATTTGCCTGGCGTTTTATTTAAAAAACATGCCGCTGATATTTGGACGAGATTTAA

>Cluster\_28064

ATGTCAGTACCTCTCATTTGACCATACCTGGCGGGGGCAGCCACGTTTTATTTGGCGGTTTTCTCGGCCTTTCGGGCAAAA  
ACCCTCGAACCCGTTACTGGCGTTTTTCGCTAGGATTTGGCGGGGATCATGTTGCTCATCTCATTAATGGAATGCTTC  
CTGCCGACTAGCCGCTGAAGGAATGTCCGCTGTGTGGGTTATGGAATGTTTATCTTCGGTCTGCTTGGCTATTTTGGC  
CTGGACCGCATGTGCGCAGATGCGCATCCGAGGATTTAATGCAAAAATCGGTCAGCCGTTGCCAAAATCGATCAAGCG  
CACAGCCATTTGCTCCTCTGGCATCAGTCTGCATAACTTCCCGAAGGATTTGCCACCTTTGTACCGGAGCAGCA  
ACCTGGAGCTGGGATTTGGTATTCGCCCTTGGCCGTAGCGTTGCACAATATTTCTGAAGGTTCTGGCCGTTGGCGGCT  
TACGCTGCAACAGGATCGAAACGTACCGGATTTCTGTGGGCGGGGATTTCCGGACTGGCTGAAATTTCTCGGTGGTGTGCT  
GGCGTGGTTAATTTCTGGCAGCATGATTTCTCCGGTAGTCATGGCGGCAATCATGGCGGCAAGTTCGGCTATTATGGTGG  
CGCTCCGTTGACGAATTAATGCCGTTAGCCAAAGAGATCGACCCAAATAAACCAGTTATGGCGTGTATGTGGA  
ATGTCAGTGAAGGATTCAGTTTTAGTGTCTACAAAACCGCAAGGATTTGGTTAA

>Cluster\_59189

ATGCGTTTCGATTGGCAGAGCTACCCAGTGGGAGCTGCACATATGCTTGTATGCCAGTAGCCGATGGATTTCTGGCTG  
CGTTGGCAACCTGGAGAACAAAGTTGGCTACTAAAAGCGGCTTTTTGGGTTACTGAAACTGTCAACCAGCCCTGGGGG  
TCATTACACATTTGATTTTATTCGGCTGGTTTTCTGTGTCTGCGTTTTTCGCATTAAGGCTGCCCTTTGTATTATTTGCC  
ATTTCTGGCGGCGCAATCCTTGTGGGACAGGCGTTAAATCCTGGATCAAGACAAAGTCCAGGAACACGACCTTTTGT  
TATCTGGCTGGAATAACACATCATATTTCCGGTTGATGAGTTCTACACTTAAAGCGAGCAGAACCGGAAATCTAGTGA  
AAGAACAGTTGGCTGGAAGAGAAAATATCCCAATATTTGGCTTACACTGGCAGAAAGAGACGGGGTTTTGCCTTTCT  
TCCGGTACACAGATGTTTGTGTCAGTTGGGACTGCTGGCCGTTGGTTGTGTGGCCGCGTGGCGAACGTTAACCAT  
TGCATCTGTGCTGTCTGGGCAACGGGAGTTCATGGGAAGCCGCTGCTGCTCGGGATGCATTTGCCACGCGATCTGGTAG  
TAGCTACGTTGATTTCTGTGGCGCTGGTGGCGGTGGCAACGTTGGCTTGGCAACGAATTTGTGGGCCATTAACACCACCT  
GCGAAGAAAATCGGAAATAGCGCAACGAGAACAAGAAAGTTAA

>Cluster\_29461

ATGACGGATTTCAAGTGGCGCCATTTCCAGGGTGTATGATCCTGTGGCGGTCGCTGGTATTTGTCGCTATCCGATCAG  
CTATCGCGACCTTGAGAAATGCTGGCGAACCGCGCATTTCCGTTGACCATACGACGATCTATCGCTGGGTCAGTGTCT  
ACGCCCGGAGATGGAGAACCGGCTGCGCTGGTTCTGGCGCGTGGCTTTGATCCGAGCTGGCCGATGAAACCTAC  
GTCAAGTGGCGGCAAGTGGACCTACCTGTACCGGCGAGTCGACAAGCGGGGCGACACGATCGATTTCTACCTGTGCGC  
GACCCGACGCGCAAGGACGCAAGCGGTTCTTGGGCAAGGCCCTGCGAGGCTGAAGCACTGGGAAAAGCTGACCCACG  
TCAAATCCGACAAAAGCCGAGCTATGGTGCAGCGATCAACGAATTAAGCGCAAGGAAAGCTGAGACGGGAGACGGCC  
CACCGCAGGTGAAGTATCTCAAATAACGTGATCGAGGCGATCACGAAAGCTCAAGATACTGATCAAGCCGGTGGCGG  
TTTTCAAATCGATCCCACGGCTATGCCAGATCAAGGATTCGAAGTATGCGAGCCCTGCGCAAAGGACAGGCTCGCC  
CCTGGTGCCTGCAGCCCGCATCAGGGCGAGGTGCGCCTTGTGGAGAGAGCTTTTGGCATTTGGGCCCTCGGCCCTGACG  
GAGCCATGGGCATGCTCAACCACCTTTCCGACGACGCGCCTGA

>Cluster\_58203

ATGCCGATTTATTCAGTCTGTTGAACGTGCGTTGAGATCCTCGACCTGTTCAACGAGCAGGCCACCGAGCTTAAGATCAC  
CGACATCAGCAAATGATGGGGCTGAGCAAGAGTACCTCCACTCGTGTCTAAAAACCTGCAGCTTACGGCTATATCG  
ATCAGAACCCTGGAGAACCGCAAGTATCGCTCGGCATGAGCTGGTCGAGCGCGCCATTTTGTCTGGGCTCATCGAT  
ATTCGGCAGAAAGGCAAAAGGCTGGCTGACGGAGCTGTCCGGCGGACCGGGCAGACCACCATCTGGGGATCTGGACGG  
GCGTGAAGGGGTCTATATCGAGAAGATTGAAGGCAAGCTGGCCGCCATCGCCTATTACGCGATCGGCCGCCGCTGCCGG  
TGCACGCCACCGCATCGGCAAGGTGTTGATTTGCCCTGGCTGGGCGAGGCCGAGCTGAACGCCCTGTGGAGGGCTATCAG  
TACATACCTTTTACGCCCGCCACCTCGCGTCTCGCGAAGCCTTAATGAGCGCCCTGGCGCAGACCCCGGACGAAAGGCTA  
CGCCCTGGACAGCGAAGAGAACGAGCAGGGCGTGGCTGCGTGGCGGTGCCGGTGTGGAACCACGAGTCCCGCTCATCG  
CCGCCCTGAGCCTGTGACGCTGACCTCCCGCTGGACGACCGGAGCTGGCTAATTTCCGCGAGCAGCTTACGACGGCC  
GGGCTCGCGCTCTCGCCGCGCTGGGCTACCCGGCCTGA

>Cluster\_5668

ATGCAATTGAGCAGCAGTGAACCTTGGCTGGTGTCTGACCGAAAAAGAGGTAGAGGTAAGCGTCAATAACCATGCTAC  
GTTTACCCTTCCGAAAAACTACCTGGCCGCTTTCGCGTCAACAAATACGTCATTGAACTCTCAACCTTAAATCACGAT  
TAATCACCCATCAACCGTAACATCATCAACGATTTCTGTTTTTAAATAAGAACTTAACCTGTGTAAGCCCTGG  
TCGCGGCTGGCAACCCCGTTATCGCTTGTCTATAGCCGATACCCGGAAGTGTTCGGCTAGCCGCAACCAAGCAAGCA  
GCAACCCAGCAGACCTTGGGAAGCGGAGTTGACGCGCGATTTGCTTTTACCCTATTGCTAACTTTCTTGGCAATCGC  
GGTTTATTGCCCTACTGATGATATCTTACGACGAGCGTCCGCGACAGCGTCTGCGCATTAATCAAAGCGATATTCAG  
CATTACTGGAATCTCGGAATTTGTCGCAAGTTCGCTATGTTTAAAGCCAGCTGCTCAAAAAGAAATTAATAAACGAAAA  
TACCAGCTATAGCCAGATTTGTCACAGAGTGTGCTATGCGTTACGCCGTACAGATGTTATTTGATGGATAACAAAAATATCA  
CTCAGGTGGCGCAATTAATGTTGCTATAGCAGCAGTCTGTTTATCTCTGTTTTTAAAGCGTTTTTACGGCCTGACACCG  
TTGAATATCTCGCCAAACAGCGACAAAAGTATGTTGGTGA

>Cluster\_53586

ATGCAAACTGAGCAACAGCGAGCCGTAACACGGCTTTGATATCCAGTGTGGATTATTTCTTTTGGCAACATGGTGGGAAAG  
CGGCTTGGTTGATGAGCTTTCCTCACGACTGGGTCGGGCGTGGGAATGGACAGCGTCAAGGTTCTATCTCTCGAAGC  
CCATCGTGTGACAACCAATTAAGATGGGCAATGCCTGACATCGACACGTAATAAATACAGTACGCGGCAATTAATGAT  
GTGGTACTGAAAGTCCAGCACATTTGTAATTTGGCGGACATCTGCTGGATTACAAGGCGTGAAGAAACGATTTTAA  
CCAAATTCAGCCATTACGTTACCAAGATGGCTGGTAGCCTTAATGGTTGGCTTTCTGCGCCTGTTTCTGTAAACTCA  
ATAACGGTGGCTGGGATGGTGGCTCATCACTTCTTTGCCAGTACGGCCGCGATGATATCCGCCAGCTGCTGGCACAA  
CGTCATCTTCAATCCACAGATCAACTTTTGCCTCACCGCTTTCGCCGCCACCACTTTCCGGATTTGCTTTTGCACCTCC  
CACTTTACGAAATACCCACCAATTTGCGATGGCCGCGCAGCTTCTGCTGCTGGTGGCCGGCTTTCCGTTGATAAATGCCG  
TCGCCGATATGTTTTAAAGGCCACATCAATACCGACTGGCACGCTGGGAATCGCCAGTCTGCTGACACTGGCTACCTGT  
GTCGGCGTAGTAATGGCACTGACGATTTGGGGCTACGCGGATGGGTGTA

>Cluster\_550

ATGATAAAACCGAGCTTATTTAGCGCGGCCATTTTACGCGATTTGCCGCTTATGCGGGTTAACTTCCATTACCGCGGG  
CTACGATTTTACCGATTATCTGGCGATCATGGCAACCGTAATTTAGCGTATGCTGAACTGGTGGCGAAAGTTGAAAACG

CAACGCTGCTTTTTAATCTTTCCAGGGCGTCTGATTATGAACTGAACATTTCAATGCCACTCGCGGTGAGGGTGGC  
GTCTGGTATAAATGGAATAACTGGCTGACAACCCGAACGGTATTGCCTTGGGATAATACGCCGGTCTTTGCCCGCA  
GGATTTTCGTCAGGATATTAACCTGGCCCTGTTGCCAAAACGCTTTTACAGCCGGTATCGCTACACTAAATATTACG  
ATGATGTCGAAGTCGATGCTGGCAAGCGGGTATCACTCTACTGCCCCGGTATCACCAGCTACCGCTATACCCAT  
TATGACTCCAGCGATGACGGTGGTAGTTATAGCAATGATTTCCGTGCGTCTGAATGACCCGCGCGACTGTTTATAC  
GCAACTATGGCTAAGCCGCGAACAGGGCTTACACTGATGACTGGACGCCAGAAAACGCTACGGCAGCATGAAGAGCG  
TCAGTTTGAACGATATTAACCCGTGACTGAGCAACTTAATCTCGGGCTGACGGCAGGTAAGTGTGGTACGACACCCCA  
ACCGATGATTATAACGGTCTGCAACTTGCAGCCATCTGACCTGGAAATCTGA

>Cluster\_57579

ATGCGCGAAAGGGTATCGCAGCAGTTAAAAGAAATGAACGGCGGTATGATGTGAAAGTACTGTACGCCCTGTGAATCAGG  
GAGCCGCGGTGGGGATTGCGCTCGCCGACAGCGACTACGATGACGGTTTTTGTATGTTACCCCGTGGAAATGGTATC  
TGGCAGTAGAGTACCCGCGGATGTTATGAGCTGCCATCGACGACGAGTTAGATGTTTCCGGTGGGAGTGGCGTAAG  
GCGCTGGGATTAATGAAAGGCGCAACCCGACGCTGATAGAATGGCTGGATTCTCCGGTGAATTTATCAACAAGATGAAGA  
AACGATAACGGCGTTAAGGCAATGGTCCCAATGTGGTTTTCTCCGTGCGTGGCGGTGGCATTACTATTTCGATGGCGC  
AGAAAACTTCCCGGATATTTGAGGGCGACGAGTTGACTGAAAAATACTTTTACTGTGCTGCGTCCGCTGCTGGCC  
GTGCGCTGGTGAAGCGGGTAAAGGGTACCAGCAATGCGCTTGTGAGTTACTGGCGGAAGCGAATGATGCTGGCC  
TTTACGCTGCAGAAATAGACGAAATTAAGTGAACGTAACAGCGCGCAGGAGAAGCGAAATATGGTCCCGCCCTCAATTT  
TACATGCGTTTATTCGTGCGGAACAGGCGGTGGGAAATTCACCGCTGTTACCGGATAGCAGAGAAGGGGACGTTAAG  
GAACTGGATAGCTTAATGTACCAGACGGTAATGCGCCGGGCATAA

>Cluster\_6847

GTGTTTAAATCTGACAACCTGAGACTCGACGAAAAATGCGCCATCATCACAGGTGCGGGTGCAGGTATTGGTAAAAGAAAT  
CGCCATTACATTCGCGACAGCTGGCGCATCTGTGGTGGTCACTGATATTAACCGCGACGAGCTAACCATGTTGTAGACG  
AAATTCACAACACTGGGTGGTCAAGCATTTGCCCTGCCGTTGTGATATTACTTCCGAACAGGAACCTCTCTGCCTGGCAGC  
TTTGGCTATCAGTAAGTGGTAAAGTTGATATTCTGGTTAACCAACCGGTGGCGGTGACCTAAACCCGTTGATATGCC  
AATGGCGGATTTTCGCGGTCTTATGAACTGAATGTGTTTTCTTTTTCCATCTGTCACAACCTGTTGGCGCCAGAAATGG  
AAAAAATGGCGGTGGCGTTATTCTGACCATCACTTCTATGGCGGCAGAAAAATAAAAAATATAAACATGACTTCCATATGCA  
TCATCTAAAGCTGCGCCAGTCACTGCTCAGAAAATATGGCGTTGACTGGGTGAAAAAATATTCGGGTAAATGGCAT  
TGGCGTGGGGCAATATTAAACCGATGCGCTGAAATCGTTATTACACCAGAAATGAAACAAAAAATGTTACAGCACCC  
CGATCAGACGCTTGGCCAAACCGCAAGATATTGCTAACGACGCTGTTCTTTGCTCGCTGCTGCGAGCTGGGTAAGC  
GGCAAAATCTCACCGTCTCCGGTGGTGGGTACAGGACTCAATTA

>Cluster\_23879

ATGAAACTGACAACACATCATCTACGGGCGGGGCCGATTATTAAGTGGCAGGAGTTCGCTGGCAGGTGCGACAGAG  
CAGCAGCGATGAAAAGCATATTAAGTTGGCGTTATTAATGGCGCAGAACAGATGTCGCGGAAGTCCGTAATAAGGTAG  
CAAAAGAGAAATATGGCCTCGATGTTGAACTGGTAGGATTTAGCGGTTGCTTACCGAAGCATGCGACAAATCATGGC  
GAGCTTGATGCGAACCTTCCAGCATCGACCTTTCTTGAACAAGATAATCAGACGCGATGGTTATAAATGGTAGCGGT  
GGGAAATACGTTCTTCCCATGGCGGGTATTCAAAAAATCAAAACCGTGGCGCAAAATAAAGAAAGTGGCGACAG  
TGGCGATCCCAACGACCCGACTAACCTTGGTGGCGGCTTTTACTGCTGCAAAAAGAGAAGCTAATTACTCTGAAAGAG  
GGAAAAGGTTATTAACCTACCGGCTGGATATAACGATTAATCCACGCAATTTGCAGATAATGGAGCTGGAAGGGGCGACA  
GTTGCCACGCTGACTGCGAACCGTTCGCGAAGTGGATGTAGCGATTATCAGCACCACTTACATCCAGCAACAGGACTTTCTC  
CGGTTAACGACAGCTATTTATTGAAGATAAAAAATTCGCGGATGTTGAAATATTCTGGTGGCACGGGAAGATAATAAGAA  
GCAGAAAACGTGAAGAAATTTCTGCAATCTTATCAATCACCCGAAAGTTCGTAAGCGGCAAGAACCATTTTAAACGGTGG  
CGCGGTGCTGGCTGGTAA

>Cluster\_18588

ATGGCAGTTGTTAAATGTAACCACATCTCCGGGTCGTCGCCAGTAGTTAAAGTGGTTAACCTGAGCTGCACAAGGG  
CAAACCTTTTGTCCGTTGCTGGAAAAAACAGCAAAATCCGGTGGTCCGTAACAACAATGGCCGTATCACCACCTCGTCATA  
TCGGTGGTGGCCACAAGCAGGCTTACCGTATTGTTGACTTCAACCGCAACAAGAGCGGTATCCCGGCGAGTTGTTGACGCT  
CTTGAGTACGATCCGAACCGTTCCGCGAACATCGCGCTGGTTCTGTACAAAGACGGTGAACCGCTTACATCCCTGGCCCC  
TAAAGGCTGAAAGCTGGCGACAGATTACGCTGCGGTTGATGCTGCAATCAAACAGGTAACCCCTGCCGATGCGCA  
ACATCCCGGTTGGTTCTACTGTTTATAACGTTAGAAATGAAACAGGTAAGAGCGGTCAGCTGGCACGTTCCCGTGGTACT  
TACGTTACAGTCTGCTGCTGATGGTCTTATGTCACCCCTGCGTCTGCGTTCGGTGAATGCGTAAAGTAGAAGCAGA  
TTCGCGTGCACACTCGGGCGAAGTTGGCAATGCTGAGCATATGCTGCGGTTCTGGGTAAGCAGGTTGCTGCACGCTGGC  
GTGGTGTCTGCCAGCCTTCCGCGTACCGGATGAACCCGTTAGACCACCCACATGGTGGTGGTGAAGGTCGTAACCTT  
GGTAAGCACCCGTTAACTCCGTTGGGCGCTTACAGACAAAGGTAAGAAGACCCGACGAAACAAGCGTACTGATAAATTCAT  
CGTACGTCGCGGTAGCAATAA

>Cluster\_34998

ATGTCAGTATTTGGTGTATCCAGGAGCGGTTATTACAACCTGGGTACAGCATGAACCTCAGACAGAAAACAAGTGA  
TGAGCGGCTAAAACCTGGAGATTAAGGTGGCACAATATCCGCATCGCGAAACATATGGAACCCGCGGCTCCAGACGGAGC  
TGGCAGAGAAATGGCATCATCGTTGGTGGTACCGACTGGCAGCTCTTCTGTAAGGAGCTAAGGCTACGCTGTAAGCAGAAA  
CGCAAGTTCCAGAGCGACTACGAACTCGAACCAATCTGCCAGTTGGCGCAAAATCTGCTGAACCCAGACGTTCCGCTCCATC  
AGCACAAATCAGGCTGGGTGGCGGACCTGACGATGTTGTCACACAGGAGGATGGTTGTACCTCGCTGGCATCAAAG  
ATGTTTATACGTCGAAATTTGTCGGCTACGCCATGGGAGAGCGCATGACAAAAGAGCTGACAGGTAAGCCCTGTTTATG  
GCGCTCAGGAGCCAGCGCCACCTGCGGGCTAATCCACACTCCGATCGAGGTTACAGTACTGCGCATACGATACGATACCG  
GGTCATACAGGAGCAGTTTGGTCTGAAAACATCAATGTCGCGTAAAGGTAACCTGTTACGACAACGCTCCGATGAAAAGCT  
TCTGGGAAACGCTGAAAAATGAGAGCCTGAGGCACTATCGTTTTAAGAGCCGGAATGAAGCCATCTCAGTAATACGGGAA  
TACATTGAGATTTTCTACAATCGTCAGCGTCTCACTCTGCTGCGGAAATATCTCCCGACAGCCTTACGGGAAAAATA  
TCATCAGATGGCTGCTTAA

>Cluster\_7102

ATGATTTACATCGGTTACCGCAATGGTGCATCCTAAATGGGTGCGGTTGGGATCACCAGCCTTGAAGAGTATGCCCG  
CCACTTTAATGCTGGAGGGCAACACCAGCTTTACGCCCTGCCGAACCCGAGGTTGCTTCCGCTGGCGTGAGCAGAGA  
CCACAGATGACTTCCGCTTCTGTTTAAAGTTTCCGGCGCAATTTCCGATCAGGACGATACCGCATGCGTATGATTTA  
GTGACTGAATTTTGGCCGATGTCACCGTTGGCTCCGCGCATTTGGCAATACTGGCTGCAACTGCCCTGCCACATTCGG  
CCCACGGGAGCTGCTGCGCTTTGGCATTCTCGATTCTTCTTCCGCAATTTAATATGGCGTGGAAAGTCCGCCATTC  
CACAGTTTTTCCGCAAGGAGAAGAAACAACGCTTAACTCGCGTTTACATCAGCGCGGCTTAACTCGGTTGATTTTAA  
GACAGCCGCGCGGTTATGTCAGCACGCTCACACAGTGAAGCTATTGCGGACGCTCAACGAAAAAACCTAAAGTTCCCGT  
ACATGCTGTACTGACGGCGACAAATCCGCTGATCCGTTTTATCCGTTAGTATGATGATGACGCAAAACCGGAAATATTTT  
AGGCTGTTTACAAAAATGAGCGAGTGGCATCAGACCACTACGCTTATCTTTTTTACATACGCCAGACATTTGCCAG  
GCACCGAACTGGTACATACCCCTGTGGGAAAGCTTACGTAACAGCTTCCAGAGATCGGAGCAGTTCCGGCTATTCACA  
GCAATCTTCTTTTCTGA

>Cluster\_34937

ATGTTTGTTCCTGTTTCTCATATTATGTGCGCGAAGGACTTGAAGCCGCGCTGATTGTCAGTTTGATTGCCAGCTATCTTAA  
GCGTACCCAGCGAGGCCGATGGATTGGTGTGATGGATTGGCGTGTGCTTGGCCGCTGCGTTGTGCCGTTGGGCTTGGGTA  
TCTTCATTAACGAAACCACCGGCGAATTTCCGCAAAAAGAACAGGAACGTTTGAAGGTATCGTGGCGGTGATCGCCGTG  
GTGATCCCTTACCTGGATGGTTTTCTGGATGGCGAAAAGTGTGCGCAACGCTCAAAGTGCAACTGGAAACAGGCAGTCGATAG  
CGCATTTGACGCTGAAATCATCATGGCTGGGCGTGGTGTGATGGTCTTTTTTGGCCGTGCAAGGGAAGGGCTGGAGT  
CGGTCTTTTTCTGCTGGCGGCATTTCAACAAGATGTCGGGATCTGGCCGCGCTGGGTGCAATGCTCGGTCTTGCTACT  
GCCGTGGTGTAGGCTTCTGCTCTACTGGGCGGTATTCGCCCAATCTTGGTGCATTTTTTAAATGACCAGCCTGTT  
TATTCTCTTCGTGCGCGCAGGGCTGGCAGCTGGTGCCATTCGCGCATTTTCATGAAGCCGGATTGTGGAACCACTTTCAGG  
AAATCGCCTTCGATATGATGGTGGTGTCTCAACTCAGTCTGTTTGGCACGCTGATGGAAGGGATTTTTGGCTATCAG  
GAAGCGCCGAGGCTCAGCGAAGTGCCTGCTGGTTATTTATCTCATCCCGGCGTGGTGGCATTTGCTCTGCCACCAG  
CGCAGGGCGACAGGCTCTGCTCCGCGTAA

>Cluster\_57856

ATGTCATATGCCAATAAGCAATGCCTTCAGAGTCAAATATTACAGATAATCACTTCCCTCATACCCAAAAGTCGACAA  
TGAGTTAACACGTAATAATGAACGAGCTCGCCTGGATACGGAAAATATCTATCTTCTGCTCTTGCTCGTGGCAATAACC  
ATAATTACGATGGAAAAGCGTTGTGCAAAATTAGAAAACCTTGATATTAGTAAAGAGTCTTGGCCATTTAATTAATGTGACA  
GAAGCATGCAGAAATCCGATGGTATTACAACAACAGGAGCTATGCTCTATCGAAACTTGAAAATCACCTCAGCTTTAGA  
CGAAATATATGGTGGTATATGTAAAAGGCGCATGCTGCTACAGAATTAGCAGAAGGTTTACGGTAAATTTTATATAGA  
AGAGCCCTTTCGATCCTGTTGAGGACTATACAGTTCATGAAATAACATTAGGCCCTGGTTGCAATGTTCCAGGTTACGCC  
GGAACCACGATAGGATATATTTCAACCTTCCAGTTTCTCAGGCAAAAAGATGGACCAATGAGCAGCCAAGAATTGATAT  
CTATATTGATCAGATAATAACTGTCTCAGGGGTAGCAAATTTCTCCGGATTTCGCCCTTGGCCATTTAATGCTAATA  
TTGGAATGGGAAATGACCAATAATTGGTATAGAAAGCTTATCCCGGTACCGCGGAGATCCATGCAAAAATGGGATATAAC  
GTTATCCCGGTGATGAAGATGCCACCTCAAACGATGACTTGAACCGCTCATCTCTCCAGAACTGTTTGAATATAA  
AAATGGTGAATGGAATTAATTGGTAAATAG

>Cluster\_34156

ATGACCCGCTGGCTTCGCGCTTTGGCGCAGCAAACTTATCCGTCGCGACCGCCGTTAACCCGTGAGGAGCTGTTTCG  
CGTGGTGCACGATGTTTTCAGCGAGGACAAACATGAATCCCGCAGTGAGCGTTATACCTATATACCTACCATCTCCCTGC  
TCGACAGCCTACAGCGAGAAGGCTTCCAGCCATTTCTTTGCCTGTCAGACCCGCGTGGCTGACCCCGGTCGTGAACT  
ACAAAGCATATGCTGCGTCTGCGCGTGGAGGCGAGATFACCGGTAACAGGTACCAGAAATTTCTCTGCTCACTCCCA  
CGATGGCACCAGTTCGATATCAGATGTTGCGGGACTATTTCTGCGGTTTGTGACAGCGGCTCGTCTGCGGTGAGTCGT  
TTGGCGAGGTGCGGGTGCACACAGGGGGACGTGGTGTGAGTCAAGTGAATGAAGGCGCTATGAGGTGCTGGGGATTTT  
GACCGGTGGAGGAGAAACGGGATGCCATGTCAGTCTGTTGCTGTTGCCACCCCGGCACAGCAGGCACTGGCAAAAAGCCG  
CCTCACATACCGCTTTGGTGAAGACCACAGCCGCTGACTGAATCGCAGATCCCTCCCTCGCCGCTGGCAGGATGAGA  
GCAATGACCTGTGGACCAGTACCAGGCTATTCAGGAGAACCTGATTAAGGGCGGGCTCAGTAGCCGTAATGCCAAAGGA  
GGACGGTACATACCCGTCGCGTTCGCGGTATCGACGGGGACGTGAAACTTAAACCGGCACTGTGGGTGATGGCGAAGC  
CCTGCTACGCACTGCAGTGA

>Cluster\_42630

ATGATTTTACTCCCATACGACGATATGGGGCGATGATTTTATGTTACTCACCTGTTGTTTTCGAGTGAGGTGTTAGC  
GAAGACGCACACAACAGCAGGCTCAAAGTCCCACTTAACTAAAGCTAGTAATAAACAGGTAAAGCAGTAAACAGAGT  
ATTTCTGCAATAGTGCAAAAGTAGTTCACTTCTGATTTGCGAAAATACCTTCCGGAACACCAAGGAAAAGGCGTTT  
CTCCGGACTGTAATGCCTTACATTTACCAGCCAAAATGCGGCCAATTAAGTGCAGAACGTAACCTGGCTGATTTCAAACAGTA  
TCAGGGCCAAATGGTCACTGCTGAGCGTGGCGCTGTAAGACATCGCCAAACGCTACAGGTGAAGTGGTCTGGTAATA  
CGCGAAAATCCCGTGAATAACCTTGTGTAACCGCTAGACATTTATCCCTACCAGTATGGTGGCGACGATGGCTGCAGCA  
GAAAAGCGGTTGGGGAACGTCGAAGCTGGCGCAACAACAACAACTTTTTCGGCATGAAATGCATGAAAGGACGTTGTAC  
CAATGCGCCGGTAAAGTAAAGGGTACTCACAGTTTAGTCTGTCAAAGAATCGGTGAGCGCCTATGCTCACTAACCTCA  
ATACGCACCCGGCTTACTCTTCCGTTCCGTAATCGCGTGCACAACCTGCGTAAAGCGGATCAGGAAAGTACTGCACAGCG  
ATGATTCACAAGCTGAAGGGTACTCGACCAAAAGGGAAGGTTATAACAACCTACCTGTTTCGCAATGTACCAGGATAACCA  
ACGGTTAATCGCGCGCATATGTAA

>Cluster\_25650

ATGAGCATTAATTAATTCGCGTAGACATGGATGGTACTTTCTTAAGCGATCAAAAACCTATAACCCGTGAGCGGTTTAT  
GGCTCAGTATCAGCAATGAAAGCACAAGGCATTCGCTTTGTGGTTCGCCAGCGGGAATCAATATTACAGTTGATCTCTT  
TCTTTCTGAAATTTGCTAATGAAATGGCTTTGTGGCTGAAAACCGCGCTGGGTAGTGAGCGAAGGCAAGAGATGTTTTT  
AATGGCGAGCTGTGCAAGGATGCGTTTACTACTGCTGTTGGAACATTTGCTGACGCGCCGGAAGTGGAAATTAATGCTTG  
CGGAAAATATAGCCCTATACCTCAAAAATATGACGATGCCATGAAAACCGTGGCGGAAATGATTTATCACCGTCTGG  
AATACGTCGATAACTTTGACAACCTAGAAGATATCTTCTTAAATTTGGCCTTAATCTCTCTGACGAACTGATCCACAA  
GTGCAAAAAGCAATTTACATGAGGCACTCGCGCATATCTGATGAGTACCGTCCATACCGGCAACGGCAGCAGTGTGAT  
CCCGGTGTACATAAAGCAATGGCCTTCGCCAACTGCAGAAATATGGGGAATAGACGACAGCGAAGTGTGCTGTTT  
GCGATGGTGGTAAACGATATTGAGATGCTGCGTCAAGCAGGCTTTAGTTTGTCAATGAAAATGCCGGCAGCGCGTCTG  
GCAGCGCTAAATACCGGCGAGGCTCCAATAACCGTGAAGGCGTACTGGATGTGATCGATAAAGTCTTAAACACGAAGC  
GCCATTTAAGCAATAA

>Cluster\_3003

ATGCCCCGCGGAAAATATTTACAAAGCAAGTTCTTTTAACTATGTTTTTTCAGCGTTAGCTTATGCGATGGCATAATTC  
TTTTCAGAAAAGGTGTGATCGTATTATGGCTATCCAGACCTTTTATTAATAATAGACTTAAATACGCTATTGTATTCCG  
CTGTGTGGCTTTTGTTTTTTGTATTTTATTTCTCGCGCCTTATATGCGCGCTTGTGTTGATTTGAAAGGGAATAT  
TATGTTCCATTTATGATTTATAGTTGTTATGCTAATGGCTAATATTGTTATATAGGATTTTCAATGGCCTTTTGGTTA  
TTTTCTCGAAACTTCTGTGATGAGTGTTCAGGATATTTTATTTATTTGCTATGCTTTTGTGTTGAAATTAACAATGTTGTT  
CCATGCGCAATCTCATAGTAAAGACACGAACATATTTGAGAGACATTAGAAAATTTGGGAGGCTTGCAGAGTATAAGAAC  
GTATTTTATTTATATCGATTTAAAATCCTAAAGTACGCTTTTCTTTAGGGGTGATAACGTTGTTGATATTGAGCTATAC  
ATTCGGGAAGGTTACTGCATTTAAAATAACGAATATTATATGTTAGTGGTAGTAATAACTAAAGTGTGCTCAATTCAT  
TTGGTAGTGGTTTTGTTGTTGTTGATTTGAGTCAAATAGCGCAAAATTTGAAATTTGTTAATGATTTAAAAGGATGAGA  
TTCACAATCATGCTCTTAAAAGGAAATAGCTAAATTTAAAAGGGTGTTCGAAATACGTTTAAAATACCGGATTA

>Cluster\_9083

ATGTACCAGGTTGTTGCGCTGATTTAGATGGCAGGTTACTTTCTCCGACCATACGTTATCCCTTACGCCAAAAGAAAC  
TCTGAAGCTGCTCACCGCGCGGCATCAACTTTGTGTTGCGACCGGTCGTCACCACGTTGATGTTGGGCAAAATTCGCG  
ATAATCTGGAGATTAAGTCTTACATGATTACCTCCAATGGTGGCGCGTTCACGATCTGGATGGTAATCTGATTTTGTGCT  
CATAACCTGGATCGCGACATTTGCCAGGATCTGTTTGGCGTAGTCAACGACAATCCGGACATCATTACTAACGTTTATCG  
CGACGACGAATGGTTTATGAATCGCCATCGCCCGGAAGAGATGCGCTTTTAAAGAAGCGGTTTCCAAATACGCGCTGT  
ATGACCTGGATTACTGAGCGCGAAGGCTCAGCAAGGTGTTCTTCACTGCGATTTCCATGAACAACCTGCTGCCGCTG  
GAGCAGGCGATTAACGCTCGTTGGGCGATCGCTCAACGCTCAGTTTCTTACCTTAACTGTCTGGAAGTGTGCGGGG  
CGCGTTTTCAAAGGCCATGCGCTGGAAGCGGTGGCGAAGAACTGGGCTACAGCCTGAAGGATGATTTGCTTGGTTGTTG



ACGGGATGAACGACGCCGAAATGCTGTCGATGGCGGGGAAAGGCTGCATTATGGGCAGTGCCACCAGCGTCTGAAAGAC  
CTTCATCCCGAGCTGGAAGTGATTGGTACTAATGCCGACGCGCGGTGCCGATATATCGCGTAAACCTATTATTCGTA  
A

>Cluster\_40944

ATGATTAAGTGGCCCTGGAAAGTACAAGAATCAGCACATCAAACCTGCCCTCCCTGGCAGGAAGCATTATCGATCCCCCT  
TTTAAACGTGCTGACAGAACAGGAACAAAGCAAATAGTCGCTCTTGGCGAACGTTTTTTACAACAAAAACGGCTTGTTC  
CTTTACAGGGCTTTGAGCTGAATTCATTAAAGAGCTGCCGATAGCACCTTCTATTGCTGCCCCTTGGAGTTAGGA  
CTGGAATGGCTGGATGGTTTTTCAATGAAGTCTTAATTTATCCTGCGCCATTTGTTGGTTCGATGATGAATGGGAAGACGATGT  
CGTCTGGTGCATAAACCAACGATTTGTTTTCAGTCAGGTCAGAGCTGGCAGCAAGGGCCATCGTTTTGAACCTGGTTGGATA  
TACAAGATTCTTTTATGATGCTTCTGGTTTTAACCTGATTATTATCAAGTTCGCTCATAAGCTGGACACCCGTAACGGCGAT  
CGCGCCAGCGGAGTTCCTTTATFCCGTGCGTGGCTGGCTGGTGGAAACAGGATCTTCATGCTGCAATGAACAACAT  
TCAGGAAGAAATCGAATTTGGTTGGCGAGAATGCCGGGAGCATTGATGCTTATGCTGCCAGTGCCTGCTGAATGTTTTG  
CCGTACTTTCTGAATTTCTTTAGCGCCCAAGAACTTTTGGCTCCTCGTTTTCCCTTCTCATTTGTCGGCAACTGTTGCCAA  
TTTTATCAACAAGATCCTTTGCAGAGACTGCATCGACTAATAATACAGACTCGTTTTTCGGCGACGAATGTTTCATTA  
A

>Cluster\_41642

ATGAATAATCTGATGGTCTATTGATGGTATTGAAGTTCGTCGTGATGCTTATGGGCGTTACAGCCTGAACGATCTGCACAG  
GGCTGCCGCTTCTCTGGATAAGCATAAGCCTGCATTCTGGCTCCGCAATGAGCAAACTGAACGTTTAATAAGCGAGTTGC  
AGATTGCAACTCGGTCAATATAGAGCCAGTTAACGTTATTCTGGTGGTGAATAAACAGGGGACGATGCTGCAAGAA  
CTGGTGTATGCCATGCAATGTGGATCAGCCCGTCATTCCATCAGAAGGTGATCCGTACTTTGACATGGTAAACAGGCC  
ACCTGAAAAATTAACCGGACAGGCTGTCGACAAGATGCAGGCTGGCTGGCTGATTCTGCTGGACTTTATGCGCCGGAGTTAA  
ATCTGTCTAATCTTCAAGTCTTGGAGCTGTCAGAACTTCAGGAGGCTGTTGGCTTACCGAATCTGCGACCCGCTAT  
GCCATTGATGCTCCTGCTGATGCACACGATGGCTCAAGTGCCTTACGCTGCTACTGAGTGCCTGCTGAAACAGTATGG  
TATCCGCTGACGGCTAATCAGGCATATCACCAGATGGTGAAGCTGGGGATCGTCGAGCAGCGGAACGATACAGCCGTA  
CCGGCATTAACAACATCAAAAAATTTCTGGTTCGCTGACAGCGAAAGGCTGCATGTTCCGCAAGAACATCACAGTCCCGCA  
AATCCGCGGAGACGCGAGCCGATTTCTTCAATCCGATTTCTGAGCTGTTAAAGCTGCTCGATACCGTTCATTA  
A

>Cluster\_40181

ATGATCGAAACGCTACTTGAAGTGCCTAATTAAGTAAACGTTCCGCTACCGGACCGGCTGGTTTTGCTGCTCAGACCGT  
AGAAGCGTTAAACCCCTTGGCTTTACGCTACGTGAAGGCGAGACACTGGCGATTATCGGCGAGAATGGTTCCGGTAAAT  
CCACGCTGGCAAAAATGCTGGCGGGAATGATAGAACCAGCAGCGCGAGTTATTGATTGACGATCATCCGCTGCATTTT  
GGCGATTATCTCTCCGAGTCAGCGTATTCGCATGATTTTTCAGGATCCTTCCGACTCGTTGATCCCGTCAACGTA  
CTCGCAAATTTGGATTTTCCACTGCGCTGAACACCGACCTGGAAACGAGCGTCGCAACAGATTATTGAAACGA  
TGGTATGGTTGGCTGCTACCGGATCAGCTCAGTTACTATCCGCATATGTTAGCACCCGCGCAAAAACAGCGCTGGGT  
CTGGCGCGCGCTGATATTGCGCCAAAAGTCAATATTGCGGATGAAGCCCTCGCTCACTGGATATGTCGATGCGTTT  
GCAGTTGATTAATCTGATGCTGGAGTTACAGGAAAAACAGGGCATTTCGTATATTTATGTTACCCAGCATATCCGAATGA  
TGAAGCACATTAGCGACAGGTGCTGGTGCATCAGGGCGAGGTTGTCGAGCGAGGACCCGAGATGTCGTTGGCA  
TCGCGCTGCATGAACCTACCAAACGGCTGATCGCCGGTCAATTTGGCGAGGCTTACGCGCGGATGCTGGCGTAAAGGA  
CCGTTAG

>Cluster\_27363

ATGAAACGTTTAAATAGCCTGTTTTATGGTTTCCCGCTGCTGCTGGGAGTTCTCTTTTTTGTGCGCATGCTGGCGGGATT  
TATCGACTCGATTGCCGGTGGCGGAGGGTTACTCACCAATTCGCGCATTTGATGGCGCGGGGATGCTCCCGCTAACCGCC  
TGGCAACCAATAAAGCTGAAGCCTGTGGTGGCTTATTTCCCGCACTATCTACTTTATTCGCGTAAAGTGGTTAGTTTA  
AGCGATCAAAAACCTAATATCGCCATGACCTTTTGTGGCTCAATGAGTGGCGCACTGATGGTGAATACGTTTCCAGGCTGA  
TGTCTTACGGCAGATTTTGGCGATCCTCGTAATTTGATTCGTTCTTATTTCTTACTGATGCCAAAGGCTGGTGAAGAAG  
ATCGCCAGCGCGGATGTACGGTTTACCCTCGCGTAAATGTCAGGTGGTGGCTGGTTTTTACGATGGATTTTTTGGC  
CCGGCAGCGGATCGTTTTACGCGCTGGCTTCCGTTACGCTGTGCGGATTCAACTCGCCAAAGCCACTGCTCACGCCAA  
ATTTACTTAACGCAACGCTCAAAATTTGGCGGCTGCTGCTGTTTTATTTCTCGCGGCAAAAGTGAATTTGGCGACGGGCTTTG  
TGATGCTGGTGGGCGAGTTCTTCGCGCGCGCATGGGTTCAAGACTGGTGTGAGCAAAGGACAAAAGCTGATCCGCCCG  
ATGATCGTTATCGTCTCGCGGTGATGAGTGTAAATTTACTTTACGATAGCCATGGACAGGAGATCCTCCACTGGTTGGG  
GATGAACATA

>Cluster\_55486

GTGACAGAACCGTTAAACGAAACCCCTGAACATAACCGGAAATATGCCGTTTGTGATCTTATGGAACGCTGGCGGA  
AATCAAACCGCATCCCGATCAGGTGCTGCTGCTGACAATATTCTGCAAGGACTACAGTACTGGCAACCGCAAGTGATG  
GTGCATTGGCATTGATATCAGGGCGCTCAATGGTGGAGCTTGACGCACCTGGCAAAACCTTATCGCTTCCCGTTAGCGGGC  
GTGCATGGGGCGGAGCCCGTGCATCAATGGTAAACACATATCGTTTCTGCGGATGCGATTGCGCGTGATATTA  
GTGCAACTGCACTCAGTCACTCGTCAATCCCGCGCGGAGCTGGAGCGAAAGGGATGGCTTTTTCGCTGCAATTA  
GTCAGGCTCCGACGATGAAGACGATTAATGACATTAGCGCAACGATTAATCTCAGATCTGGCCACAAATGGCGTTACAG  
CAGGAAAGTGTGTTGTCGAGATCAAACCGAGAGGTACAGTAAAGGTGAGGCAATGCGACTTTTATGACAGGAACTCC  
CTTTATCGGGCGAAACCGTATTTCTGGCGATGATTTAACCGATGAATCTGGCTTCCGAGTCTGCACTTAACCGACTGGGG  
GAATGTCAGTAAAAATGGCACAGGTGCAACTCAGGCATCGATGGCAGCTGGCGGGTGTGCCGGATGCTGGAGCTGGCTT  
GAAATGATAACCACCGCATTAACAACAAAAAGAGAAAAATAACAGGAGTATGACTATGAGTCTGTTAGTCTGATATCTA  
A

>Cluster\_34480

ATGAAAGCATTTGGCGTAAACCGCGGTTGCTCGCGGTTTCTCTGCTTCCCTTCTCTTCTGCCAACCGCTTAGCGTTGCA  
GGCAAAACAGTATGGCGATTTTATGCTGCTATGCTTGGCCCTCCTCGGCAAAACCGGATTTTGGCAGAGTCAACACGATC  
GAAATCGTAACGAACGAGATGAATGTGCGCTGCAAAACCGCAACCAAAAGCTGATTTTCTGACCGTACATGCTCTG  
TGGCCAGGATTTGCCATAAATCGGTTGCTGCCCCGTTGGTGTGATGAACGCGCTGGATGCGCTTCCGTTGCGCTACTCGCC  
AATCCGAATCTACCAGAAGCGCGCCAGCCGAATGTGTTTACGCGGAAACCGGATTTACTGGAACCGCGGCTA  
AATTAAGTGAAGTCAATGCGGAGCTGGCGGACGTTCCGCTGGAACGCTACGAATATGCCAAACACGGTGCCTGCTTT  
GGTTTTGATCCGGACGCTACTTCCGTCAGATGGTACGCTGAATCAAGAAATTAAGAGAGCGAAGCCGAAAAATCCT  
TGGCGATAAATACCGTAAACAGTGAAGCGCGGCTGACTTTGACCGCCCTTTGCAAAAGCTGGGGAAGAGAACGCTGA  
AAGCAGTTAAGCTAACGTCAGGGTAAACCTGCGTATTTGACTGAAATTCAGATCTCGATCAAAAGCTGACGCCATCAAC  
GCTCCGCTTTCTGCAAACTCATTCTTGGCAACACCTCACCCAGGTAACGTGGCAAAACCTTTGTTGATGATAAAGCGGG  
TTATTA

>Cluster\_9306

ATGAATGATAATATACCTACAGCGGAAATCACAACAATCGACTTGTATTACAGAAAAAACATGCCATCTTTTTTAA  
CTTCACAGCAGGAGTATCTTACCTGAGAATGAGCTAGCATCTTACGTTATAATGTCGAGCAAAAATGATACTG  
TAATCATAAAGAAAGCTTATAAATGATATCCGTTATATCAATCAAGTCAATGTTTACAGTAAATCCTGTATGCAGT  
AATCATTTCTCATATTTATGGCGAGACAAAACCTATTTGCTCGCAACCTGGAACAGCAGATCAACAACGGACGAAGTTT  
TGCACAAATATCTCAGGATTTTATGCTTCAATTTCTTCAATATAGGATGGAAAAAAGGGCGGAAACGCCCTTAAAA

ATAAAATCCATTCTCATTCAATTTGTGTAAATCCTGATGAATTCCTTGGCAGACACAATTTCTTAAGTGCCCAATAACA  
TTATGCGTTCCAGAAAAAGGGTTTTTGTCAAGAACGCCTGAACTCCACATATGACTCTTTATGATAAGTCTGCGTT  
CATGAATCTCACAAGAGAACATCTACCCACCCCTCTCAGCAGGAAAAAGATAGTAAAAGAAATGATTAATGAAAGGAATA  
TGTGTATTTTGCACCATAAGTCAGCATTTCAATAATTATGGATGCAGACCAACAGAAACAGCATTTGTAATAA  
>Cluster\_23798  
ATGCGTCCAGCAGGCCGTAGCAATAATCAGGTGCGTCCCGTTACCTGACTCGTAACATACAAAAACATGCAGAAGGCTC  
GGTGTGGTGCATTTGGCGATACCAAGTATTGTGTACCGCCCTCTATGAAAGAGGCGTGCCGCGCTTCTGAAAGGTC  
AGGGCCAGGGCTGGATCACCGCAGAGTACGGTATGCTGCGCGTTCTACCCACACCCGTAACGCGCGTGAAGCGGCGAAA  
GGTAAGCAGGGTGGACGCACCATGGAAAATCCAGCGTTTGTATCGCCGCTGCTCTTCGCGCGGCACTAGATTTGAAAGCACT  
GGGTGAGTTCACCATTACGCTGGACTGCGACGTGCTTACGGCTGATGGTGGCACGCGTACCCTTCGATTACGGGTGCTC  
GCTGGCGCTGGCAGATGCGCTACAGAAGCTGGTGGAAAACGGCAAGCTGAAAACATAATGAAAGGGATGGTAGCC  
GCGGTCTGTGCGGATTTGTAACGGCGAAGCGGTTTGGCATGGAATATGTTGAAGACTCTGCCGACAGACCGACAT  
GAACTAGTGTGACGAGACGGCGTATCATTTGAAGTGGAGGGGACGGCAGAAAGGAAACCGCTTCCACAGCAAGAGT  
TACTACCTTGTGGCGTGGCCGAGGGGAAATCGAATCCATTGTAGCGACGCAGAAGGCGCGCTGGCAAACCTGA  
>Cluster\_17752  
ATGAATTTATTTGATCGTTTGTGCTGATCGCCGCTTTTGAATGAGCAACCTGCTGATGGTGGCGAGCTCCTGCTGCATC  
TGAACCCGACGATCAACTAGCGATAAATCCGGCACCAGCTGGCGATCCGGCTAAACAGAAAGGCGATAAGTCACAGCCTG  
GACTGAAAGCGACAAGCCTCAGGACGACAAGCCTATCGATGGCGATAAGCCAAAAGAGGAAAAGCCTGGTGAAGACAAG  
GATAAGAAGCCGGAAGGCGCTCCGGAGAAATACGAGTTCAAACAGCTGAAGGTCAGGAACTTATGCTGCGCGCTTGGAA  
TCAGTTGAGCCTATTCGCCCGCACTGAACCTGACTAATGAGCAGGCGCAGAAGATGGTGCATCTGTACGGCAGCAAGA  
TTATGCCAATGGTTCAGCAGCAGCAGGCGAAGCCTGGCAGAAAACACCCGAAACAGTGGGCTGCTGACGTTAAGGCGGAC  
AAGAAATCGGCGGAGACAATCTCACCGGTAACCTGAGCGCGCACAGCGTCTTGTCTCAGTTCGGTACACCTGAACT  
GAAAGAATATCTGAAAGGACCGGCGCTGGGTAATCACCTGAGCTGGTTAAAGCCTTCAATAAAAGTGGTAAGCCATGT  
CAGAAGACGGCATGGTAACCGGGAAGAAAGCGGTCAGCGTAGTGTGCCGAAGTGTCTATGGCAAATAA  
>Cluster\_21990  
ATGACAAACGATTTATATATAACGGTAAAAGGTTGACAGCTTCGGTACTGGTTCGCCACAGACTGAACATCCAGCTAT  
CACTATTACGCGTAAAGAACACGATGAAAGAATTAAGCTTGAGCAATCGCTAAAGATGTCACCAAGGAAATCATCTTTG  
TGTCTCTGAGCCCTCAAGAAATGCCAGATATCTGCAAGGTTGAAGCAGTACTTAACTTTGAAAAGAAAATTAACCCACTG  
CTGAAAGAACACGATTTAAACTTGATGACGCTTACAGCAAAGTTACCTGATGCAATCAGCTATTGAGCCGTCAGAAAT  
TGAGATTCAGGATGAATTTGACAGAAGCCGATGTTTTACTTACATACGAAGACAATGATGGTTTTGTTACTTTCCAG  
AAAACGTCACAGACGATGATGATGCTTCCGCTGGACATCGAATTTGTAAGATGGTTAAAGCTTCAAGAGGTGCTGGT  
CAGTTTATTTACAGCAACCAATAAGAGCGATGAAGAATCCGTTGAAATTTGCCAGACAGAATCTTAGCATCACGTAACA  
GCAACTTGAAAATGTTAAGTTGTGCTCTTAAGAGAGCTTACGGCTATGAAAGACCTTATTTCTGCATATGAAACGCAGA  
AGAAGGTTGCTATCCAGGCTGATATTGACAGTGTAGTGAAGATTTCTCAGAAAACCGCAAGGCACTTTGA  
>Cluster\_23549  
ATGCAAGAGAACTACAAGATTCTGGTGGTTGATGACGACATGCGCCTGCGCGCGCTGCTGGAACGTTATCTCACCGAACA  
AGGCTTCCAGGTTCAAGCGTCGCTAATGCAGAACAGATGGATCGCCTGCTGACTCGTGAATCTTCCATCTTATGGTAC  
TGGATTTGATGTTTACCTGGTGAAGATGGCTTGTGATTTGCGCAGCTCTTCGTAGCCAGAGCAATCCGATGCCGATCAT  
ATGGTTCAGCGGAAAGGGAAGTGGACCGTATCGTTGGCTGGAGATTGGCGCTGACGATTAACATCCAAAACCGTT  
TAACCCGCTGAAATGCTGGCCGCTTCTGCGGCTGCTGCGTCTGAGCCAGCAACGAACTGCCGGGCGCGCTCACAGG  
AAGAGCGGTAATTTGCTTTCGGTAAAGTTCAAACCTTACCTCGGTACCGGTGAAATGTTCCGCGAAGACGAGCCGATGCCG  
CTCACCATGTTGAGTTTTCGGTACTTAAGCGGCTGGTACGCCATCCGCGTGAAGCCGCTCTCCCGGATAAGCTGATGAA  
CCTTGGCGGTGGTGAATATTCGGCAATGGAAGCTCCATCGACTGACGATTTCCGCTGCGGCTGCGCGGATGGGAAAG  
AAGATCCGCGCATCCGCGTTACATTACAGACCGTCTGGGGTCTGGGCTACGCTTTGTACCGGACGGTTCTAAAGCATGA  
>Cluster\_30311  
ATGTTGATCTGTTCTGTACTACGCTGCGGCAAGGATTTTACGCCAAGATGCACAATGGCTTCATAAACAATTTGGTTC  
AATGCCCTCAATCTGCTTACTGATGCTGGAAGTATTGATGGTGAATACTGACCTTTGTTATTTGATGGCTGGTT  
GGTGGTCAAAAATGGAGTTATTTAAACCAAAACCATCCAGTAATCGGGAATCATGACATTTTATATTTGACATAGATGTT  
GTCATTACTGGAATAATGGATATTTTACAAAAGCTAAAATTTACCATGCTCAGGGAGTTTAAATCATCATGACCGTGT  
TAACCTCAATTTATGATGATTTCCGTTTCTGCAAAAGCAAAAATATGGGAGGAATTTACTGCCAATCTGAACAAAATA  
TGCAAGAATGCAAAAAGTGAAGATAAATGGGGTATCAAGGTTTTATCGGTAGTGTACTAAGCCAGACTTATGGCAGGAC  
ATTATCCAGATGCAATTTAAAGTTATAAATGCGATATAGCAACAAAATCAATGATTGGATACAAATCCAGACCTGGC  
AAAATCAGCAACTGGGAAAGTACCTGACAGTGTTCAGTTGTGTTTTACCGGTAGTCCACGCCCCCTGGCGACTGGTT  
TTAACTGGGTTCCATCTTTTCTTAAAAGATACGCTTTATGGCAAAGTAAAAATCTCAAAATTAAGGTTAAAGGTTAA  
>Cluster\_40100  
ATGCAAGTGGCGGAGGTGTAAGGTGATAACGCGTATTTCTTATGATGATGCGGATGTAACCGGCAATTTGGTGCCATTGA  
AGAACTACTCTTATGGTACGAGAACCAAGGGCGGCTTCTGCTGGCGGCGACGCTGGCTTGTGCGACTGATGAGGGACCGG  
TGTGGATCTTCGGTTATGGATCGTTGATGGAATCCGGCCTGGAGTTTACCAGTCTGTCACCGGTACACTGGTTGGA  
TGGCATCGCGCTTTTGGCTGCGTCTGACCGCGGGCGGGACTGCGCACCAGCCGGGACGAATGCTTGCATGAAGGA  
GGGCGGACGACCACAGGCGTCCGCTATCGACTGCCAGAGAGACGCTGGAGCAGGAATTAACCTGCTGTGGAAGCGGTG  
AGATGATTACCGGCTGTTATCTGCCAACCTGGTGTGAGCTTGTGATGATGGACGACAGTAAACGCCATTTGTGTTT  
ATTAAGACCCGCGCATCCAGAATATGAAATCTGACACCTGCGCTCAGGTATAGCGCCGTTGATTTGCGCGCGAGCGG  
TCCGCTGGGAACCAACGCACAATACCTGTTTCTACTGGAACAGGAGCTTATCAAACCTGGGAATGCAGGACGATGGGCTGA  
ATGATTTGCTGGTATCGGTAACCAACTGCTGGCGGAGAAATATCCGGATGGTGTGTTACGGCCGGGATTCGCTGA  
>Cluster\_5993  
ATGACAACATTAACAAGCATGGGTTATCTAGAACAATTCCTGAACTGTAACCTGGAGGTAAGGCAGCGCTGTGGCTT  
TGGTTGCGTTGTTTGTGCTTCTCCCATTTGTTGAGTATGAGCATGTAATCCCACATACGCTGATGCAAGGAGCACTCTC  
CAAATGCAATAGCACTACTTTGCTTACGCTGCCATGCGAAAGTAAACGAAACGCTTTTACTCTAAAAGAGAAAATTAATAA  
GCAATGGAATCTCCTGACGCTTACAAAAGGGAATGTGGCCGATATATTTGACTTTTCTGATAGGCATCCAAACAATAAT  
ATTTGGTGGTGGCAGCTTTGAAATCCTGTACTGTACCAATAATGTTTCAAATGAGCCATGTTTAAACCATTTGAAAGAAA  
ATAATGCTTTTCTTATTTTCCGGTAAATTTTACGATAGTCAAGGATTTGTTAATCTTGAATTAATTAAGAAATGAGTGGGTT  
TGTAGTGAAGGCAATGGGATGTTACGGTGTGGTCCTAGAATAACTATATAGAAAAGGAAAGGTCCTCGTTTAAAT  
TATTAAGTTGATGCGCTGAAAGATGATGTTGGAAGATAGATATGTTGGTTAAGGGGACTCGGATTTGATAGGACAGC  
AACCAAGCTAAGAGTCCGCTCCACATCAATTTCAACCTGTTGGAGTTTCAAATGCAATATTGGTTTCTGCTTTGGCTAA  
>Cluster\_57  
ATGGATTTTGTGATAGAGGCTTTTAAACAGGCTTTTTTCTTATCGTTAATTTAGATAGAGAACTTCTTGAGATCATCTT  
GCTTTCTTAAAGATATCTTTCTGCAATTTTATAGCTCTTTTTTGGAGTTCCGTTTGGGCTTCTTAGAATGA  
AAGATTTTCCAGGTAAGAGTTTGGTTATAATTTTTTTTTAAACCGGATGGGGCTGCCCTCTGTGGTGGTGGTCTTTTT  
CTTTATATGCTTTTTTCAAGAGTGGGCTTTAGGTTTTTAAACCTCTTTATACCCCTACCGCTATGGTAATCGCACA



GAGGCTGGCGGCCCGGCTCACCGAATTTTCATAAATCGAACGCCCTGAAAACCATGCGTAATCAGCCGACGCTGCAGG  
GAAATTGCTGGCGAAAGGCTCCTGGGATATCAACTGGTGGATGAACTGGTGGCGCAGCTGGCGATATTGTGCTGCCGA  
AGCCGCGTACAGCGGTTTCTTCAATACGCCGTGGACAGCATTTTGGCGAGCCGTGGAAATACGCCATCTGGTTTTACC  
GGTATCGCTACCAACGCTGCGTGAATCGACGCTACGCGACCGCTTTTCTGGAGTATTTCCGGCTGGTGCAGGAAGA  
CGCAACACACAGCGGGCGGAATTTGCACAGAAAGCGCGTGTTCATATCGAAACCTTTTGGCTGGGTGAGCG  
ACGTCGAAACGTTCTGCGACGCGTTTTCTCCACGTCCTTTGCTCGTATCGCTTAA

>Cluster\_12418

ATGCTGCTCAGTATCATTACCGTCGCCTTTCGCAATCTGGAAGGGATCGTCAAAAACCTACGCATCGCTGGCACATCTGGC  
GCAAGCGGTGATATCAGTTTGGAGTGGATTGTTGATGGCGGCTCCTCGGATGGTACGTCGGCGTTTCTTGAAGGCG  
TTAGTGGGGAACACCGGTTACGGTTTGTGAGCGAGCCGGATAACGGCATCTATGATGCGATGAACAAAGGCATCGCGATG  
GCGCGGGCGGTTTCGCGCTGTTCTCAACTCCGGGATATTTGCGATGCGGACGCGGCACATTTATCCGCCAGCTAAA  
AATGACAGAGCCAAACCATGGTCAATTTGGCGATGGCTGGTGGATTTTCGGCAATGGCAACAAAATAAGCGCCGGCAA  
AACCGGTTGGTATATTTATCACAGCCTGCCCGTAGTCATCAGCGGATATTCATTCCGCTCTCAGGACTGAATGCTCG  
CATTATGATTTGCAATATAAAATATCGTCTGATTACGCGTTGGCAGCCAAATATACAAGTCCGGTTACGCTTTTAAAA  
GTTGAGCGGTTGGTATCCGAGTTTCTATGGCGGAGTGTCAACGACGAATAATCTGGAATTTGTGTCGGGATGCCAAAA  
AAGTACAGCGCCAGATATTACACATGCCAAATTTTGGACCGGTTGTGAGAAATTTACGTCGCGCACACCGCTAAA  
ACAAAACCTTATATGGGAAAACGTAA

>Cluster\_11787

TTGTGACGCGAAATACGCCGGGCGTGAACCAAAGTCGGGGCTCTGCGGGCGCGCACTCTGGCTGAAATGCTGACTCA  
AACGGCGTCCCAGTAGCCGTTACCGTGCCGGACGCTGATGAAATATCTGAACCTGAGCAGTTGTCAGCCCGAAAA  
ATCAGTATAAAAAATGCCCGTCAGGAGCATACCAGCCTGCCGAATCTGCTTGAGCGTCAGTTTCGAGTACCGGACCGAGC  
CGGTATGGTGTGGAGATATTACGATCTCTGGCAGGAAATCGCTGGTGTCTATGCGGTTTATGGATCTTTTTC  
CCGAGGTTTATCGCTGGAGTCTGTACGCGCATGCCGATACCGCACTGATAAGCAGTCCCTGCGGATGGCTATGAGA  
CGCTGGCCAAACCGGGATGTCGTGTTCCATAGCGACAGGAAAGCCAGTATACAGGCTTAAATATCAACAACTTCT  
TGGCGTTGAGAAATAAATCAAAGCGTCAGTCGGCGGGGAAACTGCTGGGATAACAGCCCATGGAACGCTTCTTCCGCG  
TCTGAAAACAGAAATGGGTGCCAAGCAATGGTTACGAGCAAGGACGAGGCCCGGCGAGCAATTAATGATTACATATTGA  
ACTACTACAACAGCGTCAGACCTCACCATTTATAACGGTGGGCTGACGCCGGAAGAGTCAGAGAACAGATACCATTTTAC  
TGTAACCGTGGCAATATTACTTGA

>Cluster\_26311

ATGCTATACGCGCAGTCCGTATACCGTGACACCGGAAATTTCTTCCGTAATCAATTTATGACCATCTGTGGTATC  
GTTGCTATGTGCGTTTATCACAGTGGTGTAGGGCATGTTTCTCACCAGTATGACAGCTTGCGCAGTCAATGACG  
CGTACCCGTTAGCGGAGTAGTGGGTTTTCGACCTGTTTCAAGAAATGTCACCGGAACAGCAACAAATTTTGTCTCAG  
ACTTACGCGCGTCCACTTTTTCAGGATTAATCGGTAACGCCATTTCTCGCGGGGGCGTAATATTAATATCCAGCTGGT  
GTCGCGGCTCAGAGAGTCACTGCGCTGCGAGCTATTGGTGCCAGTGCCTGATATTGCCAAAGTATTTATTCTGATTT  
TTCTGACTACCTTTTAGTACAGATTGGCATATGCTGGTGGCTTCCGGGGATATCATGGCCATTTTACTGGCTCTG  
GCTCAGTGCCTGTTGATACAGCAAAAATGGGCTTTTTCGCTGATGCGTAGCAGTATGCGGCTGACATGGCGGAATAT  
GCGTCTGGTGGCACCCGAGTACGAGCTGGTGTGCGAAAAACACTGTTGCTGCTTTTTCCTTTTTCGCGCAT  
TAACCCCGGAAATTTGGTGCCTACTGGCGAACACCTTGAGCAACCTGATTTACGCGCTATTGCTCATCTGTTCCG  
CTGATATGTTGATTCGCCAATAA

>Cluster\_60786

ATGGCTATAGCACTTGTGACTGGTGGCAGTCCGGCATCGGGCGGCAACTGCATTACTGTTGGCGCAAGAAGGTATAC  
GGTGGCGGTTAATATCAGCAAAACCTCCACGCGGCGAGGAAGTATGAACTTAATAACGCAAGCCGGTGGCAAGCAT  
TCGTGCTCCAGCGGATATCAGCGACGAAAACAGTCTGCTTGCATGTTTACAGCAATCGATCAGCAGTGAACCGCTA  
GCAGCGTGGTCAATAACGCCGGGATCTTGTTTACCCAGTGCACCGTTGAAAACCTTACCGCAGAGCGAATCAACCGAGT  
ACTTTCACCAACGTCAGCGGATATTTCTGCTGCCGCGAGCGGTTAAAACGCATGGCGCTTAAAAATGGTGGCAGTG  
GCGGCGCTATCGTCAATGCTCTTCCGGTGGCTCACGGTTGGGTTCCGCGAGGGGAATATGTTGATTACGCGGCATCGAAA  
GGGCGGATGATACGTTAAACCCAGGACTATCGCTGGAAGTCCGCGCAGGGATCCGCGTTAACTGCGTGGCGGCGAGG  
GTTTATTTTATACCGAAATGCACGCCAGCGGGCGGAGCCTGGACGCGTGCATCGGTTAAGTCGAAACATCCCATGCAGC  
GTGGTGGACAGGCAAGAGGTCGCGCAGGCCATTGCTGCGTACTAAGTGATAAAGCCTCTTACGTCACGGGAAGTTTT  
ATCGATTTGGCGGGCGGAAATAA

>Cluster\_51530

ATGAAGCTTCGCCGTGCGGCGTGTCTCTGGAACTACGCTTCTGGTGGGGTGTGCGAGTTCCGGTACAGATCAGCAAGG  
GCGTCTGACCCGTTAGAAAGGTTTAAACCGCATATGTACAACCTCAACTTCAATGATATTAGACCCGATATTGTTCCGAC  
CGGTGCTGTCGCTGCGGTCGATGATGTTCCGCAACCTGCGGTAACGGTTTGGAGCACTTACCGGCAACCTTGAAGAA  
CTGCGGTTGATGGTTAACTACTTCTTGCAGGACCTTATCAGGGGATGGTCCACTTACCCGTTTTCGTAATAC  
CATTTTGGGAATGGCGGCTTTATGATGTTGCAGGATGGCAAAACCCGAAACGCAACGAGTGAACCTCACCGCTTCG  
GTAGTACGCTTGGTCAATATGTTGTTGTTATGGGCGTACGTTACGTTACCGTTCTACGGTAGCTTACGCTGCGTGT  
GACGGTGGTATGATGCGGATGATCTTTACCCGTTCTTTCCTGGCTGACTGGCCGATGCTCTGTGGTAAATGGACGCT  
TGAAGGGATGAAAACCTGTCGCGAGTTGTTGATTTCCGACGCTGCTGCGTCACTGCGTCCGATCCTTATATTATGTTG  
GTGAAGCGTACTTCCAGCGTCATGATTTTATCGCTAATGGCGTGAACCAACCCGAGGAAATCCGACCGCAAGG  
ATTCAGGATGATTTAAAAGATATCGATTCTGAATAA

>Cluster\_38894

ATGAATCTTAACAGTATTTCCGCTTTGATGACAATTACATCTGGGTTTTGAATGATGAAGCAGGTGCTGCTGATTGT  
CGATCCCGGGGACGAGGCGGATTTAAACCGCATTTCCGCCAATAACTGGCAACCGGAGGCATATTTCTCACCCACC  
ATCACACGATCAGTTGGCGGCGTAAAGAATGGTGGAAAAGTTTCCGCAAAATGTTGGTGTATGGACCACAAGACACA  
CAAGATAAGGGAAACAACAGGATGTCAGGATGGCGAAACTGCTTCTGTTTTGGGGCATGAATTTAGTGAATTTGCCAC  
ACCGGGTACACTTTAGGACATATCTGTTACTTACGTAACCTTATCTATTTTGGCGGACACGCTGTTTTCTGGTGGGT  
GTGGTCCGTTGTTGAAGGGACAGCATCACAAATGATCAATCACTTAAAAGTTAAGTGCCTTACCTGACGACATG  
GTATGTTGTCTCATGAATATACCTTATCAAATATGAAGTTTGGCTTGGATATCTTCCGACGATTTGTCCTAAATGA  
TTATATCTGATAAGGTTAAGGAGTTACGGCAAAAATCAAATAACACTACCCGTAATTTGAAAATGAGCCAAATTA  
ATGTTTTTTTAAAGCGGAAGATATGATTTAATTAATGTAATTAATGAAGAACATTTATGCAACAACTGAAGAGCGT  
TTTTGATGTTAAGGTCAAAAGAAAGATAGGTTCTGA

>Cluster\_27075

GTGAAAACAATAAGTGTGCTTATTCCTTCTTTAATTGCATTCAAACATAGATAAAGCATTGCAATCAGTATACGATCA  
AACTACAATTTATAGAGATCGTTGCGTTGATGATTGTTGACAGATAATACGATGAGCATATTAACAACAAATCATC  
CTTTTCGTAAGCTTTGTAAGAAATGACATTAATTTAGGTCAGCAGCAAGTCAAAAATAAGGTTTCCGTTATGTTCTGGT  
GAGTTTGGGCATTTTAGATGCTGACGACATATGGTTTTCCATAAAAACAAATATTCAAATGAGTTGATGATGATAAATA  
TGGGTTGGATTTTCACTGCGTCACTTTACCATTAATACTAATGATAATCCAAGCACTGATCCAGTTCGAAATATAAA  
AGCTTTATAACCTTTCGTTCAAGAAATTTTCCCAACTCCATCAGTAATAATGAAAAGAAATTTGGTTTTGCTTTAATGAA

TTACAACGGTTTTCTGAAGACTATGATTTATGGCTAAGTTAGCTAAAGATAAATGTATAATGGGTTATGTCAAAACACC  
ATTAATATCTCTTTGGCAAACCAAGTTATGGACACTCTGGGCTCAGTTCAAATTTGATTAAGATGCAAC TAGGTGAGATAT  
CTTCGATAAATAAAAATCTTAAAGGAAAGTGGATCTGTTTTTTGGCCATATCTGGTCTTTTATATAAATTTATTCGTAGA  
TTATGTGTGGTTTTATCCGGAAGTTATAA

>Cluster\_22509

ATGTCTTTAATAATATCCAGTCCAATGCTCGTCAGCACAGCGCTGATGGCAATGCTTACCACC GCCAGCTGACGGCGCA  
TGCAATCGGTACCCCGGATCGCACCCGCTGGTGTTTAACGAAAGCGATAAATCGATCAGCGTACGCTGCGCAATAACA  
ACGAAAAGCTGCCTTACCTGGCGCAAAGCTGGTGGAAGACGAGAAGGGCAACAAAATCACTTCGCGCTGGCGGTGCTG  
CCGCGGTGCAGCGTATTGACGCTATGATGAACGGCCAGGTGAAGATTAGCGCTGCGGACATTCACACGCTGCCGCT  
CGACCAGAAAAGCTGTTCTACTACAACGTGCGTGAGATCCCGCAAAGTCCGGGAAAGCCAACCCCTGCAATTTGCGC  
TGCAACCGCATCAAGCTGTTCTGGCGACCAAAGCGCTGGAGAAGATTGACATGAGAAAACCGTGGCAGTTTAAAGTTC  
ACACTACGCGCAGTGGCCAGGACTATACCGTCAATAACCCGACGCGTACCAGTCAATCATCAGCGATGCCAGCACACA  
GAAGAAAGCGCTGACCCGCGGTTTTAAACCGCTGGTGTGATGCCACCAGAAACGTCACAACCGTTAAAGGCAAAAATGG  
CGAGCGCCCGGTGCTGACCTATATCAACGACTACGGCGCGCATGCCGCTGATCTTCCGTTGTGAAGGAAACACCTGC  
AAGGTGGATGAAGATCAAAGCAGCAAAGTTGA

>Cluster\_32461

ATGGGTCTCGCGGTAATGATAGTCTGCGCATTATTGCTAAACGCCGTGGCTACC CGCTTTCAGAAAAGCAACCTTCGC  
TCAGGCTGTAAAGCGTTCTGGATGCCTTACCAAGTTTGTCTTCTGGTGTTCATTGTGATGGCGGCATTTCTGGGCGCA  
TTTTTACC GCAACTGAAGCGTCTCGGATGCGGTTGTCTACACATTTATCTCCTCGGTGCTGATTTACCGGGAAGTAAA  
TGGCGGATTTACCAAATGATCTGGAATCGGTTGTACCACTTCGATTGTATTACTGTTGATCGGTTTTTCCGTGGG  
CATGCTCTGGGCAATGACCAATGCTGATATTCCTTATATGATGACAGCGCGTGTGATGGGGATTTCTGATAACCCACTGG  
TCATATTGCTGCTGATTAATATCTGCTTTAATTAATGTCGGCATTTTATGGACATGACACCGGCTGTACTAATCTTACA  
CCAATCTTCTGGCGATTGCACAAGAGCTGGGAATGGAATCCGGTACATTTCCGTTATTAATGATGGTGGCTAACCTTTGAT  
TGGCTGTTAAACCCGCGGTGGTAGTGGCTATTTGTTGTTGTTGTTGTTGTTGTTGTTGTTGTTGTTGTTGTTGTTGTTG  
AACCATTGCTGCCATTTTATGCCGATTTGTTAATCGGCTTGTGATGATGATCACTTACATCCCGCAAATATCTTGTTCATT  
CCACAGCTACTAGGGCTAATGTAA

>Cluster\_46848

ATGGCCAATAAACTGAAAAGCCAAACAAAAGAACTCCAGGATGCTTCTAAAAAGGGCAAATTTAAAAAGTAGAGA  
CTTAACCATCTCTGTAATAATGCTTGTGGGTACTTTATATCTCGGATATGTTTTGATGTGCATCACATTATGTCGATTC  
TTGAATACATCTTGTATCATAACGCTAAACAGATATTTGGGACTATTTTAAAGCTATGGGGTTTGTGGTTGAAAACG  
AACATCTCTTTTTGTGGTTTGCATGTTCAACAACAATACTTGTCTCCGTTTCAAAGTAAATGCAATTAGCAACTGA  
AGCTGTTAAATTTAAGTTTGTATTGATTCATGAAATCCAGTAAATGGCTTAAAGCGTATATTTGGCTTAAAAACCGTAAAAGAA  
TTGTTAAAGCAATCTTTATATTGTTTTTTTTGTCATTGGCGATCAAAGTATTTTGGAGTAATCATAAATCACTGCTTTTT  
AAAACCTTGTGATGGAGATATCATATCTTTATTTATCAGATTGGGAGAGATGCTATTCCTTCTCATACTGTATTGCTCTCG  
CAGTATGATAATTTGCTTAAATTTTGTATTTATCGTGAATATTTTTTATTTAAGAAATATGAAAATGGATAAACAAG  
AAGTTAAAAGAGAATACAAGGAGCAAGAAGAAATCCAGAAATTAAGTCTAAACGCGAGAGCGCATCGAAAATCTTT  
CTGAGCAATTGA

>Cluster\_14548

ATGGCTGAGATGAAAACCTGAAAATTGAGGTGGTGGCTATAACCCGGAAGTCGATACCGCACCGCATAGCGCATTCCTA  
TGAAGTGCCTTATGACGCAACTACTCTACTTACTGGATGCGCTGGGCTACATCAAAGACAACCTGGCACCGGACTGAGTT  
ACCGTGGTCTTCCGCTATGGCGATTTGTGGTTCTTGGCGCATGATGGTTAACACGTCGCAAACTGGCATGTAAC  
TTCTCGCTGATTTACACCGCGGTATGAAGTTGAAGCTTAGCTAACCTCCGATTGAACCGCATCTGGTGGTGCAT  
GACCCACTTTCATCGAAAGTCTGGAAGCGATCAAACCGTACATCATCGCAACTCCGCACTCCGCGGATCGAAAGTCAACA  
TCCAGACCCCGGCGAGATGGCAAAGTATCACCAGTTCCTCGGTTGCATCAACTGTGGTCTGTGCTACGCCGCTGCCCG  
CAGTTTGGCTGAACCCAGAGTTTATCGGTCCGCTGCCATTACGCTGGCGCATCGTTATAACGAAGATAGCCGCGACCA  
CGGTAAGAAGGAGCGTATGGCGCAGTTGAACAGCCAGAACGGCGTATGGAGCTGACTTTCTGTTGGCTATTGCTCCGAAG  
TCTGCCCGAAACACGCTCGATCCGCTGCCGCCATTCAGCAGGGCAAAGTAGAAAAGTTTCAAAGACTTTCTTATCGCGACC  
CTGAAAACCGCTAA

>Cluster\_10146

ATGGCTACCAATGCAAAACCCGCTATAAACGCATTCTGCTTAAAGTTGAGTGGCGAAGCTCTGCAGGGCACTGAAGGCTT  
CGGTATTGATGCAAGCATACTGGATCGTATGGCTCAGGAAATCAAAGAAGTGGTGAACCTGGGTTATTCAGGTTGGTGTGG  
TGATTGGTGGGGTAACCTGTTCCGTTGGCGCTGGTCTGGCGAAAGCGGTATGAACCGCTTGTGGCGACACATGGGG  
ATGCTGGCGACCGTAATGAACGGCTGGCAATCGGTGATGCACTGCACCGCGCTATGTAACCGCTCGTCTGATGTCGCC  
TATTCATTTGAATGGCGTGTGCGACAGCTACAGCTGGGCGAAGCTATCAGCTGTTGGCGCAACAACCGTGTGGTGTATC  
TCTCCGCGGTACAGGTAACCCGTTCTTTACCACCGTACAGCAGCTTGCCTGCGTGGTATCGAAATTAAGAGCTGTTG  
GTGCTGAAAAGCAACAAAGTTGACGGCTGTTTACCCTGATCCGGCGAAAGTCCAACCGCAACCATGTACGAGCAACT  
GACTTACAGCGAAGTGTGGAAGAGAGCTGAAAGTCAATGGACCTGGCGGCTTACAGCTGGCTGATGACATAAATTA  
CGATTCGTGTTTTCAATATGAACAAACCGGTGCGCTGCCCGTGTGGTAAATGGGTGAAAAGAGGGACTTTAATCAG  
GAATAA

>Cluster\_62536

ATGAGCTATAACCAATCATATCAATTTAACAGATGAATTTGGATGAACCTATTTATAGAATTATGCCAATACATCGTTT  
TCTTCAATTTGCTTGAAGAAAAAATAAATTAACCTTTAGTAAGCAATAAAGTGGGATGATCCATTGAGAAATGCTTATTA  
ATAGTACAATCGAAACTTCTGATGGGAAAACAGGCACATTTCTCCGAAAAGATTCTGTTTATGGTCAATGCTGGACATTT  
CATAGTGAACCTGATGCAATGTGGCGGATATATCCCATGATAAAGATGGTGTAAAGATTCAACACACCAAGGAAAT  
ATTAACCTGCATTTCAACAGCAGAACAACCGCACATAAATTAAGTGTTTTATAGGCAAGGTTCTTATCTTCCAGAAA  
TCAATCTTCTAGAAAAGCTCATGTCAGTTAATTTATTAAGATACTGATGGTTTCAAGTATGCTGAATCACTTTTATATAA  
CGTGTGGAATTTGAACACGAAAACGAAGTTCTGTTAATTTATCTGGTGTGACAATGCAGTTAATAGTGATATTTTCCA  
ATTTACAATTAATCCAGGCGAACGTGTAGATTCGATTCCTTTGATCCAAAGATGGAGAAAAATTTAAGGCAAGCATACT  
TATTGGCAATTAAGGATAAAGGTTTTAAAGCTGAAGTAAAAATATCTACGTTATACGATGCGCCTAAGGGACTGGTATTT  
AAATTATAG

>Cluster\_41979

GTGAAGTTCAAAGTTATCGCCCTGGCGGCTAATGGGTTATTAGCGGGATGGCAGCGCAGGCTAACGAATTTGCCGATGG  
ACCGCATATTTGCTCACCCTCGGTACGGCAAGCTGGATCGGTTGCCAGACATTTGCCACTTTCGATTTGAAGTTAACGTTG  
CCGCGAAGGATGCCCTACTGCCAAGAAACAGGAGATGAGCGCTGCGCACAAATACATTTCTTCTTCTGAGCTCAATCAG  
ATCGGAAAAAGATATCAGCTCAGCGAAGTTACGCATCAGCAGATATGATATCAGGATGGTAAAGTATCCTGAA  
AGGCTACCGCGCAGTGAGAACGGTGAAGTACGCTCCGCTAGTATAGCAAACTGAATTTCTTGTGGACGGCGCGCTAA  
AGGCGGTTCTTAAAGCAATTTCTTGTGTGCTGGGCTGGCGAGCGGATGCCATAAAGACAAAGCGGCTAAGGCA  
CGGATTGATAACCGGATTCATCAGGCGCAGGAACTGGCGAATGGCTTTAATCGCAAACTGGGCGGTTATATAGCGTGGC  
TTATCATGTTTCCAATATCAGCCAGCCAAATGGTGGGATGATGAAAGCTGATGCTGCACCGGTGTCGCGACAGGAAA

CTTACGAGCAGGCCGCTATTTCAGTTTGTATGATCAGGTCGATGTAGTCTTCCAGTTAGAACCTGTGGATCAACCACCCGCT  
AAAACACCTGCTGCACATTA  
>Cluster\_7104  
ATGTCACCCGACACGCTATTTTCTGCCCCATCGCCAGACTGGGCGACTGGACCTTTGATGAACGGGTAGCTGAAGT  
TTCCCGGATATGATCCAGCGTTCCGTACCCGGCTATTCCAATATTATTTCCATGATTGGTATGTTAGCCGAGCGCTTCG  
TTCAACCTGGTACGAGGTTTACGATCTGGGTTGTTCTCTGGGCGCGGACGCTCTCGGTGCGTCGCAACATTCATCAT  
GATAATTGCAAAATATTGCCATCGACAACCTCCCGGCGATGATTGAACGCTGCGCTCATATTGACGCCATAAAGC  
CCCTACGCCAGTAGACGTCATTGAAGGTGATATTCGCGATATCGCCATTGAAAACGCATCGATGGTGGTGTGAATTTTA  
CCCTGCAATTTCTGGAACCTTCCGAGCGCCAGGCGTTACTGGATAAAATTTATCAAGGGCTGAACCCCGCGCGCGCTG  
GTGCTTTCGGAATAATTCAGTTTCAAGATGCCAAAGTTGGTGAACCTGTTGTTCAACATGCACCACGACTTTAAACGTGC  
CAACGGTTACAGCGAAGTGGAGATCAGCCAGAAAGCGCAGCATGCTGGAACGCTGATGCTGACCGATTCCGTGGAACCC  
ATAAAGCAGCCCTGCATAACGCCGTTTGGAGCATAGTGAGCTGTGGTCCAGTGCTTAACTTTGGTTTCACTGGTGGCA  
TTAAAGCAGAGGACGCTGCATGA  
>Cluster\_67037  
ATGTTGTTAAATCGTAAAAATAACTTTTATCGCTGCGATTGTTCTGGGGCGGTTTCTCCTGTCTGGCTGTGGTGGATGAG  
CACCAGCAATAAAAAGCGTAATCTGGAAGTCAAAACCCAGATGAGTGAACCACTCTGGCTTGAACCTTCCACTGATCGCA  
CTGTTTATCTGCAATCAAAAACACCTCCGATAAGGATATGAGCGGCCCTTCAAGGAAAAATTAACAGCCGAGGTCAGGCG  
AAAGGCTATCGTATCGTGAATAATCTCGCCAGCGCATTAAGTGGATTCAAGCGAACGTAAGGCGGATAAAATGGA  
TTTGGCGGGAAGCAGAGGCTTTCTGAGTCCGGGTCAGAGGGGCTGTTTCAAGGCTGCGGCTTGGGGGAGGCAATACAG  
CCTATAACTCCAATTTCTGCCGTGCCACGCTGGGGTGGGACTGGCTGCGGCTTGTGGGAATGGCGGCTGATGCGATG  
GTGGAAGATATCAACTACACCATGGTAACTGATGTGCAGATCGCAGAGCGCACTTCCGCGCAGGTGACGACTGCAATGT  
GGCTGCGCTGAAGCAGGGAACGTCGGGTTATAAAGTGCAGACCAGCAGTGAACAGGTACCAGCATAAATATCAGACGC  
GTATTGTGTCCAGTGCCAACAAAGTTAACTTGAATTTGAAGAAGCCAAACCGGTTCTTGAAGATCAGTTAGCAAAATCT  
ATTGCTAATATTCTGTAA  
>Cluster\_28068  
ATGAAATCACCGTTAATCAACAGGAATGATTTATTTACTGGGGATCTGCAACTTTGCCAGGCGACTGTCTCCCCGA  
CAGAACACGCATCATTTTAAATGCTTCGAAATAAAGCGCAACGGTTCGCTGACCAACCAAAGTAAAAATCGATCCCTATC  
TGGCTCAGTTCGTGGATTGAAGATGCCAGCGGTAATAAAGCGGTTGATTAACATCTCGACATTGCCCGCGATGGAACGTATT  
GAGCCTGATGAACAGGTACAAATTCGCCATGATGGCGCTAGCCTCGTTAAACAACCTTACCACAGGACAGAGAAACGCTGTT  
CTACTATAACGTACGGGAAATTCGCCCTCGCACATAAAGAACAGAAATGTGATGCAAAATGCCATGCAAAAGTCCGCTGAAAT  
TATTTCTGGCGTCCGAAAGCAATCGAATTAAGAAGGGCAGATGGTGCCTTTACAAAAAGTACAGATAACACGGACCGCT  
GCAGGGCTGACACTCAATAATCCACCGCTTATCACATCACCGTTCGTTATATCGGTACTAACGGCAAGACACTGATGCC  
CGGTGCGGACAGTATTATGGTGGCACCATTACTTCTGCAACTCAACACCTAAGCAGCTGCCCTCTACCTTCCAGTTAG  
GCTTTGTGGCGGACTACGGCGGGCTGGAGATGTTAAAGTCAATGTAATTCGTTCAATCCCTCTGCCAAAGCTCTCCT  
GCTAAGAAGGGGAAAAATATGA  
>Cluster\_37372  
ATGAACAAATTTATTAAGTTGCACTGGTAGGTGCAGTACTGGCTACGTTAATGCATGTACTGGTCATATTGAAAACCG  
TGATAAAGAACTGCTTACGACTACCTGCTGCACCCGGCAATTTCTATTTCTAAAATCATTGGCGGTTCCGGTCTACTG  
CACAGTAA  
>Cluster\_40303  
ATGGGGGAGGAAAAGAAGAAGAGTGAATTTGCGGAAAGCGTCTCGAAAAACAGGCTGCGACCCGAACATGGCAGTCCGAG  
CAAAGACCTCTTAAACGACGAAATCAATCACCATACGGCCACGGATTTTGGCTTCCCTCCATCTCGGTAAGATGGTGTG  
ATGTCCGCTAA  
>Cluster\_3705  
ATGAGTAAAAAATCGGCCAAAAAGCGCCAGCCAGTGAAGCCCGTGGTGGCGAAAGAACCTGCTCGCACCGCCAAAAATTT  
TGGCTATGAAGAGATGTTGAGCGAGCTGGAAGCCATCGTCGGGATGCTGAAACGCGTTTAGCCGAGGATGAAGCTACCG  
CGTAA  
>Cluster\_14846  
ATGACTTTTCTCGTGGATTTCACCGAACCGGAGAGCAGGTTGTTAAGTTCAATACGTTGCGTGAAGATTTTGGCGGTCA  
GGTGTTCCTCCTTCGGCACTTCTCTGGCGTAGTTGCTCCGATCATCGCTGGTACCATGCCGGTACATTCCTGGCCCTGA  
AAGTGTA  
>Cluster\_49888  
GTGAATATGAAGAGTTAAAAACAAGCCGAAACGGAATCGCCGACTTTATCGCGCAAAAAATCGCCGAGCTGAACAA  
GAATACAGGAAAGAAAGTCTCTGAAATTCGTTTACCCGACAGAAAAATGACCGGGCTTGAAGTTATGATGTCAAAA  
TCAAAATAATGTGA  
>Cluster\_23990  
ATGTCACCTGTCATTTGTTTCATACCCGCGAGCCCTGGGAGTAAATGCGCCCCAATCACTGTTGAGGTACATAACAGTAA  
AGGTCTACAGGCTTAAACGATGGTGGCTTACCAGAAACAACGGTAAAAAGAGCTCGGATCGCGTGGCAGCGCCATTA  
TCAATAGCGGATTTTATAA  
>Cluster\_3612  
ATGTTTATCGCCTGGTACTGGATTGATTTGATTGCTCTGGTTGTTGGGTTATTTCTGCAATTTGAAACGTTATTTGTCG  
GGCGTTTCGCCAGGACAGAGACGCACTGTTGAAGCGCGGAACAATACTTAAACAGTACGAGAGAAGAGACAGCCGAAA  
AGGTAGAATA  
>Cluster\_51662  
ATGCGAAAACGACACCGATTAAACAGTCGATGACCCGATCGTACTGCTCATCAGCTTTATCTTCTTTGGCCGTTT  
TATCTACTCGTCCGTCGGTGGCAGCACCATCAGAGCAAAAAAGAGCTCAGCAATCCACACTCTCCGTCGAATCAC  
CGGTACAACGTTAG  
>Cluster\_10855  
ATGTTAACTGGGGCTTTTCTCTGCTGCTTACCGTGGCATGCCCGAGGACAGCCTCAAGCACCCGAGCAATTTCTA  
CTTAACTCTCGCTTTACCACAAACCGTTTACCAGATATGGGAATTCATATCGTAATGAATTCAGTTCCCTAG  
>Cluster\_35638  
ATGAAAGGTATTGAAATGGAACCTCCCGCGAGCCTTGAATTTGACAAGGTTGGCGGCTTTGCAATTCGCCCTTGTGGCGGT  
CGCTGTTCTGATTTGGGCTGTGCGTTGGTGGTGA  
>Cluster\_57707  
ATGATGAAAACGCTTATCGTTCTTGTGTTTGGCTTGGCAGCAGCTGCTCACGGGCTGTAACACCGCTCGCGGTTTGGCGA  
AGACATCAACATCTCGGCAACTCCATCTCTCGGCTGCCAGTAA  
>Cluster\_32300  
ATGTCAAAAACATTCACCAAAATATATTTATCTTTCTGTATTCATTTTAAATATAACGAATCTCAAATACCGATAC  
CGCGTCAATTTATTTATCCAGCTTTAA

>Cluster\_4950  
ATGTTTTTTTTTTGTGAGCACATTCCTTCTTATGTAGGAAGAGGCTGTATTATATTCAGTCAACTCTTTTTTACTAAAA  
CATTATCTATGCCATCAAAGTTGCCTGCTAG

>Cluster\_65227  
ATGCTGACAAAAATAGCCCTTGTGGCAATCATCGTACTGTGTGTACAGTACTGGGATTCACGCTGATGGTAGGTGACTC  
GTTGTGTGAGTTGAGTATCAGAGAACGTGGTATGGAGTTAAGGCAGTTCTCGCTTACGAATCGAAGAAGTAG

>Cluster\_14833  
ATGAACACTAAAAATTCGAAGACAACATTTTATCTCGTAATGATATCGCTGTACGCTACGCTTTTCAGAAAAATGTTTTTC  
CCCACAAGTACTCTGGTCGCGGTGGAATGCTTAAAGCCGCTTTGATAAATCTGGTGTATGCTGCCAACTTACTGA

>Cluster\_9252  
ATGACTCGTACCCGACGAGGCGAGTCAATTTTACTCGTTTATCATGCCAGATTACCCGTCATATCAGCGTTTCATCGT  
TGGCAGGAAGATGCAATACCCGAAGTAAGACAACCACCTGGAGGATTAA

>Cluster\_49702  
ATGGATCAAACAATTATGGCTATCCAGACTAAATTCATATCGCCACTTTTATTGGCGATGAAAAGATGTTTCGTGAGGC  
CGTCGACGCTTATAAAAAATGGATATTAATACTGAAACTGAGATCAAGCAAAAGCATTCACTAA

>Cluster\_3096  
ATGAAAAGGGCATTATGTCTGTTAAGTATGGTTTTATCTTTAACTGCCGGGCAAAACATGCAGATATGAACAATTATCT  
AGGATATACATCTGGTGAGATTAGCGCATCTATTGGATGCACTATTGAGAGTCTGTACATAGATTGTGTAATTGCCTGT  
TTTTGATATGTTTCACTCCAAACCCGAGACAGGCAAAATATGGACGAAAAATA

>Cluster\_38971  
ATGTTGTTCTTAAATGATAAAGAGCAAAATCATCAAGTATAAAGATGAAATGCTGAAAAATTAATCCACAAATTACCGAAAT  
GGTAGCTAAATACGCTGGGTGTTCTGTAGAGGAAGTAGAAAGATGTGTGAAAAATATTTTCTCCTTCTCCTCGCTCA  
CACCTTCCCTTAAATGAATTAATCAAATTAAGGCTAAGGAGATTACTAAATGA

>Cluster\_39664  
ATGAAGACCTTTGCGCTACAGGGCGACACGCTCGACGCCATTTGTGTCCGGTATTACGGGGCGACTGAGGGCGTGGTTGA  
GACCGTGCCTCGCCGCAAAATCCGGGACTGGCTGAACTGGGTGCGGTGCTGCCACACGGCACCGCGTCAACTGCCCGACG  
TTCAGACCGCGCCCGTGGCTGAAACTGTCAATCTGTGGGAGTAA

>Cluster\_5128  
ATGGCGAAAACAAAAAGAAATGGTTATATCAGTTACGGCGGTGTTTATCGGTGAATACACTGGAAAAGATTATCTGTAA  
GAACACCTATGATTTACCGGACAGTGTAGCGTGGGCTTTAAATTCAGCAGCAGACCACCGTCTGCTGAATTAACAATGA  
ACAGGTTATATGACAGGGTTCCAAAAGAGGCTGTGGCATATGTGAGGTTAA

>Cluster\_15805  
ATGACGCTTGAGCGAATCAGCGCTTTATCACGTATTGCATCGCCGTCGTGCTGGCTGGCTGGGCGATTTGTCCATCAA  
GGATGCCTCAACGCTGGGCGGCTGATGATCGGTGTGCTGATGCTGGCTATCAACTGGTACTACAAAACAAAAGCCTACC  
AGCTTCTGCGCGACGGGCGAGATCTCGCGGGAGGACTATGAATCCATCAATCGTTAA

>Cluster\_11505  
ATGATGGAATCAAGGCTCAACAGTTTGTACATCAACGGGGCGCAAGTCTTACTGACAACGGACAACAAGGTATGGG  
CGGCGTGGCGGGTATCGGTTCCACGACTGAAAAGCATCAGGGGCGCGTGGCGGAAGCAATTTTTCGAACTGCGCGGAAC  
TGGATAACGACAGCTTAGCGAGATCATCGAGTGGGTTCCGGCTTATCAGCGCTGA

>Cluster\_60521  
ATGAACAATCGATCGGCCGTTAGAATACACGGTTACAGCGGTTATCCAAAAACAGGTATGGCAGGGCCACCATCTA  
TGACTGGTTGAACCCCAATCACCACGATACGATGCCACCTTTCCAAAAAGCAATGCTCGGCGTGAATCTGTGCGGAT  
GGATTGAGCCGAGATTGATGAGTGGTTATCACAACGCTGTAAACTTATTTGA

>Cluster\_64826  
ATGATGGTGATAAATATTACAGTAGTCTGGGAATGGTTCGTTAATTAACCTTGATAATGTCAGTGTAAATGGAATCAAC  
TGTTAACGGTGATGTTATTTTGAATTTGTTGATGGTTCGAAAACCTGGCTGTTTATGTCGGCAACCATCATCACGAGAAA  
ATGTGTTTTGTGAACCTTAAAGCAATCACAAATGCAACGCGCTTAAATCAATAA

>Cluster\_40729  
ATGTCAGGTATAACCATCAATATCAATGTAATGCCCCATGATATCCCTGCAGAAATATGCAGAGATAACAGGTATCCC  
TCTTAATACATGCAAAAAGATGTTGGCTGACGGTCGAATTTATTCGCCCCAAACCGCCAAAATGGAAAAGCCTGAAG  
TAAACCTTGTGGCGATGTTAAAAGACGCTTTGGCTAACAGCTAA

>Cluster\_54045  
ATGCCAACGAAACCGCCTTATCCCTGTAAGCATATATAGTGACGATTGAAAAAGGAAAGCCAGGACAGACGGTAACCTG  
GTACCAACTCAGAGCCGATCATCCTAAACAGACTCGTTGATCAGTGAACATCCGACGGCTCAGGAAGCGATGGATGCCA  
AAAAACGCTATGAGGACCCCTGACAAAGAGTGA

>Cluster\_6253  
ATGAATGAGAACAAAATAAAAAGGCTGGAGCAACTGTTACAGGACAGCCAAACGGGAGTTTGCCACTAAATGGGGACGTGC  
CGCGCTGCCACATGAACGCTAACCTATTTCCACTTGAAGACTCATTAATAAATGGCAAAAAATCAGGCTGATA  
AGAAACACTTCTTGAATGCAATGAAGACAAATAA

>Cluster\_14259  
ATGCAGAGATGGGCTGAAATTTCCACGGCAACTAAAAACAGTCCCATCAGGCTATTTTATTTGCCATTTTGAACCTGGG  
CAGTGTCTGAACTCCTCACGTACCAGTGTACGCTCCGGGTTCTGCGCGTGTCCGTGTTCAAACCTGGCTGCAACAATTAC  
GCCAGATGGGCTCGTTTGA

>Cluster\_41361  
ATGCAGTTGAAACCTACCAATCAAAGCTGAACGTAACCCATGTTGATTTTGAACCTTCCGGGCACTGATTAGATCAGA  
GCCAAAAAGGTGAGCACCAGCACTGGGTTTATGATGTGAAATCCACAGCGGTGAAAAAGCTATCGGCATTGCCTCTG  
GCGATGATTACTTAGTAATAGATCTGATTTAA

>Cluster\_18920  
ATGGCTAAGCCGAGTACCCAAACTCACCCAAATATCAGTATCGTTTTATGGCGCTCGATCGCGCTGACCGCCAGGC  
AAAACCTGCAAAATCATGTGTTGAGGCCACCAGCGAGCATGAAGCAGTAAGGTGTTGGCACCTCACTACATCCTGTCCAC  
TGTCGCCGTTTTTCCAGTTCAGGAGGTGAGCCATGTTTTAA

>Cluster\_60536  
ATGGCTGCAGGATTTATGCGATACGGCCAGCTGCCGCTCATGTTTTTAACTGGTGAATATCGTCTCGGCGGACTT  
CTTCGGTCTGAGCTTTGCGCAGTACGCCCTCCGTTATGATCTCCGTGGATGCGGCAGCGATTGCGGCCACGCTGATTATGC  
TGTATCTCTCTTTTCCAGAGTTATTCGGCAACGTATTTAA

>Cluster\_20017  
ATGAATACAGAAAATTCACAGGCATTAATCTTAAATCTGTAAGAAGAACTGGCAGCTATTAGCAGGAATCAGTTATAAA  
CACATCGGCGCTTTGCGGCTTTTGAATAATGATGCAATAATGTGGCGCAGCGTGTGTTTTCAGACTGGATGCAGCACTT  
TTGAAGCAATTACATACTACTGTCTTAAAAACAATAA

>Cluster\_27387

ATGAATTACCAACTGGCAAACTTTATCGTGGTAAACATTTTCGACAGGATGGGATTGCAGTTAATGGTGAGTTACTGGA  
AGGACAGCTTCCGCCAGGACAGAGTCACGCGGAGGCGAGCCACCAACAGTCACTGTGACTTTCAGACTGACAGCAGAAC  
ATATCGAGAATCAGCCTGTCAATTAACCTGAACAGGGTATGA

>Cluster\_21826

ATGTCCAACAATGGCTCGTCACCGCTGGTGCTTTGGTATAACCAACTCGGCATGAATGATGTAGACAGGGTTGGGGGCAA  
AAATGCCTCCCTGGGTGAAATGATTACTAACCTTTCGGGAATGGGTGTTTCGGTTCGGAATGGTTTCGCCACAACCGCCG  
ACGCGTTTAAACAGTTTCTGGACCAAAGCGGCGTAAACAGCGCATTTATGAACCTGCTGGATAAAAACGGATATTGACGAT  
GTTACCCAGCTTGGCAAGCGGCGCGCAAAATCCGCCATGGATTATCGACACTCCCTTCCAGCTGAGCTGGAAACCG  
CATCCGCGAAGCCTATGCACAGCTTCCGCCGATGACGAAAACGCTTCGTTTGGCGGTGCGTTCCTCCGCTACTGCAGAAG  
ATATGCCGCGACGCTTCTTTTGGCGGTGACGAGGAACTTTCCTCAACGCTTCAGGGTTTTCAGCCGCTTTCGTTGGCAGT  
AAGCATGTATTGCTTCTCTGTTTAAACGATCGCGCCATCTCTTATCGTGTGCACCAGGGTTACGACCATCGTGGCGTAGC  
GCTCTCCGCGGTGTTACGCGGATGGTGCCTCCGACCTCGCATCTTTCGGCGTGTATCTCCATTGATACCGAATCCG  
GCTTTGACCAGGTGGTGTATCACTTCCGCATGGGCGCTTGGTGAATGGTGTGACAGGGTTCGGTTAACCCGGATGAG  
TTTTATGTGCATAAACCGACACTTGCAGCGAATCGCCGGCTATCGTGCAGCCGACCATGGGGTCCGAAAAATCCGCAT  
GGTTACGCGCGACCCAGGAGCAGCGCAAGCAGGTTAAATCGAAGACGTACCGCAGGAACAGCGTGACATCTTCTCCG  
TGACCAAGAAGTGCAGGAACCTGGCAAAACAGCGCTACAATTTGAGAAACACTACGCTCGCCCGATGGATATTGAG  
TGGCGAAAGATGGCCACACCGGCAACTGTTTCAATGTGCAGGCGCTCCGAAACCGTGGCTCACGCGGTGAGTTCAT  
GGAGCGTTATACGCTGCATTACAGGGTAAAGTATCGCCGAAGGCGGTGCTATCGGTTCATCGCATCGCCGCGGTCCCG  
TGAAGTCAATCATGACATCAGCGAAATGAACCGCATGAACCTGGCGAGCTGTTGTTACTGACATGACCGCCGGAC  
TGGGAACCGATCATGAAGAAAGCATCTGCCATCTCACCAATCGTGGCGGTGCTACCTTCACGCGGCATCATCGCTCG  
TGAACCTGGCATTCGCGCGGTAGTGGGCTGTGGTGTATGCAACAGAACGGATGAAAGACGGCGAGAACGTCACCTGTTCTT  
GTGCCGAAGGTGATACCGGTTACGTTATGCGGAGTTGCTGGAATTTAGCGTGAAGAGCTCCAGCGTAGAAACGATGCCG  
GACCTGCGGTTGAAGTGTGAGTGTGATGAACTCGGTAATCCGCGCTGCTTTCGACTTCGCTGCCTGACCGCGGCGGCT  
GGGCTTGGCGCTGTTGAAATTTATCATCAACCGTATGATTGGCGTCCACCCACGCGCACTGCTTGAGTTTGGAGTTCAG  
AACCGCAGTTGCAAAACGAAATCCGCGAGATGATGAAAGGTTTTGATTCTCCGCGTGAATTTTACGTTGGCGGTTGACT  
GAAGGATCGCGACGCTGGGTGCGCGTTTTATCCGAAGCGGCTCATTGTCCGCTCTCTGATTTAAATCGAACGAATA  
TGCCAACTCGGTTGAGGTTGAGGCTTACGAGCCAGATGAAAGAACCGGATGCTCGGTTCCGTTGGCGGCGGCGGCTGAT  
TTTCCGACAGCTTCCGCGACTGCTTCGCGCTGGAGTGTGAAGCAGTGAACGCTGTGCGCAACGACATGGGGTACTAAC  
GTTGAGATCATGATCCCGTTCGTCGCTACCGTTGATCAGCGGAAAGCGGTGGTGGAGGAACTGGCGGCTCAGGGGCTGAA  
ACGTGGCGGAGAACGGGCTGAAAAATCATCATGATGTGTGAAATTCGCTCAACCGCTTGTGGCAGAGCAGTTCCTGGAAT  
ATTTCCAGCGCTTCTCAATTGGCTCAAACGACATGACCGAGTTGGCGCTCGGTCTGGATCGTACTCCGCGGTGGTCT  
GAACTGTTTCGATGAGCGCAACGATGGCGTGAAGCACTGCTGTGATGGCGATTGCTGGCGGAAAGAAACAGGGCAAATA  
TGTCGGGATTTGGCGTACGGGTCCATCCGACCAAGAACTTTGCTGCATGGTGTGATGGAAGAGGGGATCGATAGCCTGT  
CTCTGAACCCGGACACCGTGGTGAACCTGGTTAAGCCTGGCTGAACGAAGAAATA

>Cluster\_21585

ATGAAGCTAACCGATGCGGATAATGCCGCGGATGGCATTTTTTTCCCGCCCTTGAGCAAAATATGATGGGCGCGGTGTT  
AATTAACGAAAATGATGAAGTGTATTTTTCAACCCCGCCGAGAGAAGCTCTGGGGGTACAAACGTTGAAGAAGTCATTGG  
GCAATAACATGATGATGCTGATTCGCGGGGATTTGGCTCGCATCCCTCAATACATTCGTCACAACCGTGAAGGTGGT  
AAAGCTCGCGTCCGAGGGGATGAGTCCGGGAGCTGCAGCTGGAGAAAAAGACGGCAGTAAAGTCTGGACCCGTTTTCGCGT  
ATCGAAAGTGAGCGCCGAGGGGAAAGTTTATTACTGGCGCTGGTACGGGATGCCAGCGGAGAAATGGCGCAAAAGAAC  
AGACCCGACAATTGATTATTCGCGTTGACCATCTCGACCCAGCCGGTGTGCTCTCGATCCGGAAACGCGATATTTGTCGAG  
TGCAATCCGCAATTTCACGAAATGTTGGTTACTGCAATTAACGAAGCCAGCGGATGACGCGGATACACTCTGTAACAT  
TCCAGAATTCCTGCTGATAACCGTATTTCGTTTACAACAGTTGCTATGAAAAACCGCCGCGATCAGGACGAATTTCTGC  
TGTGACGCGCACCGGTGAAAAATCTGGATTAAAGCCCTATCAGCCCGGTTTATGAGTGTGCTCGCGCATCTGCAGAAC  
CTGGTAATGACATTTCTCGGATATCACAGAAGAAAGGCAAAATCCGCGAGCTTGAAGGCAATATTTCTCGCCGCGATGTGCAG  
CAGCCCGCAATTTGATGAAATGGGGAAATCATTTGTCTGTAACATCGAATGTGTTCTCAACGAATCGTTTTCGCTGT  
TCGCGCTGCGCAACGGGATGCCGATACACTGGGCGTCACTTCGACCGGTGACAGAGTTCAAATGCGCAAGCTGGTCA  
GCGACCATTCGTCAGCGCGATGGCGCGCTGCGGGGATCCTGCAAAATTAACCTCGTACGAGCAGAAACACCGCGCTT  
TATCGAACCGGTGGCAGATATCAGCCAGCATATGGCCGCGTGGCGCTGGAACAGGAAAAAGCCGTCAGCATATGAAAC  
AACCTCCCAATTTGATCCGATGACCGGCTTCGCAAAATCGCAATAACCTGCACAAATTAACCTCGATGACCTGATGACAAA  
GCCGCTCTCCGGTGGTGTATCTCATCGGTGTTGACCATATTCAGGATGTGATTGATAGCCTTGGCTATGCGTGGGCCGA  
TCAGGCATTTGCTGGAAGTGGTCAATCGCTTTTCGTAAGAACTCAACCCGATCAGTATCTCTGTCGATTTGAAGGTGCGT  
CTTTTGTCTCTGAGCTGGAAGAACGATGTCAGTAACATACCCAGATCCGCGATGAGCTACGGAATGTGGTCAAGCAAG  
CCGATAATGATGACATAAACCTTCCGCTCCTTTCGATGAGTATGGCATGAGCTACGCTGGGTGAAAAACCGCATTA  
CTTGCTCTCCACTGCTCACAATGCAATGATTTTATTCGCAAAATGGCGGTAACGGCTGGCAGTTCTTCAGCCCGCGCA  
TGAACGAAATGGTAAAAGAGCGTTTGGTTTTCAGCGCAGCGCTAAAAGAAAGCAATTAGCAATAACCACTTAAACTGGTT  
TATCAGCCGCAAACTTCGCGAAGACGCTGAACTGTCAGGCTCGAAGCCCTGCTCGCTGGTACGATCCCTCCGATGGT  
TCATGTGCCCTTTCAGCGTTTATTCCTCTCGCAGAAGAGATTGGTGAATTCGAAATTCGAAATTTGGGCGCTGGGTCA  
AAGCTTGGCGTCACTGAGCAATGGCGTAGCCAGAATATTCATATCCCGCGTTATCCGTTAACTTGTCTGCGCTGCAC  
TTTTCGCAGTAATCAGCTGCCTAATCAGGTATCTGATGCAATGCAGCCGTTGGGTTATTGACGGCCACCAGCTGACGGTGGAA  
AATCAGGAAAGCATGATGATGGAACACGATACCGAAATCTTTAAGCGCATTCAGATCCTGCGCGATATGGGCAACCGGAT  
TATCGGTAGATGATTTTGGTACGGGCTTTTCCGGATTATCCCGCTTAGTCAGTCTTCCGGTAACGAAATCAAATTTGAT  
AAAAGTTTTGTGATCGTTGCTGACCGAAAAACGATCCTTGGCTTACTCGAAGCCATTACCAGCATTTGGGCAAGCCCT  
CAATTTAACCGCTCGTGGCTGAAGGCATCGAAACCAAAGAGCAATTTGAGATGCTACGCAAGATCCACTGTGCGGTTATTC  
AGGATATTTCTTTCCCGCCCCCTGCCGCGCAAGAAATTCAGGCTGGATGACGAGCGCGTTACCGCTGAAAAATCTGA

>Cluster\_20894

ATGAAAATACGACCGCTCGCGTATGCATAATTTGCGGAATTTTTCGGTGTGATTTGCCCCAATTGCCTGGGACAGT  
AACCTTGGCTTTCGACTCTCTTCGCTGTGTACTGGCATTATCCCTGTTAAAACCGTCCATTATATCGTGTGACGCT  
TGCTGTTTTCTGTTTTGGGCATATTAGCAGCAAAAGCAAAATTTTGGGCGAGGAAACCTTAACTGGCGCAGCAGCAT  
GCAATTTGTTGAGATCATTGCTACTGACGGCATGACCACCTATTACGGTCAAATTACTCATCTACAAGGTGACGATATAT  
CCCTGCGCCAGGCTCGTACTGTATGGCAATATCTTCCGCAAGCGGTTTGTGCGGCAAGATGTTGTTCAATGAAACTCA  
AAGTTCGTGACGATGAGTCAACTTAATGATGGCGGCTTGTATAGCCAGCTTATGCAATGCCCAGCATCAACCGCTC  
ACCGCGGTTTTCTGACGCAAGTGTCAATGAAACCGAATTTGTAGCTGCGTGCACAGTATCTGGCGTCACTACAACAAC  
GCTGCAACCTTATATGTTGAACCGGTTATCTTGGATTAGGTATGGGGAAACGGTTATCCGTCGCCAAAGAAATCAAAA  
ATATCATGCTGATACTGGAACGGCGCATTTAATGGCGATATCAGGATGACATCGCTTTTGGCGGCTTGTGCTGCA  
GACTCATTCGCGGTGGCAAGTTTTCTGCTGGGTGCTGATGACCTGGCAAAATGCCATTAATTTGGTGAATTCGCTG  
TGCTGTTTTTATGCTGCTTACGGGAATGCAACCTCTGCATTCGCTACCGTGGTGGCGCTTGGCATTTGGGGAATGC  
TTAAGTTAAGTGGACGCAATGGAGTGGCTGGGATGTATGGATATGTTGTCTGGCGCAATTTTGTGATGGATCCTGTT



GCCATTCCTCGCAAAGTTTATGGCTCTGCGCGTGGGTCGCGGCACTGATTTTTGGTATCAGTGGTTCCCTGTCC  
GGAGTGGCAGCTGCCCGCGTATGCGCGCGTTGTTTTCCCTCATCCTGCACTGGAATCACCCCTCTGCTTATGC  
CCGTGCAAAATGTCATATTTTCATGGCATAGTCTGACCTCATTATTGCAAACTTTTTGCAATTCCTTGGTGACATTT  
ATCACGGTTCCGTTGATCTCGCGCGATGGTTGTGCATTAAGCGGGTCGTTTATTCGGAACAAGGTTATGGTTTTCT  
TGGCGACCGCTTTGGCTTACTTTTTCTGGGGTTAAAGTTTCCCGGAAGGGTGGATCAACATTTGGATGAAACATCTG  
AATGGCTAACATTTCCCATGGTTCTTACTGGTGGTATGGCGATTAACGCCCTGGCGAACGTTGCCAGCAATGTGTGTG  
GCTGTAGGCTTGTGATGTGCTTGCCTGTGGCAAAAACCTCGACCTGACGAGTGGCAAGTGTACATGCTTGTATGTCCG  
GCAAGGGTGGCAATGGTTCATGGCGGCAAAACGGCAAGCGATTCTCTATGACACGGGACTGGCCTGGCCGAAGGGGATA  
GTGGCAACCACTGATTTATCCCTGGCTCCACTGGCATAAATCTTGAACCGGAAGGCGTATTTTGGATGAAACATCTG  
GATCACCGGGGAGGGCTGGACTCAATATGACACATGGCCGATGTTATGGATCCGAAGTCCGTTAAACTGGGAACATCA  
TCAGCCCTGATGCTGGCGAAGCGTGGCAATGGCAAGGATTGCGTTTCAGCGCGACTGGCCCTTACAGGTAGCAACG  
ATAAAGGAAATAACCATCTCTGTGTGGTTAAGATTGATGACGGGACGAATAGCATTCTTCAACCGGTGATTTGAAGCC  
CCCGCTGAACAATAAGCTTAAGCCGTTACTGGCAGCAAAATGCAGGCAACATTACTTCAGGTACCTCACCATGGCATAA  
TACCTCATCATCGTTGCCATTAATTCAGCGAGTGAATGGAAAAGTGGCACTCGCATCGGCATCGCGCTATAACGCATGGC  
GACTGCCCTCAAGCAAAGTTAAACATCGCTATCAACAACAGGGTTATAAGTGGCTTGATACTCCACATCAGGGTCAAATA  
ACGGTCAATTTTTAGCGCAAGGCTGGCGGATTAGCAGCCTCAGAGAGCAAATTTTACCTCGTTGGTATCATCAGTGGTT  
TGGCGTGCCAGTGGATAACGGGTAG

>Cluster\_42161

ATGAAAATCAAACATTTTTAACGCCAGTAACCTGCGCTCTGCTGATAAGTTTTCCGCCATGCCGTAACGCCGACAA  
TTATAAAAACGTGATTAACCGTACTGGCGCGCCGAGTACATGAAGGATACGATTACGACGATCACCCAGCTTTTAACT  
CGTTTTTCGATCTCGGAGCCTGGCATGTTTCATCTGTTGCCAGACGGCCGAACACCATGGGCGGCTTTCCGGCGTTGGC  
CTGCTGACGGAGAGTACATCAACATTAATGGCCAGCAATTTGACCGCTGACCGTCTGGCAGGACGGCAAGAAAGTCTGA  
CTTCACGCTGGAGGCATACAGTATTTCCGGCGCGCTGGTGCAAAACCTAACAGCAAAAGATGTGCAGGTTGAAATGACTC  
TTCGCTTCCGCTGACGCGCTACCTACTGGAAACCAAAATCACAGCAATAAACCCGTTGGATCTGTGTGGGACGGC  
GAACTACTGGAAAACCTGGAAAGCAAGAAAGGGAAACCGCTTTCCGATAAAAACCATTTGCTGGCAATACCCCTGACTATCA  
GCGCAAAATCAGCGCCACCCTGATGGCCTGAAAGTCACTTTGGCAAGTGCAGCCACCTGGGATCTGCTGACCTCCG  
GTGAATCAGAATATCAGGTGCATAAACTCCCTGCGGTTGACACTGAAATCAACGGTAATCGCTTTACCAGTATGGCGCAT  
ATCAACGGTTCCGACGCGCTTACACCACTATTTCCATCTGCTGACCGCTCAGGAAGTATAGCAAAAGAGCAAAATGAGAT  
CCGCGATATTTGGCGCTCCGGCTTTTATCTCACCGCTCGCAGCAACGCTGGGAAGAGTATCTGAAGAAAGGGTTAA  
CCAATCCGGATGCGACCGCAAGACGCGCTGCGGCTGAAAGCCATCGAAACGCTCAACGTAACCTGGCGATCGCGC  
GGCGGTGGGTTGAAATATAACACCGTACGCGCTGCGTGGTACCGGGCGCTGGTTCTCCGGCAATCAGACCTGGCGTGGGA  
TACCTGGAAGCAGCGCTTTGCGATGGCGCATTTCAATCCGGATATCGCCAAAGAGAATATCCGCGCGGCTTTCTCTGGC  
AGATCCAGCCAGGCGACAGCGTCCGCGAGGATGTGGGCTTTGTTCCCGACCTGATAGCGTGGACCTTAGCCCGGAG  
CGTGGCGCGATGGCGGCAACTGGAAACGTAACACCAAAACCGAGCTTGGCGCTGGTGGTGGTGGTGGTGGTGGTGGT  
CGTACCCAGGATAAAACCTGGCTGGCAGAGATGTAACCGAACTGGTGGCTATCACGACTGGTGGTGGTGGTGGTGGTGGT  
ATCACAAACCGCAACCGCTTTGCGAATATGGCGGCAATTTCCCGGATTAAGGCCAATACTGAGAATGGCGAGATGCTGTTT  
ACGGTGA AAAAGGCGCCAAAGAGGAGACGCTGCTGGGCTGAACAACACACCGCGTGGTGGAGAAAGGCCAGTACGA  
CAGTCTGGAATCCCGCGACAGGTTGCGCGCTGCTGGGAACTCGGTCGTGATGATGCCCGCTTTTTGGGTTTTATCGACA  
AGGAACAGTTGGATAAATAATGTCGCTAACGGCGGCAAACTAGCAGCTGGACGGTGAATTCGGGAAACCAACAGTACAG  
GACGGAACGTTGCTGGGCTACTCGCTATTTGACAGGATCGGTTGGATCAGGCCAGCTATATGTACAGCGATAAACCATTTCT  
GGCGGAGATGGCGAGATTTCTCGGTAAGCGGAAAGAGGCCAAACGCTATCGTCAAGTTAGCACAAACAGCTCGCGGACTACA  
TCAACACCTGTATGTTGACCGGACTACACAGTTCTACTATGACGCTGCGTATTTGAAGATAAAACCGCTGGCGAAGCGCTCG  
CGGGCAAAACGATTTGTCGAGCGCGGTAAGAGCGGCAAGGCTGGTCAACCGCTGTTTAAACGGTGGCGGCAACGCGGCA  
TGCCGACGCGGTGGTGAAGGTGATGCTGGATCCGAAAGAAATTAACACCTTTGTTCCCGCTGGGAAACGGCGGCTTAACCA  
ATCCGGCTTTTGGCGCTGATATCTACTGCGCGGGCGCTATGGTGGATCAGTTCTGGTTGGTCTGAAAGGGATGGAG  
CGTTACGGTTATCGTGTATGATGCCCTGAAGCTGGCGGATACGTTCTTCCGGCACGCAAAAGGATTAACCGCGATGGCCC  
GATTCAGGAGAAATTAACAACCGCTCACTGGCGCGCAAGGCCAACAAATTTCTCTGGAGTGGCGCGCATTTGTATA  
TGTTGTATAACGATTTTTTTTCGTAAGCAGTAA

>Cluster\_59312

ATGCAAAAGGAAACTCTATTGTCGGCTGTATTGCAATTAGCTCTGAGTGGTCAAGGTTGGGCGGAGATATCACAGAGGT  
AGAAACCAACAGGTTGAAAAGAAAATACCAATGTGACTTGTCCGGCAGACCAGGAAAACCTCAGTCCGGAAGAGCTTA  
AACGCTTACCCTCTGAATGCTCTCTTTAGTCGAACAACCACTGATGCCATGGCTTTCCACAGGCGCTGCTGCGTTAATC  
ACGGCCTTAGCGGTAGTGAACCTAAACGACGATGATGATCATCATCGCAACAATTTCTCACTCCCACCGACACCCCT  
TGATGATGAATCAGACGACACTCCAGTTCCTCCCACTCTGCGGAGATGAGATAAATACCGGACGATCCGGATGATACGC  
CTACACTCCCAACCGTTTCGTTTAAATAATGACGTTATTTCTCGATAAAAACGAAAACGTTAACTATTCGCGATTCA  
GTTTTTACTTATAACCGAGATGCTGACGGACTATATCTCTGCAAGATAGCAATGGTCTGTAAGCAACGATTAATCTTTG  
GCAGATTGATGAAGCAATAACACTGTTGCCCTTGAAGGGGTGAGCGCAGATGGCGCAACGAAGTGGCAATATAATCACA  
ACGGTAGCTTGTATTACGGGTGATAATGCCACAGTAACAACAATGGCAAAAACCGTTGACGGTAAAGTATCCACC  
GGTACGGAAATCAACGGTAAATAACGGGAAAGTGAATTCAGGACGGCGATCTGGAATGTCAGCGGCGCGCTACCGTATTGA  
TATCACCGGTGACAGCGGACGGTGGATAACAAGGGCACCATGACCGTACCGATCCGGAGTCCATGGGTATCCAGATCG  
ACGGTGACAAGGCCATCGTCAATAACGAAGGCGAGAGCACCATCAACAACGGTGGCACCGGACCCAGATTAATGGTGTAT  
GACGCCAGGCAAAACAACGCAAAACCGTTGACGGCAAGGATTCACCGGTACGGAATCAACGGTAAACCGG  
AAAAGTTATTCAGGACGGCGATCTGGATGTCAGCGGCGGCGTACGGTATTGATATCACCGGCGACAGCGCAACGGTGG  
ATAACAAGGGCACCATGACCGTCAACGATCCGGAGTCCATCGGTATCCAGGTTGACGGCGACAGGCGGTTGTTAAACA  
GAAGGCGAGAGCGGCATCAACAACGGTGGCACCGGACGCAATTAACGGTGTGACGCCACGGCAAAACAACCGGCA  
AACCCCGTTGACGGCAAGGATTTCCACCGTACGGAATTTGCTGGCAATAACGGGAAGGTGATTCAGGACGGCATCTGG  
ATGTCAGCGGCGGCTCACGGTATTGATATCACCGGCGACAGCGCAACGGTGGATAACAAGGGCACCATGACCGTACCC  
GATCCGGAGTCCATCGGTATCCAGATTGACGGCGACAGGCGATCGTCAATAACGAAGGCGAGAGCACATCAACAATGG  
CGGCACCGCACTCAGATCAACGGTAAACGACCGCACCGCAATTAACAGTGGAAAACCACTGTTGATGGAAAAGATTTCA  
CCGGTACCCAAATCGCGGCAATATCGGATTTGAAATCTGGATGGTGGTGGTGGTGGTGGTGGTGGTGGTGGTGGTGGT  
GAGAACATTTGGTGAACGGCACGGTAAACAACAAGGAGATATTTGTTGTTCCGATACTGGATCGATGGCGTGTCTCAT  
CAACGGTGAAGGGGCAACAGTATCCAATACGGGTGATGTTAACGTTAGCAATGAAGCGACAGGTTTACGATCATCAACA  
ACAGTGGGAAGGTTTCGCTGGCAGGCAATGACAGTTGGCGATTTCTCGACCGGGTAGATCTTAATGGCAACAATAAC  
AGCGTAGCCTGGCGGCAAAAGATCTAAAAGTGGTGGCGGCAAGGACGGGCAATAAACGTTTCTGGCGGATCGAATAAC  
AGTGAATATCACTGGTAACGTTCTGGTTGATAAGGATAAAACCGCAGCAATGGCGGGAATAATTTCTCGATCCATCCG  
TGGTATCAACGTTTACCGCAGTATAATAACGTTGACGCTGATGGAAAGTTAACTGTTGATCAGACAGTGGGTTACT  
TCTCGTCAGATAATTTATTTGATGGCAGCGAGAAAACCTCAGGTTGGTTGGTGGTGGTGGTGGTGGTGGTGGTGGT  
TATGAATGGTGGACTTGAACGATTTGGAGAGAAAACCGGCTTCAGATGGGTGCGAGGTTACTTCTTGGCGACAGGAT  
ATAGTTATACAGGCTTATGTCGTTAGTGGTGGTGGTGGTGGTGGTGGTGGTGGTGGTGGTGGTGGTGGTGGTGGTGGT

CCTCTGGGGTTTGC CGGGTTATTTCGGGTACAGGATAAAGCTTTGCTGGAAATTTGGCAGTGGCGCTACGCTAACAAATGCA  
GGATATTGACAGTTTTGAACATCATGGGACAAGAACCCTGGATTTGCCCTATATTTCCAGACATCTGTTACTACTTAA  
>Cluster\_48628  
ATGTGGTACAGGGAAGTACTATCACATTTACACAGGGTAGTAATACTCTGGTTGGGGTTGGGACAGCCTGGAACGTAAC  
AGCTAATGGTGTGTTGCCGGGATGATCGTCATTTGGCCCGACAAATAAGCTGTATGAGATCAAGCGCGTAACAAGCGATA  
CGAACATTTGTTCTCTCAGAACCTTATACCGGTGAAACTCAGTCTGAAGTTCCGTGCGGAATCATTTACTACCTATGAAGGC  
GACTTAACACAGTTTAGCGCGCGCTTACCGCGCTAATGTCGCGTATGTCGGCTGATTCCAAGTCCATGCGTAGTTGGTT  
GACTGCTCTGGATGAGGTGACAAATCGAGCGTGAAGACGGTACAGAAAGTACCGGTTAAGCCGCTGATGCAGATCGTCAACG  
AGCACAAACGAAACGTTGAGTGGTATAAAAATAACACTGACCGGATTGATGCGCTGGTGACAAAGCTCGTGGCGGGG  
GCCAGTGTGCCGACGACGAGAAAAGCGCAATACCGTGGAGAAAAAGCCTCTCAAGCGTCTCAAAGTGCATCCGCTGC  
GGCATCTTCAAAAAGTGGCGCAAGTGGCGAGTGCAACTGTCGCAAAAAATCTGAAACGAAACGCAAGATCAGCATATCTAG  
CGGACAGCAAGTACAGCGTCTGTAGCGTGCACAAAAGCATCGGAGGACCAACATCTGCGTCCAGTGCCTCTGCATCTAAG  
GATGCAGCGAAAAGCATCAGAGACTAACGCTTCACTCGAGTGCAAAACGCGGCTGCATCATTTGCAACAGAAAGCTGAAAATCT  
GTCTAAGGACGAAAAGCGTACAGAGACAAAACGCAAAAGCATCTGAAACGGCAGCCGGGACAGTGCATCGTCTGCAACA  
GTTTCGAAATCTGCGGCAGAAAGCGTACGCAAGCGCAGCTCAGCAAGTGGCGGATAGTGTCTCATCAAGTCAACTGCGGCA  
GGAAAATCTGGGAAAGCGCGTCTGCTGTCAGCGACAACAGTACCAGAAAAGGACTGAGGCGACGAAATCAGGCTACAGC  
CGCTAAAATTCAGCATCCGCAACGCAAAATCCTCTGAAAACAAATGCAAAAGGCTTCTGAAGATAAATGCGCGCTTCTCTAAAG  
AGGACAGTGTGAATCTGCAAGTCTGCGTCTGCATCAGCCACCTCGGCATCCGCTTCAAAGATGAGGCGACCAAGCAG  
GCATCAGCTGCGAAGGGGAGTGTCTCAACGGCATCCACGAAAGCAACAGAGGCGGACAGTGCAGCGCTGCATCTCA  
GAGCAAGCTGCTGCTGAAATCGCTGCGACCCGTCGCAAGCTGCGCTGATGCTGAAGAGATTGCGCGTGGCGCTGCTG  
CGATGGAAAGACGCAAGCCTTACCACAAAAGGTGTTGTGAAACTTAGCAGTGTCTGCACAGCACCAAGTGAATCGCTGGCC  
GCAACGCCAAAAGCAGTTAAAGCAGCAATGACAAATGCGAATAGCAGGGTGCATCTAACCGAAAAGTTAACGGTAAAGC  
ACTGACTGCGGATATCACATTAACCGCGAAAGATATTGGTACTTTAAATTCAGTAACGATGTCTTTCTCTGGCGGGGCTG  
GGTGGTTCAAACCTGCGGTACCGTTACCATGCCACAAAGCGTTCATCGTTTACATCGCATTTGATTTGGTGGCGCTGTTAC  
AACGTCGGCTCCCCACATCAGGCAGGCATTTCAGAACTGGTCTACGAGCAGGCAATGAAAACCCCAAAGGGATTACCGG  
TGTCTTGTGGAAGCGTACAGCGTGGATTAACGAATTTCCGCTGGATCAACACATCCGGCGATACATATGATATTTAGC  
TTGAGATTGGCAATTTATGCGACTAGTGTAAATATCCATTTGGGATTTGACTGCAAAATGCGACAGTTTCTATTATACATCG  
CCAACATATTTACGCGAGTAAAGCCTTCCAGCGTTACCGTTCAGCAATTACCAGCGCTGGTTATGCAGCTGTGCGCTGCC  
GCCGTTAGATATTTGGAGCACTGCCAACAAACCGGAGGAACAGTTTTCAGGTCGCTGCTGTTACTGGTGGGATCACCAGAA  
CATTAATGGTAAATGCAAGTACAGCAACGAAATGTCAGACGGCAAGATCTATCGGTGGAGTTGGTTTTCGACGGTCTGCA  
AATATCAACCTTCCAGGTGTAATACTACGGGTAATCAGAACACCCTGGTAATGCTGCAACTGCTACAAAATTTACAG  
GGCAAGACTATCCGGCGGCTGAGCTTTGATGGTACTGGAATATTAATTTGCCAGGTGTTAATACGACTGGTAAATCAGCA  
ATACAACGGGCAACGCGCTACTGCAACGAAGTTCAGACTGCGCGTACTATCAATGGGGTGTGTTTTGACGGCTCGGCA  
AATATTTCTTGTGCGCCAGCAAAATATAGGTTGCCCGGATCTCTACTGGTTGGTTAACTACAGGAAGTAAATGGCGGAC  
AATAACAACAGCACAGTTAGTGACGTTATTGCAAAAATAATGGAGCATTAAACAAAAGTGGTGGGCTATGCCAATAG  
>Cluster\_1363  
ATGTATTCAAGTAGCAGAAAAGGTGCCGAAAACCAATGGGCTTTGAAACTTCTTACTGCCGATTTTTAGCAGCGAG  
TCCCGCGGCGAAGAGTGTGTTAATAACGCCTATGATGCATTTGATTTGAAGCTCGCAAGGGTAATACTCGCCAGCTT  
TGTATGGTTTGCCTAAATCAGCACTCAGCAATAACCAATTTGCTGACTGGTTACAGATTTGCTTATGCGCGGCGCA  
GATAAACAGGTTTATTTACCGTTTACAACCCGCTACCGTTCAGCAATTACCAGCGCTGGTTATGCAGCTGTGCGCTGCC  
TTATCGTAACCTGCAACAATGGCAAAATCGCTTACACGTGGCAAAAGGCGCTCTCTGAGCGCGCAAAATAGGATT  
ATCAACGGGGCAAAATTTAACCTGGCAGATGCTGGTCACTATGATACTGCGCTGGTTAAACTTAAGCAGCTTAACTCT  
GGAGCAACCGCAAAAGCAATTTACTCGCAGAAAGCTATATCTATAAACTGGCGGGCGCTCATCAGGATGAATACCGGC  
GATGACAGAGTATTACCTGAAAATGCATCTACGCAACAAATCCACAGAAATACGTCGAGGCATTACGTAATAATCAAC  
TTGCTGCCGCGATGACGATGCCAATTTAACGCAGATATTCGCGCTGATATTATGCAGAACGTTGTCAGACTGTCTGTT  
ATGCCATACGCGAGTGAAGTGAACGTTATGCCATTTGCCGATCGCGCCCTCGCCCAATACGCTGCATTTAGAAATTTCTGTG  
GCACGATAACCCAGCCGTAAGTCCAGTACACGCGTATTCAGGTTGATCATCTTGGCGGCTTATTAATCACTGAAATACCG  
ATAAAGACGTTATTTCTCACTATCAGCGATTAATAAAGACGGGCAAAATTTCCGCTTGGGGGCAATATGGGTTGCA  
TCGCTTATCTCAAAGATCATCAGCCGAAAAGCACAAGTCAATAATGACCGAGCTCTTTATCACAAGGAGACCAATTC  
CCCGGATTTATCCGATGAAGAATTTCCGGATCTCTTTACAGCCACCTGGAGAGTGAATAATCCGGCGCGCTAACCTG  
TCACCAACATACCTAAATACCTTCGCGCCCTTTCTTTCGTTAATGGCACGCTACGAGCATCCGAAATGAAATGCTGG  
TTACAGGGCATTCTGTTCTCTCAACCGTAGCAAAATATAGTAATGATCTTCTCAGGCTGAAATGACAGCCAGAGAGCT  
TGCTTATAACGCACCCAGGAAATCAGGACTGCGCATTTGATACCGGAGTGTGTACAAGCCCGCGGTTGGCCTCGTGCAG  
CAGAAAATGAATTAATAAAGCAGAAAGTATCGAGCCAGTAAATTAATTCGAGGTTGAACAAGCTGGACAGCATTAA  
ACGTTACAAGAAATGGCAGCAGGACGCTGCTTAAACGACAGTGTGTCGAAACGTAACCGCAAGATCCCGCGCTGTACG  
ATTAACAGTGGGTTGATGTACATAATCTTGCAGAGCTTCGTATCGCTGGCTCAACAGGAATGATGCCGAAGGCCCGG  
ATAGTGGTAAACATGATGTGCACTTAACACCATCTGTTTATTACCACCGCTGAAGGATAACTGGCGGTTTTGCTGGA  
TTCCGTTATGCGCATGGAATTTAGCGAAGGAAAAGGATTTGTCGCACTGCTGCGGCTGTTGAGTGGCGGCTCAGC  
TAATATCTGGCTCGAGGACAGATACGCTGAACCGGTTTTCAATCATGAGCATAAAACCCGGCGCGCTGTCTGGCTGGT  
ATGATTTTAAATGATAACTGGCGTATTGGTTCGCAACTGGAACGCTCTCTCACCGCTTCCATTACGGCAATGAAAAAT  
GGTGTACAGGCAACAGTGTCTAGGCTTATGTTTCGCTGGTATCAAAATGAGCGCGGTAAGTACGGTGTCTCTGGGCTTT  
CACTGATTTTCCGACAGTAACACCGCTCATGAAGTCTCACTGAGGTTGAGGAAACGCATCTGGTCTTACCATAATTTGA  
TTGTCGATTTCTTACCAGTCTGTATTACGAACAAAATACAGAACACGATACCCATACTACAACCTATAAAAACGTTT  
GATATTGTTCCGGCATTTGAGGCAAGCCATTTGTTATGGCGAAGCTATGAAAATAGCTGGGAGCAAAATATCAGCGCAGG  
TGTTGGTGCCTCTGGCAAAAACATTTAGGCACGGATGCTCACCAACTCGGCTACGGGCAACGCATTTAGCTGGAATG  
ACGTGATGATGCTGGCGCAACGCTACGCTGGGAAAACGACCTTATGACGGTACAGAGAACCAACTTATACGTTGAA  
TTCGATATGACATTCAGATTTTAA  
>Cluster\_47781  
ATGATGACGACAGAAATAGTGGTTGGCCTCACGGCAGGACGCTGTCTGATTTTTCTCGCAAAACCTGATGGCGGAGGTCAG  
TGTATTCAATCCGCGCTTCTGGAATCGACCAATCAATCCGGAGTGCATATTCCGAGTTTAAATCGGGCAAACTGATGC  
CCCAGGTTGTTATAGCGTTGATATTTTATCAACGGTAAAATGTTGAACTGAGGATGTGACATTTGTTTACAGGATAAT  
CCAGATGCTGATCTGCACGCTTGTCTTATGCCATTAATAAACAACCTGCTCTCTTTGGCATAAAAAGTTGATGCGCTCAA  
ATCGTTCAAATGATGATGAGACGGTTTGCCTCGATCTCCACGTTATGAAGCTCATCTTGGAGGTTGAGGAAACGCTGAGT  
ATAAATTCAGCTGAAATATATCCATTTCCCAAAATCTACATGGACGCGATGGCTTATGATTTACATCAGCCCAACGCTGG  
GATGAGGGGATTAACGCGCTCACCATCAACTACGATTTTCTGGTTTACATACACTACGTTTACAGATTTAGGTTTACAAGA  
GACAGATACCACTTATCTCAATCTGCGCAATGGACTGAAATTTGGACCGTGGCGGCTACGTAATTTACAGTACTTTAAACA  
CCAGGATGGCGGTCGGAAATACAACTCATTAGTACCTGGATACAGCGGATATTGCCGCGTTAAGAAAGCGAGATTAAG  
ATTTGGTATACGTTGACGGCGAGCGATAATTTGACAGTACGCAAAATTCGCGGCGCGCTTTGTATACTGATAACGATAT  
GCTACCCGCCAGCAGAAATGGCTTTGCTCCTGTGGTTCTGGGATTGCAAAAGTCCACGCCACCGTCACTATTCCGGCAG

ATGGCTACGTGATTTATCAGTCAGCCGTTCCACAAGTGCTTTTGAGATCACCGATCTCAACACCGCCAGTACAGGTGGC  
GATTTGGACGTAACCATCAAGAAGAAGACGGTAGCGAACAACGATTCACCAACCTTATGCTTCATTGGCGATTCTTAA  
ACGTGAAGGTCAGACAGATGTTGATGTCAGCGTGGGTGAATTGCGCGATGAAGACGGATTACACCGGACGTCCTCAGG  
CGCAAAATCTTCATGGTTTTTCCACGGGATCACTTTATATGGAGGATGTCAGGCTGCTGAAAATATGGTTTCGACGT  
CTGGGTTCGGTAAAGATCTGGCGTTTGGCGCAAATTTCTTTCGATGTGACACATGCTCGTGCGAAATTTAGCCATGA  
TGATACAGAAACGGGTCACTCATATCGCTTTCTCTATTCAAACGATTGACGACACAGACACTAGCTTGGCGCTGGTTG  
GCTATCGTTACTCCACCGAGGGTACTATACCTCAATGAGTGGGCATCGCGCGCAACAGCCCTGAAGACTTTTGGGAA  
ACAGGTAACCGACGTAGTCGCGTGGAGGAAACGCTAACCGAGTCGTTGGGAGAGATTATGGCAATTTATACCTGACATT  
AAGCCGGCAACAATACCTAGCATACCGATGATGTGCAACGATTAATGCAATTTGGCTACAGCAGTAGCTGGAAGCTCTCT  
CGTGGAACGTCCTCGGAGTTATCCAATACTGCCAGACAGGGGACGGGGAACAACCATGCCAGTGATAACACAGTGAG  
CAGATCTACATGCTCTCTTATCTGTTCTTATCGGGTGGTGGGTAATAGTTACGCCACCTATTCGTTTCGCAAAA  
CGATAATTCGGTAGCTCACATCAACTCGGACTCAGCGGTACGGCGTGGAAAGAAATAACCTTTCATGGAATTTAATGC  
AGTCTATAACAGTACGATGATGAGGTTGGCGTAATATGTCCTGACCTATGATGGCTCTTATGGCACGGTGAACGGC  
AGCTATAACTACAGCAAAAATCCAGAGGCTGAATTAATGGTATCAGAGGGGAAATTCGGCACAGCGAAGGGGTAA  
GTTAAGTCAAGGATAGGTGAAACTATTGCTCTGTTAAAGCACTGGGGCCGGGTTAGAAAATAGATAATATCGCGC  
GTGCTCGACGGACTGGCGCGGTATACGGTCAAGACACAGCTAAACCTTATGATGAAAATCGGGTAGCAATCAGCGAT  
AACTATTTCTCGAATCGAATATAGAACTTGATTAATACCGTTCGTTACGATGGTTCACCGCTGGTGCAGTGGTTAAAGC  
GGAGTTGTGACTCATGTGGTTATCGCGTCTCTCAGAGTGTAAATGCAAAATGGTAAACCGGTACCTTTTGGAGCCA  
TTGCTGCGATACAAGATGCAAGTTTGGCAGATTGAGGAATGTCGGTACCGTGGCGAATTTATCTTCTGGTCTACCA  
GAAAAGGACAGGTTACGTTATCTGGGAGAAAACGCTCAACAATAATGCATCTTCAATTTACTTTCGACACCAGA  
AAGTGAGAGCGGATTAATGAACAGGGTGTGACATGCTAATA

>Cluster\_25315

ATGAACAAGAAGATTTCATCCCTGGCCTTGTGGTCACTGCGGATTTATGGGGTAGCACAGGCACAAGAGCCGACCGA  
TACTCCTGTTTACATGACGATACTATTGTTGTTACCGCCGCGAGCAGAATTCAGGCGCCCGGCTTTCACCATCA  
CCGCGATGAAATCCGCAAAAACCGGTTGCCCGCATGTATCGGAGATTATCCGTACCATGCCTGGCGTTAACTGACC  
GGTAATTCACCAGTGGTCAAGCGGTAATAACCGCCAGATTGATATTCGCGCATGGGTCCGAAAACACGCTGATTTT  
GATTGACGGCAAGCCGTAAGCAGCCGTAACCTGTCGCTCAGGGCTGGCGTGGCGAGCGCGATACCCGTTGATACCT  
CCTGGGTGCCCGCTGAAATGATTGAACGTAATGAGTTCTACGTTGGTCCGCGAGCTGCCGCTTATGGCACGGCGCGG  
GGCGCGTGGTTAACATCATTACCAAAAAGGCAGCGGTGAGTGGCACGGCTCTGGGATGCTTATTTCAATGCGCCAGA  
ACATAAAGAGGAAGGTGCCACCAACGCACCAACTTCAGCCTGACCGTCCCGTGGGCGACGAATTCAGCTTCCGCTTGT  
ATGGCAACTTCGACAAAACCCAGGCTGACGCGTGGGATATCAACCAGGGCCATCAGTCCGCGCTGCCGAACGATGCCC  
ACGACGTTACCAGCGCGGCGCAAGGGGTGATCAACAAGATATAATGGCGTGGTCCGCTGGGACTTCGCGCTCTGCA  
GTCACCTCGAAGTGAAGCGGGTACAGCCGCCAGGTAACCTGTATGCGGGTGTATCGCAGAACCAACTCTGACGCTT  
ACACTCGATCGAATATGGCGATGAAACCAACCGCTGTATCGCCAGAATACTCGCTGACCTGGAACGGTGGGTTGGGAT  
AACGGCGTACCCAGCAACTGGGTGACGACGAAACACACCCGTAACCTCGCTATTCGGAAGGCTGGCGGGCGGTAC  
CGAAGGAAATTTAACGAAAAGCGGACAGGATTTTGTAGATATCGAATCTTGTGATGACGCTGATGCTGCACAGGAAATTA  
ACCTGCCGATTTGATTTCCCTGTTAACCAACCGTACGCTGGGTACAGAGTGGAAATCAGCAACGGATGAAGGACTTGAGT  
TCCAACACCCAGGCACTGACCGGAACGAATACCGCGGTGCTATTTGATGGCGTGGTCCACCGGACTGACCCATATTC  
AAAAGCAGAAATTTCTCGCTGTTTGGCAAAAACAATAAGGCTGACTGACGACCAATCGTAACGCGGGCTGCGTT  
TCGATCATACAGTATTTGTCGCAATAACTGGAGCCCGCGCTGAACATATCGCAAGGTTTAGCGATGACTTACGCTC  
AAAATGGGATCGCCCGCGCTATAAAGCGCGAGCCTGTACAGACTAACCCAACTACATTCTCTACAGTAAAGGTCA  
GGGCTGCTATGCCAGCGCGGCGGCTGCTATCTGCAAGGTAACGATGACCTGAAAAGCAGAAACAGCATCAACAAAGGAG  
TTGCTTGAGGTTCAAACCGGACGCTGGCTGGCGGGCTGACTGCTGTTCCGTAACGATATCGCAATAAGATTGAAGG  
GGCTATGTAGCTGTAGGAAAAACGCGTGGCACCAGTCTCTATCAGTGGGATAACGTGCCGAAAGCGGTGGTTGAAGG  
TCTGGAAGGATCGTTAAACGTACCGGTTAGCGAAACGGTGTGTTGACCAATAACATCACTTATATGCTGAAGAGTGA  
ACAAAACACGGGCGACCGTTTGTGATCATCCCGGATATACGTTGAACTCAACGCTGAGCTGGCAGGCACGGGAAGAT  
TTGTCGATCAAAACGACTTTCACCTGGTACGGCAACAGCAGCGCAAGAAAGTACAACCTATAAAGGTCAGCGGTTGG  
ACCGGAAACCAAGAAATCAGTCCGTACAGCATTTGTTGGCTGAGCGGACCTGGGATGTGACGAAGAATGTGAGTCTGA  
CCGCGCGGCTGGACAACCTGTTCGACAAACGTTTGTGGCGTGGCGGTAATGCCAGACCACGGCGATCTGGCAGGAGCC  
AACTATATCGAGGTGCCGGGCGTATACCTATAACGAGCCGGGACGTACGTTGATATGAGCATTAACTACTCTCTG  
A

>Cluster\_42706

TTGTATCTGTTTGAAGCCGTAATCAGCTGATTCAAACCTACCTGCCGGAAGACCAATCAAGCGTCTGCGGCAGGCGTA  
TCTCGTTGACGATGATGCTCAGAGGGGCAACACGTTCAAGCGGTGAACCTATATCACGCACCCGGTGGCGGTTGCC  
GCAATCTGCGGAGATGAAACTCGACTATGAAACGCTGATGGCGCGCTGCTGATGACGTTGATGAAGATCTCCCGC  
ACCTACCAGGACATGGAACAGCTTTTGGTAAAAGCGTCCGAGCTGGTAGAGGGGGTTCGAAACTTGATAAACTCAA  
GTTCCGCGATAAGAAAGAGGCGCAGGCGGAAAACCTTTCGCAAGATGATTTATGGCGATGGTGCAGGATAACCGCTCATTC  
TCATCAAATTCGCGACGATACCACAACATGCGCACGCTGGGTTACTTCCCGGCAAAACGTCGCGCATCGCCCTG  
GAAACTCTCGAAATATAACGCCCCGCTGGCGCACCGTTTGGGATTCACCACATTAACCGGAACTCGAGGAGCTGGGTTT  
TGAGGCGCTGATCCCAACCGTTATCGCGTAATCAAAGAGTGGTGAAGCGCGCGGCAACCGTAAAGAGATGATCC  
AGAAGATTCTTCTGAAATCGAAGGGCGTTTGCAGGAAGCGGGAATACCGTGCAGCTGAGTGGTCCGAAAGCATCTT  
TATTCGATTTACTGCAAAATGGTGTCAAAGAGCAGCGTTTCTACTCAATCATGGACATCTACGCTTTCCGCGTGTCT  
CAATGATTTCTGACACCTGTTATCGCGTGTGGGCCAGATGCACAGCCTGTACAAGCGCGTCCGGGCCGCTGAAAGACT  
ATATCGCCATTCAAAAGCGAAGGCTATCAGTCTTTGCACACCTCGATGATTGGCCCGCAGCGGCTGGGTTGAGGTC  
CAGATCCGTACCGAAGATATGGATCAGATGGCGGAGATGGGTTGGCCGCGACTGGGCTTATAAAGAGCAGCGGCAAA  
CAGCACTACCGCGCAAAATACGCGCCAGCGCTGGATGCAAAAGCTGCTGGAGCTGCAACAGAGTGGCGGTAGCTGTTG  
AATTTATCGAGAGCGTTAAATCCGATCTCTTCCGGATGAGATTTACGTTTTCACACCAGAGGGCGCATTTGTCGACTG  
CCTGCCGTTGCAACGCGCTGACTTTCGCTTATCGGTCATACCGATATCGCCATGCTGCTGGCGCACGCGTCCGA  
CCGCCAGCTTACCCTGTCGCGAGCGCTTACTAGCGGTCAAACCGTTGAAATCATTTACCGCACCGGTTGCTCGCCGA  
ATGCCCGTGGCTGAACTTTGTCGCTGACCTCGAAAGCGCGCAAAAATTCGTCAGTTGCTGAAAAACCTCAACGCTGAT  
GATTTCTGTAAGCTGGGCGTCTGCTCAACCATGCGTTGGGTTGGTAGCCGTAAGTCAATGAAATCCCGCAGGAAAA  
TATTCAGCGCGAGCTGGACCGCATGAAGCTGGCAACGCTTACGATCTGCTGGCAGAAATCGGCCCTGGTAAACGCAATGA  
CGTGGTGGTCCGCAAAAATTCGCAACATGGGAGCGCTCCATTCACCGGCAACCCAAAGTCAAGGACATCTGCCCAT  
AAAGGTGGCGGCTGATGATCACTTTGGCAAAATGCTGCCCCCAATTCCTGGCGACCCGATTAATGCTCCACGCTCAG  
CCCGGTAAGGTTCTGGTATCCACATGAATCTGCCGTAACATCGTGGCTACCAGAAAGAGCCAGAGAAGTTTATGG  
CTGTTGAAATGGGATAAAGAGACGGCGCAGGAATTCATACCGGAAATCAAGGTTGAGATGTTCAATCATAGGCGCGCTG  
GCAAACTGACGGCGCAATTAACACACGACTCGAATTTCAAAGTTGAAATACGGAAGAGAAAGATGGTCCGCTCTA  
TAGCGCTTTATTCGCTGACCGCCGTTGACCGTGTGCTGCGGAAATATCATGCGCAAAATCCGCGTATGCCAGACG  
TGATTAAGTCAACCGGAAACGAAATTA

>Cluster\_42098

ATGGCTATGTTTCACACCTTCATTCTCAGGACTCAAAGGTCGGGCGCTCTTTTACTGCTTTTTGCGGCACCGATGATTCA  
TGCAACAGACTCTGTAACGACCAAGATGGCGAAACAATCACTGTTACAGCAGATGCAAAATACCGCAACTGAGGCAACCG  
ATGGTTATCAACCTCTGACGACCTCTACGGCGACATTAACCGATATGCGGATGCTGGATATCCCGCAGGTGGTCAATACG  
GTTAGCGATCAGGTTTGGGAAACAGAAATGCGACAACGCTGGATGAGGGCGTTTATAACGTCAGTAACGTGGGATACCGG  
CAATACATTAGGCGGGACTCAGGATGCTTTTGTACGCCGTGGGTTTGGCGCAAACCGGGATGGCTCCATCATGACCAACG  
GCCTGCGAACTGTACTTCCCTGCGAGTTTCAACGCGCCACAGAAGCTGTGGAAGTGTAAAAGTCCGGCCTCCACGCTG  
TATGGCATTCTCGATCTTGGTGGATTGATTAACGCTGTCGACCAAGCGCCGAAAAAATTCATGGTTCTGTCTCAGC  
CACGTCTCCGATTTTGGCGGAGGCACTGGGCAACTTGATATCACAGGTCCTTGAAGGCACFCAGCTGGCATACCGCC  
TGACGGGGGAAGTGCAGGATGAAGATTACTGGCGAAACTTCGGTAAAGAGCGCAGTACATTTATTGCCCGTCACTCACC  
TGGTTTGGTGATAATGCAACAGTAACTATGCTCTATTCCCATCGGGACTATAAAAATCCGTTCCGATCGTGAACGATTTT  
CGACCTTACGACGAAACAGCCCGTAAACGTTGATCGAAAAATACGTTTTCGACGAAACGTTTAAATATTACAGATGGAAGT  
CCGATCTGGCGCAACTCAACGCAAGATATCATCTCAATAGCCAGTGGACAGCGCGCTTGTATTACAGCTACAGCCAGGAT  
AAATACAGCGATAATCAGGCGCGTGTACCAGGATGATGCAACGACAGGAACACTGACACGGCGTGTGATGCAACTCA  
GGGATCTACCCAGCGTATGCATGCTACTCGTGGCGATCTGCAAGGGAATGTTGATATTGCCGATTTCTATAATGAGATT  
TGGGTGGGTTGTCATAGTAATATGATCTTTCGCGTACAGATATGATTCGCTGTAATAAAGCTAAAGATTTCAATATC  
TACAACCCGTGTTTATGGTAAATACAGCAAAATGTAACCGTTTTCGCGCTGCGACAGTATCAGACGATCAACGAGGAG  
CTACTCAGCGTATGCACAGGACGCACTCTATCTGACCGATAACTGGATTGCCGTCGCCGGGATCCGCTATCAGTATTACA  
CGCAGTATCGGGTAAAGCCGCTCTTTTAAATGCAATACTGACAGCCGCGATGAACAATGGACTCCCAAACTGGGGTTA  
GTCACAAACTGACCCCATCGGTATCTTATTTGCCAATATTTCGCAAACTTATGCGCAGTCTGCAATTTGCCAGCTA  
CATTTGGCGATCTTCCACCGAATCATCTAATGCTTACGAAATTCGGGGCAAAATTCGAGCTATTTCGATGTTATCAGCAG  
ATATTGCGCTGTTTGATATCCATAAACGTAACGTGTTGATATACGAAAGTATTGGTGAAGAACCATTTGCCAAAACGGCA  
GGCGGTGTTTCGTTCAAGAGGGGTAGAAGTCGACCTTGGCGGAGCATTAACTGAAAAATTAATATCATTTGCCAGCTACGG  
CTATACCGATGCTAAGGTTCTGGAGGATCTGATATGAGCGGAAACCATTCGCAATGTTCCGCTCATACCGGTTCCG  
TATTCTGACCTATGACATTTATAACATGCCAGGCAATAACACACTGACGTTTGGCGGTGGTGGACATGGCGTAAAGCCGT  
CGTTTCGGCAACCAATGGGGCTGACTATTATCTGCCAGGCTATTTCGTTGCCGATGCCCTTCGCCGATACAAAAAGAAAT  
GCAGTATCCGGTCACTGCAATTAACGTCAAAAACCTGTTTGATAAAACGTTATTACACCTCTTCCATCGCCACAAATA  
ATCTGGGCAACCGATTGGCGATCCTCGTGAAGTGAATTCACGGTGAAAAATGGAATTTGA

>Cluster\_29115

ATGAAAAAAGACATCTGCTTAGCTTACTGGCGTGGGCATTAGCACAGCTTGCTACGGCGAAACATATCCTGCGCCAT  
TGGTCCGTCGCAATCGGATTTCCGGTGGCGTAGGATTATTACAAACGCCACCGCGCGCATGGCGGGGAAGGGGAGCTGA  
GCCTGAACCTATCGGATAACGATCAGTACCGTTATTACTCAGCTTCAGTGCAACTCTTCCCGTGGAAACACACGCTG  
CGCTACACCGACGTGGCACCAGGACGACGAGCTGCAAGCGTTCCTGCGGATCAAAACGATAAAGATAAAGCCTT  
CGATCTCAAACTGCGTTTGTGGGAGAGAGTTATTGGCTGCCGCAAGTGGCGGTTGGTCCGCGGGATATCGGGCGTACCG  
GGCTGTTGATCGGGAATATCTTGTGTCAGCAAGCCTGGGGCCGTTGATTTTACTCCTGGCCTGGGCTGGGATAT  
CTGGGACACAGCGTAACTGAAAAATCCGCTCTGTTCAACAGTGAATAAATATGCTATCGGATAAACAGTCAAAACA  
GGCGGATCTATCGACGGTAGCCAGATGTTCCACGGCCCGCTCACTGTTTGGCGCGTGAATACCAGACGCCCTTGC  
AACCGCTGCGCTGAAACTGGAGTATGAAGCAATAATATCAGCAGGATTTTCCCGGGAAGCTGGAGCAAAAAAGTAA  
TTTTAACGTGGGGCTTTATCGGTTACCGATTGGCGCAGTAACTTACCTTAGCTATGACAGTGGCAACACTTTATGTT  
TGGCGTACGCTGCGCACCAACTTTAACGATCTACGCTCTTCGTACAACGATAACGCCCGCCGCAATATCAACCGCAGC  
CGCAGGATGCCATTTTGCAGCATTCGGTGGTGGCGAATCAGTTAACGCTGTTGAAATACAATGCGGACTTGGCGATCCG  
CAGATCCAGGCGAAAGGCGATACGCTGTATGTCACCGCGAGCAGGTGAAATATCGTGTATCGCGCGAAGGATCATCCG  
TGCTAATCGGATCGTGAACGATCTGCCGATGGGATGCAACGATCCGCAATACGGAAAAATCGCTAATTAACATGCCG  
AGGTGACGACGAAACCGATGTCGCCAGCCTGAAAAATCATCTCGCGGAGAGCCGTTGGGCCACGAAACGACGCTGGCG  
CAAAAACCGCTCGAGCCAGTGGTTCGAAATCCACCGACAGGCTGGTATATCGACAATACGCTTTGATTTCATAT  
CGATCCGGTGTGAACAGTCCGGTCCGGTGGCCGAAAACTTTTACATGTATCAGCTGGGCGTGTGGGAACGGCAGATT  
TGTGGCTGACGACCATCTACTGACCACCGCAGCCTGTTTGCAAATCTGCAAACTACGACAAGTTTAACTACACC  
AATCCACCGCAGGACTCGCACTTACCAGCGCTTCTGACCCATGTCGCGAGTATGTCGAGAACGATGTCTATGTGAATAA  
CCTGCAAGCAACTACTTCCAGCATCTGGGCAACGGCTTCTACGGTCAAGTCTATGGAGTTATCTCGAAACCATGTTT  
CGGGTGGGGGGCCGAAGTGTGATCGTCCGCTGGACAGTAACTGGGCGTTTGGTCTGGATGCCAATACGTTAAACAG  
CGGACTGCGCTAGTGCAAAAAGATATGATGAAATTCACCGACTACAGCCTGAAACCGGACATCTGACCGCTACGGGAC  
GCCATCTTTCGCCAGGACGCTGTTGGTGAAGCCAGCTCGGGCAGTATCTGGCAGGGATAAAGGGCCACGCTGGAGA  
TCCGTAACCGCTTTGACAGCGCGCTGGTGGTGGGTGGCTATGCCACGATCACCACGTTTCGAAAGAGGAGTACGGCGAA  
GGGACTTACCAAAGCGGTGTATGCTCTGTACCCTGGATCTTCTCGTCTGGTCCGACACGACCGCTGGCGCAAT  
TGGCTGGACGCGCTGACGCGTGGCAGCAACTTGGGCGTAAGTTCCAGTTGATGACATGACCCAGCAGCCGTA  
GCTCAATTTCCGCTAA

>Cluster\_44179

ATGAACAAATCAGGAAATACCTCGTCTGGACAGTCTCTCTGTAATGGGAGCATTGCTCTGGGATACATTGCTTTAAA  
TCGTGGGGAACAGATCAACCGCGCTGTGGATTGTGGTGGCGTCCGCTGTATCTATCTGATCGCTTACCCTTTTTATGGGC  
TGTATATCGCAAAAATGTGCTGGCGTTGACCGACGCGTATGACGCGAGCGGTGCGCCATAACGACGGGCTGGACTAT  
GTGCCGACGGACAAGAAAGTGTGTTCCGGTACCATTTTGGCGCCATTGCCGGAGCAGGTCGTTGGTTGGGCCGGTACT  
GGCGCGCAAAATGGGTTACTTGCAGGGATGATCTGGCTGCTGCCGGGTGGTTCTCGCCGGTGGCGTCAAGGATTTCA  
TGGTGTCTGTTTGTCTACGCGCGTGCAGGTCGATCGCTGGGTGAGCTGGTCAAAGAAGAGATGGGGCAACCGCGGG  
GTGATAGCGCTGGTGGCTGCTTTATGATCATGGTCAATATCTTGCAGTACTGGCGATGATCGTGGTGAAGCCCTGAC  
TCATAGCCCGTGGGAAACGATACCGTTGCGTTACCAATTCCTCGCTGGCGCTGTTTATGGGGATCTACCTGGCTATCTGC  
TCTCGGGCGTATTTGGTGAAGTGTCCGTCATCGGTCGTTATCTGATTTTCCGCAATATCTCTGGCGGCTGGGTGGCA  
GAAAGTCCGACCTGGGCACCGTACTTTGACTTTACCAGCGTGCAGCTGACCTGGATGCTGGTGGGTTACGGTTTTGTGGC  
GGCGGTGCTGCCGCTGTGGTTGCTGCTGGCCCGCGTACTACCTCTTACCTTCCTGAAAAATCGGGACGATCGTCCGTC  
TGGCGGTAGGCATTTGATTTATGCGCCGACGCTGACCATGCTGCGCTGACCAAAATTTGTCGATGGCCTGGCCCGGTA  
TGGACCGTAACTGTTCCCGTTCCTGTTATATCACCATCGCTGTCGCGCGGTGCTGGCTTCCATGCGCTGATCTCTTC  
CGGCACCACGCCGAAGATGCTGGCGAACGAAGGCGAGGCTGTTTATCGGCTACGGTGAATGTTGATGGAATCCTTCG  
TGGCGATTATGGCGCTGGTTCCGCTGTATCATCGATCCGGCGTTTACTTTGCCATGAACGCCCAATGGCGGTGCTG  
GCTCCGGCAGGACCGCGGATGTTGGTCTCTGCCGCGAGTGGTGGTGGTGGTGGTGGTGGTGGTGGTGGTGGTGGTGGT  
GCTCAACCGAGATTGCCAGGAAGTGGGTGAACAGTCAATTTCCCGTGGCGGGCGGTGCCCGGACGTTGGCGGTGGGA  
TGGCTTACATCTGCACGGTGGCTGGTGGTATGATGGATGTTGGCTTCTGGTATCACTTCGCCATTCTGTTTGAAGCT  
CTGTTTATCTGACGGCGGTAGATGCGGGTACCGGTGCTGGCGCTTTTATGTTGCAGGATCTGCTGGCGGTGGTGTCTCC  
TGGCTGAAGCGGACCGGATTCACCTGCTAACCCTGCGCAACCGCGCTGTGGCTACTGGCTGGCGTGGGCTACTTCTCC  
ATCAGGGCGTGGTTCGATCCGCTGGCGGTATTAACACTCTGTGGCGCTGTTTGGTATGTCGAACAGATGCTGGCAGGG  
ATGGCGCTGATGCTCTGTCCGTTGGTGTTCAGATGAACGTCACGTTACGCTGGGTGGCGCTGGTACCACGGC

CTGGCTACTGATTTGTACCTGACCGCAGGCTGGCAGAAAGCGTTTAGCCGGATGCGAAAGTCGGCTTCTGGCCATTG  
CTAACAAAGTTCAGGCAATGATCGACAGCGCAATATTCCTGTCAGTATACTGAGTACAGCTGGCGCAACTGGTGTTC  
AACACCGTCTGGATGCCGGTTAACCATCTTCTTTATGGTGGTCTGGTCTGGCACTGTCTCGATTAAGACGGC  
ACTTGGCGCATTAAGAGCCGAAGCCAACGGCGAAAGAAACCGCGTATGAGCCAATGCCGAAAATGTTGAGGATCG  
TAGCGCAGGCAAAAGTGGCCTAA

>Cluster\_61864

ATGATTACTCGTATTCCTCGTAGTCTTTCTCTGCAAAATTAATAACAGCCAGACAAATGAACACCAAAACCTGAG  
TGAATGTGTTTATAAAGAATCGAGGATAAAATTTCTGGCAAGGAGCTGGCGACGCTCTATTAAGAAAGCTTCTCAGAGA  
ACTGTAGACAAAATGGTCTCATATCTTTAGCAACAAGGATTTGTCAATAAAATTTCCACGTCCTGCTTACAAGCTGAT  
AAGAAAGAAATACGATAATTAATAAAAACGAAAACACGACACTTACTCAAACCATTTGCCCAATATTTGAAAAATACCT  
AATGGAAATTTTACTCAACGCTCAGACACTCTTGATAAACAAGAAATTAACCTAAAAATCAGATAGAAAAGAAAAAGAAT  
TCCAAGAATAAATTAATGGTCAATGTTATTTCCGGGGCGACCCAAAACCGTATAGTATGCCGACACATTTGCTGCA  
CAATATATTAATGATATTTATCAGAATGTTGATTAACAACCCCATCAAGATGATTAATCTTTCAGCTGAAAAATTTCTCAC  
GCCTTCAACAAAAATGCAAAAACAGACTTTGGCGTTGGTTCCAGCCGCTGAGGGGGCTTGGCTTGGCTGCTGCTGCG  
GTGATTTCCGGCTAGTTATGAAAGCATAATTTGACAAGATGGAATCAATGGCATCAGTGTATGGCAGCCATATTAACG  
GTGGATAACCATGCTTTGACGGTCCGGCTAAGAATAAAGAACACAACCTGAAGGATGTACCATTACGTTGGTTTCGGTTTA  
TGATCTAATGTAATACGATAAAAATAAAGAAATATGAGCGAAAGCAAAGAAATATAAACACTATTTCTGATGGATT  
TTATGAATGTAGATTATAGCCTCCTGAAATGGTCAAATGATCATGTTATTAATCAATCTGTTGCAATAATCCAGCACTT  
CCGAAAGAACAGCTATTGATGTTAAAAGGATCTGTGGATGAAATAACCCCTCCATATCACCTGCAACGATGAATTTGCT  
AATGGCAATTTGCTCAGAATCACAACCTTACGCACTGATGATTTCACTCCAGAAAATGCCAGAACTACATAGAAAGAGAAA  
TGTTGACTGCTTATAATAGTATTAACCTGCCAGTTTATTTGGCTATAAAATATGGTAAATGCCGATATCGTTGAGACT  
ATTTTCAATCTATTTGTCAGAAACAGGATATGAAGGATTACTCTCGAAAAAAATCTCATGCAATTTCTGGAGGCAAAAGA  
TAAAAATGGTTTTTCTGGATTATTTTATAGCATATCACGTAAGGATAAAAAATGTTGTAACCTCGATTCGAAACGCTTAC  
CTAAACTGGCCGCAACATCATTTAGATAACGAACAAGCTTGGCGCGACACGGGTTTGTGTTATGGCCATGACGCGGACCAT  
GTTTTATACCATGTTATGGCGAATGGTGTATGCCGACATGCTGAAAATTTGTTTGAACGCGTTACCTTTGTTAATTCGCAC  
ATGTCATTTGACTAAGAACAGGTAATCTGATCTCCTGAAGGCAAGGATTTTTATGGTTGCCAGGACTATATCTGGCGA  
TGCAAAATGGACATAGCGATATCTGAAAGTTATTTTGAAGCATTGCCAGCCTAGCCAGGAAATTAACATTTTACGCT  
TCCGATTTGCTGATCTTCTGACGCTAAAAGTCTTGGCGCGACACGGGTTTGTGTTATGGCCATGACGCGGACCAT  
GAACGTTATTAATACTATTTTAAACGCAATACCACCTCTGTTTAAACGTTTAAATTCGATAAAAAAATATGAAGCCCC  
TCCCTCTGGCAAAATAATCTAATGAATAACCGGTTTGGTTTTCAGCGATACAGATAAAACAACAAAATGTTGTAGAGAGC  
GTTTATCTTGCTTATCTGACCATGCACGCTGTTGGATTACCGCTGAAGATAATTAAGGATTTTGGCAACACAAAGC  
CCCAAAAATACTCTGCCCTTGGAGTTGGCTTTGAAATTTGGTCAACCGGTTATGCTGAATTAATCCCTAATAACATTA  
ATAAGATGGCTGAAAGCTTTGGCTTTACGGATAACCCCTGATACATTTGCGGAGAAAAATATATGGAAGCTTTACTCAA  
AAAGCATCTCCCATACCTACCGTAA

>Cluster\_66981

ATGATCGAATATTTGCAATTTGGGTGAGCGCTCGATTATCGGGGCGGATAGCCTTTATCCACAAACGATTTTCGCTGCT  
TAAAGCATGCGAGAATCATCCTTACGTCACAGTCAGAGAATTACGATTTTCTGAAATAAATGATAACCGCTCGGAATATC  
TAATCATTGATGCTGCTGATGGGACTGTGGCTTCTGGTAAATCAAGCCCGTATTCTGTCGTAAGAACGATTTGGCTATTGAG  
GTCAATCCCAATCAAGCATACCTATCTTGGTTCATGCAATTCGGGAAAGATTTCCCTGTCTTTCTCACAGCATGCTGG  
AGAACCTGGCTCACCAAGAAATTTGCTTATATGAGGCTTCTGGAGCGCAGTTGAGCGCAGTTGGACCCCGAGAGAT  
TCCCTGAGCGCATTTTTGGTGGCTTAGAGAATCGGCCAATGCATCTACATCGAGAAGATCAGCCACTTGAGCAACTT  
TTTTATTTGAGTCCCTATCAGCTCATTTTGGCAGCAATACCCCGATATCATCACGCGACTGACAAAGCTCAGTCT  
CCGATGGTTCAGTGGAGGGCGACCGGATTTTTAAGGGTGTACCAGAAACAGATACCTCAAGCTTAAGCATTTCGCT  
TATTAACATTTGCTGTTCTCTGTCGATGTTTCTACGGTGGCTACATACCCGGATAATCTGGGAAAAATAGAGAACA  
CTTAATGAATGGGGAAGTGAAGCTCCTAAAACCACTAACCTGACGCTGTTTATGAAGCAATCAAGTGAATGGTATCCGCCC  
AACGCTGGTAAAGGAGAAGGCTTACTTATCTGCTTTGGATCCCCGCTAAGAAACGGAGAAAACAGAACGTCGGATG  
TGATGGCTATGTTGTCGCAAAAGTTTCACTCGGTGAACTTCCGACCTGCACATGACATGATATGCTGGCGCAAAAAATGACGAGGA  
GTACAGCATCGCGTACGGCTTCTTGGCGGATCAATTAGTACCAAGTGGCGACAATTACCGCTTTTACCAGTTGAAATACG  
TTCGGCTATGAAGCCACACATGCGAGAGACATATCTGCTGTTGATTCAGAGAGTGCAGCTTTTCGAGGTATTTAGCTG  
GAGTTGGCGCTCTTGGTAGTACATTTGGCTGATATTTGGATTCGAATGGGGTGGGGGACATGGACTTTTATGATCCAGAT  
CGGCTTCTTCCACATAATTTGCTCGCCATATTTGGGTTGATTGTCATATTGGAGTCTCAAAACCCATATTTATTCAGCA  
TATTTGCCAAATCTATTTATCCGATGAGCCCTCCCTCAGGCGATCCAATAAAGTATTTCTGATGACGATGATGATTTG  
CTAAGGCAATGAATGAGGAGACTTAGTTGTGGATGTCAGTACCACCTTTGAGGTGCCAGGACTCTAGCGTTAAAAGAT  
GATATACCAGAAATAGTTAGCTGTTTCTGACTCCATCCGGTCACTGAGCTGATGTTAATGGAGATGTAGACAGACA  
ATGCCAAATGATGCAATTTGAGGGGCAATACTATCGGGCAATTTTGGAGCAATGAGTGGGGAAGTACTACCTACAGCACA  
ATTTATGGCGATCGTTGGGTGGTGGTGGATGTCGGGATATTTCTGTACGATGTCAGTGAATGTATTCTATGTTTATGCT  
AGGCGCATGGATGCACATGAAATGAACTCATTTCCGGTGTATCTAATTTCTGGCAATGGGTTGTTAAATGATGACC  
AGGCTTAGCGCAAAAAATGACGACACCCGCTTACAGGCTACCTAATGAAACAGGAGGTGCAATTTGTTGGCATAACA  
GATTTTAAAGAACAAAACGATATTTCTGGTTGACGCTCCTGAACTATCGACAGTAAATCTCTCCAGCCTCCTTTGT  
CCGGGGAGAAAGCGGACAAAGAAGCATTAGAACGGGTTACCAAGTTGACCGCTCGTGTGTCGATTTGTTGGCGAAT  
GGCATCCCATCCCAACAGCTTTTCCGCAAAAGCCAGTAAATGAAGATGATAATTTAATCAAAAAATACACAGAAAAATG  
CGTGTGGAGGTTTACTTCCGCTGATGCTGATTGTTGGGAAAACGATATCAATATTTGATGCTAGATAA

>Cluster\_440

ATGTCAACCGGATACGTTTACGCTGGAAGTGGACGGCTGCCACCGGATGCTTTTGGCGGTGGTCTCCTTTTCATCTGAA  
CCAGTCACTCTCTCGCTTTTTTCCCTCGATCTCTCTGCTGACGAGCTTCTCTCCCTTGAATTCAGAGATCC  
TCGACAAAATGGCTTACCTGACGATATGGCAGGGCGATGACGTACAGCGCCGGGTGAAAGGATGTTGACCTGGTTTGA  
CTGGGGGAGAACGACAAAACAGATGCTGTACAGCATGAAGTGTGCCACCCTGTTGGCGCACAGGCTGCCCGAGAA  
CTTCCGTATCTCCAGAAATGAGGACATCGAAAGCATCTTCCGACAGATATGACAGGAAAACGGGGTACCGAGTGGAGC  
CGCTGTTCCAGCGAGCCACATCTTCCCGTGAGTTTGTGCTCAGTACGGTGAAGTACGATGTTTCTGCTGCGGATG  
GCGGCGGAGGAAGGCATCTTCTTTATGAGGAGCAGCGCAAAAAAGTACCAGCAGAGCCTGGTCTGTCGATACCGT  
GCGTTATCTGCGGAGTCTTTGAGATCCCTTGAATCCGAACACCCGTACCGAGGTGAGCACCTCTGCATCAGCCAGT  
TTCGCTACAGGCACAAAATCCGCCCTTCTTCCGTGGTGACAAAAGACTACACTTTAAACGACCCGGCTGGCGAGGCGT  
TTTTGATCAGGAAGCCAGTACCAGGATTTACCAGCAGCATGAAAGTGAATGATGACTACCCCGGAGCTTCAAGGGTGC  
CCAGGGCAGAACTTTGCCCGCTGGCAGATGGATGGCTGGCGCAACAACGAGAGTGGCGCGGGAACAGCCGTTCCG  
CGGAGATATGGCCGGGACGGCAATTTGCTGACGGGGCATCCGAGGCGAACCTGAAACGGGAAATGGCAGGTTGGTGGC  
AGCGATCTTACGGCGAACAGCGCGTACCAGGCTACCGGGTTTACAGCAGCAGCTGGATTAACACTTTCGGCT  
AATCCCGGAGACCGGACATGGCGGCCACAGCCGTTGCTGAAACCGCTGGTGGAGCGCCCGCAGAGCGCGCTGTCAGC  
GACCGCAGCGAGGAAATCTTCTGTGATGACATGGCGCGTGGGGTGAATTTAACTGGGACCGCTATAACCCGTC

AACCAGGAAAGTTACGTGCTGGATCCGTGTGGCACAGGCGTGGGCAGGCACCGGCTTTGGTAACTGGCGATACCGCGTGT  
GGGTCAGGAGGTCATTTGGACTTCTCTAACGGCGATCCGGACCAGCCGATCATTATGGGGCGTACCTACCACCAGGAAA  
ACCGCACCCCGGCAGCTGCGGGGACGAAGACGAGATGACGATCCGCTCGAAAACCTATAAGGGCAGCGGTTTAAAT  
GAACGTAAGTTTACGATCGCACAGGGAAGAACAGGTTACATCCACGCGCAGAAAGACATGAACACCGAGGTGCTGAA  
TAACCGCACCACTAGTGTATAAACACCATGCCGAAAAAATAGGTAACAACACCGGATCACCGTTACCAATAACGAGA  
TCCAGAACATTTGGCGTTAATCAGATACAGACGGTTGGTGTCAACCAGGTGGAACCGTGGGCAGTAACAGATATACAAA  
GTGGGATCAAAACAGGTTGAAAAGGTGGGGATCATTCTGCGCTGACGGTGGGTGTGGCTTACAGACGACGGTAGGGCG  
CATTATGAATACCTCGGTGGCGTGTGGTGTGAGTCCACAGGTAGGGCTGCATAAATCACTGATGGTGGGAATGGGCTACA  
GCGTCAATGTGGGAATAACGTCACCTTCTCGGTGGGCAAGACAAATGAAGGAAAAACCGGACAAACAGCAGTTTATTCT  
GCCGGTGAGCATCTGAACTCTGCTGTGGTAAGGCAAGGCTGGTGTGACGAAGGACGGAAAGCATATTTCTCAATGGTAC  
GCACATTCATCTGGAAGGGGAGTCGGATGTGAACGGTGTGCGCCAGTATTAACGAACTGTGGTGCACACACACCTG  
TACCGGATGCGCCTGTGCCGAAAGATTTACCCCGGAATGCCGGATATGCGGCAATTTTGA

>Cluster\_27983

ATGAGTCAAACCATAAACCAGGGCCGTTTACGCATTGACGCCAATTTTAAACGTTTTTGTGGATGAAGAAGTTTTGCCTGG  
CGTGGAACTGGATGCTGCCGCGTCTGGCACAATGTTGATGAGATCGTTCACGATCTGGCGCCAGAGAATCGTCAGTTTC  
TGGCAGAGCGGATCGCATTCAGGCGGCGCTTGATGATGGTATCGCAGCAATCCGGGGCCGGTAAAAAGATAAAGCGCC  
TATAAATCTTTCTCGTGAACCTGGGCTACCTGGTGCCACAGCCTGACCACGTGACGGTGGAAACACCGGCTACGACAG  
CGAAATCACCACTCAGGCGGGCCACAGCTGGTGGTTCGGCGATGAACGCCGCTACGCGCTGAACGCGGCAACCGCG  
GCTGGGGCTCACTGATCGATGCGTTATACGGCAGCGACATCATCCGCAAGGAGGGCGATGGTCAGCGGCTACGATCCG  
CAGCGTGGTGAGCAGGTTATCGCTGGGTTCCGCGTTCCTCGATGAATCACTACCGCTGGAAACCGGACGATACAGGA  
TGTGGTGGCGTTTTAAGTGTGCGATAAACAATACGCATCCAGTTGAAAAATGGTAAAGAAACACGTTACGTAATCCAG  
CACAGTTTGTGCGTTACCGTGGCGATATGCTGCGCTGACCTGCATTTTGTGTAATAACGGCCTGCATATTTGAGCTA  
CAAATCGATGCCAACGGGCGGATTTGGCAAAGACGATCCGGCGCACATCAACGATGTTATCGTCAAGCGGCGATCAGTAC  
CATTTCTCGATCGGAAAGATTCGGTGGCGGCTTGATGCGGAAGATAAATACTGCTGTAACCGCACTGGGCTGGGCGG  
TGCAGGGGACTCTGCAAGAGAAAATGGAGAAGAAGCGTGGCAAAATCGTGGTAACTGAATGACGATCGTACGTA  
GCCGCGATGGATCTGAAATTTCTGTCAGGACGCTCGTTGCTGTTTATCCGCAACGTTGGTCAATTTGATGACCATTC  
TGTGATTTGGGACAGCGAAGGCAATGAAATCCCGAAGCGATTTCTGATGGCGTACGACTGGCGCGATTTGCCCTCTATG  
ATTTAAAGTGCAGAAAACCTCGCGCACCTGGCAGCGTCTATATTTGTAACCGAAAATGCACGGTCCGCAAGGATGGG  
TTCGCCAACAACTGTTTTCCCGCTTGAGACAATGCTCGGTATGGCACCGAATACCTGAAAATGGGCAATTTGATGTA  
AGAACCGCGGACCTCGCTGAACCTGCGTATGCTGATCGCTCAGGCGCGCAACCGCGTGGCGTTTATCAATACCGGTTTC  
TCGACCGTACCGCGATGAAATGCATTCGGTGTGGAAGCGGCGCGATGCTGCGTAAAAACAGATGAAATCGACGCGG  
TGGATCAAAGCCTACGAACGTAATAACCTGCTTTCCGGTCTGTTCTGTGGGCTACGTTGAAAAGCGCAATCGTAAAGG  
CATGTGGCAATGCCGACCTGATGGCAGACATGTACAGCCAGAAGGGCGACCAATTCGCTGCGGGGCAACACGGCCT  
GGGTTCCGTCGCCAATGCCGCTACGCTCCATGCGCTGCACTACCACCAACCAACGTAACAGAGCGTGCACAGCCAACT  
GCCAGACCGGATCAATGCTGAATTTGAACCGCTGCTGGACGATCTGCTGACTATTTCCGTTGCTGAAAACGCTAATC  
GTCCGCGCAAGAGATCTCAACAAGAGCTGGATAACAACGTAACGGGATTTGGGGTACGTTGGTGCCTTGGGTAAGCAG  
GGATTTGGTTTCAAAGTCCGGATATTCACAACGTTGGGTTGATGGAAGACCGCGCAACGCTGCGTATTTCCAGCCAG  
CATATCGCAACTGGTTACGTCACGGTATTTCTGACCAAGATCAGGTGACAGGCGTCCGTTGGAGAATATGGCGAAAGTGT  
TGATCAGCAAAACGCTGGCGATCCGGCTTATCGTCCGATGGCGGGAAATTTGCTAACCTGCTGTGCTTTAAAGCTGCT  
CGGATTTGATCTTCCGCGGTGAAAACAGCCAAACGGCTATACCGAACGTTTATACAGCATGGCGTTTACAGGAAAAA  
GAAAATCATTA

>Cluster\_14802

ATGTTCTGCGGTGTAGAACTATCTGATACAGATGCGGATAGAATATGGAATGGTGAATTTATCGCAGATAGCATTTCTTC  
TAAATTATAA

>Cluster\_9787

ATGCTCAAGGGCGATGTTGATCTGTTCAATCATGTGATTTGGGAAACGGATATTTGCGGGTGTGGTTCTGCGGGTCCGGT  
TTTTCGATGA

>Cluster\_27268

GTGCGACTGGAAGCGCCGGGCGTGATTATCGGCGCTATCAGATGGAAGAGTACGGCGGTGTGGACGTTCCGCTGTATCG  
TATTTCTGACCCGATGGCATTTTTGCGCCAGCAGAAAAACCTGCATCGCATTTGTTGGCAACCGCAATATCTGGGGCAGC  
GGCTGAACAATAACGCTGACTGGCTGTGGGATAACTGGTATCGGCAAAATCTCGCGCGTATGACAGCGTACTTTCTCTTCT  
CAGTCACGGCAGAAATGTGACTCAGGCGTTACCCGAATTAACGTCGGCAATGCCATTAATAAACCTTCTGTTATGTACA  
GAACAGCCAGTTTCCCGCTGAAAAAATATCCACTGGTGAACAGTTCGGTTACCCATATGGCAGGCTACATCGGTCG  
AGCCGACGCAAGGTTAAAACCTGGAAGGCGCATCCAGCAATTTCAATTTCCGCGCAGCCGGGCAACATCTATATTTCTCTC  
GGCAAAACAGAGCCGGGACTGTACTCTGCGAGGCGATGGTGGTGGTATCGGGCGACGAGCGTGGTGTGTTTCCGA  
TACCGTGGCGCTTAGCAAAGTGTAGGTAACGAGCTTCTGGTGTGGATCGCGGGAAAAAACAGGTTGAAGCGAAGCCCG  
GCTCAGAGATCTTTGGACTGACGGTCTTTGGCGTATGACCTCGCGGTGTGACCGATGACAGCGGTACCTTGCAGTTACAA  
CATATATGCCAGAACGTTATATTTGGTAAAGATGCTGAGGCGGCTTTTGTCTCCGAGAACTTTTCTACGA  
AAGCGAAATCTACAAACCCCGCTTGTATATCTTTACCGATCGCCCGTATATCGCGCAGGCGATCGTATCGATTTAAAG  
TGATGGGTGCGAGTTCCAGATCCGTTGCATTCACCCATCGTACGGCACCGGCGAAGCTTTCGGTGTGGACGCC  
AACGGCAGTCTGTTGCAACCGTCAATGTACGCTGGATGCGCGTAATGGCGGCAAGGGAGTTTCCGCTGCCAGAAAA  
TGCTGTCCCGGAGGTTATGAGTTACGTTTACCCTGCAACAGGCTATAGCAGCAGTTTTCCGCGTGGCAAACTACA  
TCAAACCCATTTTGGATTTGGTTAGCTCTCGACAAAAAAGAGTTCAAACCTGGCGAAGCGGTCAGCGGCAAACTGCAA  
CTGCTTTACCCGGATGGCGAGCCGGTAAAAGATGCCCGCTGCAAGTTAAGTTTGGCGCTCAGCAATTAATGTTGGTGG  
TAACGATTTGGCTTATGCCGGACGTTTCCAGTGTGCTGGAAGGCGAGTGAACCGGTTTCCGACGATAATGGTCAATGG  
CGTTGAATCTCCCGCGCCGATAAACCGAGCCGCTATTTACTGACCGTCTCTGCCAGTACGCGCGCGGCTCGAGTT  
ACCACCACCAAGAGATCTCATTTGAGCGCGGCTGGCGCATTTACTCTTAAAGTACTGCTGCACAATACAGTAATAGCGG  
TGAATCGGTTGTGTTCCGTTATGCGCGCTGGAATCTTCAAACAGGTTCCGTTACGTTATGAATGGTGTGCTCGAAG  
ACCGCAGGACACAGCGGAGAGCTACAGTACGCGGTAATCTTTACCGTCAATTTGCTAAACCTGGCACTACAAT  
CTGACATTAACCGATAAAGACCGGCTTAAATTTCCGCGGTTAAGCCATGCAAGTACGCGTAAAGGCAAGCAGCAGCTCAT  
TGGTACGGTAGATATCGTGGCAGATAAAACACTGTATCAGCCAGGCGAAACCGGAGAGTGTGATTACCTTCCCGGAGC  
CAATTTGACGAAGCATTTAGCGCTGGAACCGGATCGCTGGAACAGCAGTCCGTTGCTATCGATCCGGCAAACTGGCTA  
ACGCTACAACGTTTAAACGATACCCAGTATGAAGCCCGCTACCGGTGAGCAATTCCTTTGGCGCTAACACTACTTTTTT  
GGTGTCTATACCCGTAACCGTACGATACAGTTTTTACAGAACCGCGGATTAAGTTTAAAGTTCCCGTTCGCCGTTGGAT  
TGAAAACGGACAAAACCAATACAGCTGGTGAACGTTGTTCAATGTCGAATTAACCTGCTGCTGAAAGGTAACCTGTT  
TCTGCGCAGTTAACCGTAGGCGTGGTTCGATGAAATGATCTACGCGTGCACCGGAAATCGCGCGCAATTCGGCAAAAT  
TTTTCTATCCGCTAGGGCGTAACAATGTGCTACAGCTCAGCTGCTGTTTATCAGCTACGATCAGGCGCTCTCCAGG  
AGCCGTTTGGCGCTGGCGGACTAACCGCAGCGAGCGGAGTAAAAATGCTGGAACGCTCACGGCGTGAAGAGGTGGAT  
ACCGGGCTGGATGCCGCTCAACAACCGATAAACAAGGCAAGCGTATTTACGTTCTGATGCTGATTGCTTAAAC

CCGCTGGCGCATCACCGCGCTGGGATGAACGGCGACGGCTGGTCGGCAGGGGCGTCTTATCTGCGTTCCGAAAAA  
GTCTCTACATGAAATGGAGTATGCTAACGGTGTATCGCATGGGCGACAACCGCGCGCAGGACTGTTTTATCTTCACTCAG  
CAGGATAACGAACCGGTGGCGCTGGTACTAAATTTGCAGGTGCTGAGATGCGCCAGACGCTGACGCTGCACAAGGGGC  
GAATTATATTTCCGTGACCGAGAATATTCAGCAATCTGGCTTGTAAAGTGCAGAACTGCAACAAAATGGGCAAGTACAGG  
ACAGCATTAGCACAAAATGTCCTTTTGTGGATAACAGCTGGCCCGTGAACAGCAGAAAAATGTCATGCTCGCGGATGGCATG  
GATAATGGCGTGTGTTGCCGAGCAGGCGAGCAATATCCGGTTGCAAAGTAGCGAAACGCGCAGGAGATTTTCCGTAA  
CAATCTTGATGCGTTAGTCGATGAACCGTGGGGTGGCGTGCATACACCGGTAGCCGTCTGATCCCGCTCAGTCTCGCT  
GGCGTTCCGCTGGCCGATCATAAAGTGGCGCGCTAACGACATTCGTGATGATTCAGGATAACCGTTTGGCGTGTATG  
CAACTGGCGGGCCGAGCGCGCTTACCCTGGTGGGGTGAAGATGGCAATGGCGACGCATTCCTCACGGCATGGCATG  
GTACGCGGACTGGCAGGCCAGCCAGGCGCTCGGCGTAACGAGCAACCGGAATACTGGCAACATATGCTCGACAGTTATG  
CCGAGCAGGCGGACAACATGCGCTTATTGCATCGGGCGTGGTGTGGCGTGGGCACAGGAGATGAATCTGCCGTGCAA  
ACGTTGTTGAAAGGGTTGGATGAAGCTATCGCCCGCGCGGAACTAAAACCTGAAGATTTCTCTGAGGAAGACACCAGCGA  
TATCAATGACAGCATGATCCTCGATACACTGAATCTCCACTGGCAGATGCGGTGGCAACCGTCTTAACTGACGTTG  
TGAAAAAGCGCAGTTGAAGTCCACTGTGATGCCACAGGTTACAGCAATATGCGTGGGATAAAGCAGCAAAACAGCAATCAG  
CCGCTGGCGCACACGGTTGTGCTGCTCAATAGCGGTGGCGACGCTACTCAGGCGCGCTATTTTAAAGTGGTTGACCCG  
TGAGCAATCCACTTATGAGCGCGCTGGCCATGAACCTGGTGGCGAAATATATGGCGACGATGCCTCCGGTTGTGTTAC  
CTGCTCCTCGCGGCTATGGGCCAAAATAAGTTAACCGGAGGCGGAATACTGGCGTTGGGTTGGTGGGCGTGGCG  
GACATTTCTCTTTTGGTGACGAATTACC CGCGCAAACCTGCAGGTCGCTGGCGTGAACCGGCAAAAACGGCTCAACA  
AAGTAATATCTCCGTGATCGTTGAAACCGCAGTTGTATCCGCTTATCCCGGTGAAAGAGAGATGAGCTTTACCTTACAGC  
CTGTACCAGCAATGAGATGACAGCGATGCGCTGATCTCGATGAAATACAGCTTACCAGCGAGCAGGATGCAGTTCTG  
CGCTATGGTTCAGGTGGAAGTACCCTGCGCGGGGGCTGACGTTGAGCGGACACAGTGGGGCATTTCCGGTCAATAAAC  
TAACGCTGAAAAACAGCAGGGGCAATTGCTGAAAAAGCGGCAATGAAATGGGCGAACTGGCTATATGGTGGCGGTGA  
AAGAACTGACGGGAACGGTCACTTTCCGCCATTTGCTGCGCTTCTCGCAAAAAGGGCAATTCGTTCTGCTCCTGCTCGT  
TATGTGCGTTCTATGCACCTGCACAGCAAAGTGTTCGCCAGGGAGCAATGGATCGGGATGCAGGTGAAATAA

>cluster\_66740

ATGTCCGTAACAGTATGAAACCTATCTGGCAGAACTTTTATGTAATGGGTGGTGGCATCATTCAGCCCGCGGAGCG  
CTACCAGTTCAAATCTCCCGATCCCGATAATGCCCTAAAACCTGTGGGAAGCATTCGTCTCTTGGCGGACGGCAATCAGT  
TGGAAATTTGGCCAGGGCAATATATTGATTTGCCCTCTCCCTGCAATGGTGTTCAGCTTATCTCTGTACTCAGGACCGG  
GCTCCAGCATTACAGAAAACTACATTTCTCATTTGCGCGATGAAGTTGCAGGGCGCAGCGCGTGTTTGCCAAAACAGC  
GTTGTTAATATTTACAAATAGTATGCTCGATACCTGATTAATAGCACGAAAGATGTGGCTGCACCGGATGCTATCTGCT  
ATCCAGAACTTTCACTCATCACTGAAAAAGCTCATTACCACAGCAGTAACCGTTCGGAATGTCCCGTGTGTTGCTG  
GAGGATCAACTGGCAACCGTACTGGATGAAGCGCAACCGTATTTGGTTTCTCGTCTTTGATCGCTTGGTGGATGATG  
AAATCTGGATTTCTCCGAGCTTCATTTGTTAAAGATGATGAACTACTGAACTATAGCCGGAAGCAACTACGCACCCGAC  
TGAATGAAACCGGAAATTTGATCGGCAGATAGAAGATGTGTTGAACGCTATAGTGGACAGCTGGAGAAATGTCTGCT  
GAGTTAGTACAAAATTTATTCAGGAGCATTTTACGATAAAAATGACTGGCGTGAGCTCGATTTCTGACTACAGGAA  
AGAGAAAGAAAGAAATAGCAAAACAAAACCTGGTACTGGAGGACGTTTCCGTCAAAAACCGCGAGATTTGGCAACGGGCA  
AAAGCTCTAGTAAGCGAGTAAACGTGACATCAGTCTGCTGGTGCAGGTGCAGCCGGGAAATCACTGCTGAGCTGGAG  
TTCCGTTTTCAGGTAGTGATCTTCAGGATCATAGATGAAAGATGTCACAAATCGCCAAATTAAGAAATGTACTCTTCTG  
GAGCACAGTGGCGGCGGCAAGACTTCCCGATTAAGGACTCGGTGCCTTTGACGGGCACTCCCTGCTTTTATGTC  
TCGAGCTGATCAACCGCAATCAATCAGCCGAAAGATATAAAATTTCCGCTGTTGTTAGTTCGAGCAGGGCAATTCGGCTA  
AACGATATTCAGCATTCTACCGTGTGAGCAGTAAAGATCAATAACCCGCAACTGGAAGATAACAGCTGCGGTAT  
TGCCGAGTCTGGTAACTGATCTATACGTTGGATGACGGGAATGAAGACATCGACTGCCAACATTTATGCTCAGGTGAAAT  
TTGAGACGCTGGCAAAATCAAGTGAACCTGTTTCAAGTTGCTGCTGTTCCGGTATTCCCGTCTGCTCAATTAACGCTCAG  
GGCGGGGAGCAGAAAGGGTTAACGCTGCGGTTGCTTTTGGACAAAGTCTGTTCAATAAGTTGTTCAAAGAGAGGG  
CAATGCAACCTGGAAACCGATTAAGAAAGTGCATCATACTCGATATACTGAAACAAGGTCGTCGGAGTACGACAGCAGT  
TGTTGATGCGAAGCCCTTATTAATGAGCAACGTTTGTGGGACGGGAAATGACGATAGCGAGTTTGGCTGGATGAA  
CTCCTTGGCAGTATCTCCATCATAACGCCATATGACAGTATTTTCCCTACTATCATCGTCGTAACACCCGTCGCGG  
TCTGGTATCGTGGTACGCGAATATCGCACACTGGTACAGTACTGTTACTACGTTTGAACAGTCACTCCAGCAATCG  
GCCTGAGTAGAGCCCTAACAGCGCAGGAAAAACGCTTCTGCACTTGGGATCTGCCGCAATGATAGCCATGAGCGCATC  
TCACCACGACCCATTAGTGTGGCTACCATCTCAACTGGCAGACGCTATCGTTACTGAGTCGGAACAGAACGATTC  
GGCTTCAATTTGCCACACTACCGCGCATCTCTTGTACCGCTGATGGTTTCCGGTTAATGCGCTTTGTTTACCAAGT  
AACATGAATACCGCAACTACAGCCGTTGAAGAAAACCGCTTCTGGATTGATGTGGTCTCAGCGGAAAGTTAGCCAT  
GACTATGTTAAACGCTCTGGTAAAAGACAACTCAATGAGTTACAGGACGCTTACGCCGATGTTTCCAGAGCACTGAAAA  
CAGTGCATTTGATTTAATGCCATTAATCAAGGAAACGCCAAAGAACTGTTTTCGGGATAGTGAATATTTTAAAGCAAG  
AAAAAGAGCAGCTATTTCCGTTTCACTGTAAGTGAACCTGTAAGTGAACGCTTTGCTACCCAAATATGTTTCCCGGAA  
AGTGGTAGTTATGAGCAGCTTAAAAACGATCTCGATCTGAACAGTGGCGTATGGCGAGCTGAAGCCGATATGTTGATCGA  
TCTGCTGCGTAGCCGTTAACGTTACAGCAAGTTTGTCTGCGGTCAGAAAGCGCAAGCTGGCTATGCTCATCTGGCAT  
TTTTCACTAATACAGCACTGTGGATTGTGCGCAGATCCGCATGGAAGATGCGTCCAGCGGATTTGTTGCTATGCGCTT  
ATTGCTGGGGAAGGTGCTGAAACACAGGGGATGCTTACTTTACC CGCTTTGGACTGCGTGTGTTGATGTTGATGAGCTT  
CTGCGCCCTGCGTCTGGCCGACTAATCGGTTGCTGTGGCAACCCGACGTCAAAGTAAACAGCAATATCATGGACAAG  
GGATCGGCTGGCTGTGAGTGGCAATTTTAAACAGTACTCAATTACTCCTACAAATAGCGCGCTCTGGACCACCATAAT  
GATCCAAAAGTCACTCTGACTTTTTACCAGTCAAGAAAGTGGTGTGTTATCCACTATCTGACCCAGTACACCGAGTTG  
CGCAGGCTACGATGCGCTCACCGTACAGAAAGCAGGTTGATTTGTTCTGCGGTTGCTCCAGACCGGAAGTCCGTCAGGGC  
AACCTGCTATTGATAGTACGATTTGCTGGCTGAATTTAATGCCTTAAACGGCAATGGCTGCTGAAAATGCTGCGCTCC  
AGTGAAGAGAGCGTAAAGAGAAGCAGCGCATTAAGTGCCTACAAATTTGTGCAATCTATGTTGCAGCAGTCCGATAT  
TTGCTGGATTTCCGTTATCGGTTGGCCGAAATGATCCCGTGTCCGGGAAATGTTGACTGAAAATGAAAGAGAGGCTTTT  
CGAGAAATTTACAGGTTATCGTAAAGTGGATCTCTGATGATGTGCTCTTTGTTGGTTCAAAGAAAACCGCTCTAT  
CTGTTGCCGCTGGAAGTTAAAACAGGGGCGCGGCTGACTACAGCTATGCGGGCAACAGGCTCGTGAAGCTGAAACGTTA  
TTTACAGCAGGACATTTGGAACCAACCGTGGCATCACAATTTACCGGGCGCTCTTTATTCGTCAGGTGCTGATGC  
AGGTGGAGAACTCGCTCTGATGTTGCTGTTGACAGCAAAACTGGCTCCCTGCTCGAGCCGCAATGGTGGTTA  
ACGGGCGACTATCAGTTAGGCGAGTTGACCGATTTAGCGGACGGCTTCGTCGTTGGCGCATGTGGACAGCGCAACCTGCTT  
CGATCTCTCTTATAAAGAGACAGCGGAGAAATCTTACAGATAGAAATCCCTTATTACTGCTGCCTTCTGATTTGCTG  
CTCAGGGGATGAAACCGCTGGCGGAACGTTATCGGGTCCGGAAAAATACCGGCTTAAAGCAGAGTGTGATGCACT  
CCGACCAACCCGAAAGCGCTGGTAGAAGTCAACACCGCGACTCTGCAACAATCGTTTTCGAAAACAGAGTCTGTTACCGCC  
TGCTGTACCGGGCGCAACCCCTGATATTAAGCAATCTCATTACAGATCCTGTTGGTTATGATGCTGCGCGTACAGCC  
CGTTACATTTGGGAGCAACCAACACCGCGAAGTTTCAATGAAATCAACATACCGGCTTATTTGGAACGATGGGACCGGTA  
ACCCAGTTTACTAAATGGTGCACACAGTTGATGCGTAAATCAGTCCGTAATGTTGATGTTGATGTTAAACCTATCGGTTGCT  
GATCTTCCGACTACAAATCAGACTATGTTGATGAAAGCTTTCTTGTGATGCAACGGGTGCTAAAAAGTACAAGTTATTAAGC  
TGCTTACACCCCTTATCTGTTTGGCGACAGCCAAATGCTACCAATCCACTGCTGGCGACTATCGGAAACGATG

GCGAAAGCCTATGGGCTGGGCCATAAACAGCAGCTTAAATAGAAAATCTGATTTTGAATGCTACGAAGCGGCAGGCAT  
TTCGCCGGAGGATCCGACAAATGGTACCGACTGCGCGCAGGATTGAAGATGTATGGCAGCGTTTCCTCGATCAGGAGA  
AGGTTGAAGAAGATTCGCTTTACGCGACTTTCTAAACTGGCGGTTACAAGATATTCGAGACAATCCCGGAGAAGATG  
ACCACTTTTACGAAATGATTTGACGGTGTCACTGTGATTTGAACTGGCTGGTTACCCCGCAGAAGTGCAAAACCTTGTGGT  
TGCACTAACGCTGGATCTTTTTACGCGCAGATGCAAAAGCGGTAACACAGTAGTGCAGGGGATATTCGTACGTC  
CTAAAAATGATTTCTGGTGGACGAAGCCGATAACTTTATGCGTCAGGATTTTTCCAGTCTGCGTAAGATCCTTAAAGAAGGC  
CGTGAGTATGGCGTGGTGGGATCCTGTCAACGAGGAGATCACTCACTTAAGACCGGGGAAAAATATGCTCCTTA  
TATTTAACGTTGGTAATCCATCGTGTTCGAGATTAGGAATGCGGATATTAAGCGGATTTAACGTCGATGATAAAG  
GTGACAGGAGTCTTTGATGGGACAGATTCGGCAGCTTGAGAAGCATTTTAGCCTGTATGTGGATGGAGATAAGCGGGTT  
AAGAAAATGCGGGATCGTGCATTTTGGGAGTTAATTAATGA  
>Cluster\_56413  
ATGTTTATCAGCAATAAAGCTATTTATGTTACCAATATCATTTTCGAGTGCACACTATCTATCTGTTTTTCGAGATAT  
AAAAACAACGTGATA  
>Cluster\_49645  
ATGCGTAAAGTTATGAAGTCGGTATTTTACCTAAGATTAACCTATGTAAACAGTGTGGAAGTATTGACCAATTCATTCGG  
GACAGTTATAGTGGTAGACAAGTTAA  
>Cluster\_26953  
ATGATTGTTGTGCTAAACGGCTGGTGTGATCTCGCGCACATTAATGAAGGCATAAAAAAGCCGGCATCATGCCGGCCAA  
AAAAATATAA  
>Cluster\_46074  
ATGAAAAACAATAATCATCATGGAGCTACAGGCTCCTTTTTTATGTTTCGATTACCCCTCAAGCGTATTAACCAAAAT  
CAGGGATTA  
>Cluster\_41249  
ATGAATATGCGGATATCTTCTACGCAAGGATTTTATCTTTACTCCCGTCAATGATTGCATCTCTTTCTCTGGTAA  
CGGTGCCGCGAGCGGTCATTGATTCATGTACGGGATATGATATCAAAGCAGCTGTACGGCCAGCAGGCAAGCCTTTCAG  
GCAATATGCAAGACTGGAGCATCGCGGATGGGCATGGTGTGATTTTTTCGGGTATGGCCAATAATGCCAGCGGTGGCGCA  
GTATTTTTGCGAGCAAGGTGCTGAATTTACGATATCAACCAAAATGAAACAGGATGACCCCTGTTGCTGATAACTCGGT  
TAGTGGCGAATATAATAAATGGTGGGCTATCTTTGCTAAGAAAACCTCAACGATAAATCTGGCAATGTTATTTTCGACA  
GTAATGTTGCGAGGAGCTATGGCGGAGCAATCTATTCTGCCGTACCAATGATACCGGTGCCGCGATTTACGTGTCACT  
AACGCCGATTTTCAAAATACATCGCTAATGACGGCAAGGCGGTGCAATTTATACCAATCAATATGACGCTCTATTTAAG  
TGATGATGCTTTTAAATAAACCAGGCATATACATCAACAAGTTATAGTGATGGGGATGGCGGCGCCATTGATGTTACGG  
ATAATAGTACGGATAACACACATCTTTCAGGAAAAACGATAATTAATAATACCTCCTTTACCAATAACTATGCGAGAAGT  
TATGGCGGAGCAATTTATACAGCAGCACCATCCCCGTATCTTATGATATTTCTGTTGATGATAATTTATGACCAAAA  
CAATGGTGTGATGATGATGAAAATAACAGCGCTCGGGATATGACCAATTCGGCGACGGCAGCGCGGGGGGCTTTATGT  
ATATCGGTCTAGTGTGGCTGAATTTAATGCTGCCCGGATAAAACGCTGGTAATAGGCAATACCAGCAACGATGGCGCG  
ATTTGATCTTCTGGCGAACCGGGAGTCACTGTTAAAGAGGAGCGGGAGAGTTAGTCTCAATGCCAATAATGCGGTT  
TACCGGCGAGATGAGTATCCAGAATGGCGAGGTGACGTTGGGGCGCAGCGATGAGTTAATGAATGTCGGCGACACGCACT  
GTCAGAGCGATCCCGAGGATTTGCTTTGGTCTGATGGTCCGCGACTGTTTCTGAGTATCAGGCAAGCAATGATGTT  
GGCAATACACAACAACAGCTTTGTGCACTATTAACCGGTTTGTCTAATGGCATTTGAAATATCGACGCGCGGCAATGTT  
TACAGTAAACAGGCGGTTTTTTCGGCTCGATTACAGGTGAAGGACAGTTGACCGTAGCGCAAGATGCGAGCTATCTCC  
TGACAGGGCGCAGCTGATGGCATTAACCGCGATATTGTTGGTGAAGATAACGCCGATTTGTCGCTGGCGGGGAATCAG  
GCCGATTTACGGGCAATGACAGCGGATCCGCAATCGATCGTGTAAATGGCGGAGTATGGATCTCTGATTTACCCAC  
CTGGGATGGCGATAGCTCATACAATGACGGTCTGCAAACTCAGCGCAGCGGGGGGACAGTATGGCAGTAATGATGTCG  
TTGATATCAGCAGTGGCGATGATTTACATATTGGCGGTAGTGTGCGCAGCAATGGCGTTTATGTCGTCATTAATGCG  
GGGATCAGCGCGTAAAGCTGGCGAATAACAACGGTTAFTCTCGTAATACGCAATCGCTCCGGTACGCTTGAAGTACG  
CGATAATTCGCAATTTGGGGGACACAAGTTACAACCGTTTCACTGATCTTCACTGATCCCAACAACACAGTGAATGGATG  
TGACGACTGATGTTGACACTCGCTCGGCTACAACAGGTGAGGGCAGGAATATTGAAATGCGCGCTGATGGCGAATACAC  
GTTGAGGATGGCGTAGATACGCAATGGGGCGGTTGATGGCGGATAGTACCGGCAACAACCTGGATAGCGTAAGCAGCTT  
GACTAAAAGTGGCGCGGTACGCTGGAGTTGACCGCCAGCGGCACTGCGACTGCGGTACGTTGGAGGACGGAACCC  
TAAAAGGTGAAGCGGAGAAATATTTATCTTATGTTTCTTCACTGTGGGTGGGGGAAGACGGTGTTTTTGAAACCGGGCAA  
AATCAGGATATTCGCTCAATCGATGCGACCTTGGCGGATATCGACATAACCGATGTTGTTGCGATGACGCA  
GCAGAATACGAACCAGCGCTGGATGCCGCTGTTAGCGGCGACGGTACGCTGGTGAATGCCACCGATGGCGTACGCG  
TGGCAGGTGAACCTAATACCAACCTTGAACCTGACAGCTGACTTATCTTCCGACGTTACCGTAAATGGCAATCTGACC  
AATACGTCGGGTGCTGTCACTGCAAAATGGCGTCTGCTGGCGACAGCTGACGGTAAATGGTGAATATACCGCGCGG  
TACGCTACTGCTCGACAGCGAATTAACAGCGGATGACTCGGCAAGTGAACCACTGTTGTTGAAACCGGGCA  
ACACGGCGGTGGTAAATTAACCCATTTACGGTATTTGGTGAAGCAGATCTACAGGTATTAAGTAGTTGATTTTCGAGCT  
GATCCCGCGAGTTTCAAAAACAATGCGCAGTTTCACTGTCGAGGAAGCGGCTACGTCATATGGGGGCTATGACTACAC  
GCTGGTGAAGATAACAACGACTGGTATCTGCGATCACAGAAGTCAATCCGACGCGCGGCTGATGATGCGAGTGGATGTTGGT  
CAGATCCTGATCCCAAGCGGATCCCGACCCCAACCCCGGAACTACGCTGCTACCGCGGTTGATGATGCGGATGATGCG  
AAAGTTGGTGGATATTTTAACTGCGGGCGCAATCAGGATTTGTTGATGGAGCAGCGATCAGCTGGTGGCGA  
TGGTCAGACGCTGAATTTACGCTTATCGGGGGCTTATCATACAGCGGTTAGGGCAGTTGGCTCAGCATGAAGACA  
CTTCTACCGTGCAGCTTAGCGGCAACCTGTTTAGCGGGCACTGGGGTATGATGCGGAGTGGATGTTGGATTTGTTGGT  
GGCTACAGCGATAACCAGGGCGACAGCGCTCGAATATGACCGGAACCTCGCGCGATAACCAGAACCAGGTTATGCCGT  
TGGGCTGACCTCAAGCTGTTATCAGCAGGTAATCAGAAGCAGGGGCGCTGGTGGATAGCTGGCTGCAATATGTTGGT  
TTAACAATGATTTTCCGAACAAGCAGTGGCGTGGATCATTACCCTCGTGGGGATTTACGCTCGCTGGAAGCGGTT  
TATCAGTGGTTACCGGGCATGGTGTGGTATTGAACCGCAGACGCGAGTGGTATTATCAGGGCGTGCAGCAGGATTT  
TACCAGCGCTAACCATGCGCGGCTGTACAATCGAGGGTGGTATTTACAGCAGCGGCTGGGTTTACACAGCGAATGGC  
GTACTGCTGTTGGTGTACGCGCAACGTTAGATCTGAATTTATCAGCATCCCATTCGACGGGAATTAAGAAAGATGGC  
AGCACTATCAGTACGATCGCGGCAAGCAACGGGGTGAATTTAAGTGGGAATAACGGGCAATATCAGTACGCGAGTTTC  
GCTGGTGGTACGCTGGCGAGAAAGGAGTGAATTTTCCGACAGCGGAGGTTTTTCTCGATGACAGTGAAT  
GGTAA  
>Cluster\_42661  
GTGGTGTGCTCTGTGAGCAATCGACAATAATACCTACAATGAATAAAACCGGGGGGCTTACGCGCAATCACGG  
TGCAAAATGCCACCAAAAATCACTAATGTTGCTAAAGGTACGGTTTCTGCAACCCCGCAGGATGTAGTAAACGGCTCTC  
AATTGTACGACCTGCAGCAGGATGCCCTGTTGTGGAACGGCACAGCATTCAGTCCCGCACCGGTAGTGAAGCTACCAGC  
AAAATCACCACGATAACGTTGGCGACCAACCAACCAATATCGCCACTAACACCACCAATATCTACTAACCCTACTGATC  
GGTGAATAAATCTCGGTGAAGACGCTGAAATGGGACGACCGCGAGGCGCATTCACCGTGCACACGCTACTACGCCA  
CCAACAAAATCAGCAACGTACAAGCTGGCATAGTCTCCTGACAGCACTGACGCCATAAATGGCTCACAACATATGTT  
TTGGTGTATTCATTCAGCTCTATCTGGTGGTGGTGTGATATTAGCGATACAGGTGATTAACCGGGCAACCTATAG



TATTGGCGGCACTGACTACTAAGCTCGGTGATGCTCTGGCCGCAATTAACACTTCATTTAGTGATTCTCTCGGTGATG  
CTCTGCTCTGGGATGCGACAGCCAAATGACGGTGTGGTGCATTTCAGCGCGGTGCGGGGTAGATAACACCGCCAGTAAG  
ATTACTAAGCTCGCAATGGTGCATCTCTGCCACCAGCAGCAGCGGATTAACGGCTCACAACCTCTATACCACCAATAA  
GTACATCGCTGATCGCTGGGTGGTGTGATGCAGAACTCAACCTGACGGAACTACTCTGACCCGACTTACACCAATGCAA  
ATACCGATTACAAACAGCTCGGTGAAGCTCTGGATGCGCTTGTATGAGAAGCGCGTGTCTGGGATGCGCAGCCAAAC  
GGCGAAGGGGCTTACAACGCCAGTCATGACGGCAAGGCCAGCATTATCACAAACGTTGCTGATGGTAACATTGGTGAAGG  
TAGCACCGATGCTATCAACGGTCTCAGCTGTTTAAACCAATATGCTGATCCAGCAGAACAGCGAAGTCATCAATCAGC  
TTGCCGGTAAACACAGTGAACCTACATCGAAGAAAATGGTGCAGGTATTAACATATGTGCGTACCAATGACACCGGTTTA  
ACCTTACCAGTACCGCAGCAGCAGGTATGGCTTACCGCTGTGGGGTATAAACAATGTTGCCAAACCGCATGGTGCAGTGC  
GGCCATGGGTTATAACTCTTTTGGCCGAAGGCCATAGTAGCGTGGCCATCGGTGAGGCGAGCTACAGCGGCGTTGAGACGA  
GTATGCGCTGGGTAGCGAATCCGCTCTCAGCCGTGTGATGTTAAAGGTTCTCGTAAACACCGCGTATCGGAAGAAGGT  
GTTGTGATGGTATGACACCACGGATGGCAAACTGCTTGGTGCATTGTCGATCGGTGATGATGGTAAATATCGTCAAA  
CATCAACGTCGCGGATGGTCTGAAAGCCATGACGCTGTACTGTTCCGCAAGTGCAGAAACCGCATGGTGCAGTAGCAA  
CCACACCAACCAATACTATCACGCCAATCAACGGCTGAAGACTCAGTGGCAGTGGTGAAGACTCGCTGGCAATGGGT  
GCGAAAACCATCGTAAATGGTAAATGCGGGTATTGGTATCGGCCGAACTTTAGTTCGGCTGATGCGATCAACGGTAT  
TGCTATCGGTTACTAACGCACCGCAAAATCATGCCGACAGCATTGCTATGGGTAATGGTCTCAGACTACTCGTGGTGGCG  
AGACCAACTTACACTGCTTACAACATGGATGACACCGCAGAACTCTGTGGGTGAGTCTCTGTGCGGCAAGTGCAGTGC  
CGTCAGATCACCAACGTCGACGGGGTGGCGGATACCGATGCGGTTAACGTTGGTCAAGTAAAGTAAACGGACGCGCA  
GGTTTCCAGAAATACCCAGAGCATTACTAACCTGAACACTCAGGTCAATATCGGATACTCGCGTGACCAATATAGAAA  
ACGGCATGGCGATATCGTAAACACCGGTAGCACCAAACTTCAAGACCAACCGATGGCGTAGATGCGCAACCGCAG  
GGTAAAGACAGTGTGCGATTGGTCTGTGTTCCATTGCTGCGCTGACAAACAGCGTGGCGTGGGTACAGGCTCCGCTG  
CAACGAAGAAAATACCATCTCTGTGGGTTCTTACCAACAGCGCGTATCACCAACGTTGCTGCGGTTGTTAATGCCA  
CCGATGCGGTTAACGTTTTCGCAACTGAAGTCTTCTGAAGCAGGCGCGTTCGCTACGACACCAAGCTGATGGCTCTATC  
GACTACAGCAACATCACTCTCGGTGGTGAACGGCGGTACGACTGCATCAACAGCTTCTGCTGGCGTGAATAACAA  
CGACGCGGTGAATACGCGCAGTGAAGCAAAGTGTGCAGAAACGAAGCAATACACCGATCAGCGCATGGTTGAGATGG  
ATAACAACTGTCCAAAAGTGAAGCAAGCTGAGTGGTGGTATCGCTTCTGCAATGGCGATGACCGGCTGCGCCAGGCT  
TACACGCGGGTGGCAGCATGGCCTTATTGGTGGCGTACTTACAACGGTGAATCGGCTGTTGCTTTAGGTGTGTCGAT  
GGTGAAGCGCAATGGTCTGTTGGGCTACAAATTACAAGTAGTACCAATAGCCAGGGTGAATACTCCGCGCGCTCGGTG  
CCGGTATTCAGTGGTAA

>Cluster\_29391

ATGTCACGACGCCATTTTTACCGAACCGGACGCGAGCAGCGCTGTTTCGATCTGCCACGGACGAACTGTGCTACTGAA  
GTTCTACACGCTGGCGATGATGACCTGGAACCATTAGGCAGCGCGCAGACCGGAAACAGGATTGGCTTTGCCCTGC  
AATTTGTGCTTACGATATCCGGGCGGTGCACGCTGCTGTTGAGATGATCCCGCTGAAGTCTTTCTCTGTCGGT  
GCTCAGCTTGGAGTTCGGCTGATGCGCTTCTCACTTATGCCACACGGCGCAAAACCGCTCAGCAGCAGTGGACACGCT  
CGCGCAAAATTCAGGCTACAAGACCTTACGCGCGGTGGTGGCCGCTGATCTGCGGGAGTGGACTTTCGGCCAGGCGGAA  
ATGCCAGATCAACAGGAGTCTTGTCTATCGTTTATTGCTGCGGTGCGGAAACTTCCACCAATTCGCTCGCCGATATCG  
ACAATCGAGCGCTTGTGCGCGGATGCTCTGGTCCGCGTGAAGCGCGGATTGAAACCGGGATTGCGGAAAATTTAACAGC  
GGATGTTCCGCGATCACTCGGCAAACTTCTGAGTGAATTTGCTGCCCGCAATATCAGTCTGTTTCTGCTGCTGCAACT  
TCGAGGTTGGTAAACAACCTGCTGCTAACCGTTTGTCTGACAGGCTCGAATTTCTGCTGCTACCCTGAATATCAATCAT  
AGTCTTTGGCCAGCATACTGCCCATTGCCCAGGCTGCGTGGCAGGGTGAACGCTACTTACACGACGGTATTGGC  
TGACATCACTTCGGACCGCGCTGGCGATCTTGGCGTCTGTGTTGTTGGAGTGGGAAGCGGATGTTGCTGATGCCATAG  
TCGAAAACCATGACAGGATCGTAGGAAAACCTGGCGGGAAGCGAAGCGCCAGCATGACGAAACAATTTCCGGCTCTAAA  
GCCACACTCAGGATGACATCGTACCTTACCGCGCTGGAGCTTCTGTTGAGGCGCGAGTGGCGGATGAGCGGACCTG  
GGAGATGGCTGTGCGCAGTTCGGTTGATGCGGACCGGCTGCTCAACTGGTAGCGACAGGGACTCAACTCAGCAACACGC  
TAGCCGATGAGCCTTCTGATATGTCGGCAGGATACCATCGCTTCTGCTGTTATGCGCCCGCATGTTGCGCTGTCTG  
AAGCTCGAAGCGCGCGGTCGCGGACCATTTGGTAGCAGCAGCTTGTGCTGATCGGAGAGATGAAAGGTGTTGATCGCC  
AGAAAGCGTTTCTGCGCCAGCTCCAAATGGAACCTTACGAGCTCAGGAAAAGGAGATACCCGTTCTTGGG  
AAGTGGCGGTACTCTTTACCTCCGGATGCTTTTCTGTTCCGGAGATGCTGCGCTCGCTCATTCGCGCGCTATGGTGC  
CTCAAGCAGGTACTGGTCCGATGATCGCGCGCAGGAAAATGCAAACTGGCCGTGCTTCCAAACCCACAGGATTGGCT  
GGCAGACGAAAGCGCGACTCAGATCGCTCTTAAAGCGGTGGCCGGGCTGCCGTAACGGCACTATTCGCGACGGTA  
GCATAGAAGATGGAAAGCTTGGCGATGACAGGTTGACAGCAGCTGCGGATGGTGGCGAGGCACTCATATGGATCTG  
TATCGCGAATGCGCTCCGTTCCGATTACCGCATGCTGCTTGAAGTTGATGACAGCCCTGGTTCACAGATGCGTTTAC  
CCATCTGAGAACCGGGGCTCCATGTCGCGACCGGATCGGTCTGCTCAACGTCCTGCTCGTGAAGGGCTCAATCTGGGCC  
TGGCTAAGATGGCGGAAGCTACAACACGCATGATTACTGGCAGCTCTCACGCTTGGCCGCTGGCATGTGAAAGCGAA  
GCCATGAACCGGATGGCAATTTGGTGGTGGCCGCGGTAACCTGCCGATGTCACGCTGCGGGGATGGGCGGACGCTG  
AGCATCGAGCGATGGTCACTTTTCCGACAGCGCGGATGGCGAAGCATGAACATGGTCAATGCCAAATATGGTCTG  
TTCCCGGCTCAAAAGCCTACTACGTAAGCGACAGTTTCGCGCAATTCGCTTGTGCTGATCCCGCGCAGCGTGAGC  
GAGGCAGGTATATCTCGATGGACTACTGATGACAGGCTCGGTGCGCATGTTTCGCGAACAGTATGCGGATACAGCAGG  
ATTCACCGACCAATTTGTTCCGAGCCAGTAGCCTGCTCGGCTACAACTCGTTCGCAATCAGGGATGCGCATCGAAGC  
GGTGTACGATTTAATCCGATACGACCCCGAGGAGTTACGCAAGTTGGTAGGTGAAAAGCCCGGAGGATCTTATC  
GTTGCGAACTGGCCTGATTTTTCCGTTGTGCCGCGACGATGACCGCTGGCAAAATCAGGCCAGCAACTCTGCGCAA  
GCTCGCTTCTTACCACAGCAAAAACCTTGCAGTTGCGCTTCTGTAAGTTGGTCTGATGAAAGGCTTCTGATGACGTA  
TTGAGTGGATCTGGATACGGACATGACGCGGCTGCTCAGATCGGCTTAAACAAGGGAGAGGCCACCATGCGCTCAA  
AATGCGCTCCGATACGGGAGGACGGGGAAATTCGCGATGCGACGACAGGGGCGAGCCTACCGAATCGCTGGGCTCAA  
TTTATTGACTGCGGTGATCATTTACTGGAATACCGTCCATCTTGGTCAAGCGTACGCGGACGCGGGAACGAAGGTTGG  
ATGTTCCCTGAATTTCTTCCACATATCCCATTTGGCTGGCGCACATTTACTGACTGGCGAATATCTTTGGCCC  
AAGGAACCGAAAGCTTAG

>Cluster\_25899

GTGCTAGAAGAATACCGTAAGCAGTGTGAGCGTCCGCTGAGGGGATTGCGCCAAACCCCTGGATGCAAAACCAAT  
GGCGCACTTGTAGAGCTGCTGAAAAACCGCCCGCGGCGAAGAAGAATTCGTTAGATCTGTTAAACAACCGTGTTC  
CCCTGGCGTCGATGAAGCCGCTATGTCAAAGCAGGCTTCTGGCTGCTGTCGCAAAAGCGAAGCTAAATCCCGCTG  
CTGACTCCGAAAAGCCATTGAAGTGTGGGCACTATGACAGGTTGGTACAACATTCATCCGCTGATGACGCGCTGGA  
TGATGCCAAACTGGCAGCATGCTGCAAAAGCACTTTCTCACAGCTGCTGATGTTTCGATAACTTCTATGACGTAGAAG  
AGAAAGCCAAAGCAGGCAACGAAATATGCGAAGCAGGTAATGCAAGTCTGCGGCGGATGCGCAATGGTTCCTGAAATCGCCG  
GCGTGGCTGAAAACCTGACGTTACCGTCTTCAAAGTCACTGGCGAAAACCAACACCGATGACCTCTCCTCGGCACCGA  
TGGTGGTCAAGCCGATATCCCATGACGCGCTGGCGATGCTGAAAACCGCCGTAAGGTTATGAGCCAGATCAGC  
CTGGTGGTGGTGGCGGATCAACAGATGAAGCTCTGCAACGAAAGGTTTCCCGCTGGCTGCTGCTGCTGCTGCTGCTG  
GGTACGGGTTTACTGCGTAAATCCGCCAGAACCTCGTCTGTTGGTATGGGCGATGATTTCCACATGTTGCCGAACAA  
ACGCGCGGTTGGTGTGCTCGCGGTAATAATGACCCATCTCTTTAACACGATGGAAGACGCGGTTGACTGCCAA

TGCAAGTCGACGCTCTAACTGAACATGGGCGACGTAATTGACGTTTACCCGTACAAAGGTGAAGTGCCTAACACGAA  
ACCGGCGAACTGCTGGCAACCTTGAACGAAAACCGACGCTGATTGATGAAGTGCCTGCTGGCGGCGTATTCCGCT  
GATTATCGGGCGTGGCCTGACCACCAAAGCGCTGAAGCACTTGGCCTGCCGCACAGCGATGTGTTCCGTCAGGCGAAAG  
ATGTCGCTGAGAGCGACCGTGGCTTCTCGCTGGCGCAGAAAATGGTGGGCCGTGCCTGTCGCGTGAAAGGCATTCGCTCCG  
GGCGGCTACTGTGAACCGAAAATGACTTCTGTGGTCTCAGGATACACCGGCCGATGACCCGCTGATGACGTAACCGTCTCG  
CCTGGCGTGCCTGGGCTTCTCGGCTGACCTGGTGTGATGCAGTCTTCTGCCACACCGCGGCGTATCCGAAGCCAGTTGACG  
TGAACACGACCACACGCTGCGGACTTCAATTATGAACCGTGGCGGTGTGTCGCTGCGTCCGGGTGACGGCGTAAATCCAC  
TCCTGGCTGAACCGTATGCTGCTGCCGGATACCGTCCGTACCGGTGGTACTCCATACCCGTTTCCCGATCGGTATCTC  
TTTCCCGCGGGTCTGGTCTGGTGGCATTTGACGCCCAACAGGCGTAATGCCGCTGGATATGCCAGAAATCCGTTCTGG  
TGGCTTCAAAGGCAAAATGCAGCCGGGTATCACCTGCGCGATCTGGTACACGCGATCCCGTGTATGCAATCAAACAA  
GGTGTGCTGACCGCTGAGAGAAAGGTAAGAAAACATCTTCTGCGCGCATTTCTGGAATTAAGGTTCTGCCGGATCT  
GAAAGTTGAGCAGGCATTTGAGCTGACCGATGCGTCTGCCGAGCGCTCTGCTGCCGTTGTACCATCAAGCTGAACAAAG  
AACCGATCATTTGAATGAACTGAACTTAACTCTAACATCGTCTGCTGAAAGTGGATGATCGCGAAAGGTTACGGCTCGTACC  
CTGGAGCGTCTGATTTAGGGCATGGAATAATGGCTGGCGAATCTGAGCTGCTGGAAGCCGATGCAGATGGGAAATACGC  
GGCAGTGTGACATCGATCTGGCGGATATCAAAGAGCCAACTATCTGTCACCGAATGACCCAGACGACGACGCTCCGC  
TGCTGCGGTACAGGGCGAGAAGATCGACGAAGTATTTATCGGTTCTTGCATGACTAACATCGGTACTTCCGTGCTGCT  
GTAAACCTGATGGATGCGCAAAAGGTCAGTTGCCACCCGCTGTGGGTGACCCGCAACCGCTGATGACGCTGCGCA  
GCTGACCGAAGAAGGCTACTACAGCGCTTCCGTAAGAGTGGTCTCGTATCGAGATCCCTGGCTGTTCCCTGTGTATGG  
GTAACAGGCGCGTGTAGCAGACGGTGCACGGTGGTTTCCACCTTACCCGTAACCTCCCGAACCGTTTGGGTACTGCG  
CGAATGTCTTCCGCTTCTGCCGAACGCTGCTGTTGCGGCGCTGATTGGCAAACGCGGACCGGAAGAGTACCA  
GACCTACGTCGCGCAGGTAGATAAAAACAGCCGTTGATACCTTACCGTTATCTGAACCTTCGACCGCTTTCTCAGTACACCG  
AAAAAGCGGACGGGTGATTTCCAGACTGCGGTTAA

>Cluster\_63620

ATGAGCACAAAACCACTCTTCTGTTACGGAAAGCGAAAAATCATCCGGTGAACCTGACGCTGCTCTGTGGGCAAGCAA  
CGATTTTGAATCGACCTGTGCCACTCTGGACTACTGATCGTTAAGTCAGGTAAAAAACTGAGCAGCTATTTTAAAGCTG  
TTGCCACGATTTTCTGCTGCTTAAAGACTGCGCGTGAAGGTGAGATCGATTTTACCTGGAGTGAACGCTATCAACTC  
AGCAAAGACTCCATGACATGGGAATAAAACCGGGAGCAGCACAGCAACGCTCACTATCAAGGCAATACCAACGTC  
CGCGAAGACATGACTGAGATTGAGGAGAAATATGCTACTTCCAAATTTCTGGCCAGGAACTGCCATTCGTTGGCTGCTC  
AACACGGCAGGAAAAACCGGTAACGCACGTTTACCGCAGCGACTCCAGGCATTACACATTTGCTCGGGCTGAAGAACTA  
CCGGCTGTACTGCCCTGCTGTTTCCACAAAACAGCCTGCTGACCCGCTGGAAATTCGCGAACTCCACAAAATGGT  
TCGTGACACTGACAAAGTTTCCCTAATCTGGTAATCAAACCTGGGACTGATAACTGCTTTTTTTCGAAGCATACCTGA  
ACGCTGACTACACCGATCGAGACTGCTGACAAAAGAGCTGATGAAGGTAATCGTGTTCACACATCACTCCGACCGCT  
TCCGGTGTAAATGCTGGCGGCGGAAACCTCACCGATCGCGGCAAGGTTTCTGACACGATCTGACGCTACTGGCGCGGA  
CGTAGCCACTGGCGTACTGGCCGTTCAATGGATCTGGACATCTATAACCTTCTATCCGGCACACGCTAAACGCATTGAGG  
AAATTAATCGTGAATAAAACCGCCCTTTCTGTTTTCCGCAACAAATTCATACCATTGCCTGGCGGGCTGGATTATTTCC  
CCGCCATCTGTTGGTTGCGTCCGTTAAAAGAGCACCAATTTGGGATCGAGGTATCCCGCGCACGCTCACTGAATATCTGAA  
CAAAGTACTGACTGAAACCGATCATGCCAACCTGATCCGAAATCGTGGATATGCTGCGGTCGCTCCTCTGCCCCGA  
TGCCGACGCGAGTAAACAGAAAGGAAAAACAGGATGATGAAGAAAAACCGCAACCATCTGGAACAACCGCAGTTGAACAG  
GGAGGCTGAAACAATGAAACCGGACGCACTGAACATCACTCAGGACACGCGCGCTGGATGCTCAGTCACAGTAA  
TTCTGTTGATGCGAAATACTCAGGAATCGCGGACAGCTCCATAAAGCCCGGAAAAACATTCATCAAATACTCTGTG  
ATGCCGATAAATGCTTGTGTCATCAGCTGATGAAATTTGTTGACGGAAATAGCGACCCGAACGATCCGAAATGGGTAAAG  
GGGATCCAGACTCGCGATGTGTGTACAGAACAGCCAGAAACCGGAAAAACCGCCGGATATGAATCAACTGAGCC  
AGTGTGCAACAGGAACCGGAAATAGCTGCAATGCTCGCGCAGACTGGCGGGGATAACTGCCCTGACTGGTGGCGG  
TGATGGGCGACGCAACATACCAGGAAACATTCGATGAAGAGAGTCAGGTTGAAGCTAAGGAAAAATGATCCGGAGGAAATG  
GAAGGCGCTGAACATCCGCAATGAGAATGCTGGCAGCGATCCGATCGCGATGTCAGTGTGAAACGCGCAAGTCCG  
AGATCCCGTAATCGTAGAAGACATAGAGCCAGGATTTATACGGAATTTGAAATGAGAATTAACACGCGGGTCCCGGTA  
TCAGTAAGTCTCAGCTCGATGACATTTGCTGATACTCCGCACTATATTTGTGGCGTAAAAATCCCCGCTGGACACACA  
AAGACAAAACCGCTCGATTTAGGAATGCTTTCCACTGCGGGTACTTGAACCGGAAGAAATTCAGTAACCGCTTTATCGT  
AGCACTGAAATTTAACCGCGTACAACGCCGAAAAGAAAGAGAAAGCGTTTCTGATGGAATGCGCAAGCACAGGAA  
AAACGGTTATCACTGCGGAAGAAGGCGGAAAAATGAACTCATGTATCAAAGCGTTATGGCTTTGCCGCTGGGCAATGG  
CTTGTGAAAGCGCGGCACTGGAATCATCAATTTACTGGGAAGATCCTGAAACAGGAATTTGTGTGCGGCTGGGCACTG  
GGACAAAATTTATCCCTGAATTTCACTGGATCATGGACGTGAAACCTACGGCGGATTTCAACGATTTAAAACCGCTTAT  
ACGACTACCGCTATCACGTTTACGATGCTTCTACAGTACGCTTATGAAACAGATTTGGAGTGCAGCAACTTTCTGTT  
TTTTCTGTTGCCAGCAACTATTTGAATCGGACGTTATCCGGTTGAAATTTTATGATGGGCGAAGAAGCAAACTGGC  
AGGTAACAGGAAATATCACCGCAATCTGCAACCTGTACTGACCTGAAATACCGATGAATGGCCAGCTATTTAAGACAT  
TATCACTGCCCGCTGGGTAAGGAATATGCAAAATGACTAA

>Cluster\_41470

ATGGCGAATTTCTTTATGATCGCCCCATTTTTGCTGGTGTGCGCAATCTGTTGTGTCTGACAGGTAACTTGGCGAT  
TTTTTCATTTCCCGTTGAACAATACCCCGATCTCGCGCCACCGAATGTGCGAGTGACCCTAACTATCCCGGCGCATCG  
CCCAGACGCTGGAATAACCGTACCCAGGTTATCGAGCAAAATATGACCGGCTCAATAATCTGATGTATATGTCATCT  
CAGAGCAGCGCACCGGTCAGGCATCTGTACGTTAAGTTTAAAGCAGGCACCGATCCGGACGAAGCCGTGCAGCAAGT  
ACAAAACGACTACAATACGCCATGCGAAAGTTACCGAGCGGTGCAAAATCAGGCGGTGACTGTGCGTAAAACCGGCG  
ATACCAACATTTGACCATTTGCCCTCTGCTCTACCGATGGTTCGATGGATAAACAGGATATTTCCGATTTATGTTGCCAGT  
AATATTCAGGACCGTTAAGCCGCTGAATGGCGTCCGGGATATCGATGCCTATGGTTTCGCAATATTCATGCGTATCTG  
GCTGGACCGGCGAACTCAACAGTTTCCAGTACGCGTAAAGATGTACCGATGCCATGAAATCACAGAACCGCGCAGA  
TTGCGGTTGGGCACTTGGTGGTACGCTTCCGTCGATTAAGCAGGCGCTCAACGCCACATTAACGCCAGTCACTGCTG  
CAAACACCAGAACAGTTCCGCGATATCACCTTGGCGGTGAATCAGGACGGCTCAGAGGTAAGGCTGGGCGATGTGCCAC  
CGTCGAAATGGGGCGGAGAAATACGATATCTTAGCCGCTCAATGGTAAGCCAGCTCCCGGCTGGGGGTTAACTGG  
CCTCCGGCGGACGAAATGGCGACAGCGGAGCTGGTGTCTAACTCCGCTCAGCAGCTGGCGCAGTATTTCCACACGGA  
CTGGAATACAAGGTGGCGTATGAAACACCTCGTTTGAAGGCTCCATTGAAGACGTTGTAAGAAACGCTTGAAGC  
TATCGCCCTGGTTTTCTCTGTTATGATCTGTTCTGCAAACTTCCGCGCACGCTGATACCCACTATCGCCGTGCCGG  
TGGTGTGATGGGAACCTTCTCCGCTTACGCTTCCGTTACAGTGTCAACACCTTAAACATGTTCCGCGATGGTGTG  
GCGATCGTCTGCTGGTGGATGATGCCATCGTGGTGGTGGAAACCTCGAAGCTATTTATGAGTGAAGGAGTCACTCC  
TCGCGAAGCCACAGCTAAATCGATGGGGCAGATCCAGGGGCACTGGTCCGGATTTGCGATGGTGTCTTCCGCGGATTTG  
TGCAATGGCCTTCTCCGCGGACACCGGTTGCCATCTATCGCCAGTTCTCTATTTACATTTGTTGCCGCGATGGTGTG  
TCAGTACTGGTAGCGATGATCTCACTCCGGCTCTGTGTGCCACGCTACTTAAGCCACTGAAAAAAGGTGAGCATCCGG  
GCAAAAAGGCTTTTTTGGCTGGTTAACAGATGTTTAAACCGCAACGCGAAGCTACGAAAAAGGGGTGCGAAAAATTC  
TCCACCGTACCTGCGCTGGATTGTGATTTATGCTGCTGCTTGGCGGATGGTGTCTCTGTTCTGCTGCTTTGCCGACG  
TCGTTCTTACCGTGAAGACCGTGGCATGTTTACTACCTCGGTACAGTTGCCAGCGGTTCAACCCAGCACAGACCTT



ATACAGCCCGCGTTTTTTCGGTGGAGAACTTTTTGCGAAGTGGCAGGATTTGACCCGCATAACCGAC  
TCAACCCAGGGAAGATTTGCCCGCCAGAGGTCGATCGCCGATGATGAAAGTGGACGCGGTGAAGCGCGGTACATTC  
GATCGGCAGATCCCATTGCGGTACGCCAGCAGTGGCGCGGTGCGATGGAGTGTACGGCAACGGTTTATGCTTCAACTT  
TGATGCCCGTAGTCCGATGTGTCGTCGATGAAGATCACCAGAACCGGATTCATTACCCGAAAGGGCGCGAACCGTGG  
TCCGTGATGGCAGCGCGCGGAAAACCTTAACTTCTTCACTAACAGCCGCTGGTGGCAGAACTCTCGGAAAAACATAT  
AGTTTGGCGAGCTTAATTTGCCCGCACGCGCAATAGCTGGCATGCGAATAAAGGCGAATATGACTTCTCACACGAAGTCAA  
AGAGGCGATGTGCGGGCTGTCTGGCTGTAAAGCGTGTTCGACCAGTGCCTCATAAAATGATGTGCGGAGTTTCGCT  
CTCGTTTTCTGCAGCTCTATCACACCCGTTATTTACGCCCGCTGCGCGACCACCTCGTGCCTACGGTCTGAGAGCTACGGC  
CCGCTGATGGCAGCGCGCGGAAAACCTTAACTTCTTCACTAACAGCCGCTGGTGGCAGAACTCTCGGAAAAACATAT  
CGGCATGGTTGATTTGCCGCTGTCTGGTCCCCTCGTACAACAACAAATGGTGGGGCATCGCTCGGCAACATGACGC  
TGGAACAGCTTGAATCTCTCAATGCAGAGCAGAAAGCGCGCACAGTGTGGTGGTGCAGGACCCTTTACCAGTATTAC  
GATGCGCAAGTGGTGGCGGATTTGTCCGTCTGGTGGAAAAATAGGTTTCCAGCCTGTGTTACTGCCATTTTCGCCAAA  
TGGCAAAGCCAGCATATTAAGGTTTTCTTAATCGTTTTGCGAAGACGGCGAAAAAGACGGCGGATTTCTCAACCGTA  
TGGCGAAGCTGGGTATGCCAATGGTGGGCGTGCATCCGGCGCTGGTACTTTGTTATCGCGATGAATATAAACTGGCGCTG  
GGCGAGGAACGTGGCGAGTTTAACTCTTACTGGCGAATGAATGGCTGGCAAGCGCACTTGAGTCACAGCCAGTGGCTAC  
AGTCAGCGGTGAATCATGTTTCTTTGGTCACTGTACCGAAGTTACCGCCTTGGCGGGTGGCCAGCACAAATGGGCGC  
CGATATTTCCGCTTTTGGCGGAAACTGAAAAATGTCAGCTGGGTTGCTCGCGCATGGCAGGGACTTCCGGAACATGAA  
GCGAAAAACATAAAAAATTCGCTCGGATCTATGAGTTATCTGGCATCAGGCTATGCAGCGACTGCCGCGTAACCGCTG  
TCTGGCGACCGGATATTTCTGCGGTAGCCAGGTAACCGGTTGAAGGCACGGGGTACGCCATCTCTGTCAGGCTTTAC  
TGGAGATTATTAATGA

>Cluster\_22228

GTGAAGTTTTTTGCCCTTCTCATTTACGCCCGGTGGCGACGATTTTACTGTGCGGTGCCATTACCCTGTGGGCATACT  
GGGTTTCCGATGTGCGAGTCCCGCTGCCGACGGTGCATTTTCCGGTGCATGGTTCAGCGCTCGCTGCCCGGTG  
CGTACCAGAAACAAATGGCGTCTCCGTTGCCACGCGCTGAGCGCTCACTTGGCGCATTTGCCGAGTCCGCGAATG  
ACCTCCAGCAGTTTCGCTCGGCAGCACGCGCATTTATTTGCAGTTGATTTTACCAGGATATCAACGGCGCAGCGCGGA  
TGTGACGGCGCGCATCAACGCGCGCAAGTCTGCTACCCAGCGGGATGCCAGCCGTCGACCTATCGCAAAGCGAACC  
CGTCGGATGCGCAATATGATCCTCACGCTAACCTCCGATACTTATTCGAGGGTGAAGTGTACGATTTCCGCTCGACG  
CAGCTGGCTCCGACAGATTTFCGCAATCGCGGTGTCGGTGTGATGTTGGCGGACGCTCGCTGGCGTCCGCGAATG  
CGGGCTGAATCCGCGAGCGCTGTTAATCAGGGCGTCTCGCTGGACGACGTACGCACTGCCATCAGCAATGCCAACGTGC  
GTAACCCGAGGGCGCACGGAAGATGGCACCCACCGCTGGCAGATCCAGACCATGACGAACTGAAAACCTGCCGCTGAA  
TATCAGCCGCTGATTTTCAATTAACAACAACGGCGGGCGGTTCTGCTGGGCGATGTGGCGACGGTGCAGGACTCTGTACA  
AGATGTACGTAACGCCGGGATGACCAACGCCAAACCGCCATTTTGGCTGATGATCCGCAAGCTGCCGGAAGCAATATTA  
TCCAGACGGTAGACAGCATCCGCGCCGCTGCGCGAATTACAATCCACCATTCCGGCGGCGATTGATCTGCAAAATGCC  
CAGGATCGCTCCCTACTATCCGCGCTCGCTGGAAAGGTTGAGCAGACGCTGGTAATCTCAGTTGCCTGCTGATTTCT  
GGTGGTGTTTTGTCTGCGTTCAGTCCGCGCACCAATTTCCCGCGTGGCGGTGCCGTTTCCGTTGATTTGGTACGT  
TTGGCGGATGTGACTTGGTTTTCAGTCTCAATAATCTTTCCGTTAATGGCGCTCACCATGCCACTTGGCTTTGGTGG  
GATGACGCCATCGTGGTGTGAAAAACATTTGCCGCTCATCTGGAAGCGGGGATGAAACCGCTACAGGCGCGCTACAAGG  
TACTCGCGAAGTCCGCTTTACGGTGTCTGCGATGAGTCTGTCACTGGTGGCGGTGTTCTGCCGCTGCTGTTGATGGGG  
GATTTGCCGGTCCGCTGTTACGCGAGTTTGGCGTGCAGCTTTCGTCGCCATTGGTATTTCCGTCGCTTTCCCTCACG  
TTAACCCGATGATGTGCGGCTGGATGCTAAAAGCCAGCAAGCCGCGGAGCAAAAAGGACTGCGTGGCTTTGGTTCGAT  
GTTGGTTGCTCTGCAACAAGGCTACGGCAAGTCCGTAATAATGGGTGCTCAATCATACCGCTCTGGTGGCGGTGGTCTGC  
TTGGCACCATTGGCTGAATATCTGGCTGATATCTCGATCCCGAAAACCTTCTTCCCGGAGCAGGACACCGCGTACTG  
ATGGCGGGATACAGCTGACAGAGTATTTCTGTTTACGGCAGTGCAGCGGTAAGTTGCAGGACTTCAATAAAATATCCG  
TGACGATCCGCGGTGGATAATGTCACCGGCTTTACCGCGGTTACCGGGTGAACAGTGAATGATGTTTATCACCTTA  
AACACGCGCGGAGCGGAGCGAAACGGCCAAACAGATTATCGATCGCTTGGCTAAAAAAGTGGCGAAAGAACCGGAGCG  
AATCTGTTCTGATGGCGGTACAGGATATTCGCGTGGCGGACGCTCAGGCTAACGCCAGCTACAGTACACATTTATGTC  
CGACGATCTGGCGGACTGCGCGAATGGAGCCGAAAATCCGCAAAAAACTGGCGACATTTGCCAGAGCTGGCTGATGTTA  
ACTCCGATCAGGAAGATAATGGCGGAGATGAACCTTATTTACGATCGCGACACCATGGCGGATTTGGGAATGACGTG  
CAAGCCGCAACAGCCTGTTAAATAACGCTTCCGTCAGCGGCAAAATCGACCATTTACCAACCGATGAACAGTACAA  
AGTGGTGAAGTGAATCCGCGCTATACCCAGGACATCAGTGCCTGAAAAAATGTTCTGTTATCAATAACGAAGGAA  
AAGCGATCCCGCTGCTGATTTTCGCTAAATGGCAACCGCGAAGCCTCCACTGTCCGTTGAATCATCAGGATTTACGGCG  
GCCTCGACCATTTCTGTTCAACCTGCCGACCGGGAATCGCTCTCGGACGCCAGTGGCGGATCGATCGCGCAATGACCCA  
GCTTGGTGTGCTTTCGACCGTGCAGCGGAGTTTTGCGGAAACAGCGCAAGTGTCCAGGAGACGATGAACCTCAGAGTGA  
TCTGATTTATCGCCCATCGCCACGGTATATATCTGACTGGGTATCTTTACGAGAGTTATGTGCATCCACTGACGAT  
CTCTCCACCTACCTCGCGGGCGTCCGAGCGCTGTTGGCGCTGGAGCTGTTCAATGCCCGTTCCAGCTTACGCTGCGT  
GATAGGATCATGTTATTAATCGGCATCGTGAAGAAAAAGCCATTTATGATGGTGCATTTTGGCTTGAAGCCACGGC  
ACGGTAACTGACCCGAGGAAGTATTTTCCAGGCTGTCTGCTGCTTTTCCGCGGATCATGATGACTACCTGGGG  
GCGCTGTTTGGTGGCTACCGCTGGTATTTGTCGGCGGTGACGGCTCGGATTTGGCCAAACCTTGGGATCAGCAATGT  
CGCGGCTGTTGATGAGCCAGCTTCTGACGCTGATATACCAGCCGCTGGTGTATCTCTTTTTTCGACCGTCTGCACTGC  
GTTTTTCGCGTAAACCTAAACAAGCGGTAAACCGAGTAA

>Cluster\_44943

ATGAAATCCATGGATAAGTTAAACAACGGGTGTCGCTATGGCACCTCAGCAGGTAGTCCGGTTACTGGTTTTTACAGCT  
GCTCGATAAAGTACGCCCTCACAGTGGGACGCAATAGGTGTGCTGGGTAGCTGGTATTTGGCTGCTGACGTACCTGA  
CAAACCTTTATTTCAAGATTAAGAAGATAAGCGCAAGGCTGCGAGAGGTGAATAA

>Cluster\_39457

GTGACTGGAAAAGAAATCATCTTGAATATCTGAAAATCATGAACAATTTCTCCACATGAATTAGCACTGATCACCGG  
AATACCAATAACAGAATCGCTCAAGCAGCAAGGCATATGGTGAACAAGGACATTTGAGTGTGTTGAGCGTAAGTGA  
AGACGGTTATTTATGCAAAACGCAAGTGAAGAAGGAGCAATTAAGAAGAAATCCAGATGGTACGGGGTGGGGATGTGCA  
AATCCAATGACGGCGTTTATTAATAGGGCGCTTATGGAGGTAAGGCAATGA

>Cluster\_15983

ATGGCTAACCTACGCAAGAAGCTCGCGGACAGAAATGCCAGGTACGATTTACGGCGTATGCAATGGCAACCTGAAAC  
TACAGTTCTGGCACATTTACCGGATGGCTGGAATTTGCGGAAACGGGAATGAAGCTGACGACCTGATCGCGCATGGGCTT  
GTAGCGCTGTACAGATGAAATCGACCGACGCCATAACCTCGACAACAAGACGCCAGACTTTACCACCTCGAAGGC  
GTGATCAGGACGCGGATACTGCTGAAGGAGGGAAGATTAAGCCATGA

>Cluster\_66760

ATGCAGGTACGCAAAATATACCTGAAGCTAAAAACCTGCACGTTAGCCCTTTGTAGGCCAGATAAGACGCGTACGCTGC  
CATCTGGCATAAACAAGCGCATTTCGGGCTTTTCCCTACCTAACCTAACCCCGGAGGGGCGAGGGGACTGTG  
TGGGCACATTTTACACTTGTCTATCAGTCTGAGCCTGCCATTGGCAGCCTCTGGTGTCTTTTACGCTACCATGCTAAT  
AATCAGCACATAATAAGCCAAACCGGAGTTGACCAGCTCCAGTAG

>Cluster\_14061  
ATGCAAAACACAACATCATGACAACGTAATTTCTGGAGCTCACCGTTTCGCAACCATCCGGGCGTAATGACCCACGTTTGTGG  
CCTTTTTGCCCGCCGCGCTTTTAAAGCTTGAAGGCATTTCTTGTCTGCCGATTCAGGACAGCGACAAAAGCCATATCTGGC  
TACTGGTCAATGACGACAGCGTCTGGAGCAGATGATAAGCCAAATCGATAAGCTGGAAGATGTCGTGAAAAGTGCAGCGT  
AATCAGTCCGATCCGACGATGTTTAAACAAGATCGCGGTGTTTTTTCAGTAA  
>Cluster\_17763  
ATGACAACTAACAACCACCGGGCAACGGTCTGTATCACTCGATCGCCTGCACCAGATAAGCGAAATACTCAGCAAAGC  
AGCAGCACAAAGTACGGGAGGCAATCTCGGCTACGCAATGGCTGATGCTGTGAAGGTGATGATGGAGTGATTGCATCGT  
TTAGTGGGAGCCAGTACCTTGTCTTAAATGTAACGACACCGGAATGGCTGATAGTGGCGGCGTTCAGCCATGGGGAGAG  
CCGATACTCATCGAATGTGACTGCCGCGCCCATGCTTAAAGGAGATGAAAAATGA  
>Cluster\_47601  
ATGATGATGAACGTTTCTTTCCGGCAATGGCGCTTATGGTGTCTAGTGGGTTGTTCTACACCGTACCCGTCAGAAAGC  
ACAAACGGGTAAAGTTGATCCTCTGCGTTCGTTGAATATGGAAGCGTTATGCAAGGATCAGGCGGCAAAACGTTATAACA  
CCGGCGAGCAAAAATCGACGTCACCGCTTCGAACAGTTCAGGGAAGCTATGAAATGCGCGGTTATACCTTCCGTAA  
GAGCAGTTTGTCTGTTCTTTGACGAGATGGCCATTTTTTGCATCTTCCATGCGTTAA  
>Cluster\_28835  
ATGACGAGAATGAGCGAAACCGAATACTTAAATAATCCGTCGCGTTACCAGGATCAGCCAGGAAGCAGGCAAAACAGGA  
GGCCACGACCGGACAGCGTGTAGCCGAAAATACGCGCGTGTGGTGGCTGAGGTGATGCGCCGTGACGGTATCGAGC  
TTAACGGCGTGGATATACGCAATATACGACAGGATTCGAGGTTGTTGTCTATATCGTCGCCGCGTGGAGATGTACCAG  
GAGAAAGAAAAATTACTTACCCTGGAAGAAGCCGAGCGGTTACGACGTTAA  
>Cluster\_42765  
ATGGAAGCAGCAAAATTAAGTCTTCTGGTACAGTATTACCCTGGCAGCCACAATCAATGGAATAATCTAGTGGATGA  
GAAAACAGAGTGTATGCAACCAGAGGTGGAACAAGTCGTAACGTTAGAAATCCTAGCTGGAGTTTGTAAAGTGTAGGTA  
CTCTAGCCGCTATCGGATGCTGATCGCATACGTGTGTGTTGAAGCCCTTCAAAAGATTAGGCTTAGGAATCGCAGCC  
GGTGTATTAGGTGGCGTAATACTGTTGCCGGGATTAGCGATGAGATATGCCTAA  
>Cluster\_54558  
ATGACCAAGTTCAGAAATGATAGAAAGACTTGCCACCCAGCAATCGCACATTCGCCCAAGACGGTGAAGATGCAGTAAA  
AGAGATGCTGGAGCATATGGCCTCGACTTTGCGCAGGCGAGCGTATGAAAATCCGCGGTTTCGGCAGTTTCTCTTTGC  
ACTACCGCGCACCGTACCGGACGTAATCCGAAGACTGGCGATAAAGTAGAACTGGAAGGAAAAATACGTTCCCTACTTT  
AAACCTGGTAAAGAACTGCGCGATCGCGCAATATTTACGTTAA  
>Cluster\_21898  
ATGAATCTTGATGACATTATCAACAGCATGACGCTGAGGTATACCAGCGTTTGTGACCGCCGTTGAACTGGGGAAATG  
GCCTGATGGCGTTACGTTGACCGAGGAACAAAAGAGAACTGCCTGCAACTGGTGTATGCTGTGGCAAGCCCGCATAATA  
CCGAAGCAGCATATGACAATGACACAAATGGTCAGATGGTCATGAAGAGCAACAGCAGTAAAAGAAAGATTTTGGT  
ATCTCAGCAAAGCCTATTGCCATGTTTAAAGTAA  
>Cluster\_3485  
ATGAGCAGAACGATTTTTTGTACTTCTGCAACGTGAAGCAGAAGGTGAGGATTTTCAGCTGTACCCCGGCGAGCTGGG  
AAAACGCATCTATAACGAGATCTCAAAGAAGCCTGGGCGCAGTGGCAGCACAAGCAAACCATGCTGATTAATGAAAAGA  
AATCAACATGATGAATGCCGAGCACCAGCTGCTTGAGCAGGAGATGGTCAACTTCTGTTCGAGGGTAAAGAGGTG  
CATATCGAGGGCTATACGCGGAAAGATAAAAAATA  
>Cluster\_60745  
ATGCGAAAAAAAATAGAGATGAGCTTGATAAAAACTCCTGCAAAATGGTGTGTGATTAAAAGAAAAATTTCTGATGGATT  
GAAAAGAAATAGTTTCTCTTAAAGAAAAATCCTTCTTGAACCACCGCAAAAATTCAGAGTATGAGGAAAAGAGAGAAG  
AAAAATTTATTCAAGGTTATTATGATGGCTATACAAAAGGCATTTATGATGAGATGGATAATTTTATACCTTGTATAAGC  
TTGCTATGCTCAGAACTTGAAAAAAAGATAA  
>Cluster\_13621  
ATGGGGTCAAGTGGGACCACCGGCTACTGCGCCAGACAAAATCTTTTCTAATCTGCGCAACTTTAACTAAAAAGTGG  
TGCTGATACCCAGAGTGAAGTGGGACCTCACCTTACCAAGGTTGCGCTCTACCAACTGAGCCATATCAGCAGCTAA  
ATTTGATGCTGGCAGTTCCCTACTCTCGCATGGGAGACCCACACTACCATCGGCGTACGCGGTTCACTTCTGAGT  
TCGGCATGGGGTCAAGTGGGACCACCGGCTAA  
>Cluster\_14847  
ATGATGGAGATATTTCTGGACCATGCTGGCCAGCAGGACAGGAAGCGCATTCGTGAGTACATTGCGGAGCAGAACCTGAT  
GGCCGCCATTGAACTGGACGAACCGATTGGTTATTCAGCCAGCAGCCTGGCCGGGCGAGCGTATAAAGCCCGCAACCGT  
GTGTGGAAGGTACCCGGGAACGTTTATTCACCCGATTTTGTCTGTTTATGAGGTCGATGCCAGTGGGGAAAAGTG  
TATATCTGCGCGTCTGCATACAGCACAGAAGTGGCCATAG  
>Cluster\_51327  
ATGACTGAAGCCGAACACTACTGGGATTAATCCGCGCGCTGCTCGGAATCAGCCAGCAGCATGACGAACAGGCCACACAGCC  
GGCAGCGTGGACCGTGAATAATGTTGCGTGTGTTGCTGAGTGTGATGCGCCGTGATGGTATGAGCTTAACCGCGTGG  
ATATGCGCAACATACGAACAAGAGTCTTTGAGTTGCTGGCATAACCGTTCGCGGTTCTCAACAACGGAGGGAGAGCGGAAA  
AATACTTACCAGTGAAGAAGCCGGAACGGTTGCGGCGGTAG  
>Cluster\_57835  
ATGAGCGGTAAGCGTTATCCGAAGGTTTAAACTGAAGCAGTCAAACAGGTTGTTGATCGCGGTTATCTGTTGCCAG  
CGTTGCAACACGTTCTCGATATCACCAACACAGCCTTTATGCTGGATAAAGAAGTACGGTCCGGATTCTCCACTAATA  
AAGAACAGTCAAGTGTCTAGGCCGAGATCCGCCGTCTCAGAAAGAGCTGAAACGGGTTACCGACGAACGGGACATATTA  
AAAAAGCCGCGGCTACTTCGCAAGCTGTCCGACTGA  
>Cluster\_48655  
ATGAGCGAAAAGAAAACAACCTTATTTGTCAGGTAGCATTGTCTGATAAGGCCAATGACAAAATGGAAGTTTCAAGTGA  
ACTAAAAGAAAAAATATCAAAATGTCTAAGGCTGAAGTCATAAATACCATTCGGAACAATGACAAATGGCCGACTTTG  
ACAAGGTTATATCTTCTGTCGGGCTTCCGCTAAGACTCGTGAGAAAAATCATGCGTATCTATGAGAATCTAATATGACA  
AAGGAAGATCTCGAAACCGTATTAAGCAGATTAATAA  
>Cluster\_12051  
ATGGATTTTTTATCTTCCGGGATACTTTCTGGCAGTATTATGACATGCTTAAACATCATGTTTTCGATTAAGTCAACTTC  
AATAAAAAGAAAAGTTAAAAATGGGTTATGATGAGGCTGTAGCCCTGCTTTAGCTAAAGAGCTTGAAAAATCTGTCTT  
TGAACGATGAAAATGAGTGAATAATAGCAATGAAAGAAAACATTTGGATAGTATGATAAATCAAAAATACTCTCGCTATA  
AAACCTCATGACGCAACTGTCTATTTCAAACCATAGTGGCAGTGGTATAAATTTGGTGAATAAATAACGAGGTA  
G  
>Cluster\_42911  
ATGAACGACAGTGAATTTTCATCGCCTGGCTGATCAACTGTGGCTGACCATTGAAGAACATCTGGACGACTGGGATGGCGA  
CAGCGATATCGACTGTGAAATCAACGGCGGTGACTAACCATTTACCTTTGAGAAGCGCAGCAAAATCATTTATCAACCGCC

AGGAACCACTGCACCAGGTGTGGCTGGCAACCAACAGGGCGGCTACCATTTTGTCTGAAAGCGGATGAGTGGATTTGC  
GATCGCAGCGGCAAACTTCTGGGATTTATTGGAAACAGGCCGCGACGCGAGCAGGCGGGAGAAACCGTCAGTTTTCGTTA  
A  
>Cluster\_53929  
ATGGGCTTTCCTTACCCCGCAGCGGACTACGTCGAGCAGCGACTGTCCGTTAACTCGATATGCAATGTTGGTCC2AACAC  
CCGCGTTTTTCGAAAGGGATGGCGGTTATGTTGTCTGGATATCTCCCTGAAGCCAAAGCAGGGTAGTCAGGTTCTGATCC  
AGCACGGCGGGGACTGAGCTTCCACGTTGAGAGGGAGGGCCCTGATTACTGAAAGCGGCGAAGCGATTGAAGCGGAG  
GCCCTGGATGATACACTGTCGCGCGGTGGTACACACACCATCATCGATGTGAGAAGTGACAGCGTAGCGGTATAA  
>Cluster\_7882  
ATGTTTATAAGCTTTGATAATCAAGGAGGATTTGTTATATCAATATTAATAATGCTACAAGTAAACGGCAATATTTAA  
TGTGCTCCGAAAAACATGACTTCTTTAGATAGTAGTGGTTCATAATATATTGGCTGGTGGTGTATTTATCATATTT  
CAGATATCTATAAAATGTCCAGAGGTAGAAAATGTTTAAATTAATGTAGAAAAAAACCTGACATTGATGATATCATC  
AACGTGGCTATTTTAGAACTTCTTATCTACAAATAAAAAAACCAATAATGATGATAGTATTATTTTATGTTTAG  
>Cluster\_55973  
ATGAGTAAAGAACTGATTGCCTTATGTGCTGCCCCGATGGGCTGGCTCACACCTTTATGGCCGCTCAGGCGCTGGAAGA  
AGCGGGCGTAGAAGCCGTTATGAAGTGAATTTGAAACCCAGGGCGGACGGTATCCAGAAATCGCTGACGGCGCAGG  
ATATCGCCGAAGCCACCATCATCTCCACTCCGTGGCAGTTACCCCGGAAGATAACGAACGTTTCGAATCACGCGCAGTT  
TATGAAATCACTTTGACGACGCAATTAATAACGCTGCGGGCATCATCAAAGAAATCGAAGAGATGATTGCCTCTGAACA  
ACAGTAA  
>Cluster\_14483  
ATGAAACGCTTTCGCTATTTCTTTTATTCACCCTGCTCACGCTGTCCACCCTCCGCGCCAGGCTGATATTATCGACGA  
TACTATTGGTAATATTCAGCAGGCGATTATGACGCTTATAACCTGACCGTGGCGGAGACTATGAAGATTCGCGCGACG  
ACGGCTGGCAGCGTGAAGTGAGCGACGATCGGCGCAGACAATATGACGACCGCCGCGCCAGTTTGAAGATCGCGCAGG  
CAGCTGGACGATCGCCAGCGCAGCTTGATCAGGAGCGTGGCAACTGGAGGATGAAGAGCGGAGAATGGAAGATGAGTA  
TGGGCGATGA  
>Cluster\_4220  
TTGTTAACTCCCAGTCAATTCACATTCGTTCTCCAGCAGCCACAACGGGCTGGCAGCGCCAAATACCATTCTCGGCCG  
CCTGAATTCGCTGGGGCATCCCGTATCGGTCTTACAGTFCGCCAAGAAAAACGTTTCGACGCGCCCATGAACGCAATCGGA  
TTAAACGCTGACGCGTGAAGCTTCCGCTGCGCCAACATGAACTCCCGCTATGGATTTCGTGGTGGTGGCGAAAAAA  
GGGTTGCGGACCTCGATAACCGTGTCTCTCGAAGCGTTGGAAAAATATGCGGCCGCCACTGTGCGCTGGCTCGCGG  
GTCCTGA  
>Cluster\_11281  
ATGGAATCGAAATCAGTCGATACCCGAGTATATATCGTGAACGGGTGCAACGCTGAGTTACAACATCGCTCTGGGGAA  
CGGTATGGAAATGAACCTGCCGTAAGCGCGCTGTGCCCAAAGAATTTGTCGATGATAATCGGGTGAAGTGAATAGTG  
ACGGTAATTTGTCAATGATTTGTCGGGCGACGTTGAATATACCAGGCGAGTATTAAGCCTCATTACGACGATACGTTA  
AGCGGGCATTTTCGGGGTGGGTTATAGCCATGGTGCCGGTGTGGAGTCCCGCTGGAACGCGGTGGCTGGTGTGAACGTTGGT  
GTTCTGA  
>Cluster\_61173  
ATGGCAGCGAAAAATCCGTCGTGATGACGAAGTTATCTGTGTTAACCGGTAAGATAAAGGTAACGCGGTAAGGTTAAGAA  
TGTCTGTCTTCCGGCAAGGTCAATGTTTGAAGGTATCAACCTGGTTAAGAAACATCAGAAGCCGTTCCGGCCCTGAACC  
AACCGGTTGGCATCGTTGAAAAAGAGCGCTATTCAGTTTCCAACGTAGCAATCTTCAATGCGGCAACCGGCAAGGCT  
GACCGTGTAGGCTTTAGATTTCGAAGACGGTAAAAAAGTCCGTTTCTTCAAGTCAACAGCGAAACTATCAAGTAA  
>Cluster\_33698  
ATGACCGTACGATTTCTGGCTGTGTGGTAAACGGACAAGGCAGTTCATGATCATGAAAATGAAAGTGGACCAGTTTTTT  
AACCCAGTCGAACATCGACCACACGGTAAACAGCTGCGCGGTTGGCGAATACAAAAGCGAGTTGAGCGGTGCGGATATCA  
TCATCGTCTTACCATATTTGCGGGCGAAATCACCGTGACCGGCAACAAATATGTTGGTGGCGTGGCGAACATGCTCTCT  
CCTGCTGATTTTGGCCCGAACTGCTGGAGTGATCAAAGGCAATTTCCGCGCAGGACGTTGAAGTAA  
>Cluster\_22117  
ATGGATGATAATATAAAAAGACCAAGAACAGAAAAAACATTAAGCAAAAGGTTGCTTTGCTCAGCTGAACTTAACCG  
CCTTAAGTCTCTGGAGAAATCAGAACGAAAGAAAGTTGAAACAAGGCTAAAGATTATACTTGGTGGGAAAGTAGCTAAAG  
CTATGCAATTCGCGATATCGAACAGGTGGATAAAGAACTCGTTATGGGATTTGCTTTTCAGCATCTGACCTGAATGATATT  
GAAAAATAACATATATAAAGCAGGCAGGAAGTTTCTCGCGCAATGGAGGGAAGACAAAAATAA  
>Cluster\_2244  
GTGAACTGTTTTTCAGTTTTGTGCGGATGTGCTTTTCGATAACCCGATTACAGCGCTGATTATGTTGCGTGTTTTTGATGTC  
GGGTTCTTTCAGACGGTGAAGCGAGAGGTTATTTGATCATCAGTGCTTTGCTGATTTCTGCTGTTGTTTAAAGCAAGCGA  
TATTCAGGAAACCTGGCACTGGAAGAGCTGGTTATCTTCAATATCCGAAAAATGCAACGCTTACTATTGATGCAAAA  
GCCAGACTACAACCTGCGCGTGGCTACACAATTTCTATGCCGCGAAGGAGGTTGTATGA  
>Cluster\_38343  
ATGAGCATGGTTAAACATAAACGAGGGACCTCCTTACTACTCGATGTGCAGCATGAGGCCGAACGAAAGGCGCTGGCGAA  
TAAATCCGACGAAGATATTGATTACAGTGATATCCACCTTCCAGCGATGAGCAATGGTCTAACGCCGAACCGGTAAGT  
TTTTATCGGCCATTGAAACTCAGGCTTCCGTTGCGTATTGATGCTGATGTGATGGAATGGTTGAAGCGACAGGTAAGGC  
TATCAAACCTCGCCGGAACGCAATTTTACGTGAAGCGATGCTGCCGATCAGAACAAAAATAA  
>Cluster\_66853  
ATGTTGACGAATGACAGGGGGCGCAGGTGCGGAGGGCGCGTTGCTTTCGTCATATGAAGCAAAGTCACTAGCTGAATT  
AATGGGTGTGGATCAGGCAACCGTGTGCGCTGGGAGCGGGGACCCCTTGCAATGTCGGATGGGAGGTTGGTACAGCGTTT  
TTCAATGCTTACCAGGCTTCCGATTCATCTGACGACGCTGCGCTGAAGCGTCTGGTGAATCTCCGCCCAAAAGTCA  
CATCTGGTAGCGACCGGACATTTGTTGCTCGCGCATCTCCGGCAGGCAAGGAAATGCGGATTGACCTAG  
>Cluster\_66955  
ATGTAAGGGCAATCATCAGGTTGGTGTTCATAGAAAGCAGTGAACAGGCACGCATCCGCGCCCAACAATATTTGCAACA  
GTACAAAAATGCCAAATGAGATACATGAAATGTTGGTGTAGAAAAACAGTATGATTTTCGAGAGAAACAACAGATGACGAAT  
CTGACATTAACACCTGTACCTTGTATTTAAAAGTAAAAACAACCTGCAAACTTTTTGAAACCAATCCAAATTTACTG  
GATAAAAAATGGTAAGCCTGTGAAATAATGGTGTGTGATGTTTCCAGGAACTGCATTTTTTTCGTTCCAAAGAATTA  
>Cluster\_64821  
ATGGCGGATGCGTCAGGGAATGCTCGCGCTGAATCTGAAATGGTGTATTTATGACGAATCAGGAAATGAAAGAATG  
CATTGCTCTTTATGTGATGCGATAAAGCACGCGTGGATGAAATGCTGTTTTTTTATCGATAAAAAAGATGCGGATATTA  
CCTTCGACAAATGACGCTGAGAAATGTTGTTATCCCTGCACATTCAAAGGAAGCAAACTTCTGAGACTTGGGGCAAGGCTT  
GCCTTTTCATATTCGAAAAATTTCTGTAACGCTGAATGTAAAGGATGACGAAGATGACGAGGAATAA  
>Cluster\_63838  
ATGTTGCGAGATGAAGAAGTGTATGAGGTTACTGGTCAACGCGGGGACGACGTTCTGACGCGATGGAAGCCATACG

TTGTGCCGGGCAAAAAGACTGGCAGGGCGCAACTCAGCTAATGGCCAGTTCTGAATCTGCCTGTCTTCAGGCACATAAGA  
TTCAGACCCGATTAATTAGTTCAGGATGAAGGCTGTGGCAAAAATAAAAGTTAATTTAATCTGATTCATGCACAGGATCAT  
TTGATGAATGCAATATTATGCCAGGATTTAGCCAGGAAATTAATTTTCAATAAGAAAAGAACTCCATGCCTGA  
>Cluster\_19999  
ATGCCGGGTTACACAGAGTATGTCTGGTGAAGGATCTTTCTCATACGGCAGGCGGTGTCTGCATAACAGCTTACCG  
CAATGTGTTTATCCAGGATGACCTGGGAATGCATTTCCGTCGGATTATCCGCAACACGGAAGGTCAGCGACGCTGGCGCT  
GCCGGAATCTGAACCCGATGCCGGAAGGTGCTTAATACGGCGCTCGCCAGTGACGGTCTTCTCAGACAATA  
>Cluster\_11893  
ATGATTGTCTCTCCCGCAAATGGGTATCCGAAGAGCAGTTAATTTGCGTGAAAGGAATAAAAAAGGTACGTTAAAAAA  
GGCCCGGAAAAATCGTTTATGGAAGGAAGGGAATATAAGCATGTGCTCATGACGGTATGCCATGGGATAACAGTCCAT  
GCTTTTACACCTGGAAGAAATTTGATCGCTGGATTGAGCGCCAGGCATCAGCGAGACCAAGACGTCATCTTACTTGA  
>Cluster\_38474  
ATGACCGAGATGGAAAAACAGCTTCTGAGCGCTTAGAGAGCTTACAGACAAGCTACGAGCAACAGCAGCAGGCGTGGCA  
GGACAGCTACAGCAGCTTGCAGCACATGTTGAGGCTACCTCACAGGCGCTGACGCACAGCGACCGGGTGTGTCAGCACT  
TGAGCAGTCAGGTAGAGAGCTTGCAGCGCAGGTCGAGAGCTTGCAGGAAACGTCAGCCGCTTGATGCGTTGA  
>Cluster\_17664  
ATGAACAAAATGAAGTTAAGGCGGCTCCCGGATGAAGTTCCCGATGGAGGATAACGCCGGAATACATCACCACGGA  
AGCGGTGATCGTTGAAAACACCGCTTATTACCGCGCGCTGTTTCCAGGATGGTGACCTGATTTCTGGTGGCTGAAGAGCTG  
AAACGGCAGAACAGGACACCGGACCAGAAAAAGCGAAGGTGAAGAAAGAGAAACAGGTGGGCTCCGATGAGTGA  
>Cluster\_6730  
ATGAAAGTCATTTCTGTTATTAATCTAAAATTTGCTGTGGCTTCAACCGCACTTTTGTGTTCTGCAAGTTGTTTTGCTGC  
TGATGGCGCAACGGGTAGCACTGACTATGCAGGTCAGGCAATGATTCAGTGTGACTCAGGCAACGATCTTATTGCAA  
AAGTATGGCTGCTGTTGTCGCTGCTGTTGGTGGGGTCTTGCATTCGTTTGTGTTAAAAAGTTCTCTTCGAAAGCAGTT  
TAA  
>Cluster\_41386  
ATGATTTATTTATGGATGTTCTCGCCCTGTGTATTGTCTGCGTAAGCGGATACATCGGTCAGGTACTGAACATGGTATC  
GGCGATCTCTTCTTCTTCGGCATGGTGTATCTCGCTGCACTCATTTATTTACTTCACCATGTGGTAACTGGCGGTAATG  
AATGGGTGACGGGATATTTATGTTCTTGCCTCGGCTTGTGGCTTGATGATTGCTTTATGGTGGGGTATGGCAGGCGA  
TAG  
>Cluster\_44583  
ATGTACGAATTAACCTATCTCCAGCAGAGATTAAGAGATCACGAAATACGAGCGATACACAAAACAGCAACACCAGTT  
AAGACTGCACGGCATCCCATTTGTAATCGGTCCAAAAACGAACCAATAGTTCTACCGAGGATATTCACACGGACTGA  
CAACGATGCCAAAACATCTGAACCTGTTTCTGCTGAACCCGATTTTGAGGCGCTGAATAATGGGAAGACCAAGAAAA  
TAA  
>Cluster\_66917  
ATGGGAGAAAAATCAATATATCACAGCCAGCGCATTAATTTTCAACACAAAAAGGAAAAAGCAATGAATCTGGTAGA  
CGCTTTGTCAAAAAAGTAATATCCGGCCATATAAAGAATATGGAAAATGGTGGATAGATGTTGAATACATTTTATGGG  
GCGTTCGGGAAAAACAAGACTGATGTTGAGTCAAAGGAGCAGGCATGGAAGTTAAAGAAGGGTACAAATTTTAAACG  
TGA  
>Cluster\_6228  
ATGGCAAGGTCGGATATGATATATCAATCTGTCTTGGAACTGAATGAGTGGCTGGCAGAGAGAGGTTATGC  
CGGACTGGTGGATAACCGGAATCGCTGGCAGAAAGTTGTTACCCGCAATTCAGGACAGCTTTATATAAACGTTTCCA  
GGATGCGCTGAACACGGCATACAGTGAACACCCGAGTGGTTTCTGGGCTTGTCTCCGGGGATGAGAAATTA  
>Cluster\_26143  
ATGACTACATTAATTCAGAAAAGAATATCCGCAAAAAGTAGGGCGACAGAATTTTGTGTTCTCATTTCTGTTTATCGTATT  
GATGATACCGATATCCCTCTAATTTTGTCTGGGCAATCGGGAAAAATAATTGAGCCAGTTACTGAATGTATAACGAGC  
TGGTATGGGCGTCAATTCACACACTGCACAATAAAATTAATCCGTATAAGGAAAACTGA  
>Cluster\_29605  
GTGAGGAGCGTAACCGGAGAGGCGGGATAAGCAGAACAGTCTCAGTGTATCTCGATGAAGATACAAAATAACCGACTTAT  
TCGGGCCAAAAGATCGTAGCGGTAGAAGTAAAATATAGAGGTTAGATCCGCTCAGAGATCACTGAAAACGGTTTCTG  
ATTTCTATAATGAAGAAATATTCAGGGAGGTGATCGAAGAGAACGAGTCAACATTTAAAGAACTTTAG  
>Cluster\_40905  
ATGAAAGAAAATAATGAACCAGCGTAAAACGATTTATCCGCTTCTGATGTTTAAATCGAGTGGGATTTAGTTCGCAC  
GACCTTATATGAACGTATTAAGGAAGGAACTTTCCAGACAGAGTAAAAATAGGACCAAGATGCGTCGCTTTTGTGAAA  
GTGAGATTGATGAATGGATTGAACTACTATTCTGTAACCTCACGTCAGAACGAAGCATAA  
>Cluster\_39301  
ATGGGCGGCTGGATTGAACATATACCACCGAGGGCGAGCGCTGGGATAATCTGGCGTTCCTCTATTACGGCGATCCAAT  
GGCTATGAGCGCATCATTTGTCGTAACCCCATATTGCGATCACGCGACATGGCTCCGGGCTGCGGTTGCGTATTC  
CGGTGATCGCCCGCATACAGGTGATGAGGTCGCGGCTGAGGTCGCGCTCAGGTAA  
>Cluster\_17771  
ATGAGTGAAGAAAAAATTTGATTTCAAAAAGCACTGGCTGGGGCTGTCTCCTGATGAGCGTGAAGCATTGTCAGTTGA  
AGCCGGTACCACAGTCAATACATCCAGACGCACTGACCGTGCCTGAAAGTCCGGGTAAGCGTCTGATGGAAGGTC  
TTTTTAAAGCGTGTGCTCCCGCAATGGACAAAAGTCTAAACCTGAATTAGTGTCTTCTCTACGACCGATAA  
>Cluster\_41813  
ATGGCTCTGAAGGAGGAGGTTTATTTCAACCGACGCAATTTTGGCTACTTGTTCATAAGCATCACGAAAAGCTGCAAAA  
CAGCATCTTTCCCGGAATCACCATCAAGAACTCGCCGTTCGCTTCTTCCCTGAAATGATTAATCCGGTATCATGTGCG  
CCTTATGTGATTACAACGAAAATAAAAACCATCACACCCCATTTAATATCAGGGAACCGGACATAACCCCATGA  
>Cluster\_9799  
ATGGAACCACCGTATTTTTCAGCAACCGCAGCCAGGCGGTGACTGCCAAAAGCGGTTGCATTTGCCGAAAACGTA  
ACCGGTTGAAGTGTATGCTGTCGACGAAACAGAAATCATTACGCCAGCGGAGAGACATGGGACGAATGGTTCGACGGAC  
ACAACGTCAGCGCGATTTTATGGATAACAGGGAACAGCCCGCATGCAGGAAAGGAGTCATCTGA  
>Cluster\_48566  
ATGTCATACCCGACTAATGTCTGCTCGTGTAGAGAGCGATTTTCTGGCCAGGCTCGTGAATGATGAAAGATCGTGA  
GCAGGCTTTCAACTTGTACGAGTGGGCAATTAAGTGTTCGATCTTGGCGAGCATCGCGAACTTGGTTGACAGCTTTTAG  
GTGAGTTGATCAATGAGGTGTTGCTTGAATGTTCAACTACATGGTCGAGAAAAATAATCAATCAATGA  
>Cluster\_46887  
ATGGACATTAACAACAAGCCGATTCATTTGGCATGCGCCGTTGGTATGCGCGAACTCGATATTTCAATCATGCCGTT  
TTTCGAACATGAGTACGACAGCTTAAGCGATGACGAAAACGCACTTTTATTCTGCTGCTGGAATGTGACGATCCGGACC  
TGTTTAACTGGCTGATGAATCACGGTAAACCGCCGATGCAGAACTGGAATGATGGTCCGACTCATCCAGACACGGAAC

CGGGAACGTGGTCTGTGGCAATCTGA  
>Cluster\_24598  
ATGCAATCACCATTACGGAATGTGCGTAAGGCGCACGGATTTACTTTGACAGCATGTTGCTGCGGGCGTTCAGGTCAATCC  
AGCGACGCTGAGTCGATTTGAAAGACTGGAAACAAATTCATCTATCGAGCTTGCGAGAAGCTCTGGCCAAATTTTTTAAGG  
GAGAAATCAGCGAAATGCAGATTCTCTATCTCGACGCTTCAATCTAGTCAAACCGGAATGAGTTAAAACACAGGAA  
CAGGAGGTAAGCCGTGGGTAA  
>Cluster\_24619  
ATGATCGATCTGGAAAACAGGAACGGGAGATTATCAATTTAATGTTTACGCCAGGGTATATCCTGGCTAACCGCCGTGCG  
TATCAGGCATAAACTATCACTTGTCTGAAGTAAAGTAAATGTTAGGTATCTCCATTAATTTCTCTAAAACAGATCGAAAAGA  
CGGAACGGCTTAGTTCAAACATCAAAGCAAATGGCAGGAATTTATGGTTGTCCACCAGAGTTGCTGATATGCCCTTCC  
TGGATGACGGCTGAACATAAATGA  
>Cluster\_29371  
ATGACTTATAACATCACTATAGGAAACAAAATATTGAAATAACTGAAAGCGGATACAACATTTAAAAGCTATTTTGGAA  
AATAGAGTTTTTACCACCAGCAGTGGTTAGCTTTTGTAGTTTAGGCGGCTACAGCGCACAAACCGTAAATCATTTGGTTAA  
ATCATTTTACATCGTTCGGTGTGCTGGATTATGAAGGGATTAACCACACTACATTTCTGCTTTTGAATTAACAAAGAT  
TTTTGAATTTTATCACAAAATCAATAA  
>Cluster\_24244  
ATGGCACTCCCCGTATTACCCAAAAGAGATGACTGAACGCGAGCAGCGTGAACCTAAAACACTGCTGGATCGGGCGCG  
GATTCGCGCATGGTCGCGTACTGACCAACTCCGAAACTAACAGCATTAAGAAAGAGTACATCGATAAAATTAATGGTCGAGC  
GTGAGGCTGAAGCGAAAAAGCCCGCAATTAAGAAAAAGCAGGCTTATAAACCGGATCCTGAGGCGTCAATTTAGCTGG  
TCAGCAAATACGTCGACGCGCGGCGAGCTGA  
>Cluster\_18474  
ATGATTGAAGATCCCATGGAAAAAATGAAATTCAGAGCGTGTGATGAACGCTCTCTCCCTCCAGGAAGTCCACGTTTC  
CGCGGATGGCAGCCACTTTTTCAGTTTATTGCCGTGGGTGAGTTGTTTACGCGCATGAGTCGGGTTAAAAACAGCAGACGG  
TCTATGGCCCGCTGATGGAATATATTGCCGATAACCGCATTCATGCTGTGTGATCAAAGCGTATACCCTGCGGAGTGG  
GCGCGCATCGCAAACCTGAACGGCTTTTGA  
>Cluster\_50451  
ATGCTGCCGACGATAGCGATATGAAATAGCCTGGTATGCTTCGATACAGCAGGAGCGAATGGCTGGAAGACCGTCAAC  
CACACAGTTTACATCCAGGAATTCAGTGTAGTATATTGCCCACTGCAGGATGCTGTAGATCTGGAAATCGCAACGGAGG  
AAGAAAGATCGTTGCTGGAGGCATGGAATAAATATCGGTTATTGTTGAATCGTGTGATACATCAACTGCACCTGATATT  
GAGTGGCTGCAAAATCCTGTCAGGGAGTAA  
>Cluster\_48871  
ATGACTGATGATGATCTGGATACAGAGCAGGAGGAATTTACTCTATGGAACAATGCATCTTTGATTTCCGCATTATAAA  
CTATAATCCCGCCATTACATGGACTGTGCCAGCTGTATTTTTCTTTTTAGCGTTGCTGGCAGGTATGGTTTTCAATATTA  
GCAGAAAAATAATCTAATCGTTTTTGTGGCAATGTCGCTTCCGTAATAACAGTTTTCAATTTTTATTTCTGGGT  
GGTAAAGATAAATATATGCTGA  
>Cluster\_66915  
ATGTCAGAAAAGTGGAGTAAAGAATTCGACTCTTGCTTTTTCAGGTGGGGAGCATAGAAGAAATGCCGATGCTCTCGAGAA  
ACGCTGCGGAAGCAGGAAATGCGTTAGCCATGCTGGCAATGACAGCCTTCACTCATGACCCGACGTGGTATCTGGC  
AAATGCGAGAACGAGGCCCCCGATGGCAAAGGCATTCGGCTGGAGCTAATCGGCTTTCAGGGAATGAAACAATACCGGAT  
ACGCTTCATGA  
>Cluster\_49790  
ATGAAGAAATATCCCTTTCACATGATGCTGAACGCTGCTGCGCTGATGCTGGCAGTGTCCCTGATTTACCCGAGAG  
CGTGGCCGTCAGTTTTGTCGCGCCTGGGCGATTCTGGCGACGTTTATCTCGCTGGCTGCGCGGTGGATTTTTACCG  
CGCTGATTTATCTCGTGGCATCGGTGTTCTTCCGGCTGATACGTACGGCTGCTGTCAGCGTTTTGAGGGGCGGGAACCA  
TGTCAAAGCTGA  
>Cluster\_40352  
ATGTTTGCAAAAATGACCAATTTTTTTAAGGGTGTGATAAGAAAGTTCAGCTTTATCTTTTTCCGCTGCTTCTGCTCT  
TGCTGTATCTCCGCTTTTGTGCTGTACAGTTCGATTTTTTTCATCATTGACTAACAGCATTGATATGTCTTCTGTTCTGCTG  
TTATTTCTTCTATCGGTGTTGCAGGAGTTACAGTTTATCTGACTTTTGTGCTGGCGTTCGTAAGTATGGGGAGCCATCAGA  
AGTATCTGA  
>Cluster\_40938  
ATGAGTAAAAACGTAAAACAGACTTCTGAAAATGTGGCTTCTACTGCTGCAAAAACGCTGGCTAATCCATGCTTCTGC  
CATCCAGAAAAGCCTCGCTGGTCTGCGCTTTCGCAACGTGGGACATCAAACAGACAAGTGGGCAATGGAGCATAAGG  
CATCATCAGCTCTTGATAATCCAGTTCAGCAAGTTAACGAAGCAACTGACGCTCTGTTTTGGCACAATCAAACAAA  
GGCGTAAGTGA  
>Cluster\_24681  
ATGTCGCAGACAGAAAATGCAGTACTTCTCTATCTGGCGCAAAACGAGCATAACAGAAAGGGGAATCCGCTTTCTGATGC  
AGAGAAACAAAGATTTATCAGTGGCCCGTAAAAGAGCTTCTGTTCAAGGAAGTAAAGATTTCTTGAACCAAAGTATAAGG  
CCATGCTCATGCAAAATGTGTATGAAGATGGCTGACTCAGGCTGAAGTCTGACCGCACTGATAAAAAGTGAAGCGCAA  
AAACGATGCATGTGA  
>Cluster\_53634  
GTGCAGTTTACAACGTACCAACGTAAGCCCTGGTATATACAGGCACTGCGTCCCGATGGTTCGCCATTAACCTTTGGCTA  
TGACGTACTGGATCTCCAGGAAAATAATATTGGAGTCGTTGGCCAGGGTAGTCGCTTTTTATTCGCGTAGATGAAATTC  
CCACTGGAATAAAAGTTGCTCTCAATGATGAACAGAACTTATTTCTGTACTATTACTTTTTCAACACGTTATCGATGAAAAC  
AAAACATATATATGCCAGTAA  
>Cluster\_45311  
ATGAACAAAGAGACACAACCCATCGACCGGAAACGCTGTTGAAAGAGCCAAACAAATCATTCTGAGCATGAGGATAC  
GCTCGCAGGGATTGAAGCCACCGCGCTCAGCAGCGTAATGGCGTGTGGTATTTACCAGGCACTACTTTTTAGATGAAC  
AAGGATTGCCAACAGCCAAAAGCCCGCGGTTTAAATATGTTCAAACACTGGCCCATGTGCTTTTCAGAAAAATATCAT  
CTGGTTGATTA  
>Cluster\_66956  
ATGCCACAGCAACATCCCGGACGACTACAGGTAAGTTCGTCGACACGCACTGCAACAGCAGGCTGTTTTCAACGAAAAAC  
ACAGACAGATCCCGATGAGCTTGGCCGACGCTTCTGACGCGGATAACTGCTTGTGGTGGCACTATGCAACACCGAT  
TTCTGTTTTGCCAGGACGTCACCCGCTAGCCACTGCGCTGGCGCAAGGGTAGCCGCTCCCGCATCAGCACCTGCAG  
GACTGGCTGTCGTAA  
>Cluster\_13755  
ATGAAAAATGTTGGTTTTTATCGGCTGGCGCGGTATGGTCGGCTCCGTTCTCATGCAACGCATGGTTGAAGAGCGGCACTT  
CGACGCCATTCGCCCTGTCTTCTTTCTACTTCTCAGCTTGGCCAGGCTGCGCGCTTTTTGGCGGAACCACTGGCACAC



TTCCAGGATGCCTTTGATCTGGAGGCGCTAAAGGCCCTCGATATCATTGTGACCTGTCAGGGCGCGGATTATACCAACGAA  
ATCTATCCAAAGCTTCGTGAAAGCGGATGGCAAGGTTACTGGATTGACGACGATCGTCTCTGCGCATGAAAGATGACCC  
CATCATCATCTTTGACCCCGTCAATCAGGACGCTATTACCGACGGATTAATAATGGCATCAGGACTTTTGTGGCGGTA  
ACTGTACCGTAAGCCGTGATGTTGATGTCGTGGGTGGTTATTTCGCCAATGATCTTGTGATTGGGTGTCGGTTGCAACC  
TACCAGGCCGCTTCCGGCGGTGGTGCACGACATATGCGGTGATTAAACCCAGATGGCCATCTGTGCGCATGTGGC  
AGATGAACTCGCGACCCCGTCTCTGCTATTCTCGATATCGAACGCAAAAGTCAACAACCTTAACCCGTAGCGGTGAGCTGC  
CGGTGGATAACTTTGGCGTGCCTGTCGGGGTAGCCTGATTCCGTGGATCGACAAACAGCTCGATAACGGTCAGAGCCGC  
GAAGAGTGGAAAGGGCAGGCGGAAACCAACAAGATCCTCAACACATCTTCCGTAATTCGGGTAGATGGTTTATGTGTGCG  
TGTCCGGGCATTGTCGCTGCACAGCCAGGCATTACTATTAATAAGTAAAGATGTTGCTATTTCCCGACCCGTGGAAAGAAC  
TGCTGGCTGCGCACAACTCCGTGGGCGAAAGTCTTCCGAACGATCGGGAAATCACTATGCGTGAGCTAACCCAGCTGCC  
GTTACCGGCACGCTGACCGCCGCTAGCCGCTGCGTAAAGTGAATATGGGACAGAGTTCCTGTCAGCCTTTACAGT  
GGGCGACAGCTGTGTGGGGGGCGCGGAGCCGCTGCGTCCGATGCTTCGTCAACTGGCGTAA

>Cluster\_42340

ATGACAAAAGTATTGCTGTCTCATCCCCCGCGCCGGCGAGCCATAACTCAAGCCGCGGATGGTGTGGGTGCGAAAAAA  
TCTGTTCTCCAGCTTGTAGCAATAGCCTACTGACTATTGGCTGCATATGGTTGATGTGGAACTGCTCCACCGTTGCTGA  
ACTGGGCATTTTTCAGGCTAACCTGGGTGGCTCAACCGCTGCCGACTGCACAAAAGCCGGTCCCTGTTGGGCTCTCATC  
ACGAAACGATTTTTCAGTATTATGTATGGCTTTTACCACACGACCAACCGCTGGCGAATTAACCTCGCATTTACTGTTGG  
GCTTGTGTCGATCGCACCAATGTTCTGGAAAATACTCCCGTATCGCGGTGCTATATTGCGGTATGGGCGGTGATTTACC  
CACTGATTTCTGTTGGCTGATGATGCGGGGTTCTTGGTCTTGGAGCGGTTGAAACCCGGCAATGGGGCGGGCTGACG  
CTAACTTTAATATGTCATCAGTTGGGATGCGGGGCGCTGCCGTGGGGATCTTACTGGCGTTAGGTCCCGCTCCCA  
TATGCCGATTTGTGCGTATCTTATCGGTCATTTTTATCGAGTTCTGGCGCGCGTACCCTGATTTACCGTTCTGTTTATGT  
CTTCCGTCATGCTGCCGTTGTTTATGGCAGAAGGCACAGTATCGACAAATTGATCCGCGCGTGGTTGGCGTATCCTG  
TTTCAGTCAAGCATATGTTGCGGAAGTCTGCGAGGCGGATACAGGCGCTGCCAAAAGGGCAATGAAAGCGGACAGTGC  
GCTGGCGTTGGGTTACTGGAAAACCCAGGGGCTGGTTATTTCTGCCACAGCGTTGAAGCTGGTATTCCTGGGCTGGTAA  
ATACCATCATCGCACTTTTCAAAGATACAGCCGTTGATCATCATCGGGTGTTCGATCTTTTCACTAGCGTTACAGCAG  
GCAACCGTTGATCCCGCTGGTTGGGTATGTCGACGGAAGGGTATGTTTTCGCGCACGATCTACTGGATCTTCTGTTT  
CAGCATGTACGTTATAGCAACATCTGAAAAACGTTTAAACACCGGGCGTACACCGCATTTGA

>Cluster\_24512

ATGCAACCTTTTGGCGTACTTGACCGCTATATCGGTAACACTATTTTACCACCATCATGATGACGCTGTTTATGCTGGT  
GTCGCTGTCGGCATTATCAAGTTTGTGTCATGAGCTGAAAAAGCCGGGCGAGGGAGTTACGACGCGTTAGGCGCAGGAA  
TGTATACCTTGTGAGCGTGCAGAAAGATGTGCAAAATCTTCTCCGATGGCGGCTGCTGTTGGGGCGTTGCTGGTCTT  
GGGATGCTGGCGCAGCGCAGCAAGCTGGTAGTCTATGACGGCTTCTGGTTTTACCCTGATGACAGGTGGCGTGTGCGGT  
GAAAACCGCCATTCGCTGGTCTTGTGACGATGGCGATTGGTGAATGGGTCGCGCCGAGGGCGAGCAGATGGCGCGTA  
ACTACCGTGCAGCGCATGTACGGCGGCTGTTGCTCTTACCAGCAAGGTTTATGGCGAAAAGATGGTAAACACTTC  
GTCATACCTGAGCGGGTTAAAGGTGACGAAGAGTTAGGTGGCATCAGTATTTATGCTTTAACGAGAAATCGTCTGTCGA  
ATCCGTACCGTATCCCGCTACCAGGAAAGTTTGAACCCGAAACATAAAGTCTGGCGTCTGCGCAGGTTGATGAACTGAT  
TGACCAATCCGAAACAGATCACCCTGTCGACAGCGGTGAGCGGCACCTGGAAAACCACTAACGCCAGACAACTGGGC  
GTGGTGGCGCTGGACCCGGATGCACTCTATCAGCGGTTTGCACAACATGTTGAAGTATCTGAAAGTACGAGCGGTGAG  
TGCCCGACGTTTATCAGCTCAACATGTGGAGCAAAATCTTCCAGCGCTATCCGTGGCGGTGATGATGTCGATGGCGCTGT  
CGTTTCACTTTTGGCCCACTGCGTAGCGTACCAGTGGCGTGGCGTACCCTGATCAGCTTCCGGTTTGTCTTCTAC  
GTACTGGACAGATCTTCCGCCCGCTGACGTTGGTTTACGGCATCCCGCGGATCATTTGGCGACTGTTGCCAAGCGCCAG  
TTTCTTCTAATCAGCTGTGGCTGTTAATGAGAAAATCGTAA

>Cluster\_20517

GTGGCTCAGGTAAATGCCGTTATCACCCCGTTTTACCCCTGTTTACGGGCAGAAAAGATATCACTCACGATATTGCTCC  
TTTTGTCCCTGAGCGTGACGTATACCGACAGTCTCAAGAGCGAAATCGGATGAAATCGACGTGACGTTGGGAGACACCGCCG  
GGCGTGGCGCGAGGGCGTGGTATCCGGGCAAAGCGGATGCTGATGCTGAAGTTGGGCTATCAGGGCGAAGCGTTGCTG  
GACTGTGGAGCGTCTCTCCATCGATGAGATTGAGCTGGGCGCACCCGCGATACGGTATCCATTCGGCGGTGGCGACGTC  
GGTCAACAGCGCTCTGCGTACCCTCCAGCGAGGGCTACGAAGAGACGCGTGGATGCGATTGCCAGCCGATCGCGC  
AGAAGCATGGTCTGAAGCTGGTCCGTGATAGAGCGGATACCATGACCGGTTGACGCAATACGCGGAAACCGACGTC  
GGTTTTCTGAAGCGGCTGGCGGGTGAATGTTTATGCGCTGAAAGTCAACCTGGCGAGCTGGTGGTTTTCCCATCTGGC  
TACACTGCCAAGTAAACCGCCGGTGCAGCGCTGACGCGCAGGATGTAGCGCGCTGGTCTGCGCATACCATCAACC  
GCATCTATAAGGATGCAAAAGGTGGCGCATCAGAAGAGTAAAGAGAAGACGCTGGTACGTTACCACGCCGACGGCCCGCCG  
ACCACGGAGACCGCTGGTAAATCGACAGCGCCGATACGCTCAAGGTCATGACGCGGCGCGGATCAGGGGACGGCGCA  
GGTGAAGCCGAGGCGCGCTGGATGACCATACAGGATACGACAGCCGTTGCTCTCGATGATGGCAACACCGCAGC  
TTATCGCCGGGAAACAAAATCACTCTCAGCGGGTTCGGCTGCTCTCCGGGAGTGGCTGATCACCAGCGCCGCTCACTCG  
TTTGACCGTTCATCGGGTACAGCACGAAATGAGGTCGGACGTTGGCCGAAACCGGCTCCGGCGGGGAAAGAGAA  
AAAACCGGATACGCTGACCGTCTATCACCCGACGGCCACCCACCCAGGAGAAAAATGA

>Cluster\_41789

ATGAGCAACCGCATTTGTGATCATTTGGTTCGGGCTTCGCGCCCGCCAACTGGTAAAAATATTTCGCAACAGGACGCCAG  
TATTCCATTAACCTGATTGCGCGGACAGCATGGATGAGTACAACAACTGACCTCAGCCTAGCCTGTTATCAGTCAAGGGC  
AACGTGCCGACGACTTACCCTCCAGACGGCAGGTGAATTTGCGGAGCAGTTTAACTGCGCCTGTTTCCGCACACCTGG  
GTAACGGATATCGATGCCGAAAGCCATGTTGGTGAAGAGTCAAGATAATCAGTGGCAATACGACAAGTTAGTGTGGCAAC  
CGGTGCCAGCGCTTTGTCCCGCAGTGCCTGGCGGTGAGTAAATGCTGACGTTAAATAGTACGACAAGATATCGCGCT  
GTGAAACGCAACTGCGGGATGCCCGACGCTGTTGATTATCGCGGTTGGTTGATTGGTAGCGAACTGGCGATGGATTTT  
TGTCCGGCAGGCAAAATGGTACGCTAAATCGACAACGCTGGCAGTATTCTGGCGTCTTAATGCCACCGGAAGTACAGCAG  
CCGCTTGCAGCATCGGTTGACGGAGATGGCGTTCATCTGCTGTTGAAATCTCAGTTGACGGGACTGGAAAACAGATTT  
CTGGCATTTGCGCAACGCTGGACCGCCAGCGTTGCATCGAAGTGGATGCGGTAATGCGCGCACCGGACTGCGCCCGGAA  
ACCGCCCTGGCAGCAGCGCCGGCTGACGATTAAATCGCGCGCTTTCGCTCGATGATTATCTGCAACAGTAAATGCCGA  
TATTTATGCGCTGGGCTTTCGCGGAAATTAACGGTCAAGATTTGCGGTTCTTGCACCGGATCAACTTAGCGCGATGG  
TGCTGGCAAAAATCTTCTCGGCAATAACACGCGCTGAAACTCCCGCGGATGCTGGTAAAAATCAAAACGCTGGAAATTA  
CCGCTGCATCTGGCAGGCGAAACCCAGCGTACGATTTACGCTGGCAAAATTAATACCGAACGCCAAGGATGGTGGCGCG  
CGCGTTGACGATGCTGACCGCTTTCGCGCTTGTGGTCACTGAGGATCGGATGAAAGAGGCATTTGATGATTTGAAAA  
CGTTGTCGATGTAG

>Cluster\_29071

ATGAAAACCTTCAGCGATCGCTGGCGCAACTGGACTGGGATGACATCCACTGCGTATCAACGGCAAAACGGCTGCTGA  
CGTAGAGCGGGCGTAAATGCCTCGCAACTCACCCGACGACATGATGGCATTTGCTATCACCCGCGCCGAGTGGCTATC  
TGGAAACCTTGGCCAGCGGACGACGCTGACTCGTCAAGGATTTGGCAACGCTGCTGAGCTTCTACGCTCCCGCTTAT  
CTTTCCAATCTTTGCGCTAACGACTGTACTTATGCGGATTTTCTATGAGCAACCGCATCAAGCGCAAAACGCTGGATGA  
AGCGGATATTTGCCAGGAAAGCGCGCTATACGGGAGATGGGCTTTGAACATCTGCTATTTAGTCACTGTTGAACATCAGG

CGAAAGTGGGGATGGATTACTTTTCGTCGTCATCTCCCTGCCCTGCGTGAACAGTTCTTCTACTACAGATGGAAGTGCAA  
CCGCTGGCGGAGGCGGAATATGCCGAGTTAAAAACAGCTTGGCCTCGATGGAGTAAATGGTTTATCAGGAGACATATCATGA  
GGCGACTTATGCCATCATCATCTGAAAGGTAAAAACAGGACTTCTTCTGGCGGCTGGAACGCCGGATCGGCTGGGCC  
GTGCGGGGATGATAAGATAGGCTCGGCGCGCTAAATGGCCCTTCCGACAGCTGGCGCGTTGACTGCTATATGGTTGCA  
GAACATTTGCTATGCTGCAACAGCCTACTGGCAAAGCCGCTACTCTGCTCTCCACGCCTGGCGGCTGCTACTGG  
CGGCAATTGGCCCTGCGTCGATTATGGATGAACGCCAGTTAGTGCAAAACCATCTGCGCCTTCCGGCTGCTTGCACCGGAGA  
TTGAACTGTCACCTCCACGCGGGAATCACCGTGGTTTCGCGATCGCGTTATTCCGCTGGCAATTAATAACGTGAGCGCT  
TTTTCGAAACCGCAGCCAGGTGGCTATGCCGACAAATCACCCCGAGCTGGAACAGTTCTCACCGCACGACGATCGCAGACC  
AGAAGCAGTTGCGGCGGCTTAACTGCTCAGGGTTTGCAGCCGGTATGAAAGACTGGGACAGTATCTGGGACGCGCCT  
CGCAAAGGCCATGA

>Cluster\_59937

ATGTACGATTATATCATTTGTTGGTTCTGGTTTGGTTGGTGGCCGTTTGTGCGAATGAGTTAAAAAGCTAAACAAAAAAGT  
TTTAGTGATTTAGAAAAGAAATCATATCCGTTGGAAATGCGTACACAGAGGACTGTGAGGGTATCCAGATTCAATAATAG  
GTGCACATATTTTTCATACCAATGATAAATATATATGGGATTACGTTAATGATTTAGTAGAATTTAATCGTTTTACTAAT  
TCTCCACTGGCGATTTATAAAGCAAAATATTCACCTTCCTTTAATATGAATACTTCCACCAAATGTGGGGAGTTAA  
AGATCCTCAAGAAGTCAAATAATCATTAATGCTCAGAAAAAAGTATGGTGACAAGGTACCTGAAAATTTGGAGGAGC  
AGGCGATTTTCATTTAGTTGGGAGGACTTATACCAAGCATTTGATAAAGGGTTATACGGAGAAGCAGTGGGGAAGAATGCA  
AAAGAATTGCCTGCATTTATTAAGCGAATCCAGTGAGATTTACGTTTGATAACAATATTTTTCCGATCGCTATCA  
AGGTATTCGGGTGGGAGGCTACACTAAGCTTATGAAAAAATGCTGAAAGGTGGGACGTAATAATAGGCATTGATTTTT  
TGAAGACAAGATTTCTAGCGAGTAAAGCCATAGAATCTACACTGGACCCATGATCAGTACCTGATCAGTACCTGATAGG  
TTTTGAGCCTTAGAATATCGCTCTTTAAATTTGAGACGGAACCCATGAATTTCCAAACTTCCAAGGGAATGACAGTAAT  
AAATTTCACTGATGCTAATGTACCATATACCAGATAAATGAGCATAAACATTTTGACTATGTTGAGACAAAGCATACGG  
TTGTTACAAAAGAAATCCATTAGAGTGGAAAGTTGGCCAGCAACCTACTATCCAGTTAATGATAATAAAAACATGGAG  
CTTTTTAAGAAATATAGAGAGTTAGCTAGCAGAGAAGCAAGGTTATATTTGGCGGGCTTTGGCCGAGTATAAATATTA  
TGATATGCATCAAGTGATATCTGCCCTCTTATCAAGTGAATAATAATGAGTACGGATTAA

>Cluster\_33276

GTGAAAGTACTGACTGTATTTGGTACGCGCCCGGAAGCCATCAAGATGGCACCCTGGTGCATGCGTTGGCAAAAAGATCC  
TTTTTTTGGAGCTAAAGTTTGGCTCACTGCGCAGCATCGGGAGATGCTCGATCAGGTGCTGAAACTCTTTTCCATTGTAC  
CTGACTACGATCTCAACATAATGCAGCCAGGACAGGGCCTTACAGAGATAACCTGTGCGATTCTGGAAGGGCTAAAACCT  
ATTTCTGGCGAGTTCAAACCCAGACGCTCGTGTGTTTCCAGCGGATACCTACGACGACGCTGGCAACCCAGCTGGCGGCT  
TTATCAGCGTATCTGTTGGTCACTGAGGCTGGTCTGCGCAGGGCGATCTCTATCGCCGTGGCCGGAAGAGGCTA  
ACCGTACATTTGACCGGGCATCTGCGGATGTATCACTTCTCTCCAAACCGAAACTTCCCGCAAAAATTTGCTGCGTAAAC  
GTTGCTGACAGCCGAATCTTCAATACCGGTAATACAGTTATGATGCACTGTTATGGGTGCGTGATCAGGTGATGAGCAG  
CGATACGCTGCGTTCAGAACTGGCGGCAAAATACCCGTTTATCGACCCGATAAAAAGATGATTTCTGGTGACCGGTACA  
GGCGTGAGAGCTTCGGTGGCTTTGAAGAACTGCCATCGCTGGCTGACATCGCCACCACGACCCAGGACATCCAG  
ATTTCTATTCGGGTGCATCTCAACCCGAACGCTCAGAGAGCCGGTCAATCGCATTTCTGGGCGATGTGAAAATTTGATCT  
GATCGATCCCGAGGATTTTACCGTTTGTCTGGCTGATGAACCAGCCTGGCTGATTTTGACCGACTCAGGCGGATTC  
AGGAAGAAGCGCCTTCGCTGGGGAAACCGGTGCTGGTGTGCGGATACCACTGAGCGTCCGGAAGCGGTGACAGCGGG  
ACCGTGGCTGCTGGTGGCAGGATAAGCAGCGAATTTGTCGAGGAAGTGACGCGTCTTTTAAAGACGAAAACGAATATCA  
AGCTATGAGCCGCGCCATAACCCGATGTTGATGGTATGAGGATGCTCTCGCATTTCTGGAAGCGTTAAAAAATAATCGGA  
TATCACTATGA

>Cluster\_45867

ATGATTTTTTTTAAAGCATAAAAGCCACTGGTTGGTTAAAGAATAAGATGGAATGGTATATGAACGGTCATATAGGAGA  
ACTGGATAAAATAGTTCCCATCTTATTTACGGAGCATAAAAATATATGGAAGAGATCGTATAACTCCACGCACTGTATCTG  
CTGAAGATGGCGTTATTAATAAAGCAGAAATATCCCGATGATAACATGATGCAATATTATTTGGTGGGATAGTGAAACTCAA  
TCGAATTTGGAAGGATGGATATTGCCGAGTGCCTACTTGTAGATAATAAAGAATGGCAGGAAAAAGCGAGCGATTTATG  
TTTTGAACTTATCGATACGCAAGATGATGATGGCTATATTTGGAATTTATGATTATCATATAAAATTTAATGTTAAAGCAG  
AAAATGGAGAGTTCTGGGCAACAAGCTACTGCTTGGCTTTTGTGCTTGGATGTTATGAGTCCACCCTTAATGAGAGTTTA  
TTAACTTCTTACCCAAGCCGCAAAATGCATTTAGGCTGGCTACCCTAAAGAAACGTCACATCTTTTCTGTTGGAACA  
GGGTTTTGCTGGACATAGCCAGGATTAACAATAACAGATGTTTTCTACCGCCTTTATGAAATAACCAATAACATGAAAT  
ATCTCTCATATTGCTTGTGGCTGTATGAAGATTTTCCGCAAGATGCGTGTGCGGAGCAAGATCTGCAATAATAAAATGTC  
ATAGACCCTGGTTACCTTCTTAAAGGTCATGGCGTACATACGATGAGCATATTAGGGCATTAGCCATCGCAGCGAGCCA  
ACGGCCGAGTATCAAACTGCATTAGATATTTTTTTATCCAGTTGAAATATTATCTTACACCATCTGGCGCTCCCATTTG  
GTGATGAGTGGATTACAGGACGCACAGCTAATGCCACTTATACAGGCTATGAATAATTGTTCTGTTTATGAACTATTTAGC  
ACTTATGTTATGTTAATAAAGCTGACCACTAATTTGGTCTGGCCGATGATGCTGAGGCTATTTCTATAAATCTTCCGCT  
TCGCATTTACCTGACACAGGACAGTCCACGCGTTGA

>Cluster\_35618

ATGAATAATACCGTTTTACTTCCGGTTTCCGGTCCGCAATGGGGCGCTGGACATCCGTCCTGATCAGTGGCGCATTTAA  
CCGTTATGCCCCGGGATTTAATGTTGCCATTACACCCCGCTGGCCCGGACCGGGATTTATCAGCCCCGATAAAAAATG  
GTGGGCTGGTTGAAGTGTATCGGGGATGAGCCGCTGCTACCGGATATGTGGAGGCACTACCGCTTCTGTTATGACGCC  
AGCAGCGTCAGTATGGGGATTTGTCGGGCGAAGCAAAACAGCCGATCTGGTTGATTGCTCTGCTTTGCCACTCCAGCAGAG  
CGGAAAAAACCTGCTCAGAATAGTCACTGAACCTGGCTGCGCATTTGGCATCACTGTTGTTGATGCTGGCGTGCCTCAGA  
CTGCGGTTGATTGATGCACAGCCGGAACCGGCGAAACTGTTGCCGATTGCTTTAACCGGTTGCTGGGGCAGGTTTACAGC  
CTGGCTTATGACGATGAATGCGGGGACTGGTTCTTGGGAAACCCGGAACAGGCAAAGCGGCGACGGCCTGTTGCTGGG  
AGAGAATATTTCTTCTGACACGGAAGAAGCATCAGAGAGCGGTTTTCTGAAATATCAGGTGAGTGGGCGAGCCGCCCCG  
GCAACGACGATGATTTTGGTGGAGCCACCTTGGCCGCAATGCTCAGACCCATTGAGCAATGCGGCTGACCCGTTATCCG  
CCTTTGTTGATTGACGAGTACAGCAGCAGCAACGACAGCAACCTGTAAGGCCGTTGTTGAAATTTGAAGCGGCCAACGGGC  
TGGCCTTACCCGTTGAGACAACATATACGGTTTACGGGCTGGCGGAGGGCAGTGGCGCTTATGGCGTCCGGGGTTATCTG  
TCATCGTTTTCGACCCGCTGAATAAATTTGATAATGATGAACCTGGTATCGCAGAAGTTACCTATAACAGGACGACCCG  
GGCAGCAGCATGAATTTAGCGGTTGGCGGAGATGCTTATCTCCCGAGCCGTTTACCGCCAGGAAGAAAAAATATG  
TGAGGAGGATTTCTGA

>Cluster\_28449

ATGAATAAGCGCGATGCAATCAATCATATTCGGCAGTTTGGCGGGCTGCGATCGCTTCCGTAATCGGTCGGCGGCTC  
TGGCGACGGCGGTCGTAACGCGCGGAAACGCGGAAATCCTCGCCAAAACCGGTAAATCGCAAAACCAACGTTTTCAACG  
AACAGGTACGCTATGCCCTTCCACGGCGCATTCGAGGATCTGAAAAGCAAACCGTTCGCCACGTTTTTAAACGGTGTGGTT  
ATCGCCATCTCCCTGACGCTGCCAGCGTCTGTTATATGGTGTACAAAACGTTAACCAGGCGGCGACGCAATATATTC  
GTCACCGCAATCACTGTTTATCTGCAAAAACGCTGGATGATGACGCGCTGCGGGCGTGGTGGCAGCTGACGCGG  
AGCAAGCGGTGGAGAAAGTGAATTTATCTTCTCTGTAAGACGCACTGGGCGAGTTCCGTAACCTGGTCTGGTTTTGGTGGT  
GCGCTGGATATGCTGGAAGAAAACCGCTTCCGGCAGTAGCGTGGTGTATCCGAAACCGATTTTACAGGGGACGGAGTC

ACTGAATACGCTGCGTGATCGTATCACGCAGATTAACGGCATTGACGAAGTGGGATGGATGACAGCTGGTTTCCCGCC  
TGGCGCGTTGACCGGGTGGTTCGGCGCGTTTTCCGCAATGATCGCGGATTGATGGTGGCGGAGTGTTCCTCGTCATC  
GGTAACAGTGTGCGCCTGAGTATCTTTGCTGCGCGTGAATCTATTAACGTGCAGAAACGATTTGGTGCACGGATGGTTT  
CATCCTGCGTCCGTTCCCTGTACGGTGGCGCATTGCTGGGATTTTTCTGGTGCAATGTTTGTCACTAATTTTTGTGAGAAATTC  
TGGTGTGCGTTTTGTATCGCGGTTGCGGAAGTGGCAGGTTTTTCGGAACGAAAGTTGATATCAATGGCTTATCGTTT  
GATGAATGCCTGCTATTGCTGCTGGTATGCTCGATGATGGCTGGGTGGCAGCGTGGCTTGCACGGTACAACATTTACG  
CCACTTTACGCTGAATAA

>Cluster\_20410

ATGAAGATCAAAGCTGTTGGTGCATATTCGCTAAACAACCACCTGAACCGATGGATATCACCCGCGGTGAACCGGGACC  
GCATGATGTCAAATCGAAATCGCTTACTGTGGCGTCTGCCATTCGATCTCCACCAGGTCGGTTAGAGTGGGCGGGGA  
CGGTTTACCCTGCATGCGGGTGCATGAAATTTGGGGTGTGTGGTAGCCGTTGGTATCAGGTAGAAAAACATGCGCCG  
GGCGATCTGGTGGTGTGCGGCTGCATTTGCGACAGTTGTAACATTTGCGAAGAGTGTGAAGACGGGCTGGAAACTACTG  
TGATCACATGACCCGGCATATAACTCGCCGACCGCCGACACCGGGCCATACTCTGGGCGGCTACTCACAAACGATCG  
TCGTTTATGAGCGATATGTTCTGCGTATTCGTCACCCGCAAGAGCAGCTGGCGGCGTGGCTCCTTTGTTGTGTGACGGG  
ATCACCCAGTATTCGCGCTACGTCACCTGGCAGGCCGGCCGGTAAAAAAGTGGGCGTGGTCCGGCATCGCGGCTCTGGG  
ACATATGGGGATTAAGCTGGCCACGGCATGGGGGGCGCATGTGGTGGCATTACCCTTCTGAGGCAAAAACCGGAAGCGG  
CAAAAGCCCTGGGGCCGATGAAGTTGTTAACTCGCAATGGCCGATGAGATGGCGGCTCATCTCAAAGAGTTTCGATTTT  
ATTTTGAATACAGTAGCTGCGCCACATAATCTCGACGATTTTACCCTTGTCTGAAGCGTGTGGCACCATGACGCTGGT  
TGGTGGCGCTGCGACACCCGATAAATCACCGGAAGTTTTCAACCTGATCATGAAACCGCGTGGATAGCCGGTTCTATGA  
TTGGCGCATTTCCAGAAACGAGGAGATGCTCGATTTTTCGCGCGAACATGGCATCGTGGTGTATAGAGATGATTCGG  
GCCGATCAAATTAATGAACCTATGAGCGAATGCTGCGTGGTGTATGTAATAATCGTTTTGTTATCGATAATCGCACACT  
AACAGACTGA

>Cluster\_12685

ATGAATCTGGTGTGATGTCAGATATTACCCGCAACAGCTGGGTGCTATATGGCGCAGCAGCGCTTAAACAATATCCC  
GGTATCTGCACTGGTATCGCGATTTACCCTAGAACCCCTCGGTGCAGCAGCGTTTTGAAAACGAGTAAAGGAGAGCACTG  
AATTTACAAAAAATTAACGTTTCGGTGTGACTGACAGAAAGCGAAAAATCCTCCTGGACACCACCGGCCGATTT  
GCGCGCACGAATACCAGTTATGACGGCACAACCGCGTAACCCGAAATACGTTGGTGTGATCTGAAAAACCGCAATACCA  
GTGCGAACAGGTGAACACGACAGCTTTATTTCTGATCCGCGAGTTGATGCGTGGCGGCACACCCCTGATTTTCAAGTCCC  
GCGTCAGCACACAGATTGCCCGGAGGTGGCGCTTACCGCATCATGATCGGTTTCAACGGCAGCTCTCACGCAGATGAG  
TCCAACTTTCAGCACTAACAGCTGCTTCCAGGACGTTAACGTTGGGATGGCTGGAGCACATCAGAACCGCCAGCGGAGCG  
CGTTATGAATGATGTAACGCTGACCTCCCGCAACATGGACAACACCGTGGCGCACGCGGGTAAATATGCGAACGCTGATG  
CACTGGTACAGGACGCGCGCTCATCCCTGCTGGATGAATGGCAACAAGGAACTGACGACCTCGTGGTGTATTTGGGGCGC  
AACCTGTTTAACTCGCTGCGTCTGCCGCTGCTGAAACAGCATCAGCGGCCAGAATCCCAATGCGGAATTTACTTCCGGACA  
GCTCATCCCTGTCATCGCGCGCATTTGGCGGGCTGGATGATTCCTTGCGCCGTTCTTCCCGGATGCAACGATGCTGATCA  
CCTCGTTCAACAACCTGTCAATTTACTGGCAGAAAGGAACAATGCGTGCCTGATGAAAGACGAGCCGGAATACAACCGC  
ATCGCCACCTACCAGTCCATCAATGACGCTTATGCTGTTGAAAGACTATGGCAAGTGGCGGATGGTCACTGGCCGTAAGTT  
CGCCGACAGCTAA

>Cluster\_20766

ATGAGTAAAAAAAACGCTTCGTTAAGCGCAACCCGCGGGCGATAAGTCCAAAAAATGAGCATCATCACATTCGGCAA  
ACCGGAACCCGCTCTGACCACCGGCACGGATTACCGCGACATCTGGTACGACAATGCCCGCATCACTTCACCAGCCGA  
TTGACCGGCTGGCACTGGCACAGCTTATCAATCTGAACGCTCAGCATGGCGGCATCATCCACGCCGGAATAATGATTT  
GTGCTGATTTATTCGGCGGTGGCTGACTTACGACCAACTGGAAGCCGAGCGTTTACTATACAACCTTCGGGGATAT  
TGGCATTTGCAAAAATTCGCAACCGATGGGGGATGTGATTTGCCCTGGAACCTTTACCAGCCGCTGTATATTTCCCGCGGTA  
AAGTCAGGGACAACGCCACAGACAGCCCGCGGATTTATGTTGATTTGCAGGACGGGGAACCGAGGTATGGCCACAGGAA  
GATATCATTTTTATCAAGATGTACGACCCGCAACAGCATATTTACGGGCTGCCCGACTATATCGCGGCTGATATCTGCG  
ATTTGCTTAAACAGCGAAGCCGTGATTTTTTCGCGCGGTTACTACCAACCGCGCCATACTGGCGGCATTTCTTACACGC  
GCGATCCAGATATGACGGATGAAATGGAAGAAGAAATTTGAACAGCAGCTGCGTGCAGCAAGGATATCGGCAACTTCTCC  
ACTATTTCTGGTGAACATTTCCAGGCGGGGATGGGGATGCGATCAAGTTTATGAAATGGGGGATATCTCTGCAAAAAGTGA  
ATTTGCCAACATCAAAAACATCAGCGCACAGGACATTTCAACGCACACCGCTTTCGCGCAGGCTGGCCGGAATTTGTT  
CGCAGAACACAGCTGGCTGGGGGATGTTGAAAAGCGGAAAGGATTTACAAGAAAAGCGAGATAGCGCCTATTCAGCGT  
CGGTTTATGACTGCGCGTGAACAACGATCCCGAAATACCCGGAACGCTGCACCTTCACCTTGTATTTAAGTTACACAGAATC  
AACGGATAAGGATGCGGCATGA

>Cluster\_50272

ATGAGTCAACATCAATATTTATCCACAGCTGAAATGGAAGCCTGCTGAATATGAATCTCTGATGCTTTTAGATCAAACCTAC  
GCTCTCTGGTTTTTCTCCGATCATTAACCTTCCAGACATAGACTGGGATTTATGAAAACGAATGCTACAAGAAGAAATTTGA  
GTTCTTACTTATCTGACTTCCGTTATTAACCTTGGCGCATCCTGGAAGCCAATCGTCCGTTTTGCTGGATGTTAAATAT  
TTAGATAAACATGTTTCGAGCCGCCATCATCTCTAGATATGTGATCTCAAGATGCTAGAGTAAATGGTAAGGAAATTTA  
CCCTGTGTTTCTCCCGCATATTTCAACAACTATACATGCTGTTCAACGCAACTTAATCAATGGGCTGCTATATCTA  
TCACCCCCAGACATGGCACCAATTTACAAAGTCTGGTTAACCACTTAAATATTTATCTTAGTTTAAATGATGTAATCAT  
GATTTTGGAGATATTCAAAACGCAACTGATAGTTTAAACAACAAGCATTAAGCATGGTCAACACATTTATCAGGCCAAGC  
TCCGTGGAGAACTTGATTTTATCTTCAACCGCATACCCGGCATCACAGGCAGGGATACCCGCAACATCAAGTTTATCATA  
TTCCGCGCATGAATACGATCTTTGGATGTACGTAGTACAGAATTTAGCAATGGAAGAACGCCAAGTTTTAGTGATTTA  
CCCACCGTAGCTTACCATTACGAGCGTAGACCCAGCTTATGCTCTCAGTATGCTCAGTGAGATATTCGAACGATAC  
CTCATGGATCTTTGTAAGGATACCGCAGTTAAAGGAAATGGATGGGGCCAACTAAAAAATTTGATCTACCCTTGTGTA  
GTTCCGACAGATCAAGTCTTTGGTCCAAATTTAGTTGGGGGATGATTACATTTACCAAAGATCATTAGGCGCTAAC  
AAATCTGGCGGCTCTAAAGAATGGCGTAAAGTTGCACATACGCACCATATTACGTTAGTCTGAGACAGCTTTATTGGTT  
GGCGCAGACTCAGCTGCCAAGCCTTAA

>Cluster\_38946

ATGAATCCGGCATGCTTCCACGCTCGGAACACTTGGCGAAACGGCGTCTGTAAGCGGATATTTTACCAGCGGTGAG  
TAGTGAACACCGCGCGGTTTTACCCTGCGCAAAATGGCGGTCGCGCGGTGGCGGAGCGCTTCATAGCGCAAAAACCA  
GTCAGCAACAGGCGACGCGCCCGCAGGAGAACGATCCGGTGGCGATGCAGGCGCTAATGGCGTGTACTTCCGCAACCT  
GCCGCGCCGATCAGGACACGCGCAGCGCGAAACGTCGCAACATCGCCGGTTATCCAGCAATTTGACGAAAGCGGTGTT  
GCAAAAACGCGCGCAACGCGCCGACGAGCAGCAGGAACCTACCGCGTTCGCGCGCAGTTGCAGGAGCTGATCAGTCACT  
TGCCGACAGCGAAACCCGAAACAGCAGGCGCAGACTGGCGCATTACGCGAGTGAAGATTTACATGCCATTTCCGCGCAGC  
CCGCGGCTTCAACACCGCCAGCTCGCCGAAACCTGAACTAACCCGTTGACCGCGCCCGCAGGTCGAGCGTAAAAAC  
GGAAGAAAGTGGCGGACAGCGAACCGTTTATGGCGGTGCGGTTGTCAGGTTAAGACGCCAGGTTGGTACGCGCATCAT  
AGGAGATTTGCGCAACACCGCAGCTTTTCGATGACGAACTGGCGGAAACCTGACGACGCTGTTGAAAGATCAGATC  
CACTTTACGCTCAACAAACAACAGCAGTCTCCACCATCCGCTCAGTCCACCGTCTGCTTGGCAAGCTCGAGATCGCCGT  
ACAACCTGACACAGGCAAACTGATGGTGCACATCGCGCGAACCAAGTGAAGTCTGCGCGCGGTTGCAGCAGTTTAGCG

ACGATCTCCGCCAGCATCTGACGGCGCAAATTTTATGGAGGTGAACGTACAGGTTTCTTCCGAAGGGCAGTCGCAGCAG  
CAACAACAGTCGGCCATCAGCAGGAAGAGGTGAGTGCCCTTACAGCTTGATGATGCGCCTCAATTTCAACAGAACGA  
ATCCGTTTTGATCAAAGTAA  
>Cluster\_41530  
ATGAAAACGATGCTGGCAGCTTATTTACCAGGAAATTCGACCCTGATCTGCGGGAAGTTGCGGTGCCAGCCGGGGAT  
TAACCAGGTACTGATCAAATGAAATCCTCCGGGATTTGCGGAAGCGATGTCCACTATATCTACCACCAGCACCGCGTA  
CGGGGGCGCCACCGATAAACCGTTATACCAGGGATTTATCAACGGTCAATGAACCGTGGGGCAGATTGTGGCATTGGG  
CAAGGCTGCCCATTTTAAAGAGGGCGACCGCTGCTGGTGTATCACATTTCTGGCTGGTGGTGGTGGTGGTGGTGGT  
TCCGGTTTTCTTATTTCTGTACTGGCGAAGGAAAGCGCTTACGGCTGGCAGCTGACGGCGCCATGCTGAATACC  
TGCTGGCGGAAGAAAAGACCTGATCCTCTGCCGACCGCTGAGCTATGAAGATGGTGGTGGTGGTGGTGGTGGTGGT  
GGTACAGCTATGAGGGATTTTGGCGCGCAAGTTTCCGGCAGCGATAACGTGCTGGTGGTGGTGGTGGTGGTGGTGGT  
CATGATGGCGATGATGCTGGCGAAAGGTGCGGGTGCAAAAAGGATCATCGCGTGGTGGTGGTGGTGGTGGTGGTGGT  
TGGCAAAACAGTTAGGATGATGATGATCAGCGCTATTTAGCGACCACCGAAGGTCTGCCGAGATAATGCCGAATCACT  
CACGGCGCGGGATGTTGGCTTGTATTGTTCCGGTAATGCCGAGGTGCTTACTGGCACTGCAATCCACCGCTGACTG  
GGGACCGTGGTTTACATTTGGTGAACCGGAAAAGTTCGAGTTAGCGCCGACCTGATGCACCATCAACGGCGGA  
TTATCGGCTCTGGGTGACCACTGTTCCATATGGAAAAATGCCGCCACGATTAACGGACTGGAACCTGTGGCCGGT  
AACGCCATTAACCCACCGCTTCTCGCTGGAACAGCGGGAGATGCTTACCGCTAATGGCGAGCGCAAATGCCGGAAGC  
CGTATCAACTTCCCGGATTA  
>Cluster\_57144  
ATGTTTACTAAACGTCACCGCATCACATTTACTGTTCAATGCCAATAAAGCCTATGACCGCAGGTAGTAGAAGCGTAGG  
GGAATATTTACAGCGCTCAAAATCGAAATGGGATATTTTCAATTGAAGAAGATTTCGCGCCCGCATTGATAAAAATCAAGG  
ACTGGTTAGGAGATGGCGTCAATGCGGACTTCGACGACAAACAGATCGAGCAAGCGCTGGCTGATGTCGACGTCCCAT  
GTTGGGTTGGCGCTGATCACCTTGGCAGAAAGTTACCACCGCTTCAATACATTTGCCACCATAATGCGCTGGT  
TGAAGCGCATTTTTCGATTTAAAGAAAGCGTTAACCGCTTTCGCTTTTATGGTCTTCCGGAATCAAGCGCAAC  
GTTGGGCCACTGAGCGGAATATGCATTTCTGCTAGCTTGTGCGGAAAGAAAGTATCGCGGAGTGGTGGTGGTGGTGGT  
GAAACCGCCAGAGAACTGGCAACACCGCAAAATCGGCTGGCAGACTGGCTACAAACGCTACCACCACAAACCGGGAT  
TATTGCGTACTGACGCGCGAGCGGGCATATTTGCAAGTATGTGAACATCTACATATTTCCCGTACCAGGAAAAATTT  
GCGTATTGGCATGATAACGAAAGACTGACCCGCTATCTGTCGCTGTCGCTTTCGCTTTCGCTTTCGCTTTCGCTTTCGCT  
CAATGGGCTATCAGGCGCAAACTGTTGCATCGATTATTAGATAAAGAAGAAATGCCGCTACAGCGAATTTTGGTCCC  
ACCAAGTTCGCGCTATGAACGGCGCTCAACAGATTATCGCTCGCTGACCGATCCGCGCTTATTCAGGCCATGCATTACA  
TTCGTAATCACGCTGTAAAGGGATTAAGTGGATCAGGACTGGATGCGGTGGGATCTCGCGCTCCAATCTTGAGAAG  
CGTTTTAAAGAAGAGGTGGGTGAAACCATCCATGCCATGATTCATGCCGAGAAGCTGGAGAAAGCGCGCAGCTGCTGAT  
TTCAACCACCTTGTGATCAATGAGATAATCGCAAAATGTGCGGTTATCCATCGCTGCAATATTTCTACTCTGTTTTAAA  
AAGCATATGACACGACGCAAAAGAGTATCGCGATGTAATAGCGAGGTCATGTTGTAG  
>Cluster\_41172  
ATGCATAACTCCCCGAGTCACAGCGCGAAATCGTTTGACCTGACCTGACGGCATTTTTAATCGTTGCCCTTTCTCAC  
CGGATTTGCGGGCGCTCTGCAAAACCCGACACTCAGTATTTTTCTTACTGATGAAGTACATGCCCGTCCGGCGATGGTGG  
GATTTCTTTTACCGCAGCGCAGTCAATGGGATTTCTGGTGGTGGTGGTGGTGGTGGTGGTGGTGGTGGTGGTGGTGGT  
CGAAATCGCTGATTTGCTTTTGGTGGCTGTTAGCGCTGACTGGCTGCACCTTTTTGCTGGAATCGCAACTCTTTGT  
TTTTGCTAATCGTTGGCTTTTTCTTAGCAGTTTTGGCTCAACCGCTAACCCGAAATGTTTGGCTTTGGCTTTGGCTTTGGCT  
CTGCAAAACCGGAGCTGAGGCGGTGATGTTACGCTTTTTTACGCGCTCAGGTTTACTGGCATGGGTCAATGGCCCA  
CCGCTGGCTTATGCTTAGCGATGGGTTTACGCTTTACGGTAATGATCTGAGCGCAGCGGTAGCGTTTATTGTTGGCG  
CGTGGTGGTGGTGGTGGTGGTGGTGGTGGTGGTGGTGGTGGTGGTGGTGGTGGTGGTGGTGGTGGTGGTGGTGGTGGT  
ACCGTCCGATACGTTGCTGCTGTTGTCATTTGTACATTTGATGTTGGGCTCGAACAGCCTGTACATCATCAACATGCCG  
CTATTTATATCAACGAATGCACTTCCCGAGAACTGGCCGGTGTGATGATGGGACCGCCCGCGGCTGGAATCC  
GACCATGTTGATCGCCGATATTTTGCAAACGCTGCGGTAAGCGCTTCTTAATGCGCGTGTGCTGCGGTTGGTGGCT  
GTTTTTACCGAGGAATGCTGATGGCGCATTCACCTGCCATTTCTGTTGGCTTGCAGCTGCTAAATGCTTTTTATTGGC  
ATTTCTGGGCGCATTTGGGATGCTCTATTTTACGAGTTTGTATGCCCGGTGAGGAGGTTACGCCACCACGCTCTATACCA  
CACTTCCGCGGTGGGCTGGATCATCGCAGGATCAGTGGCGGGATCGTCCCGAGATCGGAATATACAGCTGTGTTCT  
GTTTTGCGATGGTATGATTTATCGCCACTCTGTTTTGCTTACTGCGGATTAAGATGTTTTAA  
>Cluster\_50098  
ATGCCAGACAGAATGGGCTTTTTGCTCATGAAAATTCGTCAATTTCCGAATTAGAGGCAGATCAAAAATGGACAAGAA  
GCTGAAAATCGCCGATATCGCCGACGTAACCGGCTATCGCCGAGTACGGTTTCGCGGGTGGTGGTGGTGGTGGTGGTGGT  
CCAGTGCACGCGCTCGCGAACAGGTGCTGGCTGGCGCGTGAATGGGCGTGGTGGTGGTGGTGGTGGTGGTGGTGGTGGT  
TTGCTGAACAACCTGATTTATTTTCCGCGCAACCGCGCTTTTGAACCAACGATGATACTTTTTATTACCTGTGATCCA  
GAGCATCAGCAAAGCTTATCGCCGATGAAGTGGCGTGGCTTACTGCGCGTGGAGGATTTGACAGCGATCCCGCGC  
TATTTCTCTCGCTGATGAATGAAGCAGATACGCAAGCGCGATCCTGCTGGGGATGACGATCCGCACATCCATGATCTG  
GCCCGCATCTCGTAAGCTTGTGTGCTGATCAACTGCGTGAATGAACGAATGCGCTTCCCGCGATTTGGCGGACCA  
TCGGTTAATTTGGCGCTTCCCGCCGCTATCTGTTTGAATGGTCAACCGGAGGTGATGAATGTGATGTTGCTGCGCC  
GCTACATATGAGGACGCGGTTTGCAGGATTAAGAATCATGGCGTACGATAATCTGGCTTTCACCATGACCGCTCAT  
TTGCTGAATATCAGCAGTTTTCGCTAAAGAAGCGGAAGAAAGGTCGGAGCGTGGTGGTGGTGGTGGTGGTGGTGGTGGT  
GTTGGCCAGCGGCTTCTGGTGGCGGGATTTTATGGCGGGGACGGTAAATGCGCTACATCTGCTGGTGGTGGTGGTGGT  
TACCACAGGATGTTCTGGTGGTGGTGGTGGTGGTGGTGGTGGTGGTGGTGGTGGTGGTGGTGGTGGTGGTGGTGGTGGT  
GTGCCACCGGATGAGTGGCAATGAAGCGGTGCAAAATGTTGCAACAGCGGCTGATTCGCCCGGATGCTCCGTTGGGCTC  
GCTGCTGCTGACGAGCATTGGCGGTGCGGGAGTCAAGTGGCGGGTTCGCCAGGAAAGGGAACACCGCGTGGAAAC  
GGGAAGGCTGTACGACACTCAGCTGTCTGATTCCTAGCGCTCGCTTACCGTGA  
>Cluster\_25325  
ATGGATACGTCACCTGGCTGAGGAAGTACAGCAGACCATGGCAACACTTCCGCCAATCGCTTTTCTTTATGTGCGCGTA  
CCGAGTTTTACGACCTAGGATGTTTCGCCCGCTTCGATGAACCGGCTGTGAACGGGATTCGCCCGACAGTCCCTTCC  
AGCAAAAACCTCGCCGCTTGTGTTGCGGATGCAAAAGCGGATCAAAAATCCGGTGGTGGTGGTGGTGGTGGTGGTGGTGGT  
GATCCACGTCAGCTTCTGCTGCTGATATTTCCGAATCCTGGCAGTCTTCTCCCGTACAGGAAACAAGCTTCCGCACG  
CCGTTTACCCCGCAGCAGTCTGTAACGTTGGTGAACGCTGAGGCCATTCGGGAACAAGCCACGTTTGAACAGATGGTTG  
CCCGCGTGTGCTTACCCTCACGCGCAGGTCGACAAAGTGGTGGTGGTGGTGGTGGTGGTGGTGGTGGTGGTGGTGGTGGT  
GCCATTTGATAGTGGCTTATTTGCTGGAACCGTTGATTTGCCGCAAAACCGGTTAGTTACAACCTTCCATGCTGGTGGTGGT  
TGGTGGGCTTCTGCTGGGGCCAGCCCGAACTGCTGCTACGTAAGACGGCGAGCGTTTTAGCTCCATTCGGTTAGCCG  
GTTCCCGCGCTGCTGACCGGATGAAGTCTGATGCGCAAGCGGGTAAATGCTGCTGGCTGAGAAAAGATGCCCAT  
GAACATGAACCTGGTACAGCGATGAAGAGGTAAGTGGCGCAACGAGTAGTGGATGATGATGATGATGATGATGATGATGAT  
ATTTGATTACCACGCGACGCTGTGGCATCTGCAACCGCTTTTGAAGTAAAGCGAATTCGCAAGAAAACGCACTGACTT  
TGGCTTGTCTGCTGATCCGACCCCGCTGAGCGGTTTCCCGATCAGCCCGGACTCAGGTTATTGCTGAACTGGAG

CCGTTTCGACCGGAAGTCTTTGGCGCATTTGGGTTGGTGTGACAGCGAAGGTAACGGTGAATGGTGGTGACCATCCG  
CTGCGCGAAGCTGCGGGAAAATCAGGTGCGTCTTTTTGCGGAGCGGGATTGTGCTTCCCTCACCGTTGGGTGAGT  
GGCGGAAACGGGCGTCAAACCTTCTACCATGTTGACGTTTTTGGATTGCATTA

>Cluster\_24768

ATGATAAAGAATAACTTTGGCGTAGCGTAATTTGGTTCGAAACAATATGCCGTGAATTTATTATGGGGAAGTTCTCAGGA  
TACAGAAAACAACAAATCAGGCTCTGAATAAGAGCTGACGTTGATGTCCTCAAAGCTATATCCGTTATTGGACGATTTC  
AGGGTGAAACAGTTTGGCCGTAGGAGATAAAAATATTTGGCCACAAAAGAGCCAGGTGACCTTACGTCTGCAATGATTTC  
GATGGCAGTTCTTTTTGTGGGCTGTTTCTGCTGATAATGAATTTATGGCTTGTTCATCGGTGTTGATAAAGATGGAATGGT  
TCACCTTTGACAAGTCTTTCACAGTAAGGATGATGCAAAAAAATTTCTTTTTCGACCATGTGGCATATGGATACCCTGGG  
ACAGAACATACAGTCTTTCAGATGTTGGAGTGGTGAAGCAGGAGTATTTCTGAGCTTTCACATAATCAAAGGGAAGAAA  
TTAAAGGAAAAGGTTGCCGCTCACTAATGCCATGCTGTTATCTGGCGTTGGAAATTAATAATTTCTTTGTCATCATATA  
TAATTTTATGAACCTTATGGTTAAGTGGCAGAGATAAGGATATTTCTAACGAAGAACCATCTCCGGCCGTCAGTGAGGAAG  
TCAGAAATATCCCTGGGAGGAAAAGCAAAACCGGCTCATTGTTTTCTAAAATGTATAAAAGAAATGGATTCACTCCGG  
TTCCAGGCAGCATCCGTTCCAGGCTGGATGCCGTAAGATAAAGTAACCTGTAATGACTCTGATATAAACTTTAGTGTTTA  
TCGTTCTGGCGGACTTAATATATGGTATGAAAATCCGGTCTGTTTTTTCACAGTGGAGACATCCAGACATTACCAGAA  
ATGATAATGATAAAAATAACATTTACATGGCCTCTTGAACCGTTCAGGTATGACAGTTCGATACCGAGTGCATACCTTG  
AATAAGACTCAAGAAATAAATAAGGTATCTTTCACGTAGTTGAGAATAGCTGGATAGAGATAAAAATGGAATCCGCT  
GCCGACGGCAATACAGAACGAGTGGGTTTTCTTTTTCAATTAACCATGATCCGAGAATCTTACTCCAATTTCTTCTG  
AAGTAAATGGACTGATTATCACTAATATCGATTATGATTTTTTCAGGAAGTAACGGAACGTGAAAGGTGTTTTTTGGGG  
AGAGCTTAG

>Cluster\_20541

GTGAGTATCAGTTTTGAGCAACTGGTGGGATTGTACAGGCAGATTACTTTCGGTAACGATATGGCCGAAGGTACGCTGGT  
GCTTACCCCAGAATCCTGCGAGTTGCTCAACGCTTTGCTTTGAGGACACCGATACATATGGGATCTCTCTGGCACAAGGTG  
AAGTAGTGGCTGGCCAGCAGCTGCTGTAACGCTTTTGTGAACGCCCAAAGCAAAAGCTAGGTCTGCTATGGCGTAATTTGGG  
GCTTTGTTAAAGTCGCCAAAACACCAAAGCAGGAACTTCCCGCTACTACCTGATCGACAGCCAATTTATAGTTCGGGA  
TGGCCAAACATCTGTAATGAAAACACCGCACATCTTAAACATTTCTGCGCTGCTTAAAGAAAAGTCGGCATACTTTG  
ATACCAGTGCATATGAATGCGTTTTTTTTCCGCGCGGATGATTTAAAATACCTATACGTTACAGTGCAGAAAACCGTAGAA  
AATCTTGATAAAAACCGACATCTGATGAACCTCATTGACGCTTTTTCTGACGACACACAAAAGAGCAGAAAATCTCGCTTTT  
AATTGAAAGCATCCAGTTAATCGGTGAGAAAACGAAAACAATAAAGTCTTTGAGTATGCACTGAAGAACATTGATAAAT  
TAAAAGTTGAGTTGATAAGGGTTATCGCTCTTCACTTCTGGGTTCTCATACGAAAAGGTTCTGGATGAACCTAGAACC  
GCCAAAGTTGAAGAAATGGGACGTATCCATAAAGTCTTTTCAGATATCCAAAACAGATACTGGGTATCCAGTCCGAAAC  
CATATCTCGTCGCGACACAATCAAGAAAAGCAAGTGGTGTATGCTATCAAACCATTATCAATAGCGCAGTTTTTTTTAGGG  
CCTTTGTTTTTGTACTGTTGTTATGTTGACTTTGTTCAACCAGTTACAGACGTTAACGCTATCAAAGAAGAACTTCGA  
CATAAAAGACTCAGGTTGATAAAAAGTATGATCAATAAAAATGACATTGATAGTATCTTTTGTCTGTACGTAACG  
TCTTTGCCGTGAGTTATCGGTTCTGGTTTATTTATGTTTCTTGTGTCGCTATTTATATCGACAGGATTAATTTACC  
TATACTGCACATACCCTGAAAACATGGAAATCTTGGTTACAAAAGTGATGTCATGGCGGCATCCTTGAGTAATAAGGCC  
ACTCCTTAA

>Cluster\_34007

ATGATGCTGGAACGAATAAGCTCAGCGACAGGAAACTAAAGGCGCTGCAAGGAACGCATAGGGATCGTGTGAAATGCT  
TGCTGACGGAGAGGGGTTAGGGGTCAGGTTATCAACTAAAGGGCATGTGAGCTGGGTTTTTTCATATCGCCTTGGAGGC  
GTGAGAGTTTCAGTTATTCGCTTACTCTAGGGAATTACCTGATATTAGTCTGAAAGATGCCAGGATGTGGCGTGAGCGT  
TGCCGTCATGTTGGCTAATGGTCTTGTATCAAAAATGAACTCCAACCTTTTACTGAAAGATCCCGTGTCTCTGTTCAC  
TGTTTCGAGTTCGTTGGAATATTGGTGGTCAATTTATGCAAGACATAAGCGCAAAGATGAGGAATTGATTAGGCGCAAT  
TCTGCAAAACATGTCTACCCAGAAATAGGCCATTATCCGTTATCAGGTCGATCTCGCCATTGGGTAATAATGTTTGGAT  
GAGATTCGTGCTATAAGTTCAAAACCGCGGGCGTATGTTTCAACTTCCAAGCAGGATTCGCGTTTTGCAATGTTCCG  
CGGTTATGCCATCAGTGTGCTTGTTCATTTAACGTTAACCGATGTAGGGGAATCTGCCGGACAGCGCGACCGTGT  
TGAGTATGCGCAACTATCAGATCTTTGGTATTTTGGCAAGGAGAAAACATCGGATATTTATTTTTCTAGATTAATAAAG  
TTGCTTATGCTTTGGGGCTAGAACTGTAGAGATTCCGCTTCTCATTTGATTTGAATGGGATTTTAAATGAATGGGTTT  
GATTTGTTCCAAGAAATAACAGTAAAAGTAAACAAAAGATTATTCGCGCAATTCGCCAAGGTATAAGAGACTGGTTAAAAG  
AGCTAAAACAGGAAACCGGGAGGACGGGCTTACTTTGGGTGAGGAGAGAACGCATAGAGCTGTTCTCTGAAAGGTCGC  
AGAACTGATAAAAATATTCGGACATAATGAAAATGGACCTACAGATTAAAGACGGACATTTCAACTTGGGTTAAACAA  
CATGGGGTAATGCCTCATATTGTCGAGTCAATTTAGGTCACGTATAAATGCTGGCTCCGACAGAAATTAACATAAATC  
TTAGCCAGTATATCCCATCAAATTAAGGCTCTAAATGACTGGCTTGAATGTTAGAAAAATGGTTAAAGATAAATAA

>Cluster\_33766

ATGAGCGAGTTAAATTTATCTGGAAAAACGCTAGATGGGATAGAGGTGGAATGGAAGCCCTTGGAGATGTCACGAGTGT  
CTTGGCGGGAAAAAGGCTAACTAAAATCTGCTTTCAGCAGAAGAAAAATCCCGGTATTTTCATGGCGCTTAGAACCGT  
TAGGATATTAACAATAAGTGAATCGTCCGGCTAATACCTTATGATTAACAATGTTGGCGCTTACAGCAGGTAAGTTGGC  
TATAGCACCGTTGACTTCTGGTCTCTGATGGATGCTTTTGGCTTAGAGCACAAATGAGCTATTAATAATAGGTTTTTATA  
TTTTCGCACTGATTGGTTATCAAAGTTTTGCTGAAAATCAAAGGTGAGAGTTGCGGGCATTCCAACACTTGTATGCTATG  
TTAATAAAGTACTTATCCCATCCCTGCCAGAAAACCGGAAAATCCCTGCCATCCAGTCTGAAATCGTTTCGAAT  
CTGGATAAATTTACTGCACTTACCGCTGAGCTTACCCTGAGCTTACCCTGAGCTTAAACATGCGTAAAAAACAGTACAA  
CTACTATCGGACCAATTTGCTGACTTTTTAAAGAAGGTGAGGTTGAGTGGAAAGCTTTGGGGGAAATTTGGTGAAGTTCGTA  
TGTGTAACGAATCTAAAATCACAACATCTTCTGAGGGAGAGATTTCCATTTATAAAAATGGGACATTTGGTAAGGAA  
CCCGATTCTATATATCTAGAAAATTAATTAATGAATTTAAAGAAAAATATAGTTATCTAAAAGTTGGTGAAGTATTGAT  
TTCTGACAGTGAACCATCGGCAGGACTGTTATATTTGATGTTAGGGAATCATATTTCCAAGATAGCAATATTGTCTGGA  
TTGAAAATAATGAAAATAAGTAAATAAATAATTTATTTCTATAAAAATAGCAAAAATGGGGAATATCTGAAAGT  
GGAATATTAAGAAGACTTTATAATGATAACTTAAGAAAACCTATGATACCAGTACCATTCTCTGATTCCTGAAAGATC  
GCTAGTTGAACAACAATAAATAGTGAATAACTGGATAAATTTGATGCTTTGACCAACCCATCACCGAAGGCTTCCCG  
GTGAAATCGAGTTGCGCCAGAAAACATACGAGTATTATCGTGAATTTACTGTTTCCGAAACCTGATACGTCAGT  
AATTAA

>Cluster\_28192

ATGAAGTTTGGTGAAGCATCGATTCTGGTCTGTCAGGTGATGGCGGTAATGGTTGCGTGAAGTTCCGCCCGGAAAA  
GTATATTTCCGAAGGCGCGGATGGCGGCGACGGCGGTGACGGCGGTGACGCTATGGATGGAAGCCGACGAAACCTGA  
ACACGCTTATCGATTATCTGTTTTGAAAAATCTTTCCGCGCAGAGCGTGGTCAGAAATGGCGCAAGCCGCGACTGACCGT  
AAGCGCGTAAAGAGCTGACGATTAAGTGCCTGTAGGTACGCTGTTATCGACAGGTTACCGGTGAAACCATGGGCGA  
TATGACAAAACAGCTCAGCGTCTGCTGTTGCTAAGGCGCGTGGCAGCGTCTGGGCAATACCCGTTTCAAATCTGCTGA  
TTAACCGTACACCCAGGCAAGAAAACCTACGGTACGCGGCGATAAGCGTGAAGCTGAGCTGCTACTGGAGCTGATGCTGGT  
GACGTCGGTATGCTGGGGATGCCAAACCGGGTAAATCGACATTTATCCGCGCAGTATCGGGCGTAAACCGAAAAGTGGC  
GGATTATCCGTTTACCCTCTGGTGCAAGTCTTGGTGTGGTACGAATGGACAACGAAAAGAGCTTCGTTGTTGGCGATA

TTCCAGGACTGATTGAAGCGCTGCAGAAGGCGCAGGCTGGGCATTCGCTTCTGAAGCACCTGGAGCGTTGCCCGCT  
CTGTTGCACCTCATCGATATCGATCCGATTGATGGCACCGATCCGGTTGAAAACGCGCTATTATTATCAGCGAGCTGGA  
AAAATACAGCCAGGATCTGGCGGCGAAACCGCGTTGGTTAGTCTTCAACAAGATCGACCTGCTGGATAAGGCAGAAGCCG  
AAGAGAAAGCGAAAGCGATCGCTGAGGCCTGGGTTGGGAAAGTAAATATTATCTGATCTCTGGCGGAGCGGACTGGGC  
GTGAAAGATCTCTGCTGGGATGTGATGACCTTTATCATTTGAAAACCGGCTCGTGACGGCTGAAGAAGCGAAACAGCCAGA  
GAAAGTCGAATTCATGTGGGATGATTATCATCGCCAGCAGCTTGAAGAGATTGCTGAAGAGGATGATGAAGACTGGGATG  
ACGACTGGGACGAAGACGACGAAGAAGCGTTGAGTTCATTTACAAGCGTTAA

>Cluster\_12270

ATGTTTCCATTAAATGATCTGTCTGTTAAAACTCAGTCGGTTCATTAATAAAAAATCACATCTAATACTGAATCTACGAT  
AAAACAACACGAGTTAGTATCTGATGATGCAATGATAAATGAATTATCAAGTGAGTTATTAAGTTGTCTTGGAAATGGTA  
AGTTTACACCAATAGTGAAGATAGCAAATACGAAATGCTGTCTGAAATTTAAATTTATGAGAGAGCAATGTTTCAGG  
TGGGGTAAATATACTTATTTGTTGAAAATTTAGGGGCTTATGATAAGACGGGGTCTATCACGATAGAAAAAAGTCAGGG  
GGAGGGGACTTTTACCATTTCGACATAAAATAGAGTTTATATCGACCAATATTGCAGAGTTGCTGGACAAGTTAACCAAAA  
TTACAGATAACCAGACTTTGCAAAGATTTTCACTGACTGGGCTAGTTCAGTCAAAGAAGGCGCATCCAATGACTTCAAAGAA  
AATGTGGATAGGGCATGCTGAGAAATGTTAAATGTGTGAGCTCCACAAATAATGAACCTGACTTATCATACCTATTTTT  
GGGTTCTGTACCGCTCTTCCGAGTGGATTGAAATGATTAGCCTTATTCATAATGAACCTGATTCAATACATGTGCCCG  
AATCATGCAAAAGAAATAGAAATGCAATGCTCAATAACCTTACAGAATTTCCACAAGTCACTGATGGAATTAACCTGATCC  
GTAATAATAACCTGATATCGCATATTGACTCATTTCCGCCAAAGGCTAAGATAATTTCTATTTGTACAATAAGCTATC  
GAAAATACCAACAATACAGACACCGCTAAGGTTTTGATGTTAGTGAGAATAATATAAGGAAATTAGATGGTTCCCA  
AAAATCTGAAAGAAAGTGCATATTGAATAATAAAGATTAGGTTATTTCTCTCGGATGCCATGGCAATTTAAAATTTACTTTT  
ATGGAATGTAATCTTATTTAAAGAGGCAATTTTAAATGCCATGGACTTTTACAGGGATTTGCTATGAAATATCGACGGGAA  
ATATATTGTTACGAACCCGATGATTATGATAAATATTCGGATATGGTTAAAAAGTATGTAATAGATGGTGGGATCACC  
TAATTAATATTTATATGTTAA

>Cluster\_33172

ATGATAAAATGGACTTAATAATGACTCCGCATCTTTAGTTTATGATGCTGCAATGAAAGTTAATCTGGGTTTAAAAAAG  
CTGGGATGAGATGTCATGCGCTGAAAAGTTACTTAAAGTACTTAGTTTGGTTTATGGAAATCCAACGTACAGTCGTAGTG  
AAAGACAATCATTTCAGAGTTGTTAACCGTTTTAGAGCCTGTATATCCACTTCCCAATGAATTAGGCAGAGTATCTGCT  
CGTTTTTTCAGATGGCTCATCTTAAAGAAATTTCCGTCACTAACAGCGAAAGTATGAAGCCGAGATTCGCACACCAAGATA  
TGAAAAGATTACTGTCTCTGGAGTCAAACGAACAAAATAGGTTATTACAATCTTTACCATCGATCGCCACATGCCAT  
ACATTCAGGTTTATCGTGCCTTATCTGAGATGGACCTGACTGATACTACTCAATGCGCAATCTACTTGGTTTTACGTC  
AAACTATCAACAACCTTGATTCCTATAATGCTCAAACAGATCCGCTTTCCGGGCTACACCATTAGCTCTATCTTTAT  
GGATACATCTCGAGGACTCGGCAATGCAAAGCTTTCACCTCAATGGTGTGATAATACCTGCAAAATGCACAATGTTGCTTC  
GCGATGCACTAGGACTTAAAGACACACACTCATCACCTTCCGGAAATGTTATAGATCATGGTATTTCTCGCCATGATGCA  
GAGCAAAATAGCAAGAAAGCAGCGGACGCGATAATCAGAAAGCTGAAGTTGTGGAATTTTTATGCCATCCAGAAAGCAGC  
AACGGCCATATGCTCGGCTTCTATCAATCTTTCAATGTGCCAGCCTTAAAGTTGACACATGAAAGGATCTCTAAAGCA  
GTGAATACAAATGCGGAAAGATCGTTAGATACACCTAAGCTTGCATTAACATCTCTCAATCATCAGATGGAAC  
ATTTATGTTACCAGCCATACCGGGTTCGATAAATGGCGCCAGAAGACCGCCCAACGAGATGGGCATGTTGACGACAG  
GACTTCTTATGAAGTCCGCAAGGTGTGAAATGTACAATCGATGAAATGGTAAGAGCGCTACAACCAAGGATGCGCCAT  
CTGAAACGTAATTACAAAACACTTAA

>Cluster\_22675

ATGGTTTTGCAATCCACGCGCTGGTTGGCGCTCGGCTATTTACATACCTTTTTAGTTACGGCATTTTTCTACCTTTCTG  
GAGCGTCTGGCTTAAAGGATGGTTTAAACGCCAGAAACCATCGGCCCTGTTATGGGGGCGGGTCTGGTTGCCCGTTTCC  
TCGGGATTTGCTCATCGCGCCCGCGTTCAGGATCTTCCCGCTGATTTCCGCTTGGCGGTGCTGGGTTGAGCTGACA  
CTTCTCTTTGCTGTGCGCTTCTGGGCGGGGCGCACGTAGCGTGGCTGATGCTGGTGTGATTTGGCTTTAACTCTTTTT  
CTCACCGCTGGTACCGTTGACCGATGCACTGGCGAATACGTGGCAAAAGCAGTTCCTCGCTGATACGGCAAAAGTGAGAC  
TGTGGGGCTCGGTGGCGTTTGTCAATGGCTCGGCGTGCAGGGCAAACCTGGTCACTATGTTGATTATCGGGTGTATCTC  
CGCTGTTGACGTTGGCGGTGGCATCCATGCTGCTCGGCTTTCATCCGTCGACGATTCAGCCACAAGGGGCAAGCCG  
CCAGCAGGAGAGCACCGGTTGGTCTGCGTGGTGGGCTGGGCTGCCAGAACTGGCGCTTCTGGCTGCGTTTGTGTTAT  
TGCAGGGGCGACATGCGGCTTATACCGTTTTAGCGCCATTTACTGGCAGGACGCTGGCTACTCGGCTCCGCGGTGGG  
TATTTGTTGGTTCGCTGGGCGTGGTGGCGGAAGTCAATATCTTTGCGCTGAGTAATAAATTTTCCGCGTTGTAGTGCACG  
CGATATGCTGTGATCTCGGCGATTTGCGGCTAGTGGCGTGGGCAATTTATGGGAGCAACGAGCGGCTGGCGTGGTTGA  
TAGTGGTGCAAATTTGCAATGCGGTACCTTACGGTCTGCCACTGGCTGCCATGCGCTATAATTGCTGCTCGCCAGGGT  
AGCGAAGTCAATCCGTTTACAGGCGGTTTTACTCTGCCGTCGCGATGGGCGGCGATATCGCCATCATGACGTTTTTCCGCG  
TTTTCTGTATCAATATCTCGGCCACGGCGTGTCTGGGTGATGGCGCTGGTGGCGCTTCCGGCAATGTTTTGCGCCCGA  
AAGTTGTTCCCTCATGCTGA

>Cluster\_66977

ATGTTGGGTCATATTAGAACTTTCTTTTCATGACTTGCAGGAATGGGATGGATACCTGTACGATTCAGCCAGAAAGAGT  
TTTCAGGACCCGCTAGCTTACTTCCGTTGGTGGACAGAGCTCTGATTTGGCCGATGATATGTTGGTGTAAATTTAC  
TTACAGCCGACAGAACTGCAGGAGTCCGATTACCAAACTGTTTGCATATCTTTATTTTATCCATGGAGATGGTC  
AGAGCACTCAGCGTCTCTGGTTATTTGGAGGCTCAGACGTGATGAAATTTACGATGTCAGTGTGGGTGTATCCGCTG  
GCAACAGCCAGAAGAAAATAATGTATCCCGTATCTGTCTGATAGATGTACCCGTTAGCAAGACTTACGCGGCATTCACAA  
AGCTAGTTGACCTATTATCGGGAATATATCGAACAATGGGAACCTGTTTCGTAACCCCAACCCAGCTTACGGAAGATTT  
AAAACAGGTGAAAGCGTCCGTTTTTTGTTTCATGCACAGGGGAAACGGGTACACAGTAGTTATATTAATAATTCGCTAAT  
CCCTTTGCTATGCAGAAAGGCTGGTATACCTGAGCAGGATGCCAGAGGTAATAATCACCAGCCATCGGGCAAGAGCCACTA  
TAGCCAGTCAGCTTTACAACGCCAGGGAACCACTTGATATTTTGGAGTACAGAAATGGTTGGGGCATTTCTCACCTGAA  
TCTACCCGATATTATGCGAAATTACACCGAGGTTGGCAGGATCACTGGATAAAGCTGGTACTTTGAAATGAAATCG  
CCGATGGTTTCACTTTCATGATCAAGACGCGATAGCTGAAGGGCTGGTAGCATCCGGGAAGCCATGGCGTTATTTATG  
ATCTTGGACACGGTTTTCTGACTTATGACTTTTTTGGAGCAATGCCCCATCGGATGGCATGTGCAAAATGCTCATTTTTAT  
ATGCCAAAATCTTCTGATGAAAGCAATACTTGAAGGTCGCCAGAATCTACTCAAGCTGATGCAAGAAATCCCTTTGAC  
TGATGACGAACAAGCCGCTGTAGAAAACGATATGACAGGCACTGGCAAACTTTTGAATAAGCTCACTGGGGCGCCAGCC  
CGGAAATAAGAGAAAGTAA

>Cluster\_7258

ATGAAAATCACTATTTCTGGTACCGGATATGTTGGCCTGTCAAATGGTATTCTGATTGCTCAGAGCCACGAAGTGGTGGC  
ACTGGATATCATCCAGACGAAAAATCGAGATGCTGAATCAGAAACAATCCCGATTGTGGATAAAGAGATCGAAGAGTATT  
TGGGACTAGGTCGCTAAACTTCCGTGCACACTGATAAGTGTGATGCTTACCTAGATGCGGACTACGTTATTTATCGCG  
ACACCAACTGATTTATGATCCAAAGACTAATTAATTTAACTCAAGTCTGAGTCTGTTATTTCTCGCAGCTGGTTGCAAT  
TAATCCAGATGCGATGATGTTAAATTAAGTCTACCTACCTAGGTTTACTAATTTCTATCAAAGAAAACCTGGGACCG  
AAAATATTTTCTTTTCCCGAATTTCTGCGTGGGGTAAAGCCTATATGACAACCTTTTACCATCTCGTATTTGCTATT  
GGTGGAGCTTCAGAGCGCGGAGCGTTTTGCGACTCTGCTACAGGAAGGGGCACTAAAGAAAGATATTCGACCCATTT

TACCGACTCGACCGAAGCCGAAGCTATTAAGCTGTTTCGCTAATACCTATCTGGCGCTGCGTATAGCCTACTTTAATGAGC  
TGGACAGCTACGCTGAACTCTAGGCCTGAATTCCTACTACAGATAAATTGAAGGGGTATGCTTGGATCCGCGAATAGGAAAC  
CACTATAACAACCGTCAATTTGGCTACGGCGGTTACTGCTGCTAAGGATACCAAGCAGTTGCTGTCCAACATGAATC  
GGTACCGAATAACTTAATCGGTCGATCGTCAAGCTAATCGCCTCGTAAAGACTTTTATGCGGACTTATTCCTCGGCC  
GCAAGCCTAAGGTGGTGGTGTATTCGCTGATTATGAAGTTCGGGTTTCGGATAAATTCGCGCGCTCCATTCAGGGG  
ATCATGAAGCGTATTAAGCCCAAGGGTATCACGGTAATATTTATGAACCGGTGATGCAGGAAGATGAGTTTTTTAATC  
CCGCGTGGTACGTGACTTCGAAGCCTTTAAGCTGGAGGAGACGTGATATCTCCAACCGTATGGCAGAAGAGCTGGTGG  
ATGTTGGAGATAAAGTCTATACCCGTGATCTGTTGGTAAATGATTA

>Cluster\_17154

ATGATGCAGATAACAATTCACAAAAGTAATGATTTTAGACGTTTCTTTAATCCCGTTATATTAATTTTAAATGTCAATCGT  
TTTAAACACTTTTTTTCAATATATACCAGTGAAGAAGATGGAATTCATCTTTATATTTAATCAAAAACCTGATTATA  
CGGTGTTTTTATATCTTTAGTTTTTTATTTGTTTTTTCTTTTGGGGCTTTTTTGGCGTATTTAATTAATCAAAAA  
CATAGCAACATAGAAGCCACTACTTATACAACCTTTTCTTTTATAATGGGTTATTAAGTTTTGTTTTTATTCAAATGT  
AATAAGTTAATTTGAACCCAGTATTACATGCACGAAGCTAATATATAATATAATATATATAGCGGTGGTGTCTCTGCTC  
AAACAATAGAGTCTCAGATTGCTTCATCTCCGCTGGGAATACATGGAATATCTGTAATGTTGGCTATTTTGGTATTAT  
ATGATGATATCTCGTTGATAAAAAGATAATCGAGCTATTGTTTTTATAAGTATATTTGGTTATAATAATCAATTTAT  
TAGTTATCGGAAATTCGAATCTTTATATATGTTTTATGTTTTAGCTTTGATGCTATTTCCAGACGGAGAATATCTATTAATA  
AAGGAGTTATAATAGGAGGTGTAGTCATTTTTTTATTTTCAATTTACGGCATAAATCGAAATCCTGAACAAAATTTATCA  
TTGAGTTTTGATTTTTTATTTAGATTTGTTGGCGGTTTTTATTTCCGTTACCTGTTGTAATTTTAACTATGTTATTCA  
AAATAATATACAGGATGTTTTTATTTCTCAATTTGTTTTTACCTCAAAAAATCATTTCCAGCGTCAACCAATAGCTTGG  
AGTTTTCCAGATTTTACCTACCTATAGGTTTTGTAGGAAGTGTATGTTTTTCAATTTGGGTATATTCAGCAATATATGCC  
TATTTGGTTGGGTTATAATCAATTAATATATTTACAGCGAAATACGCTCCCTTTGCAATTTTCAACCAATTTGT  
CATTTAGGCTGCATATTTGCGATGATGTATAAATTTTGTAAATATGATATTTTTCATATTTGCCGCTATATTTTCAT  
ATTTAGTGGTTATAAAAACATATATGCGCTAGAAAGGAAGATGTTTTAA

>Cluster\_20143

ATGTTTGAACCAATGGAACCTTACCAATGACGCGGTGATTAAGTCATCGCGCTCGGCGCGGGCGGTAATGCTGTTGA  
ACACATGGTGGTGGAGCGCATTTGAAGGTGTTGAATTTCTTCGCGGTAATACCGATGCACAAGCGCTGCGTAAACAGCGG  
TTGGACAGACGATTCAAATCGGTAGCGGTATCACCAGGACTGGCGCTGGCGCTAACTCCAGAGTTGGCCGCAATGGC  
GCTGATGAGGATCGCGATGCACGCTGCGTGGCGGCTGGAAGGTGCAGACATGGTCTTTATTTGCTGCGGGTATGGGTGGTGG  
TACCGGTACAGGTGCAGCACCAGTCTGCTGCTGAAGTGGCAAAAGATTTGGGTATCCTGACCGTTGCTGCTCACTAAGC  
CTTTCAACTTTGAAGGCAAGAAGCGTATGGCATTCGCGGAGCAGGGGATCACTGAACGTCCAAAGCATGTGGACTCTCTG  
ATCATATCCCGAACGACAAAACCTGCTGAAAGTTCTGGGCGGTGATATCCTTCTGCTGGATGCGTTTTGGCGCAGCGAACCA  
TGTACTGAAAGGCGCTGTGCAAGGTATCGCCGAAGTACTGCTGCTGGGTTTTGATGAACTGGACTTTGCAGACGTAC  
GCACCGTAATGCTGAAATGGGCTACGCAATGATGGGTTCTGGTGTGGCGAGCGGTGAAGATCGTGGCAAGAAGCTGCT  
GAAATGGCTATCTCTTCTCCGCTGCTGGAAGATATCGACCTGTCTGGCGCAGCGCGGTGCTGGTTAATATCAGCGGGG  
TTCCGACCTGCGTCTGGATGAGTTGCAAAACGTTAGTAAACCACTCCGTCGATTTGCTCCGACAAACGCGACTGGTTA  
TCGGTACTTCTCTTGACCCGGATATGAATGACGAGCTGCGCGTAACCGTTGTTGCGACAGGTATCGGCATGGACAACCGT  
CCTGAAATCACTCTGGTGAACAATAAGCAGGTTTACGACCGAGTATGATGATCGTACCAGCAGCATGGGATGGCTCCGCT  
GACCCAGGAGCAGAAGCCGGTTGCTAAAGTCTGTAATGACAATGCGCCGCAAACTGCGAAAGAGCCGGATTTATCTGGATA  
TCCAGCATTTCTGCGTAAGCAAGCTGATTA

>Cluster\_29023

ATGACCGGTAAACAGGCCACCATCGCAGTGGCTAGCGGGTTAAATGACGACGAAACAGTATGGTTGCGTTGCTCCCTCCCAT  
CCATCTTTCCAGTACCTATAAATTTACCAGGATTTAATGAACCGCGCGCATGATTACTCGCGCGCGCAACCAACCGC  
GCGATGTGGTTTACGCTGCGCTGGCAGAACTGGAAGCGGTGCGGTTGCGTACTTACTAATACCGGCATGCTCCGCGATT  
CACCTGGTCACTACCGTCTTTTTGAAACCGGGGATCTGCTGGTTGCGCCGACGACTGCTATGGCGGAGCTATCGCCT  
GTTTCGACAGCTGGCTAAACGTTGGTGTGCTATCGCGTGTGTTGTTGATCAAGGCGATGAACAGGCATTTACGGGCAGCGC  
TGGCAGAAAACCCCAAACCTGGTACTGGTAGAAAGCCCAAGTAACTCAATGTTTACGCGCTGTTGGATATTTGCAAAATCTGC  
CATCTGGCAAGGGAAGTCCGGGCGGTGAGCGTGGTGGATAACACCTTCTTAAAGCCGGCATTACAAAAATCCGCTGGCATT  
AGGTGCCGATCTGGTGTGCAATTCATGTACGAAATATCTGAACCGTCACTCAGACGTGGTGGCAGGCGTGGTGTATGCTA  
AAGATCCAGACGTTGCTACTGAACTTGCTGGTGGGCAAAATAATTTGGCGTACGGGCGGCGGTTTACAGCTATCTG  
CTGCTACCGCGGTTGCGAACACTGGTGGCGCATGATGGAGCTGGCGCAGCGCAACGCGCAGGCGATTGTGAATATCTGCA  
AACCCAGCCGTTGGTGA AAAAATGATCACCCGCTGCTGCCAGAAAATCAGGGGATGAAATGCGCGCGGCCAGCAA  
AAGGCTTTGGCGCAATGTTGAGTTTTGAACTGGATGGCGATGACGAGACGCTGCGTCTTCCGCGGTTGGTGGTGGT  
TTTACGCTGGCGGAATCATTAGGGGAGTGGAAAGTTAATCTCTCACGCCGCAACCATGACACATGCAGGCATGGCACC  
AGAAGCGGCTGCTGCGCGCGGATCTCCGAGACGCTGCTGCTATCTCCACCGTATTGAAGATGGCGAAGATTTAATTTG  
CCGACCTGGAATAATGGCTTCCGGCTGCAAAACAAGGGGTA

>Cluster\_37098

ATGGCAACACTAAAAGACATCGCAATCGAAGCTGGCGTATCCTTGGCGACAGTATCCAGGGCTTTAAATGACGATCCGCAC  
ATTGAATGTGAAAGAAGAGACGAAACATCGCATTTCTCGAGATCGCCGAAAAGCTGGAGTACAAGACCAGTAGTCCCGTA  
AATCCAGACAGGTGCAGTCAACCAACACCATATCTGGCTATCTACAGTACAGCAGGAGCTGGAGATCAACGATCCT  
TACTATCTGGCGATCCGCCACGGCATTTGAAACCCAGTGCGAAAAGCTGGGATCGAGCTCACCACCTGTTATGAACACAG  
CGGCTTACCAGACATTA AAAACGTCACCGGATTTTAAATTTGTCGCAAAACCCAGCCCTGCGCGCGCTGCCAGCG  
CGTTGACCGACAATATCTGTTTTATCGACTTTTACGAACCCGGCAGCGGTTACGATGCGGTGGATATCGATCTGGCACGC  
ATCAGTAAAGAAATCATCGACTTCTATATCAACAGGGCGTTAATCGTATTGGTTTTATTTGGCGGTGAAGATGACCTGG  
CAAGGCGGATATCTCGTAGGTCGCTTTGCGGAATATGGCCGACTGAAACAAGTGGTACGCGAAGAGGATATCTGGCGG  
CGGTTTTTTCCAGTTCTGCTGGGTTATGAACTGGCAAAACAAATGCTGGCGCGGGAAGACTATCCGAAGGCATGTTTTGTT  
GCTTCCGATTCCATTTGCTATCGGCGTACGCGGCAATTCATGAACGAGGCTGAAACATCCACAGGATATTTGCTTAT  
CAGCGTTAACGATATCCCCACCGCGCATTTACCTTTCCGCGCTCTCCACCGTGCATCCATTTCCGAGATGATGGGAA  
GTCAGGCGTTAACTGGTGTATGAAAAGCCCGCATGGTTCGCGCGCTGCCGCTGTTAGTCTTCTGTTCCAGCAAATTA  
AACTGCGCGCACAGCCGTTAA

>Cluster\_43155

ATGGCAACCGAATTTGAATTTCAACAAGCAGGTTGGCCCGAAGTACTTCAAGCCGTAGAGTTCACTCTGCCGATCCGGC  
GGAGAATGAAATCCAGGTCGAAAATAAGCCATCGCATTTTATCGACACGTATATCCGACGCGCTTTTACCCG  
CACCATCGCTACCCAGCGGATTAGGCACCGAGGCGGACGATCGTGAAGTAAAGTCCGCGAGTGGTGAAGCATATTAAG  
GCAGGCGATCGCTAGTCTATGCACAATCGGCATTTAGGCGTTACAGCTCTGTGCATAACATTAATGCGGATAAAGCGGC  
GATTTCTGCTGCGCAATTTCTTTTGGCAAGCTGCGGACTCTTCTTGAAGGCTTAAACGTTTATTTATCTGCTGCGCA  
AAACCTATGAAATTAACCCGATGAACAGTTTCTGTTCCAGCGGCTGCTGGCGCGGTAAGACTGTTGCTGCGGCTGG  
GCAAAAAGCCCTTGGCGGAAAATTTATCGGCACCGTAGGAACCGCGCAAAAAGCGCAGAGTGGCTAAAAGCGGCGGCTG  
GCAGGTTATTAATCTGTAAGAGAATCTGGTTCGAGGATTTGAAGAGATCACCGGTGGTAAAGAAGTGGCGTGGTGT

ACGATTCAAGTGGGACAGACACCTGGGAACGGTTCGCTGGATTGCCTGCAACGCCGCGGCTTAATGGTGAGTTTGGCAAC  
TCATCAGGTGCGGTACCCTGTTGAACCTTAGGCATTCTCAATCAGAAAGGCTCGTTGTATGTGACACGCCCTTCCCTGCA  
AGGCTATATACCACGCGGGAGGAATTAACCGAGGCCAGTAATGAACGTTCTCTTTGATTGCCAGCGGTGTGATTAAGG  
TCGATGTCGCCGAGCAGCAGAAATATCCGCTGAAGGATGCGCGCGTGCAGATGAGATCTGGAAGCCGGGCGACGCGAG  
GGTCCAGCCTGTTGATTCCATAA

>Cluster\_157

ATGCGTATCTTTGTAGATGACGGTCTACCAACATCAAACCTGGCTGGGTTGAAGACGGTGCAGTGAAAACGTTAATTAG  
TCCGAATAGTTTTAAACCGGAATGGTCTATGACGCTGCAGGACTGACTGATGCCACTATACCCTGCTCCGCAAACTATG  
AGATTGATGGAGAGAAATACAGCCTTTGATCAATFGAGTCCGGATGCAGTGCAGCACCACAGAAACCGCTTATCAGTACAGC  
GACGTTAATGTGGTTGCTATTTCATCATGCGTTGATGCAGTGCAGGATTTGCTCCGCAACCTGTTGATATTTATTGTTACTTT  
ACCTTTAGGTGAGTATCTGGATGAGAACGATCAGCCAAATCTGGCTAAATCGAACGTAAGAAAAATAATGTCAGACGAG  
CTGTAACAGTTTACGGGGCGTGAACCTTTACCAATTCGTAAGTCAGTGTCTTGCTGAGTCCGTGCTGCGGTTTGGC  
GTGCTGAAAAGATCGAATGATCTGGAGTGCCTGTTGATCGTTGATATCGGTGGAACGACCCCTTGATATGACATGTCG  
CAGCAAAATGTCGGTTCACAAAACTTATTGTGACCCCAAGACAGGCGTTTCCATCATTACTGAAGCAGTTAAGCATG  
CGATGGATGTGAATGTGAGTACAGAACGATTTCTATTTTGCAGATCGTCTAATCCAGAGTCCGGGATGACAAATGAATTC  
CTGACTCGTTATATCCGAATGCAGAACGCGTGAGCAGATCTGACAGTATTACGTGACCGGGAAAAAACTGCAGCA  
TCCGTGGCGGATTCAGTAGGACGCTTTGCTGGTTTACTGTTGATCGTATGTTGTTGTTGGCGGTGGTCCGACCTTGGCTG  
GGGCGATAAAAAAGCCACAGGAGTGGGTGATAACCGTTCTTTGTGACGTGACAACTCCAGTTCGATCTGGTGTGGGA  
ATGATGGCAATGAAGGATGA

>Cluster\_26419

ATGCGTAAATATCGTCTAAGTGAAGAACAGCGAGCCTTTAGTTATCAGGATGATGGCACTAAAAAAGTGTGTTATTACG  
GCAGATTATGCCATGAGCGATTTAACGATGTGATAGCAGGAACCGTGGCGGCTGGATCGATTGCGAAACGGTGTAG  
CACAGGAAGGAAATGCTGGATTACGACAGAAATGCTATTGGCTTCCGCGGAGCGGTGATTTCCGGTAAATACCGCATC  
ACCGGCACCGCTGATGTTGGGAGAGGTAATGACGAACGAACTGCTGGATCGATAATAGTAAAGTTTACGGTGC  
ATATATAAGTGACAGCGTACCATTAGTACTCATTAGTTTGGCGTCAATGTAGAATAATTTGGTCCAGCCTTAATTGATC  
AACATTCATGATCGTCCGCGCACAAAGCTTAACGCCCACCATCAACTCCTGCTACAAATTTATGATCGCGCAGGGTT  
AGCGCCTCGGTATTGTCCACCAGGCACAAATTTATGGCGATGCGCTGCTCCGGTATGCTTTTATTGAACATCGCGCCGA  
ATTTTTTGGATTTTTCCAGTATTGAGGTAATGAAGAGAACACTGCTGGATGCGATGCGCTGCGGTAAGTTTACGGTGC  
CACAGGTGAAAGCTGGCATAAGAAGATGCCATTCCGACGATTCATTACAGTTCACAGGTGGCGGAATATGCCATTGTG  
GAAGGTAATGTGTGTTAAACATCATGTTCTTGTATTGGCGGAAATGCCGTGGTACGTGCGGACCGATTCGTGTCGACGA  
GCAGTTGTAATACAAGGTGAAAGCCGTTATTACAGGTGCGGTGATAATGAAAACCATGTGGAGTTAACCGACACGCGC  
TCGTTGAAGCCTTTGATGGCGACAGATTCATGTCCTGGTCCAAAAGTTATTAAACGGCGAGGAGCGCATTACCGCAACG  
CTGCTGGCAGGTTATTGTGA

>Cluster\_40833

ATGAGTAAAGAGAAGCAAAACAGTTAACGGGGATGTGGGTAACGTTGTCAGCGGTGATGTTACCATTCAAACTATCTGC  
TGACATACTTCCCTCGGCCAGCAACCAATTTCCGTTGCTGCAAAAACCGGATTTACACAGATTGATGGATGAATGGTTG  
ATCTGGGGAAAGTAAGCCGAGCTATGGATGACGATCCACACGAACTTAATACCAAAACAGTTAATGAAATGACTGCG  
GCTGATTTATCATGTTGCGGTTGAGATCCTTCAGAGATATGCACAAACAGATCCAGAATAAGAAGACTGTAATCTTCTGTT  
CAGCAAAATAATGGCCTTACTGACCCCTGGGTATCGTCTTGACCGTGACAGATACTGTGAAGCATTTCCGGTACAACCC  
ATCTTAAAGCCCTAGACAAAGAGCAGTTTCAGGCTGTGTTGGTTATTTTGTGATGATCTGCTGAATATTCGTGATGAGAGT  
AAAACCTATACCTCCATCGGAAAGCGGTGCAAAATCAGTCGCAACTGTACCACCAGAAGCCGGAAGCCTCATGTAGT  
AGTGTGGGGGAGTGTAGTTCTTGTAGCAATATTTTTCGTTGGGAAATGATTTGTTCCGCTGGTAAATGGGGAATGCCA  
AAGCAGTAGCTTCTACTGAACACAGCCTTTTAAACATTAACCAACAGATGATAAAATAATAGAAGATTCCGCTCCCGCATG  
CGCAGCATGTTTCCAGGTTAAATAAGTACTCAGATGATTTCCATTCCGGTTTCAAGCTACAAGCAAAAACCGGCTGGCA  
TACCCTTAAATTTACTGTATCAGCAAAGGCATCCGTCGCCGAAATTAATAGTGTAAAGGGCAAGGTTTGTACATTAACA  
TAAGCCCTGATGGTAGTTATGCTCGGTTTACTGCTCCATGTCGTTCACTGCTACTTGATCAGCAAAAGCACTCCTGAC  
AGTAAATACCCTTTTATTCTTAAATAG

>Cluster\_46974

ATGTTATCTTCAATTAATGTCTTCAATCCAGCTTCAGAGGAAAGACAGCCTTATCAAATAGTACACTTCTCCAGAAAGT  
TCTTTTGGCTGAAAAGAATATCCTCTGGAACTTATTGATGAAAAAACCCCTATTCTTTTTCAGTGGTTTGAAGCAAGG  
CAGAGCATACGAAAAGGAGAGAAGTACCATAATGAAATACCAAAAGAACATCCGTTATTTGAGCAATATTAATAAGTCTGCA  
AAAATAGAAAATGAGCGTATAATCGGTGTCTGGTAGATGGAATTTTACTTATGAACAAAAAAGGAATTTCTCAGTCT  
TGAAAATGAATATCAAAATATAAAAATAATCTACCGAGCAGATGTGGATTTACAGCATGTATGATAAAAAACTATCTGATA  
TTTACCTTGAAAAATATCCATAAACAAGAATCATACCTGCCAGTGAGGGGATAATTAATCTGTTAGGCTTATTAAAGAGAA  
GAGTTAAAAAATATCCCGAAGGTAAGGACTCTTTGATTGAGTATGATGACGAAAAAAGAGAAACATACTTGGTTGATTT  
TTTACGAAATTTGGCCATGTTGAAGGCTGGAACTTTGTTTACAGAGACGGGAAAAACTGGATGCCATAACATATCGCCCT  
GTAGCGGATGATATATCTTGTATGCCGACATGATTTTACCAGTAAATAGGAGTCTGTATGCTCCTGATGGTATCGCT  
GTGATGTAGATTGTAATGATGAGATAAAAAGTCTTGAATAAGTGGTGCAGATAGTTGCAATCGTAGTAATCATCTCAGCAT  
ACTTGCAGGCTCGATATATGAAGAGTAAAGTTGACGCTCATCCATATATGATGGTCTAGGAAAGGATATCAAGCGGC  
ATTTTAACTATTCATCGTTACAGATTAATGCTTTTTTGTGATTTTATGAAATTAAGCATGAAAATATTAACCGAAT  
ACCAGTATGTATACCAGCAGTTCATGGTAA

>Cluster\_63786

ATGACCCAAACCGTCTGGACATTCACAACTGCATTTGAGTTTACCCTGGTTTAAACGGTGTGTTACCGCGCTCAACAA  
TGTGTCCTTGCAGATTAACCGCAGTGAAATGTGCGTCTGGTGGGAGAAATCCGGCTCAGGTAAATCAGTACCGCAATGC  
TGATATGCGCTCTGCTACCGACGGGAGTTATTGCGTACATCGGGGCGAGATTTCACTGCTGGGAGAAGATGTTCTTAA  
GCTCGGGAAAAACAGCTTCTGATGCGCGGCGCAGCAGTGGCGATGATCTTTACAGGAACCGATGACCGCCCTTAACTCC  
GACAGCTCGAATAGGTCTTCAGATGATGGACGTAATCCGCCATCATCAACCAATAAGTCGTCAGGAAGCCAGAGCTAAAG  
CGATTTGCCCTGCTGGAAGAGATGCAAAATCCCGGATGCCGTGGAAGTTATGTCGCGCTATCCGTTGAGCTTTCAGGTGTT  
ATGCGCCAGCGGTAATGATGCGCTGCGCATTTCTTCCGACCGCAATGATTTATGCGGACGAAACCGACTACCGGCTGCT  
GGAGCTCAGGTTACAGTTGCTGAGTTCGTTGCTTAAACATAAAGCCCGCCGAGTGGAACTGCGGTAAGTCTCATCA  
GCCATGATATGGCCGTGGTGTGCAACTGTGCGATAGCGTTTACGTGATGATGCGGAAAGCGTAATGAAAGCGGCGTG  
ACGGCAGAGCTTATCCATCATCCCGGCATCCGTATACCATTTGGTTTGTACAAATGCGCACCAAGCAATGAGTACCAGC  
CCAGCCATTACCAGCATTCCAGGACGTTACCAAACTCACCATTGCTGACGGCTGCGCTTTTCCGCGATCGTTGCT  
ATGCGGCGGTTGCACAGTGTGAAAACGTCGCGGCTGACAGCGTGGTGTGACAAACCAACAGCAGCCTGCGCTGTTGGTAT  
CCGACGAGGAGTCAATAGTGTCTAA

>Cluster\_32623

ATGATACGTTTCGCTGTGATTGGTACGAACTGGATCCTGCGAGTTCGTCGAGGCGCCCATGAGAGCGGTAATAACAA  
GTTAAACCGCGTATATCCCGCAGCCTTGAACAGGCCCAGCACTTCGCCAATGATTTTTCTGTGAGCATCTGTTTACGTT  
CGTGGAAAGCGATGGCAGAAAGCGATGCCATTGACGCGGTGTATATTGCCAGCCGAATGCCCTGCATTTTCCAGACA



CAACTTTTCTTAGCCATAAAAATTCATGTGATTTGCGAGAAACCGCTGGCGTCAAATCTGGCGAAGTGGATGCCCCAT  
TGCCGTGTCGCGGGAATAATCAGGTGGTGTGTTTGGAGGATTTAAAACGGCCTACCTGCCAACTTTTACCTGTTACGCC  
AGGCGCTGCCGAAAGTCGGCAAACCTGCGTAAAGTCTTTTCAACTATTGCCAGTATTCCTCGCGGTATCAGCGTTACCTG  
GACGGAGAAATCCCAACCTTCAATCCGGCATTTCTCAACCGTTCGATTTATGGATACTGGCTTTTACTGCCTGGCGTC  
GGCGGTGGCATTTATTCGGTGAACCGAAAAGCGTGCAGCAACCGCAGTTTGCCTGGCAAGTGGTGGATGCCACGGCG  
TGGTGGTGGATGGATTACGGTGGATTTCAGCGTTACGTTGAGCACTCAAAAAGTGGAGCGATTCTGTCTGGCAAGCGAGATT  
CAGGGCGAAGCGGAGCGTGGTATTGAAAACTCTCTGAATGCCAGAAAGTCTGCTTGTACCGCGTGGCAGCCAGAT  
GCAGGATCTACCCAGCCACAGCATATTAATACCATGCTCTACGAAGCAGAGCTGTTCTGCTACCTGGTGGATGAGCATC  
TGGTGAATCATCCAGGGCTGGCGGTGATGCTATCACCGCAAACCTGCTGACTGAGATCCGCCCCAGACTGGGGTGGATT  
TTTCCGGCAGATAACGTAATAACTATAA

>Cluster\_46495

ATGGTTGACATGAAATTAATCTCTGGGAAGGCTGTGACCTCACAGTTGCTGCTGCAATTAATTAATTTGTAGAGCGTAG  
TTATCCGTACTCCATATTTTTCACGGAGGTATCCAATACGCGTCTCATACAGGAAGTTATTGATCCAGCAGTAGCTGCTT  
ATGTAAATTCCTGCCACCAAGTCATAAAGACTACATTTCTGGAGTAAATCTAGGATTTAGTGATGTACTTAAAAAGTG  
GGCTTAAACGTCTGTAGTACAGCCACAAAGACTTCTTTTTCGCTAATTTCTGTTCTGACTTTAGATCAACAAAATTTCTTTGA  
TAAATGCTTTACCGTACGATTTGAGTCTTTATTTGAATTAGTCACTGAGTGGCGATCCAAAGCGGCCGAAAGTCTCTCTC  
CTGCAAAAAGGTAACATAAATTCACAGCGTAAGCTCGGTTATTTGCGAGTTCTGCGGTAATCTAACCGAATTTTCCAAG  
TTGATCAGTGAGATATCAGAATTTGTTGCTAACGATAATGAGTTCCCGTTTATGAAAAACAGGTCCTTAGTCATCGATA  
TTGTTCTGACCATAGGCCAAACTCACCAATGGTCTATGGAATCCCAAATACAGACAAGGAAAGCGGTCTCTGCAACAGT  
TCAATAAAGAATTAATAAGGCTTAGACGGCAATGCGCTAAACCGCATAAAGCTAACGCAACACAGGGGATATATTGAT  
GATACCTATTTTTCATGAGTGGATGACAGGCTCAAACTTTAACCCAGCAGATCTAGATAAACTTAGGAATATCGCCAGCAG  
AATGGTTGACTCCAAATTCAGTACTAAGAAAAAATAATCATATTTAAACACCAAGGTTTAAACAGTTTGAACCA  
CACAGGTTTGTAGAAAAAATCCTACACAACTATGACAAAAGCAGGCTGTGTCCAGGCCTTAGCGTCTGTGAGAAAGAA  
TTTTATATTTAA

>Cluster\_22162

ATGCACTGCAAGGGGGCGTGTATGAAACCACTGCTGGATGTGTGATGATCCTCGATGCCTTAGAAAAAGAGGGCAGTTT  
TGGCGGGCGTGGCCAACTCTACAAGACCGCGTCTGCTCTGAGTTACACCGTTTCAAGCTGGAAATCGACCTTAATA  
TTCAATTTGCTTTGATCGTAGCGGACCGCGCTAAATTTACCCGTACCGGAAAAATGTTATTAGAGAAAGGGCGGAAGTT  
CTGCATACCGTGGCAGAACTGGAAAAGCAGGCTATCAAACTGCATGAAGGCTGGGAAAAATGAGCTGGTGGTGGCGTGG  
CGACAGCTTCTTTTCTGCTGCTGCGCTCTCATTTGAGGTTTTTTATCAACATCATAGCGTACGCGCCTGAAGTTTFA  
TCAATGGCGTACTCGGTGGTTCCTGGGATGCACTGACTCAGGGGCGAGCGGATATTTGTTGGCGGATGCATGAGCCA  
CCATCTTCCAGTGAAGTTTGGTTTCTGCGGTTGGCGGATCTTGAACAAGTCTTTGCGGTCGCGCCTCATCATCGTTAGC  
CCAGGAAGAAGAACCGTTAAACCGTCTGATCATTAACGATATCGGGCGATTGTTGGTGGGGACACTGCGCAGGCAGGCG  
CTTCTACGGCCTCAAACTTCTCGACGAACAAGAGCCATTACCGTTTTCGATTTTAAACCAAGCTGGAGCTGCAAAAT  
AGCGGCCTTGGCTGGCGTATTTACCCGTTATCTGGCGCAACGTTTCTCGATAGTGGCGGTTAATCGAAGAAAGT  
GGTCCCAAACTCTTTTGAACCTGTCTGCTGGAATGAACAGACCGCAGGCTTGGCAGCGGCTGGTGGCGGAG  
ATGAAATTTTAGCAATAGTGGATCGCGGTGTTTATGCAAAATCTGATGACGAAAAATCAGCCATTTAA

>Cluster\_13537

ATGAATGGTGAATATTTTGTACGCCCTCGCATTACATACCTGAAATGCACTCAAAAAGATTTAGCAAGCCACTTAGTGT  
TTCTCAACACAAATTAGCAAGTGGAAAAAGGGGAACACATGTCGCTGATAAGAAAAAGTTTCAAGAAATATACAC  
AAATAGGAGATTTATCTCTCAACTAGTTGAATGGACGGGCTCAGTCGGAATGCTGAGAAATGGGATCGACTTATCCAT  
TTTCTTGCTCGACGAGCTATGGACGATGCTGAAACGGTTTATAAACAACACTTCTTACTGACGAAGATGGTTTTTTGGT  
TGAAGAAATTAATGATGATTAATAAGCGAATAGGTTTCTACACCTCTTTCCTTTCCTGAAGGATTAATATTGACGAG  
ATAATGCTGATGAAGAAGAGGCTTTTGGGAGATATTAGAGAGCAATGCTCATTGTTCTGTAATTAATGATATTTATCAT  
GCTCTGAATGATGTTTATGGTTTCTACATAGCATATGTTGATGAGTTGATTCAGGACGACGATTTAGATGCTATTCAG  
CGAAGCCATCAATATTCAGAGTTTATGATATCACTTGTGCTGCAAAATGAAATGATATCTCTGTTGCGTCAAAT  
TTAAAGAAATTTCTGTTATAGAGTTAAAAAGACTACGAAAATGGTTGAAATCAACTCAAGATGATGGCAATCAGGGCGGA  
ATTCGGTTAAGAGCCGAATTTCTGGAAATGGTTTATAACACCGCTGACCAACTTAGCGTTGACAGCAGAAGCCGAACGTTT  
CGATTTCAATAAATCTCGCATTCATCCAGATATATACATGAACGAGATCCTTACTGGCATGAGAAATTAATCACCAGTGC  
TTCCGGTAATAATGCAAAAGTTAGAAATACAGATTTCAAACCTAGATGAAACAGATTTATGCCGTTGGTAAATAG

>Cluster\_51980

ATGAAAAATGTTCTGGTCCCGTCCCAGCTTTTTCAGCAGCTGTGTTTCCGCCAGCAAGTTGCTAAGAGAGAATAATTT  
TAATCTTATTTAAGAATAATGTGGAGCATCTGCTTAAATCAGAATCCACTGCATTACGAGAATCTATTTGCCCGGTCA  
TCGCCGAAAAGATGGTTATCAGCGGACACGCTATCATTTGCTGCTGGTGTGAGAATAATATCGAGATTCGGGACGGGG  
ATAGACAATATTGATCTTCTGTCGCGCACAGCAATCCGGTATTGTTGTCATAAATGCGGTTGGGATTAATGAAATGCGGT  
TGCGGAATTTATCATTTGACTTATCTTCCGAGCATGAGAAATATCCTTGGCAGCTATCATGCGATGCAAAATGGCTACT  
GGGTGAGTGCATGGCTGTGAATTTACAAGGAAAACGGATTTGGCTGGTTGGCTACGGTAATAATAGTTAAAACTCTGGCG  
AAAAGGTTATCCGGTTTGTGATGTTGAGCTTTTACGTTTTCGCAAAACACCCGATATCAATTTGCTGCAAAAGTGGAGT  
TCAGTTTGTATCAATTTGAAGATACTTTTATGCACTGCGATGTCATCATTTGTTCTTTTGGCTTTTCTTCTGAGCTGGAGA  
ACTTCATTAGTCATAAATTTGTCGATGATGCGCAATGGTGTCTGATCATCAATGCCGCAAGGGGAAAGTGTCTGGAT  
GAGGGCGCTTACTTTCAGGTGATGAAGAACGAAATGTGTTGCGCGCTGGATGTTGTTAGCTCTGAACCGTTGGCGCA  
ATTTAGCCCATGCTACATGCCAAAAATATCATTACAAGCGCATATCGCGCGCCACCGTTGAGTCAATACAGCAAAA  
CCGGGATACAGTTGCCAGTGCATGATTACTTTCGAGGAAGGGAGATAAAAAACGTTGTGTA

>Cluster\_20078

ATGCAGATCTGTTGGCCAAACCCCGTGGTTTTTGTGCGCGGGTAGACCGGCTATCAGCATTTGTTGAAAACGGCTGGC  
CATTTACGGCGCACCGATATATGTTCCGTACGAAAGTGGTGCATAAACCGCTACGTTGGTGCATAGCTTGGCGGAGCGTGGG  
CTATCTTTATTTAGCAGATTAGCGAAGTACCGGACGGCGGATCTGATTTTCTCCGCACACGGTGTCTCAGGCGATA  
CGTAACGAAAGCAAAAGCCGCGATTTGACGGGTGTTGATGTCACCTGTCCGCTGGTGACCAAAAGTGCATATGGAAGTCC  
CCGCGCAGCCGCTGTTGGTGAAGAATCTATTTCTCATCGTACCGCCGGCACCCGGAAGTGAAGGACGATGGGCCAGT  
ACAGCAACCCGGAAGGGAATGATCTGCTGGTGAATCGCCAGACGATGTTGGAAACTGACGGTCAAAAACGAAGAAAG  
CTCTCTTTATGACCCAAACCGCTGTGCGTGGATGACAGCTCTGATGTTGATCGACGCGTGGCTAAACCGTTCCCGAA  
AATTTGTCGGTCCGCGCAAGATGACATCTGCTACGCGCAGACTAACCGTCAAGGAGCGGTACGCGCCCTGGCAGAGCAG  
CGGAAGTAGTACTGGTGGTTGGTTGCAAAAACCTCTCAACTCAACCGTCTGGCGGAACTGGCCAGCGTATGGGCAAA  
CGGCATTTTGTGATTGACGATGCGAAAGATATCCAGAAAGTGGTAAAAGCGTGAACCTGCGTGGCTGAGTCTGCGG  
CGCATCGGCTCCGATATTTGTTGTCAGAAATGTTGGTGGCAGTTTGAACAGCTGGCGGTTGGTGAAGCCATTCGCTGG  
AAGTCTGTAAGAAAAATGTTTTTCAAGTGCAGAAAGAGCTGCGTGTGATATTCGTGAAGTGCATTTAA

>Cluster\_58401

ATGCGTCAGACTAAAACCGGTATCTGCTGGCAAACTGGGTACGCCGATGCCCCACACTGAAGCGGTAAAACGCTA  
TCTGAAACAATTTTAAAGCAGACAGCGGTGGTTGATACCTCAGGTTGTTTATGGTGGCCATTGCTGCGCGGCTGATTT

TGCCGCTGCGCTCGCCGCTGTGGCGAAGCTGTATGCCCTCTGTCTGGATGGAAGGTGGCTCGCCGCTGATGGTTTACAGC  
CGCCAGCAACAGCAGGCGCTGGCACAACGTTTACCAGGATGCCCGTAGCGCTGGGAAAGAGCTACGGCTCGCCATCACT  
GAAAGCGCCGTAGATGAACTCCGGCAGAGCATGTAGATCATATTTGGTGTGCGCCTTTATCCGCAATTCCTCTGTT  
CTACGGTCCGGTGGGATGGGATGAACTGGCAGCATTCTGGCGCGCAAACTAGCATTCGGGGGATATCGCTTTATACCGT  
GATTACCGCGATAACACGATTAACATTAATGCACGTGGGCAACAGCGTACGCGCTCTTTTGGCAAAACATGGCGCAACGGA  
TCTGCTACTGCTCTTTATCATGCGATTCCCCAGCGTTATGCAGATGAAGGCGATGATACCCGCAACGTTGCGCGACAA  
CGACTCGTGAACCTGGCTTCGGCATTTGGGGATGGCACCGGAAAAAGTGTATGATGACCTTTCAGTTCGCGCTTTGGTTCGGGAA  
CCCTGGCTGATGCCTTATACCGACGAAACGCTGAAAATGCTCGGAGAAAAAGGCGTAGGTTCATATTCAGGTGATGTGCC  
GGCTTTGCTGCGGATTTGCTGGAGACGCTGGAAGAGATTTGCCGAGCAAAACCGTGGAGTCTTCTCCGCTCGCGCGGGA  
AAAAATATGAATATATTCGGCGCTTAATGCCACGCGGAAACATATCGAAATGATGGCTAATCTTGTTCGCGCTATCGC  
TAA

>Cluster\_43522

ATGCCTAACATTAACCTGCTGGCGACTGCCTGAAGATGTCTCTTTATGGCTGGTCTGCCTCTTTCATTAAAGTGGTATGA  
AGTGATGCCACTGGATTACCACGCGAGTCTGAGCGGCTGGCTGCTGTATGGTCTGGGCTGGATAAACACGCTGACCC  
AATACCAGAGCAAACCTGGCGCGGCTATGGTGTGTTGCCGCTGGTGCCTGGAAGATATACAGGTGATTCGCTGGCA  
GGTTCACCTCACTGCGCGGCTACGCGCTGGCCATGAAGCGCAACTGGATGTCGCGCGCTGGGGAAAAATCCACACCT  
CGCGACCGCGGGTGTGGTGTGAGCATGGATTCCACCGCATCCAGATTGAATGATTTGATGAAAAATGCCAAACTGG  
CCGGAACGGGCGAGAGGTTGGCGAGGTAACCGAACGGGCGATGCGCGCGAACTCGATTTTACCAGCAGCTGCGCAGC  
CGCGTGGCGACGCTGAAAGGCGCTGACGCCAATATTTCTGCAACAGGTGCGTGAATACTGCGCGCTGATGCCAGGCTTAA  
GCAGCTGGTACTCAAGCTGGAACGCTGGGCTGGAAGTGGCGATTGCCCTCGCGCGCTTTACTTTCTTGTGTAATACC  
TGCGCGAACGCTACGCTGACACCGTGGTAGCAATGAACTGGAGATCATGGACGGTAAATTTACCGGTAATGTGATC  
GGCAGATCGTAGACGCGAGTACAAGCGAAACTCTGACTCGCTCGCGCAGGATGAAATCCCGCTGGCGCAGAC  
CGTGGCGATTGGCGATGGAGCAATGACCTGCGCATGATCAAAGCGGCGAGGCTGGGGATGGCTACCATGCCAAGCCAA  
AAGTGAATGAAAAACGGAAGTCAACATCCGTCACGCTGACCTGATGGGGTATCTGATCCTCTTGGCAGCCTGAAT  
CAGAAGTAA

>Cluster\_21091

ATGAAAAATGCGCTGGTTATTTTTCATCACCTTGGCCCTGGCGGGCTGTGCGCTGTTTCACTCCATATGGGAGTATCCC  
CGTGCCGTGGCGCGGCTGCTGACCGACTGGCAGCCGCGAGCAGCGGAGCATTTATTTATGATTTGATGGAGTACCGCATGCCG  
GCTTGTGCTGCTGGCACTGTTTGTGCGGTGCAGCCCTCGCCGTGGCGGGCGTGTGATACAGGGGATTGTGCGCAACCCCTCTG  
GCATCACCGGATATTTCTCGCGCTAACCATGCCGCCAGCTGGCTCTGTGGGGGCTCTACTTCTTATGCCGTCACTGCC  
CGTGTATGGTGTGCGCGCTGCTGGCCTTTGCGGGCGGATGGCGGGGTTGATATTAAGATGCTGGCAAAGACCACC  
AGCCGATGAAGCTGGCGCTCACCGCGCTGGCGCTTTCTGCATGTGGGCGAGCTGACGGATTATCTGATGCTCTCGCC  
CCGCGAGGATGTGAACAACGCCCTGCTGTGGCTGACCGGCGCTTATGGGGCGGTGACTGGAGCTTTGTGAAGATTGCCAT  
CCCCTGATGATTTTATTTCTGCGCTGAGCCTGAGTTTTTGGCGCATCTCGACCTCCTTGCCTCGCGGATGCGCGCG  
CCACCAGCTCGGTGTGCTGGTGCCTTACCCGATTTGCGGCTTTGTTACTAGCTGTGCGCATGACATCTACCGCGGTG  
GCGCGCTGCGCGGATTTAGCTTTATTTGGTCTCTGCTGGTCCGCGATATGATGCGTAGCATCACCGGTGACCTCCGCG  
ACTGCTGCTGTTTTCAGCCCTGACAGGTGCGTGTGTTGGTGGTGGCGATCTGCTGGCGAGAAATTTATCATCCCCAC  
TGGAGCTCCCGGTTGGCGTGTGACCGCAATATTCGGTGGCGGCTGGTTTGTCTGGTTGCTTGTGAGAATGCGGATAA

>Cluster\_55161

ATGATAAAAAAACCCTGTGATTTGGGATCAGCGGTTGTTTGGCGGTTCTGCTGTTCGTTTTGATGGTGGTCACAAAAGAGA  
TGACTTTTTAATGGACAAATTAGTGGAAATGGGTAAACATTCAGACCAGTATGTCGCGAAATGGCTATAGGGCTGCCAGTTC  
CGCGTCTGCTCTACGACTTGTGCGCTCGAAGCAAGGAAATATACGGATGTGTTTTCAGCCACGACAGAAATGAGGATGTG  
ACAGAGAGAAATGACAGAGTTTGTGCTTATATGGACAAATTAAGGATGTATCGGGGTTTGTGTTTGTGCTAAATC  
TCCCAGCTGTGGCATGGAGCGGCTGCGTGTCTATGATGAAAAATGGTAAATCGAGGTCGTAAGATGGAGTGGGACTATTTA  
CGAGCACTTTGTATGAAAAAGTTTTCCTGGCTACCGGTTGAAGAGGATGGCGGATACATGATCCAGTGTCTCGTGAGAAT  
TTTTATTGAAAGAGTTTTTGTCTTTGCATGAGCTCAATCATCTTTACAAGGAGAAATATCAAGAAGAGAGTTATAGCTTT  
TCATATGCTTATAAAGCTTCAGTTGTTGGCGCATAGCCAGGCGCTATAAAGATATGGGACCATTGTTGGTGCATATAC  
ACGAGTGGGCGGACCTTGAATCATACTTTGAGGTGTATCGTGATAATCTGATGGCGATTTCTCAGAAAACAGCATCACGT  
AAAAATCACACGAATGTGCTGATGCATATACAGGGGATTTTGTAGTAATTACTTAAAGTACACGCGTAAAGAGTTGAG  
CGAGGTTACTTAACTATCGCTTTGGCACATTTGCCCTTCTTGGCGGTTGACTCTGCTGAAGCATTATCTGGGTGAGT  
ATCCTAATGATTACTTGTTCACACAGAATTACTTCGATCCCTATCCGGAAGAACTGGCTCTAAGACTGATGGTGAATTA

>Cluster\_5819

ATGGGATTTTACGACCCGCCAGTTACTCGGTTATACCGAACAAAAAGTGAATTTTCGTCGCGTGTTTCTGGAGCTGTT  
TTTTCCCGCTACGGTGAATTTCCATACCGAAGAGGTGATGCTGGACAAAATACCAGAAAACCGCGTGGCGGCTTATG  
TCTCCCGGTTGTTGAGGAAAAGTCTGCGCTCATCGCGGTTGGGAAACCGCGTGTACGTCGCGGCTACGTCAGCCG  
AAACACGAATTTAATACCAGCAGCGGTTGAGCGTCTCCCGTGAAGATCCGGCTCACTGAACGACCCCGCTACCG  
TCGCTGCGTATCATACCGGATAACCTCAAACGGAAGAGCATGCCATTTGTCAGGTGGAAGAAATGCAGGCGGTGAATG  
CCGTGCTGTATGGCAAATACACCATGGAAGGGGATCAGTTTGTACTGTGAGGTTGATTTGGACGCTTGAAGGAAAT  
AACATTTGACAGGCGACGGTAAAAAATGGTCTGAGCAGGACGCTGATACGTTTGTGATCCGACGCTATTTAGCCTCTA  
CTGCGATCAGGCCAGCGTCTTGTGAATATTGCCATTAATGGACGGTACTGCTGGCGTCTGCTGAATGGTTTTAAGCTGT  
TCCGCAAAAACTGGATAACCGTTCGCGGCTCAAATTCACAACTCGAAACGGCAGTGAAGACCTGGGGCGGTTGGTGTCT  
TTCAAAGGTTATTACCGGATCTGGCCATTTGTTGGTGGGCAAAACGCTTTATGTTGGCAGAGGACGCTACCGAAAAACGTTA  
TCTGCGGAGGCGACGCTGGTCTGGGAAATACGGCTGCAGATGGGATCCGTTGTTACGGTGCATTCAGGATGCGCAGG  
CGTTGTCCGAAGTGTGGTGGCTTCTTCCGTTACCAGAAACACTGGCTGACCGTGGCGGATCCGCGCGTGAATTTACC  
ATGACGAGTCCGACCGCTGATGGTGTGCGGATCCGGATGAGTTTGTGGTGGTGCAGGTGAAATAA

>Cluster\_53499

ATGCAAGTGAACACAGTCTCGCTGTTGTTGGCGGCAAGAAAACGTTGCGGTTACCGAGCAGACGATAGATTGGAATAA  
TAATGGAACATTAGTACAATAACCCGAGGTGGAATTTGCGGTTCCGATTTACATTTATCAGGAAGGAAAAGTAGGTA  
ATTTTCATGATAAAGCCAGGATGGTGTAGGTCATGAAGTTATCGGTAAGGTTATTCATAGCGACTCATCAGAATACAT  
GAAGCGAAACCGTAGCCATTAATCCGTTAAACCGTGGCTACTGCCAAATACGATGAACTGAACAAACGAAATCAGTG  
TACAGATATGCGTTTTTTTGGCAGTGCCATGATTTCCCTCATGTTGATGGTGGTTTTACCCGTTATAAAATGGTCGAAA  
CGTCGCAATGTGCTCCTTATCCGGCAAAGCTGACGAAAAGGTTATGGCTTTTGGCGAACCTTTAGCCGCTCGCGATTCT  
GCCGCATCAGCCCGGAGTTACAGGCAACGAGTATTTGTTTCCGGTGTGGGCCATTTGGTGCCTGATTTGTCAG  
TGCAGTGAACACACTGGGGCGCGGAAATTTGCTGTGCGGATGTGAGTCCCGCTTCCCTTTCCGCTGGCCAAAGAGATGG  
GTGCGGATGTGCTGTAACCCACAAAACGACGACATGGATCACTGGAAGCGGAAAAAGGCCATTTGATGTCAGCTTT  
GAAGTGTCCGGTCACTTTCATCAGTGAATACCTGCTGGAGGTCACCTGTCAGCGCGGCTAATGGTGCAGGTAGGAT  
GGAGGCGGATGGCAGAAATCCCAATGATGAGTTGATTTGGTAAAGGATTTCACTCAAAGGCTCTTTCCGTTTACCA  
CGCAATTTAATACCGCAGTGTCTAGGCTGGCGAATGGCGTTATCAATCCACTGCTTTTACTGAGTGTGAATATCTCTTC  
ACTGACCTGGAAGAGCGCTACGTTTCCGCGGTGATAAAACCCAGGACGCAAAAGTCCAGCTTGTTTTCTAA

>Cluster\_9813

GTGAAAAGTGAATCTTTTGTTCGGTTGTTTTAAGTACGCACGATTTATCGAGTGAATTAACAAATAAATTAAGCAGAT  
TCAGTCTTTACTGGACGATAATTAACACTGATTAAGAAATTTAATTTCTTAAAGGACCGTATCGTGATGTACCGAGAA  
CATCTGCGATCGCAATATATTAACAAACCATTCGAGCGTGGCGTTTCGCAACTTTCGGGCTCGCTTATGATGATGTG  
GTGGCGGTCAGTGTCTTGAGAAATGCAATTTGGTATTTTGTGGTTTATATGATCATCAGACTGATCCGTTTTCGCAAT  
TCATCAAGCAGTGGAAAGTGTAAAGTCCGGGTACGATGTTGTTGTGGGGTCTCAACGACGCTCGCTTCCGTTGCGTATC  
GTATATGCGGGATACGGCGTGCATATATTAAGACGATCGATTACCATATTTCTAAACACTTACAGGTTTTCGCGTGT  
CTCAGTCTGTCGCGTAAATGCAGTAACAGATACTGGGCGTTTCCACCACAGTTCATATGCGCATTAACAAACCGGG  
CTATCCCGTTCAGCGAATGACTTATCAGCCCGTTAGCGAAACGATATTAACAGCTTCTATCACATATGGTTTTCGCAAT  
TAGTTCGTTTGTAGTGTCTTCAACTCTTCTCGTCTTTGCGCTGGATGTCGATTGTTGGCACTGTAGGTAGTTTGGAGCGT  
CTGCTTTTTCGCGGTATACAGTATTTCTCGTGAACCTGATTAATGGCCATGTTGTAAGAGGTTGGACTACTACAGTCTTGT  
TATGTCCACTTTGTTTATGTGCAATTTATATGTTGGCCCTTCTTGGGGAATATCTCAGTCTGTTGCTCGATGACCGAA  
CGAAACAGCAGCATATTTCCGTTGTTTGGAGAAAACAGTGCAGTAATGATTAACAAAGACCGGTTAATGTGTTGAAT  
GATGCGACTGTGGAAGAGGCTAATCTGGTGCAACCGGACGTGACCGTTAA

>Cluster\_15412

ATGAAAACGTAAACGCTAGCTTTACTGGCACTCATAATTTTACGCAACATCCAGCCCTTTTGTTTTGTAGCTGGTGATACCAT  
TGAAGCGCGGCAACAGAGCTTTTACGCCATTAACCTCGGCATGTCGCAATCGGAGATTGAGCAGAAGATTACCCGCTTTT  
TAGAACGCACCGACAACAGCCCCGCTGCATATACCTATTTGACTGAACATCACATACCTTCTGAAACACCTGATACC  
ACTCAGACTCCCCCTGTCCAGACAGATCCTGACGACGAGCAAAAAACCGTTGCGCTACAGGTGATGTACAGACAACCCG  
CCGTTATCAGAGCATGATCAACGCCGACAGTCTACGGTAACTGATGCCAGCAACGCAATTAACAGAGCAACAGCGCG  
AGATCGTAGCCACAAAAACGCTCGCCGCACTGGAGATACGCAAAATACCGCAGTATATCAGGAGATGATTAATGCC  
AGGCTGGCGGCTCAAATGAGGCTAATCAGCGCACTACACGGAACAAGGCGAAAAATGAATGCACTGACAACCGATGT  
GGCAGCACAACAGCAAAAAGAAAGGGCTCAATACGATAAACAATGCAAAAGTCTGGCGCAGAAGTCTGTCCAGGACATG  
AGCAATTTCAAAGTCTGAGACAAGATTCGCGCAACCGCAGCAACAGTTAAACCAACACCAAAAAACGGTTGAGATAAC  
AGCCAGCAAAATTAACAGCTCAATAACCATTTAGTTCGCTAAAAAACGAAAGTTGAGGACAATCGTAAAGAAGCCAATGC  
GGGAACTGCATCTGCCATCGCTATCGCCTCACAACCACAGGTGAAAACCGGTGACTTGATGATGGTCTCAGCGGGAGCGG  
GAACCTTTAACGGTGAATCTGCGGTGCTGTGCGGAACATCTTTAATGCGGGAACGCATACGGTACTTAAAGCAGGTATT  
TCTGCGGATACACAACTGATTTCCGTTGCGGGTCTCGGCGTGGGATATTCGTTCTAA

>Cluster\_41489

GTGACCGATAAAACCTCTCTTAGCTACAAGATGCCGGTGTGATATTGACGCGGGTAATGCTCTGGTTGGAAGAATCAA  
AGGCGTAGTGAAGAAAACCGCTCGTCCGGAAGTATGGGCGGCTCGGGCGGCTCGGTCGCGTGTGTGCATTTCCGCGAAA  
AATATCTGTAACCCGTGCTGGTTTCCCGGCACTGACCGGCTAGGTACCAAGCTGCGTCTGGCAATGGACTTAAACAGTCA  
GACACCATTTGGTATTGATCTGGTCGCCATGTGCGTTAATGACCTGGTGGTGAAGGTGCGGAACCGCTGTTTTCTCTCGA  
CTATTACGCAACCGGAAAACCTGGATGTGGATACCGCTTTCAGCGGTGATCAGTGGCATTGCGGAAAGGTTGCTGCAATCGG  
GCTGTTCACTGGTGGGTGGCGAAACCGCGGAAATGCGGGGATGATCACGGTGAAGATTACGATGTCGCTGGTTTCTGC  
GTTGCGGTGAGAAAACCTGAGAAATCATCGACGGCTCTAAAGTACGCGATGGCGATGTTGCTGATTGCACTCGCTCCAG  
CGGTCCGCACTCGAACGGCTATTCGCTGGTGGCGAAAATCTTGAAGTACGCGGTTGTGATCCGCAAAACACCGAACTTG  
ATGTAAGCCATTAGCCGATCATCTGCTGGCACCAGCCGCAATTTACGTGAAGTCCGCTGCTGGAGTTGATGAAAAGGTC  
GATGTGCATGCTATTGCGCACTGACCGCGCGGCTTCTGGGAAAACATTTCCACGCGTATTGCGCAGATAATACCTCAGG  
AGTGAATTTGATGAACTCATCTGCGCAGTGGCGGAAAGTGTCAACTGGCTGCAAAACCGGCAAGTAACTGAGCGCCATGAAA  
TGTATCGCACCTTCAACTGCGGCGTCCGGATGATTTATGCGCTGCTCCGGAAGTGGACAAGCCCTCGCCCTGCTC  
AATGCCAACGGTGAAAAACCGGTGAAAAATCGGTATCATCAAAGCCTCTGATTCGGAACACCGCTGGTTATCGAATAA

>Cluster\_64417

ATGAGTGAATTACGTAAATACTGGCGTGGAGCGTGGAACCTAATTTTTATATATCTGCTGATAAATAAACATCACGGGA  
TAAATAAGAAAAGGTTTGTATCAATATCACGCTGACAGATTACGGCGGTTCCAGTAAACAGACAGACGAACTCCGCGTAG  
CAATAGTTTCTGAAACTCTGAAATTTCCGGCCCGTGGAGTGAAAATTTAGCATTGGGCTCGGTTTTCGGTAAATCAGATAAT  
GATAAAGGCATATACATCTGACGTTGACGGTGTAGCAGTGGCGGTGAACCCCGGTTAGTTGATTTCACAGCAAAAAGCGGCTC  
GATGAACGCGCAAAAGGCTCTCCAACAGTTTACAGGAAAAAGACGCGCTCATGGAGCGAGCTCACCGTCAGCGATATCG  
TTGCGACAATAGCGAGCGATAACGGGCTAAAACCTCGCTATCAAAGCGGTTTGCAGACAACATATACACGCACTCGAT  
CAAGTCCGTTGATGATGACACTGATGTCGAGACTAGCAACAGATTCGATGCGGTGAGCAAAACCGCAGGAGGGTA  
CTGGATATTCCTGCGCGTGGCGCGGGCAATCTGTTAACGGGAGCACCCTTCTGCACTACACGCTCAGCGCTCGTGATA  
ACTCCAGCTGGGTTATTGAGAAAATGGCAAAAACGGCGATAGTGGCGGAGGTGGCGAAAATTCGGAGCCGACATATCTG  
ATCAAAATACCACGATACGGCAACAGGGCAGATCAAGGAGCTGCCACAGGCAGTGGTGGTGTATCCTGTATTGAATGGCC  
GGCAGTTGAGCCCTCGCTCGACGACGAAAGAGGCGCGCGGGGCTAAAAGGAGGTGCGGCTAAAAAGAGTTTTCCAG  
TGACGTACACAACCGCAACCGCTCGATTTAGTATCTCGTACGTCAGAAATGCAAAAGTCAACAACAAGGGTTCCGGACA  
GAGGAGGACCGAGACTGGACAATCAATACGTTGACGCTGACGCTGGCTGAAAACGGATTTCTCTGCGGACTGTGCTGGA  
GTAA

>Cluster\_7943

ATGAGCAAAAACGCAACAAGCGCCAGCAGCCGCGCCGCCCCAAACACACCCGCGCACCGGCGCAGAGCATGGAAGC  
ATTACCTTTTGGTGGCCAACGCGGTACTCGACCGCCGGATATTCTCGATTATGTCGAGTGTATCGATAACGGCCAGT  
GGTACGAGCCGCGGTGAGTTTCTCCGGGCTGGCGAAAAGTATGCGCGCGCCGCTGCACCACAGCTCACCGATTACGTG  
AAGCGTAACATTTCTGGTGTGACCTACATCCCGCACCCGCTGTTATCCCGTCAGGACTTACCCGTTCCAGCCTCGACTCA  
TCTGGTGTTTGGCAATGCGTTTATCGAAGAGCGTCCGGCCTGACCGGCAAGCCGTTAAACCTGGAACCTCACCGGCGA  
AATACACCCGCGTGGCATCGAGGATGACGTTACTGGTATATTCAGTCTTACACGACGCGCACAGTTTCGCGCCCGG  
TCCGTTCTCCACTGCTCGAGCCGATATTAATCAGGAGCTTTACGGGATGCCGGAATACCTGAGCGCGCTCAATTCAGC  
CTGGCTGAATGAATTCGCGGACCCCTGTTCCGTCGCAAGTATTACAGAAACCGCGCATGCGGGTTACATCATATGTGA  
CCGACGCGCGCAAAAGCAGCACCAGCTCGAGGCACTGCGAAAGGCGATGCGGCACTCAAAGGACTCGGCAATTTTAAAG  
AATCTGTTTTTTACGCGCGGAATGGTAAAGCAGACGGAATTAATAATTTGTCGACTGAGCGAAGTCCGACGAAAGGATGA  
CTTTTTTAATATCAAGAAAGTCAAGCGCGCTGACCTGCTTACGCAACCCGATCCCATTTCCAGCTTATGGGCGGTAAGC  
CAGAGAACCTCGGCTCAGTGGGTGACCTTGAAGAGGTGCGCAAGGCTTTTGGTGAACGAGCTGACCCGCTACAGCGA  
CGGTTTATGGAGTTGAACGAGTGGGCGGTTGAAGAAATATCCGCTTCAAAAATATAGCTTCCGCGACGACGAGTAA

>Cluster\_28730

ATGAGTGAAAAACAGAAAAGCCACACCCAAAAAATTAAGGATCTAAAAAAGAAAGGCGGATTAACAAAAAGTGAAGA  
GGTAATGGCTGCAGTGCAGTCAATTAATCTTATTTTCAATTTTTTTCTTTTGTATGGCATGAGTTTTTTTGTGATATAGTTG  
GGTATGTTAATACGACAATAGACTCGCTAAATAGACCGTTTTTTGTATGCCATTCGAGAAAATATAGGTGCGGATTAATAA  
ATATTTTTATATATATTTTGCATTTCTTTGATTTGCTTTGTTGGAAGTGTACGATGGTGTATCAAAATAGGATTA  
CATCTTTCCGGTTGAAAAATAAAACCATCGGCTCAGAAGATAGTGTAAAAAATAACCTGAAAAATAATTTTTCTGTAA  
AGAGCATTTTTGAGCTACTTAAATCAGTATTTAAGTTAGTGATAATTTGTTCTCATTTTTTATTTTATGGGGCATTCATAT  
GCAATGAGTTTGTAAATTTACAGGACTGACGCATATCAAGCTCTTGTGTTGCTTTTTTGTTTTTCTTTTATG

GAAAGGCGTGCTATTCGGATATCTACTCTTTTCAGTATTTGATTTCTGGTTCCAGAAGCATGAGGGACTGAAGAAAATGA  
AAATGAGTAAAGATGAGGTGAAACGAGAAGCCAGGATACTGATGGTAACCTGAAATTAAGGGGAGCGCCGTCGCCTT  
CATTCGAGATACAAAGTGAAGTTGGCTAATAACATCAAAAAATCAACCGTTATTGTTAAAAACCCGACTCACATTGC  
GATTTGCCTATACATAAACTTGGGGAGACTCCATTACCTTTAGTTATGAAACAGGAAAAGATGCCAAAAGCTATACAGA  
TCATTAACCTGGCTGGAACCTATGATATTCCTGTTGATTGAAGATATTCCTTTAGCAAGAAGTCTCTATAAAGTATACAT  
AAAGGACAAATATAACAGAAAGCTTTTTTTGAACCTGTGGCACAAATGATTGCTATTGCGATAGACCTTGATTATTA

>Cluster\_23526

ATGACTAAGCCCATCGTTTTAGTGGCGCACAGCCCTCAGGTGAATTGACCATTGGTAACATACATGGGTGGCGTGGCTCA  
GTGGGTAACATGCAGGATGACTACCATTCGATTTACTGTATCGTTGACCAACACGCGATCACCGTGCGCCAGGATGCAC  
AGAAGCTGCGTAAAGCGACGCTGGATACGCTGGCGTTGTATCTGGCTTGTGGTATCGATCCTGAGAAAAGCACCATTTTT  
GTTGAGTCCCACGTGCGGCAACATGCGCAGTTAGGCTGGGCACGAACTGCTATACCTACTTCGGCGAAGTGAAGCCGAT  
GACGCACTTTAAAGATAAATCTGCGCGTTATGCGGAGAACATCAACGCTGGTCTGTTTACTACCGGTGCTGATGGCTG  
CGGACATTCGCTGATATCAAACTAATCTGGTGCCTGGTGAAGACCAGAAACAGCACCTGGAACCTGAGCCGCGATATC  
GCCACGCTTTCAACGCGCTGTACGGCGATATCTTTAAGGTGCCAGAGCCGTTTATTCGAAATCTGGCGCGCGCTAAT  
GTCGCTGCTGGAGCCGACCAAGAAAATGTTCAAGTCTGACGATACCGCAATAACGTTATCGGCTGCTGGAAGATCCGA  
AATCGGTCGTGAAGAAAATCAACGCGCGGCTACTGACTCCGACGAGCCGCGGTAGTTGCTACGATGTGACAGAAA  
GCGGCGCTTTCAACCTGCTGGAATATCTTTCTGCTGACACGGCCAGAGCATCCCGAACTGGAAAAACAGTTCCGAAG  
CAAGATGTATGGTCTATCTGAAAGGTGAAGTGGCTGATGCCGTTTCCGGTATGCTGACTGAATTCAGGAAACGTTACCACC  
GTTTCCGCAATGATGAAGCTTCTGCAACAGGTGATGAAAGACGCGCGAGAAAAGCCAGCGCACACGCTTCCCGTACG  
CTAAAAGCGGTGTACGAAGCGATTGTTTTGTGGCGAAGCCGTA

>Cluster\_22225

ATGAAAATCCCTCATTACAGTCCAACCTTCAACTTTTTCCGCCCGGCAGGATACTCTGCTCCCATTTGCTCCTAATCGTGC  
TGAAAATGCCATGCGGATACGTTTTGGATATAGGTAAGCGAATACCACTTTCCGCAGCAGATTTAAGCAACGTATACG  
AAAGTGTAAATACGCTGCGCCAGTACGACGCGTAGCAGGTTATCGATAGCATACAGTGCATATGATCCGCAACACTGTA  
CTTGATGCTTTGAGCCGATCACAGACATTTCTGATGCGTAAGCTATGGCATTACATAATGAGAAGGTACACATTTGGTTG  
CATTAATACAGAAACGAATACGAGCTTAAAGAAATCTTCTGTCAAAATGATGATATCAATCACTAACCTGTAACG  
AATTATATGAATATGATGCTGGGCAAGAGCCAAATTTCCCATTTGCGAAGCAGGAGAAAACGATAACGAAGAGCCTTAT  
GTCAGTTTTAGTGTGTCGCGCAGATGACTCTTATGAGATGCCATCGTGGCAGGAAGGACTGATTCAGAGATATTTCA  
TCATGTTACTGGATCTAGCGATCCATCTGGAGATAGTAATATAGAGTTAGGACCCACCGAGATTCGCGACGTCGTGTCG  
CTCAAGAACTGGGATGAGGTGTTCCCGACTTCAAAGGATATGCAGAGCCAGAACGTTGAAGCTCATCTTAGGTTACGTAAC  
CTGAATGCCCTTCGACAGGCTGCCATGAGGATGAAGAGAATGAGAGGGCTTTCTCGAAAGGCTGGGTACGATCAGTGA  
CCGATATGAGGCGAGTCTGATTTACAGAGTATTCGCTGTGTTCAACATAGGATACGGATTATCCAGCAACATGATT  
TTCTGGATTGGCTATCAACGATAATTTACAGGATGCAAAATCAGATCCAACCTGTATCATGGCGCCCTTATATTTTTACA  
TTTTGGGATGTGGACAAAACAATCAGCGATGA

>Cluster\_58516

ATGATTTACGTCCTCGCCGATTACTCATCACCTGTTTTGCTGCTGGTTTTCCGCCCTGTGTGGTTGCAGGTATCTGGGGATT  
ACGCAGCGGTGCCGTCACGCTGGAACCTCGCAGGTATTCGCCGCGCTGATGGCGGATCGCCCGCAGTATGACGATGG  
TGGTCACCGAATGGCGTTTTACCACGCGTCTGATGGCGCTGTTGATTGGCGCAGCACTGGGCGTCAGTGGCGGATTTTT  
CAGTCCGCTGATGCTAACCCTCGGCAGCCCTGACGTAATGGGCTTTAACACCGGGCGTGGAGCGGCTGCTGTTGGC  
GATGGTGCCTTTTTGGTCAGGACCTGACGGCTATCGCGCTGTACGCAATGGTGGCGGCATTTGCTACTTCGCTGCTGCT  
GGCTGCTCGCCTGGCGCAACGGCATCGACACCTTTCGGTTGATATTTACGGTATCGCGCTTCGCGCCATGCTGGTGGCC  
TTTTAATACCTGGCTGTTGCTGAAAGCGTCTTTAGAAAACGGCGTAACAGCAGGTTTGTGGAATGCCGGATCGCTCAACGG  
CTGACGTTGGGCAAAACCTCGCCTTCGCAACCCATCATTTATGATGCTCATGTCGCGCCCTTACTGTCAGCCGGA  
TGGCCTTGTGGAATGGGCGATGATACCGCGTGTGCGCTGGGCGTCAGCGTCAACGCTTCGCGCTGTTAATGATGCTG  
GTTGCAAGTGGTGTACCCTGCGGCAACAGCGCTTGGCGGGCGATTTCCTTTATTGCTTTAGTTCGACCCGACATTGC  
CCGACGATTTAGCGGCACCGCTCGCTGGGGCTAACCCAGGCGGCGCTATGCGGGGCGCTGTTACTGCTGGCGGCGGATC  
TCTGCGCCCAACAACCTGTTTATGCGGTATCAACTTCGCGTTGGCGTCTTACCCTCAGCCTCGGCGGTATTTACCTTATC  
GTCCTGTTAATTCAGGAGTCTCGCAAAAATGA

>Cluster\_38992

ATGCAAAAACGTTATCTGGGTAATCCGGACTCGAAGTCTCCGCCCTTGGGCTCGGTTGCATGGGCTTAAAGCCAGGCTA  
CGCCCGGCGACCGATACCGCTCAGGCTATCGAACTTATTCGCTGCTGGGTTGAACGTGGCGTCACTTCTTCGATACCG  
CCGAAGTATATGGTCCGATCTGAATGAAGAAGTGGTCCGCGAAGCCTTAAACCGGTTTCGTCAGCCGCTGGTAATTGCC  
ACTAAATTCGTTTTACCTTCGGCGATGATAATAGCAGCAGATTTTAAACAGCCGTCGGAACATATCCGTGAAGCCCT  
TGAAGGATCATACGTCGCTGAAAACAGATGTTATTGACCTGCTGTATCAACACCGTGTGATCCGGATGTTCTTATTTG  
AAGATGTTTCAGGAAACGGTGAAGACCTCATCGCAGAAGGTAAGGTCAAAACATTTCCGCGCTGCTGAAGCAGGACAAA  
ACCATTGCTGCTGCATGCGGTACAACCTGTCAACCGCCTGCAAGCGAATATTCATGTTGGTGGCTGAGCCTGAACA  
GGAATTTCTGCCGTTGCTGGAGGAACCTGGGAATGGTTTTGTCCCTTTCAGCCACTAGGTAAAGGTTTTCTGACAGGGG  
CGATTAAGCCGGGAACCACTTTCGCAAAAGATGATTACGCGACACCGTACCAGGTTTCGCAACACAGCCATTTGAAGCC  
AATGAAAAATGGTCACTTGTAGGTGAACTGGCTGCGGAGAAAAGGGTAACGCTGTCACAAAATCGCATAGGATGGCT  
ATTAGCACAAGCCGTTGATTTCCATCCCTGGCACCCTAAACTAAACCGGCTGGAAGAAAACCTGGCCGCTGCTG  
ACATTTGTTCTTCGCAAAAAGATACGACGACAGTAAGCGAGGCGCTGGAACAATTAATAATCGTGGTGAACGTTACTCG  
CCTGAACATCAGGCACCGGTAGGCCGCTAA

>Cluster\_191

ATGAAAAAATACCTTAGCCAAGAAGAGATAGATGCACACTTTCTGGGCTTTCTGAAGGTAAGATAGATACCACCCGAGA  
GGTCAAAGAAGAGGTTAAGGCTAAGCCTTTCGACTTTAGAAAACATATACCATATCTACCCTTAAAGATCCAGGGCTTG  
AGGTTATCAACGAACAACCTGCTCGAAGTTTAAAGATGACGCTTCTACGCTTTTAAAGAGAAAATGTTGGATATCTCGAAT  
TTACCCCTTCAGATGGAAGGTTCAAAGATTTTTTAAACAAAATTCCTGTACCTACCTCCATCCATATCTTTAAATTAGA  
ACCTCTTAAAGGACAATCTCTCTTATTATAGATGCTACTTTGGCTTTCTGTTATTGAAAGGTTTTTAGGGGGGAAA  
GAAAACATATCAAGTTGAAGGAAGAGAGTTTACACCAATAGAACAAGACTTCTGAAAAAGTGGTGACCTTATTTTTT  
AACCAGTTAGAAAAGGCTTGGAAAAACATCTATCTCTGTAACCTAAAATATATATAGAGGTGAAGTAAACCCACAGTTTC  
AAGGGTACTTATGCTGAAGAACTGTGGTAGTTACTGGTTATACGTTAGAGCTTGAATCTCTCAGCGGTAATAACTTTT  
TTTTGTTATCTCTAAGCACTTACAACCAATAAAGATTAAGCTTATTCTCTTATCAGTTAGAAAGATATATAGACTTA  
ACCTGAAAAAAGAACTTAGAAAACATATCTTAAATAGTAGTACAACTAAAAGCTATTTAGGAAAAGGCCACCATTAC  
CTTAGAAGATTTTAGTAAACCTTGGAGGTAGGAGATGTGGTAAATTTCTGATAAAAAAATAGAAAGCACTTAGAGGTTTATA  
TAGAAGGGTTCTTAAATTTTAGGCAAAATAGGGGCTTTAAAACACCTTGTCTATTCAGGTAGACAAATTTTTGTCT  
TCAGAAAATCCAGAAAATACAGAAAAATA

>Cluster\_65962

ATGAGTAGTTGGCTTGGATGCTGCAAGATGCCGAGAGATGTTGTGTTTTCTCGCCGTCGAGCTTTCGTTGCTGTTTTAT  
AGTGATTAGTCCGGTGTGACCTGATAAGACAAAAGGTGCCAGACCATAAAATCCAGCAGATGATGGGGCCAGAAAAG

GGAGAGGCTATCTCTGGCTGCTCTGTTGGGAGCCGTTACCCCGTCTCTGTAGTTGCTCGACAATACCCATGTTACGTGGA  
TTGTTGTACGCGAAGCCGGGTTTGGTCCGACTCTACCTTTTTTATTTGTTTCCACCTACTTAATCCCATTTATCGTCCG  
ACTAATGTGGATGACCTTTGGTTGGAAAGTACCTTGTGTACCGGATATATCGCAGCCGGCTCTCCGTTCTTGGCAGTA  
TTATCTCTGGATTTCTGGGGTTTGAACGTCATATCATTGCCAGTAAAAGCTCATCAGCAAAATTTGTTGTCTCCAGCAAAA  
ACTTCGCGGGGAACGACATATACGCCATAAAAAGTGAAGTGTGTTAGTCCAGCGGCTAAAGCCATTGAAACCCCGTAGT  
TACCTGTTGCAGTACCAAGCTGTAGTAAGTATTAATCCATAAAAACCTAGCCACCAAAAGATGCGTTGCAACAGTTTAAAG  
ATGTAAGTCCATATCTTTTGTAGGAGTATTAATAGGATCTTTTATTTATGGCTTTATTCCTCAGCGTGGATTGCCGCT  
CATGCAGGAGCAGATAATCCCTTCGCCATCCCATTAAAGCGCGTGTGCTGGTATTCGCTGTATATCCGGGCTGAGGCAGT  
TATCCCTCTGGCACTGTTCTGATGACAAAAGGAATGGTCTGGGAGCATTAATGGCAATTAATCATCCGAGTCCGCGCG  
CAAGCCTGACGGAAGTATATTACTTAAATCAATGTTTCCAGATGCCGATGATAGTGCATTCCTGACGGTTATATTAGGT  
ATGGCTATCTGTAGGGCTATTTGACTCAATTGCTATTTTTAA

>Cluster\_39914

ATGAGATGGTATCCATGTTACGACCTGATTTTCGAAAACTGGTAGCCAGCTATCAGGCCGGAAGAGGTCACCATGCGCT  
ACTCATTCAGGCGTTACCGGGCATGGCGATGATGCTTAAATCTACGCCCTGAGCCGTTATTTACTCTGCCAACAGCCGC  
AGGGCCACAAAAGTTGCGGTGACGTGCTGGATGTCAGTTGATGCAGGCTGGCACACATCCCGATTACTACACCTGGCT  
CCCGAAAAAGGAAAACTGGCTGGCCATTGATGCGGTACGTGAGGTCACCGAAAAGCTGAATGAGCACGCAGCTTAGG  
TGGTGGCAAAAGTTGCTGGGTAACCGATGCTGCTTACTTAACCGACCGCGGCTAACCGCATTTGCTGAAAACCGTTGAA  
AGCCACCAGCAGAAACGTTGTTTTCTGGCTACCCGCGAGCCAGAACGTTTACTGGCAACATTACGTAGTCTGTTGCTGG  
TTACATTACTCTGGCGCGCCGCCGAACAGTACGCCGTGACCTGGCTTTCACCGGAAGTGACAATGTCACAGGATGCAAT  
ACTTGCCTGATTCGCTTAAAGTGCCTGGCTGGCCATGATGCGGTGAGGCTGGCTGTTGTTTACGGAGATAACTGGCAGCTG  
AAACATTTGTTGCTAGGCTTTTGGCATATAGCGTGCATCGGGCGACTGGTATTTCGCTGCTAGCGGCTTAAATCATGAACA  
GCTCCGCGCGTTTACATGGCTGGCAACGTTGCTGATGGATGCGCTAAAACGCCATCATGGCGCTGCGCAGGTGACCAA  
TCTTTGATGTGCGGGGCTGGTCTGCAACTGGCAAACTCTTTCTCCCTCGCGCTGACAGGCTATACTGGGGGATGTTTT  
GCCACATTCGTGAACAGTTAATGTCTGTACAGGCATCAACCGGAGTCTCATCACCGATCTTTACTGCGTATTGAG  
CATTACCTGCAACCGGGCTGTGCTACCGGTTCTCATCTTTAA

>Cluster\_41824

ATGAGTCAGAATACGCTGAAAGTTCATGATTTAAATGAAGATGCGGAATTTGATGAGAACGGAGTTGAGGTTTTTGCAG  
AAAGGCCCTTAGTAGAAGAGGAAACCCAGTGATAACGATTTGGCCGAAAGGGAACGTTTATCGCAGGAGCCACAGCGTG  
TGCTGGACCGGACTCAGCTTTACCTTGGTGAGATTGGTTATTCACCACGTTAACGGCCGAGAAGAAGTTTATTTGCG  
CGTCCGCGACTGCGTGGAGATGTCGCTCTCGCGCGGATGATCGAGAGTAACTTGCCTGCTGGTGGTAAAAATTTGCCG  
CCGTTATGGCAATCGTGGTCTGGCGTTCGCTGATCTTATCGAAGAGGGCAACCTGGGGCTGATCCGCGCGGTAGAGAAGT  
TTGACCCGGAACGTTGGTTTCCCGTCTCAACATACGCAACCTGGTGGATTTCGCGAGACGATCGAACCGGCGATTATGAAC  
CAAACCCGTAATTTCTGTTTGGCGATTCACATCGTAAAGGAGTGAACGTTTACCTGCGAACCGCACGTGAGTTGTCCCA  
TAAGCTGGACCACGAACCAAGTGCGGAAGAGATCGCAGAGCAACTGGATAAGCCAGTTGATGACGTCAGCCGATGCTTC  
GCTTAAACGAGGCAATACCTCGGTAGACACCCCGTGGTGGTGTATTCGAAAAAGCGTTGCTGGACATCTCGGCGGAT  
GAAAAAGAGAAATGTTCCGGAAGATACACGCAAGATGACGATGAGCATTAAGCAGAGCATCGTCAAATGGCTTCCGAGTGA  
CGCAAACAGCGTGAAGTCTGGCAGCTCGATTGCTGGGTTGCTGGGTACGAGCGGCAACACTGGAAGATGTAGGTCGTG  
AAATTTGGCTCACCCGTGAACGTTTCCGCGAGATTCAGGTTGAAGGCTGCGCGTTTTGCGCGAAATCTGCAACCGCAG  
GGCTGAATATCGAAGCGCTGTTCCGCGAATAA

>Cluster\_57004

ATGAATAAATTCACCGGTGTTTTACTATTAGGCACGGCGTTACTGCGGGGATGTTGTCGACCGGGAAGGGTACTATAACAG  
CGTTAGGGAAGAAGAGAGCCATGGACTGACGCTCTGCGGGGGCAACCTGCATTACGTTACAGCGATGATGGTCAAGAT  
GGCCGAGAGTGTACGGCGCTACAGCCTTATACCCGCTTATGCTCCTCGCGTATTATAAATAGTACCAGCAAAAGAT  
AAGGATCGAACCTCGCTGGCCTGGCAGGCGTATGGTTTGCAGCAAAACCGAACAGCTGAAGCCTACGATAGTCTGATTAA  
AGGTTCCGCGACGTTATTTTGTGTCACAACCGTCCGGAAGGACAGAAAAACGTCAGAGAAGCGGGTGTAAACTGA  
AATATACCGCTTTCCGCGCGAAGCCTTTGCTTTATCGTTGATATTAATAACCCGGTAAATTTCTCTCTGAGCACCAG  
GTTAAAGATATTTTACGGGCAAAACTAGCCGCTGGAATAAAGTAGGTGATGACGCAACATATAAAGTCTGGCAGCG  
CCCTGAAGATTCTGGAAGCAACAGATTATGAAGGGTTGGTTATGCAAGACACCCCAATGCTGCCAGCTAAAAAATCCA  
CTGTGATTGATCTTATGGCGGTTTAAATTAAGTGGTCCGACTATCAAAAACCGCCATCTTCCATTGGGTACACCTTC  
CACTATTACGCTACTCGTATGAATGACAATATGCTCAAAATGCGCAAGCAGATTAAACTTTTGGCTATAAATGGCGTTG  
GCCATTCCGAGGAAAAATATCCGCAACGGCACTTATCCATCAATTTGGATGTCCTATATGGTACGCTTTGAAAAATCCACCG  
CGGAAACGCAAGAAATTTGTTGACTGGTTTATAAGTACAGGCGCAACAGTTGGTAGAGGATGTTGGGTTATGTCGCGCT  
TATGAAGCATCCCCGAATCATCAGGACAATAA

>Cluster\_48627

ATGGAGCATTTAACAACAAGTGCCTGGGCTATGCCAATAGTGAACCATACCAATAGTAAACTGGTTGTGGCGTTAT  
TCCATTGGCAGGAGCTGTTATAGAGGATTTAATAACGGTAGTAGCTCAACAATATACGATCCGTATAACAACGGCCA  
CAACGACGAGTGTCTCTGGTGTCTCACTAATGCGGAGTTTATCTATGATTTTAAATGGCACAGATTATTTCTCCGGGATG  
CGAAGAGTATATAACACGAAAAACAACCAACAGCCTGATGCTGCGTGCATTACCTTTACCGGTGGTACATTATCTGG  
AGGTTTGACATCTTCTGGCGAGATCAATTTCAAAATATGCAAAATGGTTTCCGCAATGCTTACGGTAGCTTTGGGTTCTTTA  
TCCGTAATGATGGATCGAACACATATTTTATGCTAACAGCATCAGGAGACACATAGGTTTATGGAACGGTTTGGCAGCT  
ATTACAATTAATAATACAGCGGTGCGGTATCAATGGTAATGGACTAAATGTGACTGGTGGCGTAAATGGTAGTTTGA  
CGGTAATGCTTCAACAGCTACGAAGTTGCAACAGCGAGAAACATCAATGGTGTAAAGTTTGAATGGCTCAGGCGATATCA  
ACATTAATACACTGGTATCTCGTGGCGGAGTTACGGCATTAAGCGGCTCTACTCAAGGCACTGCTGGCATTCAAAATGTAC  
GAGGCGTACAACAATAGCTACCCGACCAAGTATGGCAACGATTTGCACATGAAAGGTGCGAGTGTGCTGGTGGGCGCA  
GTTGCTTATTTGGCTGGAGTGGTACGAGCGGTGCACATGCGCAGTTTTCATTCGCTCAGGAAGAGATACCACAGATCGCG  
CATGGTCAAGCGTGGCGCAGGATATACGCTAAGGATGCAATCCCTGGTGTGAATAACAAACCGGTAATCAGAACTACT  
GGTAATGCCGCAACAGCCACAAAATGCGAGACAGCAAGGAAAATGCTGGTGTGGCGTTTGTATGGCTCTGCCGATATTAC  
TTTGACTGCGGCTAACCTTAAATGCTTATACGAAAAAGAGGTAACAAACCTTCTAAGTTCCATGCAAGCAGATCATCAC  
TGACAGGCTATAGTGGCAACCTGGATATTTATGCTGAAACACTGGTTGCAAAATCAGGCGGTAGTGGAGGTTTGGCTATA  
TGGGATTTGGCCCAACTACTAGCGGTCGCAATATGTACATTTGATGATCAAAACAGGATCAATACAGTTTGGGCTCAAC  
ATCTTCAAGGCGCTATAAAAAGGATATTGAAACATTACAAGATCGATATGCTGATGAACTTTTGTCATTAAAGACCTGTTT  
GGTATCGTTCAATTTGTCGAGGTGACCGAAAGGATTTGGGGTATTACGGCCTTATGCTGAAGAGGTTGGTGGATTGCC  
CCGCAATATGCTCAATTTGGCGTGAACCAACAATAATGATTTCCAGAAAGATTTTCTCAAATGGTATGGTCTGAGG  
AGTATGATGAGCGTTTGGTTGACCACTCATTCATCATATTGACCAATTTGACCAAAAGGTTGAGGAGGTTGAAACGCA  
AGTTAAATTCACCTAAAGAATAA

>Cluster\_27578

ATGAATACTCTCCCTGAACATTCATGTGACGTTGATTATCGGTAGCGGCGCAGCCGACTTTCCTGCGCTGCGCCT  
GGCTGACCAGCATCAGGTCATCGTTCTAAGTAAAGGCCGGTAACGGAAGGTTCAACATTTTATGCCAGGGCGGATTTG  
CCGCGTGTTTGATGAAACTGACAGCATGACTCGCATGTGGAAGACACATTGATTGCCGGTGTGGTATTTGCGATCGC

CATGCAGTTGAATTTGTCGCCAGTAATGCACGATCCTGTGTGCAATGGCTAATCGACCAGGGGTGTTGTTTGATACCCA  
CATTCAGCCGAATGGCGAAGAAAGCTACCATCTGACTCGTGAAGTGGACATAGTCACCGTCGTATTCTTCATGCCGCCG  
ACGCCACCGGTAGAGAAGTAGAAACACCGCTGGTGGGCAAGGCGCAGAACCATCCGAATATTCGCGTGTGGAGCGCAGC  
AACCGGTTGATCTGATTTCTTGACAAAATTTGCCCTGCCGGCAGCGACGGGTTGTTGGCGCGTGGGTATGGAACCG  
AAATAAAGAAACCGTTGAAACCTGCCACGCAAAAGCAGTGTGACTGGCAACCGGCGTCTTAAAAGTTTATCAGTACA  
CCACCAATCCGGATTTTTCTTGGCGATGGCATTGCTATGGCGTGGCGCGGGGCTGTCGGGTTGCCAATCTCGAATTT  
AATCAGTTCCACCCTACCGCACTGTATCACCCAGAGCAGCAATTTCTGTAAACGGAAGCACTACGCGGCGAAGGCCG  
TTATCTCAAGCGCCGGATGGCAGCGGTTTTATGCCGATTTTGTAGAGCGGGCGAACTGGCCCCGCGCATATTGTCCG  
CCCGGCCATTTACCATGAAATGAAACGCTCGGCGCGGATGTTATGTTCTCGACATCAGCCATAAGCCCGCCGATTTT  
ATTCGCCAGCATTTCCGATGATCTATGAAAACTGCTCGGGTGGGCATTGATCTCACGAAAGAACCAGGTTGCCGATTGT  
GCCTGCTGCACATATACCTGCGGTGGTGAATGGTGTATGATCATGGCGTACGGACGTCGAGGGTCTGTACGCCATCG  
GCGAAGTGAGTACACGGGATTACACGGCGCAACCGCATGGCCTCGAATTCATTGCTGGAGTGTCTGGTATAATGGCTG  
TCCGCGCGGAAGATATTACCAGCGTATGCTTATGCCACCGCGCTCAGTACGTTACCAGCGTGGGATGAAAGCCGCT  
TGAGAATCTGACGAAACGGGTAGTAATCAGCATAACTGGCAGGACTACGTCGTTTTATGTGGGATTACGTTGGCATTG  
TGCCACAAACGAAGCGCTGGAACGCGCCTGCCGCGGATAACCATGCTCCAACAAGAAATAGACGAATATTACGCCCAT  
TTCCGCGTCTCAAATAATTTGCTGGAGCTGCGTAATCTGGTACAGGTTGCCGAGTTGATTGTTGCTGTCGATGATGCC  
CAAGGAGGTCGGGGTTGCATTTACCGTGGATTATCCGGAAGCTCACCATTCCGGTCCGTCGATCCTTTCTCCCG  
GCAATCATACATAAACAGATAA

>Cluster\_43202

ATGATTA AAAA ACTATTACCTTTACTGTTTAAAGCACAAATTTCCGCCACAACCGTTGCCGCTACACCGCTAATACGTT  
GGTTGTAGCCAGGGCTGGATGATATTGTGAGTCTGGACCGCGCAGAAGCTAATGAACTCTCAAGTATTTCAGACTGTAC  
CAAGTCTGTATCAACCGCTAGTACAACCGGACGTAATGATCCGACGAAAATCACTCCGATTCGCGGAAAGTTGGCAG  
GCTGACCCCGCAGCAAAACGCTAACCAATAAACTGAAAAGCGATGCGAAATTTGCCCTCTGGTAAATCCGGTACGCCCGGA  
AGATGTGATTTACTTCTTATGTCCGGCTGCTCACTGAATCCTGAACTCCGGTGGCTTTATCTCAATGTGCTGGATGGCAGC  
CGGAAAATATCGCCAGCCAGTTGAAGAAAATCGATGACCATAACCGTCCAGGTGCAATGGAGTGGCGACGTCAGCCCGCG  
CTGGCACTGAATATCTCTCCACACCAATCGCCTCAATTTGTTGACGAGAGCTGGTTGCGCCAAACGCAAAAATAACGA  
CTTTGGTAATGAATGGCTGAAGATGCATTCGGCTGGCAGCGGGCGGTTAAAAATGGCTACTTACCAACCGCATCAGGCCA  
TCGTGATGGAAGCCCAACCGCAGCTACCAACCGCGCCCGGAACTGAAAACGTCATCATCAAAAATGTTCCCGGATTC  
GCAACCGCTCGCTGCTGATCCAACAAGGTGATGCTGATATGGCTCGTGTGATCTGGGAGCCGATCAAAATCGATGCATTACA  
GGGTAAACCTGGCGTAAAAGTGTAGGACTTGCCTCGCCGAAACAGAACTACCTGGCCCTCAATACCGGTAAACAGGATA  
ACCCGCTGATGAGTAATCCTGCGTTCTGGGAGGCGGCTCGTGGTTCGATTACGACGGCATCAACAAAATCTCTTA  
AAAGGCAATATTTTACCCATCAAAGTTTCTGCGCCGTTCTTCTGGAGACTGGAAGAAACACCGTTTACCTTTAA  
TCCAGCCAAAGCAAAGAGATCTCGCTAAAGCCGAAATCAAAGACCCGCACTCACGCTTGATGTCGAAAATAAACCGC  
CATTTATTACCATCGCGCAGTCAATTCAGGCCAGCTTTGCTCAGGGCGGTGTAAGAAATGATTGCTGCCAGCGCAGGG  
AGTCAGGTCATCTCTCGCTTCGCGCCACCAGCATCAGGGGGCCATTCGATGTGGTTGCCTGATTTTTCAGCCACA  
TTCCAACCGCCAGCTTTTCCGCTATAACGATGGCAAACTCCAGCACCGCTTCCGCGGTTAAACCGGCTGGAATAACCGGAA  
TGAAACAAAGAACGCTGGCGGCCATCGCTGAACCTGATAGCGCTAAACGCTTTGATTTGTATAAGAAAATGCAACAAGAA  
CTACAACGTAGTTCCCGTATGCTTTTATGATCAAGGCAAAACGCAATTTGTCATGCGTGATAATGTGACAGGGGTATCA  
ACAAGGTTGAATGCCGATATGGTCTGGTTGATCAGGTAACCAATAA

>Cluster\_38754

ATGAGCCAGCAAGTCATTATTTTCGATACCACATTCGCGGACGGTGAACAGGCGTTACAGGCAAGCTTGAAGTGTGAAAGA  
AAAAGTGCAAATTCGCTGGCCCTTGAGCGTATGGTGTGACGCTGATGGAAGTCGGTTTCCCGCTCTCTTCCCGCGGGTG  
ATTTTGAATCAGTGCAGACCATCGCTGCCAGGTTAAAAACAGCGCTGATGCGGTTAGCTCGCTGCGTGGAAAGAT  
ATTGACGTTGGCAGCCGAATCCCTGAAAGTCGCCGAAAGCCTTCCGTTATCATACTTTATTTGCCACTTCGCAATGCACAT  
CGCCACCAAGCTGCGCAGCAGCTGGACGAAAGTGTGACGACGCTATCTATATGGTGAACCGCGCCGTAATTTACACCG  
ATGATGTTGAATTTCTTGGCAAGATCGCGGACGCACACCCATTCGCGACTGGCGGAGTGGTGAAGCGGGGATTAAT  
GCCGTTGCCACCCATCAACATTCGCGACACCGTGGGTACACCATGCCATTGAGTTTCGCGGAATCGCCGCGCTGCGGCT  
GTATGAACCGGTACCCAACATCGACAAAGCCATTTATTTCCGTACATACCCAGCAGATCTGGGCTGGCGGTGCGCAACT  
CACTGGCGCGGTACATGCGCGTGCACGCGAGGTGGAAGGTGCATGAACGGGATCGCGGAGCGTCCCGGTAACCTGTTCC  
CTGGAAGAAGTCAATCGCGCATCAAAGTTCTGTAAGGATATCTCAACGTCACACCGCCATTAATCACAGGAGATATG  
GCGCACTGACCGATTAGTTAGCCAGATTTGTAATATGCGCATCCCGGCAACAAAGCCATTGTTGGCAGCGCCGCTTCC  
CACACTCTCCGGTATCCACCAGGATGGCGTGTGAAAAACCGGAAACTACGAAATCATGACACCAGAATCTATTGGT  
CTGAACCAATCCAGCTGAATCTGACCTCTGTTCCGGGCGTGGCGCGGTGAAACATCGCATGGATGAGATGGGGTATAA  
AGAAAGTGAATATAATTTAGACAATTTGATGATGCTTCTCTGAAGCTGGCGGACAAAAAGGTCAGGTGTTGATTTACG  
ATCTGGAGGCTGAGCTTCACTCGTAAAGCAGCAAGAAAGCAGGAGCATTTCGCTGAGTATCTTCCGCTGAAATCGGCTG  
GGTTCTAACGATATTTGCCACTGCGCGCTCAAACCTGGCTGTGGCGAAGAAGTCAAAGCAGAAGCCGCAACGGTAAACGG  
TCCGGTGCATGCGCTTACACAGGCGATAAACCGCATCACTGATATAACGTCGAACTGGTGAATAACGCTGACCGCCCA  
AAGGTCAGGTAAGATGCGTGGTCAAGTGGATTTGTCGCAACTACAACGGTTCGCGCTTCCACGGCGCTGCGGCTG  
GCCAACGATATTGTCAGTCTCCGCAAGCCATGGTCCGACACTGTAACAATATCTGGCGTCCCGCAAGGTCGAAAA  
AGAGTTGCAACGCAAGCTCAACACAACGAAACAACAAGGAAACCGTGTGA

>Cluster\_64421

ATGGCTATTTCTCAAAAATTTAAAACGCAAGTTGATTTTGGGGGAAGAATAGACCCGTCGTTTCCGCGCGGTACAACAGA  
ACTCAACGATGCAATTCGGCAGACGCTCGTCTACTGTGCGAAAAATTAACGAAAAGCCAGGATAAATAAAAGACAAAATCG  
CAGCAATGAAACTGGCGGGTAAAGACGTTTCTGATTTATCTGCTCAGTATCAAAAGCTGGACCGTCCGATAAAAGCGACA  
ACACAGGACCAGGAAGCTCTGAATACTCAGCTCGCCAAAAACAGCGGCTGGAGAAGTGGACGGGGCGCAGCAAAAGGTC  
TGCAAAAATGGGGAGGCGAGCCGCGCGAGTGGCTGAGGACACCGGACCGGGAGGATCAAAATGGGGGACGCTGGGGCGC  
TGGGTCTGCTCGGCGCGCGGCTGCTGGCGGTTGGCAATGAATGCAGAGACGTCAGAAAAACCGGCTGCGGCAAGTCC  
TACGGTGTGGCATCGAAAAATACGCTGCGTGGGAAAAATATGGTAAAGCTGCAAGGGTGAATGGCGAAAACGTAGGAGA  
TCTGTGCGGAGGATGACTAATAAAAATCGGGAGGTTGAAACGAAAAAACCTGAACCCCATGTTGTTCAAATGGCC  
TGACAAAAAACCGATGGCTAAATGGGATCGAGAAAAACAGTTCAATGAAGTTATGCGGCTATCTCTGAAATGAAGGAT  
GATCAACAGGCGGCGAGTCTGGCTGATCAGCTCATGGGGGGGAGCTAATAAAAATGACTTATATCGGGCGACTGG  
TAAAAGCTGGGAGCAGACTCTGTGCGACGCTCAAAAATCAAACCTGCTAACGAAAGAGGGGCTGAGGTTGACGCGCGC  
CGCACGATCCGTCAGCAATCTGTGGGGGCAATCACATCTGGGCTGGCAGATACTCTCGGAAAAATCGGAGGGGAATC  
CGCTGACTTTGACGATATGCGAGACGGCTGGCATCTGTTTAAAGAGAAATCAAGGGGGGGTGTGTGATGATTTAA  
AGAAATGGGTTAAGCCAGAAAATAAGAAAAAATGTGGGAGGGGATAGTCAAGTTTGGCGAGGCTGCGTAAATTCGGAA  
AAATAATTTGGGAGTCTGTA AAAA AACTGGAGTGTAAATACCGGACGAGAAAACAGACGAGGAGCAGCGCTATATAAC  
GAAGAATAATAAAGCGGATCAGGAATTCATGATGCGGAGGAAATAATTCACAAACCGGAATGGCGCGGATATA  
TGTGCAAAAAGCAAAGCCGCGGAGCCGTTGATAATATGCGACACCTGAACGCTTGTCTGCTGCAAAAATCAGAGGCTG  
AATCACTGCTCTGTTTGTACCTGTTTACTGGATTAATAAATAAAGGCTCAACGCTGATCAAAAATCAGCAACG

TTGAATATTGACGCGCTGAGACAAGCAGTCCGAACTCCAGCGCCAGAGCAAAAACAATAAAATTGAAATCAATATTATCGG  
AGGGCAGATCCACAATCAACACAGCAGGCTGCTGCATCGGGTGTCTCGACGGGCTGAGACAAGTTGCGAGTTTCGTACA  
ACCGTGGTGGATGTTTGATAAACACAGCGCGGGGGTGA

>Cluster\_3301

GTGAGGAACACGCTGAAACAGGCGCTCGTGTGTGGGGAATGGTGTACTGCTGGTGTGTGGTGGTGTATTATCAGTCC  
GTCTGGCGTACTGATATGGGCGGGGCGGGCGGCTATCGTTCTGACGGTTGCGCGTGGTGTATTACGGCGCAGGCAGG  
CGTGGACGGAGATGACCGGGGATGCCGGTGTGTATCGCTGCCCGGAAACGTACCGACAACCGGTAGTGTGGTCTGT  
GGGATATGTGGCGCATCTGTTCACTGACAGCCGGTCCGGCAGGTTTCAGAAGGGCTGTATCTGCATGTTTCTGATGA  
AGAACAGCTTGTGGCGCAGGCGGAGGATTAATGACCTTTCGCCGGCGTGGGCATCGCAGCTTGGCGTGGCATATACCG  
TCATGCCCCGCGATGTACCGGGATGCGGGGTTCTGACCGGACAACCTGCGCCGGTTCGCCACAGTATGGCGACAGTGCCT  
CGCCGGGCGGGCTAAACGTCCCTGGCTTCTCTGGAGCGGGCTGTCCGGCTGCCCGTGGCCGGAGAGAGCGAATTCACC  
GTGGTTTATCTGTACCGGGCGGAAATTCATGTAGCAGCTCTGCTGAAACCGCTCCCGCGCAGTGGCTCACGCAGA  
CCAGCACACAGGAGCGCAGCCAGCAACTCTGTTACCTGCTGAAAGCGGAAAGCTGATGCAGTGGTGAATCTTAATATG  
CTGGCGGCACTGAACGGCCCGAAACGAAATGTCCGCCACTGGCGATGGCCGTGGGGCTGGTCCCTCGTTGCTGCGGT  
GGATAACAACCTGTGGCAGTTGTGGATCACCGCCAGAACCGGCTGACGACGGATATCGCGGACACCGGCACAGACGCCA  
CGCTGCCGTTTCCGGATGCCCTGTTACGGCGTTCGGCGCTCAGTCCGGCTTTACCCCGCTGCGACGAGCTCCGCTGACC  
ATGCTGGGCATCCACCGTGGCGGATGCGCCGCTGTGTCTGTGACGCCAGGAGAATCGCCAGTTTATTACCGCATAT  
CGGTGATGATCTGCACAGTTTTATGCCGTTCCGGCGGAGGAATTTATCACAAAGCCGTCGCTGTGCGGTGCTGAAAG  
ACGATGCGATCATGCTCGATGGGTATTACCGGGAGGAGAGCCACTGCGTCTCGGTCTGGGGTTATACCCGGTGAACAA  
ATCCGCGAGCCGTTATACGCGCATTCGTGACTGGCGTCCGCTGAGCAAAAATGGAAGTGCAGCTCGCTTCAGG  
GCAGACCGTGGCTTTGACAGTATGTCGTTGACGTCGGACAGGCCCGCTGAAAGACGGCTCGACAAAAGTGTGG  
TGGACGCACTGGTGAACATCCGGGCAAAACCGGCTGGTGTATCTCGTGGCCGATATACCGACGCCACCGGCGACGAA  
AAAAGCAATCAGCAGTTATCGCTGCGACGTTGCCGAAGCGGTGCCAACGATGCTGCAGACAGCGACATCCCGGCCAC  
CTGTTTGGCGTACAGGGACTGGCGGAGAGCCAGCTTGGCGGACCAACGATACGCCACAGGGCCGGGAGTCAACCGGC  
CGCTGCAAAATCAGTCTTGTTCGGCTTCTGACGCTGTGACGAGCTGAAATAA

>Cluster\_27881

ATGAATATTTTCCAGAGGGTGCAAAACCTCGAAGAGCAAAAATGTCCGTTTGGCATGGCGCAAAATGTTGATAGCCGAGG  
CTCAACCCCGCCATTTGCAACAATGTTAGTGCAGCGCGATGGTTCATCGTCCGTTACAATGGTGGCGGAATGGTTG  
AGCGGAAGGTGATGAAGAGTCTTACCGCATTCAGGCAATGCAGGAACGTAAGCCGCGATTATTCATGGACGATGGCTCGTAAC  
GGTGGGATGCTGTCGGGTCAGATTGTGGAGGTGCAATGTCAGTATTTATCAGCGTCCATGGTATGCGTCCACGCTGTGT  
GTTGATGGTGGCGGGCATGTCAACCGGGCATAGCCAGAGTGGCGGCTATAGGATTTGATATCGCCGTTGCTGATA  
TTTTATCGGAAAGCCTCAATCTGAACATTTCCACCACCAACACCGCTTCTCCATGCTGAGTGTGGTGGTGGCGGCGATG  
GAAGCACTGGATATTCGCCCTGATAATTTGTCCTGATGGCCAGATAATCAGGATCGTGAAGCCCTCGACAAAACCTCAT  
TGAACAACCCATTCATGCTGGGTTGCTGGCAAGTCCCGCAAGGTTACGCTTTTCTCGCCCAATTCGCTGAGAAAG  
CGGTGGCTGAAGAACAATTTGCCGTTTACATGCGCCGTTGGTTACAACATAGGTGGCGAAACCGCCGAGGAGATCGCC  
ATTAGCGTGGCAGAAATATTACAGGTTGAAAATAACCGCGGGTGGGCTGATGATGAAGCCTTTCATCCTTCCGG  
ACACCAGCTGGTGGTATTCGGGTTGGGGGATATCGCCAGTGGTGTAGCGTTACGTTCTGTATCATGCGGGTTTTAAAG  
TGATCATGTTGGAAGTGGAAAAACCGACAGTGTATTCGTTGATACCGTGGCGTTTTGCCAGGCGGTTGTCGATGGCGAAATG  
ACCGTGAAGGCTCACCCCGCTGGCAACAGCTCTGCGGAAGCATGAAACTTACCGAACCGCGGATTTTCCCTGT  
GATGGTAGATCCCACTGTTTCAATGCTTGTGATGAACTGAAACCGCTTTGCGTGGTGGACGCTATTTGCGGAAACAGAAAT  
TGGAAACCGGGCAGATATGGCACAGTAACAATCGCGCTTGGCCGGGCTTTACTGCAAGGAAAGGATTTGTCATGCGGTA  
ATTTGAAACAAATCGCGGCACTGGCTCGGTGAGTGTACTCTGTTGTTGCGCAGGAGAATACCGGTGTTCCCGGCAA  
TATTTAGGGGCATACCCACCGGATGATCCGTTGCTGCTGCTGCAAGCATTAATGCGATTCACCGTGAATTTAGCGGATC  
TGGTGAAGAGGGCGATGTCATTGCTGGATTGGTGGAGCATGAAATTAAGACCGCTTACCGGGGATGGTGGCTGGCTTG  
TTGAACGACGGACTGGCCGTTGGTGGTGGTTTTAAATTTGGTGTATGATCCCTGCTGGTGAACCGGCTGATTTACCCAG  
CGTTTCTGATAAAGCTCGGGCGATTGGCGGGCGGTACTTGGAGCGTTAATGATGTTGATGCATCAGGGCGTTAAAGCGA  
CAAAAGAAGTGTGGAAGTGGCTTAA

>Cluster\_65655

ATGACAGTATTCAACAAATTTGCTAGAAGTTTTAAATCATTGGTGTGTATCTTTGTGTTATTGTTTTGGTATTAC  
GAACCTTAGCTCCCTTCCGGCGCGCATATGGTTCAGCGATTGCTGTTCTTCGCTCCTGACCATCCTGGTTGTAACACGTA  
TATCATCCCTTCCGCTTCCGCTGCTTGTGTCGCGCATTTGTTGTTACTGACTGCGGCAGACATGAGTATTAGCCCTAT  
TCATGGTGTACCTTTGGTACAACTTCAATGATGGATTGCGGATAGTGTGCTCCAGAGTATCGGATGAAGTTGTCAA  
AATGCTGGGGATGATATCCCTTATCTATGTGCCTTTGCTTTTTATCCCTTCTTTTTTGGCAGTAATAAAAAATATG  
ATGTTCTTGGCGCAAAAAAAGTGACAGGAATATTTATGCTGATTTGATTTTCGGCAGTTTATTTTCCGCTGTGCAA  
TTTTGCTTATAAAGATGCAAAAAAATAAAAAAGCGTTAGTCCATATATACTAGCGATTGCTACCTACATACGCGCT  
TTTTCAATCTCAACTATTTTGGCTTAGCAGCGAAAGAGCATCAAAAGTACTCTCAATGCAAAACCGTGGCTATTTTC  
AATATCAGTACGGGATACAGGATTTGATACCTACGTTGATTTGTTGGGGAGTCTGTACGTTGCGACAAATGCTTTG  
TATGGATATACACGCTACGACACCGCAAGTTGAAGCAAAAGAAACAGATCAAACGTTTAAATCAAGCAATAAGCCG  
CGACCTTACACTGCGCTGTCGGTTCCCTTTCTTAACTGCTGATTTCTGTTTTGAGTATGACATTCATAAATACCCCG  
ACAACATTAATAATATGGTAATCAAGCAGGATTTGAGACTTTCTGGCTAAGCTCGCAATCCGCTTTTCCGCGAATGGT  
ACAGCAGTTACCAGTATCGCCATGCGCGCCATGGAACAGTTTATGTCAGAGGATTTGATGAAATGTTGTTGCGCCATTT  
ATCGCAAGCATTACAGCAAAATACGCAAGCAAAAGAACTGATTTGTTCTTCAATTTAAATGGAAGCCATGAACCCGCTGTA  
GCGCCTATCCGCAATCCAGCGCGGTTTCAACCGCAGGACGATCAGGATGCTGCTATGACAACCTCCATTACATACACA  
GATAGTTTGTAGGTCAGGTTTTGAAATATTAAGATGCGCCGCGCTCGGTCATGATTTTGGCCAGCACGGCCTGGA  
ACGTGACCTACGAAGAAGAACGCTATTTTCAATGAGGAGGAGGCTAGCCAGCAGGCATATCATGTCGCCGATGTTTA  
CTGCTGATAGCCCGCTTCTTGGGATGGCGTGGATCGCAACAGGAAACAACATCTTTTCGACAGCTTACAATAATTAC  
CTTATTAATGCGTGGATGGGGTAAACAAAGCCGGAACAGCCGCAACCGCTTGGAGGAGTATTGCACACTATAAAGGAGA  
CTCACGGGTTGTGGATGCAAAACATGATTTTTCGATTATGTGATGCTCAGAAAGGAGTTTACAGAGGATAAGCAAGGTA  
ACCCACCCCTGAAGGCGAGGTTGA

>cluster\_57879

ATGAAACCAAGATTTCCGCGCCAGTACCCAACGCTCCGTTACCCGGGAAGAGTATCTGAAAGCCTGCAGGATGGTCC  
CGAGATCTATATCTATGGCGAGCGAGTGAAGACGCTACTACTCATCCGGCATTTCGTAATGCGGCAGCGTCTGTGCCC  
AATGTACGACGCGCTGCACAAACCGGAGATGCAGGACTCTCTGTGCTGGAACACCGACACCGGCAGCGGCTATACC  
CATAAATCTTCCCGCTGGCGAAAAGTGGCAGACTGCGCCAGCAACCGCAGCCATCGCTGAGTGGTCAACGCTGAG  
CTATGGCTGGATGGGCGTACCCAGACTACAAAGCTGCTTTCGGTTGCGCACGCGGCGGAATCCGGGCTTTTACGGTC  
AGTTCGAGCAGAACCGCCGTAACGTTACACCCGATTTACGAAACTGGCCCTACTTTAAACCGCGATGTTTAAACCA  
CCGATCGATCGTCAATTTGGCCAGGATAAAGTAAAGAGCTTTTACATCAAGCTGGAAGAAAGAGACTGACCGCGGATTA  
CGTCAGCGGTGCGAAAGTGGTTGCCACCACTCGCGCTGACTCACTACAACATGATTTGGCTTCGGCTCGGCACAAGTGA  
TGGCGAAAACCCGGACTTCGCACTGATGTTGCTTGGCCAAATGGATGCCGATGGCGTGAATTAATCTCCGCGCCTCT

TATGAGATGGTCGGGGTCTACCGGCTCGCCATACGACTACCGCTCTCCAGCCGTTTCGATGAGAACGATGCGATTCT  
GGTGATGGATAACGTGCTGATCCCATGGGAAAACGTACTGATCTACCGGATTTTCGATCGCTGCCGTCCGTTGGACAATGG  
AAGGCGTTTTGCCCCGTATGTATCCGCTGCAAGCCTGTGTGCGCTGGCAGTGAACCTCGACTTCATTACAGCACTGCTG  
AAAAAATCACTCGAATGTACCCGGCACCCCTGGAGTTCCGGTGTACAGCCGATCTCGGTGAAGTGGTGGCGTGGCGCAA  
CACTTCTGGGCATTGAGTACTGATGTTCTGAAGCGACCGCTGGGTCAACGGGCTTATTTACCGCATATGCCG  
CACTGCAAACTATCGCTACTGGCACCATGGCTACGCAAGATCAAAAAATTATCGAACGCAACGTTACAGTGGC  
CTGATCTATCTCCCTCCAGTGCCTGACCTGAACAATCCGAGATCGACCAGTATCTGGCGAAGTATGTGCGCGGTTTC  
GAATGGTATGGATCAGCTCCAGCGCATCAAGATCCTCAAATGATGTGGGACGCCATTGGCAGCGAGTTTGGTGGTCCGC  
ACGAACTGTATGAATCAACTACTCCGGTAGCCAGGATGAGATTCGCCCTACAGTGTCTGCGCCAGGCAAAAGCTCCGGC  
AATATGGACAAGATGATGGCGATGGTTGATCGCTGCTCGGAATACGACCAGAACGGCTGGACTGTGCCGCACTTGCA  
CAACAACGACGATATCAACATGTGGATAAGCTGCTGAAATAA

>Cluster\_49738

GTGGCGATATTGACGCAATTTCGACGCTGGCATTTTCGCGATGGTGCCTCGATTCGGGAAATAGCCCGACGAAGCGGCT  
GTCCAGGAACACCGTTTCGCAAGTATTTGCAAAGCAAGGTGGTTGAACCGCAGTACCAGCGGAGACAGCGTTGGCAAGT  
TAAGTCCTTTTGAGCCCAAGTTAAGGCAGTGGCTCTCCACCGAGCAGAAAAGACAAAAGAGCTGCGCAGAAACCTGGCC  
AGCATGTACCGGGATTTGGTCCGCTTTGGGCTTTACCGGTTCTTATGACCGAGTGTGTGCCTTTTGCCGACAGTGGAAAG  
TTCCGAACAGTTCAAGGGCAAACTCCGGGCAAGGTTGTTTTCATCCCTTCGCGCTTTGCTTTGTGGCGAAGCTTCAAAT  
TCGATTGGAGTGAGGACTTTGCCCGCATAGCGGGCAACAGGTCAAACCTCAGATTGCCAGTTAAGTTGGCCACAGC  
CGGCGCTTTGTGCTTCGGGCTTACTACCAGCAAAAATGAAATGCTGTTTGAATGCCACTGGCATGCTTTCAAATCTT  
CGTGGCATTTCCAAGCGGCGATCTACGACAACATGAAGACCGCTGTGGATTTCGGTGGGCGTGGCAAAGAGCGCAGG  
TCAATCAGCGGTTCACTGCCATGGTACGCCACTACCTGTTTGAATGCGCAGTTCTGTAATCCAGCATCGGGTTGGGAGAAA  
GGCCAGATTGAGAAGAAGCTGCAGGATTCGCCCAACCGCTGTGGCAAGGGCACAGACTTTCAAAGCTTGTGTGATTT  
GAATGTGTGGCTTTCGCTGCAAAAGCGTGTGGTCTGAGTGTGCCACCCCGAATTGGACCAAAACCGTGAAGAGG  
CCTTTGCCGATGAACAAGCGGAGTTGATGGCGCTACCAATCCCTTTGATGCAATTCGTGGAGCAAAACGAGCATCACT  
TCAACCTGCCCTTGTTCACCACGAGGGCAATCGTACAGCGTTCCTGCCAGTTACGCCAACAGGGCCATCAGCCTTCGGAT  
TTATGCAGACAAGCTGGTGTGATGGCTGCCGAAGGCAACACATTGCCGAGCATCAAGATTGTTTGGCAGTGGCCACGCTC  
GGCGTGGCCACACAAATACGACTGGCACCATTACTTGTCTGTGCTTCAAGAAAACCTGGGGCGTTGCGCAATGGTGGC  
CCATTTGCGTGAATTTGCGCCCGCTTCAAGAGCTTCAAACTCCATCTTGTGCTGCAACGCCCGGGCGGTGACCGTGGT  
GGAAATTCGGCCCTTGTATTGCACCACGATGAAGGTGCGGTACTCAGTGTCTGGAATTGGCATTGGAGTGTGGCAAGC  
CATCGAAGGAGCATGTGCTTAATCTGTTGGGACGTTTACCGAAGAACCTCCACCCAAACCGATTCCAATCCCAAGGG  
TTAAGGCTGACATTGGAACCACAGGCCAACGTGAACCGCTATGACAGTTAAGGAGAGCCCATGATGCAGCATGA

>Cluster\_29233

ATGCTGAACGAGAAACACGGGGAGCCAATGAGGCTATTGATTTTAAAGTGAAGTGAAGAAATCGCCGCAAAAACCTGGC  
GGCACTACGTCAGCAAGGTGGCGTTTCCCAATGATTTTCGCGCGGACCATACTCTGACCAGTTGCACGAAGATTTG  
ATCGGAAGGATAACCGAAGTGAATCCTTAAACATGAAGTCTCGGTTGCTGGCCGAATGATGACCCGTCGTATTTAG  
GGGAAAGCTCCTTTGTAACGTTGACAGGATGTCGGTGGCGGATTTCAACTGTACGTTGCAAGAGATAGCCGCAAGG  
TGTTTATAACGATCAGTTTAAAAATGGGATCTGGGTGACATTTATCGGTGCCCGGTCAGCTGTTTAAAGACGCAACCG  
GTGAGCTTTTCCATTCAGTACTGAGCTGCGCCTGTGACTAAAGCACTACGTCCTTTACCAGATAAAATCCATGGTCTG  
CAGGATCAGGAAGTCCGTTATCGTCAACGTTATCTGACCTCACTGCTAACGATAAAATCCCGTCAAACGTTTGTGTCG  
TTCAAAAATTTGCGCGCTATCCGTCAGTTTATGGTTCGCGCGGCTTTATGGAAAGTAGAAAACCCCGATGATGCAAGTAA  
TTCCAGGTGGGGCATCTGCTGCGCGGTTTATTACCCATCATAACGCTCTGGATTAGATATGTACCTGCGTATCGCGCG  
GAGTGTATCTGAAACGCTGTTGTAGGCGGTTTGAACCGGTTATTCGAAATCAACCGTAACCTCCGTAATGAAGGTAT  
TTCTGTTCCGATAAATCGTGAATTCACAATGATGGAACCTACATGGAATATGCGGATTAACAGATGTTGATGCAATGA  
CGGAGTACTGTTCCGCAACCTGGCACAAGAGGTACTGGGTACCACTAAAGTCACTTATGGCGAGCATGTGTTGATTTG  
GGCAAAACGTTTGAAAAACCTCACCATGCGCAAGCAATCAAAAATATCGTCCAGAAACCGATATGGCGGATCTGGATAA  
TTTTGATGCTGCTAAAGCATTAGCTGAATCTATCGGTATTACGGTAGAGAAAAGCTGGGGGCTGGGACGATTTGTTACGG  
AGATCTTTGATGAAGTGGCAGAACACATCTGATTCAGCAACCTTTATTAACGGAATAACCGGCAAGGATGTTCCCGG  
GCGCGCGTAAATGATGTTAACCCGGAATCACCGACCGTTTGAATTTTCATCGGTGGTGTGAAATGGTAATGGTTT  
TAGCGAATTAACGACGCAAGATCAGGCTGAACGTTTCCAGGAACAGGTTAACGCTAAAGCTGCAGGTGACGACGAAG  
CCATGTTCTATGACGAAGATTACGTGACTGCGCTGGAATATGGTCTGCCGCAACCGCTGGTCTGGGTATTGGTATCGAC  
CGAATGATATGCTGTTTCAAAACAGTCACTATTTCGCGACGTTATTCTCTTCCCGCGATGCGCCACAGAAATAA

>Cluster\_40823

ATGGCGAGGGGTATCTGGGTTTACCCGATGAATTTGTGCTTTTCTGAGCTCAGAAATCACTGACCAGCGCAGATTGC  
CTCCCGACGCGCGCATCGACTTTTACGGACTGGGCAATGATCTGCCCAATCCTGATCCCATTTCAAGGCTCAGGGAC  
GGGATATCCGATATCTACCAGCACTGCGCACCGACCGCTGGTTCGGGGCTGTATCCGAGACGTAAGCAGCGCTCAA  
TCGCTGGAGCGTGGACTGGAGCGTGGTACGCCCTGTCGCGGGTCTTCCGTTTATCCGCGACATGCTCGACGATCTGGA  
TCTGTCGCCATCATCGGTGAAATGAGCGATGCGGTGCTTACGGGATCAGCCCTGTGAAATCATGTGGGGCGTTCCG  
TCAGTTCGGGCGGTGACGGATATTGTGGCAACCGCTGAGTGGTTCAGTTTGAATACGGACAACCTGCGTCCGCTTC  
CGGCGCGTATGCGGGTGTGGAGGGTGTGCTGCTACCGTCAAAAATTCGTTGGTTCGGCAGAGGATGCCCTCGATGA  
CAATCCTTACGGTTTCCGGACCTGTCCATGTGCTTCTGGCGGCTGCGCTCAAGAAAGGCGGGATGAAATTCGGCTCC  
GCTTTGCCGAAAAGTTTGGCTCCCGTGGGTGATCGGTAAAGCACCGAGGGGTGCAAAATGATGAGAGATTGAAAACCTG  
CTGGATCCATGGAGCAGATGGTGGAGGACCGGTGGCCGCTACCCGATGACAGCAGCATCGAACTCAAAGCCGCGGA  
TGGTAAGGCGGACAGCAGCGAGGTATTCGCGAGCTGATCACACTGTCACGAGTGAATCTCCATTGCACTTACTTGGTC  
AGAATCAGACCAGGAAGCAAGTAAATGAGGCTCTGCACAGGCGGGCTGGAGGTAAACGCTGATATCCGCGATGGC  
GATGGGACATCATTCAGGACGAGTGAATCAGGTTATCAGAACGGTGGTACCCCTGAACTTCGGCGATGTGCCGTTCC  
GGCTGGGCACTGTGGGAACAGGAGACCTTATGACACCCCGGCCACCCGACGAAAACCTCACCCGGCGGGTCTGC  
GTCGACCCGCAATACTTTAAGCGTGAATACCACTGCAGGACGGCGATATTGACGAGACATCACCGTCGGAACGCCAG  
AATAACATGCTGCCGCTGTCATTGCGGAGGCGATTGATGCGGATATTAGGCTCAGCAGCAGCTTACGACGCGCTGGA  
CATTCTGATGAACGGAGTGTGTTAAATGGCACGCTGGAACCCGCTCTGGCACCTCTGTTTAAAGCGGGTCGAAAACGGGG  
TTAACCCGATGACTGCTGCGGCAACTGGCGAGCTTACCCTCAGATGAACAGGACGATGTCAGGAACCGCTGGCC

>Cluster\_4034

ATGCTGATAACAGCGCAGCTATCGTTATCGATATTGGCACCACCAATTCGAAAGTCACTGCTTTTCTGCTGGACGC  
AACGACGTTGGGCGCGATAAAATTCGTGACGGCAAGCAGATCTCCCAACAGGGCGATGTCGATTTTCGATATCGACGCC  
TCTGGCAGGAGTCCGCCAGGCGATAGCGCAACTGAACGCCCTTCGCGCTGCCAGTACAGCGGATCAGCATTTGCCAGT  
TTTGGCGAATCAGGCGTGTTCCTTACGAGCATGGCAGATCTGACGCCAATGCTGGCATGGTATGACCGTCCGGTGA  
AGAGTATCTGGCAACGTTAGCGAGGACAGTGCAGACTTTATGACATCTGCGGTCTACCCACTACACAGCAATTAAT  
CTGCCCTCAAATGCGCTGGTTGCTGGAACATTTACCCGCTGCGTAATCCCGCGGGCTGCGCTGGCTACATGCCCGGAA  
GTGCTGCTTGGCGGCTGACTGGCGAACAGCGCAGGATACCTTAGCCAGCGCACGCTGTGCTGGACGTGCGCAA



AGGCGAATGGTCAGCGAAAGCGGGCGGCTTGTACACGTTCCCTGTACGGCATTGCGCCATTGGTGACGCCAGGCGGAG  
ACGCCGGATGGGTGACGAGTCACTTTGCAAGACGCTTTGGGTTCTCGCAACCGGTGACGCTGACGCTGGCCGGACATGAC  
CATATGGTGGGTGCGGAGCGTTGACAGATGATGCCAGGCGATATCCTTAACTCGACGGGGACCACGGAAGGCATCTGCA  
ACTGGATACACAACCCGACCTGGATGAACAGGCGCAAACCTGACAGCTGGCAAACGGCTGTTACTCACTTGGCAACAGCT  
TCACCGTGTTCGGTTCGCTGCGGCGGTTTTCGGCTGAGTGGCTGCGCAACACGTTCCGGCTAACCGATGAGGAG  
ATCGCCGCATCACTTACTCGGGACATGCTGATATCTGGCGGGGAATGGTTGCTCGATGACATTCCCGCTTTTATTCC  
ACATCTTCGGGTTTCGGGTTTCGCCCTATAAAAAATCGCCATACCCGTGGATTATTTTATGGGCTTGGCGATACGTTAAGTA  
TCGACATGTTAATGGCAGCGTATCACTGGGATTAACCATGGAATTTGGCAACTGCTTCGCCCTGTTTTAACGTGCCTGGC  
ACCAGCGGTTAAAAGTATCGGTCGGCAACCCATAAATCTCTTTGGCTGCAATAAAAGGCGGATATTTACAGCGTCC  
GGTTGAAGCAATTGCATTTAACGAGGCGGTTTCTGTGCGGAGCATTTAATTAACCGCCGACCCGGATATTCACCGCCGCCAG  
TCGCTATAGCCCAACGTTTGTACCGAATCGGGCGAGATACCAATCAATACAGCGTTATCAGCACAAATGGAAAAGCTGG  
TATCAGTTGAAATTAACAAGAAGGCGTGATGCCATTACATCATCGGGAGGAACACTATGTTGAATAA

>Cluster\_27511

ATGCCAATACAGATAAAATCCCCCTGTCGCCGAGGAGTTTGTGCGGTGATCTTGGTTCAAACAGTTTTTCACATGGTCA  
AGCCCGTGTGGTAGATGGTGCATGACAGATTATGGCCGCTGAAACAGCGGGTGCATCTGGCGGACGGGCTGGGGCCAG  
ATAATATGTTGAGTGAAGAGGCAATGACGCGCGGTTTGAACGTCTGTGCTATTTGGCGAAAGGCTACAGGCTTTTTCT  
CCTGCCAGCGTCTGATAGTTGGTACCCATACGCTGCGTACAGGCGTGAACCGCACTGACTTTTCTGAAACGCGGAAAA  
AGTCATTCCTTACCCGATCGAAATTAATTCGGTAATGAAGAAGCCGCTGATTTTTATGGGCTGGAAACATACCCAAC  
CGGAAAAAGGTCGCAAACTGGTTATGATATTGGCGCGGTTCTACAGAACTGGTAATGGTGAATAATTCGAACCGATT  
CTCGTTGAAAGCCGCCGATGGTGTGTCAGTTTGCACGCTTTATTTTCATGGCGGGTCACTCAATAAAGAGAAATTT  
TCAGCGCGTTCGATGGCGGACGCAAAAAATGAAACGTTAACCTGGCAATTCGAATTCAGGGCTGGAACTGGCAAA  
TGGGCGCTTCGGTACCATAAAAGCCGCCATGAAGTGAATGAAATGGGCGAGAAAGACGGGATAATTACCCCGGAA  
CGTCTGAAAAAATCGGTAAGAAGTTTACGGCACCGTAATTCGCATCGCTGAGTTTACCAGGCTTTCCGAAAGAGCG  
GAAAACAGCTTCCTGCTTCCGACTGGCGATTTTATGCGGTGTTGATGACTTTAGCCATCGTGAACCTTCCGCTTTCTG  
ACGGGCGTTACGCGAAGCGTACTGTATGAAATGGAAGGACGTTTCCGTCATCAGGATGTGCGTAGTGCCTGCCAGC  
AGCCTCGCCAAACAGTATCACATCGACAGCGAACAGCCGACGGGTGCTGGATACCCTATGCAAATGTACGAACAGTG  
GCGGGAACAGCAACCGAAGCTGGCGCATCCACAACGGAGCGCTACTGCGATGGGCGCCATGCTGCATGAGGTGCGGT  
TGAATATCAACCAAGCGGTTTGCATCGCCACTCCGTTATATCTGCAAAAACAGCACTTGCAGGTTTAAATCAGGAA  
CAGCAGCTGATGATGGCGACACTGGTGCCTATCACCGTAAAGCGATTAACCTCGACGATCTGCCGCGCTTACCTTGT  
TAAGAAGAAACAGTTCTTCCACATGATTAGCTATTGCGCCTTGGCGTATTACCAATCAATCAACGTCAGGCAACCCCA  
CACCGCAACATTTAGCGCTGATTACTGATGACAGTCACTGGACACTGCGTTTCCCGCATGACTGGTTTGTAGTCAAGTGG  
CTGCTACTGCTTGTACTGGAAAAGGAGCAAGAATACTGGGAAGGCGTGTGCTGGCTGGCGGTTGAAAAATGAAGAAGAAAC  
TACACCAGAAATCGCCGCTTAA

>Cluster\_43465

ATGGGTGCCAATGGTTTACTAGCAGTCTTCTGCATACCTTATTGCTTGGTATACCTCTCTTAAACGGATGAGAGACGTTGA  
TTTTAAGGTTACGATATCTAAAATTAATTTAGTATTCAATATCTTTTTTATATCAACAATATTAAACAGTTATATATTCTA  
AGGTTTGTCTAAGTGTTCCTCCGATAAAAACCGATCCCTTGGTACTCGGTTTTAACGAAGATACATTGGCTTTTACTTGT  
CTTTGTATCATAAATATATTTTTTGGAAATTAAGTACAGGGCAAAATACTACCAAAAGCAAACCTTACCTGTTGGATCAG  
TGTTTTACAGAACATATCTGCGCGCAAAAAAATAGAACAACACTAGGATATCTTTTGTATAAATACACGAGCAGTATTCA  
ATATAATCAACCAATAAAAAATGGTATGTTTCGCGTACATAAATTAATCTAGCCCTTCAATTAATCTCCATTGAAATGGATGAA  
GAGAAGGTAAAAAATACGATTCAAAAAGTCAAGGATTTATGTCAAAGTTTTTCCCTTATGAAGCAAAAAGACAAAA  
TGATATTCAATTAATATATCAATCTTCTGAAATCAAAGGTTTTTTCACATTATCTAATTGACTTTACCCTCACGTAG  
CTATGAAGGCCACCTGCTTACAGCTTAGATATAATTTGAGTATAAATACAAATTTCTTACGTATTAAATCAATCAACCA  
AACAGCATTATGTATAGGAGTTACGAGACAACCAAAATCGTTTATATACAGGGGAGTATGCACTCGACGAAAGTAATGC  
CTTGCTTAATTTTTTAAATGATATTGCGATGGCGATAGATTAGAAATATGGAAACCTGTGGGTAATATGTCATTA  
GCTACATAAAAAAACAAGGGAGTTCTGCTTTTACAATCACTCAGATAATTAATCAAGTAGTGTGAGCGTTGG  
GAATGCCCAATCTTCGTTGGATTGACGTTTTTTCGATGTTATGGTATCTACAGCAATATTCAAAACGCTCAAAAAACAAT  
GTGGCTCATGTATATCGTTGTTTCTTAAAGGAAATACCTGAGAGCTATGAAAAATCTAGCAGCATAGATGTAATAGAG  
AGTTCCTCATGCGATTTGATTATTAATATATGAGCTAATCAGCCGTTGTAATATATGGGCAGGAGCAACAGAACACCTC  
AATATGATAAATGGACAACAGAGATAAAGAGCAATCTCCAGAGTTCTTGCCTCAAAAACCTTGGGGGAAATGATGTA  
TCTGATTTACTCTCAGAAAAAATGCATAAACAATAAAGACATATCTTTTAGAAATCATTAATAAAGAAATGGACTCTC  
TTGATAAAAAAGAAATCTGCTTACTCCAAGGAAATCTCAACAATCTTATCCGAGCATCTCCCTGCTTCCATTGAT  
ATAAATGCAGTAAATAAATACGGCAACTTTATAAAGGTGTTGTTCTATGTTCTAAAAACAATAAATCAACTTTTGAAGT  
TGAATATCAAAAATATCTGACCAATAA

>Cluster\_27190

ATGGTCAGCTCAACGACTCCGCTTTCGGGGAAATACTTGTGGAAATGAGCGGTATCAACAAGTCTTTTCTGGTGTAA  
GGCACTTGTATAGCTTAAATTTAAAAGTCCGACCACATTTATCATTCATGATTAATGGGGGAAAAACGGTGCAGGAAAAATCGA  
CATTTAAAATAGCTGTTGGTATTTATCAAAAAGACTCCGGCACATTTTATTCAGGGTAAAGAGATCGATTTCAT  
TCCGCCAAAAGACTGGAAAAATGGTATTTTCGATGGTACACCAGGAGTTAAACCTGGTATTACAACGTTTCGGTGTAGGA  
CAACATGTGGCTGGGGCGATATCCACCAGGAGGATGTTGTGATGATCAGGACAAAATGTACCGGAAACCAAGCGGATTT  
TTGATGAACCTGGATATTGATATCGATCCGCGTGCAGCGCTCGGTACATATCTGTTTCGCAATGACAGATGATCGAAAT  
GCCAAAGCGTTTTTCCATAAACGCGAAAAATGTTGATTTAGGATGAAACCGACTTCTTCGTTAACCGAAAAAGAGGTTCAATCA  
TCTGTTCACTATTATTCGTAATTAAGAGCGCGGCTGCGGTATTGTTTATATCTCGCATAAAAATGGAAGAAATCTTCC  
AGTTATGTGATGAAGTTACCGTATTCGCGGACGCTCAGTGGATCGCTACCGAACCGCTGGCAGGGCTGACGATGGACAAG  
ATCATCGCATGATGGTTGGGCGTTCTTAAACAGCGTTTCCCTGACAAAAGAAAAACAAGCCGGGAGGAGTATTCTGGA  
AGTGCCTAACCTGACGCTGCGCCGACGCTGATTCGCGATGCTCTGTTGATCTGCATAAAGGGGAGTCACTCGGTA  
TTGCCGCTGTTGGTGGGAGCGAAACGTACCGATATTGTTGAGACGTTATTGGTATTTCGCGAGAAATCGGCTGGCACCAT  
ACGTTGCACGGCAAAAAGATCAATAACATAATGCCAAGCAAGCCATAAACCAGGATTTGCACTGGTAACTGAAGAGCG  
CCGCTCAACGGGAATTTATGCCTATCTGGATATTGGCTTTAACTCGTTAATTTCCAATATTCGCAATTAACAAAAACAAG  
TTGGCTTGCCTGGATAATTCGCGGATGAAAAGCGATACCAAGGGGTGATTTGATTCGATGCGGGTAAAAACACCGGGCAT  
CGGACGAAATTTGGTTCGCTTCCGGTGGTAAATCAGCAAAAAGTATTATTTGGTTCGCTGGCTGTTAACGCAACCGAAAT  
ATTAATGCTCGATGAACCGACGCGGATTTGATGTTGGGGCTAAGTTTGGAGTTTATCAGTTAATTCGCGAATCGGCA  
AGAAAGGCAAGGGGATTTATTTATTTCTCCGAAATGCCAGAGTGTGTTAGGGATAACAGACCGTATTTCTGCTCATGAGC  
AATGGTCTCGGAAATTTCCGATACAAAAACAACAGCAAGCGAAATTTCTGCGCTTTTGCCTTTTGCACCTTTA

>Cluster\_53510

ATGTCGTAGATACCTTACGCAACATTTTCATATAAACCGCATTAGCACTTCTGATTTCAGGATTTCTTACTGCGCA  
AACCTACAGACCAGAAATACGCAAGCAAAAAATCATATTTCTTAGCTTAAAAATGCTCACTGCAGGCGGATGACACAA  
AACCAATTCAGCAAGGAAAGTCCCTAAGTATGCGGAGAGGGCTTAAAGTGCATTAACCTAAAAATACTAATGACATG

TTAGTTTCGATTGATGACATTGATTGGATTGACTCGTCAAAAAAGATCAAATTCAAAAACAGAAGCTCGGATATGGTGA  
CATGTGTCATTACACGTTTCAGGTTTCAGGAACTATTGGCCGGGCACTCGATTATTGCTATAGCGAAGAAGCGTATACGAATG  
ACCATCTTTTTGTTGTTTCGCCCTGACAAGGCTGATAGTCATTATATTTGCTCATTTTTAAATAGCTTCCATGGCCAACGC  
TTATTGGAAAGCAGGGGTATCCGGTTCACCGGGCAATTAATCTTTCTAATGAACACATTAAGTCTATTCGGCTGTTTTAG  
ACCTGATGATAAAGTACAAAAATACATCGGGGATAAAGTTTCGCCAAGCCGAACAGTTGGCGCGCTGGGGCAGGCTATAC  
GCACATCTGTTGACGATCATCTTAACAGTCTAAATCTGCCTATCAACGAGCCCCCGACTGTTAAACCGAGTCAAGCGC  
CAAAACAATGGAGGACCGACTCGATCCACGCCCTTATCGGACTCATACCTATGTTAGTGAAGTAAATGAAAAGCTACC  
TCATGACAGTATCCGGCACTTTAGTTGCATTGGCATCAGGCTACCCAGTATCCAGTAACGACTTTTTGGAAAACCTCAGGCA  
TACCTTTAGTTTCGATCCGCAATATACCGGTTTGTAGTATTATTTGGTTTGTAGTACTGGTGTAGCCAAAGCAGTATACAG  
GATGCGACTAAGTATCAAGCTAAAGACAAAATGATCGTTGTCGGTATGGACGGTATTTTTTCGCTCGCAGTTTTTCATATC  
TGACGAGCTACCTATGCTAGTAAATCAACGGGTTGCAATGCTCACCCTCAAAATATTCTGGTGAACTTTTAACACATT  
GGCTAAATCGCCCCGAAGGACAAATGCAACTAAATCAATGGGCGAGTTAAACAACCTGTAGAACATACATCTCTATCTGAT  
ATTTGGCCGTTGATAAATCTCGCTAGATAAAAAGCTTAGAAAATAAAGCTTGCATGATTATTTGCTCAATGCGAGCTGCG  
TTATCGTTATGCCAAATTTTTAACACAAGTAGCCAAAACCTGGTCGAAAACCTAATCGAAGGCCAATGACCGAGCGGC  
AATGATCGAAGCCAAACAGCCCTGGAAGATGGCGACAAACAGCTTAGATCAAGCGATTTTAAGTAAACTAAGTGTCTGAG  
GGTTATGCCATAGAAGGCCACACCCGCTATTTAGCGATGTGGATGAGTTATACAGTTTGTGGAAGAGGCGGCGCAAGC  
GGAGCTGAAGAGTAA

>Cluster\_53596

ATGAAACATTTAAATGATTTCCCAAAAGAGATAGAAATCACAGAATTGAAAGACTTGCAATATCAGCTTTTGAACATTT  
CCTTAGTGATTTCGAATGATTTCTTTATTCAAAGTAAAGATATAAATGATTACGGCTAGACTATCAACTCGAGATCACAA  
CAAAACGGTCAAGCAACTAACATTAGACTGTTTGTTCACCTAAAAGGTAAGTGAACAAGAGTTAAATAATGATGGTTTCGGT  
AGCATATCTGTTAACAGAGCCAACTCAACTATCTATTAATGCACCCCTTATTCGTTCTATGTGTGTTTTTCATGGCCAAAG  
CGACTCTAAAAATAACATTCGCGGACAGCGTATTCGGAGTTATGAACAATCTGAAAAAAATGGAATTGAGCAAGAAA  
CTATAACTGGACAGATTCAATGATAATATCTGAGTCTGTTTGCAGAAATTCGACAGGTGGTATGCTTAATGAGGTTA  
GATAATCGTAATGCAAGGATAGAATTTATAACAAGCCCTATTTCAAATGTAGTGCAGTTATAAATAAAACCATACCGAA  
GATACATATACCAGAAGTAAAAAACTAGCCCATGAATTTGCTTAAATTCGTTATATGAAAAATAATCATGATGATGATAA  
GTGCTAATTTTGATGAATTTCTAGCTATTTTCGGTCTGAACTCCGGCTATGATATTTCCATACATGTCAGAAAATAA  
AAAGCCATGGACAGATTAAATGGTAATAAAAAAAGAGTATGGATGGTATCCAATACCTCAGGAAATAGAAATGAGG  
TTACATAACTAAGGGAAGTTTATACTATCAATAGGTAATGGATTTACAGCTCTGGCAAGGATGAAGAGGCTATTCAAG  
AATATAATGCTGCTTAAATAATGATGCTGGGGAAGAAAAATAGCTGCACAATGTTACAAAAACATGGGTAGTAGCTAC  
TCAAATCTCGAAATGAGAATGAAGCATTTGAATGCTATAAGAAAGCACTTGAATTAGATCCAAACTTAAACGAGGCTAA  
TTTAGCTGTGGATAAATCCATAATCATAGGGGTAATTTATGAACACTAGCATTAGAATAATTAGACATGGTGTATGTTCCAG  
GAATTTATCAGCATAAAAATAATACATGTTACAAAGTGGAGAGTGAATACTCTTTTTAATAATGGGAGATTATCGCTCTGCA  
TATAGAGAAATCAACAACCTATTAAACAGAAATATAAATGAAGAGGACTTATGAAATGGTGCCTAATGCTAGTTGGAAC  
ATTCCTGTCGAACCTCGACTATTTTCAGCCAAAGCTAAGTTTGCCTTTTTGAATCGTTTTTAGAAAATGTACCCGAATCCT  
CTGAAGCATCTAGAAATAATCTATAGTAAAAAATTAACCTAAGAGTAAATGATAAATGAACTAAGTATGTTTCTTAGT  
TTTTAAGAATGAATTTGAATTTAGAATAAATAATATCAGCAGTGAAGATAGGGCTTCTTATGGGATCGTATAGGTCATTG  
GGCACAGGATGAAGACGAGTGGGAAAGATGCTGAGATGATTTTTCGTAAAGCTTATGAAATGGCAGGGGCTGAATATGGAT  
ATTTGCTCGGTGGCTGCTGAATCATCTGGTCTGCTTTAAAGAAAGCTTGCCCATTTTTGATTGAACAAGCGGAAAAAATC  
CAACCTGATGATTTTAGCTGGTTTCAAGTTCGCTATTTGCTACGAATTTCAAGGATATAATTCAGGAGGCTATTAACCTTTA  
CAAGAAATGTTTAGCAATCAATGAGAAAACGAACTAGCATTTGTTCAATCTTGGAGGCATTTACTGGAATTCGAGAAAT  
ATGATGAAGCAGCAGATATCTGGAACCTAGCAGTAGAATATTATCTGACCATGAGCTTTTCGCGTAAGCTTCGAAAGGAT  
ATCCATTTATTTTAGATTGA

>Cluster\_29166

ATGAGTCAAATTCACAAACACACCATTCCTGCCAAACATCGCAGACCGTTGCTGATAAAACCTCAGCAGTACGAGGCGAT  
GTATCAACAATCTATTAACGCACACAGATACCTTCTGGGGCGAAGCGGAAAAATTCGACTGGATCACACCGTACCAGA  
AGGTGAAAAAACACCTCTTTGCCCCGGTAATGTGTCATTAATGTTACGAGGACGGCACGCTGAATCTGGCGGAAAAC  
TGCCCTTGACCGCCATCTGCAAGAAAACGGCGATCGTACCGCCATCATCTGGGAAGGCGACGACGCCAGCCAGAGCAAACA  
TATCAGCTATAAAGAGCTGCACCGCGACGCTCTGCGGCTTCGCCAATACCTGCTTGGAGCTGGGCATTAAAAAAGGTGATG  
TGGTGGCGATTTATATGCCGATGGTGGCGGAAGCCGGTCCGGATGCTGGCCGCGCCCGCATTTGGCGCGGTGCATTTCG  
GTAATTTTTCGCGCGCTTCTCGCCGGAAGCCGTTGCGGACGCAATTAATCGATTCCAGTTACGGTTGGTGTGATCTCCGA  
CGAAGGTGTGGTGGCGGCGCAGCATTTCCACTGAAGAAAACGTCGATGACGCACTAAAAAACCCGAACGTCACACGCG  
TAGAGCATGTGGTGTACTGAAGCGTACTGGCGGAAAAATTGACTGGCAGGAAGGCGCGACCTGTGGTGGCAGCAGCTG  
GTTGAGCAAGCGAGCGATCAGCACCAGCGGAAGAGATGAACGCCGAAGACCCGCTGTTTATTTCTATACTCCGGTTC  
TACCGGTAAGCCAAAAGGCGTGCCTGCACACTACCGCGGTTATCTGGTGTACGCGCGCTGACTTTAAATAATGTCTTTG  
ATTTATCATCCGGGCGACATCTACTGGTGCACCGCGATGTGGGTTACCGGACACAGTTATTTGCTGTATGGCCCG  
CTGGCCTGGCGGCGGACACGCTGATGTTGAAGGCGTACCGAAGTGGCCGACGCTGCCCCGATGGCGCAAGTGGTGGGA  
CAAGCATCAGTCAATATTTCTATACCGCGCCACGGGATTCGCGGCTGATGGCGGAAGGCGGATAAAGCGATCGAAG  
GCACCGACCGTTCTGCTCGGCATTCTCGGTTCCGTGGCGGAGCCAAATTAACCGGAAGCGTGGGAGTGGTATCGAAG  
AAGATCGGCAACGAGAAATGCCCGGTGGTGCACACCTGGTGGCAGACCAGAACTGGCGGTTTCATGATCAGCCACTGCC  
TGGCGCTACCGAGCTGAAAGCGGTTCCGGCAACACGTCCTGCTTTCGGCGTGCACCAGCGCTGGTGGGATAACGAAGGTA  
ACCGCTGGAGGGGGCCACCGAAGGCAAGTCTGGTGTACTACCGACTCTGGCCGGGTGAGGCGGCTAGGCGGCTAGTTGCGGAT  
CACGAACGTTTTGAGCAGACCTACTTCTCCACCTTCAAAAATATGATTTTACGCGGCGACGGCGCGCTCGCGATGAAGA  
TGGCTATTACTGGATCACCGGGCGGTGGACGAGTGTGAACGCTCTCGGTCACCGCTGGGACGGCAGAGATTGAGT  
CGGCGCTGGTGGCGCATCCGAAAATTCGCGAAGCCGCTGTGGTGGTATTTCCGCACAATAATAAAGGTCAGGCGATCTAC  
GCCFACGTCAGCTTAATCACGGGGAACCGTCAACCGAAGTGTACGCGAAGTCCGCAACTGGGTCGCTGAAGAGAT  
TGGCCCGCTGGCGACGCCAGCGTGTGCACTGGACCGACTCCCTGCCAAAACCCGCTCCGGCAAAATATGCGCCGTA  
TTCTGCGCAAAATTCGCGGCGGCGATACAGCAACCTGGGCGATACCTCGACGCTTGGCGATCTGGCGTAGTCGAGAAAG  
CTGCTTGAAGAGAAGCAGGCCATCGCGATGCCATCGTAA

>Cluster\_39390

ATGAACCTGACGACTCTGACCCACCGGATGCGTTGTGCTGAATGCGCGCTTTACCAGCCGTGAAGAGGCCATCCACGC  
GTTGACTCAACGCTTGTGCTCGGGGAAAAATTTCCAGTACTGAGCAATTTCTGAAAGAAGTATCGCCGTTGAAAGCC  
TTGGCCCGACCGCTTAGTGAAGGCTGGCTGTGCGCATGCAAAAACCTGCTGCGGTTAAAGAAGCGGCTTTGCGGTC  
GCCACACTCAGCGGAGCGCTTTCAGTGGGAAGGCGTGGATGGCCGGAAGCGGTTGATTAGTTAGTGGTGTTCCTGGCGATCC  
CCCCAATGAAGCGGTTACTACGCATGCAACTGCTGACAGCGCTGACACCGCCTGGCGGATGATGAGATACGGGCGC  
GTATACAGTCCGCGACGACGCTGATGATTTGCTCTCGCGCTGGATGACAAGGAGGACGCAACCTCAGCTTCTTTTT  
TCCAACCGGCAACTATCTGCTCGGTAACGGCTCGCCGGGGTATTGCTCACACATACATGGCTCGGAGTATCTTGA  
AAAAGCGGACGCAAACTCGCGGTGAATGTCTACGTTGAAAAGCAAGGTGCTAACGGCATGAAAGGCGTTTAAACGGCAG  
AGCAACTCAATAGTGAACCGCTGTATTTTTGCGGCTGAAGTCCCATCAAGGAGAGTGAAGGCTTTTAAACGGCATCC

GCGCTTCTGTGCTGTTGCCGAGCCGATTCGCCATGCGGAAGCGTTGATCCAACAAGCACTGACCCTCGAGCTAGCGG  
TGAGACGGCTACCGTACAGCAAGATACGCAACCGCGGAAAAGCGTCAAACCGGAGCTGAAACAGGCGCTGTTAAGCGGGA  
TCTCTTTCGCGGTGCGCTTGATTGTCGCGGGGGTACGGTGTGGCGGTCGCGGTATTACTGTGCGAAATCTTCGGGCTA  
CAAGATTTGTTAATGAAGAAAACCTCCTGGCTGTGGATGTACCCGAAACTGGGCGGAGGGCTGCTCGGGATTTGATGGT  
ACCGGCTGGCAGCTACACCGCTATTCACTGGCTGATAAACCGCGCTTAGCGCCAGGCTTTGCGGCTGGACTTGGCG  
CCAACATGATCGGTTCCGGGTTTCTCGGTGCTGCTGTTGGCGGATTGATAGCCGTTATCTGATGCGCTGGGTAAAAAT  
CACTTGGCTCTTAGCAGTAAATCAATGGATTCTGACTTTTTATCTCTACCCGGTGCFCGGTACGTTGGGAGCGGGCAG  
TCTGATGCTGTTTGGTGGGGAACTGTGCGCTGGATCAATAAAGCTGCTTACCGCTGGCTGAACGGTCTGTCAGGAA  
GTAACCGCTGTTGCTGGGTGCCATTCTCGGTTTTATGTTGTTCTTGGACCTTGGAGGGCCAGTGAACAAGCGCTTAT  
GCATTTGCTGCTGGGCGAATGGCGAACGGCGTTTACGGCCCGTATGCCATTTTTCGCTCCGTCAAATGGTTTCGGCATT  
TACCGTAAACCGCTTCCACGATGCTGCGACCGCGCTGTTTAAAGAGTTTGAATTTGAGACCGGAAATCCACCTGGCTGT  
TAGGGCTGGCTGGTATTACCGAAGGGCGATCCCGATGGCGATTGAAGATCCGCTGCGGGTTATTGGTTGCTTTGTCGTG  
GGCTCTATGGTAAACGGCTGCTATCGTGGCGCGATGAATATCGGCTTTCGACACCCGCTGCCGGCATTTCTCGCTCTT  
TTTACTTCATGATAATGGCGGGGGCTGTTTTGGCGCAATTGGCTGGTTGGTGGCGCATTTGGTGGGGCTGCAATCT  
CGACTGCAATTTCTCTGATCTGGCGGCTCACGCGGTTAAGCATGGCAACTATCTGACTGATGGCGTAATGCCATAA

>Cluster\_19902

ATGAGTGGCGCTTTTAAACAACGATGGTCCGGGCATATCTCCCTTAATTGCAACCTCCTGGGAGAGATGCAATAAGCTGAT  
GAAACGGGAGACATGGAACGTACCACACCAGGCTCAGGGCGTGACATTTGCTTCTATTTATCGGCGTAAGAAAGCGATGC  
TGACGCTCGGGCAGGCTGCGCTGGAAGATGCCCTGGGAAATATATGGCACCGGAGAGTGTGCGTTGCTTATCTCGATGAA  
ACCGCTGCATTTCAAGCTAATGGCGATCCGCAACCTTGACGAGTAAAGTGTACGGGATCAATGGGACGTCAGGCGAGTA  
TTGCGCGGAAATTTGGTACTTGTGCGCTATCGTTAGCGGCTATCTGTTGTCAGGCCGTGAAACCGATGGCCGATC  
AACATTTCAAACAGGCATCTGGAACCTGGGCTTTTGGCAACCGCTTGTGTTGACAGCAAGGGCCGATGACGGGAACA  
ATAGCGCTGGCGTTCGGTTGAGCAAACTACCGCAGCTGATTTGCGGTTGACGTTGGCAATCGCACGGAGGTCGGAAA  
CGCAGGGAACCGCTTTAATTTATGCTCCATCTGTTGGAACAGATGAGGCGAGTAAATGACCACTGATGAGGATGGAATG  
ATGGCGTATGACTGGGACGAGCAGGTAATTTGCAATTTATCAACGCCAGGGCGGCGAGTCTTGGCGCTTACGCGG  
ACGGCAAGTCAAGGAAAGGCAATCACTGAACCTTAAAGCTTACCGCGTATTGCAACAGCAATAAAACAGTCAATCC  
GCTCAAACAGTGAAGCCACCTTTGAAAGTCAGCATCAGTTTATGATGCGCTGATAACCTTAAACCGATAATAGAAA  
CGCAGGGAACCGCTTTAATTTATGCTCCATCTGTTGGAACAGATGAGGCGAGTAAATGACCACTGATGAGGATGGAATG  
AGCCATACCTTTCGCTCATATGCCACAGGACGATCCGCAACCCCGCGCTGATTCATTTTGGTGGCAGGGCGGACGCGAG  
TAGCTTTCCTGCTCTGCTTGTGTGAGAAAGGGCGTGGCAAGGCACTGCTAAGTCAAGCAATTCATAATGAAAGCGAGC  
GTGCGAGGGGCTTATATCGCCGTCATTTGTGAGTTATATGGTATGCGGCGTGGCGGAAGAAATTTATGGTGGCGAT  
CGCAGGATAATGAAATGGCCGCTGCTGAGTCCGCTGGAACCTGGCAGGCGCACGCGCACGCTGTTTTCTTGAAGATGAAATA  
TCTGGCGGTGGAGTTACAGTCTGCTTTCGTTTACAGTTCAGGTTATCAAGCAGGGGTTATCACGCGACTGGATGCGCGGCTTAA  
TACCCATTGATGTCAAAGTGATTGCCACACGACCGCGGACCTCGCAATGCTGGTGAACAAAATCGTTTTAGTCGCCAG  
CTGATTTACGCGCTGCATGCAATTTGAAATACCATCCCGCCTGCGTATGCGGCGTGGCAGCATCTTCGCGTGGTGAA  
TAAACAAATTCAGCAGCTTTGAAACAGCTTCTTACGCGCTGAAAATGATGACGATGCCCTCGCTCGCTGCTTTCTC  
GTGATGCGCTGGCAACGATTTTGAACCTTACAGCGTCACTGAGAATCTGCTCTGAGTAGTGATAATGGACGCAATTCGC  
GTCAGTATTTGCGGAAACATCTGTTTACCGAGCAGGCGACAGATGATGTCAGCGCCACCCGCTTTCCACCAGCTCTGTC  
ATTTGCGGAAGTTGAAAGAGGCAATTTAATACGACGCCAGGTCACAGGCGGTCGCATTCAGGAAATGTCGCGCTTTAC  
TTGGAATCGCGCGCACCGCTGTTGGGAAATGAAGCAACATGGCATTTGATGTGAGTCAGTTTAAAGCGCGCTGATG

>Cluster\_21960

ATGCTACCAAAGCCCGCCGATTCGCCATGACGCTTTCATGGCGATACGCGCATCGATAAATACTACTGGCTGCG  
GGACGATAACGCTTCTCAGCCGGAAGTCTGGACTACCTGACGCAAGAAAATAGTTACGGTCACTCGGGTGGATGGCCTCGC  
AACAAAGCCTTGCAGGATCGCATATTAAGGAAATCATCGACCGCATTCGCAAGAGAGTCTGCTCCCTACATCAA  
AATGGCTACCGCTATCGGATATTTATGAACAGGCTGTGAATATGCTATCTACAGCGTCAATCGGCATTCAGCGAAGA  
GTGGGATGAGTGGGAAACATTGCTCGATGCCAACAGCGCGGCGCAGTGGAGTATTTATTCGATGGGCGGAATGGCGA  
TTACGCCGATAAACCACTTATGGCACTGGCAGAAGATTTCTTCCGACGCGAGTACCGCATTCGTTTTCTCGTAATCG  
GAAACAGGTAACGGTATCCGGAACCTGCTGGATAACGTTGAACCCAGCTTTGCTGGGCGAATGACTCCTGGACTTTCTA  
CTATGTTCCGAAGCATCCGGTGCAGCTGCTGCCATTATCAGGTCGCGCTCACGCCATCCGTTACGCCAGCATCGAGGATA  
AATGATCTACGAAGAAAAGACGATACCTATTACGTCAGCTGCATAAAACGACCTCGAAGCACTATGTAGTCAATTCAT  
CTGGCCAGCGCCACCAAGTGAAGTTCGCTGCTGACGCGGAAATGGCCGATGCGGAGCCGTTTTGTTTTCTCGTAATCG  
CCGCAAGATCACGAATACAACCTTGCATCTACAGCATCGTTTTTATCTGCGTTCCAACCGCCACGGCAAAAACCTTTG  
GCTTATACCGTACCGTATGCGTATGAGCAACAGTGGGAAGAGTAAATTCGCGCACGTGATAACATTTATGCTGGAAGGG  
TTTACGCTGTTTACCGACTGGCTGGTGGTTGAAGAGCGTACGCGGGTTAACAGTTTGGCGCAAATTAACCGCAAGAC  
CCGGGAAGTCAATTCGCTTGTGATGATCCGCGCTGATGACTGAGTGGATGCTTACAAATCCAGAATCCGAACTGAAACCGC  
GATGCGTTATGGTTATTTCCATGACACACAGATACTTTGTTGAACTGGATATGGATACCGGTGAGCGTCTGTTA  
TTAAAACAAACGAAGTTCTCGTTTGTGATGCGCGAAATACCGCAGTGAACACCTGTGGATAGTTCGCGCTGATGGCT  
CGAAGTTCCGGTTTCGCTGCTATCATCGCAAACTTTTCGCAAGGACACAACCCGCTGCTGGTGTATGGCTACGGT  
CTTACGGCGCAAGTATTGATGCCGATTTTCAAGTTTTAGCCGCTTGAAGTTTGGTTGGATCGTGGATTTGCTACGCAATGTC  
CATGTTCTGGTGGTGGCGAGCTGGGGCAACAATGGTACGAAGACGGTAAAGTTCTGAAGAAGAAAATACGTTTAAATGA  
TTATCTTGATGCCTGCGATGCAATGTTAAAACCTGGCTATGGATCACCTTCGCTCTGTTATGCGATGGGCGGGAGTGGCG  
GGGCGATGTTGATGGGCGTTGCGATTAATCAACGCGCCGAAATTTCCACGGCGTTATCGCCAGTACCGTTTGTGAT  
GTTGTAACAACGATGCTTGTGATCAATCTCTTACCAGTGGTGGTGAAGAGTGGGGAAATCCGAGGATCCGCA  
ATATTACGAGTACATGAAAGCTACAGCCGATGACAACGCTACCGCACAGGCTTATCCGCATTTACGTTAAGCAGCG  
GTTTACAGCATCTCAGGTGCAATATGGGAACCGGAAAATGGTGGCTAAATTCGCGGAGCTGAAAACCGATAACCAT  
CTTTTATCTGCTGACGACATGGACTCAGGCAATGGCGGTAATCTGCGCTTTAAATCGTACGAAGCGTACGAT  
GGAATATGCTTTTCTGGTGGCTGGCGCAGGGAACATTAACCGCTACGCTGAGGATTA

>Cluster\_24442

ATGAGTCAGCTGATGAGGCCATCTTGTATGACTGACACAGCTTACTTTCCAAAGGGTTTTGCACAGGCGAAGCCCGC  
ATGGGTTGTCACCGTAGACGGTGTGATACCCACTCTGGAACAGATGCCCTGGTAGTTCGGCAGTGGTGCACGCCGGC  
TACGTGCAGCTGTGGAACTTAAACGCGCCAGCAAAATGTGTTAATCGCCACCAGCGGTTATATATGGGACGTCGGCA  
TGTCTGCGCTGATAAAACAACACTGTTTACCGCGCTACCGCGGCAACGGCGACAACCTTCGCAAACTGGCGAGAGC  
ACTGGCGAGCGGTGGGCGATGGATCACAGCACCGCTTATGTCGAAGCGGTAGGTTCTCTGACACTCTGGCGGTTGC  
AATATCTTGGCTGGAATTAACGGAAAGTTCGCTATGGCGGATTTCTTCTGTTATCAAACCGACCATGACGAAGCGGGCT  
GCAACCTCGTGTGGCGCGGTACCTCAAGTTAATGGTGAAGTGTGCTGTTGAAGAAGTACAGCGTCTTGGCTATCCCAAT  
GTTGACCACTGCAACAGTGAATAAATGCTGATCAGCGTGAAGAAACCGGTGAAGACCGTGTGGCGGGCCAAATCTTCG  
CGCCGCTACCGCCGATTAACCATGGGGCTGGCAATTTGACTGACCCAAATGTGGCACCTGGCAACAGGAGGCGCT  
GGCGAGCTTTATCGCGACAGTGTGATCCACACAAATGTTTTCGCTGCTGGGCTGGCGCTGGAGGAAGGCTGACGTT  
AACGAATCTGACTGAAAGCCAGTTTGGTATAGGCACACCGCGCAGCACATTTCCGTTGGAATTTGTCGGCACCTATGTAC





CGTATATGGAGATCTCTGAAAAAATATCCACCACGCGCAGATTAATCTGATTAA

>Cluster\_62971

ATGTGTTCAATTTTTGGCGTATTTCGATATCAAAAACAGACGCGAGTTGAGCTGCGTAAGAAAGCACTCGAGCTGTACGCGCT  
GATGCGTCACTCGTGGCCGGGACTGGTCCGGTATTTATGCCAGCGATAACGCCATTTCTCGCCACGAACTGTGCAATTTG  
TTGACGTTAAACGGCCGGGGCGCAACTCTCTACAACCAAAAAAATCATGTGCTGGCGGTAAACGGTAAATGCAAC  
CACCAGGCACTGCGCGCCGAATATGGCGATCGTTATCAGTTCCAGACCGGATCTGACTGCGAAGTGATCCTCGCGCTGTA  
TCAGGAAAAAGGGCCGGAATTTCTCGACGACTTGCAGGGCATGTTTGCCTTTGGCCTGTACGACAGCGAAAAAGATGCAT  
ATCTGATTTGGTCCGACCATCTGGGGATCATCCACTGTATATGGGCTATGACGAGCAGGTCAGCTGTATGTGGCCTCA  
GAAATGAAAACCCCTGGTGGCCAGTTTGGCCACGATTAAGAGTTCCCGCGGGGAGCTATTTGTTGAGTCAAGGACGGCA  
AATCCGTTCTTATATCATCGCGACTGGTTCGACTTTGATGCAGTGAAAGATAACGTGACCGCAAAAAACGAGCTGCGTC  
AGGCACTGGAAGATTCGTTAAAAGCCATCTGATGTCTGACGTTCCCTACGGTGTGCTGCTCTCGGGTGGTCTGGATTCC  
TCAATATTTCCGGATCACCAAGAAATACGCCGCCGTCGCGTGAAGATCAGGAACGCTCTGAAGCCTGGTGGCCGCA  
ATTTACACTCTTTGCTGTAGGTCTGCGCGGTTCCAGGATCTGAAAGCAGCCAGGAAGTGGCAAAACCTCTGGGACGG  
TGCATCACGAAATTCACCTTACTGTACAGGAAGGTCTGGATGCCATCCGCGACGTGATTTACCACATCGAAACCTATGAT  
GTGACAACATTTCCGCGCTCAACACCGATGTATTTAATGTGCGTAAGATCAAGGCAATGGGCATTAATAATGGTGTCTG  
CGTGAAGGTTCTGATGAAGTGTGGCGGTTACTTTACTTCCAAAGCACCAGATGCCAAAGAATGCATGAAGAGA  
CGGTGCGTAAACTGCTGGCCCTGCATATGTATGACTGCGCGCCCAACAAAGCGATGTGAGCTGGGCGTGGGAAGCA  
CGCGTTCCGTTCCCGACAAAAAATTCCTTGTATGTGGCGATGCGCATTAACCCGAGGATAAAATGTGGGTAACGGCAA  
AATGGAAAAACACATCTCCGCTGAATGTTTGGTGTACACTGCGCCGCAAGCGTGGCCGCGGAGAAAGAGCAGTTCT  
CCGATGCGCTGGTTCAGTTGGATCGACACCTGAAAGAGTGGCGGCGCAGCAGTTCTGTATCACTGAACTGGAACCT  
GCCCGCTTCCGTTTCCCGTACAACACGCAACCTCAAAAAGAGCGTATCTGTACCGGGAGATCTTTGAAGAACTGTTCC  
GCTTCCGAGCGCGCTGAGTGCCTGGCGTCTTCCGTCGCGTGTCTTCCGCTAAGCGATTGAGTGGATGAGG  
CGTTCAAGAAAATGGACGATCCGCTGCTGGTGTGCGGTTGCGTTACCAGTCCGCGTAAAGTAA

>Cluster\_63856

ATGTCCGTTTAAATTTATGGTGGCGTACTGATGGCGCAGGCATCCCCATGTCCGGATGCCACATTATTTGAAATCCCG  
GGTGAACACATCAGAAGTGGTGTGCGCACTGAAGCTGATGTGTTGACCGGAAATAACGGGGAGTATTGTTTGGAGGCC  
GGACCGGAAAAATATCGCGTGTATCTGAAACAGGGCTGGCGCGCAGGACTGTGTGGCGACATTTGTTATACGATGAC  
GCAAGCCCGCGCAGCTGACGACTTTCTGACCGCTCCGATGAAGGCACCTCAAACCCGACGTGGTGGTAACTGGTTGA  
GAGAATGGTGGCACAGGCGCAGCAGAGCGCCGAATCCGCGAGGAAAGCGAACAAACAGGCCGGCAACATGTCGCTGATG  
CGCAGAAGATAAAGGAAGACTGTGACGCTGGCGGATAACGTACAGCTGAACGCCACCGCGGTTGCCGAAGATAAACA  
CACGTTGAACATCTGGCTGCAGAAGTTGAGCAGAATGCTGGACAGATGCAACAGGGTGTGCAGAGTGTACAGATGCAGT  
AAAGCAGGCTCAACAGGCGAGAGATGATTTCTGCATCCAGCGCAGAGGAATCAAAAAACAAATCGGATAACGCTGCCGAA  
GCGAACAGAGCGCAAAAAGTACCGCTGATAATGCAGCCGAAGTGGCGAAAACGCGAAAAGTCAAGCCGATAATGTTGCA  
GGAACACACTGCAGACCCACAGGATGTGACGGCAACCGCAGCAGCAGTGTATGATGCTGAGCGCTTTGCGGAGAACCG  
CAGACAGGATGCAAGCCGACAGCCTGTGACAGAAAGGCCACTGCGGAAGATGTGAAAAGTGGCGGGGAAAGCGCGCCT  
CATCTGAACAGAGCGCAGGGTAGCCAGGTTATGCGCCGAGTGTGAGCAGGCAAAAAACGACATTTGATGCTTCCGCTG  
GCGAACCCCTGAAAACGCTCCGTAATCTGTGACAGATTTGCGGCGCAGGTTGAACAAGCAACAGGAGTCACTGTATAA  
TCTGGGGCTAAAAAGCGCGCCACGATGGAACACAGGAGATATTTACAGCTGCACAGACGGTCTGCTTGTCTTCCGCG  
GCATGTCGGGATTCGGGAAAAATATTTACTGTCAAAGCAGAGTGTATTTTCACTCAGGTTCAATTTCTCTCTGTCGCGCA  
AAAAACGCTTCCCGGAGTTATGCGGTGAGTACAGGCGGAAAAACGGGTCGTAATAGAGGGGAACTATTTATTTGG  
TGTGTGGACGTCATCTGGACGAGTGCAGTACAGTGTGAAAGCAGAAAACAACTAAAAATATTTATTTCTACGGTGT  
TTAATGGTGGCGTTCATGTGAATTTGGTACTCGCCACTGGCAAACTGATGGAGTGGGAATCCCTGAAATACAGCCGCTG  
TCCGTTGTCTAGCTGTCGGGATTAACCCGGAACGACATATGACGGATACGGATATGGCAGTCTGTACTGCGCGGG  
GTACAAGGAACTTACAGCTCAGATTAATCGTCAGATAAATCGTGGTGACCTGTATCCCGCTCACGTCTTATGATTA  
TTGAGTTTAAAGTGTGTCGGGATAACAGACTACCCCGGATTAACAAACAGCGATATTTCTGTGTATGCAGGCGGTGCG  
TTTTCGGGACATACCGGGCTTGTGCGGCTCACGGCTGGGAGTGGGGTTCTGATGGCATCATGATTTGTTCTATTTAT  
CCGGTTTTATTAG

>Cluster\_55655

ATGAGACGTAGAGATTTGCTTAGAAGCATGGCATTATACCTTTGGTTATAAGCATTCCTTCAAAAGGTAAAGAAGGTTT  
TAGATCTCATCTTCAAACCTTGGATGCCAAATAAATACAGACTCAGTATACCTGAAATGTTTGGTGCAAAATCTGTATG  
GTGTTTTCAATAATAAAGAGGCTATTGAAAAGCCCTACAATATGCTTATATTAATGGATTAAGTTGTACTTTTAAAA  
GGCAATATTTACAGCGAAGATATTTCTATTTGACTTCCCTATAAGAATTTGTTTACAAAACGGATGTTACTTAAATTTTGA  
GCTTTCTGTCAATTTGGTGGCTCTTTTATTTCTGAAAGCGAATCTATAATAAACCAAGATTGGAAGCTTTTCTCGCGGAA  
CTCGCTCTTTTCTAATAAAAAATTTCTAAAATGAATAAAGGTGATATGGTTTCACTGTCATTAGATTTATCGGCAATGGTGT  
AGTCTCAAATTTGTAAGTAAATGCGCATAGATTTCTGAATGTTATTTGATATTAATGAAAATGATTTATAGTTAAAAA  
TGGAACTAGATTTCCATATAGTTACCCAATCATAGTAAACTTAAAGCGTTATGCTTTTAAAGGCGAAATACCAAAAG  
ATTCATATATAAATTAATGGTGTCTTCAATAAATTTAGCCCGGAGATATTTATCGTATCGAAAATGTAGACGGTACA  
GATAGTGTGGTGGCGTAAGTATTTTCGAATATGTTGAAGTCAAAAGCGTTAATAACTCTCATATCATTTTGGTGTG  
CCGAACTGTATATTCACACACTAATCCGTTGTTAATAAAGACTAATTTTATAAACCATGTTAATTTAACAGGTGAAGGGC  
GCATAAAAAAATTTGTTTAAAGGAATATAAAGACGTAAGCTTCTTCTTTATTTATTAACGCCTTATATATCTAGC  
TGCTATGGAGTTAACGTTAGTAATTTAACTTTAACTGGTCTTGGCGAACCGTCTACAGTCAACATAACTTATTTGTTCCG  
GAAAAGTATTTTCCGAACCTACAATTTCAAATTTGAAAGTAAAGTGAATAATCAACCTAAAAAATATAGATTTCC  
CTCAGATTTATTTATCGAATATTTACTATAAGTACTCAAAATTCATCTTCAAAAAAACAAGTAATTTACTTTTGTCT  
GATTTCTTATACACACTATTTCTGCTGGAACGATAATAAATGTTTAAATATGTCATTTGTGAGCGCCAAAGGTACACA  
TTTCAAACGTGGAGTATGGTTTTATGGTCTACGACGTTCACTGATGACTCGATCGTGGGGCTGATGTTTTTCTCAGG  
GCTCAGTTGACTGTTATTTTAAAAATTTCAATGTATCAAACTATGTTAGAAATTAAGGATTTAGTTAGATGTGATGTG  
ACTGCTAAATGTATGAGCGCAGTTACTAGAGGTGGTATAGACAATGTATTAAGGCTAGAAATTTGATGGACGTTTAAACGG  
AGATTTTTCGGACAAGAGTCAATTTACTGTAATTTACTGCGGGAACATTTAGATCTTCAAAAAGGGGTTAATTTTACACAAG  
GAGATGGTAAATATCTTTTAACTTCAACTTCAACTTTAAATTTACTGATAATAAATAAATTAAGCGTAGAGTTTCAA  
AAAACTTAATTTATGAACCAACTAGATTTCTGTTGCTTAGACAAGAGAGCTTTTGAAGATGGGTAAGATGTTTCAAA  
TATCTATATTAAGAATAACTTTCAAAAAATTTAA

>Cluster\_39367

ATGGCTGCGCAAGGTTCTTACTGATTGCCACGTTTTTACTGGTATTAATGGTGTGCGCGTCCCTTAGGTAGCGGGCT  
GGCGCGGCTGATTAATGATATACCTTCTTCTGGTACGACGGCGTTGAACCGGTACTCTTTAGCGCGCTTGGCGTCTCTG  
ACCGCGAGATGAACGGAAGCAGTATCTCTCAGCCATTTTGGCTGAATATACTGGGGCTGGCGGTGCTGTTTTTTATG  
TTGCTCGGTCAGCACTATCTGCCGCTTAATCCACAGCAGTGGCGGGGCTGTCGTTGGGATCTGGCGCTCAATACCGCCCT  
CAGCTTTGTCAGCAATCAACACTGGCAATCTTATAGCGGTGAACACCGTTGAGCTATTTCAAGCAGATGGCGGCTTAA  
CGGTGCAAAACTTTCTTTCTGCCCGCAGCGGATTTGCGGTGATTTTGGCGTTTATTCGCGCTTTACCCGCCAGAGCATG  
AACACGCTGGGTAATGCGTGGTAGACCTGTTGCGGATACGTTATGGGTGTTAACCCCGTAGCATTGCTGATCGCACT

GTTTTTTTATACAACAAGGTGTGCTGCAAAAACCTTTTTGCTTATCAGGCTGTGACGACCATGAAGGAGCGCAACAGCTAT  
TACCAATGGGGCCAGTAGCTTCTCAGGAAGCGATCAAAATGCTCGGAACTAACGGCGGTGGCTTTTTTAAATGCCAACCTCG  
TCGCATCCGTTTGAANAACCAACCGCACGACCAACTTCGTGCAATGCTGGCGATCTTCTTGATCCCAACAGCGCTGTG  
CTTTGGCTTTGGTGAAGTGGCGGGCGATCGTCGCCAGGGGCGCATGTTGCTGTGGGCGATGTCAGTGAATTTTTCTCATCT  
GCGTAGGCTAGTGTGGGTAAGGTTGAGGTAATCCTCATCTGCTGGCGCTCGGCGGGACAGCAGCATCAATATG  
GAAGGTAAGAGAGCCGTTTCGGCGTGTGGTCACTAGCTGTTTGGCGTGTGACTACGGCGGCTTCTCGGCGCGGT  
GATTGCGATGTCATGATTCGTTTACCGCTCTTGGTGGCATGGTGGCGATGTTGTTGATGCAAAATGGTGAAGTGGTATTG  
CGGCGCTCGGTTCCGGCTTTACGGCATGATGCTGTTTGTCTGCTGGCGGTGTTTATGCGGGGCTGATGATTGGTCTGT  
ACACCGGAATATCTGGGTAAGGTAAGGTTGAGCTACGCGAGATGAAACTGACTGCACCTGGCGATTCTGGTCAACCCGACGCT  
GGTGTGATGGGCGGGCGTGGCAATGATGACCGACGCGGACGTAGCGCCATGCTCAACCTGGCCCGCATGGTTTTTA  
GCGAAGTGTGTACGCGCTGTATCCGCGCTAACAACACCGGAGCGCTTTGCGGATTAAGCGCAACTCTCCATT  
TGGAACGTTTACTGGCGTGTGTCATGTTGTGCGGGCGCTTCGGGGTATTATCCCGGTGATGGCAATGGCGGTTCGCT  
GGTCAAGTAAAGAGCGCCGCGGACGCTCCGCGACGTCGCAACGACGCGCGCTTTGTTGGCTGTAAATCGGCA  
CCGTGTTGCTGGTGGCGACTGACCTTTATCCCTGCGCTGGCGCTTGGTCCGGTGGCGGAATATCTCTCTGA

>Cluster\_39632

ATGAATAAATCCCGTCAAAAAGAATTAACCCGCTGGTTAAAACAGCAAGCGTCACTCCCAACGTTGGCTGAATATTTCT  
TCGCTGCTGGGCTTTGTGAGCGGCATATGATCATGCGCAGGCTGGTTTATGCGCGGAATCTGCAACATATGATTA  
TGGAGAATATCCCGTGAAGCCCTGCTGCTTCCCTTTACGTTACTGTTTCTGACCTTTGACTGCGCGCATGGGTGGTCT  
TGGTTACGCGAAGCGGTGGGTTATCAGCGCGGGCAGCATATCCGCTTTGCCATCCGCGCTCAGGTTCTCGACCGTCTGCA  
ACAAGCAGGCGCAGCTGGATTACGGTAAACCTGCGGGAGCTGGGCGACGCTGGTACTCGAGCAAAATGACGATATG  
ATGATTAATGCTGCTGCTACCTGCGCAAAATGGCGTGGCAGTGTGGTGGCGCTGCTGATTGTTGGTGGCGATCTTCCC  
TCTAAGTGGGCTGCGCGCTCATCTGCTGGGCACTGCACCGTAATCCGTTGTTTATGGCGCTGGTGGAAATGGGGG  
TGCCGATGCTAACCGACGTAACCTTCTGCTCTTGTCTGCTTAAAGTGGGCAATTTCTCGATCGCTGCGCGCATGGAAA  
CAATGCGATTTTGGTGGTGGTGAAGCTGAAATGAAATGAAATGAAATGAAATGAAATGAAATGAAATGAAATGAAATG  
GAAGTGTACGGCTGGCGTTTTTATCCTCCGGCATCTCGAATTTTTTACCTGCTGTGCGATTGCTCTGGTGGCGGTCTA  
CTTTGGTTTTTCCCTACCTCGCGAGCTGGATTTGGTCACTACGATACGCGGTGACGCTGGCTGGCGGTTTTCTGGCC  
TGATCCTTGGCCAGAGTTTTTCCAGCCATTACGCGATCTCGGTACGTTTTATCATGCTAAAGCCAGGCTGTTGGTGA  
CTGCACGTTTTGAAACCGTTTTATGAAACCGTTCCGCTCGCCATCCGAGCGCGGTGAGGCGGAATGAGCATAACGCGATC  
GGTGACATTGAAGCCGAGGATCTGTTTATCAGCTGCGCGGAAGGTAAGGTAAGGTAAGGTAAGGTAAGGTAAGGTAAG  
CAGCAGGCCAACGAGCAGTGTGGTGGTTCGCGCGGTTACAGTAAAGTTCACTGCTGAACGCGCTTCTGGTTTTCTC  
TCATATCAGGATCGCTACGAATCAACGGGATAGAATTAACGCGATTATCAACCGAATCATGGCGTAAACATCTCTCTG  
GGTTGGGCAAAACCAATACCGGACCAATTACCGGATTAACGCGATTAACTACTACTGGCGGACCTGATGGCCAGGCAAG  
AGTTACAACAGCGCTGGATAACGCTGGGTCACTGAGTCTTCTACCGCTCCTGCGCAAGGGGTTGATACGCTGTTGGC  
GACCAGGCTGCCCGCTTTCCGTTGGGCGAGCGCGTGGCGGTGGCCCGTGCCTACTAATCCCTGTTCTGCTATT  
ACTGTTGGATGAACCGCTGCCAGCTTGTGCTCACAGTGAACAGCGGTAATGGAGGCGTGAATGCCCGCTCTCTG  
GCCAGCAACCTTAATGGTCAACCCAGCTTGAAGATCTGCTGACTGGGATGCTAATGGGTAATGCAAGATGTTGCTAG  
ATTATTGAGCAAGGACGTTACCGGCAATTAAGTGTGGTGGCGGCCATTCGCCACATTAAGTGGCCATCTGCGAGGGA  
GATTTAA

>Cluster\_29664

ATGCAACCGTCCAGAAACTTTGATGATCTTAAATCTCTCTTATTCACCGCGCATTTTGGCTGTGGGGAAGCGGTGGTCC  
GTTTCTGGATGGTTATGTACTGGTAATGATGGCGTGGCGCTGGAGCAACTGACTCCGCGCTGAAACFGACGCTGACT  
GGATTGGCTTGTGGGCGGGGAACGCTCGCCGGGCTGTTCTGTTGGCAGATCGCTGTTGGCTATATCTCCGATAAAGT  
GGAGCGCGCAAAAGTGTCTCATTTGATATCATCGCCATCCGCGTATATCGGTTGGCGAGCATGTTGTCTCATCCCGCT  
CGAACTGTTGGTGTGCGGGTACTTATCGGCATTGTTATCGGTTGGGATTATCTATCGCCACCTCAATGATACCGAGT  
TCTCCAGTACCGCTCAGCGGGCGTTTTCCATCAGCTTTATCGCGCATGTTGGTATGTTGGCGCGACCTGCGCGCATCTG  
GTCGGTTACTGGCTTTATGATGTTGAAGCGGCTGGCGCTGGATGCTGGGTAGCGCAGCGATTCCCTGTTGTTGATTTT  
GATGGTGCATTTCAACTGCTGAAATCTCCCGCTGGTTGTTACGCAAAAGGGGAGTAAAGAGTGGCAAGAGATGATGA  
TAAAACGTTTGGCGAACCGGTGGCTTTGAGGAAAGAGCAGCCGAGCAAAACCGTTTTGCGGATCTGTTTAAATCGCCG  
CATTTTTCTTTGTTCTGTTTGTGCGGCCATCTGGACCTGCCAGGTGATCCCATGTTGGCATTTACACCTTTGGCC  
GCAAACTGTTGGTTGTTGGGATGGGGGTTGGCAAAACCGCGGCTGGGGAACGTTGGTATTAGCTGTTCTTTATGCT  
TTGGCTGATTTCCGCGCATGCTGTGGTTAAACACCGCGGACGCGCTCATTGTTGATGGCAGTTTTGCCATGATGAGC  
CTGGCGCTGGCGGTTTTGGGGTGTATCCCGGATATGGGATCTGGCTGGTGTGATGGCATTTGCGGTGTATGCTTTTT  
CTCTGGCGGGCGGGTAAATTTGCAAGTGGCTTATCCTAATGAACCTTTCCCGAGGATATCCGCGCTCTGCCGTGGCG  
TGATTTAGTCTTAAAGCCGATTTGGCACCATTGTTTCGACCTGGGCACTGCGCAATCTTTATCAATAATACCGCATCAGT  
AGCACGCTGATGGGGCGGGTATCTCGCTATTTGGCTTGTGATTTCGCTAGCGGTTTTGCGCCGAGACTCGAGGAT  
GTCACGCGCAGACCAGCAATATGACGATCCGCGGCGAGAGAATGGGGTAA

>Cluster\_25079

ATGCGTTACAATCAATTTTACATTTACAACAGCTCCGACACTTTAGCCGGGAGTTTATGAGATACAAGCCCAATCAATA  
CATAATCTGTGATTTCTACGGTAACCTATTTTAAAGATCACGCTGCTGTGATATGACAGCCCTTTTTTGAAGGAAAA  
GGACGTTTGTGAGAGTCTACACAAGTAATCTTCGTGTTGACGATGAAAGCGTATGATGATGATGATGATGATGATGAT  
TGTCTACGGGAGAGTGTCCGCTTGAACAGCACAATAGAGAACAGCGTGGAACTGTTACGAGTAAGGCTAAATACGC  
CAAAACAGCTACCAGAATGCAAGATACAGCGTCTTCGTGTCGTTGTTGTTGTTGTTGTTGTTGTTGTTGTTGTTGTTG  
ACAGCACGAAGAAGAAGCCAGCCACTTTAGCTAAGGCAAGAAAAGCGGTAGAGATGTTTCTCTCTACCGTAAAAAGCCT  
GATATTGCAATTGCAAGATGTAAGCCGACCACTGTTACAGGCTGGATTGAACACATGCAAAAAACCTTTTACAAACATC  
AATTGCAAAATATACAGCCAAATGGCCAGCTATGGGAATAGCTTTCATCACGTTACACGATGCGCCAGAAAGGGCGC  
TCTCCCGTGGCGAGGGCATAGGCTTGTGTTGGCACAAGATAGAGAGACTACGAGGCAATTTTCTAACAAAGAGACTATG  
CAGGTGTTGCAAGTATTTCCGGTGTATCAGCAGAAAACAAGAAATGATGGCTTTGTGCTTTATCGGTTTTATACAGG  
TATCGGATCAATGAGATAGCAAGTCTACAATAGACGATGTTGAAAGAGATCGAAGGTGTGCTGTTTGAATCACAC  
AGGGAAAGACGAAGCTGCGGCACGTTGTGCTGTACATAGCCTTATCACTCCGTTGGTGTGCTGCTGCTGCTGCTGCTG  
CCTCAAAATGGCTTTTTGTTCTATCAGCGACATACAGAGCGTGTGATGGTAAACGTTTACCGTCAACGACGCGAGAG  
ATTTACAAGAGCTAAACGAAAGGCTTTAGGGGAAAAGGGAACGAAAGGAAGGTGTTTCAATCTCTGAGACACGGAGTAG  
CACAGCTTCTGATCGAAATCAAAATCCAGAAGACAGGATCGCCCTTCTCTGGGCAATACACGCGGCAATACAGAAACA  
TCCGCACATATAGCAAGAATGCAGCTTCTCCGGTAGAGCTTAAAAACATATTTGAGCTTCTACGCTACCTGAAATAGA  
GAAAGCTTATCAATCAATAAAAAATCAAAATTTAAGGCTAAAAACACCATAG

>Cluster\_45562

ATGGGATTAATGGCTCATTCGAACGTGGAATGGAACGTTTTCTGTTCCAGTTGCTATCAAGTAAACTCACAAAAACA  
GTTTGCAGCGGTGAGAGATGGAATTCGTTTTTACGTTTCTCAATATCATGGCAAGTTCATTAATTAATTAATTAATTTG  
CCATATTTACGCCAGACGGTTTTTATGCGGATTAAGTGCATCTGAATAGCATTTCCTCCCAACCTTGAAGAAAGCAAGCT  
ATTTTTTACTCCGTAATGAATGGTCTGTAATAATCATGTCATTAATGATGCTTTCTGGTCCGAGGAATATGGCGAT

TAGCTATGAGCAAGATGATCTTTTATGCGGATTAACGGCAATAGGAGCATTTTTTATTGTTTATACGCCATATCAGATGA  
TAGATGGGCAAGCATTCCGACGACCAATATCTCGGCGCGCAGGGGTTGTTTGTGCTGTTATCGTTGCATTGATCACC  
AGTGAAATATTTTGTGCTTAGCTCGAAACCCAAAATCACCATAACGATGCCGGCAGCTGTACCGCCGCGGTAGCGCG  
TTCATTTTAAAGTTTATTGCCAAATTTTTTGTGTCATGGTGTCTTTCCGCACTTAATATTGCTGACACTGATATCCC  
CGGACGATGCGGAAATCCGATGATCTGGCAAAAATGTCATTTATCCCGGTATTTCAATATCAATGAACCGAATAGTT  
ATCCTGGGGGCTGTGGTAAATTTCTGTGGTGTGGGGATCCACGGACCTAATACCACATCGGCAATTCGAGAAACCGT  
TTTTCTGAGGCTAATCTGGAGAATCTCTCCTGGGCGCTCAACATGGCACTACTGGGGCGCCATATCCGATTACCT  
GGACTTCTATTAATGATGCATTCGCAACTGCGGCGGTTCAGGTATGACGTTGGGGTTATGTTGGCTATTTTTATCGCT  
TCTAAGCGTGGGAAATCCGATGATCTGGCAAAAATGTCATTTATCCCGGTATTTCAATATCAATGAACCGAATAGTT  
TGGCCTTCTATTGTACTTAACCCCATCATGATGGTGGCGTTTATTATGGTTCCTATTGTTAACTGTGCCATTGGTTACT  
TCTTTGTTTCGATGGAAATATTCCACCGGTGCTTATGCCGTGCCCTGGACTACGCCGGACCTTAATTTGCTTTCCCT  
GGAACCGGGGAACTGGCTGGCTTTACTGGTGGTTTTTATGTTTAGGTGTGGCGAATGATCTATTTACCTTTTGT  
TATGGCCGCAACAAAGTCAATAACATGACAACTAACGGATAA

>Cluster\_16412

ATGAACATCAACCGATCGTAACATCCGGAATCACCACAAAAACAATCGACATCATCACGAGAACAAACGTCCTTAC  
ACAAATCCGCAATCCGAATACCTAATGGATGCGAAACGGGATTTGTTGTTTATATCCAGAGGATATGCAGCGACATG  
CACCGAATGCGGTGAAACCAACAGCTCTACTGAGCTTGATAAAAAGATGAAGGCTGCTCTCTGGGCTGGATAAATATCTT  
GCACCTCATCTTGAAGAAGGCTCTGCAGGAAAAAAGCATTGGATATGTTGGTTTATCAATGTCTCAGATGGCATT  
AGAAATACCAGCACCGTTCCGGGTATCTCTGGTAAATATGGTGTCCAGCTAAACATTGTAACCAGATATTTCATCCTA  
CATCAGGTAATTTTACAGATATTCCTTTGTCATGAAATAGGTATTAATTTAAAGACCTTCTGGTCCATTA  
AAAAATGCATTAAGCAACAGCAATATACCAACCACTGTATCGACTGCTGCATCCACTATGCACTCAGCCACTCTCGAC  
GGTAACCACCGCGTCAAAAGACCAATACCATGGTTTGGATTAACAGCTCAAGTAGTTCGTAATCATGGTGTGGAACCTC  
CTATAGTCAAAAATGAAAATGGATGGAAGCTTGTGGAGAAACCTCTTACTCCTGATGGCCCCAAAGCAAAATATATCT  
GAAGAGTGGGTGATTCAGAACCGGAGAGCAGATTTAAATATGGTGCATCTCAGCTACAGGCAACTCAGGGTGGAGT  
TGGCGCACATTTCAAGTGGGATTTAGATAACCCTAATACTAAATATGCCGTTCTTACCAATGCTGCCGCAAAATGCGCTT  
GTGCTGTAGGGGATTTGAGTATCCAGATTTACTGGTACAGATCCAAATGTTAAGTCCATATCGGTGCAATGGTTGGG  
CAAGCAGCGGGGATGCCATACAGTATAATACCCCGGATTAAGCCAGACACTATTTTATGGTGGGAGGTAAGTACTCT  
TGGACTGGGTGATTTAAACCAAGCGGAGTTGGAGAGCCAGATTCACGTGACTATCTCGTATATGGTGGGCAAGAG  
AAGGTGCCATTTTCCAAATAAAGCAGATATTGAACATGCCACAGGGGCTGATATACGCGCAATGGAAGAAGGTGATCT  
GTTGGACAACGGCATCAAAATCCAGAGGATGTGTCATCAATATCGAAAGCAATAACTCACCACATCAAAACCATCAAA  
TTATGTTGATACCGTGTATATAATCCAAGAAACAAGAGTCTAA

>Cluster\_22238

ATGTTTTCCAGAAGTCATGCGTTATATTCGACCTCGGCCCTACGGTGTGCTGCCGATTGTCATCATTATGTTTTCTAA  
AATATTAGGCATGAAGGCAGGCGATTGCTTTAAAGCAGCTGTCATATCGGGATTGGCTTTGTTGGCATTGGCCTTGTGA  
TTGGCTTAATGCTGGATCCATTGGCCCGGCGGAAAGCCGATGGCGGAAAATTCGACCTGAATCTGCATTTGGTTCGAT  
GTCCGCTGGCCGGCTCTTACCACATGACCTGGCGCTGCAAAATGGCGCTGGTGGCGATTCGATTTGCCATTTGGTTAA  
CGTGGCGATGTTACTGACCCGATGACGCGGGTGGTAAATGTTGATATCTGGAATATCTGGCATATGACCTTCCACCGCG  
CGTTGCTGCATTCGGCAACCGGTTTCATGGATGATAGGGATGGCGGGTGTGGTAATTCACGCGGCGTTTGTTTATAAGCT  
GGCAGCTGGTTTGGCCGATACCCGAAATTTCTTTGAGCTGGAAGGCATTGCTATTCCGACCGGTACGCTCGGCGTATAT  
GGGCGGATTTGCGGTGCTGGTGCATGCTATCATCGAGAAAATCCAGGCGTTAACCGAATTAATTTAGCAGCGATGATA  
TTCAGCGCAAAATTTGGCCCTTTTGGCGAACCGGTCACCGTGGGTTTGTGATGGGGCTGATTAACGCGATCCTCGCGGT  
TACGATGTCAAAGGTGATTTGCAACTGGCGGTAATAAAGCCAGGCGAGTCAATGCTGCTGATGCCACGGGTGATTAACCCAT  
CATGGATGGTTTAAACCCATCGCTAAGCAGGCGGTAGTCTGTTTACAGGCGAAGTTCGGCGGTTCAGTTCGATG  
GCCTTGATCCGGCTTGTGCTGGGACATACGGCGGTGGTATCGGCAAGCCTGATTTTATCCACTCACCATTTTAATT  
GCTGTTTGGTGGCGGTAATCAGGTGCTGCCGTTTGGCGACCTTGGCCACCATCGGCTTCTTTGTTGGCGATGGCGGTCCG  
GGTGCATCGTGAATCTGTTCCGCACCTAATCTCGGGTGTGTCATATATGAGCATCACCCTGTGGATCGCGACGCAAA  
CTATTTGGTTTGCACACCCAACTGGCGGCTAATGCTGGCGCTTAAAGCCGGGGTATAGTGGCTTCAATGGATCAGGGC  
GGTCTCCCATTAACCTGGTACTGATTCAGGTTTTCTCCCGCAAAATATCCCGGCTTCAATTTATCGGCACAATTTA  
TCTTACCCTGATTTTTCATGACCTGGCGTAGAGCTCGAGCTTTTATAAACAAGAGAAAGTCTTCTTGCAGAAATAA

>Cluster\_23389

ATGTTCCGGCATAAATATATCTGTGTCATGTTAATTAACGATGGGCTATTTGATCCTGAAAACTACAAACCTCAGGTGGT  
GCTGGCTGCCGAGGATCTTCCGATGATGTGCGGTGCTGGTTAGGGTTCGGTGGTGTGCTCGATCCCGCCAAAAGCA  
GCGGCTACTTGATCGTCGATATTTATAATGAAATCCTGCGCATGCTGTCCAACCGCATTTGCTGGATTGGGGCTGTGAT  
ATGGCAGTGGGCGGTTATGCCCGCTATATGGAGCGCATAGGGCAAGTCCGCGATGGTGAGCTTGTAAAGCCCGCTT  
AAAATCATTTCGCTCGCGTATATTTCTGTCGGCAACTACGTCATCGGCCAAATCATGCGCGGTAATTTACAGCG  
CCTCCGGTCTGGGTATGTTGCTGATGGTCACTTATTTCCGACGCTGGTGGTCTGGGAGTAAAGTCTCTCTCGCGGTG  
GCGGTTATCGCAACCCATGTCATTGAGTGGGGATTTCTGGAAACGAACTCCATTTTGTGCTGCCAGGTTCGAGGAAT  
GAAAATGGCCACTTACTTCTCCACTACAGCTTCCGGTCCCTTGGCGTATATCTCGGTGGCAGTATTCCTCCACTTTT  
TCGTGCAACCGCTTTTCGACAAAAAAGATAAAAAATATCAATCAGCAACAGGCAAGGCAAAAAAGCTCTCGATAATGTC  
CCGCTCTATACGCCATTTTACCGGTGATGCCGTTAATCCTGATGCTCGGCTCGCTGTTCTTCCCGCAGTCCGGCTGAT  
GCAGTCAGAACTGCATCTGGTGGTGGTGTACTGAGTTTGGAGGTTGACGCTGTTTGTGAGTCTTCCGCAAGCATA  
ACTTGGCGGAAACAAATGGACGATGTGACGGCGTTTTTGAACGGCATGGGTACGAGTTTGCACAGTGGTAACGCTGGT  
GTCGCGGGTGAATAATTTGCGAAAGGCTTAAACGACGATGGCACTGTCGATGCGGTTATCAGGGGGCGGAGCATCTGG  
TCTGGGCGGTTATGGCGTATGATTTATGCGGCTGGTCAATGCCATTTGTGCCATTGTGATGGGCTCAGGCAATGCCG  
CGTTTATGTCATTTGCCAGTCTTATCCGAATAATCGCAGCGGACTACATGTACCAGCGGTTGTAATGATTTATGCCGAT  
CATTTTGCACGACGCTAGCGCGCGCTTTCCCGCATTACTGCGGTGGTGGTCTGTTACGTCAGGAATTCAGGCGGTTT  
GCCTTTTGGCGTAGTGAAGCGGACAGGATCCCATGCGAGTCCGTTTCTGTTGTAATGATTTGCCACTATCAGCTAT  
TTTATTA

>Cluster\_41868

ATGAGTTCTCAATTTACGACGCTGTTGTTACTGAAATGCAGGTCATCCCGGTGGCGGTCATGACAGTATGCTGATGAA  
TCTGAGTGGTGCACATGCACCGTTCTTCCAGCGTAATATGTTGATATCAAAGATAATCCGGTCCACTGGCGTAGGGG  
AAATTTCCGGCGGCGAGAAAAATCCGTAACCGTGAAGATGCGATTCCGCTGGTGGTGGTAAACCGTGGGTGAATAC  
AAAAACGTTCTGACGCTGGTGGCTAATACTTTTGGCGATCGTGATGCCGTTGGGCGGCTTTCAGACATTTGATTTGCG  
TACCATAATTCATGAGTTTACCGGATAGAAGCGCAATGCTGATCTGCTGGGCGAGCATCTGGGGTAAACGCTGGCAT  
CGTGTGGCGATGGTCAACAGCGTAGCGAAGTCAAAATGCTCGGTTATCTGTTCTTCTGTCGTAATCGCAAAGCTACA  
CCGCTGCCGATCAAAGCCAGCGGATGACTATGCGCATGTTGCTGCTGCTCATGAAGAAGCGATGACCGCGGATCG  
GGTGTGGCTTGGCGGAAAGCGGCTGATAAAAAATATGGCTTCAACGATTTCAAACGTAAGAAGCGGTTGTAATGCGCGG  
AAGAAGAAGCCGAATCTATTTGTTGACCTGGCGCAACGTTTCCCGCAGGCGCTATACGCTCGATCTAACGTTGCCCTGG  
TCGTTGAACGAGCGATTAATAATCGGTACATACCTGAAAGGTTGCTGGCTTATGTCAGAAAGATCCGTTGGTGGCGAGCA



AGGTTTCTCCGGGCGTGAAGTGATGGCAGAGTTCGGTCGCGCAACTGGCCTGCCGACCACAACCAATATGATCGCCACC  
ACTGGCGGAGATGGGCCATACGCTCTCGTTGCAATCCGTTGATATCCCGCTTCCGGATCCGCATTTCTGGACGATGCAA  
GGTTCGGTACGTGTGGCGCAAAATGTGTCATGAAATTTGGCTGACCTGGGGTTCACACTCCAACAACCCTTCGATATTTTC  
TCTGGCGATGTTTTACCATGTTGGCGCTGCCGACCCGGTAAATACCGCGATTTGATACGCACTGGATTCGGCAGGAAG  
GTAATCAGCGCTGACCAAGAACCCTTAGAGATCAAGGGCGGTTGTTGTTGAGTGGCCAGAAAAACCCGGGCTGGGTGTA  
GAAATCGATATGGATCAAGTGATGAAAGCGCACGAGCTGTATCAGAAACACGGGCTTGGCGCGGTGACGATGCGATGGG  
AATGCAGTACCTGATCCCGGCTGGACGTTGATAACAAGCGTCCGTGATGGTGGCTTAA

>Cluster\_14703

ATGCATGTGCTTAACTTCTCTGGTGGTATTCGGCATTGGTCTGATGTGGTACTGAATTTGAAGTTCAAATCAATTC  
AATGGTGGCTTGTGGTGGCGGCTGTCGTCGGATGCTGGCGGGCATGGATTTGATGTGCTGCTGCACACCATGA  
AAGCGGGTTCGGCAACAGCTGGGGAACTGGCTATCATCGTGGTGTTCGGTGCCTCATCGGTAATTTGATGGTCCGAC  
TCCGGCGGGCTACCAGATAGCGCATAAGCTGCTGGCAGCTCGGTCGCTGCTTATGTACAGCTGTCGGTATTATCAT  
CGGCTGATTTTCCGCTGCGCATGTTCTATGAAGTGGCTTTTATCATGTTAGCACCGCTGGTATTGTTATTGCCCGCG  
AAGCTAAAATTTCCGTTCTGAACTGGCGATCCCGGAGTAGCAGCTGCCACTACCGCACATTCAGTGTTCACCGCAG  
CCGGTCCGGTGGCGCTGGTGAATGCTTATGGCGCGGATATGGGGATGGTTTATATCTATGGCGTACTGGTGAAGATCC  
AAGTGTCTGCGCAGGCTGATCTCTGCCGAAGTTCCTCGGCAATCTTGAGCGCCAAACGCCATCTCTGAAAGCAG  
ATCAACCGTAGATATGAATAATCTGCCCTTCTTCCGCTTTTCCGATTTCCGATTTGTTGCTGCTGATCCCGCGCAT  
TCTACCACCATCGCAATATCTGGCTGGTAAAAGATACCCCTGCTGGGAAGTGGTTAACTTTATCGGTTCTCGCGAT  
TGCATGTTTATTCCGATGGTGGTTCATCTGACTCTTTGGCACCGCGCGGGCAGATATGCAAGTGGTAAATGAAGC  
CTTTTGAAGCGCGGTGAAAAGCATGCAATGGTGGTTCATCATCGGTCAGGTCAGGTCGCTGAAGCAGACCATCATC  
GACACCGGATCGCGCACCATCGGCATGCTGATGTCACGCAATATCTGCCCTACATCATGGCATGGTATGGTACATC  
CGTACTGATTCGCTGCGCAGGGTTCAGGGTGTGGTTTACGCGATGACCGCGCGGGATATCAGTGCAGCAATCTTGT  
ATCCAGCAACTGGTCAGCTGGTTGGCGTGAATCCGGCGCTGCTGGTACTGGCGACGGCTGGGGTTCACACCCCTACC  
CACATTAAGCTGCTCATTTCTGGTTGTTCAAAGTACTTTGACTGTCAGTAAAAGACAGTTGAAAACCTGGGGTCT  
GCTGGAGCTGCTCAACTCCGTGGTGGGCTGATTTATGTGCTGATTTAGCATGGTAGCGTAA

>Cluster\_54093

ATGCAAGTTTCAAGTGAACCCTCAAGGCTTGGCGCGGTGTAACGATTACTATCGTCTGACAGCATCGAGACCGC  
GTTTAAAAGCGAGCTGGTCAACGTTGCGAAAAAGTACGATTTGACGGCTTCCGCAAAAGGCAAGTGCATGAATATCG  
TTGCTCAGCGTTATGGCGGCTGTACGCCAGGACGTTCTGGGTGACCTGATGAGCCGTAACCTCATTGACGCCATCATT  
AAAGAAAAATCAATCCGCTGGCGCACCGACTTATGTTCCGGCGCAATACAAGCTGGGTGAAGACTTCACTTACTCTGT  
AGAGTTTGAAGTTTATCCGGAAGTTGAAGTGCAGGGTCTGGAAGCGATCGAAGTTGAAAAACCGATCGTTGAAGTACCG  
ACGCTGACCTTGACGGCATGCTGGATACCTGCGCTAAACAGCGCGACCTGGAAAGAAAAAGACGGCGCTGTTGAAGCA  
GAAGACCGGTAACCATCGACTTACCAGGTTCTGTAGACGGCAAGAGTTGAAAGCGGTAAGCGTCTGATTTCTGACT  
GGCGATGGCCAGGGTCTGATGATCCCGGGCTTGAAGACGGTATCAAAGGCCACAAAGCTGGCGAAGAGTTCACCATCG  
ACGTGACCTTCCCGGAAGATACACGCGAAGAACTGAAAGGTAAGCAGCGAAATCGCTATCAACTGAAGAAAGTT  
GAAGAGCTTGAACGCGCAAGTGCAGAAATTCGCAAACTTCCGCGTTGAAGATGGTTCCCGTAGAAGTTCGCGTGGC  
CGCTGAAGTGGTAAAACATGGAGCGGAGCTGAAGAGCGCCATCCGTAACCGGTTAAGTCTCAGGCGATCGAAGGTC  
TGGTAAAAGCTAACGACATCGACGTAACCGGCTGCGCTGATCGCAGCGAAATCGACCTTCTGCGTCCGACGGTGCACAG  
CGTTTCCGGTGGCAAGCAAAACAAAGCTTGGAACTGCCCGCAACTGTTCAAGAAAGCTTAAACCGCGCTAGTTGT  
TGGCTGCTGCTGGCGAAAGTTATCCGCAACAGAGCTGAAAGCTGACGAAAGAGCGGCTGAAAGGCTGATCGAAGAGA  
TGGTCTCTGCGTACGAAGATCCGAAAGAAAGTTATCGAGTTCTACAGCAAAAACAAAGAACTGATGGACAAATCGGCAAT  
GTTGCTCTGGAAGAACAGGCTGTGAAGCTGTACTGGCGAAAGCGAAAGTACTGAAAAAGAAACCACTTTCACAGGCT  
GATGAACCAGCAGGGCTAA

>Cluster\_39588

ATGCAAAATAAATAGCTTCCGGTGGCAGGCTTGGACGTCAGGCGTTACTTTTCCCTCTCTGCTGGTCTTTACGAATT  
TTCAACCTATATCGGCAACGATATGATTCACCCGGTATGTTGGCCGTTGGTGGAAACAATACAGGCGGGCATTTGATGGG  
TTCTACTTFCATGACCGCGTATCTGGCGGGCGGATGTTTTTACAATGGCTCCTGGGCGCTTGTCCGATCGTATTGGC  
CGCGCTCCGGTGTATGTTGGCGGAGTGGTGTGGTTTATGTCACCTGTCTGGCAATATTAAGTGGCGAAAACATTGAACA  
ATTCACCTGTGCGCTTCTTGCAGGGCATAAGCCTCTGTTTCAATTGGCGCTGTTGGGATACCGCGCAATTCAGGAATCT  
TCGAAGAGGCGGTTTGTATCAAGATCACCGGCTGATGGCGAAGCTGGCGCTGATGCTCCGCTACTTGGTCCGCTGGT  
GGCGGGCTGGATGCTATGCTGCCCTGGGAGGGATGTTTTGTTTTGTTTGGCGCATTTGGCAGCGATCTCTTTTCCG  
TCTGCAACGACCATGCTGAAACCGCCACGGTATAGGCGAGAACTGTGCTGAAAGAACTCGGCTGCTGACTATAAGC  
TGGTGTGAAAGACCGCCCTTTGTGGCGGGGGCTGGCGCTGGGATTCGTTAGCCTGCCGTTGCTGGCGTGGATCGCC  
CAGTCCGATATCATCATACCGTGGAGCAGTTGAGCAGCTATGAATATGGTTGCTGCAAGTGCCTATTTTCCGGG  
GTTAATTTCCGGTAACTTCTGTTAGCGCTGTGACCTCGCGCCAGCGTACGTTTCGCTGATTTATTAAGTGGCGGCTGC  
CGATATGATTTGGTCTGTTGGTCTGCTGCGGCAACGGTTATCTCATCGCACGCTATTTATGGATGACCGCGGGTTA  
AGTATTTATGCTTTCCGGCATTTGGTCTGGCGAATCGGGACTGGTGCATTAACCTGTTTGGCAGCGATATGAGTAAAG  
TACGGTTTCTGGCGGATGGAAATGCTGCAATGCTGATCTTTACCCTGGTATGAAATCAGCAACATGCTGGCTGA  
ACGGGGCAACGGATGTTTAACTCTTTCACCTTGTCAACCGCATTTTGTGGCTGTGCTGATGTTTCTTTTAAAA  
GATAACAGATGGAAATTCGACGAAGGGTAA

>Cluster\_25572

ATGAAATGTAGCTGGCGGAAGCAATAAGATCCAGTTGCTGGAACCGCGAGCAATATATCCCGGCTGTTTAAAGC  
GATTGGCGAGGCGCAAGAACGCATCATTCTGAAACGTTTATCTGTTTGGAGATGACGTCGGCAACAGCTGCATGCGG  
CGCTACTGGCAGCAGCGCAACCGGGGTGAAAGCGGAAGTCTTGTGGATGGCTACGGTTCCGCGGATCTCAGCGATGAG  
TTTGTCAATGAAGTACGGCAGCTGGCGTGGTATTTCCGCTACGATCCCGCCCGGCTTTTGGTATGCGCACCAA  
TGTGTTTCCCGGATGCTATCGCAAAATTTGGTGTATCGCACGCTTATCGCTTTTATGGCGGGCTGAATATACCCGCG  
AGCATATGTCAGCTACGGTCCAGAGGCCAAACAGGATACCGGCTACGCTTGAAGGGCCGATTTGTTGAAGATACTCT  
CAGTTTGAACAGGAAAATCTGCCAGGACAGGCGCGGCCGACGCTGGTGGCGACGTCATCACAAAGCGGAAGAAAATCG  
CCAGCCGGGAGAAGCGCAGGATTTGCTGGTCTGGCGGATAACGAAGAATACCGGATGATATCGAACGTCATATCTGA  
AAATGCTCACTCAGCGCGGCGGAGAAAGTATTATCGCCAACCGCTACTTCTCCCGGCTATCGATTTTACCGCTG  
CGTAAAGCGGCACGGCGGGGTGCGGATCAAACTGATCATTCAGGGCAACCGGATATGCGGATTTGTCAGAGTGGTGC  
GCGTTTGTGATATAACTATCTGGTTAAAGCGGGCTTCAAGTGTGTTGAGTACCGCGCGCTCCGCTACATGGCAAGTGG  
CATTTGATGGACGATCACTGGCGACAGTAGGCTCCAGTAACTCGATCCGCTCAGTTTGTCACTGAATCTCGAAGCAAT  
GTCATCATCCAGGATCTGCTATTTTAAACAGAGCTGCGGATAAATCGAACCGCATTTATCGCCGAGATTTGTCAGCAGG  
CGATGAGACCATGCTGCCGAAACGCACCTGGTGAACCTGACCAAAAGCGTGTGGCGTCCACTTTTACGCCACTTCC  
CGGCGTGGTCCGCTGGCTTCCGGCGCACACGCGCAGCTTGGCGCAGGTTGACCCGCGCACAAACCGCAATGGAAACG  
CAGGATCGGGTAGAACTGAAAACACGGGGTAAAACCTGA

>Cluster\_3131

ATGGCAAAAATCGCTAAGAAGCTCACTGACACTGAAATCAAAGCACCAAGCCAGCCGATAAAGAAATCACTTGTGTTGA

CGGTGATGGTCTGATCTACGAATCGCTCCTTTGGCGAAAGGAGGCAAGAAAAATGGTATTTACAGGTATGCAGTACCAG  
TGAGCAAGAAAAAGAACAAAAATGAGCCTTGGGACATATCCTCACCTTACCCTTGAAGAGCCAGAGCCTTACGGTATGAA  
TATCTCTCCTTTCTGGCAAAATGGTGTGATCCCAAAATCCATAACAACGATAAGGCGAAGGCATTAAGAGAGTGTACTGA  
GCACACTCTCCAAGCCGTAGCGCGGAAATGGTTAGATGAGAAGGTAAGACATCAGGTATCTCACAAAGACCATCGAGCAG  
ACATCTGGCGCAGTCTAGAGAGAAATGTCTTCCGGTCTGGGTAATGTCCCTATCAATGAGATCCGACCTAAGCTCTTA  
AAACAACACCTTGATCTTATTGAGCAACGAGGCGTATTGGAACTCTACGCCGTATCATTTACAGTCTGAATGAAATCTT  
CCGGTGGGAGCTACTGAAAGACTTATTGAGTCAACCCGGCTGACAACCTTGGTCAAAGATTAGTAACCAAAAAAGC  
AAAATATGCTGCCTTCCCCCAAGCGAATTGCCAAGGTTTATGGAATCTTGGACGAATGCGTCAATCCGGTTGGAAACA  
CGTATGCTAATTGAAATGGCAATTTGTTGACATGGTTCGTCCGGGTGAAGCCGTTCGCGCAAGGTGGTCTGATATTGATA  
AACCAACAGCATTGGAACATCTCTGCTGATTTTCAATGAAAATGAAAAAGCTTCACAAAGTTCCTTTGAGTAAAGAAGCTT  
TGCGCATCTTGAATTAATGAAATCAATAAGTGGGCATAGAGAATGGGTTTCCCCAGCATAAAAGCGCCTCTTAATCAT  
ATGCATGAACAAACAGCAACCGCAGCTATCATCCGAATGGGTTTCGGAGGCGAGCTTGTAGCTCACGGTATGCGTTCTAT  
TGCAAGAACAGCGCAGAGGAGTCTGGTAAATTCAGAGCTGAAAGTTC'TGAGGCGAGCGCTTGCACACTGAAAAAAGATG  
AAATTTATCGCAGCATACAATCGTGCAGAATATCTGATAGAGCGACAGAGTTTGTATGCAATGGTGGAGTGATTACGTTCAA  
GCTCAAAGATCAAATGCTCTGGTAGCCTAA

>Cluster\_42810

TTGTATCAGGACCGCCATGAAACAGATAACCTTTGCTCCCGTAATCACCTGCTCACCAATACCAATACCTGGACGCC  
CGACAGCCAGTGGCTGGTATTTGACGTGCTCCTTCTGGGGCGTGGTTACCGGCGAGACCATTGAGCGTGTGAATATCC  
ATACCGGGCGAGGTCGAGGTATCTATCGCGCGTACAGGGCGCACAGCTCGGGCGTGGTACCGTTTATCCGAAGTCAGAG  
AAGTATGCTTCTCATCCAGGCGGAAATCTGATGAAACATGGTATTACGACTTTCATCATCGGCGGAGTGATTTGT  
TGAAGCGCAAGGTGAGCAATCTCGATGCAATGGATAATTACCAGCCATATACGCCAGGAGCCTGCGCGGCGGCGAGTC  
ATGTACATGCTTTAGCCAAACGGTGAAGGGTGGAGCTTTACCTACAACGACCATGTAAATGCATGAACCTCGATCCGGCG  
CTGGATTTGCGAAATGTCGGTGTGCTGCACCGTTTGGCCCGTCAACGTACAAAAGCAGCATCCGCGTGAATACAGCGG  
TAGCCACTGGTGGTGTGTAATCTCAAGGAACACAAATTCGCGTTCGAGCAGCCAGCCAGCTGGCAGTGTGAAATCAATCGTAAAG  
AAGGATGGGTAGGAAATCACGCACTGGCGTTTATTGGGATACGCTTTTCGAAAAAGGCGAGAAAGTCCGGAGCTGTTTT  
ATTTGTCGAGTTGCGGAAAGATGAAGCTGGCTGGAAAGCGCAGGTGAAGTCCGCTTAAGTGAACGGAACAAACCTGCG  
CGCGCCACCGGTCGGTGCAGCGAGCTTTAACCTTACGCACTATCGTATTTACCGGGCCTGGTTAACATTCGCG  
GCCACTGGTGGTGTGTAATCTCAAGGAACACAAATTCGCGTTCGAGCAGCTTTTAAATGCGTGTGATGATAACGCGCATTTGCACTGTAAG  
CTTATCTCGCCACAGGGCGGTGAACACGCCAGTTAACCCATAATAAAACGGATATTCAGTCTGCATTTAACTGGCATCC  
ATCAGGCGAATGGCTGGGATTTGTGCTGATAATCGGATTCGTTGTGCCATCGCAGCGGCGAGGTTGAGTATTTAA  
CCGAAACACGCAATCCACCTTCTGCGGACGCGGTGGTTTTCTCGCGGATGGTCAATGGTTGGCGTGGATGGAGGAC  
GGTCAGTTTGGATCACGAAACTGATCCTAA

>Cluster\_20092

ATGTCCGAAGATATCTTTGACGCCATCATCGTCCGGTGCAGGCTTGCCGGTTCGGTTGCCGCACTAGTCTCGCCCGCA  
AGGTGGCAAGTGTAGTTATCGAGCGAGGCAATTCGCGAGGTTGCCAAGAAGTCAACCGGCGGCGTCTTATGCCACACA  
GTCTGGCAACACATTTACTTCCTGCTGACTCCGCGCCGTAGAAGCCTGATCACCCATGAAAAAATCTGCGTTTATG  
ACGAAAAAGTCAGTATGACTATGGACTACTGCAATGGCGACGAAACCTCGCCATCCAGCGTCTTACTCCGTTTTGCG  
CAGTAAATTTGATGCCTGGCTGATGGAGCAGGCGAAGAACGGGCGCGCAGTTAATTAACGGGATCCGCGTCGATAACC  
TCGTACAGCGCATGGCAAAGTTGTCGGGTAGAAGCTGATGGCGATGTGATGAAGGAAAAACGGTATCTTGTCTGAT  
GGGTGAAATTTCCATCTTTCGCGAAAAGCTGGGGATGGCAAAACCGCTTAAACCGACGGATGTGGCGTTGGCGTAAAGGA  
ACTGATCGAGTTACCGAAGTCGGTTATCGAAGACCGTTTTTCAGTTGCAGGGTAATCAGGGCGGGCTTGCTGTTTTGCGG  
GATCACCCACCGCTGATGGCGGTGGCTTCCTTTATACCAATGAAAAATACCCTGTGCTGGGGTGGTTTTGTGGT  
TTGCACTATCTGCATGAGCAAAAAAATCGGTGCGGCAATGCTGGAAGATTTCAAACAACATCCGCGCTTGCAACCGCT  
GATTGGGGCGGCAAGCTGGTGGAAATATCCGCTCACGTAGTGGCGGAAGCGGCATCAACATGCTGCGGAGCTGGTCCG  
GTGACGGCTGCTGATTTGCGGTGATGCCGCGGAATGTTGATGAACCTCGGTTTTACCATTCGCGGTATGGATCTGGCG  
ATTTGCCGCGGGGAAGCAGCAGCAAAAACTGTGCTTTCAGCGATGAAAAGCGAGATTTTCAGTAAAGAAAACTGGCGGA  
ATATCGTACGATCTTGAAGTGGCCCGCTGCGCGATATGCGTATGTACCAGAAACTACCGCGTTCCTTGTATAACCCAC  
GCATGTTTTAGCGGTACCCGGAACCTGGCGGTGGCGGTGGCGGTGACCTGTTACCATTGACGGCAGTGGCCGGAACTG  
ATGCGCAAGAAAACTCCTCCGCCACGGCAAGAAAGTGGGTTTCAATCTGATCAAGGATGGCATGAAAGGAGTGACCCT  
TTTTATGA

>Cluster\_41878

ATGGAACGACTCAAACAGCAGATTGCGTCGAAAGACTCTCGTAGTGCTGGCGCAAGACAGACACCATGTGGATGCT  
GGGCTTTACGGCACGGCAATCGGCGGGCGTCTGTTTCTGCAATCAACCGTGGTGTGGCGGTATGATCCCGCTGA  
TCATCATGGCTATCTTCCGTTCCCGATGACGTTTTTTGCTCACCGGCTGACTCGCTTCGTACTGTCTGGTAAAAAC  
CCGGCGAAGACTTACCGAGGTTGTAGAAACACATTTGGTATTGGCGCAGTAAACTGATTACCTCTACTCTCTT  
CGTATCTACCCGATCTCTGCTGTTTATAGCTGGCAATCACAATACAGTTGAAAGCTTCATGTCTCACAGCTGGGTA  
TGACGCCACCGCGCGTGGCATTCTGTCTGATCTTGTGCTGATGATGACCATCGTTCCGTTCCGTTGAGCAGATG  
ATCGTTAAAGCGATGAGCATTCTGGTATTCGCTTTCGTCGACTGATGCTGCTGCTGCTGCTGCTGCTGCTGCTGCTG  
GAACGGCGCAGCACTGGAAACCGTGTCTCTGGACACTGCACTGCAACCGGAAACCGTCTGTGGATGACCCCTGGCTGG  
CAATTCGGTAATGGTGTCTCGTTCAACCACTCTCCGATCATCTCTTCTTTCGCGTTCGGAAGCGTGAAGAGTACGGC  
GATATGGCAGAACAGAAATGCTCGAAGATCTGGCATTGCGCACATCATGATGGTGTGACCGTAATGTCTTCTGCTT  
CAGCTCGCTAGCTGACTCCGGCAGACTTGGCTGGGCTAAAGAGCAGAACATCTCGATTCTGTCTTACCTGGCTA  
ACCACCTTAAACGCGCCGATCATCGGCTGGATGGCTCCGATTATCGGATTTATCGCTATCACCAAAATCCTTCTCGGCCAC  
TACCTGGGCGACGTTGAAGGCTTCAACGTTATGGTATTAATCTCTCGGTTAAAGGTAAGTCTATCGAAATCAACAA  
GCTGAACCGTATCACTCGCTGTTCATGCTGGTAAACGACTGGATTTGTGCCACCCTGAACCCGAGCATCTGGGATGA  
TTGAAACCTGGGCGGCCAATCATCGGATGATCTGTTCTTCTGATGCGCATGTACGCAATTCAGAAAGTACCGGCAATG  
CGTAAAGTACAGGGTACATCAGCAACGATTTCTGTTGCTGATGGGTTGATGCAATCTCCGCAATCTTACTCTCT  
GTTCAGCTAA

>Cluster\_63035

GTGTCAAAGGCAACCGAACAAAACGACAAGCTCAAAGCGGCGATAATTTACAGAGTGGTGCATGTCTATTTTGC  
GGCGTGTATCGAGTTCGTTTCGATGAGAATATAGAAGCTTACCGGAGGCGGCGGTTGCTCCATCGACGCTGTCA  
TGGTTGATTCAGGTGCGGTAGTTGAGCAGTACAACCGATGCAAAGCCAGGAAACAAGCGCGAAGCGTTCTGATGAACAG  
CGCAAGATGAAGGAACAGCAGGCTGTGAAAGACTGCTGAAAGAACTGAGTGAAGAAACAGCGGCTGAACAGGAACGCTGAAGCAACTGA  
GAAAGAGCGGTTAGCGGCTCAGGAGCAGAAAAAGCAGGCTGAAGAAAGCCGCAAAAACAGGCGGATTAAGACAGAAAGCAAG  
CTGAAGAGGCGGAGCAGAAAGCGGCGGAGATGCTAAAGCGAAGGCGGAGCAGATGCTAAAGCTGCGGAAGAAGCAGCG  
AAGAAAGCGGCTGACAGCAGAAAGAAAAAGCAGAAAGCAGAAAGCGCCAAAGCCGAGCCGAGCGCAGAAAGAAAGCCGCA  
GGCAGCGCTGCGGCATCAAGAAAGAAAGCGGAGCGGAGCAGCTGACGCTGAAGCAAGAAAGAAAGAAAGCGCAACTG  
AAGCTGCTGAAAAAGCAGAAAGCAGAAAGCTGAGAAGAAAGCGGCTGCTGAAAAGGCTGACGCTGATAAGAAAGCGGAGCA  
GAGAAAGCTGACGCGCAAAAAAGCAGCAGAAAAAGCGGCTGCTGAAAAGGCGAGCTGATAAGAAAGCAGCGGAGCA

AAAAGCCGCGCAGACAAAAAGCGGCAGCGGCAAAGCTGCAGCTGAAAAAGCCGCTGCAGCAAAGCGGCCGAGAGG  
CAGATGATATTTTCGGTGAAGCTAAGCTCTGGTAAGAATGCACCGAAAAAGGGGGAGGGGCGAAAGGGAACAATGCTTCG  
CCTGCCGGGAGTGGTAATACTAAAACAATGGCGCATCAGGGGCCGATATCAATAACTATGCCGGCAGATTAATCTGC  
TATCGAAAGTAAGTTCTATGACGCATCGTCTATGCAGCAGAAAACCTGTACGCTGCAGCATAAACTGGCACCAGGATGGTA  
TGTATGGATATCAAACTGAAGTGGCGATCCGCACTTTGTCAGGCTGCGTTGGCAGCAGCTAAACTTGGGAAGATC  
CCGAAACCACCAAGCAGCAGTATATGAAGTGTTCAAAAACCGCCATGGACTTCAAACCGTAA

>Cluster\_18783

ATGAAAACTCTCTGTTTAAAAAGCCTTTACTTTTCAGGTCCTGACAGCGATAGCCATTGGTATTCTCCTTGGCCATTTCTA  
TCCTGAAATAGGCGAGCAAATGAAACCGCTTGGCGACGCTTCGTTAAGCTCATTAAAGATGATCATCGCTCCTGTCATCT  
TTTGTACCGTCTGTAACGGGCATTGCGGGCATGGAAGCATGAAGGCGGTCGGTCTACCGCGCAGTCGCACTGCTTTAC  
TTTGAAATGTGACGTACTATCGCGCTGATATTGGTCTTATCATCGTTAACGTCGTGCAGCCTGGTGCAGGAAATGAACGT  
CGATCCGACACAGCTTGTATGCGAAAGCGGTAGCGGTTACGCCGATCAGGCGAAAGACCAGGGCATTTGCGCCTTCATTA  
TGGATGTCATCCCGGCAGCGTCTATTGGCGCATTTGCCAGCGTAAACATTTCTGCAGGTACTGCTGTTTGGCGTCTGTTT  
GGTTTTGCGCTCCACCGTCTGGGCAGCAAAGGCCAACTGATTTTTAACGTGATCGAAAGTTTCTCGCAGGTCAATTTTCGG  
CATCATCAATATGATCATGCGTCTGGCACCCTATGGTGCATTCGGGGCAATGGCGTTTACCATCGGTAATACGGCGTGC  
GCACACTGGTGAACCTGGGCGAGCTGATTTATCTGTTTACATCACCTGTATCCTGTTTGTGGTGTGGTATTTGGGTTCA  
ATCCCTAAAGCGACTGGCTTTCAGTATCTTCAAATTTTACGTTTACCTGTTACATCCGTAAGAAGCTGCTGATTGCTAGGCA  
ATCTTCCGAGTCCGCGTCCCGCTATGCTCGACAAGATGGAGAACTCGGCTGCCGCAATCGGTGGTGGGGCTGGTCA  
TCCCGACAGGCTACTCGTTTAACTTGTGACACATCGATATACCTGACAATGGCGGGCGTGTATCCGCCAGGCCACT  
AACAGTCAGATGGATATCGTCCACCAAATCAGCTGTGTTAATCGTGTGCTGCTTCTTCTAAAGGGGCGCAGGGGTAAAC  
GGTAGTGTGTTTTATCGTCTGGCTGGCAGCAACGCTCTCTGCGGTGGGCCATTTGCCGCTAGCGGGTGGCGCTGCTCCTCG  
GTATCGACCGCTTTATGTCAGAAGCTCGTGCCTGACTAACCTGGTGGTAAAGCGTAGCAACCATTTGCTGTTGCTAAG  
TGGGTGAAAGAATGGACCACAAAAAATGGACGATGTCTGAATAATCGTGCCTGGATGGCAAAACCCAGCAATATC  
CTCTTAA

>Cluster\_39001

ATGTCGATCAAAACAGTAAATACAGATTTTAAAGACACGATCCGTCAGCAAATGAAGATCCGATCATGCGCAAAGCGGT  
GGCAAAACCGCAGCAGCGTATCGGGCAAATCGGCAAAAAATGGTCGATGAATGGGGCACTGGGAGGAGTGGCGCGATC  
GGGCGCCAGATACCGTGATCATGTTCTGAGTAATCTCGACGCTTATCTGTACCAGCTCTCAGAAAAAGTGACACAAAAC  
GGCGGTACGCTCTATTTTGCAAAAACAAAGAAGACGCCACCCGCTACATTTTACAGGTTGCCAACGCAAAAAATGCCCG  
GAAGGTGGTGAATCTAAATCAATGGTGACCGAAGAGATTTGGTGTCAATCATGTGTTGAGGATGCTGGGATTGAGGTGA  
TTGAAACCGATCTGGGTGAATACATTTCTCCAGCTGGATCAAGATCCGCCCTCTCATGTTGTGGTCCCGCAATTCATAAA  
GATCGCCATCAGATCCGTCGGGTCTACACGAACGCTCTGGGCTATGAGGGGTGGAAACCGCTGAAGCAATGACCTTATT  
CATCCGCAAAAAATCCGCGAAGATTTCTCAGTGTGAAATAGGTATTACCGGCTGTAATTTGCGGGTGGCAGAGACCG  
GTTCCGATGACCTGGTGAACCAATGAAGTAAATGCGCGAATGTGTACCAGCTGCCATAAACCGCATATTCAGTGTGGGA  
ATGGAGCGTATTTGCCCCAGCTTTGCCGAGGTAGATGATGATCACCATGCTGGCGCGCAGTCCCGTGGTGGTCAACGTTT  
GACGGGATCAACACTGGCTGACAGGACCGCGCGGCGGCGGCGGCTGATGGTCTGTAAGAGTTTTCACTGCTGATTTATG  
TCGATAACGGGCTTCTGAGGTGCTGGCCTCTGAATTTCCGGATGTGCTGCGCTGATTCGCTGCGGGCTTGTATGAAT  
ACTTGTCCGGCATATCGCCATATTTGGCGGTATGGATATGGCTTATTTATCCAGGGCAATTTGGTGGGTGATTTCTCC  
TGACTTGGCGGTATAAAGATTTTAAAGATTTACCTACGCTGCTCTTTATGCACTGCTTGTGACAACTGCTGCTGCTCGG  
TGGTATTTCCGCTGCAAAAACGATTTTTCGCTCATCTGCGGTGATGGCTGAAAAAGGGATCACCGCAAAAGCAGAGCAA  
CGGGCGATAAAAAATGTTCCGTTATGCCAATAGTCAATCCAGGATTTGGGAAAGTGGGATGATGGCCGGCGCTCATGCGGC  
AAGCTGGTTTATCAATGGCGGCAAAACACCCTCAAATTTGGCGCGATTAGCGACTGGATGGAAGCACGCGATCTTCCCTG  
AAGCTGACGGAGAGATTTCCGTAAGTGGTTTAAAGAAACATCAGGCGCAGGAGAAAAAGAAATGGATAA

>Cluster\_24644

ATGCCAGATTTTTCTCCTTTATTAACAGCGTCTTTTGGGGATCGGTAATGATTTACCTGCTCTTCGGCGCAGGTTGTTG  
GTTCACTTTTCGACCCGGATTTGTCAGTTCGCTACATCCCGCAGTTTGGCAAAAAGTCTTAAAAATAGCATTATCCAC  
AGCCAGGCGGTTTTAACCTCATTTTTCAGTCAATGTTGTACAGCTCTTTCGCGCGCGCTGGGTAGCGGCAACCTGGCTGGCGTT  
GCGCTGGCTATTACCGCCGGTGGACAGGTGCCGCTTCTTGGATGTGGGTTGCCGCGTTTATCGGCATGGCGACCTCGTT  
TGCCGAATGTTCCCTTGACAACCTTTATAAAGAAGCTGACGTTAATGGCAGTTTCGTTGGCGGACCGGATGTTATATGG  
CGCGCGGACTGGGGATCGCTGGATGGGCGTCTGTTCCGCGTCTTTTGTCTCATCGCTACGGCATAATTTTCTGCGGA  
GTTCCAGGCAACCGCGTTCGCGAGCCCTGAGTTTTTCTTTTGTGATTTTCCCGCTGGTGCAGGATATTTTCTGCTAT  
CTTTGCTCTGCTGGCGATCACTCGCGGCTTCTATGGCGTCCCGCAGCTCATGCAGGGGTTGTCCCGTTGATGGCGATAA  
TCTGGTACTGACCAGCCTGGTGTATTTGCGTAATGAATATCGGGCAACTTCCCGCAGTCAATTTGGTCTATTTTGGAGAT  
GCTTTTGGCTGGCAGGAGCTGCAGGCGGCGGCGGATATACCTTAAAGCAGGCGATTAATAACGGTTTTCAGCGCAG  
TATGTTTTTCAATGAGGCGGGAATGGGGTGCAGCCAAACCGCGCAGCGGCGAGCTGCTGCGCTCCGCTCCGATCCGCGAG  
CGCAAGGAATTTGCCAGATGATTTGGCATTTTATCGACACCCTGGTCACTGCAGGCAAGCGCCATGCTGATATTACTG  
CGGGTAACGGCACAACTACATGCCGCTGGAAGGTATTCAGCTTATCCAGAAGGCGATGCGGGTGTAAATGGGTTCCTG  
GGTGGGAGTTTGTACCTCGTGGTTATCTGTTGCTTACGCTCAGTCCATCGTTGCCAACTACATTTATGCCAAAACA  
ATCTCTTTCTTTTACCGCTGAACAACCTAAAGCGATCGGTTGCTGCGGATCTGCACCTTCGCAACGGTCACTCGCGGC  
ACCTTGCTAAGTTTTCTCGCTGATGTGGCAACTGGCAGATATCATATGGCCTGATGGCTATTACCAATTTGACCGCCAT  
ATTATGCTCTCGCTGTGGTTCATACCATTGCCAGTGAATATCTACGCCAGCGTAAACTCGGCGTGGCCCGGTTGTTG  
ATCCGTTGCGTTATCCGGATCGGTCGCCAGCTTCTCCAGACGCGTGGGATGATGTTTCGAGGAGTAA

>Cluster\_29504

TTGATTCGTTTTATTTTCGCTTCTGTTTGTCTTTCTTCTTCGCTTCTTTTGTGCTGAGGAGAAAGAAGATCCGGATAA  
GCTTGTTCAGTGTTTTGGCCGTTTCCACTGCAGAACAGCTTATTCAGATGCGGGGGCATCGATTAATTAGCCAGGGGAG  
CTGGTCATATTTATGTTGTTCCGGTGTACGATGCGTCTCCGAAATAATCATTATGCGGTAATAGGCTATCAGC  
TCGCTCAAGCGCTTCCACCGTTGGGGTTTTTGTCCATGCCCGTGGTTCGCATATAAAGTCTGGGATTTAGAGAAGCG  
AGAGTGGAGTACCTGCACCTTCAATATCAGGGTGGTGAAGGGGATTTGACACCTGAATATAAAGCGCCAACTGACG  
AGATTTGCTTTCTCGTCCGGTCTTGTAGGTATGACTTTTCTGTTGTTTATAAAGGTGATGACGGGACCCGTTATGTT  
AATGTGCAGGGGTATTTATGAGGCAACCGCAACTCTTTTATTTGTAATCCCGATGATGATGATGACTGCTTACTGCCAA  
CTGAAACCAGTTGCTGTAGATCTTGCATTTCTCCGATGATAAGGAGGATGGCGGTAGCTCAGGTGGCGGCACTCCGGT  
GTGGTAACCTGCGCGCGGTAGCTCAGGTGGTGGCAGTTCTGGCGGTGGTAGCTCAGGTGGCGGCACTCCGGTGGTAACTC  
AGGCGGTGGTAGCATAGGTGGTGGCAGTTCCGGTGGTGGTAACTCAGGCGCGGCGAGCTCAGGTGGCGGCACTCCGGT  
GTGGTAACCTCAGGCGCGGCGAGCTCAGGTGGTGGTGGTGGTGGTGGTGGTGGTGGTGGTGGTGGTGGTGGTGGTGGT  
GGCTGGCTTGGTGGTATTTCTGGCTGGTGGCAGGATTTGGGTTTTCAGTGAATGATTTAAATAAATGCTTTTTCTGTTTC  
TCAGGATGATATTAACAGTGCAGGTTAGTTCTTATGATTACAGTAAATGAATTAATTAATTTCTGTAACGCTGAACAGG  
ATGATATGCTTCAATTTGCTGACAGGCTTTTACGCTTCTTCTGATGAGTGGCTTTATTAATTTTATAAATTTTCTGTA  
TTAACTGGTGAACTCGCTGCTTCTGGTGTCTAGCCAGTTTCAGATGAAATTTCCGGAAATAAATGGGTTGATTTTACAAT

TGACACATCTGATTTTGGCTTCAGTTTATGATGACATTATCAGGCCCTTATAGAGTATGCTCTTTATGCATTAACGACTT  
TGGTTTGTATTTTATTGTTTCGTGCTGTTCTTTTGTGACAGGGGTA

>Cluster\_509

ATGAGCCAGTACTGTTTAAAGCCACCGTTGAACGTTATTAACGTCGGTATCGCCATGTTTAGCGATGACCTGAAAAAGCA  
GCATGTAGAACTGACTCAACTCGACTGGACCGCCGGGGCAGGGCAATATGCAGGTGGTGCAGGCGCTGGATAACATFG  
CCGATTCCGCCGCTGGCAGACAAAATCGCCGCGCTAACACGACAGGCGCTGGAGCGCATATCCAGTCCGCATCCGGTGTG  
ATTGGTTTTGATCAGGCGATTAACGTGGTGGCCGGGCATGACCGCGAAAACCATTTCTACGCCGGCCGCGATCACCTG  
GGAAAAATGTGGCGGCGATGAAAGGCGCGGTACCGGGGCGTGGTGTTCGAAGGGCTGGCGAAAGATCTCGATGAGG  
CGACTGAACTGGCGGCTCCGGGGAGATCACCTTCTCGCTGGCCACGAAACGACTGCGTGGGATCGATGGCGGGCGTT  
ACCTCGGCCCTCGATGTTTATGCACATCGTGA AAAA AAAAACTACGGCAACATCGCTTATACCAATATGAGCGAGCAGAT  
GGCGAAGATTTTGGCTATGGGTGCCAACGATCAGAGCGTATCGACCGCTCAACTGGATGCGCGATGTCAGGGGCCAA  
TGCTGGCGCAGCGATGAAAATTTATCGGTGAGATCGATCTGCGCTTAATGCTGGCGCAGGCGCTGCATATGGCGGATGAG  
TGCATAAACCGCAATAACCGCGGACGACGCTGCTGATTCAGGCACTGACGCGGGGATCATTAGCGGCTTATCCGT  
CGAGCAACAGCGGAAGTGTTCGAGTTTGTGCCAGCAGCGACTACTTCTCGGCCCGACGTTGATGGCGATGTGTAAG  
CGCGATGGATGCGCGCAGCGCATCGAATACAGCACCCTGGTACCACCATGGCGCTAACGCGCTCGAGTTCCGGCTG  
CGGCTCAGCGGCTGCGGGGCGTGGTACCGGCCAGCGCAGGTCATCGGCCGATGTTGCTGGTTATAAGCC  
GGAAGATTCGGGGTGGATATCGCGGACAGCGCATCAGCAAACTACGGTATGCGGGGTTGCGCATGGCGGCGCC  
CTGCAATCGTCCGACTGGTGGCGGCACGGTGAAGAGGCTATCGATTTCTCCGTCAGATGCGCGAAATCACCTTGGC  
GAAAACCCCAACGTCACCATTCGCTGCTCGGTTTTATGGCGTGGCGTGGCAATCGACATCACCGCGTGGTAGCAG  
CGGCATTCGCGGTGATCAACCGCCATCGCCATAAAGATGCGGGCGTGGCATGATTGGCGGGCATTGTGCATC  
CACCAATCGCTGCTTCGAGAAAGCCATTTCTCGCTGGTGGCAAGCTTACGGCGCTGA

>Cluster\_27019

TTGAATATCTCCTCTGCTTACGCCAGGTTGTTACGGCACTCGCTGGCACTTAAACGCAAGAGCTACAAAGTGTGTT  
CTGGCGCAGATAACCCGCTTGTGTTCTATCTTCAAGGAAACGCTGTGTCTGTTGATGGGGTCTGAGCACCT  
TTCTGGTCACTGGCTGGGAAAAGATGCGATGGCCGGCTGGGGTGGCGGACAGCTTCAATATGGTCATTATGGCTTTT  
TTTGCAGCTATCGATCTTGGTACTACTGCTGTTGATGATTTAGTCTCGGTAAGCGAGATCGACGACGAGCGAGGGTGGC  
GACCGCGAGTCAATGGTGTATGACGTTGTTTGGCTACTGTTGGCAACGCTAATTCATCATTTTGGCGAACAAATTA  
TTGATTTCTGTCGGCGGTGATGCCACGAGAAGTTAAAGCACTGGCGTGGCTTACTGAGCTTACTGGAGCTGACGATTA  
CCAGCAGCTGCCATCACTCTTATGGTAGCGGGCACTTCTGGTGCAGGGAATACGAAAATACCGCTACTGATTAACGG  
TAGCCTGAATATCTTAATATTTATTTAGCGGATATGATTTACGGCTTTTCTCCGCGGGACGGGATTTGTGCG  
GGGCTGGGTTGGGTTAACCATTTCTCGTTATATTGGCGCAGTTGCAATTTTGGGGTGTGGCGATTGGTTTTAATCCT  
CGCTAAGGATTTCTGTTAAAGAGCTATTTAAACCGCTGAATTTAGCATTATCTGGGAAGTATGGGATGGTATTCTC  
AGCGAGTGTGCAATCAGTGTATTTACCAGTGGTGGTTATTAACCAAAATGTTGCTTCCGGGATGGGACGAGCTTA  
TTGCCGGAATTTTATCGGTTCTCAATTCGCGCTCTTATCAACTTACCGGAAAGTGCCTCGGTTCTGCTTCTACGATC  
ATTACAGGCGAAGTTGGGGTAGGGCAGATAGCGCAAGCAGAGATTCAGTTGGCGCATGTGTTCTGGCTGTCCACTCT  
TGGATTAACGGCATCGCTTACCGCTTCCCTTTCGGGGTATGGCATCGTTTTTACCCAGGATCCAGCGTTA  
AACACGCTGTTGTGATTTGATTTGGCTAAATGCTTTATTTATGCTTATTTGGTCCGCTCATGGGTGTACCCGCTGGA  
TTTTAAGGTTGCTCGTGTATGCCGTTACGCCATGTTGGGTTTTCGATGTTGAGCATGTGGGGTGGCGGGTGTAGTCGGTTA  
TGTGCTGGGAATCATGCTTGGCTGGGTTGGTGGTCTGGATGGGAATGTTTGGGACTGGGCTGTGGCGGCGTGC  
TGTTTTACTGGCGAATGGTTACTGGACGTTGGCTGTGGAAATACCTTCGATCCGAGCCAAAAGTGTGAAAAAAGCCAA  
GTTGTGTCGGAATA

>Cluster\_22650

ATGGTACCTGTGGTGGCGCTTGTGGGCGCCCTAACGTAGGAAAATCCAGTTATTTAACCGTCTAACTCGCACCCGAGA  
TGGCTGGTTGGGATTTCCCGGCTGACTCGTGACCGTAAGTACGGTGTGCGGAAATGAAAGCCGTTGATTTATCT  
GCATTTGATACCGCGGGATTTGATGGCACAGAAGACGGTGTAGAAAACCCGATGCGCGGACGAGTGTGCTGGCGATTGAA  
GAAGCGGACGTCGACTGTTTATGGTGGATGCGCGCGGGCCGTGATGCGGGGATGAAGCGATTGCTAAACATCTGGC  
CTCCGTTGAAAACCGACTTCCCTGGTGGCAAAACAACTGACGGTGTGGATCCGATCAGGCAAGTGGTTGATTTCTAGC  
CGCTTGGTTTAGTGAAATCTACCGGATCGCGCGCTCACGGTGTGGCGTATTAAGTCTGCTGGAGCAGTGTGCTG  
CCGTGGATGGAAGATCTCGCACCGCAAGAAGAGTGCAGCAAGACCGCAATACTGGGCGCAATTTGAAGCGGAAGAGAA  
CGGCGAAGAAGAAGAGACGACTTCGACCCGCAAGTCTGCCGATCAAACTGGCGATTGTTGGTGGCGCCGAAACGTA  
GTAAGTCTCACTCACTAACCGTATTCTTGGTGAAGAGCGCGTGTGTTGTTTACGACATGCTTGCACGACGCTGACAGT  
ATCTACATTTCAAATGGAACGCGACGAGCTGAGTATGTGCTCATTTGACACCGCTGGCGTACGTAACCGCGCAAAATCAC  
CGATGCGGTAGAGAAATTTCTCGTAATCAAAACGTTGACAGCCATTGAAGATGCAACGTTGATGTTGGTGTATGATG  
CGCGTGAAGGATTTCCGATCAGGATCTCTCTTGTGGCTTTATTTCAATAGTGGCGCTCACTTTGTGATTTGATG  
AACAAAGTGGACCGCTGAGCCAGGAAGTGAAGAGACGCTGAAAGAGACGCTGGACTTCCGCTGGGCTTTGATTT  
TGCTCGTGTGACTTTATCTCTGCTTGCACGGCAGTGGTGTGGTAACTGTTTGAATCAGTACGTGAAGCGTATGACA  
GCTCCACCGTCTGTGGGGACCTTATGCTGACGCGCATCATGACGATGGCTGTGAAAGATCAACACCGCTGGTA  
CGCGTCTGTGTAAGTGAATACGTTACGCCCAGCCGGGGTTATAACCGCGATTGTTGGTATTCCAGGCAATCAGT  
GAAAGACCTGCTGATTTCTACAAGCGTTACCTGATGACTACTTCCGCAAAATCGCTGGACGTAATGGGATCCGATTC  
GTATTCAGTTCAAAGAAGGGGAAAACCGTATGCGAACAGCGTAACACCTGACGCCAACCCAGATGCGTAAACGTAAG  
CGTCTGATGAAGCATATCAAGAAAAGTAAGTAG

>Cluster\_23371

ATGAAGCAAGGTTTGAACCTCAGGCTTAGCCAACAACCTGGCGATGACGCCACAGCTCCAACAGGCAATTCGCTGTGTTGCA  
GTTGTCGACGCTGGAACCTCAGCAGGAGTACAGCAGGCGCTGGAGAGCAATCCGCTGTTGAGCAAAATCGACTCATG  
AAGAAATCGACACCCCGGAAACGCAAGACAGTGAACACTGGACACCGCGGACGCGCTCGAACAAAAGAGATGCCGGAA  
GAGCTGCCCTCGATGCCAGTGGGACACCATTTACACCGTGGTACACCATCCGCGCACCGGCTGACTACATTTGACCA  
CGAGCTGCCGGTCTATCAGGGCGAAACGACACAGACCTTACAGGATTAACCTGATGTTGGCAGGTCGAGTTGACACCGTTTT  
CCGACACTGACCGGCTATGCTACCTCTATCGTCGATGCCGTTGATGACACCGGTTACTGACTGTCCCGCTGGAAGAT  
ATTTCTGAAAAGTATGGGCGATGAAGAGATTGACATCGACGAGTTGAAGCGCTCTTAAGCGGATCCAACGGTTTGTATCC  
GGTCCGTTGGCGCAAAAGATCTGCGTACTGCTGCTGATCCAACTCTCCAACTCGATAAGAACACCGCCATGGCTG  
AAGAGGCCAGACTGATCATTTAGCGATCATCTCGATCTATTTAGCCAATCAGACTTCCGCACTTTAATGCGCGTACCGGT  
CTGAAAAGAGATGTGCTGAAAAGAGCCGTAATCTGATCCAGTCTGATCCGCGCCCGGGGAGTCCGATCCAGACTGG  
CGAACCTGATGTTGATTTCCAGATGTGCTGGTGGTAAAGCAATAACGGTCACTGGACGGTAGAACTCAACAGTGAACGCA  
TTCCGCTCTGCAAAATAACACGACTACCGCTGATGTTGCAATAACCGCGCACAGTGGTGTAGCCAGCTTTATCCCG  
AGCAATCTGCAGGATGCCAAATGGTTGATCAAGAGTCTGGAAAGCCGTACAGTACGCTACTGCGGCTGAGTCCGCTGAT  
CGTTGAACAGCAGCAAGCTTCTTTGAGCAAGGCGAAGATAATGAAACCATGGTACTGGCTGATATCGCCAGGCGC  
TCGAGATGATGAATCGACGATATCTCGCTGACCGCAAAAATACTGCAATAGTCCACGAGGCAATTTTGAAGTAAAG  
TATTTCTTTTCCAGTCACTCAATACTGAAGGCGGGGTTGAAGCTTCTCCACAGCGATTGCGCACCTGGTGAAGAAAT  
AATCGCGCGGAAAACCCAGCAACCGTTGAGCGACAGCAAGTTAACCTCTTGTGCTGCGAACAGGATCATGTTGTTG

CACGCCGCACTGTTGCGAAGTACCGAGAGTCTTTATCCATTCCGCCGTCAAACCAGCGTAAACAGCTCGTTTGA

>Cluster\_21196

ATGTTTAAAGAAATGCATTTGCTAACCTGCAAAGGTCGGTAAATCGCTGATGCTGCCGGTATCCGTA CTGCCTATCGCAGG  
TATTTCTGCTGGGGCTCGGTTCCGCGAAATTTTCAGCTGGCTGCCCGCCGTTGTATCGCATGTTATGGCAGAAAGCAGGCGGTT  
CCGCTTTTGCAGAAATCGCACTGATTTTTCGATCGGTGTCGCCCTCGGCTTTACCAATAACGATGGCGTATCCGCGCTG  
GCCGAGTTGTTGCTATGCGATCATGGTTAAAACCATGGCCGTTGGTTCGCCACTGGTACTGCATTTACCTGCTGAAGA  
AATCGCCTTAAACACCTGGCGGATACTGGCGTACTCGGAGGATATCTCCGGTGCAGTGCAGCGTATATGTTTAAAC  
GTTTCTACCGTATTAAGCTGCCTGAGTATCTTGGCTTCTTGGCCGTTAAACGCTTGTGCCGATCATTCTGGCCGTTGGCT  
GCCATCTTACTGGCTGTTGCTGCTCCTTCATTTGGCCGCGGATGGTTCGCAATCCAGACCTTCTCTCAGTGGGCTGC  
TTATCAGAATCCGGTAGTTGCGTTTGGCATTACGGTTTCATCGAACGTTGCCGTTGCTGTTGGTACCCTTGGTCTGCACCACTCT  
GGAACGTACTTTCCAAATGCAGATTGGTGAATACACCACGCAGCAGGTCAGGTTTTCCACGGCGACATTCGCGGTTAT  
ATGGCGGGTGACCCGACTGCGGGTAAACTGCTGTTGGTGGCTTCCGTTCAAATGTACGGTCTGCCAGCTGCCGCAATTGC  
TATCTGGCACTCTGCTAAACCGAAGAAACCGCGGAAAGTGGCGGATATGATGATCTCCGCGGCGCTGACCTTCTCCTGA  
CCGGTATCACCGAGCCGATCGAGTTCTCCTTCATGTTGCTGCGCCGATCCTGTACATCATCCACGCGATTCTGGCAGGC  
CTGGCATTCCCAATCTGTATTCTTCTGGGGATCGGTGACGGTACGTCGTTCTCGCACGGTCTGATCGACTTCATCGTTCT  
GTCTGGTAAACAGCAGCAAACTGTGGCTGTTCCCGATCGTCCGTTATCGGTTATGCCATTGTTTACTACACCATCTCCGCG  
TGCTGATTAAGCACTGCTGAAAACCGCCGATCTGCTGAAAGCAGCGACTGAAGATGGTAAAAGCGCAAGCGCAAGAA  
ATGGCACCGGCTCTGGTTGCTGCATTTGGTGGTAAAGAAAACATTACTAACCTCGACGATGTATTACCCGCTCGCGGT  
CAGCGTTGCTGATGTCTTAAAGTGGATCAGGCTGGCCGAAAGAACTGGCGCGAGCGGGCGTAGTGGTTGCTGGTTCTG  
GTGTTACGGCGATTTCCGGTACTAAATCCGATAAACCAGAAACCGAGATGGATGAGTACATCCGTAACCACTAA

>Cluster\_7305

ATGAAGTTCTGGCGACCCGGTATTACCGGCAAACTGTTTCTGGCGATTTTCGCCACCTGCATTGCTTGTGATCAGTAT  
GCACTGGGCGGTGCGTATCAGTTTTCAGCGTGGCTTTATTTGATTTACATCAAGCATGGTAAATGAACAGCGATTACAACCTGT  
TAAGTATGCGGCTGGCGAGCAGTATGCCAGCATGGCAACTGGCGTTCTTCCGCAACAATGATCGCTTTGCTTTTCAG  
ATCCTGCGTTCAATTGAACACGATAAATTCGGAAGATAAACCCGCGGGGATGCCACCGCACGGCTGGCGTACCCAGTT  
CTGGTGGTTGATCAAAAACAAGTGTGGTGGTCCGCGAGCGCCGATTCACCTGACGGTACAGGGCAGCCATTC  
TGGTCAACGGTGGCGAAGTTGGCGCGGTGATCGCTCCCGCTGGAGCGGTTAACCGCAATACTGATATCAATTTCCGAT  
AAAACAACGGCGGCAAAACAGCTGGTTGATTTGTCGCCCTGCTGAAACGTTACTCGGGCACTTGCCATTTTCTGGCGCG  
CGGTTTACTGGCACCGGTAACGACTTGTGATGGCACGCAAACTGGCGGGGGCGATTTCACTACCCGCGTAACGC  
CCACCGTGAAGTGAACCTGGGCAAACTGGCGCAAGACTTCAACCGACTTGGCAGCACACTGGAGAAAACAGCAAAATG  
CGGCGGATTTTATGGCCGATTTTCTCAGCACTGCGTACGCCATTAGCGGTGCTGCGCGGTGAACCTGGAAGCCATTCA  
GGATGGCGTGCCTAAATTCACGCCGGAGACGGTGGCTCTTTACAGCGGAGGTCGGTACACTGACCAAACTGGTTGACG  
ATCTCCATCAGTTGTCGATGTCGATGAAGGCGCTCTCGCCTATCAAAAAGCACCGGTAGATTTGATCCCACTGCTGGAA  
GTGGCGGGCGGCGCATTTTCGCGAACGATTCGCCAGTCTGGCCGAAACTGCAATTTTCCCTGCCAGACAGTATTACCGT  
ATTTGGCGATCGCGACCTTTTAAATGCAGTTAATCAATAACTTACTGGAAAACAGCCTGCGCTACACTGACAGCGGGCGCA  
CCCTGCAAACTCTGCGCGGACGCGCAAAAACGGTGGCCCTGACCTTTGGCGACAGTGGCGCCAGGTTGCTGAGTGCAGT  
CAGCTACAAAATTTGTTTGAACGTTTTTATCGCACGAAGGTTCCCGCAACCGTGCACGCGGGTTCGCGGCTGGGGCT  
GGCGATTTGCTTGAACATTTGTTGAAGCACAATAAGTTCGATTTATGCTGCCATTTGCTGCCATTTGCGGCTTTTGGCGGGGTAAGCATTA  
CAGTAGAGTTACCGCTGGAACGGGATTTACAGAGAGAAGTATGA

>Cluster\_27519

ATGTTACCTTCTCAATCCCTGCAATTTTACCGTTAGCGCCTGAATCAAACGGTTCGCTGCTGCTTGGAGCATGAGAT  
GGGCGAGGTGGATCAGCGCGGCAAAATCTCAATTTTACACAAACAGCCTCCGGTCACTGGTACTTTACGCTTAAAGACG  
ATACCGCGAGGTGGCTGCTGCGATGTTCCGCAACAGCAACCGCGGGTCACTTCCGCGCCACAGCACGGGCAACAGGTT  
TTAGTTCGCGCAATATTACGCTCTACGAGCGCGCGGCGATTATCAAAATATCGTCGAAAAGTATGCAGCGCGCGGTTGA  
AGGATTTGCTGCAACAGAAGTACGAAACAGCTTAAAGCGAAGTTGACGGCTGAAGGTTTGTTCGATCTGCATAACAAAAAT  
CACTCCCTCCCTGCGCATTTGCGTTGGTGTGATCACCATAAAAACCGGTGCTGCGCTACATGATATTTTGCATGTGTTA  
AAACGTCGCGATCCTTCTGCGGTGATCCTTACCACCGCGTACAGGGGATGATGCGCGGGGCAAACTCCGCTGCG  
TGCCATTTGAACCTGGCGAATAAGCGCAACGAGTGTGACGTTGATCGTTGGCCGTTGGCGGTGGTTGCTGGAAGATTTAT  
GGAGTTTTAACGACGAACCGGTAGCGCGGGCGATTTTGGCAGCGCATTCGCGTAGTGAGTCCGCTCGGGCATGAAACC  
GATGTGACAAATGCTGACTTTGTTGCTGATCTACGTGCGCTACACCTTCCGCTGGCGGAGAAATGGTCACTAGGAAACA  
CAGGAGTTATGTCGCGGATTCAGTTCAGTTCAGCAGCGCCTCGGTATGGCGATGGATATTTTCCCTCGTAAACCTACC  
GCCGCTTACTCTACTTACCATCGCTGCAACAACAGCATCCCAGTTGCGTCTGGCGGCTCAGCAGCGGCGCTGGAG  
AGACTTCAGCAACGAATGAATCTGGCGATTGACAGTCAAGTAAAGCGGACGAATAAGCGGCGAGTTCCGCTTTTACAACG  
CCTGAATCAACAAAATCCCAACACGCAATCACCGGGTCAAAGCCGATTCAGCATTGGAACATCTGCTGGCTGAAAC  
ATGTGCAATTCAGCGCTGAGCGCCATGCGCGAAGCTTCCGCAATGCAAGTAAACACATCTTGAAGCGCTCAGCCCTGCTCC  
ACACTGGCGGCTGGTTATAGCTGACACGGTCAAGACGGTAAAGTACTGAAAAAGTGAACAGGTGAAAACAGGCGA  
TGTATGACACCGGACTGGAAGCGGTTGGGTGAAAAGTGAAGTAAAAGGATCACATCTGCAAGAGAGCGCAAAAAGA  
AAAAGCCGACTAA

>Cluster\_9132

ATGAGTCACATCAACCGGAAGATCCAGCAACTTTACGCTGCCCTTTAAAGAGAACTCTCTTACGGTATTGGCGACCT  
GGCCTCAACATCTGCTGGATATCGGTACGCTTTATCTTTTGAAGTTTATACCGACGTTCTGGGGCTGCCAGGCACT  
ATGGCGCATTATCTTTTGGATTTCAAATTTCTTACTGCGTTTACCGATATGGTACCGGCATTTATGTTGGATTCCCGA  
CGCAAGATCGGTCAAAAGGTAAGTCCGCTCTTTTATCTGTATGCGTCACTTCCCGTCACTTACTGGCGATCGCCAA  
CTTTGTCGGCACACCGTTTGGATGTCACCGGTAACCGGTGATGGCCATATTCGTTTATGCTTTACGGACTGTTTTTCA  
CGATGATGAACGCTCTTACGGCGCAATGGTTCGCGTATCACAAAACCCCAACGAACCGCGCTCACTGGCGGCAATGG  
GCTCAGGCGCGGCTGCTACGCTGGGCTGCTGCTGTCGACGGTGGATTCGTCGCAAGTATGAATCTTATCGAAGTAACTCA  
GCAACTGGGTATATCTTCCGCGCACGCTGTTTTTACTGTTTGGCTGCTGTTATGTGGATCTGCTACTCGGGCGTGA  
AAGAGCGTTATGTCGAAACCCAGCTGCTAATCCGCGCAAAAGCCGCGCTGCTGCAATCTTCCGCGCAATTCGCGGT  
AACCGCCGCTGTTTCTGTCGATTTGCCAACCTTGCATTTAGGGGCGTTTAAAGTCAAGCTCGCCATTCAGGCTTA  
TTACACCCGATCTGCTTAAACGATCCCTGCTGCTGATATGAGGATTTTTCAGCATGGGCTGATTTTCTATTCGCGG  
TATTCCTGATGCTGCTCAGTCAGACGTTTTGGCAAGAAGAAAGTTTATATCGCGCGCTGCTGATTTGGGTGCTGGGC  
GATCTGCTCAACTATTTCTTCCGCGCGGTTCCGTCAGCTTCCGTTGGCGTTCTCCTGCCGCTTCTTTGGCTCAGCGTT  
TGTTAACAGCTGAACTGGGCGCTGGTTTCCGACCCGTCAGTACGGGAGTGGCGGACCGCGGCTGCGTTCCGAAGGAA  
CGGCTACACCGGTTTTTACTCTTCTTCCGAAAGTGTCTCAGGCGCTGGCTGGTTTCTTCCCGCGGATGCTCAGCGAA  
ATTGGCTATGTGCGCAACGTCGCACAGGCTGACCACACATTGAAGGGTTACGCCAGTTGATCTTCACTACCAAGCGC  
ACTGGCGGTAGTCAACATTTGTTGGCGATGGGTTGCTTCTCAGCCTGAAACGAGAAGATGTATGTCGCAATGTTGGAAGAGA  
TAGAAGCCCGTAAACGACGCGGCTAA

>Cluster\_12404

ATGAATAAAATAACTTGCCTCAAAGCATATGATATACGTTGGCGCTTGGTGTGAATGAATGATGAAATAGCATATAG

AATTGGTCGCGCTTATGGTGAAGTTTTTAAACCTCAAACCTGTAGTTGTGGGAGGAGATGCTCGCTTAAACAAGTGAGAGTT  
TAAAGAAATCACTCTCAAATGGGCTATGTGATGCAGGCGTAAATGTCTTAGATCTTGGAAATGTGGTACTGAAGAGATA  
TATTTTTCCACTTGGTATTTAGGAATTGATGGTGAATCGAGGTAACGCAAGCCATAATCCAATTGATTTATAATGGAAT  
GAAATAGTAACCAAGGCTGCTCGACCAATCAGCAGTGACACAGGCTCTCAAAGATATACAACAATAGTAGAGAGTAATA  
ATTTTTGAAGACTCAACCTAGAAAAAAGGGAATTTTACCAAATATCCACCAGAGATGCCTACATAAATCATTTGATG  
GGCTATGCTAATCTGCAAAAAAATAAAAAAATCAAATAGTTGTGAATCTGGGAATGGTGCAGCTGGTCTGTTATTGA  
TGCTATTGAGGAATGCTTTTTACGGAACAAATATCCGATTGAGTTGTAAAAAATAAATAACACCCGATGGTAAATTTTC  
CACATGGTATCCCTAATCCATTACTACCTGAGTGCAGAGAAGATACCAGCAGTGCAGTTATAAGACATAGTGTGATTTTT  
GGTATTGCATTTGATGGTGAATTTGATAGGTGTTTTTCTTTGATGAAAAATGGACAATTTATTGAAGGATACATCATTGT  
TGGTTTATTAGCGGAAGTTTTTTTAGGGAAATAATCAAACGCAAAAAATCATTGATGATCCTCGCTTATATGGAATACTA  
TTGATATCGTAGAAAGTCATGGTGGTATACCTATAATGACTAAAACCGGTCATGCTTACATTAAGCAAAGAATGCGTGAA  
GAGGATGCCGTATATGGCGGCGAAATGAGTGGCCATCATTATTTAAAGATTTTGCATACTGCGATAGTGAATGATTTCC  
TTGAGTTTTAATTTGTGAATTTTGTAGTCTGACAAATAAAAAATAGTGAACGTTTGTGGTTGTTAAGGATGAGTGC  
CGCAAGTGGAGAAATAAAGTGTACACTAGACAATCCGCAAAATGAAATAGATAAATTTAATCGTTACAAAGATAGT  
GCCTTAGCTGTGATTACTGATGGATTAACATGAGGATTTCTGATGCGCTTTTAAATGTTAGATGCTCAAATACAGA  
ACCTGTAGTACGATTGAATGTAGAATCTAGGAATAATGCTATTTCTTATGCAGGAAAAACAGAAGAAATCTGAAATTTA  
TATCAAAATAA

>Cluster\_40035

ATGGAATATCTCTACTGACCGCGTTTTCCCTGTGATGGACGCTACGGCGATAAAGTCAGCGCGCTGCGCGGGATTTT  
CAGCGAATAACGTTTGGTGAATTCGGTGTACAAGTTGAAGTACGTTGGTGCACAAAACCTGGCCGCGCAGCGCATCA  
AGGAAGTTCTGCTTTTTGCTGCCGACGCAATCGGTTACCTTGATGCAATTTGTCGCCAGTTTCAGCGAAGAAGATGCGACA  
CGCATCAAACCATCGAGCGTACCATAACACGACGTTAAAGCGGTTGAGTATTTCCGAAAGAAAAAGTGGCGAATAT  
CCCGGAACCTGCACCGGTTTCTGAATTCATCCACTTTGCTGTACTTCCGAAAGATATCAATAACCTCTCCCACGCATTA  
TGCTGAAAAACCGCGGATGAAGTGTACTCTGCGTACGTCGCGTCAACTGATTGATGGCATTAAGATCTCGCCGCTCAG  
TATCGCATATCCCGCTGCTGCTCCCGTACCACGGTACGCGCAGCCAGCGCTCAACCATCGGTAAGAGATGGCAACCGT  
CGCTACCGTATGGAGCGCCAGTACCAGCAGTTAATCAGGTGAGATCCTCGCAAAATCAATGGTGCAGGTCGGTAAC  
ACAACGCCACATCGCCGCTTACCAGGAGTTGACTGGCATCAGTTACGCAAGAGTTTCGTCACCTCGCTGGTATTACG  
TGGAACCCGTACACCCAGATCGAAGTGCAGACTACGACTGATGCGCAACTGTTTGGATTGCGTTGCGCGCTCAACCAT  
TCTGATCGACTTTGACCGTGACGCTGCGGTTATATCGCCCTTAACACTTCAAACAGAAAACCATTTGCTGGTGAATG  
GTTCTTCCACCATGCCGATAAAGTTAAACCCGATCGACTTCGAAACCTCCGAAAGAACTGGGGCTTTCCAACGCGGTA  
TTGACGACCTGGCAAGCAAACTGCCAGTTTCCCGTGGCAGCGTGACCTGACCGACTCCACCGTGTGCGTAACCTCGG  
CTCGGTTATCGGTTATGCCGCTGATGCGTATCAATCCACCCTGAAAGGCGTGAGTAACTGGAAGTGAACCGTACCATC  
TACTGGATGAACTGGATCACAACGGAAGTGTGCGTGAACCAATCCAGACAGTTATGCGTGTGATGGCATCGAAAA  
CCGTACGAGAAGCTGAAAGAGCTGACTCGCGGTAAGCGGTTGACGCCAAGGATGAAGCAGTTTATCGATGGTCTGGC  
GTTGCCAGAAGAAGAAAGCCCGCTGAAAGCGATGACGCGCGCTAACTACATTTGGTTCGCGCATCACCATGGTTGATG  
AGCTGAAATAA

>Cluster\_26674

ATGAACTTTCCATTAATTCGCAACATCGTGGTGTCTGTTGACTGCTGTTTGGCTGGCGCAAACCCGCGCAAAACAGTG  
GAGTCTGGCGAATAAAGTGTGGTCTTGTGATGGTGTGGTTTTTGGCTTGCCCTGCATACCATTTATATGTTCTG  
ACAGCCAGTACTTAAAGATTTCTGTACAGTGGTTTAAACATTTGTTGGTAAACGGCTATGTTCAACTGCTGCAAAATGATCGTT  
ATGCGCGTAGTCTTCCGCTCTATTTCTGAGCGCGGTTGCCGCTGCGATAACGCATCTCAGTTAGGCAAAATCAGTTTTCT  
GACCATCGGTACGCTTTTTGTTTACCAGCTGATGTCAGCGCTGGTGGTGTGCTGGTCAACCACTGTTTGGTTTGCAGG  
CTGAAGGTTGTTTTCAGGTTGGTGCAGAACTGCAGCTGCAAGCCTGCAAGGATGCAAGGATGATGTCGCGAAAGGTTGAC  
CTGAGCGTTCCGAGCTGGTCTTGTCTTTATCCGAAAAACCGTTTGGCGATCTGACCGGAGCCAAATCCGACGCTCAAT  
TATCAGCGTGGTAAATTTTGGCGCATTCCTCGCGTAGCTGCGTGAACCTGCTGAAGGATGATGCGCGAAAGGTTGAA  
CGCTTTAAACCGTATCGATAACCTGCAAAAGTGGTGTGAACTGGTTGCGCTGGTATGCGGTTGACCCCTTACGGT  
GTTCTGGCCGTGATGACCAAAAGTGGTTGCGAGTTTCAACTGCAAGACATCATCAAACCTAGGAAGTTTCTGGTTGCGTC  
CTACCTCGGTTGCTGATATGTTTGCAGTGCATGGCTTCTGCTGGGCATTAATGGCGTGAGCCCGTGAAGTACTTCC  
GTAAGGATGAGCCAGTACGACGTTTGCCTTTACCAGCGGTTCCAGTGTGCTGCTATCCACGAAATGTGGAAGCACAA  
ACGCGTCTGTTGGTGTCTGAAATCAACGCGAGTTTCCGCGCTTCTTGGTGGCACCATTGGTCAAGACGGCTGCGC  
CGGTTTGTATCCGCGTACGCTGGCGGTTGATGCGTACCGTACCGTGAAGGATTAACCCGCTGGACCGATGCGGATGCGA  
CGCTGGTGGTATTTTACCCTTAGTTCCGAGCGGTTGCCGTTGCGTGGTGGTGAACCTTTCCGCGCACTGATTGTG  
CTGCTGCGATGGCCCTGCTGTAAACGCTGGTGGCATTGTTAATCTCCGTTGAACCGCTTATCGCATGGGCGTACGGC  
GCTAAACGTTAGTGGCTCGATGACCGCTGGCAGCTGACCAGCAGTGGTGAAGCAAACCGATAAAGCCATTTCTGGATA  
GCGAAGACGACCGCGAACGGCACACCGTTAA

>Cluster\_63590

ATGAAAGCGACTTAAAAATGAACCTAATGCGCTGGTGAATCGGGGTTGTCGACAGACATCTGCGCTCGCGCTAACCGGACT  
AAGCCGACGCGCAAAACGCTTTATCACTGCGATGGTCAATCAGTTGCTCAATATTCACGCGGAGCAGCTTGCCTG  
TGTAAAGCGCGTGCCTGAAAGAGCGCCTGCTGGCGTAAACAGCATTCCTCAGCGTGAATTTGGCATTCCGCGCTTACA  
TATGATGAAGGACTGGCGAGTTATATGGCGATCCTCCGCTGGCCGACGCCAACGCGCGGCTCAGTGAATCCGCT  
GGCGTACGTTTTTAAATCGAACGATTCGCTGCTACGCCACTTCAAGGACACCTCCACGCTGTATCTGGAGATTTGGATT  
ATCCCGCGAATGGTTGCTCGACTGCGGATGCTGGCGCAGGACTATTTAAGCTGGTACGCCAGATGACGGGTTACTC  
AATGGTCAAGCGCGCAATGGTGGTCAATGGCGAATGATGTGCAAGGGCTGGACCGCTAGCGCTGCGGACGAAAA  
CCGGCTGGCAGACATTTCCGCGCGTGGACGATATCTCCACCACTGTAACAGCAGGGGCTGCATTTATTAGCCTG  
GGCGCTTTGCTTGGCGGAGATATGGCAGGTGCGCCCGCTGCAATTTCTCCGTTGGCGGATGTCGATGCTGGGCG  
GAGTCCAACCTGGCGCAGCGGATAAAGCACACCAATGCGGAAATGCTGCGCGAGCGGTTAATTAATTAATGCGGAAGG  
GGTGAAGGGGTTCTATAAGAATCATTTTCTGCGCTTTGACCGCAGATTTGCTGTTGATTGCTGCAACCTCTCAACA  
GTGGGCCACAGGCAATTAATGATATGCGTCTGGCACTGACGCGATGATGCAAGTTTCCACTACGGGCGAGCTACCTG  
TTCCGGCTTTGTTTTTCCGCGTTATCGATAAGCTATTGTTGCTGCCACTAAAGCGGACCATGTGACCATCGATCAGCA  
GCAATAATGTTTTCTTACTGCAACAATGATTCAGGATGCTGGCAAAATGCGCGGTTTGAAGGATTAGTATGGATT  
GCTGGGGCTGGCTCGGTCAGGCGACCACCAGCGGATTTATGACGTCACGGCGAGAAAAATCCGGCATTTGCGCGG  
AACCGGCTCAGCGATGGTGGCCACTCACCCTTATCCCGTGAAGTTCTTGCCTTTGCGCGGTTGCGCGGTCAGCGGTTCTGGGA  
CAAGCAAGGGTTCCAGTTTGAAGCTTTCCGCGCAGGTGATGGATGTCGACAAACCGCTGCCGATATTCGCTTGTATG  
CCGCGTTGAATTTTTAATAGGAGATAAATGGCATGA

>Cluster\_39188

ATGCTAAAAATCTCAATACTCTGACACGCCAAAAAGAGGAATTTAAGCCTATTCACGCGGGGAAAGTGGCATGTACGT  
GTGTTGAAATCACCCTTACGATCTGTGATATCGGTCACGGCGTACTTTTGTGCTTTTGGCTGGTGGTGGCTATC  
TGCGTTTCTCGGCTATAAGCTGAAGTATGTGCGCAACATTCAGGATATCGACGACAAAAATCAACAACGCGCAATGAA  
AATGGCGAAAGCTTTGTGGCGCTGGTGGATCGCATGATCGCGAATGACAAAGATTTTGTGCTTTGAACATTTTGGC

CCCGGATATGGAGCCGCGCGGACGCACCATATCGCCGAAATTATGAACTACTGAACAACATGATCGCCAAAGTCCAG  
CTTATGTGGCGGACAAACGGCGACGTGATGTTCCGACGTCCCGACCGATCCGACATATGGCGTGCCTGCGCGTCAGGATCTC  
GATCAGCTGCAGGACGGCGCGCGTGTGACGTGGTGCATGACAACCTAACCCGATGGACTTCGTTCTGTGGAAGATGTC  
GAAAGAGGGCCAAACCGAGCTGGCGCTCCGTGGGGCGCGGGCCGTCCTGGCTGGCACATGAAATGTTCCGGCAATGAACT  
GCAAGCAGCTGGTAAACCCTTTGATATCCACGGCGCGGTCTGACCTGATGTTCCCGCACCCAGAGAACGAAATGGC  
CAGTCCACCTGTGCACACGATGGCCAGTATGTGAATTACTGGATGCATCCCGTATGGTATGGTTGACCCGAGAAAGAT  
GTCFAAATCGCTGGGTAACCTTCCACCGTGCCTGATGTGCTGAAATACTACGATGCGGAAACGTGTCGCTTACTTCTCTGA  
TGTCGGGTCACTATCGCAGTCACTTGAACCTACAGCGAAGAACTGAAACAGGCGCGTGGCGCGCTGGAAACGCTCTTAC  
ACTCGCTGCGCGGCACAGACAAAACCGTTCGCGCTGCGCGTGGCGGAAAGCGTTTGAAGCGCGCTTTATGGAAGCAATGGA  
CGACGATTTCAACACCCCGGAAGCCTATCCGTGCTGTTGATATGGCGCGTGAAGTGAACCGTCTGAAAGCAGAAAGATA  
TGGCAGCGCGCAATGCAATGGCGTCTCAGCTGCGTAAACTTTCGCGCTATTGGGCTGCTGGAGCAAGAACCGGAAGCG  
TTCTTCAAAGCGGTGCGCAGGCAGACAGCGAAGTGGCTGAGATTGAAGCGTTAATTCAACAGCGTCTGGATGCCCG  
TAAAGCGAAAGACTGGCGCGCGGACAGATCGCGCGGTGACCGCTTAAACGAGATGGGGATCGTCTGGAAGATGGCCCC  
AAGGGACCACCTGGCGTCGTAAGTAA

>Cluster\_53563

ATGGTGGTCCAGCTTACGCAAAAGCCGCTGTGCGCTACAAGCTGGCGTTGATAAATACATTAGCGAGAACAATTACCA  
GAAATCAGCCGATGGTGGCGTTTTCCGGGAAAGTTGAATCCAGGAAGCGACCCCTAACAGCCCGGATTGTTAAACC  
AGAAATTTACTGAAATAAATGAAACCCCGCTGAAAGGGCGGGATATGCGCAAAGCCTTCGACAGCGATGATTATCAG  
GTCATGCTGGTTGCCAATAAATCCAGACCGGTTTTGACCGCGAAGCTGTGCGCGATGTACGTGGAATAAGCCCTTGG  
CGCGCTGAGTCCGTCAGACGCTCTCCCGCTGAATCGCACCTATCCGGGCAAGCGGAATCAGGCATTTTGTCTCCG  
ATTTTTATAACGATCCAGACGAGATCCTCGCGCATTCAGCCCTATTTCCAGACGGCGAACTGACCGATGTGACGAT  
CCGACGAGGTATTCGATCTGTTTGAAAAACCTGCGCGCACGAGATTTTTTTCAGTGGCATGAAGTGCAGCAGTCTGCAA  
GGCGTACTTCATCAAAAATAAATCGAATGCGCGCATCAGTAATATCTGTAACCGCGGTGCAACGCTGGAAAAGCGTT  
ATCTGATGGCAATCAGCAGCCTATTTGACCGCAAGAGATGTTTCGAGCGCATAAAAAACGGCGATACCGTATTTGG  
ACCAATGCGGAAAACAGTTTTAAAGCCTGTAAGCAGGAGAAAGATCGTCTGGAGATTTTCAAGAAAGATCTCGGCAGCTT  
TGTTGCGTTTTATGAGTTTTATGTCGCAATCGTTGAGTACGATGACAAGGAGCTGGAAAAGCTAAGCCGTGTTTGGCGCC  
ATTTACGCCACTGCTGCATGAGCAACGCTGGAAGAGGATGAAATGATCTCAGTAATGTTGGAGATGAGTCACTATCTGT  
TTATCGAAAATCCTAGCAGCAAGATTTACGCTTACAGGAAGAAACCGCTGACTATACGCTGGATGCAAGTAAATTTGG  
TACGGCAAAAGCGAAAGATAAAAAAGAGGAGTTTTATCTCAGGTTCTTTCTCGGATGAATGAATATTCATTAGTGACC  
ATTTGACCGCAAAAGATATGATCAGCAATGCTTTGCGGTGTAATAAAAAATAACTGAAAATGAAAATGTTATGACACAA  
ATTAAAAACAATCCGCCAGAACAAGCGATTCTTGGTGAATTTCCCGCAGGAGTTGATAATGCTGTAATGGACAGTAATGA  
CGCTCGGCAAGAAATTTATGTTGCAATATTTACCGATCCAGCTCGGGCAAGAGCTTTTCTTACTGATGTTTGTATATGC  
TAACGGGAAAATTTGCTTTACCAACATA

>Cluster\_21974

ATGACAAGTCTGGTTTTCCCTGGAATAATGCTCGGTTTTCTTTGGCCAACCGCGCTCCTCTCTGATGTGTCGCTGGAAC  
TAAACCTGGAATAATTTTACTTTTACTTTGGGCCAAATGGCGCAGGTAAGTTCGACACTGGTACGGGTAGTGTCTCGGCTCG  
TAACACCCGATGAAGGGTTATCAAGCGCAACGGAAAACCTGCGCATCGGCTATGTACCGCAGAAGCTGTATCTCGACACC  
ACGTTGCCACTGACCGTAAACCGTTTTTTACGCTTACGCGCTGGCACACATAAAGAAGATATTTTGCCTGCATGAAAACG  
TGTCAGGCGCGGCATCTGATTAACGCACCGATGCAAAAAGCTCTCGGGTGGCGAAACGACGCTGTACTGTTAGCGCGAG  
CACTGTTAAATCGACCGCAATTTAGTCTGGATGAACCCACTCAGGGCGTGGATGTGAATGGTCAAGTGGCTTATAT  
GACCTTATGACCAACTGCGTCTGTAACCTGGATTGTGGCGTTTTAATGTTATCTCACGATCTGCATCTGGTAAATGGCAA  
AACCGATGAAGTGTCTTGGCTGAATCACCACATTTGTTGTTCCGGCACACCGGAAAGTTGTTCCCTGCATCCGGAGTTTA  
TTTTCTATGTTTGGTCTCGTGGTCTGAACAACCTGGTATCTATCGCCATCATATAATCATCTGTCACGATTTACAGGGA  
CGAATGTTTTGCGTGGGAAAATGATCGCTCATGA

>Cluster\_25803

ATGTCTGCCAAAGACGGCTTCTTATGCGTGTGCCCTGACAACGATTATCTATCATCTTCTGCATATTTCTTCAATAGA  
ATATAAAGGGTCCCTTTGGCTCAATAAATGCAGGTTATGCTGACTGGAATAGTGGCTTCGTTAAACACTACCGTGGTGAAG  
TATGGAAGTGCATGCGGACTTTGGAGTGAATTTAAAGAAGCCGAGTTTTACTCATTTTTATGAAAGCAATGTGCTTAAAC  
CATGCCGTAGCGGGCGTAAATCATACCGTTTTCTGCTATGACTCATGTCAGACTCTTTGACTCCGATATGACTTTCTTTGG  
CAAGATCTATGGTCAATGGGATAACTCATGGGGTGACGATCTTGAATGTTTTATGGTTTGGGCTACCTCGGCTGGAATG  
GTTCAATGGGGTTTTTTTAAACCGTATATAGGATGTCATAATCAATCTGGTGACTACGATACAGTAAATATGGTCAAAACG  
AATGGTTGGAATGGTTATGTTGTTGGCTGGACAGCAGTATACCATTTACGTTATTTGACGAAAATTTGTTTTATCTAA  
CTGGAATGAAATGAACTGGACAGGAACGATGCTTACAGGAGCAGCAATTTGGCCGGAACCGGTTAAATGGCGGTTTTAA  
CAGTGGCTGGAAGTCTATCTCGCTGGAAGCCAGTGTGACCTGGCGTTATTTGATAATAAGTTGGGCTACGATGGT  
TTTTGGCGATCAAAATGATTTATATGCTTGGTTATGATTTCTAA

>Cluster\_7264

ATGTCTCATTTGATTGACTTGAAGATGTTGGTGTGAAATTTCCCATTTACGACGCTAAAAGTAGATCGTTTAAATCGCA  
GGTGGCAAAATTAACCCGTGGTGAATTTCTTCAAAAAGAAAGCAGCACAGTACGGTTAAATCATGAGCGGTTTGA  
CATTTAGTCTGAAAGAAGGTGATAAACTCGGACTTATTGGAAAATAAGTGGTGGCGGAAAATCTACGCTACTGAAACTCTTG  
GCTGGTATTTATGAACCAACATCCGGCACAATTAACGAAAGGTAAGATAGTTCCCTGTTGGACATCGCTCTAGGGAT  
GGATGATGATCCACAGGATACCAAAATATAAAGCTACGTGGTTATTTACTAGGTATGACGAATGCAGAAATCGAGTCCA  
AAATAGAAGAGATCGCTTGTGTTTACTGAACTAGGTGATTAATCTGAATCTACCAATTCGTGCTACTCTACCGGATGCGC  
GTGAGATTAGCATTGCGAGTATCAACTTCACTGATCCAGATGTAATCTACTCGACGAAATTTGTTACTGGCGATGTC  
TTCTTCTTAAATAAAGCAAAGAAAAGATTCGAGGAATGTCAGGAGAGGGCAAAGGTAGTTGTGTTGCTTCCGATGACA  
ATAATGTCATTTGAAAACCTTGTAAATAAAGTCCGTGGTTAGAGGGCGGTAACCAAAAGATGATTGGAGATCCGGAAGAA  
GTACTAAAATAAATATATGATGATGTTGATTTTAA

>Cluster\_67042

ATGGAAAACAGGAATGTTCTGCAAGGATGATGACGGAATCCCGGTGCTTTGCCTTTGCTGCTCTGGCACCATTACA  
ACGTGACATTAACCAATCGTGGCATTCTGGCGATGACAGGTGACCACATTTGCTACAGCATTTCATGTGGGGACTCCCT  
GGCTTAACTGACCGGGCGGTGCGCATTTCCACTTTTTCCGACTGATGGCGGGCTGCAACCTGGCGGGCGGACAGTACCA  
CAGGCTGCGGTAATCGCTGTGGCTGATGGCAGTGTGGCGCAACCGGATTTCTGGCTGGCATTTTGTGGTACAGGAAA  
TCAGTGGTGGAACTGAACATTCGTTCTGCTTTGCGCGTGTGATGACGAGTGGTCTGTTTCTGGCAACGCCCTGATGCCA  
TAAAAGGTGCCATAAACCGAACCATGCTGGCAGTGTATCTGCCGTTCACTGCTGCAAGTTATGGCTGGCAGGAGTGGTG  
ATGCTGCTGGCAGCTGATTCCTGCTGCGAGGTGCCGAGCAGTACCAGGGCGGTTATTTTACTGTTGGCTGCTGCTGCT  
TGTATGGCTGAACGGTGAACCGGGCAGTCCCGTGTGGCGGATGGGCATGACACTGCTGGTATTTGTGCTGTTGCTG  
ATGAGTATGATCTTCAATCAAAAGCGCTGCAGATAAGCCGGTGGTTGCGAAGGTTATGTCCTGCATCTGCTGAT  
ATTTCCGCTATGTTTATGGGCTGCAGACTTAA

>Cluster\_14382

ATGTTACGATATTGCGGACAAAACGTTTGTATTCACATCTGTTTACCGGCACAGGAAAATTCGCTTCTTCAACTGATGGT

GGAGGCGATCCGCGCTTCCGGCAGCCAGCTGGTACACTGGCGATGAAACGTGTGACTTGGCCAGCACAAACGAGCCTA  
TCCTCGAACCGCTTATCGCGCGGGTGTGACCCGCTGCCAAATACATCCGGGGCGAAAAACAGCGGAAGAAGCCATTTTC  
GCCGCCATCTGGCTCGTGAAGCGTTAGGCACAACTGGTTAAAATTAGAGATTCACCTGACGCCCGTGGCTGTTGCC  
CGATCCCATCGAAACCTTGAAGCCGCCGAAACGCTGGTACACAGGGATTTGTCGTGTGCCTTACTCGGGGGCCGATC  
CGGTATTGTTAAACGCTTGGAAAGAGTCCGCTGTGACGGGTGATGCCGCTCGCGCCGCGATTTGGCTCGAATCAGGGA  
CTGGAAACCCCGCCATGCTGGAGATTATATCCAGCAGGCCACAGTGCCTGGTGGTTCGATGCTGGCATCGCGCTTCC  
CAGCCATGGCGCGAGGCGCTGGAAATGGGGCCGACGCGGTGTAGTGAATACGGCAATTGCCGTCGGGACGATCCCG  
TCAACATGGCGAAGGCATTTCTGTCGGCGGTAGAACGAGCCCTGCTGGCACGTGACTCCGGACCGGGCAGCCGAGTCA  
TTTGTCTCATGCCACCAGCCGCTGACTGATTTCTGGAGGCATCGGCATGA

>Cluster\_29660

ATGAAGATTATTACTTGTGCTATAAGTGCCTGCTGATGAACAGGATATTGCGGTCAATAATGCTGATGGTTCGTTAGACTT  
CAGTAAAGCCGATGCCAAAATAAGCCAATACGATCTCAACGCTATTGAAGCGGCTTGGCAGCTAAAGCAACAGGCAGCAG  
AGGGCAGGTGACGGCTTAAAGTGTGGCGGTAAGCCCTGACCAACGCCAAAGGGCGTAAAGATGTGCTATCCGCGGT  
CCGGATGAACTGATTGTGGTGTATGATGACCAGTTCGAGCAGGCACTGCCGAACAAACGGCGAGCGCACTGGCTGCCGC  
CGCCAGAAAGCAGGCTTTGATTGATCCTCTGTGGCGATGGTCTTCCGACCTTTATGCCAGCAGGTTGGTGTGCTGG  
TAGCGAAATCTCAATATTCGGCAGTTAACGGCGTACGCAAAATTAATCTCCCTGACGGCAGATACCTCACCCTGGAG  
CGGAACCTGGAAGTGAAGAACGAAACGTTAAGCATTTCCGCTGCTGCGGTTGTTGCTGTTTCCACTGATTAACCTCCC  
ACAAATTCCTTCGATGAAAGCCATTTCTCCGCGCGGCAAAAAGCCAGTCCAGGTATGGTGGCGGGGATATCGGTTTTA  
ACGCAGAGGCAGCCTGGTCAGAACACAGGTTGCCGCGCGAAACAGCGCGAGCGTACAGCGCATCGTGATTGAAGGCGAC  
GGCAAGAACAGATCGCCGATTTGCTGAAAATCTTCGCAAAGTCATTTAA

>Cluster\_29002

ATGGGACATCCTTTAGTGATGGGTAACGGAACTGAACGGCAGCCGCCACATGGTTCAGGAGCTGGTATCTAACCTGGC  
TAAAGAGCTGGCAGGTGTTGCTGGCTGTGCGGTTGCAATCGCACACCACCGGAAATGTACATCGATATGGCGAAGCGTGAAG  
CTGAAGCCAGCCATCATGCTGGGTGCGCAAAACGTTGACCTGAACCTGTCGGCGCATTCACCGGTGAAAGCTGTGCT  
GCTATGCTGAAAGACATCGGCGCACAGTACATCATCGGCCACTCTGAACGTCGTACTTACCACAAAGAATCTGACGA  
ACTGATCGCGAAAAAATTCGCGGTGCTGAAAGAGCAGGACTGACTCCGGTTCGTGTCATCGGTGAAACCGAAGCGGAAA  
ACGAAGCGGGCAAAACTGAAGAAGTTTGTGCACGTCAGATCGACGCGGTAAGTAAACTCAGGCTGCTGCGGCATTCGAA  
GTTGCGGTTATCGCTTACGAACCTGATGGGCAATCGGTTACTGGCAAACTGCAACTCCGGCTCAGGCACAGGCTGTTCA  
CAAATTCATCCGTGACCACATTTGCTAAAGTTGACGCTAACATCGTGAACAAGTATCATTCAGTACGGCGGCTCTGTAA  
ACGCGTCTAACGCTGCAGAACTGTTGCTCAGCAGACATCGACGGCGCGCTGTTGGCGGTGCTTCTCTGAAAGCTGAC  
GCTTTCGCGGTGATCGTTAAAGCTGCAGAAGCGGCTAAACAGGCTTAA

>Cluster\_54581

ATGAATACGCTCGTCTGAACCAGGGCAGCCATTGTTGCTCAATGCAGTAAGCAAACATTACCGGAAAAATATCGTCTT  
GAACCAACTGGATTACATATTCGGCAGGTCAGTTTGTGGCGGTGGTGGGCCAGCGGTGGTGGCAAAAGTACCCTGC  
TGGCCTGCTGGCAGGTCGAAACCGCAACCCGAGCGGATGTGTTAGCGGGCACCACACCGCTGGCTGAAATTCAGGAA  
GACACCGGATGATGTTTTCCAGGATGCGCTGCTACCGTGGAAATCGGTGATTGATAACGTTGGGTTAGGCTTAAAGG  
CCAGTGGCGCGATGCCGCAGCTCGAGCGTTGGCTGCGGTAGGACTGGAGAATCGCGCAGGGGAATGGCTGCCGCACTTT  
CTGGCGGGCAGAAACAGCGAGTGGCGCTGGCAAGAGCGTTGATTTCATCGACCGGGATTTATGTTGCTTGTGAAACCGCTC  
GGGGCTGGAGCCCTTAAACCGACTCGAGATGCAGATTGATGTTGTCACCTTGGCAGGACACGGCTTACCGTACT  
GTTGGTGACCGATGATGTGAGCGAAGCGGTAGCGATGGCTGACCGGCTGCTGTTAATTGAAGAGGGAAAAATTTGGTCTGG  
ATTTGACAGTGGATATCCCGCTCGCGCTGATAGGGTGGTGGGATAGCGGAGCTGGAAGCGGAGGTGTTGCAACGG  
GTGATGCAACGTTGGTGAATCTGAAACTCGCTGAGAAAACAGGGGTA

>Cluster\_26912

ATGAGTGCATTGAAGTTAAGAACCTGGTGAAAAAATTCACGGTTCAGACGGTGTGACGGTATCGACCTCGAGGTAAA  
GCCTGGCGAAGTAGTGGCAATTAATCGGTCAGGTTCCGGTAAAACACGTTGCTACGCAGCATAAATCTGCTGGAAC  
AACCGGAAGCGGGAACCATCACCGTTGGCGATATCACTATTGATCTGACCGTTTCAATTAAGTACGAAAAATCGCTGATT  
CGCCAGTTGCGTCCAGCAGCTCGGTTTGTCTTCCAGAACTTAAATTTGTTTCCGCATCGTACGGTGTGGAAAAACATTAT  
TGAAGGACCGGTGATCGTCAAAGGCGAACCGAAAGAAGAGGCCACGGCGCGCTCGCGAGCTGTTAGCGAAAGTTGGGC  
TGGCCGGTAAAGAAACGCTATCCACGTCGTTTGTCTGGCGTCAACAGCAGCGAGTTCGATTTGCGCGTGGCTGGCA  
ATGCGTCTGAGGTGATTTTGTGTTGACGAGCAACGCTGGCGTTGGATCCAGAGCTGGTGGGCGAAGTCTGAAACCCAT  
CCGCCAGCTGGCGCAGGAAAGCGCACAAATGGTGTGTTGACGACGAAATGAGCTTTGCCCGGGATGTTGCGGACCGGG  
CGATCTTTATGACCAGGGGGGATAGTGCAGCAGGGGGCCGCAAAAGCGTTAATTGGCGATCCTCAGCAGCTCGCACC  
CGCCAGTTCTGGAGAAGTTTCTGCTGCAATA

>Cluster\_40922

ATGAATACACAGATGCTGATCTATTACACTTATTTGAATCATTAACCTACCGAGCAAAAGATTGATATCGCAAGACGCTT  
ACTACAAAACAAAGAAATAAATCAACGACAGTTATTTCTTCTGAGGAAGATAAAGCTATTTCTGTTTTCACAACCTTATG  
TATTTGCTTTTACTTCCAACTTTTCTGTTTCTCTGATCTTGACATATCCAAGATGAATTCGTTGATTAACCTATATTT  
TTGGAGTATATGGAGTTTGGAAATCTGATCAATCTTCAACATCATCGCTGTGTAAGCACTGAATATCGCTCCGCTAA  
TATGCTTAAACATTTTAAAAAACTCAGACAGAAAAGAACTACTTGTAGAGCATCATGGTTCATCTATACTCAACTTAACA  
TTTTCGCAAAAGGGATGAGTCATCAACTGGATCAGAAACGTAAGAAGCAGTTGAGCAACGCTCGCAATCTTGGCGAGAA  
ATAGAACAGTATCCAGAAAGTTATTCAGCTATGTCAAAAAGTGAAGAAGAACCCTATCCTTAGAAAACGAGACCAAAGA  
AATCTATACGAGCATTGTTTTCAGTAAAGAAGAAAAGAAATAACGCTGTTCTTAATCCCAATAACAGCATAACATATTG  
ATAAACACGAAAAGTATATAAAAGAACAAAGGAAAACGAGGAAGCAAGGAGAACTCTGTTGACGAGACTCTCATATG  
CAGAAAGTATCCTGA

>Cluster\_38587

ATGAACAAAACATTAAGTTAATGGCAGTGACCGCCATATTGCTTCCACTCTGGTCTGTCTGGTGTGGAGCGATGAG  
TACAGCAATCAAGAAACGTAATCTTGAAGTGAACCCAGATGAGTGAACCACTTGGCTTAAACCGTCTCGCAGAAAA  
CCGTATATCTTACAGATAAAGAAATACCTCCGACAAAAGACATGTCGGGTCGACAGCGAAAGTACTAAGCGCTTCAGGAT  
AAAGGGTACTGTGACATCCGCGCCGAGCAGCGGCTATTACTGGATACAGGCCAATGCTCCTCAAAGCCGATAAAATGGA  
TCTGCGCAGACCCAGGGATTTCTGATCAGGGTATCAGGGGAGCAGCAATGGGAGCTGCTTGGGGAGGATATACGG  
CCTATAACTCCAACCTGCGGGGGCGACATTAGGTGTGGGCTTGTGCTGCCGCTCGTGGGTATGGCCGCTGATGCGATG  
GTTGAAGATATTAACCTACACCATGGTACAGATATTGATTTCTGAAAAACGAATGCCACTGTCCAGACCGGATAATGT  
AGCTGCGCTGAAACAAGGAACATCCGGATATAAGGTTACAGACAGTACGACAGCAGGCAATCAGCATAAATACCAGACGC  
GTATTGCTCTTCCGCTAAATAAAGTTAATCTCAAATTTGAAGAAGCAAAACCGGTTCTTGAAGATCAACTCGGCAAAATCA  
GTTGCTAATATCTGTAA

>Cluster\_48965

ATGAGAAAAATAATACGGCAATAATATTCGGCAGCCTGTTTTTTCTGCGAGCTGATGGCCGAAACGGTACTGCTGTC  
CCCCACCGTGGTGCATGTTGTAACGGTGGTACGGCCAGTATTGCCATCAGCAATACCAGCCGAATCTGTTTACCCTTC  
CCGGTACCGGATATCGCGGTGAACAGTCTGGATGGTGCCTGACCAATAATGAGCAGACCGCTCCGGCGGTGTTGGT



GTGGCCACCGTCAACAAAAAGCCCTTACGTTTCATCTGGAACAGAGCGTGGTCTGAACCTTCCATTCAGGCTGTTC  
CCGTGAAGCGCGGGGCGTACCATTCAGCTGGTCACTGACCTGCGCGGAACCGGAGAAGAAGCCGGTTCGGTGGAAAACT  
CCACGCCTTACAAATCCCTGCTTGTGACCATCAGCCAGGCCGTCGGTGGCGGAAAATGCCCCGAGGCTGGTATCAGGTC  
CCGGTGACAAAGGAAACCTGCAGGCCCGGTTGGGCTCTCTTCAGTGGCAGATGCCCCATGGACGGGAACTCCATGAA  
GATGGTCCGCTTTGGCGTGGAAAAATAAACCGCTGTCTGCCCTGAATCCGGGAAAGTGAATCTCGGGAAAGTGAATCTCGG  
GTGCCGTGATGTTTACGCCAGCCTGCCAGCCAGTTACTGGCAGGTGCGCGCATGGATGTATGTATGTCATCCGTGACGGGGAG  
GGCAACTGA

>Cluster\_58207

ATGGAGGCTCGTGTACCGTTGCTGGCATGGGGCTGGTGTATGGAGGTGACAGGATTACTTCGATGGCGAGGCCGATAGACT  
GGCGAAGGCGTGGCTGGCCGAGTACACACCCGCAAAATCAAGTCGTTGAAAGATGAGCGTAAAGAGGCCATTCGTCAAATCG  
TCCAAATGAGTACCGAACCCGAGGATGTGGATCTGGTCCAGGCCGCGAACAAGTTGAAATGACCAGGCTGCGTGAAGGT  
GAAAAGGAAGCTGACCTTCCAGTCTGGAACACCATTTGTTGTGTGACGAAAGCGGGAATATCCGGCTCTGTTGAACCA  
TTGGGAAACCAAGTTTTTGAGATCGAAACCAACCGTGAAGGATTTGCTTTCTGGTATCGTAAATCCACAGTACACAGGGC  
AGTCGTCACCTGGGAATCGCTTATGTTGAAGCTGAACAGTACAAGATTGTTCTCCGATTTCCCTGTTCTTTGCCGAACAG  
GATGGCAAAATGTTGTGGACCTGGTAGATCCACATAGCCTACATCTGGCTGATGCTTTGCCCAAACTGGAAGGACTTGC  
GCTATATGCCGAACATCAATCTGATGCTTACAGCGCAATCGAATCTGTGCGCGAAGTAAAGGGTAAATACGAGTGTAG  
ATTTGAAACGGCAGGATGTGAGGATGCTGTTGCTACCGCTGAAAATGCAGAAACGTTATTTAGTAGCGGACTTGTCTGAT  
GACTATCAGTAA

>Cluster\_29321

ATGTTAGATCAAGTATGCCAGCTTGCACGGAATGCAGGCGATGCCATTATGCAGGCTCAGCAGGGACGAAACCGATGGA  
CGTCGTACAGCAAGCGGACAATTTCCCGTAAACGCGAGCGGATATTGCCGCACACACCGTTATCATGGACGGTTTACGTA  
CGCTGACACCGGATATCCGGCTCTTTCTGAAGAAGATCCTCCGGTTGGGAAGTCCGTCAGCACTGGCAGGCTTACTGG  
CTGGTAGACCCGCTGGATGGTACTAAAGAGTTTTATTAACGTAATGGCGAATTCACCGTTAACAATGGCCTCATCGACCA  
CGGCAAACCGATTTTAGGTGTGGTGTATGCGCCGGTAAATGAATGTAATGTACAGCGCGCAGAAAGCAAGCCGTTGAAAG  
AAGAGTGGCGGTGTGCGCAAGCAGATTACAGTCCGCGATGCGCGCCCGCTGGTGGTGTATCAGCCGTTCCCATGCGAGT  
GCGGAGCTGAAAGAGTATCTGCAACAGCTTGGCGAACATCAGACCCAGTCCATCGGCTCTCGCTGAAATCTGCCTGGT  
GGCGGAAGGACAGGCGCAGCTGTACCCGCGTTTCGGGCAACGAAATATTTGGGATACCGCCGCTGGTCTGCTGTGGCTG  
CAGCTGCCGAGCGCACGTTACGACTGGCAGGTAACCGCTGGATTACACTCCGCGCGAGTCTTCCGTAATCCGGGG  
TTCAGAGTGTCTATTTATTA

>Cluster\_18307

ATGGAACAGGTTATTAACAAAGCGCCGCTATTACGATATTTGGTCTACAGATTGAAGAGCTGCTGTATTCAGGCGTATTTAA  
GGCCGGAGAACGCTTACCTTACAGAACGTAACCTGAGCGAGCGGTTTAAATACCAGCCGAACTACCATTCGTAAGCCATCA  
TTATGCTGGAACGAAAGGCGTATGAAATGTGAAGCAAGGGTCAGGGATTTTCTTTGTCGACTCCACCGATAAGCTCAAC  
CAGAAATCAATTAATGCCCTATTCAGAAATTTGGCCGTTTGAACGTTTACAGGCACGTCAGGTAATGAGAGCAATATTA  
CGGTTTGGCTGCCAGCCAGATCAGCTTTAACGAGTTACAAGAGTTGAAGAAAATCATTGGATTACAGGAAAACGGCATCG  
CTGCGGAAAGTGAATTTGAAGCATTGATACCGATTTCATAGCATTTATGCGCAAGCGACGCAAAATCCGCACTAC  
ATCAAAACAGCCGCTGAATTTAGCGGGCAGTGGCGACAGAAAACCCCGCTGGAAGAAACTTAACTACAAGTACCTGCA  
TGAAGAAAGCATTGCGCTGTCGAATGGCTGGAAGATCACCAGGCTATTTTCTTGGCTCTGCAACAGAAAGATTACAGAGCTG  
CCAGGGAAGCGTCTTGGAGACATCTGGAACACAGCAAAAATGAACTGATCAAAATCTTCAACAGACGCTTCCATCAGC  
GATTTTGTGACTTTTTCTTCCGCTCGTTAA

>Cluster\_25010

ATGGACCGCTTGATTTATACCGCCCTGAGCGGGGCTTCTCAGACCCCTGACGAGCAGATCAGCGCCAACACCTGGC  
AAACGCTCAACACCAACCGTTTTTCGCGCGATATGGCAATGGCGACCAATGACAAGGTGAAAGCGCGGCTTCGACACGC  
GCTATATGGCGCAGGAAGGGGTCAGCGCGTGAACGACAGCAGCTGGTGTTCGCGAGAAAACCGAACCGCCGCTGGACGTG  
GCGATTACAGGTTTACAGTTTACATGCTGTGACGATATAAACCGCAACGAAGTGTATACCCGCAACGGCAACATTCAGCA  
GGATGACCAGGGGCAACTGACTATCGACGGCAATCTGGTGTGGGAGATAACGGGCGGATCATCTGCGCCCAACGCCA  
TTGCTTCCGTTTGGCAGCGACGGCACGCTCTCCGTGACGCCGATGACCGGTGACGTGACCGCAGCATGGATATCGACCCG  
CTGAAGCTGGTGGATATCCCGCTCGCAACCTGGCGAAAATCTGAAGGGATGCTGGTACTGCCGACGGGCTTCCGGC  
CCAGCGCATGAAAACATCAAAGTCAGCGCGGTTTTCTCGAGGGCAGCAACGCTCTCGCGGTGAGCGAGATGATGCTCT  
CCATCGCCATGAACCGCAGTTTGAAGCGCAGATCAAGATGATGAAAACCGCCGAAAGATATCAGCGACGCGGGCAACCGC  
TTATGCGCGGCTCGTAA

>Cluster\_22649

ATGTTGCGTGGTCTCCAGTGTCTTTTTCTATTATATGGGCAAGTGTCTCATGGGCATCAGAAGGAAAGGTGGAACCAAC  
AAATATCAGTCTACTAGTACCCCTAATACACTTCTGATTTAGGTAGTAGTAAAAATCAAACAGCAAGATGAAAAAG  
GTGCTTTAGCGGTTAAAGGTGAGGTTATTTTAAAGTCCGCGACCGAAGTTTTGAAAAATCACCAGCCGAGCCCTG  
AAGGCTCAGGCTGAAAGCTATGCGAAAGGGCAGGTGACGTCCTGCTCAGTCTTATCTTGGAAAGCTTGTGCGCTTA  
TGGTCTGTGTCAGAACAGCTTGTCTATAGGAGAAGGTGGCGACCTGGATGGCAGCAGCTTTGACTACTTTGCTCCCTGTT  
ATGATAACAGGAAACACTCGTTTTACGCCAGTTCTCTGCACAACGTAAGAGCAGCAGCAACCATCGGTAACTGGGGTT  
GGTACGCCAGAACATTTGGTAGCTGGTTGCTTGGCGGCAACCTGTTTTATGACTATGACTTTACTCGCGGTCATCGTGC  
CTTGGGGCTGGGTAGCGAAGCCTGGACGACTATCTGAAGTTTTCCGGAAACTATACCATCCACTTTAGACTGGAAG  
ATTTCAAAGATTTTCGACTTTTACGAAGAAGCAGCAGCGCGGCTGGGATGTCGCGGCTGAAGGGTGGTTGCCAGCATGG  
CCACGGTTTGTATCTTAA

>Cluster\_32012

ATGGGTAAACTCAGGGCAAGACAGCAGTATTACGGGCGCATTCAGGGAATGGCGAAGGAATTGCCAGAACTTTTGC  
CGCTCATGGCGCAAACTTAATCTTGTGGATATCTCCCTGAGATCGAAAAGCTGGCGGACGAACTGTGTGGTCTGGTCT  
ATCGCTGTACGGCGGTTGTCGCGGATGTCGCTGACCGCGCTCGGTAGCCGCACTATTAAGCGCGCTAAGGAAAAAGAA  
GGGCGCATTGATATCTGGTGAATAACGACGGCGTTTGTGCTGCGGAGTTTCTCGATATGAGCGATGAAGATCGCGA  
TTTCCATATGATATCAATATAAAAGGCGTATGGAACGTCACGAAAGCGGTGTCGCGGAGATGATGGCCGCAAGATG  
GCCGATTTGTGATGATGCTTTCAGTCACTGGCGATATGGTGGCAGACCCGGCGGAAACGGCGTACGCTTAAACGAAAGCG  
CGGATTTGGCCCTGACTAAATCGCTGGCGTGGAGTACGCGCAGTCTGGTATTCGCGGTTAACCGCATTCGCGTGGATA  
CGTTCCGACGCCAATGGCGGAAAGCATTGCCCGCAGTCAACCCGAAAGATCCAGAATCGGTGCTGACTGAAATGGCGA  
AAGCAATCCCGATGCGTTCGCTCGCGATCCGCTGGAAGTCCGGCAACTGGCGGCTTCTCGCATCGGATGAATCCAGC  
TATTTAACCGGTACAGAAATGTGATGATGGCGGACGACACTGCGGAGACGGTTAGCGTCCGATCTGA

>Cluster\_55041

ATGCACTCTGAACCGCACCGTTTTTCTCAAACTGGCGGCTGGGGCGGCTGTTTTCTTACATTTTCCATCTGAT  
AATCGCCGCTATCGCTTAACTGAAGATGGCGGCTTGTAGTTTTCCACCGAGGGCTGACGCTGCGCTGGTTTAGCG  
TTCGACGACAGCGTAGTGATATTTCTGATGCGGTGACACTGTACTTAAAGTGGCGGCGCTGGCGACATTAATTCGCGT  
GTGTTAGGACGCTGGCAGCTGCGCGCTGTGGCGACGAGACTTTTTCCGCAAAAACGCCATTTCTGCTGTACTGCTGCT  
GCCATTGCGCTGCGGGCATTTGCTACTGGTCTGGCGTTATTAACCGCTTTAAACCATCAATCTGGAGCCGGGATTTT

TCACCATCGTGGTTCGGTCAATGCGACTTTTTGTGTAGTTGTGGTGTAAACAATGTCATCGCCCGTTTTCGCCGACCTCC  
TGGAGTCTGGTTAGGCGCAATGGATCTTGGGGCAAATGGCTGGCAAACCTTCCGCTACGTAGTGTTCGCCAATCTCAG  
TTCGGCGTACTGGCAGGAGAAATGCTGGCGTTTGCCTTGTGCTTCGATGAAATCATCGTTACGACCTTACGGCAGGTC  
ATGAACGAACGTTACCCTTGTGGTGTGCTCAATCAGCTTGGGCGACCGCGTATGATACCGGTAACCTAGTGGTGGCAGT  
CTGGTTATGTTGGTAACAACCTTGCCTGATCTGGGGCCTGGTGGCTAACCCGGAAGGCGACAATGGTCAATAA

>Cluster\_6826

ATGAAGATTGAATATACGCCAGAACGTGGGCGGGGATTTCGTCGCCCTGGTGAACCTGAAAAACAACAAATTTGGGGTTT  
TTCAGGTATAAAAAAGCGGCCCGAAATGGAGCCGCTTCTGAACAGATAACCCGCTGCGCCGTTTTGTGTGTGTGATC  
CCAAACATAAGCACGGGGATGATAGCCGCTATCAGGCTGGTGGCAATGCAATCAGTCTGGTTGAGTTGCGCATACC  
TGCAATGAGCGCTTTCCCTGTACTCTTTAAGGAATGCTCAAGGGCAAAAGCACATGGTGGCAATCTTTCTGATTCATG  
CTCTATCTTCTGCGCGCTTTTCCGTTGCCGTTGATAATGTTTGGTCAATCTTTATCGGTCATTTGTTGTCCTGCA  
TAGCAATGCGCGTAATACCTCACACCAGCGCTGATAGTATTATTCTGATCTTTGGCTTGGCGCTGGCGCGCT  
TTGATCTCGCCTTCAAGTGCCGAAACGATAAATGGCCCTGTACTTTCCGCTATCTTCTTAAATTTTTCACAGCATCAG  
TATTGCGTGTGGTACTCGAGCCTCAAGCTTTTTGGATTTTGCATTAACTGCTTTTGTGCCATATCTGATTTCTCGTTA  
TTAGTGGCTGACAGTATACACACAAGAAAACGAAAAACACTATTGACGTGGCTGACACCGTTACTAATATAGTGGCT  
GACACCTTATCAAGGTAATCGATGAAAAGCAAAAGCCCGCAAGTGTCTTACCCTCGCAGGGCTTCTAA

>Cluster\_7928

ATGGAATCACGTAATTCATATGAAAACAAAATAGATGAGATTTTCATCTTTGTCCAGAGTCAAAGGAACACCCCATAGATAT  
TCAAGAAAAAAGATGCGTTTTGTGAATGAGTTCAAGGGGATTAATTTGATAAAAAACAAGGCTTTCAGAGCTTCTGT  
TTAATTTTTATGAGTGTGCTATAAGTTTTTACCAAGAGCTCAGCCTCAGATAAAAATCGATAGCTATAAATTCAGCAGT  
CAAGCTTTTTTCCATTTTTTTCATCTACGTTTGACACATAAATAATATAGGCTTTGATTTCAAATTTATTTCTGAAGTCAA  
GCTGCTGGAGAATCTTTGAAACGGTATTCAAAATACAAAATGGCGATGATGTCGGGAGATAGCCAAAATTAACATTA  
CTCTCCAAAAGAGAGGGTGGTTTATAAATTTACGTTGGATTTGATTTTAAAGGGTGTCTTTTCTGGACAGAATTC  
AGTAACTATGATAATCAATATGTGAACCTGGGAAAGCTATTTGTTGATGTTGATACTCGTGTATTTTAAATGGCCTGC  
TTACAACAAGAGTAATGAAAAATCATTAACCTGTGAGCGAAAACGGTTTAAAGTGGAGTATTGACTGATCGTAATAATA  
AAATAAACTCATCAGGGCGTGGCACCATTTCGATGATTTTTATTTATGGATGATGACTTTGATGATAGTTCCTCTGAG  
GATGATCCCGTTGAGAAATAGTCTGTTGTGACTAGTCCCGTTGATCAAGTTCAAAAGCAGTTTTCAATGA

>Cluster\_32336

ATGCTGTGGTAATTAGTATGATGCGATGGCGTTCAGCGTTTTGGTGGCACAGCGCTCTGTATGGTGAAGCAATGCAACT  
GTTTGTGCTAGCGCATATTTGTGTGGTTGGTATCGGTGTGTCGGTTCCTGGGCGCGGAAGCGTAGCGCGCACGGGGA  
TTGGCGCAATCAGCTTATCGATATGGATGATGTTGCGTCCCAATACCAATCGGCAAAATCAGCTCTGCGCGATAAC  
GTCGGGCTGGCAAAAGCGGAAGTAAATGGCGGAGCGTATTCGCCAGATTAACCCGGAGTCCGCTGTAACGGTGGTGAATGA  
CTTCTGACGCGGATAATGTAGCGCAATATGAAATGCGGTTATTCGTACGTGATTGATGCTATTGATAGTGTACGGC  
CCAAAGCGCGCTGATTGCTTATGTGCGCGCAATAAAATCCCGCTGGTACAGACCGTGGCGCTGGTGGCAGATTGAG  
CCGACGAGATTCAGTTACCGATCTGGCGAAAACGATTCAGGACCGTTGGCGGCAAGTGGCGGAGCGCTGAAAG  
CGATTTTGGCGTAGTGA AAAACAGTAAGGTAAAGCTCGCGTGGATTTGCGTGTCTTACCAGGCGTGGTGAACCC  
AGTACAGCGCACCGTCTGTGCGATGAAAGCCACGGCGGAAGGCCAAAGCGGATGGATTTGTCCTCAGGATTTGGCGCG  
GCGAGATGGTGACCGCCACTTTTTGGCTTTGTTGCGGTTTCTCATGCGTGAAGAAGATGATGGCGAAAAGCGGCGCTCA  
GGTTAA

>Cluster\_58255

ATGATATCATTAAGAGTCCGCACAATAATTTGATGCCATATACGCAACAAGCATACTTAATACGGTTAAAAACAATCA  
GTTACCAGAGGATATCAAAAGCTCCCTGGTTTCTGTGTCGATATATTTCAAGGTTTTGATTAACAATATTTGATTTATC  
CTTATGATTTGTCGTTGATGATTTAGTCTGATGACGACAACTCATTCATCTCAGTGTGCGTACGAGATGTTGGTGGTCA  
GACGATAACGCACTACCATAAATGTGCAGTTTAAATGATTTCCCTGGATTTTATGACTGGATGGATTACCCTGATCACCC  
GGTTAAGTTGTTTTTTCATATCTTGAATAAAGGACAGTTTGGGATATGACAGGATGATGCGTTTTCTTGATA  
TTAAAGCAAAAGTGCAGGCTGGACGCTTTACCGGGTTAAGAAATAGTGCAGTTTATCGATTGATGCGAACAGATTGC  
AAATGATTTCTTCTTGAATACCATATGCTTTGCTGAGAAATTTCCCTAAAGGGAAGAGTGTATGCTGTTGGAAATG  
GCTTCCGGAATGTCGCTTATTTCCGGAGACAGACGCGCCATTAAGCAGGCGCTTGGCGATGGATTATTTACACTTAA  
AAAATATCTACCTGTTTTTCTGAATCACTGTTGATGTTATTGCTCTGTTCTGGAGTAAAAACATACAGAGATGAT  
GCGGATTAATGAATGGATATCTAATAGAGTGCAGGAATTAGGTGACAGATAATATCTGTAATAAGCAGCTTAAAT  
CCGCTACACTCTTTAG

>Cluster\_5641

ATGCTTCCATCGGAAACGATGATCTGGCAGCCTGAGTTACAGATAAAACACTCTCCAGGAAACCCGGGGCGTTCACTA  
TACGCCATCAGAGCAGTTTTATCCGCTGGCGACCAATCCCGTGGCCATCAGATACCCTCCGCTGCGCTATGCCCTGA  
TGCAGGGGACAGCTTTTGAACAAATCTGCTATCCGAAACTTGCAGCCGTTATCCGCTAGCCGCTGATCCTGATGCGT  
GGCTGGACGATTAAGGGCAACCCGCGCAGTGGTGTGCGTATTTGCTCAGGAACAGGACGGCATTAAATCGCACACCCA  
CAGCGCCAGCGCATCCAGTACGGATTTGGGGACGAAAAACATCGTCTGTTGATTACGGAACCAATCCACGAAATAACA  
CCGGGCGCATACGCAAGTCTGAGTGGTCTACGGGTTGCGCGGATCATACTCATGGTAATGGTATTCTGGCCCA  
GGAGCGCGCGTTCTGCGTTAGCATTTTTATGATGGCGGTGGTTCACTTATGTCAGGATTCACAGTATCAAGTAAGCCC  
GGGACTTCTCCGTTAGATCGTATTATCAACGTATTCAGACAGATCAGCAGGTCATACCCACTCGCTGCTGGTFA  
CTGCGCAAGTTCTGGCGCATGCACATACTGTAGGTATTGGTGGCATAACGCACTCCGTTGGGATTGGTTACATGGA  
CACACCATACCGTTAACGCTGCTGGTAACGCGGAAAACCGTCAAAAACATCGCATTAACATATTTGTGAGGCTTGC  
ATAA

>Cluster\_27198

ATGCTGGCGTTGTGCGCAATCAGCAGTGAAGCGCAGCCTTGACCGACTGGAAGGGCAGCTTGGCGTTCACTGTTGATCG  
CGTGGGAAAAGACTGGTTGTTAATGAACACGGCGGCTGCTCTATCCGCGAGCGTTGGCACTGCTTGAACAGCGGTTG  
AAATCGAACAACTGTTTCGGAAGACAACGGCGGATTCGATCTATGCCAGTAGTACCATCGGTAACATATCTGCT  
GCAGTTATCGCCGTTATCGCATTGATTTCCGAGTTGCCGATTGAACCTTAGCGTTGGGAATAGCCAGGACGTGATGCA  
AGCGGTGCTGGATTTCCGCTGATATTGGCTTTATTGAAGGACCGTCCACAGCACTGAAATCATTTCTGAACCGTGGC  
TGGAAACGAGCTGGTGGTTTTCCGCGCACTTCCGCTGGCTGCTGCTGCTGCTGCTGCTGCTGCTGCTGCTGCTGCTGCT  
GCGCGTGGATCTGCGTGAACGCGGTTCCGGCACGGGAGATTGTCGATTAATCTGTTGCTGCTCACATTTACCGAGTT  
TGAGATGGCGATGGAATTAGGTAACCTCCGAGGCAATCAAAACATCGGTTGCGTATGGGTTGGGAATTAGTTGCTGCTG  
GACGGTGAATGAAGTCAATTCAGGACAGGCATTAAGTGAAGTTGCGGTCCTCTGCCGCGCTGATGCGTACGTTG  
TGGCTATACATCATCGGCAAAAACACTTTCCACACGCTCAGCGCTTCTGGACTATTGCGATTTGCGAATGACCGGATGACC  
GCGTTAA

>Cluster\_4780

ATGCTGATGCTGCACCGGAGCGTCCGCTCAGTGCAGTTGCCAGAACGCTCTGCTGCGCCGTTCCCTCCGTCAGGCGCTG  
GATTAACCTGGTTACGCTGTCGAGTGTGAAGTCTGAAATCATTAACCCGAGGACGTTCCCGCGCTGGCGGTTTGAGC  
ATATCTGCACATTTGTTCTGTAAGTATGATAAAACACTCTCCCGATATTTTGGCTATCAGCGTTACGCTGGAGTACAGAA

CTGCTGGCAATAAAAATCAACGAGATAACCGAGTGCCAGTTACATGCCGGAACCGTTCGCCGCTGGTTGCCATTAGTCGG  
GCTTGTGTGGCGCAGGGTTCGCGCAACCTGCGTACCCGTAACCCGCAATAAGCAGCAATTCACAAAGCACTGGACGAAT  
GTAGTGGCGAGCATCCGGTCTTTTATGAAGATGAAGTGTATATCTATCTTAATCCCAAACCGGTGCGGACTGGCAACT  
CGCAGACAGCAAAAATGTGGTAAACCGGGGAGAAATGAAAATACTATCTGGCTGGTGTTCACATAGTGGAAACGGG  
CAAAGTCAGTATGTGGTGGCAACAGCAAAAGCTCAGCCTTATTTATCAGTCTGTTGAAACATCTGAAATGGACATACC  
GACGGGATAAACCTATCAGCTCATAGTGGACAACCTACATCCATAAAAAGTCGGGAAACACAGCGCTGGCTGAAAGAA  
AATCCGAAGTTCAGAGTGATTTATCAGCCAGTTTACTCGCCGTGGGTGAATCATGTTGAGCGGTATAG

>Cluster\_68

ATGAGAGCTGTCCGGTGTGCTTGTCTTCTTCCACTGCATCACTGCATGCGGCTCCGACGATGTACTGGTCCCAA  
CTATGCCCGGGAAGAAGGCTGGCAGTGGTACAACCCGAATGCGGAAGAGATTC AACCGGAGCCTGCGCCAGAGCCGCC  
TTCAGGAACGTCTGGCCAGCATGACGCCATCTGAGCAGAAAAGGTCCGTCAGCAGGCGACCCGTGAAGCGCTGGATACG  
GCCATTCTGTATCCGTCTGCGGAGAACTTCGCCGTTTTATGATACTCCAGAAATTTCTGGACTGACCGGGCAGACGATTT  
TACCAGACATCAAAGCTGGCGCCTGAAATATCCGGAACCTCGACTACAACGTGAAACGTAGTCACTACAACCGTTCTC  
TGGAAGCGCTCTTACCGAAGAGAGAAAGGTTGAGAATGCGGTATCCGTGAGTGGCACAGCGCTATGGTCTGTTCTTC  
TTCACCGGGGAAATAATGCCGTGACAACTGATGGCCGGTGCATCCGCGCTTCTGCGAAGACCGGGGCATTACACT  
TATGGCCGTGAGTGTGGACGGTAAAACTAGCGACCAGCTGCCGAGAGCCGTCGGACAGCGGGCAGGCTGAGCAGATGC  
GCGCCACACATTTCCCGGACCTTCTGCTGATCCGAAAACGCACAGTGGCAGCCTTCTGATGGGGATTATGAGC  
CAGGATGACCTGGACCGCAGATGGTCAACGTTCTTACCCATTTTAAACCTGACTACTGA

>Cluster\_29207

ATGCAAACCATCACATCGCCCCACCAAGCGCAGCTGGTTCTCGCTTCTGAGCTGGGCCGTTGTTCTCGCCGTGCTGGT  
CGTCTCGTGGCAGGGCGCGGAAATGGCCCGCTCACGCTGATTAAGATGGCGCAACATGGCGACGTTGCGCCCGACT  
TCTTCCCGCCGATTTACGCCAGTGGCAGGATTACCTCACGAAATGGCCGTCAGCTGCAAAATCGCCGTCTGGGGCACC  
CGCTGGCCGGTGGTTCTCTCCATCCCTTCGGCCGTGATGAGCGCTGAAAACCTGGTACCGTGGTGGTCTACCAACTGT  
ACGCCGCTGATGGGTCAGCTGCGGCCATTAACGAAATGGTCTTCGCCATGCTGTTGCTGGTCCCGCTCGCCCTCGCC  
CGTTGCTGGCGTGTGGCGCTGTTTATCCACACCACCGGCGTACTTTCCAACTGCTTTCGGAAGCGGTAGAAGCGATT  
GAACCCGGCCCGTGGAGGGCATTCGCGCCACCGGAGCACAAGCTGGAAGAGATCCCTACGGCGTACTACCGCAGGT  
CATGCCGTGCTGATTTCTACTCTCTATCGCTTGAATCCAACGTCGCGTCCGGCAGCCGTCGTCGGTATGGTGGCG  
CGGGCGAATTTGGCGTGGTGGAGCGATTTCGCGGTTCCGAGTCCAGCAAACCTGCGCCCTGATGGTGGTCTCATC  
ATCGTACGGTACGCTGCTGGATTCTCTCTCAACGGTTCGCTAAGCACTTTATCTGA

>Cluster\_37810

ATGAGTATGGTTGAAACTGCCCGAGTAAAATTCAGGTTTCGTAATTTGAACTTCTACTACGGCAAATCCATGCCCTGAA  
AAACATCAACCTGGATATCGCTAAAACAGGTAAACGGGTTTTATCGGCCGTCGCGTAAATCGACGCTGCTGC  
GTACCTTCAACAAAATGTTTGAAGTGTACCCGGAGCAGCGTGCAGGAGTGAATTTCTGCTTGTATGGCGACAACATCCTG  
ACCAACTCTCAGGATATCGCACTGCTGCGTGGCAAGTGGGATGGTGTTCAGAAAACCGACGCGTTTCGATGTCCAT  
CTACGCAACATCGCTTTTGGCGTTCGCTGTTTGAAGTCTCCCGTGGCGACATGGACGAGCGCTGCAGTGGGCAT  
TGACCAAAGCCGCTTGTGGAACGAAACCAAGATAAATTTGACCCAGAGCGGTTACTCTCTCTCTGTTGGTCAACAG  
CGTCTGTGATTGCGCGTGGTATCGCCATTCGCCCGAAGTGTGCTGCTCGACGAAACGTTGCGCGCTCGACCCTAT  
CTCTACCGGGCGTATTGAAGAGCTGATCACGAACTGAAGCAGGATTACACCGTGGTGTATCGTCAACCAACATGCAGC  
AGGCTGCGGTTGTTCCGACACACGGGTTTTATGTACTTGGCGAATTTGATGAGTTAGCAACACGGACGATCTGTTT  
ACCAAGCCAGCGAAGAAACAAACAGAACTACATCACCGTTCGTTACGGTTGA

>Cluster\_29309

ATGAATGACCAACCCGTTCTGTTTCAGCAGAGCGCGGCTTCTTGGCCTGACATGAAACCGTGAAGATAAATGTCTATGC  
TATTAATGAAAGAAATGATCGAATCTCTCGACCATTTTAAATGAAATGAAAACGACACCACATTACGATTAGTCTGAAT  
TAACGGCAACCCGGCGATAAATCTTTTGGCGGGCGGATATAAATCGTGGTGGCCTATTTCGCCATTAGATATGGGC  
AGAAAATGGATTAAACCGGGTAAAGACGTTTTTAAATCGCTGCGCAACTTACCCCAATTAACCGTGGCAATCTCAACGG  
TCATACCATCGGTGGCGGTTAAGAACTTGCTTGTGCTGCGATATTCGTTATGGCCGCCCCGGCGGAAATTTCTTAACC  
CGGAAGTGTATGCTCGCATGGTGCCTGGTGGATGGGCATTGAACGTGTGCTTAAATCAGGTCCGCTCCGGTGGTGGTCCG  
CAGATGCTGATGCTGGTAAACGCTGACGGCGCAGGAAGCCAGCGGGCAATTTAATGATGAAGTGGTAGAAAAGA  
ACAGGTAGAAAGCTGGATGGCGAATCAGTTAGCGCAGCTGGAATAAATGTTGTCGGTGGCAGTGGCGCATATTAGCAGC  
TGATTTGCGGCTGGAAAATAAACACGGCGATTACCCGACACGCTACTGGCTGGATTAATGTCCGCCACTCAGGATTGC  
CAGCAAGCGACGCGCCTTTGCGCGAAAAGCGGCTGAGCTTCCATATAATCAATAA

>Cluster\_20300

ATGAACGACGACTATGGATCAGCAAAACCGGCTCTCGCGCAGGATGCTGAAATGAGCGGATGCAACAACATCGC  
CAACGTTAACACCACCGGCTTTAAGCGGACCGGGTGTGTTTACGATCTGTTTACCAGACCAGGAAGCGCCGGCG  
CGATGCTCAGTCAGAACCAACATTTATGCGCAGCGGCTGCAATTCGTTGGCGGCTACGATTTGCGGCATCAGAAAAC  
TTCACCGAAGGCAACGTCGAAACACCGGACACCGGATGAATGTGCGCATTTATGGGCGAGGGTTTTTGCAGGTGCAAAA  
GGCCAACGGCGATATCGCTTATACCCGCGACGGCAACTTGCAGGTGAAACGCTGACGGCGTACTGACCAACTCGAGGGCT  
TGCCGTTGACGGGAAATCGACTTCCGGCGGGGCGACCAACGCTCGGTTGGTGGATGGCACGGTGCAGGGCGATC  
TTACCCGGCGACGCGAGCTGACTGAGTTAGGGCAACTGACGCTGGTGAACCTTCGCCAACCCGGCGGCTTTCTGCCGA  
GGCGGACAACCTCTATCTGGAACCGCGCCAGCGGACAGCGACCGAAGCGCTACCGGGCGAAGATGGGCTTGGCACCT  
TGCAGGATAATGCGCTGGAAAGGCTCGAACGTTGATATCTGCAACGAAATGGTGGCGATGATTACGGTGCACCGCGCTAC  
GAGATGAACGCCAAAATGGTGTGACGAGCGGACGATATGTTGCAGTACATCAGCCAGACGCTGTAA

>Cluster\_43458

ATGGCCTATCGTTCCGACCGCTCTATGAAGATGTTATCTGGCGAACGCATCTCCAGCCGAGGATGCTGGGCTTGCACA  
AGCCGTGCGGGCGACGATCGCGAACATCTGTAACATTTGCTGGAGTTTATCCGCTGGATGAACCCGCCACTTAACG  
CCATGACGCTGGCCCAATGGTCACTACCTAATGCGCTAAGTTCTTACTCGCGCTCTATTCCGATCATATCTCCGCAAC  
CAACCTTTGATGATCCGCGAAAACAAACCGCTGATCTCACTGTGGCGCAATGGTATATCGGCTGATGGTACCACCAT  
AATGCTGGCGCTGCTGACTCAGGAAAAGCATTAGATGTGTCGCGGAAACATGTCACGTTGAGTTTACGAAACCGGAC  
CGCGCCCTGTTTTCTGGTTCGATGTGTGTAAGATAAAAACGCAACACTACATTCGCCGACGAGCGAATGGAACGTTA  
ATCAGCCAGCGCTGGTTCCGGTGTGTCAGCGCTAGAAAGTAAACGCGGAGAGATTAACGCGAAACTTATCTGGCAAC  
CGGTTATTTGATCAACTGGTATCTGACTGAGATGAAACAGCTGCTCGGCGAGGCGACGGTTGAATCGCTGCGCTATGCC  
TCTTTTTGAGAAAACGCTTACTACCGTGAAGATAATCCACTTGGCGTACCGTGGTCTACCGACGGCCTGCTGGT  
CGCCGACTGCTGCCAGCTTATCGCTTACCGGATGTGCAGCAATGTGGCGATTGTACGCTGAAATGA

>Cluster\_12705

ATGATCTGTATAAATATATAGATAAGACATCATTTGAAACGATTTTTTAAAGATGGTTACATCTCTATAAATTAACCTC  
ATATAGTGGTTTAAATCTCTTTTGAAGCTATGGCTATGAACCTTTCATTAGATGGTGAATCGCTTGAACCTTAGTAT  
TGAGGGGGAGATCAATCAAAAATGTTGCTGCTTATGCTTTCTTAAAATCCTCTCAATGACTGATGTTGGTCACTTAT  
GCTGATAAACATCAAGGGTTTGTGTAGCAATTTGACACAGAAAGGCGAGGTTTGTATGATGAAGAAAATGCTAATTAAC  
GGCACAGAAAGGTGACATTAATTAATTTAGAGAGTGAATAAAAAGTAAACTAAAATCAGTCAAGAAAACATTTATAGCG

CTGATGTAATTAGTAAATATTGCTTACTAAATCATTGCATTGGAATATGAAGAAGAAGTTAGAATAATAAAGCGAGTG  
GGGCTATTACAAAAGCAAGAAAAATTTTAAATTGACAAGATAACTGATTTAAGTTCGGTAACAGCTATCTACATTGGGAT  
TAACAATAAAGACATTGACAAAAATCATTAGAAAAGCAGTGTGTAGAAGGGTTGGTTTAAACAAGACTGTGCGATTAT  
ATCAGTGTGAATTCAGAAAAAGTACATGGGATCTCACCATAGAAGATTATGAATATACAGAAATCCCACATGCTATGCAG  
AGTGGGGATTGAAATCTTTAGAGAAGATTGTAAGATATATAGAACGTAATCATATAGGTGATTGA

>Cluster\_49700

ATGAGTACAGCCTCGCAACGCTGGCAGGGAAGCTGGCTGAACGTGTCGGCATGGATTCTGTCCGCCACAGGAACTGAT  
CACCACCTCTCGCCAGACGGCATTAAAGGGCGATGCCAGCGATGCGCAGTTCATCGCATTTGTTGATCGTCGCCAACCCAGT  
ACGGCTTTAATCCGTTGGACGAAAGAAAATTTACGCCTTCCCTGATAAGCAGAACGGCATCGTTCCGGTGGTGGCGTTGAT  
GGCTGGTCCCGCATCATCAATGAAAACCAGCAGTTTGTATGGCATGGACTTTGAGCAGGACAATGAATCCTGTACATGCCG  
GATTTACCGAAGGACCGTAAATCATCCGATCTGCGTTACCGAAATGGATGGATGAATGCCGCCGCGAACCATTCAAACCC  
CGGAAGCCAGAGAAATCACGGGGCCGTTGGCAGTGCATCTAAACGGATGTTACGGCATAAAGCTATGATTACAGTGTGCC  
CGTCTGGCCTTCGGAATTTGCTGGTATCTATGACAAGGATGAAGCCGAGCGCATGTGCGAAAATACTGCATACACTGCAGA  
ACGCCAGCCGGAACGCGACATCACTCCGGTTAACGATGAAACCATGCAGGAGATTAACACTCTGCTAATCGCCCTGGATA  
AAACATGGGATGACGACTTATTGCGCTCTGTTCCAGATATTTCCGCCGACATTCGCGCATCGTCAGAAGTACACAG  
GCCAAGCAGTGAAGCTCTTGGATTCTGAAACAGAAAGCCACTGAGCAGAAGGTGGCAGCATGA

>Cluster\_36019

ATGTCGTTCTGGAAGTTGACGAGCGCAATATGAGCCTGTAACCTCACTACCGAACAGGTAGCTCATCATCTGGA  
GTTTGTGAGGGCCCGCCAGGCAACAATGTACAGTGTAGTTTTCATCGCTTCTTACTGGGGTGTGATTTATTCGC  
GACGTGGCCTTCCGCCACCGATCTCTACTGTTAGACCCGCTTTGTTATGCCGCAACGACCTGGCGAATGACCATC  
ATTGCCGGCTTCCCGTTGAATAATAACGATCGCTTATTCGTTGGAATTCGCGTTCGACCCGTCGCGAATAACGCTTG  
GATACCATCAGAGTCAATGGTGCATGTCTGGGCCGCTGTTCCAGAACCATCACGGTGGTGCATGAACACCCGCAAGGTA  
TGGATATGGACCCGACTGTTCACTGTTTACTACAGGGCAATGCTGGGAGAACCCGACCTGCTGGCGTCGGCCCTGCC  
TTACAATTTTTTTCACATCAGTACTCGATTGCGGTGCTGATGGCAATGCCCGTGGTAACAGTGCACATGGGATGAATA  
TGGTCTCTCATCGTTCCGCGCATCGTGGTTCATTATGTTAGTCCGTCAGCGTTCATCACAGGGTTGGCAAGGCGATA  
TCATTCCATTACGCTAG

>Cluster\_58

ATGAGTTTAAAACCTGGTAATTTCTAACCTTTGGAAGGGATATGGGGACAAAACCGTTTAAAAGACCTATCCTATGTGTT  
TGATGAGAAAAAGGTCTACGTAGTAATGGGGCTAATGGAAGTGGAAAAACTACCTTTTTAAAATCTGTGCTTACTTG  
AAACACCTGATAAAGGAGAGGTCCATTACTACAATCAACCAATAAGATTTTACCTAAAGATAATAATCTTCTTAGAAAA  
ATTACTTATGATTTCTGAGGTAGGTATTTCAATATTCAGTTTTTGTATAACGTAGCCTATGGATTAATAAAGGGG  
TTTTAACAAAAAGAGATAAATCTAAAGTAGAAGAAGTGTCTTGAATTCGTAAGACTGTCGCATAAAAAAAGCAAAACG  
CATTAACCTTTCAAGTGGAGAGGCAAGAGGATGGGCCTTGCAAGGGCGATGGTGTATAAACCTGAGTTTCTCTTTTTA  
GACGAACCTACAGCTTTTGTAGATGCTGAGAACCTAAAGCTTATCGAAAGACTTTTAAATTCAGATCAAAGAACAAAAAC  
CACTACCATAGTTATAGCCACCAGATAGTCCCTTTCGCTTTACGGTTGGAGATGAGATCTTAAAGTTAGAAAAACGGAA  
AAGTTTTTGGAGTAAGCTAA

>Cluster\_11606

ATGAGAAATATTAAGAAAAAGTACTCATTTCTGGTGTGGCGCTCAGATAGCCGCCATGTGATTAATCAACTGGCAGA  
TAAACAAACCATTAACAAACTTTATTTGCTCGTCAGCAGCAAAAATACACAACCCATCCAATAAGCCAGATTA  
TTATGGGGATGTACTGAAATCATGCAGCACTGAAGCAGCCATGCAGGGACAGGATATGTGTATGCCAACCTTACGGGG  
GAAGATTTAGATATTCAGGCAAAATTCAGTGTATCGCTGCATGAAAGCCGTGTATGTTAAACGTCTGATCTTTGTTCTTTC  
CCTCGGCATTTATGATGAAGTTCAGGAAAAATTTGGCGAATGGAATAATGCAGTTATTTGGTGAAGCCCTAAACCATTTCC  
GACGGCTCGGGATGCAATTTGAGGCTTCTGGACTGATACAAATTCCTCGCCTGCGCTGGCTGATGAAGATAAT  
ATTTGATTATGAGATTACCTCACGCAATGAACATAATCAAGGTACGATCGTATCGCGTAAGAGTGTGCGCGATTAATCAC  
AGATATCATCGATAAACCTGAGAAACACATTTGGTGAAGATATAGGCATCAATCAACCTGGTACTGATGTTGATAAGCCAT  
TCTTCATGTAA

>Cluster\_5124

ATGATTCAAACACGTAATCAATATCTGCAGTTTATGCTGGTTATGCTGGCTGCATGGGGCATTAGTTGGGGAGCCAGATT  
TGTGATGGAGCAGCCGTTCTGCTTTATGGATCAGGAAAAAATATTTGTTCTCAGTCACTGTTCTGATGTACC  
TGCTGTGTGTTTTCTGGTATACCGCCGTTGGATAGCTCCGCTACCGGTCGTTGGTCACTGCGCAACGTTGGCGTACCG  
TGGCTGGTGGTGGTGGATGGCCGTTGATGTCGGTGTATTTCTGCTCGGTAAGGCGCTGGCTCTGCCGTGAGCCATT  
TATGACGAAACTTTTTGCCGATAAGTCCATACCTGACGTGATCTGACGTTGCTGACCATCTTTATCCTTGCCCGTTGA  
ATGAGGAAACGCTGTTCCGGGGATATGCTGAACGCTTCCGTTACCGTACGCTGGACGATGTGGCTGGGGCGCTG  
ATAACGCTGTTGTTGTTGCTCGCCGCGCACAGCCAGTATCAGAACCCTGCTGACACTGGCAGAACTGTTCTGGTGGGGTT  
GATTACATCAGTGGCCAGGATCAGAAGTGGTGGCTGCTGCTGCCGTTATTTGTCATATGGAAGCAACACGCTGGGTT  
TACTGTTTGGTTGA

>Cluster\_61334

ATGAACGTTTCTCGCAACTCAACGCTATAAGCGTTGTTCTGGTTATCGTTATTTCACTGCTGGTATCACCTCCAG  
TAACATATCTGGTTGAGCTTCCCGTCTCCATTTTGGGTTTCCATACCACCTGGGGCGCTTTAGCTTTCCGTTTTATTTTC  
TTGCTACCGACCTGACCGTGCATTTTGGCGCACCGTGGCCGACGATTAATCTTCGCGTAATGATCCCTGCGTTA  
TTAATCTCTACGTCATCTGCTGCTATTTCTATATGGGTTCTTGGCAGGGATTTCGGCGCACTCGCCACTTCAACCTGTT  
TGTCCCGGATATCGCCACCGCAGTTTTCATGGCTACGCGTGGGGCAATCCCTGACGTCGACGTTTTTAAACGCTG  
GTCAGAGTCCCGCTGGTGGCTGGCACCAGCAGCTCCACACTGTTGCGTAACGTCAGCGACACGCTGGCCTTTTTCTTC  
ATTGCCCTTCTGGCGTAGCCCGGATGCTTTATGGCTGAACACTGGATGAAATCGCGCTGGTGCATTAATCTGTTCAAAGT  
GTTAATCAGTATCGTTTTCTTCCGCAATGATGGCGTATTACTCAATATGCTGTTGAAAAGACTGGCAGATAAATCCG  
AAATCAACGCTTTGACAGGCGAGTTAA

>Cluster\_20982

ATGAATATCTACGAAAGAAATGATGGCAGCAAAATACCGAAATATCTGGGTAGCTGGCGACCTGACCGGATGCTACACGAA  
CCTGATGAACAACTGGATACGATTGGATTTCGACAACAAAAGACCTGCTTATCTCGGTGGGCGATTTGGTTGATCGTG  
GTGACAGAACGTTGAATGCTTGAATTAATACATTTCCCTGGTTGAGAGCTGTACGTTGAAACCATGACGAAATGATG  
ATTGATGGCTTATCAGAGCGTGGAAACGTCATCACTGGCTGCTAATGGCGGTGGCTGGTCTTTAATCTCGATTACGA  
AAAAGAAATCTGGCTAAAGCTCTTGGCCATAAAGCAGAAAGAACTTCCGTTAATCATCGAACTGGTGACAAAGGTA  
AATAATGTCATCTGCCACCGGATTTATCTTGTGACGAAATGGAAGCCAGTTGATCATCAGCAGTAACTGG  
AACCGCAAACGATCAGCAACTCAAGAGCGGATCTGTAAGAAATTAAGGCGCGGACAGCTTTATCTTTGGTCTATC  
GCCAGCAGTGAACCACTCAAAATTTGCCAACAGATGATATCGATATGCGCAGTGTCTGCGGAAACCTCACATTGA  
TTCAGGTACAGGGGAGAGGCGCATGA

>Cluster\_29316

ATGGCTTATCGCGACCAACCTTTAGGTGAACTGGCGCTCTCTATTTCTCGCGCTTCGGCTCTGTTTTCGTAAATATGATAT  
GGATTACTGCTGTGGCGTAAGCAGACGCTGGCGCGCGCGGCGCACGTAAGAACTGGATGTTGACGTCATTGAAGCCG

AAC TGGCAAAGCTT GCTGAACAACCGATTGAGAAAGACTGGCGTAGCGCCCGCTGGCGGAAATCATCGACCACATTATT  
GTGCGCTATCACGATCGCCATCGCGAGCAGCTGCCGAGCTGATCCTGCAAGCGACTAAAGTCGAGCGGTTCCAGCCGA  
CAAACCAAGTGTGCCAAAAGGGTGACAAAATACCTGACTATGCTGCAATGAGAGCTTCCAGCCATATGATGAAAGAAG  
AGCAAATTCCTTCCCAGTGAATTAACAAGGCATGGGCAGCCAGGCAATGGGGCCAATCAGCGTAATGAAAGCGAGCAC  
GATGAAGCGGGCAGTGGCTGGAAGTGATCAAAACACACCAATAACGTCACACCGCCGCGGAAGCTGCACCACCTG  
GAAAGCGATGATAACCGCATTAATGAACTGATGATGACCTGATGGAGCACATCAGTCTGGA AAAACAATATACTATTCC  
CGCGCGCTGGCGGGTGAGTGA

>Cluster\_1676

ATGAGCAACACTACTGATGTTGGGGAAGCATGATAGCCAACATAGTTATGGCTACTACCGTGTCTGGGCTGCATTCAAAGC  
TAATGACTGGTTTAAAACCAAGCGTCTTGAGAGTGTGAAAACCTCTATAAAGAAGTACACAATCTCCATAAACGTTACT  
ATTACAGTATCCAATACGTTGAGGATTCAGAAGAATAATTTGATAGTCACTATGGGTTGCATTGCGCAATATCTGAACCT  
AAAGACAAGTCAATGCAATGGGAGGTTAAATCGAATCTTACAAAATCATCGCTGAAC TAGATTATCTGGCATCGTCACT  
ACAAATGATGGATGCAATGGGTAACAACTTAGCCCTAAATAGCCCTTACTGGTTAGTGATATGGAAGCACATGGAC  
GATTCTGTAATGATGTGATGAAC TTCAATGACTCAGTTTGAAGGTTATAAGGCAGGTATAACTGAAGAGAATCCCA  
CATACGCGAGGCTATGTGAACGGCGATTACATGGCTATCCTTACCAGTATGGATGAACCTGTAAGAATATCTTTAAGTT  
AAAAGAAATCAGTTTAAAGATTTTACCCTACATGAACTACTATGCAGTCAGTAATAACGAGGCTGAAATCGCTTATCG  
CCAGAACAGGTAAAAACAGGACATA

>Cluster\_60139

ATGGCAGTTTTCAGCAAAGTACGACGAATTTAATCACTGGTGGGCAACAGAGGGCGACTGGGTTGAAGAGCCTAACTATCG  
CCGTAATGGTATGAGCGGGTGCAATGCGTTCGAGCGCAACGGCAAAAAGCTGTATGTAAGCGCATGACGCATCATCTGT  
TTCATTCCGTACGTTATCCGTTCCGGCCGACCAACGATTGTCGTTGAGGTTGCGGTAATTAAGAAGTCCGCAACGGGCGGT  
GTCATCGTGCCGAAGATCGTTTTTGGTGAAGCGGTGAAAATTGAGGGTGAATGGCGAGCGTTGCTGGTGAAGATAT  
GGCGGGTTTCATCAGCATTTGCTGACTGGTATGCCAGCATGCAGTATCGCCTTATTTGACGAAGTACGGCAAGCCATGT  
TGAAAGCAGTGGCCCTGGCGTTAAGAAAATGCATAGCATTAATCGTCAAGTATGCGCTGTTGTTATGTTCCCATCTAT  
GTGAAAACAGAAGGTAATGCAGAAGCTGGTTTTCTTGACTGGAGAAAAGTTCGTCGCCGCTTGGCTCGCGATAAAGCGAT  
TAATCATGACTTCCGCCAGCTGGAAAAATATCTGGAGCCAATCCCAAAGCGGACTGGGAGCAGGTGAAAGCGTATTACT  
ACGCCATGTAA

>Cluster\_26023

ATGACGCAAGGCGCAGTGA AAAACAACGGGTAAGCGTTCGCGCGCAGTAAGCGCGAAGAAAAAGCGATTCTTAGCGCAGC  
ACTGGACACTTTTTACAAATTCGGTTTTTACGGCACAAGGCTGGAGCAGATCGCGGAGTTGGCGGGTGTTCAAAACCA  
ATCTGTGTATTACTTTCCGTCAAAGAGGGCGCTGTATATAGCCGTACTGCGGCAGATCTCGATATCTGGCTGGCACC  
TTAAAAGCGTTTTCCGAGAAGATTTTCGCCCTGCGCGCGATCAAAGAATACATCCGCTGGAAGCTTCCCGCGA  
TTATCCGCAAGCTTCCGCCCTGTTCTGTATGGAGATGCTGGCAGGTGCACCGCTGTTAATGGATGAAC TGACGGGCGATT  
TGAAGGCATTAATGATGAGAAAATCGGCCCTCATTTGCCGTTGGGTTAAAAGCGGCAAACTCGCGCCGATTGACCCGCG  
CATTTGATTTTTATGATTTGGGCTTCCACTCAACATTACGCCGATTTTGCCTCAGGTGGAGGCGGTGACAGGCGCGAC  
GTTGCGCGATGAGGTGTTTTCAATCAAACGGTTGAAAACGTCGAGCGGATTTATTTAGGGGATTCGACCACGTTAA

>Cluster\_31800

ATGGGTGGCGCGGTAAGTACAGACTACGATCAATAATGGAGTGTACAGGTTTTATGGCGCGCGAATGATCCCACGATTAA  
AGCGGGCGCTTAAATTTGAAAAGATGGGATTCGCTTTTGGCGTTATAGAAAAGGGAGGACTACTGGAGGTTAAAG  
CAACAGGTGATTTTCAAAAATATTCGTGACGGACACCGGTCCAGCCGGCAGCAGGAGATAGCCTTACACTGGTAAACAAG  
GGCGCGGTGATGCTGCATTTACGTTGGGCAATGCCGGAAGCGTTGTTGATATCAGTACGTATGAATATACCTTGCTGGA  
TAATGGCAACCATAGCTGGAGTCTCGCAGAGAATCGCGCACAAATGACCCCTTCAACCACGGATGTGCTGAATATGGCGG  
CAGCACAAACCGCTGGTATTTGATGCAGAATGGACACCTGCGTGCGGCTGTTGGTAGCGTAAAAGCGGTTAAACCGAT  
ACGGCGATGTGGAGTTCGGCAATTAACAGCCGCAACGACGTGACCCTGATGCAGGCGCTGGCTTTGAGCAAAACATTGAC  
GGGCTGACGCTCGGTATCGATAGTCTGTTCTCCGTTGAAAAGCAGCACAACTCAGCGGGTGTAGTCTGGACGTTCT  
GA

>Cluster\_22103

ATGCAAACTTTAAAGATGATTTTATAGAACTTGGTGATAAGTCAATAATAGATTTTTATTTCTAAGGTTACTGATAACGT  
TAAATCCTATTGGAGTCGATCATATGAAAGTGAGGAAAACCAAAATATTTAGCGGAAATTCGTTTTAGCTTTAAAAGGT  
CAGGTGATAACAGATTACCTGATGCTGGTCTAAGTATTTCCAGAAAAGAAAATAATTTGGTATATTCCTAATGTTGTA  
CCTTTAGAAAAGGACAGCTAAACTACGATGAATATAATAACAATAATACCGGATTTTTATAACTCGTGTCTAAAACCGAT  
TGCCTTGAGTTAAAATTTGATA TTTAAAATAACCTCGGATTCCTAACGCAAGATGTTGTAGGGGTTTACGCAGGAA  
AATCTATTA AAAACAATTTTTCATCTTTAGCGAATAAATCAACAGGAAGTTACATCCAAATGATCAAGAAAGATGTTTGA  
TTTATTTGTAAGAACATGTA AAAAAGATAAATATGTGAATCTTCTGATCTTGTCCGAGTATTAATGTAACAAGGCTGGAG  
TGAAGATTACGACATAAGCTAGTTATAGAGTATGAGTTTGCAAGGGACTTAATCACGTCATGAGGCAATGA

>Cluster\_35974

GTGTTTCGCTGAATACGGGGTCTGAATTA CTGGACTATCTGGTTGGGGCCATTTTTATTTGTTGTTGGTGCCAGGGCCAAA  
TACCCTGTTTGTACTCAAAAATAGCGCTCAGTAGCGGTAGAAAGCGGTTATCTGCGGCTGCGGTGATTTATTTGGG  
ATGCGGATTTGATGTTTCTGGCATGGGCTGGAGTGGCGACATTAATTAAGACCACCCCGATATATTCAACATTTGACGT  
TATCTGGTGCCTTTATTTGCTCTATCTGGGGAGTAAAATCTTTACGCGACCTGAAGGGTAAAAATAGCGAGGCCAA  
ATCCGATGAGCCCAATACGGTGTATTTTTAAACGCGGTTAATTTTGGCTGACTAATCCGAAAGCCATTTTGTCTCT  
ATGTTCTGTTTTTTCGTACAGTTTTATCGATGTTAATGCCACATACGGGAATTTTCACTTTTATTTCTGGCGCGCAGCTG  
GAACTGGTGGATTTCTGCTATTTGAGCTTCTGATTATATCTGGTGTCTTTGTACGCGAGTACATACGTACCAAAAAGAA  
ACTGGCTAAAGTTGGCAACTCACTGATTTGTTGATGTTGCTGGGTTTTGCTGCCGACTGGCGACGCTGCAATCCTGA

>Cluster\_33852

ATGTTACAGGTATACCTAGTCCGCCACGGTGA AACCGCAGTGAACGCCGAGCGACGTATTCAGGGCCAGTCTGCAGGCC  
GCTGACTGCCAAAGGTGAGCAACAGGCGATGCAGGTGGCGACCCGTGCCAAAGAGCTTGGCATTACGCATATCATCAGTA  
GCGATTTAGGACGCCACCCGCCGACGGCGGAAATCATCGCCAGGCTTCCGCGTGCATATTCCTTGTATCTCGTCTG  
CGTGAATTAATAATGGGTGACTGGAACAAGAAAATATCGATTCACTACCGAAGAAGAAGAGAACTGGCGTGGCAGCT  
GGTCAATGGCACCCGTTGACGGGCGTATTTCTGAAAGCGGATCAATGACGGAGCTCAGCGATCGGCTTAATGCGCGACTG  
AATCTTGGCGGACTTACCGCAGGGAAGCCGACCGCTACTGGTGGCCATGGTATGCACTGGGATGCTTGGTGGTACG  
ATTTCTGGATTTACAGCATGGGCAGAGCGCCGCTTACGCTGCGTAACGTTCTATTTCCGCGCTGGATTATCAGGAAAG  
CTTGTGGCTGGCTTGGCTGGTGGTGA AACCGCAGGGGACATCTCGCATCTGGACGCCCTGCATTTAGATGAGCTGC  
AGCGTTAA

>Cluster\_26063

GTGAAGCTATACATTTACGATCACTGCCCTTACTGCTCAAAGCCCGCATGATTTTCCGCTGAAAAATATCCCCGCTCGA  
ATTTACATGTTCTGTCTCAACGACGACGCAGAAACCCCAACCGGATGGTGGCTCAAAAACAGGTTCCCATTTCTGAAAAAG  
ATGACAGCCGCTATATGCCAGAAAGCATGGACATCGTTCACTATGTGCGATAAACTCGACGGCAAAACCGTTACTGACCGGC  
AAACGTTCCCTGCCATTTGAAGAGTGGCTGCGCAAGGTCATGGCTACGCCAAACAACGCTGTTGCCGCTTTTGCCAA

ATCGGCATTTGATGAGTTTTCTACTCTCCGCGCGCAAAATATTTCTGCGACAAGAAAGAGGCCAGCGGGTAAATTTTG  
CCGACCTGCTGGCCACTCTGACGGTCTGATTAAGAATATCAGCGATGATTTTACGTGCGCTGGACAAACTGATCGTCAA  
CCGACGCGGTGAATGGCGAACTTTCGGAGATGATATTCAGCTATTTCCGCTCCTGCGTAATCTGACGCTAGTAGCCGG  
AATCAACTGGCCAGCCGCGTTGCTGATACCGCGATAATATGGCGAAACAGACAAATCAATTTGTTATCATCAATGG  
CGATTTAA

>Cluster\_21271

GTGGCAAAGAATTACTATGACATCACCTCGCCCTTGGCCGATTTTGTGATCGGCACGCCTGGTGAACAACCTCGCTCA  
CCAGGGGCATTTGATGGCGATCGCTACACGCTCACTCAACAGTATATCGATATGAACCCAGCTCAACGCTGGCCGG  
TTTTTTGGCGGTAGCGAAGCCAACTGCGCGTGGGCTGGAAACCTTGCFCGGCTACTCAATGGCCAGCAGCTCGCCAGGGC  
TTAAACGCCGAATTAACCCGCTACACACTCAGTCTGATGGTGTGAGCGCAAACCTCTCCTCAGCGAAAGGTGCGCTCGA  
CACTCTGGGCAACCCGATCAACGGCCTGCAACGCCAGCTCGAAACCTTGGATTACAGTCCGAAACGCTGATGAGCGCGA  
TGGCTGCCATCTATGTTGATGTTATCAGCCCGCTTGGCCCGCGCATCAGGTCAGTGGTCCCTGCTGACTGCAAAGC  
CCACAGTGGCAGGCAAGCTTCCGCGAACCCCTGCTGGCAGGCAATTCGCGCCGCGTGTCTGGCAACAGCTCGCCGG  
TCGCTGCAACTGATGTTTTCTCGTAATCGCCTGACCCTCAGGCAAAACAAATTTCTGCTCATTTAACCCCGGAGTTGT  
GA

>Cluster\_64451

ATGAAAACCTCTATGAGGACTGGCCTGAAACTTTCGTAGCCGATTAGATATGTTACGAGCTCTGGATGATCGCGGCTC  
GACCCGAGGCTCTATCTTGGAGCGACCCGGGCAATATTTGACGCTCTGGCAGAAGAGATACGTACAGCCGTTACCAGGC  
ATCCTGAAATCGACGCGAGTGAACCTGATATCGGGCCGCTGATTCGCTATTACAAACGTTGGAGAAAAGGGGAATCCCGCTG  
GCTGACTTACTTATTTGATGGCTCCACCAACTTGTGAACGGGTTCTGATATATCTCTGAAGTGTACACAATCCCGTATCT  
GTTTTTTGACTGTTGATAGCGCAAGGCGCTGCAACGATGCCCGCATTTTTTCAATATGATGATGCGACCCGTTAATCA  
TCGCCTACCGTTTCAAACAACCTGGCGGTTACCTTGGCACTAAGGGCGGAGGACGACCACAGCACAGATTA AAAAGCGAA  
GCCATTGAACTGGCTGATCGTTTTTTTACTGAAAACCCGACAGCGCCATTATCGCGTGGTGTGCAATACATATCCGGTAT  
TTTTGTGGCGAAATACTCTGACCACCTGCAGCGCTCGACGATTAGAAAATGGTTAATTTCAATTTACAGGAGTGATAAAT  
AA

>Cluster\_20770

ATGGCATTCTCCCGCAGCGTACAGCCAGCGTATTGCGATGGAACAAAAGCTGAAACGCGAGCCAGGCACTGGAAC  
CACGGAAGCATGCACTTGTGATTAAGGCGCTGGAAACGGATGTGGAACATGCCCGTAACCTGCCAAACAATCGCGGATC  
GCGTTGAGTTTAAACGGGATGTTGCTGCGCGCTGGACACCGACTGTGGAAGCGTATCTGGAAAGCGGGCAGGTGTAC  
GCCAACCCGGTATTTGCTGGTGTGTTACTGGCTGTTTGGACGTTGGGCGATCTGGATAAGGCGCTGGACTGGGCTGACAT  
TGCAATCAGCCAGCAGGCAACCCCGGATCGGTTGCGCAGTAAATTTCCACGTTCTGTTGGCCGATACGATGCTGGCCT  
GGCGCAGGAACATCCGGGCGCGGGGAAAGTGTGAGCCGATTTTTTCCCGACATTTGAGCGTGTCCGCCAGTACCTGG  
CGGCTGCATGAACAGGTCACGGCAAGTGGTTCAAGTTTGGCGGGCTGGAGCTGCTGCGCGGCAAGATGGCCAGACAAC  
GGCTGCGGCGTGGACGACATTTGAAACGCTGGAGAAAGCGGATCAACTGCTGGCCACCCGAGAAAAATACTATTTAAAAA  
TCGGCGTCAGAACGGCACGGCAGACGATTGCCGCCGTTATCCGAAAATGACGCGAGGGGTAA

>Cluster\_42615

ATGGCGACAGGAAAGTCTGCTCTCGTGGTTTGGCCCTTGGCGGCTTATTAATGGTAGTTAGCCTGAGTGGGTGTTT  
TGATAAAGAGGGCATCAGCGTAAAGCGTTTATCGACTTCTCGAGAAATACAGTATCGGTAGCGGTGAACGTTACCAA  
CCCTGACTGCCGATCAGAAAAACAGTTTGGTCTTTTGTCTGATTAACGCGATTCTGTATGGTTATTTCTCAGCAGTG  
AATCAGGCGATGGATTCCGGTCTGCGCCGTTTGTAGACAGCGTTAACGCAATTCGCGTACCGCAGGATACGTTACGCA  
AAGCGGCCGCTGCGTGAATGAACGGTTCGCTGGGTGTTGCTGGCGCAACAGCTGCAAAATGCGAAGTTGCGAGCCGATG  
CTGCACACTTGCCTTAAAAACAGAGTGTGACCTGAAACCGGTTTGTATCAGGCATTACCAAAGTGGTAAACGACGCCA  
GCTGATGATTTGCAACCGTTGATTTCCGGCTGCAAAACTTTTCCGCAACTGATGCTAATAGTTCAATTCGTTATGAACTCAG  
GCAAGGTACTCAGGTGAGCTTTGTCGAAATGGCATCCAGTTCCCGACTTACAGCAGGCAAGTGAATATAACAAACTGA  
TTGCGCCATTACCGGCACAACATCAGGCGTTTAAATCAGGCTGACTACAGCAGTTACTGCAACCCAAATA

>Cluster\_17736

ATGGTCAGCGCAGAAAGTAAATGAAGATGGTGTATGATCCAAATAGCTGAGTTACAGGTGGCTGGCATGGGTTTAAATGGGAA  
CCAGAGTGGCTCTCTACAGCCAGGCGATGTTTCTCTCAGGATGAGGTAGATGGGAAGATGGTCAATGATACATTTAAGG  
GGTATACAAATGATTTAGTGATAGAAACACGCTAACAATACAGGGCTTTAAACACCAAAAAGAAAGATGGTTCGGTAGA  
GAGATTATTAACAGAAAGTAAAAATGAAATTTAATGAAGGACGCTGCAGATGTGCATATCAAAATGGTTCCCTTGA  
GGTGAAGATACACACTTACTACGACTACAAACTGCACTTTTCCCAACTGATGCTAATAGTTCAATTCGTTATGAACTCAG  
GTGACTCTCAAGAAATGGAAGACACCTCCAGCGGACCAATGATAGTGGCCCTAAGGGTAAATATCAAATGTTTACC  
ATGACTGCAAAAGAACAAATATGATGAAGTTGTTGATGTTAGACTAAATACGGATTAGGGAAAAAGATTAATGTT  
GAGTGATAAGTATCTCTGCTTTCTTTGTTGGATATAAAAGTTACTTCAATTTAATAAATGGTATTCCTTTAATATTT  
CTACAGGCAATCCGGGAAGTTACGGAGGCTTAGAGTGATGAATCAAAATTA

>Cluster\_47361

ATGGGTCAGAAAGTACATCTTAATGGTATTCGCTGGGTTTGTAAAACCATGGAACCTACCTGGTTTGGCAACACCAA  
AGAATTCGCTGACAACCTGGACAGCGATTTTAAAGTACGTACGTACTGACTAAGGAACTGGTAAAGCGTCCGTATCTC  
GTATCGTTATCGAGCGTCCGGCTAAGAGCATCCGTGTAACCATTCACACTGCTCGCCCGGTTACGTTATCGGTA  
GGTGAAGAGCTAGAAAACTGCGTAAGGTGCTAGCGGACATCGCTGGCGTTCTGACAGATCAACATCGCCGAAGTTG  
TAAGCCTGAACTGGACGCAAACTGGTTGCTGACAGCATCACTTCTCAGCTGGAACGTCGCGTTATGTTCCGTCGTG  
TGAAGCTGCTGTACAGAACGCAATGCGTCTGGGCGCTAAAGGTTAAAGTTAAGTTAGCGCCGCTGCGGCGCGG  
GAAATCGCACGTACCGAATGGTACCGGAAGGTCGCGTACCGCTGCACACTCTGCGTGTGACATCGACTACAACACCTC  
TGAAGCGCACACCACTTACGGTGAATCGCGGTTAAAGTGTGGATCTTCAAAGGCGAGATCCTGGGTGTTATGCTGCTG  
TTGAACAACCGGAAAAACCGGCTGCTCAGCCTAAAAAGCAGCAGCGTAAAGGCGGTAATAA

>Cluster\_35345

ATGCTGCTTTGATGAACGCTCACAGCTGACGAGGTGATGATTTTCTGCCCCGGCGACTGCTGAAACTATGGATAA  
GGCGGAATATCTGCGCCTGGATTGCACCATCAAGGAAGTCCAGTTCCACCGCGGTCAGAAACAGGATATTTGATGACCA  
CGCTCTGCTCCACCGAGCAGGAAACATCAACGGTCTGGGGCGTCTGCTGAGATTTCCATGTGCGGTAATTTTTATCTG  
AATCAGGCCAGAACCCCTGCGTGTGCTATGACAATGACAGCGGTTGATGCGTTTAAAGTGTGCTTTCCGTCGGTAA  
GGGCTTTAAGTCTTGGCGGAAGTGGTGCAGCACCTGGTCACTCCGGTACCAACGGCGTGGTGGCAGCAACGTTTTCAC  
TGGCTATGAAAGGCAAAACCGGTTGCTTTGTTGTTACCGCTGGCGTTTGTGAAAAATCTGGATAAAACCTTACCGTGAAT  
ACAGGTGCGCTGCTGACAAATGTCAGTCACTGCAACGGGGGACCGCCGCTATAAATACGCTGGAAGAAGGATGGTCA  
GCCGTTTGAAGCGGCGACAGACACCTTCAAGTAAAGCAGGTCGCGAGTCCGCTGATGCGGGGAAATATACCTGCTGG  
TGACCGATTGGCAGAGAAAGCACAGAGTGTGACGCTGTTGAAATGACCGGTGACAGTGAAGCGACGCCCGGATAA

>Cluster\_24540

GTGAGTAATAAAAACGCTCAATGTTAGGAAATCGCAGGAAATAACATTTCTGCTTGGTGGCAGGTATCTGATGTTTATGGC  
AATGGTGGTTGGCCGACGCGCTGAAGCGGGAGTGGCTTAAAGTGGCAGTCCGCTAATTTATCCGGCAGGGCAAAAACAG  
TGCAACTTGGCGTGACAAAATGATGAAATAGCACCTATTTAATTCATCATGGGTAGAAAATGCCGATGGTGTAAAG

GATGGCCGTTTTATCGTGACGCCACCTCTGTTTGGCGATGAAAGGAAAAAAGAGAATACCTTGGCGTATCTTGATGCAAC  
AAATAACCAATTACCACAGGATCGGAAAGTTTTATTCTGGATGAATGTTAAAGCGATTCCGTC AATGGATAAAACAAAAT  
TGACTGAGAATACGCTACAGCTCGCAATATCAGCCGCAATTAAGTGTACTATCGTCCGGCTAAATTAGCGTTGCCACCC  
GATCAGGCCGAGAAAAATTAAGATTTCTGCTGATAGCGCAATTTCTGACTCTGATTAACCCGACACCTATTACCTGAC  
GGTAACAGAGTTGAATGCCGGAACCCAGGTTCTTGAAAAATGCATTTGGTGCCTCAATGGGCGAAAGCAGCGTTAAATTTGC  
CTTCTGATGCAGGAAGCAATATTACTTACCGAACAATAATGATTATGGCGCACTTACCCCAAAAATGACGGCGTAATG  
GAATAA

>Cluster\_10123

ATGGTGAAAAAAGCGATAGTGACAGCGATGGCTGTAATCAGCCTCTTTACTCTGATGGGATGTAATAACCGGGCCGAAGT  
CGATACGCTTTCTCCAGCACAGGCTGCCGAACGAAACCGATGCCGCAAAAGTTGGCGGGCGTGTGCGGTGTGCTGATT  
GCGAAGGAATCGAAACCTCTCTGTTCTCGAAAAAGACGGAACATGGGTGATGAATGAGCGTTATCTCGGTGCTCGTGAA  
GAACCTTCTCTCTCGCTTCTACGCTACATGGGCGGAAACCGGTGACAAGCTGGTATTAACCGACAGCAAAGGTGAAAA  
GTCAATATTATCGGGCGAAAGCGATGCGCTGGAGATGCTGATCGTGAAGGCAATCCGATTGAATCGCAAGTTCAACTATA  
CGCTGGAACCGGCACAATCTAGTTTACCTATGACGCCGATGACCTGCGAGGCATGTATTTTTATATGGCTGATGCGGGC  
ACCTTACCTGATTGCGCGACCGGAAAACGTTTCATGGTAGCGAATAACGCAGAGCTGGAGCGTAGCTACTGGCTGCGCG  
CGGTACAGTGAAAAACCGGTGTTACTGTCAGTAGAAGGTCACCTTACGCTTGAGGCTAATCCGGATACTGGTGCGCCAA  
CAAAGTATTAGCCCGGATACCGCGGGTAAATTTTACCCGAATAAGGATTGCGAGTAGTTTGGGGCAGTAA

>Cluster\_16011

ATGCTTCCGCTGACCGTGGCAGCGGATGACGGCAGTGAGCGGCTGGTCAACGCGCCCGGACGCGGAAACCACATACCG  
CTTCAGGCAGCTGGCGTTGGGGCTTACACGCTGACAGTCCGGGCGGTAATGCCCCGGGACAGCAGCGGATCCGGCGT  
CGGTATCGTTCCGGATTGCCGACCGCGAGCGCTCACAGATTGAGCTGACGCGGGCTATTTTCAGATAACCGCCACG  
CCGCATCTTGGGTTTATGATCCGACGGTACAGTTTGAATCTGGTTTTCTGAAACGAAGATTTCAGATGCTCACAGGT  
GGACAAATCTGCCCGCTATCTTGGTACGGCAGTACTGGGTAGCCTCCGGCCAGAATATTAAGCCGGGCCATGATTAT  
ACTTTTATGTTCCGAGTGGAAATACCGTTGGCAATTCGGCATTCTGGAGGCTGTCCGCCAGCCGGTAAATAAATCTGAA  
GAGTATCTCAATTTTTTTGAAGGAAAAATAACAGCACCTGCTGGGGCAGGAGCTGAATGATCGTATTAATGCCCTGTC  
ATTGGCAGTGAAAGTTGAGCAACTGGAGGATGAGGTCAATCAGCGACTGGAGAGTGATATTGCCGGGGTGACCCAAAAA  
TCGGGGAACGAAACAGCCTCACGCGAGCTGGTGTGTAATAAATGATGAGCAGTCACTGGCCATATCCAGGTGA

>Cluster\_53915

ATGTTATATGCATTTAAGCTGGGCAGAAAACGCGCGGAGGAAACCTTATTGCCCTGAAAAAGGCGGAAAGGTGGCAG  
TTCTGATAAAAGCCAAAGTATGTCAGCAGAAAGCTCAGAAAGTATGCCGAGACCTGCAAAATCAGCAGTTCACACCATCA  
TGAACAACCTGAAGCCGTTTACTCTCTGGCTGATAAGTATGTCGGCAGCCTCGAGAATTCATCGTCTCTGGAAGGGCAA  
GGTCAGGCATTAACCAATTAACAACCTCAGCAGTATAAAGACCTTGCAGGTCAGGCTCGCTATCAGAGCTTGGCGCG  
AGCGGAAGCAACAGGTGGATTGGGTTCCACCGCAACAGTAATCAGTTAGCAGCAATCGCACCAACCGTTGGTCAGCAAT  
GGCTATCTGGACAATGAACAATTAACAACCTGGCAATATCGGCTTGGCGCTCTTCAGGGGCAGCAAAACCGCCGG  
CAAACATATGCCAACAACATGAGTCAGATTTCAACAGCAAGCGCGGCTGGCTGGCGCAACGCCAACCGACCGTCAAG  
ATTCAGCAGGGGTTAGTGGTGTGCTCATTCCGGTGGCTTTTGGTGGTGGCATAGCCAGTGTCTCGAGCTATCAACTC  
CGTGGGTTGCTGGTATTGGTGTGCTTGGTCTGCTTGGTTCAGTGTTTTAA

>Cluster\_32576

ATGGGTATTAAGGGAATGTGAAAGATCTTCGCACATCACCAGTTGACACACTGGTCAATGCGAGGAGCAACGCTTGT  
GTGGTTGTTAATGGCCGTTGCGATGGGCGCGTTAATTAATCCTGGCGCACTTTTCTTCCAGATCTATCTCTACATGGCAC  
CCTGTGAGCAATGTTGATACATTCGCTACGCCATGTTTGTGATGGTTATGGAGGATTGGTTGACAGCATCAACCCAAAG  
AACATCATCCTAAAGCTAATTTGGCTGCGTGATGGCATTTCACGGCAGCATTTCGGGACTGAAGTTTTCGCTCAAACTGAA  
CGATATCCACCTAGCAGTACATAATCCGGATCCGATTCACTGTTTGGCGTACAGGTTGCTTACCGATCCTAACTTTTC  
CCTTTAACCTGCCGCTGGCACAGTGGGCACAAATTTGGTTCAAGCCTACCGGGGATTTGGGCTATGACGCACCAATCGTT  
CCTGATGGCGTCACTGAGCAGCACGCACAGTGGTTTGTGGAAATGTTATCAGCAATCTGAAGGCTGTTATCTGCTACC  
ACCATGGCATTATGAATATGGCTCAGGCTTGTATGCTGGCTTTGGTATGTGTCTGGTGTCTGGTCAATATGAGTG  
GCGCATGGGCACCTAAAAATCATCAGAGGCTAA

>Cluster\_5

ATGAAAAGGTTACTTTTTTACCGGAGAGGAGGATTAGGTGATACCCCTTCTTACGTTTCCGGTTCTTGAGGTTTTAAAAAG  
TCAAGGTTATAAAAATAACTGTCTATAGGGGTTAAAGCCTATTATCAGTTAGCTCAAAAAGTAGGATGGGTAGACGAGATCT  
ATGAGGACCTTTTACCGCAGGTTTAAACCAACCTATGATTTAAAAATTTTCTTCTTAAAAACAGAAGGGTTCCAGCCT  
TTCCCTTCCAGAAAGGATATGGCTGGTAGACTATTACTTTAGTTGTTTAAACCTACCTAAAAAGTTTCTCAAATTTTACC  
TGTCGAAGGATCAACTGAAAGCATACTAAAAACAAGGTAGTTCTTCAATCCAGGAAGTGGTCTCTAAAAAAAATCCCTG  
ATTTTTTGGCTTTTTTCGATGATAGAAAAATTTTTAAAGAAAAAAAATTTGACTATATTTACATAGTAGGAGAGGCTGAC  
AAGTTGATAAAGGATTTTTTACCTCAAAATTTTTGGGAAGTAGAGGACATTTAGGTTTTAGCTAAGGCTTTAAAAACCGCTCG  
AGGTTTTATAGGCTTGACAGTGGGATATCACACTTTGGCAAGTATTATAGGAGTAAAAAGTTTTATCTTTTTTGGCCCC  
ACAGACCATATTTGATAGGCTCCGATAGGCCCTAA

>Cluster\_48651

ATGAGCAAATACATCATCAACGTATCGTTTTCAGACACGCGTAAATAAAACCACGCGCAGTGGAAATCGCTGAGTCTGTT  
CGGGCTTGGCCTGGACGAAAAAGAGTGGAGCCTTACGACAATCTGGAGCTGGAAGTGAAGCAGGGCGATGTGGTGTACA  
TCACCGCCCAATCCGGTTCCGGCAAAATCCGTTGTGCTGCGCGAGTTGCAACGACAGATGAAGGATGAAGGGCTGTCTGTA  
GCCCTCAGATGATTTTTTACCTTCGATAATGAGTTAAGTCACTGATCAGTTGGGCAAAACGACAGTGAATGCGCTTGG  
GTTGTTATCTATGGCTGGTCTGAACGATGCATATCTGTTTGTTCGCAAGCCTTCTGAAATGTCAGACGGCCAGAAATATC  
GTCCTAAGATTGCCAACTGATTGAGTCAAGGCTAAAGTGTGGGCTGCTGACGAGTTCCGGCGTGTCTCGACCGGTGTA  
ACCGCTCAGGTTGTGGCTTAACCTCCAGCGTCCGCTCGAAAGGTTGGTGGCAGCGTAATGGTGGCGACGACTCACGA  
AGACCTGAAGAACCGCTGCGCCCGGATATGCAGATCAACAAGCACTACAAAGAACCGCTGAAGGTGGAATATCACAATG  
GTAGTCACGATGAGGTCCATTATGTA

>Cluster\_20805

ATGTTTGAATTTTACCCGAACTGATGAAAGGCTGCACACCAGCCTGACGCTAACCGTTGCCCTCGCTGATTGTGGCACT  
GATTCGGCGTTGATTTTTTACCATCATCTGACGCTGAAAAACCGCGTGTGGTGGCTGGTGGCGGGGATATACAC  
TGTTTACCGGTACCGCGTGTGGTGCAGATCTTCTGATTTATACGGGCGGGCCAGTTCCCGACGTTGCAGGAGTAT  
CCGGCACTGTGGCATTGTTGTCAGAACCGTGGTTATGTGCGCTGATTGCGTTGTGCTGAAACAGTGGCGGCTATACCA  
GCAGCTGTTTTACGGTCAATTCGTGCGATCCCGAAGGTCAGTGGCAGTCTGTAGCGCCCTGGGAATGAGCAAAAAAG  
ATACGCTGGCGATCTGCTGCGGATGCTTAAACGCTGCTCTTCTTATTTCAACGAAAGTGGTGGTGGTGTGTTCAAA  
AGTACCTCTGCTGCTTACACCATACGCTGATGGAAGTATGAGGATACAGCCAGTTGTTGTACGGACGCACTACGATGT  
CATGGTGTTCGGCGCGGAGGATATTTATCTGGTCTGTTAACGGCCTGCTGACGCTGATGATGCTGATCAGGCGCA  
AAGCACTGGCGTTTGGAGCAAGGATTA

>Cluster\_11407

ATGACCCCAATAAAAATATTTATGACTATGCTGATTTCAAACGGCCTAAATTTGGAGCTTCCAAACGGGGCAACAACT

ACTACTGCACTCTTGTGTGCTCCATGTTCCGGTGAAGTATGGAGGCGCTTCAGGCCTCGGGAATCGACTACACCATCT  
TTTTCTACACCCGAACATTCATCCTCAGAAAAGATATTTAAATTCGTAAGGATGAAAAATTCGCTTTTCTGAAACAAC  
GGCGTGGCGTTTATCGATGCTGATTACGACACCACAACCTGGTTTGAACGTGCCAAAGGAATGGAATGGGAGCCTGAGAG  
GGGATCCGTTGTACCATGTTTGTGACATGCGTTTGTAGCGGACAGCGTGTGACGCTGCTGAAAAATGTTTCTAGTGTGA  
TCAGTAGTTTCACTGGCAATTCACGCTGGAATAATGACAGCGTTAACGAGTGTGGCGGCGAGCTGTGCGCATAT  
CCGGGTATGGTGTACTGGGATTAACTGGCGCAAGCAGCGGCGCTCGTCCCGTATGATTGAAATCAGCAAGCGGAAAA  
ATTCTATCAGCAGGAATATGTGGCTGTGTATTCTCTGCGCATACCAATCTACACCGAAATCTCAGGGACGCCCT  
TTATCAAAATGGCCAACCTCACACGAAAAGAGAGAGGAGTGA

>Cluster\_49720

ATGAATACCAATATTTACAGTATGTTCTGAGCAACTTATGGCAGCTACTGCTGACTTGAACGGAGCAACGAAAGGCCA  
GCTCGAAGCCTGGCAGGAGCATGCACAATTTGATACTGGTACATACAAACGAAAGAAGCCGCGCATTCGGATGTGGTAA  
CTGGCAAGATGATTACGCTGGATAATACGCCACTTCCGGTAAGCAGTCTGACGAAAAGGTTTATCCATTGCTTTGGTC  
AGCCCGTTGAAATTTCTCAACCTCTTCATGGCGCGCGCGGTTTGTCTCTCGATGAACATCAGAAAAGCATGGTTGCTTTG  
GTGTTACAGCGAAAAGCGTTTCGATGGGGCATCAGGTCACCATAACGCAATGGGCATGGAGCGAGTTTAAAGATTTGTTAA  
GTAACAGAAAAATTCGAGTAAAGACACTGGATCGCCTGAAGACGTTAACTGGCTGGTCACAGGATGTGAAGAGCGAA  
CTTGACAGGCGTGGGCTATGAATACCAGACTGGCATCATTTGGTGGGAGTGACAACAAAAAACTGGTCCGAGACATT  
TACTGAACCGCTGGTTGCAATGAAGCACATTTTCTACAGCTTGTATGATGCTTTATGCTGTGTGACGAGAACACGTT  
CAAAAACAAAGGCAGCATTTTACAGCAAAATATGCAAACTGGATTAA

>Cluster\_40172

ATGAAAACCGTTAGGGAGTCCACAACGTTGTACAACCTTCTCGGATCGCACAATTCATACTGGCGGTTGACGGAAGCAG  
CGATGTTTTGCGCTTTTCTACCACCGAAACCACAGAACCTGAACGTACGTTGCAGTTATCTGCCGAACAGGCTGCTCGCA  
TCAGGAAAATGACGGTCACTACCCTCCAGCTGATGATGAGTCTGACCGTCGATGAAAGCGATCTTCTGTGCATCTGGTA  
GGACGAAAAATCAATAACCGGAAATGGGCTGGCAACGCTCTGATGGCATGACACACAGCAGTGTGCTGATTTATC  
ACACGGACTTTCCCTTTGCTGAGCAGGTAGTTTCTGAAGCACATTCGCCAATAGTGATTCTGACAGCGGGGGAATATCC  
AACGCTTCAATCGGTTATGTGAAGATTACACAGGGTTGAAAGAATGACGTCATTTGGCAAAAGCGTGTAACTGTTT  
ATGAGCCGTCGTGAAGCTGCGGCATCCAGGCGCAATAACCGTGTATTTTTCGAAAGCGCAATGCATATGAAGTCGAAC  
GTGGATACCAACAGTAAAGGCCAGCGGCTGTTTCTGTTTCGCAATAAATTTGTCACAGCGGAGTGGCAAGAACGAAA  
TAAACCATTTTACCAGCTGAAACAGGTTCTCCAGGAACTTAA

>Cluster\_14906

ATGAGTGAATAATTCGAAAAGAAGATTGAGACAGCTAAATCCTTCGAAAAGACAACCTATGCAGAAAATGAACGGTCTAA  
GAAAAATGCATGGCGTGTGTCAGTGGCAGCATCATTACTGTCTTATGCTTTGGGGTGAATTTGTGTTCTTGTGCCAT  
TAAAAGAAAAGAGCTTGTCTATTGTGGCTGTTGGCGAAAAAACAGGCCGTACAGAATGATTACTCAGTTTAAACAGGAA  
AAGATCCTGCAATCTGAAGCGCTTGGGCGGATTTTGTAAACAGTATATTTACTTTACGTTGAAGTTATAATTTATCCGTC  
TCTTCAGTATGATTATGAGACTGTACAGCTATATAGCTCGAATACAGTAAAGGACGATATCTTCGTCGTATTAACAGCG  
ATATGGCTCTGATAAAAATTTATCATAATAACGGTCTTACTGTTGGGTTGAGTTCATCTCCAATATTTCTGACGCA  
ACCGCCAGATAAATGCGCTCTGTGCGTTTTTAAAAAACACAGGAGAACTTACAGCCGGACAGGTTTCAAGTTTCA  
CTGGACGGCTCGTGTGACATATCGTTTTGAACCAGAAAAGTCGGTTAAAAGTCCAGTCTGAGCTTAACTCTCGGTT  
TTACGGTAACAGTTACCAGACAGATCGGGAAGTCAGGGGGAATGA

>Cluster\_37325

GTGCCACACTACGTTTTCCCTTCCATCTGGCGAATCATAATAAAGATGCTGCCATCAATATATTTGATTATATTTATAAG  
CATAGGGTCGATTATTTTTAATGTGAATATTTCCATACAACATAGTTAAAAATGGACAGATCATTAATCAACCAACAA  
ACGCATTTTCACTGATTTTCACTGAGCTTGGCGCTTATGGCGTAAACGAAAATCATGCTGGGGTAAAAAGATGCAAAATCCCGT  
GCAGTTAATCAGGAAACACCTAAGCTCTCTATAGCGCTTAAATGGCATTTACTACATCGAATGATGAGACTTCTTTTGT  
CTTAATTAATGAGGGGAGCGAACAAAAGCGATACTCCCTCAACGAAGCCCTTGGTACAGCGCCGGGAAACGTTTATAGAA  
AAATAAATAAAACAGCGTTGTGTTTGAAACTACGGGATACGAAAAGTAACCTCTCCATCCAGGGTACCTGACATC  
ATCAAGCAGCCTGATTGAGAAAGTCAAAATGTACTCGCTGATTATATTTATCGCCACGCCTATACGTGATGGAGAACAGAT  
ATACGGCTTTCGATTGAAACCTCTGAAGGCTTCAATGACATTTACCACAGCTTGTCTACAACCGGGATATCCGCCCTCA  
GGATCAATAATCTTTGCTGACCCACCTGATGAGGTTTACAGGCATTAAGTTTACTGCTAACTCAACAAAGTGTCTCAG  
TTTACAATTCGTCGAACGGCGTACCCGCTTGATAAATGTTTCCGTCGGGAACTTACAGGAATGAATGGACTGCGTCA  
TGAAGGACTCAATAA

>Cluster\_35922

ATGGATAATTTCTTGTCTGACCTTAAACGGTAAAAACCGGTTATCACCGAGCGAGAAATCAACGGCGTTCGCTGGCG  
CTGGCTGGCGCATGGTGTGCTGGAACCTGACGCCATTAACGCCACCGCAAGCGCACTGGTATTTCAGCGGGAATACACG  
GTAATGAGACGGCACCTGTGGAGATGCTGGACGCTGCTGGCGCATATCTCACGGCGAGATCCCGTTACGTTGGCGG  
TTGCTGGTATCCTCGGGAATCCTGCTGCTGAAGCAAGGAAACGTTATTGCCATAGCGATATGAATGAAATTTG  
CGTCTGTTGGCAGTATTTGCTGAAAGCGGAGAAACCTGTCGGCGCGCGAACGGAACAGTGCCTGGAAGATTTTATG  
ACCAGGGCAAGAAATCTGTGCGCTGGCACCTTGATCTACATACCGCAATTCGTGGCTCTTGCATCCGCGATTCCGGTGA  
TTACCGCAACGCGACATTTCCCTGGGACGAGAAATTTCTGACCTGGGTGCGCGGGGCTGGAGGCTGGGTTCCA  
TCAGGAACCTGGTGGTACGTTTACCCTTTACAGCGCCAGACATTTTGGCGCGCTGGCCTGTACGCTGGAACCTGGCAAAG  
CGTTGCCCTTTGGGCAAAAGCATCTTCGCCAGTTTGCAGTAACGTCAGCGCAATTCGTGCGCTGCTATCTGGTGGAGAT  
GTCGGTATCGTGAGAACACCGCCGCTCCGTTATCGGGTGGTTTCGCAAAATTAATCGCCACTCGCCGCTCTCGAAATGCA  
TATGGCAAGTGACACGCTGAATTTTATGCGTTTGAAGAAAGAACATTTGCTGGCGCAGGACGGAGGAAACGTTTACCG  
TAACCCATGATGTAGATATGTTTATTTCCCTAATCCGTTGGTAGCGTTGGGATTACGCGCGGATTAATGCTCGAAAAA  
ATAAGCTAA

>Cluster\_5543

ATGCAATACAACCCCTTAGGAAAAACCGACCTTCCGCTTCCGACTTTGCCCTCGGCTGTATGACCTTTGGCGAGCCAGA  
TCGCGGTAATCACGCATGGACACTGCCGGAAGAAAGCAGCCGCTCCATAAATTAACGTCGACTGGAAGCGGCATAAAT  
TCTTTGATACCGCAACAGTTATTTCTGACGGCAGCAGCGAAGAGATCGTCGGTCCGCGACTGCCGGATTTCCGCCGCTCT  
GAAGACGTTGGTCTGCGACCAAGTGTTCATCGCTGGTATTACCGGAAGGATTAATCCCGTGGCATAATTTGCG  
CTCTATCGACGACAGCTGCGACGCTGCGCATGGATTATGTCGATATCTGCAAAATTCATCGCTGGGATTAACACCG  
CGATCGAAGAGACGCTGGAAGCCCTCAACGACGTTGTAAGCCGGGAAAGCGGTTATATCGCGCGTCAATGAC  
GCTTTCGAGTTTGTCTAGGCACTGGAATCCAAAAACAGCAGCGCTGGCGCAGTTTGTGATGACGAGTACTACTCAA  
TCTGATTTATCGTGAAGAAAGCGCGAGATGCTACCCTGTGTTATCAGGAGGCGTGGCGGTAATTCATGGAGCCCG  
TGGCAAGGGCGCTGCTGACGCTCCGTTGGGAGAAACTACCGCACGACTGGTGTCTGATGAGTTGGGAAAAAATCTCTAT  
AAGAAAGCGATGAAAATGACGCGCAGATCGCAGAGCGTTAACAGCGCTCAGTGAAGAACTGGGGGACACGAGCACA  
AGTTGCGCTGGCTGTTGTTGAGTAAACCGGGCATTTGCCGACCGATTAATCGGAACCTTCGCGGAAAGACAGCTTGTATG  
AGCTATTGAACGCGGTGGATATCACTTTGAAGCCGGAACAGATTGCCGAACTGGAACCGCGTATAAACCGCATCTCTGT  
GTAGGATTTAAATAA

>Cluster\_57285



ATGAAGAAATCCATCACCACGCTTGATCTCAATCTGCTGCTCTGTCTGCAACTGCTGATGCAGGAGCGCAGCGTGACCAA  
AGGGCGAAGCGGATGAACGTGACCCCTTCAGCGGTGAGTAAGTCGCTGGCAAAGTTAAGAGCGTGGTTTTGACACCCCGC  
TCTTTGTGAACCTACCGCTGGGCTGTGCGCCACACCGCTAATGGTCAGCATGGAGCAAATCTGGCGGAATGGATGCAA  
ATGAGCAATCTGCTGTGGATAAACCGCACACAGACACCGCGCGGCTGAAGTTGAGTTGGCGGCGGAATCGCCGCT  
GATGATGATCATGCTTAATGCGCTGTGAAACGGATCTACCAACGTTACCCGAGCGACCATCAAATACGTAACCTGGG  
ATTACGATTCCTTAGATGCCATTACTCGTGGTGAAGTGGATATGGTTTTTCCGGTCGCGAAAACCCATCCTCGCTCGCGG  
GAGCTGTTAAGCTCGCTACCGTTAGCCATTGATATGAAGTGCCTGTTAGTGTATGACCTGCGTCTGGTTACGCAAAGA  
TCATCCGGCAGTGCATGAAACGTGGAATCTGGACACCTTTTTACGTTATCCGCATATCAGCATTTGCTGGGAACAGAGCG  
ACACCTGGGCGCTGGACAATGTGTTACAGGAGCTGGGGCGCGAACGCACGATTGCTATGAGCCTGCCGGAATTTGAGCAG  
TCACTGTTTATGGCAGCGCAACCCGACAATCTGCTACTGGCGACCGCGCGGCTACTGTGACTACAATCAACTCCA  
TCAACTGCCGTTGGTTGCTCTCTCCCTTTCAGCAAAGCAGCAAAAAAGCTGGAAGTTCCTTTTACCTGCTGT  
GGCATAAACGGAACAGCCATAATCCGAAGATCGTCTGGTTACGGGAAACCATTAAAAACCTTTACGCGTCGATGGCATAA  
>Cluster\_60594

ATGAGTGAAGCACTACTGAACGCGGGACGTGACAGCTTAATGCTGGAGTTGCAGGAAGCAAGCCGTTTACCGGAACGCT  
GGGCGATGATTTTTGTCGCGCGCAATATCATCTGCCTGTGAAGGCAAAGTGGTGGTTTCGGGAATTTGGCAAATCGG  
GCCACATTTGTAAGAAAATCGCCGCAACGCTTGCAGTACCGGCTACCGGCTTTTTTTGTCATCCGGCAGAAGCGCTG  
CACGCGATCTGGGATGATGAAAGCGGATGATGCTGTTATCTCTTACTCCGGTGGCGGAAGCAACTGATCT  
GATTTATCCGCTCTGGAAGATAAATCTATCGCGTGTGGCGATGACCGCAAACCGACGTCACCGTGGGCTGGCGG  
CAAAGCGGTGCTGGATATCTCCGTAGAAGCGAAGCCTGCCCGATGACCTTTCGCGGACCTCCAGCACCCTCAATACC  
CTGATGATGGGTGACGCGTGGCAGTGGCGTCAATGACGCGCGGATTTAATGAAGAGATTTTGCCTGCTCCACCC  
AGCGGGGCACTGGGCGCTCGCTTGTGATAAAGTGCATCTGATGCGCGTGCAGTGCATCCACAGTGGCGT  
TAACCGCCAGCGTATGGATGCGATGCTGGAACTCAGCGCACCGGCTGGGGCTGGTGGCGGTATGTGACGCTCAACAA  
CAGGTACAAGCGCTTTTACCGACGGGATTTACGTCGCTGGCTGGTTGGCGGCGGCGACTACCACGCCAGTCAATGA  
AGCGATGACGGCTGGCGGACACGTTGCAATCGCAAAGTCCGCCATCGACGCAAGAGATCCTGATGAGCGCAAAA  
TCACTGCCGACCGGTGGTGGATGAAAACGGCAAACCTACCGCGCAATAAACCTGCAGGATTTCTATCAGGCGGGATT  
ATTTAA

>Cluster\_29190  
ATGGGCTTTACCACAAGAGTAAAAGCGAAGCGAGCGAGAAGAACCGTTCAACTTTGCGCTGTTCTGGGATAAATACGG  
CACCTTTTTTATCTGGCGATCATCGTCGCCATTTTTGGTTCGCTGTGCGCAGAATATTTCTGACCACCAATAATATTA  
CCCAGATTTTGTCAAAGCTCCGTGACGGTACGATCGGCATGGGGAAATCTTCGCTATCCGTCGCCGCTATCGAC  
CTTTCCGTTGGCGGATTTGCGGCTTTCCGGTATGGTAAACCGCTAAATGATGTTGGCAGGTATGATCCGTTTCTCGC  
GGGCTAATTTGGCGGTACTGTTGGCGGCACTGGGGCGATCAACGGCTCCCTGGTCAACTGGACGGGACTACACC  
CGTTCATTATCACCTTTGGCACCACGCTATTTTCCGTGGGATCAGCTGGTGTCTCCGATGCCAACCGGTATACGGC  
TTCATCTTTCGACTTCGTGAACCTTTTCCGCGCACGCTAATTTGGGATACCTGTCCCGTTATCTTCTCCGTAATTTGTCG  
GCTCATCTTTGGTTTCTGACAACGCGTATGCGGCTGGGCGCAACATCTACGCACTGGGCGCAAAAAACCTCGGCGT  
TCTAATCCGGGATGACGTGAAATTCACATTTCTGGTGTGTTTATCATCTCCGGTGTGTTGGCAGGTTGGCAGGCT  
GTCTCACTGCACGACTCGGTGCCGAGAACCGCTTGGCGGTATGGGTTTTGAAACCTATGCCATTGCCAGCGCCATCAT  
TGGCGCACCAAGTTTCTTCCGCGCAAGGGCGCATTTTCTCTGTTGATGGCGGGTGTGATCATCGGCACCATCAACA  
ACGGTCTGAATATTTGCAAGTACAACCTATTACCAACTGGTGGTGTGAGGGCGGATTAATTAATCGCGGCTGTGCGCTT  
GACCGCTTATCAGTAAAGTAA  
>Cluster\_60861

ATGAGTCACTCAACTTACCTTCGCGGACAGTGAATTCAGCAGTAAGCGCGCTCAGACCAGAAAAGAGATTTTCTTGTCCCG  
CATGGAGCAGATTTCTCCATGGCAAAAACATGGTGAAGTTCATCGAGCCGTTTTTACCCCAAGGCTGGTAAATGGCGGCGAC  
CTTATCCGCTGGAAAACATGCTACGCATTCACTGCATGCGCATTTGGTACAACCTGAGCGATGGCGGATGGAAGATGCT  
CTGTACGAAATCGCTCCATGCGTCTGTTTGGCCGGTTATCCCTGGATAGCGCCTTGGCGGACCGCACCATCATGAA  
TTTTCCGCCACCTGCTGGAGCAGCATCAACTGGCCCGCAATTTGTTCAAGACCATCAATCGCTGGCTGGCCGAAGCAGGGC  
TCATGATGACTCAAGCCCTTGGTGCATGCCACCATCTTGGGACCCAGCTCGACCAAGAACAAAGAGCAGCAACGC  
GATCCGGAGATGCATCAGACCAAGAAAGGAATCAGTGGCACTTTGGCATGAAGGCCACATTTGGTGTGATGCCAAGAG  
TGGCTGACCCACAGCCTGGTCAACACCGCGGCAACGAGCATGACCTCAATCAGTGGGTAATCTGCTGCATGGAGAGG  
AGCAATTTGCTCAGCCGATGCCGGCTACCAAGGGCGCCACAGCGCAGGAGCTGGCCGAGGTGGATGTGGACTGGCTG  
ATCGCCGAGCGCCCGGCAAGGTAAAGAACCTTGAACAGCATCCACGCAAGAACAAAACGGCCATCAACATCGAATACAT  
GAAAGCCAGCATCCGGGCCAGGGTGGAGCACCATTTCCGATCATCAAGCGACAGTTCGGCTTCTGTAAGCCAGATACA  
AGGGGTTGCTGAAAACGATAACCAACTGGCGATGTTATTCACGCTGGCAACCTGTTTCCGGCGGACCAATGATACGT  
CAGTGGGAGAGATCTCACTAA  
>Cluster\_35460

GTGGATAAGTCTGCTCCGGTGAAGTGGTGCACACTGACACCAACAATAACAACACCGTACAACCTGTGGCGCTGATGCGTCT  
GGGCGCTTTTGTACCGACCTTAAATCACTGAAGAACAGTAAAAAAAATACACTGTACGCTACTGATGCCAGGAAAGAGC  
TGACAGCTTTTCCCTGGCCGCTGCTGAGGATTCGATAAAGTTGAGATACCCGGCCCGGCTGGATATGGAATACGAT  
TTCAAAGCTGGTGGGGATCATTCATTTCCCTTTGCCCGCATAACGTGATTTGGTGACAAAAGTTGAACCTGCTTTTGTGA  
GTTTGCAAAACCTGTTGGTATACCTTCAAGCCAGTCAATCCCGCAGGCTGCGTGAAGCGCATCAGCCCTTCCCTGAAGCGCA  
TTGGCGGTACCGTATCTGTTTTCCCGTACCGATGAGAAGCACACCCGGGAATACATCACCCATCTGGTACAGTACAGCC  
TACTACGATACTGAGCGGATATTTGTTTACAGTACAGCCGATCCCGCTGTTTGAACGTACCAAGTTTACAGAAAAGT  
CCTTCTCCAGCTTAAAGCGATTAATGCCCTGAAGCGACGGGAGTCCGCCAGGCACTTACACCTTTATAGAGAGCCTGC  
CCCGGATCCGGCACCGTATCGCTGGCGCGGCTGCGTGCACGCTCAATCTGAAGTCTCCTGTTTTTCCCGAAGCCAG  
ACGGTACAGCGGCAATGGAGCAGCTGCGCGAGATTTGATATCTGATTAACAGGAGATCCAGCGGGGGCGGACAAAACCT  
CTTCTGCATTTCACTACCGCGTCCCGGTTAAAAGCGCGAATGATGAGAGTAAGGAAAATCCGTTGCAACTTCAACCTG  
CGGAAAAGTCACTCCGGAGATGGCGGAGAAGCTTGCCTGCTTGAAGAACTGGGATCACGCTGGATGACCTGGAAAAA  
CTCTTCAAAATCCCGCTGA  
>Cluster\_38940

ATGCAGGTCGGACTTACATCTTACATCTGCGCACCGCGCGGCACATAGCGTACCGTATCGTCAACCGTTGCGCC  
CACTCAGGCGGTGCGGCAAAAACCTCCCGCGACGGGAGTGAATATCCGGCTCGCGCTGATTAACCTCGCCCGCAGC  
GTTACAGGCTACAGCTTAAACGACAGCTCACCAGTTGACGAGCGGATCACTATCTCGGGCAACTGGAACAGCAGTTG  
CTCGATTATCTGCTATAGCCAGCTAAGGCGGCGAGGACAGTACGGCGCTGATGACAGTACTGACAAAACCGCGCGC  
GCTTTCCGGCGGCGGTTGACCGCTGACTTACAACAGTGTGTCAGGCGGAAGCGCGGTTGACCTTCCACTCGCGGATC  
TGGGAATCTGGTACACAATCCACACCGGGAACGCGCATGTTTCAAGTCTCTGACGGCGGCGAGCCAGCTTTCCGGG  
GTGATGCTGCTGAGGATGACAGCGCGGCGGATGATCAGACGCGCTGACCAACCGCTCGCGCGGCTGGGCGTGCAGG  
ACATCAGCAAGCGGACGGATCAGTTTCTCCACACCGAAAACAGTGGCTGACATCGAGCGGACCTTAAAGCTGCGCA  
CCGATGGTGAATGTCGGGTTTTATGCCACTAAAACCTTTGCGAACCCTGCGAGGCGAGCGTTTAGCGCAACGTTTGC  
CAACAGGGGGGGGGGGGATTTCCAGAGCTTAGAAGGATTAATCAGCAGCGCGCAGATGGCGGTGCAGCAGAAAA

AGCCCGCAGTTGATCGACGGCATGTACGCTTCCCAGCAAACGGAAAACGCGGTGCAGGCATCGGAGAACCTCGGCGGGC  
TGCTGGATAGCGCAATCATAACTATCAGGTTTTATTGTCAGGCGGTGAACGGTCAAGCGCGAATTTCCAGCCAGACGGTG  
AGGAATTTATTGGGGTAA  
>Cluster\_15797  
GTGCACTCAGAAGAATTAAAAAATACACTTGGATTAGCTATTCAAATCGGGAAGCTAGCATCTGATCAAAGTGTATTAA  
ATTTCTTTGAGCTTATCGATTTTGATGTTATTTCGTGATATACGCGACTTAACTGAGATGGTTAATAGCCACGGGTTCTAA  
AAGATAAAATATCTGAGACTGATTTTCTAATAGCGAACCTGAATTGGAGAACCACCATGTTAATGGTGTGGAGCTAATA  
CCATATGGGTCTGAATTTCTATCTCTTAGTTTAGCTTTTACTCCTAATCCACCATCAATTTCTACATAAAAGGGGATAA  
AAGTATACTCAAAGAATTCGGGTGTGCAATTTGATAGGATCCCGTGAACCTCCCTGCAGGGGAAGAAATAACGAGGC  
GGATCACTAATCAGATAGTGTCTGCTGGGTATATTGTTGTAAGTGGGTTAGCAATAGGCATGATGCGAATGCCACAAG  
GCAACGTTACAGGCAAAGGAAAACCATTTGCTGTCTTGGCGCATGGTCTTGAGGAGGCTAAGCCGAAGCAAACAGTCCG  
ACTTGCTCAAGAGATTTGGATAAAGGTGGTGCATGGATTTCTGAGTATCCTATGGGTGCGCCGGCCAGAAACAATCAT  
TTGTACAAGAACTCGGATACAAGTTGGATTATCTGCAAGGTTCAATTTAATCGAGGCTGCGTTAAATAGCCGGAACGATA  
ACTCAAGCTGAGTTTGAATAAAGGCGAAAAGACCAGTGTTCGCGTTGTACCTACCTACCTAATAATCCGCTTAATCT  
TAATTTGTGAGGGAACAGTTGATTAGTTAAGAGCAACATGGCTAGAGGCTAAAAACAAAACGGGATTATGATGATGTGA  
TTATGATCATAAATGAGTCCCGGAGTATTGTTAGAGCTAAATGGCCAGGGAACAGAGTACATTAGACTTGATTTAA  
>Cluster\_23776  
ATGATCATCTTACCGCGCGCGGGCTTTATCGGCAGCAACATCGTTAAAGCCCTGAATGATAAAGGCATCACCGATAT  
TCTGGTGGTGGACAACTGAAAGACGGCACCAAGTTTGTGAACCTGGTGGATCTGGATATCGCGGACTATATGGATAAAG  
AAGACTTCTTCCGATTAATGGTGGCGAAGAGTTCGGCGATGTCGAAGCGATTTCCACGAGGCGCGTGTCTTCC  
ACCACCGAGTGGGACGGCAAGTATATGATGGATAACAATCAATACTCAAAGAGCTGCTGCACTACTGTCTGCGAGC  
CGAAATCCCGTCTGTATGCTCTTCCGACGCACTTACGGTGGACGCACTCCGACTTATGTAATCCCGCAATATG  
AAAAACCGTTGAATGTCTACGGTTACTCAAAAATTCCTGTTTGAATGAATATGTTTCGCCAAATCTGCTGAAGCGAATCA  
CAGATTTGTTGGCTTCCGTTATTTCAACGTTTATGGACCGGTGAAGCCATAAAGCGAGCATGGCGAGCGTCTTCCCA  
TCTCAACACCCAGCTTAATAACGGTGAATCACCGAAGCTGTTTCGAAGGTAGCGAGAATTTCAAACGTGACTTCCGCTATG  
TGGCGATGTGGCAGATGTAACCTGTGGTTCGGAATAAGGCGTTCGCGCATCTTCAACCTCGGCACCGGTGCTGGC  
GAATCCTTCCAGGCGAGTAGCAGATGTACGCTTGTCTTATCACAAGAAAGGCCAGATCGAATACATTTCCGTTCCCGGATAA  
ACTGAAAGGCGCTTCCAGGCGTTCACCTCAGGCGAGATCTGACGAATCTGCGCGCGGGTTACGATAAACCGTTCAAAA  
CCGTTGCCGAAGGCGTAACGGAATACATGGCTGGTGAATCGTGACGCATAA  
>Cluster\_40929  
ATGATTATTTCAATTA AAAACAAC TGGGAAAAAGCAATAAAAATACATACACATTATTTAAATAAATTTGATATGCAACTT  
TTTAAATAAATCCATTCC TAGTTCTGAAGGACGAGACGAGCTAAAAAATTTATTTCTAGATGTGCATCACCTATTAATAC  
TTGCCGTAACAAGATATATTGGAGAGTATTGATATATATAGAGAGTACAACACAGATTGTCAATAACGCCGATATA  
TCGAAGCAATTCGACAAAGAAATAAGATCTATTTTAAATACAATAAGTTTGTAGGAAAAACAGGATCATGGAATGCATA  
TACTCTATGTAAAAAATCAATAAGCAGAACATGTCCTGATTTGCAATCAAGCATATGCTTTTTCGATACAAAAAAGAATC  
GCGTTTTTCGCTCCTACATTTAGATCAATTTTATAGTAAGGATGACTTTTCCCTCACCTTGCATTGGTAATTAACAATTTAATC  
CCAAGTTGTAGTTTACTGTAACCTAAGCCTTAAAGGCACAATTGATTTCTTCGCAATGAACATTTAAACCCACTGTGGGA  
TGATGAAGTTATAAATTTCTGTTTAACTCATGAGGATGGTGTTTTAACTAATAAGACGGAATGATTTTCACTACCCAGAAA  
AAATAAAAAATAACATATCTTACGATACATAAATTTCAACTAATAAACAACAGTAAATACTTTTGTGATAAACGAAAGA  
TATCAAGAAATGACAAATAGAAAGCAATAGAAATTTGCAACTGCCAAATTAATCTTGAATATGCCGTACTTACTGGAATATC  
ATATTTCAAAAATAACTCAGAAAGTAGTATATTAAGATTTGACAAAAGAGAATATAAAAAATAATTTGCTCGGTAATTTAT  
ATTTAGATATATATAAATAAATGCAAAATGCAAAATATAGTTAACACTCGTTAA  
>Cluster\_66876  
ATGAGTGA AAAAGAACATGACATGACAAACGACGGTGGAGAGAGCGTAACGTACACGCTGCGGAACATTTCCGCGGCAT  
CGACCGGGTGTATCCGACTGGCAACTCACGCCGTAAGCCAAAGGCACGTTTCTGCGTGAGTTCC TAGAAGACAGCT  
TCCGGGACGTCATCGACGGTTTCGCCCTGAAAAACCGCTCATCGCCTCTCTCGATGACGAGCTGGCCAGTTATCTGGGC  
GCCGAGGTATGGAGAAACGCTACCAGACCAATACATCACCCGCTGGAACAGGAATACCAGAAGCTGCTCGGGATCTC  
GACGGAAGAGGAGCTTCGCCGGGTGCTGACCAACACGCCCTTCTGACGACGCTGCCGACCAGGTGCTTAAAGGCT  
GGAAAAAGATCCCGCGCGGATCTCCCTGACCTTTTCCCTGTTTGCAGATCGCCGGCCGGGACAGGAAACCATTTGAC  
AGTGCTGGAACAGGATTTTCTACTCACAGCTGAGGGAGAAAAAGCACCGCTTTTACCGGGATATGATGTTATTTCTGTC  
CCTGAAAGAAACAGCATGCCGCTCTGCGGCTACAGCTGGACAGGATGACATCACCGTGCGTATTTACCGCCGGATGACT  
ACGGCTACGGTGCCTGGCGGGTGTCTGCTGTTGATGAAAGTGTCAATACCAGACGTTGGAACATCCCGTTCCCGGAA  
CTTGACGGACGTCCTTTACCCTGACCCGGGCTATGACGCCCTGATCAGCACCGCTCCCGACAGCTGGGATAAGGCCTT  
CCGTTTTGTGACGGGATTTGTGAGCTTCACTTTATAGCAATGGCTGGAAGAAGATCAGAAATCCGACCCCGCTGCCG  
CCGTCGCTGAGGCGCTGATTGAAGCGGTGTCACGATCACTATTA  
>Cluster\_22308  
ATGATTGAATTTAGCATTGTCAGCAAACTGTTCCGGCGCACAAAAGCCGTTAACGATCTCAATCTCAATTTTCAGGAAGG  
GAGTTTTTCGGTGTGATTGGCACATCTGGCTCCGGCAATCCACCACCTGAAAATGATTAATCGCCTGGTGGAGCATG  
ACAGCGCGGTGATCCGCTTTGCGCGGAGAAGAAATTCGTTTCGCTGCCAGTGTGGAGCTGCGCCGCCGGATGGGTATGCC  
ATTC AATCTATTGGCCTGTTTCCCACTGGAGCGTGGCGCAAAACATTTGCCACCGTGCAGCAATTAACAAAATGGTCCGG  
GGCGCGGATCGACGATCTGATCGACGAATTAATGGCGCTACTGGGGCTGGAGCCGGATTTGCGTGAGCGTTATCCGCATC  
AGCTTTCCGGCGGTGACGACGAACGCTGAGGAGTGGCCGCGCGCTGGCTGCCGATCCGCAAGTCTTGTGATGGATGAG  
CCATTCGGCGCACTGGACCCGGTAACGCGTGGCGGTTGCAACAAGAGATGACGCGCATACACCGTTTGTGGGGCGTAC  
CATTTGTGCTGGTCACTCATGATATTTGATGAGGCGCTACGACTGGCAGAACATCTGGTGTGATGGATCACGGTGAAGTGC  
TGCAGCAGGGCAATCTCTGGCGATGCTGACTCATCGCGCAATGATTTTGTCCGCGAGTTTGTGCTGATGAGCTG  
GGTGTACGCTGCTTTCCGTTACGTAGCGTGGCGGATTAAGTGCCTGCGGAAGAACGGGAGAGGTGAGGCGTGGCAGA  
AGAGATGACGCTACGCGATGCGCTCTCCCTGTTTGTGCGCGGGGATGTAAGTGTGCGCGTGGTGAACACGACGGGCG  
AGCCTTGGCGCACGCTGCATTTTTCAGGATCTGCTGGAGGAGCGTAA  
>Cluster\_39098  
ATGAGACTCAGGAAATACAATAAAAAGTTTGGGATGTTGTCATATTTGTCAGGCACTGTATTGCTCAGTGGCTGTAATTC  
TGCGCTGTTAGATCCCAAAGGACAGATTTGGTCTGGAGCAACGTTCACTGATACGACGGCATTTGGCCGTGATGTTGATG  
TCGTTATTTCCCGCAATCTTGATGGCTGTTGGTTTCGCCGGAAGTACCGTGCAGCAATAAAGATGCTAAGTACAGCCCG  
AATGGTCACTCAATAAAGTGAAGCTGTGGTCTGGACGCTACCTATCTTAATCATATCTTCTTGGCGTACTGAC  
CTGGA AAAACCACTCACGCTTGTAGCCTAGCAAGCCGCTGGCACACGAGAGAAGCCATTTACCATCGAAGTGGTTTCCA  
TGGACTGGAATGGTTCTTCTATCTACCCGGAACAGGCAATGCAACCGTGAATGAAATCGCTTTCCCGCGCAACACTCCG  
GTGTAATCAAAAGTGACCTCAACTCCGTTGATGAATCTCTTTCATTTCCGCTGCTGGGTAGCCAGATTTATGCCATGGC  
CGGATGACGACTCGCTGCATCTGATCGCAACGACCCGCTACTTATGACGGTATCTCCGCGCATCTCCGCGCAACGACCCCG  
GCTTCTCAGGCAATGAAAGTCAAAGCTATTTGCAACACCGGATCGCGCGCATTCGACCAATGGGTCGAAAAGCGAAACAG  
TCGCGCAACCACTGCTGACATGGCAGGCTTCAAAAAGTGGCGCGCTAGCGAATACACAGGTTGAATATTTCTC

CAACGTGAAACCAGACTTGTGTTGCCGATGTGATTAACAAGTTTATGGCTCACGGTAAGAGCATGGACATGCCAGCCAGCCAG  
AAGGTGAGCACAGCGCACATGAAGGTATGAAGGCATGGACATGAGCCACGCGGAATCCGCCATTAA  
>Cluster\_24054  
ATGGTTAAGCCACTGGCTGTGCTGCGGGTTGGCGGCAATGCGCTCATTAGGACGAGCAACGCAATAGTATTTCCCGATCA  
ATATGTTGAGCATGTGAAGAGCGTGCACATATCGTTGATATGGTTGAAGCCGATGGGACCTGGTACTAACCCACGGTA  
ATGGCCCGCAGGTGGGCTTTATTCTGCGCCGCTCTGAACTCGCCAGTAACGAAGTTTCTCCGGTTCCACTTGATACGCC  
GTGGGTGATACACAGGTGCAATTTGGCTACATGTTCCAGAAAGCGCTGCATAACGAATTTGGCTCGCCGTGGCATAAACAA  
ACCGGTAATTGCCCTGGTGACACAAACGCGAGTCAGCCACATGACGATGCTTTCCGACGCCAGTAAACCAATTGGCG  
CGTTTCTCGATGAAGCAACGGCCCAACACGCCAACCAACCACTCGGCTGGACGCTGATGGAGGACGCGCGGCGTGGTTGG  
CGGCGTACAGTTCCTCTCTCTGCACCCTGAAATTTATTGAGCAGACACCATCGCTCACCTGGTGCGCCAGGGATATCT  
GGTTATTGGCTGCGGCGCGCGGCTATTCCGGTGGTGCGAGACGGGCAACAACGAAAGGTGTAGAAGCCGTGATCGATA  
AAGATCTGGCCTCCGCGCTGCTGCCAGTCAATTAGGCGCAGATCTGCTGGTGTATCCCAACGGTGTAGAAAAAGTGGCG  
ATTAACCTTTGGTACCAACAACAACAGTGGCTCGAGCTATCAGCGTTTCCGAAGCGCAACAGCTGTTCCGGGAAGTCA  
GTTTGGTGTGCGCAGTATGCAACCCAAAGTGAAGCCATTGTTGATTTTCAATGCCAGCCAGCAACAAGGCAACAGG  
CCAGCGGCTGATTACTTACCAGCAACCATAAAAGCAGCCCTGGCGCATCAGAGCGGTACATGGATAACCCTTTAA  
>Cluster\_34188  
ATGTCGCAGAATAATCCGTTACGCGCTCTTCTTGATAAACAGGATATCTGCTGCTGGATGGCGCATGGCGACGGAGCT  
GGAAGCGGAGGGTGTAACTTAGCCGACAGCTGTGGTACGCAAAAGTGTGGTAGAAAAACCGGAGCTTATCCGCGAAG  
TGCATCTTGATTACTACCGGGCGGGGGGCAATGCGCGATCACTGCCAGCTATCAGGCGACGCGCGCGGGCTTCGCGCGC  
CGAGTCTGGATGAAGCGCAGTCAAAGCGCTGATTTGGCAAAGCGTGGAGCTGGCGCTAAAGCCCGTGAAGCGTATCT  
GGCAGAGAAACCCGACGGCGGAACGCTTCTGGTGGCGGATCCGTCGGGCTTACGGCGCGTATCTGGCGGATCTGCTG  
AATACCGTGGCGATTATCATTTGAGCGTTGAGGCAATTTACAGCGTTTCACTCGCCCGCGGTGGAAGCTTGTGGATGCC  
GGGCGCATCTGCTGGCTGCGAAACCTGCGCAATTTTTCGAGATTGAGGCGTTGGCCGAGCTGTTGACCGCATATCC  
CGGTGCGGGCGGGCTGTTCTATTACCTGCGGACGCGCAACACTGAGCGAGGTCAGCCGCTGCTGCTGCTGCTGCTG  
CGTTGCTGGCGGGTATCCGAGGTTGGTGGCGTAGGCATTAAGTGTATTGCGCTGGAACACCCAGCTGCGTTGCGAG  
CATTTACAGGTTTAAACGCTGCTGCCGCTGGTGGTGTATCCGAACTCGGGCGAGCATTACGATGCCGTGAGCAAAACCTG  
GCATCATCAGGTTGAACATTGCGCGCAGCTGGCGGATTATCTGCGCAGTGGCAGGCGCTGGCGCACGGTTGATGGCG  
GGTGTGTCGCACCGCTGCGGATATCGCCGCTTAAAAGCGGAAGCTGA  
>Cluster\_17496  
ATGATTACTTTTGATCAGGCAACCGTTGACAGCTCTGGTGCCTTTCTCATCGGGGAGCTGGAGCGACTCGACCAGACGCT  
GAACCTGCCACTGGTGGGTACACCTGGACCCGATATTCAGTTGCGTGAAGATGCTCTATCGCAGATGACATTTCCA  
GCTGGACGAATACCAGCTTCGCGGCTGCGGGTACTGGTCAAAATCCGAATGGCAAAAACCTGGTAGGCAAAAGACTCAACC  
GCTATTGCTGGCTAAACGTTGATATCGGCAATCCGGTAAACCGCTGAACCTGTGGGGATGGAACCTGGCTGGACGGT  
CATAGAATTCAGGCTGCTCAGCAGGTGCGGACGCGCCGATCGATACGCAAGATGATGACGGGATGCAACTGAAATGGCAGA  
TGGATAACGATGAACAGGTGTATGTTGGCGATTCCGCATTAACCTGAAAGGCTTGTACCCGTAACGGTGTTCCTGTC  
AACACCGCTGCAAAACCGTGGGCAACCTCAACACCGGACGAAATCCGCGCAAGCATTAACCAAGTGTCTGATGGCGTG  
GGCGGCTTCCGGTACTCTGTGGTTCGCGTGTATTGCTGATCCCGCTGAGCAGTTTGTCTGTGTCCAGCATCATCG  
TTTTCATCTCGGGTAAACAGTCCCTGTTGACGTACCTTCAGACCAACACCATCAGTATCACAGGAGCGGTGTTCCGCTG  
AATACTCGCGCGGTTAAATGGCTGAAAGGCGTGGTGTGGGGAATAAGGATGCGATGTTGCTACACCAACGATAAAAA  
ATACGTCGCGTACCCTGCTGGTTCGCTTACAGCGCTGCGGTCAGTATCGCGGCTGTGTACCAGATTGCGCACTACTACG  
GCAAGCTGGGTGACGTCAGCCAGTGTACAAGAAACCATTTCTGACGTTGATGGCATTTAA  
>Cluster\_21914  
GTGTCAGATCAGATTATCGCCCGCTCTCGCAATCCCTTGCCAAAGAACAGTCACTGGAAGCCTGGTCCGACAGCTTCT  
GGAGATGCTGAAATGGTCACTGATATGGAATCAACCTACCTGACCAAAGTGGATGTCGAAGCGCGCTGCAGCATATAA  
TGTFTGCCCGTAAACAGCCAGAAAATGCACATCCCGGAGATTTTACCGTCTCGTGGGATTAAGTATGCAAAACCGCC  
ATTGATGAAAACCTGCTTTTTCAGCGATGAAGTCCCTGACCGTTGGGGGACTGTATTGCGGCACGCAATCTTGGCATCAC  
CACATTTCTGAGCACGCCAATTCACCTTACCGGATGGATCAATTCATGGCACGCTTGGCGCCGATGAGGAGCGCC  
AGTGGAGTGAACGCGCGGAACAGGTTTTACAGTTATTCGCGGACTGATTGCACAATATAATCAAAAAGAGGCACTGGTT  
GAACAGCTGCGCGAAGCCATGCTGCGCTGATTGCGCAATCGTATACCGACTCGTTAACCGGGCTACCGAATCGCGGGC  
GATTTTGAACCTGACGACGCTGTTTTCTCTCGCCGACATCTAACCATAGATAATGATCGGCTTATCGACCTGG  
ATAACTCAAAATTAATCAACGATCGTTTTGGTCAATAATAGTGGCGATCTGTTTTCTCATTCAGTTGGCGGCACTTAAT  
ACGCTCCAGCAAAATGGCGAAGTTATTGGTCTGCTCGCGGTGATGAGTTTTTGGTTGTTTACTGAACAACGAGAAATGC  
GGATATTTCTGCTCTGCGGAGACGATTTCAACAGCAAAATACGTTGGAGAAATATCACTTAGGTGACGTTGATTTGTATTATC  
CCGGTGCAGTCTTGGCATAGTAGAAGTCGATCCTGAAACCGCATGCGAGCAGTGCCTGCATGCTGCCGATATCGCG  
ATGATACGGAGAAAAACACAACAGAAAAACCTTTTGTGCGCATCCAGCCTACATTCATGA  
>Cluster\_22237  
ATGAAATCAGTGGTGAATGATACATGATGGTATCGTGGCGTAGCAGAAAGCGTCAATTCCTGAAATTAACATCAGGATGA  
GGTCCGGTAAAAATGCGAGCTCGGGCTTATGTTGGTTCCGATTTACCCAGGATTTAAAAATGGTGACATATTATATC  
CAATAACGTTAGGCAATGAATTTAGTGGCTATATTTGATACCGTGGATCCGGTGTGATGATTTACACCCCGCGATGCG  
GTTGCGCTGTGTCGCTTATACCTGTTTACTTGTCCAGAGTGTCTGAAAGGTTTTTATCCAGTGGCAGAAATATGA  
TTTTATTGGCTCACGCGCTGATGGTGGATTTGCCGAATATATTGCTGTTAAGCGAAACAAATGTCTTTGCACTACTCGCG  
ATATACCTATTGAGGATGGCGCTTTTATTGAACGATTAACCTTGGCCGTCATGCGTTCCATTTAGCGCAAGGATGTGAG  
AATAAAAACGTTATTTATTATTGGTGCAGGAAACATTGGCTGCTGGCAATTCAGTGGCTGTCGCGCTGGGAGCAAGAG  
TGTGACGGCTATCGACATTAGCTCAGAAAAACTGGCCTGGCAAAATCTTTCGCTGCGATGCAAAATTTAACAGCCGCTG  
AAATGAGCGCGCCCAAAATACAGGGCGTTTTACGCGATCTGCGCTTAAATCAGCTTATCTCGAGACGGCTGGCGTCCCG  
CAAAACCTGCAACTGGCGGTAGAGATTGCGGCTCCTCATGCCAACTGGCGCTGGTAGGCACGTTGCACTCAGGATCTGCA  
TTTTAACATCTGCAACGTTTTGGCAAAATATTGCGTAAAGAGTGCAGGTTATCGGCAGTTGGATGAACTACTCCAGCCCTT  
GGCCGGGGCAGGAGTGGGAAACGCGGAGCCGGTTGCTGACAGAACGTAAGTTAAGCCTGGAGCCATTAATCGCTACCCGT  
GGAAGCTTTGAAAGCTTCGCCAGGCGGTGCGTGACATCGTCTGTAATGCCATGCCGGCAAAAGTGTGCTCAATCCCTG  
A  
>Cluster\_35151  
ATGGCTAACGCTGGCTCAGATTATGGCATGACATGCCAAATGACCCTAAGTGGCGAAACAATGCCAGGGTGTGAGGGCA  
GCCAATTGCAACAGTATGGCAGTGTATATCCACCTCTGGTGGAGCGCTCAGGAAATGTCACGCGAGGTACACATTTGATG  
TCACGACAGAAATTTGGCAAGTGGCTGCGCTGACAGAGGAGGTAATTTGATTCAAATTTGACAGCATGACAGGGCGCG  
GTACTTGATGGTGAATTAATCACTGGATGGGAAAACGCCAGTGTCTTAAAGAGGACAACGGCAATTTTCGCAACCCG  
AAAACTCCGCGAGAGCGCAAGAGGGCGCAGCGTGAGAGGGAAAGAAAGCGGGAAACAAATGGCGATTTGTCAGCGCGCT  
CAGGAAATGTCACGCACATGTCACGACAAGTCACGACAGATAAAGATACAGATAACAGAAATTAACCCACACATAACGG  
CGCATGCGCGAGAGTGTCTCAACCGGTGAGTGCATGGTGGCGGTTGACAGACAGCCGAACCTGAATACCTGGACGGCT  
GAGCGAACCGATCGGAAATTTTCGATGACTACTGTCTGGCAGCGCTGCTCGGATTTTCGACAACGGGACGAGTGTGGG



>Cluster\_21357

ATGACGCAGCCATTGGTCGGAAAACAGATTCTCATTGTGAAGATGAGCAGGTATTTTCGCTCGCTTCTGGATTCTGGTT  
TTCTCATTTGGGAGCGACAACGGTACTGGCGGTGATGGGGTGGATGCCCTTGAGTTGCTGGGAGGTTTCACTCCAGACC  
TGATGTATGTGATATCGCGATGCCAGGAATGAACGGGCTTAACTGCTGGAACATATACGCAACAGAGGTGACAGACAG  
CCAGTTCTGGTGATATCGCCACTGAAATATGGCAGATATGGCAAAGCGTTACGTCGTTGGCGTTGAAGATGTTTGGCT  
GAAACCGGTTAAAGATCTGAATCGCTTGCAGGATGGTTTTTGCCTGCTCTATCCCAGCATGTTTAAATCCCGCGTTG  
AGGAAGAGAAAGGCTTTTTCGCGACTGGGATGCAATGGTTGATAACCTGCTGCAGCGGCGAAATATACAGGAACATA  
CAACCGCCAGTTACGAGGTGATTTCCCAATGTGGGTTAATTTATCGTCAATTAGTTGCCGCGGACAAATCCGGCCTGGT  
GCTTGATATTTGCCGCATTTTCGGAAAACGATCTGGCATTATTTGCTTGGATGTCACCCGAGCTGGACATAATGGCGTAC  
TTGCTGCCTTGTATTACGCGCATTTGTTTAAACGGATTTATACAGGAACAGCTTGCACACCAAATCAACGGTTGCCAGAG  
TTGGGCGCTTATGAAGCAGGTAACCATTTACTCCGTCAGGCAATCTGCCGGGCGAGTTTCCGCTATAGTTGGCTA  
TTATCATCGCGAATGAAAAATCTCATTCTGGTTTCTGCGGCTGTAATGCGACGTTAAATACCGCGAACATCAGGTGC  
AAATCAGTAATGGTGTTCGGTTAGGCACTTAGTAAACGCTTATTTGAATCAATTGAGCCAGCGATGCCATGCCCTGGCAA  
TGCCAAATATGGGAAACCGGTGGTCGGCTGCGCTTGATGTTGCTGCAGAATGA

>Cluster\_38914

ATGCTGAACCTTATGCAACTGCCGCTTCCAGCATTAACGCTTTTACTCTGGCAAAGCGTGTCCGCGCTTTAACGTACC  
GGTCTCATTTAGGGCGAAACCGCGCGGGGAAAAGAGTGCCTGGCGAAATATATTTACACTGTAGCCTTTGGTAAAAATG  
ATAACCGCCCTATATCGGCGTGAACGTGTGGCGGATCCCGGAAAATATGCTGGAAGCGACCTTATTTGGCTATGACAAA  
GGCGCATTTACCGCGCAATTTGCCAGCGTGCAGGAAAATGGAGCTGGCGAAATACCGCACCTTATTGCTCGATGAAAT  
TGGCGATATGCCGCTGGCATTACAGGCCAAAATATTACGCGTATGTCAGGAACAGCAGGTTGAGCGATTAGGCAGAAC  
GACAAATCAAACTCAATTTTCGCTGATTTGCTGCACCAATAAAAAATCTGGAACAGGATGTGACTGCTGGACGTTTCTGT  
GAAGATCTTTATATCGTCTGGCGGTTATTCCTATAACCATGCCGCACTGCGTGAACGCTGTAACGATATTATTCGGCT  
GGCAGAGTCGTTTTATAAAAAATATGCCAGGTTGCTGGTGAAAAAATATCACCTTTTCAAGATCTACCCCGCGGCGCTAC  
TTAATTACCGCTGGCCGAAATGTTGCCAACGTCGAAACGCCATTACAGCGGGAATGATTTTAAACCGCAGCGCGGTG  
ATTTACCCGGATGCCCTTAGGCCTGCCGAAAACGACATTGCCGACACAGCGAATGCAATGGCCTGTTACAGCCCGCGT  
CCACATTTGCCGAAACAGCGATTAGGCGAGCAGCGACGAAGCGCTCAGTATCAATATATCGCCGACCTGATGCGTAAAT  
ATCAGGGCAACCGCAGCAAAATCGCCGACCTGTTAGGCATTACCCCGCGCACTGCGCTATCGACTGGCCTCCATGGCG  
AAGCAGGTATCGAAGTTTCTCTCTGA

>Cluster\_48789

ATGTTTGGTGCTATGCTGGCGGTTATGCTTCTGCTCTGCTGTTGCTGGCGCCATGTCTAAATGTTTGGAGGCGGTCAAAA  
AGCCGCTCCGGTGGCATTCAAGGTGATGCTTGTGCTACCAGTAACAATACTGTAGGCATGGGTGATGCTGGTATTAAT  
CTGCCAATCAAGCTCTAATGTTTCTAACCTGATGAGCCGCTCCCTAGTTTTTGTTCGTTGGTGCTATGGCTAAAGCTGGT  
AAAGGACTTCTTGAAGGTACGTTGCAGGCTGGCCTTCTGCCGTTTCTGATAAGTTGCTTGGTTGGACTTGGTGG  
CAAGTCTGCCGCTGATAAAGGAAAGGATACTCGTGATTATCTTCTGCTGCTGATTTCTGAGCTTAATGCTTGGGAGCGTG  
CTGGTGCTGATGCTTCTCTGCTGTTGTTGACCGCGGATTTGAGAATCAAAAAGAGCTTACTAAAATGCAACTGGAC  
AATCAAAAGAGATTGCCGAGATGCAAAATGAGACTCAAAAAGAGATTGCTGGCATTACGTCGGCGACTTCAACCCGAGAA  
TACGAAAGACCAGGTATATGCACAAAATGAGATGCTTGTCTATCAACAGAAAGGAGTCTACTGCTCGGCTTGGCTTATTA  
TGGAAAACACCAATCTTTTCAAGCAACAGCAGGTTTCCGAGATTTATGCCCAAATGCTTACTCAAGCTCAAAACGGCTGGT  
CAGTATTTTACCAATGACCAATCAAAGAAATGACTCGCAAGTTAGTGTGAGTTGACTTACTTCAATCAGCAACAGCGA  
GAATCAGCGGATGCTTCTCTCATATTTGGCGCTACTGCAAAAGGATAATTTCTAATGTCGTCACGTAGTGTCTTCTGGTG  
TGGTTGATATTTTTCATGTTATGATAAAGCTGTTGCCGATATTTGAAACAATTTCTGAAAGACGGTAAAGCTGATGGT  
ATTGGCTCTAATTTGCTTAGGAAATAA

>Cluster\_48595

ATGGATAAGGCTAACAAACAAGTCAAAGCAACAAAGTCAAGTGCAGTGCAGTCAAAAAACAGCCCTCCCCCAAAGCTAAGTC  
TGTAAAGCCAGCGCAGAAAAGAATAAACTGAAGGTATGACATATCCGAAAACAGTGCAGTGGACACGCTGGAGAGT  
ACTTGTGTTGCTTATTTGGATTTCTCGTTATTTTCAGATGGCCTTGTGATGCTAGATATGATATGGGATTGGATGCTCAG  
GTTGAAAATATGAAAATAATCTTTTCGACAGGTTTTTTTTATCGCGGTTTCAGATAAAAAACACCCTCACGCAAAAGTGAAG  
AAGGTTAAGCGTACAAAATACCTTATAAAAAATAAACCTATTGGGGAAGTTGTGATTTTCTGTGGTAAATGTTTTGATAT  
GCCATACAGCATGATAATGAATTAGACGAACTGCTATTTATTTGGAAGCATTTAGATAAAAAACAATTTCTAAAATAAAG  
GATAAAGCATTAAGAAGTACTCTGGATGCTCCTGTAACCTTCAATAAGGATGATTTATCTGCTGAATGGGCGACAAA  
ACAAAAGTGGTTCGACATGTTGGCTTACAGAAGAAGATAAAGAGATAATTTGAGCTTGCAAAAGCGAGTAAACAAAGCTTGC  
TAGAGATAGGTGTTCTCTTGTATAAATTCGAGACGAGTATGACCGCAGCACCACCTGTGTAGCCCTGAGCGGGTAGTA  
CCAGACTTGAACCTATGATGAATGAATATGAAAAAATAAATAACCATATACGTTGAAAGCGTGCATTAGTAGAATTCGA  
TCTGTAGTGTGATTTGTTACAAAATATGAAAAGTATCTACCTAAAATCCTTGAATATTTTGAAGATGTTGTCGCAC  
GTAGTGTCCGTTCTACTCTGATTTCGAGAACATTTTCGAAACATACAGTGTATCGTAATCATATTTGAAATCAAAATATA  
GAGAAAGCCCTAATTCAGATAG

>Cluster\_26660

ATGTCACATCTCGCAGAACTGGTTGCCAGTGCAGAGGCGCCATTAGCCAGGCGTCAAGTGTGCGCGTTAGATAATGT  
GCGCGTCGAATATTTGGGTAAAAAAGGGCACTTAAACCTTTCAGATGACGACCCCTGCGTGTGAGCTGCCGCGAGAAGAGCGTC  
CGGAGCTGGTGCCTTATCAACGAAGCGAAAGAGCAGGTTACAGCAGGCGCTGAATGCGCGTAAAGCGGAACTGGAAAGC  
GCTGCATGAATGCGCGTCTGGCGGGGAAACGATTGATGCTCCTTCCGCGGTCGCTGCAATGAAAACCGCGGGCTGCA  
TCCGTTGACCCGTACCATCGACCGTATCGAAAAGTTTCTTCGTTGAGCTTGGCTTTACCGTGGCAACCGGGCGGAAATCG  
AAGACGATTATCATAACTTCGATGCTCTGAACATTTCTGGTCAACACCCGCGCGCGTACCACGACACTTTTTGGTTT  
GACGCTACCCGCTGCTGCTGCTACCCAGACCTCTGGCGTACAGATCCGCAACATGAAAGCCAGCAGCCACCGATTCTGAT  
CATCGCGCTGGCGCGTTTATCGTAACGACTACGACAGACTCACACGCGGATGTTCCATCAGATGGAAGGCTGATGTT  
TTGATACCAACATCAGCTTTTACCAACCTGAAAGCAGCTGCACGACTTCCGCGTAACTTCTTTGAGGAAGATTGCGAG  
ATCCGCTTCCGCTCTTCTACTTCCGTTTACCAGAACCTTCTGCAGAAGTGGACGCTATGGGAAAACGGTAAATGGCT  
GGAAGTACTGGGCTGCGGATGGTGCATCCGAACGCTGCTGCGTAACTGCGATCGACCCGGAAGTTTACTCTGGTTTCG  
CCTTCCGGATGGGATGGAGCGTCTGACCATGTTGCGTTACGGCGTACCAGCTGCGTTCTTCTGAAAACGATCTG  
CGTTTCTCAACAGTTTTAAATAA

>Cluster\_26462

ATGAAGGCTGCAGTTGTTACGAAGGATCATCATGTTGACGTTACGGATAAAAACACTGCGCTCACTGAAACATGGCGAAGC  
CTGCTGAAAATGGAGTGTGTGGTGTATGTCAATACCGATTTTCAATGTTAAGAAATGGCGATTTTGGTGACAAAACCGCG  
TGATTTCTGGGACACGAAAGTATTTGGTGTGGTGGCAGAAGTGGCCCTGGTGTACTTTCATTAATAAACCGGCGATCTGCG  
AGCGTGGCGTGGTTCTACGAAGGATGCGGTCATTGCGAATACTGTAACAGTGGTAACGAAACGCTCTGCCGTTCAAGTTAA  
AAATGCCGGATACAGCATTGATGGCGGATGGCGGAAAGAGTGCATCTGTTGCGCGGATTTACCGGGTAAAGTGGCAGATG  
CTGTCGACTCGCGCGCGGAGCAGCATTACCTGTGCGGGGCTCACTACCTACAAAGCGTAAAGCTGTGCAAAAATCTGT  
CCAGGACAGTGGATTGCTATCTACGGTCTTGGCGGCTGCGGTAACCTCGCCCTGCAATACGCGAAGAAATGCTTTTAAACG  
CAAAGTATCGCCATTGATGTCATGATGAACAGTTAAAACCTGGCAACCGAAATGGGTGCAGATTTAGCGATTAACTCAC

GCACCGAAGACGCCGCCAGAATTGTGCAGGAGAAAGCCGGTGGCGCTCACGCAGCGGTGGTGACAGCGGTAGCTAAAGCT  
GCGTTAACTCGGCGGTGGATGCTGTCCGTGCAGGTGGTTCGTGTCGTGGCTGTCGGTCTGCCCGCGGAGTCTATGAGCCT  
GGACATCCCACGGCTGGTGTGGATGGTATTGAAGTGGTTCGGTTCGGTTCGGCACGCGTACAGGATCAACCGAAGCCT  
TCCAGTTTCCCGCGAAGGCAAAGTGGTCCGAAAGTCCGCCCTCGCTCCGTTAGCGGACATCAACACCATCTTTACCGAG  
ATGGAGGAAGCAAATCCGTGGCCGTATGGTGATTGATTTCCGTCGTTAA

>Cluster\_47673

TTGGATTTTAAACATCTTACTCAATTTAAAGATATAATGAACGAGCGCCCGTTAAACTTGATGACGGGAAAC  
GTTAATGTCTCATGGGGTATTGATGAGAACTACCAGGTTGGGGTGCAGATTTCAATTGCTTCAATTTGAAAAATA  
AACAAAACAATTTACCTTTACATAATCGCTGATTACTTAGACAAAGAGTATATGAATATATCACAATTAGCAACG  
AAGTATCAAAAGTAATTTAAATTTATATCATATTGATTCGAGCCATTGAAGGCGCTACCTCAATCAAAATATCTGGCCAGT  
ATCTATTTTATATCGTTTGTCTTTCATTTGATTATTTTTCTGCGCGATTGGATTATTATATATCTTGTATGCTGATATCG  
TCTGTAAGGGTTCATTGAACGAGTTAATAGCATTAGAGTTAAAGATGAATATGGGCGAGTGGTAATTGATGTAGATGCT  
ATGCAAAAGTAAAAGCGCTGAGCGTTTGTGTAATGAGGATTTTAAACGTTAGCTATTTTAACTCTGGTGTATGTATTTAA  
TTTACGGGAATGGTTAAAACAAAGACTAACGGAAAAATCTTTGATCTATTATCAGATGAGTCAATTAATAAAAAATTTAA  
AGTACCCGGATCAAGATATTTTAAACTTAAATGTTCTACATCATGCTAAAATATATACCAGAAAAATATATTTGATTTTAT  
ACTATAAGTCAAGATTTGAAGAAAAAATAGTGAATATTACACCCGGTTTATTAATGATGACACTGTCTTACATACATTA  
TACTGGTAACTAAACCATGGCATGATTTGGGCGAATACGCTCTGCGAGATTATTTTCGTAATATTTTAAATATATATAC  
CATGGAGAAATATACCTTATAAAAAAGCTGTTAAAAACATGAGTACAAGAAAAATATAAACACTTGGCTTTACCAGAAA  
AAATTTCTCGATGGTGTTTTACAGCAATTAATAATAATGTTATGAAAGGTTAA

>Cluster\_38568

ATGTTTGAAGAAACAATCCGCGCACTAAAAAGCTTGGCGACGAAAAATCTACCGTCGCATTTTCCACAGACGATAGCGA  
TTACTTTGATCGCGAGTGTCCCGCACCAAGATGCTTAGCTCAGTTCAGGTTCTGATGGAAGATGGAAGTCTAAGGTAA  
GGGATGAGGAGGTTCTTTTGTCCGTTCTGCGGTCATACCCGTGATGCTCAGAAGTGGTGAGCGCAGGAACAGCTGGAACAT  
GCGCGGAGCTGTCTGCGGAGGTTAAGGCGACTTTAGTGGTGGTACTTCCGCTTGACGCACAGAGATTCAATCAGAG  
GCAGCCCAAGGGGGATTTCATCTCGATGAGCATGAAGTGAACAGCATACCTCAGCATGTCCCGATCCCTATGCTGCGG  
CGGCACCCATGCGTCTTAAGATTGCTGTGGAGATGCGGATGTCGGTATGCCGTTGTGCGGGCGGCTATTTCTGTCCG  
TCTTGTGGGGCAACGCTGCAGAGCTTGTCTTCCGAACCTCACTGCCAAGGATCCGGCAGTCCGCTGGAAGCGGTTGACGC  
CATTAGAGCCGCTATCTGCGGACGACACTGCTGAGAACCGTGCCTGCTGATCGTTGAGAGCGCTTTGCAAGACTCAG  
TCACGGCATTTTACAGAGGTTGCAGAAGCGCTTACGCGCGCATAGCCCGACGGTGAAGACACGACGCAATGCATTTTACG  
AATCTTTCCGAGGCTCAGCTCTTTGGGAGGCGCGATAGGGGGAGGTTACGATAAGCATCTTACCACCGTTCGAGATGAA  
ACAACGACAACGGCCTTCAACAACGTCATCTGCTGCTCATACAGGGGTTGTGTCGACGATGACTACATCCGAAAA  
CCGTTGACACACGATACAAATTAGGACAGCGGTTGGTGTATCAAGCGTGGGCTGTGGCTGAAGCGCTTAACTAATCGAG  
CAATTGACCGGTGGCATCCGTCAGGACGCCAAGGATAAAGGTTGA

>Cluster\_24994

ATGAGCGAATTGACAATAAATAAGAGCAACAGCTACCTCGAACAGGCGGCGATCCTGCTGCTGTCTGGGCGAAGAAGC  
GGCGCAACCGTGTATGCAAAAACTACGCGTGAAGAAGTGGTGCCTGAGCGAAAAATGGCGCGCTTTCCGGCGTCA  
AAACCAGCATGGCGCGCAAGGTGATCAATAACTTCTTTGATGAGTTCGCGAACAGAGCGGATCAACGGCGCTCGCGA  
TCGATGTTCCAGGATCTTCAACAAAGCGTAGGCACGAGATCGCCAGCAGCTGATCAACGGCATCTACGGCATGA  
GATCCGCTCGCGGATGCGCGCTGCAATGGGTAGAACACGCGAGCTGGCGATGCTGATTTCCGAAGAATCTGCAAT  
TGCAGCGGCTGTTTCTCGCGTTTCTGACGCCGAAATCTCGCGAGCGGTGCTCTTTATCTCAACGAATCGGTCAAAA  
GAAATACTCTATCCGGTGGCGAACTCAACGACGTCACCCGCGAGTGGTGGATGAGCTGGACCGCTGATTGACGTTG  
CCTGTGCGTACTTTCCGAACATGGCTCGAAGGTAAAAGGCATCAACAGGCGGCGGATATCGTCAACCCCTTACAGGGCA  
ATCAGAGGTGATCTCGACAGATGCGCGAACGCGACGAGAGGTTGGGGCAGATCCAGGATGAGATGACGACTCTT  
TTTATCTCAGCCGCGAAGCAAGAGTGCCTGCGGCTGCTGTTGACGAAAGTCCGATGGAAGACTGGGCGTGGCGCT  
GAAAGGCACCGAAGCCCTGCTGCGCCGCTCGATTTACGCGGTAATGCCAAAACGTCAGCGCAGCAACTGGAAGCGATCA  
CCGCGGCTGCGGTCGGTGCAGCGTACGCGGATCGAACAGATCCGCGCGAAATCATGGGATCGCCCGTGAGCTGGAA  
GAAGCGGGCGAAATTCAGCTACAGCTCTTTGCGGAACGAGCGGCGGAGTAA

>Cluster\_28962

ATGGCAACCATTGCAATTTCTCGGCTGGGGCAGATGGGTAGCCCAATGGCTAAACAATCTATTGCAAAAAGGGCATTCAAT  
GCAGGATTTGATGTCATGACAGGCGCTCGATGTGCTAGTTACGACAGGGGGCCACTGCGGCACAAACCCAGCGGAAG  
CAGCAGCAGGCGCTGCAATTTATCATCATCTATGCTTCCCAATGGTGACATGTTTCGACAGGTTCTGTTGGGGGAAAAAGGC  
GTCGTGAAACTGTTTCTATCTGACGCGTTAGTGTATGATGTCGACTATTCATCCCTTACAGACCGATGCATTAATACG  
GGAGTTACAGAAAAAGGCATCAGTATGATGGACGCTCCCGTGGGCGAAGCTCCGTTGATGCGATTGATGGCACATTCG  
TGATTTTACGGGGTGGCACTGATGAGCAGATGACGCTGACGCGGATTCATGTCATGTCATGCGTAATGAGCTGGTGGT  
GCTGGCGGCGATCCGAATGGGGATCCGCGTGAAGCTAATTAACAATATATGAGCATGCGCTTAAATGCGCTGCTCCGCA  
AGCCGCTGTGTTATGTGAGTCACTGGGATTAATCTTGTATGTCGCAATTAAGGTGATGAGTGGTACGGCAGCAGGAAAG  
GACATTTTACGACCCTGGCCTGGCAAGTGTGAAAGGCGATCTTTCTCCGCTTTCATGGTGGACCTGGCATTTGAAA  
GATCTGCGTATTTCAGTTGACGCTCGCTCGGAAACGGGGCGCGCTCAATATGGGGATGTCAGCAGCAAGTATTTACCG  
TGCAAGCAAGCCAGGCAAGGGTGGCAGGACTGGAGCGCCCTGCTAAATCAGGTTCCGACAGGCTGGTCTTTAA

>Cluster\_24287

ATGAAACTGCTCAGTTTTTCTGTAGATAACGAAGAAAAGTATGGTGCCATCGTATCCGATGGAATATTGACTTGCATAAA  
ATTTATCCCGAACCCTCCGACCTGAAATCATTGTTGCCAGTCAACATTCATTAGACATCGCTTTGTTGCGGATAAAA  
AAGCCGATTACCATCAGGGCGAAGTGACTTTTCTGCCGTAATTACTCGACCAATAAAAATCATCTGCGCAGGATGAAC  
TACCGGAAAAATGTCAGAAATTTAATGAAAAAGGTGGCGATCCGACGCTATTTATCCGTTTTGCTGATACTAGACGGG  
CCACCGTTGTTGGTTAATAAAAACCGACCTGAGTAATGAATTTGATTAAGAAGCGAACTGGCGGTAATTAATAGGTCGCC  
AGGTTCTCAGATTCCTGTGATGAAGCATTTAACTATATTTGCCGTTATAGCTGTTATATGGATGGTTCCTGCTGAC  
TGGCAGCACAGCTGGTTTACTGCCGGTAAAAATGGCCTGCAACAGGTGGATTGGGCCATGGATGGTTACGCCAGATGA  
AATTCCTGACCCCTCAAAATCTGAATATTTATCCCGCTTAAACGGCAAGGAAGTGCAGAAATGATAATACATAGCATGC  
TGCATCTATTAAGGATTTGATTGCCTATATCAGTACTTTACCACCTTATCGCCCGTGCAGTATTAACAGGCTCT  
CCGGTGGGGTCCGTAATAAACCGCTCCACCGCTCTTCTTGTGGCCCTGGTGAATTTGAAAGTTGAGATTTCAAGAAT  
TGGTTGCCGATAAATCACATTAAGAAGCAACAGAGATATCCGGTCACTTTACAATCAGAACTCGATAACGCCTGCT  
GA

>Cluster\_24531

ATGGCTTCCAGTAAATCGCTACAGCAGGCAATGCCAAATAAAAAATCTGGCACAAGGTTGAACAGCGCGCGCCGATAAA  
ACCATTGTTATTGCTATACGTATTAGCGGGATACCTGAATGGACATCCCGCCTTTTCGATTAATGGCTCGGAAATCTACG  
AACCTCTGCACAGTTTACTGGAACGTTTTGGGCCACAGGCTTACAGTACCGACCTGATATGCGGTTCTGGCGATTAACA  
GGCCAGGATCTGGCAATTAACAATGCGGGTTTTGCTCAACAGCAGGAGCAGCCGACAAACCGGAGTGAAGCAACT  
GACCGAACACCGGTTGACAGGCGTTTTGATGAACAGCCTACGCCCTGGTAAACCGGCAATAAAAAATCATCAATACCC  
TGGCGAACAGATACTCGAAGCGCATTTTACCAGAGTATTACAGGAGAAATGCTGACGAATGGGTTTTGACCTCCAG

CAAATCCGTAACACAGCGACCCGTTATTTTCGCAAAAATGTATTACGGCCTTATAACTACCAGTGC GGCGATATGTGGCTT  
TAATATGCCCCACGACGACACCACCGTTCGCGTTTGAAGCGGCGCATATAAAAATGGAAACAGCAAGGAGTCCTTGTGAAA  
TTCCCAATGGCCTGGCGCTTTCGCAATTCACCATAAAGCCTTTGATAAAGGATCGATTGGCCGGATGAAAATATGCCG  
GTACTGGTCTCGGATGCGGTAAACGGCGGAGGGATCGTTGAGAGATTATTTCTGGGATTTTGACGGGAAAACATATTCGCTT  
GCCGAGGTACGTAAAAATACCTTTTGTAGGGGTTGTAGAGTGGCATCGGAAAGAGGTTTTTAGGGGGTGA

>Cluster\_25848

ATGGCTGAAGCGCAAAATGATCCCTGCTGCGGGATACTCGTTTAAACGCCATCTGGTGGCGGGTTTAAACGCCGATTGA  
GGCCAACGGTTATCTCGATTTTTTTATCGACCGACCGTGGGAATGAAAGGTTATATTCTCAATCTCACCATTTCGCGGTC  
AGGGGGTGGTGA AAAATCAGGGACGAGAATTTGTCTGCCGACCGGGTGTATTTTGTCTGCCCTGGAGAGATTCAT  
CACTACGGTCTCATCCGGAGGCTCACGAATGGTATCACCAAGTGGGTTACTTTCTGCTCCGCGCGCTACTGGCATGAATG  
GCTTAACTGGCCGTCGATATTTGCCAATACCGGTTCTTTTCGCCCGGATGAAGCGCACAGCCGATTTCAGCGACCTGT  
TTGGGCAAAATCATTAATGCCGGACAAGGGGAAGGGCGCTATTCGGAATGTGGCGATAAATCTGCTTGGCAATTTGTTA  
CTGGCCGCGATGGAAAGCATTAACGAGTCTGCTCACCCGATGGATAAATCGGGTACCGGAGGCTTGTCTACATCACG  
CGATCACCTGGCAGACAGTAATTTTGATATCGCCAGCTGCGCACAGCATGTCTGCCTGCTGCCGTCGCGTCTGTGCGATT  
TGTTCGCCGACGAGTTAGGGATTAGCGTATTAAGCTGGCGCGAGGACAGCGCATCAGTCAGGCGAAACTGCTTTTGAGC  
ACCACCGGATGCTATCGCCACCGTCCGTCGCAATGTGCGTTTGTGACGATCAACTCTATTTCTCGCGAGTATTTAAAA  
ATGCACCGGGCGAGTCCGAGCGAGTTCCTGCGCGGTTGTGAAGAAAAGTGAATGATGTAGCCGCCAAGTTTGCATATA

>Cluster\_65646

ATGAAGCCTTTTTTTCGCGTGGTGTTCGTTGCGACAGCACTTACGCTTGCAGGATGCAGTAATACTTCTCGGCGTAAAAG  
TGAAGTCTCGCGGTACCATTTGCAACCGACTTTACAGCAGGAAGTGTATCTGGCACGTATGGAACAAATCCTTGGCCAGT  
GGCTTTTAAACCGATGACGAAACGCGCACAGCTTTTATATGAGCGCGGAGTGTGTTGATGATAGTCTCGGTCGAGCATTA  
GCGGTAACGATTTTTTCGAAGCGCTGGCAATCCGACCGGATATGCTTGAAGTATTCATTTAGGCATATATTTAAC  
GCAGCGAGCAATTTTGTGCTGCTTGAAGCGTTTGTATCTGTACTTTGAGCTTGTATCCAACTTACAACCTACCGCGACT  
TGAATCGCGGATCGCATTTATATTACGGCGGTCGTGACCAAGTTAGCGCAAGATGATCTGCTGGCGTTTTTATCAAGACGAT  
CCCAATGATCCTTTCCGTAAGTCTGTGGCTTTATCTCGCCGAGCAGAAGCTCGATGAGAAGCAGGCTAAAGAAGTGTGAA  
ACAGCACTTTCGAAAATCGGATAAGGAACAGTGGGGATGGAACATTTGTGAGTTCCTACCTGGGCAACATTTAGCGAACAAA  
CGTTAATGAAAAGGCTCAAGCGCGACGCAACGGATAACACCTCGCTGCGTGTGAGCATCTCAGTGAACCAACTCTATTTA  
GGTAAGTACTAAGTCTAAGTCTGGGGATTTGGACAGCGCATCGGCACTGTTCAAACCTGGCGGTTGCCAACCACTCATATA  
CTTTGTTGAGCACCGATACGCAATTTGGAATTTATCGCTCCTGGGCCAGGACCAAGATGACCTGGCAGAACTCGGACGAG  
AATAG

>Cluster\_11795

ATGCCACTGCTGGATAAAGTGCCTGAGCAGTACGGGGTGGACCGCTATGCAGCGAACGTCATATTGCCCGTCAACGTA  
TTACCCTGTCAGCAACAGCGACATCATCCGATAAACGCAAGTGCCTGCGCAGCGCGATGACTGGCTGAGAAAGAGA  
TACAGCGGTATACGATGAAAATCACAAGGTATACGGTGTGCTAAAGTCTGGCGTCACTGTTACGGGAAGGTATCAGA  
GTGGCCAGATGCACTGTGGCAGCTCTCATGGCGGTTATGGGACTTGGCGGTGTTCTCCGGGGTAAAAGGTCCTACGAC  
CATACCGGAAAGCGGTTGCCGCGAGCCGCTAAACCGTCAAGTTCAGTTCGTTGGCAGAACGACCTGACCTGTTGGGTG  
CTGATTTTACTTACGTCAGCACATGGCAGGGCTTCGCTATGTGGCGTTCATCTGATGTGTTTGGCGGATACATTGTG  
GGTGGCGGGTCTCACCGTCCATGGAGACGACATTCGCTGCTGGATGCACTGGAGCAGGCGTTATGGGCGGCTCGACCGTC  
CGGCAGGTCCTCACAGTGAATAAGGTTCTCAGTATGTCTGCTGCGCTACACACAGCGGCTTAAGAAAGCGGATTTAC  
TGGCATCAACAGGAAGTACAGGCGACTCGTATGACAACCGCATGGCGGAGAGCATCAATGGTCTTTTACAAAGCGGAGGTA  
ATACACCGTAAGAGCTGGAAAACCGGTGAGAAAGTGAAGTGGCCACACTCACGTGGGTGGACTGGTATAACAATCGAGC  
ATTTGCTGGAAAGGCTGGGCCATACTCTCCGGCAGAAGCAGAAAAGCTTATTTATGCTCCATCGGAAACGATGATCTGG  
CAGCTGA

>Cluster\_47941

ATGAAAGGTATTATCCTGGCGGGCGGTTCCGGCACCCGATTGCATCCGATTACGCGCGCGGTATCGAAGCAACTGTTGCC  
GATTTACGATAAGCCAATGATTTACTATCCGCTGTCGGTGTGATGTTGGCGGATCCCGGAAATTCATCATCACTA  
CGCCGGAAGATAAAGGTTATTTCCAGCGCTGCTGGCGGATGGTAGTGTAGTTCCGGTATCCAGCTGGAATACCGCGAACAG  
CCCAGCCCGGACGGTCTGGCGCAGGCTTTATCATCGGTGAAACCTTCTCAACGGTGAACCTTCTTGTCTGGTGTGGG  
CGATAACATCTTCTCGGTCAGGCTTCCAGTCCGAAGCTGCGTATGTTGCGCGCGCACGGAAGGGGCGACGATTTTG  
GCTATCAGGTGATGGACCGGAACGCTTTGGCGTGGTGGATTTGACGACAATTTCCGCGTATCTCGCTGGAAGAAAAG  
CCAAAACAGCCGAAAGTCAAACCTGGCGGTTGACCGGGCTTTATTTTACGACAGTAAAGTCTGGTGGAGTACGCAAGCAGT  
GAAGCCGTCGGAGCGTGGTGAACGAGGATTACCTCAACAGATGTACCCTGAGGCGGGCAACCTGACCGTTGAAC  
TGCTCGGGCGCGGATTTGCTGGCTGGACTGGCACTCACGACAGCCGATTGAAGCCAGTACCTTTTGTGACAGAGTA  
GAAAACGCCAGGCTTTAAGATTGCCCTGCCGGAAGAGATCGCTGGCGTAAACGGCTGGCTCGATGACGAGGGTGTGAA  
GCGTGTGCCAGTTCATTAGCGAAAACCTGGCTACGGCCAAATATCTGTGGAGTACTTCTGCTGGCGCGCAGTATG

>Cluster\_23427

ATGCCCTGGATCCAACCTGAAACTGAAACCCACCGCGCAACCGGGAAGATCTTAGCGATGCGTGTGGAAGCGGGTGC  
CGTTTCTATCACTTTTCAGGATACCCACGATACGCCAGTATTTGAGCCGCTGCGGGGCAAAACGCGCTGTGGGGCGACA  
CCGATGTGATTTGGTCTGTTCGACGCTGAAACCGATATGAACGAGCTGGTGGCGATTCTGGAAAACCATCCGCTGCTCGGC  
CGGGGCTTCGCGCATAAAAATCGAACAACCTGGAAGATAAAGACTGGGAGCGCGAATGGATGGATAATTTCCACCCAATCGC  
CTTTGGCGAAGCTGTGGATCTGCCAAGCTGGCGTGTGTCGCCGACGAAAACGCGCTCAACGTGATGTTAGACCCAG  
GGCTGGCGTTTGGTACGGGTACCCATCCAACCTCTCTGTGCTGCAATGGCTCGACAGCCCTGATTTAACCGGTA  
ACAGTCTACGACTTTGGCTGCGGTTCCGGCATTCTGGCTATCGCGCGCTGAAACTGGGTGCAGCAAAAGCCATTTGGTAT  
TGATATTGATCCGACGGCGATTACAGCCAGCCGACACCGCTGAACGTAATGGCGTTTCTGATCGTCTGGAACCTACT  
TACCGAAAAGATCAGCCAGAAAATGAAAAGCCGACGCTGGTGGTTCGCTAACATCTTGCAGGTCATTACCGGTAAGCGCA  
CCGTTAATCAGCGTCTGCCAGTTTTCAGCGGTTTGTGGGCTTTCCGGTATTTGGAAGCCAGGACAGAGCGGTTT  
CGAAGCTTATGCCGACAGCTTCCGCTGAGACCCGGTCTGGAAAAGAAAGAGTGGTGGCGCATACCGGTCGTAAGAATT  
AA

>Cluster\_9741

ATGAATCAAAATCCATTTCTATGACTTTCTTGGATATTTAATACCAGGTGGTTTTTTTATCCTATTAATGATTTT  
CTGTGGTTTGGATCTGATCTAGATATTTGACTTAACTGAATGCTCAGAGGTCAAAGTCAAATCTTTGGCATTT  
TGAATATGGTTCAATAGTAATCATATCTTACATAGCTGGACACTTTATATCTATCACATCCGATTTTTTATGAAAA  
TATATGAACGAAAGAAATGCAATATCCATCAGAAATATCTATTTAATAAGTTATCAGATGACAAAAAAAACCGCTTAAACCC  
ATCAAGTGACAAACGAAAGACACAAGAGAAAAATAAAACTGCTGATAAATAAAGTAATGTTATTTCCGATAATAC  
CATGGGATACGCCACTCAAACCTATGTTATTCACAACTATTTGCCATTTCAATAGCTAATACCACATGGCTAATGATC  
AAAGAAGGTTATGAAAAAAAATTCAGAAATAGACGATAAATATTAACATCAGGACAGGCTTCTGATGATGATGATTTTCAG  
ATTTGGCTTATCATCTACGTCATGAAATTTCTAATCAACATCAAACAAAATTCAAAACATGTTGATATATGTTTTCAG  
GCAGAAATATTTGTTAGTATTTGTAATACATTTTGGATATCATTTCTAACATTAATTTATCTGCTATAGAAGGTGGG

GCGGTGCTTATATTTCTATTTTCGACGCTACTTAGCTTTTTCTTCGCTATGTTTTTATGTTGGATTGCTTAAGTTTTA  
TAGACGATATACTTTAGAGGTATTAATGCATTTGCTGTACTTTCAGAGCAAAGATGCTATTAATTA  
>Cluster\_20431  
ATGAGTGTCTCATTAATGAAAACTGCATTCGCATCGGTGAAATGGCGCTGGCCGCTCTCGCGTCAGGTGACCTTAAG  
CATTTGGCAGCTTAGCGGTTTACTTACTGTATGGTGGGAGTGCAGCGCTGCAACTGATTAGCCCGTGTTTTTGCCGC  
CACCGCAACAGGTACTGGCAAACCTGCTCACCATTGCCGGGCCGAGGATTTATGGACGCCACGCTGTGGCAGCATCTG  
GCCGCCAGCTGACGCGCATTTTCTGCTGGCGTACTCGCGCGGTGTTGATCGGTATTCGGGTCGGGATCGCCATGGGGT  
AAGCCCGAGGTGGCGGCATTTGATCCGATAATCGAGCTTTATCGTCCGGTGGCCGCGCTGGCTTATTTGCCGCTGA  
TGGTGTCTGGTTTTGGTATTTGGCGAAACCTCGAAGATCTTACTGATCTATCTAGCGATTTTGGCGCGGTGGCGATGTCG  
GCGTGGCGGGGGTGAAGCGCGCAGCAGGTTTCGATTCGTGTCCCGAGTCTGGGTGCCAGCCGTGGCAGGTTGCT  
GTGGTTTTGTCATTTTCCCGCGCGCTGCCGAAATCCACCGGATTACGTATTTGGTGTGGGTGGTGTGCTACGC  
TGGTGGCGCGGAGCTGATTGCCGCGACGCGGTTTAGGATTTATGGTTCAGTCAGCGGGTGAATTTCTCGCGACTGAC  
GTGGTCTGGCGGGGATCGCGGTGATTGCGATTATCGCCTTTCTTTTGAACCTGGGTCTGGCGCGTTACAGCGCCGCT  
GACGCCCTGGCATGGAGAAGTACAATGA  
>Cluster\_36573  
ATGCTCAGGTTCAATTTTCTCATAACCCGCTGTTTTGCATAGATATTATCAAGACTTATAAACCTGATTTACGCCACG  
AGTGGCTTTATTTTAGGTTCCGGGCTCGCGCGCTGGCCGATCAGATTGAGAACGCTGTCCGCAATTTCTACGAAAAGC  
TGCCGGGCTTCCCGTAAGTACGGTACATGGTTCATCGGGGGAGTTAGTGTGGGCCATCTCCAGGGCTACCGGTGGTA  
TGTATGAAAGGTCCCGGACATTTCTACGAAAGTCTGGAAATGACCATTATGACTGACGCAATTCGTACCTTTAAGCTGCT  
GGGTGCGAGTACTGTTTCGCCAATGCCGAGGCTCGCTGCGTCCGGAAGTGGGGCAGGACGCTGGTCCGATTTGA  
AAGATCATATCAACACCTGCCCAGTACGCCGATGGTGGTCTTAAACGATGATCGTTTTGGAGAGCGCTTCTTCTCACTG  
GCAATGCTACGATGCCGAATACCGCGCACTGTTACAAAAGTGGCGAAAGAAGAGGTTTCCCTCTGACGGAGGGCT  
GTTCTGCTCGTATCCGGGCGCAATTTCCGAGCTGCCGCGAAATTCGCATGATGCAAAATATTGGTGGGGATTTGTTG  
GTATGCTGTGGTGCCTGAGGTTATTTACGCTCGCATTTGCAGCTTAAAGTCTGGGTCTGCGGATTCGATGATGCAATG  
CGGAAGGTTAAGCGATGTAATTTGTCACATGCGCAAACGCTGGCGGCTGCGGAGCTCTTAAGCAGAATTCATCAA  
CCTATTTGTGGCTTCTGCGCAAATTTGCCCTGA  
>Cluster\_66741  
ATGACGATTAATTGAAAGCTATCATAAATGTATTAAGGAACATGAAAACTTTGTACATAAGGATATTTATGATTGCAT  
CATAAATAAAGATATTTATTTTGGTGCAAAAGATCCTGTGGCAGTAGTGCGGGGGAAATAGAAAAATTTGCTATG  
GCATTTGATTTTCCTAGTGCATCACCACGAAAAATTTTATTGAAGTTAAATCTGTAGGGCAATCAAAGCCATTATACGAC  
CTATGGCAGGGACAAGCATCAAATGCTAGCCCTCTTAAATTTGAAAGGTAACAAAAGATCAACTACCAGAAGAGATAAT  
TCATGGGAAGTATCTTGACCATATTAACACTATTAAGAACAATTTGCTGATGCTATTAATTTCTCGGATCCAGCTTTCT  
TTGAGAGACTTGTGTTACACTTTTATTAATAAATGGGTTATGGGTGGCAGGCTGAGGCGAGCAAGGTTGTTGGTGGC  
GCTGGGATGAGGCATAGATGGAATTTAATGAAGATAAATTAGGTTTGGAAAAATATATATCAAAGCTAAAAGATA  
TAATAGTAAAAGGTACCACCTAGCGAATTAGAGGTTTATTTGGTTCGATGAACAAAAAGGAGCACATAAAGGGTAT  
TTTTTTCATCTTCTGATTTTACCGAACAGGCAATTAATGATGTCAGAAAAAGCACAAGGCATGAACATCCTCTGTTGAT  
GGTGAACAGTTATGTAATATTTAGTCCAAATGGCATGGGGTTCGGAAGGTAAGTACATATGAAATCTATGAAATAGA  
TAAAAATTTCTTTGATTTATAA  
>Cluster\_20532  
ATGAGCGTGACGACGAGTGGCTGATGCTGTTCCACCAAAGCGAGCCATCGGCTATCTGGAGTCCAAAGG  
CTATACCTGTGCTGGGACTGGGAAGAAGTTTGGCAGGAGGCCACGCCGCGCTTTACCGTGGCGAAGGTGACAAAGC  
TGGATGTACTGGAAGATATCCCGCTGCCTGGAGCGTCACTGGCAGAGGGCAAAACCGGCGGTGGTTCCGTAAGGAG  
CTGGAACCAAGTCTGAAAGAGAAAGGCTGGTGGGTGAGAAAGAAATACCAGCCGGACACCGGGGAGTACCATCAT  
CCAGCAAGGCAGTACCTGGCGGCTTGATACCATCTACCACCAATATGACGGTGGTTACAGTGCAGGGCGCTGGGCCG  
AACAGATGAAAAAGCTCGACGATCGTCCATATGGGATGTAAGTGGCAATTTGCGACAACCGCACCCGTCACCCACCTC  
CTGCTGCATCAGATGGTTATGCGTCTTGATGATCCATTTGCGAGTCAATTTACCCGCTAACGGCTGGGGTGGCGCTG  
TACAGTATAGCAATGACTGAGGCGGATGTCGCGCGCGGCTGAAAATCAGGCTCCCGCGATGCGGCTGGGGGAAA  
CGATGAACTGATATCGATGCAACCGGAGAATGCAACCGGTGGCCACCTTTACTATTGGCAATACGATTATCACCCCG  
GATGCGGGCTGGTATACGCGCGCGGCGCGCTACCGCCGACTTAGCCAAATACCAGGGCTGCTCGCGCGCTGGC  
GCAACAGGAGCTGGCACCATGA  
>Cluster\_6075  
ATGGGAAGTGGATGGCATGAATGGCCGCTGATGATCTTACCGGCTTCCGGCAATGTGTAGCAGGTGGTTTTATCGTTCT  
GGCTTTGGCGCTGCTCAAAGCGACCTGCGAGCAGAAGCCAGCAGCGTGTATCGCCTGCATGTTGGTTTTATGGGTGC  
TGATGGGCAATGGCTTTATCGCCTCTATGCTCCATCTTGGTTACCAATGGCGGCTTTTAACTCGCTCAACCGGGTAGGG  
GCTTACGCACTGCTTAAACGAAATCGCCAGCGGTTGCTGATTTTGGTCCGCTAGCGGCAATCGGGTGGTTGCTGGCAATGCT  
GAAAAGCTGTCACCGCATTTGCGTACGCTGTGGCTGATAGTACGATGGTTCGCGCTCATTTTGTCTGGATGATGG  
TGGTGTGTATAACAGCATTTGATACCGTTCCGACCTGGTACAGCATCTGGACCGGATGGGCTTCTTCTGACGATGTTT  
ATGGGCGGCGGCTTACTGGTTACTGTTGTTGAGTCTGGCTGGCTGATGGCTGGGCGATGGCTGCTGCTGCGCAGCAAT  
TTCTGTACTGGCACTGGTAGTGGTGGCTGGTGTGTCAGTATGAGGCGCAGAGCTGGCGACTATTCATAGTTCTGTGTC  
AGCAGGCCGAGCGCTGGTGGCGACTATGGTGGCTGATGTCCTGGCGGATCGTGTCTTGGCGGTTGCCCTGTGCTTG  
TGGATTGCACCACAGTAAAAGGTTATCAGCCTGCGGTTCCGCTACTTTCTGTATCATTCATTTCTGCTTCTGGCAGGGGA  
ATTAATCGGTGCGCGCTATTCTATGTTTGCATATGACCGTGGGATGGCCGTCGCAAGCTAA  
>Cluster\_4166  
ATGAAAAAGCGCTCGAAGGAACCGAAACGCTACGTGAACACTGTCGCATATTTTGGTGTAGAGCCGCGAGTGTCTG  
TGTATGGGAAACGGAATTTGATTACGCAGATGCCGAATCAAGGCGTGGCGGCTAAAGAGTGGCAGCAGATCAGCGAAT  
GGGATTTGAGTGCCTACTATGTACTCAATCTCGTTTAAACGAACCGATGCAAAATAGAGTTGTTTCGCTATCTGTTCCG  
CTCTGCTGGCGCAATGGCATGAAACCGTTTTAGCTGGCGGTTATGGTGTACTCTCGAAGAACTCTTAATGAAGGCATT  
GTGTCGGCCCTATCTTGGCAGGAGATGATGAATGCTTCCCAACGCGCAGCAGGTACGGCAATTTTACTGGACACCGGCT  
TGCAGCGTATGGATAACGAGCGTGGTTTCAATAACGTTCTTGGTGGCTGGCGGTGTTCAATACTCTGGTGGGGCGCGC  
CCGTTAATTCGTTCTCTGCTGCGGCTGGTGGCGCTGGATACGCAAGGAAAGCGGCTGTGTGCTACTTACTATTCAGTATGCCG  
GCATCTAATTTATCCATAGAAGCAATCCGTTATGGTGCAGAAATGGATAGGCTGGGGCATCCATTAGGCCATAAAG  
ATGGCTGGTCTCTGATAATCGCGCTTTTCTTCCGCAATGTTAACACCTGAAATGATTTGGTGGCTGGCCTACAGGCAGCG  
GCTGAAATTCGCGTGGTGAACCGGAAGCGCAATGGCGGCGCAATGCAAGGATGCGTATGAGGCAATGGATATCCT  
CACTATCCAGATTGAAGATTTACTGCGTACTTGTCTGTGATGAGTCTGGTCTGCTGATGCTGTTGGAGTAA  
>Cluster\_67103  
ATGAAAAAGACTCTGATTGCCTGGCGCTGGCTGCCTGCTGTATCTGGTATGGCGCATGCCGAGCTCTGGTACTT  
CAATGGCAGCGCTGATCGGTGGTGCATTTGATGCACTAATTTATCGCCAGAAATGGGAATGGGAAGTTGGTACGGGG  
TTAATGGATTTTATAATGCTCTGAGTGAAGTGAACAAATATGATACAAAACCTGACTATTTACTGTTACTGGTAATAAGCCA  
ATTTTGTTAGCCGAACCAAGAAGCATTTGTAACGCCGACAGCAGGTGGCTGGGGTGGCATCCCTCAGATTGCATTTAC



CGACTATAAAGGAGCACCGGTAGAGCTCAAAAACCTGATGGTGAACATAATAAAGGTTAGCATATTTTGTCTGCCGA  
TGAAAAATCAGATGGTACTGAAGCGGGTCCGTGAGAGTGAATGCATCTTATGCTGGGGCTGTGGTTGAAAAGACTTCT  
GATAGTTCGGCTAAATTGTTCTCGCTTATGCCGGTGAGGTAATTCGCATCTTCAATGGCGGTCTCCGGTGAATGTTAC  
CCAGTCTGAACAGATCAGGTGTTGCTGCTGCTGATAGAACAGCATTTGTTGGTAGTCTGGGGAAAGCTGATTTGGTAG  
CGCAGTTTCAAGTGTATTCTCTGGGGCTACTGTGACTGTGGAGCAGCTCAGAACAATGTACAATGAGACTATTGGCC  
TCAGCTGCCATGCACTGGGTATGTCAGATGGTTCAGACTATTGAGGCAACTTTAATCAGGCTGTAACACCAGCATCA  
GTGGAGCGTCCGTGAACGTAGCAATTACTTATTACTAA

>Cluster\_53507

ATGAGTCTTTATTTATCTGCGGCACTGGCCAGTAAATCGTAAAGGCCGTTTTTTGCAAACGTGTTGCGGGGGCTACTCCCTT  
AACGAAGGATTGGATTAGCTCGCCACCAGCCAGCGGTTTGTAAATAATGCAAGCAGAAGAGTTGACTGACGCTAAATACTA  
TGCAGCACCTGTATCACTGGGCTATGCAGGCAGGTTGTGCCGCTTTGGTAATAAACCTGAAAGCAGAACAATTTACCTTA  
TTAGCGCAATTACCCTATCCACTGGATTGGCAGTTAGTACCAGCGAGCTTGAGGAGGCAGGAACCGGGGCTAACCGCTTT  
GCTAGCCAGTGAACAGCACAGGCTATTGCTGGCTTTACTGGCAGCGCAGATCGCTACCAGCACCAGGCGGTGATGTAG  
TGCATACCCGCTACATACGAAAACACAGCAACAGTGGGCTATTAGCCTTTACCACGTTACCTTTGTGGTGCCTGACTTTA  
CTCGATCATAGTGAAGCTCCTGGTGGTGGTGAATGGTTGGTGGACCATGCAGGCATGCTGAACGAATAATCGAACC  
TAAAGCGCCATCAACTGACTACACGCCAGATAAGCAGCATCTGGTTGTATTGCTATTACTTTACGCTGGCGGTGGCATGA  
ACTTACAAGCGTTGCTGAGCATAAATGCCGTTAAGCTGATGTTGATGTTAATAGCCTTGATATTGTCGAAGCGGGGTGAG  
ATGTTGCGGCAGCAGATTTTATCGACGACGCGGGCATAACAGCTACCAGTAAACATGCCTACAAGCCTCGCAATATTG  
GGCTTATGCCCATTACTTTGGCGAGCAGCTACACACAGGAACGCTATAA

>Cluster\_32007

GTGAGTACATTAGAACAACAATAGGCAATACGCCCTCTGGTGAAGTTGCAGCGAATGGGGCCGGATAACGGCAGTGAAGT  
GTGGTTAAAACCTGGAAGCAATAACCCGGCGGGATCGGTAAAAGACCGTGCAGCGCTTTCGATGATTGTCGAGGCGGAAA  
AGCGCGGCGAGATTAACCCGGGTGATGTTGATCGAAGCCACAGTGGTAACACCGGCATTGCGCTGGCGATGATTGCC  
GCGCTTAAAGCTATCGCATGAAATGCTGATGCCGACAACATGAGCCAGGAACCGGTGCGGCAATTGCGTGGCTACGG  
TGGGAACCTGTTCTGGTCCACCAAGAGCAGGGCATGGAAGGTGCGCGCATCTGGCGTGGAGATGGCCAATCGTGGTG  
AAGGAAAGTGTCTGATCAGTTCATAATCCTGATAATCCCTTCGCCATTACACCACACCGGGCCGAAATCTGGCAG  
CAGACTGGCGGGCATTACCCATTTTGTCTCCAGCATGGGAACAACCGGCATATCACCGGCTTTCACGCTTTATGCG  
CGAACAATCAAAACCGGTGACCATTTGTTGGCCTGCAGCCGGAAGGAGGAGCAGTATTCCGGGCAATTGCGCGTGGCCTG  
CGGAATATCTGCCGGGATTTTCAACGCTTCTGTTGGTGGATGAGGTGCTGGATATTATCAGCGCATGCGGAAAACACT  
ATGCGCGAAGTGGCGGCGGGAAGGATTTTCTGTGGCGTTAGCTCCGGCGGCGGTTGCCGGAGCACTGCGCGTGGC  
AAAAGCTAACCCCGGCGGTTGGTGGCGATCATCTGCGATCGCGGCGATCGCTACCTTTCACCGGGGTGTTGGGG  
AAGAGCATTTTAGCCAGGGGGCGGGATTTAA

>Cluster\_24967

ATGAAAGCCACGTCGGAAGAAGCTCGCCATTTTTGTTTCAGTCTCGAAAGCGGAGCTTTAGCCGGGCAGCGGAACAATT  
AGGGCAAGCAAATCAGCGGTAGCCGGCGGTGAAAAGCTGGAGATGAAACTTGGCGTTAGCCTGCTTAATCGGACCA  
CCGCTAACCTTAGCTGACCGGAAGAAGCGAGCTTATTTTCGTCGCGTACAGTCAATTTTGCAGGAGATGACCGCGCA  
GAATCAGAAATTTAGGAGACCGTAATACACCGCGTGGACTGTTACGGATCGATGCCGCAACTCCAGTGGTGCCTGCACTT  
TCTGATGCCGTTGATTAAGCCTTTTCTGTAACCGTATCCCGGAAGTCACTTTATCGTAGTCTCCTCCGAAACGATTTATTA  
ATTTGATCGAAGAAAATGGATGTCGCGATACGCGCCGATCGTTAACGGATTCAGCTTACGTGCGAGGCTTATTT  
AACAGTTTATCGAAAATTTATCGCTCCCCGATTTATATTTCCCGCTACGGAAGCCAGAAACGATCGACGATTTAAAGCA  
ACATATTTGCTGGGATTACTGAACCCGCTTCCCTCAATACCTGGCCGATAGCTGTAGCGATGGACAATTACATGAGG  
TGAAGTACGGTTTGTCAATCAATAGTGGGGAAACACTGAAACAGCTTTGCTGAGTGGCAACGGGATGCGTGTTTGTC  
GACTACATGATCGACAAGAAATCGCTCGCGGAGAATTTGAGTGAATGAGTAAATGCGAGATAAAGTGTGGCAGATGGC  
ATTCAGTGCAGTCTATTACAGCGACCGTGGGTAAGTACGCGCATCCGGGCTTTTATCGATTTCTTAGCGAGCATGTAA  
AAACAGCTCCCGGAAAGCTGTCAGAGAGGCTTAA

>Cluster\_26120

ATGTATTACGGGTTTGTATTTGGTGAACAATAATGCGCTAGGCGTGTGTTGATAGCGGTGCGGAGTTGCAGTGGGAAAA  
GCGGGTGGCGACACCGGTGACAGCTATGACGCATTTTTAGATGCAGTGTGCGAGCTGGTAGCCGAAGCTGACCGGCGTT  
TTGGCTGTAAAGTTCTGTCGGCATCGGTATTCGGGAATGCCGGAACAGAAGATGTACGCTGTATGCCGCAATGTC  
CCTGCTGCCAGCGTTAAACCGCTGCGTGGCGACCTGAGCGCACGTTTGTATCGCGATGTACGCCCTGATAACGATGCCAA  
CTGCTTTGCGCTTCTGAAAGCATGGGATGATGAATTTACTCAATATCCACTGGTGTATGGGGTTGATTCGCGCACCGCG  
TTGGCGGCGGCTGATTTTCAACGGTAAACCAATTACCGGTAAGAGCTATATTTACCGGCGAGTTTGGCCATATGCGTCTG  
CCGTTGATGCGTTAAACCATGATGGGGTGGATTTCCCGTTACGCCGCTGCGGCTGTGGTTCAGCATGGCTGCATTTGAAAA  
TTATCTGCTGCTGCGGTTTGGTGGCTGTATCAACACTATTATCAACCGTTGCGAGCTCTTGAGATCATGCGTATGCGT  
TTTATGCTCAAGGCGATGAGCAGGCAAGGCGCAGCTTGAAGCGTTATCTGGAATTTATGCGGTTTGTCTGGGAAATATC  
CTGACCATTTGACCCGACCTGGTCTGATTTGGTGGTGGCTTATCGAATTTCCCGCAATCACAACGCAACTGGCGGA  
AAGTTGCTCTGTCATCTTACCTGTAGCTCGTTCGCGCATGGAACGCGCGCCACGGTGTGCGGGGGAATGC  
GTGGTGGGCTTCTACATCTAACCAGTAA

>Cluster\_5965

ATGCGACTATTTAACTGGCGACGTCAGGCGGTGTTAAACGCCATGCCACTGGTCAAACCTGACCAGGTACGTACACCGTG  
GCATGAATTTGCGGACGATTTCCGCGTTCAGCATATGGCGATGACCGCCGATTTATTCGTTATTTTATGATTGTGGTGG  
CCATTTTTCACCGTGGATCGCTCCCTATGACGCGGAAAATTTTGGATTATGACAATCTGAATAACGACCTTCTTTG  
CAGCACTGGTTTGGCGTCGATTTACTGGGGCGTACATTTTACGCGTGTCTGGTTGGTGGCGAAAATCTCGTGGCGGC  
GGCGGTGTTTGGCGTGTATCGGTGCGGCGATCGGGAGCTTGTGGGCTTGCCTGGATATTTATGAGGCTGGTGGG  
ATCGGCTGATCATGCGCATTTGCGATGTGCTGTTGGCTTCCCGGATTTTACTGGCGATCGCTGTTGTTGCGGTTG  
GGAAGCGCATTTGCTAACGTGATTTATGAGCTGCGCATTTTTCATCCCGCTTTGCGCGCTGGTGGCGGCAACAC  
GCTGGTGTGAAACAGCAAACTTTATGAGTCAACGAGTATGGTGGCAGCGATATGACCGTTTGTGGTGCATATA  
TCCGCTGGGACCGTCTTCTATCGTGGTGTTTTCCACCATGCGCATGGTACCTCGATTTATCTCTGCCGCGAGCCTC  
TCATTTCTCGGCTCGGTGCGCAGCCGCGACACCAGAGTGGGAGCAATGCTCAATGAGGCTCGAGCGGATATGGTTAT  
CGCGCCGATGTCGCTGTTTTTCCGCGCTGGCTATTTTCTGACCGTACGGGTTCAATTTGTTGGCGGATCGTTTAC  
GCGATGCGCTGGATCCGAAAATTAAGGATAG

>Cluster\_20140

ATGACTGATAAAATCGCGGCTCTGTTGGCGGGACCTCCGCTGAGCGGGAAGTTTCTGTAATTTGCGCGAGCGGTGTT  
AGCCGGGCTGCGTGAAGGCGGATTTGACGCGTATCCTGTGACCCGAAAGAGTGCAGCTGACGCAACTGAAGTCGATGG  
GTTTTTCAGAAAGTATTTATCGCGTACACGGTCCGCGCGGTGAAGATGGTACGCTGCAGGGCATGCTCGAGCTGATGGGC  
TTGCCCTTATACCGGACGGGAGTGGATCTGCGCTTTCAATGGATAAACTACGCAGCAAACTTCTGTGGCAGGGGGC  
CGGTTTACCGGTCGCGGCTGGTAGCGTTAACCGGTGAGGTTTGAAGGCGCTTAAAGATAAGAGTGTAGCAGAAA  
TTTTCTCTCTGGGTTTGGCGGTTATCTGTTAAGCCGAGCCGGAAGGTTCCAGTGTGGGAAATGTCAAAAGTGTAGCAGAA  
AATGCTCTACAAGATGCATTAAGATTGGCATTTTCAACGAGTGAAGAAGTATTGATTGAAAAATGGCTAAGTGGCGCGGA

GTTACAGGTTGCGATACTCGGTGAAGAAATTTTACCGTCAATACGTATTCAATCGGCAGGAACCTTCTATGATTATGAGG  
CGAAGTATCTCTCGATGAGACACAGTATTTCTGCCCGCAGGCTGGGAGCGTCACAAGAGGCCAATTTGACGGCATT  
GTGCTAAAAGCATGGACGACGTTAGGTTGCAAAGGATGGGACGTATTGACGTTATGCTGGACAGTATGGACAGTTT  
TCTGCTGGGAGCCAACTCACCAGGATGACAGCCACAGCCTGGTCCCGATGGCGGCACGTCAGGAGGTTATGAGCT  
TCTCGCAGTTGGTAGTACGAATCTGGAAGTGGCGGACTAA

>Cluster\_39882

GTGAAAAATACGTATCGCGGTAGTGGGGTAGGCGGCATCGCGCAAAAAGCGTGGTTACCGGTGCTGGCGGACGCGT  
TGACTGGACGTTACAAGGTGCGTGGTTCGCTACCGCGCCAAAGCCTTGGCAATTTGTGACAGCTGGCGCATTCCTTATG  
CTGATTCGTTATCCAGCCTTGCAGGATGGCGATGGCGTTTGTGCTATCCGGCACCGCCAGCCACTTTGACGTGGT  
AGTACGTTACTCAATGCGGGGTACATGCTGTGTCGATAAACCGCTGGCAGAAAATCTGCGCGATGCTGAACGGCTGGT  
GGAACCTGGCGGTGCGGAAAAACGACGTTGATGGTTCGTTTAAACCGTGGTTCGACCCACTACGCTGAGTTAAAA  
CGCAACTCGCCACCGCTCCTCGCTAAGAATGGATAAACATCGTACCAATAGCGTGGGCCACACGATCTTTATTTTACA  
TTGCTGGATGATTATTTGATGTTGGTGGATACCGCGCTGGTGTGCTGGCGCAATGCAACTCTCGAAGCGGCTGGT  
GCTGACCAATGAGTCCGGCGAAATGCTGTTTGGCGAGCACCATTTTTCGCGCGTCTTTGACAGATCACCACCTGTATGC  
ATCGCCGTGCCGGAAGCCAGCGTGAACCGTGCAGGCGGTGACGTCAGCGTGGCGTCTATCGACATACGGATATGCGCGAA  
TGGCGTGAAGGAGCGTGGCGAGGCGTAGTGCATAAACCGATTCCTGGTTGGCAGAGTACGCTTGAACAGGATTTGT  
CGCGTGGCGCGGCACTTCAATGAAATCGGTAACCAATCAGACAGTTCGCGCAAAACCGCGGCAACAGGCGGTGCTGGCGC  
AACGTATCGTTGACAAGATCTGGCGGATGCGATGAGTGAATA

>Cluster\_38942

ATGTTATCTATTAACACCAATAACGCCCTCAATGGCCCGGTTAATGCAATCAGCAAAAGCAGCTTCTCTGTCTACATC  
TATGGAACGCTTGGCGACAGGTAACCGGATTAACCTTCTTTCGCGATGACGACGCGGCAAAACAAATTGTAACCGTCTGA  
CGGCACAGTCCAGCGGTATGGGCGTGGCGCTGAGCAACATCAATGATGCCACCGGATGCTGCAACCCGCGACAGCATG  
TTTGACGAAATGCTGACGCTGCTGGGCTGATGAAAGACCTGTCAACTCAGGCAGCGAACCGCCACTACAGCAGCATGA  
CCTCGACGGATGATCACCAGCAATTTCTACCGCGATGGATGACGTTGCTGACATGCTGCAAAACACTACTTCCAGCGGA  
CCAACCTGTTCCGGTGTTCGCGCACAGCAACCGGTAAGTACTGACGCTGTTCCAGAGCGCAGTAACCTTCCAGGTGGGC  
GCGGAATCTTCCGACACCATGACCGTGAATATTTCAAGCAACTGAACAGCGTGGTACTGACCTTCTGCTATCAGCAA  
CTCCTTTAGTGGCGATCAGGCGACACCACTGGCACCGCAGGCGTTTTCGCGGTACTGAACTGACTGCGCTGGCTCGG  
CTAACCGATGATCACCAGCAATTTCTACCGCGATGGATGACGTTTTCGCGAGATCAGTCCAAACCTGGGCTGCTATCAAC  
CGTCTGAACGACACCGCAACAACTGACGAGCATGCAGGACAATACCGAAGTGGCTATCGGCAACATCATGGATACCGA  
TTACGCGACGGAAGCGTCCAAATGACCAAAACAGGTGCTGATGACAGCGGATACCATGCTGAAACAGTCCAAACA  
GCATGTCAGCATGGTTCCAGCCTGCTGCAGTAA

>Cluster\_27991

ATGAATCAAAGTGTGCGGTGACGGGCGTACCGGTTTATCGGTAATAATATTCGATAACCTGCTCGCCCGGGCTT  
TCAGTTCGCGACATGACCGCTACTGCCCGCGTCACTGCAATGATAAATCTCATCTGGGTGCGCGGTTGCTGGAAGATA  
CACATTCGTTAGCGAATGGTGGTGGGAGCCAGCGCGGTGGTCCATTTGCCCGGGCAAGTGGCGGGCACAAGAAGAG  
ATTTTTTACCCTGTTAAGCTTACCGCGCAGCTGCGACTGATGCAAGCGGCAAAAGAGAGCGGCTTTTGGCAACGTTTCT  
GTTTATCTCTTCCGTTGGCGGCGCCATCCCGAATCTCTGGTACGCAAAATCCAAACAGCTCGCGCAACACGACTGA  
TCGCAATGGCTGACGAAATACGCTGGGCAATTTTTCGCGCCGACAGCGGTGATGGTCCCGCGGATAAAGAGTTAAAACCG  
CTGTTTGAATGATGCTGCGCGGCTGCTGCCAGCACTGGTGGCGCAGATACACAACCTCTTCTTCCGATGCTACCGA  
TTTTTGGCAAGCAGTGGGTCAGTGGTTAAACCGCGAACTGTACAGACGCAAACTATGAATTAATGCGATGGCTCGCTA  
GCGCTATGACTGGCAACCGGTACGACAGCTTGGCGCGAAGCCGTTGTTGGTCTGTTGGGATGGTTGGCATTCCTCAG  
CCGCTACTCACCCTGCTTGGCGATATCAGTACTGCGTTGAGTCCGCTGGCAGGTAAAGAACCGATGCTGACCCGCTCGAA  
AATTCGTGAATTAACCCAGCCGACTGGTGGCAATAAATACCGTATTTCTGAAGATATTAATGGTTTCCCGGATTA  
GCCTGGAACACGCATTACGCAACGGCTATTTTGA

>Cluster\_19864

ATGGCTGCCATTAATACGAAAGTCAAAAAAGCCGTTATCCCGTAGCGGGATTAGGAACCAGGATGTTGCCGGCGACGAA  
AGCCATCCCGAAGAGATGCTGCGCACTTGTGATAAGCATTAAATCAATACGTCGTAATGAATGATTTGCCGCTGGCA  
TTACTGAAATTTGCTGGTTACTCACTCATCTAAAACTCTATTTGAAAACCACTTTGATACCAGTTTTGAACTGGAAGCA  
ATGCTGGA AAAACGTTGAAAACGTC AAC TGCTTATGAAAGTGCAGTCTATTTGTCGCGCACACGTCATTTATGCAAGT  
TCGTCAGGGGCTGGCGAAAGCCGTTGGACACCGGTTATTTGTTGCTCACCCTGGTGGTGGTGGTGGTGGTGGTGGTGGT  
TTTTGCTGACGTTATTTGATGATGAATGAAATCCGATTTATGTCACAGGATAACCTGGCAGAGATGATCCGCTGGT  
GAAACGGGTCATAGCCAGATCATGGTTGAACCGGTTGCTGATGTCAGCCGATAAGGCGTTGTTGGATTGCAAGGCGTTGA  
ATTAGCGCGGGTAAAGCGTACCTATGGTTGGCGTGGTTGAAAAACAAAAGCGGATGTTGCCCGCTAATCTCGCTA  
TTGTTGGTCTGTTACGTTACTAGCCGGATATTTGGCCGTTGCTGGCAAAAACCTCCGGGTGCTGGTGAATGAAATTCAG  
CTCACCGCAATTTAGTATGCTGATCGAAAAGAAACCGTGGGAGCCATCATATGAAAGGGAAGGCGATGCAATTCGCG  
TAATAAATAGGTTACATGACGAGCTTCTGTTGAATACGGTATTCGTCATAACACCTTGGCACGGAATTTAAAGCCTGGC  
TTGAAAGAGAGATGGGCATTAAGAAGTAA

>Cluster\_54923

ATGCCTTACGATAGCGTATACAGCGAAAAGCGCCCGCGGACGCTGCGTACCGCTGGCGCAAAATTTATAGTGACGC  
CTCTGCGATGGTTCGCGCTGACGGCTGCGCGGGGCTGGCTGACTGTGTTATTTTGGCGGCTGGTTTGGCGCTTACGGCA  
TCGACAGCAATTTCTCGGTTATCAATTTATGCGCGCTCATGGTTCGCGCTATGGCGAAGTTTCTTCTTCTGGGGACT  
GACGACTCGGACGCGATGTTTTAAGCCGTTTACTGAGCGGAGCTGCGCAACCGTGGTGGCGCATTTGTGGTGACGCT  
TGCCGCGACGATCTGTGGCTGGTACTGGGACCTTCCGCGGGGCGACACAGGCTCCGCTCAGCGGTGCTTAAACATA  
TTCTGGATACCTTACTGGCGATCCTTCCGCTGCTGTTGGCAATTTATCGTTGTAGCGTTTGGCGGACCGAGTTTGTCCCAC  
GCTATGTTTGTGCTGCTGGCTGGCATTGCTGCGCGTATGGTACGTTGATTTACAGCATGGTGCATGACGAACTGGA  
AGATACGTTATCCCGCCGCTGAGTGGCGCATCAACGCTGAAATTTCTCTGGTTTGTGTTGATGCAACATCACCG  
CCGGGCTGGTACCGAGATCACCGCGCACTGTCGATGGCAATTTCTGATATCGCGCGCTGGGCTTTCTCGATCTCGGC  
GCACAACCTCCCTCGCTGAATGGGAGCGATGCTCGGTGATGCGCTGGAACGATTTATGTCGCCCGCTGGACTGTCAT  
GCTGCCAGGTGGCGCAATTTATGATTAGCGTGTGTTGGTTAACCTCTTGGCGATGGCGTTCGTCGTGCGATTATGGCG  
GGTGGAAATA

>Cluster\_23301

ATGACTATGAAAGTTGGTTTTATTTGGCTGGGGATTATGGGTAACCAATGAGTAAAAACCTTCTGAAAGCAGGTTACTC  
GCTGGTGGTGTGCTGACCTAACCCAGAAGTATCGCTGACGTGATGCTGCGGTTGCAGAAACAGCCTTACGGCTAAAG  
CGATCGTGAACAGTGGCAGCTCATATAACCATGCTGCGCAAACTCCCTCATGTGAAAGAGGTTGGCGCTGGGTAAGAT  
GGCATTATGAAAGCGCGAAGCCAGGTACGGTATGATTGATATGAGTTCTATCGCACCGCTGGCAAGCCGTGAAATCAG  
CGAAGCGCTGAAAGCGAAAGGCAATTTGATATGCTGGACGCCCGGTGAGCGGCGGTGAAACCGAAAGCCATCGACGGTACCG  
TGTAGTATGTTGGCGGCGACAGGCTATTTTTCGACAAATACTATGATTGATGAAAGCGATGGCGGGTTCGCTGGTGG  
CATACCGGGGAAATCGGTGACGTAACGTCACCAAACTGGCAATCAGGTCATTTGTTGGCGTGAATATGCTGCGATGTC  
AGAAGCGTTAACGTTGGCAACCAAGCGGGCGTTAACCGGATCTGGTGTATCAGGCAATTCGCGGTGGGCTGGCGGTA

GTACCGTGTGGATGCCAAAGCGCCGATGGTGTATGGACCGCAACTTCAAACCGGGCTTCCGTATTGATCTGCATATTAAG  
GATCTGGCGAATGCGCTGGATACTTCTCACGGCGTCGGCGCGCAACTGCCGCTCACAGCTGCGGTTATGGAGATGATGCA  
GGCACTGCGTGCAGATGGTTAGGAACGGCGGATCATAGCGCCCTGGCGTGCTACTACGAAAACTGGCGAAAGTCGAAG  
TTACTCGCTAA

>Cluster\_138

ATGGTCTGCGAATGTCAAGGATAGCAATCATTTACTTTGGTTAGTACTCATGCCCTTGATATAGGTGCGATGACAGT  
CTTTCTTTTATTGTTTATAGAGAAAGAGAACAGATCCTCTGGTTTTAGAGAAAATTTGCGGAGCAAGGCTTACCTTTAGTT  
ATCCAAGAATAGGAGGAGTAAGGATTGATGTAGAGAAAAAACCTTAGAAAAATAGACAGGTTTATCGATGGATTTTTT  
CAAAAAATAGATGAATACGAGGGTTTGGTTACAGAAAAACAGGATTTGGATAGCCCGTACCAGAGGGGTTGGAGTTATAAA  
TCCTGAAGATGCTATAGCTTATGGTCTTACAGGTCAGTCTTAGGGGTTGCGGAATAAACTATGATGTAAGAAAAACATT  
TCCCTTATGACGCATACAGTGGAGTAGATTTTGGAGTCCCGGTAGGAAAAACAGGAGATACCTATGATAGATATTTATGT  
CGTGTCGAAGATGAGGCAATCTGCTAAAATAGTTAAACAATGTATTAGAAAAATGCCAGAAGGAAGTATCTGCGCAGA  
AAACGCTATAGATGAATACGCTTCCCTTCTGGTAAAAAAAAGCTTCACTCCAGAAGGTTGGTCTCCTTTTATTT  
CTTTTTTAAAAAGAGAAGGAACCTCTTTTACCTGAAGGGGAAATCTATTACAGCAGTAGAAGGGGCAAAAGGAGAACTTGGG  
TTTTTTATCATAAGTGTATGGGTCAGGGAGACCTTACCGGTAAGGATTAGGGTCCCTCTTTTATACATATTTTACGCCAT  
TCCTAAGCTTGCAGAGGGTCACTTTTGGCAGACGTGGTAGCCATCATCGAACCCCTTGATATCGTTATGGGAGAGGCTG  
ATAAATGA

>Cluster\_24916

ATGAGCGGTTACTCTTTATTTTCGCGCCGCGACTGTTAACGGCGATGGCGCTTCTCCGTTGTTATGGCAGATGAATAC  
CGCCACGCGGCGGTTATTGATCCCAATCGTATTGTGGCACTGGAGTGGTTGCCGTTGGAGTTACTGCTGGCGCTCGGCA  
TCGTGCTTACGCGGTGGCGGACACCACTCAACTATCGCTGTGGGTGACGGAACCGCCATTGCCGACTCAGTATTGAC  
GTTGGTTTGGCTACAGAACCAACCTTGAAGTGTGACGAAATGAAACCGTCTTTATGGTCTGGTCCGCGAGATATGG  
CCCTTACAGAAATGCTGGCAGTATTGCGCCGGGGCGCGGATTTAACTTACAGCAGCGGCAACAGCCACTGGCAGTGG  
CGCTAAATCAAGCAAGTGGCAATGGCAGATTTACTTAACCTGCAAGCGCAGCGGAAACGCATTTAACGCACTATGAAGAC  
TTTTATCCGCGAGCATGAAACCCCGCTTTGTAAGCGTGGTGCACGCCGTTATTGCTGACGACGCTTATCGATCCGCGCCA  
TATGTTGGTCTTCGGTCCAAACAGCTTGTTCAGGAAATTCGATGAGTACGGCATCCAAATGCCCTGGCAAGGGGAAA  
CCAACCTTGGGGCAGTACCGCCGTCAGTATCGATCGTCTGGCAGCGTATAAAGACGTTGATGTGCTCTGTTTTGATCAC  
GACAAACAGCAAGACATGCGTAAATGGCAACCCGCTGTGGCAGGCCATGCCGTTGTTCCGCGGCAACCTTTCA  
GCGCGTCCGCGGCTGTTGTTCTATGGTGCAGCCTTCTGCAATGCACTTTGTGCGGCTTCTGGATAACGCCATCGGAG  
GTAAAGCGTGA

>Cluster\_2242

ATGATGACGATTGACCAACGTGAGAAACAAACAAGACTACAGGCGCAATGGATGAGTTACGGGCAGAAATGGATGAGTT  
ACGGGCAGAGATTGCATTTGCTCAGAAGGGCGAAAAGCCATGGCCTTATCGTTCCGCTGATGCGTGAAGGTCGCGGAT  
ATTCGCAAAAACAGCGTAAATATCGTACGCATATACTGGTGTGGATCGATCGTAAATGGCGAGGACAGAGAAAAATTTCA  
TGCTGCCCTGACTGCTTGTATCGCTGAGGCCAGTATTGACCAATGGAAGTGTGCTCCCAAGGCGGAAGAACGACTGA  
TAACGCGCAATTCGCTCTCGCTTTCGGGACTGCGAGTTTGTATAATTACTGGAGGTTAATCCGCGAGCCAGAAATC  
TTGCGGCTGTCGCGCTATGCGGAGAACTGGCCAGATATGCTGGAGAACGGTACCAGTCTTGTATGACCGGCAAGTTC  
GGTACCGGGAAAAATCATCTGGCGGTATCAATGGCAAAACACATCATCCGTAACATATCTGGCCAGTGTGGAGATCCCGCA  
CGTATGCGCCTTACCCGGGCTGTGAAAACTGCTGGCGGAATGACAGTGAAAAAACAGCGGATGACGCTCATTTGAGCAAT  
ATGCGTCACTGGATTTGCTGATTGCTGACGAAAGTGGCGCTTTCAGTTTGGCAGTGGCGCTGAAATGGCCATTTTTCAGGAA  
ATTTATCAATGCCCGGTATGAGGGTATTTTGCCTAATCCTGATCAGCAACCTTTCACCGGAAGAAATTTGGGGCTTCAT  
CAGTCCCCGATTGCCGACAGGATCACCGATGGCGGGCGCAACTGGTTGTCTGTTTAACTGGCCAGCTACCGTTCTCGTA  
TCGGAGGTGTTGCCCATGA

>Cluster\_26380

ATGGCTTTTCAGGTAAAAATTCATCAAAATTCGGGCTTTTGTGTAAGTGGCTCGTACGGGCAGCATTCCGCGGAGCGAGCCG  
AATGTTGAATATGTCGCAACCGGCACTGAGTAAATCTATTTCAGGAGCTGGAAGAAGGGTTGGCGGCACAACCTTTTTTTC  
GCCGTAGTAAAGCGGTGAGCTTAACTGATGCCGTTGAAAAGTTTTATCAGCACGCCAGTCTTATTTCTTGAAGAGTGGCC  
GCAGCGCAAGAGGATATTCGCCAACGACAAGGGCAACTGGCAGGGCAAAATTAATATCGGCATGGGGGCCAGTATTTCCCG  
CAGTCTGATGCCAGCTGTATATCTCGTTTTATCAGCAGCATCCGCAAGTAAAGTACGCATTTATGGAAGGGCAACTGG  
TGTCGATGATTAATGAATTCGCGCAGGGAGAACGATTTACCATAACCTATTTATCAGGGACCCACGACCACGAA  
TTTTACTTTTGAGAAATTAATGAAAGCAATTCGCGATCTTTTGGCCCGGACATCCCGCCATTGGTGGCCGTTCCGAT  
CAACAGTTACTGGACTACAGTGGACAATGCCGACGCCACACGGCAGCTACTACAAACAGTTGAGTGAATTTGCTTGACG  
ATCAGGCGCAAAACGCCACAGGTCGGCGTGTCTGCGAGAGCTTCTCAGCTGTATCAGTCTGGTGGCAAAAAGCGATTTT  
CTCAGCATACTACCTGAAGAAATGGGCTGCGATCCCTTGCACGGACAGGGGCTGGTGTATGTTGCCGTTAGCGAAATTT  
ACCGAAAGCGACCTATTTATTTGATTCAGCGCGGTGATAGTCCGACAGCACACCTGACCCGCTATTAATCAGCAATTTT  
GGCGAAGTGGGCTATCTGTAA

>Cluster\_12409

ATGATTAATTTGAAAGCAGTTATTCGGGTAGCAGTCTGGGGATGCACATGTTGCTGCCACGAAAGCAATCCCTAAAGA  
GATGCTGCCGATCGTAGACAAGCCGATGATTCAGTACATTTGTCGACGAAATTTGAGTCCCGGTATCAAAGAAATCGTTT  
TGGTGACTCATGCGTCTAAGAACCGGTTGAGAACCACTTCGACACCTTACGAACTCGAATCACTCTTGAGCAGCGT  
GTTAAGCGCCAGCTTTTAGCCGAGGTACAGTCTATCTGTCTCTGGCGTGACTATTAAGAACGTTCCGTCAGGCTCAGTT  
ACTGGGCTCGGGTCACTTCCATTTCTGTCGCCCCGATTTGTTGGGATAACCCGTTTGTGTCGATGTTGCTGACGTCG  
TTCTGGATACAGCGAGTGGCAGCCGTTGCGTTATAACCTGGCTGCCATGTTTGGCCGTTTAAATGAAACCGGGCGCAGT  
CAGGTGCTGGCTAAACGCATGGATGATGATCTGTCGAAATCTGTTTATTCAGACCAAGAGCCTTTGGACAACGAAGG  
CAAAGTCAGCCGTTATCGTTGAATTCATTTGAAAAACCGATCAGCCACAACAGCTTGTATCCGATCTGATGGCCGTTAGGGC  
GCTACGCTGCTTTCTGCTGATATCTGGGCTGAGTTGGAATAAACCTGCTCAGGTCGCTGGGACGATTTCAACTGACTGAT  
GCTATTGCAGAGTTGGCTAAAAAACAGTCTGTTGATGCCATGCTGATGACCGGCGACAGCTACGACTGCGGTAAGAGAT  
GGGCTATATGCAGGCATTCGTTAAGTATGGGCTGCGCAACCTTAAAGAAGGGGCGAAGTTCCGTAAGACATCAAGAAGC  
TACTGAGTGAGTAG

>Cluster\_35718

ATGGTTACGCGTATTACTATTGCGCCGCAAGGCCGAGTTTTCCCGTTTTGTGATGGGCTACTGGCGATTGATGGACTG  
GAATATGTCGCCCGCCAGCTGGTCACTTTTATGAAAGAGCATCTGGAATCTCGCGGTGACCACCGTGGACCATGCTGATA  
TTTTATGGTGGCTATCAGTGCAGAGCGGCTTTGGCGAGGCACTGAACTGGCACTCACCTGCTGACAGGATGGAATC  
GTCAGTAAATGCGGTATCCGCGACGACCGCGCTGAAGAAAAACGTCATTGGTCACTTACATCACTGACCCGCGATCAGTAT  
TAAGAGCGCCGAAAGTGCCTAATTAATCTCGCAGCCATCATCTGGAATTTGCTGTTAATCCACCGACAGACCCGTTAA  
TGGATGCCGATGAAGTGGCGGACGCGTTCAAACATCTGCATCAGAGCGGCAAGTGGCTCATTTTGGCGTATGCAACTTT  
ACGCTCGGCAATTTGCCCTGTTGCAATCAGCTCTGCCGTTTACCCTTCCACTAATCAGGTGGAATATCCCGGCTGCA  
TCAGCCGTTACTGCTGGATGGCAGCTCCAGCAACTACAAACACTGCGTGTTCGTCGATGGCGTGGTCTGCTTGGTG  
GTGGTCTGTTTTAATGATGATATTTCCAGCCGCTGCGTGTGACTGGCTGTGGTGGCAGAGGATTAACCGCGGGC

TCGATTGAACAGGTGGTTTACGCCCTGGGTATTACGTTTACCATCGCAGCCGTCGCAATTTATCGGTTACAGGTAAAATTGA  
GCGCGTACGGGACGCTGTGGAAGCAGAAACACTGAAAAATGACCCGTCACAAATGGTTTCTGTATCCGTAAGCGGCACCTGG  
GGTACGACGTACCGTAA  
>Cluster\_5239  
ATGCGTCTTCTTCAATACCATGCTGCGCGTGGCGATTGCAACGCTCCATCGATTTTTATACCAAAGTCTGGGCATGAA  
ACTGCTGCGTACCAGCGAAAACCGGAATACAAATACTCACTGCGGTTTGTGGTACGGCCCGAAAACCGAAGAAGCGG  
TGATTGAACCTGACCTACAACCTGGGGCTGGATAAATACGAACTCGGCCTGCTTATGGTCACATCGCGCTTAGCGTAGAT  
AACGCCGTGAAGCGTGCAGAAAAATCCGTCAAAACGGGGTAACGTGACCCGTGAAGCGGGTCCGGTAAAAGCGCGTAC  
TACGGTTATCGCGTTTGTGGAAGATCCGGACGGTTACAAAATTGAGTTAATCGAAGAGAAAGACGCCGGTCCGGCTCTGG  
GCAACTAA  
>Cluster\_40025  
GTGGCTCTGGAAGGCAATTAATGGAGGTGTCGATTTTTAAGGAGTGTAAATAACTATTTTCAGAGTGTATGGCAGA  
ACACAGAGAAAATAAAACAGTAATAAAATATTAAATGGAAAAATAAAATCTTGTGTATTTGGAACGGATTCTAATCACT  
TTTCTTGCCCGAGTCAATTTTTGACATACCCGATAACGCTGGACACACCTGCGAATGGAGTGTTCATGAGAACTCACAA  
GGTCTGAGATATGCTCTCTATATGATAAGGACAGTTAGTGCACCTGTTGAAACTGGTGGAGCTCATCCTCTGAGTGC  
AGAACCTATAACAGAATCAATGATTATGAGAAAAGATGAATGTCACTTTGATTCAAAAAAGAATCCTTTGTTGCAAGTG  
ATGCTTAA  
>Cluster\_30655  
ATGGCACTGCTGAATATTTTTGATATCGCCGGGTCGGCGTTAACTGCCAGTCCAGCGCCTGAACGTGGCGGCCAGTAA  
TCTGGCGAATGCTGATAGCGTACCCGTCACCGATGGACAGCCATATCGGGCAAACAGGTGGTATTCAGGTTAACGCTG  
CACAGGTCCTGCGACAGGCGGCTAAAGGTTGCCGATGTTATAGAAAAGTCAAGCCCGGACAAAAGTGGTTTATGAACCG  
GGTAACTCCGCTGGCGGATGCAAAGGCTACGTGAAAATGCCAAACGTTGATGTGTCGGAGAGATGGTTAACACCATGTC  
GGCGTACGCACTATACAGGCCAATGTTGAAGTCTCAACACGGTGAAAAGCATGATGCTGAAAACCCCTACGCTCGGTC  
AATAA  
>Cluster\_4769  
ATGTATACAGAATCAAATGTTAAGCTTTCTGTAAACGCCCTCTGGCAAAGTGTGTCCTTGCAACTCTGTATCGGGCTGC  
AGCTACACATCCTGAAATTAATTAATTAACAATTTAAATTAATACCAGGCGAGGCAATTAATAAGGCCATTCCTCTCTGTA  
TGGCTGATTTTACTGGTGAACCTGCATAGCTCATTTCTGAAATTTGCAAGTGCAGACAGTCCGGGCTGAGCCGACACA  
GGCACTGTGACGACGCCAGCGATTGTAATCACACTCGATATAAATTAACACCGCTTCCCGCATTTTCCCGGCTGCTAA  
AGCGTTCCCGTGGATACATTCACCTTTCAGCGAATGAAAAGAGGTAAGCGTCAACGGAGCACCGTATGACGCTTATTT  
ATTGGTGA  
>Cluster\_7961  
ATGAATAAATTTTATCAGGGTGTTTTTTATCCGGAAGCACTTAAAGAAGCATATAATTTCTGCCGGAGCGTGGCCGGAGAA  
TGCCGCCAGTGTGAGCGATGAGGTCATGGCTGTTTATAGCCAGTATCCACCAAAGAGAAAATGCTCGGGACGGATAAAA  
ATGGTTATCCTGTATGGGTTGATATCCAGCCCTGTCTGCAAAACAACGGTGTGTCAGGCTGGGCAAATGCAACCGGAA  
TTACGTCACCAAGCAGAGTCTGAGATTTGCTGGCGACAGGATGCTGTTGATTCTGGAATTTGCAAGCAGAAAGAAATTA  
CGCCTTAGCTGAGTGGAAAAATACCGGTTATTACTTATGCGGCTGACATCTCAAAGCACCGGATATCGAGTGGCCGG  
TTAAGTATGAGTAA  
>Cluster\_6684  
ATGGGGCACTGGCTGTGTCGCGAGACTCATGAAAGAGCTGGGGCTGGTCAGTTGCCAGCAGCCGACTCACCGGTATAAGCG  
TGGCGGTCATGAGCAGCTTGCTATCCCGAATCATCTTGGAGCAGAGTTCCGCGTAACGGAACCAAATCAGGTTGGTGGC  
GTGATGTGACCTATATCTGGACGGGTAAGCGCTGGGCGTACCTCGCGTGTGTTCTCGAAGTTCGCAAAACCAAGTGC  
GGCTGGCAATGTCGCTTCTCGCCGACAGCAGGCTTACCATGAAAGCACTGGAATGGCATGGGAAACCGGTGTAAGCC  
CGTCCGGGTGATGTTCCAGGCGATCAAGGCAGTCAATATACGAGCAGGCGATTCCGGCAGTTACTGTGGCGATCCGGAT  
CAGGCAGAGTATGA  
>Cluster\_7228  
ATGAAAACCTTTTATCAAAACTTTACTCGTGTGCTGTAACATTTCTGTTCTGCTTCTGCTACTGCGAAACAAGTAAAAC  
GCCAAATAACATCAAATACGTTAATACTACAGAAGCGTTTTCCTGTACCGAAATGACGGTATGAATGCCAGACAAAGA  
ATCAGTTCAACTATAAGATAACAGCTATGTTTTCGCTGCTGAAACGTTGGTGCCTGCTGCTACGACTACACTGCTCTCG  
GTAGTTAACTGAAAACCGGAAAGCACAAATGATTGAATACGGGGACAATCAACTGTGCTCAGGTAGCAACAAACCGTT  
CTTCGAAAATCAAAAATGGCGTACCAGCGTAGGAGTCACTGCACACATCCGGAAAACCTGTGCTGTAGCCAGGACAAAC  
TTAAAATCTAA  
>Cluster\_7952  
ATGAAAACGATAGTCTGTTGTTAGTGTGCGGCTGGCCGGGCTGCTCTGGATGCGGCACGAAAACACCAGTCTGACCCG  
TTCCCTTTGAGCGGCGAATAAAGTCGCCGTTGAAACAAAACCGTGATTACCATGCTGAAAAGCCAGCTTAAAACGGCT  
CCCGTATCCGTGAGGAAAATGAGACCGCTCAGGCTTACTGCGCGGTGAGCTCATCGATGCGGAGCGGGGCGCAACGC  
CGGAAACAGACCAATACGAGGTTACTCAATGAAAACGAAACAATTCGCCGCTGTTATAGCGCTGATTTGCTGATGCTGT  
GCGCGGTTGACACGCGCGCCGCTGTGCCAGCAGCGGTTGTTTACAACGCATGCCGAGGGTCACTTTGCCCCG  
ATGCCGGGAAGTGA  
>Cluster\_33870  
ATGAAATCCGTTATTACGATTTCCGCCAGCCTGGCGATTAGCCTGATGCTGTGCTGCACGGCGCAGGCAAAACGACCATAA  
AATCTTCGGCGTCAATGCAATGCGCGAAGCAGAAACCAACGATCTAGCGCTGAAAACCTTCTGTTGTCGATTTGTTAAAC  
GCATACAGCTCTCAACCGACCATGGCGATTGCGAGTTAAGCGGTGCATCGGTTTATTTCAAAGCCACCCGTAGCGCCAGT  
CAGACCTGAATAATCTTCAGAAAATAAAGAGGGCAAAACCACTGACTGGATCAACATTAACAGCGATAACGCAATAA  
ACGCTGCGTCTCAAAAATCACCTTTTCTGGTCAATCGGTGAACATCGGATATGGCCAGCTGAAAATTAATCGGCGACG  
ACTAA  
>Cluster\_41607  
ATGATTTATTTCTCAAAATCGACTAATGGTTTTTCTTTGATGGTATAAACAGCGACATGCCCTGCTGACATTTGTGAGAT  
AAGTACAGACTTATACAATGAATTAATGCGCGACAGCAGGAAGGGGGGAATTAATCACGTCAGATGAAAATGGTTTAC  
CGTACTGAAATCTCCGGCGATTGATTATGTGCGACGCTGCTGAAAATCAGCGAATGCGAGTACTGCTCATGCCGATAAT  
GTCACAGCTGACTGGCGGTTGGAATTAATGCTTGGTGAATACGACGATACAGATAAAGAAAACATATCTGCTGGATGGA  
CTACAAAAGAAAGTAAAAGCCGTCGACACTTCCGACGGCTCCTGAGATTAGCTGGCCTGAGTTACCGGAGGTGTAG  
>Cluster\_17543  
ATGACCCTATTACCAAAGAGCGACTGCTGACAATCAAGCAGTGGCGGAAAACATACGGACCGGGTAGCAACGTTGTTACT  
GCCAGCAGAAGAAGCGGAAGAACGGCAGCAATGCTCTGGCATCGTGGAGTCGAGCCGATAGGTTTCCGTTGCGAGGC  
GCAATGATAACCTTTGGTGAATGGAGTTACGTATATCATCGAGGCCAGATGATTTGAGCGCAAAACATTTAGTGTAGTAG  
GGCATTACGCGCCCTCCAGCGAAGTAGTACCGAAAACCAATGCCAATCTCTTACTGATGATGATGATGATGATGATGATG  
TGCTGTTGCCGCTATTGCGAGGTTGAGAGGCTGGAACGCTGCGGCTATGCTTACGGGAAAAGGAGACTGA  
>Cluster\_55471

ATGGCGGATAAAGAAGCTTAAATTTTGGTTGTGGATGACTTTTCCACCATGCGACGCATAGTGGTAACCTGCTGAAAGA  
GCTGGGATTCAAATATGTTGAGGAAGCGGAAGATGGCGTGCAGCTCTCAATAAGTTGCAGGCAGCGGTTATGGATTTG  
TTATCTCCGACTGGAACATGCCAATATGGATGGCCTGGAATTTGCTGAAAACAATTCGTGCGGATGGCGCGATGTCGGCA  
TTGCCAGTGTAAATGGTGTACTGCAAGCGAAGAAAAGAAACATCATTGCTGCGGCGCAAGCGGGGGCAGTGGCTATGT  
GGTGAAGCCATTTACCCCGCGACGCTGGAGAAAAACTCAACAAAATCTTTGAGAACTGGGCATGTGA

>Cluster\_62526

ATGTTTCTTACGTGATGCTGGGTAACAGATCTACAGCGCGCCATAAGGTTTCTACGATCCGCTGATGGAATGCTTGG  
ACATCCAAAGGCAGGCGGTAATGAAGAAGGCGCATCTGGGGGACGTTTACGCAATAACCATACCATCGGATTTGTCGTCG  
GCAGGCCCTTTAACCCAGCAACCAGCGAGCGTGGTAAATGGCAGATGGTTCGCACTGAATACCCACTCGTTTGAACACATC  
CAGCAGTTGTACGAACTTGTCTATCAGTCTGGGCGGAGGGATGAAGGTACACCGGGGCACAGGCCACAATACGGACAGGG  
ATTCCATAGTGTATGTACGCGATCCGGATGGCAATAAACTGCGGTTTGTATTTCTACGATTTGGTGGATAA

>Cluster\_16617

ATGCTGTATATTCTAGATTAGCTGCGGTTTTACGTCAAAGTACTCTGGTATCAGCGCCTTTCTTGTGACCGCCCGAG  
AAAGTACAAAGTTTACAAAATCCCTAAGCGTACGACGGGGTTTAGAGTCAATGGCCAGCTGCCAAAGGGCTAAAAGATA  
TCCAACGAGCATTGTTCAGCTCTATAACTTCCCTGTTTATGATGCTTCAATGGCCTATATGAAAGGGGAGGGAAATTCGT  
GATAATGCTGCAGCACACGCTGGCAACCAGTATCTCTGAAGCGGATCTGGAGGATTTTTTAACTCAATACACCAGC  
AATTTTTTGGCGGTGCATGAAATGTCTGCGCTGACACCTCAATTTGAACCCCAAGATAAGTTTTTAAACCACCGTT  
AA

>Cluster\_17735

ATGTCAGCCAGCTAACAGTGAGTCTTAAATCAGTGGCTTAGTATGGGTTCTTGGTGCAGTGCAGGAGTTCC  
ACAGAGGTGGCGCTTGGTGTCTTATCAGCGCGGTAATATTTTATACCTCGGCGGTTGAGTATCCAAATTCGCGCCGGG  
TTCTCTGTGCGATGCTCAGCTTCTCTGCGGCTTCTATTTTACAACCAACTGCCTCAATTTATCGGCGTAGCAAGC  
CTGATCCAACTATCAGCGAGGACTCTTTTGTAGAAAGGGATCGTCTTCTGCTGGCGGTTCTGTGTCGGCAATCGTCCG  
AGTACGTATGGTATCTGGCTCTATCACCCTCCGACAATCCAGCGATTTAATCCCGGGGAGAAAAGACGATGACAACT  
CATGA

>Cluster\_26309

ATGCTACAAACACATAACGTCCTCAGGGCGATCTTGTTTACGTACTTTAGCCATGCCCGCCGATACCAATGCCAATGG  
TGACATCTTTGGTGGTGGTAAATGTCAAAAATGGATATTTGGCGCGCTATTCTGGCGAAAGAAATGGCCATGGTTCGGT  
TAGTGACCGTGGCGGTTGAAGGAATGACTTTCTACGGCGGTTGGGTCGGCGATGTTGGTGTGCTGCTATGCACGCTGT  
GTCCAGAAAGGGACGACATCAGTCAAGTAAATATTGAAGTGTGGGTGAAAAAGTGGCGTCTGAACCAATCGGGCAACG  
CTATAAAGCAACAGAAGCATTATTTAAGTATGTGCGGTTGATCCCGAAGGAAAACCTCGCGCTTACCCGTTGAGTAA

>Cluster\_60043

ATGAGTAAGACACTGAACATTATCTGGCAATATTTACGCGCTTTCGTCTGATTTATGCCGCTGTATGCAGGCATTTT  
CATGTGCTTCCCTGCTACCGGTAACCATTCCGGGCGACATCATCGGATGCTGATCCTGTTTGTCTGCTGGCCTTGCAAA  
TTCTTCCGGCAAAATGGTCAATCCGGGCTGCTACGTAATGATCGCTATATGGCGCTATGTTTGTGCGGATTTGGCGTA  
GGCCTAGCAAAATTTTTGATTTGCTCCGCGCACAGTTTGGCCGCTAGTGGTTTCTGTGCACTGAGTACGTTGGTGT  
TTTTCTGGTGGTGGAGCTGGAGTTGCAACTGGTACACGTTGAAAGTCTGATGGTCAAGAAAGATCAGAAGAATGA

>Cluster\_1788

ATGAACAGAACGATCTTGTCTCCATATCGATATTTCCGATTCAGAAATTAACCAACGCGTGATTAGCCAGTTGAGGCAGA  
GGCAAAAGATTGATGATGCAGAGGTTCAATTTCTGACGGTAATACCTTACTGCTTACTATGCCTCTCTGGGTTTAGCGT  
ATTTCCGAGAATTACCGGCAATGGATGACTGAAAGCGGAAGCAAATCGCAACTGGAAGAGATCATTAAAAAATTTAAA  
CTGCCAACCGACAGAGTGCATGTCCATGTTGAGAAAGGCTCGCCCAAAGACCGCATTTCTGAAATGGCGAAGAGATCCC  
CGCTCATAATGATCATCATTTGCTTCCATCGACCGGATATCACCCTTACTGCTGCGTTCCACGCGCGAGCTGTAGTGC  
GTCACGACAGAGTCTCCGTGCTGGTGTGTCGCTGA

>Cluster\_28562

ATGGACAACAAAATATCAACCTATTTACCAGGCTTTAGTATTTGTGTCATGGATAGCTCTCGTTGGTGGTATCGTTACCTA  
TCTGTAGGGCTATGGAATGCAGAGATGCAATTTAAATGAAAAAGGATATTTTGGCGTACTGGTATTAGGACTGTTTTT  
CTGCAGCGCTTATCAAAAAGACCGTTCCGGGACAAGTATGAAGGCATACCGACCCTCCATTTATATATGACCTGCCTG  
ACTGTCTTTATTTATCTCTGTTGCGTTACTGATGGTAGGCTGTGGAATGCGACGTTTACTACTAGCGAAGAGGTTTTTA  
TGGACTGGCTTTCTTTAAAGCTTGTGGTGCAGTAGCGGTCGAGAAGAATATTCGTGATGCCGGAATAAACCCACCAA  
AAGAAACACAGGTTACCCAGGAAGAATACAGCAATAA

>Cluster\_39515

ATGTTTCTGAAAACCGAACAATTTGAATATAACGGTGTGTCGCTCACGCTTTCCGAGCTGTCTGCGTGCAGCGTATCGA  
GCATCTTGCCCTGCTGAAACGACGGGCGAAGCAGGCTGAAGCCAGCGGTAACCTGCAGGTGAGCGTGGAAAGACCTTGTC  
GAACCGGCGCTTTCTGGTGGCGATGCTCCCTGGGCATTAACCAATCCACAGAAAACGGAGTCAACATCAATGAATGAGGCT  
GTGATGCAGATCGAACAGGAGTGTCTACCACCTGGCTGCTGATGCCATTGCCCGGGGGAAGACGTTGGTGTGCGTCT  
GTCCGGGATGAGCGGGGCTGTTTCAATGTGGATACGGATAACCGAAAGTGGCGAAAAATACCGCTGACTGATGATGATT  
TTTTCTGGGAAAGTCTTCCAGCGCGAGCTGA

>Cluster\_52781

ATGCAAGAAATATGCAATTTGTTGGCCGCTATCCCATCTGAGTATCGCTGGATCGGTTACTGGTGGCGGTTCTTGT  
GACTACGTTTAAAGAGCTGACCTCGAAAGTGAAGGTGATTACTCGTGGTGAAGCTACGCGTCTGATCAACAAAGAAAGCG  
CTGTGGTTGTGGATTTACGCTAGCGTGTGACTTCCGTAAGGCCATATCGCAGGTTCTATCAACCTGTTGCCGAGCGAA  
ATCAAAGCCAAATGTTGGTGGCTTGAAGACACAAAGACAAACCGGTTATCGTGGTAGATGGTCTTGGCATGCAGTG  
CCAGGAGCTGCAACGCGCTGACGAAAGCTGGTTTTGCGCAAGTATTCGTACTGAAAGAAAGGCTCGCTGGCTGGGCTG  
GCGAAAACCTGGCTTTGGTGGCGGCAATAA

>Cluster\_9757

ATGAATAAAATGACTGTACTATTACTTAGCGCAACTATCATTTACAGTTGTACTTCTTCCGTACCATTGATAAAGAAAAC  
TCAATCAGGAAAACCTGAGGGGGTTTATCAAAAATACGACAAAAGATAAAGTCAAAGATGCCCTTGTGAATACGCAATA  
GTAGAGGGTTGATAATTTACAACCGGATAACAGCAGTGTATATGTGGTAAAGAACTGGAAGCGGCTCTGCTGTTTTT  
GGCAAAATGTTAATCGCAATGCCATTTCAACAACCCGCTATCAAAAAGTCAAGATTTACTATCGCTCAAGTTAATAACGA  
TACAAAAGTGTGGCCGATATGTGGATGGAACCAATGGCAATGGGCAAGTACAACAAATGCTATAACAGACAACG  
CAAGCAAAAACATATCCAACAACGCTTGTATGAATTTAAACCTTAA

>Cluster\_24882

ATGAGAGAATTAGCCACTTTTCTCTGGAATGCGTCTCTGGATTCTGTTGACCTATGCAGCGACAAAACCTGTTTAAACC  
GATGAAGCATGCTGACGTAATCACACAGCGGGGCTCTCGACTATATCAGGCATCTGTTTGGTTTTGTTCTGGCTG  
CAATATCTATATTTAGTAGTCAACAGCGATAAGGAAGGAGCAATTAATGCCCTTAAGCAAAAACACCTGTTTAAACCT  
CTGGTAAATAGATTCTTCAACAGGGTTAACTCTCATCGTGCATGATATTTCCATTGATAGCGATGTTTCTACCTGA  
TGATGTTATTTGTCGGGCAACCTATTGATTTCTGTTTACTACTGTTAGGCTTATCTCCCTTATAAATTTCCGCTATATA  
CCTTCGGAAGGTGTTGGTTAGTGTACGAAAAATCTTCCCCACTTGTGA

>Cluster\_47591

ATGATTCGGGAAGCGCAACGTTCCAGAATCCCCGCGATCCTCGAACTGTGGCTGGAAAGTACAACCTGGGGGCATCCCTT  
TATAAAGCGAATTAAGTGGCGTACTGCATTCGCTGGTGGGATGCCTATCTTGCCACCGCGCAAACTGGGTCTGGG  
AAGAGGACGGTAAGCTTTCGGTTTTGTGTCAGCATATGGAAGGCGGATTTCTGGCAGCAATGTTTGTCCACCGAAGGCC  
GTCAGACGGCGTATTGGTAAAGCGCTGATGCAGTATGTGCAGCAGCGTATCCCCATCTGATGCTGGAGGTTTATCAAAA  
AAATCAACCGCGATAGATTTTTACCCTGCGCAGGGTTTTACATTTGTCGATTGCGCATGGCAGGATGAAACCAACTAC  
CCACTGGATTATGAGCTGGCCGGTGGTCAAACGCTGTAA

>Cluster\_3095

ATGGGAGAGAAATCATCACTTTCTCTGTGAATCAGATGAATAAAATTTATCTGAATACGGTCAACCGACAGAGCACTAA  
AGATATTAGTTTATGAAAAGTATAAAGTAAAGTATCCCTCACGATTAATCAATATGGGAATGATAAGCATTTGCT  
CCGAAAATAACACGAATATACGGGTGTGTTCTGTCACGCGTTTTACTCTGATAGCGGAGGACTTTGGAATCAAATTA  
GATTTCAATGCAGCACAAGCTCTATAACTCATATCGTCAATGGAACGGCTGGTTTAGTAAAAAATTAGCTTCCCTTTG  
TGAGGGGATGAGTAGAGATGATAAGAATAAGACCAGAGAGATACTGGAAAAATAAGCTGCGCAGACATATTTTTGAGAAAC  
ATATTGATAGCAAAATAGACATAAAAAATACAGGGTAGCGTAG

>Cluster\_8956

ATGCGTAACCTTCGATTTATCCCCACTGATGCGTCAATGGATCGGTTTTGACAACTGGCCAACGCACTGCAAAACGCGG  
TGAAGCCAGAGCTTCCGCCGTACAACATTGAGAAAAGCGACGATAAACCCTACCGCATACCTTTGCGCTGCGAGGTT  
TCCGTGAGGAAGATTTAGAGATTCAACTGGAAGTACGCGCTGAGCGTAAAAGGCACGCCGGAGCAGCAAAAGAGAG  
AAAAAATGGCTGCATCAAGGGCTTATGAATCAGCCATTTAGCCTGAGCTTTACCTGGCTGAAAATATGGAGTCTCTGG  
CGCAACCTTCGTAACGGTTTTACTGCATATTGATTTAATTCGTAATGAGCCTGAACCCATCGCAGCGCAGCGTATCGTA  
TCAGCGAACGTCGCCGTTAAATAGCTAA

>Cluster\_215

ATGGCAATAGATAGGAAAAGGCTTTTAAAGAAGGCTTTGGGCAATAGCAGATAGGCTTTTTGGTAAAGAAAAAGAAAA  
AGTATATAGTTATGTTTCTTTTGGTTTATGAGAAAAGAAAGATTGCGAGAATTAACAGATGAAGAGCTTGAAGAAATGGTTA  
AAGCTTTTGTAGAAATGCTTTCAGAAAAATGAATGCCCTTCTGCACCTAATGAATGGAGACTTATTAAGTTTTGCAAAAA  
AACTTGGATTGGACAAATGAGCATTTATGAATTAATTAATAAATATGCTCGTGTGATCATCGGAGATTTTGGACTCA  
ATATGAAGCAAAGATTGTAATTGCTGCTATGATGACTATATTAATGGAAGAAAGAGAGAAAAAATAGAAGTGTGA  
GAAATGAAAAGTTGTATAA

>Cluster\_24888

ATGGGACTGATGACACGCAATGGCGATAAAACCGCGCGCTCGGCAGCGCTCGTTCCGCGATGGGCTGCGCCGCTGCTT  
TCCAGCCCTCGCCAGCTTCCGCGCGGCCATCGGGCTGGGCTTCTGAGCCAGTACGAGGGACTGTTTATCAGCCGCTGCG  
TGCCGCTGTTTTGCCGCGCTGGCCCTTCTGGCGAACGCGCTGGTTGGTTTACGTCATCGCAATGGCTGCGCAGTCTGCTC  
GGCATGATCGCCCGGCCATCGTGTGTTGCGGCCACGGTCTGGCTGCTCGGCAACTGGTGGACGGCAACCTGATGTACGT  
CGGCTGGCTTGTATGATGGGGTGTGATCTGGGACTTCGTGTCGCCGCGCATCGCGTTGCGGACCGGACGGCTGCG  
AACTCCCGCCAAGCGCTTGTGA

>Cluster\_35627

ATGAAAATCAGGCAAAGTCAGACCAGTCCACTTACCTTTTACCAGGATCCCGGAGAGCTGAATCGCCGGATAAAGATCCG  
CCTTCGGGTGGATGAACCCACCGCTGATTTTGGTACGGAGCCAACTATCCGGAGTCTGTTGATGCTCGGGCAAAGGCTGG  
CTCAGCCAGGCGCTGCGCTTATCAGGGCTCAGTGCAGACAGAAAATGCTGTTACGCATATTTTACAATCCGTTTCCGT  
CAGACATACCGGCAGATACAGGTTGGTTTATTAACGGTACAGCAGTACCGGATCCGGGCAATACCGCACTGAAACGGTCA  
GCGAGCTTTTTTACTGGAATGTGAGAACTGCGTACAGCGCAGCATGGGTTGAATGCCATGAATCAGACAGCATTT  
TTACACGTCGACTTAA

>Cluster\_12346

ATGGTACGATTTCATTCATTTCTCGTCTTTCTGAGCATTGCGTTTACGATAGTACAGCAGCTTGGCTATACAGGTAACCA  
GCGCCACTTTTTGGGTTTTCTCGCGCAAGCAGTCCGATGTAACCACTTTTATACCGGGTTAAAGCGGGTTGCGACA  
AGCGCTGCCATGTACAGGGCTGTTCGCACACCAGCCCTGCCGCAAGATGGTTGCTGCGCCCTCTCATCGTCCCGGAGTC  
CCGTTTTACTGGAACCATACCGACAAGCGCACTGATTTACGCTGAGAGGTTACCCCTGTTTCGGGTACTTCCGCCAGCA  
GCGCAGCAGCGCTCATGGTGCAACACCTTTAATACTGCTCAGTCTGATGCAAGCTCTTTGAAGTGGCTATGGATATGG  
CTGTTTATGTCAGCATCTAG

>Cluster\_64939

ATGGAGATACGCGTATTTTCGCCAGGAAGATTTTCGAAGAGGTCATCACCTTTGGGAGCGTTGCGACTTCTGCGTCCGTC  
GAACGATCCGGAATGGACATCGAGCGTAAGATGAACCATGACGTCAGTTTGTTTTTGGTTCGCTGAGGTAACGGTGAAG  
TGGTCCGAAACGGTATGGCGGTTATGACGGGCATCGCGGCTGCTTATATCTTGGCGTGCATCCAGATTTCTGCTGGG  
CGTGGGATTGCCAATGCGTTGCTTAACTCGGCTGGAGAAAAGCTGATTGCTCGTGGCTGCCGAAAATTCAGATCAATGT  
GCCGGAAGATAACGACATGGTGTCTCGAATGTAAGACGCTGGGATATGAACACCGCAGCTGCTGAGTCTGGGTAAGC  
GTTTATTGAAGATGAAGAGTACTGA

>Cluster\_27698

ATGGGTTTCATGGGAAATGGAGGCTCTCGAAAGCGACGAAGGGCTGGATTGATTAATGGGTAGAGGAACAACGCAAGA  
TGATTCGACCTTTGATGCCGAGTCAATTTGTTCAACGCTTAAGCCAGCATGAAGATTTGTTTCGGATTTTACGGGAGATGAAG  
AATTTCTCTACGATAAATAATGTTATCGGTCCTGTCGAACCTTATCATTAACAAAGCAGCGGGGAAAAAATCACATCGAGT  
AAACAAATGATCAACTCGACAGTTATCGGCTCAGTCTGATTTTACGCAAAAACTCCAGGGCCGTTTACAAACAATCGA  
CGACACACATGAGTGGATAATGCTTTTTGAGGGCGAGCACGCAAAAGGCAAAAGCATATCTGATTGAGATTACTGATA  
AATTAAGAGTAGTAAAGACAACAGCCTGA

>Cluster\_156

ATGGCTGATAAATCGTAAGTGTCTTTTTTATATTTATCCGGAACGAAATGCAGCTGATCGGGTAGCTGACAGGTTTCTTGA  
AAAATTCCTCAGAAAAGAACGTGGTCCGGCAATGCGGGCCATGATGTTGTGTGCTGCATTGATGAAAACAGGATGAAC  
GATTGCCGTTCTGATAGCTGAATTTCTGACAGACAGCAGCTATGCAAGGATATCAACGAATATCAGTAGTACGCTA  
CCACAACAGGAAAATGGTGAAGTGTTCGTTTGTGAGGCGATTTCTGAGTCTGCCGTAATTAATGCAAAAACGATCCT  
GCCTGGGTTGATTTCTGCTACGCAAGAAATATCTGCTCCAGTCTGATCAGAATCTCTGGAAACAAGAAACAACATTAAGA  
ACTTGTTTCCGGATGATGAATAA

>Cluster\_2761

ATGCGTAATATTAACAGGTTTTAGAGCGCTGGGGTGGCTGGGACGAGTGAAGGTGGTAGCGTCTACTTTCTCTCTGT  
TGCAGCCGGTTTTAAGAACTGCTACCCGCGACGAGTCTGGAAGGCTGAAATGCAGTGACAAATGACGCTTATCATCA  
ACTCCGCTATGAGCTGCTGAAAGAAAAAAGATCCGATCTGTGCAACGCTTCTTGGTGGCATTACGCTCCAGGCAATGCC  
GTGCGGGCGATGGGTGAGAAGCTCGGCTATCTCACACCCAGCTTCTGAAGAGGCTTCCAGGCGCAGAGGGATTTATTGA  
CGTTGCTTAGCCATGCTGGATGTTGGTGTCTGAAATGGATCAGTCGGTTTACGTTCAAAGCCTCAGGCTATCAGGACTTTG  
GTAGGAGCTGCTCGCGGCAATAA

>Cluster\_51758

ATGAAAAATTTATCGCCCTTGTGGCTTTACTGGTTAGCGGATGTGATTTGATCCTTATACTACGCGCAACCTT

GACCAGCACCAGCTGGTATGATGTTGGTATGGAAGATGCGATATCGGGCAGCGCCATTAAAGATGACGATGCATTTAGCG  
ATTCACAGCGGATCGCGGTCTATACCTTAAAGGATATGCCGAAGGGCAAAAGAAAACCTGCCAGACCGATTTTACTTAT  
GCCCGGGGACTTTCTGGTAAAAGCTTCTCGCCAGCTGCAATAATGTTGAAAAATGCCAGCCAACCTGCATGAAGTATGGCG  
AAAAGGGGCTGATGAAAATGCCAGCACAAATACGATTAATAATTA  
>Cluster\_46759  
ATGAGTAAGATTTTAGCGAATCATCCACGATTAAGTAAATTTGTATTTGGCTTATTCGGTCTGCTGGAATGATTTGGCT  
TAATAAAGCCTTCCAGGGGATGAATTAATTTCACTGATAACATCACTGCTTGTCTTAGATACGTTTGTGTACTTTTGCA  
TCTACAGTCTGATTAACCAATACCTGAGGCAATGATTTTCTTTGGGATTATAAAGTCCATCAACGAAAATATTCATCC  
AATATTTCTCATAATGATTTTGTGAGCAATGTAAGGAATAGCAGAAAAATGTTTCGGTACTTATCTCGGTGGGAATAAC  
ATTTATTAATGTTATCGCTCTGCTTACTAACTCAAAATGTGA  
>Cluster\_46614  
ATGTCCTTAAAGTATGCACATGAAAATTTTACTACTGCAGTACTTACTCTTGGCGGCCATGGAAGTATTCAGAAACGCTT  
GATTAATTCGTATGTTTTAGCCTTGGGCATCTTAAAAACAGCCGATGATATTCAAAATGCCTTACAAAGCAGGTTTCGATG  
AATTATGTAAGGAACTGACTAAGTTTGTATGCCACTGGCGATGAGGGGCGAGTTCAAGCAACAGTATCAAACTTAAACGAT  
TTCCGAGATCAATAAATGATCGAAGATATTTGTCAGTCTTAACGATGATATTTGCATGAAATTTGCTCTGACGGATGAGAC  
TTACCAAGACATACACCAAAGTTAA  
>Cluster\_25546  
ATGGTGACGAAAATCACTGAACAGCGTGGGAAAGTACGTATTTTTGGCGTAATGATCCGGCTCATAACGCCACAGG  
CAGCAGCGGGATTTCTCGGCAACACCGGCCTGACGCCCTGATGCTGGATGAGGCCACCGGAAAACGTTGGTGTCTGGG  
ACGGACAAAAGCCGGTAGTGGCTTGGCATACTGGTACTGCGCTTGAAGGCACAGAGACGGCGCTGACCTATTACAAG  
TCGGGGACCTTTGGCAGCGAGGCAATCCGCTGGCTGAAAGTGTGGATGAACACAAAAGGCCAACGCCTTTGGCGGCAG  
TGCCCTGAGTACCGGGCGCTGCCGTAA  
>Cluster\_61425  
ATGAACATGGTTGAGAATATGCTCGATCAGGCATTCAAAAGCTTAATCTCAGGAGCATCTGTTCTGCACCTGACCA  
GGGATGGCAGTATCGTATGAGAAGATATCAAAATATCCTTAAAGAACATGGTATTAACAAAGCATGTCCAGAAAAGGCA  
ATTTGCTGGATAATGCTGTGGTGGAGTGTCTTTGGAACCTTAAAGTCGGAGTGTCTTATCTTGTATGAGTTTCAAGTAT  
ATAAGCGAATGAAAGTGTCTGTACCGAATATATGAACTTACAACAGCAGAAAGTATGCTGAAATTAAGAGTCT  
GACTCCAATTGAAATTCGGAATCAGACCTATATGCCTCGTGTAA  
>Cluster\_58424  
ATGAAATATAGTTCAATATTTTCGATGCTTTTCAATTTTTTATACATATTTGCCTGTAATGAGACAGCTGTTACGGTTCGA  
TGAACATATATTTTTATGAGGTATGTGGAATAATACATTTAGATAAATACTGTTAAAAATACGGTAAAAACTGAAA  
CAATGGCGATACAATTAGCTGAAATATATGTTAGGTATCGCTATGGCGAACGGATTGCAGAAAGAAAACCATATTTA  
ATTACGGAATACAGATAGTTGGGTTGTTGAGGGAGCAAAGTTACCTTATGAAGTTGCGGGTGGTGTATTTATATAGA  
AATTAATAAGAAAATGGATGTGTTTTGAATTTCTACATAGTAAATA  
>Cluster\_3374  
ATGTTTCGGTCTGAGGAAAGTAAATCGAAACACTCATACGTTTGAACCCTTTTCAAAATTTGAAAAGAAAATGGCGAAGA  
TGTTCGATTAATAATGCCGAATTTAGTCTAAATGGTTACCGATAGCAGAAGAGAGTGGCAGCTGGTCTGGATGGGTAT  
TGCTTGGAGAAATATTTCCCTTAATTTCTATCTGAGCTCGCTGGGATGGCTTTAATGCCAGAAACGAAAAGGTTAATAGGG  
GAATGGCTCAGTTTATCCAGTTCCCGCTTAAATCTAAAGCATCTGAACTAAAATATAATCGTTTGCAGTGTGTAAGT  
ATTTGATGGAGTATTTGAACCCTGCTCAACCCTAATAAGAATATGA  
>Cluster\_13469  
ATGGACTGGTATCTGAAAGTACTAAAAAATATGTCGGTTTCCGGGTCGTGCGCGGCAAAAGAGTACTGGATGTTTAT  
TCTGGTCAACATCATCTTTTACGTTTCGTGCTGGGGCTGCTGATAAAAATGTTAGGCTGGCAACCGCTGGTGGCGAAGGCA  
TCCTGACGACAATCTACGGTATTTCTGGTGTTTTTACCGTGGTGGGAGTTCAGTTCCGGCCCTGCACGACACCGACCCG  
TCGGCGTGGTGGGCACTGTTGTTCTTAATCCCGTTTATCGGCTGGCTTATTATCATCGTCTTTAACTGCCAGGCGGGTAC  
GCCAGGCGAAAACCGCTTTGGACAGATCCGAACTGGAACCTTAA  
>Cluster\_48640  
ATGAATATTTTATGGCAACAGAAATTCGATCTACCGCTTTGGCGCAAAGAAGCTTTACGGTGGGCGCAATTAACAAT  
CGTCAGGAAGACGAATGTCGGCTGGTTAAGTTGCAACAGAGTAAATGAGAAATCGTCAGTTCGTGCTGATAGCTCTGGTA  
GTCGTGGTAAGGCGAGTCTGGAGCTGTTGATGCTGTGTTAGTTGTCCCTTTGGAAGCGGCTGTACAACCTGATGATGTA  
CTGATCCTTGAAGGTCAAAAATTAAGGTTCCAGTGTTCATCGCCGCTGGGGGCTACGAGGAAGACCTGGGCATCTTGA  
AGTAGGGGCAATATATGGGCTGA  
>Cluster\_18586  
ATGGAACATATCGCTAAACATCGCCATGCTGTTCTTCTGCTCAGAAGTTTCGCTTGTGCTGACCTGATTCGGGTAA  
GAAAGTGTGCGAGCTCTGGATATTTTGACCTACACCAACAAGAAAGCGGCTGACTGGTCAAGAAAGTTCTGGAATCTG  
CCATGCTAACGCTGAACACAACGATGGCGCTGACATGACGATCTGAAAGTTACGAAAATTTTCTGATGACGAAGCCCG  
AGCATGAAGCGCATATGTCGGCTGCAAAAGGTCGTGACATCGATCTGAAAGCGCACACAGCCACATCACTGTGTTGT  
GTCCGATCGTGA  
>Cluster\_47090  
ATGTTAAAGCATAAAATTCAAACAATATTTGAAGCTCTGTTATACATAATGCTTACTTATGGTAAATAGATGCTTTTTT  
TGCTTTCAATAAGTATGACTGGATGCTTGGATCGGGAGACAATATTTGCAATACCTTCCGTTTTCAGGCGAAGATCGTA  
TATTGCAAGCAATGATGACGATTTTTTCTTCTTACGCCACTTATTAATCTTATCTTAAAGAAAACCTTTATGCGGGAA  
ATGTTGAGTTTTGGGTATATGATTTTTGCTCGGTATTTGCTGCTGTTTGTGGTGGTGGCTTTTTTGGGGACGGTTTTAT  
ATTTGCTATTAG  
>Cluster\_64435  
ATGACCACAGAAACGATAGCCGGATGATTTTTATTCTGGACCCGATCTTGTGTGACGACCGTCCGTCATTTTCAGGG  
CGGGATCAACGTACCCCGCTGACACCGATTATGCTCGACGCTACTGCCGGGACGTTTAAAGTCTGGGACGGCTCAATTG  
GTAAGGCGGTTGGTCTCAGACCCACAGCAGTAAATACAGGCTCCAGTTCTGCAGACTGCTCGTACTACAAATCAGGATCG  
TTTTGTTATACGGCGATTAACGGGGTACGGTTACTGACGCTCGCTAAACGCAAAATCAGCGTTTGTGTTACGCCAGTCA  
CGTTGGCTGA  
>Cluster\_43572  
ATGAAGATCTTACAGCTGAACCGGATATATTTTTTTCGATCTTTTGGTCCGGTCTCACGTTTACAAAAGTGTGGC  
CTGGTCAGAAAATGAGAATGGTGGTTAGATCCACAGTGTGTTAACGGCTTATATGACAAGAGCAGTTCAGCCAGC  
AATGGGAACCTTCACTCAACTCAGCATCTGATATCAGCAGCAATGACGGCAGACCATTTATGATTTTTATCACCTAC  
TTCACAGCAATGGCGGATACCTGAACTTTATAACGCAATAAACACACTAGCCGACGATGGGGATACCCATTAATTGA  
TTTACCATAA  
>Cluster\_38475  
GTGAGTCAAGCGATTTAGTTTATCGAGACCCGATGTTTACCCTGATGATAAAAACAGATCGCCACGGATGAAGAACTCAG  
GGAGTGCAAAAGACGCTGATTTAGTTCGGGACAAAGCGATCTCATTCAGAAAACCGCGGGCTGCCAAAATCAGGA

TGGCGACGGGCAACCCAGGAAAAAGCGGCAGCGTGAGGGTGATTTACTTTCTGGCCACCGCCGAGGTGATCTATCTGGTG  
ATGGCCTACCCGAAAAGCACCAAAAGACAGCCTGACGGACGCGGAAAAAGCGCGCTGAAGACGCTGACCCAACAACCTGAA  
AGACGAGGTGTA  
>Cluster\_20777  
ATGACCCCTGAGTGAAAAGCAGCAGCTGTTTACCGTCATGGTGGCCAACCTGATCCACTGGGCAGAAGAACCGGGTACC  
GCTGACGTTTGGTGAAGCGTACCGCACCCCGGAACAGGCGCGCTGAACGCGAAGAAGGGCAGCGGTATTTGGAACAGTC  
TGCACACCAGCGCTGCGCGTGGATTTAACCTGTTTGTGAATGGCCAGTACAGACCCGTACAGAGACTATCTGCCG  
CTGGGTGAATACTGGGAATCACTGGGCGGAAGCTGGGGTGGGCGCTTCAAATCCAGACCCGGATGGTAATCATTTACGCT  
GGAACATAACGGGGTGCCTGA  
>Cluster\_44152  
ATGAAAAAGCACTGCAAGTCGCAATGTCAGTCTGTTTACCGTTATTGGCTTAAATGCCAGGCTAACGAACATCATCA  
TGAACCAATGAGCGAAGCACAACACAGGTTATTAGTGCACCTGGCGAGGTAAAGGTTATTGATCTGGAAAGCAAAAA  
TCACCATCCATCAGCATCCGATTGCTGCTGTGAACCTGGCGGAGATGACCATGCGCTTTACCATCAACCCGACAGCAAAA  
ATGAGTGAATATAAACCCGGCGACAAGTGGCGTTAATTTTGTCCAGCAGGGCAACCTTTCTTTATTACAGGATATTA  
AGTCAGCCAGTAA  
>Cluster\_53884  
ATGGTGAAAAAGACTATTATTATGTTAATCTGACCGCGGACAAAACAGAAAAGTATCTGATAGAGGTCTTACATCTCGAGA  
CAGGAGGAGAATAGCGAGATGGGAAAAAGGATAGCATATGCATTAACCAACCGTGTAAACCTGGATTTAATGCTATAG  
ATGACGGTCTGAAATATAAGATTAAATGAAGAACCAATGGACAAAGTTGACAAAGCATTAGCAACCACTTTCCCTCGCGAT  
GTCGAAAAAATTGAAGATGAAAAATAGAGGATGTCATGCACAGAGTTGTTAATCAGCTCACCAAGAAATCCAATAA  
AAAAATGGTCATAG  
>Cluster\_29089  
ATGTCAGTTCTGTATATCCAAATTCGTCGTAATCAAATTAAGTCTGCGATCTTGAAGCAACCGTGAAGTGTGAGGAGA  
TGCTGCCCTTCAGTAACCGCGCCGTTAATCGCAATTTCTTTTGTGACGAAAAGTTCTGCAAGACTTGTCTGCAAC  
TCCACCCACGTTCAACCTGGCATTCTTTTTTGGCAGCAAAACGTTATGGATATTGTTGTGAGCGCGCTGGAAATGAATGAG  
GGCGGTTTGTACAGGTTGAGGAACGCATTTCTCATGAAGTGGTCGACGGGGCAACGTTAATGAATATCGCCAGTTCCA  
CATCCATGCGCAATCAGTGGTACTCAGTGTATGTCGGTCTATGGCAATGCTTAAAGCAGAAATAA  
>Cluster\_43194  
ATGAATAAAGGGCTTCTCAGCTACTGCTGTTATTACCTGTTTTGCGCGCGCTCAGGTTGTAGACACCTGGCAATTCGC  
CAATCCGCAACAACAGGAACAGGCGTTAAATATGCGCAGCAGTTACGTTGTCCGCGAGTGCAGAAATCAGAATCTACTGG  
AATCCAATGCGCCGGTGGCAGTCAATGCGCCATCAGGTTTACACCATGGTGAAGAGGGGAAAAAGTGAAGTCGAAATC  
ATTGGCTGGATGACCGAAGCCTACGGAGATTTTCTCGTATAACCCACCGTTAACGGGTACAGCGCTGGTGTGTGGGC  
GCTGCCAGTAGTGTGTTACTGCTGATGGCACTGATCCTCTGGCGAGTGGGGGCAAGCGATGA  
>Cluster\_30107  
ATGGATAAGCAATCACTGCAGAAACGGCGAAACCGCTGGCTCTTGTAGTTACCTTTGTGCGAGCTTTGCTGGCCTTTTGG  
CCCGGAGTTTCGATTTTTTAAAAATGGCGGCAAGATTTTTATGCTGTCTCGGAGCTACGCGGCGTCCCTTTTATCAATC  
TGAAGTCCGATCCAAAAATCCCTGCTAAATCAGCAAAATATACCAAGCATCAAGCTGGGTATCACATGAATAAAAAAG  
CACTGGATTTCTGGTGTATCCCGGCGAGGAAATCTCCGAAGCGTTACTTTCGCGATCTGATCAACGATTCGTGGAATCTGGT  
GGTTGATGGTCTGGCTAAACCGGATCAAAAAGAGTGCCTGACTCAACCGTAAATCAATAG  
>Cluster\_48638  
GTGTTTATGAAGCGTTTGAAGTTTGTATGTCAGAAAGGCAAGATTGGCAGGTCGGGACTGACATTTTCTGTCACTACTT  
GCCTGCCAATGTGAAATCTGGCGTCTGTTTAAACCAAATACCGGTATCAGCATCGATCATGAGCTACAGGGCTTTT  
ATCTCGAATCATTCAAAATCTGTCGTTGTTCTGCTCAATTAACGAGGTTGAGAAAGCAATAAAAAATCATTGAGATG  
TTTCCAGTAGAGAAACGGAAATCTGGTGGTGTGTTATTTTTCGACTGTGACGACCGATGGCGATGCCAATCATTTATCCCAA  
AAATGATGGGGCATTAAATAGAAGCAGGCATTCCTGTTGAAATTTGCTGGCTATTTATTGAATTA  
>Cluster\_49927  
ATGTTTCTGAAAACAGGGCACGTTTAAATATGAAAAGCAGTCCGTTGGTGTGCTGAGTGTGCTCCGGGCTGCAGAGAATTGA  
ATATCTGGCGTTTGTTCAGCAGCGAAGCGCAAAGTTTGTATGCCGAAGAGGGGAGAACTGCCGGAGGCTGAACGACAGATTG  
CTTTCTGCGGATGGGATGATATCAATGCCTGGCTGGTTTCCCGCTCACTGTGGAATGCGGAACAGTCTCAGGATGTT  
GAGACGCTTTGCGCATCCGTTATTACAACATGGTCGATGATGCCCTGGGAGCGGGGGCGGAGATGGTTCTGTGCTGAG  
CGGTATGGGAGCCATTGAGAATGCCGGGATTTGGAGCATGAGGTGCTGACGCGGAAAAGTCCCTGA  
>Cluster\_29870  
GTGAAGCAATTTCTACTGCTATGTTCTTATTATCATATCTTTTGGGGCTACAGCAGAGTGTGGGTGCTGGGATATGCG  
CGGAATAAGCTATTGAGAACGAAATAATTTCCATCCGGAAGAAGATGGTTTGTAGTGAACATTCATCAATTAAGCAAAACG  
GTGAAGATGCCACGATCACATATTTGGGACAGATGCGGCGGATGGCTTACAAAGCATTTGCTAAAAAATCCATCAATA  
GGAATCGGGCGAATGGCGAAATCAACGCGTTATCGACTCATGGGTAATACATCCTACTGGAACAGTTTAAATGTCAA  
AACATTTCCGGTTATGAGAAATATGATTCACCAAGCTTTTGTGGAAGTAAAAAGAAAATGTTAG  
>Cluster\_7598  
ATGACACGCAAGACTCAGTTCAAAGGCAATTCAGTTCCTGCTGCTGAGCGTTTAAAGGCAAAAGCATTAGCTAACGG  
CGTGTGGCCCGGAAGAAGCAATAAGTTGAGAAAGTATTACACCGCCCTACTTAAGCAGAGCGCAGATTCAGGCTAAAG  
GTACTCACGAAACGCTGAGCGCATAGAAGCAGTAAGCCAATTAAGTTGATGGCACAGGACGTGATCTGGCAACAGAAA  
GAATACAGACGCAATTCGAGCGAGCGCCATTTGTGACGCGAATGAGTTGGACATAAGCAACGAAACTGGTGTATG  
TCTTCAAACGATAGCATTACGCGGAGGCTACCGGAAATCCAAACACTGACGCGGAGGTGA  
>Cluster\_50984  
ATGATGATTTTTATAAGCATCGTACCATTGGTAAAGTTTACGCGTAAAGTCTGGAAAGCAGTAAACACAAACCAATAA  
GCCAAGTTTACCACCAAGCAATTAGCCTCAAGATTGATATCTGGGCTGAAGCACAAAAAGATAATGGTGTATTCGAGT  
TTATCAGAGGTTTTGATTATGCTTACGAAAGCGACCTTAAAGACGCCATTGAAATTAATGGAGAATTTCAACTCTATTA  
AATAGTGACAAGCACAAAGCCGGAACAGATACGATAAAGATTAAATCATGATGCAATCACAAAGGACAATCACA  
AAGTTATATTTCTGAGAAATACGGCTTATCAGTAGTCAATACATAAGATTAAGCGTCTGTGTAA  
>Cluster\_49728  
ATGGCAACAAAAGAAGAAAATCTGAATCGTCTTCTGCTCAACTGGCTGGCTGCTGGGGCGGAGGCGGATATGTCGGGGAG  
TGCTGCGGATATTGCGCAACGTTGTCTGAGTGGGAAGAGGAGCTGCTGTTTTCCCGGAGGGGATTAAGCACTCTGATG  
AGAGCGGGGCTGATCAAAATCACACAGCAGATGGTGGAGGTTGAACAAACAGGATGCTCCGGATGATGTTAAAGCCGTC  
CGGTACGGAAAGTGCCTGCAAGTAAATGGGGTATTGCCCGGAGACAGGTCGTCCTGGTGTAGCTGGCGTTACGGGGTATGCG  
TGTTCTGGTGCCATCATCACTGGCAACGGCCATGATACAGCACGGAACGGCTGAATATGCGTGA  
>Cluster\_55560  
ATGAGCTCAGTTCCAGTTATACAACCCAAACGGAGGGCTATAACGTTGGGATTTCCGTCGCGAGTGTGACTATGTTGA  
ACGGCGTCTGACCGTTGATTTACTCTGCGGTACCGCCCAACTACTCGGATAGTACAACAGAAACCGGCTATGCCGTAG  
TGGATTGCTTCGTAACCAAGCAAGGAGATACCGTTTTAATCAATACGGCGGCGCACTGATTTTGCAAAAATTATG



GGCCGGGCATTTATTACACGAGACGGTGAAGCGTTGGAAGGTGAGGCCCTGGATGATGTTACAGTTGTCCGGGGTAGTGAC  
ATTCTGTTTCAATCGGATAGGGAAGGATGATGATGATTATCCAGTAATATGA  
>Cluster\_40801  
ATGTACCCCAATCTGGCAAAGGCCTACCCACCAATAAAATTACCGGATTTACGCGGTGAATTTATCCGTGGCTGGGATGA  
TGGCGGAGGAATTTGATGCGGCACGCGCTTTATTGAGCAATTCAAAACGGGATGTTGGAAAAACACCGCCATATTGTTGTAG  
CTAACGATGGATATGACACAAAAGATGAATGGGAGTTGGCTACGATTTCAAAAAACATATACACAAGGCAGGGGGCTT  
GATGCCACAAATACAGGAGGGAGTTGATTCCATCACCACGCCTTCATTCACGAGGAAGTATTGGTAACAGGTGGTAG  
TGAAACCCGCCCCCAATATTGCATTTAACTATATCGTGAGGGCGGCTTAG  
>Cluster\_65583  
ATGAAATAACCGCATCGCTTTAGCTGTTTCTCTCTTTGCTCTTAGTGCCGGTAGTTATGCCACTACCTGTGTACAGAAAA  
GGAGCAAAATATCCTTAAGGAGATCAGCTATGCCGAAAAACACAAAACAGAAATCGTATTGACGGTCTGAATAAAGCCC  
TGAGTGAAGTCCGGGCCAACTGTTTCAGATAGCCAGCTGCGTGCCGATCATCACAAGAAAAATCGCAAAGCAGAAAGATGAG  
GTGGCGGAACCGCCAGCAAGATTTAGCCAGGCGAAGCAAAAAGCGCAATGCCGTAAGATTGCCAAACGCGAACGGAAACT  
GGCAGAAGCGCAGGAAGAGCTGAAAAGCTGGAAGCGCGCAGCTACTAA  
>Cluster\_61157  
ATGTGGTTACTTGACCAGTGGGCGAGCGCCATATAGCAGAAGCGCAAGCGAAAGGTGAGTTTGATAACCTGGCAGGTAG  
CGCGCAACCATTTGATACTGGATGATGATTTCTCAGTGCCACCGGAATTACGTGCGGGGTATCGCTTGCAGAAATGCCG  
GTTGCTTACCGCCAGAATTTGAGCAACGGAGAGAAGCAATTCAGCTTCTGGATATTCTCAAAGGTATCCGTCACGATGAT  
CCGCAATATCAAGAGGTTAGCCGTCGATTTGTCATTTACTGGAAATGAAGCTGCGACAAGCTGGATTGAGTACCGATTTTTT  
ACGCGCGGATTATGCTGACAAGTTGTTGGACAAAAATCAACGATAACTAG  
>Cluster\_44066  
ATGCAACGAATCATTTTTAATCATCATTGGCTGGCTGGCGGTAGTGCTGGGTACGCTGGGCGTGGTATTACCGGTATTACC  
GACGACCGCTTTTATCCTGCTGGCGGCCCTGGTGCTTTTGCCCGTTCTTCCCGCGCTTTTACGCTGCTGTTGCTGTACCGCT  
CATGGTTTGGCAGCTATCTACGTTTCTGGCAGAAACATCATGCCATGCCGCGCGGCGTCAAACCGCGGGGATTTTGGCTT  
ATTTTGTCTACGTTTGCATTTCTCTGTGGTTCGTCAGATGCCATGGGTGCGCATCATGTTGCTGGTAATTTCTCGCTG  
TTTGTCTTTCTATATGTGGCAATTCGGTGATTTGATGAAAAGCAAGAAAAGCACTGA  
>Cluster\_19276  
ATGCAACAGCTCGGCGTGAAGTCTCCTGTGCGCTGAAGAAATACCGTCTTACCGGGGAAATATGGGACTCGTGCAGAA  
AAATATCCTTCAGCGACAGTTCAAAGCGGAAGCTCCCTGTGAGAAATGGGTGACAGATATCACCGAATTCAGGGCTGGCG  
GACAAAACTGTACTCTGCCGATACCTGATTTGATTTGTTAACGGGAAATCGTGCGGTGGGAAACCGCCGTCAGGCCTACA  
GAGGAGCTGGTGAAGCGGATGTTAAATAAGGGGCTGGAAGGCCCTGCTGAAGGGGAGAAAACCGCTGCTCCACAGTGATAG  
TAATAATGCCGGTATCAGTTTTTATCATCACTCTGTTTGTCTGTTAACACAGACTGGTGTGA  
>Cluster\_18984  
ATGAATATGGAACTAATTCACATACAACAAGTCCATACATTCAGCTTATAGAGCAAAATTCAGTCTTACAGCAGGAAGC  
AAAGCGACTGCGAGAGCAGGAAGTTCAAAGTGAATGAGTCGATTCAGAAGCAGATTACTTATTACAATATAACCTTAC  
AAGAGCTGGGATATACTAATGTGCTGATGAGTGGATGCTCGCCGGAACCTATCGAAAGGTGTTTACTACCGCAATGAA  
GAAGGCGACCTGGTCGGGCGTAGGCCGACAGCCAGCTGGCTTAAAGAAGCACTGTTGAATGGAATGAAGAAAGAAGA  
TTTTCTTGTGAAGGACACTGAAGAAGAAATAATACCGTGAAAAATATTTAA  
>Cluster\_15382  
ATGGATGAATACTACCCAAAAGACATGATATCGCACAGCTTAAAGTTTCTCTGTGAAACCCTGTATCATGACTGCCTTGC  
AAACCTTGAAGAAAGCAATCATGGCTGGGTTAACGACCACCTCGCGCATCAACCTCCAGTTGAATGAACTGATTGAGC  
ATATTGCGACCTTTCGCACTTAATTCACAAAATTAAGTATAATGAAGACAATAAGCTCATGAGCAGATCAGCAATATCTG  
GATGACACCTTTAAGTTGTTAGTATGTTATGTTAATTAATGCAAGATCTTCAGAAATGGCGGAGTCAAGTAAATCGACT  
ATTCGGTTGTTTTGTCAATGCGACGAAAGAAATCCTGCGAGTTTATCTTGTAG  
>Cluster\_1657  
GTGTCTCAGCTTTGCTCCCTGTGGTAGTGCTGTGCGAGTATAGCCATATGTTGCCACCCTTATGTGTCTGGTGAAAAGGTTGC  
ACCTGATCCAGAACATCTCATGCGTTTCGCTTACTGCGCTTTTGTGATGCAAGACGCGAGATTATTTAATAAAGACCTGGC  
ATCCCTCTTGTGGAGCAGCGCGTTACGTGCCGAATGATGGCCGGATTTGCGCATACTGAATGGTTGGGATTGACCGTA  
TTTGAACATTTGTTGGCAGGACGCGACAATATCGGATTTGTCAGTTTTGTTGCTCGATTTACCGAAGGTGGTAAAACAGG  
TGCAATAATTGAACGTTCCGCGATTTTGAAGAAAAACGGTCAATGGTACTATATTGACGGTACACGCTCCGAGTTGGTC  
GCAACGATCCCTGCGCTTGTGGTTACGGTAAAAAATTTAAAAAGTCTGCGGCCAATAA  
>Cluster\_2361  
ATGTTACCAACAAGTGGCTCTTCAGCAAATCTTTATTCATGGATGATGTATCAGGAAGAGGTAAACCTTCGACTCCGGA  
ATCAGTAAAGTGAATTAATCATAATCATTTTCTTACTCCTGAATTACAAGATAAACTTGATGTTATGATCTCTATATACT  
CAAATGCCAGAAATAGTAATGAGCTTGAGGAAATTTATCAAGAGCTAAGTGCCTTTTGTAAAGTGGGCTGATGGAATAAGAGA  
AATAGTGTATTTGAGGTGAGAAATGAAAATACTGATGAGGTTGTGCGGAGCACTGAGGGAGGGGATGACGATAGATGACAG  
GGATGGTTATATCAGGGAGCTTTTTTTTTCTGTAATTCATGAAAGTAAAAATGAGGAAAGTAGACAAGGTAAAGAAAGGTT  
CTAAATGTAAGTTTATGGTCTGTTATGTCGCCATCACCTTCAGAGCTATATGGTGTATCTACGAGCAATGAAATGCTCTT  
GTGGAAGGATGCAAGTATGATTTTGTATCTTTTGTATATATTAGGGTGCCGATCTTACTTACAACAAAGAGCTTTTACA  
ATGTGGATGA  
>Cluster\_9737  
ATGTTTTGCGAAGAAAAGTAGCTCAAATGGCTGCATACCTACTTCTTAAAGAGAGGTGGGCGCATGGCATATCTGAAATT  
GATGAAGCTGCTCTATCTGTCTAACCGCAGCTCGATTTTGAAGCATGGCAGGATGATCGGCGAAGATAGCCTTTACTCTA  
TGAAATTTGGACCAGTCAATGTCGAATACGCTGAACTTGATTGCGGGTAAGGCTGAAGGCATTTGGTACTGTTGATGATAAC  
TTGATAGAGACGAAACGGGCATAATGATATCGTTGCGTTCAGATCCGAGGAAATGGATGCGACAGAGGCTTTGATGAAAT  
GAGTCGTGCAGATATCCGGATTTAGATGAAATCTATTCTCGGTATGGCATAAAGCCGATTTGATCTCGCAAAATGA  
CGCATTTAGAAAGCGTTTGTCCAGAGTGGCAGCATCTGGCAATTTCTCGTAAGCCTATAGACCTGAAAGAAATGCTGATC  
AGTGAGGGTAAAAGCGAGGATGAGGCTAATCGCATAATGGCAAAATGGAAGAATCTCAGAACTTAAAGGAATTTTCTTT  
GCAATATCATGA  
>Cluster\_42833  
ATGCTGAAAAATTCAGGTTGGTTACGTTACTGGGAGCCTGCGCAAAGGCTCATTTAATGGCATGGTTGCACGTACCTT  
GCCGAAAATTTGCTCCGGCGAGCATGGAATCAATGCGTTACCTTCCATTTGCCGACATTTCCCTGTATGACGCTGACGTCAC  
AGCAGGAAGACGGTTTTCCAGCAACAGTTGAAGCTTGGCGGAACAGATCCGTCAGGCTGACGGTGGTGGTGTGATCGTACG  
CCGGAATAAATACTACTCGGTACCGGTTGGCTGAAAAATGCCATCGACTGGCTTTCCGCTTCCCGGATCAACCGGCTGGC  
TGGTAAACCGGATTTGATTGACACAGCTCAATGGCGGTGATTGGCGGCGCGCTGTGATATCACCCTGCGCCAGATTC  
TGGTTTTCTCTGATGCAATGGTGTGAAACAAGCCAGAAATTTATGGCGCGGTGATTCAGAAACAAAGTTGATCCGCAAAAC  
GGGAAGTGTGATGATCAGGTTACGCTGGACCACCTGACCGGCAATTTGACCGCATTGGTGGTATTATTCAGCGAGTTAA  
GATCTAA  
>Cluster\_15816

ATGCTTATTGGCTATGTACGCGTGTCAACAAATGACCAGAACCAGATTGCAACGTAATGCACTGAACTGCGCGGGATG  
TGAGCGGATTTTTAGGATAAAAACAGTGGCACAAAGTCCGACAGACCGGGGCTTAAAAAATGCTCAGGACACTATCGG  
CAGGAGACTCTGGTTGTCTGGAAGCTGGACAGGTTGGGGCGCAGTATGCGGCATCTGTTACGCTGATAGAAGAGTTG  
CGTCAGCGTGGCGTGAAATTTCCGAAGCCTGACTGACAGTATTGATACAGCACCCCAATGGGGCGTTTCTTTTTTTCATGT  
CATGGGGCCCTGGCTGAAATGGAACGCGAACTGATAGTTGAACGTACCATGGCAGGGTGGCTGCAGCTCGTGCCAAAG  
GCAGAGTAGGTGGACCGCTCCTAAGTTGACCACCGAACAGTGGGCACAGATTGGGCGTTTACTCGAGGCCGGAATCA  
AGACAGCTATTGCACTGATTTTTGATGTAGGCGTTTCTACCATTTATAGAAAATTTCCGGCAATAAGAGCAATGAATC  
CCCCTGA

>Cluster\_21261

ATGCCCAAATATCATCAGTTGTATCATCATGTTACCATCTGTTTCACTGAAACATCAACAACTTTCAAATGAAACAACAT  
GACGAACTCCGTCCAGAAAGATGTTTATAAAGAAATATGGTATATCTTTAAATCCGTCCGTGATGGTTGGCTACAG  
CTAAAACCTCCCTTGCTCTACTCAATGGCAGACATACAAGAAGTCACTCATTTTATTATGTCAGGGACCCAGGAATGGGA  
AGCAGGAGCGGAGCCCAATACTATGCCATAAAGCAGTGAATAAACGCCTCCGAAATAGACATTTACTCTTTTATTTTAAA  
AAAGTTAAATAATGCGCGAAATCAAATAAATTTCCAATCGATGTAAGAAACGCTTATAAACTACAAGGGCAAAAAT  
TCACATGCATTGAAGATTTTATAAAGTATAATGAAACCAGGTTAAAGGCCAATACCAATATCCAACAAGAACAAAT  
GCAGATGAAGTAAATCACTTACATATTTGATTTCTTCAGAAAAAAGAGATGTGGATATATAAAAACAAATGGAAGAT  
AATGCAAAACCAAACTTAG

>Cluster\_44739

TTGACGTTTTCGCGGGAACCTGCTGCTGTATTCACTGTGGTATGAACTTCAACCCGTTTGAAGAACCTTCGCGCAAGGGGCA  
TCACTGCCACGGCTGACGCACCTGTCTGGGCAGAACGCAAAATTTTACCAGGTTTGGGTAAAAAATTTTGTGGGCA  
TGTTTCAATTTACCTTACCCTGGACAGTCACTGCGCAGGTTGTGGCTGTATCAGCCCCGGCGACAGGGACTCATACGGGT  
GTGTGGCACCCGGCAGGCAATGAGCAGGGCCCCGCCGCAACGACGGAGAGCGCTGCGCGAAACGGCGTTGCCCTTACA  
TCCCGGGCGCTTTTGTGCGGATGCCGGGAGCGCAGGCCACGGCGCAGAGAGCGGCGCAGCGAAACGGTTCGCTGCAA  
GCCAGGTTTTCGCGTCAGGGATAGAAGCCGCGCAGGGCGGACAGACTCCGCTGGCTCCGTTCCAGCAGACGCCGCCCGC  
CAGGGGACGCCGAAAAGCCATAAACAGGAGAGAACGAAAGAAGAGGAAAGAGGAAAAGAAGAACAATAACAG  
CACGGTAACCACAGAAAAATA

>Cluster\_39870

ATGAAAAAAGCCGCTTGGTTAACCTTCGCTTCCTTGTATGTTCTCTGCCGTTTTCAGCGGTTGCCGCGATTACAAAAT  
TGACAAAAGAGGTCAGCACGCCCTTGTAACTTCCGCATCCAGCATCTGGCTATAGCTGGTTATATGGCACCTTCAAAG  
ATTTCCGACGGTACTTTTACCTTTTATGATAAAAAATCCAGCTGCCGATAAAGTGAATGTGACAAATAACACCACAGCGTC  
GATACTAATCAGCGCAACGCGATAAACATCTTCGAGTGGGATTTCTCAATACCGCAAAAATATCCACAGGCAACAT  
CACCTCCACCGCTGAAGAAAGACGGTGACGAACTGGATATTACCAGCGATCTGACGCTGAATGGTGTAAACCAAGCCCG  
TCACACTGGAAGCGAAATTAATTTGGTCAGGGTGACGCCCGTGGGGCGTAAACGTGCAGGCTTTGAGGCCAAGGCAAA  
ATCAAGCTCAAAGACTTCAATATCAAGACAGATTTAGTCCAGCGTCTCAGGAAGTGGATCTGATATTTTCACTGGAAG  
CGTACAGCAGAAGTAA

>Cluster\_60655

ATGCCCTCTTACACCTGCTCCGCCAGAATCCGGTGATGCTGCCGTTAAAGATAATGCCAGCTGCAACTGGCAATCGA  
TTCTGAATGCCAATTTATTTCCGTTGTGTACGGCAATACTGCACCATCAGTAATATCGTTAAAAAGATTAAGAACGCCG  
GAAATATGCTTTTATTCATGTTGATTTGTGGAAGCGCGTCAAATAAAGAAGTCTGTTATTCAGTTTTTGAACCTGGTG  
ACCGAGGCGCCGCAATTTATCAGTACCAAGCCCTCAATGTTGAAAGCGGCAAGAGCGGAAGGTTTTTCTGTATTCATCG  
CCTGTTTATGTTGATTTCAATTTCTGTTTCAACAATTTGATAAGCAAGTTGCGCAATCGAATCCGGATTGTATTGAGATCC  
TGCCAGGCTGTATGCCAAAAGTGTGGGCTGGGTGACAGAGAAAATCCGCCAACCGCTGATTGCCGGTGGGCTGGTGTGC  
GATGAAGAAGATGCGGTAATGCGATTAACGCGGGTGTCTGGCGCTTCCACCACGAATACCGGGGCTGGACGTTAGC  
GAAAAAATTACTTTGA

>Cluster\_34955

ATGGCTAAACCAGCGCAAGACGATGTAACCGTAAAAGAGAAGATTTAACTGTTAAAAGGATAATTTAGTACTAAGTTT  
CGATAAATCTACCGGGGTTATTTAGATGGAAGTTCCCACTCAGGGAAGGATAGCATTAAATAGTGTGTTGGAACTTTTG  
ATTTCAACGGTTATTTCAATGATCATGATAGATGGGCTAGATATAAACTCACGCTTTAGTTTTTTTACATAACATATAAT  
CGTTGGCTGCTGGTCAAATGACCACGTTAATGGAATTAGGACCGCACAAATAGGCCAGAAAATTTAAGAGAATGCCTGCC  
AATAGAAAATTAAGAAATAAAGGATCCGAAAGAATAGCAAACTCAGGTTGCAGAGGGGTTACTTGGCACAACGACAG  
AAAATGGAAATTTAGGCTAGGATTTCAATGGCAAGATTAACCACTTCGGATGCTTTGATGATCTGGAGTTAGCCGATA  
GTTGCTGAAGAAGCCGAGATAAGTATTACGGTATTTTTTCCGGCAACGAAAGGAGCACTTATGCGAATCTATCGAAGGA  
AATGTAA

>Cluster\_36273

ATGCCATTAACCTCAGATATTAATTCATCTTCCGTTCCATCTTGAATGGAGGTTCTTCTGCTCAAGTTGCAGCCACTGG  
CGTGGGAGATTTACAATGGGTGGTGAACCTGTGAGAATGAATATAGTCCAACAGATGGGCGCTTTCGCGCAGCGATG  
GCACTGGGGGATTTTACTGAAATTTTCTTTTAGGGTTCAATAATGGGCCCTCAGGCTCTTGGCGAGAGAATGTTAAGT  
ATGATACACAATCGCAAGAGAGTCTTCCAGATAAATAATCTCAATGTAAGTTTCTGTTAATCCAGATGACCTCAGTG  
CCGCGCAGAGTCTGCTCAATGTCCCATTTACATTTGGAGATACCAGAGGAAGGGTGTATTAAGAAATTCAGGGGATTCAG  
TTGATGTAGTTTATTTGATGTTACTGCATTTTCTCGGTTAGTTAGTGAATAATCACCTCACCACTGACACGAGAGAAA  
CTAACGGCATCAATGTTGTAAGTGTGATAAATGTTTTTATGACCATGGTAAGGGTAGCTTTCGTTATAAAGATAGTTA  
A

>Cluster\_39819

ATGGGGGCGAAGGCTGGTCAAAGAAAGGAAAAAAGTATCCGGGGCATTTTTACACCTATAAGAAATCGGTAAAAGG  
GCGAAAAAAGAACGTTCCGAAAGGTCAGCGCTGTTAAACAAAACAGACAAAGAACAGAGCAATCAGCAAAAGAAAGCCT  
GGTTGATCTTTCAGCAGAAACAAATGACTTTCAGAGCGCGAAGAAATCATCAAGTTATACAGTCCGGCGAATGACAGACA  
AACTTTCTGATGAAAAGAACGGACGCTTCCGGTTTGGTCTTCCGGCCAGCAAAAGTCTTCAACAGGGAGAATTTCTGGT  
TCTGAGCCTGCTGCAACGTTGAGCACTATCGTAAATGTTTACTCGGTTATCAGCTGAAAAATAAGGGTTACACCTGA  
AATATCAGGTTAACAGCATTAATCCAGGCGGGTTATCTATATCTGACGTTAGCGAAGAATGTTCTTCCGACACTCGCCA  
TTTTTTTTAAGCAACAGTACTGAGCAGATTTCTAAACCATCTGGCTAGAACCCTACCGAAATATAGTCTGGTTTATTA  
G

>Cluster\_20754

ATGGATTTCAACAGTGGTGGGCGAAAAGTTATCGAGAGATGGTTGAAGCATAATGGTTTACCACACGGCAGGCGCTAGC  
CGATCACTTGGGTGATCGAAAAGCACCCCTTGCCACTAGATACATGAGAGATAATTTCCATCAGATTGGGTAATTCAT  
GCGCTTTACAACAGGAGCATCACTGACCTGGCTAGTTAACGGTAATGGTCTGTTTTGATATGAAAAGGCAGGACATT  
CTAAGATTGCATAAGCAAAAATAGTTGATGGAATCTATATGATCCGGAACTGTTTTTTTTGATAAAAACAATACTACC  
TAAAAAATATTGTCAGCCCAATGTTTATCGAAGAAAATAACAACATATTCATTTGCTGATTCATTTTTTGAAGAATATACC  
ATGGCAAGTGGCTTCTGAGTATTGATGAAAAATTTAGTATAAGAAATGATTCGCGTATACCTAATAACTCAGTTAGGGTG  
ACTAAGGATGATATTTCTTTGACTGCCCTATAAAGATCTGAATTTCAAAGCGAACATAAAAAAATCATTTCATCTAA



CGTACCCGGTATCGGTGCTTCATTTTCGCATTAGGGTGTAA

>Cluster\_1580

ATGGCAATAAAAGGTCTGGCGCAGGCCATGAAAAATCTGGATGCAATTGACCGCCGTCGCCGTTCCCGGGCTGCCGCCAC  
GACACTTAAACGTTGGCGGAGTCCATCATCGCGAAAAACGGCCCTTTCGGTTGCCAGGAGCTGGCGGTTCCGGCCCGCT  
TCATCCGTGAGCGTATCCGCTGCAACGGGCTAGCGCAGACGAGATTTATGCGAAGGTATCATCAACACCGTAACTG  
CCCCCATAAAAATGGGGACGGCCAGCGTGGCGGTTTCCCGCAGAAAAGCGACGAAAAGAGGCGAGCGTTTCGGTCAAGAA  
AGGGGGCGGCAGTGTGCTGATTGTTGGGGAAAAGACGGATCCCAGCAGCCTTTATCACCGGCTGGCTAACGGACGCTGGC  
ATGTGATGACGCGTATGCCGTGGGACCCATCGTCCACCGGTGCTGACAGCAAAGGGAGGCCGAAAACGCTACCGTCTGCCG  
ATTTGAAGTGGTAAAATCCGACTGCGCGACCGTGGCAGAAAATTTTGAACGTTGAACGGGACCGGATGTACCGGGAAAA  
ATTACCGGCGCAGATGATGAAAGCCATGACGCATCAGTTACGCTGGTGTGAAAAGAAAAATGA

>Cluster\_25974

ATGGAAACGGTTGGTACGCGTATAAAGCTCTGAGAAGAGTTACCGGAACGTCAGAAAAGAAATTTGGTAAATTTTGTGG  
AGTAAGCGCAGTTGCTGTGGGTTACTGGGAGAAAAGACATCAATACCCCTGGTGGGGAGGCAC'TTTCGAAATTAGCGAAGT  
TCTTCAATACGTCAATAGATTACATTCTTTATGGTGTGAGTTTGAAGCAAACCTCGTCAAAAACATGCGCAGAGTTCTT  
GTAATATCGTGGGTTTACGCTGGCAGTTTACTGAGTGCAGGGCAGCAGAAAGTGT'TAGTGAAGTGGACAAGTGGGTAGA  
TACATCATTAAGATTGGTGAATACTCATTTGCATTAGAGTTAAAGTGAAGTCCATGACTAACCTAATGGCCTCCCAA  
CAATACCAAGAGCGCAAGTGAATGTTAGATCCAGATCCAGAACTCGTATGGAATAATAGTCACTCCGCTCGATTGAT  
GGAACAAACGAGCTACAGTAAAAAATAGTCAATCGATGGCCCTCAAAGT'TTTAGTGCATTAATCCTCGGTATCC  
CAACATCCCTATCAATGGTAATTGCCTTATCATTTGGTGTAGTCAAGGAGTTCAATACGAACCTAA

>Cluster\_21772

ATGGCATTGCAAGTGAAGTAAACATCACGTAATAAATTTATAACCTGCTGGCCGGAACATAGAGTTTATTTGGTGA  
AGGTGACGCATATATCCACCTCATACAGGGCTGCCAGTAATTTACAGATATCGCCCCACCGGAAATTCCTGCTGGCT  
TTGTGGCAGTTTTTAAACAGTGAATAATGATCGTGAATATTTGTTGAAGACCATCGTGGTAAAACGGTCTATGACGTGGCC  
TCGGGGGACGCGTTGTTTATTTCTGAACCCGGACCGCTACCAGAGAATGTACCTGGTTGTCGCCAGCGGGAGTATCA  
GAAGTGGGACGGCGTATCCTGGGTGAAGGATGAGGAAGCAGAAAAACTGTTTCCGATACGGGAAGCGGAAGAGAAAAAG  
CAAGGTTGATCCAGGAGGCAACAGATAACATCGCAATTTGTCAGGATGCGGTTAATCTTGAAATAGCAACAAACGAGGAA  
AATTCACAACCTGGATTCTGGGAAAAATACAGAGTATTAGTGAAGTGAAGTGAACACAGTACAGCTCCGGATATCGTATG  
GCCAGAGCTGATGAATCAGGGTTATGTGCGGGAGGACGACGAGATAACTTCAGACTGA

>Cluster\_50271

ATGAAAGTCAAGATGTTAGGTTTCGCGGTGCATATAAGCTTTTGAAGAATCGCATTAGATCCAGACTGCCTTGTGGT  
CGATGAATTTCCATATCCCTTGGCGCCAGTAGAGCAGACATTGCTGTAATAAATGGTGTATACACGGGTACGAGCTCA  
AAAGTGAATATGACTCTTTGGAGCGTTTGCCTCTTCAAATCAAGCATTATTTCTGTGAATGGACAAGTTACTCTTGTG  
GTAGCTGAGAAACACCTTGGAGGAGCATTAAGTTAATCCAGGTTGGTGGGGCGTTAAAACGGTTTCTGTTGGGCCAAA  
AGGCGCCATTTCTTATAAAGCACATGCGTGGAGAAAAGCTTAATCGAAACCATGACACATTTGATGCTCGCTCAATTTGCTT  
GAAAAGATGAATGATCGACGTAAGTGAACGATGGGCTATTTCAAAGGAATCAAAGCAAGCCCGAATTTGAGTTATGG  
AATATTTATCGCGGAAATTTCCAAATGCGAATTTCCAGCCTGAAAGTCAAGATCAAGACAGCTTAAAAGAAACCGGTAGGCTGGAA  
AGTTAAGGCTTGGCAGGCTGAGTCTGCGCAACCAATAAAGCTGTCTCACGACTAACGTAA

>Cluster\_28511

ATGCAATAGTCAATGTTTACAGGCAGTCAATATTTATTCATGGAATGAAAATCAGTTTACAGCATCGTATTCAGGAGT  
GAGTATTCAGGGGCGAGTCAAGGACAGAGTTTATGGCAAAAGCTGGAAGATTACCCCTGAAGCCTTAGTGATGCTCGATG  
CGCATCAGGATGGTGGTGTGCTGACAGTTGCTGCAAAAACCGTGGTGCATTTCCGAGGTTAAGGTGTTAATTACG  
CGGACGGATTGCAACAAACGGTGGTTACAGGAAGTTATTCATTTAATGTGCTGGCCATTTGTGCTCGTGAATTCACCCGT  
CGAGACATTTGCGTTGGCGGTCAATAGTGGCGGATGGGATGATGTTTCTGCTGGAGACTGGCAACGACGCGGAAAA  
AGGCATTAAGATCTCAAAATCGTTAAGCGCCGCCAGCGGAGATTTAACCATGTTAGCGGCGGGCAATCAAATAAA  
GAGATCGGAGGGCGCTGAATATCAGTACCGGAACGGTAAAAGCGCATCTGGAATCAGTATCGCCGCTGGAGTCAA  
AAATCGCACCCAGGCGGCAATGATGTTAAATATCTCCTCTGA

>Cluster\_35746

TTGAAAAGTAACTTTATAGAAAAGGATAAATACTGAAAAGTCAATTTGGTGTTCGCCGCAAGAAATATGGCTGCTGATGG  
TATGCTTGGATCTGTTGCTGGTTCACATATCGAGCAATGTTCAAGGCTGGACGAAGCGAAAAAGGAAAGGTGCAAGG  
GGGGAAAGCTGTTGAATACGATGTGATGTCGATGCCACCAAGAACGAGAGCAAGTTATTGCGCATTGGGGTTATCC  
ACACCGGATACTGGTGTCTCAAGCCTAAGCAGGATGAGAAACAGGATTTCTCGGAACTGATAAACAAATTAACCACAACTTAATCAA  
TATGATTGAAGAGCTGGAACCAGATGAAGCAGCAAGGCACTGAAACTTTAAGTAAAGGGGGTGTGTTGGCGTTAATGC  
CTCTTGTATTTAATGAACAGAACTTTACAGCTTTATAGGATTTTACAGCAAAAGTATTCAGACGTTGATGATGCTAGAT  
GCATTAACCTGAAGAAAACGCAAGAGATTTTGTCAAAGTATGGGATTCATGAACAGGAAAGTGTGTAGTACCTTACA  
GGAACCCAGGAGGTAAAAAAGCCGTATAA

>Cluster\_986

GTGCTGATTTGGCTATGTAAGGGTATCAACAAATGACCAGAATACAGACCTGCAACGAAACGCTCTTGTGTTGTCAGGATG  
TGAACAAATATTTGAAGATAAATTAAGCGGAACAGGACAGACAGACTGGATTAAAACGCGCTTTAAAGCGCTTCAA  
AAGGTGACACACTTGTGTTGCTGGAAACTGGATCGCCTCGGGCAGGATGAAACATTTGATTTCTCTCGTAGGGGAATTA  
CGAGAGCGAGGATTAATTTTCGAGCTTACTGACAGTATTGATACGTCATCTCAAATGGGGCGTTTTTTCTTCCACGT  
TATGGGTGCCCTGGCTGAGATGGAACGAGAATTAATCATCGAGCGAAGCATGGCTGGACTTGTGCGCCAGAAAATAAG  
GCCGATTTGGTGGGCGACCACTAAACTAACCAAGCGGAATGGGAGCAGCCGGGCGTTTATTAGCACAAGGAATCCCC  
CGCAAGCAGGTTGCATTGATCTACGATGTGGCCCTGTCAACTCTGTATAAAAAACACCCCGGAAACGACATATAGA  
AAACGACGATCGAATCAATCAAATCGATCGGTA

>Cluster\_30753

ATGAAAACGTCACCGTGAATAAAGACCGTACCATCGTCAAAAAAGGCCACTTCAGATATCTCATATCTGGGGATCCG  
GATTAGACTTGGATTGGAAGGTAACACGCGATCTAGCTGTGTTCAACATGGCTTTGGACACTAAGCTACGGGGCTGTG  
ATTTGGTCAAACCTCAAAGTATCAGATGCTGCATATGGCAGTTCGTCTCAAGCAGAGCAACGGTGTGCAACGAAAAAC  
GGCAGCCCTGTCCAATTTGAGATAACCAAGGGACAAGGGAAGCGGTTACTGCATTGATAAAGCTCGGCAACTGGCATAG  
TAAAGCTTCTTCTGTTCCGCTCTCGGTCGGAACTAACCCATATATCAACCCGCAATACAACCGAATTTTTTTCATGGGT  
GGGTAGAAAAGCTTGGTCTCGAAGATTCGCTGTACAGCACACATTCATGAGAAGAACAAAACCTTACTTAATCTACAAG  
AAAACCAAGAGTCTCCGGGTGATCCAACCTTCTGTTGGGCCATAAGAACTGGAAGACAGCTCGTTATTTGGGCATTTGA  
AGTCGATATAGAAGGCTCTTTTTAA

>Cluster\_37473

ATGTATCGGATAGTCTGGGGAAAGTTTCGACCTTAAGCGCAGCTCCACTGCCACCGGTTTACGCGAGCAAGCACCGCA  
AGGTCCACGACGCGAACCTGGCTGGCGGGGCGTGCATTTGCTTTCGCACACGCTTTCCCGCTACCGGAGATCATCTATG  
CGCAACAGGCAAACTGCATTTGGCCGGAATGGCCGCTATGGTTCAACTTAAGCCTATAGCGGTGACGATATCGCCCTG  
CTGTTGAGTGAAGGCGAAGTCCGCTGCGATATCGAAGTGAATTCGCCCGCGCCAACTGGCGCTGGCTGGCGAACGC  
CGTATTCAGCCTCGGGAAACGCTGAGATGGACCGCTGCATCCTGATCAGCAACTGGAATGTTCTGGCGCATCTGGA

CGCGCAAAGAAGCCATCGTTAAACAGCGTGGCGGACGCGCTGGCAAATCGTCAGCGTAGACAGCACCTATCACTCCTCG  
CTGTCAGTCAGCCATTGTCAGCTTGAATAATTAAGCCTTGCATCTGCACCCCTACTCCCTTTACGCTCACCGCCGACAG  
TGTGCAATGGATCGATTCACTTAACTGA  
>Cluster\_20184  
ATGCGCCCACTCAACGTAATCTGATGAAAAAATCAATTTCTGCTTCTGCTGTTGCTATTCAGCACCACCTTCCCTGTGGT  
TGCAGGACAGGATGTTGACATTGTTGCAAAATATAAAAAATAACACCTACCAAAGTGGCATCAGCAACAACGAAATATTTG  
ATTTAGGTGTCGTTGGCGTGGGCGATTTTACCGGAAACATTTACAGCCGAAATATACCCCGGTGGAAAAGATTTCACT  
ATTACAGTACAAGACTGCACACTTCAGGGCACAGGGAATGTGTTAAATCAGTTACATATTAATTTTCGCGTACTTAGTGG  
CGTAATGGCGACAGGTTCCAGTCAAAATATTCGCTAATGAAGACAACGCGGGCTAAAAATGTTGGGGTAGTTATATTTT  
CTATTCAGGACCCGGCAAATACCTTCAACGTTCTTAGTGCCACTGGTAGCGCACGTTCCGTTTATCCGGTCATGTCATCA  
GCACTAAATAATTCATCCGAAATTTAGTACCAGAAATGCAAAAAATCGATCCAGCACGTAATGTCACCTCTGCCCCACT  
GATAAGCCATGTGTTAGTGGATATCTACTACGAATA  
>Cluster\_3663  
ATGGCTGTAATTCGAATGCTTACTCCCTGCTACTGTAGCTCGTCTGTTTTTCGATACGGATGGAGTAACTATTCAGGG  
CGTGCTTTACCAGATCATCTGGGATCCAAAGACTCCGTTTGTCTGCGGTAAATCGAAGCTGCACCTTCTGTTATTGATGGTG  
ATGTTCCGCAATAAGGTTGTTGCCACTTCGGAGCTTCAGCGCTGTCGCCGGCTTGAAGGCGTGTGTTGTCAGAAATCTG  
GAAGAACAGGATGTTGCTCAGATTGAAGGATTGTTGCTGATGGCGCTGACGGTATGTTGTTGCTTGCACAGTTGTTA  
TGAAACGATAGTCACAAAAGCGGGCTTGTACTATTAAGTGATAACGAGCAATATGAAGGAGTAAAGCTCTCTGGCAGC  
ATATTCGCGCTCGTTCAACGAATCTGAAGGTGTTATTTTAGATACTGATCCGCACGGTATTACCCGTTTGTAGGGCAA  
CGGATCAGTTATGACGGGAAAGCATCCCGAATCAGAAATCTGGAGTGAACATCTGAGCGAAACAGACAGCTGTCTG  
TCTTGTGGCTGAATCTGTTAATGGTAAAGCCGCATA  
>Cluster\_60346  
ATGAGCCTGATCCGCACTGAAACAGAGACACAAAACGCGCAGCTGACCCACTGCACGACCTGCGTAGCAAGCCGTTTTTC  
TGAGTGGGGCGAAGATGAAATCAGGCGTTTTAACTGATAGACGCGCTTCTTGAGTTTGTCTACACAGACACATCCAGCC  
CGTTCCGTTATCGGCATGACCTTTCGATTACACGGAGTGTGGGAAATTTGGTGTTCGTGACGACTGCCTGGTAAATGACACGC  
GTTAAGCCGGTGCATCCAGAATAATGCGAAGCAGTGAACATGAAAGGCGTCATGAATGACAAAACCCGCTCCACGCGCA  
CAAGTGGGTAGGGTACAGCAAGGTGCTTGCCTGGGTGAGCTTATCGCACAAGACACCTTACGGGTGCGAAACGGTTTTC  
AATACTTCAAACGATGACGACATGGAACGCGCAAATCAACGCAAACCTGCCGTTGGCGGCCCTCCCAACGTTGACACA  
GAGCGAAGTGGCAAACGTTCCAACGCGATGACTTTCTGAGGATAGCCATGCCAACGATCCGAAGTTGGTGGTGATGA  
TTACGTCACCCAGGCACCGGAGCAAATCAACTGA  
>Cluster\_60535  
TTGCTGCTTGTGCGTTTTCTTCTTCTGGAGCCGAGGGAATCCGTCAGTGCATAGCGGCCCTGGCGCAGCAGTGTCT  
GTTTGTGGTGGCGAAAAGAGGTCAATTCGATCAACACCGGAAAAGTCTTGCAGGTCGCGCCATGGCAGATCGTTATTTTCT  
CACTGGGCATGTACATCGTGGTCTATGGCCTGCACAATGCAGGTTTACGGAGTACCTGTCTGGCGTGTGAATCTGCTG  
GCAGACAAGGGTTATGGGCAGCGACTTCCGACCCGGCTTCTGACGGCATTCTCTCATCAGTGTGAACAATATGCC  
GACCGTGTGATTGGTGGCCTGTCGATTGACGGGAGTCAACGCGACTGGCGCTCGTCAAAGAGGCATGATTGTTGCCAATG  
TGATTGGCTGTGATTTAGGCCGAAAATCACCCGATTGGCAGTCTGGCAACTCTGCTGTGGTGCATGTGCTTGGCCAG  
AAAAATATGACAATCACTTGGGGATATTTACTTCCGTACCGCATTTGTCATGACTGTGCGGTGCTGTTTGTCACTCTGCG  
CGCGTGGCGTGGCGCTCTCTGTCACCTTTGTAA  
>Cluster\_44470  
ATGGAAGACGAAACGTTGGGATTTTTTAAGAAAACATCTTCATCTCATGCTCGCTGAATGTGCTGCGCTGGTGCAGGT  
GGCGGCGCTCGCCATTATATGATCCGTTGGCCTCGACGCTGCTGATGATTTTCAATACGCTGGGCGTGCAGGTTATGGCG  
AGTTCATTACATCGCAGCGTACAAAACCTGGAGTTTAAACGCTGGTCTTTTTAAGCAGTCTGGTGTGTTTTTCAATGAGATC  
TGGTGTGCGTTTTTCACTGGTGAAGGGCGTCTGCTGGGCGCGTGGCTATATCTGCTGACACAAAATCACCGCGCAAGTTA  
CTTGTGGGCGGCTTCGCTGGGGTACGGTTATCCGGAGCTGTTACGATTTCCCGGTGAATCAAACGTTGAATCTTCCATA  
GCCTGATGCTGCAAGAGTGCAGGATATGCTCATCCTGATGCTGCTGTTTCCCTCGACCAGTCCGGGTTCTTCCAG  
TTGCAATAA  
>Cluster\_22387  
ATGAAGACCATTCACCTGCAGTATTGTTGCGCCTTTTCGCCACCCTTCCCGCTGGGCGGCAGAAAGCGTCCAGCCACT  
GGAAAAATCGCGCCTTATCCACAAGCTGAAAAGGCAATGAAGCGTCAAGTCAAGTTCAGTTAACCCCGCAAGAAGATGAAT  
CTACCCCTGAAAGTAGAACCTGTTAATCCGTCAGACGCTGGAAGTTCGATTGCAATTTGCATCGCTCGCGCGGAAGCTGGAA  
AGCAAAACGCTGGAAGGCTGGGGCTATGATTATATGCTTTTGATAAAGTCAAGTTCACCCGTTTTCGACGATGATGGCCTG  
CCCGGATGCAAAAAGAGAAGAAATTTGTCACCGCTATCTGGGCGATGCCGAATGCTGCGTTATAACAGCAAGCTGC  
CGATCGTGGTGTATACCCAGACAATGTGGATGTAAGTACCGCATCTGGAAGCGGGAAGAGAAAATTTGACAACGCGGTA  
GTCCGCTAA  
>Cluster\_3228  
ATGCGAATTTGGACACGGTTTTGACGTACATGCCTTTGGCGGTGAAGGCCAATATCATTTGGTGGCGTACGCATTTCTTA  
CGAAAAGGATTTGCTGGCGATTCTGATGGCGACGTTGGCGCTCCATGCGTTGACCGATGCATTGCTTGGCGCGCGGCGC  
TGGGGGATATCGGCAAGCTGTTCCCGGATACCGATCCCGCATTTAAAGGTGCCAGCGCGAGCTGCTACGCGAAGCC  
TGGCGTCTGATTCAGGCGAAGGGTTATACCCTGGGCAAGCTCGATGCTACTATCATCGCTCAGGCACCGAAGATGTTGCC  
GCACATTTCCAAAATGCGCGTGTATTATGCGGAAGATCTCGGCTGCCATATGGATGATGTTAACGTGAAAAGCCACTACTA  
CGGAAAACCTTGGATTTACCGGACGTTGGGAAGGATTGCCCTGTAAGCGGTGGCGCTACTCATTAAGGCAACAAAATGA  
>Cluster\_23565  
ATGGGAATAACGGCTCCTACTCCCTAACGCTCTGAACATAATCTGGCTGACTTTTGTGTTCCGATCAGGGATGAATGA  
ATGGCTAAAAAAGAAAGCGTTAAAAAATCACAGCTCCAGTCTGCTCGTGTTTACGTTATCTGATTTGCCAATACCCGCC  
AGGTAATCGGCTATTACTGCTTCTACAGGCAAGTATTCAACGTAATTTGGCCCTGGAGCCATGCGAGCTAATGCTCAAC  
GAATCGTTGCTGTTGCTGATTTAGGCAAGTGGCAATGATCAAGCTGGGCAAGGTTGGGCGTGGCATTGTT  
GAAAGATGCAAGCTATCGCACAATGTCCATAGCTCAACAGGTAGGGGTTCCGGCGCTCATTGTTTCATGCTTACAGCATT  
CAGTACGCAATTTCTATCTGAAGTATGCTTTGTACTTCAACATCCAGTCACTTACCTTACTGTATCCATTACTCTG  
GAGTAA  
>Cluster\_127  
ATGATAAGACAAGAAAATTCGCTACTCTTTTTAAAATACAAGAAATGCAAGCTTTATAAAAATAAAGGAAGATGTTATAAT  
TACCACCAAGACTACTTATCAAGGAGTTTAACTGAAGTCCGATTTATTTATGATTTGGGAGATGGATATTACTTTT  
CTGGAATAGCTGGGCGCTTGGATGCAATCTATTAAGTATGATTTAAAAATCCATACCCGCTTTTACTCAAC  
CAATTCATCTTAGCTAATGATTTCTGTTTATAGATAAAGCCATCTTTAAAGTTATTTTAGTATTTCCACATATTACTCT  
CTGGCAGATAGAAAAAACGTAAGTGCCTGATTTGGCGGACTGTTGGCGAAGGTTATAGAGTAGTAAAGCCAAAACCT  
ATGATCGTTTGAACGACCCCGAACCCTGATGTCACCTGCAAGAGTAACTTGAAGAAATAAGAAAAGA  
GGTATAGAGGTGATA  
>Cluster\_11024

ATGAACAGGGAAATTCAGCAGCGCTACAGTGGGTAACCTCTATGAAACGTCGGGTGATGCGGGATTGTATGCGCGTCG  
CTGTGGCATTTCGCGCCACATTCGCGTAAATGGTGGCGCAGATATCTGGCTCAGGGCATCGCTGGTCTGAAAGCCAC  
AGCCGTCGCCCAAGCGTTCACCATCAACGAAAACCGGCACTTGGGAAGTCGCTCTGATCTGGAGTTACGTTCTCAGCG  
AAATCTGGGGCAAGACGTATTCAAAGCGAGTTAAAACGCTTTCATTCATCTCACTGGCAATAGCAACAATCACAAG  
TCCTTTTCCAGAACTCAGTTGAACCCCGGGTTTCCCTGGAGAGTGTTTTATCTGTGAACCTCAGGCTCGCCAGATCATC  
GTTTTCCGATGGAAGCATAATAAGCTTTTTCTGCTTCTGCGGAGAGTATGGCCAGCCTTCCAGCAATCGTCGATTGT  
TATACCAGTCCACCCACGTGA

>Cluster\_8462

ATGACAAATAATGATACAACTCTACAGCTTAGCAGTGTCTTAACAGGGAATGTACGGAAGCCGCGTCCACTGTCAGAG  
CAAAAAACGCGCCCTGGAATCATCAGCGAGCTGGCGGCGAAACAACCTAGCCTGCGCCTCAGGTGGTTTTTGAAGCTA  
TCCTGACGCGGGAAAAATGGGCAGTACCGGTATCGGCAATGGTATTGCCATTCCGCATGGCAAACTGGAAGAAGATACT  
CTGCGCGCGTGGCGTTTTCTGTTTCAGCTCGAAACGCTATAGCTTTCGATGCCATCGACAACCAACCGGTGGACTTACT  
TTTTGGCCCTGCTGGTGGCGCAGACCAAACTAAAACGCACTGCATACCTGTCTGCTGGTGGCGAAACCTCTGCGCGACA  
AAACCATCTGCCCGCTTACGCGCAGCCAGAGCGATGAAGAGCTGTATCAATCATACGGATACCGAAGTACTCCG  
GATGAAGCGTAG

>Cluster\_48998

ATGCGTATCTTTGTTTTTTTTATATCTGCACCTTTATCTTTAACTTGGCTGCGGAAGAGTGTAAAGTTCAGCTTTAATGA  
GTCAGAATTAATCTCTTCTATAGGTATTGCACCAGTTAAGCAAGAGATAATAAAGGATGAAGGAATAACTAAGCGCAAT  
ATGAATTCAGAAGAAATATCTTCTGAAGAAATGCTTATGATGACGCTGATGAAAAATATGAGCCGAGTTTTATATA  
TCTGTTTTATAATCCATGCCCCA AAAAGGTTATTGTTGGTTTTTCAAAGCAATAAAAACAATGGGTTAAGTAA  
TGAGTCTCTGCTGGTAGAGCATTC AAGTATTTAACTGGTGTAAAGTAAAGTATTTTTGAAAAAATAAAATGAAAAAGTTTT  
TAAAGGTACAGTCAATTTGAATCTTTTGTGAAGGACAGATTC AATTTATAAAAAGTGGTGTATTTATTCCATTGAT  
GTTCAACTCAGATAG

>Cluster\_37408

ATGAAAAACGCCCCGTTTACCCGGGAAGGGTATGAAAACTCAAACAAGAGCTTAATTTATCTCTGCGGTGAAGAACGCC  
GGAGGTCACAAAAAGGTGACCTGGGCGCAAGTCTGGGCGACCGCAGCGAAAATGCTGACTATCAGTATAATAAAAAGC  
GTCTGCGTGAATTCAGCCGTCGCGTGCCTATCTCACTAAATGCTGGAAAATCTCAAAATCGTCGATTACTCCCTCAG  
CAGGAAGGCAAAAGTCTTTTTGGCGCTGGGTGGAGATTGAAAACGACGATGGCGTGACTCACCGTTTTCCGATTTGTCGG  
CTACGATGAAATTTTTGGCCGTAAGATTACATCTCTATCGATTTCCCGATGGCCCGCGCATTTGCTGAAAAAAGAAGTCG  
GCGATCTGGCGGTGGTGAATACCCTGCGGGGAAGCGAGCTGTTATGTTAATGCTATCGAGTACGTGA AACCGTAA

>Cluster\_10315

ATGAACATTAATGAAAGCTAACGTGCTACCCCGGACGCTCGCGTCGCCATCACCATCGCGCTTCAACAACCTTTATCAA  
TGACAGCCTGCTGGAAGGTGCAATTGACGCACTGAAACGATTCGGTTCAGGTAAGATGAAAACATTACCGTTGTTGGG  
TGCCCTGGTGCCTATGAGCTGCCGCTGGCGCGGGTGCCTGCTAAAACCGGTAATACGACGCGGTGATTTGCCCTGGGT  
ACGGTTATTCGTTGGCTGCGCACTGCCACTTTGAAATATGTCGCTGGTGGTGAAGCAACGGCCTGGCGCATGTTGCCCAGGA  
CAGCGAAATTCGCTGGTTTTTGGGGTCTGACCACTGAAAGCATTAAGCAAGCGATTAAGCAAGCGATTAAGCAAGCGTGGC  
GCAACAAAGGTGCAAGCTGCACTGACCGGCTTGAATGATTAATGATTGAAAGCCATCAAGGCCATGA

>Cluster\_12486

ATGCTAAGTAACGATATTCGCGCAGCTGCGCTACATTTTTGAAAGCCATAATAATGACCTGGTGGCTATTCTGGCGCT  
GGGTAATGTCGAAGCCACCGCGGAACAGATCGCGCTCTGGCTACGTAAGAAGACGAAGAGGGTTTTTACGCTTTGTCGG  
ACATTTGTTTTGTCGTCATTCCTCAATGGCTGATTTATGAAAACGCGCAAGGATGAGTCTGCTCCGCGACTGGAGCCG  
GAACGTCGCATTAATAACAAATCGTGTGAAAAAATACGATTCGCGTTTTCTGCTGAAAACCGATGACATTTCTGGCTAT  
CCTCACGAACAGCAGCTCCGCGTTTCGATGCGGAAATTCACAGCGATGATGCGCGCACCGGATGATAAAAACCTCCGCG  
AATGCGCGCATCAATTTTTACGTTATTTCTGCGTGGACTGGCAGCGGCCAGCATGTGAAGAAAAGCTAA

>Cluster\_24403

ATGATGAATCGAGTAATTCGCTCCCTGATGAGCAGGCAACATTAGACCTGGGCGAGCGGGTAGCGAAAGCCTGCGATGG  
CGCAACCGTAATCTATCTGTATGGCGATTTAGGTGTCAGGTA AAAACCACTTTAGC CGGGCTTTTTACAGGCTCTGGGT  
ATCAGGGTAATGTCAAAAGCCCCACTTATACGCTGGTCAACCTATTCGCTCGACAAATTAATGGTTTTATCACTTTGAT  
TTGTACCGCTTGCCTGATCCCGAGGAGCTGGAGTTTATGGGATCCCGCATTAATTTGCAACGATGCGCATCTGCTGCT  
GGAGTGGCCACAACAAGGTACAGGTGTTCTTCTGACCCGGATGTCGAAATACACATTTGATTAACAGGCAAGGCCGTG  
AGCGCGCTGAGTGGCGTTTTCTCTGCGGGTGAATTTGTTGCTGGCGCTTTAGCCGGTTAA

>Cluster\_7953

ATGTACAAGCCGAAGAGTCTGCGAAAAGCCTTAACTGACGCTGTGCCGGTGTGGCACGAAACCCCGATATGATGCGTGT  
CTTTATCGACAACGGGAATCTTGCTCGACGCTGGCGACCTGCTGCTTTGAGAACCCTGACCGTAACTGATGCTGGTGG  
TGACCGATTTACGGATGATATCGAGCTTTACTCGTCCGATTCAGGATGGTTGCGCATCCATCAGCTGACATTAATG  
ACGACCGATGAAGGGCGTAAAAGGGATTACCTATTTTGGCGATATCAACGACAACGACAGCACCGATATCAGTATCAG  
CCTGATGCTGACCGAGCGCACTATCGTTAAAGAGCAGGGGGATAAGCTCCACGTCGAACAGGCTGAAGAGCCGAGCCG  
CGGAGCCGTTACCCGGCAGTTGAACTGTATGTTAACGGTGAAGCTCGTGAGTCTGCTTGCATGAATGA

>Cluster\_65662

ATGCAAGCTATTCGATGACCTTACGCGCGCTGAAAAATACCGGAAGAGCTGGATTTCTGAAATCTGTGCGCCGTCC  
TGAAATCATTTGCTGATTCGCGGAAGCGCGTGAGCATGGCGACCTGAAAGAAAACGCCGAATACCACGCGAGCTCGTGAAC  
AGCAGGGTTCTGCGAAGGCCGTATTAAGACATCGAAGCCAAAGCTGTGCAACGCGCAGGTGATTTGATGTCACCAAAATG  
CCCAACAATGGGCGCTTATTTTTGGTGTACCGTAACGGTGTGAATCTGGATTCTGACGAAGAACAGACTTATCGCAT  
CGTTGGCGATGACGAAGCTGACTTTAAACA AAAACCTGATTTCTGTAACCTCGCCTATTGCTCGTGGCTGATCGGCAAG  
AAGAAGATGATGTTGTGGTCACTAAAACGCCGGCGCGGAAGTAGAATTTGAAGTAATTAAGGTGAATACTGTAA

>Cluster\_4799

TTGCGCTGGTTACCTTTTTATTGCCATTTTCTTTATGCTATATTGAGATTTCAATCTTTATTACAGGTTGCCATGTATT  
GGGGGATTTGCTGACCCCTCGTGTGTTTATTTACGTCAGTTATCGGGATGTCAGTGTACGTAACAGGGCTTTAAGA  
ATTTCTGCTGATGACGCAAAAAATGGCGGGGGTGA AAAACCGCGGAGATGATTAAGTGTTCGCTGATCATTT  
GCCGTTTTGCTGCTTTTTTATTACCGGCTTTTTTACCGACTTCTCGGTTCTGCTTTTATTACCGCGTAAAAGCA  
TCTGACAGTGAAGTTGATGCCGATTTGCGCTTTTCTGATGCGAGGCGGGTTTTAGCGCGGGACCGGTGGCGGTA  
ATACTTTTTGATGGTGAAGTACCAGCGAAAGGATGATGAGCGCGACCGCTTGTATCAAAAAGACGATCGCCAGGATTA

>Cluster\_23446

ATGTTTCGACGTAATAATGATTTTGTGTTGAAACCTATATTCACACAGAAGCTGAGTTGCGTGTGGATCAAGACAAACTTGA  
ACAGGATCTTACCGACGCAAGATTGATCGAGAAGATACTACAATGCCCTGCTTTGGTGGAAAAGCTTGGCGATTATC  
AGGAAGGATGGCAGAACCAGATGCAACTGGCTCTGATCCACTCTCAATGCGTATTTATACCCCTGAAGAGGTGAAAGG  
CTGGATCCAGCTGCTGCTGGTTTTCTGCTTTTCTTGGCAAAATTCAGGTGCTTAACTTGAATGATACCCGTAAGTGT  
AGAGCGAGTGTCTGCGCTGGATACCGCAGAGTTGACCTGGAAGACTGAAATGGGTAATCTGATGGTGTGTTCAATA  
TTCCGGGCTGCGAAAATGCGTACCAGCAAAATGGAAGAAATTACTCTTTGAGTGAATGAAGGTATGCTGCATTA

>Cluster\_23764

ATGCTAAACATCGTACTTTACGAACCAGAAATTCGCCAAATACTGGCAACATATCCGCTCTTTGCGCTAATACCGGCTT  
TCGCTGCATATCATCGAACCAATGGGATTTGCTTGGGACGATAAGCGCTGCGCCGCGGGGCTGGACTATCACGAGT  
TTACCGCCGTACCGCTCATCATGACTATCGCGCGTTCCTGCGAACAGAAAATCCCCAGCGCCTGTTTTGCCCTCACCAG  
AAAGGTACCGCTGCTACAGCGCCGTAAGCTATCAGGATGGCGATTATCTGATGTTGCGCCCGGAAACACCGCGCTGCC  
AGCGAGCATTTCTTGATGCCCTGCCCGCTGAACAAAAAATTCGTATCCAAATGGTGCCGACAGTCGCAGCATGAACCTGT  
CCAATGCGGTGTCGGTCTGGTGTATGAAGCCTGGCGGAGTTGGGGTATCCTGGAGCGGTGTTGAGAGATTAG

>Cluster\_11068

ATGGCGGTGATTGGTTATTCAGGGTATCAACACAAGACCAGACTGTAGACAACCAGAACTACAGATAGAGAAGGTTCA  
CAAGGTCGATAAAATGGTTTATTGATGAGGCTGTCTCAGGAGCTACAAAGGCCACCAGCAGAGATGGTTTTAGAGACATGA  
TGAATATGTAAGGTGTGACGATACGTTAGTTGGTAGCTATGACCGTTTAGGGCGTAATACCGTTGATGTCTCTCT  
AACGTGGAGTACTACAGACTAGAGGTGTGAGGGTGTCTCTACGTGAAGGTTTGGACCTGTCTACACCAATCGGTAA  
AGCAATGCTTACTATGATGGCTGGTTTAGCTGACCTTGAAAAAGACCTTATCAGTGAACGTAGAAAGGCTGGTATGAAC  
GTGCTAAAGCTGAAGGGTACATATGGGGAGGCTGCAAAAGCTTCTTACAGAGCTGTACAGACGCTTATTTCAAGGT  
AAGACACGTTGCAAGATTAGGAATCTCTAAAGCAACTTATTACAGACTTGCTAAATAA

>Cluster\_40889

ATGAAGAAGATTTTACTCGTTGTAGGCGCAACTCTGGCACTGGCGGGATGTGGTGAGAAAGGTGATTTTGAAGAAGCGAT  
TAACGCGAAGATATCAAAATCTAAGGTGTGCTACTCCTACAGGACAATGGCCGCGTGTAAACAAAGTTTCCCTGTTC  
GTATCAATCGTGGATATCGCTCTGACGGATACAATGAAATGATGAAATTTTAAAGGTATGGCTAATCAGGGATGTTT  
GATGTTTTCGCAAGGATCCAGCTTTCAGCAACTTGACCTTTCGGAAGTAAACAGATAAGGGGCAAGAGGTTGAGTTTTG  
GGATCGCAAAATGGAGCTGTGTGGTTCATGCGCGTGGCTGAAATTAAGAAATGGACTGAAGCCGATGAAAGGTTGCA  
TGAAGATTGTTCTGTGTGTATACGTGAAACTTGTGTATATCCTACATGGGTAGATAAAAGTGCATTCGCTGGCGTC  
AGGGGAATGACTGAACCTGCTGAAGGCTTATTCTCTTGTAAAGACCAGTAATGGTTGGAAAGCAAACTAA

>Cluster\_18

ATGGATAAGGTGTTATTAATAGGTTTTAGGGCGGTAGGCAAACTACCCTAGGTAGACTCCTTAGTAGAGCTTTAAATTC  
GGATTTTATAGACACAGACCAAGAGGTTCAAAACATTTCCGGGAAAACGATAAAAAGAGATAGTCGAAACCGAAGGATGGG  
AGACTTTTAGGAGGATGAAAAAGAGGTTTTGGTGAGATTGGTTGATAGAAAAAAATAGTGATTGCTTTAGGTGGGGGA  
GAAATTTTACATCAACAAGAAATCAAAGCTTTAAATCAAAAGCATTGGTTGATGGCTTAAAGCCTCACCTGAAACCAT  
TATAGAAAGAAATGCTTAAAGATGAAAAACCTTAAAGAAAGACCTAAGCTTACCTCTGAAGATTTAACTTCAGAGGTTT  
TTCAGTTTAAATATGCGAGAGCTTTATATCTGTGAGTTTGCAGACTTAAAGTATAGATACCGAGCAAAAGTCTCCAAAA  
GAGATACTGGATTAATCCTTAAACAATGAAAAACCAAAATATGGTAGGGGAAATTAATATGA

>Cluster\_19619

ATGAAGACCAAAAGAAAGAGCTTTGATCAATTCCTTATGGCATGATATTGATTTTGAAGATGATGCTGCAAAACAGGAAGA  
ATACCTTGAATCTGCATTGCCACTTATTGGCCAGATGTTATGTTATTTCAATGCGCTAGAGAAAGAAATAGATAAAGTCA  
TTTATGAAGGATTCACGATCGGTCAGATCAGTTAGGAATAAATTTGTCATAACATGAATTTATGCAGCAAAAGTTCGAG  
TTATTTAGACGCTCACTCCGAATTTCCATTTGGGTGTTGGGAGCATGTTGATGATGTTTGAAGGCTTATAAAGGATCT  
CAAGGAATGTGGACGGTTACGAAACATTACTGTACATGCTGACTGGGATAGCACTGATGTCGAAGGATATACATATTTAG  
GCATCAAAATAACTAACAATGGAATATCTCAGGAATATATCCAGTTTGGACTGGGGTCTGTTGAAAGTATCCTTCAATTG  
ATTTTCAGTACGAGATATAAGTTGAGTGATTATTCAGACTTAAAGGGAGATATACTGGCTTCACATTAG

>Cluster\_42023

ATGTTACGCGATAAATTTTACTATTTTTCAGCAATGGCGTGAACGCGAGTTAAGCCGTGGCGAACACTGGCTGACACA  
ACACCTGGCGGGGCGTTCTCCGCGTGA AAAAGGCATGTTACTGGCAGCGGTAGTGTTCCTGTTTAGCGCCGGATATTACG  
TTCCTACTTGGCAGCCGTTGAGCGAACGGATTGAGCAACAGGAGACGATGTTGAGCAGCTCGTGGCGATGAAAGGCTT  
CTGAAGAGCGCCGCGCGGATATTTAGCGCGCGAAAACTCCGACAGCAACGCCAGCAGGATTCGCGGGTCAATCAG  
CGACAGCGTTCGCGCATCTGTGGTCAACACGGATTGCCGAGCGTGGGGAGAATATCAAGTCTGGATAGAACCTG  
TGGTGTAAATGACCTGCTGAACGTTAAACGCGCTGGATGAAAAATATGCGCTGCGAGTGACACAAATGATGTCAGC  
GCAGGTGAGAAGCCTGGGATGGTGAATGTCAGCGGCTGGAGTTTGGGCGGGTAAAGTATCAGGAGATTAA

>Cluster\_1547

ATGATATACCCGAAATTAACAGGCAAAAGCGGTGAGCATTTACGCTGAAAACGCTGGAAGTGTCTGGATCCAGGGGAA  
ACTGCGTATGTGGGGCGTTGGTCTGATATTTGGCGACGGTAAGACGGGAAATATGTTCAACCAATTACTGACCTTAAAA  
AGCTGACAAAAACGGCAATTAACGAGCGCTTACCGGATGAAAAAGCGGGTCTGGACAAACCTGAACTGAGGCTTTT  
TTGCGGGATATGATCAACGGCAATCAAAAAAGCTGGCTGGCACATTGTACCGATTTCAGAGGCGTTAATAATCGACAGG  
TATTTGGTGAAGTACTGGCAGGTTATCCCGGCTGCTCAATGTTCTGAGTCAGCGTTATGTGGGCGGGGGATGACTAAGC  
GAAAAATGGCTGAACGCTGAATGATGCACATCCGGAATGGAGTTTAAAGAACCTGTGAAAGACGCATTGAGCATTTGGCTA  
AAGGTGGCAGAAATTTTGTACAAACCAATGTTATGGCTTTTGGTATAGAGAAAAAGTTATTGCTTTTTTGA

>Cluster\_44893

ATGAAAATCACCCCTGAACAGGTTTGTGAGGCTCTGGATGCTGGGATGCGGACCAGGAATGACACAGGAGCAGGCGGAC  
GATATTAATCACGGAAGCATTTCTGGCTTGAAGAAGCCGCAACATCGATGTTCAACGCGTCACTTAAATGATGGCG  
AGGTTGATCAACGGGCGCTGTGCGTTAACCGGGTGAAGATATTGCAACGCTGGAAGGCTATCGACACCGGATAAAGCGG  
AAAAAATTCACGGCGCTGATTCGGCAATATGGAGGCTATCCGAATTAGTGATTTACGGCTGTATCGTGAGATCAGTGA  
TGGAAAAAGCATTACGTACATGATCGCCGGATTAAACAAAGAAATATGGCGATGTTGGTGGAGTCCGGGCTGCTTTTGGCG  
ATCCATCTGTTGGAACGTGAGACTGACGAGCTTATAGAAAAAGCTATTGCTTTCAAGCATGCGTATCGTCAAGCAATAT  
CAATATTACTTTGCAGATAAAACAATGCTGCCAGGGTTCGTATGAGTATCGATGCACTACGATGGGCTAA

>Cluster\_26916

ATGATGGTGCAGCACCCTGAAAAGACGGCCATTAAGCCGCTATCTTAAAGACTTTAAACACAGCCAGCCCATTCGCGGCA  
TTGCCGTAATTAATCTGACCGCATTAACCTCGTTCGCGCAGCGCAAAATAGTGAATAAAATCGAGATTTCCCGCTGGACA  
TGCTGCTTATGATAAAATGGCTGGCAAGTGAACAAAAATCATGGGCGGCAATTTGCGGATTTCTGCGGTGATTTACATTGC  
AAAACGCAGAGTATTTTTCTGATATATTCGGCTTAAAGCAATTTCTTTTGGACAAACTGAAATGAGCCAGGTACGCT  
GCGTGAATATGCTGTTCTGCTGCGCCGTTTGGGTAATCATCTACAGGACAAATATTTACCCTCGAACAGCTGCAGGACG  
GTTTCTTGTGATAAATCCGCCCCGTGGCTGCCACCACAGCACCAACAATACCAGCATTTGCGTTACGGAAGTATCAA  
CACTATCAGCGTCAACGCTGACCGGACTTGTGCAGAAATCCTCCAGCTGCTTCTGATATATATTA

>Cluster\_28844

ATGACAACGCTGACCATTAACCGGAAGCCGAAAGGCATTTACGGCAGCCGCGAGAAAAACGACGAGGCGGCACAAGAGCA  
GGATAAAACACATTCGGCGCATAAAGTGTATACCGGCAATCAGAACGCACAGCAGAAAGCCACAGGGGCGACCCGTTGGC  
AGCATATGACAAAAGGCGAGCGCAAAACCGCCGACGCTTAAACCGCTCACTGAGATGTGGCTGACTTATTACGCAAT  
AAAGCACCAGGCGCTTAAAGTGGGGATATTCGACGACTGATGCGAGATATCGCCGTCAGGAGGCTGGCATTCGGGCG  
GGGGTATTACGTGGCGAGCTGGCATCTATGCGAGCTCTCCGCGTATTACCGCGCCCTGATAGCTGTTGGCGGCGTT  
ACGACCTGAAAGGCCAGCCATGTGGGAAGTGACACCACAGGAACAGCAGGAGCAGAAACACGGCTGATGTTGCTGAAT  
GAGAGCACAAAGCCAGCGCCGGGCGAGCAAGGGGATACATGCCAGTGA

>Cluster\_17509

ATGAAAGAAATAAAATTAACGCCAGAAATGGTGTCTTCTGTTGTGATTACAATCCATCATCAGGCGACTTTCTACTGGAG  
ATGGAGCAGGGGAGAGAGAGACCACCTTGGACATGGAACCTCGTTTTGCTTTCAGAATGCTCATCAATAAATTCCTG  
ATGGGATTTAATGATTTGATTAATGGTAAAGCATAACCTGCTCACAGACTGGCATGGTTGATTTGTTATGGCACCATT  
CCCGATGGTTTATTTGATCACATCAACAGGGTAAGAACAGATAACCGGATATCAAAATCTTCGTCTTGTACTACTCCGA  
AAATATGCAGAACAGGAAATTCAGAAGATAAATAATCGGATACCGTGGCGTGTCTTGGGATGCTAAGTACGGGAAAT  
GGAGAGCAAGAAATTAATGCGTCTGGAAAGTGTATTACCTTGATACCATGACACTGCCGACTTGCCGCTGCCGCTTTT  
GAGGCCGCCAGAATTAATATCATACCGTTTAA

>Cluster\_5159

GTGATCGTGAATTAACGGCAGCAATGACGGCTATTTCGTGAAACAGCCAGATTGCAAACTAATGAACGAGGCAAAAAC  
TCAAGCTGAAGTAAATGCGGCTATTGGTGGAGCTGAACTCAAAGCTTGGCTTATTCAGCGCAATGCGTGTCTCTCGTTG  
AATCGGTGGGCTTTATCAAGAAATAAATGCTTCTCAAAGCTAAAATTCAGAAATTCGAAACTTTGAGGCTCAGACG  
GAAGGCTATATCTTAAACCACTTGAGTCGGGTACTTTTGTATACTCGAAGGAGGTAATCGTGAACGGTGGCAGCATAAC  
CATGCATCTTTGCCCAAATGTTTTGGACAAAAGATAGTATCGATACTTCAACCATTCGCCGTTAGCGAAGATGAGCTTT  
TTCATAAAAGCAGGTGCCCTCCACTGTGAAAATAAGTTTTCTGATGAATAAAAATCCGGATTACGTATCGCTCCATCCATT  
GAGGAGTTGTCCAGAAAATTAACGGCAATCTGTAG

>Cluster\_52339

ATGCTAATTCGAGTAGAAATCCCATTTGATGCGCCGGTATTGATGCCCTGCTGCGTCTCATTTCGAAAGTGATGCGGA  
AGCGAAGCTGGTTACGATCTGCGTGAAGATGGCTTTCTGACGCTGGGGCTGGTGGCGACAGATGACGAAAGGTCAGGTC  
TTGGCTATGTGGCAATTTAGTCCGGTTGATGTGCGAGGGCAGACCTGCAATGGGTGGCATGGCACCGTTGGCGGTAGAT  
GAAAAATACCGTGGACAGGGGCTGGCACGCCAATGGTCTATGAAGGACTCGATTTCGCTTAATGAGTTTCGGCTATGCC  
AGTGGTGACGCTGGGCGATCCGGCGCTTTACAGCCGTTTCGGCTTTGAACTGGCGGCACATCAGCATCGCTTGCCGCT  
GGCCGGGCACTGAAAGTGCCCTCCAGGTACATCGTTTAGCGGATGACGCGCTGAACGGTGAACCTGGTCTGGTTGAGTAT  
CACGAGCACTTCAATCGCTTTTAA

>Cluster\_3297

ATGGCCGACAGTTTCCAGAATGAAGTCCCGCCGCTCGTGTAAATATCAAGCTTGACCTGCATACAGGCAATGCTAAAAA  
GAAAGTTGAACTCCCCCTCAAGCTTCTTGTGTTGGCGATTACAGTAACGGAAAAGAGCAACGTCGCTGTCGGAACGGG  
ACAAAGATTGATATCAATAAACAACACTCAACAGTGTCACTGAGTTTTCGCTGCGGTTAATTTAAGCAGTAGAAGAC  
ACACTAAGCGGAAGCGGTAATGAGCAAAATATCGCGCTTGAATTTAAAAGCCTGAAAGATTTTGAACCGAACAGGTAGC  
AAAAAATATCCCACAGCTTCGCTGATTAATCTCGCTATGCGCAATTTATTTACGTGACCTGAAATCCAATTCGCTGATAACG  
CAACGTTTCGCGTGAACGAAATATTTCAAAGACCCAACGCTCAGTTTCAAGAACTGCGTGAATGAACTGGCGAAATTC  
CGCCGACGAGAAACGTTTAAACCGAAGTGA

>Cluster\_20875

ATGCAGCATTTAAAAAATATTACTGCGGGTAATCCCAAACTGTTGCCAATATCAACTGACAAAAAATTTTGTGTTTAT  
CTGGTTATGGTCTGAAGCAGGAAAAAATGGTATGAGGAAGTAAGTAATTTTCAGGAAGACACGATAAAGATTTGTTACG  
ACGAGATAAATAAATTTGCGGCATCACAGAGATGCTTCAACGCTTAAACCTGAAGGTTTTCGCTTTGAGCTTTCCT  
GATATTACCGCAAAACCGACTGCTGATGACTCAGGTAATGGATGTTTAAAGATGGTGGCGTGAATTAAGCGGATTTATAC  
GGCAGACGAACAGCAGAACTGGCAGAAATCACAAAAGGCAACTTTACTTTTCGAAAGCTGAATCCGTGATTTTGGCGCTGG  
AGCGCGCTGTGAGGCTGAATATGGCAACAGATGAGGAGCGCACTCGACTGGAGGATGGGAACGCTACAGTGTCTGGTC  
AGCCGTGTGGATCTGCAAAATCTGAATGAGCCGGAAATCCCGCATGAA

>Cluster\_44255

ATGGCTATCACTGGCATCTTTTTCGGCAGCGACACCGGTAATACCGAAAAATATCGCAAAAATGATTCAAAAACAGCTTGG  
TAAAGACGTTGCCGATGTCATGACATTGCAAAAAGCAGCAAAAGAAAGATCTGGAAGCTTATGACATTTGCTGTGGGCA  
TCCCAACCTGGTATTACGGCGAAGCGCAGTGTGACTGGGATGACTTCTTCCGACTCTCGAAGAGATTGATTTCAACGGC  
AACTGGTTGCGCTGTTTTGGTTGGTGACCAGGAAGATTACGCGGAATATTTCTGCGACGCATTTGGGACCATTCCGCGA  
CATCATTAACCGCGCGGTGCAACCATCGTTGGTCACTGGCCTGCTGCGGCTATCATTTCAAGCATCAAAAGGCTGCG  
CAGATGACGACCACTTTGTCGGTCTGGCTATCGACGAAGACCGTCAAGCGCAACTGACCGCTGAACGCTGAGAAAAATGG  
GTTAAACAGATTTCTGAAGAGTTGCATCTCGACGAAATTTCTCAATGCCTGA

>Cluster\_63037

ATGCAACTGAACAAAGTGTGAAAGGGCTGATGATGCTGCTGCTGTTATGGCAATTGCGGCATGTTCTTCCAACAAGAA  
CGCCAGCAATGACGGCAGCGAAGGCATGCTGGTGGCGGCACTGGTATGGATGCGAACGGCGGCAACGGCAACATGCTTT  
CCGAAGAGCAGGCTCGTCTGCAAAATGCAACAGCTGCAGCAGAACAACATCGTTTACTTTCGATCTGGACAAGTACGATATC  
CGTTCTGACTTTCGCTCAAATGCTGGATGACATGCAAACTTCCGCTAGCAACCCGCTTACAAAGTACCGTAGAAGG  
TCACGCGGACGAACGTTGTTACTCCGGAATACAACATCTCCCTGGGTGAACGCTGTCGCAACCGCTTAAAGATGACTTGC  
AGGTTAAAGGCGCTTTCTGACAGACCAAGTCTCCATCGTTTCTTACGGTAAAGAAAAACCTCGAGTACTGGGTCATGACGAA  
GCGGCATACTCCAAAACCGTCTGCGGTAAGTGTACTAATA

>Cluster\_7587

ATGACTATCAAATCAAATACGCCATCACACGACAAGGACTGCTGGCAACCGCGCTTTGGCTTTTTGATGACTGGATAT  
TGAGTTTGGATTCTGGCTGGATTGAGCTGCGAGCGACAAAAATGCTCTGTGCGCTCACTGGCTAACTGAGGCCGACGACG  
CGTAAATTTCTGAGTGGATAAGCCACGGTGAATCTGGAATAACCCACCGTACAGCAATATCAGGCCGTTGGGTGGAAAAA  
GCCGCTGAGCAGTGCATAACAACGCGACAGACGGTAGTGTGATGCTTGTGCCAGAGGATATGTCAGTCCGATGGTTACAGCAA  
GGCTCTGGAGAGTGTGAGGAAGTTGCAATATCACTGATGAGCAGGATTAATTTTATCGAACCATCGACAGGGCTGGAGA  
AGAAGGGAAACAGCAAAGGCTCCATGCTGCTGATTTGGCGACCGTTTATCAGTCTCGACGAATGTTTACTACTGTATCC  
AAAGCGGCATTGATGGCGATCGGGCAGGGCGTCAAGATGGCGGATGA

>Cluster\_16406

ATGGGCAAAAGGTGGCGGCAAGGCGCACACACCGCTGAGGCGAAAAGACAACTCAAATCCACGAGATGATGAGCGTGTAT  
TGATGCGATTGGTGGAGGACCGATAGAAGGCCCGGTGAAAGGCTGCAGAGTATTCTGGTGAACAAAACCCCGCTGACGG  
ACACGGACGGTAATCCCGTGATACACGGTGTGACGGCGCTCTGGCGCGCGGGGAGCAGGAGCAGACACCACCGGAAGGC  
TTTTGATCCTCCGGAGCTGAAACCGGACTGGCGGTGAAAGTACGACGAAAGCAAAACCGGTGACGCGCACCATTACGTCGCG  
GAACATTGAAAGGCTGCGGGTTACCTTCCGGGTGCTGCTCACTGGTGCAGACCAAGTCAAAGGGCGACCGTAACTTCTCT  
CTGTCGGATTCTGATTCAGTTACAGCTAATGGCCGCTGGGTGACGGAAAAGGACGCTACCAATTAACGGCAAGACCACC  
TCACAGTTCTTGGCTCGGTGATTTCTGGATAATCTGCCCTCCCGGCTTTAACAATCCGGATGGTCAGGGAGACGCGCGGA  
CAGCACCAGGACGCTGCAGAAATAAGACGCTGTTGGTCTCATACACCGAAATCATCGATGTGAAACAGTGTACCCGGA  
ACACGGCCATTGTTGGGCTGCAAGTGGATGCGGAGCAGTTTCGGCGGCCAGCAGATGACGGTGAACATACCATATCCCGGCT  
CGCATCATCCAGTGGCGTCAAATATGACCCGAAAAACGACGCTACAGTGGTATCTGGGACGGCAGTCTGAAACCAGC  
ATACAGAAACAACCCGGCTGGTGCCTGTTGGGACATGCTGACTCACCCGCGCTACGGCATGGGAAAACGCTTGGGGGCGG  
CGGATGTGGACAAGTGGCGCTGTATGCCATCGGGCAGTACTGCGACCAAGCGGTCGCGGATGGTTTCGGGGGACAGAG  
CCGCGGATGACCTTTAATGCGTACTGGCACAACAGCGTAAGGCGTGGGACGTTCTCAGTGTATTTCTGCTCTGGCATGCG  
CTGTATGCCGGTATGAAACGGTCAAGCCTGACGCTGACGTTCTGAGACCGCCCGTGGATGTTGGTGTGGCGTACACCAACA



GCGATGTGGTGGTGGATGATAACGGCGTGGGATTCGGCTACAGCTTCACTGCCCTGAAGGACCGGCACACGGCGGTGGAG  
GTGAATTACACCGACCCGAGAACCGCTGGCAGACCTCCACGGAAGTGGTGGAAAGACCGGAAGCCATACTGCCCTACCG  
ACGCAACCTGCTGAAGATGGACGCTTCGGCTGTACCAGCCGGTCAAGGCCACCGTCCGGACTGTGGGTGATAAAGA  
CCGAAGTGTGGAAACCGACAGCGGTGGATTTACAGCTCGGGTTCAGGGGCTGCGGCACACACCCGGTACATCATTTGAA  
ATCTGTGATAACGACTGACCGGGACCTGACCGGGAGCTGCTTCCATTTGATGCTGCCACCCGACCCCTGAACTG  
GGACCGTGAAGTGACACTTCCGGAGACCGGTGCCGCCACGGTGAACCTGATTAACGGCAGCGGTAAGCCGGTGAAGTGTG  
ACATCACCGAACACCCCGCGCCGACCGGATACAGGTACAGTACCTGCTGATGGTGTGGAGACATACGGGGTGTGGGA  
CTCTCCCTGCCGTCACTGCGCGTCCGCTGTTCGCTGTGTCTCCGCTCCGGGAAAAACCGGACCGCACCTTTGCCATCAC  
GGCGGTGACAGCAGTACCGGAAAAAGAACCCATCGTGGATAACGGTGCCTCCGCTTTGAGCCGACGTCAAGTTCCTGAA  
CGCTCATCCACCGGAGTGCAGCACCTGACGGTGGAGGTGAGCGCAGCTGACGGCCAGTATCTGGCGCAGGCGAAATGG  
GACACGCCGCGGGTGGTGAAGGGTGTGCCTTCACTGCTGCCCTGACAGTGGTAAAGGAAACGGATGCCAGACTGGTGC  
CACCCGCATACCCGACAGACGGGACCGCTTTCAGCGGCTCCGCTCCGGGAAATACACCTGACGGTGGGGCGATAA  
ACAGCTATGGCCAGCAGGTGAACCTGCCACACCTTCCGATTTGCCGATGGCCAGCCGACCGCTCGGGATTTGAGCTG  
ACGCCGGCTATTTTTCAGATAACCGCCACGCCCATCTTCCGCTTTATGACCCGACGGTACAGTTTGAAGTTCGGTCTC  
GGAAAAGCGGATTCGGATATACAGCAGGTTGAAACCGCAGCCGCTATCTTGGCTCCGCGCTGACTGGATAGCTGCCA  
GTATCAATATCAACCGGGCCATGATATTTATTTTATATCCGAGTGTGAATACTGTTGGCAAATCGGCATTTGTTGGAG  
GCTGTGGCCAGCCAGGTGATGATCCTCCGCTTCTGGATTTTTTCAAAGGAGAGATAGGAAAAACCTCATGCTCA  
GGAGTTGTGGACGAGATTGATAACGGTCACTTGGCCTGATCTGGCTGAAATCAGGACGTCCATTACGAATGTGAGCA  
ATGAAATCAGCAGACCGTCAATAAAAACTGGAAATCAGAGCGCGCAATCCAGCAGATACAGAAAGTTCAGGTTGAT  
ACAAATAATAACCTGAACAGCATGTGGCCGTGAACCTGACAGCAGATGAGGACGGACGCTTTATATTTGGGGTATCGG  
AGCCGGTATTGAGAAATACCCAGCAGGTATGCAGAGTCAAGTGTCTTGGCTGTGACCGGATTTGCGATGATTATCCTG  
CGAATGGCAACACAAAGCCGATGTTTGTGGTCAAGGCGATCAGATATTCATGAACGAAGTGTTCCTGAAATACCTGACG  
GCTCCACCATTACAGTGGCGGTAATCCTCCGGCATTTTCCCTGACACCGGACGGGGGCTGACGGCGAAAAATGCCGA  
TATCAGCCGTACCGGTAATGCGAACTCCGGGACCTCAACAGCTACGATTAACGAAACTGTCCGGGTTCTGGGAAAC  
TGTCCGCCAACAGATTGAAGGCGATCTCGTTAAAAACAGTGGGCAAAGCTTTCCCGGGACTCCCGTGCACCGGAGCGG  
TGGCCATCAGGGACCATACCGTCAAGGTTTATGACGATCAGCGCTTTCAGCCGACAGATTGTTATCCGGCGGTGGCATT  
CAGCGCGCTAAACATGAGAAAGAGCATACTGATATTTACTCCTCATGCGCTGATAGTGTGGGAAAAACGGTCACTGAAA  
TTTTAAACCGTACCGGCTGGATAATACTGATTTACAGTGGTGTATTGATATGCCCTGCCGCTCAGGCTCAGGATGACA  
CTGGAGTTTTCCGCTGTCAGCATGGTGGTGAATAAAGTGGTATCCACAGCAAGTATCAGCGATTGCTGGTTGTGGTGT  
GAAGAAAGCCACCGCAGGATCAGTATCAGCTGA

>Cluster\_48596

ATGAAGGCTCTGATGGTTGAACTGACTTCTCTTGGGGAGTCCGCTCTAAAAGCAGAAAACCGGTGAAGATTGCCAG  
AGAAGCTGGCTACACCGCTGTAATTTCCGCGAGATAGCATGAATATGCGAGTGTATTCCACTACAACGTGCCGCTGGTG  
ACGACATGGCGGTTATTTGTGGTGTGAAACTAAACATTTGTGATGATCCACATACGAGCACCAGGCTAAACTTGCTAAA  
GAGTCTATGGGATGATGAATCATTAGAGCGTGGGCGAACTACTCCTTACCGCTCAATTAATAAGTAGAGCAGGATA  
TCCGACCATCTGCCAACTAATGACGGCCCAACACAGAGAACAGTCTACTTTGTACCAGCGTCTCCGCTGACGACAGT  
TGGTTCTACATATGCCAAAGCAACATCATCTGCTCACTGCCGACATCGGTAGCGTGTCCAAACGCAACGATTTTGA  
AAAATCATAACTCACTGATTACAGCGGTTGAAAAAGCAACTTCTATAGTGTGGTTTATCCGACCCCTACCCCATTTCTA  
CGACAGATTAACGTTCCGGGCGATGAAAGTCCGACGCTGAAATAGAGCAGTACGCTTCTATCCCGCTTATTACG  
AATCGATCGACGTCAGACATTAAGACATTTGCGCACATGTTTACGAACAACATCAAAATCGACCGGCTACGCTGTG  
CGTATCCCCACAGCAGATAACGCGTCAATGGTCCGCGCATCTCCTTGAGGCGCTGAAAGCCTTCTCCGTTCCGAT  
GGATGTGCCGCTAACAGCTGCAATGGCCTCAACAAACGAGGATACCATATCGATGCCGTCACATGGCGCTGGCATGAAT  
TGCACCCAGCATGCAAAAGATGCGAGACGACGAGCTGCAACGCTGATGAACTGCCGCTTGTGGGCTGCGCTAAGCCT  
CTTACCACAAAAGAGTTTGGCTACACACCACCGGCTTCTGAGAACAGGTTTATGTTGAGCGACTTAAGTACGAAATGGA  
CAGCTTACTCGCTGGGATTTTGTGGTTACTTCTGATGGTACGCGATCTGATGAATCACAGCGTGAACCTGGCATTC  
CTGTCCGGGCTGGTGGTTCCTCCGCTGGCTTCTGGTGGCATGGTGCATAGGCATAACCAACGTCAGCCCTATCCGT  
CAGGCTTCTGTGTTGAAAGCTTTTCAACCTGAGCGTCTCGACTTGCAGATGCGGACTTGGACTTCAGCCAGGCAAG  
TCGCCATGAGGTGATCGAGTATCTGAATGAACGCTACGGCGAAGATTACGTTGCAGGCATTCGAACTTACCCTACCTGG  
GCGCGGCTCTGCACTACGTCACCGCTCGTATTTATGGTGTGGAGTCCGACAGATATGGCGGTATCAAAAGAACTGAAG  
AACGTCGAGGATGATAGCTTCCATTGGAAGAGCTGCGCGAACAACCTGGCAAGCTCGACAAAATACCGGACAAAATATCC  
TGATGCATTTCAATGCAAGCTGCAAGTTACAAGCCTTATGCTGGCTATGGTAGACATGCGGCGAGGATGATCCTGACG  
GTGTTCTCTGACAGAACGAACACCGGTTGAACGACGTTGGTGCAGCGGCTTGTATCGCATTTGACAAGCGTTACTGCGAG  
GCTATGGGCTAATTAAGCTGGACGTAATGGCCTGGCGACTCCTGATTTGCTCGATAGTGAACAAACGCTACATTAAGA  
GAACACAGGTGAGGATCAATCTTGTATGCCATTTCTTGAAGATCGCAAGGTGCTGGATGGTTTGTCTGGGTACA  
CTCAAGGTTTTCAGCTGAAATCAGGCCAAATGCGCAAGCTGCTTAAAGATTTAGGTGGTGAATTTAGCCATGAC  
TTTTAAACGGTCTGTGCTAGACTGCGCTTCCGCGCCGGGCAATTCAGTCAAGCATGTTGGATGATATGTTTCTGT  
CGCCAAAGGCTTTATGACGCCGGAATCATTAACCCCGTTCCTTGTGAACTTACCGCAGAAACAAATGGCGTGTATCTTT  
ATCAGGAACAGACGATGAACGCGACTCGATGCTTGGCGGCTCACAAATGGCTGAAGTGCAGCGGCTTCGTAAGCGAT  
GGCAAAAAGACATGGAGAAAAATGAAGAGCATGGGTGAGAAAGTTCATCGTTACAGGCTCAAGCTGGCTGGATAGACTGA  
GCTGGAAGATGGCACTACACAGCGCATTACCGTGCAGCAATTTAAATGCGAAGACGGAACACTGAAAACGTGCGAAG  
AGGCGCTTGAACACGGCGCAAAACTACCTATAAACGCAAGTACCGGTGACAGCGTCCACCCAGGGCTATCAGAGATGAAA  
GCGAAGGAGATCTGGACCGCATTCGAAAAAATGGTGCCTACCAGTTCAACAAATCACACTCTGTTGCTTACTCCTTGT  
CAGTTATCAATCTATGTTGTTGAAAACCTATTAACCGCAGAGTTTTTCGCTGCTGCTCTCACTATTTGGCGAAGATA  
AACACCAGGGGCTGGTTAAAGATGCGCTGACCTATGGTATTCGCGTATGCGCACCAGAGCTTAACGTGTCATCAACCGA  
ATCGAGATCCGACGCTTGAAGATGGCAGCCAGGTGCTGATGCGCCCTTCTCTGTGTGAAGGGGTGTTCTGAGAAATGG  
CTGCAAGCTCATGAGAGCGCGAGAAAAAGTTGGCGGCAAAATTCAGTCACTGGCGCAATTCGAAGAACTGTGCGAGA  
AACGTTGCCGTGAATAGTCGAGTGCAGCAATCGCTGCAAAAAGTAGGGGCTTTGCATCCATCGAGCCAGGTAGTCTGCCA  
GCAACTGATCCAGAGCGCTACGCGACCGGCTGAATTTGATGGGAAACCTTGTATAGACGCAAGTAAAGCCTCAGCTCC  
GTTTGAAGATGAACCCCAACGTTCCGCTGAGATTAACGTTGCTGATGACACGGATGGCGGCTGAAAATGGGCTTAGGTGATG  
AACTAATCCCGCCAGCATTTGGTATTAAGCCGAAAAATCATGATCATTTGGACAAATGCGAAGCAAGTATGCTGAAAC  
GGTTACTTTATGAGAACCGGATACGACGATTTTAAAGCCAAAGCTATTGACGGCTGGAGATTTACGATGGGCGATCTCTA  
TGTACAGGCTTTGCAAGAAAGTTAAAGACAAAAGAAAGACTACACAAAGACGAGATCGGCCAGTTACCGACTTTA  
TGCCTGAAGAGATCAATCTGGTGGTCCAACTATGCTGACGCTGAGTGTGGCAGTCCGGGCGACATCGCTTCAACAAAC  
AGCAAAACCATCCGACTGTTGGAGCAAGAGTATCTCCGGAGCTGGATGCTGACTGTTTTCTACGGATTTAAACCGAA  
TATTTTGTACTTTCCGCTAGAGGAAGGCCAAAAGCTGGAAGCAATTTCTGAGAGGTAGCGGAGACTATTAGCAAATGA

>Cluster\_25144

ATGCACTCTGGAAAAAGAACTTGTAGTATCACAATTAGCAATTGGCTTGCACCTGGCTATCACCTCTCAGGCTAATGC  
AGCGACCAACGATATTTCTGGTCAAACCTATAAATACTTTCCATCACTACAACGACGCCACCTATGCTGATAACGTTACT  
ATGATGGTTATGTAGGCTGGAATAACTATGCCGCTGATAGTTATTAACGCGGATATCTATCCGGTCAATTAATACGCT

ACCGTTAACGGCGTATTCTACCTACTATCTGGACGATGGTATTCTACTAATACCAACGCCAATAGCCTGACAATCAA  
AAACAGCACTATTACCGGTATGATTTATCCGAGTGCACTAGCAACTGATTGTTCTAATCGTGGGATGACTACTACCATG  
ACCGTCTGGCATTGCTGTGTGATAACTCGACTATCGATGACAACATACGAACATTTATACCTACAACGGTACTTATAATAAT  
GCCCGCCAGCATGTTGTGGATGTTTTACAACATGGGACGGCTATCACTCTGGATCAAGAAGTTGATCTGTCTATCAC  
CAATAACTCATGACCACTTTGATGAAAATCTTCCCGAATGTTGACTGACAGATTATGAGTGGGAAGATATCGACGACAACACTCG  
GTGTAACAGCAGCGAAGTGTAAACAACACCATCAATGTTGCGAAGTCTACTGTCACTTCAAGTTTCAAGTTGATGAA  
GGAACAGAAAGTTGGTTGGTAAACTGCGCAATGCCAGCGATTACAACGGCATTGACTGGAATGCTGATGATGTAGCATT  
AGCGATTATGACACATCCAAATGCTGACAACGGCATGACAGCGACTGCAACGTTTGTATAATCTACCCGTGATGGGCGAGC  
TTTTCTTCCAGCAACTTTGATGAAAATCTTCCCGAATGTTGACTGACAGTTGACTGACAGTTACCGTGACGCGGATGGTGTCTCGAC  
ACTAATGGTTGGGATGGCACCAGTCTGTGATCTGACCTGAACAATGGCAGCAAAATGGGTCGGTGGGCAATGTCCGC  
ACACCAGGTTGTCTACTGCTTACGGTAGCCTGATTACAACATCGGTACCGAAGAGACTGCAACGCTTATCGATATCACCG  
CGAACAGCTTGTGGCCGCTCATCGACTGTTGGCGTTGAGAACGATGATTGACGATACAACGAATATGAGCATATTTATGGT  
AACGAAGTTTACGAGCAACTGTCGGCGAATGCTCTGACGTTGATACTGTAACCTGACCGAGCTTACAGTGGGATACCACCAAACTTCTGTGAT  
TGATACTCTGAGCATCAACAGTGGTTCAACTGTTAATGTTGCTGATTCAACGCTGATTCTGACTCTATCTCTGACTG  
GTCCTTCTGCGCTGAACATCAACGAAGATGGTCAATGTTGCAACGATTCACTGACTGTGACAAACAGTACCGTAACCAT  
TCTGATGAAGTTCTGCTGGCTGGGCTGTAGGTGATGCGGCTGTGATGCAACAACATCAAAGTGACTAACCGGTAAT  
TCTGATGTAGGTAACCTGTCGGCGAATGCTCTGACGTTGATACTGTAACCTGACCGAGCTTACTGATACCGAGGTA  
ACATTCACGCTGGTGTGTTCAACATCGAAAGCAACCGCTTCGTGCTGAATGCTGACCTGGTCAACGATCGTACAACGAT  
ACCAATAAGTAACTACCGCTACGGCACCATCGCGATGAACCTGATGGTCACTGACCATCAATGGTAACGGCGATAA  
CGACAACACTGCTTCTATCGAAGTGGTCAAGCAAGTTGATAACCGGGTGACCGTGTAGTGGCGCAACCGGTAAT  
ACAAAGTTCTGATCGACAACGCAACTGGTGGTCTGCTGACTACAACGGTAACGAACTGATCTACGTTACGTTAAGC  
AAAAACAGCAACGCAACCTTCTCTGCTGTAACAAGCTGACCTGGGTGCATACACCTATCAGGCTGAGCAGCTGGTAA  
CACCGTTGTTCTGCAACAGATGGAGTACCGCTACGCTAATGCGCTGAGCCTGAGCCTCCGCTGCGAACACCAATATCT  
GGAACCTGGAACAAGACCCGTTGGTACTGCTGACCAACTCTGCTCATGTTGCTGATAACGGCGGCGGATGGTAA  
AACTACTTCCGGTGGTAACTTCAACGGCGACAACGGCACCATCAACTATGATCAGGATGTTAACGGCATCATGGTGGT  
TGATACAAAATGACGGTAAACAACGCTAAGTGGATCGTGGTGGCGTGCAGGCTTCGCTAAAGGTGATATGAATGACC  
GTTCTGGTCAAGTGGATCAAGACAGCCAGACTGCCTACTACTCTTCTGCTCACTTCCGGAACAACGCTTCTGTTGAC  
GGTAGCTTGAGCTACTCTCACTTCAACAACGCTGCTGCAACCATGAGCAACGGTACTTACGTTGACGGCGGCAAC  
CTCCGACGCTTGGGGCTTTGGTTGAAAGCCGGTACGACTTCAAACTGGGTGATGCAGGTTACGTGACTCCTTACGGCA  
GCGTTTCTGGTCTGTTCCAGTCTGGTGTGATTACCAGCTGAGCAACGACATGAAAGTTGATGGTCACTTACGACAGC  
ATGCGTTATGAACGGGTGTAGATGACGTTTACCTTACCTACAGCGAAGACCAGGCTCTGACTCCGTAATCAAACT  
GGCTTACGCTACGACACTCTAACAACGATAACGATGGAACGGTGTATCCATCGATAACGGTACTGAAAGGCTGGCG  
TACGTGTTGGTCTGGGTACTCAGTTCAGCTTACCAAGAACTTACGCGCTATACCGATGCTAATACCTCGGTGGTGGT  
GACGTAGATCAAGACTGGTCCGCGAATGTGGGTGTTAAATATACCTGGTAA

>Cluster\_66924

ATGAACATAAAACCGTTTAACTTCTCACTATCGAAGACTGCTGAAACCGCTATCCCGTTTCTCTGTGCGAAGCAGTTTTGT  
TGAGTATTGGCATTACGTAATTTGGTCTGGACAGACAGGATCGTGAACGTCGCCATGGCTGAATTCGCCCTATA  
TTGACGCCACAAAGCTTGGAGAAATATCTCTGCTGTTTGAAGTCAAGCGGTCGCTTACGGGAAATGGATGAAGCATCCGAC  
CAGACTGGCCAGGTTCACTGGAATCGTATCACCAGATGATGACAGCCTGAATACCGCATATAAAAACAGCGCTCA  
TAAAATCAGCTGCTTTTTGAGCGTGCCTGAAATGGGAAAGAGGAAATCGAAGACATGGTCCGCCACAAAACCGCT  
CACTGGCTAATACAGGTAATCCAGTTACAGGATGTTGGTCTGATGAGAAAGTCAACAACACTGCTCCCATGGCTGGTCCGGGAG  
CGTTGCTGGCTGGCGATCTGGAGTGGACCCGACTTATCAGCAACAGCGATCGCACTGCCATGATGAGCTTGTGAGAAAG  
ACTGGCTGAACGGGTACCGAAGCAGCTTTGCCAGTCCCTTGGCAGTGGACCTTATCTGCCTGAAATCCGCCACG  
AAGCTTTTCTGATAATGTGGAACAGGCACTGAGACATTCATCTGATGGCCTGATTTCTCCGGCTTCTGGATATACACGAA  
GTCGGCGGTGAAATACGTCGTGACAGAACGGTACAGCACACCGCTAAGTGGCAACCCACCTGCCGTAAGATGCCCA  
GCCAGCAGGATATCGCTGGACTGACGATGAATCCGTACTACATGCTCCTTCAATGCAATTTGACGTTATCAACACGCAAG  
TGACCACACAGGGAACCTTGGTTGAGGCGGGGACTCTGGCAGGAAATGGTATCGATTAATTTACCTTACCTGCAAACTTG  
CAGACGTTTAAACGAACTGGTCCGTGCGCTCCCGCGCAGTCCCTGGCGCATCAGAAATGGATCTGATGCCCGGGGGAT  
GAAGGCTCTAATCTGAAGAAAACGCTTCTGACTTACAGCAGCTTCAATTTCTGCGGTTCTGCCAATGTATGAATCCGTTA  
TGACCCTGGCGGCAACGGATGAAAAGAACCTGCTGCATAATGACCATCATGGCCTCCACGTTGGGAAAAACACGTTGAA  
ATATGCGCACGAAACACCGCCATTTGAAATCGGCCATTTGAAGCTGGGGCTATGTGGCACACGACAACTTTGGCGA  
TCCCGCGCGCCTGGGTGAATACCATTTCTCGCGCATCCGGAGGCTCCGGCCCGGTTCCCTGTATCCCGGTTGTAC  
ATGCCATCTCGCTTTTCCCGCTTAAACAGGCGAGCTCTGTCTGGCAGGCAAAAGGAAATCTGATGTTACATACAGAAAGC  
GTTCCGCAATTTGAGTTGGTCTGGCGTATCCCAAAAATAAACATACAGAACTGGCACAGGCGATCCGGGACTGGG  
TAAATCAGTTCTGATTAATACGTTGTCGAAATACAGATATCATCTGTCAGAAAAAACCCTGCCCTTCAATGCTTACG  
ATAAGGATACAGTGTCTCAGGACTGGTTCAGCTTATTCGCGACAGTCTTCTCCGGAAGAAAAGACGAAGCTGTGGT  
ATTAATTTCTGAGCAATGATCCGGAATACACCCGTAACCTTTTGTAGCTGATGTACGGCGCTAAAAGGCTTATTACCGCGGA  
AAGAATTTATGATGATCCGGTACTGTGTGCTCTGTGTGATACCGGTACCGGTCAACCTGTAAACCGGACACCC  
GACAAATTTATCAACAGCTTATCTGAGCTTGGCTTTTAAAGAGTACGGTGAATAATCCCGACTTTATCCGCGCTCAACG  
GAAGAACTGGTGGATTACGACTGCAGGACTCGGGACTGTATGAAAAAATGATGCAACCTGGTGGGCGAGATCAACCTG  
GTTGCAAGTCCGGGATATGCTCCACAATGCCGGGTATATCATGGCGGCTCAGCGGGCACATTAATCAGGCAATGCCCGCAG  
TTCCCGAAGTGTCTCTGATGCTGGGCCATACAGTCTCAGGATGTTTTGCTGACTGTTACGCTGATGGTTCAACAGAA  
CTTCTGCTGGACTACATCCGCGCGCTCTGAGCAGGGACATAACGACTACCCCATGATATCCGGGTATACCCGGTTTAT  
GATCAACCCGAAACCGGGTCACTGCTGTGATCTGAATAATGTTGCGGGTACAAAACGCTGACAGCAGGCTTAAAA  
CCGGCATCATGTACTGCTTGCAGGTGATGCGCGGTGGTACTTCAACCTGCCACAATACAGGGATGAAGTGTAAAG  
CAGCTTCCACGGGAATACCATGAAATCGCTCTTAAACGATTAATAACCAACTTGAATCAGGAGGTTAAGCAAAAAGTTATGA  
TGAAGTGCATAACGCCCGGGGCAATTGACTTCACTGGGAAAATCTGGATACCCAGGAGCGTGAGCAACGCAAGTTGCTA  
TCCGCACGGTTCTGAGTACGAGTATCTGAGGGACTACCCGAAAGCGTTCTTAAAGTCAAGCAAACTCTCTGTTACTG  
CGCTACAAACCCGAAATATCCCGTACTGAGGGATAACTTCAACGTTCTGAAATTTATGCTGAAACGCTTCTGAAAT  
GCCGGAAGGCGCGGCAACATAACAGTGAATGTTTCTGGGATATTGAGGTAATAAAGTGGCAGCTTCCGAGAA  
TACTCAAATTTACCGTGGTCCACTGGAGCTATGGCGCTGAACTCATCGCAAAAAGACAGTGCCTGCGTAAAAACTG  
ACAAATAAGTTAGTTTCACTTCCGGCAGTAAGATTTCTGGCGAAAACCTCCCGAGGTTCTGCAACGCTATTAATTTGA  
GCACCGGCGGGCAACATAACAGTGAATGTTATTTGAAGAACTGGCCTCAGAACTCATCCGAAAACAGGATACAATC  
TCTGA

>Cluster\_38994

ATGTCACGTTATAAAAACAGGTCATAAACACACGATTTCTGTTATTCAGTTCTGGCCGCTGCGTGGCGGACAAATAT  
CTCTGTTACAGTTCTTTTCCACTGCTGTACCTTTACCCAGTAATGGCGGACGCTGCGCAGCATGCGGTTACGCCAC  
GGTTGAGCATGGGAAATACGAGTAACTGCTGATAATAACGTTGAGAAAAATGTCGCTGCTTTCGCCGAAATGCCGGG  
ACATTTTTAAGCAGTCAAGCAGATGAGCATGCGACAGTAAATTTTATTACCGAATGGCCACCGCTAAAGCTAACCGGA

AATTCAGGAGTGGCTCGGAAAATATGGTACAGCGCGCTCAAACCTGAATGTCGATAAAGATTTCTCGTGAAGGACTCTT  
CGCTGGAATGCTTTATCCGATTTATGATACGCCAACAAATATGTTGTTCACTCAGGGGGCAATACATCGTACAGACGAT  
CGTACTCAGTCAAATATTTGGTTTTGGCTGGCGTCAATTTTCAGGAAATGACTGGATGGCGGGGGGAATACTTTTATCGA  
TCATGATTTATCCCGTAGTCATACCCGCATTTGGTGGTGGTGGCGAATACTGGCGTGAATTTTAAACCTGAGCCCAATG  
GTTATATCCGGGATTTCTGGCTGGAATAATCCCGGATGTTGAGGATTTATCAGGAACGCCCGCGAATGACCTGGTATG  
CGTGTGAGGGCTATTTACTGCTGGCCGAGCTTGGCGCAAGCCTGATGTATGAACAGTATATGGCGATGAAGTCCGG  
GCTGTTTGGTAAAGATAAACGCCAGAAAGATCCACATGCGATTACCGCTGAAGTGAATACACGCCAGTGCCTTCTTGA  
CCCTGAGTGGCGGCATAAGCAGGGCAAGAGTGGTGGAGATGACACTCGCTTTGGCCTGGAAGTAAATATCGGATTTGC  
GAACCTCTCGGAAAACAACTCGATACAGACAGCATTCGGAGGCCTGAATGCTGGCAGGCAGCCGCTAGACTGGTATG  
GCGTAATAACAATATCGTCTTGTAGTATCGAAATCTGAAGTGTATCGGATTTGCTCTGCTGAGCGTATTTGAAGGCAAGG  
GCGGCCAGACGGTTTCCCTGGGGCTTGTGGTACGAAAGCAACCTCACGGTCTGAAAAATGTGCAATGGGAAGCGCGTCT  
TTGCTGGCCGAGCGGAAAATACGGGGCAGGGCAATCAGTGGCAAGTGCAGCTCCCGGCTATCAGGCAGGCAAAAGA  
CAATATTTATGCGATTTACGCGATTGCCATACGATAACAAAGGCAATGCCCTCGAAACGTGTGCAGACAGATGTTATTA  
GCGGAGCTGGTATGAGCGCCGATCGTACGGCGTTAACGCTTACGGTACAGCCGATTTCAAATGCTTGTACCGGTAAT  
GAGCAAAAGCCGCTGGTGTCTCTGCGCGACGCCAGGGCCAGCCAGTACAGGGCATGAAAGATCAGATCAAGACTGA  
ACTAACCTTCAAACCGGCTGGAATATTTGTGACTCGTACCCTGAAGGCCACTAAATCAGAGCAAGCCAACTGGGTG  
AGTTACCCGAACTTGAAGCAGGGGTGTATCAGTCTGCTTTACTACCGGAACGCGAGTCAAGTGGGCAACGATTTACTGTT  
AGCGTTGATGACATGAGCAAACTGTACTGCAGAACTGCGGGCCAGGATGATGGATGTGTCAAACCTCCACCTGAGTGC  
TAACGAGCCGTCAGGTGATGTGGTGTGATGGTACGCAAGCCACACGCTGACACTGACAGCGGTGGACTCCGAGGGTA  
ATCCGGTACGGGAGAACCCAGCCGCTGCGACTTGTTCGCAAGCACTAATGGTGTACCGTGGTCCATTTCCGAA  
ATAAAACAGGGGTTTACAGCGCCACGGTTTCTTCGACCCGCTGCGGAAAACGTTGTTGTGCGTGCCTTACGCGAGCATTA  
TCAGCTGGGCACATTAACAACAAACGCTGAAGTTTGTTCGCGGGCCGCTTGTATGACGACATTCGCTCCATCACCTGAATC  
CTGATAAACCCGGTGGTTGGCGGTACAGTTACGGCAATCTGGAGCGCAAAAGATGCTAAATGACAACCTGTAACTGGCCCT  
AATCCGGATGACGCTGCTGCTTACGGCGGACGCTGCTGTAGCTTACGGCATCAGGCTGGACGGATAAATGGCGACGGAC  
CTGGACTGCGCAGATTTCTCTCGGCACCTACGGCGGGTGAATTAGAGCTTATGCGAAGCTCAATGGGCAGGACCGCGCAG  
CAAATGCGGCAAAAGTAAACCGTGGTGGCTGATGCAATTACTTCAAACAGTCAAGAGTCTCTGTGCGAGAAGATCACGTA  
AAAGCCGGTGAAGCACAACCGTAAACGCTTATTGCAAAAAGATGACATGGCAACGCTATCAGTGGTCTTTCCCTGTGCGG  
AAGCTGTACGGGTGCTGCTGCTGTAAGGGGCGACGCTTTCCAGTTGGACCGAAAAGGTGACGGTTCCTATGTTGCTACG  
TAACTACAGGCGGAAAGACGGGCGAGCTTCTGTGATGCGGCTCTTCAAACGGCCAGCTGACGCCACCGAAGCCGCGCAG  
CTGACTGTTATTGCGGAGAGATGTCATCAGCGAACTCTACGCTTGTTCGCGCAATAAAACCTCAAACGGTAAACACGAC  
GACGGAACCTACCTTACCGTGAAGGATGCGTACGGGAACCTTGTACCGGGCTGAAGCCAGATGACCCGAGTTTAGTG  
GTGCGCCAGACCGGGACAGAGCGACCTTACAGCAGGAGACTGGACGAGAAACAGTAAATGGGGTCTACGTGGCGACCTTA  
ACGCTGGGATCTGCGCGGGTACGCTGTCTGTGATGCGCGAGTGAACGGCAAAATGCCGTTGCTCAGCCACTGGTGT  
GAACGTTGCTGGTACGCATCTAAGGCTGAGATTCGTGATATGACGGTGAAGTTGATAACACGCTGGCAAATGGACAGT  
CGACTAACAGGTAACCTGACCGTGTGTGGACAGCTATGGTAACCCGTTGACGGGGCAAGAAGTTACGCTGACTTTACCG  
CAGGGTGTACAGCAACCGGGGAATACAGTAACCAACCAATGCGCGCAGGTAAGCCGGATATTGAGTTGATTAACCCCT  
TGCAGGGAACTTGAATCGCGGCCGCTGAAAACCTCTCAGAAGACGGTACGGTGAATTTCAACGCGGATGCCAGCA  
CCGGTACGCAAACTGCAGGTAGACGCTGCTGCTCAAAGAGTGGCAACGGCAAGAGTGCCTTTACGCTGATGGCGAAC  
GTTGAGGATAAAAAATGTTAACCTGTTCCAGGGAGCCTGGTACCTTTAATCTGCCCCGGGTGTCAAGCGCTTACAGG  
CGATAATGTTGTTGAAAGCAACAGTACAGGGGAAAGCAGAGTTACAGGTGGTTTACAGTGCAGCGCAACGATAGAGA  
TCACGGCGTACAGGAAATGACAGCCCTTCAATGCGCAGCTGTAAAGTGTGCGGCGATAAGACTACGGCAGCATT  
TCCAGTATTGAGGTGATTGGCAACTATGCACTGGCGGACGGCAAGCCAAACAAAGCTATAAAGTTACGGTGAATGATG  
CAATAACAATTTGTTGAAAGATAGCGAAGTACGCTGACCGCCAGCCGCTTGTGTTAAACCTGGAACCGCAATGGCAGT  
CGACAACGAATGAGCAAGGGCAGGCTATTTTACCGCCACCCTACTGTTGCGGCGACATATACACTCTCGGGCAGATG  
AGTCAGAAACACGGTACGATATCAACGAAACCGCCGAAGCTAAATTCGTCGCGGATGATAAAACCGCAGCTCACCCG  
ATCATTAATGTGCTTCTGCTGGTGGCGGATGGGAAGTGCAGTGCAGAGTGGAGGTGACCTGATGTGCGCAACTAAC  
CCGTTGGCGGAAATATGTTGGTGCAGACTCAGACGCGCGGAGGGGTGACGGAGAGGATTAATCAGTTCTGCTGCCGTGAAA  
AATGACCAATTTCTGAGCGGAAAATACAGCGTACATTTAGTACCAACAAGCCAGGTGCTATACGTTTACATTTAACGC  
CCTGACGATGCGCGGTACGAAAATGAAGCCAGTACGCTGACCTTACCGCGTGGATGCCGATACGGCAAGGGCGAGG  
AGGCGATGAAATAA

>Cluster\_52772

ATGAACAAAATATTTAAAGTTATCTGGAATCCGGCGACAGGCAGTTACAGCGTCCGACGGAACGGCGAAGAGCCGTTGG  
TAAAAAATCAGGGCGCAGTAAGCTGTTAATTTCTGCAATTAATTTGTCACAGTGCATTTTACTCCAGGAGCATACGCGAG  
GACTCTCTCTCGACGGCGGTGACATTTTCAATCGACTCCATTTGACCAATTTACTGGCTTGCTATTGGTCAAGGTCTGTGTA  
GCAACCAATAATGTTGGGGAACCTGACGGAGTTGCTATGGCAATAGGATTTGAAAGCCAAAGCACTCGGGCGGGGAATG  
AGCATTTGGCTATGATGCTGAAGCAAGCGGAGATCGAGCAATAGCGTTTGGACAAATTAACAGAAGCATCAGGCAATAGAA  
CAATAGCAATGGGTAGTGGAGCAACTGCCACTGGTGCACATTTCTGCGCTAGGGGGGCAACTAAGACTCTAGGTATG  
TATTCGTGGCAATAGGCGGGATGCTACTACAGATAGCGACTACGCGCTTTCATGGGCAATAGGCGAAGGCAATGG  
ACTATACGCGCTGGCAATGGGTGAGGAAAGTGTACTTTCGAACGATAACGCGCATCGCGATTTGGGAAAAAACGCAAGCC  
AGGGAGTGAATTTATAGCCTGGGTAATGCAAGCCAGGCATCGGGCTACTCCAGCCTTGCAATAGGTGAGTTAAGTGA  
ACGGTGTGAAAATGCTATTGCACTGGGAAAACCTCAGTAAACGCAAGTAAATCAATTCGCCCTGGGTAGTAAACAG  
CACTGACTGCTGGTGGGCTCCGTTGCGCTGGGAGAGAAATAGTTTGTGAGGCAATAAACAGTCTTGTGTTGGGTAGT  
AATCCAATGCAACCGGTGATAACGCAGTTGCCCTCGGTGTAGGATCTGTGCGAGCGCAAGACAATACCGTTTCCGGTAGGG  
AACAGCACAAACACAGCAAAATACCAATATGGCTGCGGTCAAATAAGAAATGGCAGTACTGAGGCATTAACCGTTT  
ACAATTTATGGACTAAGTACTCAGTCCAGCCGACCTCGGGGGTGGTGTGGCGTAAATGAAGTGAAGTAAATG  
CGCAAGCTTACAAGCTGAAAGCAACATCTACAATAATGTGGTGGTGTGCTGCTTTTAGGAAATCGACAATGACACTCTGCAC  
TGGGACAAAACCAATAAAGCATTAGTGCAGCTATCTCGCAAAAACGCTGATGACTCCCTAAAGGAGCGCTCAGACCA  
AAACAAAATCATTAAATGTTGCAAGGGTACTATTTCCGCCACCAGCAGCAGTGTAGTAAACCGCTCTCAATTTGACGACC  
TGCAGCAGGATGCGCTGTTTGGAAACGGCACAGCATTCAGTGGCCGACACGGCACCGAAGCCACCAGCAAAATCACTAAT  
GTTGAAGATGGTACTATTTTACAGACACAGTAAGATGCGGTTAACGGTTCCAGTTGAAAGAAAACCAAGACAGTGTGGC  
CACCACACAGCCAAATATCGCGGATAACACTGCTGATAATTGCAACCAACACTACCAATATCGCGGATAACACTGCTGATA  
TCGCCACTAACACCAGGATATTGCAACCAACACTGCCAATATCGCGGATAACACTGCCAATAATCGCCACTAACACTAGC  
GATAATTGCGACTAATACCGCCGATATAGCTACAAACGCTAGCAGTATCACTACTCTGAACGGGACGTTGATACCTCCGGA  
AAAAGATGCCCTGCTTGGAAATGGCACAGCATTCAGCGCCAAACACAGCCAGCAGCTACCAGCAAGATCACCAATGTTA  
CCGCTGGCGACCTGACTGCTGGCAGCCTGACGCGGTTAATGGCTCCAGCTCAAACACCAACGATAACGTTGCTGACC  
AACACCACCAACATCACCAACCTGACGGATTCCGTTGGCGACTTAAAGGACGATTTCCCTGCTGTGGAACAAAGCCGCTGG  
CGCATTCAGGCGCGGACCGCACTGATACCACAGCAAAATCACTAACGTTAGAGCTGGCTCGGTTCTAAAACAGCA  
CTGACGCCATTAACGGCTCAACAATTTATGGCGTAGCGGATTCATTTACGCTCATATCTGGTGGTGGTGTGATATCAGC  
GATACGGGTGATTAACGGGCCAACCTACACTATTGGTGATACTGACTACACTAACGCTGGTGTGCTGCGACCCAT

TAACACATCATTTAGCTCATCACTCGGCGACGCCCTACTCTGGGATGCAACCGCAGGTAATTCAGCGCCAAACACGGCA  
TTAATAATGATCCAGTGTAACTACTGATGTTGCAAAACGGTGCAGTCTCGTCCACCAGTAGCGACGCCATTAACGGTTTCG  
CAACTTTATGGCGTTAGTGACTACATTTGCCGATGCTTTGGGCGGGAACGCTGTGGTGAATGCAGACGGCAGTATCACTAC  
ACCGACTTATGCCATAGCGGGGGCGCAGTTACGACAATGTCGGTGCAGCGCTGGAAGCGATCGATACCACGCTGGATGACG  
CCCTGCTGTGGGATGAGCAGCCAAATGGCGGTAACGGTACTTTAGCGCGCTCACGGGAAAGATAAACTGGTGAAGTGA  
ATCACTAACGTCGCTAACGGTGCAGTCTCTGCCACCAGCAGCGATGCCATTAATGGCTCACAGCTCTATAGCACCATAA  
GTACATCGCTGATGCGCTGGGTGGTATGCAGAACTCAACGCTGACGGAACTATCACTGCACCAGCTTACACCATTGCAA  
ATACCGATTACAACAACGTCGGTGAAGCCTGGATGCGCTTGATAATAACGCTCTGCTGTGGGATGCAACAGCCAAATAAC  
GGCGCAGGTGCTTACAGCCAGCAGTCAATGACCGCAAGGCAGCATATATCACAAACGTCGCTGATGGTAACTGGTGAAGA  
TAGCACCAGCGTATCAACGGTCTCAGTTGAATGCAACCAACATGATGATCCAGCAGAACAGCGAAATCATCAATCAGC  
TTGCCGGTGACACCAGTAAAACATACATCGGAGATAACGGTGCAGGTATTAACATATGTACGTACCAACGACAGCGGCTTA  
CGTTCAACGATGCCAGCGCAGCAGGTATTTGGCTACTACCGTGTGGGGTATAACACTGTTGCCAAAGCGGATAGCAGCGT  
GGCAATCGCTTACAGCCAGCAGTCAATGACAGTCTGAGCAGTATTGCGCTGGGTAGCGAAATCCGTCTCCAGCCGTTGATG  
TGAAAGGCTCCCGTAATACCCGCTTACGGAAATGGGGTCGAGATCGGTTATGACACCAGGATGGCGAACTGCTTGGC  
GCGTTGTGATCGCTGATGATGTTAAATATCGTCAAATCATCAACGTCGCGGATGGTTCTGAAGCCCATGACGCTGTTAC  
TGTTCCGACGTTGCAAAACGCTATTGGTGCAGTAGCAACCAACCAACAACTACTATCACGCCAATCAACGGCTGAAAG  
ACTCACTGCAGTCCGTTGAAGACTCGCTGGCAATGGGCGGAAACCACTCGTTAATGGTAAATGGCGGATTTGGTTCGCG  
CTGAACACTTTAGTCTGGCTGATGCGATCAACGGTATTGCTATCGGTTCTAACGCACGCGCAAAATCATGCCGACAGCAT  
TGCTATGGGTAATGGTTCTCAGACTACCCGTTGGTGCAGACCAACTACACTGCCTACAAATGGACGCGCCGAGAAAT  
CTGTGGGTGAGTTCTCTGTGCGCAGCAAGACGTTCAACGTCAGATCAACCAACGTCGCAGCAGGTTCCGGCGGATACCGAT  
GCGGTTAACGTTGGTTCAGTTGAAAGTAAACGGACGCGCAGGTTTCCAGAAATACCAGACATTTACTAACTGAACTCA  
GGTCACTAATCTGGATATCGCGTGACCAATATCGAAAACGGCATTGGCGATATCGTAAACACCGGTAGCACTAAGTACT  
TCAAGACCAACACCGATGGCGCAGATGCCAACGCGCAGGGTAAAGACAGTGTTCGATTTGGTTCTGGTTCCATTTGCTGCC  
GCTGAAGCAATACACCGATCGCAGTGGCAGCGGTTCCGTAGCAGCAGAAAGATAACGATCTCTGTGGGTTCTTCTCCAAACCA  
GCGCGTATACCAACGTTGCTGCGGTTGTTAATGCCACCGATGCGGTTAACGTTTCGCAACTGAAAGTCTTCTGAAGCAG  
GCGCGTGGCTAGCAGCAAAAGCTGATGGCTCTATCGACTACAGCAACATCACTCTCGGTGGTGGTAAACGGCGGTAGC  
ACTCGCATCAGCAACGTTTCCGCTGGCGTGAATAACAACGACGAGTGAACACTAGCGCAGTTGAAGCAAAAGTGTACAGGA  
AACGAAGCAATACACCGATCGCAGCAGTGGTTGAGATGGATAACAACTGTCAAAACGTAAGCAAGCTGAGTGGTGGTGA  
TCGCTTCTGCAATGGCAATGACCGGCTGCGCGCAGGCTTACACGCGGGTGCAGCATGGCGTCTATTGGTGGCGGTA  
TACACGGTGAATCGGCTGTTGCTTTAGGTGTGTCGATGGTGAAGCGCAATGGTGGTGGGTCACAAATTACAGGTAG  
TACCAATAGCCAGGTTGAATACTCCGCCGACTCGGTGCGGTTATTAGTGGTAA

>Cluster\_53938

ATGAATATTGAACAGATTTTAAAAAACCTCTAAAACGAAATATAAACGGGGTAGTCAAAGCAGAGCAAAACCGATGATGC  
CAGCGCTACATCGAGTTAGATGAATATGTCATCACCCGCAACTGGAACCACTCTTCGCCATTTCTTCGAATCCTATG  
TTCTTCCGCTGCGGCGGAAAGGATCCGTATGGAAAACAAAGTCCGCGTATGGGTTTCAGGCTTCTTCGGTTCCAGGTAA  
TCGCATTTTAAAGATCTTTCTTATCTTTTATCTAAAACGAAAGTTACACATAACCGGTACGGAACCTAATGCTTACTC  
CTTCTTTGAAGAGAAAATCAAAGATGCATTTATCTTCCGATATTAACAAGCGGTGCATTTACCCGACTGAAGTCATTC  
TGTTCAATATTGATTCGCGTGCCAACGTAGATGACAAAGAAGATGCCATTTCTTAAAGTCTTCCGAAAGTCTTCAACGAA  
CGCATTTGGATCTGCGCTGATTTCCGATATTGCCATTTGAGCGGAGCTGGATAAACCGGCTCAGTATGAACACTT  
TAAAGCCGCTTTTCCGATATCAATGGCTCGCGTGGGAAGCAGCGCGACGCTTACTTTCATCAGCGATGACATGG  
CACAGCATTAAGCCAGGCCACGAGCAGAGTCTTGAAGCCTCCGCCAATGGGTGGAACAACTCGACAAAACCTTCCCG  
CTGGATCAATAATTTTCCAGTGGGTAAAAGAGTGGCTGGATGACAAATGGTAAGAATCCTCTTTATGGTGGATGA  
AGTCGGTCAAGTCTTATGGCAAAAATACGCAATGATGCTGGAAGCTGCAGACTATTAAGTGAACAACTTGGGGTATTTGG  
GTGGCCGCGCATGGGTTATCGTGACTTTCGAGGCGGATATCAACGCGCAATCGGTGGTATGAGCAGTGCAGCAGGACAG  
GACTTCTCCAAAGTCCAGGGCGCTTCTCTACAGCCTGCAACTTTCCAGCTTAAACATCAGAAGTTATCCAGAAACG  
TTTGTGGTAAAGACTGACGAGCAAAAGCGGCGTGGCAAAAGTGTGGCAAGAGAAAGCGGATATCTGCGTAAACGAC  
TGGCTTTTGAACACTTACAACAACACTACTGCCTACTCGCTTCTTTTACAGCGAAGAAGAGTTCGTTGCAACTACCCGTTGTC  
CCGTGGCACTATCAGATTTCTGCAAAAAGTGTGTTGAATCTATTCGAGCAGAAAGTGCAGCGGTTAAACAATGGCCATGGG  
TGAGCGTTCTCAGCTGGAGGCATTTCCAGACGGCGGCGCAGCAATCTCAGCGCAAGGGCTGGATTTCTGCTGGTCTTTCT  
GGCGTCTATGCGGCCATTGAGAGCTTCTGGAACCTGCGGTTAGCCGACCATCACTCAGGCTTGCAGAAATGGCAT  
CTTGATGATTTCTGATGGCAAACTGCTTAAAACGCTGTTCTGATCCGCTATGTTGGAACCGCTGAAAAGCACCCTGGATAA  
CCTGGTACATTTGCTATCGATAGGATCGATGCCGATAAAGTTGAGTTGCGCCGCGGTCGAAAAAGTCTCAACACGC  
TTGAACGCTGATGCTCATTGCGCGCTGAAAGATAAATATGTTCCGACCAACGAAAGAAAGAGATCGAAAACGAG  
ATCCGTAACGTTGATGCTGATTTCTGCGATCAACAAAAACTGGCATCGATCATCTTTGATGACATTTGAAAAGCCG  
TAAATATCTTATCCGGCTTAAACAAGACTTTGATGATGCTTACGCGCTTCTTGAACGGGATCCATTAGACCGCAGTGC  
TTAACGATCTGGTGGTGAAGATCTGACCCCTAAAGATCCGACTTATTGCTTATAACAGCGATGCGACCTGTGCGCT  
TATACGTCAGAAGCGCAGGCTGATTTTGAATTCGCTGCCCCAAGAGGGCGTACCTGGAGCGATTTGATTTAGTCTGT  
CCAGACTGAAAAGTTCCTCAAAGATAACGCCGGCAACGTCGGAACAGGCTACCCTGCTCTCAGAAAAGCGGCTGAAA  
ACAGCAACCCGGGAAAAATTACTCCGTTTCAGTTGGAATCACTACTTGCAGAAAGCAGATGCTTGGGCGATTTGGCGAGCC  
TTACCGAAAAAATCCTCCAGCCATCGAACATTGCTGATGAAGCCTGCGTACGTGATGAAAACACCTTCCGCAAGCT  
GAAGATGCTGCGGCTTTTAAACGGCGACATCTCCCGTGAATTCATGCATTAAGTACGGTGGAGAACGACCCGAACTGG  
ATCTCGGTAACCTCGAAGAGTCCAACCCGAGCCATGCGCAGGTGAGAACTGGATCAGCATGAATATCGAATACAAT  
AAACCGGTGATTTACCGGATATTTGAAACATTTGCGCGCTCGCCCTTATGGCTGGCCGAAAGCAGAACTGAACTGCT  
GGTAGCCGCTGCGCTGCAAAAGTAAATTCAGCTTACGCGCAGCAAAACAACGTCGAAACGAAAACAGGCGTGGGAAT  
TATTTAATAACAGCCGCGCCATAGCGAATTTGCGTCTGCATAAAGTTCGCGCTCATGATGAAGCGCAGGTGCGTAAAGCC  
GCGCAAAACCATGGCTGACATCGCTCAGCAGCCGTTAAAGCAAGCGGAAAGAGCCGCGCTGGTTGAACATATTTGCTCAGT  
TTTTGAAGAGTGGAAAGCAGAGCTGAACGATTTCCGCGCAAGCAGAGGGCGGAAACAATCCGGGAAAAACGAGATTG  
AATCCGGTCTGCGCTGCTAATGCCATTTCTAATGAGAAAGAGATTGTCCTGATCGAAAAGTCTCATCCCTGAAA  
GATGAACCTCTGGATTTACGCGAAGACCGTGAAGATTTGGTGCAGTCTTACCGTAAGCAATTCGCCACCTGGCAAAACT  
GGGCTGCGCTGAATGGCAGCTTAAATCTAACCGCGCTGAAAAAAGACCGCAGCGCTTAAAGCTGGGCG  
AGCTGAAAGCATCTGGCAATGCCGAACCTTATAAGCATCTCAATCGCATCAGCTGTGATTGAACAGGTCCAGAAC  
GTCAACATCAGTTAGTCAACAGCATGCCAGCAGCCCTCGAACGATTTGACGCCCCATCGAGGAAAGCCGCTCAACG  
CTTGCTCGAAGCGCACCCAGCTCAGAACTGCAAAAACGCGTTCTGCTGCCGATGCAAAAAGCAGAAAACCGCGTGAAG  
TCAGCCAGTCTAATTCGGAAATTTTGGCGAACAGCAAGAGACAAAAGCGCTGCAAAATGGATGCAATAAAAGATTAAC  
CTGTGGATCGACGAGCTGCTAAAAGCAAGAAGCACAACCTCCGGCAGCAAAATGAAGCAAAACGCGTGCAGTCAAG  
ACAGACTTATGTTGTGGTGGAAAACCGCTTATCCAACCGGTACGAAAAAACGCACTGTTGTAATGTCGCCAGTGA  
TGGTAAATGCCACCGGTTGGTGAAGTTCTAGAAACGACCGAAGCTGGAAAAGCGCTCGACAGTTACGCACACCGCTG

>Cluster\_61345

ATGAGCGGAAAACCGGGCGGCGCTCAGGTTGACATGACGCAGTATGGCGGTAGCATTTGTTTCAAGGTTTACAGCCGGGTACG  
TATTTGGTTCGCCCCACCGGCTGGCTGTTTCGGTGTGCCCGGGGAGTACGTCGGCCATCCGGTCAATCCCTGCTCG  
GTGCAAAAGTCTTCCCGGTGAAACCGACATCGCCCTGCCCGGCCGTCGCGTTCATCTCTCCGCACCTACAGCAGT  
TACCGGACAAAACGCTCCGCGCGGTGGGGAGCCTCGGCCCGGCTGGAAAATGCCTGCGGATATCCGTTACAGTGGC  
CGATAACACAGTACTCAGTGATAACCGCGAAGCCCGGTTATTTTGGAGCCTGTTTCCCGGTGAGGACCGTTGCA  
GCCGACGAGTCACTGTGGCTGGTGGCGGCGCGTGGCAAACCTGGATGAAGTACCGGCTGGCCGACTCTGGCAG  
GCGTGGCCGGAAGAACTCCGCTTAAGTCCGCATCGTTAFTTGGCGACAACAGTCCGCAGGGGCGGTGGTGGCTGCTCG  
TTGGTGTGAGCGGGTGGCGAAGCGGATGAGGTGCTGCTGCGCGCTGCCGCGTACCGGGTACTGACCGGGCTGGTGG  
ACCGTTCGGGGCGACACAGACGTTCCACCGCGAAGCCCGGTTAAATTCAGCGCGAAATCACCGGCTGACGGATGGT  
GCCTGGGCTCACTTCCGGCTGGTACTGACCACGCGAGCGGCGAGCGGAGAAAGCCCGGAGCAGGCCATTTCCGGCGG  
GACGGAACCGTCCGCTTTTCCCTGATACCCGCGGTTACACCGAATAATGGCCGGGACACCGCATCCGCTGCTGCTGCC  
TGTTGGTGAACGACGACCCGGAATACCCGGAGAATTTACCTGCCGCGCGCTGGTGGCTATGGCTGGACGCCACGCGC  
GAACTGGCGGTGGTGTATGACCGTACTGGCAAACAGGTGACGCTTTACTTACGATGATAAAATACCGGGTACGGATGGT  
GGCGACCGTACACGGGCGCGGAAATCCGTTACCGTTACGACAGCGAGGGCGGGTACAGAACAGCTAAACCCGG  
CAGGCTTAAGCTACACGATACGATGAGAAAGACCGCATCACCATCACCGACAGCCTGGACCGCGTGAAGTCTGCAC  
ACGCGAGGCGAAGCCGGCTGAAGCGGGTGGTGAAGAAAGAACCGGGACCGGACCGCTACGAGAGTCACTGTTGACG  
CGTGGCGAGGCTCAGGGCACAGACGGATGCCGACGCGGAGCAACAGAGTACAGCCCGATGTTGGTGGCGGCTCATCA  
CGCGATAAACACCGCGGATGGCAGGGCATCGGCTTTTACTATAACACCACAACAGTTAACGTCAGCCACCGGGCT  
GACGGCTGGAAATGCGCGCGGAATATGATGAAATGGGCGCTGATTGAGGAACTGCCCTGACGGCGATATACCCCG  
CTACCGTTATGATAATCACACAGTACCTTACCTGCCGCAACGGAAGTGCACCGGACCGGAAACCATGACGCTGGA  
GCCGTTACGCTCAGTTGCTGAGCTTACCGACTTTCGGGTTATGTAACCCGTTATGACCATGACCGCTTCCGGCAGATG  
ACGGCGGTGACCCGAGGAAGGGCTGAGTCACTACCGGCATACGACAGCCGTTGACAGTTAATGGCGTGAAGACAC  
GCAGGGCCATGAAACCGGATGAAATACAACATCGCCGTTGACCTGACCGCGCTCATTTGCCCGGACGCGAGAAACG  
GGACACAGTACGATGCGTGGGGAAGCGCTCCGTACCGAGGCGGGCTGACGCGAGTATGGAATACGATGATGAGAA  
GGACGGGTGATCCGCTGACAGTGAACGCGAGCCACACACCTTCCGTTACGATGTACTTACCGGCTGATACAGGA  
AACCGGCTTTGACGGCGCACACAGCTTATCACACGACCTGACCGGCAACCTTATCCGAGCGAGGATGAGGGTCTGG  
TCACCCACTGGCACTATGACGAAGCAGACCGCTCACGACCGGACCGTGAAGGGTGAACCGGAGCGGTTGGCAGTAT  
GACGAACGTTGGCTGGCTGACAGACATCAGCCATATCAGCGAAGGGCAGCGGTTGGCGGTGCATTAACGATGATGAGA  
AGGCGGGTACCGGTTGAGCGTACAGCGGTGCATCACCGCAGACGGAAGCAGTCTGCGCAGCATGAGACCAGACATG  
CGTACAACCGCGAGGGGCTGGCGAACCGCTGTATACCGGACAGCCTGCCGCGCTGGAATGGCTGACCTACCGGAGCGGT  
TACCTGGCAGGATGAACTCGGCGACACACCGCTGGTGGAGTACACCGCGACCGCTGACCGGAAACCGCTGCGCAG  
CTTCGGCCGTTATGAACCTCACCGCTTATACCCCTGCGGGCAGTTACAGAGCCAGCACCTGAACAGCGCTGTCTG  
ACCGGATTAACCTGGAACGACAACCGGCAACTCATCCGATCAGCAGCCGCGCCAGACCCGGAGTTACAGCTACAGC  
ACCACCGGAGGCTGACCGCGTTCACACACCGCAGCGAATCTGGATATCCGATCCCGTATGCCACAGACCCGGCAGG  
TAACCGCTTGCAGCCGAGCTGCACCCGACAGCACCTCAGCATGTGGCGGATAACCGTATCGCCGTTGACCGCGC  
ACTATCTTTTACCGTATGACCTCACCGGCTCACCGGAGGTCAGACGAGAAACCGACCTCATCCGGAAGGGGTTATCCG  
GATGAGCGGACTCACCGTACCATTACGACAGTACGACCGGCTGGTGCATACCGGGACACAATATGAAGAGCCGCT  
GGTCGAAAGTCTGCTATCTTTACGACCCGCTGGGCGCAGGGTGGCAAAACGGTGTGGCGGCGTGAACGGGACTGACGG  
GCTGGATGTCGCTGTACGGAAACCGCAAGTACCTGGTACCGTGGGACGGGACCGGCTGACACAGTACAGAACGAC  
AGGACCGCATCCAGACGATTTTATCAGCCGGGAGCTTACCGCACTCATCAGGGTGAACCTGACCGGCTGAGCTGGC  
GAAACCGCAGCGCGAGCCTGGCGGATGCCCTTACGACAGTCCGGCGGAGACGCTGGCAGTGTGGTGTCCCGCCGG  
TGCTGGTGCAGATGCTCGACCGGCTGGAAGTGAATCTGGCTGACCGGGTGAAGTGAAGAAAGCCCGCTGGCTGGCA  
TCGTGGCGCTGACCGTGGAGCAGATGAAAACAGATCCGATGACACCGGCTGACACCGCGCGGAAATACCTGATGCA  
CTGCGACCATCGCGGCTGCGGCTGCGGCTCATCAGCAGGAAAGGGCAACAGCGTGGTGGCAGAAATATGATGAATGGG  
GCAACCTGCTGAAATGAAGAGAACCAGCATCAGCTGACGAGCTTATCCGGCTGCGGGGACGAGTATGATGAGGAGTCC  
GGCTGTATTACAACCGCCACCGCTATTATGACCCGCTGCAGGGGCGATATATCACTAGGATCCGATTTGACTGAGGG  
GGATGGAACCTGTATGGATATCAATTTGAATCCGATGACAGATCAGCCCTGCGGTTATCTATGTTGGGAGGATGCA  
AATCGGGGCGATGTAATAATGGTCTTTGGCGCACACTATCCGCTATGATAGTCCAGATAAATTTGATCTATAGATAGC  
ACCGCATATGACGCTTAAATAAAATAAATAGCCAATCTATTTGCGAAGATAAAGAGTTCGCTGGTTTAAATATGTAAGGA  
TAATAGTGGCAGATATTTCTCAACAGCCTAACCGGAGGAAAGAAAGGATCATATCCATTAATAGCCCTTGCCTTA  
ATGGTACTGAGAAAGTATCAGCTTATCATACTCATGGTCAAGTATGATCATGAGAAATATTTGGGACGAAATATTTT  
AAGATGAGAAAAATAGTTAAAAGTAAAGATAACAATATCAAGTATTTTATTTAGGTACGCCAGTGGTAATTTTAAAGC  
AATAGATAACCACGGGAAGGAAATAACAAACAGAAAAGGATTAACCTAATGTCTGCAGACTTACGTTAATATGTA  
>Cluster\_62870  
GTGAATGTCACCGGGCGGAGGGCTATTACAACGCCACGCTGGACTATGGTGACGGCTGCACCACCGTACCGGACGGCAA  
GGGATTCACCGTTATTACTATGATCTGACGGCAATATCTGCGGGAAGAAGCGCCGACGGCAGCACCACCGTATG  
AATGGGATGAATCCATCCTGCTGGCCGCTACTCCCTGCCGGCGGGTGGAGAAGTTGAAATACACCGCGCACAC  
GGTCACTTAAGCTTACACGGCGGACAGCGGCGGAGTGGCAGTACCGTATGATGAGCGGGCTGCTCAGCAACAT  
CACCACCCAGCGGGCAGACGCTGGACACAGCAGTGTGATGAAACCGCGGCTGCCGTTAAGTCTGGTGTCCGACAGGGC  
AAGAGACCGGCTGGCGTACACGCGCAGGGGCTGTTGTCGGGAATATCCCGCAGGATGACGGCGTGGGATAGAG  
TACGACCACCAACCGGCGGAAACACTCACCGAGCTGATGGCCGTGAACACCAACCGAAATACAGCGGCTCAGACCT  
GCCGTTGAAGATGCGCGGCGCCCGCGGCTCAGTCACTGCGGTTACAGTGGCAGCAGCACCATAAACTGAGCGGATGAA  
GTGCTGGAACCGGCGGGAAGGATTTGCTATGACCGCCACGGCAACCTGCTGGCGTACACGGACGGCAATGGTGTGTC  
TGGACAATGGAGTACGGCCGCTTTCGATTTGCGGCTGGCGGCAACCGGACGGTGAAGGCCACCGTGGCAGTACCGTACGA  
TAAAGACAGCTGCAACTGACAGAAGTCAATCCGCGAGGCGGAGTCACTACCGTTATATTTGACAACTGTGGACGGG  
TGACGGAAGAGCGTGACTGGGCGGCGCTGGTCTGGCGTTACCGCTATGACCGGATGGCCCTCTGTACCGCGGGTTAAC  
GGCTGGAGGAAACCATCTCTACAGCCGGGATGCCGACGGCCGCTGGCAGAGGTCATCACCGCGGAAGGCAAAACGCA  
GTATGCCATGACAAATCCGCGAGGCTGACGGGTATCTTACCGCCGACGGTATCATCAGCGCACCGGCTATGACGAAC  
CGGGGGGTTGAATGTCACCACTCAGGCGGACGGGCAATGAATACCACTACCCGATGAACACACCGTATCCGCTGT  
ATCTGCCACCGGAAGATGAACCGGACAGACACCCCGGTAATCCCTGCTGAAAACACGCTACCGTTATAACCGCCCGG  
AGAAGTACGAGGCTCATTTGCGGGGGATGAGACGCTGACGTTACGCGTGTGAGCGGGACGTTAAGTGTTCGGC  
ACAGTAAACCGGGTTTTGGCTGTGAGCAGGGCTGGAATGACAGCAGCCAGCTTGTACCCAGCGCGCGGATTTTCCCG  
GAGGAACCACTGGGCGGGCTGCTCCCTCACTGGTACGGAGTACCGTTACGACAGCGGGGCAATGTGTCGGCTGT  
CACCGCGGGAAGATTACCGGACGGGAAACACCGGGATACCGGCTGGACCGGAACGGTCAAGGTCACCGGTTACAG  
CCTCAGGACCGGGCTGGGCTATGGCGAAGGGCAGAGTCTATGGCTATGACAGTTGTGGCTACCTGAAGGCGCAGTCT  
GCGGGCAGGACCGGATAAGTGAAGAGACTGACAGTATGCCGGAGGACCGGCTGAAACAGGCCGGAACACGCAATG  
TGATATGACCGCGAGGCGGATGGTTCAGCGCACAGACCGTACCGGCTACCGCCGGAACAGAGCGGTTCCGGT  
GGGACAGCGTACAGCTGACCGGATTTGACGCGCACAGGGTGGAGTGGGAATACCGCCAGCAGCCAGCGGCGAGA  
CGAACAGGAAACGCTGCGACCGGAAGAAAATCCGCTTACGATCTGTGGGACGGCAGTATTGGGAAATCCGGGA

ATACCGCGATGATAAACTGTACAGCGTACGGCACCTGGTGTTTAACGGCTTTGAGCTGATAAGCCAGCAGTTCAGCCGGA  
AACGGCAGGCGCATCCGTCGGTGGCCCCAGTGGGTGACGCGGACGAATCATCGGTCGAGCGACCTGACGGGCGCTCCG  
CTGATGCTCTTTAACAGTGAAGTAAAACCGTCTGGCGACCGGACAGACCAGCTGTGGGGGTGGCACTCAGCCTGCC  
CGCAGACACCGGCTACCCGGACCGCGCGGGGAGCTGGACCCGGAAAGCAACCCCGGCTGCTGTATGCGGGACAGTGGC  
AGGATGCGGAATCCAAATGCTAGGGCAGCTTTGATTATGGCCATCGCAATATTTATCTTAGGAAAAATGCTACTTATA  
CTGGGGTTGCTGGGCGGGGAGCAGACTTACCGGTATGTGCCAATCCTTGTGGGTGGTGTATCCGCTGGGATTTGGCTGC  
AAGTTCTAAAATCAGCAGTTTGTAGGACATATTTGGCGATGGTGTGCTGTTAGTGGGCATACGGGTTTCTGGATGGG  
TTCGTTTATCAGCTAGTCAAATAAAATATTTGCTAAAGAAATGGAGAAGCTAGGAATTAAGTAATAAGGAAAGCAGAT  
AAATATTTGGCCAAATGCTAGGGCAGCTTTGATTATGGCCATCGCAATATTTATCTTAGGAAAAATGCTACTTATA  
TGAGGTGTATCATGAAGTGTATCATGCCAAGCAATTTGCGAAAATTTGGACGAGAAGCATAACGAAGCAGTGGACTTAT  
CTAGGGAGAACAGCTTCTAAATGAAATATTAAGAAATTTATTAATGAAGCGGAAATAGCTCATGCCATAAAA  
TATGTTGAGGGATTGAGAGAAAAATTCATGATGGGACTAACAAATTA

>Cluster\_38832

ATGTCGCTACCAATGCATCGCACATTTGTTTTAACTGGAATAATATTTGCGTTATCGGCAGTGTATTCATTGAGCTATGC  
ACGAGATGAATTTAACCTTCGATATCCTTGTAGTTGGATAGCCACTTGAATAACACAAGTACTGGCAGATTTTCATTAATA  
ATAAATAACTTAACCTCAGGTGATATCTTACCTCTGTATGTTGGGGCAAGATCTCTTTGATAAGAGAAATTTACATTT  
GTTCTTTCTTCGGATAAAAAAGTCTCATTTCTTACAAAAGCGGATCTCCGTGAATTCGGTCTTAAAGTTGATGT  
GATTCCTGCGTTAAAAGTAATGAATGATGATACGAGTTGGAGATATTCACAGATTTATGATGGCGCAGTTATGATT  
TCCAGTTAGACAGTCAAACGCTGTGGCTGCGGATCCCTCAAATCTATCAGAATGCAATAGCCGAGGTAGTATTCGACCG  
AAATACTGGAATGATGGTGAAGTGCAGTGGTAAAGTTATGTCAGTGGTCCCGGCAAAATAGTGTATGATAA  
CCTGAGTTCAAATTTGGTTGAATTTAAATTCAGGTATTAATTTAGGCGCATGGCGGCTACGAAAATAATACAGTTTACAATG  
AATCCAATTTGGGAATCGATTAGCACCAGTTTGCACCGCATATCAAAGCATTAAAGAGTCAGATGGAATTTGGCGAGCT  
TTCACAAATGGTGTATCTTTTTCAGAGTGTGCAATGACAGGATTAATACTTGAACCTGATACAGTATGTTACCTGCAG  
CGAATAAGGCTTTGCCACTAGTATCGTATCGTAAACAGGATGCGCAAGTTGTGATTAACAAATTTGCTATGCTA  
TTTACCAACATGGGTATCAGCAGGGCCATTTGAAATTAAGACTTAAGTCAAGGTAACGGCAGGATCTGATCTGGAAGTC  
ACCATCAAAGAAACAAATGGGCAAGAACAGTTTTATTCAGGCGAGTTCAACGGTCCAAATTTACAGCGAGAGGGCG  
ATTAATAATAGTCTTTCAGCTGGAAAAATATCGTGACAGTGAATAATGCTGAGACACCTGTTTTGGTGTGCAACCG  
CGATATAGGCTTTGCCCTATGGAATAACGATTTATGGCGGACTTGGTGCCTCAATGTATCATTATGCTATGCTA  
ATTGGCGCTGATTTAGGCGCTCTGGGTGCGTATCTGTTGATATCACCAGCAAAAACGAAGTTGATGATGGGCGTGA  
TGATGCAACAGGGCTGTCTATGGCGTGCACAGTATGCGAAAAGATTTTCCAGACACTGATACGACAGTAACTCTGCAAGTT  
ATCGTTATTCACATCAAAATTTACACTTTCCAGGAAGCACTTGATCAACGTGATACACTGATGACAAGGGTATTTAC  
AGTTATTCGCGACAGCAAAATTAATCGCGTAATCGTTACAATTAATCTTTACAAAATAATGGTCTGGGCTCGGCTCA  
CCTTAATGGTTATCAACAGGATTTATGGGGAATGCATGGGCGCAACCGCAGTATAGGAATGGGTTACAGTACGACCTGGA  
ATAATATTAATGCTGTGTTAATACACACTAACGAAAACGCCAGGAATGACTGGCGAGCAGCAATTTTCATTAACACTC  
AATATTCCTCTCTCGTGGCTGCCAGATTCATGGGCGATGTATAACGTAACCGTTCGGATAAAAGTAATACATCACA  
TCAATTCGCGCAAGTTCGCGTACTGCTCTACAAGATAAACCACTGAGTTAATTTACAGCAAAAGTTATATACTGATAAATG  
TGGTTATGGTGCAGCATGAATGGAGCTTATCGTAGCTCAGTGGTGAATTCGGTCTGGGATATAGCTATGATAAAAAAT  
AGTCGTGAGTGAATTCAGTGCAGGAGTTCGGTGTGCTCATGCTCATGGAGTAACATTTGGGCAATCAGTGCAGGA  
TTCATTCGCGATCGTGCATATTAATGAGGTCGCAATGTAAGTCAAAAATGCGCAAGGCTTTATACATGATTTTGGG  
GAAATGCGATTTGCCAATATGACGAATTTATCGACATAACCGCTATTACTGTGAATACTCAGGGGCATACAGTCTTGTGAT  
ATTTCTGATGCCACACAGATGTTATTCCTTCGAAAGGTGCTGTTGCTGCTGCTGATTTGATGCACGTAGCGGAATGGC  
AGCCTTATGACATTAGTCCATAATAAGAACCGTCCCGTTTGGGCGATTTGCTGACATTAGGGAATAGCACACAGCGATG  
TTGGTGAAGATGGAGGTTTATATACAGGTGTGCAAGAACTAATGACATTTACGGTTACAGTGGGAAAAGAGATTAAC  
CAGCAATGTACAGGATTTACTGTACAGAAAAATACACCAGGGTATCTATAAAGCCACAATGGATTGCTCGATAA

>Cluster\_3304

ATGGGTATTCAGAAATTCGATCATTTCACACCACAAGCTCAAAAATTCGTGGCTGCAAAGTCCGGTGGATGTGCTGACCTT  
CGAAGCCGCGAACAACCTGAGTACCCCGTTCCGCTACGACATTGATTTACCAGCAGCGATAAAGCCATCACGCGGAGT  
CGGTGCTGATGCAGGACGGCGCATTCAGCCTGACGGCACCGCCGGTACAGGGGATGCCGGTACAGACTGCCCTGCGCACC  
CTGCACGGGCTATCACCGGCTTTAAACACCTGTATCCTGACAGGATGAAGCCGTTACGAAGTGCAGCTTGAACCCCG  
AATGGCGCTGTGGCCCGCAGCCGCAAGCCATTTACCAGAACCAGACGGTGGCGCAAATAGTCGAAAAAATCCTGC  
GCGAGCGGCACAGATGCGCGGTGAGGACTTCTGTTTAACTCAAAAAGCGAATACCCGTCGCTGAAACAGGTGATGCA  
TACGGTGAGGACGACCTGACGTTTATTTACCGCTGTGTGCGAAGTGGGTATCTGGTCCGCTTGGCACCGACGCCCG  
GCTGAAAATTTGAGTTGTGAGTTTACGACGACCAGAGCGGCTATGAGCGCGGACTGACGCTGCCGCTTCGCCATCCTT  
CAGGGCTGTTGATGGTGAACGGAAGCCGATTTGGGGCTGAACCCGCATACAGCCTGGTGGAAAAAAGCCTCACCCAG  
CGGACTACAACTACCGCACCGCCAGCAGAGATGATGACAGAGCAGATGACGCCACCGGGGGGATACACCCAGCAG  
TGCGGAAGCTTACACTACGCTGACAACCTCTGCAAAAAGGCGACAAGGAGGACGCGAAAGCGGCGGTTTTATGCC  
GTATCCGTCACGAACGCTACCTGAATGAACAGGCCATTTCTGACGGCCAGAGCACCAGTTCACTGCTGATGCCGGGGCTG  
GAAATCAGGTTTACGGGACGACGCGCTGCGGTATTTCCGCAAGGGCTGCTGATACCGGCTGACGGCCAGCGCGGCG  
CCGTGACCGCTATGAACTGACGTTTACGGGATACCCACTCAGAACGCTACGGCTATCGCCCGGCTTATCCCC  
GCCCGTAAATGGCGGAACACTCCGGCGGGGTACACAGTACGGTGAAGAACGACATCTACGCCATATCGATAAGGAC  
GGGCGCTACCGGGTCAATCTGACTTTGACCTGATACGTTGGAAGCCGGGCTACGAAAGCCTGTGGGTACGCCAGTCCGG  
CCGTATGCGGGGAGACCTACCGCCTGCACCTGCCGCTGCTGGCGGGAACGGAAGTCAGCATCCCTTTGAGGAAGGCA  
ACCCGACCGACCGTATATCGCCGGGTAAAACACGACTCGGCACACACCGACCATGTGACCATTCAGAACTACAAGCGC  
AACGTGCTGCGCACCCCGGCAACAACAAATCCGCTCGATGATGAGCGCGGCAAGAGCATATCAAGGTCAGTACCGA  
GTACGGCGGCAAGAGCAGTTGAATCTGGGTCTATCTGGTGGATGCCGGAACAAACAGCGCGGGGAAGGCTTTGAACCTG  
GTACCGATATGTTGGGCGCGGTGCGGGCAAGAAAGGGATTTTATCAGCGCGGATGCGCAGGATAAAGCGCGGGGAG  
GTGCGGCAAAATGGCTCCGGCGATGGCAATACTGGATGGCGCACAGTACAGATGACGCTGCTGCTCACATGATGCGCAG  
GACGAATGCGGATCCGGCAGATCTGTATCGCAGATAGCGCTGTTGCAGCAAAAGTGTAAAAGATCTGACGCGAGCCGTA  
TCCTGCTAAGTGCACCAAGGGCGTGGCGATCGCCAGCGGCGAGCACCCTGCAACTGGCGGCGTCAAGAAATGTGATAGCG  
AAGCAGGCAACAACAGCATACGCGTATGTAATAAATATGTTTATCGGTTGAGTACAGGCGCTGAGCGTGTGTCGCG  
TAAAGCGGCATCAAGCTGTTTGGCAATAAAGGGGCGTCTCGGTACAGGCACAGAACGATCTGATGGAACGTTTGGCAC  
AGAAATCGATAGAGATCACAGTACGGAAGATGAGATCAAGATCACCGGAAGAAAGAAATCACCTTAAACGGCGGTGCG  
AGCTACATCCGGCTGGATGCTGCGGATAGAAGCGGGAACCGCGGAGAATAAACGTTAAGGCCGATATACGGGCGG  
TAAACAAAGCGGAAGCTGACGCGGAGCTGATGGCAATTTCCGCTGATTAAGTCTGAGGATTTTAAATACAGAGCTTTATTT  
TGCTGGATGAAAATACTGGCAACCCTTATTAATTTGGCCCTATGAACTAGAAGTGGAAAGTGGGCTAAAATGAGTGGG  
ATTAATGATGAAAATGAAAATACAGAACTAATACTCTGATAAGGAGGAGGTCGTTAATATTTAGTGTCTTTGAACCCGA  
TGAGTTTTTAGCATGACATTAATTA

>Cluster\_16078

ATGGCTATCAAAAAACCGAAGCTTATTTCTCCCTGTGGCAAGCTGCGACGAACTGCGTGGCGGATGGACGCCAGCCA

GTACAAAGACTATGCTACTGACCCGCTGCTGTTTATGAAGTACGTTTCCGATAAGTATAAAGGCGATCCTTACGGGATGATCG  
TGATACCCAAAGGAGCCAGCTTTGACGATATGGTTGCGCTGAAAAATGACAAAGAGATCGGCGATAAAATCAACAAAAATC  
ATCCACAAGCTGGCGGAAGAGAAGCGCCGGAAGGGCGTATCGACGAAGCCGACTTTAACGACGAAGATAAATCGGCAA  
AGGCAAGGAAATGATTTGACCGCCGAGGCAAGCTTTGTCGCTATCTTTGAAGGGTTAGATCTCTCCAGCAACCGGGTCGAAG  
GCGACGATCTGCTGGCGATGCCATGAAATATCTGATGCGTCACTTCGCAACCGAATCCGGCAAGAGTAAAGGACAGTTT  
TACACTCCGGCGGAGGTGTCACGTATTTGCGGAAGGTGATTGGTATTACTCCCGATAACGCGGAGATGCAACGGTTTTA  
TGACCCAACTGTGGCTCGGTTGCTGCTGTTGAAAGTGAATGATGAAGCCGGCGGACTGTCGATTTTCGGCCAAAG  
AGATGGATAACGCTACAGTGGCTGGCGGGATGAACATGATCTGCATAAACAATGCCACCGCGAAAATCTGGCAGGGC  
AATACGCTGAGCGATCGCAGTGGAAAGAGCGCAACCGCAACCTGAAAAGCCTTCGATTTTGGCGTGGCGAACCCGCTTT  
TTCCAATAAAAACTGGACCAACGGGCTGACGCCAAAAAAGATCCGTTTGAACGCTTCGGCTGGGGTATTCCGCCGAAA  
AAAACGGCGATTATGCTTTTGTGTCATATCAAAAAGCCTGAAAAGTACCGGCAAGGCGCGGTAATCCTGCCCCAC  
GGCGTACTGTTTCGGGTAACGCGAAGCGAATATCCGTGAAAACCTAATCAAGCAGGGCTATATCAAGGCGTTATTGG  
TTTTGCCAGCAACCTTTTACGCGCACCGGCATCCCGGCTGCATCATTTGTGATTGATAAAGAGCACGCGCCACAGCCGA  
AAGGCATTTTTATGATCGACGCCAGTGGGGCTTTATCAAAGATGGCAACAAGAACCCTGCGTAGCCAAGATATTCAC  
CGTATTGTGGACGTGTTCAACCATCAGCGAACGGTGCAGGCTACAGCCGGATGGTGCCTCCAGCGAGATCGCCGGAA  
TGATTACAACCTGAATATCTCGTTATATCGAGAGTGGAGCGGCAAGATTTGCACGATCTGACCGCGCATTAACAAG  
CGGTATACTCAGTGGCGATGATGCTTTGAAGGATTTGGCGGGTATTCCCTGCCCTGCGTAATGTCTGTTTGGT  
GACGACCACCCGGTTACTGCGGGCGCAAGTGGACGCTCAGCAGGTGAAACCGACCATTTCTGGCTCATCAGGAGTTTAA  
GGATTTTGGCACCCGAGCTGCTACCGTTAAGTCTGGGTAAGAGAGGCGAGGTCTGGAAGAGATCCGCAAGGAGATA  
AACCCAAAGCGCTAATCCAGCATATCAGCGAAATGCTATGCGCGAGTACGCCAACAGTGAATGCTGACAAATACAGC  
GTGTACAGATCTGATGGATTACTGGGCTGATGTCATCGAGGACGATGTGATGTGATTATGCAGGATGGCTGGCAAGC  
CGCGCGCAATCCGCGAGCTTACGCGGTGAAAAGCAAGATGGCAAAAACATCTGGAAGAAGACGACGATTTTCGAGT  
TTACCAAACGGCGCTACAAGGCCGATGCTGCCCCGTTTCGCTGGTGGAAATTCGCTGTTTCCCGAACTGCTGGATGCG  
CTGAACCGCGCGAAGGCTGAGTGAAGAGCCAGTCTGCTAGTGAATTCATCGAGGAGCAGGCAGGGGAAGAGGA  
TCTGCTGGCTGAGCGAAAAACGATAAAGATAAAGTGCAGCAAAAGCTGGTGAATGCCGCTTGGCACAGTTGAAGAAAA  
CCCCTGCCGACCCGGATGAGCTGGCAGTCTGAACCGCTGCTGGCGCTGATTAAAGCCGAGGCGAGTGGCAAAAAGCG  
CTAAAAGCCGACAGAAAGCGTTGGATCGAGCGGATTTAAACATATCCACGCTGGATGAAGCAGCGATTAACACGCT  
GGTAGTGCAGGATAAGTGGCTGGCAACATTTGCAGCGAGGATAAAGCGGAGATAGAGCGTATTACCCAGCACTGGCGT  
CGCGCGTAAAGGAGCTGGAAGAGCGTTATGCTGAACCGTTGCCAGCACTTGCAGCCGCTTGGAGCGTTGAGCGAGAAA  
GTGCGCGGCATTTGCGGCGATGGGGCTGGAGTGGTGA

>Cluster\_709

ATGAAAATACCCACTACTACGGATATCCGCGAGGATACCTGGTGTCTGGCGGAAATTTGTATTATCATCTCTGCCAT  
TTTACTCTCTTTTTAAGCTATGCGGAAAGTTATTTCAACCCGGCATTTTTATTAGAGAATGGCACATCCGTTGCTGATT  
TATCGCGCTTTGAGAGAGGCAATCATCAACCTGCGGGAGTGTATCGGGTGGATCTCTGGCGTAATGATGAGTTCATTGGT  
TCACAGGATATCGTATTGAAATCGACAACAGAAAATACAGGATGATAAATCAGTGGGTTAATGCCCTGTTTAAACAGGT  
ACTCCTTGAACGAAATGGCCTTAATAGCAGTGCATTTCCGAGTTAAGCCAGCAAAAACAATAAATCGCAATTTTAC  
TGAAGCTGTACCTGATGCCACAATTAACCTTGTATTTTGCAGCGATGCCCTGAACATCACTATCTCTCAGATAACGTTG  
TTGAGTAGCGCTACGGTTACATTTCCGCTGAAGAGTGGGATGAAGGTTATCCGCTTACTCTGAATTATAATTTTAC  
CGGTAACAGAGTAAATGTTAACGATAGCTATTTTTTGTAGTCTGAGCTCAGCGGATAAATATGGCCGCTGGCCTTACGCA  
ACAAATGGTTTCTGGAACATTTTTTCGCGAAATGGATATCTCAGAACAGTGGAAATAATTTGGCACCTGGGTACAGCC  
GCCATTATTCGCTGAAAAGTGAAGTGGTAAATGGGAGAGCGCAATACAGGAAGTGATAATTTTCGATGGTGTGGATTTTCG  
TGGTGTACGGCTTTATTTCTCCGATAATATGATATCTGATACCGCAAGGGTTTGGCCCAACCGTACGTTGGGATTTGCC  
TACCGCGCCGCAAGCAGTAAAGCTTCCGAAATGGTTTTATATCTATCAAAAGCTATGTTTCCCGGCGATTGTAAT  
ACAGATTTGCACCCGACATCTTCAAATGGCGATCTGGACGTCACCATCGACGAGCGGATGGTAAATCAGCAAGTATCAC  
TATCCCGTATTCAACAGTGCATTTTACAACCGAAGGGCTTTCAAATTTGACCTGACGGCGGGCGATTTTCGTAGCG  
GTAATAGTCAAGTATCATCGCTTTCTTTTTCAGGGCAGCGCACTCGCGGTTTACCACAGGAATTTACTGCTACGGC  
GGGACGCAATATCTGCCAATTTACCCGCTTTTATTAGGACTGGGGCGCAATCTCGGAAACCTGGGGGCGAGTGTCTGCT  
GGATGTGACCCATGCGCGCAGTCAAGTGTAGCCGACGACAGTCTGATGAGGGGGATTCCATTCGCTTCCCTATGCGAAAT  
CGATGAACACCTTTCGGCACAATTTTTCAGTTAATGGGTTACCGCTATTGACACAAGGTTTTTATACCCCTGATGATGTT  
CGGTATCGTCGAATGGAGGGTACGAATATGATTACGATTAACGCGGTGAGCATCGGGATGAACCGATAATCGTGAATTA  
CCAAATTTACGCTTTAGCCGTAAGACCGTTCAGTTAAATATTTTCAACATCACTTAATGACTTTGGCTTCCGTTTATA  
TCTCTGGTACCCATCAAAAATACGGAATACCTCGGATTCAGATACCTGGTATCAGGTGGGGTATACCAGCAGCTGGGTT  
GGCATCAGTTATTTCACTCTCATTTTCTGGAATGAATCTGTAGGGATCCCGATAACGAAACGATTTGTCGACTTAATGT  
TTCAGTGCCTTTCAATGTTCTGACCAACGCTCGCTACCCGGGAAAAATGCGCTCGACCGGCTTATGCTCCTTTAACG  
CCAAACGTAACAGCAACGGGCAAAATAGCTGGCTGCGAGGTTAGTGGGCACTTACTGGAAGCCACAACTGAGTTAT  
CACGTAAGCCAGGGTATACCTCGAATAATGGGTATACGGGACGCGCAACGCAAGCTGGCAGGCGCTTACGCTACGCT  
GGGGTTCGGGTATAACTACGACCCGATCAACATGACGTTAACTGGCAGCTGTCTGGCGGTGGTTCGGGATGAAAATG  
CAATAACGCTGAGCCAGCTTTAGGGGATACCAATGTTTGTGATTAAGCGCTGGCGCAGGCGTGTACGCAATTTGAAAT  
CAAATGGCATTTTAAACCGACTGGCGCGCTATGCGGTATGCGCATGCCACGGTTTTATCGGTATAACCGTATTCGCGT  
TGATACCAATACGATGGGAATTCATCGATTTGAAAAAATATAGCAGCGTGTGTCGCGACGCAAGGCGGTTGGTTC  
GTGCCAATTTGATACCCGATAGGCGTGGGGCGCTCATTACCGTTACCCAGGGCGGAAAACCGGTGCGCTTTGGATCA  
CTGGTACGGGAAAACAGTATCGGAATAACAGTATGTGGGTGATGACGGGCAAGTTTATTTAA

>Cluster\_17465

ATGCCAGAACATTCTTTTCTCCGTTTACGGGGGCTTTCGTTGGTGGATTGCTCTGGCAATTTCTGGAAGTCCATTTAATGTC  
CCTGGCAGAGCATACCTTCAAGTTGATGGCGGATTTCTGATTTAAAAGGCAATACCAAAATGATTTGGGGCGTTTTT  
GCAAAAAGGCTATGTAGAACCGGGAATAATAACTTACGCTTCACTGATAAATAATCAGCCGTTACTGACGACTACGAT  
ATCTACTGGTACGCAACTGAAAACGATCCGAATAAATCATATGCTGCTTATCGCCAGAGCTGGTTGCCAGTTTGGTCT  
GAAGGAAGATATTTGCGAAGAATTTGCAATGGATCCGCGATGGTCAAGTCTGAATACGGCACTTTTAGCAGGTACAGAAA  
TTAGCGCGGATTTAGGCCAGTCTGCACCTCTGTTTCTGTACCCGAGGCTTATCTGGAATATACCCAGCAGGAGTGGGAC  
CCGCTTCCGCTTGGATGACGGTATCCTCGGCTTATGCGGATACAGTATCAACGCGCAAAACCCGACATGAAAATGG  
GGGTGATGACACTAACGACATCAGCGGTAATGGTACGGTGGCGTTAACGTTGGGCGTGGCGCTTACGAGCTGACTGGC  
AGAGCGATTTATCAGCATACCCGAGTAACGATGACGGGACACTGACGATAGCGGTACGCAAAAACCTGGGAGTGGAGT  
CGTTACTACGCTGGCGCGCTTCCGCTATTAAGAGCCAACTTTTCGCTGGGCGAAGATTTCTCACTCCGATATTTT  
TGATGGCTTCAAGTTACATTTGGCGGACGATCAGTACCGATGATCAAAATGTTACCGCAAACTGCGCGGCTACGCCCG  
ATATTTCAAGTGTGACACACTACCGTAAAGTGACCGTAACCAAAATGGGCGTGTATTTACGAACTCAGGTGCTC  
GCAGGTCCATTTCCGATTTAGGATATTTGGCATTTCCGCTCTGGCAGCTGCAATGTCGCAATTTGAAGAACAACCGGCA  
GGTACAGGAATACGACGTCAGCAGCGGCTCATGCGTCTGACTGCCCGGCGAGGTACGTTACAAAGTGACAATGG  
GGCGTCCAAAACTGGGACCATCAGGTTGACGTTAGCTTCTTCTCGGGCGGCGAGGCAATCGTGGGGATTTGCCAATGGC  
TGGTCTCTACGGCGGTGCGTTAGCCGATGAAAACCTACAGTGGCGGCGCTGGGCTCGGTGCTGACTGGCGCTGCT

AGGGCGTTAGCGTTTATGATGTCACCTACTCTCGTGTCAACTCGACGATAACAGCGTGTATGGCAACAAAACGCTGGACG  
GCAACTCTTATCGCGTCAGCTATGCCAAAGATTTTGTGAACTCAACAGTCGGGTGACGTTTGTGGATACCGCTTCTCT  
GAAAAAACTACATGACCATGAGCGAGTATCTGGATGCGAACGACGACACCGGGCGCGCACCGGTAACGACAAGAGAT  
GTATATGGTCACCTATAACAGAACTTACCGGATGCGCGGTTTCGGTCTATCTCAATTTATCCACCATACTACTTGGG  
ATCGCCAGGATCAGACCACTACAACATGATGCTTCTTCAATTTAGGAAGCCTTCGTAACCTGAGCGGGCAACGCT  
CTGACTGGTTATCGCTACGAATACGATAAAAAGTCCGCAAGGGGTTTATCTGTCTTAAAGTTTGGCGTGGGGCGACAA  
CAGCACTATCAGTTACAACGGCAACTATGGCAGCGGTGCGCAGCAATCAGGTGAGTCTGTATCACCATTGATGACG  
CCAGCCACTACAGTTAAGCGCCGGAACAGCGAAAACACAGCAGCGTGGATGGTACTACAGCCACGATGGCACTCTG  
GCAAAAGTTGATCTCAGTGTAACTACCATGAAGGGCAATACACCTCAGCAGGGATCTCTTACAGGGCGGGCAACGCT  
GACCGCTCATGGCGGGGCACTGCATCGTACAAAAATATGGGCGGCACACGCTGTAAATCGACGCTGATGGTGTGCTA  
ATGTGCCGGTTGAAGGTAATGGTTCGCGCTTTATACCAACATGTTCCGCAAGCGGTGGTGGCAGATGTAATGATTAC  
TACCGCAACACAGGCTTATATCGATTTGAACAACTGCCGAAAACCGCGAAGCCACGAAATCAGTGGTTTACGGCAACGCT  
GACGGAAGCGCTTATGGCTACCGTAAATTTGCGGTAATCAGCGGTGAGAAGCGGATGCGAGTCTGCCCTGAGGATG  
GCAGCCATCCGCCATTTGGGGCGGAAGTAAAAACGATAATCAACAACAAGTAGGGTTGGTTGATGACGAAGGTAATGTT  
TATCTGGCAGGCGTTAAACCGGGTGAACATATGACCGTTTCTGGGAGGGGGAATCTCACTGCGATATCAGCCTGCCAGA  
CCCCTTACCGAATGACCTGTTCAATGGCTTGTGTTTACCATGCCAGCAAAAGGGGGGAAGTTCCTCCGTCATACCGCATG  
ATATTC AACCCGTCATTCAGGAGCAGACACAACAGGTGACACCAATGGAACCGCGATGCTGTCTTTCATCGAACCAATAA

>Cluster\_27319  
ATGGCTACAAATTCATGTAGACGGCAAAGAATACGAGGTCAACGGAGCGGCAACCTGCTGGAAGCTTGTCTGTCTTGGG  
CCTTGATATTCCTACTTTGCTGGCATCCGGCCTGGGAAGCGTCGGTGTCTTCCCGCAGTGTGCGGTGAGCAATACC  
AAAACCGGAAGACACCGGTGGTCCCTGGTGTGCTGATGACACCGGCTTCCGATGGCACCTTTTATTCATTTGAC  
GACGAAGAAGCGAAACAGTTCGTTGAAAGCGTGGTTCGAGTGGTAAATGACCAACACCGCGCAGACTGTCCGGTATGTGA  
AGAGGGCGGTAACCTGCCATCTTACAGGATATGACTGTGATGACCGGACACAGCTTCCGTCGCTACCGTTTACCAAAACGTA  
CCCGTAAATCAGGATTTGGGGCATTCTCTCACGAAATGAAACCGTGCATCGCTGCTACCCGCTGGCTGGCTGGTAC  
TACAAAGATTACGCTGACGGCACGGACCTGGGCGTTTACGGTGCACGACAACGCTTACTTCCGGTCGCCCGGAAGACGG  
CACGCTGGAAGCGAATTTTCCGGTAATCTGGTCAAAATTTGCCCGACCGCGTATTTACCGCAAAAACGCACTCCGAGC  
GTTACAACCGTAAATGGGATATGCACTTTCGCGCAGCATCTGCCAGCAATGTTCCATCCGGTGTAAACATCAGCCCGCGC  
GAGCGTTATGGCGAACTGGCTCGTATCGAAAACGTTACAACCGGTACCGTAAACCACTACTTCCCTGCGACCGTGGTACG  
TTTCGGTTACGGTTACGTCACCTGAAAGATCGTCCGCGTCAGCCAGTACAGCGTCTGGCGATGATTTTCAATACCCTCA  
ACGCCGAACAGGCAATGCAGGGCGCAGCAGATATCTCGCTCAGTCAAGAAAGTGATCGGTATGGTTCCTCCGCGTGC  
AGCGTGGAAAGCAACTTTGCGCTGCGTGGTGGGCGAAGAAAACCTTCTATACCGGTATCGCTCAGCGTGGCAGGA  
ACGCTGCACACTGGCGCTGAAAGTACTGCGTGAAGCGCATTATACTCCGGCTCTGCGCGAAATCGAATCTTACGATG  
CGTACTGGTGTGGCGAAGACGTTACCCAGACCGCGCGCGCTCGCGTGGCAGTGGTCAAGGTTAAAGGTTAA  
GCGCGTGAATGGCGGCAGCACAGAAAGTGGCTGACTGCGAGATTTGCCGCAATCTCAACATCCGTCACGTCGAAGCA  
TCCGCTGTTTGTACCAACGTTGATGACACCCGCTGGATGATATCGCGCGTGGACTTACCGCGCACCGGTTGAAGTAA  
AGGCGGTTTAGGTTTGGCCATCGCCATCGCGTGGGCAACTTATACTCCGGCTCTGCGCGAAATCGAATCTTACGATG  
CGTACTGGTGTGGCGAAGACGTTACCCAGACCGCGCGCGCTCGCGTGGCAGTGGTCAAGGTTAAAGGTTAA  
GCGCGTGAATGGCGGCAGCACAGAAAGTGGCTGACTGCGAGATTTGCCGCAATCTCAACATCCGTCACGTCGAAGCA  
TCCGCTGTTTGTACCAACGTTGATGACACCCGCTGGATGATATCGCGCGTGGACTTACCGCGCACCGGTTGAAGTAA  
AGGCGGTTTAGGTTTGGCCATCGCCATCGCGTGGGCAACTTATACTCCGGCTCTGCGCGAAATCGAATCTTACGATG  
AGCAAAATCGACGTCATCGTGCAGGCACGCTGGTGGTGCAGAAACCGTTGATATCTCCGGGACGAACGCTGGTAGCGC  
TGAAGTGTATTCAGGCTGCGGCTAACGTTGGCGAAAGCCCTGAAAGGTTCGCGCGCTGACGTCGGTATCACCATGATTTGCC  
GTTCCGTTCAACAGCATGGGGTGGGCATTTATGGCGGTGGATCGTCTGAGAAGCGTTAACCGAAGTAAACCGGACCG  
GCCGATGCGGTGGTGGTGTGGAAAACGATCTGCATCGTCAAGCTTCCGCTACCCGCGTGAATGCTGCGCTGGCTAAAGC  
GCCGCTGGTGTGATGGTGGTTGACCATCAACGCACAGCGATTATGAAAACCGCCATCTGTTACTTCCGCGCCAGCTTTG  
CTGAAAAGCGCGGTACGGTGATCAACAACGAAGCCCGCCCAACGTTTCTTCCAGGTTTACGATCCGGCTTATACGAC  
AGCAAACTGTCATGTCAGGAAAGCTGGCGTGGCTGCATCTGCTGCATAGCACCTGCTGAGCGTGAAGTGGACTGGAC  
GCAGCTCGACCACGTTGATGACGCTGTTGTGGGAAAAACCGGAACTGGCAGGTATCAAAAGTGTGCGCGGATGCGGA  
CATTCGGTATTCGTTGGGAGAAACTGGCCGTTGAAACCGCATCGTATAGCGGTGCTACCGCCATGCGCGCCAAATACAGC  
GTTTCATGAGCCGCTGAGCCGAGGATATGACACCATGTTTACTTCTCGATGGAAGGTAACAACAGCCGACCGCGCA  
CCGTTCCGCAAGTGCCTTTGCTTGGCGCCAGGCTGGAACCTCCCGCAGGCGTGAACAAATTCAGGCAAGTGGGGCG  
GCAAACTGCGTTTTGGCGATCCGGGCGTGGCTGTTTGAACACAGCGAAAACGGTCTGGATTACTTACCAGCGTACCG  
GCAGCTTCCAGCCGAGGACGGGAAATGGCGTATCGCGCCGTTACTACCACTGTTTGGCAGCGATGAATGTGACAGCG  
TGCTCCGGTCTTCCAGAGCCGATGCGCGAGCCGTACATCAAACTCAACCCAGCGGATGCCGGAAGTTGGGGGTGAACG  
CAGTACACGCGCTCTCTTGTAGTTACGATGGCAACATGCTCAGCTGCGCGTTGAAATCTCCGAAAGGCTGACGCGAGG  
CAGGTGGCTTCCGATGGGATGTCGGCATTTGCTCCGGTGTGGCTGGCGGCATCTTGGATCTCAAGGAGGCACA  
ACAATGA

>Cluster\_35249  
ATGACCCAGCAGGAAACACGCCCTGGCAATATCAACCTGGGTAATGATGTACCGTCAATGTCAACGACGCCCTCTGGATA  
TGCAAAAGGAATCATTTATTCAGGGCAAAAACAGCTCCCTGACAGCTAACCGACTCACAGTAGATGTTGTGGTCAACCT  
CTGCCATCGGCATTAACCTAATTTGGTACTATACCCATGCTGACTTAGGCACAGGCAGCACCAATTAAGAGTAAACGATGAC  
GGCATCATTTATGGGCAAGCTCAACACTAACAGCCACTCAATTCACCATGAAAACCTCGAACGGTATAGGCCCTAACCAT  
CAATGACTATGGCACCACTGTCGATCTTGGAAAGCGGAAGTAAATCACGACCGATGGAAGTACAGGTGTTTATATCGGTG  
GTCACACGGCAATAACGCCAATGGTGTGCGCGTTTTACGGCTACAGACCTGACAATCGATGTTTACGGGCTACAGCGCC  
ATGGGGATAAACGTACAGAAAACTCTGTTGTGCTGATCTCGGAACAAACAGTACCATTAACCAATGGCGATAATGCTCA  
CGGCTCTGGAGCTTTGGCCAGGTTAGCGCAATGCACTGTTGATGTAACCTGGAGCCGCGCCAAATGGCGTCAAG  
TTCGTTGGTGTACAACCACTATCGGTGCAGATAGCCATATTTCTTCCGCGCAGGGCGGTGGCTCGTACCAGTGGTTCA  
GACGCGATAATCAATTTTACTGGCACGGCAGCGCAACGAAACAGCATCTTTCCGCGGTTCTTATGGTGCCTCGGCCCA  
GACGGCAACGGCTGTTGTCAACATGCAAAATACCGATATACAGTTGATCGTAATGGCAGTCTGGCGCTGGGTTTGGGG  
CGCTCAGCGCGGTGAGAATAACCGGACAGTTTGGCTATCACCGCGCGGAGGAGCCAGGGAAATTTATGCCATGACC  
AACAGCCAGATCGACCTCAGGAGCATCTGGTCAATGATATGAGTACACCCGACAGATGGCCATCGCAACGCAACATGA  
CGATGGTTATGCCGCCAGCCGATCAACGCCCTCGGTCGATGCTTATCAACGTTAGCGTTCTTCCAAAGGTTGGGCTAA  
TCAATCTGGATATGCACCTTGGTTCGGTGGACAGGTTCTCCCTCAGCGATAATGTCAATGGCGGAAAACCTGGACGTT  
GCAATGAATAACAGCGCTTGGAAACGTAACAAGTAAATCTAATCTCGACACGCTGGCGCTGAGCCATTAACCTGATTT  
TGCCAGCCAGGGTCAACTGCCGCGCATTTGCCACATTAACGTTAGAGAACCAGGCGTAAACAGTACCTTTATATGCT  
GTGCTGATGTTGTTGGCGAGGTTAATGGCGTTAATAATAAAGGGGATTTATTGAATATCAGCGGGAGTGTGCTGGTAA  
CACGTTATGGCTATCCGCAACAGGCGAGGCGGCAACAGGAAATGAAGTCTGACAGTGGTAAAAACCACTGACCG  
CGCGGCTCGTTACGCGCTTCTCAGTTTGGTGGGGGATATCTGTACGATGTCGCTAAAAATGGCAACTTAACTGGG  
AGCTTTACGCTTCCGGGACAGTTCCGGAACCGACTCTTAATCTGAAACCCACACCGCTCCGCTCAGCTCCCATAGTC  
AACCCCGATCTTACGCTGAACCCGCTCCACGCTAAACCCACCGACCGCAGATGCTGGCGGCAATTTATCTCAATG  
CGGTTACTTATGAACTAGTTGAAAACGCTACGCTGATGCAACGAGTGGTACCTGCGAAATCAGAGTAAAGACGGTA  
ATATCTGGTTGCGCAGTTTATGGGGAAAGCCTGGACTCTTGGCAGTGGCAAACTGAGCGGCTTTGACATGGGTTACAGC  
GGTATCCAGTTTGGTGGGATAAACGCTCTCTGATGTAATGCCGTTGATGTGCGTCTGATATTTGGCTCAACACATGC



ATCGCCGGACTATAGCGGAGGCGACGGTACCCGACGTTACAGACTACATGGGAATGTACCCAGTTACATGGCACAAAACG  
GTTTTTACAGCGTCTCGTTATAAAAAGCATCGCGCCAGAAAAAGTTCACAGTACTGGACAGTCAGAACAAACGGCGTT  
AACGCCAACGGCACTGCGAATGGAATGAGCATCTCCCTGGAAGCCGGGACAGGTTCAACCTGTCCTTACTGGTTATGG  
GTTCTATATAGAGCCGAAACCCAGCTTACATACAGCCACCAGAAATGAGATGACTATGAAAGGCAGTAATGGCCCTCAATA  
TACATCTGAATCACTACGAATCGCTGCTGGGGCGTCCAGCATGATACATGCGGGTATGACATCACCGCAGGCAACAGCCAG  
CTGAATGTCTATGTAAGACTGGCGCTATCCGCGAGTTTTTCAGGGGATACCGAATATCTGTTGAACTCCCGGGAGAA  
GTACAGTTTCAAAGGTAATGGCTGGAATAACGGCGTGGGAGTCACTGCACAGTATAACAAACAGCACACATTTCTATCTCG  
AAGCGGATTACACGCAAGGTAACCTCTTTGATCAGAAGCAAGTCAACAGAGGATATCGCTTACGCTTTTAA

>Cluster\_25588

ATGAAGGGGAGCAAAAGAAAAATCTATGCCGGATGTTCTGGACTCTGCCAGTTGGTACGTATTGAAGCTGTACACCGAGG  
ATTCTTTTACAGCACTTGTATGCGGTTGGCTGCTGCTGCTGGCACAGAAAGCCAGCGTGGAGACAGTAACCGTTGAGC  
TGGATGAGGATATTGAGCTCAACTCCAGGCAGGAGCGCATATATGTTTCAAGTTAAAACCCGCTGAAACCCATCATTTCC  
AGCGATGTGTTTGAAGCTCTCGCGCGGTTTGGCGAGCTGCGTAAACGAGCACACTGATGGGCGCCGCAAGGAAAGCGCTTC  
TTTTGTTATCGTCGCAACACAGGCGCCAGGTCACATCTGCAGAAAGATGATTGAGGATAAGAGACTTCTTGGGATGTCC  
GTTTTATCTGGCCCCAGTCAACCCTGAGCGCCATCTTGCATCTCCCTGCTGCGGACCCGTTGGCTGATGCGGCGCGG  
TGGTGCATCGCGCAAGCAGAGCAACTGAATTTTTCTGTTATTGTCGCCAGAATCTTGAATCTGGAAGCTGGCCGGTCTGGT  
CCAGCTCGCGCCACCGGAGGTGATGCTGACGGACAGCATGCGTTTTTATACCCGGGATCTTCTGCCCCGTTTCCGAACAGC  
TCATCGTTAGTTACAGGACTTCCCTGCACCGCCGACACTTACCAGCCAAAGAGAGGAAACCTCTTTTGTGTGGAT  
GTGCGGATACGCATCATTTGCGGCTTGTCCGGTGCAGGTAAAACAGCTTGGGCGACAGACAGCCGCCAGCAGTACCCA  
GGTGTGTGCGTATTACGATGCTGGCGACTTCCAGGCCCTGCACCTTGCAGTACGCTGGTTCGTGAGTGGCAGCCCGGT  
TTGGACTCAGCAGCAAGGTGGCTGCGAAGAACTACTGCTCCCTGGTGGCAGTGGCGTTGAAGCGCTGAGAACGTTTCGAC  
ACCTTCTTGCAGCAACCGAACGACAACCTGCTGCTGGTTCGGATAACCGCATCGTATCCCTGTTGGAGAACTTGGCGGA  
TGTTCTGCAGCCACAACCCGTAATTTTGTGCTGCTGTCGAGCCCATGACAATGTCCGTCAACTGGAGGCGATGA  
CTGGACTTCAAGCTGAGTAAATGTTTACAGGGATGGGATATCGACACAGTGGCTGCCGAGTGGCCGACCTCGGTGGGCGCC  
AGTGCCTGGGATATGAGCAGCTACGAAGTACACCGGAGGTTGCGGCTGTATGTCGAAAGCGCGGAGAGTTGCCGC  
AGAGGAATACAATGGAGATATAGACACCGCGTGTGCTGAACTGCGGCAACAGGAAAACAGCACGGAAACCGCGAGGAA  
TCATTTCTAGCCGTGCTATCAGGGGTTGAGCCACTGGTCCAGAAGCTCTGGCGTTGTTCAGTCTGTCCGATGTGGGG  
CTAAGCCGTGATGAAATGTTTACAGGTTACCTTGGCCGCTCATTTGAATATCCCTTCAAACGGGGCAGCCACATTAATTA  
AATGCGGGCCACCGGAACCATTTGAAAACATGGAACCAGACGTTAAAGGTACACGATGCTGTGAGGGCGTGGGGCTGC  
AACCTTACCATGATGGAGCTGGCTATCGTAAATAACGCGTTACTGGCGTTAAAAGATCTTTTGTATTGATAGCTTTCAG  
CAAGAACGCGACACTCGCGATTTTCTTCTGACGCAGATTTACATCAAGCTTAAAGATGTGATGACGCTCATCGCTCT  
ATCTGGTGAAGACTATTTTATGAGATGGGCATTAAGTCTGACATTAAGTGAAGCCCTGAAACAGGCGCAGCTTCGGACT  
CTCTGGCGCTTTTACAAAGTTCTGGGCACTCGATGGGCTCGTTTTTTCCGAGCTTAAAGACGGTGTCTTGGGCAAAT  
GCACAATGGCTGGAAGCGATGGGAGCCTTGCTTGCAGAACATGAGTTTGGTTACCGGGAACGCACAGCTACACCATGAA  
ACGGATGCTTTTCTTACAGAAAAGGGAGACCTTAGTGAAGTGCACACGCTGGCTGAAGATGCCCGCCCGAGCTTCCGG  
ATGAAGAGCATGCGCTATTTTGAAGTATAAACCATGCTATCGCCTCTGGAGACTGAAAAGATATAAACAAAGCAGAAACA  
CTGTGCTGAGCGTAGTGAATCGCTACTACAGCTTATTTGGTATTTACCCACAGGATGTATGGGTAACCACTCGGATGT  
GCTGTGGCAATCAACACAGCTGAAAATGTTACAGGACATCAACATCTGGCCGATGCCCTAGAGTTGCTCGCCA  
GAATTAATGAGCAGCGAGGAAAGTGTCCACCTTCTGCGCATTCACCGGATGAAATTTTACAACATGACCGCAGCCCGC  
GAATCTGTCGGTCCGGTAGGACAGGATCTAGTGTGATGATTTGTCGCAATAAAGGACTATGTCGGTGCAGAGAGGTGAT  
GGAGCAATACGTCCTGCCAGTCAATGAAGCGGCTTGGTACAGCGACTGGTTCAGGTCCGAGCCAGTACGCGCTCA  
TACTGGCACTTGCAGGCGAACATGCACAGGCTGAAGCGGAGATGCGTCCGCTAGCCCCTTTTTGAAGGGTTAA

>Cluster\_66982

ATGTTTGCCTGGCTGATATCAACAGTTTCTACGCCTCATGTGAAAAAGTTTTCCGCCCGGACCTTCGCAACGAACAGGT  
CATCGTACTCAGCAATAACGATGGCTGTGTGATCGCACGCAGCCAGATTATGTGGAATGCAAGTAACTGTTGTAG

>Cluster\_35023

ATGAACATCATTTGATGGAATGGGGCTTCCGAAGTCTTAGATATACAGCGTTACATGCAAACAAAGTGTGAAAACACA  
GGTACAAAAAAGCCGCCCTTGGAGGACTCGATTTGCATACGATGTGGTGCAGGCGGACTCAAACATGCGATTTAA

>Cluster\_6407

ATGATGAACATCGAAGAAGTGCCTAAAAATTTTTGTGAAGATGGCCTCATGCTGTGTGCGTTGAAAATGGAATCTTGG  
TAAGCGTAAACTGACCGCTATGTAGCCATCAGACGAGAATTTGGTAACTTAGACGCCCATCTGATATAG

>Cluster\_15967

ATGCGCAATGAAATAGCCATCAATCACCAGATGCTTCCGTGCTGCACAGAACAAAGCAGTAATAGCCAGATTTATTTGGTGA  
TTCCAAAATGTGGCTTGAAGCAAATAAAGCGATGAAATCAGCTATCAACCTTCCGTGGTATCGCAGGAAATGA

>Cluster\_23791

ATGGCTAAAGGTATCTGTGAGAAAAATCAAGCTGGTTTCTTCTGCTGGTACTGGTCACTTCTATACCACCTACGAAGAACA  
ACGTTACTAAGCCGAAAAACTGGAAGTGAATAAATTCGATCCAGTTGTTGCGCCAGCACGTGATCTACAAAGAAGCGAAAA  
TCAAATAA

>Cluster\_17640

ATGCGTGTAGCGTTTATCGGTTTATTACCATACCCGACTCGTTTTTGGGCTTCTGCGCTAATTGCAAAGCCACATGCCCT  
GATGGCTGACAGCATCATCCCGCACAAAAGCGCCATACCGGTATTGCTGCTGCACGACGCGAAGCAAAGAAACGCAGGA  
GAGCAAAATGA

>Cluster\_43570

ATGTCTGGGATGAGAAAAGCATCGGAACATCGTTCTCCGATAAAAACCCGCCATGAGTTACGCTCTGTTCCAAGATTTTAT  
CAATGCGGGGCTGCGAGCTCAGAAGAGCGATGAGGCTAAGTCTGCTGTTAAAAATCATCGGATTACCAATCAGAACTGA

>Cluster\_10669

ATGGCTAAGAATTTTAGCTACGCCAGTACAGGGATAATTTATGCGCTGCGTCAAAAACTGCTACACTCCGCTCCCTC  
ATGTCATTTGGTTTTTGTCAATTTCTTTTTCAGTATCTCCCTGAAAACCTACACCGGTAAACGTCGGGCGGTTCCGGAGT  
AG

>Cluster\_15661

ATGCGAAAACCGCAGGAAAAATAACCGGTTAATCACCGAAAAGATGTGCTACGTGACCAGTTTTATCAGGGGGTTAATCC  
AGCAATAGCTGTGCCACTGAGAGAAATACTTAAACAGGTACAAAACCTTCGGAGAAGTCAAATGA

>Cluster\_15090

ATGATTATCAAAACGTTAAAAATGAGCGCACGAAAGCGAAAATGATGAAACGTTTCGCTCACTATTTACCAGGTAAATTT  
ATGGGATTTAGCGTAAAAAAGACAATTTCCGAGTCTTGGCCGCTATTGATTAG

>Cluster\_45924

ATGCGCGCATGTTAGAGGATGAGCGTTGTTCTTTAGCTGCCATTTCAATGACGGCTCGCTCCTCGAGGGACAGCCG  
AAGTGCCAGTCTTGGACCTGTGGCGGTTTACGCGGAATGCGTGTATCTGGTATCTGTGA

>Cluster\_12322

ATGGATAACTTGGCCTTCTCTTCTGCGCCGACAGCAGATTCCATTGATGCATCGATCGCTCAACACTACCCGGACTGCGA  
ACCTGTGCGGTTTATCGGCTACGCTGCCATTTTCTGTAATCGCCGGATGGCGAAACGTTCTGGCAAAATCTGCTGGAAG  
GTCGTGAATGACGCGCAGCCTTTACGCGGGAAGAGCTTCTGGCCGTGGTCTGGATGCGGCCATCATTGACGATCCTCAT  
TATGTCATATCGGTTCCGTTAGACAACGCCACTGCTTCGACGCCACCTGTTGGCTATTCGCGCAGGGAAGCGGA  
GTCCGTAATCCGAGCAGCGCCTGTTTTGACGCGCGTGGCGTCTCTTTCCCGCAGCAGGCAGGCTACCGCTACCGCCCGGA  
TCCCCATAAGACCGCGTTTTCTGCTCTTCCCGGATGAGTACCTACCCCGTTCGCGAAGCATGAACGTGACAGAAGTC  
GCGAGGTAAGAGTCTGCAATCTCTGATAGGCATGATAAAGACTATATTGCCACCCGCGCCGCTAGAACTCAACCT  
GCACGGCCCGCGCTTATCGGTACAGACCGCTGCTCCAGCTCGCTGGTTGCCGTGATCTGGCCTGTGAAAGCCTGCGCG  
CTGGCAATCCGATATGCGGTTGCCGCGCGTGGCGTCTCTTTCCCGCAGCAGGCAGGCTACCGCTACCGCCCGGA  
ATGATTTTTCTCTCTGATGGTCACTGTCGTCCTTTGACGCTCGGCTGAGGGCACCTGGGCCGTAACGGTCTCGGCTG  
CGTGGTGTGCGTGCCTGAGAGACGCGTGTCTGTCAGGCGATCCGATATCTCGGTGATCCTCTCCAGCGCGGTCAACA  
ACGACGGCAACAGAAAGTTCGGCTATACCGCCCTTCCGTCGACGGCAACAGGCAGTCAATCGAAGAGGCGTTAATGCTG  
GCGCCATCTGCTCGCAGGAGGTTACATTTGAAACACCGCACACCGCTGGGCCAGCGGCTGAAATGA  
AGCGTTACGCAACGTTATGCGCTCGCCGAGGATCAGCGTGTGCGCTCGGTTCCGTGAAAAGTAAACATGGGCCATC  
TGGATACCGCGCGGCGATTGCGCGACTGCTGAAAACGCTTCTGGCAGTCACTGCGCGCAAAATCCTCCCTTACTGAAT  
TTTACACCCCAACCCGCGCTGAACTTGAAGAGAGCCCTTTACCATAACCGGTGTGCGCACAGGATGGCAGGCA  
AATGCGCTATGCGCGCTCTCTCTTTGGTATGCGCGCACCAACTGCCATATGATCGTCCGCTCGCTGCGCCAGCGC  
TCAACGCGCGCTCCCAATACGGATAGCGGCAGAAAAGTACCGCGTGTGCTCAGCGCCGACGACAGCGGTTG  
CGCGCGTGGCGAGGATGATGCGGGCGCTGAGAGAGAATGCGGATGCCAGCTCTCGGCCCTCACAGCCCTGCACCC  
GCGCGTCTCGATCTCCCTTCCGCTGGCGGCCATTAACCGTGAACCGCGAGGCGCTCAGCGCTGGGCTAGTG  
AGAAATCGGGGGCGTGGTTACAGCGGCCAGCGCCAGCGGCAAGCAGGTTGGTGTTTTACCGCGCAGGGCTCGCAC  
TGGCGCATATGGGTCAACGATGATACAGCACCAACGGCTTGGCGACACGCTGGATCGCTGTTTTCTCCGCTGTAG  
CGAAATGCTCAGCGCTCACTGCGCAAGCGATGTTAAACCCGATTCGGCGCAGCTGGCAATATGGCCGCGCGCAGC  
CGGCCACGCTCTCGCAGATGACATTAACCTGCTGCGTGGCGTGAAGACTGAAGCAGACTTCCGCTTACCTGGGCGAT  
TCCGTCGGTGAATTTGCGCTGCGTGTCTGCGGACACTATACGATTGAACAGGTCATGCCACTGGTTGTGCGCGCGG  
CGCGCTAATGACAGTGGCGAAGCGCGCGATGGTGGCGGATTTGACAGACGAAGACACGCTGATGCGCTGGCTCGCC  
AGTTTGGCTGGATCTCGCGCCCAACAACGGTACGCAACATACGGTATTTCCGGGCCGGAAGCCCGTCTCGCGGATTT  
TGCGCCACGCTCTCGCAGATGACATTAACCTGCTGCGTGGCGTGAAGACTGAAGCAGACTTCCGCTTACCTGGGCG  
GATACTCGATCGGTTCCAGGACGCTGCGCGGACTGCACGCGGACCCGGGCAAAATACCGATTATTTCCACGCTCACCG  
CCGACGCTATTGATGAGTCAACGCTCAACAGGCGGATTAAGTGGCGCCGACACATGCGCCAGCGGTTGCTTTATCCAG  
AGTATTAGGTTGGCGCATCAGCTCGGCACCCGCGTTTTTCTGGAGATGGGGCCGATGCCAGTTGGTTGCTTGGCGCA  
GCGGAATACCCGATAACGCATACTGGATAGCCAGCGCCCGGCTAACAAAGAGGCGAGCGATGCTCCCTCAATCAGGCC  
TGCTCCAGCTTACGCTGCGCGCTGCGCTACCGTGGGCCAGCTGCTGGCGGGCGATGGACAACGATATCGCTGCGCA  
TGTATCCGTTTGATACTGAACGTTACTGGAAAGAGCGGCTCTCCCGCGCTGCGAGCCTGCCGACGCGAGCGTGTCTGC  
CGGCTGGAGTGGCGATCGCGCCGACAGCGCTCGATCTCCCTCGCTGGAAGCGCTTAAACAGTCCGCCACCGCGAC  
TGCACGCCATCTACGCTCGATCAACTGTTACAACGCTGTACTCCGCGGATGCCATAGAGAACCGCGTGGAGCCCATC  
ATGCGCGTGGACGCTGCTGCCCCGCTACCAGCAGCTACTCCAGCGCTGCTGAATAACTGCGTGGTTCGACGGCGATTA  
CCGCTGCACCGCGCGGATACGCTCCCGCCCGCCCATTTGAACATCAACAGCGGGAATCACTGCTGACGATGAGCTGGCG  
GTTATTTGTAAGTTTTCAGGCTATTTCCGACACCATTCGCGCTGCGCGGATCGGTTATATGAAATGATGAGCGCGCG  
GAAGAACCCTGGCGTTATCTTTCCCGCAAGCGCTCCGACGCGTGGAAAGTCTGATCAGGAATTCAGCTTTGGCGC  
CTATTTCAACCAATCGCGCGCGGGTATTACGCGGCTTGTCCAGACGCGTCAAGCCCGCAGCGGTTGCGTATCTTG  
AAGTTGGCGCGGAACCGCGCGCACCCCGCTGGCTGCTCGCGGAATCAACGGCGTCCCGGCACTGGATACCATTTTC  
ACCGATATCTCGCGCTGTTTACCGCTGCGCCGACGAAATTCGCGACTATGATTTTGTGAAGTATAGCAGCTGGA  
TCTCGAAAAGAGGCGCAGTCTCAGGTTTCCAGGCACAGTCTTACGATCTTATCGTGGCAGCGAACGTTACCGCCA  
CCCGCCATATGGCGCAGCTCGATAAATCTGCGCCCTGCTCAAGCGGGCGCGCTGCTGATGCGCGAAATCACC  
CAGCCAATGCGTCTGTTGACTTCTGTTTTGCGCCGCTGGTTCTTCCGCTACAGGATCTGACGCGCCGGAAGGTGAGTT  
ATTTCTCACCCGCTCAGTGGCAACAACAGTGGCGCACCGGATTCAGCAAAGTGGCGTGCATACCGCAGTGGCA  
GCCCGACCGCGGATGAGCGAACATATCATCTCGCCAGCTGCGCGGTAGCGCGTAAACATTCACCGCG  
CCATCAGAACCCGTTGTTGGGCGAGCGCTGACGGATAACGGTGTATTCTCGCGACTGGTCTGATGCGCAGGTCAGCC  
CGAACGTTTAAACCGCGCTGGCAGGAGGCTGGCGTCTGTTTACAGCGCTCATGGCGAGCTGCTGCTGTTGGAACCGC  
CCCCGCTCGCCCGGAGTGGTGGGAAGGTTCTGCTTAAAGTGGCAAAACAAAGCCTTTTCCCGCGTACGATGGCG  
GTTGAAGCCGCTCATCTGCTGGCGAGTGGTGGCGTATCGCCCGCGCGCTTCTTCCGCGCCGAAACGCTATATCA  
ATGGCGCTGGACGCCCTCAACGTCGCCAGCATGACCATCGCTTACCTTACCTTACGCGCGGTACGCTTGGCGCA  
CGCAGGCTGGCGCAATACGGCATCATCAGATCCGACGCTTTCAGACTGATGATGTTGAGGAGAGCGGAGGAT  
ACGCTGGCTTACGCGGAAAGTATAGCAGCGCTCACCGCAGCGCAGCGGATGATGTTGTTGTTACTCGCCCGCTG  
GCGAGTGGAGAAAATGAAGCCTCTCTGCATCCATCAGCGCTATGGCGCTTGGCTTGGCTGCGCTGCGGCCAACGAACAGC  
CGGAACGTTGCTTGGCGCCATCGATCTCGCGAAAACACCCGTTGGGAAACGCTGCAATCAAGGTTGAGCGCAGTCTCA  
CTATCAGCGCTGGCTGCGCGACGGGTGACACCTTTGGCTTCCCTTACTGTCGCCAATACGGGATGCGCGCTGA  
ATTAACCGCAACGTTTACCGCGATAGCCGCTGGCATCTGGTACCGGAGCGTTTTGGCGGATAGCGCGCTTGGCG  
TGAAGTGGCTCAGAGAAAAGGGGCGCAGCATCGCCCTGCTGGCGCGCGCTGGATGAGTATGGCTACGGGACGTTG  
GAGGGCGGCGAGCAGCGCTGCTGCGGTTGATGTTGGCGATGCGGGCAACTGGCCACGGTTCTTGACGATCTGGCGCG  
CAAGCGCGCATTTGCCGAGGATTCATGCGCGTGGCGTATTGGCTGACGCGCCTTGGCAGGACTTGTAGCCACACG  
TGGCTGCGTTTTTCCGCGTAAAAGCGCAGGCGGCAAGCAGCTGTTGCAAAACCTGCGCAACACGACGGACGCTATCTT  
ATTTCTACTCTTCCGCTGCGCCACCTCGCGCGCGGGTCAAGCGCCATGCGCTGGCTGCGGCTGCCGTTGACGG  
GCTGGCCAGCAGTTTTCCACCTTGTATGCGCGAAAACGCTCTCTGTCGCTGGGGCGCATGGGAGAAAAGCGGTCGGG  
CGCCACCGCGGAAATGCTGGCGACGCTCGCCAGCGGATGGCGCGTTAAGCGATGCGCAAGGCTGCTGGCACCTG  
GAACAGGCGGTGATGCGCGCGCCCGTGGCGACTGGCGATGCGGTTTTATACCGCAAAAATGCCCGGTTACAACAGGC  
TCTGTTTAAACATCAGCGCCACAGAAAAGCGCAACGCGGTCATTCTCCTGCTGATGACAACGCTTAAACGGCAGCC  
TGAGCGATGAAACAGCGGTGATGGCATGGCTGAAAAGCGGATGGCGTTTCAAGCTAAGGCTGAGCGATCCGGCGTCACTG  
CATCAAAACAGGATCTGTTGCAACTCGCATGACTGACTGCTCTTCTTCTTGAACCTAGTAGGCAATATTCAGCTACTT  
GGGCTACGATCAATGCGGAACGGCGTGGCAGGATCTGCTCTCTATGGACTCAGCAGCTTATCTGTTCTAAGCCAG  
AGCGGACGCTTGGCGCTTCCGAGCGGAAAGTGTGGCGCACGAGCGCGGACGAGGTTATGCGCCCTTCCCTTTGACGCG  
ATTCAGCAGCTACTGCTGGTGGGCGAACCCACTTATGGCTATGGCGCGTGCCTGTACGTTGTTGAGTGGGA  
TAAACGCCAGTACTGATCTCGATCTCGCCATACTGGAGAAAGCATGGAACCCAGCTCATCGCAGCCAGTATGTTGCGTA  
TGGTGGTTGATGCGCAGGGCAGCAGCAATCTGGCGAACGCGGAGTATCATATCCCGGTGACGATCTGCGCGCG  
CTTTCCCGGAAAGAACGCGCATCGCGTGGAAAACGCGCGCATGAACTGAGCTATCGGTTTTGCTGCGCCAGGATG  
GCCCTTTTTGAGCTGGTGGTACGGAATTCAGGATTCGCAATACCGCTGCTGATATGAACTCGACCTTTCGAGTTG  
ATGTGACAGTTTTAAAGTATGATGGACGACCTGGCGCAGGTTGGCGCGGTTGAAACGCTGGCGCGCTCGCTATTACC  
TTCCGTGATATGTTGATGGCTGAACAGGCGCGCGACAGACATCGGCATGGCAGGATGCTGGGATTAAGTGGCAGAAAA

ACTGCCGCAACTGCCCTTAGCGCCAGAGCTGCCGGTGGTTGAGACGCCCCGGAAACGCCACACTTACCACCTTCAAAT  
CGACGATCGGCAAGACAGAAATGGCAGGCGTGAACAGCGCTGGCAGCAGCAAGGCGTACACCGTCTGCCGCGCTGCTC  
ACGCTGTTTGGCCGTACCTTGGAGCGCTGGAGCGGTACCAACAATTTAGCTGAACCTGACGTTCTTCAATCGCCAGCC  
GATCCATCCGCAATCAACAGTGTGATTTGGTGAATTTACCTCCGTCACGCTGGTTGATTTAACTTCTCAGCGCCGGTGA  
CGTTGCAAGAGCAGGATGTTAAAGACTATTGCCCATCTCTGCAAGCCGTCATCGCCGCCCTGAAAGCTGAAGACTCT  
ATCCGTGAGCTGGCCCGCTGCGCGGATCACAACGTCAACCGTGTATGCGGAGTGTATTACCAGTATGCTGGGGATGAC  
GCTGGAAGGCATGACTATCGATCAGGCGATGAGCCATCTGTTCGGCGAACCTGCTATGTATTACGCAACCGCCGAG  
TCTGGCTGGATCATCAGGTCATGGAGAGCAACGGCGAGTTGATGTTAGCTGGTACTGCATGGACAACGCTGCTGGAACCC  
GGCGCTGCCGAGGCGATGTTAAAGACTATTGCCCATCTCTGCAAGCCGTCATCGCCGCCCTGAAAGCTGAAGACTCT  
CGCCAGCGGCATCGCCAGGCACATTTCCCGCGGACGCTGGCGCTGAACGCGCAGGCGGACTACGACCTGCGGGATATTG  
AGCAGGCGACGCTCGAATACCCCGGCATCCGGCAGGCCAGAGCGGAAATAACCGAACAGGCGCGTTGACGCTGGATATC  
GTGATGGCCGACGATCTTCCGATCAGCGGCGATGCTGTATGAGCAGCAACTTACCAACTGGCGCTGCCGTTGCCGTTGA  
GCAGGCGCAGCTTATGAGCTGGAGGCGACTGGCGCTGAGGCGCGTGCCTACAGGGGATCGCGGCTACGCTAA  
ATCGTACGCGCTGTTTACCACGCGGAGATCGCCATCGCTTTAGCGCAATAGTACAGGCGCTGCCGCGAAGCGTCT  
CACCAGCGTCTGCTGCGCCAGTGGCTACAGTGTCTGACGGAAAGAGAGTGGTTAATCCGCGAAGGTGAAAGCTGGCGTG  
CCGATTTCCGCTCAGCGAGTCTTCCGAGCTCAGGAGCGTCCCGCAAGCCAAATGGAGCCAGGCGCTGGCGCAGTATC  
TGGAAACCTGTCATCGCCGAGCAGCGCCCTCTTCCGGCGAGTGTCTCCGCTGGAATTGCTGTGTTAACGACGACAT  
CGCGTTACCAGCGCGCTGTATCGCGACAACCCCGCAGCGCTGTCTGAATCGCTATACCGCGCAGATTGCCGCTTGTG  
CAGCGCAGAACGGATTCTGGAGGTTGGCGCCGAAACCGCAGCCACTACCGCGCGGTGCTGAAGGCCACGCGGAAACCC  
GACAGTCTGACTACCTCAGGACGCTCCCGCGCAGTTCCTCAATGACGCCAGAGCCGTTTCCATGATGAATCGCAGGTG  
TCTTATGCTTGTTCGACATCAACCAGCGCTGGATTTCCAGCCACCCGAGGCGGTTACGACCTGATCGTTGCCGCT  
CAATGTGCTCCACGACGCCAGCCATGTCTGTCAGAGCTTGGCAGATTAAACGTGTTGCTGAAAGCCGCGGACGCTTTC  
TGATCGTTGAAGCGCAGGAGCGAAACAGCGTATTTCCAGCTGGCGAGCGTGGGCTTTATTTGAGGGATTAAGCGGATACCC  
GATTTCCCGCCCGGATGAGAAACCGATGCTCACCCTCCCGATGGCAGGAGGTTCTGCTTACGGCGGTTGCAAA  
CGAGCTGGCGTGGCCCGCAGGAATCGTCGCCGCTGCCGAGCATCTGCTGGTAGCGGCTTCCGCTGGCGTAAATCGCC  
CGGATAAAAAGCGGTGAGCCGCTATTTACAGCAGCGCTTTGGCACCGGCTGTCGCCATTTTACAGATCGCGCAAGAGAA  
CGGTTATTTACCGCGCTGCATGCCCGCTGTATGCGCCGACTGAGCCAGCCAAACCCACGCCAGTTGCCGGGGGAAATCC  
GGCGCTGGAAAACAGGTGGCTGAACTTGGCAATCGCTGTCTGCCCGCCGTCGCAAGGCATCACGACTTTTTTCGAAC  
TGGGCGCGCAGCCTGATGGCGACAAGGATGGTCGCGCAGCTAAACCGAGAGGGATGGCAGGGCTAACCTTCAGGAT  
CTGTTTACGCAATTCGACGCTGAGCGACTTCTGCGCCATCTACAGGCGGCTACGTCAGGAGAGGACAACCCGATACCCCT  
TTGCCAGGGCAGCAGTGAAGAAACCTGTTGTCTTCCAGCTTCCAGCGGCGATATCAGCGCTGGCTGCGGCTCGCTA  
GCGCGTTGAACAGGCGGCTTTTCCGCTGCAAGCAAAATCGCCGACGCGCTTTGCCACGCTCGACCATGATCGATGAG  
TATGTGCGGTGTCATCCGTCGTCAGCAGCTCACGGCCCTATGTGCTGGCGGGTTGGTGTATGGCGGCTTCTTGGCGC  
GGGCGCGCACAACGCTGTACGCCAAAGCGCAGCAGGTTCCGATGGTGTAAATCGATCCCGTGTGCCGACAGGATTTCT  
GTTGCGAAAACCGGGCGCCCTGCTGCGCCTGTTAGCCGAAAGGACAACCGCTTGGCACTGCCGAACTTTTCGACCCAG  
CAGCGCTGCAACAGGCGGCTTTTCCGCTTATCAGCTTCAAAACCGCCGATGGTGTGCGCAAAACCTTACGCTGCA  
AGCGGCAGAAACGTGGCTCGACAACATCGCGCATCTGCTGCGTTTACTGACTGAGCATAACCGGGCGAAAGCGTTCGG  
TCCCTGTCTCATGGTGTATGCCCGGGAGCCCTCGCGCTGGACGCCAGCAGAAACCGAGTGGCAGGGCTGGATAAAC  
AACGCCGACAGCCTGTGATTGAAGCCAGCCACTGGCAAAATCATGATGGAAGCCCGCCACGTTTACGCTTGTGCGCAACA  
CATTACGCGCTGGCTTTGGCAACCTCAACGCAACCCGGGAACACTGTTATGA  
>Cluster\_15663  
ATGAAATCAAAAATCAAATCGCTACTGGTGCCTGGTTATAACCGGCTGGTTAAGTATTTCCGTTTGTTCGATTTCTGGTT  
TAAAAATCTCAATCTGAGGGAATCATGA  
>Cluster\_28780  
ATGAAACGCACTTTTCAACCGTCTGTACTGAAGCGCAACCGTTCTCACGGCTCCGCTGCTCGTATGGCTACTAAAAATGG  
TCGTCAGGTTCTGGCAGCTCGTCTGTCTAAAGGCGCGCTCGTCTGACCGTTTCTAAGTAA  
>Cluster\_21435  
ATGGAAGGTAAGTAAATTTTTTGTTCGTTGCAATACTACGGTTTTCAGTCTGATTACGATGAAACCGCTGCCGTTCCATT  
GTTCTCACGCTGAGAGAGAATCCTTTTGTTCCTCTGTTTTAAACATGATGATAGCTAG  
>Cluster\_30982  
ATGGGTGCGAAAATTTTAAATAGCAAAAACCGCAATATCGGGATAACGCTACAGGAGAAGGCGATATTCTATTTTCCGGAA  
ACAAGGTGAATATCAAATAATCCTGTCAAATTTGCCCTTTCGCCCTGAAAAATGCATAG  
>Cluster\_62577  
ATGACACAGCAGCGTTGTTACTACCACCCTGCGCGCGTACGGACTCGCTACAGTGTAGGGGCCAAAATATTTCTACT  
GCTCTGGGCTGCAGGAGTGGGAGCAGCTGTACAGCTGTACAGCGTCTGGCGTACTGA  
>Cluster\_13929  
ATGAAACTTTTCGGAAGTCGATCTGCGTAACTGACGGTCAAGCATCCGTTCTCCGCTCAGTACCAACAATGGTCCGCGA  
CGTGGTGAATTTCTTACGTTGGATGCTTGAACGATCTGATCCAGAAAGCGGAACCCAGCCATGCGATGAAAATTTT  
GCATTTGCCCGGACTTTCAGGAGGTTGAAATTTTACGGGATGGTGTTCAGGACAGCAGCTCGCCAAATGGCTGGAAGCG  
GTAGCCTGGTCTGCTGTGCCAGAAGCCGGACGCCGAACTGGAAAAAACCGCCGACGAGGTAATCGAACTGATCGCTCCGC  
CCAATGCGAAGACGGCTATCTCAATACTTACTTTACGGTAAAAGCACCAGAAACCGTGGAGCAATCTTGGCGAGTGT  
ATGAACTTTTACTGCGCGGTCATCTGATTGAAGCCGAGTCTCGCTTCTCCAGGCCAGGGAAAAACGACGCTTGTGGA  
GTGGTTTGGCGCTGCGCCGATCATATCGACCGGATTTTGGTCCAGATGAAGACAAGCTGCAGGGTTATCCCGGCTATCC  
GAAAATGAACTGGCGCTGATGCGTCTCTACGAAGTCAACGAGAGCCGCGCTACCTGGCGCTGACGAACTATTTTGTG  
AACAGCGTGGTGTGAACCCGACTATTACGACAGGAATATGAAAAGCGCGGCGAGACCTCGCACTGGCACACCTACGGC  
CCGCGTGGATGGTGAAGACAAGCCCTACAGCAGGCAATTTGCCCTTGGCAACAGCAAAACCGCTCGCTCAGC  
GGTACGTTTTGTCTATCTGATGACCGCGCTCGCGCATCTCGCGCTTTAAGTACGATGACAGCAAGCGTCAAGACTGCC  
TGGCGCTGTGGAACAATATGGCCAGCGTCACTATATATACCGCGGCATTGGCTCACAGAGCAGCGGTGAAGCGTTC  
AGCAGCGATTACGATCTGCCGAATGACACGGTATACGCTGAAAGTTGCGCCTCCATCGGCCTGATGATGTTTGGCCGAC  
AATGCTGGAATAAGGAGGCGACGCTCAATATGCGGATGATGGAGGCGCGCACTGTACAAACCGTGTGCGCGGATG  
CGCTGGACGGCAACATTTCTTCTATGTGAATCCGCTGGAAGTACATCAAAAATCGCTGAAATCAACCATATCTACGAT  
CACGTTAAACCGATCCGCCAGCGTTGGTTTGGCTGCGCTTGTGTTCCGCAAAATATCGCCCGGCTGCTGACCTCGATTGG  
TCATATCTCTACACCGCGGTGAAGATCGGTTGTATATCAACATATACGAGGAAACAGCATGGAAGTGGCCGTTAGAAA  
ATGGCACACTGCGCTGCGGTTAGCGGAACTATCCGTTGAGGAGGAGTGAACAATTTGGGTTGCAATTCGCCGCTGCAATTC  
GTGCTCATACGCTGGCTTTACGCTGCGGACTGGTGCACACAGCCGAGATCATATGAATGGGGAAGAGGTGCGACA  
GGATATTCGTAAGGGTATTTGCACATTTACCGCAATGGCAGGAGGGCGATACGCTGAATCTGACTTTGCCGATGCGCG  
TACGCCCGGTTTACGGTAAACCCGCTGGTGGCTACGTCGCGGAAAAGTGGCGATTACGCGCGCCGCTGGTGTATTG  
CTGGAACAGGCGGACAACGGCGAGTCACTGCATAATCTGTGGCTGCCACCGATGCGCATTTTACGACATTTGAAGGCAA  
GGGATGTTTACGCAATAAGATCTTAACTCAGGCACCGGTTACCGGTATGAACAGAGCAATCCAGAGCAGCAACCGCTGT

GGCATTACGACAGCGGCCAGCCAAACGCCAGCCGCAAACTCTGACCTTTATCCCGTGGTTTAGCTGGGCTAACCGGGGC  
GAAGGCGAAATGCCGATCTGGGTGAATGAGGAAAAGCATCGCCATCCGGAGGTTGGATAA

>Cluster\_32975

ATGTCACGTCCCGCAATTTACCTCGTTGCGTTTGGAGTTTGGCTTTGGCTGTTTCTGCCACCTTGCCAACGTTTGCCTT  
TGCTACTGAAACATGACCGTTACGGCAACGGGAATGACAGTAGTTCCTCGAAGCGCTATGATGGTCAGCGTTATCG  
ACACTTCCGCTCCTGAAAATCAAACCTGCTACTTTCAGCCACTGATTTGCTGCGTATGTTCTGGAATTTACTCTTGATGGT  
ACGGGACGAACCAACGGTCAGGATGTAAATATGCGTGGCTATGATCATCGCGGCTGCTGGTTCTTGTGATGGTGTTCG  
CCAGGGAACGGATACGGGACACCTGAAATGGCCTTTTCGATCCGGCGCTGATCAAGCGTGTGAGATTGTTCCGGGAC  
CTTCAGCATTTACTGTATGGCAGTGGCGCTGGGTGGAGTGATCTCCTACGATACGGTCGATGCAAAAAGATTATGGCAG  
GAAGGACAAAAGTAGTGGTTTTCGTGCTTTGGTACTGGCGGCACGGGGACCATAGCCTGGGATTAGGCGCGAGCGCGTT  
TGGGCGAACTGAAAATCTGGATGTTATTGTTGGCTGGTCCAGTCGCGATCGGGGTGATTTACGCCAGAGCAATGGTGAA  
CCGGCGCAATGACGAGTCCATTAATAACATGCTGGCGAAAGGGACCTGGCAATTTGATTTACGCCAGTCTCTGAGCGGT  
TTAGTCGCTTACTACAACACGACGCGCTGAACCAAAAATCCTCGCAGACCGTTGAAGCTTCTGATAGCAGCAACCGAT  
GGTCGATCGTTAACAATTAACGCGATGCGCAGCTTTCTTATAAACTCGCCCGCAGGGTAACGACTGGTTAAATGCGAG  
ATGCAAAAAGTTTACTGGTCGGAAGTCCGTATTAATGCGCAAAACACGGGGAGTTCGGCGAGTATCGTGAACAGATAACA  
AAAGGACAAGGCTGGAGAACCCTTCCACTCTATTGCGCAGTTCGCTTCTACTTACTGACATATGGCGGTGAGTA  
TTATCGCTCAGGAACCAATCCGGTGGCGCAGCGGCTTCCCGCAAGCAAAAATCGATTTTAGCTTGGCTGGCTAC  
AAGATGAGATCACCTTACCGGATCTGCCGATTACCTGCTTGGCGGAACCCGCTATGACAGTTATCGCGGTAGCAGCGAC  
GGCTACAAGATGTTGATGCCGACAAATGGTCACTCTGTCGGGGATGACTATCAACCCGACCACTGGCTGATGTTATT  
TGGCTCATATGCTCAGGACTTCCGCGCCCGCAGTGGCGGAAATGTAACGATTCTAAACACTTCTCGATTGGTGGCT  
TCTATACCAACTATTGGGTGCCAAACCCGAACTTACGTCGGGAAACTAACGAAACTCAGGAGTACGGTTTGGCTGGCT  
TTTGTAGCTGATGTTGTTCAATGATGCTCTGGAATTTAAAGCCAGCTACTTTGATACCAAGCGAAAGATTATATCTC  
CAGACCGTCAATTTCCGGCGCGGACAACTATGTCGATAACGCTCCGAAACGCAAAATCTGGGGTGGGATGATGATGA  
CGAAATATACCACTGTTGTTAGCTTGGCTGATGTCGCTATAACCGTACCCGCGCAAGACACCGGATACCGGGAAAT  
ATCTCCAGCATTAACCCGGATACCGTTACAGTACCCTGAATATTCCGATCGCTCACAGTGGCTTCTCTGTTGGTGGGT  
CGGTACGTTTGGCGATCGCTCAACACATATCAGCAGCAGCTACAGCAACACCTGGCTATGGTGTGAATGATTTCTAGC  
TCAGTTATCAAGGCGCAGCGGCTCAAAGGCATGACCCTACTCTGGTATTGGGCAACCGCTTCGATAAAGAGTACTGG  
TCGCGCAAGGCATCCACAGGATGGTCTAACGGAAAAATTTTCGTGAGTTATCAATGGTAA

>Cluster\_22017

GTGAGCATGGATAAAGCGATTTTATCAGACATTTTTGATGAAAGCGGACGAACTGTGGCTGATATGGAGCAGCATCT  
GCTGGTTTTGCGCCGGAAGCGCAGATGCCGAACAATGAAATGCCATCTTTCGGGCTGCCACTCGATCAAAGGAGGGG  
CAGGAACCTTTGGCTTTCAGCGTTTTCAGGAAACCCAGCATCTGATGGAAAACCTGCTCGATGAAGCCAGACGAGGTGAG  
ATGCAACTCAACCCGACATTAATCAATCTGTTTTGGAACGAAGGACATCATGAAGAACAGCTCGACGCTTATAAACA  
GTCGCAAGAGCGGATGCTGCCAGCTTCGATTATATCTGCCAGGCTTCCGCTCAACTGGCATTAGAAGCGAAAGCGGAAA  
CGCCATCTGCAGTACCCGATTAAGTGTGGTGGCAAAAGTGAACCGCAAGATGAGCAGAGTCTAGTCAGTTACCAGCA  
GCAATTAATCTTTCGCGCTGAAGGCGCGGCAAGTTCAGCTTGGAAAGAGTGGGGCATCTGACAACTGACATGCTG  
CGTGGTGAAGGGGCGGATTTCTCTCGGCAATATTACCGGGCAGATCGCCGAAGATGACATCACAGCGGTACTCTGTT  
TTGTGATTGAAGCCGATCAGATTACCTTTGAAACAGTAGACGCTCTCGCAAAAATATCCACCACCAGTGTCTAAACTG  
GCAGCGCAACAGCGCAACCCGTCGCGTGGAGCGGAAACCGCAGCAGTGAATCCACCAGCATCCGTTAGTAG  
GGTAGAAAAGGTTGATCAATTAATTAACCTCGTCCGCGAGTGGTCTCACCCAGTCCATGCTTGTCTAGCGCTCCAGTG  
AATGAGCCGGTTAATCATGTTGATTTGATTACAGCATGGGGCAGTTACAAGTAAAGCTCGTATTTGCGAGGATCA  
GTGATGTCGATTCGATGATGCCGATGGAATATGTTTAGTCTGATATCCCGGCTGGTGGTGGTATTTGGCGGAAAACT  
CGCAAGCAGGTGAGAACGACGCTGGTGGGAGTTCCTCACTGCAACTCGAAGAGCTGATAGAAGCATTATTCGACCCG  
TGACCACCTGGTACGCAATAGCCTCGATCACGGTATTGAACTGCCAGAAAAACGGCTCGCTGCAGGTAAAAACAGCGTC  
GGAAATTTAATTCGTCTGCCGAACATCAGGGCGGCAACATTTGCATTGAAGTACCGACGATGGGGCGGGGCTAAACCG  
TGAACGAATCTGGCAAAAGCGGCTCGCAAGGCTGACCGCTCAGCGAAAAACATGAGCGACGACGAGTTGCAATGCTGA  
TATTTGCACTGGCTTCTCCAGCGGAGCAGGTCACCGACGCTCTCCGGCGTGGCGTGGCGATGAGACGTTAAACG  
AATATCCAGGAGATGGGCGGTCATGTCGAGATCCAGTCGAAGCAGGTTACTGGCACTACGATCCGATTTTACTGCGCT  
GACGCTGGCAATTTGACGGCATGTCGATACGGTGGCGGATGAAAGTTTTCATTTCTGCGGCTGAATGCTGTCATGGAAT  
CACTGCAACCCCGTGAAGCCGATCTGCATCCACTGGCTGGCGGCGAGCGGGTGTGGAAGTGGCGGGTGAATATCTGCC  
ATCGTCAAACTGTGAAAGTGTTCACAGTCCGCGGCGGCAAAACCGAAGCCACCCAGGGAATTTGTTGATCTTACAAG  
TGGCGGTCGCGCTACGCTTGGTGGTGAATTAATTTGGTCAACACCAGGTTGTGGTTAAAAACCTTGAAGTAACT  
ATCGCAAAAGTCCCGGCATTTCTGCTGCGACATTTCTTGGCGAGGCGAGCTGACATGATGTTGATGCTCCGCTTG  
CAGCGGATAAACCGCAACACGATGCGCAACACCGCCGCTGA

>Cluster\_38499

TTGCAAAATGCCGTCATGCCAAAATAGATGAAATGTTGGTGTGCTCATGCCGGCTGTTTTGACGATTTAGAGTCAGT  
CATTTTACATCGGAATAATAAAGCGATTTTGGCTAATCTAAGCGGATTTGAGCGTATTTGAACCTTGGGATGAGAAATAGGA  
AGGTTCCAGGAGGACTGATGGTTGTTTGAATCATCAACACTCTTGTACGACTATTTGAGTACACAGGTGAAGATGCA  
ACTTACAACAACATGAAAACGTTATTTCTATATAGAACCAACCGGAGTTAAATATGATGAGATTAGACCAAAATGTGG  
TCTTCCCTTATTAAGGATAATGGATTTATCCCAAAATGATAGATATATATAGACATTTCTATTGATTACCCGGGTATAA  
GAACGTTAATCCAGAACCAAAATATTCAGCATTTCCGGTGTAGTGAAGTATTTCTGTTGGCATTGAAACAAATAGCTTT  
CCCGTACCATCAGAAGAATTAACCATTTGCTGTATTTGACACTGGGGTAAGCCCAATCGCGGCAACAATTAATCCCTTG  
GGTAGTGAGTAGGAAAACATACGTAATTTCTCTGATACGAGTTATGAACATGGGACTATGGTGTCTTCAATTGATATCAG  
GCGCTCATTTTTAAATGCAATCATCCATGGATTCTGATACAAAATCTAAAATCCATGATGTTTGTGCTTTAGATGAA  
AATGGATCTTATATACAGATTTAATCTGAGGCTAGCAGATGCTGTAATAAAAAGACAGATATAAAGTCTGGAATTT  
ATCTTTGGAGGCGGACCATGTAATGAGCAGATGTTTGTAGTATTTGGCATGGAGTTAGATCGGCTCAGCGATAAATTTG  
GTATTTTGTGTTGATGTTGCTGCAGGTAATATGATGATGAACCTATACGTACATGGCCAAATCTGATCCGCTTGGAGGT  
GCTGATTTAATTTCTCTCTGGAGAGTCACTCCGAGCATAACAGTTGGTTCAGTTTCTCATATGGAAGCTAATGATGC  
TTTTAAGTGAATTTGAACACCGACCAATATACGTCGTCGGCCCTGGGCTGATTTTACTCCAAGCCAGATATAATCC  
ATGCTGGCGGTTGGGTTTCAATAGACCTTGAATGTGAGCAAGCAGTTTAAAGGTCATAGGCAACAATAAGCTTTTC  
TCTAATTTTGGTACTAGTTTGTGCTCCAATTTGGCAAGTTTACTGCGCATACATGGCAGAGATAGCCACTAATTC  
AGACTTTAATGTTTCAACATCATTTGATTAAGCATTAATTAATTCATTTCCGCTCAATTAATCTTCTCTGATTAATTCGCA  
GTGAAAGACGCTATTTGGGAGCGGAAATCTTAATGAGGTTATTGAGACTTATGATAGTATGATAGGTTTACTCTG  
ATTTTCCAAAATTTCTTGGTTCCCTGGGTTGAGGTTGAGAAAAGGAAAAATCCCATACATCGGCACCTTATTTCAAAATGG  
AAAATTTAAGGTGAGATTGTAATTAATGCTGCATATGCACCACCCTGAACCTAATGCCGGCAGTGAATATGTTCCGG  
CGAACGATAGAGTAAAGTTTGGCTTAAATGAGATAAATACTATAAAGGAAAAGTACCTATGGAAGGAGAAAACCGGTC  
TCTGATATGAGAGACTCAAATGAGCATGGTGGAAAGTGGTACCAGTAAAAATTCATCGCAAGGCATTTAATAAGG  
AATTAATTTCCGGTAACTGGGCTCTTCAAGCTAAAAACAGTTGAGAGCAATGAACCGGCTTAAATGGAGCTTTACCTG  
TAACTATTTGATGTAATTTAAAAATCATTAGATGAAACACACAAGTTTATGCTGATGGCGTAAGAGCTTTAAATGCTAAT

AACTGGGCTCACTATCCATTGCCCTGCTCGTGCCAGTTTCCGTATAA

>Cluster\_28720

ATGAATAAACTCTTAAATATATTTAAAAAGCAGAGTCATATCAGCATCTTATCTGGCTCTCTTCTTTATGGCTGT  
AATGATGATGATTTATCCACTACCAACAGTTGTGGTGGATATCATTATCGCGATTAATATTTCCGACAGCTTTACTTTTTAT  
TAATGCTTCCCAATCATATATAAAAAATCCCTTGAACCTACTCTTTCCCAACAATCCCTGTGATTACGACGCTTATCGCC  
CTGTGCTCAGTGTAGTACAACAGACTTATTTCTGCTGCATCAGATGCGGGTGACATATTTACTCCTTCGGTAACCT  
TGTGTTGGCGGTAATATGTTGTTGGCCTGGTATTTTACTATTATCACCATTGTTCAATTTATGGTTATTACAAAAG  
GGCCGAGCGTGTGCTGAAGTGAAGTGCCTGTTTCCCTTGATGGTATGCCAGGAAAGCAAAAGAGTATTGATGGTGT  
ATGCGCGCAGGCGTTATTGACCCGCTTGAGGCAAAAGTTCCTGCTCCCGAGTGCAAAAAGGAAAGCCAGTTTATGGTTT  
AATGGACGGGGCGATGAAGTTTGTAAAAGGGGATGCTATTGCTGGTATCATTATGTTTTAGTTAACCTTTTTGGTGGCG  
TGCTCATTGGGATGTGGCAATTTGACATGCCATTTAGTGAGGCACTTAGCCTGTTTCTGTATTGTCTGTGCGTGATGCT  
TTGGTTGCCCATCCCTGCGCTTATTTCTGTCACCGGGCGTGGTGTACTCGTGTGCCCGTGAAAGCGAAAA  
AGAAGAAAACCTTCCAGGTGATATGTTCAACAGGTTTCTGTTAATAGTCGCCCTTTTTTAATCAGTGCCGCACTAATGC  
TCGTAATGGCGATTATCCGGGCTTCCACATTTGGTCTTTCTTATTTCTGGCGGTTTGCCTGTGGGGATAGCCTGGAAA  
TTACAGAAGAAAAGAACATTTGGAACTGGCAATAAAGAGATGCTATGGGAGCTGATTGTCTAATAGCCAAAACATCTC  
ACCGGCGCTGAGCCATTGATTTAACTTAAGTAGTAATATTTATAGTTAGACATACACAGCAAAATGAGGTGATGCT  
GTTGGAATTTCTTTGAGGAAAGTGAATTTCCATTTGCTTAAGATTTATGTTAATCCGGTTAAAAATAAATAGCGCAATA  
GAATTTTTGCTCTATCAAGAGTCAATATACAAAGATACCTTATAGATGATACGTCTATTTGAGGCTGGGCATGCAGA  
GATATCATTCGAATTTGCTCAGGAAAAGCTTTCGACTAATCTATCGTATATAAGACGAAAGACTAATCAACAGCTCG  
CTCACCTTACAGGTATGGATGTTTATGCAACAACAAATGATAAGATAACGTTTGTCTAAAGAACTGTATTGTCTAAT  
GCCAAAAGATTTCATGCGGTACAAGAAACGCGTTATTTGATGGACATCATGGAGAGAAAATAAACAGCATTGTGAAAGA  
GCTGCAGCGCCAGCTTGGTTGAGCAAAATTTGACATTTCTACAACGCTCTCGTAGAGAAAATGTCTCAATTAGAGATC  
TGAGAATCTTTGAGACGCTTATTTTTTGGTCAACAAAAGAAAAGGATGTGGTTATCTGTGCGAATACGTTCTGATC  
GCCCTGCGTCCGCAATATTTAGGTGCTATAGCGTTAGCGGTACACTCTGAAACGTTTGGCTTATTTGGCTTATGGAATG  
AAATGAGCTACGAGAGTGCATGACAGCAACGCTCATCAGGTTGCTATCTGAATATCTCACCGGAGCGAACTGAGCAGATA  
TTGGCTTCTTAAAAAATATCATGAATCCAACGGGGAACGGCGTATTCTGACCGCTTTAGATATCAGGCGCTATGTGAAG  
AAAATGATTGAAGGTTCCGTTCCCGTCACTCCCGTCTCTTTTTCAGGAGGTTGGGAATAATATCGAACTTAAAGTATT  
AGGAACGGTAAATGATTTTCAGAGCATGA

>Cluster\_27154

ATGACTCAAGTCGCGAAGAAAATCTGGTGACGTGCGCACTGCCGTACGCTAACGGCTCAATCCACTCGGCCATATGCT  
GGAGCACATCCAGGCTGATGTCTGGGTCGTTACCAGCGAATGCGCGGCCACGAGGTCAACTCATCTGCGCCGACGATG  
CCCACGGCACGCTTATCATGCTTAAAGCTCAGCAGCTTGGTATCACCCGAGCAGATGATTGGCGAAATGAGTCAGGAA  
CATCAGACTGATTTGCGAGGCTTTAACATCAGCTATGACAACATCACCTGACGCACAGCGAAGAGAATCGCCAGTTGTC  
AGAATTTACTACTCTCGTCTGAAAGAAAACGGTTTTATTA AAAACCGCACCTCTCTCAGCTGTACGATCCGGAAAAAG  
GCATGTTCTGCGCCGACCTGTAACGCTGAACTGATTTGAAACGAAATCGCGGTTCTGGTGCTACGCGGTAATGCGTGA  
TTCTGAACACTTCTTTTATCTGCTCTTTTACGCGAAATGTTGACGCGATGGACCCGAGCGGTGCGTTGCAGGAGC  
AGGTGGCAAAACAAAATCGAGGAGTGGTTTGAATCTGGTCTGCAACAGTGGGATATCTCCCGGACGCACTTACTTCTG  
TTTGAATTTCCGAAACGCGCGGGTAAATATTTCTAGCTGCTGGCTGGACGACCGGATTTGGCTACATGGGTTCTTCAAGA  
TCTGTGCGCAACGCGCGGACAGCGTAAAGCTTTCGATGAATACTGGAAGAAAGATTTCCACTGCGGAGCTGTATCACTTCA  
TCGGTAAAGATATCGTTTACTTCCACAGCCTGTTCTGGCTGCATGCTGGAAGGAGCAACTTCCGTAAGCCGACCAAC  
CTGTTTGTTCACGGCTATGTGACGGTGAACGGCGGAAAATGCTCAAGTCTCGCGGCACTTTTATTAAGCCAGCACCTG  
GCTGAATCATTTTTCAGCTGACAGCTGCTGCTTACTACTACTGCAAACTCTCTTCCGCGATTGATGATATGCTACTCA  
ACTTGGAGGATTTTCGTTACGCTGTGAATGCGGATATCGTGAACAAAGTGGTTAACCTGGCGTCCCGTAACGCTGGCTTT  
ATCAATAAGCGTTTTTTCAGCGGTGTCTGGCAAGCAGCTGGCTGACCCGAGTTGTACAAAACCTTACCTGATGCGCTGA  
AGTGTATTGGTGAAGCGTGGGAAAGCGCGAAATTTGGTAAAGCTATCCGTGAAATCATGGCACTGGCTGACCTGGCTAAC  
GCTATGCTGATGAACAGCTCCGTTGGTGGTGGCGAAACAGGAAGCGCCGATGCGCACTGCGAGCAATTTGCTGATG  
GGCATCAACTTGTTCGCGTGTGATGACTTACCTGAAACCGGTAACCGAACTGACCGAGCGCGCAGAAGCATTCCT  
CAATACAGAACTGACCTGGGATGATATCCAGCAACCGCTGTTGGGCCATAAAGTGAATCCATTCAAGGCGCTGTATAACC  
GCATCGATATGAACAGGTTGAAGCCCTGGTGAAGCATCAAAAGAGGAAGTAAAGCCGCTGCCGCGCAGTAACCTGGC  
CCACTGGCAGATGATCCGATTGAGAAACCATACCTTTGACGACTTCCGCAAAAGTTGACCTGCGGCTGGCTGATGTA  
AAACGCGAGTTTTGTAGAAGTTCTGACAAACTGCTGCGCTGACGCTGGATCCTGGCGGTGAAAACGCAATGTCTTCT  
CCGGCATTGCTTCTGCTTACCGGATCCGCAAGCACTAATTTGGTGTGCTACACCATATGTTGGTAACTGGCACCACCT  
AAAATGCGCTTCCGATATCTCCGAAGGATGGTAATGGCTGCTGGTCTGGTGGGAAAGATATCTTCTGCTAAGCCGGGA  
TGCCGTTGCTAAACCGGGTCAATCAGGTGAATAA

>Cluster\_64084

ATGAGTACCACAACACGAAAATTTAAAACCGTTATCACCGATACAGGTGCCAAAAAATAGCTCAGGCAGCGCCGACG  
TGTAAGCTGTCCGCTGACTCATATGCGCTGGCGACGTTGGCGGACGTTGCCACACAGCAGTAAGCAGACCC  
GTCTGGTGCATGAGGTGTGGCGACACACTGTTAATCGCGTCACTCTGGACGCAACACATCAGAACCAGCTTATTTGCGGAG  
CTGGTTATTCCTCCTGAAAGCGGGCGGATTTCTGGATCAGGAAATTTGGTGTATTGATGAGCAGCGGATTTAATCGCGGT  
GGGCAATACTGCCGAAAGTTACAACCAACCGTTGCGGAAAGGTTCCGGACGTCACAAAACATTTTCGCACCATTTCTGACCC  
TATCCAGCACTGCCACCGTGGCGCTTACCGTGGATAACACATGTTGATGAGCCACAGTGGATTACGTGGATGACAAACTG  
AAAGAGCATGAACAGTACGACGCTACCCGACGCTCGCTGACCGCAAAAGGCTTTGTTCAACTCAGTAGCGCCACTAA  
CAGCGTGTCTGAAACGCGAGCTGCAACCGGAAAGCGGTTAAGCCGCTATGACCTTGTAAACGGGAAATATACCGCAC  
AGGACGCCACTATAGCGGAAAAGGCTTGTTCAGCTCAGTAGCGCCACCAACAGCGATTCTGAAACGCTGCGGGCAACA  
CCAAAGCGGTAAGAGCGACATATGACCTTGTCTAACGGGAAATATACCGCACAGGACGCTACACAGCGGAAAAGGTT  
TGTCAGCTCAGTAGTGCCACCAACAGCAGCTGAAACATTTGGCCGCGACATCGAAAGCGGTTAAGGCGGTAATGGATG  
AAACAAAATAAGAAAGCCCATTAACAGCCCGACGCTGACCGGAAACGCAACACCACTGCGCGCAGGGGAAACGAAT  
AATACCAAAATCGCAAGCAGCGCTTTCGTTATGGCTGCGATTGCCGCTTGTAGATTCTGACCTGATGCATGACAC  
GCTGAACAGAGCTGGCTGCGCGCTTGGCGAACGCACTTTTTCGCAACCACTGACCTAACGCGCTTGGCGGTAAGCAAC  
CGAAAGATGCCACCTGACGGCGCTGGCCGGCTTGTACTGCGGACAGAGGTTTCCGATTTTACGGGGAATGATGTC  
GCCAGCTGGCACTCTGACAAAAGTCCGGCGGGATATTTCTGCGAAATCGACCGTTGCGCGCTTATCGAATACCTCGG  
TTTACGAGAACTCGGCAAGCGGGGAGAAAATACCGTTACTCAGTACAGCGAATACCTGGACCAATCGACAACTCA  
CGGTTGGCTTTCTGGGAACTGTCGGGCACTGCTGCAACAAAGCTGAAACAGCAAGCAAGCAAGCAAGCAAGCAAGCA  
GGTTTTGATGGTTCTAGCGATATTTCAATAGTGCCAAAATGTCAATGCATTTGCACCTCGACAAACAGGTAATACTGT  
TAATGGTGTATACCTCGTTGGATGGAATTTGGGATAGTGGTGCATATAACGCCATGATTGGTGGTGCATCTGCATTAATC  
TTCATTTAATAATAAATGCTGGTAGCTGTCTGCGGTACAATTTCCGTTGAAATATAAAAATGGTGGCAATTTCTCAGCAG  
TCGGCTCGTATGGTTATGGGTTTGAATTAGGTTGGTTCAGATTCTATACACGACACGAAAACCTTACGCGGAGATGT  
TGGTGCATATACGCGGCGAAGTGAATCAAGTTTTATACAGTATTCGCTTGGCGTCTGTCTGTTTCAGACAT

GGAATGGTCCCGGCTGGTCTGACAGGTCAGGTTATGTCGTTACGGGTTTCAGTTAACGGAAACCGTGATGAATTAATTGAT  
ACAACACAGGCAAGGCCAATTCAGTATTGCATTAATGGGACGTTGATTAACCGGGGAGTATTAA

>Cluster\_2740

ATGAACCGCTGAAACTATTAAGATTTCTCGTCTCGCTTGGCTTCAGTGTGGATGATGCAGGAGCGAAAAAGTTCGGTTC  
TGCTCCCGCGGTCAACATGCAATGTCATCAAAATGGGGCTGGCTGTGAAGGAGCTGCGTTGTCCGTTGGCTTCA  
CGGCTAAGATCGCCTCCGGCCTGGATAAATCTTTACTGGGCGTACAGCGCACCGGCGGACAGTCCAGGGAATTCAGTCT  
ATTGGCTATGCGGTTTCGAGGTTGGCGGCAGCGTGGACGCTGCGGATCTTCTGGAAGCTATCCCGGTTTATTCG  
TAACAATCCCGGTGCAGAGGCTTTCTGAATCGCTGGGCGTACAGACCCGTTGATGCCAGCGGTAACATGCGTGACATGG  
CCGCTATTTTACGGGCGTTGGACAGAAATCAGCAGCATGCCGTATTACCGGGCTAACCCAGTATGCGCAGATGCTGGG  
ATTGACGAAAAATACCCTTATGGCGATGCCCGGGGTGTGGGTGGCTTCTCCGGGACGTACAGCGCAATGGCGAAAGCTAT  
CGGCTCAATGCTGACGAGGCGGCCAGAGCTCAACAATTTTATGACCTCCCTGCGTGAGTTTGGCGCGATGGCAGGCA  
TGGCCCGTGACAAAAATCCGCTCTAATCTTGGGGGGGGCTTGGGGTTCGCTGGACACCTGCGCCGCAATATCTGGAC  
AATCTCCCTCGTATCGAGCAGACCTGACGAAAGCCATTAAGGCATTTCTGGCGCTCGGGGATATTATCGGACGATGCT  
CTTCAGACTGATTGAGGGGACATCAGGCCTTATCACCTGGTGGCAATCGCTGGATAAGCAAACCGGGAGTTGATCTCGC  
TGTTTGGGCGACTGACGATTGCGCTGCGCATTCGAACAGTACGTTCTGGATGTCGCCGATGGCCTCATTACCGCGCTG  
CGGCGGGTATTGCCCTCCTGTGGGAGGACTATCAGACCTGGAAGGAGGCGGCGACAGCTGATGACTGGGCAAGTG  
GAAACGGAGTTCCGTCGCGCTGAAGATGTTGCTGATGTTAAACGACCGTTAACGACCTGGTGAACAGATGCTGGCA  
AATGCTCAATATTGACCCCAATCATGGTCCCTGAAGTGGGATTTACGCAACTTCATCGACCAGATGGGCGAATTCAGC  
AAAATGCTGAACATGATCGCCGACTGCTCAACGCTATCAAGATGGCGCTGGGCTGATGCCGTGAGCTCGGCAAAACA  
GATACTTAATCAGGCGGAAATTCGCTGACGATGGTACAGACAGCGCTAACAGTACTGCCGACTGCGGCAATTA  
AAGACACTGGGGATTCGATCCCGCAGTGTGGGCGGACGCTACGCGGCTGGTTGGTGATGATGAGCGGAAACAAT  
GCACAGGCTACGAAACGAGGAGAAACGGAATAACAATCCGGGAAACCTTAATTTGCTGGTTCAGGACGGGCTTCTCTTGA  
ACGCCGGGCGGGCGATTTGCCAGATTTGAAACTGCTTTTGTATGGATTACGGGCTCTTCTCGTCACTAATGCTGTACG  
CCGACGGGGAATAAACAGTGTGGAGAAATTAATCTCTACCTGGCGCTGCGTCTGATAAATAACAACACCACTCGAT  
ATCAGGGCTGATCGCAACGACTGGGAGTGGATCCCGGGCTGCCCTGAATATGAGCGATCCGCAACCATGTCAGCATT  
GATGAGCAGCATTTACAGCATGAGAATGGAAGAAATATCTATTTCTCGGGAGCTGATTAAAGGCTGCGGTGGCGGGA  
TTAGTGGCAAAGTACAGAGGTTAACAGCAAAATACCTACCACATTTACGGTGGTGGAGATCCGACGCTGTCCGGTAAT  
GAGTTGACGTCGCGCAACAGTTCGAAATGCTCAGGTCATGCCAAGTAAATCAGGTGAGGGTGGGTTAG

>Cluster\_2220

ATGAAACCCACTTTATATACTGCTACTGGTGGTGGTTCACGCGAGCCGTTGAACTGGGCAAGGCGGCGAAGGTGCGGT  
TTATGATATCGAGGAGTTTGTGATAGCGTCCGCAAGATTTATCACACGCGCCACCCGCTTAAAACAGGACAAACTTG  
CCTTATGGCTCGCAGAGTGCAGCGCAGTTTGTGAATATGTCGCTGGCCGCGAGGCACCGTTCACGGTGGACGAGCG  
GAAAAGTTATCGGTTTTATGATGCCAAAAGTTTCTGGTAAAGAACCATTATATGATCTATAGCCCGCACATCGTCCG  
CCAGAGTTACCCTCATTTGCGTGGGATTTTCTACTCTATGTTGCGCGCAATATGCTTCATCTTTTGTACGGTTACG  
CGCATGGGCGACTCGTGGGTGACGTAACCCAGAACAGCTTTATGGTAGGTGCGGACAGCAAAGTGGTGTGATGATAGC  
GACTCCTTTTCAGATTAAACCCCAATGGCACGCTGCATTTATGCGAAGTCCGCGCTGCTCGCATTTTACGCCCGGAGT  
AACCATGCGCTCATTTGTCGGCTTTGAACGCACGCGAATCACGATAATTTGGCCTTGGCTTGTGATATTTACGCT  
TGTTTGGTGGGCGCATCTTATTTCTGGTGTGCGCTTATCTCTGATGCGGGGAATGCGCTGGAGACGGATTTGCTCAT  
TTCCGTTATGCTTACGCTCAGATAATCAGCGGCTGTTTAAAACCGCGCACGATCGATTCCGCTGCTGATGTTACC  
GGCGATGTTGAAGCCATGTTTTCAGCAGCATTACCGGAAAGTGGCGTGGCAACCGGGCGTCCGACGGCAAAAGCGTGG  
TAGCGGCATTTGATTTACTACGCAACAGTTAAAGAAATGTACCGTTTCGGCAATGATGTTTACCCCGCTCATTTGACT  
GACTGCCCGTGGTGTGCGCTGGATAATCAAGGCGTTATCTATTTTATTGATCTCGGTGAAGAGGTCATACCACCGCGG  
TGATTTTGTGCTGGCGAGAGTCTGGGCGATGGTATGATGATGATGATGATGATGATGATGATGATGATGATGATGATG  
ATTTCCAACCGACTGGCAGGCGGCTTCCCTCAGGCTGTTACGGCGGAATACATCATTTCTGATTTGAGATCGCACTGTCA  
GCGTTATCGCTGTGCTTTGCGGCTTCCAGGCAGAACCGGTTATATTTTATTTGATTCCTGTGCTGGCGGCTATCTGGAT  
TATTGGCAGCTGACAAGCAAAGCGTACAAAGCAGAAATCCAGCAACCGCGTGGGCAATTAATCGTGGCAAAATGGACT  
ATGACCATTTAGTTCAGCCAGATCAGCAGTGGGCGGGCTGGAAGGTTTATCGCAACCGGGCGATGCTCGAATAATG  
AAGGACGAAATTCGCGGTTACCAGGAAAGAGAAACGCGCTTGGCAGCACTTCACGACACCGCAAGGGAACGGCAGAA  
GCAGAAGTTCTGGAGGGATTTTATTGATGTTGCTCTATTTCCCGGCTGGCCCTGCGCGTAAAGCGGCTTACGCT  
CCTTTGGTATTGAAACAGCAGCGGATGTTACCCGAGGAGCGTTAAGCAAGTAAAAGGTTTGGTAATCATCTGACCCAG  
CGGTTATCGACTGGAAGCGAGCTGTGAACCGGTTTGTGTTTTCAGGCGGCAACGAAAGCGGTAACGCTGCAGACAGACA  
AGCGGTAATGGCAAAATAGCCGCAACAGCATCGGCTGGAATCGGCGCTGACTGTCGGTGGCGGAGAGTTGCAGCGAT  
TCCGCTTTCATGCCCGACGACGGACCATGCCCTGATGGAACCCCTACGTCAGCGGCGTGAATAACTGGCTCAGGCGCAG  
GCAGATTTAAGCCGTTGCTGA

>Cluster\_39657

ATGACCATACCACAGACACCACCTTTTACAGACCCGCGTCTGACGGCGGCTGCTGTACTGGCAGGGGTTTTCCGT  
GCCGAGATTGCCCCATGTTGCGATGAAACGCCCGAGGCTGACAGCTGGAACAGCGCGACGGCTGGGACAGCGTTG  
CCCCATCAGCCGTTGCAAAATGAGTCTGGAAGCGCGGTGACCCAGTTCATCATCAACCGCAGAAACCGGGGTTGAC  
TTCAAGGAAATGACCTGCTCGGACGCCAGATTGAACGACTGGCAGGGTCAACCGCTACAGCCAGACCGGCAACGAAGC  
AGACCTTAATCCGAACGTCGTAACCGCAACAAAGCGGGGCTCGCAACCGAAAAGAAATTTTTCAGCGACGAGGCCA  
TCGAAAAGCTGGAGCAGATTTCTTTGAGCAGTCTTTCGAATATCAGTTGCACTGGTATCGCGCCGGGCTTGAGCACCCG  
ATCCGCGATATCCTGAAATCCCGCAGATTTGGCGGACGCTTTATTTTCCCGGAGGCGCTGCTGCGCGCCCTGAAAAC  
CGGTCATAACAGATTTTCTGTCGGCCAGTAAAACCGAGCGTATGTTTCCGCAATACATCATCGCCTTTGCCCGGC  
TGGTTGACGTTGACCTGACCGGTGACCCGATTTCTGGGCAATAACGGCGCAAAACTGATTTTCTCGGCACCAACTCC  
AACCCGACAGAGCCATAACCGGACCTGTACGTCGACGAGATTTCTGGATCCCGAATTTTTCAGGTGCTCGGTAAGGT  
GGCATCAGTATGGCCCTCACAGAGTCACTGCGATCGACTTCTTCTCACCCGTCACGCTGGCGCACGACGCTGACG  
CGTTCTGGTGGGTAACGTTCAACCGGGGACGCGCCAGCGCGCGCAACCGGTGGAATCGACGTCAGTCAATAACGCC  
CTTGCCCGTGGGCTTCTCTGTGCGGACGCGCAGTGGCGGCGAGATTGTCACCATGAGGACGCGCTGAAAGCGGCTGCAC  
GCTGTTGACATTTGAGCAGCTCAACCGGAAACAGCGCGCAGGATTTTAAAACCTGTTTATGTTGTAATTTGTTGACG  
ACAAGCGCTCGGTTCCCGTTCGAGGAGCTGCAACCGTGTATGTTGTCAGACGCTGGAAGAATGGGAAGACTATGCGCCG  
TTTGGCCCAATCCGTTCCGGCTCCCGCCGGTATGGATTGGTTACGACCCGTCACCCGTTGGCGACAGCGCCGATGCGT  
GGTGTGGCACCGCGGTTGGTGGCGGTTGGCAATTCAGAATCTTGAAGCTCACCCGTTGAGGAAAGGCAATGGAATTTGCA  
CTCAGGCGGAATCCATCCGCAAACTCACGAAATACACGTCGAATACATCCGTTATGATGCCACCGGCTCGGTTGTC  
GGCGTGTTCAGCTGCTGCGCTCTTCTATCCCGCGCGGATATCCGCTACACCGGAAATGAAAACCGCAATGGT  
GCTCAGGCAAAAGACGTTATTCGCGTGGCTGCTGGAATATGAGTTCAGCGCCACCGACATCACGCTCGTTTATGG  
CTATCCGCAAGACATGACAGCAGCGGACGACGCGCCACTATGAGGCGAGCGCAGCGAGGAAAGCCAGCCAGCCGAC  
CTCGCTGGGCGACCATGCACGCCCTGTTAAATGAGCCACTACCGCCGGTATCAGCACCCCGCTGACATCCACCATTCT  
GGAGTTTTACTGA

>Cluster\_20508

ATGCGTAGTTTTAGCCAACCTGTGGCCGACTCTCAAGCCCTGTTAGCGTACGGTTCACCGTGGCGTAAACCGTTGGGGAT  
TGCGGTCCTGATGATGTGGGTTGCGCGCGCGGAGAAAGTCAGTGGGCCCTGCTTATCAGCTATTTTATCGACAATATGG  
TAGCGAAAAATAACCTGCCGTTGAAAGTGGTTGCAAGGCTGGCGCGCGGTATGTTGGGCTGCAACTGTTTGCAGCCGGG  
CTACATTACCGCGAGTCGCTGCTGTTTAAATCGGGCGGCAAGTAGGCGTAGTGCAACAGTTGCGTACCGAGCTGATGGATGC  
TGCCTTACCGCCAGCATTAAAGCGAGTTTGATACCAACCCGTCGGCGAGGTGATTTCCCGCTCACTAATGACTGAAG  
TGATCCGCGATCTCTACGTTACCGTAGTGGCAACTGCTCTGCGTAGCGCCGACTGGTGGCGCGATGCTGGTGGCGATG  
TTCAGCCTCGACTGGCAATGGCGCTGGTGGCGATAATGATTTCCCGGTGGTCTGGTGGTAATGGTATATATACAGCG  
TTACAGCACGCGGATTTGCTGCTGCTGCGCGCTTATCTGGCGGATATCAACGACGGCTTTAACGAAATCATCAATGGCA  
TGAGCGTTATCCAGCAGTTCCCTCAGCAGGCGGATTTGGCGAACGTATGGGTGAGGCCAGTCGTTCACTAATATGGCG  
AGGATGCAAAACCTGCGCCTCGACGGTTTTCTGCTGCGTCCGCTGCTGAGTCTGTTTTTCATCGCTCATTTCTTGTGGCTT  
GTTGATGCTGTTTGGCTTCTCCGCCAGCGGCACCATTTGAGTGGCGTGTGATGCGTTCATCAGTTATTTGGGGCGAC  
TTAACGAACCTTAAATCGAACTGACCACGCAAGCGGATGCTGCAACAGGCTGTTGTTGCTGGTGGAGCGGTTTTTGG  
CTGATGGACCGGATCCGCAATATGGCAATGATGATGATGATGATGATGATGATGATGATGATGATGATGATGATGATGATG  
ATTTGCTTATCGCGATGACAATCTGGTGTAAAGAACAATTAATCTCTCTGTGCTTTCGCGCAACTTTGTAGCGCTGGTGC  
GGCATACCGGCAGTGGCAAAAGCACCTCGCCAGTTTATGATGGGCTATTACCGCTAACGGAAGGTGAGATTCGCCTT  
GATGGTCGTCATTAAGTACGCTAAGTCAACGCGGCTGCGCCAGGCGTGGCAATGGTGCAGCAAGATCCGGTGGTCTG  
GGCGATACCTTCTCAGCAACGTGACGCTGGGACGTGATATCTCTGAAGAACCGCTTGGCAGGCGGCAATCGAATCGAATCGT  
AGCTGGCGGAGCTGGCGGTAGCATGAGTGTGATGTTTACACGCCGCTGGCGAGCAGGGGAATAATCTCTCAGTCGGG  
CAAAAGCAACTGCTGGCACTGGCGCGGCTGCTGGTGGAGACCGCGAAATCTGATCCTTGTGAGGCACCGCCAGCAT  
TGACTCCGGGACTGAACGAGCGATTAACATGCTCTGGCGGCGTGGTGAACATACACTAGCTTGTGGTGTGATTCAGC  
GCTTATCGACTATTTGTTGATGCCGACCAATTTCTGGTCTTCACTGTTGGCGCAAGCCGTGGAGCAGGCACTACCGCA  
CTGCTGGCGGCCAGGACGATACTGGCAGATGATCAACTGCAACTTGGCGGCAAGAGCTGGCAGCAGCGTGGTGA  
AGAGGAATCATTTGAGCGCCTGA

>Cluster\_16906

ATGTTAACGGCATGTATATCATTTGGGGTTGCGATGACGACGAACACGCATTTTAGAGGTGAAGAATTGAAGAAGGTTTG  
GCTTAACCGTTATCCCGCGGACGTTCCGACGGAGATCAACCTGACCGTTATCAATCTCTGGTAGATATGTTTGGAGCAGT  
CGGTCCGCGCTACCGCGATCAACCCGCGTTTGTGAATATGGGGGAGGTGATGACCTTCCGCAAACTGGAAGAACGCAGT  
CGCGCGTTTGGCGCTTATTTGCAACAAGGGTTGGGCTGAAGAAGGCATCGCGTTGCGTTGATGATGCTCACTTAT  
GCAATATCCGGTGGCGCTGTTTGGCATTTTGCGTGGCGGATGATCGTGAACGTTAACCCGTTGTATACCCCGCGTG  
AGCTTGGAGCATCAGCTTAAAGATAGCGGCGCATCGCGATTTGTTATCGTGTCTAACTTGGCCACACTCTGAAAAAGTG  
GTTGATAAAACCGCGTTTACGACGTTATTTGACCCGATGGGCGACAGCTATCTACGGCAAAAGGCAGGTTAGTCAA  
TTTTGTTGTTAAATACATCAAGCGTCTGGTGGCGAAATACCATCTGCCAGATGCCATTTCAATTTGCTAGCGCCCTGCACA  
ACGGCTACCGGATGACGTACGTCAAACAGAACGTTGGTCCGGAAGATTTAGCTTTCCTGCAATACACCGCGGCAACCT  
GGTGTGGCGAAAGCGCGATGCTGACTACCGCAATATGCTGGCGAACCTGGAACAGGTTAACCGGACCTATGTTCCGCT  
GTTGCACTCCGGCAAGAGCTGGTGGTACGGCGCTGCCGCTGATACATTTTGCCTGACTGACATTAAGTGCCTGCTGT  
TTATCGAATCAGGGGGCAAGAACCTGCTTATCACTAACCCCGCGGATATTCAGGGTTGGTAAAAGAGTTAGGCAAAAT  
CCGTTTACCCTATCACTGGCGTTAACACCTTGTCAATGCGTTGCTGAACAAATAAGAGTTCAGCAGCTGGATTTCTC  
CAGTCTGCATCTTTCCGCGAGCGGAGGATGCTGTTTACAGAAAGTGGTGGCAGAACCTGGGTGAAACTGACTGGACAGT  
ATCTGCTGGAAGATATGGCCTGACCGAGTGTGGCGGCTGGTGGTGGTGGTGGTGGTGGTGGTGGTGGTGGTGGTGGT  
AGCATCGGTTTACCGTGGCGCTGACGGAAGCCAACTGGTGGATGATGATGATAATGAAGTACCACCGGTCACACAGG  
TGAGCTTTGTGTCAAAGGACCGCAGGTGATGCTGGGTTACTGGCAGCGTCCGGATGCTACCGATGAAATCATCAAAATG  
GCTGGTTACACCGCGGATATCGCGGTGATGGATGAAGAAGGATTTCCGCGCATTTGTCGATGATAAAAAAGCATGAT  
CTGGTTTCCGCTTTAATGTCTATCCCAACGAGATGAAGATTCGTCATGACAGCATCTGGCGTACGGAAGTGGCGGCT  
TGTTGGCGTACCTTCCGGCTCAGTGGTGAAGCGGTGAAAATCTCGTTGTGAAAAAAGATCCATCGCTTACCAGAGGT  
CACTGGTGCATTTTGGCGCGTACGCTCACGGGCTACAAAGTACCAGAGCTGGTGGAGTTTCTGATGAGTTACCGAAA  
TCTAACGTCGAAAAAATTTTGGCAGGAGAAATACGTGACGAGCGCGCGGCAAAAGTGGACAATAAAGCCTGA

>Cluster\_10216

ATGGCTCAACGTGATAATCTGTATCGCCGTAGCAGCGGATTTTATGTTGTCCGTAATGTCAGTTCCCGCCGATACCGTCT  
CTACACGGGACAGCGTGAAGATTCACGCTTCAACAGAAACAAACGACATCAGAAAAAGCGGAGCGATGCGCGAGTTCTAT  
TGGCTGTCTGGCAGCGATGCTGGGTGAGTATCAAAAATTGGATAGAGAAAAGTTGGTAAAGCAGTGGCGCTGCTTGGCT  
GGAGAAGGAATGATCAGCCTCGTGAATTTTGGCGTTTAAAGCAGCGCTTCCCTGCAACAAAGTGGCGCAGCGACTTGA  
TACGAATATCCCCTTTTTTGGCTGCTGATGGGCATCTGCCACTATGTAGAAGATCTTCACTCGTTGATAAGGATG  
ATCCTGAGGCTTCTGGATTTATCATCGATAGTGCCATTAACATCGGGATCAGAGGTTCTTGAACGGTTATATCCAGCCT  
TTGGTTACCTCAGCTATATTACGTCAGATGATCGCTGGCGAGCCGCTAGACGCAAGAACCGCATTTAAATCTCTCAGAGC  
TTCACTCAAAGCCGATGTTGCTGACTTTCCCGTGGTGAATCTCGCTGCTGCTGCTGCTGCTGCTGCTGCTGCTGCTGCT  
CCGAGCGCTTACGATTTGTTTGGCTGTCAATATAGCCCCACTATCTCTGCAACTACTGAGAAGCCAAAAGCAATATCC  
ACTGCAATATTTGCCATCATTTGCCGAGAAATGAGTATGTAATTCGAAATACTACTCGGTGAAAAAGGAGGATTTAG  
TGAAAATAATATTCGCTACAAGCGCGGGGAAATTCAGGAAAAGGCAGAGAATCGAGTCCGGGAGGTTTGTAGCTAC  
TGTTTGAAGTATGGGTGATCAAAGCTTTGTAAGTATGATCGTGAATCTCCGCGAGTATGAGAGCTTGTAAAGTTCG  
ATACCTGCAGCGGTGATTTAGCTAAAATCCGATACAGAAATCAATGACATTCATGAGTTGATGGTTAAAGCAAGAGAA  
TGGCGACCTCTAATGAGCGATAACACCGTTCGTAATATATGCGGGTTATCTTCAAGCTTTTCAAGTGGGCGAGATGGAG  
AAGTATTTTTTATTAAGTCTCTCGCAATCAATTTCTCGCACCTGTAGAAAATGAAAAGATGGATCAGGACTTCAAAGCT  
GATTTCACTGATGAGGATTTGCACGCTATTTTTAACCGCCCTTGGTTTAAACGTTGAACTGTGGATAGAAAATAGCGGGG  
GCGCTTCCATCATACCGTGCATTTCACTACTGCTGGTGGCACTATCGGATTTTACCAGGAGCAAGGATTAATGAGTTAT  
GCCAGCTTTATCTGGATGATATTAACAGGATGCTGCCGATTTTATTTCTTGAATCAGCAACGAGCGTGTGCTGATCAG  
TCACTGAAAACGATTAATTCACGAAGAAAATACCGTTCCGATCCGATCCGATCAAACTGGATTAATCCGCTATTGCCA  
AGCATTGAAGAAAGCAGGTATGCGCGTTTATTTCTGAGCTTCTTACCCTCTATAAAAGGATACGGAGATAAGGCTT  
CGGACTGGTTTAAACCGTTCGTTGCTGAAAGTGCAGTTAGGATTTGAAAAGGGCAGTAAGAAATCTTCCATTCATCCGT  
CACAGTTTTCAACAGGCTCAAACAAGCAGGAATGAACCGCCCGGAATCCTGGAGACTAACTTCTTGAGAAAGAG  
GTA

>Cluster\_38447

ATGTCAACCGGATACGTTTACACTGGAAGTGGACGGCTGCCCGCGGATGCTTTTGGCGGTGGTTTCTTTCTCATCTGAA  
CCAGTCACTCTCTCGCTTTTCCCTCGATCTCTCCCTGAGTGGTTCAGCCAGCAGTTTCTCTCCCTTGAATTTGCGCAGGTGC  
TGGACAAAATGGCTTACCTGACGATATGGCAGGCGATGAAGTACAGCCCGGGTGAAGCGGCTGGTGAATTTGAA  
CTCGGGGAGAACGACAAAACAGATGCTGTACAGCATGAAGTGCACCCGCGCTGTGGCGTCCGGTCTGCGCCAGAA  
CTTCCGATCTTCCAGAACGAGGACATAAAAGCATCTTCCGACGATGTTGCAAGAAAACCGGGTGAACGAAATGGAGT  
CGCTGTTCCAGCGAGCGCATCTTCCCGTGGTGTGTTGCTGTCAGTACCGTGGAGACTGATACGATTTTCTGTGGCGATG  
GCGCGGAGGAAGCATCTTCTTTTATGAGGAGCATGCTTACAAAAGTACCAGCAGAGCCTGGTGTGCTGCGACACAGT  
CCGCCATCTGCCGAATCTTTTGAATCCCATGGAACCGAACCCGTTACCGAGGTGAGCACCTCTGCATCAGCCAGT

TCCGCTACAGCGCACAAATCCGCCCTTCTTCCGTGGTGACCAAAGACTACACCTTTAAACGCCCGGGTGGGCCGGACGT  
TTTGAACAGGAAGGCCAGACCAGGACTACCAGCGCACGAGTATGAAGTGACTACCCCGGACGTTTCAAGAGGCC  
CCACGGGCGAAGCTTTGCCCGCTGGCAGATGGACGGCTGGCGAAACAACGCGAAGAACCCGCGGGGAATGAGCCGCTCGC  
CGGAGATATGGCCGGGACGACGAATTTGTCTGACGGGGATCCCGAGGCGAACCTGAACCGGGAAATGGCAGGTTGGTGGCA  
AGTGAACCTGCAGCGGAAACAGCCACAGCGGTGCCAGGACGGCAGGAGCGGGGACGGCGCTGGAGAACCATTTGCGGT  
GATCCCGGCGAGACAGAACATGGCGACCACAGCCGTTGCTGAAACCGCTGGTTCGACGGCCCGCAGAGCGCTGTCGTGACAG  
GACCGGCGAGGAGAAATCTTTCGCGACGAAATGTTGCGCGTGGGGTGAAGTTCAACTGGGACCGTTATAACCCGGCA  
GACCAAGACAGTTTCGTGCTGGATCCGTTGGCACAGGCGTGGGCGAGCACCGGTTTGGCCACCTGGCGATACCCGCTGT  
GGTTCAGGAGGTGATGAGACTTCCTCAACGGCGATCCGGACCAGCCGATCATATGGGGCGCACTACCACAGGAAA  
ACCGCACCCCGGCGAGCTGCGGGAAACAAGACGAGATGACCATCCGCTCCAAAACGTACATGGGCAGCGGATTTAAT  
GAGCTGAAGTTTGATGATGCGACAGGAGAGAAACAGGTTACATCCACGCGCAGAAACATGGATACCGAAGTGCTCAA  
CGACCGTACCACCCGTTAAACACGATCACCGGAAACCGTAAAAATGACCAGACGGTTCAGATCCAGGAAGGTAACC  
GCCTCTTACCGTGGAAAAAGGCCACAAGATCCCGGACTGAAAGGGTCTTTATCTGAGGATGTCCTTTCAGGACAGA  
GGCAGGATTCGGGTTCCGTTGATGTTGACGCTGTAACAATGGTGGCGAAGGCGACGGTATACAGGCTTATACGGCGAT  
TAAGGAAATTTTGTGCTGGTGTGGAGGAAAGCAAATTCGCTGACGCCGATGGCATTAGCTACAGGTCGGGGAATCGA  
CGTAATCAGGCTGTCGAAGGATGGCATCACCATCGTGGGCGGTTCTGTTTTCATCACTGA

>Cluster\_63879

ATGAGTATATCCAGACAACACTGAATAATATGGCCCGGGCTGTGAGAACTGCGTTGCAGCCGCTGGTAAGGGCATTGCC  
AGTAACCGGAGTTGAATGGGCAGATCAAATTTATACCTGCCTAAAGAATCGTCATATGGTGAGGGGGAATGGAAAACCC  
TGCCATTTTCAGTTCGATATGATGATGACAGGAGAAACAGGTTACATCCGACGATCCGTTACCTAATCTGATTAATCGGCGCGCTG  
GGCTTACACAAAATGTTGCTGGGTGGGTGCGGTTATTTATAGAGCATAAATCCCGTAAACAGCCTGCTTTTCCAGCCTAC  
TGATCTGCGCTGAAGATTTTATGAAAGCGCATGTGGAAGCAACATTCGCGGATGTCCCTGCCTTAAAGCGTTGTCTC  
CGTGGCTGGGCGAAAAACATCTGTGACAAACGCTCACCTGAAAGCGTTTTCCTCCGGTGTGGGGTTCTGGTGCCCTGGG  
GGAGTCTGTGCTAAATTTACCGTGAATAATCTGTGGATGTGGTGTGCTATGACGAACTCTCCCTGCTTTCAGGATGT  
GGAAAAAGAGGTTCCGCGACGCTGCTTGGTGAATAACGATTTGAAGGCTCGGTATGGCCTAAGTCCATACCGGTTCAA  
CGCCAAAATTAAGGCTCCTGTGAGATGAGAAAGCCGGAATGAATCTGCGCATTTTATGCTTCTTTCCTTGC  
CCTCATTCGCGGGAGATCCAGTATCTGAAGTTTGGTGTGATGTCGACGCGCTTTGGCTGAAATGGGAGAAGGGTAAACC  
GGAAACGGTGTATTTACCTGTGTGAACATATGGTGTGTGCTGTCGCTCGGAGTCCGAACTTACGAGATCCGACCGTGA  
TTTGTGACAAATACCGGATGTGGACGCTGACGGTCTGGCATTTCAGTCCAGTGTGAGGAGATGCCGCCACCGCGC  
TCCATCACGTACCACATCTGGACGGCTATAGCCGTTTACCACCTGGTGCAGATTTCTACGACTGCTGGATGCGCT  
GAAAGTCCGAACGGCGTCAAGACATTTATTAACACCAGCTGGGAGAGACCTACGAAGAGGCTGTGGGTGAAAAACTCG  
ATTACAGGCACTGATGGATAAGTTGTGCGTTACACGCTGCGGTGCCTTTTCGGGTGGTTTATCTGACGGCGGGCAT  
GACTCTCAGCGAAACCGTTTGGATGATGTCGTTGGGATGGGCTCCGGGAGAGGAAGCCTTTCTGGTGGATAAAATCAT  
CATATGCGGCGTCTGATGAGGAGAGAGCGCTGTACCTGTGGATGCGGCGATCAACAAAAATACTGCCATGCAGATG  
GTACCGAAATGTTCCATTTCCCGTGTCTGCTGGGACATCGGGGGATCGATGGTGAATAGTTTATCGGAGATCAAAAA  
ACCGGTGTTTTCGGTGTGCGGTAAGAGCGCTTCTGTCTATGGCAAGCCAGTGAACCATGCGGAAAAACTCGCAA  
TCAGCGGGTGTATCTGTGTGAGGTGGGACGGACCCGAAAAGAAATTCCTATGCCGATGAAGTCCGCTCCCA  
CGCTGCGGATGAAGCCAGTCTGATGCCATCCGTTTTCTGATGATCCGGAGATTTTTTCGAGACAGAGCGCGAGCAA  
CTGGTGGCGGAAGAGCTCGTGGAGAAGTGGGAAAAGGAAGATGCGCTGTCTGTGGGATAACAAAAAGCGGCGTAAACGA  
AGCGTGGACTGCTGTTGATGCTACCGCGCATTACCTGTGTGCTGCAACGCTGGCAGCTTGTATCTGGCTGACTGCT  
CAAAATCCCGGAGAAAGGAACTGTCCGGCAACCTTGAAGAACTGGCAGCAAACTGTCCGGAGGATGAATGGTAAC  
TATGTA

>Cluster\_28804

ATGTGTGGAAATGTTGGCGCGATCGCGCAACGTTGATGTAGCAGAAATCCTTCTGAAGGTTTACGTCGCTTGAATACCG  
CGGATATGACTCTGCCGGTCTGGCCGTTGTTGATGACAGAGGTCATATGACCCGCTGCGTCCGCTCGTAAAGTCCAGA  
TGCTGGCTCAGGCAGCGGAAGAATCCTCTGATGGCGGACCCGGTATTTGCTCATCTCGTGGGCGACCCAGGTTGAA  
CCTTCAGAAAGCTAACCGCATCCGCTGTTCTGAAACATTTGTTGGTGGTGCATAACCGGCATCATCGAAAACCATGAACC  
GCTGCGTGAAGAGTTAAAGCGCGTGGCTATACCTTCGTTTCTGAAACCGACACCGAAGTGTATGCCATCTGGTGAAC  
GGGAGCTGAAACAGGCGGTACTCTGCTGAGGCTGTTCTGCTGCTATCCCGCAACTGCGAGGTGCGTACGTTACAGTG  
ATCATGGACTCCCGTACCCCGGATACCTGCTGGCGGACGTTCTGGTAGCCGCTGGTGTATTGGCTGGGTATGGGTGA  
AACTTTTATCGCTTCTGACACGCTGGCGCTGTTGCCAGTACCTGCTGCTTTATCTTCCCTTGAAGAGGCGGATATTGCGG  
AAATCACTCGCGTTCCGTAACATCTTCGATAAAACTGGCGGGAAGTAAACGTCAGGATATCGAATCCAATCTGCAA  
TATGACCGCGCGATAAAGGATTTACCACCACATACATGACAGAAAGAGATCTACGAAACAGCCGATCAAAAACAC  
CCTTACCGGCGCATCAGCCAGGTCAGGTTGATTTAAGCAGCTGGGACCGAACCGGATGAATGCTGTGCGAAGGTTG  
AGCATTTAGACTCCTCGCTGTGTAATCTTTATAACTCCGGTATGGTTTCCCGTACTGGTTTGAATCGCTGGCAGGT  
ATTCCGTTGCGACGTCGAAATCGCTCTGAATTCGCTATGCAAACTGCGGTCGCTGTAACAGCCTGATGATCACCTT  
GTCACAGTCTGGCGAAACCGCGGATACCTGGCGGGCTGCGTCTGTGAAAGAGCTGGGTTACCTTGGTTCGCTGGCAA  
TCTGTAACGTTCCGGTTTCTCTGTTGCGCGAATCCGATCTGGCGCTGATGACCAACCGCGGATCGAAAATGGCGTG  
GCCTCACCAAGCATTCACACCAGTAACTGTGCTGTTGATGCTGGTGGCGAAACTGCTCTGCTGAAAGGTTGGA  
TGCTCCATGAAATGACATCGTGCATGGTCTGACGGCGCTGCGGAGCGTATGAGCAGATGCTGTCTCAGGACAAAC  
GCATGAAAGCGTGGCAGAAGATTTCTCTGACAAAACATCACGCGCTGTTCTGGGCGGTGGCGATCAGTACCCAACTCGC  
CTGGAAGGTGCAATTAAGTGAAGAGATCTCTTACATTCACGCTGAAGCCTACGCTGACGGCAACTGAAACACCGTCC  
GCTGGCGCTGATTGATGCCGATATGCCGTTATCGTCTGACCCGAACAACGAATGCTGGAAAAACTGAAATCCAACA  
TTGAAGAAGTTCGCGCGCTGGCGGTCAGTTGATGCTTTCGCGGATCAGGATGCGGGTTTGTGAGCAGTGACAATATG  
CACATTTAGATGCGCATGTGGAAGAGGTTGATGACCCGATCTTCTACACCGTTCGCTGCAACTACTGGCTTACCA  
CGTTGCGCTGATCAAAAGGACCGAGCTTACCCAGCCGCTAACCTGGCAAAATCGGTAACGGTTGAGTAA

>Cluster\_40985

ATGCGATATATAGCAGGCATTGATATCGGCAACATCAACAGAGGTTGCGCTGGCAACGCTCAGTGAACCTGGAGAGTT  
GTCGTTCTGAGTAGCACCCTGGCGGAAACCCGGAATTAAGGTACGTTGCGTAACTGCTCAATGGTATTCAGGAGGCGC  
TCGCAAGGCAACGAAAAGTCCGATCAATGTTAGCATAATTTCCGTTATTCGATCAACAGCAACTCCCGCTCAT  
GGTGTGTTGGCATGGAACCATCACTGAAACTATCATACCGAATCAACCATGATCGGTCACAACCCGAAACTCCGGG  
CGGAGTGGGGTGGCGTAGGACTACCATCACCCGCAAGGATTAATTAACATGCCCGCGGACACACCTACATCTGCTG  
TGGTGTCACTCGGCATTTGATTTTCCGATATGCAACGATGATAAACGCTCCGTACGAGCCGGATATCAGTACTGACTGGC  
GTTATTTCTCAACCGCATGGCGTACTGGTCAATAACCGCTGGAATTTCCCTCCCTATTGTTGATGAAAGTCTCTTA  
CATCGATCGTATTCGCTCGCATGCTGGCTGCAATTAAGTTGCGGTTCCCGGAAAGTTATCGAAACCTGTCTAACC  
CGTATGGGATGGCCGTTTTCGCCCTCAATGCTGAAGAGACTAAAAATATTGTTCCCTGTCGCGCGGGCGCTAATCGC  
AACCGTTCAGAGTGGTAGTGAACACGCTTTCGGCGAGTAAAGCCGTTGATGATCCCGGAAATATCGAACTGGT  
TTCTGCGGGCGCAACCGGGTTGATGTAGCTACTGGTGGCGATGCCATTAAGAAAGCGGTCGGTGGTGGTGGTGGT  
TGGAAACGTTGACGGGAGAACCTGGCTCAACATCGCGGAAATGCTGGAAATGTTGCGCAGACCATGGCTGAACTGACC



AACAAACCAGCAACGAAATTTTTATTTCAGGATTTGCTGGCGATAGATACCTCTGTCCCCTCAACGTAACCGTGGTCT  
GGCAGGTGAATTTTCACTGGAACAGGCTGTGGGTATTGCTCTATGGTGAAATCCGACCGTCTGCAAAATGGCGATGATCG  
CCAGTGAAATTAAGCAAAACTGCATGTGATGTTGAGGTCGGAGGCGAGAAGCAGAAGCCGATTCAGGGGGCCTTG  
ACTACCCCTGGAACGACAGCTCCACTGGCAATTTGAGCTTAGGTGCAGGCTCTACCGATGCCTCCATCATCAATCAGAA  
AGGGGAAATGATGGCCACTTTCAGGTAACCTTGGGGGAGGGGCGACATGGTAACAGATGATATATCCGTCGTGAGGCTTAAATG  
ATCGTTATCTGGCAGAAGAAATCAAAAAGTACCCGTTGGCAAAAAGTAGAAAGCCTGTTCCACTTACGCCATGAAGATGGC  
AGCGTTCAGTCTTCCCTACTCCCTATCCCTCATGTATTGCCCCTGTTGTTGGTGAACCTGACGAACTGGTGGC  
TATTCCCCTGATTTGACGCTGGAAAAGTACGCGCTGTCCGTGCGAGTGCAGAAAGAGCGTGTCTCGTAACATATGCCC  
TGCGTGGCTGCGTACGTTAAGCCTGCGGAAATATTCCGACATTCGCTGCTGTTCTGGTAGGTGGCTTCCGCTG  
GATTTGAAAGTACCGCAATTTGGTACCGACGCGTGGCACATTTATCGACTGGTCCGCGGGGGGAAATATCCGTGGTAG  
CGAAGGTCGCGCAATGCGGTAGCTACTGGGCTCTCATCGCTGGCACAAGGAGTCGATTTCATGAAAGTAA

>Cluster\_53907

ATGGCAGAAAAAAGATGACTGACTGGCATCGCAAGGTGCTGTGCAACTTTGATAATGCTGGTCAGCAACGCAGGATAT  
GCGTGAGCAGATTATTGAGGCTCAACGTTTCGTGAGGGTGTCCGGCGCACAGTGGGAAGGCAGCAAAACGCTGGTTACT  
CATTTGATGAAGGAGGTTTGGAGCATTATCCGCGTTTTGAACTGAATAAGATTGCCCGTGAATGTGATCGCATCATGGC  
GAGTATCGACGAATCGCATAGCGTTAAATTCAGGCCAAGGACGATAAGGCATCGGAAGCGTTAGCCGAAAAGATGAA  
CGCAAAATTCGCGCTACTATCAGAAACATCCGTTGGCGAAGCGTGTGATAACGCATTTGATGATGCCATAACGGGTG  
GATTCGGTTGTTCCGCATGTGTCCGATTACGAAGATGAAATGGATCCGAGTAAACGAGCAGCGACGCATCAGCCTTCTT  
CCTGTTTACGACCCAGCGCATGCGTCTTCTTCGATCAGGACAGCAAGCAATATGACCGTTCATGATGCTATGTGGGCTAT  
GAAATGTTTCCATGACGCTAAAGCGTTCGAGGCTGAATACCTGATTCATTCGCGGCAAGCCTTTCTCGTATGACA  
CTGGTACTCAGTATGACTGGTCAACGCCGATGCCATCTATGTTGGACGCTACTACGAAGTTCGCATAGAGAAGGTGAAG  
CTCAGCGGTGGCGCAACCTGTTAGCGGAGAAAAGCGCAATTTATGATGAAGAGCAAAATCAAGATATTTGTCGACGAGCT  
GACCGATGGTGCATTCGAACTGATTTGGCAGCGCAACGGTGAAGAAAGCGCGCTTTATTTGGCGTCTTCTGTCTGGCGTG  
AATCGGTTGAAGAATTAAGCGTATTCCGGCGAACAATTTCCAGCTCTTCTCATCCCGGTATATGGGCGTCCATTGTTGAT  
AATCAGGAGCGAATCGAAGGCCACGACGAAAAGCGATGGATGCACAGCGTCTTGAGAACCTGATGGTTTCCATGATTGC  
AGATAACGCTACTCAGGCTGGCGGTGATGGCATTCCTGTGATTTGATGTTGACATGATTCTGGTCCCTTCGCGCACTCATT  
GGGCGGAGCGCAAAAAAGCGCCGCGCTTCTGCGGATGGTTCAGTCTGAAAAACAAAAACGGAGATATTACTGGCGAG  
GTCAGGTCAGCGATTATACGCTTCCGACAAAATGCTTCCAGCTCTTCCCGGCTATTTGCAGTACACCGCAACCGGCTAT  
TCAGCAAAATACAGGTGCGTCCGAGATTGAGAACATGCCGAGCAACGTCGCCACCGATACCGTTGATAGCATCTTAAACC  
GGATGGACACGAGTCTTATATCTACATGGACAACATGCTAAATCCATGCGTCCGCGTGGCGTTGTGTGGCTTTCTATG  
GCGCGTAGGCTTATGGCAGTATACGCCGATGCGTATCGTTAATGAGGACGGCAGCGATGACGTGGCGTTGATGACTGG  
TGAAGTGGTTGACCGTCAAGACAGGGCAGGTTATCGCGCTTAAACGACCTTTCGCGAGGTAACATGAAGTGAATGACTG  
TCGGTTCAGTCTGCTACTCGCCGTGATGCAACGGTTAAGTCTGTACTTTCCATGCTGGCACTTATCCACCAGGAACG  
CCGAAGCAGCATCTTGTATCGTTCGATGATTTCTCGCAAAATATGGACGGCGAAGGGATGGACGACCTTAAAGAATACAACCG  
CAATCAGTTGCTTCTGTCTGGCGTTATCAAGCCGAGAAGCGCTGAAGAACAGCAGATGGTTGAACAGCGGAAACAACA  
AGGCCAGTCAACCGGCTATGGTTGCTGCGCAAGGTCAGCTTCTTGGTTCGCGAGGCTGAATTTGCAAGTGAATGACTG  
AACGAGCAGGCGACCATTCAGTTAAAGCATTCAGGCACAGACTGATGCTCAGGTTGCAGCGGCAACGTTGTGAAAT  
CCTCGCATCTGCCGATAGCCAGCAGAAATCTGATATCCGCGAGGCTCTGAAACTGCTCGGACAGTTCCAGCAACAGCAAG  
GAGATAATGCCCGTGTGATGACAGCTTGTCTGAAAAGTCAAGGACAGGCGCATGCGCAGCGCATGGACATCAGCAGC  
ATCCTGCAAAAAATCAACTCAGCAACAACACAGCAGTAA

>Cluster\_58080

ATGGCGCGTTTCAAAAACGCTCAGCCAAAACACTCACTGCGTAAAATCGCAGTTGTAGTAGCCACAGCGGTTAGCGGCAT  
GTCGTTTTATGCACAGGCAGCGGTTGAACCGAAAGAAGACACTATCACGTTACCGCTGCACCTGCGCGCAAGAAAGCG  
CATGGGGGCTGTGCAACTATTGCGGCGGACAGTCTGCTACCGGCACTAAAACCGATACGCGGATTCAAAAAGTGCCA  
CAGTCTATTTCTGTTGTGACCGCGAAGAGATGGCGCTGCATCAGCCGAGTCCGGTAAAAGAAGCGCTTAGCTACACGCG  
GGGTGCTCTGTTGGTACCGGTGGCGCATCCAACACTATGACCACCTGATCATTCGCGGCTTTGCGGCGAAGGCGAAA  
GCCAAGATAACTATCTGAAATGGCTGAAGTTGACGGCAACTTCTATAACGATGCGGTCATTGACCCGATATGCTGGAA  
CGCGCTGAAATATGCGTGGCCCGTTTCCGTGCTTTACGGTAAAAGCAGTCCGCGGCGCTGTTGAATATGGTCAGCAA  
GCGTCCGACACCGAACCCTGAAAGAAGTTAGTTTAAAGCCGGTACGACAGCCTGTTCCAGACTGTTTTGACTTTA  
GCGATTGTTGGATGATGACGGTGTACTCTTATCGCTGACCGGCTTTGCGCGTTCGCAATGCCAGCAGAAAGGG  
TCAGAAGAGCAGCGGTTATGCTATGACACCGGCGTTACCTCGGCTCCGGATGATAAAAACCAATTTTACCTTCTGTTA  
CTTCCAGAACGAGCCGAAACCGGTTATTACGGCTGGTTGCCGAAAGAGGGAACCGGTTAGCCGCTGCGAACCAGGTAAGC  
GTCGCGGACAGACTTTAATGAAGGGGCGAAGAACAACACTATTTCTCGTAATGAGAAGATGGTGGCTACAGCTTCGAT  
CACGAATTTACGACACCTTTACTGTGCGTCAAGACTTCCGCTTTGCTGAAAACAAAACCTCGCAAAACAGCGTTTATGG  
TTACGGCGCTGCTCCGATCCGGCGAATGCTTACAGCAAAACAGTGGCGGCAATGAGCCGAGGATAAAGGCTAATTC  
TGGCAGTAAATACGTCGTTGATGATGAGAAGTCGAAAACCTTCTCCGTTGATACCCAGTTGCAGAGCAAGTTTGGCACT  
GGCGATATCGACCACACCTGCTGACCGGTGTCGACTTTATGCGTATGCGTAAATGACATCAACGCCTGTTTGGTTACGA  
GCACTCTGTGCACTGCTCAATCTGTACAATCCGGTGAATACGATTTCCGATTCGAATGCAAAAGATGCCGCAACCTCG  
GCCCTTACCGCATTTGAAATAAACAGAAAACAAACCGGGCTTTATGTTCCAGGATCAGGCGAGTGGGATAAAGTCTGGTC  
ACCTAGGCGGTGCTTATGACTGGCAGATCAAGAATCTCTTAAACCGGTTGCGGGGACGACGATAAACGTTGATGACAA  
ACAGTTTACCTGGCGTGGTGGTGAATACCTGTTTGGATAATGGTGAACACCTTACTTACGCTATAGCGAATCGTTTGA  
AACCTTCTCGCAAGTTGGGAAGGATGGTAATAATTTTCGACCCGCTTAAAGGTAAGCAGTATGAAGTCCGCGTGAATAAT  
GTACCAGGAGATCGTCCGATTTGATGTTACTGGTGGCGTATAATCTCACTAAAACCAACAACCTGATGGCGGACCTGGA  
GGGTTCCCTTCTTCGCTGGAAGGTGGCGAGATCCGCGCACGTGGCGTAGAAATCGAAGCGAAAGCGGCGCTGTCGGCGA  
GTGTTAACGTAGTCGGTCTTATACTTACACCGATCGGGAATACACACCGGACTACTATAAAGGCAATACGCTGCA  
CAGGTGCCAAAACACATGCTTCTGTTGGGCTGACTACACTTCTTTGACGCTCCGCTTTTCCAGGTTGACGCTGGGCG  
CGGTGGTCTTACTGCTCCAGTTATGGTATCCGGCTAACCTTTAAAGTGGGAAGTTATACGGTCTGGATGCGGT  
TAGTACGTTATGATCTGGCGGAGTCCGGATGGCTGGCTCCAACGTTGGCGCTGATGTTAAACAACCTGTTGATGCTGAA  
TACGTCGCGAGCTGCTTAAACATTTATGGCTGCTTCTGGGGCGAGAAGCTCAGGTCGTTGCAACCGCAACCTTCCGTTT  
CTAA

>Cluster\_58216

ATGAAATTTGATAAACCAGGCGGAAAACCGGATCGATCAGCTGAAGGTTGTCGGTCTGCCATGACCGCATCGACCG  
ACCGCTGAAAACCTACCGCACGGCAGCTACGCTACGATACGATGGAAGAGCCCAACCGCGCTATGCTATATCG  
TCGGTTCCGCCAATTTGCCAAAAGGACGCGCTCACCGCTTGTGATACGAGCGCCGCAAAAAGCGCGGGCTAGCTGCTG  
ATTACCGCAGTAACCGCGGGGCACTCGGCAAAAGCGCAAAAACACCGCAGGCTGTTAGCGGCGCCACTATTGAGCA  
CTATCATCAGGCCATTGCGCTGGTAGTGCCGAGACTTTCGAACAGCGCGGAGCGCGGCTGCTGGTGCAGCCACT  
ATCGCGGTAATAAAGGAGCTTACTCCCTGGCGGACGAAAACAGGCGTCAATCAGCCGCGGAAAGACACCGCAAAA  
AACGTCGGTGACTTTGACGGGGCTTTCACCTCCGCTGCGGTGAAGATTGATGCTACCTACACGACCCCGGACAGGCA  
TATGGCGATGGAGCGCATGCTCGATGGCGCTGCGGATGGAATAAGCTTACCTCTGGACCTCAAAATCAGATGATTG

ACTGGTGCCGACCGATCTGGCAAAAACGCTGAAAGTTCCTGGGAGAAATGTGCGTATTATCTCCCCGTATATCGGGCGA  
GGGTTTGGCGCAAGCTGTTCCTGAGAAAGCATGCGCTCTGGCGCCCTCGCCGCCGAGCGGTGAAACGTCGGTTAA  
AGTGATGTCCTCCCGCCCTCTATTCACATAACACCACGCGACCGCCCGCCACCTTACGACTTGCATCGGTGCGG  
ACCAGAGCGGGAATAACCCGCTATCTCATATGAAAGCTGGTCTGGAAACCTGCCCCGGCAGCGCCGAAACCGCGGTA  
CAGCAAGCGAATTACTCTACCGCGGGCGAATCTGCAACCTACCGCCCTGCGGCTCGCCACGCTTATTGGCGAAGGGA  
CGCCATGCGTGGCCCGCGAAGCCCCGGTCTGATGGCGCTCGAAATCGCGATCGACGAACTGGCGGAAAAAGCGGGCA  
TCGATCCCGTGCAGTTTCGCATCTGAATGACACTCAGGTTGACCCCGCGACCCGACGCGCTGCTTCTCGCGCTCAG  
CTTATCGAGTGTTCGCGACCGGAGCGGATAAATTTGGCTGGAAGCAGCGCAACGCCACCCGGACAGGTGCGCGACCG  
GGAGTGGCTAGTCCGGCACGGTGTTCGCGCGGGCTTTCGCAATAATCTGCTGGAAAAATCGGGTGTCTCGGTTCACTCG  
AACAAAACGGCACCGTTACCGTAGAAACGGACATGACCGACATTTGGCACCGCGAGCTACACCATTTCTGGCCAGACGGCA  
GCGGAAATGCTTGGCGTACCGCTGGAGCAGGTTGCGGTTACCTCGCGGATTCAGTTTCCCGGTTCTGCGGTTCTGG  
TGGACAATGGGGCGGAATACCTCCACCTCCGGCGTTTACCGCCCTGTATGAAGCTTCGCGAAATGATTGCCTCGGCAG  
TCGGTTTTGATCTGAGCAGTCCGAGTTTGGCCAGCGCAAGATTACCAACGGTACCCGAAAGCGCCACGCTACATGAAGCC  
ACCGCAGGCGGACACTGACAGCGGAAGAGCATTGAATTCGGAACACTGAGCAAAGAGTACCAGCAGTCCGACCTTTCG  
CGGCATTTTGTGGAGGTGCGCGTGCATAGCGCGACGGGAGAAGTTCCGGTCCGGCGTATGCTCGCTGTGTGCTGCAG  
GACGCATCTGAATCCGAAACTGCGCGCAGCCAGGTCATTGGCGCAATGACTATGGCATGGCGCGGCACTGATGGAG  
GAGCTGGCGGTGGATGACCGTTTTGGCTACTTCCGTAATCAAGTACGATATGGCGGGTATGAGGTGCCGGTACCGGATAT  
CCCAAAACAGGAGGTGATTTTCCGATGATACCGACCCCATATCTCCCGATGAAGCCAAAGGTGTCGGTGCAGCTGG  
GCCTGTGGCGGCTGAGCGCGCTATCGCCAACCGGGTGTATAACGCCACCGGTATTCGGGTACGGGATATCCCATCACT  
CTGGATAAGCTGCTGATAAGCTGCCGGATGTGGTTAA

>Cluster\_24154

ATGCCGTTGCCACGTTGCTTGGCCGTTCCGTTCTCCTGCTACCTTTGACTATCTGCTGCCAGAAGGCATGACGGTTAA  
AGCCGGGAGTCCGCTACCGTGCCTTTGGCAACAACAGGAGCGCATCGGGTTGTGGTGTCACTGAGCGATTCAGTG  
AGCTGCCCGCTTAAGCGAGTGAAGCGGTAGTTGAAGTGTGACGTTGAGCGGTGAGCCGATTTACTCATCTCCGCTGCGGATTA  
CTGCTCTGGGCGGAGATTACTATCATCATCGATTGGCGATGTGCTGTTTCAATGCTTCCGATTTTACTGCGCCAGGG  
GCGCCTTGGCGCAACGCGCCGATGTGGTACTGTTGGCACTGAACAAGGCCAGGCGGTGGATCTTAACAGCCTGAAAC  
GCTCACCAAGCAACAACAGGCACTGGCAGCGTTACGGCAAGGCAAACTGCGGTGATCAGGTTGCCACGCTCGAATTT  
AATGATCCGCTTGCAGCGCTGCGCAAAAAGGCTGTGTGATTTAGCAAGTGAACACCAGAGTTTACGCGTGGCG  
AACGAACTATGCCGTTTCTGGTGGCGGTTGCGGTTGAATACCGAACAGGCCACCGCCGTTGGCGCAATTCATAGCGCG  
CAGATACCTTTTCTGCTTGGCTGCTGGCGGGCTTACCGGTTCCGTTAAACGCGAGGTTTATCTCAGTGTACTGGAAAC  
GTGCTCGCTCAGGGCAACAGGCGCTGGTGTGGTGGCGAAATCGGCTGACACCGCAAACTATCGCCGTTTTCTGTGA  
ACGTTTTAATGCCCCGTTGGGAAGTTCTGCATTCGCGCTTGAACGACAGCGAGCGCTTTTCGGCGTGGTGAAGCGAAAA  
ATGGCGAGGCGGCGATTGTCATCGCCACCGCTCCGCGCTGTTTACCGCTTTAAAAATCTCGCGGTGATTGTTATTGAT  
GAAGAGCAGCAGCTTCTTACAAACAGCAGGAAGGCTGGCGCTATCATGCCCGGACCTGGCGGTGTATCGCGCGCATAG  
CGAGCAAAATCCCAATTTCTGGCTCCGCAACGCCCGCACTGGAACGTTATGCAACGTGCAGCAGAAAAATAACCGCC  
TGCTGCGCTGACCCGTGGCGGGGAATGCGCGCCGCAATTCACATGTGCTGGATTAAAAAGGTCAAGAGGTGCGAG  
GCGGGGCTGGCTCCGGCTTAATCACCCGATGCGCCAGCATTACAGGCCAACAAATCAGGTTATCTCTTTCTTAACCG  
CCGGGTTTTGCGCTGCGCTACTGTGCCACGACTGTGGTTGGATAGCCGAATCCCCACGTTGCGATCTACTACACCG  
TGCACTCAGGCGCAACAGCATTGCGCTGCCACCATTTGCAAGACTGAGCTCAGGCTCCGTTGCCGCGCAGTGCCTTCTGCGGT  
TCCACACACTGTTGTCGCTGGGGCTGGGCACCGAACAGCTTGAACAGACGCTCGCGCGTTGTTCCCTGGTGTGCCAT  
TTCCTGATGACCGCGATACACAGTGCAGAAAGCGCGCTGGAACAACAACGCGGGAAGTACATCGCGGTGGCGCAC  
GGATATTGATCGGTACACAAATGCTGGCGAAAGGTCACCACTTCCGGATGTGACGCTGGTGGCGTTACTGGATGTGGAC  
GGCGCGTGTTTCTGCGGATTTCCGCTCGGCAGAGCGTTTTGCGCAGCTTTATACCCAGGTGGCAGGCGCTCCGCGGG  
TGGGGTAAACAGGGCGAAGTAGTTCTGCAACGACCATCTTGAACATCCGCTGTTGCAACGTTGCTTTATAAAAGCT  
ACGACGCTTTGCGCAACAGGCACTGGCTGAACGACGATGATGCAGCTGCGCGCGTGACGACGCTGATGATGTCGCT  
GCGGAAGATCATAACAATCAGCAGCGCCATTTGCTTCAACAACACTGCGTAATCTCAATCTCGCCAGCCACTGGCAGA  
CGAACAACGTGGGTTCTCGGTCGCTTCCGCGCTGGCCCTAAACGTTGGCGGTGCTGGCGCTGGCGGATTTGTTGCG  
AGCACCTTCCGCGTGGCTTACAGCACATCAATGGTACGCTGGCGCTTATAATAACAATACCGGATTTCCGCAAG  
GTGAAATGGGTGCTGGATGTCGATCCGATTGAGGGTTAA

>Cluster\_53566

ATGTCATCAACTAATTTACGCCAGATTGCGAGCTTCCCTGTGGTCTGTGCGCGACCTGTACGCGGCGATTTTAAACAATC  
ACAATATGGGCGAATTTATCTCCCTTTCCTCTTCTGCTGCTGGAATGCGTTCTCGAAACGACGAAAGACGCGGTCA  
TTGCCGAGGCTCAAAAAGTAAAAGCAATGAAACTGCGCGAGGAAAGCCAGGAGAAAATGATCCGCGAGCGACCAATGCC  
CTCACGTTCTCAATGCCCTCAGCGATGGATCTCAGCAAAATGGGGCAAAATGGCATACAGGACAACCTGGAACACTACAT  
CCAGTCTGTTCTTTCGATGTCGCGGATTTTTCGAACTTTCGAACTTCAAGTTACGCGAGTTTGTGCGGATGCGGATGCGA  
ACTTACTGTTCAAAGTGGTGCAAAATTTGCTAAAGCAGATTTATACCGGAGCAGCTACCAACACGATATGGGGCTG  
GATTTGAGGAGCTGATCCGAGCTTTTGGCGAGAGTTCTAACGAAACCGCAGGGGAGCCTTTACCCCGCTGATATCTCT  
CAATCTGACCACTGCTGGTGTTTTTCGATGATGAGCGCTCAATAAAGACGGCATCATCCGACCATTTACGACC  
CAACAGCGGGAACCGCGGCTTTCTCTCCCGCATGGAGTTGCTCCACCAACAAAAACCCCAATGCGGTGATGCGCGCG  
TTTGGTCAAGGATTAATCCGGAATCTACGCCATCTGCAAGCGGACATGCTGATTAAGGGCAGGATGTCAGCCTTAT  
CAAACCTCGGCAACACCTGTCCAACGATCAGCTCCCGCAGAAAAATTCGATTACATGCTTCTAATCCACCTTTTCGGCG  
TGGATGGAAAAAGATAGAAACCGACATCAACGACGAGCAAACTCAAAGGTGCTGATGGTGCCTTTGGCCCGCGCTG  
CCCCGAGTCTCCGACGGTTCTGTTGCTGTTTCTGCTGCATCTGATCAGCAAAATGCGCGATGCCAAAAGCGGTGGCGGACG  
GATCGGCATCATTCTTAATGGTTTCGCGTTATTACCGCGCGCGCAGGAGCGGTGAAAGCGAGATCCGCGCTACATTC  
TGGAAAGCGGATTTGCTGGAAGGCATTTACGCTTCCCGACCGATATGTTTACAACACCGGTATCGCTACCTATGTTGG  
GTGCTGTCTAACAAAAAGCGCCAGAACCGAAAGGTAAAGTCCAGCTAATCGACGCGGCAACCTGTGCGCAAGATGCG  
TAAATCGCTGGATCAAAACGTAATATTTCTCGGGGAGGAGGATATGGTTTAAATCACCGCACGTTTGGCGATTTCGAAC  
CCGTTGCCACCACTACGCTTGGCGGCTTAGGCCGAGGAAAGCACCAGCAAAAATCCAGCCGGGAGCGCCAGCCCGCA  
ACAACCAAAACCGAGCGGCAAAAACCTTTGCCAGCAAAAGTCTTTACAGCACCGAGTTTGGCTATCGTCCGATCACCGT  
TGAGCCCGCTTACGCTGCGCTCAGATAAGTATGATGACGCTTATGCAACTTGGCGCTTTCGCGCTTTCGCGGAAAGG  
CGCGGATGGAGCAACTGTATGACGCTTTGCTTCCACTGGCAGGACGGTAATACCGCGACTTAACAGCGGTAGAAAGT  
GAAGCCCGCGCATTTCTTAAAGCGATTTTAGCGAGCTGAAAGAGAAGCAAAATTAAGATCTGCTCGACAGCAAAATATG  
GCTGGCCAGCGCGGTTAATGGAAAAAGCGCGGCTAATCAGCGCGCATGGGTATGCGAGCGGGCGCAAGACACCG  
TTAGCAACTGACTTTAATCACTTCCAGTTGACGCTGAAAGAAGCGCTCAGAACCAGCGGTGAAAGCTGGATGGATGCAAGAG  
AACAGCAGTTTATCGATGCTATCACCCGCAAAAATCCGGATGCGGAGCGGTTATCAGTAAGTACTGAAAGAGCGGC  
CCAACCGCTGTACGGCGGTTTGGATACACCGAAAGGTTGTGGAGTTTGGTGGATGGCGACTTCCGCGATACCGGAG  
ATGTCCCGCTGAACCGCGGATCTACAGCGAGTTGATCGAGGGTACTTCAAGCAGAGATGATGCGCGGATGCGCGCGG  
GACGCGTGGATTAACCGCGATAAGCGTACCGGAAAGATGGAGATATCGGGATGTGGGGTATGAAATTCGTTTAAATCG  
TCATTTTTATATTTATCAGCGCCAGGCGCTGGAGGAGATTGATGCGGATCTGGATGCGATAAGTCCGAGATTATGA

AACTGTTGCAGGAGTACATTCTGA

>Cluster\_6219

ATGGTTCATAAATCTGACAGTGAATAGTGCATTGAGGGCAGAAAATGCCCGTCTGGTCTCATTACTTGAAGCTCA  
TGGGATGAAATGGCGACGTAACACCGCGATCTCTGTGCAGCGCTTTCGTATATCCACCAATGAGAAGGTTGCATTA  
TTCTGTCGGTTCCTTCGCGGGCTGATGATGATGATGAGGACCTTAGATGGGAAAGTAAAACCGAGCGCAAAATCAGGTCCT  
CCTGCCTGCGCTAACGAATGGCAGGCGAGAATATGCGGTAAGCCCGGATAAAAATGTGGGGACTGCGCTCACCCTCAGTT  
GATTCCTGTATCTGATCTCGTCACTACACCATCTGGCAGGTACCCATACTGCGGGATGTAATCCGTGCTGGAAGATG  
ATTCCTGTTATTTCTGGCTGTTGATTTTGTATGAAGCTGAATGGCAGAAGGATGCATCCGATTCATGCGATCCTGTGAT  
GAGCTGGGTGATCCCGTCCGCTGGAAAATATCCCGTCCAGCTCAGGAGCGCATGCTCTGGATATTTTTGTCTCAGAGT  
TTCGGCCCCGGAAGCTCGCCGCTGCGGGACTGCTATTATAGTTATACGTGTAATCGAACTCGACAGCTGCGATTGGGTT  
CTTATGACCGATTATTTCCATAATCAGGATACGATGCCAAAAGGGGATTTGGTAACTCATAGCATTACTCTGCAAAAA  
AGACCGCGTGAATCGGGGGGAAGTGTTTTTGTGTGATATGAATTTCCAGCCTTATTTCTGATCAATGGGCTTTTCTGATC  
GGTGCATCCGATGAATGTCGAGAATATTGAACCGACGATATTACGGGCTACAGGAAGTATCCATCCTCTGGATGTGAAC  
TTATCAACGAAGAAGACCTGGGTACGCCATGGGAAGGGAAAAATCATCAGGAAACAGACTGAATATTTCTATTGCAGAA  
CCGCTGAAAATCAGCTGGCAAAACAGATCTATTTGAAAAAGCGCAATTACCTCAGGTGCTGATTAACCGACTTATTG  
GCTGGCAGCATTTCCGAACCTGAGTTTTATAAGGCTCAGGCAATGCGTATGTGAGTGGAAATAAGCCCCGTGTATAG  
TTTTGTGCGGAGAATTAACCGCAACATTCGTTGCCCGCAGGATGCTGGAAGGCTGTAACAGCGTATTATCTTTGTCAG  
AATATTGCTGAGAAATTAATCGATAAACGATTTGTGCGGACGGAATGTAATGCCGTTTTTATGGGAAACCTCAGAGCGGA  
GCAGGAAGAGGCGGTTTTGCGCATTACTCCGTTATGACACTGGTGTGCTTTGTGCGCAACGGCTTTTGGTAAGACAGTTA  
CCGACGCGGAGTATTCCAGCAGGAAAGTGAATACACTGATACTGGTACACCGGACTGAATGCTGAAGCAGTGGCAG  
GAGGCTCTCGAGGTTTTCTGAGGTTGGTGACAAATTTGGTATTTATCGGGGGAGGTAACATAAACCTGTGGCAATAT  
TGATATTGCGGTGGTGCAGTCCATATCCAGACAGGAGAAGTTGAACCTCTGGTCAGGAATTAATGGGCAATCATTTGTTG  
ATGAGTGCCATCATATTGGCGCGTTTTCTTTTTCTGCGATTTCTGAAGGAAACGAATGCCAGATATCTGCTTGGCTGAGC  
GCAACACCAATCCGACGGGATGGTCTGCATCCATTATTTTATGTACTGTGGTGCATTCCGCATACAGCGGTCGCCCC  
GAAGGAAAGCCACATAATCTGGAGTACTGACCCGTTCCCGTTTTACATCTGGTCATTTACCATCGGATGCGAGAATCC  
AGGATATTTTTCAGAGAAATGCTCTGGATCATGACAGAACGGTGGCGATAGCTGAAGAAGCCATGAAAGCTTTTCGGGCG  
GGGCGAAAAGTTCTGGTACTGACTGAACGTACAGATCATCTGGATGAGATAGCATCAGTGATGAATTCAGTAAATTTGTC  
CCCCTTTATCTCCAGGGACGACTATCGAAAAAAGCGTGGATGCTGATATCCGGGCTGAATGCTCTTCCCTCGGAT  
CTCCCCGTTTTTTGTGTAACAGGCGAGCTTATTGGTGAGGGATTTGACCACCTCCGCTGGATACGCTGATTTCTGCC  
ATGCTGTGTCATGGAAAGGACATTACAGCAGTATGCGGGACGCTTACACAGAGAGCATACCGGTAAGGCGATGTCAG  
GATCATTGATTTTGTGGATACCGCGTATCCAGTGTGCTCAGAATGTGGGATAAACGCCAGCGGGGTTATAAGGCGATGG  
GGTACAGGATTGTGGCTGATGGTGAAGGCTTTTCAATTTAA

>Cluster\_17789

ATGGAAGGGAATTTAGATTAATAAACACAGCGTTAGCTGCATCCGTTATCAATGTGTGCTGCTTTTCTGTGCAGGCCGA  
TAACCTTGGCATAATGGCAAAGCGAGAACCAACACAGGTAAGCTTAACGGTACACCGCCGAGGCGAGAAAGTGTGCTG  
TTCCAGTATATCAGGGAAGTACGAAACTTGCATCTGCAACTACGACTGCCATTGTTGC AACGGCATTGGCGAAAAGCATTC  
AGTGCTGACACGACACCGGAAAAACTGTATCTGACGAATCCATCAGATGCCGAAGGGGATCGTTTTGATGATATACCACA  
GCTCTCATGGCTAAATAGTGTGGCCAGATGTCAGTCTGGTCTGGGCTAAAGCGGATAAACCCCAATGAGCCCTCAATC  
CAACACCGAATATAGCCTCTCTTTTTGTGAGCAAAATCTTTCCGGCAGTGTAGTGTGGCCAAAAGTCTGATAGCAAT  
AGTCCGGCAACGCTGTTACTGCATACCACATCAGGCTGACCGGATAATGGGCTGTGTGCTTAGCGAATACCAAAATCCC  
GTTGAATGTGGCGCTGCGGTGGCAACGCGGATGCGCGCAGCATAAGTGCAGCGAAAGCGAAAGTTGGGGAGACCATTA  
CGTTGACTCTGACGGTGAAGATGTTGATGGCAATCTGAAAGCGGGCAGCCCTTTTACTGTTAGGCGCGGCTACCCACT  
AACCGTCAGAATGTTGCAATGATACTGGTCCCGCTTCTGCTGGGCGGTACAGTTATGACAGACACACCGGAAATA  
CAAAGGGGTAACGGGGGAAGGTGGCAGTCCGACCATCGCGGTAACGCAAAATGAGGGGATAGGGGTAATAAACACCGCTGT  
ACATTACTGCTACCGCATGAGTACTCCCTGACGCAAGATGTCACTTTTACCCTGATCACCAGCCCGGACAGCAGCTC  
GCCAATATGTTGGGGCCATATGAGTGAACGTTTAAAGCCAGTAAACGGTATTTGTTTAAAGCGCCAGACTTGTCTACTGA  
GGTACAAAACCCCTTTAAAGAGTGTCTTGAATCAAAATGAATCCCTGGGTTCTGGTACAGTAATAACCTTTGAAACACGG  
TTGAGAAAAGGGGGGATGTGGCCCTGGAGGATCACTCAATGTTCCAACGCAACAGAACCTGAACTCGTTGATCGATGCT  
TATCCTGATGGGGTGAAGGCCAAAACAGTTTTGCTGTAAAGCGTAAC TACCATTCAAACGCTCAGACTCAGCCGTTGT  
TAGTAGTCGTAATTTCTGATGGTTAATCTGAGTAATAGAAGCAGACTTCTGATCAGTTTGTCCCTGATCCAGTAACAG  
TAAACGGCTTTTTGGTAAATGTGCCAGCAGACTACGAATCCGAAAATACGAAAATATAAGCTTATAAATCCGTCGGATAG  
GTTTTAGTTGTTGGTTTCAACCATGGAAGTAAACAGTAGAGGTACTTTTAAACGCATTCAAAGGGAAAACAGTTGGTAAACA  
GTCAGTGAAGGTCGCTTTCAGGCTGTGGATGGTAGTGGGAAAGGTGTTCCATATGCACCGGGAAACAATGACATATCGTT  
ATCCAATAAGCCCTCAGGGGAATAAGAGTGGGGTTGCCGATGACTATAGTCAATAGTACGCAAAAGACTCATAGTATT  
GATGAGATGAGGATTAATATGCGCAGCGGATAAGTCTGGTTTTCTTTGAAATTTACATTGGCACAAAATAACAACGGTTTT  
GGGAGCCTCCACGATATATATATCCAGAATGACAAGTCCGATCTGAGTGGAGCAACAGCTCAAGGATCAATGCCAGTCA  
TTTTTGTAGACAAATACCAGCCCGGATACGCTGACGCTGAGTTTTGGGGGTATATGGAAGATACGTTAACGCTGAATGTT  
CGGACATTTAATCGCCGAAACTTTTTAGTGAATACCAATCGGGGGATTCATATAAGTTTGAAGCGATCCGTTAGG  
TATGCAGGTCGACAGAAAACCTGGCAATGGTAACGTCGCAAGCAGCTATAGGTAGTGGTGGTTGTGCGCGCAGATAAAT  
ACCGGACAGTTGCGGATTTAAGTGGCTTCCGCGTGAAGTTGATTTCTGATGATATATATCTGAAAGGTGGATGGCCT  
CGGGGAAACGGCAATAAAGGGTACTGGACTAATAATCCGACTTCCATTACTCAATGGATGAATATGCTGACGGGAGGATT  
AGGTACGGCGCCAGTCACTCTCCAGATTTGCGCCAGTAA

>Cluster\_28660

ATGAAAATAGCGACGGAACCTGGTTGATTCACCTGGCTCAATTTGATTACCCCGCTCAGGTGTTGAGGTTGAAGA  
GCAGGGTAATGAAATGGTGGCTATGCTGCCCCCGTATGTCGCGTGAACGTACCTGGCAGCTTGATACACCTTTATTTA  
CGCTGCGCTTTTTCTCCACAGGAAGGATTTGTTGGTGTACGGATGAGCATTTTCAGGGGGCGCTGAATAACCGGCTCT  
CATATCCGCTCAATATTTGACAGGATGTAAGGTCACAATCGAAAACACAGAAGCTTATGCTGAGTTAAAAGTGGCAA  
CTTAAGCGCGCTGTGAGCAAGGTTCTGGTCACTGGATTTTCTGCACAACGGCGAACGTTATTACCGGTAGTACAG  
TGAAAAATAATGGTACGTCAGGACCAAGTACACGAAATTAATGTTTGGAGCGCTGGATCTTGGGCTTGGCGGAA  
ACAGTTTACGGCTTGGGAGAGCGCTTTACTGCTGTCGCAATGATGCGCAGACGCTGAGAGACCTGGAACCGGCGGCG  
CACAAGTACTGAACAGGCGTATAAAAATATCCGTTCTATATGACTAACCGTGGTTATGGGTACTGGTCAATCATCCTC  
AATGCGTCTCTTTTGAAGTGGGATCGGAGAAAGTCTCCAAAGTGCAGTTCAGCGTTGAGAGTGAATATCTCGAATACTTT  
GTTATCGACGGCCGACCGGAAAGCGGTTGATCGTTATACCCGTTTTACTGGTCTGCGGCGCTGCCCGCCGCTG  
GTCTTCCGCTGTGGCTAACCTTCAATTTACCACCACTACAGCAAGCAGCAAGCGGTAACAGCTTTATCGATGATG  
CGGAACGCAATCTGCCATGCATGTTTTCCACTTGGACTGTTTCTGGATGAAAGCCTTCCAGTGGTGCATTTTGGTGG  
GACCCGCTGACTTTCCCGGACCCGGAAGGATGATCGCGCCCTGAAAGCGGAAAGGGCTAAAAATCTGCGCTCGGATTA  
CCCTATATCTGGGCAAAAATCCCTGTCTTTAAAGAGTTTACAAGAGAAAGGCTATTACTCAAACCGGACCGGTTCTG  
TATGGCAGTGGGATAAATGGCAGCCAGGCTGGCGATTTATGACTTTACCAATCCGGATGCCCTGCAAAATGGTACGCGC  
AAACTGAAAGGCTGTGGTCCGATGGGCGTTGATGCTTTAAGACCGACTTTGGCGACGATTTCCACCGATGTTCAATG

GTTTGATGGTTCGAGCCGAGAAAATGCATAACCATTATGCGTACATCTACAACGAACTGGTGTGGAACGTGCTCAAGG  
ACACCGTTGGTGAGGAAGAGCCGCTCTTTGTTTGCCTCGGCTCGGTCGGTGCAGAAAATCCCGGTACACTGGGGT  
GGTACTGTTACGCTAACACGAATCAATGGCGGAAAGCCTGCGCGGTGGTTTGTCTATTTGGCCTTTCAGGTTTGGT  
CTGGAGCCACGATCTCGGCGGCTTTGAAAATACCGCTCGGCGGCACGTTTACAACCGCTGGTGCAGGCTTTGGTTTGC  
CCAGCATGAACCGGTTTACATGGCAGCAATCTTATCGTGTGCGTGGGCTACGATGATGAGTCTGTGATGTTGATGAGC  
TTCTTACGCAACTGAAATGCCGATGATGCGGTATCTGTATCGTGAAGTGCACGTGCAACCGCGGGGTACGCGGAT  
GATGCGGGCCATGATGATGGAGTTCGGGACGATCCGGCTTGTGATTACCTTGACCGTCAATACATGTTAGGCGACAACG  
TGATGGTTGCGCCTGTGTTCACTGAAGCGGGCGATGTGCAGTTCTACCTGCCGGAAGGTGCGTGGACACACCTGTGGC  
AACGATGAACCTGAGTGTGCTGGCATAAACAGCAGCAGCAGCTTCTGAGTCTGCCGTTTATGTGCTGCTGATGAGC  
CCTACTGGCGCTGGGCAACAACGATCAACGTCCCGATTACGCGTGGCAGGAGGTACGGCATTCACCTCTTTAATCTGC  
AAGACGGGATGAAGCGCTGTGTAAGTGCCTGATGCTGACGGTTCGGTGTATCTTAAAGCAGCAGCTACTGGC  
AACACGATTACTGTGACTGGTACGGGCGAGGCGAAGAACTGGACACTGTGCTTGGCAATATTTGTAAGTAAATGGTCT  
GCAAGGCGGTTCCGAGGCTGAAAGTGTGAGCAGGACTGGTGGTACTCCTCAAGGGAATGCGCTGACAAATACGTTGTAA  
>Cluster\_28456

ATGTCGACTCCTGCAATCACGGCAAGAAAGCCCTCAATTTGCTGCGTTCAAACCGTAACTACGGTACAGAACACCAA  
CGACTGTTGCTGCGACGCGCATGTTCCAGCAGCCCACTCTCTGAAAACGCTTCCGGCACCCTGATAGCTGGAAG  
TCAGCGGTATGGACTGCGCGCCCTGTGCGCGCAAAAGTGAATAATGCGTGCAGCTTGCAGGCGTGAATGAGCAG  
GTGTTGTTCCGCCACGAAAACCTGGTGGTGGATGCCGACAATGACATACGGGCACAAGTTGAATCTGCGGTGCAAAAAGC  
GGGCTATTCCCTGCGCGATGAACAGGCTCCGACGAAACCAAGAATCACGCTGAAAGAGAAATCTGCCGCTGATTACCG  
TTATCGTGAATGAGCAATCAGTTGGGGCTGGAGCTCAATCAATCATCGTTTGGTCAACTGGCGTTTATCGCGACACG  
CTGTTGGGCTGTACCAATTGCTCGTCAAGCATACGCTGATCAAAATCTGGCAGCTACTTCCGCAATGAAACCTTAA  
GAGCGTAGCCGCTATTGGTGCCTGTTTATTGGCGCAACGGCTGAAGTGCATGGTGTGCTGCTGTTTGGATTGGCG  
AAGCATGGAAGGCTGGGCGCCAGCGCGCGCTCAAGGGGTGAGCGGTTAATGGCGCTGAAGCCAGAAACCGCCAGC  
CGTCTGCGTAAACCGTGAAGGTTGAGGAGTGGCAATAAACAGCTGCGGCTGGCGATGTGATTGAAGTTGCGGAGGTGG  
CGCTTTCCTGCCGACGTTAACTGCTCTACCGTTTGGCAGTTTGTGAAAGCGCCCTGACCGGAGAAATCCATTCTCTG  
TGGAGCGCGCAGGGCGATAAAGTTCCTGACGCGCCACAGCGTAGACCGTGGTAAACGCTGGAAGTGTGTCAGAA  
CCGGTGGCAGCGCCATTGACCGGATTTGAACTGATTGAAGAAGCCGAAGAGCGCCGCGCACCTATTGAGCGGTTTAT  
CGACCGTTTACCGCTAATTTACAGCCAGCGATTTATGGCCGCTGCCCCCTGCTGGTAAACGCTGGTCCCGCGCTGTTT  
CCGCCAGCTGGCAGGAGTGGATTATAAAGGGCTGACGCTGCTGCTGATTGGTTGCCCGTGTGCTTTAGTTATCTCCAG  
CCCGCGGCTAATCTCCGGCTGGCGGAGCAGCGCGTGTGGGGCTTGTATTAAGCGCGCGCGGCTGGAGCAGCT  
GGTCTGTTTACCAGTGGCGTTGATAAAAACCGGTACGCTGACCTCGGTAACCGCGGTTACCGGATTCATCCGG  
CAACGGGTTATTAGTGAATCTGAACCTGACACTGGCGCGCGGCTGAGCAAGGCGGACGCATCCACTGGCACAGGCC  
ATTGTGCGGAGACAGGTTGCTGAACCTGCCATTCCACCGCCCAATCACAGCGGGCGCTGGTGGGTTGGCATTGA  
AGCGCAGGTTAACCGTGAAGCGCTGTTGATATGCGCTGCCGAAAACATCCTGCTGATGCATTTGCTGTTGATTAATG  
AATGCGAAAGCGCGGCAACCGGTAGTGTGTTAGTACGTAATGATGACGCTGGTGGTAAACCGCGGTTACCGGATTC  
TGGCGCGCGATGCTGCAACTGCTATCAGTGAACCTGAACGCTGAAAGGTTGTTCAAGGGGTTGATCCTCACCGGCAATCC  
ACGCGCAGCAGCGCAATCGCGGGAACTGGGGCTGGAATTTAAAGCGGCCCTTGGCGGAAGATAAAGTTAAAGCGG  
TGACCGAGCTGAATCAACATGCGCGCTGGCGATGGTGGCGGCGGTTAAGCAGCGCCAGCGATGAAGACTGGCGCC  
ATCGGATTTGCAATGGGCACTGGCAGCGGAGCTGGCCCTGGAACCGCAGATGACGATTAACCCATAACCACTGGCGCG  
TCTGGTGAATAATGATTGAATGGCAGCGCCACTCACGCGCAATATCGCCAGAACATCACTATTGCGCTGGGGCTGAAAG  
GCGTTTCTCTGCTACCAGCTGTTAGGGATGACCGGCTGTGGCTGGCAGTGTGGCAGATACCGGTGCGACGGTGTG  
GTAACGGCGAATGCGTTACGGTTATTGCGCAGGAAATAA

>Cluster\_8246

ATGCGAATTAACACTCTGGCTCCGTTAGTCAATCCCTGTCTCGGATTTTACGCGCAGCAGCATAGTGTGTCAGAGGATGT  
GATGATTGCTCGGCATCCGGCTATGAGAAAAGCTGACTAACGCAGCCGCGAGTGTTCGTGATTAGCCAGGAGGAAT  
TGCAGTCCAGCCAGTACCAGCATCTGGCGGAGGCTCTGAGATCAGTAGAGGGTGTGGATGTTGAAAGTGGTACGGGTTAA  
ACCGGAGGCTGGAAATCAGCATCCGAGGAATGCCAGCACTTACACGCTGATACTGATGATGGTGTGCTCAGGGCCG  
AAGCAGTGACGTGACTCCCAACGGTTTTTCTGCCATGAATACCGGTTTCAATGCCCTCTGGCCGCCATTGAGCGTATTG  
AGGTTATCAGAGGGCCGATGTCCACACTGTATGCTCTGATGCGATGGCGGTTGGTGAATATCATTACCAGAAAGAAT  
GCAGCAAAATGGCTCTCTTCCGTTCAATGCAAGGCTGAATCTGCAGGAAAGCAACAAATGGGGTAAACAGCAGCCAGTTTAA  
TTTTCTGGACAGTGGTCCCTTGTGGATGATTCGTGACGCTGAGGTACGCGGTAGCACACACACAGCTGAGGTTCAAT  
CGGTACATCACTGAGCGATACAGCAGCCAGCGTATTCTTATCCACGGAGTACAGAAATATAATCTGGTGCACGCT  
CTTGACTGGAAGGCGTGGAGCAGGATGTGCTCTGGTTTGTATGAGTACCACCGCGCAGCGTTATGATAACCGGGATGG  
GCAACTGGGGAGTCTGACGGGGGATATGACCGGACCTGCGCTATGAGCGAAACAAAATTCAGCTGGCTATGATCATA  
CTTTACCTTCGGAACATCGAAATCCTGATCTGAACTGGAAACGAGACAGAAAATAAAGGTCGTGAGCTTGTACCGAGTGA  
CTGAGCGCGCAAAATGGGGCTTGGCGGTCAGCCGGGAGCTTAAGGAATCGAACCTTATCTGAAATTCATTACTGCT  
TACCCCTCTGGGAGAATCTCATCTGGTTACGGTGGGGGCGAGTTTACAGAGCTCGTCCATGAAAGACGGAGTTGCTCTT  
CCAGCACAGGTGAAACTTTCCGGCAGAAAAGCTGGTGGTATTTGCTGAGGATGAGTGGCATCTACCGATGCAATGCTG  
CTGACTGCGGGCAGCCGCTATGAACATCATGAGCAATTCGGGGACACTTACGTCGCGTGCATATCTGGCTGGGATGT  
GGCAGATGCTGGACGCTGAAAGCGGTTGTGACACGGGATATAAGGCACCCAGAATGGGGCAGCTACATAAAGGGATTA  
GTGGTGTGTCGGGCGAGGAAAACAAATCTACTTGGTAAACCCGACCTGAAGCCGGAAGAGAGCGTCACTTATGAGGCT  
GGGTGTATACGATAACCCCGCGGCTGAAATGCCAATGTACAGGTTTTATGACTGACTTCTCAACAAGATTTGCTCT  
TTATTCATAAATGATAACCAATAGCTATGTAACAGCGGAAAGGCCCGGTTGCACGGTGTGGAATTTGCCGGCAGAT  
TGCCGCTGTGGTACAGAGGATGTCACGCTGTCACTGAATTAACCTGGACCCGAAGTGAACAACGTTGATGGTGAACAAA  
GGTGGCGCGCTGAGTTATACCCCTGAACACATGGTGAATGCGAAACTGAACTGGCAGATCACCGAAGAGGTGGCATATG  
GCTGGGTGCCCGTTATCGCGGGAACACACCGTTTACCAGAAATTAATCTGACTGAGCGCTGACAGAAAGGATGAT  
ATGATGAGAAAGGAGAATACCTGAAAGCCTGGACGGTGGTGGATGACAGGCTGTGCTGGAAGATGACGGATGCCCTGACG  
CTGAATGCTGCGGTGAATAACCTGCTCAACAAGGATTAACAGTGTGACGCTGACGCTGTACAGTGCAGGTAAGAGTACGCTGTA  
TGCCGGTGAATCACTTCCAGCAGGATCATCAACAACAGGATATGTGATACCTGAGCGAAATTAAGTGTGCTGCTGAACT  
ATCAGTTCTGA

>Cluster\_45954

ATGAGTACCACAACAGAAAATTTAAAACCGTTATCACCGATACAGGTGCCAAAAAATAGCTCAGGCAGCGCGCCAGA  
TGGTAAAGCCTGTCGCGTACTCATATGGCCGTGGCGACGTTGGCGCGCTTGCCACACCAGAGCAAGTAAAGCAGCC  
GCTGGTGTGATGAGGTTGGCGACACACTGTTAATCGCTCATCTGGACGCAACACATCAGAACCCGATTAATGCGGAG  
CTGGTTATTCCTCCAGAAAAGCGGCGATTTCTGGATCCGGGAAATGGTGTTTTGTGATGAGCACGGCGATTTAATCGCGT  
GGCAATACTGCGGAAAGTTACAAGCCAGCCGTTGGCGAAGGTTCCGGACGTTGACAAACATTTGCGACCATTTGACCG  
TATCCAGCATGCCACTGGCGCTTACCGTGGATAAACCATGGTGTGAGGCAAGTGGATACGTTACGTTAACAACACTG  
AAAGAGCATGAACAGTACGATGTCACCGGATGCTCGCTGACCGCAAAAGGCTTTGTTCAACTCAGTAGCGCCACTAA  
CAGCGATTTGAAACGCTGGCTGCAACGCCGAAAGCGTTAAGTGTGCTGATGATCTTGTCAACGAAAATATACAGCGC

AGGATGCCACAACAGCGCGAAAAGCCCTTGTCCAGCTTAGTAGTGAACCAACAGTACATCTGAAACGCTGGCGGCAACA  
TCAAATGCAGTAAAAGCTGCCTATGACAATGCTGAAAAACGCTGCAGAAAAGCTAAGAATGGTGAGGATATCTCTGATAA  
AGACACCTTTACGAAAAATATCGGTGCCGTCGATATAGTGCAGAGCTGAATATTTGGTGGAGATAGTGAAGCATGGA  
CAACTGGCGAGTTGATTTTTTGGGTAGAGAGTCAAGGGGCACTTAAACCATCTTACTGGATGTCAAAGGCTCATGGGCT  
TATGCCAAATAAAGGTCATTACAGATACAGGTTGCGGAAGTATTTGCTTTCAGGTTGCTGTTGTGGAAGTCCGAC  
CCGCGGCGCAATGACCATAACGATTACCAACACCCAGTACATCCAGCGGTGAAGGCATCCCTAATGCTCAATTTACTTATA  
TTAATCATGGTGTGCTTATGCTCCTGGCTGGCGAAGGACTATAACTCCAGGAATAAGCCAAACAGCATCAGAGATCGGG  
CGCTTACCCTCAGATGGGACAGCAGTATCGTCAGTTAATCTGGCTTCAAAGGTCGGCTGACCGCCCTGACAGATAATAT  
GCAGGGGGCCACAGGCTGGAGTTATACGAGGCGTATAACAACGGATATCCAACAACGATGGAATAATCATTAACCTGA  
AAGGGATGACAGCCGTTGGCGAAGGCGAATTACTCATCGGCTGGAGTGGTATAAGCGGTGCTCATGCTCCGGCATTATTT  
CGTTCACGACGGGATACGCCCGACGCAAACTGGTCGCCGTTGGGCGCAGCTTTACACCTCGGCTCATCTCCTGAGAGTT  
TTATCCAGTCCGTTGCCAGGATTCCTGGCCATCAGATACCGTTCCGCTGCTGTTATGCTGATATGCGTGGGACGATTAAGGG  
ACAAATCTGCATACCGAAACTTGCAGTTCGCTTATCCGTCAGGCTTATTCCTGATATGCGTGGCTGGACGATTAAGGG  
AAGCCCGCAGTGGTTCGCTGCTTATGCTCAGGAACAGGACGGCATTAAATCGCACACCCACAGCGCCAGCGCATCCAG  
TACGGATTGGGGACGAAAAACCATCGTCGTTTGATTACGGTACTAAAACGACAGTTCATTGATTACGGCACAAAAA  
CTACGAATAGCGTGGAAATCATTCACACAATAACCTGTTGGTCACACTGGCGCGGGGAATGGTGTATCAGCCGGTTAT  
AACGCTGCTTAGTGTGTTACACCATCGAGCGAGGCGATGCTCACAATGTATATATCGGTGCCATAACCCACAC  
TATCGGCATTGGTGTCTATGCCATTCTGTCTATTATGGTCCCACGGACACACCATCACCGTTAACGCTACGGGTAACG  
AAGAAAACACCGTAAAAAACATCGCATTTAACTATATTGTGAGGCTTGCATAA

>Cluster\_20780

ATGAAACAGTTAGATTTTACATTAAGCCTTATTGATAAATGTCCCGCCGTTAAAAACAGGCGCAGGGCAACGTAACGGG  
CTTTGCTGAAAAATCAAAAAGAGCCTTTATGCAGATTGGTGGCGGCTTCTGGCGCTGGCGGGTACAGGGATGGCCATTA  
AAGGTGGCTGATGCCCGCATTGAAATGTATGACGCGCTGAATGATGCGGGTGCAAAAGGATCGATGATTTCTGCGCTT  
AAGGCCGTTTCAGGCTGGCGCTGGCTTCAGTACAACATCGCGTCCAGTGCAGTGGAGTTCGCTCCAGTCCAGGACAG  
TATAAATGCGTCCATTGCCGGGCTGACCGGGAATGAATGCCGAAAAGTACGAAAAGTCCCAATACCCCTGGCGTTGCGC  
TCAAATCCACCGCAGCGGAAACCGCTGAGTTTATGGGGCAGATGTTCCGTAACCTTCTCCGCGGATGCCAACCGGCTGGGA  
AAGGTTGAGTTTGTGAACAGCTGGCCGGAAAAATGGTGTACATGCGCAAAACCTTTGGCACGGAAATGGCCGCTATCAA  
GGATTTGATGGAAGGGCGCGCGGTGTTGGTACCAACTACCGCGTGGGCTGGATGAACAGCTGGCCGTTGGGACAGC  
TTCAGCGGACACTGGGAACGGAAGCCAGCAGCGCTTATGAAGGCTTTATGACCAGGACATTTAGGGCGGTAAAAAGCTG  
GGGCTGTCTTACCGGATTCACCGGCAAAATGCTGTCCATGCTGAAATGCTGATCAAGTTACAGGGCAAGTATGGCAA  
AAGCCTGGAAGGGAATCTGAAAGCCAGGCTGAACTGGATGGCGCATTGGTGACAGTTCGGCGGTGGTGAACACCTTT  
ATGCCAATGTGGCGCTGCTTACGCGCAATATCACAGAAGTGGCGAGTACTGATGGTCTGAAGCGTACCCAGGAATGGCG  
CAGAAAATGGTGAAGCCGTTGGGATCGGTTTGTGCGCAATCCTGAAGGCTATCCAGACCGTCAATGGACTGACGCTGATCCC  
GGTCTCTATCCGGTTCGTAACCGACTGGCCGATATGGGGCAGACTTTTGCCTGGATGACGCTATTTCCCAACATTTG  
CGCGTGTGTTGTTATGCGGCAATGGCCTTACTCAGTTCGCGGCTGTTGGCGCAGTCCGCAACATCGTGTGGGTGCT  
TCCAGATTCTATGCGGCTGCTTACGCGCAATATCACAGAAGTGGCGAGTACTGATGGTCTGAAGCGTACCCAGGAATGGCG  
GCTGGGGAACATTGCCGTTGGTTCGCTGGAACGCCACGCTGAAATTTCTGCGGCTACGTTGCTGGCGGTTGCTATGGCGG  
CAATGATGGCCGGGATAGTATATCAATCTGATGAGCTGGCCGATCTGCTGGTGTATGGTGGCGGTTGCTTACTTGTGCTCC  
GGTTGCTGGCTGATTTAAACACTGGGACACGGTAAAGAACCGGCTCATGGATACCGCTGCATTTACAGACATGCCCGCAG  
GGGGTGGCATGGCTTGGCGGGGTTTGTCTTACGCTGGCAGTTTATCAGCGAAGGCTGGAACAGTTTTTATTTCCATGCT  
TGACCGGGTTTCTCCTTCCAGGCATTAAAGCGGGCTGGCCACGGGCATTGTGTCATTGTTGATAATGCTGTTGTTGCTC  
GTTAAAAACCGCTTCTGAAATCATGGAAGTGGATTGTAAGTAAATTAATAACATTCGGGTTGTGATATTGAATGACTGGC  
GGTGGCGCTTACCCGGATTCGCTAAAAATGAAGCGGAGTATTTCAGTGCAGGAAATGAAGCAATCAGCGAAAGCTG  
ACGGTGTCTTGTGCTGCGGTGACACAAAAAATTAACGCCACAGCCGGCTTTTAAACCGGAGGCGAATTAAGGCGATTGAA  
AAGGGCGGATCACCAAAACGATTAACAGTAATGCCAAATCCGTAACCGCAATAGCCGGAATAATGACCGGTAACAT  
TTATCCGAAAGAAATGATTACACCCGGTCACTTAAATGGAATTTACAGGAGCTGGGCGCATGA

>Cluster\_42708

ATGAAAGGTCGCTGTTAGATGCTGTCCGCTCAGTTCCTTAACGGGCGTTGGCGCAGCGCTTAGTAAACAGCTGGCGAA  
AATCAACCTGCATACCGTACAGGATTTGCTCTTACACCTTCTCTGCGCTACGAGATCGCACACATCTTACCCCATCG  
GTGAATCTAGTCCGGGTGTTTATGCCACGGTGAAGGCGAAGTGTGAATGCAATATCTCTTCCGCGCAGTCCGGCGGATG  
ATGACCTGCAGATCAGCGACGGTTCGGCATTCTCACATGCGCTTTTCAACTTCAATGCGGCAATGAAAAATAGCCT  
GGCGACAGGCCCGCGTGTGGCTATGGCGAAGCAAGCGCGGCAAAATGTTGCGGAGATGATCCACCCGGAATACC  
CGCTGCAGGGCATCTCAGCAGCGCAGAGTTACAGGAACCGTCAACCGGTTTATCCAACTACGGAAGCGTAAAGCAG  
GCTACGCTGCGTAAATTAACCGACAGCGCTGGATCTGCTCGACACATGCGCCATTGAAGAACTCCTGCCCGGAACT  
GTCACAAAGGATGATGAGCTACCGCAAGCGTTGCGCACTTTGCAACCGCCCGCGCAGCTACAGCTTAGGCAATCTCG  
AAACCGGCGCAGCATCCGGCACAACGCGGCTGATCTGGAAGAGTTGCTGGCGCACAACTCAGCATGTTAGCCTTACGT  
GCCGGAGCACAGCGTTTTTATGCCCCAGCGCTGAGCACCAATGACGCGCTGAAAAATAAACTCCTCGCCGCTTACCGTT  
CAAGC AACGGGCGCACAGGTACGCTAGTGGCGGAGTACGAGCGGATATGGCGCTGGATGTGCCAATGATGCGCCTGG  
TGACGGGCGATGATGTTCCGGTAAAAACGCTGGTTCGCCGCTTCCGCGGTTGCGTGGCGTTGCCACCGCAACAGGTTG  
GCACTGATGGCACCAACGAATTAACCGGAGCAGCAGCCTAACCTCCGTAACGGTTTGCACCGCTCGGTATCGA  
AGTAGGCTGGCTCGCCGAAAAACAGAAAGGTAAGCACGACTGGCTCAGCAAGAGCCATCGCCAGCGGTGAGGTGACGAG  
TGATGTTGGTACGCACCGCATTTCAGGAACAGGTGAGTTTAAACGGCTGGCGCTGGTGTATATCGACGAACAGCAT  
CGTTTTGGCGTGCATCAGCGTTCGGCTTATGGGAGAAAGGTCAGCAGCAGGGCTTCCATCCGCATCAGTTGATCATGAC  
CGCCACGCCATCCCCCGCACGCTGGCGATGACTGCGTATGCCGATCTCGATACTCGGTGATAGATGAGTGCACCAG  
GCCGACGCCAGTACTACGGTTCGCTATTCCTGATACCCCGCTACCGATATCATGACCGCTGGCCACCGCTGTATG  
ACTGAAGGCGTACAGCGTACTGGGTTTGTACGTTGATGGAAGAGTGGAAATTAAGGAAAGCGAGCGGCGGAAAGCAG  
CTGGGAAGAGTTGAAACTGGCGCTACCAGAGTTGAATGTTGGCTGGTACACGGACGGATGAAACCCACAGAGAAACAGG  
CGGTGATGACATCGTTTAAACAAGGCGAGCTACACCTGCTGGTGGCCACTACTGTCTGAAAGTGGTGTGATGATACCC  
AATGCCAGTCTGATGATTATCGAAAACCGGAGCGCTGGGCTGGCGCAGTTACACCGCTTCCGGGCGCTGATGCTG  
TGGCGCGGTTCTCCTCAGTTCGCTTCAAAAACCGCGCTTCCAAAACCGCGCAAAATCCGCTGCAAGTACTAC  
CGGACAGCAACGATGGTTTTGTGATGACAGAAAGATCTGGAATTCGCGGCCCTGGCGAATGTTAGGTACACGTCAG  
ACGGGTAATGCTGAAATTTAAAGTGGCGGATTTACTGCGGATCAGGCGATGATCCGGAAGTTGAGCGCTGGCGCGACA  
TATTCAGAACGTTACCCACAACAGCAAAAGCCCTGATAGAACGCTGGATGCCAGAAACAGAACGCTACTCGAATGCGT

AA

>Cluster\_51671

ATGCTGCGATGGAACCGTGTATTTTCTAACATTTATCTCTGGTGTGCTTTTCGCGGCGCCAGAGATAAATGTTAAGCA  
AAACGAATCGTTACTGATTTAGTACGAGCAGCACAAACAGGATGAACAAACCAACAGGGTAAATCGCTGAAAGAGC  
GCGGAGCCGATTACGTATCAACTCCGCGACGCAAGGGTTTGAAAACTTGACCCTGAGGCGCTGGAATCTCAGGCCAGA  
AGCTATCTGCAAAGTCAAACTCACTCAACCGCACAACTTATATTTGAAGACACTCTCTCCCTACGGTAAGGTCCGTTT

GAACCTCTCCATTGGTCAGGGCGGGATCTGGATGGCAGTTCCATCGATTATTTTGTCCCTGGTACGATAATCAAACCA  
CTGTTTATTTTTCAGCCAAATTTTTCGCGCAACGAAAAGAAGATCGTACGATCGGGAAATATGGCCCTGGGGTAAGGTATAAT  
TTTGATAAATATCTATTGGGTGGAATATATTTTATGATTATGACTTTACCCGTGGACATCGCCGTTTAGGTTTAGGCGC  
CGAAGCCTGGACGATTTAAATTTTCAGGCAACTATATCACCCACTTTTCTGACTGGAAAGACTGAGATTTTTCG  
ACTTTTATGAAGAACCCTGCGCGGGTGGGATATTCGCGTGAAGCTGGCTACCCGCTTACCCGAGTGGTGGCGGA  
AAAATTTGCTTCGAAACAATATTATGGGAATGAAGTCCGCTTTTGGTACCGATAGTCTGGAGAAAGATCCCTTCGCTGT  
CACGCTGGGTGTGAAATACCAGCCGTTCCGCTCATTTGTGTCGGTACAGATTTCAAAGCTGGCACTGGCGATAATACCG  
ATCTTTCTGTTAACGCAACGCTGAACTACCAGTTTGGCGTCCCGCTCAAAGACCAGCTTGATCCTGACAAAGTGGCGCG  
GCTCACTCGCTCATGGTACGCTGATGACTTTTGTGAACGTAACAACCTTATTTGTTCTGGAATACAAAGAGAAAGATCC  
CCTCTATGTCACTTTGTGGTGAAGGCCGACGTCACGAATGAACATCCCGAGTGGCTGATTAAGATACGCCCCGAAGAAG  
CCGTCGGTCTGGAATAATGTAAGTGGACATTAACGCCTCATTAATCATATACAAATCGTTGCTGCCTCCTGGCAG  
GCGAAAACAATGCTGCCCGCACGCTGGTGTATCAAAGAGAATACCTGACAGAGGGTAAACAATAACCCACTG  
GAACCTGGTCTGCTGCTGGCAGTACAGTTCCGATCAAGCGAACAAGAAAACCTAATACCTGGCGAGTACGCTCG  
CGCTGGAAGATGAAAAGGGCAACCGACAGAATCTGGCGTGGTGGAAATCACCGTTACAGCAGGACCGTAAATAGAGTTG  
ATTTGTTAATAACATCGCGAACGTCGAGAGAGAAACAACACAGCCAGGAGCGCTCAGGCAGATGGCGTTGATGG  
TGTGGTGAATGATCTCGATGTAACCGACAGTTTGGCGATAACCCAGCCGAATGGCAGTGGCTGCCGGAAGATAACC  
TCAGCCCGGACCTTTCAGACCGCGCAACAACGATGACTTAAACCAACAAGCCTTGGCTCGACCGAACCCTCGGTT  
TTTATCGTAAACAAGATAAAGAAAAGGGCACTGTACCCTCTCCAGTACCTTACCCGGCACCTATCGCTGGAAGCAAA  
AGCCGCGCCCTACGATGACAGTAATATGTTGATGCTACTTTCTCGGGCAGAAATGGTGGGCTAAATGCTTTTATCT  
ATCGAGTGGGGCGGCTAAACCCAGCAACCTGATAGGTAAGATAAAGAACCGTTGCCGTTAAACAATATTTATCGATTT  
GTTTTATGGCGCGCAACAATAAAGAGGTTGCTTCCAGCAGGTCGAAAACCTGACTGACGAAGAGATGGCGGATGACGA  
CTACAAGTGGAAATTTACCGGCAAGAGCATCAATGGTGAAGTGGGTGCACAGGCGAACACTTCAATGAGGACATTTGTA  
TTCCGGCCACTAACCGTGAAGCGCGCAAACTATGGCCACAAGCGGGAGATGGCTTCAGGGATACGGTTTACGCGTG  
CTGTATACCAAAAATAA

>Cluster\_20204

ATGGCGCGTTCCAAAACCTGCTCAGCCAAAACACTCACTGCGTAAATCGCAGTTGTAGTAGCCACAGCGGTTAGCGGCAT  
GTCTGTTTATGCACAGGCAGCGGTTGAACCGAAAAGAAGACACTATCACCGTTACCGCTGCACCTGCGCCGCAAGAAAGCG  
CATGGGGCGCGGCTGCAACTATTGCGGGCAGCACTCTGCTACTGCGACTAAAACGGATACACCAATGAAAACAAACGCG  
CAGTCCATTTCCGTTGTGACCCGGGAAGAGATGGATATCAAACAACCCGCAACGGTAAAAGAAGCTCTGGATTATACGCC  
AAGTGTCTTTTCAACGCGTGGTAGTTCAACAACGATGATGTTGTTTCTATACGTTGATTTACACAGCCAGTACAGTAA  
ATACTAACCAATATCTGGATGGCTTAAACTTCAGGGGATAACTACTCTGAAGCCTCTATTGATCCTTATTTCTTGGAG  
CGTGTGGAATTAACGCTGGCCAGTATCCGTAATGATGGTGGTAAAGCCATCCGGCGGAGTAGTGAGCATGTTAAGCAA  
ACGGCCTTCAACGGATCCGATTAAGAGATCCAGTTCAAATGGGAACGGATAATCTTTGGCAGACCGGATTCGATTTTA  
GTGATGCAATAGATGATGATGGCCTTTGGTCAATATCGTTTACCGGATTAGGACGTAGTCAGGATGCGCAACAAGATAC  
GCAAAAACATAAGGATGACAGTACCTCCCTCAATTCAGTTGGCGTCTGATGATAAAGCCGATTTACCTTTCTGAGTAA  
TTTTCAGAGTATCCCGATGCGGGCTATATGGTGGTAAAGCCGCGCAGGGAACCTGTTGTTCCCTATCAGGATGTTAAGC  
GTAGCTGGCACAAAATGGCAACAGATTTCAATGAAGGCGAGAAAATAAAGATGTCCTGCTGCTCAACAATTAATTGGC  
TACAGTTTTGCTCATGAAATTTAATGATACTTTTTACTGTACTGAGAATCTGCGCTATACCCGCTATACATACCTACGA  
TGCAGTATATGGCAATGTTACATCGCGCCAGCAGCAATAGCCGCTGTTATGTACTGTTACGTTACGTTACGAAAGATTTAAATCTGT  
TTACTGTTGATACCAACTTACAGTCCAATTTGCTATCCGTTGCTGTAGCGCATACTTTGCTTACTGGCGTGGATTACCTG  
CGAATGCGTAACGATATTTGATGCAAACTATGGTACTGTAAATCCGATTAGCATGACGGATCCACAGTACGGTAACGCCAA  
TATCAATATCAATTTCCCATATGCGGTAATTAACCGTCAAGAACAGACAGGCTTTATATTCAGGATCAGTCTGAGTGGGA  
ATAAGTGGGTATTGACGCTGGTGGTGGTACGATTTGGCAAAACCTTACCATACTGTTCAACGAGTTCTTTGGAT  
GAAATTAACGATCAGCAGTTACCTGGAGAGGTTGATTAATTTATCTGTTGATAAATGGTATTTACCTTATTTTCACTGTA  
TAGCGAATCCTTCGAGCCAGTATCTGGAGCGACTAAAGAGGTAACCGTTGATCCTTCTCGCGGTAAGCAGTACGAAG  
CAGGTGTCAAATACGTACCAAAAGATACGCCTGTCACTGTCACTGCTCGGATTTCCAATTAACGAAAGACAAAATCTG  
ACTGCAGATCCAAGTAACTTTGTTTACGCTACAAGGGGGAGATTGCTTCTGCTGGCTTTGAGATTTGAGGTCGAAAGC  
AGCTGTCAACGCTAATATCAATGTGACTGCGGCATACAGCTACACCGATGCTGAATACACCAAGATACACTGTACAAGG  
GTAACCGCCCGGACAGAGTCCCGAAATATGGCTTGGCTGTGGGCGAGATTACACTTTCCACGAAACGCTCTTAGTGGT  
CTGAGTCTTGGTGCAGGGGACGCTTATTTTGGCGACCTCAAGTTTCTACACTACGGGTGATAAGACCAATCAGACAT  
CAATGTGGGGGTATACCTTAGTTGATGCAATGATAAAATGATCTTGCTCGTTTCCGGTATCCCTGTTCTTCTGTTG  
GTGTTAACGTAATAAACCCTGTTCCAGCCGCAATATGCTCCAGTTGCTATCGTATTATGATGTTACTGGGGCGCAGAA  
CGTCAGGTCGTTGCAACCCCAACCTTCCGTTTCTAA

>Cluster\_19794

ATGAGTTTTAACGCAAGGATATGACCCAGGGCGGTGAGATTGCGTCCATGCGTATCCGCATGTTTACGTCAGATCGCCAA  
TATCATACTTTACTGCCTGTTTATTTTTTCTGGATCCTAGTTGGTCTGGTTTATGGGTAATAAAGTGGCAGACGCT  
TTGTGAATGGCTGCAATTTACTGGTGGTGCACCAGCTGGAAGGATGCGGGATTTAATCAGGTCACCGGCTATGAG  
ATCCAGTATACCGCAAAAACCTTCCGATGAACCGGCTCAGGTACTGCATGATAAATATATGATCTGTTGCGGTGAGCA  
GTTATGGTCCGCTTCTGCTGGCTGCTGCTGCGCCCTGGTTATCTGCTGATACACTTCTTTGTTGCTCCTGGATTCT  
TGGGGCGTCAGGGTAAACAACAGAGCGAAAATGAAATCAAGGTTGGTCTGCTGAGTGCATCCGAAAGAGGTGGGT  
AGGATGCTGAAAAAAGATGGCAAGGATCCGATATCCGGATTTGGCGATCTGCCGATTAACCGGATTTGAAATCCAGAA  
CTTCTGTCTGCACGGCACTGTCCGGCCGGTAAGTCCGAGGTTATCCGTCGCTGCGCCAACTACGCCCTCAGCGTGGT  
ATATGGTGGTATTATGACCGTTCGGGGAAATTTGTTAAAAGTTACTATGATCCCTCCATCGATAAAATCCTGAATCCG  
CTGGATGCACGCTGTGCTGCTGGGATTTGTGGAAGGAGTGCCTGACACAGCCAGATTTGATAATACCGCAATACTCT  
GATCCCGATGGGGACAAAAGAGGACCCGTTCTGGCAGGGTTCAGGACGTACCATTTTTCGGAAGCGGCATACCTGATC  
GTAATGACCCCAACCGCACTACAGCAAACTGGTGGACACTGCTTTCCATAAAATGAAAAGCTGCGTACTCTCTG  
CGTAATTCACCGCGGCCAACCTGGTGGAGAGAAAATCGAGAAAACGGCCATATCCAATCCGTCGTGCTGACCAACTA  
CGTGAAAGCCATCCGTTACTGCAAGGGGATGAGCATAACCGGTGAGCCCTTACCATCCGTCGATGGATGCGTGGTGTCC  
GGGAAGATCAGAAAACGGCTGGCTGTTTATTTCTGCGAAGCCGACACCCATGCCCTCCCTGAAGCCGGTGTCTCCATG  
TGGCTGTCCATTTGCTGTTGTTGCTGCGCAATGGGAGAAAACCGTAACCGTCTGTTGGTGTGTTTCTGTGACGATT  
ACCCAGTTACACAACTGCGCGACCTGGTGGAGATCTGCGGAAGCCCGTAAGTTCCGTTGGTGTGTTATGTTTGGTA  
TCCAGTCTTATGCCAGCTGGAAGATATCTACGGTGAAGAGCGGCTGCCACGCTGTTTGGACGTCATGAACCCCGTGC  
TTTTTCCGTTCTCCAGCATAAGATTTGACAGTTCGCTGCGGTGAAATGGTGGAGAAAGAGCACCTGAAAGCCAGCGA  
CGATATTTCTACGGTCTGATCCGGTACGCTGACGGGATATCGACCCGTAAGGATATGGAGCGTACAGCCTGGTCAGTT  
ATTCAGCATTCAGTCTCTGCGGATCTGACCTGTTATGTCACCTGCGCGGACCGTATCCGGCAGTAAACTCTCCCTG  
AAATATCAGACACGACCGAAGGTCGCTCCGAGTTTATTTCCGCTGACATCAACCCGAAATGGAGAACCCTGAGTGC  
CGTACTTGGCGCAAGGGAAAGAGGTCGTCAGATGCGCCGCTTTCGAACCGGATGTCGCCGAGGTTGTTTCCGCGG  
AAGACGTGACTCAGGCTGAACAGCCGCAACAGCCGGTGTCTCTGCTCAACGATAAAGAGTCAAGTGCAGTGCAGTGTGAAT  
GTTCCGGCAGGGGGATCGAGCAGGAGTGAATAAAGCCGGAAGAGATGGACAGCAACTGCCACCCGGGATCAG

TGAATCCGGTGAAGTGGTGGATATGGCCGTTTATGAGGCATGGCAACGGGAGCAGAATCCGGATATCCAGCAGAAGATGC  
AGCGTCGTGAAGAGGTGAACATCAATGTGCATCGGGAGCGGGGAGGATGTTGAGCCGGGAGATGATTTCTGA  
>Cluster\_39476  
ATGGCCGACGAAACAGACTCAATTCATTTCTGTGTAAGTTTGACGCAGACTGGATGGCGAGCGATGAAGCCAGAACC  
GGCGACAATAGCTGTATTTTAGCCGAGTGTGCGAATGGGATGACTGGCTATCAAACACACCACCCGCAATATCGCG  
GACAAATTCGATGTTGTTCCGCCGTTGGTTCAGGAACTGGTGCAGAGATGCGCCGGAACCCATTCGACGTTCTCTCCGA  
CCCAAAGACGGCGTAAATCATGATGCAGCCGATGTTGATGGGGATGATCGTACTGATATGCGCCATAACACGGCAA  
GATTCGCCGTTAACGTTGGCGTTCGTGAGCAGATAGAGTCCGGCGTTGGTGCATGGCGTCTGGTACACAGTACGAAGACA  
ACGACCCAAACGCAACAATCAGGTAATCAGACGCCCTGCGAATTCATGAAGCCGTCTCACACGTCATATGGGACGCCAAC  
AGCAAGCAGATGGATAAGAGCGACGCTAAGCAGTGCACGGTGAATTAACGCCTTGTGCGCAATGGCTGGAAAGAGTTCGC  
AGAGGATTACGGTATTGATCCGGACACCTTGCCATCTTTCCAGAAATCCGAACGATACATGGCTGTTCCGTGGGTATCGA  
ATGATGTCGTCTACGTCGCTGAGTATTACGAGGTCGAAGAGAAGAAAGAGAAGGTCTTCATCTACCGCGACCCGCTGACA  
GGTGAAGCGGTGAGTATTACGACGAGGATATCAAAGAGCTCATCGACGACCTGGCTAATCGTGGATCATTAAGGTAGC  
AGAGCGTAAGGTCAAGCGTCGGCGTGTGTATAAGTCGATCATCACCTGCACCGCAGATACTGAAAGACCGCGAGAAGATAG  
CCGGAGAGCATATCCAATCGTTCCAGTGTATGGCGAATGGTCAATTGCGTGGTGAAGGAGTGTACGAAGGAGTGGTA  
AGGCTGACGAAAGACGGCTCAGCGCTTCGTAACATGATCATGTCGTTCAACGGCGATATCGTTGCTCGTTCACCGAAGAA  
GAAACCGCCTTCTTCCCTGAGCAAGTCCGAGGCTACGAATACATGATGACGTTGGAAATGATGACTATCGTACTATCTC  
AGAACAGGACCGATGAAACCGTAAACGACCTGCGGATTTGGTCCAATCTCTACATGGAACCCCTGAAGTCCCGCAAGCC  
AACGCTTACATGCTTGAAGCTGCCACCAACGACGTAAGAGAGGTTGGCTAGTCTTGGCGTGGATGCGCAGCGCGCAAATGG  
TCAGGTGCTTTCGATACCGTCAACTGAACTGCGGGCAGACCTTGAGACATACGTTGTTTTCAGGATAACCTGGCTA  
CCGCAATCGGTGATGGCGAGATTTATGCTCAATGCTCAACGATATTTATGACGTTCCCTCGTCAATGTAACGCTGACA  
CTTGAAGATGGAAGCGAGAAGACGTTCAACTCTATGCGCAAGTGTGCGATTACAGTCCGGCAATGTGGTCACTCAA  
CGCATTCGTGGTGCATATGAGTGTATACAGACGTTGGGCCATCTTCCAGAGTATGAAGGAACAGAACCCGCGCAGAGA  
TTCCAGAGTGTCTACCAAGGTTCCGCAAGTACTCCAGGTTCCAGATGCTGATGCTGCAATACTTCCGCTGATGCTGAC  
GGTAAAGCGTCGAGATGATGCGAGAGTACGCGAACAACAACGCTGGAATGATGGGGTGAAGAAACAGAAACACCTGA  
AGAGATGGAGATGTTGCAACAGGCAACAACAGCCGACAGCCATCAGCAGAGCAAATTCAGGCGCAGGGTATCCTTC  
TGCAAGGTGAGGCTGAATGCTCAAGGCAGAGAACAACAGGCGCAGATTCAGGTTGAAGCTGCCAAGGTTGAAGCTCAA  
AACCAACTCAACGCGCAGAGATGCGAAGATCTTCAACAATGAGTCTCGCAAGAGGCAAGCTGCGTGCATGATGCTGAC  
CAAGCTCGTAGGTCATTCAGCAACAGCGCAGCAAAGATGCTGCTGTAACGCTGAGCTGCTTCTTAAAGATGCAGACC  
AGACTCATTCACAACGCATGGATTTCCGCAATCTTATGCGTCAAGTTCAAATCCCTCCGCGGAGTAGCCGAGACACCT  
CAATAA  
>Cluster\_63553  
ATGCTGAATTTGATGCCAGCGGCTTGCCGAACGATTTGATATTTGTTAGATATCCCTTGTGGCAGGCGATTACCACCT  
TGCGATCCATAATCTCGAGATACTTAAACGAGAATCTTGCAGGAGTGTGATCTACGCCAGACATCCCGAAGGCAC  
CGTGGGAGATTTAA  
>Cluster\_15790  
ATGGCTGATGCAATGGATCTCGTACAGCAGCGCTTGAAGAAGAACGCCAGCGTCATATCCGTGCTGCCCGGCCAAAAC  
GCCGGGCTATCCCGCGTCTTTGCATTTGAGTGTGAAGCACCAATCCGCCAGCAGCAGCTCGCGCCATTCGGGTGTGC  
AGCTTTGCATTACTGTCCAGGAAATCGCAGAGCTGAAAGGCAACATTAACAACGGAGGTGCTGTATGA  
>Cluster\_21993  
ATGCTACCTAGGTACAAATTTTATAAATGGCATCACATCTAATCAGACAAGATACCCGCTCAAAGAATATGAAGATGT  
TACGCTTGACCGTAAACAAGAAAAGACTAAAACCATCAAAATGAGCAGTTACGCCATGAATTAAGTCACTGGATATCG  
AGCTTGATTATAGTGACCCGACTCAATTTAAACGGCTTATGAACTCATTAAAGATTTGGGGGAAGAATGA  
>Cluster\_17634  
ATGGCTTTTAAACTTCTTAGTGTACCGAAGCAATATACCAGCCGCCGGAGAACGCCACGAATACAGGATGAATGACGG  
TAGCGCGGTGGTTGAGTTCGCCGATATCCGGGGCTTCCCGTGGCGGTTCTATGACAGTGTGGGACGTGCGGATATTA  
AAAGAACCCTGCACAACAATATGAAGGCTGCGGTAGAACGTCATAAGAGAAGGTTTAACTGCAAAATGA  
>Cluster\_31790  
ATGCATAAAATCGATTTTGAAGTATTAATCCACTCTGAAAACGCAATTAATTAAGCACGCGAAATGAATGCGTGTGTAAT  
TAAATTAATGAAGTCCCGAAGGTGGCGAAGATCATTCATCAATTAATGTTTCCCGCTGTTGACAGATTAATGACACCTG  
TTATGATGAACCTCAATAAGGCTATGGCAATTCACGAGAATAATAAAGCGCCCAACACCGGAGAATAA  
>Cluster\_19622  
ATGACCTACAACCAATGAGGTGCCAGCACTGGCCGTTACTGGGCTGTGGGAGATGGATGACCTACAGCTTTTGTATTTA  
TTTCAGAGTGTATGTTATGCGAAATCTCGTAATGCTATGATTTATAGTGTATTTTCGATTAATGCGGCTCTGTGATGC  
GAAGAGATGGCGGGGCTTAGCCGTGCCAGCAGATGAGCATCAAGATCAGATTGTGAATGTGATTCATCACTGA  
>Cluster\_46724  
ATGATTTGTCACGTTGTGCCGATGAACAGATTGAAGTGTGCGGAAATCGCCGGTGAAGATGTCTGGACGGTATATCA  
GTGCCAGCATGCTTTTATACCTGGCGGATACCGAACGCTGCGCCGTACCAGCCGCAACATATCCCGAAGCGTTCC  
GCATGACGCAAGAAATGATGATGACGCGCAATGGTGGCCGAGCATCCCGCCGCTGCTGGTGAAGGTAAGCGTTAA  
>Cluster\_20760  
ATGCACATGACACGTCAGGATTTACCCGCAACGAAATCAGGTAAGTACTGACCTTCTGGCCATGCTCACAAAGCCACACAGGA  
AGGTAAGCCGCTGCTGCTGATGCTGTTCCACCCGCTGGAATAAGTGGCCACCCATGCAGCAATGAAGGTTAAGCG  
CAACTGAAGTCAATGAGTAAATCCCGAAGAAGCCGACGATTTGCAGTAAGGGCGGTGACGATGCGAGTAA  
>Cluster\_14845  
ATGAAATGTAATGATTACCAGTCAATTAAGAAAGGAAATGGCGAATATGTTAATAAAAATACGAGTGAATACTAATATTT  
CCGAAGTGAATTTTATGCTGAATGGCGTGTCTTACTACTATTGCTTGTGGGAGCTCCGGAAGGGGGGGTAAAGGTTT  
ATATCATTTATGATAACCTTGCCTTTCTTTCTTCAAAAATATATATACCAAGAAGAAAACGTACACGCCTGA  
>Cluster\_11172  
ATGCGAGTTGATGAACCTTGTCCAGTTTTTTGGTCTGTTTCCAGAGGTTGCCGATTTTTATGGGATAACCCGCGAAGCTAT  
TTACATGTCGCTAAGCTCCTGTTGAAATAGTTCGAAAGGGGAGGGCTGCGGAAGCTGCTGCATACTCAAGGGGAAAT  
TATCTTTGAACCCAGAATTTACAAAAGAAGGATACCACTCAGGGCGAAGGAAAGGGGATTCATGA  
>Cluster\_38682  
ATGAACATGCGCGACAGAAAATTCGCGCCGAAGTGGCGGAGGTGGCTAATACCATGTGTGACCTTCGGGCCAGGCT  
GAACGATATGGAGCATCGTGTGCTTTTATTCCGATGTGCTTTGTTGAACGCTGACACGCCAGACGCTGTATCGCGCCA  
ATCGCTGTCTATGGAGCATATACCGAAATCTTGAAGTGGATGCGTCTTCAAGATTA  
>Cluster\_5983  
ATGACCCCTAACATTTCAATAACTCTGAATACGCCACAGTCAACAATCAGAGCTTATAGGAACTTACTGGCTTTCAAT  
CGACACAATCAACGATATGTTGGCGGATGGTGCATTCCTCGGCATCGTCTTCGTAAGACAAAGAAAAGAAAAGGTTAA  
TGATCAACCTTGTGCTCTTACCGTTGATGCATTAATGATGCAATGTTGATTTCAACTAG

>Cluster\_67090  
ATGGTGTAGATACTACGGGGCCCTGAGTCCGGTACGCGGGCTTACTGAAAAGATTTTGTGTACGCCATAACGGAGACAGA  
GAGAAAAACGGCGATGCAAAATCAGGTGGAGAGGTATGTATCAGAGGTTAGTGAAGGTTGACCCGCTGAAGTGTGTCTGT  
GCAGAAGTCAGAGGCGTTTTACGGGACTGAAGAGGGTTACCGTCTGGCGGAATGCATGA  
>Cluster\_59265  
ATGATTGCACATCACTTCGGAACGTATGAAATACCACGTCAGTGTGTGACTCCTGGCGATTATGTTCTTCATGAAGGCCG  
GACATATATTTGCCFCGGCAACAATATTTAAAAAGCGAAAACTATATATTCGTAACTGACCACAAAAACATTCATTACTG  
ACCGCATGATTAAGTCTTCCTCGGTGATGGTTTACCTGTAAAGCGGGAGTCATGGTGA  
>Cluster\_17627  
ATGGACAAGCAGACCATTAAACGCGTCCGTTCCCGTGCCTGTGGCCATCCACACCCTGGTGGTTCGTAAACGGGACA  
ACATCACCGTTTACTGTGGTTTATGCCGCGCCGCTGGGTGGTCCGTATGGCCGTAACGGAAATCATCCAGACAT  
TCAGCGCCTGCGCCGCTGGTGAACATCCTGTATCGACGGCTGCACCGCTGTATGGCAATGA  
>Cluster\_64820  
ATGACGAGGAATAAGCAACAAGCACCGGAAATAACAGCGGAGGTGTTGATTAAAGACAGCGCCGAATGCCTGGCATCAGT  
ACCTGCATTTGATTCAACAGCGAATGCAAAAAATCTCCGTCTGCAGCTTCGTTTATTCTGTGCAGGCATTGCCCGCCAGA  
TGATGATTGCGCAGATGTGTATGCGCGAAGCACAGCGTCTGGAACATATGGAGGCAAAATAGTGATTAA  
>Cluster\_48412  
ATGAATCACGCCGAATCTCTTATGACGATATTTGTCGCGCTGAAGCATCTTCGTAACGTGGGGAGTTTGTACCAGCAAT  
GGCTGTTCTTCAGGATTGCCACGAAAACTGCCGCTGCTCAATGTGAGCAACTGGCTTCCCTGATTTATCTGTATGACAG  
AGCAGCTTGATGGCGTGTACAGCGTTGCCAGGATGACCTGATGAACATGGAGGTGGTGAATGA  
>Cluster\_67022  
ATGGCAGATGAAATCGAACGTTTTTCACTCTCATCAGCGATGCTGGAAGCCGATCGCATACAACGTATCCGGCAGCAGTT  
AACGGGCATCAGTCCCTGTTCTGCGATGACTGTGGTGCCTGGTCCGGCAGAGCGTCGCGGCTGATACCGGGTGTGC  
GAAATGCGTGGGTGCCAGGAGTACAGGAGATTCAGGCCGCCATTACAGGAGGTGGCAGTGA  
>Cluster\_42343  
GTGAATCAGGCCATCCAGTTTCCGGATAGGGAAGAGTGGGACGAGAATAAAAAATGTGTATGTTTCCCGCTCTCGTGAA  
TGGTATGAAACTGACATGTGCGATCTCTGGCGAGAGTCTGGCGTATCGCTTACTGGAGATACGCCAGAACAGTGGTTAG  
CGAGTTTTCTGTCAGCATCCTGGACCTGGAAGAAGAAGCGGAAAACTTAATTCAGGAACAAAGTGAAGATGATCAAGGG  
TGGGTCTGGTTACCTTGA  
>Cluster\_49990  
ATGATGTACAGCAAAATACGATGAGGCGCAGTTCCTACTTGGAGCTTACGCACGAGTTGCACGCTAAGATTAAGCAACGTGC  
AAAAATGAATAACAGGCTCATCAATTCCGAAATGTGGTACGATGGAAGAATCACTCTCCAAACCATCACCTGTAAGCG  
GGTATCGTATGAAGAAGAGAGGCTGGCCTCATTAATCTCGGAACGAGTAAAAGAAGTGTGGCTGATATCCTTAGAAAA  
GAAAAAACCCGCAATTA  
>Cluster\_36238  
ATGAAATACCTGGTTACGGGTGCCGCTGGTTTTCATCGGCTTCCACGTTAGCAAACGCCCTTTCAGGGTGGCCATCAAGT  
AGTCGGTATGATAATCTGAACGATTACTACGACGTCAGCCTTAAACAAGCTCGTCTGGAATTAAGTGGCACAACCTGGTT  
TCCAGTTTCATAAAATGATTTAGCCGACCGCGAAGGCATGACCGATCTTTCGATCCGGGCATTTTCGAACGTGTGATT  
CATCTGCCGCATAG  
>Cluster\_67052  
ATGACTTCAAATCCTCATTGATAAAATCGTTATGACCATCACTACTATCGGTATCGATCTTGTCTAAAAATGTGTTCGC  
TGTTTCATGGGGTTGACAAAATGGCAAAACCGTTCTGGTGAATCCAGAGTAACCCGCGCAGCTCTTCCCGGGCTGATG  
CAAGTTTACCGCCCTGTGTTATCGGGATGGAGGCGTCTCCGGGGCTCATTACTGGGCAGACTGTTTTCGCAATATGGTC  
ATGAGCCACGTCTGA  
>Cluster\_54404  
ATGAAAATCAATACTGTTGTTGCTGCTATGGCTCTTTCAACTCTGTCAATTTGGCGTGTTCGCGGGCGAACCCGGTAAC  
GGCATCCCAGGCACAGAAATGAATAAAATCGGCGTGGTTTCTGCCGATGGCGCATCCACCCTCGATGCCCTGGAAGCGA  
AACTGGCTGAGAAAGCCGCGGACGCGGTGCCAGTGGATACAGCATCACTTCCGCCACCAACAACAATAAATTAAGCGGT  
ACTGCGGTAATTTATAAGTAA  
>Cluster\_52904  
ATGTCCCATACCGGGGGAAAGAAGGAACGTATCCTGGCACCCGCGCCAGCGCAACCATGATTGGCGACGATGAAACCAA  
CTGGGGCACAAAATCGCTGGCGATACCTGACATGCCATTTACCGCAGTACTGGACACAATATTGCTACCGTGGGATGTGT  
TCCGCAAGACAGCTCAGTGCCTCGCGGTTGAAAAAGCGAAGCCAACGCACAAGCCACCAATGCGGTTATTCACCG  
GCCAGAATGCCGTGATAACTGA  
>Cluster\_40771  
ATGTTCCGTTGTCCGCTTTGTGGCGCATCTGCCGATCCGCACAGTCTCCGAAAAATGATTCAAACACCGTGGCGCA  
AAAGTATTTACCAGTGTAAACAATCTGGAATGCGGCGTATGCTTCTCAACACTGGAAGCTTTCATAAAATTCACATCAAAAC  
ACGCTCCGGCGTTCACCTTTCAGAAGGTATCCCGTGGCATGAGCTGCCAGCTTACACAGGGGAAACAATCAGATGAGT  
TTGCCTTTATCTCAGAATTA  
>Cluster\_199  
ATGTTTTACGCCGTTTCTCTCATTCAGTTCACCTTGGTGGTTCGGCGGCTTCGACTTGTATCAGTAGGCAGTGTCTCGCC  
GCACCCCAAAGGAACTTACTGACCCGATTTGCCGACATCCTGTCCCGCACGGTCCCGACGCATGGTTTAGAGTCCGCG  
CGTTGCACTGTGGCTAAAGATACAATTTGAGTGTATTTGTGTAACCGCAACGTTGGTATTTTGTGGGTGTGAATACT  
ACTTTATTGATATTTAAGTGA  
>Cluster\_22814  
ATGATCCGATTTGAAATTTTTCGACCGCCAGAGCACAAAAACCTCAAATCAGGCACACTTCAGGCCTACAGAATGA  
AATCGAACAACGCTGAAACCACTACCCGAAATCTGGCTGCGTATAGACCAGGGCAGCGCCCGTCTGTATCTGTCA  
CAGGAGCCCGCAACGACAAGGATAAAGAACGTATCCTGTCTCTGTTGAAAGAAATCTGGCAGGACGACAGCTGGCTGCCT  
GCAGCATGA  
>Cluster\_6821  
ATGAAAAATAATAAACTGGCGACCAGTGAATTAAGAAGCCTTGCCAACAGCGCAATATCTTTAAACAACGAGCAACCGA  
AGTAATGAATATTTGGCTTCAGTCTGTTGAAATAATGAACGCGATGAATCAACTGCAAGATTAATATTAGCCGTTTCTG  
AATTACTGGATAGTTCACCAGCAAAATAGAGAGCATATCAGAGAAGATTAACGGCTTATCAGGTCACGCTATCGGGGAA  
TAA  
>Cluster\_50009  
ATGGCAGAGATTTTCCCATGACTGAAGAACAAGAAATTCAGTTAGAGATTTACAAACTGGTTCATGAACCAGAACCGCAGC  
CGCAGAAGAAGCATTTTCAAGTTTCTGTTACTGACGAGTTGAAGCTTGGCTATTCAAAATTCACCTTCAGTCCAGCGGGC  
CTAATTCAGATATCACGATCCGCACATTTGAAGCGGTGCGTAAATCGAAGGAAGTGTAGACCTGTTACCACCGGAGCA  
TAA



>Cluster\_31021  
ATGTTGGGTTCTGCTTCCCTTCCGCTCCGCATGGCGCGCCGGTCTTACGTCTGGTTTCGGTAAATGCGCTCTTTGTCGCACC  
AGCGCAAGCATTTACAGTTCCGGAAGTGGGAAAACGCTCAATTAATGAAATCAATCGGATCCGCTACGAACTGGAATTA  
TGGCAGTTGCTCTGCTGTGCAAAAACCTCACTATGCAAAAAACGTTGCTTTGTGTGTCACCAACATACAGCCGATAA  
>Cluster\_53928  
ATGCACCGTCAGTCAGACATCTATCAGGCTTTCCGCGAGTCGGTATTGCGCAACTCCAAAGGCTACCAGTATCTGCATAC  
AAAGGATTTGTGTCAGCGCTGCTCCGCGTGGGCTGCACTTTACCGACTCAGAGGCTAATGCGTGGATATCTAGAGAGC  
AGACGTACTTTGTGTCGACAAAACCCAGCACCATAGCGAAAACCGTTTGTGGATGATGGCTAACATGGGGAGGGTTTGTAA  
>Cluster\_48602  
ATGACGATCACTATCTACGGACGAGATAACTGCTCATACTGCAAAACGTCGGTTCGAGCTGGCGAAGCACTAAAGGGACA  
TGGCTACGGTGTATATGAGTACATCGACATCACCAGTCCGCGTATCGACAAGGAAAACTTAGTGAAATTTGTGGTAAAC  
CGGTAGAGACTATCCCCAGGTACTGATCGATGGCCAACCGATTGGCGGATACACAGAAGTGGCTGCATACGTCAGCACC  
CTCTGA  
>Cluster\_1315  
ATGTCGCAGACAGAAAATGCAGTACTTCTCATCAGGTACAAAGCGAGCATAACAGAAAAGGTAATCCTCTGACGCTTGC  
AGAACGTCAGCAGGCATCCCTGGCAAGAAAACGAGCCACACATAAAGAAGTCAAGAGTGTATATCTGCTGCGTTAAAG  
CGCAATTCGACAGGAGATGTGTGAAGCTGAGGGTGTACTCAGGCTGAGATGATTGCCAACTGATAAAGCAGAAGAGTGT  
TTTAGCTAA  
>Cluster\_44018  
ATGCCGAAGAAAAATGAGGCTCCCGCCAGCTTTGAAAAGGCGCTGAGCGAGCTGGAACAGATTGTAACCGCTCGAAAG  
TGGCGACCTGCCGCTGGAAGAGGCGCTGAACGAGTTCGAACGCGCGTGCAGCTGGCAGCTCAGGGGCAGGCCAAATTAC  
ACAAGCCGAACAGCGCTACAAAATCTGCTGTCTGACAATGAAGACGCTCTCTAACCCCTTTTACACCGGACAATGAG  
TAA  
>Cluster\_24267  
ATGCTGGAAGTACTTTTTGTAATTTGGCTTTTTTGTGTCATGCTGATGGTACCAGGTTTTCGTTGCTGGGTATTATCGCCGC  
GCTGATTTGTGGCAGCGCTTTATGTTCCCTCGCGGTATGCTGGCATTGATGATTAAGTTGCTGCCGTGGCTGCTGTTGG  
CGGTTGCGGTGGTGTGGGTGATCAGGGCATTAAAGCACCAAAAGTGGCGAAATATCAGCGTTATGACCGCTGGCGTTAC  
TAA  
>Cluster\_17631  
ATGAACCGGAAACGCTTTAATCAGCTATATCCGCCAGGACTCGCTTCATGCACATTCACATCGGGCAGTGCCTGGTGG  
TCGGGTGGTAAAACTGTTGCACCTGCCAGAGATTTTAAATGTGGTTGTGGTTGAAATTAATGTCGAGCCTTATTTCCG  
TTAAAGTCGAAACACTGAAAGCACCGCATTA  
>Cluster\_39337  
ATGGCGACGATTAATATGTGTACTGCAAAAAAGAAAGTCACTGAACTGGATTTTCAACAAGCAAGCTTATTGCAGACTGA  
TGAATATAAGGAGTGGTGCCTAAATTTAATTTTGTCTGTCCGCACTGCGAGCAGGCTTATAACGCCTTATTTCCACTA  
TGGAAATTAACCCCGCAACGGAGTGGCGCATGA  
>Cluster\_5991  
ATGCAGGACTATTTTTGGAGTCTTTGAAGCTCCAGCGCATTGATTTTTTTCTTAAGCTTGTAGCGGCTAGTGAAGTGTAG  
TGATGAAGAGAAGGGCTGGCTTTGCAGTGGTTTCTGAACCTAACAGATGAACATGCAAAAAATCAGAACCACGAAT  
ACAACCGCTCAATGGATGTCATCAGTTGA  
>Cluster\_25066  
ATGAAATGGTTTACACCGAAACAGTCCGTAGAGGCATTTAAAAAAGGTGAGCTTACACGCCATCAAGTAGTAATGAATCG  
TAATATGGCAAGGATCGAGTTATCCAGAGCAGCAGCTTGCCTCAATGAAGCACTCAAGATATTGATGAACTAAGAA  
AAAATGAAAAAGAACTGAAACAGAGTAA  
>Cluster\_43633  
ATGAGTTATCCCTGGAGCGTGGAGCCAGCTGGAAATACAGGAACGGACACTGGATGGCCCTTCGCTGGGATGGTAATCA  
GAGACAGGCTAAAATGTTGTGACGCGCTTTCCGCTGCAATTTTTGGGATAATGTTGGTTCCGGGGCACCAGGACCGCC  
TTCAGTACAGCTTGTGAAACACAGGAACCGCTTAA  
>Cluster\_50967  
ATGACAGAAACAACCTCACAAAGATGATTAATGAAGGCATTTGTCTGGAGCCTGATTCATTTGCGGTAAATGTTTATCA  
TTTATTGCATGCAACACAGGTATTACATATTTCCAGTAATCACGAAACGAAACACTCGGCAGCGAAATTTCTGAATTTTG  
CATGTGAGTATGCAAAAGCTGCTGCCGAAAATAATTAG  
>Cluster\_18919  
ATGTCAACAGTAATACAGCGTGATAAACAGCCAAAGGCAGGGAAAGGCACCAGCTTTCCAAGTGAAGTACGCCCCAGA  
ATTGAAAGAGCAATTCGAGGCGCCGACGAGATGAGGATGAGTTTAGCTAATTTGGATGAAAACCTTGGGGCGCAAAG  
AATCCAGCGCTGGGTATTTAGCCGAAAGCTGA  
>Cluster\_61201  
ATGTACGTTGCTTTGTAATGGTATCAGCGATAAAAAAATTCGTGAGCTGTGCGCCAGTTTCCCCCTACTCGTTCCA  
GCAATTAATAAATTTATTTCCGCTCGGCAATCAGTGGGTAATGTTGTCGGGGCCGCGTGAAGTATGGAGGATGAAT  
TAATGCAGCTGCCGGAGTTAAGGAGTCCGCATAA  
>Cluster\_41780  
ATGCTGATTTCTGACTCGTGGTGGTGGAGACCCTCATGATTTGGGATGAGGTCACCGTGACAGTTTTAGGGGTAAAGGG  
CAACCAGGTACGTATTGGCGTAAATGCCCGAAGGAAGTTTCTGTTACCGTGAAGAGATCTACCAGCGTATCCAGGCTG  
AAAAATCCAGCAGTCCAGTTACTAA  
>Cluster\_59108  
ATGTATCTGCATAAACAATAATGCGCCATTTTGTGATTAATAAAGAAAAAGCAAAAACATCGATATTCATTTT  
TGGTCAATGGGTTTTCTGGCCTATCGTTGTTATTTGTGCTACTGGTTATCATTTTCATCTTGGCAGCATATTGGAGCGTGA  
TCAATTTTGTGATCAGCTGTGA  
>Cluster\_6723  
ATGAGTCCACTCTGGTATCAGAAATGGCTACGCTCAATGAAGTCAGGCGACAGATGCTGAATGAACATTACGATGTCAC  
CACAGCAGCTATGCTGTGCGTTACGAAAGCTATCCCAATTTCTGTCGGGAATAATTCGCGGATGTTGGAGAGTACCCAA  
GAGAGATATTACCAGGTTAA  
>Cluster\_15992  
ATGAGGGACAAACCCACGAATCATAAACCGGTAATAAACCCGGTGTGCATCGTTTTTGGATTATTTCCCGCACACTCAGCGA  
GAAGGAATCCCCGTCGGCTACGATCATGTTAATGCGGGAATACGGCGACGATACAGCGCATGATGTCAGGCTTGA  
ATACCTTTTATCCGTTAA  
>Cluster\_31224  
ATGGAAGGTAAAAATGGCTGAAAATAGTGTGCGATAGCGGTGCGGGTTTTTCGACGGAGCAAGCTGTTTCTTGCCTGCAA  
CAATCTTGCAAAAAAATGCGATCGCTAAAACAAAAGTCAATTTGCGGCAATATAGTTATTCATGACCGTGCATCTT

GCATTCAGTGTAATAA  
>Cluster\_26947  
ATGAGCTTTATGGTTAGTGAGGAAGTTACGGTTAAAGAGGGCGGCCCGGGATGATTGCTACTGGATACTCCAGCGGTAT  
GGTTGAGTGTCTGGTATGACGGTTACGGGGTCAAGCGGGAGGCTTTTCATGAAACCGAGCTGTTCCGGGGGAGGGGA  
GTCGTTCTGCGGAAGAAGTTGA  
>Cluster\_3651  
ATGAAACGTGTTTGTAAATACCAGTACGCTGGCAATGTGCGAAATGCCGGCGTGGTATGTGAAATCAGCCCTGTCCCT  
GGTGTGGCGACTCCCGCTCATCTTTCTGCTGACACCTCTGGTACGCCAGCGGACTATCGTCTTTCTGACCGATT  
CGTCATTCATTTTTATTGTCTGTAA  
>Cluster\_17650  
ATGACGCTCAGCACTGGACCCACAGAACGCCAGTAAAGCCGGCGCTGTGTCTGGCCCTGTTCTGGTGTGTTGCT  
TCCGGTGGGATGCACAGACATTAACAGAGCGGGCCAGCTGTTTACGCCGGCGGCGAGTCTGCCGATTATCGATGGTA  
TCCGGCAGTGTTCACAGAAGTGA  
>Cluster\_25043  
ATGTTTAAAGCCGACAGGAACACCACAACCTCAAAAACGCTACAAAAGTCCCCACGGAGCACTCGTTACTGTGAAAGCGT  
GTCTCACAAACGAGTACGTTTTATCGCGACGGGTATCAATCGCCATGCGTACAACCGCTGGCGCGCTCATGAAGGAGT  
TCCGGGAGTTAAACAAATGCTAA  
>Cluster\_44777  
ATGCCCGGAAAGAGCCAGGCTGTTCTCCGGTGTGTAAGCGGCAATATGAAAAGCGAGAATCGTTCTGACGTCAAA  
TAAAGGATTCGCAACTGGGGGAAATGCTCGCGATAATGTACTGGCAACAGTATCCCTGAGCATCTGCTGCATCACT  
CAACCACGCTGAAATATTAAGGGGGAAAGCTACCACCTGAAGGAAAAACGTTAA  
>Cluster\_5505  
ATGAATCTGCCTGTAATAATCCCGCTGACTGGCACTACTATGCGTTCGCCATTTGGCCTTATATTCATCTTAATGGCGT  
GGTGGGTTACTGGGATTTGAAGCAAAAGTTGGCAGACCTATGCCCTGGTGTGAGTGGGTGATTAGTTCTGGC  
TGGCGGGTTGATTATTCGTCGTCGCGATGAAGAACTGAAAACGCCCAATAA  
>Cluster\_25933  
ATGACGCGACAGGAAGAACTTGCCGCTGCCCGTGGCGCACTGCATGACCTGATGACAGGAAAACGGGTGGCAACGGTACA  
GAAAGCGGACGGAGAGTTTACGCCACTTCGGTGTCTGACCTGAAAAATACATTGCAGAGCTGGAAGTGCAGA  
CCGGCATGACACAGCGACGCGAGGGACCTGCAGGATTTTATGTATGA  
>Cluster\_38617  
ATGGCGAAAACAAAACAGGAATGGCTGTATCAGTTACGGCGATGTTTATCAGTCAATACGCTGGAAAAAATTATTCATAA  
AAACAGAGACAGTTTATTAAACAGTGAACGTGAATCATTTAATTCAGCAGCAGACCCGGTTAGCGGAATTAATCACCG  
GAAAGTTATATGACAGGATACCTAAAGAGATATGGAATATGTAAGGTTAA  
>Cluster\_11888  
ATGTCAAAATAAATGACTGGTTTAGTAAAATGGTTTAAACGCTGATAAAGGTTTCGGCTTTATTTCTCCTGTTGATGGTAG  
TAAAGATGTTTTGTCATTTTTCTGCGATTGAGAATGATAATATCGAACCTTATTTGAAGGTCAAAGGTTACCTTCT  
CTATAGAGAGTGGTGCTAAAGTCTGCAGCAGCAATGTCATCATTACTGATTTAA  
>Cluster\_26132  
ATGCAGAAAACGAGAACCCTGCATCATCGCGCCAGACTATACCAATGATGAACTTTATGAGTGGATGCACCAGAAAATTA  
TGCAGCGCAGGATCTGAAATGGGCTAATGAAAGTCAAGGGTAAAGCAGGCTGAAAATCTGTCTCTGAGCAGGATATCA  
CCAATCTGAAAAAGCAGCGGCAATTAACCATTTGCCAGAATGATTACATACCCGCGTTAA  
>Cluster\_1575  
GTGAGCACAGAAGAACGCGAGAAAATGATACAGCGGTACCGTGAAGCGGAAATGGCCGTTACTGGAGGGAAAGTGTGTAC  
CTTCAACGACAGCAACTGACGCTGGAAGCCTTTCTCAGATCCGCGCGGACGTCAGGAGTGGGAACGAGGCTGCGC  
CGATGGTGAAGCGGCGGCGGAAAACAGGATTTAACTGGCGAGGTTTTAA  
>Cluster\_14978  
ATGAAAAAATATCTGCTTTTGGCTTTGCGCTTCTCGTTGTTGGTTGTAGTGAAGAAGTAAAAAGTGTGGATTGGTGGGG  
GCAGCATCTTACGGAAGCTAAACAAAAGCAGGCAGAGTGTGAGAAGTCTGGCTCTGATCTCAGAAGTGAAGAATGTTA  
AACAGCATTTGTTTATTCAGTCTCAGAAGGATGCTCCAGTCCCACATTCGATTTAA  
>Cluster\_35783  
ATGATGCTGAAAATTAACCCGACGCGGAAAAGCCATCCGTGACCCGCTCACGATGAAATTAAGTGGCTCCGGAGGGGAGA  
AGAAAAGCCCGTAAACAGTTTCTGGATACGTCGCTTGCAGCCGGTGTGTTGAGTGGGAACCCGAAAACACCG  
CGGATGATACCGACGCTGCGCCGAAAACGGAGTAAATCGAAATGA  
>Cluster\_17523  
ATGGAACAACGCATAACCCGTAAGATTATGCAATGCGCTTTGGGCAAACCAAGCAGCTAAAGATCTCGGCGTATATCA  
AAGCGCATCAACAAGGCCATTCATGACGCGGAAAGATTTTTTAACTATAAACGCTGATGGAAGCGTTTATGCGGAAG  
AGTTAAAGCCCTTCCCAAGTAAACAAAAAACAACGCTGCTAA  
>Cluster\_19677  
ATGCGCTCCAGCATATCCAGCACCTGATCCACTGGGTAATTTCCACCGGACGCGTCATCGACGGTACTGGCGGCTGGG  
CTTTACGTTGCGCGACAAAATAACCCGAAAGCGGCTACGGAGTGTGAGGTTTATCGTCTCCAGGCTGATACGCTGCG  
TGCAGGTTACTGATGCTGACGCCGCTCCTGACTTAA  
>Cluster\_60267  
ATGCAACACGAACACAGCTGATTCAGTGGTTGATTTGAAATTCATCATGGCTGATACTGGCTTTGGTAAAACCTTCAT  
CTATGACCGGATTAAGTCAAGCGACCTGCCAAAAGCCTAAAGTTATCCACGGGCGAGCAAGATGTTTATATCGTACCAT  
GTGAATTCAAAAATAAGCTCTTAAGCCGCGCAATGGGTAA  
>Cluster\_62810  
ATGGTTTCAACATTACGGAACGACAGCCGTTAATCGCGGTGCGGTCATGCCAGGAATGCTGGTCAACACAAAAGTGG  
TACCTGGACTGCATCAGCTAATTTACGCGGACGCTTTTATCTGCATCGCGGATCGAGCGCATTTATACCCGTTGATTTGC  
TCGTGGAAGTTTTCTCGACGCGGTAACGGCTGAATCGCTAA  
>Cluster\_1559  
ATGGTTACAGTCTGTAAGTGCAGGCGTGGTCAAGCGGCTTGGTTATTAACCGGTAACGGGTGGTGTCTGTCCA  
GAAAGATGTTGCGAGAATGAATATACGCGGCTTCTGATGAGCTTAAACGGGCGATCAATGATGCGGAGTGGGTAC  
TGGGACAACCCGCTGCGGCTGCTCCGCTGGGAGTGGGTTATGA  
>Cluster\_41208  
ATGCACCAATCTGGTTCTGTTCTTTCTGCTTCCGCAATATCTGTTCTGGTGGCTACAGGCTTATATTCACCCATAGC  
ATTGGCATCAACTGTTGAGTATGGTGTGACAGTTGATGTTGTTCTCTGGAAAAGATATCCAGCTGGTTTATGGGGCGC  
CAAATAATACGAAAATCAATCTGGCGGAGAACAGCATATATAA  
>Cluster\_23824  
ATGAAAAAGAAAGTAGGCTACCACCGAGTTCCTGGCGAAGAACGGCGATGTTCCGTATCAAAACCTTGCTGGGCGGAC

ACTTGAGCCTGCGAGACTACGATGCGCAGGTGGGGACGCGCAGGTGGGCGAAGCGATGGCGATGGTTAAAGCGCTAAACC  
GGATGACGTTGTTGGGTATGCCGATAGTGTCCGGATCGCATAA

>Cluster\_13484

ATGTCCCCTGTTTTCATCAATTGGTAATGATATTTAGTAGTGAATTTAGTCCGTCGAAAAATGAATGACCTTCTCTGAAAGCCC  
CATAGAAAATAACCTCGAAGCACTAGACCAGGTATAGAAAAAACTAAAAACAGACCTCTATTCAATAGGTCACCTTTACTTFA  
ACGCGTTACAACAGGTGAAAAATGCATTTACTGTTGATTTTCAAAAAAGAAATAGCGTACTTACAAAATGTAATTCCTT  
TATAATGACTCGTCTCTTCTGCTGGATTTTTAGGTTATAACGCCAAATATTCACAGCTTCCGACAAATACCTGCGAAT  
TACCATTAATGAACCGTTAAAAAACAGGAAATATCTACAGGCAATATCAATGTTAATGCCCCATAAAAAGATATTTACA  
ATGAAATCAGAGGTTGAACGTAATCTTTAGTTGTGGGACTGGAGATATAGTTGATCTATCCCTCTCGGACTTACGTAAT  
GTCGATTTAGATTATTTAGTTTACAGATAAACATATGGCTAATACTATTTTAAATCCTTTTAAATTTGGATTCAACAAA  
TTTTACTAATGCCAACATGTTTCAGGTTAATTTGTTAGTTCAACACAAAACGTCACAATCTCTCTGGGATATTTACTTAA  
AAATAACGCTGTTTAAATAAGCATTAGCGATATGTTTCTGAAGAAAAATCAAGTTTGTGCGAAAGTTGTTTAAATGAG  
CTTGGAGCAATTTCCGAAAGCAATTAATAAATTTATGAGATTGCAATTAATAAGTCTATACCAAGGCACTCTTACGTA  
TAAATTAGAAAATGAATTAACAAAAGAAATATATAAAGTCTATCGAAAAATTAACAATTACTTGAACAGAATTAATTTAC  
CAGAGATGAAGGATTCTCATGAAAAAATAGATTATATCATCGATATAATCATTAAAGATTATGAAAGCGTCAAAGAA  
AATGCTTACTTATCGATCAAAAAATTAATTAACAATACAGATTTAAACATAGAGGATTCTAGCTCAGAGGAATTCCTTTC  
AGATAATACACTCAGAAAAGCAAAAAATCCCTGCAAAATTTGAGGTTGTAAAAATATAACACATATGAAGCATATA  
ACTCAGAGAATCTATATTTTACCAGAGAGGAATATACGTATGATTACGACCTTTTAAATGCAATATAG

>Cluster\_54891

ATGACAACATTACTTAACCCCTATTTTGGTGTAGTTTGGGGCATGTACGTGCCACAAATCCTGATGCCGTGCTCGCGCA  
GCTGGAAGAGCTTTTGTGTCAGTGCAGCAAAAAGATCCTGAATTTTCAAGCTCAGTTCAACGACCTGCTGAAAAATATGCCG  
GGCGTCAACCGCGCTGACCAATGCCAGAACATTACAGCCGGGACGAAACACCAGCTGTATCTCAAGCGTGAAGATTTG  
CTGACGGCGGGCGCATAAAACTAACAGGTTGCTGGGGCAGGCGTTGCTGGCGAAGCGGATGGGTAAAAACGAAATCAT  
CGCCGAAACCGGTGACGTCAGCATGGCGTGGCGTTCGCCCTTCCAGCGCCCTGCTCGCCCTGAAATGCCGATTTTATA  
TGGGTGCCAAAGACGTTGAACGCGAGTGCCTAACGTTTTCGTTATGCGCTTAATGGGTGCGGAAAGTGTATCCCGTGCAT  
AGCGGTTCCGCGACGCTGAAAGATGCTTGAACGAGGCTGCGGACGTTGGTCCGGTAGTTACGAAACCGCGCACTATAT  
GCTGGGACCGCAGCTGGCCCGCATCTTATCCGACCATTTGTCGCTGAGTTTTCAGCGGATGATTGGCGAAGAAACCAAAG  
CGCAGATTTCTGGAAGAGGAGGTCGCTGCGGATGCGCTTATCGCCTGTGTTGGCGGCGGTTCCGAATGCCATGCCATG  
TTTGTGATTTTCAATGAAACCAACGTCGCGCTGATTTGGTGTGGAGCCAGGTGGTCCGCTATCGAACTGGCGAGCA  
CGGCGCACCGCTAAAAACATGGTCCGCTGGGTATCTATTTCCGTTATGAAAGCGCCGATGATGCAACCGAAGACGGGCA  
TTGAAGAATCTTACTCCATCTCCGCGGACTGGATTTCCGCTCTGTGCGCCACAACACGCGTATCTTAAACAGCACTGGA  
CGCCTGATTACGTTCTATTACCGATGATGAAGCCCTTGAAGCCTTCAAAACGCTGTGCTGCACGAAGGATCATCCC  
GGCGTGGAAATCTCCACGCCCCGCCCCATGCGTTGAAAATGATGCGCGAAAACCCGGATAAAGAGCAGCTACTGGTGG  
TTAACCTTTCCGGTCCGCGGATAAAGACATCTTACCCTTACGATATTTTGAAGACGAGGGGAAATCTGA

>Cluster\_42729

ATGAGGATAGTGTATTTTGTCAATGCAGCGTGGTACTTCAAGTGCATTTGGTTGGACCGGTGAGAAGCGCAATTAGCAA  
AGGGTATGAAGTTTCACTTTGTAAGTAATTTGCTGATGACGCCATCAAAAATAACCTGGAAAAAAAGGTATAAAATGTT  
GGGATATTGAGCTTAAACAGATTTTCTAAAAATGTGTTTAAAAACATTTCAATAATTCATGCAATTTAGAAAAGATCTGTAAG  
CAAAATAAACCCGATTTTATCTAATTAATAAATAAACAATCCTTTTGGTGGATTGTATGCCCGGTTGCAGGCAT  
CCCTTTTGTGCTGAGCTTTTGTGGGATTTAGGAGATTTTGGCAATAAACAGAGGTTGGTTGAAATAAATTCATTTCAACT  
CAGTACTGTCAATTTATAGTCTTTTGTCTATCAGCAAAAAGCCAGCGCAAGTAATATTTGAGCATAATGCTGACTTTGCT  
GAGCTGAGTAAATATATTAATTTGATGAAAATAACATCCACATCATTGAAGGAGCCGGGTTAGACAGGTTTCCGCTTAA  
TTATCAGCCAGAACCAACTCAGAATAATTTCTCGGTATTTTGGCAGCCGTTTGTCTATGGTCAAAAGGGCTCGGTGAAG  
TAGTCCGAGCCATCGGTAAGGTTAAACAAAATGAAAATAACACAACTTATACGTTGCGGAAATTTCTCGATGACAAAAGAT  
CCGGATAGAAATTGAATTAGATCAAAATTTGCAATGGGAAAAAGAGAAAAATCATTTGGTTAGGTCGAAGAGATGACAT  
CCAAAATTAATCAGAAATAGCCATGTCGTTGTTTGGCAACTAAATAATCAGAAGGCGTCCCAAGAAATAATCATGAA  
CGTGTGCTATGGCCGAAAGTTGCATTTGTCGAAATGTACCCCGCTGTAAGCCATAAATAAAGATAATTTCAATGGATG  
GTACTAAAAACACATAGCCGTAATGAGATTGCGGAGAAAATTTGAATATCTTAGAGATAACATGGAATAAAGAAAAAAT  
CGGTCTACGCTCAGCCGAAATTTGAAAAGAAAGATTGCAAAAGAAATTTGTTATAGATAAAACCTTGCGCCGATAAATA  
CCTGTGACGGAAGATCACTTCCGAGAATAAATAAATCCTGGTGTCCCTGTTGA

>Cluster\_3307

ATGCCGTGTCGACTTAATACCATTCCCGACGAGAACTCTATCCCGCACCGCCAGCCCGATTAAATGGCTGTCAGCCTT  
ATTACTGATGCTGTTTGTGGTGTGGCAATAACCTCATTTATCCGACGCGATGAACTGGCAAAAAACGCCCCGATTTCT  
GGGGCTGGCCTGCGGTGCTGCTGCTTTATCTGGTGGTGGTTGCTTCAAGTTGCTGTTGTTTATCACGCACTTAC  
ATTCGGGCTGATGCTGGAAATAAGCGCCGGGAAAGGATTTTTCAGGAAACGCGACGGGGACGACGGGCTTCAGAT  
ACTTAGTTTTTCCGTACAACCCGCTGAATGGTGTATCCGTTGCAAGAACTACAACAGCATTTCTGGCGCTCAGCAGG  
TGTGAAATACTTACGCTGATTTGCGCGGAGAGATACTGTGCGTCGAGTGTCAATCCCGTATTAACCAATAAACCGGTT  
ACCGGCGTTTATCCGAAATTTTCCGCTTTTATTTGATATCAGACCGCAATTTCTGCTGCCCCGATTTTCA  
TATCAACGTAATCTGGAATTTGATGCGCGCTTTTCCAGGGCCCTCCGTCGAGAACTATCTGGCAGGACGAAATGGCAAAAAG  
CCGACTCCCGGAAAGCCGCTGTTTTCGCCCCGAGCCGGGCTGGCCGCTGGACGACTGGCTGGACAACCTTTAT  
CAGAAAAGGCGCTACTGCTGGTGTATTTCCGTTGATCTGGAACCGAAGACTCCGGAACGGACGGCAGAAATCTCCACCGC  
GCTGACCGCTGCGCTGCTGCATCGTCTGAACGTATCAGATACAGAGATGATGGCTCAGGCATTTGCACAGGCGC  
TGGACTGGATGCCGGTGCAGCCAGATGCCATATCCGGCATATGGACTGCCGAACCTGGACAGGGAACAGCGTACCGGTTG  
TTATCCCCTAACAGCCGTTTACTCAGGAAGCCCTGATGTACGAGCTGGATGCTTCTGGGGCGCTCCGACCGGCAGC  
GCCGTGGCTGTCCGTCGCTGCGGCAACGCTGGCGGCAATAACAATCACAACACCCCAACTAACGCTCAGCGCGGTTACAG  
GCGGCAATATTATGCGGACCGTGGTGTCCGATTTCCCTTCCACAGGAGCATCATAG

>Cluster\_202

GTGAAACATCTGATTAATCTTACCAGATTTGATGATAAGACATAAAAAAGAGCTTTAGAAAGAAAAAACTCTTACAGGA  
GATAACCAGAAAAGTAGAGGAGGAGTTTATCAAGACGTTGATTTTAAACCTTAGCAAGGCAGACCTTTATCTTAAAG  
TAAGCCAAACATCTTTACGAAATGGCTGACCTGGCTTTCAAGGTTGTTAGAAAGATAAAGCTTACGTAATAATGAGGAGT  
GTTTATTTTGTATTTTCCAGGCTTGAGGATTACGGGAAGCTTTTCAAGGTTGATCTTTTCTGTTTAAACCTGGAGCGAC  
CATAGACGTTGAAGAATATGATAAAGAAACCCCTTTGACTTTGCTTACTTAAAGAGTGCATATTTGAGTTAAAAG  
AAGGATATTTGTAGACACACATCGGTAAGTACAGCTTACCTGGCATATCCACTGTGCTGCTTAAATCCTCAAATAT  
TTAGAGAGGAGATAGATTTTCTTACAAGTGGAAATAGACCTTTTTCCTCATATGAAAACACAGGGCGGTTTAAA  
GGCAATTACAGGAAAGAAAGTTGCTGTTACTGGCTTACACCCGGATAGTTTTTATCAGGGGAAAAAGCTTTCTTCCAG  
AAAATAGGATTACTGTGCAAGACATTAAGGCAAAAAGGATTTAACGGAAGAGAACTAAGGTTTACTTCTTAAAGACCCAT  
TACCAGAAATCCCTTAAATTTTGTGAAAGGACTTGGAAAGTGAAGAAATACTGCAAAAGATTGACAGCATCTTTG  
TTTGGTAGAGGCTTCTGCAAGAAAGGACAAAGAGATCCCTTACTTGGTCTATTTTGAAGAAATTTTGGCCAAAGTTGGG  
AAAAGGCTTAAAGAGGATTTAAACACCCCTATGGTTATCTCAGAACCTATCTCTTTTGAAGAAACTCTATCCCTAT

CTAAAGCAAGGTATTAGTGTGAGTTTAAAGAAAAGTGTGTTGAAAATCTTCAAACCTTAAACAAGGTGTTAAAGGTTTT  
AAGGTTTTCCATAAAAAGTGATGGATGAGGAAGTACTTAGGTTGGTGGCGTTAAGAGATGAAGCCAGAAAAGAAGGAAAT  
TTGCAGAAGCAGACCAGATAAGAGAAAAATTACTTGTCTAAGGGATTTTGGGTATTGACCTCCCTGGGGTACGGAGGTG  
GTAAGTTTTAGAGGTATGA

>Cluster\_25147

ATGTTTAAAGTCTTTTTTCCCAAAGCCGGGAACGTTTTTCTCTCGGCCTTTGTGTTGGGCATTGATTGCCGTTATCTTCTG  
GCAAGCCGGTGGGGGTGATTGGGTGGCGGTATCACCGCGCTTCCGGGCAGATCCCAGATTAGCGCCGGCGTTCTGGT  
CGTTGGATTTCCTGATTTTTTACGCTTACTACATTGTTTGGCTAGGACTTTTTGCATTGTTCTGGTTTATCTATAGCCCG  
CACCGTTGGCAATACCTGGTCAATACTCGGTACTCGCTGATTACTTCTGTCACCTGGTTTTTGGTGGAAAGTCCGGGTTGC  
CGTCAACGCCCTGGTATGCGCCGTTCTATGATCTGATTCAAACGGCGCTAAGTTCGCGGCATAAAGTCACCATCGAACAA  
TTTTACCGGAAGTGGCGCTTTTTCTGGGGATTGCGCTGATCGCGGTGGTATCAGTGTCTGAACAACCTCTTTGTGTCAGT  
CACTACGTGTTCCGCTGGCGTACGGCGATGAACGAATATTACATGGCGAACTGGCAACAACCTGGCTCATATCGAAGGGGC  
CGCCAGCGTGTGCGAGGAAGACACCATGCGTTTTGCTTCAACGCTGGAGAATATGGCGCTCAGCTTTTATCAACGCTATCA  
TGACGTTGATCGCCTTCCGCGGTGCTGGTAACGCTCTCCGCACATGTGCCGAGCTGCCGATTGTCGGGCACATCCCG  
TATGGTCTGGTATTGCCCTATCGTCTGGTGGTGGGACCGGATTACTGGCAGTGGTAGGGATCAAACGCGCGG  
GCTGGAGTTTAAAAACAGCGTGTAGAGGCTGCTACCCTAAAGAGCTGGTTTTATGGTGAAGCAGTCCACGCGCGCGA  
CGCCGCTTACGCTACCGGATGTTTAGCGCCGTCAGGAAAAACTATTTCCGCTCTATTTTCACTATATGATTTCAAT  
ATCGCCGCATTTCTATTTGCGAGTGCATAACGTTTTTGGTTTTGTTCTGCTGTTCCGTCATTTGTTGCCGTACGAT  
TACACTCGCCCTGATGACCGAGATTACTAACGTTTTTGGTGGTGGCGGTGCTTTCCAGTACCTGATTAACCTATGGA  
CCACTGGTTGAGTTGATGCTATCTACAACGCTCGCGCAGCTTGAACATGAGCTGGATGGTGACAAAATTCAGGAA  
GTAACCCATACCTTGAGCTAA

>Cluster\_39686

ATGCCCGCTTCCATATATTTGCAATTAATAAATAATTTGTAATTATAAGGTTAAATATCGGTAATTTGTATTTAATAAA  
TACGATCGATATTTTACTTTATTCGCGAGGTCTCCCTTTTAAATTAACCTGTTTTAGCGGAGGATCGGAAAAAATTCAA  
CTCATTTGTTAATTTTTAAAAATTTATTTTTATTTGGATAATCAAAATTTACTCCGATTTGTCATGAAAAACATGCGAGT  
TACGGCCCTATAAGCCAGCGGAGATATGATCTATATCAATTTCTCCTATAAATGCTTTGTTAGTATCTCGTCCCGACT  
TAATAAAGAGAGAGTTAGTGTGAAAGCTGACAACCTTTTGTCTTTTACTTCTGCTGCAATGGCCAAAGTGGCCGAAG  
AGGCAGGTGTCTATAAAGCAACGAAACATCCCGCTTAAGCTTTCTATCTGGCGATTACCGCCGGTTTTTTCATCTCAATC  
GCATTCGTTCTTATATCACAGCAACCACTGGCACAGGTACAATGCCCTTCGGCATGGCAAACTGGTTGGCGGCATTTG  
CTTCTCTCGGGGTTGATTTCTTTGTTGTCTGCGGAGCCGATCTCTTACTTCCACAGTGTGTTGATGTTGTTGCCAAGG  
CGAGTGGGCGCATCACCTGGGGTCACTGGCGAAAACTGGCTAAATGTTTTATTTGGCAACCTGGTGGCGCACTGCTG  
TTTTGACTTTTTAATGTGGCTTTCCGCGGATATATGACCGCAAAATGGTCAATGGGACATAACCTCCACAAACCGCGA  
CCACAAGTGCACCATACCTTTTATTTAGGCGCTCTGCTTGGTATCCTGGCAACCTGATGGTATGCTGGCAGTATGGA  
TGAGTTATTTGCGCCGACGCTGATGGCAAAAGCGTTCATTATGGTGTGCCGGTCCGATGTTGTTGCCAGCGTTTT  
GAGCAGTATCGCAACATGTTATGATCCCGATGGGTTTGAATCCGCGACTTCGCATCTCCGGAATCTGGACCCG  
GTCCGGTTCTGCACCGAAAAATTTTTCTCACCTGACCGTAATGAACTTATCACTGATTAACCTGATTCCGGTTACGATCG  
GTAATATTATCGCGGTGGTTTTGTTGGTTGGTTGACATACTGGGTCATTTACCTGCGTGAACGATCACCATTAA

>Cluster\_51147

ATGATTCACCGTCTTTAGCGCTAGAACTTGTTTATATATTTTTCTTTTTTACTGCGTTGTTAGTTACCTAAATGCTTT  
GTTAGGTGGTAAAGTTAATGGAGATTTTTCTGGAGTTAATATTAATTTAGATTCCATTCAATTTATGGAGTCTTTAATTC  
TTACTTTGCTCCATTTTTATTTCTATGTTATGTTATTTCTCTTTTTAATCCGATTAATTTAAGAACTAGATGCTGGA  
CAGTTAGGTTTTAGAGTAAGTGTTTTTTTAAATTTGTTGTTTTTGGTCAATTTTTGTTTACCATAAAATATGTTGTTGG  
TATAATGGCCAGAACTAGTATAGCGTGGCAGCAGTACTCTTATATATCTATTTTACGAATCGTATGATGTTTTTT  
ATTTAGGCGTTTTTATTCATTTCTATTTGATCAGGGGAGATTTCTTTTTTTTTGGATCTTTATTTCTGTTGTTGGGAGTG  
ATTTAGAGGAGGATTTGGGTTTTTTTATACGTAAGTATAGCATGATACTTCGTTATAATATTTACTTTGGGTAAGTTTTT  
TTTCAGAAAGCCCTTGTCTTTGTTCTGGCATTAAATCATATCTCTCTTTCGTTGTTGATTCATTTGTTTATATAGAGC  
TTCTCCGTGGAGATTACATAAAATGAGCAATTTACTTTCTATCAGTTAAATTTGAAAGTTAATAGGAAATAGCTCTTCTCT  
TTTTCTAATTTAGGTATGATATTTCCAAATGAGGGCTATTTTTTGCAAAATATTTTTATTTATGGACCAGTTTTATTTTAT  
TAAGCACTTTTTTCTGCTTTTATAGGTGAGTGCATAATTCAGATGTTATTCCTGAGAGATTATGATTAATATATTTG  
GTGGTATTTATTTGATAAGTCTTATATGGTGGGATTTGCTGGGAATATGATATCTCTTCTATGATAAGTCCGACTATA  
ATGATGATTAATTTGATTTTAAATTTTTATATCTGTTATATGATGATCATTATTTGTTGTCAGGATTAATAGGATTTAAATAT  
TCGAGAGTATGCCTTTGTCTTATTTGTTATATCTTGTATGAGTGGTTCGCTCAAGAAATTTGCAAAAGTTGCTATTAAGCA  
TGTATTTTATATGTTAATTTCTTCTTCTGTAACATCAAAATTAAGAGAGGCTTTGCTAGAGGTGAGAGGGTA  
TGA

>Cluster\_66725

ATGAGCAAAATATCAGGTTGGAAATTTTTCTCAAACATTACATCAGCCGACAATGTAACAAAAAATGAAGACTTAGA  
TACCTGGTATGTTGGGAATGAATGATTTTTGCCGGAATGGCCGAGGGCAGAATAGCAGAAGCAATATTTCTCCCAGAG  
CATTTTTGGAGTTTTTGGCTAAGATATTTACCTGGGTTATGTTGGATTTAGCAACGCTCCAACGAGCGGGTAGAAAT  
ATGATGGCTCATATTAAGTCTCTATCTTATATCAAAAAATAATGATGGTAGTGAATAATGAAGTTTGTATGAATAATCC  
TGAAGGGGAGCGAGCGGATTTATCTAAGGTGGAATAGAAATACACTGCGCTCAGCTTTAATAATGGGATTCGTGAAG  
GACATACAGTCAATATTTACACAACCTGATGGTTCGACTAATCGTTATGAAGGGAAGTCTTTGAAAGAAAAGATGAG  
AGTTCAATTACACCTGATTACTAACAAGATTTCTGGCGTGTACCACGGAAGCTAACAGGAAATAGCTCGCTATTAA  
TATTCGCGAGGATTAATAAATTTCTCAGGACTTGAATAACTCGCAGGTGAGTTGTAAGATTCAGTTGATTTCTACGATTA  
CGGATTTATAGAAAAACCATTTGAATAATGCATTTATTAGCAATAGGAAAGAACATCTGCTATTAATGCTTATGATGAT  
AATGAATCGATTTCACTACTGCTTGGTGAAGAAAGGATACTGAAAGAAATAGATGGCCTAACGCAGTAAATAATTTATCT  
CTTTAATAATAAGAAAGCTACTGCAATGAAAATAAGATGACATAAAGTAAACCTGCTCATATCTTTATGATTTCTTAG  
ATGATGCAAAAGTTAACCTTACACCGGTCATCGATTGATTTCTGGAGATTTTTTTAAATTTCCATATATTAATGATGTA  
AGAATACTGGATTGGTGTTTAATAAAGAAATGCAATATTTTGGTGTCTGAAAAGATAAAGTATGCATGCTCCGTGAT  
AAATCATATTTGATTTTAGCCGATCAATCTAAAGATTTTAGCTGCGATCAATCTAAATTAATAATAGCTGAGACCTTAT  
TTTTCAATCTCGATAAAGAACATATAAAATACCGTAAATACAGGAATTGA

>Cluster\_4618

ATGAACAGTTTAAACGGCAATAACCGTTTTGTCGCAACAGCTGGTGTGCTAGTGTGCTGAACACCTGTTGTTACGGCATGA  
ATGCAGATTACCAAACTCACCTGGCTGTAAGTAAACACAGAGAACTTTACTGACTGTGGGGGGCGAGTTGTGCAGGAACT  
TAACCGCTGGTTTTCTGACGGAAGAGGGCTTTATGTCTTATTTTCTGTTGTTGTTGTTGTTGTTGTTGTTGTTGTTGTTG  
TTCCGAAAGACTACCCGATGAGTGTCTTTAGTCTTTTGTGAAATTCAGGCGTATTTGTTGAGTGTGAAGGACCACCA  
GCACATGATTTCTGCCATTTCCGGGACGTTACACTGTTTACAGGCACTTAAAGCGGGTCCCGGGATTTGGCTCTGGAGA  
AGGCTACCGGCTCAACCGCGTATGCGGTTTTTTTGTGTCAGCATTATTTTGTACGCGCAAAATATGGTGGGCGTACA  
GGGCATCGCAAGATGCGCGGTAAGGGTAGCCGCGGTAACGCCAACCTGTTACGCTCACCACCTTATGATTTGGCGT  
CTTATGTTGTTGAGTTTTTTAAGCTTGTCTACCGAGGCTGCCATTATGGTACGATCCCAACCTTTGTTACCCTGAAATCA

CGATCATCAATGGTCTGCTGTCTACTACATCTCTTGCAGTTGCTAACTACTTTACTAAACGGCATGAGCGGGTTTTAGAT  
AGAATTCGAAACCTTGAATGCTCCGCTGAATTTGCTGAACACAATTTTGTGTTAAGTGGTTATATCGACGCTTCAGGCCG  
CAAACCTACTTGTATCAATAACCCGGATGGCTTTGCGTTTCTGCTATGGGTTTCACGGGTAACGCTGCTGCCAGT  
TCAAAGAGGCATACATCAATGCCTTTAACCCAGATGGAGAAAACAGCTTTCAAAGCCCTCTGTACCGAGCGACGTTGCACAT  
AACGCCAGGTTCTCTATTTCTACATTTTCAATTCATCAGGTTCTGGTTGCAGCAGCTTTATCCCATGCTGGAAAAAGC  
TGAATCACCGCTGGCTGTAAGTCTGTATGACCGAATTAACGATGCGGCATTTCTGCCGCTCTATTTCATTCGCTGTA  
ACTTTCAGAGGTAAGGGGGCGCAATGA

>Cluster\_40807

ATGGCTGAGATAAACAGCACTGCGCAAGTCACATCAGCGTTAACCGGGCTCAGCGATGTGCTGACACCGGTGTTCACTTT  
GTGGTATCTGCAGAAAAACATCACCTCTGATATCGCGCTTATGTACCCGCTGTGACCTGGAGCGATAACATCAAAAATG  
AGTCCGATACCAATGAGGTGGAGCTGGACGACACCGATGGCCGCTGGCTGGATAAATGTTATCCGGGCAAGGGTGACACG  
CTGACGCTGAAAATGGGCTATCAGGGCGAGAAGCTGTCTGCTGCGGTACGTTCTCTATAGACGAGATCGAAGTGAGTTT  
GCCCGCTTCCGTTTCTTCTATCCCTGGGTGGCCACCTCGGTTAACAGTGCCTGCGGACTAAAACCGCTGCTGGTTTTG  
AGAACACCAGCTGGCAGCTGTTGCGGGGGGATTGCCAGAAAGCACCAGCTGAAACTGGTGGGCAGCATTGAGTCCATC  
AGAATCGACCGGGTGACCCAGTATGCTGAAACCAGCTGGGTTTCTGCGCCGCTGGCCAGCGAGTATGGTTATGCACT  
GAAAGTGGTCAGTGACCACTGATTTTTCTCACTGCGCCACTGCGCAGTCAAGGAGCCGGTCAAGGAGTAAACCCG  
AGGATGTGGCCCGCTTTTTCCCTGCGTGCACATCAACCGGCTATAAATCTGAAAAGGTAAAAACACCAAGAACGACG  
AGTAAAAAATGATCGTCTACGAAGCTGATGGTGTACCCGTGAAAGCGACAAAAGCTCAAAGGTGGTAAGGTTACCAG  
CGCTGACTCACTTCAAGTTAACAGCCGCTCAGCGACCCGACAGTGCCTGGATTAAGCGGATTCAGCACTGCCAGAC  
ATAACGAATACAGCAGAACGGCTCCCTGACGCTGACGGGAACACTCACTGACAGCGGAAACAAAATGAACTGGTG  
GGTTTTGGGCAGTTATCCGGCCATGGCTCATAACCACTGCCGCCATCGGTTTTGACCGTAACAGCGGTTACACCACAGA  
GCTGGAAGTGGCAGGGGGCCAGTCAAGAGGGAAAAACAAAACCTCAGAAACTCAGGTTTATCACCCGGATGGCA  
GTACATCGACGGTATTAAGGAGAAGAAAAATGA

>Cluster\_36201

ATGCATTCGAAAAATATTGACGCTTACATCGGGCTGGATGTACATAAAGAAACGTTGGCGGTTGCTATTGCTGCACCTGA  
ACGGCTTGGCGAAGTTCGTTATTATGGTACGATTAACAACGAAGCCAGGCTGTACGTCGATTATTCAGAAATGACAGG  
GACTTTACGGAAACATTTCTTCTGTATGAGGCTGGCCCTGTGGTTTTGGGCTATATCATCAACTCACAGCGATGAAT  
ATAAAATGCCAGGTTATTGCCCTTCCGGATACCAAAATCACCGACAGACAGAATCAAAAATGATCATCGGGACGCAAT  
TTCTCTTGGCAGGTTACTGCGGGCTGGTGAACCTACCCCTGTCTGGATCCCTGACCTGACTCATGAAGCTATGCGGGATC  
TAATCAGAGCCCGTGCAGCAGCGAAACGAGACAGCAGAGTTGCCCGACAGCGAATTTCTGAGCATGCTATTGCGAACAGAC  
AAACGTTATGACAGGAAGCACTGGACCGGCAACATCGAACCTGGTTAGCCAAATCAATCATTTAGTCAGCCATCTCAACA  
GATTCGTTTTCAACACTATTGCTCAGAGTCTGGAGCAGATTGAAGATCGCATACTTCAACTCGACAGGAAATATCCCGCC  
TGTTACCTGAGTGGTCTCTGTGCAATCTGGTCTGCCAGTTACAGGCCCTTAAAGGTGTTGGTCAGCTAACCGCAATAACC  
CTAGTTGCTGAACCTGGGTGATTTTTTACGATTTTCCAGTCCAAAACAACTCATGGCTTTTCTGGGACTGGTCCAGGGGA  
ATATTCCAGTGGAAACGACATTCGTTCCAGGGGAATAACAAGTTGGAAACAGCGAAGTGGAGCGTCTGCTTTACGAAG  
CGCCTGGCTTTTACACTTTCAGTACCTGCAAAAGTTGGTGCATGGCTTATATATTACCGACCGGATTTCTGTAACAAATATCC  
AAAGATATTGCATGGAAGCTCAACAACGATTTGTGTTCTGTTACCGAAGTCTGACAGCAAAGGGAAAAAATCACAAGT  
AGCCATTACGGCGGTGGCTGCTGAGTTGACTGGATTTATGTTGGGATATTGCATTGCTGCCAATCACCATTCAGTCAG  
AGAAGCAAAATTA

>Cluster\_22493

GTGAAATCCTTGTGATGAAAATATGCCTTATGCCCGGACTTATTTAGCCGTTTGGGTGAGGTGACCGCGGTTCCCGG  
CGCTCCATCCCGTGGCTCAACTGGCAGACCGGATGCGCTGATGGTGCCTTCCGCTACGAAAGTGAATGAAATCCTTTGC  
TGGCAGGAAACCCATAAATTTGTTGGCATGCCACCGGGGACCCATGTCGATGAAGCATGGTTAAAGCAGGGCG  
GGAATTTGGTTTTTCCGCTGCACCTGGCTGTAATGCGATTGCGGTAGTGGAAATATGTTTTCTCCTCCCTGCTGATGCTTGC  
CGAACCGATGGAATTTTCACTGCACGAGCGTACCGTGGGGATCGTGGGCGTTGGTAACGTTGGTCTGCTGTTTACAGGCCG  
GACTGGAAGCTTTAGGGATCAAAACCTTACTTTGCGATCCGCCCGCGCCGACCGTGGGGATGAGGGGGATTTCCGCTCG  
CTGGATGAAATAGTTTACGATGCGGATATCTGACTTTCCATACGCCACTTTTAAAGATGGTCCGTGCAAAAACGCTGGA  
TCTGGCGGATGAAAACCTGATCCGACGCTGAAACCGGGAGCGATCCTGATTAACGCCGCTGCGTGGCGCAGCTGCTGATA  
ATACCGCCCTGCTGACCTGCCTGAGCGAAGGCCAGAAGTTAAGCGTAGTGTGATGCTGGGAGGCCAACCAGCACTT  
AACGTGGAATGCTGAAAAGTGGATACTGGCAGCCGCATATCGCAGGCTATACCTGGAAGGTAAGCAGCCGCGGTAC  
TACCGAAGTGTGTTGAAGCTTATAGCAAGTTTATGGGCAATGAACAGCAGCTTGGCTGGATACATTACTGCCCGCCG  
AGTTTGGTGCATTTACGCTGCATGGCCGCTCGATCAACCGACGCTGAAAAGGCTGGTGCATTTGGTGTATGATGTGCGC  
CGCGATGACGACCGCTGCGTAAAGTCCCGGGATACCGGGTGAAGTTCGATAAACTGCCCAAAAATATCTTTGAGCGCCG  
TGAATGGTCACTCTGATGATGATTTGTGATGACGCCAGTGGGCATCATTGCTGTGTAACCTGGGTTTTAACGCCGTTT  
ATCATCCGGCACGTTAA

>Cluster\_59936

ATGATCTATCTTTGTAATAGTGTCTTTCTCATTACAGCATTTATCTGTTTATATCTTAAAGAGGATATATTTTATCCAGC  
CGTATGCGTTAATATCATCTTCGCACCTGCTTATTTGGGATATGAAATAACGTCAGATATATATGCTTTTCAATTAATG  
ACGCTACGTTGATTTTCTACTTTGCAATGTTTTGACATTTACCTGTCTATGTTTATTGACGGAAAGTGTAGTTAGATCTA  
AATATCAGAAAAGTCAATAATGCTATTTATAGCATACCATCGAAGAAAGTGCATAATGTAGGCTGTTAGTTATTTCTTT  
TTCGATGATATATATGATGATGAGGTTAAGTAACCTACAGTTCGGGACTAGCTTACTTAGCTATATGAATTTGATAAGAG  
ATGCTGATGTTGAAGCACATCAAGAAATTTCTCAGCATACATGACGCAATCATTCTAACTACTTTTGGCTTTATTTAT  
TGGTCAAAAAATTTACTAATACAAAGGTAAGTAAAACATTTACTTTACTTGTTTTTATTTGATTTCTTTGCAATTTAT  
ACTGAATACTGGTAAAGCAAAATGTTCTTTATGGTTATCATCTCTTATGCTATTCATGCTGATGAGTGTAAATAGAGTAAACAT  
ATGTTTATCTTATACAGCTGTAGGTTCTATTTCTCCTGTTATATGCTCTTTTACGTGGACTGCCTGGGGGATGGCA  
TATATCTATCCATGATTTTGGTCAAGCTATAATCGGCTTTCCAGGAGTTTATTTTACGCAAGTAACTAACTCTGCCAG  
TTCTCATGCTTTTTGGTTTTTTGAAAGGCTGATGGGCTATTAACAGGTGGAGTCTCTATGCTGCTGCAAAAAGATTTG  
TGTGGGTTGGTTTTGCCAACAAATGTTTATACTGCTTTTTTCGGATATGTTTATATTTCCCGGAGCTAAGCTATTTGATG  
ATGGTTATTCATGGCTGTATTTCAAGTGTTTTATGGAGATGCTCTGAAATACATATCTGTGAAAATATTTTATTCATA  
TTTTATTTATACCTTTTCTTTTATTTTATGAAAGCTTCATGACTAATATTAGCAGTTGGATACAAATAACTCTTT  
GTATCATAGTATTTCTCAATTTCTTAAAGGCCAGAAAATAAAGTGA

>Cluster\_48447

GTGAAAACTATAAAGTTATTACCCCGCTTTTTCTACCTATGCACAGGTTAAAGCTATGATGAAAGCGTCTCAGGCTA  
TTCCCTGAAAGCGGTACGCAATATGATTACCGCATTCCGATCAAAACCGGTACGCGCAAAAACCGGTTGACTGGTCCG  
AACCTGACCTGTGGATCAGCGAACGCTTAAACGGGCGAAGATGCCGACATCGCCCGTCTGATTTGGGATACAGATAATCAC  
ATATTGAACCCGCGCCACAGCTACGGCTGCTACTTATTTCTCAACTATCCCAAGTTGAGCTGATGAAAGCAGCCGACA  
TGATACCTGGCAGCCACCTCGCGGGGCAAAAATTCCTGCAAGATGACGAAAAACCGTGGCTTCACTGGATGACGAG  
AAGGCATTTGCAACTGCTTGAAGTGTGGCTGGCCGAGAAATGTCGCGCCGCGCCGATTTATTTGCCGGAATGGCAGGCC  
TTTTTGCATCAGCATTCGAAATTCGCGTCTGCAAGTTCAGTGAAGACGCTCTACTCCGCTCTATTAACCTTATTGA

CCGTGGCATGGTTACTCGCGAAGGTATGAGCTATTGCATACCCGATACCGGACGCGCTGGCTTGGAAAAGCGTTGCCAG  
CACGAAAAAGCGATCCGCGTAAAGAGCTGCTGGAAAGCGGTGAAACGCTACAACGAGCAGCAAAAAGAGCTGCTCGCGGAA  
CAAATCAGCAAAATGAACCCGTACAATTTGAACAACCTGGTCGGTCAATTAAGCAAGCAATGGGCTACGAGCAGGTGCA  
AGTACCAAAAGCTCAGGCGATAAAGGTGTGGACGTGATTTGGTCAGGTGCAGGTCCGGCATCACCACTATTTACCAAGTGG  
TGCAGGTCAAAGAAATGCAAGAACCCATCACTCGACCGTATATCGACCAAGTTGCGCGGAGCGTTGCCCTTACCAGAAAGCC  
ATTCGCGGTACGCTCATCACCCGCGGAAATTTGCAGCGAAATGTGCAGAAAGCGCGCTTTTCCGGGGGCGCGCCCAT  
TACGCTTATCGACGGCGATCGCTTACTGGAACGTAAATCGAAAAAACGTCGGCATTGCGCCGAGCAATGCAGTGGAAAT  
TGCTGGATGTGGATTTGCAGTTGTTTATGAGCTGGAGATGGATTA

>Cluster\_17474

ATGCTCACCGTTAAGCAGATTGAAGCAGCAAAGCCGAAAGAAAACCATACCGCTACTCGATGGTAATGGCCTGTACCT  
TTATGTCCCTGTATCAGGGAAGGATAGGCAAGCTTCGCTACAGATTAAGCGTAAGGAGAAAATCCGACTGTCGGAA  
AATATCCGCTTATGACTTTGCAGGAAGCAAGGGATAAGGCATGGATGCGAGGAAAGACATCTCGGTTGGCATCGATCCG  
GTAAGGCGAAAAGGCTTCGCTTAACAACAATTCATTTAGTGCAGATTACAAGGAATGGTACGAGCACAAGAAAGCAAT  
CTGGTCAGTAGGCTATGCAACTGAACTTGCCAAAATGTTTGTATGACGACATTTTACCCATCATCGGCGGTCTTGAGATTC  
AGGATATTGAGCCGATGCAACTGCTGGAAGTAAATCCGAGATTGGAAGATCGCGGTGCAATGGAGCGAGCCAAACAAGCC  
CGCAGAAGATGCGGCGAGGTTTTCGTTACGCTATTGTACCAGGAAAGGCTAAATATAACCCGGCACCTGACCTTGCGA  
CGCATGAAAGGATACCGCAAGAAGAACTTCCGTTCCCTTCCAGCAGACAGCAATGTCGCTTCAACAAGCACTGGCAA  
CATTTTCAGGAAGTATCGTATCGCTCATGCGACAAAAGTTTACGTTATACAGCCCTAAGAACGAAAGAGCTTCGTTCC  
ATGCTATGGAAGAAGCTCGATTTGAAAACAGGATTTACCAATCGACGCCAGTGTGATGAAGGGACGCAAAAATTCATGT  
GGTCCCGATGTCAGACAGGTGGTGAATCTCTACTACGCTAAGCTCAATCACCAACCAGTCTCAGAGTTTGTGTTTGG  
CCGGCGCAGCAATAAGAAGAAGCAATCTGCGAAGACCGGTTATGCTTGTGATCAAACAAAATCGGCTATGAAGTCTG  
GAAAGCGGTACGGATTCAGGCATGAATTCAGCAGGATTTGAACGAGCAGAAATGGCTGCTGACGCTATTGAAGTGA  
ACTGGCACATGCCAACGGCGGATCTGTGCGTGGGATTTACAACCATGCTCAGTATCTCGATAAACGAGAGAAATGATGC  
AGTGGTGGGCGGACTGGCTTGATGAAAAGGTAGGGTGA

>Cluster\_3438

ATGCTGTAAATTAAGATGACCGATCTGGATCTTGTCTGGAAACGCTGATTTATCCGTGCGGATCTGAACGTACCAGTAAA  
AGACGGGAAAGTAACACGCGACGCGCGTATCCGTGCTTCTGCGGACCATCGAACTGGCCCTGAAACAAGGCGCAAAAG  
TGATGGTAACTTCCACCTGGGTCGTCTTACCGAAGCGGAGTACAACGAAAGAAATTCCTCTGCTGCGCGTGTAACTAC  
CTGAAAGACAACTGTCTAACCCGGTTCGCTGGTTAAAGATTACCTCGACGCGGTTGACGTTGCTGAAGGTGAACTGGT  
TGTCTGGAAGAACTTCGCTTCAACAAGGCGAGAAGAAAGACGACGAAACCCGTCCAAAAAATACGCTGCACCTGTGTG  
ACGTGTTGTAATGGACGCATTCGGTACTGCTCACCGCGCGAGGCTTCTACTCACGGTATCGGTAATTCGCTGACGTT  
CGCTGCGAGGCGCTGCTGGCAGCTGAACTGGACGCGCTGGTAAAGCACTGAAAGAACCTGCTCGCCGATGGTGGC  
TATCGTTGGTGGTCTAAAGTATCTACCAACTGACCGTTCTGGACTCCCTGTCTAAAATCGCTGACCAGCTGATTTGTTG  
GTGGTGGTATCGCTAACACCTTTATCGCGGCACAGGCCACGATGTGGTAAATCCCTGTACGAAAGCTGACCTGGTTGAC  
GAAGCTAAACCTGCTGACCACCTGCAACATCCCGGTTCCGCTGATGTTTCGCTAGCAACCGAGTTCTCTGAAACTGC  
ACCCGCTACCCCTGAAATCTGTTAACGATGTGAAAGCTGACGAGCAGTCTCGGATATCGGTGATGCTTCCGCTCAGGAA  
TGGCTGAAATCCTGAAGAAATGCGAAAACCATTTCTGTGGAACGGTCCGGTGGCGTGTTCGAATCCCGAACTCCGCAAA  
GGTACTGAAATCGTGGCTAACGCTATCGCAGACAGCGAAGCGTTCCTCATCGCTGGCGCGGCGACACTCTGGCAGCAAT  
CGACCTGTTCCGCAATGCTGACAAAATCTCTACATCTCCACTGGCGGCGGCGATTCCTCGAATTCGTGGAAGGTAAAG  
TACTGCTGCAGTAGCGATGCTCGAAGAGCGCGCTAAGAAGTAA

>Cluster\_44617

ATGAGTAGTAATATACATGGAATAGTTGCACCTGCAAAATAATTTTGAACAAGCCCTGGAACAATATAAAAAATGAGCA  
CGAAAAAATACAAAATAATTCAAATCACGCTTTTTGAAAACACACTGGTGTGTTTTATGCGGTTGTATAAAGAAATCAGAC  
GTCAAAAAGCTGAAGACTACATTCATGCTGGAAATGCGATTCAGTACGAAAAGAAATTTGAGGAAATGCAGAATGATAAT  
GATTTATCATATATTTTGAAGCAATGCGTACTAATGATACAGAACTTATTCAGGGGTTTTCAGAAGGTATTACATATAC  
TATACAATATGTTTCAGATATTTGATATTTGTTAGAGTGTCTTGGCCGGGAGAGGTTTTCAGAGTCTATCACAGATTTTAAAG  
GTTATATTTGGTATGGCTTTTATGGAATAATTTGAAAACATTAATGCGTGTGATGATGTTTTTTCTGAGTATTGTTTATGAT  
GATGAAAATATGAGTATCCAGCCAGAATGGATAAATACGCCGGGAATACTGATTTAGATACTGGTATTGATTTGCTGG  
TATATCTTTTATTCAGAGTGAATTAATAAAATTTATGGATTAATAATACGCTCCAGTAGATGGCGATGGCTATTTGCTGT  
TAAGGGCCATACCTGGTTTTTAAAGAACAATGAGTATTCATGGGCGCTGGGCGAGCATAAGACGCAAAAGCAAGTATACGAA  
GAGTTTTTAAATTTGTTGATAAACAACGATCGAGGCTTCTGTTGATACGGCATTCAATGATCTCAGGAAAGATGATAA  
GACATTTTCGCGGTTAATCTACAATCTGACAACAAAATTCAGGGGAGGGTGGTTTTTTATCATGGAGTTTTTTGCTCT  
TTAAAAAAGAATTTATTGATAGTTGCTTGAATGACAAAATGCAATACGCAATTTACCCGAAATTTATATTTAATGATAAC  
AAGGTACGCTTGTTTTAGACACCGACCCAGAGCAGAGGGTAAATGAGGTGAAAATTTCTCCTACTGCTCTTTTCAGATAG  
CATTTGCTCATATTTATTTGTTAATGATTAATATGCAATCAATCTGTTGGGAAATGAAATCCGTTTCAACGAAAGATC  
TTGAGTATGGTTATTTAATGAACACTGGCAATCATTTATGACGTTTACCCTCCTGAACTTTTTGCTCAGGCTTACAAG  
TTAAACAATAAGGAAATGAATGCBAACTCGACTATTTAATCCTTATGCAATTTACTGA

>Cluster\_20142

ATGATCAAGGCGACGAGCAAAAAGCTGGTAGTAGGACTGGAGATTGGTACCAGCAAGGTTGCCGCTTTAGTAGGGGAAGT  
TCTGCCCGACGGTATGGTCAATATCATTGGCGTGGGTAGTTGCCGCTGCGGTGGTATGGATAAAGGTGGGGTGAACGACC  
TCGAAATCCGTGGTCAAGTGCATACAACGCGCCATTGACAGGCAAGATTTGATGGCAGATTTGTCAGATCTTCCGGTATAT  
CTGGCGTTTCTGGTAAAGCAGATCAGCTGCCAGAATGGTATGGTGGCTATTTCTGAAGAAGAGTACGCAAGA  
AGATGTGGAAAACGTCGTCATACCGGAAATCGGTGCGTGTGCGCGATGAGCATCGTGTGCTGATGATCCCGCAAG  
AGTATGCGATTGACTATCAGGAAGGATCAAGAATCCGGTAGGACTTTCCGGCGTGGCGATGCAAGGCAAAAGTGCACCTG  
ATCACATGTCACAACGATGCGGAAAACATCGTCAAAAGCGGTTGAACGTTGTGGGCTGAAAGTTGACCAACTGATATTT  
TGCCGCTGCGCATCAAGTTATTTCGGTATTGACGGAAGATGAACGTTGAACTGGGTTGCTGCGTGTGATATCCGTTGGT  
GTACAATGGATATCGCCGTTTATACCGGTTGGGCAATGCGCCACAGGAAGTAAATCCCTTATGCTGGCAATGTCGTGACC  
AGTATATCGCTTATGCTTTGGCACACCGCAAGTGCAGCGAAGCGATTAAGTTCCGACCGGTTGTCGCTGGGCTC  
CATCGTTGAAAAGATGAGAGCGTGAAGTGCAGGCTAGGCGGCTGCGGCGGAGTCTGCAACGTCAGACCTGG  
CAGAGGTGATCGAGCCGCTATACCGAGCTGCAACTGCTGGTCAACGAAAGATATTTGCAATGTCAGGAAAGCTTCCG  
CAACAAGGGGTTAAACATCACCTGGCGGAGGCAATGTTAATACCGGTTGGCGAGCGCAGATCGAAGGCTTTGCAGCCTG  
TGCTCAGCGCGTGTTCATACGCAAGTGCATCGGCGCGCGCTGAACATTACCGGTTTAAACGATTTATGCTCAGGAGC  
CGTATTTTCGACGGCGGTTGGATGCTTCACTATGGGAAAGGTCACATCTTAAACGTTGAAGTGAAGTGAAGTGAAGTGA  
GTTACAGCATCAGTTGGCTCGTGGATCAAGCACTCAATAGTTAGGCTGCGAAAAGAGTTTTTAA

>Cluster\_45290

GTGAGTCACTGGGCTACATTTCAACAACACAGCAACAAATTTATGGGTGACCTTCCGGCAGCAGATTTCTCGCGCTGGCCGT  
CTTTTAAATGGATTTGCTTATTTTAAACAATCTATGGTATGTCGGTCAATTTGCTTATTTTCCATATCAAGCAT  
TTTCAGAGTTGGATCTCTCCTTGTGGCAACGCGCCACTATTTATGCTCGGCGTCTTTCTTGTCTGAACTCCATTGGC  
TTACTGTTCCGGGCAAGCTCGCATGGCAATCAGTATCATTTTGTGTTGATAGCGTAATTTACACCTGCATTTTTA

TCCCTGGCTGAAATTTAGTATTGGATTTTGCATTTTACGCTGGTGTGTTTTGCTGATACTGCGCAAAGACTTCTCCACA  
GTAGCGCCCGCAGCCGGGACAATTTTGCATTTTATAGTTTACGACATTAAGTTTACTCAACCTACGGTGGCCTTTAT  
TTAAGCGAAGGTTTTAATCCGCGAATAGAAAGTTGATGACCGGCTTCAATTTTCGATAGAAACCATGTCAACCGTCCG  
CTATGGCGATATTGCTCCCTGTTTCTGAATCAGCAGCATTTGTTACTATTTTCGGTCAATTTTCCGGCATTACCGTTTTT  
CCACATTAAGATACCGCTTTTGGTGTACTCTCGCCAAAAGATATGAGCAGTGAATGTAACAACTGTAAAAGGAAACATCATACAATG  
CATCGTAAAGATCAATTTTATGTTTGGCGACATTCGATTTCTCGCCATCAATACGATCCGCAACTGAATCAACCGCGACA  
AAACGTAAACGGTTATCAGCAACTGCGCTGAAGATGATATCAAGCAACTGAGCAACGCTTAGGCGGATAACGCTGATGTTA  
TCCCGGTTGACAGTAATGACAGTTTCAATTAAGAAAGCGGGAAATCGATCGTTGCGGGCCATTCTGGCGCTGAGTGA  
AACGATCGAGATAACCGCTTTTGGTGTACTCTCGCCAAAAGATATGAGCAGTGAATGTAACAACTGTAAAAGGAAACATCATACAATG  
TAGCAAAAACCTGAATAAGATTAAGATGGTACATCCGGATATCATTTCTCTCACCGCAACTGTTTGGCAGCGAAATTTCTGG  
CGCGAGTTTTAAATGGTGAAGAGATTAATAATGATATGCTCGTTTCAATGTTGTTGAACCTCAGGTCATGGTATTTTTCAGC  
GATAACGATGAACAAGAAACGAAAGCTGACAGTAAAGAATCGCGCAAAAATAG

>Cluster\_62527

ATGAAGCCATTTTGGGGGCGCTTGGCAGGTATGGCAGCGTGTATTTTCCACTGGCGATGATCATCTACGATTTTTC  
AGCCTACCTGACAACGGACTGATTCAGCCGGGCGTCAATAACATTATAAATGAGTTACAGGCGGATGTTACGCTGGCTC  
CAGCATCGGTCAGTTTGTATATGGCAGGCGGACTGGCGCTCAGTGGCTCCTGGGGCCACTCTCCGACAGGATGGCCGC  
CGCCCGTCTGCTCAATGGATGCAATGATCTTTGCTTAGCTCCGCTGAGCATGCTGTTTGTCACTCCGATCGAACAATA  
CTTCGTCGCCCGCTTTATTCAGGACACCAGCATCTGTTTTATCTCCACCGTTGGTTATGTATCAATACAGGAGGCTTTG  
ATGAAAAAGATTCCATCAGGATCATGGCTGCGCTGACCTCCATTTGTTCTGCTCGCCCCAGTTATCGGGCCGGTGGCCGCG  
GCTGCGCTGATGGCGTTCACTTCACTGAAACTGCTTTTGCATCATCGGTGTGTTTGGTCTGGTAGCATGGTTCTTACT  
ACTGTTCAAATGCGCGGAGACAGTTATACTCAGGGAAGATCAATCAAACCGGGTGAAGTGTGTGTCAGATTTTCATCGCG  
CATTTCCGATCCAGTGGTGTGACCGGCTCACGCGAGTCTGTTTGGTAACTGCCCATCATACCTGGGTGGCGCTC  
TCCCCCGTATCTGATTGAGCAGCGGGGGATGCTCCCGTACCTATGCTGGACACAGGTGCCCGTGTGTTAGTGGGAT  
CATTTACCGCAGTGGCATCGTAGCTAATTTATCAAGACCGACTTCCACCGGTTTTATCTGGGGTACTGTTCCGATAC  
AGCTTGTGGCTTGTGGCTTGTGGTGGCAGCAACTGCTATGGCCACACGCTGCGCTATGGTCACTGAGTACTGGGAACGAGC  
TTTTATGCCCTGGGTATTGGACTGCTCTATCCGGTGTGTTTCTGCTTTACGCTCTTTTCTCATAACCTGCCAAAAGGCAC  
CGTTTCTGCCACGCTGAATATTTGCGGCTCGGCATAAATGCCCTTAGCATTGAATAACCGCTGGGTTTACTTCCATG  
CTGGCGGCAGGATTTCTTCCACTGCTGCGGCTGCTGGCGGTATGCGGCTCATCATATCAGTTGCCCGCTGCTTAAA  
CTGCGTGGCAGCATCAGAGCCAGTCACTACCGGTAGGCTGCCAGAAGCAATA

>Cluster\_41746

ATGAGCAGCAATAAAGAGTTAATGCAGCGCCGAGTCAAGCGATTCCCGTGGCGTTGGGCAAAATCACCCGATTTTTCG  
TGACCGCGGAAAACCTGCGGGTGTGGGACGTTGAAGCCGTGAGTATCTTGATTTCCGCGGCGGGATTGCGGTGCTCA  
ATACCGGGCACCTGCATCCGAAAGTGGTTGGCGGGTGAAGCGCAGTTGAAAAAAGTTCGCACACCTGCTTCCAGGTG  
CTGGCTTACGAGCGTATCTTGAAGTGTGCGAGATTATGAATCAGAAGGTGCCGGCGGATTTTCCAAAGAAAACCTCTGCT  
GGTTACGACCGGTTCCGAAGCGGTGAAAAATCGGGTGAATAACCGCCGCGCCACCAACGTTAGCGGCACCATCGCT  
TTAGCGGTGCTTACCGGGCAGCAATTAACAGCTGACCGTACCGGCAAGGTGAATCCGTTACTCTCGGGGATGGGG  
CTGATGCCGGGTCAATGTTTATCGCGCGCTTTATCTTGGCCGCTGCACGGCATAAGCGAGGATGACGCTATCGCCAGCAT  
CCACCGGATTTCAAATAAGCGCTGCGCCGGAAGATATCGCCGCCATCGTGAATGAGCCGGTTCAGGCGGAAGGCGGTT  
TCTACGCGCGGACGCGCTTTATGACGCTTTACGCGGCTGTGTGACGAGCACGGGATCATGATGATTCGGATGAA  
GTGCAGAGCGCGGACGCGGTACCGGCACGCTGTTTGCATGAGCAAAATGGCGTGGCACCAGATCTCACCACCTTTTC  
GAAATCGATCGCAGCGGTTTCCCGCTGGCGGGCTCACCGGGCGCGGGAAGTGAATGAGCAGCGCTCGACCGGGCGGAC  
TGGGTGGCACCTATGCGGTAACCCGATGCTTGCCTGAGCGGCTGGAAGTGTGAAAGTGTTCGAGCAGGAAAAATCTG  
CTGCAAAAAGCAACGTTCTGGGGCAGAAGCTGAAAGACGGATTGCTGGCGATCGCCGAAAAACACCGGAGATCGCGCA  
CGTACCGGGCTGGGGGCGATGATCGCCATCGAGCTGTTTGAAGATAGCGATCACAGCAAAACCGGACGCAAAACTCACCG  
CCGAGATCGTGGCAGCGCCCGGATAAGGGTCTGATTCTTCTCTCTGCGGCCGATTTACAACGCTGCTGCGCATCCTT  
GTACCGCTCACCATTTGAAGACGCTCAGATCCGTGAGGGTCTGGAGATCATCAGCCAGTGTGTTGCTGAGGCGAAGCTGTA  
G

>Cluster\_25220

ATGAAGATAGCAACGATAAAAACCTGGGCTTACTTCACTGGCGATGCTGCGGGACTGGTAATGGCTGCACCTGCGGTGGC  
CGATAAAGCCGACAAATCGCTTTATGATGATTTGACTGCGCTGGTGTGTTTATGACCGTTCCGGGATTTGCCCTGTTTT  
ATGGAGGCTGATTCGTGGCAAAAACGCTGCTGTGATGCTGACGCAAGTGAACCTGACGTTTGCAGTGTCTGTATTTCT  
TGGGTGGTTTACGGCTACTCGCTGGCGTTTGGCGAAGGCAACAACCTTCTCGGCAACATTAACGGGTTGATGCTGAAAA  
CATTGAACCTGACCGCGGTGATGGCAGCATTTATCAGTATATCCACGTTGCGGTTTTCAGGGATCGTTTGGCTGCATTACCG  
TAGGCTTGATGTTGGGGCGCTGGCGGAACGAATCCGCTTCTCAGCTGTGTTGATTTTTGTTGGTATGCTGACGCTC  
TCTTACATTCGATTCGATTTGGCGCATATGGCTTGGGGCGGCTTGGCTTCTCACGGGGCACTGGATTTTCGCGGTGGC  
GGTGGTGCATATTAACCGCGCAATCGCCGCTGCTGGTGGCGGCTATCTGATAGGCAACGCGTGGGCTTCGGTAAAGAGG  
CGTTTAAACCGCACAACTGCGGATGCTTACCGGGACTGCTATTTCTATATCGGTTGGTTTGGCTTTAAACCGCGGG  
TCAGCGGCGACGGCAATGAAATCGCGGCACTGGCAATTTGTGAATACTGTGGTGCACCTGCGCGGCAATTTCTGGCTG  
GATCTTCGGTGAATGGCGCTGCTGGTAAAGCTTCACTGCTGGGAGCGTGTCTGGCGGATTTGCCGCTGCTGGCGG  
TGACGCCAGCCTGTGGTTACATTTGGGTTGGCGGCGGTTGATTTATCGCGGTGGTAGCTGGTCTGGCGGGCTTGTGGGGC  
GTTACCATGCTCAAACGCTTGTCTGGGGTGGATGATCCCTGCGATGCTTTCGGTGTGCACGGGCTTGTGGTATTTGCTGG  
CTGTATCATGACCGGATTTTGGCGAGCTGCTGCGCGGCGGCTGGGCTTCGCTGAAGGTGTGACGATGGGCCATCAGT  
TGCTGGTACAGCTGGAAGCATCGCCATTACGATTTGCTGCTGCTGCTGCTGCTGCTGCTGCTGCTGCTGCTGCTGCTGCT  
TTGACGGTTGGTCTGCGTGTACCGGAAGAGCAGGAGCGAGAAGGGCTGACGCTCAACAGCCACGGCGAGAATGCTATAA  
CGCGTAA

>Cluster\_59550

ATGGCAAGCAGTAACCTGATTAACAATGCAAGAGCGGGGGCTGGTAGCCAGGTGACGGACGAGGAAGCGTTAGCAGA  
GCGACTGGCGCAAGGCCGATCGCGCTCTATTGCGGCTTCGATCCTACCGCTGACAGCTTGCATTTGGGGCATCTGTGTC  
CATTTGTTATGCTGAAACGCTTCCAGCAGGCGGGCCACAACCGGTTGCGCTGGTAGGCGGCGGACGGGCTGATTTGGC  
GACCCGAGCTTCAAAGCTCCGAGCGTAAGCTGAACACCGAAGAAACTGTTCAAGGATGGGTGACAAAATCCGTAAGCA  
GGTTGCCCGTTCTCGATTTGACTGTGGAGAAAACCTGCTATCGCGGCAACAACATGACTGGTTGGCAATATGA  
ATGTGCTGACCTTCTGCGCGATATTGGCAAACTTCTCCGTTAAACAGATGATCAACAAAGAGCGGTTAAGCAGCT  
CTCAACCGTGAAGATCAGGGGATTTCTCACTGAGTTTTCCTACAACCTGTTGACGGGTTATGACTTCGCTGCTGTGAA  
CAAACAGTACGGTGTGGTCTGCAAAATTTGGTGTCTTGACAGTGGGGTAAACATCACTTCTGGTATCGACCTGACCCGTC  
GTCGTCATCAGAATCAGGTGTTTGGCTGACCGTTCCGCTGATCACTAAAGCAGATGGCACCAAAATTTGGTAAAACCTGAA  
GGCGGCGCATCTGGTTGGATCCGAAGAAAACAGCCGTCACAAATTTACAGTCTTGGATCAACCTGCGGATCGCGCA  
CGTTTACCGCTTCTGAAAGTTCTTCACTTATGAGCATTTGAAGAGATCAACCGCTTGAAGAAAGAAAGATAAAACAGCG  
GTAAAGCACCGCGCGCCAGTATGACTGGCGGAGAGTGTGCTGCTGCTGCTGCTGCTGCTGCTGCTGCTGCTGCTGCTGCT  
AAACGATTTACCGAATGCTGTTTACGCGGTTCTTTGAGTGCCTGAGTGAAGCGGACTTGAACAGCTGGCGCAGGACGG

CGTACCGATGGTTGAGATGGAAAAGGGCGCAGACCTGATGACGGCACTGGTCGATTCTGAACTGCAACCTTCCCGTGGTC  
AGGCACGTAATAACATCGCCTCCAAATGCCATCACCAATTACCGTGAAAAACAGTCCGATCCTGAATACTCTTTTAAAGAA  
GAAGATCGTCTGTTTGGTCGTTTTACCTTACTGCGTCGCGGTAATAAAGAAATTACTGTCTGATTGCTGGAATAA  
>Cluster\_24441  
ATGAATAAAAATAAAGAAATATCGATGGCATATGATTGCCCTCGTATGCTTTTACTGTAATCAATTAATCTGGACAGAAC  
GGCGTTAGGTATTGCGGCTCCAACGATTATGGAGACAACCGGAATAACCAAAGAACAAATTCATGGATTGTCAGTGCAT  
TCCAGTTGGCCTATACATTTGGGGCAACCGATAAATGGGGTCTTTTATTGATACCGTGGGCTGAAGTTAAGTTTGGGATA  
TGTGCCGCAATCTGGGGCTGGCGACAATGGGGCATGCCTTGACAGGAACATGGTCTGGCATTATGCGCGCCCT  
GATGGGTTTCAGCGAAGCATCGGCAATCTCTCGGGTGTAAAAACCGCATCAACATGGTTCGCGGCAAAAAGCGTGGCG  
TGGCGACAGGTGTTTTCAATATGGGCACCTCCTCGGCGCGATGCTTGTCTCCACCGTTGATTGCTGGTGCATTATGTTT  
CATAGCTGGCAATTTGCGCTTATGTCTCAGGTAGCCTTGCTTTACTCGCGCTTATTTTGGTCTTTTGTATAAAGA  
TCCAAAAGATGCTAAACGCCCTTCTGATGAAGAGCGCCACTATATTGAGTCTGGGCAAGAACAGCATCTTAAACAGATA  
AGAAAAGAAAAACGTCATCAAGCATATCTCAGCCAACTGTAATTTCTGGGGATTGGCATCGCGCTTTCTCGCTGAC  
CCGGCATGGGGAACCATTAACCTTCTGGGTACCGATTTTCTCGTCAAAACCGTGCATTTTAGCTGAAAGAAATTGCCAT  
GTTCTGCTGGCTACCTTTCTGCTGGGCGATCTCGGCTGTTTAGCCAGTGGTTTTGTGCGGAAGTCTTCCACGATCGCG  
CGGTGAGTTAATTAACCTCAAGAAATTAACCTTACTTACGATGAGTACCTGCGCATTCGCAATCAATGTCTTTCTCAAGCAAC  
TCTGGGCGGTGACCTATTTCAAAAAGACGAAGTAGCTACCGCTGTGGGTATGGCAGGAGCCTGTGCATGGAGCGGTGAGT  
TGATTTTCAACCTGTTTATCGGGCATTCGTTACATTAATGGCTTCCGCGCTTCTTTATTGCCCTGGCTTTCTTTAAC  
ATTATTGGCGCATTCGCTGTGGATGCTTATCAAAGTTAAAGACGAAGAACCACAAGTACAGTTAGCGACAAGCTAA  
>Cluster\_22342  
ATGGACATAATGAGAAGTGTGTGGGGATGGTGGTGTACTGGCAATAGCATTGTTTGTGTGTCAGTGAATAAAAAGAGCAT  
CAGTTTGGCCACGGTTGGAGCCGGTGTGCTGCTACAAATCGCCATTGGCGGAATCATGCTCTAATTTCCACAGGAAAAAT  
GGCGGTAGAACAGCGGCGATTAGGCGTTCATAAAGTGAATGTTTACAGTGTAGCGGATGCGGCTTCAATTTTGGTTCA  
TTGGTTCGGCCGAAAATGGATGTCCTGTTGATGGCGGGCTTATCTTCGCTTTCGCGTACTCCCGGCGATTATCTT  
CGTCACTGCGCTCATCAGCTGCTGTACTACATTTGGCGGTGATGGGCTGCTAATCCGCTTCTTGGTAGTATTTTTCAGA  
AAGCCCTCAACATCAGCAAAATCGAATCTTTGTTGCGGTTACCCTAATTTCTCGGCAAAATGAGATCCCAGCGATC  
GTTAAACCTGTTTATCGCATGCAATCGCAACAGCATGTTTACGGCAATTTGTAGCGGATGGCGTTCATTTGCGGTTTC  
GATGATGATTGGTTATGCGGAAATGGGCGTACCAATGACTACCTGTTAGCGGCATCGCTGATGGCGATCCCTGGTGGTA  
TTTTGTTTTGCACGTTATCTTAGCCAGCCAGCCAGGCTTTCGCGAGTGCATTTGAAAATCTGTGTTACGCGAAACACCG  
CCAAAAGCATATTGAAGTGCAGGCGAAGCGTCAATGACCGGGTGAATAATGACCGCGGTGGCTACGGTGGTGTGAT  
GGGTTTTGTCGCAATTTATGCGCTGATCAACGGCATTTACCGCGAAATGGCGGCTGTTTGGTTTTGCGCAATGCGTCA  
TGGAAAGTATTTTTGGCTATGTGTTGGCACCACGCGGTGGATCATGGGTGTGGACTGGAGTGTGCCAACCTTGGGGT  
AGCCTGATTTGGGCAAGAACTGGCGATTAACGAATTTGTCGCTTACCTGAGTTTTTCGCGCATATCTGCAACCGGCGGCAC  
GCTGGAAGTGAACCGTGGCGATCATCTCCTTTGCGCTGTGTGGTTTTGCTAATTTGGTTCTATCGGTGTTGTGCTT  
GGGCTTTTTGCGGCTATTTTCGCAAAAACGTTCCGGAATTCGCCAGCTTGGTTTACGGGCGCTGGCGGCGGCACACTT  
TCTAACCTGATGAGCGGACCATTTGCCGGTTCCTTTATTGGTTTTAGCTTGA  
>Cluster\_30102  
ATGAAAAAATCGCGCTTATATCGGCAGCATGATCGCGGGCGTATTATTTCTGCGGCAAGTTTTACTGTTTGGCAA  
GGAGGAACCGCCCGAGAAAAACGTCGACCGCAGAACGTAAGTCTTATTTCTGGTACGACCCGATGATCCCAATACCG  
GGTTGCGATAAACAGGGAATCGCGGTTTATGGATATGGATCTGGTGCAGAAATATGCGGATGAAGAGAGTTCTGCGTCT  
GGTGTGCGCATAGCCGACTCAGACGCAAGATCTGGGGTGAACCGCGACCGTCAACGCGGGCCGCTGACTTTTTC  
CCAGATTTCCCGGCAATGTCAGTTACACAGAGTATCATGATGCAATTTGTGCAAGCCGCGCGCCGGTTTATCGACA  
AGGTGATCCGCTTACCGTGGGCGATAAAGTGCAAAAGGGCGCGCCGCTTCTCGACCTGACCAATTTCCGACTGGTGGAA  
GCGCAGAGTGAATTTACTGCTGCGCGAAACCGCGGTACCGCGACCCAGACTGAAGGCATTTCTGAGCGACTGCGACT  
GGCGGGAATGCGGAGGCTGATATTCGCGCCTGATCGCCACGCAAAAATCCAGACTCGCTTTACGCTCAAAGCGCCCA  
TTGATGGCTGATCACCCTGTTGATCTGCGCGGGGAATGAATATCGCAAAAGATAAAGTGGTTCGCGAAATTCAGGTT  
ATGGACCCGGTGTGGTCACTGCTGCGATCCCGGAGTCCATCGCTGGTGGTGAAGATGCCGCGAGTTTACGCTCAC  
CGTTCGCGCGCACTGATAAAACACTCACCATCCGCAATGGACGCTGCTACCTGGCGTGGATGCTGCGACCCGACCG  
TGCAGTTGCGTCTGGAATCGACAACCGCAGGCGCTAAAACCGGCATGTACGCTGGTTGCACTCAATACCGCC  
AGCGAACCGATGCTGCTCATTTCCGCTCACAGGCGCTGATGATACCGGCAACGAACAGCGGGTGAATACCTGATGCTGA  
CGGGCGCTTTGTACCGAAACCGCTTGGCTTTTCCAGGCATCGCAAGGCGTACCGCGTTACGCTCTGGTCTGGCGGAAG  
GTGAAAAGTGGTTTCCAGCGGCTGTTCTGATGATTTCTGAAGCCAATATTTCTGGCGCACGAGCGGATGCGCTCT  
GAAAGTGTACCCATGCGCATTA  
>Cluster\_43123  
ATGAAAACACAGCTCTACGCTTTTATGGTAAACGTTATTTACGCTGGAACCTTTGACCTTCTGAAATGCAGGAGGA  
TGAAATCCTCGCAACGGTGGTCACTGACAGCCTGTGCCTCTCTTCTGAAAGAGGCAATCTGGGTGAAACCATAAAA  
AAGTACCCGACATGTGGGCAACCAATCCATCATCATCGGCACGAATTTGGCGGATATTTGCGGCTGGTAAAAAG  
TGGCAGCACAAATTCAGCCGGTCAAGCTTATGATTTACAGGCAACCTGCAACTCCCGACCCCGGATTGCCCCGG  
CTACTCTTCCCGTGGGTAGGCGGCAAGCGACGATGTTGTTTATCCCAACAGGTCATGGAACATGATTGCTGCTGG  
CATACGACGGCGAAACCTATTTTGAAGGCTCGCTGTTGAACCGCTTTCTGCGTGTATTGGCGGTTCAACGCCAATAT  
CATCTTCAGGAAGGTAGTTATAACCACACGATGGGATTTCCCGCAAGGGCGCACGCTGATACCTCGGCGCACCGCC  
GATGGGCTGCTGGCATTGATTATGCGCTACATGGACCCGTTAACCCGCTGCTGCTGCTCATTACCGATACCGACAACG  
ACAAATTGAGTTATGCGCGCAAGCACTATCCATCAGAACCAGCAACACTGATTCAATTAATGCGCCGATGCGAGCA  
TTTGATACGTTAATGGCAGTGAAGTGGCGGTACGGCTTCGATGATTTTCTGCTTTTGTGCTTAATGAAGGACTGGTGC  
TCTCGCTCTTCTTCTGCTGCGGACAGATGTTGTTGTTGTTTCTGCGCGGCAACAGGATAAAGCACTTCAGCGCCAA  
TTAATTTCTACGATGTGCATTATGCATTTACCCACTACGTGGGCACGTCAGGCGGCAATACCGACGACATGCGCGCAGCG  
GTCAAATTTGATGAGAGAAAAAGTGCAGGCGCAAAAGTGGTAAACATATTTCTGGGCTGAATGCGCGGCGGCAAA  
TACGCTTGAATGCTGCGCTGCGCGGCGGCAAAAAGCTGGTGTATACCGGAAATTTCTGCGCTGACGCTACTCACGC  
AGATTCAGGATCAAGCACTGGCGGCTATTCGGCGGATTCAGGGGATCTGGTGGTGGAGCGGAGCAATACCTGCTC  
GCCATGCAAGGCAATTTCCATGATTAA  
>Cluster\_23134  
ATGGCACTGTTTTACTATCAGGCGTGGAGCGTAATGGTCGAAAACCAAAGGTATGATTGAGCGGATTTCCGCGCTCA  
TGCCCGCAGTTTGTGCGCGTAAAGATCTCATTTCCCGTGACATTTGAAGCCCGGCTGAATGCTTTCGCGAGGGGAATGT  
TGCAGCTGCGGACACGCACATCTGCGGTGGCGGCGGAGATCTGGCGCTTTCACGCGCAACTGGCAACGCTGGTA  
CAGGCAAGTACCGCTGGAACCTGCTTACAGGCGGTCACTGAGCAAAAGTGAAAAACCTGCATGTGAAAAGTCTCGGAAT  
GGCGCTCCGCGGATTCAGGAAGTTACACCTGTGCGGACAGCTGCGCGCAACATCCCGCGCTTCTTGTGATCCCTGT  
TTTTGTTGATGGTTCGCTGCGGAGAAAAATCCGGACATCTCGAGTGGTGTCTCAATCGCTGGCGGATTAACCGAACAG  
CGGACGCTCTGAAATCACGCTGCTGCAGCCATGCTTACCGCTGTTACTGCTGGTGGTGGCACGGGCGTGGTCA



TATTTTGCTGACGGCAGTAGTGCCGAAAATATCGAACAGTTTGATCATCTCGGACACGGCTGCCTGCCACCCGAA  
TGCTCATCGCTATGAGCGACGCGTTACAGGCCAGCGCGTGTACTGGCTGGCGGGTTTCTGGGGCTTCTGGTCTGGGG  
CAACGGCTACTCAAAAATCTGCGATGCGCCTGCGCTGGGATAAAACCTTGCTGCGTTTGCCCGTGACGGGGCGTGTTC  
GCGCGGACTGAAATACGGCGCGTTTTCGCCGACATTAAGCATCTCACCGCCAGCAGTGTCCGCTGCTGGAAGGCATTC  
AGACCGCCGCGCGCTGTCGGCAAAATCGTTATGTCGAGCAACAACCTGCTGCGGGCAGATCGGCTCCGCAAGGAAGC  
AGCCTGCGCGCGCGCTGGCGGATCTGCGCCTGTTCCGCCGATGATGCTGTACATGATCGCCTCCGGCGAACAGAGCGG  
CGAGCTGGAACCATGCTTGAACAGGCCGCGTCAACAGGAACGGGAATTTGATACCCAGGTGGGGCTGGCGTTAGGGC  
TGTTTGAGCCGGCTGGTGGTATGATGGCGGGCTGGTGTCTTTATCTGTCATCGCCATCTCGAGCCGATGCTGCAA  
CTGAACAATATGGTTGGAATGTAA

>Cluster\_13843

ATGTCAATTGACTTTACCCAGGTATAATAAATACATATCACGGCGATATTTATAACTGCACAACAAATACCGATAATGT  
TAAAACGCCAGACACACCGAAGTGGCCTTGTGATAAATGGGAAGAACAACCCATTAATCCACATTTCTTGAGAGAAG  
GATACAACCTGAACAATTTGATTTAGCTAGCAACAACCTCAACAATAAATGATGCCACACAGCACCACATATAACA  
AATGCAGACTACTCAAAAGTTGTGGTTCAACTTGAAGTCTTATTAATAACATTGAAACGATAAGTTGACACCACCTTAC  
GCAACAGACACAATAACTTAATCAGATTCAATAACATTAGATACGAAAAGGATAAGGATTCGTATGTCAAATCATGT  
TTGTCGTTAATCAGACCAACAATCCAATCAATAACTAAAATCTCGTAGAAGAAGGAATACCCGAAATATTCAGTGT  
CAAACCGTTTCTCCGATAATAAAAATTTGCTGGCAACAGCTGACTTACCAGTATATAAGAGACATTCGAAAGCTT  
GTACTTAAAAATGGCGAAGCTGTATATTGAGCACAGTAAAATGAAAATAGGATGGAAGCCCTTGCTGGATGCGACTTTA  
TTGATTTCAACATGACAGGGCAAGATATGTCAGGCTAGTCTTAACTTATCAAATTTTATTTTGAAGATCTACTTAAT  
ATAAATTTCTACTGACGCAAAATTTTAACTATTTTACACACAAGGAAAATCCCAATCCCAACTACATAAAATATGA  
ACAGCATCTTGACAAAACAATCAATGGCTTGTTTTCTACATTGTTAACTATTAATGACAACTTTTACGCGCGAAGCCG  
AAATGCTTCGAGAATAATGATTTCTTAGAGGCAAAGTAGTGAATCTTCAATTTGATGACATATTAATAATAAGCAA  
GAGTTCAAAAAATATGTTATAAACAACCTCAAGAGTTTACAACACCCCTCTATAACAATAAAATCAAAAAATGGGCAAC  
AATGCTAAAAATGAATTCATAGCATTTCATTACGAGACACTTCAACCCGAAAAGATTTCATACCCCTTTTATTTAAAGA  
GAGATCTGCCAATGAAAAAGATATAAATATGGGATGAAAATAGAAATACCATCTGGCAAAAAGAAATTCGCTTATCAAAT  
CATATCAGAATATAATACCATAA

>Cluster\_41469

GTGAGTAATAATGACACACTGCCAAACATAATAGACGGACAAACACCTCTGTTGTTCTTACACGCCCTTTTATTCCTAC  
CCAAAAGCGTTGCATGGTATTCGTTTTGATTTAATGACGGAGCCCGCTTAAACTTGGCCCTGGTCACTGGCAGGTAA  
ATTTAATTTGATGACGACTCCGGCAATATATTACTGACCTGTGAGACTGATCAAGGCTGTGTGATGAGTAAATAAAGTAC  
TTCATCAACTTTCGCATCCAGGTATTTAAAGACGGTGAACAGCACCTGTGCTGGACGTAGTTCAGGATCTGCGTGATAA  
AAGTGTCAATATCCACTTCCCATCGGCACCTTTGGAGGAGCTCCTTGGTTGGTTTCCCTATGCTGAACGTTTCCGCGAGA  
AGCATCAGTGTGAGTGGAAATGTGTGATGACAGAGGAAATCATTGAACGTACGCGACCAGTATCCGCAATCACTTTT  
TCCACTCGTGAAGCATTCAAACCCACAGCCCTACGCGAGCTACCGCATCGGACTGTTTTCAAGGCAATGATACTCA  
TCAACCGTGGATTTCCGCGAGTCCGGCTTAGTCTGATCGCTGCTTATATCCGGAATTTTCCGCGATGAAGAGCCGC  
CGTTACTTAAACTTTGATGCTGTCGCGACGATGAAACCCCTACGTTTGTATCCGCGTTCAGTCTTCCGCAAGCGAAA  
TACTGGAACAACGGCTATGGCTGGTCCGAGGTAATTTCTGAACGAAAACGCTGGGCTACCGAGTGTGTGCATCGATAA  
AGAGGGCGACCATGGTTATGGTTTTGTCTGGAATCACATCCGCAACGGCGCGGAGGATTTCACTGGCGCGCTGGCGCTAC  
AGCAACGGTGGATTTGCTTCCCATGCGCCTTTTTTGTGCTGAGCAGCGGCTTGAAGTTGGTTAGCGTGGAGTTGT  
CACATCCCGTGGTGGTTGATTTAGTGGTTTACCAATCCTTAAGTGAAGTTCTATACACCGTGGCGCTATCAATTTTA  
TGGCTGCCATGGTTGCTGGGACGATATGCGCATCGATTTTGTATCACCAGGATTTCTGCAATGTCCAGGCACAAAGGTA  
CTGAGCGGAGTATGAGTGTCCCGCTGATCACCGGTGAGCAGGTATCCGCATTAATCATCAATGATCAGACGCTG  
AGGAGGAAACACGGCTCTTAATCTTAAAGGACTAA

>Cluster\_61031

ATGGCAACACTAACCCACCACCAACAGTACCGTCTGCTGGCGGGCTGGTATTATCGGGCGCACCAATTATGGCGC  
AGGGATGTTTTCTGCCAGTGGTCAATGTCGGGGCGTGGTTTTCTGGTCAATGGCGGGCTGATCTTACCTGGTTCT  
GTATGCTGCATTCGGCTTGGATGATTTGGAAGCTAACCTGAATACAGAATCGGTTTCGAGTTTGGACACCATCACAAA  
GATTTGCTGGGCAAGGCTGGAACGTGGTCAACGGCATTTCCATTGCCCTTGTGCTCTATATCCTGACCTATGCCATAT  
TTCGCGCAGTGGTTCGATTTCTGCATCACACCTTTCGAGAGATGTCACCTAACGTCGCCGACGGCGGGCGGGTTTTGGTT  
TTGCATTTGCTGGTAGCCTTTGTGGTGGTGGTGGTGGTGGTGGTGGTGGTGGTGGTGGTGGTGGTGGTGGTGGTGGT  
GTCACTTCCCTTCTCCTTCCCTTGGTAGCCTGCTGGGCGATGTCAGCCTGCGACATGTTTCAACGCTCCGCAAGCA  
TGGCTTTATGACCCGATCTGTTGATGACCTTCCGCTTCTGCTGGCATCGTTGGTTATCACGGTAACGTGCCAAGCC  
TGATGAAGTATTACGGCAAGATCCGAAAACCATCGTGAATGCTGGTGTACGGTACGCTGATGGCGCTGGCGCTGTAT  
ACCATCTGGTTGCTGGGACGATGGGTAACATCCCGCTCCGGAGTTTATCGGTTATGAGAGAGGGCGGTAATATTGA  
TGTGCTGGTACAGCGCTTAAAGCGGCTACTGAACAGCGATGTCGAGCTGCTGATGCTGGTGGTGGTGGTGGTGGTGG  
TAGCGAGTTGCTTCCCGCGTAACGCTGGGTTGTTGACTATCTGGCAGATCTGTTGGTTTGCAGACTCGGCTGTG  
GGCGCTTGAACCGCATTTGCTGACCTTTGCCCGCCAGTTGGGGGGCTGTTGTTCCCGCAACGGATTCCTGTACCG  
CATTTGGTTATGCTGGTTAGCGGTTACCATCTGGGCGCAATTTCTGGCGCTGTATAGCCGCTGATCGCGTAAACGCT  
TTGGCAGCCGAAATTCGCGCTGCGGGTGGCAAGCCGATGATTGCGCTGATTTGCTGGTGGTGGTGGTGGTGGTGGTGG  
GTGCATATTTTATCGAGCTTTAATTTACTGCCGGTGTATCAGTAA

>Cluster\_11020

ATGAGTGATACGCTTTTAAACGAAAAATCCTTACCAGGAGAAATGTTTTGCGTGTGCAATCGCCCGCATGAGTGGAT  
TTTTGAAACATTTCCGTCGGTATGTCTGTCTTTTTCAGGTGGAAGGATTCACCGTGTCTTTCCATCTTGTGGCAGAGG  
TGGCCCGCAGGAGAAAACGTCATTTCTCTGTTCTGTTTACTGGGAGGCCAGTATCGGTGCACCATGAAACATATT  
CAGAAGATGGGGAATGTACCATGATGTGACGGAACCTTTACTGGGTGGCATTCCCTGACCACGGTAACCGCGT  
CTCCGAGTTTTCAGCCGGATGGATATGCTGGGAGCCAGGAGTGGCTGGGTTCCGAGCCAGGAAAGAGCCATACCG  
ATATGACATATTTCCCTTTTCCGGTATGCCATGACGTTTGAAGAATTTGTTCCGGCATTTTCTTCCGTTTGGCGGT  
AACCAGTGTGGAGTGGCAGTGTGACCGGTGTTGTCGCGGATGAATCCCTCAATCGCTTTATGGGGCTGGTGTCTCAGCG  
CAAATGAGATGCGCATGATAAGCCCTGGACCACGGCATCGCTGAAGGGTTTTATACACCATGTATCCGTTGTATG  
ACTGGAAAGCCCGGATATCTGGATATAAAGCCAGAGCTTGTCCATTTACAACTCTCTGTATGACCTGATACCGT  
GCCGAGTGGCTTACGCAACATGCGTGTCTGTGAACCTTTGGTCTGAACAACGTAAGGGGCTGTGGCTTTACCATGT  
TCTGGAGCCGAAACCTGGGCCAGGATGTTGAGCGGGTGTGAGCGCTGCCAGCGGGCGCTTTATGCCAATGAAAGCG  
GTGCCATTTTGGCCGCGTAAACGATATATAAACCAGCCATCATACCTGGCGAGCTATGCGATGTTCTGCTGGAT  
GTGATGCCGAAAGAACCGCAGAACATTTACCGTAATAAAATTTGCTGCTTACTTACCCTGGTATCAGACCGGGCTTCC  
GGATGACATCCCGATGAACAGGAGAATGACCTGGGAGCCGGATATTCCTGCTGGCGGCTATCTGTAAGACACTTA  
TAAAGAATGATTTCTGGTACCGGACCTCTCCTTCACTCGGAACAACCCCGCCTATGAACGTTATCTGACCGCTATG  
AAGAAAGGAGGAAGGAAATGGGGATTTCTGTGA

>Cluster\_36949

ATGGCAAAGGTATCGCTGGAGAAAGACAAGATTAAGTTTCTGCTGGTGAAGGCTGCACAAAAGGCGCTGGAAAGCCT

TGCTGACGCTGGTTACACCAACATCGAATTTACAAAAGCGCGCTGGATGATGAACAATTAAGAATCCATCCGCGATG  
CCCCTTTCATCGGCTGCGATCCCGTACCATCTGACTGAAGAGCTGATCAACGCCGAGAAAACTGGTTCGCTATTGGC  
TGTTTCTGTATCGGAACAAACCAGGTTGATCTGGATGCGGCGGCAAGCGCGGATCCCGGATTTAAACGCACCGTTCTC  
AAATACGCGCTCTGTTGGCGAGCTGGTGTATGGCGAACCTGCTGCTGCTATTGGCGGCGTCCGGAAGCCAATGCTAAAG  
GCACCGTGGCTGGATTTCCGCGCTGTGTGATGCGCTGGCAGCAAAACATCTGGCGGGGCGCAATCGACGATTCGGT  
CATATTGGTACGCAATTGGGCATCTGGCTGAATCGCTGGGAATGTATGTTTACTTTTATGATATTGAAAATAAACTGCC  
GCTGGGCAACGCCACTCAGGTACAGCATCTTTCGACCTGCTGAATATGAGCGATGTGGTGTGATGCTGATGACAGAGA  
ATCCGTCACCAAAAAATATGATGGGCGCGAAAGAAATTTACTAATGAAGCCCGGCTCGCTGCTGATTAATGCTTCGCGC  
GGTACTGTGGTGGATTTCCGCGCTGTGTGATGCGCTGGCAGCAAAACATCTGGCGGGGCGCAATCGACGATTCGCC  
GACGGAACCGCGACCAATAGCGATCCATTTACCTCTCCGCTGTGTGAATTCGACAACGTCCTTCTGACGCCACACATTTG  
GCGGTTCCACTCAGGAAGCGCAGGAGAATATCGCCTGGAAGTTGCGGGTAAATGATCAAGTATCTGACAATGGCTCA  
ACGCTCTCTGCGGTGAACCTCCCGGAAGTCTCGCTGCCACTGCACGGTGGGCGTCTGATGCACATCCACGAAAACCG  
TCCGGCGGTGCTAACTGCAAAATCTTCCGCGCTGAAACAAATCTTCCGCGAGGGCGTCAACATCGCCGCAATATCTGCAAACTCCG  
CCCAGATGGGTTATGTGGTTATTGATATTGAAGCCGACGAAGACGTTGCCGAAAAGCGCTGCAGGCAATGAAAGCTATT  
CCGGGTACCATTCGCGCCGCTCTGCTGTACTAA

>Cluster\_41982

ATGTCTAAGATTTTGTATTTCTGATAAACCTGGCGTAATCACTGGTGTGACGTACAGAAAGTTTCCAGGTAGCAAAAGA  
AAACAACCTTCGACTGCCAGCAGTAACTGCGTGGTACTGACTCCATCAACGCCGCTGCTGAAAACCGCTGCTAAAGTTA  
AAGCGCCGGTTATCGTTCAAGTTCCAAACGGTGGTGTCTTCTTATCGCTGGTAAAGCGGTGAAATCTGACGTTCCGAG  
GGTGTGCTATCCTGGCGCATCTCTGGTGGCATCAGTTACCAGATGGTGAACATTTATGGTGTTCGGTTATCCT  
GCACACCGACCACTGGCGGAAGAACTGCTGCCGTGGATTCGACGGTCTGCTGGACGCGGGTGA AAAACACTTCCGACTA  
CCGGAAGCGCTGTTCTTCTCATGATCGACCTGTCTGAAGAATCTCTGCAAGAGAACATCGAAATCTGCTCTAAA  
TACCTGGAGCGCATGTCCAAAATCGGCATGACTCTGAAAATCGAACTGGGTTGACCGGTTGGTGAAGAAGACGGCGTGA  
CAACAGCCACATGGAGCTTCTGCACTATACCAAGCGGAAAGACGTTGATTATGCGTATACCGAGCTGAGCAAAATCA  
GCCCGGTTTACCATCGCTGCCCTCTTCCGTAACGTACACGGTGTTTACAAGCCGGTAAACGTTGCTGACTCCGACC  
ATCCTGCGCGACTCTCAGGAATATGTTTCTAAGAAACACAACCTGCGCGACAAAGCTGAACTTCGATTTCCACGGTGG  
TTCCGGTTTACTGCTCAGGAAATCAAAGACTCCGTAAGCTACGGCGTAGTGA AAAATGAACATCGATACCGATACCCAAT  
GGCAACCTGGGAAGTGTCTGAACTACTACAAAGCGGAAAGCTTACCTGCAAGGCCAGCTGGGCAACCGCAAAAGC  
GAAGATCAGCCGAACAAGAAATACTACGATCCGCGCTATGGCTGCGTGGCGTACAGCTTCGATGATCGCTCGTCTGGA  
AAAAGCATTCAGGAACCTGAACGCGATCGACGTTCTGTAA

>Cluster\_35855

ATGGTAAACGTGAGGGAGGATGAACCTTTCAAACCTCATCGAGCAAGGCATCAAAGGCAACGCAATGCATTTACTCTCT  
ATGCAGAAAGATGATTAACAACATCCGTA AAAATGATGAGGCTTAGCTTCTAAGCTGGCTTCGTTAGTTGCTGAGGGAA  
CAGTATTACGTGGGCGATCTAGTAAGGCTCCTATGCGCTGGATGGAGACTCCAGACGAAACCTTTTGCAAGAAACATCT  
GTCAACGCAATTTGTAAGAACCTGTATGGAATACGGATATCTCAAAGAAGCTGGAGTCAATTTGTAACGAAAGAGAGAA  
TGCGGTTCTTTGTTCAAAGCTGGTCTTGAACCTGTGAAGACGCGTTTTACTTTCTGGCCGCCAGGCGTAAACGAA  
TGTCGCGACATTTGGCTGCTGCAAAGTTAAATTTACTCTTTTAAACATTTGGATCTCTCATCTGTAATGAGTTCTTTTG  
GGAAAAACAGGTAATAATATAAATCCGTTATGGATATGCAAAAGAGAAACCATGTGTCCTTTTGTGATGAAATTTGA  
TGCTGTTGCAAAAAGACGTTGATGATGACAGGGACGTTGAGAAATTA AAAACGTTTAGTTACTGTACTCTACAGACCATAG  
ATGAGTGGCCAGCGACTCTGCTTCTGTTGCTGCGACTAAATCACCTGATATCTTAGATCCGGCTGTTTGGCGTCAATTT  
GAGCACATCTTAATTTAATATGCCATCAGTAGAAGTATGATAGATAGATATTTAGTCAATCATATAATTTGAACCTGAAC  
ATCTAAAAAATTTGACCATTTATAGATGGCATGCTCTTTGCCATCATTAACCGTATTTTGAATTTCTCCAAAAAGAAATG  
AGGTACTTGA AAAATTTCAATTTGAAAGCTCATTAATGAAGCCGTAATACGGAGAGGGTTTCAATGGATGAGTTTACAG  
GATAATGATCTCAATATAATTAATATCATTTTACGCGTTTTTCAAATAGGAAGATAGCTGAATAGTTGGTGTTCACA  
TCCAAACATCGCGAATAAATTAACAAAAGTGGGGATTAATGA

>Cluster\_19903

ATGAAAAAATTGATCAATGATGTGCAAGACGACTGGACGAACAACTGGCAGGACTAGCGAAGGCGCATCCATCGCTGAC  
ACTGCATCAGGATCCGGTGTATGTCACCCGAGCTGATGCCCGGTTGCAAGGAAAGTCCCGCTGCTGTCGGGTGGCGGCA  
GCGGACACGAGCCGATGCACTGTGGCTATATCGGTGAGGGATGCTTTCCGGGACCGTTCGCGGCGAAATTTTACCTCA  
CCGACGCCGATAAAAATCTTGAATGCGCCATGCAAAATGATGGCGGCAAGGTTACTGTTGATTTCAAAAATTAAC  
CGGCGATATTTTAACTTCGAAACGACCAACCGAGTTACTGACGATAGCGCGTAAAGTGAACCACTGTTGGTCAATTGATG  
ACGACGTTGACGTA AAAAGACGCTTTTATACCGCGGGCGGCGCGGCTGCAACACCGTATTAATGAAAACCTCGTA  
GGTGCAGCGCGGAGCGTGGCGACTCCTGACGCTGTCGGAACCTGGGCGCTAAGTTGAATTAATCAAGGCCATTAAT  
AGGTATGCTCTCGTCCGTTGACGCTTCTGCGCGGGCAACCTCTCTTTTACCCTGGCGGATAATGAGATGGAGTTTGG  
CGCTCGGCTCATGTTGTTGAGCGGATTTGACCGCGCCCTTCTCTTCTTCTGATCAAAACCGTTCGATGAAATGTTGAC  
ACCTGCTGGA AAAATGGCTCATACCATCGCACTTTGCGTTTCTGGGATATCAACAAGGACGCTGGCAGGAAGAACACA  
AACCAACAAACCGCTCCAGTCTGGCGATCGGGTGTATGCGCTGGTTAAACAATCTTTGGCGCAACTCCGCTTTCTGAGCTGT  
ACGGCGCTATAAACCGCTGACCAACGTTGCCAGCAAGCGGATGACTATCGAAGCTAATTTAATTTGGCGCTACTGC  
ACCTCACTGGATATGACCGGTTTCTCAATCACCTTACTGAAAAGTTGATGACGAAACCGTGGCATCTGGGACCTCTGT  
CCACACCCCGCCCTTAACTGGGTAATAA

>Cluster\_20859

ATGCGCCAGGAAACCGCTTTAAATTTAATGCCACTGTCCCGTGTGCCGAACTGAACGGCATCGACGCCGGTGTGATGT  
GTCGAAAAAATTCACCGTTGAACCGTCCGCTACCCAGACCTGATGAACACCATGACAGGATCCTCTGACTTTCTGACCC  
GCATCAATATTGTCCGGTCAAGGAAATGAAAGGGGAAAAAATGGCATCGGTGTACCGGCTCCATCGCCAGCACACC  
GACACCGCGGTTGGCAGCGAGCTCAGCCGAAGGACTTCTCGAAGCTGGCGCTAACAAGTACGAATGCGACAGATTA  
CTTCGATTTTATATATCCGCTACAAAACGCTGGACCTGTGGCGGCTTATCAGGATTTCCAGCTCCGTTCCGTAACGCCA  
TTATCAAAACGCCAGTCCCTTGTATTTATCATGCGCGGTTTAAACGCGTGAAGCTGCGGAAACCTCTGACCGCAGCAGC  
AATCCGATGCTGACGATGTTGGCGTGGCTGCGGATACCGCAATGAAAGCCCGCGCGCTGATGACCAAGT  
CACTGACGAGGAAGCGCACCACTCTGAGGTTATCCGCTGGGCAAGGGCGGTGATTTATGCGAGCTCGATGCACTGG  
TGATGATCGGACCAACAACCTGATTAACCGTGGTATCAGGAAGACCTGACTTGTGGTGTATTTGGGCGTCACTA  
CTGGCGGACAAGTATTTCCCATCTGCAACAAGGAGCAGGACAACAGCGAAATGCTGGCGCTGACGTCATCATCAGCCA  
GAAACGCATCGGTAACCTGCCGCGGATACGCGTCCCGTACTTCCGGCGGATGCGATGCTCATCAGAAAGCTGAAAAAC  
TGTCATCTACTATGATGATGACAGCATCGCCGCGTATGTTGAAAAACCGAAACTCGACCGCTGGAGAACTACGAG  
TCAATGAACATTTGATTAACGTTGGAAGACTACCGCGGTTCTGTTGGTGA AAAAATCAAGGCTGGTACTCTCCAC  
ACCGCTAAAGCGACCCGAGAGCCGGGAGCGTAA

>Cluster\_1034

ATGGATAGCTCCACCATATTGGTGTCCACTATTCTCTCAGGAATTTAGGATCTGCCAGACGGTGTGAGACGACGCT  
TACTCTGGCTCAGGGCTGTGGGAGCTGATAGACAACAGCCAGCTTGGGATGAGATGGCGGAGATGAAGACCACCATCA  
CCGAAACCGCAATGAAATCACACAGACGGTCAATAAACGCTGGAAGACCAGAGCGCCACCATTCAGCAGATACAGCGC

GTGCAGAAGGACACAAATGATGACCTTGTCTGACTTTACATGCTGAAGGTACAGAAAACAAAAATGGCATACCCATGT  
TGCCGGTATTGGAGCGGGGATTGAGGATACTGATGGCCAGCCCTGAGCAACATACTGCTGCTGGCTGACCGTATTGCCA  
TGATTAACCCGGAGGACGGCAACACCACGCCGTTATTTGTGGCGCAGGGGAATCAGTTGTTTCATGAACGATGTGTTCCCTG  
AAGCGGCTGTTGGCGGTGAGTATCACCTCGTCCGGCAATCCCCCGACGTTTCCCTGACGCCGGAAGGGAAGCTGACAGC  
CAGGAACCGGGATTAGAGTTTCCATGAAACCGGCAACCGGATGTCAGCCGGGTGTTTCATCCGGTATAGATATGCCCGCAGG  
TCAGAGGGAACTGTCTGCAAAACAGATGAAGGCGACCTGGTGAAGACGGTGGGAAAAGCCTTCCCGGAATAACAGT  
TATGCCAGCGGGACGGTAACCGTACAGTTTACGATGACCAGGGCTTCGACCCGCGAGATTATCATTCCCGCGGTGCTGTT  
TCGCGGGACGAAACACCAGAATTTCAACAGCCGAATCAGCAGTCTGACTGGTATCCACCTGTAAGCTGCAGGTGCTGA  
AGAACGGGTTGAGATTTCCATGAAACCGGCAACCGGATGTCAGCCGGGTGTTTCATCCGGTATAGATATGCCCGCAGG  
CGGGTTCATGTCACCCTGACGTTAATGTGTGCTGGCCGGTGCAGAACAACTGGACGCCGACAACGTACATCAGTGATTT  
ACTGGTTGTTGGTTCATGAAAAATCCACGGCAGGGATCAGTATCAGCTGA

>Cluster\_4936

ATGAATATACTATTACGGAATCATCACGAATATAGGTGGTCAAGGAATTACAGGCTGTTGCTCAAATGAAGGCCCTGAA  
GAAAATGGGGCATTACGTTCTGCTTGTCTGCAGGGAGAACAGCAAAATGCTTTTGAAGCCAGTAAGTTTGAATGATA  
TCACATTCGCGTTATTTTCGAAACAGTCTTCACATTCCTACTGTATGGAGATTACTCGGAATAGTTCATAGTTTTACGCC  
GATGCAATCGTTTGTACAGTGGACATGATAGTAATATGTTGGTACGGTTTTTTACC TGGAACATCCATTCCATTG  
AATTTACAGGCAAAAGCATATTTGACACGAAAAACAAATTTTTTTCATAAATCATTTTTGCGATGAGGTGATGTTTC  
CCGGAACAAATATGAAGACACATCTGGAGCAGGAAGGATGTCGAACTCGGGTTACTGTTGTGCTCCTGGCTTTGATTT  
CAGGAATTTACGTTGATTTCCGAAACAGTTTGGCTCCGAGTGTCTTTCCCTGGCTGGCGTCCCGAAGAGGATGCCCGT  
AATTTGCTCAGGTAGGAATGTTGCGCCGAAAAAGGGCAGCAATTTATGTTGAATTTACTGTTCCATTTAAAAATGAATG  
GACGACAGTTCTGTTGGTTGATTGTTGGGGCTGGTTCACTGAACTGCGGGAACATTTACAGTATCAGATTGACAGTATG  
GGCATGTCATGATGATGTTTTTATGCTGACAATGTTTTTCTGCCGCCCGTATATCGGGTTGCCAGTCTGGTGGTTCT  
GCCTTCAGAAAACGAATCTTTTGGTATGGTGTGCGCAGAACATCGGCATTTTTCTGTGCTGTAGTGGCCACTCAGATTG  
GTGGAATCCCTGAGTTTTCAGAACACAGCAGCCGGGATTTGTTTCCAGCAGGTAATAAGCACGACGATGTCGCC  
CTGAATGATTTTTTAAATGACCCGTTTATCAGATGGCTCGCTGGCAAAACAGGATATAGAAGAGCGGTTTGA  
TATTAATAAACTGCGTTAAAAATACTCACATTAGCGAAGCAAAAGTAA

>Cluster\_37378

ATGAAGACGTTTCCCTCTGCAAAAGCTGACGATTATTGAGGCGCAGCAAAAGCAGTTTGGCTGGTGGATAGCATTGTGCG  
CCATTTCCCGCGCAGCGAGTTTCTTACTGGCGGTGATTAGGCTAACGCCAGGACTGAATCAACCGCGCTTACCCAGC  
GTGTGGAACAGGTGCTGGCTGATGCATTTACAGCACAGCTGCGGCGCTGGTGAGGGCGCGGGGACTGGCGGATTCGC  
GCCGGCTGGCGGCTTGGCTCAAACCGGGCAGCGTCTTCTGGTGCATGACGCGCCTGTTTACCCGACGACACGGGTTAT  
TATGAGCAGATGGGGCTGACGCTTATTACTGTGATTGTTCAATGACCTGTCCGCACTGAAGCAGGTGCTGACGAGCAAC  
AACCGGATGCGGCGCTGGTGCAGCATACCGCCAGCAGCCGAGGACAGCTACGTTGCTGGCAGATGTGCTGGCAACGTTG  
CGCGCGCAGGTGTTCCAGCGTTAACCGATGACAATAATGCGGTGATGAAGGTGGCTCGAATCGGCTGGAATCGCGCC  
GAATGCTCGACATTTTCCCTGCTCAAGCTATTTGGCCAGAGGGTGTGGTGCAGTGGTCCGCGATGCTGATGTTATCA  
ACCGTATTCGCGCCAGCTTACTCCGCGGTAGCCAGATCCAGGCGCACAGGCGCTGGAAGTATTGCGTGGTGGTGG  
TTTTGCCAGTGCATGACCGGTCAGGAGGGTATCTGAACGGTGTGCTGGCTTTCGTTAACGGTGGTGGTGGTGGC  
AGTGAAGAGCGCGGTGATTGCTAATGCGCAGTCAAGGTTGTTGATTGTCGAGTTTTCATCAGCCGATTGCCCGCAGAGTGC  
TGGAAAGAGCGCAAAAGCGCGGTGCTTGCCTTACCCGTTGGTGCAGAGTCAAAATGAAATCCCGCCGCTCTTTTAT  
CGCCTTTCCGGAACGTTTCCGCGGCAATCCACAATCGAATCATGTCGATTTGCGATTCGCATTAACCCGAATCGCAGCGGTGA  
AGAGACGGTGTGCGGATTTTGGCTGAGAGTATTGCCAGTATTTAA

>Cluster\_51157

ATGCTACCCTAGTAAAAGTTTCATATGCCAGAATCCAATATATTAATGCCTTACTCGAAAAAGTTCTTTATAGTGGTAT  
GATTGCTGAAGGAGATAGCGTATATACTTTCGAAAAGCTATTTTCTGAAAAGTTTGGTTTACAAAATGGAATGCAATGA  
GCAGTGGAACTGCAGCTTTCGATACAGCACTTGTCTTCTGAGGTTGGTATCTCTGACGAAGTCATCACACAGTATG  
ACCGCTGAGCCAACTAATACGACTATTTTGCAAACTGGAGCAAAAGCCTATTTTGGCGATGTCGACGTTGAGAATGGTAA  
TATATTAGTTAGTTCTATAGAGGAAAAAATACAGAAAAACAAAAACAAATATAGTAGTACATTAATGACGTAATGCAATG  
TTGATATAAAGAGAATCAGAAAACAGCAGATAAAACATAATCTGTTACTGATAGAAGATTGTGCTCATGCTTTAGGAGCT  
ACATTTGAAAATAAATATGATAGGACGTTTGGTGTATTTTCAATTTTTTCGTTTCAAGCTATTAACATTTAAACACGAT  
TGATGGTGGTTTTTATCCATGAAAGATGGAAAAAACACGAATAGCAAAACAAAGTAAAGATGGTTTGGTTTGA  
GAGTTGATAGAACAACAGTCTAATATAAATCAGCAGGGTTATAAATAAATAAATGTTGACGAGCAAAATAGGTTA  
TCTCAATTTAAAAACAATAGATATAGACTCAATAAATAAAGAAAATGGAATAATTTACAATGAAAATAAGCTAAAAAT  
CTCAGGGTTAAAAAGCGCAAAAATATTAACAGGAGCAGAGCCATCTTTTGGCTGTATACGCTTCTATGTGAAGAGCCTG  
ATAATATTATGAGTGTTTAAAAAAAATGCGGTTATGGCTTCAAGATTACATCGACCAATCATTTGCATCAAAATTTTC  
GGGAATGGTGTTCAAAAAATACCTTATCTGATGAGTTTATAAGCAGATGGTTCATATACCTTGTGGTGGTGGGTTTCG  
AGAAGAAGATCGTGAGAATATTATAAATGCTTGTCTTAGGTTAG

>Cluster\_11037

ATGAGTACAGAAATGAAAACGGGGCTGGTGTCTGTCGGTGGCGGGCGGTGGGCGCTTATCAGCGGGAGTGGTTAAGGC  
ACTGGCAGAGTGTGGTACACAGATCAGCATGGTTTTCAGGGACCAGCATTTGGCGCATTCATAGGTGCCATTTATCGCGGCT  
CTCCCGATCTGTCTAGAAGCTGCCGTACGCCTGGAGGCGCTCTGGGAGCATCTGGGGAATAATCAGGTGCTGTCCGTAAC  
AGATTGGTTTACTTTTCATTGCTGAAAAAATGTTTCCAGGCAATGAACCTCTGCCAGATCCCCGGACGTGCAGGAGCACT  
GCTTACGACGCTTCTTCGCATATATCGACAATCAACGGGTTGACAATCTGATGGCTCAGCGTTGTTGTCAGATGAGC  
CCCTGACAGCGCTGATGGATCATATCTTGATACTGATGCTCTGGCAGACGGGCTACCCTGTATGTGTCGCTGTACCCC  
ACAGAAGGGGGCATGACAGGATATATTGACTGCATTCTGTGCTGAACTGGGTGTGCGAACACGAAAAACGCGGTTTTTCA  
GCATATCCAGAGCCTGCCCGCGGACAGCAGAAAGAGGCTGCTGCTGCGTACGCGCGCTGCCCTGCTGTTCCGTCGCC  
GTGAGGTTTCAAGGGACAAATGTTCCGGTATGGTGGTATGGAGGATGGCGAAATATGACGGGAAATACCCCTGTGACGCT  
CTGGTTCGATGCCGATGCAATATGGTATTGTGACGCATCTGAGTGACGGTTCCTTATGGGATCGCCAGGCTTTTCCGGA  
CACCACAATCCTTTCAGATCCGTCGCCGAAAAGGCTGAAATATGACAGGTGATGGTGGCAACAGCGCGGCTCTGCTCAGTT  
TTACATCGGCACATACCGACGCTGCGCTCAGCAGGGCTATGAAGACACGATGCTGGCGATGGAGCATATCCGGAACCCG  
CTGGCAGCACGTCAGGCATGACCCGCTCAGAGCGGTTATGACGAAAAGCCTGGATATAACCGAAGAGGCGAGTATTGGC  
ACTGAAAACCGGATGGCCCGGATTAATAA

>Cluster\_22329

ATGATCACCATTCGTGATGATAGCGCTCAGGCTGGCGTCTCTGTGGCAACGGTTTCCCGGTGCTCAATAACAGCAGCGT  
GGTCAGTGCAGTACCGCTGAAGCAGTAATGAAAGCGGTGAGTGGATTATCGGCCAAACGCCAATGCCAGGCGC  
TGGAACCTCAGGTTAGCGATACCATTTGGCGTGGTGGTATGGACGTTTCTGATGCGTTTTTCCGCGCGCTGGTAAAAGCG  
GTGGATCGGTCGCCAGCAGCATCAGAAATACGTTAATCGGCAATAGCTATCATGAAGCGGAAAAAGAGCGTCAACC  
CATTTAGGTTGTTAATTCGCCAGCCTGTTAATGCCTGATTGTTTCACTAAAAGCATTTGAGTGACGATGACGACAAAT  
TTATGGATAACATTTCCGGTATGGTGTAAATCAACCGGTTGTTGCCGGGTACGCCCATCGTTGCGTTTGGCTGGATAAT  
CTCAGCGGTGCCGAATGGCGACGCGCATGTTGCTGAATAACGGTTCATCAACGATTTGGTTATCTTTCTCCAGCCAGG

CATTGAAGATGACGCCATGCGTAAAGCAGGCTGGATGAGTGCCTTGAAGAGCAGGATATTTATCCGCCGAAAGCTGGA  
TTGGCACTGGCACCCGGACATGCCGGCGGTGAGGCGCGATGGTTGAACTGCTGGGGCGAACCTACAACCTAACCGCT  
GTATTTGCTTATAACGACAATATGGCCGCTGGCGCACTGACAGCATTTAAAGATAATGGCATTGCGATTCCGTTACATCT  
CTCAATCATTGGTTTCGATGATAATCCCATCGCCGTTACACCCGACCCGCAATTAACGACTGTGCGTTATCCCATTTGCTT  
CAATGGCTAAATAGCTCCGAACTGGCCCTGACGGGGCAGCAGACAATATTGATCCCTGCTGCCAGCCACTGGTTTATG  
CCGACGTTAGTGCCTGCCATTTCTGTCGCAACGCCAGCAATGCGGGCGGATCACTAATCAACAACTAGCGCATGTA  
A

>Cluster\_60288

ATGGATTTATCGCTATTTAAAGCGTTGAGCGAGGCAGATGCGATCGCCTCCTCGAACAGGAAGTGGCGCAGATCCTGCT  
GGAAGAAGCGGATCGCCTGCAAAAAGAAGTGGCATTGATGGTCTGGGATCGGTGCTGATCCGCTGAATGAATCGACAG  
GTCCGAAGGTGATGATCTGTGCGCATATGGACGAGTGGGATTATGGTGGCAGCATCTCCCGCGAAGGGGGCATTGAT  
GTGCTGCCGTTGGCAACGTACGCATGGCTGCCCGCAGCTGCAGCCGGTGGCGATCACCACCCGTAAGAGTGCAAAAT  
TCCAGGCCGTGCTTACGGCGACCCGGCAGGGGAATGACGCGCCATGCGCGTGGACATTGGTGGCGCTCCTATGACG  
AAGTATGACAGCGGGAATTCGTCGCCGATCGCGTCAGTTTGATACCCTTTTTCAGGTTCTCCCTACCAGCGAGTG  
ATGGGAAAAGCCTTTGATGACCGCTCGGTTGCTATCTGCTGGTACGTTACTGCGGAACTGCACGACGCGGAACTACC  
TGCGGAAGTGTGGCTGGTGGCAAGTCCAGCGAAGAGTGGGATTACGCGGGGGCAAACTGCCACCCGCGGGTGTCCG  
CGGACGTCGCCATTTGTGCTTATACCCGCTGCTGGCGCAAAAACCTTTGATTATGGCGCGCTAACCATCGCCGATTGGT  
AACGGCCGATGCTGGTGTAAAGCGACAAGTGCCTGATGCGCGCCAAAACCTTACCCTGGGTCGAAACCGTGGCGG  
AGAAATTTGGCGTGGCCTTGCAGGAGATATGTTTCAGCAACGGCGGACGGACGCGGGGGCGGTGCACCTAACCGGACCG  
GCGTGCACACAGTGGTGTGGGGCCAGCAACCCGCTGATGCGCGCATCGATTGCGGATTGCCGCGCATTTTTCAGATG  
CAGATGACGACAACTTTTATCTGCCCCATTTCAACGCTTACGCGTGAGACGGTTTTCAACTGACGGATTTTCAGATGA  
A

>Cluster\_14125

ATGAAAGTTATGCGTACCACCGTCGCAACTGTTGTGCGCCGACCTTATCGATGAGCGCTTTCTCTGTGTTTGCAGAAGC  
AAGCCTGACAGTGCAGGTGCAACCTTCCCTGCGCCGGTGTATGCCAAATGGGCTGACACTTACCAGAAAGAAACCGGTA  
ATAAAGTTAACTACCAGGATATCGGTTCTTCCGGTGGCGTAAACAGATTATCGCTAATACCCTTGTATTTGGTGCCTCT  
GACGCGCCGCTGTCTGACGAAAACTGGCTCAGGAAGTCTGTTCAGTTCCCGACCGTGATTGGCGCGTGGTGTGCTGGC  
GGTTAACATTTCCAGGGCTGAAGTCTGGCGAACTGGTGTGGATGGTAAACCCCTCGGCGACATCTACCTGGGCAAAATCA  
AGAAGTGGGATGATGAAGCCATCGCCAACTGAATCGGGTCTGAAACTGCCCTTACAAAAACATTTGCTGTAGTACGCCG  
GCAGATGGCTCCGGGACTTCCCTGCTTTCACCAGTACCTGGCGAAAGTGAACGAAGAGTGGAAAAACAACGTTGGTAC  
TGGCTTACCGTAAAATGGCCGATCGGTTGGGCGGTAAGGTAACGACGGTATCGCCGCGTTGTTTCAGCGTCTGCCG  
GTGCAATTTGGTTATGTTGAATATGCTTACGCGAAGCAGAAACCTGGCGTACACCAACTGATCTCCGCTGATGGTAA  
CCGCTTAGTCCGCAAGAAAACTTCGCTAATGACGCAAAAAGGTGCAGACTGGAGCAAAAACCTTCGCTCAGGATCTGAC  
CAACCAGAAAGCGAAGATGCATGGCCTATTACCTTACCACGTTTATCTGATCCACAAAGATCAGAAGAAACAGAAC  
AAGGCACAGAAGTCTGAAATTTCTGACTGGGCGTACAAAACCGGGGCTAAACAGGCGAACGACCTGGATTACGCCAGC  
CTGCCGATAGTGTAGTTGAACAGGTTCCGCGTGGCGTGAAGACCAATATTAAGACAGTAGCGGTAAGCCGCTGTACTA  
A

>Cluster\_36836

ATGACAACATTTTATTCAGCTTCATTTGTTAACCCGTTACCCTGCTGCCAACCTTAAACCGTATGATACCAGGTCGCCAAA  
AAGTGTGGTGGTGGTGGAGCAACGCGTCTGCGGTTTCTCGCAAAGTCTGAAACGTCGCTGGCGCACTTCTGCACCTTT  
TTGAACAGGCACCTGGGGCCATATTTGTTATTCGCAAGTGGGCGTATTGCGCGTGGAGGGCAACTATCTGATTGAGAAA  
GGAATCGAAGAGAAAAAGCCATCGAATGGGCGCAAAAATTGAGATATCTTTGGGAAAGCTAAAAACGACAAAAAAC  
AAAAGATCCGCTCACTAACCGCGAACTGAACAGTTAGTCCATATCAGCCCGGAGAAATTTGACGCGGTAAGTGTGCTGG  
CCCATCAGCTTGCAGAAAGAAAGCGCGCAAAAGAGAAATCTCGCGTTGTTACGCAAAAGACCTTACCGGATGAT  
ATTGCCATGTTTGGTGTATGCTGGCGAATAAACCCGAGTTTAAATGTTGAAGCGCCTGCCAGGTAGCGCACGCAATTTGG  
TGTGAGTGAACCGATTTGCGAAGATGATTTTTTACCGCGTTGATGATTTGCGCCAGGCTTTCGAAAGATGCCGGTGGC  
GGCATCTTTGGTGAACCGGATTCGGTTCTGCACGTTTACACCTATACTGCAATGATAAAGATCTGCTGGTGCAGAAAC  
CTTGGCGGTGACGAAGCGTTAGCTAATCAGACCATACGTTGCCCTTACGGAAGCCGCACTTAAAGTCTCCCAACCGGCA  
ACAGAACAGCTTTGCCAGCGTGCCTACGCTCCTGGGCGTGGCAGAAAAGGCACCGATCAACCGGTTCTCTGGCGG  
CAGCTTTCTATGAACCCATTAATGGCACCGGTCAGTTAGAGGTGGCGTGCAGCGTATTAACAATCTTTCGCGAAAATATG  
AATACGGTCTACGAACAGAAAGCCGATTACGCAAGTTTTGACGTGATGAACAAACAGGGAAGCATGAAGGACGTGCTGGA  
CTTTATCTGCGCGTAA  
A

>Cluster\_58677

ATGCTGGAAGTGAATTTTCCAGACGTTGGGCAACCATTTGCCGACTATTAATGAAACGCTGCCCGCAATGGCATTGAC  
TGCTATCTTTGGCGTCTCCGGTGGCGAAAACTTCCGCTGATTTAACGCCATCAGTGGACTGACGCGCCCGCAAAAAGCC  
GAAATGCTCAATGGGCGGTAATAATGATGCGGAAAAGGTTATCTGCTGACGCGGAAAAGCGTCCGCTGGCTAT  
GTTTTTTCAGGATGCGCGGCTGTTCCCGCATTAACAAGTGGCTGGCAATCTGCGTACGGCATGTGCAAAAAGTATGGTCA  
TCAGTTGATGATAAGTGGTGGCGCTTTTAGGCAATGAACCGTTGCTTGACCGTTTACCAGGCAGCTTGTCCGGAGGGCA  
AACAGCGTGGCGATTTGGTGGGCTTTGCTGACAGCACCGGAAATGCTGTTGCTGGATGAACCGTGGCTACTGGAT  
ATTCGCGTAAACCGCAACTGTTGCTTATCTGCAACCGCTGACACGGGAAATCAACATTCGATGTTGTATGTCAGCCA  
TTGCTGGATGAGATCTCCATCTGGCAGACAGATGATGGTACTGGAACCGGTCAGGTGAAAGCCTTTGGCGCGCTGG  
AGGAAGTGTGGGGCAGTAGCGTGAATCCGTTGGCTGCCGAAAGAGCAACAAAGTAGCATTTGAAAGTGAAGGTTGCTT  
GAGCATCATCCGCATACCGGATGACCGGCTGGCGCTGGGCGATCAGCATTTGTTGGTCAATAAGCTGGAGCAACCGCT  
GCAAGCTGCGCTACGTATCCGATTCAGGCTTCCGATGTTTCTGCTGTTTACACCGCGCAGCAAAACAGCATTCGTA  
ACGTTATGGCGGCAAAAAGTTGTTAATAGTTATGACGACAAACGGCCAGGTGGAAGTGAAGTGGAGTGGCGGTAACCG  
CTGTGGGCGGATACAGCCCGTGGGCCAGGGATGAACTGGCGATCAAACTGGCTGTGGCTGTACGCGCAAAATTAAG  
TGTGTCGATAAACCGCTGA  
A

>Cluster\_20752

ATGGCAGTACGAAAACCTGCACACAGGTAATGGATATGCGAATGCTACCTGCTGGGCGCAGCGGGCGCGTGTGCGTAA  
CGATTCGCCACCAAGCGCAAGCACTGGCTTTTGGAGCTCACACAATGATGAGGCAGAGACTAAGCTTTGGCTGGCG  
AATCGGTAGCCCTTCGAACCTTACAGGATATCGTTGAACTCTGGTTCAAACTGCACCGCAAACTCCCTGACCTGCGGAG  
CATGTTTACGACAAGTTGATACTGATGGTGCATGCTCTCGGAAATCCCTCGCCACCGATCTAACATCCAAAATGTTCCG  
GCACTATCCGATGAGCGCTGACGGGTGAAATCTACTTACGCAAAAATGGAAGAAAGGAGCCAGCCGCTTAACATCA  
ATCTGGAGCAAGCTATCTGAGTGGGCTTTAGCGAGTTAGCCGACTCGGTGAATGGACAGCACCAATCCACTGGAG  
AACATGCGTAAATTCACCATTTGCCGAAAAGAAATGGCCTGGCTGACACATGAACAAATCACAGAGCTTCTGTTGACTG  
TCAACGCCAAAGCCCTGCTCGCTTCTGCTGCAAAAATCTGCTGAGCACCGGAGCAGCTTGGCGGAGCTGTGAAC  
TGACAGCTTCTCAGGTCACGAAATACCGAATCAGATTTGCTGAGAACTAAGGGCAAAAACCGCAGCATTCGATCAGC  
AAAGAGCTGATGAGGAAATGTTGCTTACCGCTAGACGGCTCAAATTTACTGACTGCTACTTCCAGTTTTCAGCGTGT  
GGATAGAACCTCGATCTGACTACACGCGGGCAACTTACCACGTTTACGCCATACGTTGCGAGCACATTTTATGATGT  
CCGGCGGAAACATTTGCTTTGCAAAAATCTGGGCCACCAGATATAAAAATGACTATGCGCTATGCACATCTTGGC

CCTGATCACCTTGAACAGCACTGCGTTTCAATCCATTAGCCACACTTTCACATAAGCAACGAGCCTTGAAGCAAACAGCTAA

>Cluster\_26280

GTGCGGGTATTACTTCGACCTGTCTGGTACCGGAACTCGGGCTGGTGATCGTTAAGCCGGGCGTGAATCCATGCCGGT  
ATTCACAATAACCCGGGTATTGGTGGAGCCGGAACGAAAAGCATGCGTAATCTGCCGTCCGGGGTCCCTGCCGTTTC  
GCCAGCCGCTGGTGAAGACAAAACATTGCTGCCGTTTTTTCAGTAACGCACGGGTGATTCGTGCTGCTGGTGGTGGT  
GCATTGCTGACTGGCTGTGCGCCATATTAATTCCTGCCAGTGGCCACACGGGATTCATCACAGCGAAACCGTCAAT  
TCACCGTTATGGTACCGGCGCAATGGTGTGTGCTGGCACTGCGACAACCAGCTGCGTGACCAGACATCCGAATCACTCG  
AGCAACTTGTCTCAAAAACCTGTCAGCATGGATGATTGACGTACCGTACGCAATAGCGGTACGCAAGGCGGTGAA  
TTATCTCTGGCTGAATTTATCTGGTGGGCGGTCGCAATCAGGTGGCGGACGCGCTACCGGAAGCGGTATTACGTCGTT  
GCTGGGGTTCGCTGCGGAAAAATCCGCTCAATGTACCGTGAAGCGACATCGTACCGGGAGAGCAGACCACCAGCA  
TACTGAAGCAGCGCAAAAAATCTTGGCCGCTGCTCAGCCACCAGCAACAGAACCACCACAGGAAAAGACGGTG  
GTCAGCATGCGCTGATCTGAGCCTCCGGAATCTTTTATGAAACGACCTAAACGTCGCGCTGGGTAAACGAAAAA  
CACACGCTGGGTGAAGACTCAGCCGTGTGCGTGTGTGGTAAGCCAGCCGACGATCCCATCACCTGATTGGTCATGGT  
AGGGCGGAATGGGACAAAAATCTCACGATATTTTACGCTACCGCTGTGTCGGGAGCATCACACGAGCTTACGCGGAT  
CCGCTGGCTTCGAAGAAAAGCATGGCTCTCAGGTTGATTTAATTTTTCTGTTTTCTTGATCACGCCTTGAACCTGGCGT  
GCTTGGGTAA

>Cluster\_59933

ATGGGAAAAGCATAGTCGTTGTTCTGCGGTCATTTTACCCTGGCGGTCCATTTACCATTGTAATAATTTTTGGC  
AGCAACTAATAAAGAAAATGTCAGTTTATCGCATTAGTCCATTCGTAAGAGTAAAAGAAAGTTATCCATGGG  
TTAAATTCATTGAGTTTCTGAGGTTAAAGGTCGTGGCTAAAACGTTTGACATTTGAATATGTAGTTTGAAGAAAAT  
TCAAAGAGCTGAATGCTACGCATGGATTGTCTGCATGATATACGGCCAAATGTCGCTCAAAAAAGATATGTGTA  
TTGTCATAACCCCTGCACCTTTTTATAAAGGAATTTTATTCCTGAAATTCCTTATGGAGCTAGCTTTTTCTTATTTAAA  
TGCTATACGGGTATATAAATAAACAATTAATAAATAAATACATGCAAGTGTGTTTGTCAACAATTCGGATGAAAGAAA  
TTTTATCAAGAAATATCTATAAATAAACAATTCATTTGTCAGTCGGCCAGAAATTAATATCTGATAAAGCCAACTACTGA  
TGATGATTCTCAATTTAAGAATAACCCCTCTGAGTTGACAATATTTTACCCTGCTGTTCCACGAGTATTTAAAATTACG  
AGCTTATTTAGTGCAGCAAGGAAATGAAAGAAACAATCAATATAAATTTCTGTTACTATCAGTGGTACAGAAAAT  
CCGTATGCAAAAATATATTTAGTCTTGCAGAGGACTGGATAATGTTTCTTCCCTCGGGTACTTGGATGAAAGAAA  
CGATCATTGTTATAATATTTAGATATAGTTTGTGTTTTCCCTCTAGGTTAGAAACATGGGGATTGCCGTTGCTGAAGCTA  
AAGAGCGAGGTAAGTGGGTATTAGCATCAGATTTCCCATTTACTAGAGAACTCTTGGTAGTTATGAAAGAAAGCTTT  
TTTTGATTTAATAACGATGACATGTTAGTTAACTTATTTGACTTCAAAAAAGGTAACCTCAAAAAAGATATCTCTGA  
TGCAAAATTCATTTATCGTAATGAAAATGTATTAGTTGGGTTTGTATGAACAGTAAATTTTATTACTGAAGAACATTGA

>Cluster\_26345

ATGAAGTATATAGCAACATCTGTAGTGGCAATGCTGCTTATCGGGTGTGATAATACGCAAAGTAAACAATTCATCCCC  
GTCAGAACAGAGAGTCCGGCTGTTACGCTCAAATCTCAACCGGTTTCGATAGTCAAGTAAACCGGACGCCAGCTG  
CTGCGCTCAGTGTGAAAGTACGTCGCGAGGTTGGGGAAATATCCAGAAAACGCTTATTTAAGGAAAGGTCGTCAG  
GCTGGACAGCCTCTCTACCAGATTGATGCGGCCAGTTATCAGGCTGCATGGAATGAAGCCCGGCGAGCATTACAACAGC  
ACAGGCTAGTAAAGCCGATGCCAGAAAGCCGAGCCTTATGCCCGACTGGTGAAGAGAAATGGTGTTCACAACAGG  
ATGCTGATGATGCTCAGTCTACCTGTGCAAGAATAAAGCAAGTGTAGAGGCGAAAAAGCCGACTGGAACCTGCGCGC  
ATTAATCTTGGCTGACCAACCGTAACCGCAGGATTTCCGGGCGTATTTGGTATTTCTGTCGTAACCCCTGCCGCTGCT  
GACCGCTGCGAGGATACAGCTTAACGACTATTCGTGCTGATGATGATGTCGACCTCACTGCTCCAGTGTGCG  
ATTTATTTAGTCTGCGTAAACAGTCACTGGCCAGCAACAGTGCACCATGAGCGTCTCACTTATTTCTGGAAGATGGCACA  
ACCTACAGCGAAAAGGGGCTCTGGAACCTCACCGAAGTCCGCGTGGATGAGTCTACCGGTTCCGGTACATACCGGCAAT  
TTTTCCCAATCCACAACAGCAGTATTACCGGGAATGTTGTTGTCGCGCTCGTGTGATGAAAGCGTGTGAAACAGCTA  
TTCTGCGGCTCAACAGGCGGTTACGCGGATGCTAAAGGCAATGCAACTGCGCTGGTGGTGAATAAAGACAATAAAGTA  
GAGCAGCGAACGCTCGAAACGGGAGAAACGATGGTGATAAATGGCTGGTGTGAAACGGCCTGCACAACGGCGACCGACT  
GATTTGTAAGGTTCTGCCAAAGTCACTTCAGGGCAGACCCTCAAGGCTGTTGAGTTTCAAGGCTAATGAGGCAACGCCT  
GA

>Cluster\_41773

ATGATTTGGCAACTTACCAGCAGATAAAGCTGGTTCGGCTACGTCAGCGTTTTAGCTGGGTTGAGGAGATGCATCACAC  
GCCACAAGACCCCTGAGCATCATGGTGAAGGCGAGCTCGCGGTACATACGAAAATGGTGTCTAACGCCCTCATTACTCTGT  
CAGAATTCAGCAACTCCCGCTCAACAGCAGGAAGTTTTATGGGCGGCGGCTTATTGCATGATGTTGAAAAGCGCAGC  
ACTACCGTGCAGGAAAACGGAGCTATTCAGTCTCCTGGTCAATGCTGTCGCGGGCGAACGACGCCCCGACAAATTTATG  
CGCGATATCCCAACCGGTTCTGCTGCGCGAGCAAAATGTTGCACTGGTACGTCGATGGGTTACCCTGATGTTGTTAC  
TGGAAACGTCGCAACCGGAGCCTTGTGCTCAGCGCTCAATGCGCATGCAACGCGCTGCTGCTGCTGCTGCTGCTGCT  
GCCGATCTGCTGGTTCGCAACGCGGATCAGCAATCAATGCTGGAACGATCGATCTGTTGAGCTGTTTTGCCATGA  
GCAACAATGCTGGGAAAATGCGCCGTTCTGTTTCTGATTCGCAAGCTGGCAATACCTGACCCATGAGCAAAAGTTCT  
CTGATTTTGTCTCCTGGGAGGCTGAACCTTTTGGGCTATTTGCTGTGGCTTACCGGTTAGGGCAAGATCGCTAT  
ATCAATGAACAGTCCAGGGAATGGAGCTTATCAGCCTTATGATGATGCGGCGGCAATCAATGCCAGTCCCGACGACAA  
AACCGCTACCGGGGCTATTTGTGCAACAGGCAAAAGAGGCGCGCTTTTTTACGCGAGAAAAGCGTTCATCTGGA  
ATGCAACGAACTTACCAGCAGCTACGAGCCAGCTCATCAGTCTGTTTACGGCTTACGGCGCAAGTAAAATCGTT  
TATCTGGAAGTGCATGGGCGCAATGGAAGCAGCAAACTCCAGCAGGATGATGAGTTCCTGAAAGCGGTGATGATGCG  
GATGGCTCAAGGCTGGAAGTTCTCAACTTGTATGAAGCACATAGCGTGGAGTATCGGGTATTGAAAGGTA

>Cluster\_55636

TTGAGAGTCTACACGCTATAAGACCTACTATCCCAGTACCTACGGCGGATTGAGCAGGTCATTTATCAGCTAAGTCA  
GGGCTGCGCCCGCGGGGAAATCGCAGCCGATGTTTTACTTTTTAGCCCGGACAAAAGAGACAGGTCCTGTCGCCCTACGAAG  
ACCATCGGGTCAATTTATAAATAAGCAGCTTTTTGAAATGCTCCACGCGGTTTTCTGTTGAAAGCGTTAAAGCGTTTTAAG  
CAGATTAAGATGATTACGACATCATCACTACCAATTTCCGTTTCTTTCATGGATATGTTGATCTCTCGGCGCGGCT  
TGACGCAAGAACGGTGGTACCTATCACTCGGATATTTGTAACAAAACCGTTAATGAAGTTGTACCAGCCGCTGCAGG  
AGCGATTTCTCGCCAGCGTAGACTGCTGCGCTCGTCCGCAACGCAAGATAAGTACATTTCTTCCAGCTCTGCGGGGCTG  
CAGGATAAAAACCGTGGTATCCGTTTGGTCTGGAGCAGCATGACGTGCAGCAGCATCCGAGCGGGTGGCGACTGGCG  
GGAACCGTGGCGATAACTTCTTCTCTCTGCTGCGGCTTTCCGCTACTACAAGGGTGCACATTTCTGTTGATGGC  
CCGAGCTAGCCGCTGCGGTTGGTGTATGCTGCGGGGCGGCGCTGGAGCGGAAGTCCGCGCTGAGGCGGCAACCG  
GGGCTGAGCAATGTTGGTGTACCAGGCTGCTCAACGCAAGATAAGTACATTTCTTCCAGCTCTGCGGGGCTGGT  
ATTTCCCTCGCATCTGCGCTCTGAGGCTTTGGCATTACGTTATGGAAGGCGCAGCTTTGCAAGGCGCTGATCTCTT  
CGGAGATCGGTACAGTACTCTTTTCAATTAACAGGCAAAAGTGGTGGTGGTGGTGGTGGTGGTGGTGGTGGTGGTGGT  
CTGGTGGAGCGGATGAAAGTACTGGAATAACGAGGAACTCAACCGCTATGGCGAAAACCTGCGGCTGCTGTTGGA  
AGAGATGTTTACTGCGGACATATGATTGACGCTATGTTCAATCTTACTACTACATTTGTTGAAAGCAAACTCTGA

>Cluster\_59047

ATGGCAGCCAGACCGCGTAAGAATAATGTTTCAGTCCCTAECTTATATCCGCTTTATAGTAGGAAGGTAATAAAGTCTA  
TTGGCGGTATAAGCATCCAGTGACAGGAAAATTCATGCTTTGGGAACAAACGAAGCTGAAGCTATCGCTATTGCCACTG  
AGGCCAACACTCGCTGGCTGAACAAAGAACCCGGCAGATTCTGGCTATCAGTGACAGGATCGCAACCAGCAAAGGAAAG  
GCTATCACAACTCAACCTGGTTAGATCCGCTATCAAGCATCCAGGATGACAGGCTTAAAAGTGGTGAATAAGACTCAA  
CACCTATAAACAACAAAGCTAAACAGTATCCTTGGCTCAGAGAACGAGCAGGAATGAAGTTGATCTCAGCGATATGTCA  
GAGATATAGCACAAATGGCTTGATGAGTATATCGCCGCTGGGCGGCAAGAATGGCACAAGTAGTTCCGCTCCGCTGATT  
GATGTTTTCAAAGAGGCGCAGCACTACGGAGAAGTACCTCCTGGCTATAACCCAGCATTAGCCACTAAACACCAAGAAG  
AAAAATTACCCGCAACCGCTGAGCCTTGAAGAATGAAAAAAATCTTCGATATCGCAGACGCTACTCATCGTTACATGG  
GAAATGCCATGCTGTTAGCGCTGTTACTGGTCAGCGGTTAGGTTGATATTTCCGCTATGAAATTTAGCGATATTTGGGAT  
GATCATCTTCATGTCATTCAGGAAAAGACCGGGAGCAAAATCGCAATTCCTCTTTCTCTTCGCTCAATGCGATTAACTG  
GAGTTTACGCGATGATGAGCCGCTGCGGTGACTATGTCAGTCACTAGTGCATCTTAGTGCATTTTTTTCGTTCAACTTCAC  
AAGCAGAGCGGGGAGGTTAAAGCCAATACATTCAGCATGAATTTTAGTAAAGCAGAGATTTAGCAAGAAATGAC  
TGGGAGAGGGTTTACCCTCGCACATTCATGAGCAAAGCTCTTTATCTGAACGCTCTGTATAAAGAACAGGGGTTAGACAC  
ACAAAACACTTGGTCATAAAACACAACAACAAACCGATCGTTATCATGATGATCGAGGTAAGGATGGAGCAAAGTAG  
CGTTGTGA

>Cluster\_38697

ATGGCTAAGCAAGATTATACGAGATTTTAGGCGTTTCCAAAACAGCGGAAGAGCGTGAATCAAAAAGCCCTACAAACG  
CCTGGCCATGAAATACCACCCGGACCGTAACCAGGGTGACAAAGAGGCGAGGCGAAATTTAAAGAGATCAAGGAGGCTT  
ATGAAGTTTTTACCGACTCGCAAAACGTCGGGCATACGATCAGTATGGTCATGCTGCGTTTGGAGCAAGGCGGCATGGCC  
GGCGCGGTTTTGGCGGCGGCGCAGACTTCAGCGATATTTTGGTGACGTTTTTTCGCGGATATTTTTGGCGGCGGACGTGG  
TCGTCACAGTGGCGGCGGCTGATTTACGCTATAACATGGAGCTCACCCTCGAAGAAGCTGTACTGGCGTGACCA  
AAGAGATCCGCATTCGACTCTGGAAGAGTGTGACGTTTTGCCACGGTAGCGGTGCAAAACAGGTACACAGCCGAGACC  
TGTCGACCTGTCTATGGTTCTGGTCAAGTGCAGATGCGCCAGGGTTTTCTTTGGCGTGCAGCAGACCTGTCTCACTGTCA  
GGGCGGAACTACGCTGATCAAAGATCCGTCGCAACAAATGTCATGGTCACTGGTCTGTTGAGCGCAGCAACAGCTGTCCG  
TTAAAATCCCGCAGGGGTTGACACTGGAGACCGCATCCGCTTTCGCGGCGAAGGTGAAGCGGGTGAACACGGCGCACCCG  
GCAGGCGATCTGTACGTTTCAAGTTTAAAGCAGCACCAGTTTTCGAGCGTGAAGCAACAACTGTATTGCGAAGT  
CCCAGTCAACTTCGCTATGGCGGCGTGGTGGTGAATCGAAGTACCAGCCCTTGTGGTCCGCTCAAACTGAAAGTGC  
CTGGCAGAACTACGCTGATCAAAGTGTTCGCTATGCGCGGTAAGGCTCAAGTCTGTCCGCGGTGGCAGCAGGGTGTAT  
TTGCTATGCGCGTTGTTGTCGAAAACCGGTAGGTTTGAACGAGAAGCAGAAACAGCTGCTGCAAGAGCTGCAAGAAAG  
CTTTGGTGGCCAAACCGGCGAGCACAACAGCCCGCTTCAAAGAGCTTTTGTATGGCGTGAAGAAGTTTTTTACGACC  
TGACTCGCTAA

>Cluster\_44922

ATGTCAGGCTCCCTTATTCCGAACGCCACCAGCGTCCGTCGCCACATTCAGCAACGCATCTGGAGGTAACGTGCGGGT  
ATTACTTCGACCTGTTCCGGTACCGAACTTGGGCTGGTGGTGTAAAACCGGCGCTGAATCCATGCAGGATTTTCATA  
ACCTCGAGTCTTGGTGGAGCCGGAACGAAAAGCATGCGCGGCTGCGCTCCGGAGTCTGCTGCTGTTCCGCCAGCCG  
CTGGCGGAGATAAATCATTAAGTCCATTTTTCAGCGTAAAGCGGTTGATTCGCTGCTGGTGGTGGTGGTGGTGGTGGT  
TGACTGGCTGTACGCCACATTAATCCGTCAGTGGCCTCATGGTACTACCATCACAGTGAACCCGTCATACATCGTT  
ACGTCACCCGCGCATGGTGGTGGTGGTGGTGGTGGTGGTGGTGGTGGTGGTGGTGGTGGTGGTGGTGGTGGTGGTGGT  
GCTACCAAAACCTGTCAAGCATGATGATGATGATGATGATGATGATGATGATGATGATGATGATGATGATGATGATGATGAT  
GGCTGAAATATCTGTTGGTGGCAACATAAATAACGTCAGCGGACGCACTACCGGAGACGGTGGTGGTGGTGGTGGTGGT  
TACCGCGGAAAAAATTCGCTCAGTATACCGCGAGAGGACATCGTGGCGGAGAGCAGACCCGACAGCATGCTGAAG  
CAGCGCACAAAAAATATTCGCTACTGCTCAGCCCAACAGCAAAACCCGCCACAGGAAAAGACGGTGGTAAAGCATTGC  
CGTTGATCCGGAGTCAACCGGCTCAGTATCTCCAGCGCCAGAAAACACGACGGGAAGAGATGCCGTGTATACAGCGTGG  
TAAAAACGCGAAGATGCATGACGTGTGGTAATCAGGCAGATGATCCGATCACATCATTTGGTCACTGGACTGGGAGGGATG  
GGAACAAAGGCTGATGATTTGTTGTTATTCGCTGTGCGGTAATGCATAGCGAATACACGCCGGGTAAAAGATTT  
TGAAGAAAAACAGCGCAGCCAGCTGTTGTTGCTGATTCGTTTTTAAATGCACGCGAGAAAATTCGGGTGCTGAAAGTGA  
AAGCATGA

>Cluster\_28234

ATGCAAAGCGTTACCCCAACATCGCAATACCTGAAGGCGCTCAATGAAGGCGAGCCATCAACCCGACGAGCTTCAAAAAGA  
GGCGGTACGCGCCTGGAATTTATTCAGGAATCAATAGCAGCCTCCAGCCCCAGGACGAGTGGGCTAATGG  
CGCGGGTCCGTAAGCTGTGGGTAAACCGGAAGACACAAGCATACGCGAGTGGCTGCTTATATATGTTGGGCGGTTGA  
GGACGCGGAAAAACCTGGCTGATGGACCTTTTCATCAAAGCTGCGGGAGAGCGGAAACAGCGTCTGCACTTTACC  
TTTTATGCTGCGGGTGCACGAAGAGTGAACGAAATACAGGCAAAAGCGATCCGCTGGAATTTATGCGGATCGCTTTA  
AAGCAGAACTGACGTGCTCTGTTTTGACGAATTTTTGTTGTTCTGATATACCAGTGCATGCTACTTGGCGGCTGATG  
AAAGCCCTGTTCCGCGGTTATACCTTGGTAGCGACTCAAAATATTCCTCCGGACGAACTTTATCGAAATGGCCTGCA  
ACGTGCGGTTTTTTGCTGCAATCGATGCCATTAACAGCATTTGATGATGATGATGATGATGATGATGATGATGATGATGAT  
GACTGCGTACACTCACTCAGGCGCATCTGTGGCTTTCGCCACTCAACGATGAAACCCGGACGCAAAATGGATAAATATGG  
TTGGCGTGGCGGGGTAACAGGAAAATTCACGACGTTAAGAAATTAACACCGGCGTTGGCGCAATGGGCGCTGCA  
GAACCAGACGCTGGCAGTTTCTTTTACTACCTTTGCGCTGATGCCCGCAGTACAGCATGACTATATTGCGCTCTCACGTC  
TGTTTACACAGTGTGTTGTTGATGTGCCGGTATGACGCGGTTGATGGAGAGCGAAGCGCGGCTTTATGCGCTG  
GTGGATGAGTTTTACGAGCGCATGTCAAATAGTGGTGGTGGTGGTGGTGGTGGTGGTGGTGGTGGTGGTGGTGGTGGT  
GCTGAAGTTTGATTCACGCGTTGCCGTGTCACGCTGCAAGAGATGCAAGCGAAGAGATTTGAAGCGCGAGCATTTGG  
CGGGTAA

>Cluster\_14345

ATGGACCGCATTTATCAATCACCAGGTAATACATCCAGGGCGCTGATGTGATTAATCGTCTGGGCGAATACCTGAAGCC  
GCTGGCAGAACGCTGGTTAGTGGTGGTGGTGGTGGTGGTGGTGGTGGTGGTGGTGGTGGTGGTGGTGGTGGTGGTGGT  
ATGCTGGACTGGTAGTAAATTCGCCGTTTGGCGGTGAATGTTCCGCAAAATGAGATCGACCGTCTGCGTGGCATCGCG  
GAGACTGCCAGTGTGGCCTAATTCGCTATCCGTTGGCGGAAAAACCTCGATACTGCCAAAGCACTGGCACATTTCAAT  
GGTGTTCGGGTAGCGATCGACCGCATTCGCTCTACCGATGACCGTGCAGCGCATTTGCTGTTATCTACACCGATG  
AGGTGAGTTTGAACGCTATCTGCTGTTTGCCTAATAACCCGAAATAGTGGTATGTTGTCGACACAAAATCGTCCGGCGCA  
CCTGCACGCTGTTAGCAGCGGTTATCGCGGATGCGCTGGCAACCTGGTTGAAGCGGCTGCTGCTCTGATGCGGCGC  
GACCACATGGCGGGCGGCAAGTGCACCCAGGCGGCGTGGCCTGGCTGAACTGTGCTACAACCCCTGCTGGAAGAAG  
GCGAAAAGCGATGCTTCCGCCGAACAGCATGTAGTAACCCGCGCTGGAGCGGCTGATGAAAGCGAACCTATTTG  
AGCGCGGTTGGTTTTGAAGCGGCGGCTGGCGGCGCTCACGCGGTCATAACCGGCTGACCGCTGACCGGCGCA  
TCACTATTATACGGTGAAGAAGTGGCATTTGGTACGCTGACGAGCTGGTTCGAAAACGACCGGTTGAGGAAATCG  
AAACCGTAGCTGCACTTAGCCATGCGGTAGGTTTGCCTAATACTCGCTCAACTGGAATATAAAGAGATGTCGCGGCG  
AAAATGCGAATTTGGCAGAAAGCGCATGTGCAAGGTTGAAACCATTTCAACATGCTGCGGCGGCGGACCGCATCA  
GGTTTACGCGCTCTGCTGGTAGCCAGCAGTACGGTACGCTTCTTCAAGAGTGGGAATAA

>Cluster\_22574

ATGAGCATTGAGATTGCCAATATTAAGAAGCTTTTGGTCGCACCAGGTGCTGAACGATATCTACTGGATATTCCTTC  
TGGTCAGATTGGTCCGCTTCTGGGGCCGTCGGTTCGGGAAAACACGCTGCTGCGGATTATCGCCGGCTGGAGCATC  
AAACCAGCGGCATATTCGCTTCCACGGCACCGAGCTTAGCCGCTGCATGCGCGGACCGTAAAGTCGGTTTCGTGTT  
CAGCATTACCGGTTGTTCCGCCATATGACGGTATTCGCAATATCGCTTTTGGCTGACGGTGTACCCGCTCCGAGGC  
CCCGAATCGCGGATCAAAGCGAAAGTGACAAAATGCTGGAGATGGTGCAGCTTCCCACTCGGAGACGAGTATC  
CTGCGCAGCTTCCGCGGCCAGAAACAGCGTGGCGCTGGCGCGCGCTGGCTGTAGAACCAGCAATTTCTGTGCTT  
GATGAACCGTTTGGCGCGTGGATGCGCAGGTGCGTAAAGAGTGGCTGCTGCTGCTGCTGCTGCTGCTGCTGCTGCT  
ATTCACCAGCGTGTGTTGACCCATGACCAGGAAGAAGCGACCAGGAGTGGCGGATCGTGTAGTGGTGTAGGCGAGGCA  
ATATCGAGCAGCGTGTATGACCCGACCGAGGTATGGCGGAAACAGCGACCCGTTTGTACTCGAATTTATGGCGAAGT  
AACCGCTGCAGGGAACCATTCGCGCGGGCAGTTCATGTTGGCGCACATCGCTGGCCGCTGGGCTATACACCTGCGTA  
TCAGGGCCAGTGGATCTCTCCGCGTCCGTTGGGAGTGGATATCAGCCGCTACCGCTCGATTGCGCGCTGCCGG  
TACAGGACTGGAAGCCAGCCGAAAGGCCACTACACCAATAGTCTGTCAGCCGCTGGGTTGGTACAACGAAGCGCTG  
ACGTCGTGATGCAACCGGACGACGCGCCGCAACGTCGAGCGCTTTATCTGTTGGTCTGCAACATGCGCGGCTGTATAA  
CGCGCAGGAGCTATTGAAACCCGCGATGAGGAACTTGCTCTCGCACAAAGCGCTGA

>Cluster\_57276

ATGAAATTTACCGTAGAACGTGAGCATTATTAATAAACCGTACAACAGGTGAGCGGTCGTTAGTGGTCTGCTTACCGT  
ACCGATTCTCGGTAATCTGCTGTACAGGTTGCTGACGGTACGTTGCTGCTGACCGGTAAGTACTGATCTCGAGATGAAATGG  
TGGCAGCTGTGGCGTGGTTCAGCCACACGAGCCAGGAGCGACGACCGTTCCGGCGGCAATTTTGTATATCTGCCGT  
GGTCTGCCGTAAGCGCGGAAATTCGCGTGCAGCTGGAAGGTGAACGGATGCTGGTACGCTCCGGGCGTAGCCGTTTTTC  
GCTGTCTACCTCCGAGCGGGATTTCCGCAACCTCGATGACGTCAGAGTGAAGTGAAGTGAAGTGAAGTGAAGTGAAGT  
CGATGAAGCGCTGATGTAAGCGACCCAGTTTTCTATGGCGCATCAGGACGTTGCTATTAATTAATGGTATGCTGTTTT  
GAAACCGAAGGTGAAGAACTGCGCACCGTGGCAACCGACGCGCCACCGTCTGGCGGCTGTTCAATGCCAATTGGTCAATC  
TTTTCCAAGCCATTCGGTGTATGCTACCGGTAAGGCGTGAATGAACTGATGCTGATGCTGACGCGCGGCGACAAATCCCG  
TGGCGGTACAGATTGGCAGCAACAACTTCGCGCCACGTTGGCGACTTATCTTCCACCTCAAATCGGTTGGTGGTCCG  
TTCCCGGATATCGCGCGTTCGCGGAAGAACCAGCAACATCTGGAAGCTGGCTGCGATCTGCTCAAGCAGGCGTT  
TGCCTCGCGCGGATTTCTCTAACGAGAAATTCGCGCGGTACGCTTTATGTCAGCGAAAACAGCTGAAAATCACCG  
CCAACAACCCGGAACGGAAGAAGCGGAAGAGATCCTCGAGTTACCTATAGCGGTGCGGAGATGAAAATCGGCTTCAAC  
GTCAGTTAGTGTGCTGGATGTTCTGAACGCGCTGAAATGCGAAAACGTCGCGCATGATGCTGACCGATTCCGTTCCAGCGT  
GCAGATTGAAGATGCGGCCAGCCAGGCGCGCTTATGTTGTCATGCCAATGAGACTGTAA

>Cluster\_25151

ATGGAAAACCTGCGGGTAGGAATCGTTTTTGGTGGTAAATCAGCGGAACATGAAGTGTCTCTGCAATCGGCAAAAAACAT  
TGTGATGTCATTGATAAAAAGTCCGCTTCGATGTTGTGCTGCTGGGCATGATAAAACAAGGCAATGGCACGCTAGCGATG  
CCAGCAATATCTGCTAAATGCAGACGATCCTGCCATATTCGCTTGGCGCTTCCGGCAGCAGCCTTGGCAGGTGCCA  
GGTAAACATGAGCATCAGCTTATCGACGACAAAACCGTACGCGTGGCGACGGTGGATGTCATTTCCCGATTGTCCA  
CGGTACGCTGGCGAAGATGGTTCCTTGCAGGGAATGCTGGCGGTCGCAATTTACCGTTTGTAGGTTCTGATGTTCTGG  
CTTTCAGCGGCTGTATGGATAAAGATGTCACCAACGCTGCTGCGCGATGCGGGCTGAACATTTGCGGCTTATTACC  
CTGACGCGGCTAATCTGTCACAACATCAGTTTTTCCGGAAGTGGAGTCTAACTGGGGTTACCGCTGTTTGTAAAACCGGC  
TAATCAGGGCTCTTCTGTTGGTGTGACGAAAGTAAACAGTGAAGAACAGTACACAATTTCCCGTGCATGCGGTTTCGAGT  
TCGATCATAAAGTATGCTGAGCAAGGATCAAAGTCTGTAATCGAATGCGCAGTCTTGGCAACGATAACCCGCA  
GCAAGCATACTGTGACGAGATCTGACTCACCAGCGATTTCTATGCTTACGACACCAAGTACATTTGACGAAGATGGCGGAA  
AGTGGTAGTTCCGGCAGCATTGCGCCAGAAATCAACGATAAGATCAGCGGATGCGGTTTACGCTTACAGCAGTTGG  
GATGCGCAGGCTGCGCGTGTAGACGTTTAAACCCAGAGAACGAAAGTGGTGTGATCAACGAGATCAACACCTGCGT  
GGCTTACCAACATCAGTATGTAATCCGAAGCTGTGGCAAGCAGCGGCTGCGGTTACACCGACTGATCAGCGTTTGTAT  
TGAGCTGGCGCTGGAGGCTCAGCTGCGGATAACGCACTGAAAACCAATGTAA

>Cluster\_26079

GTGATTAATTTCTCTGCAATTAATCTTCTACTGGTATACAGCGCGGCTCAGGCTGAGCGTATTCGCGATCTCACCAG  
TGTTCAGGGGTAAGGCAAACTCACTGATGGCTATGGCTGTTGGTGGGGCTGGATGGAACCGGTGACAGACAACCC  
AGACGCGCTTACCACACAAACGCTTAATAACATGCTCTCACAGCTGGGAATTTACCGTTCCGACGGGCACCAATATGCA  
CTAAAAACGTCGCTGCGTAATGGTGCAGCGCTCACTTCCGCGTGGACGCCAGGGGCAACCATCGATGTTGGTGT  
ATCTTCAATGGGTAATGCCAAAAGCTTGGCTGGCGGTACGTTGTTGATGACACCGCTTAAAGGGCTTACAGTCAAGTGT  
ATGCGCTGGCGCAGGGCAATTTCTGGTTGGTGGCGCTGAGGACCTCCGCTGGCGGTAGCAGTGTTCAGTGAACCACTG  
AACGGTGGACGGATCACCAATGGTGGGTTATTGAACGTAATGCCCAGCAGTTTGGCGTGGGAAATACCTTAATTT  
GCAACTTAACGACGAAGATTTACGATGGCGCAGCAAACTGCTGACACCATCAACCGCTGCGTGGATATGGCAGCGCA  
CCGCTTAGATGCGCGACTATTACGTTGCGGTACCAAGTGGCAACAGTTCCAGGTCGCTTCTTCCGATTAATTCAG  
AATATGCAAGTGTGATGTAATCCCGCAGGACCTAACAGTGTGATTAACCTGCGCATGCTGCGTGGTGGTATGCGGCA  
AGTGACCTCGACAGCTGCGCAGTAGCGCAGGGAATCTCTCGGTTACGGTCAATCTGACGGCAATGTCAGCCAGCCAG  
ATACACCGTTTGGTGGTGGGCGACTGTGGTTACTTCAAAAACGAGATCGATTTACGCCAGAGCGGCGGTTCCGCTGCAA  
AGCGTACGTTCCAGCCAGCCTCAATAACGTTGGTGGCGGCTCAATGCGCTGGCGGCTACCGGATGGATCTGATGTC  
TATTTGCAATCAATGCAAAAGTGGGATGCTGCGGGCAAACTGAAAATCACTGA

>Cluster\_20326

ATGAGTGACAGCCAGACGCTGGTGGTAAAACCTCGGCACAGTGTGCTAACAGGCGGATCGCGCCGCTGAACCGTGCCCA  
TATCGTTGAACTTGTTCGCGAGTGCAGCGAGTTACATGCGCGGCACTCGGATGTTATTTGTGACGCTGGGTGCGATTG  
CCGCGGAGCTGAGCACCTGGGGTACCCGGAATTTGCCAGGACTATCGCTTCAAAAACAGCTGCTGGCGCGGTAGGGCAG  
AGTGCAGTGTAACTGTGGGAACAGCTGTTTTCAATTTACGGCATTATGTCGGGAGATGTTGCTGACCCGCTGCTGA  
TATGGAAGATCGTGAACGCTTCTTGAACGCCCGGATACCTGCGTGCCTGCTGATAAACAATATCGTTCCGGTAATTA  
ATGAGAACCAGTGTGTCGCTACTGCAGAGATTAAGGTCGAGTGAATAACGATAACCTTTCTGCGCTGGCGCGGATCTGGG  
GGTGGCGATAAATGTTGCTGCTGACCGATCAAAAAGGTTTGTATACCGCTGACCCGCGCAGCAATCCGCGAGGCAACT  
GATTAAGATGTTGACGGATGATGACGCACTGCGCGGATTTGCCGTTGATAGCGTTTACAGGCTCGGAACTGGCGGCA  
TGAGCACCAATTTGACGGCGCTGACGTTGGCTTGGCGTGGGATCGACACCATTTATGCGCGGGCAGCAAGCGGGC  
GTTATTTGGTGTGATGTAAGGAGGCAATTTCCGTCGCTGACGCTGTTTCCATGCCAGGCGACTCCGCTTGA AAAACG  
CTGGATTTTCCGTTGCGCGCTTGGGGTGAATCACGGTAGATGAAGGGCAACTGCCGCTTCTGGAACCGCGGAGCT  
CCCTGTTGCCGAAAGGCAATTAAGCGTACTGGAATTTCTCGCGTGGTGAAGTCACTCGGATTTGCAACCTCGAAGGT  
CGCGATATCGCCAGGCGTCACTGTTACAACAGCGATGCATTTACGCGTATTTGCCGACACCACTCGCAAGAAATGTA  
TGCAATACTGGGATATGAATACGCGCGGTTGCGGTTACCGTATGACATGATTTACCGTTAA

>Cluster\_48574

GTGTCACCTCTTTGAACTCGTGAGCATCGAACCGTCAAGTAAACAGCATCGTATGCAAAAAGTTATTGAGACGGTGT  
TAAAAGCGGCTGACGGCTGATGATCGCACAGGCACTGGTACTTTAAGCACCTGCTACGTTCCCTTACTACATGCTTA  
CTGGTGGGACTGTCCGCTTATTTCTGGAAGGCGGTAATCTTAAAGCACTGCTTGTGCAACTTGTGATGTTATCTGAAA  
GGCAGGGCAACATCCAATTTCTCAAGGATAACGGCTTAAAGATTTGGGATGATGGCGGATGAGAATGGCGATTGGG

GCCGGTTTACGGTAAGCAGTGGCGTCGATGGGAAGATACCCGCATCGTGAGCCATAGTGAATATCTGAGCAAGATCGATA  
CTTTCCCGTGAACCGGGTACAAAGTCGAGGGATACCTGGGTATCAGTGAAGATCGCGTAGTGTCTCCCGTGAATCGAT  
CAGCTACAGCGTATGTGCGATACACTGCGCAGCAACCCACCAGTCTGTCGATCATGCTAACGCATGGAACGTAGGCGA  
GCTTGAGGATATGAACTGCCACCTTGCCACTTTGCTCTCTCTTTGTGGAGTCTGAGCTTGATTTTGAACCCCGTTTAA  
CGATGGCAACTGACATTTGGTCTTCAACACAGTCCGCTCGGTTATGAGTCTATCTACACCAAGATGCTATACGATCTGGAG  
ATGGACGGCAGTGTACTGAAACTGAACTGGATGAACTTGGAAATCCCCAAACGCATCCCAACTCCTGCCTCGTACAGCG  
TAGCGTAGACACTTTTGTGGTATGCCATTCATATTTGTGGCTATGGCATTCACCTCATTTTCTCGCGAAGATTACGG  
GTCACATGGCCGGTGCATTTGTACATTTTGGCTTTGACGTGCATTTGTACAACAACCACATGGAAGGTGTGTGTGAGCTA  
ATGAAACGACAGGCTCCAGAGCATTCAGATCCGGTCTGATTTTCCCTCATGAATGGTCTGAGCTGGATGATTTCAAATG  
GGACGATATTTCTGATTTTGGCTATGACCTCTACCGTGGATCAAGGTTCCAGTGGCGGTGTGA

>Cluster\_29216

TTGAATCTGATGCGCTTTTTTACGCCAACCAATATCACTACGTCAACGGCTGATATTGACCATCGGGGCCATTTTGTGGT  
GTTTGGAGCTGATACGCTTCTTGGCTATGGCATGAAAGTACCGAGCAGATTCAGCTGTTTGGAGCGGCTACGCGACA  
ATCGCAACAACGATCGCCACATCATGCGTGAGATCCCGGAGGCGGTGCGCAGCCTGATTTGCCCGGCGTCTTTATGTT  
AGCCTGACGCTATTTATCTGCTATCAGGCGGTACGCGCATCACCCGACCGCTGGCGGAGCTGCAAAAAGAGCTGGAACG  
CGCACCCGCGACAATTAACGCCCATTTGCCATTCATAGCCACCCTCGAAATCGATGCGGTGGTTTCCGCAATTAACG  
ATCTGGTCACTGCGCTGACAGCAGCTGGATAACGAAAGGTTGTTTACCCTGACGCTCGCGCACGAACTGCGAACGCCA  
CTGGCGGGGTGCGTTTGCATCTGGAACGTGGCGAAAACGCATCACATTGATGTAGCACCGTTAGTGGCAGCACTTGA  
TCAGATGATGGAGAGCGTCTCCAGCTGCTGCAACTGGCGCGTCCCGGACAGTATTTTCTCCGGTAATATCAACATG  
TAAACTGCTGGAAGATGTCATTTCCCTCGTATGACGAACTAGTACCATGCTCGACCAGCGCAACCCCTGCTA  
TTGCCAGAGAGCGCGCCGACATCACCGTTTCCAGGTGATGCAACCCTGCTGCGGATGTTATTGCGAAAACCTGGTAGAAAA  
CGCCCATCGTTATAGCCACAAGGCAGCAACATTTATGATTAAGCTGCAAGAAGATGGCGGAGCGGTATGGCCGTTGAAG  
ATGAAGGACCGGGTATTGATGAGAGTAAATGCGGGGAGTTGAGTAAAGCGTTTGTACGAATGGACAGCGGTTATGGCGGG  
ATTGGTCTGGGGTTAAGTATTGTACGGCATTAACAGTTGCATCACGGCAGTTTTCCTGCAAAAACCGGCAAGAGAC  
TTCCGGCACGCGGGCCTGGATACGGCTGAAAAAAGATCAGTACGTGGCAAAACAGATATA

>Cluster\_28767

ATGGAACATTTTCGACGTGGCGATTATTGGCCTCGGCCCGGAGGGTGGCGTTGGCACGAAAGTTAGCAGAAAAATGCA  
GGTATCGCGCTGATAAAAAAGCACAGTGTGGTACTGAAAGTTTTCAGCAAACCTTGTGGCGGCTGCTGGCACCGGACG  
CGCAGCGATCTTTTATTCGCGATGGACTGACGCTTCTGTGATGTCATCGCCAAACCCGAGATTTTTCAGCGTCAAACCC  
GTCGACGTCGCGCATCGCTCACGCGTAACTACAGCGAAGCTATATCAATATTACTCGCCATGCTTTTCGACTTGTGGAT  
GAAATCGCTGATCCCCGCGAGCGTTGAGGTTTACCACGACAGCCTGTGTCGAAAAATCTGGCGTGAGGATGATAAATGGC  
ATGTCATTTTTCGCGCAGACGGCTGGGAGCAGCATATTACCAGCCGCTATCTGGTGGTGGCGGATGTTTGTGCGCAAGCA  
GTGCGGGACATCTTACCCTGATCAGATTCGTAATATGTCCCATCCAGCAGTGGTTCGCGAGAAAACATCCGGT  
ACCGTTTACTCCTGCATCTTTGATAATGCGATAACTGACTGTTACTCATGGAGTATCAGCAAGACGGTATTTTATCT  
TTGGCGGTGCTTCCGATGAAAGACGGTTCAGGCGGCTTTCCGCGGCGTGAAGAGAAAAATGAGTGCCTTTTTCAGTCCAG  
TTTGGTAAAGCGGTTGAAAAGCAAAAAATGCACGGTCTTTCCTCCCTCACGCTGGCAGGATTTTGTCTGGCGCAAGCA  
CGCCTTTCTGATTTGGCGAAGCGGCGGATTTATCAGCGCCAGCTCGCTGGAGGGGATTAGCTATGCGCTGGATAGCGCAG  
AGATTTCTGCGTTCGGTATTACTGAAAGCAGCCAGAGAAGCTCAATACCCTTACTGGCGCGCCACTCGCAAACTCGCTTTA  
AACTTTTCGCGCAAGATGATAAAAAAGCCGATGCCCTACAGCAGCCGCTTTAAGAAAGTGGATTTATGCGCAGTGGAGTGGC  
GCATATTTCCACAGTTGAAAAGATTATCCAACGCGCTTACCATCGCCACCAGCAGATGATGATA

>Cluster\_40114

ATGATCCCGTTGATGTTGATCTGGCGCTACTTCCGTACCCGAGGCTGCATTTTACCAGTCCGCGAGGCACTGAAAAACTG  
GCAGGCAAAAAGGCTGCATFCAGTTCCCGCAAAATGTCTTATCTCATAGCCCGTGGTTTTCAGCGTTATCTGACGTTGCCCT  
TTAATCAGTGGCCAAATGATGGATAAAGCGTTAATGATGACGCACTTCGATGAGATGAATACCGCAGGTTTAAAGCGCGAC  
GAACCTTCTCGATTGTGCAATGCGCAGTGAAGCAGAGTCTGATTTCAAAACCTGCGTTGGTAAAGTTTCAGCGTTGGGCTTTC  
ATCAGGTACATCCGGCGCTCGTGGACTTTTGTGTTAGCCCGCAGCAGCAACAGATGTGGGCGCGGTTGTGCTGGCAA  
AAGTGTGGCCGATGATTTTATTTGCAAAAGAGCGGGTGGCGCTGTTTTCGCGCGGCAACAACAACCTGTATCAAAAGCGT  
AATAATCGCTGGTTAAGTCTCGATTTTACGATCTGCTAGCGCCATTTTCAGGCGCAACTCAAACCTTCTCCAACAGCGAGC  
GCCACGATTTATTGTGCGCCAGCTCAGGATTTACGCGCACTGGCGCTGGAGGTGATGGCCGCGAATGACGCTAAAGG  
TCAAAAAGTGATTTCCGTGGCGGAAGTCTGGAGCCGAGGATCGGGAATTACTGGCGCAACGTTTCCACAATGTGGGG  
GAAATTTATCAGCGCAGCAAGGCTTTCTCGCTTCCACTCCCGGTGTTGGAACGTTACATCTCAACAAGAGGTTTGTTC  
CATTTGAACCGCAATGGCTGGATGAGCACCGTTTCTGTCGATCTGCTACAGACTTTACCCTGACACACAGCCGATAGTGC  
GTTATCGACTGGATGATGTGCTGGTGGCAAGCGAACAGCCATGCCCTGTGGCAGTGCACAATGGCGGATGGCGGATTC  
GAAGGCGGCAAGGATGACCAACTGCAACTACCAACAAGATCCGCGGATATTCAGACCGTTTTTCGCGATGCTGTAGTCTG  
TGCTCCGCAATGACACTCCGCTAACAGTCTGATTTATCCCTGCTCAAAAACCGGGTACGACCAATTTGACGCTTAACTCGCC  
ATTGCGAGCTGTGGATGCTGGAGCATTTCCGGGAGGCGTTGAATGCTTGTTTATACGCCAGGATATCGCTGTGCGGCAA  
TTAATTTGGTTCGAGGAACGCAAACTGTGCCAGTCTCTTTTACAGCCAAGCGCGGCGCATTGTGCGTCACTGGGGGGC  
GGAATGA

>Cluster\_28002

ATGCTAAATTTATTTGTTGGCCTTGATATATATACGGGGCTTTTGTATTACTTGCTCTGGCATTGTGTTGTTCTATGA  
AGCAATCAATGGTTTTTATGACACAGCGAATGCGGTGGCAACCGTTATTTATACCCGTGCCATGCAACCACAGCTTGCTG  
TAGTCATGGCGGCAATTTTTTAACTTTTTGGCGTATTGCTTGGCGGGCTTAGCGTTAGCCTATGCCATCGTCCATATGTTG  
CCAACCGATTGTTGCTGAATATGGGGTCAACTCACGGTCTGGCGATGGTCTTTTCCATGCTGCTGGCGGCGATTATCTG  
GAATCTGGGAACGTTGTTCTTTGTTTACCAGGCTCCAGTTCGCACACTTTGATTTGGTGCATATCGGCATCGGTTTAA  
CCAACCGCTGTTAAATGGTTTCGTCGGTGTGGATGCGTTAAACCTGCGCGAAGTCAACAAGATTTTCTTCACTCATT  
GTCCTCCCGCATCGTGGGGCTGGTATTGCGGGGGGCTGATTTTCTGCTGCGTACTGGAGCGGCAAAAAGCG  
TGACCGTATTACCAGCATTCGGGAAGATCGCAAAAAGAAAAAGGCAACGTAAGCCGCACTTTCGGACGCGTATTGCC  
TCATTTGTTCCCGTTCGGGCGTGGCGTTTTCGCACGGCGCAACGAGCGGCGAAGGAAATGGTCTGGTGTGCTGGT  
CTGGTGGGATGCTCCCGCGGTTTTCGCTCAATGATGATGCGTCCGGCTATGAAATACCCTGACCCGATGCGGCT  
ACCACCTTCGAACCACTTGAATGACCTGCAACAGCATCCGAACTGACGCGAGAAGTTGATTAACGATGGAACCTTCCGCGCA  
CATCGACTGATGGCAGCAAGTAAACAGATTTCACTGTCTATCCGGCAAAATACCTTTGATGCGATTGCGCGGTTAAAACG  
ATGCTGCCAGGCAATATGAAAAGTTACGAGCGGTTAAGCGTGAAGTCAAGCAGCCAGCTGCGCGCATTTATGCTGTGCA  
CTCTGATACTCCGCGAAGCTGGCGAACTGCCAGGCTGAGTAAAGAAAGACCAAGACTGCTGAAAAAATGCGCAGCG  
ATATGTTAAGCACCAATTTGATACGCTCCGGTGGATCATATGCAAGTAGCTTGGCGCTCGGCTGCGCATTGGCACCATGAT  
GGTGGCGTCTGTAGCGATGACCATCGGTGAGAAGATTGGTAAGCGCGGTATGACGATGCGCAAGGATGGCGGACCA  
AATGACGGCGGAGTGTCTATCGGCTTTCAGTTATATTTGGGATGCCGCTCCACAACACAGTACTCTCATCTGCGC  
TAGCAGAAACGATGGTGGTGGAGCGGCGGTTACAGCGTAAACCGGTAACCAGCATCCGATGCGGTTGGGATTTACT  
TTACCGGCGGCGATTTTTCTTTCTGGAGGGTTGACTGGATGACATTGCACTGATTTAA

>Cluster\_64783



ATGTTTTATATTGATAACGACAGCGGGCTAACCGTCATGCCGCCCGTATCCGCCAGCGTAGTGTATCGTTCGCTGGTT  
TTCAGAAGGTGACGGGAATAATGTTATCATGCCCCGCATGGACTGGTTTAAATATTGTGCAGCGGGAGTTTAAACA  
CGCTGGAAGAAGCCGGTATTCACCCGGATAAAAACAAATTAACCAGCTTGCCTGTCCATTAATCCATTATGAGCAAT  
AACCGCTGCTGATAAAAAATAACCTCAGCGAAATTAATAATGGCCGGGCATCAGCACAGCGTACAGCACGTAAGATCT  
GGATATCTATGATGCCAGCTGAACAAAAGGACTCGTTCAGCTAACAGTGCCTACTGACAGCCCGAGTGAACCGTGG  
CAGCCACCAGAAAAGCGGTGAAAATGGCATGGATAATGCCAATGCCCGTCTGGCAAAAAGACCAGGACGAGCAGATATT  
CCCAATAAGCCGCTGTTTATCCAAAACCTCGGTTTACAGGAAACGGTAATCAGGCTTCTGGTGGCTTGCAGAAAACCA  
GAATGGCGCAGATATTCTGATAAAAAGATTATCTGCGCAATATTGGAGCAACAAATCAACAACCATGTCTTTAATG  
GTGGTGCAGGATGGTTCAAACCTGGCAACTGTAACAATGCCACAAGCCAGTTCCTGGTTACATAAGCCTGAATGGTGGT  
GCAGGGTATAACGTTGGCTCCCCGACGCAAGCAGGCATCTCTGAGCTGGTCTGCGTGGCGAAATGGAATCCAAAGGG  
TATTAATGTTGATATTGCGCAGCGACCTCGGTTGGATTACTAATTTGCGATGGGTGAATACATCCGGTGTACCTATG  
ACATTTATGTAGAAATAGTAATTAACCCAGCGGTGTTAATATCCAGTGGGATTAACAAGGATGCCACTGTACAAAT  
CATAACATCAACAACTTATACAGCGAATAAACCCGACAGCCTGACAGATGGGACTGTATATGTAATTTACAGTCCACAT  
AAAACCGACTGCTGCTGATGTTGGGGCTTGTCTATTCTGGTGGTCAATGAATGGTGCCTGGGTATCGGAACATCCA  
GTGCTCTTGGCGGTAACCTGATTGTTTTGGGTGATAATGACACGGGCTTAAACAAAATGGCGACGGTAACTCGACGTT  
TATGCTAATAACGCTCATGTTATGCGCTTTGTCCTCCGGCAGCATTAAGTAATAAAACCATAAATATTACAGGGCGTGT  
TAACCCCTCGGATGCTTAACCTTACCTCGGTTATGTAAGGATGTTCCGCTGGGTAACCGTGGTGTGTTGTTGTTGATG  
CGCGTGGTGGTCTTATGAAAAAGCCGGACAGCAATTAACCGATTAGAATCATTTGGTGAAGTAGATGGCGATGATGAA  
GCCATCTTCAGACCAATAAAAAATACATCAATGGCACATGGTATAACGTCGCACAGGTGTA

>Cluster\_28863

ATGGGTTCCACCTCGTCGCTGTATGCAGCCATTGATCTCGGTTGCAATAGTTTTCATATGCTGGTGTGCGCGAGGTGGC  
TGGAGCATCCAGACGCTGACGCGAATTAACGCAAGTGCCTGCGCTGGCTGCTGCAAGTATAGCGAAAATGCCCTCTCTA  
ATGAAGCAATGGAGCGCGGTTGGCAATGCTGCGCCTGTTTGGTGAACGCTCTGCAAGATATCCCTCCCTCGCAAAATCCG  
GTTGTCGCTACGGGCGATTACGACTTGGCGTCAATACGGGTGATTTTATTGCCAAAGCGCAGGAAATCCGCTGGTGTCC  
GGTACAGGTGATCAGCGGTGAAGAGGAAGCGGCTCTGATTTATCAGGGCGTGGCTCACACCCTGCGCGTGGCGATCAGC  
GCCGTGGTGGTATATCGCGGAGCCAGTACTGAACTGTTAACCGGCACGGGTGCACAACCCTCTTTGTTGAGCCTG  
TCGATGGGCTGCGTTACCTGGCTGGAACGCTATTTGCGCATCGTAATCTGGGCGAGGAAAATTTGATGCTGCAGAAA  
AGCGCACGCAAGGTGTTACGTCGCGTTGCCGATGAATFACGGTATCAGCGTGGAAAGTGTGCGTGGCGCTCGGTA  
CCGTGCAGGCGTTACAGGAAATCATGATGGCACAGGGATGGAACGCATTACCTGGAAAAGTTGCAGCAACTGAAA  
CAGCGCGCATTCATTGCGGTGCGCTGGAGGAACTGGAGATTGACGGGCTGACGCTGGAACGTCGCTTGTGTTCCGAG  
TGGTCTGGCGATCCTGATAGCCATTTTTACCGAAGTGAATATTCAGTGTATGACCCTGGCGGGCGGTGCGCTGCGTGAAG  
GCCGTGCTACCGTATGTTGTCATCTTACCGTCGAGCAGGATATTCGCAGTCTGACGCTGCGTAATATTACGCGCCGTT  
ATGATCGATATTGATCAGGCACAGCGCTAGCCAAGGTTGCGGCTAACCTTCTGATCAGGTGGAATAATGATGGCATCT  
TGAAGCAATAAGCCGCGATTTGCTCATCAGCGCTGTCAGCTTTCATGAAATCGGCTGAGCCTGACTTCAAACAAGCCG  
CGCAACCGCTGTTACTTGGTGGTAACTGGATTTCCCGGTTTACCCCGCACAGAAAAAATGCTGGCGACGCTA  
CTGCTCAACCGACTAATCCGCTGATCTCTCATGCTGATCAGCAAAATGCCGTACCAACCGCGCTGCGTAACCAACT  
CTGCCGTTTACTCCGCTGGCTATCATTTTTGCCAGCGCTGCGCTGACGATCTGTCGACAGATGACATTACAGGCTA  
ACCATGAAGTGTGACCTTGGACGCTTCCGCAAGGTTGGTAACCAACATCCGCTGGGTAAAGAGATTATTGATCAGGAA  
AGCCAGTGGCAGAGCTATGTCCTGTCGCGCTGGAAGTGCATTA

>Cluster\_64789

ATGTTTGAAGATGCTTAAATGCGGTTAATCTGTCCGGGATAAAATCGCGGTTGGTAAGAAAACAACCGGCAAGGCAC  
GTTCCGTAACCGTCCGCTTCTCGTCAATGAGGAGCAAAAACAGGCTGGCGGACGTCGTCGTTAAACCGGATACCCGT  
TACGTGATACCGGGCGGTGCAATGACCTGGGGAAAAACCTCGCTCCGCACATTCAGCATCTGCATTTGAAACGCAAC  
GCAGAGACTGCCAGAGATGAAGCGGGTGCCTGATGGATGCTCTGATGCACCGGGCAGCGGCAACTGGTGCATCCAGA  
GTTCCGGCACTGTGGACGTCATGGTGGATTCATGGGAATGCCGTAATAAGCGGATGAACTGAAATATTACGCGTTACCG  
TTACCGTTTATCCGTCGTTGAGGATACAGCCCGGACGCAAAAACAGACACCAGTACAGCCGTTATCTGCGCAGGCGGTT  
GCTGTAACCGGTTGCTGGGGATACGTTGCTCTGTCTGTCGAGACCCTGAAAAGATGGCACAGCGCGGCAACCGCT  
AATGGATGCCGTCACCGGTGTCATCGATGATATCTGTGATGCGGTGGATAATCTGGGGATCACCCAGACTGTGACGGCC  
TGATGGGGTTACTTCTGCAATGAAGGTTCTGTGACCGGCTGATAAATAAACCCAGCCATGCTGACATCTTCACTGATG  
GGGCGGTTATCCGGGCTTTCATCGTTATGCGATACCCGAACAGCATTTCACCTGGAACCGTCTGGCGCAGCGGTTGGA  
AAGCCGATCCCTCCACCACTGACAGCAAGGTTGCCATTACCACTTCATACAGCAGCCCGGTTGCAGAAAAAATAATGG  
CCACTGAACTACGTCATGCTGGCAGCAGCACAGACATACCGGGCGGAGGCAGCAAGCCAGGCACTGACTGCGGCCTG  
GATTCAGCCGTCAGATGGATAATGCCGCGCCGCGCACCGGCTGGATGTATCAGTCAACAACCCGGCATCGCCAGTGG  
TGCCAGCAGCACAATCGTCCAGGTCACAAAAGCCAGTTGAGTTAACCGGATAAACCCGGACGCGGCTTTTCCACCAG  
TATCCTTTTTCAGACAGCTAGCACAGCCAGCCCGGTTATTTGAAAGCGTGTCCGATATCGAAAAAACAACCTGCTA  
GGGGCGGCTGATAGCGTCAATCTGACGGCATCTGAGCAGGTTTTTTCGACAGACAGTGTTCAGCTTACGCAACTGG  
TCTGCTGTTGTTGCCGACTGGAAAAACCGGGCTGCAACTGGCGGTTAGTGAATCACACCCTGCCAGAAAACGCTCC  
CGCAATGGTTGCACTGTACCGGTTCCAGGAAACAGCCGAACTGGCAACCGCTGGCCCGCAGGAAACGGTATCAGCAAC  
CCGTTATTTGTTCCCGTGGTGTAGTATTGAGGTGATTAATGAGTAA

>Cluster\_43384

ATGGAGTTTAGTGTAAAAAGCGGTAGCCCGGAGAAAACAGCGGAGTGCCATGCTCGTGGGCGTCTTGAACCCAGCTCG  
CCTTCTCCGATTGCAGAACAGCTCGATAAAAATCAGCGATGGGTACATCAGCGCCCTGCTACGTCGCGGGCAACTGGAAG  
GAAAACCGGGCAGACATTGTTGCTGCACCATGTGCCAAACGCTGCTTTCTGAACGCATCTCTCTTATTGGTTGCGGCAAA  
GAACGTGAGCTGGATGAGCGTCAGTACAAGCAGGTTATTCAGAAAACATTAATACGCTGAATGATACGCTCAATGGA  
AGCGGTCTGCTTTCTGACTGAACACAGTTAAAGCCGTAACAATACTGGAAGTGCCTCAGGCTGTGCGAGACGGCAA  
AAGAGACGCTCTACAGTTTCGATCAGTTGAAAACGAAACAGAGCAAGCCGCTGCTCCGCTGCGTAAATGGTTCACAC  
GTGCCGACCCCGGTGAGCTGACCAGCGGTGAACGCGGATCCAGCATGGTCTGGCGATTGCCGAGGGATTAAGCCGC  
GAAAGATCTCGGCAATATGCCACCGAATATCTGTAACGCTGCTTACCTCGCCTCTCAGCGCGCCAGTTGGCTGACAGCT  
ACAGCAAGAATGTCATACCCGAGTTATCGCGAACAGCAGATGAAAGAGTGGGGATGCATCTCTATCTGGCGGTCGCT  
CAGGTTCCCAAAAACGAATCGCTGATGTCAGTGAATGAGTACAAAAGCCAACCGCTCGGAAGATGCACCGCCAAATCGTGG  
GGTGGGTAAGGTTTAACTTCCGACTCCGGCGGTTATCTGATCAAGCTTTCAGAAGGCATGGATGAGATGAGTACGATA  
TGTGCGGTCGGCAGCGGCTACGGCGTGTGCTGATGGTTCGCGGAGCTGCAACTGCCGATTAACGTTATGGCGTGTG  
GCAGGCTGCAGAAAACGCTGGCGGGCTGCCATCTGTCGGCGGATGTTTAAACCAATGTCGCGTCAAACCGGTAGA  
AGTCTGAAATACCAAGCGCCGAAAGCCGCTGGTACTGTGCGCAGTAACTTAACTTACGTTGAGCGTTTTGAGCCGAAGCGG  
TGATGATGTTGGCAGCTGACCGGTGCTGCGTGTATCGCGTGGTCAATCATATTACGCTGATGGCGAACCACAAT  
CCGCTGGCCCATGAACTGATGGCGCATCTGAACAATCCGGTACCCGCGCATGGCTTTTACCTGCGTACAGGATCA  
GAAACAGCTGGAGTCCAATTTTGGCGATGTCGCGAACAATGGCGGTCGCTGGTGGGGGATTAACCGAGGTTGCTCC  
TGTGCGGCTTACCCGTAAGTACAACCTGGCGCATCTGGATATCGCGGAAACCGCTGGCGTTCTGGTAAAGCGGAAAGGC  
GCAACCGGTCGCGCGGTGGCGTGTGTCGACAGTTCCTGCTAAACCGCGCGGTTTAAACGGCAAGAGTAA

>Cluster\_53541

ATGCAATATTTAAAAAACGCTTTTCTTTGATTGAACTGAATGTTTTATTCCAGCAATATTTATTTGCGGTAATCAT  
TCTGTGCTTGACGATATATCCGCAAGATACCAGCCGGTATATAATAAAAATACATCATTTTTAACCTGGGAAATGGGGC  
GGATTTTTCTGGTCAATGACTTTTTCTGGTTGTACTTTGTTGTCTGTGGCTGGCCCTTCTCACGTTATGGCGATATTTGTTA  
GGTCAGTCGGGCAAAAACCTGACTTACGTTGTTAACCTGGCTGGACTTATTTTTACTTCTGGAACGGGGGCGCACT  
GTTATATCTGGCCTCTGTAGAGTGGATTGGATCATTCAGCAACCGCCTTTGGCGCAACAGCAGGAAGCGCTCAGGCTG  
CTCGTTGGCCCTCTGCTTATGGCATGTTCCATTGGGGCCGCTCCGCATGGGCATGGTATTTGATTGCGCCGTTCTTAT  
GGTTGGTTTATGCATGTTAAGAAAAAACTCATTAAGGTCAGTGATTTATGTCGTGGGTGTTGGGAGCGCGTGGCGA  
TGGTTTTTGGCGGCAATTTGTGAATTTTTCTACATGTTGGTTGGCTCGGCGGCGGTAACGTCTCTGGCGCTGGGAA  
CGCCGATGATTTCTGCCGATTTTTGCCATGTGTTCCATCTGGATCCTGCCGGGCGATTATCAATGTCATGGTTATTTTT  
ATCTGGACGCTAGTACCATTATTCATCTCTTTTTGGACTTAAAAAAGGTGTGGCATGGGCCAGTAACTGGAATATTCG  
TGCTGACATTTTGATGCTACTGGCAATACTGATTTGTGGACCAACGGCATTATACTTAATCAATCAATTGATGGTCTCG  
GCCTGATGCTGCAAAATTTGTAGCGATGAGTTTAAAGTACCGATGCTATTTGGTCTGAGCGGATTTCCACAGATGTGGACC  
GTATTTTTATTTTTCATGGTGGGTGCTGTATGCCATCCCATTCGGTTTATTTATCGCCGATTTTCAAAGGAAGGACGAT  
CCGGCAATGATTGTATGTGGAACCTCTGGCAGGTTTATGGGATGCATGGTTTTTACATGGTACTGGCTAATTTCCGGCT  
TATCGTTGCAGACAACCTCATGTCATCGATTTTGTTCACATACTAACGAACAAGGGCAGGCGTTGTCGTTTCTCGTTTA  
CATGAGCAGACTACCCGCAAGTCAGGTGTTTTGGTTGCTTTTTGGGGCTATAGCATAAATTTCAATATATCTGGCGACTG  
TACTGTGGTTTATGCCCTCGGTTTTGCGACGAAAAACGGGAGATAGTGAGAGTGAACCGGCATTCTGGAACGTGGCAT  
TTTTGGTTGATTATGACTGGAATCGTCGCCATCACACTCTATCTTCTGATGCGCAGAGTTTGCAGCCGCTACAACCGGTC  
TCTATCTGGCCGACTACCGCTTTGCGCGGTAGTGTATTTTTATTGAAGAGTTTTTTGACACAGCTTGGCGCTGAAGA  
GAAAACCGGAGAGATGAATAA

>Cluster\_11957

GTGTCACCTGCAAAACAAAAACCACTGAAAGCGTCAGTTTGAACGCTTTCAAACAACCGAAGGCGTTCTATCTCATCTT  
CTCGATTGAGTTATGGGAACGTTTTGGTTATTACGGCCTACAAGGAATATGGCTGTTTACCTGGTTAAACAACCTGGGTA  
TGCTGAAGCGGATTCATACACCCTTTTCTCTTCTTTAGTGCCTGGTTTATGGTCTGGTCTGCTATCGGCGGCTGGTTA  
GGTGACAAGGTACTGGGTACTAAACGCGTAATTTAGTCTGGCGCTATTGTCGTGGCGATTGGTTATGCTCTGGTTGCCG  
GTCTGGTCAAGCGCGGTTATCGTTTATATGGGTATGGCGGCTATTGCGGTGCGTAACGGCCTGTTTAAAGCTAACCCGT  
CTTCTCTGCTTTCTACATGCTATGAGAAAAACGACCGCTCTGAGCGGTGCATTCACCATGTACTACATGCTCCGCAAC  
ATCGGCTCTTCTCTCTATGATTGCTACGCGTGGCTGGCCGCGAAATACGGCTGGAGTGTGCGTTTGGCTTGGAGCGT  
TGTAGGCTGCTGATCATTATCGTTAACCTTCGCTTCTGCCAACGCTGGGTTAAACAGTACGGTTCAAACACGACTTCG  
AGCCTATCAACTACCGTAACCTGCTGCTGACCAATTATTTGGTGTGTTGGCACTGATCGCTATCGCCACCTGGCTGCTGCAC  
AATCAGGAAGTTGCGCGTATGGCCCTGGCGGTTTTGCTTCTGGTATCGTGGTATCTTCGGTAAAGAAAGCCTTCGCGAT  
GAAAGGTGCTGCGCGTCTGAAAAATGATCGTTGCCCTTCACTCTGATGCTCGAAGCCATTATCTTCTCGTGTGTACAGCC  
AGATGCCAACGCTCACTGAACCTTCTTGGCATTTCGTAACGTTGAGCACTCCATTCTGGGCTGGCCGTAGAACCCTGAGCAG  
TATCAGGCATGAACCCGTTCTGGATCATCATCGGTAGTCCGATTCGGCCGCTATCTATAACAAGATGGGCGATACCCCT  
GCCGATGCCAACCAAGTTTGAACCTCGGCTATGGTATGGTATGTTGCTTCTGGTGGCTTCTGATTCTCGGCTGGGTGCGAAATTCG  
CGTCTGACGCTGGTATCGTGTCTGTAAGCTGGCTGGTGCAGCTATGGCCTGCAGAGCATCGGGAACTGATGATCTCT  
GGTCTGGGCTGGCAATGGTTGCAACCTCGTTCCGACGCTCTGATGGGCTTCAATTAAGGTTAGCTGGTTCCGACCA  
TGCCGTTGCAAACTGATTGGTGGTTATGTTGCGGGTATGATGGCTGTGCCGATAACGTTACCGCCGCTGATGATGTCAC  
TGGAAAGTTTATGGTTCGCTATTCTTGCAGATTGGTGTCTGACTTGCCTATTATTGCAGTACTGATGCTGTGACCGCGCT  
AACTGCACCGTATGACGAGGATGACGCTGCAGACAAAAGCGGCAAGCTGCTGTAGCGTAA

>Cluster\_26026

ATGGCTATTAGCACACCGATGTTGGTGACATTTTGTGTCTATATCTTTGGCATGATATTGATTGGGTTTATCGCCTGGCG  
ATCAACGAAAAAATTCGACGACTATATTTCTGGCGGCTGATGCTTGGCCATTCGTGACGGCATTATCGGCGGGTGGCT  
CGGATATGAGCGGCTGGCTGTTAATGGGGTTGCGAGGCGCTGTTTTCTTCCGGGATTTCCGAAAGCTGGATCGCCATT  
GGTCTGACATTAGGCGCGTGGATCAACTGGAAGCTGGTGGCGGGCGGTTGCGTGTGCATACCGAATAACAATAAACGC  
CTTAAACATTTGGCGGATTTTACCAGGCGCTTTGAAGATAAAAAGCGCATTTTGCGCATATATCTCCGCGATTATTT  
TGCTGTTCTTACCATTATTTGCGCTTCCGGCATTTGTGGCAGGCGCGCTGTTTGAAGTACCTTTGGCATGAGCTAC  
GAAACGGCTCTGTGGCGGGGGCTGCGGCGACGATCCTTTACACCTTTTATGGCGGTTTCTCTCGCGGTGAGCTGGACTGA  
CACTGTACAGGCCAGCCTGATGATTTTTGCCCTGATCCTGACGCGGTTATCGTGATCATTAGCGTCCGTTGGGTTGGCG  
ACTCTGGAAGTAAATCAAACAAGAGCATCGAAAACCTGGATATGCTCAAAGGGTTGAATTTGTCGCCATTATCTCG  
CTGATGGGTTGGGGCTGGGTTACTTCCGGCAGCCGACATCTTGGCGGTTTTATGGCGGAGATTCACACAGCAT  
TGTCCATGCGCGTCTGATCAGTATGACCTGGATGATCCTCTGCTGCGAGGGGCGGTGGCTGTGCGCTTCTTTGGTATCG  
CTTACTTTAACGAGCACCAGGCTAGCAGGTGCGGTAACAGAACGCTGAACGCGTGTATTGAACTGGCCGCAAAAT  
CTGTTTAAACCGGATTTGCGGGATTTGCTGTGCGGCTTCTGCGCGGTAATGTCACCGTTAAGTTGCCAGCTGCT  
GGTATGTTCCAGTGGATACCGAAGATTTATACAAGCGTTTTCTGCTAAACAGGCCAGCCAGAAGAGCTGGTGTGGG  
TAGGGCAGTGTGTTGCTGGTGGTGGCGCTGGTGGCGATGCTGCTGGCGGCAAAACCGGAAACCGGCTGCTGGGCTTA  
GTGAGTACGCGTGGGAGGCTTTGGCGCAGCTTTGGTCCGTTGGTGGTGTGTTCTCGGTGATGTTGGTACGCTACGCG  
CAACGGTGGCGTGGCGGATGATCATCGGTGCGCTGATGGTTATCGTCTGGAACAGTTCCGGCTGGGTTGGGTTGTACG  
AAATATTTCCGGGCTTATCTTCCGCGATATCGGGATTGATGTTAGTTTGTGGTAAAGCGCCGTCAGCGCGGATG  
CAAAAACGCTTTGCCAGGCGGATGCGCACTATCATTCGGCTCCGCGTACGGTTGACGGAAGGGTAA

>Cluster\_8556

ATGAGAATTCACCTACCGTACCCCGCAGTTGGGCGCTGGCACAACGAATGGTTATCTCTATTCAGAGGGCGAGATTAT  
TTATCTCGCGGATACGCCATTTCGAGCGGTTACTCGATATTCACCGTCAAGTTGGCCAGTGCCAGACCTGACCACTGCT  
CACAGGCTGATTTTGAAGCTCGGCTGGAAGCGGTTATCCATCAGAATACCGGTGAGTCGCAACAGATTGCGCAGGATATC  
GATCAATCCGTCGATCTTCTCTGCTTTTCCGAAAGAGATGCCGCAAAATGAAGATCTCCGAAATGAAGATTGAGGAT  
GGTTATCCGCTTGTATCAATGCGATTTTGTAGTGAGGCCATCAAAGAAACCGCCTCTGATATCCACATTTGAAACCTATGAAA  
AAACAATTCGATCCGTTTTCTGCGATCGACGCGCTTTTGGCGGCAATTTTACAGCCAAACAAAAAAGCTGGCGGCACTGCTT  
ATCTCCGCAATTAAGTCAATGGCTCGTCTTGATATCGCCGAAACAGTATCCACAGGATGGAAGAATTAGTTTGGCTAT  
CGGCGGATTAACATAGATGTTCCGCGTATCCACACTGCCCTCATCTATGTTGAAACCGCCGCTATCCGCTGCTGGATA  
AAAACAGCCTCCAGCTTTTATTGAAACAACCTGGGGATGACGGCAGCGGATAAGCAGGATTTAGAAAATCTCATTCAGCTT  
CCGACCGTATTTATCTTGTGACAGGGCGACAGGCTCCGGTAAAGCACCACGCTCTACGCCATCTTTTCCGCGCTGAA  
TACTCCCGGCAATATTTCTGACGGTGAAGATCCCGTGAATATGAGCTGGAAGGCATTTGGCAACCGCAGGTTGAATA  
CAAGTGTGGATATGTTTTCTGCTCGCGGCTGGCGCCATATTCGCGAGGACCCGGATGTCGTCATGGTGGGGAAATTT  
CGTGATACAGAAACCGCGAGATTGCGGTTCCAGGCTCGCTCACCGGCTATCTGGTACTCTCAACACTCCACACTAACAG  
TGCATCAGGCGAGTACCCGGCTCCGCGACATGGGCGTCAATCTTCTGCTTTCTGCTTCTCCCTGGCAGGATTTATCG  
CGCAACGCTGGTTGCTGCTGCTGTTCCGCAATGCGGCAATTTACGCTCCGATACCCCAACAGCGCAGATTTTAA  
TATCATCAGCTCGCGGTGACAACAATTTGGCACTCCCGTAGGCTGCCCTCATTTGCCATCAATCCGGCTACAGGGGCGCAT  
GGCGATCCAGAAATGATGGTGGTACGCGCGAATTTACGGGCGCTATTCATGAAATGTGGATGACAGCACTGGAGC



ATGAATACCCAGTATAATTCAGTTATATATTTTCGATTACCTTAGTCGCTACATTAGGTGGTTTATTATTTGGCTACGA  
CACCGCGTTATTTCCGGTACTGTTGAGTCACTCAATACCGTCTTTGTTGCTCCACAAAACCTAAGTGAATCCCGTGCCA  
ACTCCCTGTTAGGGTTTTGCGTGGCCAGCGCTCGATTGGTTGCATCATCGGCGGTGCCCTCGGTGGTTATTGCAGTAAC  
CGCTTCGGTCTGCTGATTCACCTAAGATTTGCTGCTGTCTGTTTTTTATTTCTGGGTAGGTTCTGCCTGGCCAGAAT  
TGGTTTTACTCTATAAACCCGGACAACACTGTGCTGTTTATCTGGCAGGTTATGTCGGGAATTTGTTATTTATCGCA  
TTATTTGGCGGTATTGGCGTTGGTTTAGCCTCAATGCTCTCGCCAAATGTATATTGCGGAACTGGCTCCAGCTCATATTCCG  
GGAAACTGGTCTCTTTTAAACAGTTTGGGATTATTTTCGGGCAACTTTTAGTTTACTGCGTAAACTATTTTATTGCCCC  
TTCCGGTGTATGCCAGCTGGTGAATACTGACGGCTGGCGTTATATGTTTGGCTCGGAATGTATCCCTGCAGTGTCTGTTCT  
TAATGCTGTATACCCCTGCCAGAAAGTCCCTGCTGGCTGATGTCGCGCGCAAGCAAGAACAGGCGGAAGGTATCCGT  
CGCAAAATTTATGGCAACACGCTTGCAACTCAGGCAGTACAGGAAATTAACACTCCCTGGATCATGGCCGCAAAACCGG  
TGGTCTGCTGCTGATGTTTGGCGTGGCGTGGTGTAAATCGGCGTAATGCTCTCCATCTCCAGCAATTTGTCGGCATCA  
ATGTTGGTGTCTACTACGCGCGGAAGTGTCAAACGCTGGGGGCCAGCAGCGATATCGCGCTGTTGCGACCAATTATT  
GTCGGAGTTATCAACCTCACTTACCCTTCCGCTTCCGCAATGATGACGGTGGATAAAATTTGGTCTGTAAGCCCAATTTA  
CGGCGACTCGGAATGGCAATCGGTATGTTTAGCCTCGGTACCGGTTTTACTCAGGCACCGGGTATTGTGGCGCTAC  
TGTGATGCTGTTCTATGTTGCCGCTTTGCCATGTCCGCGGTTATGCTGGGTACTGCTGTCGGAAATCTTCCCG  
AATGCTATTCTGGTAAAGCGCTGGCAATCGCGGTGGCGGCCAGTGGCTGCGGAACTACTTCTGCTCCTGGACCTTCCC  
GATGATGGACAAAACCTGCTGGCTGGCTGGCTGGCTGGCTGGCTGGCTGGCTGGCTGGCTGGCTGGCTGGCTGGCTGGCT  
TGGCAGCACTGTTTATGTGGAATTTGTCCCGAAACCAAGTAAACCTTGGAGCTGGAAGCGCTCTGGGACCG  
GAAACGAAAGAAACACAACAACTGCTACGCTGTAA

>Cluster\_13826

ATGCTGAATGACTTTTCGCAAAATAGATAACGATTTAGGCTGAATATCATCTATTTCCTGCAACATGGTCACTGGAAGGT  
AAATGATCGTAGTACCAGATGGAGAAAGTATGTTTTACAATAGTGAACCTTCTATAGATATCAAGATATAATAGAT  
TCGCCGACAATACTACTGACACGTTTATCTTTACAATTAACAGATAAATACCATGTGTAAATTTATCGTCTCCCATT  
ACCGTTACGGTATAGGATAGGCGGTTATTTATTTTAAATTTTAAATTTCTTGGAGATAAATCAGATGTAATTTAAAGTTGA  
TGGGCTTTCTATCATAGCGAGAAATTTCTTTACTCTTCTTAGTGGTAAATTTCAAACCTGACTGGCGTTGGGATGTCTCTA  
AAGAGACGTTTACTAAGGAAAAGTTGATAGCTATGTTAAATCTGTGTTTTCAAATAAGACTTTTATAAACAGTGTGGT  
GTGATTAACCCACAAAATGCCAACACGGCTTATTTGGCGATACAGATGGAAGAGTAGGCGCTGTACTTTATGCATTTGCT  
CGTTTACGGCATATAGGCATCAGGGAAGGGTGGGATTTATTTATGTAATTTAAACACGGAAGACATGGCTTCA  
CTGCATACAAACATAAAAATAATAAAGTGTCTACGATTTATTAATACGAGAGACATGATCTTGAATGAGTTGCATCAA  
CATGTTTTTTAAAGGACGATGCATAACCCCTTGTATCTTCCCTGGGATCATACAGCGATAGATTAGTACTATTTT  
TGGTGATAAATATATCTTACTTTGCTAAATTCATGCGAAATATGGAGGTAATAAAGATAGCCGATTAATAAAAAAT  
TCCGCTGTTCTGGCTGGAATCATGAAATCAATTTAATGGTAACTATACTGCAGCACTAGCAAAATCATAAACTCTCTGCC  
GGTGATACGTATAACTTAAATAAACCGCTCGATGTTTGTCAATTTAGCTCAGAAAGGCAAGTTTTAACAGTCACTACCG  
AATAAAGAGATGAAGAAAAAATGTTATGTTCTCGGTGCTTTCAGGTTCCATTTAATCAGATGAAAAATCCTACTG  
ATCCTGAGGAATAGCCAAATTTTTAATAAAAAACATAAAGAACACATGGATGATCTCTATTCATCTAATCCGAAGC  
AATACTTTGAAACCCAGCTGTATATGCTGATTAATTAATAACACTACTGATTTGACAGCAGCAGCAGCTGAACTCTT  
CATATGTTGGGAGACACTCAAAGGTGAAGACCCAGCAATACATTAGACAAAATATGGCATCATGGGTCCGGGGTAG  
ATCAGAATCAAAATTTGATAATGGTATTTATGGGGTAAATTCCTGAAAGGACCGTGATAAAAAATAATAAAATAAT  
TATTTCTCAGGCTTAGTTGTTTTCAATCTCATTA

>Cluster\_21523

ATGTCAGTACCCGTTCAACATCCATGTATATCGATGGACAGTTGTTTACCTGGCGTGGAGACGCATGGATTGATGTGGA  
AAACCTGTCTACAGAGGCTGTCAATTTCCCGCATTTCCCGATGGTCAGGCCGAGGATGCCCGTAAGGCAATCGATCGCAGC  
AACGTGCACAACAGAAATGGGAAGCGTTGCTGTATTGAACCGCAGTGGTTGGTGGCAAAATCTCCGCGGATCCGG  
GAACGTGCCAGTGAATCAGTGGCTGATTTGTCGAAAGAGGGGCAAGATCCAGCAGTTGGCTGAAAGTGAAGTGGCTTT  
TACTGCGGACTATATCGATTATATGGCGGAGTGGCCAGCGCTTACGAGGCGAGATTATCAAAGCGATCGTCCAGGAG  
AAAATATTTCTTGTTTAAACGTCGCTTGGCGTACTACCGGATTTGCGGTGAACTTTCCGTTCTTCTCATTTGCC  
CGCAAAATGGCTCCCGCTTTTGAACCGTAAATACCATCGTCAATTAATAGTGGGCAAGTGTAACTGTCAGAGACGTTG  
ATTCGCCAAAATCGTTGATGAAATAGGCCTTCCGCGCGCGTGTAAACCTTGTACTCGGCGTGGTGAACCGTTGGGC  
AAGAACTGGCGGGTAAACCAAAGGTGCGAATGGTCAAGTATGACAGGCAGCGCTCTGCAAGGTGAAAGATATGGCGACT  
CGGCGCAAAAATATCACCAGAGTGTGCTGGAATTTGGGGGTAAGCACCGGCTATCGTAATGGACGATGCCGATCTTGA  
ACTGGCAGTCAAAGCCATCGTTGATTTACCGCTCATTAATAGTGGGCAAGTGTAACTGTCAGAGACGTTGTTATGTAC  
AGAAAAGCATTTATGATCAGTTCTGCAATCGGCTGGGTGAAGCGATGCAGACGGTTCAATTTGGTAAACCCGCTGAACGC  
AACGACATTCGATGGGACCGTTGATTAATGCCCGCGCTGGAAGGGTTGAGCAAAAAGTGGCGCGCAGTAGAAGA  
AGGGGCGAGATGGCGTTGGGTGGCAAGCGGTAGAGGGGAAGGATATTTATTCGCGGACATGCTGTGATGTTTTC  
GCCAGAAATGTCGATTTGATGATGATGCAATGCAATTTGGCCGTTTGGCCGTTGTCGCGGTGCTGCAATTTGACAGCT  
ATCTCAATGGCTAATGACAGTATACGGCTGACCTCATCAATCTATACCCAAAATCTGAACGTCGCGATGAAGCCAT  
TAAAGGGCTGAAGTTTGGTGAACCTTACATCAACCGTGAACCTTCAAGCTATGCAAGGCTTCCACGCTGGATGGCGTA  
AATCCGTTATGGCGCGCAGATGGTAAACATGGCTTGCATGAATATCTGCAGACCCAGGTGGTTATTTACAGTCTGTA

>Cluster\_20637

ATGTCATCGTTGCAAAATTTGCAAGGCAGTTTCGCTTTGGCGACACAAAACGCTGCAATTTGCTCGGCTAACGTTAAA  
CGCGGGTGTAGTTGGGCGTTTGTGCGTTGCAATGGAAGCGGAAATCGGCGTGGCCCGCGCTGTGGGGGAACCTT  
CGCTTTTGAAGGTGAACGGCAAGCGAGTTTCCCATCACTGCTCTCTCCCTTCGAGCAATTTGCAAAAAGCTGCTCAGC  
GACGAATGGCAGCGGAATAACAGCGATATGCTCGGCCCTGGCGAAGATGACACCGGGCTACCACGGCTGAGATCATTCA  
GGATGAAGTAAAGGATATCCGCTTGCATGCAACTGGCGCAGCAATTCGGTATTTACCGCCCTCCTCAACCGACGCTTTA  
AATACCTTTCCACTGGCGAGACGCGAAAACCTGTGTGTCAGGCGCTGATGTCGGAGCCTGACTTGTGATCCTTGTGAT  
GAACCGTTTCGATGGCTGATGTTGCCCTCACGTGACGACTGGCTGAGCTACTCGCTCGTTTACATCTGCTGCTGCTGCT  
TCTGGTACTGGTCTCAATCGCTTCCGATGAGATCCCGAAATTTGTCCAGTTTGTGCGCTGCTGGCGGATGACACCTTAG  
CGGAAACTGGCGCTAAAGAGAAGCTGCTCCAACAGCACTCGTTGCGCAACTGGCGCATAGCGAACTGCTGGAAGGTGTG  
CAATGCGCGGAGCGGATGAACCTTCACTAGCTCAGCCTTACCAGCAACGAAACCGGCTTGTGCTGAACAAATGGCGT  
GTTTTCTTATAACCATCGCCCATTTAATAACCTTAGCTGAGGTTGAATCAAGGCAACACTGGCAAAATTTGCTGGC  
CAATGGCGCGGAAAATCGACATTTAAGCTGATTTACTGGCGATCATCCGAAGGTACAGCAACGATTTGACGCTT  
TTCCGACGACTCGCGGACGGCGAAACCATCTGGGATATCAAAAAGCATATCGGTTACGTCAGCAGTAGTTTGCATCT  
GGATTACCGGTCAGCACTACTGTGCTAATGTGATTTCTTGGCTATTTGATTCGATTTGCAATTTACGCGCTTTT  
CGGATCCCGCAGCAAAAACCTGGTGCAGCAGTGGCTGGATTTCTCGGCAATTTGATAAACGACAGGCTGACGCTCTTCCAT  
AGTCTTTCTGGGACAGCAGCTGCTGGCGTGTGCTGCTGCTGCTGCTGCTGCTGCTGCTGCTGCTGCTGCTGCTGCTGCT  
ACCACTACAGGGGCTTGTCCGCTCAATCGCCAGCTTATCCGCGTTTTGTTGATGTTGCTGATTTAGCGAAGGTGAAACCC  
AATGTTGTTTGGTTTCGCACACCGTGAAGATGGCGCTGCTGCTGCTGCTGCTGCTGCTGCTGCTGCTGCTGCTGCTGCT  
TTTTATCGCTATGCGCTGACAAAATAAATGTA

>Cluster\_66951

ATGAAAAAATACACCAGCGTTCAATGAAGCTGGCGGTGCTCCCTGCATGATCGCCGTCGCTCTTCCATCTCCGGATG  
TACTTTCAGCGAAATCAATAAAATGCAGAAAAAGCACAGGAAGACTCAGCACATGCAGGAGAAAAGGTATCAGCCCTTT  
CTGCCCGCAATCACAGGCTCTTACCTGGCTCGATAATCAATGGATAAAACCTGTTCGGTTCGCTCAGGTATCAAGAGAG  
AAAAAACAAACAGCTCCGGCCTGTACATCAGCAGGCAAGAAAAGGAGAGATCACTCTACAGGAACCTGGGGCAACGAT  
TACTGCCGTATCGGCATCCCGTAATCATCACCTCAGCAGCAGCAATCAACTCTTGAAGGAGCGCTACCACAGAGA  
TGAATGGGACACTACCAGCACCTGATGAAAATGGTCTGCTGCCGTTAAGCAGCCTGGGAGCACAACAATGACTACCTCC  
ACTCAGCCATTAACGCTGAATAAAGCTCATGTGGCAGGGAGATATCAATGGTCTTCTGGATCTGATGGCAGCCGAAGCGG  
TCTGTACTGGCGCATGGATAATGGTCCGATTGTATTCTATCTGACTGAAACCAGAACGATATCCACTTCATATGCTGAACA  
CCAAAACCAGCAGCAGTTCCAGCCTCAGCTCTGGCTCAACAAGCACAATGGGGGCAACAGGAGGCGAGGATAAATCAGCA  
TCCGGTGTATGCTACGTCCTCTCAGAGCACAACCGTCCGGTACAGGAATACGACCTGTATGAAGACATCCGGAAAACATTTGA  
AGCGATGCTGACACCAGAAAAGCCGTTACTGGTTATCTGCATCGAGCTCAACGCTGACAGTCACTGATCTCTGCTG  
TCCAGGAAGCCGTCGCACGATATGTGGACGAACAAAACAGTATTAAGAACCAGGAGTGTCTGACGTCACAGGTCTCTG  
AGTGTGACGAACACGAAACGAGCAGTTCCGGTCTGGACTGGAACCTTGTTTACAAAATCGTACATTTCCGACCGGCAAC  
GTTGAACAATGAAGCGGAGATTTTACAGGCGCTACATCTGCAGGCGTATCAATTTCTGGATACGGCAACAGGGAATGCCG  
CCAAATTCAGCGGTTCCAGTCTTCTGATTAAGCACTGAGTGAACAGGCGGATGTGAGTGTGACTTCACAAGAAAGC  
ACTGTACAAAACCTGACGCGACTACCTATCCAGATGGCAGATCAGACGGTTCACGTCGCCAGTACAGCAACAACAGC  
TACAGATGTCGGGATCAACAACACTAACCCGGGCAATGATCACACCGGATTAATATGACCTGCTCCCTTAAATTC  
AGAAAACGGGCAATCTCCAGTTACAGATGAACCTTAACTGTCTGATCAGATCCCCAACCTATCCGTAGCTTTACGTC  
GAAAACAGTTACATAGAAATGCCATATACCAAACCTGCGTTACGAGCCAGAAAGTCAATCTGAAAGAGGGCAATCACT  
TGTCGTTACTGTTTCGATCAGAAACATACGACGACAAGTAAAGCCGGTACGTTTACGCCAGCAATCCATTAATTTGGTG  
GTTCAAAAACGGGAAAAATGAACGACGACGCTTGTGATCATATTACCCCGACTTTCCCGTCAGGAGGCAATAATAGGC  
TGA

>Cluster\_41119

ATGTACGATTTTAACTCTGGTGTGCTGCTGCTTACGAGATGTGCGTTTTTTTTAGTCATTCGCTGGTAAATGAGTAAAC  
GCCATTATTCATACCGTTAATGCAGGTACGCGTTCGCTGCGGCATAAATTTCTCTGTACATCGTCTTTTCCATCTTCT  
GCATCATGGGCACCTGGTTTGGGTTGCACATGACGATTTCTATTTGCCAATACCCGTGCATAGGTGCGGTAATGGGCGGC  
TTACTCGGCGGTCCGGTCTGGTGGGCTGGTGGTCTGACCGCGGGTTACATCGATATTCGATGGGGGGATGACCGC  
GCTAAGTTGATGATCTCGACCATCTGTTGAAGGATTTCTGGTGGCATGGTACACAGCATCTCTGATCCGTCGCGGCGCA  
CTGATAAAGTCTTTAACCCTATACCAGCGGTCGCGTACGTTCTGCTGAAATGGTGAATGTTGATTATCTGCGG  
ATCGCCGACCTTATGAAGATGCGGTGCTCTGGTGAATATTTGCTGCGCCAAATGATGGTCAACAAATCCGTCGCGCC  
GGCACTGTTATGCGTATATGCTCGATAAACGCGCGATGTTTGA AAAATACACTTCGGCTTTTCTGCCACTGCGCTGA  
AAGTGGCGCCTCGACGGAAGGCAATTTTTCGCGCAAGGGTTTAAACGAAAGTGAACAGCATGAAAGTGGCAGGCTGTAT  
CAGGAGCTGGATAATGGTGCAGTCCGATTAACGATCGAGAGAAATGCTGGCTTTTACCAGGATGGTGACGACCA  
TTTACCAGCAACCGGATTTCTTTCGACTTATACCTTAAAGCGATTAAGCCGTTAAGTGGTCTACGCTGATGGCAACG  
AAGTGCCTTACCCTGCTCTTTGATCCGCAATGCAAACTGGGTCGACGCTGGTCAATCCGTTGCGTGGTGA AAAATCAG  
CGAGTGGTGGTCAAAATTTGATAGGCGCAAAACCTTTTATTCAGTTCAATCAACCGCAGCTGGCGAGGCTGTAT  
TGCGCAACTGCTTTCCGCGCAGATCCTCGCGGGCAATATGAGCGGCAAAAAGCGATGCTCACCCAGTACAGATCAAA  
TGCTTACCGCCAGGTGAATCCCAATTTTGTGTTAATGCGCTTAAACACCAATTAAGCGGTGATCCGCGCGACAGCGAA  
CAGGCAAGCCAGCTGGTGCAGTATCTTTCCACTTTTTCGCAAAAACCTTAAAGCGGCTTCGAGTTTGTACTCTCGC  
CGACGAAATGAACATGTGAACGCTTATCTGCAAAATGA AAAAGCGCGCTTCCAGTCCGCGTTGAGGTTCAACATGCTA  
TTCCGCAAGAATTTATCCAGCAGCAATTTGCCCGGTTTACCCTGCAACCGATAGTGGAAAACGCCATTAACATGGGACA  
TCAACAATGCTGGATACAGGCGGAGTGGCAATCAGCGCCGAGCTGAGGGGCAACATTTGATGCTGGAGATCGAAGACAA  
TGCCGCTTTGATCAACCGGTAACCAATGCCAGTGGGATGAACTGTTGGTGAATAGCGTTTACGTTGGTGGTGGTGG  
GCGATGACTATGGGATAAGCGTCCGCTGTGAGCCTGATAGTTACACCCGAATAACGTTACGACTACCATGGAGGGACGAG  
GCATGA

>Cluster\_25679

ATGTTTTGTGTGCAATGTGAACAACTATCCGTAATCCGCGAGAAACGGCTGCTCATACGCGCAGGGGATGTGTGGTAA  
AACGGCGGAAACCTCTGACCTTCAGGATTTACTCATCGCGACGCTGCAAGGGCTTTCGGCCTGGGAGTGAAAGCACGCTG  
AATACGGCATCATCAACCAGATGTAGACAGCTTTGCGCCAGCTGCCCTTTTTCACAACCTGACCAACGTTAACTTCGAT  
TCTCCGCGTATTGTCGGCTACGCTCGTGAAGCGATTTGCCCTGCGCGAGGCGCTGAAAGCACAATGCTGGCTGTAGATGC  
CAACGCGCGCTCGATAACCCGATGGCTGACCTGCAACTGGTGAAGCAGCATCTCGGCGAGCTCAACTGTCAGGACGAG  
AATTTACCCTAACAAAGATAAAGCGGCGATTTGGCGAAAACATTTCTCGGCTGCGTCTACTGTGCTGTATGGCTGAAA  
GGTGGCGGCGCTATATGGAACACGCGCATGTTCTCGGTTAATACGACAAACGATATTTATGCCAGTACCATAAAATCAT  
GGCGTGGCTGGGACCTGGCTGCCGATATGAACGCGCTTCTTGGTGAATGAAATCGGCCAGATGAACCTCAAAG  
TGATGAGCATTCTGACGAGCAGGCGAAACCGTAAATACGCTCACCCAGCAGCAACTCAGGTCACAGTCAAGGCAAGCGG  
GGTAAATGCATTTGATTTCCGGTACGATCTCAAAGATCTCTACAACCTGCTGGAACAGACCAGGACAGGGCGTTAA  
TGTCTACACCCAGGCAAAATGCTGCCCTGCGCATGGTTACCAGGAGCTGCGTAAATTCAGCATCTGGTCCGTTAACTAG  
GCAGCGGCTGCGAGAATCAGCAAGTGGAGTTCTGCTTCCAGGCCCCATCTGATGACCTCGAATCAGCATCATCGAC  
CCAAACCTAGGCGCTTATGACGATCGTATCTGGACCCGACGATCGTTGGCTGGCGGGTGTGCGTCACTGGATGGCGA  
AGATTTCTCTGACGTCATTTGCCAGGCGCAACAGATGGCGGGCTTCCGTTACAGCGAAATTCGCGACCTGATCACCGTGG  
GCTTTGGTCCGACAGACTGCTTGGCGAGCCGATACGCTGATTTGATCTGGTGGAGCCGTGAAAAACTGCGTCAATATCTT  
CTGCTTGGCGGCTGTGACGGCGCACGCGCGAGCGTCACTATTTTCAACGATTTTCGCCACCAGCGTGGCGGATGCTGCGCT  
GATCTGACCCCTCGCTTGGCGTAAATATCGCTTTAATAAACTTGAATTTGGCGATATCGAAGGCTGCGCGCTGCTGGTAG  
ATGCTGGTCAATGTAACGATGCTTACTAGCAATTAATCTGGCGGTAACGCTGGCAGAGAACTGGGCTGGCGAGTCAAC  
GATCTGCCGCTGTGCTGGTGTCTCTCTGGTTGAACGAAAGCGATTTGCTATCTGCTGACGCTGCTTTCTCTGGGTGT  
GAAAAATATCTGTCACCGGCGGACTGCACTGGTTTCTGACACCGACTGTCAGCAGCAGCTGTCGGCGGTGCTGAACGAGAAATTCGGC  
TGCGTCTATCACCACTGTTGAAGAAGACATGAAGCAACTGTTGAGCGGTAA

>Cluster\_5981

ATGAATTCATTTGCCATCGTTAATCTTATTAGCATTTCTCGCCCTGTTCTAGCTGTAATAATTTAAACAAAGTAA  
AAAACCAAAGCGCTATAGATAACCTGACAGCTAACAAACATAGCCCTTTCTAACCAACTGATGAAAAATCAAGAAAAAC  
TAGCACAGACCGTACGAGAAATATCAGAGCTTGAAGGGCGAGCAGCACCATTGTGGCAATACGAAGAAATGCACAGCGCA  
GTAATGGATGCAGAGAATAAGATAAAAAATGCGGACTCAATAGCCAAGCAAAAAATAGATGAAGCCCAAAATTAAGCGCGC  
TAAAACAGTAAACGAAGCAAAATATCAAGCTCAGATGACAATAAGCAACGCTAATAGCGAAGCTATAGCAATCACCAAAG  
ACGCTCGGATGCACGCTGAAAAGCCAAAGACGCTTTGATAAATGATAAATAAGCAAAATGAGCTAATCTCAAGTGT  
AATGACAATGCAGTAAAAATTTCTGATGACAGAAAGAGCAAGGAGATGCTGGTTACGATATGAAGCTAAAGA  
GTTTGCAGAAAAATATGAAGCAGTTGCAAAATCAATGAAAAATAAAATGAAGGTTATGGTGAATGGATCCCTA  
ACCGTAGTGTACTTGTACAGCTGGCAGAAAATTAATGAAATTTACAGATGACGAGCAAGGAATACAAAAAGCCAGAGATTA  
ACCAAATCATTAATAAAACTAATAAAGCTGCTTCTGTTGATTTGTTGAGCAAAAACAGGCGTAAATCTGCCATAAACTT  
TGTTTTGGATGCCCTCAATGGAAGAGTTGACAGTATTTTATCAAAGTCAACACACAAATTTTGAAAACTTTCCCAAG



>Cluster\_28385

ATGGATAACGTTGAACTTTCACCGGCAACACGCTGGGGGATGATGCTACCGGATTACTTCAGGGGCTGGTTTGTACCT  
GCTGATCGCCTGGCTTGGCGGAAAAATCTCAGTTGGATTGTTTATGGCGTGCCTGTGACCGTGCCTTTTCATCCGTTT  
TACTCTTTCCTCGTATCTCCTTTAAACAGAAGCGCTTTGGGGATGGCTGGCGCTGGTGTTTATTTGCCACGCTGGGAATG  
AGCGGTAGGCTGGTACC CGCGCTGGCGGTGATCTTCGCGGGAACACAGTACAGTAAATCGACTCTATTTCAAAGTTGT  
GCTGCTGATGGCAATGTTGTTGCTACCGTGGATAACAACAAGCCTTCGCATCCGCAATGACAGTAGCCGCTATCGCTACT  
TTTACCAGTCAGTATGGCATAACGTACTTATATTAAGTGTGATTTTTCFCGCCAATGGCTAACGTGGTGGTACTTTTA  
CTGTGGAGTGAGTTGTTTAACTTGTGGCATCACGTTTTTCAAACCGCTCTTTTGGCAACCGACTGGTTTATTTATCT  
CACGTTAGGCTGGTACC CGCGCTGGCGGTGATCTTCGCGGGAACACAGTACAGTAAATCGACTCTATTTCAAAGTTGT  
TCACGTTAATCGCCACGGGGTGTGCTGCCGTTAGTATCATTGCTAACCCGATATTTATCATCACCCGCTGCCGTTACGGGC  
CTGAGCGGATTTTCGCGCACATTTCCGCGCGCGGGTGTGCTGTGACGCTGGCCTTTTGGCAATTGATCTTAATGGCTAT  
TGTCCGCGATCCGCAAAAATCGTCACTTCCCTGGACGGGGCGTTCGCTGGCTGATTTAAACCGCTCTGCTGGCTGCTC  
CGCTGATATGTTTCTGTCGCGCGCTGGCGCTTATGGCTGCGGGTGCCTCAGTACGGCTGGACTGTGACCGCTTTCAGGGC  
GCGCTGGCGGTGCTGGTGTACTGGTATGGTGCCTGGGCGATTTTGTGCTGATCGTCTGGCGTAAAGGGCAAAACCCCT  
TGTCTTTCAGGGCAAGTGAACCTTGGCGTTTCTGTTATTTGGTGTGGTAAATACGGTGTCTTAAATCTCCGCTGCTGG  
ACAGTATGCGCATAGCTGACAGTCAATGGCAGCTTACAGAGTGGCAAAAACACGCCAGACCAGTAACTATCTAC  
ATGCTCGAACAGACGGGTGCTGATGGACGCTGCGCTTGGTGTGATGCTGAAAAGCGATGCGCGTTTATGAAAAGTTGT  
ACGTGCGCGGATCTGTTGATGGCGTTAGATGGAGAGCAACATCTTCAGCAACAGATATCGGAAAAGTATTAGCCGAAA  
ATGTTGTTAATGGCCCTGGTTCCTGGTAAACCGGATGCGACATTTCTGGTGGCTTAAATCCAGGATCGCTATAACGTGATG  
ACCTGTATTGAAAAGACGCTTGGTACCTGGTGCAGCAAGATCTGAATAGTGAATGGCAGGGCAGAGCGGATCTTCTTTC  
CTTTGATGATAAAGATAACATTTGCTATGGCTTTGATCTGACAAAGAAAAGTAAAGAGCTTACGATGAGTTTACTTTC  
CGCGTATATAACGAAAAGAAAATTAATCTACAGCTGCTAAGGATGAAAACCTGGGAACGAAGCTAAAGCGTGGCGGAT  
CTTGTAGTGGATGTTGAAAAGCTGGATGTAATCTGAATGAGTGA

>Cluster\_18233

ATGCCAATAATAACAAATCGGCATCAAATATGTTGAATATATTTCAAAAAACAATCCCCCTTATTTATCAAAAAAGAG  
AGATGCCAGTATAAATCTAAATGAAAAGGTTAGTGTGATTGCAATGGGAAATCATATGGTGTGACATATAGCATCATAT  
GGAGTGAGTTTTTTGTAGTAATTCAGGAAAGATAGACTACGAAACATTTTCATCCCTCAATTTAAGCAAAGCTATT  
GTAATTCAGGAAAACAAGGGGACAAATAATATTAAGGGTGTGATTTTGGTGTGAAAATGAACTTTGGGGGAGCTTAT  
ATATAACCTTTTTCTTCAACTTGAGAAAGAGAATAAATCTCACACATCATTAGAAGTTCAATTCCTCCGGGCATGCAATGG  
CTCTGGGCATTAATAAATAAACAACGACAAGGAAAATAAGTTTGTATTAATTTCTATGATCCCAATCAGACCGCGACGCAT  
AAACGAGTATTTTTTGCCTAATAACATTTGTGATATAAATAAACCCTGACAGCATATGATTTTCTTAGTGAGCAATGTCT  
GAAATGTTATGGCTAAAAGAAGACACACTGCTACTTTTTTGTGATAAAAACAATAATGCAACAATAATGTGTTTA  
TAAAAAATACCTGATAATATTTCCAAAGGTGTGTTATTAATTTTGTATGGGAGCAGGACTAAGAGAGATAAATAA  
AAGGTATATAACGATACTCGATTACAGATCTTACAAAATCTCAGATGAAAATCTTGTGTGAATCAAAAAATGTTAATA  
TGTTCTGGGTGCTTTTAGCTCTACAAAATGGACATGATAATGTAATGATGAATATGGTACTTTAATTA AAAAGTCAA  
ATCTTAATAAAGAAGAAATTAATACATATATTAATCTGCAAGACTTTGGATGGAACCATACCTGGTTTTATACGGCCCTT  
CAAAATGGACATGCTCAAGCTATTAAGAGTTATGGTAACCTTAGTCTGGATACATTGATAAAAAATATAGATTTAGAGTA  
TTTTCTTTCAGCATTTAAATATGAGGCGCATAGCTCTAATAAATAATACCTCGGATTAATTTCTGCAATTA AAAATGGT  
ATGCAGACGCAATAAAGCATATTTGTGACGTACTTGGCAATGATTAATTTGACAAGAGTGAGATAATCAGGATGCTTGG  
GCGGAAAATTTATGATGGTGCACCCAGGATTACTTTCTTGCCTATCAAAAATGGAGATATTAATACGATTCAGTCTTTT  
CTACTAATAATGTTAGATATATCAAAGATTTTATCGAAGAGTTATTGACTGCAAAAATTAATGATTTACGGGGTTAT  
CATTAGCGATCAGTCATAGACATGATCATGTTGTCAAAATATACGGAAAGTTATTTAAAAAATTTGATACCGTCCAT  
AAAATGCTCAATTAATFCTAGCATTAGCAATTTGATGTCGAGAGAAAATAATGCAACAATAATTAATGATGAGTACAAAT  
AAATAAGGAGTAAAGGAAATATGTAGAAAATTTTAAAAGAAATCAATATATGCCAGAAAAGGTAGCAGAAATACCTAAGCG  
AGTTCAGCGGAAAACATTTCTCGATGATATAATTAATTTATTTCAATTTGA

>Cluster\_43508

ATGACAAGCCTTTTGGCCGAGAGGTAGCGAAAAGAAGAACCTTTGCAATTAATTTCTCACCCGACGCGGTAAGACTAC  
CATCACCGAGAAGGTGCTGCTGTTCCGACAGGCCATTCAGACCGCGGTACAGTAAAAGGCGTGGTTCCAACCAGCAGC  
CTAAGTCGACTGGATGGAGATGAAAAGCAGCGTGGGATCTCCATTACTACGCTGTGATGCAGTTTCCGATACACGAT  
TGCTGGTTAACCTGCTCGACACCCCGGGCACGAAGACTTCTCGGAAGATACCTATCGTACCTGACGGCGGTGGACTG  
CTGCTGATGGTTATCGACCGCGCAAAAGGTGTAGAAGATCGTACCCGTAAGCTGATGGAAGTACCCGCTGCGCGATA  
CGCCGATCCTCACCTTTATGAACAACTTGACCGTATATCCGCGACCCGATGGAGCTGCTCGATGAAGTTGAGAACGAG  
CTGAAAATCGGCTGCGCACCGATCACCTGGCCGATTGGCTGCGCAAGCTGTTTAAAGGCGTTTACCACCTTTATAAAGA  
TGAACCTATCTCTAGAGCGGTAAGGCCACACGATTCAGGAAGTCCGCAATGTTTAAAGGCGTGAATACCCGGATC  
TCGACGCTGCGCTTGGTGAAGATCTGGCACAGCAGTCTGCTGACGAACTGGAGCTGGTGAAGGCGCTTAATGAGTTC  
GACAAAGAGCTGTTCTTGGCGGCAAAATCACCCGGTATTTCTTGGTACTGCGCTGGGTAACCTCGGCTCGATCATAT  
GCTGGATGGCCTGGTGGAGTGGGCGCTGCGCCGATGCGCGCTCAGACCGATACCCGTAACCTAGAAGCGAGCAAGATA  
AATTTACCGGCTTCGATTTAAAAATTCAGGCCAACATGGACCCGAAACACCGGACCGGCTGGGCTTTATGGCGGTGTA  
TCCGGTAAATATGAAAAGGCAATGAAGCTGCGCCAGGTGCGCACCGCGAAAAGATGATGATGATCCTGACCGCGTACCT  
TATGGCAGGCGACCTTCCGACGTTGAAGAAGCGTATCCGGGCGATATCCTCGGCTGCACAATCACGGCACCATTCAGA  
TCGGCGATACCTTTACCAGGGTGAAGTATGATGAAGTTACCCGTTATTCGAACCTCGCGCCAGAACTGTTCCGCTGATC  
CGCTGAAAAGATCCGCTGAAGCAAAAACAGCTGCTCAAAGGCTGGTACAGCTTTCCGAAGAGGGGGCGGTGAGGTGTT  
CCGTCCGATCTCCAACAACGATCTGATCGTTGGCGCGGTTGGTGTGCTGACGTTTGTGTTGGTGGTAGCGCGCTGAAGA  
GCGAATACACGTTGAAGCAGTGTATGAGTCAACGTTGCCACCGCCGCTGGGTAGAATGTGCGGACGCGGAAGAAA  
TTCAAGAGTTCAAGCGTAAAGCAAGCAAACTGGCGCTGATGGCGGCGATAACCTCGCTTACATCGCTACCAGCAT  
GGTCAATCTGCGCCTGGCGCAGGAACGTTATCCGGACGTTTCAGTTCCACCAGACCCCGGAGCATTA

>Cluster\_34663

ATGAAACGAAACGCTGTCTGATGATGTAACGGTGTTCGCTTCGGGAGAGCCTCAGTACAAACGGGGCGGCGCAGG  
ATTTGGCGGGCAATGGCGGAGTGGTTGCCACCGGCGCAGAGTCCGATGACAGCCTGTTGCCCGGTTGCGTCTGGGA  
ATGCCGGGCAAGATGATCTGGTGCACAATAACGGGATACCGGCAATGCGGCTGGCCCTGCATAAGAGTACATATGTCGG  
CATATGTTTCTGATCAGTACCGTCCGAACCTGGCGCTGGCTGGGGATGCGGGAGACTGCAGCAAAAAGTTTGTGCTGATGA  
GGTGGAGGCGGCTGGTCCGAATACGCCGAAGGATGCTGGCGAGATCGACGTTGGAAGGGAACGCAGCTTTACGGAA  
TTATCCGTGAAGGTGTTGGCGTTTCAACGGCGAAATCTTTGTGACGCGCTGGGATACGGAGAGCAGCAGCA  
CTGTTTCTGATACGCTTTTAAAGCGGTGAGTCCGAAACGGGTGGACACCGCAGGACCGGATGAGGGAACCGTTTCTGCG  
GGCGGTTGTGGAGTGCATCGATATGGCCGTGCGCTTGGCTACCATATCTGTGAGGATGATTTCCGTTCTCTGGTAGTG  
GACGATGGGAACCGATCCCGCTGAACCTTCCACCGGGCGTCCGGCATGCTGCATATTTTCGAGCCGTTGGAGGACGGG  
CAGACCGTGGGCTTAATCAGTTTACAGGCTCATGGAACGGCTGAAGATGCTGGATTCCCTGCAGGCAACAGCTTCA  
GTCGGCCATTTGTGAAGGCGATGATGACGCGACGATTGAAAGTGAACCTGATACCGAAAAGGCTTTGAAATATATCGCC  
GTGCGCCGACGGGCGAAGGATAATCCGCTTATTAATATTTCTGGATAAGTTCTCCACCTGGTATGACACGAATAACGTTG

ACGCTGGGCGGTGTCAAATTCGACACCTTTCCCGGGTATGATCTGAAACTTCAGACTGCGCAGGATTTCAGACAATGG  
ATTTTCGCGCTTGAACAGGCGCTGCTGCGGTATATCGCCCGGCTTTGGCGTTTCCACGAACAGTTTCCCGGGATT  
ACTCGAAGGTCAGTTATCAAGTGCCCGTGCCTCCGCCAATGAGTCTGGCGCTATTTTATGGGGCGGCAAAATTTATT  
GCGTCCCGCTGGCCACGAGATGTTTTCTGCTGGCTGGGAGAGGCTCTTCTTCGGGGGATTATTCGTCGCCGACGGC  
GCGTTTTGATTTTTATCAGGCGCATCAGCCTGAGTTCACGGCTGAGTGGATTGGTTCGGGAAGAAATGGCCATTACCGGG  
TCAAGGAGGTTCAAGAAATCAGTGTGCGCATTTAGGCGGACTGAGCAGTATGAGAAAGAGCTGGCGTGTGGGCGAG  
GATTATCAGGACATTTCCGCCAGCAGGTCAGGAAATCTGCTGAGCGGCAAAAAGCCGACTCTCACGTCGGGTGTGGAT  
AGCGCAGGCGTATGAGCAGCAGATAGCGGAGAGTCGACGGCGGAAAGAGGAGCAACACCACGTGAGACGTAA

>Cluster\_21932

ATGGAATTTCTAATGACCCCTCAATTTGGGCGGGCTACTCACGCTTGTGTCTCGAAATTTGCTGGGTATCGATAA  
CCTGGTCTTCATCGCCATTTCTGCTGACAACTGCCGCAAAACAACCGGATAAAGCGGTTTCTGGGATTATCACTGG  
CGCTGATTTATCGCTGCGGGCTGCTGCTGCTGATTTTATGGATGGTACGCTGACCAACCGCTATTTACCGTCACTGGAT  
TTCTCCTTTCGCGTACGCGACTGATTAATGTTGTTCCGGGGGATATTTCTGCTGTTCAAAGCAACAACCGAACTGCATGA  
ACGACTGGAAAACCGCATCATGATTCGGTACGCGTAAAGGCTACGCCAGTTTCTGGGTGGTCTCACACAGATTGTCA  
TCCTTGACGCCGCTTCTCTGTTGGATGCGGTAATACGGCAGTAGGGATGGTTAACCACTTCGCAAGTATGATGGCGGG  
GTAGTATTGGCATGGCGGTTATGCTGCTGGCATCGAAACCGTACGCGGATTTGTTAACAGCATCCAACGGTGGTGGT  
GCTCTGCTGAGCTTCTCTTAATGATAGGCTGACTGCTGGTGGCAGAAGTTTCCGGTTTCCACATTCGAAAGGTTACC  
TGTATGCCCGGATTTGCTTCTCGATCATCATCGAAGTGTAAACCAATTCGCGCTCGCACTTTATTCGTCACCAGTCCG  
ACTTTGCCGCTGCGAGCGGCTACTGCGGATGCCATCTCTGCTTTGATGGGCGGAAACGTCAGGCCAATGTTTCAGCAGCA  
TGCCGATAACCGCATACCGATGCCGATCCGGAAGGTGCGTTTCCGGAAGAAGACGTTACATGATTAACGGTATTGA  
CGCTGGCGTCCGCTTCTCTGCGCGGGATCATGACGCGCGCGGTGAAATAAGCTGGGTTGACGCTAATCTCGGGTCCGAT  
GAAATCCGTGAGCAACTGCTCTCTTACCGCACAGTCTGTTCCGGTATGTCGGGTGAACTGGATGAAATCATCGGTAT  
CGTACGTGCTAAAGAACTGCTGGTGGCGCTGGAAGAGGGCGTTGATGTGGCGGCGATTGCTTCGGCGTCTCCGGCAGTTA  
TCGTCGGGAAACCTCGATCCGATCAACCTGCTGGGCTACTCGCTGCTGCTCGCGGAGCTTTGTTATCGTACCAAC  
GAGTTTGGTGTGGTACAAGGCTAGTACGCGCGTGGATGTGCTGGAAGCCATTGCGGGTGAATTCGGGACGCTGACGA  
AACGCCGAAATCATACCGACGGTACGCGTGGCTGGTAAAAGGCGGTACAGATTTGATGCTTGCAGCAGGCGCTTG  
ATGTTGAGCACCTTCCGATGACGATGATATCGCGACGGTCCGCGGCTCGTGTATCTCGGCAATGGTCAATTCGCCGT  
TGGGCGATGTGATTTGATGTAGGCCACTGCAATATCCATCATTTGAAGCCAAATGATTATCGTGTGATCTGGTTCGCAT  
TGTTAAAGAGCAACCGCGCACGATGAAGATGAGTAA

>Cluster\_56251

TTGATCCCAGCATCACAGGCGCTGGCTGGCTGGAAAACATCTCAGCGTTAAAGGGGATACAGCGTGGGCTGGA  
GCGGAAACTTTGCGTGTAAATGCTGATGGCACACTGGCAACAACAGGTCATCCTGAAGCATTAGGTTCCGCACTGACGC  
ACAAATGGATTACTACCGATTTTTCGGAAGCATTGCTGGAATTCATTACACCAGTGGATGGTATTTGAACATAATGCTG  
ACCTTTATGCGCGATCTGCATCGTTATACGCGCGCAATATGGCGATGAGCGGATGGCCGTTAAGTATGCCATGCTA  
CATCGAGAAGGTCAGGACATCGAACTGGCACAGTACGGCACTTCTAACACCGGACGCTTAAACCGCTGTATCTGTAAG  
GGCTGAAAATCGTACCGCGCGTGTATGCAAAACCTTCTCGCGGTGACTACAAATTTCTCTTTGCGCAATGGCTGCG  
CAAGCGAAGTGGGTTGATATCTCGGGCGTGTATGCCAAAGAGAAAATTTCTGCGGGCTATTTCCGCTTATCCGCAATTA  
CTATCGTTTTCGGTTGGGTCATTCCTTATCTGTTTGGTGCATCTCCGGCGATTTGTTCTCTTTTCTGCAAGGAAAACCAA  
TATACCAATAAATCGCAAGCAATCTTGGTATTTACTTCAACGATCTTTACGAGTACGTAGCGGGCTTTAAACAGGCAAT  
CAAAACGCCATCGGAAGAGTACGCGAAGATTGGTATTGAGAAAGACGGTAAAGAGGCTGCAAAATCAACAGCAACGTTG  
AGATTGAAAACGAATGTACGCGCGGATTCGTCAAAACCGCTTACCCGAGCGGCGAGTGGCCTTCTGATGCGCTGTGTA  
CGTGGCGGATTTGAATATTGAAGTGGTTCGCTGGCATCAACCCGTTCTCGCCGATTTGGTGTAGATGAACAGCAGT  
GCGATTCTCGACCTGTTTATGGTCTGGTGTGCGCTGGCTGATGCACCGGAAATGAGCAGTAGCGAATTTGCCTGTACAC  
GCGTTAACTGGAACCGGGTGTATCTCGAAGGTCGAAACCGGGTCTGACGCTGGGTATCGGCTGCGAAACCGCACAGTTC  
CCGTTACCGCAGGTGGGTAAGATCTGTTCCGCGATCTGAAACCGCTCGCGCAACCGCTGGATAGTATTAACGGCGGCGA  
AGCGTATCAGAAAGTGTGTGATGAACCTGCTGCTGCTGCTGCTGCTGCTGCTGCTGCTGCTGCTGCTGCTGCTGCTGCT  
CTATGATTGATATGTTATTTGGCGAACAGGCAAGCATTTGCGAAGCCTACCGTAACTGCTGCGTGAAGAGCCGCTG  
GAAATTTGCGCGAAGAGGATTTGTAGCCGAGCGGAGGCGTCTGAACCGCTCAGCAGGAAATGGAAGCCGCTGATAC  
CGAACCGTTTGGCGTGGCTGGAAAACACGCTGA

>Cluster\_48212

ATGAAAAGAGTTCTGACGGCGCTTGCAGCCACACTCCCTTTTCGAGCTAACCGCGGGATGCTATTAGCGGGCCGTTAGA  
GCGCCAGCAACGAACTGGCAGGCGATTATATGTTCCGATTTCGTCGTTTACGCTCGGCATTACCTACTGGGCAAT  
CAAAACCGCTACGTTCTCGTAGCCTACTACCCGAGGCGCAATATCACTGGTTCAGAAACCGGCTGGCGATTGCG  
GGGACTATATGCTCCCGCCCTACTTCTGGGGATCTCCGCGTGGTGTTTACCTCCGCTATGACGCGCTAAATTTACTC  
GCTGGGCTTCTGTTGGGCTGGCGGATCATTTTGTCTGATTGCCAAGCTGCGTAACTGGGGCGCTACACCTTTG  
CCGATGTGGCCTCTTACCGTCTGAAACAAGGGCGATTGCTATTTCTTTCGGCTGTGGTCTCTGTTGGTGGTGGGCGCTT  
TACCTTATCGCCAGATGGTGGGCGCAGTAACTGATCGAGCTGCTGTTGGCTTAACTATCACATTCAGTGGTGGTGGT  
GGTCCGGTGTGATGATGATGATGATGATGATGATGATGATGATGATGATGATGATGATGATGATGATGATGATGATGAT  
TGTGCTGTTGCTGCTGCTGCTGCTGCTGCTGCTGCTGCTGCTGCTGCTGCTGCTGCTGCTGCTGCTGCTGCTGCTGCT  
GCGATGGCGGTACACCGAAAGGTTGCGACATCATGAAGCCGGGCGGGTGGTGAAGATCCGATCTCCGCGCTCTCTCT  
GGTCTGGGACTGATGTTTTGGTACGCGGGCTTCCCGCATTTCTGATGCGCTTCTTTACAGTCAGCGATCCCGCGAAG  
CACGTAAGAGCGTGTCTACGCCACCGGTTTATGGGCTACTTCTATATTTCTGACCTTTATTTATCGGCTTCGGCGGATC  
ATGCTGGTGGTGGCAATCCGGAATATAAAGACGCGCGGGCCATCTGATTTGGTGGTAAACATGCGCGCGCTTACCT  
GGCGAATGCGATGGGCGGCAACCTGTTCTCGGTTTTATTTACGCGTTGCTTTTGGCCACCTTCTTCGGTGGTGTGCTG  
GCTGACGCTGGCGCGCATCAGCGGTTTCGCGATGACCTGTACGCTAACGCTTCTCAAAAAGGCGCGGCAACGAGTGA  
GAACTGGCGGTATCGAAAATCACCGTGTGATTTAGGTGTGATTGCCATTATCTCGGCGTGTGTTGAGAATCAGAA  
CATCGCTTCATGTTAGGCTGGCGTTTCCCATCGCAGCGAGCTGTAACCTCCCGATCATTCTGCTTTCTATGTTACTGTT  
CGAAACTGACCACTCGTGGCGGATGATGGTGGCTGGCTGGGCTGATTACCGCAGTGGTACTGATGATCTCCGCGCCG  
ACGATTTGGGTACAGATCCTTGGTACGAAAAGCCATGTTCCCGTATGAATACCGCGCGCTGTTCTCTATCAGCGCTGCG  
ATTCCTCGGCATCTGTTTCTCTCGCAACCGATAACTCAGCGGAAGGTGGCGCGAGGCTGAACTGTTCCGTGCACAGT  
TTATCCGCTCCAGACCGGCTTTGGCGTTGAGCAAGGCGCGCACATTA

>Cluster\_28713

ATGCCATTTGGTAACTTGGTAATAATGTAATAGCAATCATTTAATTTCCCTGCGCCGCACTACCTTCACAAACAGA  
CGGCGCGCACGGGAGGAACTGGTCTATTAATAGCTCTACAGGAGCATTAGGATCTCGTTCATTGTTTTCTCCCTGA  
GAAATCTGTTGGCTGATTCTGCTGATTTCCAGAGATATTTCCAGGACTTCTGCAAAACCATCGAGGCTTCTGCTGAGCTACA  
TCTGAGACATGCTTGTCTGGAGGATTTGAAGTTCTCAGTAAAGGGGCACTTGATACTCTTAATCAGCAAAATGGACC  
CTCTGCATTTCTGTTGAAAGCGCAGGACAGTGGTACTCATGCCGCTATTTGGAGAAAAAATGGTTTGGAGGTTAGCGTTG  
CATTAAGTCTCAAGAAATGCAAGCTTGAATCTATTGATATTGAGGGGAAAAACAGATTTGTTTTACCGGGGACGT







ATCGCCATGTGTCCCATCTATCCTCTGACGTGTGCACCAACGATATGATGATGGCCACGAAAGCAATGCATCGTCTGTTA  
CTGGTTTACTGATTTTACTACTCGTGGATATTTACCGCAACATATGCTGAATTTACTTTGCCAGGAAAGGATTCACACCTCG  
ATATCACACCAGAAGATAACCGGATTTCTTGCCAGTGGTGTGTGCGACTTATCGGCTTTAGCTACTACATGCTTTTACG  
ACACAATTTTCGCCCGGATAAACCCGCAACTGGATTTATGTTGAACCCACGAGATTTGGTCAGCAACCCCTTATATCGATACATC  
CGAATGGGAATGGCAAAATGATCCGCGAGGGTACGTTTACTCACTCAACTGGTTCGGGATCATTTCCAGTTGCGCGTGT  
TTATGTGCAAAAATGGATTTGGTGGCGTTGACCAGAGACAAGCTGACGGCACGGTGAACGATCACTATCGCATGATTAC  
TTTGTCTCCCATATTCGGGAAATGAAAAAGCGCTACGGAAATGATTTATGTCGATAAAGACAACGAAGGGAAGGGAACGCT  
GGAACGGATACGTAAGCGTCTTTTACTGGTATCGGGATCTCATCGCAACAATGGCGAAAAATTTGA

>Cluster\_18411

ATGAGTACTTCAGATAGCATTGTATCCAGCCAGACAAAACAATCGTCTGGCGTAAATCAGATACCACATGGACGTTAGG  
CTTGTGGTACGCAATCGGCGCGGGGTGCTGTTCTTCCCTATCCGCGCAGGTTTTGGCGGACTGATCCCGATCTTTC  
TGATGTTGGTATTAGCATAACCCATCGCGTTTTATTGCCACCGGGCACGGCGGCTGTGTCTTTCTGGCTTAACCCCT  
TCCGCAACATTTACGAAACGGTGAAGAGCATTTTGGTAAACTGGCGGCTGGTTATCACGTTCTTCTTCCG  
GATTTGCCACTGTTGTGGATTTATGGCGTTACCATTACCAACACCTTTATGACGTTCTGGGAAAACCAGCTCGGCTTTG  
CACCCTGGAATCGCGGCTTTGTGGCGCTGTTCCGTGTGCTGATGGCTTTCGTCATCTGGTTGGTAAAGGATCTGATG  
GTTAAAGTGATGAGTATCTGGTATGGCGTTTTATCGCCAGCTGGTGTGATTTCTCTTTCGCTGATCCCTTACTGGAA  
CTCTGACGTTATCGACACCGGTTGACCTCGTCTGCTGTTAACTGGTTCATGACGGTATCCTGATCCGCTCTGCTGG  
GGATTTCCATCATGGTTTTCTCTTAACTTCTCGCAATCGTCTTCTTCTGTTGGTTTCTAAACGTGAAGAGTACGAG  
AAAGATTTGGTTCGCGACTTACCAGGCGTAAATGTTTACAAATCATCTCTCGCGCCAGTATGCTGATGGTTGCAAGTGT  
GATGTTCTTTCGTTAGCTGCTGTTTACGCTGTCTCCGCGAATATGGCTGAAGCGAAGCGCAGAATATTTCCAGTGC  
TTTTCTTATCGGCTAACCACTTTTGGTCCATGACCGGTAACAAAACAACGTTTTGCGATTACACTGGAAATATGGCGTTCC  
ATCATCGCACTCGTGGCTATTTTCAAATCTTCTTCCGTCATCTCTGGGACGCTGGAGGGCTGAATGGTTGATTCT  
GAAGTTGGTTATAAAGGTGACAAAACAAAGTGTGCTGGGTAACCTGAATACTATCAGCATGATTTTCAATTATGGGCT  
CCACTGGGTTGTTGCCCTACGCCAACCCGAACATCTCCGACTGATGAAGCCTATGGGCGCACCGATTCGCATCAGT  
CTGTGCTGTTGGCGATGTATGCCATCCGTAAGCGCGCTCTTGGCGAAATACCGTGGTCTGCTGGATAACGTTTGT  
TACCGTATGGTCTGCTGACCATCCTGAACATCGTATACAACTGTTTTAA

>Cluster\_41539

ATGAGCCATAAACCTGCGCATTTTATTATGGTTCGATGACGATCCGGGATTGCTGAAACTGCTTGGCCTGCGCCTGACCAG  
CGAAGGCTACAGCGTGGTACCGCGGAAAGTGGCGTTGAAGGATTACGGGTACTGAATCGGAAAAAGTAGATTTAGTCA  
TCAGCGACCTGCGGATGGATGAAATGGATGGTATGACGCTATTTGCTGAAATTCAGAAAGTGCAGCCGGGAATGCCAGTA  
ATTATTTTACCAGCATGGTTCATTTCCGATGCGGTTGACGCAACACAGCAGGGCGTTTTAGTTTCTCACCAGCC  
TGCTGATAAAGACCGCTATATACGGCAATGACGATGCGCTGGAACAATCCGCGCACGCCACCGAAGCGAAGCGCGG  
AGGCGATTGTACCCGACGCCGCTGATGCTGCGTTTGTGGAACAGGCGCGGCTGGTGGCGCAATCAGACGTTAGCGTT  
TTGATTAACGCGCCAGAGCGGCACCGGAAAGAGATTTTCCGCCAGGCTATCCACAACGCCAGCCGCGCAACAGCAAAACC  
ATTTATGCTATTAACCTGCGGCATTTGCCAGCAATGCTGGAGTGGAGTGGAGCTGTTTGGTCAATGCGCGTGGTGGCTTTA  
CTGGCGCTTACGCAATCGCAAGGTTTTATCTCCAGCGCGGAAAGCGGTAAGCGTATTTCTCGATGAGATGGCGATATG  
CCCGCACCGTTGACGGTCAAACCTGCTGCGCGTGTGACAGGCGTAAAGTGGCGCCGCTGGGCAGTAACCGCGATTTGA  
TATCGACGTTGCGGATTTTCTGCCACTCACCGGACCTGCAAAAAGCGATGGCGCGGAGGAATCCCGCAAGATCTCT  
ATTAACCGCTCAACGTTGTGACGCTGAAAATTCGGCCTGCGGAGCGCACAGAAGACATTTCCGCTACTGGCAATCAC  
CTGTGCGCGAGGCGGAGAGCGACATAAACCGTTTGTCCGCGGTTCTCCACCGATGCGATGAAACCTGATGACCCG  
GAGCTGGCGGGTAAATGTGGCCAGTTGGTCAACGTGATTGAACAGTGGCTGGCGCTGACCTCATCTCCGGTGTATTAGC  
AGGCAATTAGTAGAGCAGGCGCTGGAGGGTGAATAACGCGCTGCCAACCTTTGTGAGGCACGTAATCAGTTTGAATC  
AATTTTGGCTAAGCTGCTGCAATTAACCAAGGCAACGCTACCCACCGGAGAGAATGGCGGGCGCAACCGGACAGA  
ATTTTATAAACTGCTATCCCGACAGAGCTGGATGCAAACGATTTCAAGGAATGA

>Cluster\_66739

ATGTACCCTATCGCAACTGAGTTAAAGGTGGGTAACAATCAACTGGATAGCTACCTGCCAGTACGCAATAAAAAAATATGA  
TGTTAACCCTGGCAATTTGTTACTGGCCTGCTCTTAGCTATGCCCTGAAATGCAAAATGACGCTACGATCCTGACCAAT  
TCCGTGAAGATTGTAACACATATGCAGGAGCTGCTTGTATGAGCCTGCATTTCTGGTCCGTGCTGGAACGGATGATTTT  
TCCAGCCAGGACATTTTCCGTGTCTCCCACTTTTTTTACTTTTTTACGCCAGTTTAAATGGTAAAAAATAAGTGGCGG  
TTCAATGGCAGATAAACGACTTGGCAGCTGTTTGGCAATTTAATGGGCGATTTACGCTTCTGTTACCCCATACAGACA  
GACTGAACTTCAATGAGACGAAATGCTGAATAAGCTCAATGAAAAAATAAAGCAGTTGGAGAAAGGGCGTTTGGCGAA  
GAGCAACCATATCTTCCGTATATGGTAAAGTCTTTTCACTGATCTGGCATTCTTGGCAGAATCCACAGTACCTTTT  
ACAGGAATGACCAACACCTACGTTTGTACGCTTTTACTGTTGCTGCTCAACTGGCGCTCAATATTGACAATTTGGCAGG  
ACGGCGAACCAAGCAAACTACTGTTTTTATCTTGTATGCGAAAAAGGAGCTCCGAACGGGAAAGGTGAAACGTT  
TATGGCTATAAGCTGTTTCCGAGCCAGAGCGAAAAAATCTTCCGCTGCTCTCTGCTTAGAGTTTGGTGGGAAAA  
AGGACAGAAAAAGCGTCCGTTATGGCAGATTTATCAAGACACTCTGAATGATTACAGCTATCTGCCCAGTACTAAATG  
ACCTTAATGTTTTATTTGAGGATTTTATTTGTGGATCGAGGCTCCCGCTTCTGACCGCGCAACAACTAGAAAAGTGT  
TTCAACAGCTATATCTGTTGCGTAGAGCAATTCGAAGTAAAAAATAACCGTGGGATATAAATAAGAACTACGTT  
TAAGGAGCTGGAAGCCAGATTTGCACCTGACTTCAATTCAGGTTCCGTTGGTCCGTCAGGGAAAGTGTGGTGTGAATCAGG  
ATCGTCTTCTGTTGCTGACCAATCTCACTGTGGCAAAAATGACAAGCTCCGCTACACGAACTGCTGCGTGGTTTTGAA  
CAACGCGGTTTTTATCTGGATAACAGTCTGCGCAACGCTGGTGGCGTTTTATGACGCATGGGAAATGTAGAGCGAAT  
GAGTGATAGTGGAGCGCGTGTATGTCGTAACAGTATGA

>Cluster\_24376

ATGCTAGTTGTAGAACTCATATAGTTTTGCTGGCGATCTTCTTGGGCGCCAGATTGGGGGAATAGGTATTGGTTTTG  
AGGCGGATTGGGGGTGCTGGTTCTTGGCGTATTGGCGTTAAACCCGGTAACATCCCGTTTCGATGTCATTTCCATATCA  
TGGCGGTTATCGCCGCTATTTCTGCCATGCAGGTTGCTGGCGGCTGGACTATCTGGTTATCATCAGACGAAAGGCTGCTG  
CGCCGTAACCCGAAATACATCAGATCCCGCACCGATCGTGACCTATTTCTGACTATCTTTGCTGGTACTGGCAACAT  
CTCTCTGGCGACACTGCCAGTTATCGCTGAAGTTCGGAAGGAACAAGGCGTTAAACCTTGGCGTCCGCTGTCTACTGCAG  
TGGTATCCGCGCAGATTCGATCACCAGTCCGCAATCTCAGCGGCGAGTGGTTTACATGTTCTCCGTTGGAAGGTCAT  
GGCATAGTACCTCCATCTGCTCTCCGTGCTATCCGCTCAACCTTCCGCTGCTGGCGGTTTGGTGTATGCTTCCGCTCAC  
TATGCTGTTCACTCCAACTCTCTGACGATCCGATTTATCGCAAGGCTTGGAAAGAGGGCTGGTTGAACTGCGCGGTTG  
AAAAGCAGATTTGAAATCAATCCGGTGCAAAACGTTCCGCTGCTGCTGGGCTAGTTGGCGTGGTTATCTAT  
GCAATCATCAACAGCCCAAGCATGGGTTGTTGAAAAACCATGATGAACACCACCAACGCAATCTGATCATCATGCT  
CAGCGTTGCAACTCTGACCACCGTTATCTGTAAGTTCGATACCGCAACATTTCAACTCCAGCACTTCAAGCAGGTA  
TGAGCGCTGTATTTGTATCTGGGTTGCGTGGCTGGGCGTACTTTCTGTTTCAACAACATCGACTGGATCAAGAT  
ACCGCTGGTGAAGTGAATCAGGTCATCCGTTGGCTGCTGGCGTCACTTTCTTCTTGTCTGCTGCTGCTACTCTCA  
GGCTGCAACCGCAAAAGCACTGATGCGGATGGCTGACGCTGAACTTTCTCCGCTGACCGCTGTTGCTTTTGGTGTG  
CGGTGCTGGTCTGTTTCTTCTGCGACCTACCCGACGCTGGTTGCTGCGGTACAGATGGATGACACGGGTACTACCCGT  
ATCGGTAATTCGCTTCAACCATCCGTTCTTATCCCGGTACTCTGGGTTGCGCTGGCCGTTGGTTCCGCTTCCGT

GCTGGGTAGCTTCATGCTGTAA

>Cluster\_4564

ATGAAAACCCGTACACAACAAATGAAGAATTACAGAAAGAGTGGACTCAACCGCTTGGGAAGGCATTACTCGCCATA  
CAGCGCGAAGATGTGGTGAATAACGCGGTTACGTCATCCTGAATGCACCTGGCGCAACTGGGCGCGGCAAAATGT  
GGCATTGGCTGATGCTGAAATGCTTTGAACTGATGAAAGCGATGATTGAAGCCGGTGCAGCGGCGAGTTCACCTTCAAGA  
GCGAAAGCGGGTATTGAAGCAGTCTATCTGTGCGGGATGCGAGGTAGCGCGGACGCTAACCTGGCGGCCAGCATGTATCC  
GGATCAGTGCCTTATCCGGCAACTCGGTGCCAGCTGTGGTGGAGCGGATCAACACACCTTCCGTGCTGCCGATCAGA  
TCCAATGGTCCGAGGCATTGAGCCGGGCGATCCGCGCTATGTGATTTACTTCTGCCGATCGTTGCCGATGCGGAAGCC  
GGTTTTGGCGGTGCTTGAATGCTTTGAACTGATGAAAGCGATGATTGAAGCCGGTGCAGCGGCGAGTTCACCTTCAAGA  
TCAGTGGCGTCACTGAAGAAATGCGGTACATGGGCGGCAAGTTTTGGTGCCTAACAGGAAGCTATTCAGAACTGG  
TCCGCGCGCTTTCAGCTGACGTGACGGGCTTCCAACCTGCTGGTGTCTGCTACCGATGCCGATGCGGGCGATCTG  
ATTACCTCCGATTGCGACCCGATGACAGTGAATTTATTAAGTGGCGAGCTACAGTGAAGGCTTCTCCGACTCATGC  
GGCATTGAGCAAGCGATGACCGTGGCTGGCTATGCGCCATATGCTGACCTGGTCTGGTGTGAAACCTCCACGCGG  
ATCTGGAATGGCGGCTCGCTTTGCACAAGCTATCCACGCAAAATATCCGGGCAAACTGCTGGCTTATAACTGCTCGCG  
TCGTTCAACTGGCAGAAAACCTCGACGCAAAAATATGCGAGCTTCCAGCAGCAGCTGTCGGATATGGGCTACAAGTT  
CCAGTTTATCACCTTGGCAGGTATCCACAGCATGTGGTTCAACATGTTGACCTGGCAACGCTATGCCAGGGCGAGG  
GTATGAGCAGCTGCTGAAAGTGCAGCAGCGAAATTTCCGCGCGCAAAAGATGGCTATACCTTCTGATTCACAG  
CAGGAAGTGGGTACAGTTACTTTCGATAAAGTACGACTATTAATTCAGGGCGGACGCTTTCAGTCCACGCGCTGACCG  
CTCCACTGAAGAACTCGCAGTTCTAA

>Cluster\_28371

ATGGATGAATTTCAAACAGAAAGCAGAGTGAAACCCGATCCAGCGATCGTCTGACTGGTCTCTCGTCAATCTTCTGA  
ACGTTCTGAGCTACTGAACTGGCGAACCAGCATCAATTTTATGATATTGAACTTATGACTGACACTGACGATCGCCGTC  
CGACTCTGCGCAAAAAGAGCGCAATGAGGAACCGGAAATCGAAGAAGAAATGACGAATCCGAAGATGAAACCTGGAT  
GAAGAGCGGTGATCAACACGTTGCTCCGCTAAGCGCAAAAAGCAGCCAGTAAACCGCTTCTGTCAGTATATGATGAGG  
CGTCCGCAATCTGGTCTTACTGCTGTTGATCATCGGTATCGGTTCTGCGCTAAAAGCCCTCGACCTTCTCCAGCGCTC  
AAACCGCTTGGCGGAGAAGATTTGATCTTGCAGGCAATGCGACCGATCAGCGAATGGCGTGCAGCTGCGCCGGGA  
ACCAGCTTGGGAAAATACTCAGCAGGATGTTTCTTCTGCGCGGATCTTCTACGCGGACTCAAGGGCAAAACCCCGG  
GGCAACGGATGTTCAACACGTTGTTGAGTGCAGGGTACCTGAAACATGCGCTGACCCAGCCAAAATCAGCAACGAT  
TGAACAATGTGGCGGTCAATTTACATTTGCCACTGAACCCGCGACTGTCGCGCTGTTGCAATGGCAATGCATCGCGT  
GACACGGCGAAAACGCAACCCGCTGAACGCTCCGCGCACATACGCGCCAGCTCGTCAGCAGGCGGTGATGAACGAAAA  
ACCGCAAGCAACCGTGAACCGGAACCGAAGCCGGTAGCACAGACCGCAAGCGTACTGAACAGCTGCTCTGTGGCGA  
GCACGAAGCACCAGCTGCGACTTCTACCGCAGCAACAAAAGAGACGGCGACTACGGCTCCAGTACAGACGGCATCCCG  
GCGCAACACCGCAACACCAGCCGCTGGAGGGAAAGACCGCAGGTAATGTGGTTCGTTGAAATCGGCACCGTCCAGCA  
TTACACTCTGACGCTGACGATTTCTTAACTACGACAACCTGAACGGTTGGCGAAGAAAGAGAATCGAAAACTACG  
TTGCTATGAAACGACCGGTAATGGTCAGCCGCTGGTATGCTCTGGTTTCTGGCGTGTACGCTTCGAAAGAGAGGGCGAA  
AAAGCGGTATCTACATTCAGCCGATGTCACCGCCAAAACCCGCTGGCGGAAACCCGCTGCGTCAAGTCCAGCTT  
GAAGTAA

>Cluster\_62665

GTGCTGGAACGGCTGCTGTTGAAAAGGCTGGTGTGAGCTGCTACTTTGCTGCTTCCCGCTTTCATCTGGGTGCATT  
TTTTGGTTTACCTGCCCTGGTTTTTGGCTGTCATCGGTAACGGGACTGCTTATCTGGCATTCTGGAATTTATTGCGCTTT  
CATGGTGGCTGTGGGTGGATCGTAGTATGACCCCGCCACCGGGCGGTGTTAGCTGGGAACCGCTACTATACGGTTACAC  
CAGATGACAGTGCAGAAATAAAAAACGCCCGTGAACCTGGGCAATCTGATTAACGCTTTCGTTAGCGCGCGGAGTCCGCT  
GCCCGACGAGTGGTCTGACCACTGAAGAGGGCGGTATTTCTGGTGTAAACGGTCTGGCGCAACAAATTTCTGGTTTCG  
GCTGGCGGAAAGATAACGGGCGAACAATCCTTAACTGCTGCGTTACCCGAGTTTACGCAATATCTGAAAACCGGTGAT  
TTTTCTCGCCGCTCAATCTGGTCTCAACACCGGGCGCATCTGGAATTCGCGTCACTGCTTATACCCACAACAGTT  
GCTGATGGTGGCGGTGATGTCACGCAATGCATCAACTGGAAGGGGCGGGGTAACTTTTTTGCAACGCTGAGCCATG  
AGTTACGCTACGCCATTGACCGTGTACAGGGTTACCTGGAGATGATGGATGAGCAGCCGCTGGAAGGCGGCTGCGGAA  
AAAGCGTTGCACACCATGCGCGAGCAGACCCAGCGGATGGAAGGGCTGGTGAAGCAGTTGCTGACGCTGTGAAAATAGA  
AGCCGACCCAGCATTGCTCAATGAAAGGTTGATGTGCGGATGATGCTGCGGCTTGTGAGCGGTGAGGCTCAGACTC  
TGAGTCAGAAAAACAGACATTTACCTTTGAGATAGATAACGGCTCAAAGTGTCTGGCAACGAAGATCAGCTACGCACT  
CGGATTTGCAACCTGGTCTATAACGCGGTAATCATACTCCAGAAGGCACGCAATATCACCGTACGCTGCGCAGGATGCC  
GCACGGTGGCGAATTTAGCGTTGAAGATAACGGACCGGCATTGCACCGGAGCATATTCGCGCTGACCGAGCGTTTTT  
ATCGCGTTGATAAAGCGCTTCCCGCAACCGCGGTAGCGGATAGGGTTAGCGATCGTGAACATCGCGTGAATCAT  
CACGAAAGTCCGCTGAATATGAGAGTACAGTAGGAAAAGAACACGTTTCAGTTTGTATATCCGGAACGTTAATTGC  
CAAAAACAGCGATTAA

>Cluster\_32894

ATGCCATTAGTCAATGTTGCTATCGGTGTAATCTTGTATTACTCCTGATGATCCGCTTCAAAATGAACGGTTTCATCGC  
TCTCGTCCCTGGCGCTTGTGTTGATAATGCAAGGAATCCGCTGGATAAAGTTATTGGTCCATCAAGCCGGTGT  
TCGGCGAAACGCTCGGTAGCCTTGCCTGATCATGGGTTTTGGCGCAATGCTGGGCAAAATGCTGGCAGACTCGGTGGC  
GCACAACGTATCGCCACCAGCTGATGCTAAATTTGGTAAAAACACATCCAGTGGGCGGTGTTACTGACCGGTTTTAC  
CGTTGGTTTTGCCCTGTTCTATGAAGTGGGTTTTCGTGTGATGCTGCCGCTGGTGTTTACCATCGCGGCTTCCGCAATA  
TTCCACTGCTGATGTTGGTGTACCAATGGCGGCTGCACTGCTGTGACCCACGCTTCTGCCACCGCATCCGGTCCG  
ACTGCGATTGCCACCATTTTCAATGCCGATATGGGTAACCCCTGCTGTACGTTACTATTCTGGCAATCCCGACCGTTAT  
TCTCGCGGTTCCGGTTTACGCTCGCTGCTGAAAGGATTCGATAAGCCAAATCCCGGAAGGCTGTACAGCGGCAAACTC  
TCAGCAAGAAGAGATGCCAAGCTTTGGCGTCAAGCTTGGACTTCTGTTGGTCCGCTGTTGCTGATGGCGGATGCGTGC  
ATTTCCGAAATGATCCTGCGCAAAAGGTCACGTTTTCTCGCGGTGGCGGAGTTCTCGGTGACCCGCTAATGGCAACGCT  
GATTGCGGTGCTGATGCTATGTTACCTTTGGTCTGAACCGTGGTCTCAATGGATCAGATTAACGACACGCTGGTTT  
CTTCCATCAAAATCATCGGATGATGCTGTTGATCATCCGTTGGCGGTGCGTTCAAGCAGGTGCTGTTAGACAGCGG  
GTGGCAAAATACATGCTTCCATGATGCACGAACCAACATTTCTCCGCTGCTGATGGCTGGTGGTATGCGCGGCTACT  
CGGTTACCGCTGGGTTCCGCAACCTTCCGCGCAATCACTGCGGGGGTATCGCGGCAACCAATTAATGGCAACGCTG  
TTAGCCCGAACTGATGGTTATTGCGGTTGGTTCCGGTAGTGTGATTTCTCTCAGTGAACGATCCGGGCTTCTGGCTG  
TTCAAAGAGTACTTTAACTGACTATCGCGGAGACCATCAAGTCTGGTGCATGCTGGAACCATTATCTCGGTGTCGCG  
TCTGGTAGGCTGTCTGCTGCTGAATATGGTGAATTTGA

>Cluster\_53700

ATGGCTGATTATCAGGGTAAAAATGTCGTCATTATCGGCTGGGCTCACCGGCTTCTGCGTGGACTTTTTCTCTCGC  
TCGCGGTGTGACGCGCGGCTTATGGATACGCGTATGACACCGCTGGCTGGATAAATACCCGAAGCCGTAGAACGCC  
ACACGGTGCATGAAATGATGAAATGGCTATGGCGGAGATCCGCTGATTCGCGCAGTCCCGGATTTGCACTGGCGGCTCA  
TCCTTAAAGCGCTGCGCTGATGCGGAAATCGAAATCTGTCGATATTCAGCTGTTCTGTCGCGAAGCACAAGCAGGAT  
TGTGGCGATTACCGGTTCAACGCAAAAGCACGGTACCACGCTAGTGGGTGAATGGCGAAAGCGGCGGGGTTAACG

TTGGTGTGGGTGGCAATATTTGGCCTGCCTGCGTTGATGCTACTGGATGATGAGTGTGAACGTACGTGCTGGAACGTGTCG  
AGCTTCCAGCTGGAAACCACTCCAGCTTACAGCGGTTAGCAGCGACATTCTGAACGTGACTGAAGATCATATGGATCG  
CTATCCGTTTGGTTTACAACAGTATCTGTCGAGCAAACATGCGCATTTACGAAAACCGGAAAGTTTGGCTGGTTAATGCTG  
ATGATGCTTAAACATGGCGATTTCGCGGTGCGGATGAACGCTGCGTCACTTTGGCGTCAACATGGGTGACTATCACCTG  
AATCATCAGCAGCGAAACCTGGCTGCGGTTAAAGCGGAGAAAGTGTGAATGTGAAGAGATGAAACTTTCCGGGCA  
GCATAACTACACCAATGCGCTGGCGGCGTGGCGCTGGCAGATGCTGCAGGGTTACCGCGTGCAGCAGCTGAAAGCGT  
TAACCACATTCACGTGCTGCGCATCGCTTTGAAGTTGCTGGAGCATAACGGCGTACGTTGGATTACGATTCGAAA  
CGGACCAACGTGCGCAGTACGGAAGCGGCGCTGAATGGCTGCAGTAGACGGCACACTGCATTTGTTGCTGGGTGGCGA  
TGGTAAATCGGCGGACTTTAGCCCACTGGCGGTTACCTGAATGGCGATAACGTACGTTCTGTATTTTCGGTCTGACG  
GCGCGAGCTGGCGGCGTACGCCCGGAAGTGGCAGAACAAACCGAAACTATGGAACAGGCGATGCGCTTGTGGCTCCG  
CGTGTTCAGCCGGCGATATGGTCTGCTCTCCAGCCTGTGCCAGCCTTGATCAGTTCAGAACTTTGACACACGAGG  
CAATGAGTTTGCCGCTTGGCGAAGGAGTTAGGTTGA

>Cluster\_64436

ATGCCGTGGAACAATTTTCCGCACCTCGCCGCTAGGGCGTTCAATCAACCCTTTTGTGAGCCCGCTACGCGCGGGT  
ATTTTTTTCTGCGCTGAGCGACCGGTTCCGTACCGGGGACTGATTGATACAGCGTCAGGAGAGGTAATGAACAGCGACG  
AAATGAACCGCTCGCATGGGGTGGGACAGCAGCGAGCAACACGCCAGAAATCGTATCGCGTGGAGCGGTATAGCC  
GTTCTGCCGTTACCGGAGCTGGTTCTATAAATTTGGTTTATATCAATCCGGTCAAGCGGATGAGTGGTTACGCGAAAT  
CGCAAACCGCTGCAGCAGGCGATTTCTGATCCCGATGTTAAGGGATCCTGCTGGATATGATTTCCCTGGCGGTGAGG  
TCGCCGGCGGCTTTGATACCGCTGATTTAATCGCCGGGCGGAGAGCAAAAACCGGTGTGGCGCTGGCCAGCGATACG  
GCCTGCAGCGCCGATATTTGCTGGCGTCAAGCTGTTCCGCCGCTGATAACGCAGACCGGCACGGTGGTTCACTCGG  
TGTCTGATGGCTCACCGTGCCTGCGAAAGGCGTGGAGATTGCCGGGTTGACGTGACGCTGATTTACGCCGGCGCC  
ACAAAGTCGACGGAAACCGTATTTCCAGCTGCCGACGAGCTTCCGCGAGAAATCCAGCTGAGTATTAACAGCACACGC  
GAGCAGTTCCGCGAAAAGTCTCGGATTAACCGGGCTGAAAATAATCCAGGGTCTGGCCACAGAGCCGCGATTTTAT  
CGGCGCGGACCGATTAATTAATCTGGTCTCGCTGATCAACCTGTTAATACGCGGACGCTATCGCAGTATGAGCCGAC  
TGAAACCAAAAACGGAGCGATTTATGCCAGGTACAACGAAACACCGCGGAGACCACGACCAGAACAAAACCGCGCT  
ACGACTACGGTCCGCGCGGTTGAGTCCAACGCGGAGCAGATTCGCGCGGACGCGCATCGAGCGAACTGGCACGCGTGT  
GGCCATCATCAACTGTCCCGAAGCTGTTGGCGCGAGGCGCAGGCAAAAAGCGCTGCTGCCGTCCCGGGATGACGGTCCG  
GGCAGCGGACCGCTTCCCTCGCGGACGACCGCAACCGCGGAGGCGGAGAACGCGCGCTCGATACACTCATGAGC  
ACTGAATCACCGGAAACTATTAGGATGCCGCGACACCACGGCAACAGGAACACCGCAACGCTCTCGATGCTGGTCCG  
GGCAGGGCTTCAATTTTAGGGATGAATAA

>Cluster\_26995

ATGTTCAACGAGCTGTCAAGGTTTTCACGCCGTCGGAATGGCACTTTTTTCACTTCAAAAATTCGGAGAAAAGATGG  
CAATGAATCAACTGGGGTTATGACTGTGGTTCACCAGCGAAAAGCCATAAATAACATAATGACTCATCTCATATGG  
AGTTTAAACAAAATGATAGTATAGACATGATGGTCAATTTCTCATTTTGTATGATGACCATGTTAATGGGTTGATTA  
TTAAGGAAGCACACAATAAAAAGATGGTGTCTCTTATAGTATGACTCAGGCTATTAGAGAAATATCTATAGTGG  
ATCCATGGGATATCACTTCTGTAGCACTTTTTCAGTTAAATCCAGCCTATGGTTATATAAATAACGATCTATAAATC  
GGGTGGAGAAAATAATATTAGTACAAGGCAATGGCGGCCAAAATACTTGATAAGTTGATAACTCCCAGATTTTCCCA  
AAAAATCTGATGAGCTTTAATACTAAGAGATAAATAGATAGTTAAAAGATATAGAACAGAAAGACATATAAATGA  
TGCTAAGGATAATGTTTTTTGATTTAGGTAGCCAAATCAATAGTAGTGAATAAAAATGTCACAACATAACCATATGC  
AGCTGTTAGTGTCTCGATGGTATATTTGAGTTTGTATTTTAAATGCGGAAAAGTCAATTAATAAATCACTCAATTTGTA  
TATGAGAAAAGATGAGGAATTTATGCCATCAAGTCTCAATTTAAACTTGTGATGCTAAGAAAAGATATCCAGCAACAAT  
TGAGAGTAAAGACCTACACTGTGGTATTAACCTCAGTATTTGATGATAAAGTGGCGGAGAAAGTTAAAGGCTTCCCATCAG  
AACATTTGTAGGACCAATAAAGCTCAAAACAATATTTCTTGTGATGATGCTTCACTAAAATTTGCCATCGGCTGCGG  
TTCCATTTTCTGTTGGTAAATGTAAGAAAAGCTACAATATTCATCTTCTGTTTGTATTTTACAGGGGATATTAATCT  
GACAACTCTGTTCTAGATGATTTTGGTCCATCTGGGAACTGCTCGATGGAATGTTGGATGTTTTCAGATTCCTC  
ACCATGGTCTGCGAGTTGCTGGGAAAAGGACATACTAAAAGGATCAAACTGCTTATTTGTTCAATGTGCTACTCCT  
ACAGTAAAACATCCAGTCACTTTGTTTTAGATGATTTGAATAGTGAAGAGCATTGTTTATAATGCATCTCGACAAAA  
CCCAGTACATTTTTCATATGTTTTTTTTACAATGA

>Cluster\_23382

ATGAGTCAGAATGTTTATCAATTTATCGACCTGCAGCGTGTGATCCGCCAAAGAACCGCTGAAGATCCGCAAAATGA  
GTTTGTGAAATTTACGAGCCGTTTCCGAAAGCCAGGCCAAAGCGCAGGCTGACCGTGCCTGTCTGCGCGCAACCCAT  
ACTGCGAGTGAAATGCCCGGTACACAACCTACATCCCAAACCTGGCTGAAGCTGCCAATGAGGGCGTATTTTTGAGCG  
GCGAAGCTGTGCAACAGACAAACACCCGCGGAAAGTTTGGCGGACGCTGCTGCCCGCAAGACCGTCTGTGCGAAGGTT  
CTGCACCTGAACGATGAGTTGCTGCGGTGACCATCGGCAACATGAGCGTTATATCAATGATAAAGCGTTCCGATGG  
GCTGGCGTCCGATATGCTCGGTTGAAACAGACCGGTAATAAAGTGGCGATTTATCGGCGCAGGTCGCGCGGTTGGCG  
TGCGCGGATGCTTACGCGCAACGGCGTAAAAGCGATGCTTTCGACCGTCAACCGGAAATTTGGCGGCTTGTGACCT  
CGGTATTTCCGGCTTTCAAGCTGGAAGAAAGAGGTAATGACGCGCGCGGTAATCTTCCCGGATGGTATTTGAATTC  
AACTCAATACCGAAGTGGCGCGGACGCTGCAGCTGGAGATCTGCTGAGTACGATGACGATGCGGTTGCTTGGCGTCCG  
ACTTATCAGTCAATGCGCGCGGCTGGAAAACGAAAGCAGCGGATGGCTGTATCGCAGCGCTGCCGTTCTTATCGCCAA  
CACCAAACAGTAAATGGGTTTTGGTGAACCCGCGACGAACCGTTCGTCAGCATGGAAGGCAACCGGTTGGTGTCTT  
GCGGTGGCGACACTGCGATGGACTGCGTGCACGCTGTACGCCAGGGGGCAAGACGCTTACCTGTGCCTATCGTCTG  
GATGAAGAGAACATGCGCGGTTCCCGCGGAGTGAAGAACGCGCGGGAAGAGGCGTAGAGTTCAAAATCAACCTCCA  
GCCGCTGGGTATTTGAAGTGAATGGCAACGGCAAAGTCAAGCGGCTAAAATGGTGCACAGAAATGGGCGAACCGGATG  
CCAAAGGCGTCCGCGCGGAGATTTGGCAGGTTCCGAACATATCGTTCCGCGAGATGCGGTGATCATGGCTTTGGT  
TTCCGTCACACAACATGGAATGGCTGGCAAACACAGCGTGCAGCTGGATTCGCAAGGGCGCATTTACGCCCGGAAGG  
CAACGCAACAGCTTTTCAGACAGCAACCCGAAAATCTTTGCTGGCGGATATCGTCCGTTCCGATCTGCTGCTGTTA  
CCGCCATTTCCGAAAGGTCGCAAGCGGCGAGCGCATTTAAGACTGGCTGGAAGTTAA

>Cluster\_21614

ATGCCGCTGATTTACAACCTGCTGGAATATCATCGGGGACGATCACAGCCCCGGCGGGTGGGTAACAAACAAATCAT  
TGCGGATACCTTAGCTCTGTATACGGGAGCCAGGCGGTTACTTATCTCACGCACACCACCGGGTGGGCAACACTGC  
GTCGCGTATGCAACGTCGCGGTTTCTACAGCGGCTACCGTATCGCCACTATTGATGGATTTGCCATGCGTCTAGTG  
GCGATGTTTCCAGCGCTAGTGGGCTCAACGCTGAGGTCCTTCAACTGCGCAATCGCGGAACTGACTATCCCGCTATACG  
ACTGGCTGCTGCCATGCTGCAGGACGAGCATCTCAATGATGTTCTGCGCGGAGTTACGTTCACTCATCTGCTGGACG  
AATACCAGGATCGAATCTGGTGAACATGCAATGGTAACCGGTTATCAACAGTGTCTGCTGCTGCTGCTGCTGCTGCTG  
CCTATGCAGGCTATTTTTGGCTTTGGGGTAATCAGCTCGTGAACGAGGACGACATGTAAGTCTGCTCACTTTCCACTGAT  
TGGTGGCTCAATCATCTGCGCTGGGCTAACTCAGGGGCGCGGAACTTGGTCTGCTGGCTTCTGGACTGCGCGGAGGA  
TGTGCTGAATGGCAATGCCATTGACCTTCGCCAGGTCGCTGCTGAGGTTAGCCTGGGTACCGTTACCGGAGAACTGGT  
GTTTACGAAACGCTTACTGCGCGCCAGACCCGAGCGGTTACCGCTACCGGGCAGGTAAGTGGTATGGAACAGCTACGA  
CACTGCGGGCGCAGCAGATGGCCAGCAGACCCGGGTGCGACGACCGTCAAGCTGCTGATTTGGTTGACCTTACCG

ACTTTGGTGCAGGTTTAACTGGAGGCAGCGGATGCGTTGACGCGCTTGGTAAAGTTTGCCGAGCGCTCATGACCAG  
GTTGGCCCCGAGCATTGCTGCCCGGGTGGAAACGCTACGAAGAGGAAGAGCCGCAATCCGCCGACGGTCGAGAAGC  
AGCGTTAGTGGCATTTCAGAGAGACCAGATTTTACGCTGGCCGAGAGGCGCTGCGCCTTCTGACTCGTCAGGACAATG  
CGCGAGTCTATCGCCAGAGGTTTTCGCGTGTGTTTGGCGCCCTGCAGTCCGGTGTGCGCGGAGGCTGCACTTTTGA  
GACGCCACATAAAGCAGCGGAACGCAATCCGACAGAGTACCGGTTGCCCGGGTGAATCCGGCAGCATTGTT  
GCTAAAGGACTGGAAGGGAGGTGGCAGTCACTACATCCCGGAAGAGATGGATGCACAACACCTCTATGTCGCTATGA  
CGCGGGAGCTTCGCGGTGTTGTGTGCTCGTAACCTCCATATTGGCGGCCGCTAA

>Cluster\_66780

ATGACGCGTTATCAACATCTGGCGACTCTACTTGGCAGCGGATGAGCAAGGCTGTATCGTCACGGGGAGAAATTGCC  
GTCGGTGGCAGCTTAAGTCAGGAGCACGGCGTCAGCATCAGCACCGTGAACAGGCGTATCAGACGCTGGAACGATGA  
GGCTCATCACTCCGAGCCGCGTTCGGGTTATTTTGTGCGACAACGTAAGCCAGCCGCTGTACCGCCGATGACGCGT  
CCGGTGCAGCGCCGGTGGAAATTAACCCAGTGGGATCAGGTGCTGGATATGCTGGAGGCGCATAGCGACAATTCATTGT  
TCCGTTAAGCAAAAGCAGCCGGATGTCGAAACGCCAGCCTGAAACCGCTGTGGCGTGAAGCTAAGCCGGTGTGCAGC  
ATAATCTGCAAAACGTTCTCGGTTATGACTTGTAGCCGGTACAGGAGTGTGGGGAGCAGATTGCCCGCTGATGCTC  
GACAGCGGCTCGGTGGTCAACGCGATGACATCATCATCACCAGCGGCTGCCATAACTCGATGTCGCTGGCGTTAATGGC  
GGTGTGTAACCGGGCGATATGTCGCGGTCAATCTCCCTGTTATTACGGTTCGATGCGATGCTGCGAGGCATGGCGG  
TGAAGTGAATTGAATCCCAACCGATCCAGAACTGGCATCAGCGTTGAAGCACTGGAACCTGGCGCTGGAACAGTGGCCG  
ATTAAGGCATCACTCTGGTGCACAACTGTAATAATCCGCTGGGATTTATATGCCGGACGCACGAAACGGGCCGTTCT  
CTCTCTCGCTCAGCGTATGATATTTGTGATTTTTGAAGATGATGCTACGGCGAAGTGGCAACGGAGTATCCGGCCCGC  
GGACCATCCATTCATGGGATATCGACGGCGAGTGTGTTGTGCGACTCGTTCAGTAAAGTATGCTCCAGGCTGGCG  
GTGGTTGGTTCGACCGGGCGTTATCACGATAAACTGATGCAATATGAAATACGCCATCAGCAGCTTTAATGTGGCTG  
CACGAAATGGCGCGGCAACCTTTGTGCTGGAAGGCTACTATCATCGCCATAACCGGGGATGCGGCAGAGCTATCAGC  
GCAATTTGGCGCTTTATACCTGCTGGATACGGGAATATTTTCCCTGCGAAATCTGTATTACGCGCCGAAAGGCGGATTT  
TTACTGTGGATAGAAATTAACCTGAACAGGTCGATATGGTCTGCGTGGTGGCGGAGCTGTGCCGCATGAATATCCAGGTGGC  
AGCAGGCTCGATTTTCTCGGCTTCCGGCAAAATACCGTAATGTCTACGCATCAACTGCGCTTTGCCGCTCAGCGAAACCT  
ATCGCGAAGCACTAAAGCAAATTTGGCGAGCGGCTGATCGGGCAATGGATAA

>Cluster\_16092

ATGCAGAACCGAAATTCACACAACCGACTGATACTTCTTGGCAGATGAGAGAGGGGAAGCATTTATGTCGGGAAAAAC  
CACTTTATCTGACCATGCTGTTTTGTACTTCCCGGATCCACATTTGTGGTACCCTCATTAATGAGAAGGGCTGGCAGG  
CCGTCAAAATCCGGCGCAATGGCAACCGACCGTGTGTAATACCGCGCGGAAGGGGACCAGATGCAGAAAAATGGTGTAT  
ACCGGGCAGTTTGTTCGGGAAATGCGGTACGTACCACCATCAATAAAAAATGGTCGTCAGATTGTGGCTGTTGAAGGAAC  
AGCAAAATACCACCTGTGGTTTATGCGCGCGGACACAGAGCTACACGGGATGCGCTGGATACCAACACTGAATGGCGGTT  
ACCAGTATGTGCACAACGGAGGCACAGCCTCTGACACGGTGTAAACAGTGACGGCTGGCAGATTGTCAAGGAAGGTGGT  
CTGGCGGATTTACCACCGTTAACCCAGAAAGGCAAACTGCAGGTGAACGCCGGTGGTACAGCCAGAAATGTCACCTGAA  
GCAGGGAGGCGCACTGGTCAACAGTACGGCGGCAACCTCACCGGAGCAACCGTCTGGGCAATTTCACTGTGAAAAACG  
GTAATGCTGACCGGTGTTGTTGTTGAGTTCGCGTCCGTTCCGCTGGAATGTAATGTAATGTAATGTAATGTAATGTAATG  
GATGACGGCGGAACCTGGCAGTGTCTGCCGTTGTAAGGCAACAGATGTCACCATGACATCCGGTAGTGCCCTGATTGC  
AGACAGTGGTGCCTGTTGAGGGGACCAATGCCAGCGGTAAGTTCAGTATTGATGGCACATCCGGTACAGCCAGCGGAC  
CTGCTGGAAATGGCGGACGCTTACGGTAAATGCCGAGGACTGGCCAGCAACACCACTGTCGGACTCCTGGGAAAC  
TGACCGTGGCTGCGGGGAAAGTCTGAGTGGCAGAACACAACTCAGTAAAGGCGCCAGTATGGTACTGAATGGTGTATG  
GGTCAATACCGGCGATATGTTAAGCAGGGGAGATTCGCTTTGATAATCAGACGACACAGGATGCCGTGCTGAGCCGTF  
CTGTTGCAAAAGGCGACGCCCGGTAACGTTCCATAAACTGACCAATAAACCTCACCGGCCAGGGCGGCACCATCAAT  
ATGCGTGTTCGCTGATGGCAGCAATGCTCTGACAGCTGGTGAATTAATGGTGGTCAAGCAACCGGCAAAACCTGGCT  
TGGCTTACAAAATGTCGGAAACAGTAACCTCGGGTGGCAACACCGGACAGGGTATCCCGAAATACGATTTACAGAAA  
ATTCATGCAAGTAAAGGAAAGACTCTCATTGCTGTTACCGCAGTTCGAATATTGA

>Cluster\_58190

ATGTCCATACGTTTGAAGGTTATATGCAAAACAACAACAAAATGCGCCACTGAAGCGCACAATGAAAACGCGTCACCT  
GATTATGCTTTCCCTGGCGCGGTGATTGGCACAGGATATTTCTTCAATACCGGGTACATCATTTCCACCCTGGAGCGG  
CGGAAACGCTGCTGGCCTATCTGATTGTTGCGCTGGTGTCTGGCTGGTTATGCAAGTGTCTGGCGGAGCTGTCCGGTCCGG  
ATGCCGAGACCGGAGCGTTTACGTTTATGCGCGCGCTATCTTGGTCCGGTACCGGGTATACCGGCTGGCTGGCTTTA  
CTGGCTGACCTGGACCTGGCGCTGGGTTTCGAGCTTTTACCGGCTGGATTCTGTATGCAAGTACTGGTTTCCACAGGTTA  
CGGTATGGTCTGGTGGCTGGTGTCTGCGCGATTATTTTGGTCTGAATGTTATCTCCACGCGCTTTTTTGCCGAGGG  
GAGTCTGGTCTCGCTGGTCAAAGTGGTCACTATCATCGCCTTATCATCTCGGTGGGCGCGGATTTTCCGCTTTAT  
TCCGATGCAAGGATGGCTCCCGCGCGGGGCTGAGTAATATCACGGCAGAAGGCTGGTTCCCGCAGGTTGGCTTACCGA  
TTTTGATGATGATTTGGTGGGAGTGAATTTGCTTTTCCGGTACCGGATTTATCGGCAATTCGCGGCTGAAACCGGAAAC  
CCGCGCAAAGTTATCCCGGTAGCGATTCTGACTACCATCGCGGACTGATTATTTCTTTATCGGCACCGTGTGTTGTGCT  
GGCAGCGCTGATCCCGATGACGAGGTTGGCGTGGAGAAAAGCCGTTTGTGCTGGTATTTGAGAAAAGTAGGGATCCCGT  
ACGCGCTGATATTTTAACTTCTGTGATCCTGACGGCTATTTCTTTCGACGCAACTCGGGTTATATGCTCCGGGCGC  
ATGCTGTGGTCTGTCGAATGAACGTACGCTACCGGCTGTTTTGCGCGAGTAAACGAAAACGGCGTCCGCTGACGCGC  
GCTGTCGGTCAAGTATGCTCGGTGGTGTGCTGGCGCTGTTTTCCAGCGTGGTGGCCCGGACACGGTATTTGTTGGCGTGT  
CGGCAATCTCCGGTTTGGCGTGGTAGCGGTGGTGGTGGTGGTGGTGGTGGTGGTGGTGGTGGTGGTGGTGGTGGTGGT  
CAACAAGGTAAGGCAATGAGTGAATACATATTCGCGCGCGTGGTATCCGCTGGTGGCAGTATAGGTTTGTGCTGGT  
CCTGGTGGCTGTGTTGGGCTGGCATTCGATCCAGCGCAGAGAATGCGTGTGGTGGCGGTTACCGTTGTTGCGTTGCT  
GCTATGGTGTATTTCCCTTACTCAACCCGAAACGCAAAACAGGAGCAGAACATGTGCGAGATAA

>Cluster\_42159

ATGTCTGATACCAAACGTAATACAAATCGGCAAAATTCGGCTTGCCTCGCTGACTTTTGGCGCGTTTACAGCTTTAACAA  
CGTTATCAATAAATAATTTGAGCTTGGACTGGCCTCGGCACCGATGTTTTTCCGCGAGGATTTTTTATTTTATTCCT  
TCTGTCTGATCATCGCAGAAATTTGTTTCGTTAAATAAAAACTCAGAAGCCGGTGTCTACGCGTGGGTAAGAAAGTTTCGCTG  
GGCGGGCGTTGGGCAATTTACTGCCTATACTACTGGTTCGTAACCTGTTCTTTTACCCTCACTGTTGCCGCGCGT  
TATTTGTTATGCTTCTTACGCTTCCCTCGCTACGAATATATTATGACCCCGGTTGCCACCACATTAATCAGTATGCTG  
TGTTCCGCTTCTCCACCTGGGTTTCCACCAACGGGGGCAAAATGCTGGGGCAATTACCTCCGTCACCTCAACGCTGATG  
CTGCTGTTAACGCTCTCCATTTTACTGGCAGGATACGGCACTGGTTGGCGGCTACAGCCTGCCGATCCGATCACCGT  
TGACGCGATGATCCGAACTTCAACTGGCGGTTTCCGCGGTTACCACCTGGATCTTTATGGCCGAGGTTGGCGGGAGT  
CCGTCGCGGTGATCGTTAACGACGCTCAAAGGCGGTTGAAATCTGCTGTTAAAGTGAATCATCTCCGCGGGATTTTATG  
GGCGTACTGATTTCCGTTTCCCTCGGTGCTGATTAACTCTTCTGACGACGAAAGAGTGAATTTACTGGCGGATCGGT  
GCAGGATTTCCAGCGCATGGCGGCTATTTGGTCTGCGGAAAGCGTTGATGAATCGCTTTGTCGGTCTGGTCTGCTTTA  
CCCGGATGTTCCGGTCCCTGCTGATGTTGGACCGCAACCGGTTGAAATTTTCTTCTCCGAAATCCCGGAGGATCTTT  
GGTAAAGAAACCGTCAACTTAAACGAAACGGCGTTCGGCGCGCAGCGTGGATCCAGTTCCTGATGCTCATCCGCT  
GATGATTATCCGATGCTCGGTTCCAATACCGTGCAGGATCTGATGAATACTATTTAATATGACTGCCGAGCGTCCA

TGCTTCCGCCGTTATTCATCATGCTGGCTTACCTGAATTTACGCGCCAAATTAGATCACCTGCCACGGATTTCCGCATG  
GGCTCCCGCCGACCCGGTATTATCGTTGTTTCAATGCTGATTGCGATATTTGCCGTAGGGTTTGTGCTTCGACATTTCC  
GACTGGCGGAATATTTCTGACCATATTTTTTATAACGCTGGCGGATTTGTTATCTTCTCGGCTTTGCGTGGTGAAAT  
ACAGTAAATATATAAAGGATTAACGGCTGAAGAGCGCATATGAAGCGACGCCAGCAGCAATGTTGATTAA

>Cluster\_17665

ATGAGTGAATTCAGTTTGACACCATTTTCGGGCGATATCCGTAAGCCCGGTGTGCATTTTGTAGTTAATACCCGGCTGGC  
CGTTAACACGTTGCGGGTAAACGAACAGCGTGTCTGGTGGATTGGCCCGATGCTGTCAGGCGGCACCCGCCAGCCCTGA  
ATGCGGTTTCCGTGTATTTCCGAAGCAGGCGGATTTGATTTTCGGGGCCGGTTCCTGGCGCAGCAATGGCGCGCGG  
GCCATTAACGCCAACAGCTATCTGCAACTGGATGTTATCGGTATGTCAGACGGTGGTGAGGAAAGCGGCAACAGCGC  
AGTTAAAGTCAACGGCTGCAACCAGCAGCGGTACGCTGTCGGTATGGATTGCTGGCGAGCAGATCGCCATTAATGTGG  
ACGTCGGGGATGAACCGTCAAAAATCATTTCCGGCACTGGTGACGGCAATGACGCAGACGCCATCGCTTCTGGTACGGGG  
GAATACAAATCTGACACCTCTCAACTGACAGTACCAGCCGGACCAAAAGGTACCTGGGGGAATGATATCACCCCTGTCGGT  
ATCCACCACTCAACCCCGCTTGTAGTGGCTACCAGCCGGATGGCGAGCGGCAAAATGACCCGGATATTCAGCCCGCAC  
TGGATGCGGTCTTTGCTGCCGGTCAACAATTTCTGATTTGTCGGTTCAGTACCACACCAGCCCTTGGCCCTGAAGCAG  
CACCTGGAGAAAACCGGGAACCGCATGGAACAGCGTGGCGCGATTTGGTGTGCGGGCTGGACAGGTAGTCTGGGAAAACGG  
GATCACCCCTTGACGCGGTGTGAACAGCGGGCGGTGTCTGTCCCTGGTATCGTGGTCTGTGTATGCTTCTGCGCGTGC  
TGGCCGCATCTACGCGCGAGTAATGGCGAGCGAAGAAGACCCGGCACCCCGCTGAACCTCGTGGCGGTCTGCGGGTGC  
GATGTGGTCCCATGTACAGCGCGAAAGCCGTAACGAGCAGGAAAGCCCTGCATAACGGCTGACACCGGTTGAGGT  
TGGACCGGGTAAATACGGTGCAGATTTGTCGGTGGCTCAGTACCTACACAGTGAACGCTCAGGGTGTGGCTGATCTCTGT  
TACTGGATATCAGCTCCATCAGAAGCTGGACTACCCGCAAGCGTCCCGCAAGCTATCAGTCTTCGCTTCCCGCT  
GAAAAACTCAGCAACCCGAACCATCGAAAAGTGAAGCGAACGTATGACGCTGCTCAAGCTGGAGGAGTGAAT  
TCTGGAGAAATGTTGAAGCGAATAAGGCAAACTGCGCGTTCAGCGAAACGGGAAAGATGCAAACTGCCGTGGACTGCGCGA  
TCCCTGCCGACGTGGTTAACGGCTGCATGTGTTTGGCGGTGCGATCGACATGATTTTGTAA

>Cluster\_56275

ATGTCAGTATTTCCAGAAAGTTTTTTATGGGGCGCGCTTGGCCCAACAGTCTGAAGGTGCGTTCGGTGAAGGTGA  
CAAAGGTCTGACCACTGTGATATGATCCACACGGCGAGCATCGAATGGCGGTGAAACTGGGGCTGGAAAACGTTTTTC  
AGTTGCGAGATGACGAGTTTTATCCCAGCCATGAGGCGACGGATTTTTATCATCGTTATAAAGAAGATATCGCCCTGATG  
CGAGAGATGGGATTCAGGTTTTCCGTACCTCAATTTGCGTGGAGCCGCTCTTTTCCGCGAGGGCATGAAATCAGCCCAA  
TCAGCAGGGCATTGCTTTTTATCGTCTGTCTTTGAAGAGTGTAAAAGTACGGTATCGAACCCGCTGGTACGTTGTGCC  
ACTTCGATGTGCCGATGCATCTGTGTCACGAATATGGCTCCTGGCGTAACCCGCAAGCTGGTGGAGTTTTTCAGCCGCTAC  
GCCAGAACCCTGCTTTGAAGCATTGTATGGTCTGGTGAATACTGGCTAACCTTCAATGAAATCAACATATGTTGCATAG  
CCCGTTCTCCGGCCGGGTCTGGTGTGTTGAAGAAGGTGAAAATCAGGATCAGGTGAAAATATCAGGCCGCGCATCACCCG  
TGGTTGCCAGTGGCTAGCCACCAAAATCGCCATGAGGTTAACCCGCAAAATCAGGTGGGCTGTATGCTGGCGGGCGGT  
AACTTCTACCCCTTACAGTTGCAAGCCGGAAGATGTCTGGCGGGCTGGAGAAAGACCCGGGAAAACCTGTTTTTATCGA  
TGTGCAGGCGGGGGCACGTATCCGGCTTACTCTGCCCGCTATTTCCGCGAAAAGGGGTAACCATCAACAAAGCACCGG  
CGGATGATGAAATCTGAAAACACCCGTGATTTTGTCTTTTTCAGCTATTACGCCCTCGCGCTGGCGGTGGCGGAGATG  
AACCCAAACACAGCAGTGGCGCAACGTGGTGAATCGCTGCGTAATCCGTATCTACAGGTGAGCGACTGGGGCTGGGG  
AATGATCCACTCCGCTCTGCGTATCACCATGAATATGATGATACGATCGTTATCAGAAGCCGCTGTTTTCTGGTGAAAAACG  
GCTGGGCGCAAAAGATGAATTTGCTGCCAATGGCGAGATTAACGACGACTATCGCATCTACTTACGCGCAACATATC  
CGCGCAATGGGCGAAGCGATTTGACAGCGCATTTCCGCTGATGGGCTACACCACATGGGGCTGTATTGATTTAGTTTCCGC  
CTCTACGGGTGAAATGAGCAAACGCTACGGCTTTGTCTTTGTTGACCGTGGACGACGAGGCAACGGTACGCTGACGCGCA  
CGCGTAAGAAATCATTTCTGGTGTATAAAAAAGTATTGCCAGTAATGGGGAAGATTTAGAGTAG

>Cluster\_28958

ATGTCCGCTGAACACGTACTGACGATGCTGAACGAGCAGCAAGTGAAGTTGTTGATTGCGCTTACCAGATACCAAAGG  
TAAAGAACAGCACGTCATATCCCTGCTCATCAGGTGAATGCCGAATTTCTCGAAGAAGGCAAAATGTTTACGGCTCCT  
CGATTTGGCGGCTGGAAAGGCATTAATGAATCCGATATGGTGTGATGCCAGACGCATCCACCCGAGTATGACCCGTTCT  
TTCCGCAATCTTACCTGATATCCGTTGCGACATCTTGAACCTGGACCCCTGCAAGGCTATGACCCGTCAGCCGCTC  
TATTGCGAAGCGCCGAAGATTACCTGCGTCTACTGGCATTGCCGACACCGTACTGTTCCGGCCAGAACCTGAATTTCT  
TCCGTTCGATGACATCCGTTTCCGATCGTCTATCTCCGGTCCACAGTTGCTATCGACGATATCGAAGGTGCATGGAAC  
TCCCTCCCAATATGAAGTGGTAAACAAAGGTCACCGTCCGGCAGTGAAGGCGGTTACTTCCCGTTCCCGGGTAGA  
CTCTGCTCAGGATATTCGTTCTGAAAATGTGCTGTTGATGAGAACAGATGGGCTGTTGAAAGCCATCACCCGCAAG  
TAGCGACTGCTGGTCAAGCAAGTGGCTACCCGCTTCAATACCATGACCAAAAAGCTGACGAAATTCAGATCTACAAA  
TATGTTGTGCACAACGTAGCGCACCGCTTCGGTAAAACGTCGACCTTTATGCCAAAACCGATGTTCCGGTGATAACGGTTC  
CGGTATGCACTGCCACATGTGCTGTCTAAAACCGCGTCAACCTGTTCCGAGCGCAAAATACGAGGTCTGTCTGAGC  
AAGCGCTGTATATATTCGCGGCTAATCAAACCGGAAAGGATTAATGCCCTGGCAAAACCCGACCAACTCTTAC  
AAGCGTCTGGTCCCGGCTACGAAGCACCGGTAATGCTGGCTTACTCTGCGCTAACCGTTCTGCGTCTATCCGATTTCC  
GGTGGTTTTCTTCCGAAAGCACGTCGATCGAAGTACGTTTCCCGGACCCGGCGCTAACCCGTACCTGTGTTTGTGCTG  
CCCTGCTGATGGCCGGTCTTGACGTTCAAGAACAAGATCCATCCGGGCGAAGCCATGGACAAAACCTGATGACCTG  
CCGCGGAAAGCGAAAGAGATCCACAGGTTGCTGGTCTTGGAAAGAGCAGTGAACGAACTGGATCTGGACCCGCA  
GTTCTGAAAGCCGGTGGCGTGTCACTGATGAAGCGATCGATGCGTACATCGCTCTGCGTGGGAGAGATGACCGGTG  
TGGTATGACTCCGCATCCGGTAGAGTTTGGAGCTGACTACAGCGTCTAA

>Cluster\_44897

ATGAAAAGACTATATTATACCCATCATGATAGTCAACCTTAAAACCTGCTATAGAAGGTGATGTTTCTGATAATGCGAA  
TATTTTTACAGTAATGTAGGTAATAAATGGCGTTGGAAAAGCAGATTGTTATCTCAGATTGCTAAAGACTGTATCAAG  
ATATTCAATTTCTGAAAACCTTTAATCCATTTTACAGAGAAAATAACACCAAAAGTTAATGGCCGATCTACACGCCCA  
TTCCGATAAATTTCCCTCAGGGCGTAGGTCATTAATCACCAGAAAGAAAATAAATTTATCGTATGTTGGGTATGCGTGG  
AGAAGGCCCTTCCGGGTATCAAAATGCCGTATCCCTTTTATCTTACGACGAGAGGTTGGCTAGAGAAAACCTGCTTATT  
CAGAAAATCCTGCAAAATTTACTCGATGTTTTCATTCTATTGATTTTGGAGCCCATATAGAGTTTGTATTTAAACCACT  
TACAACGGACCGGACCTCTGACTATAACTTCATTTGGTATATTTAGATGATATTAACGGAAGTTAAGGAGTTATA  
TTTTAAAATACAAATATAAAAATTTGACAGGAAGATTTGAGAGTCTCTTAAAAGTAAAACCTCCGAATCACTGATATTT  
ACGAAGCACTGGTTGAGATTAATCGATTTGAACCTGAACGTAGGGCTGTAACCTTGTGCTGATTTTACCAATGGTGAA  
ACATTTGGTTGGCTCGACTTATGCGAATAATATTTTCTAGATCAATTTCTTAAACTTATGAACGCTGGCTTCATGAGATT  
GATGGATATGCGACTATAAAAAAGCTATGGTCCATGTCACCTTAAACGTGCGAGCTCGGGGAGAACAAATGTTTATTAG  
TGATTTGCTTGGAAATGACGGGATATAACTGATGGTTGTTCTATAATAACTAAATGATGAACCCGAAATAAGCTTGCATCCT  
CGATGGCAGGAAGATTTATCATATGTTAACAAAAGCATTTTTAACTTACTCAGGTTGTCAATTCATAATTGCAACTCA  
TTCACCAAAATAATATCAATTTGCCGAATAAAGGTTGTATATAACATCTTTGTCGAAAAGTTATCTTTATAAAGCAA  
AATCTTTAGCAACCGGCTGCGACTATCAACTTGGCAACTATTTGATGCCCTGGCATTATGATGAATGAATACATTTGCC  
AGATTAGCTTTCAATTTACTTTCAAAAGTTAAGACTGCTAAGTTAGTAACAGATGATAATGGCGTGAATTAACAACT  
CCAGCTTCTCCTTGAACCGTTAATAGTAAATGACCCATTAATGAACCTGTAATTTCCGTATCTCAGGTGTGTGAATTT

ATGCCAAAAATTA

>Cluster\_37541

ATGGAGATGTATTTTAAAAGAATGAAAGATGAGTGGACCGGACTTGTCGAACAGGCAGATCCGCCATTCGTGCTAAAGC  
CGCGGAAATTTGCCGTTGCCATGTCTATCTGAGTATCGAATTTTATCGAATTTGTCGCCATCGACCCGCATGCCGAAG  
AATTTCTTGAGTAAGCAAGTTGAGCCGCAGTTGAAGATGCGATGGAACGCTGGATTATTAAGCTGCTTTCTGCCCAG  
GTTGACGATGTCGAAAGGCTAATACAAATCCAGCATACCGTCGCGGAAGTGCATGCCCGCATAGGAATTCGCGTAGAAAT  
TGTCGAGATGGGGTTTCGGGTGCAGAAAAAATCCTCTATCCGGTGATCTTCTCTCCGATTATTCGCCCGCAGAAAAAC  
TTCAGGTTACCATTCTCGATTAAACAGTATGGATATCGCGATGGAAGTGAATGACTCGCGCGTTTACCTTTAGTGACAGT  
AGTGCCCTCAAAGGAAGATGAAAACCTATCGTATCTTCTCGTTACTGGAACCGCGAAGAAAGAAAAAGAACCGCAATAGC  
CTCAATACTTTTATGGAAGATAGATATTTATCTATAAAAATCCTGCTGGATTCTGATTTAGGCAGTAGTTTGCCTTTAAGCC  
AGGCTGATTTTGGCTGTGTTTAAACATAAAGTTCGACATTAATTTAGTGGCATTTGCCAAGTAGGCCATATCTCCCGT  
CTGATTCAGGATTTCCGACGGTATTTCAATCAAACCATGCGTAACACCAGGAATTTGAATAACAGAAGTCTGCGGGTAA  
ATTTTATACAGATAAAGAAATACCGTATCGCAAATTAATACCTTGCTGCGTGAATTGTTTGAAGAAATATCGCCACAG  
AAGTCCGTATGGATGTACTGACGAAATTAACCCGCTTTCCTGCCGACTATCTTCAAACGCGAAATTTGCCATGCC  
AACCGGACCGGTACACCGCTGTCAGTGCAGTATTAGCGTTGATAAAATCAAAGAGATCAACGATACGTTGGGCCATAA  
CACTGGCGATGAAATCTGCGTAAAGTCTCTCAGGCTTTTATGACAACGTCAGTGTAGTATGTTTCCGCTACG  
GGGCCGATGAATTTATCATTTGTTTTGACTGAAGCTTCTGAAAAACGAAACGTTACGTAACCGCAGAACGTTTCGCGC  
GTGGAGAAAAACAACTGAAAGCCGCAACGGCGAGGATATTGCCCTCCTACTTTCCATCGGTGCCGCATGTTTAAATGG  
TCATCTGACTATGAGCGCTCATTTCAAATAGCCGATGAAGCTCTGTATATCGCCAAAAGACGAGGTAGAACCCTGTG  
AATCTGGAAGCCAGTCTTTAG

>Cluster\_20229

ATGCTGAGTTTTCTCTGGGATTTGGCTTCGTTTCATGTTGACTGGGTGACTTATCACCGTGATGAATTTGGTCAATTT  
CTGGTTGCCGGCGTTTGGTGTTCGCGTTGAGCGTTTCTCAATAGGGTTGGTAAAGCGCTCTGGCGGCGAACTGATA  
AGCTGGACCCGAATATTCGCCCTGATCCCGTTGGCCGGTTATGTCAAAATGCTGGATGAGCCGCCAGAACCGGCT  
GTTCCGGAACCTCCGCCACCATGCTTCAATAATAAATCTGTCGGCCAACGAGCGGCGATTATTGCCGCAGGTCCGGTTGC  
AAACTTCATTTTTTCTGCTATCTTTCCTACTGGCTGGTTCATTATTTGTTGCTGCTGGCTGACGTCGGGTGGTGGTAA  
TAGCAGCCAATTCGATAGCTGCGGAAGCACAATTTGACACAGGTACGGAACTAAAAGCCGTAGATGGTATCGAAACCGCT  
GATGGGACCCCGTTCAGTTTTCAGTGGTGGTAAATTTGGCCGATGAAAGCATTACCATTACCGTAGCCGCAATTTGGCAG  
CGACCAACGGCGGGATGTAAAGCTCGATTTACGTCACTGGCGTTTGAGCCTGATAAAGAAGTCCGGTATCTTCGTTGG  
GGATTCGCTCCTGTCGGCCGCAAAATGAACTGACTGAAAAATGTGCAGCAAACTCGCGCGCAAGCAAGGCAGGTTTG  
CAAGCAGGCGACAGGATGTTAAAGTTCGATGGTCAACCTTAAACGCACTGGGTGACCTTTGTGATGCTTGTCCGGGATA  
CCCGGGTAAATCCTTAGCGTTAGAAATCGAAAAGACAGGGGAGTCCCTTGTCTTTGACATTAATCCCGGAGATAAACCG  
GTAATGGTAAAGCGATTGGTTTTGTCGGTATTGAGCCGAAAGTCAATCCTTTGCTGATGAGTATAAAGTTGTACGCCAG  
TATGGGCCCTTAACGCTATCTGCGAAGCCAGGCAAAAACGTCAGGCTTGTGATGAAGCTAACGGTCAGTATGCTGGGAAA  
ATTTGATCACCGGTGATGTAAACTGAACAACCTCAGTTGGGCGGATCTCTATCGCCAAGGGGCTGGGATGACAGCGGAAC  
TCGGGTAGTTTTATACCTTACCCTGTCGCTTTCTGCGCTTATTTAGCGTGAACTTAGGGATAAATTAACCTGTTTTCCGTTCCCGTGA  
CTTGACGGGGGCACTGCTGTTCTTGTGATCGAAAAGATCAAGGGCGGACCGGTATCCGAGCGGTTCAAGACTTTTGT  
TTATCGCATTGGCTCGATTCTGCTGGTGTGTTAATGGGGCTTGACATTTTTCAATGATTTCTCTCGGTTATGA

>Cluster\_53539

ATGGTGGACATGATTAATGAAAGTGCACGGCAAACGCCAGTCAATGCACAAAACGGACGTTCTGGTTATCGGTGGCGGTCC  
GGCAGGATTAACGGCGGCGATAGCGCGGGGCGCTAGGTGCCAGAACCATGATTTGTTGAGCGTTACGGCTCACTAGGGC  
CGGTATTGACGCAAGTTGGTGTGGAAAGTTTGGCTGGTATCGCCACTCCGGGGACGGAAGATTGTGAAGGATTTGTCTGT  
GAATTAAGGAGCCGCGGCGAGCATTTGGCTTACGCGCAACGAACTCAGTCAATTAGCGAAGTATATAGATCTATAGGAG  
ATTTAAAGTTGTTGCCGATCAGATGATAACGGAAGCTGGCGTTGAGCCGTTATATCACCTCGGGTTGTGGATGTGATCA  
AGGAAGGGGATACGTTATCGGCTGTATTTGTCGAGAACAATCAGGACGAGGGCAATTTCTGGCGAAAAGAATCGTCGAT  
TGCACGGGGGATGCTGATATTTGTCGCTCGTGCAGGCGCCCTGGACGAAAACGGGGAAAGGACCAACTGATGGCGCTCAC  
CGTGTGTTTCAGTTTCGCGCAGGTTGATGTGGCACGCTTTTAAACCGTTTTGTTGCGGAAGAACTTAAAGCCACCTATGGCG  
ATTTGGGGCAAAAACCTGGACGATTCAAACCAGGGTAAAGAAGACCCGATGTTTAGCCGTTATATGGAGGATATTTTTACC  
CGCGCGCAACAGGATGGTGTGATTTCCAGGTGACGCCAGCGGATGCGCGAACCTGGTCGACCTTTTCGAAAGCGGTTGA  
GGCTTTCAGATGAATATGGTGTACGCCTTTGGTTTTGACTGTACCGATGCTCTCGATTAACCAAAGCTGAGATGGCC  
GAAGCAGCAAGCATATTTGGGCAATTTAGCAGCATACCGACTATGTTCCGGGCTTTGAAAATGTACGGTTACCAATTTT  
GGTGCCACGCTGGGGACCGTGAATCACGGCTTATTGAGGGGAAATACGTATTGCTGATGATACGTCCTTAATCAGGG  
CGCTTGTTCGACAGTGTAGGATTTTCCCGGAATTTATTTGATGGTTCGGGTTATCTCATTTTGCACAGCCGGCGCTT  
TCTTTAGATCCCTTATGGTGTCTGTTGTCGCGCAAAAAGTGGAGAACCCTTTGGTTCGGCGTCTGTTATTTCCCGCAGC  
GTAGTTGCCACATCTTATGCGTAACATGATGTGTTGGTTCGGTACCCTGAGGCGGACTGCTGCGCGGCTGATTTCT  
GCTACAGCAAATTTGACCGTGCCTCAGTTGCTATCCCTGATTTGCAAAAACGCTGCAACAGCAGGGCGTACGCTCTGG  
CATAA

>Cluster\_63652

ATGGCTGATATATCAACACCCAACTCGACTATAACGATATGCTGGAGCGTGGGATATTAACGACGCACTGATGGGCGG  
TACGCTTGAATGCGCAGGCAGGGGAAATTAATCTCCAAAATGGCCTAACGAAGATGAAGACGCTTATAAAAAACGCC  
TGTCTGTGGCTACGCTACTTCTGTGTATGAAGAAAGCATCAAGCAAAATATTTGGGCGCATATTTGACAGCCGACAGTA  
TTGATGAGGAAACCGCCGCAAAAATCAGGGAATATGCAGAAAATATCGACATGGAGGGGAGCCGACTGGATGTGTGGCG  
GCAGCAATTTTTCAGCTTCGATTTTCAGTATGGTGTGGCACATGCGCTGGTGGACTATCCACGAACGGATATGAAAGAGA  
TTCGTACAAAAGCCGATGAAACGCGACCGGTGGTCTGTCGTTACGATGCTGAATCCACGCCAGGTTATTTGGATGG  
AAATCGAAAGTTGAAAAGGGAAAGTTTCTCACTGATTTTCGCTATAAAAAGAGGTCACTATTATTTGATGGTGTGATTT  
CGGCGAGAAGAAGTGGACAGATCCCGCATATATGCCCCGTTCGAGTTGAAATTTATCGACGTTAGCCAGGCAATTAAG  
GCGAATCTGCTGGACGCTTCATGAGTCATGGAATACCAGCCGTGATGATTTCTCTGGTAACACTGTACACGAAGAAA  
ACAGGATTTATGCGTGGTACACCCCATTTGCTTAACTTTGCGTTGCTGAATATCAAGCACTGGCAAAGCCAGCGGAGCA  
GGCAATAATTTCTCATGTTTACCCTGCTCCATTGCTGGTGGCTTACGGGCTGGACAGGAATGAAGAATGACGCTGTTGGT  
CATCCACCCGACTGATTTTGGAGCAGAACAAAATAGCCCTCGAATATGTTGAACATAGTTGGCGACGATGATGATCT  
GGCGAAACATCACTTGAGAAGCTGGAATAACAGATGCGTCACTGCCGCGCTAAACTTCTGCGTGTGAAAATACATCCAC  
CAAATCTGTTGATCAGACTAATGAAGAGCGAATGCAGGAAAACTCGCCGCTTTATACAATGGCGAAGCTCCCTCGAAGATG  
CCCTCGATAAATTTCTCAGATAATGGCGAATGGATCGGAGAGAGTTCCGGTGGCAATGTTGGATGTGGCAGTGAATG  
GATGATCTGCCAGGTGTTTTGACTCATCTCCCGCTGGCTGTTTCACTGATTTGCTGAGGCGGCTGATATACGTCAGAT  
TGATGCGGTTCCGGTGTGTCAGGCTTGAATTTATCGATCAGGATTTCCGCTCAGAGGAAGTATGATGAATTAATAA  
ATCAGAGTGAATGCTGATGAAATCAATGATGCAACCGTGAATGA

>Cluster\_29873

ATGCTGATATAACTCCAAATGTGTAATTTGGGATGCTTCTCAACTTCTACATGCTGCTTCTTTTAAAGCCGTAGC  
TAATGGCAAAATTTATATCGGTAATAATGACACTGACCCGGTAATCTGAAAACAGATTACAGTTTATGTGGAGAAGC



AAGACGGCTCTCACGTTCTGTATCGAACCAATCATCATTAACGCTGCTGGTTACCCGGTATATAACGGACAGATTGCC  
AAGTTCGTAACCTGCGAAGGCCATTCTATGGCTGTATATGATGCGTATGGTGGCAGCAGTTCTATTTTCTTAATGTGCT  
GAAGTATGACCCAGAACAATTTAAAGATACACTTCATTCTGCGAGCGGAGCGGATAATGTTGGATATAGGGGTTATACTG  
TTAGTGTAGTATCTTTACACACCCGCAATTTGAGTTTTGGTAACTTAAACGATTTGTCTGTCTCATGACAAAATACAAGATAGGA  
GATAAAGTATTTGACATCGATATAAATTCATCAGATGGGAATGGCTTCATTGAGGTTGTGTCATCAGATGAACC  
AGTTGGAATAAAAACTTACGATGGTAAGTTAAAGCTAAAGCGAACATCTGGGCATAATATCTTGAGTTAATAATAAAAA  
ATGGTGGCAGCCAAAGATAATGCCCATAGAGGATGGCAGGAAACCGCCAAATGAATATCAGGGAGCATTGACTGGC  
CCTGTTTTATTTCCGTTCCAGAAAAACAAGGGCATCAATTAGATTTTGTGCTGAAAAGAGGAGCTTTTGGTGTGAAAGGGGA  
TACCAAAATAACATTTAGACGGAGTTCCTGTCTATATCCATGATGAGACAGTTGATAGAATACAAATGGTACTGGTGGCCG  
TATCAACATTTACTTTTTTGTAGCTAAAGGCCCTCGATGCTGGATCGTATGTTTTCTGGTATTTATGCAGATGAGAAAAATA  
CTCAATTTATGATGAATGGATTAGAGAATGCAAGCGTCCGCGAGTAATGCCATTGTTGAGTGGTCTGCGCCAAATGAGTGT  
CACTCAAGCTGATAATTTCTTGAACCTATAAAATAAATATATGGCACAAAGCCGACGAATGTCTTTGTTTATCAACAT  
ATCCTGGCCTTCTTGAACCTGTGCGTTCAAAAAATGCTTATATTTGGACTTGGTGTATACCATCTTACGGTGTGTCACCA  
ACTACAGAACAATTTGAGCTGGCGTATAAGCTTGGCAACTGTGGTATATCTCTATCAGGTGGAATAATACGAATGCCGC  
TGTGTAAATTCAGTTAAGAAATATGGTTGTTGTTGATTTATGCAATGCTAACACCCCGGCAAGAATTTGATAATTGCA  
TATCTGCAGGCGTTGATAAATGATTACTGATTGCTATAGAGGGTAA

>Cluster\_40993

ATGAATACTCTGAATTAGAAACACTGATCCGCAATATTTCTGCGTGAACAACCTGTCCCGCAACACCACGAATGCAAAG  
AAACGCTATTTTCCAGACTGTTGATGAAGCGGCTCTGCGCAGCACACCAGGCTTTTACGCTTTCAACAGTGGCCGCTTA  
AAACCCGTAGCGCAATTTACGCGCCATTCGCGAAGAAATTAATGCCCCGCTTACCGAACTGGCAGAAAGAGCGCCAAA  
GAAACGGGGATGGGAAATAAAGAAAGATAAGTACCTAAAGCAAAAGCAGCACTCAATAATACGCCAGGAATTTGAAGATTT  
AACACCACCTGCCTAACCGGTGATGGTGGCATGGTTTTGTTGAATACTCCCGTTTGGGGTATTGGCTCGGTACCGC  
CAAGCACCACCCACGGAAACCATTAACAAACAGCATCAGCATGCTGGCAGCAGGTAATAGCGTCTACTTCACTCA  
CACCCGGGACCAATTAAGCTTTCGTTAAACTGATTACACAACTGCAAGACATCGCGTTTCGCTGTAGTGGTTCGGCGC  
CCTGATCGTTACCGTATCTGAACCGACCTTGTGTCACCGAACAGATGATGGCGCACCTAAAGTCAGCGTTCTGGCGA  
TTACCGGGGGCCGGGATCGTCCCATGGAAATGAAAAGTGGCAAGAAAGTATTGGTGGCGGAGCGGGTAAACCTCCG  
TGTATCGTCGATGAAACAGCGGATATTTGAAAGCCGCGAGGACATCATCAACGGCGCTTCAATTTGATTACAACCTGCC  
GTGATCGCTGAAAAGAGCTGATTTGCTGGCTCAGTGGCAGATTAATTTAAATCAACAGATGCAAAAGTTTCGGCGCAC  
TTCTTTAAACATGAACAAACGGAGAAATGCGTGAATTTGCTGCGCAGACGGTAGCGCCAAACAAAAACTGGTTGGG  
AAAAGCCATCAGCCTTGTGGAAGCAGCGGCCCTCCCTTTGCCCGCAAAAGCGCCGCTACTGATTTGCTGTTGTTGA  
CGCCGATGATAGTTGGGTTACGTGTGAACAACCTGATGCCAATGCTGCCCATTTGTAAGGTCAACGATTTTGACAGCGCT  
TCGCCCTGGCGTTGAAAGTGAAGACGGCTTGCACCAACGGCAATTTTGCACCTCGCAGAACGTTCTCAGCGCTCAACCT  
GCCGCGCGCTTATGCAACCTCAATCTTTGTCAAAAACGGCCCTCCGCGGGGATTTGGCGTGGCGGGCAAGGCTT  
TACGACCTTACCATTGCAACACCGACCGAGAGGGTACAACCTCAGCAGCGACTTTTCCCGCTCACGACGCTCGCTGT  
TAACCAGCGGCTTTTCCATTTCGCTAG

>Cluster\_60553

ATGGGGCAATCATCGCAACCACATGAGTTAGCGGGCGGCTGAAGTACGCCACGTCACCATGTTGCTATTGCGCGTGT  
TATCGGGCAAGTCTGTTTGTGCGTTCAGCGTCCGCAATCGCCGAAGCGGGCCCGGCGGATTTACTGGCCTATCTGTTCC  
CCGGCTACTGTTGGTGTATGATTAATGCGGATGTTGGCGGAAATGGCGGTTGCCACGCCGATACCGGTTCTGTTTCCACC  
TATGCCGATAAAGCATTGGTGTGCGTGGCGGGCTATACCATCGCTGGTGTGACTGGTGGTTTTGGGTACTGGTTATCCC  
GCTGGAAGCAACATCGCCGCAATGATCTGCCTCATGGGTTCCAGGATTTCCATCTGGTTATTTTCCCTGCTCATTA  
CCCTCGCCTTAACTGGCAGTAACCTATTAAGCGTTAAAAACTACGGCGAATTTGAGTTCTGGCTGGCGCTGTGCAAAATC  
ATCGCTATCCTGGCCTTTATTTTCTTGGTGCAGTCGCAATTAAGCGTTTTTACCCTATGCGGAAGTGGCGGGATCTC  
AAGATTGTGGGATAGCGGGCGCTTTATGCCCAACGGTTTCGGTGGGTTAAGCGGATGTTGATCACCATGTTCTCGT  
TTATGGGGCAGAAATTTGACCATTTGCCGCGCGGAAATCCGACACCGCGAAACATATTGTCGCGCCACCAACTCG  
GTTATCTGGCGTATTTCTATCTTATTTATGTTCTATTTTGTGCTGCTGGCATTAAATTCGGTGAATATGCCCGGACT  
AAAAGCCGTCGGTCTTAACTGCTCGGTACTGGAATGCTCAATATTTCCCATGCGAAATTAATCATGAGTGGTGGAT  
TACTTTCCGTAACAGTTGCTGAACTCGCGCTGTATACCGCTCAAGGATGCTCTACTCTTAAAGTGTGCGGGTGTAT  
GCTCCCGCGTAAATGGGTAATAACCCGAGTAAAACCCGTAAGTGGCGGTTACTCTCCACCGCGCGGATTTCTT  
AACGGTGGTGGTGAACCTTACCGCCTGCGAAGGATTTAAATTTCTGATCGACAGCTCCGGCGCTATCGCCCTGCTGG  
TTTTATTAGTCTACCGCTTTTACAGTTTGGGATGCGGAAATTTCTGCGAGCAGAAAGGAAAGCGAAATTTGGTATG  
TGGCTTTATCCGTGGCTCACCTGGCTAGTCACTCGGCTTTATTTACCTTTTGTGTTGGTAGTGTATTTCCGTCGGCGCA  
ACAGTTAGAAATGATCTCCACCGCTTATTAGCGATAGGGATTATCTGTACCGTCCCAATTTAGGCTCGCTGGAAAAAC  
TGGTATTGTGGCAAAAACACCGGTTTCAATAACCGCGTGA

>Cluster\_23541

ATGCATATCAACATTTGCCCTGGCAGGACGTAGATACCGTCTGCTGGATATGGACGGCAGTTGCTCGACCTCGCCTTCCA  
TAACATTTTCTGGCAAAAGCTGGTGCCTGAAACATGGGGCGGCAAAACCGGATTTACGCCACAGGAAGCGATGGAATATA  
TGGCCAGCAATACACGAGTACAGCATACGCTAAACCTGCTACTGCTTTGATTACTGGAGTGAGCAACTGGGTTGGAT  
ATCTGTGGATGACCAACCGAGATGGGACCGCTGCGTACTGCGTGAAGATACCATTCCGTTTTCTTGGAGCACTGAAAGC  
CAGCGGTAAGCAGGAAATTTGCTCACCATGCGCATCCGACAACTGGCGGTAACCTTGGCAGTACCGGTTGGAGCAT  
CACACCTTGATTTTACTTTCCACCCACATTTGGTTATCCGAAAGAGGATCAGCGGTTATGGCATGCGGTGGCCGAA  
GCTACGGGCTTAAAGCTGAAAGAACGCTGTTTATTGATGACAGCGAAAGCGAATTTCTCGATGCTCCGCGCAATTTGGTAT  
TCGTTACTGCTCGGTGTGACTAATCTGACTCCGGGATTTGCCGAGAAACAGTATCAACGCCATCCGTTACTGAAATGACT  
ACCGCCGCTGATCCCTCGCTAATGTGA

>Cluster\_37725

ATGAATACAGAGCTCTTTTCCCTGCTGTTACTGTGGCATCATTCGCCCTCCGCGGCAACTGGGCTGTCAAAAA  
CGGCTGGTGTGACACCATGACGGAAGATGGTACGGCGCTGGTAATGCTGAAAAATGGCAGGATGGTATTACCGGCTGA  
TGCAGGGATGCCGAATGGTGTACAGACGCTCCGCGGAGCGGATCAGTATTACCGTAACTGATCCCCACATCACAA  
ATGTGTAATCAGCAGACGGGATTTAGGGCTGTTGAGGTGGAATCGGACAGGCGCGGAAATGGTCAAAAAGCGGTTCA  
CTCCATAGCAGAGCGTGTGTTGCTCCGTTTACAGGCATTTGGTGTGATGAAATGGAATTTACCGCGGTTGATGTAAGG  
TCTGTCCGAAATTTGTCACATCACTTGGCGGTTTTTCCCGAAACAGACGACCCTATTAATAAAGATTTCCGTTCTGCA  
GCTGCTCGCAGGATACGCTCGGGAATATGACGAGGAAACAAGAACCGCTGATTTTGGCTTTACGAAAGTAAAGG  
CAATAAGTTGAGTTGAAGTATTCATCTGAAAGACCTGCGTACGACAAAGTGACCGTACCGTTGGTGTGACGGTA  
ATGCCACCGCGCCAGCGTTGAATTTATCCGAAATAG

>Cluster\_66854

ATGAACAAGCTCAAACCGCAGGCGGTGATCCGAACCGCGCTCGAACTGCTTAAACGACGTGGGCATGGAAGGTTCAACGAC  
GCGCCGACTGGCTGACCGCTCGGGGTGCAACAGCCAGCGCTCTACTGGCATTTCAGAAACAAGCGGTGGCTGCTGACG  
CACTTGGCGAAGCATGCTGACGATAAATCACACGATTCGACGCCAAGGGATGACGACGACTGGCGTTGCTTCTGAA  
GGCAATGCATGCAATTTTCGACGGCGTTGCTCGCTTATCGCGATGGCGCGGTTATTCATGCCGGGACGCGGCCAGCCG

GCCGCAGATGAAAAAGCCGACGCGCAGCTTCGCTTCCCTTTCGATGCTGGCTTTTCGGCAGGTGACGCGACCTATGCGT  
TGATGGCAATCAGCTACTTACCCTCGGCGCTGTCTTTCGAGCAGCAAGCTAGCGAGGCAGACGCCGAGGAGCGGGGCGAA  
GATCAGTTGACCACCTCAGCGCTACGATGCCGCGCGCTACAGAGCGGATGAAAACTGCTACGAAGCGGTCGGGA  
CGGGCATTTCGAGCGAGGCTGGCTCTCATCATCGGCGGCTTTGAAAAATGAGGCTCACTACGAACGACATTGAGGTGC  
TGAAGAATGTTGACGAATGA

>Cluster\_3300

ATGAAAAAGAGACGGATATCAATATCGACGCGTGTGCGCGACACGTTTCTGACGGTGGTGAACGCGTCAGGGAAC  
CACCGTGCCTCAGGATGGAGCTGTATCGCCACTGCCAGCGGAGGTGGAGGGGGTCCGCGAACGCTGAAAGATGCCG  
GGTTCAGCCGGGGAACGTTGGAGCACATTACTTACGCACAGTGCGCCCTTCTGGACGAAACAGTCTCGAGTCGCGAGCGG  
ATGGACGACGGTCAAGCCATCTGGATGAAGGATCCACTCCAGGCGCATTTCTTCAACACCCTGCAGGCAGGCGAGCTGCT  
GTACGAGCGGATGAAGCAGGTGTTCAGGAGCCCGCGCTGCACAGGCAGTGTGACCTGCTTTCACCCTGCTCTGCTGCTG  
TGGGATTTCCGGGGCTTATCAGGATCCGGTGGCCCGGAGCGGTGACCAACTTATTTGACGCTCAACGGGGTGGTCCGG  
CCATTTGGCGTGTTCGCGAAACGGCGGTGACCTGAACTGAGCTTATCCCGCTCAGCACCCTTTGCTGCACTTCGCGGT  
TTTCTGGCTGGTAACGCTGACGCTGCTACTGGCCGGTGTCTGGTGGGGACTGCACCCTGGCTGAACGCTGCTGGTGGATG  
AATGCTGCGCAAGCCGCGGTA

>Cluster\_44903

ATGAATAACCAGTATTTACAGTTTGTGCGTGAGCAGCTCATTATCGCCACCCTGATTGAGTGGGGCAACAAAAGGTCA  
GCTTGAAGCTGGCAGGAGAAATGCCATGTTTCGATACAGGGCGTTACAGGCGTAAAAAATCCGGTACCAGGATGAAGTGA  
CTGAAAAATGATAACCGGGGATAATCCACCAATCCCGGAAAGCAATCGCTGGCGAAGGGGACGTCAATTCCTCTGGTC  
AGTCCGATTTGAGTTTTCGACATCATCTGGCGGGGGTGTCTGTCTCTTGAAGAACATCATAAAGCTGGTGGTGGTGGT  
GTGTTACAGCGGGGATTTGTTGGGAAATATCAGATCGCGATAACACAGTGGCGTGGAAATGAATTTAATACTCAATCCG  
GTACCAGAAAAATTCAGGAAACGCGAGAACGCTGAAAAAATTAATCTGGCTGGCGGCGCAGGCAGTAAAAGCAGAA  
CTTTTGGTGGGGAAGTTATGAATACAAGGAGCTGGCATTACTGGTGGGAGTGACAATAAAAACTGGTCCAAAAATTT  
TACTCGTACTGGTTGCAATGAAACATTTTTCACCAGCTGATAGTGAGCTTTATGTTGTAATGAGAACCGGTT  
CAAAAACAAAGCGGCATTTTCAAAGCAAAGTGTGCAAAAAGTAGATTGA

>Cluster\_20819

ATGTTTCAAAAAATAGCAGTGAATGTTTTGGTACTTTCTGGCTGTTTTTGGCGGCTGTGGTAGTGCCGACTGGCCG  
AGGCTTCCCGAAATAGGCATTTGTTTTGCCGGGTGGCGTTGGCGTTTCGCTGACCAATGGCCCTTTCGCTG  
TTGGTCATATTTCTGGTGGTCAATTTAACCCGGCGGCTACTATTGGTTTATGGGCTGGCGGACGTTTCCCGGCAAAAGAA  
GTCGTTGGCTACGTAATTTGCCAGGTTGTCGGCGGATTTGTTGGCGGCGCTGCTGTATTTAATTTGCAAGTGTAAAAC  
GGGTTTTGACGCGGACGCGAGCGGTTTTGCTTCAACGGTATGGCGAGCATTACCAGGCGGTTATTCATGCTTTCCG  
CGCTGGTAGTTGAATGATTTGAGTGCAGGTTTCTCTGGTGGTATCCAGCGCAACTGACAATAATTCGCTCTGCTGGT  
TTTTGCGCAATTTGCCATTTGGTCTGGCCTAACCTGATTAATCACTTAATCAGTATTCGGTGACTAACACTTCCGTTAACCC  
GGCGCGCAGTACTGCGGTTGCTATCTTCCAGGGCGGATGGGCATTAGAACAACGTGGTCTTCTGGTGGTGGCAATTTG  
TCGGCGGATATTATCGGTTGCTGATTTACCGGACTCTACTGAAAAACCGGATTA

>Cluster\_40846

ATGACAGACCAGAAATAACACATTGAGAAACTGAAAAAGTTGCTGGCGTGGCCGATCCGGCAACCCGACGAGGCCG  
TCTGGCACTGGCGGAGCCGTAACACTGATGGATGTTTCACGGCATCACACATTCGACATTTGCTATGAGTGATATGATG  
AAACCATCAGTCACTACTGGCGACAGGCAGTCTCCGTCACCGCTACATGCTGGGCTGATGAACATCATCCGCGAG  
GTATTTGGTGTAACTCCATCATTCACCCCGCACGATCCGTTCTGTGGGTTTCTACGGCAACCGGAACTGCGGCACT  
GGCTGCATACACCTGGGAAGTGCCTGGCCGTCAGTGA AAAAGCGCGTCAGCAGTATATCAGTGCACAGAACAAAAGAA  
TAAAAACCCGACCCGACAGCCGTTGGAGACAGTTTGGCGAAGGCTGGGTGCTGGCCGTTATCAGTGAACACAGCTCC  
TTTGCCCTGACCGATGATGAGCGTGAACCTGATGACGAGTGGCTGGAACATAAATAACCCGACAGCAGCAACACAGGGC  
GCTAAACCGGAAAGCCGCAATGGCGACGCTCGGCTATGCGGGGTTTCGTTGAAGGGCAGAACGTCAGACTGCACC  
GCCCGGTCAGTGGCAGGAACAACAGAAACTGGAGGCCAGATGA

>Cluster\_44747

ATGTGTGCGCTGGATCGTAGAGAAAGGCCACTTAAACAGTCAATCTGTAATAAATACATCCTTAACTTCAAGATATCTA  
CAGAAATTTCCCGTTCCGGTTTGTGTCGTAACAAAACCGGAAATCCTTTATGCCAATGGGGCTTTTATTGAACCT  
TTTCCAGAGAAGATAAACCTTATCCGGAGAGGTTATATACGCTGCAGGTTGAAATTTTCTTTCACTACTGAACCTG  
GAATGCCAGGCTCTTGGACATGGCTCTGCATTTTGTGCTGCTTTAATTTTCAATGGCGAAATCTATCAGATAAGGATGGA  
GAATGTTTCTTTTATAATGACGAATCTTTGTTTATGGCAAAATTAATCCGTTTCTGATTATCCATTTTTTTCGTTAA  
ATCAGAGTGAAGTAATAACAATACTTCTGATAAATTAACGATATGGAATGATCTTCTCCAGGGACATTTGGTGTGTTTC  
TCTTTTTATATGCTGGGTGTTGGTACGCAACAATGCCAGAGAGTTGGGTATACAGACAGAGCATCTGAGGATCGAAT  
TAAACAGTTAAACGGAAAAATAAAGAAATTTTTGAACACTTTGATTTATCAGAGTGCATGATCTATAAAGGAGAAA  
TAGATTCGCTATTAAGTATAATTCGTGAATTTTATGGTGTAAAGTAA

>Cluster\_54948

ATGAAACTGCAAGGGGTAATTTTCGATCTGGATGGTGAATCACCGATACCGGCATCTGCATTTCCAGGCGTGGCAGCA  
GATTCGCGTGAATTTGGCATCAGCATTGATGCGCACTTAAACGAATCCCTAAAAGGGATCAGCCGATGAGTCTCTG  
GGCGATTTCTGCAACACGGGGGCAAGAGGGCGACTTTAACTCGCAGGAGAGGGCGCAACTGGCGTATCGCAAAAATCTG  
CTCTATGTCCACTCACTACGCGAGTTGACGGTCAACGCTGTTCACCGGCATTCGCTCTTGTGTCGAGATCTCCGTCG  
ACAGCAGATCTCGGTTGGGCTGGCTTCTGTCTCCTGAAATGCGCCGACGATTTTAGCGGGCGTGGAGCTGCGCGAGTTTT  
TCACCTTCTGCGCGGATGCTTCCCAACTTAAAACTGAAACCGGACCCGGAATCTTCTCGCCGCTGTGAGGGGCTG  
GGCGTGGCGCGCAGGCATGATCGGCATTGAAGATGCGCAGGCGGGCATTGACGCCATTAAACCCAGCGGATGCGCTC  
GGTGGGATCGCGCGGGCTTAAACGGGGCGCAATTAATGTTGCTTCAACGGAACTCACTCACCTGGCCGCGGTTATCGG  
CCTTCTGGCAAAACGATAG

>Cluster\_56090

ATGAAATCAGTTATGGCTGAGTTTATAACCACTGAAACGGTGACCGAGGCGCACTATATATCGAATAATTTTACTCGCGG  
AATCCTGCATCAATACTCTAAGGAAACACAATGTACACCTAAATACACATCGACGTGCACAAATATACTACGGCAACT  
GGAGGGCAGGACATGTAAAGTGGGCCACCCGCTACGGTGTCCAACTTTACCATCCCATTTCGCGCATCGCGGCTCAA  
GGCGTCTGCTCTGCGAGGCTGCCAGGCTACCCTGATATGGAGAGCTATATGAAAGTTACTCAGACTAGAAAAAATAG  
TACGCCAATAAAAGTTTATGTTTACCCGAAGAAAAATTTCTCATCAAGAAAAATGCAGAAGCATCTGGATTAAGTGTG  
CCTGTTTTGTTGCTAGAGTTGCACTGGGTTATCAGGTTGATTTATCGTAGATATAAAACAGGTTAATGAACTTAGCCGA  
GTAACCGTGTACTTGGAAAGACTTGGCGGATTACTTAAATATGGCTCGCAATGATCCTCGAACAGTTGATTTTTACC  
CACACTGATAAAGAACTTCTGCGAAAAATAAATCACTCGGCAAGAACTAAGGAACATTTATGGATAAAATCTTGGATA  
AATAA

>Cluster\_27824

ATGGAACGAAATAAACTTGTCTGTCAGATTATTGACACTTGCCTGGAAATGACTCGCCTGGGGCTGAACCAGGGGACAGC  
GGGTAACGTCAGTGTACGTTATCAGGATGGGATGCTGATTAACGCTACAGGATTTCCATATGAAAACTGACGGAGTCCG  
ATATTGCTTTTATTGATGGCAACGGCAACATGAGGAAGGAAACTCCCTCAAGCGAGTGGCGTTTCCATATGGCGGCC

TATCAAAGCAGACGGATGCCAACGCGGTTGTTTCAACAATCATGCCGTTTATTGTACGGCAGTTTCCATTTTAAACCGACC  
GATCCCCGTTACTACTACATGATTGCGCGGGTGGCGGTAATTTCTATTCCCTTTCGCGCCTTATGCGACCTTTGGAACAC  
GCGAATTTCTGAACATGTTGCGCTGGCTCTCAAAAATCGTAAGGCAACTTTGTTACAACATCATGGGCTTATCGCTTGT  
GAGGCGAATCTGGAGAAAGCGTTATGGCTGGCGCATGAAGTTGAAGTGTGGCACAACCTTACCTGACGACCCCTGGCGAT  
TACGGACCCGGTGCCAGTGTGAGCGATGAAGAGATTGCCGTAGTGTGGGAGAAATCAAACCTACGGGTTACGGATTG  
AAGAGTAA

>Cluster\_52771

ATGAACCTAAAGAAAACTGTTAAGCGTGTAAATGATATTGCAACTTTGCTTATTGGTAGGGTGTGACTATATTGAAAA  
AGCGAGTAAGGTCGACGATCTCGTTACACAGCAAGAGTTACAAAAAGCAAAATTTGAGGCGCTTGAAAAACAACAACTA  
CCATCATAAACAGTACAAAAACGCTCGCTGGCGTGGTGAAGGCAGTTAAAGACAAACAGGACGAATTTGTCTTTACAGAA  
TTTAAACCCGGCACAAACCAATACTTCAATTTTAAATAACGGTTCTGTTGGTTTGGCAGGAAAAACTGTCTATTGACGC  
AGTAGAAAACGGCAGCGTTATTCGTATTTTACTGGTTAACTTATTAAGTGTCCCGTATCAAAATATGGGTTTCTACGGCA  
CATGGGGGGGAGAACCCACCGACATCAACGCATTAACAAATGGCAGCAATGCTATTTAGTACCCTCAATGAACCTC  
TCCCTGAAATTTACCAGGTCAATGGCAAGACATTAATTTGACGCTAAAAGGTGTCTCGCCAAACACCTCAAAATATCT  
GAAATTAGCCATCAACATGGCAAATATTAGTTGACCGCTTCAACCTGCTGAATCTCCACAGCGGAAAAACAACAAAT  
AA

>Cluster\_34507

ATGAAATCTTTACAGGCTCTGTTTGGCGGCACCTTTGATCCGGTGACATATGGTCATCTAAAACCCGTGGAACGCTGGC  
GAAATTTGATTGGTCTGACCGGGTCAACAATCATCCCTAATAATGTTCCCGCATCGTCCCAGCCGGGAAAGCGAACAGCG  
TGCAGCTAAACACATGCTGAACCTGGCATTGCCGACAGCCATTATTACTCTTGATGAACGCGGATAAAGCGCAAT  
GCCCTCTTACACTGCGCAACACTGAAAGAGTGGCGCGAGGAAACAAGGACCGGACGTGCGCGTGGCTTTTATTGG  
TCAGATTACTGCTGACCTTTCCGACCTGGTACGAATACGAAACGATACTCGACAATGCACATTTGATGCTCTGTCGGC  
GTCAGGTTACCCACTTGAATGGCGCAACCGCAATACAGCAATGGCTGGAAGATCAATTTGACACATAACCCGGGAAAGAT  
CTTACCCTTACCCCTGCGGTAATAATTTACTGGCTGAAACCGCGTGGTTAACATCTCGCGCACCATCATCAATGAACG  
TTTGCAAAACGGTGAATCATGTGAGGATTTATTGCCGGAACCGGTACTGACTTACATTAACCAACAAGCTTGTATCGCT  
GA

>Cluster\_18979

ATGTCCTCAATTAATGACCATTGGCTCACAGCCAATATTTTTAATTATTGTATTTTTCTGTTATCATTACTGCCAATATT  
TGTGTTATTGGTACTTCACTTCCGAAAATTTCTATTGACTGGGGATATTGAAGAACGCATTAGGCATTCAACAGGTAC  
CACCAAACATGGCGCTAACATCAGTGTCTTTGATACTGACAATGTTTATATGCTCCGATAAATATTACAGATAAATGAT  
AATATTTCTCAGGAACCAATCAATTATACCGACTCTGATTTTTTCAAAAAGTTGATGAGAAAATATTATCACCATATCG  
CGTTTTTTTGAIAAAAAATACAGAGAAAGACAATGTAGAGTTTTTGAACGTGACGCTCAAAAAAATGGGTAATGAAA  
CTATCTTAAAAAAGACTCTCTATTTATACTGTTACCGGCTTTCAGATGGGGCAGCTTGAAGCTGCATTCAAGATAGGT  
TTTTTGTCTATTTACCCCTTATGCGATAGATTTGATCATTTCCAATATCTTATTGGCTTGGGTATGATGATGGTATC  
GCCAGTAACAATTTCCGATCTTTAAGATCTTGTATTCAATCTTGTGGAGGCTGGCAAAAATATTGCAATTTCTGT  
TGGTGGTGAATTGA

>Cluster\_22035

TTGATCAACGTTCTACTTGTGATGACCACGAACTGGTGCAGCGAGGATACGACGCATTTCTGGAAGATATAAAGGGTAT  
AAAAGTCTCGGTGAGGCATCGTGCCTGAAAGACGCGTTAAATGGTGCAGGCAATGCGGTTGACGTGGTGTCAATGG  
ACATGAGTATGCCGGCATTTGGCGGCTTTGAGGCGACGCTAAATCGCGCTTCCACAGCTGATGTCAAAATCATCATG  
CTTACCGTCCATACAGAAAACCTTTACAGCGAAAGTATGCAGGCGGAGCTGCGGCTACCTCAGCAAAGGCGCGGC  
TCCGACGGAAGTCTGAGTGGCATTCGTTCTGTCTATTGAGGCGAGCTTACATTTGCTCTGATATCGCTCAACAAATGG  
CGTTAAGCCAGATCGAACCCAGAAAAACAGAAAGCCATTTGCCAGTTTGTCTGAACGTGAATTCAGATATGCTGATG  
ATCACCAAGGGCCAGAAGGTCAATGAGATCTCAGAACAGCTCAATCTCAGTCCGAAACGGTGAACAGCTACCGCTATCG  
TATGTTCACTAACTAAACATTCATGGCGATGTTGAGCTGACTCACCTGGCAATTCGCGATGGTCTGTGTAATGCGGAGA  
CATTATCAAGTCAGTGA

>Cluster\_24447

ATGTATCTTGATACCAGCAACGTACAGAGCCTGAAAGAAAAGCTGCTGTTATGCGCGGTTAATGAATTTGCCGAATATGG  
TTACGAAGGGGCCAGAGTCGATAATATCGTCAAGGCGCGGGTGCAGTAAACAGACGCTTTATCACCACTTTGGTAATA  
AAGAAAATTTATTTATCGAAGTACTGGAATATACCTGGAACGATATTCGACAAAAAGAAAAGGCCCTTGATTTCTCAGAT  
CTTCCGCCACAGAAAGCCATTGAGAAAATAATCGATTTTACATGGGATATTATATTTCTAATCCCTGGTTTTAAAAAT  
TGTGCATAGTGAATAAAGTAAGGTTGTCATTTATGCAAAAACACAGCGTCTTTTAGAAATTAACCATGCGCACTTGC  
AGTTAATGAATCTTATTTGGATGAAGGGAAGAAAACAAATTTTTAAGCCAGATATCGACCATTTGAGGTTGAATATT  
AATATGCTGCGCTTGGGGATATTTATGATCAACCAGCATAACGCTTGGTCTGGTTTATCACATCAGTATGGTTTACC  
CCAGGCACGGAAGCCAGAGCTAAGGTCATCAAAGAGCAATCTTAGCTGGCTTTTGGTTGACCTTTCATCTACCGCGC  
GCGAATAA

>Cluster\_54870

GTGATTCAGACCTTTTTGATTTTCCGTTTACTTCAAAATTTTTATCAGGTTATTTGCGCTGGTCAACCCGGTAGGGAT  
TATTCCCCTCTTTATCAGCATGACCAGTTATCAGACAGCGGCAGCGGAAAACAACTAACCTTACAGCCAACCTGTCTG  
TGGCCATTATCTTGTGGATCTCGCTTTTCTCGGGACAGATTTCTGCAACTTTTGGTATATCAATTGATTCGTTCCGT  
ATCGCCGGGGCATCTTGGTGGTACGATAGCGATGTCGATGATCAGCGGCAAGCTTGGCGAGGATAAACAGAAACAGCA  
AGAAAAATCAGAAACCGGTCAGTGAAGCATTGGTGTGGTGCATTTGGCGTTGCGGTTGATGGCGGGCCAGGGGCGGA  
TCAGTTCTACCATCGTCTGGGGTACGCTTATCACAGCATTAGCTATCTGTTTGGTTTCTTTGTGGCTATTGCATGTTT  
GCTTTATGTTGCTGGGATTTGTTCCGCATGGCACCCTGGTGGTACGGGTTTTACGCCAGACCGGCATCAACGTGATTAC  
CGGATTTATGGGGCTATTGCTGATGGCATTTGGGGATTGAATTTATCGTTACTGGTATTAAGGGGATTTTCCCGGCTGC  
TTAATTA

>Cluster\_11458

ATGAATGAGCTGATAAATAGCAATGCCATCAAAATGACAAGCATTGAAATCGCTGAGTTGGTGGGAAGTCGTCATGACAA  
GGTGAACAATCCATTGAACGACTGGCGGTTTCGAGGTGTGATCCGAAATCCCCAATGGTGGTTTTCGAAAAATCAATA  
ACTTAGGATTACTTCTGTCGCTAGAGGCTTACGTTTTTGGAGGCGCAACAGGTAAGCGCGACAGCATTTATGCTTGGC  
CAGTTGTCGCGGAAATTCACCGCTCGCTTGTGACCGCTGGCGAGAATCGAAGGGCAACCCGAAAAATACCACAAC  
CTTTCTGAGGCATTGCGCTTGGCGCCGACCTTGAAGACAGAAAGGCTGAACGAGGAAACAGCTTGTCTCGCAGCAC  
CTAAAGTTGAGTTTGGCATCGCTTGGCGAGTCCAGCGCAATTTGATTTGAAACTTTGCAAAAGTTGTTGATTTGGT  
CCAAACAACATGTTTGGTGGATGCGGATCACAAAATCTTATTTGCTTACAGGCTCCGCGGCAATGTCGAATGCGAGGA  
ATATATGATCTGTTGCTATTTACAGTGAAGAAACAGCGGTCACACAAATCAGGAAATACAGATATCGTTCCACCACAA  
AAATCACCGGGCTGGTCAACAGTGGCTGACAAGAAAGCTGCTAGATAACGGAATGCTTAAAGTAACAGGGGAGGCTGCT  
TAA

>Cluster\_66971

ATGGGCGAGTTAAAAACAACCCATACGATAATGACAATGACAATAAGTACCGGAAAAATCAGTCAACATTAGTCAATC

CAATGAACACTGACAGAAGCAGCTTACTACTTGGCCGTGCAAGCCAAAGGGTGCATGGTTATGCCTTATTCAGTGCTATC  
CACTGAAAGATGATCCTGATTCGGTATCGCCAGTATTCACAGTTCCTGTTGCTGATTATCAAAAAGTATTTCAAAGTGCT  
GTTGATACAGCGTATCTGATGTTAAAAAGGGCTCACGACGCTGAAAGTAGTGTGTGTTTATCCCAAAGACGG  
AGAGTTTGGACGAGATCAAAACGGCCCTGGCTGGCTGAGGCTGGGCTAAAAAAGGGCGGAAAAATGGCAAAATGAAATTTA  
ATTACAAAGTCAATGCCTATCTGATGGACTGACAGCCAGTTCACCACGTATTCACCTATGACTGCGGAAAAATAAC  
AGTGTAGGGTCACTCGACTGTATGAAAGCCTGTGCCATACCCTCCAGCGGAGTATGGGTTACTACTCAGGAATGGCT  
GTCAGAGCGATTCATGCTTCCTGAATCGCAAAGATCAAACCTTCGCTGAAATGAAGAGAACGTTTATCAATCCGGCACTGA  
AAAAGATAAACGCAAAATACACCCTTAAAGCCGCAATGACACAGAATGAAGATGGCAGGTTAGTCTTACCATTGTTGAT  
TCGAAAAACTAA

>Cluster\_20681

GTGAAAGGTTTAAATTTGGTGTACTCGGTGGAATGGGGCCGGCAGCTACCGTCGACCTGTTTAAATAAATTTGTAACCTTTTAC  
CGCTGCACAATGTGATCAGGAACATATTCCTTTAATTTCTTCGATCCCGGATATTCCTGACCGTACCAGTGCATTTAA  
TGCATCATGGCGCTTACCATTACCCGTTATGCTGATATATGCATAAGCTGGAAGATGCGGGGCAAGATGTTATGTT  
ATTCCTGTAATACCGCGCATTACTGGTTCAAAGAATTTAAAGATGCTTGTATATTTGATATATTAAGTATCGTAGAAAC  
TACGATCAATGAAGTTCGCGCCTGTGGTAAAACCCGAATTTGGCTGTTAGCCACCAATGCCACGCTATATATGGGTTTAT  
ACCAAAAAGGAATTTGAGTCGCTGGGATTTACCTGTGTGACGCCCGATGCCAGCGTCAAGAAAAAGTATGGAAGTATTT  
TATTCCTTGAAGCTGGCAATATAGCGCACGCAAAAAGTTGATGAATGAGCAGGCTGAAATATTTATTTCTCGCGGTGC  
AGAAATCCTTGTCTTGGTGTACAGAAATCCCGTTATCTGGCGCAAGCCGTTAAAGAGCAGACTTCCCGCTATATTTG  
ACTCAACGGCGTCACTCGTTCGTGCCGGAATAAATGGTACGAAAATCGTGTCCGTAACATTTATCTTTTAAACCAATAA

>Cluster\_25616

GTGATTGAATTTAAAAACGCTCTCCAAGCATTTTGGTCCAACCCAGGTGCTGCACAATATCGATTGAACATTGCTCAGGG  
CGAAGTCGTGGTGAATATCGGGCCGTCGGTTCGGTAAATCGACCTGCTGCGTGCATCAACAACGGAAGAAATCA  
CCTCCGGCGATGATTGTCGATGGCCTGAAGTTAACGATCCGAAAGTTGATGAGCGCTGATTCGCGAGGAAGCGGGT  
ATGGTGTTCAGCAGTTCCTTACCTTCCCGCATTTGACGCGTGGAAAACGTCATGTTGGCCCGCTCAAGAGCTGGT  
CGCGAATAAAGAAGAGGGGAAAAACTGGCGGTGAGCTGCTGGCGAAAAGTGGTCTGGCAGAGCGTGCACATCACTACC  
CTTCCGAACCTTTCGTTGTTCAACAGCAGCGTGTGGCGATGGCCGCGCTGGCGGTGAAGCGAAAATGATGCTGTTT  
GATGAACCGACTTCCGCTCTTGACCCGGAAGTGCGCCATGAAGTGTGAAAGTTATGCAGGATCTTGTGGAAGAGGGAT  
GACGATGGTAAATCGGTGACCCAGAAATCCGTTTTCGCGAGAAAGTGAATTCGCGCTGATCTTTATCGACAAAGCCGA  
TTGCAGAAGATGGCGATCCGCGAGTGTGATCAAGAACCAGCCGAGCCAGCGCTTGCAGGAATTTTGCAGCAGCTCTCT  
TAA

>Cluster\_17153

ATGATTTCTGTAATTTATGTTGATAAATAAATGATTCATATGTAATGCCTGCGATAAATAGCATATTGAATCAAACCTTA  
TAAAAAATATGAGTTAATAATTTGTTGCTAATGGCAATGAAGCCAGTGACATTCGCCGTTCTTAAAAAATAACATAAAAC  
AAACAGAGAAATGTTAATATTTTAAACCAATATAGGGCAATTTGGCTTTTCTTTAAATTTGGCAATATCCAAAGCTAAA  
TATGATATCATCGCGAGGATGGAATTCGATGACATAGCCTTACCCTAACCGACTCAAAAGCAAATTAATATCTTATAGA  
TAATGAACCTGATTTTAAATTTGGAACCTCAATAAATCTAAATTTGATGAAAATGATGGTTTTTTAGGTGAAGGCTTTACCCA  
GACAAAAATTAATAAATAGATATATAATGTTTCGAAACTGTTTCGCACATCCTTCAATAATGTTTCAGAAAAGATTTGTTT  
CTTAAAAACAGAGGGTATAATGGTGGTTTTAACCTCTGAAGATTATGATTTGTGGTTAAGAATGCGAAGCTTAAAAACCG  
TTGGGATAAATGGAAGAGCCTTTGTTAAATTAACCGTGTTCACCTCAAAATCAACACAGAAGCTTAACTGGCATATTTATG  
AATGTCTGGGATTTCTTTTTCGAGAAATTTCTTAAAAAGAAAAGTATAATGAGTTTCTTCTTCTGTACATATCTTTATTT  
AAAGCATTAGTTAAATAA

>Cluster\_5621

ATGGCTGATATAGCAACAATGAGAATGAAGGCTCTGCACTTCTGGGATAAACACGGTATTTCTGCGGCTTCTGAAGCCTT  
TGGCGTGTCTGCGCACGCTTTACTGGTGGCGTCACTTACTGAACAAGGGAGGACCTGAGGGGCTAATCCCGCACAGTA  
AGGCACCTCTGGTGCAGCAAAAAGCACTGGCATCCGATGTGCTGAAAGAGATTCGACGCCTCAGGACAGAGCTGCCA  
AACCTCGGTAAAGAGCAGATTTTGTTCGCTGAAAGCCCTGGTGCACAGCGCCATCTGACCTGCCGAGTGTTCAC  
CATCGGCAGAATGATCGCCACCGCACACGATAAAATGGGATGGTACCAGTACGCTGAGCTCGCGGGTAAAGCTCTGC  
TTGTCAAAAAGCGAACCGCAAAACCCACCGCCAAAGCACTACCGTCTGGTAAAGACCGGTGAGCTCATTGGGATGGAC  
GCCATTGAGCTCAGAATGGGTGAAATGCGTTCGCTATATCATTACCATGATCGACGAACGTTGAAATTTGGCAAAAATTA  
GGCAGGCAGAAAAGTGTGTCAGGAGGGCATAAATACAGATATGAGTAAACGGTCAACAATGTACTGGAGTGGACAAG  
GTCGTCCGCCATAATGTTAATGTCAGAAGCAATAAAGCCGGAGTCTTCTGATGATTTTCTTATATCTCAGGATACATCA  
TCTTGTCTGATTTATGAGTGA

>Cluster\_5842

GTGGCGTCCCTTTGCTGCTGACGCCCTGTCTGGTGCCTCATCTTTGAAGCAGACGAGATGATGCCGATGACGCCCG  
CGAATGGCGGACGATGCGGCAGCCGTTTTTGGAGATTCTGCGTGGTTTTCCGACGCTTTCGCGTTTCGCTCGGATGCT  
TCGCTGCGGAAGCAGACCTCGCTGCTGCGCTGGCTGTACAGCGGCTTCGCCAGCCTTCGTTGTGGCTGTTGAAGCAGAC  
GATGCAGCACTTTCTGCCGATTTTCCGGCGGCGGTGGCCTGAGGCTGACCGGCACTTGTGAGCGGGCACTGGC  
AGATAATCGACCGCTGTTTTGAGTCTGCCGAGCTGAGGCGTCTGTCCCGTCCGTTTTCAGAAGACTGGCGTTCCG  
TCTCGGACGTTTTTTCGCGCTTTCGAGAATTTGCTGCCGCTTTCGCGAGGAAGCTGCGCTGCTGGCGCTCGAGGCTCGC  
TTCGTTCTGATGATTTTTCGCGCTCTTTTGAAGCCGAGCATCCCGTGTGAAAGTGGCTGCTTCTGAGCCTTTCGTTG  
CGCGGTGGATGCAGAAGTGGCTGCTGATTTGTTGTGACGCTGCGGCATTCGTTGCTGACGTTTTTCGCGGCACTGGCGTGG  
TAACTGCGCGCTTTTTGATGACTCTGCAGCAGCAGCACTTTTGTCTGCTTACCGGCCCTTTGTCGATGCCGTTCTCGC  
CTGGAAGACGCTGACTGA

>Cluster\_1370

ATGATCCCGTTCGACCTTCATATGCATACCGTTGCCAGCACATGCATATAGCACATTGAGTGATTACATTGCCAGGC  
CAAAACAAAAGGCATTAACCTTTTTCGATCACCGATCATGGCCGGATATGGAAGATGCTCCGATCACTGGCACTTCA  
TTAACATGCGTATCTGGCCGCGAGTGGTTGATGGGGTAGGGATCTGCGCGGCATCGAAGCTAACATTAATAAATGTTGAT  
GGTGAATTTGATTCAGCGGTAAAATGTTTACGCTGATCTGATTTATGCGGTTTTCATGAGCCGGTTTTTGCACC  
ACATGACAAAAGCGACCAATACACAAGCGATGATCGCACTATCGCCAGCGGCAATGTGCATATAATAAGCCATCCCGGAA  
ATCCAAAATATGAAATAGATGTGAAAGCGTGTGTAAGCAGCCGCAAAACATCAGGTGGCGCTGGAATCAATAATTTCT  
TCATTTTTACTCAGTAAAGGCGAGTGAAGACAATGCTGCTGCGGTAGCCGAGCGGTACGTTGATGCTGGAGTTGGGT  
GGCATTAGGCTCGGATTTTCACACCGCGTTTTACCATGGGGAAATTTGAAGAGTGTCTTAAAAATCCTCGACGCGGTAGATT  
TTCGCCAGAGCGCATTTTGAATGTTTCTCCGCGCCGTTACTGAACTTCTTGAATCTCGCGGATGGCACCGATTGCG  
GAATTTGCAGACCTTTAA

>Cluster\_53921

ATGTTGTCATCCATAAAAAATAGTGAAGCCCGGCGAGTGCGCCGAACACAAACCGGGCTCTATGTCAGTAACCGTATGCAA  
GAAACTAACATGAAATTTGATGCAAAAATCAGATTACAACCTCACGGAGTTGAGTTGGTGCCACCCCTGATATGCATG  
GTGTTTGGTTTACATCATCTAATATGTCATCTGCACTTAAATATGCAAAATAGCCGTGCAGTAAACAATGATTTATAACAAG  
TATAGCGATGAGTTTAGCGCCGGAATGACTCAGGTAAGTACCTCAGGAAATTTATCGAAAAAGTGGAGT

TTTCTACTACGCGGTGCCACCTAATCGCGATGTTTGTCTCGACTCCGGTAGCCAAAGAGTTCGCCGCTGGTGTCTGG  
ATATTTTGGATCGCGCAGGAGAAATGCTCACCGATTGCAAAAACAGTTTACTGACGAAGAAGTGGTAAATCTCTGCTACTTA  
CAATGTGGATGGAGAAGAGTCAACAAATGTGCAAAACACATCTACCCAGGAATGAAGCAAATTTGGTTCGAGCTTTCAGG  
AAGAAATTTACGATATTCGATATGAGACTCGCTATATGTGAGAAGAAACCAAGAAATCACTTCTTCGTGAAATGAAGAATC  
TTGATACCAACAATTTTGTGTAAGAACGCTCAGCCAATGCTGACAAAACCTGCGCGGAGGAATGGATTCAATTGA

>Cluster\_1606

ATGCAAGGATATTCACGAAGAAGTCTGAACGAGTCCGGTAAATCAGAGCAGTACCAGCGGGTGGTGTCTGGGAAATTTGA  
CCTGACGGTGCAGGGCGGTGAGCGGATTTTTTCTGTAATGAGCTGAATGAAAAAGGGGAGGCGGTACCTGGCAGGGGCG  
GGCAATATCAGGCATACCCGATTGACGGCAGTGGCTTTGAGATGAACGGGAAGGGCAGCAGTGCCTCCGCGCTGCTGACG  
GTGTGCAATCTGTTCCGTTCTGGTCCCGGAATGGCGGAGGACCTGCAGAGCCTGGTGGGGGCCACGGTGGTCCGCGCGCG  
GGTGTATGCCCGTTTCTGGATGCGGTGAATTTTGTGGCGGGCAATCCGGAAGCGGACCCGGAGCAGGAGCTGAGCGACC  
GCTGGGTGGTGGAGCAGATGTGAGAGTGCAGGGCCATGACAGCCTCGTTTGTGCTGGCAACACCGACGGAGAGCGGACGGA  
GACGCTGTTTCCGCTCATGCTGCGCAACACCTGTATGTGGGATFACCGGGGAGATGAATGCGGTATAACGGTCC  
TGCGGTGGCGGATGAGTTCGATAAAACCACCAGGATACCGTAAGGACAGATGCAGCAAGTGCATGCGCGGGTGTGAGA  
TGCGCGGATGGTGGCTAATTTTGGCGGTTTCCCTTCCATTAACAACCTTTCGCGAGTAA

>Cluster\_20116

ATGTTAAAACCTGACTGATATCACCTGGCTTACCACCATTTGCCGATGCGTTTTAGCTTAACGGTGAACCGCGGAGCA  
GGTGGCTATCCTCGGGCCAGCGCGCGGGTAAAAGTACCCTGCTTAAATTTGATCGCCGTTTCTGACGCCAGCCAGCG  
GTTTCGCTGACTATCGACGGCGTAGATCACACCAGCAGCGCGCTCACGCCGTCGGTGTGATGCTGTTTCAGGAGAAC  
AACCTGTTTCAGCCACTGACGGTCCGCGCAACATCGGGCTGGGGTAAATCCGGGGTGAACCTAAATGCGCGGAGCA  
GAAGAAAATGCGACCGATTGCCACCAGATGGGGATTGATAAATTAATGGCGCGTTTACCTGGCGAGCTTTCGCGCGGTC  
AGCGACAGCGGCTGGCGTTAGCGGTTGTCTGGTACGCGAACAGCCATTTTATGCTCGATGAACCGTTCGCGCACCTC  
GATCCGGGCTACGTCAGGAGATGCTGACGCTGGTGTGATTCGAGCTGCCAACAGCAAAAAATGACGCTCTGTATGGTGTG  
GCACAGTGTGGAAAGATGCGCGCGGATGCCACGGCTGGTGGTGTGCGCGACGGGCTATCGCCTGGCAGGGTAAAG  
CCGATGAGTGTGAGCGGTAAGCGGAGTGTCTCGCGCTGTTGGAAATTAAGGTTAA

>Cluster\_23209

ATGTTATCTGCTGCTACCTACACTTGCATTGCAGAGCAGCCGATGGATTTATTGATTATCGTCAATGAATATCTAGA  
TGACTCTCGCACCACCGCGGATCGCGTCAATTTGGTACATTTTGTAGTAATGTTATCGGTTTGTATGGGGAAATACGTT  
ATAACACTGACGAAGGAGACAAAGATAAATGGGATCCTTACAAATTTGGTAATAATGGAACGGGTTTATCCATTGTATAC  
CGATTTAAGCCACTGGATGACAAAAATTCCTGGTTAGAGCCTATGTTTCGGCTTGATACCACGCAATATTTGGTCAACTTA  
CGAATATGGTCTTCTGCGGGTTATGATTTTCAGCAAAGAGTGGAAAAGTTCGGGTGCTTTTCGTTATGACATGGATAAAG  
CCACCGATAAATCCAAAGGTTATGGCAACGATGATCGTAATAACCGCGCTTACGATGTGTGGATCGACTATCGACCCACA  
AAAACCAACTTCCAATATCAGTTAAACCTGGTCTATTACAATAATGGTATTTTAACTGGAATGATGGCCATAAAAACTA  
CACCGCATATTTAAAGTAGGGTACAAAATGGGATCGTGGATACCCATATATGAGTATTGCAGATTATAAAGGTGTGGATA  
AAACATCAAGTAATCGCCAAATCCGCTGGCGCTGGGGTCTGACTTATACTTTCTAA

>Cluster\_44868

GTGAACGGAGGTGATTATTTTATAATAACCTTTTATTACAGTACCAGGTACAACGGCATCATGGCAACTGACTCAAC  
ACAATGTGTAATAAAGCGCTGGCCGCCAAAAGTGTTCGACAGGGATGCGCGCTTGATAAGGCCATGAAATTTGTTCT  
GGCAACCGGTTATGAAGCGACTTCTCTTGGCGACTCGTGCAGGACCGGAGCCAAAGCGCCACGCTATACGCGGAA  
TTTACCAACAAAGAGGGGTTATTTCTGTCGGCTTCTCGACCGCTATATCGATCGTTTTGGCGCTAAGCATGAAGCAGCT  
GTTTTGTGAAGAGAAAAGCGTGGAGTCTGCGCTGGCTGACTATTTGCTGCCATCGCCAACTGCTTTACGAGCAAGACA  
CCCCGGCAGGCTGCTTATGATCAACAACCTGCACCACCCTTCCCCAGATTACAGGAGATATCGCCAATACGTTGAAATCA  
CGCCATGCGATGCAAGAGCGCACTTTGACAGTTTTATGTCACAGCAAGCGCGGGGAAATCCGACCCACTGTGA  
CGTGACACATCTGGCAGAAATCCTTAATGTATTTATCAGGGATGTGATCAGCGCACGCGAAGGTGCATCGCTGGAAA  
AACTAATGCAGATTCGCCGAACGACTTTGCGTTTATGGCCGAACCTGGTGAATAA

>Cluster\_40140

ATGACCCCTGATTACCTCGCGCTTCCCTGGCCGACGTTACTTTCGGTCTGCATTCATGGTGTGTTGTGGCGGGTTT  
GCTCTATACCTCGGTACATCAGGTTATTGAACTACCTGCGCCCGCGCAGCCGATTTCTGTACGATGGTTGCGCTGCTG  
ATCTTGAACCGCCACAAGCGGTTAGCCACCACCGGAGCGGTTGGTAGAGCCAGAACCAGCACTGAGCCGATCCCTGAA  
CCGCCAAAAGAAGCTCCGGTGGTCAATGAAAAGCCGAAGCCGAAACCTAAGCCAAAACCGAAGCCGGTGAAGGTTGGA  
GCAGCCAAAACCGCATGTCAAACCCGTGAGTGCAGTCCGCGCATACCCTTTGAAAATACGGCAACCCGCGCCGACAT  
CAAGTACGGCAACGGCTGCAACCAGCAAGCCGGTTACCAGTGTGGCTTCAGGACCACGCGCATTAAGCCGTAATCAGCCG  
CAGTATCCGGCAGCAGCAGGCAATGCGCATTAAGGGCAGGTTAAAGTAAATTTGATGTCACGCCAGATGGTCCGCT  
GGATAACGTACAAATCCTCTCAGCAAGCCTGCAAAACATGTTTGGCGTGAGGTGAAAAATGCGATGCGCAGATGGCGGTT  
ATGAGCCGGTAAAGCAGGCGAGTGGATTGTGGTGAATATCCTGTTTAAATTAACGGCACTACCAGAAATTCAGTAA

>Cluster\_38948

ATGCTACAGGATGATTTCGAGTCAAGAATTTGCTGCCACGCTGGTATTAATCCGCGCAGGAGAGCCACTACTTTGCA  
GGCTATTTACCTTACCTGCGTAAAGTGGTGGCGCACTTCCCGCGAGTGAATTTGCATTTATGACCTCAGGATATGG  
AACAAACCGCGTTAATGGGGCTGTTGAACGCCATTTCTGCTATGGGCTGCCGAGCAAGGTTTTCGCGGCTATGCCGCTG  
CACCGTATTCGCGGTGCGATCCTGGATGAGCTGCGCGCTCTGACTGGCGACCGGCCAGCTGCGACAGAAATATCATCA  
GATGAAAGACCTGATTCGCGAAACCGGTAATAAATGGGGCACGAACCGGAGTGGCAGGAGCTGGCTGAGGAAGGGATCT  
CGCATGAAGATTAATCTCGAATATCAGCAACTGGAAGGGCGGAAACGCTCGCCAGCTGGACGAACTGTGACCGCGGAA  
GGGCTGGTATTCGCTTGTGGCCGGAACTGGAAGATCAGTTTGTACCCAGCAAAATGTTGCAACCGCGCTTTCACA  
ATTAAGCGAAAAGAGCAACTGATCCTCTCCATGTATTACCAGCATGAGATGAATCTCAAGAAATTCGCGCTGATTTAG  
GGTAACCGAGGCCGAATTTGTCAACTGAATAAACAGATCGCGCAGAAAATTCGTGATTTTGTCTATCCGAATTA

>Cluster\_1685

ATGGCTATCCGTGATGAAAATGAAATGATTATTGAAAGCCGACCAAGTGCATTTGATATTCACGAATTAACCTTTGCGTGA  
ATCTTTTGTATGAGCTTGGCGGGAATCACACGAAGTAAATAAAGGTCATATATTCACCAGAACCTTTGAGATTTCAA  
GAGTTGAAATGATTTTTCGATGAATGAGGAATGTGAGCTTGAATTTGAAACTAAAGCTGCAACGCAAAATTTCAAAC  
CTTCGAGACTCTCAAAAAGCCTAATGAAATGTTTACGAAAACCTTCAAGTCCAAACTTGAAAATGAAATGAAATGCAAGG  
TATTTTGTATGGAGCTTACAGCAAAATACCTACGATTTATATAAAGACTAGACCGTGGCGGATATGACCATTCAG  
AAATTTGGTAAAGTATTCAGATTTACCAGAAGCCAAAGACTTATTCGCACAGAAAGAGCTGTCAGAGCGCCACATAAA  
CTGACTTTAATTTCTGATAAATCACAAGCTGAGCTTGAAGAAATGGCTAGAAAAGCGACTGATGAAGGTAAGGGAAC  
CGAGATTAATTTGGTGAATCAACTCTGGCTAATTTGATTTCTGACCACTAAAATAATCGCTAAGGAATACAAAACAAGAGC  
TTGCACAGATTAGTACTTCAATGACTTTTGTGAGTGTCCACGAGAAATTTAGTAAGGTTATTTAA

>Cluster\_2126

ATGATGAAGATACAAATCGCGTAAAATCTGGTACTACCGTATAACCTCATCATCTGTTGTTGCTATGCTGCTGCGATG  
GGCGTGTCTCCCGCGTCCATGAGTTTATCAATCGCAGCGTTGCGCGGTTTTCGCGCGTGGACCAACAGGGTATAGAAC  
GCTTTATTACGCTTACGCGCACTGGCGGAGTGTCTGCTTGTGTTGATGATTTTACAGGCCATTGCTGCACCGCTA

CCTGCGTTTTTATCACCTTTGCCAATGCGTCGCTGTTTTGGCGGCTTCTGGGGCGCTTGTCTGCTGGACCAGTTCGAT  
GGCCGGCGCGCGCTGTGCTTTTTTATCGCCAGAGTGATGGGGCGCGAAGTGGTGAAAAAATTAACCGCAAAAACCGTGC  
TTGACAGTATGGACGGCTTTTTCACCTCGCTACGGCAAACACACCATCCGTCGCTGTCGCTTATGCGCTTTTGTCCCTTC  
GATCCAATCAGCTATGCTCCCGGCTGACTTCAATACGTTTTTCGCTCGTTTTTTATCGCCACCGGGCTTGGTCAATTACC  
GGCAGCTATTTTATCCCGGGGCGCAGCATGTTAAACAGCGGTACTTCTGGTTTGTACCGGACTGTTTATTCTGT  
TTGCCCTGACCGTGGTATTTTTATGGCGAAGAAAAATGGCTTGAGCGCCAGAAAGGAATGACTGA

>Cluster\_51729

ATGAGCGAGCAGTTAACGGACCAGGTCTGGTTGAACGGGTCCAGAAGGGAGATCAGAAAACCTTTAACTTACTGGTAGT  
GCGCTATCAGCATAAAGTGGCGAGTCTGGTTCCCGCTATGTGCCGTCGCGGTGATGTTCCCGATGTGGTACAAGAAGCTT  
TTATTAAGCCTATCGTGCCTGGATTCCGTTCCGGGGAGATAGCGCTTTTATACATGGCTGTATCGGATTGCTGTAAT  
ACAGCGAAAAATTAACCTGGTTCAGGGGCGTCCACCTTCCAGTGATGTGGATGCCATTGAAGCTGAAAACCTCGA  
AAGTGGCGCGCGTTGAAGAAATTTGAAACCTGAGAATTAATGTTGTGAGAAAGACTGAGACAGATAGTTTTCCGAA  
CTATTGAGTCCCTCCCGAAGATTACGCATGGCAATAACCTTGCGGGAGCTGGATGGCCTGAGCTATGAGAGATAGCC  
GCTATCATGGATTGTCGGTAGGTACGGTGCCTTACGTATCTCCGAGCGAGGAAGCTATTGATAACAAGTTCAACC  
GCTTATCAGCGCTGA

>Cluster\_41432

ATGAAATCGCTGCCGTTTAAATGTTATGCGCTATGCCGTTGATGCTGACCGCTGTTCCACGATGTCGTCAGTTAACTGGTC  
GGCCGCTAACCCGTGGAAGTGGTTTGGATCATCCACAAAGTGGAGCAGCGAGCGGCTGGGTGAATTAACGGCTCCACAC  
CACTGCAAGAACAGCCATGCTGATGCGCTTGTATGGCGATTATCGCCTGCGCAGCGGAATGAAAACCGCGAAGCGCAAC  
GTGGTGGCTTTTTGAAAGTATGAAAGCGCACACGTCGGCAGTGGTTATTAACGGTATCAAGGCAGCATCAGCCGCA  
TGATGTGCTGGATAGCGATATTCTGCTGACACCGGTGTTAAATCGGTACACCGTTTTAGTGACCTTTTACAGCAAGCAT  
TTGGCAATTGCCAAAAGCGCACAGTATGATAATCGTCCGTCGAATGTAAGCCGAAGGCAGTCAACATATTAGCTAC  
CAGTTACGCGGGGAATGGAGTGGCCTGAAGGTTAATGCTTTCGACGATACCTGAAAAACGGAAGTCAAGTAAAT  
TATCTGGCGCGTTAA

>Cluster\_13223

ATGAACAATAAACATAAACATGCAGGTCATATTACATATTGAAGGCCACAGCTTAAAGTCTAATGAGTCTGGCATGTG  
GAATCTTACAGAAATATGGAAAACTCCCGGATTACCTAACAAATAGCTACCCCTCTCAGTGGCGCGCAAGGTAACAAAGA  
GGCTCACCGACATGCAAAAAATGCACGTGAGAAAGATTGGTATTGAAAGCATAACCTACGACAGCAAAACAGGCTACCCCT  
AAGTATGCAGGATGGGCTCTGAAGATTTCGAGGACATGGTCTATGCAGCCTTTGAGGCTATCCTTGAGATGCTGAAAT  
TGCCACGGTCTGCTAATAAAGATGGTCAACTTGGCTATCACGCTGAAGCTGAGCTATTGGAACGCTATAAGGACGACT  
ATAGAGAAGCTATGCAGACCCCTTAAAAAGATTGGTAAACGTTGACGGCAGGAAGCCGAGCGCATCTACAAGGCCGTA  
CTTAACGGTAATCTGACGAAATTTCAAGGGTTATCCATGATTTCTCGACGAGTGTCTGGTACGCCGAACAGTGAATCT  
ATGA

>Cluster\_34173

ATGGACATCGATTTCAAGAAGTTGGCTCCCTGGAAGTGGTTCAAGAACGAGCAGCAAGAGCAGCAGACCGCCTTCCCT  
GCCGGTGCAGCGCAATTAACCTGCGCAGCGCGAGCGGGCAGTCAAGCCCTCCGCAACTGCACTCGGGAAATCGACCGGC  
TGTTGATGACGCATTCGGGGCTTCGGTTTTCCGGCTTGAACATGCCCGAGTGGCCATCCGATTGGTGGGATGCTG  
AAGCCGGCCCTGGACATCCAGGAAACCGACAAGCAGTACAAGATTGCCCTGGAAGTGCCTGGTGTGAGGAGAAGGACAT  
CCAGATCACCTCGACACAGCAGTGTGATGGTGGTGGAGAGCGCCAGGAACAGGAGAAGGAAAGTGGCTTCC  
ACCGTGTGGAGCGCTCTTACCGCAGCTTTACGCTACCTTGAACCTGCTGACGACGCAACAGGATTCGATCAAGGCA  
TCGTTCAAGAACGGGTGCTCACGGTACGATCGACAAGCGCAGGTCAGCGCGCGAAGCAGGGACGCTCGATCCCGAT  
CAACGGCTGA

>Cluster\_19847

ATGGGGTGGCATTGCGCTACAAAAACGCTGGCTAAAAAGTGCACAGTGGGCAACAAAGCAATGGCCACAGTTTTCCGG  
TGTGGTCCGCTGACGGCAGAAAACCGTAAATGGATCTTGAAGTACTGGGGCTGACAGCCAGTTGGTGGGCTGGGGAG  
TAGGACGCAGACTGACGGAAAAGCTGAATGCGCTGGGTATTAACACAGCACTGCAACTGGCGCAGGCTAACACGGCATTC  
ATCCGAAAAAATTCACGCTCATTTCTTGAGCGTACGGTACCGCAACTAACGGCGAGTCCAGCATATCCCTGGAAAGAAC  
ACCACCGGCAAAACAGCAGATTGCTGTAGTCCGAGTTTTGGTGAACGAATCACAGACAAAGATGCCATGACACAGGCTG  
TTGTTCAATGATGACAGGCGGGCCGAGAAACACGTTGGGAGCGTCAAGTATTGTCGGCAGGTGACGACATTTGTACCG  
ACATCCCCCTTTGAGTAAAGAACCTGTTACAGCAATGCCGCTGTGAAAAAGCTTTTCAATTGCCACACAGGACAGCCGG  
GGCATTATTGCCCGCCGATGACAGCCCTAA

>Cluster\_21263

ATGCCGATGAATACTACAAGTACGCTTTTCAGCTCTTTTGGTATAAGTTGCCATAGAGAAAACTCCTTACGGAACCTTT  
CCTAGGGAAGAATGATGAGGTCATAAAATGTTCAATGGGAGAACCGGACGATTCACTTTTCTGTTCCGAAATTTAGCGGCA  
ATATCTGGATACAGTGAACAGGCAAGATACTAAAGATATTAATGGTGGATAAAAAGATGAACGGATAGTATATCCCTCA  
AGGGTATCAACCAGGAGATTGATAATTACTGTTTTCAAAAAATGCAAAAATTTCCACTGAAGAGAGGCAAAAGGCTTT  
TTCTCTTTGAGCCAGAGATATCAACTAATCTTTGATGTTAAGGCAGCACAAAGTTCTATTAATCATGTGATAATGGGGA  
ATGCTTCTTTGGCAAGAAAATAGATACCTTTTGTGATAGTATGAGCCGGATGTAAAAAATCGTACGGCAGATTGCATA  
GCAAACTTGCCTTGACAGCAAGTTTTACCAGAAACATATCGAGCCGATATTGATATTGAAAAACTACGAAATGAGATCCC  
AGATTATTTGAGGTGTGCTATACAGGCATA

>Cluster\_4642

ATGAAGGGCTTGAGAAATGCCATCCGCAATCTGAACAGCCTTGATACCCGATGGTGCCACAGCCAGCGCATGGCGAT  
AAACCGTGTGGCAGAAAAGCGGCTCGGTTGCCACCCGGCAGGTTGCCGGGAATACCGTGGCGGAGATAACAGGTTGA  
AAGGGATCCCTGAAACTGGTACGTCAGCGTGTCCGGGTGTTTTAAAGCCAGTCCGTCAGGAAAAATGACGGCAGGATC  
CGCGTTAACCGGGCAATCTGCCCGCAATTAAGCTGGGGACAGCCGGGTGACTGGCCCGCGTGGTGGAAAACTGCA  
GTACCGTGGCAGTGTGCTGAAGGTGGGTAATAATCTTTTCCGGGATGCTTTATTCAGCAACTGGCGAATGGTCCGCG  
ATGTGATGCGCGTATTGATGGCAAAAATCGTTACCCCATGATGTGGTGAAAAATCCCGCTTTCCGGACCGCTGACACAG  
GCATTTGAAGATGCCCGCAGCCATCATGCTGCGGAAATGCCGAAACAGCTGGGGTATGCACTGAAACAACAACTGAG  
GTTATGGCTGACCCGATGA

>Cluster\_66316

GTGAATCTGATGACGACGATAACAGCGGTTGTGCTGGCAGCGGTAAGCCAGACGAATGGCGCGGTAGATAAAGGATT  
GCTTGAATTAACCGCAAAACATTTATGGCAACATGTCGCTGACCGCTTATGACGCAGCTCTCTCACGTCGTTGTTAATG  
CCAATGCCATCAGGAAATCTATCAGGCAAGCGGCTGAAAGTATGAAAGATTCACTGGCGGATACCCAGGCCCTCTG  
CGAGGAATGCTTTCAGTAAATGACGAGGAAGCGGCGAGTGGTTTTTTGTTTTGTTCCGTCGATACCTCTTATATTCGGA  
GGATTTAGCAGCCGGCTTAATCATCAGCGCAAAGATGCGCTGTCGTTGGTCCACGACGGTGAACCGGATACCCGA  
CTATTGCTCTGGTAAACCGCAATTTAGCCTTTTATTACTGGAATATCTGCAAGCAGGAGAACGCCGGTAAATGGCATTT  
ATGCGTCTGGCTGGCGTATGCGGTTGATTTACGCGATAATAAGATGCATTTATTAACGTGAATACGCCAGAGGAGCT  
TGCCCGATGGCAGAAAAACGATGA

>Cluster\_5710

ATGTCCTTGATTAACACCAAATTAACCTTTTTAAAAACCAGGCATTCAAAAACGGCGAATTCATCGAAATCACCGAAAA  
AGATACCGAAGGCCGCTGGAGCGTCTTCTTCTTACCCGGCTGACTTTACTTTTCGTATGCCCGACCGAACTGGGTGACG  
TTGCTGACCACACGAACTGCAGAACTGGGCGTAGACGTATACGAGTATCTACCGATACTCATTCCACCCACAAA  
CCTTGGCACAGCAGCTCTGAAACCATCGCTAAAATCAAATATGCGATGATCGGCGACCCGACTGGCGCCCTGACCCGTA  
GTTTCGACAACACTGCGTGAAGATGAAGTCTGGCTGACCGTCCGACCTTCGTTGTTGACCCGAGGGTATCACACGAAG  
TCGAAGTTACCGTGAAGGCATTGGCCGTGACGCGTCTGACCTGCTGCGTAAAATCAAAGCAGCACAGTACGTAGCTTCT  
CACCCAGGTGAAGTTGCCCGCTAAATGGAAAGAAGGTGAAGCAACTCTGGCTCCGTCTCTGGACCTGGTTGGTAAAAT  
CTAA

>Cluster\_17657

ATGAGCAGCGGTGAACCTGGATATTAAGATTGATTTAAGCGGTATAACACCACGCTGGGTAACTGATTCGTTCCGTGAA  
GGACCGGCGCAGCTGATGACGGCGCTTGCGGTTCCATGCTGGATGCGGTTGAGACTAACCTGGAACACAGGGTCCGC  
CGAAATGGATGGCTGGAGTCCGGCTTATGCGAAGCGGCGGGCCCGGGCAAAATCCTTCAGAAGTCCGGGCGACTGGCC  
GCCAGTATCCGCTCTGCGGTTAAACAATAACGAGGCCAGGTCCGGACAAACGTCGTTATGCCCCTATCCACACGAAG  
CGGCGAAATCCGCCATCAGGCACGGACGCAGAACCTGTATTTAAACAGTACAAAACGGCAGCGTCAGCACCCGCTTTG  
TGAAAAGCGCAACAGTAATTTTGTGACGAGCGCAACGCTCGGAGCGTATACGCTCAACATGCCCGCGCGCCCTTCCCT  
CAGCTTGTGACGAGCAGCATCGACGAGCTGGAGAACCAGCAACCGCTATTTTGGCGGTGTGATTGACTGA

>Cluster\_29513

ATGAAAGATATGAAAGCTGTTGTGGTTTTTACCAGGAAAGATTGAACATAATGAGAACCAGGGGGGGTTCAGGCTACTG  
GCATGCCAGAACGACAGGCTCAACGATGCCGATTACCTCATAGCAGTAAAGAAACAGAGGAAACGTTGGGCAGTAAAG  
ACCTGGAACACGGCAGCAGATTCTGATCGCAAATACCGGGTGTTTTAAAGCCCTGATTACGACGACAGGAACGTC  
ATAACCTTTGATGAATACGAGAAATTCACACTCCAAAAGCATGGAATAATGCTAACCGATGGTCAGCGCTATCCGGTTCC  
TTACCTGAGCGCACAGGAAGCTTTTTTACGTATTTGGGGTAACCCGGAACACGGAATGGAAGAAATTCATCCTTCAT  
CCCCATCGGTTCCTAATACAGTGTATCCCTGGTCTGGCTGAAGAGAAAACAGAAAACCTCTCCCTTAACGAGGCAATTGAA  
AGGCCAAAAGGATATTAGCAACGCAACAGGGATTGATAGCTCAGCCATAACAATAAGCATCAAGATCTGA

>Cluster\_67064

ATGAAAAAGCATTTCTTATTAGCATGTGTTTTTTTTCTCACTGGGGCGGGGTTTCTCACGCTGCGGTTTCAGAAAACCAT  
ATTCAGTGTGACGCTGGTGGCTCGGCTCTGTCATGTGGTGGTGGATGCGGACAGCACCAGGCAACAGTGGCCGGCTGACGT  
TCCGGACTTACCCTAAGTCCACGGGCGCTGTACCGCGGTGACTTTCACGCTGCGTCTGTATGAGTCCGGCGCCAGC  
GTTACAGGTTGCTCTGCGTTTTCTGCGGGCAGGTCCGCAACCTGGATTTGGTAACCCGGGACAACCTGGACGCTGCCGG  
CGTGGTCAACCGCGGTGCCGGTGTGTTTTCGCGTGGATGTACGGGCTGTTGATGACAGGCTGATTATCGCGGACGTC  
TGACGAGGATAACCATTCGCTGAAATAACCGGTTGATTTGCGGCTAAGGGCCAGTTTCGTTTTCTGCGCAGCCGGTG  
TTTTCCGGCTGATGTGAAGCGGGAGAGTATTCCGGGCGCTGACTTTTTGTTGCTCACTTATCAGTAG

>Cluster\_22033

ATGCAATTTAATATCCCTACGTTGCTTACACTGTTCCGTTGTCATCCTTATCCCATCTTTGTTATTTGGTCTTTTTATTTGCC  
TGTCACCTGGTCGCCATTTGCCGCGCGCTCATTTCTGCGTCGCGCGGTTGACTGACTGGTTCGATGGTTTTCTGGCAC  
GCCGCTGGAAACAGGATCCCGGTTGGTGTCTTTCCTTGCACCTGTGCGCAGATAAAGTTCTCGTGGCTATCCGCTATCCGCTG  
CTGGTAACCGAGCATTACCACAGCTGGTGGTGACCTTACCAGCAGCAACGATGATCGCCGTAATTTATTTCTGCG  
GCTACGCGAATGGATGGCGGAGTTGGGTAACCGCAGTACGCTGCTCTCCTGGATTGGGAAAGTGAAGAAACCTGCCC  
AGATGGTGGCTTACCTGGCTGCTGTGGCTCCGAATATTGGGTTGAGTACGCCGTTATTCGACTTTCTTTGTGGCT  
GCGGTACTGACTCTGTGGTCAATTTGCAATAATTGAGCGTCCGCTGACAGATTGCTTGTGATCAGTGA

>Cluster\_66

ATGCCAAGATATGCGATGGTTATAGATGTAGAGAAATGTGAGGGTGTATGGCTTGTGTTATAGCGTGTAAAAAGGAGAA  
TAAGGTAGCAGATGGTTATTTTAGGACAAGGTTGGTAGAAGAGTTAGAGGAGAAATTTCCCAACCTCAGGATGGAACCA  
GGTCAGAACTTTGTAATCATTTGTGAAATGCTCCTTGTATAGATGCTTGTCCACCAGGGCTTCTCACAGGGCAAAAGAT  
GGAACCGTTCAAATAGACATAAAAAGTGTATTGGATGTAAAGGCTGTATTTTGGCTGTCTTATGATGCAAGATACAT  
TCGTCCTGATGGGACAGCTGATAAGTGTACCTTTTGTGACGACAGAAATAAAGAAAGGAAATTTACCTGCTTGTGTAGAAA  
CTTGTTTGGGTAATCGAGGATCTTTGGAGATTAGACGACCTGAAAAGTGAAGTGGCTAAGATTTTAAAGGATCAGCAT  
GCTGCTGTAAGGCTTGAATGGGCAGGTAACAACTCGTGTTTTTTATATTAACAAGAGATTTCCAGGGGGTTTTAA

>Cluster\_3906

ATGATCCTGCTTATAGATACTACGATTCTTTTACCTGGAACTCTACCAGTACTTTTGTGAACCTGGGGCGGATGTGCT  
GGTTAAGCCCAACGATGCGTTGACGCTGGCGGATATCGACGCCCTTAAACCACAAAAAATTGTCATCTCACCTGGCCCT  
GTACGCCAGATGAAGCCGGGATCCTTTCGACGTTATTCGCCACTATGCGGGCGCTTCCGATTTCTGGCGTCTGCCCTC  
GGTCATCAGGCAATGGCGCAGGCAATTTGGCGGTAAGTGTGCGCGCCGCAAAAGGTCATGACGGCAAAACCTCCCGCAT  
TACACATAACGGTGAAGGCGTATTTCCGGGGCTGGCAATCCACTTACCCTGACACGCTACCATTCGCTGGTGGTGAAC  
CTGACTCATTACCAGCGTCTTTGACGCTGACGGCTGGAGCCGAAACCCGCGAGATTATGGGGATTTCCGCTATCCGCTG  
GATCTGGAAGGTGTGAGTTCATCCAGAAAGTATTCTTAGCGAACAAGGACATCAACTGCTGGCTAATTTCTGCTATCG  
CTGA

>Cluster\_41605

ATGCTTATTGGCTATGTACTGTGTCAACAAATGACCAGAACACAGATCTACAACGTAATGCGCTGAACCTGTGCAGGATG  
CGAGCTGATTTTTGAAGACAAGATAAGCGGTACAAAGTCCGAAAGCCGGATTGAAAAAATGCTCAGGACATTATCGG  
CAGGTGACACTCTGGTTGTCTGGAAGCTGGATCGGCTAGGGCGTAGTATGCGGCATCTGGTCACTTCTGGTTGAGGAGTTG  
CGGAACGTTGGCGTTAATTTTCGACGCTGACGGATGCTATTGATACCAGCACACCGATGGGGGTTTTTTCTTTCATGT  
GATGGGTGCCCTGGCTGAAATGGAACGAGAATGATTGTTGAACGAAACAAAAGCTGGACTGGAAGCTGCTCGGCACAGG  
GACGAATTTGGTGGACGCTGCTCCAACTTACACAGAAACATGGGCGCAGGCCGGCGATTAATGATCAGGCGTTCCT  
CGCCAGAAGTGGCGATCATCTATGATGTTGGTATATCGACACTGTATAAGAAGTTCCGGCTCGGAGATAAATGA

>Cluster\_50453

ATGAATACAGCTATAACTTTTTCTAACGAGTCACCAAAAGTCTTTTTCAAAGATGGTCCGCTGGTTACCACCTCTCAAGC  
TGTGCGGACTACTTCGATAAACACATAAACAGTTTTAGCTAAGATGACACACTCGACTGCTCTCCCGAATTTACAT  
CAGCCAACCTTTCCGGCCGATGTTTCAGACTGTGCAAAATGGCAACGGCGCAGACGTAATCACGATGCTACCTGATCACA  
AAAGCAGCTTTCATGTTCCCTCGTAATGGGATTTACTGGCAAAAAGCAGCCAGACTAAAAGAAGCTTACATTTGAAATTT  
TAACGCAATGGAAGAAGAACTCCACAAACGTCCTCTGACGACAAAACCTCCCGCCCAAAATAATGGATGCGCATTAC  
TGATCCACTTCGATAAACACGGTCAGGTCAGTTCACAGAAAAGTCCCGCCGATGCGATGGTATGACGCTGGAACGG  
TTTTAAATTTATCTGGAGCAACATGGGTGGATGCTTGCCTGTAAGAACAATTTGGTGGAAAGTTGATGCGGTTTTAA

>Cluster\_9571

ATGATTAAGGTGATGGCGTACCAGGATGGGGCTTACAATCAGTGTGCTGATGCTAACACTGGCTGATATTCCTTATCA  
GTTCTTTGATGTCAGTGGTTTTGACCACAGGGAGCTTACGCGAGTTATGAAAACCTGAAACCCCTGTGTGCAAGTTT  
CGACACTGGCGCTGGAAAATGACGAGATTATGACGGAGACAGCGCGATGTCATTGATGGTTCTCGATGCTGACCCGGAC  
CTTGGCCCAACGGTTGGGCGCGCAACGTCAGCTGTTTCAACGGCTATTGGTCTGGCTGGTTGCTAATGCTATCCAAC  
ATTCATTTCTCGCGATTACCCTGAGCGTTGGGCTCTGACGCACTGAACAGTTAAGAAAGATGTTATGAAATACGAA

AATCGCTTTATATCTGGTTGAATTCGCAGCTCACTGCTGAACCTTATGCGTTTGGTGAGCAACTAACGCTGGTGGACTGT  
TATCTTTGCACTATGCGCATGGGGCCCTGGGCATGAATGGTTTCAGGATAATGCCACGAATATCAGTGCATGCTGA  
TGCTGTATGTCAGTTACCGAAATACAAGAAGTATTAAGGAAATGAAATTTATTGA  
>Cluster\_29033  
ATGAAAGCTTCACTGGCGTGTTCAGTCTTCTGACGGTATTTACCAGTACTCTTAAAACTCCCGCCATTCAACCAAC  
CGTGGTACAAATCCAGGCCAACCAACCTTGCATCGCGGACGGTGCAGACAGCAATCGGCAGCAGCTATTTTACG  
ATCCGGCGTATGTGGCGTACCTATCCGCGGTGATGTCGCCAAGAACCGGTGTTGTTCTGATGGTATCCGA  
GCATTCGCGCAGCAGAAGGTGATTTGCAGAACTGGTTCACGAAGATATGGCGAAGAATTTTGTGAGTACCCGCAAAA  
ATGGCAGTTAAAGCGCCCGGACAGCAACATCGATCACCGTCCGGTGCCTAATCTGGAACCTGGTTTACCAGCAGATA  
AAACACGCCCCACAGCAAGAACCCCGGTGACTATCAAGCGGGCGATATTTGCTCCTGGCGATTAGATAACGGGTGGCA  
CATATGGGGTGGTGTGAGTGGCTTCGCCCGGACGGTACCGCGCTGGTGTATACATAACATTGGCGCAGCGCGCAGGA  
AGAAGATGACTGTTTAGCTGGCGGATGGTGGGCGACTATCGGTATTTTGTCTAAATAA  
>Cluster\_35136  
ATGGAATTTAAAGATTTACCAAAAGAAATCCAGATAATGCTGCAACGACACTCGGTGATAGTCTGGTAAAAATTGACCC  
GGCATACACCAAAAAGAAACCATCGATAATATGGTTCCTAATGTGCGCAATGCTTTTTCAGGGCTATATGGTCTGATA  
ATCAAAAACAGGAAAAGATATGATGACCGGTAATTTCTGTTTGCCTGAATGGTCAATGTTATTTTCAGCAATCAGAACA  
GAAACGGCAACTGTTTTTATTCTGCTGATTCAGAGTCTGCTGATGTTCTGTTGAAAATCAAAAGATTTAGAAAA  
CGATGCAAAATTTACAGGGCGCACAAATAGCACATCCATATGCACATATTTAAGCTCTGTGGATGTTAAAAATAATACCC  
TGCAAGTTGCTTTGCAACATTCACCGCAAGAGTTAAAAACGAAAAAGACGATCGCGGATAAAAATAAATACGATGCACCT  
GATTTGTTTATTTACAGTCAAAGCTGCTGGAATCATGAAGAGCGACTTAAAAACACAACATCAAGCCCACTTCTGT  
AAATTTACGATGGGTAATGAGGATTTATTGACGCTTCTCTGCCATAA  
>Cluster\_58806  
ATGACAACCCAGTATGGATTTTTTATTGATTCAGCCGTTGCACCCGTTGCAAAACCTGCGAGCTGGCCTGTAAAGACTA  
CAAAGATTTGACCGCCAGAAGTCACTCCCGCCGATTTTGAATATGCTGCGCGGACGTCGGCAGGAAGATAACGGTGTCT  
GGCACCAGAACGTTGTTGCTACTATCTGTCGATTTTCAATGTAACCACTGCGAAGATCCGGCTTGTACTAAAGTCTGCCCG  
AGCGGTGCGATGCATAAACGTTGAAGATGGTTTTGTTGTTGGTTCGATGAAGATGTGTGCATGGCTGCGGCTACTGCCATAT  
GGCTTGCCTGATGGCGCACCGCAATATAACGAAACGAAAGCCATATGACCAATGCGATGGTGTATGACCGTGTGTTG  
CGGAGGTTAAAGCCCGATCTGTGTTGAATCTTGTCCGCTGCGGGCGTGGATTTCCGGCCCTATCGACGAGCTGATAA  
AAACATGGCGATCTGGCGCCGTTGCGCCGTTGCGCGAGCTCACTTTACCAACCGAATATTTGTGATCAACCCCAATGC  
CAATAGCCGCCGACCGGGGATACCACTGGCTATCTGGCAAACCCGAAGGAGTGTGA  
>Cluster\_9149  
ATGAAACGACGTGACACCATCGTGCCTACACCGCGCCGAACGTATCAACCACTGGATCACCGCCTTCTGCTTCATCCT  
GGCGGCGGTGAGCGGGCTGGGCTTTTTGTTCCCGTCTTCACTGGTTGATGCAAAATCATGGGCACCCGAGCTGGCGC  
GAATTTCTGCACCCGTTTTGTCGGCGTGGTATGTTTGCCTCGTTTCAATCATCATGTTTTTCCGTTACTGGCATCACAACTA  
ATCAATCGGGATGATATCTTTGGGCGAAGAATATCGTAAGATCGTCTCAACGAGGAAGTAGGTGACACCGGGCGTTA  
TAACCTCGTTCAGAAATCGTTTTCTGGCGCGGATTTATTTCTGTTGCTGCTGGTGGTGGTGGTGGTGGTGGTGGTGGT  
GTCCTTATTTTGGCCTGCTTCTCAATCCCGGTGATCCGATTCGCTTAATGCTGCATTCATTTGCCGAGTGGCGTTA  
ATTTGTTGTTATCATGGTGCATATCTACGCCGCCCTTTGGGTGAAAGGCACGATTACCGCCATGGTGGAAAGATGGGTTAC  
CAGCGCTGGGCGAAGAAACATCACCCGCGTGGTACCCTGAGGTCCGCAAGACAACGAAAAAGAAAGCTGAATGA  
>Cluster\_6900  
ATGAACCATCAGGATGAATTTGCCGTTAGCGAAAGTCAAGCAAGTTGACGAGGCGAAGCGGCAATGGTTGACGGGGATGCG  
TCACCCGTTGATACGGTAAACCGAACCAAGACCTGCTGAAATCCCTGGCTGAGTTCATTCGCCAGCATTCTGCGGCTGGGC  
AGCTGGTGGCGCGCGCGTGTCTCTCGCCACTTATTTGGTTGCGAAGAGGAACCTGCAGTTTTCGCGAAGCAAT  
AAGCAGAACCGGAGACTACCGGATATCGCTTGTGTTGACGGGAAGCAAGGATGATTACTATTACTCAACGCAGGCCATGAG  
TGAAAACATACCGCGGATGCTTTGCAAGTTGTGGAGCAGGACATTTGTCGCGCCATTGCACACGCGGTTCTGTTTGGT  
GCCAGACGATCTCTGCTTACAAAGTCCGATGCTGATGCAAGCGCCATATTACTTCCAGGAAGCGCAGATTGAGCC  
CGCATCGCCGCGATGGATGTTGCACCTGAATATGCCGATATACCGCAGGTGGAGTTCATCGACCGCGGTTGTACTGTT  
TAGCGAGCGATTTATGACCTATGGCAAGGCTTATGGCTTATGCGAATGGTTCGAGGTAGAGCAGTTTTCAGAACCCCTGA  
>Cluster\_10973  
ATGAACATAATCAAGCAACCGCTGCGTTCGGCGTCCGGTCCGGTCCGGTCCAGTAAAACCGCGCTTCTGGAAGCCCT  
CTGCAAAATCCATGCGTGCACCTGGCAATTAGCCGTAGTACCAACGACATCTACACCAGAGAAGATCAACGCATTCTCA  
CTGAGGCCGAGCACTGGAAGCGGAACGCATTTGTCGGTTCGAAACGGGGGCTGCCCTCATAACGCCATTCTGTAAGAC  
GCATCAATGAATCTGGCAGCCGTTGGAAGCACTGAGTGAGAAATTTGGTAAATCTCGATCTGATCTTTGTTGAAAGCGGCG  
CGCAACCTGAGTGCAGCTTACGCCCGAACCTGGCGGACCTTACCATAATATGTCATAGATGTTGGCAGAAAGGAGAAA  
TCCCGCGTAAAGCGGCTCCGGGATCCCAAAATCCGACTTCTCTGATCAATAAAACTGACCTTGCACCATCGTGGG  
GCCTCCCTCGAGGTAATGGAGCGTATCTTTACGTATGCGCGGAGAACGCCATGGGGTTACTAACCTGAAAAGTGG  
TGAAGGCTGCAAAACATCATCGCTTTTATCGAAGAGCAGGGCATGCTGGGTAAGTAA  
>Cluster\_48648  
ATGACGGTCAAAAAAGACGAGGTA AAAACTCGCCTGACACCAGCGGAGTGGGCGAAGCTGAAGCCAAATGGACGTCAGG  
CGAATATACACTCTCAAAGCTGGAGGAAGATACGGCATTCGTCGTGAAACACTCTCCAGACATTTCAAAAAGCGAGGAT  
TAGAGAAAAGCGCGGACTCTGTTGGGAAGATGGTTCGTGAGTCTCTTAAATCTGACGCAGAGCTTCGCGCTAAAGCCCGT  
GCGGAAAAGATAGAAGAGCTGTCACGTTATGACGGCTGGCGGTATGCGTTGGGGCAGATGGTGTGATGGTCTGAGTAC  
TACGGCCAAACGTTAGGGTAAGCCTTTAGGGCGATTGAGGATCTCTCAAGAGCTTACAGAGAGCCAGTAATACCCCTG  
CAAAATGCTTTGAAGTTTCTGTTCCAAAGCATTGGGCATGGATCATGCGGAAAATGACGAGGAAGAAATCCGAACCTGGTA  
TTTGGTGAAGCTTACGCCCTCCAGGTGGCGAAATACGTCAGGAAGACGACGAGCCTGAAATCATCGATGACGAATGCT  
TGAGACGTTGGAAGAAAGCTCTAAGCGAATTTGATGCGACAGATGATGGAAGTGAAGGGGAGGACGAATAA  
>Cluster\_35706  
ATGAAATTTGTTCTACAAACCGGGTGCCTGCTCTCTCGCTTCCCATATCACCTGCGTGAGAGCGGAAAGGATTTACCCCT  
CGTCAGTGTGGATTTAATGAAAAACGCTCTCGAAAACGGTACGATTAATTTGCGGTTAACCCTAAGGGGACGGTGCCTG  
CATGCTGCTGGATGAGTACTTTGCTGACGGAAGCGTACGATTAATGCAATCTTCCGACAGCTTCCGACAGCCTCCCGACCC  
CAGTTGCTGGCACCGGTAACAGTATTTCCCGCTATAAAACATCGAATGGCTGAATTTACATCGCCACCGAGCTGCATAA  
AGGTTTACACCTCTGTTTCCGCTGATACACCGGAAGAGTACAAACCGACAGTTCCGCGCAGCTGGAGAAGAAAGCTGC  
AATAATGTTGAACGAGGCACTGAAGGATGACACTGGATCTGCGGGCAAGATTTACAATTTGCTGATGCTATCTGTTTACG  
GTTCTGCGTGGGATACCGGTTGAACTGAACTGGAAGGTTAGAGCACATTCAGCATTTTATGCAACGATGCTGGCTGA  
ACGTTCCGGAAGTACAAGACGCGCTGTCAGCGGAAGGCTTAAAGTAA  
>Cluster\_17782  
ATGAACGGTAAATACACTCTGATTTATGCTGATCTCTTGGTTCATACCGGACAAAGCAGCCGACGCGGACGCGGCGC  
CGGATTTAAATATCCGTTATGAACGTTGATATCTGTCGCTGCCAGTGTGGGATCTTGGCGCGGACGATGCTCTAC  
TGCAATGTTGGTGGTTCCTACTCAGCCGTTGAGCGTTGAAAGTGGTGAATCGTGGGCTTCAAGCTGATGACCATG



AAGGGATTACCTGGCACAAGACGAATAAGCACAAAGGTAACAGCGCATCGGCATGGGCCACATGACAAGGGCGAACAG  
CGAAGACTGCCTGTTTGGCGTGCCTGGGAACTACCGGCCGCATGGATGCGTCAATCGCCAGCACGTCACGGCCCGC  
GCATGGAAAACCTCGCGCAAGCCTGACATCATCCGCGAAAACCTGGTGCAGTTGCTGGGCGATGTTCCGCGCATGAGCTA  
TTCGCCCGCCAGTCTGCATCATGGTTTCGACGTATGGGGCAATCAGTGCAGAGGCCCGTGGTGCAGTTGCTACCAGGCTG  
CTCTGTTCCGGTTTAAGGACGGAGGCAGCATGA

>Cluster\_34391

TTGCCCTTCTGTTTCTGGTCTGTTAACTTCCGTGCCGCGCAGCGGACACGTTATTGATTCTGGGTGATAGCCTGAG  
CGCCGGGTATCGAATGTCTGCCAGCGCGCCTGGCCTGCTTGTGAATGATAAGTGGCAGAGTAAAAAGTTCGGTAGTTA  
ATGCCAGCATCAGCGCGCACCTCGCAACAAGGACTGGCGCGCCTTCCGGCTCTGCTGAAACAGCATCAGCCGCGTTGG  
GTGCTGGTTGAACTGGGCGCAATGACGGTTTTCGCTGGTTTTCAGCCACAGCAAACCGAGCAAACGCTGCGCCAGATTTT  
GCAGGATGTCAAAGCCGCAACGCTGAACCATTGTTAATGCAAATACGCTGCTGCAAACATATGGTGCCTTATAAATG  
AAGCCTTTAGCGCCATTTACCCAAACTCGCAAAGAGTTTGTATGTTCCGCTGCTGCCCTTTTTATGGAAGAGGTTCTAC  
CTCAAGCCCAATGGATGCAGGATGACGTATTTCATCCAAACCGGACGCCAGCCGTTATTGCCACTGGATGGCGAA  
GCAGTTGCAGCCTTTAGTAAATCATGACTCATAA

>Cluster\_26322

ATGAGTGAATGAACGCTACCAACAGCGTACGAGCGAGTGAAGAAAAAGTAGATGCTCGTGGGCCAGGCCAGGATGA  
ACGCGGTATTATCATCTGCTTTTACCGGCATGGAAAAGGCAAAACCACCGCGCATTTGGTACGGCAACACGCGCAGTTG  
GTCACGGAAAAAAGTGGGCGTCTGTCAGTTTATTAAGGCACCTGGCCTAATGGTGAACGAAATCTGTTGGAGCCACAC  
GGCGTTGAGTTTTCAGGTAATGGCAACGGGCTTTACCTGGGATACAAAAACCGAGAGTCTGATACCGCGCCTGCCGCGA  
AGTCTGGCAACATGCAAGCGGATGCTGGCTGATTCCTACTGGATATGGTTTTCGTCGATGAACTGCATATATGGTAG  
CGTATGACTATTTTCCACTGGAAGAGCTGATTAGGCGTTAAATGAACGTCACATCAACAGACGGTGTATATACAGGT  
CGTGGTTGTCATCGGGATATCTTGAACGCGGATACGGTAAGTGAATACGCCCGCTCAAACATGCCTTTGATGCCGG  
TGTAAGCGCAGATAGGATTGATTACTAA

>Cluster\_47469

ATGAATGAAATCATTTCTGCAGCAGTTTATTGATCCTGATTATGGATCCGCTCGGAAACCTACCTATTTTTCATGTCCGT  
ACTGAAACATACTGAACGAAAGACGGCGGGCAATCATGGTGCAGAGTGTGCTTATTGCTCTCTGGTGTGATGCTGGTGT  
TCCTGTTTGGCGGTGAGAAAAATTCGGCATTTCTTAGCTACGAGCAGAAACCGTCTCCATTTCTGGCGGCATCATTTCTG  
TTTTCTGATCGCCATTAATAATGATTTTCCCGAGCGCTTCCAGAAATAGCAGCGGCTTCCGGCAGGTGAAGAGCCATTTAT  
CGTGCCGTTGGCAATTCCGTTAGTCGCCGGGCCGACTATTCTGCCACGCTGATGTTGTTGTCATCAGTACCCGAATC  
AGATGGGGCATCTGGTGTGCTGCTGCTGGCCTGGGGCGGCACCTTTGTCATCCTGCTACAGTCTTCGCTATTTTTTA  
CGTCTGCTGGGCGAGAAAGGGTGAACGCACTTGAACGCTGATGGGATTGATCTGGTGTGATGATGCAACCCAGATGTT  
CCTCGACGCGATTGCAATGTGGATGAAGGGGTAA

>Cluster\_53944

ATGCAAACTTATAACACCAATCCCGCTTACGAAATGGCTCCCGAGCTCCTGGAGCACTTAAACCAGCATCTGGATTTCATT  
ATTCGGGGTCTATTTCGAAACTGTTACCGTTTACAATGGATTTTGGCTTACCGAAAAACACCCCTCAGCTACAGATGTGCCT  
GCAGGTACCCATTCGCGCGAGATGCTGCAACGATTAACAGGTTGGGAGAGAAAACCTGGTCCGGTATGCCTGGGTGATG  
GAAATACAGAACGTAAGGGCTTACATTCATTTTGTGGCTATCTGAACGGCCAGAGCCACAGGAGTTCGTATCTGGT  
ATCCAGATTGATGGGATATCTGGAGGCGGGTTACCGAGGTAATGGTTACTACCCTGGTCCGGTTTAAATAAAAAAT  
ATCCGGTAAACATTAACACGCTATTCATATTCAGATCACAAAGCGGTAATGATTTACGCTATGCCATCAGTACCTG  
GCCAAACGGGAACAGAAAGAATGTGGCATCATCTGAAATGCAGCGGCTTCCGAAAAAAGTAAACCGGGTGCACCCAG  
ACTGGACAGCCCTTCCGGGGATATGTCTCTGGTGTAA

>Cluster\_67044

ATGGTGACCGGAAAATCAGAGAAAACAGGTGATGCGTTTATTGATTACGAGAACTGCAGTAACTGACAGAAATTCG  
CTTAAATATATATACAGAGTTAATTATATTTGCCGCGCGGAAACAGAAATAATGTGGCACTGCCAGTAAACGCTTTCCCTG  
AAGCAGTAAAGTACACTCCGGCATGTGAGTGAAGTCTCCCGGAAACATGTTGATTTTCATCTGGTACTGGAGCTGGGG  
CAGTGTGTATGCCACTACGGGCGGAGAAGGAATACCATATTGTTCCGCTGACAAGGGATATGACGGTATTGTCCGGAC  
ACTGCAGGCGCGCGGATTCGTTGCGCTGCGCTCTCCCGATTAAGCGCTCATCAGTAAAGATGGTGCACCCAGCATCGG  
ATATCGTTATCCGGTGGGCAACAAAATTAACAGGACGCGGGGAGGTTGTAATATGCCGGTAAACAGAGAGACATTT  
AATAATTTTAAATACAGATGCGCGGTGAATGGCGTATGCTGACAGAGGATACCGGATGAACTGGTCCGTCG  
CGGGTAAATGAAAATTCAGGGGAATAAAATCATCTGGTAA

>Cluster\_5974

ATGCTGAAAAATTTGAATCTCTCTCTATTTCTCTTATTAACGCGACGCCAGACTCGGCTCCGTGGATGATCTCGTTGGC  
GATTTTTATTGCTAAAGATTTGATTACCGTGGTCCGTTGCTGGCCGTTGTTGTTGTGGGGGCTTACAGCACAAC  
GGCAACTGGTATAAAAAATCGCTATCGCGCTGGCGGTACGCTGTTTGTGCTCCGACGATGGGACATCTTTTTCCGCAC  
GACCGACCTTTTTCGAAAATACGGCTATAACTTCTGCTCATCATGCGCGGATGACTCATTCCCAAGCAGCATCGGTA  
GGTATTTTACCTTTGCACTGGCATTTTTATGCTGGCATCGCTGTGGTCCGGCTCACTTTTAAATGGTGTGGCCGTG  
TCATTGCTGGTCCGCGCTTTATCTTGGCGTCCACTGGCCGCTGGATATGCTCGGTGGATGCTGGCAGGATGATTGGC  
TGCCTTAGTGCCAGATTAATCTGGCAAGCGATGGGGCAATAAATCTATCAACGCTGCAATCGTGGTATCGCGTCTGTTT  
TGCAATACCGATCCGAAAAGGCTGGGTGCGTACTGA

>Cluster\_6878

ATGAACAAACACACCGAATGATACTCGCAACATCTCTGGCGACGGGCGAGCAACTTTGCCTGCAACGTTGGATTAC  
CGGATGGGGCTAAGCAATTAATAAAACCGCTGAAGTGCAGAAAGGGTCTTCTATCACTACTTTTCGCTCTAAAGAAG  
CGTTTGGCGTTGCCATGCTTGGCGTCAATACGCGCATATACCAGCGACTGACTGAGTGTGCAATCCGCGGAGGTT  
AACTACCGCGACCGCATACTGGCTTATTACCAGCAAACACTGAACAGTTTGGCAACATGGAACCATCAGTGGTTGCT  
GACAGTAAACTCTCTGCCGAAGTGTGCATCTGTGAGAAGATATGCGCAGCGGATGGATAAAGGTGCTCGCGCGTGA  
TCCCGCTGCTCTCTCAGCGCGCTGGAAAATGGCCGTGAGAACCAATGTTTAAACCTTTTGGCGAACCGCTGCAACAGGCA  
CAAGTGTCTTACGCACTGTGGCTTGGCGCAATCTGCAGGCCAAAATTTCCGCGAGTTTCCGAGCCACTGGAAAACGCGCT  
GGCCATGTAAAAAATATATTGCGACGCTGCGTTTTAG

>Cluster\_31637

ATGATAAAAGTGTATTATCGTATCCTTAAATGATTCACCAGAGAAGAACATCAATCTCACAAATGTTGTGAAAAATACGGTGT  
AGAATTTGAGTTTGTGATGACGTTAATGGCAGAAAATAGATGATAAATATATCAATAAAATTAATTTCTATGAGTGG  
CAAAGTTAAATATATAAAGAAAGTTAGGTCCAGCAGAGATTGGTTGTACATTAAGTCACTCAGTATATACAAAAAAT  
ATTAATAGTTGGTTATCGTTTGGAGGATGATGTCGATTTTGGATGAACGATTTGTAATAAATTAATCAACTGATATAAC  
GGTTTAAAGGACTGATGCTCTCTATCTTCTGGTGGCAAGAGGACTTGAGTCAATTTAAAAATTTTCTTAAAGAT  
TTGGTGGTATTAAGGTGAATACAGATATAGTCTTCTTAAAGACTATCTGTAGCGAACGTTTTTTATTTTCGAACATGTTGC  
TATATGATTCATCTTCTGTTAGCTAAGAGAATAGTAGACTTCAACAAAATAAATTTACTTTAGCTGATGATTGGTTTTAA  
TTTTATCAAAGTTTAAATATATAAACAATATATATATATGATCTGTTGACATCCTAGTGAATCTGATGATCTCTCTAA  
TTCATTCAGATAGCTAAAATTAATTAACAAGGCAAAAATATATAGAACATTCATGAAAAGAATAGTATTAATAATTC  
AGGCTATATTGAGGTTTTTCTGA

>Cluster\_53543

ATGAATATTGTATTATCGGCACCGGCATAATGGGTAAGCCGATGGCTTATAATTTACAACAAGCCGGACATACTCTTTA  
TTTTTCAGCGCATTTTGAACCTGCACCGCAAGAGCTTATTTGGCGAACGTTGGCATGTTTGTGCTACACCGCGTGAAGTGC  
CGCAGGAGTGTGAGGTCAATCATCACCATGCTCCCTGATACCCACATGTTGAGGATGTTCTTTTTCATCCCAACTTTGGC  
GTAATACACGGTTTAAAGCCACGGGAAAATTTGATGATGATGAGTTCAATTTCCCGGTTGCCACCAAGCATTTGCACA  
ACGTATTATCGCGCAGGCGCGGAAATATATCGATGCACCCGCTCTGCGCGGTGAAGTTGGCGGAAAAGCCGGGACGTTT  
CCATTATGGTTGGCGGATGTGAAGAGTTTATTTCGAGATCAAACCGATTCTGGAATTGATGGTAAAAATATCACTCTG  
GTCGGTAACGTCGGTGTGGTCAAACGTCGTAACCGTAAACAAATTTATGTTGCACTCAATATGACGCGGTGGCTGA  
AGCCCTGCTCTTTGGCAGTAAATCAGGTGCCGATCCCGCCGCGTACGTTGAAGCGCTGATGGGAGGGTTGCCCTCTC  
GCGTGTGGAAAGTTTATGGCGAACCGGATGATTAAGGAACATTCGACCCGGTTTTCGTATTAGTCTGCATCAAAAAGAT  
CTGAATCTGGCGTGGAGAAATGCCCGCTGTTGAATACCCCGCTTCTAACACGGCGACGACACAGCAGTTATTTAGCGC  
CTGCGCCGCGCTCGGTGGTAAAGAGTGGGATCATTTCTGCGTTAATTCGGGCGCTTGAACACAAGCCAATTTCACTATCC  
GTAATAA

>Cluster\_43052

ATGAGCTTTTTTCAAGCCAGCCAGCGGGATGCCCTGAATCAGAGTCTGGCAGAAGTCCAGGGGAGATTAACGTTTCGTT  
CGAATTTTTCCCGCCGCTACCACTGAAATGGAGCAGACCTGTTGAACTCCATCGATCGCTTAGCAGCTGAAACCGA  
AGTTGTATCGGGTACCTATGGCGAAAATCTGGCGAGCCGACCGCTACGCACAGCATTATTAAGGGCATTAAGAGTCCG  
ACCGGCTTGAAGCGCACCGCATCTTACCTGCATTGATGCGACGCTGCCGAGCTGCCGATCATTCACGCGACTACTG  
GAATAACGGTATTTCGCCATATCGTGGCGCTGCGTGGCGACCTGCCCGGGAAAGTGGTAAAGCCAGAAAATGATGCTTCTG  
ACCTGGTGACGCTTTAAAAGAAGTGGCAGATTTGATATCTCCGTTGGCGGCTATCCGGAAGTACATCCAGAAGCGAAA  
AGTGGCCAGGCGGATTTACTCAACCTGAGACGAAAAGTGGATGCCGAGCCAAACCGCCATTACTCAGTTCTTTTCGA  
TGTCGAAAGCTACCTGCGTTTTTCGGATCGCTGCGTCTCGGCAGGCATTGATGTGGAATCATTCGGGAATTTTGGCGG  
TTTTCGAATTTTAAACAGGCGAAGAAAATTTGCCGACATGACCAACGTTGCGTATTCCGGCGTGGATGGCACAATTTCCG  
GGCTGGATGACGATGCTGAAACCGCAAGCTGGTGGCGGCAATATTTGCCATGGATATGGTGAAGATTTAAGCCGCTGA  
AGGAGTGAAGATTTCCACTTCTATACGCTTAAACCGCGTGAATGAGTTACGCGATTTGCCATACACTGGGTGTTCCGAC  
CTGTTTTATAA

>Cluster\_40809

ATGTTTGGCGTACTGGGTGATATTGAGTTTGGAGTGTACTACTGGGACGGCTTCGAGGCCAGTTTCGGCGTCGATTA  
TGCGGAGCATGCCCGCATCGGGGTAAGCCTGGCCTGCAGTTCGTCGGCGACAGGCTGGACGAAATCCAGATAACTCTGG  
TTTTCCCATCAGCATATTGTTGTATCCCGATGTGGAGCTGGCGAGACTGCGAACGCCATGAAAGCCCATCAGGCACTGGCG  
CTGGTCTTCGGCAACGGTACTATCGCGGCTGGTTCGTGATTACCGATGTGACTGCAACCAGCGAGCAGACTGACAGTAC  
CGCAACCGTCTGGCTGTAGTGCACCGCTGCTCTCCGGAAATACACCGGTGACCCGAAAAATCCTCTGCAACCCAGC  
CAATACGCACGAAGCTCCCGGTTGTCGGGGCGTCTCCGGTGCATACCTTACCTTCCAGGGTGGCGAGTTTATCCGC  
AACGGCGTCAACTATGCGAAAACAGCGCAGTCTGACTCCAGACCACTATCAGCGCGTTTCGGGTGACACAGAAAATGAA  
GGATAACCCCGTTGTCGCACTGACCCGTGTCGGGGCGTGTAGCGGGACTGGGTAATATCTCCGGGCTCTGGGGAAAA  
GTGTTCCGGCGTTTAAACGCACTCTGAAATCCTGCCCCGATGCCATCAGTCTGGCCAGAACAGCCAGCAAGCATCAG  
TATGTACAGCAGGCACAGTCTGCGCTGAGTGGTGTGGACAAAAGAAATATTCAGGTGCTCTGGATACCGTTTCCGGCA  
GCTTAAACGCGCCGCGCACAGCATTCAACCGCATGCTCTCCGGGATTAAGTGCAATGGCCGCCAGAAATACGACGAGAGTG  
TGTA

>Cluster\_26894

ATGCCTGCTGTTGACCTTTCCAGTTACCGGACCCCGCATTAATCGCGGAGCCTGATTTTGGGCAATTTGCGGTGACAC  
AAAGGCCATGATGATGTCGGCTTATCCCGCCGAACAGCGTGAAGCCGTTCTCCGCGCGCTGGAGCTGGAAATCCGAACCC  
TGAACGTTATCGCCAGATAACAGCGTTTTCGTGAAATGCTGTTACGCCAGCGGGTCAATGAGGGGGCAGCGGCTGCATG  
TTAAGCCACAGCACCGGGACAGACCTGGACAACCTCGCGGCAATATGAACACAAAGCGCCTGACCATCACTCCGGCAAC  
GGATACCACCGACCGGTGATGGAGAGTGCACCTCAGTACGAGACTGCGGGCGCAGCGGCGTACGACGCGCTGAGTGTG  
CTGGCCCGTCAAGTGCATACGAGTATTTTGGCCGAGCGCCAGCGGCTGGTGGCGTATGCGCGGGCCATCAGCCCGTCT  
CCGCAAAATGTGCGGTTTCCATCTCTGTCACCTGAAGCGCAGCGCACAGCAACGGAGCGTTGCTTAATACGTTCCGCT  
CGTTCTGAATGCAGAGGATACCCGTCGGTGGCCGACCGCCTGACCGTACAGAGTGCAGAAATCGTGACATGGCGGCTGA  
ATGCAAACTGTACTTTTACCCCGCCGGAATCCGAACCTATCTGGCTGCGCGGGAATCGTCTCAGGAAGTGGCTG  
GCTGAGCAGGGGCTTATCGGTCAAGACGTTGGCGTTGTCGGCAATGCTGCCGCACTGCATGTGCACGGTGTGCAACCGGT  
GGAGATAATCGAACCCACAGAAATATGCCCATCAGCGACATACAGCGCGCGCTGTGAGTCTCACCATCAGCGAAG  
GTGGGCGCAATGAGTAA

>Cluster\_59240

ATGAAGCGTGAAGAAATCGCTGATCTGATGGCGTTTGTGCTGTTGTCAGAGGAGCGTAGCTTCACTCGTGACGACGCCC  
CCTGAGCATGGCCGAGTCAAGCTTTAAGCCAGATAGTGGCTCGTATAGAAGAACGATTGGGATTGCGGCTTCTGACGCGAA  
CCACGCGCAGCGTTGTTCCAATGAAGCGGGCAGCATCTTTTGTCTGTTCTTGGCCCTATGTTGCATGACATAGATTCA  
GCCATGGCATCCCTGAGCGATCTGCAGAACCCGCCATCCGGGCAATACGTAATTAATCTGTAAGAAATGCAGCAAAAAC  
GATATTGTTACAGCAATCGCACATTCCTGAAATCGCATCTGAAATGATATTCAGTCCACATTTGATTTAGTTGTTGA  
CCGATGTCGTTTCTGAAACGTTTGTGATGACAGCGTCCGTTCTGGGTGGGGAGATGGATAAAGATAATGATCGCCATTCGAATC  
GGCCAGATATACCAATGGCTATTGTTGGCTCACCGGATATTTTCTCGCCGAGTGTCCAACGTCAGTGTACAAT  
AATAGATCATCAGGCAATTAATTTGATCTTCCACATCGGGTACAGCAAAATCGCTGGAGATTAATACGCGGTGGACGTG  
AAGTTCGTGTTCCGATGGAAGGTGAGCTTTTACTGAAATACGATAGACCTGATCATTGATGCTGCAATTTGATGGCATGGA  
TTGGCGTATCTACCTTATGATCAGGTTGAGCGGCTATTAAGAAAAAAACTGATACGTTTGGATAAATTCACACC  
AGATTTACCCGTTATCACCCTGACTATCCACACCGTGCACATGCTGGCTCGGCATTCATTATTTATAGATAGGCTGA  
AGTATAAAGGTGCTGTTAG

>Cluster\_31636

ATGTTTTCAATTATAATACCTAGCTTTAATCGAGAGAAAACCTTCGTAATGCATTGGCCGAACATAAAGCAACTCTA  
CAAAGAGTTTGGGTTATTTGTTGTTGATGATGCTTCGGACAGTGAATATGATTGAGCTGGATCTTTATCATTTTGAAC  
TGAATATTTTCAAGCAATAAAAAATTTAGGACCATCAGGTGCTAGAAATATTGGAGTTAGTTAGCTCGTTATGATTTG  
ATCATTTTTTTGGAGATGATGATTTTATTCACCGGAAAACGATGATCTTGGAGGAGACTATATTAAGAAATGATAT  
TGACTTTATCTATCAGAGCTCGTATATTTATGATCAATGAAAAATAGTTATATTTCTAGTCAAAAGGATATAGATA  
AAATTCAGGTGAGGTATATCAACATATGCTTTCTGGTAAATTTTATGGGGGCGCTCCAAATTTTGAATAAAAAAAGC  
CTGTTTAAACAACTTCAATGGCTTTCTGATAATGTACGAGCAATTTGAAGATTACGAGTTTCTACTAAGTTAGTCCGTTGA  
CGTTAGTAAAAAAAGAAATTTATTTTGTAGATAATGTGCTTACTGGGTGTAATTTATAACAAAATCAACCGCGCTCTA  
AAAAATAAACAAATTTAAAACAAGCATGTACATATATATCAGAGGAATATATTCGAGACACCCGGAATTTAATCTTTTT  
AAAATAAATACCTCGTTGATGACTGCACATGCTTTGTTAATGAGTTTAAATCGTAAATCTGCTTTCTTTTATTTTAAAGC  
AGGATTTGTTATGTTTAAATATAAATATATTTGATCTGGGATTTCTTTTATCTCCAGTTTGTGATTAAGCTTA  
GGGCAAGGTTTAA

>Cluster\_317

ATGCCGCTCGCCGCTATAACCTGACACCCGACGTGACGAGCTGCTGGAACGCATTAATCTCGATATCCCCGGCGCGGT  
GGCCAGGCGCTCGGGGAAGATTTAGCGGAACAGTCGATGCCAACAAATGATATACGGCAAAACTTTTACCGGAAAAAT  
CTCGCTCTCATGCCAGGTGATCACCCGCGAGAATGGCGTCTTTTGGCGCAAACGCTGGGTTGAAGAGGTGTTTATTCAA  
CTGGCAGGCGACGATGTCAACATAATCTGGCATGTGGATGACGCGCATGTCAATGCAATCAATCTGTTTCGAAT  
TGAAGCCATCCCGCTGCTTAACGGGCAACGCATGCGCTTAATTTTGGCAAACCTTTCCAGGAGTTGCCAGTA  
AGGTACGCCACTATGTGGAATTGCTGGAAGGCACCAACACGCAGTTGTTGGATACGCGCAAAACCTTACCCGGCTGCGT  
TCAGCTCTGAAATACGCGGTACTTTGGCGGGCGGAGCAATCACCGTCTGGGCTTTCTGATGCCTTCTGATCAAAGA  
AAACCATATTTGCTCCGGCTCAGTGGCCAGGCGGTCGAAAAAGCCTCTGGCTGCACCCGGATGCGCCAGTAGAAG  
TCGAAGTAGAAGCTGGAAGAACTTGATGAAGCCCTGAAAGCAGGAGCCGATATCATCATGCTGGATAAATTCCGAAACA  
GAACAGATGCGCGAAGCCGTCAAACGCACCAACGGCAAGGCGTACTGGAAGTGTCTGGCAACGTCACGACAAAACACT  
GCGTGAATTTGCCGAAACGGGCTGGACTTTATCTCCGTCGGTGCCTAACTAAACACGTACAAGCACGACCTTTCAA  
TGCGTTTTTCGCTAA

>Cluster\_61029

ATGAAATATCTCTTAGGGCCAGTGTGTGGTACTGGCCAAAAGAGACGCTGGAAGAATTTTATCAGCAGGCGCCACCAG  
CAGCGCCGACGTGATTTATCTTGGTGAAGCGGTATGCAGCAAGCGTCGGGCAACCAAAGTTGGCGACTGGCTGGAGATGG  
CAAAATCGCTCGCGGAGTGGTAAGCAGATTGTGCTCACCAGCTGGCGTGGTGCAGGCATCATCTGAATGGGCGAA  
CTGAAACCGTATGTTGAGAACGGTGAAGTTCTGATTAAGCCAGCGATCTCGGCGTGGTGAATATGTGCGCTGAACGCAA  
ACTGCCGTTCTGCGCGGGCACGCGTGAAGTGTACAACGCGGTGACACTGAAAATATGCTCAAACAGGGCATGATGC  
GCTGGTGTATGCCAGTGGAGCTTTCCCGGACTGGCTGGTGAATCTGCTTAATCAGTGCATGAGCTGGGCATTCGTAAC  
CAGTTTGAAGTGAAGTCTGAGTACGGTCACTGCGGCTGGCTACTCCGCGCTGCTTTACCGCGCTCGGAAAG  
CCGCCGAAAGATGAGTGTGAAACCTGCTGCATTAAGTATCCGAAACGGGCGCAACGTGTGTGCGAGGAAAAACCAAG  
TGTTGTACTCAATGGCATTCAGACCATGAGCGGTACGTTTACAACTCGGTACGAGCTGGCATCCATGCAGGGCCTG  
GTTGATGTGGTCCGCTGTCACCGCAGGTACTGACACTTTCCGCGATGCTCGACGCTTCCCGCTAAATGAAATGGCGC  
TGCACACTGCGGTTGACGGCGAACAGCGACTGTAACGGCTACTGGCGGCGCTGGCAGGACTGGAGCTGCAAGCCTAA

>Cluster\_26591

ATGTCAATTAACAATTAAGTATTTCTCAACAATCATTTGATAGCGGTAGTTGCGGTTCTTGCCGGATGGTGGCTGTGGAA  
TTATTACATGCAATCTCCGTTGACACGCGACGGGAAAAACGCGCAGAACAGGTTTCTATCACCCACAGGTGTCCGGAC  
GTATTTGTTGAGCTGAAATATAAAAGAACCCAGCTGGTTAACCGGGGGATCTTCTGCTCAGCATATAAACCCCTTT  
CAGATCGCCGAGCTGAACGCACAGGCTCAGCTGGCGAAAGCGCAATCTGACCTCGAAAAGCCAAACAGAGCGAATCG  
TCGTCGCTATCTCTCACAAAATTTTATTTCTGCGAAGAACTCGATACCGCTAACCTCAATGTAAAGCGATGCAGGCCA  
GCGTTGATGCCGACAGGCGACGCTGAAACAGGCACAATGGCAACTGGCGCAAACGGAAATTCGCGCCCGGTTGAGTGGAA  
TGGGTGACTAATCTCACCTACCCGATCGGCGACTACGCTGACACCCGGGAAACCGCTGTTGCCCTTGTGACAGCCACTC  
GTTTTACGTCATTTGGTTATTTGAAAGAAACCAATTTGCCCATATCCGCGAAGGTGCACCAGCACAAATACCTCTATA  
GTGATAACAAAACGTTACAGGGTACGCGCTCAGTATCCGTGCGGCGATTTATGATCAGAGCGTTGAAAGTACTCAAGC  
CTTATCCGGATGTGAAACCTAACGTCCTTGGGTTGCGCTCGCCACACGCGTTCCCGTCCGCTTTACGTTGGATAAAGT  
CCAGCGGATGTCACCTGGTGTGCGGACCACCTGTACGATTTGCCGTTAGTCAATAA

>Cluster\_24820

ATGAGTATTAACATTTTCTGTCGCCCCATTATCCCTTTTTTGGCGCATTTTGCCTTCTGTTTTTGGCTCACCCAGAAAC  
GCTGGTGAAGATAAAGATGCTGAAGATCAGTTGGTGCACGAGTGGGTTACATCGAAGTGGATCTCAACAGCGGTAAGA  
TCCTTGAGAGTTTTTCGCCCCGAAGAAGCTTTTCAATGATGAGCACTTTTAAAGTTCTGCTATGTTGGTGGGATATATCC  
CGTGTGAGCGCCGGCAAGAGCAACTCGGTCGCGCATACACTATTCTCAGAAAGACTTGGTTGAGTACTCACAGTCAAC  
AGAAAAGCATCTTACGGATGGCATGACAGTAAGAGAATATGCTAGTGTGCCATAACCATGAGTGATAACACTGCTGCCA  
ACTTACTCTGACAAAGCATCGGAGGACCGAAGGACTAACCGCTTTTTTGCACAACTGGGGGATCATGTAACTGCGCTT  
GATCGTTGGGAACCGGAGCTGAAATGAAGCCATAACAAACGACGAGCGTGCACCACGATGCTGCAGCAATGGCAACAAC  
GTTGCGCAAACTATTAACCTGGCGAATCTTACTCTAGCTTCCCGCAACAATTAATAGACTGGATGGAGCGGATAAAG  
TTGAGGACCACTTCTGCGCTCGGCCCTTCCGGTGGCTGGTATTGCTGATAAAATCGGAGCCGGTGGGCTGGGTTCT  
CGCGGTATCATTTGACAGCACTGGGCGAGATGGTAAAGCCTCCGCTATCGTATGTTATCTACAGCAGGGGAGTCAAGCAAC  
TATGGATGAACGAAATAGACAGATCGCTGAGATAGGTGCCCTACTGATTAAGCATTGGTAA

>Cluster\_7661

ATGAGTAGTTTGTGTTTAAACGATAAAGTAGGGCAGTGCAGGCGGATATCGTCGCGGTGCAGTGCAGGTTGGTTTA  
CGGCAGCGTGGGCAACAGCATTTCCGCTGCTGATCAAAACAGAACCGCTGAATGCTTTGCGCTGCGCAGCGTATTGCG  
TGAGCAATACGCCGATTTATGACACTTTCTACGGTGGTGGATTCGGACGAATGGTTTACGGCTATTGCGTGGCCTT  
CAGGAGCGTGCATGCGCTGCGCCAACTTCGCTGCTGTAACACCGGCTATATGGGAACCGCATCGCAAAATCAAAATCCTTCC  
CGAGTGGCTGACTGCGCTACGCAAGACCATCTGACCTATTGATCATGGTGCATCCGGTGGTGGGATATTGATAGCGG  
GAATTTACTGACAAACGCTTCCCGAAGCGTATCGAAATATTTACTGCGCGTGGCGAGGAAATACCCCAATATC  
TTTTAGTTGGAATCCTGACCGGTAAAAATGGCGGATCTCGACAGTGCATTTGCTGCGCAAAAAGTCTGCTTTTCAAG  
CACATTAATGGTGGTGGTTACCAGCGCTCCGGTAAATGAAGAAAAACAGGAGATGCAAGTTTGGTGGTCACTGCGC  
ACAGCGTGAATGCTATTTCCATTCAGGGTAAAAACCGACTGAAAGGACTGGCGACCTGTTTGTGCTCAGCTCATC  
AGTGGCTTCTGTAAGGGGAAGGCTTAAACCGATGCAAGTGCAGTGCACCGGCTTGGCGTACTGGAAGTGCATGCGCTACAC  
CCAGCAGCATGAGAGCGATGAATGATTTTCCGCGCTGGCGGAAGCATAA

>Cluster\_33993

ATGACGCTATTTACAACCTTACTGGTGTAAATTTTCGAGCGCTGTTTAAAGTTGGGCGAGCACTGGCAGCTTGATCATCG  
TCTTGAAGCGTCTTTCGGCGGGTGAACATTTTTCTCTCGGGCGCACGTTAGGCATGACCATTATTGCGATGGGCGTGA  
CTTTTTTACTGTTACGCGCATTTGAGGGAGTATTTGTTAACGTTCCACGCTACTGGTGGTGGCTGATTTGGTTGCTG  
TGTATTGGCGCAGTAAAGTTCGCTTCAATATCATGCTTATCTGACAGCTGCTTACGTAATGATAGCCATGCCCGTGC  
CAGATGGCTGGCGAATCACCATGATTCACGGCTCCCGGAGGCTGCGACGAACTGAGTATTGCTGGTGGCTGCAAA  
ATGCATTTGCTGTGGATTAACCTTTCGTTTTTATCTTGCACCGCTGTTCTGGCTGATTTGGGGGAAACCTGGGGACCGT  
ACGCTGATGGGGTATGCGTTTTTTCGCTGATGGCAATCTGGCTGGCGGATATCAGACGCGCATCATGTTTTACAGT  
CGGCATTTGATGCGCTTCACTGATGATGGTGGTGGCTGCTTGGCGGTTGGTATATGCTTGTATGGCTGATG  
GTGAAAGCGCTTACCGGCTGGTTGCTTCCGCTGGGTTTCCACTTCCGAGTATCAGGTGTTGAAACGCTTGGCG  
CAGTCTCTTGGCGGTAACCGCATGCTGATAAGGTGGAGACGCGGAAGCAGCGGTTCAATGGCGAAGAAAACCTC  
GTTCTGTTGCTGGTGGTGGTATGCACTACTGACATTTACGGGCGTTGGTGTAA

>Cluster\_962

ATGAAGAAGATTGATTACAAGTCCATACAAAACCAATAGACTCAGCATCAGAGCGAAAAAACAAAAAGAGGCTGA  
AAAATTAGCAAAATATATCAGTTTTATTTAGAAACATGCTCACGGCGATGGCGACAAGAGTTGCTTTTCAAGTGCCTGGA  
CCCAAGCGTTCGGTATACTTCGTAAGCAGATGCAATATCGCTTTCATCTGGCTACATAATGAAATTCGCCCTACTGAA  
AGCAATTTGTTCTTAAACTCTGCTTTTACCTTTGATAACCTGATTTGGAGATCTTATCGACAGGCTGTGTAGATAAGGA  
TCCTGATACAAAATGTTTTCTTCAAAAATAAAGAACTTATATGGTAAATTCGGTATAAACGGATGGCAAAAATATG  
TACGTTCTTACGTGCATTCGTTGATGCGTATAAAAATTCGACATGATTTATACATATTTGCTGGTGGTGAATTTG

ACGCTTTCGGCAGACAATAAGATATTCATACCTGTACTTGGCTTGGGCTGATTAATGCAGTAAATGAAAAAGATGTTAT  
AATTGTTAAGCAGTGGCGAAAAATATGAGGGATATAGATATCTGCCATGCTTTGATATATAAAAAATACAGAATAAATCT  
ATGTAATAAATAAATAAAGAAGATATTTCTTCCTCAGAAAAACATAGATCTTTTACAAGAATTTCTGGTACAATA  
GATGTCATCTTAGGTTCTAGGTTTATAAAAAAGACTGAAAGAAAGCAGGCTTTTCTCTCGTGTAGAGATAAGCGAGTCAGA  
GTTATGGGTATATCAAATAATCCTGTAACCACGCTCACCAACGAAACCCAAACAAAAAGTGGTCATAA

>Cluster\_41031

ATGAGTATAGTGGTTGCACGCTTGGCTGGAGGTTTAGGAAATCAGATGTTTCAGTATGCGAAAGGTTATGCTGAGTCAGT  
TGAGCGAAATAGCTATCTTAAATTAGATTTGAGGGGATATAAAAACTATACACTACATGGTGGTTTTCGTTTAGATAAGT  
TGAATATAGATAAATCAATTTGTCATGTCAAAGAAAGAAATGTGTGTCCTCCCTAATTTTATAGTGGCTGCATTAATAA  
TTTCCAAAATATCTTTATGTAGCAAAGGTTTGGTGTAGTCAAGCAATCTCAAAGAAATAAATGGCAGCATGAAAGGAAG  
TGTGGAGTTTATAGGTTTGGCAAAATGAGAGGATTTTTTGTAGAGCATAAAGAAAAATTAAGAGAGATATTTACACCTG  
TCAATATAAATTTGGATGCTAAAGAATTAAGTGTGTAATTCGATGCACCAATTCAGTCTCCGTGCATATACGCCCGGA  
GATATATCTTAAACGCTGATGCTTAAAGATACATGGTGTGTACTGAAAGATATTATATTGACAGCATCCGTTATTT  
AAAGGAAAGGTTTAAATGACTTGGTTTTTTTTTGTATTTAGTGTATGATATCGAATGGTGTAAAGAAACATAAAAAATGAAATAT  
TTTCAAGGAGTGTATGATGTAAGTTTATGAAAGGAAATCTCAAGAGGTAGATATGTGGTTAAATGTCAAATGCTAAATAT  
CATATAATAGCTAATAGTTTCAATTTAGTTGGTGGGGGCGTGGCTAAAAAACTATGATTTAGGTATTACAATTCGCCCAAC  
GCCTTGGTTTGGAGAGAAGAACTTAATAGTTTTGATCCATGCCAGAGAAATGGGTTTCAATGAAAAATAA

>Cluster\_4

ATGAGTTTAAACATAGCTTTAGCCATAGACTTTTAAAAAGTTAACCCCAATGTGATAACCTCTGGCCTTTTCTTGGCTGA  
CCATTTGCCAGAGTTTCTAACATCATACTTTTTCATGCCATCGAATACCTTTCFACTCCTCCCTCAACCTT  
ATTTAGAAAAGGAAAAACAAAAGTTAGACCAAGATTTAAAGGAACTTGTAGTTCTTATTTAGACGAAAAATTCAAAAA  
CGATTTACTTTTCAGACTAAAGTCAATTTTAGTAACTTTTGGTATTCCTTACCAATTTTATCGAGCAGGTCAAACCTT  
TGTAGTAGTTTGGGTTATGTCCTTCTTAAAAGTCCCTACCGCAGAGAAAAATGATCGAAAGGCTTAACTGTAATTT  
TCTTAGTGTGTTAAAGCAACTCTCTTAAAGATCCAAAGATAGGTTGTCTTATAGATTTTCTGAAACACGCAATCC  
TGTAAAAAATGGCTTCTCTTTTAAAGCAAAAAAAGCTCTTAGAAATATCTTCCCTAAACGTAATACAACCGCTGATTT  
TCTAAAAAAACTGTGTTAAACAATGACCTTATCAAAGAAAGAACTTGAGCAAGATATACTTTATGGAACAAACTTATAG  
CCAAATTTAGTGTGAACAGGAGTTTGTCCAAAAATAAAGTTTGAAGTAACAGTAGGTAACAGGCTTAAAAAATAGAA  
GAATTTGTTAAAAACAGGCAATCGACCTGTTAATCATGGGAAAAAAGGTAATAATGGTTCAAAAAGGTTAGGTTCTAT  
TGCCAGAGAAGTCGTTAGAAGGATTGAAATACCTATGTTGATAGTAGTCAAGTTTTTTTTATAG

>Cluster\_13121

ATGCGTAAATATCTTTAAGTTTACTGAAGGATAAAAAATTTGTGACTTTTTTTGATTTCTGGGGAAAAACCCGACGCGG  
CGAGAAAGACGGGGCGACGACTATCACCTTCTTGGCTGGCATTCGCTGGATGTAGCCGCGATGGGCTATTTAATGGTTA  
AAAGAAATGCTTCCGGCTGGCTGATTTATTTTCGTCATTTAGGATTTTCTGACAAGGAACAGGCGGCTCAATTTTTCGCC  
TGGTGTCTGTGCTGGCACCATATGGAATAATTTGCCCGCTCTTTTCAACAACCTTACCTGCCCTGAACTCAAGATTCA  
GGAAGGTGCCAAAAAATACGAAAAAATCTCTCATTTCAACGCTGGGCTACTGGTTGGAATCATTATTTAAGTGAAT  
GTCAGGAGTTACTTCTTCTTCTTCCGCTCTTCCGCGCAACTTAGGCGAGTGTAGAAATGTGGATGCGCCGTCAGCA  
GGGATCATGGTCCGCCCTGATCGTATGGATGAATTTGGATAATTTTCTGCCGAAGACAAGCTGCAGCAGGATTT  
TCTCCTTGAATCAAAACCTGTTTCCGCTCATAGAGATCCCGCATTTCTGGGATGATGATGAGGGCATTTGAACCTATAA  
AACACTTTCTGGTATATCTCTGCAACCGTCTGCTCGCAGCTGCGAGGTTCTGCTCAACCGGATTTTTCACCGCTC  
GCACCCCAATGGATATTTAAAGGTTACTGCGCAAAAACCTTAAATTCAGGCTCAAAAACGCTTAAACCTTCTCTAA  
AGCAAAGTCCGCTTTCAACGGAATTAATACGCTGTTTCTTTATGAGAATCCGACACCGTGA

>Cluster\_33601

ATGCAAAAACAGCATAACGTCGTAGCGGGCTGGATATGGGGCAACGCATATCCGCTTTTGTCTGCGGACAGCAGAAGG  
TGAAAAGCTACACTGCGAAAAAAGCGGACCGCAGAAGTTATTGCTCCCGACCTGGTGTGGGATCGCGGAAATGATTG  
ACGAGCAACTCAGGCGCTTAAACGCTCGCTGTCATGGTCTGGTGTAGGATTTCCGGCGCTGGTCAAGTAAAGTAAACGC  
ACCATTTTCTACGCCCTAACCTGCCGTTAACAGCGGCAGATTTATATGATCTCGCGGATAAGCTCGAAAAATACGCTGAA  
TTGTCGGTGGTGGTTTTCGCGGACGTTTAACTGCAACTTTCTGGGACGTAGTAGAAAACCGCTTACGCAACACTGG  
TTCTGGCAGCCTATCTCGGTACGGGGATGGGTTTCGAGTGTGGATGAACGGTGCAGCGGTTGCACACGGTGTG  
GCAGGCGAACTGGCCATATCCCTGGGAGATATGACCAACACTGCCGCTGGCAATTTCTGGGTGCTGGAAACCAA  
TTGCTCTGGAATGGCGCTAAGACGCTGGTACGAACAACAGCTCGAAATACCATTTAGCGATCTTTTCTGCTCATCGG  
AAGACGCCCTTTCTGTCAGAGTCTGCTTGAAGAAAGCGGACGAGCCATGCGCAGCATTAATCTGTTCTGATCCCGAT  
CGGTTGATTTGCGGCTGGGTTGATGGATATGCCCGCTTCCACGCGAGACTCTCATTTGCCATGACCCAAAAGTACCT  
GCGCGTCCACTGCCGATACAGGTCGTGCGCTTTATTGCCGCTCATCTTCTGACTTTAATGGCGCTCAGGTTGCAGCAA  
TATTGGCGCATCAAGTTTTTGGCCACAGTCTGTGCTAAAGTCCCATGA

>Cluster\_33565

ATGATCAATATAGATCTCAGAGGTTTGACCCCGCACCGGTTACCCCTTTCAATCGTGTAGGTTAGTATTTGATGTC  
TATCCAGGCTCTGGGAAGCTGGCTGGGTAGTATGACGCGGTTAAAGGTTAGTTGTACTTGGTCATGCTGGTGAAGGTA  
CTTTCTGACCAAGATGAACAGGCGCTGTGATCCGCTTTTCTGTAATACTAGTGGCAAGCTGCCTATCATTTGCC  
GGTATCACCGGTGAAGGACTGACGCTCGCTGCTAAAGAAAGCACAACGCTGCCGTTGGAAGCTGGTCTTACAGGCGCTGTT  
ATATCTTCTCATGGATGGTTGCGTTTCCGCTTACCAGGACGGCGCACCACAAGATCGTACCGGCTTGTCTATGAAGAAA  
CGGCGCTGCCCTTGATCTGTTTTCAGTATCTGATGTGACTAAAGCAACCTATAATCTGCAAAACACTGCTGGATATTTCC  
GCACAACCGGTTGTTTTTCTGATGAAAAATGGTGTACGCAATATGCGTGTGGGATACAGAGATCCCGGTTATCCCGCG  
CGAGCGTCCGGAATTACAGATCTCAGTTGCCATGATGAATATCTGGTACACACTGCTTTTGGAGTGTAGTGGTTCTTGT  
TCGGCTATGGCAATATGCGCCAGAACCCTCATCGAGATGATCAAAGCAGGTAAGCTGGCGATTAATAAAAAAGCAGCG  
CGGATACATGACCGTCTGCTGCCAGTAACGAAGTGCATATCATCGCGTTCCCATATGGAAGGAACCGTCCGCTGAA  
ACACGCGCTGGTTGCTCGCGGATTTCTCGAACATGCTACTGTTTCTGTTCCCGCTATTACCGCTGGAGCATGGTCCGGAAG  
AAGAAATTCATGCTGCTATGCGTGCAGCTGACCTGCCGCGGTTAAATAA

>Cluster\_9134

ATGTCGTTAATTAAGTGCCTTGTATGCAAAATCAACAATATGCATTGCAGTGGACAGACCGTTTCACTTCCGCGGGGGA  
TTATACCGGACCATTTGACCGTCCGCTGCTGGCTGAATTAACCTTTTCCAGGTTGTCAATTTAGTCATCCCGCACA  
AACCCGAAGAGATGCCGCTGGCGCATCTGGGTAAGTGTCTTATCCGTTGGCGAACCGGATCGCCACGGCTGTATCCGC  
TATCAGGGGACGGAATATCAGTTACCAATTAATGAACATAGTTCAAAGCCGCTATTCACGGGCTGCTTGCCTGGCGAGA  
CTGGCAATTAGTGAATTAACGCCACCAAGCTTACCTGACAGCTTTTCTGCGCCAGTTACGGCTATCCGCTTATGCT  
TGGCTTCAAAAGTTGTTTTATTCGCTCAACGACACACGGGCTTTTCCGTTGAGATCGCAAGCCAGAATATCCGCTGTC  
GCAGCGCTTATGGCGTGGGTTATCATCTTATTTAACCTGCAACTTAAACATCTGTTGATGAATATCTGTTCCAGCTTCC  
GGCAAAACAGGTTTATGCGCTGATGAGCAGCGCAATCGCAACAGCTTACCACGTTGATGAGCTGGATTTAAATTTCA  
CGAGCGGAAAAAATATGCGCGCAGAAAAATCGACACACTTTAAACCGCTAATGATTTGTGGGAAATGACCAATACC  
CATCCACAGCAGGCGCTTTCGTTAAGCTTTGTTCCGATCAACTCTGGGTTGACGTTTATAGCGGTGAAAAATACAGCG  
TCAGGACTGGCAGTTGAACCTATGAGTTGCCCGCTAACGCTTTAATTCAGGTATCGACTTATTATTTACTGGAATCAG

GAAAACCGCACCGCTGTTTTTAAATATTTACGGACAGAGAAAATAA

>Cluster\_22280

ATGAGTAGCAAGATCCTCGGTAATGTCTGGGATGCATGCGCAGCATATGGCGTCAAAGGTGCAAACTGATGATTATGGC  
GCGCTGGCTGATTTATTCGAATGATGACGGGGTGTGCTACCGGGTGTGAAACCATAATGTCGACAGCTTGGATTGGGAG  
AAAGTCAGTGCAGAACCGCAATCTCCGAACGGGCTGATGGCTGGCTGACGCGTCAGTCACGCCGAAAGTAAACCT  
AATACGTCCAATCTTTATCATCTGAATGCTGATCGGCTTGAGCAGCTTCCAGAACTGAGCGGGATAAGGTTGCAGAACT  
GAAACAGCAGCGCAGACTTTCAGTATTACGTGACCCCTTTCAGATTTCTGAACCTTCAAAAATCTGAACCTCAGAAATCTGTAT  
GTTACGGCGTGTGTTGACCCTTCAGATTTGCGCAAAAATACCGGTTGACCCTTCAAAAATCTGACTCCAGATCCACAAGGT  
TTAAAACATGAACCACCGATAAATTCAAAACATGAACCGCAAGATATTTGGCGCATCCGCTGACCGCTGACCGCGCTGACCGCGG  
TTCTGCCAGACAGGAATATTTACCGGAATTTGAACAGGCTGGCAGGAATATCCCAAACGTGCTGGTGGCAATTTCAAGT  
CAGCAGCCTTCAAAGCCTGGAAAGCCCGTATCAGGGAGGGAATAAACCGGAGACCATGCTTGTATGGCGTGAAGCGGTAT  
GCCCGCTGGGTACGTGCTACAGGAAATACCGGCACACAGTTGCTGAAGCAGGCTGCGACGTTCTTTGGACCCGATCGTCA  
CTTCGAAGATTACTGGCAACAGCCAGCCGCTCAGCGAGTGGGCGCACAGCGCATGATGTCTGGCTGGCGTGGGAG  
CCATGTCTGACAAATTCGGTAAATCCAGTAACAAATTTGACATTTCTGA

>Cluster\_27206

ATGTCTGAATTAATAATTCCTTGAATTTTACAAATTTCCCGGAAGTGCAGGACGCTTTAAAAAACAAAAACCGGT  
TGTGGCGCTGGAATTCGACCATTTATTTCTCACGGGATGCGGTTCCCAACAAATGCCCAGACCGCAATTTAAGATTGAAGAAA  
CTATTCGTAACAGGGCGCAGTACCTGCCACTATCGCCATTTATCGGTGGCGTGTGAAAGTGGGTTTAAAGCAAAGAGAA  
ATTTGAATTTACTGGTTCGTGAAGGCATAACGTGACCAAAAGTTAGTCTGCGCATTTACCTTTTGTGTTGCGCGCGGAAA  
AAATGGCGCAACCACTGTGGCTTCAACGATGATTTATGCGGCGCTTCCCGGAATTAAGTATTTGCCCAGCGGGGAATG  
GTGGTGTTCATCGCGGGGCGGAACATACTTCGATATTTCTGCGGATTTGCAAGAAGTGGCAAAATTAATGTACCGGTT  
GTTTGTGCGGGGCGAAATCTATTTCTCGATTTAGGCTTAACTACCGAATATTTAGAACTTTCCGGTGTACCGCTAATTGG  
CTATCAGACCAAAGCTCTGCTGCGTTTTTCTGCGCACAGCCGCTTTGACGTGAGCATTCGCTCAGACAGCCCGCAGCG  
AAATTTGCCCGTGCATGCGGGTGAATGGCAAGCGGGTAAAGCGGTGGCTCTGTTGAGCAACCGATCCCGGCAACAG  
TTTGTCTATGCCGGAACACACTATCAATGCGCGCATCGATCAGGCGGTAGCTGAAGCTGAAGCGCAGGGTGTATTGGTAA  
AGAAAGTACGCCATTTCTGCTGGCGCGCTGCTGAGTTGACCGCGGTGACAGCCTGAAATCCAACTCCAGCTGGTGT  
TCAACAACGCCATCTGGCGAGTGAATAGCCAAAGAATACCAGCGTCTCGCGGGTTAA

>Cluster\_25826

ATGAACACGTTTTTCTCAAGTCTGGGATTTACGGATACCCCTTCTGCTGCGCGAAGTGCAGGAGTGCAGGCTGCGCAGGCTTT  
AGCTAATCAAATCAACACGTTTCGTCCTCAATGATGCGGACGGCGCACAGGCAATCCAGCTCGCGCTAATCATGTCTGGA  
AATTAAGCGGCAAAACCGGACGAGCGGATGATCGAAGATTACGCGGTTGTCATGGCTGACACTATTCGCCAGCAGCGCGCA  
GACGGTCTGGTACTGTTGGCAAAACACCCGCTCGCGGCAAAATTAACGCGCGGAAACTGGGTTACCGCTTAAACCGCGCGT  
GTCACGATGCCAGCGCTGTTAGCGTGCAGGACGGTAAAGCGACAGTGAACACATGGTTTACGGCGGTCTGGCGATTG  
GCGAAGAAGCAGCATTCGCCAGCCGCTATGCGGTACGACCATCAGCAGCGGCACGTTTCGATGCGGCTCAGCCAGACCGCTCA  
CGCACTGGCGAAACGACACCCGTTGGAGTGGCAGGCTCCGGCTGTTGGCGATTACCCGCAACCCAGGCGCGTTCAGAG  
CAACAGCGTTCGATCTCGACAAAGCCCGCTGGTTCAGCGTTGGTTCGCGGTATTTGGCAGCAAGAGAAACATTCGCGTGG  
CAGAACAGCTTTGCAAGGCGATAGGTGCGGAGTTGGCTGTTCTGCTCCGGTGGCGGAAACGAAAAATGGATGGAGCAC  
GAACGCTATGTCGGTATCTCCAACCTGATGCTGAAACCTGAACTGTACCTGGCGGTGGGGATCTCCGGGCAGATCCAGCA  
CATGGTTGGCGCTAATGCTGCGCAACCAATTTTCGCTCAACAAAGATAAAAAATGCGCGGATCTTCCAGTTCCGCGGAT  
ACGGCATTTGTTGGCGACCGCTGAAGATCTTCCGCGCATGACCCGAGCTTTAGCGCTGTA

>Cluster\_53483

ATGGAAAAACAACCAACTGGTTATCGCTCTCGCGGTAATGCCCTGCTTAAACGAGGCGAACCCTCGAAGCAGAAAT  
CCAACGTAAAAATATCGATCTTGGCGCTAAAACATCGCCCACTGACCTAACACTGGCGGGTTGTACTGGTTACGCGGA  
ATGGCCCAACAAGTTGGACTTCTGGCACTTCAAAAATAGCGCCTATGCCATGTCGCTCCCTATCCACTCGACATTTCTGGGG  
GCCGAAAGCCAGGGGATGATCGGCTACATGCTACAACAGGCGCTGAAAAATCAACTACTACAACGTGAAATCAGCGTGT  
GCTGACGCGAGTTGAAGTGGATGCCAACGATCCCGCTTTCAGTAAACCACTAAGTACATCGGCCAATTTTACGACACG  
CTCAGACTCAGGTACTACAGGCGAAGAAAGGCTGGGTTTTCAAGCAGATGGTCACTCTTTCCGCGGGTCTGATCCTTCT  
CCACAACCTAAACGCATCGTCGAGCGGGATGCCATCCAGACACTGATCGCCACGATCATCTGGTGTATCTGTAATGGTGG  
CGTGGTGTTCGCGTGGTTGAAAAAGCCGATGGATACCATGGGATTGAAGCGGTTATCGCAAAAGATCTTTACGCGCGC  
TACTGGCAAGTCAATGCTGACGCTTGTGATCCTCAGTATGCGGACGAGTATATCTCGACTGGGGCAAGCCA  
ACCCAACGCCCGCTGGCCAGGTCACGCGGAAATTAACCGAAATGCAAGTGTGATGCGGGTCTATGGGGCCGAAAGT  
CACCCTGCGCAAGTTTGTAGTGTAGTGCAGTGCAGGCGGATGCGCTCTTTGAGATGGTCCGAAATTTCTCG  
CCGGAGACAAAGGCACTCTTATTCGCTTATACCCCCATAACCCAGCTTGA

>Cluster\_23022

ATGGCCGCGTTAACTTACGTATATTGAAATTTTTCATGCGGTAATGACCGCGGAAGCCTGACTGAGGCGGCACACCT  
GCTACACACCTCACAGCCAACCGTCAGCGCGAAGTGGCGGCTTTGAGAAGGTGATCGGGCTGAAATGTTTGGAGCGCA  
TACGTGGACGATTACATCTACCGTGCAGGACTGCGTCTGTTTGAAGAGTGCACAGATCTTGGTACGGACTGGATCGC  
ATTTGTCAGCGCGCAGAAAGTCTGCGCGAGTTTTCGCGAGGAACTGCTATTTGCTGCTGCGGCTTTTTCGCAATC  
TTTTTTACCGCAGCTCTTCAACCCCTTTTGGCACGTTATCCGATGTCAGCTTAAACATCGTCCCCAGGAATCACCGC  
TACTTGAAGAGTGGCTCTCGGCCAGCGTCATGATTTAGGACTCACTGAAACGCTCCATACGCTGCGGGACAGAACGCT  
ACCGAATTTACTCTTTAGATGAAGTGTGTGTTACCTCCGGCCATCCGCTGGCGGTAAAAAGGTTAATACGCGCGGA  
TGATTTTCCAGGTGAGAACTACATCAGCTTTCCGCTAGTACAGCTATCGCCAGTTGCTGGATCAATTTGTTTACTGAGA  
ATCAGGTTAAACGACGATGATCGTAGAAACCCACAGCGCGGCTCAGTCTGCGCAATGGTACGGGCGGGGTAGGCGTT  
TCGGTGGTTAACCCTGCTACCGCAGTGGATATGCGGCAAGCGGTTTGTGGTGCAGCGGTTACGATTCGCGGTTCCAT  
CACCCTGACGCTGATCCGCCCTTGCACCGCCGTCATCAGCGCTGGTGCAGGCGTTTGTGAGCATTACAAGCGGGAT  
TACCGAACTGGTCACTTCTTTGACGCTATTTTGTGCTCAGCTACGACAGCATAA

>Cluster\_15050

ATGAAAAAATGAGGGGATTTACCGTAATGCTAACGCTTTTACGCGGATAATAAAATGATTACCTGGGTCTTAA  
ACGGTAATGACTGGTATATCGAAAACGGTGGCGAGCTTTATTTGCGGTGTGTGATCCAGTGAATGCAGTATTTAA  
CTTTAGAACGAGCGGTGGAGCTTTGTTGCTGAAATAGCCAAACAGAGTACCGGTTATTCGCTCGCGGCT  
ATTTCTGATGATCTGGAACAGCAATTCAGGAGCTCAATGCTATGGCGGCAACGGGCAATGATGCGCTGGTGTAGTGAC  
GAATCATCTTGTATCCACATAACGAGGCAACCGGATTTCTTCCGTACGCTTGTATGCGCTATTTGATGCTATTACCGGAA  
GTATGGCGCTGGGCTGTATGAAATGCCCCGCCCCGATCGCCGCTTATTAACCGATGAGGAACGCTTTTACTGCGCACAA  
AGCGGGCGTTTTTCAAATCTTAAAGACGCTCAGTTGTGATCTACTACAGTGCAGCGGAGGTTGCAATTAACCGCACAC  
GCCAATGACGATTTGTAATGCTAATGCTGCCATTTGCTGGGAGGCGATGCTTGCAGGTTGCAAGGTTTTTGTGGCGTCT  
TTACCAACTTTTACTCTGACTTGTATCACTGGCTTTGGCTTGAAGGAAAAACAACCCGAAAGGCAAACTCACTCGCC  
TGTTTTTATCGCTGAGTGGCTCAGTGAAATATTTGGCTATCCGAAATGCAAAATATTTATCAGCAGCGAGGAAAC  
ATTTGACTGTGTTTATTGCGGGTAAACGCTGACGATGTGCTGAAAAATATTTGGGGCTGGAGGTGGTACTAAAAACAA  
TTGCTGATGCGCGAGATTTCCAGCGTCAACACTCAAATATTA

>Cluster\_14742

ATGAGTCGTTACAAAAATTTACGCCACAATGTGATTAACCAGGTCATTGATGATATGGCGCGGGTTCATATCCCTTCCCC  
ACTTCCATCGCAAAGTGCCTGGCGGAAATGTACAACATCAGCCGCCACAGTGCCTCATATCTCAGCCACTTACGGG  
AATGCGGCTCTTTGACGCAGGTTGGAAACGACTATGTTTATGCGCGTAAACCTGACCATGATGACGGTTTCGCTGTACT  
ACCGTTCAATGAGTGAACAAAAAAGTGTGAGCAGGCTTTTTTCAGATGATAAACACAGCCAGTTACGCCCAGG  
GAAACGCTTTCTGAACGCAACTGGCTCGGGCGCGGGTGTACGCCCGTTGTAGTAAGAGAATATCTTTTAAATTCG  
GCCGTTAATCTTATTACAGCGAAAAGCGCGCCAGTGGAGCATGAAGCAATTCGATCAATCTACGCCGAGCAGCTG  
TTTGAGCTACGCGAAATGCTCGAAACACATTCACCTCAGCAGCTTCTCAACCTGCCTGATCATGATCCCGCTGGCTGCA  
GGCGAAAACCATGCTGCAACGCTCATCGGCTACTGCGTGACAACATCGGCAATAGCTTTTCGCATGTTCTCGCAACTTGACA  
GAGATTTTCACTCCTTACTGCTTTCAGCTGCCGACAATATCTTTTTGATCAATCGCTTGAGATCATCTCAGTCATCTTT  
CATTTTCACTATCAATGGGACGAAAGCGATCTTAAACAGCGCAATATCATTTGCCGTCGATGAGCATATGACCATTTCTCAG  
CGCTCTGATTTGCCGAGTGACCTTGATGCCACCTTGCGCTCCGTAACCATTGAAATTCAGCTAAACAATCAATGATTC  
GATCCATTAAATGAGAACACGCGTTATGCTCATTAA

>Cluster\_35561

ATGGGTAAACAATCAGTATAAAGGTCCGTTCGGTATTTATCTTCTATTAATGGCAGGCAAAGTTTTGTCCTCAGTTG  
TAATGTCGATGGCGGTCAGGATTTGGAGCAGGTACAACCTCTGTTTATGTTAATCTCGACCCGTAATACAGCCGGGCC  
AGAATCTGGTTGTGATGCTGCTCAGCATATAAGTTGCTGGAATGATTACGGCGGCTGGTACGACACTCATATTAAC  
CTGGTACAAGGCTCAGCTTTCGAGGCTCCCTACAGTCATATAAAGGATCGCTGACTGGAATAATGTGACCTACCCCTT  
CCCGTTGACGACAATAACCAACGCTATTGGATATTGGTGATAAGACACCGATGCCATTACCGTTAAACCTCATATATACC  
CAGTTGGGCGGCGGTTGAGTTGTCATAAAAGCGGGGAGACTTTGCCCCGATTTCATATGTATAAAAATGCAACATTA  
GGAAGCGGAAATCCGCGTAATTTTACGTTGGAATATTATTTCAAATAACAATGTTGTTATGCCAACAGGCGGCTCACCGT  
TGATAGTCGTAATGTCACCGTGGATCTCCCGACTTTCCTGGAAGCGCAGAAATACCCCTTGCGGTATATTGCTCAAGCG  
AACAAAAGCTCTCATTTTTATCTTTTCGGGTGCCACCCTGACAGTAGCCGACAAGTGTGTTGCTAACACAGCAGCTGATGCA  
ACAAAAGCATCGGAGTGGGTGCTACTTAATGCGTAAATGGAAAAAATCTGGCTACGGGAGAAAATGTTCTCCCTGGGGAC  
AGTAAATAAAAGCAAAGTACCTCTGGGTTAAGCGCAACCTATGGACAAAACAGGAAACAGGTTTCAGCCGGAACCGTCC  
AGTCAGTCATTGGTGTCACTTTTATCTATGAATAA

>Cluster\_19637

ATGGCTAACTCACAGTTCTTGAACCTCAGCACTAGCGTGCATCCGACTCCGACATTTTATCTGTACTCATGAAGGC  
CAAAATGATTGCAGTGAAGCTCGGCCTCAGCGATTTGACCGAGTGGATACAGCTCGAATTAATGGCTATCCAGCTTTG  
ATACGGTTCTGAAATACAGGAAAGGTCAATCGCAGTTAAAGCATATAGTCCCAACATCAGAGCTGGGTTCCGCTTGGT  
GTCAACTTCAACGACGCGGAATTAATGCAATGGTATCAACGTTTACATTACAGAATCAATATCATCTATAAAAAAGAT  
GAGCAATAAAGGAGAAAACCCCTTTTTTACCTCTCCCGGATGGATGGCTGATACATTAGCTCAAAGTATCGGACAAAAGA  
CTGAGATGGTATGGGTTATAAGCGCTGGTGTACTAGAACATGTAATTACTACCGTTAGGAATAAGATCCTCGACTGGTCT  
TTAGACTTAGAGTCAAAGGTTATTTAGCGGAAGGTTACAGTTTTCATTAAGAGAAAAGAGGTAGCGCCAATGACTGT  
CCATAACGTGACCAACATTCATGGCAACGTAACAATGCTGGCTTATTGGCTCTGGTAACGGGGACATTTACAAAAATA  
ATACTGTCAACGCTGGAGACTTCACTCGCTTGAAGAGCAGCTCAAGGATTGGGGCGCTAATGATGAAGATATTAAGAGC  
CTTCAATCAAGCTATACAAGAATCACCCGCCCAACTACCCCGGACAATTTCACTGATAGCCTTGGGAAGTGGGTTGTAAA  
TATGATGGTAAAGCATATGCGGGGACGCTAAATATTGACGCGTCTGCTGCACCAGCTCTACTAACTAATGCAATTTGTC  
ATTACTACAACATTCCTGTTTGA

>Cluster\_66976

ATGATGCAATCTGAACATACAGCGCCTTGTCGACAAACATCAGTCTTCCGCTACTTTGGGATACCCGATCGGA  
GATCTCTGAAAGCGAGCTTGCGGCACTGGATACATATTGGTGCACCACTTCCAGCAAGGAGGTA AAAAATGGTCACTGATA  
TACAAAAACGGCTTTTCCCGCCTTTCTTTTACCCTACGCGACACTGACCAAGTAAACAAAATGCAATGCGGCAAGCCCTACAAT  
TCATCTATTACAGATATAGTCTTAGAGATGCAGCGCATCCGAAAAACATACTGGGCTTGACACAAGAAGAGTGGTTAGA  
AGTATTTTGAACAGCGAAGGGGAAATTTGTCGACGGTTTGGAGCCAGCGGCAACTGTGCGCAATATGTTATAGCGTTAG  
CATGGTTGCTATGTGGGTTTGGAGCGGCTGGAACACTGTGGCATATTTCTATCAATATCGGCTCTGTCTTAAAGTTTTGGC  
CGCAGAGCACCAGATTTTGGCCTGACCGAGCTTGACAATATGATGCAAGTCTGGGATATGTGCTCTCGTATGTCGGA  
CAACGGCATCAGAAATGCCATGTGTATGGCAATGCTTCTGCAAGGGATGCTCAACTAGACCATATCACCGTGACCACGT  
TGCAACAGATTGCTGCAACGCTGCCCGGATTCCTCCCGGAAGCCTCAGTACTCTATCGCGTATACTGGCTGCATCAGGG  
ACTATTGAGGAAGGGGTTGATTACCGAATAACAACAGCTGCCCGTCTCCCGCGAATATAATGCAACAGCTGATGTACC  
AATCAAAATGGCTGGTATGGTGAACAGGTTGGCTGCTCAGTACTTCGCCCTTCACTATTTTTGTCCGGTGGTATG  
TTTTGCTAAAGTGTGGTCACTGGTTAGCTGA

>Cluster\_31957

ATGTCAGCCAAAGTGTGGGTTTTAGGGATGCGGTCGTAGATCTTTCGCAAGTACAGACGGGCGGCTACTGCCTTGTCC  
TGGCGGTGCGCCAGCTAACGTTGCGGTGGGAATCGCCAGATTAGCGGAAACAAGTGGGTTTATAGGTCGGGTCGGTGAATG  
ATCCTTTTGGTGCCTTAAATGCAAGAAGCTGCTAACTGAGGGTGTGATATCAGTATCTGAAGCAAGATGAATGGCAC  
CGGACATCCACGGTGTCTGCTGATCTGAACGATCAAGGAGAAGCTTCAATTTACGTTTATGGTCCGCCCAAGTGGCGAT  
TTTTTTAGAGACGACAGACTTGCCTGCTGGCGACATGGCGAATGGTTACATCTCTGTTCAATTCGCTGTCTGCCGAGC  
CTTCGCGTACCAGCGCATTTACTGCGATGACGGCGATCCGGCATGCGGAGGTTTTGTCAGCTTCGATCCCAATATTCTGT  
GAAGATCTATGGCAAGACGAGCATTTGCTCCGCTTGTGTTTGGCGAGGCGCTACAACGCGGATGTGCTCAAGCTCTC  
GGAAGAAGAAATGGCGACTTATCAGTGGAAAAACACAGAAGATCGGATATATGCGCCCTGGCAAAAAGAGTATGAGATCG  
CCATGCTGTGGTGAATAAAGGTGCAGAAGGGGTTGGTGTGTTATCGAGGACAAGTTACCATTTTGTCTGGAATGTCT  
GTGAATTTGTGCTGATAGCACGGGGGCGGAGATGCGTTGCTGGGTTACTCACAGGCTGTCTCTACGGGGTTATC  
TACAGATGAGAGAAAATGCGACGAATTTATCGATCTCGCTCAACGTTGCGGAGCGCTTGCAGTAAACAGCGAAAAGGGCAA  
TGACAGCGCTGCCATGTGCAAGAAGTGGAAAGTGAGAAGTAA

>Cluster\_37736

ATGGGTTCCACCAGAAAGGGGATGCTGAACGTTCTGATTGCCGCGGTGTTGTTGGGAAGTTACAGGGGCTGCGCGCAATA  
CATCATGGAGCAAAGCAGATGTCGTCGAGTTTTTACTATGACGCGTTTATGATATCCCGGTTTATGATCTACTGACCC  
TGTCATTTGTTCAATGGCGATAAAATCTTTTCTATTATTAACAATCATAAAGATGCCATTAGCTGTGATTTTTTCCGTTG  
GTTGGCGCGCTAACTGATGACGCTCACTTTTTGCTAACCATCGAAAAATCGAACCGCACCCGCAACGGTTCGCAAT  
CCTCTCACCGACGATTTACTGCTGCTGCTCCTACTGGTGCCTAAATCGCGCCGGGCAATCTGGTTTTCTGCGCTATTT  
TGACATCGCTGGTGGGACTTTTTTATTTGGTGACACAGGTAATCCGAGCTCATTTATGATCTCTCTGCCGCGTGTGTT  
TGGGGCATTTGCCCTGGCTTGTGCTGCTATACACCTATCCCTCAACGCTAATGCCCCGCTATGGCCAGCTTACC  
AGTCTGCGCTGGAGTATGCTGATTGGCGGCTGATTTCTGTTGCTTTTTATGCCAGACAAGGAACAACAACTTTGCTGTTA  
ACGGCAGTTGATTTGCGGTTTTTTTTATTTGGTGGTCAATGGTACGTCCTGACATTTAGTCTGTACTGAAAGGAGCA  
CAATTAATTTGGCGTCCAAAAGCCAGCATTTTGGAGCTGTGCAAGCAATTAAGTAGCGCGCTACTCTCTTTGCTGTTGCT  
GGGATCAGGTTCAATTTACCGACTGGTGGAAACGCTGCTGATTCTGTATCGGTTGATTTGATTTCAATGGATTTCC  
GTCGCGCGCCAGAAAAATAAATCGTCCGGCGCGCATGAGTGA

>Cluster\_19916

ATGTCCTCTGTTTCACTTAATTTGCCCATCGGGTTACTGCATTAACAGCAGCCGCGCTGCGTGGTATCCAGCGCCTTAC  
CGACCGGGGCGATCAGGTCATAAAGCTCGAGGTTATTGCCCGTCTGTTGAGCGTTTTTGGGGTACGGAACGGAGCGTC  
TGGAGATCTCAATCTCTTGGCAGACTGACTACCCCAACACCATCGTGCTGCTGTACGCGCGGTTACGGTGCCAGT  
CGTTTACTGGCAGATATTGACTGGCAGGCACTGGTGGCTCGCCAAACAATGACCCGTTACTCATTTGGCGGACATAGCGA  
TTTTTACCGCTTACATGCTGGGTTCTTGGCGCAAGGCAATGCTACACCTTACGGCGCCCATGGTGGTAGCAAATTTG  
GCGCGGATGAACATAAATGCCTTTACCGAGCACCCTTCTGGCTGGCGTTACGCAATAAAACGTTACCATTTGAATGGCAA  
GGGGAAGGCCCGACATGTGAGACGGAAGCAGCGTGTGGGGAGGCAATCTTGCATGCTGATTACTGATTTGGTACACC  
GTGGATGCCAAAAATTGAGAACGGTATTCTGGTGTGGAAGATATTAACGAGCACCCTTCCGCGTGAACGATGCTGT  
TGCAGCTCTATCATGCTGGAAATTTGCCACGTCAGAAGGCGATTATTTCTGGTAGCTTTAGCGCGAGCACGCTAATGAT  
TATGAGCAGGTTACAACCTGGAGTCACTGACGCGTTTTTGGCTTCCCGCTGTGATTTCACTCATTACCGGCTCGA  
TTTTGGTCAATGAACAACGACGCTTACGCTGCCGTTGGCGCACATGCCATTTGAATAACACCCAGGAGGCACTCAGT  
TGACGATTAGCGGTCATCTGTTCTTAAAAATGTAA

>Cluster\_29122

ATGAAAATGAATAAAAGTCTCATCGCTCTCTGTTTATCAGCAGGGTGTGTCGCAAGCGCACCTGGAATCAGTCTTGCCGA  
TGTAACTACGTACCGCAAAACACCAGCGACGCCAGCCATTCCATCTGCCGCGCTGCAAACTCACTGGACACCGG  
TCGATCAATCTAAAACCCAGACTACTCACTGTCGACCGCGGCAACAACCTGAATGTCCCTGGCATCAGTGGTCCGGTT  
GCTGCTACAGCGTACCCGCAAAACATTTGGTGAACGACTGACCTGACGCTGACCGCAAGTGAACAACAAACACCGAAT  
TGGCCGAATGTGCTGATTTTGTATCAGAATGACCCATCAGCCTTCTTCCCAGCAGTTATTTCACTACCGAGAAC  
CCGGCGTGTAGTGCAGATCGGCTGGAAGCGTTATGGCCCTGACACCGCGTTGGGGCAGCAAAAATTTATGTTCTGT  
GCTTTTACCACGAAAAAGATCTCCAGCAGACCCTCAACTGCTGACCCGGTAAGCCTATGCCAAAGCGCTGGTAA  
CTCGATCCCGGATTTCCGATCCGGTTGCTGCTCATACCAGGATGGCTTACTGAAACTGAAAGTGAACAAACGAACTCCA  
GCTCCAGCGTGTGGTAGGACCACTATTTGGTTCTTCCGCTCCAGCTCCGGTTACGGTAGGCAACACGGCGCATCAGCT  
GTGGCTGCACCCGCTCCGGCACCGGTGAAGAAAAGCGAGCCATGCTCAACGACACGGAAGTTATTTTAAATACCGCGAT  
CAAAAACGCTGTCCGAAAAGGTGATGTTGATAAGCGTTAAACTGCTTGATGAAGCTGAACGCTGGAAGGCGGATCAG  
CCCCTTCCACCTTATCAGCAGTGTAAAAGGCAAGGGTAA

>Cluster\_42738

ATGGTGACGGTGTTCGGCATTCTGAATCTCACCGAGGACTCTTCTTCGATGAGAGCCGGCGGTAGACCCCGCGGCGC  
TGTCAACCGCGCGATCGAAATGCTGCGATCGGATCAGACGCTCGGATGTCGAGACCGCCGCGCAGCCATCCGACCGGA  
GGCCTGTATCGCCGCGGATGAGATCAGACGATTTGCGCGCTCTTAGACGCCCTGTCCGATCAGATGACCGGTGTTTCA  
ATCGACAGCTTCCAAACCGGAAACCCAGCGCTATGCGCTCAAGCGCGGCTGGGCTACCTGAACGATATCAAGGATTTCC  
TGACCCCTGCGCTCATCCGATATTGCTGAGGCGGACTGCAGGCTGGTGGTTATGCACTCAGCGCAGCGGGATGGCATCG  
CCACCCGACCGGTCACCTTCCAGCCGAAGACGCGCTCGACGAGATTGTGCGGTTCTTCGAGGCGGGTTTCCGCTT  
CGACGGAGCGGGTGCCTGCCGACCGGCTCATCTCGATCCGGGATGGGATTTTCTTGAGCCCGCACCGGAAACATC  
GCTGCACGTGCTGCAACCTTCAAAAGCTGAAGTCCGGCTGGGGCTTCCGCTATTGGTCTCGGTGTCCGGAAATCCT  
TCTTGGGCGCCACCGTTGGCCTTCTGTAAAGGATCTGGTCCAGCGAGCCTTGGCGGGAACCTCACGCGATCGGCAAT  
GGCCTGACTACGTTCCGCAACCCAGCGCTGGAGATCTGCGCGGCACTGTGCAAAAGTTAG

>Cluster\_27642

TTGATTACAAATTACATTCGACAAACTAACCTACATATCTTCACTTTCAGTTGGTACTTTTCACTTTCAGCAATTGCTGCATTATA  
TGCAATATGTTTAAAGATATTTCAAGAAAGGCTCTCTTATAAACCCAAATTTAGTATAGACACTTTAAATGTCAAGATGA  
ATGTTAACGATTTCAACGGTTTTTATGTTGATATCTTACAAGCCCTACGCTTCCACAAAACAAAATTTTCAAACATAGGA  
TTGGGGGGCGCAATTTCACTTAGATATCATTTGGGATTTTAAATATAAAAAAACAATAATCTATACTTAGAGTTGTTTTC  
GAAAAAATCAAAAAAGAGATAAATCTTTTACAACCGACTCCAGTATGGAATGTTCAAATAATAAAAAAGAAAGAAAG  
TATATATGTACAATFACTTTATCGACACCTTACGATATGATTTTCTGTTACCATATAGTATAGATAAGAAACAAAAAC  
ATTTTGTACCAACCGCGCAATTGATAATTTCTATTGAATATAGCATATCTTTCACATAGACTTAAATTAGTGGTCTTCT  
ATCATTCACTGGTCCAAAATTAATATTGAATATCAAGATATAGAGGGTAAAACTAAAAAAGTCACTTGGCAACAAAAT  
TGGAACTGGAGTGGCAGGTTTCACTGGTGTATAATATGGAGGCAAGATTTTGCACCTACGGTTTACACCTGTACCAGAGAAA  
TGGACTACAAAAGTCTTAGAGAAGATACGCAAAAGCGCCGCAACCGCATGTTTCAAGATAA

>Cluster\_27532

ATGTCCGAAACAAAAACGAACTTGAAGACCTGCTGGA AAAAGCAGCAACCGAACCGCGCACCGCCCGGCTTTTTCCG  
TACTCTACTGGAATCCACCGTCTGGGTGCTGTTACGGCGCGCAGGGCGAGGCTGTGGTTGAAGATAGCGCGCTGTGAT  
TACAGCACTGGGAAAAGAAAGACGCGCACCGCTATTCTTTTTTACCTCGTTAGAAGCACTTCAACAGGCGGTTGAA  
GGCGAACAGGCATTTGTCGTTATGCCGTTCCGACATTTGTTGAGATGACCCTTGGCGAAAACGCTTCTCTTAATGCCAA  
ACTGCCAACCGGTAAGAATTTATGCCGCTGAAATCAGTTTGTGATTTGGTGAAGAAGGGAATCCGCTGAGCAGTCAAG  
AAGTTCTGGAAGCGGTTGAAATCGCTGATTTATCGGAAGTCCGAGCGCGCACGCGAAAATGATTTGATTTCACTACC  
TTATTTAAACCAATTAAGCCGTTAAGCCGTTGAAAGCGTCTTTTTTTTCTCAATTAAGAGAAAGAGGCAACGCTTACT  
TATTGGCATGAAGCCGATGGTGTATCGAAGAAATTTATCGAGCGCGGGAAGTGTAGCGACCGATACTTACCTGGCG  
ATGAACCCATCGATTTTGTGAGTGA AAAAGGGGAAAAGGAAATTAGCCACTTTATACCGAACATATTGCGCCATTC  
TATGAACGTGCTGGGGTGGTTTTTGGCTGACTTTAAACAGAACCGGATAATCTAA

>Cluster\_61814

ATGATGAATCCATTAATTTCAAACTGGGCGCGTACTGCTGGATAGTGAAGAGGCGCTGGAACGCTCTGTTAGCGCACT  
GGTGAATTTACTGAGTCACTACGCTCCGCTGGTGTGTTGTCAGCGCGCGGTTGCGTGGTGGATGAGCTGATGAAG  
GGCTGAATCTGCCGTTGAAAAGAAAACGGCCGCGGTTGACGCTGCTGATCAGATAGACATTTATCCCGGAGCACTG  
GCGGGAACGGCAATAAAACCTTGTGGCATGGGCAAGAAACATCAGATTGCCGCGTAGGTTTGTCTCGGTGACGG  
CGACAGCTCAAAGTGAACCGCTGATGAAGAGTTAGGTCATGTTGGACTGGCGCAGCCAGGTTCCGCTAAGCTTATCA  
ACTCTTGTGGAAGACGGTTATCTGCCGTTGGTCACTTGGCGTAACAGACGAAGGGCAACTGATGAACGCTCAAT  
GCCGACCGCGGCAACCGCGCTGGCGGCAACGCTGGCGCGGATCTGATTTTTGCTCTCCGACGTCAGCGCATTTCTCG  
CGGCAAGGGCAACGCTTGGCGAAATGACCGCGGCAAGCAGAACTGATTGAGCAGGGCAATTTACTGACGGCA  
TGATAGTGAAGTGAACCGCGCTGGATGCGGCCGCGACGCTGGGCGTCCGCTAGATATCGCTCCGCGCTATGCG  
GAGCAGCTCCGCGACTGTTAACGGTATGCCGATGGGTACGCGGATTTTATAGCTTAA

>Cluster\_9139

ATGAGCCTTACCGAACTAACCGGTAACCGCGGCACGACCACTCTCATGCTGATCGCCGAGCGTGGGTATATGATAT  
TGATGAGCTGGCAATCTGCTGGATGCTCCACGACAGCGCTCCGCGGATATTCGTAATTAAGCGAGCAAGGCTGA  
TTACGCGCCATCAGCTGGCGCGGTTCCAGCTCGTTAATACGCGCTTCGAGCAGCTGAGGTTTCGCAAAAC  
GAGGAAAAAAGCGATTGCCGAAGCGGTTGGCAGACTATATTTCTGATGGTTCAACAATATTTTATCACCATTGGTACGAC  
TGTTGAGCATGTTGCCCGGCGTTACTTAAACATAATCATTTGCGGATAATCACCACAGCCTCGGTGTGGCGCATATTC  
TTTACCACAAACCGCGCTTGAAGTGTGTTGCCCGCGGATCACTTGCCTCTCATAAATAGCGGGATCTTGGCCCTTGA  
CGCGCTCTTTGGTGGCTGATTTCTGCTGATTTCTGGTAAACGCTTGGGGCGATTGAGAGCGATGGCGGCTGAT  
GGAGTTTGTATGAACGAAAGCTAACGTTGAAAACGATGATGGCGCACGCGAGAAATATTTCTGCTGGTCCGCGATCACA  
CTAAGTATCATGCTTCCGCGCGGTTGAAATTTGTTACGTTGGCACAGGTCACCTGCGCTTTTACCAGCAGCTGCCGCC

GCTGCGCTAAAATCAGCCTTACAAGACAGCCAAATTGAAATCATTTCTCCCCAGGAAGACGCGTAG

>Cluster\_39255

ATGCTGGTTGCCGACAGGACTTTGCTGTACATCTGTGTGGGAAAAGAACGCTGAGATTTGTGCCTCGTTGATGGCGCA  
GGCGGGGAAAACAGAGTTTCGCTGTTTTGCTCTGCCGGAAGCATTTACTGGCGCTGATGATCATGATGCGGATCTTTCCG  
TTAAATCAGCACAGCTGCTGGAAGGCAATTCCTGACCGTTTACGGCAGAAAAGTAAACGTAACATGATGACGCAAAAT  
CTGACGATTCATGTTCTTCAACACCGGGGGCGCGCTGGAATATGCTGGTGGCGCTACAGGCAGGAAACATCGTCGCCCC  
TTATGCAAACTGCATCTCTATGATGCATTTGCCATTCAGGAATCAGCCATGTTGATGCTGTAATGAAATAGCTCCGT  
TACTGGAGGTGGAAGGATGAAGGTCCGTCTGATGACCTGTTATGACTTACGCTTTCCAGAGCTGGCGCTGGCACAGGCA  
TTACAGGGAGCTGAAATCCTGGTACTTCTGCGCCTGGGTGGATGGATACCACCGGGCTCAAAGAGCATCACTGGTCAACGTTGCT  
TGCCGCTCGTGCGCTGGATACCACCTGTTATATGTTGGCGGGGGGAGTGGGGAATAAAAAATATCGGGCAAAGCCGGA  
TTATAGATCCCTTTGGCGTCACCATGCGGCAGCGTCAGAAATGCCTGCATCTATATGGCGGAAGTGACGCCGACAGT  
GTGCGTCAGGTACGCGCAACTGCCCGCTTAAACAACCGTCGCTTTGCGCCGCCGCAATTAATTATGA

>Cluster\_36440

ATGTTGGAATCAAGCAAAGTTCCCGCCCTGACACGGGCTATTGATATTCTCAATTTGATTGCCCGCATGGCCCTGTAG  
TGCTGCGACGATCATTGACACATFGGGAATCCCTAAAAGCAGCGCTATTGCTGCTTAAATGAACTCAGGCGTCAAGCCT  
TTCTTAGCCTTGATCACCAGAAAATTTTTGTTTGTGGACAGGCTGGTGGAGCTTTCCGGTCATGCGTTAAGCAAGATG  
GATCTCCGGAACTGGCTCGACCGCTTTGACGCAACTGATACCCAGGATACCACCGGGCTGTTATGTCACTGGGAACTTGA  
TAACGGCAGCGCTTATTACATTTTGAAGTGGAGTCATCAGCCACTATCAGCGTGGTCCCATGAAGGAAAAGCCTTT  
CGCTTTATCGCTCCGGAATAGGTAATGCCTGCTTGGCAGCACTGACGCGGTACAGCAAAATATTATCGAAGGGCTG  
CTTGGGAGCAGGCGACCCACAACGATTAATCAACGAACTTACGAAGAATGGCGCGTATTCGCGGATATTCGCGCTAGG  
CTGGAGCTATGACAAACCGCGAAGATTACGCGATGTCCTGTTGTGCTGCTGCGCGGCTGTTTAAACGCAATAACAGCTTA  
CCGCTGCGATCTCGGTGGTGGTACCCGCTTACAAATCAATGAAGAATACCGTATTATCTGGCGGGCAAGGCCATTGCC  
TGCGCCAGGATATTTACGCTCTGTTGGGATGGAAGTCCCTTTGACTTACAAGCCTATAA

>Cluster\_59772

ATGATTGAAATATTATTTCCCGGTTGGTTAGCCGGGATCATGCTCGCTGTCGCGGGGTCGGCTGGGTTGTTGTAGT  
CTGGCGTCGTATGCTTATTTCGGTGATACGCTGGCTCATGCCATTACTTGGCGTCGCGTTTGGTTTGTGCTGGACG  
TGAATCCATTCTATGCGGTGATTGCCGTTACGCTGCTGCTGGCGGGCGGCTGGTATGGCTGGAGAAGCGTCCACAGCTG  
GCGATCGACAGCTTATTAGGGATTATGGGCGCACAGTGCCTGTGCTGGCCCTGGTGGTGGTGGTGGTGGTGGTGGTGGT  
TCGTGTTGATTTGATGGCTTACCCTGTTCCGTTGATTGCTGGCAGTGACGCCAGAAGATCTCATCTCTATTGCGATTGGCG  
TGGTCATCGTGGTGGCTATTTGTTCTGCAATGGCGCAATTTGCTGTCAATGACGATAAGCCCGGATCTGGCGTTTGGT  
GATGGTGTGAAATACAGCGAGTGAATTTGTTGTTGATGCTGGTGACGGCATTGACGATTGGTGTAGCGATGAAATTTGT  
CGGTGCGTGGATTATTACTTCTGTTGCTGATTATTCCTGCTGCTACTGCCGCGCTTTTCCCGCACGCCGAAACAGATGG  
CTGGTGTGCTGTTTGGTGGGGATGGTGGCAGTGACTGGCGGTTTAACTTTTCCCGGTTTACGATACGCCGGCGGGT  
CCGTGCGTGGTGCATGTGCGGCACTGTTATTTATCTCAGTATGATGAAAAGCAGGCCAGCTAA

>Cluster\_25909

ATGATGCATCTTTACTGGTGCGCTAAAAGCATCTGGCGAAAAGAGATCCATCGCTTTATGCGTATCTGGGTGCAGAC  
GCTGGTGCCGCACTCATCACCATGACCCTTACTTTATTTATCTTCGGTAACCTGATTGGTTCGCGTATTTGGCGATATGC  
ATGGCTTACAGTACATCGAGTTCATCGTACCGGGGCTGATCATGATGTCGGTGTATCACCACCGCTACGCTAACGTCGCG  
TCATCATTTTGGTGCCAAATCCAGCGTAATATGAAGAGCTGCTGGTATGCGCCGGTCCGACTCATGCTCATATTATGC  
CGGATATGTCGGTGGCGTGGCGTGGCTGTTGTTGTTGGTATTTTGGTGGTGGTGGTGGTGGTGGTGGTGGTGGTGGTGGT  
TTCAGGTGATTCGTTGGGATTCGTTGCCCTTAAACCTGGTGTCTACTGCGGTGCTATTCTCCCTTGGCGGTTTGGTGAAC  
GGCGTGTTCGCAAAACGTTTCGATGACATCAGCCTGGTCCAACTTTGTGTTAACGCCACTCACGATTTTGGCGGGGT  
GTTTTACTCCCTGACTTTGTTGGCGCGTTCGGCAAGGGCTGTCGCACTGAACCAATCGTTTATGATGATGAGGTT  
TCCGCTACGGCTTCTCGGTATCAATGATGTTCCGCTGGTCTACTACTTTGGCGTACTGGTGGTCTTTATTTGTGGCGTT  
TATTTGATCTGTTGGTGCCTGATCCAACGTTGGCAGTGGTTTGGCTAGCTAA

>Cluster\_39414

ATGGCTGTAACATAAGCTGGTCTGTTGCTCATGGCGAAAAGTCACTGGAACAAAAGAAAACCGTTTACCAGGTTGGTACGA  
CGTGGATCTGCTGAGAAAAGCGTAAGCGAAGCAAAAGCAGCAGGTAAGTGTGAAAGAGGAAGGTTACAGCTTTGACT  
TTGCTTACACCTCTGTGCTGAAACGCGCTATTCATACCCTGTGGAATGTGCTGGACGAACTGGATCAGGCATGGCTGCC  
GTTGAGAAATCCTGGAACGTAACGAACTGACAGCGTACACGTTGCGTTGACGGGCTGAAACAAAGCGGAAACCGTAAAAGTA  
TGGCGACGAGCAGGTGAAACAGTGGCGTGGTGGTTTGGGTTGCTGCTGCTCCGCGAACTGACTAAAGATGATGAGCGTTATC  
CGGTCACGATCCGCTTACCGGAACTGAGCGAGAAAGAACTGCCGCTGACGGAAGCCTGGCGCTGACCATTGACCGC  
GTGATCCCTTACTGGAATGAAACCATTCGCGCGTATGAAGAGCGGTGAGCGGTCATCATGCCGACACCGTAACTC  
GTTACGTCGCTGGTGAATATCTCGATAACATGAGCGAAGAAAGATTTCTTGGCTGAAATATCCGACCGCGCTGCCG  
TGGTTATGAGTTTACGCGAAGCACTTAAACCGTGAACCGCTATTTATGCGGTAATGCTGACGAGATCGCGGCAAGGA  
GCGCGGTTGCTAACCAGGTTAAAGCGAAGTAA

>Cluster\_24426

ATGACTGAAGCACAAAGACATCAAATCCTCCTGGAATGCTCGCACAAATTTGGGCTTTGTGACCCTTGGAAAAGTGGTGA  
GCGTCTGGGAATTTCCGCCGCACTGCACGACGCGATAACAATAAATTTGACGAAAAGCGCAAACGAAAAGTGGCGCA  
ATGGCGCAGAAGCTATTACCAACAGCGCCGCGCTGGACGCGATGAATCTGCATCAAGCGCAGAATCACGATGAAAAA  
GTACGATTTGCTAAAGCGGCTCGCAGCTGGTTAATCCGGGCGAAAAGCGTAGTCATCAACTGCGGCTCCACCGGCTTTCT  
GCTTGGCGGGAATGTTGGCAAGCAGTGCAAATCATCACTAATTTATCTACCCTGGCAAACTACCTGATCGATCAGG  
AACATGACAGCGTATCATTTATGGGCGGACAGTACAACAAAAGCCAGTCCATCACCTTAAAGCCGAGGGCAGCGAAAAC  
AGTCTCTATGCGGGGACTGGATGTTTACCAGCGGCAAGGACTGACAGCAGAAGGTTGTATAAAACCGATATGCTGAC  
GGCAATGGCAGAGCAGAAGATGCTGAGCGTGGTAGGAAAACGTTGGTGGTACTGGTTGATAGCAGTAAGATTGGCGAACGG  
CGGAATGCTTTTACCGGTGCCGATCAAATCGATATGCTGATCACCGCAAAAATGCTAACCCGGAATCCTGCAACAG  
CTGGAAGCGCAAGGGTACGATTTATGCGTGTTTAA

>Cluster\_55367

GTGACCAAACCTCAAACCTTGGCACTTGGAGTGCTTATCGCAACGCTGACAGGCTAGCGCACGCTGAAGGTAATTTTC  
CCTGGCGCAGGCTAGGTGTGTTGAAACCCATATAAAGATTACGATACCGATGTTTACCCAGTACCGGTAATCAACT  
ATGAAGCGGATAACTTCTGGTCCGTTGGCTTAGGTGGTGGTACTACCTGTTGGAATGACGCAACGGATAAACTTTCAAT  
ACCGCTTACTGGTCCGCTTTACTTCAAAGCGAAAAGCAGTGGCGATCACCAAATGCGTCACTGGATGACCGTAAGAG  
CACCATGATGGCTGGTCTGTTATGCTCACTTTACCCAGTACGGTTACCTGCTGACCCCTGGCTGGCGGATACCCCTGG  
ATAACAGCAACGGCATCGCTGGGATATGGCCTGGTTGTTACCTTACACCAACGGTGGCTGACCCGCTGACTCGGGTATT  
GGTGTGACGTTGAAACAGCGAAAACGAGAAGCAATACTATTTATGGCGTATCGCGCAAGAGTCCGCTCGCAGCGGTCTGG  
TGGCTATAACCCGAAACAGCAGCTGGAGCCCTTACTGGAGCTGAGCGCAGCTACAACCTTCTCGCGACTGGAGTGT  
ACGGTACCGCAGCTACACCCGCTGTGATGAGTTACTGACAGCCGATGGTGGATAAATCCTGGACTGGCTGATT  
TCTACCGGATCACTACAAATTTCTGA

>Cluster\_62517



ATGGATATTTCCAGTATTTTTACCATCAGTGAAAGCGAACCCGCATCCACAACCCGTTACCGAAGAGAAGTACTCCAC  
GCTGGGTCCCGTGTGCGCATGAAACCGGAGACCCGAATTTCTGGACCTCGGCAGCGGGTCGGGCGAGATGCTCTGCACCT  
GGGCCGGGATCATGGCATTACGGGGACTGGCATCGACATGAGTTCGCTTTCACCGCGCAGGCCAGACGCCGCGGGAA  
GAATCGGGCTCAGCGAACCGGTACATTTTATTATAAATGATCGGGCGGGTTACGTCGCCAATGAAACATGTGACGTAGC  
AGCTTCGGTCCGGTGGATTTGCGGGAGGCTTTGCGGGAGACATCGAACCTGCTGGCGCAGAGCCTTAAACCGGGGG  
GGATCATGCTCATCGGTGAACCTTACTGGCGTCACTCCGGCAACGGACGAGATAGCCAGGCTGCGGGCTGAGCTCG  
ACAAGCATTTCCGACGCTGCCAGGACTTGTGAGTGCATTTCGATGAACCTCGGCTACGACGTAGTGAAATGGTGTGCG  
AGACCAGGAGGGCTGGGACCGATATGAAGCTGCGAAATGGCTGACCATGCGCCGCTGGCTGGACGCCAATCTTACGACG  
ACTTCGCCCGCGAAGTCAGGGCCGAGCTAAACATCTCGCGAAACGTCACGTAACGTACGCGCGGGAATACTTTGGCTGG  
GGCGTGTTCGCGCTCATCGCCAGGTTAA

>Cluster\_321

ATGGCCCTACAGCAAAATCCGCCAACCAAACTCTCCGATGTGATTGAGCAGCAACTGGAGTTTTTGTATCTCGAAGGCAC  
TCTCCGCCCGGGGAAAAAACTCCACCGGAACGCGAACCTGGCAAAACAGTTTGACGCTTCCCGTCCCTCCTTGCCTGAGG  
CGATTCAACGCTCTCGAAGCGAAGGGCTTGTGCTTCGTCGCCAGGGTGGCGGCACCTTTTGTCCAGAGCAGCCTATGGCAA  
AGCTTCAGCGATCCGCTGGTGGAGCTGCTCTCCGACCATCCTGAGTCAAGTATGACTTGCTCGAAACACGACACGCCCT  
GGAAGGTATCGCCGCTTATTACGCCCGCTGCGTAGTACCAGTGAAGACAAGGAACGCATCCGTGAACCTCCACACGCCA  
TAGAGCTGCGCGCAGCTTGGCGATCTGGACGCGGAATCAAAACGCGCTACTCCAGTATCAGATTGCTTGCCTACCGAAGCG  
GCCACAATGTGGTCTGCTTCACTGCTAAGGTGTATGGAGCCGATGTTGGCCAGAATGTCCGCCAGAACTTCGAAT  
GCTCTATTTCGCGTCCGAGATGCTGCGCGTGGTGGTGTGAGTGTACCGCACCCGCAATTTTGAAGCGATTATGGCCGGTAAAC  
CGGAAGAAGCGCGAAGCATCGCATCGCCATCTGGCCCTTATTCGAAGAAATTTGCTCGACAGAAGTGTGAAGAGAGC  
CGCGTGGAGCGTTCTGCGTCTGGAGCAACGAAAGAAATTAG

>Cluster\_41798

ATGAGCAATTTATTAGGCCCCCGTGACGCCAACGGCATTCCGGTCCCGATGACGGTGGATGAATCCATCGCCAGCATGAA  
GGCGTCTTACTGTGATAAAATCAACGTTCTGCCTACGTTTACTCGCTGGACTGCGGGCTGTAAACGGTTGCGAAATCG  
AAATTTTCGCCACCGCTTTTCGCGCTGTTTCGATGCGAAGCCTTCGGCATTAAGTCTGCCGTCACCGCTCATGCGGAT  
ATTTTACTGTTTACCGGCGCGGTACCCGTCGAATGCGATCCCTGCGCTGCGTGGCTGGCAGTCCCGCGCGGACCCGAA  
AATCTGTATCTTACCGTGCCTGCGGTAACAGCGCGGGATCTTCCACGATCTTACTGCGTGTGGGGCGGTACGGATA  
AAATCTTCCAGTGGATGTTTATATCCCTGGCTGCCCGCAACGCTTCCGCCACGCTGTACGCTTTTGGCGGATGCTC  
GGCCTGCTGGAGCAGAAATCCACGCCCGTGGGCGGGTGGAGCAGGATGAACAACCGCGGAGATTCTGCATGGCGATAT  
GGTGCAGCCGCTGCGCGTGAAGTGGATCGCGAAGCACGCCGCTGGCGGGTTATCGTTACGGTCCGCAAGATTGCCGATG  
ATTTCTGACGCAATTAGGGCAGGGCGAAGAACAGGTTGCACGCTGGCTGGAAGCGGAAAACGATCCGCGTCTGAACGAG  
ATTGTACGCCATCTGAATCATGTTGTTGAAGAGCGCGCTATCCGATGA

>Cluster\_35163

ATGGAGACTGTTTTTGCACGCACTGAAAGCAATGGGAAAAGCCACATCCATAGAACTTGCTGCGCGACTTGATATCAGTCC  
TGAAGAAGTGTGAACCAACTATGGGAATGAAAAGGCTGGTTTTGTTGATAAAAGCGCGTACACCTGGCGTGTGGCTG  
ATAACCACTTACCGAGGAACAGCCAGCGAGCAAGCTCCCGGAAGAAATCACACAGCAACAGTAGCCGAAAACTCA  
GAGTGGGATTTAACCGCGACGATGAACAACGAGGACCACAAATGGCTGATGAGCTGGCTACATGTTTTGGTACCACATC  
ACGCAAAAGTGGCTTCAACGCTGGCAATGGCAATCAGCAAAAGGCTGCTGATTCGCGTAAATCAGGGCGGTAATTTCCGT  
ACTGCATACCGGGCGATAATTTACCAGCAGAGCCGAAAGCAGCATCGGTAGCGAAACTGATGTTAAGCGCTTCTCAT  
ACCGCAGGTTTGGGTTTACCAGTACAGGAGGCTGCAACACAGGAAGATATTAACAACAGAAACTGTGGCGGACATTTG  
GTCGCTGCCATCGTTTACGAAACGCGAGCGGATGACCTGGTTTTTACCATCACGTCATATGGCAAAACCGCAACTGCGT  
GGGCGAAAATCATGTCCAGAAGTGGGAGCGAGTCTGCGCCGCGTGGCGGAGCTGAACAAGCACCGGGATATTTGTTGCA  
CAGATTACTGATTCTCCCGCGTGTGTTATCGGAAAAGTGA

>Cluster\_11575

ATGGAAAATATAATGAACAATCCGGTTATCGGTGTCGTAATGTGCAGGAACAGGCTTAAGGGTTCATGCGACCCAGACTCT  
GCAAGAAAAGTACCTGAATGCCATCATCCACGCAGGCGGCTTGCCAATGCGCTACCACATGCGCTGGCGGAACCGTCA  
TACTTGAACAACCTTTTGGCGAAAATCGATGGCAATTTATCTTCCGTTGTTAGTCCAGCAATGTGCAGCCGACATTTG  
GAAAACGGCGATGAGCCTGACGCGGATCCCGGGCGTGTCTTCTGAGCATGGCGTTAATTAATGCCGCACTCGAAAGGCG  
CATCCCCATTTTCGCCATCTGCCGGGTTTACAGGAACCTGGTGGTGGCAACCGGTTGGTTCGTTGCATCCGAAGCTGTGCG  
AACAGCCTGAATGTGGAACATCGGGAAGATCCCGAATCGCCGTTGGAAACAGCAATATGCACCGTCCGATGAAGTTG  
GTTGAAGAGGGGGGATTAATGCTGCGTGGTGTGCTGCTGCTGCTGCTGCTGCTGCTGCTGCTGCTGCTGCTGCTGCTGCT  
GAAGTCTGTTAGCCACGGTGTGCTGTTGAAGTCTGCTGCGCGGATGGCTTAGTTGAGCGGTTAGCGTCAATCATC  
CTTTTGGCGTGGGCGTACAGTGGCACCCGGAATGGAACAGTAGCGAGTACGCGCTTTCGCGTATATTGTTGAGGGCTTT  
ATCACCGCTGTGTCAGCACCATATCGCTGAAAACAGCGACTCTGA

>Cluster\_17776

ATGAATACCGGTATCTATTTTCGACATCAGCAATGAGGACTACCAGCAGGTCAGCGAGTGAAGTCAACCTGGATAT  
GGTAGCCAAAGACCTGCCCCTTCGAAATGGGTCAAGGCGAGCGCGGAAGATGAAGAGAAAAATCGGCACCTGGACATGG  
GTACCAGCCTGCACTGCTGCTACTGAGCCGAAAGGATTCGATAAGCTTTTCACTGCGGCGCACAGTTCAACCCGCGC  
ACAAATCAGGGAAGAGCAGACGAAGAAGCATTTCTGAAAGACGTTGCCGACATGGGATGACGGTATGATGATGCGGAGCA  
GGCCGGAAAGCTGAAACTGATGCGGACAGCGCAATGGCTCACCGGCGGCGCTGGATGCTGGAAGCGCCAGGACACT  
GTGAAGCATCGATGTACTGGAATGACGAAGATACTGGCGAATCTGCGCAATCCGTCGGATAAATGGCTGAACGAGCAC  
AACGTGATCGTCTGATGTAAGAAAGGTTGCAGACATGGATCGCTTTCGCGTCAACATCGAGGAATTCGCTACCCATCCCA  
GGACGCCATGTACCGGAAGGCGCACTGAAAGTAAACCGGCGAGCCACAGGATTTCTTCTTCTGGCTGTGAGCGAAACCA  
TCGACTGCGGTGATACCTGTCGCGTGTTCGAGTGGATGCGCCAGATGTTGACGCGGGCATCAGTTATTCGCGCGG  
GATCTGAACACCTATCAGGAATGCCATCAGCGATGAATGGGGCGCGTGGAAATTAATAACGCCCTGAATGGGCACG  
AAAACAGGATATGTACGTATGA

>Cluster\_66878

ATGGGTGTCATGAAGGAATATATGCAGGATCTGGAAGCTGAACGGTTTGTGATGATGGCTGAGGAGAATTACCCGGATGT  
TAATCCAACTCTGAAGATGGGAGCAGCCGCAACCTGTACTGCTGGGAGCAGGAAGCGTGGCCGATCAGGCTCAGT  
GGGAACATCAACACCGGCTCTTTTGGCTTCCCTGAAACGATTTTATCTGCGTACATACAGCAAGGAGGAGCTGAAG  
AAGCTGTATACCTACTCGATAAGGAGCAGCCTGAACTGGTGTACAGGATGCTTTCGTCATGCCGTGACTGTAATGGA  
GGCGTACCTGATGTACTGCGCAGGGCTCTGCTTGGAGTATGACTGGCCCTTAAACGTTTCTTAAATGAGTACTATCTCA  
AATCCGCACTAAGGTACTAATAAAGATAAAAACCGCCGCCACAATGGATGTTGAACTGTTGAGCTGTTGAGCTGCGAGCCGA  
AATTATGTTTCCGAAATGACATTTTCAACGTTTAAACCAATTTGAGCGCTATTTTCGGGGCGGCTGCTGCGACCTCCCGT  
CTGGCAACTGAGCCACTGGGCATCATCTCAGACTGGCGAAATGATCTTGTACACCGCAACGGCTGGATGAACATGATG  
TGCCACGGGGGATATCAGCACAGCAGCTGCAGAATACCTGCGAAAGTATCGGACCTGATAGAGGCTGCTGACATATCC  
CTGCGTCAGGAAGTTGACTATTTTCGGTAACTGGCGTAAAGGAAAACCGGCAATCATCGCATCAGCACTGAATATATC  
GCCAGTCCGAGAGTCACTATGA

>Cluster\_4620

ATGAGTATGGAGCTGATGGTTAAAGCGATGAAAATTCGAGTGGGAAATCCATTGCGAAAACCTGGTCTGATCAAGCTGGC  
TGATAATGCCAGGCATCAGGGGGAGTGCCTGGCCAGCTACCAGCATATGCTGATCAGTGCGAGATTAGCAAAACGTTCTG  
TGATGAATCATATGCGGCCCTTTGTGAGTCCGGGCTGGTAAAAAAGTCACCCGAAAAGGTGAAAAGGTAACCTCAAGT  
AATATCTATCTCCTTCATCTGGAATGGTGCAGGAGATTCACATAGGGGGTAGTGCATAAATTCATCTATCTGGTGCAGCAAA  
TTCCACAGTGTAGTGCAGGAGTTGCACCAGGGGGTAGTGCAGGAGATTCACCCAGAACCAGTCACTCTTTTGAACCAAGTCA  
AAGAACCAGTCAATGAACCAATAGCTGTTGGTGCATCTGCTGATGAGTCTGTGCGAGTTCGTTCAAACCGACCGGAATAC  
TCTCCGGAGTTTGTAGCAGGCATGGCTGGTATATCCCAAACGTGCTGGTGGCAATTCAAAATCTGCAGCCTCAAAGCCTG  
GAAAGCCCCTTGAATGAGGGGGTAAACCCCGAAAACCTAGCTGGAAGGTGTGAAACCGTACGCGGGCTGGGTATCTGCCGA  
TGGGTAAACAGCGGCACAAATTTGTGAAACAGGCTGTACAGTCTTTGGTCCGGATCGTCATTTGGAAGAATCTGGGAA  
GTTCTGCGGTATCTGCAGCCAGACGCGAGGACCCGTACTTCAAAGCCAGTTACGACAATGTGGACTACAGCCAGATCCC  
GGTAGGATTCAGGGGGTGA

>Cluster\_66938

ATGAAAGCACTCACCTCTCATTTTGCAGTAATACTGCTTACTGGTGTTCCTTCCCCTACCATCTCGCAGGTTGG  
GGTCAATACGCCACCACCTGACATTAATGCATGGCTTAAACCACGAAGTAAAAGCCGGATAGTCTGTGAGAAACACGCT  
GGAAAATGCTGACCGACGCGAGGTAAAACGCTTGGATTTCTGGTGGCAAGGCTCAGCGTTCATGGGAGCTGATTCAGGCA  
CTCAAACGCCCGGAAAGCACACTTAATGCCTTATACGATTTCCGGCCACTGATTAGCCCGGAAGGCTGGCTGCCACCGGT  
TATFGATGAAGCACAGGAGCTAGCTCATATCACGCCAGATCAAATCCGGACCTCTTCCCGGGTCTGGACCATCAATTGCC  
CTGAACGCTTTGTGACGAATCCACCGGGCTGGCGTGACTGGCTTCTCCGGGGCTTTCAAACAACGCCACTCCGGGTACA  
GAAGGCAGCGTCTGTCAGAAAGCAGCGTGCACGAAAAGTGTGGGAAACCGCATACGGCAGGGATGCCAGGAAGGAAG  
ACAAAACGCCAGCTGACGCTTGAAGCCAACGAAAACCCCTACCCGTGATTACCGGGCATGATGCTGTACTCACTCT  
TCTGGCGTACGGGCATGATCACCGCTCCGATGTTTCTGATCAAAATGCAAAACCGTTACAGGTGACGGGAAAACCTGGT  
ACTGGAGATCGTGTCTGTCGCCCTAAAAATCATGCGGAATCAATCTTCAAGAAATCTCACTGGCGTCCGCTTATAGGCAC  
TGAAGGAGGCTCCCGATGA

>Cluster\_19428

ATGCCGATGTTTCTCTTTTTACGCCGTTTACGCCATTACCCCGCCGCTTTTGGCGGGTTGATAATTATCTGTTATTGAT  
GCTAATTCGCGCTCTTCGCGCCGTGGCTGGCACCCTACGATCCTAACTGGCAGGATGCGCGCGCGCGGTTACAAGCACCGA  
GTCGTCAGCACTGGCTCGGCACCTGACAGTTACGGGCGAGACCTACTTTACGTTAATCTACGGCAGCCGCGCGGCACTG  
GGCTGGTGGCATTTGGTGCACAATCATACACTCCCGTGGTCTGCTGATTGGCATTATAGCCGGGTACTCCGGCAGGCTG  
GCTGGAACCGGTGCTGATGCGTTTTACTGACGTAGTAATGTCAATGCCGCTTTAATCTGGCTTTTGGCTTTTGTGTTG  
TGCTGGGGCCGGGCTGGTTAACGGCGCACTGGCGCTGGCATTAAACCACTGGCTGCTTATGCGCGTCAGGCACGGAGT  
GAGATCCAACGCTGCGACACAGTATATCTTGGCCCGCAGAAATGATGGGCATCCGCGCAGGCGTCTGCTGGCTGG  
TCATATTTTGCATTGTGCTGCCATCTGCCATGTCCGCTGCGCGTGGATTTAGCGGGTATCATTGCGCGGCTGCTG  
GCCGCGTTTTCTTGGGCTTGGTCTCGCCGCCAATGGCGGAATGGGAGCCATGATCGCCGCGGTATGCAGGTCATT  
TTTGATCAATGGTGGATTGCCGCGCTCCCGGCCAATATCTTAATGCCAGTCTGGCTTTAATCTGCTGGGTGATGG  
CTTGGCGGATGTTCTGGAGCCTCAACATGACTGA

>Cluster\_23814

ATGTTTGGCGATATGAAAAGTATGGTATGAAAGCCTGGCATGAACATACGCCCTTGTGCGGATCAACTGTATGAATCT  
GAAAAGTGTCTACCGAGCTATCCGCGTGGCGGAGAAGAAATCGCGCTCCGATCATTTCTCAATCTATCAGGGGCACTG  
GCATTTTTCTTCCGACCCCTCGCGCGCAGTGGTTAAAACCGCTCGCGGAATCTGCCTCAGTACCGGCTCTGGCCTG  
GATTATGGCAAAAATCCGGACTGTATTCGTACGCGTTTTCTGCTGGTTTACGCGGATTAATGATGATGATGCTTCTGCTTT  
TCCCTGGAGGAAAACGTGCGCCAGACCAGGCGGTGGTGGAACTCGCCGCGCAGCGCAGCTCTGCGTGGAAAGGTGAAC  
TGGGCCATCTGGCAGATGCGCCGCTTATGACCAGGCCCAATGCAGACATGATGACGCAACCCACTGATGTGGAACCG  
TTTTATCTGTCAGACAGGCATTTGATCTACGCGGTTTTCTGGTAGGCAGCGGCATGTACGCGGTTGGTGTGTGATC  
TGCTATTGATTTTACGCTCTGGCGGAGATTTTCCATTGCTCGAGCGTGCCTCTGGCATTACATGGCGGTAGCGGTACGC  
CGTTCGATCAGCTCCAGCTCTGTACGACTCTGGGGTGGCAAAAATCAACGTGGGGCGGCCATTTTGAACGGGGGAAA  
TCCGCGCTCTGCATACCCTCTGTACAGATATAATCAATGAACTGGTGGACGCGCTGAAAAGCTATGGAAGTGGCTTCGA  
AGAAGCGATTACCCGTATTTACAGCGGAGCGCGCTATCGGCAAGCCTGA

>Cluster\_48588

ATGAAGAAAGGTTTACTTGCAGTGTCTTGGCGCTATTTGCACAATGGGTCTTACTGGCTGTGATCGCGTGGAGCCTGG  
ATACGTTGGCATCAAAGTAAACAATTAGGTGAAGCAAAAGGATCGGTGAAGTGGTTGGCTGGTCCGCAATGGACAG  
GTCTTAAACCCGAACCTTACGTATTTCCGACCTTCAAACAATGAAGACCTACGACGAGCCGTTCAACATCTCAGATGAGT  
GACGGTACTGCTATTTGGTCAAAAATTTGGCGTTGCGTATCTGGTTAATCGTGACAAGGTAACGACGGTGTCCAGACCTA  
TCGCAAAAGCGGTAGACGATATACCCGAATCAGATCTGCGTCAAAAATTTGCCGACTCTTAAACCGGTTTGGCCAGCCGTA  
TGACCACCTGACTCATTTATCGACGGTGGTAAGCGCAATTTGCTGGACAACGCACTGAAAGATATTCAGAAAGAGATGTCT  
CCGGTTGGTATTGAGCTTACGCTGAGCCTGTCTATGGGTTGGAAAGCCTGATTACCCAAAACCGCTATTGAAATCTAACCC  
CAAAGTAAACGGCTAACACGCGTACTCTGCAACGTCAGCAGGAAGTTGAAACGCGTAAAGCTGAGGCGAATATGCTACGTT  
AACAGGCTAATGGTGAAGCTGATGCTATCCGTGCTGCTGCGCAAGCAGAACGCGACGCAATTCGCTCTGCGCGGTGAAGCT  
CTGCGTCAAACCCGAAGCTTATGGAGCTGGAAGCCATCAATAATGGAATGGCCAGTTACCGCAGTACATGACTCAAGG  
GGCTAACACTCCTTTTCAATTACAGTGAATAA

>Cluster\_27447

ATGTTTGCAGTTTTCATCAAGACGCGTGTGCGGGCTTTACCTTAAAGCCTCGGCACCAGTCTGCTGTTTGTGTGCTGAT  
TTTGTGCTGCGCGCTCTCGCGCTGGTGTAGTGCAGCTGGTCTCAGATGAGTGGGCGCAGTACTGGGAGGTGATCACAAC  
CGCAGGTGGTTCGCGGCTTACAAAGTACGCTGCTGTGACGCTTTTGTGCGCTCGATTTTTAACGGCGTTTTTGGTTGCTG  
ATGGCGTGGATCTTAAACCCGCTATCGCTTTCCGGGCGCACGCTGCTTGTGATGCGCTGATGGATTTACCCTTTGCGCTGCC  
AACGGCAGTTCGCGGTTTGGACGCTGGCTCGCTTTTTCCGTTGAACGGTTTTTACGGTGAATGGCTGGCGAAGTTTGATA  
TCAAAGTTACCTATACCTGGCTGGGATGCGGGTGGCGATGGCTTTTACCAGTATTCCGTTTTGTTGGTGGCTGCTGAG  
CCGGTGTGGAAGAGTTAGGCCCGGAATATGAAGAAGCGGGGAAACGCTTGGTGAACGCGCTGGCAGAGTTTCTGCAA  
AGTGGTGTGCGCGAGCTTTCTCCGCGCTGGTGGCGGCGTGGCGCTGCTGTTACCCTAGTCTTGGTGGATTTGGCG  
CGGTGATTTTCTATCGCCGGAACATCGCTGGAAGACGGAAGTACGCTGCTGATGATTTTCTGTTCCGTTACAGGAGTTT  
GATTACCCGCGCGGAGCGGATTTGCTCGGTGATCTCCGCGCATCCCTGCTGCTGTTTCAATTAACACTCTGCA  
AAGTCCGTTTTGTTGCGGCTGTGGTAGGTCATTA

>Cluster\_58128

ATGGCGTTCAAATTCAAAACCTTTGCGGCAGTGGGAGCCCTGATCGGATCACTGGCACGGTAGGCTGCGGTGAGGATGA  
AAAAGATCCAAAACCATTTAAAGTCCGCGTGTATTTGGTGGCGAACAGCAGGTTGCAGAAAGTCCGCGAGAAAGTTGCCA  
AAGACAAATATGGCTGGACGTTGAGCTGGTAACTTCAACGACTATGTTCTGCCAAACGAAGCATTGAGCAAAGCGGAT  
ATCAGCAGCCAAACGCTTCCAGCATAAACCGTACTTGAATCAGCAACTGAAAGATCGTGGCTACAACTGGTCCGAGTAGG  
CAACACTTTTGTGTTATCCGATTTGCTGGTTACTCCAAGAAAATCAAAATCACTGGATGAACCTGCAGGATGTTCCGAGGTTG  
CCGTGCCAAACGACCCAACTAACCTTGGTCTTCACTGCTGCTGCTGCAAAAAGTGGGCTGATCAAACTGAAAGATGGC  
GTTGGCCTGCTGCCGACCGTTCTTGTATGTTGTTGAGAACCCAAAATCTGAAAATTTGTTGAACTGGAAGCACCGCAACT

GCCGCGTTCTCTGGACGACGCGCAAATCGCTCTGGCAGTTATCAATACCACCTATGCCAGCCAGATTGGCCTGACTCCGG  
CGAAAGACGGTATCTTTGTTGAAGATAAAGAGTCCCGTACGTAACCTGATCGTGACGCGTGAAGATAACAAAGACGCC  
GAGAACGTGAAGAAATTCGTCCAGGCTTATCAGTCTGACGAAGTTACGAAGCAGCAAACAAAGTGTTTAACGGCGGAGC  
TGTAAAGGCTGGTAA

>Cluster\_39915

ATGTTTTTAGTTCGACTCACACTGCCATCTCGATGGTCTGGATTATGAATCTTTGCATAAGGACGTGGATGACGTTCTGGC  
GAAAGCCGCGCAGCGATGTGAAATTTTGTCTGGCAGTCGCCACAACATTACCGGGTATTTTACATATGCGGGATCTGG  
TAGGCGAACGTGACAACGTCGTATTTCTTGTGGCGTGCATCCACTCAACCAGAATGATCCCTACGATGTAGAAGATTTA  
CGCGCTCTGGCGGCAGAAGAGGGTGTGTAGCGCTGGGTGAAACCGGGCTGGATTATTATACACACCGGAAACTAAAGT  
ACGTCAGCAAGAGTCTTTCATTCATCATATCCAGATTGGTCTGTAACGAACAAGCCGGTTATCGTCCATACCCGTGACG  
CCCCGCCGATACGCTGGCAATTCTGCGCGAAGAAAAGTACGAGGATTGCGGTGGCGTACTACTGTTTACAGAGGAC  
AGAGAAACGGCGGGTAAATTTACTGGATCTCGGATTTTACATCTCCTTTTCCGGCATTTGTGACCTCCGTAATCGGGAGCA  
ACTCGCGGATGCTGCGGATATGTCCTCCCTGGATCGGTTACTGGTGGAAACTGACTCACCTTACCCTTCCGCGGTACCGC  
ATCGAGGAAAAGAGAATCAACCTGCGATGGTTCGTGACGTTGCAGAATACATGGCTGTGTGAAAGGTGTGCGGTTGAA  
GAACTGGCGCAGGTAACCCAGGATAACTTCGCCCTGTGTTTACATCGACGCTTCCCGCTTCAATCCATCCGTTGA

>Cluster\_59730

ATGGAGATTACCACCTCTTCAAATGTGCTGGTATTTATCGTAGCCTGTATCGCAGGTATGGGATCAATCCTCGATGAATT  
TCAGTTTACCGTCCGCTAATCGCGTGTACCCTGGTGGGTATCGTTCTTGGGGATATGAAAACCGGTATTTATTCGGTG  
GTAGCTGGAAATGATCGCGCTGGGCTGGATGAACATCGGTGCTGCAGTTGCGCTGACGCGCTCTGGCTTCTATCATTT  
TCTACCATTCTGGTTATCGCAGGTCATCAGAGCATTTGGTGCAGGTTGCACATGGCAATCCCTCTGGCCGCTCGCGGCA  
GGTACTGACCATCATCGTTCTGTAATTTACCGTTGCTTTCCAGCAGCGTGGGATAAGGCTGCTGATAACGGCAACCTGA  
CAGCGATTTCTGGATCCAGGTTTCTTCTGTTCTGCAAGCAATGCGTGTGGCTATTTCCGGCCGCTCATGTTGCGCTG  
TCTGTTGGTACCAGCAAGTACAGAAATGCTGAAATGCGATTCCGGAAGTGGTACCAATGGTCTGAAATACGCGGTTGG  
CATGATCGTGGTGGTGGTATGCGATGGTATCAACATGATGGTGTGCTGGCTACTGATGCCGTTCTTCTACCTCGGCT  
TCGTAACCGCAGCATTCACCAACTTTAACTGGTGTGCTCTGGGTGTGATTGGTACTGTTATGGCAGTGTCTACATCCAA  
CTTAGCCGAAATACAACCGGTAGCCGCTGCTCAGGAGCTGGTAAACACGATCTCGATAACGAACTGGACTA  
A

>Cluster\_9479

ATGACATTACCAACAACATTTTATTCATTCCTCCGATATTTACCTCGTTTTTCTGCTCCACCGACAAACCAGCAAACTAAA  
ATTTTCATCAATACGACCGCTACATTTACTGTCAAATCGTGGAAAGAGATCATAATTGCGATGGCAGACGACTGTTGAGA  
TCCACAACATAGATCTCTCAGACTGGCAAGCATTAATAAACTAGCGATGGCGTATAATGCTTACGATGGAATAACAATG  
AAGGGTGATAAATCTTTTGGATGGAACCATGAAGCTACATTAGATAAATTTACGCCAGAAATACAATAAAGCTTACCG  
GGGTGCGCGTTAACCCGAGAACTGAAATATTTATGCAAGATGTCGAATCCTTCGAACCCAACAGTAAATACACAATAC  
ACGAGGTTGTTTTGGGACCTGGTATGGTACTCCAGACTATACCGCCAAACGATAGGATACGTTGTAACCCCTTCTGCG  
CAAATGCCTAATTTGCTGGTCACTGAACATACCAACAATCGATTTTATATCGACCAACTTCGCACTGTTACAGCGGCTT  
TAATGCCCTCGGATTTCTGATGCTGCTTAAACCGGTATTTCTGATTTACCCCATGATTTGAAAAATTTGGTCTGGGTT  
CCTTATCAAGTTCAGCCGAATCTACTCGGTTTTGGGTTTTCGAGCGAGTCCCGCAGGAGCGAGACATCAGTTGCGCTCGT  
ATGTATCTAACCGCAGCAAAACATCTGACTTATGACACAAGAGAATGGTGAATGGATCTACTTGCAGAACTAA

>Cluster\_5368

GTGACGCAACCCAGTGCTCCGGCTCCCCAAATCGTCATCGACAGTACGACGACAAAGCCTGGCGCGACACGCTGTTAAA  
AGTGGCGGCCATTTTATGTGAACGCCAGCGGATTCACCGCAGGGCTACCGTCTGCGCGCCATGCGCTTTGGCAGAAACA  
TCACAGTACGCCCCAGGCGAAAGCGATGGCCGACTCCACTGGCTGCGGCTCCTCCGCGATATGGTGGCAGATTTACCAT  
GCTCAGCTCGGTAGTCCGATATGGCGCTGTGGCAGCGGTGGAGAAAAGCCTACTGCTGGCTCCTTACTGCTGGATGG  
TCACTGCCTTTCTGCACAGACGGCGCTGCGTCTGGGTTACAAAACAGGTTGGCAGACGCCATCCGCGATGAGGTATCCGCT  
TCCCTGAGCGTCTGCCAGCTTACCAGGCTGCTGTTTTAATGACCACACACCGTTTATCAGTGAAGCAGACGAAACAATGG  
CTGGCAGCTTCGCCCCGACGCAAAAGTTCACCGGTTGCGCAAACTCGGTGAGGAATCGAAGGCAGCAGAGCTGTTTTCG  
TGAGCAGGCTGTGAGGCGCGCTGCGATATCTGGACATGCTACCCGAAAGGCGATCCCGCGATCAGTTTCCACCGCAGT  
ACCTTGGCCGACAGTTGACGGAAGAGGCGGGGCTGGTACAGCTTGGCAGCAGCAGTACCGGATGTTGTTTACGATGGGA  
TTGCAGATGATGTTGGCAGACTGGGAGCCGCTCCCTGTTGAGCAGCTAGAACAAAAATTCACGGCAGAACAAATA

>Cluster\_55243

GTGGCGCGGATAAACCGTATTTTCGATCAGGCTCTGTGCTTTTACTTTTTACCACCTGCCTTTAACGCCATGCCCCATGC  
TTCAAAGCAAGCCAGGGAGAGTTCTGCTACCACATCATACCAAAAAAGCAGATAAAAAAGAAAAGCACGGCAACCACCA  
AAAAGACCCAGAAAACAGCGAAAAGCCGCGCAGTAAAAGTACGACAAAAGCAAAACCGCTTCTTCCGTTAAAAAATCT  
TCCATTACCGCTTTTAAAAACGCCAAAACCTCGCAGCAAAACCGCGTCAATAAAAACCGGCTCAGCCAGCTTTACCGAAAA  
GTGTACCAAACTGAGGGCTATAAATCGCATTTGTGAAAGTCAAAAATGCGCGCTCAGGAATCTTTGCGCAGCACA  
AAGCGAAGGTGCAAAAAGCTACGAAAGTGGCAATGAATAAATGATGCAGCAAAATGGTAAGCCATATCGTTGGGGTGGC  
AGCTCACCGCTACCGGTTTTGATTTGACGCGGCTGGTTTTATTTACGCTTATAAAGATTTGGTGAATAATCGTATTCGGC  
TACGGCGAATGAAATGATACCTGCGTGTGATGACGCGCAATCGAACCTAGTGAACCTGAAAACCGGCACTGCTTTT  
TCCGTACTCAGGGACGCGCACAGCCGATCATGTCGGCGTGTATGTCGGCAACGCAAAATTTATTCAGTACCCGCGACA  
GGTCAGGAAATTCAAATCACTTCTCTCAGTGAAGACTACTGGCAGCGCACTATGTTGGCGCTCGTGGGTAATGACCCC  
AAAAACACTTCGCTAA

>Cluster\_23423

GTGCCGAGAAAATCGTCTAACCTACTGAAACGCAGATTAAAAATGCGAGAAATGTTGCGCCAGGGTGAAATCAAAGT  
TGATGACTTATCTGCGCAACTTGGTGTCTTGGCGTGACGATCCCGCGGATCTCAGTTATCTGGAGCAACAGGGATATTT  
TAAAGCGATCATTTGGCGGTGCTATTTGCGACACCCTCTCCTGAAACGAGGATACAACCGATCCGCGCATTTGCT  
CTGGCACAACAAGTGAATAAGCACGACATTTGCGCAGCATTAATTCGGATCTGACACGCTATTTCTTGGCATGGGAC  
AATCTGCCGTAAGATCATTTCCATTTGCTCAGCGAAGTGAATAAATGCGCTGTGATCACAACGATCCCGAACATGCGCTGC  
TGGCAAAATCAGTTTATTTGATGGCGAAATATACTGGCTGGCAGTGAATGTTGCGCCCGATACCGCACTGGCCGAAAA  
CAGCTTGAACAGGCATTTACGATTTACCATTTACATATGCAATTTCTGAAATCAGCCATCTGGATGCTGATGGTACTTT  
AAATATCAACGTTCCAGACTCGCCGCTGCTTGGCAGCTCTGTTTTCTGATCATGCCAGAAATAAGACGGTATTCGTTGCC  
CCGATCTGCGCCATCAACGGCTGCTATCGGGCATTTGATCAGGCGAGAAATGTTGATGCTCAGCCGACGATTAACGAA  
CAATATCAGCAACAATTCAGTGGCTGATTTCTGTTATCTTTTATACAGTAATGAGTGTCTTACCTGGTCCAATCGCGA  
AAGGTTACAGGAATGA

>Cluster\_12324

GTGACGCAATCTGCAATGTGCATCCCGTGTGGCCCGCCGGAACGGCAATCTGCGCATCTGGTTCATGTGCCCTTTCCG  
TGGCGGACGAGTACGCGCTTTCCGCACTGGCAAGCTGAGCACTGGCTGATTTGCGCGCTTTCTTGGTACCTGGCCGG  
GGCGGATCGCCTTCGCCATCTGGAACCGCTCAGAAGCATTACACAACCTGGCGGCACTGCTGGCGAAGCAGCTGGAAGCA  
TCCGATCTGCGCTGACACGCGCTTTTACTCGCCGGGCACAGCATGGGGGCGCAGGTGGCGTTTGAACCTGCGCACTTCT  
GGAGCAACGGGGCTTGGCCACAAGGACTGATTAATTTCCGGTGCATGCCCGCATCTGCATCTGACACGCCAGCTCA

GCCATCGCGATGATGCCGACTTTATCGCTGAGCTGATAGACATTTGGCGGATGTTCTCCTGAAC TGCGGGAAAACAGGAA  
TTAATGTCGCTGTTTCTTCTCTTCTGCGCGTGATTTTTACGCCACCAGAGCTATCCTACGACTCGCCGAGCTGTCG  
TCCGCGCTGCGCAGCCTGCGCTGTTATGTTGCGGCAGCCACGATCGCGAAGCCTCTGGCAGCAGGTGATGCCTGGC  
GTCAGTGGCTGAGCCACGTTACAGGCCCGGTGGTGATTGACGGCGATCATTTCTATCCATTCAACAAGCCCGTCTTTT  
TTTACGCGAGATTGTCGCCATTTTCCCCACGCAATTTCTGCAATGACCGGCTTCAAAAACAGCCAGTACTTCAGAAAG  
GTGA

>Cluster\_48568

ATGAGTTCGGTTGAAAATGTAATGACAAATGATGATCTGGATGAGCTGACAGCCATGTTGCAATCAGTTGATGAACCAGT  
AAAAAAGCTGCACAGGTTGAAAATACTGATGATATTGACGATCTGCTTCTCGGCTCGATGCTGGCGTAGCCATGAGTT  
CTGATGATGTTGCCGAAGAACTGTTCAATGAAGAAAAGCAGGTGATTTACAGCTCCGCTTTAAATGAGTTGGAGTTAGCT  
CATGAGCCTATAAACGTAATTAAGGCTGAAAGTGTGAATCTGCCGAAAACGAGCCAGAACAAATGGGGTTTATGAGGT  
TGAAGAGTGTGTTGAGGTTAATGATGAATTAAGTTCACAGTCAAAATGATAGCAATACAAATAAAAAGCTCGTACTG  
CAAGAGTCTCGTTTACTTTAAGTGAATAAGATGATTTGTTTCAATAAAGCAGGCTTAGAAAAAGATATTTCTTA  
GACGCTTACGAAAACGCGCTGTCAAAGCAAAGGATAAGATATTAACCTTCTTAATGTTTGGTTAGCGGAGGTCCAGATAT  
TAGTGTTTACACGTAATTTCTCATGAGACACCTTCTCAGAAAAGAGGCTACAAGTAAATAGTATTAAGATTGCTTTAA  
TGAGCAATCCAGAAAACCGTATCCGCTAACACTGCGTCAACTCAGGCTGGGCAATGATGGCTGATTTCCAGCTACA  
GGAATTGCTGTTAGAGACGGTGGAAATCTAACATTTGAACGAAGAATCACCGATCGTTAAGAAGTTTGTGCGCGGATACAC  
TATTGGATGA

>Cluster\_64792

ATGGCTGGAATCAGCGTCAGGGGTGGCGTTCATCCGTGTCATGGCATGGAGCTTGAACGATGGAAGGTGCCTCCTT  
CACACCTTCCGGCATCACCGTGAAGAAGTGACCGGCTCGCGGTTTATGGCTGGAAGGTAAACCCCGCCGCAAAAGC  
TGGATGCAAAATCCGGGCGGTGGTATATCGGCTGATGAAATCATCGGCTGGGAAAATATCACGGCAGAGTTTCAG  
GCAGATACCGGGAAACCTGGATGATGGCGAATGCTTGGCAGGAGATGAACGAAAACGACGGCGGCAAAATTTCCGCT  
GGTACTGATGGCAAAACAAAGCAACGCATTGCATAA

>Cluster\_39818

ATGGTGGAGAAGAAATGGCAGCTGTGCAAAAAATCCAGACTGGGCGAAGCGTTAGCTATGTAATCAGTGGGATGC  
CCTCTGTTATTACAGTGTGACGGTCTGGCGGAGGCGGATAAATGCTGCGGAAAGAGCGCTTCTGTCAGTCTGTCTCG  
GAAAAGAAACTTTATGTTCTTTGGCAGCGATCACGGCGGCGAGCGTGGAGCAGCTGTTGTACGGCTGATCGGCTCC  
CGTCTGAACGGTATCGATCCGGAAGCGTATCTGCGCCATATCTGAGCGTACTGCCGGAATGGCTTCCAACCGAGTTGA  
TGAATCCTGCCATGGAAACGTAGTACTACCAATAAAATAA

>Cluster\_30588

GTGACCTTTGAGCAGAAAAAGCCGGGCCATTGCCCTGATGGACAGCAAAAAGATGTGGCGGAGCAATTATGCCCTCC  
TCTTCTGCGTATTCTCTGGCGGCTGGGTATCCGGCTTCCGCCATTACCTTTATGCGGTTCTGGCAGGTACGGTGTCTGA  
CGGGGGCTTATGGGGCACTTCCGCGGATGTGCAATGTGGTTTATCTACTGGGGGCCCTCAGGAATGATAGCAGGTGAG  
GCCATTATATAAGTATCACGAGTGGTTTTTTGTCGGACTGTGCATGGCCTCTTCCACTGGTGGCGCAGGAAAGTTAA  
CCGGCTGCCACCATTGGGATGATGTGTA

>Cluster\_37497

ATGTCATTTCTGTACCCATCCAATTTGTTCAAAATTTCTGCTGATGAAACCCGCTGGGCATCGTTTTACTGCTCAGCGA  
ACTGGGAGAGTTATGCTCTGCGATCTCTGCACCTGCTCTGCAGCTCGAGCCAAAGATCTCCCGCACCTGGCATTGC  
TGGCTGAAAAGCGGGCTATTGCTGGACCGCAAGCAAGTAAAGTGGTTTACTACCGCTTATCACCGCATATCCAGCATGG  
GCGCGAAAATTTATGATGAGGCTGGCGATGTGAACAGGAAAAGGTTACGGCGATTGTCGCAACCTGGCTCGACAAAA  
CTGTTCCGGGACAGTAAGAACATTTGCAGTTAA

>Cluster\_17475

ATGATAACAAATGATGAAGTATTACAAAGATGAAAATAACGTCGTATATGCCTACGATGCGTATGGCACACAGGATGCTTT  
TATCAAAGAGGGCTTGTGCCAATCACAGAGTGAAGGTTATGAAAATTTATTAATCCCCACCAGTCTATGAACAACCTCA  
TCCAGGCTGCTGAAAATGAGCGACAGCGATTACTGTCCGCGCTGATGCAATTTATGCTCGACTGGCGCACAGAGCTGATG  
CTGGGTGAAATCAGCGATGCCAACAGAGCTAAACTTTCCGGCTGGCTTTTATATAAGAATCAGGTTAAGGCTGTTGATGT  
AACAAACCGACCTGAGCATGTTAACTGGCTGTCTATCCCGAACTTTAG

>Cluster\_27646

GTGGCCAAAATTTGCTGATATTGCTTTTACGATAACAAAAGCCAGAACTGGAAAATGGGGTGGCTTTCTATTTCAA  
AACCTTTGGTTTTCTGTTGAAGCTCAGGTTGTGGAGTTTGTCCACCGATGGAAGGCAAACTGCTCGTCTGGCCTGGC  
ACGGATGGTCCGGTGAAGAAAATACTACTCAACGCTCTCGATGTACATCATGCAATGGTTACTGGAGGATCTTTCCAGTAA  
CGGTTACGTTATCTGACGAGGAAACACAGAACGGAGTTCCGGCAAAAAGAACTGGCAAATACTCGCCGAAACCAATGCT  
GAATGGTCACAGCATGGCTTGATGGCTAGTTGAAGCAGCAACGAAATAA

>Cluster\_44350

ATGGATTATTCACAGTTAAGTGAATTTGAAATTAACGTGGCGGTTATTCGAAGCATTTCATAACGGATCGCCGGATTACAA  
AGAAGGTGAGAATGGCGATATGGTGTCTCATTTGAGGGAGACATGTAACGGAGACGCAAGTTGAAGTGAAGTTG  
AGCGCGATCCTTTAACCATGCGCAAAACCCAGCAGACTCATGGCCGATTTGAAAATACAGGATTAAGCATTATCAAT  
CTCGATGAAGACGAGTGGGGTGACGCGGTGTCGCTACTGTAATCTAAGCGAGCTATACATGAAAATCCCTTTCGCGC  
CGCATGATGTCTTTCTCATGATGCAGAGAATCCAATAA

>Cluster\_20789

ATGGAAACTTCTATTTTCGAATCAAAAAGAGGTGTTGAGTATCAACTAGTTAATCACTCAGGCCTTGAATTTGAAGTTCC  
TCTTGATGGCAAGGCCGTTGGTAGCATTGTGTTTAGAGAGGTTGAGCTTCCACATCCACCTTATGTACTGTATCACATTA  
CGAATTTAGGCCTTGATAAATGCAAAAAGCAAGGTGTTGGGAGAGCTTGCCTGTTGTTCCATAAGGAAATTTATAGCGCT  
CCACTCAGTCCGGCAGAGATGACGGTATCCTGGAAGATGATGGAAGTCACTTACAGGGGATGGGGTTGGTTTTATAGC  
CAAAATGAGACAAGAAGGAATAGTCTGCCCTAAAACAGAGTAA

>Cluster\_3509

ATGAAATCATTAACCACGAAACAGTGCAGGATATTCTGATACATGGCTGCAGGACAATATCGACTGCGAATCAGGAAT  
TATCTTCGACAACGATGAGGATAAAAACAGATTCGGCAGCAGCTTGCCTGTGTCGGCGGAGTTTACTGACTTTTCAGAT  
TCTCAAAATTAATAACGGACAGGCTTTTATATGACCCGTAAGACCCGTCAGCTTATTAAGCAGTTTCTCTATT  
GTTATCGCTGTGATTTCTTCCGGTAAATGAGGCAAGAACCCATGTCACAAATTTTATATGACAGACAACCACTTTCCCGT  
GCATCTTCCAGTTCCGGGACGTTAA

>Cluster\_15979

GTGGCTGACTGGCAAAATACCAATCATCATTTCTTGGCGGAGCTTGGCTGTTGCTGGCTTTATCCTGCTGAAGAAGCATAA  
AGACCGTGATCAAAAAGTCAAGTCTCTATGGGTATCCGGCGAACAGCACAAATGGCTGACTATTTACCACCTACCGAA  
AATCAGGCCGTTGGGTATTCGAATGGGATGATCTGTTTCTGAAAAGCGACCAAAAGTCAATGGGAGACATCAGCGAATGC  
ATGATGTTTGAAGAAAGAAAATCCGGCGCAACCCGAGAAGAGTTAACGAAGCGTGGAGGCGATTAAGTGAGAGGGGGTA  
TCAATGA

>Cluster\_7968

ATGTTTTCTATAAAACCAGGACCCAGAAATTTACCTATCGACAACCCACATTGTTATCATGGAACATTACTGACGGGGA  
TCTAAATTCAAAATTAATACATAGAAATCTAACTGTATAACAAATATTAATAATCTTGTGGAGTTACCTCAAG  
GATTAAGACAGAGAAATATATCAACTTTTCACGCAGAAAAAGTTATAATGATCTGTTAAAAACGATTATAAAAT  
TCCCTTTCTCCAGATACAACCTTACCAGAGTTGAATAAAGCAGCACAGCGTAGCATTACAGCGCCAGACAGGATAGGAGA  
AAGAAAAACATAG

>Cluster\_48989

ATGCTGTTAAAAATGGAAGAGATTAAGCTTCAGCTCCGTCGGATGATGATTTCTCTGATGAAGATGAGTTGCTTGA  
GCTTGGTAAGGCCGCTCAGAGTCGTACGGAAAACCTTCCCTAACCGTAAGTTGTATGCAACCGCAGATGACAGGCCGCTGCGG  
ATGATCCTGATGGCTTGTGATATCTGATGATGTGAAGCTGGCCGCTTCTGCTACTTGTGAGCCATTTCTACGAAAAACCGC  
TCAACGGTTACAGACGTTGAGAAAATGGAGTTGCCAATGAGTTTTAACTGGTTGGTTGTTCTTATCGCCTTATACCACT  
ATGA

>Cluster\_42473

ATGGATCAGTTCGAATGTATTAACGTTACCAGCAGCACCAGAAAGTTGCAGGAAAAAGAGGCGGTGCTGGTCGATATTCC  
CGATCCACAGAGTTTCGCAATGGGGCATGCGACCCAGGCTTCCATTTAACTAACGACACACTGGGCGGCTTTATGCGTG  
ATAACGACTTTGACACACCGGTGATGGTGTATGTATCACGGCAATAGCAGCAAGGCGCGGCGCAGTATCTGCTGCAA  
CAGGGTACGATGTGGTCTACAGCATTGATGGCGGCTTTGAAGCTGGCAGCGCCAGTTTCCCGCAGAGGTGGCGTACGG  
CGCGTAA

>Cluster\_34021

ATGTTTGTACCTAAGCGTGGTGTATTTGCTGGCTGGATTTTGGAGCCGAGAAAGGAAAGAGATCGGAAAGTATCGCCC  
GGCACTCATACTGCTCCCATGAGCAATATAACCGACTCACCGGGCTTGTATATGCTGCCCATAGTACGAGCATACGAA  
ATGCTCCACAGAAAGTTCCGGTAACAAATCTGGACGCCCCAGCGTTGTAGCAACCACACTCATTTCAAACCTTGGACTGG  
CGTACGCGAAAGCGGCTTAATCACAGAGGCAGAAAGTGGGGTATTTAATGATGTGCTTGAAGAGTCAATTACCCTGAT  
TGGCGGAGAGCATCTGCTAAGTAA

>Cluster\_24674

ATGCCCTTACGCGGAAACGATATCAGACAGAAAAAGGTTGAGGTTCCATACACCGACTGGATGAAAAAATTAAGACGTAA  
AGACCAGACCGCAGCGTTAAAGGTGGATTCAGAAATGCGCCGCTATGAGCGGAAATTTGGAGATCATAAATTCGAAA  
GGGACGGTGTCTGGGAATTACGAGTTGATTACGGTCTGGTTACAGGGTTTATTTCAATCGAAGATGGCGAAATAATT  
CTTCTGCTCATTTGGAGGGAATAAAAAAATCTCAGACAGTCGATTTAGATAAAGCGTTAGTTATCTGCAAGATTTTAAAAA  
GAGGTCAAAAAATGACAGCCACTAA

>Cluster\_15788

ATGGCTATTGAAGCGCTGCGGCGACTGTTCCATTAAGCCCCGGTGAACGCTGAATGGACTTAATCATATTGCGGAATT  
AAGAGCGAAAGTTTGGCCTGAATATTGAGTCAGAGCTTGGAGCGTTTATTAAGATATGCGTGATCCACGGGATATCA  
ATAATGAACAAAATAAACGGGCACTGGCTGCCATATTCCTTATGGCAAAAATTCAGCTGACGTCATAGCATCAGCATT  
AATGAGCTGACCACTGACGAAAAGCGGGAGCTGATTAAGCAATGAATCATTTTCGTGACGAGTGGTGGCTTATTTCCAG  
ACGGCTAACCATGCCGAATTA

>Cluster\_66874

ATGAAAAATTTGTTTCGACACCGAGGGAACGGTTCATTTCCATTCAGACTGAAATCCATTTTATCTGGACGATTTACAC  
CACAGCTAAAACCTTTACGTCACTGCTGTTGGGCACATCGGACAGAAAGCAATACTGGAGCGCTGCTCTGTATTTTTC  
TCTTATGGCTACGTGGTCTCTGTGCTGCGGTGGTCTGGGCTGTAGTGCCTGGCTTAAGGCTTTATTTGTGTCGAAA  
TTTGGCGTTTCAGCACTCTGGTTCAGCCAGTAAAGAGTTTGTGCTCAGGGTATCGGTAAGATGGTGGGGGCCATCTG  
CCGAAAGTTACTCTATTAAGTAA

>Cluster\_64797

ATGTCAGGCACTTCGCTTAATTCACAACGGCTGGACACTTCTCGCATCACTTGCACGGCGATTATTAATGTCTTCGCC  
GGTCTACCGCCGCGCGGTATCGCCTTTACGCGTGGCGAAAACACAGTGAAGTCACCGAAGAACAACCTGGCGATCATCC  
GTGCCGACAGCGTGTGTCTGTTGATTCAGCAACGGCAGCAGAAACGCTCGCTGAGGCCTGGGGGGCTGGACGTTCTGGGT  
GTGGGCGATCTGAACGCCGATCCGTGCGACCGTTCGGGCTGAGTACGGCAAAACCGGAACACTTTACCGCAGGGGG  
GGAACCCAAAGTGAAGCGGTGATGCGGTGCTGGGGGAAAACGTCACCTGCGGCACAAATCAAAGCAGCACTGGCTGAGG  
CGCAAGCATGA

>Cluster\_14899

ATGACAGCACAGATAGCGGCTTACGGTTCGGCTGGTGGACACCCGAGGTTAAACAGACCAGCAAGGGCACACCGATGAC  
GCTGGCGGTATGGCGGTATCACGTCATGCGAGTCAGGCACAGGACGGACAGGCGACGTTATGGCTATCGGTCTATCGCAT  
TTGGTAAGCAGGCCGACTTCTGGCTAAACATCAAAAAGGCGACGTTGCCAGCGTATCCGGCACGATGACGGTACGCCAG  
TGGACCGGACAGAACGGGAGACCGCTCAGGGTTATCAGGTTATGACAGACAGGTAATCAGTCCCGTGGCGACGCTCC  
TGGCGGAAACAGACGCAAAACACAGGCGCACAGGGTAATCAGCCACCAGCGGAGGCGATGACCCCTTACGGTGTATGATA  
TTCCGTTCTGA

>Cluster\_24998

ATGAAAACGGTCAATCACCCTTCGGCACCTTCGATGTGTTTCATGTGCGGTATCTGCGCTTTTACAACGTGCCCGCAGCT  
GGCGAAGCGCTGCTGGTGGCGGTATCGTCCGACGCTTAAATATCGCAAAAAGGGCAGAGCACCGGTTTACCTCAGG  
ATGACCGCATGGCGATCATCGCCGGGCTGGCGTGGATGGCGTATTTCTGGAAGAGTTCGTTGGAGCAGAAAGCGGAG  
TATCTGCGGGGTACCGTGGGATATTTAGTGTATGGGCGATGACTGGGCGAGAAAGTTTACAGCTTCGCGTATATTTG  
TGAGGTGGTCTATTTCCCGCAGCGGCTGGTGTGACGACGGGGATAATTGAGGTGATTAGGGGGAATATATAAAGT  
ACTAA

>Cluster\_50258

ATGAAAAACGAAACCTTCGGTGCCTGCTTACATAGCGGTAATAAATTAATACTGTCTCAGGCCGATTAGGTAAGCT  
GGTCAAAGTGGCTCAGCTAAACAATTTCTCAATGGGAAAGAGATGAAACACAGCCGGCGGGGAAAGATTTATCGCACTGA  
GCCAAGCGCTTCAGTCTCACCGACTTGGCTTCTTTTGGGATGAAGATAAAACAACAGGCGAACCAGTATCCGCAATAAT  
CAGCCAGCCATTTGACAGAAAGTCAAAAAGAGTTACTTCAACTGTTTCGACGCACTGCTGACTCAGAGCAAAAGGCCCT  
GTTGTGAGAGATGCGTGCCTGAGTTGAAAATTTCAACAAACTTTTGAAGAACTACTTAAAGTTCGCAAAAAGAGCGCAA  
ACAAATAA

>Cluster\_54486

ATGAATGCGTCATATGCACTTATTGAAAATGGGATGGTGTGAAATGTCATTTGCTGGGATGGCGAGGCTGAATTCACAGT  
GCCGGATAATCAGCAGCTCATTAATATTTCTGATATCAGTGTGAGCAGCCGGAATCGGCTGGGTTTATTCAGACGGGGGAT  
TTACTGCACACCCACCCAGGAACGTTCTCATGATGAACTGGTAGCTGACGCTGAACAGAAAAACAGTCTGTTAGAC  
GCAGCAATGGCCAAATACGCGTATTCAAGTTAAAGTTCAGTTCAGGCGGCGCAACTGACGCAAGAGGAAACTACCCGACT  
TAACGTTGTGCTGGATTATATCGAGGCTGTGACGGCAATAGATACCAGCACCGCACCTGATATCATTTGGCCTGTTTTC  
CTGCAAGCAGATAA

>Cluster\_58981

ATGCTCGATAAGCTCAGCGCCGCTTACGTTTTCAACAAGAGGCGCTCAATCTGCGCGCCAGCGTCAGGAAGTGTGCTGGC  
AGCAACATCGCCAAATGCCGATACCCCTGGTTATCAGGCGCGGATATCGATTTTGCAGTGAACCTAAAAAAGTCAATGC

AACGTGGACGGGATGCAACCAAGTGTGGTTGCCTGACGATGACCTCAACGCAACACATTCGGGCGCAGGCGCTGACGCCCT  
CCTACCGCAGAATGCAATACCGTATTCGGACAGCCCTTCGCTTACGGTAAACCGTCGATATGGATCGCGAACGCAC  
CCAGTTTGCAGATAACAGCTGCAATACAGATGAGCCTTAGCGCGTTAGCGGGCAAATCAAAGGCATGATGACGTTT  
TACAGAGCGGAAATTA  
>Cluster\_31213  
ATGATATGGAAACGAAAAATCACCTGGAAGCACTGAATGCTATGGGGGAAAGGAAACATGGTGGGATTGCTGGATATTCG  
CTTTGAACATATTTGGTGTGACACCCCTTGAAGCGACAATGCCAGTAGACTCACGGACAAGCAGCCTTTCCGGGTTGCTGC  
ATGGAGGTGCATCCGTGGTACTGGCCGAAAGTATCGGTTCCGTTGCGGTTATTTATGTACCGAAGGTGAGCAAAAAGTG  
GTTGGTCTGGAAATCAATGCTAACCCAGTCCGCTCGGCACAGAGAAGGGCGGTTGCGCGGCTATGCAAAACCGTTGCATCT  
CGGTTCCGCTCACCAGGTTGCGAGATTGAAATCTTCGATGAGAAAGGGCGTTTGTGCTGTTCTGCTCACGATTGACGACCG  
CTATTTTGTGA  
>Cluster\_57904  
ATGACATCCGACGAGACTGGCAGTTACAGCAACTGGGCATTACCCAGTGGTCTGCTGCGCTCGCCCTGGCGCGTTGCAGGG  
GGAGATTGCCATTGCGATCCCGGCACACGTCGGTCTGGTGTGTTGGCAAACGATCTTCCCGCCCTGACTGATCCTTTAG  
TGAGCGATGTTCTGCGCGCATTAACCGTCAGCCCGACAGGTGCTGCAACTGACGCCAGAAAAAATCGCGATGCTGCCG  
CAAGGCAGTCCGTCGAACAGCTGGCGGTTGGTACTGACGAACCGCTATCACTGGAAGGCGCTCAGGTGGCATCACCGGC  
GCTCACCGATTTACGGGCAACCAACGCACGCGCCGCTTATGGCAACAAATTTGCACATATGAACACGATTTCTTCC  
CTCGAAACGACTGA  
>Cluster\_9807  
ATGAAAAGTTTTTCATTGGAGTTCAAAAAGGTAGTATCAGAAAAGTACCTGGAGGGAGAGTTGAGTCTGAAATCTGTAGC  
AAGGATGTACGGTATCAGTCCCTGCACAGTAAGAAAAATGGGCTTATGCTTATCGGGAACATGGGATAAGCATACTTACGG  
GTAAAAAAGGACGCTATTTCTGCTGAGTTAAACTCACAGTAGTAAAGAAGTCTGTGGATGACGTTTCTGTTGCTGAA  
GTAACCGTAAAGCAGGAAATACAGCCTTTGGTACTGTATGCAACTGGCTGAAAAATATAGAAAAATATATAGCGAAGAT  
GCTTTTCATTCGAAAAATAAAAAATAGTATTCCTGTGCGCGATAAAAAGCGCCATTTACAGACCACCACCTACCAACATTA  
>Cluster\_28439  
ATGACCATTTCAGTTTATCTCTGCGGAGGAGATAATTTATTTCCAGATAAGTTGCTTAGCGTTACACCAGGTGTAACAGG  
AATGTCTGATCCAGGGCGAGCAGAAGCGCTTTTGTACCGGGTACTGAATAAGTACGAGTATGAAGGCGTTTCCGATCTTT  
GGCTGTGCGCGGCGATGCATCTATTTGGCAATCTCGCGGCTCATATTTTAAATGATGGTAATAAGCGCACCGCCTGTTT  
ATCACGCTATTTCTTAAACGTAACGGCCTCATACTGTGCTGCAACCCAGAGTTTGTGAAATTGACGGTTGATGTGGC  
GGCGGAAAGTATCGTTAGAAGATATCTTACCCGCTTGCCTCAACCGAAACCTGA  
>Cluster\_28698  
ATGAATACATTACCCGACACTCAGTACGGGAGGCATCGGGCTGCCGCTCCTCCGTACCATCTGGCAGACACTGCTCAC  
CCGACTGCTGGACCAGCACTATGGCCTCAGCTGAATGACACACCGCTTCCGCTGATGAACGTGTGATTGAGCAGCATATTG  
AGGCAGGGATTTCACTGTGTGACGCGGTGAACCTTCTCGTTGAAAAATACGCGCTGGTACGTACCGACAGCCGGGATTC  
AGCGCAGGAGCCCATCGCAGTTAATCAACAGCATTGATATTTCTCCGGCTCGCAGGGCGACCGGCTGATGACCCGGAA  
CAATTACAGAATGGTAAATAACATTACCCAGGGCAAGCATCCGGAGGCAAAAACGATGA  
>Cluster\_19972  
ATGAAAAGACATCGATACTGAAACCCGGAATAACACCGCGCGGATGATGTGACGGCAGGTGAGGATATGGCTGTGCAACG  
TGGCGTAAAACATGACCCGACCAATGAGCGTGGTGGCGAAAAAATCAGTATGTGGAGATCACCGGGCTATTGAACAGG  
CTGGATCCCTGCGCGGCTGTGCTGTCTGATGTGCTGAAATCTGAAAGCGGATACCATGTTACGCTGTTGCCTCGCGTG  
ACCTCGCCACGACTGGATGAAGTATGATTAATAAATGCTTACAGCGATTTTATTCAGTTGTCGCTGTGGCTGTAA  
TTTTATGAGCGAGCCAGACTCTGCGCGAAGAGCGTGCAGGAGACGGCAGCGTAA  
>Cluster\_63338  
ATGACCATTGACGCAACGCTTGAAGAAGCCATTGACGCTGCACGCAAGAATTTCTTGCAGACAACCCCGGCATCGACGC  
CGAAGATGCGAATGTGCAACAGTTCATGCCCCAAAAATACGTTTTCGAGGACGCGCACATCATGTGGCAAGTTGAGTTTT  
TTGCCGACGAAGGGGAAGAAGGTGAATGTTTACCTATGCTTAGCGGTGAAGCCGCGCAAAAGTGTTTTTGATGGCGACTAT  
GATGAGATAGAGATACGCGAGGAGTGGCAGGAAGATAACATTAATGATGAAAGGAGGGAATTTACGCTTGGCTGAGCC  
ACCGCTGGATACCGAGGAAGGACGCGCAGCAGCTGATGAGTGGATGAACGTTAA  
>Cluster\_22108  
ATGCGAAAAATAAAAAACAAAAATCTACTTGCCTACAGCTTTGACAGGAAACATGGATAAAACATAATCCCTGTTTTACA  
GGATTTAAGAAAAACGATATACAGCGACAGAATGTTATCAAGGCTTGCAGATAGCGGCAATATGTTTATCCATAGTTCCAG  
TTGGGTATCCGGTTGCTAAATACAAAAACCGGGGATTAGCATAGGTATAGAGCCATTGAATCCAATGATAAGACAAGAT  
CTGACTCTGGATATATAGTGGTCTGAGAAACGGGAAAAACATCACAGGAGATTAATGGTTTACTTAAACAGGTCATTGCT  
AAAAGCAATAAGCACTTTTAAAGGATCACATCAACGAATATGAATCAGTAAAAATCAAAATGCGATAA  
>Cluster\_24053  
ATGACTACAACGCTTTTAGCCGTTAACGGAACGCTGATGCGCGCCTGGAACCAACCAATATGCAAAAAGCGGGCGG  
TATTTTTCGCTGAAAGACCGAAGTACGCCCAATACCGGTTGTTGGAGTATTAATGATCGCCATCCGGGAATGATTCGGC  
TGAATGAAGGAGGAACACAGCTGACGTAGAAATTTGGCAATTTACCGCTGGCAGTTTTCGCTGTTAATGAGCGAA  
CCGCTGGGCTGGCAATTTGGCAAAATCAAACTTGGCGATGGTAGCGAAGTGTGGGCGTACTGGCAGAAAACTGGCTGAC  
CGAAGGCCAACGGGAAATACAGAACTGGGTAGCTGGCGCAAAATACACCGGGCATTTCATACATGTGTAA  
>Cluster\_39340  
ATGAAAGAACCAGCAACAGCCAGAAATCTTTGCTGACCTTGCACACCAGTTCGCAACACATTTGAAAGAAATGGTTGGAAT  
GGAAGATGATATCGCTGAACAGATTGCCGCTGCTGTTGCTAATCACATGATGCAGGCATGGGGCGGACAAACCATTTACC  
TGCCCAAAGGCATGGTCTTCATGACATCGCGCGGGACTATAAAATCTGGCAGGAGTGTGATGAGCAGCAACTACCGCGAA  
CTGGCGAAGAAGTACAACCTGACTTTGCAAGTGGATCTACAAGTGGTAAAAAGATCCAGCGTTCTGAAAGCGCCCGCG  
ACAGCTCCCATTTATCTTATCATTTGATGAACCTGAAGCAGTAAAAATCACCCCGGAAGTGA  
>Cluster\_43395  
ATGGGAAGAAAGAAAAAGAACTTAAACAGTATTGAAAAAACAGTAACTTCAATTCAACAAGACAACGTCACCCGAC  
ACACCAATAACGAAATTCAGGGGAAGAGATAATTTATTTCTTGAACAGAAATCCCTGAAATTAAGCGATGAAGAAT  
TAGAAATAATCCAGTCAATGTCAGGCAATTTACTTTCGCCCAAGAAACAAGAAAAACAAATATCATTTCTGATGCTCGCTG  
AGGCGGTGGCAGCTTTTAGGGTTAGTCTCTATCATATTTTTTGGGATTTAACGCTTTCAATAATTGTGTAGGTGGTGC  
ATCGGAAGTGCATCTGATGGCTCATTTAGAAGATACATTAGCTTCTAACAAACGTTCTAACTAA  
>Cluster\_46632  
ATGACTTATACGGTAAAAATTCAGGGATGATGCGCTCAAGGAATGGCTGAAACTGGATAAGACCATTCAACAACAGTTTGT  
GAAAAAATAAAAAATGCAGCGAAAAATCTCATATACCGTCGGCAAACTAAGAGGGCTAAAGGACTGCTACAAAATTA  
AATACGTCATCGGATTTCTGCTGTTTATCAGGTGATTGACGATATGTTAATTTATGCGGTTGTTGCGGTAGGAAAA  
CGAGAACGTAGTAACGTTTATAATCTCGCCAGTGAAGAAATGAGATAG  
>Cluster\_39472  
ATGACTGAACAAGAAATGCGGAGATACCAAGTGCACAAAAAGTTCGCGCCCTGAAGATTGGCTCTATAGAACATAAGCC

AAACCCAGATCAGTCTGGTAAGACTGGCTCTTCTAGTTATGGGGCAATTATTCATCCGGATGATAAGAAATACGCAGCAT  
TTGATGTTAGCGCGGAATATATCTGTAAGCACCCACCAATGTCTGGAGCTATTACGTTGCTATGAGGATGGATATGAA  
TCATATTTCTCTGCTGAGGTATTTGAGTCTGGATATTCAAAATATAG  
>Cluster\_17112  
ATGCAACAAGAAGGCTTAGGAATGGTAGAAACAAAGGCTTAACTGCCCCATAGAGGCCGACAGCCATGGTGAAGTC  
GGCAAATGTTTTGCTGGTTCGGCTACGAAAAAATAGGTTCCGGGCTGGTGACCGTCATCGTTCGTTGGTGTATGTCGGGGCGG  
TAAAAGCGCAACAGACGCGGGTCCCGAGCTGCGCGTAACGTCGGCGAAGTAAAAGCCGTACACGTTATCCCCGCCCA  
CATACCGATGTCGAAAAAATCTTACCAAAGGGAATTAACCCATGA  
>Cluster\_47067  
ATGAATAACCATTTTGGTAAAGGCTTAAAGCAACGCATGCCGACAGTGGCGTTAAATGTGACAAAAAT  
CTGTGCCGATTATAAACCGGTTTGTATAGGCTACTCACACCGGATGTACGAAAAGACCGGAGATCGCCAGCTTAGCG  
CCTGGGAAGCGGGTATTTGACGCGCGCTATGGACTGGATAAAGAGATGGTAATGGATTTCTTTCTGAGAAATATTC  
TGTCTACGTTGCGCTTTTATGGCCGTTATCGCCTCGAAAAATGA  
>Cluster\_42997  
ATGGATAAGGCACATTTTGGAGCGTTGACTCACAGCATGGCCAGATGAATGAAATTTGAAGGAACGCGACAGCCTTC  
CGGACTTTTGAAGTTGATGCTATGAAAATCAAAGAAATACGCCGCGCTTCAGGGTTGTCACAATCTAAATTTGCCGATC  
TTATTTCTGTAAGCGTAGACACGTTGCGTAACTGGGAGCAGGGCGACGTTACCAGCCGGGCTGCAAAAGGCTTTGCTG  
CGAGCGATTGCCAATGATCCGCAACATGTGCTGCAAGCACTTAACCGTTAG  
>Cluster\_22098  
ATGAAGATAGAACTTATTACGACAAAACAGTTTATTGAACAAGCCGAATATTATTCAGGAGCTATATGGACGGATTGGC  
AAGGAATGCACCGATGATTTTTATTATTTTATCAACAATAAAATACAAATATGAATGACATCATGGAAAGTATCATAAAA  
AAACGAGATATCATTTTTACGATGACTCAGAAGAAGTAAAAGGAATCGGATTTATGGAGAAGTAAGCCACAGTAAGGTA  
AAGCAACACCTTCGTCAGCTTTGGATTATCTATAAGTGTGTATACCGCTAA  
>Cluster\_45241  
ATGGATGAAGAATATCGTAAAGACCTGCAATTTGGTTTGGCTGACGCATGCGTTCGCTGATGCCGAGAGTATT  
CATGGAGGCTATGCCGCAAGAATGGCAAGAGAAGATGGCGCAGTTGCTTTTGGAGTATGGCGACAGATCAAAACGGATG  
TCTGCGGAGTTACAGCTGTTTCTGTTACTGCCAAAAGACGGCAACAACCGCTTTATGAGGATGCCAGAAGATATTCGAA  
TATCGTCAATCCCGCGGTGAGTTTATCGAATCATTTCTGAAGAAGTAG  
>Cluster\_49774  
ATGAAAAATATATTTGCTTAACTGGCTGAAGATTTCTAGTCAATGAAAAATGGTGATTTGTCGCTAGCTGATATTAACG  
CGATAAAACACTGGGGATATGGTGAATCAACATATAGCCATTTATGCGGATAAAATTAATCTCTGTCTGATGTGGTCA  
ATTTACTTTGTTAAACGCGCTGATTTTCAACAAGCAAAATCTCCTCCGTGGATGAAGTACGAAAAATTAACGACAGAAATGCC  
AGCTATTGCGCTGATGAATTTAAAAAATGAACGACAAAAGGAGCTGGTAA  
>Cluster\_55785  
ATGTTTACTATCAACGCGAAGTACGTAAGAGCAGGGTAAGGGTGGCAGCCCGCCTGCGTGGCGTAAACAGTTCCC  
GGCAATCATCTACCGTGGCAAAGAGCGCGCTGGCTATCGAGCTGGATCACGACAAAAGTATGAACATGCAAGCTAAAG  
CTGAATTTACAGCGAAGTCTGACCATCGTTGTTGACGGTAAAGAAATCAAAGTTAAAGCTCAGGACGTACAGCGTAC  
CCGTACAACCGAAGCTGCAGCAGATCGACTTCGTTCCGCTTAA  
>Cluster\_28667  
ATGGACAAAGGCTATGAAGCCGAATGGCTGGAGGCTGTCTGAAAAACCGCGTTACGAACTCATATCCAGTCAAGGAA  
AGAGGAGTCGGAAGCCATCAAAGCAGCGATTTTAAAGCTCACCGCTGGTTCGTTGGAGAGAACGCACAGTTGGATGAATC  
GCTTCCGTCGGGTGTTGACTCTCTGGGAGAAGAAAGTCAAAAAATATGTTGGCAATGCTGTATCTTACCTGCGCGCTCAT  
GTCTGGAATAAAATCCATTTGGGATAG  
>Cluster\_11446  
ATGGTAACCATTTGCTGGAAAGAATCCAAGGTACGGCAAAAAGCCGCTACAAAGCTCGCAGAGCAGAACTTATTGCCGA  
CGCAGCAGTAATGAAGCACTGGCGCGAAAAATGGCGTAAAGCTCTCTGGTTGCGTCAGAGCAGACAAAAGCAGCATCAC  
TCGGAAGCCTTCGCTGCAAGAAGCAGATGAATGCAGTGGAAAGTATTTGCCTGCCAAACGTAGCCATTTACGCGGCAGGC  
TACCGGAAATCAAAAACACTGACGGCGAGATGA  
>Cluster\_10546  
ATGTCAGATAACACTATTTAAATCATACCTCAGCACATGACCGCCACATCAGTTCTTATTACGCTGATCGTCTGAAAC  
AATCATTACTTTTTACCGCATGAATTTGAGCATCACATGCAGTCTGATGAGCAAGGAAAGAAATAGCTTCCAAGTAAAG  
TTGAGTTGATCCCTAACATGTCACTCTCAATGACCCGGATCAAGCTGTTGCATTAGTAAAATCATTACAGGTAGCTCTC  
AGGATAATGGGCTATGGAAAGACTGA  
>Cluster\_11724  
ATGGGGAAATTTGGAGGTATGTCCATGGTGGAGATTACTCATCAGCACCAAATAGCATTAAGAAATGTGCAAAAAATA  
TGGTTTCGAGCCAGAACCAAGTAAAGATCTGTCAATGCAAAACCTCCTGGCTATCAACTACTGATGCGGCTCTTGCAACTG  
GTGCTACAATTTGGCGCAGGGTATGTTATATATAGAGTATTCGATTTATACCTTCACTTGCACCACCTCTTTGGTGGTCA  
ATACCTGCAACGTTGTTACTCCATGA  
>Cluster\_48086  
ATGGTCACAGTTAACCTTCAATTTGCCCGGTTGCCAGTCCGTTACGTTTACCCTCACGGGCAGAACCCAAAAAGACATGA  
TCGATTCGCGCGCGTACTGTCAACCGGATTTTACGCTCAGTTACTGTTACGAGCCCGTAAACCGGGAGTTAAAGACC  
AAATCGCTGAAATGACTTTCAACGGTCCGGGTTCCGATATGCCCCGTACGCTGAAAAATCGGCATTAATACAGTCAATC  
CGAACTTTAAAAAATCTCGCCAGGAAATAA  
>Cluster\_48664  
ATGACTGATTTACCATTACCACAAAGCACAATAATGTTTCTCGAATCATGGCTGGACTTGCAGGAAACAGAACAGCA  
AGAAATGGATCATGTGGATTATGATGAGCAGGTAAAGCAGCGATTTCTTCCACTTTGAGGGATGCGTTTACGACATGCGC  
ACTTCAATGCGAGATGACCGCTTCCCTGAATGGCAGCAAGCTATCCACTAACGCCTTTGCCATGCTGATGATCCGTTG  
GATGATTCAGGGGATACCATCGACATCGTCTGCTCCACTGA  
>Cluster\_66859  
ATGGGAAAAAATCAGGAAGAAAGAAAACTCCCGTCATTTGGTGAAAAAACGCTGACTTTTTTACCACCGTCTTTATC  
CGAAAAACAGATATTTACACCTGTATTTACTGAACAGACGGCAGAAATCAGCCCCCGGAAATAAATTCATCTGCCG  
TCGAAACACATATCCCGAAGCGCCAGCCAGGAAGAAGAAAAAGAAAGACACGTTTTTCCACTCCCCTCCACTGGACC  
CGTGAGGGCACTGTGCAAAATAGTCGGTGGTGA  
>Cluster\_1274  
ATGGACAATAACACCATTTCTCTACAGGAGTTGCTGACAGCATTTCCAGGCTTCGGGAAGACGTGAATACCTTACCCT  
CGCTTCTCATATCTGGCATTTCTCAATTTCAAGGGAACAGATGCAATCAACGCTGGCATCAATCCAGTTTGAATCATGCA  
ATCCCAAATGGTCTCAGGAACAACAAGACTCTTTACAGGCGGCTGCTGTATTACTGGATGAAAAATATGCTGGTAAAAAT  
ACCATTTCCGGGACTCTTCAGAGAACCCGTA  
>Cluster\_58953

ATGTTTCAGACCTTTTTTAAACTCTCTTATGCTCGGCAGTTTGTTTTTTCTTTTATTGCCATTGCTGGAAGCACCGTGCA  
AGGGGGCGTGATCCATTTTTATGGCCAAATTTGGAAACCGGCATGTGACGTGACACCCAGTCATCACCCGTAGAAAATGA  
ACTGCCACAGAAATGGTTCTATTCGGGGCAAACCTACTCCAGCAAAGCGTTAATGAGCGGCAATGTCAAAAACGCGCAA  
ATAGCCCTCAGTAAAAGTGAGTATCTTTGATAAACAGAAAAAGCTGGCTGTAATGAACATCGAATAAATACTAA  
>Cluster\_36075  
ATGACGATCACAACAAACAGAGTAGAAAAAATCATATATCGCCATGAAATGGGACTGAACAGCGATATCACTGCCGAAGA  
GGTTTATGACCTGGCTGTACTGGCGCTGAATTTATCAAATATCGCAAACCTGAAGCGATACGAGCTTGATATGGATGGTT  
CGGACTCGTGGGTCAGGATTTGGCGCAGATATGACTGAAGATCCTGATGGTGATTATGTCCTGTTTATGACGTGGTT  
AAGTTGTTTGAATTTGATAACAACCACTCAAAGTTAGAAATCCCGGCAAAGGAGGCTGCCAGTGAGCAAGATTGA  
>Cluster\_20536  
ATGATGGATAAAGTACGCCGTGAGTCGATGCGCTGGAATCTGATGCTGGCGCTGAACAAGCGCGGCCCTATACCAGCAA  
TGAACGGTTTTACTGGCGGTGATGCAGCGGATTTACCCGGATGCCACCGCGCTGGAGCTGGCGCGGAGCTGGACTATC  
TGGCCGACCGCGGATGCTGGAACTGGTGAAGGAGCGCTGGCGCACCTGGTTCCGGTGATTTAACCCGTCTCGGTGTTGAT  
GTGGTTGAGTACTGTGGACTGCGGCCCGGCATCGCCCGCCGCAAAGTACTGGAGCGAATGA  
>Cluster\_35759  
ATGAATAATGGTGTATTTTTCAAATCAGAAGAGCTTGTGCCCTGCTGATGGCCGGTGGTTTGGCGAAAAAGAAGTGCA  
TGACTTTTGTGAATTTTGTATATGAGACGTCTCATGAAAAAGCTATTGATGAGGTCATGGCGTACCGGTTTGGCATTATG  
CTGAGTACTGAGTCTCTACTGGATTATGAAAAATCTCCGCGCTATTGCTGATGGCAACGATAAATCAGCAGCCGTGGCT  
GCACTGGATGTGTACGGCAAATGAGTCTGAAATTTTTATCTGAAATTTATCTGAGGGCCGCAAATGA  
>Cluster\_35594  
ATGTATGAGCTACTATTTTCAACCCGAAGCGGAAAGCGAAATTTATGACCTCGAACCTATATGCAAGCAAAGGTACTTAA  
GGGACTAGAAAAGCTGGAAGCGAAAGGGCCGAACTCCGCTATCCAGATACAGGCATTATCCAGGATGGTTTGGTTGAGT  
TGCGCGTAGGAAGAAAAGACATTTCAAGAACATTTTTTCTTACGCTAAAGGTCGAAAGATCTATATTTTAAAGACGTTT  
ATTAAGAAGACCCCTAAGACTCCGAAGCGGAAATGCTCTGGCGACGTCAGATGGGAGAACTGAAAGATGGCTGTTA  
A  
>Cluster\_66404  
ATGAAGGCAATACAATGTTGTTATTTCTTGTCTTAGTCTCCAGTCATTTAATGGCTGGAGTTATGGGTGATGATAATAT  
ATTTTTAAGTAATTCGGATTCAGCTGCTTATATTTGTGTGGCTAAAATATTTCCAGATGGAGAAAAATTTTTAATATATA  
AAGTAAATATAATTAATGCTAGTTCAAAAAAGATGTTTTTTTTTATGAAAGCCCAACATCAACCCACAATGACATAATG  
GGGGCGGGGGAATGTCATATGCCTATGAAATATGATGTAATAATATATGTCATTGAGAAAAAAGAGCAGAATGAG  
GTAA  
>Cluster\_66537  
ATGAATGGCACTATTTATCAGCGGATAGAAGACAATGCGCATTTTACGGGAGTTAGTCGAAAAACGGCAACGGTTTGGCAC  
CATCCTGTGATTTATGCTGGCAGTTTATATCGGCTTATTTTACTGATCGCTTCGCGCCCGGCTGGCTGGGCACCG  
CGCTGAATCCGAACACAGCGTCACACGCGGTAATCCAATGGTGTGGAGTGATTTGATCTCCTTTGTTCTCACCCGGT  
ATCTACATCTGGCGGCAACGGCGAATTCGACCGCTTAATAATGAAGTCTGCATGAGGTACAAGCATCATGA  
>Cluster\_48099  
ATGACGAAAAATTTGACAGTAAACCGCATGCTCTCAGGTGTTGCCATACCTATATGGCAGCAGAGGCTGGAAAAGTGC  
CGCGAAAGCAAAGGCTGGGAAGTGAAGTAGAAACCCAGGGTCAATTTGGCTGGAAAAATGAAGTACTGCGGAAGATG  
TGGCGAGCGCTGATATGGTGTATTCTGACCAAAGATATCGCATCAAGTTTGAAGAGCGTTTGGCTGGCAAGACCATCGTG  
CGGTCACATCAGCGATGCAGTAAACGTGCTGACGCCATTATGAGCAAATGAAGCTCACCTGGCGCAAACCGCTTA  
A  
>Cluster\_23976  
ATGAGTGAAGCCAGAATTACACCTGATGAAGTCAAGGCACATCTTCGACTTGATGATGATTTATCCGGTGAAGGCGAACT  
TCTGAAAAATGTATACCGATGCGCGCTGGAAGCCTGCCAGAAGCATATCGGGAACCGTTTGAAGACGGGCTGGAATTTA  
CCCCGGCAATGCGTGTGGTTGCTGATGTACATCGCTTTCCTGTACGAGAACAGGGAAGCAGTTTACCAGTGGAGCAG  
TCTGAACCTGCTATGGCTATTTCTGCGCTCTGGTGGTTTATCTGATGTTGGGGTGTACTGA  
>Cluster\_34630  
ATGACACAAACAAGTTACAGCAAATATCACAGCGCAGCTTGTATCGCGCAGAAACAGATTTACTCATCAACCTGTCAAC  
GCTTACCCAGCGCGGCTTGGCAAAGATGATTTGGCTGTCAATGCAAGATAAGCAGAACAGACTGGAGGTTTATGCTT  
CGGTCTTGTGTGCTTTCCGGAATGTCATCAGACATCAGTCCGATAGTAGGGCTTTTAAAGTATCGCTTGTGAAATCACA  
AAGAAAAACGCCCGCGGCAACCGAGCGTTCTGAACAAATCCAGATGGAATTTCTGA  
>Cluster\_49701  
ATGAACGCTTATTACATTCAGGATCGTCTTGGAGCTCAGAGCTGGGCGGCTACTACCAGCAGATAGCCCGTGAAGAGAA  
AGAGGCAGAACTGGCAGACGACATGGA AAAAGGCTGCCAGCACCTGTTTGAATCGCTATGCATCGGTCAATTTGCAAC  
GCCAGGGGCCAGCAAAAAGCCATTACCCGTGCGTTTGTATGACGATGTTGAGTTTTCAGGAGCGCATGGCAGAACACATC  
CGGTACATGGTTGAAACCATTTGCTACCATCAGGTTGATATTGATTCAGAGGTATAA  
>Cluster\_6334  
ATGAGTATTGATCGCACTTCGCCCTGTAAGCCTGTAAGCACCGTTCAACCGCGGAAACCACTGACGCGCCGGTAAACGAA  
CAGCCGGGCGGCAAAAACAACCGCTCCACCAGCACAGTGTGACGTTAAGCGACGCGCAAGCAAACTGATGCAACCCG  
GCAGCAGTGATATCAATCTTGAACGTGTGAAAGCGTTAAAACCTGGCGATTCTGTAACGGTGAACAAAAATGGACACCGGC  
AAAATTTCCGATGCGCTGATCAACGAAGCGCAGCAAGACTTGCAGAGTAACTGA  
>Cluster\_67007  
ATGAGCGCATTTTCTTTTAAACCACTTATCAGCCAATCGGTGATCAACAGAAAGACGCAATCGCACAAATCGACATCAT  
GCAGAGTCGTGCTGTTTTCAGGCAATCTTGCATATCAGAGCAACAGGATGCGGAAACGCTGATGAAACAGTTAGGGCAAA  
TCAATGATGAACCTGGGCGCTGTTGGATAGCCTGGAAAAATCACAGCAGTTATCAGAAAAAAGCCAGTGAATTTGAGT  
GCACTGATGATGCTTTTTCAGCCAACAGACCGGTCAGCCATGACCAGTCCGGTGTGA  
>Cluster\_14953  
ATGAAATGCTCATCTGTTTTACTTCAACCACTAATCATGTTTTTACATTCGAACGAGTAACGCTTTGCACTATTATCCT  
TATGCATAAGGATACGGGACAACAGTATGTTGCTTACTGATAACAATAAAATTCGTGACTATAAAACCGGAATTTG  
TTCTCAGTTTGGCGAATTAAGCAGAGTGTGTTGATTTAGTCTTTTCTACAGGGACGAATATGAAAAATATTTTGTAT  
TCGTTAAAAGATGGCGATGAATGCTTGGTTTTAAAGATTTTATGAGTGCCTTCGTTAA  
>Cluster\_39330  
ATGAAACCCACCTTACTTCCGGCGCACGATCTTGGCGTACTCAAAGCCCTGAAAGGCTACTCGCTCACTGGGTTGTC  
CAATGGCGAATTTGGCGGCGGCTTGCATGAATCCCGGCAATATCACCCGCGCGCTGACACTCTGATCGAAGAGGGAC  
TGGTACAACCGCTGGAAAAATGGGCGCTTCCGATGAGTATGGCGATGCTGCAAAATCGCCACGCCCACGCGACGGAGTC  
ACACGCGCTCAGGACAGGCTGAATGAAATGAATCAGCGGTTGCTGGCTGGCAGTCCGCTAA  
>Cluster\_37500  
ATGCAAGTTGGAAGAGTGCCTAAAGCGTGAAGAGCTAGGTCACCCGACCGGTTTGTTCATATTTAAACATCTTGTCAA



AGCCGGGAACAAGGGTTGCCGGTCCGGTGGTGTGAGTTGCAAAAGCAGCTGGGATACCTGGCTCCACTCAGCCACATATAT  
CAGCACTGTATCGGTAGGACTGGTCAAACAAAACCGTGAAGTGGAGCTGGACGCTGATGTGTGTTTTCGCAATACGCAATGCTG  
GAAGCGATAATTGAATTCCTACGCGAGGAGTGTGCGTAAATAGCAAAATGCTGA  
>Cluster\_3136  
ATGACAAAACAGATATCAACCAGTAAAAACCCGTAAACAGCATTCGCCTGAATTCGCAGTGAAGCCCTGAAGCTTGC  
TGAACGCATCGGTGTTACTGCGCGAGCCCGTGAACCTCAGCCTGTATGAATCACAGCTCTACAACCTGGCGCAGTAAACAGC  
AAAATCAGCAGACGTCTTCTGAACGTGAACCTGGAGATGCTACCGAGATGTCACGTCTCAAACGCCAGCTGGCAGACCG  
GATGAAGAGCTGGCTATCTCCAAAAGGCCGACATACTTCGCGAAGCGCTGAAATGA  
>Cluster\_28165  
ATGGAAACACTCACCGCCATCAGCCGTTGGCTGGCAAAACAACATGTTGTACCTGGTGTGTGCAGCAGGAAGGGGAAC  
GTGGTGGCCAAATGCTTTTTATCTTTTTGATGCGCAGAAAGTGCCTTCTACATTTTGACGGAAGAAAAACCGCTCATG  
CGCAGATGAGCGGGCCGCGAGCGCAATTCGCGGAACGGTAAACGGTACGCCGAAAACGGTAGCGTTAATTCGCGCGCTG  
CAGTTTAAAGGTGAGATCCGCGAGACTGGAAGGCCGAGGAAAGCCACTCGCACGCAAGGCGTACAATCGTCTGCTTTCCGCT  
TGCCAGAATGCTGTGCGCCCGGTATGGGAAATCCGGCTCGATGAAATCAAATCACCGACAACCGCTGGGCTTTGGTA  
AAAACTGGTCTGGCAACGGTAA  
>Cluster\_12687  
ATGAGTATGGTTGCCAGAACTGAACCCAGACCCGAGAGGACGACATCACCGATACCGATGATGGCGATACCCGCATTTCC  
AGCGGGTGCATTTGCGCCGATATTTGTGCTGCGCGAGCTGCGTCTGGCGGTACGACTGCGGGCCGCTGACCACCTCCC  
GCCTGCTGCATATGCGACCGGGCTGTGGCACAGTTACC CGGAGCTGGAAGCATGCGAGCAGGAACAGCAGCGACGT  
GGCCATCAGACGCTGGCCGATGTTCCGGCACCGTAATTAACGGAGAAAGCGTCAATCTTGGCACTGGCGCAATGCTGT  
TTATACCGCCAGCGCGCCCTGATTTCTGGAGCGTTACC CGATGCGGACACAACGGACAAAGGGCAGCCCGGGCGGACG  
CACTGGATATACAGACATCGGATTTGTGGCGGATGTGAGCTGGGCCATCTCTGACATTTCTGTGCGCCCGCGAATCTTT  
GCGGAATTTGCTGCTGA  
>Cluster\_14966  
ATGAGACATTTTCTTAAGGCTCTTTCTTTGTTGTTTCCCTGTTACCAGCTACATTTGTGTGCGGCTGAAATCCAGGGGAA  
AGTTATTCGCGTTCTCGATGGCGACACCATAGAAGTTAAACACTACCCGCGAAAATTTGTGTGTATGAAGTTCCGATCA  
GGTTTCGATTGATAAATATCGATGCTCCTGAAAAGAAACAGGCTTTCCGGGCACTGGTACGAAATCAGCTTAAAGCTCTG  
CTCGCAGGCAATCAGTTACCGTCTCTTATACGCGAGACAGCCGCTACGGACGATTAATCGGTGCTGTTCCAGCAGAA  
CGGCACGGATGCCAGCCGCTTTATGGTTCAGCTGCGGCTGCATGGGTATATGAACGTTACAACACAGATAAATCATTAC  
CGGCTTTGCAACGGGAAGCGCAGGAACAAAAGCGTGGTTTATGGGCTGACAGTAAATCCGGTTCACCGTGGGAATGGCGA  
CATAAACAGAACTGA  
>Cluster\_59656  
ATGCGTAAATTAAGTGCATGTTTGTGCTCTACCCTGGCTCTTGGCGGGCTAACCTGGCCATGCCGCGAGACACCAC  
TACCAGCAGCAGCGCTGACGCGAAGCCGATGATGCACCAAAAGGCAAGTTCCGCTCCGATCAGGACATGATGTTCAAAG  
ACCTGAACCTGACCGCAGCGCAGAAACAGCAGATCCCGGAAATCATGAAAGGCCAGCGTGACCAGATGAAACGCTCCGCCG  
CTGGAAGAACCGCCGCAATGCATGACATCATTTGCCAGGATACCTTCGATAAAGTAAAGCTGAAGCCGAGATCGCAAA  
AATGGAAGAACAGCGCAAAGCTAACATGCTGGCGCACATGAAACCCAGAACAAAATTTACAACATCTTGACGCCGGAAC  
AGAAAAAGCAATTTAATGCTAATTTTGAAGAAGCGTCTGACAGAACCTCCAGCGCAAAAGGTAATGCTGCAACTGCT  
GAATAA  
>Cluster\_7572  
ATGAGAAAGACTTTCTTAACCTGCTTTGTGTGCTAGTAGCCATAGCTCATGTGCTGATGAAGACATCACCTTTCACGG  
GACATTAATGTCACCCGCAACCTGTAGCATCAGCGGTGGTAAAACCATGAAAGTCAATTTCCGCGATCTCATTATCGACG  
ACATCAACGGCAACTATGGTCTGTAAGAGGTGCATATGAATCACTTGTGACTCGACGACCCGCTATCCGATCCAGGATGGGAG  
ATGACCTTACCTGGACTGGTACACAAACAGTTTTAAATGATGACGAAATGAAACTGATGTACCCGGTTTTGGTATCGA  
GCTTCAGCAGCATGGTACGCGTTTAAACTCAATCTCGCTTGTATCAACGCCACTGATTTTACGCAAAAGCCGAAAGC  
TGGAGGCCGTACCGGTAAGGCGAGTGTGCTGTTAAGCGATACGAATTTTTCGGCTTACGCAACATACGGGTGGAT  
TATCAATGA  
>Cluster\_60461  
TTGTCTGAAGTCAATTTAGCCACGAATACTGGATGCGTCAACGCGCTGACGCTGGCGAAACGTCCTGGGATGAGCGGGA  
AGTGCCGGTGGCGCGGTATTAGTGCATAAACAACCGGTAATCGCGAAGGCTGGAACCGCCGATGGTTCGCCATGATG  
CCACCGCACATGCAAAATCATGGCCCTCGCGAGGGTGGTCTGGTGAAGCAAAATTAATCGTCTGATGACGCGCCATG  
TATGTCACGCTTGAACCATGTGTAATGTGTGCCGAGCGATGATCCACAGTGCATTTGGTCCGCTGGTCTTTGGTGGCGG  
TGACGCGAAAACCTGGCGTGCAGGATCTTAAATGGATGTGCTGCATCATCCGGGTATGAAATCACCGAGTGGAAATACCG  
AAGGAATACTGGCGGATGAGTGGCGGCGTGTGCTCAGTGAATTTCTTCGATGCGCCGCAAGGAAATTAAGCGCAGAAA  
AAAGCGCAATCTTCGACGGATTA  
>Cluster\_25594  
ATGGCTAAGACCCGCGCAGTGCATGACGACGATAAAGTCAATTCAGGGTAAGGAACCTTGATCTTTACATCAAAGCCGA  
GCTACAAGCCATGTTGCAAGAGGACTGGAAAAATCCCAATTCAGCATCCAGCTTACATGCCGCTTAAAGCCAAAG  
GAATAGTTAAAGGTGGCATTTAGTACCTCACCTCTCGAAAAATATCATCAATAATTACAGGCTTCGCCAGCATAACAAC  
TATGAAGATGGTAAACGAGAGTTGACAACAGATGAAAAGGCTAAATGGCTATGGGGCAACCGCGCTGCTTATATAAG  
TAAGGCAAAATCGTCTTGATGCTGAAATTTATAGCATTGAAAGCTAAATATGAACGAAATGTACTGGCGCTGCCGACATCA  
TTGAGTATATCGACAACGCAACTCTATCAAAGTTGAGGACATGCTTCGAGACGATCTCATTCGAGAACTTGTGAGCGC  
AAAAGAAATTAAGAATGAGCTAA  
>Cluster\_24239  
ATGAACATTACGCTCGCCCGCATGATGACCGCTGATCCACGGCCAGGTCACCTACCGTCTGGTCTAAAGTGGCTAACGC  
CCAACGCTATTATTATCTGCAATGACGAAGTTTATAACGATGAAGTTCCGCGGACATTAATGCGTCAAGCTGCGCCACCGG  
GAATGAAGGTTAACGTGGTCAATATTGAAAAGCCGCTCGCGGTTTATCACAACCCGCAATATCAGGACGAAACCGTTTTT  
TATCTTTTCACTCGCCACAAGATGCCCTTAGCAATGGTTCGCCAGGGGTAATAATAGGTACCTGAAATATTGGCGGTAT  
GGCTGGCGTCTGGTAAAGAACAGTTAACCAAGCAGTTTCAATTAGATGACGATGATATTAACGCAATTCATGAGTTAA  
ATAATCTTGGCGTACATACCTGATTTACCGCTGAGCGTCAATCCCTCAATCAATATATATCGCAAAAATAAACGAACAG  
TTAATCGCAATTA  
>Cluster\_60584  
ATGACAGAAATCAACATCCGCTGCCCGGCATATGCTCGCTGTTGGATCGTGGGTACGCATTTGGCGGTGCCGATCA  
CAGTGAGCAAGAACTGCGACGTAACCTCGCGCACCGATTTATGGGCAAAAATGGCCAGAAAGAGATTGATGCTACGGCAG  
AAGATTACGAGCGGTTATGCTGGTGCATGAACATGGCTATCTCGATGACAGCCGATTTGTGCGCGCTTTATCGCC  
AGCCGTAGCCGAAAGGTTATGGACCTGCGGCTATTCGCCAGGAATGAAATGAGAAAGGTTTTCGCCGAAAGCGACAGA  
AAAAGCGATGCGTGAATGAGATCGACTGGTGGCAGTTCAGCGCGGATCAGGCGCAGGAAATATGCGCAACCTTTGCG  
CAACTGTCTTTTCAAGAAAAGTTAAGATCCAGCGTTTTCTGCTCTATCGTGGCTATCTGATGGAAGATATCCAGGATTT  
TGGGCAAAATTTGCGGACTGA

>Cluster\_20751

ATGTCCGGCATTACGGATTTTTTTTTCAGTTGTGGCTGCAGTTGGGGCAGTTGTAATCATCCCTGCTGCATATCAACCTAT  
TTATCAATCATCTAAAACAAAAAATATGAGTCTTTGGTAAAAGTTGATGGGGCAATGAAGTGACATCTCTACTTCTT  
ATCCACATTTTCATACATACAGTTAGAGAAAGCAGAAAGTAAATGGACTTTTTTCAGGAGAACTCACCTGCACAAATTAAT  
CCCGAAGAAAAGTTTCGTCTATTCCAGGTAATCAGATGATGCTTAGGACTATAGATGCTGTAATACATCGTACTTTGGCTG  
GCGGGCTATTGAGATTGGAAAGGCTAAAATCAAGTATGACCGCCGACAAATCAGTGTGATTTATCCCAAAAAGGTTG  
CTCAGAAGAACTTGAGACTGATTGCGAACGTGCAATCTTCAGCACAGCCTCCCTTTATGGGAAATGACAAATCTCCG  
GTATAA

>Cluster\_48572

ATGAAGATGATAGCTGCTGTGGCCGTAACATGAGATCGGCATAGCGAACGAACTGCCCTGGCGTTGTTCTACCGATCT  
GAAGCTATTTAAGAGACTCACCAAAAAAGCCACTGTGCTTATGGGGCGTAAAACGATGGAAAGTCTCAACCGCCTCTTC  
CAGAGCGTCATAACCTCGTTTTGACGCGCTCTCATGGCTTTGTACCAATGGATTCTACCTGCTGGTGTGGATGATGTG  
TTGCGATTACAGAGCCTGTGTGGGTGATGGCGGGGAACAAATTTACTCGCTATTTCATGCCGATGTTGAAGAGATTG  
GCTCTCCACATCGCGTTGATGTGCCAAACCGCGATGCATTTCCCGCAAGCATGATGCGTAATTTAGGCTTTGTGC  
CTGTTGAAACAGTTTTTACCAACGAGCCAGCGAGGAAGGCCGCTTTTCGAGATCGTATACAGAAGGTCGTA

>Cluster\_19996

ATGCATAAATCAGAAAATGAAAAATAGATTTTTATTCTGGATGAGCATGAGCGGATATCCAGAAAACAGGGTTCTTTGTG  
TATGGCACTGGGTAAGGGCTTTTTAGTTATAGCTATTTCTTTGGTGTGGCACATTTCTGTGTTCTGGCCTGTATCTGA  
AATCCCTGTGCCCTGTCCGTTGCCGTGTTGTGGGGTATTCAGTCGATTTTTTAAATATACAGCGTACCGGAGGAATCA  
CGCATGGTACTCAGTCTGAGAAATTAACCCGCTTATCGCTGACTGAAGACGTACAGATGTGAGACAGGAAGCT  
TAACCGTTTTGTTGTCGGGTAATAAACTGACTGGTCGGGATGAACAGGATATCCGGCCTCTGCGCAGGAGAAAGTGGATG  
CAATGAGGAGTCTGCCACCCGTACGCTGAACAGGATACTATTCGGAAGTTTACTGAAGGAATAAATCCGAATGA

>Cluster\_18422

ATGCCAAAATTTGTTTTAAGTCGGATTGATGAACGCTTGAATTCACGGTCAGGTCGGCGTTTCTAGTGGTGGATTGCGGG  
GGCAAACTGGTGTGGTAGCCACGATGAGGTTGCCGAGATCCGGTACAACAAAACCTGATGGAAATGGTACTGGCAG  
AAGGGATCGCCGTACGTTTTCTGGAGCTGCAAAAAGTCAATCGACAACATTCATCGCGCCGCGATCGACAGAAAATCCCTG  
CTGGTTTGTAAAACACCGGCCGATTTCTGACGCTGGTGAAGGTTGGCGTTCCGGTGAATCGCATTAACGTTGGCAATAT  
GCACACGCCAATGGCAAGCAACAAATCGCAAAACGGTTTTCTGTGGATGCGGGTATATCGACATTTAACGACCTGA  
AAGCCGTCGGGTGGAATGCTTCCGTTACGGGCTCCCGACAGAGCCTGCTGTGGACCTCTTTAAATTACTTTGA

>Cluster\_64468

ATGGAAAACCCAGAGGAATTACAAAAGAGATTTTGACCTGGGCGCAAGGGCTGGGCAGGAACCTGTCACGATTGAAAT  
CTGCCGGGCTGGTTTCAGTCAGGACGCAATGATGAGTTGAGACTACATGAATTTGAGACCGCGGACGCAATGTGGACT  
GGAGAGCCATCAACAACAATCGGCAGAAAATCTTTCCGTTGTTACGTGGCGAGACAACGGCGGCGCGGAAAACCTCAG  
GTGCTGGCCAGTGTGATGAAAGCCGTGCTACCCGACAGAGCGGGCGGCTGCGAGTCCCGGGCGATCCCGTTTTGCT  
GGCAACGCTGGCGGCAAAAGAGGGTGAAGCGATTAACGCTGTACATCTCCACTTCGCGCCAGAGTTAACTATCCAGG  
AAATTGACGAAGCAATAGCGGCGCTGGTAGCGACGAGGAGAGTGATACGCACCTGGCAAGACCACCATGCGATGA

>Cluster\_54155

ATGAAAACCTCAGGATTACCGCTTAAAGTCAGGAAGCCTTTTAGTGCTTATGGCGAGCTAATCGAAAACGACGAAACGGGATTT  
TTCCATATTAACAATGGCCTGGTGGAGCTTACCACGATTTGGCGCTGGTTGAGATTCTTGAGCAAGACCGTACGCTTA  
TCAGCATTTAACCGCGCGCAACCGCGAAATCTGCCGCTGACCAATTCACGAACTGAAACGTCATCCGCTGGGTACTCAGGGC  
TTTTATCCCGATGAAAGGTGAGGTTTGTGGTGTCTGGCGTTAGGTGACGACAACAGACCTGTCAACGCTGCGGGC  
GTTTATACCAACGGCGAACAGGGAGTGAATTAACATCGTAACGCTTGGCATCAACCACTTTTCGCTGGCAGCGCGTCA  
CCGATTTCTGACCATCGATCGCGGCGGAGTGAACATGTGATGTTGAAAGTATTCCTGAACAGGAACCTGTTTTGGC  
TGA

>Cluster\_41351

ATGCAAGTTTTTATCATGCGTCACGGCGACGAGCCCTCGATGCCGCCAGTGATTCGGTTCGCTCTGACCACTAACGG  
TTGTGACGAATCTGCCCTGATGGCGAACGCTGAAAGGTCAAAAGTGGAAATCGAACGCGTTCTGGTGAGCCGCTTCC  
TGCGAGCCGAGCAAAACCTGGAAGAAGTAGGGGATTGCTGAACCTGCCCTTCCAGTGCAGAAGTTCTGCCGAGTTAACG  
CCCTGCGCGATGTTGGTCTGGTCGGCGCTATTTGACGGCGTTGACCAATGAAGGTGTTGCTTCGGTACTGGTGATCTC  
CCACTTACCGTTAGTTGGGTATCTGGTTGCCGAGTTATGTCCGGGCAAAACCGCCCTATGTTTACCCTTACAGGATTG  
CCAGCGTAACGCTGATGAAAGCGGAAAAGGCCAATTCAACTGGCAAAATGAGCCCTTGTAAATTTGAAGATGGCAAAAAGCA  
ATTTAA

>Cluster\_48662

ATGAATTTTATCGTACTGTAACGCACCCGACATGGCAATATCGTGTAACTTCTCTGACATGAAAACGAGTACT  
TGGTGACATGGCGGACAAATGAGACGGTAGAAGTGTGAGCAAGAAAATGCAATATTGACAGCGACATCATTGGCAATC  
GTCGTTACTCGCGGATTTGAGAAAGCCTATGTGGTAAATTCGATTCGGAACGTTCTGCTTTCCGGTGGCTCCGGG  
CGATTTCTGCCAGTCCAAGCTGATGAGTTCCGCTACGCAGATTTCTTTGATTAAAAACCTCAATCGTCTGTTCAAAATTTTC  
CGACGATGAAGCAGTATCGCAGGGATGCGGATCGCAACAATGCGATTAATGCAAAAACATTAACGATACCGCTGGCG  
TTGACACATGGAACGTTTTCGCTAACTTTATGCTGAATGTATACGCAAGCAACCGCATCCACATCTTGTATGCGGTG  
TAA

>Cluster\_17732

ATGATCTGGGCATTCATCAAAAGCCTACTGGAAACAGTTGCTTATAGTGTGATGCTTGTGCTCTTGTGATCAGCGGCGT  
GGCTGCCCTGGAATGTCCACGGTGACCGCAGTACTATGCCGGTATGCCAGGCGCAGGAAGACCAGAAAACAGGCTGATG  
ATAAAGCCCGTAATCACGATGAACAGGAGAAAGCTACCAATGAACGTGAAGCGCAGCAGAGGATCGACAGGCGCGCAAT  
GATGCTTTGATGCTGCCGCTCGCGTGGCAGGTTGCGAGCAACAGCTCGTTGCCATCCGTTGAGCAGCTCAGGAGTATAA  
CTCCACTGTGCGCACTGGGGCTCAGCGCAGATACCGGAGTTTGTCTGCGCAGCTGCTCAGCAAACTCTCTCAGCGGAA  
ACCGACAGCTGGCAGAGTACGCTGACCGGGCCGAGAAGCCGACGAGTCTGTGAAAAGCAGTACGATTCGCTGACCCGG  
TGA

>Cluster\_163

ATGGCATTGATGAGAAGTTTTCTGACGCGGGGCCAGGCATTACTGCAGGACAGTCTGATCCCCCTTCTGGCTCGTACAGG  
CCTGGCCGCCACATTTCTGGCTGTGACGGCAAAGTAAGGTAGAGGGTTGGTTCTGGATATACTGGGAGGATGCCACCGG  
AATGGATGTTCCGCATATTAACCGTTCCGGGTTGCGCTGTTTGGCCACAGATACCGACTGCCGTTTTCTGGCACCAGG  
ACTGCTGCACTGCTGACGACGAGGCGGAACATATTTTCCGGTTCTGCTTGTCTTGGACTGGCAACCGGTTTTTCCCG  
ACTAGTGTGCGCAGGATGACGATAGTGATCCAGGTGTTTGTCTATCCCGATGCTTGGCGGTTTCTATGCCACCTGGCTTA  
CCGCCAGATGATTTACTGGCGTATGGCGGCGAAAATATTCCTGGATAACCTGCTGAAACGTACGTACCGGCGTAGG  
CACCAGAATGTGATGCGAAAAGGAATAACCTTATGATGACGCTATAA

>Cluster\_67131

ATGAAAAGACAATTAATGACGCTTTCGTGCTTCTGTTCTGGCTGTATCAGCAATGACCGTTGCTCATGACGCAACCAG  
CACAACTGTAATGTTATAGAACTGTCAACACCGCAACCTGTGATGTGGTTGCAAAATACCAGTCCGTAATCTGGGTA

ATGCTAAGCCAGCAGAATTTACCACAATAAATGCAGCAGTTGCCCTCAACGAAACAGCAGTTTGGCTATTTTCGTTACAAAAC  
TGCTCCGGGCGCCGCACTGGACAAGCCCACTGAAAGTGACCGGGCCTGTTTCAAGTGACGGGAGTACTTATTTCTCTAA  
AGACCCTTCCCTCGGTAGTAGCTATAGTTTGACTGACAAAACAGCTCAAGCGAAGTATCTAAATGGTGGCCTAATTAATC  
TGGGGAGCGCAAATGCTCCTGACGGCCTCTGAAATAGCATCCAGATGCCGTTTGGAGTGCCTCTAAATCTTCGACAAC  
TCCCCAAAAGGTGGTGTAGTTGTTGAGGCACCATTAACCTTCTCATTTGTATATAACTAA

>Cluster\_67079

ATGCACCGCCTTGATGAGGTGGTTGATACGCTGCTTGTCTGCAGAAGAAGCACCGGATACGGTTTGATGCTGGCAGGT  
CGTTAAACGGGATCACGCCATTATTTTCGTTCTTCGATCAGGGGATGAATCCTGCACTGCCAGGGTTGCCACTGGACCC  
CCTTTGCTTACCCGCTGCTACTGAATCTGGCAAGCCTGTTTCGATAATGAACTGGCTGAAAAAGCGTGGCGTGGCCGCTC  
GAAGCCATGATGGAAGGCTCCTCATCTCTGTTTCAGTGAGGCTGCAGTGAGCTGCTTGGCGCGGTTTACACCTGGGGGA  
CCGCGTTTACATTGAATTGATTACCGATGCGTTGCTTGGCGCATGACCCACTTTGACGAACTGGGATATAACTGCAAAA  
CCGGTAAACAAAAGCTGCAGATCATGCCAATAATGGTTGGATTTCAGTTTCGATTCGATTTGGCGGGTATCTGTTCCCGCTGGGA  
GCACCAATTCGCAAAAGCCGACATCGTTGGTAACCGGCTCATTTAA

>Cluster\_55162

ATGAAGTTATGGCCTGTGTTGACTGGCATTGCACTCTCTTTCACTCTTATAGCATGTAAGGCCCGACACCACCTAAAGG  
TGTGCAGCCGATTTACAAATTTTGACGCCAACCGTACCTCGGAAAATGGTATGAAATAGCTCGCCTCGAGAATGGTTTCG  
AACCTGGTCTGGAACAAGTACCGCTACTATGAAAACCGGAACGACGCGGAGGATTCGCGTACTTAACTGGATACGAT  
CCAACGAAAAACAATGGAGCGAGAGCGAAGGTAAGCATACTTTACTGGAGATACTAAAACCTGCAGCGTTGAAAGTTTC  
GTTTTTTGGCCCTTTCTATGGTGGCTATAATGTAATCAAGCTGGATGATGAGTATAAGTATGCTCTTGTTCAGTGGTCCGA  
ACAGAGAATACCTATGGATTCTGGCAAGGACCCAACTATTCAGATAAATGTAAGCAGACTATGTGCGTACCGCTCAA  
AAGTTGGGATTTCAATGTCAATGAACATATATGGGTTAAACAATAA

>Cluster\_48679

ATGAAGGTCGAAAAAATAGATGTTCTTTTCTTTGTGCTGACGGATCTGGAACGCCCTCGATCCGGTTTCGAGTAATGATTGA  
AAACTACGAACTGGTAAGGGAAGAATACCATCATCTGCTACGGAAGAGCTGGACTGCGGCTGGTTGCTATGGGGG  
GTGATGATGTGCAGACGTTTCAATTAAGCGGGTACGACAACGAGTATCTAAATCGGCTATTTTCGACTCTCAACTGCGAAGCAGC  
GTCGACGATGACAACGATGCAAAATCTGCTTTTTCGTAAGTACGAAATCATAAAGTTACGAAAGAGAGAGAAATCGACGC  
CGTACTGGCTCGTGAATGTGGGACGAGGCGGAAAAACCGGATGACGTAAGAAAGAAAGCTGCTGTTGTTTCGGCGTGGTA  
ACAAACTGCTGAATCTTTTGGTGTGATGATCCGTTGGTACTGCGCACTGGCCAAACGCTCAACCCGAAATACAGTATCTG  
GAACGCATTGTGAACGGGTACGTGAAGGGCTGAAAGAGTTAGATAAGTTAGAGGCATCGTAA

>Cluster\_25461

ATGAAAACGATTTGAAGTTGATGATGAACCTCTACAGCTATATTTGCCAGCCACACTAAGCATATCGGGCAGAGCGCATCCGA  
CATTTTACGGCGTATGTTGAAATTTTCCGCCGATCACAGCCTGCTGCTCCGGTGACGAAAGAGGTTCCGCTTGCCTCAC  
CTGCTATCGTCAAGCGAAGCCGGTCAAAACGATTAAGACAAGGTTCCGCGCAATGCGTGAACCTTCTGCTTTCGGATGAA  
TACCGCAGACAAAAGCGAGCGGTCAATCGCTTTATGCTGCTGTTGTCTACACTATATTCTTTCGACGCCAGCGGTTTTC  
CGAGGCCACGGAATCGTTGCACGGTCTGACACGGTGTACTTTGCGGCAGATGAACAAACGCTGCTGAAAAATGGTAATC  
AGAACAGCCGAAACATGTACCAGGCACCGCTATGGTGTACTCACCAACCAACACCGCCGTAATAATGTCAGCATGATC  
GAACACATCATGCAGTCGATGCAATTTCCGGCGGAATTGATTGAGAAGTTTTCGGAACTATCTAA

>Cluster\_62815

ATGCAACCCTTACATACCAACAGACTAGCGGATTTAGCCGACTGCGGTGATAAATCGTTCTCAACAAAACAGGCGCC  
AGGCCACGAAAAATCCGTGATGCCGTTTCGCGCCTGGTTCGGCTGCAGATAATCAGGATGTTGTTGCCGCACTCATTTGTA  
ATGAGTATCGGGAGCAGGGCGGCGCACCATCGATTTCCTGATGATGTCAGCCGTGCACGCCAGAAGCTGTTCCGCTTC  
CTCGATAACAAATTCGATTTCTGAAAAATACCGAAATAACGTGCGTGAACCTGACCCCGCAATTTTCGGCGTACTACCGCT  
GGAATATCGCGCCACTGGTTGAGCAGATAGCTTTCATGGCTGGCTGAAATGGAAGAAAGTATTAAGAAAGATAAAATCACTGACGGCAA  
AACAGGCTGTCTTCAACGCACCAGCCACCAGAACTGAAGGAAATAGTGAAGGATTTGTGTCGATGTTTCGTTG  
GACCCAGATCTGGCTGGTCCATTGATGGCGATGTTTACTACCATGCTGGGGCGATATGA

>Cluster\_25086

ATGGAATGTCAAAACCGTTCTGATAAATACATCTGGTCTCCCATGACGCCTACTTCTATAAAGGACTATCTGAACTGAT  
TGTGGATATCGACAGATTAATTTATCTATCGCTGGAGAAAATCAGAAAAGATTTTCGTTTATCAATCTCAATACGGATT  
CTTTAACTGAGTTTATAAACCGTGATAATGAGTGGTTATCCGCGGTAAGGGGAAACAGGTCGTATTGATTGCGGCCAGA  
AAGTCAGAAGCCTTAGCAAAATATTGGTATTACAACAGCAATAATTAGGGGCGTGGTATACGCTGGACTGAGTCGTGATAT  
TAGAAAAGAACTGGCCCTATGTGATTAATGGCAGGTTCTGAGAAAAGATATTAAGAAAGATAAAATCACTGACGGGAAA  
TGGAAATTTATCCGCATGACGGCTCAGGGAATGCTGCCTAAATCGATTGCCAGAATTGAAAATTTAGTGTGAAGACAGTG  
TATACCATCGGGCGGAATGCAGAGGCCAAGCTGTACTCAAAATATATAAGTTGGTTTCAGTAA

>Cluster\_47587

ATGAAAAAGGTTCTGTTTGCCTTATCTGCGCTTGCCTGACCTTACTTCCGTTATTCGACGCTGATGCGGGCGACGGTAC  
TGTTAAATTCACCGGTGAGATTGTTGACGCCGTTGTTGTTGTTGTTCCAGACACTCAAAAACAAGAAGTTGTTTCGGGTC  
AGGTGAACAAGTCTGATTTACTGCTATGGGTGATAAATCCACAGCAACCGCGTTCAAAATCAAACTGAAAAACTGCGAT  
ATCTCCACTTTCAAAAATGGAATCAGCTTTAACGGGCTGGCGATGCAGACAACAGCAAACTGGTTCTGTAAGCAC  
TGAACCAAGTGGCCCACTGGCGTAGGTATCGGTTATTTATGATAACCAATACCCCTGGTTGACCTGAATACTGGTAAAT  
CTGCTACTGCTCCTGAAAGAGGTCAGACGTTCTGTATTTACCGCTAACTATGCTCTACCAAGATGCAGTACCACG  
GGTTACGGTAAACGCTGAAGTCGACTTCAACCTGACTTACAACATAA

>Cluster\_15666

ATGAGAAATATAAGCAACATAGACGAATTAAGAAATAAATATCATATGATGATGTTTTAGGTGTACTTAGATGGAAAGT  
GTCCTCTTCAATAATGTTAAGGTTGGCAGTGTGCTGGTTACATTAGGAGTGTGGTTATAGGATGTTAACTATCGATG  
GTGTAATTTACTTATGCTCACCAGTTATATGGATGATAAATAATGGTGGATTTCCATTAGGGTATAAAATGATCATATA  
AATGGAGTAAGGTAGATAGTAAAGCTATCTAACTTCCGATTGTTACACACCAACAGAAATGCACAGAAACCAAGAGAAA  
AATAACCAATTCGTCAGGAGTACTGGAGTGTATTTCAATAAAGAGAGATGCAAGTGGATGCGGAATATAATGCGTATGATG  
GGCCACCAAAATATCTTGGAAATTTGCTAGCATCATTGACGCTATTGTCAGAAAAGGAAGGGCAGAAAAAGAACTGGGT  
TTTTATGAAAACCATGGCAGACCATAA

>Cluster\_55572

ATGGATCAATTTGGTTCAGAAATGCCCTTTCACCTGGCATGAAGAGTTTCACTGTTTGTGCGGGATCAGTTAATTCGGGTAC  
GCTGCAACTGGTCTACTGACACCGGCACGATCACCGGCGTGTGTATAAGCGTGGCACTGCTGCTGGCATGATCACCGCA  
GTGGCAAAATATACAGCAGTGTGAAAACCGCAACGGATGGTAGCGAGACGCGCAGCGCCATTCGTTGATGATGTTGAC  
GCTTCCACCATGGCGATCAGTCCGGCGGCTGTTACTGATGGCGGAGTTCAACCAAGAAATCATATTTTTCGAGTATC  
CTGGACTGCGCCGAACTGAAAACAGCACTACGCTCCGCTGGCCATCTTCTGAAAGACAGCGCCAGGCACCTTTACCAG  
CGTTCCGAAAGCAGCCAGCAACTGGCTGGCACCATGAACACGCTGATCGTAGTGTCTATGTTACCGGAGCCATGACGGATG  
TGTGTCAGATTACAAACCAACAGTCTGATAA

>Cluster\_35361

ATGAATCGTATTGAAATTTATCATGACTGGTTACGTGACGCCACGCAATGGAAGCAAGCCGAATCTATGCTTGAATC

CATGGCCAGCCGTATAGATAAATTATCTGAACTACGCGCTCGTATTGAACAACATCTTAGTGAACCAAAAAACCAGATTG  
TTCAACTGGAACATATTCCTTGATCGTAATGACATTTACGTTTCAGTCATTAAGATTCCATGAGTAAATGGCTGCGCTT  
GGCAGTCAATCGGTGGTATATTCCTTCTGATGAAATAGTCAAAGGCTCTATAGCGGATATGTCTTCGAGCAATTTGA  
AATCGCCTGTACACCTCACTATAGCAGCAGCAAAAAATGCCGGTGATACAGCTTCAATCCAACCATCGAAGCGATTT  
TAAATGAGGAAAAGCAAATGGCCGACTGGCTGATTCAGAAATATCCGCAACAACCTGAGAAATTTTAAATTCGCTCTGAA  
ACTGATGGCGTAGAAGCGAAGAAATAA

>Cluster\_2750

ATGAATAATGTATTTCTGTACCGGATGCCTGTTGGTATTGCGGGGCTGTCTCTCGCCCGCAGGACTTAAACCGTGAACC  
GGTGGTCCCTTAAATCCGATAAACGCTTCGCTGCCTATGGGCTGGCTGGTAAATACGATGATGACGGTTTTTTCTGTCGCGC  
TGGCAGATGGTGATACCGCAGACAAGGTGAAGGGGATCTACGTGCGCCCTTATCCGACCACGTCGAGCCGGACATGGTT  
CGCCAGGTGGGAACAGGCAAGAACTTCCCGGGCAGCCATGAAGCGTGGCTACGTGACCGTTAATCTCGGTTCTGATTT  
TGATGCCAGCATATCAAAAAAGGCGACCCGGTATACGTTGTCGCTCCACTGATGAATCCATCAAAGTGCCGCTGGGTG  
GATTCATGTCACGTCAGTCAGTGGCAAAAATGTGGTGTGACCAACGCTGAATTCACAGGTGCCGGTATGCTAACGGC  
AATGCAGAAATTTCTGGAAGATTTAA

>Cluster\_6675

ATGCTGACCGCGCCACTACCACAGCTTCTTAACTGTCGAGTCGCTTTATGGCACACATCACGGCTGGTTGAAAAGCTG  
GCTGACGCGCAAACTCCAGTCTGCTTTTTGATGCAGATGACATTTCCCGAGACACTTTTTTGGGGTAAATGGTACGCGAAA  
CGCTCTCGACGATCCGGATCCTCGCTCCTTCCCTGCACTATCGCAAACCGGTGATGGTGGACCTGTTTCGCCGAAAC  
GCGCTGGA AAAAGCGTATCTGGAGATGCTGGCGCTTATGCCGGAGGGGGAGCGCCTTCACTGAGGAAACGCGAAAGCCA  
ACTCGAGACCTTCAACTCCTCGACAGCATGCTGGACGGCTAAACGGCAAAACACGTGAAGCGTTTCTGCTTTCGCAAC  
TGGATGGTCTGACATACAGCGAGATTGCGCACAACCTCGGTGTTTCCATCAGCTGAAAAAATACGTGGCGAAAGCC  
GTCGAGCACTGCCTGCTGTTCCGCTGAGATGGGTTATGA

>Cluster\_206

GTGCAAAAAGAAATGGCGATACCTTGTCCGGTGGGCTTACTTTTGA AACGACTCAATCCTTGCCTGGATTCGAAATACTGA  
CTGGGCGAAGATTGGATTTAAAAATGATGCCGACAGCGATACTGATTCATACATGTGGTTTGA AACAGCGCACACCGCA  
ATGAATATTTCAAATGGAGAAGCAAAACAAAGCACCACAACAAAAGACCTGATGACGCTGAAATGGGATGCACATAATAT  
CTTGTTAATGCCGTCATTAATGGCAGCCTTGGAGTTGGTACGACGAATGCGTTAGGTGGTAGCTCTATTTGTTCTTGGTGA  
TAATGATACCCGGATTTAAACAGAAATGGAGACGGTATCTTTGATGTTTACGCTAATAGTCAGCGAGTATCCCGCTTCAGA  
ATGGAGTTGCTATTTGCTTTTAAAAACATTCAGGCGAGTGATAGTAAAAAATCCTCGCTATCCAGCTCCAACACCTCCACA  
AAGAAATGTAACGTTTAAATTTATGGGGTGTTCACCCGTCGGTAA

>Cluster\_57878

ATGCAATTAGATGAACAGCGCCTGCGCTTTCGTGACGCGATGGCCAGCCTGTCCGCGAGCGGTAATAATATACCACCGA  
GGGCGACGCCGACAATGCGGGATTACGGCAACGGCGCTGCTCGGTCACGGATACACCACCATCGCTGATGGTGTGCA  
TTAACGCCAACAGTGCATGAACCCGGTTTTTCAGGGCAACGGTAAAGTTGTGCGTCAACGCTCCCAACCATGAGCAGGAA  
CTGATGGCAGCCACTTCGCGGGCATGACAGGCATGGCGATGGGAAGAGCGTTTTAGCCTCTCATGCTGGCAAAAAGGTC  
GCTGGCGACGGCTGCTGAAAAGGTTGCTGGCCAGCTTGAAGGTGAGATCCGCGATGTGACGGCAATTTGCAACATC  
TGGTGTATCTGGTGGAGATTA AAAACATCATCTCAGTGCAGAAGGTCACGGACTTATCTACTTTAAACGCGCTTCCAT  
CCGGTGTGCTGGAATGGAAGCTGCGATTTAA

>Cluster\_20878

ATGGCAATGCCGCGCAAACCTCAAGTTAATGAACGCTTTTCTGAACGGCTACAGCTATCAGGGCGTTGCAAAAGTCCGTCAC  
GCTGCCAAAACCTGACCCGTAAGCTCGAAAACATATCGCGGTGCGGGAAATGAACGGCAGCGCACCCGGTAGACCTCGGCCCTTG  
ATGACGATGCGCTGTCAATGGAGTGGTCTGCTCGGGGGCTTCCCGGATTCGGTTATCTGGGAGCTTTACGCCGCAACCCGGT  
GTGGATGCTGTGCGCGATTCGTTTTGACGGCTTTACAGCGTGACATACCGCGGAAACCGGTGGCGCTGAGGTGCTCAT  
CGCTGGACGTCAGAAAAGAAATCGACACCGGGCAGGGTAAACAGGGAGAAGACACCGAGTCGAAAATCTCCGTGGTCTGCA  
CCTATTTCCGGCTGACGATGGACGGTAAAGGAGCTGGTCAAAATCGACACCATCAACATGATTGAGAGGTGAACGGCGTC  
GACCGGCTGGAGCAACACCGCCGCAATATCGGCCTGTGA

>Cluster\_46583

ATGAACTCAGTATCTTTTACC CGCAAGTAAAGTTTTTATCTGCAAGAATTGTTTCCAGAATAAGAGGATGCGGGAAAC  
GCTTCCTGATGATGTTATGAAATACCAGAGAAACATATGAGCAATTTCTTGGGCTGCATCCAGAAGGGAAAGAAATTTG  
CGCTGACAGTTCCAGGACGGCCAATATGGATTAATTTCCCGCCGCTTCAAAGAGGATGAGATGCTGGCGGCTGAAATG  
AAAAAGATATCTTTGGTTTCAGAAAGTCAATACCTACATCAATACCCATCAGTGGCCTGGCAAAAGCTGCTATTGGTCTG  
GAAAGGTTACGAGCTGGAACAATAAATTTATGGCTGGATTATCTGGACGCACGGAACGTTGTTGATACCTCCAGTGCCT  
CAGATATTGAATGGCCTACGCTCCGGTAGTTCAGGCCAGATGA

>Cluster\_2665

ATGAGTATGTCAACATCCACTGAAGTCACTGCTCATCACTGGGCATTCGCTATCTTTCTTATCGTTGCCATTGGCCTGTG  
TTGCCATGCTGGTAGGCGGTTGGTTTTAGGCGGTCGCGCACGCGGAGGTCGAAAACGTCGCGTTTGAATCCGGTGA  
TCGACTCGGTCGGCTCCGCCCGCTTACGCTGTCCGCCAAGTTTTATCTGGTGGCCATGTTCTTCGTTATCTTCGACGTT  
GAAGCGCTGTATCTGTTTCGATGGTCAACCTCTATCCGGCAAGCGGCTGGGTAGGCTTTGTTGAAGCTGCAATTTTTAT  
TTTTGTGTTACTGGCAGGCTGGTTTTATCTGGTGCATTTGGCGCGCTGGACTGGACGCCCGCGCTTACGCCCGCGAGC  
GTATGAACCCGAAACGAAACAGTATCGTAATCGTCAACGCTAA

>Cluster\_20176

ATGTTAGGTTGGGTAATTACCTGTACGATGACCGGGCGCAAGAGATACTGGATGCGCTGGAGAAAAACATGGGGCACT  
TCTTCAGTGCCGGCCGTTGAATTTCTGGCGCGGATTAAGCTCTAATATGCTCAGCGCATGATGTGCGATGCCTTGCATG  
AAACGGACTCTGGTGGGGCGCTATCTTTTAAACCGATATAGCCGGAGCGCCACCGTACC GCGTGGCTTCATTATTAAGC  
CACAAACACTCTCGTTGCGAAGTGATTTCTGGTGTACGTTACCGTTAATGAAACAGATGATGGCTTCCCGTGAACCAT  
GACCACTTACCGGTTTCCGCGAGCATATTTGTCGAACTGGGTGCGCGGAGGTGAGTAGTCTTTGGCACCACAACAAAAA  
ATCCGCTTTCTGCTCAAAACATAAATTTGTATGAGTATTA

>Cluster\_48247

ATGCCGTTAAGTCCCTACCTCTCTTTTGGCCGTAACGTGTCGCGACGCAATGCTTATTATCAACGTACGTTGGGCGCTGA  
ACTGCTCTATAAAATCAGCTTCCGCGAAATGCCAAAATCAGCGCAGGACAGCGCCGAGAACTGCCCTTCCGGAATGCAAT  
TTCCCGATACCGCATCGCTCATGCCAACGTGCGCATTTGCCGGAAGCGACATCATGATGAGCGATGCCATGCCGTCAGGA  
AAAGCCAGTACTCCGGCTTACGCTGGTGTCTGATTCGCAACAGGTCGAAAGAGGAAACCGTGGTTTGACAATCTTCC  
CGCTAACGGA AAAATCGAAATGGCTGGCAGGAAACTTTCTGGCGCATGGCTTTGGCAAAGTCAACGATAAATTTGGCG  
TACCGTGGATGATTAATGTCGTCAAAACAACCAACCAAGCAATAA

>Cluster\_24774

ATGTTTAGTTTATCATTAATTACAGGTGTGACGATGTTGTTCTCAATGCCAGTTCTGTGAATAAATTTGAGCCTGCACT  
ATTAAGTCTAGTTATGACGTGCAAGGTGGTAAACCTGGTAGTGTATTCATTAATAAGAAATGGAAGCCATGATTTAGGTA  
TTATGACAGATAAATACCCATGCTATGGTTAAAACCTTATCAGTAAGAGTTTTTTTAAACGGAGATGAGAGGCTGCTTATACC  
AACTTAAGGATGATGATGTTTTAACATATCAGTAGGGCCCTGGATCCTCCGAGATCTATTATATTCGAGGGTGGTAA

TTTATGGGAAGGTGTGGCCGATATCATTCGGCCACACCAGAGTATAAATATAGATATATAGATAAAGTGAAGAATGTCT  
ATGGTCAAATAACATACAGCCAATCAATACATCAAAGGAATATGTAA  
>Cluster\_60737  
ATGAAGCCACGAAATATTAATAATAGCCTACCCTGCAACCATTAGTTCCTGATCAGGAGAACAAAAAATAAGAAAAATGA  
AGAGAAATCCGTTAATCCAGTTAAATCACAATGGGGTCTGGTTAAATATATATGAAACAAGAATCTCTGGAGGAAAT  
ATCTAACACATGATTTGTCAATAAAGATAGCGGATATTTCTGAAGAGATAATTAGCAAGCAATATTTCTGCTATGAGC  
ATATATAAATTTTCGATAACAGATGATTTAATGAGTATGGCTGTAATGAACATATAAACTGACCAAAATAGAGAATAA  
TGTAGACCTGAATAAATTCCTACTATATGACACAGACGTTCTATCCCCCGCGTCACCAGACATAATAAGAAAAAACA  
AACGACATTCCTACCCTTCTCAAAAATCCCTTTTAAATTTTCATGA  
>Cluster\_22155  
ATGCAACGTATGATGCTTATCGGCCACGAGTGCAGGAAAAACGTCCTCACGCAATGTCTGCGTGGCGAAAAATATCCA  
TTATCAGAAAAACGAGCAATCGTCTGGTCCCGGACCACATGATACACCAGGCGAATACCTCGAAAAACCGCAGCTCT  
ACAGTGCATTTGGTTCAGTGCCTGCGAAGCAGACATTTATCGCGTGGTACTTAATGCGGACGACCCGTGGTCACTTTT  
TCGCCAGGCTTTACCTCGTCAATGAATCGCCCGGTCATTGGAGTAGTAACCAAAGCAGATTTAGCCAGTATGGAACAAAT  
ATCTTTGGTGAATGTTGGTTACGGGAAGCTGGAGCGACAACGTGTTAATAACAGTGCAGTAAATAACAATGGAGTTA  
CAGAATTTTTGCTTGTGTCATACAGAAGAAGGCTGTGCTAA  
>Cluster\_17677  
TTGTTGTTTTATCGCGTTGGGGTATTAAGAATGAATAAATTTTATAAAGGCTCTTCTATCCGGAAGCACTAAAAGATGT  
ATATATCAGCGCCGGTTCATGGCCTGAAAATGGCGCTGATGTTGATGATGAAACAATGGCAATTTACACAGGCGTAGCGC  
CAGAAGCAAAACGCTGGGGCTGATAAAAATGGTAATCCTGCTGGATGATATCCCGCCACTCTCCCGTGAACAACAG  
ATTTATTCAGGCTGAACAGAAAAAGAACGGTATTGCGTTCTATGGCTGATAAGGAAATAGTCTGGAGACAGGATGCTTTTGA  
TGCGGAAATCGCGACGGCAGAAGAACCCTGCTTATCTGAATGAAAAAATACCGGCTCTTGTGATGCGCGTTGATA  
CATCAAAATCCCGTCTGGCCTACGCCCTCCGGGGAGCAGCCAATTGA  
>Cluster\_12034  
ATGGCAGAGAATGTTGCACATATTTCCGCGTTCAGAAAAAAGAAAGAGAATGCCTATAATGTATCCAACAACCAAGTAAC  
AGGAAGTGTGTAATGATGGAGGTGATGGCATGAATGACGACCTTGAACGCGGGTCAAGTTCGCTGGAAAGTGTGATGACCTG  
AAATCAAAAAACACTGATTTACTCTCACCAAGAAGCAATCCTTTGCTACCAAACTGATGTAAGGAGATTCGCGAA  
GGTTGAGGCTTGAGATGGCAGAAATCGCCCAATCCCTGAAGTCTGAGATGGCTGATTTACGCCAGTCTCTGAAAGTTGA  
GATGGCTGAGCATGTAACCTCAGAAATCATTGCAAAATCAGACTTGGTACTCACAGGATTTGCTCTGCTGCGA  
TGCCCGTGTCTGTTGGCTGTTACTGTTATTAAGTAA  
>Cluster\_49469  
ATGATGAATAGCTCCATTAATCCTTTTCCCTGCTGGCGTTATATTACTGGCTGGCTGATAGCTCACCCGCTTCCCGCAT  
CGCAGATTTGTCAGGCGCAGGGCGTCCAGCATGACACCTGTTATCTCGCAGAACAGCAGCGCCAGACGGCTATTTTTAGTG  
CTTCTGAAGCGCAGGCATTTAAAAATGCAGAAGCCGCAACAATGCCAGGCGCAAAAAAAGCCATTTATAAAGGATTT  
GGCATGACCTTTAGAATGAGTAGTAAGAATTTGCTTATCTCAATGATTCATTATGTGCCATAGATGAAGATAATGCCGA  
TGCCACGGTTTATCAGTCCGGTCTGTATAATGTCATTGTTTATCATCACAGGAAAAAGTCCGCTTAAAGAAAGAGGCC  
AGTTTGTGGGTTATTTAAAAATGA  
>Cluster\_39396  
ATGATCCCATCTCAAATCTTTTCAACACCTTCTCTGTCATGCAACATACGCTTCAGAGACAACAGTTGACACACAAAA  
ATTTCTGACATCTCTACTCAGCGGGTGTTCCTAAAGAACTGGCTTATCTGAGCAGATGCTGGCATCAATTCATC  
CGACTATCGCCAAAACATTTATGAAACAGAAAATCTCAGCGATCAAAAATTTACTACATATTGATTTGCCGTAGTACAAAT  
GAAATCAAGATAAATATCTTTTTTGGTCAACAACGAGAAGGATTAATTTGAAATTAATTTCTGACTGTCAATTTTTCTGAT  
ATTTGCTTCAATTAATGACTCCGCCATTTCTAAATTTCAACACCAATCCCGTTAACGGTTCAGTTAATCGTGAACAT  
TGTATGAGGATTACTGATTAA  
>Cluster\_35174  
ATGAAATGACTGAATTAACAAAAGAACAATTAATCGAAGAAGCCAAATTAATAATAGCGATTACGAAATGCCACCCCAA  
TTCAGGGATGGCGCGAGTAGAGGGCGAGTTATTCAAAAATGCACTGGCATCGCTGGAAGCAGAGCCGATAGCGTGGCGAT  
ATCGCTACGTGAAAAAAGGTGTTATGGACTCTCAGGGGAGTTGTTGGTGGTACTGGAATATGTACCGAAAAAAGAG  
GATTTGTAACGACAGCGCGAATATGAAATTCAGGCTTATTACTGCCCCACAGTCCCTGTTACATCAGAAGAACTGGT  
TAAAGCTGTGCATTTTATGAACAACATAAAACGCGAAAATCCACCAGCATCCGGCAACCAGATTAATGGGTTAATGATGC  
CGTTAAACGACCAGCCGACTGA  
>Cluster\_740  
ATGTTCTGAAAACCGAATCATTGAAACATAACGGTGTGACCGTTCACGCTTTCTGAACTGTGACGCCCTGCAGCGCATTGA  
GCATCTCGCCCTGATGAAACGGCAGGCAGAACAGGCGGAGTACAGACGCAACCGGAAGTTTACTGTGGAAGACGCCATCA  
GAACCGCCGCTTTCTGGTGGCGATGCTCCCTGGCATAAACCAATCCCGCAGAAGACGAGATGCCATGAAAGAACG  
GTTAAACAGATTGAGCAGGAAGTGTCTTACCACCTGGCCACGAGGCAATTTCTCATGCTGAAAACGTTGGTGTACCGGCT  
GTCTGGTATGATGAGTTTGTGGTGAATAATGCCCTGAAACAGACAGAGGACGCGGGCCCGCAGAGCTGTTTCTGCGG  
GAAAGTGTTCGACGGTGAAGTGA  
>Cluster\_45790  
ATGATACTTGGTCTGTGAAAAAAGAAACCGATATCCGGCGTGAAGGCATTTGTTTTCCTGATGCATGTTACCTGGT  
CTTTGTCACCAGATACCGACTCCAGATTTTGGACATGACGCGACAGAAAACTACGCCTTACTTTTCAAATGTATGTG  
CTGATTTTGAAGCTGAACCTGTTGAAATGGATGGCGAACGATACCGTCCATTTGTTAATTAATATCTCCCAAACCTG  
CGGATATCCAGTCTGGTAAACAGCCTCAAAGGCGTATCGGGTAGGTTACTGCGACGAGATCGACCAGATATTGACGTCAG  
GTATTACTACAAAGGCGTTTGTGGAGTCTGGCTATTTTGGCAGTAGCTGCGGAGGTGCGCCAAATATCCGTCATCCGCC  
AATACATTAACAACAGCAACACCTGGTTAG  
>Cluster\_62530  
ATGGATAACTATACGCTGCATCGTGGCAGACTTATCGACCATATCCAGCTCGTGGTAAACAACTTTGGCCGAAGCAAAGC  
GTTTACACTGCTGTTCTGCGGAACCTTAAGATCCCATGTTTATTACCGATGACGATATATCTGGGCTGACGAACTGG  
TCATTTCTGTCGGTAAAAAGTTCCGAGTCTGGCAGAGTGCCTACAGGACGGCACCATCTGGCCTTTCAGGCCGACAGCCGT  
GAATCGGTGAACCGGTTTTTACCAGCAGCAATAATCAGCGGACGATGATAACCGGCGACCTGCCGAACCTATCA  
TCCCGGATACTATGCCGCTTTGTTCTGGATCCGGACGGTAAACAACATCGAAGCTGTTTACCATGGTGGGGGATCGCA  
GTGCCCGCTCTGTAGAAATCAGCTTCACTGCTGTA  
>Cluster\_29501  
ATGAATCAAATTTATGACAGTTTTCCGTTCTTCCCTGAGGGTTTTACTGCAGGATGACAATGGCGGGATTTTTTAT  
TCACGCCACTGTCAATAATGATGAGGAGTTAAACCACGGGTTCTCATATAACCTGAGGCTAAACCCAAATATGCCA  
TTGTTATTTGGCTATCCGATGAGGACGAAAAATTAAGAGTCCCGCTGAGGAGCATGAGCGATTTTCTGTAAGGAG  
GATTTAAATTTTTTAAATCATGTCCTGATTTGAGGCAACCTGTTTATCTCAGGTTGGATGTTAATCTACGCTGAGC  
AGGCTCTGAACGTCATGGTGTCTGGTATCGTTTTATTTCCGGCTCCATGAAACGTTTTGACGGTACGCGCTGGTGCAC  
TGCCCGCAGGTAAGAAAAAGGCTGA

>Cluster\_63641

ATGGGTTTTTCGTAGCGCATCAATCTTACGTTGATTATAGTGGGATTATTATCGGGTGCACCTGATGCTGATCGACAAA  
TTATCATGACCGTACATCATATTACTCCGATAAAAGCAATAGAGACACAGTATGTGAGTTCATCTGAACGTACTCTGATG  
TTAGTGAGGATATCCGTCGTATGCCATCAAATCAAAGAGCGCCATCGAAAAACAGTTCCGGGGATGCGAGTAAGTATTCA  
GGAAAAGAGTGTACTGACAATGCGATAFGCCATCCGAACTTCCTACTGAGGTTAAAAGAGAAAGTGGAGACCTCGA  
TTTTATGTCGTGAACGATGAATGCGATAAAAGAATGCTGATATACCTGCCCCCTTCGCCGGAAGTATATAAAGTATTTC  
AAAATGGGGTGTGGATTTTAAACCCTGA

>Cluster\_6145

ATGGAACCTGACGACTCGCACTTTACCTGCGCGGAAACATATTGCGCTGGTGGCACACGATCAC TGCAAACAAATGCTGAT  
GAGCTGGGTGGAACGGCCTCAACCGTTACTGGAACAACACGTACTGTATGCAACAGGCCTACCGGTAACCTTAATTTCCC  
GCGCGACCGCATGAACGTCAACGCGATGTTGAGTGGCCCAATGGGGGGTGCACGAGGTTGGCGCATGATCTCAGAA  
GGGAAAATTGATGATTTGATTTTCTTCTGGGATCCACTAAATGCCGTGCCGACGATCCTGACGTTGAAAGCCTTGCTGCC  
TCTGGCGACGGTATGGAACATTCGCGTCGCCACCAACGTGGCAACGGCAGACTTCATAATCCAGTCCGCGCATTTCAACG  
ACGCGGTCGATATTTCTGATCCCCGATTATCAGCGTTATCTCGCGGACCGTCTGAAGTAA

>Cluster\_62873

ATGCAGTTCACTTTTAAATGAAGGCCACATTTCAACTGCCGTCTCAATGGCAGGATCAGTCAATGCAGGTCCTGGTGCCAC  
AGATAACAGTGGCATCAACCTGGTCATTACC CGCGAAGCCGTTCCACAGGGAACCTGACACCAGAGCTGTACCAGGAAA  
CGCTGGCGCTGTACCAGGGCAAACCTTGATGGGTACACCGAACATGCCTGCCGGAAATCACTCTGGCAGAGGCCCGGCC  
TGCTGCTGGATTATTCTCGAAGCGGTCGGAAGATGAGGGGAAATCAGGGGCGGATTAGCCAGATAGCCGATTTCCAGCG  
CGGTGGAGATACGCTGACCTTCACTTTCAGCACCTCTTATCTTACCTGAAAGAACAGTCAAAGACGATGCTGCTGGAGG  
TGATAAAGAGATTTCAACCCGTTGCCACCGGAGATGACATCTCAAAGGACAGCCGCGCTGA

>Cluster\_10136

TTGACTACTAACACTCATACTCTGCAGATTGAAGAGATTTAGAACTTCTGCCGCACCGTTTCCCGTTCTTACTGGTGGGA  
TCGGGTGCTGGATTGGAAGAAGTCTGTTTCTGCGCGCAGTAAAAAATGCTCTGTCTCAATGAGCCATTCTTCCAGGGCC  
ATTTCCCTGGAAAACCGATTTCCTGGGTGCTGATTCTGGAAGCAATGGCACAGGCAACAGGTATTCTGGCGTTTAAA  
AGCGTAGGAAAACGGAACCGGTTGAGCTGTACTACTTCTGCTGTATTGACGAAGCGGCTTCAAGCGCCCGGTCGTGCC  
TGCGGATCAAATGATCATGGAAGTCACTTTCGAAAAACGCGCCGCGGCTGACCCGTTTAAAGGGGTTGCTCTGGTCCG  
ATGGTAAAGTAGTTTGGCAAGCAACGATGATGTGCTCGTAGCCGGGAGGCCCTGA

>Cluster\_44684

ATGCTGGAGGCGACCCAGGTCAGAGGAGATTTCTGTTAAAGCTGTATCAAAGCCTTCCCGAAAAAGTCGGTACGTGGGG  
TAACACGGAAACACCAAACGGTACGGTTACAGTCACCATCAGCGATGATCATAACTTTGACCGCCAGATTATTTATCCGC  
CCATTATTTTAAACGGTATAGCGTATGACGATCCGGGGAGCGGAAATAACCCAGGAGGCAGCGATACACGGGTTATGGT  
TTTGAAGTTCGAAAAACGGCGTATTAATCGCATCCAGAGAACTAAAGGGGCCATTTCCCGGTAGTTACAGTGCAGTTAT  
TGATATGCCGAGTGGCAGGGGAAGCGTCACTCTGGAGTTTAAAGATTTTCCAGAAAGGCAATCAGGGGGCAGGCAATATCA  
CCGACTGTACGGTATTGTGACCAAAAAAGCCGCTTCCGGCATCAGTATTTCTGTGA

>Cluster\_10986

ATGCAATTAATACACAGCAGGCCCGGATTTTAAAGTTGCCAACTTACTGGGCACCGGCAAGCCGTTTCCGCTGCCGA  
CATTTATAACCACTGGAATGCTCTGAGCCGACATTAACCCGGGCCCTCAAAGAGCTACGCGAGTCAATTTCTCCGGGAGA  
TCAAATACAGCAAGCAGGTCACTTCTATCATCTGTTAATCCGGGCACTGGATAAAAAGACCCTCCGGGATGAAAT  
GAAGCGCTCGCACAGGAATGCTGAACTGAAAAACCGGTGAGTCCACAGGGAAGTCTGTACTCGATAAAGGATAAAAAACAGC  
CGTGTCAATATCGCTACGATGCGGATTCTAAGAAAAATTGACCGTCTGGCTGCGCTGAGTGACTCGACCCGAAGTGAAG  
CGGTAGAGAACTGGCTCTGCACCTCGTGTGAACTGATAAAAGAATACAGCGCTAAAAAGTCTCTGA

>Cluster\_32824

ATGCCACGTCGTCGCGTCATTGGTCAGCGTAAAAATTTGCCGGATCCGAAAGTTCGGATCAGAAGTCTGGCTAAAATTTGT  
AAATATCCTGATGTTAGTGGTAAAAATTTACTGCTGAATCTATCGTATACAGCGCGTGGAGACCCCTGGCTCAGCGCT  
CTGGTAAATCTGAACTGGAAGCATTCGAAGTAGCTCTGAAAAACGTCGCCCGGACTGTAGAAGTTAAGTCTCGCCCGGTT  
GGTGGTTCTACTTATCAGGTACCAGTTGAAGTCCGTCGCTCGTAAATGCTCTGGCAATGCGTTGGATCGTTGAAG  
TGCTCGTAAACGGGTGATAAATCCATGGCTCTGCGCTGGCGAAGCAACTTTCTGATGCTGCAGAAAAACAAAGTACTG  
CAGTTAAGAAACGTTGAAGACGTTACCGTATGGCCGAAGCCAACAGGCGTTCGCACACTACCGTTGGTAA

>Cluster\_34617

ATGGAACCTGGCTGTTGTTACCGGCAACGAGTTGGTGAATTTATGCGAAATGAAGTGGTCTGATATCGTAGATGGATATCT  
TTATGTCGAGCAAAGCAAAAACAGCGTAAAAATGCGCATCCCAACAACATGCAATGTTGATGCTCTCGGGATATCAATGA  
AGGAAAACCTTGATAAATGCAAGAGATTTCTGGCGGAGAAAACATAATTGCACTACTCGTCTGTAACCGCTTTTCATCC  
GGCACAGTATCAAGGATTTTATGCGCGCACGAAAAGCATCAGGTTCTTCTTTCGAAGGGATCCGCTACCTTTCCAG  
GTTGCCGAGTTTGTCTGCAAGACTCTATGAGAAGCAGATAAGGCGATAAGTTGCTCAACATCTCTCGGCGATAAGCTCG  
ACACCATGGCATCACAGTATCGTATGACAGAGCAGGAGTGGGACAAAATTGAAATCAAATAA

>Cluster\_18874

ATGTCAGAACAAAACAACCCGAAATGACTTTCCAGATCCAACGTATTTATACCAAGGATATTTCTTTTCGAAGCGCCGAA  
CGGCGCGACGTTTTCAGAAAAGATTGGCAACCAGAAGTAAACTTGATCTGGATACGCGATCTACTCAACTGGCAGATG  
ACGTTTACGAAGTGGTACTGCGTGTACCGTAACGGCCCTCCCTGGGCGAAGAAACCGGTTCCGTGTGAAGTTCAGCAG  
GGCGGATTTTCTCCATCGCGGGTATCGAAGGACCCAGATGGCAGATTTGCCCTGGGCGCATACTGCCGAAACATTTCTGTT  
CCCGTATGCTCTGAGTGCATCACCGATGTTATCCCGGTTACATTTCCCGCAACTGAACCTTCCGCGGTTAACTTCG  
ATGCGCTGTTCACTGAATATTTGACAGCAGCGGCTGGCGAAGTACTGAAGAATCATGAGATGCCTGA

>Cluster\_26041

ATGAAAAACAAATGTTATTTATGATGTTAACAATACTGGGTGCGCTGGGATTGCAGCCGACGAGGTTATGATTTAGC  
TAATTCAGAAATATAACTTCGCGTAAATGAATGAGTAAGTCTTCATTTAATCAGGACCCATTAATGTTCAAGCTGGGA  
CTAATAATAGTGTCTAGTTACGGCAGGGAGGCTCAAACCTTTTGGCGGTTGTTGGCAAGAAGGTAGTAGCAACCGGGCA  
AAGATTGACAGCAGGAGATTATAACCTTGCAATATTTGATCAGGCGGGCAGTGCACACGATGCCAGTATTTTCGCAAGG  
TGCTTATGGTAATACTGCGATGATTAATCCAGAAAGGTTCTGGTAAATAAGCAAAATTTACACAGTATGGTACTCAAAAA  
CGCAATTTAGTGTGACAGACAGTCGCAAAATGGCTATTTCCGCTGACACACAGCTAA

>Cluster\_12406

ATGTTTATGTCATCAGATAAAATTTAGAGAAATTAAGTATTGCTTCCATTAGTATCAATTGATCTGCTAATTGAAAAACA  
GAATGGTGAATTTATTTGGTCTTAGGAATAATCGACCGCCAAAAATTTTGGTTCAGGTGGTAGGATTCGCA  
AAAAATGAATCTAATTAAAAAATGCTTTTAAAGAAATATCACTATGGAATTAGGTAAGAGTATGTTATTTTCAGGAAAGTGT  
TTTTAATGGTGTATGGGAACATTTCTATGATGATGGTTTTTTTTCTGAAGCGGAGGCAACACATTAATAGTGTCTTGT  
CACACTGAAAGTTCTTAAAGTGAATTGAATCTCCAGATGATCAACATCGTGAATACCTTTGGCTAACTAAACACCAAA  
TAAATGCTAAACAAGATGTTCACTAATAATCAAAAAATTTTGTAA

>Cluster\_43670

ATGTCGAAATCTGTACAGAGCAATAGCGCGCTCTGGTGCACCTCACGCTAAACTCGACGATGGCACCACCGCGGAGTC

TACCCGCAACAACGGTAAACCGGCGCTGTTCGCCCTGGGTGATGCTTCTTTCTGAAGGGCTGGAGCAACACCTGTTGG  
GGCTGAAAGTGGGCGATAAAACACCTTCTCGTTGGAGCCAGATGCGGCGTTTGGCGTCCCGTACCAGGACCTGATTCAG  
TACTTCTCCCGCGTGAATTTATGGATGCAGGCGAGCCAGAAATGGCGCAATCATGCTTTTTACCGCAATGGATGGCAG  
TGAGATGCTTGGCGTATCCGCGAAATTAACGGCGACTCCATTACCGTTGATTTCAACCATCCGCTGGCCGGGAGACCG  
TTCATTTTGATATTGAAGTGCTGAAATCGATCCGCACTGGAGGCGTAA  
>Cluster\_7588  
ATGAAGCAAACCTTTCTGCTTCGCAACGAAGCAATCAGAAATAACGCCATAGACGCCATTCTCTCACTACCCATCGCAGCA  
CAAGTACCCACGAAAGTCCACGTTAAAGAACCCAAAGCGCAGCAAGCGCAGAAATGACCGTATGTGGCCGATGCTGAACG  
ATGTTTCGCGTCAAGTGCATGGCATGGTCAACGGCTGGCGCCGGAAGACTGGAAAGACCTGTTCACTGCCCTGTGGCTT  
AAGACCAAAAACTGGAGCAACGAAGTGTGCTTGGTATCGACGGTGGCGTGTGTCATGCTTGGCGTGGTACCAGCAAAAT  
GCGGAAGGCCAGCATGACTGAGCTTATCGAAATCATGTTCTGGTTCGGCTCAGAGCGCAACGTCGGTGGAGTGATGACT  
CCTGGCGAGATGAATGGTCAACAAGAAAAGGGAGAGCTGCATGA  
>Cluster\_21295  
ATGAGCGATGTACCTTTCTGGCAAAGTAAACCTGGACGAAATGAGCGATGCGGAATGGGAGTGGTGTGTGATGGTTG  
CGGTACAGTGTTCCTGCATAAACGATGGATGAAGACCCGACGAAATCTACTCACTAACGTCGCTGTCCGAGCTCA  
ATATTAACCTGTCAATGTGCGGAACACGAACTCGTTTCGAGTTTGAACCCGACTGCATTAATTAACCCGTGAAAT  
TCCCAACCATTCGATTCGCAATGACCTCGCTTATCGCTTTCGTTTGGCGGAAGTAAAGGTTTACCCTGGCTGATCC  
GCTACTTACTGGTTCGAAAGCGCAATGCATGGTGAACGATATCTGTGCGTCATATCGCAGTAAAGAAATCAGAAGTGA  
TTGACTGGCAGGATCATATCTTAATAAACCTGACTGGGCGCAGTGA  
>Cluster\_66949  
ATGCGTCCAGGTAATACTCATATTCCATCCATATTTTTCTTCTCCGGTTTTTCATTTGCAACAACACAACCTCTTGT  
CACAAATAGGAGAAGTGAAGCACAACAAAACCGGAATATCTTTTACAGGCAAAAGTTCAGGGCGCACAGCTACAGAAAC  
AACTCGAAGAATCAGATAATCTTTCATCATCTGAAACTGTTTCAGGTTTCTCTGGTGTGACTGCCCTTTTGCATCAGTT  
TCAGAGCAGCCGACATCTAAAAACAGAAAGAAATGCCCATCATATTGGAATAAACCGCAAGATAAACCGTCTTAATGC  
CGTCTTCGATGGCTGATGGACGTCAGACAAGCGTCAACACTGGCAGCCAGCTTCCAGGCACATCCGTCACAGTGAAGT  
CGATCTCATGTCTGGCGTCACTTAAGTATGGCACCACCTTACTTTCTGTA  
>Cluster\_43374  
ATGATCATCGGAAATATTATAATCTTACGCGTGGCTACCCAGGAGTTACGCCAGGCGATTGAGCATATCAAAGCACA  
CGTTACGGTAGAAACGCCAAAGGCAAGCAGCATATCGAAGGCAATCGTCTGTTTATCTTATCTCGGAAGATATGACCG  
AGCCGTACGAAGCTCGCCGTGGCGAGTACCATGCCCGTATCTCGACATTCAGATTGTGTTAAAGGTCAGGAAGGCATG  
ACCTTCAGCACACAACCTGCAGGTACGCCGGATACCGACTGGTTAGCTGATAAAGACATCGCATTTTTTCCGGAAGGCGT  
TGATGAGAAAACGTTATCTTAATGAAGGTGATTTGTTGTTGTTTATCCGGGGAAGTGCATAAACCGCTGTGCGCAG  
TGGGCGGCCAGCCGGGTTTCGCAAAGCAGTAGTGAAGATGCTGATGGCGTGA  
>Cluster\_24438  
ATGCAAGTTATTCTGCTTGATAAAGTAGCAAACCTGGGTAGCTGGGTGATCAGGTAACGTTAAAGCGGGCTATGCTCG  
TAACCTTCTGGTACCGCAGGGTAAAGCTGTTCCAGCTACCAAGAAAAACATTGAATTTCTCGAAGCACGTCGCGCTGAAC  
TGGAAAGTAACTGGCTGAAGTTCTGGCAGCAGCTAATGCTCGCGTGGAAAAATCAATGCACGGAACCTGTTACCATC  
GCTCTAAAGCTGGCGACGAAGTAAACTGTTCCGTTCCATCGGTACTCGCCACATCGCTGACGCTGTAAGTGCAGCTGG  
CGTTGAAGTGGCTAAGAGCGAAGTTCGCTGCGAAGCGGCTTCTGCTACCCTGGCAACCGAAGTGAAGTGCAGCTCCAGG  
TTCACAGCGAAGTATTTCGCGAAAGTATCGTAAACGTAAGTGTGATGTAATAA  
>Cluster\_29098  
ATGCAACGTCATATAAAAAATACATTTCTTTTGGGGTGTGATGGATGTTATCGCGATAGCCACATATCTGTTCTA  
CTCGCTGGTAATGGTCTGATCCCTTTTATTCGATATCGTTTCACTTCTTACTTAAGGATATCGGTTGTTGAAG  
GCGGTTTTTACGCTTATGCAGTCCGCACTGTTACGCTACAAAATAGTATTATTGCTCTCTTTATCTTTTCTGCGCAATGT  
TTTTTAAGACAAAATTAATTTAGTTTCTTTTTTGGCTATTCAGGAGTTTATGCGTTTTGCTACCGTAAAGCTGCTCAAT  
CTCCGTAATACCGTTGTTACTTAATATTTTATTCACAGGATCTGGTCTTAATATTTCTGTTTATCTTCTCAGAGG  
TCACAAAAGTGACAAAGATATCTGGTGTAAACGACAGGGGAAAGTGTGA  
>Cluster\_35633  
ATGGCAAAAGTGGCTGACGGGATCCGCTACGCCGAACGTTGTTGTCAGGAGAAATGTCGCTGGTGAATTTGTCGGTCT  
GGCTGCCAGCGTTTCTTGTATGATCTGAAGTACGGCGAAGAGCGGGGATTTATTTCAAGTGAACCCCGTGGCGAGCACA  
TCCGTAATTTCTACAAAATTTGTGCCCATGTAAAAGGGGCGCTGGCAGGTGAGCCATGAACTGATGACGATGGCATGTT  
TTTTATCTCATTAATATTTTGGTTTTGTGCTATCCGCTGGTGAATGAAGAGACCGGGGAAAGTGTGTCATGCGCAGCGATGG  
CAGCGGACCCCGGTGATGGTGCCTGTTCCGGACAGCGTACAAAGTGGCGGTAACCGGTAACCGGTAACCGGTAACCGGTA  
CATCAGGTATCGGCTGTATATGACGGGGCAGATGGTGAAGCGGGGCTGAGGTGATTTAGCCGCAACCGGTAACCGGTA  
CAGCCAGAAATCGTGTGTTGAAGACGCCAAAATATGGTCAAGAAAGCCGATGACACTCGGGCGGTTGTTGATTTTCAA  
CAAGCTGGCGATTTACCAGGAGCAGAGCGCATCAAATTTGAACCGCTTCTCCTCGGATGCAAAACACCTGGATGGTCTGA  
ACATCCACTGCGCATTAATTTGATGAGCTGCATGACATAAAACCCGCGAGCTGTTGGGACGTTCTGGAAACGGCAACCGGT  
GCCGCTCGAGTCCCTGTTATTTGGTATCACCACGGCTGGCTTAAACAGGAAGGATTTGTTACGAGCAACCGGATTA  
CGCCATCAAGGTATTTGCGAGGCTATAACAGCAGCTGGAGGGCGCGTAAAAGACGACTCCTACTTTGCGATTTTACA  
CCCTCGATGAGGGAGATGATCCGTTTGAAGAAAGGCTGCGGAGAAAGCGAATCCCGGCTGGGCATCTGTAACCGCTGG  
GATGATCTGCGTCCGCTGGCGAAAAAGCGAAAGAAAGGCTCTGCGCGGGTGAATTTTTTACCAACACATGAATGT  
GTGGTAACAGCAGAGCTGCTGCTGGATGGACATGATTAAGTGGGGAAGTGCAGAAATACATTTGCTCCACAGCATGAGCTGA  
AAACATATCCCATGTTGGTGGCGTGCACCTTGTCTATAAGATTGATATCTGTGCGGGCGGAAAACTGCGGAAACGGAT  
AACGGGATGTTTACGCGGATTTTAAATTTCTGGCTTCCGGAAGGACGGTGGAAACGATGCTCACGGCAGCAGGAGAACT  
TTACCGGAAGTGGCGGAGATGGGTAAGCTCATCTGACGGATGGTGAATGTTATCGATCATGCTCAGATCAAAAGTGACC  
TACTGGAATGGATTTGGCGGTGAAAACCTGAGGGAATGGGATTTGACCCGTTGGAGCGCAATGCAGTTCAAGTCTGGCGT  
ACTGAAGAAGGTATACCGCTGGTGAAGTTCCGACAGCGTCCGCAATCTGTGAGGGCCATGAAGGAAACGGAACTACT  
GGTCTATGCGGGGCTTTCCACCACAGCAATCATCCGCTCATGAACTGGATGATGCTAACGTTACCGTAAAACCGGAGCA  
AAAACGACAAATCTTCCGAATAAATCCACGCCGGAAGCCAAAATCGACGGCCCTGTTGCGATGTTTACAGCAATGAGC  
CGGATGCTGGTCAATGGCGGTGAACCGGAGCCGATCTGTGTAACATCTGGTCAGCGTTGGTATTTCGCTCGCTTTAA  
>Cluster\_50603  
ATGAATCAGTCACTTACCCTTGCCTTTTTGATTGCAGCCGGGATGGTCTGGTGTAGTCCAGAACACGCTGATGGTGGCAT  
CACCCAGACCTCTTACCATTCTATCCGCAATGTTGCTGAACACTCAGTGGTGGGATTTGCTCTTTGTTCTATTTTAT  
GGTTTAAACAGGATGGCGGGTTTGGCGAACTGGTGGTCCAGCGTGCCTGGTGGACACTTATACCTGGCTGCTGGGA  
TCGTTTTTTGCTTCCGCAATATCAGCGGATATCAGAAATGTTGGGAGCGGCAACTATGTCAGTACTGGTCCGAGCCA  
GCTGATTTGGCGTCTGGTCTGGATATCTTCCGAGCCATGGCGTACCCTTCCGGCGTTGATCGGCCAATTTGTTGGC  
CAATTTTACTTGTGGTTGGCGCTGGCTGGTGGCCAGACGCTCATTTTAA  
>Cluster\_39293  
ATGAGCCGGTGTATCTGGCGTTTATAAAGGGCGAGCCGATCATCATGGGTTCCGACGCTTTTCCGACTGGCTGACGGC

GCTGGTGACGCGGGGTGAGTATTCTCACTGCGAGCTGGCTGTTGACCAGGGTAACGGCGAGTTCTTTGTTATTTCGTCGT  
CGGTGCGTGACAAGGGGGTGCCTGTAAAGCAAATGCCGCTGCCACTCGATAAAAGGGATCTTATCGCGCTAAAAGCGCTA  
CCAACCAGTGTGGAGCAGTCTTCCGTCGAAACGACGCCATGAAATATGACTGGCTGGGGCTGTGGGATTCTGTTGTTTT  
TAATCGTGGACGGGAGAACAATATTTCTGTAGCGAGTTTTCGCGAGATTTTCTTGGACTGGTCGATAGCTGGCGTTATT  
CACCCAATATGCTCCACGCGCTGGCCAGCAGTATTCAGACTATGAAGTTATAA

>Cluster\_7954

ATGAATGACTTTAAACCCCTTGACGATAAGCTCGCGGGCTGATAGCGGGCTGTACCTGTGCCGTCGCAGAATGGC  
CGCAGATATCGCGAAGACCTGCGAGCCGTCACAGCGCCGGATTAAAACGCAGAAAGCCCCGGACGGGACACCTTACG  
CCGCCGAAAACGCCAGCCGGTAAAAGCCAAAAGGCCGGGTTAAGCGGGAAATGTTTCGCCAACTCCGACACAGTCCG  
TTTATGAAAGCTACGCGGGGAAATGACGCGGGCTGTTGGAATTTACCGTAAAGTACAACGGATGGCGAATGTGCATCA  
GTACGGCCTCAAGGATAAGCCCGGGCGAAACAGTACGCGGTACAGTATGATGCCGACCATTTAGGTTTCCAGAGTG  
ACGACTGGCTATTATTGAAGTTATAATAGCCAAGGGCTTCGATATCTAA

>Cluster\_19444

ATGAAAAAGATTGCATTTGGCTGTGATCATGTCCGTTTCAATTTAAAACATGAAATAGTGGCACATTTAGTTGAGCGTGG  
CGTGAAGTGATTGATAAAGAACCTGGTCTGACAGGCTACTGATTAATCCGCATTACGCCAGTCAAGTTCGACTGGCCG  
TTGCTGGCGGAGAGGCTGATGGCGGGATTTGATTTGTGGCACGCGGTCGGTATTTCGATAGCGGGAACAAGTTTGGC  
GGAATTCGCGCGCTGTTTGTAGCGAACCTTATTCGCGCAACTTTTCGCGCGAGCATAACGACACCAAGCTGGCTTT  
TGGTTCAAGAGTGGTTGGCTCGAACTGGCAAAAATGATTTGTCGATGCGTGGCTGGGCGCACAGTACGAAGCGGTGCT  
ATCAACAACGCGTGGAGGCGATTACGGCAATAGAGCAGCGGAGAAATGA

>Cluster\_18794

ATGGGGAACGAAAAGAGCTTAGCGCACACCCGATGGAAGTGTAAATATCACATAGTATTTGCGCCAAAATACCGAAGACA  
GGTGTCTACAGAGAGAAGCGTAGAGCAATAGGCTGTATTTGAGAAAGCTGTGTGAGTGGAAAAGTGTACGGATTCTGG  
AAGCTGAATGCTGTGCAGATCATATCCTATGCTTGTGGAGATCCCGCCAAAATGAGCGTATCCGGCTTTATGGGATAT  
CTGAAAGGGAAAAGCAGTCTGATGCTTTACGAGCAGTTTGGTGATTGAAATCAAGTACAGGAACAGGGAGTTCTGGTG  
CAGAGGGTATTACGTCGATACGGTGGGTAAGAACACGGCGAAGATACAGGATTACATAAAGCACCAGCTTGAAGAGGATA  
AAATGGGAGAGCAGTTATCGATTCCCTATCCGGCAGCCGTTTACGGGCGTAAAGTAA

>Cluster\_48925

ATGAGGAAATATATTTCCACTGGTATTATTTATCTTTTCATGGCCGGTATTGTGTGCAGATATTCATGGACGGGTTGTTCC  
TGTACTGGACGGTGATACCATCGAGGTCATGGACTCACGGAAGCAGTGGGATCAGGCTGGTAAATATTGATGCGCCGG  
AAAAGAAACAGGATTATGCGCGGTGGTCAACGGACATGATGAAATCACGTTGCGAGGAAAACGGTTACCGTCAATAT  
TTTCAGCGAGATCGTTATGGTCTGTTTCGCGGAGGTTTATGCACCAGACGGAAATGAATGTTAATCAGTTTATGGTCCG  
GGCCGGGCTGCCGTTGATATGAGCAGTACAACACAGATCCCGTGCCTTCCCTTCAAGAACGGAAGCCAGACAACAAA  
AACGTTGGCTCTGGTCAGATGCTGATCCGGTTCACCCCTGGATATGGAGACACCGTAAATAA

>Cluster\_34168

ATGCTGCATTGACTCCGTTGGGACCCCTTCGGGAACTGGATGAATTGCAAAACCGCTGGCGACGATGTTCCGACGAAT  
ACCCAGCGACAGGCGCCCGTACCGGCAACGAAGCCTGACCGCGGACTGGGCTCCAATGGCGGACATCAGCGAGG  
ATGAGAACGCATTCCTCCTCAAGCTGGATCTGCCGGAGGTTCCAGGGATGCCGTCGCGCTCAGCGGAAAACGGTGTG  
CTCACCATCAGCGCGAGCGCAAACCTGGAAAAGAGGAGCAGGGCAAGAAATCCACCGCATCGAACGTCCTTATGGCCG  
CTTTGTGCGCAGCTTTGCTTGCCTGACAACGTTGATCCGACAGGTTGACGGCTTCCATGAAAGACGGCGTGTGGAAG  
TGGCGGCTTGTCAAGCGGCAAGCCAAAACGAAACAGATGAAATCTCAGTCAACTAA

>Cluster\_52862

ATGAAAAAATAAATACCTGAGTATCATTCTCATTTCAAAATGCTGTAATGCTTCCGATTGTTTTGAAATACAGGAAAAGC  
ATATAACATAGATCCATTAATATAAAGCAATTCATGGAATGAATCAAAATGCAAAAGCGGATAAAAAGCAAAACAA  
ACAAAACGGAACGTATGATATAGGTATAATGCAAAATTAATTCATCTCATTAGATTTATTAAGCAAAATTAATATATCT  
GAAGATGATTTATGAAATATGCTGTATAAACAATATCTGTTGCTGGTATATCTTAGCTTAAACATAAAATCCAGAGG  
GAATACATGGGATGCAAGTTGGTGGCTATAATGCAGGTTACTTTAATACCAAAATGCAAGTGAAGTACAGAAAGCAATACG  
CAATGAAAATATAAACAATATAAATAAATTAAGAATAATGAGCAAAATATCGATTAA

>Cluster\_23535

ATGAACATGCTCTTTGACTGGTGGTTCGCCACATCACCCCGCTCCCGCAGTTTGTCTGGGACGCTGGTTGCTGGTGT  
AGTTACGCTCATTCTTCTGTCATTGACACACCAATGAAGAGAGCGACGCATTAATTCGACTACGGGCAATCATCACAGC  
AGTGGGCTGCACCTGATCCGCTGGTAGACACCACTTCCCTCAGCGAAGAAAACGCTGCCCTTTTCGCGCACTGATTTT  
CAGTTATCCGGCGCGCAACTGGTTTACTGGCATCCATCCGCGCAGGGAGGTGAGTTGGCGTTGAAAACGCTGTGGGAAGC  
AGTGCCGTCGGCATTACACGGCTGGCAGAGCGCAACGTCAGCGTGGCCGTTTGTGTTAAGCGTGGAAAGGTGATGACC  
TTTTGTTACGCTACAACCTGGAGACCGCATGAGGGTTAA

>Cluster\_50039

ATGAAACAAATGACACTAATGAGATGGATGGATTTCTGAAAGGTAATGCATCCCATGTGATTTAAAGGTTAACGAAAC  
AAACGCTGAATATCTTGTGCGTAAGTTCCGTGAACTTGAATCAAACTAGAAAACGGCGTTGCGGGAGTGTAGTTCTGCTG  
GAATCAGATTGATAACCTGAGGCCAAGTGGCGGAAGTGGCTGCTGAAAATACCTCGCTTAAGCAATCTGAGAAGGAA  
TTTAATGACTTTTGTCTGAGGAGTTTAGCGAATGGGAAGATGATGTTTACTGAAACCCGACCCACCGATTTCTGTCG  
TGAAATTCGTGCGCAGGGCGTGGAGATGTTTGGGAGTGTGCATACACTTGAACATCATGATCAGCAGTAGCCTTCG  
CCGCTGAGCTTCGCAAAGGAGGCAACAGTGA

>Cluster\_26665

ATGAGTAAAAACGATATCATTATCAGAACTCATTATGAGTCTCCTCTTAGAATGCACATCGATAGCGACATACTAACGCC  
TTCATCAGAGCCTATTAATCAATTTGCGCGCCAGCTCATCACCTACTTGGATACCTCTGATTTAAGTTTCGATGCTGTCTAT  
ACTGTGTTACTCAGGAATTTACCGCAAGCTGTGCAAAAATATCACACAATTTGTTATTCCTACTGCCCTTTTATCATATAGC  
TTTACCCTTACCCATCCATGCAGAAAATACACTCATACATACATAAAGAAATCATTTCCTTATTTCTGGA  
AACACGCTTATTAAGCTAACCATTTGCGAAGCATACGGATTAATTTGAACAGGAACAGTTAACTGCCGAAAACGTA  
ACCATTGCATGAAACTGTCCAAAAAAATTCATAG

>Cluster\_46839

ATGATAAACGATCTGAAGAGTATATTGTAAAACTCAGAGGAAGTTGATGTTTTTATCAAAAATTTTGAAGTTGGAG  
AAAAAATACCGGCAATATCAGGTCCTGTAATCTCTATATACCTACCAGATTCAAAGATAAGTATCTTGAAGTAGAGT  
CATATTTTCTGACAAAATCAATATGGAATGTCATATTTACATTTTCATGATGATAAGCGTTTTGTTTTTTTACCGATCAA  
TTTTATTGCTGAATTTAGTCCGAGGAATTTGTTGTAATTTGTTGAGCAATTTAATTAATAATCATTTCTCCCTGA  
CAAGGTTAACGAAATCTGCGAACAGCCAGACATTTATTGTTGAAAAAATGTTTGAACACATCTTTGGATATGAATA  
ATTTGTTTTGGCAAGCCTTGGAGACTTATAG

>Cluster\_43573

ATGAACATCCCTACTCATCTGAAACACAACCGATTATCGCTGTGAAAACATATGATCGAATTTGATGGACCTTATGCTGA  
TGACACTGATGCTATGGGCTTTCCGTTGGAATTTGCTCAATGGAACACCCCGGGTATACCGAGCTATCAGCAAAAGTGT  
GGCGCAACACCGGAGAAAAGTGGTACGGCAATCAGAAGAAATACCTTTCATCGTGTATCGACTTGGCACGCTTATC



TGCATAGCAATGGATTACAGTAAACATGGCCGCTTATCTTCCAGCGCAGACTTTCGGGTCAGTCGTTCCAGGAGCAATCC  
TGAGTTATCTCGTACATTTGATTTAATGAAAAACGAGCTAAAAGAGAAATCACGAGCATTTAGATGAGAGTCTTAAAGCGTT  
TAGCAGCAGAACTAAAACGTTTAGGTTATTA  
>Cluster\_58212  
ATGGCAACCCAGCAACTGTATCCATAGAACCCACTCTGGCAGCTATCAGAGCTCGCTGGTGTATTAATCAAGTAAAC  
AACTCAATCTTTAACGATCCTGCGTCCATGGAAGAGGTTGTGCGAGTATCTCAAAGGAACATACTCAGCTCTTCGCAAGT  
CTGTGCGATGCGCCAAACGAAAATTTTACATCTTAAACAAAGAAATGCAAAAATGCTACTAACCTTCTCGCGCGCTGATG  
TCATGTAAAAATCAGGCATCCAGATCCGATCACAGTACGGCTAAATCAGCTAAAAAGTGCCTTATCATCAGATTTCAGGTGA  
TGGTAGTACCCCGACCCCGAGCCGAAACGTTTCCTTTCATTAACCCCTACTAATCAATAATGCTTAAAG  
CTTTCTTTGCCAATATCTCAATCACTGAGGTGGCAAAATGA  
>Cluster\_43027  
ATGACCATACAGCAATGGTTATTTCTCATTTAAAGGGCGTATTGGACGCCGTGATTTCTGGATTGGATAGGCCGTGTGGTT  
CGCAGGCATGCTGGTGTCTTTCTCACTGGCGGGTAAAAATTTACTCGATATTCAGACCCGCGGCTTTTGCCTTGTGTGCT  
TGTCTTTGGCCACAGCGGCAGTAAACGTTAAGCGCTTGCATGATCGCGGGCGTTCGGCGCATGGGCATTTCTGATGATT  
GTGGCGTGGATGCTGCTGGCGGGTAACTGGGCAATTTTACC GGGTGCTGGCAATGGGCGGTGGGCGCTTTTATCCCGAC  
ATTGATTTCTGGTGTATGCTTATCGATCTTGGTGCCTTTGGTGGCACACAAGCGCAAAATAAATATGGTAAAGATACCC  
AGGATGTGAAGTATAAAGCCGACAATAAATCAAGTAATTA  
>Cluster\_26168  
ATGTTTTATAGTCCATCTTAAACATTTTGTGAATCCGCACTTAAAGGATGATTACATTAATGCAAAATTCATGGCCAGA  
TGATGCTCTGGCTGTAGTGTATTTATAATGAATTTGCAATCAATACGCTCCAGATGACAAAAATTCGTGTGGCAG  
GAAAAAATGGATTACCACATGGGCACCTAATCTCCACCATCACATGAAGAATTTATTAACAGGCAGAAATCAGAAAGG  
CAATATTTGCTTAACTAGGCCAACGAATACATGAACAGTAAGCAATGGCCCGTAAAGCGCTATTGGTGTCTGAAAGG  
TGATGAATGGCGCAATAAATTTGTGGCTGGATTTCTGGACGCACTGGAGCTGATCGATACTTCCGGTGGCCAGATA  
TTGAATGGCTACGCCCTCCGGCAGTTTACGGCCAGATGA  
>Cluster\_17525  
ATGATTAAGAAGCTATTCTTATATCATTTCCGATTGGGATGGATGAAGGCAACCCAGTAACTCCAGTCTTATCTATGA  
AATGGATAAAGACTCCCATGAAGTGGATCTATCATTTGGCGCTTTTTTATCGGCCTTAAAGGCTACAAAAAATATTTCCA  
TAGGCATTGAGGTTTCAATGCTCAAGAAATACCGATACCAATGACACAAAACTGACTCCAACATAAGTTTTTTTACG  
GTAGCAGAAAGCCACGATGGAGAAACATCGTATCAACTTCTATGAGAATTAACCTCCCAAGGGTAAAAATATCAAGCC  
TGGGATATTCGAAGTTAGAGCATCACTGGTTAATCCTGATAAAGCGAAGTAAATGATGTA AAAAGTTTCTTTTTTGGAC  
TGAAGATAACAGGATCAGTTCGGGATGAGTTTAGATAA  
>Cluster\_13762  
ATGAGTGAGATAGTAATACGCCACGCAGAAACACGGGATTACGAGGCCATCAGGCAGATTACGCCCCAGCCGGAGGTGTA  
TTGCAACACACTACAGGTGCTCATCTTCCGATCATATGTGGCAGGAGCGACTCGCCGATCGTCCCGGCATCAAGCAAC  
TCGTGCGCTGTATTGATGGAGACGTCGTGGGCCATCTCACCATTGACGTGCAACAGCGCCACGCGCAGTCAATGTGGC  
GATTTTGGTATCTGTGCTGCACTCTCGTTGGAAGAACCGCGCGCTCGCCAGCGCCTGATGCGAGAGATTGTAATGTTG  
CGACAACCTGGTTGCGGGTAGATCGCATTTAACTAACCGTGTTTGTCGATAACGCCCGGCAATTAAGGTCTATAAAAAAT  
ACGGCTTTGAAAATGAAGGGACTGGTAAAGAGTACGCATTCGCTAATGGTGAATATGTCGATGCATATATATGGCGCG  
GTGAAGTAA  
>Cluster\_17463  
ATGAAACGACTACTTTTGGCCGGGCTGGGAGGAGTGCTGCTTACGGGCAGTGCTCTTGGCGGTGAAACGAAAAGTGTGGC  
ATTTGACATTTGGCGGTAGTGGTAGACCACCCACCTCTTTGTACCCTAAAAGGCAAGTAAAGTTCGATTTTGGTGTATGATCA  
TCAAAAAAATCAATGGTACTGAATATCGCAAAGATGCAGGTTATACCGTTGAACGTGAGTGTGCCAATAGCCTGAGCGCATCA  
CAGATGCAGTTTAAAGGCAACAACCACCGATCAATGGCGAAACGGTGTAAAGCACGGGAATTAACGGGTTTGGCATTTCG  
TATTTGAAAATGCAGCAGATAACTCTCTGTTTGGGATTTGGCGACAAATACCTGGACTCCATTTAGCGTCAGTAGCCAGCCAC  
AACTAAAAGCAGTGCCAGTCAAACAGAAATGGCGTGACGCTGACAGGCGCACAGTTAACGCCAGCATGACAATGGTGGTG  
GATTACCAATGA  
>Cluster\_33396  
ATGAGCTATGCAGTAAAAAACTGCTTACCCTATTGGGATCGCCGACTACCTGTGCTCCGTTAAGCTTGTCAAAGC  
GTGGGGTGTCTGTTGTAAGCACCTGAGGAATCGGCTTATAACAACGATGGGTTAAGCGGCTGGCTGCATCAAAAAGG  
GTGTCATAGGATTTATTTGATTTAGTGAACATTCTAATCGTCAACGTTTTACTGTTGACACAGGATTAAGTCAATCAT  
GTGCTGGGCATACCCAGGACGGAGAGTACCATCGGATAATGTCCGGAAATTAATCAACAGGTGCTCGTATTACCGTGA  
GGTTGAAGCAAACAGTTTGTGCTGCTGAGTTGTTAATGCCTGAGTCTGCTATACGCTCAATTTGGTATCCAGAGAAGGATTTG  
ATAGCACTTTGAGATTAGCAAGCATCTTTAATGTATCAGAAGCCGCTATGCATTTGGCGCTTAAAGAGCTTAGGAATGGCT  
TATTAA  
>Cluster\_1611  
ATGAAAAATAAATCAGGTAATCTTATTATAGAGAAGCGGTGATATTATAGCTCACTTGGCTTTTATATTATTTGCA  
TAAATATCATTTGCGTGTAGATGAGAAGAAATCTCGAAATGTATTCAGCGCCATACGATGAGCTCATCTTATGAGGGG  
ATTCACGCAAAAACCTTAGCTACTTTCTGTCAAACATGGATTTGATGATGAAATCCGTGAGTTGCTTAATTTATCTATTGAT  
AGAAACATGATTTATAAAGATGAATATCCACAATGGCGGAACCTGAAGGTGCTGTGTCGCTATGCTTTCCGATTCGTG  
GAGTTTCCCGATTCGCGACACACCTTAGGTTGCTCAACCATTGGTTTCACTGAAAGTGTCTATGCTCGGCCGCTTGGCGT  
TAAAATGGCAGTGGTGTAAAAAACCGCAAGTACAAGGTAATCAACCGAACCTGATTTGCGGTCCTGTGCAAAATATGCTG  
GCATAA  
>Cluster\_66448  
ATGGCTTTAAATCTTCAAGACAACAAGCGATTTGTTGCTGAAGTACAGCGAAGTAGCCAAAGCGCGCTGTCTGCAGTAGT  
TGGGATTTCCCGTGGCTAACTGTAGATAAAAATGACTGAAGTAAAGCAGGTTCGGAAGCTCGCGAAGCTGGCGTATACATGCGTG  
TTGTTGTAACACCCCTGCTGCGCGTGTGTTGAAGGTAAGTACTCCGTTGAGTGCCTGAAAGACGCGTTTGTGGTCCGACC  
CTGATTGCATACTTATGGAACACCCGGCGCTGCTGCTGCTGTTTCAAGAGTTTCGCGAAAGCGAAATGCAAAAATTTGA  
GGTCAAAGCCGCTGCCTTTGAAGGTGAGCTGATCCCGGCTCTCAGATCGACCCGCTGGCAACTCTGCGGACCTACGAAG  
AAGCAATTGCACCGCTGATGGCAACATGAAAGAAAGCTTCGGGTCGCAAACTGGTTCGTAAGTCTGCTGCTGCTGCTGCTG  
GCAAAAGAAGCTGCTTAA  
>Cluster\_34161  
ATGAAATCAACACGCCCTTAAACCATTTACAGTCTTACGTAACCAATGGCCATCATGAGTTTTTACGAGCGCTTCGAGCA  
GGTCTGCGCTGCTGCTGCTGCGCGGTGATCGCCGTCATCATCGTGGTGTGCTGTTCCAGCTCATCTCCATCGTCTTCA  
CGTGTGCTGGTTCTAGATGCCTTCAATCCCTGGACCACGAGGATTTCCAGAGCGTGTTCGGCATGATCATGACGCTCTTG  
ATCGCGATGGAGTTCAAGCATTTCCATCGTGGCGGTGGCGCTGCTGCGGACAGCATATCCAGGTCAAGACCGTGGTCTCT  
GATCGCGCTGATCGCACTTCCCGCAAGTTCGTGATCCCTCGACTCCAACGCGAGCCCGCAAGATAGCCGGCTGGCTA  
CGGCCACGCTGGCTGCTGGGTGCGCACTACTGGCTGCTGCGCAAGCGCGGACCGCGCCGCGGAGACCTTGAGCATGAC  
CCGTCATCATCCAGTGA

>Cluster\_21035

ATGAACATTGTTCGATCAACAAACCTTTTCGCGATGCGATGTCCTGTATGGGCGCGCGGTC AATATCATCACTACGGACGG  
TCCAGCCGGGCGCGCGGGTTCCACGCCAGCGCGTCTGCAGCGTGACCGACACGCCCCACATTAC TGGTGTGCCCTGA  
ATCGTGGGGCGTTCGCTTCGGCCGGTATTCAATGAAAACGAAACGCTGTGTGTAATACTACTTAGCGCCGGGACGAGTGC  
CTTTCAAAACCTTTTTCGGCGCAAACGCCCATGGAAACCCCGCTTTCGCCCGCCCGCTGGCAGACTGGTGTACCGGATG  
CCCGCAACTGGAAGAGGCACTGGTTTCGTTTACTGCCGATATAGCCAGGTGGTGAGCGTCGGCACCCACGACATTTTGT  
TTTGGCCATCGAAGCGATTTCATCGTACGCCACACCTACGGGCTGGTGTGGTTCGATCGCAGTTATCACGGCGTGATG  
CGCCCTGCTTGTAA

>Cluster\_58449

ATGGTTACTTTCCACACCAATCACGGCGATATTGTCATCAAACTTTTTCGAGATAAAGCACCTGAAACAGTTAAAACT  
CCTGGACTACTGCCGCGAAGGTTTTTACAAACACCACTTTTCCACCGTGTATCAACGGCTTTATGATTCAGGGCGCG  
GTTTTGAACCGGGCATGAAACAAAAAGCCACCAAAAGAACCGATCAAAAACGAAGCAACAACGGCCTGAAAAATACCCGT  
GGTACGCTGGCAATGGCAGCTACTCAGGCTCCGCACTGCAACTGCACAGTTCTTCATCAACGTGGTGTATAACGACTT  
CCTGAACTTCTCTGGCGAAAGCCTGCAAGGTTGGGGCTACTGCGTGTTTGCTGAAAGTGGTTGACGGCATGGACGTGGTAG  
ACAAAATCAAAGTGTTCGAACCGGTTCGTAGCGGTATGCACCAGGACGTGCCAAAAGAAGACGTTATCATTGAAAGCGTG  
ACCGTTAGCGAGTAA

>Cluster\_14324

ATGAAATACGATACTTCCGAGCTTTGTGACATCTATCAAGAAGATGTTAACGTCGTGGAACCGCTGTTCTCAACTTTGG  
CGGACGGGCGTCTGTTTGGCGGACAAATAATCACGGTAAATGTTTCGAGGACAACGGGTTGCTGTACGATCTGCTCGAAC  
AGAAATGACCGGGCATGAAACAAAAAGCCACCAAAAGAACCGATCAAAAACGAAGCAACAACGGCCTGAAAAATACCCGT  
CTGGCAGTACAAAATGAAATGGGAAGGCTCGGTCATTTTACGGCGCGGTGCGTACAGGTAGATGACCTGGAAGAGTTGGATAT  
CGGCATCCAGGCGATGGCGGCAATTCGGTTCGGTGGCGTGGCGAAGGCAATTGGCGAAAGCGATGTCGCCGCTCAATTTTG  
GCGGTGTACCTTCTTCCGGCGACCACTTTTATGCCGACAAACCGGGATTATTTCTTCTGAAAGTCCGCTGGATATT  
GAATGA

>Cluster\_25445

ATGATTATCGGTAATCTCAACCATTGTCGCTGGCGGGCTTCCTGCCGCGGTGAGAAATATTCTGCTGCGCCCGGAGTG  
TTCGTTATCGGCGTTATCCACCAGAGAGGACGGTTCGCTGGCAACTGAAGGATGTCGGTGGTCTGCACGCTGGGAACTT  
CAGACACGCAACCCCGCAACTCCGCCATACGGATATCACCACTATGGGCCGATATACAGGTGGTGTATTCTGGTTT  
GAGGGCATTAATGCGGGAACCGGCCCATCGCTCGGAAAACGATGAAGAACGTAAGCCCGATCTGTTTATCGCCCATC  
CCCTGAAAACAGTGTCCGATCACCTTACACGCGGTGATTTCCCGCTCTTTATGCCCTGAGGAACTCACAGCGCTGT  
GCGCAATTGGCAGGGCTACTTCAATACGCAAAGCGGCTTTAAAGTACCGCGGACATGCTGGAAGCCTAA

>Cluster\_47272

ATGGAATCGTCTCAGAGAGAACCTCAACAGGCTACCAGCAAATCCATGACGGTATTATTCACCTGGTCGATAGCGCCCG  
GACGGAAACGGTACGTAGCGTTAACCGCGTATGACCGCGACATACTGGGAAATTTGGCCGACGAAATGTCGAATTTGAAC  
AAGTGTCCGAGGCGGCTGCGTATGGTGGCGAGTAAATCAAGCGACTATCAAAGGATTTAAGTCTAAGGTATAAGCGT  
GGTTTCTCGCAAAAACCTTACGCCAAATGAGGCTTTTTTACCTCTTTTTTCAACAGTGTGAAATTCGCCAGACAGTGT  
TGGCAATTAACACCATTTGGGAATTCGGCAGACACCATCTGCAGAAATCCCATCGGCAAGATTTGGCAGACGCTGTCTG  
CCAAATGAGAGGGCTGTTGATATTTCCACAGCTTTTGTATTGTCATCTCTATTTTCGGTTTGTATATTCATGCAAAATAA

>Cluster\_39670

ATGCTCAAACCCGACAGCCTGCGCAGGGCGCTGACTGATGCGGTCACGGTGTGAAAACAGTCCAGAGATGCTTCGGAT  
ATTCGTGGATAACGGGAGTATTGCTCCACGCTGGCGAGTCTGCTGTCTCGAAAAGCGTTACACGCTCAATGTGATTTG  
TGACCGACTTTACCGGTGATTTTACCTGCTCATCGTGCAGGCTGCTGGCGTGGCTGCGGGAAAATCAGCCCGACATCATG  
ACCATGACGAAAGTTCAGAAAAGGGCTTACGTTTATGACAGACATAACAATGACAGCAGCTTTGATATCAGCATCAG  
TCTGATGTGACCGAGCGCAGCTGGTACGCGAGGTTGACGGTGCCTGCATGTGAGAAATATCCCGGAAACCCCGCCG  
CGGAGCCGCTACCCGCCCGGTGGAGCTTTATATCAATGGCGAACTGGTGAGCGAGTGGGATGAATGA

>Cluster\_60533

ATGAAAATACGTTTCACTAAGCCGTTTGTACTGGCAAGTACAATGTTCCGCGAGCTTTACAGCCTCTGCGGTCCCGGACT  
CTGGCAACAGGGGTACGGTACGGCAATGCGGAATACAGTGTGACGGATGCCAGCGGAAAGATGTTTACCATCAACTGCA  
CGGGAAATCCGGACAGAACGGTATTTACAGCAGCTCGGTTTTCTGATCCTCGCCGGGATAAAAACGGTCACTCGCAT  
GATGACAGTACCGGCATCACAGTGGTATGGACCATAAGCAATATGCCATTCCTCAACCTTTGGCTGGCGTAACGGAGA  
TAATGCTGGTTCAGCTTTCATATGGATATCCGTAAGGCCCGGAGTTCGAGTCTACGTCATGACACGAAAGTTGGAT  
CGTTTAAACCTGATGTTCCGAATGCACAAAAGGCTTCCGCAACATTAGCGGACTGCACTAACGACTGA

>Cluster\_61085

ATGAAACGGATAATAACAGGATGCCTGCTGCTGAACTTCGCCATGGCCGCTCAGGCGAGAGTGAATATCTCCAGTAGCAT  
ACAAAATATCGACTATGGCAACGAAGTCTGCCATGCCCAAGTTGACCGGGGTAACAACAACAATTAGCAGACAGAA  
CAATCACGCTGGTAAATGCAATGCGATCAGGACGCTCATATTCGTGTTCAAGTTGAATACCGCTAATATTTCCAACACGGA  
TTTTGGATTTGGCCGAATGGTTCATTAATCTGATCGCCAGCGATGCAATTTTCAGGTAGTAACAATCTCGACCTGGCGTT  
AGCCAGTGGCAAAAATGACAATCCGGGACGACAGGAACAGCATCAATTAGGGAAGGTGCGAATAAGCGGGGAAATTTCT  
CTCGGCTGACTCAGTCAATTTCAATTTCTTTCATGTTTTCAGGCGATTTTTTCTCCCGTAAATGCCCTGAATCAGCCTATTTAG

>Cluster\_56609

ATGACAAACCTGACACTGGATGTAACATTATCGATTTCCCATCAATACCTGTGGCGATGTTGCCGACCCGCTGTAGCCC  
TGAATGCTCAACTACAGCGTGGCGAAATTTATCATGTGGCGTAAAGAGACGGGGCTTCTCCTGTTAACCAAAGCCAGA  
CTTTTGGCGTTCGCTGGGACGACCTGCCACCACCGCACCAGGCGTTTCGCTTTGATATCTGCGGACGCTTAGCGAA  
CCGATTTCCGATAATCGTTATGGTGTGAGCAATGGTGAACCTACCGGTGGACGTTATGCGGTGGCCCGCCAGCTTGGCGA  
GCTGGACGATATTTACACACGGTATGGGGCATATTCGCCACTGGCTGCCTGCAAGCGGGGAGAAAAATGCGTAAAGCAC  
CGATTCGTGTTTCACTACCAAACTTTCGCGAAGGGGTGACAGAGCAGCGACTGAAACGGATGTTTATGTGCCGTTGGCG  
TGA

>Cluster\_22053

ATGTTACAGATTAACACAGATGATCTACCCATCCAGCAGTGCAAGCATTAGTGGCTTACCATATTTCCGGCATGCTGCA  
CGACCTCCCCCGAAAGCAGTCAATGCTTTAGATGTGCAAAAATACGTAACCCGACAGTGACATTCTGGTCAATGATGG  
AAGCGAACAACCTCGCAGGAATTTGGTGGCTGAAGTTGCTGATGATAAACAATGGCGAGCTGAAATCAATGCTACCGCG  
CCTAATTTATTTACGCTGCTGGTGTGCCAGTCTGATTTTACGCCACATTTTGCAGGTTCGCCCATGACAGATGCCTTCATCG  
CCTGAGCTTAGAAAACGGGTACACAGGCTGGATTTACGGCTGCCATCAACTTTTATGAAAGCATGGTTTCGTTGATTTGCG  
AACCTTTGCTGATTAATCAACTTGTATCCACAGCTGATTTTTTTCATTTGACGCTATGCGAAAATAATGAATGCAATTTGCA  
>Cluster\_53822

ATGCGTTTACATGTTAAATTAAGAGTTCCTTTTCGATGTTTTTTATGCGCATATTTATTTTCCCTGCATTCATGCTTC  
TTTGTTTTTTACGGAGTTAAACCTCTATATTTCAATAAATAAGTCTCACGGAATAATTTATGATGGAGATGTTGTA  
TTCTGTGCTTTGGTTTACATGCTGTTTTCTTTTTTAAATGTTTACATGTAATTTTACTTACGATAAATAAATCATTCTTAATC  
AAAAAACGAAGGTAGTCAATTTCCGACAGACATAACAATACAGCTAATCTTATATTTTACTAATAGCTATCGTAAT

AGCACCTTTAATAGCTCCTTTTGTACAGGATATGTCAATGCTAATTATCACCCCTGCGGTAATAATACGGGAATTTTCC  
CAGGAGCAATCTATATTAATAAATGGCATGAAATGTAATAATGAATATATTTCTCGCAAGGAAGATTACAGCAGTTAAATAA  
>Cluster\_54439  
ATGGGTGTGTATAAGGCAAGGCGATTACGCCAAAGCACGAAAAAAGTTGGTATTCACGATAAAGTTCTCATGGCTGCCGC  
TGAAGAAGTGTATGCAAGGATATGGGAGCTGATTTAGTGTAGCGGTGCATCAAAAAACGGTTACCCCTCAACAAGGAA  
AGAGTGGTGGAGCCAGAAATTTCTTTTAAATCAGCAAAATCATGTGTTTTTATGATGGTTGGTCCAAAGAGTGGT  
CTAAGCAGTAAAGGAACCAAGAAATCGAAGATGATGAACTGGCAGCCTACAAAAAATGGCAATGCATTTCTGGCCTT  
TAGCAATAAGCAATAGAGGATTGATCGAACTGGCTTCTTGATTGAGGTGAAAAATGAGCGATAA  
>Cluster\_26020  
ATGCCAAAATCCGTAATTATTCCTGCTGGCAGCAGCGCACCGCTGGCCCCCTTCGTTCCCGGCACGCTGGCTGATGGCGT  
GGTGTATGTCTCCGGTACGCTGGCTTTTGTATCAACATAACAACGTGCTGTTTGCAGATGACCCAAAGGCGCAACCCGCC  
ACGTTCTGGAAACCATCCGCAAGGTATCGAGACGGCGGGTGGCAGATGGCGGATGTGACCTTCAACAGCATCTTTATT  
ACCGACTGGAAAAATACGCCCGCATTAACGAAATCTACGCCGAGTTTTTCCCGGTGACAAAACCGCCCGATTCTGCAT  
TCAGTGGCGACTGGTAAACCTGACGCGCTGGTGGAAATCGCCACAATTCGCGCATATCGCCAAGTGA  
>Cluster\_50037  
ATGGCACATTCGATTACTGTAAGACTAAACAAGCCCGCAAGAGAGTTTACGGCCGGGAAAAATATCGGATTCAACATCCG  
TGCTGGCGTTTCAGTATTACGATCGCCAGACAAAAAAGAAAGAAATGGACAACTACAGCGCCGTTGTATTGCCAAAGCCCG  
GAGCGCAAGCGGATTACTACCGTAGTGTCTTGTGAAGTGGCATTGCTGAAATACCGGAGAAAACATCAGGGTTGAT  
GTTTATCAGGGGCAAAATGGTCAATCAATCACTCTTGAATACGAATGCAAGATTGGATTTGCAACTTCAGGAAACAG  
CCAACAGCAACAAAGTAGCAATCATCAAAATCATCTGAACACGACGATTCATTCCTCTAA  
>Cluster\_22304  
TTGCTGAAAACCGCAGCGGACAGACGGCGGTTCATCGGCTGTTCAACGATGCCGATATTGACCGGATCCGCGAGATCAAACG  
CTGGATCGACAACGGTGTGACGGTACGCAAAAGTAAAAATGCTGCTCAGTAATGAAAAATGTGATGTGCAAGACGGCTGGC  
GCGATCAGCAAGAAACATTTACTGACTTACCTGCAAAAGCGCAATCTGCATAGCCTCGCAACGTGGATCAAGAGCGCGGT  
CAGGATTACCCCGCCAGACACTCACCACACATCTGTTTATTCCTCTGCGCGACGGCTTCAGTGCCAACAACCGACTCT  
CCAGACGCTGCTGGCGATCCTCGACGGCTACTGATCAACTACATCTCTATTTGCTGGCTTAG  
>Cluster\_17647  
ATGCTGAACCTTATCAGGCGCGGAGCTGTGGCAGTACCATCGGTGGTGCAGTGTGTTGGCCTTCTCACCATAAC  
CGATTTCCGGGTCGTGGTGGCGCGTTTTGCCGGGGCGTTTTTGTGTCACTCAGCAGAAAGAAATCCCGGATGCGCGAA  
TGGCTATTACCTGCTCGTCGCGTTTTGTGGTGGCGTTCTGGGGCTGGCGTGGCTGCCTCAGTATGATGGCTGACC  
CACTACAACGACAAAACCGCTTGTATGATGTGTGCGGTGCGGTCTCGGCGTTATCCATCAAGATACTGACCTTTCTTTA  
TCAACAGGAAATTCATCGCTGTTCGGCTGTTTTCCAGACTGCGCGGGGAGGGGGTGGAAATGGAAGTAG  
>Cluster\_26519  
ATGAAATTCAGGCCATTGTATTAGCAAGTTTTTCTTATCATGCCTTATGCGTTGGCAGATGACCAGGGGGGATTAACA  
GGATGACGCGCCACCGCCGCTCATGCAATAGAAGATGGCTATCGCGGAACCGATGATGCAAAAAAATGACCGTTGATT  
TCGCAAAAACCATCCAGCTGGCGCTTCGTTTCACTACCGGTAATTTGATTTCACAAAAGGAGAGACCGTTACGTT  
TTTTCCGATAAGAGCGGTGAAATTAATGTTGTTATTCCTGCGCGCTCTTGTATGGACGAGAAGTTCAGCCGGACAGAT  
GAGCAACATTAGCGGACGCTGGATAAGAAAAGCGCGCGACCTCGTTCCGGTCACTCATTTTCAGAAAATAA  
>Cluster\_44724  
GTGGACGATGAACGGAAAAAGAAAAATACACACTTTATCTGCATCCGAAAAAGCTGCAGACTTTCAAACCTTTGGAAGC  
GATAGAGTCCGTTCCGCGTCTGAGCGTGGTGGCTGTTCCGGAATGCATTTATTTCTGGAATGGCGTTACACCAACTTG  
ATCCTCGCCTGCCTGTATTGCTGACAGCATTTTGAGCGAGGAGTTTTTCAGCAGATCAGGTTGTAACCTTACTCAGTCA  
ACGACTGGATGGAAGCTTCTCAGGCGATATCAGAGCTGTGTTGATGATGAACTCGGTCTCGCAATCTGTGAAAAAAT  
GCCTCCTTCTGCTACTGATTCGGTGCAGGAGCAATGAATGATGTGCGCTTAAAAATGAAAAAATATTCTGA  
>Cluster\_20310  
ATGTACCAAGTACAGGACGGCTATTCGCAATATAAAGAGATCGATCTCGCGCGGCTACTGCGGCGGCATCGCCTCTTGA  
ACTGGTGCCTGGTGTGTTTTTCTGGCCTGATGGACGAGCTGGAACGCGCAAAAAGCCATATTGAAGGGCGCGTTTTGAGA  
AGAAAGCCAGAGCATCAATAAATGCATCGACATTTCTCAATGCACTCACCAGTTCGCTGGAATTTGAAACCGCGCGGAG  
CTGGTGGTGAATCTTTCCGCGCTTATGACCACGCGTTTATCGCTTGTATGAGGCCAGCGGCAACTGTCCGAGAGAA  
AATCGATGAAGTGAATGATCTTAAGCAACCTGCGCAAGGCTGGGAAGGGCTTTCCGGCAAGCTGGGTTAA  
>Cluster\_4785  
ATGAAAGGTGATTGGGCGGACAGTCACTCGGATGAAGTTGACGATTTTTACAGACATCAGGCTGATATTAATATTTATTC  
ATTTCTCGCAGGCCAGCTTATCGTCTGAATGACTATATCAGTTTTTATGTTTGGTGGGATATCTCATACTAAAGCGA  
AGGGAGATTATGAGTGGAGAAACAGTGTGGTGTGATGAGTCTGATGGATATTTAAGTGAATCTGATCAAAAAAATCC  
ACTGATTTTCTGATGCACTGGTGTATTTATTTAATCCCTGGGCAATATGCTGTGAAATGTTGGGTATGAGGGAACATA  
AGCAGATATATATGGAACAATTCGGTCAATGGATTTACTGTTGGAGTGGTTATCGTTTTTAA  
>Cluster\_2748  
ATGGCGAAAGAAAGCTGGTTACCATCCATGTTACACCCGTTTACGCTGACGCTCGCGATCAGTCAAACAGGAGTT  
TGGCCGGGACCGGCATAACGTACCGGAAGAGTTCGCTGCACTGGTTTACCCAGCGCACTCTGAGCTTTCCGAAAGCG  
TGATTAGCGACACCGATGATCTGCAACCATTATCGACGGCTGCAAGCGCAGATTGCCGACAAAGATAAGCTGATTGCC  
GATCTTAAAGATGCATTGCTCAAACCTGCAGGAGCAGAACGACAGCCTGCAAGGCGCAGATTACTGCCGCCCGGACTGGCGG  
TAATGGGGCTAAAGATGTCAAAGATCAAAGTCTGCCAGCGGTAAGTGA  
>Cluster\_33541  
ATGGCCAATAATACCCTGGATTATCCGAATTTCAAAGCTGCTGGCTATTCCTGGAAGGTTTACGCGCTGCATGGAT  
CAACGAAGCGGCATTCGCTCAGGAAGCGTAGCGGATTTGTTAGCGGTGGTTATCGCCTGCTGGCTGGATGTGGACGCGA  
TTACCCGCTGCTGCTTATCAGCTCCGTTAGTATGATGCTGGTGTGATGTTGGAATTTCTCAATAGCCAGCTCAAGGTT  
GACCGAATTTGGCTCTGAATACCATGAGCTTTCCGGACGCGCTAAAGATATGGGATCCGCGCAGTGTGATGGCATTAT  
CGTCGCGGATTAACCTGGTGCATCCTGTTATGGTTCGATTTTGGATAA  
>Cluster\_7540  
ATGGCACAACTGCGCTATTATTCGATAAAGAACCTTCGTTTGCCTACGTTTATCGGAATTAAGGAAGAAGAAATTA  
CAACCGTCAAGATATGTTATCAATGTGACGATCCACTACCCCGCGATAAAGCGCGCACTAGCGAAGATATCAACGATG  
CGCTGAATTTATCGCACCGTAAACGAAAAACATTTATTCAGCATGTAGAGAATAACCGTTTCTCTTTGCTGAAAAAATTA  
CAGGATGTGCTCGATATCGCACGTGAACATCACTGGGTGACGATGCTGAAAGTGGAGATCGATAAAGTGCACGCGCTGCG  
CTACCCCGATTCCGTTATCCATGACCTTAAGCTGGCAGCTTAA  
>Cluster\_30721  
ATGGAAATTAAGATTTACCGCTGATGTACAGAAAACAGCAGCTCATACATTGCATTCTGTGCTGCGAGAAATCGGGAA  
AGATATTGCAAGCGAGCAAAAAGATCTGGCCCGGAAAAATCAAGACCGCTTTCGTTGAGCTTTATAATGTTGGCAGT  
ACTCTGAAACTGTGAGACCAAGACCGTAAAGTTACCAATATTTCTCACCTTGGCCAGCGGATTTATCAGGTGAAATATGC  
ACCGAGATTTCCAGCGAAGTCTCCGGTAATACGAGAAGCAATTTGCCGTCGCGGTTTGGATGGAAGTTACGATCATGA

CGTCCTGCAAGTTCCTCAGGACAATGGTGACTTCACTGGGGATTTGA

>Cluster\_17749

ATGTCAGGTGAAAAAGCAAGATACCGCGTCTCGGTTTATCTCACATTCATAACACCTCTGGCCAGAAGGCTCTGAAGT  
TGAGTATGACGGCGAACCCAGGTACGGCGTGGAGCCACTGAAACGATGCGGCGAAATGGCAAAAGAGATCGCCGAAAAGC  
GTAAGGAAGATCGGCTTCTGTAGTTATCAATGTTCATCTCCAGTTCGCGTTTCACTCAAGTAGTGAGGAAAGTAAATCT  
GATGGCACTGGCGCGGTAAGTGAAGACCTACTCTGCTTCGACAGCAGTATGAGGATTTACTAGGCAAGAAGCCGGGCAA  
TAAACGGCTGAAACTCTGGCAAAAGAGATCGCCGAAAAGCGTGCCGAACTGGGCGCTAA

>Cluster\_66792

ATGCCGCACCTTTATCGTTGAATGCACTGACAACATCCGCGAAGAAGCCGACCTGCCGGGTTGTTTCGCAAAAGTGAATCC  
GACGCTGGCAGCCATGGGTATTTTCCGCTGGCGGGTATTCGACAGCCGCTGCATGGGTCGATACCTGGCAGATGGCCG  
ACGGGCAGCGTATGATGCTTCGTCATATGACGTTGAAAATCGGCGCAGGTCGACGCTGGAAAGCCGTCAGCAGCGC  
GGTGAATGCTGTTTGAAGTGAATAAAACGCACCTTCGCGCCCTGATGGAGAGCCGCTGCTGGCGTTGCTGTTGAGAT  
TGAAGAGCTGCATCCGACGCTGAATTTTAAACAAAACAACGTGCACGCATTGTTTAAAGTAG

>Cluster\_679

ATGCTTCATACTGCCAATCCCGTTCATCAAAACAAAGCCGGTTTGCTCAATCTGGCTGAAAGAACTCAGCAACGTATCAAA  
AGCCTGTAAAATCATGGGCGTTTCGCGTATACGTTTATCGTTACCGCGAACGTTGCTGTAAGGCGGTGTGGATGCGC  
AGATTAATCGTAGTCCGCGCTCCTAACCTTAAGAACCCTACCGATGAGGCAACTGAACAGGCTGTTTGTGATTACGCC  
GTCGCTTTCCGACACATGGTCAGCACCCGGCCAGCAACGAGCTGCGTAAACAGGGGTTTATCTCCGACAGTGGTGT  
CCGTTCTGCTGGTTACTCCATAACCTTGAATACTCAAAAGACGATACTGA

>Cluster\_41067

ATGGGCGCTGCCATTACCAAAGCCCTGGATATGGTTGAGGAGCGGAAACGTGAATATCGTGCCAAATGGTATTTCTTATTA  
TCGTCCTGGATTTTCTGATCACCGATGGCGCACCAACCGATGAGTGGCAGGCTGCCGCCAACAAAGTGTTCAGGGGG  
AAGAAGATAAGAAGTTTGCCTTCTTACCATCGGTGTTTTCAGGGGGCGGATATGAAGACGCTGGCCAAATCAGCGTCCGT  
CAGCCTTTGCTCTCGAGGGATTACAATTCGCTGAACGTTTGTAGTGGTTATCCAGTTCCGCTGGCTTCGTTTCCCGCTC  
CACGCCGGAAACGGAAGTTGTGCTGGAAGCGCCAAAAGCTGGACGTCAGTGTGA

>Cluster\_67139

ATGTCAGATCAAAAAATAATTTTGACCTTCAAAAAACAGACACTTGAATCAAAATGGGAAAGGAAGCATTAAAGCATGGG  
CTGGTCAGCTATTTCCACATCCCTTTTCTTCTTACAGGTTGACTCAATATGACACCCACAACATTCATGTTTACTCC  
ATCTAATTTACTACTGGTGGAAACCCCTACGATTGGCCACACCCCTCTCAGGAGAGCATTGCAGTTAGAATGGGTGTTTCA  
TCAAGAACAGTACACGCTCACTCCAAGAGCTTGAACACTACGATTGCTTACAAAAATTCGTACAAGTAAGGACAACCC  
TAAGTACAAAGGAAGAACAATTTACGATATGCTCTTTTGGTTAAGTCACTAAATATTTCTACTCTGACCTTAAACGCCA  
AACTGAACGAAAAATAA

>Cluster\_64796

ATGAGCTATGCCCTCTCTTACGACATGGTAAAGCGTTACCAGCGCAGCAATCTGGACAAACTGACCGCTGATAAATCGGA  
CAACTTTGAACAGATGATGCATGATACGAGCGGTTACAGGATGCCAGCGGCTTATCGACGGTTATATCAGTCCCC  
GTTACAGCTGCCATTTGTCAGTGGTTCTGTAACGCTGGTTCTGTTTTGTTGCGATATTGCTTTTTTATACCTGTGTGAT  
GAACAGGCAACAGAGCAATGCACACAACGTTACAAGACGCCATCAGGTGGCTGGGGGTTTCTCGACGAAAAATTACC  
GCTTGGCGCAGATGTCATGGTGTGTAACCGGTCAGCGAAAATCTGGTTGAGGTGCAGTCTGACGACGCAATTTTCTCC  
GCAACCAGAAGGGGTTTATCTGA

>Cluster\_1009

ATGGGAGGCTGACTGGCGCGCATGCTTGGCGGATGACATCCACGAATATGCCGACTGGCGACATTTTACCAGCAC  
GCATTTTTCACGATACCCAGCTGGATATGCATTTTTCGGGGTGCATGACTGACTCAGCCTGTTTTTTGCGATC  
CGGATATGCATCTGATTTTTCAGTCTGCTTGTTCCTTGCATGAGGAAGAGCAGGTGGAGAGGCGGATGAGGACAAA  
ATGCTGATGCAGAAAGCGCAGGACTTGGCGAGGCGTCCGGTTCCGGTGGGAGCGGAGGGCGGATATTTTATCGTCTGC  
GGATGTGGCGGATGTCATGGTGGATGATGCCGATTAATGATGCTTACGCGGGATTTCGGAGGTGTGAGATATGTCC  
CAGCCGTTGGTGA

>Cluster\_54668

ATGAACAATTTAATTTATACGACCCGACAATCACCAGTACGTTTACTGGTTGATTATGTTGCCACAACCATCTTGTGGAC  
ATTATTTGCGTGTTCATATTTCTTATTCGCCATGGATCTGCTGACGGGTTATTTACTGGCAAAGCGAGGCCAGAAAGCCGAC  
TTCAGTTCTATTTTGTGGCAGTGGCGAATGCCGCTGTTAATGCTTGGGCGCTGTACAATAAGCTGCGTTTTTCAA  
AAACAGCAGCATCATGCAGCCCTACCAATATACGCCGCAAGAATATGCAGAGAGCTTAGCAATACCTGATGAGCTCATCA  
GAACTACAAAAAGCCACAGGATGAGCGTACACTTACCAGCCAGGGGCAAAATAAAATGGTTGTTTTCAGAAAAAGCCG  
TAGTCCGGGCATAA

>Cluster\_12890

ATGGCTATTGAACCTACTTTTTCCATCATCAAACCGAAGCGGTTAGCAAAAAACGTCATTTGGTAAATATCTTTGCGCGCTT  
TGAAGCTGCAGGTTCAAATTTGTCGGCACCAATGCTGCACCTGACCGTTGAACAGGCACGTGGCTTTTATGCTGAAC  
ACGATGAAAAACCGTTCTTTGATGGTCTGGTTGAATTCATGACCTCTGGCCCGATCGTGGTTTCCGTGCTGGAAGGTGAA  
AACGCCGTTACGCTCACCGCATCTGCTGGCGCGACCAATCCGGCAACGCACGCTGGCTGCTGCTGCGCGCTGATTA  
CGCTGACAGCCTGACCGAAAACGGTACCACGGTTCTGATTTCCGTCGAATCTGCGCTCGCGAAATCGCTTATTTCTTTG  
GCAAGGGCAAGTGTGCCCGCGCACCCGTTAA

>Cluster\_25007

ATGTCATTTACTGATATCTATCAGATTTCCGGCTCGGCGATGACGCGCAACGCTACGCTGAAATACCGTTGCCAGTAA  
CCTGGCGAATGCCAATGCCCGCCAGCAGCGAGGCGCAGGCATATAAAGCGCGCAGCCCGTGTGTTGCGGCGGTGATC  
ACCACAGTTTGTGGCGGTACACATCGTCATGCCATTGACGGTGCAGTGTGCAGGTGCAGGACGCTGCTGCAAAACCGGC  
GGGCTGTGAAACGCTATGAACACATTCGCGCTCGCCGATGCTAACGGGATGCTTGGTATCCGACGCTAACGTTGGT  
GGAACAGATGGCGGACATGATGTCGGCTTCGCGCGATTTCGAAACCAATGTCGATGTGCTCAACAACGTGAAAAGTATGC  
AGCAAAGTTGCTGAACTGGGAGAAGCCTGA

>Cluster\_19636

ATGGTTACACGGACAGACCAGCTACTAAGAAAAGCTATGAGGGGCTATCTGGAACACCTTGGCAACATGCCGCTGGCGGA  
ACGGATTACAATGCTGCTGATTTCAAGATGTTGATCTGCTTTTGTGTAATGGTTCCGGCGGCTGGAGCTGCGCCGCG  
CTGACGTTGGCTGCCGTCCTGCTTCTTTGGAATATCAATACCGCCGCTGCTGCTGACAGGTAAGCCGCTGCGCCTT  
GCGTCTGCCGTTCTGGATCACTGCCACCGAACCAGGCGGCTGCTGCTGCTGCTGATCGTTCTGCTAACGCTGCTGAGGG  
AGGCCGCTACGTTGGGCGGACGTTGTTGTTAGCGTTACGAATCTAAGGGCTATGATTGGCAGCTATCGCAAGCAATACA  
CTGGTATTGGCATGTTTATATCCATAA

>Cluster\_63905

ATGAAAATCAAACATGAACATATCCGCATGGCGATGAATGCCGTTGGCGCATCCGGACGGCGAAAAAGTACCGGCTGCGAA  
AATTACCAAAGCGTATTTTCGAGCTGGGAATGACGTTCCGGAACTGTATGACGACAGCCATCCGGAAGCCCTGGCTCGCA  
ATACTCAGAAAATTTTCCGCTGGGTGGAGAAAAGACACCCCTGATGACGTTGAAAAAATTCAGGCGTTGTTACCAGCGATC  
GAAAAGCAATGCCTCTCTGCTGGTGGCCGAATGCGCAGCCACAGTTACGCTGGTTTCGGGAGCTGGTGGAGACGCG

GGAACGACTGGTGAGAGACGCTGATGATTTTGTGCGAGTGGCGATCGCTGGTTTCAATCAGATGAATCGTGGTGGCCCCG  
CAGGAAACACTCTGGCTGTGCATTA  
>Cluster\_4388  
ATGCCCTGCCCCGTCGCTCTGATCCTTGGCGCCGGCGTGGAGAGCGCTTCTCGCCTCCGGGGGAAATACCCATAAGTG  
TATCGGCTGGCGTCACTCCCGAGGTTGGCCTTATCGCTGGCCATTGGAAGAAAACGGGAGAACTTTCGACCTTGGCA  
TTGAACCGCAGATTACGACTAATGATCTGCGTCTGATGTTGAGGCTGGCTTTCGCGCGGAGGAATAACAATGGCCACT  
CAGGAACTTTCAGGCCATATATGAAAGCGGTAAAGCTTGTATCGCTGCTGATGACTTCTTCCACAATTCGCGGGCTT  
CTATCTGTATTTCCACAGCGTGCAGATATGACCAAAGCTCCGCGCCTGATGACTACGTCAAAGAAATGGCGGCAGC  
AATTGGTTTAA  
>Cluster\_63642  
GTGGGATTAAGAAAATCGTTATGTTGACTTTTTGGGTGCGTTTTGTTGCGGGATGCACACCTTACACCTTACAGATTG  
CCACAAAACACTGCTACAGGTAGTTCAGTTCAGGACGCTGGGATGATCAGGATGAATGGGGGGCGCAAGCGCGGGGAA  
TCAGAGCTGCAATTAATGCCCCAACTTGTAGGCGCATAACTGGAAAGGGAATAATGCAAGTTGCATATGGAATTCCT  
CAGGATGGCAGCGGTTAAAAATATCTACCAGTAACGGTGATAAAGCCTATTGCGAAGCGATAAAGTCCGAGCTCATA  
AGCCAAATTTCCGCGCTTCAACAATCCGGAAGTCTACAGAGATTTTCAGAAATCTGGCTTTCAGATGCGAGGTTAG  
>Cluster\_61102  
ATGACCTGGGAATATGCGTAATTTGGGTAGTCTGCGCATCATTATTGGTGTGTGGCCATGCGTTTTGGTAATCGTAA  
ACTACGCCAGCAACAGCGTTCAGTACGAACTGGAAAAGAAATAAAGCTGAACGGACGAGTATCGCGAAGAGCTGGTTA  
GCCACTTTGCCCGCAGCGCGAAATTAAGGATACCATGGCGCAGGACTATCGCCAGCTGATCAGCACATGGCAAAAAGC  
TCCAGCAGCTGCTGCGGAACGCTGCTGCTGAGCAAAACCCGTTCCGTAATCGTCTGGCAGAGTCTGAAGCAGCAACGA  
TCAGGCACCGGTGAGATGCTCGGACTATTTGAAAGCGCATCCGCGCTGCTGCGTACTGGCGCAAGCGCGACTAA  
>Cluster\_9976  
ATGATTCAGTATGTTCTTGCATCGCTATTCACAGGGAAGCAACGTTAAAAACCATGAAAACAGGCAACAGAAAACCGAC  
GACACCGGAGATATTTCTCTATGAATATCTGGAACCGCTCGATTGAAAATCAATGAGTTAGCAGAGTTGCTGCATG  
TTCATCGTAATAGCGTCACTGATCAATAACAATCGTAACTCACCAGTGAATGGCATTCCGTTCTGGCGAAAGTT  
TTTGATACACAGTGCATTTTAGGCTAAACCTCCAGGCGGAGTTGATCTTTGGGAAGTTGAAAACAACATGCGCACCCA  
GGAAGAATTTGGGACGGATTGAAACAGTGGCTGAATATTTGGCACGCGTGAAGAGCGTCAAAAAAGGTCGCGTAA  
>Cluster\_35841  
GTGGAAAACAGTTAATAGCGATTTGCATTTAGGTCAGTACTGGAGAATAGACATTTGATGCGATCCAGAACCTCGAGA  
TGAGGTTGAGCAATATTTTCTCTACACGATGTTGGTTTTAGCAAAAATGAAAGTTTTTCCGTCGAAAATCCATATAAAC  
TTGCTCTGTTCTTTGATTTCCGGAAGAAGGGTGTGGAGGTTGCAAAAGCCATTATGGGACTCTTAGACCGAAATGATATT  
GAAATAACGATGATCGTCTACGACAGTACCGCGAGTCTGTAAAAGCATCAAAATGCGTAAGCTGAAGACGATAGA  
GAAATGTAAGATTTGCTTAGTACGTGTGCGCAATTTGGCGTTAACGAAAATAAGGAAAAGAGGGGAGCGAATGA  
>Cluster\_13711  
ATGAGGGTTAAACGCTGGTTGTTGGCAGGTATTGCATTGTGCCTTTTAACCGGTATGCGTGACCTTTTTAACCGCGCGA  
AGATCTATGCCGGATTAGCGAACTTAGCCAGTGGCGCTATCAGGGGATGGTAGGGCGAGCGAGCGCATCATCGGTGTA  
TAAAAGACGGGCAAAAGAAATGGCGACGGTGCAGCAAAACGATGTGCTGGAAAACGGCTGGACAATTTTACAGCTGACG  
CCAGACGTAACGCTGGGTACCGGCAAACTGCGAAACCGCCACAATGGTTGTGGCAACGGCAAGGAGATACAAATGA  
AGCAATGGATAGCCGACTACTGTTGATGCTGATACCCGGCTACAGGCGGCAAGCCGCAAAAAGTGACGCTGATGGTG  
GATGA  
>Cluster\_65205  
ATGGCGTTACGAAATAAAGCGTTCATCAGTTACGACAGCTTTTTTCAGCAGCACACGGCTCGCTGGCAGCAGGATTACC  
TGACCTGACCAAAACACAGTACGCGGTGATGCGCGCATTGCTGATAAACCTGGTATCGAACAGGTGGCACTGATAGAAG  
CAGCTGTACGACCAAAAGCAACGTTAGCAGAAATGTTGGCAAGAAATGGAAAATCGTGGCTTAGTCAGACGTGAACATGAC  
CCCCTGATAAGCGCGCAGCTTTGCTGTTGACTGCGAAGCGGAAAAGATACTTGTGCGCGGATACCCATTGGTGA  
CAGCGTGGATGAGGAATTTTGGGGCGTTGAGTGGAGAAGAGCAGGAGCTGTTTATGACGCTGGTGGCAAGATGATGA  
ACGCATAG  
>Cluster\_28383  
ATGAAAGAAAACCTGCTGTTGAGGTTGACTGGATAAATGGCTATGGGCTGCCGTTTTTATAAAAACCCGCGGCTGGC  
CCGTGAAATGATTTGAAGCGGTAAGGTGCATTACAACGGGCGAGCGCAGCAAGCCGAGCAAAATCGTCGAGCTGAATGCCA  
CGCTCACTGCGCCAGGAAATGACGAACGACCGGTGATTTGTAAGGCGGATTACTGAACAGCGCTCGCCCGCAGCGAG  
GCAGCCTTGTGATGAAGAGACTGCGGAAAGTGTAGAGAAACCGGAAAATGGCGTGGCAGTAACTTAATGCCCTT  
AACCATGCCGACCCGAGCGACCCCGGCAAAAAAGAGCGCGCAGCTGTACGATTTAAACACGCGCAGCTGAAT  
AA  
>Cluster\_30544  
ATGAACCGACATACAAAATACGCCAGGTGCTACTGGCAGCCTTCAGGAACAGTGTGGAGACAGCGCCACGTTTTTTGA  
CGGACTTCCGGCATTTGTTGATGCGCAGGAATGCCTGCGGTGGCGGTGTTGGCTGAGTATGCTCAGTACACCGGAAAA  
TGACGGATGAAGTACTGGCAGGCTGTTCTGCATATTGCTGTCTTCAATCCGGCACAGGCACCGGATTCAGAGCTGGAT  
ATGTGGATGGAGAGCAACATTTTCCGGCCCTGAATGATGATACCGGCACTTTCCGGACTCATCGACACCTGATCCGACT  
CGTTTTAACTATCAACGTGATAATGAGATGGCCACTGGGCGATGGCGGAAATCACGTACCAGATCAGTACACGAATT  
AA  
>Cluster\_9723  
ATGCAAGTCTTTTCCAGTGTACTACTTCACTGATGCTACTAATGCATTTATTAGCATCCAAAAAGAAATATTACAGCGA  
TTTTAGTTGCGTTGGTTGATCTTGGGCATTCATTGTTGTTATTGATGAGCATCAACATCGAAATCTCAACCAAAATACAG  
AACCTGTAACATCCTTTTAAAGCAACAATTTTCAATCAGGATCAATAATAATATTAGATTATCTGATTTAACGCATTTCTG  
ATTTTCGAATCTTCAACACAAAATGTTGTTTCCACACAAGAAGCACTTACCATGATGATATAGATATCTCCGGTTATG  
TGTTTCTTACTCGTTAAAACAAGTAGCCATTATTAAGGAATTGATTATAAACAGTATCATAACAAAATAAGAGCCC  
TAAATAAACTTAAACATAAAAGGTAAGTGTGAGTTGTTTATAGCACTCTGTGAATGGGATAAACATTATTTTAACTCCAA  
TCTTGGGTAAGAGAAAGTTGA  
>Cluster\_15796  
ATGCTTTTACCCGTAAGTATTACATCGTGTGGCTTGTATACCCCTACTGGCATTGTTGGGAGAGCGCAACCTCATAGCGA  
TGAATATCAAGGCAGATGATGGATTTTAAAGGATGAAAATAATCGTAATCATCAAGGGCCATTAACCGTTTTTCTCGAT  
TAGCTATAGATAAGTTGGGCGTTAGTAATCAGAGGTGGCGTGGCGTTTTGTTGAGTCTCCTTTTTCGATAGCAGTT  
GTCCGCTCACACTGAAGGCAGAATTTTACCAGCTTTGATTGAGGTCGCCGAGCAATCGTAAATGTTTACCCTGGGG  
CATTGTTGATGCTGTTTGGAAAGAACACGCTGTTCTTAGCGCACATCGTGAAGGAGGAGATCGCTCAATTACTGGTC  
ACATGCTAGTATCAGAGTTAGGGGTGGTAACTCATGGGCGAAATGTTTACTACTAGATGATGTTAAAACAAACAGGC  
GGTAGTTGCTGCGTGTTTTATTTACTGGAGTCTGCAGGAGCTGGAGTTATAATGCCATTAGCTCTGCTAGAACTGC  
AACTATGAGGAGTAG  
>Cluster\_42268

ATGAGTAAAGCCAGACGTTGGGTTATCATTTGTGCTATCACTGGCGGTTCTGGTATGATCGGCATTAATATGGCCGAAAA  
AGACGATACCCGCCAGGTGGTTCGCAACAACAATGATCCACCTATAAAAAGCGAGCATACGGACACGCTCGTCTATAACC  
CAGAAGGGGCACTAAGCTATCGATTGATGCTCAACACGTTGAATATTTATCCGATCAGGCGGTTTCGTGGTTTACGCAG  
CCGGTACTTACCAGCTTTGATAAGGATAAAAATCCCGACATGGTCCGTAAGGAGATAAAGCCAAAGCTGACCAATGACCG  
GATGCTCTAATTTATATGGACACGTTGAAGTCAACGCACCTGTCGGGACTCTCAACTTCGCAGAATCACGACGGATAACG  
CGCAGATCAATCTGGTGACGACGATGTTACCTCTGAAGACCTCGTACGTTTACGGAAACAATTTAACTCCAGCGGT  
CTGAAAATGCGCGCAACTTACGCAGCAAGAACCGGAGCTGATTGAAAAGGTTAGAACATCTATGAAATTCAAAACAA  
ACAAACTCAGCCTTAA

>Cluster\_47783

ATGAAGCGTAATATATAGGCGGTGCATTCACCTCTGGCATCTCTAATGCTGGCCGGGCATGCACTGGCAGAAGATGGTGT  
TGTTCACCTTCGTCGGTGAATTTGTCGACACTACTTGTGAAGTTACCTCCGATACAGCCGATCAAAATGTCCTGGGTA  
AAGTCAGTAAAAATGCATTTTCAGGTGTAGGTAGTCTGGCGTCCGCACAGAAGTTCAGTATTAACCTGAAAAATGGCCG  
GCAACGTACACTCAAGACCTTACCGAACAGCTGCAACAGCCGATGGGTTGATTGTCGCCACGCTGAAAGTGGGTACCGC  
GCTTACAGCAGGCAACCTTGGTATTTTACCGTACAGGACAAGCGATTGGCGCAACCGCGTGGTATTCGTATTTTTA  
ACCACTCCGATAAATTCGACAGGTTAACTTTATAACGACTCTGCTTATAACCGCTATCGATGCTGAAAGGCAAGGCTGAAATG  
AAGTTTATGACGCTATGTGGCAACCAATGCGACCGTAAACGGCTGGTACGGCGAACGCGGATTCACAATTTACTGTCTGA  
ATATAAGAAATAA

>Cluster\_20918

ATGCGTGTATCACCCTGGCGGGTAGTCTCGCTTTCCTTCTCGCTCCAGCTCCTTGGTGAATATGCGCGGGAAAAACT  
AAATGGCCTGGATAGAGGTTTATCATTGGAATTTGCAAAACCTTCGTCGCCGAAGATCTGCTTTATGCTCGTTTCGATA  
GTCCGGCCTCAAGACCTTACCGAACAGCTGCAACAGCCGATGGGTTGATTGTCGCCACGCTGTGTATAAAGCCGCGC  
TATTCGGTGCATGAAAACCTTCTCGACCTGCTGCCAGAAGCTGCGTTGCAAGGCAAGTGGTGTGCGCTGGCGAC  
AGGCGGCACCGTGGCCATCTGCTGGCGGTGCAATATGCTTAAAGCCAGTTTAAAGTACGCTGAAAGCCAGGAGATCC  
TGCACGGCGTGTTCGCGATGACTCAAGTAATGATTACCAACAACCCAGTTACGCAAAATTCGCAAACTCT  
CTTGATACCGCGTAGAACTTTCTGGCAGGCGTTGCACCGCCGCGATGTTAGGTTCTGACCTACTGTCTTTCGAGG  
TAATGCCCATGCGTAA

>Cluster\_45624

ATGACTGACTACCTGTTACTGTTTGTGCGAACTGACTGGTCAATAACTTTGTACTGGTCAAGTTTCTCGGTCTCTGTCC  
GTTTATGGGGGTTTCCAAAAAATGGAACCGCGATGGGCATGGGGTGGCAACAACGTTTGTGATGACGCTGGCGTCTA  
TTTTGCGCTGGCTTATCGATACGTGGATTTTGTATCCACTTAATCTGATTTACCTGCGCACCCGCGCATTTATCTGGTG  
ATTGCTGTGGTGTGAGTTCACCGAGATGGTGGTGGCGAAAACCGCCGCTGCTTTACCGTCTGCTGGGATTTTTTT  
GCCGCTTATCACCAACTGTGCAAGTGTGCGCGTGGCGTGGTGAATATCAATCTCGGGCAAAATTTCTTGCAGTCCG  
CGCTGTACGGTTTTTCCGCGCTGTGCGTTTTCTCGTGGTATGGTGTCTTCCGCGCATCCGCGAACGCTTGTGTG  
GCTGATGTCCCGCACCTTTTTCGCGTAATGCCATTGCGTTAATTACCGCAGGCTTATGCTCTGCGCTTTATGGGCT  
TAGTGGTTTTGGTGAAGTTGTA

>Cluster\_1866

ATGTCGGATACCACCGAAGTGGTTGATTTAGCCGTAATCTTCCCTGATCTGGAGATCGAATTGAAATACGCTCGCGTGA  
TAACATCACAGGTAAGCTATTTATCAGCAAGCGGTTGCTGTACACAAGGATGCGATTACCGCGTGGCGAAAAGTA  
TCAGTATCGCCAGCTGTCAGGTTACAACCTGGTATTTACGATGCGTATCGCCACAACAAGCACAGCGGATGTTGTGG  
CAAGCCTGCCCCAGACCGCAATAATGTTGTTGATGTGACGGTGGTCTAATCACAGCCGTCGACGCGGATCGACGTGAC  
GCTTCGTGATGAGCACGGAAACATCCTCGATATGGCGCAGGGTTCGATGAAATGCACGAGCGCTCCCATGCCTATCACC  
CTTCCGTCGCCCGCGCGTTCAGCGCAATCGGCTGTTGCTGAATGCGATAATGACTGGTGGCGGTTTTGTGCGTATCTCC  
AGCGAATGGTGGCACTTCGAATTACCCAGCGAGGTTACCTCTGCTCGTATCAATTCACCTGTTTTATATCCCC  
TGGCACACAACACGTCAGTTAA

>Cluster\_62803

ATGGTAAATCAGCAACAGCAACAGATTAACGAAAATCTAAAAATTTAGGGCAATCCGTTGGTATCAGAAGCTGCAGGAGAT  
TACTTATCTTGAAGCAGGACAACACATGCGGGCTTTAAATCAGCTCATGTGGCAAAATCCCTAGTTTCGTAATTTGCTGTCA  
ATGGTGGGTTGTGGTATGCAACAACACTGGCAAAATGAAAGTTCCTATGGATTATCTTTGAGTGTAGCATTGTTTGTAT  
TTCACAACAAATGATTACACTTTATCGCTTAAGTCTTTAATGGTTCGAAAATAGCACACAAAAAACAATGAAAGATCC  
TTCAAAAACTATATTTAAATGAAATTTACTAGAGACGCTGGATTTAAATTTGCCCTCTAGCTATGATAAATAGGAAACTG  
GTTACATAGTAGTGTGCTGGCTGGCGAGTAAATGCTTATTGTTGCTTCTTTGTTAATATGCTGGAGTATATCATCTCC  
TTGTTTTCAAAAGACATTTACATAATACATACAAAGCAACAATTAATAATTTAGTTCAGGATTTATTTATCGAAGCAAA  
ATCAGGATTTATCAAAAGTGA

>Cluster\_67016

ATGGACCTGAGCGCCATCGCTCAGCCCTGAAGTTCACATCCCTGACATTTGTCAATCTGCTGTTTTTCTCGGACTAAG  
CCTGTCCGCCAACGTTCTTGGCTGGTTACGTATGAAAGACCTGGAGCGGGACAAAAGAAACCTATATCCCGATGTTTT  
TTAATCAGCCGTTTTTCGCTTTCACGCAATGTGGCAGATGCCAGTATCTGCAGCAGGTGGCTGAATCTCTGATGTTTTCTG  
CGGTTAACGTCACGCGGAGTTCGATTAAGCACAGATCAGGATTAACGTTACTTTCGCTTACGACAGCGTGCACGTCGCGG  
GATGAAAAGCAGTCTGGACGCGAGAAAGCCAGTCAGATCATCAACAACAACGCTCTCTTCGCGGTTTTTACATGACGGGATG  
ATGTTACCGCAAGCCGGTGTGGTGGATTTTCGCGGGACACTGAAAACGTTGGATAGGTAAGCGGGAAGCTCTGCCGGA  
GAGAAAGCGTACCAGGCTGGAGTGGGTTACCGGGATGGCATGACGACAATCAGGTCATTTAAGGAACTGGTGAATGAAAA  
AGAGAAAACCGCACAGTAA

>Cluster\_25222

ATGAAACTCGTGCACATGGCCAGTGGTTTTAGCGGTTGGGATGCGTTGGCGGCTTGGCGAGATAAAGCGCGGATATTCA  
GACGCCAGCACCGGCTGCAAAATACGCTCTATTTACAGCAACAACAACCTGCTATCCAGCAACCGAATGCTCCGGTACCG  
TTTTGGATCCGTCAGAAAAGTTCGCACTGGCCGCTGATGCGCTGCTGACCGTGACACTTTCTGACGCGCTCGTTAGCGGATG  
CCGTCGAAAAGTGTGGCGCAGAAAAGCGGTGCGTACCAGGTAACAGTCAACATTCAGCTTTGTTCTGCCATTTAACCC  
GGCAGATGTTACGCGCAAGCGCGCTATTTGTTGAGTGGCGGATACCGTGAATGACAACTGGTATTTATTACCGATA  
CCGTTACGCGGTGATCAACAGGGCGGAATAAAGCCGACCTGACATTTGGTGGCGGTGACGCAAAACCGCGTGGCGGTT  
CAGGCCAGCGGTGGCGCAACGACTACCGTACCATCAACTTACCAACCCAGTGAATCCGCTCTTCGGCAGTTCCAGCTCC  
AACGCAATATTA

>Cluster\_6814

ATGATGAGTATGGAATCCGGTCACTCGAAATCACCACAGCGGACGCAACACGCTTACAGGCTACGTTGTTCCGTTGGGA  
TAACCTTTTCAGACTGCTATGCGGGGAGTTTTACGAAAATTTCCAGCGGGGGCGTTTTACTGAATGGCTTGGCGTGGGTA  
ATGAGCTTCCGCGCTGTATGAGCATGACCACAGCATGTTACTGGGGCGACCCGTTCCGGTACGCTGAGACTGGAAGAG  
GATGACACAGGTTACGTTTTGAAGTATCCCACCGGATACCAGCACAGGGCGGGGACGTTATCGAACTGGTTAAACGTTG  
TGATATATCCGGCATGAGCTTTGGCTTTTCGCTCCGTAAGGATGATGGGATACCACAACAGATCCATGCGTGGCGCACCG  
TGCTGGTGGCGGAACTGTACGAAATTACCGTTACATCCGTTACCGGCTTACCTGATTTCCGCGGTGGAGCTGGCCCGCGC  
TCCCTGTACGAGCAGACCCGAAAATGCGCGTGGGATAATCGCGCTGGTGGCGGATTTAGCGGGGGTGTGA

>Cluster\_42440

ATGAGCAAATCATACAAAAACCCACCATTCTGAATGTGAAACTGTAGCCCGTTCGCCGACTGTTACCGTCGAAAGCGT  
GGATCTGGAGTTCAGCAATGGCGTGC GGCGTGT TATGAACGAATGCGTCCAACCAACCGGGAAGCAGTGATGATGTGTC  
CGATTTGTGGACCGTACCTGATCTGATCCGCGAATACCGAGTGGGAATGAAATCCTACGAAATAGGTTTTCGAAAGGA  
TTAATTTGATCCGGTGAAGCGTCTTTGAAGCCGTACCCGCGAGCTAAAAGAAGAGGTTGGATTTGGTGGCAACGATCT  
GACTTTTTTGAAGAGCTCAGCATGGCACCGTCTTACTTTTTCCAGCAAAATGAATATCGTGGTAGCGCAAGATCTTACC  
CGGAATCACTGGAAGGCGATGAGCCAGAGCCGTTACCACAGGTGCGCTGGCCGCTGGCCGATATGATGATTTGCTGGAA  
GCCCTGACTTCAACGAAGCGCGTAATGTCAGCGCGTGTTCCTCGTGC GCGAATGGTTGAAAGGGCAGGGGCGAGTGTA  
A

>Cluster\_59939

ATGAATGTGATTAGAAGTGAATTTGAAGATGTGTAATTTCTGGAGCCAAGAGTATTTGGTGATGATAGAGGTTCTTTTA  
TGAGAGCTTTAATCAATCAGCATTTGAACATATTTAGGCTATCCGGTCAGCTTTGTTCAAGACAATCACTCAGCTTCAT  
CAAAAAATGTACTCAGAGGCTTCACTTTCAACGCGCGGAGTACGCACAAAGATAAACTTGTACGCTGC ACTCATGGAGCA  
GTTTTTGTATGTTGCTGTTGATATTCGACCCAATTCGGTATCCTTTGGTAAATGGGTTGGTGTCTGCTTTCAGCTGATAA  
TAAGCAGCAGTTGTTGGATACCAAAAGGGTTTGCATGCTTTTGGTCTGTCTGATATCGCTGAATTTCAATATAAAA  
CTACAACATATTATCCTTGAAGCGAATTGTGGAATATGTTGGAATGATGAACGCATGCAATTGATTGGCCCCAAACA  
TCAGGGTTAATCCTTTTCGCAAAAAGATGAAAGGCTCTTTACGTTAGATGAGCTTATCAGATTAATAAATTAATTGCATGA

>Cluster\_48801

ATGTCCACCCATGACAGTCTGATGAACTGACTGACACACTTATCCAGCAGAACGGTTACCAGGGGTTACGCTATGCTGA  
ACTGGCGAAGACGCTGGGTATCCGTAAGCCAGATTCACACTACCATTCCAGACAAAACAGACTGGGAATAGCTTACT  
GTGAATATAAAAAAGCCGGTTTTCTGGCCTGGAAAGCCACCTGCAGCAAGTTACCCTGC GGGAAAGCCGCTGAAGGC  
TATATGGAGGCTTCTGGCCTGCGCGGACACCGGCCAGATGTGCGGGGTGTACGCAATGATGTCGGACTGTAACCTGTT  
TGAGCCTCCCTG CAGGAGGCGTTAACCGGTTGGCACAGACGGACTGCGCATTTCTGACGGCGGTCCTGCTGTCCGGAA  
AGGAAAGCGGGAAGCTTTTTTTCTGCCCGGAGAAAGATTTGCTATGATTTGGCCAGTTTCGATAAAAGGCGCCCTG  
ATGCTGAACCGCATACCGCTCAGCAGCCTGCATCCGCACGATGAAAGCGTGGAGCAGTTGCTCTGCCGGTCTGA

>Cluster\_31941

ATGAGTAAGTTTGCCAAAACAGCCATTGCTGCGGCGATGGTTCATGGGCGCAGTTGTTTCCAGTTCTGCTTTTGCAGCAGG  
CAACAACGGTACC GCGCTTCTACGGCACCATTGAAGACTCCCGTGCTCTATCGTTCCAGACGATCAAAACTGGAAG  
TCGATATGGGTGACATCGGTGCGGCTAAACTGACCGGCGGTGGCACTACCACACCGAAAGATTTCCAAATCCGTTTACAG  
GATTTGTGTTTACCAC TGAACAAACATGGAGACCACGTTCCCGGCACTAACTACGCGGGCCAGC CAACGAGATAA  
CTATGCGTTATTCAATGTTGACAGCGGTTGTCATGAACCACGTTGAGCCTGGTAATCGGCGATACCCATGGCAAAGGTT  
ATAAAGTGGCGGAAAGATTTGTTACGCAATCGTGTGATGATGATCTCAACCGGCAAGGTTAAAGACAAGCAAAAGCTGAAC  
TTTTAAGCCTGGCTGGTGGGTGAAACCGATGCGCCGATCTCGGCCAGTTCGAAACCTGACCACATTCAGATTACCTA  
TCTCTGA

>Cluster\_19621

ATGAGGACTTTTTTACTACTGCGCGTTTTCAACACGCGAGCAGGATACGCAGAATCAGGTGCTGGCTATTGAGCGTGCCGG  
GTATAAGGTGCCGAGAGCAGGTAATCAGCGAGGACATTTCCGGCAGCGTTCAGGCTATGCAGCGCCCTAAGTTCCGGG  
CGATGGTTGAGCACAAGCTGGAAGCGGGAGATCAGCTTGTCTGCTGAAACTGGACAGGCTGGGGCGTGACAACATCGAT  
GTGCAGCAGACATCGACATGCTGTTAGAACGCGCGTGAAGTGGTGTCTCTTGACCTGCAGCGCGTGTACTGACTTC  
ATCTGAGGGCAAGCTAATCCGCCAGATGTTGGAGCCTTTGCTGAGTTTCGAGCGAAACCGTATCCGTGAGAGGAGCCTGG  
ACGGGCTGGAGAAGGCGAAAGCCAAATGGCGTTAAGCTGGGACGCAAGGAAGCCACCGACACCCTCAAAGGTCAGGAG  
CTGCGGAGTGAGGGGCTGTCTCAATCGAAGGTAGCGAAGCATCTCGGCGTTAGCGTGACACCCTTAAACGTCCTGGAA  
CAAGGGTTAG

>Cluster\_7109

ATGGCGAACTGGCAATCTATCGACGAGCTGCAGGATATGTCATCGGATTTACC GCGATTTATCCACGCATTAGATGAACT  
TTCCCGCGCTCTGGGGTTGAATATCACTCCGCTGACTGCCGATCACATTTCTTTGCGTTGCCATCAAAAACGCCACTGCTG  
AACGCTGGCGTCCGCGGTTTGAACAGTGTGGCGAGCTTTTGTGCAAAAATATGATCAATGGCAGACCCGATTTGTCTGTTT  
AAATTCATGAACCGGTACAGGTTGGCAGTGGCAGTTTTCTATTGTTGGAGCTACCGTGGCCCGGGGAAAACGTTACCC  
ACAGCAAGGTTGGGAACATATTGAATCCTTCTGCCGGGTGATCCAGAAACGCTGAATGCCCGTGCCTGGCATGCTTT  
CTGATGAAGGACTCAGCTACCGGGGATCTCAGTGAAAACAGTTTCGCCAAAAGGTGAGCATGAGCGATTACCGAATCCG  
ACGCTGGCGGTCAACCGATGGCAAAAACACTATTAAGTTTCACTCCGTGGTCCATGGAAGAGATCGTTGCCAGCGAGCAGT  
GGCGTAA

>Cluster\_42008

ATGAATACGTTGACTTTCTGCTTTCAACGGTCATTGAGCTGTATACCATGGTGTGTTATTACGCATCTGGATGCGATG  
GGCTCATTGTGATTTTTACAACCCCTTCTCACAGTTTTGTAGTGAAGGTAAACGAGCCGATTTATCGGGCCACTGCGCCGG  
TTATTCGGCAATGGGACCCATTGATAGCGCTCGCTGCTGGTTGCCATATTTCTCAGTTTCATTAAGCCATCGTGCTG  
TTTTAAAGTGGTGACCTTCTGCCAAATCAATTTGGATTGCGGTTTTATTAATTTCTGCTGAAAACCATCGGCTGCTGATTTT  
CTGGTCTGCTGGTATGGCGATATGAGCTGGTGAAGCAGGTCGTAGCCGATTTGAATACGTCGATGATTTTCAATGCGCG  
CCGATCCGCTGCTGCCCGGATTCGCGCTGCTACCGCAATGGGTGGGATTTGATTTCTCGCCGATGATCTCGCTTCTG  
CTGCTGTATGTCATCAATATGGGTGTCGAGAAGTCTTGCAGGCGACCGGAAATATGCTGCTGCCGGGCTGTGGATGGC  
GTTATGA

>Cluster\_48625

ATGTACGGGAAGCAAGATATATCGATCTGACGGGAAGGTCTGGATGCTCCTTCTTTGTCTCTATCGTTTTTCAGAGAAA  
GCAGGTTGTTTCTTTGTCTGGCGGGACAGAGTTTAAACCCAAATATCTCCAGATCGTTCACCGATGATTTTTGTGCTG  
ATTCGAAAGCTGTTTCAATTAATAGCCAACAGAAATAGTGCCTAACAAACAGGTTGATTTACAGTTTCGGAGGTCAGGTTAGC  
GACTCTAGTGGCCAGCATACGTTATTTTCGAAAGGTATAGCCAAAAGAAACCTGGGGCATGAGTTTTTTTCAATGCGCG  
AGGAGAGGAGATCTATAATACGGCAAAATATCCCACTTTCAATTTACCTTTCTTAATAATACGGAGTGAACAGTTCTGGAG  
GGCATGTTTTTTGATTACCGCCAGCGATAATCCCAACATATGCAAAATGTTTCCGCGGTTCCAGTACCGGGCGGGCCATG  
ACAATGGTTTATGGATATGGCGCATATGAAATACTGTTAGTTCATATTCGTAACCAACTTAAATGGCGGCCATAGTTT  
TAGCGTAAATGGCAGAGTACCGGTAATAAATAAGAACTGTGATAACTGA

>Cluster\_983

GTGCTGGCGAGCCTCGGTGGGCTGGTTTTCTATGCGGCAAGGTTCAATTTCAAAGAAGCAGGCAACGCCATGAATGAATT  
AATTGCCAATCATGACTTCGACTTTCCGAGTTAGTTACC GCGCAGAGGTC AACCGGTAAC TGACACCTTCCAGATTG  
CCAGGGCATTTGGTAAACGCCATCAGCATGTGATTTAGGCTATTAATAATGTTGAGATGTTCTGAGGAAATTTCTCGACAAC  
CATTTTTGGGCGCTCGAGAAAATCAATGACTTAGGTATTTTTGACAAGAAACAGATTTACTACCGCATGGACTTTAGTGG  
CTTCGTTATGCTGGTTATGGGATTTAACGGGGCAAAAGCCGATGCTGTTAAAGAAAGCCATATCAATGCGTTTTAACTGGA  
TGTACGCAAGCTCCGTAAGTACAGCGAAAGTTATGAAGCAGAACGTAACCGGTAATGCTGGAGTACATGAAAGAGAAAG  
GATGTCGCCAGCATGTCAGGCGCTGCTCAATCGCTGGGGGAGAACGAAAAACCTCAATTGCTTGCAAGCTGGAACG  
TCTGGAGAGACAGGGACAGTTTTTATTACCGGATTCGATAAAGGTATTCAGCCTGA

>Cluster\_43149

ATGAAAGCGTTAAACGGCCAGGCAACAAGAGGTGTTTATGCTCATTCCGTGATCACATCAGCCAGACAGGTATGCCGCCGAC
GCGTGCGGAAATCGCGCAGCGTTTGGGGTTCGGTTCGCCAAACCGCGGTGAAGAACATCTGAAGCGCTGGCAGCGAAAG
GCCTTATTTGAAATTTGTTTCCGGCGCATTACCGCGGGATTCGTTTTATGCAGGAAGAGGAAGAAGGGTTGCCGCTGGTAGGT
CGTTGGGTCGGGTGAACCGCTTCGGCGCAACAGCATATTGAAGGTCATTATCAGGTCGATCCTTCTTCTGTTCAAGCC
GAATGCTGATTTCTGCTGCGTGTGACGGGATGTCGATGAAAGATATCGGCATTATGGATGGCGATTGCTGGCAGTGC
ATAAACTCAGGATGTACGTAACGGTCAAGTCAGTGTGTCGACGATATTGATGACGAAGTTACCGTTAAGCGCCTGAAAAA
CAGGAAATAAAGTCAACTGTTGCCAGAAAACAGCGAGTTTAAACCAATTGTCGTTGACCTTCGTGACGAGAGCTTCCAC
CATGGAAGGCTGGCGGTTGGGGTTATTTCGCAACGGCGACTGGCTGTAA

>Cluster\_21779

ATGAGTAATTCGTTGTTACCACCATCAGCCAGCAGTTTCATGCGTTGTGCCGAAGCCGTCGGAACACGCATTACAGACAT
TCCGGTAGACCTCAATACGCTGTGGTTCGGCCGATACCTGCCCGGTGCATCTGCTGCCTTATCTCGCCTGGGCGTTTCCG
TTGACCGCTGGGATCGCAACTGGCCGGAAGAGACAAAGCGACAGGTAATTCGTGATGCATGGCTGATACACCGACACAAA
GGGACCATCAGCGCACTGCGAAGAGCCGTGGAGCCTCTCGGCTACCTGATTGAAGTAAAGGAGTGGTGGCACTCAACGA
GGAGCCAGGAACATTTCCGATTGTTGTCGCGGACTTGTATCAGGGCATCACCGATGAAATGATCAGGAACCTTGGCGCC
TTATTGGGATGCAAAACAGTAAGTCGCCATCTGACGGGCTGGCGATCAGCCTGAGTGTGAACGGAAGATTTTCGTT
GGTACGGGATGCTATCACCGGATGCCCTGACGGTTTATCCCTACACCCGGAGTCCATTATTTGTCGAAGGGGATTTATTT
CCCTGCCCGGCCATTATTAAATTGATAATCTGAGAGTAAACGCATGA

>Cluster\_6227

ATGCGTACACGAATGACTATCTGGCGGATAAAACTGTTTTTACAGAAGGAACGAATCCCCCGTCTTCGCCGCGAGTG
GCAGGATGTTCTGGAGGAGTGGCCGACAGAGGCCGGCCAGAAAGACGGTTGCGTATTGCACTGCTGAATGTGGATT
ACGTCACCAAGTTTGAATGCCTTTTCCGTTGCTGCTTACCCGTACACCGCAATGATTGCCCGCTCGGTGAAGAATGG
GGCATCAGCCAGAAAAATGTGGTGTTTAACGATAAAGCGTTGGCTGCGTGTACAGCCTGAAGGCCAGCCTTTCTGGTGT
GCCGGATACATACCGGTATCATCTGTCTCACCGTATTCCGTCGGTGGTGAAGTGAAGAACACATCATTTGCCATATCAGC
AGGTTGCCCGGAAAGTGAAGCGCCCGTGAACGGCTGAAGTATGCACCTGGAGGCGGGTTTACTGGTACTGCCTGGAC
GGCCTGTTCTGGTTTGGCAGTCAGCGTATTTGCGCTGATGTTCTGAGGCTGAGAAAGCCGGAATGCCGGTGGTGACCA
GACCGTGGAGGTGCACGATAACCTGACGGGAACAACCCGCAAAGTACCGGCATACCATCTCTGA

>Cluster\_17064

ATGCGTCTGACAGCAAAACAGGTGACATGGCTGAAAGTTTGCCTACATCTTGCCGGATTGTTGCCGTTTCTCTGGCTGGT
CTGGGCGATCAATCACGGTGGACTAGGTGCCGATCCGGTGAAGAGATATTCAGCATTTCACCGTCTCACTGCCTGAAAT
TTTTGCTTGGCCCTTTGTTAATCACACCTCTGGCAGCCTACGCAAAAACAGCCGTTATTGATACGCACTCGCCGCTGTTA
GGCTTATGGTGCCTTTGCCCTGGGCGACACTGCAATTAACAGTTACGCATTTGCTGGAGTTGGGCGTGAATAACTTGGCGTT
ATTAGGTAAGGAGTTAATTACCCGGCTTATTTAACGTTAGGAATTATCAGCTGGGTTATTTTGTGCTTTAGCGTTCA
CTTCAACCCAGTCGATGCAGCGAAAACCTCGGCAAAACACTGGCAACAGTTGCATAAATTCGTTCTATCTTCTGCGCATCTG
GCCCAATACATTATCTGTGGTCAAGATTTATTTCAACCCAGCCTCATCTACGCTGGGCTGGCTGTACTGCTGTTTT
AGCCTTACGGTATAAGAAGTTGCTTTCCTTTTCAACCGGTTAGCAGCAAGCCACAAACAAATTTATCTCTATAAA

>Cluster\_10530

ATGACCACCTCAACTCATCCTCTGTTGTTGAAGGTACAATCTCAAATGAACCTACGCTTCTGGTGAACCGCGCTGATTTGCA
TGGATTTTAGAGGTAGGTAAGATTTTCTAACTGGATACGGCCAGGCTAAACGAGTATGGATTCTGATGAAAATTTAG
ACTACATTTCTATTTTCGCGAAAATTTGGCGAAAACCTCAGCGCCGCCGCGCAAGGATTACCACCTCACCCACAGCC
AAAGAGCTTGCATGGTTGAACGTAAACGAAAAGCCGCCAGATACGCCGATACCTTTCATCGCGTGCAGAAAAGAACTTGC
CAACATGCAGCCGAGATCCAGCAGCAATTCACAGACGAGGAATCATCTCTCTTTGCTACATGCAGGTACAGATGGAGA
ATGCACAGGACATCTCGAAAACGCTGTACCCGATAATGAAGAACTTAACTCATCATACGCGAGTAACCTGATGACTT
CGTTTTGAGACCATCTACATGGTGCAGAAACAGAGACGCGCTACTGAGGGAGGTAACACGTCCTCGACATGTCAAGTTC
CGTTATCCAGCGGCCATGCCAATGCTGAAAAGCCTGCCGGCAAGACAATTTCGAGTTTTTAA

>Cluster\_20211

ATGCTCGTCTATTGGGCTGGATATAGTCGCGCACAGCGGTATTGCTATCTCTGCGTTTTGTTAGCCGAAAATTCGCTAT
GGACCCTTTTGGTGTCTTGGTATTGGGCGTGGTTACCGCAGTAGGCGGGCAACAATTCGCGACATGGCGCTGGATCACG
GCCCGGATTTTGGGTGAAAAGATCCCACCGATCTGGTCTGTGAATGGTCAACCAGCATGCTGACCATCGTCTGCTGGTCCG
CAGCAAGACGCTTACAAAATGGATGTTGCGGGTGTGGACGCGGTTGGTCTGGCGGTGTTTGTGCGCATTTGGCGTGAA
TAAAGCCTTTAATGCGGAAAGCCGCTCGTTAATCGCGGTTTGTATGGGCGTCATTACTGGCGTGGCGCGGATCATGC
GTGATGACTGGCCCGGAAAATCCCATGATTTTACGTACAGAAATCTACGCACTGCCTGATTTATCGCGGTATTGTC
CACGCTACGGCTTATTACACATTTTCCGTACCACTGAAAACAGCCAGTATGATGGGATGGTCTGACCTATTGATTCCG
GCTGGCGGCTATTCGTTGGCATCTTAAGCTACCGACTTTCGCTGGATGAGAATGGTCTGTTGA

>Cluster\_17747

ATGGCTTCGTTATCGAGATCTGCAACCGCGCGTGTAGCAATAATCGGCAACAGTGTAGCATTAACAGCCTGAATGAAGC
CAGCAAAAGAGCGGGCAGTGTCCCTGCATTTTGTATGATGTGCTGATGCTGCTGCTGCTGACTTCGACTGGAATTTG
CTACCAAAACGCTGGCGCTGGCTGATACCAATAACCCGCTCCTGACTGGCAGTACGCTTACCAGTACCATCTGATTGC
GTCCGTATAAAGTGAATCATGCCGACCGGCATACGTAATCCTACCGCTGCGCAGCGCATTTGAATATGTTGTCGGTTCCAA
TGAGGAACTGACAGGTAAGCTCATTTACACCGATCAGCGAAAGCGTGGTTGAAGTACGTTGGCGGGTTACTGACGTCA
ATATGATGATGCCATTTTATGAGGCGCTTTCCTGGCGTCTGGTGTGCAATTAATATGGCGCTGACCGGTAGCGCA
GATCTCGGTAACAATGCATGACGATGTACAACCGTGTGATACCTGAGCGCTGGCTCACATAGCCAGAACGAATCACAGGA
GCCACAACCGCGGTAGATGAGTTCACAGCAGCGAGGTTGTCATAA

>Cluster\_20191

ATGTCTAAAATAATAGGTTTTCGCTGTCCGGTATTATGTTGGCAATGGCTGCTGGTACTACATTTGCTGTCAACGATAT
GGACGGCGTCAATTAATATATTAGCGGTCTGGTGTGATAAACCCTTGTGAAGCTCGTGTGATGGCGGTAACAAAGACG
GTCGTATCTGCTGCAAAACCGCTACTGTTGCTGAAATTTACTGATGGTGTACTGGATACCCTGTAGGCGCTAAAGCTAAA
CCATTACGATTTACTATTGACTGCAGCAAAGCTAACCCGGCTCCGGGTACTACTGCAAAAATGACCTTTCGTTCTGTTTT
TTTTGGTAACAGCAAGAAACACTGAACAACGACATGTCTATTAAACCCCGTCTGACGGCGTAAATACTGCTCTGCACA
ATATTGAAGGTTCTACTATTAACAGGTTTCAAGTCAATTAATCCGGTGTATTTACAGCAAAAACCTCTGGATTAACGCT
AAATCTGCAACCTACGATTTTAAAGCATCTATGTTGCTGCGGATGCAAGCAAAGCAGTACTGCCGGTTATGTA AAAAC
CAACTCAGCATATACCATTAACCTTACCAGTAA

>Cluster\_53922

ATGACTTTGAAGAAATGTAGCAAACATCGGATCCGTTGTACGGATAAAACCATGACAGCCAAAAGTCTTCTGATGATGGT
TAATGAAGCTCGCAAGTTATGTTGAGAGCCATCAGTACGTAACAACAAATTCATCGAGAAAATGAGGATGAATGGAGG
CGGAGACCTACACAAAAGTGTAGGTTCGGAAAACCGGGCTGACATTGATGTTATCTCCATGATATCAAGCAGCGCTT
CGTGTGCTGCTCGGAACTAAAGCAGTTTCGCCGAACTGTAGACAAACTTGAAAGTATGCAAGAAAGCGCACATTA
AAGCGGTAATTCGTCAGTGGACTTGTGTTAGATATCGCCAGGCTCGAACATGAAAATGACGGTTGAAGCTGTTACCAATC
TGTTAGATTTGATGCCAAATCTTGGCCGGAAGCAAAGCAGACTGCGGACGAAAGCATATCAACCCGATAGTTGGTTTTT



AATGCAATACCTCTTCCAGCAATAGAAGAGCATTACTACTCAGCAGGGGAGGTTGCAGAGCAGCTTGGAGTAACGGCAA  
CAAGATTGGTCGCATTGCTAACGCAAACTGA  
>Cluster\_40896  
ATGATAGAAAATAAGATACAAAACGGAAGTAAAGAAAATCAAGAAGAGGTTACTCGCCATGTAAAAAACCCATTCCTTAA  
TGATACAAAATAACATACAAAAACAGGTATCAGACGTATCACAACAGGAAAAGACCGCTTAGCCGTAGTAAATGAAAAA  
CAGGAGAACAGGTTGGGCATGGTGGTTTCTTTCAGTCAATGGAAGTAGACAAGACACAGTTCGTGAAGCTTTATGTGGAT  
GGCTATCAGCTATTGAGGGTTTATCCTCATCAGGTAAGAAAGTATTTAAGATACTGTATCTTGTATAGAGACAATAA  
AGATACAGATACGATATTAATGTCAATTCGATATTTGTTGATCAAGAGATTGTAAAAAATCAAGAACGCATATTTCAAAG  
GGATGAAAAGAACTTGTGTGACAAGAAATTTATTGCTGAGACATTATGAGCAATGATACAGAATATTATTTTATTAATCCAGACTATATG  
TTTAAATGGTGATCGCTTAACTTTCATGAAAATTTATTACTTGAAGGACAAAAAGCTAAAACTAAAGAGAACAAAATTA  
TTGCCAAGGCAAAACGCAGTAG  
>Cluster\_24732  
ATGGCAAATAATATGTCACTCCGTCAGATATGCCATGCCACCCGGTATGTTGTGCCAGGGCTGTGTTGGTGTGTTCTG  
GTGTCTGAAATACGCCGTATTCGCGCTGGCCACAATGGCTCTGCTGGCGTTACTGGTTTTATGGAAGGACAACACCA  
CACCGGGGAAATGCTGGTTTCAGGAGATCGAGTTTGTAAAGGGGAGAACGCCAGCCGGCTGTATCCGGTCCGACTGCT  
TCGAACAGTTTGGTTCGATTTAGCGATGCCCTCCGTGTAACTGTCGCTGTTTTCGCCGGGGGATGTTGCAGAAATATGC  
CAGGGAGACTGACCACTCTCTGATGCAACTGTTCCAGCATTATGGGCAACCGTGGCACTGATGTATGCTCGCTGGCGG  
TGATCTCCGAAAATATCCGATGCGACCCGAAAATGAAATGTGTCCGGGTCGCACTGCAGATGAACATCTGAAGGAA  
GTTCTTACGGAAGATGCTTCCCTGCCGAAAATCAGGAAATGCCATGTTTATTTCCCTGATGACCGAACAAACAGAAG  
CAACGGAGATAAAAATGAACATGCGTAA  
>Cluster\_42410  
ATGAGCGATAAATTCGGCGAAGGGCGCATCCGTATCTTTATCCAGGCCCTTGATATCATGCGTAACCGGTTGAACATCCG  
CCAGCAGCAGCGGGTGGAAACAGGTCGCTTACGAAATGACGGCGCTGCGTGTGCGACCATGAGCTTGGTCCGCTGGTGC  
GCGTTTTACCGCATTTGGCCTATCCATCCAGCTGATCAGGATATTTTCGACTGGCGGGGCAACTGCGTGAAGTT  
GATATTTATCAGGGCGATACGCCGTTCTGCCACTTGTCTATATCGAAAAAGAGGGCAATGCCCTGATGCAGGATCTGGA  
GGAAGAAGGTTATCTGGTTGGCCGAGGAAAGGAAAGTTCGTCGAGCGCTGGCGCATTAATTTGTGAAATCAACGTGC  
TGCATCCCTTCCGGTGGGAAAGTGGTTTGGCACAGCGGATCTTCTCGAGCAACTGGCGATTATGCGGGATATCAACTG  
AGCTGGCAGGGTATCGAAAAAGAGGCTGGAATCAGGCAATCAGGAAATGGGGCAATGGGGGATCTCACCGCGTGCAGAT  
GATATTTAGCAAAGTGGTAAAGCGAAGCCGGGAACTGAGTAA  
>Cluster\_57003  
ATGATGAATATAATCAGACTTTATATTTATCCGTTATTTCTCGGCTTTGTTATTGTGCCGTTGTTGGTGTGGCCGATGGT  
GGTTGCGCTGGCTGCTTGTATTTATCACGCTGAGTTTTCTGGGGAAATGCTGTTCTCAATCCCGCTCATGATCAGCGTA  
TTTCACTTCTGCAATTACAACCTTGGTTATCGGCTGAATATGCGCTTTTCTTCTGTGTAATGTGTTGCGTTGGTTGGCAA  
TTTACTCGTAGAATCAATCTGAATGAAAAGCAGGCTCCATTGTTGGTGGTATTGCGACCGGCTATTTATGGTTGAT  
CCTCTGGAATATCAATTTTTACATCGCGCCAGGAAAATTTGCGTTGCTGGAAAGTATCCGCAATTTCTTTCTGCTGTTG  
TCTGGCTACCCCTGAAATTTTTCGCACTTTTGGCTCAGCGTGGACGATTTTTATCGTCAATAAAGCCACAGCTTTGGT  
TTTTGCGTTGGGATATTTATGCCAGTGGTGCAGCAAAAATAGATGCCAGATACGGAAGTTGAGTGAAGTGGGAACTGCTT  
AAGTTTTGTTACGTTGGGATGATGGCGTGGGCTTTGCGGTA  
>Cluster\_29351  
ATGGTCACTAAAAACAATCTCGCGTTCAGGTCGTCACAGCTTTCGCTCCTGAGCAGGCTGTCTCTGCGGCAAAAGT  
GCTTTTTACCAAAAAGGTTTCGATGCTGTCAGTGTGCTGAAGTTACTGATTATCTTGGTATTAACCCCGAGCCTCT  
ACCGGGCTTTTGGCAGTAAGGCTGGGTTATTTAGCCGTGACTCAATGAATATGTCGGTACGGAAGCTATTCGCTTGGC  
GATATCTTTCGTGATGATCGTCCGATGAGGAGGATTTATTTTGGTCAAAATCTATAAAGAAATCTAGATTTAAGCAATTTGCA  
CGGCGCTGCGCTGGCTGTATGGTTCTTGAAGTATTCATAGTATGATCCACAAGCGCGTATATTGCCATTCAATATT  
ATCACACCGCAGAAACAGCATTATGACTATATCGCCAGGCGCATCCACAAGCGCACAATGTGTGACTGATTTTATG  
AGTACCGTGTATGTCAGGGCTTTCTGCGAAGGCACGAGAGGGGCACTCTATCGAACACTCTGTGCAACAGCAGCCCTGGC  
GGGGAAGCGATAAAAACTATTTCAAGGAGTGA  
>Cluster\_3305  
ATGGCAGATAAATTCGAAAAGAAAAAGAAACCACAAATAAATCAGCAAAAAAACACTAACGAAGAAGCGGAAAAAT  
AATCCAGCAAAAGACACCCGACCAAAACAAGTGAATGTAGATCCAGCTATAAGATTGAAACAAATTCGTTCAACTTGTCC  
GTAATAATAATAAATCATCATGGGAGAGGATTTATTTTGGTCAAAATCTATAAAGAAATCTAGATTTAAGCAATTTGCA  
GGTAAAGATAAACAATAATGCGAAAGGCTTAATGCAAAATGCAACGAAATGCAGTGAAGCAGGTTTTTAAATATCGACAACA  
AAAAATAAAGGAAGAATGACGACTGATAAAGAGACAAATGAAGCTTTTCGCTAATGCTGATACATTTTATAAATCTGATA  
AAATATTTGATGAAAAGAAAATATTAAGATTGGCACAGAGTATTTGCAATACGATGATAAAGAAAGCAACAATTTGAG  
GAGGCATATCGTGGAAACAGATGAAGCATACTATTTCTGTATAAAAACCTTGGCTGAAAACCTGGCTAAAGATCTCTGATA  
CATAAAATACTAATGGAGGAAATAGGAAGATAG  
>Cluster\_25235  
GTGAAAACACCCTGCTACTGAAAAACGGAAGGACAGCTCGCCACGTTGCGTCAAGCTTGTGCCCCGTAGCGCAAT  
TGCCACGCTAAGTGGCGTTTTGACAGGACCTTTTTTCAGACCCGTCGCAACAACACTACAGGCTTGTCTCGATGAGGCGG  
GCGATAACCTGGCTGCGCTTCTGTCATGCGGTTGAGCAGCAACAGCTGCGCAAGTTCGCTGGCTGGCAGAACATCTGGCG  
GCGCAACTGGAGGCTATAGCGCTGAAGCCACAGCCTGGTTCGCTACGCGAGTGGGATAGCGCACACCACCAGAAAATTTGCCG  
CTGGCAGCGTAAACGTTTTCAGCATCAGGATTTTGGAGCGCGCTACGTTGAGATGTTTCCGAACTAGAGCCGCTGCG  
CACGAGCGACCGATCTCGTGAACAGCAGACGCTGCTGCTGAAAGTGGAAAGCCTATGAAGCGCGCTGGCAGCTGCGC  
CATGCGCTGGAAAAAATCGAAAACAGGTTAGCGCGTTTTAACCCGCTAG  
>Cluster\_18765  
ATGATTTTTCTCATGACGAAAGATTCTTTCTTTTACAGGGCTTTTGGCAGTTGAAAGATAATCACGAAATGATAAAAAT  
CAATTCCTGTGACAGATCAAAAAGTAGGCAATAAACCTTCAAGGTGATCATTGACACCTATCACAACCATATCCTTG  
ATGAAAGAGCGATTAAATTCCTGGAGAAATTAGATGCCGAGAGAAATTTGTTTGGCACCTTATCACATCAGTAAACTA  
AAAGCTAAAGCGCTATTTATTTTGTGACGCGTAAAGAAAGTATCAAAAATCTTCTTGGATTTACTTATGGTAAACACT  
GCCCATAAAGAAATCAACAATATTTTTTACACATAACTGTTCAAAAATTTATGCAACTGATTTCTGAAAAACAATAAAGAA  
GCAATATCACGCTCAACGCTCAACATTTCCGCAACAAACATTAAGATTTCAGAAATCAACATTTATGTACAAGCTGAAATTA  
AGAGCTATGAGCGCATCTCACCTGGGTATCACATCTTATTTTATG  
>Cluster\_36739  
GTGACGTCACCTTCCGGACAGCAAGAAACATTTAAAAATATAATCAATCCAGAACATCTACGGCAAAACACTTGGAGGTA  
ATCTCTTACTGCTGTTTCAAGAAATCACAATGTGAAATCATACCCCAAAAACCTGGCGAAGCGATTATTCATGCTTTTA  
ATGCCACCTACCAGCAGATCAGAGAAAATATGCTGAAATTTGACGTTTGCATTTATGGGTATATCAAAATCCCTCCAGTG  
ACAACTTTCCGCGCGAGCAGGACCAAAAACCTCCGAAAGAAAGGGTTACTGGTTTATGCTTATCAACCCGAAAGATCT  
TTGTACCATCCATAATCCAAATGGGAGATTTGACAGATTTTATTTGCTTGGTTAAAGATGCTAAAAAATTTGGTATCGATA  
TCATCTCTGATTATACCTTTAATTTATGGAAATTTGGGGTAGTGGTAAAAATGACCTGGATTATCCCTCTGCTGATATA

CGAGCGAAGATCAGTAAAGATATAGAAGGTGGTATCCCTGGCTATTAG

>Cluster\_4635

ATGTCAAATGTGAGTGGGATCGGTGATGCTTATTACTGGAGTGTTTTTAAATCGCCGAGGCTTTGGGCTTCACCGGA  
CACAGTAAAAAACCGCTCTCCGCGGCAACACTCCTGTGGCTGCGACTGTACGGGGAAACCCGTTTTACGCCCTGCAGC  
ATGTCGGGGAGCCCTGTTTAGTGTGAAGCATGAGGCAGCAGACTGTGTCATGATCCATCCCGTATGGAGCCGAAAGAG  
AGAAAGGACTGGTACCAGTCTGAAAATGAAAGGATCAAGCTGGAAGAGGAGCAGCGAAAACCTCATCCAGTTGATGAAGT  
AGTCATCGTCTATTCGTCATGAGAAAGGCTGTGTCAGGTTCTGGAGACAATTCGGATGTCTTGAACGCGATTGGC  
CCCTGACTCCTCAGGCCGTCGGCGTGTACAGCAGGCCATTGATGACCTGCGATACACTCTTCAGGAAAAATCCTACGAG  
GCTTGTGCTGCTGAATTAATTCCTGATGAGGAAGGAGAGATCTCTAG

>Cluster\_35757

ATGTTTTTAAAACGTCAAATCCACAGCACTGTGGCATGGGACCAGTTTATGGCGGACTGCCTGAAACTACGCGAAGA  
AGCCCGCATCTTGATAAGGTTCTGGACTGTGGTTGGCGGTGAGTATTCAGTACAGGTATTTGGTGGCGTCATTTTCATG  
GTGTAATTTTCCGGGAAATGAGCGCCCTTCTCGCGGAGCTGTGGACCGTACAACGGCCCGCATCAGGTAACAGTTTC  
AGGCCCAGAACTTCGGGATACCTGCTCATCTCAGGGGCGAGCAAGAGAGCTGGCGAAAATATGGCAGGAGAATATTCC  
GGTCACTTACGCCCGCACAGCGCTCTTTTACCAGCAGTGGGACTGGATTTACAGCGCAACAATATTCCGGCCGCTCCAGT  
GGTTCCGTGTTGGTGTGATGATTTACGTCATGACGGGGATGACACCCGCGCAAGGCCGATGACTGAAATCCTTTCTGAC  
GAAATTTATCCGGGCGCAAAAACAGCGCGGAGGTAACATAATGAAAAACAGTGA

>Cluster\_14136

ATGTCGAAATTTATACGGTAGCTCGCCCTACGCCAAAGCAGCTTTTGAATTTGCGGTCGAACCAAAAGTGTAGAAGC  
CTGGCAGGACATGCTGGCGTTTGGCCGAGGTAAACAAAACGAACAATGGCAGAGTCTCTCTGGCGCGCTTGGC  
CAGAAACGCTTCGGGAGTCTGTTTATCGCAGTTTGTGGTGAACAAGTGGCAACTGGACGAAAACGGTCAGAACCTGATTCGGGTAATG  
GCTGAAAATGGTCTGCTTAAACGCGCTCCCGGATGTTCTGGAGCAGTTTATTCACCTTCGTCGCGTGTGAGTACCGC  
TGAGGTAGACGCTATTTCCGCTGCGCAGTGTGTAACAACAGCTCGCGAAAATTTCTGCTGCGATGGAAGAACGCTCTGT  
CAGCAAAAGTTAAGCTGAAATGCAAAATCGATAAGTCTGTAATGGCAGGCTTATCATCCGAGCGGTTATATGGTCAAT  
GATGGCAGCTACCGGTCGCTTTGAGCGCCTTGACAGCCTTGCAGAGCTTTCAGTCTTAA

>Cluster\_18808

ATGTGGAGAAATAGTATACGTTGCTGTTGCCCTTTTGTAGCTCTGGCATATTTTCCGGCGCTGAAGCCAAAATAAGCCCT  
CGGTGAAGCAGGAAAACCTGACGTTTCTTCTTTCAGTCTGCGCCAAAGGTTGTGAGTTTGGCAGCCTGATTTAGAAAGTTG  
TCATGGGGAAAATGATGTTAATGAAGCCAGTACGGTCCGGAAGAGTCAAAAACGAAAAAATTTCTGTAATCGAATAAAA  
GATTTGTGACGGAATATCAAAAGCTAAAGTAAACAATGGACGGCTTCTTACACCAATGATAACTCTCTTTTGTCTGGA  
TGCCGGAGGCGCAACGGGAATAGCCCTGCAAAATGTTGACGGCAAGGGCACAACAGATTCGAAAGTCTGTTGGTGGAA  
CGCGGATAGAGTGGCCAGTAAATGGAACAACAACCCCACTGAACTACAAGCGAGTTATGTCGTTGTAACGCCAATGCA  
ACGCTGGACATGCAAAATGCCATGGTCAATTTCTCCGTGGAGTATGAGTAA

>Cluster\_41938

ATGGGGCAATGAAAAATGATGTTACCCTGGCAACAGGGAACAATTTCTGATACAAGTATCAAAAATGCGTTGCGAGTTTGT  
TAGCCGAATTTATTTAGTACCGCTATCGTGGTAATGAACTGCACGAACGTTATGCGAACAGAGCAATATCACTATTA  
TCCACAACCCAGATTTATGCGCAGGGTTTACTGACATCAGTAAAGGCCGAGTACCCGCGGTGCAACAGAACATTTGTTTT  
CTCACCCAGGAGATGATGCAACCTCACCATCGATATTTTGAAGAAATCTGGTCTGACGAAATGATGGCGCAATACT  
GCCACTCCATAATGGCATCCCGGCCATCCGATTTTGTGTCAAAACCATGCTGATGACAGGCAATACAGCAGCCCAATG  
TCACCAATATGCGTCAGGCACTCTTATGGGAGAACATTTATTCGTCGAAATAGAAAAATGCGAATAATTTTATGATAT  
GATACTCCGGACGACTTTTATACAGCGAAGAAAAGGTATACTGAAATTTAG

>Cluster\_233

ATGGGTAAATAAAGGTGCCATGACCATCCGTGTAACCACCCGAGCATGTCAGCGGTGGCGGAATTAACGCTCAATT  
CACTTATATTAATCATGGTGTGCTTATGCTCCTGGCTGGCGAAGAGACTACAACACGAAAAACAGCAGCCTGCATTTG  
CTTTAGGGCAGACAGGAAGCAGTGTGGAAATGACAAAGCTGTGGATGGAACCAAAATAGCGCGGTTTATAATGCGACT  
ATTAGTGGAGCGTCAACATTTGATTTCTTCACTTTAATATGAATGCGGGGAGTTGCCGGCGGTTTCAAGTTCCGTGTAATTA  
TAAGAACCGCGGTTATTTATTTATCTGTTACGCGCAGATGTTATGGCTTTGAAGCTGACTGGTCAAGGTTTACACCACAA  
CCCGCAAACCCCTGCGGGAGATGTTGGAGCATATACGAGGCAAGTAACTCAAGGTTTATACAGGTATTCGCCCT  
GGCGTCTGTCATCTGTTGAGCATGGAATGGTCCCGGCTGGTACTGA

>Cluster\_42150

ATGTTTGGGATATTTTGGCTCCAGGTTACGGGTCGTTTTTGGGATCAACCCTGGTCTTTCATCCGCGGAAACGGG  
TTTTCCCTTTGCTCATCCGGCAACCCGCTTCTGGAAGGTGATAATACAGGCCGGGTTTACTGACCGTCAAGTGAAGCCGC  
AGGAGGCACAGCATCTGCTGGATATCGTGTGCGCTACCAAACTGGTAGACCGTCCAACGGTGAAGCCAAATGAAGTG  
TCAAAGCAGGAGCTGCACGAGGCGGCTAAGCTAATGAAAAATAGAAGATTAACAGCCGAGGCGTTGGCGATTCT  
GGCAACACCGGATTTAATGAAACAGGATTCAGCCAGCGGTTGACAGTGGGGGAAACCAACGCTTACCATTTGCTGACGC  
AGATTTGGGTGCTGCCAAATCCAGCGGTTAAGTCCGCTTACTGAGAAACTGGTGAAGCGTATCGCGAGTTGGAC  
CAGGCGTGGTGGTGGCTGGCTGTA

>Cluster\_38667

ATGAAAAAGTGGATGTTAGCAATCTGCCATGTTTATAAATGGGAGCTGCGAAGCCCGGATGCTTTGATCTTGCAGG  
TCGGGATTAACAAAATAGACCCGGATTTACTGAGAGCGATATCATGGAAAGAAATCCCTTTACCGGGTAAATGCCATCGGTA  
TTAATCCGGTAACGGGATATGGCAGCAGACTGATGACAGGTAGATTTCCAGCATTTTAAACGAACGAGCCGCTATGGAATT  
AAGCCGAAACATCTGACAACAGATCCCTGCATGAACATTTATACCGGTGCTTATATCTGGCAATAGCCTTTAAAAAATG  
GGCGTCTCTGGGAGGCGTGGTGCATACAATGCCGGATTCAGGAAGACCGAACGCGAGAACCAGAGAGCTTCTGCCCT  
ACGCATCAGAGGTTTACCGGATTTATACCGGATAAAAAGCAGTAAAGGTATCCGGATTCGGCCACGAAAGAAATCACCT  
CCGGAAATTAACAGTGTGCAGAAAAATTA

>Cluster\_47350

ATGGCTCACATCGAAAAACAAGCTGGCGAACTGCAGGAAAAGCTGATCGCGGTAACCCGCTATCTAAAACCGTTAAAGG  
TGGTCGATTTTCTCCTTACAGCTCTGACTGTAGTGGCGATGGTAACGGTCCGCTGGTTTTGGTTACGGTAAAGCCG  
GTGAAGTTCACGAGCGATCCAGAAAGCGATGGAAAAAGCCGTCGCAATATGATTAACGTCGCGTGAATAACGGCAT  
CTGCAACACCCCTGTTAAAGGTTTACACAGGTTTCTCGGCTATTCATGACAGCCGGCTTCCGAAGGTACCGGATCATCC  
CGTGGTGAATGCGCGGCTTCTGGAAGTCCGTTGGGTTTCAACGTTCTGGCTAAAGCATAATGGTTCCACCAACCCGA  
TCAACGTTGTTCTGCAACTATTTGATGGCTGGAAAAATATGAATTTCTCCAGAAATGGTCTGCAAGCGTGGTAAATCC  
GTTGAAGAAATTTGGGGAATAA

>Cluster\_20771

GTGTGCTACTGTGCCGTGGAACCGGTCAGTCCGCTTTTTTCCGGGAAATTTATGTTTACGGGAAACCGCTGGATATCA  
GGATGAGCCGCTGACGAATAACGGGTTCTGGCCGGATGAACTGAAGGACTTTTACGGCGCAGCGGTCAGTCCAGGCTG  
ATATCGAGCGGACACCATCAGTCAGGCTGCTGGCCGAGTCCGGAGGTGAATGCTCGAGCTGGAAGAACGTCAGGCGC  
AGCTGGAAGCAAAAGGCCACACCTGGCAGCAGATGTTCCGGCGTAAAAATGGGCGGGCTTAAACAGTCTGTGTGCCCA  
GTACATGAAAGCGGTTATTTGCCAGGCAAAAGCGGATCTGCTGGGGAGTTCCGCACTGTAGGCGGACGTGAAACCCATC

CGGGACAGGAAAGTATGAAACCCGCGCCGGTTACTGGCTGAGGCTTACAGTGGTTATCCGCCGATGAAGGGCTTAAA  
CGTGCAACGGTGAAGAAAGTATGA  
>Cluster\_20809  
ATGCGCTATAGCAAATGACCATGCTTATCCCTTGGCAGCTGCTACTCAGTGCCTGTACCACCGTACGCCAGCTTATAA  
AGATAACGGCCCGCAGCGGTTCTGTGTCCAGGGGGGCTGATAGCGTGGCTCAACAATCTATGACTACCGCATTC  
AACATCGCAGCAATGACATTACCGCCCTGCGCCCTATTTGAGTGACAACTGGCAACCTACTTAGCGATGCCAGCCGC  
GATAATAGTFCATCGTGAATGTTAAGCAGCGATCCGTTCTCCAGTCAACACCTTGCAGACAGCGCCACGTAGCCAG  
TGCATCGACTATCCCTAATCGTGTATGCCGTAACATTCATTGCGCGTGGATCTCAAGCAGGGTGACCAGGGCTGGCAGG  
ATGAAGTGTAAATGATTCAGAAAGCCAGTGTGGGTCACTGACGATGTGCGCTACTTAGCGGTAGCGTTTATGCCACA  
CGGGGTACGCTCCGTCAGTCCATCGAGAATCGCTAA  
>Cluster\_47987  
GTGTTTGAATATCGGTTTTAGCGAACTGCTATTGGTGTTCATCATCGGCCCTCGTCTTCTGGGGCCGCAACGACTGCCTGT  
GGCGGTAAAAACCGTAGCGGGCTGGATTGCGCGCTTGCCTTACTGGCGACAACCGGTGAGAAACGAACTGACCAGGAGT  
TAAAACCTCAGGAGTTTTCAGGACAGTCTGAAAAAGGTTGAAAAGGCGAGCCTCACTAACCTGACGCCCGAACTGAAAGCG  
TCGATGGATGAACCTACGCCAGGCGCGGAGTTCGATGAAGCGTTTCTACGTTGCAACGATCCTGAAAAGGCGAGCGATGA  
AGCGCACACCATCCATAACCCGGTGGTGAAGAATAATGAAGCTGCGCATGAGGGCGTAACCCCTGCGCTGCACAAACCG  
AGGCCAGTTCGCCGGAACAGAAAGCCAGCAACCCAGAGCCGGTGGTAAAACTGCTGCGGACGCTGAACCGAAAAAC  
GCTGCACCTTCCCTTCCGTCGAGTGATAAACCGTAA  
>Cluster\_49500  
ATGTTTCCCGCAATAATCCGGCGCGTGTGCCATCTGATGGGTCCAAAAGCGACTGGGCTACCATGCAGTTCCGCCG  
CGAAATCTTCGAAATCTGAATGTCGCCGACCACTTGAAGTGGTTTCTGCTCACCGCACCCCGATAAACTGTTTCAGCT  
TCGCCGAAAAGCGCGAAGAGAACGGTTATCAGGTGATTATTCGGGGCGCAGCGCGCAGCGCACCTGCTGGCATGATT  
GCCGCCAAAACCGTGGTTCGGCTGCTGGGCGTGCCAGTACAGAGCGCCGACTGAGCGGTGTCGATAGCCCTTACTCCAT  
CGTACAAAAGTCCGCGCGGATTCGCGTACGCTGGCGATTGGTAAAGCTGGCGCGCAACCGCGGCTTACTGGCAG  
CACAAATCTTGGCAGTTCATGATAAAGAACTGCACCAGCGTCTGAATGAATGGCGCAAAGCACAACTGATGAAGTGTG  
GAAAACCCGGACCCGCGAGGTGCGGCATGA  
>Cluster\_60240  
ATGACGGGGGAGTTATGAGTCAAAAGTTTGTAGTGGGCGCAGGGCTGCTGGTATGCAGTGTCTGTAGTTTATCTGCTAT  
GGCTGGTAGTAAACCCGTTGATTTAATCTGCGCGTGTGGTTCGATGCTCCGCCACCCCTGTTCAATCAAGGGCAGCCAGG  
TAGAGTTCCGGCAATATGATGCTGATAACGTTGATGGCACCAATATTCGGCAAGATGCAAAATACACGTTGAACTGCACA  
AACAGTCTTGTAACGACTTGGCGATGCAACTTAAAGGCAATACCTCAACGATTAACGGCGAAACGGTACTCAGTACCAA  
TATCACCGGGCTGGGCATTCGGATAGAAAATAGCGCCGATAACCTATTGTTTGGCGTCCGTTGAAAATAGCTGGACCCAT  
TTAATATCAATAACAGCCAGTGAAGGCTGTACCTGTGAAGGCAAGCGGGGCGCAACTTGTGCGGGGAGTTTAAAC  
GCCAGTTTACCATGGTGGTGGACTATCAATGA  
>Cluster\_39441  
ATGAATCACTTAATGGTTGACCTTGAACAATGGGCAACGGGCCATACCGCCAGTTATTTCTATTGGGGCAGTATTCTT  
TGACCCGAATACCCGAGAAACAGGAGAAGAGTTCTCGGTAAATATCTCGCTTGAGTCAATCGGATATCGGGCGCGTC  
CTGACGCTTCAACGATTTTATGGTGGATGGAACAGAGTGAAGAAGCCAGAAAATCGCTAACAGCAACCTCAAGAGGCTT  
TCAACGGCTCTTTCATGGTTATCTGAATTCATCATAAAGAACGCTAACACAAAATTCGTTTCAGTTTGGGGAAATGGAGC  
ATCATTTGATGCTGTTTATCTCCGCAACAGTTATTCGCTGACAGGGCAGCCAGTTCCGTTGGCAGTGGTGAATGACCGCG  
ACGTAAGAACAATCGTCGAGCTTGGAAAGGTAATAGGATTCGACCCCTAAGCGAGATATGCCATTCAAAGGAACCTGCCAC  
AACCGCTTGTATGATGCCATCCACCAAGCCAAATACGTTTACGCGATCTGAAAAAAGTTAGCTAAATAA  
>Cluster\_10641  
ATGATACCTGTATGGAGCAGGCATGTCGGACTGGGCAGAGCGCTGAAAAAGGGGCTGTCGATTATTCGGCTCCGAT  
TTATCCGGACCAGGCTGCACATGCACTGGCGATTTTTAAACAACCTGCGAATTTGGGATGCACCCGGGTAGCCCGACATTCC  
GGGAGTCTGTGCACCGTGGGTGTTTACCTGGTGGCGGCCCTGTTGGCTCCTACGATGGCAGACCCGGTGTTCGCCAT  
ATCAAGGAAGTGTATTATCCTTATCCCAAGAAAACAGTAAAGTCCACGCTGGCCGCGGGGATCATGATGACGGCGGTT  
ACTGAACTGGCGGACGGCGGGGCTACACCATTCTGGCCCGACCGTGGAGTGGCGGCTAACGCCCTTCAACCTGCCA  
GGGATATGATACGACGGGACGATGATCTGGATGACCTCTGTGAGGTGCAGACACATATCCGGACCATCACCCATCGGGTG  
ACGGACACCACCTGAAGTGGTGGCAGCCGATCCGAATACGGTGTCCGGTATCAAGTCCGTGGGGACACTGA  
>Cluster\_46774  
GTGGACGATTTGACCGCACAAAGCCCTGAAAGATTTTACGACCGTACTGCGATGCGTGGCATGAAGAGCATAAAAGCTG  
GCCGTTAAGTGAAGAACTGTACGGTGTTCCTTACCCTGCATTATTTCAACTACCGAAGATGCCGTATACTGGCAACCC  
AGCCGTTTACCGGGGAACAAAATGTAACCGGGTTGAACCGCTTTTGGATATTGTGATACAACCCAAATTCATACCTTT  
TATACGACTCAGTTTTCGGGGATATGACCGCGGATTCGCGGATATCAAACTGACATTGCTGCAAACTGGAGTGAAGA  
CGACTTCCGTCGGGTGCAGGAAAATCTGATTTGGTCACTGTTGACTCAGAAAAGGCTAAAACCTGCCGCCACGCTATTTA  
TCGGCAGCTGGAAGAAGAGTTAGAGGTCACTCGGTGTGTAATCTCTCCGGTGAAGTGTGAAAAGAGACGCTGGGAACA  
CGTAAACGGACGCATTTAGCCCTCAAATCTGCGGAATTCCTTAATCAACTTAAGCCCTTCTGTAA  
>Cluster\_38802  
ATGGTTATAGATATGAAACATACCTGTAGAAAGTATGATCCCGAAGCGGAGATTAAGCGGCTATCGCCGAACCTGGGTCG  
TCAGATTACTGAGCGTTACAAAGACAGCGGACGATATGGTGTGGTGGGCTGCTGCGAGGCTCATTTATGTTTATGCG  
CGACCTGTGCGGTGAAGTTCAGGTATCTCATGAAGTCCGATTTATGACCCGCTCCAGCTACGGTAGCGGCATGTCCACC  
ACCCGTGATGTGAAAATCCTCAAAGATCTGGATGAAGATATCCGTGGCAAGGACGCTGCTGATTGTTGAAGATATCATCGA  
CTCGGGGAATACACTGTGCAAGTGCCTGAGATCTTAAGCCTGCGCAACCGAAGTCCGTTGGCATTGTTACGCTGCTGG  
ATAAACCGTCCCGTGTGAAGTGAAGTCCCGGTAGAAATTTATCGGTTTCTCGATCCCGGATGAGTTTGTGGTGGGTTAC  
GGCATTGATTACGCACAGCGTTACCGTCACTGCGGTATATCGGTAAGTGAATCTGCTGCGGACGAGTAA  
>Cluster\_4314  
ATGGGGCTATTTACCCAACCTGAAAAAATTTGACAAAAGCTTACGCGCGGTTATGCCCGGTGGGGGCGCTGGGTATGGCG  
GACGTTAATTTGCTGTTCCGGTACTGGTCTGTTGTTGGAATATAGGACAGGCGAGTATGGGGAGGACCAAGAGTGGAGTGA  
TTCTCGAAATTCACAGTGAAGTTCACCGCGGATACCGGATTCAGTGTAAACGGCGTGGCGGGCGGATTTTGGCA  
AATGGTGGCGGTTCAACAACCTGTTGTTGGTGTATTTAGTGGGGATACGGCAGAGGTTATCTGGACATTAAGTACTACTCG  
TACACAGTATAATGCTGGAAATGCTCTGGAGAAAACGGAATATGACGTTACCTTCCCCAAAAGAGAATGGGGAGAAGATT  
TTCTGCATGTGCATTTTATGCTTGGCGATAAAGTGTGCTGGGTTGGAGTAAAGATTTCTTTTCTCCGTATGAAGATCTT  
CACAAACGGGGGTTACAAAGACCCGCTTCCGAGGATGTGAAAGATAAACTTTATGGTACAGGGAAAATGAATTTGA  
>Cluster\_2734  
ATGAGCAAGCGTTCTGCTCAATAGATACAACAGAAACAAAAGGCAATGAGACTATAGGCGCTGATTTTATTTCTGCATATA  
TTATAAAGATAGATATGAGGAAGCAAAAATCAACATATCTGCTTGTGAGGACAAGTTAACTACCTTCTTCTGCTATTTTAG  
CTGTAGAAAACCTCTGCTCTACTGCTGTATTTGGGACTGTGATTTCAAAAAGTGGGCTAAAGAGTAATTTGGTTTTTAAACA  
TTATCTATACTTTGTGCATATCTGTGCTTTGTTTGTATTTATGCTTTTTTTTTCTATGGCGTACTTGGGACTGAA

AGATATACCAAAAATGCCTATTCATAAGCGAAAAGAAGAGCATGATTTTTTATTTTACGGTGATAAAAATAAAACGCTTA  
GATACCATATGTTTCAGTATGGTAAAGCTGTTGAATTGATCGAAAGCTTTCATAAAGAAAAGGCAGTTTACGCTCGTTAT  
CTTTTTGAAGGAATGCGTTATCTTTTCGGTTTTTTCATATTTATCGGTTACTTTTCTTTTGATAAATAAGGCATAG  
>Cluster\_7864  
ATGATAAGAAAAGAAGCGGCCCTTTCATTAATTGAAGTAATGATGCGCTCCTTTTTTTTTTCGATTGTTTCTCTTCTGT  
ATATAACTATTACACAGGAGCGCAGAACCAATATATAAATAATGTCTCTGCTGTTATGTGCAGATATGCTGATGCTC  
TTAGCTACTATTTACAGGATAGCACAGCAACCAATGGTAACGGTAGTGTATCATTTACTCTGGTTGCTTCTGGATAT  
TTGCCACCAATGCAAGAAACGCTCTGGTGTGGAGAATAAGAAATAAAAATGATGTCGATAAGAATAAGAATGGTCTGAT  
AGCATTATATGGTGGAGAGTATTATTCACTTACCTCTGAGAACAATAAAAAAATTTCTGGGGATTCGTGGTGCATCTGCTA  
AAGATAATAAAAATCATATCTGCAGGTGGGTATTATTCACTTGCCTGTATCTGACTTTACAGGTTTTCGCACTGTTAATTTA  
AGAGGATTAATGCTCATTCTCCATTCAGACATCAGGCAAAAATTTGTGACAGAGGTGGATATGATTTTTGA  
>Cluster\_9552  
ATGGCAAAGTACAACGAAAAAGAGCTGGCGGATACGAGCAAGTTTTTAAGTTTTGTCCCTCCGACACAAAACCGGAGGCGAT  
TGGTATCGTACTGGACCGTGAAGGATGGGCGGATATCGATAAGCTCATACTTTGTGCCAAAAAGCGGCAAGCGGTTAA  
CCCGTGCATTTGCTGGATACTGTGGTTGCCACCAGCGATAAAAAGCGTTTATAGTTATTCAGTGTATGGTGGTGCATCCCG  
CGGTTTCAGGGGCTCGACTTCGCAGGTTCGCTATTTCTTTGCCGAAAAACACCGCCACAGTTTCTTACCACGGTAC  
GGCAAGCCGTTTTCTTTCAGGAGATAAAAAAACAGGGGCTGATTGCAAGGTGAGCGCTCATTACGTACATCTCTCTGCTGATG  
AAGCAACGGCACGCAAGTGGGAGCAGACACGGATCGCCGTTATTTTAAACCGTCAAAGCACAGGAAATGGCGAAACGA  
GGCTCCCTTTCTGGCAAGCGGAAAAACGGGCTCGGCTGACATCAACGGTTGCGGTTGAGTTTTCTTGGTGGTAA  
>Cluster\_17461  
ATGAACAAGTGAAGAAATATCAACGATCAGGGTGCACAACTTCTGTGGCGGTTGTCTGGTGTGGTGCATTC  
AGCACTGGCAGCTAATAATTTGCATTTTACGGCAACCTGATGAGCAAACTGTACTCCGGTGAACAGGCTGGAACGT  
TGGCAGAGGTACAGTTTGTGATATCAGCTACAAGATTTGATGGTGCAGGTCAGTCCGATCGTGTACCGGTTGGTTTTT  
CGCTGAAAAGATTGCCATGGCCAGCGCAGTACAGCTAAAAGTTACTCTGACCGGAACAGAACAGCAGTGGCAGCCGG  
ATTCCTCGCTCTGGATGGTACCTCCGGCGCACAGGGCTAGGCATTGGTATGGAACTACTGATGGTACTGCTGTGCTA  
TTAATAACACGACGGGAGTGACCTTTGTGCTGAATGATGGCAATAACAGTCTTAAATTTAGAGCATGGTTACAGGCAAAA  
GAGGGCGTGATGTAACACTGGTGTATTTACCGCCAGTTAACCGCAACGTTTGGATATATTTAA  
>Cluster\_3116  
ATGCCGGAACAGCGTACCACATGTTGTTCCGCCACCATGTGGAATACCGGGATCCGTATCCGGTGAAGCCCGGACACTCAC  
CCCGGAATCCTTCGACCTGGATGGTCTGCGCCCTTTTGTGCGGGTGTCTGTCGGAGAAAGTGCAGCTGGTCCGCTGACGG  
ATGTCAGTTTGTGCGTCAAGTGGAGAGCTGGATGGTACCACCCGCCCCCGCGGGAGCCGTTATGGCCGGTCCAG  
GATGAGACAATCGCAACTGGCTGAAACAAGCGTGAAGCGGGTGAAGCTGATGGCGTGCATTTTTTCGATTTCCGGTCC  
ACCACATACCTTCCGGCACAGCTATATCATGCACATGCTCTATCACCGCCAGCCCGGAAGGTTATTCAGGGCTGGCCG  
GTCACAAGGATCCCGCTCGATGGAGGTATATACCGGGTGTTCGCGCTGGACATGGCCGCCACACTGGCTGTGCCGTT  
ACCGGTGACGGGATGATGCCCGCAGATCCTGCGGACACTCCCCCTCTGACGTGA  
>Cluster\_40142  
ATGAAGCAGTTTCTGATTTTTTACCCTGGTGTCTTTTTTCGCGTTTTACAAGATTTATGACATCTATGCGGCTACTGC  
GGCGCTCATCTGCCACCGCGATTTGTGCTTATATATAGCTGGTTCGCTTTTCGTAAGGTTGAGAAGATGGCCCTGATCA  
CTTTTGTCTGTTGGTCTGCTTCTCGTGGCTTACGCTGTCTTCCCAATGATGAGTTTATTAATGGAAGTTACTGTCT  
ATTTATGCCCTGTTTGGCGGTGCCCTGTAGTCAAGCAATGGGTGATGAAAAAGCCGCTAATTCAGCGGATGTTGGGTA  
AGAACTACCCTGCCGAATCGGTATGGTCAAGCTGAATCTGGCCTGGGCTGTTTTCTTTATCCTTTGCGGTCTGGCAA  
ACATCTACATCGCATTTCTGGCTGCCGCAAAATATTTGGGTCAACTTTAAAGTCTTTGGCTGACCGCCCTTACCTTAAT  
TTCACATTTGTTAAGCGGTATCTATATCTACCGCCACATGCCGAGGAAGATAAATCCTAA  
>Cluster\_59063  
ATGCCATTTGCTTGTATTTCTTCAATTTTCATAAAGCTTGGTTTTGGGAGAAGGCTCTGCATTACCTGTGGTGTCCCGGT  
TCCGTGGCCTTACGCCACTCCGCCAACAGGCTGGCTGAAATGCAATGGTGCAGCTTTTTCTGCTGAGAATACCCGGAAC  
TGGCAAAGGCTTATCCGACAAAATAAATTTGCTGATTTACGTGGTGGTGGTATTTATTCGTGGCTGGGATGACGGCGGGGAT  
GATACAGGTCGCTCTATTTTTAAGTATTCAGGGGTATGCAACGGAGGATCATGCTCATGGATTACCGTCAAGATCCACGAT  
TGTGACTGATGCAACGATTAATTTCTATTTTATGATAAATAGTGGCAATAGTGGCACTGACATTTATCAAAAGAGGAAACA  
CAAACGATGCCGATTACCAGCCCGGATTTATGGAACCTTTAAACATATAAACAATCAGTGGATGGTTTAGGTGCCGCA  
GCCTCAGAAACCGCTCCCGGTAATATGCAATTTAACTATATCTGAGGGCAGCCTGA  
>Cluster\_21849  
ATGACGTATCAACAGCTGGACGCATTTGCTGTTTTGAAAAGGATTTTGGGTTGGGTTGATTTTTATACCTGCATTGATCTC  
TACATTTGATTTCTTGTGAAATTTATGAATACCCGGCAGGAAACAGGAAGGCATTAATGCGGTCATGCTCGACTTTA  
CTCATGTCATGATCGATATGATGACGGCAATACCGCTTTTTTGAATGTTTCTGTTGATCAACTCTCCGACCGCAATTTT  
AATGGTGGCGTGAACGTTATGTTCTGGGTGATTTTCATCTGATTTTTGTCGGACTGGCGTTGCAGGATTCGGAGCCCG  
GATGAGTCCGACGCGCTTCTTTCGGGAAAGGTTTGAAGATCAACTCATTTGGAAGAAAGCAGGAAAGGAGGGG  
TAACCGTGAACAAATAGTCAAGTATGTTGTTCCGCACTACTATTTTCTGCAAGTTTTCTCGCTGTATATCTCTG  
CCGTTATTTGATTTGTCAGGTTATGTTCTTTCTCTGCTTGGGTTATTTAA  
>Cluster\_51154  
ATGAAGATCATAAATACAAAAATGAAGATGTAATAATCATTAACCAATTTATCATGAAGATGAAAGAGGATTTTTTAT  
GGAGATTTGGAATCAGAAAGTTTTTAATGAAGTAATTTGGGAAAACAATCTTTGTGCAGGACAATCACTCGAAATCATATA  
AAGGTACTCTTAGGGGTTACACTTTCAAACAGTAATCCGCAAGGAAAATAGTAAGAGTAATAAATGGAGAAGTGT  
GATGTTGTTGTTGATTTGAGACATCAGTCAAAGACTTTTGGAAAATGGGTAGGAGTTTATTTATCGTCTGTGAATAATTA  
TCAACTTTGGATTCTGAAGGGTTTGCACATGGTTTCTATGTAGTGAGTGACCATGCGGAGTTTGTTTATAAATGTACAG  
ACTATTATAATCCTTACTCGCAACAGACTGTCTATGGATGATCTGAGTTGGGTATTCATGCCCCATTAGCAACTGCT  
CCAATTTTATCGGAGAAGGATAAGTCAAGTGTAGCTTTAAAAATTTGAAAGGCTATTTTAA  
>Cluster\_9432  
ATGAGTGCCAATGAAAACAACCTGATTTGGATCGATCTTGAGATGACCGGTCTGGATCCCGAGCGGATCGCATTTGTA  
GATGCCACGCTGGTACCAGTGCACCTGAATATTCTGGCAGAAGGCCGACCAATTGCAGTACACCAAGTCTGATGAAC  
AGCTGGCGCTGATGGATGACTGGAACGTCGCACCCATACCGCCAGCGGGCTGGTAGAGCGGTGAAAGCGAGCACGATG  
GGCGATCGGGAAGCTGAACCTGGCAACGCTCGAATTTTTTAAACAGTGGGTGCCGCGGAAAAATCGCCGATTTGCGGTA  
CAGCATCGGTCAGGACCGTCTGTTCTGTTTAAATACATGCCCCGAGCTGGAAGCCCTACTTCCACTACCGTTATCTCGATG  
TCAGCACCTTGAAGAGCTGGCGCGCTGGAAGCCGAAAAATCTGGATGGTTTTTCAAGAGCGGGGACGCATCAGGGC  
ATGGATGATATCCGTGAATCGGTGGCGGAGCTGGCTTACTACCGGAGCATTTTATCAAGCTGTA  
>Cluster\_20471  
ATGAATACTAACGTTTTTTCGACTGCTCTGCTGGGAAGCCTGTTGAGCTTTAGCGCTGTGTGCAGAAAGCGAAGTGGC  
ACAGATGAAACACAGCGTCAAGCAGCTGAACAGGAGATGACGCAACTCAATAAAGAAACGGTCAAAATCACTCAGCAAA  
ACAGGCTGAATGCAAAATCCAGCAGTGGGGTTTACCTTCTGCTGGAGCGAAAACACAGCAAGACTGGAAGCCAGATC

GGTACTTTACGTATGTCGCTGGTGAATATTACGCCGTGATACAGATGGCACCACCTGACGCTACGTATTCAGGGCGAGTC  
GAATGATCCCTTGGCCGCATTCAGCGGAACTGTTGAATATGGGCAAAATTCAGGGAAACAATAGACAACCTTTCAGGAAATCA  
ATGTGCAGAAATCAATTGATTAACGCCCTGCCAGCGCTCTGCCCCAGCGATGTTGATATTCGGTTACAGTTAAAGGGT  
ATGTCTGTGGATCAGTTAGGCTTTGTACGTATCCACGACATTCACCTGTTATGCAGTAA  
>Cluster\_62547  
ATGAATACCGCATTTATCCCCGCTGTCATCTCAGCCTGAACTTTTTTCCACTGGCGGTTATGGCTCAACATGATTACCTGCT  
TACCGCGACATCCGGATTAAACACCTATGCTCAACGGACCATCCGACGCGCTACCAATCTGCTGGATAAATATCTGCGCC  
AGCCCGGTATATCCTTTACTCAAGTACTGCTGCCCGTACTGGCTTCGGTTACAGCTGGCAGGACAAGAACGGGAAGTG  
TTTTATGGTGTCTATCTCGATAAACCAGCATCGTTTACTGGAGAGTGAACCGCTATTTGCCGGTTCGATTAAACCATGTACA  
GGTCCATCCCCGTGAGGTAGTGAATCAGCGCTTCGTTTCAATGCTGCGGCGGTTGTGTTGGCGCATAACCATCCATCCG  
GTGATCCGGAGCCAGCCAAATGTGACCGCAACATACGGGCAGGCTTAAAGAAGCGCTGGCACGTTGATGTGAACACT  
CTCGATCATCTGGTTATCGGTTCCAGATGGAATGTGTCTGTTGAGAGCGAGGCTGGATATGA  
>Cluster\_15804  
ATGAAAGTGGTGCGCATCAGTATGACACGGTGGACGCACCTTTGCTGGCGTCATTACGGGGCCACGCAGGGTGTACGGA  
GCAGGTACTGAAGCAAAATCCGGGGCTTCCGCAATACGCCCTTTTTTACCTCACGGGCTGCAGGTGGAGCTGCCGGACA  
TCCGACAACCACCCTGCAGACCGTCCAGCTATGGGACTGA  
>Cluster\_49572  
ATGGGTGAGATTAGTATTACCAACTGCTGGTAGTTGCGGCGCTGGTCTGTTCTGCTGTTTGGGACTAAGAAGTTACGTAC  
GCTGGGCGGAGACCTTGGAGCGGCATTAAGGGTTCAAGAAGCGCATGAATGATGACGATGCTGCGGCGAAAAAAGGCG  
CAGACGTTGATCTTCAGGCTGAAAAGCTCTCATAAAGAGTGA  
>Cluster\_37352  
ATGGCAATCCGAAAACGTTTTTATGCGGGCGCAAAATGCCCGGCTGTCAGGCGCAGGATTCAATGGCGATGTGGCGGA  
AAATAATATTGATATTGTTGAATGTGTTAAGTGCAGCATCAGATGCGAGAAGCAGACAAGAAGCCCGCATCACGTT  
GCAAAGATGAGCAAGTATCGGGATTTTTCATCCGGACTAG  
>Cluster\_26266  
ATGAGCAGCTTATTTTTAAACCGAAGATGAATTGCTAATATTAACGGGCTGCAAAATATGCAAGCCACCAGCGAAAATGGTT  
AATGGAAAACGGGCTTCCGTTCTATACCAATCGTAGTGGCAAACCGATTGTCAGCCGGATCTATTTACTGCAATAAAA  
CTTTACCACCACGCGAGGTAGAGCCGAATTTGGTGCAGTCTGA  
>Cluster\_61905  
ATGAATATATCATATGTTGAATAGCAACAAAACGACATCTTTACTGTTGAGCTAGATGCACTAAAATAAAGATATCTC  
TTATGCCAAAAGATTTCTTTTTATACATAGAAAACACAGTTAAAAATGCAAAAAGATTTTTTAGACCTGGAGAAGAAGTATC  
AAGTTCTATTGCAAGTAAAGTTTTTCCAGCATTATTGATTTAG  
>Cluster\_727  
ATGAATAAAGAACAATCTGCTGATGATCCCTCCGTTGATCTGATTCGTTAATAAATATGCTTAAATAGCACCATTCTAT  
GAGTTACCCTGATGTTGTAATTCATGTATAGAACATAAAGGTGCTCTGGAAGCATTACAGGCAATTGAGGCAGCGTTGG  
TGAAGCACGATAAATAATGAAGGATTATTCCTGGTGGTTGACTGA  
>Cluster\_21004  
ATGCTAAAACAGCAAGATATGACAGAAACCGCCGCGCAGTCCCTTCAATTTCTTACCTGCTGACAAGTGGGTAACGCCACG  
CATGATGACGAGAACTACCGGAGTAAAGCAAGCCGCTGCCAGTTAATACTGACTCAGTTAGTCTGCGGGTCTGGCGA  
AGGATAACGCGGGTACGGGAATAAATTCAGACGCTGCCAGTAA  
>Cluster\_29431  
ATGACAGATCCACTCAAAGCCCTTTTCGGCAAGCCTGATTACTCCCATATCGTAAGGGACACCACGGCCACTATCAGCAT  
CACAGCCGCTGAAATGGCCGCTGTTTTGGAGGCTTACGACAGGGTATAGACACGCTGGACGGCACCACCAGAACGGCCG  
TGGATTCCGTTATATCGAAACTCAAGGACGAGGTATGGCCATGA  
>Cluster\_35704  
ATGCAGGTTAATGTTTTTTAATAGCGAAATTTTTCTATTCTGATCAAGATCAGCATGCTGTCGCAATGTAAAAA  
CATTGCAGAATCAGGTTAAAATCATTTAAATTTACACACGCAACAAATATTGACCTACAAAAATTACACTGGCTATTT  
TTCAGAACTGGACTATCTCACTAGTAAAAACGCTAAATAG  
>Cluster\_18912  
ATGTCTATCTATGACCCGAAATTAGCCGAGGCAACCCACAGCGGCCACCAGCCCAATGCTGACCCGTCAGGATCTTGA  
AACGGCAAAGGCACGCAATAACTTCGATCGCCAGAGTCCGCAACCTGCAGCAACTCAACGAATCAAATGCAGGTTCTGGA  
GTGAACAGAATGAGAAAGCCAAACGTTAA  
>Cluster\_11621  
ATGTACAAAAGCCAGTAAAACGACTGAAAATCAACTTTTTAGGGTGTGAGTCAAGTGTAAATCAAGTTTGTCCAGATT  
GTTCCGCTGTTGTTGCTGTTGTTGCTGTTGTTTACAGTTGTTGTCAGTTCTAAAAAATCGCAAAAAAATATATTTCTC  
TGGCTATTGGCAGTGTGGTTACGTTTTTTGTGA  
>Cluster\_53910  
ATGGCACGAACAATGCTCTATAAGCCTGGCAACATGATCACCTGTGGTCAAGTTTGTGCTGATACATCATTTGTGATGA  
CGAAGAAGTTAAATCTCACTGAAAAAAGGTTGGGTAAAAACTCTGAAGAAACCGCAACGAAGCAAAAAAGTGGCTAAGG  
CGAAGAAGATGGCGAAAACGAAGGGTGA  
>Cluster\_29499  
ATGAGCAGGAAAAGTATTGGTATAAGCAACGAGAGATATCTGAGAATAGAAAGAGCAGCGTAGATATCACAGCCAAAAC  
AGGAAAAGTCAAAAATGGTCGGAGATCGTGAATATCTGATAGATGAATATTTAAACGATGCAAAAACAGATATGATTT  
CGAAAAATGAAATTCACAAAAAATAAG  
>Cluster\_7936  
ATGTCACGCGATGAATTAAGGATGTTTTAGGTGCAATGATTCAAAATATGGATGAAGGTTTTGAAATAAAAACCGTGA  
CGGCGGATACTTCGCGTTGACCTGAGTGGGATGCTGCAAGAATTTAAAGATGGATTAAAGGCCGAAATCATCAAC  
AGTTAAAAAGCAACCTGCTGTTGATTTGGATATAGTTAA  
>Cluster\_10561  
ATGACGTTTACAGTAAAAACCATTCCTGACATGCTGTTGAGGATATGAAAAATCAGACCGAGGTAGCCAGAATACTGAA  
CTGTAGTCGCAACACGGTCAAAAAATATATTGGCGATAAAGAAGGCAACGGCACGCCGCTGCTCAACGGTGTCTTATGG  
TCCATCGTGGATGGGATAAGGGTAAAGACTCTGATGCGTGA  
>Cluster\_9793  
GTGAACAAAACAGCAACAACTGCGCTGAATATGGCGGATTTATCAAAAAGCCAGAGCTGACACTGCTTGAAAAACTGGA  
TGCTCTGGATGCCGACGAAACAGGCGGCCATGTGCGAACACTGCACGAACTCGCGGAAGAACTCCAGAACAGCATCCAG  
TTGCTTTGAGACCGAAAGTGAACAGGAACATAA  
>Cluster\_24524  
ATGAAACAAGAAATGATTATCAGCAAAGACGGGAAAACGATGATGTTAGTGTGATAAAGCTCATTAAGTTGCCGACT  
GTTGGGAGTTACTCCGAAAGTCTCGTTCTACCACTGCTCAATATTTAAATCGGCTGATGCGGTTAGTCTTGTGATG

CCCTTAAATCTAAAATTAACAACCTGAAAGGAAAAATAA  
>Cluster\_10637  
ATGAAGAAATACAGGTAACGGTAAAACCTTTTCAGGGAACAATTCGGTTCGGTGTGTTGCAACATGGCCGTGTCTGCT  
TGAAGAGGTGTTTCAGAGGTAAATGCACTGAATGTTATTACGAACATATGAAGTGAATGCCACGCATGAAGAAATTCACCG  
TTGAGTGTGTGATGAATACTGATAAATGCCGAATGGTATCCCGTGAATTACAGCCAGTGTGTTGA  
>Cluster\_995  
ATGATGGCCCGAAATATAAAAATGGCAACGGATGCGCAGAACCTGGTTACAGGCGCGGGGAGTCATGTAATGAATCATA  
TCTCGCGGTGGCGCGTCCGATTTCTGAAATCACTTACCACCGGTGGAACCTGGTAAAAACCGCGTCAAGAAATATGGAGC  
ATAAGTCCGGGTGGCCCGTTCGTATGACGGCCCGTCTTAATGGTTGCCAGATTATCTGGAGATAA  
>Cluster\_48419  
ATGACAGGCGAAAATCGTGGCCGGGAAGGCGGAAAGACAGAAAGTACCTATGCAGATACTCGTAATGATCTGATCCG  
CAGTGGCCTTGAACCTGCTGACGCAGAATGGTTTTCTTGGCAGCGGAGTCGATGCCATTGTTAAAAATGCCAATGTCCCTA  
AAGCTCATTTTTATTACTACCTTAAGAGTAAAGAGGATTATGCTGTCAACGACGGATGA  
>Cluster\_17632  
ATGATTGATGATGAAATTCGGCAGCAATTACTGCTAACAAAGCTGCGTGGAGCTTCTGTTAAACAGCTTTTTCAGAAAA  
TGGCTGTCTGAACCTCAGCGCCCTGGATTTCTGAATTACGCAACTTCCAGCAGGCCTTCAGGAACGTGGGAGTTCGTTT  
TGGCTGCGGCGCTGGATGAACATCTGCTGCTGATTGAGAACTGGTCGCAAGACGATTAA  
>Cluster\_30767  
ATGGTAAACCACCTCCCGTGGAGGTGGTGTCTGTCAGTCAGGTGTTTCGGGCTGCGGCTTTTGTGTCTCTGGTAAAG  
TGGTTACGATTTCTTTGTGTTATTCCTCTCTGCGTCTATGTCCTGGATAGCCATAAGAGTTCAGATACTGAGAAATTTA  
ATTTGGTGTCTCTCTGCGCGCGGTTGGGATCATGTCAAAGCGCAGGATTTCTGCTGAATACTGTGTAG  
>Cluster\_9579  
ATGTCGCATCTGGATGAAGTCATCGCGCGGTGGATGCGCGGATGAAGAGAGCGTCAATTGCCATATGAACGAATTTA  
AATGCCCTGAGCAATGACGCGGAGTTAAGTCGGGAAGATCCTTACCCAGCAGCAGCGTTCGCGCAGGCTATTTGCTC  
ATCACGGTCGCAAGCATAAAGAAGATATGGAAGCGCGCACGAACAGTTAACCAGGCGGCACCATCTCTGA  
>Cluster\_3661  
ATGTGGAAGCCGTTAAGAGATGAGAACCCTTTATCAATTTTGAAGATCTATGGATACACCTGTGACAGACTGGTACGAGA  
AGAGCAACCTGAGCAATGACGCGGAGTTAAGTCGGGAAGATCCTTACCCAGCAGCAGCGTTCGCGCAGGCTATTTGCTC  
AACTATTTGGAAGAAATCTGTGGATGGTTATTAAGTATCTATTTGGTGGATTAGTCAGTATTAA  
>Cluster\_25410  
ATGAAATTTATTTACCGCGCCCGGCCAGCGCGGTGACGTTAGCCGATGGCGCAGAAGTGTGCTCTGGCCAGAGCATGA  
GGTGAACCTGCCCGAAGATCTGGACTATGTGCAGACGCTGCTGGCGCTGAAGCATCTCACACCAGCGCAGTTGAACCCG  
AAGTGGTCCCTGAACCTGAACCAACCCCTGAAGGTAAAAAGAGAAGGAGACAACCAGTGGCAGCTAA  
>Cluster\_37292  
ATGAGTCGATATCAGCATACTAAAGGGCAGATAAAGGATAATGCGATAGAAGCATTACTACATGATCCCTTATTCGACA  
GCGCGTAGAGAAAAATAAGAAGGGGAAAGGCAGTTACATGCGAAAAGGAAAACATGGCAATCGGGGAACTGGGAGGCCA  
GTGGCAAGAAAGTAAATCACTTTTTTACCCTGCTCTTCTGCTTTCAGGCGCTTGTAA  
>Cluster\_67071  
ATGAATAAGGATTTTGTAGGTAGCATTGTTAACTTTATGAAAGACCAAGAAGAAATCTTTCCGAAAACATTTCTCAGTAC  
CCGTGAAATTTGCCGATGCAAGTTCGGTTGACAATATATCAGGTTGGGGAGCATCTGGACGATTCAGTCAATTCAGTGTGG  
TGGAAAAGTAAATTCGGTTCGAGAAAACCCCGGCGAGTGGAGGCTACTCTGA  
>Cluster\_50405  
ATGTCAAATACACAGAAAATTTAACAACCTGAAAAATATAACGAGTGGGTGAAAAAATCTCTGAGCAGATTTTTAAAAAT  
TACTGGCGACGAGAAATGTGGCAAAAAATGAATTTGGAACCTGGACACCTGAAGGAAACGCACCAAAATTTATGCTGGTGGG  
AGGTTGATCCGGTTGATGCTGCAATGAAGCCATGAGTTACCACAACGATTAA  
>Cluster\_50022  
ATGGACACCGTTAACGGAATGTGTTTCAGACGCACCGCTGCCAAAAATGTAATGCGAAAAATCACCGACAATATTCGA  
CATGGAGAACGGGTGCCAAATCTACTGCGCTAACCCAGCGCTGTGGCGCGCGGAATATAGCAGTGGGTAACGGAGT  
GGAATAACCTGAAATCTGTTAGAGAGGGAAGTCATGAAAAAATTAACCTTTGA  
>Cluster\_55055  
ATGTTATGTTTTTTGATTATATCACTCTCCCTTCATTCAGCTTGTCTATTTTCTCTGAAAAGAAAATAACTAT  
TCACATTTGTCAGATGTTTCACTTGTATCACAGGATTTCTATAATCTCAAAAAGTTTTAATGATGGATATGCTCGGAG  
TTGGAGATGCAATTAATATTAATAACAAATAAAAAATATCCGGCAGGTATGCTAA  
>Cluster\_5177  
ATGAAGCAGCGTATTACAGTGACAGTTGACAGCGACAGCTATCAATTGCTCAAGGCATATGATGTCAATATCTCCGGTCT  
GGTAAGCACAACCATGCAGAATGAAGCCGCTGCTGCGTGGCAACGCTGGAAGTGGAAAAATCAGGAAGGGATGGTTG  
AGGTGCGCCGGTTTTATTGAAATGAACGGCTTTTTTGGCGATGAGAACAGGGACTGGTGA  
>Cluster\_51672  
ATGGCACTCAACTGTCCAACCTGCAAAACCCCTCTCGAACGCAATGGCGAGACTGCTCACTGTGCAACTTGGCACAAGA  
CTTTACCGTCCAGGCTTTGCCCTGAGTGTATCAGGCGTTACAAGTGTAAAAGCTTGTGGTGTCTGTGGATTATTTCT  
GCCAATGCGGACCGTTTTAATATCTAAAAACCGGTTGAATTTATTTATGCTTAA  
>Cluster\_60718  
ATGAAAAAATGGGCGAGTAATAATTTCTGCACTCGGACTGGCGTTGCTGTTTCCGGGTGTTCCAGTGAATACGTCATGGC  
GACCAAGATGGCCGATGATTTTGACCGATGGAAAACCTGAAATGATGATGATACCGGCTGGTGAATATCACGATC  
AGCAAGGTAACGCGATGCAAAATTAACCGTATGATGTTTCGCAAAATATTGAACGTTAA  
>Cluster\_20007  
ATGTTATTTACCATAACATCCGTTGCCCGACCCCGGACAGCTTCGCGCGAACGGGGCGGAGTCAGCCAAAACCA  
ACAACAAATCACCGAAAAGCTACCGGATCGCGCTGATAAAATTTTAA  
>Cluster\_9883  
ATGCGTCAGTTTTTATCAGCACTATTTTACCAGCAGCGAAGTGTGCTGGTTGCGTTGGTTAAGCGTCCACAAACGATT  
AACCATGCTTGAAGGACTGATGCAAGTGGATGACCGCAATTTCTGAAAGTTGA  
>Cluster\_35766  
ATGTACAGAAAATTCAGTATGAATGTTTTCGGCCGCTCCACGCTGATGATGCGATAAAAGTGAATGCCCCTTGTGGTTCT  
GATAACCATCAGTCCGTTGGTGTATCTTTCTGTCTGTTAA  
>Cluster\_17761  
ATGTCCAAGTGGCAGCTGCTGTTTACTCCATGATAATCGGGTTGGCGTGGCTGCAGGAATCAGGGTTTACATCGCCTG  
GAAATCATTAAATTAATCTGGCATGGAGCGCTATCCGTGGCTAA  
>Cluster\_17740  
ATGATTGTTATAATCTTGTGTTGTTGGCACTTGTGCGCTTGTGTAATGAACCGTAAATGTATCATGAAGATGGGGA

ATTTGCCGTGCGAGTTGTTTTAATATTATCTGGTATAGCAGGGTACATAGGTTTGTCTATAG  
>Cluster\_15238  
ATGAAAGTCTTAACTCTCTGCGTACCGCAAAGAACGCCATCCAGACTGTCAGATTGTGAAGCGAAAAGGACGGCTGTA  
TGTGATTTGTAATACTAATCCACGTTTTAAGGCCGTTCCAGGGTCGTAAGAAAAACGTTGA  
>Cluster\_8147  
ATGTTGCAACGTAACCTTTACGTAAATTAACATGGTTAACATTTATGCCACTATTGTTTGTAAATTCATATTTTCGTAAT  
GCTTCTGAATTTTTCGTGTGATGGTTTTAAATACTATGGTGTACTCTGTA  
>Cluster\_24667  
ATGTCAACACGACAGATCGTACAGCTTGTGATTTCTTGTCAAAGGCTGGGAAACCAGAATCCCGGCAATGACGTTTAC  
TGAGTGGGATCAATTCGGTGGTGGTTAAACTACCTGCAAGGGTATGAAATGTTTTAA  
>Cluster\_31469  
ATGAGTATATTTATCTCATGGCTTGTCTGATTATTTCCGGTGGTCTGCGCCATTGGGATTATGCGAATTTAATTCAGT  
AAAAAAGATTGAACGCTTTTTCACTGAAGAATAA  
>Cluster\_14162  
ATGAACTACGAGGAAGGGAACAACATTCATACTGAAATGAAATTTTTTCACTCACTATTTTATTTTTAAAAACAACAA  
TTTTATATTGA  
>Cluster\_61835  
ATGGTTTACTCTTATACCGAGAAAAACGTAATTCGTAAGGATTTTGGTAAACGTCACAAAGTTCTGGATGTACCTTATCT  
CCTTTCTATCCAGCTTGACTCGTTTCAGAAATTTATCGAGCAAGATCCGTAAGGGCAGTATGGTCTGGAAAGCTGCTTTCC  
GTTCCGTATTCGGATTCAGAGCTACAGCGGTAATTCGAGCTGCAATACGTCAGTACCGCTTGGCGAACCGGTGTTT  
GACGTCAGGAATGTCAAATCCGTTGGCGTGACCTATTCCGACCCGCTGCGCGTTAAACTGCGTCTGGTGTACTATGAGCG  
CGAAGCGCGGAAGGCACCGTAAAGACATTAAGAACAAGAAGTCTACATGGGCGAAATTCGCTCATGACAGACAACG  
GTACCTTTTGTATCAACGCTACTGAGCGTGTATTCGTTTCCAGCTGCACCGTAGTCCGGGCGTCTTCTTTGACTCCGAC  
AAAGGTCAACTCCGCTCTTCGGGTAAGGTGTATTAACGCGGTATCACTCCCTACCCTGGTTCCTGGTTCCTGGTTCGA  
ATTCGATCCGAAGGACAACCTGTTCTGATCGATCGACCGTGCCTGCGTAAACTGCTGCGACCATTTCTGCGGCCCTGA  
ACTACACCACAGAGCAGATCCTCGACCTGTTCTTTGAAAAAGTTATCTTTGAAATCCGTTGATAACAAGCTGCAGATGGAA  
CTGGTGCCGGAACGCTGCGTGGTGAACCCGCTCTTTTGACATCGAAGCTAACGGTAAAGTGTACGTAGAAAAAGGCCG  
CCGTATCACTGCGGCCCACTTCGCCGATTCGAAAAAGCAGCTCAAACCTGATCGAAGTCCCGGTTGAGTACATCGCAG  
GTAAAGTGGTGTGTAAGACTATATTGATGAGTCTACCGGCGAGCTGATCTGCGCAGCGAACATGGAGCTGAGCCTGGAT  
CTGCTGGCTAAGCTGAGCCAGTCTGGTCAACAAGCGTATCGAAACGCTGTTACCAACGATCTGGATCAAGGCCATATAT  
CTCTGAAACCTTACGTGTCGACCAACTAACGACCGTCTGAGCGCACTGGTAGAAATCTACCGCATGATGCGCCCTGGCG  
AGCCCGGACTCGTGAAGCAGCTGAAAGCTGTTCCGAGAACCTGTTCTTCTCCGAAAGCCGTTATGACTGTGCTGCGGTT  
GGTGTATGAAGTTCAACCGTCTCTGCTGCGGGAAGAAATCGAAGGTTCCGGTATCCGAGCAAGACGACATCATTGA  
TGTATGAAAAAGCTCATCGATATCCGTAAACGGTAAAGCGAAGCTCGATGATATCGACCACTCCGCAACCGTCTGATCC  
GTTCCGTTGGCGAAATGGCGGAAACCAAGTTCCGCGTTGGCCTGGTACGTTGATAGCGGTGCGGTGAAAGAGCGTCTGTCT  
CTGGCGATCTGGATACCTGATGCCACAGTATGATCAACGCAAGCCGATTTCCGAGCAGTGAAGAGTTTCTCCG  
TTCAGCCAGCTGTCTCAGTTTATGGACCAGAACAACCCGCTGTCTGAGATTACGCACAACGTCGTATCTCCGCACTCG  
GCCAGGCGCTGACCCGTTCAACGCTGCAGGCTTCGAAGTTCGAGACGTACACCCGACTCACTACGGTCCGTTATGTTCA  
ATCGAAACCTGAGGTCGAACATCGGTTGATCAACTCTGTCCTGTCGTCACGACAGACTAACGAATACCGGTTCCCT  
TGAGACTCCGATCGTAAAGTGAACGACCGTGTGTAACCTGACGAAATTCACCTACCTGTCTGCTATCGAAGAAGGCAACT  
ACGTTATCGCCAGGCGAACTCCAACTTGGATGAAGAAGGCCACTTCGTAGAAGACCTGGTAACTTCCGCTAGCAAAGGC  
GAATCCAGTCTGTTGACCGCGACAGGTTGACTACATGGACGTATCCACCCAGCAGGTTGGTATCCGTCGGTCCGCTCCCT  
GATCCCGTTCTGTAACAGCATGACGCCAACCGTGCATTTGATGGTGGCAACATGCAACGTCAGGCGGTTCCGACTCTG  
CGCTGATAAGCCGCTGGTGGTACTGGTATGGAACGTTGCTGTTGCGGTTGACTCCGTTGTAACGCGGTAGCTAAACGTT  
GGTGGTGTGTTAGTACGTTGGATGCTTCCCGTATCGTTATCAAAGTTAACGAAGACGAGATGTTACCGGGTGAAGCAGG  
TATCGACATCTACAACCTGACCAAAATACACCCGTTCTAACAGAACACCTGTATCAACAGATGCCGTGTGTCTCTGG  
GTGAACCGGTTGAACGTTGCGGACGCTGCTGGCAGACGGTCCGTTCCACCGACTCCGTTGAACTGGCGCTTGGTCAACATG  
CGCGTAGCGTTATGCGCGTGAATGGTTACAACCTCGAAGACTCCATCCTCGTATCCGAGCGTGTGTTTCAAGAACCG  
TTTCAACCATCCACATTCAGGAACCTGCGGTGTGTGCTCCCGTACACCAAGCTGGGTCCGGAAGAGATCACCCGCTGACA  
TCCCGAACGTTGGGTGAAGCTGCGCTCTCCAACCTGGATGAATCCGGTATCGTTTACATTTGGTGGGAAAGTGAACCGGTTGGC  
GACATTTCTGGTTGGTAAAGTGAACCGGAAAGGTTGAACCTGAGCTGACCCGAGAAAGAAAACTGCTGCGGTGATCTCCG  
TGAGAAAGCCTCTGACGTTAAAGACTCTTCTCTGCGGTACCAAAACGGTGTATCCGGTACGGTTATCGACGTTACAGTCT  
TTACTCGCGATGGCGTAGAAAAAGACAAACGTTGCGCTGGAATCGAAGAAATGCAAGCTCAAACAGGCGAAGAAAGACCTG  
TCTGAAGAACTGCAGATCCTCGAAGCGGCTGTTTACGCGTATCCGTTGCTGTGCTGGTAGCCGTTGGGCTTGAAGCTGA  
AAGCTCGAACAACCTGCGCGCGATCGCTGGCTGGAGCTGAGCTGACAGACGAAGAGAAACAAAATCAGCTGGAACACG  
TGGCTGAGCAGTATGACGAACGAAACAGGTTGAGAGAAAGAACTCGAAGCGAAACCGCGAAAATCACCCAGGCGGAC  
GATCTGGCACCGGCGTGTGAAGATTGTTAAGGTTATCTGCGGTTAAACGCGGTTACAGCTTGGTGAACAAGATGCG  
AGTCTGCTACGTTAAACGGGTTAATTTTAAGATCAACCGGATCGAAGATATGCTTACGATGAAAAAGGCTACCGCGG  
TAGACATCGTACTGAACCCGCTGGGCGTACCGTCTCGTATGAACATCGGTGAGATCCTCGAAACCCAGCTGGGTATGGCT  
GCGAAAGGTTATCGCGGACAAAGATCAACGCCATGCTGAAACAGCAGCAAGAAAGTCCGGAACCTGCGCAATTCATCCAGG  
TGGTACGATCTGGGCGCTGACGTTCTGTCAGAAAGTTGACCTGAGTACCTTACGCGATGAAGAAGTTATGCGTCTGGCTG  
AAAACTGCGCAAAAGGTTGCAATCGCAACCGCGGTGTTTCGACGGTGCAGAAAGAACGAAATTAAGAGCTGTGAAA  
CTTGGCGACTGCGGACTTCCGGTACAGTCCGCTGTACGATGGTGCAGTGGTGAACAGTTCGAGCGTCCGGTAAACCGT  
TGGTTACATGTACATGCTGAAACTGAACCACTGGTTCGACGACAAAGATGCACGCGCGTTCACCGGTTCTTACAGCCTGG  
TTACTCAGCAGCCGCTGGGTGGTAAAGCACAGTTCGGTGGTTCAGCGTTTCGGGGAGATGGAAGTGTGGGCGTGAAGCA  
TACCGCGCAGCATAACCTCTCTGGGTGGATGAAGATTTCAGCTGAAATAATTCAGCTGAAACGCTCGTACCAAGATGATAAAA  
CATCGTGGACGCAACCATCAGATGGAGCCGGCATGCCAGAATCCTTCAACGATATTGTTGAAAGAGATTCTGTTCTGCTGG  
GTATCAACATCGAACTGGAAGACGAGTAA  
>Cluster\_14715  
ATGTCTTCAACAATAAGCGCATCAATAAAAAAATATGATCAAAACTCTTTATGTGGTCTGGGTGACAAAAATACCCCGCT  
GACCGCGGAGTTTGTGTTATTTACACAATTTTTTTCCCGCTCATGGCGACGGCACAAAATGTGGTACATGCTAAACCTC  
AGACGACAGTTTCTATCTGCCCCCTCTAATAGAAAATAATACGTGCTTACACGCTTGGTGCCTGGAATCAGCGCA  
AGCCTGTGCTGATCGATTCCGTTTCTACTGGAGGAGCTTCGCTGCTTAAATCAGTTCGGTACTTTGCTCGCGCTTTGA  
TAACGTTCCGACAGGTTGAGAGCTGGATGTTCCGCAACAACCTTGCAGAAAAGTCAATGAGCAAAAATGCGCTACCG  
CTGCAATGGCGAAAACACGCTGGAGAATCAAAATAGCCAGCACCTTCGACGAGGTTGGCACCTGCTTTCACAAGATATG  
AATAGTGAAGCAGGCGGCGGATGGCGCTGGTTGGGCGTCTTTCAGAAGCCTCAGGCGGATGACTGATTTGGTTAAATAA  
CTTTGGCACTCGAAAATCTCTGGGTGGATGAAGATTTCAGCTGAAATAATTCGCAATTCGCAATTCGATCCTGATCCGT  
GGTATGACACACCTGATTTATCTGCTTCTCAGCCAGCATAACCTTACCCGAAACAGCAGTCTGATCCAGATCAACCGGT  
TTGGGCTGGCGTCAATTTACCCCGAGCTGGATGTCAGGATCAACCTGTTTTTTGACCAGACCTGAGCGCTATCCTC

CCGCGCGGGTCTTGGCGCAGAATACTGGCGTGATTATCTGAAGTTGAGCAGCAACGCTTATATCGGCCGACTGGCTGGC  
GTAGCGCACCGGAATTGGATAAATGACTACGAAGCCCGCCGCGCAACGCTGGGATTTACGCGCGGAAGGCTGGTTACCA  
GCCTGGCCACAACCTGGGTGGAAAACCTGGTCTATGAACAATACTATGGTGATGAAGTGGCGCTGTTTGACAAGAATGATCG  
CCAAAGTAATCCCATGACTATTACCGCGGGCCCTCAACTATACCCCTTCCCGCTTCTGACTCTCAGTGGCGAACAGCGTC  
AGGCAGTCTGGAAAAGATATACCGGTTACGCTGCCAGGTTTACGCTTAACTACCCAGCAGTTCAGTCAAGAACAGCTT  
AACCCGGACGAAGTGGCCGGACGGCGAGTCTGGCCGGTAGTCTGTTATGACCTGATTGATCGCAACAACAACATCGTTCT  
GGAATATCGCAAGAAAGACTGATTCGCTGAGTCTGCTGGATCCGGTGAAGGAAAGTCTGGAGAAAATAAACCCGCTGG  
TTTCTCGCTACAGACCAAAATATGCCCTGAAAGGCTATAACATCGAAGCCGCTGCGCTGGAAGCTGCCGGAGGTAAAGTC  
AGCAGTCTGGAAAAGATATACCGGTTACGCTGCCAGGTTTACGCTTAACTAACTCAGAAAACCGGATAATACATGGTCT  
GATAGACGTTACCGCGGAGGATGTAAGAGGAACTGTACGGCATGAACAAGCATGGTCTGTTATCAGGCTCCGACAT  
TAAGCCAGAAAGATTTCTGTTATCCGTTAATCCGCTAACCTAGCTGCAGATAAAAAATCGACGACCACATTGACCGTT  
ACTGCGCACGATTCGACGGAACCTCCGGTGCAGGGGCTGGCGTGAACCCGCGAGTGAAGGCGTTGAGGATATCACCT  
GTCTGACTGACAGATAACCGGTGATGGTAGTTACACACAGATGCTGACCGCGGAACGACATCAGGTTACGTAACACTGA  
CGCCGCAAAATTAACGGTGAAGTGGGTAAGAAATCCATTGCTGTTAATATCGTCCCTGTTGCTCATCCCGGACCAT  
TCATCAATAACAATAGATAACGATATCGTATTATGCCGGAGACGACATCAAGGTTAGGGTGAAGTGAAGACGACAGCAA  
TCAACCGGTTGCATCTAAAAGAGGAAATGGTAAAAGCCGTTACTGTGAAAACAGCAAACTGGCGCCACGATTTGCT  
GGCAGCAAGACGACATCGCGGTTTATACCGCGAATTATCCCGCCATAAGCAAGGACAGCACATAAGGCAACAACCTTACG  
CTTCAACTGGAATGCTCCACTGCAATCGCATATTTATAACATTTAGGCAAAACCAGAATAAGGCTCGCGTCCGACATT  
ATCAGCGCAAAATGACGTTTACGCGGATAAAAAGACATTTAATACCTCAGCATCAACATCACTGATGAGAGTGATA  
ATCCCTGACAAATCATCAGGTCACCTTTAAGAATGAAAAGGAAGCGGGGATTTGTTGAACCGCGCAGCAAAATGACG  
GATGCATATGGTGTGGCCAAATCAACATGGAAGTTCAGGTTGCGGAAGAAAATACGATTAGCGCCACCTGCCAAATGG  
TTTCTCACACGGATAATTCGCAAAATTCGTTAGCGATTGAGTACGCCAAAATCAAACAACCTGGTTGCCGATCCAGATA  
CCATTATTTCTGGCAACAGCCAGGCGAGTACTCTGACCGCCACCGTACAGACTTTCAATAACAACCCATTAAGAGATG  
AAAGTGAATTTTGGCCGAACTTCAGGTTAGTGAAGCAACAGCAGCCGCAACAGACAGTCCCGGTTTGGTGGCAGT  
GCACCTGACAGTTCAAAAGCTGGTAGCTATTCGCTGATGCTCGCTTGAGGCGGATAAAAAATTTACCAGTCCGTTCA  
CGATCACCGTGGTCCCAACAGGGAACAATCGGTAATGACCTTAAATGCGGGTCCAGGAGTGGATCGCTAACAAATACA  
AATACCGTTATCTGACAGCCAGTGTGAAAAGATGTTTATGGACACCCGTTGCCGGATGAGGATGTGAAATTTACCTTGGC  
AGCCTCTATGACCGGGAACCTTCAGGTTAGTGAAGCAACAGCAGCCGCAACAGACAGTCCCGGTTTGGTGGCAGT  
GTGGCAGAAAAGCGGGTGAAGTTACAGTTACGGCGAGCTGACGAGAAAATAATACCGTTGCTCATCAGCAAGTCACTTTT  
ATTTGGGATACAAACAGCGCGCAGCTCCAGCGCTGACTGCGCTTAAATAACCATTTGTTGCGGGTAAAGTACGGGGAG  
TACCCTGACTGCAACGATCTGGAGCTTACCAAAATCCGTTAAAGACCAGCTGGTCACTTTCCAGAGTAACGATGTCA  
CTCTAAGTGAACAGAAAGTCAACCAATAACCTGGGTCAGCGGACGGTAAACAATGACCAAGCAATATTGCCGGCAACAT  
AACGTCGTTGTAACCGGAAAGCGCAAGCTCCGATAATAAAACGTTTATGTTTATCAGTGTGCGGATGAAAGTTCGGC  
GAAGGTAATAAGTATAACCGGAGCCGAAAACGATAACCGGTTGGCGAAAACATCAGCTACGGATACCTGTCAGGAGC  
CGTTTAAACAATGTAATAGCGGGTCAACCGCTCAGATTAAGTGGCAGCCAACAGCTAACATTCAGTATAGGCGATACGGCT  
TACACTGATAATAACCGTTACCGCTACGTTAACCTTCTCAGCACCCAGCTGGGGTTTATCAGGTGACGGCAACGATGGA  
CAATAACAGTAGTAGTAAGTTGACGTGAATGTGGCAAAATGGCAAGCTCGAGTTAACATCATCGAAGCCAGAAACCAGG  
TCCATAACAGTAGTAAGTATTACGCTGACCGCAACCGCGAGAAAATGCTCGGGATGAATTAATGCCTGGACAAATTTACCC  
TTTAGCGTAACGCTGAAGTGCACAGCTAAGCAATACAGGGGAAGTCTTACTGACCAAGTATGGTCAAGGCAAAAGTAC  
GCTGACCGTAGCAAAAGTGAATGTCTATACCGTTACCGCCACAATGGGCAAAAGATGTTCCCGTTACAGCCAGGTAACCG  
TTGCGGTTAAGGCAGATGCTAAAACGGCACATGTTGTGAGCGTCTGGCTCTCTGACACCATCACCGCCAGCGCGTT  
GATAGCAGCACCATCACTTACAGGATGAAAGATGATTACGGATTTCCCGGTTGAAGGTGTCGATGTTGCTTACGCTTAGA  
ACCAAAAGTTCGCCCGTAGTTAATATTCCAACCTACGCTACCGATCAGTCCGGCAAGTACAGGCGCAATAACAGGTA  
CATTTGGCAGAAACCTTAACGGTCAATGTGCAAGTTCTTGGTACAGCAACCAATCCGCAACCAATTACCTTGATTGCCGAC  
ACGGCGGATGAAAGTAAAGTCAATTTTGAATCCGACGTTGGCACTCTGATGGCTGACTACCAGCATAGCGGAAACTTAC  
GCTAACATTTGAAGCAAGTACGGTAACCCGATAGTGACGCTCTGATCATCTGGAATTTGTCCAGTCAAGTCCCTTCGTTGA  
ACTTTCTCAAGTTGAGTGAATTTGATTACAGCCAAAGAAATTAAGCGAGTACACCGTACTGCTGCAATAAAGCGCTGTTCCCG  
GGAACAGCGACTCTCATTTCCATGCTGAACGGGTTTATCAGGCAAACTTAAAGCGTATCGCTGAATCTCATCCGCTCGAT  
AAAAGAAATGTCGGTCACTGCTGCAAAACAACATACCTTCTCCACGGCTAAATTTCCGAGCGAAGGTTTTGCAGGAG  
CGTATTACACACTCAACAATGATAACTTTGAAGCGGTTAAAACCGTTGATGATTATATGTTTTCAAGTTCACAGAGTTGG  
GTGTCGGTTCGACTGCTTACGGTAAGGTTTCTTTTCGAAAATACGGCGATCAAACGTCAGTCAACAATAAGCGCTGTTCCCG  
ACAAGGAGGTACAACCTACCAGACCTTAATTAAGCTGAAAGGCTGGTGGGTAATAATGGAATCAAACCAATATTGGC  
TAGCTGCCAATGCCCTCTGCTCATGCAAAAATGATGGATATAAATCTTCTGCGATCACACATTTGACGCTGCGGAAAAC  
CAACGCACGAGGATCGCTCTATGGTGAATGGGGAACTTGGAGCGTTTCCAGTAATTCGCAATTTACACAAGGTGC  
TTACTGGCAAAATGAATCGATGATTACAAATAGCATTACTATGTGCAGATGCTAACCGGATGACCGGAAGGACGCGT  
ATTCCAGCCCCAACTGACCGCTGCCGTAATCACTTTAA

>Cluster\_50023

ATGACCATCTACATCACTGAGCTAATAACAGGGGCTATTTATACAGTAGCCCTTTTTTATTGGATTAGAACGAGGGGGA  
TCCTGATGGACACCGTTAA

>Cluster\_875

ATGGAAAATAATAACCGCTTAATGCCTCATATAAGGCGGACAACCCATATCATGAAGTTGCCCATCGTAATAGTTTTGA  
CTTTCATTTCTTTAATGCCGCTAG

>Cluster\_6887

ATGAGCACCGACCTTAAATTTTCACTGGTAACAACGATTTATCGTCTCGGTTTATGATCGTAGCCGTTGGCTTACTGCCG  
GCTGCACTGA

>Cluster\_59871

ATGATCGTAACCATAGCAACAGAAATGCTGGTGGTGAACCGCTGAAGCATGGACTGTTGGTGCAAAAATATGATGCTAAT  
AATGTGATTTAG

>Cluster\_40683

ATGCATGATTTTTTTCACAGCAATATTGAATCTCATCGTTTTAGCTCGTTGGGCTTTGCGGATTTTATTGTGCTATTGGT  
GTTTTGCGTTATGAATCGAGTCAATACAAAAAGACAAAGCTTACAATTCGACTTAACTTCTTCTGCTGTGAGATAGAGA  
TTTCAATAAATAAATAG

>Cluster\_26148

ATGGCTGATTTTTGTTCAACTAAATACAACGCTCGGTTTTGAAGAAATGGCATGAACTGTTAATGGACTATGCAGAGTTACG  
TGGTGGCAGTGTCTGATGCTGAAGCATGGCGTATGATTATGAAGCAGGAAAACCTCCGGTCAAGCATATTGTGATG  
AGTGGGGCGATGAATGA

>Cluster\_2733

ATGACAACATCAAAATATGACAACCTCACAGCAAAGCAAGCAACGCAAGCAGAGCAATCCATGGCTGATTATGAAAGCAG  
TATAATGCTTGAAGTACCTTTTGGTGGATTGGATTACATGACAGAAAGCGTTAAAGAACCTGAGTTGGACAATTTTAAAC



AGAAAAAATAA  
>Cluster\_47532  
ATGCATCCGCTTACTCATCCACTGCCTGTACGGCGCATGCCCTATTGTTAGATAATGGCATTCTACTCCGGCCAGAGC  
ATCAGTTAACGGCCACCACCCGTACTTCTGACCAGGACTTTGAAAGCGTTATGCGCATTACCAGAGTGAAAAATGCCTCAG  
AGCTAACTGGATAA  
>Cluster\_34012  
ATGTACGAGATTATATTAATTCGGTAATGTGGTAACAGGAGAGGAAGAAAACCTCCACACGATACGTAAATATAAATC  
AAAAGGAAAAGCGGCAAGGGACGCTATCAGGTATACGGAAGAAATGCGCCGAAATATCAATTGCCAGAAAGAACTCA  
CAGCATCAGTGGTAAAGGTGAAGAAATGA  
>Cluster\_50968  
ATGGAAGAAAAGAACAGAACATAACACATGAAAAAGTCAGAGTGTGTTGACCATGAAAATGGGAAGGTAATTCACCTC  
AAAACATCTGTTGGATAATGAATTTGTTGGCTGCACGGATACATTTTTGTTGGATGGTAAAACGAGCGGGTTACACTATTA  
TTCCACCAGCAAAGGAGCAACATTATGA  
>Cluster\_6252  
ATGGATTTATCACCAGAAGACGCAAAAGTTTTACGAGAAGTGCACACCGTATGCTCAGAGAAGCCATTATCGAACAGCA  
AACGGGCATGAGCGCCATAGACCCATTGCGATACAAACGGGCCATCTCCTTTAGTTGACGACAATTCGAATGCGGATA  
AAACACGTCCACCACACTGA  
>Cluster\_64476  
ATGCTTAAACTCACATTAAGCGTGGTGACGCGTTTACCTGGTACTTCCCGATGGAACCAACGGCATTATTGAAGCAGC  
GAGCCGCTGCGAAGTTGGGCTACACCTGCCAGAAAACATTAAGGTCACGCGGGAGAAATCGGCATTCCCCCACCAGAAC  
TGATTACGCCATAATCAGAAATAA  
>Cluster\_21559  
ATGACTGGTCAGTTTCAACCCGTATGTATTGACATAAGTGAGCTATCTCAGATGTTACTTATATCGGAAAATATATGCT  
CTCTTCCGGAAGTAAAAAGAATACTATGGTTTTAGCATAATTAGAACAGGAGAGCGTATTTTAAGACTTGATGATAATC  
ATATCAAATAA  
>Cluster\_5049  
ATGTTTCGTTGGGGCATCATATTTCTGGTTATCGCGTTAATCGCCGCCACTTGGGTTGGTGGTCTGGCCGGTACCCG  
TGCAGGCGCAGCTAAAATGTCTTTGTCTCGGATTAATCTGTCTCCTGGTGATTTGTTTCATGGGCCGAAAACGACCCT  
AG  
>Cluster\_14941  
ATGAAAAAATAACAGGGATTATTTTATTGCTTCTGTCAGTCAATATTCTGTCTGCATGTCAGGCAAATATATCCGGGA  
TGTTACAGGCGGGACCGTATCTCCGTCAACAACAGCTGAAGTGACCGGATTAGCAACGCAAGTAA  
>Cluster\_28387  
ATGGGAAAACGGGGTGGCATTTCGAATAATTTATACAACGTAACACGCAATGGTCAATTTATCTGGCGTTGATTTATCC  
TAAAAATGAACAGGATGATTTAACAGAGAACAAGAAAGGCATTGAAACTATTTGTCGAGAGCTGCTTTAA  
>Cluster\_51086  
ATGGAGCTACTGCTTGGTAAAAAGGTGAGCTGATTTTTACAGGATTTAATGTGATTTCTGTGGTGATACAGAGAAGCT  
GCTTTTTTATATACAGCTGTAATATTGCGGTTGACGGTTGAAAAAGTGAAGAAACATTTGTTAATCATGCAGATTACCT  
TATAA  
>Cluster\_48767  
ATGATGGCAAAGATACCACCACCTAAAACGCCTTTGGCTCATAATCGAGCCTTTAGCGATAATATTAACCGCAGTGG  
CATAGCCTGGTGTATAACACTGAGATTGTACTCGCTGCTTGTGAGGCATTGAAGCCGAACACAACGGCGAGGATGTT  
TGTA  
>Cluster\_66781  
ATGGAATTTACGAAAACAAAGCAAACGCGCTTTATCAGACTTGTGCAACTCTGGCATGCGGTGAGGCGTTGGCGGCG  
GCAAATGCAGACCCGACGAGTGTACAGCAGATGAGTGATGAACGGTTGAGGGATATTGGGTTACGACGGGAGGATGTGG  
AGTGA  
>Cluster\_2759  
ATGTGGACTCTTTTCAGGCAGGTGTTCTGGCCGAACGAAGAGCTACCAGCGTTACGCTTCTCCTGCGCTGAAGGCAAAGCC  
GGATAGCTTCTACGATGCGGGTTATAACGAAGTATTACAGGACTGTCTGTAACATCTGACGGCATCAGGCATCAAGGTAA  
GATAA  
>Cluster\_34154  
ATGCCCGTTATTGCCATTATCGCCATTGTTGTCATCGTCATCATTCTGAACAAAACCGGGGTGCCGACAGTCTCGCGGC  
CCTGACCCCTTGCCACTGTTGCCGCACTGCTGACGGGAGGTGGCGCAGCCGGTGTCCAGTGTGCGCTGACACCGTTCCG  
TCGGCCTGCGCGTGGGTATTTTCTGTTGGCATTATGCTTTTGCCAAAGTGGTTCGCTGATTTTCAGGAAAAAATAA  
>Cluster\_1578  
ATGGCGAAAAATTTGTACAGGACGGTACCACCATGAACTGGTGAATGCCGGAGATCAGACCATCTGAGCGGTGCTGC  
GGTGGTGGTCCGAGATATGGTGGCGTGGCCATTACAGATATTCTGCGGTGATGCCGGTGACGGTTTTGCGGAAGGCG  
TGTTCCTTCTGCCAAAACAGTCTGCTGACGACATTCAGTCCGGCGCGTGGTTTTATCTGAAGGACGGGGTTGTGCAGCTG  
GCTGCAGAGGGTGGCGTGGCCGCGGGGTAGCCTGGGAAAATGCTCCTGCAAAACAGCGCCACTGTGGCGGTAATAATCAA  
TGCTGA  
>Cluster\_20571  
ATGAAAAAATGATTTCTCATCGCCATAATGGCATCGGGGCTGGTAGCTTGTGCGCAATCAACCAGCCACAGGAAGACAG  
TCGTCTGAAAGAGGCATACAGCGCTGTATCAACACCGCACAAAGTTGCCAGAAAAATGAAAGCCTGCCAGAGCGTGT  
TAAACGTGCTGAAGAAAGAGAAACAATCAGCAGTTTCCGACCAGGAAAGTGTCCGCTACTGGATTATCAGCAGTGT  
CTGCGCGCAACGCAACCCGAAATGATCAGGCGGTGAAAGCCGATTGTGATAAGGCTTGGCAGGAAATTCGCACTAATAA  
CAAATAA  
>Cluster\_3238  
ATGGAGCGAAACGGCAGGTGAGGGGGCAGGCGGAAGGAAGTGTGCTGGTTCATCAACAACAGGCGGGCTGGACTG  
GCTGGCAGCGCAGGGGAGAGAAGCGGTTTTACACTGCTGGATACCTCGGTTGATGCCACCGACAACAGCAACTGCGGC  
GGGAAAACCTCCGGCAACTGATCCAGTTTCACTAGCTGGATTATACGGGGATGCTTACGGTCACCGATCCTGGGTTATTT  
GTGCAACGCTGAGCCAGGGTATGGTAAAAGCCGGCGTTCGGCTGTGGTCTGATGCTGATCAAAACCGGAGCAGAGGC  
GTGA  
>Cluster\_14981  
ATGTCATTTAAGAAATCAGTATGTAATCGTATCAGTTCATCTGTCACTGCTGTAATGCAGCGTAAAAATAAGGTAGTTAT  
GGCAGTCCGCGGGGCAACAGTTGCATCACCAGGCTTTGCGGATGGATTTTCAAAGGCGAAACGCTGCTGGAAAAAGGTTA  
AAACAGGGCTTAGTGGTCTTTCACTGGTACGGTGCATTTGCTGCTGTTGGGTCGGCTACAAGTTCTGTTGGTGGGA  
AGCACGATTCGTGAATGCTCACCATCATCATCGGGCAATTTGTTATCGCCAGTGGGCTGAAGTTGCATTAATGATGGT  
TAACTAA

>Cluster\_44069

ATGTTTGGTAAAGCGGCTGGGTAACCTGATGAAGCAAGCCAGCAGATGCAAGAAAAATGCAGAAAATGCAGGAAGA  
GATCGCGCAGCTGGAAGTCACCGCGAATCTGGCGCAGGTCTGGTAAAAGTGACCATCAACGGTGCACACAACGCGCTC  
GCGTAGAGATCGACCCGAGCCTGCTGGAAGACGACAAAGAGATGCTGGAAGACCTGGTGGCTGAGCATTTCAACGACGCA  
GCAGCTCGTATTGAAGAAACGAGAAAGAAAAATGGCTCTGTATCCTCCGGAATGCAGCTGCCGCTGGCTTTAAGAT  
GCCGTTCTGA

>Cluster\_30590

GTGGAAGGTGACAAAAATTTATAATGCTGCAGTTGCTGAATGGGATAAGTTACAGCAACGATTGCTTGATGCCAGAAAT  
AAAATTTACAATTTTGGCTGACTGGATCAGTTTGGTAAGGCTGTCCGGACAGATAACTGGCGCTCTTTTTTTGTTA  
AAACAGAAACCATCATAGCAGGTAATGCTGCAACGGCTCTTGTGACTGGTCTTCACTATTTCTCCCGAAGCACTTTA  
GGCATTATTGGGTATGGTTTACTGATGGCTGTCCAGGATACACTGATTGATGAAACGCTGTGAAAAAGCGAATAGTTC  
TGGGGTATTTAAATAA

>Cluster\_31984

ATGTTTCAAGTCTACTGTTTCTGGCGGCCGCTGATGGCATTACCCCGCTTGGCGCAACCGCAGGTGAAATCACCTACT  
GCCATCAATCAAAATTACAATTTGGCGATCGCGATCATTACGGTAATTACTGGGACGGTGGTCACTGGCGCGACCGTGACT  
ACTGGCATCGCAATTATGAATGGCGTAAAAACCGCTGGTGGCGTCAATGATAATGGCTACCACCGTGGCTGGGATAAGCGT  
AAAGCGTATGAGCGTGGCTATCGTGAAGGCTGGCGCATCGTGACGATCATCGCGAAAAAGCCGCGGACATGGACACCG  
CCATTA

>Cluster\_56484

ATGCTGCAACCCGCTGATATCCAAATTTTGGCGCTTACTGCGTGTGAACTGCCCGCTGACCAAGGGATGCGTT  
GAATCAGGACAGCGGACGATCTGAACCAACGGTTGCAAGATCTGAAAGAACGCACTAGAGTCACAAATCTGAACAGTTGG  
TCTTCATTGCGGCATTGAATATCAGCTATGAGTTAGCGCAAGAAAAAGCGAAGACTCGTGACTACGCGCAAGTATGGAA  
CAGCGTATTCGGATGCTGCAGCAGACCATAGAACAAGCGTTACTTGAACAAGGTCGCATCACCGAAAAAACTAACAAAA  
CTTTGAATGA

>Cluster\_58940

ATGGAAGACGGCGTTTCAAGCAATGCGCGATTATCTTGGCGGACTGGATATCGCTTCGCGAGAGCATCAGGTTCTGATGAA  
CGTAACAGCAAAAAGCGAGGTGCGTCCGTCATATCAAGAAAAATCTCTCATTACACTTAACATACAGGTAAGATGGA  
CTGAATCTCTCGATACATTTCTGAATATGCCAACCCCGTAGCTTCCCTTGAATAAGTAATAAGCCCTATTTGGGGAAAT  
ATGTTAAATGATTTTGTGGCGTGGATCAGCAACGAGTTATGCATTGTGCTAAAGCATTTAGTGATGCAAAAGGATTTCAA  
ATGA

>Cluster\_59050

ATGAATGAGCAGAATTTGAAGCATGTGATCGCATTTGTTGCTGGAAGACGCTAAACGTTTGCAGCAGATAGAGCCAAATGC  
AGGCACTGAGGCCCGCATTTTGTAGCAAAACAGGCATTAAGACTTGGCGGGCGCAAGCCCTGGTCAACCGAGTTCA  
TGAATTTTCATGGCTAACACACTCACCCCTCTGCCATGCATGGAGAGAAGGTGAGCCGTGTTTATCACGACACAATGGTT  
AAGGCTTTAAGAATCGAGCTTGATGGGCTTAGCGTAAGATCGTAATGAACGAAATCGTTACCAACTAA

>Cluster\_21237

ATGAATGAAATTAAGAAAAATACCAGTAGTACGTGATGAATATGGCTGCTGGACGCATCTGAATATGAAAAATTTCTGTGA  
CGGTCCGGGAATATATTTCAACGGAAAGAGTTTAAACGCTCGATGGAGGAAAAATAATCTTCAATACGTCCTCTGCTTCAGAG  
ATGAAGGATGTGCTGACCTTGATGCGTGTGATGCTGATTTTCTGCTGGAACCGGAACGACAGAGGGCAATGGATGG  
TTTTATTGGTTCAATACATGACACCGAAGATGGCCGTTTGTGATGCTGAGAAATAAGCCGCAAGCATAA

>Cluster\_24664

ATGATGGTACTTTCGATAGTGAAAAATTTCTCTCAGAGCTGGATGTTTATCAAAAAGAGATCATGCCCTGGTTGTGGTCT  
TGTTTTGGAGCTATACCAACGCTGTTTGGAGTGCCTGCTGATGATAAAGTTGTGCGCGGATGCGCGGAAGAACAACACGCC  
AGGCGTTTGAACCTGGCTCGCCAGGAATTTGATTATCTTTCTGCGGAAGAGATTGCTGAAGAAATACGCGCTGACTCAGAA  
CGTGGTTATGCTGTACGGCTTTGATCGCGATTGCTGCCCTTCGGTTGCGGTGATTACCATGA

>Cluster\_29593

ATGGAAAAAGAAATTAAGCAGTAAATACATTCATATGTATATGAGTATATCCCGAGTGTTCATTGCTTTGACAGGCAATGT  
ATTAAAACTGTTTCTTTTGGCTATGGTGATATGCCCTGTTGGTGTGGTTTTATCTTTGCCCTGAACATATTTATCTCAGACA  
TTGTTAAACGACTGGCAGGATGACAGATACACTGGAAAAAATACTGCTTGTCAAACCTGTATCTGAAGACGCTTCTTATTCTG  
ACAGTGGTAAGCGTTGTTGTCTTGTCTCTTTCTGTCAGATAAGTTTATGCTGTTAAGCGCAGGAAATGA

>Cluster\_39975

ATGGGTAAACCAACATTTAGATCATTTTACGATGTGGTCCGGGAGCTTGAGGATGTATATGGCCATAAAGAGCTATGGCT  
GTATTCAGGAGCGGCATACGCAACGCAACAGAAATGATTAACGCCAGACATAACTGGAATCGCCAAAAATCTGAAAC  
GTAACGGAAGAATGGTTGCGAAGCAATGGATAACTCGGACTCATGGCAACTGGTTGGTGACTACAAAAAACCGCTGTTC  
CAACATTTGTGCTCCCGCTGGCAATCTGTGATGATGACTATTTTAAAGGCTATTACATTTATCGCCCTGA

>Cluster\_17207

GTGAAAAAGATAGCTGTATATCATTAATAGTGTTTTCTTATGCTGGTTGTGCTGTGCATAATGATGAGACAAGTAT  
CGGTAATTTGGCTTGCATATAAAGTAATATTCAGCGTAACTCGATAACCAATACATACCGAAGCCGAGCTTCTTT  
TAGCCAGGGGTAGAATATCTGGTGCAGAAAAATATAGTAAAAAATGATGCAACTCATTCTGTGTTACTCAGGGCAAAAAA  
ATGAGATAGTTGACCTGAAGACAGAAGGTGCAGGATTACATGGCGTCTGCTGCTGACATTCAAATGTGGAGAGTGA

>Cluster\_23693

ATGCATCGACGAGTGAAAGTGTGCTCTATGGTCAAGTGTAGGTGAACTCTCTCAGAACGACAGTGGTTTTTTGTTCCA  
GTACGCCAGGATTACCACGACCGCAATCTCAATCAGCCTGCCGTCGCACAGCGTCACTTTCCAGTGAGACGTTGCT  
ATCCTTATTTGCGCTCACTGGCGCCAGAAGGATGGCTGCGTCAACGCTACAGCCAGATACAGCATCGTATGAAAACGAT  
CTGCTGGGAATGCTTATTGATAACGGCAAGAATCTGCTGGGGCCATCCAGATTTTACCTTGGGAGGAATAA

>Cluster\_60534

ATGAGCAACATTACCATCTATCACAAACCGGCTGTGGCACCTCACGCAACACGCTGGAGATGCTTCATAACAACGGCAA  
CGAACCGACAATAATTAATATCTCGATATGCCACCGACCCGATGAACTGATTAACCTTATTTAGATATCTTCAAGT  
ACAAAATCATCGAGTGCATCAGGAGCAATGTCACCTGATGCTGCTTGTCCTTGAATGTGATTGGCCATGTTGATATC  
CGCAGTATTCATTCATCTTTTAAATTTAAATGAAAAAGTTAGTCCGCTCATGGGTTATCAAGAATGGTTGA

>Cluster\_40997

ATGACGACTCAGCACACAACCTGAAAGGATGATTGAGGATATGTCCTGGTAAAGCAGGTCACGCTGGCACATGTCATCGC  
CAATCTGGGAAGGATCTGTTTAAAGAAATGGGTTTACCAGACACCGTTTCTGCTATTGGCATTTGACGATTTACCCCA  
GCGAAGCATCTATCATCGCATGCGATATCGCCACAAAAATCAGGCGCTGTAGAGATCGGTTTCTTGTGATCGTTTTACCGGT  
GCCGTAGTGTGACTGGTGTGTTCTGCTATTGAATAATGCACATTAGCCAGGTTACCCGTACGCTGGTGAATGATGCG  
CTTTACCGCTGCCCATTACGCGGACCTGA

>Cluster\_17479

ATGCGATACAGACGTGAAGACGCGGATGGCGATTACACCTTTGGCAGCGGTGATGACACCTGGCTGATTAACCTCGCTGA  
GGCGTGGCGCAGGCTGTGAAAACGCGATTGCAATTTGGTATGGGCAATGGTTTCTCGACACTACCGAAGGGACTCCGT

GGATCCAGTCTGTGCTGGGCAGGCAAAAACCGGAACTTACAACCTAGCGATCAGAAAACGCATTTCTGGAAACGCAGGGC  
GTTAAATCAATCCTCTCTTTCAATACGACGGTGGATACCACGACCCGACGTGTATGTTTTCCGCTGAAATCGACACTCT  
CTATGGAATAACGACTGTTACATCGGAGCGTAA  
>Cluster\_65186  
ATGCACGAAATAACCCCTCTGCCAACGGGCACTGGAATTGATCGAACAGCAGGCCGCAAAAACGGCGCAAAACCGGTAAC  
TGGGGTCTGGCTCAAAAATGGCGCATTTTCTTGTGCGAAACAGCTCTCTTGCCTTTTGTGTTGATCTGGTTTGCCTGGC  
GCAGCGTGGCGGAAGGTTGTAACCTGCACCTCGAAGAACAAAGAGGCCGAATGCTGGTGTGAAACATGCCAACAGTATGTG  
ACGCTACTGACCCAGCGCTCCGCCGCTGTCCACAGTGTATGGTGACATGCTACAGATTGTGGCAGACGACGGTTTACA  
GATTCGGCGGATAGAAATAGACCAGGAGTGA  
>Cluster\_45906  
ATGCATACCTCCGAGTTGCTGAAACACATTTATGACATCAACTTGTCAATTTACTACTTGCACAGCGTTTGGATTGTTCA  
GGCAAAGCGTCCGCTATGTTTCGCTCTCGGCATAAATGAAGAAATGGCGACAACGTTAGCGGCACTGACTCTTCCGCAAA  
TGGTTAAGCTGGCAGAAACCAATCAACTGGTTTGTCACTTCCGTTTGGACAGCACCAGACGATTAATCACTTACGTTGACGCAA  
GATTTCCGCGTTGACGATCTCCAGCAAATTCATAACCGCATCATGCTCTCAACACGCTTGTGAAATGATGTTAATCAGCC  
TGAAGAAGCGCTGCGCAAGAAAAGGGCCTGA  
>Cluster\_27504  
ATGACCAAAACAGGTAAAAATCTACCATAACCCACGCTGTTCAAAGAGCCGGGAAACGCTGAACCTGCTGAAAGAAAACGG  
CGTGGAGCCAGAAGTGGTGTCTACCTTGGACACCCGCGATGCGGCAACGCTGCGTGAATTTGCTGAAAATGCTGGGGA  
TGAATAGCCCCGTTGAAATGATGCGCCAGAAAGAGGATCTTTATAAAGAACTGAACCTGGCTGACAGTTGCTTACGCGAA  
GAGGCGCTGATTCAGGCAATGGTAGAGAAATCCGAAGCTAATGGAACGCCGATGTGGTCCGGAATGGCAAAGCGCGGAT  
TGGTCTGCCACCGGAGCAGTACTGAAATCTGGGTTAA  
>Cluster\_66435  
ATGAAACAAAGCAATCAAGATAGAGGTACGCTGCTGCTGGCGTTAGTTGCTGGCTTATCGATTAATGGTACTTTTCGCAGC  
GCTGTTTAGCTCCATTGTGCCATTTTCTGTATTCCCGATTATTTCCCTGGTGTGACGGTTTACTGCTGCATCAACGTT  
ATCTTAATCGCACTATGCCGGTAGGCTTGGCGGGTCTGGCAGCTGCTGTTTTATCTCGCGTACTGCTGTACAGCAGC  
GTAGTTGCTGCGGAATATCCGGATATCGGCTCTAACTTCTCCGGCAGTACTCTCCGTCATTATGGTGTCTGGATTGG  
CGCGAAGATGCGTAACCGTAAGCAGGAAGTTGCTGAGTAA  
>Cluster\_12191  
ATGAAAAAAGAGGGCGTTTTTAGGGCTGTTGTTGGTTTCTGCTGCGCATCAGTTTTGCTGCCAATAATGAAACCAG  
CAAGTCCGTCACTTTCCCAAAGTGTGAAGGCTGGATGCTGCCGGAATGCGCGAGCGTAAAACGTTGATTAACAAAA  
ATCGCGTGGCGCGTTGGGCGAGATGATCAAAAAATGTCGGTCAAGCCGATCCCGTGGCTGGGTCAGTTGACAGGACATT  
CAGGGTAAAGATGATAAATGGTTCAGTACCGCTAACCGTGGTGTAAAGTGCAGATATTCATTAACAGGTGACGCTGGA  
CTGCAAAGCGGAATGGCGGAATATCAGCGCGTTAA  
>Cluster\_3702  
ATGCAGTGGTATTTAGCCGATTAATAAATATGTTGGTTTCTCTGGTCCGCGACGTCGTAAGAGTACTGGATGTTTAC  
TCTGATTAACGCCATTCGTCGGCGCTATTATCAATGTCAATTAATGATTTTAGGTTTAGAGTTTCCATTCCCTTCTCTCA  
TTTACCTGGCAGCAACAATCATTCGGTCAATTGCTCTGTGTGTTGCTGCTGTCACGATACTGACCGTTCAAGTGCCTGG  
GCGTCTCTATCTGGTACCGATCATGGCTGGTGTAGTTCTGTTGATTTGCTGTTTAGAAGGCAATTTGCGCAGCAA  
TCGTTACGGAACGATCCTAAGTTGGTTCAAAATTA  
>Cluster\_20871  
ATGACAGCGCGTTATCTCGGAATGAATCGCAGTATGGCTGACTGTCACCTGACCTTGAACATATCAGCCAGAGTATCGG  
CGATATCTGTGCACACCCGTCGGCTCACGGGTGATGCTGCTGATTACGGCTCGTTGCTGGCGTCAATGATGACCCAGC  
CGCAGACTCCGGCGCTTGAAGTTCAGATTGAGTTCAGATTAAGGTCGCCCTGTTACATGGCAGTGTGAAATGGGAACCCCGCTG  
TCATCCGTCACCACTGAGCGCAGTTTGGACGGCGAATGACGGTACCGTTAACCGCCAGCACACGACACTGCCAGCC  
ACTTTCGTTAACCATCCCTGTGAGTTGA  
>Cluster\_64428  
ATGTTTGGAAATGAACCGTGACACCGGTAAGCCTTTATCGGGACTGATCACATTTGTCAGTCTATCGTTGATATTTTAA  
GACCCCGTGGGAACCCGTGTAATGCTGCCGGAATATGGAAGCAAATTTTACCTTGTGATAATCCACAGATCCAT  
CACTTGTCTATCGGATAAATATGAAAGCGCTGGCGCAATAGCAGCTGGGAACACCGCTCAGAATTGACAGATAAAT  
GTGTTAGCAGTGGATATCGGGAATAACAATAATTAATATCGCAACAGATATCGAAACACAACAGCGATTAGAGTTTAA  
TAATATGGAGCTGATATTTTGA  
>Cluster\_48367  
ATGCGAATATTTGCTACGGCAGTTTACGCCACAACAAGGCAACAGTCACTGGATGACCAATGCCAGTTACTGGGCGA  
TTTCAGTATCGATAACTACAGTTGTATAGCTGGGCCACTATCCAGCGCAGTTCCGGGGAACGGAACAGTACACGGTG  
AAGTTTATCGTATTCGACAAACCGCCAGCTGGCGAATTTGATGCTTGCACACCAGGGCGGTGAATACCGCGCAGTTG  
ATTCAGACGCGTACGGGAGTGCATGGATGTACGTTTATCAACGACCCGTCGATGGATTAAGCTAATGAAAGCGGCGA  
CTGGTTAGACAGGATAAGTAA  
>Cluster\_17760  
GTGGCTAAATCCACAGCAGAACGCAAGCCGCGCAGCTGCCCGTCTGGCTGAAAGCCGGTAACCGCAAGATGGAATTGCA  
ACTCGACAGCAGGAAATGGAAATGCTGGCGCTAACTGCGCCGCCGTCGCCCTGGTGTGCGCCGATGATATGAGCG  
AGTACATCGCGTTGCTTATCCGTCAGGATAATGCCCGCTTCTGTTTCGATCAAGTCAATCAGTGTAAACCGCTGCGTA  
AAATGCGGCGATGATTAACAGTTAAGTGTGCTGCGATGGTGTGATTCGGCATGTTGGGTAACCTGCTGGCTGGCATGA  
AACTAAATATCAGTGTGA  
>Cluster\_50835  
ATGAACAAGAAATATGGCAGGAATCTGAGTGCAGCGCGGTATTAACCATGCTGGCGGGTTGTACGGCTTATGATCGTAC  
CAAAGACCAAGTTTGTACAGCCTGTGGTGAAGACGTCAAAAAAGGCATGAGCCGGGCGCAGGTTGCACAAATTCGGGTA  
AACCTTCGCTGAAGTGAAGTATGATCCATGCTGCTGGTACTTGGCAGACCTACATCCTGGGTCAACGTTGATGGTAAAGCA  
GAAACCTACTTTGTCGCGTTAGATGATACCGGACATGTCATCAACTCCGGTTATCAGACCTGTGCTGAATACGACACTGA  
TCCACAGGCTACGAAGTAA  
>Cluster\_40725  
ATGAAAGTAAAAATGTTCAACTATAGTACTTTTTTATCTATGTTTTCTTTTTCCGCCGTCGCAATGCCTTTTAAAC  
TATGAACTGAGAGTTTTAATGGGGTATGGCCATTTAATACTGATGAGGTTCAATTACAGTGTCTTGTATGGTAAATCCTT  
ATGTGATGAATTTGACGATAAATAGTTATATGCACCTTACAGTTTGGCTCGAATAAAAGGTAACAAATTTGGTGCCTTA  
CCGTTAGATAACAATAAATCCATTTTGGCTAGATAATGATGCCGCCAGGGTTAAAAAAGAGTCTGGGGGATGCTCACTAA  
GGCTGATTTGATTTATGTGATAAGTAA  
>Cluster\_49742  
ATGAAAGGCTGGCTTTTTCTGTTATCGCAATAGTTGGCGAAGTAATCGCAACATCCGATTAATAATCTAGCAGGGGCTT  
TACTAAGCTTGCCTTCCGCCGTTGTCTATAATCGGTTATGGCATCGCATTTTTATTTCTTCTGTTTCTGAAATCCA  
TCCCTGTCGGTGTGCTTATGCAGTCTGGTCCGACTCGCGTGTGATTAATTAACAGCATTGCTGTTGCTTCTATGGG

CAAAAGCTTGATGCGTGGGGCTTTGTAGGTATGGGGCTCATAATTGCTGCCTTTTGGCTCGCCGATCCCCATCGTGAA  
GTCGCTGCGGAGGCCACGCCATGGTGA  
>Cluster\_53870  
ATGTCAGATTTGGCTATGAAGGTTTGAATGGCAATCGACTGGCGATGTTGGCATCAGTAGCGCAACTCTTGCCTCAAT  
CGCATGTGGACTGAAAAGAATACTATGGTCACTTCGGCGCTCCCATGACGCAGCAGACTTCCGGCGATGCGTTG  
CACTTGTGTGAGCAGATTCCAGAAATCAGAGATTCACTTGCACAAGTTGCAAAGCGCGTCCGACATTCAAAGGCATCCTC  
AACGAATGGGATCCCTCGTTGCTCTGTGAAGTCTGAAATGAAGATACACGGAAACAAGCACCACAGACTTACAGAAG  
AATCAGCGAGCTACGCAAGGACTAA  
>Cluster\_16416  
ATGTTCTTAGCTAGGCGATCAATATCGCAGGTGAGAAAGAGCTCCTGGGGATGCGGCTGGCCGAAAAATGAAGGGCGAA  
TTTTCTGGTCAATGTGCTGACTGAACTGAAAAACCGCGGTCTGAACGATATCCATCGCCTGTGTGGATGGCCTGAAAG  
AATTCGGGAGGCCCGCATCCAGTTATGCATCGTGCATATGGTGCACAACAGCATGCGCTTCGTGTATGGAAGGAATAC  
AAAGCCGTCACTCACGACCTGAAAGCGATTAGCTCCACAGAAGAGGAGGCCAGCAGGCACGTGGAAGCGTTTGTCTGCG  
GCCTGGGACTGCGCTATCCGAGATAA  
>Cluster\_58622  
ATGGAACCTAAAAAATGATGGAACATAATTTCTATTACACCCGATTACAGACAAGCCTGGAAAGTGGTGCATAAATTTGTC  
AGATATTTCTACTGTTGACTATTTTGTGCCGTTATTTCTGGTGCAGAAGGTTGGGAAGATATAGAGGATTTCCGGGAAACAC  
ATCTCGATTTTTTGAAGCAATATGGTGAATTTGAAAATGGTATTCCTGTTACGATACCATTGCCAGAGTTGTATCCAG  
GAAAAGATCACGTAA  
>Cluster\_41126  
ATGCAGACAATCATCTATCAGATAACCCCCAGCAATGGTGTACGGAGAGAGTCTCATTCATCAACAGGGCTAAAGCC  
TGGCACCATTTAGCGGGCAGAAGAAAGTCAATGGATGCAGGAAAAGAATACCGCCATTACGCTGTAGAGGTGATCCGG  
GGCACTACAGTGAATGCCGTGTACACATCGAAGAAATTTGCGATGGAATCGAAAACGAGAAACACCAGGTGCCAAAAAT  
GCAAGTTCCGGTTAA  
>Cluster\_62516  
ATGTCACAACATGAACAGTCTGTGTCAGGCTTGGCGGATGCCGATGTCGGCACCAGATGCACACAGCGCCAGTGATCAATA  
TTGTGCGTACTGCAGCGACAGCAACGGCAATCTCAAACCTGGGAAGAAGCGGTATCAGGTTTACGCTTCTCTTGATT  
CCTGGCAAAAAGTCCGCCGGAAGAAGTTCGGAAGCGAGCAAAAGCGTTACCTGACGGCAATGCCCGCTGGGCTCATAAA  
GCAGATGAATGA  
>Cluster\_39955  
GTGAGTGAATCAAAAATGCCAGGTTAATGGCAACAAGATAGAACCATGTGCAGCACTGGCAAAGTCCCTTGAGCATGATGC  
TGAATACACGATGCGAAAAGGTCCTGCTGATATACAAAATCTGGAATGAGAGTTAACTCGCGTCTGATTTTTGTGATGT  
TGCGTTCCGGTGAATTTTCTAAATACCAGTTCGGGTTTCATTTTGTCCGTTCTGTGGTGAAGTCTGAAAACGTGGGAG  
AACAGAAATGAATGA  
>Cluster\_10199  
ATGGCTGCTAACGCAATTTGTTTCGCGCCGAATCGATGAAGATCAGAAGATCAGGCGGCGACGACTGCGCGGGATGGG  
GCTGACCATCTCTGACCTGGTTCGCATAACCCCTCACAAAGGTCGCGGTGAAAAGGCATGCGCTTTGATTTACGCGAGC  
CTAATCAATTAACCATTCATCAATCAAAAACAGCGAAGCTGGCGTTGATGTTTATAAGGCCAAAAGACGCCGATGATTTA  
TTGATAAATTAGGAATTTAA  
>Cluster\_21853  
ATGCGTTTTAGTGAAGCCAGTAATGAAGAAACCGCTCCGTCAGCAAAACCGCCAGATTATTAGCTATGTCCACGCACGGA  
ACCCGCGCCGACAGAACATGCGATAAAGATGGATTCTGTTCTGATGCTGCTGGATGCTGCGTGGCAAAATATGTTGCGTTG  
TACTGATGGGGAGTCAATTTCTGCGCTCACCGGCTTACTGTGCTGAATCCGCCACGCGTTGGGCAATCAGATTCGT  
CAGGAAAATGAGGTCGAAGAATAA  
>Cluster\_29587  
ATGAAAGTCATATTCACGTCGAACCGTTTTATTGATTTTTCTTATCCGGCTTTTGATTACAGCGATTGTCAATTTCCCGGT  
AATFATCTGGTCTGGGATACGGTAAAAGAAACACCGCAGACGGGATGCTTGGCGTCTTTTCTGTTTACTTTACTCCG  
GTGTGCTCCTGTTTATCTGTATTTTTGTTTTTCTGCCCTGACTGGCTGCAGAAAGCTGATGAAAGAAAAAATGATGAA  
AGGAATGAAGATGAATAA  
>Cluster\_11189  
ATGATTGAGGTTCCGATGGACAAGGACAGCCCTGAAGCAGTTACTTCTGTGGATACGCGGTATCGGCAGGCGATAAAGGA  
TAAGGTCGGTGCCTAAAGGATTTCTCTGGTAGCCATGGATTTTAAAAGCTATCAGGGAGTGACAATCGATTCCGTT  
TGAGGGTCCGGCTGTACAGGGTTATTTTGTATGTTGAGGATGGTATCCTGTTTCTGGATATTAAGGAAATTAAGCCG  
AGAAGCACACCACATACTAA  
>Cluster\_11504  
ATGCCATAACATTATCTCAGTGATACAAGCGCCAGTGTACGCGAGCTGAAGAAAAATCCGATGGCGACAGTCAGCGCCGG  
TGATGGTTTTCCCGTTCGCTATCCGTAACCGTAATCAGCCTGCTTCTACTGTGTACCCGACAGCTGTACGAAAAGATGC  
TCGATGCCCTGGACGATCAGGAGTGGTTAACTGGTAGCCGAACGCAGCAACCAACCGCTGCATGATGTAGACCTGGAT  
AAATACCTATGA  
>Cluster\_51247  
ATGTTTCGCTTTGATTCAACGCGGTCAGATATACACGGACAGAGCTGGATACCCCGTGGTATTACTCGCATCACTGAGCA  
CTCAGTGTCTTTTCGACGGATGGACGGAGATCCGGCGGGTACGCAATGGTGAGTTAAACTGCTGTTTTCGAAACATATTG  
ACCACCAGGAGTACCAGAAAATTTCTGCGGACACTGAGCAGGAAAAGCACCTGAAAAAATACGAGCCATAAAAAGGAAG  
TAA  
>Cluster\_59206  
ATGAACCACGATATCCCGCTAAAATATTTTGTATTTGCGGATGAGTACGCGACCGAATGCGCAGAGCCTGTGCGAGAGGC  
TGAACGCACACCGCTGGCCCACTACTTCCAGTTACTGCTACCCGTTTGTGTAACAATGAAGAGATCAGCGAAGAAGCCC  
AACATGAAATGGCTGCTGAAGCGGGATTAATCCCGTACGCATGATGAGATCCGAGAGTTTTTGAATCAATGGGGTAAT  
GAGTAA  
>Cluster\_67058  
ATGAGCAGCAGGGACCTGGCAAAATTCACCGATGTCAGACGTTACGCTACGCTGGTTTTGTATAATAACAGAGGCCAGGGC  
CACCTGACTGACGAAGTATGATCTGCACGAGCGTATCCTGGGTAGTCTGTTTACGAGGGGGCAAAACGCACGAGGCC  
GAACGGCTCCAGCAAAACGGGAAAGCTTATTCAGAGCAAGCTGAAGCAGTACGTTACCGTCCGGCAGGCGTTACTTAA  
>Cluster\_19767  
GTGTTCTGCGACTGGGCAGCAATATCGAAGGTCAGAAAGAACGCGGGGTATGTGGCTGGCCGAAAAATGAAGGGCGGAA  
GTTCTGGCTCAATGTGCTGACTGAACTGAAAAACCGCGGTCTGAACGATATCCATCGCCTGTGTGGCTGGCAATCCAG  
TCTGCGTCCAGAAATGGACGATGCCGTTGAAGGACTGGCGAATGGCAATGAGCCGCTTATTATCGAGTTTGGTGA  
>Cluster\_6781  
GTGTTTGGGGAAAAAATCGGCCAGATCCGAGAAATTTTAAATCAGCGAGTACGCTTGGGAAGAATGACCTGCTTATTT

CGCACCTTCCTTAAAAACAAAAGCAGAAGCAGATATTTCTGAATATATAACAAAAAAATTTATTGAACCTAAGAAAAAGA  
CCGGGAAAGAAGTTACCAGTATTCAGTTTACCGCACGGGAAAAAATGACGGGTCTTGAAAGCTATGATGTCAAGATTAAT  
TTAATCTGA  
>Cluster\_54790  
ATGAATAAATCAATFCCAGAGAGATTTATTTTTCAATGTGCTTTGTTTAAAAAATCTCGAGAGGGAGGTGTTTCATGACGCA  
TGGGTATGTTGATAGTACATATTATGATCAGGCTTTACGCTTTCGCTTTAAAAAGATGAAACCAGTGTGATTTCTTTCTGATC  
TCTATCTGCAAAATATTGCAGTACATTGAAATGCATAAGACTACACTAACGGATATCATTTAATGACAGGGAATCCGTG  
CTCTCTTAG  
>Cluster\_27645  
GTGCTCGTTTACACGGCCTGCGATCTATCGCCAGTACAGCCCTAATGAACAAGGCTTTCCGCTGATGCCATTGAGGC  
AGCACTTGCCCATGTAGACAAGAATGAAGTTCGTCGCTCTTATAACCGCAGCGATTACCTGGAGCAGCGTCGTCCAATGA  
TGCAGTGGTGGACGAATTTGTTCAGCGGCAGATCGTGAAGTATTATTGAAGGTGGGATGAAAGGAATGCGATTGGTT  
GGATAA  
>Cluster\_64443  
ATGCCTAAGTTAAAACTTGTAAAGACATGCTATTGCCAGGTAATAAATAGTATGAGATTTATGCAAGAAATGAATATAG  
CAACGTAGAACAATTTACTATAAACTGCGCTCTTGTAAAGAACGAGCAAGGCCAGGATGGAATGTCTGAGGCGCAAT  
GGTTATTTATAATCCATGTTTCCATTACCAGATGACCGCAATTATGCAAGGTATCAAAATATAGACGACTATCTGGTC  
GATTGCTAA  
>Cluster\_14809  
ATGAGTACCCGAAATATCCAGTAAACACCGCGTGTACACGCTTCTTGTGTCGGGAAAGAAAAAACACCGGGGAAGA  
GTGGGACGTCCTGGAATTCAGCAGCCTGACTGAGCTGAAAAAATATCGCAAAAGCCACCCGAAAAAGATGGCCTTCAGTT  
ATAGCTACGCGCTCAGTCAGGCTGTGGATAAGCAGTTCGCCCATATCAACATTGCGGAAGCCGATCACATCAACAGTTC  
CTGCGTCAGATTAAGCGTCCCGGCTCGATATCCGGGCGATCTGCTGA  
>Cluster\_25919  
ATGACGGGCAAAGAGGCAATTATTCATTACCTGGGACGCATAATAGCTTCTGTGCGCGGACGTTGCCGCGCTAACAGG  
CGCAACAGTAAACAGCATAAATCAGGCCGCGCTAAAAATGGCAGCGGCAGGCTTCTGTGTTATCGAAGGTAAGGTCTGGC  
GAACGGTGTATTACCGGTTTGTCTACCAAGGAAGAACGGGAAGGAAAGATGAGCACGAACCTAATTTTTAAGGAGTGTCCG  
CAGAGTCCCGCATGAAACGGGTATTGGCGGTATATGGAGTTAAAAAGATGA  
>Cluster\_15639  
ATGGCTAACCTGCAACTTCCCGTCAAAGGTGAATACTTCGATGCCATGATTCCGCGGGAGAAAACGGAAGAGTATCGCCT  
GTGTAATGACTACTGGAATAAGCGAATTTATGTTCCGGGAGTATGACCGACTGATTATCACAAGGGATATCCGAAGCGCG  
ACGATTCAGTCCGAGAAATAGACCTCCCGTATGAAGGTATGAAATCAAGACAATCATACATCCACATTCGTTGATAAAA  
CCGGTAAAGGTGTTCCGATAAAGGTGAATACCGCAATGAATAA  
>Cluster\_3002  
ATGGCCTATGAACGTGAAAACCTAATCGAAAAGCACCTCGTCGCTGAAGTAAAAAAGGCTGGCGGGTTCGCTTTAAGTT  
CGTATCCCGGCTCCCGCTCGGTACCAGATCGCATTTGTTCTGTCTACCGCGGCTCGTATCATTTTTCGTTGAATGTAAT  
CCCCGGCAAGCCACCACGGCTGACCAGTTGCGCGAACACGGACGGTTCGCGCGCTGGGCTTTACCCTAGTGGTGTCTG  
GATAGCAAAAATCTGGAGCCATTTATTTAAGCCGCAATAAAGGATAA  
>Cluster\_42448  
ATGAAAGATGAATTTATTTGCTGATCTTCTTGCCAGCGCAGAAGAAATGGTACGCATCGAAAAGGGTGAAGAAACGCTGA  
ACCAGAGCAGTCCATACCTTTTAGCGAAATCGATGTAAAAGCGATCCGTAAGCAACGGGTTTACGTCAGCAAGATTTTG  
CTGTGCGCGTAGGGGTAAGTTATGACCTGGTCAAAGCTGGGAAACCAACCGCTCAGCCTACCGGAGCACCCGAAAA  
TTGCTCCTGCTTTTGCAAGCGAATCCTTTGATTATCAATCAATTGAAAACAATCTAA  
>Cluster\_48764  
ATGAAGTTGCTTGATAGTAAATGAAGTGTGTGAGCTCTTAGGCATCAGTAACTCCTTTGTATCGTTGGTGGCGGGTGT  
TGAGGATTTTCTGGCTTGGGCTAAGTAGCGGCTTCTCCTCAGGCTAACGCTACTCAGAACTCTTTAGGCAGGGAAAAATA  
GGCTCGTTAGGAGGGAATFACAGCAAAACGCTCTCGGTGTGCAAGAGACGCCAAGCGACTTCCCTCGTCTTTCAAGATC  
GGTCGTTCTGTTAAATGGAAAGACGCCGAAATTTAGGCTGGCTTGAACCGCACGCGTTTGA  
>Cluster\_8449  
ATGAGCGAGTCACTGAGCTGGATGCAGACGGGTGACACGCTGGCGTTATCCGGAGAGCTGGATCAGGACGTTTTGCTACC  
GCTTTGGGAAATGCGTGAGGAAGCGGTGAAGGGGATTACCTGCATCGATCTTAGCCGTGCTCCTCCGCTGGATACGGGG  
GACTGGCACTGCTGCTCCATCTTATCGATCTGGCGAAAAGCAGGGCAACAATGTGACGCTTACGGGGTAAACGACAAA  
GTGTATACCCTGGCGAAATTTGATAAATTTGCCTGCTGATGTTCTGCCTCGTTAA  
>Cluster\_15647  
ATGCCAGCGCCTCTGATGTTGGTGCAGATGACCCGCGCGCTGTTCCGGCAATTCGTTATCGGAGGTGCTGGATAAATTCAG  
AAAAACTACGATCGAATAATGTCTTACCAGCAGGAAACGAAAGAGGAAAAGGAATTTCCGCACTGTATATGGCTTGCAG  
AGAAAGAAGAACCGGAGCGAATTTACCAGACATCAATCCGACCTTCCGCAAGCCACATATACCCACTTCCCTGAATAT  
ATCGACCCGCGCTGCGTAATTACCCTCACGCTATGGCGCTATCAGTAAATGACTGA  
>Cluster\_54796  
ATGGCGGATGAACCGCACACGAAAGGTGCATTGCTAGGCGCAGGCGTTGGTTTACTTACTGGCAATGGTGTAAATGG  
CGTACTGAAAGGTGCAGCTGTTGGCGCTGGTGTGGTGCAGTAACAGAAAAAGGCCGCGACGGTAAAAATGCGCGTAAAG  
GTGCAAAAGTGGTGGCGCGTGGTGTGTCCTGACTGGCGTTCGAAAGGCAATGGCCCTCGAAGGGGCGATTAAAGGTGCC  
GTGATTGGCGGTACGGTGGTGAATTTGCGGTAATAAATGAAATAA  
>Cluster\_19860  
ATGTCAGCACTGAAGAAGCAGCGCATCGATCTGAGATTAATGAAGACGACAAACACATGATCGAAGAAGCTGCAGCAAT  
GACTAACCAAGTCCATTTCCAGTTCATGTTGCTAGTACCGCTCAGCAGCTGCTGCTGAAGTTATTTGATCAGCACCGTCCG  
TGCTCCTCAATGAGGAGTCTGGAATCTGGTTATGGATGCAATCACTAATCCGCCAGCACCAATGACCGGCTGAAACGC  
GCCACTAACCGTCTCCGGGAACCTGGAGTAA  
>Cluster\_14983  
ATGTATCTGAGTAAAAACCCGTTATGCGTGCATGCTTGAAGAAGGGATATATACGCCCGCGCTGGTGGTGGATCACAT  
TATCCCGATTAATGGCGGTGATGATGTTCTTCTGGCCGAAATGGAACCATCAACCATTTGTGTCAGGCGTGTCAATAAC  
AGAAAACGAAATGGCTTGTATCCGCAACAAAAAGCAAGCGTGGCGCAGGTGGATTTCTGTAAGAGGAAAGACGGCCGCT  
AACCGCAATAACTGGATGTATGACGCTGATGAATGA  
>Cluster\_4961  
GTGGCTGAGCCGTACCGGTATACCGGTTGGTGTGCGAAAAGATGCTTCCGCACGCACGCGGATAAAGAGGGGATAGT  
TTTCTGAGGACAGGGAGAGAAGCAGGCTTCTGATAAATGCAAGATTTTTCGGAGGTGGTTACAGTGAAGTACAGCCG  
TTCTGGCGAGGAGAGACTGATATCACCGATGGGATAAGGCTGTCTGATTGGTATTAATAATAAAGATCATCAGAG  
AGTAAACGTAAGGATTTGCCAGAGTAA  
>Cluster\_4926

GTGGGCGATCACGATCCACGTAAGCCGATGAATGAGAATACGGTGAACAAGGCTTTGCGCGTAATGGGGTATGACACGAA  
GGTCGAGGTTTGTGGGCATGGCTTCAGGACGATGGCTTGTAGTTCTGTTGATTGAGTCGGGATTATGGTCGAGGGATGCGG  
TAGAGCGGAGATGAGTACCAGGAGCGTAGCTCTGTGCGAGCCGCTTACATCCATAAGGCGGAACATCTTGGGGAGCGT  
AGGTTGATGTTTTGAAGTGGCACACTGA  
>Cluster\_37317  
ATGCCACGTTCTCTCAAGAAAGGTCCTTTTATTGACCTGCACCTTGCTGAAGAAGGTAGAGAAAGCGGTGGAAAGCGGAGA  
CAAGAAGCCCTGCGCACCTGGTCCCCTGCTTCAACGATCTTCTTAAATGATCGGTTTACCATCGCTGTCATAATG  
GTCGTCAGCACGTTCCGGTATTTGTAACCGACGAAATGGTCGGTCACAAACTGGGTGAATTCGCACCGACTCGTACTTAT  
CGCGGCCACGCTGTGATAAAAAAGCGAAGAAGAAATAA  
>Cluster\_20008  
ATGAAAAATGAAGACGATTAACAAGTCCGGCTGGACCACATAACGACAAATCCGGCGACAGGAAAAAATGTTCTGGAGG  
CGCAGCCCGAAACTTAAGAATATACCAAGCTGGCGGAGCAACTCCGTGCGGGTTAAAGCTGCAATCGAGGGTGTGCAGT  
CAATACAGCCAAATCATTGATGTACAACAGTCACAAATGAGCAACAGCAAGTTCAAATAGCAATGCTGACTCAATCTTTG  
TCTCAGGCAATCAATGAGCTAACAAAAAGCAGGAATAAATAG  
>Cluster\_3031  
ATGATCGCGGAGTTGAATCACGCATCTGGCATTAAATCGACGGTATGGTTGACCATGCCAGTGTATGAGTTGTTTGC  
CAGTGGGTATTTGCGTGGCCACCTGACATTAGCCATCGCAGAAGCTGAAAAGTGGTGTGATGACCACTCCGCTCAGCGGTC  
ATACGACCGTTAGCCAGAGTCTGAAAAAGCCATTGGTGCCTGTAATGTCGCGCGTGACCAGGCGCTGGTGACCGAT  
ATGTTGGAAAAACCTGTTTCAGCAGGCGTACAGCAGTAA  
>Cluster\_32703  
ATGAAAAGTAATTTCAATTGACTGGCATCCCGCTGACATCATTGCAGGTTTGGCAAGAAGGGAACGTCATGGCGGCGGA  
GTCCTGCAGAAATGGTTGAGTTCCTCAACGCTGGCGAACGCAATATACGCCCATGGCCGAAAGGAGAGATGATTATTG  
CGAAAAGCCCTGGGAACTGACCCCTGGGTTATCTGGCCATCAGCTACCATGATCCGACAGCCATGAGTTTATCGACAGA  
ACGCAGTTGATGCTGACTACATAAACCGAAAAATGA  
>Cluster\_39690  
ATGGAATCCCTAACGTTACAACCCATCGCTCGTGTGATGGCACTATTAATCTGCCCGGTTCCAAGAGCGTTTCTAACCG  
CGCTTTATTGCTGGCGGCATTAGCACATGGCAAAACAGTATTAACCAATCTGCTGGATAGCGATGACGTCGCGCATATGC  
TGAATGCATTAACAGCGTTAGGGTAAGCTATACGCTTTCAGCCGATCGTACGCGTTGCGAAAATCAGTAAACGCGCGGA  
CCATTACAGCAAAAAGTGCCTGGAGTTGTTCTCGGTAACGCGGAAACGGCAATGCGTCCGCTGGCGGCGAGCTCTTTG  
TCTGGGTAGCAATGATATGTTGCTGACCGGTGAACCGCTATGAAAAGACGCCCATTTGGTCACTGGTGGATGCGCTGC  
GCCTGGGCGGGCGAAGATCACTTACCTGGAACAAGAAAATATCCACCATTGCGTTCACAGGGCGGCTTACTGGCGGC  
AACGTTGACGTTGATGGCTCCGTTTCAGCCAGTTCCTCACCGCACTGTTAATGACTGCGCCTCTTGACCCGGAAGATA  
GGTGATTCGATTTAAAGGCGATCTGGTTCTAACCTTATATCGACATCACACTCAATCTGATGAAGACGTTTGGTGTG  
AAATGAAAATCAGCACTATCAACAATTTGTCGTAAGAGGGGGCAGTCTTATCAGTCTCCGGTACTTATTTGGTCGAA  
GGCGATGCATCTCCGGCTTCTTACTTCTGGCAGCAGCAGCAATCAAAGGGCGGCACTGAAAAGTGAACCGGATTTGGACG  
CAACGATGCTGAGGTTGATTTCCGTTTTCAGCTGATGTTGCGTGAAGAAAATGGGCGCGACCATTTGCTGGGCGGATA  
TTTCTGCATGGCGGGTGAACGCTATTGATATGGATATGAACCATTTCTGATGCGGCGATGACCATTTGCCACG  
GCGCGTTTATTTGCAAAAGGCACCCACGCTGCGCAATATCTATAACGCGGTTTAAAGAGACCGTATGCTGTTTTC  
GATGGCAACAGAAATTCGTTAAAGTGGTGGCGGAAAGTGAAGAGGGGCGAGTTTATTTGCGATTACGCCACCGGAAAAA  
TGAAAATTTGCTGAGATCGCCACTTATAATGATCACCAGGATGGCGATGTTTCTGCTGGTTCGATTAACAGATACGGCT  
GTGACGATTTGATCCAAAATGTACCCTAAAACCTTTCCAGACTATTTGAGCAATGGCGCGGATAAGTCAATCCGG  
CTGA  
>Cluster\_29868  
TTGGCTCGCTCAGGTGCAATAACGTTGGTCTGACCGGTTACGTTGGTCTGGTGGAGTTGCTGATATTTACAATCAGGA  
ACAGCAACAGAAAGCGATTAGTGCCTTCAATAAGGTTACGCTGATGCATGGGCTTCTGGTATCCATCGGGACTATTTA  
AGTTTGCCAGGAAAAATCCAGCGTTTGTGTCACAGGCACAACAGGCGTTTCTGGTCTTAATGATCAGCAACGCAACGAT  
ATGGCGATTTAGCATGAGGGCTAACGTCGCTTTCCTCAGGGACCGGAAGCCTACAGTAAATTCATTAAGTACAACAA  
GGACAGGTTAAATCGCGTTGGTGTCAATGCTGACTGGATGATTCAGACAGGATCCAGAAATCCAGAGCAGCTATCACACA  
TGCTGACTACTATGCTCTCGGTCGCTTGGACAGAAAAGCGTTTGTGTTGAGGATAAGATGGCTGGTCTGAAAT  
GACCGAGGCGAGCTGGCAGAGACAATCCGACGCAATCAGGCTGGTGAAGCACTTCAGGCGAGAGGGCAAAACCTTTCTTA  
TCAGTCAGCAATGATGGGCACAATATCCGACGCAACGCTTGGCTCTGGATCAGCAAGAGTTTCGGGTTTAAAGTACGAC  
AAGCGCAGGAAAAGGCTCAGCAGTTGATAGTGAAGCACCTAAGCTGTGATGAAATGGAAGGCAATCGAGACGGCT  
GTAACAATGCGCAGCAGTATCAAACTCAGCCAAATCTATGAGTGGCTTGCACAACAGTTCAGAGCAGAAAACCAAC  
GACAGGTTTGTTCGGTAAACGACAGAATGTTTCGAAAATTTACCGGAAGCGATACGACATTTGCGTGAATTTGCGCATCC  
GCCAAAATGCCCTTGTAAACAGTCAAGTTCTTAAATTTCTTCCCGCCAGCAACGATAAAGAGCTTGGATCGTT  
CGGACGGTGGCCAACTGACATGGATAACCTGAGACGGTTCGCAAGATGGCTTGTGATGCAATGGCAAACTTTGAGCGACG  
AAACGCGCAGTTTAAATGAGTTTAAAGCTGAGTGGATGAGCGCAATGGCAATCTGGCAATCGCGTAAATGGCGGTCAGA  
TATTTGGGTTGGATGTTAAAAAGGTGAATCATTTGGGAGTGGCTTAAAGCGTATATGTCATTGAATGACTCAGCAGCGG  
CCAGCACAAAGATTGACACCTTCAGGAAACCAGGAACTCAGGTTGGATCATAATGCTCAAAATCAGTCAATCAATTTAC  
GGTGAATGA  
>Cluster\_43437  
ATGAATAAACTCATTTGAACCTCAGACGCGCAAAATGTTGGCGCTCTCTTTACTGCTTATCGCCGCTGTACCTTTGTCTGT  
TACGCTGTTTTTGGCCCAATTTTGGGTGAGCGGTGTAAGGCGATTGCTGAAGCGGCGATGGTGGCGCGCTGGCGG  
ACTGGTTTGGCGGTGGTGGCGCTGTTTCGCGCGTGCCGATCCGATCATTTCTCGTCAACGCGGATTATCCCGGTAAT  
AAAGACCGGATTTGGCGAAAATCTCGGCCAGTTCGTGACAGGAAAATTTCTCGATACCAATCGCTGGTGGCATTGATTCG  
ACGTCAGCAACCGCGTTTGTGATGCGCACTGGTTTGTAGTCAAGCGGAGAACCGCCGCGGTTGGTCAAGTATGTTAC  
AGATCATGAGCGGTTTTCTCGAACTGACCGATGATGCGCGTATTCAGCGCCTGCTTAAAGCGCGGTTCCACGGGCGATC  
GATAAGGTCGATCTTTCCGTCACAGCGCACTGATTCTGGAGAGCATGACCAGAAACGATCGTATCAGGTCGCTCGA  
TACGCTGATCGCACAGTTGATCGCCCTTCTCCAGCGGATAAAATCGCGCAAGTTTATCGCCAGCAAAATTTGCTGCTGGC  
TGGAGACGAGCATCCACTGAAAAGCCAAATTTTGGCCAAATGGTGGTGGCGAAACGTTAATTTGCGGATGATGCTTGGTCA  
GCGGTGAATCTTTGCTTGTGATGATATCAGCCGCGATCGTGGCGATCAGATCCGCCATGCGTTTGTGTCGCGCACTTTTGC  
CCTGATCGACAAGCTGAAAACGATCCGAAAATGGCAGCGGAGCCGATGCGGTAAAAAGCTATCTGAAAAGAGATGCTG  
CTTTTAAACCGTATCTCAGTGAATTTGGGGGATTTACGGGAATGGTGAATGCGGATATCAACAGTGAAGATTTCTGCT  
GTGAAAAGAACGTTATCGCGCGGGCGGCTCAATGGTTTGGCGAAAACGTTAATTTGCGGATGATGCTTGGTCAAGTATG  
TGGTCACTGGAACAAGCCGCACACCGCATTTGCGCCTGAGTTTCCGCAATCTGACTCGCCATATCAGCGACAGGTA  
AAAGCTGGGACGCAAGGATATGTCGCGCAAAATCGAGTTAAATATCGGCAAAAGATCTCCAGTTTATCCGTTCAACGGT  
ACGCTGGTTGGCGGTTGATTTGGACTTATTTGTATTTGCTGTGCGAGTCCCGGCTTGTTCGCCCTCGGCAATTTATA  
G  
>Cluster\_21948

ATGGCTCTTAAACACACCACAAATTACGCCAACAAAGAAGATAACAGTGAGGGCTATCGGGCAGGAACGCGCGTGGTGA  
TTACCAACGTTGCCCGCAATGTGACATGCTGTTTACGCTGCCCGAGATAAATTCTCATCAAAGTGCCTATTGTCCGCGCT  
GTCAGGCAAAAATTCGCGACGGGGCGGACTGGTGGCTAACCGCGCTGGCGGCAATGGCCTCACCATGCTGTTGCTTATG  
CCGTTTGGCTGGGGCGAACCGCTCTTGCATATCTGGCTGTTAGGCATTCGTATGACGCCAACGTTATGCAAGGCATCTG  
GCAAAATGACCAAAACAGCGATGCGATAACGGGGCGGAGGCTTTTTCTGCGTATCGGTGCGCCATTTTTCGGTGA  
CCTCCATAGCTTATTTATGGTTTGGTAACCGATGGGAATGAATTTACGCCCGGTACTGCTGATGCTTGGCGGCTGAAA  
GAGTGGGTGATGCTGGATATCTACTGGTGGCATTGGCGTGTCTTATAAAGGTACAGGATATGCCCATATCCAGGC  
GGGTGTCGGCTTGTCTCTTTTGGCGTGGTGGATTTAACGACGGTGGCTGTCACATCTTAATGTTGAAGAACGTTG  
GGAGCGATTTTACACAGCGCCGCTACCCGTAGGGCAGGAACTCCGTGCTGCTTGGGTGCCATTTTTCGGC  
TATCTGATCAGCGGGTGGCTGCCCGGTTGCCATATCCCGTACGCTGCGTGGCGTATAGTCTGCAAAAATGCTG  
GGCGCGCTGTTAGCGTCAATCGTTTGTGTTACCTGCCAACGTTGCTTATCTCATTTATGAAATGGTGGT  
GGCAGGAAGATACGATTTTCCGGAATATGTCGCTGGCAAGTAGCAACATTTGGGTTGGGGAAATCGTGTATTACGCC  
AGTATTCAGTACCGTTTACTAAAGTATCGTCAATGTTCACTTTACTGTTGAGTATTCATTTTAAATGCCAGCAAGGTT  
ACGCACACGCTTCTGTTACTGCGGATGGTGGCTGGATTGGTGGTGGTGGTGGTGGTGGTGGTGGTGGTGGTGGTGGT  
CCATGTCGCTGATTAATCCGATCAGATCCTCGCTTTTACTATGGGACCGGCTGCGTTTATTTCGGGCGAGCGGTAAT  
TTGACTATCTTGGCTGGAAATGGCTGGACAGCGCTTACTTTGGGATGCACATGAGTACAGAAACGCCCGCTTCGACGA  
CTGA

>Cluster\_11742

ATGAAAACAACTACTTTAAACGACAACCATATTGCACATTTAAACGCCAAAACACTACAAAACCTGGAATATTTAAACTT  
AAGCAATAACAATTTACTGCCAACCAATGACATTTGATCAACTAATATCATCAAACATCTTTGGCATGTATTAGTTAAGC  
GCATCAACAATGATCCACTTGCACAAAATGCAGTACTGGACTGCAGTAAGAAATAAATGATGACACTAATGAAGTACC  
ATTGATTTATCAGGACTTAATTTAACCACTCAACCACAGGGCTGCAAAACTTCACTTATCAATCTTGATAATAACCA  
ACTCACACATTTTATGATGCAACCACTACGATAGACTCGTAAAGCTAAGTCTGAATAGTAAATACCTTGGAGTCAATAAAT  
TTCTCTCAAGCGAATAATGTAAGTATTACACATATATCTATGAATAAATGCTCTCAGAAATATTGATATAGGCTT  
TCATCAGTTACTTATTTTGTGGCGCACATAATCAACTAGAGTGTGTGCAATTAGAATCTGCGAATGGCTGCAATACCT  
GAATCTCAGCCATAATCAATTAAGTATGTTGTCAGGTAATAAAAATGAACCTTACTGCTGGATCTATCCCATAAATA  
AACTAACAAAGTTTACACAATGACTTATTTCCCAACTTGAATACGTTACTTATTAACAACAATTTGCTTTCTGAAATTA  
ATAATCTATAGTCAACTTCTGCAATGTTTCAGACATTAACCGCTGCTAACACCAAGTGAATAATATAAATCTGATTTCT  
GACTTATCTTCCATCTATCAAAAGTTTAAAGCTGGACAATAAATAAATAACCCACATTTGATACATAATAATACATCCGATA  
TTGGAACCTTATTTCCCATAAATAAACAAGAGCAAAAACCTTAAATTTTTTAAATGTTTCTGGGAAGAACAATGGCCTACT  
ATGCAGCTCATGTTATTTAATTTGTTTTCCAGCACTTAAGCTTAAACTGGCTGGCAATTTCTTCGCTGGTGCATT  
TGAATTCACCTCTGACGGAATAGATGTGGATAAACGAATGTTTCACTATCCTATTAATAAAGCATATACCCCATATAATA  
TACACACTTACAAGACAGAGGAAGTGTAAACAGAGGAATATAAAGTTAAACAATGACCTTAGATGAAATAACAAT  
ACTTACTGTAATAACGATATTACAATCAGGCAATAAGAGAGGAACCGATAGACCTTCGACAGATCGTTTTCTCCAG  
TTCATGGCCTTTTTAG

>Cluster\_24412

ATGGGTAACAACGTCGTCGACTGGGCACCCAATGGGGTGACGAAGGTAAGGTAAGATCGTCGATCTTCTGACTGAACG  
GGCTAAATATGTTTACGCTACCGAGGGCGTCAACAACGAGGCGATACTCTCGTAATCAACGGTGAAGAAACCGTTCTCC  
ATCTTATCCATCAGTATCTCCGCGAAGATGTAACACAGCATCATCGTAAACGGTATGTCGTCGCTCCGCTGGCTG  
ATGAAAGAGATGAAAGAATCGAAAGACCTGGAAAGACCTGGCCTCCCGTTCGTCGAGCGTCTGCTGTCGCGAAGCATGTCGCTGAT  
CCTTGATTTACGCTTGGCTGGATAACGGCGTGAGAAAGCGGCTGGCGGAAAGCGATCGGCACACCGGCTGGTGA  
TCGGGCTGCTTATGAAAGATAAAGTGGCAGCTGCGGCTGCGTGTGGCGACCTTTTCGACAAAGAAACCTTCGCTGAA  
AAACTGAAAGAGTGAAGATAATCACAACCTCCAGTTGGTAACTTACAAAGCTGAAGCGGTTGATTTACCAAGAAAGT  
TCTGGATGATACGATGGCTGTTGCCGACATCTGACTTCTATGGTGTGTCGCTTCTGATCTGCTCGACAGGCGGCTC  
AGCGTGGCGATTTCTGTCATGTTTGAAGTGGCGAGGGTACGCTGCTGGATATCGACCAGGCACTTATCCGTACGTAAC  
TCTTCCAACACCACTGCTGGTGGCGTGGCGACCGGTTCCGCGCTGGGCGCGGTTATGTTGATTACGTTCTGGGTATCT  
CAAAGCTTACTCCACTCGTGGTGGTGGTGGTGGTGGTGGTGGTGGTGGTGGTGGTGGTGGTGGTGGTGGTGGTGGTGGT  
AGGGTAAACGAATTCGGCGCAACTACGGGTCGTCGTCGTCGTCGTCGTCGTCGTCGTCGTCGTCGTCGTCGTCGTCGTC  
CAGCTGAACCTCTCTGTCGCTGGCTTCTGCCGACTAACTGGAGCTTCTGGATGGCTGAAAGAGGTTAAACTCTGCGTGGC  
TTACCGTATGCCGGATGGTGGTGAAGTACTACCACTCCGCTGGCAGCTGACGACTGGAAAGGTTAGAGCCGATTTACG  
AAACCATGCCGGCTGGTGGTGAATCCACTTCCGCGTGAAGATCGTAGCGGCTGCCGAGGCACTGAACTACATC  
AAGCGATTAAGAGCTGACCGGTGGCGATCGATATCATCTTACCAGTCCGGATCGTACTGAAACCATGATTTCTGCG  
CGACCCGTTCCAGCGTAA

>Cluster\_27506

ATGACGCGCGTGTCTATCGGGGTGAGTGAAGACCGCCACTTTTACAGACAATCCCGCTAGTTTGAACATTTGTTTCGC  
CATGTTTGGTGAACCGTCTGGTGGCGCTTATTTTCAATTTAACCCGGCGACTGTACTGTTATTTAACGGTATAGGAA  
CACTGCTGTATCTCTTCTGTAAAGGAAAAATTCGGCTTATCTTGGTTCAGCTTTGCTTTATTTTACCCGGTATTTG  
TTACTGTTGCCCTTAGGGTATGAAGTGGCTGGCGGCTTTATATGTCGCGGCTGCTGTTCTGCCTGGTTTCTTTTAT  
CGTGAAGAAAGCGGGACCGGCTGGCTGGACGCTGTTTCCACCTGCGGCAATGGGGCAATCGTTGCGCTCATCGGTC  
TGGAGCTGGCGGGCTAGCTGCCGGTATGGCGGTTTACTCCGGCTGAAGGGCAAACGCCAGACTCCAAAACCATCATC  
ATCTCTATTACCACCTGGCAGTACGGTTTTAGGTTCCGTCGTTTTCGTTGTTTCTGGAATATCCCGATTTTAAAT  
TGGGTGCTGGTGGGGTACGCGCTCTCTTTCGCAATGGGAATGTCGATACCAGCCTAATTTAACCGTCACTGGTTG  
CGTGCCAAACCTCTATACACCGGCTTCGAGTGGTTCGCTATTTCTGACTATTTTGGCAGCGGCACTGGTGGTCAATTGCC  
GAACACGTAGGGCACCTGGTCTAACCGTAACATCGTCAAAAAGATCTACTGCGGATCCGGGCTGCACCGTTCGAT  
GTTTGTAAACCGCTGTCGACCGTATCTCCGGTTTCTTGGTTCCACACCAACACCACTATGGGGAAAACATCGGCG  
TGATGGCGATCACCCGCTTACAGTACTGGTATCCGGTATCCGGGCTGGCGGATTTTCGCTATCCGCTTCTGCGTGGT  
AAACTGGCTGCTGATCCAGATGATTTCAATGGCGGCTGATGGGGCGGTTTCCGCTGCTGCTTACGGTGTCACTGGTGC  
TTCCGGTATTCGTTGTTGATCGAATCGAAAGTGGATTACAACAAGCACAGAACTGATCCTGACTTCCGTTATTTTGA  
TCATCGCGCTCAGTGGCGGAAGGTAACATTTGGCGCGGAGCTGAAAGGATGGCGCTGGCGACCATCGTGGTATC  
GGCTTAAAGTTTGAATCTTCAACTGATTAGTATGCTGCGCCCTGAAGAAGTGGTCTGGACGCAAGAGCGGGATATAAC  
AGACAATAA

>Cluster\_24222

ATGAAAGTATTAGTATTGGTAACGGCGGGCGGAGCAGCGCTGGCTGGAAAGCGGCCAGTCCGCGTGGTTGAAAC  
TGTTTTTGTGTCGCGGTAATGCAGGCACTGCGCTGGAAACCACTGCAAAAACGTCGCTATCGCGGTAACCGATATCC  
CGGCGTGTGGATTTCCGCGAAAACGAAAAGATCGATCTGACATCGTGGCCGGAAAGCGCGCTGGTGAAGGCGT  
GTTGATACCTTCCGCGCCCGGGCTGAAAATCTTCCGGCCAAACCGAGGTGGCGCGAGCTGGAAGGCTCGAAAGCGGT  
TACCAAGGATTTCTGCGCCGCAATAACATTTCTACGGGCAATACAGAACTTACCAGGATGAACTTCCGCTGCGGCT  
ATCTGCGTGAAGGGTGGCGCAATCGTCAATTAAGCGGAGCGTGGCTGCCGGAAAGCGGTTATCGTGGCGATGACG  
CTGGAAGAAGCGGAGCGGCTGTTACGATATGCTGGCGGCAACGCTTTTGGCGACGCGGTCATCGCATGTTATCGA

AGAGTTCTCGACGGCGAAGAAGCGAGCTTTATCGTGATGGTAGACGGCGAGCATGTGCTGCCGATGGCCACCAGCCAGG  
ATCACAAACCGGTAGCGGATAAAGATACCGGGCGAACACCGGGCGGATGGGCGCTTACTCCCTGCGCCAGTAGTGACT  
GATGAGGTTTCATCAGCGCAGATGGAGCGTATCATCTGGCCAACCGTGAAGGCATGGCGGGGAAGGCAACACCTACAC  
TGGTTTTCTTACCGGGGCTGATGATCGACAAACAGGCAATCCGAAGGTTAATGAATTTAACTGCCCCTTTGGCGATC  
CGAAACCCAGCGATTATFGCTGCGCATGAAGTCGATCTGGTTGAGCTCTGCCCTGGCGGCTGTGAAGGTACCGTTGAC  
GAGAAAACGTCCGATGGGATGAACGCGCTTCTCTCGGCGTGGTGATGGCTGCGGGTGGATATCCGGGCGATTACCGCAC  
CGGCGATGTGATCCAGCGCTGCCGCTGGAAGAAGTGGCAGACGGCAAAGTGTCCACGCGGGCACGAAACTGGCGGATG  
ACGAGCAGGTAGTGACCAGCGGGCGGCGTACTGTGCGTTACCGCGTGGGTATACCGTGGCAGAAGCGCAGAAACGC  
GCTTATGCCTTAATGACAGATATCCATTGGGACGACAGCTTCTGCCGAAAGATATCGGCTGGCGGCTATCGAACCGGA  
GCAGAACTAA

>Cluster\_25165

TTGGCCTCGTGGTTCCTTATCTGCAAGCTATCACTTTATTTGGCTACGGTGATGGTAGCCGTTCTGGTGGTTGTGATGG  
TGGTATGAAAAAAGTTATTTTATCTTTGGCTCTGGGCAGCTTTGGTTTGGGGATGGCCGAATTTGGCATTATGGGCGTGC  
TCACGGAGCTGGCGCATAACGTAGGAATTTGATTTCTGCCGCGGGCATAATGATCTCGTATTATGCGCTGGGGTGGTG  
GTCGGTGGCGCTATAATCGCGCTTTTTCCAGCGCTACTCACFAAAACATATCTTGTGTTTTCTGGTGGCGTTGTGCGT  
CATTTGGCAACGCCATGTTCCAGCTCTCTTCGTCTTACCATGATGCTGCCATTTGGTGGCTGGTTCCGGCTTTCCGCATG  
GTGCATTTTTTTGGCGTGGCGGATCGTGTATCAAAAATTATCAAACCCGGCAAAGTACCAGCGGCTGGCAGGGATG  
GTTTCCGGGATGACAGTCGCAATTTGCTGGGCATTCCACTGGGAACGATTTAAGTCAGGAATTTAGTTGGCGTTACAC  
CTTTTTTGTGATCGCTGTTTTAATATTTGCGGTGATGGCATCGGTCTATTTTTGGGTGCGGATATTCGCGACGAGGCGA  
AAGGAAAACACTACCGCAAAATTTCACTTTTTACGCAAGCCCTGCCCGTGGTTAATTTTCGCGCTACGATGTTTTGGCAAC  
GCAGGTGTTTTGGCTGGTTTCAGCTACGTAAGCCATACATGATTTTTTTCGTTTTTCGAAACGGCGATGACCTT  
TATTATGATGTTAGTTGGCTAGGGATGGTGTGGGAAATATGTAAGTGGCAGGATTTACAGGACGTTATTCACCACTGC  
GAATTTGCAGCAGTACTGACTTTTATCATTTGACTGGCACTGCTGATGCTTTTTTCTTCGCGGATGAAAAACACGTCG  
CTTATTTTTGCTTTTTTATTTGTTGCGCGGATTAATTTGCCCTATCAGCACCTCTACAAATATTATTACTCAAAATGCCAA  
AGGCGGAGAGTTATAGGTGCGCGAGGTGGGCAATAGCGTTTAACTTCGGTAGCGCCGTCGGCGCATATGCGGTGGTA  
TGATGCTGACGCTGGGCTGGCATATAATACGTGGCGTGGCCGCGCCCTGCTTTCGTTTGTGCGATGTCGTCGTTG  
CTGCTGTATGGTGGTAAAGCGCCAGCAAGCGGCGGATAGTCCGGTGTGGCGAAACCACTGGGGTAG

>Cluster\_36513

ATGAAACGTGAGTACTTGGCTGGGCATTTGTTCCAGCATCGGTAATAACAGCAGGAAGTCTGGCATCTCTGCG  
TGAAGGACCTTCAGGGATCACTTCTCTCAGGAGCTGAAGGATTCGCGCATGCGTAGCCACGCTGGGCAACGTA  
TGGATAACCACTGGCCTCATTGACCGCAAAGTTGTCGCTTTATGAGCGACGCATCCATTTATGCATTCCTTTCTATGGAG  
CAGGCAATCGCTGATGCGGGCTCTCTCGGAAGCTTACCAGAATAACCCGCGGTTGGCCTGATTGCGAATTCGCGG  
CGGCTCCCGCGTTTCCAGGTGTTGCGGCTGACGCAATGCGCGCCCGCGGCGCTGAAAGCGGTTGGCCCGTATGTTG  
TCACCAAAGCGATGGCATCCGGCCTTCTGCGCTGCCACCCCGTTAAAATTCATGGCGTTAACTACTCCATCAGC  
TCCGCTGTGCGACTCCGCACACTGTATCGGTAACGCACTAGAGCAGATCCAACCTGGGCAACAGGACATCGTGTTCG  
TGGCGGCGGCAAGAGCTGTGCTGGGAAATGGCTTCCGAAATTCGACGCATGCGCAATGGGTGCGCTGTCTACTAAATCAACGACA  
CCCCGAAAAAGCCTCCCGTACTTACGACGCTCACCGTACGGTTTCGTTATCGCTGGCGGCGGCGGATGGTAGTGGTT  
GAAGAGCTGGAACACGCGCTGGCGCGTGGTGTCTACATCTATGCTGAAATCGTTGGCTACGGCGCAACCTCTGATGGTGC  
AGCATAGGTTGCTCCGCTGGCGAAGCGCAGTACGCTGCATGAAGATGGCGATGCATGGCGTTGATGCCCAATCGATT  
ACCTGAACTCCACGGTACTTCGACTCCGGTTGGCGACTGAAAGAGCTGGCAGCTATCCGTGAAAGTGTTCGCGGATAAG  
AGCCCGGCGATTTCTGCAACCAAAGCCATGACCGGTCACTCTCTGGGCGCTGCTGGCGTACAGGAAGCTATCTACTCTCT  
GCTGATGCTGGAACACGGCTTTATCGCCCGGAGCATCAACATTTGAAGAGCTGGACGAGCAGGCTGCGGGTCTGAACATCG  
TGACCGAAACGACCGATCGCAACTGACCACCGTTATGCTAACAGCTTCGGCTTCGGCGCACCAACGCCACGCTGGTA  
ATGCGCAAGCTGAAAGATTAA

>Cluster\_38365

ATGGCGCTGTCTGATGCGTGGTTCAGTCTGTTGGAAAGGAACGTGATAAGGTTTTGGTTAAATCCGATCGTGATGG  
TCTGTCTGTCAGAGTATCACCGAAAGGTCGCGTAGTGTTCCTCAATATCGTTATCAATGGGCAGGAAAGGTGAGCGCCTTG  
ATATCGGAACTTACCCGGCAACTGGACTAAAAGAGGCCAGAGAAGAAGTTATCCGCTCTCGTGGTGAACCTGAGTCAAAC  
CGCAATCCACGATTTGGTCAAGCTGGCAGAAAAACGTAAGCTACTGAAGCCATGACGCTAGAACTCTGTGATCCGTGCTTG  
GTATGAAGCATATTTGTTAAAAATAAAAAAGTTCTGAACGATACTCCGCTCGTTTGGCTGCACCTGTTCTCTAAAA  
TCGGAAATATCCCTCACGATGACGCTACATTTGCATGATTTGGTTAGAAGTCTGGAGCCCTTTAGCACTTAAGACTCAAGCA  
ATAGCAGACCGATTGCTAATTAACGCAAGCAGGCCATGCTCTGGCGTATAAGAGAAAGCTCATGAAACTCGCCCGCT  
GTCGGATATCACGGGTAAGATATGGATATCCGTAAGGTCAGAAAGAACGGTTTCTGACACATGATGAAATTTAAATCC  
TTTTATGCTGCGATCGATGGTCTCGAATGGTTCCTAAATACCGGGCTTCAATTAACCTATGCTGCATTTGGTTCGCTG  
AGTTTCAGAGCTAATTTACTGCCAAGGTGGACGATTTGATTTTCAATTAATAAATATGGACTGTACCACCAAGACGACATAA  
GACAGGGATATAACAGGCAACCGCTAAAGCGGCCATATTTGAACCGTTGAAGAGCTTATAAATACGTTATCTCTTA  
TGAACAACGGTTCCGATATGCTTTTTACTAAGGAAGGAAGCAGGAAACAGTTGGTTCGGACATCATTTGAGTCTGCTG  
TACAATTTAATGACTACGATGCGCGCTTTGGGTTCAATTTCTCATTTGGTCTCTTTCATGATTTGAGACGAACAGC  
ACGAAACAACTTTTCTGATCTTACTGCGCTCATATTGCTGAAATAATGCTCGGTATAAACTGCCAGGTGATGCGCAAG  
TTTTATGACAAGAGTGATTATCTAGAAGAACAGCGTAAAGCCTACCAGGATGGTGGGAGAGAGTTGAATCGATTGTTACT  
TGTACTCGTTCAGGCTCGAAATGA

>Cluster\_8849

ATGTTAACAGCCTCGCTGGCGCTACGTAATAAAGAAAAGTGGAAACCGTACTGGAATAAAGCGTTGGTATTCCTTTTAT  
TGCAACCTTTTTCTGATGGTATAACCGTTATAAACACATCATATCTATACATTAATGATATTTACGGTAATCTATCAAG  
TTTTCTGCTCGCGGAAACATTTAAAGTACTCTATAAAAAATACTTTTTTATAGTGTCTGGCACTATCACTCATTTCT  
TTATATGCTACTTTTATATACCTGATCTGAAAATCAGTTTAAAGAAATTCAGTAATACGGTACTTAAAGGATTTTGGC  
CTATAGTTTACTTATACCTGCATTAATAAAGATGAAGATAATGAAAGCATTTGGTAAAATTTGACTATACTCATTTAGTTA  
CCGACTTGGCTTACGTTGCTTGTGTAAGTATTTCTTATATATCAGGATTAATAAAGGAATAATGCCATTTTCCACC  
TATGAACACCGTAGTATTTCCGATTCATGGTGTCTGTTTCCAGCATTAATAAACCTTTGGCTTATCAAGAAAACCTC  
TTATAAATAGCATTTTACCATGCAATATAAATAAGCGTGTGTTAGATTTTCCGTCATGGAAGTTCAGGCAATCCATTGG  
CAGTATTCATAGTACTCTGCTATGGTTAATCTTAAATCGTCAAGTGAATAATTTGATGCTGACTTCCATCGTTATTTCT  
GTTGCCGAGTGGTGTATTTACCTATAAAGGTGATCATGCTGTAAGACAGGCTTATTTATAAACTCAACAGACCGCA  
CAGTTCTTATCGTATACCAATGGTACTCAAGTACGGCGTGGACATTAATTTAGGAAAATCTCTTAAAGGATATGGCT  
ACGGCAGTATGATTTTACCATGCAATATAAATAAGCGTGTGTTAGATTTTCCGTCATGGAAGTTCAGGCAATCCATTGG  
CCACACAACGTTGTTTTGTTCAATTTGGTTTGCAGCGGTTGGCTGGACTACTCGTTTACTTTATCTGTATGGCTCTAT  
TATCAAAGAGACGCTAATGCAACGTTTAAACAGTTGCTGCTACTCTTATAATGGTCAATTTACTACTATTTTTTAAACC  
TTGTAAGCTTTTATATTAATTCGAGGTAACCTCGAGGAAGTTGATCTCAAACCAATTTGGCTTGAATGTTGGTTTACTGTTA  
GCAATGCGGAATAAATAA

>Cluster\_23846



ATGTTATCCTCATATAAAAAAAAACCTTCTCAATGGTGGCATGCGTAATCGGGAATTACAACCTCCGATGGGAAACCTAAC  
GCTAGGTACGGAAGATAACGATATGTTTACTTTCCCTTGAACAAGGCTCAATCAGTTTTTACTTGATATACGTGAGG  
AAGGTGTTTTCTTTTATCTCCGGTTGAATTTTGGATTGATGGCAACCCACGCCATGAAGCAGATAAACCATTACCT  
GTCGGAAAGGTTATGATATAGCGGGATGTTGCTTTCATCATTTGGTGATATTGACCATTCTTGGCATTGTCTGATGTGCC  
AGAAAGGTTTTCTGCGAAAAATCAACGAAAAAGCCTTATCCTGGCGAGCGTGATTTGGTGTACTTTTGGCGTTGCTG  
GTGCCATCGGCAGTTACGTTTTGCTTTCCCAAAAGCTGAACCCCAACGTTTACCAGAGCTGATGTATATCAGCAGCTA  
AAAGAAAAACAACCTCATGCAATCACTCTGGTATGGCATGGAAAAAATATCGCGCTTTATGGGCGTTGCGAATCAACC  
GGATTTAACTCCATTTTTTAATTAACCTGAAAGAAAAAATATTTTTTATTACAATAATATCATTTGCAATAACAGATCA  
TATCCGCAATTAATGATGCTTAAACGGAATACGGTTATAAAGATATCATCATTAACAAAAGGTAATAAGCTGGATTTCT  
CTGTTATCGGGATACATTTCCCTTACCCAAATGGAGCGAAGTTGAAAACTGTTACTGAATACGCCAGGGGTTGCAGG  
ATGGGAAATACACAACAACAGTAACAATAAAATCAATGAACTGGCATCAGAGTTTAAAAAGAAATAAACATAAACTATG  
TCAATATTTTCAAAAAGAAATGATGTCATCATTTGCGGGGGAAGTTTCTCAACAGAAATGAGAGTAAGATCCTTGCCATT  
ATAAATGCAATGAACAAAAATAGTAACGTCAAGTACTCTTTCAGAACATTCAGCCGTACATTTAGCAGATATTTTTCC  
CGGAAAAATACTCAGAATCAGCGGTACGATGAAGAATCTACAATGCTCTTGATAATGGTACCAGCCTCGGGATTGGTA  
GCATTTCTGAAAGGAGGCTATGTCATCGACGCAATTGATCCTAAAGATGGTATCAACATCTCCGCCAGCAGAAATATA  
CATATCCACTGTCTGATTA

>Cluster\_58518

ATGAATAAACAACTCTGGCTGCTTAACTCAGCCTGTTGAAAACGCACCCGGCGTTTCGCGCAGTATTCCTCGCTCGTTT  
CATCTCAATGTTGCTCTGGGTTTGGCTCGCGCTCGCGGTGCGCGTGCAGATCCAGATGATGACACATTCACCTGGCAGG  
TGGGGTTTTCGGTGACGCTGACCGCGCGCGCATGTTTGGCTGATGGCTGGCGGTGTCGTCGGGATCGCTATGAG  
CGCAAAAAAGATGATTTTGGTGGCGCGCGCACCTGTTGGCATTGGCTTCAATGGACTGTGCTTAAATGCATGCTCGGA  
GCCGTCATTGCTGGCAATCTATTTACTTGGTTTATGGGATGGTTTTTTCGCATCGCTTGGCGTTACGGCGCTATGGCGG  
CGACACCAGCAGCTGGTAGGGCGTAAAACTTAAATGCAGCCGGGGCGATCACCATGTTGACCGTGGCTCTGGGGTCGGT  
ATTTCCCGCATGATTTGGTGGCTTATTTGGCGACCGGAGCTGGCAGTACCAGTACCGGCTGGCGCGGCGCAGCTT  
TATTACCTTGCTACCGTTGTTAAGCCTTCCGGCGTTGCCACCGCCACCGCAGCCGCTGAGCATCCGTTGAAATCATTAC  
TGGCAGGATTTCTGTTTCTGCTTCCAGCCGCTGGTGGCGGGATTGGCTGCTGGGTGGTTTATTGACGATGGCGAGC  
CGGTTGGCGGTTACTGTATCCGGCGCTGGCTGACAACTGGCAGATGTCAGCGGCACAGATTTGGTTTTCTACCGCGGAT  
CCCGCTCGCGCGGCTATTTGGTGGCTTAACTGAGCGGAACTGGCAGATAGTGCAGCAGCAGGTTATTGATGCTGCTCT  
CCACGCTGGGATCGTTCCCGCATTGGTCTGTTTGGCTGATGCCGATGTTGGATTTTAGCGGTGGTTTGTCTGGCGCTG  
TTCGGCTGTTGAGTGGCGTCACTGCTGCTGCAATACAAATGCTGCAACGCAAAACCCCGAAGCGATGTTAGGGCG  
GATTAACGGTTTGGTGGCGCGCAGAACGTGACGGCGGATGCCATAGGCGCGCGCTGCTGGGTGGTTTGGCGCGATGA  
TGACACCGTTGCTTCCCGAAGCGCGAGCGGTTTGGTTGTTGATTATTCGGCGTGTATTATGCTGCTGGTGGGAG  
TTGCGACATTTTCGCGACAGCCGCGCAGGTGACAGCGTCCGACAGTTAA

>Cluster\_60701

ATGTCAGGATCAACACTGCAATCAGCCGTCGTCGTTTACTGCAAGGCGCGGGTGCATGTGGCTATTGAGCGTAAGTCA  
GGTCAGTCTGGCTGGCTGAGCCAGGTCGTTGGCGGTGCGCGTCTGGCTGCGTCCAGCTACACCCGCGTGACCGTGAAT  
CAAACTGCTCAGCTGAAATAAAGCAGTTCCGCTTGAATACCCGTAACCGCTGGTGGTGGATATCGAAGATGTAACCTG  
AACTCGGTTACTCAAGGGGATGGCGGCACAAATTCGTCAGCAGCAGCCGTTTCATCAAGTCGGCGCGCTCGGGCAATTTGA  
CCCGCAAAACCGTACGGATGGTTTTTGAATTAAGCAAAACGTAAAAACCGCAGCTGTTTGGCTTGGCGGTTGGCGGGT  
TTAAAGAGCGTCTCGGTGATGGACTCTTATCCGGCAATGCACAGGATATGCAGGACCCGCTGCTGGCGCTGCTGGAGGAT  
TACAACAAAGGCGACCTCGAAAAGCAGGTGCGCGCAGCGCAAAGTGGTCCACAACCGGTTAAAGCAGGGCGCGATCGTCC  
GATGTCATATGCTGACCTGGCCAGCGTGGCGAAGACTCCGGTGGCGGAAATACAAAACCGCGCAAAAAGATG  
TGGTATTGCAAAATGCTGCGCTTTCGCTCTCTGATCAGAAAAGAGGCAATATGAAGGTGTACATGACGCGCAATGAA  
GACATCTTCAATCCATTGCAAGTGCAGTAGCAAAAAGCCAGAAAACAGCGTGTGACCTGTTTGTCTCTATCCATGCCGA  
CGCTTTTACCAGTCTGACCGGAGCGGTTCCCTCTGTTTGGCTCTCAACCAAGGTGCAACAGTACTGCGGCAAAAT  
ATCTGGCACAACCCAGAACGCCCTCGGACTTGAATGGTGGCGTGGCAAAAAGCGGTGACCGCTATGTCGACCACACCATG  
TTCGATATGGTACAGTCTGCTGACCATTTGCCAGCAGCTGAAATTTGGTAAAGCGGTACTGAATAAGCTCGGTAAACATCA  
CAAGCTGCATAAAAATCAAGTTGAACAGCGCGGTTTGGCGTACTAAAGGCACAGATATTCCTCCATTTCTGGTTCGAAA  
CGCGTTTTATCAGTAACCTTGGAGAAAGCGGTAACACTGAAAACGGCGACTTTCAGCAGGAAAGTTGCGGAGTCTATTCT  
CGGGGATTAAGCGTATTTTGGCGATGGGGCAGCGTGGCGAGAAGGGATGA

>Cluster\_21266

ATGGATAAACTACTTGAGCGATTTTTGAACTACGTGCTCTGGATACCAATCAAAGGCAGGGGTGAGACAGGTTCCAG  
CACGGAAGCCAAATGGAAGTTATGTCATCTGCTGAAAGAGCAGCTGAAAGAGATGGGGCTTATCAATGTGACCTTAAAGTG  
AGAAGGCGATTTGATGGCGACGTTACCGGTAACCTCCCTGGCGATATCCCGGCTATGGCTTATTCTCATGTGGAT  
ACCTCACCGGATTCAGCGCGCAAAAATGTAATCCGCAAAATTTGAAAACATATCGCGGTGGCGATTCGCGGAT  
CGCGATGAAGTTTTATCACCGGTTATGTTCCCGTGTGTCATCAGCTACTGGGTGAGCAGCTGATTACCACCGATGGTA  
AAACCTTGTAGGTGCGGATGACAAAGCAGGTTATGCAAAAATCATGACCGCGCTGGCGGTTATGCAAAAACCAAAAT  
CCGATGGTGATATTCGCTGCTTACCCCGATGAAGAATGGGGCAAGGGGCAAGCATTTTGAATTTGACGCTT  
CGATGCGCGTGGCTTACACCGTTGATGGTGGTGGCGTAGGTGAACTGGAGTTTGAAAAACCTCAACCGCGTTCGGTCA  
ATATCAAAAATGTCGGTAACAATGTTACCCGGCAGCGGAAAGGATGATGGTAAATGCGCTGTCGCTGGCGGACGCT  
ATTCATGCGGAAAGTTCCGGCGGATGAAAGCCCGGAAATGACAGAAGGCTATGAAGTTTCTATCACCTGGCGAGCATGAA  
AGGACCGTTGAACGGCGGATATGCACTACATCATCCGTGATTTGACCGTAAACAGTTTGAAGCTGATGAGGATGATAA  
TGATGGAGATCGCAAAAAGTGGGCAAGGGTTACATCTGATTGCTACATTTGAACTGGTGAATGAAGACAGTTACTAC  
AATATGCGCGAGAAAGTGGTTGAGCATCCGATATTTCTGATATCGCCAGCAGGCGATGCGTACTGCGATATGAAAC  
GGAAGTGAACCGATCCGCGCGGTACCGAGCGCGCAGTTGCTGTTTATGGGATACCGTGGCCGAACCTGTTACATG  
CGGTTACAACATCATGTTAAGCATGATTTTGGACTCTGAAAGGATGGAAAAAGCGGTGACAGGTGATCGTCCGTATT  
GCCGAGTTGACGGCGCAACGGAAGTAA

>Cluster\_183

GTGGGAAATCTTCTTTGATTAATGCTTTAACCAGCAAGAACCTTGGCATGTTTTCGGATATTCAGGAACTACCCTGA  
CCCGTAGAAAAAGTATGGAGATTTCTCCCTTAGGGCTGTGGTAATCATAGATACAGCTGGAAATGACGATGATAGGTA  
AATTTGGGAGTTGCGGAAAAAGAGTCTTATGAAGTGTAAATAAAGCAGATTTGGTGTGCTGGTAATGACCCATG  
ACAGGTTTTCGGAGAAATTTGAGGAAGAGGTAGTAAAAAGGCTAAGGATATGATACTCCGTTAGTGCATGTGATAAATA  
AATAGACACTTTATCTCAGGCTAAAACACAAAAATTTCCAGAACCTAAGGTTTTTCGTAAGTGC TAAGATAAAGAAAGGA  
TAGACAGTTTAAAACAGGTGATCATAAAGCATGACCCAAAGACTGGGCTCTTCAACTATAGTAGGAGATGATAA  
CCTGGAGATTTTGTGGTATGTTAGTCCCGGTAGATAAAGCAGCTCTAAAGGTAGACTTATTTTGGCTCAACAGATGGT  
TATAAGAGACATTTTAGATAAATGAAGCTATCGCTTGGTGGTAAAAGAAAGGGAGCTTAGGTTTTGTTTTTGA  
AGGTTAAACCAAGTCTGGTGGTAAACAGATGCTCGTTTACACAAAGTTTCTGCAGACACTCCACGACATAGGCTT  
ACGCTTTTTTCTGTTCTTTTCGCAAGATATAAGGGGATTTGCAAAACCTGGTGAAGGGGTTCTGCTGTAAGACACT  
TAAGCCTGGAGATAAAGTGTGATCGCAGAGGCTTGTACCCATCATCTGTAGAGATGATATAGGTAGGGTAAAAATTC

CCAGATGGCTTAGGGCTCAGGTAGGACAAGACCTTGAATAGAGGTAAGAGCAGGTGGAGGGCTTCTTCTGAAAACCTT  
GAGCAATAATAACGATCGTTTATTGCGGAGCTTGCATGCTAAATAGAAAAGAAATGCTTCAAGGATTATGCAAGCTAA  
GAGTGCCAAGGTTCTTATCGTAAATATGGGGTAATGTTGGCCACATGCATGGGATTTAAAAGAGCTCTTCTCCTT  
TTCTCATTTGCAACGGTGGTTGTTTCTGAAATCAGAGATTAAAAAAATCGCAGATGACTTTAAATGCATAAAAGCT  
TTCTTTTAAAAAGAACAACTAA

>Cluster\_28966

ATGCTGAAAAGTTACCCGCACCAGCTGAAGGGCTTCCGGTAAAGCCATGAGACGTGTCGTTATGGGAGTTTCCGAGG  
CGCGTAAATGGAATGGATGACTTCTTATTTTGGCAGCCGACAGGACTGGTATTTGCACCCTGTTTATCCAGACA  
GCGATCCCTTTATAGGTCATATAGCTTCCCTTTGGCAGCTTTGGTGGTGGTTTCTGACTCGTCTTTAGGTGGCAGCTC  
TTTGGTCAATTTGGCGATAAAATCGGGCAAAAATAACACTTATCTGGACGCTGGCTATTGTCCGTTGTCTCCACATTTT  
GATTTGGTTTTATCCGACGATATCAGGAAATGGGCAATTTGGCAGCCGCTTGTATTAATGGTGTGCTTGGATTGAGGCT  
TTGGTCTTTGGTGGCGAGTACGGCCGGAGCGGCATTTGATGACCATAGAATCAGCGCCCGAATCCCGACCGGATTTTAGGT  
TCACATCCCGCAACCGCTGCTGCTGCTGATTTATGCTGGCAACCGGATTTTGTCTCTGTAAACCATTTTCTTACTTC  
GGAGCAGTTTCTCTCTGGGGATGGCGCATTCGGTTTTGGCTTCTGCGGTGATGTTGATCGTTGGGCCTGTTTATCCGCC  
TGATACCGAAGAAACGCTGGATTTCAAAGCAAAAACGACGAATAAAGAAAAGTCCGTTCTCCGTTGATTGAA  
TTATTTCAAATAACATCCAGAAAATTTTTATGGCACTGGGTGGAGGCTGGCGGAAAGTGTCTCTTAATATTTAA  
CGCTTTTTGGTATTGTCTATATTTCCAGCAATTTAGCATTTGCTGCGAGAGATTTCCCTGACGGGTATGTTGCTCCG  
CGATCGGTTATTTAGTTGTCCATTTGGTTGGATGTTATCAGATCGTATAGGTCAAAAAGTCTGATTTGTCCGGAGCA  
GGATTTTGTGCTGTTCCGCTTCTTCTTCTTATTTATGAGTACGCAACACTTTTACCCGATGTTCCGTTACCAAGTAC  
CCTGGCTACAACCTAGGTCAGCATGATTTGCGGTGACGCCAACACTTTTACCCGATGTTCCGTTACCAAGTAC  
GATATACCGGCTTTCTTTTGTCTTATCAATTTTCCGCGATTCTTGGCGGACTAAGCCCTTATCGCCTCAAGTTGCTG  
GCGTATGGGGGAGGAAAACCGTGTATGTCGCTGTTTATTTGCTGCTCAGTTCCTTCTTTGTTGCGCTGCGT  
GATTGAGCCAACCGATGAACAAGAAACCGCTTCTTACCGCTACATCAGGGAACAACTCATGAAAACCTGA

>Cluster\_21890

ATGGAACAATATGATCAAATTTGGCGCAAGACTGGACCGCTTGCCTTTGGCCCGGTTTTCATTATCGTATATTTGGTATAAT  
AAGCTTTAGTCTGTTATTAAACGGGGTTTTGAGTACTCCGGTAAATGTCGCTTAGCAAGCTGGTAAGCAATGGATGGT  
CAAATAATTTCTCAATGCCGCTTTACCTCGGCATTAATGTTTGGTATTTCATCGGCTCTCTTACCGTGGGTTTAT  
GGTACTACTTTTGGCGGGCGAGGGGTTCCGATAAACTTCTTCATCGTGGTATTGCGGCAACAGGGCCGCTTTT  
CCCTGATATGACTGGCTCATCTTCTTTCGCTTCTGATGGGAACAGGAATGGGGCGCTGATATGGTTGGCTACGCC  
CATTTACGGAGTTTATCCCGCGACGGTCCGTTGAAAATGGTCCGCGCGGCTCATTGTTGGTGAACGGTCCGCCATG  
CTCTCTGCGCGATAGGCGTGGTGGTTATCGCTTTTTTAGTTGGCGGATAATGTTTCTGTGGGCGGATTTGGCATACT  
GTTAGCGTGGTTTTCTCTCAGGTAATAACTTTATTTAGTGCACAGCATGGCTGGCAGGAAAGGCAAAATCGCAGGTGCAG  
AAAGCAACTTCGTGAAGTAGAGCAGCAAAATGAAAGAGAGAAGAGATTTCGTTTACCCCGCTTACTTTGAACCAGAGC  
AACAGCAAGTTAAGGTAATCAAGGGTACTTCTGGCTCCTGTTAAAGGGGAAATGTTACGAGCTACATTTAGTCGCGAT  
TACTGTTTTAAATGAATGAACATTTCCGCTTTAACCATCCCGTATGGATACCGACCATATTTGTTAACCCTCCGGATTTG  
ATGTTGATAAATCAATTTAATGACCGCTGTTAATTTAGTATGATTTGGGCTCCGCTCGGCTAGGGATATTTTATGCGCAT  
GATCATTTTCTCTGTCGATATTTGGCTCTGCCTTACTTATTATTTATGCTGTGTAGGCTATATCTATTTCAATTCAGAC  
TACAGAGTGGGCGATTTTTAATCTATGGCTGGTATGATCTTCTTTTTATACATGATGTTGCTTCCGCTCGCGGCTTT  
ATATCCCGGAACTTTGGCCACCGCATTTACGCCCTGCTGGTTTCCGTTTTCGTTAATGCCGTCGGAGCATCTGCCGATC  
TTACGCCCTATGGCGTTTCCGGCATTATTAACACATTTGGTTCGATTTACGGTGTTTATGGTGTCTGGTGTCAATTTAGT  
GCTGTGCGCTGTTTCTCTCATTTTTTGGCATCGAAACCGGAGGTTGCTGGAAGAGATTTCTGAGGTGAATTA

>Cluster\_60255

ATGAATAAAGCAATAAAGTATCATTTGATATATACTTTTGTGTTTGGATTATTGTCGCCCTTATCTAAAAACATAATGATGTT  
AAATACATCTGATTTCCGGAAGAGCCATTAAAGCCATTAATTGAAGACATACCAGCATTTACATATGACTTACCTTTATTGT  
ATAAATGGAAGGTCATATTTGATTCAAATGATAGCTATGAGTATAAAGTTCATATAGTTATAATTTGTATACATACGTC  
CTGTTTTATTAGCATTTTTACTGAATATCTTGATGCTAGGGTGTATCGTTATTTCTAAAAGTAAATATAATTTATTTCATT  
ATATGGCATATTTACTTCAATATAATAAACAAGAAAGGATGTAACTTTATTACATTTCTTATTTTAGCTTTTTCTATGT  
GTTCTTCATCAACACTGTCAATGTTGCTCATTTCTATCAAGAGCAAAATAGTTATAATTTTCCCTTCCATTTTTGGTGTAT  
TCATTAACATGCAAAAACAATAAATCTATGCTTTTGGTATTTTTTTCGTTGCTAATAATATCTACTGCTAAAAATCAAT  
TATAATTAACCCCAATAATAGTATTCATATATAATTTTTTTGATAGACAAAACTAATTTAATACTGTAATATGCG  
TGGTGTGCTTTGCTTGCCTCAATATTTGCAATATCTTATAAAGGTTGTTGAATTAATAAGTAAAGTAAACATAC  
TTCCGTTAGTTATCTTTATATGAAAACAACGGGTATAAATGCCATCGTATGTTGATGATAAGTGTGTTGGTTAGATGC  
CTGGGGTAATAAATTCGACATATCATTTGGCGCAACCCCAACGAAAGTTGGAACGGAAATGTTTCAATCTCATAAAGATG  
AAACGTTTTCGAATGCACCTTTTTTATTGGTTAGCAACCAAGCACCATCTTCAAACTCCATTTGATGATGGTGTGATG  
TCTCAGTATAAAGAAAATTTATTTCCATGATATAAATAAACAACGTAATATAAGGAGAAATCAAACTACGATCATT  
TACTAACATAAAAGACAATATTTAATAAACAATAGATTTATATCATTTGTTATTTTATTTGCTTCTATTTTATTATTA  
GAAATAATAAATAAAGGATCTTTATTTGTAGTATCTTTTTGGAATATCTCAATTTATGTTGCTATTTTTCGGGGAA  
GGATATAGAGATTTAAGCAAGCATTTATTTGGAATGATTTTTTCTGCTGACCTTTGCTTATACATAACAGTCTGTTTTTT  
AATTTATAAATAAATTTCAAAGAAATCAAGACAAATGAGCATGTAAGCACTAA

>Cluster\_37746

ATGAATAATGACAATACCGATTACGTGAGTAATGAATCAGGGACGCTTTCGCGATTATTTAAACTACCTCAGCATGGGAC  
CACCGTCCGCACAGAATTGATTTGCGGGGATGACCACTTTTTAAACCATGGTGTACATCGTTTTTGTGAAACCCGCAAAATCC  
TCGGCGGGCACAATAGGACCCGAAAGTGGTGTGTTGTTACCACCTGTTTGGATTGCCGGTATCGGCAGTATGCGATGGGG  
ATATTTGCTAACCTTACCCTGGCCTGGCTCCGGCAATGGGGCTGAACGCCTTCTTTGCTTCTGGTGGTGGGGCGAT  
GGGCATCTCTGGCAGACCGGGATGGCGCAATATTTGGGGCGCAGTTGGACTATTTTGTCTCAGCTGTTTTCGTATCC  
GGTACTGGATGATCTTCAACATTTCCCTTAAATTTACGATATTTGATCACAGCGGAAATGGATATTTTATCGCTTAAAG  
GGATTAATAAATACTGGCGTTATTGTGCGCAATAAAGACACGCTGGTGTGATGTTGGCGATTTAAGTTCACGGCGTGT  
GTTAGGATTTTTAGGGTTTTTATTTATAACCGTGTGTCATCAGCTCATTTTCATGCCGCGGTGCTGGTTTTCTATTGTGG  
TGACGCTTGTGTGGATTTATTTTCCGTTGATGTTTATTTAGCGCGCTATTTCCATTTCCGCTGATATTAGCGCGCT  
AATGGTGAATGATTTGAGCGGCGCTTAACACTTGAACCTCCGCGGATATTTTCTCTTTTATGCTGATCAACTAATTT  
TGATTCATCAGGAACATTAATTTGGTGAACGTAATAAGCGGGCTAATAGATAGTAACGGTAAATTTCCCAATATGAATA  
AGGCGCTGATGTTGATAGCGTCAAGTCCGTTGGCGGGGCGTTTATCGGCACCTCGCTGTTTACTGCTTATTTGAAAGT  
ACTTCTGGTGTGGCAGCTGGTGGTCGACGGGGCTGACGCGGTTGGTGTGGCGTTATGTTTCTGTTAGTATGTTCTTCT  
CTCACCGCTGGTGGCGATGGTTCTCTTTACGCAACCGCCGGAGCGTTAATCTTTGTTGGCGTCTGATGACTTCCGAGCC  
TGGCGCGGTTAACTGGGATGATTTTACCGAATCGGTGCTGCGTTTATTACCAGGTTGATGATGCCCTTTACTTTCTCG  
ATCACCGAAGGATGCACTCGGCTTTATGTCGTAAGTGCATATGAAAGTGTGACCGGGCGCTGGCGGATCTGAACCT  
GTGTTGGTGGTGGTGGCAGCTCTGTTTGCACAGAAATTTCTGGTGGATTT

>Cluster\_64067

GTGAAAAAATAGATAAAAAGGATGCAAGAAAACGCTTTTTACGTGGTGGATTGCTTTTTAAAAGGCGTTGAGAGAAA

AAATAAAGAAGAAATTAATAATAAAGCCTATGAAAGGTTACATTTTCTGACGAAGTAACACCAGTGAAAAGTCAGGTGG  
CTACTTTTTATTGAAAGTATTTTCCATCCGTAAGAAATATGATACGCAACTCTTCGTCGCAAGAGATAGAATAATAATA  
CCTAAATATTTTCGATTTGTTTGGATCATCCAGAAAATCTCTTTTGTATTTTTCATGTTGTAACAGATTGATTGCCAGGGG  
TAAACGTAATCATATTTTTCGTTGATATACTAAAAATAAAAGCATTTGTTTAGGTGCGGAATGTCCTCTTGGTGTGCAC  
TGAGCTAGCCAAACGTCACAATATAAATTTAAAGATCTCAAGTACAACCTTAATGGCATTTATCGGGCTTGAGCAGCG  
TATTTAGAAATTTTCGTTGACATCGGGTTGGTTAAAGAAATAAATAAAGTGACGCCAGGGAAGGTGCATGATGAAACAGA  
AAAATCGAAAAAGATAACCCCTAAGAAAAGAAATTTCTCTGCTGATAGTATCGGCAAGGAAAATGCGTCTGCATTTGCAC  
AAGATACCAAAAAATAGAATGCTGAGAAATTCCTAATATATAAACCAGTGTCTAAGTGATCATCAATTAATAATAGTT  
AGCAAGGCAGAAAACGTCACAATCTTGCATGGGCGAATTTAGAACCTTTGATAATGCAGAGAGACATTTGTTGGCTTGAGCAGCG  
TCCGCGTTGGTATTTGAGGGGGTTGTAAATAATGGCTTAAAACAGCCAACATGTGAAATAGCTGTTTTTAACCTTTGGAA  
AACTATTGATGAAACTTTTTCAGGACTTTCTTTAGAACATTAATTCATATAACAAATCACAATAACCCCTTATGTGGAAAA  
CACATAAATAAAGGGATGTTTAGAGAAGTTTGTATTACAGTCGCTGCTTTGCAGGGGGGGTTAGTTGTAATAATGA  
AACGGAGCAGATAAGTTCTGTTACGGGAACCTTGAACCTTTGAAAGTTTTCAGGATATGCATGATAGTTTAAAGAA  
TATCCAAAGAACTAAGTGGAACATCAGAATGTCTTAAATTTCTGGATGCACACATATAAACTTTGATGGTTCTTATAAG  
TTGAAAAAGCAACGTTAGATAACCAAGTGACAAATCACTTATCCATTTAATAATACAGGGCTTGAATCTGCAACCAGA  
TCGTACCTATCTTAAAGTGTATGCAGAAAGCCGTTTCCGGGAGTTATGATTAATATACGTTTTCTTTACCGGAAAAATG  
CAACTCAAGAACCTGA

>Cluster\_21101

ATGAACGACATCTTCTGACGACATCTTCTGCTGAAACAGCGCCTGGCCGAACAGGAAGCGCTGATCCACGCCCTGCA  
GGAAAAGCTGAGCAACCGGGAGCGGAAATAGACCATCTGACGGCGCAGTGGATAAACTCCGCGGATGAACCTCGGCA  
GTCGTTCCGAAAAGATCTCCCGCGTATCGCACAAATGGAAGCCGATCTGAAACCGGCTTCAGAAAAGAGAGCGATACGCTG  
ACTGGTAGGGTGTATGACCCGGCAGTACAGCGTCCGTTGGCTGACGCCGACCCGTAAGCCGTTCCCTGAATCACTACC  
CCGTGACGAAAAGCGACTTTGCTTGGCGCGCGTGTGCTGCCGAACTGCGGGGTTCACTGAGCTATCTGGGCGAGGATA  
CCGCCGAACAGCTGAGTTGATGCTGAGCGCTTCCGGGTTATCCGGACGGTACGGGAAAACATGCGCTGATCTTAAAGAA  
GATACCATCGTGCAGGCACCTGCACCTTCCGGGCCATCGAGCGGGTATCGCCGACCGGGGCTGCTGGCCCGCTGCT  
GACCTCGAAGTATGCAGAGCACACCCCGTGTATTTGCCAGTCAAGAAATACGCGCCGCAAGGTGTTGGAGCTGAGCCGTT  
CACTGCTGTGCGGGTGGTGGATGCATGCTGCCGGCTGCTGCTCCGCTGGAAGAGGCGCTTCATGGCTATGTCATGACT  
GACCGCAACTCCATGCCAGTATACCCGGTCCAGGTCAGTGTGCTGCGGGTAAAGAAAGACGAAAGACCGGAGCTTGG  
GGCGTATGTTCTGATGACCGCAATGCCGGTACGCGTTGGCACCCTGCAGTGTGGTTCCGTTACAGCCCGGACAGAAAA  
GCATCCATCCGACACTCATCTTCTGCTTCCAGCGGTGCTGCAAGCGGATGCGTACGCGGGTTCACAGACTGTAT  
CGCAATGGTGGGATAACGGAAGCTGCTGCTGGGCTCATGCCCCGAAAGATCCACGATGTGCACGTCGCGATCCCGCTC  
AGCATGACGGAAGAAGCCCTGGAGCAGATCGGTCAGTGTACGCCATAGAGGCGGATATAAGGGGAATGCGCCGACAGC  
AGCGGCTTGTGAACGTCAGCGAAAACGAAACCGCTGTTGAAATCCCTGGAAGCTGGTTGCGTGAAAAGATGAAGACC  
CTGTTCTCGGCTCTGGCCATGGTGGTGAAGCGGGGAGCCTACTGTACAGCCTGATCGGGACGTGCAAACTGAATGACCT  
GGATCCAGAAAGTACCTTCGCCATGTCCTGGCGTATAGCAGACTGGCCGGTCAACCGGGTACGCGAACTGCTTCCGT  
GGGCATAGCACTGCCAGTGAATAA

>Cluster\_5294

GTGCTAAGCCGAGGAAAGCGAGGCTGAACAGGCACTCCCGCTCCACAGGTGACGGTGTATCCCGCTGAGCAGCATGC  
TATTTCCCGCAAAGATATCAGTGAAAATGCCCTGAAGTAAATGATACAGGCTCAATAAAGCGGGATACGAAAGCTGGCTGG  
TTGGCGGGCGCTGCGCAGCTGTACTTTGGCAAAAAGCGGAAAGATTTTGACGTAACCACTAACGCCACGCTGAGCAG  
GTGCGCAAACCTGTTCCGTAACCTGCGCCCTGGTGGTTCGCGTTTCCGCTGTCGCTCATGTAATGTTGGCCCGGAGATTAT  
CGAAGTTGCGACCTTCCGTTGGACACCAGAGGTAACGTCAGCGACCGCACGACCTCCCAACGCGGGGAAAACGGCATGT  
TGCTGCGGACAAACATTTTTCGCTTCCATCGAAGAAGACGCGCAGCGCGCGGATTTACATATCAACAGCCTGTATTACAGC  
GTAGCGGATTTTACCGTCCGTTGATACGTTGGCGGATGAAGGATCTGAAGGACGCGGTTATCCGCTGATTGGTAAACC  
GGAAACGCGCTACCGTGAAGATCCGTTACGTTGCTGCGCGGATACGTTTTCGCGCAAATGGGATGCGCATCAGCC  
CGGAAACCGCAGAACCGATCCCTCGCTACCTGCTGAACGATATCCCACCGGACGCTGTTTGAAGAATCCGCTT  
AACTGCTACAAAGCGGCTACGGTTACGAAACCTATAAGCTGTGTGTGAATATCATCTGTTCCAGCCGCTGTTCCGAC  
CATTACCCGCTACTTACGGAATAAGGACAGCCGATGGAGCGGATCATTTGAACAGGTGCTGAAGAATACCGATACGC  
GTATCCATAACGATATGCGCGTGAACCCGGCTTCCGTTTTCGCGCATGTTCTGGTACCCACTGCTGGAGACGGCACAG  
AAGATCGCCAGGAAAGCGGCTGACCTATCACGACGCTTTCGCGTGGCGATGAACGACGCTGCTGGACGAAAGCTGGCC  
TTCATGGCAATCCCGAAACGCTGACGACATTAACCCGCGATATCTGCGAGTTGCGATGCGGATGCGGAAATGGCG  
GTAAACGCGCATGGAACCTGCTGGAGCATCCTAAGTTCCGTCGCGCTTATGACCTGTTGGCTTGGAGCTGAAGTTGAG  
CGTAACGCTGAACGTCAGCGTCTGGTGAATGGTGGGGTGAAGTCCAGGTTTCCGCGCCACGACCAAAAAGGGATGCT  
CAACGAGCTGGATGAAGAACCCTCACCGCTCGTCTGCTGCTCCAGCAAACGCGCACACGCTGCTGAGGGTACCG  
CATGA

>Cluster\_61600

ATGTTGAATAATGCTATGAGCGTAGTGATCCTTCCCGCAGGCAAAGGCACGCGCATGTATCCGATCTCCGAAAAGTGT  
GCATACCTTCCCGGAAAGCATGTTGTTCCAGTGTCTGATGCTGCAATGAATAGGCGCACGCGACGTTCCACTG  
TGTAAGGCTCAGCGCGCGATCTGCTAAAACAGCGCTGAAAAGACGACAACCTTAACCTGGTGTCTCAGGCAGAGCAGCTG  
GGTACGGGTCATGCAATGACGAGCGCCGACCTTTCTTTGCGCATGATGAAGACATTTAATGCTCTACGGCGACGTTGCC  
GCTGATCTCTGCAAAACACTCCAGCGTCTGCTGATGCTAAACCGCAGGGTGGCATTGGTCTGCTGACGGTGAACCTGG  
ATGATCCGACCGGTTATGGAGCTATCACCGTGAAAACGCGCAAAGTTACCGGCTGTTGAGGACAAAGATGCCACCGC  
GAGCAGGCTCAGATTACGAGATCAACCCGCGATTCTGATTGCCAACGGCGCAGATATGAAACGCTGGCTGGCGAAGCT  
GACCAACAATAATGCTCAGGGCGAATACATACCCGACATTTATGCGCTGGCGTATCAGGAAGGGCTGAAATCGTGC  
CCGTTTATCCGCAACGTTAAGCGAAGTAGAAGGGCTGAATAACCGCTGCAACTCTCCGCTGAGGCGTGTATTATCAG  
TCCGAAACGCGTGAAAAACCTGCTGTTAGCAGCGTATGCTGCGCGATCCAGCGGCTTTGATCTGCGGATGCGGAAATGGCG  
TCACGGGCGCGATGTTGAAATGATACTAACGTTATCATCGAGGGCAACGTGACTCTCGGTCATCGCGTGAATAATGGCA  
CCGTTGCGTGTATAAAAACAGCGTGTATGGCGATGATGCGAAATCAGTCCGTTATACCGTTGGAAGATGCCAATCTG  
GCAGCGCCTGTACCATTTGGCCGTTTGGCTTCCGCTGGTGTGCTGAGTTGCTGGAAGGTGCTCAGCTCGGTAACCT  
CTGTTGAGATGAAAAGCGCGCTGTTGGTAAAGGCTCAAAGCTGGTCACTGACTTACCTGGGCGATGCGGAAATGGCG  
ATAACGTTAACATCGGCGGGGAACCATTACCTGCAACTACGATGGTGGCAATAAATTTAAGACCATTATCGGCGACGAT  
GTGTTTGTGGTTCCGACACTCAGCTGGTGGCCCGGTAACAGTAGGCAAGGCGCGACCATTTGCTGGGGTACAACCTG  
GACCGGTAATGTCGGCGAAAATGCATTAGCTATCAGCCGTGTGCCGAGACTCAGAAAAGGCTGGCGTCTGCTCCGGTAA  
AGAAAAAGTGA

>Cluster\_9292

ATGATAAAAATGAATGCGCTTGAATTTTCTGATGGATAAAGATGCGCAGGGGTATAATCGACCTGCTGATTTGGATTT  
AACAAAGTTGCTATTTTAAAGGTGACGTTATATCGAAGGTGCTTTTTTATCATCAAATCTACAACATGTAACATTCGAAT  
GTAAGAATAATGGGGATTGCAATTTTACTACTGCAATAGTTGATAATGTCATATTTAGATGTCGACGTTTACACAATGTG  
ATTTTTATCAAAGCGAGTGGTGAATGTGTCGATTTTCAGCAAAAATATTTCTGATACAGTTGACTTCTCGCAGAGTCAACT

TGGTCATAGTAATTTTCGCGAATGTCAGATTAGAAATTCAAACTTCGATAAATTGTTATCTTTACGCTTCGCACCTTCACCA  
GAGCAGAGTTTCTGTCTGCCAAAGAAATATCAATTTATTAATCGAATTTGACAGCTGTTATGTTTATTATGTCGCAATG  
TCGACAGGAATTTTAAAGATTGCATTACAGAACAATTGGAATTAACATTGATTATTCAGATATATTTTGGAAATGAAGA  
TCCTGATGTTTATATCAATAACATTTATAAAAAATGATTGATACATTTGCCAGATAATGCAATGATATGAAATCCGTTCTCG  
CGTAAAAATCGTATGCAATTAATAAATCTTAATATTGTTTAAATAAAAACTTTATTGAGAATATGAAGAAAAATTTAGC  
CATGTCTTATATAAAAGATCCCATTTATACGCAGTTATATCCATTCTGATGAAGATAACAAGTTTCGATGATTTTATGCG  
TCAACATCGATTACAGTGAAGTGAATTTTCGATACCAACAGATGATCGATTTTATTAACAGATTTAATACGAATAAATGGC  
TAATTTGATAAAAAATAACAATTTTATCCAACTTATCGATCAGGCCTTACGATCAACGGATGATATGATCAAAGCAAAT  
GTTTGGCACTCTTTATAAAGAGTGGATTCTAGTATGATGTTTACCCTATATTTATAGAACTGAAGATAAATTAAGAAC  
CTTTAACCGAATGAATTAACACGAAACGATAATATCTTTATCTGTTCTCTCAGTCGATGATGGGCCAGTTATGGTGG  
TAAGTCCAGCGCTTACATGATATGTTGAATCTACAAAAGATACCAATTGGAAATTCACGATATATCTACAAATCCAGA  
CATGAGATGTTGCTGTTAATCTTACTCAGGAAACACTTTTACGCTCCAAATCTCATGGTAAATATGCGCTTTTCCCAT  
TTTACTGCGAGTTGGCGAGCTCATCGTATAATGAATAAGGGTGTTTAA

>Cluster\_52879

ATGACTGATCCTATCCTTCTGCTTCTGTCATTAATTTGCGGTTTTTGTGTTTTACTCGCAATGGGCTCACCAATCGGGAT  
ATGCATCGTTATGCTCTTTCAGTACAATGATGCTGGTATTACCTTTTCGACGTCGCAATGTTTTCACCGCACAAAAA  
TGTTCCAGCTCCGCTTTTCTGCTTTATGGCGGTACCGTTTTTCTGTTCTTTTCGGCGTGATTATGAATAGTGGTGT  
ATCGCTTCCAGCTGGTAAATTTTGCAGCTGTTTACGGGAAATTTACCGGTTCTCTTTCACCAATATTTGTTGG  
CAATATGATGTTTGGCGCTATTTCCGGTCCGCGATTGCGCTTCAACTTCTAATGGTGGCGTTATGGTACCAATGAGTG  
CTCGTGAAGTTACGATCGTATTTGCTGCTGCGGTAATATGCTCTGACCAACAGGCATGTTAATTCGCGCCACG  
ACGGCTTTTATTTCTTATGCAATTTGGCCAGTGGTGGGACATCTAATGCTGCACCTTTTCGCTGGAGGTTAGTTGCGGCTT  
ACTTTGGGGCATAGGATGATGCTGGTAAAGCTGATTGTAGCGAAACGGCACAACTATCGTGTTTTTTTTACCGTACAAA  
AAGGGATGGTGTGAAGTCTCGGTTGAAGCAATTCAGGCTGATGTTAATTTGTTATTTATGTCGGTGGCATCGTGCAG  
GGAATTTTACCGTATTGAAGCTTCGGCATTGCTGTGCTATACGCTGCTACTGACTGTGGTGTTTTATCGTACACT  
GAACTAAAAAGATCTTCTTCTATTTTACTCCAGACAGTTGTGATGACTGGAGTATTGTTCTTCTGGCAACGTCTT  
CAGCGATGCTTCTTCTATGTCGATTACAAATATTCGACAGCGTTAAGCAACATGATTTTAGGAATTTCTGCCAATAAA  
TTAGTTATCTGCTGGTAATCACCGTCTTTTGGCTTATATCGGTGCAATTTATGGATATTTGGCCAGCCATTTCTATATT  
TACGCCAATCTGTTGCCAATTAAGATTAACTAGGTGTTGATCCCAATTCATTTGGTATTATCATGATTTATAATCTGG  
CTATCGGTACGATTACTCCACCAGTAGGCGAGTGGTTTATACGTCGGTGCAGCGTCCGAAAGGTAAGGTTGAAGAAGTA  
ATCAAGCCGTACTCCCTTTTATGCGCTTATTATTGGTGTATTACTACTGATAACTTATATACCAGGAATGACGTTATT  
CCTGCTCGCTTCTCGGCGTTATGTAA

>Cluster\_22986

ATGGGAAACATCAATACAAACGCAGAGTTACCGTGGCGTAGATAAAGATGCAGGGCAGAGCAGAAGTTACATTATTCC  
ATTCGCACGTGCTGTGCTCACTGTTTTTTCTTTGGGCGGTAGCCAAACCTTAACGACATTTTATTGCTCAATTCACAG  
AGGCTTTTACGCTGACAAATTTCCAGGCTGGCCTGATCCAACTCCGCTTTTACTTTGGTATTTCATTATCCCAATCCCT  
GCCGGATATTGATGAAAAAATCTAGTTATAAAGCAGGATTATACCAGGATTTGTTTTATATGCTTCCGCGCTGCAAT  
ATTTGCGCCCGCAGAAATAAAGAACACACTTGTTTTTAGTTGGCTTATTATTATGACAGCCGATTAGGTTGTC  
TGGAACTGCCGCAACCTTTTTGTTACGGTATTAGGGCCGAAAGCAGTGGTCACTTCCGCTTAAATCTGGCCAAACA  
TTTAACCTATTGGGCAATTTATCGCGTGTCTTTGGGCAAAAGTCTTATTTTGTCAACGTGCCACATCAATTCGCAAGA  
CGTTCTCGATAAAATGTCCTCCAGAGCAATTTAGTGCCTATAAACACAGCTGGTATTATTCGGTACAGACACCTTATAGA  
TCATCGTGGCTATCGTGTACTGCTGCGCTGCTGATCATGCTGACGAAATTCGCGCATGACAGAGTATAATCACAGT  
GACGCCAAACAGGATCGTTCTCCGATCGCTTCTCGCTGGCGCTAATTCGCCACTGGCGCTGGGAGTATTAGCGCA  
ATTTCTGCTACGTTGGCGCACAAACCGCTTCTGGAGCTATTAAATTCGCTACGCTGTAGAAGAAATTCAGGATGACAG  
CAGGCTTTGGCGTAACATTTAAACCGGAACATGGTGTGCTTCTTTATTTGGTGGTTTACCGGTACCTGGCTCATCAGT  
CGCTTCGCACCACAAAGTCTTGGCAGCTACGATTAATCGTATGCGACTGTGCCGATCTCAGCTTCCGCTGGTGG  
TCATGTTGGTTAATAGCCCTGACTTTATGTCAGTGCCTTTATGTCGATTACGATACCAACAATCTTCTCGTGGGCAATTA  
AGAACTTCGGCCAGGACCAAAATACCGTTCGCTTCTTACCTGTTATGACCATTATGGCGCGGTTATTGCTCCTCGGTC  
ATGGGGTTTGTGCTGACGACGCGGCAACATCCCACTGCGCAACTGATCCCGCACCTGCTTCCGAGTCACTTTTAT  
CTTTGCCGCTTCCGTTCTCAAACCGCACTAACTGA

>Cluster\_28117

ATGCGTAAAAATTAAGGGTTACGTTGGTATATGATGCGACTGGTGACGCTCGGCACCGTGCTTGGTTACCTGACGCGTAA  
CACTGTGGCGGACGCTGCGCCAACCTCTGATGGAAGAGTTAAACATCTCCACCCAACAGTATTCCTATATCATCGCAGCGT  
ATTTCTGCTGCTTATACGGTCAATGCAACCGGTAGCGGGTTATGTTACTGGATGTGCTGGGTACGAAAATCGGTTATGCAATG  
TTTGCTGTACTGTGGGCGGTTCTGTTGGTGAACCGCGCTGGCAGGTAGTTGGGGTGGCTGGCGGTTGCTCGTGGTGC  
GGTCCGTTGCGCGGAAAGCCGATGATTCCGGCGGCTGAAAGCCAGCTCCGAATGGTTCCGCGGAAAGAGCGTTTCA  
TCGCGGTAGGTTACTTTAACGTAGGTTCTTCGATGTTGGTGGATGATTGCGCGCGCTGGTGGTATGGGCAATCGTGATG  
CACAGCTGGCAGATGGCATTTATCATCTCCGTTGCTTGGCTTTATCTGGGCGATGGCATGGCTGATTTTCTACAAGCA  
TCCGCGGACAGAAACATCTGACCGATGAAGAACCGGACTACATTTAATGGTCAGGAAGCCAGCAGCGGTTGACA  
GAGCAAGAAAAATGTCGTTGGTCAAGATCTCGTCAACCGTCAAGTTCTGGGGTATCGCGCTGCGCGATTTCTGCGAGA  
CCGGCATGGGGTACTTTTAAAGCGTGGATCCCGCTGTTTATGTTAAAGTTTACGGCTTTAACCTGAAAGAGATCGCGAT  
GTTTGCCTGGATGCGGATGCTGTTGCTGACCTCGGTTGATCTCCGTTGGTTACCTGCGCGGCTGTTCCAGCGTTGGT  
TTGGTGTGAACCTGATCGTTTCCGTAAGATGGTTCGTAACCTGGGTTGCTGCTGATGATTGGCCCGGTTATGATCGGT  
CTGTTACCAACCGTATGTCGCGATTAATGCTGCTGTTATCGGTTGGTTTGTCTACCAAGGCACTGCTGGCGCACTGAT  
TACGCTCTTCTGACGTTGTTGGTCTGTAACGAAAGTGGCGACGGCAACGGTTTAAACGGGATGTCGCGATGGCTGGCAA  
GTACGCTGTTTGCAGTGGTAGTCCGTTGACTGGCTGACACCATCGGCTTACGCGGCTGTTCCGAGTACTGGCAGTGTTC  
GACCTGTTAGGTTGCGCTGTTTATCTGGACCGTGTTCGAGAACAACCGCGATGAGTTGGCGCAGGAATCACATAACGA  
TCCCGCACCGCAACATTA

>Cluster\_63651

ATGATCTCTCCAGCCTTAATGTGCTCAGGCGGATTTCTTTCAATGCCCAATAAATTTAAAGCCTAATTTGCTGGTTT  
TGGCTCGGGCAAAACATGGGTTGGGTTGGCGGATATGCAAGGGATTGGGAGCATCCAGGTATAAATCAGGGATATT  
TTGGCCAAACGATATCCCAAAATTCGCGATATTTTTTACCCTACAGTGGAAAGAGTTGCTGCTGACTGGGGATTGAACGTA  
AAAATTAATGAGGGAAATAAAGAGGTTCACTTTTATTACGGACCCAGTATCGGGGAACCACTATCTGCAGATCGATGGA  
GAAGCCACAAACGATCGCTGTTTCAAAATGGTAAATGGTGGTGAATGGACATTTTGGCCAGGAAAAAGCCCA  
GAACGGCGTGGCGCAAGATAAATGCACGTTATGCGTTATAAAGATTGATGACTTCGCAACCGGTTATGACGTTACACACG  
CCGGAAGGATTCAAATTTGCTACGAGCAGTTTGTAAAGCGTGGTGAAGAAACAGAGCTGGCCCTACTGTATGGTCT  
GGTGCAGGACTTACTTTGATAATGAAAGAACTGGCAGCAGATTACATCTTCTGCTTCTGAAATCATACCTCCAG  
AGCTGATTAAGCCTATCTTCAGGACAGTTTACTAACCTGACAGAGTGGTACTGTTTACCATCAGTTTGGACCGGAAACG  
AATAAATTCGAAGAGTGGAGCAGCCAGGGAGCGGATTTATATTGGGATGGATTTTAACTTTGAAAGATGGCGGGAAT  
CGTCCATGTTGCTGCTTGGGGCTTCCATGTCGGTAACTGAAATCATCAATGCTTACGATACGCGGATGATGATCCGCA

TCATTAAGAACGCTTCTGGCTGTATGATGGGAATGATTACCGAAAAGTGAGGAAAATTTATATTTATCCAGATGCTTCC  
GGGATTTCCAGAAAATCAAGTAAACGCAAGTACGACGGATATAGCCAGCTTAAAGCAGGCTGGTTTTAACGTTGGTGGAA  
CAGCTCGAACCCGCCAGTAAAGATCGCGTTAACTCAATGAATGCAATGTTCTGCAATGCCAATGGTGAGCGTCGCTATA  
AAGTTAATGTGAAGCGTTGCCCGTTATATGCGGAATCTCTGGAGCAACAGGTCGCGGATGAGAAAAGGGGAGCCTGATAAA  
AAATCTGGCAATGATACCCGAATGATCGCGGAGGTTATTTTCATCGTTAAGCAATTCCTATTGTCAAACCGACCGGAAG  
AGTCACATCACTTCGGATTAA

>Cluster\_20903

ATGAGTGAATTTTCCAGACAGTCCCGAACTGGTTGCTGGGCCAGAAAAATGACTTCTCCATCTCGCTGCCGGTAGA  
CCGACTCTCTTTTCTGCTGGCGGTTGCCACGCTGAACGCGGAGCGCTCTGGATGGTGAAGGCGAGCTGGTGG  
ATGCATTTCCGCATGTGAGTGTGCGTTTGGAGCAAACAGCGAAACATCGGCGTGCGCGCAACAACGCGATCAACGAC  
ATGGTGGCTCAACGCTCTGCTGAACCGCTTTACCAGCGAGCAGGCGGAAGGAAACGCAATTTACCGTCTGACGCGCTCG  
CATCGGCATCACTGACTATTACATTCGTCAGCGGAGTTTCTACGCTGCGTCTTTCTATGCAAGTGTGATGTTGGCGG  
GTGACGTAAAACCGCGCAGATGCCCGCAAGAGGGCGGTGATGAATTTTACGCGCCGTAATGTCATGCGCCACTG  
AAATATTCGGTAGCAGAAATTTTCGACAGTATTGACCTGACGCAACGCTCTGATGGACGACAGCAGCAGCAGGTAAGA  
TGATATCGCCAGTTGTTGAACAAGACATGGCGGGCGGATCTCCAGCTGTGAATTTGTTGCTTTCAGAACTTCGGGA  
CGCTGCGTGAATTCAGGATCGCTGGAAGCGGACGCAAAATGCAAGGCTAATCTGTTGCGCATTGAGTGTGCGG  
ATGACCCATGACGATCTGCAATTTGTCGATCTGGTCTGCTGATCTGCGAGCAAACTTGACCGTATATTCATGCTG  
CCAGCAATCCATCGACTTGTGGATTGGCTACGACCGCCACGTACACAAATTTATCCGTACCGCAATCGATATGGATAAA  
ACCGCGTCTTTGCTGACGCGTTACGTCAGTCGCTGACAAACCTATTTGATGAGCGTGGGCGCTAACCTATGCAATGCG  
GTACGAAAGAACTTAAACGAGATCCGCAACAGCTGGCGGGGATCATCGAAGAACAACCTGCGGTGTACAAAACAGACAAG  
TGCGGCTGGATCTTGGTCTGGTGTACGCGAATATCTGTACAGTATCCGCGTGCACGTCACCTTGGCTTGGCGCAT  
GTTATTTGATCAGGCGGTACGCTCTGGCGTAGCGCAAGCAGATTTACCAGGACTGCCAGGAAATGGCAGCCGATTAATGA  
TTACGGAGCCAAGTACAGGCGCATGTCATCGACAAATATTGA

>Cluster\_26225

TTGATCTTACGCATCCTGTATGATGCAAGCAGACTAACCTATCAACGTTGGTATTATTTCCCGCAGACATGACCCTTTT  
AGCACTCGGTATCAACATAAAACCGCACCTGTATCGCTGCGAGAACGTTGATCGTTTTCCCGGATAAGCTCGATCAGG  
CGCTTGACAGTCTGCTCGCGCAGCCGATGGTGCAGGGCGGTGGTGCCTGTCGACGTTAACCCACAGAACTTATCTC  
AGCGTTGAAGAACGGGATGACCTGCAAGAGGCGCTTATTCGCTGGTGTGATTACCATAATCTCAACGAGACGATCT  
GCGTAATAGCCTCTACTGCGATCAGGATACGATGCGGTCAGTCAATTAATGCGCGTTGCCAGTGGGCTTGATTTCTCTCG  
TCCTTGGCGAGCCGAGATCCTCGGTGAGTTAAAAAAGCGTTTGGCGATTCCGAAAAAGGTCATATGAAGGCCAGCGAA  
TTGCAACGATGTTTTCAGAAATCTTTCTGCTGGCGAAACCGGCTCGCACTGAAACAGATATCCGGTCCAGCTGTGTC  
TGTCGCTTTTGGCGCTTGTACGCTGGCGCGCAGATCTTGAATCGCTCTACGGTGACGGTACTGCTGGTTGGCGCGG  
GCGAAACCATCGACTGGTGGCGGTCATCTGCGCAACAAAGTACAGAAGATGATATCGCAATCGCACTCGCGAA  
CGTGCCAAATTTGCGAGATGAGTTGGCGCGAAGTATGCTCCGAGGATATCGACGAACTGCTGCGGAAAGCCGA  
TATCATCATGATGTTTTCAGAAATCTTTCTGCTGGCGAAACCGGCTCGCACTGAAACAGATATCCGGTCCAGCTGCGCA  
ATCAACCAATGCTGCTGGTGGATATGCGCTTCCGCGCGATGTTGAGCCGGAAGTTGGCAAC TAGCGAATGCTTACCT  
TATAGCCTTGATGATTTACAAAGTATTTATTCGCAACAACCTGGCGCAACGGAAGCTGCTGCTGTTGAGGCGGAAACTAT  
CGTCGCCAAGGCGCAAGTGAATTTATGGCATGGCTTCGAGCAACAAGCGCCAGCGAAACTATTCGCGAATATCGCAGCC  
AGGCAAGAGCAGCTTTCGCGATGAGTTAACCGCAAAAGCGTTAGCGCCCTTGAGCAGGGCGCGCAGCGCAATAGCCATTATG  
CAGGATCTGGCATGGAACCTGACTAACCGCTTGATCCATGCGCAACGAAATCACTTCAACAGCCGCGCGTACGGGGA  
TAACGAACGCTGAATATTCGCGGACAGCCTCGGACTGGAGTAG

>Cluster\_29971

ATGACCCATCAATTAAGATCGCGGATATCATCGCTCTGGGCTTATGACATTTGCGTGTTCGTCGGCGCAGGTAACAT  
TATTTTCCCTCCAATGGTGGCTTGCAGGCAAGCAGCTGCGACTGCGGATTCGGCTTCTCATTAAGTCCGCTG  
GCCTACCGGATTAACGGTAGTGGCGCTGGCAAAAGTTGGCGGCGGTGTTGACAGTCTCAGCAGCCAAATGGTAAAGTC  
GCTGGCGTACTGCTGCGCAACAGTTTGTACCTGGCGGTGGGCGGCTTTTGTGCTACGCGCGTACAGCTACCGTTCTTT  
TGAAGTGGGATTTGCGCCGCTGACGGGTGATTCGCGCTGCGCTGTTTATTTACAGCTGGTCTATTTTCGCTATCGTTA  
TTCTGGTTTCGCTCTATCCGGGCAAGCTGCTGGATACCGTGGGCAACTTCCTTGGCGGCTGAAAATTTATCGCGCTGGTC  
ATCCTGCTGTTGCCGAATTTATCTGGCCGGCGGTTCTATCAGCAGCGGACTGAGGCTTATCAAACGCTGCGTTTTT  
TAACGGCTTCGTCACCGCTATCTGACCATGGATACGCTGGGCGCAATGGTGTGGTATCGTATTTGTTTAAACGCGGCG  
GTTCTCGTGGGTTACCGAAGCGGCTGCTGACCCGTTATACCGTCTGGGCTGGCTGATGGCGGTTGTTGCTGACT  
CTGCTGTACTGGCGCTGTTCCGCTGCGGTTGACAGCGCGCTGCTGGTTCGATCAGTCTGCAACCGTGGCGGATCCT  
GCATGCTTACGCTACGATACTTTGGCGGCGGTTAGCTTCTGCTGGCGGCTTAATCTTATCGCTGCTGCTGTTT  
CGCGGTTTGGCTGCTGCTGTCGAGAAATTTTCCGCCAGTACGTAACCGCTCTCTTATCGTACGCTGGTGTATC  
CTCGCGGCTTCTCGATGGTGGTCTAACCTCGGCTTGAGCCAGCTGATTCAGATCTGTTACCGGCTGCTGACCGCCAT  
TTATCCGCGTGTATCGCACTGGTGTATTAAGTTTTTACAGCTCATGGTGGCATAATTCGTCGCGGCTGATTGCTCCCG  
CGATGTTTATCAGCTGCTTTTGGTATTTCTCGACGGATCAAGGCTATCGATTCAGCGATACTTACCGCTGCGGCG  
CAGCGTTTACCGCTGGCCGAAACAGGCTGGCGTGGTTTAAAGCCAACAGTGGTGGTGGTCTGGCCATTAATTCGGGA  
TCGCGCGGAGGTCGTCAGGTGACTCCAGCGCTACTAA

>Cluster\_42794

ATGTTGCCGTTTCTGAAAGCGCCTGCCGATGCGCATTAAATGACTGATAAACATGAAATGATGCCCGCTATCGCTACTG  
GCTGCGCATATTTCTGCTGACCATCTGGCTGGGTTACGCGCTGTTTACTTACGCGGAAAAGTTTAAACGCGCGCTAC  
CAGAAATCCTTGCTAACGGCGTGTCTAGCGTAGCGATATGGCCTGTAGCGACCCTGTTTTACATTACCTACGCGGCTG  
TCGAAGTTTGTCTCCGGCATTGTCAGCGATCGCTCAAAATGCCCGTTATTTTATGGGATAGGGCTTATCGCCACGGGCAT  
CATCAACATTTCTGTTTGGCTTCTCGACGTCGCTATGGGCGTTTCCGCTGCTCTGGGTGCTGAACGCGCTTTTTCAGGGCT  
GGGTTTACCGGTTGTGCGCGCTGTTTAAACGGCTGGTATTCGCTACCGAGCGCGGCGGTTGGTGGGATTTATGGAAC  
ACGGCACATAACGTCGGCGGCGCACTCATTCCTATTGATGGCAGCGAGCGGCTGCATTACGGCTGGCGGCTGGGAT  
GATGATTCGGGTTGATGCGGATAGTCGTTGGGATTTTTCTGCTGGCGGCTGGCGATCGCCGCGAGGCGTTAGGTT  
TACCGCGGCTGGTGAATGGCGGCAACGCACTGGGATTTGCTCAACAAAGAAGGGGCGAGGCTGACCGCTAAAGAG  
ATCCTCACCAATATGTTGCTGAATCCGATATCTGGCTGCTTTCGTTTGGTATGTGCTGGTCTATGTTGCTCGGGC  
GGCGATCAACGACTGGGGCAATTTGATATGTCGAGAGCCTGGGCGTGCATGTTGTCACGGGCAATACGGCAGTGACAA  
TGTTTGAACCTGGGCGAATTTACGGTGGCTGGTAGCGGTTGGGTTTCGGACAAACTGTTTAAACGGCAACCGCGGCG  
ATGAATTTGATTTTTCGCGCGGAAATTTGCTTTCAGTCCGCTGCTGGCTGATGCAATTTGCAAGCTACGCTACGATGCA  
GGCAACCTGCTTCTCACCATTTGGTTTTTTTGTCTTTGGCCGAGATGTTAATCGGATGGCGGCGGACAGTGTTC  
ACAAAGAGGCGGCGAGGGCGGCGAGGGGTTTGGCGCTGTTTGGCTTATCTTGGTGGCTGCTGCTGGTGGCGGCTG  
CGAAAGTACTCGATACCTGGCACTGGAGCGGATTTTGTGGTATCGCCATCGCGCGGGATTTCCGCACTGCTGTT  
ACTGCCCTTTTGAACGCCAGACACCGGAGAAAGCGTGA

>Cluster\_107

ATGAAAAACACGCGATTGGCATTGCCGACTGAATGCGCTGTCCATTGACGATGACGGCTGGTGCCAGCTATTGCCCTGC  
CGGTCATTTTCAGTCCCGGATGGTTCGCCCGTTTGGATGACAGGTTGGTCAGGGTGGTTCATCGACGGTGGATTGCCG  
GGCGTCTGGTTGAAGGCGTTCGCGCGCTCAACCAGGACGTGCTGATTGATTACGAGCATAACCAGCTACGTAAGGACAAA  
GGATTACCCCGGAACAACCTCGTCGCGGCTGGCTGGTTTAAACGCGGATGAAATGCAGTGGCGTGAAGGTTGAAGGGTTATT  
TATCCACCACGATGCGCGGAAAGTGGCGTCTGTTATCCGCCAACTGGAAAAGGCACAGAAAAGCCCGCTGGACTGACG  
ATGACACCACCACCGGTGCGGTGCTGCAAAATCCGCCTTGTGCGCTGACCAATGACCCCGGTGCCACCGGCATGAAAAAG  
CTGACCGCAGTGGCGGACAGCTTCCCGACATCCTTCAACAGGAGAACAACCCATGAATGAAACGCTGCGCAAGCTGCT  
TGGCGCTCTTGGGGTGAATGCTCCCGGAAAATGCAGACATCACCATGAACAGGCGAGCGCGGCTGAGTGGCGTGTATG  
CGCTCGAAAACAGATGCGCGGAAAGTGGCGTCTGTTATCCGCCAACTGGAAAAGGCACAGAAAAGCCCGCTGGACTGACG  
AAAATACGTCCTGTGAAAAGCTACAACGCCCTGCGTGTGAACTGGCAGAGGCGACTGCACAAAAGCGCCACAGCCAGCCT  
GAGCGCGTCTGGCAAGGCGGAACAGGAAAGCGCATTTTCAAAAAGCGAACGTACCTACCTGGAACAGCTTGGCGGTTC  
AGATTGGCGTGGCGCAGCTGTCGGCAGCAGCTTGAGAAAAACAGCCCATCGCTGCGTGTATCTGCCATGACAGCCACCACA  
CGGAAAATCCCGTCCGAGGAAAACCGCGGTGGCGTCTGTTGCTGATGAACAGGCGAGCTGAAGGCGCTCGGCAT  
TACTGAGGCTGAGTATCTGAAAATGAAACAGGAAACAGAAAATGA

>Cluster\_19869

ATGAACCTGTTTAAATCCCGACAGGTTAATCACTTTTCCCTGCCGATGATCCACAACCTGGTGAACAACCTGCAAAGCGGTAC  
GAAAGTTTATCTGGCGAAAATCAGCGCATCATCGGTATGCCAGCGATGGGCATTCGCTCAAAAATGGCGGTGTTGATTTATG  
CTTGTCTTCTCTGTACTTACTGGCGTGTCTTCAACGTCAATGGGGACTGTATCTGTTGTGGTATCTCGCGATGATGTTT  
TGGCCCATTTGTTAGCGGTCAATGTGGTGCATGACGCTTTCGCATGATGCGTTTTTGGCTGGTAAAAAGACCAATGCCCG  
ACTTAAACCGGTGGGTTGCTTTTCTATGGGGCTAGATCCGGACTGCTGGCGGGTGGCCACGTTGCTTTCATCACGGTT  
TTACCAATATGAAATTTTACGATCCAGACAGCAGAAAATGGCATTCTTCGCGAGACGCCGTGGCAACGGTGGCGACCT  
TTTATGCGCCAGCAACATCACTATTTGGCCTGCTGCGCGCTCACCTTTCCCTGGTATATCTGGGTAGTGGACTGGCT  
CGATCGCGCAGGGTTTACGCCGGTCAAGCGACATCTGGCCCTGCGAGGCTTTGCTGGCTGGGGATTTTCTTAGCCGGGA  
AATCGCGCATTTGTCGCGTGTGTGATCTTCCCTGGCTTTTGTCTGATTTTATGTTTATGACCATCTGCTGACTTAT  
CTGCTCAGCCAGCTGCTGGCGTCAATGATTTTTGTGACGTTGATTATTGGAACGCACTGGGCGAAGGGACATAACGAGTT  
ACCACCAGAAAGGGGCAAAATGCCCGTGGCGAGCTGGCGCATACCTTTGTTACCACCTTTGACTGGAGCCCGCAACCTG  
CATGGCTTGGCTACTGGCTGGCGGGATTAATCTGCACCTAACCCATCATCTGTTTCCCTACTGGCATCATCGCCATTTAT  
CCGCGCTAAGCCGATTTATGCAAAAATGCGAGCCAGCAAGGTCTGGATTACAGTTGTTGACGTTTACGGATTTGGTT  
GAGGCTACAGCAGCAGTTTTTACGGCAATGGGGGAGAAGCCGAAAGCCTGA

>Cluster\_42900

ATGACTGTACTGATTCACGTAAGTGGATCGGATATCCCTACCCATAACCGAACCGTTCGCGGTTTTTCAACGACCGCGT  
GGCCGCGACGAGCGGCGCAGCGCGGAGTTTATGGTTGCTGGCAAGGACGACGCTTAAGTGATAGCTGTCGCGCGCTTT  
CTGTGCAATTTTTCCCTGGGAAAAATCGCTGGCGGAAGCGGTATCGCGAAAGCAAAAGCTAACCGTCAGCAGCGATTT  
TTTTTCCACGGTCAAGTCCCACTGTGGCTGGCTGCTGAGTGGTGGCATTAAAGCCAGCCAGTTTTACTGGCA  
TATCTGGGGGACAGCTGTACGAACTTCCAGTGGCTGAGATAAAGCTTTTTTACCCGCTACGTCGCTGGCGCAAA  
AGCGAGTCCGCTGTTGATTTTCCACCCGCGGTGATTTGAGCTTTTTTGGCAAAAACGCAACCCAAAGTGGCGGGGCAACT  
CTGACTTCCCGACGCGGATGGACCTTCTCTCAATACGATGGCAACGATCGGCAACGTTGAAGGAAAAATGACCATTCT  
GGTGGGCACTCCGGCGATGACGAAATGAGCATATTTGCTGCTTGGCGCGGCTTCATCAGCAATTTGGCGATACGGTAA  
AAGTGGTGGTCCGATGGGATATCCGCTTAATAACGAAGCTACATCGAGGAAGTTCGTCAGGCGGGGCTGGATTTATC  
AGCGAAGAAAAATCTGCAAAATCTGAACGAAAAACTGGAATTTGACGCTATCTGGCGTACTTCTGTCAGTCCGATTTGG  
TTACTTTATTTTTGCCCGCCAGCAGGGCATTGGTACGCTGTGCTTACTGATTCAGGCGGGCATTCCTTGTGTGTTAACC  
GGGAAAAATCCGTTCTGGCAGGATATGACGGAACAGCATTTGCCGGTGTGTTTACTACCGACGATCTCAACGAGGATATT  
GTGCGTGAAGCGCAGCGCCAGTTGGCGTGGTGGATAAAAACACCATTGCCTTCTTAGCCGAACTATCTGCAAGGCTG  
GCAGCGGGCTGGCGATTGCCCGCGGGAGGTTGCATGA

>Cluster\_78

ATGGCTTATTCACCACCGACATTATCATCGCTGATTGCCCGTACAGAACAGAAATATTGAACAGCGCTGCCGGTGGTGC  
GCCTCAGGCCCCTGAAAAACGCTGAGTGCATTTGCTTATGCTCAGGCGGGCTTGTCTGCCGGTGTGTCACGAGCATATTT  
CATGGGTTGGACGGCAGATTATCCCGTCGACAGCAGATGAAGATGAGTTGCTGGAGCACTGCCGGTTCGGGGGGTGGCG  
CGCAACAGGCGCAGCCGCCAGCGGCCGCTGACTGTACCACATCGCAGCGACCAACCTTCTGCCGGTACACGCTG  
GCAGCGTGTGATGGTGGTGTACAGCTGGCTGATGCCATTGTTGATGACCGTGCAGGAACGAGGAAATACCGTTA  
CCGCACTGGCTGCCCGGTGAGGCAAGAAATACCGGTGAGAATACCTTTTAACTGATCACCCCGGTTGCTGTTGTT  
TCCGATGCCATCACTGTAAGGAGGTTTTCCGGTGGAGTGATAATTGAGAGTGCAGCGGAGCTGCTGTCACGGCTGGAATA  
TCGTGTCCAGTATCCTCCGTTCCGGCGTAAATCAGTTTGTATACGCTCCGCTGGGACGTTGAAGTCAAGCGCGTTACCCG  
CCTGGTGTTTCCGACATGGAAGGCGGTGGCAGCTCGGGTACGTTTGTATGATAACCGGAGCAATTTTTTCCA  
CAACCGGCAAGCGTGAAGCGCTGGCGGATTTATCCCGGCTACCTACTGACCCGATACCCGGTCAATTTGCTGGCAGCC  
TGACGGTGAATGTCACGTATTTGCCCAAAGGCAAAGCCGTTAAATCCACGGATTATATATCACCGAAGACAGCCG  
AACTGAAACAGGCTATTACCCACGCCATTAATACCATGTTTTTAAATGAGGTGACCGCGGGCGGCGCACTTGCCACCTCC  
CGTATTATCCGTTGGTGGCAGGTGTTACCGGTTGATTTGAAAGTGGCTTCCCGACAGAGATCCAGCGTTCCGGA  
GAATACGGAACTGTTAACACCGGGGACAATGAACTGATGA

>Cluster\_40804

ATGGCGCTGACAGAACCCGATTTTATTGAACGCGATGCCGACAAAATCACGGCAGAAATGATTGCGAAGTATGAAGCGGA  
TACCGGCAAAACGCTGTACCCGGCACAGGCAAGCTCTGCTGATTGATCTGTGGGCCATTCGCGAAAATGCTGGTCAGGG  
TTGCGGTACAGGAGGAGCAAAAGCAGAACTGCTGCGCTTTCGCCGTTAGCCGATGATTGATTACCTCGGTGAACTGGTC  
GGTGTATACCGCTTTCGCCGCGCAGCCTGCCACTACCAGCTCCAGTTCTCCGTAGATGAGGCACTGGCCATTGATGTTG  
GATCCCGGAGGCAACCCGCTCAGCGCTTCCGACAGCGTTATTTTGGCACCGATACAGATGTGGTACTGAAGGCGGAT  
TGTGCTGCTCAATGTCAGCTCCACCTGTACCGAACCAGGATACCTACTGACCCGATACCCGGTCAATTTGCTGGCAGCT  
TTACTCGATGAGATTGATAACGTCGACCTGCTGGTGGCAATCTGACGGCCAGTTCCGGCGGTTTCCAGAACAGGAAAGCAG  
TGACAGGCTCCGGGAGCGTATCAGGCTGGCCCCGGAGTCAATCAACATGCCGGAAGCGTGGCGCATACCGCTTTTCATG  
CCATGACGGCCCATCCCAACATTTGTCGATGTTGCTGCTTCCCGGTTCCCGGGACCGTAGATCTGATCCCGCTGCTC  
AGTACCGGCTGCGCGGAGCGGTTTCTCACGCTGTTGAGAGGTTTCTGCTCTGATGAGAAAAGTCAAGCCACTGACTGA  
TACAGTGGCGGCTAAAACACCAGTGAAGGTGGAATTACACCATTTGAAGCCAGGATTACGATCTATCTGATCAGGATGCCA  
GGTCTGTAAGAAATGCGCGTAAACAGCGCATACAGAACTGGGTGGCATCACGTGCCGCAACGCTGGGGCGCGATATTGTC  
CCCAGCCAGATTTACAGTGCATTTGCTCCGTTTCCGGGTTGATACAGGTTGAAGTGGTGCACCCGCACTGCCGGTGGTGGC  
AGAAAACGAAATGGGCAAACTGTACCGCAACTCTTAACTACTGAGTGTCTGATGACTGA

>Cluster\_25576

ATGAGTAATCCGATCCTGTCTGGCGTCCGCTGCGGGCCTGTGCGTCAAAGAGACGCGGCGAGATTGTTCCGCGATCCGAG  
TAGCTGGCTGATTGGCGTATGATGCCACTGCTGCTGCTGTTTATTTTGGATACGGCATTAACCTCGACTCCAGCAAGC  
TGCGCGTCCGGATTTTACTGGAACAGCGTAGCGAAGCGGCGTGGATTTCACCCACACCATGACCGGTTCCGCTTACATC  
GACGCCACATCAGCGATAACCGTCAAGGACTGATCGCAAAATGACAGCGGGGAAAAATTCGCGGCTGGTGGTTATTC

GGTGGATTTGCGGAACAGATGGAGCGGCCAACGCCACCGCACCATTAGGTGATCACCGACGGCAGTGAGCCGAATA  
CCGTAACCTTTGTCAGGGGATGTCGAAAGGATCTGGCAGATCTGGCAAATGCAGCGCGGAGGATAACGGGCAGACT  
TTTGAACCGCTTATGTATGTACAACCCGCTACTGGTTTAAACCGGGCGGATAGCCAGCACTTTATATCCCGGTGC  
GGTGACCATATCATGACGGTCACTCGGCCGATTTCTACCTCGCTGGTGGTGGCGCGAGAATGGGAACCGGGCCACATGG  
AGGTTTGGCTCTCTCAGGAGATTACCCGACGGAGCTGCTGTGTAAGCTGATCCCTTATTACTTTCTCGGGATGCTG  
CGGATGTTGCTGTATGCTGGTGTGCGGTTTTATTCTCGCGGTGCGGATCGCGGGTCTGCTGATTTCTGTTTTTAT  
CTCCAGCCTGTTTTACTCAGTACCCTGGGGATGGGGCTGCTGATTTCCACGATTACCCGCAACCAGTTCAACGCCGCT  
AGGTGGCCCTGAACCGGGCTTTCTGCCGTCGATTATGCTTTCCGGCTTTATATTTTCAGATAGACAGTATGCCCGGGTG  
ATCCGCGGGTGACGTACATATATCCCGCAGTTATTTCCGTGACACTCTGCAAAGCCTGTTCTCCGCGGGAATTTCC  
AGTGGTGTGATAGTGAACGTGCTGTTTTGATCGCTTCGGCGGTGATGTTTTATCGGCCCTAACGTGGCTGAAAACCAAC  
GTCGGCTGGATTAG

>Cluster\_16374

ATGCTTGAGCAAAACAGTAAAAACATCAATTACAGCTTTGGCTGGCGAACACCCGTAAGCTTCTTGGTTCATCACTGGG  
TGTAACGGCCCAAGGATTACCCCTTTTTATTGAACGTGTAATAAGTGTAGTTCAGCATAATCCCGACCTAAAAGACAGAA  
TCGACGATTTCTGAAAGGTTTAAATTTTAGCGGGAATCGATTACTTTCTATTATAGAAATCACCGATGAAGACGTAGCA  
AAATTACAAAACATTTTCAAAAACAGAAAAGGACAATAGCCCTTCTCAGAAAAATACCAATTCCTTTATCCAGAGA  
GGAGCTGTTTGTCTGATCACTGAGCTGATTTTGTGTAAGTACCTGTAAGTATCATTGCTGATAAAACAAATGACACTG  
CTGTTTTTTTATCCAAGCGTATTACACTGAAGTGTAGAGCTTGACCAACACATCTTAGCGATGCGGGTATGGAATTA  
CGTGCTAATGGTGGAGAAAATAAAATGCAAAAACAGCCAAAGTACGCAATGCTTTAATACCATCATGCTAATGCTGCGA  
AAAAATATTAATTTTACGATTGATTTATCTATCTTCCAGAAAGTGAATCACAGCCTCAACAATACCTGTGGCTAAAT  
TTATAAAAAAAGAGCTGGCGTTTTTTTAAACAATCCTCTGAAATTAATTTGGTTCAATAACAAGATCTTTACGAAAAAGTA  
GATGGCAGATTTCTCATGTATCTTTTATCACCCTCAGATGGCAATACAAGTCTTTAAAACCTCAACCAAGTCAAAGTG  
TTTTGCGTCAAGATGTTTACCATCATAGTGGAGAGTCCGCAAGCCAAATATGCAAAAAGTTAAGTTGGGAAAAATTTGGG  
ATTTACCAAAAGTTCTTACATATTTTACATAGTAAATACAGTAAATATACAGGAAAAAGGACAATGCTGATAAATCTAGA  
ATTAGGTTGCATGAAGCAATGCGAAGAAGTGAACAACATGATTCGATTATATTTATTTGTTGAAAAAATATTTGGATTC  
TGTTAAGTCTGTGAAGAGAAAAAGAGCGAGATCATCAGGCCATAAATGA

>Cluster\_6726

ATGACGGTTCATGTCGTAACAGGAAAATAGGTTACAGTAAAGACTGGTTAGTGTGCGAGAATACAGGAAAGACTAGC  
TAAAGGCTGTCTGTAGCCACTAATCTAGATATTAACACATAAATGCCCCATGGTTGGTTCGTTATGCGAAAAAACAC  
GCGTGATTCGTGTCCCTGACAAACCTTCCATTAATGATCTGCTGGCTATTTGGTGTAGGCAATACTTCCATGATGAATCA  
CGTAATGGTCTACTGGTCTTGTATGAATGTGGGACTTGGTTTAAATCCCGTTCGTGGGGGATAAAGACAGACAGCCAGT  
TATTCAGCTGGTTTTTGCATGCCCATAAATAGGCTGGGATATTTTCTGATTGAGATATTTGATTAAGGACAAGC  
AAGCAGGCTGGCGCTTGGCGGAGCATGTTGTTTTATGTCGTCGTTAGATAAGTTAAACATCCCATTTTATGGTCTTTTC  
ATGAATATAAATTTAGGTCCTGTTTTTCTTTACCAAAAGGTTCACTTTGGTATGTTAAATATGGTGACAACGTTAATTC  
ATAAATCTGTGATAAATGGATGTATACCGAAAAGTCAATATATCCGCCTACAATACAAAACAGGCTTTTACTGATAAAT  
ATCCGCACTGGTGGTCTTATTCGCTTTTGGCCCAATTTATTAACACATGAGTCAAGTTTTCCGTTAACAAGGGTTTTAAT  
ATGCGCCTCACGAAAATTTACTTTGAAAAATCAAACCGATTAAATATTAATGCTTTCTTCTGCGATTGGGGCTGGACT  
TGGCTTCTGGCTACAATCTGGTAAGAATGCTGATGAGATTTCCGCTATTAATCTGCTCATGCTGAACAGGTGAGGGCAG  
TAACCTGCAGACTACCGAGCTTTACCGAGACTATCAATTAATCTTCTCTCACTGGTTTTGATGTTCCGTTACG  
TTTTGATGCTAAGGTTATGAAGTACCAAGTATTTGATTTAATTAAGATGTTAATTTGTTGATATTAAGATGCTTATTAAGATGCGCT  
CCGATTTGTTATCAGAAAAGGCCGTTATTTACAAAACATCACCCTGCCAGGAGTAA

>Cluster\_23913

ATGTCCCTCACCCGCTTGTGTATCCGCGATTTCCGCAACATGAAACTGCGGATCTCGCTTTATCTCCCGGCTTTAACTT  
TCTGGTAGGTGCCAACGGTAGTGGCAAAACCAGCGTGTGGAAGCCATCTATACGCTCGGCCATGGTCCGGCGTTTCGCA  
GTTTGCAGATTGGTFCGCTCATTGCGCCATGAGCAGGAGCGGTTTGTTCCTCATGGCGGATACAGGGCGAAGAGCGCGAG  
ACGGCGATTGGCTTAAACCAAGACAAAACAGGGCGACAGCAAAGTCCGCATCGACGGTACAGACGGGCATAAGGTCGCGGA  
ACTGGCGCACCCTGATGCCAATGCAAGTGTGATAACCCAGAGAGAGAGAGGTTTACTTTACTCAACGGCGGCCCCAAATACAGAGAG  
CATTTCTCGACTGGGGATGCTTTCAACAAGAACCCGGATTTTTCCAGCCCTGGAGCAATCTCAAGCGATTGCTCAAGCAG  
CGCAATGCCGGCGTGCCTGAGGTGACACGTTACGAACAGCTACGCCCGTGGGATAAAGAACTGATCCCGCTGGCGGAGCA  
AATCAGTACTTGGCGCGGAGTATAGCGCCGGTATCGCGGCCGATGGCTGATACCTGTAAGCAATTTCTCCCTGAGT  
TTTTCTGACTTTCTTCTTTCCAGCGCGGCTGGGAGAAAGAGACAGATACGCTGAGGTTGCTGGAACGTAATTTGAACCG  
GATCGCCAGCTAACCTACACCGCGCACGGCCCGCATAAAGCGGACTTACGCATTCGCGCCGACGGTGCGCCGGTGAAGA  
TACCTTATCGCGTGGGACGCTTAAGCTGTTGATGTGCGCCTTACGCTTGGCGCAAGGAGAGTTCTCACCCGTGAAAGCG  
GGCGGGGCTGCTTACTGATAGATGATTTGCTTCTGAGCTTGTGATGATGAGCGTCCGCGGCTGCTTGCAGCCGCTTA  
AAAGCGACGCAATACAGGTCTTTGTCAGCGCATCAGTGTGAACACGTTATAGACATGTCGGACGAAAAATTCGAAGAT  
GTTTACCCTGAAAAGGGTAAAAAATACGGATTAA

>Cluster\_62197

GTGGAACAGCCCGTGATACCTGTCCGTAATATCTATTACATGCTTACCTATGCAATGGGTTATTTACAGGAAATTAAGCA  
GGCAAACCTTGAAGCCATACCCGGTAACAATCTTCTTGTATATCTGGGGTATGTATTAATAAAGGGGTTTTACAGCTTT  
CACGCCGAGGGCTTGAGCTTGATTACAATCCTAACACCAGATCATTCCTGGCATCAAAGGGCGAATAGAGTTTGCTAAA  
ACAATACGCGGCTTCCATCTTAATCATGGGAAAACCGTCACTTTTTGATATGCTTAATGAAGACACGCTGGCTAACCG  
AATTATAAAAAGCATAATGCCATATTAATTAAGCATGAAAAGTTAAATTCAACTATCAGAGATGAAGCTCGTTCACTTT  
ATAGAAAATACCGGGCATTAGCACTCTTCAATTTAACTCCGACGATTTTACGCTATCTGAATGGCGGAAAAAATACGCGT  
TATATAAATTCGTTATCAGTGTCTGCAATTCATCGTCAATAATCTTATCCAGGTCAAAACAAAGGACACTACCGTTT  
CTATGATTTTGAAGAAGACGAAAAAGAGATGTCATTACTTTATCAAAAGTTTCTTTATGAATTTTGGCGTGTGAATTA  
CGCTGCAAAACACAAACCCGCTCTTATTTAAAATGGGATGCATCAGTATATCGGATCAGTCACTTAATTTGTTACTCCGA  
ATGGAACCTGACATCACCATTCGCTCATCAGAAAAAATACTTATCGTTGACGCCAAATACTATAAGAGCATTTTTTACAG  
ACGAATGGGAACGAAAAATTTCAATTCGCAAAATCTTTATCAACTGATGAATTAATTTAGGTCGTTAAAGCCTGAAAAATG  
CGGAAAACATAGGGGGTTATTAATATAATCCCAAGTATACCGAGTGAACATCGTTATAAAATTAATGGCTTCGAT  
ATTTGGCTTGTGACCGTCAATTTAGTTCAGGAATGGCCGTGATACATCAAGAATTACTCGACATTTTTCGATTAATATCT  
CAAATAA

>Cluster\_28040

ATGAGTCGGATAATGAACCTGCGGCTACGCCACTACGTTGGTAAAGTTTTGACACTGGTACGCCCTAAAAATCTGCT  
GTTGCTTGGTGGGCTGTTCTCTGCTTGGCGTTGGAATACTGATAATTCGGTCTGATGACAGGGTTCTTTCTCTGTTCCGGCAT  
CGGAAGTAGGACGAGCTTGTGTTGCTCCAGAAAACGTAAGCACAGACGACGTTATATTTGTCAGGATATTCGCTTGCCG  
AGAGTCACTATGGCATGCTATGCGGGCCATGTTAGGTTATGGCAGGGGCCGCAATGCAATCCATGACAGTAAAGCGCT  
TGCCGATCCTGGTTTTAATCGCGCTCAAGAAGGATGTAGCTGGCTGTGCTGTGGCTGATTTTCCAGTTTCCAATGCTGG  
GAATGTTCTGGCTCCAGTGGCTTGGCTTGGTGGCTTTAATCGTGAATTTTGTGCGCGGATATTTCCCGCCCGGATTTGTTCTGATTTGGTATTTGGTGTTCCTGCTTTTCCGCGCGGATATTCGCTGATTTATGACCACTGC

AGATGTTCCGAGATGTACAACTGCATTGATGTGGTTATCGGGAAGCCATGCAGTAACTGGATGTTAGTCGGTATTT  
CAGCCTGTTGGATTTGCCAGCCGCTCTTTTATGCTGTTACCGCCAGGACTCGGGATATCGCTCTGCTTGGTCATCAG  
GTTGCAACCGGGTTAGGGGTGAATAGTTCTCGTCTGGCGTTGTTACGTGTCGCGCACCATAATCTGACAGCCGCTCG  
CGTTTCGTTGTTGGTAAACATCGGTTTTGTCGGATTGATAGCACCCATATATCACGTTTATTTCTACCTGGCGGGCAGA  
GCACATTAAGTCTGCGGGAGCGCGGTATCGGGGGCTGTTAGTTATTTGCGGATAGCATTTGGTCTGTTTGGT  
CCTTTGCAACTGCTGCCGAATCATTATCTCACTGATTTGGTGGACATTTTTTTTGGTACTGCTTGGCAGCGCAGGAA  
CAGTTTTTAA

>Cluster\_15091

ATGCGTATTGAAGAAGATCTGAAGTTAGGTTTTAAAGACGTTCTCATCCGCCCTAAACGCTCCACTCTTAAAAGCCGTT  
CGATGTTGAACTGGAACGCTCAATTCACCTTCAAACATTCAGGTCAGAGCTGGTCCGGCGTGCCGATTAATTTGCCGAAATA  
TGGACACCGTAGGCACATTTCTATGGCCTCTGCGCTGGCTTCTTTTGATATTCTGACTGCTGTGCATAAACACTATTCT  
GTCGAAGAGTGGCAAGCGTTTATCAACAATTTCTCAGCTGATGTGCTGAAACATGTGATGGTTTCTACCGGCACGCTGGA  
TGGCGATTTCGAAAAAATCAAACAGATTCTCGACCTGAACCCGCGCATTAATTTGCTTTGATTTGACGTGGCGAATGGTT  
ATTCCGAACACTTCTGTCAGTTCGTTGCGAAAGCGGTTGAAGCGTGGCCGACCAAACATTTGTGCAGGCAACGTAGTG  
ACTGGTGAATGTGTGAGGAGCTTATCCCTCCGGTGGCGATATCGTTAAAGTTGGCATTTGGCCAGGTTCTGTTTGTAC  
AATCGCGTCAAACAGCGCTCGGTTATCCGCACTTTCTGCGGTGATCGAATGCGCCGATGCTGCGCACGGTCTGGGG  
GAATGATCCTCAGCAGTGGCGGCTGCACACCGCGGGCATGTCGCGAAAGCCTTTGGCGGCGGTGCGCATTTCTGAATG  
CTTGGCGGATGCTGGCGGGCCACGAAGAGAGCGGGTGCATCGTTGAGGAGAACGGCGAGAAATTTATGTTGTTCTA  
CGGCATGAGCTCAGAGTCTGCGATGAAACGTCACGTTGGCGGGTTCGCGAATATCGCGCAGCAGAAGTAAACCGTTA  
AGCTGCCGCTGCGAGCCGGTTGAAAAACCGCGCTGATATTTGGCGGCTGCGTTCAGTTGTACATACGTTGGG  
GCTTTCACGCTGAAAGAATGACCAAACGCACCATTTTCCCTGTGCGAGGAACAAGAAAACCGCATCTTCAAACACCT  
GTAA

>Cluster\_26707

ATGAGCGAGAACTCGATTGCTTTGACCCAAATACAGCCAGGCGTGGTTGCGGCTGTAAAATTTCCCAAAAAGTGTGGA  
AACCATCTTGCACAGTGAGCAGGCGAAGTTTGTGATCCGAATTTGCTTGTGGGTAATGAAACCCGCGACGATGCGGGG  
TGTACGATCTGGGCAATGCGACACAGCTTATCAGCACCACCGACTTCTTATGCGGATCGTTGATAATCCTTTGATT  
GGCCGATTTGGCGGACTAACGCCATCAGCGATATCTTCGCAATGGGCGGAAACCGATTATGGCGATTGCGATCCTCGG  
CTGGCCGATTAACAACCTTTCCCGGAAATTCGCGGAAAGTACCGAAGGTGGACGCTATGCATGCCGTGAGCGGGTA  
TTGGCGTGGCTGGCGGCTCACTCCATCGATGCGCGGAGCCGATTTTGGTCTGGCGGTAACGGGGATCGTACCAGCCGAG  
CGGTTGAAGAAAACAGTACCGCACAGCCGGATGCAAACTGTTCCTGACGAAACCGCTGGGGATTGGCGTCTTACCAC  
GGCTGAGAAAAATCACTGCTGAAACAGAACATCAGGGACTGGCGAGGAAAGTATGTCGCGGATGAACATCGCAGGCG  
CGTCTTTGCCAACATCGAAGGCGTAAAGCGGATGACCGGACGTTACGGGTTTTGGTTTTGCTGGGGCATTTAAGCGAAAT  
TGTCAGGGCGCAGGTGTGCAGGCGCGCTGCATATGACGCGATCCCGAAATTTGCCGGGGTTGAAGAGTACATTAAGTT  
GGGCGCAGTGCCTGGCGGACCGAACGTAATTTGCCAGCTACGGTCACTGATGGGTGAAATGCCGCTGAAGTTCCGG  
ATCTGCTGTGCGATCCGCAAACTTCTGGCGGTTTTGCTGCTGGCGGTCATGCGGAAAGCAGAAAATGAGGTCAAAGCTACA  
GCCGCCGATTTGGCATTGAACGACCAACGCAGGATTGGTGAACGTTGCGCAGCGCGGCGGCTGCTGCCATGTTGATGAG  
TTAA

>Cluster\_48914

ATGGGCAACGCAATGCACCTCTCTTAAGACACTTCTACAATTACCTTACCGATGGCGATGCAGTCGACAAATTAATTA  
TGACGGTATAACCTTCCATCTCCGCGGAAAAACGTAACAGCACAATGTCCTGAATGCTTTAAGCGTAGCTACTCTGTT  
ATAGTTGTCGTCGGCGTCGGATACAGCATCTCCCTGTTTCAGGCGAGAGCTATGGCTTGTATTTCCGTCGGCCACAG  
TACAGCCGTAACCCGGTTGTTTACGAAAAATTTTGGCGGGTTCGCTTACTCCCTTCGCGGTTACACACAGCAGCTT  
ACAGCGGTTTACAATAATTAACAACGTCACCTGGGATTAATTTGCCGGAGGTGAGGCTGAAAAACGGGCGAGCAACG  
GTCTCCGTTGAGTGCAGATACCTTCTTTCGAGAGTTATCAATACCCCGGAGACGAAACTGTGAGGCTCGCCCCATGTC  
GGTATTGATGAGTGGCGTGGCATCGGGGCCACCGTTACGGTACGTTAATAGTCAATCTTGATACTACCGTCTCTCGT  
CCTGCTTCCCGGCGCGATCAGCGTACGCTGGCGACCTGGTTACAGAAAATATCCGAAATACAGGTTGTCTCGCGTATC  
CGAGTGGAAATCTATGCGCAGCAGCAGCAGTGAAGTGCACCTCAGGCCAGCAGGTTGGCCGATCGATGGCACCTGAAA  
AATATTGGCGATGCGTTTGAACGAATGATGTACAGACATATGCCCTCTGATACGCTTGTGTCAGTGTGTACCCAAA  
GAAATCACCTGAGCCAGAACAGTCTGTGCTGCAGCATCGCTCCGTCGTCGGAACCGCTTAAACAGCAACCTGCAAAA  
AACGGCATCAGCGTTGGACAGAGGTTATGGCCGTCATAACAAGGATGTAGTTTACAGGAAATATCCCGTATTACAGGC  
CTGTGCGGAGTGACAGTCACTGCTGGTGGTTACAGGAACATTTCCCTGAAATGTCAACAGGCTTCCAAAGCGAGGCTT  
CTGGCCCCATGGAGGAGTGGTTAA

>Cluster\_12388

ATGAGCCAGAAGTATCTTTTATTGACCGTGTGGAACCTGATTTCCGAACCGCAAGTGACTTTCAGTTCGATCGCTT  
TGACAAACTCGCCTTCGAGCCGGAAGTTGTTCCGTTTTGCTGAAACTGCAAAAAGCAGGTTTTAAGCTGTTTATGATCA  
CTAACAGGATGGACTCGGAACCCAGAGTTTCCCGCAGGCTGATTTTGACGGTCCGCATAACCTGATGATGCAAAATTTT  
ACCTCTCAGGGCGTAAACGTTTGAATGAGGTTATGATCTGCCCCACTTGGCAGCGGACGAGTGTGATGCGGTAAGCCAAA  
AGTGAAGCTGGTTGAACAGTATCTGGTTGAACAGGCAATGGATATGGCGAACAGCTACGTCATTTGGTATCGGGCAGC  
ATATTACGCTCGCTGAAAAACATGGGCATTTAGCGGATTGCGTTACCATCGCGATACCTTGAACCTGGGCGATGATCGGCGAG  
CAGTTGACCAAACGTCAGCGCTACGCACAGGTTGAGCGTAATATAAGAAACGCAGATTGACGTCAAAGTCTGGCTGGA  
CCGCGAAGGCCGAGCAAAATCAATACTGGCGTTGGCTTCTTTGACCACATGCTGGATCAAATCGCCACCCACGGCGGTT  
TTCGATGGAGATTGCGCTCAAGGGCGATCTGTATATAGACGATCACACACCGTTGAAGATACCGGTCTGGCGCTGGGC  
GAAGCCTTAAAGCTGGCGTTAGGCGATAAACCGGGCATCAACCGTTTTGGTTTTGCTGCGGATGGATGAGTGTCTGGC  
ACGTTGCGCGCTGGATATCTCGGCCCTCCACACTGGAGTACCGCGGGAGTTTACCTACCAGCGGCTTGGCGATCTGA  
GCACGGAGATGATCGAACACTTCTCCGTTCACTCTTACATATGGGCGTCAACCTGCACCTGAAAACCAAAGGCAAAA  
AATGACCACCCCGTGTGGAGAGCCTGTTTAAAGCCTTTGGCCGACGCTGCGTCAGGCGATTCTGTTAGAAGCGGACAC  
GCTGCCCTCTTCAAAGGAGTGTCTGTAA

>Cluster\_26324

GTGGAATTGTTGCTGAATATGGTTTGTTTTTGGCGAAAATCGTTACCGTTGTGCTAGCGATTGCGGGCATTTGCCCCAT  
TATTTGCAATTTGCTCAACGTAATAAACCGCCAGCGTGGCGAGTTACGAGTCAACAATCTCAGCGAACAGTATAAGGAGA  
TGAAAGAAGAACTGGCCGCGGCTGATGGACACTCATCAGCAAAAACAGTGGCACAAGCGCAGAGAAAAGCACAAG  
CAAGAAGCGAAAGCCGAAAAGCGAAAGCTAAACTGGGCGAGGTTGGCAACTGATAGTAAACCTCGCGTCTGGGTGCTGGA  
TTTTAAAGGCAGCATGGACGCCCATGAAGTGAACCTGCTACGTTGAAGAGATAACGGCGGTTACTCGCAGCATTTCAAACCG  
AGGATCAGGTTGCTCCGCTGGAAGGCTTGGTGGCATGGTGCATGGTTACGGGTTGGCGGCTTGGCAGTTGCAGCTG  
CTGCGTGAATAAAAATATTTCTTTAACTGTTACTGTAGACAAAGTTGCTGCCAGCGGGCTTACATGATGGCCTGTGTGGC  
GGACAAAATTTGTTTCCGCAACCGTTTGTCTATTTGGGTTCCATTTGGCGTGGTGGCGCAAAATGCCCAACTTTAACCGCTTCC  
TGAAAGCAAGGATATTTGATATCGAACTGCACCCCGGCGAGTATAAGCGCAGCTGACGTTGCTGCGGTAAGAAATACC  
GAAGAAGGCGGGGAAAATTCGCGAAGAGTTGAACGAAACGCATCAGTTATTTAAAGATTTTGTGAAGCGTATGCGTCC  
GTCCTGGATATTTGAACAGGTGGCAACGGGTGAACACTGGTACGGACAACAGGCGATGAGAAAAGCCTGGTTGATGAAA



TCAACACCAGTGATGAAGTTATTTCTTAGCCTGATGGAAGGCCGGGAAGTGGTCAATGTACGCTATATGCAGCGTAAACGA  
CTCATTGACCGATTACCCGCGAGCGCGGACAGAGACGCGGATCGATTGTTGTTACGCTGGTGGCAGCGTGGGCAAAGCC  
GTTGATGTAA  
>Cluster\_26054  
ATGCCAGTGTACACAACCCGATTTCCAACGACGCGTTAAAAGCCAAAATGTTGGCTGAGAGCAACCGGAATCACCAT  
TTCGTTTTTATAAGTATTTCCACATTTGCCGATCCTAAGGCGACCCGTGACGCTTTATATCAGCTGTTTACCAGCGTGGATG  
TTTTTGGGGGAGTGTATCTGGCGCATGAGGGCATTAAACGGCAATACAGCGTACTGCGAGCAATGTTGAAACATTTCCG  
CGCAGCTTTATGCTTCGACCCGGCTTTAGAGGGCTTACGCTGAATATCGCGTTGGATGATGACGGGAAATCCTTCTG  
GGTACTGGCAGTAAAGTCCGATCGTATCGTTTCCGACGGTATTGACGATCCTCACTTTGATGCCAGCAATGTTGGGTG  
AGTATCTGCAAGCGGGGAAAGTGAACGCCATGCTTACGATCCCGATGCATTGTTTATCGACATGCGTAAACCACTATGAG  
TATGAAGTGGGGACTTTGAAAACGCGCTGGAAATCCGGCAGATACCTCCGTTGAGCAGCTGCCAAAAGCAGTCGAGAT  
GATGCAGGCACATAAAGATAAAAAATCGTTATGTACTGCACCGCGGCATTCGTTGTGAAAAGGCCAGTGCCTGGATGA  
AACATAACCGATTCAACAAAGTCTGGCATAATCGAGGGCGAAATATTGAATACGCCCTAAGGCGCGCAGCAGCGGCTTG  
CCGGTGGCTTTTATTGGCAAAAATTTGTTTTTGGACGAGCGGATGGGCGAACGTATATCTGATGAGATTATCGCGCACTG  
CCACCAGTGGCGTGGCGCTGGCAGCAGCATACCAACTGAAAAATGATGGCTGCCATCTGCTGTTTATTCAGTGTCCAG  
TATGTGGGAAAAATACAAAGGTTGTTGTTAGTGAATTTGCTGCGAAGAAAGCGGTTACCGCCAGAGAACAGCGACAC  
CGTGGGCGAGGACGTGAAAATGGCAATAAGATCTTTAATAAGTCTGTTGGACGCTGTAATACAACACTGGGCATTCCTGA  
TCCAACAGATAA  
>Cluster\_58269  
ATGGCAACCATCAAAGACGTTACAGATGCTGCTGGTACTGGTGTGCTGATTGGTCTTAATATGCGACCACTGCTCACCTC  
CGTGGGGCACTGTACCACAATTCGCGCCAGGCGAGCGGAATGAGCTTTAGCGTGGCTGCCCTGTGACCGCTCTGCCGG  
TGGTTACCATGGGCGGGTGGCGTGGCGGGAAGCTGGCTTCATCAGCATGTCAGCGAACGTCGCACTGTCGCCATCAGT  
CTGTTGCTGATTGGCGTGGTGCATTGATGCGTGGCTTTACCAGCAAGTGGCGTGGCTTACGAGCGCACTGCTTGG  
TGGGTGGGATTAACGGCGGTTACCGCAGCTTACCGGTTACCGGTTAAACGGCGGTTTACGAGCGCGCAGCTGGTGA  
TGGGGCTGTGGTCCGCGGCTCTGATGGGCGGCGTGGGCTGGTGGCGCATAACGCCCTGGTTAGTTCAACATAGCGAA  
ACCTGGTATCAAACACTGCGCTGGTGGGCGCTGCTGCGGTTGTTGCGCTCTTTGCGCTGGTGGTGGCAAGCGCCGCGA  
GGTGGCTCTTCCACAAGACAACCAACTCCGGTTCGCGTGGTATTCACTCCCGCGCGTGGAGCGTGGGTGTTTACT  
TCCGTCTGATTAACGGCGGTTACCGCAGCTTACCGGTTACCGGTTTACCGCTTTTATATGAGATTGGTGGCAGCGCG  
TACAGCGGTTCTTACTGGCATTGATGACGCTTGGGCAAGCGCAGGAGCTTTGCTGATGCTGCTATGGCTCGCCATCA  
GGATCGGCGCAAACCTGTTAATGCTGGCGCTGGTGTACAACTGGTGGGTTCTGCGGCTTTATCTGGCTGCCGATGCAAT  
TGCCGGTATTGTGGGCGATGGTGTGGGTTAGGTCTGGGCGGCGGTTTCCGCTCTGTTGCTGCTGGCGCTCGATCAC  
TCTGTCAACCCGCTATTGCTGGCAAGCTGGTGGCGTTTATGCAAGGAATCGGTTTATCATCGCCGGCTTGGCCCGTG  
GTTTTCTGGCGTGTGCTAGTATCAGCGGCAATTACCTGATGGACTGGGCATTTTCATGCGCTGTGCGCTGTTGGGCTGA  
TGATCATAACCCCTGCGTTTTGCACCAGTACGTTTTCCGCGAGCTGGGTCAAAAGGGCATGA  
>Cluster\_23891  
ATGAAAAGGCATAGAAAACGTCATTTGTTATTGATGTTGGTATTACTCGTGGCGCTCGGTGATGGCGCAAACCATTTA  
TATCCAGCTATTGCCGATATGGCGCGCATCTCAACGTTCCGTAAGGGGCGGTGCAGAGCGTAATGGGCGCTTATCTGC  
TGACTTACCGTGTCTCACAGCTGTTTTATGGCCCGATTTCGACCCGCGTGGGTGCGCGACCGGTGATCCTCGTCGGAAT  
TCCATTTTTTATGCTGGCAAACGCTGGTGGCGGTCAGCACTCCAGTTTATGATGGTATTGATGCGCCAGCGCGCAGGG  
GATGGGCGACCGGCTGGCGGCGTAATGGCGCGTACTTTGCGCGCGATTTATATGAACGGACACAGTTGCGGACCGCTA  
ATAGCCTGTTAAACATGGGGATTCTTGTAGTCCACTGCTGCGACCGTAATCGCGGCTGCTGGATACGATGTGGAAC  
TGGCGTGCCTGTTATCTCTTTTTGTTGGTCTTTGTTGCGGCTGACTTTTCAATGATGGCCCGTGGATGCCGGAACCGC  
TCCGCTCGACGCAACCGCAGCGCCTGCTTACAGTTATAAAAAGCTTTTTCGTAACAGCGGTTTAACTGTTTCTTTCG  
TGATGCTGATTGGCGGCTGCGCCGGAATGGCGCATTTGAAGCCTGCTCCGGCGTGTGATGGGCGGCTGTTAGGGCTG  
AGCAGTATGACGGTCACTATTTTGTATTTCTGCTATTCGCGCGCATTTTTTGGCGCATGGTTGCGCGACGTCCTCAA  
TAAACGCTTCTCAACGTTGATGTGGCAGTGGTATCTGTTGCTGCTGGCTGGCTGGCTGATGTGGATCCCCGACTGGT  
TTGGCTGATGAATGTCTGGACGCTACTCATTCGCGCGCTGCTTCTTTTTTTCGTTGCGGATGCTGTTTCCACTGGCT  
ACCAGCGGCGGATGGAGCGGTTCCCTTCTGGCGGGCACCGCTGGCGCGCTGGTGGCGGCTGCAAAAACATTTGGTTC  
CGGCGTGTGGCGTCTCTGCGATGTTGCCGCAAACCGGTCAGGGCAGCTGGGATGTTGATGACCTTAATGGGAT  
TGTTGATCGTGTGCTGGCTACCCTGGCGACGCGGATGTCGCATCAGGGGCGCTGTTTTAA  
>Cluster\_20941  
GTGTTAGCCAAAGGGCGGAAAAATCATTACTTCTGTCGCCATCCGTGGGTCTTTTCCGGGGCCGTGCCCCGATGGAAG  
TAAAGCCAGCCTCCGTGAAACATTCGATATTGTTGATCATCAGGAAAATGGTTAGCAGCGCGGCTTATTCGCCAGCTT  
CGCAAAATCCGGCGCGCTGACGCTTTGACCCGCTAGTCTATCGACATTTGCTTTTTTACCAGCGTTTACAACAA  
GCACAAAATGGCGTACTGGCTGGCGCAAAAAGATGGCTCAACAGCTATCGTTTAAATCGCCGAGAACTGATGGCT  
GCCGGTATTAATCTATCGATCGTTTCGGTAATTTTCTGGTGTGCAACTACTGAGTGTGGCGCAGAATATCAGCGCGCG  
CATTAATAGCGCCCTGCAACCGCTGTACCCGGAATGTGCGATTTACGATCGCAGCGATGTTGCGGTACGTAAAAAGAA  
GGGATGGAGTACACCGGCGCCGTCACCGGCGAGTTGCCCTGCTGCTGCCGATGGAAGAACCGCGGATGAAACT  
GCTGGTGGATATTACGACCGGACACAAAACGGGCTACTACCTGGATCAGCGTATAGCCGCTGGCTACCCGCGCTACG  
TTGAAAATAAACCGCTACTGAACGTTTCTCTATACCGGTGGTTTCGCGTATCGGCACTGATGGGCGGTTGAGCCAG  
GTTGTCAGCGTTGATACCTCCAGGAAGCCCTGGATATTGCACGGCAGAACGTTGAGCTGAACAAACTGGATCTGAGCAA  
GGCTGAGTTGTCCGTGATGATGTTTAAATTTGCTGCTGCTACCTATCGCGATCGCGGTAAGAAAATTTGACGTTATCGTA  
TGGACCGCGCAAGTTTGTGAGAAATAAAGCCAGTTGATGGGCGGCTGCTGGTATAAAGACATCAACATGCTGGCG  
ATTCAGTTGCTGAATGAAGCGGTTATTCCTGACTTTCTCTGTTCCGGTCTGATGACCGAGGATTTATTTAGAAAAT  
CATCGCGGATGCCGCAATGATGCGGCTGATGATGATAAATTTATAGAGCAGTTCCGTCAGGCAGCCGATCATCCGGTGA  
TCGCTACCTATCCGGAAGGGCTATATCTGAAAGGGTTTTGCCTGTCGCGTCATGTAA  
>Cluster\_41503  
ATGCAATTGCGTAAATTAAGTCTGCCAGGACTGCTTTCCGTTACCCCTTAAAGCGGCTGTTCCGCTGTTTAAACGCGAAGA  
AGATGTGGTAAAGATTTCCCATTTGCCAACCGTTGAAAACGATTTACGCCGACTACTGTGTGGAGCACTTCCGTGGTA  
CGCGCAATGGCAACTGCTATTCCAACTTCACTCCGCACTGGCGGCAACAGCTTGTCTATGCAAGCGGACCGCGTGGTTA  
GTAAAAGCGCTGAATGGGATGACGGCAAAAGAAATCTGGTCTGTCAACCTGGCCGAGAAAGATGGCTGGTCTCTAAAGA  
TCCGTGCACTTACTTTCGGCGGCTGACCGTGTCTGGTGGGATGCTTACATTTGAAACCGAAAAGGCGCAGGTTTACGCGC  
TGAATACCAAGCATGGTACTGTGGCAGTGGCAAACTAAAGTCCGGGTAAGCACTTTCGCGCCGTTGGTGGTCAAGCGGCT  
CTGGTGTAAATCCACACCAAGTAAACCGTCAAGTTACAAGCTGAAACGAGCTGACCGGCGCTGTCAAAATGGACAGTTAACCT  
CGATATGCTTCCGCTCTCTTTGCGTGGCGAGTCTGCGCGGCAACCGCTTTTGGTGGCGGCTCGTGGTGGCGATAATG  
GTCGCGTACGCGAGTGTGATGGAACAGGGCGAGATGTTGGCAGCAGCGTATTTCCAGGCGACCGGTTTACCGGAA  
ATTCACCGTGTGAGGATGTTGACACGACTCCGCTGTTGTTAACGGCGTGTGTTTTCGCGCTGCGCTATAATGTAACCT  
GACGGCGTGTGCTGCGCAGCGCTAGATTTATGTTGAAACCGCAACTGGGTTCCGGTGAATGATTTTATCTGTCAGCGCA  
ACCGCATCTATCTGGTGCATCAAATGACCGGGTGGTGGCTGACCATGATGGCGGCTTACGCTGTGGACACAAAGC



GCCACCATTATGGCGTTGACCGCTGGCGTCAGCATGACCGTTTCATTCTCCACGCGGTTTGGCGTGGGAATTTTTAAGCC  
ACGTACGTTGATGATCACCTCACAGGTGTTATTCTGGCGGGGGATCACCTTGCCGTTTACCTTCCCATCGCGTTT  
CGTGTGGTATCACGCTGATTGCGCGGTTTCTCGGTAGGTTTGGCGTAGCGATGAGTCAGGCGTTGGGGCGGTTT  
TCATTACGCGGGCGTAGCCAGCTCGACCTTAGGTAATGGCGAAGTTTGGCGTTCGTCACTGTGGATTGGCTGGCGC  
GGTGGTGGTATCGCGCATGGAATATGCTGATCGGGAATCTGATTACCTGTAGCATAGTGAAGCTGTGTGCTGATTATGT  
TCGTGCGGCTGGACGCCCGTTGCCGCTCATGAAGAAATCCATCACCACGCTTGA

>Cluster\_14083

ATGAAAATCACAAAATACCACGTATCGTTTACCTCCCCGCTGGATGTTCTTGAATAATGAAACCGATGAAGGCGTGGT  
CGGTTGGGCGAGCCGCTGATTGAAGGCCGCGCCGTCAGGTGGAAGCGCAGTTACAGAGCTGGGTGACTATTTGATTG  
GTCAGGATCTTCGCGCATCAATGACTTATGGCAAGTATGATGATCGCGCCGGATTTTATCGTGGCGGTCCAATCTGATG  
AGCGCCATTCGCGGGATCGACCAGGCGTTATGGGATATCAAAGCAAAGTGTGAATGCGCCGGTCTGGCAACTGATGGG  
CGGCTGGTTCGCGCAAAAATAAAGCCTACAGTTGGGTCGGCGGCGATCGTCCGGCGGATGTTATCGACGGCATAAAA  
CCCTGGCGAAATCGCTTCGATACCTTCAAACGTAACGGTTGGAAGAACTGGGGCTAATTGATAACTCCCGCGGTA  
GATGCGGCAGTCAACACCGTGGCACAATTCGTGAAGCTTTGGCAATCAGATTGAGTTTGGTCTGATTTCCACGGTCCG  
CGTCAGCGCGCAATGGCGAAAGTGTGATTAAGAAGCTGGAGCGGATCGCCCGCTGTTTATGAAGAGCGGCTGCTGG  
CGGAACAAGCCGAATACCTACCCGAAACTGGCGGCAAAACGCATATTCCTGCGCGGGGTGAGCGCATGTTCTCACGT  
TTCCGATTTTAAACCGCTGCTGGAGCGAGCGGATTTTCGATTCTGCAACCGGATCTCTCCATGCAGGCGGATTAACCGA  
ATGCTACAAAATTTGCTGGAATGGCAGAAGCCTATGATGTGACCTTGGCGCCGACTGTCCGCTCGGACCGATTGCACTGG  
CGGCTTGCTGATATCGACTTTGTTTCTATAACCGGCTACTTCAGGAACAAGTATGGGCAATTCATTACAACAAGGCG  
CGGAGTTACTCGACTTTGTGAAAAACAAGAAGACTTCAGTATGGTTGGCGGCTTCTTAAACCGTTAACGAACCGGG  
CTTAGGTGTGAAAATCGACGAAGCTAAAGTTATTGAGTTCAGTAAAAATGCCCGGACGGCGTAATCCGCTGGCGTC  
ATGAAGATAACAGCGTAGCAGAGTGATA

>Cluster\_62130

ATGAGACGAACATTTACAGCAGAGGAAAAAGCCTCTGTTTTGAACATGGAAGAACGGAACAGGCTTCACTGAAATAGC  
GAATATCTGGGTTCAAACCCGGAACGATCTTCACTATGTTAAGGGATACTGGCGGCATAAAACCCCATGAGCGTAAGC  
GGGCTGTAGCTCACCTGACACTGTCTGAGCGCAGGAGATACGAGCTGGTTTGTACGCAAAAATGAGCATTCGTGCGATA  
GCTACTGGCGTGAATCGCAGTCTTCGACGATCTCACGTTGAAGTTTACGCGTAATCGGGGCGAGCGCTATTACAAAGCTGT  
TGAATGCTAATAACCGAGCCAAACGAAATGGCGAAAAGGCCAAAACCGGTCTTACGGATCAAAAATTTACCATTCGAAAGC  
TTGTTCTGGAAGAGCTGGAGATGAAATGGTCTCCAGAGCAAATATCAGGATGGTTAAGGCGAACAACACCGTCAAAAA  
ACGCTGCGCAATATCACTGAGACAAATTTATAAAACGCTGTACTTTCGTAGCCGTAAGCGCTACACCACCTGAATATACA  
GCATCTGCGCAGCGTCGCATAGCCTTCGCCATGGCAGGCGTCATACCCGCAAAGGCGAAAGAGGTACGATTAACATAGTGA  
ACGGAACACCAATTCACGAACGTTCCCGAAATATCGATAACAGCAGCTCTCTAGGGCATTTGGGAGGGGCTTAGTCTCA  
GGTACAAAAACTCTCATATAGCCACACTTGTAGACGAAAATCACGTTATACGATCATCCTTAGACTCAGGGGCAAAGA  
TTCTGTCTCAGTAAATCAGGCTCTTACCACAAATTCCTGAGTTTACCCTCAGAACTCAGAAAATCACGACATGGGACA  
GAGGAATGGAATGGCCAGACATCTAGAATTTACTGTGACGACCGCGTTAAAGTTTACTTCTGCGATCTCAGAGTCTCT  
TGGCAGCGGGAAACAAATGAGAACACAAATGGGCTAATTCGCGAGTACTTTCTTAAAAAGACATGCTCTTGGCCAAATAC  
TCAACATGAAGTACTGCTGGTTGCTGCTCAGCTAAACAACAGACCGAGAAAGACTGAAAGTTCAAACACCGGAAGAGA  
TAATTTAAAGGGGTTGCTGATGACAGATTGA

>Cluster\_24334

ATGATTATCAATAACGTCAAAACGTTGCTGGAAGACGAGGTGGTACACGGTTCTTGGAGATGCAGGACGGCGAAATCCG  
CGCCTTTGCGGAAAGCCAGAGTCACTGTCAGAAAGCAATGGACGGAGAAGCGGCTGGCTGCTACCGGGCTGATTGAGC  
TGCATACCGATAATCTGGATAAAATCTTCAACCCCGCGCCGAAAGTTGACTGGCTGCCCCTCGGCGATGAGCAGCCAC  
GACGCGCTGATGGTGGCGAGCGGATCACCAACCGTCTGGCAGCGCTGGCGATTGGTGATGACGCGACCGCGCGGATCG  
GCTGGAGAATCTGGAGAAGATGATCAACGCCATCGAAGAGACGCAAAAACCGCGGCTCAACCGTGGCGAGCACCGTCTGC  
ACCTACGCTGCGAACTGCGCATCACACCACGCTGCGCGTGTTTGAAAAACTGTTACAGCGCGAACCGGTAACGCTGGTG  
TCGCTGATGGATCACTACCGGGCCAGCGCCAGTTCCGCAACCGCGAAAAATACTGTAATATATCAGGGCAAAATCACT  
GCTCACCGATGCGCAGATGCAGCAGTATGAAGAAGAGCAGCTGGCGCTCGCCGACGCTGGTGCAGCCAAATCGCGAAA  
CCATCGCCGAATGTGCCGCGCGGACACATTCGCTGCGCAGCCAGATGACGCCACGACGCCCACGTTGCTGATCT  
CACCAACTTGGCAGCGTGTATCGCGAATTTCTTACCACATTCGAAGCGCGAGAAGCCTCGCGCAAGCAGCGCATGAACGT  
ACTGATGGGCGCGCAATATCGTGGCGGGGTTCCGACTCCGGCAACGTTGGCGGCCAGTGAATCGCGCGAGCTTGGCC  
TGCTGGATATCTCTCTTCCGACTACTACCCCGCAGCCTGCTGGATGCGGCGTTTTCGCGTGGCGGATGACCAAGCAAC  
CGCTTTACGCTGCGCAGGCGGTGAGGCTGGTGACAAAAACCGGCCAGGCACTGAATCTCCAGGATCGCGGGGTGAT  
TGGCGAGAGCAAAACCGCGGACCTGGTGTGGCCATCCAAAGGCAATCACATTCATATTGACCACGCTGGCGTCCAG  
GTAAGGGGTTGTTCTGA

>Cluster\_10991

ATGCTGATATCTCGAAGATATGATTTATCGCGTACCTCTCATGCGGTACGATTCAGGTAACCCGTGACCAGGGTGA  
AGTTTCGCTCGATGACCTGTTTGCATCGCTGAAAGACGTAACCCGAAACGCGCTTTTCTGTTTGTGACGAAAGTACTCG  
GCAGGCATATCCCGTGCACCCCTCAGTATCGACAGCCCTACAGACAGCTTCCAGCCAGTTCCTCCGACTGACA  
GGACCCGTACTGTTTATCGGTATGGCTGAAACCAGCGCTTGGGCTTGGGCGCGGTGATTTGATGAAAGTGCAGCCAGCA  
TCGTGAATCTGTCTATCTGACCTTACCCGTCACCCGTTGATGGCACGTTGCTTTGCGAGTTCAAGGAAGAACACAGCC  
ACGCCACCGATCATCTGATCTATCTGCCAGATGATGAAGAGAAAAGACGTCGTGTTACCAACGACGAAACGCTGGTTTTG  
ATTGATGACGAGGCAACCACCGGTAATACCTTTATTAACCTGCTTCTGCCCTGCGTAATACCGGCAAGCTTCAACATAT  
TGAACAGGTTATCGCCGTAACGCTGACCGACTGGAGTGGCAATGCCCTGTCGGAGCGCACCCCTTGCCTGCTACTTCGG  
TTTTCGCTTGAAGCGGTCAGTGGGGATGGACCCATTACTGATGACCTGTCCCGGACATGGCGAAAGTCAACGTAATC  
TCACGAGGAGAAATGACACATCCAGGGGAAACAGTATGGGGCCGACTGGGGATGCTCGCACCTGCAGCCGATCTCGGCCA  
TGAGGTTCTCCGTCACAAAGGGGGAACGTTATCTGGTTCTCGGACCGGGAAATTCGCTGGGAGCCGTTGCTGCTGGG  
AACGGCTCGAAGCTGCCGAGCACAGGCATTTTATGGATCGACCACCGCTCCCTGTCGCGGTTGGTTATGCCATTGAG  
TCCGCCATTTCTTTACGGATAACTACGGGCTGGGCATCCCAATTTTGTCTATAACGTCGCCACCAGCAGTTTACCGC  
CATTTCTGTGTACTGAGACACCCGAGAAAGTATTGACACGAGCTTCTTAAAGCGCTGGCTGAGGTTGCGCCCGTCCG  
TGGAGATTGTTACCTATGAATAA

>Cluster\_41757

ATGGCTGATCAGGCGGGACAGGCTGGCACATTTGTGATGAGCGGATATATCCGCAACAACTACTGTACAAGTTGTAGC  
TTTTGCGCGTGAAGTCAAGCAACCGTTGCCATTTCAAATGGGATACCCGCACTCGATCTTTTCCGCGAGAGCTGTGGG  
CGCGGGTGTAGGGCGCTGCCCTTCTGATCCAGACGCGCTTTGATTTGGCGTTAGGCGATGCTCTGCGTGGAGGCGGCTTG  
CGGAGGCAATAGTTGATTACTTACGCTTTTACGTTGGATTGATGTCAGCCAGAGCAGGCTTTTACTACTCAGGTTA  
TGGCGCTCAATAGCTTTAATCTGACGCGCTGGCGAAAACCGGAAACGGGATGTTGATGAAAGTCAACGTTTCCAC  
TGATTCGCCCGATTTGCTCACTCGCATGATGTGAAATTTTGGCTGTGCGGTTGATGACAATGGACTGGATATACAAGC  
GGAATACAAAATTTCTGATGCGGTTTGGCTGATAACACAGCACACCAAGTCCGCTGGGTGTGGCGCTCTCTTT  
AGCGCGCAGGCATCAGATACTGGAATGGCAGATCGTAGTCAGGCATGGAATTTGAAGATGATTTAGACAGTGAATTT

GCTATCACGGTAAGCCGTTACCGCGTTAAAAAGTCTCGACGCCAGCCGAGCGGTAATTTATGCCGGAACATTACAGCAA  
GCGTATTTCTGCTGATTGCGCTGTCGCTGGCTGGTGGTCCCGGTAAGCAAATTCACAAATTCGCCACCAGGCGTCACT  
GGCTCCATGTGCGGTACCTGTTCTATGGCAGAACACATGGCAGACTTCTTCCGCGAGGGGCAATTTCTGGCGGCATCTGA  
AGAAAAATGCGTCAGCATTTATGCTCAACGTCGGCAATGGATTGAGCAAGCGTTGACGCAGCAAGGATTTTCAAGTTGTGCCG  
CAGAAAGGTGGTATCCAGATGGTATGATCAGAAATGATAGGGGATGATATTGCCATGCGCGTAAAGCCAAATGCTGCAGGCC  
TGCGGTGCAGGCACTTAGCGACTGGCGTATCCGTTCAAGTGGGGAAGGTGGATTACTGCTTTCGTTTGCTAATATCGTTA  
ACGAAGGTATGGCGGCAGGTTAGCACAACAATACGTTAAAGCCTTAAGCTAA

>Cluster\_6840

ATGCAAAAACCTCAATACTCAGTGCAAAAATATGCCTGGGGCAGCAAAAACGGCGTTGACTGAACTTTATGGTATGGAAAA  
TCCGTCAGCCAGCCGATGGCCGAGCTGTGGATGGGCGCACATCCGAAAAGCAGTTTACAGAGTGCAGAATGCCGCCGGAG  
ATATCGTTTCACTGCGTGTATGTGATTGAGAGTGATAAAATCGACTCTGCTCGGAGAGGGCGTTGCCAAAACGCTTTGGCGAA  
CTGCCCTTCTCCTCAAAGTATTTATGCGCGCAGCACAGCCACTCTCCATTCAGGTTTCAATCAAACAACAACAATTTGAAAT  
CGGTTTTGCGCAAGAAAAATGCGCGAGGTATCCCGATGGATGCGCCGAGCGTAACTATAAAGATCCCTAACACAGCCGG  
AGCTGGTTTTTGGCGTGCAGCCTTCTTGGCATGAACGCGTTTTCTGAAATTTCCGAGATTGTCTCCCTACTCCAGCCG  
GTCGCAAGTGCACATCCGCGGATGCTCACTTTTACAACAGCCTGATGCCGAACGTTTAAAGCAACTGTTCCGCCAGCCT  
GTTGAATATGCAGGGTGAAGAAAAATCCCGCGCTGGCGATTTTAAAAATCGGCCCTCGATAGCCAGCAGGGTGAACCGT  
GGCAAAACGATTCGTTAATTTTCAATTTTACCCGGAAGCAGCGGCTGTGTTCCCGCTATGTGCTAATGTGGTGA  
TTGAACCTGGCGAAGCGATGTTCTGTTGCTGAAACACCGCAGCCTTACCTGCAAGCGTGGCGTGAAGTATGGC  
AACTCCGATAACGTTGCTGCGTGGCGGCTGACGCTTAAATACATTTGATATCCGGAACGTTTGGCAATGTGAAATTCG  
AAGCCAAACCGCTAACAGTGTGTTGACCCAGCGGTGAAACAAGTGCAGAACTGGACTTCCCGATCCAGTGGATGAT  
TTTGCCTTCTCGCTGCATGACCTTAGTGATAAAGAAACCACTTAGCCAGCAGAGTGGCGCAATTTTCTGCTGCTGCA  
AGGGATGCAACGTTGTGGAAGGTTCTCAGCAGTTACAGCTTAAACCGGGTGAATCAGCGTTTATTGCCGCCAACGAAT  
CACCGGTGACTGTCAAAGGCCACGGCCGTTTAGCGCGTGTTTACAACAAGCTGTAA

>Cluster\_23312

ATGCCAGAAAATACACCCCTGCTGCTGCCGCAACCGGTACATGGACTGAAGAAGAGATCCGCCATCAGCCTCGCGCATG  
GATCCGTTCACTACCAACATTTGACGCGTACGTTTCCGCGCTCAATAACTTCCCTTGAACCGTTACTGCGCAAGAGAATC  
TGCAAAATCATCTGACCGGAGCCGGAACATCGGCATTTTATCGGTGACATCATCGCGCGTGGCTCGCCAGCCATACCGGT  
AAAACTTTCAGCGCCGTACCGACACCGATCTGGTCAACCAATCAATGGACTACTTGAACCCAGCTCATCCGCTACTATT  
GATCTCTTCCGTCGATCCGGCAACAGCCCGGAAAGCGTCCGCCCGTGAACCTGGCAAAATCAATTTGTACCAGAATGCT  
ATCACCTGCGCATCACCCTGCAACGAAGCGGGCGCTCTTTACAAAACGCAATCAACAGCGACAACGCGTTTGCCTGCTG  
ATGCCCGCAGAAACGCACGATCGCGGCTTCCGCGATGACCAGCAGCATTACCACCATGATGGCCAGCTGCCTCGCGGTTTT  
CGACCTGAGATGATCAACAGCCAAACCTTCCGCGACGTGGCGGATCGTTGCCAGCGCATCCTGACCTCACTGGGCGATT  
TCAGCGAAGGTGTGTTGGTTACGCACCGTGGAAACGGATCGTTTATCTCGGCAGCGGTGGCTTACAGGGCGCAGCACGC  
GAGTCGGCGCTGAAAGTGTGAACTGACAGCGGGTAAACTGGCGGCTTCTATGATTCCCGACCGGATCCGCTCATGG  
CCCGAAATCGTGGTTCGATAACGAAACGCTGGTGGTGGTGTGTTGTTCTCCAGCCACCCTTACACCCGTCAGTATGATCTTG  
ATCTGTGCGAGAACTCCCGCGGATAACCGCAATCCGCGTAACTGGCCATCGCCGCGGAAAGCAACGACGTTATTGGC  
GCCGTTCCACATATCATCTGCCCGCTCCCGTCACTTTATCGACGTTGAGCAAGCATTTGCTTCTGATGTACGCCCA  
GACATTTGCACTGATGACGTCGCTGCACATGGGTAATAGCCGGATACCCATCAGCCAGTGGCACCGTTAACCGCGTGA  
TGCAAGCGTAATCATTCATCCGTGGCAGGCATAA

>Cluster\_29486

ATGAGAATAATTGATCTTTTTAGTGGGTGTGGGGGTTATCCCTAGGCTTTTTGAAGGGGGGTTTGTATGTTGTAGGTGC  
TTATGATTTCTGGGATCCGCTGCTATTTGAATGTTACAGAGATAAATTTAGCCATCCGATAAAAAAATAGATTGAGCAATG  
TTGATGATGTGGTGGGAGCTTAAAGATATAGACTTGCATGATGATATTTGGAGGGCCCTTGGCAAGACTTCACTCAT  
GCAGGTTTAAAGATTGAAGGTGCTAGAGCTAACCTTACCTGCTCATTTTTCAGAAATTAATAAAGAATAAAGCCAAAGTG  
GTTTGTGATGGAAAATGTAGATCGGGCATTAAAGAGTGGTGCCTATTTAGAAGCTCGAGGAATCTTAAAGAATCAGGGT  
ATGGGTTAACAGAAATGTTTTGGATGCCAGTAAGTGTGGTGTCCGCAAAAAGAAAAGATTTTGTAAATGGAAAG  
CTTGACGTGAGGGATGGTTTTTATCTTAAACGAAGTGTGTCGGGATATCGAAAAGATAGTATGACAGTTAGAAATATCT  
TGGTGATTCATTGGGGATTGAGTATTATTACAGACATCCGAGAAATTAACAGAAAGGCTATTTTCTCTATTGATGAAC  
CTCGCCAAACAGTAAAGAGGGGTTAATAGACCGATACCTGATGGATATTAGGGCATGCAGGCGATCCTGTGATTTTCT  
GAGAATGTAAGGCCATTAACAACCTTGAAGAGCAAGATTGCAAAATTTCTGAAAGCTTTAAATTTAAAGGTGCAAA  
AACAAATTTGGAGCAAAATGATAGTAATGCTGTTCCCGTTGAGTTAGCAAAAATATGTTGCGGTGACAATCAGGATG  
AAAAAAACAAGTAAAGGTTATTATGATAAAGAAGGCTTTAGGGCGTGGTGTGAAATGAAAAGAACTAACAAAAGA  
ACCTCTAGCGATATATATCTAGATGTTGCAGAGGTGTTTCAATTTTTGATTCAGAGGGGGTGGATTTTATAACTGTGA  
AATAGATGAAATTAATGAAACTGGAAGGCTTGAATCGTTTGTGAGCTTGGGGTTAGCCTGAAGTCTCAGTTAAGAA  
GGGCTTTTAAATTAATTCGAAATATTGTCGAAGGTAA

>Cluster\_30847

ATGAGTCACTCATCCGCCCCGAAAAGGGTACTGGAGCTGTCAATTACAGATTGGCGACCCGGAAGATCCTGCGTTCGGCA  
ACAACGCTCATCAAGTATGCGCAGCCACCTGTGGATTTCCGTTCCCTGCTGCTGCTGGCTTTTGGCTATGGATGT  
TGTTCAGCGCTGTTGCGGTGAACCTTACCAGAAAGTCGGTTTTAATTTTACGACCGATCAGTATTTATGTTGACTGCGCTG  
CCTTCGGTTTCTGGCGGCTTATTACGTTTCCATACTCCTTTATGGTTCCTATCTTCGGTGGTCTGCTGGACGGCGTT  
CAGCACCGGATTTCTGATTATTCATGCGTCTGGCTGGGTTTTGCCGTCAGGATAACCTCCACGCCTTATAGCGTCTTCA  
TCATCATTTCTCTGCTGTGCGGCTTTGCTGGCGGCAATTTCCGATCAGTATGGCAAAACATCAGCTTCTTCTTTCCGAAA  
CAGAAGCAGGGTGGCGCGCTGGGCTGAAATGGTGGTCTGGGCAACATGGGCGTCAGCGTCATGCAAGTTGGTTGCTCCGCT  
GGTGGTATCACTGTCGATTTTTCGAGTATTTGGTAGCCAGGGCGTCAAACAGCCGGATGGGACTGAGCTGTATCTGGCGA  
ATGCGTCCGATATGGGTGCGGTTCTTGGCACTTCCACCATTTGGCGGTGGTGGTGGCATGAACGATCTTGTACTCA  
AAAGCCTCCATCAAGGAGCAGTTGCCAGTACTCAAACGGGGTCACTGTGGATATGACCTGCTGTATGCGCAACCT  
CGGCTCCTTATCGGCTTCTCCGCGGCTTTGCGATGCTGTCAAAAACGAGTTCGGGATGTTTCCAGATTCTGCAATACG  
CTTCTTCCGGCGGTTTTATGGTGGCTGGCGGCTTCTGCAGTGGTGCATTTATCTGACCGTCTGGGCGGAACTCGGTGTC  
ACGCTGGTGAACCTTATCCTGATGGCGATTTTTCAGCGGCTGCTGTTCTGACCTTACCAGCTGACGGACAGCGCGGAAG  
CTTCAAGGCTTCTTCCGATGCTGCGATTTCTTGGCGGCTTCTGACCGTGGCTAGCTGAGCTTCCAGATGATTT  
CCGTGATCTTCCGTAACCTGCAATGGAATCGCGTGAAGCAGAAGGGGTTCTGACGAACGTCGATGCGTGAAGCGCA  
ACCGACAGCGCGGCGGCTGGGTTTCACTCTCGGATTTGGCGGATTTGGTGGCTTCTTATCCGAAAGCGTTTGGTAG  
CTCGCTGGCATTAAAGGGTTCCGAGTCCGCGCAATGAAAGTATTTTTGATTTTCTATATCGCTGCGTGGTGGATACCT  
GGCGGTATATGGTCGGCATTTCTAAAAATAA

>Cluster\_54485

ATGAGCACAAAATTTTATACCCCTGCTGACGGATATTGGCGCGGCAAACTTGGCAGCGCCGCGCTCGGTGTGCCGTT  
AAAAATGCCCATATGGCGGTGCGGATGGCGGGAACATTACAACCGCGGACGCAAGCAGACAGACTGTTAAATG  
AGAAACGCGGGCTGCGTGAATGCTCTATATCGACCCGAGAACAGCAGCCAGATATTGCTGAACAGGTGATCCCT  
GAAAACGAGGGCGGTTGGTGGATACGTGAAGTGGCCGTTTGTATGATCCGGGCGATTGATTGCCGTGGGCAACTGCC

GGAAAGCTATAAGCCGCAACTGGCTGAAGGCAGCGGGCGTACCAGACCGTGCCGATGGTGTGATTACCAGCAGTACGG  
ACAATATCACCCGTAAGAAATCGACCCCTGCTGTAGTGCTGGCAACCCGCAAGTATGTGGATGACAAAATATCAGAGCAGCGAA  
CAGTACAGCAGCTCACCCGGACGCTCGCTGACCGCAAAGGGTTTTACTCAGTTAAGCAGTGCAGCAACAGTGAATCCGA  
AATACTGGCCGCAACACCGAAGGCTGTGAAGGCGGCATATGATCTTGCAGCAGTAAAGCATCCGCCAGTCCACACACC  
CTGGGAATCAGATAACAGGATGTGCTGCAGCTTCACTAGCTGAAAGGCAACCTGCAACTCAGCAGCGGCAATGATACAGC  
ACGTCAGAAACAGCAGGCTGCCACACCAAAGGCAGTGAAGGCGGCATATGACCTTGCAGCAGGTAAAGGCACCTGTCAGTCA  
CACGCACCCGTGGAGCCAGATAACAGATGTGCCGTCAGCTTCACTGACGGTAAAGGCACCGTGCACATCAGCAGCGCTA  
CTAACAGCAGCTCAGAAACGAGGCTGCCACACCAAAGGCGGTGAAGGCTGTATATGACCTTGGCAATGGAAAACAACCT  
GCCGACGCCAGATGACCCGACTGGCAGGCTTGGCAGTAAACACCGCTGATCCGAGCAAGGATAGTTATCTCTGTCATA  
CAGCTGACAACCTGACTAACGTTGGACGGAATATTCGATAAAGCAAGCACACAGGCGGTTATTCATATCTTGGTTC  
TGAGCGATGCAAGTGGATACGTTGGACGCTGGCTGAATACCCAGGTTTTACCTCATCAGGTACGTACACCCGACGCCA  
GGAACAAAACCGGATAGGTTAGGTCACAATAACGGGCGGGGTTGGCGGAGGGGGCGGCTGCAAGGCTATATCCAATAATGAAC  
GTTTTTCGTTGCTGGCGCGGGGCGAGTGGGACAGTAATCACACCGCTGATCCGAGCAAGGATAGTTATCTCTGTCATA  
TCGGCGCAGGTGGGGCGGGCGGCTTAGTGGCAGAACGGCTCAAGGGCGGTGATAGCTCGTTCCGATCGGTAATAGCC  
CCTGGTGGTGAAGTGGTGGAAAATCAGGAGTCAAAAACAGAACGGTGGTAAACGGCGGTGTGCCAAGTACTGGCGGTAT  
CAACATCATTTGGTGGAAATGGAGGCGAGGTCAGTCCGGAATATCGGCGTACGCGGTGAAGGCGGAACATCGCACTGGG  
GTGGCGGTGGCAGCGCTGGCGGTGGTGTAAAGGCATATGGTTCAGGTGGCGGTGGCCATACAGATGCC

>Cluster\_45193

ATGGAAAATTCACGCATCCCTGGGGAACATTTTTTTTACCACAGTGATAATACAGCGTGTTTTTATCGGCACTGGCCCCG  
TTTTACAGCCCGGGCGAAAAGGTCATCGTCTTATTTTCAATCGGGTTCATGAACATTTCTGGTCTGTACAACTCTCGTTG  
ATGAAGTGGCGATGCCAGATACTGCTTTTTATGATGCGGATGCCCGGGGGCATGGAAAACCTCGGGGCGCGTGGTTAT  
AGCCCATCTTTGCGGCTTCACTGCAGGATGTCGATGAAATTTGCCGTTTTGCTGCCAGCGACAGCCAGGTTGGACTGGA  
AGAGGCGGCTGTGATCGCCGCAAGGCTCGGCGCAGTGCATGCTGGTTCACATGGGTTGATGATTATGCGCTGCAATCGG  
GGCTGGTGTGGCTTCTCCGGCTTAAAGTTAAATTTGATGTGCCGTCGCAGTCTCGCTGGCGTTATGGCATCGT  
CTGCGTGGTCTGTTTTTATTAATTCCTATGTGAAAGGACGCTATTTGACCCAGCATCGGCAACGGGTGGCGAGTTTCAA  
TAATGATCCGCTGATCACAGGGCGATTGGCGTCAATATCTTGTCTGATCTCTATAAAAACGCTGAACGATTTGTTAGCG  
ATGCGGCGGCTGATTCGCTCCCCACGCACTTCGATATCAGGCGGATGACTATGTGGTGCATCGCAACCGCATCGAT  
TTTTATCAGCGTTACGTAGCCCTCTCAAAGAGCTGCATCTGCTGCCAGGCTTTTATCAGCACAGCTTGGGTGAAGAGAA  
CAGGGCGCTGGCATTTGAAAATGCAAGCTTTATTAAGTCAATTTATATGCTAATAAATCGCAAAAATTTGATATACAG  
ATGAAGACTGCACAGGACCATCAGCGGATCGATGGCGGCTACTTTCTGGTGGACCCGTCGCATTAATCGCGGTTGATTTG  
CGTATCGCTTTTAAAGCTATGGCGATGAAATTTGTTACGTTAGTTCGCGGCGCACTCTCGGGCTGCATCTCGGAATGAGC  
TGATTCAGGCAGTTCGCTGGATTTATGCTATCAAAATCAACCACAAGGTAGTAACGCATTCGGGCGTTTAGTCGACAAAA  
TCTACCTGAACAGTGTGGCTGGCGGCTATTCGCCAGCGCAAAACCCATTTACAATGCTGATTAACAAGCCGTTGCC  
GATCTAACCGCAAAGGTTTAGCCATCCGCGTGGTGCATTCGCGTGGCAGGCGATGGGCGCTATGCTGGATCGCTGGGA  
GAATGACCTGCCGATGCGATATTTTGTACGTTAGTTCGCGGCGCACTCTCGGGCTGCATCTCGGAATGAGCAGCCGCT  
TGATTCAGGCAGTTCGCTGGATTTATGCTATCAAAATCAACCACAAGGTAGTAACGCATTCGGGCGTTTAGTCGACAAAA  
TCTACCTGAACAGTGTGGCTGGCGGCTATTCGCCAGCGCAAAACCCATTTACAATGCTGATTAACAAGCCGTTGCC  
GATCTAACCGCAAAGGTTTAGCCATCCGCGTGGTGCATTCGCGTGGCAGGCGATGGGCGCTATGCTGGATCGCTGGGA  
GAATGACCTGCCGATGCGATATTTTGTACGTTAGTTCGCGGCGCACTCTCGGGCTGCATCTCGGAATGAGCAGCCGCT  
AACGGGAATGCTCTGGCAGGTGCGTTTTGAACAGGGCGATGCGTTTTAACCCGGAGGAACTCAGCGGTTAACCTCGCGG  
CCTACGCTGGCGATTTGCTCTGGCTGTATGAGCTTTTTCCGAAAATGAGCAGGTAAAAAATCCCTCGCAGCTCTTGC  
CAATCGCATGAAACCGGTTGGCATTTCTATCTACACCGGCGACCCACAACCTGGAGTGTATGCTGGATGATGCTGGG  
TAACAGTGCATAAAGATGTTAAACCGTGGGTGATGCGCTGCGTTTCGCAAGGGGAGATGGATTTACTCGTGCGTGATGCC  
GGATTTGATAAATGCACACAACGGATTGATGAGTGGGTATTTTTACGGTTTCGATGGCGGTGCGTGTGATAACTGA

>Cluster\_22006

GTGAATATTCAGGCTCTTCTCTCAGAAAAGTCCGTCAGGCCATGATTGCGGCAGGCGCGCTCGCGATTGCGAACCGCA  
GGTTCGTGATCAGCAAAAAGTTCAGTTCGGCGACTATCAGGCTAACCGCATGATGGCAGTGTGCAAAAACTGGGTATGG  
CACCAGCAAAATAGCAGAGCAGGTGCTGACTCATCTGGATCTTAACCGTATCGCCAGCAAAGTTGAGATCGCCGGTCCA  
GGCTTTATCAACATTTTCTTGTATCCGGCATTCCTGGCTGATCATGTTTCAAGGCGCTGGCGTCCGATCGCTCGGGTGT  
TGCTACGCGCAAAAACAGACCATTTGTGTTGACTACTTGCAGCAAAAGTGGCGCAAACTGGTGCATCACCATGACCGAACCAG  
GCTCTACCATTTATGGTACGACAGCAGTGGCTACTCTGGAGTTCCTCGGTACAAAAGTATTCGCGCAAAACCGTCCGGC  
GACTGGGGCACTCAGTTCGGTATGCTGATTCGCTGGCTGGAAAAGCAGCAGCAGGAAAACCGCGTGAATGGAGCTGGC  
TGACCTTGAAGGTTTCTACCGCATGCGAAAAGCATTACGACGAAGTGAAGAGTTTCCGAGCGTGCACGTAACACTAG  
TGGTAAAACCTGCAAGCGGTGACGAATATTTCCGCGAGATGTGGCGCAAACTGGTGCATCACCATGACCGAACCAG  
ATCACCTACGATCGTCTGAACGTGACGTTGACCCGCGATGACGTCATGGGTGAAAGTCTCTACAACCCAAATGCTGCCGG  
TATCGTGGCGGACTGAAAGCCAAAGGCTGCGCAGTAGAAAGTGAAGGCGCGACCGTTGATTTCTTGTATGAGTTCAAAA  
ACAAGGAAGGCGAAACCGATGGGCGTTATCATTCAGAAGAAATGGCGGCTATCTCTACACCACCATGATATCGCTGT  
CGAAAATCTGTTATGAAACACTGCATCCGATCCGCTGCTGATTTACATCGATTTCCGTCAGCATCAACCGAACCAG  
GGCATGGGCGATCGTCCGTAAGCGGGCTATGTACCGGAATCCGTACCACTGGAACACCACATGTTCCGATGATGCTGG  
GCAAAAGTGGTAAACCGTTCAAAAACCGCGCTGGCGGTACGTTGAAACTGGCCGATCTGCTGGATGAAGCCCTGGAAACC  
GCACGCGTCTGGTAGCAGAGAAAACCCGGACATGCGCAGTACGAGCTGCAAGAACTGGCAAACTGGCTAACCGGTTGGTATGG  
TGCGGTGAAAATATGCGGATCTCTCCAAAACCGCACCAGGACTACATCTTCGACTGGGACAACATGCTGGCGTTTGGAG  
GTAATACCGCGCATACATGCAATGCTTACACGCGTGTATTGCTCGGTTCCGTAAGCAGAAATTAACGAAGAGCAA  
CTGGCTGCAGTCCGGTAATCATCCGTGAAGATCGTGAAGCGCAACTGGCAGCTCGCTGCTGAGTTTGAAGAAACCT  
CACTGGTGTGCCCGCAAGGCGCAGCGCATGTGATGTGCTTACCTGTACGATCTGGCGGTTGCTGCTGCTGCTGCT  
ACGAGCACTGCCGATCTCAGCGCAGAAAACGAAGAAGTGCCTAACAGCCGCTGAAACTGGCACAACCTGACGGCGAAG  
ACGCTGAAGCTGGGCTGATACGCTGGGTATTGAGACAGTAGAGCGTATGTAA

>Cluster\_14939

ATGAGCGGTGGCGATGGACGCGGCATAACACGGGCGGCATAGCACAAGTGGTAAACATTAATGGTGGCCGACCGGGCT  
TGGTGTAGGTGGTGGTCTTCTGATGGCTCCGGATGGAGTTCGGAAAATAACCCGTTGGGTTGGTTCGGTAGCGGCA  
TTCACCTGGGGTGGTGGTCCGGTATGTTAATGGCGGGGGAAATGGTAATCCGGTGGTGGTTCGGGAACAGCGGTAAT  
CTGTCAGCAGTAGCTCGCCAGTGGCATTTGGTTTTCCGGCACTTTCCACTCCGAGCTGGCGGCTGGCGGTCAGTAT  
TTCAGCGGAGCAATTAATCGCAGCTATTGCTGATATTAATGGCTGCCCTGAAAGGACCGTTTAAATTTGGTCTTTGGGGG  
TGGCTTTATATGGTGTACTGCCATCACAATAGCGAAAGATGACCCCAATATGATGTCAAAGATTGTGACGTCATACCC  
GCAGATGATATTACTGAATCACCTGTGAGTTTACCTCTCGATAAGGCAACAGTAAACGTAATATGTTGCTGTTGTTGA  
TGATGTAAGGACGACAGCAGAAATTTTCCGTTGTTTCCAGTGTTCGATGAGTGTTCGGTGGTGGTGAACAACTA  
CCGAACGTCAGGTGTTTTTACCGCACTAATTCAGGTCACCTGTTTCTGAATATTTTCAAGTAAATAACAGTACCCAGCA  
GTACAGCATTAAGCCAGGTGTTACAATAATACTGATAAGGATGTTCCGCCGCGAGATTTACTCAGGTTGGTAAATAC  
CAGGATGCAAGTTATTCGATTCGGAAGGACAGCGGTCATAATGCCGATATGTTTTCAGTGTGATGTTTCTTACTCCTG  
ACCAGGTAACCAACAGTCAAGTGAAGAAAATCCGGTCAAGCAGGATGGATGCTACGCATCCGTTGAGCGGCTGAG  
CGAAAATTAAGCAGCGCGGTGCAGAGCTGAATCAGGCAAGTGAAGATGTTGCCAGAAATCAGGAGCGCAGGCAAGC  
TGTTCAAGTTTATAATTCGCGTAAAGGCAACTTGTATGACGCAATAAACTCTGCTGATGCAATAGCTGAAATAAAC



A

>Cluster\_26788

ATGAATCCACAATGTTACGCGTAACAAATCGAATCATTTGAACGTTCCGCGGAGACTCGCTCTGCTTACCTCGCCCGGAT  
AGAACAAGCGAAAATTCGACCGTTTCATCGTTCGAGTTGGCATGCGGTAACCTGGGCACACGGTTTCGCTGCCTGCCAGC  
CAGAACAAGCCCTCTTTGAAAAGCATGTTGCGTAACAAATATCGCCATCATCACCTCCTATAACGACATCTCCGCT  
CACCAGCCTTATGAACACATATCCGGAATCATTTCGTAAGCCCTGCATGAAGCGAATGCGGTTGGTACAGTTGCGGGCGG  
TGTTCGCGGATGTTGTGATGGTGTACCCAGGGGAGGATGGAATGGAATTTGCGCTGTTAAGCCGCGAAGTGTATGCCA  
TGTCTGCGCGGTTGGGGTGTCCATAACATGTTTGTGTTGCTCTGTTCCCTCGGTGTGTGCGACAAGATTTGCCGGGG  
CTGACGATGGCAGCCTTTCGTTTGGGCATTGCTGCTGCGGTTTGTGCGCTCTGGACCAGTGGCAAGCGGTTTGCACAA  
TAAAGAAAAGTGCATTTCCGAGCTTTATGCGGAAGGTAAGTGGACCGCATGGCATTACTGGAGTCAAGAAGCGCGT  
CTTATCATGCGCCGGAACATGTACTTTTACGCTACTGCCAACCAACAGATGGTGGTGGAGTTTATGGGGATGCAG  
TTGCCAGGCTCTCTTTTGTTCATCCGGATTCTCCGCTGCGCGATGCTTTGACCGCTGCAGCTGCGCGTACAGTTACACG  
CATGACCGTAATGGTAATGAATGGATGCGCATCGGTAAGATGATAGATGAGAAAAGTGGTGGTGAACGATATCGTTGCAC  
TGCTGGCGACCGGTTCCACTAACACACCATGCACCTGGTGGCGATGGCACGAGCGCGCGTATTTCAGATTAACCTGG  
GATGACTTCTCTGACCTTCTGTGATGTTGTACCGCTGATGGCACGCTCTACCCGAACGCTCCGCGCATATTAACACCTT  
CCAGGCGGCGTGGCTACCGGTTCTGGTGGTGAACGTCTCAAAGCAGGCTGCTGCATGAAGATGCAATACCGTGG  
CAGGCTTTGGCTGCTCTCGTTATACCTTTGAACCATGGCTGAATAATGGTGAACCTGGACTGGCGGGAAGCGGAAAA  
TCACTCGACAGCAATGTGATCGCGTCTTGAACAACCTTTCTCTCATATGGTGGGACAAAAGTGTAAAGCGGTAACT  
GGGCGTGGCGTTATGAAAACCTCTGCCGTGCCGTTAGAGAACCAGGTGATTAAGCGGCTGCGGTTGTTTTGAAAAGCC  
AGCATGAGTTATGCGGCTTTGAAGCGGTTGCTGGACCGGATTTGTCTGTTGTTGCTCCGTATCAGGGGCAAAA  
GCGAAGCGAATGCCAGAATTAACAATAACATGATGCGCCACTTGGTGTATTTATGGACCGGTTTCAAAAATTGGTTAGT  
TACCGATGGACGACTCTCCGGCGTTTCCAGTAAAGTGCCTGCTGATCCACGTAACACAGAGGCTTACGATGGCGGGC  
TGCTGGCAAAAAGTCCGCGACGGGACATCATTCGTGTGAATGGACAGACAGGCGAACTGACGCTGCTGTTAGACGAAGCG  
GAACGCGCTGCTCCGGAACCGCACATCTGACTGACGCTGAGCGCTACGCGTGGGAACAGGACGTAATTTACAGCGCTT  
CGGTGAAAACCTGTCGGTGCAGAACAGGGCGAACCTGTATCACTTTTAA

>Cluster\_23591

ATGATAAAACCGAGCTTTTACGCCGGTGGCCATTGCTGCTCTGCTCACAGGAAGCTGTTTTAGTACGGTAGCCGCGCC  
ACCTGTTTTCTTATGGTGTGGAGGAAGATGCTTTTCATCCGGTACGCGCTAAGCAGGGAATGGTGGCGTCTGTAGATGCTA  
CTGCCACTCAGGTGGGGTGGATATCTCAAGGAGGGCGGGAATGCCGTTGATGCTGCCGTGGCGGTGGGCTACGCGCTG  
GCAGTAACGCATCCGCGAGCAGGAATCTGGGCGCGGTGGTTTATGCTGATCCGCTCGAAAATGGCAATACCCACGCG  
TATCGATTTCCGCGAATGGCACCCGCAAGCGACCCGCGATATGTTCTCGATGATCAGGGCAACCCGGACAGCAAAA  
AATCACTCACTTCGCATCTGGCTTCCGGCACACCGGTCAGGTAGCGGTTTTCGTTTGGCGCTGGATAAATACGCGCAC  
ATGCCGTTGAATAAAGTGGTGAACCGCGTTTTAACTGGCACCGGATGGTTTTATCGTTAACGACGCGCTGGCTGACGA  
TCTCAAAACCTACGGCAGTGAAGTGTGCGCAACACAGAAAACAGCAAGCTATCTTGGAAAAGAGGGCGAACCGCTGA  
AAAAGGGCGACAAGCTGGTGCAGGCGAACCTGGCAAAGAGCTGGAGATGATTGCCGAAAACGGCCCGGATGAATTTCTAC  
AAAGGCACGATAGCGGAACAGATTGCCAGGAGATGCAGAAAACCGGTGGCTTGTATCAGCAAAAGAAGATTTAGCGGCATA  
TAAAGCGTGAACGACACCGATAAGCGGCGATTATCGGGGTATCAGGTTTACTCCATGCCACCGCATCTTCCGGCG  
GTATTCATATCGTACAAATCTCTCAATATCTGGAAAACCTTCGATATGCAGAAAGTACGGCTTTGGCAGCGCCAGCGATG  
CAAAATCAGGCAAGCTGAGAAAATACGCTATGCCAGCCCGGAAATATCTTGGCGACCCGATTTTGTCAAAGTACT  
GTGGCAGGCGCTGACCAATAAAGCCTATGCCAAATCTATTTGCCGATCAAAATGATATCAATAAAGCGCAAGCCATCCAGCG  
AAATTCGTCTGGCAAGCTTGGCGCTTATGAGAGTAATCAAATACCCATTACTCAGTAGTGGATAAAGACCGGTAAACGCC  
GTGGCGGTGACCTATACGCTGAACACACCTTCCGTTACGGCATTTGTCTGCGGGCGAGAGCGGTATTTTGTCAATAACCA  
GATGGATGATTTCTCCGCAACACCGGCTACCGAAGTTTACGGCTGGTGGGCGGATGCCAACCGCGCTGGCGCGCA  
ATAAACCGCCGCTGTCTGATGTCACCAACCATTTGTGGTCAAGGATGGTAAAACCTGGCTGGTCAACGGAGCCAGGC  
GGTAGCCGATTAACACACTGTCTGCAAAATGTTAGTGAATAGCATCGATTATGGAATGAACGTCGCGAAGCGACCAA  
TGGCGCGGTTTCCACCATCAGTGGTTGCCGAGCAGCTGCGTGTGCAAAAAGGGTTTACGCCGATACGATCAAGCTGC  
TGGAAAGCAAAAGCTCAGAAAAGTGGCGCTGAAAAGAGCGGATGGGCAAGCATTAATGGTTGGGCGGACCGGTGAG  
CTGTACGGTGCATCCGACCCAGCTCGGTGGATGATTTAACGGCGGGTATTAA

>Cluster\_42952

ATGACGCCAGGTGAAGTACGGCGCTATATTTTCATCATTCGCACTTTTTTAAAGCTACGGACTTGTATGAACGATCCCAA  
AATGCGTATCACCTTCCGCTACCGCTATGGCGTACTCATTTCTGGATGCCAAATCGGCATAAAGACAAAACCTTTAG  
GTGAGCGACTACGGCTGGCCCTGCAAGAAGTGGACCGGATGGATCAAGTTCGGGCAGATGTTATCAACCCGCGCGAT  
CTTTTTCCGCCACATATTTGCCGATCAGCTGGCGTTATTCAGGACAAAGTTCGCTCCGTTTGTATGGCAAGCTGGCGAAGCA  
GCAGATTGAAGCTGCAATGGGCGGATTTCCGGTGAAGCGTGGTTTGCAGATTTTGAATCAAGCCGCTGGCTTCTGCTT  
CTATCGCCAGGTTTCATACCGCGCGATTGAAATCGAATGTTAAAGAGGTTGGTGTATTAAGTCAATCCGCGCGATTTT  
CCGGTCAATTAAGCGGATCTGAAACTTATCTACCGTCTGGCTCGCTGGGTGCCGCTTTGCTGCCGATGGTCCGCTCT  
GCGCCAAACCGAAGTGGTGCAGGATGCAAAAAGACTTTGATTGATGAACGATTTGCTGCGGGAATCTGCCAACGCCA  
TTCAGTTCCGCGCAATTTGAGACAGCCGATGCTTACATCCCGAAGTTTACCTGACTATTGTAGTGAAGGATG  
ATGGTGTAGGAGCGCATTTACGGCATCCCGGTTTCAGATGTTTGCAGCGCTGGAGAAAAACGGCCTAACATGAATTTGCT  
GGCAGAACGCGCGGTGACGTTCTTACTCAGGCTTTCTGTCAGAGCTTTTCCATGCCGATATGCACCTGGCAACA  
TCTTTGTAAGCTATGAACACCCGAAAACCCGAAATATATCGGCATGATGCGGGATGTTGGCTCGCTAAACAAAAGAA  
GATAAACGCTATCTGGCGGAAAACCTTATCGCTTTCTTTAAATCGGATTAATCGCAAAAGTTCAGAGCTACACGCTCATTC  
AGGCTGGGTGCCGCGAGATACCAACGTTGAAGAGTTCGAAATTTGCCATTCTGACGGTCTGTGAACCTATCTTTGAGAAAC  
CGTTGGCCGAAATTTCTGTTGGACATGTCTGTTAAATCTATTTAAATACGGCGGCTCGCTCAATATGGAAGTGCAGCCG  
CAACTGGTGTACTCCGAAAACCTGCTCTACGTCGAAGGGGTAGGACGCCAGCTTTATCCGAGCTCGATTTATGGA  
AACGGCGAAGCTTTTCCCTTGGAGTCTGGATTAAGATCTCTCGGCTGCAAAATGGCCATGTCGCGGAACTTTAAAGAAAAG  
CGCGTCTGGTTCGAAAATGCCAGAAGTGCCTGAAGTGTTCAGACAGTTTGGCCAGGGCAAGTATTTACAGCAC  
AGTGTGATAAGATTGCCCGGAGCTTCAGTCAAATCATGTACGCTCAGGGACAATCGCGTTATTTCTCGAATTTGGCC  
TACGTTAGTATTAAGTGGCACATTTCTTGGTTCAGCCGACCTGAATGGGGCTGATGCCCGCTGGTTAATGGCAGGTG  
GCTGTATCCGCTGGTTTTGTCGGTGGCGCAAAACACCGTGA

>Cluster\_19898

ATGCCCTTCCGCGCTCTGATCGACGCTTGTGGAAGAAAAATATACTGCCGACCGGTTTACCCGTGACCTGATTGCCGG  
GATAACCGTCGGGATTAATGCTATCCGCTGCGCATGCGGTTGGCTATTGGTAGTGGTGTGGCCCGGAGTACGGTTTAT  
ATACCGCAGCTGTTGGCGGATTTGCTATTCGCTGACGCGGGGGTACGCTTTTACGCTTTCCGCTCCGATGCGGCATTT  
GTGGTAATTTCTATCCGTTTTCGCAACAGTTTGGACTGGCAGGACTGCTGGTTGCGACCTTGTCTGCGGGATCTTTTT  
GATTTGTATGGGGTGGCAGCTTTGGGCGCTGATTGAGTATATCCGGTTTCCGCTACCTTAGGTTTACCTCGGGTA  
TCGGGATCACCATCGGTACCATGCAGATTAAGATTTCTCGGCTGCAAAATGGCCATGTCGCGGAACTATTCACAA  
AAAGTCCGCGCATTTATTTATGGCTGCGGACCATTAATGTGGGTGATGCAGCCATTGGCATTGTGACCTTGGCATTCT  
GGTTTTCTGGCGGCTCTGGGCATAGTTTACCGGCCACTTCCGGCTTGTGCTGGTGGCGGTTGATGGGATTTG

TTAACCTGCTCGGGACATGTTGCTACCATCGGTTCCGAATTCACCTACGTCCTGGCCGATGGTTCTCAGGGTAACGGT  
ATTCCGCAACTGCTGCCGCAACTGGTGCCTGCGTGGGACTGCTTAATTCAGAAATTCACGCTAACCTGGGATTCTATTTCG  
CACACTGCTGCTCGGGCATTCTCAATGGCAATGCTCGGCGCAATCGAATCTCTGCTCGCGCGTGGTGGTGGTA  
TGACCGGGACGAAACCAAGGCGAACAGCGAACTGGTTGGACAGGGATGGGGAAATATATCGCTCCGTTCTTTGGTGGT  
ATTACCGCTACAGTGCATCGCGGTTCTGCGCTAACGCTCCGTCGCGGGGCACTCCCTATCTCGGCGGTGATCCA  
CTCTATTCTGGTTATTCTTGGCCCTGCTGGTACTGGCACCGCTGCTCTCTGGCTGCGCGTTTCCGCCATGGCAGCCCTGC  
TGTGATGGTGGCGTGGAAACATGAGTGAAGCGCACAAAGTGGTGGACTGCTGCGTATGACCGAAAGATGACATCATC  
GTCATGCTGCTGTGCATGCTGCTGACCGTGTGTTGATGATGGTATTGCCATCAGCGTGGGGATCGTCTGGCATCGCT  
GCTGTTTATGCGTGTATGACGACGTATGACTCGCTGGCACCGGTAGTGTAGACGTTCCAGACGATGTCGCTGGTCTGC  
GCGTTATTGGCCCGCTGTTTTTGGTGCCTGAAAGGCTTATTACGGACCTGGAGTACGCTTGAAGGCAACGGATT  
GTGATCTGAAGTGGGATGCCGTTCCGGTACTGATGCTGGTGGTCTGATGCTCCAGCGTTTTGTGAAGCTCTGCC  
CGAAGGATGTGAAGTGGCGGTGTCAACCTGGAATTCAGCCACTGCGCACTATGGCTCGCGCAGGCATTCACCCGATCC  
CGGACGCTCGCATTTCCCGAATCGTCGCGCGCGATGGCGGATTTATAA

>Cluster\_24422

GTGCACTGGCAAACTCACACCGTTTTTAATCAACCTATACCATAAATAACAGCAACTTATACCTGCTGATGGCGCGCT  
TTGCGAAGCGGTAAACCGTGAAGGTGCTAGCTGGGATAGCGATTTTCTCGCCAGTATTGGTCAGCAGTTAGGAACCGCT  
AATCCCTTGAACCTGGGCGGCTGGCAATGTGAATCGCTGAATTTATGCGCTACGATGCGCAAGGACCGCTGGAC  
GATGTGCGTTTTTACCCCGCTGGCACCCTGCTGATGACGGCGCTATGTACCAATCGGGTGCACAATCTTGCCTGGGAAGA  
AGACGCTCGCTCCGGCGATTTTGGCGCGCGCGCGCTTTTATGTTACATGCGCAGTTGAGGCTGGATCGTTATGTC  
CGATAACGATGACCTTTGGCCCGCACGCAATGTTGTTACAGATGTTACCCGCGCGTTTACAGGACTGGACCCGCGCTG  
CTGAGCGATCGCTACGATTTCTACTTATTGCCAGGTGGGCAAAAACCTGGCTTGTGATCGGCATGGGAATGACGGAAAA  
GCAGGGCGTTCCGATGTCATGAGCAACACCACCGCGCAGAGCGTCTGGACGATGGTCTTATCGGCTGGTGGGCATA  
AATGGTTTTTCTCGGTGCGCAAGCGATGCGCATCTGGTGTGGCACAGACCAGCGCGGTTTTGTCTGCTTTTTTGGT  
CTCGCTTTTTTGGCTGCGCAAGCGGCAACGCAACCGGATTCGCTCGAGCGGCTGAAAGATAAGCTGGTAACTGATCCG  
CAGCTGCGAAGTGGAGTTTACAGGATGCCATTGGCTGGTGTGGGGCAGGAAGGGGAAGGAATTCGCTGATCCTGAAAA  
TGGGTGGGATGACGCGTTTTGATGCGCCCTGGGTAGCCATGCCATGATGCGCGTGCATTTTCTGCTGGCGATTTACCAT  
GCACATCAACGCCATGTTTTTGGTAATCCATTGATCCAACGCCCTTATGCGTCATGCTTAAAGTCGATGGCACTTCA  
GCTTGAAGGGCAACCGCGGCTGCTGTTTTGCTTGGCGAGCGTGGGACCGCGCGCGCATGCCAAAGAGCTCTGTGG  
CGCGTTTTATTACGCTGCGCGCAAAATTTGTGATCTGCAACGTTGGCATTCCGTTTTGTGGCCGAAAGCGATGGAGGTGCTG  
GGCGCATTGGTTATTGCGAGGAGAGCGAGCTGCGCGGCTTTACCGGAGATACCGTAAACAGTATTTGGGAAGGTTTC  
CGCAATATATTGTCCTGGATGTGCTGCGGTTCTCAATAAGCAAGCGGGGCTATACGACTTATTGTGGAAGCATTTG  
TGAAGTGAAGGCGAGGATCGCTATTTTGTATCGCGCGGTTCCGCTTTACAGCAGCAGCTGCGTAAGCAGCTGAAGAA  
TTGGGGCAGAGATTACTCATCAGCTATTTCTGCTGGGCTGCGGTGCGCAAAATGTGAAATATGCCTCCTCGCAATGGC  
GCAGCGTGGTGTGAGGTGATGTAGATACGCGCGCGCGTACGGTTGTACAGCAGATCCAGAATGATTTATTTGCTGC  
GGCGACGGGAGGATGTGTTGTAA

>Cluster\_66745

ATGAGTAAATAGTTCAGGCTATGATTTGGCCGAATACGAAGATTTTATTAATCAGGAGCAGTTCGCTGGACGCCCTCT  
GGCCGAATATGTTGCCGAGGTTACAGAGAATTTATGTCGGTAAAGCGTCCGTTGGTAAATGGCTAATAGCGTGGGAAAG  
ATTCTTCCGCGTAGTACGCTAGTGTATCTGGCCCTTGGCTTGGCCCGGAAATGCGCAGCAAGATGTTTTTGTGTA  
GTGTCATCCGATACGCTGGTGGAAACCCAGTAGTAGATTTAATTAAGAAAACGATGTTGAGATTTAGAGGACGGCC  
AAAACGTAATGGCTGCGCATCACTCAACATGCGGTAAAGCCTAAAACTAATGAACCTTCTGGGTCAATTTACTGGGGA  
AAGTTATCCGGCCCAACCCGTAAGTTTTGCTGGTGTACCGAGCGTATGAAAATCAATCCGGTGGAGCATTATTTAA  
GAAAAGTACAGCACTTTGATGAAAGTATGTTGCTCCTGGCTACGTAAGTAGTAGAGAGTGCCTCCCGCAGCTCAT  
CGCAAAAGCAAAAATGATGGCTCACGCTTGGCCCGCATACCAGCTGGCAAAATGCGTTTTATCTATACCCCTATTGATA  
CCTGGGATGTAGAAGACGCTGGAAGCTGCTGCGCGCGGCTTCCGCTATGCTCCTGAAGATAFCGACGAATGGGAAAGC  
CCGTGGGGTGAANAACCTGCTCTGTGGACGCTGTATATGGACTTTCGCGCACAGGGTGGTGTCCCTTGGTAATAGA  
CGAAAGTACCCCTTCTGGGGAACCTGCTTGGATGCTGGACTGTACCGTAGTCAACAAAGATAAAGCGATGGAAA  
GTCTGATCAAAAATGGCGAAGAGTGGATGTGCGCATTTGCTGAAATATCGTGATCTGCTGGCGTTTACCACCGATCCGGT  
AATAAAGACCTATCGCAACTATAAACGCCGTACCGTAAAGTGGAGCTATCAGTACGCTAAAGACCGTGAAGATCGCAG  
TGCAGAGCGTAAGCATGTTCTGGCCCTACTGGCTCAAAATCGCCAGCAATGGTAAAAGACTTACTGGAATGAGC  
GTGATTTAAACGCCCAAGGCCACACGATTAAGTAAATCAACCGCGGAACTGCACGCTATCCGCCAAGAGTGGTTGAAG  
GATCCTAACGAGCCAGCTGGTACGATACGTTGCGGGGATTTACCGGAGGTGTATCAACGGGATCTGGACTGGGTAGT  
TGATGATCAATACGCTTTGATGCGCAGCGATGCAGATTTGTTGTTACAGATAGCTCAGGGATTTGATGTTGCACCCGAGA  
TGGTCAATGAAGCTGATGAAGTGAAGTATCAATGGAAGGTTAAGCCGTCGTCAGGGATTTTTGACAAGCTTGGTACC  
ATTTCAAAACAGGACTGGGCGAGCTCGAAGAGATCCAGCAGCAACAAAGCAACTACAAAACGTAACGACCCGGATAT  
TCATCAGGAAGAAGTACCAAGCTGGAAGTGAAGTTCAGGTTTACAGCGCAGAATTTAGACGCCAGTGAATCCTCTG  
TTTTGGTTCGAGGAGGAAAACGAACTGCTCATTTAA

>Cluster\_25214

ATGCGACTGCTCAACCGTCTTAACCAAGTATCAACGCTCTGTGGCAACCTTCCGCGGAAAGCCGCAACCGTCAACCGTCA  
CGAACTGGCCGAACGCTGTTTTTGCAGCGAACGCCATGTTCTGACGCTGTACGCCAGGCACAGGAGGCGGGATGGCTGG  
AGTGGCAGGCGCAGTACAGGACCGGAAAGCGCGGTCAACTACGCTTCTGGTACGCCAGCAATCGCTACGCAATGCGATG  
ATGGAACAGGCGCTGGAAACCGGAAAGCAGCAAGATGTGCTGGAGTGGCGCAACTGGCCAGGTGAGCTGGCCTACT  
GTTACAGCCGTTTTATGGGCGGACAATGGCAAAACGATACGCCACGTTGCGTATTCCCTACTATCGCCCGCTCGAACCGC  
TACAAACCGGGTTTTTGGCCCGCGTGTGAGCAGCATCTCGCCGGGAGATATTTCCGCGCTGACCGCTTCGATAAT  
AATACTACGCGCCGATTTGGCGATTTAGCAGATCACTGGGAAACCTTACTGACGGGTTACGCTGGGACTTTTTATCTCG  
TTCACCGCTACACTGGCATTAACGCGATGACGATAAAGGCTCACTTACACAGCAGTATTGATGCTGTTACAACCTGC  
CAGCACTGGATCAATATTATTAGCGTGAAGCGTATTGAAGTACCCATCCGCAAGTGTCTGACCTTCTTTTTACATCTC  
CCCGATTACTGGCTTGGCAGCGACTGGCGAGCTATTGAGCCATCTGGCGCATCCGCAATTCACCACTGATCGGCACTGG  
TCCTTTTCGCTTAAACAAATTCACAGCGGAGCTGGTGCCTGGAAGCCATGATTTATACCAATTTACGTCATCCGCTGC  
TAAAGCGGTTGATGATGATAACTCCGCACTTTTCGAAAAGATTTGGGAACCAAGTGGGAAACCAAGTGGGAAACCA  
ACCATCGGCAACCGGAGGAGTGCACCGGTCAGCCAGGTCAAGTGGCATCAGTTTAGGTTTTGCTATTTAACGTT  
GCGCAAAAGTCCCGCACTCTCCCTGCGAGGCGGAAAAGTGTATCTCAATTTATCATCAATCCGTTTTATTACAACCT  
TAGAAGTCGGAGAAAACCTGATCACCGCAGTATGATTAACGAGCTGGACTATTCGCAATGGCAAGTACCGGAT  
GAAGTTAAACTACGAAAACCTTACGCTGGTTTTTACCTTACCTACCGATAAGAACTTACATACCAATGGCAAGCCTTACAGC  
GACTGCGAGCGAAGGTTGTGAACCTTACAATTTATTTTCAACGCAAAAACCTGGGACGATACGACCCCTACTGGCAC  
ACGAGACCTCATGATGGCGCAGATTAATGGCGAAGCAGCCGAAATATACCTGGAGCAATGGCTGGTTCGATCA  
CTGTGGCCACATGTTTTGACGCTCCAGATATGCACATTTGCAATCGACACTGGACGAGTGAAGTAAATGCTGATGA  
GAAAACCGATTTAATGCCCTGAAAGCGTTTTTTAGCCAGTAAATGGCAGATGCGACGCTGACCGCGTGTTCAACTATC  
ACTATCGCATTAGCGCCCTCCCGCGTGAACGGTGTGCGACTGACACCGCGCGGCTGGTTTTGATTTACCGAAGCCTGG



CTTCCCGCGCGTCGCAATGA

>Cluster\_6267

ATGACCCCTGCCCTCTGAAAAACAGCCACAGATGTGGCTGCGCAGTGTCTCTGAATGCACTGATTCGTGAAACCACAGA  
CTGGAAAACAGACAGAAATCCCGCCAGACGAATGATCAATCCCGCTGGATGAGCAGAAATCGCTCCATTTTCAGAGTGGCTT  
ATTTCTCCCAACCCAGCATCACCGCTTGTGATTTCTCCCTGAGCGTACGGCTGGTACCGGCATCAGGCAGTTATCCTGTCCGACTT  
ACCACTCTCTCCCGGCTTATTATGATAAGCTACGGCATCAACTGTTTTCTGCCCGTCCCTCTGCGAAAATTTCCACCA  
GCGCGTGTGAAAAGCCAGCGCCATACGCAACAGGCAATTGATGCCCGTCATGACTGGACCGCCTGCGTGAAAAGCGT  
TGAATTTTGGCGAAGCTGAGCAGGCGTGTGACAGGACACGCTTCCACCTGCGCTAAGTCTCATGAACCGTTTAA  
CGCGGGAGGCTGACAGCTACCTGCTGATATGGCACCCTCCACTGCCACTGCGGTGGTTTTCTGGTGGATAAAACGCAAT  
CGCCGGTAAAAGTTTGCATCTCAACCTTCAACAGCGGCTGACGCGATTTGCGCGAGAGAATGCGCCTCAGTTACTCAACG  
AATTAAGTACAACAATGGCTGTCCCGTGTGACCCGTTGGCAGGGGGAATATCTTTTGCAGCAGGGGTGGTGCAGGCA  
CTTGTGTCTAAAAGGCTGATTAAGACTTAGGTGAGGCGGACGCTCGTGGCTGCGGACCACCTTCCCGCTTCCCTCTA  
CTGTGTCAAAGCCGCGATATGATCAAGTTCTCCCTGAGCGTACGGCTGACCAACTCCATCCGTACTGTCCGTGAAAAG  
AAGTGAAGCGTGGATGCGCCTGGCAGCGCTGGCTCAAACCGACGGCTGGCAGATGCTACAGGTCGCTTCCGACTTTC  
CGGTAATGCAGGAGGATGGCTGGGCGGGCTGCTGATCTTAACGGCAACATCATGCAGGAAAGTCTGTTTGGCCTGGC  
TGAAAATCTGTGGTGGATCAGCCGAAAAGCCAGACCACTACTGGTCTCCCTGACTCAGCCGACCTGATGGCGGTG  
ATTCGACTGTGGTTTTCCGGGTAAAACGCTGAGCGATCGCTCGGTATCACTGTGCAACAGCCGCGCATGATGGGT  
GATGCATACTGTGACCAAGTGTAAAGCCGCTGTTTACGGCTGAAGCGGATTACGGCTGGTGTGCTGGCGCATCAGCA  
AAATATTTCTGTCCAGATGCTTGGGGATCTGCCGGTGGATTTATTTACCGTGTACTGTGAGGCGAGCGCTTTTATGCCT  
ACGGCAGACTGGCTGATTTCTATTGGCGAGGCGAGCGGAAAATAATTTACCCATGAGCAGTGTGCTGCGTATTTT  
CCTTATTACCTGGTTTTAACTCCACTTTTGTGTGACCGCTGCGCTGGGGCTGCGGGCTGAGCAGGCAATGCATCT  
GATGGCTCGTGTACGAGCATGCTGGCTGAAGTGGTGTACAGGTGACTCATAAAACCTGTCTCAACTACGTGTGAAA  
GTCCGTACTGGAACGTAAGAGTAACTTTTCTGTTATCTGAACGATCATAACGAGAACCAATTTGTTGACCTTCCGGT  
ATCTATTTTCGATTTTCGCTAACCCGCTGACGGCTCAGGAGGTCTGA

>Cluster\_26929

ATGAATGCGACTGACGCCAGACAAAATCTCTTGTAGTGGCTTAATCGCCTGCGTGCGAATCCGAAAATTCATTTGATTGT  
TGCCGGTTCGCGCAGCAGTAGCGGTTCATGGTGCCTGATCTGTGGGCGAAAGCCCGGACTACCGCACATTTATTCAGCA  
ATCTTTCCGATCAGGATGGTGGCGCAATGTGACGCAACTGACGCAAAATGAATATTCCTTACCCTTCAGCGAAAGCCAG  
GGCGCTATTGAAGTTCGGCAGATAAAGTTTACGAACTGCGCCTGCGCCTGGCGCAACAAGGTTTGCAAAAGCGCGCGC  
GGTCCGTTTCGAACTGCTCGATCAGGAAAAGTTTGGTATCAGCCAGTTTCAAGCAACAGGTGAATATCAGCGGCGCTGG  
AAGCGGAGCTTTCGTAACCATCGAAATATCGGCCGGTAAAAGGGGCGCGGTACATCTGGCAATGCCGAAACCGTCT  
TTATTCGTCGTAACAAAATCCCTTTCGATCGGTGACGGTAAATCTGTTTACCAGCCGCGCCTGATGAAAGGCA  
AATTAGCGCCATTGTACATCTGGTTTCCAGCGCGGTTGCTGGTCTGCCCGGGGACGTCACGCTGGTGGATCAGGGTG  
GACATCTGTTAACCCAGTCCAATACCAGCGGGCGGATCTTAATGACGCTCAGTTGAAATATGCCAGCGATGTCGAAGGC  
CGTATTCAGCGCGGTTGAAGCGATCTGTGCGCTATTGTGCGCAACGGTAAATATTCACGCCAGGTTACGGCGCAGCT  
GGACTTCGCGAGTAAAGAACAAAACAGCAAGCAAGTATCGCCCTAATGGTGTGAAACTCAGCGCGCGCTTCGTTACCGC  
AGCTTAATGAGAGCGAGCAAAAGCGGTTCCGGTTATCCGGGCGGCTACCGGGAGCGTTGTCGAATCAACCGGCTCCTGCG  
AATAACCGCCCAATCAGCAGCCTCCGGCAAAATCAAAATAACCCGAGCAGCAGCGGAGCACCACCGCAATAGTGGGCG  
CGGTAGCACACAGCGGAAATGAAAACAGTAACTACGAACTGATCGCACCATTCGTCATACCAAAATGAACTGGGCGATG  
TGCACAGCTCTGTCTGCGGCTGGTGAATTTACAAAACCTTCCAGATGGCAAAACCGTTCCTCTCAGCAACAGCAG  
ATGAAGCAAAATTGAAGCTGTGACCGCGAGGCGATGGGCTTTTCTGAAAACCGGCTGATTCGCTCAATGTTGTTAATC  
GCCGTTCAATAGCAGTACGAAAGCGGCGGAGCAGTCCGCTTCTGGCAACAGCAAGCGTTTATCGATCAGTTGCTGGCTG  
TCGGTCCGCTGGTTGCTGGTACTGCTGGTGGCTGGTGGTGGTGGTGGTGGTGGTGGTGGTGGTGGTGGTGGTGGTGGT  
GAGGCGGTGAAGACTGTGACGAAACAGGCGCAGGCCGCGAGGAAAGTGGAAAGTGGGTTGGAAGTCCGCTGAGCAAGA  
CGAAACATCCAAACAGCGCGCTAACCAACGACTGGGGCAGAAAGTATGAGCCAGCGTATCCGTTGAAATGCTGATA  
ACGATCCGCGCGTGGTGGCGCTGGTCAATTCGCCAGTGGATAAAATAACGATCATGAGTAA

>Cluster\_53505

ATGGCTTATAAAGTTTTAGGTAAATAGTCGGTAAACACTGGTGTGATGCCAGTCACTTAATATGGTTGTACAAGACTCGTT  
TTCAGTACGCCGTTGGTGGTGTGATGCTTATGCACAGGAAAGCAAGATGAGGTGCAAGTTGCCGCTTCCGGGCGAG  
TGACCAAGATAAGCCGTAATATGCTCTATAACCGCGGCTTTGGCGATGGTGAACCGAGCTTGGCTTTTGGCCGGT  
GCGAATGTAACCTGGTGAAGATATGTTTGGCTCAGCTCAGCTGGTGGTGGTGGTGGTGGTGGTGGTGGTGGTGGTGGT  
TCCACGTCGCGCGCTTAAACCGGTTACCGCTGTTGAAACCGTTCGATTTTTCAGTTTGTGAGTGAATTTTACGAATTAATG  
AACACTCCAGTTTGCACCTTAGGTAACCTTAGTAGCTACGACAAAGGTGAGAATACAGTTCCCTGTTTTTATGAGCTGAAC  
AAGTTGGTCACTGAGCATTTGGCTGTTTGGCAATGACGGTTTTCAGGTAAGTCTTATACAGTTGGCCGCTTATTTGAGCG  
TTTTAGTCCGCTGTTAATAACCGGTACGGTAGTAGTATTGACCCACATGGTGAATACGGTAAAGCCCTCAGTTGGCGTAAATC  
TGCAATTCACAGCTTCTTGAAGCCACTGACGATAAGCGTATCAAGAAGCACTGCCACTGATAAAACAGACCTTTGAA  
AAGCTGCAGACCGCGGTCAGGTTATTCAGGTTTACTGCCGAGCAGCAATCTTTTAAACATAAATACGCCAGTAAAGAA  
TACGCCATTAGCCTTTCAGTTTGGCTTTTGAATGGACGATATTGCTGAAATATTACCTGGCTTAAACGAAACCGCAGC  
AACGAGTACTCGATGTTGCAATTCGTTATTTGGCGCTGTCAGATAAAGACTGAGCCACGAGATAATTAACCCGCTACGCTT  
TTATTAGGTGATGGTATTGAAGAGTTAAAAGAGTGGGACGACCTTCTGAAGCTGAGGCGAAGGCGTTATCAGCCGTTAG  
TGCCCGCTGCGCTCGATGAAGCTTTCAGTGTGCTTAATGAAGCTAAAAGTTTTTACAGCGCAACAATGGCTGAGCCAA  
CTGATATTTACAAAATGGTGGTGGCGGCAATCAACAGGGCGCTTGTAGCTGTTGACTTCAAGGTTTGTAGTGTAT  
ACCGCTAAGCAAGTCAATTTGTGCACTGTTATCTAGTGAATATTTAAAGCAGCCTCGAGCAAAACGGACCCGCTGCGCCC  
ATGCTTTATCATTTACGAAGAGGTCATAATTTTGGCCCGCGCGGCAACGAGTCACTACCGCATTTATTAAGAAAG  
TCGCTGGTGAAGGTCGTAATTTGGTGTGGATTTGGCATTGTTGAGCCAGCGTCCATCGAAATTAGATTACAGATGTGACC  
TCTCAGTCAATACGCTAATACGATCGCTTAAAGAACCTTACGATCAACGATTTATAGCTAAAGCATCAGATATTGTT  
GAGCAAGCTGATCTGGAGGAACCCGAGTTTATCAACCGGTGAAGCTTTGGTGTGTTGGTGGTGGTGGTGGTGGTGGTGGT  
TGCTTGTAAAGTTGGTAGTAAGGCATTAATTCAGGTTGGTGAATCACAGAGGTAAGTGGTGGTGGTGGTGGTGGTGGTGGT  
GGCTAA

>Cluster\_27977

GTGTTTTGGCGTGATATGACGTTGTCTATCTGGCGTAAAGACAACTGGCCTCAAAACAAAAGCGTTTACTGCCGCT  
GATGCTGGCAGCGCATTGTGTAGTTTACCGGCTGGGCGGAAGAAGCCACTTTCACCGCTAATTTTAAAGATACCGGAT  
TGAATTCGTTTATCGAAACCGCTCGGCGCTAACCTTAATAAAACCATCATTTATGGGGCGGGCGTACAGGGGAAAGTGAGT  
ATTCGTAACCATGACCCCACTAATGAACCGGAGTATTACCAAGTATTCCCTTAACTTGCAGCAACAGGGGTTATGCGGT  
CGTACCGATGAAAACAGCAGTGTGAAGTGGTGAATCCAGCGCCGCAAGTGCAGCCGCTGCCGCTGGTGGTGGTGAAG  
GCAGCGCAACTACGCGGGCGATGAAATGGTCAACAAAGCTGCTGCCGTTACGTAATGTGCTGGTACGCGAGCTGGCACC  
ATTCTGGCCAGATGATTGACAGCGAGGCTCAGGCAAGCTGTTAATTTACGATCCCTCAACGATGATTTATGCTTACC  
ACGCGCTCAGTTGTGGAGCGCTGACGGAAGTGTATCCAGCGGTTGATCACGCGGTTAATCGCACCGAAGAGGTGATCC  
CGTGGATAACGCTCAGCTCGAAAATGCCCCGCTGCTGAAAAGCTGACCAAAAACAGCGCGGAGAACGACCGCAGCA

ACGCTGAAATCTCAAATTTGTCGCCGATGAACGCCAACAGCGTGATTGTCAGTGGTGACCCCGCCACGGAGACAAAAT  
GCGCGCTCGATCCGTCGCGTGGATTTCAGAAAATGGAGCCAGCGGCAACAGCCAGGTGTTCTATCTCAAATACAGCAAAG  
CCGAGATCTGGTCGATGTGCTGAAGCAGGTACAGCGGTACGCTACCGGGCGCTAAAGAAGAGGGCGGAAGGCACGGTTGGT  
AGCGGGCGTGAGGTTGTCCTCCATCGCCGCCAGCAACACAGTAATGCCCTGATTTGTTACCGCGCCGAGGACATCATGGA  
GTCCGCTGAAAGCGATGATTGAACAACCTGGATTCGCCGTGCTCAGGTGCATGTCGAGGCGTTAATCGTGAAGTTGCCG  
AAGGCAGCAATATCAACTTCGCCGTGTCAGTGGGGTCAAAAAGATGCCGGATTAATGCAGTTTGGCAACGGTACGCAAAATC  
CCTATTGGTACGCTGGGGCAGCGATTTCTGCAGCCAGCCGAGAAAGGTTCCACGGTGCATAGCGAAAACGGTGCATC  
CACCATAAATCCGGATACTAACGGCGATCTCTCCACGCTCGCTCAGCTTCTTTCTGGCTTTAGCGGTACGGCGGTGGCG  
TGGTGAAGGCGACTGGATGGCGTGGTACAGGGCGTCAAAAACGACTCCAGCTCGAACGCTGCTTTCCACGCCGAGTATC  
ACCACGCTGGACAACCAGGAAGCCTTCTCATGGTGGGCCAGGACGTTCCGGTATTAACCGGCTCTACCGTTGGTTCCAA  
TAACAGCAATCCTTTCAATACGGTAGAGAGGAAAAAGTCGGCATCATGCTGAAAGTACGCGCAGATTAACGAAGGTA  
ACGCGGTACAGATGGTGCATTTGAGCAGGAAGTCTCGAAAGTGAAGGGCAGACCAGTCTCGATGTCGTGTTGGCGAGCGC  
AAACTGAAAACACCTGCTGGCTAACGATGGTGAAGTCTGCTTGGCGGTTGATGGACGACGGCGGGGAGTAAAC  
CGTGGCGAAAGTGGCGTGGTGGCGATATCCCGTTGATTGGTAACTGTTTAAATCGACGGCGGATAAAAAAGAAAAAC  
GTAACCTGATGGTGTATTCGCCGCCGACCATTCGCGTACGGTATGGCGGCAGACGGCGTGTGCGAGCGCAATATAAC  
TACATGCGCGCCGAGCAATCTACCGCATGAGCAAGGCTTAAGCTGATGCCGCACATCGCGCAGCCGGTACTGCCAGC  
GCAAAATCAGGCCCTTACCGCCAGAAGTTCTGCGCTTCCCTCAATGCCGGGAGAACCGCTTAA

>Cluster\_7260

ATGTCGGCAGCTTTAAAATTTATACCAGGGTAAAATCAACTGAATATGTGATTTAGACCTTCATGCTTTGCTCGATTC  
TAATGCTGAAAGCTCGTTTGGTCCGAACATGGTAGTGATGGTTCTAACCTAACATAACATGTTTATCGATGAGTAGAG  
TTTTTCTTAACTGAAAACCTGTTTAAATCTATATATCAGCATATACCTAATTTCAAAGGTGATACTCTGATTTGATAAC  
GGCAGTACATTAGAAGAACTTTCAGTTTACAAAATTTAAGTGTAGGATTCATTACATATTAGGGTTATCGAACTTGG  
TAATAATTTTGGCGTAAGTGGCGGAAGAAATAAGCGTTAGAGCATATAAAAAAGAAATGGGCTATGTTTCTTGATAATG  
ATATTTATTTTATAACAACCCGTTCCGAGATTGCAAAAGGATTTTCAAACCTTGGCTGTCATTTTCATCAATATGCCA  
TTGCTTGATTTCTGATGGAGAAACATTATTCGCAAAATGGAGGAAATTTTTCTCCATATTGATAATGATTCGGTGCATGT  
TGGTGCAGGAAGTGCATGCGTCCAGGAAAAATAACTACATATGATGGTGGAGGCTTCCCTTTCATATTTCTCTTTGGCG  
GTGCGAGTGTATTTAAAATTTGACTCTCTGAAAAGTTTAGGGAAGTACGATGAAAATATGTTTCAATTGGATTTGAGGATTA  
GATTTATCGCTTCCGCTTTTACCAGTCAGGAATAAGTGGTACATGTTGGTGCATATCTTTAATCCATGACCCCAA  
ACCTAGTTCTAATAAAGATAAGGATTATGAGAAAAATTCGCTTCCAGAAAAGTATATTAAGAGAGTCTGCGGATTAATCTTG  
AAAACAAATGGGGAAATGGTTTTCGGTCACTCCAGTTGATGATGGTGGAAAGAGAACAACAGTATTTTGAAGTATA  
ACTCAAAAAGAAAGTAACTATTCGCAAAATGATGATAATAAACAATAATGTCATTTGTGATTTTCCAGTAGCAAAAACCGAG  
AATTCGATTTGATTTTGAATGACTGAAAACCTGGGCATTTCTCAAATATAGCAAAATCAATAGTCAATCATGTCAGATTCCT  
ATGATTTTACAATAATACCAACTGAAATCATTTGATAATATCAGTCAGGTTATTTATGATGACCAAAAATCATGATAAATC  
CATTTCTTCTGGCGTGAATCGCTTAGACTTATATATGATGAATGCTATATAAACTATAACCGGCTATTTGGATTTGATGA  
GCTTAGTTTAAAAACAATACTTAGATGGAAGGATAAACAAGTAGTGTATGATCATCTATTTCTTGATGAACAAG  
CTATAAAGTTAAGAAAAACATTTTATAAATGATTTAATAACTGCTTATACAGTTAGTTTCAAAAATTTATGATGATACTG  
TCATCAATAGCCGAGTATCCTAATCCGTCAGTTCTTGCAGAGATGGTGTGATTTAAAACATTTTATCTCTCGATCT  
TGAACGCTTTGACAAATTTGAGTCGAGAACATTCGCGGTAGGTTGGGCTGGTAATTTCTAAATGGGCGGAGAAAGTAGAGG  
ATTTTAAAGTTTACCATTCTTTATTAAGCCAGCAGTGGAGTACAAATCAATCAGAAGGATTGAATATAGATAGTACTGCTT  
GCTGATCGTCAGCTCGGATTTTATTCCTCATGATGAAATGGTAAATTAATATAGCCAAATTTGATGTCTATGCTCTCTC  
AAAATTTGAGGGCACACCAACCTGTACTCGAATCTATGGCATGTGGCGTTCGCGTGAATGACTGATGTCGGTGTGG  
TTAATGATGCTTTTGGTGTATGCAAAAAGAAATGGATTTTCCAGTTAGAAGCAAGGATGTTTGTATAGATAAATCTCGG  
GATTTTATAAATAGCGGTAACACAGTGGTAAATGTTTATCTTACAGAAATTCGAGCAAAATAAAAAATTTGGATTTGAA  
AGTTAAATCTGAGAACTTCCGCATTTTTTTCGACAAAAATATTAGAATCTAAAAAGCACAGCAAGATAAACACTGAAATGT  
GA

>Cluster\_45483

ATGAGTGAATATGATAACAATCCCAAGAAAGTCTACAAGTCAGATTAACAAGCGGTATTTCTTTACATCTGCTTTGCTAAT  
TTTCTTCTTGTGCGCTTTGCGCCGATTTCCCGGATGTCGCCGACAAAAATTTAACTACTTCAGCAACAAATCTTCA  
CGAATGCCAGCTGGTTCTACATCCTTGCCTGGCCGATTTTACTGAGTGTACGCTTCTTGGACTCTCAGCTACGGT  
GATATCAAGCTGGGCGCCGACCATGCGCAGCCTGATTTAGCTACCCTCTGGTTTGGGATGCTTTTTTTCGGCAGGGAT  
GGGATCGGCGCTGATGTTTCTTGGCGTTGCCGAACCTGATATGATCATTATCTTTTCGCCACCCGTTGGCAGAAACCG  
TTGCGGCAGCTAAGGAAGCAATGCGTCTGACCTTTTTCCACTGGGGACGACGATGGGCAATTTATGCCATTTGCGG  
CTGATTTCTGGCTTCTTACGTTACCGTCTACGGTCTGCTTTAACTCTGCGCTCCGCACTCTATCCCATTTATGGCGATC  
CATATAGGACCTGTAGGACATGCGGTTGATATTTTCCGTTGATAGGCACGGTCTTTGGCGTTGCGACACTACTGGGTT  
ACCGTGTTTTTCAGCTGAAATGCGGTTTGAACCATCTTTTTCGGGGTCCCATCAATGAAACCGGTGACGATTAATTCGATC  
GTGGTATCAGGGGTTAGCGACGATTTTCACTGGTGTCCGGTCTGGATAAGGGAATACGATCTCTGCTGAACTCAATCT  
GGGCTGGCTTTGTTGCTCTTGGCGCTGGTCTGTGCTGGGACCAACCGTGTCTGCTGAAAGTCAATTTGTGAAAAATA  
CGGCGGTTATCTTTGGAACCTGTTGAGTAAACGTTCAACCTTACCGGTATGAGCCAGTGCAGCAACTGGTGGGG  
GGCTGGACATTACTGTTACTGGGGATGGTGGCTTTCATGGTCCGCTTGTGGGATGTTTATCGCACCGGCTCCCGCGG  
GCGAACCATTCGCGAGTTTGTACCGGGCGTGTGTTGTTCCCGGGGTTTACGCTAATGTGGATGACGGTGTTTGGTA  
ACAGCGCATCTATCTCATTTATGAACAGGGGGCCACAGACTCGCAATACTGTTACGAGGATGTGGCGTGGCCCTG  
TTTTAATTTCCGGAACATTTCCCGTCTCTCTGTGCTGTCATTTCAATGCAATGGCGATGGTCACTGCTCTCTTTGTAAC  
GTCTGCTGATTCGGGGCAATGGTTGTGGATACCTGCGCATCAGTGGAGTGGCAACACACCCGCTTGGCAGCGAATAT  
TCTGGCCCTCGCTCATGGCATTGTTGCAATGGCTTCTCTTTCGCGGAGGGTAAAGTGCCTGCAACCGGTGACAATA  
GCGAGTGCATGCGCTTCTCAGTGCATTTACTAATATCTATATACGACTTTTAAAAGCTTTGCGCGGGGATTTGACCAA  
CGCTGAAAGCCTGAGCAATGGCGACAATTTCTCCACGGCTGACGTAACCAATTTCTTGGCAAGAGGTTACGCAATA  
TCGCGTATCTGCCGAAGCGATCTCTTGTGAAACGTTTATGGACGACGTTATCCAGCTGCAATGACGCTGGTTACGGAG  
GAACCTGAACAAGCAGGGGACGATAAGCCACATTAAGTATGATGTCAGTGCAGCATCGTATTCGCTTGAAGTGCATTTGGGCA  
CGAGCTGAATTTTATATAATGAAGTGAAGGCTTCGCGGATATCTCACCAGCTTCCGCTCGCCGCAATGGATAATGATG  
AGCAGAGCTGAACAATATCGATTTATTCGCGCTGAGTGTATTTCTCAAAGAAGGCGCTCAAAAATTTATGATGATGGG  
TGAACACGAGACAGCTGATTAATGACATACTGGACAGTACGAAAAACACTGCATCTCTGCACCTGGTTCGTTAA

>Cluster\_45175

ATGCAGCAGTTAGCCAGTTTCTTATCCGTTACCTGGCAGTCTGGCCGGGGCGTAGCCGTTTGTATTCACCAGCTATTAG  
CGCGAGGCGTTATGGGAAGTGACCAGTGAAGGCTTGTATATGGCGGCTGCCCGCCAGTTTGGCAATTGAAAAGGTGCC  
CCGCCCTTCGCGCTATGACCTTTATCGAACGTTGGCGGATGCTTAAAGCGGTGCTTAAACATCTGCTGAGTGAAGAAG  
CGCTTCTATGCTCTTTCTGCGCAACAGCGCAACCGGGCAGACAGTGGGTTGATAATGAAGGTGGCATTGGGACGTT  
ATTTACCCTACGCCCTCGTGGTAGCCGAGCTGCTGACGATACGCTGTGGCGGAAAGTGAATGATGATCCCTTATCGA  
AAGAAGGTGGATTTGCGCGCGCCATGTACTGACCTCAAAGTCAAGCGTGGCAGTGCATATTAACGCTTTAACTTCCCC  
TGCTGGGGAATGCTGAAAAGCTGGCACCAACGTTGGTGGCGGAATGCCAGCATCATCAAACAGCTACCGCGACGGC

CCTACTGACTCAGGCGATGGTGAATCAATGTGCGATAGTGGTCTTGTCCCGAAGGCGCAATTAGTCTGATCTGCGGTA  
GTGCGGGCCACCTTTTGGATCATCTGGACAGCCAGGATGTGGTACTTTCACGGGTCAGCGGCGACCGGACAGATGCTG  
CGAGTTCAGCCAAATATCGTTCGCCAAATCTATCCCTTACTATGGAAGTGTATCCCGAACGCTGCTGCGTACGCGGCA  
AGATGTCAACCCGGATCAACCCGGAGTTTGCCTGTTTATTCGTGAAAGTTGTGCGTGTAGATGACACAAAAGCCGGGCAAA  
AATGTACGGCAATCCCGGGATTTATGTGCGCAGGCAATTTGTTAATGCTGTGACGATGCTCTGGTTCGCGGATACAG  
AAAGTCTGGTGGTGTCTGCTCAGGAAGGCGTGAATAAGGGCGCACTGGTAAATGCTGAGCAGCGTCCGATGTGCA  
GGAAAAGTGAACATATTTGCTGGTGCAGGATGCGGATTCGCCCTCGGTGGTCAAGCGGATTTATCTGCTGCGGGTGCCT  
TCTTCCCGCAACCTTATGTACTGTCCGAGCCGGATGAAACACCGGCGGTACATGCAACAGAAAGCCCTTGGCCCTGTC  
GCAACGCTGATGCGCAGCAAAAACCGGACATGCTCTGCAACTGGCTTGTGCGAGGCGGCGGTAGCCCTGCGGGAACGCT  
GGTGACGGTGTATCCGAAATTCGCGCTCAGTTTATTACCAGCGGCGACGTACGATGGGCGAATTCAGATCCTCAATG  
AGGAATCGCAAAAAGAAATCCACCGGGCATGGCTCCCACTGCCACAACGTTTACATGGTGGGCTGGTCCGCGAGGAGGC  
GGTGAAGAATTAGTGGTTTACGAGCGGTGAACATTACATGCAGCAACCGCTGTTACAGGTTAGTCCGACGATGCTTGC  
CGCTATCAGTAAACAGTGGGTGCGGTCGAAAGTGCAGAAAGTGAAGATCGTATTCATCCGTTCCGCAAAATATTTTCCG  
TGCAACAGGCGACAGCTGTTGACTCCCGCCGCAATGACAGAGGCGATATGTTAACTTTGCTTGCCTCAGCGGC  
GATCATTTCTATGCGCATATGGATAAGATTGCTGCTGCCGAATCTATTTCCGTTGAGCGTGTGGTGCATGGGTATTTTGT  
GCTTTCGCGGCTGCGGGTCTGTTGTCGATGCCGGTGTGCTCGGTCATGCTAATATGCGGTGAAAAACCTGCGCT  
TTATCGAAACCGTAAAGCGGATACCATCCAGGTGCTGCTCACTGTAAGCGCAAGACCGTGAAAAAACAGGCTAGC  
GCAGAAGAAAACCAACAGGTGTGGTGAATGGGCGGTAGAGGTATTCAATCAGCATCAAACCCCGTGGCGTGTATTC  
AATTCGACGCTGGTGGCCAGGACGACGCTGATTTTGTGATTA

>Cluster\_48598

ATGTCCAAAAACGTTCCATCAAAGAGGTTACGACTTCCGTGACAGTGTAAAACGAGTAGTCTGCTCTCTTTTACAGTAA  
AAACATCCCTGTTGCGAAGCAGGGGACGACGCTTATGTACGCTATAACGATGATGGAGACCAATTCGTAACATCC  
CATCAATCCAGATAACGCAACCCGGCATTTGATGAATGCAGTACGCGGATTTCTAGATCATGAAGTTGCTCACATTTTGT  
TTTACCGATATATGTGTCCAAACAAAATGAGAGAAAAGCAGTCCCTTCCGTTGCTACTATGAAATGCTTTAGAAGA  
CGTGTTCATCGAGCGAAAAATGGGCGAGTCTTTAACGGAACAAGACGTAATCTGATGGCAACTCAGCGCCTGATAATCG  
AAAAAGTCTTTAAACAAAAGGCTTCAGAGGCTATTAATTTGTTGGCAAGATCAGCGCGCGCTTTTTCTAAACTCTTTT  
CTCTGTCCGGTGTAAAGAGCCTGGGATGGCCAAGCAGCTTCTGATGATTTTATGGATGAATACTGGCCTGTCAATTGAGAA  
ACCAATTTCAATTTATAAAGAACATGGTATCGATGTGGCGGTCGTAACATGCTTGCACCGAGGATTTTAAAGGTTGG  
CTGCGACCATAGCTAAGATCCTCAAAGACACAGAAAGTGAAGCAAAGGTAAGGAGTCAAGTCCGGGAAAAACCTCCGAT  
CCTTCAGACGCTGACCAAGCGGATTCCTCTGGAGAAAGTAAATGAAGACAAATGAAGATCACAAAGACACATGAGATGCTAGA  
TAACCACATATCTATAGATGATGGGTACACGGTAAAGTACATACATGATGATAACGATAGTATGATTAGATAAATCTG  
AATCATCGAAACAAATATTCGATGATACAAAAATGATAAAGAGGTAATAGATTCTGACTTCCAATAGCGCGACGACA  
GAAGCAACTACCTCGGATCAGAAAAAGAAAAACGGCAGAAGACGGCTCTTCAGACATTCCTACTCCGTTCAAAATGAG  
TCTGGAAGAGGCTTTAGAGGAGCTTGTATGATGGAAGATGAAGTCCGAGGATGACAGAAAGATGCATATCCGAAACGA  
TTAAAAGCGAGTTAAACAGAAAGCTCGAAAAGCGAATACAGCCCATACAATCGCTCATAAGGCTTCAATCGGTTGATGAT  
CAGGCAAGGACCCATATAAACCGCTTATAAACAATCTCCGATATGATTTAGTTGGATATCCAATAGCGCGACGACA  
CATCGTTCCTGAAGCAACCAACTCTTCGACAAAATATAATGAAAAGCATCTTTCTGTCAGGTTTCTGTCGACGCTGGCAA  
AAGACCTGGAGCGTGCATTTGCAAGCAGAAACAGAGTTTCAATTTATACCGGGCAGCTCGGGGGCGCATTTATGTTCT  
AGTATCTACAGATTAGCAATGAATGATGATCGCTGTTTCTGTAAAAAGAAAGAAATCAAGGCTTTAACGCTGTGTTTCA  
ACAAAGTATGATTTATCAGGTTCAATGAGCGGCGAAACGATTAACCTGGCTCTTGCAAGTGCATATAACCATCCCGGATG  
CGTTGATCGAATAAATGTTCCCAACATATACCGGGCTTCACAAATTTGGTGTAGTATGAGCAGGAGAGCTTAAAG  
GCAATCAAGTATGAGTTCTCTCGCTTTGAATCTTTAATGCTACCTATCATCAAAAATTTGAAATGAAAAGGCAAAATCTCG  
CGAAGTTCGCTCAGTATGGGTGCTAGGCTACACATTCCTACTTCTTAATAACGTTGATGGTGAAGCATAAGCAGCC  
TTGCATCGTTATTTCTGGTTCGATGGAGGACAAGATCATGCTTGTCTTAAGCGATGGCGCGCGTGGGCTGTTGGG  
AGAGGTTTTCAGCTCATTTGCGTTCGGTTGCGAAGCAAAATGAAACGAGACTGACATTTGATTTGATGGCAATTTGGCAT  
CATGACTGACGACCGGAGAGATTTTACGCAAAACATGCCCTAGTAAAGAGCGTTGATAGTCTTGGTTTATCTGTAGTTA  
CTGAACATCTCTGATCATTTTGAAGTGA

>Cluster\_37180

TTGCTTAATCCGATCGTTTCGTAATTCAGTACGGCCAACACCCGCTGACTCTGGAAACCGGCATGATGGCTCGTCAGGC  
TACTGCGCTGTTATGGTTAGCATGGATGACACCGCGGTTTCTGTTACCGTTTGGCCAGAAAAAGCCAAACAGGTC  
AGGACTTCTTCCACTGACCGGTTAACTATCAGGAGCGTACTACGCTGCTGGTGTGATCCCGGTTCTTCTTCCGCTG  
GAAGCGCCCAAGCGAAGGCGAAACCCGATCGCGGCTGATTTGACCGCCGATTCGCGCGCTGTTCCCGAAGGCTT  
CGTCAACGAAATTCAGGTTATCGCCACCGTGGTTTCTGTTAACCCGCAAGTTAACCCGGATATCGTCCGATGATGGT  
CTTCCGACGCGCTCTCTGCTGCTGGTATTCGTTCAATGGCCGATTTGGTGTGCGCGGCTAGGTTACATCAATGACCA  
TACGATCTGAACCTGCTCAGGACGAGCTGAAAGAGAGCAAACTGGATCTGGTGTGCTGGCTACTGAAGCGCTGACT  
GATGGTTGAATCTGAAGCTCAACTGCTGAGCGAAGACCAGATGCTGGGCGCAGTAGTGTCTGGTTCATGAACAACAGCAGG  
TTGTTATTCAGAACATCAATGAACTGGTGAAGAGCCGGTAAACCCGCTTGGGACTGGCAGCGGAGCCGGTAAACGAA  
CGCTAAACGCGCGCTGCTGCACTGGTGAAGCTCGCTGAGCGATGCTTACCACATCCGCAACAAAGAGCGTTA  
TGCGCAGGTTGATGCTCAAAATCTGAAACCATCGCAGCGCTGCTTGTGAAAGCAAAACCTGGACGAAAAACGAACTGG  
GTGAATTTGACGCGATCGAGAAAAAGCTTGTTCGTAGCCGCTACTGGCAGGCGAACCCGCTATCGACGGTCTGTGA  
AAAGATATGATCCGTTGGTCTGGATGTGCGTACTGGGCTGCTGCGCGTACTCACGGTTCTGCGCTGTTCAACCGTGGTGA  
AACGCGGCGCTGGTTACCAGCAACGCTGGTACTGCTGCTGACGCGCAGGTTCTTGTGATGAATGATGGCGAAGTACCG  
ATACCTTCTGTTCCACTACAACCTCCCTCCGTTACTCCGTTAGGCGAAACCCGATGGTCCGTTCTCCGAAAGCGTCTGAA  
ATTTGGTACGGTCTGCTGGCGAAGCGCGGCTGCTGGCAGTCAATCCGATATGGCAAAATCCCGTACACCGTACGTTG  
TGTGCTGAAATCACTGAATCCAACGGTCTCTTCTATGGCTTCCGTTGCGGCGCTCTTGGCGCTGATGGACGCGAG  
GTGTGCGGATCAAAGCTCCGTTGCGGGTATCGCAATGGCTTGGTGAAGAAAGGCGCAAACTACGTTGACTGTCTGTAC  
ATTTTGGGCGACGAAGATCACTGGGCGATATGGACTTCAAAGTTGCAAGTTCCCGCGACGGTATCTCTGACTGCGAGT  
GGATATCAAAATTAAGGTTATCAACAAAGAGATCATGCAAGTTGCGCTGAACAGGCTAAAGTGCAGCTCTGATATCC  
TGGGCGTAAATGGAACAGGATCAACCGCCCGTGGCGATATCTGAGTTCCGACCGCGTATCCATACCATCAAGATC  
AACCCGGAACAAGATCAAAGATGTTATCGGTAAGGCGGTTCTGTAATCCGCTGCTGACCGGAAGAAACCTGGACCACT  
CGAAATCGAAGATGACGGTACTGTGAAGATTGCAGCGACCGGCGAAGAAAGCAAACTGCTATTCGCTGATCGAAG  
AGATCACTGACAGAAATCGAAGTGGGCGGCTTACACTGGTAAAGTGAACCGTATCGTTGACTTTGGCGCATTTGTTGCC  
ATCGGCGCGGTAAGAAAGGCTGTTCCATCTCTCAAATCGCTGACAAACCGCTTGAAGAAAGTGAACCGATTACCTGCA  
GATGGTCAAGAAAGTACCGGTAAAGTTCTGAAAGTTGATCGCAGGCGGCTATCCGTTGAGCATTAAGAAAGCGACTG  
AGCAGTCTCAACTGCTGACGACCGGAAAGCTCCGGTCTGTAACAGGCGGATTA

>Cluster\_20874

ATGAGCACAAAATTCAGAACCTTATACCACCTGCCGGTGCAGAAAGCTGGCAGCGGCAACCGACCGGAGGGCGGAA  
GGTCAACATTAACACGATGGCGGTCGGGATGGCGGGGTAATTTGCCCTGTCCTGGATGCCGAGACAGCCGGCTTATCC  
ATGAAGTCTGGCGACATGCGCTGAACAAAATCAGCCAGGACAAACGAAACAGTAAATTAATTCGACAGCTGGTTAT

CCGCCGAGGTGGGCGGTTTCTGGATGCGTGGCTTGGCTGTACGATGATGCGGGAACGTTAATGCGGTGGCGAACAT  
GGCCGAAAGTTTAAAGCCAGCTCTTGGCGAAGGCTCAGGGCGTTCGACAGACCTGCCGTATGGTCATCATCGTCAGCAGTG  
TGGCTCAGTGGAGCTGACCATTGACACCACAACGGGGATGGCAACGCAGGATATGTTGATGACAAAATGCGAGGCAC  
GAACAGTACAGCAGCTACCCGGACGCCTCGTACGCCGAAAAGGTTTTACTCAGTTAAGCAGCGCAGCAACAGCAGCTG  
TGAACACTGCGCCCAACGCCGAAAGCGTAAAGGCGCTTGTCCAGCTACGATGACCTTGCTAACGGGAAATATACCCGACAGGACGCA  
CCACAGCGCGAAAAGGGCTTGTCCAGCTCAGTAGTGCCACCAACAGCAGCTCTGAAATGCTCGCCGCAACACCAAAAGCG  
GTTAAGGCAGCATATGACCTTGCACGGGAAATACATGACAGGACGCCACACAGCGCGAAAATGCTTGTCCAGCT  
CAGTAGCGTCAACACAGCGATTCTGAAACGCTTGGCGCAACGCCAAAAGGCGGTTAAGACAGTGTATGACCTTGTCAAC  
GGAAATACACTGACAGGATGCCACCACAGCGCGAAAAGGCTTGTCCAGCTCAGTAGCGCCACCAACAGCGATTCTGAA  
ACGCTGGCTGCAACCAAAAGCGGTGAAGTCTGCCTATGACAATGCTGAAAACGCTTTCAGAAAAGATCAGAACGGTGC  
GGATATTCGGGAAAGGATACCTTTCACGAAAATATCGGTGCCGTGCTGCTTTTAGCGGCGCTTTCAGCACTGAAGCCG  
TCCGTGTCATATGCAAAATACAAAATCATTCAGGATACCGGATGCGGTGATATCCACCCTGGCTGGTTGTCTGCGAGT  
CATGGAACTAAATCTGCAATCACTATCCGAGTGACCACGCGACAACATCAAGTGGTGGCGGTACAACAGCGCGCAAT  
TCACCTACATTAATCATGGGACGGCTACTCCCGGCTGGCGTCTGACTGGAATCGTCAGGCGCAGCAATGACCCGA  
ACGATTAATCAGGATGGCGGAAGCCAGAAATGCTATATGCTACGGCTTATGTTTCAGGCACAGAGCGGCAAAAATA  
TCTCAGAAAAGTTTTCTGGTGGAGAGGACACATATCTGGCATGAAACAGTACAGGCGGGGTAATTCCTGGCGCACAG  
GAACTATGACGCTCAGGAAGAAATATCACTCAGTCCGCTTATGGTCTTCGTTCTAGAGGTGAAATTACATCACTCAGT  
GCTAATGGTCTGCGCATTGCTTATGGCAATATGGATTCTTTATCAGGAATGATGGTGGCAGCACATAATTAATGCTGAC  
GGCTTGGCGCAATAATTTGGTCTAGGAACGGTTAAGGCGCTGACATCAATAACGCTAATGGCGGAGTCAATGG  
GGCATGGTCTGAGTGTACTGACGCTGTTAACCCATCAGATTACGGAATTTTATTCCGCTATGTAAGAGATGTTCCG  
CTGGGTACGCGTGTGTTACAGCATGCAAAAAGGCGTGTATGATGAGAAATCAGGCCATGTAATTACAGGCGTGGCAT  
TGTCCGCGAAGTTGATGGCGATGATCCGGCAGTATTCAGACCAATACAAAATACATTAATGGCACATGGTAAACGTCG  
CACAGGTGTA

>Cluster\_21796

ATGGCTAACGGTTGGACAGGTAATATTAAGAGTCAATCTCACGACAGGAAATATTACCCTCGAAGATTCAGTAAGTT  
TAAAAGTTTTGTCCGTTGGCATGGGCTTCGGCTACAAAATATGATGATGACGAAGTACCGCCAGGCACGAAAACCTTCGATG  
AAGCGAATAAATTAAGTTTTGTCTACCGGCCAATTAACCTGGATCTGGTGGCCCTGTAGTTCTCGCGTAAATACCTCA  
CTTTCTACTTTTACCAAAGGAAATTTAGTCGTCGATGCCCATATGGGGGGCTTTTTGTCAGCGCAATGAAATTCGCTGG  
ATACGACCTCATTATATCGAAGGAAAGCGAAATCACCGGATGCGTGAAGATTAAGATGACAAAAGTTAGCCTTGAA  
AAGCCGATTTTTATGGGGAAAAGGACGCGCGCAACGACGGAAGAAATTTGTGCTTACCAGTCCGAAAACCTGTGTG  
CGCGTATTTGGTCAAGCTGGGAAAACCTTGTCTCTCTCTGGCATGTTGAATAGCCGTAACCAACAGCGCGCGTGGCG  
AATGGCGCAATAATGGGTTGAAAACCTGAAAGCGATTGCGGTTGAAGGGACGAAAGGGTCAACATTCGCGATCGTC  
AGGAGATGAAGCGTCTCAACGATTACATGATGACTGAACCTTATCGGTGCGAATAACAACCATGTCGTGCCAAGTACGCGC  
CAATCGTGGCAGAGTATTCAGATCCCAAGTCACTGGACAGCACGTAAGGGCTGTTTTGGGGCGCGGTGAAGGTGG  
TCCGATTTGAAACGGGGGAAATTCGCGCAGGCAATCAGAACACCGTCCGCTTTCGCTATAAATCCGTTTTGACTTAG  
GTCGCGCGCAGAGAAATACACAGTAAAATGAGTGGCTGCCACTTTCGCGGATTCGTTGATGACCCAAATGAATAT  
CCTCGGGTGAAGAGTTTTGGCGTCCCAGCACAGTGGTAAACATTTGTGATGACAACTTTGTCATACCACTCTTCCC  
GAACGCGCGCAAGATTTTGAAGATAAAGACAGATGGTCTGTGATTTGGTAACTGGTTGGTCTGAATTTGTTCCGAT  
ACGGCTATGGTGTAACTACGGGCGATTGCTACCGCACTTTACTTATTTACAGCAAAGGTGTTTCAAGCGTGTCTG  
CCTGCTGAAGAGTATGCGGAAATTCGCTGGGATCAACTGGAAGCGGGTACGTTAACTTTATTAAGATTTTTACTACCG  
TCTGGCGCATCGCTGGGTGAGTTGAGTCACTGGTGTGATGTTTCAATGCAATGCGAAGCGTGAATTTGGGTGAAG  
AGTACAGGGCTACGCGAAAATAAATCTGGTCCGCTGAAAGCCGTAATTTACGGGGTATCTGGCGCTTGAAGCCAAATTTCAAAGC  
GTCGCGTCCATTGTTAACTGATGTTCAACCGTACTGATGACGATACCCATATCAATTTTATGGTTCCGGCTTGGC  
ATTTGAAACTGACGCGTGAAGTGGCGAAAAGAGCTTTTTGTTCTGAAAGTGTACGATGAAACAAAAACTACACCCGA  
TCAATGACGCAAAAATTAATATGCTAAGTGGTGGTGTGGGGTGTGTTGCAATACGCGCTCACCTGTGCAACTGG  
GTCGCGCAATGACCGTTTTFCGCGCTGAAAAGCCGTAATTTACGGGGTATCTGGCGCTTGAAGCCAAATTTCAAAGC  
GATCACTGGCGAAGATATGACTCAGGAAAATTAGATTTAGCTGCAGAGCGTATCTTTACGTTGCATCGCGCTACACGG  
TAAAACCTGATGCAACCAAGATATGCGTAATGAACACGATCTTATCTGTTCCGCGTATTCGACAAGGATCCGCGATC  
CCGGTCTTTACTGAAGGTACAGCAAAAAGGACCGTACGATATGATGCTTCCGCTCACGATGTTCTACAAGAAATGGG  
CTGGGACCCACAGCTTGGTTGTCCGACCCGCGAAAACATTCAGAGCTGTGGGGTGAAGATATTCGCGCGCATCTGGCAG  
CACACAATCTACTGCCTGCGTAA

>Cluster\_41992

ATGTCTCACGTAAGAGCTTGCCAATGCTATTCGTGCGCTGAGCATGGACGCGAGTACAGAAAGCCAAATCCGGTCAACC  
GGGTGCCCCATGGGTATGGCTGACATTCGCCAAGTCCGTGGCGTGAATTTCCGAAAACACAACCCGCGAGAATCCGTCCT  
GGGCTGACCGTGACCGCTTCGTGCTGTCCAACGGCCACGGCTCCATGCTGATCTACAGCTGCTGCACCTCACCGGTTAC  
GATCTGCCGATGGAAGAATGAAAACCTTCCGTCAGTGCACCTAAAACCTCCGGGCCACCCGGAAGTGGGTTACACCCG  
TGGCGTGAACCACTACAGTCCGCTGGGTACGGGATTTGCCAACGCAGTCCGATGCGGATTCGCAAAAACCTGGC  
CGCGCAGTTTAAACCTTCGCGCCACGACATCGTCAGCACTACACCTTTCATGGCGCAGCGCTGCATGAGAA  
GGCATCTCCACAGATTTGTTCTTGGCGGGTACGCTGAAGTGGGTAACCTGATGCGTTCACGATGACAACGGTAT  
CTCTATCGATGGTACGTTGAAGGCTGGTTACCGACGACACCGCAATGCGTTTCGAAGCTTACGGCTGGCACGTTATTC  
CGGCATCGAGGGTCAATGACGCGGCATCCATCAAACGCGCAGTAGAAGAAAGCGCGCAGTACTGACAAAACCGTCCCTG  
CTGATGTCGAAAACCATCATCGGTTTCGGTTACCGAACAAGCCGGTACGCACGACTCCACGGTGGCGCGTGGGCGA  
CGCTGAAATTTGCCCTTACCCGCGAACAGCTGGGCTGGAATATGCACCGTTTCGAAATCCGCTGAAATCTATGCTCAGT  
GGGATGCGAAAAGAACGCGCAGGCGGAAAGAGTCCGATGGAACGAGAAAATTCGCTGCTTACGCGAAAGCTTATCCGCA  
GAAGCCGCTGAAATTTACCCGCGTATGAAAGCGGAAATCCGCTGACTGACGCGGAAAGCGGAAAGGCTCATTTGCTAA  
ACTGCAGGCTAACCCGCGAAGATCGCCAGCGTAAAGCGTCTCAGAAATGCTATCGAAGCGTTCCGGCCGCTGTTGCCG  
AATTCCTCGCGGCTCCGCTGACCTTGCCTGCTAACCTGACACTGTGGTCTGGTTCGTAAGCAATCAACGAAGATGCT  
CGGGTAACTACATCCACTACGGTGTTCGCGAGTTCCGATGACCCGATGCTAACGGTATCTCCCTGCAGGTTGGTTT  
CCTGCCATATACCTCAACCTTCCGATGTTCTGGAATACGACAGTAAAGCTGACGCTTACGCTGCGGATGCGTACGAAACAGC  
GTCAGGTGATGGTTTACACCCACGACTCCATCGGTCTGGGCGAAGATGGTCCGACTCACAGCCGGTAGAGCAGGTCGCT  
TCTCTGCGCGTACCCCGAACATGCTTACATGGCGCTCCGTTGACAGGTTGAATCCGCGGTAGCGTGAATAACGGCT  
TGAACGTCAGGACGGCCGACTGCGCTTATCTCTCCGTCGAAACCTGGCGCAGCAGAACGTAAGAGCAGCTGGAAGAGCAGCTG  
CAACACTCCGCGCGGTTATGCTGCTGAAAAGACTGTCTGAGGTCAGCCGGAACCTGATCTTCATCGCGACCGGTTCTGAA  
GTTGAACGCGCTGTTGCCGCTACGAAAACCTGACTGCGAAGCGGTGAAGCGCGGTTGGTTTCCATGCGCTTACCGA  
CGATTTGCAAGCAGGACGCGGCTTACCGTGAATCCGTAAGGTCGCGGAAAGCGGTTACCGCTCGTGTGGGTTGAAGCGG  
GTATTTGCTGACTGCTGTAAGATGTTGGCTGACCGGCTATCGTCCGATGACACCTTCGGTGAATCTGCTCCG  
GCAGAGCAGCTGTTGAAGAGTTCCGCTTACCGGTTGACAACGTTGTTGCGAAAAGCAAAGCGCTGCTGTAA

>Cluster\_20500

ATGATGGACAGCTTACGCACGGCTGCAAAACAGTCTCGTCTCAAGATTATTTTCGGTATCATTATCGTGTCTGTTATAT  
GACCGCGTGGAGTGGTTACTGATTGGCGGAGGCAATAACTACGCCGCAAAAGTGAATGACCAGGAAAACAGCGCTGGGC  
AATTCGAGAACGCCCTTCAACAGCGAGCGTAATCGCATGCAGCAACAGCTGGGGCATCAATACTCCGAGCTGGCAGCGAAC  
GAAGGCTATATGAAAAACCTGCGTCAACAGGTCGTAATCGTCTGATCGACGAGGCGCTTCTGGATCAGTACCGCTCGTGA  
GCTGAAACTGGGTATCAGCGATGAGCAGGTTAAACAGGCGGATTTTCGCCACCCAGCCTTCCAGGTTGACCGAAATTTG  
ATAACAGCCGCTATAACGGTATCCTCAACCAGATGGGGATGACCGCGATCAGTACGCTCAGGCGCTGCGTAAACCAGCTC  
ACTACCAACAGCTGATTAAACGGCTGGCGGTACCGATTTTATGCTGAAAGGTGAAACCGACGAGCTGGCGGACTGGT  
AGTCAACAACCGCTGGTGGTGAAGCGACTATCGATGTTAACCGCTGGCGGCGAAGCAGCCTGTGACCGAACAGGAAA  
TTGCCAGCTACTGACAAACAAAACAAAACAATTCATGACGCGGAAACAAATTCGCGTGAATACATCAAGTGGATGCC  
CGGACGATGCAGCAACCGGTTAGCGATGCGGATATCCAGAGCTACTACGATCAGCATCAGGATCAATTCACCCAGCCGCA  
GCGTACCCGTTACAGCATCATCCAGACAAAACGAAAGTGAAGCGAAAGCGGTAATGATGAGCTGAATAAGGGCGGTG  
ATTTTGTGCTAGCCAAAAGAAAATCTGCCGATATTTATCTCGCCGCAACGGCGGTGATATGGGGTGGTTAGAAGAT  
GCCACTATCCCGGACGAACTGAAAAATGCGGGTCTGAAAAGAAAAGCCAACTGTCTGGTGTATCAAATCTTGGCTCGG  
TTTCTGATTGTGCTGCTGGACGACATTCAGCCAGCGAAAAGTGAATCGTTAGACGAAGTACGTGACGACATTCGGCGCA  
AAGTGAACACGAAAAGCCCTCGATGCGTACTACGCGCTGCAGCAGAAAGTGAAGCGATGCGGCAAGCAACGACCCGAG  
TCTCTGGCCGGTGCAGAGCAGCTGCGCGCTTAAAGCCACTCAGACGGGTTGGTTCAGCAAGATAATCTGCCGGAAGA  
GTTGCACTTCAAGCCAGTTCGCGACCTATCTTCAACGGCGGTCTGGTAGGTGAAAACCGCGCCGCGCCGCGGATCTG  
ACATCATCACCGTAGACGGCGACCGCGCATTCGTGCTGCGCATCAGCGAGCACAAACCGGAAGCGGTGAAACCGTTGGCA  
GATGTTCCAGGAACAAGTTAAGGCACTGGTTCAGCACAACAAGCTGAAACAACAGCGGAAAGTGGATGCTGAGAAAATGCT  
GGTTGATTTGAAAGCCGGCAAGGTGCGGAAGCTATGCAAGCTGCGGCTGCGGCTGAAATTTGGCGAGCCAAAACCTAAGCC  
GTTCCGGTCTGACCCGATAGCCAGGCTGCGTTGCACTGCCACTGCCAGCGAAAAGCAAAACCGAGCTACGGTATGGCG  
ACCGATATGCAAGGTAATGTAGTCTGCTGGCGCTGGATGAAGTGAAGCAAGGTTCAATGCCGGAAGATCAGAAAAAAGC  
GATGGTGAAGGATACCCAGAAACAACGCACAAATCGTCTTTGAAGCTCTGATGAGTAACTGCGTAAAGAGGCGAAAA  
TCAAATTTGGCGATGCGCTGGAACAGCAATAA

>Cluster\_66861

ATGTTGACCCCTGTACGTATTACAAATCCCGGTGCAGAATCGCTGGGGTATGATTGATGAGTGGCCATGAAATTTATGGCCGT  
TGATATTTATGTAACCCCTCCACGTGTCGATGCTTTTACATGGTACCCCGCTGCATGGAGTTCCTTTGGGAACAAAACCA  
CTGGGGCCGGAATCGATGGGTCGATGATTCCCAACCGAAGTGATATCGAAAAAGGGACAAGAAATCACAGCGTAC  
AAAATCACGCTCAGCGCGCAGCAGAAAGAGAATGAGAATAAGCGTACTGAAGCCGAAACCGCTCTCGCGCGATTGC  
TGCAAGGGAAAAGATGAAAACACACTGAAAACATTCGCTGCCGAAACGCAGATGCCGCTGATATTACAGCAGAGGAT  
TCAGACTCCTGCAGGACAGCTGAGAGAATACGGATTCGCTACTGAAATCGCCGGATATGATGCCCTCCGGCTGCATACA  
GAGAGCCGGATGCTCTTTGCTGATGCTGATTCTCTTCGATATATCTCCCGGGAGGCCAGGTGCTTAATCGAACAGGCTGA  
AAAACGGCAGAAGGATGCGCAAAACGCAGACAAGAAGCGCTGATATGCTTGTGAATACGAGCGCAGAAAAGGTATTC  
TGGACACCGGTTGTCAGAGCTGGAATAAATGGCGGGCAGCCCTTCCGCTTCTGATGCACAAACAGCCCGCTGCTC  
GGCAGCAGACCCGGAATGACAGGGCCATTTAGAGCCCGGAAATAAATCAGTTGACGGAATCGCTTAACAGCCGC  
CCGTAATGCATTAACAGAGCTGAAACAACAACAGCAGCAAGAAAACACAGCCCTGACGGCAAAACGATAGTTTCCCTG  
AAAAATCCCGGGCGGTTCAACAACAATCATTCTATTGTTGTGAGCGGTGATCCGAGATTTGCCGTTACGATAAAAAATC  
ACAACCAGCGCAGTATCGATAACCGTGCAAACTGAAATATCTTCTGACCCATTCGGTCTGGACTATAAACGCAATAT  
TCTGAATGACCCGGAATCCGGTGGTGCAGAGGATGTGGAGGTGACAAGAAAATTTATAATGCTGAAGTGTGCTGAATGGG  
ATAAGTTACGCAAAAGATTTGCTTGTGATGCCAGAAATAAATCACCTCTGCTGAAATCTGCCGTAATTCGCGGAGAAATAAC  
CTCAGTGCAGAACAAATGAGCAAAAGCATGCAATGACGCTCTTAATGCCCTGTTGAAGGAAAAGAGAATATCCGTTAA  
CCAGCTTGGCCGATCAATCAGAAGATAGCGAAGAGAAAAGAAAACAGGATGAACTGAAGGAAAACGAAAGCAATTA  
ATTTCAACAACAGAGTTCCGAAAATCAGTTTTCAGAAAATATGGTGCAAAAGCTGAGCAGTTAGCCAGAGAGATGGCCGGG  
CAGGCTAAAAGGGAAGAAAATACGTAATGTTGAAGAGGCATTAACAAACGATGAAAAGTACCGGCTGACATTAACAAAA  
AATTAATGCAAAAGATCGTGCAGCGATTGCCGAGCCCTTGGTCTGTGAAGCTGTCTGATATATCGTTAATCTGAACA  
GATTCAGTCCGGGACTGGGATATGCAGGAAAATTTACAAGTCTTGCTGACTGGATCACTGAGTTTGGTAAAGGCTGTCCGG  
ACAGAGAATCGGCTCTCTTTTGTAAACAGAAAGCATAATAGCAGGCAATGCCGCAACCGCTCTTGGTAAAGGCTGCT  
CTTCAGTATCTTACCAGGAGCGCTTTAGGCATATTCGGGTATGGTTACTGATGGCTGTACCGGTGCGCTGATGATG  
AATCGCTTGTGAAAAGCGAATAAGTTCTGGGATTTTAA

>Cluster\_39655

ATGTCCTTTTAAACTTACTGAAATCTCGGCTATTGGATACGTTGTAGGATTAGAAGGGGAAAAGAAATAGGATAAACCT  
GCATGAGGGGTTGCAAGGCAGATTAGCATCGCATAGAAAAGGGGTGAGCTCAGTAACGCAACCAGGAGATCTTATGGGT  
TCGATGACAGGTAATATATAGTGTGCGAAGAGTGACAGATATGGCATTTGTTGAAGCGGATAAAGCGCATAAAGCAGAAAT  
GTAGGCACATCTGATTAGCTGATATACCTTAAGACAATATTCGCCATGCAATTTGGCTTTGTGAAAAGGGAGTTAAA  
TGGTTATGTTTATATAGAAAGATTGGCGCTTACCTGCAATTTGGGTTCTTCTGCTGTTCTTTGACTTCAAGTTTGA  
ACATCATTTATAGTATTGATAAAGAAGAACTCCAAAAGCGGTTGAATTAGGTGTGGATCTCGAACTAAAACCGTTAAG  
ATATTTGCAAGTGTGATAAATTTGTCGCGACATTTAGCCGTTCTTGGTAGTACAGGATATGGTAAATCAAATTTCAA  
TGCCTTTGTTAACGAGGAAGGTTTCTGAAAATACCCCTAACTCAAGAATAGTTATTTTACATAAATGGTGAATACGCGC  
AAGCTTTTACAGGTATTTCAAATGTAAAGCACACTATTTAGGGGAATCCCAAATGTTGATAGTTTGGAAAAAATCAG  
CAAAAGGGTGAAGTATATAGTGAAGAGTATATTTGTTATAAAAAGATACCATATCAGGCAATTAGGTTTGTGGGTTAAT  
TAAATTTAAGCAAGTGAATAAACAATTTGCCCGCATTAAGAAATGCATTAAGTGAATTAATCGGACTCATTTTA  
AAGCCGTAATATTTACTTGGAAAAGATGATGGTGAACCTTTCTTTTGTATGATGATGTCGTCGACACAAATCAAAGT  
AAATTTGGCTGAGTGGTTGGATTTATTAAGCGTAGACGCTTAAAAGAACGAATGATGGCCACCGTTTAAAAGTTTAGC  
GACTTTGGTTGCTGAATTTGGATGTGTAGCTGCTGACCGTTCTAATGGAAGTAAACGTCGACGCGTTGGTTTTAGTAAGC  
TGTGTCATTTGTAATAATCATAACAACACTTGCAGAGGATATAAGATTTAAATCTATTTGTTAATTTAAATGGAGGGGTT  
GAGCTAGCAGATGGTGAACGCATTTGGGATAAAGCTATGAGTGAAGTGTGATTAATCTTTTGGTAAAGAAAAGGACA  
AGAAAATGATTTGGAATGTTTATATAGTTAATGAAAATTTGGCACAAGATCATGCTCCAATGTTACTTAGTGCATTTG  
TGGAGATGTTTGTGAGATACTATTTAGACGTTGGCAGGAACGTTCTGATCCTACGGTACTTTTGTGGAAGAAGCGCAT  
CATTACCTGCGTGACCTTATGCTGAAATGACTCACAGATTAAGCATATGAACGACTTGTAAAGAAGGTAGGAAAT  
CAAATGCTCTTTAATTTAGTACTACGCAACCTCAGAGCTTTCTCCTACTGTTTGGCAATGTGTTCAAATCTTTT  
CGTTACGTTTACTAATGAAAGAGATTTACAGGCACTCAGATATGCAATGGAAGCGGTAATGAAACAATCTTAAACAA  
ATATCAGGTTTACCAAGAGGTGATGCTGTTGCAATTTGGTTCTGCAATTTAATTTGCCTGAAGAATTTCAATTAATCAAGC  
AAGCCAGGGCAAAATCTCAGATGCTGTTTTTCTGAAGAATGGGCTAATTTGATACAGAATTACGTTGTTAA

>Cluster\_20164

ATGAAAATGACTTTGCCGTTTAAACCCCATGTGCTGGCGCTAATTTGCAAGTGCAGGGCTTTGTGCCGCTCTGCCGGGCT  
ATATATAAAAAGCCGACAGTGGAAAGCGCTGTGGAAGCGCAATCGACACAACAGACTGCGCTGACATCTCCGAGTTA  
CGCTTCTGCAACCGTTCCCGCGCTCCCGTAAACGCTCGGCTCAGTCAAACTACATTCAGCACTGCAAAATCAGATCAA  
TGGGTGCGCCCGCTGCGCTGTACCCGACTCTCTGCTTTTCAAGTGTAAATGGCATCAACCTATCCGGCAACGTTGCT  
TCAAGCAGTGAATGGTGCAGCATAATCCACTTAAACAAGCGATGCTGCTATTCAGTCTGTATCTGACAGCCCTGGG

ACGCCAGCGTCAAATCACTGGTGGCCTTTCCACAGTTGATGGCATTTGATGGGCGAAAACCCGCAATGGGTGCAAAACCTG  
GGCGATGCTTTTTGCGCGAGCCGACAGGACGTGATGGACTCGGTACAGCGATTGCGGCACTGGCGCAACAAACCGGCTC  
GCTGAAGTCACTAACTGAACAAAAGATCATACGACAAACGAAAAAGTCGTACCGGTAATCAGCCCGCAACGCCCTG  
CCACAAATCAAATACCGTTTCTACGCTCAGCCCGTCTGCGAGAACCCTGCACCCGACCGTAATAACCATTTAGCCAGCG  
AATCCGGATGTGGGTTTATATCCGAACTACAACCCAAAGGTTTACGGCAGTTGGGCCAATACCGCTTATCCGCGAGT  
TTATCTGCGCGCCGAGACCCGGAGAACCGTTTGTGACAGCTTTGTGCGCGGATTCGGCTATAGCATGGGCGTTGCTACCA  
CATACGCATATTTCAGCAGCATCGACTGGGACGACGACATCATGACCATCATCATGACGATGATGATTATCATCAC  
CACGATGGAGGTCACTGTGACGGTAATGACTGGCAACCAACGGCGACAAATCAATATCGACGTCAACAATTTCAACCG  
TATCACTGTGAGCATCTTACTGATAAGAAATATGGCATGGCGGCACAATCCAAACTACCGTAATGGTGTGCCCTTATCATG  
ATCAGGATATGGCAAAGCGGTTTTCATCAAACCGATGTCAACGGCGGCATGAGCGCCACGAGTTACCTGCTCTATCGCGC  
GACAGTCAGCGTCAAGCGCGCAGCAAGTCTTTCAGCAACGAACACACGCCGCCCGCTATTACACGAGATACCCAAACG  
TCAGGACGCGCACAGCGGTTTAAATGAAGTGAACACTATGGGAGCTATGACGACTTCGCGGACTTCAGCCGTGCGCAAC  
CACTGACCCAAACAAAAGGACCCGCTCGTCAAGCTTATCATGTCGGCTTATCCTGAGCAGCCGCGCAGTCAGTGTAG  
AAAATTCAGGCTAACCCGAGAATCAGCAGAGAAGAGAAGCGGCACGTCAGCGTATTCAGTCCGCGCCGCTGAGCAGCG  
CCAGGCGGTTGCGGAGAAAATGCAGACTAACCCGAGAACCAGCAGCGAAGAGAGGCGAGCGCGCCAGCGCATTGATCCG  
CATCAGCAGAGCAGCCAGGTTTAAAGAAAAGTACAGCAGCGCCCACTGAACCAAGAGCAACGTGATAACGCCCCG  
CCCGGTTCAATCGGCATCACTGAACACCGTCCGTTTTCGGGAGAAAAGTTACGGAGAGCCGCGCCCACTCTAAA  
CGACAGTAACCGTACTGCCGATTAATAACGAGCAGCGGTCAACAGTACGCGAACGTCCTCTGACGTTGAGCAGAA  
GACTGGAAGGTTAA

>Cluster\_59696

ATGAATATATTCGATCACTATCGCCAGCGATATGAAGTGCCTAAGGACGAAGAGTTTACACTGACGAGGTTTCTTACCAC  
TTGTGCGCAAGATCGCAGTGTCTTATGCCAACGCGGCTGAGCGGCTATTGATGGCTATCCGGTGAGCCTGTCATGGTTCGATA  
CAGCCAGGAACCCAGACTTTCTCGACTCTTTTCTAACCGGTCATTGACAGTTATCCGGCGTTTGAAGAGTTTTCAGCG  
ATGGAAGAGCGATATCACTAAGTGAACAGATTTGTCTTATCTGAAACACCGGCTCAGGGGTGGAAGAGAAGAAACAAATCCGTA  
TCTGCTGGGGCTGTGGGTGGGGTAAATCATCGCTTGTGAGCGACTGAAATCATTAAATGACGCTCGTACCGATTTATG  
TATGAGCGCGAACGGTGTAGCGTAGCCCGTCAACGATCATCCGTTCTGTCTTTCAATCCGCGAGGAAGATGCGCAGATT  
CTGGAAAAAGAGTATGGCATTCTCGCCGTTATCTCGGCACCATCATGTGCGCGTGGGCGGCAAAACGCTGCATGAATT  
TGGTGGCGATATCACTAAGTTCGCGGTAGTGAAGTCTGGCCGCTCAATTCGCAACAAATTCGCTACCGCAAAACCGGTA  
CCGGCGATGAGAACAACAGGACATCTCCGCGTGGTGGGAAAGTTCGATATTCGTAACCTCGAACACTACGCGCAGAAAT  
GACCCGAGCGCTTACGGCTATTCGCGTGTGCTGTGCGCGCAATCAGGGGATCATGGAATTCGTTGAGATGTTTAAAGC  
ACCGATTAAGTGTGCTATCCCTTGTAAACCGCACTCAGGAAGGTAACATAACGGGACGGAAGGATATCTCCGCCCTGC  
CGTTCAACGGGATATTCGCGCACTCGAACGAGTCCGAATGGGTCACTTTCCGTAATAACAAAAACAAACGAAGCCTTC  
CTCGATCGTGTTCATCGTGAAGTGCCTTATGCTTGGCATTTCGGAAGAGATCAAAATCTACGAGAAATGCTTAA  
TCACAGTGAATGACTCAGCCCCATGCCCCCTGGCAGCTCGAACACTGTACGTTTTCATTCCTTTCGCGCCTGA  
AAGAGCCAGAAAATCCAGCATTATTCAAAGATGCGGGTTTATGATGGCGAAAGTCTGAAAGACCCGATCCCAAAGCC  
AAGTCGATACAGGAATATTCGCGCACTACGCGGTGTCTGAAGGGATGAACGGTCTGTGTCGACGCGTTCGTTAAGAT  
CCTCTCCCGGTGTCAACTTCGATCATGTAGAAGTGGCAGCAAAACCCGGTCCATCTGTCTACGTCCTGGAACAGCAGA  
TTGAGCGCGAGCAGTTCCCAACAAGAGCAGGCAAGCCTATCTGGAGTTCTGAAAGGTTATCTGATCCCGAAATATGCC  
GAGTTTATCCGCAAGAGATCCAGACGGCTACTTGAATCCTATTCGAAATAGGGCAAAACATTTTCGACCGTTATGT  
TACCTACGCGGATTTCTGGATTCAGGATCAGGAGTATCGCGATCCGGATACCGGGCAGCTGTTTACCGGAGCTCTTTA  
ACGCGGAGCTGGAGAAAATCGAGAAACCGCGGGGATCAGTAATCCAAAAGATTTCCGCAACGAGATTGTTAACTTCGTA  
CTGCGCGCAGAGCAATAACAGCGGACGCAATCCGAATGGACCAGCTATGAAAAATGCGCACGGTTCATCGAGAAGAA  
AATGTTCTCCAAATACGAGGAGCTGTGTCGGTATCTCGTTTAAAGCCAAAACGTCACCCGACGAGCAAGAAACAGC  
ACGATTTGTGTCGACCGTATGATGAAAAAGGCTACACCCGTAACAGGTGCGTTTACTGTGCGAATGGTATTTGCGCGTA  
CGTAAATCGTCTTAA

>Cluster\_25392

ATGAATATTTTAGTGTTTTTTCCAGCGACTCGGTAGGGCTTACAGCTCCTATCGCGGTGCTGCGGTGGCGGCGCTGTT  
GCTGCGATTGCGTCAGCCAGATTTACTTAAAGTTCGCTTATTTGCCAGGCGGGCGGTGCGATTTTGTATAACCTCGCAT  
TAATCTTCCGCCATCGCGCTGGCATCCAGCTGGTCAAGAGACAGCGCAGTGTGCGCGGCACTGGCGGGTGCAGTACG  
TTTTGTTTAAACAAAGCGATGGTGACCAATCAACCCAGAAAATTAACATGGGTGTACTGGCGGTTATCATTACCGGTCTGGT  
TGGTGGCGAGCCTATAAACCGTTTGGTCCGATATTAACCTGCCGACTTCTGAGCTTCTTCGCGCAACAGCCTTGTGCG  
CGATCGCCACCGGCTTCTTCTGTCTGGTGTGCGGCCATTTTTGGTTACGTCGCGCCCGGTACAGCACGCTATCCAT  
GCAGCGCGGAGTGGATCGTTTCTGCGGGCGCGTGGGTTCCGATATCTTTGGTTTCAACACCGTCTGCTGATCCCAAC  
CGTCTGCATCAGGTGTAACACCATCGCTGGTTCAGATTTGGTGAATTCACCAACCGCGGGGACCGGTTTCCACG  
TGATATCAACCGTCTTATGCGGGTACCGCCAGCGCGGGGATGTTCAATGTCGGCTTCTTCCGATTAATGATGTTGCT  
CTGCCAGGTGCGGCGTGGCGATGACTTCGCGACCCGAAAGAGCGTCCGATGGTGGCGGATGCTGCTTCTGT  
TGCTGTTACTGCGTTCCTGACCGGTGTGACTGAGCCGCTGGAATTCCTGTCTCATGTTCTTGCACCGCTGCTGTACTCC  
TGCACGCACTGACCCGATACGCTGTTTGTGGCAACGTTGCTGGGATCATGCGCGCTTCTTCTTCTGCGGGG  
GCTATCGACTACCGGTTGATGATAACCTGCGCGCCGACGCAAGCCTGATGCTGCTGCTGGTGGTGGGGTTGTCTT  
CTTCGCTATCTACTCTCGTGGTTCAGTTTGGTTATCCGATGTTCAACCTGAAAACCGCGGGTCTGTAAGATAAAGAAG  
ACGAGATCGTTACTGAAGAGGCTAACAGCAATACTGAAGAAGGTCATCAACTGGCAACCAACTATATGCTGCGGTT  
GGCGTACTGACAACCTGAAAGCATTGATGCTGTATTAATCTGCTGCGCTTACCGTGGTTGACTAGCTCGCGTCAA  
CGATGCGATGTGTAACGCTGCGGTGCTTCTGGGGTAGTGAACACTGAACAAACAGACTATTCAGGTGATTTGTTGGCGGA  
AAGCAGAAATCCATCGCGATGCGATGAAGAAAGTCTGTCGGTGGTCCGGTAGCCGCTGCGTCAAGCAACTCCG  
GCAACTGCGCTCCTGTAGCAAAACCGCAGGCTGTACCAACCGCGGATCTATCGCGGAGCTGGTATCCCGATTACCGG  
GGATGTTGGTGGCACTGGATCAGGTTCTTACGAAAGCATTCGCAAGCAATTCGCGGCTGGGTTGACGGTGTGGCGGTAACCGA  
CAGATAAAATCGTCTGATCACCAGCCGAGGAACAATCGTGAATACTTCAACACCAACACGCAATTCGTCTGGAAC  
GAAAAAGGCGAGGAGATCGTCTCCATATGGGTATCGACACCGTAGCGCTGGAAGGTAAGGCTTAAACGCTGTTGATGA  
AGAGGGCGCGCAGGTAAGCGCAGGGCAACCGATTCGGAATGGATCTGGATTACCTGAACGCTAACGCCCGTTCGATGA  
TTAGCCCGGTGGTTGCGCAAAATACGACGATTCGAGGCTTATCATTAAGCTCAGGCGCATTTGTGCGGGTCCAA  
ACACCGCTGATGAAATCAAAAAGTAA

>Cluster\_42233

ATGGCTGAATTCGAAACCACTTTTGCAGATCTGGCGCTGAAGGCTCCTATCCTTGAAGCCTTAAACGATCTGGGTACGA  
AAAACCATCTCCAAATTCAGCAGAGTGTATTCCACATCTGCTGAATGGCCGCGAGCTTCTGGGTATGGCCAGACGGGA  
GCGGAAAAATGCAGATTCTCTTACCCTGCTGCGAGAACTTTGATCCTGAGCTGAAAGCACAGATTCTGGTGTCTG  
GCACCGACCCGCAACTGGCGGTACAGGTTGCTGAAGCAATGACGGATTTCTTAAACCATGCGCGGCGTAACCGTGT  
TGCCGTGACGCGGCAACGTTATGACGTGCAATACCGCCCTGCGTACGGGCGCAGATCGTTGTCGGTACCTCCG  
GCCGTCTGCTGGACCACTGAAACGTTGCACTGAGCTTCTTAAACGAGCGGCTGTTCTGATGAAAGTACGAGAA  
ATGCTGCGCATGGGCTTCACTGAAGACGTTGAAACCATTTATGGCGCAGATCCCGAAGGTCATCAGACCGCTCTGTTCTC

TGCAACCATGCCGAAGCGATTTCGTGCGATTACCCGCGCTTTATGAAAGAGCCGAGGAAGTGGCGATTTCAGTCCAGCG  
TGACTACCCGTCCTGACATCAGCCAGAGCTACTGGACTGTCTGGGGTATGCGTAAAAACGAAGACTGGTACGTTTCCTG  
GAAGCGGAAGATTTTGATGCGGCGATTATCTTCGTTCTGTAACAAAAACCGACTCTGGAGTGGCAGAAGCTCTTGAGCG  
TAACGGCTACAACAGCGCCGCGCTGAACGGTGAACATGAACAGCGCTGCGTGAAGCAGACACTGGAACGCCTGAAAGATG  
GTCGTTTCGGACATCTGATTGCGACCGAGTGGAGCCGCTGGAGCTTGGAGCTATCAGCCTGGTTCCTTAACATC  
GATATCCCGATGGATTCTGAGTCTTACGTTACCGTATCGGTCTGACCGTCTGCGAGTCTGCTGGTCTGCACTGCT  
GTTCTGTTGAGAACCGTGAAGCGTCTGCTGCGCAACATCGAACCGACCATGAAGCTGACCATTCGCGAAGTAGAACCTG  
CGAACCGCAGAAGTCTGGGCAACCGTCTGGAATAAATTTGCGCTAAAGTACAGCAGCAGCTGGAAGCAGCGATCTG  
GATCAATACCGTGCATGCTGAGCAAAAATTCAGCCGACTGCCGAAGGTGAAGAGCTGGATCTCGAAACTCTGGCCGCGC  
ACTACTGAAAATGGCACAGGGTGAACGTACTCTGATTGTTCCGCCAGATGCGCCGATGCGTCCGAAACGTGAATTCCGTG  
ACCGTATGACCGTGGTCCGCGCATCGTAACGACCGTGGCCCGCTGGCGACCGTGAAGATGCTCCGCGTCCGGAACG  
CGTGATGTTGGCGATGACAGTGTACCGTATTGAAGTGGCCCGCATGATGGTGTGAAGTTCGTCATATCGTTGGCGC  
GATGTAAACGAGCGCATCAGCAGCGTTACATCGCTAACATCAAGCTGTTGCTTCTCACTCCACATCGAACTGCACTG  
CGAAAGGTATGCCGGGTGAAGTGTGCAACACTTTACGCGTACTCGCATTTCTCAACAAGCCGATGAACATGCAGTTACTG  
GGCGATGCACAGCCGATACTGGCGGTGAGCGTCTGGCGGTGCTGCTGGTTTCGCTGGCGAAGCTCGTGAAGCGCGT  
TAACCTCAGCGGTGAACCGCTGAAGGGGGCGTGGTATGGCGTCTGTTTAGCGCGAAGCTCGTGAAGCCGCGCAC  
CGCTCGTATGACTCTACCGGTCGTCTGTTCCGTTGGTGGTATGCGTAA

>Cluster\_45328

ATGTTTCAGGACAACCCGCTGCTAGCGCAGCTTAAACAGCAACTGCATTTCCAGACGCCACCGCTGAAGGGGTGGTAAA  
AGCCACAGAAAAGGCTTTGGCTTCTTGAAGTGCAGCGCAAAAAGTTATTTCCGCCCGCCGAGATGAAAAG  
TCATGCAATGCGGACCGAATATTCGCGGTGATCCACAGTGAAGAAAGACGTGAATCCCGCAGAGCCAGAAGAACTGGTTGAA  
CCGTTCCTGACTCGTTTCGTTGGTAAAGTTCAGGGCAAAAATGACCGTCTGGCCATCGTTCCTGATCATCCACTCTTAAA  
AGACGCCATTTCTTGGCCGCGAGCCCGTGGCTTGAACACAGATTTAAAGAAGCGACTGGGGCGTTGCCGAAATGCGCC  
GTATCCGCTGAAAAGCGAATTCGCGCATTCACCACTGACACAAATACATCACTTTTGGTGCAGCACCACCTTTTC  
TGGTGGTTACCCCTGCGCGCCATAATCTGAAAAAGAAGCACAGACGGCGTCTGCTACCGAAATGCTCGATGAAGGTCT  
GGTTCGTGAAGATCTGACCGCGTGGATTTTGTCACTCGACAGTGCAGCAGAGAAGATATGGATGACGCCCTTTTTCG  
CTAAGCGGTTGCCGGATGACAACTTCAGCTGATTGTGGCGATTGCCGATCCAACCGCGTGGATTGCTGAAGCGCAAG  
CTGGCAAAAGCCGCGAAAATTCGCGCATTCACCACTGACCTGCTGCTGCTTCAACATCCCTATGCTGCGCTCCGAGCTTC  
TGACGATCTCTGCTCACTGCGCGCAATGAAGTCCGCCGACTGGCATGCCGATGACGCTCTCCGCTGATGGCACA  
TTGAAGATAATATCGAATTTCTTTCGCCGCACCATCGAATCCAAAGCGAAGCTGCTGATGACAGGTTTCTGACTGGCTG  
GAAAATACCGGTGACTGGCAGCTGAAAGTGAAGCAATGCGCAACAAGTCCGTTTGTAGCGCAAAATTTGCCAACGCCG  
CGCGAGTGGCGTATAACCCAGCAGCTGGTGTAAAGATCGCCGGATTACCGCTTTTATTCTCGGTGAAAAAGGTGAAG  
TGCTGGATATCGTCCGAGCCTCGTCCGATTTGCCAACCGTATCGTGAAGAAGCGATGATTGCCGCTAACATTTGTGGC  
GCCCGCTACTGCCGATGAACTCGGTTTGGCATCTATAACGTGCATATGGGCTTTGATCCGCGAATGCCGACGCGT  
GGCAGCGTTGCTGAAAACCGCAGGTTGCTGATGCTGATGCGCAAGAAGTGTCAAGCTGGACGGTTTCTGCAAACTGGCT  
GCGAATGACTGCGCAACCAACTGGTTTCTCGACAGCCGATTCGCTGCTTCCAGTCAATTTGCTGAAATAGCATGAA  
CCCGTCTCACTTTGGCTCGGTCTGGAAGCATACGCCACCTGGACTTCGCCGATCCGTAATAATGGCGACATGATCAA  
CCACCGTCTGCTGAAAGCGGTTATCAAAGCGAAAATTCGCGCATTCGCGACGCGCCACAGGATGAAATCACGTCCAAATGGCCGAGC  
GTCGCGCTCAACCGGATGGCAGAACGTGATGTTGGCGACTGGTTATACGCAACGCTTCTGAAAGCAAAAGCCGGGACC  
GACACCGTTTCGCGCGGAAAATTTGCTGATATCAGCGTGGCGCATGCGTGTGCGTTTGGTTGATAACCGCGCTATCCG  
CTTTATTCGGCACCTTTCTTACAGCTATGCGCGATGAACTGGTTTGCAGCCAGGAAAACCGCACTGTACAAATTAAG  
GTGAAACGGTTTACAAAGTAACTGACGTTATTGACGTCACCATTCGCCAAGTCCGATGGAACCCCGCAGCATATTGCG  
CGCCGGTCCGCTAA

>Cluster\_31902

ATGCCGATACGTTGGTGATTATCTTTTTGTTGCCATTTTAAACAGCCTTGGCCACCTGGGTAGTTCGGTGGGCATGTT  
TGACAGTCAGGAAGTGCAGTATCAGGTTGATGGTCAACAAAAACAGCAAGTTCGTAGATCCACACTCATTCGCGATTC  
TGACTAACGAAGCAGCGCAACCTGAGTATCACCAGCTGACAGCTGTTTACGACGGCGATGAACCGCGGCTCGATGAA  
TTCCCGTTTGAAGGGTTAACCTCAGGATCGAAATACGGGACAGCGGTTGGCATCATATGTTTATGCTGGTATTGGCGG  
CGGTTTGGCATTGTGATGCGTACAGGAACCATGATAACGGTATCCTGGCGCTTATTGCGCATACCCGCGGAAATGAAA  
TTCTCTTTATCTGCGCTGTTTATTCTGTTTCACTTGGCGCGCGGTTATTTGGTATGGGAGAAGAGGCGCTCGCCTTT  
GCCATTATCATCGCAGCCGCTAATGGTCCGCTGGCTATGACAGTATTACCACCGTCCGTTGCTGACCTATTATGGCAGCA  
AATCGGTTTGGCAGTTCGTGGATGAACCCGTTTGTGTGGTCTGCTCAGGGGATTGCCGGCTTCCGGTGTCTTCTG  
GCTCCGGTTCGCGATCGTGGTGTGGGTTATCGCCACTCTGATTGGCTGATCTTACCATGGTGTACGCCCTCAGAGTG  
AAAAAGAACTCTCTCTGTCACGCGTGCATGAGTCCGACCGCTTCTTTCGTAAGAGCAGGCGGATGTTGAACAACGCTC  
GTTTACCTTTGGTACTGCTGGTATTGATTGTTCTGACCGCGCTAATGGTCTGGTGTGATTGGGGGCTTAAATG  
CCTGGTTTATCCAGAAATGCCAGCAGTCTTCCACATGGGCTGTTGATGATTGGCATCATCGGCGTTGTTTCCGCTT  
AACGGCATGACGGTTAATACCATGGCTTTCATCTTACCGAAGGGGCGGAATGATGATCGCCCTGCGCTGCTGGTAGG  
TTTCCCAAAGGGATTTGCTGCTGGTAAATGGTGAAGCGGCTGATGACGCTGTTAAATACCATCAACAGCA  
TTGCCAATGCCATGAGCGGTTGGATAACCGGTCGCGCCGTTGTTTATGTTGCTTTCAGGCGATTTAAATTTCTTC  
GTGACGTCGGGTTCTGGTCAAGCGGCTAACCATGCGGTTACGTCAGCGCTGGCGATCTGGTCTGGTGTAAACCGTCA  
GGTTACAGTGTGGCGTTCAGTGGTGGTATGGCTTACGCCACATCATTTACCAGCTCAGCTTCGTTAATGGCAACGC  
TCGGTGTTCGCGGGTGGACTTCCGTAACGTTGCTGAGGTTGGCGGACACTGCTTGGACTGCTGTTTATTATGTCAGC  
GTCGTGGTATCGGCGCTCAGTTGATGGCTACCATAA

>Cluster\_23340

ATGAACAAAGAAATTTGGCTGTAGTTGAAGCCGATCCAAATGAAAAGGCGCTACCTCGCGAGAAGATTTTCGAAGCATT  
GAAAAGCGCTGCGCAGCAACAAAGAAAAATATGAACAAGAGATCGACGTCGCGTACAGATCGATCGCAAAAGCG  
GTGATTTTGACACCTTCCGTCGCTGGTTAGTTGTTGATGAAGTACCCAGCCGACCAAGGAAATCACCTTGAAGCCGCA  
CGTTATGAAGATGAAAGCCTGAATCTGGCGGATACGTTGAAGATCAGATTGAGTCTGTTACCTTTGACCGTATCACCA  
CCAGACGGCAAAACAGGTTATCGTGCAGAAAGTCCGTAAGCGCAACGTCGATGGTGGTGTGATCAGTTCCGTTGAACCG  
AAGTGAATATCATCACCGCGTGGTGAATAAAGTAAACCGCAACAATCTCTGATCTGGGCAACACACCTGAAAGCG  
GTGATCTGCGTGAAGATATGCTGCCGCTGAAAACCTTCCGCTTGGCGACCGGCTTCTGGCGTGTCTATTCCGTTCC  
CCGGAAGCGCTGGCGCAACTGTTCTGCTACCCGTTCCAAGCGGAAATGCTGATCGAACTGTTCCGATTTGAAGTCC  
CGAAATCGGCAAGAAGTGAATTAAGCAGCGCTCGCACCCGGTTCTCGTGCAGAAATCGCGGTTGAAAAC  
AACGATAAACGATTCAGTCCGTTAGTGTGTTGATGAGTATGCTGGCGCGGTTTCCAGGCGGTTTCTACTGACTGG  
CGGCAACGATTCGATATCTGCTGTTGGATGATAACCGCGCAGTTCTGATTAACGCAATGGCACCGGACAGCTTG  
CTTCTATCTGTTGGATGAAGATAAACACACCATGGATATCGCCGTTGAAGCCGGTAACTGGCGCAGGCTTGGCCGT  
AATGGTCGAACGTCGCTGCTGGTTTCGACGCTGAGCGGTTGGGAACTAACGCTGATGACGCTTACGACTGAGCTTAA  
GCATCAGCGGAAGCGCACGAGCGATCGATACCTTACCAAAATATCTCGACATCGACGAAGACTTCGCGACTGTCTGG  
TAGAAGAAGGCTTCTGACGCTGGAAGAACTGGCTATGTGCCGATGAAAGAGCTGTTGGAATCGAAGCGCTTGTATGAG





CTGTGAGTGATTTTCATTCGCTCTGTTTAAATGTGAAAACGCCATCGATGGAACAGGCAATTGGTCTGCTTTCCGGTGGCAAT  
CAGCAAAAAGTAGCGATTGCCCGTGGTCTGATGACACGCCCTAAAGTGTGATCCTCGATGAGCCTACCCGTGGCGTAGA  
TGTCGGCGCGAAAAAGAGATCTATCAACTGATTAACAGTTCAAAGCCGATGGCTTGAGCATATTCGGTGTATCGG  
AGATGCCAGAAGTATTAGGCATGAGCGATCGCATCATCTGTCATGCATGAAGGGCATCTCAGCGGGGAATTTACTCGTGAG  
CAGGCCACCCAGGAAGTGAATGGCTGCCGCTGTGGCAAGCTTAATCGCGTGAATCAGGAGTAA

>Cluster\_21907

ATGAAATTCACCATAGAAATGCTCCGGCATTATTCGCGCAAGTGTCAATTTGCTGACATCTTCCTTCTTATTTTTGA  
ACTTGTCCGACAGTACAGAGCAATGAGTGCCTATCTGCGCTATATCGTGCAGAGAGCAGACTCCTCCTTTCTTATGATA  
AGTATCAGAATCAGAGTATTGCCGCGCATGTGATGCGCGCTCTCGCTGCTGAGCAGTCCGGAAGTGTCCGCGAGAACAGCGG  
CGCGCCATCTGCGAGGCTTTTGGTCTGCAATAATACCCATGGCTTAAACCTGACTGCCATAAATACCCCTGGCTTACG  
CGGCACACTACAAACCGCATCCACTGACTGCGACACAATTTGTGGAAGCTGCAGCACTATACCCGCTTTTGTATCAGGCAG  
TGGAAAGCAACCCGACAGGATGATTACGGTTCAGGCTTGGGATGGCCGAAGAGAAATTTCACTATATCTCGATCTC  
AATGACCGCTATGCTATTTTTATGAGCCGGTTAATGTGAATACTTTGCGATGAATAACTGGTCTTTCTGCGAGTCAGG  
AAGTATTGGCATCGATCGCAAGATATTGAAAAGGTATTTACCGGGCTACCGTTTTATCGAGCATTTACCAGGATCAGC  
GTACTAAACAGAACGTGATGAGTTTGTCTGACCGCGTATATGTGCGAGGGCAGCTAAAAGGGATTTGTGCTGCTGGATAT  
AACAAAAACAATCGCGGAATATCTTTACACTCATGACCGCCCTCTCCTCTGGCGTTTTCTCAATGTACGCTAACCGA  
TACAGTTACAGGCGCGCATTATCATCAACAGAGCGAAGATAATCTGTTCCAGTATGTCAAGTACAGTTACAGTACACTTAC  
CGGGCGGCATTCTGCTCTGTTATCCATTGATAATCTTTACTTTATCACGCTCTCTGTTGAAAAGCGTTCTGTTCTGGATT  
TTGACCGGCTTAAATTTGCTGAATATGGTGGGATGCACTTCCGTTTTATACAAAATGTGTCGCGAGAAAATATAGTGA  
TGCGATCGACTGACCTTATAATCGCAAAATTTAACCCCTGAACTGGAGCAGGCTTGCAAAACCTGGTCAATCCGGTT  
CTTCGGTGTGTTTTATTGCAATTGACATGGACAAGTTAAAGCAAAATAAATGACACCTCGGTCATCAGGAGGGGATTTA  
GCGATTACGTTATTAGCTCAGGCGATTAACAGTCGATTCGTAAGTGAATATGCCATCCGACTCGGTGGCGATGAAT  
CTGCATCATTTCTGTCGATTCGACGCGCGCAAAATGTCAGCACAACCTGCCTGAACTATCGAAAAACGCTGCAACATATCG  
CGCGCAGAAAAGAGATCGGCTTCTCTTCCGGTATTTACGGGATGAAAGAAAACGATACGTTACATGATCGGTATAAAGCT  
TCCGATGAGCGTTTTATATGTCAATAAGCAGAACAAAAACAGCCGTTTCATGA

>Cluster\_42031

ATGGTGCCTGTAGCACAGGAAACCACCGCTAACACCGTGCCTGTCGCCCTACAGTTTCAGCCGTCGGTTTTAGCCTGGTGGC  
ATGGTCCGAAGCGTCGCTGGAGATCCTCCATGTTTCATCGTTGTCGCTCTCTGTTTTGTCAGGAGCTACACGGGGCTGA  
ACGCGCCCTTTACGCTGAGGCAAAATCGACGAGGCGCAATTTGAACAGCGGCTGAATGCGGCTTGGCAGCGGACTCTTCC  
GAGGCCCGCCAGCTGATGGAAGATCTCGGTTCTGCTGAGGACTTTTTACTCTCGCAGAAAGTACCGGAAACGGAAGA  
TCTGCTGGAAGTGCAGCAGATGCGCAATCATCAACTGATCAACGCCATGCTGGCAGAGGCAATCAAGAAGGCGCTT  
CGGATATCCACATFGAGACGTTTTGAAAAGAGCCCTGGTGTATCGGTTTTCTGTTGACGGCACATACATGAAATGTTGCC  
CCCGGTCGTAACCTGGCTCGTCTGTTATCGGATTAAGTGTATGGCAGCGCTGGATATCGCCGAAAACCGGTACC  
GCAGGATGGGCGCATTTGCCCTGCTGCTGGCGGTCGGGCGATTGACGTCGCTGCTCCACCATGCCTTCCGCTGGGGGG  
AACGGTGGTCTGCGACTGCTGGACAAAACAGGCTCGCTGACGCTGGAGCGTCTGGGTTTTAAGTCTCGAAGTACT  
GCGCAGTTTGGCCGACGTTTACACAACCCGACCGCATTTTTCTGTTGACGGGCGCCGACCGGTTTACATGAAATGTTGCC  
GCTGTACGCTGGATTGACAGGAGTGAACAACCACTCGCGTAACATTTCTCACGGTTGAAGACCCATCGAATACATGATTG  
AAGGGATCGGTGACAGCGAGTTAACACCCGCTGGCATGACCTTCGCCCCGGCTTGGCAGGATTTTGGCTCAGGAC  
CCGGATGTGGTGTATGGTTCGTTGAAATCCGCGATACCGAACCCGACAGAAATCGTGTTCAGGCTTCACTGACCGGACCT  
GGTACTTTTCCAGCTGCATACCAACCGCGGTTGGGGGATCACGCGTTTGCAGGATATGGGCGTTGAGCTTTTCTCTGC  
TCTCTCCAGTCTGACGGGCGTGTATGGCGAGGACTGGTTCCGACGCTGTGTCCGATTTGCCGCCAGTCCGCGCTGCC  
ACCGACGAAAGAAAACCGCTGCTGGGATTTACCAGTGCAGCAACCGCTCACGCTGTACCATCCGAGGGCTGTCCCGCTG  
TAATCAAAAAGTTTTTCCGGGACTACTGCCATCCATGACGCTGATCTGGTGGAGCCACATTTGCTGATTTGATCCACC  
GTCAGGCCGGGAACTGGAGCTGGAACGTTATGTCCGGCAACACTCTGCGGGTATCCGAGTAACGGCATTGAGAAAGTG  
CTCGCCGAGAAACCTCTCTCGATGAAGTCTGCGGGTAACTGAGGCGGTA

>Cluster\_14659

ATGAGACGAACATTTACAGCAGAGGAAAAGCCCTCTGTTTTGAACATGGAAGAACGGAACAGGCTTCAAGTGAATAGC  
GAATATCCTGGTTCAAACCCGGAACGATCTTCACTATGTTAAGGGATACTGGCGGCATAAAACCCCATGAGCATAAGC  
GGGCTGTAGCTCACTGACACTGTCTGAGCGCGAGGAGATACGAGCTGGTTTGTACGCCAAAATGAGCATTCGTGCGATA  
GCTACTGCGCTGAATCGCAGTCTTCGACGATCTCAGCTGAAGTTTCAGCGTAACTCGGGCAGACGCTATTACAAAGCTGT  
TGATGCTAAATAACCGAGCCCAACAGAATGGCGAAAAGCCCAAAACCGGTCTTACGGATCAAAAATTTACCATTGCGAAGC  
TTGTTCTGGAAGTGGAGATGAAATGGTCTCCAGAGCAAAATACAGGATGGTTAAGCGAACAAAACACGCTCAAAAA  
ACGCTGCGAATATCACCTGAGACAAATTTATAAAACGCTGACTTTCTGAGCCGTAAGCGCTACACCACCTGAATATACA  
GCATCTGCGACGGTCCGATAGCTTCCGATGGCAGGCTCATACCCGCAAGGCGAAAGAGGTACGATTAACATAGTGA  
ACGGAACACCAATTTCCAGAACGTTCCGAAATATCGATAACAGACGCTCTCTGGGGCATTTGGGAGGGGATTTAGTCTCA  
GGTACAAAACCTCTCATATAGCCACACTTGTAGACCGAAAATCACGTTATACGATCATCCTTAGACTCAGGGGCAAGA  
TTCTGTCTCAGTAAATCAGGTGGCCAAATTCAGTAAACCACTTACCACCTTACAGAGCAGACGAGACAAAAGAAATGGTTG  
ACGCATCAGCTCAACCCATATAGTTGTAACACTTGAGCCAAACCTTTGGCCGCTTTTACTTTGAGATTAACATTTGCT  
AATACAGGGAACGCACCTGCCTATAATGTTGAGGTTGTTGATCTCCACTAGTAAATGCGGAGCATAGAGAAAAAAG  
TGAGATTCGTTTTAGTAAGGTAAGCGTTAAAAAATGGGCAATCACTTACCAGCAATCTCTGTAAGTATGAACAAATCA  
AAGATCAAATTTATAATATAAGCTGGGCAAGCAAACTAAATCAAACGATAGAGAAACAAATGAATATGTGTAT  
GACATGGCGACATTTGAAGGAATAAGTTATCTAGGAGCAGAAAGCCATTTGACGCAAAATGACAGCAAAATTAAGGAT  
AAGAGAGGATTTGAAACCTATTGCAAGGAGCTAAAAAAGTAAAGCAGACGCTATATACTTCAAGCGATAGAAACGAAG  
AACGCACGTATCTGCAAGAGCAACAGATTTGGCAATAAAAAGGAGAGATGAGAAAAGAGAAAAAGATTAGAGTCTGGT  
GAATAA

>Cluster\_13928

ATGACCTCTACCCGATTACTACCCTGATATCGCTAAAGGTAATAATGACGATGCGTTATCTGTACGGGAAAAAATAGG  
CTACGGCTGGGTGACGCTGGCGGCACCCTAATAACTTGCCTGATCATGAACCTTCTCACCTTTTCTACACCACGTTT  
TTGGATTAACCTCCGGCGTGGTTGGCAGCTGTTTATTGCACTGCGCGTGTGTTGATGCCATCTCCGACCCCGGTGATGGGC  
GTCATTTGCCGACCCGCAAAAGTCTGCTGGGGCGCTTTCGTCCTGGCAGTTATGGATTGCCATTCCCATCCGCAATTA  
CGGCATCTGACGTTACCCGTGCCAGATGCCAGCATGGGAGTAAAAATCACCTGGGCGTTCCGCACTTACCTGCTCCTTT  
CAGTCGGTTATACCGCCATCAACGTAACGTAACGCTGCTGCGCGTGTCAACACCATGACCACCCGCCACAATGAAGTATCTCC  
TGCCAGTCTTCCGATTCGTTCTCTGCGCGTAGCGGGATTTCTGGTTTCGGTAGGCTTACCCTGGATGGTAGATCTCTT  
CGGTACAGGCAACCGCTGCACGCGCTATCAACTGGCGCTGCGCGTATTGTGCGCCATTGCCGTTGATGTTCTCTGCT  
GTTTTTTCTGGGTTGTTGACGGGTGCCGCTCTCCCAATGGGAAATTTACCCTGCGCAACATCTTCCGGGCTGCCG  
AACACGACCAACTGCTGCTGATGCTGGTATGCTTTTCTGCTGATTAACGCTTTAATATTTCCGGCGGTTGGGTATAT  
GTACTTCAATACCTACTGCTTACAGGCAAGTACCGGCTACAGCTGCTGTCTTCCACCATGGTCAACCTTCCGCTCCATTA  
TCGGCTCGGTGATTTGTCAGCCGTTAACCGCGGTTTCGATACCGTCAAAATTTATTACTACCAACCTGCTCCTCGCT  
GCACTGGCGGTGTTGATGTTGTTCTGCGCTCCGGCCCGGCTTATCAACGCTGTGGTGGCGGTGATCCTCGGTAATGG

CGTGATCTTGGCTTACATGGCATTGCACTTCTCATTTGATGGCCTTTGCCGATGACTACGGCGAGTGGAAAAACCCGCG  
TACGTTCTTCCGGCATGAACTTCGCTTCAATCTGTTTTTTCATCAAGCTAGCCTGGGCTCCAGCGCCGGGATCATCAGC  
CTGCTGTTTTATTTTTGTGCGCTACCAGCTGGCGTGGAAAACAGACCAGTTCGCTTGGCGGATCACGGCGATGGA  
AACATTGCTGCCTGCGTTATCCACCTGCTGCTGGCAGGGGCGATCCGCTTTTGCAAACTCAATAATCTATGATGTCGC  
GCATAGCTACCGACCTGCGTCAGCGTCATGTACAGCCTAA

>Cluster\_41943

ATGTCTGATATAAACCATGCAGGTTCTGACCTTATATTTGAACGGAGATCGCCCTCCCTTTCATCAGGCTCTCGTAGG  
TGCCATTACCCATCTGTTGGCAATTTTCGTTCCGATGGTAACCCCGCTTAATCGTGGGTGCGGCTTACAGCTTCCCG  
CTGAAACAACCTGCTATCTTGTTCATATGGCGATGATCGCCTCCTGGTATTTGGTACCTGGTTACAAGTAAACCCGTCACGC  
ATCGTGGTTCTGGTTACTTTCAATTCAGTCAGTCAATTTTTTCATTTGTACGGTCAATGATTGCGCTGGGTAGCAGCAT  
GAAAAGCGACGGTTTTACGAAAGATTAATCATGTCGTCGCTCCTCGGCTCCTTTCGTTGGCGCATTTCTGGTTGTGCG  
GCTCTTCTTTTATCTGCCCCATTTACGTCGGGTTATTACGCCACCGTCAGTGGCATTTGTTGGTGTGATGATCGGCTTA  
AGTCTGATTAAGTTGGCATTATTTGATTGTTGGCGTGGTTTTGCGAGCTAAAAGCAGCGGTACGTTTCGGCAATTCAGGCA  
TCTCGGCTTGGCTTATTGGTTTTGATTGTTGGTGTGATCGGCTTAACTGCTGCCGAGTCCGTTGCTACGCATGGGTGGGA  
TCGCCATTGGGCTATGTTGCGGCTATATCGCATGTTATGCGCTGGGCATGGTGGATTTAGCAGTATGCGCAATTTGGCC  
TTAATCACCATCCCGCATCCGTTCAAATACGGCTTTAGTTTTAGCTTCCATCAGTTCCTGGTGGTTGGCAGCATTTATCT  
GCTTGGCGTGGCAAGCTGTGCGGATATCACGCCAGCGCAATGGTTTTCCGCCCTCCCATTCAGGGGAAGATATC  
AGTCCGACTGAAAGGGCGGCTGCTGGCAGATGGTCTGGTTTCTGTTATCGCCTCCGCTGTCGGTTTATTACCATTAACC  
ACGTTTGGCCAAAATAATGGGGTTATTCAGATGACTGGCGTGGTTACGCTTATGTCGGGCGAACCATCGCGGTAATGCT  
GGTTATCTCGGCTTATTTCCGATGATTGGCGGCTTCTTACGACCATTCCTCAGCAGTTCCTGGGAGGCGCAATGACGT  
TGATGTTTTCCATGATTGGCATCGAGGATTCGCATCATCACCAACGGTTTAAAGCGCCGAGAACACTTATTGTC  
GCCACTTCTTTAGGTTTAGGGCTTGGCGTCTCCACGATCCCGAAATTTTTAAATATTTGCCAGCCTTATTTATGATTT  
AGTTGAAAACCTTATTTGCTGCGGGTTAACTGCGATTTTATTAATAATTTACTTCCCTGGTGGTACCGACAGGAAA  
ACGTTCTGCCTGGTATTACCTCAGCGGAAGAGATGGATTAA

>Cluster\_62200

ATGAGTGGGGGAAATTCGCGGAGGGGTGGGTTATCGCCCAAGTATCTACGGTCACAACTCTAATCCGAGGAGTAACGTA  
TAAAAAGAGCAGGCAATAAATTTATCTAAAAGATGATTATTTGGCTCTTATCCGTCGCAACAATATTCAGAATGGCAAGT  
TTGATACCTACGACTTGGTTTTTGTTCCTAAAAATCTTGTAAAGAAAGTCAAAAAATATCTCCTGAAGATATGTTATTT  
GCAATGTCATCAGGGAGCAAAATCCGTAGTTGGTAAATCCGCACATCAGCATCTACCATTGAAATGTAGTTTCGGCGCATT  
TTGCGGTTGATTCAGTCCGAAAAACTTATATTTCTGTTTTTATGCTCATTTCACAAAATCTTCTCTTTATCGAAAACA  
AAATTTTCACTTCTGCTGGTGCAAAATTAATAATATTAAGCCGGCAAGCTTTGATTGATAAATATACCAATCCCA  
CCACTTGGCGAACAATAATCATCGCTGAAAAACTCGATACGCTGCTGGCGCAGGTAGACAGCACCAAGACAGCTTTTGA  
GCAATCCCAAAATCTGAAACGTTTTCTGCAAGCGGTTATGGGGGGCGAGTTAATGAAAATGACAGAAAATGGC  
GTAATTTTGGCCCAACATTTCTGATTTAAGAAGTTAAATTTGAATCTATCTTAACTGAATACGTAATGGTCTTTTCA  
TCAAAGCCAAATGAAAGTGGTGTGGTCACTCAACTACCGATTAGTTCTGTACGTGCTGGCCATGTAGATCAAACGA  
TATTCCGTTTTCTAGAAAGTTTCAAGAAAGTAACTAAACCCGACAAAATTAACAAGATGGAGATCTTTTATTTACTCGATA  
ACGGAAGTTTGAATTTGTTGGTGTGTTGGGTTATTGAAAAAATTAACAATCAAAATTTGCTATATCTTGATAAATCTT  
ATTCGAGCTCGATTAAACCAAGATGCTTTTACCAGAATATATCGAAATATTTTTTTCATCCCTCAGCAGCAATGCAAT  
GATGAATCGGCTGAAACAATCTTGGTCAAAAAGGTTATTCAGGAAAAGTATCAAAATCCCAAGTTGTTTTATACCTC  
CAGTAAAAGAACAGCCGAAATCGTTCGCGCGTGGAGCAACTCTTCGCTACGCCAGACCAATAGAAAACAGGTCACAC  
AACGCTTAGCCCGGCTCAACAACCTGACGCAATCCATCCTGGCAAAAGCGTTCCGTTGGTGAACCTTACCGCCAGTGGG  
GGCCGAAAACCCGGATTTGATCAGCGGAGAAAACAGCGCCGCCGCTTGTGGAATAAATCAAGCTGAAACGCGCAGCTA  
CGGGGGTAAAAAGCCTCAGTAAAAAATCCTGA

>Cluster\_61817

ATGCCACATCTCTACGATACGATGCCATAGTAATAGGTTCCGGCCCCGGCGGAAGCGCTGCAATGGGCTGGTTAA  
GCAAGGTGGCGGCTGCGAGTTATCGAGCGTTATCAAAATGTTGGCGCGGTTGCACCCACTGGGGCACCATCCCGTCGA  
AAGCTCTCCGTCAGCCGTCAGCCGATATAGAAATCAATAAACCCTTTACAGCGACCATTCGCGACTGCTCCCG  
TCTTCTTTTGGCGATATCTTAAACATGCGGATAACGTGATTAATCAACAACCGCATGCGTACGGGATTTTACGAACG  
TAATCACTGTGAATATTCAGGGAACGCTCGCTTGTGACGAGCATACTGGCGCTGGATTGCCCGACGGCAGCG  
TTGAAACATAACCGTGAATAATTTGTTATTTGCTGCGGCTCTCGTCCATATCATCCAACAGATGTTGATTTCCACCAT  
CCAGCATTTACGACAGGACTCAATTTCTCAGCATGACCCAGCAACCGCCGATGACTTATCTATGGTGTGGATGAT  
CGGCTGTGAATATGCGTCGATCTTCCGCGGATGGATGAAAAGTGGATCTGATCAACACCCGCGATCGCTGCTGGCAT  
TTCTCGATCAAGAGATGTCAGATTTCTCTCTCTATCACTTCTGGAACAGTGGCGTAGTGTGCTCACAACGAAGAGTAC  
GAGAAGATCGAAGGCTGACGATGGTGTGATCATGCTTCAAGTGGGTAATAAAGTGAAGCTGACTGCTGCTCTTA  
TGCCAACGCTGCGACCGGTAATACCGATTGCTGCGTTTACAGAACATTGGGCTAGAAACTGACAGCCGCGCATGTA  
AGGTCAACAGCATGATCAGACCCGACAGCCACAGTTTACGCGGTGGGCGAGTGTGTTATCCGAGCCTGGCGTCCG  
GCGGCTATGACAGGGGCGCATTTGCCGCGCAGGCGCTGGTAAAAGGCGAAGCCACCGCATCTGATTGAAGATATCC  
TACCGTATTTACACCATCCGGAAATCAGCTCTGTGGGCAAAAACCGAACAGCTGACCGCAATGAAAGTGGCATATG  
AAGTGGGCGCGCCGATTTAAACATCTGGCACGCGCAAAATCGTCCGATGAACTGGGCGATGAAAATTTTGTTC  
CATCGGAAACAAAAGAGATTTGGGTATTCATGCTTTGGCGAGCGCTGCCGAAATTTATCATATCGGTCAGGCGAT  
TATGGAACAGAAAGGTGGCGGCAACACTATTGAGTACTTCTGCAACACCACTTAACTACCCGACGATGGCGGAAGCCT  
ATCGGTTAGCTGCTTAAACGGTTTAAACCGCTGTTTTAA

>Cluster\_24274

ATGAGTACAATTTTTGATGTGGCAGTTATGGGGGTGGGCCAGGTGGTTACGTAGCGGCACTGCGGGCTGCGCAGAATGG  
GCTTTCCGTTAGTATGATGATGATGTTAATGACAGGGGCAACCTTCGCGGGCGGTACGTGCTCAATGTGGCT  
GTATTCGTCAAAATCGTTGCTGCAATCTCCGAACTGTACGCGAAAGTGCAGATGAGGCGAGCATTCATGGCGTTAAT  
GTTGACGGCGTATCTTTCAATGACGCTGCGATGATTCAACGTAAGACGCCATAGTAAGCCGCTGACAATGGGCATCGG  
CTTGCTGTTAAGAAAAATAAGTGAAGTACCTGTGCGGCTCGCAACGTTAGAACATGCTCAGGATGAGATTTGGCAAT  
TACGTGTAACGATCAACAAATCCGCGCCGTAATGTTGGTGTGCAACAGGTTCTCAGCCGCGTCAACTGCTGGCGTT  
ACCATGATAATCAGCAAAATTTCTGATAATCGCGCGCCCTTACCGCACTTTCTGGTGTGATCTCGTCAACTCGGTTG  
CGCTGGCGTATTGGCTTGAATGGGCTGTTGTTGGAATCGGTTGCGTTTACAGCTCACGTTGCTGGAGATGGCGCCAA  
CGTCTTGGCTGCACTGGAAGCTCGCTGTCGAACGAAGTCCGTAAGCAATGATTGCCAGTGGGATGAAAATGCAACTG  
GCAGTAGAGATTGAGGCTATTGAACAACGGGATGACGGTGTGCATGTGCGCTGGCGGCAAGGTTGAGAAGCGGAGAAAG  
CCGCTTCGATAAATTAATTTTGGCATTGGACGTTGACGCTGCTGCTGCTGCTGCTGCTGCTGCTGCTGCTGCTGCTGCT  
TCGATAACCGTGGCGGATTTGCCGTCGATAACTTATGCGTACCGGAAAGCCGGCTGTGGCAATTTGGTGTGCTGCTG  
CGAGGGCGGATGCTGGCGCATAAAGCGATGGCTGAAGGTAGGTTGCTGATCAAAATGCTGGACTGGCGTAGAGCC  
GATTAATTTTGGCTGATCCCTTGGTGTATTACCCAAAGGTTGCGTGGGTAGGGGAAAACGAGCCCTACTGA  
AAGCCGTTGGCAGAGTCTTTAAACAAGGAAATTTCTGTTTTGCGGTAACGGTTCGCGCTTAGCATTAGGCCAGGAAGT  
GGGCTTGCAGTTATACAGCGATAAACACTGACCGGCTACTTGGCGGAGCATTTGTTGGCCGAGGCATCGGAGCT

GATCAATGAAATTCGGCTGGCGATGACTTTTAGCGCCTCTGGCGAGGATATTGCTGTGCGATCCATGCGCATCCGACAT  
TAAGCGAAGTCATCCACGAAGCAGCAATGGCCTGAATAATAAAGCATACACGGATAA

>Cluster\_53912

ATGCCGATTCAGCAACTCCCGCTTATGAAAGGTGTCCGGCAAAGACTTCCGAAACGCGCATATATCGACTATCTGCCAGT  
GAATATGCTGGCTACACCCAAAGAAATCTGAAACAGCAGCGGATATCTTCGCTCATTCGCGGATTCGCAACCGCTCG  
ATGTGAACGGCGTATCTCGCGCGCTCGAGTACAACATGGCGCAGAGTGTGTTTATCGCGTATGTGGTGGCAAGCTGTAT  
AAGGGCGAAAGTGAAGTCGGTACGCTCGCGGAAAGTGGTFCGCGTATCAATGGCGCATGGTCAACATCTCAGGCTGTAGG  
CGTTAATGGTCAACTGGTTCGAGTATCGCTATGATGGTACGGTTAAAACCGTCTCAAACCTGGCCTACAGACAGCGGATTCA  
CACAGTACGAGTTAGGTTTCAGTTCCGATATTACCGCTTACGTTGGCGTATCGTGGTCAAAAAGCAGCAGCATGATTCA  
TGGTTTATCACTGACCTTGAAGACGAATCGCATCTGACCGATACAGCGCACAATATCGTGTGAGTCTCAGCCTGACGG  
CATCATTTGGCATCGGAACATGGCGAGACTTCATCGTCTGCTTTGGTTCATCGACGATTGAATATTTCTCCCTGACTGGTG  
CAACCACCTTGGTGCAGCTTTGTATGTGCACAGCCACTGATGGTGA AAAAAGGCATCGCCGGGACTTACTGCAAA  
ACGCCATTTCGCTGATTTATGCGTTTATCAGCAATCCGCGCAACTGGTGCAGCTCTGTATACATCATCGGCTCCGGTCA  
GGTATACCAATCGCTAGCGGAGCATTGAGAAAATCCTCCGCTCTACACTGCTGATGAACTGGCTGATGGTGTGATGG  
AATCGCTCGGATTTGATGCTCATGAGTTGCTGATTATCCACTTCCGCGCCATGTTCTCGTGTACGACGCATCTTCAAGC  
GCCAATGGTCCGCAATGGTGTGTGTTGAAAACCTGGCCTGATGACGATGTGTACCGCGCTATCGACTTCAATTTACGAAG  
CAATCAGATAACGTCGCGCGGATAAGCTGGAATCGGTGAGCTACCGGAAAATTGCAATTCGACATCAGCAGCCGATCAGAAGC  
AACAGGAACACCTGCTGTTTACTCCGTTGTTCAAAGCGGATAACGCCAGATGCTTCGATCTGGAGGTGGAATCATCCACT  
GGCTAGCTCAGTACGCCAGCCGCTGTTCTCTGCAACCCTGACGGCATAAATACGGAGCTGACGAGATGATTGA  
ACAGAATGAACCTTCGTTTACGACAAAACGTTTGTGGAAGCAGTAGGGCGCATCAGGAAAAATGTCGGCTTCAAAT  
TGGCGTTTATCAGCAAGTCACCTGTCTGCTGGCTGCGCAGATAAGGATTGAGTAA

>Cluster\_24269

ATGGCAGGAAATAAACCCCTTCAACAAACAGCAGGCTGAACCCGCGAACGCGATCCACAAGTTGCCGGCTGAAAAGTGCC  
TCCGCACTCGATCGAAGCGGAGCAGTCCGCTTGGGCGGTTAATGCTGGATAACGAACGCTGGGATGATGTAGCCGAGC  
GTGTGGTGGCAGATGATTTTTACACCCGCCCACACCGTTCATATCTTTACTGAAATGGCGGTTTGCAGGAAAGCGGTAGT  
CCTATCGATCTGATTACCTTGGCGAATCGCTGGAACGCCAGGGGCAACTCGATAGCGTCCGTTGGTGTGCTTATCTGGC  
AGAGCTGTCAAAAATACGCCAAGTGCAGCGAACATCAGTGCCTATGCGGACATCGTCCGTGAGCGTGGCGTTGTCCGTTG  
AGATGATCTCGGTTGCGAATGAGATTGCCGAAGCCGTTTGTGATCCACAGGGCGTACAGTGAAGATCTCCGACTT  
GCTGAATCCCGCTCTTTAAAATGCGGAAAGTGCAGCAAAACAAAGACGAAGGGCCGAAGAATCGCCGATGTGCTCGA  
CGCAACCGTGGCGGATTTGAGCAGTTGTTTACGACGACACACGATGGCGTTACCGGGTAAATACCGGTTATGACGATC  
TCAACAAAAAACCGTGGCTTGCAGCCGTCGGATTGATCATGTTGCCGCGCTCCGTCGATGGGTA AACGACATTT  
GCGATGAACCTCGTCAAAAACCGCGGATGTTGCGAGATAAACCGGTGCTTATCTTCTCGCTGGAGATGCCATCAGAACA  
GATCATGATGCGTCTCTGGCGTCTGTCGCGCTTGACCAGACTAAAATCCGTACCGGGCAGCTCGATGATGAAGACT  
GGCGCGCATTTCCGGCACCATGGGATTTTGCAGAAAACGTAATATCTATATCGATGATTCTCCGGCTTACGCCA  
ACGGAAGTCCGTTCCCGCGCACGCGTATTGCCGTAACCGCGGCGCATCGGGCTTATCATGATCGACTACCTGCAACT  
GATGCGGCTACCGCGCTTTCCGATAACCGTACGCTGGAATAATGCAAAAATCTCCCGCTCGCTGAAAAGCAGTGGCAAG  
AATGAACGTTGCCGTTGGTGGCGCTGTCCAGTTGAACGTTCTTGGAAACAGCTGCCGACAAACGCCCGGTTCACTCC  
GACCTGCGTGAATCTGGCTCTATCGAGCAGGATGCGGACTTGAATGATGTTTATCTATCGTGTGAGGTGATACAGAAA  
CAGTGAATTTAAAAGCAGTACGCGGAAATTTATCGGTAACACAGTAAACCGGCAATCGGGACGGTACGCTGACCTTTA  
ACGTTAATGGTCCGCTTTCGACAACTATGCGGGCCGAGTACGACGCAAGTAA

>Cluster\_58626

ATGACTACCATCTGGTCTGGTTTCGCCAGGATTTACGCTCTGCACGATAATCTCGCACTGGCTGCCCGCTGCCGCAATTC  
GTCTGCACCGGTGCTGGCGTTGTATATCGCTACACCAGCCAGTGGGCGACGCATAACATGTCCCGCGCTCAGGCTGAAC  
TTATCAATGCTCAACTGAATGGGCTACAAATAGCGCTTCCGAAAAAGGATTTCTTTTATGTTCCGTTGAAGTGGATGAC  
TTTTGTCGCCAGTGTGCAAAATAGTTAAACAGGTGTGCGCGGAAAACAGCGTTACCCACCTGTTTATAACTATCAGTATGA  
AGTGAATGAGCGGGCGCGGGATGTGGAAGTTGAAAAGAGCGCTGCGTAACTGGTGTGTGAAGGATTTGATGACAGCGTGA  
TCCGTCCCGCTGGCGCGGTTGATGACCGGTAATCAGAGATGACAAAAGTCTTTTACGCCCTTTTAAAGAAATGCTGGCTGAAA  
CGGCTGCGGGAAGGGATGCCGAGTGCCTGCGTGCAGCAAAAGTTCTGATGAGCGGATCGATAGAGCCCTCGCCATCCAT  
TACGCTGAATTTATCTCGTCACTTTTCGATACGCGCATTTTCCGGTGGAAAGAAAAGCGGCGATGCGCAATTTACGCC  
AGTTTTGCCAGAACGGTCCGGAGAATAAGAGCAACACGAGATTTTCCGGCAGTGGAAAGCACCAGCCGTTTGTCCGCG  
AGCTGGCAACGGCGGGTTATCGCTCCGCAAGTGTCTGATCGCTTGTGGCTGAACAGCCGAGCGCTGGAGCTGGAGTGG  
GGCGGTTAGTGTCTGGCTTAAATGAGCTGATCTGGCGGAGTTTACCGTCACTGATAACGATACACCCCTCGTTGTGTA  
AACATCGTCCATTTATGCTGGACGGATCGTGTACAGTGGCAGAGCAATCCCGCACATTTACAGGCCGTCGAGGAAGCC  
AAAACGGGATCCCGATTTGATGTCGCTATGCGTCACTTAAACAGCACTGGCTGGATGCATAACAGGCTACGGATGAT  
TACAGCCAGTTTTCTGGTGAAGATTTTATGATCGACTGCGCGGAAAGCGGAGGATATTTTATGTCGAGCTGATGATG  
GTGATTTGGCAGCAATAACGGTGGCTGGCAGTGGCGCTTCAACCGAACCAGTGCAGCGCGTATTTTCTGATTTTTC  
AACCAGCAACCCAGGGCGAGAAATTTGATCATGAGGGCGAGTTTATCCGCCAGTGGCTACCGGAACTGCGCGATGTGCC  
AGGAAAGTGGTGCATGAGCCGTGGAAGTGGCGCAAGCAGGTGTGACGTTGATTTACCGCAACCGATAGTCTGAGC  
ACAAAAGACGAGAGTACAAAACGTTGGCAGCTATGAGCGCGCGGAAAGGAAATAA

>Cluster\_48654

ATGACTGTTCGGATTGTATCTAACCGCAGTAAATGCGCTTATTTCTGGCGCAGATGACAAGGTAAGCAACTGGTGCAGCA  
AATGTTGAGCTACGAAGTCGAGACTGGCGACTGGAAGGGCACAAGCAGATGTTCAACTGGAGTAAAACCTCGTTCCCTG  
CTGGCTTTGCCAAGCCTGTAGCGCGCAACTGAAACAAGCGGGCATCAAATGTGTTTATATCCGCAAGACAAAAGCCCG  
GCGCTTGGTAAACCAAATCCGGCGGTTAACCCATTTCCATACATCTGATTAAGCGTATCAGGATCAGACTGTGGAAC  
ACTGGTTCGAGAGGGAATGATGATTGCGCAGATCGTACTGTGGCGGAAATCTAACGTTGCCTGCAAGCAGCTGCAC  
GATTCGGTTCGATGACATTTATTTTAAACACCCGCTCTGCTGATGTTTCAAATGGCGGAAACTTCCAGAGTCCATC  
GACTACCGCGCCGAAAATGGCGAACCGTGGTAAAAGACCAAAAGGTTGGAGTCAATGGCTCGGGTGGTCCAGGTATC  
ACGACATATCAACGCTCGTACAGTTCAAACCTTTGCAAGTTTCTCGAAGAACCACCAGCGATGCAACACCAGATAAGA  
AAAGCTACCACCTCAAACGTCGGGAGTTGGTGAACGCTTCTTTCAAGTGTCTCTTCTTATTTCTGGAAGAGGGCCAT  
GAGTCTTACGGCTCAAATTTCTATGACATCGCCAGATTATGTGAAACCGGACTACTCGTTCAGCGCTTACAGCCAGCC  
GTTTATGAAGGATTCGACGGAAGCAACATGCGCTGATGGCGGTTGGCGGGCAATGAAATTAAGTCAACAGAAAAGT  
ACCTGATTGATCGAGGCTATTCGCAAAAGCCGTTACTTCTTTATCATAAAGTTGCCTACAAGCCAGACGAGGCCAAGATC  
AAGCCGAACTTGGCAACAAACCTCAATTTTAGAGTTGGTATGAGCACCCTACCAAAAGGCTTATCAGTTGGGGAT  
CGTGTATAAATTTGGCAGCTAACAGGGCCATTTGTCGCGAAGCATGCTCTATAAGCAACATTTCTCAATTTGATGACT  
TGGTTCGCTTAAACGCCAGGGCAAACTCTGATGAAATGATGAAAGTCCGGCTTAGAGTTGACTTCATCTATGGG  
GAATCTAACAGCGGACAAAGGCAAGCAAGCTGAACAGTTTAGCGTCTGGAGAAATAGATGTTTAAATAGGCTCGACTAT  
TCTGGATGTCGGTGTGATGTCGCAAGCGTTGGTGGGCTTCTTGTGTTGGTGGTGGGAAAGCAGAAAGTTGAAATGAGG  
AGCGTGTCCGTCGTTGCTTACGACCAAAAAAATCAGGCAAAACGCTGTGTTTTATCACTGATTTCATTGACATTAGCAAC  
AAATACCTGTTGCTCTACTCTTATGAGCGAAAACATCATCGACACCACCTGGCTTTGCAGAAGGTGATTTGCCAT

TGATGGAGCATTTCGATTTTGGAGTTCGAAACGAGATTAG

>Cluster\_1310

ATGGACACCTTACTTGTCTATGAGAATGCCCGCTGCGGGCAGTGTGACAGCGAACAGGACACCATCCGCCAGATGGC  
GAAATACAACCGCTGCTCTCACAGCGGTGGCGGCTTATGCTTCCGAAATCAACCGGCTGAAGGCGCTGGTTCCGAAAC  
TGCAGCGTCCGAGTTCGGTAAAGCTCAGAAAATCTCGCGTAAACCGGAACAGTACAGGAAACCCATTGACAGCGAG  
ATCAGCGCACTTTCAGGAAGAAATGGCGGAAACGCTGGGTGAGCAATATGACCCGGTACTGCCATCCGCCCTGCGCCAGTC  
TTCAGCCCGTAAACCGTTACCGGCTCCTTCCCGTGAACCCGGGTATCCGGCCGGAAGAGGAATGCTGCCCGGCT  
GTGGTGGTACCTCAGTCTCTGGGGTGTGATGTGTCAGAGCAACTGGAGCTTATCAGCAGCGCTTTAAGGTTATCGAA  
ACACAACGTCGAAACCGGCTGTGTGTCGGTCCGACCATATCGTGCAGGCAACAGTACCTTCAAACCCATTGACAGCGAG  
TTATGCCGGAGCGGGCTTCTGGCCATGTTGTACCGGAAATATGCAGACCATCTGCCGTTATACCGCCAGTCAGAAA  
TATACCGTCCGAGGCGTGGAGCTGAGCCGCGCCAGCTGGGCGCTGGACAGGTGCCGTTGCTGAACCTGCTGGAGCCG  
CTGTATGACGTCCTGCGCCAGTATGTGCTGATGCCCGTAAAGTCCATGCTGATGATACCCCGTCGCCGTCAGGAGCC  
GGCAGCGTAAACCCGACCGCCCGGCTGTGGGTCTACGTCCTGATGACCGTAAACCGGTTCCGAAATGCCCGCG  
CGGTCTGGTTCGCGTACTACCGGACCGGAAAGGTATCCATCCACAAAATCATCTGCCCGGTTACAGCGGTGTGCTTACG  
GCCGATGCTTACGTTGGTACCGGCTGTATACGAATCCCGCAGAATAACCGGAAGCCGCTGTATGGCTCATGCCCGGAG  
AAAAATCCACGATGTCATGCAAGAGTCCCACCGCATCCACCGGAAGCCCTGCAGCGTATCGGTGAACCTGATGCCA  
TAGAGCCAGAACTCGGGATGTACAGCAGAACCGCTTGGCGGCAAGAAAAGCCAGAGCTGCCCACTGATGACGTCA  
CTGTATGACTGGATACAGACTCAGATGAAAACACTGTCGCGTCACTCGGATACGGCAAAAAGCGTTCCGATACCTGCTGAA  
ACAGTGGGATGGCTGAACGTTACTGCAAGTAAAGGCTGGTGGGAAATCGACAACAACATCGCAGAGAACGCTTACGGG  
GAGTGGCCGATAGGCGGAAAAAATGGCTTTCGCGGTTCCGACAGCGGTGGCAATGCGGCGGTGTTGACTCGCTG  
ATCGGCACATCGCTTGAACAAATGTGGAACCGAAAAATGGCTTACGTCATTGACATATCCAGGATTGGCCCGC  
AACCGGATACGGATCTGTTGCCCTGAAAGTTGATCTGACCTCTCAGTAA

>Cluster\_29027

ATGAGAACCTGATTTACGACTTTATCAGTCATATTCAGCGTATGTTTTCTCACAGTATACTAGCTCAGGACGTTACTAT  
TTATTATACGAATGATATTCACGCACATGTCAATCCGGCAAAAATCCCGCTGTTGATAAGAACAGACTTGTAGGTGGTA  
TGGCTAATATTCAGGCATCGTTAATGAAGCGAAGAAAAAACAAGATGCTTTTTCTTTGATGACAGGCGACTATTTT  
ACCGGTCGTTATCAGTACCCTGACCAAGGTTGAAGCTATTTATGATATCATGAACACCATGCCCTTTGATCGGGTGT  
CGTTGGTAAATCAGGATTCGATCAGCGGTCCTCAATATGGTATCTCAGTTATCAAAGCAAAAATCCCACTTCTGG  
GAAATATCTACTACCGGATACGAATAAACCAGTTGGGATCATCCGTGGACCATTATCGAAAAAGATGGTTAAAGATT  
GGTGTGATGGATGTCATGGCGCATTCGCTTTCATGATACAGTCGCGCAAAAAGCACGTTGAAGGCGTGAAGCCAGAGA  
CGAAATAAATATTTAAATAAAGCACTTGCAGAAATAAAGGTTAAAGTGCACATTACCGTTTTGCTAATTCACGAAGGT  
TCCCGCGCGTCAATCAAGCTTTGGTAGTAAAGATGTGGAGCGGCTACTACAGCAGATATGAGACAGCTAAAAAAGTG  
AATGGTGTGATGCTTAAATACCGGTCACGCACATGTGGAACACCGCAACCAATAAAGTTAATAACATTAATTTGT  
ATCTACCGATGATACCGGACCAACATCGGAAAATCTGCTTTCATGATACAGTCGCGCAAAAAGCACGTTGAAGGCGT  
TCCGCGCGCTCAATCAAGCTTTGGTAGTAAAGATGTGGAGCGGCTACTACAGCAGATATGAGACAGCTAAAAAAGTG  
AATGGTGTGATGCTTAAATACCGGTCACGCACATGTGGAACACCGCAACCAATAAAGTTAATAACATTAATTTGT  
ATCTACCGATGATACCGGACCAACATCGGAAAATCTGCTTTCATGATACAGTCGCGCAAAAAGCACGTTGAAGGCGT  
AAGCTTAAACAAATAACACAGGAAGTTGTCGGCAATCTCCCGTAGTTTTAAACAGTACAGTATGGTAGTTCTCTCTAC  
CGGCAACCTTATTTGATGCAATGATGAAAAAACCTGATGCCGTTGCCGATTTCAAATAAGCGTGGGATTCGAG  
CTGATTTTCCATAAGCGGATATCACATGGGAGATGTTATAGCACATTCCTTTAAATAATGACCTCATCGAGATGGAT  
TTGACGGGCGGATCTCAAATCATGATGACGATGCAACCAATCAACTAACCGGTGTTTACAAGTTCTTCAAAGTGT  
TGGGTTGCTATGACAGCAAAAACCCCTCAACCAACCGTTAATCTCTTTCACCATTAACCGGCAAACTGTGGAAAGATA  
ATCAAACATATCGTATTGCCACGCACTCTTTTGTGCCAGTGGTGGTGCAGGTTTGAAGCATTTTGAATGGAATAAAT  
GTGAAGACGATACCGGAAACACCTCGCGGAAATCTATCATCGATTATTTCAAATAATCATAAACCCTGTCAACCCAGACT  
AACTAAACGAGTCAATGGACGTCGCCAAATAA

>Cluster\_29159

ATGAGTCACTCGTGCAGCACCAATTAATGCGGCTTCCGGCATTATCTTTTTAGTTCCTTTCCCATTTATCTGTCGCT  
ATGGATTGCCCTCTTTGGGCAAAAATCAGAAGTGAATAACTCAGCTCCGAACTTTGCTCAGCTGGCGTTGGATAAATCTG  
AGCTGGTCAATTCGTCAGGAGATTTAGTGAAGCATGACGCTGAACGCTATCAGGGGCAAGTTTGCACCTCAGCCATCAA  
AAGCGAATGTTGAATATTTATTCGGCTATCTTTATATTAATGAATGATTTATGCTCGTGATAACCATTTTTTATGCTC  
ATCGCTGATAGCTCTGTAATGCTATACGATGTCACCGGCGGATTAAGCGCAACCTAACGTTTTCTATCTATTAT  
ACCGTATACGCTTTTTCTCTGGCTAATAAATGACCTACATGCAGCGGGGAAATATGTTGGCGGTTATCAACCTCTC  
TTCGGAGTGAAGTGAATGCTGATGATGATCGACATTCGAATGGGTGTTGATGATACGGTGAAGCAAAAACCTTTCTCGT  
AAGCAACGAGGCTCGGCAGCAACGTTTTCTCCGCTGATTCATTTGAATGATTTAACCGTACAAAAGAAATGGCTATTTAT  
ATCGGACAGTTTTATTCGACAAAACGCCCCAATGTCAGCCATTTGTCGACTTTCATCAACGCTTATAACTCATTTTTAT  
AATCATCTTATTTTTGCTGTTGCCCGGATTTTTGGGAGTCTGTTCTGCTATTAATCTGGCTACGTAATTCGACAAA  
CTATTTGCTTCCAAACGCAAAATGCAACCGCCCTCGAAAACCATCAACTTTGCTTTATTACCAAGCAATAATCGATA  
TCAAACAGAAAATGATCGGTGCTGAAGCTTGTACGTTGGCCTGGTGGAGGCAAGTAAATGAATCCGGCAGAG  
TTTTATCCGCTGGCAGAAAAGGAGGGATGATCGAACAGGTAACGATGATGTTATGTTATGATAATGCTTCCGCGATTTGG  
CGGTATTCGCAACACATACCGATCGCTATGTTTCTATAACTGTCAGCTCCGATTTTCACTACCTCAGGTTGATG  
CGGAAACCAATCAGAAAACAGAGCAACATGCGGTGCGTCCGACGCAAAATTAATTTGAAGTGAAGTGAACATGCAATTTCT  
GATGTCGACAAAATGACGCGGATTTATTCGGCTTTCGCAAGGCGGTTACGAAGTGGCAATGATGATTTTGGTATTGG  
CTACTCTAACTTGCAATAACCTTAAATCATGAAATGTCGATATTTGAAAATCGATAAATCGTTTGTGGAGCGCTGACTA  
CCCAAAAACAGTCAATTTGATTGCGGAACACATCATCGACTGGCGCACAGCTGGGATTAACCAAGTATGCGTGAAGGC  
GTCGAAACTGAGGCGAGGTTAACTGGCTGCGCAACCGCGGCTGCGCTATTGCCAGGATGGTTTTTTGCGAAGGCGAT  
GCCGCGCAGGTTTATGCAATGGATGGGGTAA

>Cluster\_26639

ATGAAACCTGTAACCAACCTCGTATTAATGAGCAGAGTCCCGTCTGCGCACAGGAAGCGGTGAATTATATTTCCCGA  
CGAAGCAACACTTTGTGTGTTAGGCGCTGGCGGCGGATTTCTGGAAGCCACCAGTAAATACCTGCTCTGCTGATAAAT  
ATAAACAGACTCAAACGCGACGTAATTTATCGATTATAAGTCCAAACAGGGCTTGGAGATCGCGCCGACCGTGGTATTAGT  
CCGCTGGCGCAAGAAGGCTTGGTAAATGGGCAATATGCGGTCACCTGGGGCAATCGCCGCGTATTTCTGATCTCGCAGA  
ACAAAATAAATTTATGCTTATAACTATCCACAAGGTTACTTACACAACCTTACGCGCCGCGCAGCCAGCCACCGCTG  
GTATTTATGATGATATTGGCATCGGAACATTTGTCGATCCACGCCAGCAAGGCGGCAAACTGAATGAAGTCACTAAAGAA  
GACCTGATTAACCTGGTCCGAGTTGATAACAAAGAATATCTCTATTACAAAGCGATTGCGCCAGATATCGCCCTTCAATCG  
CGTACCACCTGCGCAGCGAAGGCTACGCCACTTTTGAAGATGAGGTGATGATCTCGACGCATTTGTTATTTGCCAGG  
CGGTGCACAAATAACCGCGGATTTGTGATGATGACAGGTGCGAAGAAATGGTTAAAGAAAGCCACGCTGCATCCATAATCTGTC  
CGTATTCGGGTTATCTGGTGGATATTGTTGGTGGTGCATCCGGATCAAACCAACTGATGGCGGTGCGCCGTTAACCG  
CTTTATTTCTGGTACTTCACTCTTGTGATGACAGCAACAACTAGCCTCCCTTAAACCAACGTAATTTAGTTGCACGCG  
GTGATTTATTCGAAATCGCAAAAGGCGCAGTGGGAAATGTCGGCTCGGTTATGCTGACGCGCATTTGGCTGGTCCCGG  
GAAGAAGGTTGTGCTGATGACTTTATTTGACGGTAGAAACAGGTCGGATTTGGCGGATTTACTTACAGGCGATCGCCTT  
TGGCGCAACGTTGAATACCCGCGCATTTCTGGATGACGTCACGATTTGATTTTTATCACGGTGGTGTGCTGATGTTTT

GTTATTTGAGTTTTGCTGAAGTCGACCAGCACGGTAACTCGCGGTGCATAAAATCAATGGTAAAATCATGGGCACCGGT  
GGATTTATGATATCAGTGCCACTTCGAAGAAAATCGTGTTCGCGGCACATTAAGTGCAGGAGTTTAAAAACAGAAAAT  
TACCGACGGCAAATAAATATCGTCCAGGAAGGACGGGTGAAGAAATTTATTCGGGAATACCGGAAATAACTTTCAGCG  
GAAAAATCGCTTCGAGCGAGGGTGGATGTTTCGTTATACATGAGCGCGCCGATTTACGTTAAAAGAAAGACGGCTCG  
CATTTAATCGAAAATCGCTCGCGTGGATTTACAAAAGATATTCGACAAAATGGATTTACCCCGATTTTCGCC  
AGAACTCAAATGATGGACGAAAGATATTTATCGATGCGCGGATGGTTTTGTCTGCTGAAGCGGCTCATTA

>Cluster\_7119

ATGTTTAAATCGTATTCGAATTTGACCACGCTGTTTTTAAATTTGATTCTCTGCGGGATTTGACAGATTGGCAGTAAACGG  
CATGTCTTTTGGGCATTTFCGCGACGATTTGCAACGACTGAATCAGGTGAGCAGAGCAATCAGCAACGTTGCGGCATTAG  
CGCAAACTCGGGCGGTAATGTTACAGGCCAGTACCGCGCTGAACAAAGCGGGCCTCTGACGGCACTTAGCTATCCGGCG  
GATGACATTAACCGTTGATGACGACGGCGCGCCAGTCTGACGCAATCCACCACGCTGTTTAAAAGTTTATGGCGAT  
GACTGCGGGCAACGAGCAGCTCAGGGCATTTGCAAAAAGAGACGGAGAAAAGTTTGGCCGCTGGCACAACGATCTCGAAC  
ATCAGGCGACCTGCTGAAAAGTAACTCAACTTTTCGGATTTCTCCTACTGCGCGGTTGACGGGATCACGAATGCGATTGAC  
GTTAACTTTGAGGCTGGCAGCTGGAGATCAACCATGTGCTGGAAGCCCGCAGTGGCAAAGCCAGCTAACTATCAGAT  
TTCCGGCCTGGGTGTTATCAGCATGATTATTGTTGCGCGGATCTACATCAGCAGTGGCGTGTGGTGGACGCGCAAGATGA  
TTGTTCAACCATGGCCATTTACGGTAGCCATTTTGACAGCATTTGTCGCGGTAATCTGGCGGCTCCGATGGCGGTATAT  
GGTCTAATGAGATCACCCGCAATTTTGGCAGTCTGAAGACCATGACAGCAGGCTTTGCGTGGGACGGTAAGTGTGGCG  
TAAGGAAGCCAGGAGATGCACATTTGGTATCGCGGAGATTTGTCGCGAGCAATAACGATCTCTCAAGTCTACCGAACAGC  
AGGCGGCATCGCTGGCACAAACGGCCGCGCAGTATGGAGCAATTAACCGCCAGGTAGGGCAAAACGCCGATAACGCAAGCA  
CAGGCGTCGGAATGGCAAAAATGCGCGGACAAACGGCGGAGCGGGCGGTGTTGAGTCACTACCATGACTCACACCAT  
GCAGGAGATCGCCACAGCTCGCAAAAATTTGGCGACATTTACAGCGTTATCGACGGAATTTGCTTTCCAGACCAATTTTC  
TGGCCCTGAATGCGGCAGTGGAAAGCGGCTCGCGCCGAGAGCAGGGGCGTGGTTTTGCGGTAGTGGCAGGTGAAGTGGC  
AATCTTGGCAGCGTAGCGCGCAGGCAAGAGATCAAAAGGGCTGATCGAAGAGTCAATCGTGTCCAGCAGG  
TTCCGAACTGGTGAATAACCGCGCGGACCATGATCGATTTGTCAGTTCGGTGACCCGCGTGAACGACATTTGGGAG  
AAATTTGCTCTGCGTGGGAAGAACAACAGCGGGGATTGAGCAGGTTGCACAGGCTGTGAGCCAGATGGATCAGGTGACT  
CAGCAGAACGCTCGCTGTTAGAAAGCGGCGGTGGCAACGGAACAACCTGGCGAATCAGGCCACCATCTTTCGTCGGG  
TGTGGCGGTATTTACCCTTGAAGAACATGAAGTAGCACGATGAGTCCGTTGACGTTACAAAATGCGCCAGTGGTATCCT  
GA

>Cluster\_66869

ATGACATCGATTATAGTTACTTCTGTTACTCAAAACCGGTCTTGCCTTAGCTCTGTACTTGTAGAGGAAATGCTGAAAAC  
CTCGGGCGTTAACCGTGATACCGCGCGCAACAGATTTCCCGGGCTGCTTCTGACGGGCAATCCACTGTGTTGACAAGC  
TTTTCCCAAGCGGAACGATTTATTTATCTGAAAACAAGAGTATGGTACCGGGCGCTTCTGGTCAAGTCTCAATGCGGCC  
CTTCTTGATACCGGGTGGCCTACGGTCTCGCCCTGAGTTGCCCGGGCACGGGGGGATCCTGCCGTCAGAAATTT  
TTCGTCAGCTGCGGTTCCCGGTAGCAATGAAAACAGATTTACTGGAAGTCAAGTCTGGACGGTCTGCTTCAAGTACA  
AAATGGTCAGGCTGTTACGTTACCGGGTCTGGGGAAATGTTGCGCTGACAGAAAAAATGATAACGGTTATCTGCGC  
GCGCTCCATCCCTGAAAGCCGACTACTCACCGAGTCAAGTCTGATGAAATCCCTGAGTCAAGTCAAGTCAAGTCAAGT  
CATCATCAGTTACGACACGCTGCGTACGCGAGAGGAGCTCAATTCGGATCAGACTCCCCTGGTGGCAAAATTTGATTTTG  
ACGTCATCTGCTGATCTTATCTTAACTCTTCTGCAAGTCTTCCCGGTGAGTGAATCCGGCTGGTCTTCTTGTCTGCG  
GACATGCTCTTGGGCTGTAAGCTCAGTCTGGTGCATCTCCAGCTTTTATTTACGAAATGTCGTCGATAAACAGCCCTCG  
GAACAGCCCGAGTGCCTGTTTATGTTTATCGCTGATGAATACAGTGAAGAGGATTTCTGGAATGAAGCGTCCGGGA  
TAATACCGCCACGCGGAAATCTCTTCCGGAAAGACTTTGCTGATGCACTCTTTCAGTACGGGATCTTGTGCGCTCC  
ATAACGCTCAGCTTAAAAGATAATATAGCCGCAATAGATGACATCATGTTCAAGTGGCGAATATAGCCGGCGGCAATA  
TAGCTTCCAGGCTGATTTTGAATATATTTGATATATTTGCTGAGACAGCTGCGTATAGACAGTAAAGAGCTGTGAGTAA  
TATGTAAGTGCCTTAAAGGGGAGACGGCGGAATGTGATGACTCAGTTGAAATGGGCATGCGAAAAATACCTTCAATTGAG  
TGCAGGGTTATAAACCTTATTCGACGGTGGAGATGAAGATGAAAAAATGGATTGTAAGCAGGTTCCCGGTATCTT  
CAGCTATGCCAAAAGGAAATACCCACGCTGAAATTAATGTTGAGTATGACTACAGGAAAGCTCTGCGATGATTTCCA  
GAGATCGCTTCCGTAATTTCAAGAAAATAACTTAACATAACGCTTATAATAAACCGTCAAGGAGCGCATGAAGTT  
TGTGCCAGATAAAGGCGACAGGAATGACGCGCTTATCCGGTTTTTGTGATAAGCATTTTCTCAGTTATCCAGAAAAAT  
CGTTCGCCGTAACATGTCGCCGACCCGGTTCAGGCTTGCAGGTCATGATGAAGCAATAGAATTTGATTTCTGA

>Cluster\_40148

ATGGCTGACATTTCTGCTGCTCGATAAATACGACTCTTTTACTTACAACCTGGCAGATCAGTTGCGCAGCAATGGTCATAA  
CGTGGTGATTTACCGCAACCATAATTCGGCGCAGACCTTAATTTGAACGCTGGCGACGATGAGCAATCCGGTGTGATGC  
TTTTCTCTGGCCCGGTTGTCGGAGCGAAGCGGTTGATGCCGGAACCTCTCACCCGCTTGGCTGGCAAGCTGCCAAT  
ATTGGCATTTGCTCGGACATCAGGCAATGTCGAAGCTTACGGGGCTATGTCGGTCAAGCGGGGCAATTTCTCACGG  
TAAAGCTCGGCTGATTTGAACATGACCGTTCAGGCGATTTGCGGGATTAACAACCCGCTGCCAGTGGCGCTTACTACT  
CGCTGGTTGGCAGTAAATTTCCGGCGGTTTAAACCATCAACGCCATTTTAAATGGCATGGTATGGCGGTGCGCCATGAT  
GCGGATCGGCTTTGTTGATTCCAGTTCATCCGGAATCCATCTTACTACCCAGGGCGCTCGCTGCTGGAACAAACGCT  
GGCTGGGCGCAGCAGAACTAGAGCAACCAACAGCTGACACCGATTTGGAAAAATGATATCAGGCACAGACGCTTA  
GCCAACAAGAAAGCCACAGCTGTTTTACGAGTGGTACGTTGCGGAGCTGAAACCAGAACAACTGGCGCGGCGCTGGTG  
AGCATGAAAATTCGGGTTGAGCACCCGAACGAGATCGCGGGGCGCAACCCGCTACGGAACCGCGCGGCTTCCC  
ACGCCCGGATTTCTGTTTCCGATATCTGCTGCTGCTGCTGCTGCTGCTGCTGCTGCTGCTGCTGCTGCTGCTGCTGCT  
CGTTTGTGCGCGCGGCTGCGGGCTCAAAGTGGCGAAACCGCAACCGTAGCGTCTCCAGTAAATCCGGCTCGTGGAT  
CTGCTGGCGGCTTGGTATTAATCTTGATATGAACCGGATAAATCGCGCCAGGCGCTGGATGAGTTAGGCGTCTGTTT  
CCTCTTTGACCGAAATATCACACCGGATTCGCGCATGCAATGCGGTTTCGCCAGCAACTGAAAACCCGACACATGTTCA  
ATGTGCTGGGCGCAATTAATTAACCGGCGCATCTCCGCTGGCGTTAATTTGGTGTCTACAGCCGAGCTGGTGTGCTGCGG  
ATTTGCCAAACCTTTCGCGCTGCTGGGATCAACCGCGGCAATGTTGCGGAGTGGTGCACAGCGCGGATGATGAAGTTTCA  
CGCGCGACAATCGTTGCCGAATGATGACAGCGAAATTAAGAGCTATCAATGACCTCTGAAGATTTTGGCTGACAC  
CCTACCATCAGGAGCAACTGGCAGCGGAAACCGGAAGAAAACCGTGCATTTAACAGCTTGTACAGGTTAAAGGC  
GACGCCCCATGAAGCAGCCGTCGCGGCAATGTCGCCATGTTAATGCGCTGATGGCCATGAAGATCTGCAAGCCAA  
TGGCAAAACCTTCTTGGGACTGCGCAGTGGTTCCGCTTACGACAGTACCAGGCTGCGCGCACGAGGGTAA

>Cluster\_49737

ATGTTATTCGATATGAAGATCGCCTTCGAGCCGTGAGGTTGTACCTGAAGCTTGGGCGCCGGATGAGCGCCACACTACGGCA  
GCTGGGATAACCCCAAGAACTCGTGAAGCCCTGGTTGGCAGAATTCGAACGGAATCAGGATCTTCGCCAGGCTATC  
AACGGATAAAAACCGCAGTACACCGATGAGCAAAAAGCAACGGCGAGTAGATCACTATATCGAACAAAGGCTACTGCTGAGT  
CACACAATCCGAAGCCTGGGCTACCCAAGCCGCGAGGCTTTCGCTGCTGGATCCGTTGATTTACGCCCTGAATTCGCTAG  
GACGGTCTGCGGACGAGCTCCACAGTTCGCGCTCTGCGCTCGAGAAGCAGCAAGCCGCTCATTGCACTGAACCTGC  
CGTAGGTTTCGGCAAAAGGATGTTGGCCGACATGTCGGTGTATCGGCAACAGTGTGATAAATGAGTGGCAGATCAGTAT  
GGCAAAAGTGGCCCTAAAACCCATGACAAAAGAAAGGTGACACCTCGCTCGAGCAGCGGATGAGGCACTACTCAGGGA  
ACTGGCCGAACTGGAGAGCCAGAACCAGCGCTTCGCATGGAGATGCAATTTGAGAGAGCGAGTGAATTTGATAAAAA

AAGACATGGGCATCAACCCCTCGAACTGACAAGCCGAGAAAAACGAAGGTGGTTGATGCCCTCAGAGTACCGTTTCCA  
TTAGCCAATCTGTGTGGCGCCTGAAGCTGGCGCGCAGCACATACTTCTATCAACGCCGCGGCGAGACCGGGCCGACAA  
GTACACGCAGGTGCGTGAGGTCAATTCGGACTATCTTCGAGGACAACCTACCCGCTGCTATGGCTATCGACGCATTGATAGTG  
CCTTGGCGCTTGGTGGCATGGCTGTGTCGAGAAAGGTCGTGGCTGCTTGTAGTGGCGCAAGAGCGTCTGGTCTGAGAAACA  
CCGGCCGCGCGCTTCTCGCGCTATGCTGGCGACCCGACACAGCGGTCCCGAATCTGCTGAATCGCGGCTTTCACGC  
GTCGGCGCGAATAACGAAATGGTTGACCGATCTGACGGAATAACACATTCGGCGAGGAAAGGTTACGCTCGCGCATCG  
TCGATTGCTTCGATGGGCTGGTGGTGGCTGGAATATCGGCACAGCCGGATGCGAACTGGTCAATACCATGCTGGAT  
CACGCGGTACGGACACTGCGACCCGGTGAAGTCCGGTTATCCATTGCGACAGGGGCTCGCATTATCGCTGGCCTGCGTG  
GATCCGCGCAGTGAATAATGCCAATAAACCGCGTCAATGTCGCAAAAAAGGGCTGCTCGCCAGACAATGCTGCATGCGGAGG  
GCTTTTTCGGACGATTGAAGACCGAACTAATCTACCCGAGGAATGGCAGCACGTGACGCTGAAAGACCTCATGACGCGA  
ATCGATGCTATATCCACTGGTACAACGAGCGCGCATCAAAGTGTGCTTGGCGGGCTAGTCCCATCGAGTATCGTCA  
TGGCGTGGATTGATGTCGGTATA

>Cluster\_56657

ATGTCTTCTCATCCGTATGTACCCAGCAAAATACCCCGTGGCGGACGATACCCTCTGATGTCCACTACCGATCTGCA  
AAGCTATATCACTCATGCTAATGACACTTTTGTGCAGGTGAGCGGCTATACCTTGCAAGAGTTACAAGGGCAGCCGACACA  
ACATGGTGGCTCACCCGGATATGCCAAAAGCGGCTTTGCGGATATGTGGTTCACCCGTAAGGAGGGGAGCCCTGGAGC  
GGCATCGTGAATAATCGCCGCAAAAATGGTGAACCTATTGGTGGCGGCAATGCGGTACCGATGGTGGCGAGGAA  
AATCAGTGGCTATATGTCGATTCGTACCCGGCGACGGATGAAGAGATCGCGGCGGTGGAGCCGCTGTACAAAGCGTTGA  
ACGCGGAGCTACAGTAAGCGTATTCAATAAGCCCTGGTGGTGGCTAAAGGCTGGCTGGGTAAGTGCCTTCAATACCG  
CTTCGCTGGCGGCGCTGGAGTGAACCTGATGTTTATCTTGTGCTGGCGGCATGCTTGGTGTGTTGTTGCTGCCCGG  
GGTGAAGTATATCTGTGCGTTAGTGGTATTGTTGGCAAGCGCTGTTTGAATGGCAGATTGTGCGCCGATAGAAA  
ATGTTGCCATCAGGCATGAAGGTGGCGACCCGAGAAGCTAATAGTGTGAGCATCTGAATCGCAGCGATGAGCTGGGG  
CTGACATTAAGTGGTGGTGGCAACTTGGCCTGATGTGCGGTTGGCTAATTAACGATGCTCAAGCCAGGTGCTCAGTGT  
CAGAAATGGCAGTGAAGCGGCGGCAAGGCTTTGCACTGGTGGTGGCAGGGAAGTGCCTCATTTAGCCAGCCGACG  
AAACGGTGGCGACCATGAACCAATGGCGGCGTGGTGAACAGAACTCTGCCAGGCGTGGCTGCCGATAAAGTGTCA  
ATCACTGCCAGTAATGCGCGAGTGCAGGCTGGGAGGCGATGACCAGCGTGAAGACAATGACGATATCGCCGACAG  
TACCAGCGCATTTGGCACCATTACTTCGCTGATTAACGATATTGCGTTTTCAGACCAATATTTGGCCCTGAATGCGGCGG  
TGGAAAGCGCGCTGGCGGCAAGGCTTTGCACTGGTGGTGGCAGGGAAGTGCCTCATTTAGCCAGCCGACG  
GCTAATGCTGCCAACGATATTCGCAAGCTGATTGATGCCAGTGTGATAAGGTGCAATCCGGTTCGCAGCAGGTACACGC  
CGCCGACGGACGATGGAAGATAATGTTGTCACAGGTGAAAAACGTCACCCAGTTGATCGCCAGATTAGCCATCAACGC  
TGGAAACAGCCGATGGGCTTCCAGCCTGACCCGTGAGTGGATGAGCTTAACCTGATCACCAGAAAAATGCCGAGCTG  
GTGGAAGAGAGTGCAGGCTGTCGGCGATGGTGAACACCCGCGCAGCCGACTGGAAGACGCGGTGACGGTACTGCATTA  
A

>Cluster\_25597

ATGGCATAATCCATCTTACATTTATCGAGGAACAACCAGAGAAGTCACTCTCATAGTTGATGATGTGACTACCCACCGGT  
CATGTTCCGCCAATTTTGGAAATGAATGAACCTGAGCAAGAAACATCTGGGGACTCAGAAAAACATTTGTGTTCGCTGC  
GCTTCTTTTACGCTCTATTACTTTAAAAGCACAACAGAACATTTGACTACGATTTCTATCGGTCTGCTACAATATCTCC  
TGTTTTATCAGGGAGCTTGTATGGCTTCTTTACTTACCTGCTCGGGAAGCAGCAGCTGAGTGACGAGGCGCAGCAATATCT  
TACCGGTTTTTACATTTCTGCACCTCTCCAGAATCAACAAGTCAACCTATGTTAACCACCTGAGAACCGTTGGCCGATCTC  
TTAAGTATCTCAACTATAGATATATGAATCTGGCATAACAGGATATGTACCTGTTGAAGCTCACAGATTAACAGGGC  
AACACAGAGATCTCGCTGACAGAAATTAAGGCTTCAACAGAGTTGAAGTATCCAGGAACGAACCCGACACCGATACAA  
AAGTATCACCAGTCAAGAAAGTGTGAACTCAAGCAATGTTAATCCCTCCACTCTGAATTTTCAGATATCAGAACCG  
CGCAATTAATCAGCGCGTGGTAAATCCCAAAACCCATTTCAATTCAGGATTTCAACAATACCGTAACCTACTTATCCAC  
CGGTTAATGTTTAACTATGGCTTACGTTGGTGAAGTTCAATTTGTTGTTGAAGGATTGCGTGGGGCCAAACCTTCCAGA  
CTCAGAGGTAACATTCGTTTCACTCTGATGTACAAAATCTACCAGATGATGTAGTTGATCCAGGAACAACAACCTT  
CACTCAAGACTGAGCATTCACAGCGACAATCGAACTAACCGAAGATGACTTCATTTATGTTTACCATTATATGGAGCAA  
TATCGGGCCCAATTTATTTGAAGAGAAAAAATTTGATGACCATGAAATTTGTTTTTATTAAGGCTCAGGTAGGTAACTCC  
ATTAACCTACGATGCAATTCGAACATTTTATAAGGAAAAAATTTGATCCGGCATTCATTGCCCTATTCCTCATATATCGTA  
CGAAAAGTAAATAAATAATTAATTAATATGGTAAATATAACACCACAGCTTGGCGGCACTACTGGGCTAATATCACTCT  
GAGTTTATTTACAATAGTCTCCTGAGTGAATCACTAATCTGGCGAAGACTATGGTATTCGAGCAAGGATGAATGGAGT  
ACTTGAACCCAGTATTGAACAACCTCTGCTTTAGCGCGCTGGTCACTGACCAGTAAAGTTCCATTAAGATATGCCAAGC  
GGTTTATTTGAAGTGGTGAATACAGAGCAACTATAAGCGTACGAAACATTCAGATATGCATTTAGCTTCCCAGAAACA  
AACATTTCCGAAAGAAAAACCTCCAACCTGCTAGAAGATAATGTTTATGACGAAGACTCACATTCAAAGATCTATTCAA  
CTGA

>Cluster\_11864

ATGGCAATCTTGATGATGTGATTGGCGTTTTTTTACCAGGATGGAAGCAGCAAGGCTGCGTTCCCGTGGGTTGATCCA  
GGCTTATGAGGCGGTAAAAACGACGCGGACACAAAAGCCGACGGGAGAACCAACTGCCGACCAAGTAAAGCCAGTACG  
GGCGGCTGTCTTACGTGAGCAGGCGCTTACCTGATAACAACCCAGCATCTGGTTATTTGGTGTATTTGACAGCTGGAA  
GAACGGTGGTGGGAAAAACGGGATTTATGTCGAGCCACATCCGGTATTACGCAATGGGGCCATTGCCCGTACCTGGC  
TGGGAGATTGCAACCCGATGGAGTGAATGGTCTGTGACCCGGAAGTCAACGGGCGAGTTTACCGGTCCGATGCTGGAAC  
GTCTGATGCTTCGTACCTGGCTGCGCGATGGTGAAGTGTGTCGCGGAGTGGTTTCCGGGCGCATAAACAGCCTGGCGCT  
TCTGCCGTTGTTCAATTTTGGCTGGAGGCGCTCGAGCCGACTTATTTCCCATGACCAGTGAAGAGCAACAGGCTGAA  
TCAGGCGGTGTTTGTGATGACTGGGGCGTCCGAAAAATATCTGGTGTATAAAAGCCGTCCTGATCCGGACGGCAGA  
TGGAAACCAAGAAAGTGGATGACAGCGAATGCTGCATCTAAATTTGTTTCGCGCTGTCACCAAGATGCGCGGACGCT  
TTGTTGTCGCGGTGCTGATCCGCTCAGTGGCCTGAAAGAATATGAAGATTCGAGCTGACTGACGCAAGGATCGCCG  
TGCTCTGGGATGTACATCCGAAAGCGCAGGGCAGAGCTGATGAACCGGATGTTAATGGCAAGGAGAAATGAACCTG  
AGCTTACCATTACGCGGGCATTATTTACGACGATCTGAAACCCGCGAAGAAATCGGAATGGTGAAGTGGATCGCCCC  
AATCCTAACCTTGAACCTTTTTCGTAATGGTCAATGCTGCGTGGCGGCGGGCAGTCTGCTGAGTTTTTCCAGTACAGC  
CGCAACTATAACGGCACTTACAGCGCCAGCGTCAGGAGCTGGTGAATCCACTGATGGTACCTGATCTGCAGGACT  
GGTTTATGGTGGCTCACCCGCGCATGTATCGCTGAGTGGCTGAAACAGGCTGTCGCTCCGTTTACGGCTACCC  
CGGATCTTGACCGTTCTTCACTGTATACCCGGTGTATTTCCGACAGTGTGATGCGGTGGATTGACCCGTAAAGGAGC  
TGAGGCTCGAAAAATCCAGATTCGTTGGTGGAGCGGCGACAGAATCAGACTGGGTACGCTGGTGGTCCGTAATCCGGATG  
ATGTCAAACGTCGGCGCAAGCGAAATTTGATGAAAACCGCAAGCTGGATCGGATTTGATACCGATCCGGCCAGTGA  
AAAGGAGGAGTAGTGGCCAAACGAAACGACAGGAGCCGACACCCGACGACCCGAAAGATAA

>Cluster\_20214

ATGGCACAGATTGATTTCCGAAAAAATAAATGGCATCGTCTTACCGTTACCACAGGGCGTTAAAAACCGAACTGA  
GATCTCGGTATCTTCGAGAGCGATCGGGCGTATCACTCAACTCTCCGGCAATTCGTCGCTGCAACCAAGACCCAG  
TTTTTCCACTGGAGCGAATGCTGCCGTGCGCACGCGTCTTACCACCTCGATGGAAGTCCAGCAGGTGGGGCGTACATC  
GCCAAGAAATTTTAAAGCGTCTGAAAGAGCTTAAATTTACTGGAGCGTATGGTCTCGATGAACTGACCGGGCCTTTGA

AAGCATTGTTGAGATGTCATGCCGTGATGCACGATATCGGCAATCCGCCGTTTGGTCATTTGGCGAAGCGGGCATAAATG  
ACTGGTTTTGCCAGCGTTTGTACCCGGAAGATGCCGAAAGCCAGCCTCTGACTGACGATCGCTGCAGCGTGGCGGCAC  
CGTTTACGGGACGGGGAAGAACCCTTAAACCGCTGCGGCGCAAGATTGCTCAGGACTTATGTCATTTGAAGGTAACGC  
ACAGGGTATTCGTTTGGTGCATACATTTGATGCGGATGATCTCACCTGGGCACAGGTTGGCGGTATTTTAAATATATACCC  
TCCGGCGTGGTGGCGGTGAAACGCCCTGAGACACACTACTATTTAATGAAAAAGCCGGCTATTATCTTTCCGAAGAA  
GCCTATATGCCCCGTTGCGTAAAGAACTTAATTTGGCGCTTTTACAGTCGTTTTTTCGTTAACGTTGGATTATGGAAGCTGC  
CGACGACATCTCCTATTGTTGGTGGCAGACCTTGAAGATGCGGTAGAGAAAAAATATTTACCGTTGAGCAGCTTTATCATC  
ATTTGCACGAGGCGTGGGGCCAGCATGAGAAAGGTTGCGCTTTTTTCGCTGGTAGTTGAAAAATGCTGGGAAAAATCACGC  
TCAAATAGTTTAAAGCCAGTACGGAAGATCAGTTTTTATGATTTTACGGGTAAACACCCTAAATAAATGTTACCCFTA  
CGCGGCACAACGATTTATTGATAATCTGCCTGCGATTTTCGCCGGAACGTTAATCATGCATTATTGGAAGATGCCAGCG  
AATGCAGCGATCTTCTTAAAGCTATATAAAAATGTCGCTGTAACACATGTTGTTTACGCTCCAGATGTCGAGCAGCTTGA  
TTGCAAGGCTATCGGGTCAATTAGCGGATTTATTAGATTTATCGTCTTTATTAAACCTGCCGTTATCAGACTTTACTGA  
ACTGGTAGAAAAAGACGGGTGAAACGTTTCCCTATTGAAACCGCCTTATTCCACAAACTCTCGACGCGCATCGGCTGG  
CCTATGTCGAGGCTGTCAGTAAATACCCTCAGATTCTCCTGAGTTTCCGCTATGGGAATATTATTACCGTTGCCGCTG  
CTGCAGGATTTATATCAGCGGTATGACCGACCTCTATGCGTGGGATGAATACCAGCTGATGGCCGTAGAGCAATAA

>Cluster\_21163

ATGAATTTTATAAATCGTGGCCGCGCTCAGCTCGATGACCATGTTTTTCGCGTGTGCTGGCTTCGCACGTGACGCAAT  
TGTCGCCAGAATCTTTGGCGCAGGGATGGCAACCAGCGCTTTTTTCGCTGCTTTTAACTTCCTAACCTGTTACGCCGTA  
TCTTTGCCGAAGGGGCATTTTCCAGGCATTTGTACCGATTCTGGCGGAATATAAAAGTAAGCAGGGTGAAGACGCCACG  
CGGGTCTTTGCTCTTATGTTTTCGCGCTGCTGACACTTGCCTGGCGGTTGTGACGGTTCGCTGGCATCGCCGACCC  
GTGGGTGATCATGTTGACCGCGCAGGCTTCGCTGACACAGCTGACAAATTTGCCCTGACCAGCCAGCTACTAAAGATTA  
CCTTTCCCTATATCTTGTGATCTCCTTGGCGTGTGGTGGGAGCATCTGTAATACGTTGGAACCGCTTCTCGATTCCG  
CGCTTTGCTCCAACACTGCTTAAACATCAGCATGATGGTTTTCGCGCTGTTTGGCGCACCGTACTTTAAACCCACCGGTGCT  
GGCGTGGCGTGGCAATCATGATGAATAACAACCTTTGATGGACTGGGGCTGCGCTTTGTTTCCCTGTTGGCGCTGGC  
TGGTCTTGGCGCATTAACCTTCCAGATGCGGAGCAATGCGCGTGGTGAACAGATGGGACCGCGCATCTTGGCGTCT  
TCTGTGAGTCAGATCTCCTTAAATCATCAACACCATTTTTGCGCTGTTTCTGCTTCCGGTTCGGTGTGCTGGATGATTA  
CGCCGACCGCTTAAATGGAGTTTCCGTCGGTGTGCTGGGCGTGGCGCTTGGCACCATTTTGTACCGTTCGCTGTGAAAA  
GTTTTGCGCAGTGGCAATCATGATGAATAACAACCTTTGATGGACTGGGGCTGCGCTTTGTTTCCCTGTTGGCGCTGGC  
AGTGGCGTTGGCTTGGGCATTTTCCGGTCCGTTAACCGTTTTCGCTGTTCCAGTACGGTAAATTTACCGCTTTGATGC  
GCTGATGACCCAGCGGGCTTAAATGCTTACTCGGTGGGTTGATTTGGCTGATTTGATGTAAGTGTGGCTCCTGGCT  
TTTTATCCCGCAGGACATTAACCGCCAGTGAATAATGCCATGTTACGCTGATTTTAAACGCAATGATGAACCTGGCG  
TTTTATTGGTCCGTTGAAACATGCCGGCTGTCACTTTCTATTGGTCTGGCGGCTGTCTGAATGCTTCGCTGCTTACTG  
GCAGTTGCGTAAAGCAGAAAAATCTTACCCTGCAACCGGCTGGATGGCGTTTCTGTTGCGTCTGGTGGTGGCGTACTGG  
TGATGCTGGCGTCTTTTAGGTATGTTACATATCATGCCGAGTGGTCAATGGGTACCATGCCCTGGCGTTTACTGCGT  
TTAATGGCGGTGCTGGCGGGATTTCCCGCTACTTCTGCTGACTGGCGGTACTGGCTTCAAAGTTAAAGAAATTTGC  
CCGCCGACGGTGTAA

>Cluster\_18971

ATGAAAAAATAAGTTTTTTTTTACAGCACTATTTTGTGCTGACGTCACAAAGCTGCCCGTCTCTTGGAAAAAAG  
ATTAGGCAAGAACAATATTTTATTTACTAAAAGTTCTCAGTACGTGCAATCTTAAATGACTTTGCTGCTAACTACA  
GCATTTCTGTTTTTTCATCAGTAGTTCCGTTGAATGATGATTTCTCTGGCGAAATAAAAAATGAAAAACCTGTAAGTACTG  
GAAAACTGTCCAAACTCTATCATCTCATATGGTATTAATGATGAGAATCTTGTATATTTATAAAACAAATGAAATATC  
AAGAAATATAATACACCAACATATCTGGATATGACTCACTGCTAAAATATCTGAGTATACAACTCAGTAAACAAAA  
ACTCTTGCATGTAAGAAAAATACAGCATTTAACTCGATTTAAAGTTCGGGGTGTCTCCTGAATGTATAAAATATTAACA  
TCTTTATCAGAAAGTCTTGATAAAGAGGCACAGTCTAAAGCAAAAATAAAGATGTTGTTAAGGCTTTAAACTGAACTA  
TGGCTCAGCGACAGATATAACATACAAATACCGTGACCAAAATGTTGCTGCTCCAGGTGTTGCTCCTATCTGAGACAA  
TGGCAAGTAAATGGTTCGCTTCCAGTACCGGTAAGGTTGCCGTCGAGCGAAGCGGTAACCTGTTGATAACAGTGAACG  
ATTTCCGCTGATCCAGCTTAAATGCAAGTGTGTTTAAAGACCGCAATAACGATGGATATCTATCAGCAATTAATTTCT  
TGAGCTTGATATTTGAACAAAGGCAAAATGAAATTTCTGCTCAATTTATGATGTTGATGCAACAGATCTTACGACGCTC  
GCTTAAACTGGTCCGGTACGTTAAATGCAGGACAGGTACGATGCTTAAATAGCTTACCAGCACAGCTAATATCAGC  
TCTTCTGTGATAAGTAAATGCCAGTAAATTTATGATTAGGGTGAATGCGTTACAACAGAACTCGAAAGCTAAAATACTCTC  
TCAGCCGCTCAATTAATTAACCTTAAATATGACGGCGATTTCTGATAAAAAACGTAACGTTTATAACAAAACTCCGGAG  
AAAAGGTGGCGTCTCTGGAAGTATTACAAGCGGAACATTTGCTGAGAGTGACACCAGCTATACCTGATGACAGCTCGAAT  
AGTCTTACCAGGAAACCTCGGGAACGAGTTCTGTTGTTACTTGTATTTAGGATGAGGCAATCAATCGACTAACCAAGCAA  
TGCTCAGGATGCCAGCAGCCTTACCTGAAGTACAAAAATCAGAAATGACAAACAGAGCGACATTAAGTGCAGGAGAAA  
GTTTTATTACTTGGCGGATTTATCCAAAGATAAAGAAAGTTCAAGTAAAGATGGTATACCCTGTTAAGCGACATCTGGT  
ATTGGTAGTTTATCTCCAGTACGGTAAACAAAAACATAGTGTGTTGCTGACTTTTTTAAATTAAGCAACCCCGATAAA  
ATCTGCATCTAGCGAATAA

>Cluster\_62820

ATGAAAAAAGCCATAGCATATATGCGATTTTTCATCACCAGGTCAGATGCTGGCGACTCATTAAACCGACAGAGAAGACT  
TATTGCTGAATGGTTAAAGGTAAATAGTATTTATCTTGTATACCATAACATATGAAGATTTAGGATTAAGTGCATTCA  
AAGGAAAGCATGCACAATCAGGAGCTTTTTTCGGAAATTTTAGATGCTATAGAGCATGGTTATATATTGCCAGGAACTACA  
TTGTTAGTTGAAAGTCTGGACAGACTTTTCAAGAGAAAAAGTCCGTTGAAGCGATTGAGCGTCTGAAATTTGATTTGAATCA  
CGGTATTGATGTTATAACTCTTTGCGATAATACAGTCTATAATATTGACTCTTTGAAATGATCCATATTTCATTAATAAAG  
CCACTACTTATAGCACAAGGGCAAAATGAAGAAAGCGAGATAAAGTCAAGTCCGGTTAAATATCATGGAAGAAAAACCG  
CAGGATGCACTGGAGTCAGGCAGGATTAAGACGGCGTCTTGTCCGAGATGGCTCTCCTTAGATGACAAAAAGACCGCTTT  
GTTCCAGACCCCGACAGGGTGAAGAACTATTGAGCTAAATTTTTAACTCAGGATGGAAGGCGCTCATGTAATGCAATAG  
CCAAGTATTTAAATGATCATGCTGTAAGAATTTCTCAGGAAAAAGAAAGTGCATGGGGACCTTCTGTAATGAAAAATTA  
TTAGCGAATAAAGCTCTGATAGGTATATGCGTACCTTCATATCTGTCGAAGAGGTAAGGAATAAGTGAATCGCTGGCTA  
TTATCCAGAGTCAATCAGATGATTTGTTTTACGCTGTGACGAAATTCGGTTGGCACCTTTTTGGTATTAGCAATAGTA  
GCAAAAAACCTATGTTGATAAATCTACTTCGAACAGTTATGAAGTGGAGGCTTGTGGTAAATACCATGATTTGTTATGCG  
GTATCTGGAAGTTTGCATGGCTATTATGTTTGTCCGATGAGAAGACTGCATCGATGTGACAGGCCATCAATAAAGAGAGA  
TTTTGGTTGATTTAATATCATTAATGAGTTGCTTTTTAATTTGATGATAAATCCAACAGTTGAAAAACAAGAAAGATGCTA  
ATGAACTTTAGAGTTGAAAAATTTAGCTCCAGATGAAATTAATAATTTAATTCGTCATTTATCTGTTGCCCTGAA  
GTTACCGCTATAGCAGAAAAAATCAGATATTAGATAAGGAAATACGAAGGGCTTCTGTTATCATTTAAAAAATTTGAAGAG  
TAAAGCGGTGAGCTCACTTGGTGAATTTTATGCTATTGACTTAAACAGTAAAAATGGGCGAGAGCTATGCTGACTACTTG  
CCTATAAAACATTTGAAAAAATCATAATCAATACAGATAATAAAACCTGTGATATCTATTTTATGAATGGCATTTGTTTTT  
AAACACTATCTTTAATGAAACAAATATCCGCCAGCAGCGATAAGTACTCTCAATATATGTTGATGGTGGAGTTTA  
TTTTTGA

>Cluster\_54026

ATGCACTCCTGGAAAAAGAACTTGTAGTATCACAAATTAGCATTTGGCTTGCACCTCTGGCTATCACCTCTCAGGCTAATGC  
AACTACTTTAATAACATTCGGGTATCACGATGACGCAGTCACTCTATTCAATTTGGGGGACAACTACTAAAACGTATCAGC  
ACTATTTGACGTATGGTGGCTATGTATACGACCATGCGGCTGATGGTTATTTTGATACGTATTTAGTGGCGATACCGTT  
AATGGTGTAAATTTCTACTTATTTACTGAAATCACGACTATGGAACAGATACCGCTAATACTCTGAAATATACGAATCAAA  
TATTCACGGTATGATTAATCTCCGATCAGATCGGATACGGTATTCAGTCTGGACCAACGGTAGCGATTAATCTAGGTCATG  
ATTTGGGTAGATGGCGATATTTTCTACTCTGAACATCGCGAACTCAACAATTGACGATGATTTTGATGCAATTTACTTCAAT  
GATACTTATCTGGATGACAGCGTAAAACGTCTAAAACAGATTATGATCGTCTGGTAAACAGCTGCTCTTGGCACCCTGT  
AACTCTGGATGTTGAAAGTAACTCAATATCAGCAACAACCTCCCATGTTGCAGGTATTACTCTGGTCAAAAACGATTTAG  
GTAATCGGACTTACAATACTGAAGGTCACTGAGTGGGACAAACAATATCGTTGTTAATAAATCCACTGTAATCTCAGGTTCCG  
CTCTCAGAAGACGAACAATCAGATCGTGGTCAATTTGGCAACTCTGTTGAGCCAAGCGACTATGGTAATGGTGCATCAGG  
TGCTGATGATGTTGCATTAGCCTTCATAGATGATGACACTTCTGATTAATCGTATGGTCAACAACGTTACATTTCAACAAT  
CTCAGTTGCTTGGCGACGTTGTATTTGACAGTACCTGGAACGCTAACTTTGACGCGACGGGTACCTGATTGACAACTCT  
ACCATGCTTACACTCATGGCGGTTGGGCTACTGACGATCAGAACGTCGATCACTGAACTGACTCTGAACAACACCAA  
ATGGGTTGGTTCAGCGAATATTGATTATGACGTTGTTGTTGCTGACGAAGCCTTCTACGAGTTGGCCAAACAGCCTGA  
ACCCGTACGCTTCTACTCTGAAGATGGCTGGAATCGTGTGATAACGCTAACGCATTCCAGAGTGGCGTATTGATGTT  
GTTCTGAACAATGGTCTGATTTGGGAACCACGAAAGATTCTCTGATCGATACCCTGGCTATCAACAGCGGTTCTCAGT  
TAACGTGAGTGCAGATTCTTCCCTGACTCCGACACCACTCTGAAACGCTAGTTCTTCAATGGAAGTAACTGAGGAAAG  
TTAACTGATCACTGATCATTGATACCTTCTACTGTTAACTTCGGTGAAGATACGCTTACGCTTGGACATCTGCA  
CCGCTGTACGCCAACACCATTACCGTTACTAACGGTGGTGTGCTGGATGTAACACCAACATGAATGAATCGCCACGGAT  
AATCTAG

>Cluster\_53053

ATGGCAGAAACCTCTTCAACCACCGCAGGCGCACAAACGTTATTACGTGGACTGGCGGTTCTTAATGCTGTTTATAACGG  
CTGCCATGACATAAAAGTATCGGCGAGTTACACCGCAGCACCAGGAGCACAACCCATCGTTTATGTCACCGTTCTGGTGG  
AACACCGTACTTCCGCAATGTCACACGCGGGTACCAACTGGTGGTCCAAACTGATCGAATTCGGTGGCAGACACTG  
GAAAGCACCTCACTGTACGAAATGCCCAGCCGTTTTGCAACGCCTTGCCTGTACACCTGGACACCGTGCATCTGGG  
GATCGTTGAGGCGACGAAAGTGTGATCTGGAGAAGTCAACAGTCAAGCGCGGGCTGGAAATGCGCTCACGCCAGGCC  
ATCGCATGCCACTGGCAATCACCGGCATCGGCAAGGCATTGATCCTCAACCGAACAAGAGAGTGGCGCACGCTGTTT  
AAGACCTGTGGTGTGATAAACAACAACTGGCGCATTTATTCAGAACATCGTCTGTTATGCGCCAGTGGTGGTGGTGG  
TCTGGAAGAGAACGAGCCGACTATCCGTTGCGTTGACGCGCGGTTTACAACGCCCGGGATGAAATTTGGCGGCTATTT  
CTGTCGCCAGTACCACCACTGATATGTCGCTGGCGGCTCTGGAAGAACGGCACCTTACGTCAAACTCTGTGCAAGAG  
ATATCCGCTGAACCTGGGCTGGGGTAAGCACGCTCCGCAAGATAAATAA

>Cluster\_166

ATGGCGACCGCAACATGTTCCGTCAGTGGTGCAGTGGCGGCGTGGCTGGAACATCACTGAAATTAATACGCCAACCCG  
TGGCTGGGTTTCGGTAACATACTCTGCTGCGGCTACTGTTGGCTCTCCGGCAGAACTGATGCGGAGTTACGATACCGCC  
AGTCGCAAAAGTGTGCGTTGCCATCAATAACCCATTTGAAGCACTGGATGGTGTCTGTTCTAATGTTACCGGTGTAACC  
CGCCCAAACTCTATGAAACGATACTGGTTCGAGGAGGTAACGGTTACCGCCACTCTGTTGCTGTAATTTGTTGGA  
TGGCGGTGATGATGGAATATTGCTCAGGCTATCAGAGGGAATAAAGGCCAGGGGACAGCCACTCACGGTACAACATCCG  
TTACGGTTCCGGATAAATACCGCAATCCCATGTAATCAAAATCTCGGTTCCAGTGAATGTCCTGTTTATGCCCGGAT  
AAATTAAGATTTTACCGGTTATACCTCACAGATAGGCGAGCAGATCCAGCAGGCTATTTCCGACTATCAATAGTCT  
GATGATGGTGTATTCGCTCCTTTAAAGTCACTTACTCACCGCGAATCTTGGCGTGGTGGTGGCGGGAATGACCGT  
ATTACGATATTCAGGAACGACGATTGGGAAATCTCCGGGGCTTGTGCTCATCAACATTTGATATCAGATACACGAA  
TCTGCGTCTGTACCCCGGAAAAATATCGTTATAACGGTGGAGTCATGA

>Cluster\_23254

ATGAATAACATCCCCGCTACCCGACGCGGTTCCGCAATGATCTGCGCTTCCGTGAACTGACTGTGCTACGCGTTGAGCG  
TATCAGCGCGGTTTTCAGCGCATGTCTTGGCGGCGAGGCGTGGACGGTTTACGTCGCGCGGCTTTGACGATCACA  
GCAAACTTCTTTCCTCAACCTGACGCTCACTTTGTGCGCCCAACGGTAAACGGAAGAGGGCATCGTCTGGCCGGAAGGA  
CCACGCCACCGTCCGCTGACTATACGCGCTGTATGACGCACTACGCCATGAACCTGGCGATCGATTTCTTATCACGA  
CGGTGGGTCGCCAGCGGCTGGGCGATGCAGGCGAAACCGGGCGATAAACTTACGGTGGCAGGTCGCGCGGTTTCCGCTGG  
TTGAGCAAACTTCCGTTAAACCGCAAGTTAGCAGGCTGGTTAGCGTGGCGGATAACGCCCTGTGAGGATTTATCTCGGCA  
CCTTGTGTTTAAATATCGAATGGCTGGCACATGATGAGCAGGCGGTAGATGCGCGTCTGGCGCAGATGCAAACTCCG  
CCGATGATTAATCTATCTGGATAACCGGCGAAGGCAAGTCTGTTAAGAAATTAAGCCGCTGCTTTGAGCGGAACAGTAT  
GACCCACAGCGGTTACGCGCGGCGGCTTACTGGCACGCAAAAGTAA

>Cluster\_64521

ATGTATAATCCTCTTATTCTTGTAAATAAGCCTGCGTATAATGCTGAAAAACGATTAGGAAGTCTGTACTTTCTGTATT  
AAACCAATCTTATAAAAAATTTGAACTCATAATATGTGATGATGGTTCCTACTGACGAAACAAAGAAAAATATTTCTTACTT  
TTTCAGATGCACGTATTAATAATTTATAACAATAAGTATGAAAAAGGTGACGAGGGGCGCAAAATAGTCTATTTGATATC  
TGTAGTGGTGAATGTTAGTTTCTTGTAGTATGATGATATATGGCATCTGATAAAAATAGAAAAACAACCTTTCTATTTAT  
GATAAAGAAATGACTGTGATTTCTTATGGGGACTACTTTACTTTTAAAGATGATGATAATACAGGCTTTTCTGGCAC  
CTGTAAAAACAGTTATGAAGATCTTTTAAAAACATGATGATAGGTTGTTGACCGTAAATGCTTCATAAGAAATGCTC  
ATTAATCAAAGATTTCCATCCGGTTATAAAGAAGATTACCAGTTATGGCTGAGAAATTCATAAAGATGGCATAATTTGCTG  
AAATATGGTTCCGACGACTCTTATTACAGATTAGGAAAAACACTTTGTCATAAATAAATTTGATGAACTTAAAAAAC  
AATGGTACGTAATTAGGTTACAACATGTTGGCTATATTTAAACAGTCTGCTACTTACTTATGTTTATTTTGGTTTAA  
AAAAACATTTGTCAGGCTATAGAAGTGGATTAGGGGTGAAGATATAA

>Cluster\_67106

GTGCTGAATATTTATTCATCGTCTGAAATCCGGTATGTTTCCGGCTCTGTTTTTCTGACTTCAGCCAGTGTGCTGGCGCA  
CCCCCTGACTATTTCCGCCGGCCACTGGCTGGAGGAAATGGCTGTGGGCGTAACGGAACCTCAGCGGTACGCTGTATGTC  
GCGATGTGTCCTGGCAGTGGCAGCCCGCGCTGTGCGGATGAGCTCTCCTGATGACAGTGCAGGCTGGCCTGGCAGCAGT  
AAAGTGGCATGTTGCTGAAAGCCGAGAGGCGAGGATTTTATATTTCTGGCGGACATACCAATCAGTCACTGCAACTGC  
CCGTTCCGGGCTGCAGCCTGGTGACATTTACTAGGTTGGCGCCATCATCTCCCGTATTGGCCCGGAGGACTG  
CCCGGGACAGGTTGCGTTACGGGAAATCACGTTACGCTGCGCCATCTTCTGGCATGGCAGGACAATATTACTGGCGGT  
CAGGGCTGGAGCGTGGTACGCGGAGAGGTGACGCGGAGGCGAAAAGCAGGTTAAACGCCAGTTATGGCAGGTTAAACGG  
CTATGAATGGACCCCGACTATGCGGGTTAACCGCGCTCTGATGCGTTTATTTACAGGAGTGAAGTCCGCTGTTGTCAC  
AGGAAATGGTTCGACGACTTATTTCCGGTGCCTGGTGGATACCTGAGTGTGTTTCCGGTGAATTTCCCGGTTGAG  
GAGCCGTTAAACGCTGGCAGGTAATCTGACACCGGTTGGTGTATTTCTGA

>Cluster\_50979

ATGATTTACACTAGTCACTGCTGTTTACACTGGTAAAGATGGTGTACTTCTTCCATCTACAAGGACAGCCAGATAATTTCTT  
AACCTTATCAGCAACTGAACAGATGGAATATGACAGCCCTATGATGGTGAACCTCAAAATATGCAATCAGGGCAGACTG  
TAACAGATAATGTAATGCGTTCCACCAAGAACTATTTCAATCAGTGGTGTGGTGTGGTGGTGAATCCGGTAGTATCTT



ATCTCAAGAGATAATAAGCTGGTGGAGAACTTCATCGACACTCTTGA AAACTGGCGTGACCAGAAGCAGATTATTTCCGT  
CATCTGTAAGATGGTATTA AAAATTGATGACTCCATTATTAACAAGCTTTAAAGCCTCTAAAGATGTTGGTATTTCAAATG  
GTCATAAGAAATCCAGCTAACTTTTCAGGAAATTAACCTTTAAAGCTATTGTTGGGTCAAACGATATTTCCGGCTGCTACTGGA  
AAGACGCTACTACAAATGATGGTGGTGTACACAGCAAAAAGATACAGGGAACACTACGACAAGCTTAGGTAACGGTAT  
GTTGATGTGTAGAGATATAATAATCGCTTACAGAGTAACTTTCTAATGAGCAACTCAAGCCGTATCAATTTGGTAT  
GGAATGTAGAGTTAAGAACGGA AAAAGCACCTTCTCAGATGCGCTAATGAGCAAGCTTCAAAGGTGCTTAATAATGCT  
GGTACAGGTAGTACTTTGAAGAAGTTTTCCGGTGAATCCGATAAAGCGCTACTGA

>Cluster\_17482

GTGGCAAGACCAAAAAGCTGAAAGCGGAAGAGCGTTTTGACCAGTTGGTTAAGATAATCAATAGCGGTCAACCTCTTGATAT  
TTGGACCTTTTCGACAGGTGGTCTCGGAGTATGGCTCTAAGCGTACTCCGCTGCTGACACGCTTGTAGCTTTGGCTCATA  
TTGCTAAAGGTGATGTGAGTGTCCGGATGAAATGCTTGAAGCTATCCFCCCACATGCTGATGTTAACTTTGGCGGGAT  
TTTTGTAAAGTGTCTAGCGTTTTTCTCTACTCGAAAAATCGGACTACTACATCTATTTCTTAGCTGATAAGTATCCAAC  
CAAGTGGTTTACTTATAGGGCTGGTGGCTTGCCTATTTTGGTAGGGAACCTATCAAAAATGCGTAGAATATTTTGGACGTC  
ATTGCAAAAATGTTATCCCAAGAAGAACAATAGGGATGACGCAGAAGCCTTCTTGCAGGAGGTAATTACGATATGGATGAA  
GCATACAAAAAGTCAGGATGCTCTTCAGAACATAATGCAAGTTGCTTTCGCTGTTCAATAGAGTCTAGGCTGAATTTCC  
TCCAACGTAATCTGCTGACATCAACGGTGCATCTGGTGGGACTTATCTGGTTGAGGTAGTTAATGCATCCCTGAAC  
AGTGGTTGCAATGAATATGCGACTTGCAGATGAAATTTGTTCAATCGATTTACTTGTATGATTGCAATCTTATTCACGCT  
TTTTCCGTTGAAAGAAATAGCTTGAAGGGTGTAAATATGCCTATAACTAG

>Cluster\_35153

ATGGAACCGTATTGTAGCAGCTGAAAGCACTGAAAGAGCCTTTCACAGGTAGTGGCGGCCAGCCTTGGAAATCAGTGC  
TGAAGAGGCTGTCAACGAGCTGTGGAACTCAAAAAGAAATGGCGTCGTTGATAAAAAGCTGTCACACCTGGTTTTCTGGCTG  
GCGAAGGTGAATCCCGGTAACCGAAGAGCGGCCAGTAAAATCTGAAGCACAGGATATGCTGACCGGGGAGGTGCAACAA  
AAAGTTACCAGCAGATGATGATGAGTTTATCGGTGAGGAGTGGGCTAAAACGCTGTGAGGAACTGGCGGGTAAAGTTCCG  
TGTCACTACTCGCAAGGTTGCTTCCAGCTGGCGGTGGTAAACCGAACGGGGCGGTGCACCGGTTAATCAGAACGGTA  
AATTTCTGTTACTGATGCGGGGATAAATTTACAGCAGAGCCGAAAGCCGCGTGGTAAACGGAAAGTATGTTAAGGCC  
TTTTCTCAGCCAGAGGTGCTGCTTACAGTCCGGAAAGCCGCAACAGGAAAGAAATTA AAAACAGAAACTGTGGCGGA  
CATTGTGACGCGTTGCCATCGTTTACCAGAACGCAAGCAGATGAGTGTATTTTCCGTCCTTTCGACGGGCAAACTGG  
CGCTGCGCAGGGCGAAAAGTGTATTTCAAGAGTGGGAGCGAGTCTGCGCGCGTGCAGGAGCTGAACAGCACCGGGAT  
ATTTGTTGACAGATTACTGATTTCTCCCGCGTGTGTATCGGAAAAGTGA

>Cluster\_20858

ATGGCCGAAACCTTTGACCGGAGTCTATGGTTGCCGATTAACCTGGAACATCTGCGCGGCATCTGCCTGACGGTAT  
TTTTAAGCGTTATGGCGATGTGGTCGAAGTGAAGCGGAAAAGATTGACGATGATTGCGCGCTGAAAGGCAAAATGGGGCC  
TGTTTGGCAAAATCACCCGACCGATGACCTTATCGCGATGAACAAGCCGCGCAGAAGTCTACACCTCAATGGAAAT  
CAGCCGAACCTTTGCCAACACCGGCAAAATGTTATCTGGTGGGGTGGCCGTCACCGATGACCCGGCAAGCCTCGGCACGGA  
ATACCTGGAAATCTGCCGACGGCAAAACACACCCCTGAAACCGCTTCAAATTAAGCCCTGAAAACCTGATTTTCACTGG  
CAAGCCTTTGAGCTGGAATTTGAAGACCTGAAACCGTGTTCACCGCCTGACCGAAAAGTGAATTTCAATTTT  
AGCCGAAAACAGGCCAGCGATGACGCCCCGCTGATGATGATGTCATGAAGCGGTGACCGCTGTTGCTGAACATGTGACGGA  
AAAAGTGAAGTGCCTGACGAGCGCCTCGCTGAGATGGAACCGCTTTTTTCCGCACTTAAAGCAGGATGTGACTGACAGGG  
CGGATGAAAACAGCCAGGATTTCAACCGCTGAAAACAGCTTCGACAGCACCGAAAGTCTGACCCAGCAGCGCCGACG  
AAGCCACCGCGGTGGCGGTGATGCCCTGATGACGAAGCTGCTGA

>Cluster\_22132

ATGAGTAAATTTTGGGCGATGCTCTCATTTATTACGCGCTGCTGCTGTACCAGCTGCTGGTCCCAGGGACTGGATTT  
CGAGCATTTACTTCGCGGTTATTACTTTTCTTTGATTGATTTGCTTGGCGCGATTAGCGGGTTGGCTTTCATG  
TGCTGACGGCATGGTGTGGCGCACCACTGGCGGCACTGTTTAGCGTACTTGTGCTGGCGCTGATGACCGGGGATTTCCAT  
CTGACCGGCTCGCTGATACCTGTGATGCGGTATTTCTGACAGTACCGCGATGCGCATGTTGGAAATCATGCGTGATAG  
CCGTTTAGGCACCCAGCGGCTTGGCATTTGATTTTGTGGTACTGGCAAAAGATTCTGGTGTAAAGCGAGTTGGCTCTGC  
GTGGCAACCGATCCTTGCATCGCTGGCGGACGATGTGCGGTGACCGCGGGACTGCGCATTTATTGATGATGCTCAT  
CGTTATGCGCGGGAAGAAGGGCTTGGCAATGTGTTTCAATGGCAAAATTTGATGGCGGACAAACCTGCGTACACTCGGCT  
AGCCGCTATTTTTGCTGCGGTATTTATGCGGGTATGCATGGTGTGGCTGCTATGGTGTGACGATGTGGCGATTTTCA  
TCTCGGTGAGCTTCTCAAACGTCAGCTGGCGGGCAACCGGCGATACGCTGGGAGCAGCCTAGAGCTTGGTGAACG  
GTTTTCTGCTGGCACTGCTATAA

>Cluster\_33426

ATGGCTGATTGGGTAACAGGCAAAAGTCACTAAAGTGCAGAAGTGGACCGACGCGCTGTTAGTCTCACCGTTACGCCCC  
CGTGCTTCCGTTTACCGCCGGCAATTCACCAAGCTTTGGCTTGAATCGACGGCGAACCGCTCCAGCGCCCTACTCCT  
ATGTTAACTCGCCCGATTAATCCCGATTCGGAGTTTACTCTGCTGCTGACCGTCCCGCATGCGCAAAATTAAGCCACGACTGGG  
GCACTGAGACCAGGCGATGAAGTGCAGGTGGTTAGCGAAGCCGCTGGCTTCTTTGTTCTGGATGAAGTACCAGATTGCGA  
AACGCTATGGATGCTGGCAACCGGTACAGCGATTGGCCCTTATTTATCGATTTGCAACTAGGCAAAAGATTTAGATCGCT  
TCAAAAATCTGGTGTGGTTACGCCCCAGTTATGCCCCGACTTAAAGTATTTGCCACTGATGCAAGAAGTGA AAAA  
CGCTACGAAAGGAAACTGCGCATTCAGACCGGTTGCTGAGTGGGAAATGGCGGGGACTACTACCGGGCGGATACCGGC  
GTTAATTGAAAGTGGTGAAGTGAAGCGGATTTGGCTGCGCATGAAATAAAGAAACAGCCTGTTGATGCTGTGGCGCA  
ATCCACAGATGGTGGCGGATACGCAACAGTTGCTAAAAGAGACCCGGCAGATGACGAAACATTTACGTCGCGGACCGGGC  
CATATGACAGCGGACATTAAGTGA

>Cluster\_30675

ATGAATTTTGAAGGAAAAATCGCACTGGTAAACCGGTGCAAGCCGCGGAATTTGGCCGCGCAATTTGCTGAAACGCTCGCAGC  
CCGTGGCGCGAAAGTATTTGGCAGCAGCGACCAGTGA AAAATGGCGCTCAGGCGATCAGTGAATTTTAGGTGCCAACCGCA  
AAGTCTGATGTTTGAATGTGACCGACCCGCTATCTATCGAATCTGTTCTGGA AAAAATTCGCGCAGAAATTTGGTGAAGTG  
GATATCTGGTCAATAATGCCGGTATCACTCGTGATAACCTGTTAATGCGAATGAAAGATGAAGAGTGAAGACGATATTTAT  
CGAAACCAACCTTTTCACTGTTTTCCGCTGTGCAAAAAGCGGTAATGCGCGCTATGATGAAAAGCGCTCATGGTGTATTTA  
TCACTATCGGTTCTGTGGTTGGTACCATGGGAAATGGCGGTCAGGCAACTACGCTGCGGGCAAGCGGGCTTGTATCGGC  
TTCAGTAAATCACTGGCGCGCAAGTTGCGTCAAGCGGTTACTGCTGAAACCGTTGTTGCTCCGGCTTTATTGAAACCGGA  
CATGACAGTGGCTGAGCGATGACAGCGTGGCGGATCTTGGCGCAGGTTCTTGGGGTGGCTCGGCTCGGCGGCGCACAGG  
AAATCGCCAACCGGTTGCATTTCTGGCATCCGACGAAGCAGCTTACATCAGCGGTGAAACTTTGCATGTGAAGCGGGG  
ATGTACATGGTCTGA

>Cluster\_51847

ATGGAAGCCCTACTCCACAGCTGCTCCTGGTTCCGGCAGCTTTCATGGAAGGATGCAAGACAGTTTACCGATTGTTAT  
TAGTTATATTTCCGTTGGCTTTGCGTTCCGCTGTAATGCGACCCGCTGCGGATTTCTCTCTCGAAAGCGTTTTTTCT  
CCTGCATCATTTATGACGGCGGAGCCAGTTCGTCATTAACCGGATGCTGGCAGCGGGAGTAGTTTGGGTTGCTGCA  
CTGACCGTCAATGGCAATGGATGTTTCGCCATGTTTTGTTATGGCCGCTCACTGCGTAGCCGATTTATTTACAGCTCTGCAAAA  
ATCGAAAACCGCCTGTGGCGTTTTGGCTGACGGATGAGTTTTTTGGCGCGCAACCGCAAAAAGTGGTACGCAATAATC

GCCGCTGGAGCGAAAACCTGGATGATCGGCATTGCCTTCAGTTCATGGTCATCGTGGGTATTTGGTACGGTAATAGGGGCA  
TTCTCCGGCAGCGCTTGTGCAAGGTTATCCCGCGTTGAAGCAGCATTAGGTTTTATGCTCCGGCCTCTTTATGAG  
TTCTCTGCTGCCTCTTTCCAGCGCAAAACATCTTTTGGCTTACCGCAGCGTTAGTTGGTGCCTTGCAGCGGTAACGC  
TATTTTCTATTCCCGTCGCCATTCTGGCAGGCATTGTCTGTGGCTGCCCTACTGCGTTAATCCAGGCATTCTGGCAAGGA  
GCGCCGATGAGCTATGA

>Cluster\_10094

ATGGATGAGGGGTCACTGTCTCTGCCACATTTACCGGACACGACGAAAAAGCCAGCGCAACTACCATCTCGCGCTTCG  
TGGCAACAGCCTGAATCCGATGATCGACGCGGCACGCGCTACTCGGTATGGTAATGCGCCTTTCAACCATGAACAGCC  
AGACGATGCCGGAGCATCTTTTGTCTCAGGTGGTGACAGATGTTTCAGGCCGTGGAGCAACTGCTTCAGGAGCAGGGCTAC  
GAACCGGGCGTGATTATCTCGTTTCGCTACATCTCTGCACGTTTATTGATGAAGCGGCGCTCGGTAACGGCTGGTCAA  
CAAGAACGAGTGGATCAAGCAGTCAATGCTGGTCCATTTCACACAGCAAGCCTGGGGTGGCGAGAAAGTTTTCATCCTGC  
TGGAGCGCTGAATCCGTGAACCCAAACGTTACCAGGATCTGCTGGAATTTCTCTGGATCTGTTTTTCTCTGGGATTTCCG  
GGCGCTACAAAGTGGCAGCACAGGATCAGGGGAATTTGAGCAGATCTACCOCGCTGTACCACAGTTCGATCAAACT  
GCGCGCGATGCCCTTTCCCGCTGTACACCAGGACAAAAAACCCAGGGCGGGCTTATCAGCTCATCAGTCGCCTGA  
CTGTTAAACATATTTTTTGTGGTGGCGTGTCTGTGCTGGCGTTGTTTTACCTGTCTATCTGTGCGGCTGGACAGCCAG  
ACGAGGACATCTGCACCAGCTAAACAAATTACTTCGATAA

>Cluster\_47963

ATGGCGCATCGGCTACTCATTTGGTAAAGGAATGATCACCTTGAATCTCAAACGGATTTTTCTCACCTCACCTTACTTCC  
CTTGTGTTGCTGTTGCCGCTGATGATTGGCAGCTCTCAGATCCGACGCTGACCGTACAGCGTATACCGTTAATCCTCAA  
CAGAGCGGTTGAAAATGTAAGTGGCAAAAGCCAAATGGCGAAGCCTGGGGAATTTACATGCTCTGCTGGCGGATGAA  
AGTCAGGGTTCAGGTGAGATGGCGATGAACGGCGCATCTATGATGAAAGCTATGCGCGCTCGGTTTTGTACATCGAAAA  
CGGTCAGCAGAAGGTGGCGTTAAATCTCGCTTACAGGTGAAGGAAATTTCTTATCCGCTCTGGCGGCTGTTTTATGTGCG  
CGGGAGATAAAGTCCGCTGCTTCTGCTGGATGCTTCAAACAGTAAAGAGATTCAGTTTGGCGGTGACGTCAGGCGCA  
ATGTTGATGGAAAAACAGTGAATTAATCCGCTATTCACTCCAAAGCTCGCTCACGTAATAATCGTAACGGTGTGGGAT  
TAATAAACATGGGAATGCCGTGTTTTGTTGAGCCAGCAGGCGACAAATTTTTATGATTTGCTGTTATGCCAAAGCGA  
AATGAAAGCTTGGCAGCTGCTTTATCTGATGACAGCATTTACATATGTAATGAAAGCGGGGCAATCCCGTGGCAA  
CGCTATCCTTTTGTACCATGATTTCCGTAGAGCGGAAAGGTTAA

>Cluster\_10615

ATGAATATGTAACCATCAACAACAACAGTTTCCGGTAATCGAATATCGCGGTCAGCGTGTGTGACATTTGCAATAAT  
TGATGACGTCACACAGCGCCCGAAGGTACCGCCGCTGCTGCGTTTAAACCGCAACCGTCTCACTTTATCGAAGGGTGG  
ATTTTCTTGAATGATCGCGACGTAATACGTACGGAGTCACTTTCTGATGCCTTTGGCGCGCAACTGCCAAAGGGATC  
ATTTCTTTTCGAGTCTGGTTACCTGATGTTGACGAAGCCTTTAAACGATGCTCTTGCATGGCAGGTTACGCGCAACTGGT  
TAACAGCTATTTCCGAATCACGCGCCGCTGACGGAAATGGAGATGATCGCTGCAATGGCCGCGATGCCGTTGCCAGC  
AGAAGCGCTGAGTCATGTTGAAGAGAAGATCGAAACGGTCAACAAAGCTGTGGAGAATCAACCGCGCACAAATGCC  
ACCGGATATGTCGGTTACCGCCAGGTGGTAGCCAAAAGCGGAATGAGTACGCGCAAGTGTGGGAATCTGGTCAACGCCA  
CCACATCCTTACCGACACCGCAAGAAATTTGACTCCGACGGTCTGTTGTCTCGCAGGGCTGTCTCGCATCTGTGGCAG  
TTATGGCGGCTTCCACCAATGATGTCAGAGGCTGAACCACGCGCACACGCTGGTATCACCGAAGATGGGGCTTTTT  
CAGGTAATCGGATGGGAGATAAAGCATGA

>Cluster\_29201

ATGAATCAACCGTTACTTTCCGGTCAATAACCTGACCCACCTTTTATGCCCGGGCAAAGGTTTCAGCGATGTCTTTTTGA  
TTTTATGGCCGGGAGAAGTTCTGGGCATTGTTGGGGAGTCCGGTTCGGGAAAGACCACGCTACTGAAATCAATTTCCGCC  
GCCTGACGCGCACAGCAAGGGGAAATTCGCTACGAGAACCCTGCTGATGCGATGAGCGAGGCGACCGCGCTCGCCTG  
CTGCGCAACCGAATGGGGTGTGGTACATCAGCATCCGTTGACGGCTGCGCCGCGCAGGTGTGGCAGGGCGCAATACCG  
CGAACGGTTGATGGCAACCGGAGCGCTCATTACGGCGATATTTCGCGCACCGCGCAGAAAGTGGTGGAAAGAGGTGGAGA  
TCCCGCTAACCGTATCGACGACCTGCCGACCCTTTTCCGGCGGATGCGAGCAACGTTTGCAGATTGCCCGCAACCTG  
GTGACGATCCGAAGCTGGTGTATTGATGAAACCACTGGCGGGCTGGATGTGCTGGTACAGGCGCGCTGTGGACCT  
CTCCCGCTGCTGGTGTGAGGCTTAACTGGCGGTAGTGTGCTGACCCACGATTTAGGCGTCCGCGCTGTCTGGCGG  
ACCGTTTGTGTTAATGAAGCAAGGAAAGTGGTGGAGAGTGGGTTAACTGACCGCGTGTCTGACGACCCACACCATCCG  
TATACCCAGTTGCTGGTGTATCGGTTTTGCGAATTTGA

>Cluster\_62529

ATGACCGTTATTCCGGTATCAGCCCTTGAATGCAGCATTACTGAGCTGTGCCGAATTCCTGACAGAGCTTTAATGAATC  
ATTGACACCGTTTGGCTTGCACCGGATATGTTTGCCTCAGTTTCAATTTCCGAAGGACTCAGCCTTGAAGACTCGTTT  
TCTGGCTGGTCAATGATAACCGCGCGCAATAGCCATCTAACCAGCAAGTGGCAAAAGCGCTCTGCGAGCATTTGTT  
GTGTTGCTGAGTACCGGAGCAGGACTGGCAAAACAGATGCTTAATCCTCTGTTTACCTCCTTAAAGAGAAAAAGTT  
ATCCAGCGTGGAGGTGGAAGTGTGCGGCAAAATACCCGAGCAATCGCTCTCTATCACCGCTCGGTTTTTCAGGTTCCG  
GACATCTGTGCAAAATACCGGGAGATCCACAGTCTCATCTGGAATACCTTACGGGATATGGAAATCCAGTCTGCTGAT  
GACTTCTCTGCTACCGCTGTTGCTGACACAGATGATGATCTTCTTGGCTGGCCAGCCCTTGCAGCTCTTGTCTATTCC  
CTGGCAGTCTCAGGATAACGAACATGCATGATGCTGTGCTGCGCAAGTTCATGGGCAACCTCAGCTCAGCTGTTTGT  
TTGTGGAAACCGTGTATCGTTACAGGGACGGCTAAAAGAAATGCTTACAGAAAATGAATGCCAGATGGCCTGGCATAGGT  
ACATCAGCAGCATCCAGAAACGCTGGCACCATATTTACTGCGGCGAGTTATCAGGCTGAACCGTTATGCCAGTTTGA  
AATGGAATGACATTTTAA

>Cluster\_28606

ATGTCGTGTAAGAACTGGAATTTGCTGGAACAATATTAAGCTGAAGCAGAACGCTGGCGGACTGTGAGCCAATGCT  
GGCAGTTTTTACCACGCGACGCTACTCAAGCAGGAAAACCTTGGCAGTGCATGAGCTACATGCTGGCGAACAGCTGT  
CATCGCCATATGCGCGCTATTGCTATCCGTGAAGTGGTGGAAAGCCTACGCCGCGACCCGGAATGATCGCCTCT  
CGCGCTGTGATATTCAGCGGCTGCGTACCCGTGACCCGGTGGATAAATACTCAACCCCGTTGCTATATCTGAAGGG  
TTTTCATGCTTTGACGGCGTATCGCATCGGTCAGTGTGTTGGAATCAGGGCCGTCGCGCGCTGGCTATTTTTCTACAAA  
ACCAGGTCCTGTAAAGTTCAGGTTGATATTCACCGCGCGCAAAATTTGGTCCGCTGATCATGCTCGACACGCGAGC  
GGCATGTTGTGGGTGAAACGGCGGTGATTGAAAACGACGATCGATTTCTGCAATCTGTGACGCTTGGCGGTACGGGTAA  
ATCTGTTGGCAGCCGTCACCCGAAATTCGTGAAGGTGTGATGATTGGCGCGCGGCAAAATTTCTCGCAATATGAAG  
TTGGGCGCGCGCAAGATTGGCGCAGGTTCCGTGGTGTGCAACCGGTGCGCGCACACTACTGCCGCTGGCGTTCCG  
GCACGATTTGTCGCAAGCCGATAGCGATAAACCGTCAATGGATATGGATCAGCATTTCAACGGCATTAACCATACGTT  
TGATATGGTGTGATGATCTGA

>Cluster\_30357

ATGAGCGTAAAGTTATCGTACAGACATGGACGGTACTTTTCTTAAACGACGCAAAACGTTACACCAACACGTTTTAT  
GGCAGTATATCAGGAACGAAAGCGCGGATTTGAGTTCTGCTGCTAGCGGTAATCAGTATTTACAGCTATTTTCTG  
TCTTCTCAGCTAAAGGATGAGATCTCTTTTGTGCGGAAACCGCGCACTGGTTTACGAAATGCGAAGCAGTATTTCT  
CACGGCAACTGACCCGACATGAATCGCGGATTTGATTTGGCGAGTTGCTAAAAGATAAGCAACTCAATTTTGTGCGCTG  
CGGCTGCAAGTGCATATGTCAGCGAAAACGCCCGCAAGCATTCGTGCGACTGATGGCAAAACACTACCATCGCCTGA

AACCTGTAAAGATTATCAGGAGATTGACGACGTACTGTTCAAGTTTTGCTCAACCTGCCGGATGAACAAATCCCGTTA  
GTGATCGACAAACGACATAGCGCTGGATGGCATTATGAAACCCGTTACCAGTGGTTTTGGCTTTATCGACCTGATTAT  
TCCCAGGCTACATAAAGCAAACGGTATTTGCGGTTACTGAAACGCTGGGATCTGTCACCGCAAATGTTGGTAGCGATTG  
GCGACAGCGGTAAACGATGCGGAGATGCTGAAAAAGCGGTTATCTTTGCGATGAGCAATGCTGCGGAAAAACATTTAA  
CAAATCGCCGTTACGCTACCGATGATAATAATCATGAAGCGCGCTGAATGTGATTCAGGCGGTGCTGGAAAAATAACC  
GCCGTTTAACTTTGA

>Cluster\_25528

ATGACCACACGCGTGTGCTCTCGACTTAGACGGCACCTTATTGACCCGAAAAAGACCCCTGCTTCCCTTCATCGATAGA  
AGCCCTGGCCCGCTCGGAAGCAGGCTATCGATTAATCATCGTACAGGTCGCCATCACGTCGCTTATCATCCTTTTTT  
ATCAGGCGCTGGCGCTGGATACACCTGCTATTTGCTGTAATGGCACCTATTTGTATGATTATCATGAAAAACCGTGTG  
GAAGCGGACCAATGCCCGTTAATAAAGCCCTGCAACTCATGAGATGCTGAATGAGCACAACATTCACGGTCTGATGTA  
TGTGGATGATCGGATGGTTTATGAGCACCCGACCGGACATGTCATTGCGACGTTAATGCGGCAAAACCTGCCGCCG  
AACAGCGTCCGACTTTCACACAAGTCTGCTTCTGCTGAAACGGCGCAACAAGTTAACGCCGCTATGGAGTTGCCCTG  
ACGCACGATGACCTGCCCAATTCAGAAATTTGGTAAGCATGTCGAACATGAACTGGGACTGGAGTGTGAATGGTCTG  
GCACGATCAGGTTGATATGACGCGCGGCAACAGCAAAGGTAACGCTTTGACGAAATGGGTTGAGGCGCAAGGCTGCT  
CGATGAAAAACGTCGTGGCTTCCGGCAATACTCAATGATATAGTATGCTGGAAGCCGCTGGTACAGGCGTGGCGATG  
GGCAACGCCGATGACGCAATAAAGCGCGGCCAACATTTGTGATTGGTGATAAACACCACCGACAGCATTCGCCAGTTTCA  
TTATAGCCACCTGATTTAA

>Cluster\_43117

ATGGTGCACCCATTCGCCGAAACCGCGCAGAAAACCCGCGTTGCCACCGCACCAGCGACTGGACAGGTTCACTCTTT  
AACCGTGGCCTGAAATTAAGGAGTGGATTGCCGAATCCAATGGCAGTGTGGCACTCACGGAACCTGGCACAGCAAGCCG  
GGTTACCAATTCACAGCACCACCGCTGCTAACACGATGCAACAGCAGGGCTTTGTCCGTCAGGTCGGCGAACTGGGT  
CACTGGGCGATCGCGCACACGCTTTATGGTTCGGCAGCAGCTTCTCCAGAGCCGTAATTTGTTAGCAGTTGTTCAACC  
TATCTTCCGCAATTAATGGAAGAGTCTGGCGAAACGGTCAATATGCGGTTCTTGATCAAAGCAATCACGAAGCAGTTA  
TTATCGACCAGGTACAGTGTACTCACCTGATGCGTATGTCGGCCTATCGCGGTAATTCGCGATGACCGCTTCCGGT  
GCGGGTAAAGCCTTCTGCGCAACTGAGCGAAGAACAGGTGACGAAGCTGCTGCACCCAAAGGGTTACATGCTTATAC  
CCACGCAACGCTGGTGTCTCTGTGCTTTAAAAGAAGATCTCGCCAAACCGCGCAACCGGGTTATTCATTTGACGATG  
AGGAACATGCTTGGGCTGCGTTGCTTCCGAGCGTGTATTTTCGATGAGCACCAGCGCAACCGTTGCGCAATTTCAAT  
TCCGACCGATTTACAGTATTACCGATGACCGCTGACCGAGTTTGGCGCGATGGTGAATTAAGCGCGCAAGGAAGTAC  
GCTGGCGTACGGTGAATGCGCTGA

>Cluster\_45224

GTGACTGAATTAACCAAAGAAATTAATCGAAGAAGCAAATAAAAAATAGCGATTGCGAAATGCTACTCCAATTCAGG  
GATGGCACGGGTAGAGGGCAGTATTCAAATTCACCTGGCATCGCTGGAAGCAGAACAATAGGTGCTTCCACATTTG  
TAGAACAGCAAGTTGACGGAACAAGTTACTATATCAAGGATGGGAATGGCCTATTGATACTGGGATTATTGAAGTCTAC  
GCCGCTCACCGATGACGGTAGTGTGTAACGATGATCTGGACCTTCTGCTTCTGCTTACAAGAGCTTACACCTGCGAT  
TATGCGCAACCATATCGTGTATTCGAACGATACGGAATAACCCAAACGATAGCATTACTACAAATTCATGCGCTTCGAA  
TTGCGCTGGATGGCATAGAGCGGAGCGCCTATGCTTACGAGCTGAGCCATGCCATCAAATTAACCGCTCAATGGCA  
AAAGCTATGCGCTTAACTTGGTGCAGAACTGAATAACGAAGAAGCAGAGATTTTCGCGGATGGGTAATAACCGCCAT  
GCTTCATGCGCAAAACTTTCGGGAAATAAGAATTCGCTCAACCAATAATTTTCGGATAACCTGGAAACGTCACCAACT  
CTCCGCAATCCCTGATGAGGTGTGTCTCGCAATCTCTGAAGGTCGCAAGGTTTCGTCAGATTTTCGATCTTGAAGGT  
GACAGCGAGGTATCGGTGGTGTCTGGATGAGGCCGAGCAAGAACTTATCGTTACCATTAACAAATACGCCAGTCAGAT  
CGCAGTAGAAGCGATACAGGGGGCGCAACATGA

>Cluster\_5216

ATGAAAGTATCAGTTCAGGATGCGCGTTACACTTTTAAATATGAGCAAGAAGCAGATATTTATAAGATGGTGAGCGGGGA  
CAAGATGGACGTGAAGATGAATACTTTCAACGCTTGTGGGAGACGTTACGCCATCTGTTCTGGTCAGATAAACAGACTG  
AGGCTTATAAACTTCTGTTCAATTTCTGTAATAACAGACTGGCAACATCAACGCCTCAGAATACTTTACTGGGGCTATC  
AACGGAATGAGAGAGAAAAGTTTATCAATAGCTGGAATATTAATCAATAAACTTAAAAACATGCGCAAAAAATCCGGATGA  
GTTGGTTCGCAAGGGCAATATGCGCTGGGTGCGCCAGACCTTCCGGGATATCGAGTTAAGTGTCACTTTTTCATGAAA  
AGAATAAGATATGTAAGTACAGCTTGCAGCTGCATAAGGGCAGGTAACCTGGGCGTTGATCTTAGAAGGCTTACCTT  
CCCGCGTTGACATGAGGGATTGTTACCTGGTAAAAAACAATGAAAGGTAGCAATGATATCTTTATGAGAGACCTGG  
GTGGAATGCTAACCTGGCGGTGCTACCCGGACGGTGTACCCCGGACGGTGTCAACCCGGACGGTGTCAACCCGGACGGT  
GTGCTATCTTGACGGTGTACCTGTAACGGTGTACCTCCCTATATGATGAGGTAATTTATTAATAAAATCCCCC  
AAAAAATGATACTAAAGGAGTTGCTACTGAAGAAGTTGCTACTAAAAAAGTACTGCTGAACAAATTAAGTACTGACAACGCA  
ATTATGAATGAGCCAGAATA

>Cluster\_18088

ATGATCATGAAAAAGTCAATGAACAATAATTTGTGTACAGGCATCGATGAATGGACAGGAGGTTATCATTTCTGGGCTGG  
CGTCCGTTACAACAAAAATATGGCATGGCTGTACTGAGCATCCTGCTAACAGAGTTTTTATGTCAGAAATGAACAAA  
AAAAAATCTATAAATGATTAATAATGATGATGATGATGATGATGATGATGATGATGATGATGATGATGATGATGATGATG  
AAAAATCTCGAAAAAATCTCAATCCATCGCTACTATTGATTCCTGCGGATCACATTTGAAATGCAATATCCCGAGTCTG  
TTCAGGTATACAAATTAATAATGTTTCTCTGATGAAATCAAGCGTTGATACAAAGCAGAGTATGCGATAAGTCCGATG  
CATTAACATCATTAATGAGCAATTCAGCGTTCAACTTCTGATGATGAGATTGGTTTTATAGCATGTCATATTTAAAT  
AATTATGAAAATTCAGTTGATTAATGATGATGATGATGATGATGATGATGATGATGATGATGATGATGATGATGATGATG  
TTATAACGAAAAGGTGGACAGAAGTTTCAATTAACCTATTCAGATTTATGATGCACCTTAAATAATTTTCAAGTCCGCTG  
TATGCAATGAAAAATAAAGCAGAAAGATATTGGTATATCTATGAACAGTTTCTTGAAGGACATCCTGTTACAGCGC  
GCAATTCATGAAATGAACGGTATCTGTATGCCACTTTTAAATATGAATTAATTTTAGAAGAAAAACTATATCTCTAT  
TCGTACCAAAGTATTAATGGACTAA

>Cluster\_5692

ATGACCGAATCAGTAGCCGTTTTCGCGCGCAACAGTTAACCCGCGGATATGGCAATATACCGTTGCCGAAAACTGAC  
TGTAGAAATACCTGATGGTCACTTCACGGCAATTAATCGGGCAAAATGGCTGCGGTAATCCACGTTACTGCGTACCTTAA  
CGCCCTGATGACCGCTCATGGGCACTGCTGATGGGAGGCGACATTAACATTAACGCGGATGAAAGGTTGCA  
CGCCGATTTGGTCTGTTGGCGCAAAATGCTACCACCGCGGGGATATCACCGTGCAGGAGCTGGTGGCGCTGGACGTTA  
TCCGATCAACCGCTGTTTACCCTGCGCAAGAGGATGAAGAAGCGGTAACGAAAGCAATGCAGGCCACGGGAATAA  
CTCATCTGGCAGATCAAAGCGTGGATACCTTTCTGGCGCAACCGCAGCGAGCTGGATCGCATGGTGTGGCCAG  
GAAACGGCAATTTGCTGCTGACGCAACCCAGCTGCTGATGATGATGATGATGATGATGATGATGATGATGATGATGATG  
CGAACTGAACCGCAAAAAAGGCTATACCTGGCGCGGTGCTGCACGATCTTAATCAGGCTGCTGTTACGCCAGCATT  
TGATGCAATGCGGGAAGGAAAAATTTGCTCAGGAGCGCCGAAGGAGATTGCTACCTGCTGAACTGATGAGCGCATT  
TATGGTCTGGCTGCATGATCATGACGATCCAGTTGCCGGAACCGCTTGTGGTGGCTCGGACGACCGCCTTC  
AACCGCAATAGTTAA

>Cluster\_67101

GTGAGTAAGCGTAAACGAGTAAACGACGTTTTCTCACTAACCCGGGTGACAAAAGCACTGGGAATGACTCTGGCGCTGATGAT  
GACCTGTACAGAGTCCGATGGCTTCCCTGGCAGCAGACCAGCCGCTATATCTTTTCGCGGGGACAAGGATGCACTGACCA  
TCACAGTCAACAACATGATAAAGAGCGTACCTTTGGTGGTCAGGCCTGGGTGGACAATATCGTGGAGAGGACACCCGT  
CCGACCTTTGTGGTGACACCATCTTCTCAAGGTGAAGCCGAATGGCCAGCAGACACTGCGTATATATATGGCCCTCGGA  
CACTTGCAGGGAAAAGAGTAAAGAGTCCGCTGACTGGCTGAACCTGCAGGATATACCGCCGCCCTGGAGGGGAAGCGGTATTG  
CGGTGGCACTGCGTTCGAAAGCTGAAACTGTTCTATCGCCCAAGGCACTGCTTGAAGGCCGCAAGGGGCGAGAAGAAGGC  
ATCAGCCTGCAGAGCCGCCCGGATGGCAGGACCATGCTGGTGAACACCACGCCGTACATTTTTGCGATTGGCAGTCTGCT  
GGACGAAAACGAAAAGAAAATGGCCACGGATAACGGGACGACGAGAAAATGCTGATGTTTATGCGGGGGATGAAGTGC  
AGGTGAAGCGAAAATGTGGTGAAGTGAAGTCCCTGAACGATTACCGGTGAACCTGCAGACCTGGACGATTAAACAAGAAGAAA  
CCGGCGCACCGGAAGCCGCAAAAGCTGAGAAAGCAGATACCGCAGAGCAGAAAATA

>Cluster\_22952

ATGTCAATCGAATCTCAATGCGTTCCTCAATGGATTTTTCTCCCTGAAAGGTAAAACAGCAATTTGTTACCGGCGGGAA  
TAGCGGTTTAGCCAGGCATTTGCCATGGCGTTGGCCAAAGCTGGCGCAAATGCTTTTATCCTAGTTTCGTCAAAAGATA  
ACGGCGAAAACAAAGGAAATGATTGAAAAACAGGGTGTGCAAGTTGATTTTTATGCAGGTGGATATCACCGCAGAAGGCGCG  
CCGCAGAAAGATTATCGCTGCCTGCTGTGAGCGCTTCGGTACCGTAGATATCTGGTTAACAATGCCGGTATTTGTAAGCT  
GAATAAGTGTGACTGACTTGGTCTGCCGACTGGGACCCGATGATTGACGTGAACCTGACCGCCGATTCGAGTTAAGCT  
ACGAAGCGCAAAAATTTAGTCCCGCAGAAAAGCGGTAAAATCATTAATATCTGTTTATTGTTCTCTTCTTAGTGGT  
CAATGGTCACCTGCTTATCTGCCACTAAACATGCTCTTGGCCGATTACCAAAGCCTATTGCGATGAATTAGGCCAATA  
TAATATTCAGGTGAATGGTATTGCTCCTGGTTATATGCAACCGATATACCGTGGCGACCCGTAGTAATCCAGAAAATA  
ACCAGCGTCTTGTGATCATATTCGGCAACCGTTGGGGTGAATACCTAGGATTAAATGGGTGCAGCGTATTCCTCGCA  
AGTCCGGCATCGAATATGTCACCGACATTTATTAGTGGTTGATGGCGGTTATTAGTGGCTAA

>Cluster\_67061

ATGAAATTTTCATCAGATCCGTAACGCCACTGCAATTTATTCATTATGCAGGAAAAAAAATCCTGATTGACCCGATGTTATC  
AGCAAAAGGTTCAATCCCTGGTTTTCCATTGACGATGAACCCGCAATTTACGGAACCTCTGTTGACTTACCTCTCCGG  
TATCAGAGGTTATTGATGTAGATGCTATTATTGTTACTCATACGCATGATGACCACTGGGATGCTGCTGCCGGGGCGCTG  
ATCCCTCGGATATGCTTATTTTTGTACAGAATACTGAAGCAAAAACGAACTGGCCCGCATGGATTATTAACCTACA  
AGTCTTGATAATGAAATGAAATACGCCGGAATTCGCTTAATTCACCTCACTGTCAACATGGTAGTATGAGGCATTTCC  
GCAACCCGCTGCCGAGACTATAGGTGAAGCTATGGGGTATTTCFCCAGTCTGATGGCGAAAAGACTATATAFA  
GTTGGTGATACTATCTGGATTAATGATGTAGAGCAGGTTATGCATAAATAACGCTGATATCGTTATCTGAAATACGGG  
ATATGCGCAGGTGAAAAATCTGGGGCTATTATCATGGTAAAGAAAGTGTGCTAAGGACACATAACATACTTCCAAAAG  
CACATATTTTCCACACATATGGAATCTGTAATCATTTGGACAACCCGAAAAGAAAATCCGTGAGTATGTAGATCTT  
AATAAGATTACTGACAGGTTAGTATCCCTGAAGATGGTGAAGTCTGTTAATCTTTAA

>Cluster\_33164

ATGAATGAGATAATGACGGTCATAGTATCATCATTTTTATTGTTACTACAGCCGCTGGGGATGTTTATATCTACCAAT  
ATTTTCAACAGGTTGTTTACTCAGTAACCTTATTCGCAACTCAATATGATTGCGTTTTACGCTTCCGATCATAGTAGAGA  
ACTATACATTTTTGCGAAAATTTGCCATCTGGAATCTTTTCAGTTGACAGGAATAGCGCTAAAAGAAAATAGATTTGGTTTT  
TTCATTGGGTTATCATTTACTATCTTTTTTGGGCAATAGATGCGGCTGGGCAGATTATGATACTCTAAGAGGTTCAAC  
AATATCTTCAATTTTTAACCCGTCATAGTATTCATCTTCTATCACGCGGTTATTTTGTACCAATTTATCTCTGTGA  
TCTTTGTTTATCATGTTGGGATACAAAGCATCTAGATAAGCTATATTTATCTACGAGATATACCATTACAAGCCGAT  
ATTCATTTCAATGCTGCTTTTAAATAGATTTTTGTTTTCCTATGGGATTCATTTATTAACATGATGTTTATCATTTTTCAGT  
TCCATGATATCCGATATATCTTATGTGATATGGGTTTGGGTTTCTTAAACAAAACAGCACCCTAGCTAAACGATTTCA  
CATATCACTGCCAGTAAAAAGTTTGTATAGCAATCTTTTATATTGCTATTAGTTATTCATGTTTTTCTGATTTTATTACG  
GCAATATTCATTCTGACATAATGATAGATCGTTACCGAGCATGATTAATGATGA

>Cluster\_28626

ATGTTTGAACCTTAAAGAGCCGTTTGGCCAGTATGCGCGGTAAGATCCTTTTGGAGGAGTTAAAACCTTGCAGGGTGA  
GGTTTTTCGTTGAACCTGAAAACCTCGCCGCACTCTGCGCTTTGAAATGGCGGGCAAAAAGCTATTTTCTCAAAATGGCATCGCG  
GCACGACCTGAAAAGATTAATCAAAAATTTACTCTCATACCGATGCGAGTATAGGCGCAGACCCGGAATGGAATGGC  
ATTCATCGACTGCGGGATGTCGGCGTTGATACTATGATGCGGGTGGCATTGCGCGAAAAGGCATTAATCCGCTCACCAG  
AACCTCGTTTATTAACCGAAGATCTGACACCACCATCAGTCTGGAAGATTACTGTCTGACTGGGCGACTAACCTC  
CAGATGTTCCGCTAAAGCGTATGCTTATTAAGCGTGTCCGATGATGGTGGCGATATGCATGCTGCGGGCATTAACCA  
CGGACTGTTTATATCTGTCATTTTCTGCTGCACCTGGCTTTTTTCCGGTAAGGAAGAGGAGTTAAAATTTTCGGTAAATGA  
TCTGCACCGGGCGAGCTTCCGACGCGCTTCCACGCTGTTGGCGGATAAAGATCTTATTGGGCTTTATTTTTCTTCGA  
TGAATATCCGCTGACTCAGCGGATATCTGGCGGTTTATGAAAGTGTATTTTCCCGCCCGCTTAAAGACATTTCTCAAG  
CAGGAACAAGGACTGCTGTCGAAGCAGAAGCAAAAAGCCACAAAATCAGGAAAAGAACGATTGCAAAATCGTTGTAA

>Cluster\_63619

ATGACTAAGCAACCACCAATCGCAAAAGCCGATCTGCAAAAACCTCAGGAAAATCGTGCACCAGCAGCAGTTAAAATAG  
CGACGTGATTAGTTTTTAAACAGCCATCAATGAAAGAGCAACTGGCAGCAGCTTTCACCGCCATGACAGGCTGAACT  
GTATGATCCGTATCGCCACCACAGAAATTCGTAAGTTCCGCGTTAGGAAACGTGACACTATGAGATTTTGTAGTGGC  
ATCGTACAGTGTTCACAGCTCGGACTTGAGCCAGGTAGCCCTCGGTATGATGATATTTACTGCTTTTGGTAAATAAAA  
CGAAAAGAGCGGTAAGAAAGACGTTTCAAGTAAATCATGCGTATCGCGGATGATGATCTGGCTCGCCGTTCTGGTCAA  
TCGCCAGCCTGTGACCCGTTGTCGTTGAGGTTGACGAGTTAGCTTCAAAATTTGGCCTTGTGAAAAGTTAATACAC  
CGCCCGGGAGAAAACGAAGATGCCCGGTTACCCAGCTATGCTGTGCAAGACTGAAAGACGGAGGTTACTCAGTTTGA  
AGTTATGACGCGCAAAACAGATTGAGCTGGTGGCAGCCTGAGTAAAGCTGGTAATAACGGGCGTGGGTAACCTACTGGG  
AAGAAATGGCAAAAGAAAACGGCTATTGCTGCGCTGTTCAAAATTTGCGCGTATCAATGAGATCCAGCGTGCAGTATCA  
ATGGATGAAAAGAACCACTGACAATCGATCTGACAGATTCCTCTGTATTAACCGGGGAATACAGTGTAAATCGATAATTC  
AGAGGAATAA

>Cluster\_22067

ATGATGACGGTGAACAAGCGATCAATGGCTTCCGTTTAAAGCCTGTACTTCTGGCCGTTACTGCGCGTCTGGCGCTCAT  
TTCTACCCGCGCAATTTGAGCGAACCGCAGCTGCCGAAACGGGTAACCTGGGCTGGCAATGATGATCAGTTCGCTGCA  
TTGCCCCATATTAACCTGCAACAGATTTCCCTGTTTTTTCGTTTCTTCTGCTCTGTTGCTGCGCGTGCAGCAGCATCTGATC  
GGCATTGGCGTTGGTTTTTACCATGCAATTTGCCCTTGGCCGCTGTGCGAACCGTGGCGAAATTTATCGGCTGCAAAATGGG  
GCTGTCATTTGCGACATTTGTCGATCTTGGCAGCCATCTCAATATGCCGTTTTAGCGCGCATCATGGATATGCTGGCAT  
TACTGCTGTTCTGACATTTAACGGTCAATTTATGGTTGATTTACTGCTGGTTCGATACCTTTCACACCTGCCGATTTGGT  
AGCGAACCTTGAACAGCAATGCTTTTGGCCTACCAAAGCAGGGAGTTTATTTTCTTAAACGGCTGATGCTGGC  
GTTACCGCTCATTACTCTGTTGCTGACCTGAACTGGCATTAGGTTTACTGAACTGATGGCCCGCAATTTATCCATTT  
TTGTTATTTGGATTTCCATTAACCTGACTGTGCGCATCTTTTAAATGGCGGCAATTAATGCCGTTAATTCGCGCTTTTTGC  
GAACATTTATTCAGTGAATTTTTAATTTGCTGGCTGATATTAATAGTGAATTAACCATTAATAA

>Cluster\_62147

ATGTTTCCGAAAGGGTGAATTCATTTAGTCCGCTGAAAAAATTAACCCACATTCATGCGTTGGTATGGCAAGTTA

TATGGAGTTATTAATAAAATTCAGTACCCAAAAGCAGCCTGCTTAATTTATTGAATGTAATGGTGGATTGTGGTTTCT  
TAATTA AAAACAAAACCGCTACTATTCCTGGAATAAAAACTACGAATTGGGTTGTCAGGCGTTACACCGTCAAAAT  
ATATTTGAGGTGACTAAGCGGCCAATGCAGGAGTTGTCGCTGAAAAGTGGACTGGTTTGTCTTGGGGCGATGGAGAG  
CATTTCCGGCTATCTATCTCGACAAGATGAAAAGTCCGGACTCTGTACCAGCAGCAAAAGCTGGATTGGCAAAAAACTTG  
AGTTGCATATATCCGCGTTGGGTAAAGCATATTATGCTGGAAGACACGAGAAGAACTGGATTATTTTTAGAAAGCCTC  
ACGTTAACTCCACATACGCGCAATACATTTACCATAAAAAATGTTTTCTGGAAGAATTACAAAAAACCGCCTTCGGGG  
ATGGGCCATAGACAACGAAGAATCAACCTATGGGGCGGTATGTTAAGTATGCCGGTATTCAAATATGTATAACAGAGTTA  
ACTATGCAATCTCACTTTCTGGCGATCCGGTAGTTTATTCAGGAAATAAGATAGACAGCTATCTGGAATTGCTCCGGAAA  
TGGCTGAGCAAAATCATATGGGCTGGGATACAGAAACGAAAATGAGCACTTACGAAAAGGAAACTGA

>Cluster\_34682

ATGGCCGGTCTGAAGTCCGGCTGGGGCGAGTGGGCAGAAAGTGGCAGCGACAGTTTTTTCGAGGTTAAAAGCGTGGCCAC  
GCAGACCTTTGACGGTATGACAGAAATATGGCAGCGATGCTGACCGGCGAGCAACAGAGCTGGCGTGGTTTACCCGTT  
CTGTGCTCTCCATGCTGACAGAGATTTTTCTGAAGCAGGCCATGGTGGGGATTGTCGGGAGTATGGCAGCGCCTGGGT  
GGTGTCTTCGGTGGTGGGGCGTCTGCCTCCACGGGGACGGCCATTAGGCTGCGGGCGGAAC TTCCATTTCCGAGCCGG  
AGGATTTACGGGAACCGTGGCAAAATACGAACCTGCCTGATTTGTCACCGCGGGGAGTTTGTCTTACGAAGGAGGCAA  
ACAGCCGGATTGGCGTCGGCAACCTGTATCGTCTGATGCGCGGATGCGGAAGGTGGTTATGTGGGGCGTCCGGAAGT  
CCGCGCAGATCCGCGCGGGAAGGCATTAGTTTAACTCAGAACAACACAGTGGTGATTGAGAACGAGCCCAACCG  
ACAGGGGGGGCCGAGCTGATGAAGCGGTGTATGACATGGCCCGAAGGGGGCGAGGATGAGATTCAGGCGCAGATGC  
GTGATGGCGGCTTTTTCCGGAGCGAGCGATGA

>Cluster\_55566

ATGAGCCTTTTCTCAACAGACGATTATCAGAAGGCACTGCAGGCGCTTATCCCCACCGCCGAGCGTGGACACGGGATCC  
AAAAGCTGTTACGGCCGTGTACTGCGGGCCATTGCGGCCAGTTTCCAGCGAAGTGATAACGACGCAC TTGCATGTCTGC  
CGGTGCTCTTTCCAAAACCTGCGACGATTATGCTCACCAGTGGGAAAAAACACTCGGCTTACCTGATGATTGCTCGATT  
GGCGAAGTGGATACGATTGGCAAGCGTCACTGACATTTGATCGAAACTCATCAGTACCGGCGGGCAGTCAAAGAGCTA  
TTTTCATCAGTATTGCGCAGCAATGGGTATACGATTTTCGATTAAAGGAATACCGGCGAGCGCTGCTGGCTTATCGGTAT  
GTGGTGACGGGCTAAATGGGGATGACTGGCCATTGCTGCGCTGGTAGAGCGGAAGACACAACGATAACTTATGCCCGT  
GCAGGCTGAGTTATTTGGCGATCCATTACGTTCTGGGGTAATCGTCAGCTGAATGCCGGATTAATGCCCTCGCCCC  
CTCATACACCCTGGTCAAATTCGGCTATATCTATTTCCGTTTTAACGATGAGGGGGTTTACGAAGTCAAGCCTGAGTTT  
CCAAAATATTTGATATCGCTTCCGGTTACGTTTTAA

>Cluster\_22399

ATGAAAACAAAATTGATGACATTACAAGACGCCACCGGCTTCTTTCTGACGGCATGACCATCATGGTGGGCGGATTTAT  
GGGATTTGCATCCATCCCGCTGGTTGAAGCATTACTGGAATCTGGTGTTCGCGACCTGACATTGATAGCCAAATGATA  
CCGCGTTTTGTGATACAGGCATCGGTCCTCATCGTCAATGGTCGAGTCCGCAAGTGATTGCTTACATATCGGCACC  
AACC CGAAAACAGGTCGGCGCATGATATCTGGTGAAGTGGACGCTGTTCTGGTCCCGCAAGGTACGCTAATCGAGCAAAT  
TCGCTGTGGCGGAGCTGGACTTGGTGGTTTTCTCACCCCAACTGGTGTGCGCACCGCTGAGAGGAAGGCAACAGACAC  
TGACATCGACGGTAAACCTGGCTGCTCAAGCCCGCTGCGCGCACCTGGCGCTAATTCGCGCTCATCGTTGCGAC  
ACACTTGGCAACCTGACCTATCACCTTAGCGCCGCAACTTAAACCCCTGATAGCCCTGCGGCTGATATCACGCTGGT  
AGAGCCGGATGAAGTGGTCAAGCCGGCGAGTCAACCTGACCATATGTTACCCCTGGTGGCTTATCGACCACATCA  
TCGTTTACAGGAGAGCAAATAA

>Cluster\_17759

ATGGCCGGCGACTATGGCGGCTTTGTTTTGCGTGTACTATTACAAAACGGTAAATTACTTCCGGTGGTAAACATGCC  
CGCAGAACAAAAGCACCAAAACGAAAATCAACTCAGTACAAGCCCTAACAGCGATGCAAGGAGGCTTATGCGCAGGAAT  
ATACCAAATGCCCCTGAGAAATCAGACGCGAGGCGGATTAACGAGGGTTCTCGCTTAATACGGCAGCGGTTAAAGCAGT  
GTCATGATGCGTGTAGAGCGCATCCAGAAACGGATCGCCGAGCTGATGGAGGAACGCAACAAGCGTTTTCGCGTCACTGC  
TGATTACGTGCTACTTCCGCTGGTGGAAATCGACCAGATGGATGTTGATCGACATCCTGAACGATGATGACACCTGAAGC  
CTATCCGCGAGTGGCCGAAGATAATGGCGCACCACTGAGTGGTTTTGACCTGTCTCTACCATCATGAACATGGATGAG  
ACATCAATCGAGACCATCTCAAGAAAATCAAAATGGCCTGACAAGGTGAAGAACCCTCGAGCTGATTGGTAAAGCCTCGA  
CGTCAATGCGTTCAAAGAGCGCTGGAAGTTTTCCGGCACCGTCAACCTGCGCACCGCATGGCTAAGGCCCGCTCGCG  
TGAAGAGCGGGCTGGTGGTGAAGAATGA

>Cluster\_31482

GTGGAGAAATTTGCTGGTCTGTTTGGTCTGGTGGGGCAGGGCGTAGCGAATTAATGAAAGGCATGTTTGGCGGGAC  
GCAAATCACCGCCGGTCAAGTTTTATATCGACCAACAGCCGATCGATATTCGTAACCGAGCCACGCCATTGCGCGAGGCA  
TGATGCTCTGCCCGGAAGATCGCAAGCGGAAGGCATTATCCCGTGCCTCGCTGCGGACAATATCAACATCAGTCCGCT  
AGACGCAAAATGCTGCTCGGCGTGTGTAATCAACAACCGTTGGGAAGAAAACAATCCCGATCACCACTTCTGCGCT  
CAACATCAAAAACCGCCGGCGCTGAGCAACTGATTATGAATCTCTCAGGTGGAAATCAGCAAAAAGCCATTCTGGGCGGCT  
GGTTATCGGAAGAGATGAAGGTCATTTTGTGATGAACCTACCGCGGCATTTGATGTTGGTGTAAAGCAGAAATATAT  
AAGCTGATTTATGCGCTGGCGGCGCAGGCTGTGGCGTCTGTTTGCCTCCAGCGACTTACCTGAAAGTCTCGGCGTTGC  
CGACCGATTTGTTGATGCGGGAAGTAAATCGCCGCTGAAATGTTTACACGAGCAGGAGATGAGCGTCAAGGCACTGA  
GCCTTGGGATGCCTAAAGTCAAGCAGGCTGTTGCTGA

>Cluster\_17477

ATGAGCAAATACACCGAACTAATCACGAACTACCACGCTACCAAACTAAATTTCTTGGCGATGTTGATCTGATGACCCG  
GCCATTATGATGTTGCGGCTGCCACCAGAGGGCTGATTAAGCTGATTTGATATGACTCTGCGGTTGGTGTGCAACTTG  
ACATTTCTGGATTGTGGATCGGACGTAGCCGTTGTTGTCAGCCAGCCTATCTCAGGTGTCTATTTACAGTGGGATACCGAC  
GGGCTTGGATATGATCAGGGGTATGGCAGGACCATACGATCTGATTCAGGATACATGATCTCAGCGATGAAACTTA  
TCGTGCTATTTAAAGCGAAGATTGCGATTAATAACTGGGACGGACGGAATGATTGCTTCCGGCAATTTCTGACGCGG  
CAACAGCAGGATCCGCGGCTGCGAATGCAAGTGCATAGTGCATTAACAGGACATGACGATATCGGCTGGGCTTTCCGTA  
GATATTTAGATGATACGCGTGAAGTTAATGCGGCAATTAACAGGGGTATCTAACAGTAAAGCCGCGGGGTATGGGC  
GGGGGGCATTGAAACACCTTCGGTGGAACTCCATCGGAAGGCTCAAAATTTTTGGTTTTGTATGGATAACGAATTC  
TCAGTGGTTTTGATGAGGGCATGGGGAGTATTACTCTGA

>Cluster\_60644

ATGAGATCTTATTTGATCTTGGCGCTTGTGGGCAATGCAAGCTGGGGCAGCCGACCTTTGAAGGAACGGCAGCTAC  
CGGAAGATTTCCGACCCGAGCGGGTTATAGGGCTACTCGGGGCTTGTCTTGGGATCCAACGTTGATGATCTTCTTCA  
TACAGGCGTTATCAGAGAGTGTGCAATTTGAGTGCCTGCGATGAACATTTCTGACGATCGTCTGTTGTTCTGTAACG  
GGTTGCGGTGATTAACCATACAGTCTTTGGAGCGGAGAAAGATTACCGTGGTTTTGAAAAGTCAAGAAACGATTAACAA  
GCGGAATATTTATGATGCTCTCTTTACCGTCTGCTCTGTTAACACCCCATGCAACGATGGTTATCTCAGAACTTG  
AAAAGCAGTATTAAGGCTCGGTATACCTTACCTGGGGCGGAGAAGTTGCCACTAACACACCCGCTTTTTTTGGGG  
ACATGTCAGGCATCGGATCTCAGAAGGCTATTAATTTATGAGCCGTTGGCGCGATATATATATGTTGAGGAATCAGT  
TACAGGCGATCATTTAAATTTACGCGCGCGACGAACCGATGATCACCTTGCCTCGACAATTTGCTTCCCGAGAATGGT  
ATGTTGATTAAGGAGGTATGGATGATCTCAGTAA

>Cluster\_25160

ATGAGTGCCTCGTTGGCGATCCTGACCATCGGCATTGTACCTATGCAGGAAGTTTGGCCGCTCCTGACAGAATACATTGA  
CGAAGATAATATTTCCCATCATAGCCTGCTGGGGAAGTTAAGCCGCGAAGAAGTATGGCGGAGTACGCGCCAGAAGCAG  
GTGAAGACACAAATTCACATTAATAATGACAAACAGCTGGCCCATGTTTCGCGTTCGCAAAAGTGAACGAGACCTGCAA  
GGTGTGGTTGAAGTGTGATAATCAGGGTTATGACGCTATTTTATTAATGAGTACAGCAAACATTAGTAGTATGACTGC  
CGTAATACGATCTTTCTTGAGCCGTCGCGAATATGGCTCCGCTGGTTTCTCTATTGTTGAAGATCATCAGGTGGGG  
TTATCGTACCGGTTGAGGAGTTGCTGACCGTTCAGGCGCAAAAATGGCAAATTTGCGAAGAACCGCCAGTATTTTCATG  
GGTAATCCCATTCATGATTCGGAACAAAAATCATTGATGCGGGAAAGAATTACTGGCAAAAGGTGCAGATGTCATCAT  
GCTGGATTGTTGGGATTTAACACGCTCATCGGATTTACTGCAAAAACAGCTCGATGTTCCCTGCTTCTCTAACC  
TATTGATTGCACGGCTGGCTGCGGAATTACTGATGTAA

>Cluster\_27627

ATGCATCGTATAGACACGAAAACCGCGCAGAAGGATAAGTTCCGCGCGGGTAAAAACGGTTTTTACCCGTTGGTAACCCCA  
GACCGCACACCTGCCACCGATCTTGATGATGACTACTTTGATATGTTGCAGGAAGAAGCTCTGACGCTGGTGGAGGCAT  
CCGGTGCCAGCCTGGAGAAGGGGCGGCATGACCAGCTGCTTACCAGGCTTCGTCGCTGCTGTTAAGCCGCAAGAATCCG  
TTTAGCGATATCAAAATCGGATGGCACGGTGAACACGGCTCTCGAAAACCTTGGTTTGGGAGAAGCGGCAAAAACGGAATG  
GGGCACAGGGGAAAATCAGATACCGGACATGGTTTCATTTAGTGGGGTGGGGATTTTACGGAAAACAATTTTGGCCAG  
GAGGTTGATACTCCAGTGGCTGACGATTCATCAAGTGCAGCAGCAAGCTGTAACACTGAATAATGGTAATTTATCAG  
CTGTCAGGCTATAAATGGCCCCAGTCAATTTGGTGTCTGTTTGTGCTGTTGCCA AAAAGTTTCTGGCTCGACTAACGA  
AGCATACGCAATCTCAGTTAATCGTCACTTACCAGATGTAATTTGTACCTGGAATGCCGTAAGGCTGATGATGTCCATA  
TTTTAGGAATTGGGAAATTATGA

>Cluster\_16585

ATGAGTAAGTCGAAAATGATTGTGCGCACCAAAATTTATTGATCGCGCTGCTACTGGACCGTGGTGTATTGCTTCTTCTCT  
GGTGGCGCTGTCCGGATTTTCGTTCTTCTTCCGACGCTGCAATGGCTGACGCAAACTTCGGTACGCGCAGATGGGGC  
GCATTTGTCACCGCTTCTCGGCATTGCGATTTTCGTCGCGCTGATGTTTATGTTTGTGCGTTTGTGATCGATCGAACATC  
CCGGATAAGAAAGATATTCGCTGGCTGTGAACATTTGTCGAAGTATTAAGGCAATGAGCACAAAAGTGGCGGATGTCCG  
TAAGTACAACCGCGGGCAAAAGATGATGTTCTGGTCAATCATGAGCATGATTTTCGCTGCTGCTGGTGACCGGAGTGATTA  
TCTGGCGTCCGTACTTTGCGCAGTACTTCCCGATACAGGTTGTCCGTTATAGCCTGCTGATCCATGCGGCTGCAGGTATC  
ATCCTGATCCACCGCTCTGATCCATAATGATATGATGATGATGATGATGATGATGATGATGATGATGATGATGATGATGATG  
GGTGAGCCGTCGCTGGCGAAGAAAACCATCCGCGCTGGTATCGAGAAATCGAGAAGGCAGAAAGCGAAAAAAGAGAGTG  
AAGAAGGGTTATAA

>Cluster\_17794

ATGGATATTAATCTTTGGTTATTTATGGAAGCACTGCTCGTGAGATCAAACGAGGCATCTGATGTGGATATGTTTGC  
TATATACGATGGCTACATTAACAAAATGATTGTGAAAGGAAAGTTAAATATAGCAATGTATCCGTTGCAATTGGCGAAGA  
AAATAATGGAAGTGGGAGTTTATTTGCTTGCCTTGAAGGAAGAGGGCTTGCCAATATTTAACGAGGAGCTATTTGAA  
AGCATATCATCATTAATAACAAAAGAAAATTTTATCAGATGATATGATACGCAAAAATTTATGCAATTTTATATG  
TGCTGAAAACAAATCAATTTCAAACAAAATTTTAAATGAAAGGATATCATGGTGCCTAAGGACAAATTTCTTATATCAC  
TCAGTGCAGAAATGCGAGCGCAATTTTCGCAAAAAGAAAGCTTGGCGCTTAAGTTTCAACAGAAATTAATAACACACCAA  
GACATATCAACACTTATTGATTTAAAATCATCAAAGGATGATAGCAAAAATTTGATACCTATATGCCAAAATTTTCTATC  
AGTCTACGGTGTGAGAGTCAACGGTTTTATGACACACCATTTCTCAGAAAAGCATAAAAAGTCTAACTAACGGGAATG  
GCACATCATTAATTAATAA

>Cluster\_38518

ATGCCCGTCGTATAAATATCTCAGATGGAAGGGCGCTGCCTGAAAAGTGAACGGAAGCTCTGCGTAATATAGCAAGAAG  
CAATCAGAGTGTACTCTGATTTGTGGAAAGTCTAGTCTGAGGCTGCACCATAATTTCAATTTATGGATGCTTTTATGTTGG  
AGCCGATTCAGGGCAGTCTTCTTGACCGCTTGGAGGGAGGTGTCGTCGCTTGCAGAGAGTCTGGAGAGACAGCTTAAT  
CATGGCAATCTTTCCTGACGGCTTCAGTTTATATATGGAGCAGGTTTCGTTTAAACCCATTCGTTTGAAGGGGGCAG  
AAATGCAGTGCAGACCAGAAATTAATTTCTATGCATTTACCCTCAATCCTGGAGATTTTCTTGGTGTGAGCAACATCTGA  
GTTGCCGATAACATATATGATATACCAAAAACAGGCGTTTTGTTAAAAATGCACTGCATTCAAAAGTCTGTTCTTTTATC  
GATAAGGATGCTTGTCTGAGGCTATCCGACACAATGTTTTTCACTCCCTCAGTCGTGAAGCGTTTTCTCCAGAAATGAT  
CGTTGGCAGAGAGAGTGTATTTTGTATCTAACGATCAGCGTTTCTGATCATTTCCGGGCAGGATGTACGTTTTTGA

>Cluster\_6576

ATGCCAATAAATTTAACACCATACTAACAGCGAGTGGGGGACGTTGGGAAATACCGCAGGATACTCTTTCTGGCATAACG  
AACACTGGCTTTTAAACGGAGGAGCTCAGGTTTCAGATGGGGAGCACTATTTGTTACAATACGTTCTGCTTTTTAGGCTTCT  
TTATGGGAAGTGTAAAGCCCTGAAGGATTTATCAGAGAGAGCTTTACAAACTGCATTTGAATAATGTTAATCGTCTGAACCC  
GACCTTAATGGAGGGCTATCCGGCCGAGATTTTGGCAAGTATACCCAGCCGATGTTTCTCCACCTCGTCTTCTCTGT  
AATGCAAAACAGAGTTGGTGTAGAGCAAAATAGAAAATGCTCATTTAATGTTAAGTCACTCTGAGGCGCAGTGAAG  
AGGCATTAACATGCCGATTAACATATGATATCCCTGAGCATGGTGTGATATGAGAAATGCTGGAATTCAGATGATGT  
ACTTTATATGATAAAGATCATTAATAACATCTTTGTTAACAAGTTCACCTCACTCTGAGCAGAGAAAAATAACAGA  
GTCATGATGTTAGGAAAACCTGCTGCTATTTTATTGATGACATCAGGAAGTATTAATAATGTTCTGTTGGTGTGAGATAACCA  
GACTATAA

>Cluster\_48535

ATGGGAAAAAAATCACTGGATATACCACCGTTGATATATCCCAATGGCATCGTAAAGAACATTTTGGAGCATTTTCAGTC  
AGTTGCTCAATGTACCTATAACCAGACCGTTACGCTGGATATTACGGCTTTTTTAAAGACCGTAAAGAAAAATAAGCACA  
AGTTTTATCCGGCTTTATTTACATCTTTCGCCGCTGATGAATGCTCATCCGGAATTCGGTATGGCAATGAAAGACGGT  
GAGCTGGTGTATGGGATAGTGTACCCCTGTTACACCGTTTTCCATGAGCAAACTGAAACGTTTTTCATCGCTCTGGAG  
TGAATACCACGACGATTTCCGGCAGTTTCTACACATATATGATCCGCAAGATGTGGCGTGTACGGTGAACCTGGCCATTT  
TCCCTAAAGGGTTTTATTGGAATATGTTTTTTCGTTACGCCAATCCCTGGGTGAGTTTTACCAGTTTTGATTTAAACGTF  
GCCAATATGGACAATCTTTCGCCCCGTTTTTACCATGGGCAAAATATATACGCAAGGCGACAAGGTGCTGATGCGGCT  
GGCGATTCAGGTTTCATGATGCGCTTTGTTGATGGGTTCCATGTCGCGCAGAAATGCTTAATGAATTAACAACAGTACGCGATG  
AGTGGCAGGGCGGGCGTAA

>Cluster\_27906

ATGGTTCAAGACCCCTCATTAAGCAGGATATTCGCTGGCAGAGGAAATGGCAACAGCGTCACTACGGCATTGGGCT  
GGTGTGTTGATCTGTTGGGCTGGTGTGCTACTGGTTACAGCGGTTGATCTCAATGCCAGCGCCACGGCGATAACCAAGTT  
ACAGCCTCATAGCGGCGAGTATGATCTGCTGTTCTCGCTTCGACGCTCATACGCCATTTCCCATCAACGGGCAAAA  
ATGTGGCTGAAGAAATTTGACCACTGTGCCATTTATCTGTTGATGTTGCGGAACTACACCGCTTTTTCTGGTGGGGCT  
GGATCTCCGTTAGCGCGGGTTGATGATGTTTATCTGGAGCTGGCATTGCTGGGTATTCTGTTTAACTGACCATCG  
CGCACCGATTCAAAATTTTATCTGTTGACCTATCTGGCAGTGGGCTGGCTGCTGCTGGTGGTAAATTTATGAAATGGCA  
GTTAAGCTCGCGGGCGGACGCTTACTTGGCGGTAGCGGCTGTTGTTTATTCGCTCGGGGTGATTTCTCTCAGCTG  
CAAGCGCATTCATACAATCATGCCATCTGGCACGGCTTTGTTGCTCGGGGTAGTGTGCTGCACTTTCTGGCATCTATT  
TGTATATTTGGGCAGGCGTAA

>Cluster\_34891

ATGGATCGTATTGTTAGTCTTTCACATGACCGTACATCACTGCTAGCACCCATAAGGTGCTGCGTAATACCTATTTTCT  
GCTGAGCCTGACGCTGGCCTTTTCGGCGATTACCGCAACTGCCAGTACGGTGTGATGCTGCCATCTCCGGGTCTGATTC  
TGACGCTGGTGGGTATGATGTTGATTTCCGACCTATAAAACGGCGAATAAGCCGACCGGGATTAATCTCCGCAATTC  
GCCTTTACGGTCTTCTGGGTATATCCCTCGGACCTATCTGTAACACCTATCTGTCTGCGGGAATGGGTGACGTAATCCG  
TATGGCACTGGGCGGAACGGCGTTAGTGTCTTCTGCTGCTGCATATGTGCTGACCACCGCAAAGATATGCTGTTCC  
TCGGCGGTATGCTGATGGCGGTATTGTGGTGGTGTGATTTGGTATGGTTGCGAATATCTTCCGACGCTGCCGTGCTG  
CATCTGGCGATCAGCGGGTCTTCACTTCTGATCTCCTCTGGCGCTATCTTGTGAAACCAGCAACATCATTATGGCGG  
TGAGACGAATATATTCGTGCCACGGTTAGCCTGTATGTTTCGCTGTACAACATCTTCTGCTGAGCCTGCTGAGCATTCTGG  
GCTTTCGCTAGCCGCGATTAA

>Cluster\_12188

ATGGCTAACTGGTTAAATCAACTGCAATCCCTGCTGGGCAAAGCAGTCTTCTACCTCCTGCTGCGGATCAGGGATT  
GGGCAAACTGTTAGTGCCAGGCGCATTAGGCGGACTGGCTGGGCTGCTGGTTCGCAAAATAAATCAGCACGTAACCTTCTTA  
CGAAATATGGCACCACGCGTTACTGGTTGGCGGCGAGCGGTAGCGGTACGGTGTGGAATAAATACAAAGATAAA  
ATTCGCGCGCGCATCAGGACGAACCGCAGTTTGGCGCGCAAAGTACGCGCTGGATGAGCGTACAGAACGTTTGTATCT  
TGGCGTGGTCTTTGGCGCTAAAGTGTGATGTTCAATTTGATGCCAAAGAAGTGGCGGCAATCGACCAGCAATTCGCTGAAG  
CCGCGTGAAGAGCAGGCGGTACTACTTGAAGCAGCAATCGAACACCGCTGGATCCACACCGCTGGCTACCGGG  
GTCCGCAATGAGAAGAGGCGCTGGAATCTATTTCTGAGTTGGCGGCTATTGATAATTGACATTTTATGGAACGCG  
TTACTGAAATGCACTGGGTGACGCGCTGAAAATCCCCAGGATGTTCTGACGGCATTGAACGCGATCTCGAACAGCAAA  
AACGCACTTTGGCGGAATAA

>Cluster\_8222

ATGTACCGTTATTTGCTATTGCTGCGGTGGTACTGAGCGCAGCATTTTCCGGCCCGGCTTGGCCGAAGGTATCAATAG  
TTTTTCTCAGGCGAAAGCCGCGGCTAAAAGTCCACGCTGACGCGCCCGTACGTTTTATTGCGGATGTAATAATTAAC  
GGCAGGGCAAAAAGAGCGGTGTTGATCTGCAATCGTGGCGCTATCAGGTGCGCAAAAATGAAAACCGCCAGCGCGTA  
GAGTGGGAACATGCTGTTCCCGCTGGCAGTTCGGTACCAGCGCCAGTGTGCGAGGACGGTGGACGTAAAAACTGCGC  
TAAAGATCCGGTCTATCGCAAGATGGAAGCGATATGCATAACCTGCAGCCGTGAGTCCGGTGAAGTGGCGATCGCG  
GCAACTTTATGTACAGCCAGTGGAAATGGCGGTGAAGGCGAGTACGGTCAATGCGCCATGAAGTTCGATTTCAAAGAAAA  
GCTGCGGAACCAACCGCGGTGCGCGCTGACCGCTGCGGCACTACTTCTATATGCGCGACCAATAACAACACT  
CTCTCGCCAGCAACCGCAGCTGTTCAACGCATGGAACAAGATGTATCCGGTTACCGACTGGGAGTGGAGCGCGATGAAC  
GCATCGCGAAGGTGCAGGCAATCATAACCCGTATGTGCAACGCGCTTCCAGCGCGGAAAGACTAA

>Cluster\_41540

ATGCGACACATTTTCAACGATTATTGCCCCGACGGCTGTGGCTGGCAGGGCTGCCATGTCTGGCATTGCTGGGTTGCGT  
GCAGAGTCACAATAAGCCAGCCATTGAGACGCCAGCAGAAGAAAAATCCGGTTTATCAACTGGCTGACTATCTTTCTA  
CTGAATGTAGCGACATCTGGGCGCTGCAAGGTAATAACCAACCAACCAATCCGCTTTACTGGCTGCGGGCGATGGATTGT  
GCTGATCGTTTAAATGCGCTGAGCAGTCCGCTCAGCAAGCCCGCAATATGACGACGGCAACTGGCAAAAATACCTTTAAACA  
AGGGATTTTGTCTCCCGCAGCCAAAATACCGCTATGACGCGCCAGCTGGTCCGCGCATTTGATGCGGCAATGAGTACCG  
AGATCCCGGCACAGGTTCCGCCACTGTATCAACTCTGGCGGACGGTCCAGGCGTGCACACTGCAACTGGCGGAAGAGCGC  
CAACGCTACAGCAAACTCCAGCAGTCCAGCGACAGCGAGCTGGATACTTTGCGCCAGCAACATCACGTTCTACAAAGCA  
ACTGGAACCTACTACCCGCAAGCTGGAACCTGACCGATTTGAACGCGCAGTCTCGACCCGCAACCGCTGGAAAT  
TCTCGCCGGATACCGCGCAGAGATGAAAAGCCGCGCATTCCACCGATGAGGTCACTCTGATGAGCATAA

>Cluster\_29282

ATGGGGATTTTAAAAAGTTTATTTACGCTGGGGAAATCGTTTATCTCCAGGCGGAAGAGTCTATTGAAGAAACCCAGGG  
CGTGGCGATGCTGGAACAGCATAATTCGTGACGCAAAAATGAACTGAACTCGATAAAGCCGGAAAAATCTCGCGTTGATCTGCTGG  
CGCGGGTGAATTAAGTACAGATAAGCTGAAAGATTTACGTGAGCGCAAAAGCCAGTCTGGAAGCCCGTGGCTGGAAGCG  
TTAAGCAAGAACGTTAATCCGCTGTTGATTAACGAAGTTGCTGAAAGAAATCGCGCGCTTGGAGATCTCATTACCGCTGA  
AGAGCAAGTGTGCGAATCTGGAAGTCTCTCGTATGGCGTGGAAAAAGCAGTTACAGCGACAGCGCAGCGTATCGCTC  
AGTTTGAAGCAAGAAATGGAAGTCTTAAAGCTACTGAAGCCTATGACGCGTGCACAACAGGCTGTAACGACCTCTACCGTT  
GGCGCATCTTCCAGGTTTCCGACAGCGGAGAAATCCTTAAACGCTGCAACCGCTCAGGCCGAACGTCAGGCTCGCCT  
GGATGCTACCGCAGATTTGAAAAAGTCCGACAGCGTCCGCTGATTTGATGAAAAGCTGGCGGAAGCCGGAATTTGGCGGTA  
GCAATAAAGTAGCCCGCAGGATGATTAGCAAGACTGCAACGCCAACAGGGCGAGTAA

>Cluster\_20904

ATGTCATCGACAAATATTGAACAAGTATGCGGTTAAGCTGGCGCAGGCGCTGGCGAATCCGTTATTTCCGGCGCTGGA  
TAGCGCCTTACGTTACAGGCGCCATATTTGGCCTCGACGAACTGGATAATCATGATTCCTGATGGATTTTTCAGGAATATC  
TGGAAAGATTTTACGCGCTTATAACGTTGAGCTTATTCGTGCACCGGAAGGGTCTTCTATCTACGCCACGTTCCACC  
ACGCTGATCTTCCGTTCCGTTTGTGCGAACTGGATATGATGGTGGGAAAAATCCTCTGTTATCTCTATCTCAGCCCGGA  
ACGGCTGGCGAATGAGGGGATTTTACTCAACAGGAACGTACGACGAACTGCTACCTGGCGATGAAGCGAACTGC  
TGAAACTGGTGAACAACCGTTCAACCGGTTTCAGACGTTGACCGTCAAGAGTTGAGGAAAAAGTACGTTCTTCCGCTCAAC  
CGTTCGCTGCTTTAGGATGTTGTTGTTTATGGGCCACGACGAGCAAGTTCCGCAATACCGAATCCGGTGTTCGCT  
CGGACGATGTCGCTGCGGACGATCCCGTGAAGCAGCAGCTCGCTGATTTCTGACGCGCAAGCAATGCGGATTTG  
AAAATCATCTGCAACTCAACGATGAAACCGAAGAGTACGCCAGATAGCGGAGAGGAAGATAA

>Cluster\_15200

ATGAAACCGGCAAGAGTCCCTCAAACCTGCTGCTGCTCCTGATTGCTGGGGCGATTGCGCTGGGGAGAGCTTTATCGCAA  
GGCGCTGGAGCGTCACTCAACCGTGGTTCACTAAAAATGATGGATTTCATCTGCTTAAAGATTGGCAATTTAAGCGCAG  
AAATCAATTCGCAAGCGTGGCGGTTTCTCATCAAGTGAATGTTCTGCGCAAGGAATGCCCGTCCAGGTGCAGGCGGAC  
CCACTTCACTCTTCTTTGGCGATAAATCCGTTGATGTTTGTCTACTGGCACATACATTTGCGGTGGTGCATGATCCGCA  
TCGTTTATTCGCTGAAGCTGATCGGTTACTGATGATGATGCTGGCTGGTGGTATGATGCTTACATCCATCCATGTTTAA  
TGGGATTACGCAAACTTGTGCGGTTATGCGCAAAACCTCGCCCTATAACAGCCGGATGTTACTCTGATGCGGCAGCTG  
GACTGGCTCTTGTGTAATTTGAAGTGTACACGCGCAGCGTTTCCACGTTCTCCCGTGGAAACAAACACGGAGGAAA  
ACTATTGAATGCGCATATCTCTGCGCTTGGTTGCTTACAACCTTATGTTGCCCGGAAACCGGACTATTCCTTTAACGCTAA  
ATCCGATGAAACAGAGCAAGAAATAAACCGAAATTCGCGGCGGTTGGTGGCCACCGCAATGCTGTAACAGGCT  
TAA

>Cluster\_53568

ATGACAACCAACTACTGGACCTGAGCTGGAATGCAAAATGCCATCCCGCGATGCAAAATGTCGGTACGCGCGCAGCCTT  
GTTTACCTTCAAAAACGATATGGCAGGGTTTGTCTGGGATGCCGCGCAACTGGAATAAACCCTATACCTTTTGTGTAAG  
TTAAACGCTGCTCGATGGTGTCACTGTTGGCGGCGATAAGGTGAGTACTGAGCAGGTGTTGAACCTGGCAGATAGC  
GCAAAAAAAGTGAATGAACTTGTGCAATTCGGCGGTTTCGACCTTGATAAGAAAAAGTTCACGTTACTTAAACGATTTAT  
TGCGGTAATGAGGCTGGAGTGGGGCTTTTCGCGCGGAAGGTGAAGAGTTACATTACAATGCGCGGCTTCACTCTCG  
GTGAACTGGGCACTATTTTCCACCAGCCACTGAAGCAGGTGCACCTGAACTGAAATCGAATATTCGCGCAGGTGTGGCA  
CAATAAAGAGATGCCACCGTTGCAAGGGCGCTGGCAATGTTTATTTATTTGGTGTCTATTTTTCAGTTTCTTTGATGG

CAACAAGCGTACCAGTCGCCATATGATGAACGGTTGGTTAATGCGCCACGGTTACAATCCCATTAGTGTACCCGACGCTC  
GTGCGCTGGAGTTCAACAGCAAAATGGTGCCTTTTATCACAGCAAAGATGCCAGTGAATGATGGCATTTTTTGGTGGAT  
TGCTATCAGGTTTGA  
>Cluster\_56682  
ATGGTGGCGAAAAATTAATCTCTTATCACGGCTTACGCCGCTTTTATTCGTGTTTCGCTCCTTTTTTGCACAGTCAAATAT  
GACTGTTTTATCCFATGGCTGTTTTCCATTAAATAGTCAGGGGGAAGGTAACGTTCCGCTAATATCTAAAAAGTAATGAAGTTC  
AATATATAAAAGCGACGGTATTTTCGTATGATAATCCTTCAACGCCCTCAGAGCAGGAAGTTGAAATAAAATCCGGAGAT  
GCCACTCATCTTGTAGTGTGCCGCTAAGTTTTCGCTGCCAGCGGGTAGCAGTAAGACTGTGCGCTTTGTTGCAATGGA  
ACCAGAGCAAAAAGAAAAAATTTACGCGTTAAATTTGAAGCGGTTCCAGTATGATGACGTTGCCACGGATAAAAAAG  
ATCTCTCTATGCAGTTAACAGTTAACTTAAATTTGGGGGATTTGTTGTTAGTGTCCACCTCAGCAACCTATTGCTAAGTTA  
GAAGTAAATGCTGCCAAAAATTTAGTTAATGCAGGGAATCAACGCTTAAAGATTTTAAAGATCGCTTATTGTAATAAAATA  
TAGCAAAGAAAATGTAAAGATACAGACTGTAATAAAAAATATCTTCCCTGGTCAGGAAAGAACTTTGAAAGCATATCTG  
GCTACGACAAAATCGTTGTCAAAATATAAATAACTGGATCACCAAAGATAATGGCGAGTTTGAAC'TGGCGGTCCATTAA  
>Cluster\_63020  
ATGAGACTCGAGTTTCAATTTATCGCTATAACCCGGATGTTGATGATGCTCCGCGTATGCAGGATTACACCCCTGGAAGC  
GGAAGAAGGTCGCGCATGATGTTGCTGGATGCGCTTATCCAGCTGAAAGAGAAAAGATCCAGCCTGCTGTTCCGCGCT  
CCTGCCGTGAAGGTGTGTCGGTTCCGACGGTTCGAACATGAACGGCAAGAATGGTCTGCTGCTATTATCCCCGATTTCC  
GCACTCAACCAGCCGGGCAAGAAGATTGTGATTCGCCCGCTGCCAGGTTTACCAGGTGATCCGCGATTTGGTGGTAGACAT  
GGGCAAAATCTATCGCAATATGAGAAAATTAAGCCTTACCTGTTGAAATAATGGACAAAATCCGCCAGCTCGCGAGCAT  
TACAGATGCCAGAGCAGCGAAAAAATCGACGGGCTGATGAATGTAATCTCTGCGCATGTTGTTCAACCTCTGTCGCG  
TCTTTCTGGTGAATCCGATAAGTTTATCGGCCCGGACGGCTTGTGTTAGCGGCATATCGTTTCTGATCGATAGCCGTA  
TACCGAGACTGACAGCCGCTCGACGGTTGAGCGATGCATTCAGTGTATTCCGCTGTACAGCATCATGAAC'TGCGTCA  
GTGATGTCGGAAGGGGCTGAACCCGACGCGGCCATCGCCATATCAAGTCGATGTTGTTGCAACGTAATGCGTAA  
>Cluster\_23588  
ATGATCTACTTACGCAAAGCAAATGAACCGGTCATGCAAATCATGGCTGGCTGGACTCCTGGCATACTTTCTCTTTTGC  
CAACTATTACGATCCGAACCTTTATGGGCTTCTCTGCGCTGCGCGTATTAACGACGACGCTGATGAAGCAGGGCAGGGCT  
TCGGCACTCACCCGCATAAAGATATGGAATTTTACCTACGTTGCTGGAAGGTAAGTGTGAGCATCAGGACAGCATGGGC  
AATAAAGAACAGGTTCCGGCGGGGAGTTCCAGATTAAGTGTGCGGTTACGGGTTTCCGTCAC'TAGATACAACCAAAG  
CAGCACCGAGCGTCTGCATCTGTATCAGATCTGGATCATGCCGAAGAAAACGGCATTACGCCGCTTATGAACAGCGTC  
GCTTCGATGCCGTGACGGCAAAACAACTGGTGC'TTTCGCCGATGCGCGTGTGTTTCAATGAAAGTGCATCAGGATATG  
GAACTGTATCGTTGGGCGCTGGTGAAGATGAGCAGTCGGTGCATCAGATGCGCGTGAACGCCGCGTCTGGATCCAGGT  
GGTGAAGCAATGTCAACATTAACGGCTGAAAGCCTCGACCGCATGTTGTTGCAATCTGGGATGAGCAGCGCATTT  
CCATCCATGCTGATAGCGACAGTGAATCCTGCTGTTTCGATTTACCGCAGCTCAA  
>Cluster\_26522  
ATGACCGTCGAAACGCAACTTAATCCCACACAGCCTGTCAATCAGCAGATTTATCGTATTTCTCGTCGCGACATTGTCCA  
TTGCCGTGATGCTCCAGGCACACCGTTGTCGGAAGAAAGAGTTTCTGTTTCGTTTCAATGTGTCACGCCAGCCGTTCCGTG  
AAGCCTTTATTAAC'TGGCGGAAAACGGTCTGATTCAAATTCGTCGCCAGCGTGGCAGCTACGTCACAAAATTTCCATG  
GCCAGGTGCGCAACGGCAGTTTATCCGTCAGGCCATTGAGTGCAGCGTGGCGCGTCCGGCGCGGAGCATGATTACCGA  
AAGCCAGTGTACCACTGGAACAAAATCTTCCACGACACGCAATGCCATTGAGCGCAAGCAACTGGATGATTTTGTG  
AACTGTAGTCAACTTCCATCAACTCCTGACCCAGATTCGCGACTGTCAACTGGCGTGGGATACCATTGAGAACCTGAAA  
CGACCGTTGATCGCGTGGCTATATGAGTTTCGACACGCTTTCTCCACCAGAAATGCTGTTAGCCAGCATCTTGAGAT  
TTTTCTGCTGCAAAAACGTTGATGGCGATGCGGTAGAACGTCGAATGACGCAACATTTGACGAGAAATCAGCGAATCCG  
TGGCCAGATCCGTCAGGAAAACAGCAGTGGTTTAGCGAAGAGTAA  
>Cluster\_38481  
ATGCTAAAATATACTTTGTATGCTGAATATTACCGGTTGTTTCATCAATCCTAATTTAATAGAGTTGGGATGTTTAA  
TTTTGTTAAATGAGTCAAAATGGATGTTTCTTCAATTAAC'TGGTGGGCTCCTACTAGTTTGTGATAGGCTCGTAATAC  
CATGATTTTATCTGTGTCAGTAAACTGCGTCTTCTTATGTCCTTCCACTAGCTCAATGATGTTTCTTCTGCG  
TCTGCAAAATCAAATATTACTACCAATGTTTGTAGAAATGAAAGCATCTAACACATTTCCCTCTAATGTTTTTTTTAAAT  
TCTGCTGTATCACTAATTTCTGTTTTCGCTTGTCTGCGTTATCTTTTGGTTCGTGATATATATCAATATGGATAA  
ACCTACATTTGCAACTGAAAATATAAATTAATGCAATTTTAGCTATAAGTTACATTTTATGTCATGATGACATCT  
TTTTCAATTTCTGTTATTAGGAAATGGTAAATCTAAGCTTGTGCAAAATTAATCTGGTTGACGGCTCGCAGCTGCTGC  
TTCAACGTTAATCGCAGCTCATTATGGCTTTATGCAATATCTATGGTAAAAATAATATATCCGGCTTTTCAATTTTAT  
ACCTTATGATAGCTTTTTGCTATTTAATAGAGCGAAAATGCTATTGA  
>Cluster\_19630  
ATGCTGACCAAGATGTTAATCCGTACCTTCCGGTGTGATGCTGCATCGCAGCAATCGCCATACATGGCTGCACCTGT  
TGGCGCTGCAATGGCGCATCCGCTTTAGCTCTGTGCTGTGATGCTGATTTCCTCCGTACCCAGCCGTTAACGGTA  
ATGATGGCGGCAATGGAATAATGGCAGTATCGCGAATCAGCAGGATCAGAACGCTGACAGCGCGGGGCGCAGGTGGGC  
GATACTATCTCCCTGATGGATGGAACAGTATTGAGTACACCCGAGCTGCAAGGATGATGGGGCAGTTTCCACGATC  
TGTGAAAAGCCAGTAGGGCAGGGGACAGTTGACGCTATGTTGAGTACGCTGCGACGCTCGACCGCGGACGCAATCGA  
CCCTTGAACGGATGGTTATGCTGGCGACCTGCGCAGATGACGGGGCGGTTGAGTATCTGCAAGAGCGTATGGCTGGC  
GGTTCCATTACCGGTTACGTCGCCAACGGCCAGACTGCCGCGCAACCTGTCCGGAATGTCATGCTGAGTTTATAGCAGC  
GTATGACCAAGCTTTTCGAGTGGGCGCAGCAATCAGGGTATGGCCCCGGCATCGCCAGTACGACGACAAATACCGTGCCTC  
TGGTTGCGCAGCGCTCCGCTGGCAACGCTGCTGGTTCGCTAA  
>Cluster\_39199  
ATGAAACTGTTGATGTCGAAGATGAAAAGAAAACCGGAGAATACTTGACCAAAGGGTTAACCGAAGCCGGTTTTGTGGT  
CGATTTGGCCGACACAGCGCTGAATGGCTACCATCTGGCGATGACCGGTGATTATGATCTGATAATCCFCGATATATGC  
TGCCGGACGTGAACGGCTGGGATATCGTGCATGTTGCGTTCGCCAAATAAGGGGATGCCGATTTCTGTTGCTTACCGCG  
CTTGGCACCATTGAACATCGCGTCAAGGGGCTGGAGTTGGGGGCGGATGACTACTGGTGAAGCCGTTTCGCTTTGCTGA  
ACTGCTGGCGGGGTGCGCACTCTACTGCGGCGGGGGCGGGTGTATTCGAAAAGTCAAGTTTCAAGTTGCCGATCTGA  
TGGTCGATCTGTCAGCCGCAAGTCAACCGCAGCGGACCGCATCACTCTGACCAAGTAAAGAAATTTACTCTGCTGGAG  
TTTTTCTCCGCATCAGGGGCAAGTGTGCCCGCTCGCTTATCGCTCGCAGGATGGGACATGAATTTGACAGCGA  
TACCAACGCCATTGATGTGGCGGTGAAGCGGCTGCGCGCAAAATCGACAACGACTTTGAGCCAAAGTTGATTAGACCG  
TGGCGGCGTGGTTACATGCTAGAGGTGCCGGATGGTCAGTAA  
>Cluster\_66932  
ATGACCGAAAATACCGAGCTATCCTCGCCATCACATCCGGCACCTGACCCGAAAATACGAAAGCACAATCAGGGCTAT  
GAAGCAGTCAGAACAGCGGGCAATAATGTCCTGCGCTGATAAAAGCGCTTTTATGTACGGGCACATGCTTCTTATCA  
GTATTTACTGGTAACGCAATTCAGTATGGCACTCAACGATGTTGGAGCGGAAATTTTCGTACAGCAATAGGTCGTCG  
GTCAGGCTGGCACCAAAATCAGCCAGCATGGAGTCAGAAATGATGCAATGGCCTTTGGCAGCGGCACTGGCGACCGC  
ATTCACCTGGATTTTGTGCACTATCGTTCACAGATCTCCTCCTGCTCCGCTTTTTCTGACGAGGTTTTGCGGGAT



ATGTGAATGCATTACAGGCATCTAACATTTCTGGAGACGATCAAGAAAGAGAAGATGAATCTGACCGCCACGACAGGTGCT  
GGCGTTCTGGTACACAGAGGACAATGTCCGACGGCGTATGGTTCTGGACATTCAGTATCCTGTCCGTATGGCTCTGGT  
CGCCAGACAACAGCAGGACAGCAGTCTTTTGGTTTTCGAAATCACCATCCAGCGTGTGACCCAGACTGAAACCAT  
CCGGTATGAAATCCGGCAGATGATCTCCCGTAACGCCGACCGAACCCTGA  
>Cluster\_26952  
ATGGAGTTTACAACACTGGCAGGCACAGTTCGAGAACTGGTTGAAAAACCATCATCAACATCAGGACGCGGCGCATGACCT  
GTGTCATTTTCGCGTGTCTGGGTACGGCACAGAAATCGGCGCAGATGACGATGTCGATATGCTGGTGATTTAACCG  
CCTGTTATTTTCAGATATCGTGAGCATGGCGAAAAATCATCCGCAACGGCAGCGTTCCTCAATCCTGGCGGCAAGAG  
ACGCGTCGCTGCTCCGTGAAGAGTTCGTGCAATTTCCGGCGGAGAAAAATGAGGCGTGTGTCATGCCATTGGCCGCTCA  
CAGTTTCAGCGCGCAAAATCGCCCCCTTAAACACGGAAGCTAAAATCGTCCAGGATGCGGATCGGCTGGAAGCCCTGGGG  
CGATTGGCCTGGCGCGCTATTTGCCGTTTCAGGGCATTTGGGCTGGCGCTGTTGATGGCGAAGATCCGTTCCGACAG  
CATCGCCGCTTGATGATAAACGCTACGCGCTGGATCATTTCCAGACAAAATTTACTGAAATACCGCAAAACATGCAAC  
CGCAAGACGCTAAGCAGCAGCAACCGCAATTTTATGTCGAGTTTATGGCGAAGCTCGGTGCCGAACTGGCGG  
GGGAGAATGAAGTATCGATCACAAGGTGATAGATGCGTTTTCACCCGCTGGCTGA  
>Cluster\_60716  
ATGTCCCAACCTCGCCACTGCTCTCTCCTCCCGAACTGAAGAACAGTTGTTAGCGCAAGCACAGCAACTTTCTGGTTA  
TACATTGGGAGAATCGCGGCACCTGTCCGGCTGGTTACGCCAGAGAAATTTAAACCGGATAAAGGCTGGATTGGCGTGT  
TACTGGAGATCTGGCTAGGTGCCAGCGCAGGGAGTAAACCTGAGCAGATTTTGTGCTCTGGGCGTGAACCTAAACT  
ATCCTGTGGATAGTCTTGGTCCGCTGGAAACAACATTCGTTTGTGTTGCCCGTTAACGGGCAATAGCGGGGTGAC  
CTGGGAACCCAGCCAGTCCGCCACAAACTCAAACGCGTACTGTTGATACCGGTTGAAGGCGAGCGCAGCATCCCGCTGG  
CGCAGCGTCGCGTTGGATCACCGTTGCTGTGGAGCCGAAATGAAGAGGAAAGACCGGCAGCTACCGAAGACTGGGAAGAA  
TTAATGGATATGATGTTCTCGGTCAGGTTGAGCGGATACCCTGCTCAGCGGGAGTATTTACAGATACGACCGAAAGC  
AGCGAATGCGAAAGCGCTTACCAGGCAATTTGGTCCCGGGGCAACGGATTCGACGCTGCCACGCGCTTTTATTTGA  
AGAAGAATTTCCAGTGCATACTGGCCGCTCATTTTCTGATCCAGTAG  
>Cluster\_53291  
GTGGCTAAATTTTCAGCTAAGTATGCTCTGTCTGGCAATACGCTAGTTATCTATTTTCTTAAACAAACGCTTTTATCGCCG  
CTTTTCGTAATTTGCCATTTGATGCTCTGGTGTGACGCTACGCTACTGGTTATGCTGCTGGTTTTTGGCAATATTTCTCT  
TGGCAAACTATATTTGGCGAAGCGCACTGGTTACTATGGCTATTAGTTCGGCCACCATCGCTTTGGCGTACCAGTGTAT  
GACAAATCGGGCGATCATTAAGCGTCACTGGATGCTGTTGACGGCAGCGTACTGACGGCAACGGTGGTGGCAGTGACCAG  
CTCAGTGTGGCTGGCGCGATTTGTTTACCCTGCCAGATGAGATCAGCGTAGCCGTCGGCGTGGCTTCGGTCACTACGCCAT  
TTGCTTTGGCAGCGAGCCAGTCCGCTCGGCGGACAGCCTGATCTGGTGGCGCTGTTGTGGTGGTCAACGGTGTGTTGGC  
ATGGCGATTGGCGACGTTGTTTGTTCCTCTCTATTCGCGAAGGGATGGCGAAAGGTGCTGGATTTCGGCGCGCATC  
TCATGGTGGCGGACTGCGCGGTCGATGAACTGGGTCAACAAGAAGCGTAGTTGCAAGCCTGGTATGATGCTTTCAG  
GTGATTTGATGTTATTTGGTTTCCCGCTGGTGGCAGGATGATGTTCTGA  
>Cluster\_45855  
ATGAACGATATTTGAGAATATGGTAATCGCTATCATGTGTTGCAATCCTTTCTATGCCACAATTGGCAAGTAGTCGCGA  
AATAAGAATATTACTACCTGCGTCTATATGAATCTGATGTTAGTTACCCCGTATTGATATATGCAGATGGGCAAAAT  
TATTTGATAAATCTATATCATTTGGTCCACATGATGGGATATACCTGAGGCGGTAGATGCTTTTTCCAAATTCACAA  
TACGACGGTGTATCATTTGAGGATTTGATAATGCATCGTCTCATGTTAAATTCAGCCGATGGATGATGATGATTTCTCCATG  
GCCCGCAAAACACATCTTTTCCCTTACCTTGGCTGGGACCTGATGTTGATATAGTGGAGAAAAGGTGGCTGTATGTTG  
ATTTTATTTGGACAGCCTCAAGAACTATATTGACAGTAAATTTTCGAACTCTCCAGATCGTAATAATACAGCGATAGCA  
GGTAGTTCTATGGGGCGTACATCAGTTTGTGTTGCCGCAATCCTTCGTCAGGACGTTTTTTCAAAGTTGGCGTTTTTTC  
CCCGCATATGTTTAAATGACAGCGCAATGCTGAATTTTCTCAGGACAATAATAGTTGAAAATCTTACCCTGATATC  
TTGATGTCGGTACGACGAAACTAGTGGTATGCGCGAAGACTTTCCTGAAATTTATATTTCCGGTGTGAAAAATATGC  
GTGAGCTTCGTAACAACAGCAATGTAACCTATGGATTATCACCTATGGGGAGGTAATACCCACTCTGAGTCTGCATGGC  
AAAACGCTTCCAGAGATGTTGAAATATTTTTATTGCTGA  
>Cluster\_26826  
ATGATCGACTTTGGTAACTTTTATTTCTGATTGCCAAAAATCATCTTTCACACTGGCTCGAAACGCTGCCCGCGAGAT  
TGCTAACTGGCAGCGCAGCAGCAGCAGCGGCTGTTTAAAGCAGTGGTCCAACCGGTTGGAATTTCTGCTGAAATTAAC  
CGTATCGTCTGGATTTATTTGCATAGCGTAACCGCGAAAGCGCAAGACCCTGAGCGCCGGGCAAAATTAAGCGCATTTGAA  
ACGCTGATGCGCAACCTGATGCGCTGGCGCAAAAGGCGCTTCTCACTGTATGGCGTCAACATCGATACCGCAATGGCCTC  
CGACTGGAATGGGATCGCGTTCGCCCATCTTTCTGATTTAACCGGCGCACCATTTCTGATGTTGGCTGCGGGAGCG  
GTTATCACATGTGGCGCATGATTGGCGCAGGCGCGCACCTCGCGGTGGGGATCGACCTACGCAACTGTTTCTGTGCCAG  
TTTTAAGCGGTGCGTAACTACTGGGTAACGATCAGCGCGCACATTTGTTACCCTTAGGATTTGAAACAATTTCCGGCACT  
GAAAGCCTTTGATACCTGTTTTTCGATGGCGCTGTTTTATCTGTCGTTTACCCTGGAGCATCTCTGGCAGTTAAAG  
ACCAACTGGTGAATGAAGGTGAAGTGTGCTGGAACGCTGGTTATTGATGGTGTGAGAACACGGTGTGTTGCGGGG  
GATCGTTACGCACAAATGCGTAAATGCTATTTCTATTCCTTCGCGCTGGCGTGA AAAACTGGCTGAAGAAGTGTGTTT  
TGTGATATTCGATTTGCGGATGTGAGCTTACCACACAGAGAGCAGCGACCGCAATGGATGGTCAACGAGTCTC  
TGGCCGATTTTCTCGACCCGATGATCCGGTAAAGACGTTGGAAGTTTATCTTCCGCTAAACCGCGGTGATTTGG  
CGAAGCCGTAA  
>Cluster\_66973  
ATGAGGAAAGTTTTAGCTCGTGGCCGAGTTCTTTGGCAACGCAATTCAGAATTTGCGGCAATGCTTGAAGCGATGGCGA  
TGTAAAAACCTTTACTCTCAAACTGGTAAACAGGCCAAATTTGTGAAAACGGTGTGCTAAGCGGTGAGATCGAATCGA  
AGACATTTGTTGATTCATCTGTTAATGGTTCGCGACCAGGCAATGTTATCCCTGAGTCACTGATGACATTTCCCGTACC  
ATAAACTGCAGCAGTTTTTCCCGCTATTGGGAGAGAGGTTCAACGGCGAATGAGATCCTGGACGGCACAGCTCGCCG  
GGCAGCTGCATTTATAACAATGTTAAATTCGAAATCTTGTATACAAAGGACGATATTGAACCTGTGATGACAGCAAT  
TGGCAAAAGACATACAACCCGACGCTGAGCATAGCTTGGCTGAGCTGGGAAAACGACTCGAAGTTACGATGGAACAGT  
ATGACGAAGGAAGAGATTGCTCAGGCAGAAAATCTCTCCTCGGAAAGTGACTCGTGGCTTTAGGCGCAGCAGTGGC  
AGATGAAATGGTTGACGTTTCCCTGTGATAAATGATAATTTGTTGCCGATTTATCATTTTTTACTGAAACTAGCTGAAG  
AAGCAAAACAACAGCAAAAGATCAGTAACGAACCTGATGGA AAAAGTTTACGATCGGTTGAAGACATGCCAGATTTCCG  
GCAATGATAAAAAGCAAAATTTCTGGCTGTATCAGAGCTGAGAGCAATCGCTGATAGTTCCGCCGACCCGACGGTTCA  
AATGAGAAGCTGAGAGAATTTTTCAGATCGCAACCAATTTGCAAGAAAGAAAATTTGATTCAAAGAAACGACTTGTGTTT  
ATGAGTTTTCCCGCATTTCCGCTGAGGCACAGTCCGAGATAGATGAGGCAATAAAACGATTTCTGGAAGACTTCTGAG  
TCAAGTGAGTAA  
>Cluster\_28268  
ATGCGCATCGGCAATATCAGCTCAGAAATCGCCCTGATCGCAGCGCCCATGGCTGGCATTACAGACAGACTTTTTCGGAC  
GTTGTGCTACGAGATGGGAGCGGATGACAGTATCCGAGATGATGCTTCTAAACCCAGGTTTGGGAAAGCAGCAAAAT  
CTCGTTTACGGATGGTGCACATTTGATGAACCGGATTTTCGACCGTGC AAATTTGCTGGTAGCGATCCGAAAGAAATGGCA  
GATGCAGCAGTATTACGTTGAAAGCGGTTGCCAGATTTATTGATATCAATATGGGTTGCCCGCTAAAAAGTGAATCG

CAAGCTCGCAGGTTACGCCCTCTTGCAGTACCCGGATGTCGTTAAATCGATCCTTACCGAGGTCGTAATGCAGTGGAC  
TTCCTGTTACCCTGAAAAATTCGCCTGGCTGGGCACCGGAACCCGTAAGTGCAGAGATTGCCCAACTGGCTGAAGAC  
TGTGGCATTACAGGCTCTGACCATTCATGGCCGTACACGGCCCTGTTTGTCAATGGAGAGCTGAGTACGACAGTATTCCG  
GGCAGTTAAGCAGAAAGTTTCCATTCGGTTATCGCGAATGGTACATTAAGTACCCCGCTAAAGCCAGAGCTGTGCTCG  
ACTATACAGCCCGCATTCTGGTGGTATCTGGTGCAAACCGAAGGTCGCGCCGTTGCCGATCCACAGGCATGGCCCTTCTC  
CTGGACACTGGGGAGTTGCTGCCCCCGTGCCTTTGGCAGAGGTTAAGCGCTTGTCTTTCGCGCACGTTCCGGAACTGCA  
TGACTTTTATGGTCCGGCAAAGGGTACCGAATTCGACGTAAACACGTTTCTGGTATCTCCAGGACACGCTCCAAATG  
ACCACTTTCGCGGCACATTAACGCCATTGAGGATGCCAGCAACAGCTGGAGGCGTTGGAGGCATATTCGAAAATTTT  
CCGTAA

>Cluster\_42168

ATGAATACTGTCCGACGCGCTTGTATGGGGCGGATTGCTGTTGTTGTCCACATTATGCTGGCTATCGACCTGTTGTT  
GCAGGGCGCTCGTGGGCGACATGCCATGACCATGAAACAGGCTGCGGCCTGGTCCGCTGGTCTGGGTGACGCTGTGCTTAC  
TGTTTAACCGCCGATTCTGGTGGTATCTGGTGCAAACCGAAGGTCGCGCCGTTGCCGATCCACAGGCATGGCCCTTCTC  
ACGGGTTATCTGATTGAGAAATCGCTGGCGGTGATAACGCTCTTGTCTGGCTGATGTTGTTCCAGCTATTTCTCTGTTCC  
GGCGGCATTAACAACGCGCGTGCCTGGTGTATGGCGTACCGGGCGGATGTTCTGCGTACCATCATGATCTTCACTGGTA  
GCTGGCTGATTTACAGTTCGACTGGATCTTGTATATCTTCGGTGCCTTCTGCTGTTTACCGGCGTGAAGATGGCGCTC  
GCCCATGAAGATGAATCAGGCTACGCGACAACGCGCTGGTGCCTGCGCTACGCGCTATTTGGCGCATACCGCACCAT  
CGACAACGAGCATTTCTTTGTGCGTAAGAATGGTTGTGTATGCCACGCCGTGATGCTGGTGTGATTTCTGGTGGAGT  
TGAGCGACGCTGATTTTCGCGGTGATAGTATTCGCGCTATCTTCGCGGTGACCCGATCCGTTTATTGTGCTGACCTCA  
AACCTGTTTGCATCTTCGCGCTGCGTGCATGATTTCTGCTGGCAGGTTGGCAGAGCCTTCTCGATGCTCAATA  
TGGTCTGGCGGTGATTTCTGGTGTATCTGGTGTATCAAGATCTGCTGATTTGCTGACTTCTACCATATTCGATCCGCTC  
TGGCGTGGTGTGGCATCTGGTGTATGACGTTTATTATCAACGCCCTGGGTGAATTATCGGCATGATAAGCAGCGGTA  
GAATAA

>Cluster\_33952

GTGTTAAAAAATGTCTGCCCTGCTGTGCTGTGCACAGCGCCGTTTTCGCTAAACCCGTTCTGACTGTTTATACCTA  
CGATTCCCTCGCCGCCGACTGGGGCCCTGGTCCGGTGGTTAAAAAAGCCTTTGAGCCGACTGTAATTGCGAAGTGAAC  
TGGTGGCGCTGGAAGATGGCGTTTTCGCTTCTCAACCGTCTACGGATGGAAGGCAAAAACAGTAAAGCCGATGTTGGTGTG  
GGCTGGATAAACAACTGTGTAGACGCGCCGAGTAAACCCGACCTGTTTGCAAAAGCGGTGTGGCAGCGGATGCTGTTAA  
CGTTCGCGCGGCTGGAATAATGACACTTTCGTACCGTTGATATGGCTACTTCGCCCTCGTTTATGACAAGAAACAAC  
TGAAAAACCCGCCAAAAGCCTGAAAGAACTGGTTGAGAGCGATCAAAACTGGCGGGTGAATTTATCAGGATCCGCGCACC  
AGTACACCGGGGCTGGGCTGTTGCTATGGATGCAAAAAGTCTATGGCGATGACGCCCCACAAGCCTGGCAGAAAAGTGGC  
GAAGAAAACCGGTACCGTACCAAAGGCTGGAGCGAAGCTACCGCCGTTTAAAAAGGTGAAAGCGATCTGGTACTGA  
GTTACACCACCTCCTCGGCTTATCATTCTCGAAGAGAAGAAAGATAACTACGCCGCGCGAAGTTCAGCGAAGGTCAC  
TATCTGCAAGTGGAGTCCGCGCCCGCAGCGCTGCCAGCAAGCAGCGGAGCTGGCGCAAAAATTCCTCCAGTTTATGTT  
TCTCCGGCTTCCAGAAATGCGATCCCAACCGCAACTGGATGATCCGGTGGCAACGTCACGCTGCCTGCCGTTTTG  
AAAAATTGACCAACCCGCAACCCAGTTGGAGTTCACGCGAAGCGAAGTGGCGCACAAAGTTCAGGCATGGATTAGCGAA  
TGGAACGCGCCGCTCAGCCGTAA

>Cluster\_38550

GTGGTATTTCCGGCTGAACTGGTGGCGCTGCTGGACAGACTGGAGGAAGAAATCCGGGCAGACCGCTGAGCAGTGAAG  
CCGTCAGTGGCTTCCGCACTGCGGGCTGACGCTGGAGCAACTGGCCAGACAGGTGGAGCCGGAATACACACCGCGCGAA  
AAGTTCATTTTACCACCTGGACACCCGGGCCCTGCGCTGGCGCTCATCAGCGAAGAAAGGCAATACGGTGTGGAGCGCG  
GAATATGATGAATGGGGCAACGCTTAATGAGGAGAACCCGCATCATGTGATCAGCCGTACCGTCTGCCAGGGCAGCA  
GCATGATGAGAACTCAGGCTGTACTATAACCGTACCGCTACGATCAGTACGATCCGTTGACGGGGCGGTATATTAATCAGGAC  
CGATGGGGTTGAAAGGGGATGGAATTTATATCAGTATCCTTTAAATCCACTACAACAAATGACCTTATGGGATTTATG  
CAGACTGGGATGATGCCAGATCTGGAGCATGTACGGGGGAGTTTGTGGTGTCTTTTACGATAAATAGGACCAAGTAA  
ATTTGATAGTACTGCAGATGCTGCTGTAGATGCTTTGAAAGAAACGCAGAATAGATCTCTATGTAATGATGGAATACT  
CTGGTATTTGCTGTAAAGTACTAATGGAAAATATTTTGCATCTAAGGCAGAAACTGATAATTTAAGAAAGGATCATAT  
CCTCTGAAAAGAAAATGTCCACAGGTATAGATAGAGTTGCTGCTTATCATCTACGCTGCAGATAGTATGGCGATTA  
TGTGTGATGAATTTTTCAGTACGGATAAAAATCTTGTAAAGAAAGTAAAGATAAATACTTGAAGCATTTTATCTCGCAA  
CACCTGATGGACGATTTGAGGCGCTTAATAAAGGAGAATATATTTTATCAGAAAATAGTTCGCCGGGATTGAGTTCA  
GTATGCATACCGTATCATGATTA

>Cluster\_5749

ATGATTTTACGCTCAAGTTGCTGCGATAATTTATCAATAGATGAGATTATCGAACGCTGCTGAAAAAGGCGATTGCGAGGC  
TCAATATATGTTGGGTTTATTAATAATCGCGATAGCGCAATTTGATTCCTCGGACGACGAAAAAGCCTTTTACTGGCTGA  
AGCTGGCCCTGAGCAAGGTCATTTGTGAAGCACAGTATTTCTTAGGGCAAAAGTATACCGAGGATAAAAAGCCGTCATAAA  
GATAATGAGCAAGCCATCTTCTGGCTGAAAAAGCTGCCCTACAAGGCCATATTTTCGCTTCCACGCCCTTGGCTGGAC  
ACTGGATCGTGGAGAAGCCCAATTAATAAGAAAGCGGTTGCTGTTATCAGATAGCCGCGGAGAGCGGAATGCTTTATG  
CGCAAAATAATCTTGGTGGATGTACAGAAATGGCAACGGATCGCAAAAGATATGCGCTGGCATTTTCTGGTACAAA  
CAAGCTGCATTAACAAGGCCATAGTACGCGCAAAAACAATCTGGCCGATCTTTATGAAGACGAAAAAGGCGTTGCTCAAAA  
CAAGACACTCGCCGATTTCTGGTATTTGAAAAGCGCACAGCGGTAATCGGCACGCCAGTTTCAAAATGCAATGGGAT  
ATAACGCTGGCGAAGGGTGGACAGGACTATAAGCAAGCGATGACTGGTATCTGAAGGCTGCCGCTCAGGGGAGCGTC  
GGCGTTACGCTCAACATCGGTTATATGTATAAACACGGCAAGGCGTTGAGAAAAGATTATCAGGCTGCCTTTGATGGTT  
TACGAAAAGCGCTGAATGCAATGACGCCACTGCCTGGTATAACCTGGCCATTATGTATCACTACGGAGAAGGAAGACCTG  
TCGATCTCCGACAGGCTCTGACCTGTATCGTAAAGTTAGTCACTCCGGAACAGAGATGTCAGTACAGAAAATTCGTGAG  
ACTGAAGATTTACTGTAG

>Cluster\_39060

ATGCAAGGCGCCGACAATTCGTTATCATGCCCGTAAATTTAACGACAAGGCGTGGAAATTTATCATGCTGTGGTTCAA  
AAATTTAATGGTTTACCCTGCTTAGCCGCGAGATTTTCGCTGCGTGCAGAAAGAGATGGAAAAACGCTAGCCTCGATGGCAT  
TTACCCCATGCGCGCAGCCAGGACATGGCGAAGATGGGCTGGGTACCTCCGATGGGATCGCACAGCGATGCGTTAACGCAC  
CTTGCCAAATGCTCAAAATTTGTTATCTGTGCGCGCAAAAGAAAATCCTCCCGTCCCGGTTGATTAACACAGGCGTGA  
AGCGAAAATCGCCAACTGGAAGCAGAACAGGCGGTAAGCTGAAGAAAACCGAAAAGATTCGCTGAAAAGCAGGATGTT  
TGCACCTCTGCTGCCGCTGCTTTACGCGTTTGTAGCCAGACATGATGTTGATCGACACGGTTAACGGTTTGTATTATG  
GTGGACTGCGCAGCGCCAAAAGCGGAAGATACGCTGGCCTGCTGCGTAAAAGCCTGGGGTCTGTTACCGGTTGTACC  
ATTTGAGCATGGAAAACCCGATTTGAGCTGACGCTGACCGAATGGGTACGTTCCGGCAGCGCGGCACAGGCTTCCAGCTC  
TTGATGAAGCCGAGCTGAAATCGTTGATGGAAGATGGCGGCTGATCCGCGGAGAAAACAAAATCTGACCAGCGAAGAG  
ATCACCAACCATTTGAAGCCGAAAAGTGGTGAACAACTGGCGCTTACTGCGCAGCAGCGCATTCAGTTTGTGATGTTG  
CGACGATGGTTCGCTCAAGCGCTGAAGTTCTGCGACGAGCTGCGCGATCAAAAACGAAAGATATCGACCTGAAGATTTCG  
CCCAGCGCTTTGATGCGGATTTCTATCTGATGACTGGTGAACCTGGCAGCGTTAATTTAAAACCTGATTTGAAGGATTAGGT  
GGCGAAGCACACGTTAA

>Cluster\_46562

ATGAAGCAACTTTGGTTTGCATATAGTGACAGGTAGCCTGTTATTTCTGCTAACGCCCTCGGCCACTCCCGCGTC  
CGGGCGTTATTACAGCAGATGAACCTGGCCAGTCACTGACTGAATTACGAGCTGTCAATCATCAGCATCAATAAACAGG  
GTGTTGAGTCTCTCGCTTATCGACATGCACGCCCTCGATAAACCGTCTCTTGCACAATTTGTGCAAAATGGATGGCCCGCC  
CGGAAAGTGCATCAGGATATCAGCAGCAGATATGCAAGCAGCTATTTTGAACCGGACTTGAACCGTTCACGCTTAATGGCGATTACAT  
TGTGATTCTCTGCCATCGCTTATCTATACCGATTTCAAACGCCTTTCTCCTTACTACGACTTATCTCCGTCGGGCGCA  
CGCTATTGCTGATCGCTTTTGGGAAGTCAATTCGCGTGGTTGCCGAGATGGTACACGCTACAGCTACATCGTGTGGATG  
GACACCGAATCGAAATACCGATGCGGGTTGATCTCCTTGATCGCGATGGTGAACCGCTGGAACAATTTCCGCTGATTGC  
TTTTAACGTCAATCAGGATATCAGCAGCAGATATGCAAGCAGCTATGCAAGCAGCTGGCGAAGGCAAATTTGCCCGCTTCTGTTCTCTG  
TAGGTGAAAAAGCTAAATTCAGCTGGACGCCAACCTGGTTGCCACAGGGTTTTAGCGAAGTTTTCCAGTAGTCGACGTCCG  
CTACCGACGATGGACAACATGCCATCGAATCAGCTCTTATTCCGACGGATTATTCAGCTTCTCGGTAACCGTTAACCG  
CGCTACGCCATCGAGCACCGATCAGATGTTGCCACCGGACGCAGAACCGTCACTACAGCGTACGTGATAACGCCGAAA  
TCACCATTGTCGGTGAATTCGCCCGCCGAAACGGCGAAACGCATTCGCCGAGAATATTAAGTTCCGGGGCAGCGCAATGA

>Cluster\_3516

ATGAATACATTGATTATACTAATAAAGTAATGACGGTTAATTTCTGTTTCGGAGAATACTACCGGCTCAATGCAATTA  
CGCATCTGCTAATTAATCATCTTTGCTTACCAGTGGTAAGGTCGATGTTTCTAAACTGATGCTGGAAATCAAAATCTCC  
TGGCAAGATGTTGCGTATATTGCAAGTATACCAACAGCAACAGTTGTGTCGAGAGTATCAGATCCAACTGGCCGCTTTT  
GAGAGCCAGAATAAAGCCATTGATGAAAAAAGGCCGTGCAACAGCCGCTCTGGTTGGTGGGCTATTTTCATCAGTATT  
GGGATCTTAGGCTCTTTAGCAGCAATTAACAGTGTCTAGCAAAGGCGCGAGTGTATTTGCTCAAAAAACCGCTCTACAT  
CTTCTAAGGCTATTGATCGGCTTCTGATACTGGCACTAAAACGTTGACTAAGGCAACGGAAAGCGTTGCTGATGCTGTT  
GAAGATGCAATCCAGCGTGTGTCAGCAAGCGATGACTACAGCAACGAGAGCGGCCAGCCGTACATCCGACGTTGCTGATGA  
CATTGCCGATTCTGCTCAGAGAGCTTCTCAGCTGGCTGAAACGCTGCAGATGTCGCTCAGAAGGCAAGTCGGGCAAGCC  
GCTTTATGGCTGCAGTAGATAAGATTACTGGCTCTACACCATTTATTGCGGTTACCAGTCTTGGCGAAGCGACGAAGACA  
TTGCCAACACGGTATCTGAATCAGTCAATCTAACCTAGCAGGATGATGAGTACGAGCAGGTTATAAGTCTGTGGGAGAACTCCA  
GCAGGGTAATTTGGATCTGTATAAGCAAGAAGTTGCGAGAGCGCAGGATGATATCGCTAGCCGCTGCGTGTATGACAA  
CAGCCGCTCGGATCTCACTGATCTTCAAGATCGTATGGTCAATCGGTTCCGTTAGCTGGGTAA

>Cluster\_24034

ATGCTGAGCGCATTTCAACTGGAATAAACCAGTACCCGGCTGGAAGTCAAGAGTCAACAACCCCTTGTAAATGCAGT  
ATGGATTGATCTTGTGCAACCGGACGACGACGAGCGACTGCGGTACAATCTGAACTCGGCCAGAGCCCTGGCAACCCGCC  
CGGAACTGGAAGCATCGAAGCATCGGCACGTTTCTTTGAAAGCAGCAGCGCCCTGCATATTCCTCTCTCTCTCTCT  
GAAGATGCGGAAGATCACGCCGTAACCTCCACTGTGGCATTACCATCCGTGATGGTCTGTTTACTCTGCGTGGAGCG  
TGAATTGCTGCTTTTTCGCTTTACCCTATGCGTGGCCAGTGCAGTGGTAGACGGTAACGCTTACGAGCTGCTGCTC  
TGGATCTGTTGCAAAACAAAATCGAACAGTTGGCGGATGAAATGAAAACATCTACAGCGATCTGGAGCAGTTGAGCCGG  
GTAATATGGAAGGGCATCAGGGCGATGAGTATGACGAGCGCTCTCCACACTGGCGGAACTGGAAGATATCGGCTGGAA  
AGTTCCGCTGTGCTGATGGATACCCAGCGTGGCTGAACTTCTGTTGCGTAAAGGCGGTTTACCAGGCGGGCACTGG  
AGCAGGCGCTGAAATCTGCGAGATATCGAATCCCTGCTGCCGATAACGAATCTCTATTCCAGAAGTGAAGTGGAGCTTCCGCTACCCAG  
ATGACGCGCGGATGGGTTTTATCAACATCGAGCAGAACCCTCATCAAATCTTCTCGGTGGTATCCGCTGCTGTTCCCT  
GCCACCGAGCTGGTGGCTTCCAGCTACGGGATGAACCTTTGAGTTTATGCCAGAACTGAAGTGGAGCTTCCGCTACCCAG  
GTGCGATTATCTTTATGATCTTCCGCGGCTGGCACCGTATCTGTACTTTAAGCGGAAGAACTGGCTGTAA

>Cluster\_27209

ATGAGCAGAGCTGTTGCTACGATCACCTTAATCCGGCTTATGACCTTGTGGTTTCTGCCGGAAATGAAACCGGCGA  
AGTGAACCTGGTGAACACCCGGTCTGATGCGCGGGTAAAGGCATCAACGTTGCCAAAGTATTAAGAACCTGGGAA  
TTGATGTCACCGTTGGCGGCTTCTGGGTAAGACAATCAGGATGGTTTTCAGCAACTGTTACGCGAGCTGGGATGGCC  
AACCGTTTCCAGGTTGTACAGGGGCGCACCCGAATTAACGTTAAGCTGACGGAAGAACGCGGAAAGTACCGACTTCAA  
CTTCTCGGTTTTGAAAGTCAACCCCGCCGACTGGGAACGCTTTGTGACTGATTCTCTGAGCTGGCTCGGTCAGTTCGATA  
TGGTCTGTGTCAGCGGAAGCTTACCCTCAGGCGTACGCGCGGAAGCGTTACCCGACTGGATGACTCGCTGCGTGTAGTCA  
GTCTCTTGCAATTACTTTGATAGTAGTACGCTGAAAGCCTTGTAGTAGGTTTGAAGCGGCAACCTAA  
CCGCGCGAGCTGGAATCTGGGACGCGGTAACCTGCTGAAATGAAAGATGTGATTGAAGCTGCACATGCGCTACGCTG  
AACAAAGGTTATGGCAGTGTGTTATTTCACTGGGTGCCGAAGGCGCGCTTTGGGTTAATGCCCTCCGGCGAATGGATCGCC  
AAACCACCGTCACTGATGTCGTAAGCACCGTTGGCGCAGGGGATCTATGGTTGGTGGCCTGATTTAAGGCTGTGCTGAT  
CCGTGAATCCAGTGAACACACACATGCGCTGCGGACAGCTGTTGACGCCCTGGCGGTAAGTCAAAGCAATGGGGTATTA  
CCGATCGTCCGAGTTGGCCGAATGATGGCGCGCTGCACTTACAACCTTTAACTGA

>Cluster\_43723

ATGATGGAATACTATAAATACTACGGTGTGCTGGATGAAGCCGTTAATGGCTCAATATCCGCTCTGATGGCATCTA  
CATGATGGGACTTTTGGTGGCGGTTGCTCACTCAGCTGATCTCTCGCAGCTTGGCGAAGAGGGGCTTTGCTGGCGA  
TCGATCGCGACCCGAGGCTATCGCCGTTGCGAAGACTATTGATGATCGCGCTTCTCCATCATCCACGGACTTCTCC  
GCGTGGGCGAATACGTTGCCGAGCGGATCTTATCGGCAAGATCGACGGCATTCTCCTCGATCTTGGCGTCTCTTACC  
GCAACTGATGATGCTGAGCGCGGCTTTTCTTTATGCGGATGGTCCGCTGGACATGGCTATGGACCAACCCGTTGGG  
AGTCAGCCGCTGAAATGGCTACAAACCGCAGAAGAACGCGATATCGCTGGGTTTGAAGAACTATGGTGAAGAGCGTTTT  
GCCAAACGATTTGCCCGGCCATTGTGAGCGTAACCGGCAACAGCCGATGACCCGACCAAGAACTGGCGGAAGTCTGT  
GGTGTGCAACCGCGGTGAAAGATAAGTTAAACATCCCGGACCCGTACTTCCAGGCGGTGCGCATTTGGGTAACA  
GTGAACTGGAGGAGATAGAGCAGGCGCTAAAAGCTCGCTCAACGTCGTTGGCCCGGGTGGGCGGCTTTCGATCATCAG  
TTCCACTCGTGGAAAGCCGATTTGTGAAACGTTTTATGCGTGAAGAACGCGCGGTTCCGCAAGTTCGGGCGAGGTTACC  
GATGACTGAAGAGCAGCTCAAAAACTGGTGGCGGTCAGCTGCGAGCACTAGGCAAGTTAATGCCGGCGGAAGAGAG  
TGGCTGAGAACCCTCGTGGCCGATGTTCACTTCTGCGTATTGCAAGAGGACGAATGCATGA

>Cluster\_15051

ATGAAACGAACCTGATGAGTTGTGCGGTTGCTTCACTGCTGGTTTTCAGGTTCCGCGCTGGCTGCATGGCCAGAAAAAC  
AATCCAAATCATTGTCCCTGGGCGCGGGAGGAAATACCGATACTGTGACGCTTGGCGAAGAGGGCTGCAAAAAAG  
AGTTGAAAGTGAATGTCAACGTTGTAATCGCAGCGGAGGTCGTTGGGTTGGCATTGATGCCATTGCGAAAGCTAAA  
CCGATGGCTATACTCTGGGAATTCGACGCTAGAAATCACCATGATGACCAATCAGGGGATGACGGCTTACGATCA  
GAACTACACGCCAATTACACGGCTGGCAGTGAATCTGGGAGCGTGCAAGTCCGACGAAATTCGCAAGTTCGAAAAATCG  
TCCAGATGACCGACTACATCAAGCGGAAATCCAGGTAAGTTAAAAGCATCGGTTAGCGGTTAAATCCGGCTGGCATCTA  
AACTTGATAGGTATGCTGCACAGTATGGGGCTTCCGCTTCTGCGGTGACCTGGGTCCTTCTGAAGTTCCAGTCTGCG  
ACTGATGGAACTGTTTCCGGTGGTATAGATTTTACAACGCTATCACCGGGCGAAGCGAAAAAGTATGGTGCATGCCAAAA  
TGGTGGTAAATTTAGCGACCATGGCAGAAAAATCGGACGGCTTATAAAGATCTTCCAGTATTCACAACAGCAACTGGC  
TATAAATATCATTTTGGCGACATGGAATGCCCTTAGTGGTTCCGGCGGGTACTCTGAAAGAGGCTCACAAAAATTAACCTG  
CGCTATGCAAGGAGTGTGTTGCGCAGGGGAAATTAACAAGATTTCTGCTACCAACAGGGTTTTGAAGTTTTACCCGCTGTATG  
GCAAGAGATGACGACATTTATGGCAGATGAAGTGCAGATACGAAAAATTAATAACAAAAATCAAAAGTTAA

>Cluster\_45863

ATGTTTCAGCGCACTAGATATTAACACGTTGATGCAAGGAACCTTTATATGGTGATCCATCACTCAGGGTTGATACCATTCCGCCAATCCATAGTCTTTAGTTGGTGGACTCTCGATTGTTATGACACCTGGAGATTTGTTGCATATACCAACGACTGGTGCGGATATAAATATCGGACCGGAAGAGATCATTAGTCTAATGCTAAGGCAAAGATTGTAGTCGATTATCTGAACGTGAATAACCTTAACAAAGTTTAAAGATACTATAAGGTACATAAGTATCGTTTGGTTGAGCAAGAAAACCTTCAACGATACCTGA TGTAACATTTGGTAAACACTGCCAGATGAGTGAACCTTTTATGCGGGGTGTTAAAATGTGAACCTGTGTGACCA TAGGTGATAAATGTTGCCATTTCATGCGAATACAGTGATTAAGAAAGGCCTATTATTTGGTAATGATGTTATTTGATTCTAATAATTCATCGGTAATATAGCTTTGAAATATATGGCTGATGAACGTGATTCATATGTCGAGTCGATAGCATCGGTAGAGTTATCATAGGTGATGATGTTGAAATCGGTTGTAACAACACCATGACCGGAGAACACTTGGAGATACGATAATGGTCA AAGGCACCTCGTATTTGATAATCAAGTGCAGATTGGACATGACTGCATAAATCGGTAAATAAATGCCGTGATTGTTTCCAAATGC GGTTTTTTCAGGACACGTAGTTTTAGGCGACCATGTTATTACACATGGTCAAGTCGGAATCGCCGGTACATATCAATTGG TAGTTATTCGGTAATTAAGGCTAAATCAGGTGTAGCCATTCTTGTCTGAAAAGAGTGACCTTTTTGGTTACCTGCCA AAAATACGCGAGAATACAACAAAATCTCGCTGTCTTAAATAACTAACTAAACAGCATGGTGATATAAACAGTGA

>Cluster\_27481

ATGAACGAGTTAGACGGCATCAACAGTTCACCCTGCTGGCAGACAGCGGGATATTGAGTCCATTGCCATTATCA TCCCCAGGATGCCACCACCAATCTTCCGTGTTACTCAAGGCTGCCGGATTATCACAATATGAGCATTAAATAGACGATG CTATCGCCTGGGGTAAAAAATGGCAAGACCAGGAACAACAGGTGGTTCGACGCTGTGACAAACTGGCCGTCAATTTCC GGTCTGAAATCTCAAAATCGTACCCTGTCACAGAGTCCACAGAAAGTTGATGCACGCTCTCTTTTGATAAGAAAAGAG TATTGAGAAGGCGGCCATCTGGTGGACTTGATATCAGCAACAAGGCGTTGAGAAATCGCGCATCTGATCAAGCTGGCTT CGACCTGGGAAGGAATTCGCGCGCAGAAAGAGCTGGAAGAAAGAGGTAACAACGCAACCTGACGCTGCTGTTTTCTTTT GCACAGCGCGGGCTGTGCAGAAAGCAGGCGTTTTCTGATTTCCGCGTTTGTGGGGTATTATGACTGGTATCAGGC ACGCAAGCCGATGGACCCGTATGTTGGTGAAGAAAGATCCAGGCGTTAAATCAGTACGCAATATCTACGACTACTATAAGC AACACCATATGAAACCATTTGTGATGGGCGGAGCTTCCGTGCACCGAACAAATCTCGCCTAACCGGCTGCGACCGA CTGACTATCGCACCAGAAATTTGCTGAAGGAGCTACAGGAAAAAGTTTCCGCGAGTGGTACGTAATAATCCCACCTTCTCA GACCTTCCACGCCCTCCATGAGCGAAGCGGAGTTCGGTTGGGAGCAACAATCGGATGCGATGGCGGTAGAAAAAC TGCTGAAGGCATTCGTCTGTTCGCGTTGATCAACGCAAACTGGAAGATCTTCTTGCGCCAAACTATAA

>Cluster\_45480

ATGTTTTCTATAAGTAACCTATCATTTATCGGTTTCTTAAAGGATTATTTGTTCTCAGATTCACCTACCGGGGAAGTG GAAACACGAAAAATTTCCGTTTCATGTACATTTTGCATGTTCTATAAAATCCGGTTGTCAGTATTCGATATATATGAACT GCGTTCTTGGCGTGCATTGAGGATATCTGGCAATACACCCACGTTGCCAGCAAGAAATTCATCGCCCTTATTTGCAT AAAGGGGGGCGCGCTGGACCCGTGGACAAATATATCTTGGAGCATTATCGCTTGTGCAAAAATTTGCCAGAAAAATATTC TAAATTTTTGTTTCCAAAAATCGGTATCATTAGTCCAATTCATCGGAAAGATGGAGAGAAATTTGATATCCAGTGTT TCCCCAGTGGTTTTGACCGGGAAGGAGGTTGATGTTGCTCATTGTTTTACAATAAAACAGTTATTTGCCGTTTAAACATTT TCAGTCAATCTGACTCAAAATGGACACATTTGCTTTTATGGCGGATTACAGGAGCCCCATAAAAAACCGGACTGATGT TATTCGGTGGCAACCCGGGCTGTTATGGGATTTCCAAAACGGATATTTTTGAAGCATTGTTGTGCGTTGATGAAAG CTTGCAATATCTCTGAGTGTCTGGCAGTCAGTGAGCACAGTCATGTTTTCCGCAATTGAGATACTGGTATCAGAAAACG CAAAACCTTTGTTGCGTCTATAGTGTATTTCTGGGACTGTAGCAGGAAAAACCTGTGGTGAATTCAGATGCGATGCGAACA CAGGTGATTCGAAAGCCGTAAGCGATATAGCCAGTAAAAACGCTCTGAGTACCGAAAACGATACGCTTTGCTGGATT ATATCCATGAAACTACTATCCGCTCTTTGGATGCATATCTGTACACTCAGAAATATCAGAATTTAAATTA

>Cluster\_22110

ATGGCAGGGAATAGGCAACATTTTATCCACGTTTTTTTACAAAGAGGTTTTTCTAACGAAAAAATGGGAAGTATTTTAC TAACTGGTATAGAAAAGATTGTTTCAAGGAAAAATGATAGTAGAGAAATATGGTTTGGAAAAAAGTTTATTTCTCACT ATGGCGATTCACGCGTTGATAAAAAAATAACAGAAAACGAAACATACAGTTATTCACGCATACCTAAATAGTTTGTGAT GGGGTTACAACCTAGACAACAGGAAAGATTAGCCGATTTTATTTATCATATGGAGATTAGAAAACAAAAAATTAAGAGA AAACATGATAGATTATGGGCATATTTTGGTGAGCAATAAAAAAGAGATTGCTAGACAAAGGAACTCTTATTGATTATT TCCAAAGAAATCCAAAAACAATCAAGAAATTACTTCAAAATGAGTTAAATAAACTACCATAACAGCAAGTCTACATGAG CAATATAACTCCATGTTTTTTGATAACGTTCAATTTATGGTACCAAAATGCTGCAGAAAAGATGCTATCAACATTAGTTCC GAAGTTTGAAGCAAGAAATAATATCAAAAAATACCTGAAATAGTAAAAAAGGTTACGTTAGATGTTTTGTTTCTGAGG ATAAGAAAAGTAATATTTATAAGAAATATGCATTACAAAGTATTGAAAACAATCAATCTTTGATTTTAGGAGATAGTATT GTAATCTTTGAAGTGTCTGGGGAACGAAAGTTTAAAGCCATTCTATGAAAGTAATGATGATTTAAATGATATATATATCC ATTAGATTCAATTCGCTACTTTATGCAACGCCAAATCCAGAAGATAAACCAACGTTGGATGTTAATAAGGCTATAG CACAGTGTTCATTTGATTTTTTTCATTAGTAAATTTTCATAGTGAATGCAAAATATTTTCGAAGTGGATTGGTAAAAAT CGCTTTATAGTTACAACCGAATAATATTGACGAAATTTCTAAGCAAAATAATAACAGGGAATTA

>Cluster\_20769

ATGCACCTTAATAATCGTGCACGGGATTTACTGGATAAATATTCGAGTGGTATGGCGCAGCAGTTTGGTGCACGTGATAC CAGTCGCTATTTTCCCTGAATGACCCGAGGAAAAATGCGCTGCGCTGGCGTGTGGAGTCCGTGGAGTTCTGAACA TGATCACCTGTCTGGATGTGGACAGCTGAGTGGCCAGGTGATTTCTGTGCGTTCCCTCGTGTGCATACCGGCCGAGT GAAAATGGCCGCTTTGTTCTGTCAGGTTGGCGTGAGCGGCAATGACTATTCACCTGGTTGAAACGGACAGCTGCGCCGACT GCGTTGGATCTGCTTTCCGCTGGGCAATGCGGTAAAGCAGAAAACGAGTTTTACAACTGGTCCAGGCTTTTACCA CACAGGCTTTTGGCTGGATATGCTGCGTATTGGTTTTAAACGGTAAAGAGCCGTGCCAAAACGACGAAATCCAACGGATAAC CCGAACGGCGAAGATGTCAACATCGGCTGGCATGAGCGTATGAAAACGCTGCTGGGCGGTAATCAGATTATGACCGATCC GGTCTGTGATGAAGCCGGGATTAACAATCACTGGATGCAATGGCTTCTGACCTGATTAACGCCAAGATTCTTGCC AGTTCCGCAATGACCCGCGTCTGGTGGTTCTGGTCCGTCGCGATCTGGTTGGCTGAAACAATACCGGCTGTATCAGGCC GCAGACCGCCGACTGAGAAAAATGGCGCAGATGCTGGGAGTACCATTGCTGGCCGCTCTGCTGTTATCCCGCGTT TATGCCGGTAAACGATGTTGCTTACGCGCTTTCTAATCTGCATATCTACACCCAGCGCAACCCGATGCGGTAAAG CCGAATTTGTTGAAGACCGTAAACAGTTTCGAAAACAATACTGCGCAATGAAGGGTATGCGGTTGAGGTGCCGGAAC TGATGCGGCGATTGATGAATCTGCCGTAACCATCGCAAGGTTTTCCGAACAGCAGAGGGCTGA

>Cluster\_33094

GTGGACTCATTTTTCTGCCATAGAGATAGATAAAGTTAAAGCTGGGATTTTCCGCTGGGTAATATAAACTACTTCTGAATG TTTAAATGTTGCCATATGGTGTGATGCTAATATCTTGTGATGGTGTAGGTTTCCATTACATCAATTTGCTCAAAATAATC GACATATTAATCTTGATTTTATATATATGCTGATGTTTATAATGATGCTTTTTTTTCAAAAAGTTGCAAGATTCGAGAG CAATACCAATTAAGAATCATTATATAGAATTAACACTGATAAGCTCCAGTGTTCCTTGTACACAGGCTCTGGTCAAG AGCAATGTACTTCGTTTTATTTGCAATTTCAATTTATGGGTTTAAACACTTGATCGTTTGTCTTATCTTGTATGAGATGTTG TTTGTAAGGCGATATTAGCCAACTATTGCATCTGGATTTAAACGGAGCGGTTGCAGCTGTTGTTAAAGATGTTGACCCA ATGTCAGGAAAGCGGCAATCCAGTTGCTGATCTGATCTGATTTACTTGGGAGTACTTTAATTTCTGGTTCGTTTTATGATA TTTAAAAAATGGGCTAACGCCAAAATAACAGAAAAGCGTTGCTATTTCTTATGAGTAAAGATAATGTGTATAAATACC CTGATCAGGATGTTATGAATGCTTACTGAAAGGGATGACAATTTTTTCTCCTGTTGATATAACAATATAACAATTA AAAAGTAAATAAAAGACAAAACACATCAAAACTAAAAAGCTGATACAGAAAAGTACTCTGCTTATTCATATACAG TGCAACTAAACCGTGGCACAATGGGCAATTTATCCATCGGTAATAATAAATAGCTTTAGAAAATTCACCATGGA AAGATGACTCTCCAGAGATGCAAAATCAATTTATGAAATTTAAAAAAGATATAAACATCTTTTGTAGTACAGCATAAATAT

ATCTCAGGAATTATAGCAGGAGTCTGTTATCTTTGCCGAAAATATTACCCTAAATAA

>Cluster\_26245

GTGAAGATCTCGTAACAGGGGCGACCAGCGGCTTGGGGCGAAATGCCGTGCAATATTTGTTGCAATCGGGTGAAGTTCGGT  
TGTGGCAACAGGGCGAAATTTGTGAGGTTGGCAGAACCTGCAGAAACGCAGGCGCACAGTTTGTGGCTCFCGATTTAACCG  
AGGAACCCAGGATGCGGCGCCGCTGATGGACGATGCGATGCGGCTTGGCACTGTGCGGCAAAAGTTCGCCCTGG  
GGCGACAAAACCGCGTTCGGCTTGCCTAATGTCAACGTGACCCACACTCTGGCACAGGCGGCAGGCGAGCTGAATATTCC  
CCGGTTTATFCATATCTCCACGCTGCGGTTTACTTTGATTTTCAACATCACAATGACCTGCCAGAAACGTATCTTGCC  
GAGCATTTCCAGCCATTATGCCAGCAGTAAATATGCCGCTGAGCAGGTTATTGCTGGCGCTGTTTCGATATTCTGCC  
ACGAGATTTATTTCTTTGGCGTCCCGTGGTTTGGTTGGTTCGCCATGACCAGGTAATTGTTCTCGTCTGATGCAGCAAT  
GCAACAGGGGCGGCTTGGCTTACGTTTGGCGCGGGGCAACCGGTTATTGGATCTCACGTTCTGCAAAAACGTTGGTGT  
ATGCCATGCGGCTGGCAACGAACGTTGAAGGCTTACGCTCGGGCAGTATTTACACATCAGCAATCACCAGCCGAGCAG  
CTATCGGTGATGCTTACGCTTGTGTCACCAGCACTGGGCTTGAGTTACCGCATTTGCTGCTGTTCCCTGGTCCGCTGCT  
TTCTCTGGTGCAGGCTGGCCTGGAACGTACGGGAAGTGCCTTAAATCAGGAACCTGTTATCACACATACAGCGCCGGA  
CACTCTGTTTCGATATGACGCTGAGTGCAGCAAAAGGCCATTACAGAGCTGGGATATCGCCCGGCTTTTCGATGGAACAA  
GGTATTGCAATCAGCGGCAATGGCTGAGGGAAACATGGCAAAAATAACCGCATTTGA

>Cluster\_33476

ATGAACCACTCCTTAAACCCCTGGAACACATTTGGCATTGATCATAATGCTCAGCACATTGTATGTGCCGAAGACGAACA  
ACAATTACTCAATGCCTGGCAGCATGCAACCGCAGAAGGACAACCCGTTCTTATTTCTGGGTGAAGGAAGTAAATGACTTT  
TTCTGGAGGACTATCGCGGCACGGTGTATCAACCCGATCAAAGGATTCGAAATTCATGATGAACCTGATGCGTGGTAT  
TTACATGTAGGAGCGGAAACCTGGCATCGCTGGTAAATACACTTTGCAGGAAGGATGCTGGTCTGGAAATCT  
GGCATTAATTTCTGGTTGATCGCTCATCACCTATCCAGGAATATTGGTGTCTTATGGCGTAGAATTACAGCGGTTTGGC  
CTTATGTTGATTGTTGAACTGGCGACAGGCAAGTACGCTTAACTGCCAAGAGTGGCCTTTTGGCTATCGAGAC  
AGTATTTTTAAACATGAATACCAGGATCGCTTCCGCAATTTGTAGCCGTAGGCTCTGCGTCTGCCAAAAGAGTGGCAACCTGT  
ACTGACGATGATGCAATTAACCTCGCTGGATCCTTCAACGGTAAAGCAGCAAGTATTTGATGCGGTTGATCATATGC  
GCACCACAAACTCCCTGATCCAAAAGTGAACGGTAAATCGGGTAGTTTCTTCAAAAATCCTGTTGTTTCTGCCGAAACT  
GCTAACGCGTGTGTCGCAATTTCCAAACAGCCACATTTACCCAGGTTGATGGTTGATGAAACTGGCTGAGGTTG  
GCTTATTGATCAGTGCAGCTTAAAGGGACGCAAAATGGTGGGGTGGGTTACCGTCAACAGGCGCTGGTTCTCATAA  
ATGAGACGATGCAAAAGCGAAGATGTTGACAGCTGGCGCATCATGTAAGCAAAAAGTGGGTGGAATTTAATGTC  
TGGCTTGGCCTGAAGTCCGCTTATTGGTGCATCAGGTGAAGTGAAGCAGTGGAGACAATTTTCATGA

>Cluster\_41566

ATGAACGATGAAATGAAAGGTAAGGCGGCAAGGTTAAAGTATGATGATGTCGCGAGTATGATGATTTCTGATAAACGTAC  
CCACAACCCGCTACCGGAAAGGGGCGGGCTCCAGGAAAATCTCGTGTGACGGTGGCCGTCGCCCGCCCGCGATG  
ACAAAACAGAGTACGACCCGTGACCGCAAGTGGGAAGATTCCGCGTGGCGCACGGTTCCCGCGCGCGGGTGTAGAGACG  
CCGGAAAAGGCGGATCACCGTGGCATCAGTGGTAAAAGTTTTATTTGATCCGGAAGTTTTGCGTCTGACCGTGGGAAAGA  
AACCCGCTCTACGGCGAAAACCGCTGTGAGGCACTGTTCCAGAGCCGTCGGAAGCGATGTTCCGCGCTGGTTTATCC  
AGAGCGTAAACCGCACTTTTAAAGAACCTTGGCTGGATGGCGGCAAAACCGCAAGGCTAACCTGTTGGTGGATGAAGCG  
GAAGTACAAAAGCGTACGGCACGGAACATCACGGCGGCTTTGCTTCTGATCAAAAAGCGTAAACGGTACAAACCGTGA  
GCAGTGGGTAAGCCAGGCGGCGCAGGATTTGTTACTGGCCCTGGAACAAAGTAACTAACCCGCATAACCTGGCGGCA  
TGATGCGTAGTCTGCGCACTTCCGCGTAAAGTGTGTTGGTGCAGGATGCAGCAGTCTGGGCGGCTGGGCGGCTATC  
CGTACCGAGAAGGCGGCGCAGACAGCTTACGCGATTTACTGGCGACAACATTTGTTAACGTTGTTGATTTCCGTC  
GGCGGTTACACCGTAGTGACAACCTTCCAGCGAGCGGTAACCGCTGTTCAAACAGTCTGCCAGCGAAAATGGTAC  
TGGTGTGGGTCAGGAATATGAAGGGTTACCGGATGCCACGCGATCCGAACGATCTGCGCGTGAAGATTGATGGTACT  
GGCAACGTTGCCGCGTGAATATCTCTGTCGCAACCGGCTTCTTCTGGCAATGGTGGCGTCAAGTAAAGCCTGA

>Cluster\_7409

ATGTCGCGACTCAGCCCGTCAATCAGGCCCCTTGGGCGGTTTTCTGTCATAACCGTCCGCGCTACTGGTCTGTTATGGAT  
TTTTCTCGTCTTGTGTTGGTTGAGTTTGTGTTCTGAACCTATCGCAACGATAAACCGTTGCTGGTGCCTTATGACGGCA  
GTTGGTATTTCCGTTATTTGAAAACCTACAGCGAAAGCGGTTTTGGCGCCCGCTGGCAAGTCAAGCTGATTTACAGGAA  
CCGTGGCTGAAAACACCGGCTGAAAATAACCGCTGGGTTACTGTGGCACCGATTCGCTTTGGTGTACAGTATCAACTT  
TGCATCCGATAAGCCCTTCCCTTCTCACCCCTCCCGGCAAAACGCGTGGGAAACGGATGCCAACGCGCGGATGTGCTGG  
CACGATTTCTTATGGCACGCGGATCTCGGTTCTGTTGGCCTGATGCTGACTCTCTGTTCCAGCGTATGGGCGTGTG  
GCGGGGCGCTACAAAGGCTATTACGGCGTAAAGTCACTCTCGGGGCAACGCTTTATTTGAAGTATGTTGGGATGCC  
GACGCTGTTTTGATTTATTTTACCTTCCAGCGTGTACAGCCTAACTTCTGGTGGTGTGGCAATTACTGCTTGTGTTG  
GCTGGATGAGTCTGGTCCGCGTGGTGGCGGCGGAGTTTTTACGTTACTCGTAATTTCTGACTACATTTCTGCGCGCACAGGCG  
CTTGGCGTACGCGATCCAGTATCATCTGCGTATGTTGCTTAATGCCATGGTTCGCGACCTCACCTTTTTACCGTT  
TATTTTATGATTTGATTTGATAAACCCCTGACTCGCTGATTTTCTCGGCTTCGGTCTACCGCTCGGTTACCGTCACTG  
GTGAAGTGTGTTACAAGGGAATAACCTTCCAGGCCCGTGGCTTGGGATCACCGCTTCTTGTGCGGTTGGCATATTA  
TTGCTTTTCTGATCTTTTATTTGTAAGCCGCTCCGCGACGCAATTTGATCCTAAAGGCGGTGTAG

>Cluster\_20364

ATGATTTCTAGGTAATGATTACGTTGATTTAGCCCTTTGTTCTCTGCGCATAGCACTAGAAAATATCTGCTCTTACCCT  
CGACTTCACTGATCCGGTGGGCGTTAGTTCTCATAAAGTAGCTGTTCCAGCTTGTGCAAGCAACGAAATCTCTGTTCA  
ACAAAAGAACCTCTCGTTTCTCTTCTGAACACAATGTTACTAAGCGAGAACAAGGTAAGAATGGCTGATGAAATCCCG  
TATTTCTCTGTAAGATGATGATCCGCTCTCTGATGTTCAAGGCAACGTAAGCCAGGCACTGATTTTCAGGAAACACT  
CACTGATATCTATGCTGACTATGTTGCTAAAACACCAGTACGCTATCAGCGTACAAAAGAGAGCGTGTGGCTGCATCTC  
TGTTTAGCGGTAACACTTACAGCCTAAAACCTGATGATGTTCTTATCGAATGGGGCAAGCTGTTTAACTGATCAGTATG  
AAAGCCACTGTGAACGCTTCCAGCACTGACACCACGAAGATTTTAAAGAATTTGATCAGATTGCTACTGACATTTATCGA  
AAAAGCACAAAGCCAGGCGGCTGTGTAGAGCGTATGTTGTTTCTGTAAGCCGGAAGCCTTCTCTGCAATTTATTTCT  
CTGCTGGTATGGCAACGCATTTCCAGTATGTAAGCCACTGGAAGAGGGAAACGTTGTTGATCAGCGTGTGACCTGCTA  
CCGGGGTACAGCGTTCATATCCAGGAACATATGATGTTATTTAACTGGTAGATCCGCTACACCTTGCACATAT  
GACCGTACGCTGTAGCCGTGCCTAAATTCGCTAAAGGCTTAAAGCTTACCAGGCCATCTATGGGGCGGCTTCCAGCA  
CTTTTGAACGATTAATAACCGCTCTGCTGAGGTTGATGAGTACAGCTATGAACTTCTGCTGGTGTGATGATGATG  
GTTACAGAGAATAGCCAGATGGTTGTAACCCAGGTTAGGCTTCTCCGTTCAAATCACTGTTAAATAA

>Cluster\_58856

ATGTAACCCCTTCTGTTGTAAGCCCTTTTCCAGCTCGATCCAGAGCGGCTCATGAGTTTACTTTTACGCAATTACG  
CCGTAATTACAGGAACCGGCTTTGAAAGCACTGGTGGCGAGAAAGTGCCTGCGAAACCTGTTAACTGCAATGGGCTGACG  
TTAAAATCCGCTTGGCTGGCAGCCGCTTTGATAAAGACGGGGAGTGCATTGACGCTTAGGCGGATGGGATTTGGA  
TCGATCGAGATCCGTACCGTACGCCACGTTCCAGCCAGGTAATGACAAAGCCGCTCTTTTCTGCTGGTATGATGCGCA  
AGGTTTGTATCAACCGTATGGCTTTAATAATCTTGGCGTTGATTAACCTCGTAGAGAACGTAAGAAAGGCGGATTTAGC  
CGCTCTGGGATTAACATCGGCAAAAATAAGATACGCCAGTGGAGCAGGCAAGATGACTATCTGATTTGTATGGAA  
AAAATCTATGCTATGCGGGATATATCGCCATCAATATTTTCATCGCGAATACCCAGGATTACGACGCTGCAATATGG

TGAAGCGCTGGATGATCTCTTAACCGCGATTAATAAAGCAAAATGATTTGCAAGCGATGCACCATAAATATGTGCCGA  
TCGCAGTGAAGATCGCGCGGATCTTTCTGAAGAAAGATTGATCCAGGTTGCCGATAGTTAGTTTCGCCATAAATATTGAT  
GGCGTTATGCAACCAATACCACACTCGATCGTCTCTGTTTCAGGGAATGAAAATTTGCGATCAAACCGGTGGCTTAA  
TGGTTCGTCGCTTTCAGTTAAAAAGCACCAGAAATTTATTCGCCGCTTGTCTACTGGAATTAACCGGTGCGTTACCGATCATCG  
GTGTTGGCGCATGACCTCGGTTATCGCTGCGCGTGAAGAAATGTTGCGGGTGCCTACTGGTGCAAATTTATCTGGT  
TTTTATTTTAAAGTCCGCGCTGATTAAGAAATCGTTACCCATATCTAA

>Cluster\_41641

GTGAGAGCCTACTGACCCCTGAAATGGCCCGGATGCGGATCGTATTGTTTCAGGCCAGGTTTCAGAGTTGATGCCCT  
GTTTATGCAAGGGCGTGTCTGCTGAGAGCTGAGCCGGAACGTTATTCATCTTTTCGCCAGTGGTGGCGTTCCGGCGGCAT  
CACAACCGCTGGCGGATGATCTTCCGCTTGGGGCGTATTCGCAATGAGGCAGTGTCCGCTGCTGTTGGTGGCGTGGAA  
TGTCTTGAAGCTGGTTACTTCCGTAAGAGGCTGCCAGTGGCCTCATTCGACTGGCACAGCGAGAATGACAACAAT  
GCGACAGCTCCGGCGCAATCCGTTTGTGCTGGCACTGCGATAACCAGCTGCCGCGATCAGTTCACGGAAACCGGTGGAAT  
CAATGGCAACGATAACTGTGCCGCTGGGTGTTGTCCTGTTGTCGCTGCGGATCTCGGTTTGTGATAGTACAGTGTG  
ACAATACCGGAACGTGCTGGTGGCTGATTCGTAATGACCTGGCGGATGCCTTACCGGAAAGTGCAGCCCGTAAGGCACT  
GAGATTACCGAAGCTGTGTGCAAGGCGTCCACCGGAAAGTACCTTGTGCTTCCGTTCCGTCACCAGCATTTATCC  
AGGATAAAGCGAAAAGTGTGGCGCTGAAAGTGGATCCGAGTCCGTTGAGTCTTTTATGTTACGCCAAAACCGCCG  
CGCTGGGTTAATGAAAAGTACACGCGTGGGTTAAGACACAGCCGTTGTCATGTTGTGAAAAGCTGCTGATGATCCCA  
CCACCTGATAGGTCACGGTCAGGTTGAAATGGGTACAAAAGCGCATGACCTCTTGTGTTGCCTTGTGCAGAAAGCATC  
ACGACGAGCTGCATGCCGATACCGTGGCATTGGAAGAGAAGTATGGCTCCCAACTGGAGCTGATATTTCTGTTTATCGAT  
CGCGCGTGGCGATGGGGTGTGGCCCTGA

>Cluster\_40226

ATGAACTCGCCGTTTATAGCACAAAACAGTACGACAGAAGTACCTGCAACAGGTGAACGAGTCTTTGGCTTTGAGCT  
GGAATTTTTTGTACTTTCTGCTGACGGAAGAACCGCTAAAACGCTGCAATGGCTGCGAAGCGGTATGTAATTTCTGTAACG  
ATGACCGCAGCCGCTGGTGTGGAAGAGCTGAAAAGCACGGCTTAAATATATCGCCCTGCCGTGTGCCCGGTTCAAT  
AACGTCGACCTTGACGCGGCAAAAGAACTGGGGCTCAAAGTAGTCCGTTCCAGCCTATGATCCAGAGGCGGTTGCTGA  
ACAGCCATCGGTATGATGATGACGCTGAAACCGCGTATTCACCGCGCTATCAGCGTACCCGTGACGTAACCTCTCTC  
TGGAAAGTCTGACCGGCTTACTATGATGGAACCGGACGCGTATTCGTTACCGTAAAATCGGTGTGGCGATGCTG  
CGCATCTGAAAGTTTTGGTATGCGTCTGCTGGCGTTCCGATCCATCAAGTGGCGAGCGCTGCCGCTGGTGGGA  
GTATGTCGATCTGCCAACCTGTCTCTGAATCAGACGTTATCTCTGCACTGCCGCTGACACCGGAAAATACCATC  
TGTGAAACGAGCGCTTFCGATCAGATGAAAATGGCGTGTGATGATCGTCAATACCAGTCCGCGTGCATGATGATTCT  
CAGGCGCAATTAAGCGCTGAAAATCAGAAAATGGTTGCTGGGTATGGAGCTGTATGAGAACGAAACCGGATCTGTT  
CTTTGAAGATAAATCCAACGACGTGATCCAGGATGACCTATTCGCTCGCTTGTCTGCCCAACCGTGTGTTACCG  
GGCACCAGGATCTCTGACAGCAGAAGCTCTGACCAGTATTTCTCAGACTACGCTGCAAACTTAAGCAATCTGGAAAA  
GGCAACCTGCCGAACGAACTGGTTTTAA

>Cluster\_513

ATGATGAATAAACGTTTTGTTATCAATATGGTGTCTTCTGCTGTTATTAGGCGCTGCGCTAATTTCTGCGCCGCTCCAGGC  
AGCGGAAAAGTCTGGTGAATATTTCTAAAGTCGATGGTATGCCGTTGTTAATCGCATGGGCGAAGGTGTGGTTGAGG  
CGGTAAGGCTTTGGTGTAAATGCTCACAGTGGGGCTTCAAGTACTGATGCTCCGCAACAGTTAAAATTTATTGAG  
GATTTAATCGCCGTAAGTTAATGCAATTAATCTGCTGCAAAACGATGCCAACGTTGGAACCGGTAATCAAAAAGC  
GCGAGATGCCGGAATTTGGTTCTGACCAACGAAATCCCGGCTCAGCCAAAGTGTAACTGGGATATTGAAATCATGATA  
ACGAAAATTTGCCGCTGAAATATGTTGACGATATGGCGAAACGATGGGGGCAAGGGCGGCTATGTTGATTTACGTGGGT  
AGTTTACCGCTGCCGAGCATAACTTATGGGCTGACTTCTGTTGAAATACCAGAAAGAGCATTACCCGGATATGCAATGA  
AGTTACCGGCGCATGCCGTTGCCGAGTGTGGATGACTACGTCGTACCACACTGGACCTGATGAAAACCTCATCTG  
ACTTGAAGCGGTTGTCTCTTTGGTTCAAACGGTCCGATGGCGGGGACGTCGCGTGAAGAGAAACGGGCGAAAAT  
AAAGTCGAGCTATGGCATGATGATCCCTTACAGGCGGCATCACTGATTAAGAGTGGTGTATACCCGAAAGGATTAC  
TTACGATCCGGCTCTGACGTTACGACTCGCAGCGCTGCCAGCAGCTGCTGAAAGGTGAAGAGATCAAACCTGGAT  
TAGAAATGCAAACTCGGTTAAGCGCAGCTAGATATGATAAAGCAATATTCGTTTTCCATAAGGTATTACTGGTCAAC  
AAAGACAATATCGACTACTTTATTTAA

>Cluster\_61065

ATGTCGACGCTAGAGTTACAACCGGTTTTGACTTTTCAAGCAGGTAAAGAAGTCTTGGCGATTGAACGTGAATGCCCT  
GGCGGAGCTTGATCAATACATCAATCAGAAATTTACGCTTGGCTGTGAAAAGATGTTCTGGTGTAAAGGGAAAGTTGTG  
TCATGGGGATGGGAAAATCGGGCATATGGGCGAAAATGGCGGCAACGTTTCCAGCACCGGTACACCTTCAATTTTCT  
GTCCATCTGGTGAAGCCGCGCATGGTGTATTTAGGCATGGTTACCCACAGGATGTGGTGTATTGCTATCTCTAATCTG  
TGAATCCAGCGAAATCACGGCTTAAATCCAGTGTCTAAAGCTTCTACGTTACCGTAAATCTGCATCACCGGTCGCCCC  
AGAGCAGCATGGCCGCGCGCAGATGTGCTGTTAAAGTAAAGTAAAGAAAGAAAGCTGTCGTTAGGGCTGGCACCG  
ACCAGCAGCACCCGCCACGCTGGTTATGGGCGATGCCCTCGCTGTCGCGCTGTTAAAAGCAGCGGCTTTACTGCTGA  
AGATTTTGGCTCTCACACCCAGCGGCGCACTGGGTCTGAACTTCTGCTGCGGTAACGATATTTATGATACGGGCG  
ATGATATCCCGCATGTTAAGAAAACGGCCAGTCTGCGTACGCGTTGCTGGAAGTTACCCGAAAATCTTGGTATGACT  
GTCATTTGCGATGACAATATGATGATGAAAGGCATCTTTACCGACGGTATTATACCGGCTGCTTTCGATATGGGCGTGA  
TGTTCGCTAGTTAAGTATGCGCATGTTGATGACGCGGGGGAAATACGTTGCGCCCTGGCATTTCTGGCGGTTGAGGCAC  
TGAATTAATGACGCTCCGCCATATCACCTCCGTGATGGTTGCCGATGGCGACCAATTTACTCGGTGTGTTACATATGCA  
GATTTACTGCGTGCAGGCGTAGTGTA

>Cluster\_67144

ATGAGCGTAAAAATAAAAAATTAAGTATAGAGAGCCTCTTCGATGAACATAATGTTGATGGATTTTGGACGATGTTAA  
TGTATTAGTGGGGAAGAAATGGGAAAGGCAAGTCTGTAATATGAAATATTTACAGCCTACTGAATAAAGAGAGTCCCA  
CAGAAGTAAATTTATGCAAAAAGGCGCAGCAATTTACTTAAATGATAAAAGCAATGATATCAAGAAAGAACGCCATCTTCA  
AGTGAGTTTTTAAAAATAATAGCATCCAGGTGCTTAAAGGCTGCTGAAAATAAAAAAGAAATAAAAAAGCTTGCAAA  
AATAAAAAACAAGAGCAAGAGGAGAAGATTAATCAGAAATGGAGTTGATTTTGGAAAAGCTATCTTCCAAAGACACTG  
ACGCTCCAAAAGGATATTTCTGTTGAGATGGGGAAAAAGAGAAAGCAAGAAAGAAAGATAAAATCAATACAAC  
TACATATCAACATTAATCAATGAGTGCCTCAACAAATGAAAATAAAGAAAAGTTACGGCAAAAAGTGAAGGTTATAGA  
CTTTGAAATAAAGAGGAGAAGGATGCCGATTTAAAAATAATAGCAAGCGCTCAAGGAGCAGCGAAGAAAAGAAAACAT  
TACTTGTGTTTTTAAATGTTTTTTTAAAGACACGAAAAGAGGTTGTAATAGAGGATGATTTAATAGTTTTTCTAGAA  
GATAAAAAACAACATAAGAAATAGAAAATATCATCTGGAGAGAGACAGCTGATTTATACATTTCTTAGGGTCTTTAA  
TTCTGAGAGAGAAAACAAAATAACTTCTGATGAACTGAAATGAAATGAAATATCTTACATCTTTTCACTGGCAAGAAATCAATTT  
CATCAATAAAAAATAAGAGATGATGCAAAATAATATAGTAAACACAGCCCTGGAAATAGTAATGGACGGTGGATG  
GGTGCATACAAAAGAGATTGATTTATAATTAATAAGCCGAGAAAGTAA

>Cluster\_42012

GTGAAAAGCAATGGATTGTTGGCAGCGCTGTTTATGTTGATGACTGGTAATGCTGGGCAGATGGCGAATCGCCAAC  
TGAAAATATCTTAAAGATCAATTCAAAAGCAGTATCACGGCATTCTCAAGCTTGTATGCCATCACCTTAAAAATCTTG

ATGCTAAGGGTAATCAGGCCACCTGGTCAGCGGAAGCGATGTCTCTCCAGTGACGATCTCTATACCTGGGTCGGTCAG  
TTGGCAGATTACGAACTGCTCGAACAGACCTGGACGAAAGATAAACCGGTAATAATCTCGGCGATGTTAACAGTAAAGG  
AACGCCCGCTCTGGCTGGTGGTGAACTTTTACTCTTTTCAGCGCGCAGCCAGCGATCGTGGCGGGTGGTCGACGATA  
TCAAAACGAATAATAAATCTGTATCTGTAATAGCGAAGATTTCAATTTATCGCTTTAGTCAGCTTGAGACTGCGTTGAAT  
ACCCAGAAGAACTTACCTCTGCTGGAAAGAAAGTGAAGAGCGCTTGATAAGCAAAATGGTGGCGGCAGAAAGCAGC  
GGATGCATATTTGGGAAAAGATGCAAAACGGTAAGCAAAATGACCCGCGAAGACGCTTTAAAAAAATTCACCAACAGCGTG  
ATGAGTTTAAATAACAGAACGATAGCGAGGCTTCGCGGTTAAATATGACAAAGAGGTTTATCAACCGCGGATTCGCGCA  
TGCCATAAACAGAGTGAAGAGTGTATGAAGTGCAGTTCAGCAGAAGCGAGATTTGATATCAACGAACAACGGCGACA  
GACTTTTCTGCAATCACAAAAACCTAGCCGTAATTCAGGATGACTGATAACCGCTCGAAAAAGGGCAATATCCGTTAA  
CGATGAAAGTTTCAGAAATAAACAGTAAAAAGTCGCGATTTTGTGAAAATTTAGCAGTATCAACAGGCTAATGACCG  
TGGAAAAAGATACCGAACAATTCGCGGCCAATGGGGTATTAAAGTAA

>Cluster\_22562

ATGAAACTTTTTCTGATCTCGATCCTTTACCTTAACCTGATCAGCGTGGTGTGCTGGCCCTTTTCTTCCGGCCAG  
AGGCGATTTCTGCCCTTTCTTGAATACTGACCCTGCAGCGATTCGCTGCTGTTCTTTATGCACGGCGGAAAGTTGT  
CGCGTGAGCGGATTTATGCTGGCGGTGGTCACTGGCGACTGCATTTGTGGGTAATGTGCAGCACCTTCGCTGCTTTCCG  
ATTTCTGGCGGTGCTGTTGCTGGTGGAAACCGGTAATGTTGACCCGATGCTCTACTCCGGTTTTCTCTACTTGTGCA  
TCTCCCGCGCACCTGTCAGTTCGCAATTCGCTCACTGCAATGGCGCGGTAACGTCGCGCGCGCGGTTTTGTTGCGCT  
CAGCATCCAGCCTGCTGGGGATTTTCTTTACCATTGCTGGTGGTCTGGTGTGATGAATGTTACGGTGCAGGGGGCAGC  
CTTGAGCAGGTTCGTAATAATGCTGCAACTGTTGCTGCCATTTGTGTTGGGCAATCTTCCCGGCTTGGATTGGTGA  
CTGGGTGTCGCGTAATAAAAAATGGATTGCGAAAACAGCAGCAGCTCCATTTGTTGGTGGTATACGCGCAATCAGCG  
AAGCGCTGTTAACCGTATCTGGCACAAGTTGGCTGGGGATTTGCTGTTTTATCGTGGTGGTTCAGTTGCGTTCTTCTG  
GCTATCGTATTGATGTTAACGCTTTTATGGCAGCGGACTGGGCTTCAATAAGCAGATGAAATTTATCGCTTTTGT  
TGGTTCGAAAAAGAGTTCGCAATGGCATCCGATGGCAACATTTCTGTTCCCCACATCGGTGATCGGTATGATGGTGC  
TGCCCTGATGATTTTCCATCAGATCAATTGATGGTGTGTCGGGTGCTGGCGGTCGATACAACGCCAGCCGAAACAG  
TTACAGGCACAGCAGAAAGCAGCGCGGATAAAGCTTAA

>Cluster\_11357

ATGAATGCTGTAACGAAGGAAGAAAAGTCTCTCTGAAATCGCGGATCTTAAAGTGCACCTTTGAAATCAAGATGGCAA  
ACAGTGGTTCGGCAACCAGGAAAACGCTCAAAGCGGTCGATGGTGTCACTCTTCGCTGTAAGAGGGGAAACATTAG  
GTGTGGTAGGGGAATCGGGATGCGGTAAGTCCACCTTTGCTCGCGCCATCATCGGTTTGGTCAAGGCGACCGAGGTCAT  
GTTGCTGTTAGGTAAAGAGTTCGCGCATGAAGCCGATGAATGGCGTGCCTTCGAGTATATCAGATGATTTT  
CCAGGATCCGTTGGCATCGTAACCCGCGTATGACCATCGCGGAGATCATCGCTGAACCACTGCGTACTTATCATCCGA  
AAATGTCAGCGCAGGAAGTTTCGCGAGCGGTGAAGCGGATGATGCTGAAAGTCCGGTTATTGCTAACCTGATTAACCGC  
TATCCGATGAGTTCCTCCGGTGGCAGTCCAGCGTATCGGATTTGCTGCTGCTTTATTTGAACCGAAGCTGATTA  
CTGCGATGAGCCGTTTTCGCGCTGGACGTTCAATTCAGCGCGAGGTTGCAACCTGCTCCAGCAGCTGCAACGTTGAGA  
TGGGATGCTATTAATTTTATCGCTCATGACCTGGCCGTGGTAAAACACATTTCCGATCGTGTGGTGTGATGATCTC  
GAGCATGCGGATTAAGTGGGACCTATGATGAGTCTACCACAATCCACTACATCTTACACAGGGCAATTCGCGC  
AGTCCCATACCTGATCCGGATCTGGAGAAGAACAACCATCCAGTTACTGGAAGGGGAATTAACCGTCGCGGATCAACC  
CGCTTCCGGTTGTTTTCCGTAACCGTTGCCGATTGCCGGTCCGGAGTGCGCCAAAAACAGTCTGTTCTGGAGGGG  
AGTTTCAGACACGCGGTTTCTTGCTGAAAGTCGATCCGCTTAA

>Cluster\_24632

ATGGATCAGCGCCGATTTATTCGCGACCTTTAATCTGGTGGAGGTCATCTGGATCAGCCCTGCTGCTCGACAATGT  
AGCGGCGAAAGCAGGTTATTCAGTGGCACTTACAGAGAATGTTAAAGATGTCACCTGGCCATGCTATTTGGCGGATATA  
TTCGTGCTCGTCTGTTTTCGAAATCGCGGTCGCACTGACCTGACTGCGCGTCCGATTTCTGGACATCCGCGCAATAC  
CGCTTCGACTCTCAACAGACATTTACCCGCGCTTTCAAGAAGCAGTTTGGCCAGACTCTGCACTTTACCGCGGTTCTCC  
TGAATGGAGCGCCTTTGGTATTCGCCCGCGTACGTCGCGGTAATCACTATGCCAGAGCACAATTTGTCACCTCTG  
AAGATACGCGCTGATGGTGTACCCAGAGCTACTCTGTTGCTGGAGCAATCTGATTTCCGCGATGAAATGGCG  
TACCAGTTCTGGCACGATTTTCTCGGCACTCGCAACCATTCACCAGTGCCTTACGTTTGAACGAAACAGCTCCGAG  
CCAGGATAAAGACGACGAACAAGAGGTTTCTACACCACCGGTTAGCTCAGGATCAGGCAGATGGCTATGACTGACTG  
GGCATCCGCTGATGTTGACGGGCGGCAATATGTGATGTTTACCTATGAAGGTCGGGAAACCGCGCTGAGGAGTTTATC  
CTGACGGTATACGGAACGTCATGCCAATGCTTAACTTGACGCGCCGTAAGGTCAGGATATTGAGCGATACTACCCGGC  
AGAAGATGCCAAAGCGGGAGATCGCCCAATTAATCTGCGCTGTGAACCTGCTGATTCGATCCGCTCGTTAA

>Cluster\_43270

ATGGCCATAAGCATCAAGGGTGTAAATACCGGTTATTCGCAAGAGTAATAATTTCAATGCACTGGCGCTGAAAATTA  
AGAACCTCGCAATAAAGAACTGTTGTTTATGCTGCCATGGAATTCGCGGACCTTCTGATTGCGTGGAAAGTCGTC  
TGCTCAAAAGCATAAACTGGATGCTGTCAGCCCTTCAGTATGAACAAAGTACGCAATAAAGTCAATTAAGAAAATGGCA  
GAAAATATCCAGAAATTTGTTGATGAGCTTAAAAATGCGGATATTAATCGTGGGTTAACACGCTGGAACCTACCGA  
TGATCAGGCGGAAAATCTTACCTTCGTAATTAACGCTACATGACGGTAGCAAAATGTGAGTTAGTCTGATGAGTTGCA  
TTGAAATGCTGGCGGAGCAATCATTCGCAATTAATAATGCGGAAATGCGTGAACCTGCACTTACGATTTACCTCACTG  
TTAGATTTCTGCGGTTATACGACGTTGACTGCCAGGAAAATGGCAATCTGGAATATGACACCTATTCCCAACCGGAATG  
GAAACATAACTTGTCAACCATTTCTGGCGGTGCTTTACCGCTTAAAGATGAAAGTGGCAATGAACAATTTAGCGGGC  
CAGTGGTGAACCGGTAAGCAACCGCGGTAAGAAAGTGGAGGCGATCACTCGCGAATGCTTGTATTTAGCCCGGCA  
CTGAAAAAATCTGCGGTTGCGCATGTCAGGCTATGTTTCGACCGTAGCGGCAATAACGCCCAACCGCTAATCAGGA  
TCAATGCTTACGCGGCTGCATCACTTACGTTCAATCCACCAGCAAAACTGCACCACAGGCGAAATAA

>Cluster\_38996

GTGGAATTTCCGATTAAGTAACAATCTGAAAATGCCGATGATGGAATTTGGTGTTTTTTTCAGGTTACCAGATAAAGACGT  
GTGCAAACAGTCACTGTTGAATGCTATCCGACCGGTTATTCGACTCATCGACACTGCAGCGGATACGCTAATGAAGATG  
CCGTCGGTGAAGCCGTTCTGTAAGCCATATCTGAAGTTTATGTAACCGAGAAGGTTATTTATAACGCTAAATTTGTTG  
GTGAGGATATGTTGAATCAGGATATTCGAGCAGCAGGTTATGAAAGCATCAATTAAGAAAATCGGGGCTAGAATCTCGA  
TCTCTATTTATGACACAGGCCATGCGGATTAATTTAGTGGCTGGCGTGCATCGAAGATGCTATGAAGAGGGCAAT  
TAAAGCCGATTTGGGTTTCCAATTTCTACCTCATGTTCTGGCAACTTTTGGTGAACCGTAAGAGTTAAACCGATGGTC  
AACAGGTCGAGTTACATCCCTATTTTGCCCAACAGAGGCGTGGCAACCATGAAGTATTAACGTCAGCCTGAAGC  
ATGGGCTCCGTTAGTGGTGGACGACATAAACCTTTGAAAATTAATCTGCTTACAGATTTGAGATGCCATCAAAAAT  
CGATTTCTCAGTCACTTGCCTGGAATATTCACCGGGAGTGGTCTTATTCGAAATCAACACATCAACAGCGTATC  
GAAGAAAATTTTGGTATCTGGGATTTCTCACTGACAGAGAAGAAATGGCGCAAAATAGTTCGCTAGATTTAGGTTATG  
TGGGAATCGGTAACATTTAATCTGAGTTTGTCTGTTGCTGTTGCTGTAATAATACATGATTGA

>Cluster\_35158

ATGACCACTATTACCAAGAACGATTAATGATGTTTCAATAAAAAATCCGCTTGAACCGGGCTTACCCTGGTGAACAAAT  
GGAACCTGGCACGGATTCGCTGGCATCGCTGGAAGCAGAGCGGTTGGCAAGATTAATAGCTCAATACCATTAGGGGTTG  
ACGTAGGCAACAAAATTCGTACAGGCCATTAGAGAGCTTCTGACTTTGGCGGATATCTATTTGCCGCCCTCCAGCG

CCGATAGTGC CGGAAGAAATGTATTTGGCAGGATGCGCCAGTTGAAGGCAGCAGCAAAGCGGCTGCATACGCTACAGGCTG  
GAACGATTGCCGCGAAGCCATGCTTTCAGTCCGGAACCTTTTCGGGAAAAAATAAGATTTCGTCAACCAATAATTTTCGGAAAA  
TCCCGGAAGCGTCAACCAGCTCTCCGGTAACTCCGGCTCTTCTGCCTGGTGGTTTACCATTGAGGAGCGGAAGGAATTA  
CATGAAGACCTGGTACGCAAGCCACATAAGCAAGCCCTTAAAGTGGCGAAAAAGATGAAAAAGAAAGATCGCGATGCTGATTT  
CGCGTGGATTACGGCTATAGTTTACGCAAGCCTGGTTTGTAAAAAGCATCACATGGAGCAGAAATGCACATTCGGCAACT  
ATCCGGTAACTCCGGATAGTTGGATAAGCTGTAGTGTAGCGAATGCCGGATACCAAAACAGCCGTTCTTTGTTGCGGTGGAG  
TTTGACAGAAAGGTGACATGGCGAATGAAATGGGCGACTTACATCCCGGGTCACTCTGACGCTAATGATGGGTGGATAAT  
TCCTGGTGCCTGCGTGGAAACCGTACACTGGATGCCGTACCAGAACCGCCGAGGAGGTGCGCAATGA

>Cluster\_59046

ATGCGCTCACCAATTTGTTCATCTTTTCTCAGCAATTAATTCATCACCATTAAAGATTGCACCAGAGAAGGAGCAAGATCT  
TAAACGATAGTTGACGACAAAAAATTAATTTTCAGTTGTGAGTGAACCTGGTTTTAATATCCGAGTCAGGAAGAAATG  
AGAGTAATAATTCACATGAAATAGTTCTAACAGTAGCTTCACTGAAATATATTTGGGCATTTTCCAATTTCTTTGGGTT  
TTTTACGCAAGAGTACTCCAAATCTCAGAAAAAATAAGTATGAGCAGCTTTGATTTAACAGGAAAAAATAGGCTTAAAAAGTC  
TGATGAACCTTAAATGGGCAAGGAAAAAATTCGAAACAACAGGTTGCGAATCATGGCTAAAAAATGTCCCAAGCCAG  
AAGCATATTTACAAGGAAGCGAAGACTACAAGTTGCTAGCGAGATATTTCTTTGTGCTATTGCTTGGATTCTTCATCAT  
GAAATAAGTCATGTTGTTTTACAGCATCCATTGGTCACTACAGCATTCACCACCAAGAGGAGCGTGAAGCAGATTACACA  
TGCTACAAAATGGATATTAGGCAACCTGTATGAATCCGCTCCTGAATTAAGAAAAACGTGCACATTGGCATTGCTGCGCCAG  
TGCTTTGTATACAAAGCTTAGAAGTTGAAAATTTACTTCTGTTTACAAAATACACACCCAGCTGCATATGAGCGTATATAT  
TCGAAATTTTCATGCTACCTGTGCGAAATGAAGAGTTGATGAAAGCTCTATGTACAGTGATGCTTCAATATCTTTTCCA  
TGGCAAAAATATCAATGTGAATCTAGATGGGAGTCTTTTTCATCGATTTTAGGTGATCTTCTGTGATATTTACAGTC  
TTACCAGTAACTGA

>Cluster\_38703

ATGTCTCATATCAATTACAACCCTTGTATTACTTCTGCGCATGTCTACAAGAAGGTTCTGTGGTTGGCGCAGCGGAGGC  
GCTTTATTTAACACCACAACCATTACCGGGCAGATCCGGCGCTGGAAGAGCCCTGCAAGGAAACTATTTAAGCGTA  
AAGGACGTGGTCTGGAACCCAGCGAACTGGGGAACTGGTCTATCGCTATGCCGATAAAAATGTTACCTTAAAGCCAGGAA  
ATGCTGGATATCGTCAACTATCGCAAAGAGTCCAACTTATGTTTGTATGTTGGTGTGGCAGATGCACCTTCCAACAGTCT  
GGTCAGCAGTGTTCGGATGCGCGAGTTGTGGAAGACGAGCAGATCCATCTACGCTGTTTCAATCGACGCAGAGATGC  
TTTTAGAGCAGTTACGATCAGCATAACTGGATATGATCATCTCTGACTGTCGATCGATCCACTCAGCAGGAAGGGCT  
TTTTCCATGAAAATTTGGCGAATGTGGTGTGAGTTTCTGGTGCCTAACCCACTACCAGAAAAGCCGTTTCTGCTGTCT  
TGAAGAGCCTGCTTACTTATTTCCGGGGCGTCTCAATGTTGGGGCTTAAACTATTAAGTGGTTTAACTCCAGGGCT  
TGAACGTGCAAAATTTGGGTGAGTTGATGATGCTGCGTTGATGAAAGCCTTTGGGGCAGCAGATAACGCTATTTTCGTT  
GCACCTTCGCTTTACGCTAATGATTTTCTATAACGATGACTCGTGTGGAGATAGGCCGTGTTGAGAAGCTGATGGAAGA  
GTACCACGCGATTTTGGCGAAAGGATGATTCAGCACCTGCAGTACAGCGTATCTGCAATACAGACTATTTCTGCGCTGT  
TTACTCCAGCTTCAAAAATA

>Cluster\_41425

ATGGCGAAGTTACCCAATTGAAGCGTTATGACGCGCGCCGATTAACGGGGCAAAATGGTTTCTGATGGCATCGGGAT  
GCTGGTTTCCGGCTTCATCTGCTGGTCCGATGATTTACATCTTCGTGCAGGCGTTCAGCAAAGGGCTGATGCCGGTTT  
TACAGAATCTGGCGATCCGGACATGCTGCACGCCATCTGGCTGACGGTGTATGATGGCTGATGCTGCTGCTGCTGCTG  
CTGGTGTCCGCTATCTGCTGGCTGCGTGGTGCAGCGCTTAACTTCCCGGACGCCAGTTGCTGCTGACGCTGCTGGA  
CATTCCTTTTGGCTGTGCGCGGTGGTTGCCGGTCTGGTGTATCTGCTGTTTTACGGCTTAAACGGCCGCTGGCGGGCT  
GGCTGGATGAACATAATCTGCAAAATATGTTCTCTGGCGGGAAATGGTGTGCTGCTCACCATCTTCGCTGACCTGTCCGTTT  
GTGGTCCGCGAGCTGGTCCGGTAAATGTTAAGCCAGGGCAGCCAGGAAGACGAAAGCAGCGATTTTGTGGGCGCATCTGG  
CTGGCAGATGTTCCGCTGCGCTCAGCTGCGCAACATCCGCTGGCGCTGCTTTATGGCGTGGTGTGACCAACCGCCGCG  
CGATTGGCGAGTTTGGTGCCTGCTGGTGTGTTTCCGGCTCGATTGCGGGCAAAACACTTTCGCTGCGGTTACAGATTGAA  
TTGCTGGAGCAGGACTACAAACCGTCCGCTCCTTTACCGCTGCGCGTGTGTTGACGCTGATGGCGATATCACCCCTGTT  
TTTTAAGAGTATGTTGACGTGGCGTCTGGAGAAATCAGGAAAAACGCGCGCAGCAGGAGGAACATCATGAGCATTGA

>Cluster\_23421

ATGAAAAATATTAATAACTTGGTTTCAGCTATGTTGGTGGAGCTGGCATTGTTCTCGCAAAGTTCGTTGGCAAAAAGGTA  
TAAATTTGGTGCCTCATTATTAACACAACAACATCCTTTCTATATTGATCTTGCGAATGCCATGAAAGAGAGGCAAAAA  
AAGACAATGTCAATTTAAGTGTCTCTATTGCCAATCAGGATTTAAACAAAACACTTTCATGATGTTGAGGATTTTATTACT  
AAAAAAGTGGATGCAATTTATCTCTCCGGTCCGATTCGAAAGCGCTCCAGGCAGCATAAATTAAGCCGATAAGCCCGG  
TATTCCTGTTATCACCGTTGACGTCGCTGCGGAAGCGCTCCGGTCTGATCGCATGTTGCGACCGATAACTATCGGGGAG  
GCGTTGAAGCAGGCAAGTTAATGGGTAACCTTTTGCATGGTAAAGGTACTGTAGCCATTTATTTCTTATCCGGCCTACAA  
TCGGTGGTTGGCGCGCTGATGGTTTAAAGAAAGGTTAAGTGATACCCGGATATTAATAATTTGTTGCTGAACAGCCTGG  
TATTACCGCGGCTGAAGCGTTAACGACTGCGCAAAAACATTTATGCAAGGCAAAATGCCAACCTGAAATGGTCTGTTTGGCTTTG  
GTGATGATGCGCGCTGGCAGCGTTTATCGCAGCAAACTGCGCATAAACGACAACATCAAAATCATTTGGTTTTGACGGC  
ATGAAAGAGCGCGTGTATGCCGTTGACAGTGA AAAACGTTTGGCGCGTGTATTCGGCAATATCCCGATCAAAATGGGGC  
TAAAGCATTGATGCCGCTGTTGATCACCTCAATGGTAAACCGGTAGAAAAATGATCCCGGTACAACCCGGCTTTATA  
CAGGTAATAG

>Cluster\_21815

ATGGATGTTACCGCAAAATACGAATTGATGGGTTGATGGCTATCCCATCCGCCACAGTTTATCGCCTGAAATGCAGAA  
TAAAGCCTTAGAAAAAGTGGGATTGCCATTTACTATATATGAGCTTTGAAGTGGATAACGATAGTTTCCCGCAGCAATG  
AAGGATTA AAAAGCCCTCAAAATGCGTGGAACTGGTGTGCTGATGCCGAACAAACAACCTGGCGTGTGAATATGTTGATGAA  
TTAACGCCAGCGCCAAACTGGTGGGTGCCATCAACACCATCGTTAATGATGATGGCTATCTGCGTGGCTATAACACCGA  
CGGCAGCGGTCATATTCGCGCATTAAGAGAGAGCGGTTTTGATATCAAGGCAAAAACGATGGTGTCTATTAGGGGCGGTTG  
GTGCTCAACCGCAATTTGCGCGCAGGGGCAATTTGAAGGTTTTAAAAGAAATTAACCTCTTTAACCGTCCGGATGAGTTC  
TTCGATAAAGCCCTCGCTTTCGCGCAGCGGTTAACGAAAAACCCGATTGGCTGCTGACAGTCAACCGATCTCGCCGATCA  
GCAAGCCTTTGCAAGAGCCCTGGCTTCCGCCGACATTTAACCAATGGCACCAAGTGGGTATGAAACCCCTTGAAGATG  
AATCATGGTAAATGATATCAGTCTGTTACATCCGGACTTCTGGTCACTGAATGCGGTGATAACCCCTCATATGACGAAG  
TTATTACAGCAGGCGCAACCAAGCGGTTTCAAAAACGATTTGATGATACCGCATGTTGTTGTTGGCAAGGGGCTGAACAGTT  
CACGTTATGGACTGGCAAGATTTCCCTCTGGAATATGTTAAACAGGTCATGGGGTTCGGTGCCTGA

>Cluster\_19688

ATGCGTTACTGGGCAGACCTATTAATAAAAAAAGTAATGGCGAAATAACACTTGGCTCTATCCAGCTCCCAATTGGG  
ATCAAAACAGGATGTCACCGAGCAAGCCATGATGGGCAATGAATGTCATAACCTTGAGTGTATGGCTTTTCTTCCCGGATT  
ATGAACCCGATTTGGGGATTTTGTGTTGGACCGTATCTGACTGACGATCCGCAAAAACCTGTTCAAAATATATGAAGCGAC  
TGGTTTTAAACAAAAAATGAAAGTCTGAAGAAAAAGGGAATTCATGTTGTTAATGAATAATATCTCTATGGCCTCGACA  
GATTTATTCGAAAAAACCATTCGCAACCTTTGACGATTTGCAAGGTTTAAAAATTCGCGTTCCTAATAACGCTATGCAAA  
TAAAAGCCATTACGCGATGGGGCAACCAACTCCCATGCCATTAGGCGAAGTTTATCCCGCATTAACCCAGGGGCTT  
ATTGACGGCTAGAAAACCAATTTTCAGTGTGCAAGGGCAAAAACCTGATATGAGCAGGCAAGATATCTGACAATGGTTAA



CTACCTGACAAATACCTCAGTGTGGATAGGTGGTGAAGCCTTCTTAGCACCCCTTACCAGAACAAATGGAGATGATCC  
ACCAGACCGGCTATGAAGCGGTGTCTATAGCCAGAACTCACCTTGAGCGTGATGCCGAAATGTTGAAAACCATGCGAG  
GCAGCCGGCTCGAAGTGTCTATCCCGATACTGGACCATTCCAGAAGAAAGCACGCGAAGTTTACTCTCAATCCCGGA  
ATGGACACAGGTCTGTAGAAACCATTTCAACGACCAATGCAATAA  
>Cluster\_28641  
ATGAACGAACATCATCAACCTTTTGAAGAGATAAAGCTGATTAATGCAACCGGAGCAGAACAAATGGTCAGCAATACAAC  
TGGGAAACTACTGGGTATTTCAGAGTATCGTCACTTTATACCTGTATTAAACGCGGCCAAAGAGCTTGTCTGAATAGTG  
GTCACACAATTTGATGACCAATTCGAGGAGATCCTCGATATGATCAAAATTTGGCTCAAAATGCCAAAAGAGCATTAAAAGAC  
ATCGTACTCTCCCGCTATGCCTGTACCTGGTAGTACAAAACCGGACCCCTGCCGAAACCGGTTATTGCCGGCAGGGCAAA  
TTATTTTGTCTATCCAGACCCGACGGCAGGAGCTGGCTGACGATGAAGCTTTCAGGCAACTTCGTGAAGACGAAAAGCGTC  
TTTTTCTGAGAAATGAGTTGAAAGAACATAACAAACAATAGTTGAGGCGAGCGAGCAAGCTGGGGTAGCGACAGCTATC  
GATTTCCGCATATTTAGAAATCATGGTTACCGGGGGCTGTATGGTGGATTAGATCAGAAAAGCCATCCATCAGCGGAAGGG  
GCTGAAAAGAGATCAGAAAGATCCTGGATCATATGGTTCAACAGAACTGGCGGCTAATCTCTTTCGAGCTACCCAAACAG  
AAGAAAACCTCAAGCGGATGGCGTGAATTCAAAACAGCAAGTAAACCCACACACTTTGACGTGGGTGCGAAGGTGAGG  
CAAACCATTCAGGAACCTTGGCGGAACCATGCGCTGAGGAGTTGCCGACCCCGCAGGTCACATCAAGCAGTTGAAAAACA  
GTGTAATAATACAGAGAAGAAATAGCAGAACTAAAACCTCTTTTGTGTA  
>Cluster\_13941  
ATGTCAAATACATACCAGAAAAGAAAGGCAAGTAAAGAGTATGGTTTGTATAATCAATGTAAGAACTAAATGATGATGA  
ATTTATTTCCCTTACTTGTATGATCACAATTCCTTGAAGAGGATTCATCTGCCAGAGTATTACAGTTAAGAGGTGGGCAAG  
ACCGTGTAGATTGGCAATGAGTCTGCTCTGATAAAAATTAATCCGTAGAGATATCGGAGCATTATATCTACTCGGCA  
ATAAAAATTTGCAAAAATGCGAAGATAATGTTTTAATATTTTGAACAAATATGGCATTGAATGATAAGAGCGCTTGCCT  
TCGAGCTACGGCAATCGAGTCAACGGCTCAGCGATGCAAGAAAACCCATTTATTCACCTAAAATAGTAGAACATCTC  
AAATTTACTGCTTTTGAATAATCGACTAATGTGACAGCTGCTACAGCATTGCTATTTCTGTTATCAATGATAAAGCAACA  
ATTTCCACTATTGATTAATCTGTTAAAAGATCCTAAATGGAGATGTCAGAAAACCTGGCGCATTGCAATAAATTAATGATA  
ATATGATAATAGTGATATTAGGGATTGTTTTGTGGAGATGCTTTCAGGATAAAAATGAGGAAAGTCCGATTTGAAGCAATA  
TCGGACTTTTCTCAGAAAAGATAAAAGGGTTTTATCTGTTTTATGCGATGAGTTAAAAAAAATACTGTTTATGATGAT  
ATCATTGAAGCTGCGGGTGAATTAGGTGATAAACCGCTACTTCTGTTTTAGATACTATGTTGTACAAGTTTGTATGACAA  
TGAATTTAATCTCCGCTATTGATAAGCTGAAGCGTTTCATAG  
>Cluster\_28436  
ATGATTGAGAACCCTCCGTGGCTGACAATATTCAGCCATACCATGCTGATCCTCGGGATCGCGGTGATCCTTTTCCCGCT  
GTACGTGGCGTTTGTGCGGGCAGCGCTGGATAAACAAGAAGTCTATGCCGACCCGATGACGCTAATCCCGGCACACATC  
TGGGGAAAACATCCACAACATCTGGGTAACCGGGTAGGCACGAATAGCCGCGCTTCTGGCGGATGTTGCTTAACAGC  
TTTTGTGATGGCGTTACGATACCGCTCGGCAAAATACCGTCTCGATGCTCTCGGCATTTGCCATTGCTGGTTTCGTTT  
TCCGCTACGTAACCTCTTCTTCTGGATGATTTTTATCACCTTGATGCTGCCGTTGAAGTGCCTATCTCCCGACGGTGG  
AAGTCAATCGCAACCTGAAAATGCTCGACAGCTACGAGGTTTAAACGCTGCCGCTGATGGCTCGGCGACCCGACGTTT  
CTGTTTTCGCCAGTTCTTTTATGACCTACCGGATGAGCTGGGAAAGCCGCGGATGACGCGCGCTCCGCAATCGGTTT  
CTTTTGGACATCGTTTTTCCGCTGTCCAAAACTAATCTGGCGGCGCTGTTTGTGATCACCTTTATTTACGGCTGGAAC  
AGTATTTTGGCCGTTGTTGATTATTACCGAGCTTGTATCTCGGCACCACCGTGGCAGGGATTAAAGGGATGATCGCCACA  
GGCGAAGGCACAACCGAATGGAATCGGTGATGGCGCGATGTTGTTAACCTGATCCACCAGTATGATTTGTTTATG  
GATGACCGTGCCTTCTGTCGCGGCTGTCGATAGTGAAGATAA  
>Cluster\_58522  
ATGGCTATTCCAAAATACAGGCTTACGCACTGCCGAGTCTCACGATATCCGCGAGAATAAAGTTGACTGGGCCCTTTGA  
ACCGCAACGTGCCGCTTGTAAATCCATGATATGCAGGACTATTTGTGAGCTTCTGGGGCAGAACTGCCCGATGATGG  
AGCAGGTGATCGGCAATATTGCTGCGCTGCGGACTACTGCAACAGCACAATATCCCGGTTTATTACACCGCCAGCCG  
AAAGAGCAGAGCGATGAAGATCGGGCGCTGTTGAATGATATGTTGGGGCCGGGCTGACCCGCTCGCCGGAACAGCAAAA  
GGTGGTGGATCGCTGACGCCAGATGCCGACGACCGTGTGGTGAAGTGGCGCTACAGCGCTTTCATCGTTCTCCGC  
TGGAGCAAAATGCTGAAAAGAGAGTGGACGTAACACAGCTGATTAATFACCGGGTATATGCCACATTTGATGACCAAC  
GCAACCGACGATTTATGCGCGATATTAACCGTTTATGGTGGCGGATGCGCTGGCCGATTTACGCGTGACGAGCATT  
GATGTCGCTGAAATATGTTGGCGGACGTTCTGGCGGGTGGTGTGATGACGAAAGATTACTGCCAGCACCTATCCCGCCA  
GCAAAGCGGCGCTGCGTGAAGTATCCTGCCGTTGTGGACGAGTCCGATGAACCGTTGATGACGACAACCTGATCGAC  
TACGGTCTGGATTCCGTTGCGCATGATGGCGCTGGCGGCGCTGGCGCAAGTGCATGGTATATCGACTTTGTCATGCT  
GGCGAAAACCCGACCATCGACGCTGGTGAAGCTACTCTCCCGGAGGTGAAATAA  
>Cluster\_41161  
ATGAAATAACATTGGAGCGCAGTGTAGTGTCTGGCGGTCTGGCAATGCCGCAATTCGCGCCGCGAAATCGACGCAAC  
CGGTTTTGCTTTGTTTACCAAAAACCAACGTCAGTGGCGTCCGCAACCGCTCACGACGCAACCATCGATGAATTCAAAG  
CCGCTGTGAAAATATCACTACACATCGGCGCAAAATTTCCCCACGACAGTTATCTGATTAACCTCGGACATCCGGTT  
GCTGAAGCTCTGGAATAATCGCGCGATGCTTTTATAGATGAAATGACAGCTTGGCAACAGCTGGGGCTTTCTTTGCTCAA  
CTTCCACCTGGCAGCTCATCTGATGCGATTTCAAGAGAGATTGCTTGGCGGATTTGCCGATTAATGCCAATCCATGCGC  
TGGATAAAAATCAAGGTGTCACCGCGTATTGAAAACACCGCGGTCAGGGCAGTAACCTTAGGGTTTAAATTCGAACAT  
CTCGCAGCATTAATCGACGGCGTGAAGATAAATCCCGCTCGGCGTCTGCATTTGATACTGCGATGCTTTCCGTTGCCG  
GTATGATTTGGCTACTCTGCGGAATGCGAGAAAACGTTCCGCTGATTTTGGCCGATTTGTTGGCTTTAAGTATCTGCGC  
GGATGACCTCAACGATGCGAAAAGCAGCTTTGGCAGCGCGGTTGACCCGATCATAGCCTCGGCAAGGCAATATCGCT  
CATGATGCGTTCCGCTGGATCATGCAAGACGACGTTTCGACGGCATTCCGCTGATCCTTGAACCATCAACCCGGATAT  
CTGGCAGAAAGATCGCTGGTGAAGCGCAACAACTGAAAAGCGGTGGCTGA  
>Cluster\_42508  
ATGACTGACAAAATGCAAAAGTTTAGCTTTAGCCCCAGTTGGCAACCTGGATTCTACATCCGGGCAGCTAACCGGTGGCC  
GATGTTGTCGGCTGACGAGGAGCGGGCGTGGCTGAAAAGCTGCATTACCATGGCGATCTGGAAGCAGCTAAAACGCTGA  
TCCGTGCTCACCTGCGGTTTGTGTTTATATGCTCGTAAATATGCGGGCTATGGCCTGCCACAGGCGGATTTGATTCAG  
GAAGTAACTACCGCTGATGAAAGCAGTGGCCGTTTTTAAACCCGGAAGTGGGTGTGCGCCTGGTCTCCTTCGCGGTTCA  
CTGGATAAAGCAGAGATCCACGAAATACGTTCTGCGTAACCTGCGGATATCGTCAAAAGTTGCGACCAACCAAGACGCA  
AATGTTCTTCAACCTACGTAACCAAGCAGCGTCTGGGCTGGTTTAAACAGGATGAAGTCGAGATGGTGGCCCGTGAA  
CTGGGCGTAAACGCAAGACGATGCTGAGATGGAATCAGTATGGCGGCACAGGACATGACCTTTGACCTGTCTCCGA  
CGACGATTTCCGACAGCCGATGGCTCCGCTGCTCTATCTGACGATAAATCATCTAATTTGCGCAGGCTATTGAAAG  
ATGATAAATGGGAAGAGCAGGCGCAACCGCTGACCGACGCGATGCAAGGTTGACAGGCTGACGAGCGTACGCAATATC  
CGCGCGCTGGTGGACGAAGACAACAAGTCCAGTTGACGAGACTGGCTGACCGTTACGGTGTTCGCGTGGCGTGT  
GCGCCAGCTGGAAGAAGACGCGATGAAAATTTGCGCGCTGCTATTGAAGCGTAA  
>Cluster\_26537  
ATGGGAAATGGATGGCATGAATGGCCACTGTTTATCTTTACCGTATTGGGTCAATGCGTAGTAGGCGCGCTGATGTTAG  
CGGAATTGGCTGGTTCGCGCCAAAATTAACGACAGCCGTCAGCACATTAATTCGTGGCATGTTTTTCCCTGCGCTGTTGA

TGGGCATCGGGTTTATTGCCCTCTGTGCACCTGGGATCGCCACTGCGGGCGTTAACTCGTGAATAGAATCGGAGCT  
TCTGGTCTGAGTAACGAGATTGCTGCCGGTCCATATTTTTTGGCGTTGGCGGATTATGGTGGCTGGTGGCGGCATCGG  
TAAATGCCGCAAGCGTTGGGGAACACTGGTTACTTGTGACGATGGCGCTCGGCGTCATTTTCGTCTGGATGATGACCT  
GGGTGTATCAAACTGCACACTGTGCCAACCTGGCATAACGGTTACACTACGCTGGCTTTCTCCGACGGTATTGTGAGC  
GGTCAATAACTTGGTGCACAATCTGGTGCAGCCGGTTACATTTAATACCACACCATTTGCCATCATAGCATTCT  
GGCGCTGATCGCTTGTGCCGGTTGATTGTGCTGCAAGGTTTGTCTCTGGCGTCTATTCACTCATCCGTACAACAAGCCA  
GCGCACTGGTACCAGATTACGCCCTCTTACAGGTCTGGCGTGTGGTATTGTTATGCGCAGGTCAGGATGCTGGCTTTGT  
CCGCTCATTCGTGCGCGTGAACCTCACGTTGCCGGACTTGTTCGGGGTTAATCCTCATTTCTTGGCGGTGAGATGATCGG  
CGTGTGCTCTTTTATGGCCTGCACATGACAGTAGGAATGGCTATTGCAGGTTAA

>Cluster\_35489

GTGACCAAGAAGAACGCTTTGAGCAACGGATAGCCAGGAAACGGCTATCGAGCCACAGGACTGGATGCCCGATGCTTA  
CCGAAAGACACTGATCCGCGAGATTGGGCGAGATGGCCACTCCGAGATTGTTGGTATGTTGCCGAAGGTAACGGATCA  
CTCCGCGCACCAACTTGGCGGTAAAGCATTTCTGTTGCCCAAAGTGCAGGATGAAGCCGGTCATGGTCTGTATCTCTAT  
AGCGCCGCGGAAACACTGGGCTGCGCCAGAGAAGACATCTACCAAAAAATGCTCGACGGACGGATGAAATATTTCTCCAT  
CTTTAATATCCGACATTGAGTTGGGCTGATATCGCGCTTATCGGCTGGTGGATGGCGCAGCGATCGTCAATCAGG  
TGGCGTTATGTCGCACTTCTTATGGCCGATGCCAGACAAATGGTGAATAATGCAAGAAGAGAGTTTACCAGCGT  
CAGGGTTTGAAGCTGCATGGCACTGCGCGAGGGCAGCGAAGCTCAAAAGCAGATGTTGCAAGACGCCATTAACGCTTT  
CTGGTGGCCAGCTTAATGATGTTCCGGCCAAACGATGATAACTCGCCAAACAGCGCCAGAAGTCTCGCTGGAAAATCA  
AACGTTTCCAAACGACGAACTCCGCCAGCGTTTTCGTGGATAACACCATTTCCACAGGTTGAAATGCTCGGTATGACCGTT  
CCTGACCCGGATGCAATTTGACACTGAAAGCGGTCACTACCGCTTTGGTGGATGACTGGCAGGATTTAACGAAGT  
AATTAACGGTCCGGAATTTGTAATCAGGAGAGGCTCGACGCCAAACGTAAGCTGGGAAGAAGGTACTGGGTGCGGG  
AAGCAGCGCTGGCCATGCACAAAAACACTTGGCCGTAAGTTCGCATAA

>Cluster\_22519

ATGGACAACGACAAAATTTGATCAACACAGCGACGAAATGAAGTTGAGAGCGAAGAAAAGAGCGCGTAAAAAATAGA  
AATAGATGAAGACCGACTCCCTCCCGGGCGATGGCAATTCATGAGCATATCCGCCAGGATGGTGA AAAAGAGCTGGAAC  
GCGACGCAATGGCGCTACTGTGGTACAGCATTTGGCGGGGCTGTCGATGGGCGCTTCGCTACTGGCAAAAGGATATTT  
CATGTGCAACTGGAAGGCGTCCCGGGCAGCTTCTGCTGGAGAATCTCGGTTATACCTTTGGTTTTATATCGTCATAAT  
GGCCCGCCAGCAATTTTACCGAAAACACCGTAACTCGGTAACCCCGTCAATGCAAAAACCGACAATGAGCAGCGTG  
GCTTACTTATGCGGTTATGGGGCATCGTGTGCTGGGTAATATCTCGGGACAGGATTTGCTGCGTGGGCATTTGAATAT  
ATGCTTATCTCAATGAAGAAACFCGCGATGCAATTTGTCAAAAFCGCGCATGGATGTGATGAAGAACACCCCGCAGGAT  
GTTTGGCAACGCGATCATTTCCGGCTGGCTGATCGCCACTATGGTATGGATGTTTCTGACAGCGGGTGGCGAAAAGATTG  
TGGTGAATATATTGATGACCTGGCTTATTCGCCCTGGGTGACACCACCTACATCGTTGTGCGGTTCTGTTGAAATCCTCTAT  
CTGGTGTTTAACGGTACGCTGCACTGGAGCGATTTCACTGCGCCCTTCGCACTACCTACTTTAGCGGGGAACATCTGCGG  
CGGCACCTTTATCTTCGCGTTAATGAGTCAATGCACAGATCCGTAACGACATGACCAACAGCGCAAGCAGAAAGCAGCGC  
AAAAAGCAGAACCTGGCGAAAACATTAAGAAAATGATAAAAAACCCGTCATAA

>Cluster\_4614

ATGAAATTACCAAAATTTGTAACGCAATTTGTGTACCGAGCAACATTACCTAGTATACAGGCTATTGAAGGTCATCTTCT  
CGAATCCCTTATTTCTGAAATCGGGGAAACAGAAATTTTACCGTCCCTCTTTTGTAGAGAAATCCGTCACTGGTGAACCTG  
TAATCCGATATCTGTTGGTACGCAATGGTAACTCCGTATGATCAGAAAATAATTTCCCGACATGTCGTATGAAAGAA  
GCTAATTTCTGAAATCCAAACAATCGAAAATATGTCGGGAATAAATAAAGCGTGGCGAACGACTGGCCATTTATGATAA  
CGTACGAGTAGATCTATGCAAAACAGGCATTTGTTAAGTCTACGCTGATTTCTGATTTGATACAGCACTGATGAGAAATTA  
TGGTAATCAACAACAATAAATAAATAGCTGGTATGGTATGCGCAATGCTGATTAAGGTTGTCGGTTCACTGAAACA  
GAAACAATCAACATFCAGTGAATCAAGAAATGGACTGACTACACCGCTGAATAACTACATCAATGGTGCACCAATGCAAT  
TGAAGGATTCAGTGTGGAAAATTTATTTACGCTATCACGCTACGCAGATCAAAAAGGAAATTTATTCGCTACTCAGCTGAGC  
ATGAGTCAATTCAAAGCGAACTGGCCGATAGTCTTAGTAGTAGTTTCACTGCTGATAAAAATGGAGTTATCCGGTTGCGGT  
GTGACCTTCAATTTACCAGAAAATTTCCATTTTTCGCGCATCAATCTCAATCTCAGACATTTAATGATGAAGATGATAA  
AGCATTCAGTGGCGTCACTCAGACTGGCGCTGACCTTTTCCAATTCAGCAAGGTAGTTAATTTGATGTGTGACCTTCTTT  
CTTACAAAGAAGATAAAAAGCAAAATCCAAACACTTAA

>Cluster\_40867

ATGCTTTTGGCCGGAGTATTTACTGACGTTGCTCGATGATATCGCCACACTGCTGGACGATATCTCCGTGATGGGCAA  
ACTGGCGGCGAAGAAAACCGCGGTGTATTAGGGGATGATTTATCGCTCAATGCGCAACAAGTTTCAGCGCTGGCGGGCCA  
ACCGGGAATTTCCCGTGGTCTGGGGCGTGGCGAAAGGATCGCTGATCAATAAAGTGATTTGGTGGCGCTGGCGCTGATC  
ATCAGTGCCTTTATCCCGTGGGCGATTACGCCACTGTTGATGATTTGGCGGCGCTTTCTCTGCTTTGAAGGGGTAGAGAA  
AGTGTGCAATGCTGGAGGCGCTAAACATAAAGAAGATCGCGGCGAGACTCAGCAGCGTCTGGAGAAGCTGGCGGGCG  
AGGATCCGCTGAAGTTTGA AAAAAGACAAAATAAAGGGCGATTCGTACCGATTTTATATTGCTGCGGAAATCGCGCC  
ATCAGCTGGGGATTTGTGGCAGAAGCGCGTGGTTAATCAGGTGCTGGTCTTTCAGGCATCGCGCTGGTAGTGACCGT  
GGGCGTCTACGGTCTGGTAGGGTTATCGTTAAGATTGATGACCTGGGGTATTGGCTGGCGGAAAAATCCAGCCGCTGTA  
TGCAGCATTAGTAAAGGTTATGATCATTTGCCCTGGTTGATGAAAGCATATTCGATTTGTCGGCAGCTGGCGATG  
TTCTCGTCCGCGCGGGGATTTGGTACATGGTATTGCCCGCTGCATCAGCCATTGAACTTTCCGCGGGCAGAAAG  
TGCAGTGGTGGCGATGATATTACCGACTGTTTTAAATCTGATTCTTGATTTATCATCGCGGATCGTGGTGTGGGAG  
TGAAAGCAGTAGGCAAAAATGGCGGTCAGGCACATTA

>Cluster\_61499

ATGACTATTTATTTTATAAATGGGTTGCAGATTATGAATAAAAATGATTCAGTACCTGAAAAAAGTACAAGATAAA  
AAATATAACAACCCAAAAAATAAATGATTTAATAAAAAATATCAAAAATAGGGATGGATAATGATGGCTGGGGC  
GATTAATTCATCAAGCATTTACCTCAATGATATTA AAAAAGATGACATAAATATCATTAATGACAGTGTGTTAATAAAGGT  
ATCAATAACAATAATTA AAAAATAAATAAAGTCTATAAAGTTTGTCTTCTAAGAAATACTGTTGGCGAAGATTTATTCT  
TGATAACGCGAATTAATTCGATATTTATATGATTTTGGAGCATAGATTTATAGGGAATGAAAAGATCAAGGCAATGAAAC  
AATTTTTTCTATAGGAATGGATGAAATGAGAAATATAGTTTATCTGACAAAAATAACAGCCAGCCAATATGTTTTTCT  
CTTGGTCTGATAAAGGGCGTCTCAAAATAATTAATGATTTAGCCGAGAGATTAACAACACTAGGATGTAAGCTAGATTT  
TAATGTTGTGCAAAAGATAAGACATCATCTACGACTTCAAGATTTGATTTGAAAACAATAATATCTTATGAAGAGAAATTA  
GAAGAACAATAATGCTAATAATAATGTTGATAAACCAGAAAACCAATCTGGCTGGACTTTCGTATACTTGAGGCA  
CTATTTTTTCAATAAAAAATTAATTAATAATAATAAATGATTTGGTTTCAGAAATCTATAGTGAATCTCGCTTTTTTAT  
AATAGGTCAATGATGATGGGATAAGTTAGAGTATTTTATAAATCATCTGTTAAACCAATGGATATGATAGTTTATATA  
AATTCAGTCCAGATAAATGATGTAACGATGTTTCTGATTTTATAGCAAAATAA

>Cluster\_27326

ATGATAAGTGCAAAATCGTCCGATAATTAACCTCGACTCGATCTGCTGAGAACATTTGTTGCTGTTGCCGATCTGAACAC  
TTTTGCTGGCGAGCTGGCGTGTGTGCTGACTCAGCTGCCCGTAAGTCAGCAAAATGACAGCGTGGAAACAACCTCGTTG  
GAAAAGAACTGTTTCGCTCGTACGGTCCGCAACAACTGTTAACTGAACATGGCATTTCACTTCTGGTTACGCCAGGAAA  
ATCCTGCGTTTTAATGATGAGGCTGCTCATTAATGTTTCAAGTAACTTTCAGGCGGTAACTATCGGTGCTTTCAG

TGAATCTGCCGATACGATCTTACCTTTCCCTGTTAAATCGCGTGAGTTCGGTTTATCCGAAACTAGCGCTGGATGTCCGGC  
TTAAACGTAATGCCATACATGGCAGAAATGCTGGAAATCCAGGAAGTGGATTTGATGGTAACACCCATCGTCTCTTACC  
TTTAAAGCATTGAACTTGGCTACCTCGCCAACACACTGGTACTGCGCAGCGGAATACGTTATGCAAAAAGGTGAGCCGAT  
CCCTCTTGTGTTGCTGGATGATCAAGTCCGTTTCGCGATATGGTGTGGCGACGCTTAAATAAAGCAGATATTTCCCTGGC  
GACTGGCTTATGTCGCTTCGACGCTTCGGCGCTTCGTGCGGACAGTGAAGCCGGTCTTGGCGTGACGGCAGGACGGTCT  
GAGATGATGAGTCCGGACCTGCGTGTGCTGAGTGGAGTAGATGGCTTACCGCCGCTACCTGATACCGAATATTTGCTGTG  
CTATGACCATCCAGTAATAAGTGGCTGGCCAGGTGATCTATCAGGCATGGAGAGCTACCATAATCCGTGGCAATACA  
GCCAATGTCTGCTCCGGAAGGAGATGACTCATTTGTTGATTGAAAGGGATATAGAGTAA

>Cluster\_64001

ATGTGGTCAGAATATTTACTCGAAGTTGTTGATGCGGTAGCGGTAATGGTAGTTTTAGCGCTGCGGCACAGGAGCTGCA  
TCCGCTTCTCTTCCGCTGAGCTATACCGTGGCTGAGTGAAGAGTGGCTGGCGGTGCGCTCTTTGAAACGACGGCACC  
GTGATGTGGAGCTGACCGCTGCTGGAGCGTGGTTTCTCAAAGAAGGGCGCTCTGTTGTCAAAAAAATGCGATCACCCGC  
CAGCAATGTGACGATAGCAGAACGGCTGGCGGTCAGTTAGTATCGCAGTGGATAATATTTGTCAGGCAAGCAGCTAC  
ACGGCAGATGATCGTTGATTTTTATCGCCATTTTGTGATGATGTCGAACTTCTTGTCTTTTACGGAAGTGTCAACGGTGTCT  
GGGATGCGCTTTCCGACGGGCGCGTGGAACTGGCGATTGGCGCAACACGCGGATCCGGTAGCGGCTGTTATGCTTCTC  
CGGATATGGGATGCTAAGCTGGAGTTGCTTGTGTCAGCCACCACCCGCTGGCTGATGGATGGCCATTCAGCGA  
TGATACGTTGCGCAACTGGCCGCTGTTGGTGGCGAAGACACCTCGCGAACGCTACCTAAACGTTATTACCTGTTGCTGG  
ATAACCAAAAAGAGTTGCTGCTGACTGGGAATCATCGGCAACCTGTATCTCGGCAGGATATGCATAGGGATGGTG  
CCAACACATTTCCGCAAAACCGTGGCTTAATGAGGGGAAGTGGGTAGCACTTGAATGGAAAACCCCTTCCCGGATTCGGC  
ATGTTGCTGACATGGCAGCAAAATGATATGTCGCTCGCTTAACTGGCTGCTTGTAGTATCTCGCGATAGTGAGACGC  
TGAATAAGGAGTGGCTGCGGGAGCCGGAAGAGACTCCCGAACCGGTGATTAA

>Cluster\_60268

ATGGAACCCCTTCGTGAAATAAGAAATCGGCTGCTTAAACGGCTGGCAATATCAAAAAATGCATACTTTTGAAGTGGCTGC  
CAGGCATCAGTCTTCCGCTGGCGCAGAGGAATTTGCTGAGCCAGTGGGTAAGTACCGGTATCAATCAGCTGG  
AAGAAGAATTGGGCATTCAGTTGTTGTTGCTTCCCATCGCAAAGTGGAAATTAACGCACGAGGGGAAACGTTTATTGG  
GCGCTAAAATCGTCTGATACCTGAACCAGGAAATTTCTGATATCAAAAAATCAGGAGTTATCGGGAACGTTAACTCT  
GTATTTCCGGCCCTCTATCGCCCAATGCTGGTTGGTGCCTGATAGGTGACTTTACACGCGGATATCCGCTCTATTTCGC  
TCACCGTGTCTACTGTTAATGACACAGCTCAATCTGCAACGTCGGAATCGATTGGGATCTACTTTGATGATGCGCCG  
TCAGCGCAACTACTCATCACTTTCTGATGGATGAAGAAATCCGCGAGTATGTAGCCGGAATACGCTCAAAGACATGC  
TTTAAACCAACACGTAATTAACCTGTGTCACTGTACGTTGCTCCATGACAGACAGGCAATGGAGCAACGACTCCGGTACGG  
ATGAATGGCATAGTTGGGCGCAACATTAATGCGGTTAATTTGCCGACATCTTCTGGAATGGCTTTGATCGTTCGATTAA  
GCTGTTATTTGCGCATGAATCATATTGGGTTGGCGATGGGAAGAAAACGCTGGTACAAAAAGGCTTGCACGTGGTGA  
GCTCGTCCGCGCTTTGGCGATATGACGGTGAATGCCATCAGCATTTATACATCACCACATTACCGGCAGGACGTGGC  
CAAAAATGAAGCCTTTATTATCTGGCTAAGAGAACAGGTA AAAAACCACTTCATAA

>Cluster\_60642

ATGACCTGGCTTCCCTTAAATCCCATTCCTCACTCAAAGATCGCGTCTCCATGATCTTTCTGCAATATGGGCAGATCGATGT  
AATAGATGGCGCTTTGTACTTATCGACAAGACAGGATCCGCACTCATATTCCTGTTGGCTCGGTTGCCATCATGC  
TGGAACTGGTACACGGTTCGCGATGCAAGCTGTACGCTGGCTGGCGCAAGTGGAAACATTTGTTGGTATGGGTTGGGGAA  
GCGGCGTTCGTTGTTTATGCTTCTGCTCAGCTGGAGTTCGCGTTCAGATAAGCTGCTCTATCAGGCAAAAATTTGCTCT  
GGATGAAGATTTGCGTCTGAAGGTCGTAAGTAAATGTTTGAACCTCGGTTGGGAGAACCTGGCCCTGCCCCGCTCCG  
TAGAGCAACTCAGAGGTATAGAAGCAGTTCGCGTGGCGCAACCTACGCACTTCTGGCGAAGCAATACGGCTGACATGG  
AATGGACGCTGCTACGATCCGAAAGACTGGGAAAAGGGCGATACGATCAACCAATGCATAGCGCTGCAACTTCCCTGTTT  
ATACCGCGTAACCTGAAGCGGATACCTTGCAGCTGGTTATGCAACAGCTATTGGGTTTGTGCATACAGGAAAGCCTTTT  
CCTTTGTTTACGATATTGACAGACATCAATAAATTTGACACTGTTGTACCGAAAGCTTTTGGAGTAGCGGCTGTAACCT  
GGTGGCCGACCGGGAAGTCCGTTTGGCGTGCAGGATATTTTTCGCGAGTAGTAAAACATTAGCCAAATGATTCGGCT  
TATAGAGGACGCTGCTGGCGCTGGGAAATACAACCGCCGGCCACCTGAAGATGCACAGCTGTTGCCATTCGGCTTC  
CTGTTTCACTGGGAGATGACGCCATCGGAGTAGCTGA

>Cluster\_45398

ATGAAACCCGCACTGGATAATGAGTTTACAGCAATGGCTTTCCCAAATCAATCAGGATGCGGAAATTTTACCGGACGCCT  
GCTGACTGAGCGTTACACGGGTGACTGGACACGCATTTTGC AAAGGACTAAAGCTGAGTACCGTGACAACACGCGGGG  
TGAATTTATCCCGCACCTGGCAGGAAGTAAAAGCAGCAGCATGCTGGTTTACACCGTTTTTTCAGCTTAGTGTCCAG  
GCAATAATGGAGCAGGATGAGCGTCAAGTGGCGTGGCGATATTACGTTACGATGCCTCACGCCCTGTTTC  
GCTTACTGGCAGGAGTCTTCTAAACAGATTTCTATTACTTTTGGCCAGCACTCTGCTGGAACAATATTTTCCCATCAAA  
AACCTGTCTGCGCAGAAAGACTGGACGCTGACTTACCCATGGTGCAACTCAGTCACTGCTGTTACAGGAGAGCATGAA  
AATCCGGCACTTTCTGAAACAGAAAGTGAAGTTCGCTACAGGCGATGGTGTGCTGCTGCGCCCGGCTTCAACG  
GGAATCTGTTCAACCTCGTCTGTAACGCTAGTTTCAAAAAGTGGTTACGTTGATAGACGATAAATTTCCGGAAGAGATAT  
TACGCCCGGAGTGGATAGCCGGAGAGACAGGATGTCAGTACGTTGTTGACCGAATGTTTGGCGATAAAGGTTGGTA  
GTCCGCAATATATTCGTAACCGTCTGATTTTGTGCGATGCGGATTCGCTTCCGATGCGGAGATGAAAACCTGGC  
AGGCATCGGCTTTCAATGGGATTTTCTGACAGAGCTATTTTCAACCGGATTTAAGCAACGCTTTGGGATGACGCCAG  
GCGAGTATCGACGTAATTTCCGCTAA

>Cluster\_23245

ATGATGAGCGAAAGTAATAAGCAACAGGAGTGAATAAGTTGACGGAGATGTCGCTAACTTTACCGCATGATTTCTAC  
CCGAATGCCTGATGACGTTGGGATAAACTAAAACAGCTAAAGGATGCCGAAACATCGTCGATGGGAAAAATCATCTACC  
ACACGATGTTTCGATAACATGCAAAAAGCAGTACGCTGAAATCGTCCGCTGTCAGGACACCGGCAATCATGTTTTTT  
GTTAAGGTCGGTTCCTGTTTCCACTGCTTGGCGAGCTGCAAAAGCATACTCAAACAAGCCGTGGAAGAGGCAACCGTCAA  
AGCCCACTGCGCTCAAAATGCGGTTAGAAATTTTGGACGAAGTAAACACCGGCAAAAATACCGGACGCGGCTACCGTGG  
TCACCTGGGATATCGTCCCGACGGTACGATGCGGAAATCGAAGTTTACATGGCAGGCGCGGCTGCACGCTACCAGGC  
CGATCGAAAGTGTAAATGCGCTCAGAAGGCTACGAAGGCTAGTGAATTCGTTCTCGAAAATATCTCCACCCCTCGGCT  
AAACGCTGTCTCCGCGTACTTGTGGCGTTGGCATCGCTACCTCGGTGGAACCGCCGAGTGTCTCGGCTAAAGCCA  
TTTTGGCCCGGATTTGGCAGCCGCAATCCCAATCCAAAAGCGGAGAGCTGGAGCTACCGCTGGGAAAGGAGCAACCGT  
CTGGGATTTGGTCCACAAGGCTGACTGGCAACAGTTTCAAGTATGGGCTACATATCGAATCTGCCGCCGCAATCCGCT  
AACCATCGGCTGCTGTTTCTACCGGCTGCTGGGCGCATCGTCCGCGCACACTGCGAGTTTATGCGGATCTCACCTTTG  
AAAATCTGTCTCATACCCGGAGCGGTTATGA

>Cluster\_28896

ATGAAAAAACGTTTTTACGCTGTTTTTTATTAACGTAATCTGGGGTCACTATCCGCTTATGCGGATAACGCTTTGATTTT  
ACAACCGGATTTTACGCTGAAAGATGGTCCGCTCTCGGCGATGAAAGGGTTCGCTTTCCGCGTTGACCAATCTTAAAA  
TATTTGATTTAACACAGCAAAATCCACCGTATAACATCTGGGAAGCGGCTTACCGCTGTATCAGACTGCCATCTACTGG  
CCGCAAGGTTCCGTTGTTTGTAGCTGGTGCATCCAGGTGTTGGTACAGACCGTAAAATCGGTAGTGTGAAAACCAAAA  
TGGTCACTACTTCTTTACCAGATAACGGTACGCTCAGTTGGTGGCGAATCGCTGGGATTTGAGAGCGTCCGGCAAA

TCGATGAAAAACCAACCGTCTGAAAGGTTCCGAAAAGTCATATACCTTCCACGGTCGTGACGTGTATGCCTACACCGGT  
GCACGTCTGGCTTCCGGGGCGATCACGTTTCGAGCAGGTGGGGCCAGAGCTTCCGCAAAAAGTTGTGCAACTTTCTTATCA  
GAAAGCCAAGCAACAAAAGGTGAAGTGAAGGGCAATATCCCGATTCTCGATATTCAGTACGGCAACGCTTGGAGCAATA  
TCAGCGACGAGTTGCTGAAATCAGGCAGGAATCAAATCAACGACACGTTGTGTGTGACCATTTCCGAAGGTTCCAGCA  
AAATACGCGAGGAAAATGCCGTATGTCCGCAAGCTTCCGGCGATGTGCCGGAAGCCAGCCGATGGTGTATCTAACACGCTT  
ATTTGAATGTTTCCGTGGCGCTGAATATGGATAATTTCCGCGCAGAAACATCAGGTTGCGCTGCTGACTGGAATATTG  
ATGTAAGAAGTGGCTAAGTAA

>Cluster\_53878

ATGAGCAATATCGTTGAATTCGTTAAACAGCAGGAGCAGTTATTTCTGCGGAGCATTGACTGAACAGACGGTGACATGGGC  
TAAGGAAAGCCAGTTTGCATTCAGTATTTCCAGAAAAATGATTACCTGGCTAAAACGGCAGCTGGCAATCCAACAGCG  
CACAGAACGCCATCATCAATGTTGCGGGCATCGGTATCACCTTAAACCCGGCTAGCAAACTGGCTTATCTGGTTCCGCGC  
GACGGCATGGTTGCTTGTATATCAGTTACATGGGGTTACTTCATCTTTCGCAATCGACAGGATCAATTAAGTGGGGGCA  
ATGCAAACTGGTGTACTCAAACGACACCTATGAATCAAATGGCCCTTGAATTCAGCACCAACCCACAAAATACAACCAATTTG  
GTGAGCGAGGCTCTATTGTTGGTGGTTATTGTACGGTTAAAACAGCAGATGGTACTACCTGACTGAAGAAATGAGTCTG  
GCAGAAATTAAGCTGTGGAAGCAACGAGCAAGGCAAAAGAAATGGACCGTGGAAAAATCTTGGGAAGAGATGGCACGTA  
AACAAATAGTTAAACGCGCCAGCAAAATCTGGCCAAAAGCCAGCGACTGGATAATGCCATTACCTGCTTAACGAAGATG  
AAGCTATGCATCAGGAACCAATTTATGCCACAAAATCAGAGGAAGATATCCGCGAAGATGAACGGAAACGCCAGCAGGAA  
ATAATGAAAAAGCACAACCTTCTTTGTGATGAAATGACTCAGGCTGAAAAATGGATGATTTGAAGAGATATTTTGCAGA  
AGCATATCGCCTGACATCTGGAATGAAATTCAGCAGAACATACAAGCCATTTACGCAAGTTCGAAAGCGAACTGGAGG  
TTGCCAGTGAGCAAACTGTATGA

>Cluster\_4925

ATGGCTCTGAGTGTGTAAGGTTCCGTTCCGGCTAAGCCTGAAGCAAAAGCCTATAAGCTGACCAGCGTGAAGGCATGGT  
TTTGTGGTTTACCCCTAACCGGCTCCAAATCTGGCGGCTACGTTATCGCTTTGGCGGTAAAGAGAAGATGCTGGCATTGG  
GGAAATACCCGAAAGTGTGCTGTGACAGATGCCAGGGCAGCCGGGATGAGGCTCGTAAGCTTTTAGCTAATGGTGTGAT  
CCCAGTGA AAAACAAGAAAGCTGTTAAGGTAGAACAAGAGGCGATAACGTTTGAAGTAGTCGCGAGAGACTGGCA  
CGCCAGCAATCAGAAAGTGTGCGCATCGCATAGCGCTCGTGTGTTGAAAAGTCTGGAGGATAATCTCTTTACTGCTATCG  
GTAAGCGGAACTTTGCGGAACTGAAGACCGGGATCTTCTGTACCCATTAAGCAGTTCGAGTTCATCCGGCGGCTCGAA  
TTGGCCCGCCGTTTACAGCAGCGTACTACCGGATTTAGCGCTTTGCGGTTTCAGAGCGGCTTAATCGACTACAACCCCGC  
GCAAGAGATTGCAGGTGCGGTTGCTACGGCGAAAAGACAGCACCGTGCAGCTCTTGAACCTGAACCGTATACTGAATTAC  
TTCATCGCATAGATCACATTTCTGGCAGACCGTTAACTCGACTGGCGGTTGAACTCACTTTATGGTTTTCATCCGTTCC  
AGCGAGCTGCATTTTCCCGCTGGTTCAGAGTAGATTTTGAACCGGCTATGTGGACAAATCCAGGTGAGCGTGAAGCACT  
GAAAGGATCAAGCATTTCTCAGCGTGGCTCGAAGATCGGGACACACACCTTGTACTTTGTCTCGCGGAGCCCTAAGTA  
TTTTGAAAAGATCAAAAGCATGAGCGGAAATTGA

>Cluster\_51384

ATGACCGAATCAACAACCTCCTCCCGCATGATGCGGTATTTAAACCTTTATGTTCTCGCCGATACGGCGGAGATTT  
TCTGGAAATACATCTACCAGAGCGCTGCGCAAGCTTTGCAACCTGCAAACTTACGCTGGAACCCACCAGCTTTATTG  
AAAAAGTTTACGCGCTTACTACTCGGATGTTTTGTGGTCTGTGGAACACAGCGAGGGTGACGTTATATCTACTGCGTG  
ATTTGAACATCAAAGCTCTCGCAAAAAGAAATATGGCTTTTCCGGCTAATGCGCTATGCCACTGCCGCCATCAGCGCTCACCT  
GGCAAAAGGCTATGACAGAGTCCCGCTGGTGGTACCATTGCTGTTTTATCATGCGGAAACCTCGCCCTACCCGACTCAC  
TCAAATGGCTGGATGAGTTTGAAGATCCGCAACTTTGCCCGGCGAGTTGTACACCGAAGCTTTTCCGTTGGTGGATATCACC  
ATCGTACCTGACGATGAGATCATGCAACATCGCGGTATAGCTCTGCTGGAACGATTCAAAAGCATATTCGCGACCGCGA  
TTTTAATCGGTATGGTTCGACAGGATCACCACGCTTTTGGTTAGAGGCTTCACTAATGACAGCCAGCTACAACCGCTGTTTA  
ATTTCTGCTGCAATACCGCGGATACCTCCGTTTACCCGTTTATTGAGGAGATTGCCGAACGTTTACCACCTTCAACAAAG  
GAGAGATTAATGACTATTGCTGAACGGCTGCGGCGAGGAAAGGCATCAAATGGCTGGCAGGAAGGTAATTAGAAGGTTT  
GCATGAACAGCCATTAATAATTGCTTTGCGCATGCTGGAACAGGGCATTTGATCTGACAGGTGCTCGCGGCCACTCAGC  
TAAGCGAAGCCGATCTGGCAGCGAATAACCCTAA

>Cluster\_26641

ATGTATCAACGCTGTTTTGATAATGCCAGTGAACCGTGTGTTGTCGCCGTA AAAACGCCACGGCTTTCAGTTTTGCGATT  
TAGCGATGATCAAAAATGGGAGTCTGGACATCAGCTTCATGACAAATGAAACCGAGCTGATTTACGTCAGAAAGGGGTAG  
CAAGGTTTACCATCGATTCTTCGTTATATGTGCGCATGCCGATGACATTTGTTGGTGTATAGAACGTGGCAGGCTGCATGCC  
GTGGCCTCTGACGTTAACGATCCGGCAACGACGTTGACCTGTGCGCTGTACGGCTTTTCAAGTTTTCAGGGGCTGAGGAAAA  
TCAGTACTGCAACCGCATTTCTTCCCGGTAATTTGCCGAGGGCAGGAAAAGAGTCAATAAAACCTTTATTTAATGAGC  
TAAGTGTGATTTTCCCGCAAAAGTAAAAATAGCCAAACATCTTCGTTATGGGACGCAATTTGCCCTATACGTTAGCAATCTT  
TACTACGAAAACCTTTAAAAATGCTTATCGTTCCGAGCAGGGTATATTTAAAAAAGATGTTCTGATAAAAAGATATCTTTTT  
CTATCTGAAATAATAACTATTCGCGAAAAAATCACTTTAGAGCAGTTATCGAAAAAATTTCTGTCGCAAAACGTTACAGGTTATCT  
GCCATGAATTTACCAAGAGTATCGTATTTCCCTATTAACATGTTATTTCAACGGCGTATGACGGAAGCGAAATGGTCA  
CTCACTAATACTGAATTTACAGGCAGAGATCTCCTGCGGTGTTGGTTATGAAAATGTCGATCACTTTGCCAAAACGTT  
TTTGGCCCATGTCGGCTGTTCGCCAGGATTAACCGAGGCAATTTAAAACTGTTTTGCGGAAACAAGAAATCCTATCTG  
AATTTCTCAACCGGTAAGTCTTTGCCGATA

>Cluster\_28491

ATGCCAAGGATCATCACCAGGCGCTTTCTTTTTTCCCACTAACGTTATGATTTTACGCGTGGTCTCTGCGCGAAGAC  
CATGGTAAAACGAAAAAATTTGTTTACGGCATTACTGGCTCTTACTGGACTTTTAGCGTAACGGCTGCCGAACGTATCG  
TGGTGCAGGAGGATCGCTGACGAGTTAATCTACGCGATGGGCGCTGGCAAAACCGGTTGGTGGTGTGATGAAACGACA  
TCTTATCCACCAGAAACCGCAAACTGCCGATATTTGGTTACTGGAAACAACTCAGCAGCGAAGGCATTTTGTCACTTCC  
CCCGGATAGCGTAATTTACTGGCAGGATGCAGGACCGCAAAATTTGTCTCGACCAACTGCGGGCGCAAAAAGTCAACGCTG  
TCACTCTGCCCGGTGTACACGCCACCTTTGAGCAGATGTACGCCAACATTTCCGCAACTGGCAAAAACGTTACAGGTTCTC  
GAACAAGGCGAGGCGCTGGTGCACAGATCAACCAACCGCTGGAGCGAGTACAGCAAAACGTTGGCGGCCAAAAAGCCCC  
GGTTAAAGCCATGTTTATCTCTCCGACGGCGAAGTGCGCCACAGGTTGCCGTAAGGCGAGCGTCCGCGACGCCATTC  
TTTTCGTTGCCGGAGCAAAAACGTTCCGTACCCACCAGCAGTACAAAAGCTACAGCGCGAATCGTGTATGCGGCTAAC  
CCTGAAGTGTATGTCGTCACCTCACAAATGGTTCAGTGGCGATTAATTCGCGTACGTTCTATTGCCGGAATACCACAC  
TGCCGATGGA AAAACAGCGCATTTATCACCCTGATCAAACCTGATTTGGAATGGTCCGCGTATGCTGATGTCG  
TTGAGTCTTTACACAGCAGCTTTGGCCCAATA

>Cluster\_24200

ATGGCTAAGAAAAGTACAAGCCTATGTCAAGCTGCAGGTTGCAGCTGGTATGGCTAACCCGAGTCCGCCAGTAGGTCCGGC  
TCTGGGTACGAGGGCGTAAACATCATGGAATTTGCAAAAGCTTCAACGCAAAAACCTGATTCATCGAAAAGGCTCTGC  
CGATTTCCGGTAGTAAATCACCGTTTACGCTGACCGTTCTTTTCACTTTCCGTTACCAAGACTCCCGCGGACGAGCTCTGCTG  
AAAAAGCGGCTGGTAAAGCTGGTTCCGGTAAAGCAGCAAAAGAGTGGGTAATAATTTCCCGCGCTCAGCTGCA  
GAAAATCGCGCAGCAAAAGCTGCCGACATGACTGGTGGCCACATGAAAGCGATGACTCGCTCCATCGAAGGTAAGTGCAC  
GTTCCATGGCCCTGGTAGTGGAGACTAA

>Cluster\_15809

GTGAACAAACCACAAATCCCTGCGCCACGCCCTTAATAAAGCAGTGCCCTATGTCCGTAATAACCCGGACAAACTGCATCT  
GTTTGTGGATAACGGTTCGCTGGTTGCCACGGGGCCAGCTCCATGTCATGGGAGTACCGCTACACCTGAACTGGTGA  
TTGAGGATTTTCAGCGGCGACAGAACTCTGCTGATGGCCCGGTTTTCGCTGTGGCTGCGTGATAACAGCCGATGCCATC  
AATAACCCGGGTTACGGGAAAAGTTATTACCTTTGAGGTGATATTTGCGCAACGATGTCGTGTGATATCAGCCTTAA  
CCTGCAACTGACGGAGCGTGTGCTGGTACGACTGACGGCAGTGTGTCGAGTGTGAAGCGGTAGCGGAACCTGATGAAC  
CTGAAGAAATGTGGACGGTGAACGTGGCTGA

>Cluster\_6965

ATGCTGCTGACATTAAGCACTAATGTTACTACAACCGCAAAGTAAATGAACCTGCTAGGTTGTCTGCTACATTTACTCC  
CGGTGCATCACTGACTACAGATAACCTTAAATCACAACGATTTGGTTTTATTACTCTCAGCGGTATAAAGGATCTCCCT  
TAGTAAGAGATCTGTCTTTCTCCGACGTAGGCGGTGTTGCTAAAAGTCTTTCTCTAAATGGCATCTCCGAAATGATACT  
CTATACGTGAATGCCATTTATGATAATGCAATGCTCAGTGTCAATGGTGGCCGATCTCGGGTTCGGCGCAGAATCTCTC  
TGAAGGTCAGGCGAGTATAGAAATGCGTACTATTGGTTGCGAGAAACAATTTCTGCAGGCCAATATACGGGAAATGTGC  
CAATTACTTTAGCTAACAGTAA

>Cluster\_48686

ATGTTAGGTTTCTTCAAAAAGAAAACCTCGTAAAGCAGTTATCGAAGTCAAAAAATGGAGAACCCTGATGCGGTTGAGGC  
CACCGTGTGGGGCGGTACATGATCTCCCTATGCGCAGGCACATGTGACGCAAAAAGAAATGCCATTCTTGAGAAGACAA  
TTGCAGCTCTGCCCTGCGTTTTCTCCGTTTTGCTGGTGAATTTGCCCAAATGAGCGCAAATATCCGTGCTCGTTACGAGCG  
TCCCTTCGTTCTGTAAATGCACAGGCTATTCTGTGAGTGTCTGATATTGCGGGTACTCCAGAGCGGTCGATGTTCTGTG  
TCTGTGCCCTGATATTGCCGATCAGCAGGCGATTGGTGAACAAGAAGCAGGCACTGAAAAGATCGCCAGGCGCTTC  
AGTTGTCACCTGGATGCTTATCTCTAA

>Cluster\_20348

ATGAGTTCTCGGAAATGTTTGTGTCGCAAGTCAATGTTTGTCTTAGCTATGGCTATTGCTGGTCCCATTTTTTACACGA  
CCTAGATCACAAATGCTGTCTATTTCCGCTGCTGGTGTCTTTCAACTATTTCTGGAGTTCTCTTTGGTTTTGTTTTGGCAT  
CAGTCACCATGCTAAGTAGCTTTGATAGTTCAAAGGGAATGTAGGCGCTCTAAAAAGTAACGGAGTACTAAAAGGCATT  
ATTGAGGGGCTTTTTGATACAGGAACTACGCTGATCACAGCCTGCCTATTAGCAATGATCTCGATGTTTGGCCCTGTTGT  
CAGCAATCTGCCCTCGGATTATTATGCCCTGCTACTCGCAGGGGCATATTTGATTATATCAATGATAACTTTTTTCTTTA  
ACTGGAAATCTTTTACTTAAAATAATAAGTTACATATGA

>Cluster\_47481

ATGAAACGACTTCTGATTCTTACGGCACCTCTGCGGTTTGTGCGCTTTGCACAGCCCATTAATCTCTGAACAACCCATA  
CCAGCCGGGGTATCAGATACCCAGCCAGCAGGGATGCAAAACCAGATGCAGACTCAGCAAATCCAGCAAAAAGGGATGC  
TGAATCAGCAACTGAAAACGCAAACTCAGTTGCAACAGCAGCATTTAGAAAACCAGATAAACAATAAATCTCAGCGGGTG  
TTGCAGTCAACGCGGGGAGCGAAATCCCGCCGGCAGCAAATGCTGCCAACACCAACGGCGGGATGTTAAACAGCAA  
CCGTAATCCGGATAGTTCGTTGAATCAGCAGCATATGCTGCCGAGAGGAGAAAACGGCGACATGCTGAATCAGCCAGCA  
CGCCGACGCTGACATTCGTTGAAAATATTGGGCGCTAA

>Cluster\_55659

ATGTTTGAATCAATTTTAGTTATTTGTACGGGCAATATTTGCTGTTCTCCAATAGGAGAACGGCTTTTACGAAAATTGCT  
TCCCTCAAAGGTGATTAATTTCCGCTGGTACGAAATGCAATGGTTGGTTATAGCGCGGATTTGAAATGCTTGTAAAATCGCAT  
CATTTGATAAATCTTTCGCTCGAAAATCATGTAGCAAAACAATCTCAGCGTCCATGGGGCGCAAAGTACGATCTTATATTA  
GTAATGGAAAAGGCCATATAGAGCAAAATCGGGCGTATCTCACCCGAAGCCAGAGGGAAAACAATGCTTTTATGGTCACTG  
GTGAACCCAGCGAGATATCCAGATCCATATAGAAAAGTGAAGAAGCATTTGATCAGTATATAATTTAATAGAAATTGG  
CCGGTGAAGCGGCTGAAAACCTAGGCGCAAAATAA

>Cluster\_35791

ATGACCGATTTAGCCATTATCTGGACGAAACGGACGCGGCGATATTGCACAGGATGGCATTTGACATGCTGACCGACGACAG  
CCTGACAACCGATGTCGACATCTCCCTGTTTACAGACCGGCGCGCTGGATTCTGACACGCTGCCGGATGGTTTCAGATG  
ATCGCCGTGGATGGTGGGGTGACAGTTACCGCGACCGCCCATCGGTTGCGGGTGTGGCTGTATACAGTGAAAAAGCC  
ACACCGGATACGCTGGAACCGCGCAGAGGGTATGCCGAAGAGGCGCTGGAATGGCTGAAAACAGCGGGCGGGTAAAGTGC  
GATTAACGTCAGAGCGGAACAGTTACATCAGGGCTGGTTATACCTCTACATTTGCACTGACATTTACCGGATGGTTCCGTTA  
TTCCTTATGAGTTTAAAGCAGCATTTAACGGGGTTAA

>Cluster\_35767

ATGCAGCATGATTTATTTGAACAGATCCGGCAATTCGCCAGTTAATCGGACATATTGATAACATCCCGGCCCCGGAAC  
GGAATCACGCTGGCCCGTTCGGTGGTTGATCTGATTGATGTTCTGAAAACGAACTGAAAACGCCAGAACGTCAGCAATC  
CCCGTGAGCTTGCCCGTAAACAGCCGTTGCCCTGTCTGTTTTCTGGCGGGCGGACAGTTTTACATCCCTGCGCGCAT  
ACGATCTGACCGGTTACGCGACGATTTGCTTTACTGCCAGTTCAATGGTTCGTAACATGGAAGAATGCGTCCGCGAT  
TCCCTGTCCAGCCGACAGATCTACCAGATTTAGCCCGCAGAGAAAGCTGCATACACGACGTCATCAGCCGATGATCTGT  
TCTCACCTGAAAGCCAGAATAA

>Cluster\_64817

ATGAAAATTGATTATGACGAGATAGCCAGAATATTTGATGATTTCTGGAGGCGGACACTGCATTCATTTCGACTGGAAGA  
TGTCCGCTGGGATCGTTCTCAGCGGCACAGCGACGCCATCAGAAGCTGGTTTTCCATCTTCTGTGTGCTGGTTGAAAATG  
GTTTTATCAGCAACAGATATCTGGAACAGGACCGCAAAAAGCATTTGGTCTCACCCGACAGCCCTCGGATATTCATAT  
TCAGGCACAGTGTGACACTCACACAAGATGGTTCATGATTTTGGAAAAGCCTACATCAAAAACCCATTTCTTGAGCGTAT  
AAAACAGGAGCTTGGCGACGCCCGATGACGCTCGTAACAGACGTCGGCAACAGTGGTTAACCTCGTTTCTTAAAAGA  
AACTCGGGATTGAATAG

>Cluster\_37105

ATGATTGCGATTGCCGACATCTTGAAGCAGGAGAAAAGCTAACTGCTGTGGCACCTTTTCTGGCGGGTATTTCAGAACGA  
GGAACAATACACCAGCGCTGGAACCTGGTATGATCATCTGCTGCTCAACGATCCTGAAAACCCCTTGCATGATCTGGTGT  
GTGCCAAAATAACCGGTTGGGAAGAATCAGCGCCGAAATTTGCGGAATTTAATGCCATGGCTCAAGCCATGCCATGGCGGT  
ATAGCCGTGATTCGTACCCCTTATGGATCAATATGGTTTAAACCTTTCCGATCTGCCGAAATTTGGCAGTAAATCTATGGT  
GTCACGCGTTTTGAGCGGAAAGAGGAAATTAACGCTGGAACACGCTAAAAAATTTGGCAACCGGATTCGGCATTTCTCCCG  
CCTGTTTTATTGATTAA

>Cluster\_58524

ATGATCTGGAACGCCATTTAACGCTCGACGAACTGAACGCCACCAGCGATAACACAATGGTGGCGCATCTGGGAATTTG  
GTATACCCGCTGGCGCATGATGTGCTGGAAGCCGAAATGCGGTTGATACCCGCTACTCATCAGCCGTTCCGTTTACTAC  
ATGGCGGCGCTGCGCGCGCTGGCGGAAACGCTGGGATTCGATGGCCGCGATTTATGATGACCCGCGACGACAGTGTGTG  
GTAGGCACAGAATTAATGCAACACACCATCGCCCGGTGCTGAGGGAAGGTACGCGCGCTGTCAGCCGCTGTCATCT  
TGGTGGCAAAATCAGAGCTGGGAAATCTGCTTTTTCGATGAACAGGGCGGCGTGTGTCACCTGTCGCTGGTGGTACCG  
CAGTTTTGGGATGA

>Cluster\_25980

ATGCCAAACTGGTGTCTGAATCGTATGATTTTTCTGGTGAACCGGCACAGATCGCTGAGATTAACGACTGGCCAGCGG

CGCAGTCACACCGTTTTATCGCCGCGCCACAAATGAAGGTATTCAGCTGTTTCTGGCCGGAAGTGCCGGACTTCTGCAGA  
CCACTGAAGATGTGCAGTTTGAACCGTGCCCGGACTGACGGCTGCCGACGTTGTTGATCGCCGGAGAAATATCGCG  
TTCACACGCTGGCTGACACACCTGCAGAACGGTGTCTACTGGATGAACAAAACCTGCCGTATGCTGCAATGAACTCTGGCT  
GCAGAGCGGTACTGAACAGCGTCTGCTGGGAAGGATTACCGGACGATGTGAGGGATACCATCACCGCACTTTTACCAGCAA  
AAGAGGTGACTGA  
>Cluster\_7820  
ATGAATACCGTTTTGTACCCATTGTCAGGCCATCAATCGCATTCGCCGACGATCGGATCGAAGATGCGGCAAAATGCGGACG  
CTGCGGTACGACTTGTGTTGACGGAGAGGTGATTAATGCGACCGGTGAAACACTCGACAAAATGCTGAAGGATGATCTAC  
CTGTGGTGTATCGACTTCTGGGCACCGTGTGCGGCCCTGCGCGTAATTTFCGACCAATTTTGAAGATGCTGCGCAAGAG  
CGTAGCGGTAAAGTGCCTTTGTGAAAGTGAATACCGAAGCTGAACGTGAATTGAGCAGTGCCTTTGGAATTCGTAGTAT  
ACCGACGATCATGATTTTCAAAAACGGTCAAGTGTGCGACATGTTAATGGCGCAGTACCGAAAAGCGCGTTCGATAGCT  
GGCTGAACGAATCTCTTTAA  
>Cluster\_48570  
ATGTTTAGTGAATGTTGCTTGAAGATGAACTGGATCGGAAAACAACAGAGGCTTTGATTTCGTGTAGCGGACGAAATTC  
CCGCTCGCTTATGAGCGATCGAGAGGCTCGCCTGGCTATTCGTGCCATATTCGAAACTGCGCAGGGGCTTGTGGCGCAC  
AAGTAGGTGAAGCATTAACTCGCCATGTCTCAGTTCAGTGAAGCAGTAAAAAGCCTCTGTTTCTATGCATTTGATG  
CTGCTGGTGGTGGCAGCGTCTTTATATCTCTGTTGCTGGATGCAACCAATCAATATTTCTAACACATGCTGCGTCAAGTAA  
GTGAAAGATCCGATTGCTGTGAAACAGTGAAGAACTTTGAAAAAGCGGCTCAATTTGTACGTAGCGCACTACTTA  
AGGGCGTAAAGAAGTTGTAA  
>Cluster\_3064  
ATGGACAGATACCTTCTATTCACAAAAAGAAAATGGTTTTTTTACCATTAAATAAAGCACCTTCAGATGCTGTTGAGAT  
AACCACGGATGAATGGCTGTCTACTGATGGTCAAGATAATGGCATGAAAATAGTCAGCAATCAGGAGGGATATCCGG  
TTTTGACAGAGCAACACCTTTATCAAAAAGAAAACCTTATGCAATGGCAGAGTTGAAAAAGGAAAACCTTATTAATGAA  
GCCAACGAGCAGTGAATAGCAGGCAATGGCTGGTAAAGCCGCTATTTGGTCTGTAAGGTTGACGAGCTGGAAACAATA  
TAATTTATGGCTGGATTATCTGGACGCACTGGAAGTGGTGTATCTCCAGTGTCCAGATATGAATGGCTACGCCTC  
CGCAGTTTCAAGCCAGATGA  
>Cluster\_57642  
ATGAAAAAAGTCTGTCACGGTTTGCCCTATTGCGCATCAGGTTGCAAAATCAACCTGGTCTGTAACCGCAAAATCGT  
CCGGGCGGAGGACGCGCAGGGGAAAACCAACAGGGTACCCTGTGCTGAAGGTTATTAATGGCTGGGATTTTCAATTAACG  
ATACCCAGATCTTACCCCGCCTGAAAACCCCATGATCGCTCGCCAGCGTGGCGGCAAACTCGAACTGTTTCTCTGG  
GATGAGGCACTGAATTACGTTGCGGAGCGCTGAGCGCATCAAGAGAAAGTACGGTCCGGATGCCATCCAGACGACCGG  
CTCCTCGCTGGTACGGGTAACGAAACCACTATGTAATGCAAAAATTTGCGCGCGCCGTTATTTGGTACCAATAACGTTG  
ACTGCTGCGCTCGTGTCTGA  
>Cluster\_24902  
ATGACAGTGGCTATATTGCCATAGGCAGCAATCTGGCTCTCCGCTGGAGCAGGTCAATGCTGCCCTGAAAGCATTAGG  
CGATATTCCAGAAAGCCGATTTCTGCTGTTTCTCGTTTTTACCACACCCACCGCTGGGGCCGCAAGATCAACCCGATT  
ACTTAAATGCCCGCTCGCGCTGGAACCACTCTTGCCCTGAAGAGCTACTCAATCACACACAACGTATCGAATTCGAG  
CAAGGTCCGCTCCGTAAGCTGAACGCTGGGGACCGCGCAGCTGGATCTCGACATCATGCTGTTGGTAAATGAAGTAAT  
AAATACCGAACGCTGTCACCGTTCGCGACTACGATATGAAAACTCGCGCTTTATGCTGTGGCCACTATTGAAATTCGCG  
CGGAATTTGTTATTTCTGATGGCTTATCATTTAGTTGAAGCTCTACAGGCAAAAGGCTTTAATGAATTTAGAAATGGTAA  
>Cluster\_60646  
ATGGCTGATGAAATGATGCAATGGCTTTATATCGAGCCTGGCAACAACCTGGATAATGGATCATGTGCGCAAAATAGACG  
TGTTTCAGAACCTTCAGTAATACCGGATATCCCTGCGTTTTATAGCTGGTGC AACCTTTGGTTGGGAAAACCCACGTC  
ACCAGCAGGCTCTTTTGGCATGGTGTGTTGCTGAGCGCAGGAAAGAAATGTCATCCGACATCAGGACAAAAAATCGGAG  
CAAAACAACAGGTAATCTCGTTGGGAAGAGCTTTAGCCAAATAGTGAAGAAATTAACGAGCGCCGATCTTTCAATTAATTCG  
GGCTGACAGAACAGCCGATATGGTCCAGTTACGTCGATTACTTACTCACGCCAACCCGACTTTGACTGGCCATTAATGG  
CCAGGATGTTGACCTGGTGGGAAAGCGGCAACGCCAGCAACTTCTGGAAGATTTTGTATTGACCACAACAAAAATGGC  
TAA  
>Cluster\_41213  
ATGAATATTCGCCGTA AAAACCGCTTGTGGATTGCTGTGCCGTTGCTGGCGGGCTGGCGCTGACTATCGGCTGGTGTCT  
ATATGCGCTGCGCTCGAATATTGATCTCTTTTATACGCGGGGAGATTTCTCTACGGCAAGCGTGAAACTCAGCAGATGC  
CGGAAGTCCGCTCAGCGTCTGCGCTTGGCGGATGGTGTATGCCGGGAGTGTGCAGCGCGATCCCAATTCGCTAAAAGTA  
ACTTTTACCATTTACGACCTGAAAGTTTCAAGTATGCTCTTTACGAAGGCATTTTGGCGGATCTGTTCCGTTGAAGGGA  
GGCGTTGTTGGTGCAGGGCAACTGGA AAAAGGCAATCATATCTCGCAAAGAGTGTGGCGAAACAGCATGAAAACCT  
ACACGCCCGCAGAAAGTTGAAAAGCGATGGAAGTAAACACCGTTCGCCCGCGAGTGTTTATAAGACCCAGCATCATGA  
>Cluster\_54137  
ATGACACCCGAGTTAAATTA CTGAAAAAACAAGATTTCTGTTTCAAAATCCATACCTACGAGCACATCCGGCTGAAAC  
CAATTTTGGCGATGAAGTCTGCAAAAAATAGGTTTGAATCCGATCAGGCTTACAAAACGCTGCTGGTGGCAGTGAACG  
GTGATATGAAAACACCTTGGCCGTTACGCCGCTGCGAGTCAACTGGATCTTAAAAAAGTAGCAAAAAGCGCTGGGT  
GCCAAGAAAAGTTGAGATGGCCGATCCGATGGTTCGCGCAGCGTTGACGGGATACCTGGTTGGGGGATAGCCCACTGGG  
GCAGAAAAACGTTCTGCAACGATTTATCGACGCCCGCACAAGAAATTTGCCACTATTTATGTTTCCGGCGGCAAGCGCG  
GACTGGATATCGAACTGGCGGACGCGATCTGGCAAAGATCTCGATGCCAAATTTGCTGATATCGCCCGCGGATTTAA  
>Cluster\_53480  
ATGAAGGAATACGATGATTA CTCCGCCAAAAGAAAAGAACCTGGCGGCTGTGTCAGCGCCTGATTACCGAAAAAAGTTA  
TCTTTTACAGGAGGAAATCCGCCGATTTGCAAAAACCTGGCTTTGACAGTATCAGTCAAGTCAACCGTTTACAGCACTAC  
TGAATTTGCTGGGAGTCTAAAAAATAGAAATACAAAAGGACAAAAAATTTATTCGGTGAATCTCAATTAATTTCCACA  
CCTGACGCAAGTTCGATCCGTCGCTGAAATGGTCTGAGTGTGAGCATAATGGTGAATTTATCTTTATCCATACCGTCCG  
CGGATATGGTCCGGCAGTACGCGCAATCTTGAATTTCCATGCTTTGCCAGAAATTTCTGGCGTGTGCTGGCAGCAATA  
TCGTTTGGTTCGACCACGTTGGTAAAGCGCACAGCCCTGGTGCACAAGCAATTAATTAATTTAAATTTGAATATA  
TATTCATGA  
>Cluster\_62331  
ATGCGCCGGATATTAATCAGTCTTACTCGAAAAATGAATCAGGCGGTTATCCCGGCTGATTGGCCTTTTTTCCAGCGTGG  
CTACAACATGAAAAGCTGACCGTTGCGCCAACCGACGATCCGACATTTCCGCTATGACCATCCAGACCGTGGGCGATG  
AAAAAGTGTCTGGGAGTCTGAAAAGCAATTTACACAAGCTGGTGTGATTTCTTGGCGGTTGAGTGAATTTGGGCGGCGG  
CATGTTGAGCGGAAATCATGCTGGTGA AAAATTCAGGCCAGCGGTTACGGGCTGACGAAGTGAACGTAATACGGAAT  
ATTTCCGTTGGGCAAAATTAATCGATGTCACCCCTCGCTTTTATACCGTTCAATTTAGCAGGCCACGCGATAAGCTTGTGAT  
TTTTAGCATCGATTCGCGATGTGGGAAAATTTGGAAGTTGCTGCTGCTGGTGTGGTGGACTTTCCGCGCGGATAAAA  
ATAATGCGTTGA  
>Cluster\_60539

ATGATGGAACAGTCACTCATCCACAGACACCGGTACTTCCACTGACCGCACAAACGCACGGTAAAACGCGCCTTAACGCT  
GCTTGACCGACACTGCGCGAAACAGGCGTGGCATTCACTCCACTCAGGCTGCTCGTACTGGCTGAAAGCTGAAAAATGG  
CGGGGCTGGAGCGTGAAGAAATTTATGATGCTGTATCTGAACCAGCAGAAACAGTTGATGCCCCAGAAACCCCTGTTTGGC  
GGTTCTATTAGCAGTACCAGGATACATCCCCGTGAGTGGTCAAACGCGCCCTGTATTTCAATGCAGCAGCAGTGATACT  
GGCGCATAACCACTCCGCGACACTACTCCAGCCAGCAGATAAGACTATAACGCGAGCGTCTGGTGCAGGCGCTTC  
AGCTCGTTGATATCCGTGTCCTGACCACTCTGATTTGTTGGTGGCAGGCAAATCTATTCTGTTCCGAGAACACGGTCTGCTT  
TGA

>Cluster\_49588

ATGAACAAGGTTGCTCAATATTACCGTGAAGTGGTTCGCGTCACTGAGCGAACCGCTGCGCAATGGCGAACGTGATATCGA  
CGCACTGGTGAACAGGCGCGGAGCGGTAATAAAAAACAGGGGAGTTAACGCGAACCGAGGTCGATGAGCTGACGCGAG  
CTGTGACAGCTGACTGGAGAGTTCGCGCATGAGCTATGAAGAGAGCCGAAAGAGAGTCTGACAGCGTCTTTATGCGG  
GTGATTAAGAAAGCTTGTGGCAGGAGCTGGCAGACATCACCATAAAACGCAGCTTGAATGGCGGAAAGTTTCCAGGA  
CCTCAATCATCATGGGTTTATCACAGCGGAGAAAGTGGTAGGGCTGGGAAATCTGGTCTGCGAGAAATCTCACATC  
TCCCAGTCTATACACCGGAAAGTGTGACGCTATGCCGAAATGTGGTCATGATCAGTTCCAGAGACGTCGGTTCGAGCCG  
TAA

>Cluster\_64444

ATGACCGATCCTAAATGGCTAATGAGGACGAAAAAATCTCGGCATTGCGGAAATGAAAGGGAAGCAACATGCTGCAGA  
AATTGTGCAGTACTGAAAGATATCAAACGCGGCGGCATTAAGGATGATGAAACCCCGTGGTGCCTGCCCTCACCGGAG  
CAATGCTGGAACGCTGTAGGTATTCGCTCAACGCGTTTTGAGTCTGCGAATTTCTATCTCGATTGGGGTAAATGAACTGAAG  
GAACCCGCCTATGGATGCAATGCTATTCTGTCTCGGTCGGCGGTGGTACGTTGGCTTGTGTTGTCGGGAAAAATGCCGC  
CGGGGATTTAATGATTTTGGGTGGTAACAGGACAGATGAAGTAAATATCAAAGCTTTTCTCGTTCCCGCTAACAGGCT  
ACCGCTGGCCAGCAGGCCAACTGATGTTCCACAATCACTTCCATTGCTGAATGCTGAGAAATCTATCTCAGAAGGGTAG

>Cluster\_52353

TTGTCCACATTAGAGCAAAAATTAACAGAGATGATTACTGCGCCAGTTGAGGCCCTGGGTTTTGAACTGGTTGGCATCGA  
ATTTATTTCGCGGTGCGACATCCACACTGCGCATCTATATTGATGATGAAAGATGGCATCAATGTTGATGATGTTGCTGATG  
TGAGCCACAGGTAAAGTGTGTGCTGGATGTTGAAGATCCCATCACCGTGTCTATAAAGCTGGAGTCTCCTCACCGGCT  
CTCGATCGCCACTGTTACGGCTGAACACTACGCCGTTTTGTCGGGAGAAAGGTTGACTCTGGTCTCCGATATGGCGGT  
ACAAAACCGCTGTAATAATGGCAGGCGTTATCAAAGCGGTAGACGGTGAATGATCACAGTTACCGTCAAGGTAAGATG  
AAGTGTTCGCGCTGAGTAATATCCAGAAGGCGAACCTGGTTCCTCCACTTTTAA

>Cluster\_56911

ATGATTAATCATGTTGGGCGAGAAAAATCCACATCGGAAAAACAGATCGTTGCGGCACCTGGCGGTTCTCTCGCTCGCGGT  
TTTTTGTGGCTTGGGTTGATAAAACCGATAGATACCTACATTGACAGCATCAGTCCACGCGCAAAAAAATTAAGAAGG  
ACATCAAATGGATGCAGGATCAAGCGAGCACCCATGGTTTACTCGGTCATCCTGCGCTTACGCAGCCCATCAAAAATATC  
CTTCTCGAGGAAGCAAAACGTTGAGATTTGGCTATCACGCTGGAAAACGGCCCGGACAATACTCTGACAAATCATCTGT  
CACAGTCCCTCGAAAACGTTCTCCCGTGGCTCACTACGGCACAGGTAACATACGGTATTGTTATTGAAGACCTTCACT  
TTACTCTTCCCGGAAACGAAGAGATCACCTCAGGCATTTGTCCTTACGGGAGCAACAATAA

>Cluster\_20869

ATGAATGAGTTTAAAGCGTTTTGAAGACCGGCTGACCGGACTGATGAAATCGCTGTACCGTACAGGCGTGGCGACTGAG  
TACCAGACTGCGGAAACGTTCTGCGGCAGAGTCAAGCAGCTGGGTTGATGGCACAGAAAGCCCGGACGCGCACACCCCTACG  
CACACGCGCAGCAGAGCGCCAGAAAAAAGACCGGTCGCGTTAAACGAAAAATGTTTTCGAAAATTTATCACAGTCTGT  
TTTTTGCATATCCGGCCAGCCGTAACAGGATCAATGGAGTTTACGGCGGAAAGTACCGGAAAATAGCCAGTGTGCA  
TCAGTTCCGTTCTGTGCGAAAGAAACCCGGAAGACGGTAAGAAAATGATTTATCCGGCGGCTCCTGTGCTCGGCTTTACCG  
GTGAGGATGTGCAGATGATTGAAGAGATTATCTGGCTCACCTCGACCGTTAG

>Cluster\_20690

ATGGCAGAAACCAAAATTTGTTGTCGGCCCGCAGGCGTTAGCGTAGGAGAAGAGTACCCGTGGCTGGCTGAGCGTGACGA  
AGACGGTGGGTTAGTACCTTTACCGGTAAGGTGCGCAACCATAAACCCTGGGCGACAGCGTCAAAGCATTAACCCCTCGAAC  
ACTATCCGGGAATGACAGAAAAAGCACTGGCAGAAATCGTTGATGAAGCGCGTAACCGTGGCCGCTGGGGCGCGTCAAG  
GTAATTCACCGCATTTGGTGAATTTATGGCCGGCGATGAAATGTTTTTGTGCGGTTTACAGTGCAGTGCAGCAGTGC  
GTTTGAAGCCGGGAGTTTATTTATGGATTTATCTCAAAACCCGCGCACCGTTCTGGAAGCGCGAAGCCACGCGGAAAGCG  
ACCGCTGGGTCGAAGCTCGGGAGAGCGATCAGCAGGCGGCAAAACCGTGGTAG

>Cluster\_18513

ATGCGAAGCTCGGCTAAGCAAGAAGAACAGTTAAAGCATTTAAAGCATTACTTAAAGAAGAGAAATTTAGTCCCAGGG  
CGAAATCGTCGCCGCTTTCAGGAGCAAGGCTTTGACAATATTAATCAGTCTAAAGTCTCGCGGATGTTGACCAAGTTTG  
GTGCTGTACGTACACGCAATGCCAAAATGGAATGGTTTACTGCTGCCAGCTGAACGGGTGATACCAACCCCTCCAGT  
CCATTGAAGAATCTGGTACTGGAATATCGACTACACAGATGTCAGTTGTCGTTGATTCATACCAGCCCTGGTGGCGGCGAT  
AATTGCTCGCTGCTGACTCACGCGCAAGCAGAAGTATTCTGGGACCATCGCTGGCGATGACACCATCTTTACTA  
CCCTGCTAACGGTTTCCAGCTCAAAGAGCTGTACGAAGCGATTTTAGAGCTGTTGACCCAGGAGCTTTAA

>Cluster\_40831

ATGACGCACACACTGAATCCGGTCACTACTGTCCTGTCGCGTCTGTGGGACAGCGGTAAGTTACGTACTGGCGCG  
GATAGAAGAGATGGTGAACAGGAACTCGGAAACAGCGTCATTGTCGATGCTGCTGACGTTGAGAAATGAGCGCGTATGA  
ATGGCGAAGATCTGACGACCTGGCAGAAAGCCAGGGGTTGGCACAGTATCAGGCTGGAGGAATACACGGGACAGGGCCTG  
TTGTCATACGGCGAGGAGCGTATCTGTGCGACGAATGAGCTGCGGATGTTATATGCCCCACGGCCCGCAACCCCTGGAT  
ACTGCCCGATGACTGCATGCCACCATTGCGGCACTGATGACAGTTTACGATCAGGAGCTGCTCATGAAGGAGTTACGTA  
AACTCACCGGTCAGCAACAGAATGTTGTTCTCGTCTCCGAGTACGGCAACAGGAAACGCCCCGATAATCTTTAA

>Cluster\_11159

ATGAGTCAGGACAGTAAAGTGTATCCCGCTTTTCTCGGATCGGTTGATATTGCTCGTTATTTCTGCAATCATCTT  
TTATTACCATTTTACTTTTACAAAAGCGGTTTACATACAGAAGGAATCATTTGTTGATGCCGTTTGGTACAACAATCACT  
CAAACGAGCTCGATGATAATGGTTCCTGGTATCCAGTGGTTGCTTTTCCGCTTATGCCAGATTACACGCTAATTTTCAAT  
TCGAATATCGGTAGTGTATTTTATGAAGATAGCGAAGGTGACAGAGTCAATGTCTATTATCCGCCAGGGCATCCAGAACA  
AGCCGAAATAAACCAATCCCTGGGTTAATTTTTTAAATGGGCTTTGTTGGCATAGCAGGCAATATTTTCCGGTAGTGTGC  
GTCGATAATCACGCTCCCTCCACAAAAAATCTCGCAGGAAACGGAAGTCCCGCCATGA

>Cluster\_10971

ATGCTTTATTTGACCCGGGCGGTTGGAGACCCCGCTCAGACAACCTGCCAGGTTACCTCCCTGTTGACATGCGGGTAAA  
AAGCCGTTTAAAGTCAACCTTAAACGATGGACGTCAGGCTGGACTGTTGCTGCCACGCGGCTGCTGCTGCGCGATGGTG  
ATATCTCAGTAACGAAAACGGTGTGATGAAATCAATTAAGGTGATCGCCGCTGATGAAGCCGTTTCTGTAGTGCCTGCGCA  
GATCCTTTTATGCTCGGAAAGCTGCTGGCATCTCGGCAATGCCACGTTCCGCTGCAATAATGCCCGGAGAGCTGCG  
CTACCATCAGCTCAGTCTCGATGATATGCTGCGCCAGTTTGGGCTGGATGTTGATTTTGCACATCTCCGTTTGAGC  
CGAAGCTGGCGTTACGCCAGCAAGTGCAGCGCCATAATCAGATCAGGAGCACAGCCACTGA

>Cluster\_38912





TCAGTATTGCTGGAGAAAGGCGGCCAGTTCATCGAACACATGCGGGGATTGTCGCTAAACGCTTGTCTCCGGCAT  
TACCGGCTAATGACGGTAAGCAAACCCCATGCGCGGGCATCCGGTGTATTATCGCTCAGCACGCCACCGGACCTGCTGT  
CGCGGTTGCTGGCTAAGTGGCATAACATTCGCGAGGGTGTTCGTTAAGCGAAGAACAACAACGTTATATCGTGGCGGT  
AATCTATCACTGGTGGTGTACAGATGAATCAGCCATGA  
>Cluster\_51793  
ATGACGCTTATAGCGGGATGAACAATACCAGCGGCAAAGTCACTACTGATATTGATCATCTGCGCCAGTCCGGTGGGGA  
CATTTCTGCTGACACCGCAGGGTAGCCGATTGCGCGCCGGGAATATGGTTCCTGCTGCGGACTGATAGATCAGCCAC  
AAAATCCGGCATTACGCCTGCAGGTCATGTCGGCAGTGTATGTGGCGTGAGTGCCTGGGAGCCACGGTTGACGCTGGAT  
TCCATCACCATCAACAGCAATTTGACCGGTTCAATGGTGGTGGAGCTGACCGGGCGGGAATACGGTGTGCTGTGTC  
CCTTCCGTATCAACAGGAGCAGAGAATGGCAGTGATTGA  
>Cluster\_45331  
ATGGATAAAAATAAAATCAAATGCGCGTGATTTAAGACGCAATCTCACTTTGCAGGAACGAAAGCTCTGGCGATATCTTCG  
CAGCCGACGTTTTGGTGATTTCAAATTTTCGCGTCAACATCCGGTGGGAGCTACATTCTCGATTTTGCTGCTGCTCGG  
CGCGCGTAGTCTGTTGAGCTGGATGGTGGGCAGCATGATTTGGCAGTTGCCATGATACCAGGCGCACTAGCTGGCTTGG  
TCCGAGAGCTGGACCGTGTGCGTTTCTGGCATAACGAGATTGATTGTAATGAGGAGCGGTGCTGGAGATTATCTGCA  
GAACTGAACCGCGTCAACCCTCACCTGA  
>Cluster\_66927  
ATGTCACGTATTCGTGTCATGGCGGCCGCTGTGATGCCGCAATTTATCCATGCACAACGTTTGTAAATGTCATGCCGGAG  
CAAACCTGACTAAGTTCCTGCTGCTCATTCCCATGATGTTGCTGCCAAAGCCGTTCTTCCGATGGAGATCTTCCCGATA  
TTTTCCGCATGCCAGTAGTGGTCCGACGACGAGAAGGTTCAATTTGTCGCTATTGGTTCGCTTTATCGGTGGTCTCTG  
TTTTCTCGCGCCGCTGATTGGCCTGAAAAAGTCCGTAACCAAGGGGAAATGGGCTGGCTGGTTCATTTCTATCTGCT  
CCTTGGGGTGTACTTGTGCGCCCTACCTGAAATGATGAGTGCAGCCAGAAACAGTTAGGGATATCCACTATATCCATTG  
GCTAA  
>Cluster\_1584  
ATGGGAGACCCGACTGGCGCGCATGCTTCCCGGATGACATCCACCGAATATGCCGACTGGCACCGTTTTTACCAGCAC  
GCATTTATTTTTCAGGATACCAGCTGGATATGCATTTTTCCGGGTGACGTACGCTGTACTCAGCCTGTTTTTTTGGCATC  
CGGATATGCATCCCTCTGATTTCACTGCTGCTGGCACCCGACGTGATGATGAGCAGACGGAGATGCCGGATGAGGACGAT  
ATGCTGATCGGAAAGCGGACGGTCTTTCTGGTGGTGTCCGCTTTGGGCTGACGGGAAGGAAATCTGTTGGTTCATGTA  
TGACATGCCGAGCAGTACAGAGGATGAAGCCATGCTGATGATGGTGTCTGAGGAAATCCAGGAGGTGACGCTATGGCG  
GGTAA  
>Cluster\_37183  
ATGGCGAAAGAAATTTGGTCCCGCAGCGGTAGCGCAGGAAATGCAAAAAGAGATCGCTCTCATCTGCAGCGTGAAAT  
TAAAGATCCTCGCTGGGCATGATGACCACCGTTTCCGGTGTGCAAAATGTCGCGACCTGGCGTATGCCAAAGTATATG  
TGACGTTCCCTCAACGACAAAGATGAAGACCGGTTAAAGCGGGCATCAAAGCGTTGCAAGAAGCTTCTGGTTTCATCCGC  
AGCCTGCTGGGAAAGCGATGCGCCTGCGTATCGTCCGGAACGACCTTCTTCTACGACAACCTCTGTTGAAGGGAT  
GCGCATGTCAAACCTGGTGACCGCGTGGTCAAACATGACGAAGAACGTCGTGTTAACCCGGACGACAGCAAGGAGGACT  
AA  
>Cluster\_24766  
GTGAGGACACTAACCCTTTTTTTTTGTCTTTTGGTATCCTGTTTTACTCAGGCACAGGAAAGTAAATAAAAGCAAGAA  
ACTTTTTTTCAGGGACACAAACGTCAGTTGCACTGCAGGCAAGTAAAGAAACAATTAAGTACCAAAGCTGATTGGTCTG  
TAAAAAAGGACAGACTTTATATGTTGTTCTTTCCGACGAGGCGCAACAGAGCGGATGACTGATTTATGGCATGCAAAAT  
TATAACTATACTTTAAATGCATCTGCAGTGTAAAGGATATGTCGCTGGATGATGCAGTAAAGAACTACTAGAAATCGAT  
GGAAATGTGTCAACCGGCTTTATTAATTTTATAACGGGAATCATGTCAATCTAGTTACACAATCACCCGAAGGAT  
AA  
>Cluster\_29116  
ATGACGCTACTCTCTCGTCCGCGGTGGAGTTTATCTCCACCATTTTGCAGACCGTACTCAATCTTGGCTGTGTGCGCT  
CGGCTGATTTTTGGTGTCTTCCTCGCGCAAGAAACGGTGCATCTGGCTGATGTGCTGTTCCGCGCAGAACAAACAGTA  
AATATGAGCTGGTAGAAGGGCTGGTGGTTACTTTCTCTATTTTCAATTTATCGCGCTGATTTGTAAGTACTTTTCACTCC  
GGTTTTCACTTCCCGCTACGTTACTTTGCTATATTGGGATCACCGCCATTGTGCGCTGATCATCGTGCATATAAATC  
GCCACTGGATGTGTTGATCTACTCGGCAGCGATCCTGTTACTGGTGTACCCCTGTGGTGTGTAATTCGAAACGGCTGA  
AGCGGGAGTAA  
>Cluster\_56238  
ATGAGCCAGCTCGTCTACTTCTCCAGCAGCTCCGAAAACACGCAGCGTTTTATCGAACGTTTAGGTCTGCCCGGGTGGC  
CATCCCGCTCAATGAGCGGGAACGGATTACAGTAGACGAGCCTTACATCTGATCGTGCCTCTTACCGCGCGGCGGTA  
CGGCTGGCGCGGTGCCACGACAGGTAATTCGCTTTTAAACAGCAGGACACAACCGGGCTTGGCTTCCGCGGCTTATTGCT  
TCTGGTAATCGAACTTTGGTGGGCGTATGGCCGCGCGGAGATGTGATTGCCCGGAAATGCGGCGTCCGCTGGCTGTA  
CCGTTTTGAACTCATGGGTACGCAAGCGATATCGAAAACGTTTCTGTAAGGAGTAACCGAATTTTGGCAACGACAACCGC  
AGAATGCCTGA  
>Cluster\_39776  
GTGGCGCAATGTTGCGAAACCGCTGGTCACTTATATCGACAAGCCCTGGTACCGATCGCACCGTGTCTCCGAAAT  
CACGGTATTAGTTGGGCACGACTCCAACATGCTCTCTGTTAACGGCGCTGGATTTCAAACCGTATCAGTTGCATGACC  
AGAACGAACGCACCGGATGGCGGCAAAATCGTTTTCCAGCGTTGGCATGACAGCAAAGCCAATCGGACCTGATGAAA  
ATTGAATATGTGTACCAGAGTGCAGAACAGTTACGTAATGCCGATGCGTTAACCTGCAGGCACCTGCGCAGCGCGTAC  
GCTGGAATTAAGCGGTTGCCGATAGATGCCAACGGTTTTTGGCCAATGGTAAAGTTTATGATAGCGTATGAAATGAAGCGG  
TGAATAA  
>Cluster\_53290  
ATGCCCGTGGCGCTTCGCCGATTAACCCCTGCCGTAGTGAATCTATCCAGGTATTTTTTTCAGGTTGTGCTGTATGCAGG  
TTTTATTTATTTTTGCGCAGTATCTCGTCTCCTGGCTGCATTTGCCGCTGCCTGCCAACCTGGTGGGATGATCTGATGC  
TGGCGCTGATTTGTTGTCGATTTCTTCTGCAATGGGTTCCGAGCGGGGCGGTTGGCTATTTGGCCGAAATGTTGCTG  
TTTTTTGCTCCTGCGTGGCTGGTGGTGAACATATGCAACAATATTACTGGTGGATGGCTGGCGCTTTTTTGTGCTGAT  
CGCGCTGAGTACGGTGTGTTGCTGGGCAGGCTGCCTGGGTAGTGAAGAAAGTCTATCGCTATGAAATGGCAGGTTAA  
ACCGTGGCTAA  
>Cluster\_32591  
GTGTGCGAAATCAATCGTTACGCTATTACGCTTACCTGTTGCATGTTTACGTTGTTTTTATGACAAAATACCCCGCTCC  
AGTTTTTGGTGAATGTCATCATGCAACATGCGTCACTATGTAGCGGAGGTATGCGCGGACTTTGGTGGCGGTTAAAGG  
AATGTGACGGCGAGGACATGATGTTACATGCTGATTGAATACCACCGTTGGTGCACCAAAAGCTGGTAAACAGC  
CTTAAAGCTGTTACCAGTAGGCGGCTGCGAATGATTTTATTGATTGTCGCGCGCGCTATTCAAAGCCGCTACTTGGTC  
ACGCTCTTATTTTCATCGGTTTCAATGTTGGTGGAGCACCGCTGGAAGTTGTGAAAAAGTATATTCAGAATCAGCGTGGCTGA  
>Cluster\_98

ATGACCTTCGCCAGTAAAAGTTTACTGCTGGCAGCCGTTTTCGCCGCGTTTTGTCCGGGGTGTGTGGCACAGGCTGGA  
CAGCACCCGCCACGATAACCAGACGCTGCGCCGTGAATTACAGACGGAGCAACAGGCCGCAACACGGGTGAATGGTTGT  
TACACGGTCAGGAACAGACGATGCAGGTATTTCCGCTATCCGTGCCGCAATCGTGCCGCGGGCTGGCAGACGAGACA  
GAACATCATGATGCAAAAACAAAAATTACAACCCCATACCGGTGACAAATGCGAGCACTCGTCTGTGCCTGCCGTTGC  
TGCTGACAGGTTGGGGAACTCGAAAAACGCACCCGTGCCATCCGTGGTGATCCTGCCGAAACTGA  
>Cluster\_17492  
ATGCCGACTCTTGATGTAACAGATGTGCTTTTTGACCCCGATTTTTGCGACTTCAATTTGTGGGTAACACGCCGAGTGCA  
AACGGTTGATGAGGACGGGATCGGCAGCGACAGTGAAGTAAAAAGCAGTTTGGCCGAGTCGTAACCTGTTGATCGCTCTC  
TGGAAAACCGCCGTATGCAGGCAGGGCAGGTAATCAGCCGTTGCAATTCGATTTGACGACTGAGCCGACTGACGCAGGGA  
CAGACTGGCCGTGATGCCGATATCGTGACGTATCAGGGTCTGATATCGTGTGACCTTCGTGACCCGATACAGCTTA  
TGGGGCCGATTCGTTACAGCGCATTTGTGAGTTGATGCCGTTTTGATGGGGAACTCCGATTGAGCAATAA  
>Cluster\_10999  
ATGAATTTACAATCCGGACAAAACATACCCTTTCAGCAATCTACGATCAGGCTGAATCTCAGTACCCGCAAAATCCGG  
CTTTAAAGGCGAACCCGATACCTGCCTGTTTCATGCTTAATGCTCAGGGAAAGGTCAGTGGCGATTCTGACTTTATCTTTT  
ATAATAATTTGCTCTCTCCCTGAGGGGGCAGTCAAGGCTCGTTACCGGTTTCGACGAGGCCAGCATTTGAGATAGCACTGGAT  
CGTGTTCGGCGAACGTCAGTAAAATTCGATCACCGTTGCTATTGATGGTGAAGATACCATCAGTTCCAGGCTGTACGCT  
TACTGACAAAATGGCGATTGAGAAGGTGCAATTTGACTTATTTGGATTTGGTCTGGCCGAGGTGGTGA  
>Cluster\_48600  
ATGCTGACAAACAGATTGAATTTATAGAAAAGTCGCTACGCTGCTTTTTATCGCAGGGTTGATTGAATCCTCACCTATGAG  
CCAGGCCAGATAGCCAAAACAATGGGTATAAAAACGCCAACACCTTTCTTTAAATAAAGCGGCAAAATTCCTTTTC  
CTATCGATAAGGTTTCGTCGCTGGCGCTGGGATTTGACCAAGTCGTTCTATGATGATGGTGTGGAAGAACC  
CAACCCGAACTCGCAGCATTTTTATACAAGAAGGCATGCTCTCTTTACGAGGACGAAAACAGGTTCTTGTGCATA  
TAACGAGCGATTCCGTAAGAGAAAAGGCGCATCAAAAAGGTTTGTGAGGCCATAAAGTCTCTATGA  
>Cluster\_17481  
ATGCCATAAAGTACTGCTGAGTTTTTATCTTACGCGGAGCGTTGCTTTGCGGAGGATTCTGAAGTTGGTTATCGTAATAC  
TATTTCCGGGCATATTATGCGCTTTACCATGAAATAAAGAGAACTGACCACTCTTCTGCTTATACGAAAGGATCATC  
ATTTCCAGTCTTATCTTCTTATAAAAAAAGAGTGAACCAAACTGGAGCCATATGATCCATTAAGCATAAAATCCATG  
GCTTACAACCTGGACCAACAGAGACTGGCTGCAATGAGCCAGATTTATGACCTACTAGCTGTGCAATAGATAAGCAAT  
GGCACAGCAATCTCTTCTTAGAGGTTAAGACTATTTTTCTCAGTGGGAAAAAATGAAGACTGATGAAGCTGTTTAA  
>Cluster\_1005  
ATGAAACATACTGATATCCGTGCTGCAGTGTGGATGCCTGAGCTGCATGAACACGGGGGCGACGCTGTTTGTGGTGC  
CCCGTTGTTTTTACGAAAGAGGATTTTTCCCGCGTTCGCGTTTTATCTGACGGATGCAGAGTATACCGGTGAAGAGCTGG  
ATGCGGATACCTGGCGGGCCACACTGCATATTGAAGTTTTCTGCTGCTCAGGTGCCGATTACAGAGCTGGATTCTGTTG  
ATGGAGTCCCGGATTTATCCGGCGATGTCGCGATCCCTGCATGGCAGGGATGATTACCACGATGGTTACAGCAGGGCTA  
TGACTATCGTCTGATGACGATATGGCGTTATGGAGCTCTGCAGATTTGACTTATCCATTACATACGAGATGTGA  
>Cluster\_24696  
ATGAAAGAAAATAAAAATAATCCTGAACCAAAATCAGAAGTACAGAACGAGATTATAAATACATTTCCAGAATTACTGA  
CAGGTATGCTGTAATGCTCTGTTGATTTCCGTCAGCAGGAAATGTTTTATGGAATGTTTATGAAATTTATTTTGTGCT  
GTATTTGATTCGGTGAACGGGACCCGAAATTAATAACCTAGCTTATATGTTGGAACATCCTGATGATGCCATTTCCGCT  
ACGTTATGGGCGCTTGCATCCGGCTTTTTTGTGCGGGTTATCTGCTGCTTTTATGTGCGTTACCACTGCAAAAATACAG  
GATATTCCTGTTGAAACGCGTATGTGCCGGGAGAACACATTAAGGGAGGGCAGCAATATGCTTCGCATTAA  
>Cluster\_63657  
ATGATCACCTACGTTGACCTGTGATGACGTTGATAATGCGTTTGGGAACGCTGGACGAGTGAGAACGCTAAAAATAAAGC  
TGTTTTAATGGCTAATGCCTGGCTTAATGGCTTCAACCTGAAAATTAACCCATCCCGTATCCGGGAGAGGTAACCTTG  
CGGAGCATATGCAGCCAGAATTTGCCCTATTCCGTAAGTTGTTTCAGCAGAAAATGATTTCTGGCGTTGTTATCAGTAAA  
GCCGTGTCGGCTGACGGGGTCAGTGTATCGAAATCATTTCCTGAGTTGCCAGCAAAACAGCACTGCATTGCTTGAACCCGA  
TTTACAGCTTGGCATAGCACTGCTGAAACCGTACGGACTTAGTCGCTCACAAAGTCAGGTTGTTGAGGGGGGATAA  
>Cluster\_42554  
ATGAGCCATGCTCTCGTTACAGGAATTTTTGAAAACGGAGCCAGACGGTACGCTGGAGGCGATCGCCGAACAATACAACAC  
CAGCTGCTGGAGGTAGTGAATAATCTGCCCTCCTCCGACTGTTGTTGTCAGGTGATAAATTCGATACTGCTGCGGATACCG  
TCTCGAATGGGGCAACGTCACCCAGTTAGTACATACTAACGATGTAATACTCGAATTTAGCCGGCAACTGCCCTCCGGT  
TTCCATCGCCACGGCTATTTCAACCTACCGGAAAGCAGCGCATGTCGGGCAATCAAAGCAGAAAACAGCAGCATAT  
TGCCTTGCAGCAAGTAAATTTATGGGCATGGATACCGCTCTATTCTCTTTTCAATTAAGGAAGGCAGCGCAATGCTGA  
AAATCTTCTCGTAGGGATGATCATCGTACGCTCCTGAGCGAAACAGTCAGCGCTTCCATGCTCTGGCAGCATCGTTA  
AAGGAACACGCTGA  
>Cluster\_29390  
TTGGGACATCGTGCGCCATTTACTGCCGGTTTTCAACAGCGGATCAGTCTTGTGAACGCCAGGAATTTGATCTGCGAGC  
CTTCGCCGGCTGTGCCGGTACAGCGTGTGGGAATTTAAGGAAACAGGTTAGGAACTAACTCGACCGGGCCGAGC  
GAAAGAAAGTCTGCGCGCTGCCCAGTCCAGACAAATTTGATGCAATCCTGGTCACTGAGCTTTCCCGTGGGGGCGCTCG  
ACGCTCGATCTGCTCAATACGCTACGTTGAACTGGAGAATGGAAGGTTCCCGTATGATGATGAAATGGGATGGGTTCGA  
TCTTTGCTGCGCTATGGAGCAATGCTGGCGACTTTCTTTCCGGCATTGGGAGTTTGGCGGGATCTCATCAGCGAGC  
GGTCAAGTCAAGGCTTGTGTTGCGAAGGCAAGTGGTAAAGAGGCTTGGTCTGAGCCGAGTGCAGCAAAATCAGAC  
CGACTTTTGCCTAAGGTTGGTGGATGAGGGCCGAGGGACGAGCTATCGCTGGATCGCACGCGAGCTCGGTATCAGCAA  
GAATACCGTCTGATCATCGTCAACGACACAGAGCTAACGCTTAG  
>Cluster\_23749  
ATGAAACTCGTCCGTAGCTACACCAGCCGTTTTGTACGCAAACTTTCTATTCTGTTGTAGAAAAGGGCATAACGTTGCA  
ATTTATTAATGAACCTGCCCTATAACCGGATAACCGCGTGGCGCAATTTAACCCGTTAGGAAAAGTGGCGGTGCTGGTGA  
CCGAAAGAGGGCGAATGCTGGTTTGTATCCGCGATCATCGCTGAATATATTGAATTAATGAATGTTGCTCCGGCGATGTTG  
CCGCGCATCCGCTGGAGTCTGTCGGGTCGGCAAAATTTGAGGCACTGGCGGATGGCATTTATGGATGCGCGGCTGGTATC  
GGTCTGAAACAGGCGCTGCCGGCGGCTGCAATTTGACTGAAATTTGACTGAGGTTGAGGAAATAACCGCACTGCT  
TGGATGTTGCTGGAAGGATATCTGGTCTGATGGCACACTCAAACCGATACGGTCAATCTGGCGACTATCGCCATTGCTG  
GCGTCCGATATCTCAATTTCCGCGCGTTGCGCCAGGCTGGTGTGTCGACCGCCACACTTAGTCAAACCTGGTGCAAAA  
CCTGTTTAGCCGCGAAAGTTTTGCTCGCACCGAACCGCAAAGGCTTGA  
>Cluster\_67028  
GTGTGGAAGATTGCTCTGCTGCTGCAGCATAGCCATGACCTGATGCTGTCACCGGCATTTGCTGTGCTTCGACGAGCAG  
TGCGGCTTTTATTTGAGTCCCTGCTGACAGAGTGATATGTTGCGCCGCGAGGCCACTGTACCGGAGTTTCTGACGAGC  
CAGCACCCGAAACATAACGATGCGTGGATACAGAGTCTGACCCGAAATAACAGCAGGCATCCGCCCCGCAAGTAAAGAAA  
ACACCGCTGCGCTGATTTTTTTGCTGTTCTCCATACCGGAAAGGTTGATTCGATGCTGCGGAGGCGCAGGGCGCT  
GGGTATCCCGCACTGGTTAACGACTCATCGAATGACTTCCGAAAACAGCAGAGGCGTATTCCGTTATACCCGGG

AGAAAAATACCGGGGTTGTCAGATAGACCCGATGCGATTTGCAAAAATACGGCATCACATCCGTGCCGGCACTGGTGGTG  
ACCTGTGGTGAACGGTATGACCTGATTCGCGGCAATATCCGCCTGAAAGCGGGCTGGAGCGGGTGGCGAAGGAAGGGGA  
ATGTGCTCCGGTGGCTGAAGCGATTTCTCAGGGAGAGTGAACGATGA  
>Cluster\_23246  
ATGAAAAAGATCCTTGACAAACCCCGATCAAAGCTGAAGATCTGCAAGATATTCGCGTCCGGGATGTGATCTACCTGACCGG  
TACGCTGGTGACCTGCCGTGACGTTTGTACCGCGGATGATCGAACTCAAACGTCGGATCCCTTACGATCTCAACGGCA  
AAGCGATTTTCCAGCTGGCCCCATCGTGGCAAAAACGGCGAAATGGGAGATGGTGTCCGTCCGGCCGACAAACAGT  
ATGCGTATGGAAGTTTGAACGAGAATTTATCGAGCAGACCGCGTGAACCTGGTGGTCCGCAAAAGCGGAATGGGGCC  
GCTGACCCGAAGAAGGCTGCCAGAAATTCAGGGCCTGCATGTGATTTTCCGGCTGGCTGTGCGGTACTGGCGCAACTC  
AAGTGAAGAAGAAATGAAGAGGTACACTGGACAGAACTCGGGATGCCAGAGTCCGTGTGGGTCTGCCGGTCAAAGAGTTT  
GGCCCGCTGATTTCTCTATAGATACCCACGGCAACAACCTGATAGCCGAAACAAAAGCTGTTCGCGAACGCCGCGA  
TCCCATCGTGAAGAGATCTGCGAGCACGTCATTACATCAAATA  
>Cluster\_23850  
ATGTTTAGTCCAACGGCAATGGTAGGTAGAGCGTTAGCTCAGGCGGTTACACAACTCTTAGACCCGCTGTAACCAAGGC  
TGCGACGCAAGCGGGCATGGCAGCCAGTGGTATGAGGTTACACGCTATGCAGTCGAACCTTATGATTAATCATGGCAAA  
TGACTACCCAGCTACTACAGCCGTAGCCAAACAACTGGTAGCGATACTCAGCAATGGTTCAAGCAAGAGCAGATT  
ACTTTTCTATCCAGAGCAGTAAACAAAACCTGTGGATGCTATTGATGAGTAATAAATCAGCAATAGTAAGGAGACTA  
ATGTGCGATTTTTAAAGAGGTTGAAATCGCGATACAGCAGCCTCTCGATATGAACTGTGCACAATCATCAATTAGTCACT  
TTTTGCAATCAAATAAATACTTTAATCAGAAAGTTGATGAGCAGTGTGGTAAAGGAGTGGATCCATTACACGTTTTAAC  
ACTCAAACAGGATGATGAAACAGGCCTCGCGAAGAACTTTGAACAGAAATTTGGCACCGTGAAGTCAAGTCAAGTATCAA  
GGCTCTAAGTGAAGGCGATTGCAGAAAATGTGAGGATACTCGACTGTAG  
>Cluster\_13046  
TTGAAGGAAATTTTGGGAGAAGATGGTGCATCCGGGAGGATGACTCAGTGGCGTTCCGCCCTTCGGGCGGTTGCTGACGC  
AACGTTATCCTCCCTGGTCCGCGTTAATACCGCTAFTCTCTTCGATACCTTATTGCTGAAGGTTACGGAGAAATATGG  
TGCATCCGGGAGGATTCGAACCTCCGACCGCTCGGTTTCGTAGCCGAGTACTCTATCCAGCTGAGCTACGGATGCATCCGG  
AAAATTTATTTTACTGCTGATATGATATCGCTACTAAAGCCATATCAAGTAAGAGATGGTGCATCCGGGAGGATGACTC  
ACTGGCGTTCCGCTTCGGGCGGTTGCTAAAGCAACGTTATCATCCCTGGTGCCTGCGGTTAATTCGGCCACCTCTTCGA  
TACCTTCAATTCGTAAGGATTTTCGAGAAATAGTGGTGCATCCGGGAGGATTCGAACCTCCGACCGCTCGGTTCCGTCG  
TACTCTATCCAGCTGAGCTACGGATGCATCGGGAAAATTTATTTTACTGCTGATATTGATACCGCTACTAAAGCCATATC  
AAGTAAGAGATGGTGCATCCGGGAGGATTCGAACCTCCGACCGCTCGGTTTCGTAG  
>Cluster\_64830  
ATGACAGGCGAAAAAGAAAGCAAAAATGCAGAGCGCATTTTTATGCCCTCGGAAATAATGCGTTTCAAGGAACGCCTTGA  
AGAGGCAATGAATGGAGAATCAAGCCGGGCGTTTGCAGCTAAGTGGGACTTTCTGATGGGTTATCAGAACTACCTGT  
CTGGCAAGACATACCCGCTTTTAGATCGATTAGCACAATAAGCCTACGCAACAGGGCGTCCAATAGAGTGGTTTATCCAA  
AGTCAGAGCATGCCAATGGTTGAGCATAAAAATGCTCGAGAGAATAAAAATCCTCAACCTGACCGCAGCACATTGAAAAC  
TAAACTGATCGCAATTTGTAAGTGTAGAGCAAGAACTGCATCTGCGATTGAGTTGTTTCAGAAAAGAAAGGATTTG  
AAGCTCTTATGCCCTGAGATTTTTTCTCCGATGATCCATCCAGGCTGATTTGCAAGGATTTTCGAGCAACCTTACAA  
ACAGCCAAAATGCTTGAATCATTACCAACAGATACCCGTAAGAGATTTTGTCAAAGTATGGTATTTATGAACAGGAATG  
TCTGTAGCTCTTCAAGAACCACAAGATGTAAAAAAGCCGTATA  
>Cluster\_39267  
ATGCGACTGTGGTTAATTCGTATGGTGAACCGAAGCAATGTGATGGTCTGTACAGCGGTATGCGCCACACCCCT  
GACCGCGCGGTTATGAGCAAGCGCAAAATCTGCATACCGCTGTACATGATGTTTCCCTTTGACCTGGTTTTATGACAGTG  
AATCGGAACGGGCAAGCAGCATACCGCGACTGGTTCTTAGTACCGCCAGCTCCCGTTCATATCATCTCCCTCAAT  
GAAATGTTTTTTGGCGACTGGGAGATGCGACATCATCGTGACCTCATGCAAGAAGATGCCGAAAACCTATAGCGCGTGGTG  
CAATGACTGGCAGCATGCTATCCCCACGACGGTGAAGGATTTAGGCAATTTTCGCAACGTTGGAACGATTTATCGCAA  
GGCTTAGTGAATATCAGCACTATCAGAAATATTTAGTCTGACGACATCAGGGCTACTGAGTCTGTTAATGCTCGTTTA  
ATTGGCATGCTGCGGAGTCTATGTGGCATTTCCGCGTTGACCAAGGGTGTGGAGCGCCATTGATATCAACCAAAAAT  
CGCGACGCTACCGCTCTCAATAGCCGTGCCATCGGGTGCAGAAATGCATGA  
>Cluster\_53937  
GTGATAGATCCCGTTCTTGAATATCGCTGTCTCAAATCCAGAGTCCGATTAACGAAGATCGCTTCTCAAATAAACGG  
CTCCGAAAATGAAATTTGGTCTTTTGGATCTTTGATATCCCGCGAGTGCGAACGTCAGGTACGGGAGCATTTGAAATATC  
TGCTCCGGCATCTGGAAGGACCATAAATTTGCTGTCTGAATGCTTCCAATCATCATCGATATGCTCAATGAACGC  
GGCCTTTTCGAGCGCGTCTGCCAGCAGGAAGTCAAAGTGGTACTGAGACGCTGAAAAAGCAGCTTGTGGTCCGTTAAA  
TCAGAAAAAGATCGTGTATTTATAGCGAAAAAGTGCATGCTGGCTGCCAGGATTTTGTATCTTACCGGCATGGGCA  
ACGCTGGCCATTTAGTACCGGTCATGAAGTGCATGAGTGCCTTGCAGATGCTATGGGTTTACCCCTGCTGATGTTT  
TATCTGGCACCTACAGCGGGTACAACCTTTCCCGCTCAGACACCGGTTCAAAAATTTATATCGCGCTTTCAGACT  
GGTACCAGATACGGGACCCGAGCAACATTTGAATCCTCAATGA  
>Cluster\_64513  
ATGAACGTGGTATCCTTGATACTGGCTGCGCCAACTGAACTCGGTGAAGTCTGCCATTGCGCGCCACGGTTATGAACC  
CAAAGTACCGCTGACCCGGACGTAGTGTGCTGGCCGATAAACTGTTTTTACCGGGCTGGCACTGCGCAAGCGGGCA  
TGGATCAGGTACGTGAGCGGAGCTGTTGATCTCATCAAAGCCTGTACCCAAACCGGTTGCTGGGCATCTGCTTAGGGATG  
CAACTGCTGGGGCGGCGAGCGAAGAGAGCAACGGCGTGCAGTTGCTGGGCATCATCGACGAAGAGCTGCCGAAAATGAC  
CGACTTTGGTCTGCCACTGCCACATATGGGCTGGAACCGGTTTACCCGAGGAGGCAACCGCTGTTTACGGGATTTG  
AAGACGGCGGCTACTTTTACTTTTGTTCAGACTACGCAATGCCGGTCAATCCGTGGACCATCGCCAGTGAATACGGC  
GAACCGTTACCGCGGGGTACAAAAGATAACTTCTACGGCTGCGAGTTCCACCCGGAGCGTTCTGGTGCCGCTGGTGC  
TAAGTTGCTGAAAAACTTCTGGAGATGTGA  
>Cluster\_133  
GTGCTGATGGTTATGTAAGGATCAACAATGACCAGAATACAGACCTGCAACGAAACGCTTGTGTTGTGACAGGATG  
TGAACAAATATTTGAAGATAAATTAAGCGGAACAAGACAGACCGGATTAACAGCGCTTTAAAGCAGCTTCAA  
AAGCTGACACGCTGGTTGCTGGAACCTGGATCGCTTGGCGAAGCATGAAACATCTGATTTCTCTCGGAGACTA  
CGGGAGCGAGGATTAATTTTCGAGCTGACCGACAGCATAGATACATCTTCCAAATGGGGCGTTTTTCTTCCAGT  
GATGGGTGCCCTGGCTGAAATGGAACGTTAATTTGTTGAACGTACTGCGCGGACTGGCGGAGCTGGCGGAGCGCGCAGGG  
GGCGCACAGGCGGAGCTGACCGAAGCTGACAAAAGAACAGCATGAGCAAAATGCAAGGCTGATTAAAAACGGTCAAGC  
AGAAAACAACTGGCAATAATTTACAGCATTTGGTATATGCACAATTTATCGTTTACCACCCGAGGAAATCAAGTGAAC  
AATTGAGAAGAGTAAACAAAATAAACCGCTAA  
>Cluster\_51734  
GTGACACCGACCTTTTAAAGTGTCTTTTGGACTTACACCTGATTACCGCATGACGCGAGGACCGAACAATATTTCTCGC  
CCTTAGCTCTGCTACGTCGATGGATTTTCGTCAAAGTACCCGTTGCTGCGAGGATGAGTCTGGGATTTTGTATGTTGA  
TGTTACTGTGTGCGGGCATTTCATTTTCTACTGACAGTATTGACCCGGCAGCGGTACACCTTTTGTAGTTGGCGGGGGCG

GCATATATTTGCTGGCTGGCGTGGAAAATCGCCACCAGCCCAACAAAGGAAGACGGACTTCAGACAAAACCAATCAGTTT  
TTGGGCCAGCTTTTCTTTTCAGTTTGTGAACGTCAAAAATCATTTTGTACGGTGTACGGCACTGTCGACGTTTTGTTCTGC  
CGAAACACAGGCGCTAAGCTGGGTAGTTGGCGTCAGCGTTTTGCTGGCGATGATTGGGACGTTTGGCAATGTGTCTGG  
GCGTGGCGGGGCATCTGTTTCAGCGATTGTTTTCGCCAGTATGGTCGCCAGTTAAATACTGCTGTGCCCCTGTTGCTGGT  
CTATTGCGCGGTACGCATTTTCTATTA

>Cluster\_21573

ATGGACGTCAGTCGCAGACAATTTTTTAAAATCTGCGCGGGCGGTATGGCGGGAACAACAGTAGCAGCATTGGGCTTTCG  
CCCAGGCAAGCACTGGCTCAGGCGCGAAACTACAAATATTACGCGCGAAAGAGATCCGTAACACCTGCACATACTGTT  
CCGTAGGTTGCGGGCTATTGATGTATAGCTGGGTGATGGCGGAAAAACGCCAGAGAAGCGATTATCACATTGAAGGT  
GACCCGGATCATCCGGTAAGCCGTGGTGCCTGTGCCGAAAGGGGCCGTTTGTGGATTACGTCAACAGCGAAAACCG  
TCTGCGCTACCCGGAATATCGTGCGCCAGGTTCTGACAAATGGCAGCGCATTAGCTGGGAAGAAGCATTTCTCCCGTATTG  
CGAAGCTGATGAAAGCCGACCGTGACGCTAACTTTATTGAAAAGAACGAGCAGGGCGTAAACGGTAAACCGTTGGCTTTCT  
ACCGGTATGCTGTGTGCTTCCGGTGCACGAAACCGGGATGCTGACTCAAAAATTTGCCCGCTCCCTCGGGATGCT  
GGCGGTAGACAACCAGGCGCGCTCTGA

>Cluster\_5133

ATGAAAAAATACATTTTTTGTGCGAGCAGTGTCTGCTGTTGACCGGCTGTGCCGGCTTAAAAGCAGCTTTGACTG  
TGATGCCAACACGCTGATACCTGTATGACCATGACGAAAGCCAACACGCTGGCACGGGACAAGCGGCAAAAACAGGCGG  
GAAAGCCGGCTGCCGGCGGACTGCCTTCCCTGGTTAATCTCCCGGCCACTTCTGCGGGGTGCTTCCGTCAGCATCCCGC  
TATGCTGTGACGACTCTTCCCGTATACAGGTAACAGCAACAACCTGCAGTATCAGTTGACGGCGCAACAGGTAAAAG  
CACGAATGCCGAGCCCAACCCGTGACGCCCCGTCTGGTTGCCGGAACCGGTAACACCAGTTTCGCGTCCGGTGTGT  
CCGTGGGCAATCCGGCTCCCTCATGCCAGACCGTGCCTTGTGATAAATCCCGGCTCTGTACATCCTCAGCGCAGCCGGAT  
CGCATAGCCACCGTCTGGATCGCCCTGGGTGGACAGCGATAACGCTTCCATCAGCCCGGTCGTGTCTTTTTGTGGT  
CAGCCCTGCTGACTGGGTCTTCCGGCCCGCATAAAATTA

>Cluster\_30855

ATGAGCAATTCAGTCTACGCTGAAACAGATGCTACTGGGCTGGGAACTGTTGGGGTTATCTACAACCTTTAGCGACTA  
CCTGCAAGGTGAGGGATATCAATTAACCCGTCATAAATTTGATAATTTGATTGCGTTTTCCCCCTCCGCTGTGTGGCTGT  
ATCTCTCGTTTTTTTTTTCATTTGTGCCGTTAGGTTATTTATCCACGCCACTTTGCCACCTGCGCTGGCTGGCCCGTTCAATG  
CAAATTTCCGCACCTGGTGGCTGGCTGCTTATCTCTCTGCGCCACAACCATGCATTATCCCTCGTTTGGATTGATGGG  
GATATCCGCGGGCGCACTCAACAGGCTGATCGCCATTGACTCAAGCCAGAAGCTTTTTCCCTCCTTACACGCCGCGCTAA  
CGCTGTTGGCGGTATGGGCGATTGCTAAAAAGGGGAACCGTTGGCTGACGCTAATGAGCGTGGTCTGGGCGATAGCAATC  
GCCTTTTCGATTCGCAATTACGCAGACATTTATTTATCGATTTAGTAGGGCGCGGTTGCTGGCGTCGATTTGCGGTTG  
GATATGCCCAACATGCCGAGAAAAGGACACAATATGAGTGA

>Cluster\_29396

ATGAAGCTGATTATTTTTATTCTCATTTGTTCTGATTATGTCAGCGTTACTTATCCGGATTATCCTCAGAAGTGTAATCA  
GCATTCCTTTGCTGATGCAATGTCATCGCGCAGGTATACGGACCGGTGATGCAGAGCGAATACTGTGAGCCGGTGAAT  
ACTGGCAACGTCAGAAGACGCTGCTGACAGAAAGGGAAGCTCAGTTTTATGAAAGGACTGTTCAGAATTTGGATATGAAG  
CGGTGGTATCTGTGTCGCGAGGTACGGTGCAGATATCGTCCAGCTGAACGGGAATAATCCGGCCACGATCACGCCAGTG  
GTGGCAGTTATTCAGGATGGTGTCTCAGTGGCATGTTGATGTGGTTATCGTTGAGCGGCTTCGTTTCAATTTGTCAG  
CAGTAGAGTGGATGATGCCAGCATTTACGACTGAACGCAGACGCCGGGATATTTCTTCTGGAAGAGGTTCTGAGGCAG  
GCTGGTATTTCCGTTGCTCAGAAGCCAGTATGCCAGAAAATGCTGCAGATGACCGGAGAATGGTGAATACAACAGGGGC  
TGCCAGCAGTACCCGGAACATCGTAGCTGA

>Cluster\_65110

ATGAGTAGTAAAGAACAGAAAACGCTGAGGGGCAAGCCCGGAAGAAATATCATGGATCAGCACGAAGAGATTGAGGC  
AGTTGAGCCAGAAGCTTCTGCTGAGCAGGTGGATCCGCGCGATGAAAAAATGCGAATCTCGAAGCTCAGCTGGCTGAAG  
CCCAGACCCGTGAACGTGACGGCATTGTCGTGTAAGGCGGAAATGGAAGAACTGCGTCGACGACTGAACCTGGATATT  
GAAAAAGCCACAATTCGCGCTGGAGAAATTCATCAACGAATGCTGCCGGTGTGATAGCCTGGATCGTGCCTGGA  
AGTGGCTGATAAAGCAACCCGGATATGCTGCGATGGTTGAAGGCATGAGCTGACGCTGAAGTGCATGGATGTTG  
TGCGTAAGTTGGTGTGAAAGTATCGCCGAAACTAACGTGCCGCTGGACCCGAAATGTGCATCAGGCTATCGCAATGGTG  
GAATCTGATGACGTTGCGCCAGGTAACGTAAGTGGGATTTATGCGAGAAGGGTTATACGCTGAATGGTTCGATCCTGTC  
GGCGATGGTAACTGTAGCGAAAGCAAAAGCGTAA

>Cluster\_27764

ATGAAGTGAATAATTTGCGCTTTTTGCCCCTGACTGCAGGGATGCATATCACGTTTCATGCCCTCAGACAATGTGAACAC  
TCCTGAAAACCGCAGTTTCTGAGCAGCAGGAAAATTTAAGCAGACAACCTGCGTGAAAAACCTGACCATCAGCTGAAAG  
CCTGGGCGGAGAAGCAGGTGCTGAAAACCCCTTCAGCGTTTCAGATAAACCATTCTGGATGAGCTGGTTCGTAACACG  
CAGGCTTCCAGGACGGGAAACCCCGGAGGGTCTCTGATTTTGTGTCGTTTTCCATTTCCGAAAGGGGGTGAACCG  
AATGCTGGGCGAAACTCGGCACTACGGTATACCCGCCACACTGCGGGGATGTTGAACAATGACCTGAAGACCACCGCTG  
AAGCCGTGCTGCTCCTGGTGAAGAGCAGCGCGACTGATGGTGTTCAGATCAGCCGACGCTGTTTTACAGTACGGCAT  
CGCAGTACCGGCACTGGTGGTGTCTGCAGTCAGGATACGACATCATCCGGGGAACCTGCGGGTGGCCAGGCGCT  
GGAGAAAGTGGCCCGGAGGTTGACTGCCGAGGTTGCTCATGATTTACTGGGAGGAAAGGAGATTCCGGGAAATGA

>Cluster\_16372

ATGAGTGAATGAAACATCTGACTGCAGACCTTCAATCATTAATTAGAATGGATCCTGAATTTAGGGGAATGGTTCAAAG  
AAAATTAGCTGCAGACAAAATAATTTTGTAAAGCAACTCTATGAAGATTTAGACGACGCTATTACAGAAATTTAGAAAATG  
ACAAAACACTTCTATCAAGATGCTAAGTGGGAGAGGACGAGCTAACAGCGTCGATCAAAAATTTCTGAAAGGTAGGTTT  
TATGATGTTGAACATGATACTCAACATGGCGGTACGTTGATTTATTAGTTAAACATCAATTCGAAAAATTCGAAATGGAT  
CGGTGAAGCAAAAATATGGAGAGGCCCAATCTATTATAATGGCTGGATTACAGTAACCGAACGTTACGGCACGGGTA  
CGTCAAGCTGACGATCATGAGGAAATTTCTAATTTATATAAAGCTGACAAAATCAGCAGTAAAAATCAATGAATGGAAGAA  
TTTTTCTCTACGACCGTTTTCGGACGAGAAATGAAGCGGAAGGCTCTCCCTCCGCTTTAAGAGTATCAAAAGCATCC  
AGCAACAGCGCTTCCATATCATGTAAGACACATGGGAGTATCCTTATACCATTACACTGGTAAAAAAACCGCTGACTCTT  
AA

>Cluster\_19810

ATGAGATGCCGGGGCTGATTGCCCTGCTGGTATGGGGCAGAGTGTGGCCGCGCGGATCTTGGCACCTGGGGCGATCT  
GTGGCCGTTAAAGGAGCTGGACATGCTGACGGTATGATGACGCGCTGACGGTACTGGAGCAGTCCGGTGGATGGGCC  
GAAAAATGGATGCCCTTAAAGGAGCGGTGATCCGCAACAGCTCTCGGCCCTTCCGCTGCCGGTATCGGACGACGGAG  
AAATACGGCAGCCGGTTTGTGACCCCTCCGTCAGACTGCGGATATCCGGGATAACGAAAGGGCGGTTTGGCCCG  
TCAGGTTGAAGTGAATCCGCTGCAGTATGTTCTTTTAAACAGACGCTGATTTTCAATCAATGGCGATGATCCGGCGC  
AGTTGGCTGGATGAAACGCCAGACGCCGCCACACTGGAGGACAAAAATTTATCTGGTGCAGGCGATATCCGGGAGATG  
CAGAAGCGCTGGACAGCGTGTTCATTTGACAGAGCGGTGCTCTGCGAGCGCTCGGCATCGAATCAGGATACCGGC  
ACGGGTGAGCGCCGTTCCCGCGGATCGCTTCTGAAGGTGGAATTTATCCCGCAGAGGAGGGCAGAAAATGA

>Cluster\_20870

ATGAACACTCTCGCAAAATATTCAGGAAATCGCGCGCGCACTGCGCAACATGATCCGCACCGGCCCTTGTGCTCGAAACCGA  
CCTTAATGCGGGTGCCTGCGGTGTCAGACCGCGCGCATGTGCACCGACTGGCTTCAGTGGCTGACTCATCGCCCGGAC  
GTTTCGCGCACATGGTGGGCACCTTCCGTGGGGGAACAGGTGCTGATTCGGCCGTGGGCGGTGAACCTGCACACGGCGTTC  
GTTCTGCGGGGATTTATTCGGCGGATAACCCCGCACCTCTGCGTGGCGGATGCCCTGCATATCCGTTTCCCTGACGG  
GGCGGTGATTGATGAACCTGAAACAGTGTACTACGGTAAGCGGAATTAACACGGCCAGCGGTGACGGCTTCTGATT  
CTGTTACTGCCACGGTGCCTGGTGCACGGTGAAGCATCAACCCGCTCACCTGGACACACCGGAAGTGGTCTGCACT  
AACAGCTGACTACCGGCACGCTGGAAGTGCAGAGGGCGGGACGATGCGCGCAACATGAAACACCGGGCGTGAAC  
CTCATCAACGGTAAGGTACTGCATACCATAAACACCCCGGCACAGCGGGCACAACCGGGAGTCTCTATGA

>Cluster\_48659

ATGGCTAACATTATCATTCTTAAAAATCCATCATTGAAGCTGCTTCCATTGTATCCGATGAACTGCGCGAAAAAGCAGA  
TCTGGCAACTCAACATATAACGAACATATAAAAAATGGTACGCACACTAAAGCAGACAAAGCAATATGCAAGCTGCGA  
CCACTAACTTGTCTTACTCATCAACACGTCGTAACCGCAGTAGAAGACGAAAAATATGCTCTGTTTTCTACTATGCG  
ATTAAGCAAGCAACACGCGCCAGAAATTTTTCCGTGATGCAATGACTAATAGTTATCTCTGAAAAACFGGTTTA  
TCTGGTTAAATCAATTAATCTGGTAAATGCGTTTTATCCATCGCTGATATGTCAGGATCTCGTGTATTCGTTTTAATCG  
ATATGATTAAACGACGAGATCGACACGTTTACCAATGGCGCTGTTTTCGATTAAATGAATGAAGCTAAAAAGCGTGTGAA  
ATTAATTTGGACGCTGGCTATACCAAGCAACAGTTGATCAATCTTTGCGAACGCTTGGACTTGTGAAAAAGTCAA  
AGGACTGGGAGCGCAAGCTGGTACTCAGCAATATCGCTTCAAAAAATGATTTCTACAATTATTTAGCTGATGCTT  
TCAAAGCGTAA

>Cluster\_30729

TTGAATTAATAAATAAATGGAATAAACATACGTTTCAGAAAATGCAGCGAAACCGCACACTATGCCATCTAATCTCTG  
TAAACAGATTGAAAGCACTAATAAAAAATGGCAATGCCCTTGATTTGGATGTGAAAAACTTAGATATTGAAACAAATAG  
TAAATAAATTTGAACTGTGACATTTTTAGATTCCAGAAGACAACCTAGAAAGAGTGCAAAATATCAGAGGTGTACAAC  
ACGATTCCAGATTACGTGATAAACTATAAGAAATGCTAATAATGTTTTCTTATGAAAAATATAGATAAAAAACAAATCA  
TTATGATTTCCATCTTTGCGCAACGCTGTTTTCCGCAATTCATGTAATCCAAATTCACAAAGTCCCTCAGGATTA  
GAGAAATTAATAAGAGTGTGGTGAAGCACTGATTGTCAATCAATACAAAAGTCTTATTTCAAGAGGTACGAGAGCGGT  
ATTAACATTTGCGATGGGTATATATACAAAACCTCGTAATGCTTTCTACTATGGTTTATTAGATGTGGATCTGTAAG  
TAAAAATGCTCAGATAAATTTAGAAAATAAATAAATCATGGAGCAAAGCAGGTAGTTCATATGTGGTTGTTGGTAAAC  
ATATACATATTTAG

>Cluster\_63907

ATGGAAAGCCTTGGCAGTACGGCTTAAGAACTCAGAAAAGATAAGGGACTCACCCAAGTAGAACTGGGTAAGCTTTCAGG  
CGTGACTGGGGTTACTATAGGGTACTGGGAGAAAGATCTAAACGAACCCGGCAGCAAAGCTCTAAGTAAGTTAGCCAGG  
CATTAGGAACACTAGTCCATCTCCTGTATGGAGTATCGTCTCCTGAACTATCTTTTGTGCGAGAGCAATCCAGGCACC  
AAGATCCCTACTTTTCGTGGGGTGACGCGATTTCTTTCTAATCTTAGAAGGAGAGAAAACAATGGGAAATGTCGATAG  
GATCACCACATTTCTTGTATGTAGTGAAGGTGATTTTCCGCTTCAATGCCTGATGACACTATGCATAACCCCTCAGGCT  
CACCAAGTATCCCGTTGGTGCCACTGTGATCCTAAGCAGGAGAGAGTTATAAAAAATGGCAGTATCGTCCGTGTAATA  
GTTCCAGATCCACTTACAATAAAGCCGCTATGACTATAAAAAAATAGTTATTTGATGAAAAACTTGTGATTTAAGGCC  
TCTCAATCCGCGCTATCAATCATCTTGGCTTACGCCAGAGTGTAAAATGTTGCGGTAGCAAAAAGGTGTCAGTTCACCC  
TATAA

>Cluster\_17623

ATGACTAGAAATGATGATGCTTTTTCTTTTGTGTCAGCGGGGAAAAAGAAAGTTTTCAGAGAGCGTTTAGTAAAGCTGATAGG  
TAACCGTAGTGTGACAACCTGCTGCGAGTATGGGAAATCCCCCTTCAACCTTAAACAACTACATTCATAAAGGAACAG  
AGCCTTCTTTTAAATAGCTTGCCTTATCTCAGATAAAGAACAGTGAAGCTTAAATTTGGCTTGGCTTACGGTGAAGAACCC  
ATCGCAAAAGAAAGTTCTATCAAAATCAACAGCGCAGCCTTCTCCGATATTACAAACGAGCTAGTTAACGAGTTAAT  
GAAAAGAGCGTCCACAGAAGATAAGGAACAGCTGATAAGTGAATATGCGGATATGGGCATTAAGGAATCTTGGAAACGCC  
TACAGCAACCCACAGGCAAACTAAGCAAGCCGATAGCGAACTTGGAGGAGCAAAAGAAAGGCCATTCAAAGCCTGAACATC  
AGGCAATCGCTTAAAGACGCTGTTTGCATGGCATTAGCTGGCGATGAGGAAAAATGACAAAGAGATTTTGCGCCGCGCCAA  
AGCCATTTCTGTGCTGGAACACAGGTGATCGGTTCCCGTCCACCCGGAGCAAGAACTAAGCCTGTAACAAAGAAAT  
CAGCATAA

>Cluster\_33900

ATGGCCTGGATGATTTGGTTTTATTTCTCAGAAAGGTGGTGTGGGCAAAAGCACATAAGCGAGAGCGTTAGCGCGTGAAGC  
ATCCGCTGTGGTATCAAAAACAAATTAGCTGATCTCGACTTGGAAACAGGCAACGAGTCTGAGTGGCATCGTAGACGTC  
TGTCAGCTGGTTTTGTCACCGGTTGCTTCCGTTGAAGTGTTTTTCAACAGCAAAGCAGGCGATAGAATCTGCCGGGATTTT  
GACCTTCTGATTTGATGGCCCTGCTCGTGAAGTAAAGTACTTTCAGAAATGCTAAGGTCGCCGACCTTATCTGCTCA  
GCCAACGGGAGCCTCCCTTGACGATCTTGTCCCGCAATTAAGTTTTTCAACGCTTGGTAAAAAGAGGTATACCCAGCTT  
CAAAACTGCTTTCTCGCTTTAAGCCGGTGTAGTACCGAAGCGGAAGAGCTGGATGCTCGTCATATATCAGTGAAGAGGT  
TATGAACTTTATCTGGATGCTTTTTGAGAAGCCAGCATACAGAAAAGCGATGAATTCAGGACTCGCTGTGACAGAAAC  
ACGTTATAAAGGTTTAAACGAGAGAGCTGATGAACTTATCCAGGCACTCATCGATAAGATTGGAGAAGAGTAA

>Cluster\_64981

ATGAACCGCTTTGTTGGTGGCCGAACCACTGTGGTGTACAGGATGTAATACCTGTCTCGCTGCCCTGTTCCGACGTGCATAA  
AACGCAAGGTTTACAGCAACACCCGCGCTGGCCCTGGCGAAGAGCTCAACAATCACTGCCCTGTGCTGTGTCATCACT  
GTGAGGAAGCCCTTGCCTGCAGGCTGCGCCGTTCAATGCCATCTCTCAGAGGATGATGCGATCCAACCTCAACGAAAGC  
CTCTGATTTGGCTGCAAGCTTTGCGCGTGGTCTGCCCCTTGGCGCAATCAGCGCTTTCAGGAAGCCGTCGGTGGATGC  
CCATGCGCAATATGTTTTTTCAGGCTGAAGGCTCACTCAAAGACGGCGAAGAAAACGTGCTGCCCAACATGCGTTGCTGC  
GCTGGGAACCGGGTGTCCAGACGCTGCGGTTGAAATGCGACCTGTGTGATTTCTTGGCAGAAGGTCGGCCTGCGTTCCG  
GCTTGGCCGAATCAGGCGTTACGGCTGATCACCAGCATAGCCTGCAACGTCAGATGAAAAGAAAACAGCGCCTTGGCCG  
AAGCTGGTTTGCCTAATGGCGGGGAGGATCCCCCTTCCCTCACTCAGGACCAACACTAA

>Cluster\_66289

ATGACCTTAGAATGGTGGTTTTGCCTACCTGCTGACATCGATCATTTTAAAGCCTGTGCGCAGGCTCTGGTGAATCAACAC  
TATGACCACCTCGCTCAACACCGGTTATCGCGCGCGGTGGCGTCTATTTGCTGGGCTTTCAGACCGGACTGGCGATTCATA  
TTTGTGCTGGTTGGCGTGGGGTGGGAGCCTATTTCCGCTCAGTGAATGCGTTTGAAGTGTGAAAGTGGGACGCGCG  
GCTTACTTGTATTTGGCTGGGAATCCAGCAGTGGCGCGCGCTGGTGAATGACCTTAAATCGCTGGCCTTACTCAATC  
GCGTCGACATTTGTTCCAGCGCGAGTTTTTGTGAATCTCACCATCCAAAAGTATTGTTTCTGGCGGCGCTATTTTC  
CGCAATTCATCATGCCCAACAGCCGCAACTGATGAGTATATCGTGTGCGGCTCACCATAATGTTGGTTCGATATTAAT  
GTGATGCTCGGTTGGTCAACCCCTTGTCTAACGGATTGCTCTATGATGATTAAGGACCAAGCAGATGAAAGCGCTGAATAA  
GATTTTCCGCTCGTTGTTTATGCTGGTGGGAGCGCTGTAGCATCGCGAGGCATGCGTGA

>Cluster\_28940

ATGGAAAGCTGGTTAATCTGCGGCACCGGTCACGGTCTGTAAGAGATCAAAAAGAGCCGCTTCAATACCGCTGTTGGC  
GCATACCGATGGCGTTGAGGCGCGAAAGCGTTTTGTTGAAATCGGTGCGGGCAGAACACCCCGATGCCCGCCACCATTCG  
TGGCGTGGTGGCGGGTGGCGCGGATGATTCACAACAGCTGGGTTCTCTGACGACGGGGAGCCGAGGGACGGCAGGT

AAACCGATGCTCGCCAACTAATGGGCAGCGGCTCGGGAAATACCCTGTGGTGGTGGCTACTACGGCGGCATATT  
GCTTGGCACCGGTGGTTAGTGAAGCGTATGGCGGCGCGTGAATCAGGCGCTGCGCCAGCTAACGACCCAAACGCAAGA  
CACCATTAACCGAATATACTTTGCAATGTGAATATAGTCAGTTAACCGGCATTGAAGCGTTGCTGGGGCAGTGTGACGGC  
AAAATATCAACAGTGAATATCAGGCATTCGGTTCTGCTCGGGTGGCGCTCCGGCGCGAAAGTGGCTGAATTTCCCG  
AAGCTGGCGGATTTAGCCGTGTTTCAATGCAATTTAGCGATTGAAGAATAA

>Cluster\_66112

ATGCTGTTACACATTTTGTATTTGGTTGGCATTACTGCCGAAGCCATGACGGGGGCTCTGGCGCCGGGGCAGCCGCAT  
GGATACATTTGGCGTAATTTATTTGCGACCGCCACCGCAATTTGGCGGAGGGTCAGTGGCGGATATTTGCTGGGCCACT  
ATCCGCTCGGCTGGGTCAAACACCCGGAATATGTGATTTATCTGCTACCGCCGAGTACTACCACATCTCGTTGCTCT  
GTAATGCCTTACCTGCGCAAAGTGTTCCTGGTGTCTGATGCGCTTGGACTGGTGGTCTTTTCTATCATCGCGGCACAGGT  
TGCCTGGATATGGGGCAGCGCCCAATTTGCGCTTGTGCGCGCGGTAAACCCGGCGTGTGGCGCGCTTTTGGCGG  
ATATGTTCTGTAACCTATCCCCTGGTATCCAGAAAGATTGTATGCCGTTGCTCATTTGGCTCCGCGGTGCTGTAC  
ATCCGCTGCAACCTATTTTCAACCATGATGTGGTAAATTTACTCCACCTGGTATTCGGCTTTTTTGGCCGCTTACT  
GGCGTACGCTTAAAGCTGGGATTACCGGCTTTTTACTACAGCCAGGACACTAA

>Cluster\_60523

ATGACATACGATAGTGAATTCGGATCACATGTATCCCTATATCGGGATAGAATCAAACAGGTTATTTGATGACTCCCTAAA  
CGAACATCTTAACCTCAATGATTTCTACGTTGATCTGCATGACCCAATGATACAGAAAATATGGATAACCCATTCTTTT  
AACCCAGGTTGACTCTGGTGTATATCTCGCTTTACCAGTGCCTTAAAAGCAAAGCTTAAACATGATAAGCATATTTAA  
ACTCAACGGAAAGACTGGCTGATAGTCGACATTTCCACTTTACGTTACGCATGGGTGAGAAATATACCAAAAATAGAAA  
CGCGCATTAACATTTGATACTGTGTTCAATCAGGATGCTTATATCATTTAGGTGATACGACTTAAACCGTAAACCGT  
TACGTCAAATGATAACGACAGCTTGGTACAGTGCCTTGGCATCCCTATAGATAGTACGCGGGAAGTTAGTTAAATACCCG  
CCAAATGGCAAATACCTTCAATCGTAAAGGACAACCTTTGAGCAGACTTATAGCGATTTGATGAATAGGGTGGATTA  
CATGACCAAAGTAAAGACTAAAATAGTCGTTGACGAGACCGTAATTTTCGGCTGACGTCGCGGGTAA

>Cluster\_67088

TTGCATTTGAATATACATGTACCAGCGCAACCTTACCCAAAGTGCAGTGTACATGTGCGCCCTGGTCAACAGTATTGA  
TTTTTCAGCCCGTACGGTTCCGGGTGAAAAGTCAAAGCAGGTGAGGCAACCTGGCCTGAGTGGCGGTGGCTTTACCG  
GTGTTGAGCGCAGAGCGCCAGTCTGAGTGTAAACTGCAATAACATTTGATGCGGGAATCACCAGTTTCTTTTACCGG  
GGATTTATCCGGAACGAACTGGGAATACGGCAAAAATGGTGGTACTTCAATGCTGAGCGCAGTATCGCTGGCTG  
GAATCTGAAAATGGAAGCCACAGGTAACGGTACCCTAAGCCTTGATACGTCCGGAATGCTGCATGTCAGAATTAAGT  
CTCTCTCCGGAGCGAATGCAATTTGAAATGGGCCCGCCAGATTAGGTCAGTACCTGAGTGCAGAAAGGAATCTGCCTGTCAG  
TTTACTCGCAGCTACCAACAGTGCCTAATTTGTGGAGGGTTTTCAGATTTACTGAAATGCCCTTCCGGGAGTGTCAAC  
TCAACCGTTAGTCTCAGAGCCCGGTTATGGTGACACACGCGGGCATTAAATGCTGGAAGTAAACTCATATAA

>Cluster\_20421

ATGATCGCAATGAACATGTCGATGACAGAAAGAATAAAAGCAGGCAAGCTATTTACCGATATGTGCGAAGGCTTACCTGA  
AAAAAGACTTCGTGGA AAAACGTTAATGTATGAGTTTAACTACCTGCATCCATCAGAAGTTGATAAAAAGAAAAGTCTGA  
TTAAAAGAAATGTTTTGCCACGGTAGGGGAAAACCGCTGGTGTAGAACC CCCGCTATTTTCTTTACGGTTCCAACATCTAT  
ATAGGCCGAATTTTTTATGCAAAATTTCAATTTAACCATTTGTCGACGACTACACGGTAACGATCGGTGATAACGTA  
TGCACCAACGTTACTCTTTTCCGTTACGGGACACCCGGTACACCATGAATGAGAAAAACGGAGAGATGTACTCTTTTTC  
CGATAACGATTTGCAATAACGCTCTGGATCGGAAGTCTGTTGTTTAAATCCAGGCTCACCATCGGGATAAATCTCGGTT  
ATTTGGCGGGTAGTGTCTGTACAAAAGCAATTTCCACAAAACGCTGCTGGCTGCTGGCGTTCTTTGTCGGGTTATTCGCGCA  
AATAAACGACCGGATAAGCAATATTTTCAAAGATTTTAAAGTTGAGTCTTTCAGTTTAA

>Cluster\_58208

ATGAAAACATATCAAGGTAATCTGAGTACATATCCTCGAATATCAGAGTAAGATTAATAAAATTTATGTTATTTGAC  
TAACCGGTATCCTAGGTTAATGCTGTACGTTGTCGATCTCCACTATCCAAAAAGTTGATAACGGTGACAATATCTGTT  
GCTTCCCCTAACCTGGAACCTGGGGTGTATATCCGGATGCGTGAATCCCTCAGAGCTAAGCTGGAGGCTGACCGTACCCGT  
AAGGTGCGTGAGGATAAACGCATTTACCCTTGCCTTTATTTATTTATATGAGGCAAGAGTATCTGAAATCAGGTAATATG  
CCACTATCACAATTTGCTTGTGTTCAACAAAGACGCTTACTACACCTCGGGGATACGATCAGGACGATAACCTTAGAG  
GGATGATCACAGGAGCCTGGTACAGCGCCTGAGACTGGAGAGAGACGATCACCTGGTCTGGTCCATTTTCTGAAAAC  
TGTAAGTATGTGTAGACACCAATAGTACTGACTTCCAGCAGAACTACAGGCGCTGTTAACCCGACTGGACTACCTGAC  
CAAAGTTGAAAGCAAAGTGTGGTGAAGGAGACCGTAACCTCGGCTGTAGCCAAATCGAACTGTA

>Cluster\_39326

ATGAAACACTTTTTCTTACCTTTGGGGTTTGTGCGCTGTTGTTGTCGGGATGTTGGTGTGACGATGTTACACAGCCATC  
TGCATCGACAATGTTTACTGTTGAAACCGATAGTCCGGTAGTGAAGCGCGAATGCCCCTTATTCGCCAACAGTGTCCAG  
GACTGGATAAATACGACGAACTTTGATAAATTTAAGTCTACGACGACGATGCGTCCGGTGACAAACGGTGGAGTTT  
CACGTCAAGAATGAGAACAGCATACCCGTAATTTACACCGCTGATCATACTGTTTCTTTTCTTCAACAAATAC  
CCAGAAAGTGAAGATTTCAAATCCGCTGCGAGTCTGTTGCTTCGATAAAGCGGATGTGCCGTTGGTGGGATCTGGTTG  
TGAACCTGGATAAAGAAAGATTTCTATGACTGCTGATAAGAAGCCGCGCGAGGGGTGCCGATGTTTACTCGCCA  
GAGCAAACGGGATTTACTGGACGTGTCAAGACAAGATTA

>Cluster\_35626

ATGAATCAGACAGCATTTTTACAGTCTGACTTTAAACAACCAAAGGAGCTGGAGTTAATCGTGCCCGCTGCGGCGGGC  
ATTTGTGACAGATCGGACGCGTCTATATGCGCGACGCGACAGCTCTGGTGAATTAACCGCGGGCTTCCGGTCCGGGAGAGA  
ATCCGGGATATCAGACCGGGCGTGTGGCCGCTCCATCGGTTATACGTTCCCAAAAAACGACGCGTCCGCCCGGACTG  
ATGGTGA AAAATTTCTCTAACCGAAAAACGGGACGGGAATCGCGGTTTCCATGAAGGCGCATCCTATTTATCCGGCATT  
TCTGTATTTACGGCGTTCGCCATTGAGCGTATGGAATGGACAAAAGGATAAGCGGAGAAAGCACCATTCTTCGACTT  
TCCGGCTGGCCCCGCGTAATAACTTTATGGTGTGACTTATGAGCGCGGGCGTCACTGGACGCGAGAACTGTTGTCCCGT  
GAATGACGCGTTTCTTACGTTCCGGTAAAAGGAAGCATAAATGA

>Cluster\_11192

ATGTTTGCATGCACATCTTTTTCTTGCATGGTCCCGGTTGCCCTCCCGTGAATTCAGTATCAGCACCTGAATCCGCGAT  
TACCCCATATCTTCTTGTGATTTGCCCAACCGCACAGGGGATTCACCATGCAAGTGTTTTTTAAATAACAGCAAAAC  
AAAAAATCAAGCATATCAGCGGTGTTTTTTTTTATACCGGCAACAGCAATACCACAAATGCCGACAGCAGCATCCA  
TCCGCCAGCACCGACATGATCTGCTGGTGAATCCACCATCACCCAGAAACAGCAGGAGTCCACAGCGGCCAGACG  
CAGTTTTACCGTCAAGTGGTTCTCCAGTGCAGGCCAAGAACCAGCAATCTCTTCCAGAACCTTACGCTCTCCGG  
CTCAATTTACCATCTGCTTCAGCAATGGCCACCGCACATCCAGCACATCTTCCGCTTACGCGTATCGTGTTCACAT  
CTTCAATTTACAGCAACGCTGCACGACCAATTTTAA

>Cluster\_36932

ATGAATATGGGCTTTTTTACGGTTCCAGCACCCTTTACACCGAAATGGCGGCAGAAAAATCCCGGATATTTACGGCC  
AGAACTGGTGACCTTACATAACCTAAGGACACTCCCGAAATTAATGGAGCAGTACGATGTGCTCATTTCTGGGTATCC  
CGACTGGGATTTTGGTGAATCCAGGAAGACTGGGAAGCGTCTGGGATCAGCTCGACGACCTGAACCTTGAAGGTAAA  
ATTTGTTGCGCTGTATGGGCTGGCGATCAACTGGGATACGGCAGTGGTTCCTCGATGCGCTCGGTATGCTGCATGACAA

ACTCTCGACCAAAGCGTGAAGTTCGTGCGCTACTGGCCAACGGAAGGATATGAATTTACCAGCCCGAAACCGGTGATTG  
CTGACGGGCAACTGTTTCGGTCTGGCGCTGGATGAACTAACAGTATGACCTTAGCGACGAGCGTATTACAGAGCTGG  
TGCGAGCAAATCCTCAACGAAATGGCAGAGCATACGCCTGA  
>Cluster\_21633  
ATGACGGCTCTCGAGCGGAGTTTTTCACTTTGGATGAAGTTAACCGACTCAAGATTATTCAGGACGTCATCGACCGGG  
TCTGACAACACAGATGGCAGCGCAGCGGCTTGGTATCTCCGACCGCCAGTGGCGTCTGCTGCTTGGCGGTTATCGTGAAG  
ATGGTCCGGTTGGATGACCAGCGCGCTGCTGGTAAATCCAGCAATAATCAGCTGCCCTCAGGACTGGCCGCATACGG  
CTGAATATTATTCGCAACGCTATAACGATTTCCGGTCCGACTTGGCCTGTGAAAACTGGCTGAGGTTACGGCGTTCA  
TATTTCCAAAGAAACGGTTCGTAAGTTGATGACTCAGGCCAGTCTTTGGGTTCCACGTAAGCAACGTGACCAAAAATCC  
AGCAGCGCGTTACCAGCTGCTGTGCGGTTGAACTCATACAAATGACGGCTGCGACCATCACTGGTTTAAAAACCG  
GGACCAAGTGTAAGCACTGGTTTACGTTGATGACGCCACCAGTCTGCTGA  
>Cluster\_24542  
ATGAGAAACAAACCTTTTATCTCTTTGCGCTTTTTTGTGGTGGCGGTAAGTACAGCTTTGGCTGCGGATAGCAGCAT  
TACTATCCGCGGCTATGTCAGAGATAATGGCTGTAGTGTGGCCGCTGAATCAACCAATTTTACTGTTGATCTGATGGAAA  
ACGCGGCGAAGCAATTTAAACAACATTGGCGCGCAGCAGCTCTGTGCTTCCATTTTCGTATTTTGCCTGACCCCTGTGGTAA  
GCTGTTTCTGCGGTAAGGTTGGGTTTACTGGCGTTGCAGATAGCCACAATGCCAACCTGCTTGCACCTGAAAATACGGT  
GTCAGCGCTGCGGGACTGGGAATACAGCTTCTGAATGAGCAGCAAAAATGAGATACCCCTTAATGCCCCCATCCGCGGA  
TTTTCTGGACGACCTGACGCGGGTAAACCAATACGTTGAATTTTTACGCCGGCTAATGGCGACACAGGTGCTGCT  
ACTGCGGGCATAACAATGCCACGGCTACCTTCACTCTGAATATCAGTAA  
>Cluster\_19859  
ATGGACGGTTTAAAGGATTGAGATTTTTTTCAGAGGAAAGTGAATATCAATTAAGCAACTTCGATTGTGGAGAAGAGTATCT  
GAATACTTTTCTCACCGATCATCTGCAACGTCAGCACAGTAGTAAGTTTTACGGGTTATCTGCTGCTGACGAGAGAGG  
ATAGACCAGCTGTATGGGGTACTACACCTGTGAGGAGTTGCTTTGAGAAAATACTTCTCCCGCAGCAAAACACAACAA  
AAGCGTGTCCCTACAAAATGTGCCGAGCGTATTTGGCCGCTGCGCAATGAGTAAAGCATTCATCACCAGGGATA  
TGGAGAAACACTTGTATTCCCATGCGATGAAAGTCTGTATCAGGCCTCGCAGGCTGTGGGTATACCGGAATGTTCTGTG  
AGGCGCTGAACGATAACGCCAAAATTTTACCTTCGACTGGGTTTTATACAGTTAAAGGAGAAAACGTGATTCTGCT  
TTCTACCCGACAAAATCTATTGAAGTATTGTTCCGAAAGTAAATGACGAATA  
>Cluster\_26895  
ATGAGTAATTCGCTGTTACCACCATCAGCCAGCAATTTTATGCGTGTGCGGAAGCCGTCGGAACCGCATTACAGACAT  
TCCGGTAGACCTCAACACGCTGTGGTCCGCGGACACATGCCCGGTGCATCTGCTGCCCTTATCTCGCTGGGCATTTTCCG  
TTGACCGCTGGATCGCAACTGGCCGGAAGAGACAAAGCGACAGGTTATTCGTGATGCATGGCTGATACACCGACACAAA  
GGGACCATCAGCGCACTGCGCCGGCCATTTGAGCCGCTGGGATACCTCATTCGTGTGTCTGAGTGGTGGGAGTTCGGCG  
AGAACCGGAACATTTACCGTTGAAGTCCGACGCTGGACAGTGGCGTACGGAGGAAATGTATCTGGAAATGGAGCGGT  
TGATTGCTGATGCCCGCCGGTACGCGCCACATGACAGGGCTGAATATCATTAGGAGATCCCGGGAGATATTTTCGCA  
GCGCAGCAACTTACGAGGTTGAAGTCAATACCATCTATCCGGACGATTA  
>Cluster\_61193  
ATGAATCAGCAACCGGGTTTACCCTGCTGGAGATGATGCTGGTGTGCGGCTGGTCTGCTATCACGGCAAGCGTGGTGTCT  
CTTCAATATGGCCGGGAGGATGTCGCCAGCCTGCTGCGCGGAAACAGCGCGCGGTTTACCCTGCACTTGAATTTAG  
CCATCGACCGCGCAGCTCAGTGGTCCGCTGCTGGTATTCATTTCTCTGATTCAGCATGGCGCATTTATGGTACCGGGC  
AAAACACCATCAGCTGGCGCTGGGTTCCATTACAAGAAGATGCCGACAGAGCCAAAATGACTGGGATGAAAGAACT  
CTCAATTCATCTTTCAGCCATTTAAACCTGATGACAGCAACAGCCACAGGTTGTGATTCTGGCCGACGGACAAATCAGCG  
CCTTCTCTTTGTTGATGGCTAACGCCGGGACCGGTGAGCCGCTCCTGACGTTAGTCTGTTTACGGCTCATGGCCCTGGAT  
CAAACGCTCGCCAGAGATACCCGCCCATGA  
>Cluster\_23974  
ATGTTTTGCAATCGCTGGTGGAGCCGTGAGGGGGTGGGGTGGTTTTTTCAGGACGAAACCGTCCCTGCCGGACACCGA  
CCGCTCTCAAAATTTTGTGACCGGAATTTTTTGAATAAATGGGCGAAAAAGAACATGGCAAGACACCAAAAG  
CCCGCTTACCTGGATGAAATCGCGTTCAGGCAAGTGAAGGAAATAATCGCGCAGCTTTCGCGACGGGAGACCTTACC  
CCCGCGACTGGAGCAATCTGGAGCTGTATTGCGTTAACTACTCCATATACCGCAAAGCCGTCGAAAGACCTTGGCACGGC  
CGGTTTACGATTTGTTAAGCTAGGGCAGCGAGAGCAGAAACCTGCCCTGAGCGCAAAGGCTGACGCTGAAAGAATAA  
TGATCAAAATGGCTTCTTTGCTGGGTTTTGACCCGGTAAGTCCGCGCAGAAATCCACCGAAACAGAGGAAGAGGACGAG  
CTTGACCGCTGGCATGA  
>Cluster\_27753  
ATGAAAAATTTAGCTCATATTGCTCTGGTGACGGTGATACAGTTCATTGCCTGTTATCTGGCTGATTGGGGGAGTGCCGA  
AACAGTTTTTATCCTGTGCTTTATGTAATAATGGCAGGATGTTTATATGTTATTTTCTCAAAATCGAAAAAACGGC  
ATGTGTCGGATGAGTTTAAATTCAGTAAAGCGTTTGGTATATATACTGATGCGCAGTATCTTCTTACTCTCTCCGTTATTA  
AGCCTGATGGTTTTTATCATTTGGTACACTATACGAATTAAGGCGAATTAGTGGTGTGTAAGTGAAGAGAATGGATGCA  
ATCTCAGGTAATGAACAACTAATGAAGATTTGCATCTGGATTTTGTATGATGTAATTTGATATGTTGATTTTATC  
GTACTAATCCGGCAACAGGATTAGCTATGATGAGGATTTGATTCAGCAGGAAATACTTTGGGACTTGTGGCAGGAC  
TATGATGACAGCGGATAA  
>Cluster\_30  
ATGACGCTTTCGGTGATAGATTTTGAAGAAATGTCCTTGGGTGGAAAGAGGCGAACTCTACAGAGTTTGACCCCAAAC  
CCCTTATCCAGTAATCTATTATGAAAGAATGGTATAACTACCGTACAGGCAAGATAGAAAATAGAGAGAAGGGTTGTG  
ATTTGGGTGGCAGCATGCGCCTTGGGGCTTATCCTTGCAGACTTTTAAAGGCTCGAAAGCCTGGGAGGCTTATCAACAA  
GATGAGATTTTGGAGAGACAGACATCGTTATGATTTAAACAATCGTTATAGAGAGGAATGAGAAAAAGCCGGCTTAA  
GATCAGGGACTTCTCTGACGGAGAGCTGGTAGAGATAGTAGAGATCTCAGACCATCTTGGTTTGTAGGGGTCCAGT  
TTCATCTGAGTTTAAATCTAAACCTATCGCCCCCATCTCTTTTAAAGGACTTTATCAAAGCCTCTTATCAAAACAAG  
AAAAAAGGGGTTAA  
>Cluster\_58154  
ATGTCGAATATCGTCTGTTATTACATCAAGGGGGGAACATGGTTTTTTCACGGTGAATTTACGAAATCGTGAAGCCAACT  
TTTGACCAACAGTACCAGATGCTCCGTCACGCCATTATTAAGTTAAAGCAGAGCAGGCTTTTGAATAACAACCGCTGG  
TCGTTTTGCCAGAGCATAATGACATGATCTGGACATTACCTGAAGGCGATGATGATTTTTCTCGCGCTGGCGGGAAAT  
AAAAAGCAATTTTACCATGCTTGGGATGAAAAATATCTGGCAACCACTTTTGGGAGCACGCCATCCGCAATACCAA  
AGATATAGGCATCATGTTGATTATATTAATAATCCAGTAAAGCATGGTTGGGTAAGCAAGTGAATGATTTGGCCAT  
TCTCAACGTTCCATCGCGATGTCGCGGAGGTTATATCCATTCGATTGGCGGGGACGTAACCGGATTTTGTGCGGG  
GAGGCTATCATTTTATAA  
>Cluster\_40322  
ATGAAAAGACTTCAAGAGGTTCTGTAGCTACGTTTTGACGTTATTTACAGCAACTCTCCAGGCCGCGCATGTCAC  
TATCACTGTTAATGGTGGGTAGTCGCTAAACCATGCACTATTTCAAACCAAAGAGCTAACGTTAATCTCGGGGATCTTT  
ATACAGCAATCTGCAACAACCTGGTTCGATCTGGCTGGCACAATATTACTTTGCTATTAACCGATTGTCGGATTGAA

ACAAGTGCAGTGACGGCAATCGTGACAGGTTCAACTGACAATACGGGTTATTACAAAAATGAAGTACTGCCGAAAATAT  
TCAGATAGAGCTAAGGGATGACAGGATGCGACGTTAAAAAATGGCGATAGCAAAACGGTTATGTTGATGAGATCACTC  
GTAATGCACAGTTTCCACTTAAGGCAAGAGCTATCACGGTGAATGGAAACGCAAGCCAGGGAACGATCGAGGCGCTAATC  
AATGTGATCTATACCTGGCAATAA  
>Cluster\_22508  
ATGAAAGCGTTCCTTCTGACCGGATCTGCCGCGTATTGCTGGCCTGTGGCGTACCGTTTTCCCGGCAATGGCGGGCGG  
CAAAATCGTCAATCTGACGTTGCGGCTGCTGGTGGATGGACCGCGCCCTGTTGCGGTAAGGGGAAGCGCGGTAGAGTTCG  
GCAATGTGATTATAAAAGCATTGATGGTGCCAACTACCGTCAGCCAGTGGGTACACCTGAACTGCTCAAAACAGTGTG  
AGCGACAGCTGCAAAATGACGCTTCAGGCCACCACCAGCCATCAACGGCGAAACGGTGTGAGTACTGGAATCAGCGG  
TTTTGGCATTCGTATTAGAAATGCCGCTGACCAATTCGCTGGTGGCAGTGGGTAACAGTAGCTGGCTGCCGTTCAACATCA  
ATACACAGCCAGACTTCGAAGCCGTTCCGGTGAAGCAGAGCGGTGGAACTGATGGCATCGGAGTTTACCGGACCATG  
ACCATGGTGGTGGACTACCAATGA  
>Cluster\_19377  
ATGTCACACCCCGCTTAACGCAACTGCGTGGCTGCGCTATTTTACAGAGATCCCTGCCCTGGAGCCGCAACTGCTCGA  
CTGGCTGTGCTGGAAGATTCATGACAAAACGTTTGAACAGCAGGGAAAAACGGGTGAGCGTACGATGATCCCGGAAG  
GGTTTGTGCGAGCAGATGAAATCCCCGAAGAAGTGCCTGCTGCCGAAAGAGTCTCGTTACTGGTTACGTGAAATTTTG  
TTATGTGCCGATGGTGAACCGTGGCTGCCGCTGCTACCGTCTGCTGTCACCGTTAAGCGGGCCGGAGCTGGCGGTT  
ACAAAAATTAGGTAACCGCGTTAGGACGCTATCTGTTACATCATCGACATTAACCCGGGACTTTATTTGAGATAGGCC  
GTGATGCCGGACTGTGGGGGCGAGCTTCCCGCTGCGATTAAGCGGTAACCGCTGTTGCTAACAGAAGCTGTTTTTACC  
GCGTACCCTGTACTAA  
>Cluster\_9794  
ATGAAGAAGCAGATTCCTTGCCTCGCTTGGCTATCATTGCCACTGATTGGCATGGCAAAGGACTCTGGTTATGGCAATAC  
CGAATGGGGTATGACCCCAAATCAGGTCGTTGACGCCAGAAAGGAAAAGCTCAATTAATCCCCCTCAAAAAGTATAAAG  
ACCAATGGGGAAAAGTGAACGCTGAATATAGGTAGTGGAAATATATACAGTTACGTTTATTTTACGCTAGCATA  
GATAAATTAGTCCAAACCAACGTTGCCAGCAAAGAAAAGAAAACGAGGGAATAGCAAACAACCAATTTAACACATTA  
TCAATTACTTACAAAAGTATGGCAAACACAGTTTGTAAAGTATGAAAAGCAACATGGAAAAGTACTACAAACA  
TTGAGCTAAATAAGATGATCATCTCCGGAATATAGGCTCAAACACTAGTTCGCTACATTCCTAATAAGACCGTATTTCT  
GACAGCTTAACCTGTAA  
>Cluster\_51669  
GTGACCAGTTACACTCTTACCAGTGCAGCCGCTGGTTCGCTATATCGGTTATGAAATTACGCCAACACGCAGACCGGTAC  
GCCAAACGTCGGGACTCGCTGCATCTTTATGACGTTTCTACTGCCAGCGGGCGGGAAGCGACAGCGATAACGTTGCAC  
CGGGCCCGTGGTTAACCAAGAACCTGAAAGTCCGCTATCTTTGTTGATGTTACAGTATCAACCTTATCAACCGTAGCAG  
CCAATCGAACTTGGCAAACCTACGTGGCCAACTGTACTCGGATGAGAAACAAAATGGCAAGTTTGTATGCGGGTACCGA  
TGCTGACGTCACCCCAATATGACTTCCGTTGGGTACTTTCTGGCAGCAGCCAACAGCTTGGCACTTCCGGTGGCATCG  
TTAACTCAAGCTTCGATAAACAATTTGGTCAATCCCTGCGACCAACGACGAAGCCAGAACCAACCTTAAACGGCCCTGCG  
CGCATGGAAAAGAGGACCTTTCCATCCAGCAACCGCGCAGCGGGTACAGGGTTACAAACTTACATTTATTTACAAACA  
CAAATAA  
>Cluster\_48578  
ATGAGTAAAAAATCAGCGTAGTTGGTGTGATCCCTCTATGAGCAACTTTGGGCTTGTGTGGGCACTTTAGACCTTGA  
AACGGACGAACTTGAATTCACGGCTTACTCTTTGTTGAGACTAAAGCGGGGAGTAACAAAAAGACCGTTCTGTGTGAACA  
GTGACGATCTGCGCGCGCCAGTGAATATGGCGTGTGGCAAACCAATCATTGATAAGGCAATATGTTTTTGTGAG  
CTACCGGTTGGGAGCCAAACTCTCGTTGCGAGCGTCTTACGGTATTTGTATCGGTTACTTGCCTGTGTGGATAAGCC  
ATTTGATCCAGCTTCACTCAAACGAAATTAAGCATTTTGTGCGCAATAAACTTACTACATCGAAAGAAGAGATTTCCAGT  
GGGCTACGAAAAAACCCCTAAAGCACCCTGGCTGCGTTCGTAAGCAATCTGGACAGGATGTTCTCGTGAACAAAAACGAA  
CATTTGGCTGATGCGGTGCTGCCATCCATACCGGTATGCAACAGATCAGTTCCGCCAGGTGCGCGATGTTCTTAAGTC  
TCTCATTTGA  
>Cluster\_22770  
ATGAAACTGACGCTGTTATTGCTGCGCTGCGTGGCCGCTGCCCCTATTTTGAACCGGGTGGCAGGCGGGCAGACT  
CAAAAATCTGCCGAGGTCGAAAGCTGAGACTCCCGCGCGCTATGTTGTTACCGGGTATGACTCTCCCGGAGAAAAACA  
AAAGCCAGACCGACTACTGGCAGGAGCTGAAAGAGGGCTTCTCCGTTGTTGTCATACTGAGTAACGGGCGTATGAGCGC  
GGTCACTTGGCTTCACTGATGTTGGTGGACGATGTCGCGCAGATGCTCTTTAAGGCCCTGCTGGGCTGGAACCGGAAGC  
GTGCGGTAACCCGATTACCTATGACGGCGGCACGCTGCTGGATCTGAATCGTCAATGAGCTGATTTATCAGTTCGATTTTT  
CGGTCATCAGCGAGCTGACTGAAGACGATACCCGCCAGCAGGATGATCTGAACAGTCTGGATGAACTGCAACCGCTGGCG  
ATGATGTTGATTATCTCGAGCCGGTAACGGGCTGACGGCGATATCGAACATCACACCGAAATAACCTTCCCTTCTCTG  
A  
>Cluster\_28841  
ATGAAAAACACCGATTTTGAATCCGTACATCTGAACTGACCGCCAGCGATAAAAAACTGGTGGGTTATGCCGTTTCGCTG  
GAACAGCTTTTCAGAAATATCTGGGACGAGTTTCGCGAACAGTTCACCGCGGGGCTTTTGTGACTATCTGGCGGCGAG  
GTAATGATGTGCGCTGTCTGTATGAGCATGACTATACCCAACTGCTGGGGCGTACCAATCCGGCTCACTGGTACTGACT  
GAGGATAACACCGGGCTACGTTTGAATGACACCGCCAAATACCCAGCTTGGAAAAGATGTGCTTACGCTGGTGGAAAGC  
TGGCGATATTACAGGAATGAGCTTTGGCTTTCGCGCATTTATGCGAGGAGTGGAAATATCGCGCAAAAACCGTATCTGCGTA  
CTGTAACCGCAGCAGAACTCCGTGAAATCACGATAAACATCGATGCTTATCCCGAATCCGGCGTGGAGATTTGCCAC  
CGTTCGTTGTTTGCACAGTACCTGAAATACGCCCCGAGGAAATAATCGTCACTGCTGGGCTGAACTGGCGGGGTTGTG  
A  
>Cluster\_10998  
ATGGCAGTTTCTCTCGTAAAAGCGGCAACGATCTCTGACCAAAGAAGCACCAACCATGAATGTCGCTATGGTTGGCCT  
GGGCTGGGATGCCCGTGAACCGATGGTCAGGGTTTTGATCTGGACGCTTCCGTTATTCGCAAGTGGTGAAGACGGTAAAG  
TACTGTGAGATGCCCATTTCAATTTCTTCAATAATAAAACAGCCCTGATGGCGCAGTAGAGCACCAGGGCGACAACCGT  
ACCGGTGAAGCGGACGGCGAGATGAGCAGGTCAAAATCGATCTGACCAAAGTCTCAGCAGACATCAAAAACTGGTATT  
TGCCGTTACCATCTATGATGCAAGAGCGGTAACAAAACCTGCGCATGTTGAGCAACAGCTTCAATGCGGCTTACAAACA  
ACGACAACGGGACGGAATTTGCCGTTTTCGATCTGCTGAAGACGCTCAACCGAAACCGCAATGGTCTTCGGTGAAGT  
TATCGCCATGGTACTGAGTGAAGTTTAAAGCTGTTGGCCAGGTTTTTCCCGTGGTCTGTCAGCGCTTGCTTCCCGAGCA  
CGGCGTCAATGTCTAA  
>Cluster\_11094  
ATGTTTGGCTATCGCAGTAACTGCCCCAAGTGGCCTTAAACCACAGACCGACTGGTCTGCGTCTGGTGCATGATCGTGA  
TGCTTGGGCTTTCGCGATTTATACGCAGAGAAATCGCCATTTCTCAAGCCCTGGGAGCCAGTGGCGCAGCAAAAGCCACT  
GTTATCTCATCAGGCTGGCAGGCCAGCCAGCTGGGATGATTAACGAAATTTACATAAAACAGGTTGAGCTTACTTACTTTA  
TTCGACCCGGAGAAAAAGAGATTTATGGCGTTGCCAATTTTTTCCAATGTTGTTGCTGGCTCTTTTCAATGCTGCTATCT  
CGGTTATTCGATTTGGCAAAAATGGCAGGGCAAAGACTCATGTTTGAAGCCCTGACCGCAGCCATTCGTTATATGACG



GCACCCAACATATTCATCGCATTATGGCTAATTATATGCGCACAATAAACCGCAGCGGTGATTTACTGGCGCGACTGGGT  
TTTGAAAAAGAAGCTATCGCAAAGACTATCTGTGATTGATGGACAATGGCGGATCACGTACTGACGGCATTAACCTAC  
CCCAGACTGGACGCCCGGCCGCTAA  
>Cluster\_64475  
ATGAGCACCGCTATCGCTATTGCAAAAGAATATGCCAGCTGATTGACCTGCTGGAAACCTCCGACGAACTGACGCCAGA  
GATGATCGCCGACACGCTTGAAGGTATGGAAGGAGAATGGGAGACAACTGGACGCCATGATGGTCACTGCGCAATT  
TACAGGGCAATGCCAATACCTGCGCTCAAGAAATGCTCGCTGGCTACCCGTAAAGACGTCATTTGAAGGCAAGGAAAA  
GCAATTCGGAAGCATATGCTCACCTGCCTGCAAGCTGCTGGCTGGATAAACTGAAAACCGCAAAAAACACATTTACTGA  
TGCACAGGGGGCTATCCGGTAATATCGATAGCGAAGATAAGATCCCGGATGAGTATGAAGGCGTGTCACTTGTGATG  
TAGAAACGGTTATTACACCAAACAAGCGAGCCATTAAGAAGTATTGAATCTGCGGAGGCGGTTGCCCGGAAATCTG  
GCGGTGGAGAAACACCCTGCGGAGTTATTAACCCGGTACAGGGCCACATCTGGAACGGCGGCAACGTTACTGAG  
GGTACGCTAA  
>Cluster\_18553  
GTGAATAATAACCTGCAAGGAGACGCTATCGCAGCTGCGATAGATGTCTCAATGAAGAACGTGTCATCGCTATCCAAC  
GGAAGCCGTTTCCGGTGTGGGTGCGATCCTGATAGCGAAACAGCAGTGTGACTGTTGGAGTTAAAAACAGCGTCCGG  
TTGATAAGGGGCTGATTTCTAATCGCCGCAAACTACGAGCAGCTTAAACCCATATTTGATGACACCATGCTGACTGACGG  
CAGCGTGAACATATATTTCTCGCTGCGGAGGTCTGTCACTTGTGTTTTCCCGCCCTGCGACAACACCCGCTGGTT  
GACGGGCCGCTTTGATTCGCTTGTGTACGAGTCCAGCACCATCCGTTGGTGGTGTCTTTGTGCAAGGCTTATGGTAAAC  
CGCTGGTTTCTACAGTGCACACTTGTAGTGGATTGCCACCTTGTGCAACAGTACAGCAAGTTCCGCGACAATTTGGCGG  
CGTTCCCGGTTGTGCTGGTGAACGGGGGGGCTTTAAATCCTTCAGAAATCCCGGATGCCCTGACGGGTGAACGTT  
TCGACAGGGGTA  
>Cluster\_20785  
ATGCAAAATATTAGAAATTTAGACTGGTGGATATGCCGAAAAACCGTGAGAAAAACCGGGTGAATAAATATAGGTAG  
CCTGTTTTTAGAATCGGAAGACGGGCTGGACTGTTACGAGTGCAGGCTTCAAGCCTTTTATTAGATGATACGGCCAAATCATGT  
ATGACGGATCTGGCATTATCTGGGGAGTTGTTAATAAACCTGTACCACAGCGGAATAACACTTATGCGGTGTGATGTTA  
TGGCCGGTGAATATGCTGTTGCCGAGCTGGATGTTGCGTTATGCCCTGATGATGTTTGGGATGTTACATGGAGATA  
TATTGATGAAAAATCGAATAAATCCCTACTGATTACGTTGCTATTGCTGAAAGTAAAAAATCCCGACTAATGAATGAAG  
CAAACTGTGATAGCGCCGCTTGAACGGGCTGTAAAACTGGGATGGCCAGTAAAGATGAGATTCAGAGTTGGAGGCA  
TGGGAGCGATATAGCGTATGTTAACCAGGTCGATACAAAACTGAATGGCCAGAGGTGCTGATGTGGCGTGA  
>Cluster\_10808  
ATGAAAAAAGTGTATTGACGGCGTTTATAACTGTGGTATGTGCAACGTCAGCGTTATGGCAGCTGATGATAATGCTAT  
CACGGATGCAAAAGTAACTAATTAATGGTAAAGTATTGCTCCAGCTTGTACCCGTTAGCTGCGACGAAAGATTACAGTAG  
TCACATTGCCAAATGTCAGCGCCACCAAGTTGCAAACTAATGGAGCAGTCTCTGGCGTTAAACTGATGTACCAATGGC  
TTAGAAGGCTGTGATGTTACTGTAATAAATGCGACGTTTACCTTTAGTGGTACGGCTGACGGCGTCAACCTACAGC  
ATTTGCCAACCAGGCTACCACCGATGCAGCGCAAGTGTGCTTACAAAATGTATCTGCCAGATGGTTTACATCGGTAA  
CTCCCGGTAACGAACTGCAATTTAGTACGGGATTTGCTGAGCAACAGTACCTTTAAAGTTGATTATATCGCT  
ACGGGAAAGCGACTTCTGGTAATGTGAATGCGGTAACAAATTTCCATATTAATATTATTA  
>Cluster\_11433  
ATGACCCTATTACCAAGAAGCCTGCTGACAATCCAGCAGTGGCGGAAACATACGGACCTGGTAGCAACGTTGTACT  
GCCAGCAGAAGAAGCGGAAGAACTGGCAGCAATGCACTGGCAGCGCTTGGAGCAAAGCCGGTGGCGTGAAGGTAACCT  
TCACGCAAAATGACCGTGAATATAACACGTTCACTGGTATGTAATCTGACAAAGCAGAAGTCAACCGTGGGTGCGGCTG  
CATAAAGCATGTAATTTTCGGGCAGATAAACAACCGCTTTATACCGCCAGCCAGTGCAGGTAACCTCCGGATGCTGGAT  
AAGCTGTAGTGGAGGCAAGTGCAGAAATGGGAGAGCGACAACTATGTTGTTAGCAGCTGACTTTAAAAACAACACTACCA  
CAAACTCCCAACACTCAGGTCGGCGTATATGGCGACTGTTTAAATGATGGCAATCCCACTTGGGATGACGGTATGGC  
GAAGACCTGATCTCAAAGAGGTAAACCCACTGGATGCAGCTACAGAAACCGCCGAGGAGGTGAATGA  
>Cluster\_25652  
ATGCGTCGCGCTAACGATCCGCAACGGCGAGAAAAAATATCCAGGCCAGCTGGAGGCGGTGAAACTTTACGGAATACA  
TGCTGTTACACACCGCAAAATGCTACCTTGGCGGGGTGCGGTTGGGATCGATGACCTACTATTTTTACGGCATTGATG  
AGTTGTTGCTGGAGGCGTTCAGCGGTTTACTAGATCATGTCGCCGCAATATCAGGCATTTTTAGCGATGTTAGTGT  
GCTCCAGGCGCATGCCAGGCTATCCCGATATGATCTACAGCTCACAGGTCGCAACCGCGGATAATATGGAGCTGATGTA  
CCAGCTTACGCGCTGGCTAGCCGAAACCGCTATTAACAAACCGTAATGCAAACTGGATGACGCGCAGTCAACAAACCG  
TCGAACAATGGTTTGAACCCGGAACCGCCGCGCTTGTGCGTTTATTTAGGGGATGACGCTGCATTTTGTACCGGAC  
CGTAAGCCGCTATCACGCGAGGAGATTTGAGGATGGTTGAGAGGATTGCTGGGTA  
>Cluster\_25065  
ATGAGCAATATCGGTTATAAGCGTGTGAGCACTGTAGATCAGAACACTGATCGCCAGCTGACAGGATTAACGCTTGATAA  
AGTCTTTGAAGATAAGCTGTGAGTAAAGACACTAACCTCCAGGATTCAGGCGTGTATTATCTATCTGAGAGAAGGGC  
ACACCTTACACGTCACCTCTCGACCGTTTAGGGCGTAAACCTTAGACATTTGCTTAGTGAACAACCTAATAAT  
CGAGGTGTAATTTGCTGATTTCAATAAGAAGGATCATTTAGACATTAACAAGCGGATGGGAAAAATGATGCTTACGAT  
GTTGTCGGCAGTTGCAACGCTGTGAACGTGAACCTGATGTTAGAGCGTAAACGAGAAGCGCAAGCGCTCAATCTACAAAGC  
GTGGTAATGGAAAAGCAGTAGATAGAGAAGGTATAAAGAAAGCCCTTTCTGATGGCTGTGAGTGCCTAAACCGCCGAG  
AGCTTTAATGTTGCTCCTCAACGGTACAGCAATTAAGAAGGAAGAAGAGGAGGCGTAA  
>Cluster\_65529  
ATGCTGCTTTTAAAAAGTCACTTCTTGTGCTGGCGTAGCAATGATTCTTTCCAATAACGATTTGCTGACGAAGGTCA  
CGGCATTTGTTAAATTTAAAGGTGAAGTTATCTCTGCTCCATGTTCAATTAACAGGTTGACGAAGACTTAACTGTAATC  
TGGGTGAAGTAGCAGATACCGTTCTGAAAGCGACAGAAATCTTTGGCTGAGCCTTTCACTATTTACCTGCAAGACTGC  
ATGTTGAGCCAGGTTGAAACCACTTATTCAAAGCGAAGGTTACTTTTACCACAGCGAATACTATGACGGGTACTGATGA  
CCTGCTGAAAAACACCAAGAACTGAAATCGGTGGTCCACAGGCGTTGGCGTACGTTTCTGGATAGCCAGAGCGGGC  
AAGTGACTTTAGGTACTCCGGTAGTAATTACATCAACAAATCAACAGCTATCAGGAACTGAACCTCAAGCTCGTATG  
GAATCCCCAAGCAAGATGCTACCCCGGCAACGTTTACGCTCAGGCTGACTATAAGATTGCTTACGAGTAA  
>Cluster\_62524  
ATGTTTTTAAATAACACCATCATCTTCCAGTAAGAAAGTATAAGCATTTTGACAAGGCATTTATCTGTGCATCTGAATA  
TGTTCTGTTGTCAGAGGCCAATATCGGAAATCTGCAATCACTGATAGGCAAAATGTCATCAAAGTGGTAAGAAGGTTCTCG  
TCCATCTGGATTACTCGCGGGTTTAAACCCGATCAGGCTGGGATCAATCTACTGAAAAGTTATATAAAGTTGATGGT  
GTTATTTCTTCCAACTCTCCGCTCGCTATGCAAAAAAGAGGGGTTATTGACTATTTTTCTGACTATTTTTCTACTTATCGA  
TTCTCGATCGCTGGATCAGTCTATCGATATCGTTAAACATAACCCGCGGATGCAATAGAAATCTTACCTGCTGAATATG  
CCTGCCAGTGCCTGGAAATGATTAGCCGAACTTAAATGGCTTTGACGTGATAATTCATCGCCGAGGCTTTGTAAAGCGG  
AAATACCTTGTAGATAAAAATTTCCATGCGGGGTTTAAAGGAATAACCACAGCGAGCGGGTTTATGGTAA  
>Cluster\_1677  
ATGGAGACAATCGGTTATTGCGAGGTGAGTACAGATGACCAGTCTATCGCTAACCAACAATGCAAAATGAAGAGGCAGG

GTACAACATTGCTAAATGGTTCAGTATGAGGCTGTCAGTGGTTCGTCAAAGCTTCTTCAAGAGATGGTTTCAGCAGAC  
TATTAGCTTATGCACGAGAGGTTGACACCGTGGTGGTGGCTGTAGACCGTCTCGGACGCGACACAATCGATGTGTTA  
TCAACCGTTAAAGCTCTACAGGCTAAAGGTGTGCGGGTGTGTTTCGTTGCGTGAAGGTTTCGACCTGTCTACCAATCGG  
TGAAGCAATGCTGGGTATATGTCAACACTGGCACAGCTTGAAGAAGCTTGAATAGCAGAGCGTAGAAAGGCTGGAATAG  
AGCGTGTCAAAGCTGAAGGGTTCACATGGGAAGCCGTTAAAGCTTCTTCAAAGGCTGTACAGACGCTTATTTACAA  
GGTAAGACACGGTTACAGATTCAGGAAGAGTTAGGAATTTCTAAAGCAACTTATACCGATTAGCGAAGTGA  
>Cluster\_43358  
ATGACTAAGCAGCCGAAGACTGGCTCGACGACGTTCCCGGTGATGACATCGAAGACGAAGACGATGAAATTTATCGGGT  
CAGTAAAAGTGAAATTTAAACGTGATGCCGAGGAGCTAAAACGCCCTGGCGCGGAAATTTGTTGATCTGGGAAAAACGCGC  
TGGATAAGATCCCGTTAGATGCGGATCTACGCGCGGCTATTGAGCTCGCCAGCGTATTAAGATGGAAGGTGCGCCGCGC  
CAGTTGCAGCTCATCGGTAAAGATGCTGCCAGCGCGAGCTAGAACCGATCCGTCAGGCGCTGGATAAGCTGAAAAACCG  
CCACAACCAGCAAGTGGTGTGTTCCATAAACTGGAACCTGCGCGATCGTCTGATCGACCAGGGTGTGATGCCATCG  
CTGAAGTATTTGAATCTGTGGCCGATGCCGATCTCAGCAACTGCGAACTCTGATCCGCAACGGAAGAAAGAAAGAA  
GGGAATAAGCCGCGAAATCCGCACGTGATTTTCCAGTATCTGCGCGAGTTAGCGGAAAAACGAAGGTTAA  
>Cluster\_33889  
ATGTTTACTGAAGAAGAAAAATCCGCGCCATTGAGCTTTATTTCAAATATGGTAAGAAGCTGGCTCCCGTCTGACGCGA  
ACTGGGCTACCCCTCGAAAAGGAATCTGCGTCTGTTGATCCGCTTATGGGAAGCAGGTGGTGGCGTACATCCTGCCGCT  
GTTACTGTGACATGTTAATGCTAATGTATGCATACATTAG  
>Cluster\_48620  
ATGCTTCTACTGTTCAATCATGAGTTGCACAATAAGTGGTTCGCGTATTAAGCTCAACCCGCTGGTGTGCTTTTCTGCGA  
TGGCGCTACACCGTATACATCAGCCGTGATGATCTCATGACCAGAGACTGAAAGAGAGGTACTTTTTTACAAATATGA  
TAGGGGAGCGATTGTGTGGATGGGCGAGAAAAGTACCATA  
>Cluster\_36063  
ATGATTAGTTACGAAATCATCATCTCCACTACGGAATACAGAAACGATGTATCAGTTCGCACGGATGTATCTGTCTGGCA  
CCGTGCTATAAATCCAGAAAAACAGCGGAACGAAAGCGGACAGAGATGTGTGAAACCATCTCAATGAAAGGTAGCCCGG  
TTAAATACGTAACACGCGGAGGTGCGTCCATGA  
>Cluster\_48181  
ATGATAAGTCAATCTAAATTTCTGGCGCAATAACTCTTTGATGAAACATGATGTGGTGCAGGAAATAATATAGTAGA  
TCTTGATTTACTACGTAATTTCAATGGGGTCCAGGTTTAAACAGAGATAACTTTATTTATATCAGCAATATTTTTTCAA  
ATATAAAACAACGGAACGAAAAATCATGCAATA  
>Cluster\_63649  
ATGACTGCACAACAATCGCTGACGTTCTGGATGTTGATCTGAACCGACTGAAAGAAAATCGGGAAGCAATGACAGATTT  
TTATGCGGCCATCCGTAAGGGCAGAGCGAAAGGTGAAGCCGAGTTACGAGCGGCAATTGTTAAGCTTGCCAGAAAAGGGG  
ATGCCCTTGTCTGCGCGAACTACTCAGGGTGGATAAAAAATCAGGACTAA  
>Cluster\_10613  
GTGATCCAGCGGGTTACCTGAGTTATCCAGAGAAGATGTTTGGTCTGAGCGTAAATTTATTTCCCGTCCAGTTACGTT  
CTCCGGTGACGGCAAGCGGTGAGAAATCAGTTTGTGATCCATCATCAACTCAATGTATGGCAATCCTGAAATTTGTGTGA  
TGCCTTGTGATCATGCGGATTTCAATGTGGCTCAGGAGCATCCGGAATGA  
>Cluster\_65  
ATGAAGTACTTGAACACTACTGATTTGTAGCCTCTTCTTTCAGAGAGGTCAAAGTTTATGACGAAATATGCCCTTATCGG  
GTTGCTCGCGGTGTGCGCCACGGTGTGTTTTCACATGATATTCAGGGAACGGTTGTGTGAGCTGAATATTCACAGGG  
GAAATACAGTGGTGCAGATAACTCTGGCTACGAAGCACGGAAGTAA  
>Cluster\_25920  
GTGGTTGAGTTGATTTTTTCTGCATTGAGGATTCTCGGTGCTATGTGGATGGTGGCGACGTTTCATTGTGGTTGCCAGCAG  
TTTTGTCCGGCTGGTAGGCGAAGGTAAGACCTGGTGGTGTGCTTTTTCGGTAGCATTTCCTGTGGGTGATTATCGGTG  
TTATGCCCTGTTGTCGTAGCAAAAGTGGCGTGGCCTTTTGTGAGTTGA  
>Cluster\_9544  
ATGGTGTGTTGTCGGTTAGGTGCGGTTAATCAAATTTTTGCGGATGCGGCGTGAACGCCCTTATCCGGCTTACACGGGC  
AATTTTACGGCCCTGTTAATCTCAAACATATACCATTAGCACTGGAAGTTGGCACGTACAGGTGGGCAAAAAACGAAAA  
CTGGTCAACCAAAATATCAGTTTGATTGACCAGTAA  
>Cluster\_44740  
ATGACTTACAGTCATAAATGGATTCCTTATGACAAATTTGGTAAACAATGCCGTCAAAATTTGGTCGCACAATTCCTACGGC  
GTGGATTAAGCAGGTCCTGACCTGCTTTTTTTCATATCTGCATCTGACTCTTTCCGGTGTTCCTCCTTCTGTCTCTGC  
GTTCTCATTACCTGTACGCCAGATGA  
>Cluster\_2251  
ATGCATCAGAAAACAGCAGAACACGAACAAACCAGAATATGCTGACCATCAAAAACGGGAAAGTAATATTCATTCGCCA  
TGTTCATGACGATGAACTTGTAGAACTCTTTCAACATTCCTGTTTATGTCAGAAAAGCAGGATATGACGTTATGTCAC  
CAGCAGATGAAGATGAAGATGAGGAATA  
>Cluster\_14892  
ATGAACAACGAAGAAATACGGGAAATCGCATTTATCCATACTTGAAGACAGGTAGAAAAAAAATTAAGAGAAATGGATGA  
AATGCCTGACCATGAACAGGAAGCAAGGCCAAAAAGATTTGCCCTTGAGGATTTTCTTAAAAATTTGCCAAGAAAAGATGA  
GATCGTGGCGTTGTTGTCGCCCTGA  
>Cluster\_48675  
ATGAGAACACTAGAGGTTTCGCGTGAAGACGTAATCCCTGGTGTGTCATTAACATCTAAAGGTCAACAATGTGCGGT  
TAAATCTTTTGGATGAAAAATGACAAAGTGACTCTGTTCCGTACGGATGGTTCGAAACTGATATGACTACGACGAAT  
TGCTTGTGTTGAGAGAGCTGCCATA  
>Cluster\_31569  
GTGACTTACGCGTTTGCAGTGGTGTGACCGTTTTTCTTATAACGGGTGAGCCACAAAATGTGATTACCGGAATTTATGC  
CAGTAAAGAAATCCAGCTCCAGGCAAGACGAGCAAAAAATTTCTGGTGAATGCCTACCGGTAAAAAAGTATCGCTGT  
ACCTGAATAACGAAACACCGGCTGGATA  
>Cluster\_51125  
ATGACCGATACCAGCCTGATTCCTGAGAAAAGTGTGATGAACAAGCTCGGTGTTTCATCACGTCAGACAATCTGGAACATA  
TACCAACGGCACGGATTTCCGAAGCCAGTCAGAACCCACCCAAATCATACCTTCGTGAAGCTGTTGAAGGGTGGATTC  
TTAACGGTGGCGTTAATCAGAAATGCTCCTGA  
>Cluster\_6913  
ATGCTTACTCAACTTGTATCCACCAGCTGGCCATTGAATTTTTTACGCGGTGACCAGAGCAATCTTTACCTGCCAATA  
TCTCAAACGCTTGAACAACACTGAACTTGAATTTGCTGACCTGCTTACTCTCTCTCTGCTGAATTAAGAAGAAATCT  
ACTTTGCCCTGGCGTCTGGGCGTGCATTGA  
>Cluster\_44887

ATGGAACCGTTATTACCAACGTTAATACGCTCTGAAGGTTGTTTTGATATGGTGTCTGCTCAGTAACCGGAGTTTAC  
GGAAGATGCCATTAAAGATGAGAAAATATGAACCTTATCTCTCAATGATAATCCATACTTTCCAGAAATGGCCCTTCTTG  
AACTTGGTATTATCGGAGAACAGCAGTGA  
>Cluster\_62821  
GTGATGTTAATTGGCTACCAGAACGTTACTCATCTTCTCAGGATGCGGAGCATGGTGAAGCTGGTCACTTCACTTCCAT  
CGAGCAAGAAATATCCCCAGATACTCAACAGAGCGCAGCAATCCTCGTCCGAGAAACGGCACATGTAAAACCTCAGCCGT  
GGCAGGATGATAAGTGGAGTCGAGTATTGCCACATTTGCGTCAGAATGTTATTAACAACGTTAG  
>Cluster\_5136  
ATGGCCGACGTTCTGGACATTTACAGAAGCAGGAAGACTGCTGAACCGGCTGCATATTCAGGCTGCCCGCAGTTGAT  
CATAAGGGGTGGGAAAGCCTCTGCGAGTGTGAATGTTGTGGCAACGATATTCCTCTCAAACGCCAGCAAACGATACCTG  
GTGTACGAACCTGCACGGAATGCCAGCGGTTACTGGAAATCCGGCAGAAACACTACCTGAGGTGA  
>Cluster\_25059  
ATGAAAGGCAGAACGCCACACATGAACATCAAGCCAACCACTTCCCCTGATGTCGCAATGAGATGATGCCATTGCGG  
TGATATGCACGGATTGGAGCGTGAATTTATGATAAGATTGATGAAAATAGAGATAAGGCCAGTGAAAATCAAAGTGG  
TCATCGGCCTGTTGATTTATCAATCTTATCCCGCTACTTATCGCATGGTCCAAAAATGA  
>Cluster\_29432  
ATGGCCATGAGCATGTATTACATCAAGACAGGTTGAGTACTGGAAACCAAGGGTACGGGTACACCAAGAGCCGCGA  
GGAGGCGGGGTTTTTACCCTCAAGGACATGGAAGAATTGAACCTCGATGGCTGCACCTGGAACCGCCGAAGTGGCGT  
TCCCTGGACGAGGACGGCCCCAGTCCCGACTACCCACCGCTCACCTGCCCGCGATTGA  
>Cluster\_65865  
ATGCAATACACTCCAGATACTGCGTGGAAAATCACTGGCTTTTCCCCTGAAATCAGCCCGCATATCGCCAAAAACTGCT  
TTCCTTGGCATGTTACCTGGCTCCTCTTTAAATGTTGGTGCCTGCTCCACTCGGCGACCCATTCATATCGAAACCC  
GTCGTGTGAGCCTGGTATTACGCAAAAAAGATCTGGCCTTATTAGAAGTGAAGCGGTTTCTGTAA  
>Cluster\_60696  
ATGAAAAAGACTGCCCAATTATTTCTGCTGTATGCTGACTTTTGGCCTGAGCGCCTGTTCCGGTTCGAACTATGTGAT  
GCACCAATGACGGACGTACCATCGTCTCTGACGGCAAACACAGACTGATAACGATACCGGTATGATTTCTGATAAAG  
ACGCTAATGGCAACAACAGCAGATCAACCGTACTGACGTGAAGAGATGGTCAACTGGATCAGTAA  
>Cluster\_48403  
ATGGTCTTGAAGTACTAATGGTGGCAGGCGGACTCGAACCGGCAGTATTTCTACGGTTGATTTTGAATCAACTGC  
GTCACCGATTTCGCCACTTCGGCACTGAAGAGTATGCGGAAAACGTTGTGGATTATACCTGTCGACGCCACCATGCA  
AGCGCCAGCTTGCACCTACCTCGCTAAGTGCTGAAATTTTACGATTACACTCAGCGATATGTAA  
>Cluster\_35747  
ATGTGTTCCAACGAAAAGGCCCGTATTGGCATCGTGGGATGTGATTGCGGGACTTAAGAAAAGAAAGCTCTCTTTATC  
AGCTCTTTCCCGGAGTTTGGTTATGCGCCAACACATAGCTAATGCGCTAGAACGACACTGGCCAAAGGGTGGAGCAGA  
TTATTGCTAACGCCTTAGAAAATAAACCGGAAGTAATCTGGCCTAGCCGATATCAAGCAGGTGAGTAA  
>Cluster\_37286  
ATGGCAATGCCACGCTTGTGCTGATCTGGTGAATAAAATGAATTTTTCAGGGCGCTTGGCAACCAGTGCAATCCAATTC  
AAGTTTTCCAGAAATTTCTCCGGTTCGGTCCACAAGAATCGCACCTTGTTTTATTAACAGTGAGGCCCTTCGCTTCCCG  
ATCCCTATGAGCCTGGTGGATTGGCCCTATATTTCCAGACATCTGTTATCACTTAA  
>Cluster\_6418  
ATGTCTAACAAAATGACTGGTTTGTGAAATGGTTAACCCCTGAAAAGGTTTTGGTTTCATCAGCCGAAAGATGGCAG  
CAAAGATGTGTTTGTCCATTTCTCAGCAATTCAGAGCAACGATTTCAAAAACATTAACAGAAATCAGGAAAGTTGAATTTG  
GTATTGAGAACGGACCTAAAGTCTGCGCTGTTTATGATAGTGGCGCTTGA  
>Cluster\_29617  
ATGTCTCACTCCAGCTCAGTATGGCTCTTACCGTGCAAATTCGAAAGGAGTAAACCATGAAACTACCGGAAACGCC  
TTATCTGGTGGTATTAATCGTGTGCTGCACGTTGTTGATATTCACACTCCTGACCCGGAATCGCCTGTGCGAAAATACGG  
CTGAAGGACGGATACAGGAGGTTACGGCAAGCATGGCTTACGAATCCGGCGGTAA  
>Cluster\_18918  
ATGAAATCGCAAACTTTTACCTTTCCCTACCAATGGCAACGCAGCCAAACAAGTGGCGCACATCTTGGAGTGCATAT  
CAGCACCGTATGGCGCTATGCAAAACGCTCTGATTTTCCAAAACCCACCAGTTAACCGACGGCGTGACCGTCTTTGACG  
CCGACGCTATTTCGCAATGGAACAAGCAAAAAACCGGGGGTGAATGCTTAA  
>Cluster\_39462  
ATGAGTGAATTACCTGAAATGGTATCTCTGCCACCGCTGGTTAATTAAGTTTGTGTAAGAAAGACTGGATGACAGCGGATGC  
CAACAAGCTTAAGCAAAGAAAAGACTATTACTACGCCAGAATGAAGGAAAACACTACTGCTCAATTCGCACTCGCATATTTA  
TTAAAAAAGACCTTTCAGTCAATTTCTCAATTTGCGAGGGAAGTAAATGGCTAA  
>Cluster\_35764  
ATGGGTAAAGGCTGGAATGCATCTTTTCATCTTGGCAGACGTGAGCGGCTGCGTCAGGAGGTTTTGACCCGTGTCGCCGG  
TGGCCACGGCTGCGCCCGCAGTATACCGGTCATGATGGCACCCACCGCAGTTATTACATGAAAGGCTGGCAGTCAG  
TTGATATGCCGAAATTTCTCATATTGCTGCTTACAGGGAGAAACATTATGCTGTA  
>Cluster\_63910  
ATGCAGAAACCAGAGCCCGTCACTCATCGCTCCAGGTTATACCGATGACGAAATTTACGAATGGATGATCAAGAAAAGTTAA  
GGCGGCGCAGGATCTGAAATGGGCTGTGACTCCAGAGAATGCAGTCAAAAACCTGTCAGAACTGGATAAGGAAATTC  
CCAGTCTTACAGAGGCGACATCATTTGAACGTAGCCAAAGTGGCTGTACACCTGCGTTAA  
>Cluster\_34970  
ATGTACCAGATGGAAAATAACACAACAGGTGTGTATACACCACGTCAGCGGTGGGACGGGATACTGGCTACTGCAGTT  
GCTGGCAAAAGTCTCCCAATCCAGTGGTGGCAATAGTGTATTTGGTGGTGGTGGTGGTGGTGGTGGTGGTGGTGGTGGT  
CAAACCTTTATTTCAAGATTAAGAAGACAAGCGTAAGGCTGCACGGGAGAGTAA  
>Cluster\_81  
ATGATAGGAGCAGATGCCGTGGGTATGTCTACTGTGCCAGAGGTGATAGTTGCAGTTCATGCAGGATTAAGGTTTTAGG  
AATTTCTGTTATTTCAAACGTAACGATCCAGACAACCTTATTCTATCTTTTTTCTGAGGTGGTTGAACAGTCAAAAA  
GAGCAGAAAACGGTTAGAAAACCTTATAAGAGAATTTTTGAAGGAGCTTCGTTTATAA  
>Cluster\_66868  
ATGAGCTTGATGACTGAAGCCTGTAGGTTATTTGATGTTATCAATACTCTTTTTTTAGTGGCAAAATTTTCTACAGGAA  
AATGAAGTTTGTGACAGATAATCTAAAGGGCTCATTTATGTCATTTAA  
>Cluster\_26328  
ATGCCCTTCTGAAAATCAGGAAACCCCGCCGATCCTGAAATTAACCGTAAAGCCTGGCTGGCGGTTTTTCTTGGTTCTGC  
ACTTTTCTGGTGGTGTGTCGACTGCTGATTTGGAAAGTGTGGGGATAA  
>Cluster\_17504  
ATGGCAAAACCGACTGGGAGGCCATCGAAACGGCTACCGTGGCGGTTGAAGTATAGGGCATCTATTTATTCATCATTT

TGAAAAAAGAGTTGTCCGGATAGGTTTCAATAACGGTTATGTTTGA  
>Cluster\_32400  
ATGAATCTTTTAAATGCGCGCTATATTCAGTCTGCTGTTGCTTTTACTCTCTCTATTCTGTCATTTCTGATGTGTGTC  
AATGGCCATTGAAAGTCGCTTCAAATATATGATGCTGCTTTTTTAA  
>Cluster\_45004  
ATGATAGTGTCCATTAAGAATGGACACTATTTCCCCGGAACCTGAACTCACCGCACAGGCGTTCTACATAAAACGCTT  
ACGTTTCATGTTGACTCGAAGTTCGACTTCAGATAAATCACGCTTTACCTTGATGGAGCCTGTACATAG  
>Cluster\_49736  
ATGGTTGATCGCTTCCTCGCGCTCTCCACGGCGACGATGGCCCGCCATCAGCAAGTGCAGCAGTTCCCTATGGTGC  
CCTCGCTGCTGTGAGCAGGTAGCGAGCATGTCCAGGGTCTGACGCTCAGTGAACGAAAACCTCACGTTAA  
>Cluster\_40335  
GTGCCGAATCCGGATGAGCAGCCTCAGGCTGAGATCTGGATGCGGGCGCATCCGGCAGGGTGTCTGAAATTGAAGTTGG  
CGCGAACACGGTTTCATTACAGGACGCGACGCAAAATCCCCGACACCGTTTTAG  
>Cluster\_44653  
ATGCAATATGCCATTGACAGGGTGGCCTGTTGCTGGCTGCCCTTCCGAATCTTTACTTTGAAACGAATCACCCGTAATACG  
TGACGGATGGAACGCCTTATCGACATACTTAATCAGCCAGGAGTCCCCAAAATGGATAA  
>Cluster\_64811  
ATGTACAGAAGATTAGTAATGAATGTTCCGGCATGGCTACGTTGCTGATGGTATGAAGGTATCACAGTTATGCACT  
GCTTGCCGTAGTACAGGGGATCTGTCTGTAGTTTTTTCGCTGA  
>Cluster\_34138  
ATGCTGCCTTTTATTTTGGCCGTTATGCAACTTAAAGTTGTATTTCTTACTTTAAACAAGGTAAACAAGGTTTATATAAA  
TGTTGTTCTTAAATGA  
>Cluster\_66916  
ATGATTAATCTGTTAATCATCGTTCTCAGGGCAGTAGTTGCCGTTGCAACCGCGCTGATGCTGTTCTGGAGCTGATCCG  
GGAACCTTATCGACTGA  
>Cluster\_15498  
ATGAGCGAAGCTCTCGGTATCACTGCATTTTATATATTCATAGCCGAATTATTGTTGCTGCAGTGTATACCTTGAACA  
ACGCTGGTAG  
>Cluster\_1888  
ATGCGGCTTAATATGCGGACTTCAAAGGCTTTAAAGCCTCCCTTTTATCCGCGATCGCGGATATCGCAGCGTTTATCCC  
GTACAGCGGATAA  
>Cluster\_67009  
ATGTTATGCCACGACAGCGGCATGGAAGCCACACAAAAATATCATATGAGTGATAATGCTGACTGGCCGAAGCTCCG  
CGAAGCGGGAACCATCTTATATATATACCCGTTAA  
>Cluster\_59468  
ATGTTTGAAGAAGATCGGAGTCTACGGGGTAGTTTTGACAGCACAGTTGTTCTCAACGGCGCTAAAAAACAATACACATT  
AAAAATGTGGTAATTTTGAAGAAAGTCAATATATAA  
>Cluster\_57936  
CTTTTCATCTGACTGCAACGGGAATATGTCTCTGTGTGATTAAAAAAAGAGTGTCTGATAGCAGCTTCTGAACTGGT  
TACCTGCCGTGAGTAA  
>Cluster\_12063  
ATGCCGACTAAACGCTTTGATAAAAAACACTGGAAGATGGTGGTGGTGTACTGGCAATCTGTGGCGCTATGTTGTTGCT  
ACGTTGGGCAGCAATGATTTGGGGCTGA  
>Cluster\_53877  
GTGAGCAAACTGTATGAAATGCGCAATGAATACGCAAAATGATGGATTCAGATTTAGAGCCAGAGATGATGCTGACAC  
AATAGAAGGCATGGAAGGAGAATTTACCAGATAAAATAGAGCAACTTCTTGCCATTATTAATAAATGAGTCTGGTGAATCGC  
CACGGATAATCTAG  
>Cluster\_54737  
ATGGCCGTACAACAGAATAAACCAACCCGTTCCAAACGTGGCATGCGTCTCCCATGACGCGCTGACCGCAGTCACCAG  
CCTGTCTGTAGACAAAACCTTCTGGTGAAAAACCTGCGTCACCACATCACTGCCGACGGTACTACCGCGCCGCAAGG  
TCATCGCTAAGTAA  
>Cluster\_15652  
ATGCAACAGTTTCGCTATTGACAGGGCGGCATCGGTTCCGCTTTCAACCCGATTTTATCGGTACAGCATTACGAAAAAA  
TATTTTAAACCGAGCAGACTTTAAACAACCAAGAATGAAAAGCTTGTCTGAAAAGCTTTGGGATATTTTGAACAACAAG  
GCCGTCATGA  
>Cluster\_30793  
ATGAGTTATTTCTCATTTGAGATTATTCATTCCCGTAAAAACATAATTCCTATCATCACAGTCACGCTCATTTTGAA  
TTATCTGAATAATAGCGAGCGTTCTTTAGTTAAGCAGATCTTAATTGAAGACGAAATTTGTGTGTGCAACTTACTTAA  
TACCGGACAACTAA  
>Cluster\_26181  
ATGAAACTGAAAAAATCCCTGGGTTTCAAGTTTAGGATTTATTGCTCTGGCGGTGGGTAATGTATATGCAACACAATTTGTT  
GGATTATTATAGTATAAATTTCCCTATATAACCGATGAAGAATCACCGATTGAAATCAGAAATAATACTTCTACAAGTAATG  
GAGAGTATCTAATCACTTAA  
>Cluster\_5501  
GTGATCCTGCGCGTGTAAATCCGCTTATGTAACAATCTTTGGTTTGTGAAATCCGTCGAAACAATTTCTTATGGTCAGGC  
TGGCGAACTAAGCGCCTTGTCTATGGGTCACAATGGGCGGTTTCATTTGGCTGACGCTTTGTAGCGGTATGCGGTTAATA  
CACAGCAGTTGTTAAACGATAA  
>Cluster\_50601  
ATGCTCTCTATCAACACATGCTTGTTTTTTATGCGGTTATGGCAGCAATCGCATTTCTTATCACCTGGTTTCTTTCTCA  
CGATAAGAAACGCATCCGTTTCTTAAGCGCCTTTCTGGTGGGGCAACATGGCCGATGAGTTTTCCCGTGGCGCTGTTGT  
TTTCACTGTTTTAA  
>Cluster\_18913  
ATGAGAAAGCCAAACGTTAAGCCGCTCTGCTGTCCGCCGAGCAGATGCAGGCCATACGCAACATTCAGGAACGTGAACG  
CCAGCGCTCCAATCTCGGCGTCGCTCCACCGTTACCAGATTGCCCGCGCCCATGGCTAAGGCTCTGGCCTCACTGG  
CAAGCGAGGGCGCTAA  
>Cluster\_25053  
ATGGCTATTTTCAGTAAAGCGGTATTGATAAGTGAAGAAGCAATGGAAGCGATAAAGAAAATTCAGGAAGAGCAGCGTAA  
AAAATCAGGAATGGAGTAGCGCAACTCTGCATGAAATGACAGAGGGTTAATAGATAAAGGCGCTGGCAGGCTGTATGT  
GA

>Cluster\_3032  
ATGCCTGATGCGACGCTTATCGCGTCTTATCAGGCCTTGATTATCCCTCCAGTGCAGAGAAAATCGGCCAGTTTCTCT  
GCCTGCAGTCCGCATGCCGTATCGGGCTTGGGTTCTAACCTGTGCGTAGATTATGCAGCGGACTGCCTTTCTCCAA  
AGTGA  
>Cluster\_66737  
ATGGCGTTAACAGATATAAAAAACAGAACAGCCAAAGCCAAAGGATAAGCAATACAAACTGACCAGTGGCAGCGGTATGCA  
CTTGCTTGTCCATCTAATATTAGCCGTTGACTATGCAAAAATCAGTCTGGGTAATAATTAGCGTATATGTTTAA  
>Cluster\_20353  
ATGAAAAACATTGCAGCTATAAACGTAATAACCGCAAGATTCACGCTCGTAAGTTCCTGTCTACGCCAGAAGAAAAGC  
CTGGTTAGAGCGTAAACAGAGAGAGAACGAAGAAAAGAAAATCCTTAGTGAGTTGAAATGGCTTAGAGAGGATTTCTGA  
>Cluster\_62242  
ATGAGTTTTTTTGTGAGTTGAAAACCTCTCTGGAAGAGGCTGTGCGAGATTAACAAGGTTTAAAAACCTGCACGGGT  
GACCCGCCACGAAATGAGGATGCTAAGGCTGTGTAGACCGGAAACGGTGTTCACGCCGCATCCGGCATTCCGTGCTCA  
ATGCCTGA  
>Cluster\_15920  
ATGAAGAGACAAAAACGAGATCGCCTGGAACGGGCACATCAACGTGGTTATCAGGCCGGCATCGCCGGACGCTCAAAGA  
AATGTGTCCCTATCAGACGCTGAATCAAAGGTCACAATGGCTGGGAGGCTGGCGAGAAGCCATGGCGGACAGGGTAGTAA  
TGGCCTGA  
>Cluster\_38646  
ATGAAAAAAGAACAGAAACATGTGGCCTGCAGCTCCCTTGCCATCAGGATGTATCTCTCCCTGTACCCCGTGACACTTT  
CAGTATGGAAACAGCAGACCAATACAGAGACTGGCAATTAATTGCAGCCAGTCTCAGGAAAAAGATAAATGGGAAAAGAA  
GCTAA  
>Cluster\_59332  
ATGAACCTAGCAATTCAGATCTTAGCCTCTACCCGCCATCCGGCAAGGAGAAAGGCTATGAAGCACAACCTCTGGTGG  
TGTGTCTGCTCATTATCTGCATTACGATCTGCACATTCACACTCTGACCCGACAAACGCTCTACGAACCTGCGGTCCGG  
GACGGTGA  
>Cluster\_64397  
ATGAAAACCGCAAAAGAGTACAGCGATACCGCAAAACGTGAGGTCAGCGTCGATGTGCGATGCCCTGTGGCGGCGATCAA  
TGAAATTAGCGAAAGCGAAGTTCATCGCAGCCAGAACGATTCTGAACACGTTAGCGTCGATGGACGTGAATATCATACAT  
GGCGTGAATTGGCGGATGCCTTCGAACTGGATATTCATGACTTCAGCGTCTCTGAAGTGAATCGTTGA  
>Cluster\_6187  
ATGGCTAATGTTACGGTACTTTTACTATTACCGAATTTGCTGCATACCGGCATCTCTGAAGAGGAGTTGAATGAAAT  
TGTGCGTTTTGGGGTGGTTGAACCGGCTGAGATCCAGGAAACAACCTGGGTATTTGACGACCATGCCGCCATTGTTGGTGC  
AACCGCGGTACGCCTGCCTCATGAACTGGCTCGGACTGGCCGGGATCGCGGTGGCGCTGACGTTAATGGATGATATT  
GCGCACCTGAAGCAGGAAAACCGCCTGCTGCGCCAGCGGCTTTCCGGTTGTAGCTCATCCGTGA  
>Cluster\_11622  
ATGGCTACAGGTTCAAAAAACGCAAAATCACAATCACTGACAGCTCGGATCCCGCATGATGTTATTGAAGGCATGGAATC  
CGTAAAACCTGGACCGTGAAGCAACCGCGGATTCATCGTAAACGCCATCGCGGTGAAATCGCCCGCCAGGCAGAAAG  
GAAGCGGAGAAAACCTCTGGTTTCTTCTGCTCGATGCATCGCGCAGTGGAAAAAATCGGAGTCAAAGCAGCCGAGGAG  
ATCGGCCAATCTACCTCCGCTGCGGCTGAAGAACTCAGCGTGCAGGCTGCAAGGCCAAAGAGCAGGAGTAA  
>Cluster\_4325  
ATGGGAAATGGTAACTTTTGGCAGTTGTTCTTGGGTAAGAACCTTACAGCAAAAAATCTGATTTTGTAAAGGCATGGTT  
ATTGTGGTGGGCTATTACCATCCTTGCTCTATTTATTTAAGCCTGACTACGACATTAATTTAAGAAGTATAGGTATAG  
GGTTAAGTTTGGGTTTTGTCAAATCCTTGGTAGATATACGATGTCTTAGGATGGAGTAAAGTACTGGGGAGTTTGGGG  
GTATTTCCGTAAACAAATATTGTTCTTTTCTTATCTTAAATTTTTCAAAAAAGATAA  
>Cluster\_25407  
ATGACAGACACATTCAAACTGCAATACCCCTTACCAGCACCCTCCGGGACGCTATCGACGAACTGCAACTGACTCGCCT  
GAAGGTCAAAGATATGCGTGGGCTCGACGTATCAGCGATAAACCTGAAGACTGGGACGAACCGCTACTGGCGGCGATGA  
CCGACTGGTCCCGAAGATTTGGCCGAAATGGATCTTGTGACTATCAGGCGTTCAGGAAACGATTTAGAAATGCTT  
GGGCTGGGCGGCAACCCGACGAACTGTTGGCAGGCGATGGCGCTGCTGGCACGGTGGTTAG  
>Cluster\_20021  
ATGGAAGAAGATATTAGCAATGCAATGGAACAACCTTTTAGTTCGACTATCTCACTACAAACAAGAATAAATCAAGCCTA  
TTCAGATTTATGCCATTATACGCTCTCTCAATGCGTTATTAGCTTAATGAAGGTGAATGTAAGCCTTGACGATTTTATCT  
CTCTGGTGAGCGATTTAGAGCAGCTATCTGAGGACGATGCCAAGCTGTGCACTCGAACCATCAGGACACCCGCAAGCAG  
TTAAAGGCTGCAAGTGAAGAGATTGAGCAATTAGTAAATGATTTAGCAAAAAAGTCTATTTCTTCTAAGTGA  
>Cluster\_21753  
ATGACGACACCAACCAGACGGATAAGTTTCTATCTGAAGCCTGCGGCCGTCAGAAACGAAAGCAAGCATGCGCCTGGCT  
GGACAGCCTTACACGAAAGCCGCAAAAGCGGCAACCGTGGCTTTTCTGGCCGGCTGGCATTCTGAAATGAATC  
CAGCAGAGGCTTACCGACTGGCTGCATGGGCTGACGATGAGGCGTTATCAGTGCACAAACCAGGACAGAAATGCCCGCG  
TCACAGCCAGTATCAACCGCACAGATAACCGTCAAGTGGCCGAAATATCCGGGCTTATTTCCGAATAA  
>Cluster\_37308  
ATGGCTAAGCAATCAATGAAAGCAGCGAAGTAAACCGGTAGCTTTAGCTGATAAACTTCCGCAAAACCGCTGAACT  
GAAAGCGATCATCTCTGATGTGAACGCTTCCGACGAAGATCGTTGGAACGCTGTTCTCAAGCTGCAGACTCTGCCGCTG  
ATTCCAGCCCGTCTGCTCAGCTAACCGCTGCCGTCAAACAGGTCGCTCCGATGGTTTCTGCGGAAGTTCGGGTTGAGC  
CGTATTAAGTCCGTGAAGCCGCTATGCGCGGTGAAATCCCGGCTGAAAAAGGCTAGCTGGTAA  
>Cluster\_5278  
ATGGCCGCTGCGCAACAGTTACGCGCTCAGCGAGTCTGAAGCCGAAGATATGGCCGATTTAACGGCAGTTTTTGTCTT  
TCTGAAGAACGATTTGTGGTTACAGAACTTACCTAACCGGCAAAATCGTCGCGCACTGGTCTTTTCTGCTCAGCAAAACC  
AGTGGGACCTCAGTAATACGACACCTTCGACATGAAAGCCCTCGGTGAAGACAGCTACCCGATCTCAGCGGCATTGGC  
ATCCCGCTGCTAAAAAATGCAAAAGCCCTGGCCGCGATTCCTTAAGCCTGCTTCCTACGTCAAATAA  
>Cluster\_64808  
GTGGATATTTATTAGTGTGACCTACTCGATAGGCAAGTGGCAGCACCATTGGTGGCATTTTGTGGTGGGCGGTGAGGCG  
TACATTTGCCAGTACGGAACGTTGGAGCAAATCGAAAGCCGTTAACCGGCTTGAACGAAAGTGGCAAAACATGCCA  
GTGCACAGGATTTACATGCTGTCCGGTTACAAACCGCAGAAACCAATGGTGAAGTGAAGCGATGAACCGGCACATACAG  
GTGCTGACCCATCAACTGGAGCTTTTGTCTGAAAAGGCGCTCGGAGAGAACAAACATGA  
>Cluster\_37583  
ATGGAATATAAAGATCCTAATGCATGAGCTGTTGAGCAGCTGGAACAGATTGTTTTAAAGATGAAACGAGAAAATTC  
CCTGACGCACAGAAACAGTCTCTGATACCAGAAATGAGCAGTTACGAAAAGGACAGGATTAATAATCGATGATTTCCGCC  
GGTTTTGGGCGTATCAGTCCCATGGTAAAGGATGGGAATCCAGACGCGTGAAGCCTCAAGTCCGCAACTAAAATTC

ATGCGTTTGATTCAAGCCAACCCGGCATTAAAGTAAGCAGTTGATGGAATAG  
>Cluster\_51773  
GTGCCAGGTA AAAATGCGGTTGAGGTGGCTTATGCGCTACCTGAGAAGCAGTACCTGCAGCGGTGACGTTGCAGGAGGG  
CGCGACGGTTGAAGAAGCTATTCGCGCCAGTGGTTTGCAGGAAATGCGTACCGATATCGATTTAACTAAAAACAAAGTCG  
GCATTTACAGCCGTTCCGGCAAACTCAGCGATATGTGATGATGCGGATCGGGTGGAGATTTATCGTCTCTCATTTGCC  
GATCCGAAAGAGCTTCGCAAGCAACGAGCAGAAAAATCAGCAATAAATA  
>Cluster\_66960  
ATGTCACCTCAAATGATACAGAACTCCCGCCATCCTCTGTTGGAAGGCATGTTTCCCGAGCTATCAACAAACAGCT  
TAAAGTCTGCGTTTTCGCAATGGGTGTTCCCTTACGACGCCATTGCCAGAACTGTCGGCTTCTCCGAAACGGTAC  
GAACCTACCTGAAGCGAAGCCTGAAGAAATTAATCTGGAAGGATATGATGCACTTCGCTCTGCTGTGCTGATGCGAACT  
TTCGTTTTTATGATAGCAATACAGCTAAAGAAACGAAAAATGTGA  
>Cluster\_21625  
ATGTTTGCATTTTATTGCTGCAATAAATACTGCTCTGGTTTATTTCGTAAGTTTGTAAATGTT  
CTCTGCAATTTATATGTTGTTGAGAAGTCTTCCGTTGATTGTGACTCATCTTCTGATGGTAGCAGTATTTCTCCG  
TTTTTTCAGAGTTGCCTTCTTCTGTTTTGTGGTTCTTAACTGATGCTTTTTGATGTTGTTTTGCCCATGATGGTTTCA  
GCCATGTTTACGCGTTTCTTTATACGCCGATTCATTCTTTAATTA  
>Cluster\_56231  
ATGACTGAACTCGCGCAATTACAGGCCAGTCCGCAACAGGCAGCGGCTTATTGAAAGCAATGAGCCATCCTAAACGATT  
GCTGATTCGTGCATGCTTAGCGGTTCCCGGGCACCAGCGCGGGAGAGCTGACGCGCATACCGGACTGAGTGCCTCTG  
CGACATCAGCATCTCGCTCGTATGCGGGACGAAGGGCTTATCGACAGCCACCGGATGCCAACGCATTCTATATTC  
ATTA AAAATGAGGCGGTAATGCAATATTCGCCACCTGAAAAATGCTATTGTTCCGTTAA  
>Cluster\_17779  
ATGAGCAAATTAACCCGTTTGA AAAAGTATCACCTGAACTATGTTCTCAGCGTCAGGCTTCAAAGTTGTGCGCGTTAC  
TCCGGCGGCGATAGAGGTAGAAAAGCGCGTGTGAGCGTGAATCGAAAAGGCCAGTACCGCATTCGAGCCGACTCTGGT  
TGCTGTGTATGGATGTAGCGGTCGGTGAAGTGGAGCGGCCAGAAATAGCGATACCGGATCAGTGCATATCAAAGGT  
AACGGCCTGCGCCGAGGCAATATGCAAGGATCGGATGTCGCGGGGTGTTGATGACTAA  
>Cluster\_49057  
ATGTGTTCTGCATATAGGGGCGCTCGGGTTGATGGTAAAATATCACTCGGGCTTTTCTCTATCTGCCGTTACGCAATG  
CCTGAGACAGACAGCCTCAAGCACCCGCGCTATTATACTGCGCTTTTAACTCCTCTGTTTTATCAATCTTTTTCTG  
AAGACGCTTCGCATTTTTGCGGAATAATATTTCAATACATCAATTTATTTAACTTAAATATATCCAGGAATTCACAAAA  
AAGGTGTTTTCTCTATCAAAGTGAATGGCTAAAGGAAATTAATATTA  
>Cluster\_174  
ATGAAGGAGGTGTTAAGTCTCCTAAGTTTCAAACGTTAATGTCTCAAAAAACAAGGTAGCTTTTGCTCTTACTTTTTAT  
CCAGTTGTTAATTTATATGTTTATCTACCTTTTAGCTTTTAAAAAGATTTTATAGCCATTAAGGTTACCGGATCAA  
TACCTTTAGGAATCTCTGCGGATTCAGTAATAATTTTTCTGCTGTTAACTGGAGTTTATACCTTTGGGCAAC  
AGGCTCTATGACAGGTTGGTTGAAGAGATTA AAAAGAGAAATGAAAAACATTA  
>Cluster\_57006  
ATGCAAAACAGAAAATGGATTTTACCTCGCTGGTAATGACTTTTTTCCGGCATCCCATTTCTGGCGCAGTTTTTGGCGG  
GTTATTGCCATGCTGGGTGTCGACTTCCGGTATTATGAAAGTTGTAATATCTTATCACGCCAACAAATTTACCTTC  
TGCTCAACGCTTTTATGCTGACGCTGGGGCGATAATAATTTTTCTCTGGTGCCTGTTGGCGGATAGCGCGCA  
GAAAACAGAGAAATAGCCGCTGCGGGCAATGCTTTTTTCTCTTACCCGCGCTATTAACCTGGTTGGCGGTTTTTTAG  
TCTCATTAGTGGGTGGTGA  
>Cluster\_44337  
ATGGCTAAATCAGCAACAGAGCACAAGCCGATCAGAGAGCCAAGCAAGCATCATCCGGTATGCGTAAGCTGGAGCTTGT  
ACTTGATGCTCAGAAAATGAAATGCTGGAGCGTAACTGTGCCACGCTGCTTCAGGCGTGCCTTGCAGTTTGGTGT  
AGTACATCGCGTTACTGAGCCGCGAGGATGATGACCGTGTGCGCTGGCGTATAAAATCGATCAGCAGAAAACGGTGC  
AAGTGGCGGAGAGAGTTCTGTTAATTCATGCCGTTAATGTTGACTCACAAATGCTGGGTGACCAAAAGGCTGGCAGCA  
AACAAAATTAATGATATA  
>Cluster\_48980  
ATGCAAAACAGCAGATCGCACTGGAGTCACAGAGAACCAGAAAGATACAAAGTGGCTGTTGGGATGATGATTGTGCT  
TCAGTCCCTGTGCCCTGCTGCCGCTGCTGACCGGTTGCGGAAAGTACGCGAACAGTTTACGTCAGGTTCCGGTAGTTCCG  
TACCAGCCAGCCTGACGGCTGAAACCCCTCAGCCTGATTTACCTAATCATTTTACGTTGGGCTCGAGCTTAGATCTGAAT  
GTCGCTTGTGCTGCAATGGCGCAATGTAATACCGATAAAGCTGACATCAGAAGGATGAAAGTTGAGCGTGGTCACAT  
CATGCAAAAAAATGA  
>Cluster\_38510  
ATGAACAGGAAATATATCTTAATAATAATGTTGGTGGGATGGTTTATGGTGGGTATACTCTGTATATGTCATGGGATTA  
TGAGTTTAAATACAGATTCTGTTCTGTTGTTCTCTGCGGAAATGGTTTTGTATCCGGTTGCCAGATGGTGTATTG  
AAAATCTGCCCTGAAATTTACCAGCCTCATTCTGGAACAGCGGTTTTTTGCTGATACTCCCGGAAAAATGGGATTA  
CTTGCGGTTTATACGGGTACTGTTTTCAATATATCTCTTCCGTTAACTCTGATATATACTTTCTGTTATCATAAAAAG  
GCTGCTGTAAGATAG  
>Cluster\_66026  
ATGAAAACCTCAAAAACGTGGCAAACTATTATTTGTTGTCGGGGCGTGGTTATCTGGTTGGGCTATGGATCTCATG  
CCCATTGCTAAGTGGAAAAGGCTATTTTCTGGCGTGTAAATGACAGCAACTTTTGGTAACTATGCATATCTTCGCGCAG  
AAAACTCGGGCAACTGGATAATTTTTTACCCATATCTGCCAGTTAGTTGCGTTAATCACTATCGGTTCTTTGTTTATC  
GGTGTTTTTAAATGCACCTATCAATGCTTATGAAATGGTGTATACCCCATCGCCTTTTTTGTCTGCTTGTGGTCAAAT  
GCGTTTGTTCGCTCGGTATGA  
>Cluster\_22120  
ATGAAACCGTATACTATGCTCTATAGTGAATCTTTCGAAATAAACGCATCAACAATTTCAAGTAAAACAACTCTACCGT  
AAAAACATTTACCACAGAACCTAATGATGAAGATTATCTCAACACTTGGACAACGCATACAAGAGTCAATGAGAACCAAG  
ATGAGGATTACAGTTTACGCTTACCCCGCAACTGTGAAAGAAAATACGAAATATCTAATGAAAAGCAGCTCTGATGATACA  
TTTTTTACAGAATCTATTGAAAATAATGATGATGATTTTATAGTATGTAGAACATTTGTAACAAATGTCGTTGAATCAG  
TGATGATGATTTCTATTTAACTAA  
>Cluster\_19664  
ATGATTGAGGTTCTGCTGCACTGATGATTGCAGAAAAATAGCCAGTGAAGTCGATTCTTTTTCCATCGGCACCAACGA  
TCTGACGCAATATATATGCGCGCAGACAGAGGAAATAGCACCCTCGCGAACGTTGCTGATTATCGTAATGACCGGTTGA  
TTAACGCTATTGCTATGGTGTGTCAGGCGGACGTAATAATGAAATTCGGGTCAGTATGTCGGCGGAAATGGCTGGAGAT  
ACCCAGCAACAGCAGCACTGCTCACCATGGGGATTGATAAGCTCAGTCCAGTCCGTCGCGGCTTCCGGCCTTGAAGC  
AGCAATCAGAACCCTCCACTAA  
>Cluster\_17767

ATGAAAAGGCAGTTGCAGGCGCTCGGAAGGCTCAAGACAGGCCAGATGAACAAGACGGAAGAGGCTTATGCGGCACACCT  
AAAGCGCATAACCGGCACGTGTCGTAGCCTGGTACAAAATTTGAGGGCATCAAGCTGAGGCTGGCTGATAACACGTTCTACA  
CGCCGGACTTCGCGGTGATGCTAACCACCGGAGAGATGGAATTGCACGAGGTGAAAGGTTCTGGACTGATGACGCCAGG  
GTGAAAATCAAGGTAGCCCGAGACATGTACCAATTCACGTTTAGAGCGCTAAAGCCAAATACCGAAAAGCAAAGGTGGTGG  
CTGGAACGCGAAACGTTCTGA  
>Cluster\_20781  
ATGAGTGAGAGTCTTTATATTGATTGCTTATTAGGGCGGTGATTTTGTCTGAATACCGGATATGAACCTGAACTGTG  
TAATAACCGTAAAAGTATCGGACAGGACATTATTCATTCATTTATGAAAAGCGGGCTGGCAACGGAACGATTGCCGAAC  
GCAGCCCAACAATGCGGGCGGATATTTTACCCTGATGGAATTAAGTATGAAAGATGATGAACGGATTATTCGGGGAACA  
GTGGAAATCAGTGAGGAAAGCCAGAAACGATTATGATAACGGCCAGCACCTATGACTTTGGCGGCATATCTGCGCAGGT  
GGATTTATGA  
>Cluster\_55227  
ATGAAAAAACTGTTAATTATCATTTTGCAGGCTCTCTCTCGGCTGTAGCGCTTTAATCAGCTGGTGGAGCGCATGCA  
AACCGATACGCTGGAATACCAGTGTGATGAAAAACCGTTGACGGTCAAACGAAATATCCGCGCCAGGAGGTGAGTTTGT  
TTTACGATAAATCAACTACTGCATCTCAAACAGGGCATTTCAGCCTCTGCGCGCGTACACTGACGGAATCTATGTTTTC  
TGGTCGAAAGCGGATGAAGCGACTGTCTATAAACCGCACCGCATCGCTTGAATAACTGTCAGTTACAAAATCCACAGCG  
TTGA  
>Cluster\_39467  
ATGAAGATGCCAGAAAAACATGACCTGTAGCCGCCATTTCTCGCGCAAAGGAACAAGGCATCGGGGCAATCCTTGCGTT  
TGCAATGGCGTACCTTCGCGGCAGATATAATGGCGGTGCGTTTACAAAAACAGTAAATCGACGCAACGATGTCGCCATTA  
TCGCTGTTGTTCAATTCGTGACCTTCTCGACTTCGCGGATTAAGTAGCAATCTCGCTTATAACGAGCGTGTTCATCGGC  
TACATCGTACTGACTCGATTGGTTCGCTTATCAAACGCTTCGCTGTAAAAAGCCGGAGTAGAAGATGGTGGAAATCA  
ATAA  
>Cluster\_17916  
GTGGATCACTATTGCACCGTTAGTGACACCAAGGAAGCGGACTACGTTCTTATGATGGCGATGGCCTTGAGCTACTTAT  
CAAATCCAGCGGGAGTAAAATCTGGCAGTTTCGCTACATTCGCGCTGTACCAAGAAACGTTGCGAAAGAGAGCATAGGCC  
CCTACCCGTCAGTTACGCTTGGCGATGCCAGAACTACCGGGCAGAGTACGCTCTCTCTGGCGAAACAAATCGATCCA  
CAGGAACATCAGCAAGAACAACTTCGCGATTCGCTTGAAGCTAAAACCAATACCTTTCCAACTCGTGGTGAACGATGA  
>Cluster\_34794  
ATGCAATTTCTACAACCCCAACTCTGGAAGGCAGACCATCGTTGAATATTGCGGTGTTGGTGACCGCGAAGCGATT  
AGGTGCCAATATTTCCGTGATTTCTTTGCCGGTATCCGCGATATCGTTGGCGGACGTTCCGGTGCATGAAAAAGAAC  
TGCCTAAAGCACCGGAGATCGCCTTTGAAGAAATAGGCCTCCAGCGCGGGCGCTGGGGCCGATGCCGTCGTCGATTA  
GATATCGACTACGAAACGGTCCGGCAAACCGCAGTATGCTGATGGTTAGCGTCAGCGGTACGGCGGTGAAAACCGCTC  
ATGA  
>Cluster\_22785  
ATGCCTCATAACCCAAATACCTGGCTGGAGTTGGTCCAGAGCTGGTGGCGTGGAGACACACCGCTGGGCGCAGTGATTAT  
GTCGATCGTTATGGCTGGCTTGCATTTGCTATTTTGGCGGTGGTGGTGGCTGGAACGAAAAACGCTCGAGATTTTGC  
TCTGTGGTCTCTGACGCTGACTTTTGCATCCGCTCTTGAATATGTCGGATGGCTAAATCTCTTTCTGTTGCCATTGGT  
GGCGCGTTGGCTGATCGGGTGCATGCTATTCGTGGGGTCAATGAGAGTAAATCGGTAATAAGTTGGTGGCTCTAA  
GGAGTAA  
>Cluster\_22938  
GTGTGCCACTACACTTACCTGAAAAAGCCCGGTACCGATGAGCCGGCTGGAGCACATGCCAGTCAGGATGAAATCGG  
GCTGCTTTATAACAGCCACCGTACAAAACGGGAAGAATACCTGTGATGAGTGGTGGTGGTGGTGGTGGTGGTGGTGGTGG  
GGCATGTGGCGGATAAGGGGGGGCCGATGTTGAGGTTCTACGGGTTCTGAGTCCGGCGAAACCGCGATTGCTGGAAGA  
AGTGGTGTACGTCATAACAGAAACAGTGAGAAAACGGCGAGGCAATCACCTTGAGAGGGATTACCAGCGGTTACTGA  
AGGTTGA  
>Cluster\_21251  
ATGAAAAGAAATCTCCGTTAATATTTTGTGCTTCTTTGGTTATGGGCTGTACGCAACATAAAACAGATATGCCTCG  
ACAGTTGGTTAAGGCATTAACACAAATATCCGGCTATGCGCGCAAAATATATAAAGGGACGGGTTGATGTGAAGTTG  
ATATTGGTGTGATGGTACTGTACCCGAATGAGTTTATCCGTTAGAGCCGACCAATCTGTTTATGAGCAGGTTGTA  
AAGCGGATGGCAAATGGCGATTGAGAAGGACAAGCCGCTAAAGCGTGAAGAAAACATTTATCTTTAGTCTTCCAGC  
ACCTGA  
>Cluster\_990  
ATGGCTAAACCGCAAAACGATCAAAAAGTCCCGCAGCGGCTTATGTGCCACAAAACCGGATGCGGTGATTACCGATAT  
TAAACGCATCGGGGATTTACAGCGCGAAGCATCAGTCTGGAACCGGAAATGAATGATGCCATCGCGGAAATACGGAGA  
AATTTGCAGCCCGATTGCACCGATTAACCGATATTGAAACCTTTCAAAGCGGTTACGGATGTTGTAAGCGAAC  
CGCGACGAACTGACGAACGGCGGCAAAGTGAAGACGCGAATCTGTCACCGGTGATGATCTGTTGGCGGTTCCGTCGCA  
TCAGTAA  
>Cluster\_29401  
ATGATGACGCTGGCGGGGAAAAATCTCCGCTTTTCCAGCCGGTCCCGGAAAGAGCACAAGGAAAGTCCGCGCGGCTC  
CGCTTTACCCGGCCATGACAGGCATGGCCTTATGGGTTTTCAGTTATGTGGCTCAGCGTCTGTGCGGGCTGTGCCGTG  
CCTCCATCGTAGCCGGCTTCTGCGGACGGATGCAAGGTAAGCTGAACCGTGCCTGACCCGTCCTCTCCCTCCCGT  
CTGCCGTGA  
>Cluster\_56346  
ATGATCCACAGTAGCGTAAAGCGTTGGGAAATTCACCGCGGTGCGGATCCCGCTACGTTAATGCAGGCGCTCAATCT  
GAATATTGATGATGAAGTGAAGATTGACTGGTGGATGCAAAATTAATATTGAGCCAGTGCCTAAAGAGCCGATTTTA  
CGCTTGTGAACTGGTCAACGACATCACCGGAAACCTCCACGAGAAATCGACTGGGAGAGCCGAAAGATAAGGAA  
GTCGTGGTAA  
>Cluster\_1302  
ATGGGACGCTGGCTTGTGTCAGGCTCATGAAAGAGCTGGGGTGGTCACTGTGACGAGCCGACTCACCGGTATAAACG  
TGGTGGTCAATGAACATGTTGCTATCCCTAACTACCTTGAACGGCAGTTTCGCGTGACCGAGCCAAATCAGGTGTGGTGG  
GTGATGTGACCTATAGTGTGCCCGGAGTTCAGGCGGGCATGGATGCTTAAATGAACCGGAGTCTGTCTGGAATATTGA  
>Cluster\_43597  
GTGAAGACGGCCGCTGGACCTCGCCCGGAGCGCCAGGCGCACGAGCCGGCGCGGACCCGCGCACCGCCACGACGACG  
GCGGACGCGCAGCAGGAGCGCCAGAAGCCGCGCAGAGAGCCGAGCGCGGCTGAGGCTTGGACGCTAGGGCAGGGCA  
TGAAAAAGCCGTAGCGGCTGCTACGGCGCTGACGCGGTGAAAAGGGGAGGGGATGTTGCTACATGGCTCTGCTG  
TAG  
>Cluster\_62822  
ATGATGTCCTTACCAAATGTAATTAATGCACAGCCATAAACTAGCGTAAATGCAGCGCTCTTGGACGATACGAAAT

AGTTGTAGAGAGGGATCTCCATTTTCTTCGTGAGTTATACATATCAAGCCGAGAAGAATTTGTCGGACATGGGTTTATG  
CAAATGAGCCAATATTTTCATGAACATCCACTGTCTGTTGGCCTTCTGTTATGTCTATCACAAAGGTTATGATGAAAT  
GAAAAATCATAA  
>Cluster\_32182  
ATGGACTTCTGGACATCTGCTTAATGAAGAAAACTGGCAGCTCATCAACGTAACAGGCGATGTATACCCGAATGGC  
AGCCTTCCCGGGCGTGAAGAACTGCAAGAGTATGACTTCACGTTTCGCCACCGGAGCACCAGCAAGCAACTCCAGTCTG  
TACGCTCAGCTCAGCTTCATAGAACGTAATGAAAAATATCGTATTACTGGGGCCATCAGGTGTGGGAAAAACCATCTGGCA  
ATAGCGATGGGCTAG  
>Cluster\_29872  
ATGGGAAGAGATGACCCGCAATTTAATCTGCGGCTACCTTACAAATTAAGGAAAACTAAAAACAGCGAGCCAAATCCAA  
TGGCCGCTCTATTAAATTCAGAATAGTTTTCAGATAGTACTGATGCTGTATCAAGGCAATCCAAAAATTTTTCAGGCTATCGAG  
ACGATGCGGAACGCATCGCTGATGAGCAGTCCGAACTTGTAAAGAAGATGGTGTGATACGCTGAAGGATTTGTACAAA  
AAACCCACCTGA  
>Cluster\_21058  
ATGACGGCGTTACTCTCCAACCTGGGTTGACGCGTGCCTGTAAATGGCTCCGCTGAATGATGCCCTATACCGTTATGT  
GATGAACACCCGCTGGGAACCATCCACGGCAGCTCGGTCGGCGAACTGCTGGCGTGGATCAAAGAAGATGAAAAACCTC  
GCAAAGGCGAGATGGTGTGATTATTGAAGGCCATAAAGCCAGGATGACGAACCTGCCGCCGATGCGCTGCTACCGTG  
GCGCTGTTGTAG  
>Cluster\_20034  
ATGGACTCTATTCACGGTATGAAGTGTAAATATGATGATTGAATCAGGCGAGCAATATACGCATGCCAGTCTGGAAGC  
AGCAATTAAGCGCGTTTTGGTGAACAGGCACGTTTTTCACACCTGCTCGGCAGAAAGGGATGACTGCGGGAGAGTTGGTGG  
CGTTTTCTGGCAGCAAAGGCAAAATTTATACCTTCAGAAGAAGTTTTTCAACCGATCAGAGTAAGATTTGCCGCTACTGA  
>Cluster\_19628  
ATGGCAGAGAACGAAACCGTGCACCCCGCGTTAACCTGATCTCTACGTGAACCTTGACGAACAACGGAAGGATACGC  
TCCGATTGAATCACAGGGTTGGGATGTGCTGACGCAGAACCTGACCGGAAAGGTCGAACCTGACCCAGCCAAACACTTA  
ACCAGAATCCGAAACAACGCCCGCAGGCTCCGTTGGTGTGAGCGTGGTGGCTTCGTAACGTTGATTAATTTAA  
>Cluster\_34018  
ATGAAAAAACAAAAAGAAATGCGATGCGTATTACGCTGATTCTGATTCCGCTCGAAATCGACCATAAAAATAATCAGAT  
ATGTAAGGACAGAGAGATGAACCTACTCCAGTGCCTCAGGATGTTTATCAGTCAAGGAAATTAAGGCCGGGAAAAAGCATG  
AAGAAGACCGCAACGGGCGCAATGTCGCGGGGGATGTGTGGGCTGGGCAAAATGACCAGAACCACACGACATAA  
>Cluster\_14954  
ATGAAACCCGATAATACACCTGAAAATGAAAAAATACGTTTAAAAGCAGGATTAACACAAAAGGAATGCAGTCATAT  
TTATGGTGTGGGCTAAGAACCTGGCAGAAAAAGAGGAAGTTAATACCAAAACAGTCAAAGTCTGTCACTGGTTGAGT  
TTGAGTTTTCTTTTGTACTTGCAGGAGAACATCTGAATACGTTCTGCAAAAAGGGAGTCAAATAA  
>Cluster\_56094  
ATGCAAGAACTAGCAGATTAAGACCTAATTAATCGTAAGACCTACTCAGCATGATTCCTTTGTCTGATCGAACGATCTA  
TAACCTGGAACAACGTGGTGTGTTTCTCAGCGTATTGTTTGGCAGAGCCGAAGTGTTCGGTGGGATTTAGCGGAGGTTG  
AAAACCTGGATAGAAAGCAAGCGCAGATCTGCTTAAAGGCAGCAAGACCCGGTTTTATGTGGTCAAGTGTGA  
>Cluster\_66394  
ATGTCATTAGAAGTGTGTTGAGAACTGGAAGCAAAAAGTACAGCAGGCGATTGATACCATCACTCTGTTGCAGATGGAAT  
CGAAGAGCTGAAAGAAAAAACAACCTACTGTGCGAGGAAGTTCAAAATGCCAGCATCAGCGGAAGAGCTGGAGCGTG  
AGAACAACCATCTGAAAGAACAGCAGAAAGCGTGGCAGGAACGCTGCAAGGCCCTGCTGGGTGCGATGGAAGAGGTTGTA  
>Cluster\_16417  
ATGGCTAGTGTACCAACTCTTTTCTGGGCTAATAGCTATGATTGTTTGTATTATTTGTCTCTGTCTATTATTTTTGA  
CATCCATGCGACTTCTGATATTGATAATCTCAGTTGTGGAGTTCTGTCGCGCTTCCGGGAGGACGCATATCAAACTAC  
TGGATCTTCTGTTAAACACTGTAAGCCATCTACATTTGCATGTTGTTGAGTCTAAGATACAATTTTTAGTGTACGATAA  
>Cluster\_40672  
ATGGGCAATGTGATTCAACTGGCTCCCAATGAATGGGTTTGTGAAAGCGTTCTTATCGCAATTACCGGGCTCAAACAGG  
CACAAATCTTCCGGCCCGGAAAGAAATGCTGGATGGTGGAAAGAGAGTATATTCAGTATCACAGACGTAATCCAAAGC  
CTTCCAGTGAATGATGTATAACAGAAAAGCAATAGATGCCTGGGTCGCTCAATGAAAAACAAAACCCAGGTGA  
>Cluster\_17624  
ATGATGGTTAGAAATGAAGTAATGAACAAAGACTGGCACCAGGATACATCGTTGCCGCTGTGCACACAAAGGTTTTTAC  
ATTGCGTGAACCTTCTGAAACGCGTGGTCTAAAAAAGACTCTTAAAAAATGCACTGTATCGCTCATGCCCTAAATATG  
AACGCATCATAGCCGATGCTATTGGTGTGGAACCTGCGGAGATCTGGCAAGCCGGTATGCCAGTAAGCGCGCTAA  
>Cluster\_64290  
TTGTGCGTGGAGATTTTGTATTTCTGACAGGTCGGTGTGTCATCCCGATGTTGTAACATCGTAAAAATGACAT  
TGAGATTAATCATATACTAAGCAAAACCTGGAATAACATCTTTTACCGCTCCACCGGGCGGTTTTTTTTATTCTGAACC  
CTAAAAAAGAAACACGGACACTGATAATGCCGTTGGCAATGCCATGTAAGTTAGCGATGAATATGGCGCAAAAAAAG  
CGCGCCCTCGGATTAACGCCCGGGACAAAGTCCATGA  
>Cluster\_66845  
ATGAAAAACAATACCGCACAAGCAACAAAAGTAATTACCGCGCATGTGCCATTACCTATGGCTGATAAAGTCGACCAGAT  
GGCCGCCAGACTGGAACGCTCCGGGGCTGGATTAACAACAGGCGCTTCTGATGGCTGCCCAGGAGGAGGAGCGTA  
ATCGCCTGACGCTGGAAGCCCTGGACGATGTGACATCCGGACAGGTTATCGACCATCAGGCTGTACAGGCTGGGCGGAC  
AGCCTCAGTACTGCAATCCGTTACCGGTGCCACGCTGA  
>Cluster\_7328  
ATGTCATACAAATCCGTTGATAAACAGAAACTGAAAGCAGTGCAGTAAAGATTCAGGCCAGGTCGTGGCGCTCAAGAA  
AATGCTCGACGAGCCGACGAATGCGCTGCAGTTTTACAACAGATTGCTGCTATCCGTGGCGCGGTAACGGTCTGATGC  
GGGAAGTGATTAAGGTCATCTGACGGAACACATCGTTTACCAGGGGATGAGCTAAAACGTAAGAAGATCTGGATGTC  
GTTCTGAAGGTGCTGGATTCATATCAATAA  
>Cluster\_63621  
ATGATTACCAATTAAGAAGCCACTGTTGTAACCTACCGATGACATTTGTTACAGGAGTGAATCTGGAAGGAAAGCGCATTGG  
CTACGTAATTAACAGAAAAATAAAGAAGCCCAATTCAGTGTGGTTGATATCGATGGTCCATCAGGCAACGTAACAAAC  
TTGATGAAGGTGTCAAAAAATGTGCTGGTGCATATCGGAAAGAATCGCCCGCAGAAAAAAGCCGAATTTCTGGCA  
ACTTAATGCAATGAAATTAAGGTTGAAATCTGA  
>Cluster\_9321  
ATGGCTACCTCACCCTGGCGTGGTCTTCTTTCGCTGGCAACTTCTTAGTGCCGTAATGATGTTTCTGGCCAGCACACT  
CAACATCCGTTTTTCTGGTCTGATTATGTCGGGCTTGGGTTGATCAGCAGCGCTGCGGCTGTTGTTCCGCTGTTGGT  
TCGCAATGGGTTGCTTGGCATCAATGGCGGACATACCCTATCTGGCACAACTCGAGTCCGGTGTATGATAGAAGAG  
ATGAATCAGACACCGCCACAATGGCCAATGATTTTGACCTGA



>Cluster\_48978  
GTGGAGCTAAATGACCCGACAGCAACTATAAATGCGCTGTTATGTGCTTGTGTGTTATACTCTGATGTTTTATCGTGC  
TGGTGATTCGCGGCATCGTCTTGGGTTTACAGTTCAGCTTGGCTGATTAAGTGTACATACAGTGTGTTCCGTTGGCCT  
ATCTCTGTGGGATTTATCCCATTCCTCATGGCCCATTTATCGTGGCGAACACTATTTTTCTTTCCGTGCTGGTGGCTGTC  
AGAGGCAACGTTGCAGCTGTGGTTGATCATCTGAGGCACTAA  
>Cluster\_62811  
ATGCCTGAAAAAGTTGCAAACTGGAGTCCGATGTTGCTCATATCAAACGAGACGTTGATGAACCTAAAAACAGACGTTAA  
AGCTATCGACAAAAATATGATAACTATTTCTTGCACGCTGGACTCTATAAAAAGAAATCCTTAACAAAACAGCCATCAAGTG  
ATGCTGTGATAGAAAAGATTTTCAGACGCAAAAGCTTGGCTATTGCTTGGTGTTCAGCAATCATCGCTGCAGGAACAGGA  
CTTTATAAGCTATCAATGTACTTTTTCTTTAGTGCTTAA  
>Cluster\_24697  
GTGCGAAATAAGCAGGTGGTGTACTCATTGCCGGAATATCCGGCATCGCGACGGGAATAATCGTCAGCCTGAATATCCC  
CTTTATCCGTAGGGGCTTTTTTATCCCGCCAGCCCTGTAGAAATAGTCGTTTCGCTGTGTC'TACCTTTTCTGTTCTG  
TTGTGTTTTTTTGTGGGGCAATTTGGGATGATTTTGGTGTCTGAAATATATTACAGCTGCATGACCAGTCTGAATAAA  
TTATCAGAAATATCAGAGGGAAC'TATAATGAAAGAAAATAA  
>Cluster\_31674  
ATGTACCAGATGGAAAAAATCACAAACAGGTGTGTACATACCACGCTCAGCGGTGGGGACGGGATACTGGCTACTGCAGTT  
GCTGGACAAAGTCTCCCATCCAGTGGGTGGCAATAGGCGTATTGGGTAGCGCCAGATATCGAGTGGCCGTAATACCG  
ACGTTATAACCTATAAATGTCAACCTGACGGAATGTTGAAAGGATGGAGTGAGCAGCCAGACACAAAAAACGGAGTCC  
GGCTCCGGTTTTTGTGTTGCCATATAA  
>Cluster\_18469  
ATGGCACATAAAAAGGCTGGCGGCTCCACACGTAACGGTCCGATTCAGAAGCTAAACGCTGGGCGTTAAGCGTTTCGG  
TGGCGAATCCGTTTTCGGGGGTAGCATCATCGTTCGCTAACGTTACCAATTCACGCTGGCGCTAACGTAGGTTGGG  
GTCGTGACCACACTCTGTTTGTCTAAAGCAGACGGTAAAGTGAATTCGAAGTTAAAGGCCGAAAAACCGTAAATTTATC  
AGCATCGAAGCTGAATAA  
>Cluster\_44461  
ATGCAAACCGTTATTTTTGGTTCGGGTTGCCCTTACTGTGTGCGTGCAAAAGATCTGGCTGAGAAATGAGCAATGA  
ACGCGATGATTTTTTCAGTATGATAGATATTCGTGCGGAAGGATCACTAAAGAAGATCTACAACAAAAGGCAGGTA  
AACCCGTAGAAACCGTCCCGCAGATTTTTGTGATCAGCAACATATCGCGGCTATACCGATTTTGTGCATGGGTGAAA  
GAAAATCTGGACGCTGA  
>Cluster\_41199  
ATGCGCACATCAGGAAAACTTAATAATCAGAAGAAGCAGCATAACCGGCCATTGACCTTACAGAGCACTGGCTGAGAGT  
GGCGATAAAAATCATCGACCGCAACACGGGGGAAGGATACGCGAAAGCACATCCCGACCTGATAAGCGCATTCATGACCA  
CGCGGCGACGAACTTTGCCACGCTGACAGAACGGGAGATTGCCGAAGCGGAACAGGTGACAACCATCAACGTTAAAACC  
GGAGAGCAGACAGCATGA  
>Cluster\_62519  
ATGAATTTATCCCGTCAGGAACAACGTACCTTACAGTTCCTCGCTAAAGGTGGACGATTTGCACAGTCCCGGATTCCTT  
AGGCCGCTCAC'TTCCGTTGAATGCTACAGCCGGAAGGGCTGTGCTGACCGACTGCACGCTCGCCGCTTCAAAAAAC  
TCAAAACCAAAAACTTATCAAGTCCGTCAATGGTCAAGCCTACCGCATCAACACCACCGGCTGAATAACGTTCCGGCT  
CAGCTCGATAATCGCTAA  
>Cluster\_56506  
ATGGCGACGCTGGGGCGTCTTATGAGCCTGCTGTACCCCTTTGACGTGGTGTATGGATGACGGATGGCTGGCCGCTGTA  
TGAATCCCGCTGAAGGGAAGCTGCACGTAATCAGCAAGCGATATACGAGCGAATTGAGCGCATAACCTGAATCTGA  
GGCAGACCTGGCAGGCTGGGACGGAAGTCCGTGTCGTTCTCAAATCGGTGGAGCTGCATGACAAAGTCAATCGGGCAT  
TATCTGAACATAAAAACATATCAATAA  
>Cluster\_38512  
ATGAATATTAATATGAATACCTGAATGAAAATAGACTATTGGTTTATTTTTTTAAGAAGTGAAGCGGTGATTCCTGA  
CAGGTTTTAAAACCTTATTTTGTCTTATGATGGATTAAGTTTTTGGCACATTTGGTTTTTCAATCCGACGAAAGTTTTGAGG  
ATGAATTAATTTTTATATATTCAGAAAACAAACGAGAGGGTAAAAACTTTTTTGTGAAAATAGATTTAAACCGTATCAAG  
TTTTGATTTTTAAGAACGATTCCTAG  
>Cluster\_7800  
ATGGCGTTGTTAATCACTAAAAATGCATCAATGTGATATGTGTGAACCCGAATGCCGAATGAGGGATTTCAATGGG  
AGATCATATCTACGAGATTAACAGCGATAAGTGTACCGAATGCCTAGGGCACTACGAGACACCACCTGCCAGAGGTTG  
GCCCGATCCCAATACTATTTGTGAAAGATCCGGCGCATGTCGAGACAGAAGAACAGTTGTGGGATAAATTTGTGCTGATG  
CACCACGGGATAAAAATTTAA  
>Cluster\_36398  
ATGCACACTAACTGGCAAGTTTGAGCCTGGTCTGTCAGGCCAAAAGCGAACGAATTTTCAAGCATCAGCACCCAACTGAA  
CGCCTTTCCCGCTGTGAAGTTGTGTCAGCGACGCGCGGCTCAGTTGATGTTGGTGGTGAAGCAGAGACAGCG  
AAACGCTGATCCAAACCATTTGAGTCAGTACGCAACGTAAGGGGCTGCTGGCGGTGTCGCTGGTTTATCACCACGAGGAA  
GAGCAAGGTGAGGAAACACCATGA  
>Cluster\_63015  
ATGGCTGATACAAAAGCAAACTCACCCCAACGGGACACAGCTGTTGAACTGGATGTGCTGAAAGGACGCTGGGTCA  
AGATGTTATGATATCCGTAATCTCGGTTCAAAAAGGTGTGTTACCTTTGACCCAGGCTTCACTTCAACCGCATCCTGCG  
AATCTAAAATTAATTTTATGATGGTGAAGGATTTTTGCTGCACCGCGGTTTCCCGATCGATCAGTGGGACCGAT  
TCTAACTACCTGGAAGTTTGTACATCCTGTGAAATGGTGAAAAACCGACTCAGGAACAGTATGACGAATTTAAAACCTAC  
GGTGAACCGCTATACCATGATCCACGAGCAGATACCCGCTCTGTTCCACGCTTTCCGTCGCGACTCACATCCAATGGCAG  
TCATGTGTGGTATTACGGCGCGCTGGCGGCTTCTATCAGACTCGCTGGATGTTAACAATCCTCGTCACTCGTGAAAT  
GCCGCGTTCCGCTGCTGCGAAAATGCCGACCATGGCCGCGATGTTTACAAGTATTCATTGGTCAAGCATTTGTTTA  
TCCGCGCAACGATCTCTCCTATGCCGTAACCTCCTGAATATGATGTTCTCCACGCGGTGCGAACCGTATGAAGTTAATC  
CGATTTGGAACGCTGATGAGACCGTATTTCTGATCCTGACGCTGACCATGAACAGAACCGCTTCACTCCACCGTGGCT  
ACCGCTGGCTCTTCCGGTGGCAACCCGTTTGCCTGATCGCAGCAGGATTTGCTTCACTGTGGGGACCTGGCAGCGTGG  
TGCTAACGAAAGCGCGCTGAAAATGCTGGAAGAAATAGCTCCGTTAAACACATTCGGAAATTTGTTCTGCTGCGGAAAG  
ATAAAAATGATTTCTTCCGCTGATGGGCTTCGGTCCAGCGGTGTACAAAAATACGACCCGCGGCCACCGTAAATGCGT  
GAAACCTGCAATGAAGTTCTGAAAAGAGCTGGGACCAAAAGATGACCTGCTGGAAGTGGCTATGGAGTGGAAAACATCCG  
GCTGAACGACCCGTAATTTATCGAGAAGAACTGTACCGAACGTCGATTTCTACTCTGGTATCATCTGAAAGCGATGG  
GTATTTCCGCTTCCATGTTACCGTCAATTTCCGCAATGGCAGCTACCGTTGGCTGGATCGCCACTGGAGCGAAATGCAC  
AGTGACGGTATGAAGATTGCCCGTCCGCTCAGCTGTATACAGGATATGAAAAACGCGACTTTAAAAGCGATATCAAGCG  
TTAA  
>Cluster\_45860

GTGAATACACAACAACACTGAAAAATGAAGAGTGCACCTGTGCTACCTATTTCTGTTTGGATTATGGGCGGGACTCAGTTATC  
ACGTCATTATATATGTGAAAGCGGGGATATCTTTTGCATAACAAGTATGCTTTTTGCTTTATCTTTCCGATATTGTGCATA  
CATTAAATAGGTTTGTTCACATTAGGTGATGTCGCGCAAATTCGAAAAGGGTTGACTGTTATTCAGGGTGACAATCTCTATA  
TTTTATGCTTTGTAGAGGGCTGATAGCGACCATTTATGTTGGCTTATTCGCCACATTTTACATCCTTAAATATTAAGATGC  
CGGAACCTCATCTTATGGCCATCTGACTTTAAACAACATGTTATATAAGCTCTATGAGGATAAAATTTGCAATTTACTAGTCC  
TAACGCCCCCATTTTTAGCGAGTATAGCATTTCATTTTACCTATTGTAATTACAGTCTTTGTATCGTTTACAAACTAT  
GCTGCGCCAAATCACATCCACCAGAAACCTGGTTGATTGGGTTGGGATAAAAATTCATAATGTTGTTTAAATTTAA  
AATATGGTCTGATACGTTTCTAGGTGTCGCTCTCTGGACATTTATTTGGGCAATTTGCGCGACGATTTTACCTTCAGTT  
TTGGCTTTTATCTGGCTTTAGCCTGGCTTAAAAAAAATATACGTTTCGCAAAAAGTCTGGCGATGATATTTATACTGCCA  
TATGCCATACCCACATTTGTAACGTTACTTATTTTCCGCTCTCTTTTAAATGGAATTTGGTCCGGTTAACTCGTTTCTGAA  
CAGTATCGGAATGAATTCAGTTGATTTTCTGTCGGTTCATTAATGCAAAAAAACAGTAATTCGCCGTTTGTGTTTGGG  
TAGGGGCACCGTATTTATGCTATTGATCGCGGTGCATTAACAAACATATCCCGAGATTTGTATGAGGCTAGTGAGGTC  
GATCGGCCAACTTAAATGGCAACAGTTTAAAGGAAATACACTTGGCAATGTTGTTACATAGGTTGCGCCAACTTGGTAAT  
GACATTTGCATATAATTTCAATAATTTTGGTGCATTTATCTTCTGACTGAAGTGGTCCGACTAATCCGGAATACAGAT  
TCGCTGGGCATACCGATATTTTTTATTACCTGGATTTATAAACTCACATGAATTTCCAGCAATATCATATAGCTTCTGTGA  
ATCTCCATCATATAATTTTATCTTCTTATCGGTTATAGCAATATGGCAATTCAGACGGATGAAATCATTTAAAGATGATGT  
AGGGATGTGA

>Cluster\_21047

ATGCAATATGAAGATGAAAAACGGCGTGAATGAACCGTCAACCGGACGTTTACTGAAAGGGATTGGTGCCTGGCGCTGGC  
GGGAAGTTGTCCGGTGCCTATGCACAAAAACGCAAGTTCGCGCGGGTACGCTTTCACCGGATGCACGCAATGAGAAA  
AGCGGTTTTATGGTGGAGCATCAGCTGGGATCTGACACCCACAACAGGCTGCAATGATGCTGGTGGCGTTTGTATGCTGT  
GCCAGCGATAAAGCCGATCTTGAACGGTTGTTTTCGCTTGTGACTCAGCGTTTTCGCTTCTGACTCAGGGCGGAGCGGC  
ACAGAAACCGCAAATCCGCGCTGCCACCCTCGATTCCGGCATTTCTGGCGCTACATTCGCCCGGATAATCTCACCA  
TCAGCTTATCGGTGGGCTACTCATTTGTTGATGAGCGTTTGGCTTGGCCACAGATGCCAAAAAGTTGCAAGATG  
ACGCGTTTTCCCTAACGACTCTCTGGATGCGCGTTATGTCATGGTGTGTTGCTACAAATTTGCGCCAAACCCAGGA  
CAGGTTGATCCATGCGCTGCGCGATATCATCAACACACGCGCGATTTGCTCAGCGTGCCTGGAAGCGGGAAGGGTTT  
TTTCCGACCACGCGCGTAGTAAAGGCAAAGAGACGCGGATAAATTTGCTGGGCTTTAAAGACGGCACCGCAATCCC  
GATAGCCAGAATGCGAAGTTGATGCAAAAAGTGGTGTGGTTCAGCGAGATCAGCAGGAGCCTGCTGGGCAATCGGTG  
CAGCTATCAGGCAGTACGCTTGTGATTGTTTTCGAGTGGAAATTTGGGACAGAACCGCGTGAAGAGCAGCAGACGAT  
TTGGTCTGTGATAAGCAAAACCGGTGCGCCGCTGGGCATGAGCATGAGCATGATGTTCCCGATTACGCTAGCGATCCGAA  
GGGAAGGTGATGCGCTGGACAGCCATATCCGGCTGGCGAATCCCGCACGGCGGAGAGCGAGTCCAGCTGATGCTGCG  
TCGTGGCTACAGTTATTTCACTGGCGCTCAACACTCCGGCAACTGGATATGGGTTGCTGTTTGTCTGCTATCAACAG  
ATCTGAAAAAGGCTTCTGACAGTACAAAAAGGCTCAATGGCGAAGCGCTGGAGGAATATGTCAAACCTATCGGTGGC  
GGCTATTTCTTTCGCTGCGCGGTGTGAAGGACCGCAACGATTATCTCGGAAGCGCATTTATTCGGGGTTAA

>Cluster\_56504

ATGAAAAACCAAGTTGCTGCTATTTATGGCAAGCGGATGTCGCTGCGCGTATTTGAACTGCCAGAAATACCGATAA  
TGAATTAATGTTGAGTGAATTTCTGACAGCTCTGTTTATCGACCTGGAAGCGCGTACTCGGTAGTGAACATAAAC  
CGCTACCCGACGATTTTGAAGAAATCATCCGGTCAATACCGGCAATGAATGTCCGGGGTTATTTGTCGAAGTGGGTAAAA  
CTACTGGCAAAATATAAAAAAGGCCAGCGTTTGTATTTGCAACCGCGCATGGGTTTACCAAGCGGATATTCACGGCGTA  
CAGCTACGAAATATTTGGCGGCAATGCCACTTATATGATTTATTTCCGAAATCGCCATTAATTTGGGCTCGGATTTACCGT  
ATCACGGCTCTTATTTTGTGCGCGCTGCTGGCAGAGCTATGTCGCTGATTTATGGTGTCTATCATGCCAATTTATCAC  
ACCACGCAATATGTTTATGAGCATCGCATGGGCGTCAAACTGGCGGCAATATGCACTGCTGGCGTGCAGGTTCCGAT  
GGGATTTGGCGCTACGATTACGCCATTAACCGCGCATTACAACCGCTGCGGGTGGTGGTGGTGGTGGTGGTGGTGGTGGT  
GTCTGGCGCAGGTACAGAAGCTGCTGCCGTTGGAAGTGGCGGCGAGTAAAGGCATGAGCTGGTGTATGTGAATACAAA  
GGGATGAGCGATCTGTCCAGATGCTGCGGGCGTGCAGGAGATGCCGGGTTGATGACATTTTGTATTATGCGCGGCT  
GCCTGCTGCTGTTGATGGTGTGATGAATTTACTGGCGGAAGTGGCTGCTGAACTTCTTTGCGGGCCGACGGATAAAA  
ACTTCAAAGTGGCGTTTAAATTTCTACAACGTCCTATACACAGCACCGCTGCTGGTACATCTGGCGGTTAACGGAC  
GACATGAAAGAGGCGATTGCCCTTAGCGCCACTGGGCGTTACAGCGCTGTTTATGGTGACCATATCGGTGGCCTGGA  
TGGGTTGCCAGAAACCGTCTCAATCTGCCGGATATCCCTGGCGGTAATAAACTCATTATAACCGCGTGACCATGCCCG  
TCACTGCCATTTGCCGATTTTGGCGAAAAAGGCAAAACCGATCCGCTGTTTAAAGATTGGCGGGCTGGTTGAGGAAAC  
CAGGCATCTGGAATGAACAGCGGAGAAATATCTGCTGCACAAATTTGGCTGTGATATCGGGGAGCCGCGCAATGA

>Cluster\_19644

ATGAAATCTTCCAGTCAATTTCACTGTGTTTCAATACCGGCATTTAGTGAAGTGAAGGATGATGCCCGTATAAATAATGC  
GGTAGTCTACCTGCAGACCTATTTAAATGGCTTGAGCTGCGCTGCTGAAAGACGATGCTGATAATCACTCATGTTTGC  
TCACCCCTTAGCAGCGGAAATGGAGTAAAAACCGTGCAGTAAAAAACTATGCAAGGATTAATCTCAGTCCAGGGCGAA  
TTTTCTGAAATCTTCCGCTAAAACAGGTCAGGATAATGAGGATACTGTTTCTCAACAATTAATGATGATTTACGTACGTT  
AAAATCAATTTCTGTCATATTTGCCCTCTTGAATCTGGCGTCAAAATATCTAAAAATGCTCTGATGGATACTTTTATCA  
AATTTATAGAGAGCGTGCCTAAGATTGTGCAGAGAGGTTAAAAACGTGACTATTTACGTGAGGAAAGATAATCTTCCAT  
ATGAAAGGAAGATTACGGATCTCTGCACAAATTAAGCAAAAACGTATTAGCGCGGATCGTTTTTCAGTTGGAGATGACGA  
GTACAGCGTCAATCGTCTGGAAAACCGGATACTCAAACTGCAATCAATAAGATTAGTCGCCAGACCAGTAATCCACAAT  
TATTACAGCAGATAACACAGCTGCAGTTTCACTTTGAAAAATATCACGTCAGTTTATGATGCTTTATATAGCTTTTCGAGCAG  
TTACACTTTGATAGACAAATGCATCACTATGAGCAAGCATTTAGCGTGGCGAAGATGATTTTATTTGGGCAATCTCCACA  
CTGTATGATGAGGATGTTAATGCTTTTTCACTGCTTTTTCCCGATGGAGGCTGTTTTTGAATCTTTTTGTGACGACATGGA  
TGGCTTATCGTTATATGATAAATGGCGAGTGGACGCACAGGTAAGTTCAAAAAATCTGATTAGTTATACCGTAAAGCT  
TTATTTAAGCTGCGGCTGATATTTGTTTACGGCTCGTAAAGTACTACTGGTTTCACTTATTTACCTGTGATGTTAAATG  
AAGATAGTAAATGGCAGAAAGGACAGTCTTGAACAATCTCAAGCCGATCTCTACCAATGCTTGCCATGATGATGAAAT  
ACCAGGAGGGGAAGGTGATGATTTTGTATATACCCCTATCATAACGGATTTAATCAGCCATCTCTCATCTTATGAA  
TTTAGCCATCAGAAGGAAATAGTTACGTTTATGGGTTGTACCTTTCTTTATTTGGCGAGAGTTTACAAAACATCAGAGTT  
CGTTTTCTGTTGGGCTGAATTTATTTAG

>Cluster\_21068

ATGAACGATAAAAAACATCAATTCAGATGCTGATGGGTATCTGAATAAGACTCCCTTGTTCAGTTTATTTTGTATACGTT  
TTTTATTTCCGCTATGGGGATGCGCAGCTGCATTAATGAGATTAATCACTCAATTCAAAAGTATTTTCCGTAAGTA  
ACTTTGCTTCAGCATTTGGTGCAGAGCGCATTTTATGGAGTTATTTTTAATTTGCAATACCAGCATCTCTGTGATTTAA  
AAGACAGTTATAAGTTGGCAATTTTAAATTTGGCTGACGCTGATATTTGGTGGTTGTACACTTTTTTTTCCCTGCCCGCA  
TATGGCAACCTACACTATGTTCTTGCAGCTATTTTGGGATTTGGCTGAGTTTCTTGAACCTGCAGCGAAC  
CATACAGTTCAATGATCGGTCAAAAAGCTATGCCACATTTGCGGCTCAATATCAGCCAGACCTTTTATCCGATTTGGTGT  
CGCTGGATTTTATTTGGGCAATATCTGTTTTCTCCGAGGGGAAAGCTTGAAGAGCAGATGCTCGGATTTGAACCG  
CGAGCAAAATTCACAACTTAAAGTGTGATGTTTGAAGAACCCTTGAACCGTATAAGTATATGATTTATGATTTCTGTTG  
TGGTATGTTGTTTCTTTTAAACCGCTTCCCAACCTGTAAAGTGGCACAGACAAGTACCATAAATGCCCGTACGCA

ATGGATACGCTGCGCTATCTGGCTAAAAATTCGCGCTTTCGTCGTTGGTATGTGGCTCAATTCCTTTATGTGGGTATGCA  
GGTCGCAGTATGGTCATTTACCATCCGCTGGCCTGGAGTTGGCGATATCAACGAACGTGATGCTTCAAACCTCATGG  
TCTACAGCTTTCGCTGCTTCTTTATGGCAAGTTTATAGCCAACATCCCTATGACACGCTTTAATCCGGAAAAAGTCTTA  
ATTCCTTATTCGGTTATAGGGGCGCTGTTCTGGCATAATGTTGCACTGGCTCCAAAGTTTCAGCGCGGTCTATGTCCGCGT  
CCTGGTAAGTGTGTTTGGCCCTGCTGGGCGACGATCTATGCAGGAACACTGGATACAGTTGATAACCAACATACAG  
AAATGGCAGGAGCAGTTATGTTATGGCTATTGTTGGCGCAGCGGTGGTTCCGGCAATTCAGGGGTATATGACAGATATG  
TTCCACTACTACAGCTTTCATTCTGGTTCATGCTGCTGTTTGTCTATGTGGTGTCTACTTCTGGCGTGAAGCAA  
AGTACGTAATGCACCTGGCTGAAGTCACAGAGTCTGTA

>Cluster\_2996

ATGCCAGACGTTTCATGCACAACCTTCTCCATCATCAGCGCATCGATGGATGCGCTGCCAGGAAGTCTGGCGCTGGAGGC  
CACACAACCGGATAAAGAAACAACCTTTTGAATCGAGGGCACTGCAGCGCACGCGCTTGTGAAAAAGTCTACGAAAACA  
GGCAAAGCCACCCGGAACACTACGCCGGATGCAATGTTTCTATGTTTTCGCGCTCATAACCCCTTCGCGAAAACTCTGAT  
GATACATCTGGCCACAGGTGGATGAAATGGTCGAAGCTTGGCCGCTGATGTTGATACAGCTCTGCACACTTGCACA  
GAATAATGAACTATTGGTTGAACAACGTGTTGATTTCTCACATATAACGGGGTGAAGAATCTTTCGGAACCTGCCGACG  
GCATAATCATCGCTGGTAACGAATTAACAATCCACGACCTGAAATATGGCAAAGGCGTCCGCATTTGATGCAGAACAAAAT  
GAGCAACTACAATGTATGCTCTGGTGCCTCGAACAAATTCAGCATGCTGTATGACTTTGAGACTGTAAGATTTATTTAT  
TCACCAGCCAAAGCTCAACCACGTTTCAGAATGGTCGTTAACCCGTACAGGAACCTTCAGTCTTTTCGTTGAAACGGCACAGG  
AGGCCGCAACAGTGGATCCTTGTCTCAATATGCTGAATGCGAAGGCATTGAGACACTACCGCTGAAAAACTTCATA  
CCTGGAGAAAAACAGTGGCGCTTCTGTAAGCAAAAAGCTATTTGCACTGCCAGAAAAATGCAGCATTTACAAACAGCGCC  
CAGCGATTTTGAAGATCTGACAAAAGCTGTCAGCGAAATAATCACCATAATGCGCAGCGCAGTGTACTCTGTTAACCATG  
AGCAGCTTTCGCGAGACTTATAGCCAGGCGACTTTATTGAATCCTGGCTAAAGGCAGTACGGGACCGGTTTCAATGAA  
CTCAATGCCGGACATCCGGTACCGGGTTTAACTGGTAAACAGAAAAAAGGTAACCGGGCTGGAGTGATGAAGAGGC  
AGCTCGCGCACTTCTGAAGGACAGTTCAGGTACAAAACCTGAAGAAATTCGACTTTTAACTTATTAGTCCCACAAAAG  
CCGAAAAACTTATCAAAAAGGCGCTCCAGCCGTTGGTCAAAAAGTGCAGGCACTGATAACACGAGCTAGGTGAACCA  
ACCGTCAATCCCGAGTGCAGACCCAGCCCGCACTCAATATCAACCTGTAATGATTTGACGACGTTATCCGACGATAC  
GCTAACCGCAGACCTCATCTGA

>Cluster\_15398

ATGAAATTTCCCGTAAACGTAAATCCAAACATTAATTTCCCGTAAATGCACGCGATCCGCTGCTTACGAAATTCAGCC  
AGAAAACGAAACAGCGCCGCTGGGTAGTGGGTATCGATCAAACGCTGGTCGATATTGAAGCGAAAGTGGATGATGAAT  
TCATTGAGCGTTATGGATTAAGCGCCGGCATTTCATTGGTGTATGAGGATGACGTTGCCGAAGCGCTTATCAGGAACATA  
AAACAGAAAAACCTGATTTACCCATCAGTTTGGCGGTGGCACCATTGGTAAACCATGCACAACACTCCTGGTGCCTGGGA  
CGACCGTTTCGCTGCTGCTGGCGCTCATGTGCAGCAATATGAAATTTGGCAGCTATGCCATTCGTTACCTGTGTAACACCT  
CCAGCCGTACCGATCTTAACATCTACAAGCGTGGATGGCCAAATGGTTCGTTGCTTTACGCTGATTGGCGAGTCCGGG  
GAACGTACCTTTGCTATCAGCCCGCCACATGAACAGCTGCGGGCTGAAAGTATTCGCGAAGATGTGATTGCCGGAGC  
CTCGGCACTGGTTCACCTTCTATCTGGTGCCTGCAAGCGGGTGAACCAATGCCGGAAGCAACATGAAGACCATTTG  
AGTACCGGAATAATAACGTACCCGCTGCTGAGCTGAGCCTGGGCAACAGTTTGTCTATTCGCGAGAATCCGCAATGGTGG  
CAGCAATTTCTCAAAGACCAGTCTCTATCTTGGCATGAACGAAGATGAAGCCGAAGCTTGACCGGAGAAAGCGATCC  
GTTGTTGGCATCTGACAAGGCGCTGGACTGGGTAGATCTGGTGTGTGCACCGCCGGGCAATCCGCTTGTATATGGCAG  
GCTTTTACGGAAGCAGCAAGCAACGTAACCAACAGCATCCGCTGCTGCCGGTGTATAGCGGAATTTAACCATGATGAG  
TTTAGCCGCGCCATGCGCCACAAGGATTTGCCAGAACTCCGCTGCTGCTTATTGACACATTTGCCCGTATATGGCGGGCC  
GGAAAAAATCATGAACACTAACGGAGCAGGGGATGGCGCACTGGCAGCGTTGCTGCATGACATTACCGCAACAGCTACC  
ACCGTAGCAACGTACCAAACTCCAGCAACATAAAATTCACCTGGTAACTTATTCATCCTTAGCGCAGGTGTGTAATAT  
GCTAACCGTGTGAGCTATCAGTACTGAACAGCATTCACCTCGTTTAAACGCGCGCTTCCGCGAGCGTGAAGACAGCCT  
GGAAGAGTCTTACTGGGATCGTTAA

>Cluster\_5954

ATGGCTTCTACTTTTACCAGCGACACATTCGCTGCCGATCACAAGCAGCTATCCGTCAGATGAAGCAGCGCTGCGGGC  
GCAGCTTGGCGACGCTCCAGCAGATCTTTAATCAGCTAAGCGATGACATTTGCCAGCGAGTGGCTGAAATCAACGCACTCA  
AAGCACAGGGCGATGCCGCTGGCCGGTGTCTTATGCCGATATCAAAGCAGGTCAATGTTACTGCAGAGCAGCGCGAA  
CAGATTAACAGCTCCGCGTGTGCGGTGATAAAAGGCCATTTCCCGCGCAACAGCGCTAGGCTGGGATCAGTCGATGCT  
GGACTATCTGGACCGCAACCGCTTTGACGAGGCTACAAGGCCCGCGGATAATTTCTTCGGGACGCTCAGCGCTTCCAC  
TCCCGAGATTTTACCCTACTACTGGTCCGAGCGCAATGTCAGGCGCCGCGAGTGAAGAAATGGCGAATGCCGATCG  
TTTCTCAATCGTCTGTGGACATTTGAAAGTGTGAAAGCAATGGTTTAAACCGGATGTGAGCGTCACTACCTGACCG  
TATCCGCCCGCTCCGCCGGAACGACCTCCAAAGTCTTGGAGCGCATAACCGACTCCGGGCACTGGAACGCTGGCTGCT  
TCCAGCGTATCAGCGCTTTTCGCCAACGCTTTAATGGCAATCTGGCGCAATATGATCCCTGGCATGCGGCACTCGT  
ACGGAAGTTGAAGAGTACACCGTGGCAACACCAAAATGTTCCGCTGTTTCGGACATTCAGGCTGACAGCGCTCTC  
TGATATGCTGCTGGTCAAGGGCTGCTGCAGCTGCTGCCATTCCTGAAGCTATGGCGTACGTACTGTACGTCGCTGC  
TTGATGATGTGCCGGAGGATGAACTGTGCGCGCTAGCGCCGGAAGAGTATTGCCGATCAGAGCAATGGCATCCACT  
TGCCCGCTTGAATAACAAAGGTTGGGCAACGCTGATGTACATTTCTGCGGACCGATGTGCGGAGAAAAATCTGCT  
ACGGCACAAGGTGAAGGCGCACTGGAATAAGGCGCATCGCCGGGCACTTCCGCGGAGGACTATGAAACAACTGG  
GAAGGACGCTTACGCTTCCGACCTCAACATTCACGGTAAGCGAGCGTTGGGCATGGATGTTTGA

>Cluster\_23921

ATGACTGATCAATCAGAAAAAAACACTCTGCATTTTGGGGTGTATGGTTATAGCCGGTACAGTAATGGCGGTGGGAT  
GTTTGGCTTACCTGTGACTTGGCGGAGCCTGGTTTTTGGGGCGCTTTTATCTTATATCGCCTGGTTTTCAATGT  
TACATTCAGGGCTATTATATTAGAAGCAAACTAAATATCCCGTCGGATCCAGTTTAAACACCATCACAAAGATTTA  
ATCGGTAACACTTGAACACTTATCAGCGTATTACCGTTCGTTTCGTTCTCTATATCCCTCACTATGCTATCTCTGC  
TAATGGTGCATCATTAGTGAACGATATCAATGAATTTGGGCTATCAGCTAATCCAGTATTGTGGGATCTGCACTG  
CCATTTTCGTTGGCAGCTATTGTTGATTAAGCTGTTAGCCGCGAGTCTATTACCTCGTTGTTCCTCGGGTTGAAGATT  
ATCTCTTTGTGATCGTGTGTTGGTCTTTCTTCTTCAGATCGATTATCCATCTGCGCGATGCCACCAGCACCCTGC  
GGGAACATCTTATTTCCGTATATCTTTATGGCTTTGCGCGTGTGCTGGCGCTATTTGGTTTCCACGCAATATCCCA  
GCCTGATTTATTTGCTATGGCAAACGCAAGATAAGTTAATCAAAGCGTGGTCTTTGGTTGCTGCTGGCGCTGGTGAAT  
TATCTCTTCTGGCTATTTGCACGATGGGAATATTCGCGCAAGGCTTAAAGCGATAATCTCCTCAGCGGCAACCT  
TGATTCGCTGGTGAATCGTTCCTCGGCACCAACAGCATGGGATATCGAGTTTGCCTGCTGGTGTCTCCAATCTAG  
CTGTTGCCAGTTTCGTTCTTGGTGTCACTGCGGATTTGCGGATTTTCGATTTATCTGGCGGATCTGTTAAGATTGATAACTCCAC  
GGCGGGCTTTCAAACCGTGTGTTAACCTTCTGCCACTGCTTTGTTGATCTGATCTTCCGCAACGGCTTCATTTA  
CGGGATCGCGGCTCCGCGACTGTGTCACCATCTGGGCGGTAATAATTCCTGCTGTACTGGCAATCAAAGCCCGCAAGA  
AGTTTCCCAATCAGATGTTACAGCTTGGGCGCAATTTATTCGGGATTTGTCATTTCTCTTGGCATAACCGTAAT  
TTATGCTGGTTCGGTAACGCTTTAACGTTTACCTAAATTTGGCTAA

>Cluster\_53868

ATGCTGGAACAAATGGGCATTCGCCGGAAGCAAGCCTCGTATAAATTAGCGCAACTCTCCAGCCGCGAAAAAATCGCGT  
GCTGGAAAAAATCGCCGATGAACTGGAAGCACAAGCGAAATCATCTCAACGCTAACGCCAGGATGTTGCTGACGCC  
GTGCCAATGGCCTTGGCGAAGCGATGCTTGACCGTCTGGCACTGACGCCCGCAGCGCTGAAAGCATTGGCCGATGATGTG  
CGCCAGGTGTGTAACCTCCCGATCCGGTGGGGCAGGTAATCGATGGCAGCGTACTGGACAGCGGCCCTGCGTCTTGAGGC  
TCGTCCGCTGATCACAGGTGGTATAGGCGTATGCCATATTTACGTTGATGAAAGTGTAGAGATCGCTGAAGCATAAAA  
TGAAAACCGGTAATGCGGTGATCCTGCCGGTGGCAAAGAACGTTGCGCACTAACGCTGCAACGGTGGCGGTGATTGAG  
GACGCCCTGAAATCCTGCGGCTTACCGCGGGTGGCGTGACGGGATTGATAAATCCTGACCGTGGCTGGTCACTGAAAT  
GCTGCGTATGGATAAATACATCGACATGCTGATCCCGCGTGGTGGCGTGGTTTGCATAAACTGTGCCGTGAACAGTCCGA  
CAATCCCGGTGATCACAGGTGGTATAGGCGTATGCCATATTTACGTTGATGAAAGTGTAGAGATCGCTGAAGCATAAAA  
GTGATCGTCAACGCGAAAACTCAGCGTCCGAGCACATGTAATACGGTTGAAACGTTGCTGGTGAATAAAAAATCGCCGA  
TAGCTTCCGCGCCGATTAAAGCAACAAATGGCGGAAAGCGCGTGACATTACACGCAGATGCAGCTGCACTGGCGCAGT  
TGCAGGCGAGCCCTGCGAAGGTGGTGGTGTAAAGCCGAAGAGTATGACGATGAGTTTCTGTATTAGATTGAAACGTC  
AAAATCGTCAACGATCTTACGATGCCATCGCCATATTCGTGAAACACGCGCACACAACACTCCGATGCCATCCGACCCG  
CGATATGCGCAACGCCAGCGTTTTGTTAAAGTGGATTGCTCCGCTGTTTACGTTAAACGCTCTACGCGTTTTACCG  
ACGCGCGGCGATTGTTGCTGCGGTAAGTGGCGTAAGCACAAAAAATCCACGCGCGTGGCCCAATGGGGCTGGAA  
GCACTGACCATTACAAGTGGATCGGCATTGGTATTACACATTCTGTGCGTAA

>Cluster\_45861

ATGAAGCTTCAAAATACGTCACAGTTATAATTTCTGCAATTTCCAGTACGCTAACACCCAGGCGATGGCAGAAAAAT  
AATTCCTGAAACTGATGCTGAGTTGTTAGTTTGGTCTGATGCCACAAGCGCGGAATATATGAAATATGCAAGCAAAAGGAAT  
TCAAATAAGATTAGCTACAAGTAAAGTTTACATTTCCGAATATAGCGCAAATGGATGCAGCATCAAGAATTTATGCGAG  
GATGGGGGTACGACTCGTGTAGCTGATGTAGCTGAAATTTGAACATGATACCCCTGGGGCGTTAGTCTGTTGCTGGCGGT  
TATGAAAAACATGGTCTCAGCTGAGCGCATTAaaaaacattttatccagggcagatgctggcagctacatatataaaca  
TCAGCTATGGTTTTCTGTAAGTTTTCGCAACGCTGGCGCTTTTCTATAATAAGGATTTGTAAACACCCGACCAAAAAACA  
TTCGAAGAAATGACAGCGGAATCAATTTTGGCGTGACACGCATCCAAACATTAGATGGTATGCTGCTGATGGGATTCAAAA  
TTATTATGTTTACGATGTTTATTACCTGTTATGTTGTTGCAACGAATTCGGTAAAAACCGGTAACGATCCTAAAGCTCTAG  
GCATCGCTTCATCTGAAGCGAAGAAAGGCTAGAGACGATGAAACGCTTAAAGAAAGCAATCCCTCTAATCCCTTTGAT  
ATGGGTAATCCACAAGTTCTAAGAGTCTGTTTAAAGGTAAGTTGCTGCTGTAATCGACGGACCTTGGTCCATACA  
AGTTTACATTGACAGCGGAATCAATTTTGGCGTGACACGCATCCAAACATTAGATGGTATGCTGCTGATGGGATTCAAAA  
CAGTACGGCTGGCGTTGTAAGCTCATTACCGAATATCCTCATGCGCTGAAATTTATCGCTGACTACCTGACAACGGAT  
AAGATGTTGATGAAGCTTATGAAATGACGAATCTCATCCACCAATCAATTCCTTATGAACAAAAATAGCCAGACAGG  
TAGTGAAGCTATAAAAGCAATTTATGCTCAAGCTAATTTGTTCTGACGCAATGCCATCAATACCGGAAATGCTTTATCTAT  
GGTCTCCAATGACTAATGCTATTTTGGCTACCTGGGTTGAGAATAAAAAACCCGGATAAAGTTTAAATCATGCACAAAA  
ATTATTGAAGAACAATTTCTGCTTACAGGAGTAA

>Cluster\_42173

ATGACTACGCAACTTACCGGGCTATTCGGCGCTGGCTCATGGCAGCCTGGTAAAAACAATCCTGGTCCGCTTGT  
TCTGGGGATTCTTCTGGCATGGATCTCAAAACCCGCGCGGAAGCTGTTGGTCTGTTAGGTACTTTGTTCTGTCGGCGCAC  
TGAAAGCCGTTGCCCCATCCTGGTGTGATGCTGGTAATGGCATCTATGCTAACACCAGCAGCGGGCAGAAAAACCAAT  
ATCCGCCCTATTTGTTCTCTATCTGTTGGGCACCTTCTGCTGCTGGCCGAGTAATCTTCAGTTTGGCTTCC  
TTCTACCCCTGCACTGTGCTAGCGCGGTGATATTTCCGCGCTCAGGCATGTTGTAAGTGTATGCGCGGGTGGTAA  
TGACATGTTTCCAACTCCATTGACGCGCTGCTGAAAGGTAACATATATCGGGATCCTGGTGTGGGCAATGGCCCTGGT  
TTCGCACTGGCTACCGTAAACGAAACCCAAAAACCTGGTCAACGATATGTCGAATGCGGTTACCTTTATGGTGAACCT  
GGTATTGCTTCCGACCGGATCGGATTTTGGTCTGGTTTCTTACCCCTGGCAACCACCGGTTTCTCCAGCTGTGGG  
GCTACGCGCAACTGCTGGTGGTGGTGGCTGTATGCTGCTGGTGGCGCTGGTGGTAAACCCCTGCTGGTGGTGG  
AAAAATCGTCTAACCCTTCCGCTGGTACTGCTGTGCTGCGGAAAGCGCGTGTATGCCCTTCTCACCCGAGCTC  
TGGCGGAACATTCCGGTGAATATGGCGCTGTGTGAAATCTGAATCTGGATCGCGATACCTATTCGGTTCTATCCCG  
TGGGAGCCACCATCAATATGGCGGGCGCAGCAATCACCATTACCGTGTGACGCTGGCTGCAGTTAATACGGTGGGAT  
CCGTTGATCTGGCCACAGCGCTGCTGTTGAGCGTATGGCTTCGCTGGTGGCTGGTGGTAAACCCCTGCTGGTGGTGG  
GTCTCTGCTGCTGATCCACTGGCTGTAAATGTTCCGGTATTTGAAACGATATCGCCATGCAGGTGGTTGGCGTGGCT  
TTATCATCGCGCTATTGCAAGACTCTTGGCAACCCGCGCTGAACCTGCTCAACTGACGCTGTTCACTGCGGAGCTTGC  
CAGGCGGAAGCAGTCTGCTGGCAATAGCGCCCTGCGTAACTAA

>Cluster\_31795

ATGGCTGAAGAGAAAAAGGCGGTGTTTCGGTGTACATAAAGCCCGACATCGTGAAGGCGCTCAAGGAACGCCACCAGCA  
GAACGTAAGAGCAGGCATTCGCGGAGGACTTGACCCGCTGGCGATGGTTGAGCGCTCAACAGGCTGGCAGGTACGCGCT  
ATTTACGCGCGCGCTGGTATGAAATCAGGTTACGCGGGGGGAATAATGACAGTAAAGCAATGGCAGTCTAACACTAAC  
CAGCTTTTTGCGTAAATCGCGAGGATATTCGGAATTTAAATTCAGTCCGCTGTTTACCAGCTTTTTCCCGAA  
CGTGGCGACATTCAGCACGAAAAACATCATGCTGGATACCCCTGGACATGAAGAGTCAACCATGTCGGCGTTTTGTTCCG  
CTATGGTGGGTAGCCAGTTTACGCGGATAAAGGGTACGAAACAGCAACATCAAACTGGCTACATGAAGCCAAAGCAC  
GAAATCGATCCAAAGAAAAACATCATGCCATGGCTGGGAGAGATCCGGCACAGCTTAAAGCCTACCTATGCGCGTAT  
GCGCTGATTAATGGCAATATGCCCGCCAGATAAACCGCATAAAAGCGCGCGTGAATGGCTGGCGGTAATGCGGTA  
CGACCGGAAAAAATCATATGAGGGCGAAGGCATAGAGCGCTATGAAATCGACTGGAAGATACCGGAAAAAATCATATA  
GAGCAGGCGCAGGTAAAAAATGGTCAAGCAGGACAAAGAAATCCACGATCCAACTATGATATCGAACTATACGCCGA  
TCAGGAGGTTGCCCGCCAACTCATGATTTATGGCGCTGAGGATGGCGAAGCTTACGCGCTTTAAAAAATTCGGT  
AGCTGTACGATCTTCCCGTGGTTACAGAGTCCGCGCAGAGCTGGCATGTAaaaaactggcggaagtggtagctttaa  
GGCTATCTGGCGGATATTGCCCTTATCGTCTATTCGGCAAAATACGCCGACAGTACGCGCAGAAAAAATATTTCCTTGA  
GCCTGATTTGCTTGTCTGGGCAACACTAAATAAAGGGCTGGTGGCTATGGTGGCATTATGGATCAGGACGACAGTAA  
GAACGGGGCAACCGCAAAACATGTAACCCGAAAAAATGGATGAGGACGAGATCCGGCATTTGATGATGATGATGATGATG  
CACAGTGCACCGCAGCCGTTACCGGAGTTATTGCAAAATTTGTTACCGTCAAAATGGGTTAA

>Cluster\_14967

ATGGGTAATTAACCTGTTGAGCAGGCTTTACGGCTTCAAAAGAATATTACGGTGAAGATAATTTTGAACGTGCTGT  
AAAGGATTTGATTACTACTTCTAAAGTGGCAGAGATTTTATAAACAAGAAAGAACCGTAAAAATTTATTGCAATCTGGATA  
TCGAACCTGTGCTTCAACCGTTGTTTACATACGGGAAGTAAACCTGTTATGGCTAAAGCTGGGAGAAATAAAAAATTTATG  
TTCAAAGATGGTTCTGGTGCATACAGGATTCATCTGGTCAAAATGAAGTTGTTTATATTTTCGCTTCAATTTAACT  
TAAAGTCAGGATGGATACGCGCTGGGACTACTAAAAGTATGTCATGCTCCACAATCTTTGCGAGGACGAGCAGCGCTA  
AATTAACCGCTCATTTGCCACGTAAGGTTATCTGGAACCTGGGTTACTATGATGGTGTATTATTTATCAGGTAAGGCAAGA  
AAGGAGAAATGAAATGCTATGCGTTTTCTCAGTTTCACTCAAAATTTGACGAGCTGGAAACGACTTTAATCAGTTCTT  
TTCTGATAATGATTTCTATACCGGATGGTCACTGAGTATGCGTAAAGTGTCTTTTACTGGCCCCCTGGAACAGGCA  
AGCAACTATCGCAAAAGCTTTGGGGCAAAAGTATCAGGATAAGTATGTTTTTGTTTATGCGGATGATTAATTAAGAT  
GTTTGGCTACGCTGCTGCTCAGAAGAAAAATCCCGCTCATTTATATAGCTGAAGAGGTTGATGAACTTTATCGGGCTGATGC  
CGGAACGTTAAGTTTCTTGTGATGGAGCTGATACCCGCAAAATGTCGAGGTACATATGATGATCTTTTCTACAACTATC

CAAAACGCATCGACCCAGTATTAGGAAACGTCAGGTCGAATTGACAGGATAATCTCTGTAGGTGCTTTTCAGAACCAA  
GCTGCTGCCGCTTTCGCCAAAATGACTTACCAGAAAGTAGAGAAATGACCTTAAAGAGCTTGGCGCAGTGCTGGACAG  
AACGACTCCGGCTGAAATCAAGGAAATTAATAATCGCAATCGGAATGATTCGCGGAACCAAATGAATATCAGTGG  
ATGTAATAAAAAATGCTCGTGCCTTTTTGAAAGGAAACCTTGACTCGAGCGTGAGGAAAGCAGATGAAGATATAGAGGAA  
AGGAAAGAGCTTTATAAAAAGAACGGGGCGCAACCTGACTATTTAAGTTACCTGGAGGATTAA

>Cluster\_24379

ATGAGTGGACTCAAACAAGAACTGGGGCTGGCCAGGGCATTGGCCTGTATCGACGTCATTATAGGCACTGGCGTGT  
TGCCGTTCTCGCTTAGCTGCGCTGGTAGCGGGCAATAACAGCCTGTGGGCGTGGCCGTTTTGATTATCTTAGTGTTC  
CGATTGCGATTGTGTTTGGCGATTCTGGGTCCGCAATATCCAGCGCAGGCGGTGTCCGCACTTCGTCGGTATGGCGT  
GGTTCGCGGCTTGAGCGAGTCACCGGCTGGTGTGTTTTATCGGTCAATCCCGTGGGTTTGCCTGCCGCGCTACAAATTC  
CGTCGGGTTCCGCGCAGGCAATGTTTGGCTGGCAGTAGCGAGCACTGTTGTTGGCAGAACTCGGTACGCTGGCGCTGGTGT  
GGTATATCGGTACCGGTCGAAGTCCAGTGTCAATCTACAAACAGTTATTGCCGGACTTATCGTCGCACATGATTGTC  
GCTATCTGGTGGCGGGGATATCAAACCTGCCAATATCCCTTCCCTGCCAGGAAATATCGAACTTACCGGTTAAT  
TGCTGCGTTATCAGTGATGTTCTGGTGTGTTGTCGGTCTGGAAGCATTGGCCATCTTGCCTCGGAATTTAAAAATCCAG  
AGCGTGATTTTCCCTCGTGTCTTGATGATGGCCGTGCTGCTGGCAGGATAGTCTATTGGGGCTGTACGGTAGTGTCTTA  
CACTTCGACGCTATGGTGAACAAATGGCGGGCAGCATCGCTTCCAAAATGTAGTGCAGTTGTTCCGGTGTAGGAGC  
GTTATGGATTGCTGCGTAAATGGCTATCTGGCCTGCTTTGCTCCAGTCTCAACATTTATATACAGAGCTTACCGCGT  
TCTGGTGCAGGCGCAACATAATCTGACCACTACCTGGCAGCCTCTCTTCTCGCATATCCGAATAATGCCCTCAAT  
GCGGTGCTCGGCTGCTGCGTGGTGGAGCAGTGGTGTGATCATGCTTTAGAGATCAATCGGACGCTCTTATTATTTATGC  
CAATGGCATCTTTATGATTTATCTGTTATGTCATGCTGGCAGGCTGAAATTTATGCAAGGAGCTTATCGACTAGG  
CAGTGGTTGGCGGGCTATTTATGCTTCTGTTACTGGCAATGGTCCGGTGGAAAAGTCTACGCACTGATATGCTGGCG  
GGGTTATGGCTGTTCTGCCAAAACGAAAACGCCGAAAATGGCATAACCACATAA

>Cluster\_23358

ATGGATAAATTTCTGTGTTACAGGGCCAAACGAAGCTCCAGGGCGAAGTCAAAATTTCCGGCGCTAAAAATGCTGCTGCTGCC  
TATCCTTTTTTGGCGCACTACTGGCGGAAGAACCAGTAGAGATCCAGAACGTCGCCGAACTAAAAGACGTCGATACATCAA  
TGAAGCTGTAAAGCCAGCTGGGTGCGAAAGTAGAACGTAATGGTCTGTGCATATTGATGCCCGGACGTTAATGTATTC  
TGCGCACCTTACGATCTGGTTAAAAACCATGCGTCTTATCTGGGCGCTGGGGCCGCTGGTAGCGCGCTTTGGTACAGG  
CGAAGTTTCACTGCTGCTGGTGTACGATCGGCGCAGCTCGGTTGATCTACACATTTCTGGCCTCGCAACAAATAGGGC  
CGACCATCAAACGGAAGAAGGTTACGTTAAAGCTTCCGTCGATGGTCTGTTGAAAGGCGCACATATCGTGATGGATAAA  
GTCAGCGTTGGCGCAACGCTGACCATCATGTGTGCTGCAACCTGGCGGAAGGACCACGATTTATGAAAACGCGAGCGCG  
TGAACCGGAAATCGTCGATACCGGCAACTTCTGATTACGCTGGGTGCGAAAATTAGCGGTACAGGACCGGATCGTATCG  
TCATCGAAGGTGTGGAACGTTTAGCGCGGCTGTCTATCGCTGCTGCCGATCGTATCGAAAACCGGTAATTTCTGGTG  
GCGGCGGCGATCTCTCGCGGCAAAATTAATCTGCGTAAACGCGCAGCCAGATCTTGGACGCGTGTGGCGAAGCTGCG  
TGACGCTGGAGCAGACATCGAAGTCGGCGAAGACTGGATTAGCCTGGATATGCATGGCAACGTCGGAAGGCTGTTAACG  
TACGTACCGCGCCGATCCGGCATTTCCCGACCGATATGCAAGCCAGTTTCACTGTTGAACCTGGTGGCAGAGGGAC  
GGCTTACATCGCTGAAACGCTTTTGAACCCGCTTTATGATGATGTCAGAGCTGAGCCGATGAGGCGCGCACCGGAAAT  
CGAAAGCAATACCGTTATTTGTCACGGTGTGAAAACCTTCTGGCGCACAGGTTATGGCAACCGATCTACGTGCATCAG  
CAAGCCTGGTGTGCTGGCTGGCTGATTGCGGAAGGGACGAGGTAAGTTGATCGTATTTATCACATCGATCGTGGCTACGAA  
CGCATTGAAGACAAACTGCGCGCTTTAGGTGCAAAATTTGAGCGTGTGAAAGGCGAGTAA

>Cluster\_2855

ATGGCCAAAGAGATCAGCAGTGAACCTTCTGAACACCATTCTTACCCTGTCCGGCGACCGGAAAATATCGCCAGTTGTGG  
TAACGTGATGACCGCGCTGCGTCTGGGTGTACATGACAGTTCAGTGGTTGATCCCAATATCAAACCGCTGGAAGGCGTGA  
AGGGCGTCAATTTGACCGGACAGCTGAGGTCGTTTGGGCTGGTAAAGCGCATCGTGGCGCAAACGATGAGC  
GAGCTGCTGGGCGAGGACCGGTACAGGATGCCGAGAAATCGCCGCCAGAACAAACGTCAGTTAAAAGCAAAACAAC  
CTCCGGCGTGAACAATTTCTCGCAAAATTCGCCACCACTTTCACGCCGCTGATCCCGGTTTTATTGCGCGCGTCTGC  
TGCTGGGGATAGCGACGTTAATTTGCCACGGTGTGACGTTCCGGCAGATGCTCAGGGCAGCTACCCGACGCGCTGAAT  
TTTTATGAAGGTGTTTCAGCAAAAGGTTTGTTCAGTTTCTTGGTGGTATCTGTTGGGCTATAACGCCGCGGATGTTGGCGG  
CACGGGCGTCAATGGCGCAATTAATGCGCACTCTTTTTGCTCGGTTATAACCCCGTGAACACCGGTTACTACGCCG  
GTTTTACGATTTCTTTGGTCTGCCCATCGATCCGCGCGCAATATATCGCGCTGCTGATGCGCGTGGGCTGCGCC  
CGCATTGAAGGATGGTGGCGGCTTTATGCGGACGATCTCGACATGCTGCTGACCTCGTTAATCACCTGCTGATCAC  
CGCTACGCTTGGTACCTGATCATTAATGCGCTGGGTGCTGTTATTTCGAAGGTATGTCATGGCTGTTTATGCACTGA  
ACAGTAATCCGTTGCGGTTGTCGGTTTTAGCCGGGCTGTTCTGATCGCCGTTGTTTGGCGTGCATCAGGGCTTTAT  
CCTGTTTACCTCGGTTAATGAGCAGCCAGGATTAACAAGCTTATTTCCCATCTTTCAATGGCAGGCGCGGCCAGGT  
GGGCGGGCGCTGGCCTTACTTGGCGGCGCAACCGCACAGTGCATTAACGAGTCAAGTACGAGTACGCGGGCGATTATCCCG  
GTCGCTGGGCGTGGTGAACCGTTGATTTACCGCGTCAACCTGCCCGCATGAAACGTTTTATTACCGGTTTATGAGC  
GGCGCAGCGGGCGTTTTGTTTATCGGCTGATAGCCTGGTGGGCTGCGGATGGGCTTAAACAGCGCTTTGGGCGGTC  
TGGTCTGGTGGCGTGGCGCTGATGACTTCCGCAACAGGATCTTCCGGCAATGGCGGTTTTATGCTGGCGGATTTCTGG  
TGCCATGGGTTTGGCGGTTTTATTTACACAGCTCTTTGGCTGCCGTAACGTCATCTGGACTGA

>Cluster\_23351

ATGCGATTTTCCAGATTTATCATCGGATTGACCAGCTGTATAGCGTTCAGTGTTCAGGCGGCAAAATGTTGATGAGTACAT  
TACTCAACTCCCCGCTGGTGCAACCTTGCCTGATGGTGAAAAAGTCGGCGCGTGGCCCGCTATTGATTACCACA  
GTCAGAGATGGCGTGGCCGCGTACGACAGAAAGTATTACTGCACTGGCGCGTGTATTCACTCGGCCCCGATTTT  
CGTTTTACCACGACGCTTGAACCAAAGGCAATGTGGAACCGGCTACTTAAGGGTGACTTAGTGGCGGATTTGGTGC  
CGATCCGACGTTAAGACGTCAGGATATTGCAATATGGTTCGCGACTTTGAAAAATCTGGCGTCAACCAATCGATGGCA  
ATGTTGATGATAGTACCTCAATTTTCCGAGCCAGGATAAAGCCCGGCTGGCCATGGAATGACATGACAAATGCTTT  
AGCCCTCCGCTGCGCCGCAATAGTTGACCGCACTGTTTCTCCGTCFCGCTCTACAGTGGCCCAAACCTGATGAT  
GGCTTTTATACGCGTGGCATCTTATTACCCGTTACGATGTTTACGCAAGTACGACCCCTCCCGGTTGTTTGCAGG  
CGCAATACGCGAGCTGGATGTTGGTGCAGGCGACTGAAACGCTTTACGCTGACCGGATGCCGCAACGCTTCTGAG  
CCGCTCCGTTGGCTTTTGGCGTGCAGGATGAGCCAGCTATGCCGGGCAATCTGAAAGATGAGTTAAAACAGGCAAG  
TATCAACTGGAGCGGAACACTGCTGCCGAGACTCAGGTTAAACGAACCTGGAACGCTAGTTGCCAGTAAACAGTCCGCCC  
CGCTGCACGATCTGCTTAAAGATTATGCTGAAAAAGTCGGACAACATGATCGCCGATACGGTTTTCCGATGATAGGCCAT  
GCGCGCTTCAATGTGCTGGAACATGGCGGGCGGGTCCGACGCGTGCCTGATGCTGCGGCAAGCCGCTGTCGA  
TATTGGAACACCAATTTATGCGGATGGTTTACGGCTTTCCGCGCATAACTGATGCCCCCGCACCATGATGACGGTGC  
TGCAATACATTGGCCAAACAGCAATGAACCTTAACTTTATCTCCATGCTGCGGCTGGCGGCTATGACGCGCTTTGAG  
TACCGTGCAGGCTGTCATCAGGCGGGCTGGATGGAAGTCTCAGCGAAAACCGGTTGTTGACGGGGTATATAACCT  
GGCGGGATTCATTAACAGCAGGCGGGCAACGATGGCGTTTTGTCGAATATCTTCTGGCTATGCAAGTAAACCGGCG  
ATCAGCGTAATCGCGTATTCGTTGGTACGTTTTGAAAGCGGTTGTATAAAGATATTTACCAGAACAAATTAG

>Cluster\_40269

ATGAAAAATACCAGCAGCTTGCAGAACAAATACGCGAGCAGATTGCGTGGGTTACTGGCAACCCGGCGATCGTTTGGC

TTCGTTGCGTGACCAGGTGGCGCTTCTGCGCATGAGCTTTATGACTGTCAGCCATGCCATATCAGTTGCTCGAAAGTCAGG  
GATATATTTATCGCCGACCGCAATCGGGTTATTACGTTGCGCCACAGGCAATAAAAAATGCCGAAAGCGCAGTCATTCCA  
GTCACACGAGATGAGCAGTCGATATCAACACCTATATTTTTGATATGTTGCAGGCCAGTCGTGATCCGTCGGTCTGTTCC  
GTTCGCTCGGCTTTCCCGACCGCGACTTTTCCCCCTCCAACAACCTAAACCCTCGCTGGCGCAGGTAAGCAAAACCG  
CACGCGGATGAGCGTGTGATAAAGAACTTACCGCAGGAACGTAAGAACGTCAGCTAGGCTATTGCTCGCTGCGGCTAGC  
CAGGGCATCACCATTTCTCTGATGAAATTTGCTATTACCGCGGGGCGTTAGAGGCATTAACCTCAGTTTGCAAGCGGT  
AATGAAACCGGGCATTTGGGTGATAGTAGAATTCCTTGTTCACGGCGCTGTCAGGCGTGGAGCGGTTACGGCTGA  
AGGCGTTATCGGTAGCAGCGATATAAAGAAGGGATCGATCTCAGGCGCTGGAACCTGGCGTTCAGGAGTATCCGGTG  
AAAGCGTGTGGTGTGACTAATAGCCAGAACCACCTGGATTTACCTTAACGCCAGAAAAAAGTCCGGCTAGCAGT  
GTTGCTCAATCAGTTCAACGTAACGCTGATTGAAGATGACGTTTATAGCGAACTTATTTTGGACGGGAAAAACCGCTGC  
CTCGAAAGCGTGGGATCGCCACGATGGTGTTCGATTTGCTCTTCGTTTCGAAATGCTGGTGCCTGGTTTTCGTAT  
GGTTGGGTGCGCCCGGAAAAACATGCACGTAATACTCAACGCTGTCAGTTGATGAGTACGCTTCCACCAGCTCACCGAT  
CGAGCTCGCTGGTGGATACCTTTCTACTCGCCGATACGATGCTCATCTTCGCTGCGCTGCGCTGCGGCAAC  
GTAAACAACGCGCTGCGAGGCTTTGCTGCGTTATCTGCTGCGGAAGTCAAATTCATCACAATGACAGCGGTTATTTT  
CTCTGGCTGGAGCTCCCGAGCGGTTAGATGACAGGAAATTAAGCCTGGTGGCACTGACGCATCATATCAGTATGCGCC  
GGTAAAAATGTTTTTACCGGTGAAAACGTTGTCACGTTTTTTTTCGTTTTAATACCGCGTGGCAGTGGGAGAACGTAAG  
AACAGCGGTAAAAAATTAGGCAAACTTATTAAGAACCGCTGTA

>Cluster\_61973

ATGACTACAAAACCTCAGTTATGGATTTGGAGCGTTCGGGAAGGATTTTTCGATCGGCATTTGTGTATATGTACCTCATGTA  
TTACTACACCGATGTCGTCGGGCTGCTGTTGGTTCGCTGCTACTTTGTTTCGTTGGCGGAGGATCTGGGATCGTATTA  
ACGATCCGATTTGGTATGGATTGATAATGCTACGCGATCGCGATGGGGTAAGTTCAAACCTGGATCCTGATCGGTACG  
TTGGCAAACCTCTGTAATCTTATTTCTCCCTTTAGTGCATCTGTTGAAGTACTACTCAGATTGTCTTTGTTGCGT  
GACCTACATCTCTGGGCGATGACTTACACCATATGGATATTCCTTCTGGTGGTGGTCCAAACCTACCGCTCGATA  
AACGTCAGCGCAACATTTTACCGGCTTTGCTATCTATTATTTTTCAGCTGTCAGGCTTTGTTACGCGGATGTCGCTA  
CCATTTGTTAATTTATGTCGGCGGTGGCGATCGGGGATTTGGCTTTCAGATGTTCACTCTGGTACTGATCGCTTTTTTAT  
TGTTCACCCATCATCTCTGCGCAATGTGATGAAGTCTTTTCGTCAGACAATCAACCGCTCTGCTGAAGGAAGCCATC  
TGACACTTAAAGCCATCTTTCGCGTAATTTATAAAAACGATCAGCTTTTCATGCCTCTTGGGTATGGCTCTTGCTTATAAT  
GTAGCGAGCGCAACATTTTACCGGCTTTGCTATCTATTATTTTTCATATGTTATCGGTGATGCGGATTTGTTCCATTA  
TCTGTGATGCGGGAGCTGCTAACCTGGTACGTTAGTATCTTCCACGCTTAGTTAAATCATTATCCGACGCAATTT  
TATGGCCCGAGCATCTATCTTCCGGTGTAAAGCTGTGGTGTCTCCGTTAATGGCATTAATGAGCTATCACAACGTC  
GTCCTCATTTGATTTGGGGTATTTGCTGAATGTGGGAACGGCGCTTTCTGGGTATACAGGTCATCATGGTGGCAGA  
TATCGTTGATTAACGGTGAATATAAACTGACGTCAGCTGTGAAGATATCGCTTACTCCGTGCAACTAGGTTGGTGAAG  
GCGGTTACGCTTTTGGGCTTTTTTTCATGCGGTTGTGTTAGGATGATTGGCTATGTACCGAATGTTGAACAGTCTACG  
CAAGCCCTATTAGGTATGCAATTTATTATGATTGCTCTACCAACTCTGTTTTTCATGGTAACCGTGTCTCTACTTCCG  
TTTTATCGCCTCAATGGTACAGCTGCGCAGGATCCAGATCCATCTGCTGGATAAAATACGCAAAGTACCGCCCGAGC  
CTGTTACTGTGATTTCCGGTTCGGTGCAGTGTGATGATGTTGAAACCGCTGA

>Cluster\_39005

ATGTCCCGAATGGCAGAACAGCAGCTTTATATACATGGTGGTTTATACCTCCGCCACCAGCGTCCGACCTTCGAGACCAT  
TAACCCGGCCAAACGCTAACGTCGTCGGCAGCGTGCAGGCCCGGGCGTGAGGATGTCGATCGCGCCGTAAGAGTGCC  
AACAAAGGGCAAAAATCTGGGCGCGATGACCGTATGGAGCGCTCGCGTATTCTGCGTCGGGCGGTTGATAATCTGCGT  
GAACGCAATGACGAACTCGCAAACTGGAACCTTGGACACCGGAAAAGCATATTCGGAACCTCAACCGTTCGATATCGT  
TACCGGTGCGGACGTGCTGGAGTACTATCGCGGCTGATCCCGGCGTGGAAAGCTGCCAGATCCCGTTGCGTGAGACGT  
CATTTGTTTTATACCCGCGGGAACCGCTGGTGTGGTGGCGGATTTGGCGCATGGAACCTACCCGCTCAGATTGCTTTG  
TGGAAATCCGCCCCGCGTGGCGGGGTAACCGCATGATCTCAAACCGAGCGAAGTACCCCGCTTACCGCGTTAAA  
GCTGGCTGAAATTTACAGCGAAGCGGCGTCCCGGACGCTGATTTAAACGTTGTCGGCGGCTGGGCGCGGAGACCGGC  
AATATCTGACCGATCACTCCGGCATTTGCCAAAGTGTCAATTTACCGCGCGCTGCCAGCGGCAAAAAGTGTGGTAACT  
TCGGCAGCCTTTCCCTGAAAGAAGTGAACATGGAGCTGGGCGGTAATAACCGCTGATCTGTTTTTCGACGATCGGATCT  
CGATCTCGCCCGCATATCGCCATGATGGCGAATTTCTTACGCTCCGGTACGGTGTGTACCAACGGCACTCGCGTCTTCG  
TTCCGACGAAATGCAAAGCGCATTTGAACAAAAGGTTCTGGCGCGCTTGGCGCATTCGCGCGGGGACGTTTTTCGAT  
CCGCAAACTAATTCGGCCCGTGGTCACTTCCCGCATCGCGATAACGTGCTGCGCTATATCGCCAAAGGCAATAGAGGA  
AGGCGCGCGCTACTGTGCGCGCGCATGACTGAAGGGGATAGCTTCGATAACGGCGCATGGGTTGCAACCGCATGTT  
TCACCGATTGACGCGACGATGATGACCATTTGTCGCGAAGAGATTTTCGGGCGGTTGATGTCATTTCTGACCTACGAGTCG  
GAAGACGAAGTCAATTCGCGCGCTAACGATACCGACTACGGTCTGGCGCGGGTATCGTGACGCGAGACTGAACCGCGC  
GCATCGGTCATTCAGCTGGAAGCGGGTATTTGCTGGATCAACACTGGGCGAATCCCGGCGAGATGCCCCTTG  
CGGCTACAAAACCTCCGCAATTTGGTCCGAGAACGGCGTGTGACGCTCCAGAGTTACACCCAGGTGAAGTCCATCCAG  
GTTGAGATGGCTAAATTCAGTCCATATTTCTAA

>Cluster\_42884

ATGGTAACTACTTCAATACACTGAATCTGCGCCAGCAGCTGGCACAGCTGGGCAAAATGTCGTTTTATGGGGCGGATGA  
ATTCGCCGATGGCGCAGCTACCTTACAGGTA AAAAGTAGTCATCTGCTGGCTGTGGCGCACAGGGTCTCAACACAGGGCC  
TGAACATGCGTGATCTGTCTCGATATCTCTACGCTCTGCGTAAAGAAGCGATTTGGCGGAGAGCGGCATCTGGCGT  
AAAGCGACCGAAAACGGTTTTAAAGTGGGTACTTACGAAGAATGATCCCGCAGGCGAGATTTGGTGGTTAACTGACGCC  
GGACAAGCACACTCTGATGTAGTGGCACCCGTACAGCCTGATGAAAGACGGCGCGGCTGGGTTACTCGCACGGTT  
TCAACATCGTCGAAGTGGGCGAGCAGATCCGTAAGACATCACCGTAGTAATGGTTGGCCGAAATGCCTTGGCACCGAA  
GTGCGTGAAGATCAAAACGTTGATTCGGCGTACCGACGCTGATTTGCCGTTACCCGGA AAAACGATCCGAAAGCGAAGG  
CATGGCTGCTGCTAAAGCGTGGGCGGGCAACCGGTGGTATCTGTCGGGCGTGTGGAATCCTTTCTGTTGCGGAAG  
TGAATCTGACCTGATGGCGGAGCAAAACATCTTGTGCGGATGTTGCAAGCTGGCTCTCTGCTGTGTTCTCGAACAATG  
GTGGAAGAAGGCACCGATCCGGCATACGCGA AAAACTGATTCAGTTCCGGTGGGAAACCATCACCGAAGCACTGAAACA  
GGGCGGCATCAGCTGATGATGGACCGTCTCTTAACCGCGGAAAACCTGCGTGTCTACGCGCTTTCTGAAACAGCTGAAAG  
AGATCATGGCACCTGTTTCCAGAAACATATGGACGACATCATCTGCGCAATTTCTCTCCGGCATGATGGCAGACTGG  
GCCAACGACGATAAGAAACTGCTGACCTGGCGTGAAGAGACCGGCAACCGCCCTTCCGAAACCGCGCCGATGATGAAAG  
CAAAATCGGTGAACAGGACTACTTCCGATAAAGCGTACTGATGATCGCGATGGTAAAAGCAGGCGTTGAGTTGGCGTTT  
AAACCATGGTTGATTCGGGCATCATCGAAGAACTGCTTACTATGAATCACTGACGAACTGCGCTGATTTGCCAACACG  
ATCGCCGTAAGCGTGTACGAAATGAACGTTGTTATCTCCGATACGCGAGTACGGTAACATCTGTTCTCTTCTACTCG  
TTGTGTCGCACTGTGAACCGTTTATGTCAGAGCTGCAACCGGCGACCTGGGTAAGACTATTTCCGGAAGGTGCGGTAG  
ATAACGCGCAGCTGCGTGTGATAAATGAAGCATTCGACGCAATGCGATTTGAGCAGGTAGGTAAGAAACTGCGCGCTAT  
ATGACGGATATGAACGTTATGCTGTTGCGGGTTAA

>Cluster\_61755

ATGGAGTCACTCTACGTTATGTCGCGATCACCAACTGCCCGCGGGATCGCTCACACCTACATGGTGGCGGAAGCCCT  
GGAACAGAAAGCCGTTCTCTCGGTCATACCATAAAAGTGAAGTCAAGGGTCCAGTGGCGTTGAAAACCGCTTATCCA

GCGAAGAGATTGCCGCTGCCGATTACGTCATTCCTCGTACCAGGGCGTGGCCTGAGCGGTGATGATCGCGCGGTTTGGC  
GGGAAAGAAAGTTTATGAGATTGCCATCTCCAGCGTTGAAAAATATCGACCAGATTTTCAGCGAATTACCGACAAACTC  
GCAGCTTTTGGCCGAGATAGCGCGTGAAGCTTGGCAACAGGAAGTCAAAGCGGTAGCGTGATGAGCCACCTGATGG  
CGGGCGTCTTCGGCGCTGCGGTTTGTTCATCGCGGTTGGTATCCTGGTGGCGCTTGGCAACATGCTGGTGCAGTTCGGT  
TTGCCGTATAGCTGTTTTCGGAAAGCGCGCTGCTACTTACTACGTTTACCGGGCGGTGATGTCGACCTCATGGCGGGTCTGCT  
TATGATCCCCATCATGGGCGCTTATATTGCCTCGTCGATTGCCGATAAACCGGCTTTCGCTCCGGCGTTTCTGGTTTGGT  
ATCTGGCGAACGACAAAGCGCTGCTCGGCACCCAGTCCGGTGGCGGATTCCTCGGCGCGGTGGTGGTGGGCTGGCGATT  
GGCTATTTCTGCTTCTGGTTCCGCAAAGTGGCGCTTGGCAAAGCATTACAACCCTGCTCGGTTCAATGCTGATCCCGTT  
CGTTACTCTGCTGGTTTTCGGCGTGGCTACTTACTACGTTTACCGGGCGGTGATGTCGACCTCATGGCGGGTCTGCTCC  
ACTTCTGAATACCATTCCTCCATCAATGAAGTTTGGCGCAGCGTTTCTGGTGGTGGCGATGCTGGCGTTGATATGGGC  
GGCCCCATCAATAAACCGCTGGTCTTCTGCTTCTACTGCTGGAAAAACACATTTATGACTGGTACGCCATCGTCCG  
CGTTGTCGGCTGATGCCGCCGTCGCGGGCGGCTTTCGCGAGCTTCAATGGCCCAAACCTGTTTACCCGACAGGAAAAAG  
AGGCTGCCAGTATGTCATTTGGTGGTGGCCACAGTCCGCAACCGAACCAGCGCTATTCCTTACGCTCTGGCGGGTCTGCT  
CCGATGATTACGCCAATACGCTGGCGGGCGGCTTACCGCGTGGTGGTGGTGGTGGTGGTGGTGGTGGTGGTGGTGGTGGT  
TGGTTTGGTATCTTTGACCCGCTGATCGCCCTGATGTCGCGGTGGGTTCTGTTTATCTGGTGGTGGGATTGGCCTCG  
CGTGAACATTTCAATTCATTATCGTCTGAAAGGATTGGTGGTACCGCGCAAAGCGAAAGCGCGCAACAGGAGCTTGTG  
CATGAACATTGA

>Cluster\_43256

ATGAAAACACCCCTCACAGCCGCGCGATATACTATATCGTGGCGATCCAAATCTGGGAGTACTTCAGTTTTTACGGCAT  
GCGTGCCTTACTCATCTCTATCTCACCCATCAGCTTGGTTTTGATGATAACCATGCCATCAGCTGTTCAGCGCATATG  
CTTCTCTGGTTTACGTTACCCCTTATCTCGCGGCTGGCTTGGCAGCCGCTGCTCGGCAACCAGCTGCAGTATTGCC  
GGCGCGCTGTTAATGACCTTGGCCATGTTGGTCTGGGATTGATACAAATTCACCTTAGCCTGTATCTGGCGCTGGC  
AATCATTATTTGTGGTACGGTTTATTCAAATCAAACATCAGCTGTTTTGCTTGGCGAGCTCTACGACGAGAACGATCATC  
GACGTTAGCCTCATTTGCCGCAAAATCTGCGTGGTATGCTGGCGGCAATCGGTTCTATCGCCGCCCAATCGCCTGGGCT  
GCTCAGTGGTATGGATGGCATGTTGGCTTTCGCTTGGCGGAGCGGCATGTTTATCGGTTTGGTGGTGGTGGTGGTGGT  
TCATCGTCAATTCAGTCCACGCGTAGTATGGATAAAAAAGCGCTCACAGCGTCAAATTTGCCTTACAGTATGGAGCT  
GGTTAGTGGTGGTCTGTTTACGCCCCAGTATTTTTACCCTGCTGCTGGGAAACGACTGGTCCGGATATTTGCTGGCG  
ATCGTTTGGCTCATTTGCCGCAAAATCTGCGGCAAAATCTGCGGCAACACCGCGCTGATGATAAAATTCGCGAACC  
TGTATTGTTGATGTTTGTGCGGACGTTGTTCTGGGTACTGGCACAACAGGGCGGCGAGTACCATCAGCTTGTATTCGATC  
GCTTGTGTAATCGTCAGGCATTCAAATATGAAGTACCTACAGCCTATTCAGTCCGTTGAATGCCATTGCGGTGATGCTC  
GCTGGGTTGTTCTGGCTGGCTGGCTGGCTGGCAGAAAGCGCGCAATTCAGCATTCGCGCTGCGTGGTGAAGTTTGGCTT  
TGGCTTACTGCTGATGGCTTGTGGCTTTATATTGCTGGCATTGATGCCCGACATGCAGCGGCTGGCGGTCAAGCGTCAA  
TGGCGGTGATGATAACGGGCTGGCGCTAATGGGCTTGTGTAACCTTTATTTGACCCGGTGGCGATTGCGCAAAATCACG  
CGTCTGAAAATGCTGGCCTATTAACCTGATTTATATGCTGGCAACAGCGCAGTCCGCAACGGCTGGCAGCGCTCGT  
GGCACAGCAGACGAGTCCGAAATAGCGGTATGGCAATTCGCCCTTACCAGGATTCCTTTCTCAGATGGGAGAGT  
GGACGTTGGCTTGTGTCGGGATCATCTGGTATTGGCTTTGCTACCCGTTTTCTGTTTACGACCGCCGCAATATGATA  
CAGGAGAGCAACGATTAA

>Cluster\_21943

ATGCCAAAAGTTTACGGCCGACGGCTGCGGTTGCCCGCAGGATACGGTGGCATATTAACCATTGTGATTGGTATTTTCGAT  
GGCTGTCTTTCAGCGCGCAATCGCAACGTCGCGCTGCCCAAAATCGCCACGGACCTTCATGCCACGCGCAGCCAGTTCCA  
TCTGGGTAGTGAACGCCATCAAAATCGCATTTGTCATCTCCCTGCTCTGTTTTGCTTTCGGCGATATGTTTGGCTAT  
CGACGATTTATAAATCGCGCTTGGTCTGTTTTCTGTTGTCTTCACTGTTCTGCGCCCTTTCGATTCCGCTGCAAAATGCT  
CACCTTGGCGCTGATCATAACAAGTTTTCGGCGGTGATGAGCGTTAATACCGCACTTATCCGCGATCATATC  
CACAAAGTTTTCGGGTAGAGGGATGGGCATAAACTCGTTTATTTGTTGGCTCTTCTGCTGCGGGCCGCAAAATGCT  
GCAGCAATCCTCTCCATCGCATCTGGAATGGTATTTTTAAATCAACGTACCGTTAGGATTTATCGCCCTGCTTCTGGC  
GATGCGTTTTCTGCGCTCAATGGTCTTCGCGCCAGTAAACCCGTTTCGACCTGCCAGTGGCGGTGATGAACCGGTTAA  
CCTTCGGCTGCTTATCATCTGCGTTGAGTGGTTTCGCTGAGGCAATCGCTGACATGATTGGTGGCGGATGTTGGT  
ATGGTTGCTGTTGGTATTTTCTTATTCGCGCCAGCTTCTCTTCCCGTACCCTGCTACCGGTGGATTTACTGCGTAT  
CCCCTGTTTTCACTTCTTATTTGCACATCTGTTGCTTCTTCGCGCACAAATGCTGGCAATGGTTTTCCCTGCCCTTT  
ACCTGCAAAACCGTCTCGGGCTAGTGAAGTCGAAACAGGTTTACTTCTGACACCGTGGCGTTAGCAACGATGGTATG  
GCTCCGCTGCTTATCATCTGCGTTGAGTGGTTTCGCTGAGGCAATCGCTGACATGATTGGTGGCGGATGTTGGTGG  
GCTTTTTTCCCTGGTCTGCTGCGCCGCTACCTGCGGATATCAATATATCTGGCCGATGATCTTATGTTGGTCTGGAT  
TTGGCTTGTTCAGTACCCAATAACACACCATTATTTACTCCGCTCTCGCAACGTAGCGGTGGAGCCAGTGGCATG  
TTAGGAACGGCTCGTCTACTGGGTCAGAGTACGGCGCGGCGCTGGTGGCGCTGATGCTAAATCAGTTTGGTGGTAAATGG  
TACTCACGCTCGCTGATGGCTGCGGCTATTTCCAGTGGATTCTGCGCTGATCAGTGGGTTACGATACCATCAGCCAC  
GATCCAGGCATAA

>Cluster\_41561

ATGACTGTAACGACTTTTTCCGAACTTGAACCTGACGAAAGCCTGCTGGAAGCCCTCCAGGATAAAGGTTTCACTCGCCC  
GACCGCATTCAGGCTGCGCCATTCGCGCTGCGCTCGATGGCGGTGATGACTCGGGTCTGCGCCGACAGGCACCGGTA  
AAACGGCGCGGTATCTGCTGCCAGCGTTGCAGCACCTGCTCGATTCCACGTAAGAAATCCGGTCCGGCGGTATTTTG  
ATCCTTACCCGACTCGGAACTGGCGATGCAGGTGGCCGATCATGCCCGGAACTGGCGAAACATACGCATCTGGATAT  
TGGCACCATCACGGCGCGGTGGCTATATGAACCACGCAAGTGTTCAGCGAAAACAGGACATTTGGTGGCCGCA  
CCGGACGCTGCTGCAATACATAAAAGAAGAGAATTCGATTGGCGCGGTTGAAACGCTGATCCTCGACGAAGCAGAC  
CGTATGCTGGATATGGGCTTTCGCCAGGATATCGAACATATTGCTGGCGAAACGCGCTGGCGTAAACGACCCCTGCTCT  
TTCGGCAACGCTGGAAGCGGATGCGATTTCAGGATTTTGGCCAGCGCTGCTGGAAGATCCGGTGGAGTTTCTGCGAAT  
CGTCCACCCGTCAGCGCAAAAATAATTCACGTTGGTATTTACCGCGCCGATGATCTTGAGCATAAAACCGGCTGCTGGT  
CATCTGTTAAACAGCCGGAAGCGACCCGCTCAATTTGTTTGTGCGTAAAGCTGAGCGTGTGATGAGCTGGCAAATG  
GCTGCGGAGAGCAGGCATCAACAATGCTATCTCGAAGTGGATGTTACAAGCAAGCGTAAAGCAAGGATTAACCGCT  
TGACCGAAGCGCGTAAACGTAAGTGGTGTGCTGCGGCGCGGTTGCGGATTCGACATTCCTGACGCTCAGCCAGCTC  
TTTAACTTCGATATGTCGCGCGCAGTGGCGATACTTATTTGACCTATCGGATACCGCGCGCGGCTGATAAGGCA  
CGGATTTTCTGTTGGAAGCCATGACCATCTGCTGCTGGGCAAAAGTTGGTCTGCTATATGAAGAGCAATTAAGCTC  
GCGTAATTTGACGAGTTACGCCGAAAACCGTGGCGCAAGCGGAGAGACCGGCAAGCCATCGAAGAAAGTACTGGCA  
AAACGCGCGGAGAAAAGAAAAGCTAAAGAGAAAAGAGAAGCGCGGTTGAAAACCGCATCGCGACACCAAAAATATTGG  
TAAGCGCGGTAACCAAGCGGAAACGGCGTGGCCAGCAACGACGAGAAGTAA

>Cluster\_17411

ATGAAAACATTTCCGTACTCCGAAACGCATCCGCTGACCTGGCGTCTGCGCGATGACAAACAGCCAGTGTGGTGGGA  
CGAATATCGCAGCAAAAACGGTTACGAAGCGCGGTAAGCGCTGACCGGTTGCTCCGGAGCAAAATCGTTTAAATCAGG  
TAAAAGACTCTGGTCTGAAAGGGCGCGGTGGCGCAGGCTTCTCGACTGGCCTGAAGTGGAGCTGATGCCGAAAGACGAA  
TCCATGAATATCCGTTACCTGCTGTGTAACGCCGATGAAATGGAGCCGGGCACCTATAAAGACCGTCTGCTGATGGAGCA

ACTGCCGCACCTGCTGGTGGGAAGGCATGCTCATCTCCGCTTTCGCGTGAAGCTTACCGTGGCTATATCTTCTCGCGC  
GCGAATATATCGAAGCGGAGTGAATCTCGCTCGTCCATTGCCGAAGCCACCGAAGCGGGTCTGCTTGGCAAAAACATT  
ATGGGAACAGGTTTTGATTTTCAACTGTTTCGCTCATTACCGGGGAGGGGCTACATCTCGCGTGAAGAACCGCGTTAAT  
TAATCTCCCTGGAAGGGCGCGCTTAACCCGCGCTCGAAGCCGCCATCCCGGCAACCTCCCGTGCATGGGGTAAACCAA  
CCTCGGTTAAACAACCTCGAACCCTGTGTAACGTTCCCGCGATCTTCGCTAACGGCGTGGAGTGGTATCAGAACATCTCG  
AAAAGTAAAGATGCTGGCACCAGCTGATGGGCTTCTCTGGTCCGGTGAAGAAATCCCGGCTGTGGAACTGCCGTTCCG  
CACCACCGCAGCGGAGATCCTCGAAGACTACGCGGGTGTATGCGTGACGGTCTGAAATTCAAAGCCTGGCAGCCAGGG  
CGCGGGGACTGACTTCTGACCGAAGCGCACCTTGACCTGCCGATGGAATTCGAAAGTATCGGTAAGCGGGGAGCCGT  
CTGGGTACGGCGCTGGCGATGGCGTTGACCACGAGATCAACATGTTGTCGCTGGTGCCTAACCTGGAAGATTTTTCCG  
CCGTGAGTCTGCGGCTGGTGTACGCCATGCGCGACGGTCTGCCGTGGAGCGTGAAGAAATCTACGTGCGCTGGAGCGTG  
GCGAAGGCCAGCCGGCGATATCGAAACACTTGAGCAACTGTGTTCGATTTCTTAGCCCGGGTAAACCTTTCTGTGCCAC  
GCACCTGGTGCAGTGGAGCCGTTACAGAGCGCCATCAAAATATTTCCGCGAAGAAATTTGAGCGGGGATCAACAGCCGTT  
CAGCAATACCCATTTGATTAATGGGATTACGCCAACCTGCTGAAAGAGCGCTGGTAA

>Cluster\_62472

ATGGCAACCACCCGCAACAAGGTGATGTGGCAGGAAGGATGCTGATGCGCCACACCATTTCAGCAACAGCAGCGTTA  
CAACGACTACCTGGATAACACGCGTTTCCGGCCATGAATGATTTATCTGGGGATTTACCGAATCACCCCTCAACAATG  
AACTGTGCGCAGGGTAAAGTACATGATGACGCGCTGAGGCACACTGCGCCGACCGGCTTTTTCTATCCCGGAC  
CAGGACGCACTGCCCGATCCGCTGCACCCGCAAAATTTCCGGACGAAAGAGCCGCAATATCTACCTCGCTCGCGGT  
CGCCAGTGTGTGAGAAATGAAATCAGCGACGGACGGCGAATCGGGCGTTACCGGCTGAATTAAGCCGATGTCCGGGAT  
TGCATTCAGAAGAAGGTGACGCGCAACATTTGACGCTGGTCAACTGACGCGCGCATATGAGCGGTGCAGAGATATG  
AGGCCTATATTACGCTCCCGCTTTCGCGTATCAGCGATGCGCATGCCGATGCCGATGGCTCCCTGACGTTGGATGACGATTTTTAT  
CCCCCTCTGCCAGATATTCAGGTGAGTAAAGAACTGCGTGTATCTCAAGAGGTACAGGGGGCATTTGGCGGACGGG  
CAAGCGATCTGGCAAAACCGTATTGGCTTCCGGCGCAGAGCGGCATCGCGGATGTGGCGGAAATTTATGATGTTGCAGTTA  
CTTAACCGTAAACCGGTTACCCATCGCGCCGCGATCCGAGCTCCACCGCAAGATTTCTCGCCGGAAGAAATTTCTGATCTTGC  
TGGGTTGCTGGGTGAACGTGATGACCTTTACCGAGCCGTCGCGCTGCCCTGCCGCTTGTATGTATGATCATCATGATC  
TGACCAAAACATTTAAAACACTGTTACCGGAAGTCAAACGGGCGCTACATACCGTACTGTCGCAAGAGCGGTCAATCTG  
CCGCTGCATCTCGCTGACGGTATCTGGCAGGCCGATATCCATGACACAGAACTGCTGCAATCTGCCACCTTTGTGCTGGC  
CGTGGCGGCAACCGTCCGGTGCATCAGATCCAGCGTCACTTTATCCAGCAGTCAAGAAATTTCTCGCCGGAAGAAATTC  
GCAATATGGTCACTGTGCAGATCCCGGTTATCCATTTGCGTGCCTTATGGTGGCTCCCGCCAGCTTCTTATCATTTCC  
GGGTTCACTATTTTCGAACCTCGACAAGAGCGGACAGGCTGGACAGAAATGGTGCAGGCGGGCCGTTGCATGCGATGT  
ATCCGGCAGTTTCCCGGATCTGAACATGCAACTGTGGCGGATAAGAGGGTAA

>Cluster\_40958

ATGTTTAGCTTAATCATGGCCGGAGAACCAGGACGTTTTTACCCTGGCGTGTATGGACCCAGGGCTTACAGAAGCGGA  
GGAAAGATCTCGATGTCCCGCATGCTGGAAGGCACCCCAAGCGATATTTACAGTAAATTAACACCAATAAGACCCCGATA  
CCTTAAGAGAACCTCCGAAGCTACCAGTATGTTTATGACCGAACTTATACAAAAGATGATGAATATGATACCAACAAAG  
TACATCAGATCAGACTGGGGAAATAAGAAATTTACGTAAGATGGTGGCGATTTTTATTTTCTTTTCAAGATTAATCA  
TAATTTGGAGAAATAACGAATCCCAACGACATTTATATAAGAAACCTTAGGGCTAGGATCTTTCGGGTTAAGCCGTA  
CACATTTGGCAGTAAAAATAAGGATTTAAATATTTGTTCTGGAATCATTGGTTTAAACAAACAAAATAGTCACTCCAA  
GGTACAATCAATTAATAAACAACAATACCCAGTACGAGAAATATATAGATTTAATTTTATAAAGAAAACAACTT  
TCGTGATGCTCTACTTACTTTTTATCTGTCGACACTCTAAAAGCTCATATGAGCTTGTCCCTCTCTTTTACAGAAAATTC  
AAAACGGGACGTACAGGCATCTTGTCTTCAAGATCTGATTTAGTACGTGAAATACTCAGCGCAAGACCAATGAATTTAAG  
GAGGATAAATTTACGATTTGATAAACTTGTCCGATGACCAATTTAGGCTTGCCTACAAGACTCTTAGACATACATCTAA  
CCCCTGATAGCATTATATTTTGTCTGCTGTGCAACCCTGCAAGTAAAGAAACGGACAGGTGATTTGCTTTCAACAAATAGAA  
AGAAAATTAATATTTTGCAGTACAGATACAGTGAAGTGTATAGCAAACTTATCACTTTTATCTTACGAAGAGTTGGAAAA  
TTGTCCTCTCTGATTTCCAGAAAAGGTAATATGGAGTTATCTGAACCTACTGATAAATTTGCAGACCTTATACAGAATGA  
AAAATCATATTTTGAAGACAGAAATAATCTGATGACTTAAGGAAAGTTGTTTTCTTAAAGGCTAAAAATAAATAATGAAC  
GCATACAATCTCAGGACAGGAGCTTTTCTTCTGTTCCGACTTATCCCATTTTACCAGGAAACAGATGCTGATTTCTCTCT  
AACAGAGTGGAGATAGCGAACAATAAATAAATTTTGAAGAGCTGGCGCAGCTTAATATATCCGAAAGCACTGATATATCC  
CAGCATGGAGAAAACGGCAGCAGAAATTAATAAAGTTTATATCCGATCATATA

>Cluster\_55322

ATGAGTAAATGTTTATGCTGCTGAAAAGGTACTCCTCCCTTTGTCAGTTAAAAATAGGAAAGCAGCCACACGTTAATGC  
AATCAAAAATGGCTTTATTCGCTTAATGCCGTTAACCTTTCGGGGGCGCATGTTTGTATTAATTAACAACGTTTTTCTAA  
GCTTTGGGAGGGGTCGTTTTTTTATTCCTTAGGTATTCGCTCGACGCTCAACCATGAAACACTTAAATGGTCTGAAA  
GGTATTTGGCGCAACGATATTAACGGAACATTAAGAAATATGCTTTAATGGCACCTTCTTTATTTGGCATGGCGCTGGC  
AGAAGAGCGTAAAGTCAAGTGCAGTGGCGTGGGTTGTTATCCGTTGACAGCATTTATGACCGTCAACCCATATAGTGTG  
GTGAGGCTATGCGGTTGGTGAACACTGGTTAGGTGGGGCAATATCATCTCCGGATATTTATTTGGCTGGTGGTGGCA  
GAAATGTTTACTTTATTTGTCGCGCAGTATGGGTCATTAACCTGCCGACAGCGTACTGCTTACGATATCGGCTTCTT  
CTCGGCATTAATCCCGGCTTTATTTATTTCTTTCGATGGGATTTATGCTGGGCTTGAATACCTGGGCAACCACT  
TCCATCAGATCATTTAGGATACCATCTCAACCCCATGGCATGTTGGGTAGCGTGGTGGGCTGGGCTATGATCTTT  
GTTCCACTGCTCTGGTTCCTCGGATTTATGCGCGCTGGCGTGCACCTGGACAACGGCATTTATGACGCGTGGGC  
ACTGGAATAATCGCGACCTATCAGCAATATGGTTCGTCGAAGCGGCGTGGCAGCCGGTAAGACCTTCCATATCTGGG  
CCAAGCCGATGCTGGACTCCTTTATTTTCTTGGGGCAGTGGTGCAGCTTTAGGCTGATCCTGGCTATCTTTATCGCC  
TCTCGCGCTGCTGATTTATCGTCAAGTGGCAAACTGGCGTGGCGTCCGGCATCTCCAGATTAACGAACCGATTCTGTT  
TGGTCTGCAATTTATCATGAACCGGTGATGTTTATCCGTTTGTACTGGTACACCGATTTCTGGCGCAATCACCTCG  
CAGCGTACTACATGGGCAATTTCTCCGTTGACCAATATGACCGTGGACCATGCAACCGGTCTGGGAGCCTTCTTT  
AACCAACCGGTAGCGTCCCGCATTTGCTGGTGCACCTTTCAACCTTGGCATCGCAACGTTAATTTATCTGCCCTTTGT  
TGTGGTGGCTAACAAAGCACAATAAGCATTGATAAAGAGAGAGCAAGAGATATCGCTAACGCCCTGAAATTTTAA

>Cluster\_26932

ATGACCACGCGCTGACTCGCTGGCTAACACGCTGGATACCTTTGAAGCCAAAATGGCGCAGTTGCCGCTGGTACGTCG  
CTACGGGCGATTAACCCGCGCTACCGGGCTGGTCTGGAAGCCACCGGATTAACAAATGCGGCTCGCGCAACCTGTGTCA  
TTGAGCGCCAGAAGCGCAGCAACGCAGTAGAAGCGAAGTGGCTTTAACGGTCAACGGCTGTTTTTAAATG  
CCGCTGGAGGAAGTGAAGGTGCTTCCGCGGCGCGGTGATATGCCAAAACATTTCCGGCAGAAGGGCTGCAAGCGG  
CAAGCAGTTGCCGCTCGTCCGCGTATTAGTCTGTTCTGGACGGTAGCGGTAACCGCTCGATGGCTGCCCTTCC  
CCGATACCGGAAACCGGTGCGCTGATTACCCCGCAATTTAACCCGTTGCAACGCTACACCGATTGAACATGCTGCGGAC  
ACCGGCTGCGCCAATCAATGCCCTGCTTACCGTCCGACGCGGGCAGCGTATGGGCTGTTTCCGGGTCCGGCGTTGG  
TAAAAGTGTGCTGTTGGGGATGATGGCAGCTTTACCCGCGCGGATGTCATTTGCTGGGTTTGTATGTTGAACGTTGGC  
CGAAGTAAAGATTTTATTTGAGATATCTCCGTTGCCGGAAGGGCTGCACGCTCAGTGGTGAATGCGGCTCCGGCGAT  
GTTTCTCCGCTCTGCAATGACGGGTGCGCCTATGCCACGCGCATTTGCCGAAGATTTTCCGATCGGTTGCTGAGCATGT  
GTTGCTGATTTAGACTCCCTCACCGCTACCGGATGGCCAGCGTGAATTTGCGCTGGCGATTTGGCGAACCACTGCCA



CTAAAGGTTATCCACCGTCCGGTGTGTTGCCAAATTACGGCCTGCTGAGCGTCCGGAAATGGTATTAGCGGCGGGCGG  
TCGATTACCGCGTTTTATACCGTACTCACCAGGCGATGACCGAGGACCCATTGCTGACTCCGGCGGGCAATCCT  
CGACGGTCAATTTGCTGCTCGCCGACTGGCGGAAGCCGGGACTATCCGGTATCGATATGAAGCGTCGATCAGTC  
GCGCAATGACGGCGTTGACTCAGTGAGCAACATTACGGCGGAGTCCGACCTTCAAACAGCTGTGTGCGAGTTTTCAGCGT  
AACCGCGATCTGGTTAGCCTCGGCGCTATGCCAAAGGAGCGATCCGATGCTCGATAAAGCCATCGCCCTGTGGCCGCA  
GCTGGAGGCTATTGCAACAAGGCATTTTTGAACCGCGGACTGGGAAGCGTCTCTCCAGGGCTGGAGCTGATTTTTCC  
CGACAGTGCATAA

>Cluster\_53513

ATGGGTGAAGTTATCTCCGTTTTTGAATATGACCTACTGGGAGTGAAAAGCGGCTTCAAGTTGGCGCAAACCGGTGCC  
TCCACAGGCTTTAATTTATTTAGAACGGCTTAGCCTGGCAAGTAATCAAGGGAGCCAGTTCTCAAACCTACCTCTCGCT  
CAGGCTTCAAATTTGCTTACAGTTCAAACCTACCGGGGATGCTTTCAAACCTCACGGTTCCAGCTTGAATACTGCC  
AAGTTGGTAAAACCTCACAGCGGCTAATGCACGTCAAACCTTGTGACGATGCTAAGCCATCTGCCGTTGGTTTCGACA  
TATTCAAACCCAGCAAGCCACTCTTCAGGCTCAGCGTATGCCTTGGCTTGAGATTTTTTATAAACAGTTTTTGTGATAGCG  
TCAGCCAATTGCTTAAACAGGGTTTACGCTCCGACTATGTGAGCAAGCAAGGTAATCTGGCTTTTATGAAGGGCAAGCTG  
ATGCTTTCGACAGCTGCGACATAACGGGTAATCGCCATAAGTTTTGTGTGATTTGATGACTACATGCTGATTTG  
TGCAGCCAATCGGCTTACACTCCGCTAGATAAGCTTCTTAGTCTAAAGCTGTATCAGAGAATCAAAGCTGGCTTT  
ACGAACCTCGCTTTGCGTTTACGCTTTCACCTTAGCCGTAATTCAGCCGGAATTTGAACGTGATATAAACAACTTACGCTCGAGCT  
GGTATGGCTCATTACAACGAGCCAATGGCATGGGCGCAACTGATCTGAGGGGAATGAGCCGAGTGTCTTGCAGGGGAA  
CACCAAAGCGATATCATTGTTCCCTATGGAAGCGGATTTTGAATCTTTGTTGGCAGACACCTACCTACGAATTC  
CTTCTACCTCAAAGTTTTACCTCAAGCAGCAACTTATCTTTGGTAAAGCATGGAGTTAAAGATTGCTTTAAGCTTCGC  
CCCAGTTCCCTGATTTCAATCAAATAAACAGTTCAAACCTGTAATGGTAATGATAAAATGGAAGTTGGTGAATGAGAG  
CCAGCAGCAAAAATCACTTATGGACTGGCACAAGCTGACTTCTATCAAATGTTGCTACGGACAAAATATCTTGGTG  
GGAATGGCGAAATGATCTGATTTACCTGCGCATGATGACTTTAGCCAACCGATACCGCAGGATTTTTGCTTTCTCGGAG  
ACTTTAAATATGAGGTTGCGCATACCGGATAATGGCAAAACCGGCTGAGAGGATGATGTGGCCGAATGACGTGTCTTG  
TACAATGAGCCCCAACTGGATTGGATGGCTGCTTCAATATCTATAGTGGAGCATGAGATGA

>Cluster\_4033

ATGAACGATATCGCGCATACCTCTATAATATTGTGCAATATATATTTGGGATTTGGCCCGACGGTAATGTTGCCGTTGGT  
GTTATTTATTTGCTCTCTGTTTTAAAGTAAAACCCGCTAAAGCCTTACGTTTCGTCATTAACAGTCGGCATTGGTTTTG  
TCGGTATTTATGCCATTTTCGATATTTGACCAGCAATGTCCGGCCAGCGGCCAGGCGATGGTTGAACGCACCGGAATT  
AATTTATCCGGTGTAGATTTAGGCTGGCCGCGCTTTCGCTATACATGGGGTTCCGCAATTGCCCGTTTGTATCCC  
CCTGACCATTCTGATTAACGTGGCGATGCTGGCGTTAAATAAAACCCGTACCGTTGACGTAGATATGTGGAACACTGGC  
ATTTTGCCCTTGTGGTACGTTGGTTTTATACAGCACCCGGAGCCTGTCTTTGGTTTTGCTGGCGCGCGGATGCTGCG  
GTGGTAGTACTTAACTCGCCGACTGGTCTGCGCCACTGGTACAAAAATACTTTGGACTGGAAGGGATCTCATTGCCGAC  
GCTCTCTCGGTGGTGTCTTCCCGGTCGGTCTGCTGGTGCACAAAATCATCGACCATATCCCGGCCCAATCGTATTC  
ATATCGACCCGAAACCTACAGAAAAAGTTGGCATTCTCGGCAACCGATGATGGTTGGCACTATTTGCGCATACTG  
CTCGGCGTATGTCAGGATACGATTTCAAAAAGTGTTCCTGCTGGCATCAGCATGAGGCGGTGTGATTTGCTTGCCTGCC  
ACGCATGGTACGCATCTGATGGAAGGTTTATTACCGTGTCTGAAGCATTAAAAAGTATCTCAATGCCAAAATACCTTG  
ACCGTGACGATCTATATCGGCCCTGGATACCGCGTTGCCGTAGGTAACCCGGCGATATCTCCACCGCCCTGCTGGCT  
ACGCCTATCTCGGCTTTTATCGCCTTTGCTCTCCGGTAAATGAAGTCTGCGGCTTGGCGACTTGGCAACCTGCGCGGT  
AATGGCGTCGATGATTTGCTTTAGCCAGCCGTTGGCAATATTTCCGACCGTTCTGGCGCGGATCCCGGTTGATTTGCCG  
ACCTGTGGATTGCGACTAAAATCGCACCCTTATTACCGGCATGGCGAAAGACGTTAACTTCAAATTTGCCGAAGGCTCC  
AGCGGCCAGGTTTTCCAGTTCTTGTGATGGCGGTAACCCGTTCCGCTTCTGGCTGCTGGAATCTTCAAAGGCAATATCAT  
CGCCATTGGTCTGGTCCGGTTATCGCCCTGGTACTGTATGGCATTTCGGAATAACGGGAGCACGGTTTATGCCTGA

>Cluster\_25806

GTGAAACATCTGCATCGATTCTTTAGCAGTGATGCCTCGGGAGGCATTATCTTATCATTTGCCGCTATCTGGCGATGAT  
TATGGCCAATAGCGGCGCAACAGTGGATGGTATCAGGACTTTCTGGAGACCGCGGTTCCAGCTCCGGGTTGGTTCACTCG  
AAATCAACAAAACATGCTGTTATGGATAAATGACGCGCTGATGGCGGATTTTTTCTGTAGTCCGTTGGAAGTTAAA  
CGTGAACATGATGCAAGGATCGCTAGCCAGCTTACGCCAGGCGCATTTCCAGTTATCGCCGCAATCGGCGGGATGATTGT  
CCCGCATTTGCTCTATCTGGCTTTAACTATGCCGATCCGATTACCCGCGAAGGCTGGCAATCCCGCGGCGACTGACA  
TTGCCCTTGCCTTGGTGTGTTGGCGCTGTTGGGAAGTCTGTTCCGTTAGCGCTGAAGATCTTTTGTATGGCTTGGCT  
ATTTACGACGATCTTGGGCGCATCATTATCATCGCATTGTTCTACACTAATGACTTATCGATGGCCCTCTCTGGCGCCG  
GGCTGTAGCAATTGCGGTACTCGCGGATTTGAATCTGTGTGGTGTACGCCGACGGGCGTTTATATTCGGTTGGCGTGG  
TGCTGTGGACAGCGGTGTTGAAATCGGGGGTTCACGCAACCTGGCTGGCGTCTATGTCGGCTTCTTTATCTTTGAAA  
GAGAAGCATGGCGCTCTCCGGCTAAACGTTGGAGCATGTTTTGCATCCATGGGTGGCGTATCTGATTTGCCACTGTT  
TGCATTTGGTAAATGCTGGCGTTTCACTGCAAGGCGTACGCTGGATGGCTGACCTTCCATCTCGGATTTAGGATCATG  
CTGGTTTGTGATTTGGCAAGCCACTGGGTATTAGTCTGTCTGCTGGTGGCGTTCGCTTGAATTTGGCACATCTGCCA  
GAGGGAACGACTTACCAGAAAATATGCGGTTGGTATCCTGTGCGGATCGGTTTTACTATGCTATCTTTATTTGCCAG  
CCTGGCATTGGTAGCTAGCTAGATCCAGAATGATTAACGGGCAAAAATAGGATATCCTTGTGCGTTCAATTTCTTCCGCGG  
TAATTTGGATATAGCTGGTTACGCTTCCGTTTACCTCCATCAGTTGA

>Cluster\_27993

ATGGGGCTATACGATAAAATATGCGCGCTTGTGGCGAGCGCTGCAATTTAGTGATAACGGGTTAACACCAATTTGGCAC  
CTGTATTGATGAAGTATAATTCGCCACCGAAGCCGGATCGGCAATAAAAAAGTGAATTTGGCGGGGACCAATAATTAATC  
TCGGTTTTAACCTTAAATCATGATGCTATCCGCGAAGGTCAGGCAGCGTTAGCGGCCCAAGGCACCGGCACCCGCTTCT  
CGTATGGCAACCGCAGTTATGCGCCGATCTGGCGTTAGAGAAAGAGATTGCCGAGTTTTTCAATCGCCCTACCGCTAT  
CGTTTTTTCAACTGGTTATACCGCTAATTTAGGCGTCACTACGACACTTGGCGACATAACCGCGTGGTGTACTGTTGATG  
CCGACAGCCAGCCAGTATTTATGACGCTGTTCTCTCGCGCGCGGAGATTATCGTTTTCCGCCATAATGACGCTCAAC  
GATCTGGAACGGCGCATGGTCCGCTCGGTGAACGGGCAAGAGGCGATTATATCGTTGAAGGCATCTACAGTATGCT  
CGGTGACGTTGCGCCGCTGGCAGAAATGTTGATATCAAACGTCGCTCGGTGGTTATTTGATGTCGATGAAGCTCACT  
CGTTCCGTTGCTAGGCGCGACAGGCGCGGACTGGTTGAAGCCGTTGGCGTTGAAGCAGCAGTGGATATATCTGCTGGC  
ACCTTCAGTAAAAGCTTGGCCCTCGATTGGCGGTTTTGCTGTGCGTTGCGAAGCGATGGAAGTGTCTGCGCTACCGCAGCCG  
CCCGTATATTTTTACCGCTCTCCTTCTCCGCTTGCATTTGGACCGTGGCTGCTGCTTGAAGACCAATTTGCCCTACAAC  
CAGAGCTGCGGCAAAAATGATGGATAACGCCAACCTCTGATGACGCTGTCGAAAAACTGGGTTACGAGTTAAGTTCA  
CATATTAGCCCGTAGTGCCAGTAATAATCGGTTGAAAGAGGATTTACGCATCTGGCGGAGCTTATTTCTGCTGGG  
CGTTTTATGTTGAATCTTATCCTGCCACTGCGCGCTGACGCTACGCTGCTGAGCTGTAGCTAAACCTGCCACAC  
GTCGTGAGCAAAATCGATGCCATCATTACGGCATTGCTACTCTGAAGCAGTAA

>Cluster\_19638

GTGCGGATAGCTATTTCCAGCTATATGCGCCACCTGTTTCAAGGGAAGCGCTACTTTATGAAAAGCACAGGAACACGAGA  
CATACGCCAAGCGGATTTGTTTCGAGATGCTATTTGCTCTGGAATGGACTCGCTTACGGAATCTGCTAAAAGCCAAAGGCG  
GCTCATCTGTAGACCAAAATCATTGATGAGCTACGCGGTGTCAGTGTGTAGCCAAAGGACCCCGCATGTTTTGGTGA

TCGATTACAGGCTTGCCCTTCTTGTCTAAAAATGCGTGATTTGTACCTGCTTCAATACAGCGAGAAGCGAAAGCTAACCC  
GTTATCCAAAGACCAACAAAGCCGTAGAGGTGCTGTTAAACCCACTTGAAAAAGAAAGATGTTTCAGTTGCGGGATATTAACC  
GAACCATAGTTACAGGCTGGTTAGATAAGCTCAAACTGAGCGAGCGCCCAAATATCCAAAATATATAAGCGCAGCTG  
GCGCAGATATGGGATCTGGCAGCAATCGCTATCACGATGACACACAGGACAACTCTTGGCGCGGTATGCGCTGCAAGC  
AAAAAGCAGCAAGGTAGCTATGAAGCTTTCGACCCGGGAGCTGGCAAAAGTCTATGCCTTGGTTGATGACGAGATGA  
AGCGGGTAACGGCTATTGGTGCATACAGCGGTATGCGGATCAATGAGATATGTACGCTACGTGAAAGCAGTATAAAACT  
ATCGAGGGTATATGTGCTTTGAGATCACCGAGGGGAAGACTAAGAGCGCGGCGCAATCGTCCCTGTACACAGCAAGAT  
AATCCCTCTCGTGAAGTCAATGCTCAAGACCACATAGCGGTTTCTGTTCTATCACGCATCAATAACAGACCGGGCCG  
ATGGGAAGCGCTCAACGTGGCATACGCAGCAATTCACGCGAGCAAAAGCCTAAAGCTCTTGGCGAGCCTGCCGAGAGAGA  
AAAGTGTTCCTACTCCTCCGCCATGCTTTTGTGCAACAGCTCGACCGTCTCAAGTGCAGAAAGATCGTATTGCCCTGCT  
CGTCCGTCATGAGCGCGGAGTACAGAGAGCTTCAAACTTACCTCGAAAAATGACGCTTCCCTATAGAGATCGGTAAGT  
ATGTCGAACCTATCCAGCATGAAGGAATAAACATCTAA

>Cluster\_20883

ATGCTGGATACGCTGACATTTGATGCAGGCAGTACGCTGACGCGGATTAATCATGCTGATGCTCGACAGCAGGGATATTAC  
CGGCAATATCAGCGACCGTCTGATGAGCATGACCTGACGGATAACCGGGGCTTTGAGGCTGACACAGCTTGATATTGAAC  
TGAACGATGCCAGCGGCAGGTCGGGCTGCCGGTTCGTGGCGTGTCCGACGGTGTATATCGGCTGGAAGGTTTGGCC  
CTGGTATGCAAGCGGAAATTTACCGTTGATGAGTTGAACACCGGGCGCGCGGATGTTGTTACCATCCGCGAGGATG  
TGCAGATTTTCGCGGACGCTCAATCCCGCGGGAAGGCTCCGTCATGACACCACGCTCGGTGCGATTGTTGAGGCGA  
TAGCCTCCCGTAACAGGCTGGAAGCCGCTGTTGCTCCGTCACCTGGCGGAATTAATAATCCCGACATCGACAGCTCGCAG  
GAGTCTGATGCGAAATTCCTGACCGTCTGCTGAACGCAACGGCGGTGAGGTGTCGGTAAAAATGGGAAAACCTGCTGTT  
TCTCAAAGCGGGGAGGGGTGACTGCCAGCGGTAATAAAATCCCGCAGATTACCATCACCGCAGCGAGCTGACCGT  
ATCATTTTGGGATTTGCTGATGCTGGAGCTATACCGGCTAACGGCAAAGTGGTTACACACCAAGACCCGAAGCCGCAA  
AAGCAGAAGGTAAAACTGAAACGCAAAAAGAAAGAAAAACCTGCGCGCAGCTGGAGCACCCGAAAGCAAAACCGGTCAC  
GCAGAAGAAAGCCCAAAAGTACCGGAAGCGCGGAAGGTGAATACATGGCCGGTGAAGGTGACAACGTTTTTGGCCCTGA  
CTACGGTATATGCCACGAAAGCAGAGCCATGCCGCGGCTCAGGCGAAGTGGGATAAACTGCAACGGGGTGTGGCGGAG  
TTCFCCATCAGCCTGGCTACCGTCCGGCAGATATTTACAGGAAACCGGTTAAAGTGTGAGGCTTTAAGCGCGTCAAT  
AGACGAGCAGGACTGGACAATCACTAAGGTGACACATTTTCTGAATAATAGCGGCTTCAACGCTCTTGGAGCTTGAGG  
TCAGGCTTTCTGATGTAGAGTACGAAACAGAAGATGATGAGTGA

>Cluster\_23128

GTGAGTTCCATGCTTGAGATTTTTTCCCGCTTGGCGCGCTGATCCCATCCGTTGGCAGCGCATAACCCGACGTTGGA  
GCACGGTATCTGGCCTGACGTTGCTGACGAACGCTCCAGCAATGGCTGCAAACTGATGCGATTGACCTTACATTTCCCG  
CGCAATGGATCAGCGTCTGGCAGGTTGAAGTCCCGCGCAAGCAGATACCGACGATTTCTGGCCCGCTTGCCTG  
GAAGAAGAGCTGAACCAGGATATCGATGAACTGCATTTCCGCCGTTGAAAATCGACCAGCAACTGGCAACCGTAGCTGT  
GATTCACAGCAGCATGCGCAACATTCGCGAGTGGTTCAGGCAAAACGGCCTACCCGCGCTACCGTCCGCGCGGACT  
GATGCTTATCTTGTGGGTTATGGCTGGCGATGCGCAACGGGTTATCTGCGCATCGATGAATGCCGGGGATGGAGC  
GCGGTTGGGCGCTGGCTCCGCTCATGTTCCGCGCACGCTCAATGAGCAGGATTTACCGCTTTCACCTAACCGTTTCCG  
CATTCACCGGAAGAACTGCTGCTGATGGCTGGTGCAGACGCCGAACGCTGACCGTTACGGCTTCCCGCCATTACCA  
CTTATGGGCAACCCGAAGGGAACCTGCTAACAGGGCCGTCGACGCTTCTGTCAGTACCGAAAACAGTGGGCGCGCTGG  
CGGTTGATGATTTGCGGATATGCTGATTTCTGTTGCTGTTAGTGAACCGGGCGTGACGTTATGGAGCTCAGCGA  
ACAGGTGGCGCAAAAGCCGACCCAGTCGGAAGAAACAGTTCTTAACGCTATTTCCCGGAGCAGAAGCGGATTTGTGAATTTAC  
GCTCTCAGGTGACGATGGCGCTGAAAAATATCGCCACAGGCGACGATACCGGCTGCTCGAGAAATTTGTCAGCGATC  
GCCAGTACCTGAAATCAGCGCTCACTTACCGACATCGAAATCGCTGGTTCACCTTTGATCAAAAACGCCAGACGCTTCA  
CTCCAGCTACGGGCTGCGAACTTTGCGAGCTTCGACAAACTGCTGAGCGCACGCGGCGAGATATGTTGTGCAACAGG  
ACGCGTTACAGAAAGAGGGTGTGCGGTTTCCGCGCGGCTAACGTTGCGGAGGAAATAA

>Cluster\_65382

ATGAGCGTAATCATGCTCGGTGGCGGCATGGCGGGCGCAGCCTGGCGCTGGCTATTTCCCGTTAAGTACCGGGCGCT  
GCCGTTACATTTGATTGAAGCGACCGCGCAGAGTACATGCTCATCCGGCTTTGATGGACGAGCTATGCGCTAGCGG  
CGGGGACCTGTCAGCAACTGGCGCGCATCGCGCTTGGCAATCTCTGGCTGATTGGCGCAACCGCCATCACTACCGTGCAT  
GTCAGCGATCGTGGTCTGCTGGATTCTGTCACCTCGCGCAGAAAGTACCAACTGGCGCGCTGGGCGAGGTTGTGCGA  
ATTGCATAATGTCGGGCAACGGCTGTTTGCATTTGCTGCGAAAAGCACCCTGGCGTAATGCTGCAATTTCCCGCATCGCGT  
CTAACGTTGCCGCTACTCAGAGTCACTGTAAGTGAAGTGAAGTGAAGTGAAGTGAAGTGAAGTGAAGTGAAGTGAAGTGAAGT  
GCTGATGGCACCCATTACGCGTTAGCCACCGCGTGGCGGTTGATTGGCAGCAGGAGCCTTACGAACAACTGGCCGTTGAT  
TGCCAACGTTGCGACTTCCGTTGGCAGCAGAAAGCGCGCTTTTGAACGCTTACGCAACATGGCCCGCTGGCGATGTTTC  
CGATGCTGACGGACGCTGTTGCTGCTGCTGCTGCTGCTGCTGCTGCTGCTGCTGCTGCTGCTGCTGCTGCTGCTGCTGCT  
AAGTTTTGCGGTAACCTGCACTGCTGCTGCTGCTGCTGCTGCTGCTGCTGCTGCTGCTGCTGCTGCTGCTGCTGCTGCTGCT  
GCTGGCGTTAACCGCGCGCCAGAGCTATTACCCATCGTACCGTGTGGTGGCAATGCGGCGCAAACTCTGCACCCGA  
TTGCCGGGCAAGGTTTAACTCCGATGTCGAGATGTCATGAGCCTTGGGAAACCTTAACTCAGGCGATGAGCGCGGA  
GAAGACATCGGTGATTACGGCATATTGTGCCGTATCAACAGCTGACAGAGCGATCGCGAAGCAACATCGCGCTCAC  
GGACAGCTGGTACATTTTGGCAACCGTTGGGACCGCTGTTGTTGCTGCGGCGCAACATCGGACTGATGACGATGGAAT  
TATTCACCCCGCAGCGATGTTGCTGGCGCAGCGACCTCGGTTGGGTTGGCGGTTGA

>Cluster\_34529

ATGACAAATCAACCAACGAAATGCCATTTGTCGGCGGAGGAATGGTGGCGGCGCAGCTGGCGCTGGGGCTGGCACAGCA  
CGGATTTGCGGTAACGGTGTATCGAGCACGCAAGCAGCGCGTTTGTGCTGATAGCCAAACCGGACGTGCGGATCTCGG  
CGATCAGCGCGGCTTCGTTATCATGCTTAAAGGGTTAGGGGCTGGGATGACGATACAGGCTATGCGTTGCGCATCTTAC  
CGCAGACTGGAACCTGGGAGTGGGAAACCGCGCATGTTGGTGTGTTGACGCGCTGAACCTAAGCTACCGCTGCTGGCTA  
TATGGTGGAAACACTGCTCCTGCAACAGCGGTTTGGAGGCGCTGGAAGCGATCCGAAAGTAACTGCTGCTGCGCAG  
GCTCGCTGATTGCGCTGATCGCCATGATGATCTTACGAGCTGGAGCTGAAAGGCGGTAAGTGTATTGCGCGAAGCTG  
GTGATTGTTGCGGACGGCCAAATTCGCAAGGTGCGGAGATGGCGGAAATGGCGTTCATGATGGCAGTATGCGCAGT  
GTGATGTTGATTAGCTCCAGTCCGAGAACGATCCCGGCGCAGCAGCTTGGCAGCAATTTACTCCGACGGACCGCGT  
CGTTTCTGCGGTTGTTGATAAATGCGCATGCTGCTGCTGCTGCTGCTGCTGCTGCTGCTGCTGCTGCTGCTGCTGCTGCT  
AATATGGCACAGCTCCAGGCGAAATCGCGAAGCATTTCCCGTCCGCTGCTGGGTTACGTTACACCGCTTGGCGTGGTGC  
GTTTCCCGTGACGCTCGCCATGCTGCTGCTGCTGCTGCTGCTGCTGCTGCTGCTGCTGCTGCTGCTGCTGCTGCTGCTGCT  
ATCCGCTGGCGGGGAGGAGTGAATCTGGTTATCTGATGCTGATGCTGATGCTGATGCTGATGCTGATGCTGATGCTGATGCT  
TACGGCGAAGCGTGGCGAGTTATCTGCTTCAAGCGTTACAGATGCGGCGCATGGCGGATAAATCACTTACATTAAGCAAG  
CGGTATGATCTGTTTATGCGGATTCAGCAATAATCTGCCACCACTGCGTTTTATGCGTAATCTCGGGTAAATGGCGG  
CGGAGCTGCTGGCGTGTGAAACGTCAGGCGCTGAAATATGCTTAGGGTTGATG

>Cluster\_11894

ATGAAATATCCGACAGGCGTGGAAAACCATGGAGGAAATACGATATCTGTTTGTGTTATAAAGCGTAAAGATCAGGGA  
AAATCTGGGGGTTCTTGACACAGCAAAAACAGGCGGTTGCAGGTGAACCTACGCTCCTCTGTTGTTACGCAATAAAAA



TTTCGACATGGGGGTGGGCATGCTCACCCGTTTCCCTCGGTGCTAACGACACCGAGCGTGAATTATGATTAACCTCATTG  
CACCACACTGGGACGGTAACAGGTTTGGCTGATCACCCGCGGGCGGCGCACTCTTTGCTGCCTGGCCGATGGTCTATGCC  
GCTGCGTTTCCGGCTTCTATGTGGCGATGATCCTCGTGTGGCGTCTTTGTTCTCCGTCCGGTCCGGTTTGGACTACCG  
CTCCAAGATTGAAGAAACCCGCTGGCGTAACATGTGGGACTGGGGCATCTTCATTGGTAGCTTCGTTCCGCGCTGGTAA  
TTGGTGTAGCGTTCCGGTAACTGTTGACGGCGTACCGTTCAACGTTGATGAATATCTCGCTCTGTACTACCCGTAAC  
TTCTTCCAGTTGCTTAACCCGTTTCGGCTGCTGGCAGGCGTGGTGAGCGTAGGGATGATCATTACTCAGGCGGCAACCTA  
TCTGCAAAATGCGTACCGTGGGCGAACTGCACCTGCGTACCCGTGCAACGGCTCAGGTGGCTGCCTGGTGACACTGGTCT  
GTTTCGCACTGGTGGCGTATGGGTGATGACGGTATCGATGGTTATGTCGTGAAATCGCAATGGACCATTACGACGCC  
TCTAACCCACTGAATAAAGAAGTGGTTCGTGAAGCTGGCGCATGGCTGGTTAACTTCAACAACACGCCAATCTGTGGGC  
TATTCGGCACTGGGTGTGGTTCGCGCTGCTGACCATCCTGACTGCACGTATGGATAAAGCCGCGTGGGCGTTGTGT  
TCTCCTCCCTGACGCTGGCTGCATCATCTGACAGCCGGTATCGCAATGTTCCGTTTGTGATGCCGTCAGACCATG  
ATGAACGCAAGTCTGACAATGTGGGATGCAACTTCCAGCCAGCTGACGCTTAACTGATGACCTGGGTGGGTTGGTCT  
GGTACCGATCATTCTGCTACACCCGCTGGTGTACTGGAATAATGTTCCGGTCTATCACCAAGAAGATATTGAACGTA  
ACACCCACTCTCTGTACTAA

>Cluster\_55567

ATGCCATTTAAGCGGAAACACTGAGCGAGCTCCGGCAGGAGAATCGCCAGTTTATGCAGGCAGAGCTTGAAGTGTGG  
CGCGCTGTTACGGTTTGGCAACCTTAAGGTGCTCGCTGATATGGATGCGGGCATGGCCCATCTGCACTACGCCTACCTGG  
ATTATATTGCCCGTACAGACACGCCCTTTCACCTCTACCGATGAGTGGCTTGGCCGATGGATGGCGCTAAAGCAGATTTAC  
CGAAAAGCCGCAACGGCAGCAGCTCTCCGGCGGCGACCGTTACCGGAAACGCCGGGAAAAACTGTCAAAAAGGGCGGT  
GTTAAACCGTATGATGTTACCACTACACAACCGATGATGCCATAACGATAAACACTGTGGCAGTCCGGTGGTGTGCTG  
TAACAGCGTTTTTCCGGATATCACAGACGATGTGACAGGAGGAGCGCTTCCGGAATGCCGATGCTGGCACCATCTCT  
ACACTGGATGCTAATGCCCCCGGATAGACAGCTCGGTTACGCTGATTGAGCCGCCACCGGCGGCAACATTTGAAAG  
TGAAGAGGATTTCCGATTACGTGGTCTGCTGGCGTATCAGAATCCCCGAGGCGGGAGTGACACTGATATAAAAGT  
GGGCTTTATCCGCTGCGGGATTACCAGGCATGGATACGGCGCGGGGGATGGGCGGGTACCGTGGTGTATTACATC  
ATGTGCGACGGCGATGATAAAACCAATCATGGATTCCCTGTAGGAACGACGGTGTCTCTCAACTGGAAGAGTGGGGGC  
TGTAAAAGCCACCGGGGATCAGGGGAGAGTTGCCGATTATATGATCCGCTTGGCGCGGTACTTCCCTTAACTATGTCT  
GCTCTCCCATCGAACCGTTATCGATTTGAAATAGGCGGGATATCTGATGCCGACAGCGCAACGACTGCGGCCATTGCT  
GATGCGATTGACGGGTATGTTTGAATCCGCTAACCCGCTCGGCACAGGGAATACTTTCAGATCTCAACCGTCT  
GATAGGGGATGTTGCCGTACTTACAGTTATATCTTGTGTGCGCTTCTGCGAATATTGAGCCGGGAGTTGGGGAGCTGG  
CTGTTCTGGTGAAGTGAACATACATGA

>Cluster\_38712

TTGATTAAGTCAGCGCTATTGGTCTGGAAGACGGAACCCAGTTTACCGTTCGGGCCATAGGGCAACAGGTTCCGGCGGT  
TGGGGAAGTCGTTTTCAATACTTCAATGACCGGTTATCAAGAAATCCTCACTGATCCTTCTTCTCGTCAAAATCGTTA  
CTCTTACTTATCCCATATTTGGCAATGTCGGCATAATGACGCGGATGAAGAACTTCTCAGGTACATGCCCAAGGCTCG  
GTGATTTCGCGACCTGCCGCTGATGTCAGCAACTTCCGTAATACCGAAGACCTCTCTTCTTACCTGAAGCGCCATAACAT  
CGTGGCGATTGCGGATATCGATACCCGTAAGCTGACGCGTTTTACTGCGGAGAAAGGCCACAGAATGGCTGCATATTG  
CGGGTGACAACCCGGATGCGGCGTGGCGTTAGAAAAGCCCGTGGCTTCCAGGCTGAACGGCATGGATCTGGCAAAA  
AGAGTAACCCAGCAGAACCCCTATAGCTGGACACAAGGCGACTGGACACTGACCGGCGGCTGCCAGAAAGCAAAAAGA  
AGACGACTGCGGCTCCAGCTGCTGCTTATGATTTGGTGGCAAGCGCAACATCTCGGTATGCTGGTGGATGAGGTT  
GTCGACTGACCATCGTTCCGGCACAACCTTCTGCGGAAGATGCTGAAAATGAATCCGGACGGCATCTTCTCTCAAC  
GGTCTTGGCGACCGGCCCGGTGCGATTACGCCATTACAGCCATCCAGAAATCCTCGAAACGATATTCCGGTATTCCG  
CATCTGTCTCGGTATCAGCTGCTGGCGTGGCGAGCGGTGCGAAGACCATCAAAATGAAATTTGGTCAACCGCGGCA  
ACCATCCGTTTAAAGATGTTGAGAAAACGTTGGTATGATGATGACACCGCCAGAACCACGGTTTGGCGGTGACGAAACA  
TTACTTGCAAACTGCGTGTACGCATAAATCCCTGTTGACGGTACGTTACAGGGCATTTATCGCACCGATAAACCGGC  
GTTTCACTTCCAGGCTACCCGGAAAGCCAGCCCTGGTCCACACGATGCCGCGCGTTGTTGACCCACTTATCGCGTTAA  
TTGAGCAGTACCGTAAAACCGCTAAGTAA

>Cluster\_15815

ATGATCTTTGCTGCACGTTACTTGGTTCGAGTTGCCTTATGTCTCAATATCCAGATGGTGATTATGATTTTCTATATGA  
AAATAACCATTTACGCTTAAACAGTTCACACGATTACTATGCACTATTAAAGATGCAAGCTTATCCCTCAAACCCAT  
TAATCGGTACCAGAGAACAATACTACACATCACAAAATGAAAGAGGGATAATGAAATGCCGGACTATTTTCTCTC  
GCCAACTATTGGGAATGTTTGGACCTTTTAGAAAATATACATGAAGAACTAATCAACTCTATAAGAAACCAAAATAGGAA  
AGAAGATAACTTCCATCTGTGGAAGATGCTGAGATGCTCCTATCCAAAATGAGCCAGCAAGATATAGATAAAAAAATAG  
AGTTAGAGAGAAAATAAAAACTGCTAGAGAGATATTTCCACCTAAAAGATCAGAGGAATGATCGGAATAATAAACCC  
TTTATAAAAACAGTATAGAGTTGCCCTTAAAGATCAATTTGCAGACGAGATATCTTTTATCAAGTTGGCTCAGGATTTAC  
CAACGGATGTTTACAAAGCATTATTGCGATGGTATTAAGATAAGTGCATTAAGTAACTTCTTTAGTTGGAGTAACTACCCCATTA  
TGAGAGAAAGCTGGTATAAACACGATGAAAGTCTCATTGATAAATTTCAAAAACGTTTAAATGTCAAATGAATTCATGAA  
CATCTGAACTATATTGATATTAGAGCAGACAATCTGTTTCATAAAGGTGCATTTAGATCAGCCGTAATGGAAGCATCAGC  
AGGCTTGAAGCTATATTTTCAGAAAATTTAATGCTTTTATCGCAATGGTATCAATGAATGCCAGCAAAAAGAAA  
CATTAATAAAAACTGGAAGTTTCGATGATGATAAAAACTATTCAAACTCTTTAACAATCTCTGTACCCGAAAT  
GCGCCACTTGAGTGGCAACATGCAATAAAAACAGGAAAGAAATACGTTGACAAAATAGCTCATACATCAGATGAACCAAC  
AGAGAAAGAAAACAAAAGAAATTTAATAAAGCATCAATTTATTAATGAAAAAATAGACTCATACTTTAAGAAAATTAATG  
AATCAACGAATCAAAAATTTATGA

>Cluster\_34164

ATGCAGATACAATATAGCTATCGAGCTATCGACAAAGAGTTTCAATGAACCTTGGCAGAGAGCTTTGGGAAATGTGATCGA  
GCACGCCCTCAAGCATTTGCTCGACAAACACATAAAGATTACGCGGACTTCAAATCGTCTTGTATCGCGACAAGATCA  
AGCGCAATTTCTGGCAGTGGCTATATGCACCTGCCCGGCAAAAAGATTGTCAGTGTACTGCATCAGACGAGCTG  
ACGCCCTCGCGCAGATGCTCGCAAAAGTCTGTTTCCGTCAGGCCAAGAAGCATTTTGACCGACTGCATGCTCAGGATCA  
AATCAAGCCCAAAGCAGCAGCGAGCGCTTGGCGGAGCTCAAGGTGCGGATGGCCGAAAACCCGATCAGCCGCCCATG  
AGGCCGAGGTGATCCGAATGCCTTACTGTGCAAACTTGGAGTGTGCGAAGCGGTGAGCTGGCTTATCTGCGGGCCGCTC  
GGCATTACCGCCGATTTATCCGACGCTGCGGACGTTGGTGGATGAAGCGATTGTCGAGCTAAGGTGGAATGGCAATC  
CGTGCCGGGGGAAAAAGAGGCTTACACCGGCTTTTGAAGCATCTGTTGCGGCTCTGGATAACGAGTGGCAAGCAGCC  
GGCAATTTGGCAATTTCTCTGACGCGCGGCTGCAACCGGATGCCAAGACGTTGGCCGAGGCCATGGTGGAAAG  
GAAATCTTCAATTTTATCAGCAGATGACACACTCAAGCTGGCCGATATTTTCGTTGGCAGTCACTCCGATGTCG  
AACGATCGCGAAACAGGAGGAGCTGATTGATCGGACGAGCGAGTTCTGTTTGGATTTGACCTGCTGAAGGACATGCCG  
GTTTGTGGCGGCGCATTTTCTGCTTATCCGTTGAGGCGGCTGAATGCCAGCAGCGTCTGAAATCTGCTGATTCCT  
AGTAAGGAAGATGCTGTCGAAAGTGGCTCATGACGGCCGAAAGCATTCATCGTCTCATCTGGAAGAGGCGGGAGTAA  
CAAAAACGGGAACGATTTGGCTCCAGGCTTGAATGGTGGCATGTTCTGTGACCCGAAAGCAGGAGGACTCACTGTGGT  
CCAAGGAGGCAACCATGAAAGATGA

>Cluster\_23794

ATGAGCCTGGCCGTTAAAAAATCGTTCGCGGTTAGCGGGCGTATTGCTGCCTATAAAACCCCTGAACTGGTGGCTCG  
TTTTCGCGGATCGCGGGGCGACGTCCGCGTAGCCATGACCGAAGCGGAAAAGCCTTTATCACCCACTTAGCTTGCAGG  
CGGTTTCTGGTTATCCCGTTCCGACAGTCTGCTGGACCCGCGAGCCGAGCCGCTATGGGCCATATTGAGCTGGGTAAA  
TGGGCTGATTTAGTATTCTCGCCCTGCCACCGCAGATTGATTTGCCCGTGTGCTGCCGGAATGGCGAATGATCTGGT  
ATCGACGATTTGCTATCGCCACACCTGCGCTGTAGCCGCTGCCCGCATGAACGACGAGATGTACAGTCCGGTTCACFA  
CGCAGCATAAATTTAGAGGTGCTTGCCTCACGTGGTTTGTCTCATCTGGGGGCCAGACAGCGGCAGTCCAGCTTGTGGT  
ATCGGCCAGGACGAATGCTGATCCGTTAACTATTGTGGATATGGCGGTAGCGCATTTTTCGCCCGTCAACGACTGAA  
ACATCTGAACATTATGATTACCGCCGGTCCGACCGCTGAAACCGCTGATCCCGTGCCTTATATCTCTAATCACAGCTCCG  
GCAAGATGGGTTTGTCTATCGCCGCGCGCAGCCGCTGCTGGCGGCAACGTCACGCTGGTATCAGTCCGGTTCACFA  
CCGACGCCACCGTTTGTAAACCGTGTGATGTGATGACCGCGTGGAAATGGAAGCCGCGTGAATGCTTCTGTACAGCA  
GCAAATATTTTTATCGGTTGCGCCGCGTGGCGGATTATCGCGCAGCTACCGTGGCCCGAGAAAAATCAAAAAGCAGG  
CCACGCGAGGTGATGAATTAACAATAAAAAATGGTTAAAAACCCGATATCGTCCGAGCGTGGCCGACTAAAAGACCAT  
CGACCTAGCTCGTGGATTTGCCGCGCAAAATAATGTGGAAATAACGCCCGGCAAAAAACCTAGCTTCCGTAACAACT  
TGATCTGATCTGCGCAACGATGTTTCCAGCCAACTCAAGGATTTAACAGCGACAACACGATTACACCTTTTCTGGC  
AGGACGGAGATAAAGTCTTACCCTTGGCGCAAAAGAGCGCTTGGCCAAATATTACTCGACGAGATCGTGACCCGTTAT  
GATGAAAAAATCGACGTTAA

>Cluster\_58405

ATGGCAATGAGTGAACAACCCAGCCTGTGGCGGGCGGGCTGCTCAACGACCAAGGCCGAACATCGTTTGGTATTTT  
AGGTGCTATCAGCCTCTCACATCTGCTGAACGACATGATCCAAATCGCTGATTCGGCGATTTATCCCGTGCCTCAGTCA  
AATTTTCTCTGACATTTATGACGATTTGGCATGATAACCTCACCTTCCAGCTCGCCTCTTCGCTACTGCAACACGCTGC  
GGCTACTGGACCGATAAATATCCGATGGCATGGTGTGCAATTTGGCATGTGCTTTACCTTAAGCCGTTCTGGTGTGCT  
TGGCTGGCGGGCAGTTTGGCGCAGTTCTGCTGGCGGGCGGCTGGTGGTACCGGTTTATCGGCTTTCATCCGGAAT  
CTTCTCGCTGGCCGATGGCTTCCGGCGGGCGGATGGCTGGCGCAATCTATCTTTCAGGTCGGCGGCACTTTGGC  
AGTTCCCTGGGACCTTGTGGCGGGGCTGATTATCGCCCTTATGGCAAGGCAACGTTGCCGTTTGGTGGTGGCGGAAAT  
ACTGCTGGCGATCGTGGTGTGGCGCAATCAGCCGTTGGTACTGGCACAGCACCGAATGAATAAAGGAAAAACCCAAAG  
CGACGATTATCAATCCACTGCGCGCAATAAAGTTGTACTGGCGGTGACGATTTCTGTTAATCCCTCATTCTCGAAATAT  
TTCTATATGGCGAGCATCAGCAGTATTACACCTTTTATCTGATGCAAAAAATTCGGATTATCTATCCAGAATGCTCAGCT  
TCATCTGTTTGGCTTCTTGTGGCGGCTGATTCGCGGCTGATCGCGGCGCTGTAGGGGATAAAAAATGGCGGAAAT  
ATGTGATTTGGGGCTCTATCCTCGCGTGGCGGCTTACGCTGATTTTACCTACGCCAGCCGACCTGGACGGGGGTT  
TTAACGGTGAATTTGGATTTATCCTCGCTTGGCATTCTCTGCCATTCTGGTCTACGCTCAGGAGCTGCTTCCAGGACG  
TATCGGTATGGTTTCTGGACTCTTTTCCGTTTGTCTTTGGCATGGGAGGTCGAGGAGCGGAGTTCGGGGCTTATCG  
CCGATCACACAGCATCGAGTTAGTCTATAAAAACTGTCTTCTTCCGCACTATTGGGGATGTGACCATATTCTCCGCT  
GATAACCGGCATAAAGACTGA

>Cluster\_66913

ATGCTTACAATCGACGCTGTGCGAGAAGATCCTATGCAGATATGGGGCGCTGTTGGTGTCTTCTTATCTGCTGCT  
ATTCGTCATATGGTTATTCTTGGCGGAAGTGGTTTACGCCAGCTGCCGATTCCTCATACCTTATGGGACTGGTTGACT  
GGGACCATTTTCAACTATGCAGCACCCAGATACAACCTGCTTGGCATGACCGGTAACAACCGCCCAACATAAGCTAT  
AGCCAGTGGGTTAACGCTATGGAGCAGACCATAGTATTTCTGTGGATGTAACCTTACCTGTGACACTTGGTGTGGT  
GAAATGGTATCAACATCCGGGCAAAAGCCGTTTACCCGACAGCAGTAGATATACCCGACTGGCACACATTTGCTT  
CGTTGTCCCTGCTATCGCCCTGTACTGGCAGATGGTATGATCCGAAAAAATCTTTTCATGGTGGCAACGACCTGAAACGG  
CGGTTTGCCTCACCCCGGAAGCATTGTCGAGCAGCATACTCTCATCACCAATATGCAGCTGATGTGCGAGTGCAG  
ACGATGTTTTCATGGCCAGTTGGGTAACCTTTAACGTCCTGGAAAGACATGGCACCATGAAAAAGCGCTCTTTGGCA  
TATTTGGTCTCAGTATTTCTGGATGATCGTAAGGCAGCATTAAGCTCATGATACACTGAACCTCTCATGCAGAAAT  
AAAAGCAACGGGACAGTGGGAAATTTCTGTACCCTGTTTATTACTGGCAGCAATCAGCTTCCAGAGAGTGAATAAAG  
CAACGGAGCACAGCAATGGCTGAAACAACATCGTACGTCGCCAGTGGGCTGGTCTGGCTGTATGCACATGACCTGCGGC  
TTACGCCACCAACTGGATTTGGCTGAAAGGCGTGGACAGGACGCTGTTTATGCATTACCCGCGCAATACCCAGAA  
GGATTTATGAAAGCGCTGGCGTGGTGGCCGTTGACGCTGACAGGCGCAAGCCATGCGTTTTGGTCTTCCCTCCCTGA  
ACCTGTGTTGATGAAAGCGTGGAAAGGCTTACGGCGGATATGCTCAGTCTCGGTTTATCTGGGATGAAACCACAACAG  
ATCGCGACCGGAAACCGCCATCTGACCAACTGGTCCCTCACCGACGACATCTGCCCGCACACCTGCTACAGACAAC  
GAATCTGA

>Cluster\_64744

ATGGTTACAGTTGTGACCAATTTATGTCATTTATCTCAAAAGCAACTCAGTCAGACATTTGCAGAAAAATTTACTGTGAC  
CGAGGAATTAAGTCTTTAAAAAAGCAGCCTTATCCGGAGATGAAGAAAGCATTGAGTTACTGCATAAATATGGCT  
TAGGTTATGATAAATTTGGAAAAGAGCTGAAGACATTTTACCATATGTTAGAACCCCAAAATGAGACCTTATCG  
ATTTATCCGACTTATCAAAATGCTTGTTTAAAAATATATAATTTGGCAGATACCCGCAACCAACTTCCCTTAAACCAAC  
TGGTCCGGATAATTCAGATGTTCTCCTGTTCAAAAAGCTATTTCCCTTCGAAATTAATGACAAATATCGGTGATGAAA  
TTCTCTTTATATCTGAAAAACAGTCCGTTTCAAGGTTGCTTTTAAATGATGAGAAATAAGAACTGAGTGTGATGAAAC  
TTCTGGGATAAAAACTGCTCAATTAACACAGATGAAATAGATGCTATTTCAAGAATCGCCGCTAATGCAAAAAATAC  
TGAAGTCAATTTACTTGGTCTTACGTCCTTACGTCCTTACCCAGCAACTGAAAGAGCGCTCAATGAAAAATTA  
AGAGGATCCATCATGGCCGAAAGCAGTCCAGTTATTTCCCATAAATCTGGCGGACACTGGATATTAGTTTCCGCTACAG  
AAAATAGTAAATGAAAAAATAATACACAACAATAAATGCGTCATATTTCAACTCATTTGCGCGCACTAGGCCATGATAA  
AGAAAATTCATTTAAGCGTGTCAATTAATAGTTTAAATTTGAAATTCATGGGAGAAATGCGAATAAATAAATAAAGTTT  
ATTTAACTGAACCCGAGATAAATTTTTACATGCCGATCTTACGCAATATTTAAGCCAAAGTTGCGGTGCAATTTGTGTC  
ATGGCAGCCAGGAAAGTGAATGAACAAAGGAAAGCAATTTCTGACAGCGCCCTATACGTTATAAAAAATGATGCTGA  
CAGATTTAAAAAATATTCAGCAGAAGAGCAGTACGAAATTTGATTTTCAACATAGACTGGTAAACAGAAATTTGTTATTTAG  
ATAAATATGGCGATGCACGAATCAATGCTTCTTATACACAATTAGAAAATAAAACACTTACAACCAAAAAATAGAGCATCC  
GGCAAAAGAGTGAAGTAA

>Cluster\_21147

ATGTCACCCTGTGAAATGACACCCTATAAACTGGAACGAAACCTGATCGTCCGCTGGCTAGGCTGTTTTCTTACCCTG  
TGCCGCTTACAGCTGGTAAATGCCTTCTTACCCTTACGTTGAGCAGCTTGGCGTTACCGGCCACTCCGCCCTGAATA  
TGTGGTCCGGTATGCTTACGATTTATTTTATTTTTCGGCATCGCTCACCGTTTTGGGTGGACTCGCCGACCGT  
AAAGGCCGAAAAATCATGCTATTACGCTCTGCTCTGGCATGGGCATCGTGTGTTGATGGGACTGGCACAAAAAT  
CTGGCAGTTTTGATCCGCGGGCTTCTGGTTACTTGGCGGATTTGTCGCAACGCTAATGCTCTTATGCCCACAC  
AAGTACCGCTAATAAAAGCGGCTGGGCGTGGTACGCTCTCCACAGGCGGCTTAGCGGCGGTTGCTCGGCCAATG  
GCTGGCGGTTGCTCGCCGATAGCTACGGCTTACGTCGGTATTTTATTTACCGCCAGTGTGCTCATACTCTGCTTTTT  
CGTCAACCTGTTTTGATCAGAGAAAAATTCAGCCGGTTCAGCAAAAAAGAGATGCTGATATCGGGGAAAGTGGTGAAT  
CACTTAAAAACCCGAACTGGTACTCAGCTTGTGTCACCAGTTAATCATCCAGGTGGCGAGCGGCTCAATTTGCCCT  
ATTTCTGACGCTGTATGTCGCGAACTGGCGGTAACGTCAGTAACGTCGCTTTATCAGTGGCATGATCGCTCGGTTGCC  
AGGCGTGGCGCTGCTGATAGTGCACACGACTCGGCAAACTTGGCGATGAAATCGGCCCGAAAAGATCCTGATTACGG

CGCTGATCTTTTCTGTACTGCTGTTGATCCCAATGCTTACGTTACAGCGCCATTACAACCTGGGATTTTACGTTTTTTC  
CTCGGTGCCGCCGATGGTGCACACTACTCCCCCGGTACAGACACTATTAGTTTTAATACTCGAGCAACCAGATCGCCGGGG  
TATCTTCAGCTATAACCAATCGTTTCGTGATATGGCAACGTTACCGGACCATTGATGGGAGCAGCGATTTACAGGAACT  
ACGGTTTCAGGGCGGATTTCTCTGTACCGCTGGCGTCTGTTATTCAACGCAGTCTATTCATGGAACAGTCTACGTCGT  
CGTCGAATCCCCAGATATCGAACTGA

>Cluster\_48988

ATGAACTGCATGAACTGAAACGAGAACGTAATACTATCGCAACTGACATGCGCGCCCTGAATGAAAAAATTGGTGATAA  
CGCATGGACGGAAGAGCAGCGCACTGAGTGAACAAAGCAAAATCCGAAGTGGGAGCGCTTGATGAACGAATTCACCGG  
AAGAAGAACTGGCTGCTCAGGATCAGGCGTACATTTGAAAGCAATGAGGAAGAGCAGCGTCAGAATCTTGATCCGGAAAA  
AATCCGCAACAGGATGAGAAACGAGCTCAGGTTTTGATAAGTGGATGCGTCACGGTGCAGTGAGCTGACATCAGAAGA  
ACGAAAGCGTTGCGTGAACCTCGTGCCAGGGTGTAGCTCAGGATGAAAAGGGCGGATATACCGTACCAGAAACATTCC  
TGGCGAAAGTTGTTGAGAAGATGAAATCTACGGTGGCATCGCCAGTGTGGCGCAGATTTGACCACCTTCGACGGTCCG  
ACTATGCGTGGGCAACGCTGATGGTACTTCCGAAAGTTGGTGTCTGCTGGCGAAAAATGAAAGAGCCGGTGAAGAAGA  
CACCGATTTCCGTATGGGAAGTCTTGGGGCGCTCAAAATGACATCGAAAAATCATTGTTGTCATATGAGTTGCTGCAGG  
ACAGCGCGATCGATATGGAAGCTTATCTTGCCCGTCCGATTGCTGAAACGATTTGGTCTGGTGAAGCCCGTTATCTGATT  
CAGGGAAGTGGTGTGGTACGCCATAACAACCCAAAGGGCTGGTCCGATCTGTGACCGGCACAACACAGACTGCCCGCGC  
AAATACGGTGAAGTGGCAGGAAATTTGGCTCTGAAACACAGCATTTGATCTGCATATCGTCGGCGGCGAAATTTCCGCC  
TGGCGTTTTAACGATAATACGCTGAAACTGATCAGTGAGATGGAAGACGGTCCAGGGACGCCCTTTATGGTTGCCGATATT  
GTTGGTGTGGCACCTGCTTCAGTGTGAAATGTACCGTATGTCATTGATCAGGAAATTTGATGATATCGGGCGGGTAAAA  
ATTCATGTTCTGTGGTGACTTTGATCGCTTCATTATCCGCTGCTGTGCGATACATGATTCTTAAACGCTGGTTGAGCGTT  
ACGGGAAATATGATCAGACTGGTTTTCTTGCCCTTCCATCGTTTTGACTGTATCTCGAAGACACACTCTGCCATTAAAGCG  
CTGGTGGGAAAGGTAGCCTTGGTGGTTGA

>Cluster\_15198

ATGGACGATGGGACGCTATCGCGCCAGATGGTACTTGTGGGCTTTCATTGGCGACGAGCTAAAGATGGGAATTCGGGA  
AAACGACCGGATTCGCGAACAGAAACAGAAATATTTACGCAATAAGAGCTATCTCCACGATGTAACCTTACGGGCAGAGC  
CGTATATGTAAGTGGATAGCCGGCAAGTTAAAAACGTAACATGCCTATGGAAGTGGTACTACTACCCATAGTGGAGAGC  
GCTTTTGATCCTCAGCAACGCTTGGCGCAATGCCCGGGCATCTGGCAGATCATTCGAGCACGGGGCGCAATATG  
TTTTGAAACAGCCCGCAATTTATGACGCGCTCGCGATGTTGTTGCTTCAACAACTGCCCGCTGAACATGATGACGCTG  
TGAACAAGATGTTGACGGCGACTGGCTTCTGACCGTAGCGGCTTATAACAGCGGCGAAGGTCGGGTGATGAAAGCAAT  
AAAACGAAACAAAGCGCTGGGAAATCCACGGACTTCTGTGCTTACCGTTGCCGAGGAAACGAGCAGTACGTGCCATA  
AATGCTGGCATTTGAGTGAATTTCAAAAAACAGCAAGCGTTATGGCGTACGCTGCAACGACCGATGAAAGCCGTGCTC  
TGGCGCTGTGCACCTGAGCAGCCCGTTGAAATGGCGAAGTTGACAGATATGGCGGGGATTTCCGTCAGCAAGCTGAAG  
ACATTCACGCGAGCGTGAAGGCTCCACGCTGGGCGCAAGTGGTCCGAGTACGTCATGTTGCCAAAGAAGCATGCAGA  
TCAACTGCGTGAATCTCTGGCTTACGGCAGAAATGCTGCTGTACAGTCCGACGCTGGTTGCCGACAATACGCCGCTTAA  
GCCGTGTTTACACCGTACGCTCTGGCGACAGCTTTCAAGTATCGTTTACGCTCTCGCGTAAAGCACCAGAAATTTGCAG  
CAGCGTGAACAAACTGCGCGGATCTAAGCTGAAGCCAGGCAAAAGTTGACGATTGGTGCAGGCAAGTACGCGACT  
GGCAAAACAGCGATAGCATTACGTATCGTGTGCGCAAGGCGATTCGCTTTCAAGCATGCTAAACGCCACGGCGTGA  
ACATCAAAGATGTAATGCCTGGAACAGCGACACTGCGAATCTGCAACAGGCGATAAGCTGACGTTGTTGTGAAAAAC  
ACAACATGCCAGATTCCTGA

>Cluster\_60502

ATGATGGATAACGATAAATCTCTTAATAAGCGCCACGTTTAAAGAGCATTACGCAACATCAGTATGACCAGCATATT  
TATCACTATGATGCTGATCTGGTTGCTGCTTCCCGTACCTCGGTGCTGACCCGAAACAGTACGCGCAAAAAACCTGG  
CACTGACAGCAGCAAAAGTACCTACAGTCTGGAAGCAGCTGCTGTTTTTGGCGATGGCCCTGCAGCACTGAAACACTG  
GCAGCGCTGGGCCAGCAAGGGCAATTTTCAACTGCAGAAGTACGTCATGAAAGCAGCAAAATATTTCTGGCATCTGGCATT  
CACCCGTAAGGATCCAGGCGATACTTTCAGTAATTTCAATAAGCAGTGGCTCTTCCCTGCCCCATCATTTACGCGATT  
GTCACAATGGTGAACCAATTTGGCGAAGTACGCTTAAACCGCTCGCGCAGATTTCAATCAGCCATTTTATCTGGTTTTGCT  
GCCGTACTGACCGGTTGATTTCTGCTGGCATCAGGATCGCAATACCCTCACCCGATTTTGACACAATGGCGTGGTAGA  
AGCGCTGAAAAATATCACCGATGCTGTACATGATGTGCGTTCCAACCGCAATTTTCCCGACGAGTTTCGGAAGAAGCTA  
TCGCTGAGTTTACCGCTTCCGCTCTGACTTCAACAGTCTGCTGGATGAAATGGAAGAGTGGCAGCTTCTGTTTACAGGCT  
AAAAATGCGCAGCTTCTACGTACCGCGCTACATGACCCATTAACCGGGCTGGCTAACCGCGCAGCGTTTCTGATGCGGCAT  
CAACAGCTTGATGAACAATTTCCGATGCGCAAAACAGTCCGGCTTACTATTTCTGATGGCGATAAATTTCAAATATCAT  
ATGATACCTGGGGTATGCGACGGGCGATAGAGTCTTGATGAAATCGCAAAACGTTAGCTGAAATTTGGCGGCTGCGA  
CATAAAGCATACCGCTGGCGCGGATGAATTCGCTATGGTCTCTATGATGTACAGTCCGAAATCTGAAGTGCAGCAGAT  
ATGTTACGACTGACACAATCTTAAATCTCCGTTTGGATCTTCAATAAGGCCATCAGACCACCATGACATTAAGCATTTG  
GTTACCGGATGACCAATGAGCAGCGCTCTGCGGAAAAATTACAAGAGCTTCCGATCACAATATGATCAGGCCAAACAC  
CAGCGTCCGAAAAAGCTGGTGGATAA

>Cluster\_8112

ATGAACGTTTTTAAATCCCGCGAGTTTCCGCGCCAGTTTCCCGCACTACAGGATGCGGGCGTCTATCTCGACACGCGCCG  
GACCGCGCTTAAACTGAAAGCGTGGTTGAAGCCACCCAAACAGTTTTTACAGTCTGAGCGCCGAAACGTCATCGCAGCC  
AGTTTGGCGAAGCCCAACGCTGACCGCGGTTATGAAGCTGCAGGAGAAAGTGGCGCAATTAAGTATGACCGGAT  
GATAAAATATCGTCTGGACGCGCGCACCACTGAATCCATCAACATGGTGGCACAATGCTATGCGCGTCCGCGCTGCA  
ACCGGCGATGAGATTATTTGTCAGCGTGGCAGAACACCAGCCAACTCGTCCCTGGCTGATGGTGCAGCAACAACTG  
GAGCCAAAGTGGTGAATTTCCGCTTAATGCGCAGCGACTGCCGGATGTCGATTTGTTGCCAGAACTGATTAATCCCGT  
AGTCGGATTCTGGCGTTGGGTGAGATGTCGAACGTTTACGGCGGTTGCCCGGATCTGGCGCGAGCGATTACCTTTGCTCA  
TTACGCGGGATGGTGGTGAATTTGATGGTGTGTCAGGGGCGAGTGCATTTCCCGCGGATGTTTACGCAACTGATGATG  
ATTTCTATGCTTTTTCAGTCTACAAACTGTATGCGCGCAGGATCGCGCTGCTGATGTTGTAATTCAGAACTGAGCAG  
GCGATGTCGCCCTGGCTGGGCGGCGCAAAATGGTTACAGAGTGAAGTTTGGACGGCTTACGACTCAATCTGCGCCGCTG  
GAAACTGGAAGCTGGAACGCCAAATGTCGCTGGTGTATAGGATTAAGCGCGCGCTGGAATGGCTGGCAGATTACGATA  
TCAACAGGCGGAAAGCTGGAGCCGTAGCTTAGCAACGCTGGCGGAAGATGCGCTGGCGAAACGTTCCCGGCTTTCTGTTCA  
TTCCGCTGCGAGGATTCAGCTTCCAGCTTGGCTTTGATTTGCTGGCTTATCATAGCGATATGGTGAAGCTGTCGGCGA  
GTACGGTATTTGCCCTGCGGGCGGGCAGCATTTGCGCTCAGCCGCTACTGGCAGAAATAGGCGTAAACGGCACACTGCGCG  
CCTCTTTTCCGCCATATAATACAAGAGTGAATGGATGCGCTGGTGAATGCCCTTACCGCGCGCTGGAATTTATGGTG  
GATTAA

>Cluster\_38322

ATGGAACAGACTGGCGTGGTACGGCCAAACGATCCGGTTTTTTAGCTGATGTCGCTCAGCGGGGCGCAACTGGCGT  
GGTTACCGCGCTGACCATATCCGAAACGGCGAAGTATGGTCCGTTGAAGAGATCCCTCAACGCAAGGCGATCTGTTGAG  
ACGAGCGCTGGTATGGTCTGCTGAGAAAGCGTCCCAATTACGAAAGATATCAAACCCCAACTGCGCAACTATGAGCAG  
TGGATCGTAACATATCAGCAGACTCTGCGCAACCTGGCGCAGTGGCGCATTCGACCGCTGCTACAACTTATGCGCGT  
GCTCGACTGGACCGTACTGACCTCGAATACGTCGTCGACAGCGCTCAAAGCTCTGCGCTTTGACCGAGATCGAATTCG

CTGCATTCGAAATGCATATCCTGAAACGTCAGGCGCGGAAGCGGATTACACCGAAGAAGAAATGCTCAGGCAGCTGTT  
CGCTTCGCCACTATGAGCGACGAAGACAAGCGGCTGACCCGTAACATCATGCTGGTCTTCCGGGCGCGGAAGAAGG  
GTACACCTCGACCAGTTCCGTAAGCACCTGGAGCTATATAAAGATATCGACAAGCCAACTGCGCGAAAACTTGCGG  
TCCTTCGTAAGAGCATTATTCGGTTGCGGAAGGTTGGCTCCGTAAGGCTGTTACCCCGGACGATCCGCCCGCCCG  
ATCCTCGGCTGCCCGCATGTTTCCACCATTGAAGATATGACAGTGGATGGTTGATACCGGATAAACAGCATGGCGAACGG  
TTTACCATTGTGCACCGGTTCTACGGCGTGGCTGACACAGCATCTGGTTGATATGATCAAGCAGTTCGGTCCGCGTA  
TTTACTTACCCATCTGCGCTCCACCATGGGTGAAGATAACCCGAAAACCTTCCACGAAGCGGCGCACCTGAACGGGTGAC  
GTTGATATGTACGAAGTGGTGAAGCGATTGTTGAAGAGGAACACCGTCGTAAGCGGAAGGCAAGAAAGACCTGATCCC  
GATGCGTCCGGACCAGGTCATCAGATGCTGGACGACCTGAAGAAGAAAACCTAACCCAGGTTACTCCGCAATTTGGTCGTC  
TGAAAGGCTGGCCGAAGTTCGGGTTGCGAAGTGGCGATCCAGCGGCTTCTTTAGCCGTTAA

>Cluster\_20782

ATGACGGAAAACCCGAGGTTGATTTTGGGAAGTGGTGAAGGCCAGCGGGATGCCGGTGACGGAATCTGAAGTGGGGG  
TCGCTTTAATGCGATTGCGGCTGAGGAGGGCATGATCACTAACACATCCCGTATGTCACCGTTCTGGCGGTTAATTACGG  
CCATTGTGACTGCGCCGGTGATGTGGCTGAAAGAGGTTCTGGTGTCCACGGTGTGGCCAATATGTTTGTGGCCACGGCC  
AGCGGGAGCATGCTGCGCTGTTGGCCTGGGCGGTGAACGTGACGGCGAAACCTGCCAGCGCTGCGCAGGGTGTGATCCG  
TTTTCTTAAGGAAGATGCCAGGCGGTTGTGACGGTGAAGGCCAGAAGGTTATCCAGACTGAACGCATCAACGGCAGGG  
TGTACGAACCTGGCCAGCCAGGGCGATGTGGTATCCCTTCCGGCACGGACAGCCATTGCTGCCGGTGAAGCCACCGGA  
ACCGGGGAGCCTATAACCTTGGCCAGGGTATTACCGCATTTTGCCTGTGGCCGTGGATGGTATCAGCCATGTGGCCAG  
CGAGGAAAACCTGGCTGACGGTGGCGGTTGCCGATGAAGAAAGCATGATGAACGCGTGAACGCTGCGCAACCAAGTTCA  
ATCTGGTGGCAATTACCACACGGATGCGGTTTACCCTCAATGATTTGCCGGTGTGGCGGGTGAAGCCAGGATTT  
TTCTTTGAGCATGAAGCCGCGAGGGGACCGGTTACCGCAACCGCTATCTGTTGCTGGACAGTGGGGTGGCTTCCGCACC  
GTTCTGTAATGCGGTGAATGATTACATCAACACGAGGACATCAGGCCACGGCGACGATATGACGTTTACGCCATGC  
CGAAACCCGTCACGATCTGGCTGTGACGGTGTTCGTCAGAAAATCTGGCCAACCTGACAGATGACGAACGGAAACAGCCTG  
AAGGCTGGCATTGAAAACATGATCCGCTGTGCTTTTCCGTAACCGTATTTTGGACGTCAGAAAAGAGCTGGCCATTT  
CGGGTTCCTGTTTTCTCAGTTGGGGGGGAGATCCACAAAACCTTGGCTGGCGGATTCGCTGCTCTTTACTGGGTG  
ACATTACCAGTGAGCTGAATGTGCCGCTCTGAAGTCACTGGTAGTGAGTCTTGAGAATGAATGA

>Cluster\_51495

ATGAATGTTATTTTCATCATTAATAACAGCTTAAACAGACGCGAAATATTTAAAACAAAAAGATAAAGACGAAGGCCAGACT  
GGCATTTCATAAAATGCGATACAGAAGGAAAACATCATTACAGCCGGATAGTTATAAAAACAGTGTGCATTTTCATGCACA  
TGCAAGCCATTGGTGAACGCATCCTTACCTCAGGGTTTATTAACAACCTTCAAAAATCCGGTATGGTGTATATGTGATA  
GCACCTTCAAGAGTATCATCTCTTACTGATATGTTGGCGTGGATGCCTTATATCTTACGAGAAAAATAAATTTAA  
CGAACTAAAAGCAAAGATAAAAAAAGTGAATGTAGATCTGTTGTTGACTTCTCAAAATTTTGAACAACAGCGATAACCA  
GATTGCAAACTACATTTACTTAGACCTAAACACTCTATCTGTTTAAATCATCTTCCGTAACATTTTTGATACAAAT  
ATAATCGATAATCGTCCATTACACATCTGAAAGAATGAAAAAGTTTATCTTAAAGATAAAAAATAAATAATTA  
TGCTGCAGCGCTTAAATTTGACAACAAATATAGAACGCAAAATATGTTGCAAAATGAATTCAGGAAGAAAAACAAAA  
AATTTATTTATTTAACTTATGGCTCAGAAATGAGAAACCTTATCTGATGAACAGATAAAACAAAGTACTAGCTTAC  
CTTAATAACCTTAAAGGATATCACACAATAGTTTTTAAATATGGGAAAACAGATTAATCACAATGGATTGGATAATGTGTC  
TCTATCTCCATTTCTGATGCGGGATGTTTCAATTTGCTTGGTTCCGCAATGCTGATTTTTGTTATAACTGTAGATACTGCCA  
TTGTACATTTAGCCAGTGCATTAACATTAGACAATACTGTATATAATAACAGAATGCATGAAGGAAAATTCGAAAAT  
AATATGTTGTTGGGGCCAAACAGCAAAATTAGCGACTCAACTACCACATCCGAACATCTAAGGTTGAAAGGGGGGACGA  
TATGCATAAATTCACATAATGATCTTAATTAATGCTATCAAAACAAGATTTGACAACGATATACCGAATTACCCTCGG  
ATTTAGGTTGTAATAATAGATCCAGAAACCCAGAATTAGAAAGTAGCAATTTCTTATAA

>Cluster\_3346

ATGAAAGACGTTGTGATTGTGCGGGCGTTACGGACACCTATCGGCTGCTTTCGCGGTGCGTTAGCGGGTCATTCCGCCGT  
GGAACCTGGTAGTCTGGTGTGAAAGCGTTAATAGAACGTACCGGCTTCCGTCATATGCGGTGGATGAAGTAATCTTGT  
GTCAGGTTGTGACTGCAGGGGACGGGCAAGTCCGGCAAGGCAATCGGCTATTTAAAGGTGGTCTTCTAATAGCGTTTCT  
GCAATCACTATTAATGACGTTTTCGCGTTTTCGGCTTAAAGCACGTCATCTGGCTACTCAGGCGATACAGTGTGGCGAGG  
TGATATTTGTCATCGCCGGTGGCCAGGAAAACATGAGCCGCGCACACATGTTCTGACTGATAGCCGACCGGTTGCACAGC  
TTGGCAATAGCCAGTTGGTTGACAGTCTGGTGCATGATGGGTTGTGGGATGCCCTCAATGATTATCATATTTGGTGTACC  
GCCGAAAATCTGGCTCGGCAATAAGGCAATCAGCCGTCAGTTCGAGGATGCTTACGCACTTAGCTCGCAACAAAAGCGG  
AGCGCGGATTGACGCCGGACGATTTAAAGATGAGATCGTCCCGTAATGATCCAAAGTAACGGTCAGAGCTTGGTTGGTTG  
ATACCGATGAACAGCCACGCACTGACGCCAGTGCAGAAGGTTTAGCCGTTTAAATCTTCAATTTGATAGTCTCGGTTCT  
GTGACCGCGGGGAATGATCATCCATAAACGATGGCGAGCTGCGGTAATGATGATGAGCGAAGCCAAAGCAGGAGCGTT  
GAATTTACCCGTTGCTGGCCCGCATCCGCGCATTTGCCAGCTTGGTGTAGATCCGGCATGATGGGAATTTGCCCGGTTG  
ATGCGACCGCGGTTGCTGGAGCGTGTAGGCTGGCAGTTGGCTGATGTCGATCTTATCGAGGCTAATGAAGCGTTTGGT  
GCACAGGCGCTTTCGGTTGGCAAGATGCTTGGTGGATGAGCGTCCGGTCAATGTCATGTTGGTGGCGGATCGCACTCGG  
TCACCCGATAGGCGCTTCCGGTTGCCGAATCTGGTTTCTGTTTCAATGAAATGGTGAACGTAATGCCCGCAAGGGC  
TGGCAACGCTTTGATCGGCGGGGGCAGGGCGTGGCATTGACATTGAACGTGACGAGTAG

>Cluster\_25009

ATGAGTTATGAAATGCGCAACGGGGCTGAATGCCGTTAACGAACAGCTGGACGGGATCAGTAACAACATCGCCAACGC  
CGGAACGGTAGGCTATAAGTCGATGACCACCCAGTTTTTCAGCCATGATGCGCGAAGTCAAGGCGATGGGCGTACGCGTGG  
CAGGCACCGCGCAAAGTATTTCCGCGGGCGGTTTCGCTGGTATCCACCGGTAACGCGCTGGATCTGGCGATTAAACGACG  
GGTTTTTTTTGTTACTGCGACAGCGGGCAACATTTCTTATAACCGCGCCGGATCGTTTGAACCGCAAAAAACGGCTA  
TATCGTCAACGCTCGGGCGCTTATTTGAGGGTATCCGGTGCATGACACGGGACCCCTGCAAAACCGGTACAGTCAACGC  
ATATCCAGATTAACACCGGTAATATTTCCGGCGAGGCCAGCAGCGCTGACCTTTACCGCAACTTCGATGCCAGTACGAC  
GACGCTATCGACCCGCAACACCTTACCGTTCGACCGGCAACAGCAGCTCGTACACCGACAGCTACACACAGCGTGTGA  
CGACTCATTAGGCAACGAACATTCGGTATGCCAGTACTTACCAAAAACAGCGACAACACCTGGGAAGTGCAGTACACCT  
TCGACGGTTCAGCAGCAGACCGGCTTCCGGCGACGAGCTTAACTTCCAGCCGAAACACCGGAAAACCTGACCTCGCCAACC  
ACGCCGACAGCAATTTGAGTTTACAGCCAGCGCGCGGCCCATCGATTTAACCTGCGATTACTCGACCTGTACGCAATA  
CGGCTGTGAATTTTCGGTTCACCAACCGCCGCGCGCTACGCTTCAACCGCAGAACCGGTCGAGCTGTGACAGCTGACG  
ACGGTAAAGTTTACGCTACCTACAGCAACGGCGAGCGCATGTTGACGGGGCAGTGGTGTGGCGACCTTCCGAATGAA  
AACGGCTGGAGGACGAGCGGACCGGCTGGGTACAACCGCGGAATCCGGCACCCGTTGATTTGGCGTTCCCGGTTCC  
CGCACCTCGGCAACGCTGTGCTCGGCGTGTCTGAAGCTCTAACGTCGATATCACAGCGAGTTAGTCAACTCATGATGA  
CCGCCAGCGTAACCTATACGGCCAACCAAAAGTTAATGCCACCAGCAGCAGCTCGATGACGCGCTGTTCCAGGCAATG  
TAA

>Cluster\_3983

ATGAATCTTTCAGCCAAATGCACAAGCGACTCTCTGCTAACACGAGGATTTTCTCGCGGGCGGGGAGTGAAGCATAAACC  
TCTTAGTAATAGTGAATGGGGAAAGTTTGCATTTATGGTGAAGCACCAACGATCAGTCCCGCGGAGCTTCTGGTGGCCG  
AACCGCAAGAGAACTTACAGGCTGGAGCGATCCGCTATTTCTCAGGAGCGTATTTCTGGCTGTGCTGGCGCGGGTCAAT

AGTCTGGCGTTGGCGGTAGATAAGTGGCAACGCGCCGGTTTATGGATCATAACCCGAGGAGATGCTGATTATCCCGTTCC  
CTTGAAAAACCGATTGCGAACGGATGCACCTCCCGTTTTATTTGGCTGCGGGAATAAAGCATTACTGCAGCGGAAGGTA  
TGGCGATTGTTGGCTCGCGAGATGCTCCGACTGACGATTTGCGCTATACCCAACAACCTGGCCGCGAACTGGCCCAACAG  
GGGATTTGCGTTATCTCTGGTGGTGGCGGAGGATTTGATGAATGTGCAATGGCGCTCGGCACCTGGAGGCCGGGGAACTCG  
CGTTGGCGGTATAGCTGATAGCTTGTAAAAACGAGTACGTTAGTGAATGGCGTGAAGGGCTTATAGCAGGCAACCTGG  
TGTTGATTTCGCCGTTTTACCCAGAGGTCGCTTACCCTGCGCAATGCGATGGCGGAAATAAATATATTTATTCGCTT  
GCTGAAAGCGCAATGGTTGACGTGCGGGAATGACCGGTGGAACGATAACCCGGGCGATAGAGGCATTAAAACATCAGTG  
GCTGCCTGTGACGTTAAACCAATCAGGATATGCAATCAGCCAAATCAGGATAGTAGAAAAATGGGGCGTATGGAGTG  
CTGAACAGGCTGGAATGTGCGCATCAGACTGTGACAGCTTCCGCGGTGATGTATGACAGAGCACTCCGTAACGCTCAA  
CCAGAACTGTTTTGCTGCATGAAAATGACGCAAAATACGCAAGTAAATGCGCGCATAACGCTGTCGATTTTTATCAACT  
CTTTGTGGCGAACTGGCGATCTTTGCAAGGAATCGATAAGTATTGAAAGGCTGTGCTCTTGTACTGTTTAAACCATCG  
AACAAATTAGTGTGTGGCTGAACCGCGCAGAAGAAGAGGGAAGGGTTATCCGATTGGCGAAGGTCATTATCAGTTTCAAG  
TAA

>Cluster\_48668

ATGACTGATACCGTTTTTCAAAATCGTTACAAAAAGAAGTCGATCCTGAGCAGTACTTGGCGCTAAAGAATTTAGATGA  
CAGTCCGGTTTCATGCTATTCGCCGTGACGATATCATCTGCCCAATTTGCAAGTTGGAGGTGGTTCGTTTCGTTAGAGCCA  
CTAGCAATGGTTCATGCTATCAAGAGAGGCGCATTTTCAGATTTACCGGTGAAGATGGTCAAGGCCATCATCCATGATGAT  
TTCATGGAGATAGACTAACATCTGAGGTGAAGCAGCACCTTGTCTCATTTACAAAAGATCGAACAAAGTATTCGAGGT  
AATACGAAAGCTGCTGCTGTGCGGCATACAGGAAGGGATATTTACTCAAGAAAAAATGTGGCAGATGAGGGAATGGTTC  
TCAATAAGCGAAAGGATTTCCACATTTGAAATATGGTTAGAAAAGCGAGCATTTAGACTGGCTTTATATATTTAGTGGTTA  
CGTATGCTATCTAGCATGGACAACTCCTGATATTTCTACTCTTTCGCGCCCATTCAGGTTACTGTGCGCTGGTTTTCTTG  
GAAGCGTGGCATTGACAAAAGAGGTGCTAAGAGTTCACATCAAGACTCTCCAGCAATTCGCTGAAATTTTCACTTCACATA  
GAGACATTTCTGTAATCTTGAACACATAAAACAATAATCGTGACCGCACAAATTTCTCGATCCATCGCATTTGGAGGACGAG  
ATAAGTAACTACCTGAAGCTTACTAGTTTTGTGATGGCAAAATACATTTAGTGTGTTTACAGCAAAAACCGGTTAGCAGCAGAGC  
ATACGGGGAAGCTAAGTTTTCTGGCATTTGCAGCACTTTTGTGTTGCTGTCAGATGGGACCTCAACATTTGCTATGGTA  
AGTTTTCTAAGATTGCCAGAGTGAAGGAGGTGATGACATGCTGGCTGGTAATTTTCATTTGGTCTTAATCCTTACTTCCGA  
TACGACCTGGCTAATGACAGTGAAGAGATTGCAGGATAACTGGCCGATTTGAATACCAAGAGTTGGAGCATTTGGAATGTTGA  
GAAATCCATGCTGACGCATATGAAAAGTGGCGTGCAGCAGAGCTGAATTCGCTCCACCCCTATTGCGCAGACTTGTATA  
TTGCCAACATGAGAAAAGTGCACAAAGACGAGCAAGTCAGGCAGTGGATTAAGAACGGGGATGTTTTGA

>Cluster\_41

GTGCCTTTTGAAGATGATGGTCTTCTTAATATCTTTACTAACCTACCTCCAGGATCTTCATTAAGAAGAACGATAAATGT  
TGCCAACGAAATAAGTGATACCTTAGCCAAAACCAAAGAAATAGAGGAGTGGATAAACATAGCAGGCTTCGATTTGCAAAA  
CTTTTGGTTTTAAAAGCGATTCTTTGACTACTTTTTATTATCTAAAGGATTGGAAAGAAAGGAAGGGTAGAGAACATTTCT  
TCATTTGCTTTGGTTTCAGAGATTAATCAACAATTTGCCAAAAACCGGGAGGCTTTAATCTTTGTAGTAAATCCACCTCC  
TATTAGAGGCATGATTTGGTAGGTGGTTTTGAAATGTATATCCAGGATAGGTCAGGAAGACCTCTTTCTGCACTTTATA  
AATATGTTCAAGAGATAGTGGCTAAAGCTAATCAAAAGCTGAACCTTACCAGCTTAGAACCCTTTTTCTTCTTAATGTT  
CCTACTTATAAGGTTACAGTTGACAGAGAAAAGCTAAGGCCATGAGGTAGATGTAGATGAAGTTTATCGTACTTTAAA  
AATCGTGTGTTGGTAAATACATATGTTAATGATTTTAACTTTACCGTAGAATTTTTTCATGTTAACTTAGGTGACGAGAGGTG  
ATTAAGTATGATGATTTAAGAGATATAGTTATGTCTATGTTTCGCTCAAAAATGGAACCTTGATCCCTATCAGTAGTTG  
ATTAAGTAACTGATTTAATCCAGATGCTCTTATTTAGAAAATTTAATATGTTTCGTAAGTGTCAAAGTTTTAGGAAATCC  
TAAGCCTGGATATACTTACAGGTGATGCTATCAAGGCTATTTCTGAGGTAGCCAAAGAGTTTTACCTCCAGGATATACGA  
TAGCCTGGCAGGAACGCTTATCAGGAGGTCAAGGTACAACCTAAGGGTAATTTAGCCCTTATATATGCTTTAATCTTT  
ATTTATCTTATCTTGGTTGGCTTTATGAAAGCTGGACGTACTCCCTTCCCTTAAAGTGCACCTTTTGGCCCTTTT  
TGGGGCAGCCTTGGGATTAATCTTTTTGGTTTACAGAATGACGTATATTTCCAAGCAGGGCTTTTGGTTTTGATCGGAC  
TTTTCTGCCAAAAATGCTATTTTGATCGTTGAGTTTGCAGAAGAAAGATTAAAACGTGGTATGGGGGTTGGTTGA

>Cluster\_21868

ATGACTTTATGGATCAACCGTACTGGGTGACGGGCCAGGGCGCATTTGCGTGTGAAGCGTAATCCGGTATCGGGCAGGTT  
GTTATGGCAGGGCAATGATGCCGATGCCGCTCAGGTGCGGCAGGCTTGTGCGGCAGCCGTCGCGGCTTTCCGCGCTGGG  
CGCGGCTCTCATTTGCTGAACTGAGGAGTGTGCGAACGCTTTGCGCGACTGCTGGAAGCAATAAAGGCGAATTAACC  
CGGATTTGCGCAGAGAAACCGGTAAGCCGCGCTGGGAAGCGGCAACCGAAGTACCGGATGACCAATAAAATCGCGAT  
ATCAATTAAGGCGTATCAGCTTCGCTACCGCGAGCAGGCTAGTGAATGCCGGACGGCCGGCGAGCCTGCGACATCGCC  
CGCACGGCGTGTGGCGGTGTTTTGGCCGTATAATTTCCCTGGTCAATTTGCCGAACGGACATACTGTTCCGGCATGCTG  
GCAGGTAACACCATTTATCTTTAAACCCAGCGAAGTACACCGTGGAGTGGCGAAGCGGTAATGCGTTTTATGCGAGCAGCC  
TGGCTTGGCCGGCGGCTGCTGAACCTGGTGCAGGGCGGGCTGAAACCGGTCAGGCGCTGAGTGGCGTGGAGGATCTCG  
ACGGCTTGTCTGTTTACCGCGAGCCCAATACCGGCTACCGCTCAGCTGATCGTCCGCTCAGCCGCGAGGAAATTTCT  
GCCCTTGGATGGGCGGAAATAATCCGCTAATTTATCGATGAGGTGGCGGATATCGATGCCGCTGTCCATCTGACCATTTCA  
GTCGGCGTTTGTACCGCCGGTCAACGCTGCACCTGCGCCCGCGTTTTATTTGAAAAGTGGAGCGCAGGGCGATGCGT  
TTGATATCAGAGCAGGCTGCACAGCAGGTGGTTACTGCCCTGGCAGGAACTGGAAGCGATGGGTGGGCGACCCCTGCTTGC  
GCCGGCTTATTACAAGCAGGAACATCGTTGCTGACGCGGGGATCATTTGAAATGACGGCGTTGCTGGCGTACCAGATG  
AAGAGGTGTTCCGTTCCGCTATTGCGCGTCTGGCGTTATGACACCTTTGATGAGGCGGTTCCGATGGCGAACAACACCCG  
TTCGACTCTTTGCGGTTGCTGTTCCCGGAGCGGAAATAATTCGATCAACTGCTGCTTGGAGCACGGCGGGGATTTG  
TAACTGGAACAAACCGCTTACCGGTGCTGCCAGTACCGCGCATTTCCGCGCATTTGGCGCTTCCGGTAACCATCGCCCA  
GCGCTGTTATGCGCAGATTTGCGCTGGCGATGGCGAGCTGGAGTCCGACTCGTTAACATTTGCCCGCACACTT  
AACCCCGGCTGGATTTTTCCGATGAGGTGGTGGCATGA

>Cluster\_41865

ATGGTTGCGGTAAGAAGTGCACATATCAATAAGGCTGGTGAATTTGATCCGAAAAATGGATCGCAAGTCTGGGTATTAC  
CAGCCAGAAGTCTGTGAGTGTCTAGCCGAAACCTGGGCGTATGTTCTGCAACAGACGAGGGGCATCCGGATGCCAGTCT  
TGTTATTGTTGGCGTGGTGTGATGATGGTGGAGTCTCTCGACATTAAGTATGGACATTTGACACGCTCGGGCGGGCGCTG  
CTGTTCCCTCGGCTGATGCCAACGCTAGTCAGCGAAGTGTGCTGCGTGAAGCGCTCGGTAAGTTCGCTGGCTTAACTTAT  
TCACGGCGTGGTATGCGGGGATCCGCCAGCTGAAAGCGACGCACACTGATTTCTGTTTCCCTCCGAACAGGTCGATA  
ACGTTTCGCGGATGTTATTTGGCGATGGTTCGATGATTTTTCGCTGCTGATCATCAACTGGCGGAGCGTATTTGCTACCTG  
CGCGAAGTAAAAGATGCGCCGGAAGATGAACGCTACTGGCGGCAAAAGAGTGCACCAATATCTACGCGCCCTGGCGAA  
CCGCTTTGGGATTTGGGCAACTGAAATGGAGCTGGAAGATTTACTGTTTCCCTTCCACCCGACCGGAATAACAAACGCA  
TCGCAAAACTGCTGCATGAACGCGTCTCGACCGGAACACTATATCGAAGAGTTTGTGGCCATCTGCGCGCTGAGATG  
AAAGCTGAAAGCGTTAAAGCTGAAGTGTATGGCGTCCGAAACACATCTACAGTATCTGGCGCAAAATCGAGAAAAGAA  
GCTGCCCTTCGATGACCTGTTGATGTGCTGCGGTACGTTATTTGCTGCCGAGCGTTTACAGGATGTTTATGCTGCACTGG  
GGATAGTGACACTCACATTCGCCACCTGCCGATGAGTTTGCAGATTACGTCGCTAACCCGAAACCAACCGTTATCAG  
TCCATTATACCGTGGTTTCTGGGCGGGTGGCAAAACCGTTGAGATCCTAACCCGACCAACAGATGCATGAAGATGC





GCTGAAGCAGGAGCTGATTATTGCTGGTTGCGCCGCGCTGCTGGTCCCTTTGTGGCCACATTGCGCGTACTGGTATA  
TCGGGCGCACCGGTCGCCAGCAGAGTGAAGATGAAATCATCGGGGCGCGCTCTCAGTGAGTACCAAAAAGCAGTTGCC  
CGGATGATGAAAAACGTTGGGAAGCATCCGATATCCGCATCGATGACCTGCCGCTGAAGCTGGATTCGAGATACAGAA  
TATGTTCCATCCCGGTAAGTCCACTCTGATGCGCAAGATATGAAAGCAACTGCGCGCAGGAGGGG  
ACCTGGCTATTATCTACGACAAGGCTGTACGTTTCAAGATTCTACGATGAATCCCGGATAAAAAGTCTGACTAACTG  
CTGGATGCCCGTTGCCCAACTGGGATTGTGGGAAGAGTGGCGTACGATTTCCGAACGGAGAATGCCAGTGAACCTT  
GATCCCGGCCAGCAGTGGTGAAGATCCGTTCTGGCAGGCGAGTGGCGTACCATCTTTGCGGAAGGCGAGAACGCATGC  
GCAGGGATGAAGACCGCAGCTACAATAAATTCCTGGCAGCTCTGCTGGCAATTCAGCTGATCAACTGAGAAGCTTTCTT  
GCCGGCAGCCCGCTCCACCTGTTGACGGTAAAGATTGGAAGACCGCCATTTCCATCCGCGAGCGTGTGACTAACTA  
CGTCAAAGCGATGCGTTATCTGCAGGGTATCGACAGGCCCGGACGCGAAAAAGTTTACCATCCGGGAATGGATGAAGGGCC  
AGGCCGATAAATCGAAAAATGGCTGGCTCTTTATACCTCCGACGAACAGAACCATGAGTCTCTTAAGCCATTGATTTCA  
CTGTGGCTTAAGTATGCAGCCACAGTCTGCTGGCGATGGGGCCGACCGCCAGCGAGTGTCTGGTTTTTTTATGACGA  
ACTGGCTTTTGTGCAAAATACGCACTCTGCCACGAATTTGTCGAGGCGCGTAAGTTTGGCGGCTGTTTTGCTGCTG  
GCTTCCAGAGCTTCGCACAGCTGGAAGAAATTTACGGCCGAAAGCGGCGGCGCTGTTGACCTGCTGAATACCAA  
TTCTTCTTCCGCTCCCGAGCGCCAGATTGCGAAGTTTGTGGAGGAAGATATCGGTGAACCTGGCGAAAAAATTCAG  
TGAACAGACAGCTTGTGCTGAACAGGTGCGTACGGGATTTCTTTTGGCAAGGAAGAAGACCGCTCAGTATTGTCA  
GCTACTCCGATGTGCACTGCACTGACCTGACGTTTGTGCTCACCTGCGGGGAAGTTATCCGCTGTGAACTGACA  
ATGAAGTATGAGGCGATGCCCAAAGTGGCTGACTCGCTGTTGTTGCGTGATGTACAGACCAGTCTGGATCAGATGCTTGA  
AGATGAAATACCCGTCGCACTGAAGAAGAGAGGCATAAGTTTCCCGGCTGTTCCGAAGGGCGCTCGTTAATTCAGGCTG  
TTCCGGAGAGTAACTGTGCAATACGCCCCCTCTTCTGCGCGGCTGGCTGCTGTTCTTGGGAAAGCAACACACT  
CCTGAGACGCGCAGTATACAGACAGAAAACGCTGCCGCGGATGAGATACCAAAAACAGGGATCCACTGTTGTCAGC  
GGAAGGTGGCTCCACTCCACCGGAGAACTGAGCGGATATTGAACAGGATTTACTAAGGACGTTCTCCGGGCTGTA  
ACAGCGATGGTGAAGTGGTGGATTCCGAAGCATATGAGGACTGGGTTCCAGCTTCACATCAGACCCGCGATATGACCCG  
AGGAAGAGGTCAACATCAATCATGCGACAGATAAAGCGGTGATTTTGATGACGACAGGAGGTGTTCTGA

>Cluster\_45174

ATGGGAAGCCCTCTCTGATTCTGCCCCGTAACAGCCCTGGCGTTGGCAGTCCGCTTAAGTTTCGCTGGCAAGCGCC  
GGTATTGCCCCAGGTTGGTGAAGCGCATATGGTGCATGGAATAAACGCTTAAAGAAATTTGGTGCAGTGTGCGAGTGGG  
ACGACTACGCCAGATCTTTACCTGATTAAGATGGCCGCTGACGTTGAAAGTGAAGCCGTTGGTGCAGAACAGCAATGGT  
AATGGTCACTCTGCGACTGCAAGTACCGGTAGTGTGAAAGACAATAAAGCCTGGGTTTCTGACACCTTTATTAACGA  
TGTPTTCCAGTCCGGCTGGATCAAACTTTCCAGGTAGAAAAGCGCCCTCACCACTTAAATGCCTAACTGCGGACGAAA  
TTAAACAGGCCGTTGAAATTTGTTAAAGCTTCCGCGGACTTCAAAACCAATACCCGTTTACTGAGATCCTCCTGCTACCG  
CCAGATAAAGAAGCTGCTGCGGCTTTGCGCTGGAAAACAAACCGGTTGACCGCCACGCAAAAGCCGAGCTATTATGCT  
CGACGGCAAAACATATCATCGAAGCGGTGGTGGATCTGCAAAACAACAACCTGCTCTCCGCAACCCATTAAGACGCCC  
ACGGTATGGTGTGCTGGATGATTTCCGCAAGTGTGCAAGCATTTATTAACAACAGTGAAGAAATTTGCCCTGCCGTGAAG  
AAGCGCGTATTACTGATGCGAAGAAAGTGAATACCACGCGCTGACCGTAGGTTATTTGATGGTAAAGATGGCTGAA  
ACAAGATAAAGAAGCTGCTGCGGCTTTGCGCTGGAAAACAAACCGGTTGACCGCCACGCAAAAGCCGAGCTATTATGCT  
CGACGGCAAAACATATCATCGAAGCGGTGGTGGATCTGCAAAACAACAACCTGCTCTCCGCAACCCATTAAGACGCCC  
ACGGTATGGTGTGCTGGATGATTTCCGCAAGTGTGCAAGCATTTATTAACAACAGTGAAGAAATTTGCCCTGCCGTGAAG  
AAGCGCGTATTACTGATGCGAAGAAAGTGAATACCACGCGCTGACCGTAGGTTATTTGATGGTAAAGATGGCTGAA  
ACAAGATAAAGAAGCTGCTGCGGCTTTGCGCTGGAAAACAAACCGGTTGACCGCCACGCAAAAGCCGAGCTATTATGCT  
TGGTGGCGGCTGTTGATTTAGAACAGAAAAAATCGTTAAGATTGAAGAAGGTGCGGTAGTTCGGGTGCCAATGACCGCA  
CGCCCATTTGATGGCCGTTGACCGGTTGCTCCGGCAGTTAAGCCTATGCAAAATCATGAGCCTGAAGGTAATAATAC  
CATTACTGGCGATAATGATTCATGCGGAACTGGGATTTTCACTCAGCATGAACTGCGCGCTGGCAGCTATGATCTCCA  
CCGTGACTTATAACGACAAATGGCACAAACGCAAAAGTCAATGTCAGAAAGTTCTCTCGGCGCATGATTGCTTACGGT  
GATCCTGATATTGGCTGGTACTTTAAAGCGTATCTGGACTCTGGTACGATGATGGCAGCGTAACTCCGCAATTCG  
ACGTGGCAAAAGATGCACCTCTAACGCAAGTGTCTCTGAAATGAAACACTGCGGACTACTGCGGTACCGATGGAGATCC  
CTCGTCTATCGCGGTTTGAACGTTATGCGGGCGGAGTATAAGCATCAGGAAATGGGCCAGCCAACTGACGATACC  
GAACGCGGGAGTTGGTGGTGGCTGGATCAGTACAGTGGGTAATGACTACATTTTGGTGGATCTCCATGAAAA  
CGGCACTATTGGCATTGATGCGCGTGTACGGGATCGAAGCGGTGAAAGGTGTTAAAGCGAAAAACATGACAGATGAGA  
CGGCGAAAGATGACACGCGCTACGGCAGCTTATCGATCACAATATCGTGGGTACTACACCAACATATTTATAAATTC  
CGCTCGATCTGGATGATGATGGCGAGAATAACAGCTGGTGGCGGATGACCCGTTGGTAAACCAGAACTGCGGTTGG  
CCCACGACACAGTACCATGCAAGTTAATCAGTACAACATCGGCAATGAACAGGATGCCGCGCAGAAAGTTGATCCGGCA  
CGATTCGCTGTTGAGTAAACCGCAAAAGAGAACCGCATGGGCAATCCAGTTTCCATCAAAATATTCTTATGCAAGT  
GGTACTCACCCGGTAGCAAAAGGTGCCAGTTCCGCGCGGACGAGTGGATCTATCATCGTTAAGCTTTATGGACAAGCA  
GCTTTGGGTAAACGCGTTATCATCTGCGGAGCGTTTCCCGGAAGGCAAAATATCCGAACCGTTCTACTCATGACACCGT  
TTGGACAATACAGTAAAGATAACGAGTCTGGACAACACCGACGCGTGTGCTGGATGACACCGGCACACATGTTG  
GCCGCGCGCAAGAGTGGCCGATATGCGGACCAATGGTACATACCTGCTTAAACCATGGAACCTCTTTGACGAAAC  
GCCAACGCTAGGGCGCTGAAGAAAGATAAGTGA

>Cluster\_60987

ATGAAGGTAGATATGATACCAGCGATAAGCTGTACGCGGACGATGGCTTGGCTTTAAAGGTACGGACTGGA AAAACGA  
AATTAATGTCGCGGATTTTATTCAACATAACTATACACCGTATGAAGGCGATGAATCTTTCTCGCGAAGCGACGCTG  
CCACCAGGAATTTGGGAAAAAGTAAATGGAAGGCATCGTATCGAAAAATGCAACCGCGCGGTTGATTTGATTAAC  
AATATTGCCACCACAATTAACCGCTCATGATGCGGGATAATTAACAGCCGCTGGA AAAAATTTGTTGGCTGCAACCGGA  
TGGCCGTTGAAACGTTGCGCTACACCGTTCCGGTGGCATTAAATGATTAAGTTTCAATCCAGCCCTATGGCCGAGAAA  
TGGACAGTGAATTTGAATATCTGTTTACCGATCTGCGTAAAACCCATAACAGGGCGTATTTGATGTTTACTACCGGAT  
ATGCTGCGCTGCCGTAATCTGGCGTGTGACCGGTTTACAGATGGCTATGGCCGTGGGCGCATTATCGGTGACTATCG  
CCGCTAGCGCTGTATGGCATCAGTTATCTGGTACGTGAACGCGAACTGCAATTTGCCGATCTCCAGTCTCGTCTGGA  
AAGGCGAGGATCTGGAAGCCACCATCGTCTGCGTGGAGGCTGGCAGAGCATCGTCAATGCGCTGTTGAGATTCAGGAA  
ATGGCGGCGAAATATGGCTTTGATATCTCTCGCCGCGCAGAAATGCGCAGGAAGCGGTGAGTGGCTACTACTCGCTTA  
TCTGGCGGCAAGTGAATAACGAAAAATGCGCGCGGATGCTGCGTGGCGCACGGCATCGTTCTCGATATCTACTATTGAGC  
GCGACTTTAAAGCTGGCGTACTCAATGAGCAGCAGGCACAGGAAGTATCGATCACTTCAATCAAGATCCGATGAGTA  
CGCTTCTGCGTACACCGGAATTTGATTCGCTGTTCTCCGCGACCAATCTGGGCGACGGAAGTATGATCGCGGGATGG  
GCTGGACGGTCTGACCTGGTGACCAAAAACCTCTCCGCTATTGTCACACCTGACACTATGGGCGCGGACCGGAAAC  
CTAACCTGACATTTCTTTGGTGGGAAGAAATACCGATTCGCTTCAAAAATATGCGCGCAGGTGTCGATCTGACTCT  
TCTTGCAGTATGAAATGACGATCTGATGCGTACTGACTTCAACAGCGACGATTAACGCGATTGCTGCTGCGTACGCC  
AATGGTGAATTTGTAAGCAATGCAAGTTCTTTGGTGCACGCGCTAACCTGGCGAAAAACGCTGCTACGCAATTAACGGCG  
GGTGGACGAGAAGCTGAAGATTGAGTTCGGGCGAAAAACAGCACCCTGATGGACGACGCTGCTGGATTACGACAAAGT  
ATGGACAGCTGAGTCACTTATGAGACTGGCTGGCGGTCAGTACATACAGCGCTGAATATCAATTCAGTACGACCA  
CAAGTACAGCTACGAAGCTTCGCTGATGGCGCTGCACGATCTGATGTCTATCGCACTATGGCATGGCGCATCGCGGGC  
TGTGCGTGGCGACGGACTCCCTGCTGCAATCAAAATCCCGCGTGAACCAATCCGTGACGAAAAACGGCTGGCGGTTG  
GACTTTGAAATCGACCGGTGAATATCCGAGTACGGAACAACAGCAGGCGGTAGACAGCATGCTGCGTGGCTGTTGA  
ACGCTTTATGAAGAAAAATTAAGCGCTGCCAACCTATCCCAACGCGTCCCTACCCAGTGCATCTGACTATCACTTCTA  
ACGTTGGTGTACGGCCAGAAAACCGGTAATACGCGGACGGTCTGCGCGCGGAACACCGTTGCGCGCGGGCGTAAACCG

ATGCATGGTCGTGACCGCAAAGGTGCCGTGGCCCTATTGACGTGGTGGCGAAACTGCCGTTACCTACGCCAAAGATGG  
GATCTCGTACACCTTCTCAATCGTTCCTCGGGCGCTGGGCAAAGAAGATCCAGTACGTAAAACCAACCTTGTCCGGCTGC  
TGGATGGGTATTTCCACCACGAAGCGGATGTCGAAGCGGTCAACACCTCAACGTCAACGTAATGAATCGGGAATGCTG  
CTGGATGCCATCGAGCACCCGAAAAATATCTTAACCTGACAAATCCGTGTCTCTGGCTACGCCGTGCGCTTCAACGCACT  
GACCCGTGAACAGCAACAGGATGTTATTTACGTACCTTTACCAGGCGCTCTGA

>Cluster\_21854

ATGTCGCAACATAACGAAAAAGAACCCACATCAGCACAGCTCACACTACAGATTCCAGCGAAGCGAAACCGGGGATGGA  
CTCACTGGCACCTGAAGACGGATCTCATCGTCCAGCGGTGAACCAACACCGCCTGGTGCACAACCTACCGCCCCAGGGA  
GCCGTGAAAGCCCTGTATACCGGTAAACGAAAAACTTAAATCTCTGGAAGACGTACGCAAAGGCAGTAAAAATTATGCGCTG  
ACCCTAATCAGGGCGTGCGCATCGCCGACGATCAAAACTCACTGCGTGGCGTAGCCGTGGTCCAACCTGTGTGGAAGA  
TTTTATTCTGCGCGAGAAAACTCACTCACTTTGACCATGAGCGCATCCCGGAACGTATTGTTCATGACGCGGATCAGCCG  
CTCACGGTTATTTCCAGCCATATAAAAGCTTAAGCGATATCAACCAAGCGGATTTCTCTCAGATCCGAAATAAAATCACCC  
CCAGTATTTGTACGTTTCTACCGTTCAGGGTGGTGGTCTGCCGATACCGTGCCTGATATCCGTGGCTTTGCGCAC  
CAAGTCTATACTGAAGAGGGTATTTTTGACCTCGTTGGCAATAACACGCCAATCTTCTTTATCCAGGATGCGCATAAAT  
TCCCCGATTTTGTTCATGCGGTAACCAAGCAACCGCACCTGGGCAATTCACAAGGGCAAAGCGCCACGATACCTTCTGG  
GATTATGTTTCTGCAACCTGAACTCTGCACAACGTGATGGGCGATGTCGGATCGCGGATCCCGCGCAGTTACCC  
CACCATGGAAAGCTTCGTTATTCACACCTTCGCGCTGATTAATGCCGAAGGAAAGCAACGTTCTGACGTTTCCACTGGA  
AACCACTGGCAGGTAAAGCCTCACTCGTTTGGGATGAAGCACAACCACTAACCCGACGTGACCCGGACTTCCACCGCCG  
GAGTTGTGGGAAGCGATTGAAGCAGGCGATTTTCTGAAATACGAACTGGGCTTCCAGTTGATTTCTGAAAGACGAAT  
CAAGTTCGATTCGATCTTCTCGATCAACCAACTTATCCCGAAGAATTGGTGCCTTTTCCAGCGTGTGCGCAAAATGG  
TGCTCAATCGTAATCCGGATAACTTCTTTGTGTAACCAAGCAAGGTTGGCTTTCCATCCAGGGCATATTGTCCCGGCTG  
GATTTACCAACGACCCGTTATTGACGGGGCTTTGTTCTTATACCGATACACAAATCAGTGTCTTGGTGGGCGGAA  
TTTTCCATGAAATCCGATTAACCGCCGACCTGCCCTTACCATAAATTTCCAGCGTACCGCATGCATGATGGGATCGC  
ACATCAACCGGCAATTAACGAACCGAAGTACGATCAACGATAACTGGCGCGGAAACCGCCGGGCGGAAACCGCGC  
GGTTTTGAATCATACCAGGAACCGTGGAAAGCAATAAAGTTCCGAGCGCAGTCCATCGTTTGGCAATATTATTTCCCA  
TCCGCGCTGTGTTCTGGCTAAGTCAAGCGCATTTCGAGCAGCGCATATTTGTCGATGGTTTCACTTTGAGTTAAGCAAAG  
TAGTTCGTCCGTATATTCTGAGCGCGTGTGTTGACCGAGTGGCACATATTGATCTCACTCTGGCCAGGCGGTGGCGAAA  
AATCTCCGTTACCGAATTAACGACCGAAGTACGATGACCGAAGTAACTCAACCCACCTCCGAGCGTCAACGGTCTGAAA  
AAGGATCCATCTTAAGTCTGTACGCCATTTCTGACGGTGTGAAAGGTCGCGTGGTAGCAATTTGCTTAATGATGAAGT  
GAGATCGGACCTTCTGGCATTCTCAAGGCACCTGAAGGCCAAAGGCGTTCATGCCAACTGCTTACTCCCGAATGGGG  
AAGTGCAGCGGATGACGGTACGGTGTGCCTATAGCTGTACCTTTGCCGTTGCGCTTCCGTCAGCGTGCATGCAGTCA  
TGTCCGCGCAATATTGCGGATATCGCTAACAACGCGGATGCCAACTACTATCTGATGGAAGCTACAAACACCTTAAAC  
CGATTGCGCTGGCAGGAGACGCGCAAGTTTAAAGCAACAATCAAGGTCGCTGACAGGGTGAAGAAGGATTGCGGAA  
GCTGACAGCGCGATGGTAGTTTATGGATGAAGTGTAAACGCTGATGACAGCACACCGCGTGTGGTACCGATTCCTAA  
GATTGACAAAATCCCGCGTAA

>Cluster\_20669

ATGATCAAGTTATCTGAAAAAGGCGTGTTCCTCGCCAGCAATAACGAAATAATGCGGAAGAATTTTACCAGCGGAAAT  
AAAAAAGAAAGCAAAAAAAGGCACCTATTGCCTGGTCTATTCTCTCTCTATAATACGTCGGAATATGATAAAT  
TTAAAATTAAGTTTGAATTCATAGCCTTACCGATATTAACCTTTGTTGTTGATGACAGACCGTAAAGCGTCCGGTATG  
GAACGTTTTCCGCTTCCGATATGCTGACCAACTGCCATAACTCACTCTGTGCTGTGGGCGGCACTTAACGGTATGA  
CCATGTTTTTGGTTTATCGCGCGCCAGCGTTATGGCGGTATTTTTGTGCCACCGCATATTGGGTCAATCAATATA  
TGCCTGAAATGATGGCGGGCGGCGGCAAAATGATCCTCGGGTACAGACGCCATACCCGTTACGGTGCCTTAGGACAATG  
CGGTTGGCGGAGGGCGGCGGAGTTGGTAAACAGCTGCTTAATGACACCTGGGATATCGACTATCCGGCGTGGTTGCG  
GGTGCATCTGACCGGAAAACCTGCGCGTATGTGGGCGCAGGATGTGGCGTGGCTATCATCGGTGCGGTGTTCAAAA  
ACGGTTACGTCAAAAACAAGTGTGGAGTTCGTAGGTCGCGTGGTGGTGGTGGTGGTGGTGGTGGTGGTGGTGGTGGT  
GACGTGATGACCACTGAAACGACCTGTTAAGTTCTGTCTGGCAACCGATGAAGAAGTCCATAACTGGTGGCGTGC  
CGTGTGGCGGACAGGATTAATCTGCCAATTAACCCCAACCGTACTACGATGGCTGCATACAGCGGTTTATGAGTTC  
CCATCAAAACAATGATTGCGCTGCCATTTCCACCGAGCAACGTGTATGAAATCGACACGCTGAACCAGAACCTGACCGAC  
ATTTCTGCTGAGATTGAAATGAGTCCGACCGCTGGCGCACGGTAAAGCCAAACTCTCGCTGCTGGATAAAGTGA  
TGGTGGCTGAAAGTGCAGCAGGGGATTTATCGCGGGCTGTTCTGGCGTAACTACGAAACGTCATCGCGGCGGCAATG  
CGCTGCGCGGCTCAATCTCGCGCAACGATACCTTCTCGTTGGCGGTTTACCCTGCATCACAGCGGTTTATGAGTTC  
GCCAAAAAAGGTGTGGTGCAGATTTGATTGGCGCAGGCGCAATCATCAGAACCAGGTTCTGCGGCCATGCTTTGGTGC  
GGCGGATACGCCAATCAACAACGGTTTGGATTTGCGCCACACCGGTAACCTCCCGAACCGGAAGGCTCTAAGCCAG  
CTAATGGGCAGATGTCAGCGGTGGCGTTGATGGACGCTGTTCTATCGCTGCGACTGCGGCAACCGTGGCTATTTAAC  
TCTGCCGGAACCTCGATTGCTGGGACAACGTGCGGATACGCTTTCGATGTAACCGGATATAAAAAATCGCGCTATCA  
AGGCTTTGTGAAAGGGGCGACCCAGCAACCGCTGATCTACGGACCGAACATCAAGACTGGCCGGAATTTGGGCGCGTGA  
CTGACAATATCGTCTCAAAAGTGTGCTCGAAGATTTCTCGACGAAGTGACCAACCGGAACTGATTCCTTCCGGTGA  
ACCTTCTTATCGTTCAAATCCGATTTGGTCTGGCGGAGTTTACCCTGTACCGCGCATCCAGGTTATGTTGGCAGAAG  
TAAAGCGACTGCCGAGCTGGAAAAATCAGCGTCTGGCGGGAATGTACGCGAGCTGACAGAGGTTTGGCGCATTAAGC  
AGATTGCTGGTCAAGAACATGTTGATCCGCTGCAAACTGAAATTTGGCAGCATGGTTTATGCGGTGAAACCGGATGGT  
TCTGCGCTGAACAGGCGGCGAGTTGTACGCTGTGATTGGCGGTCTGGCGAATATTGCGGAGGATACCGGACTAAACG  
CTATCGTTCTAACGTCAATCAACTGGGGATGTTACCGTGCAGATGGCGGAAGCGCAACCTTTGAAGTGGAGGATTAACA  
TTTACATCCCTGGCATTAAGCGGCGCTGGATAATCTGGAACGACGTTTAAAGGTTATGTGATCCATGAAAAATGACCCG  
GTAACGGAATACGCTGTATATGGAAGTCTGACTGCCGAAGACCGGAGATTATCAAGCGGGTAGTTTGATTAACTT  
CAATAAAAACCGTCAGATGTA

>Cluster\_20704

ATGGCATTAAACCGCGCGCTTAAAGCGCAAATTTGCCGCTGGTATAAGGCGCTTACAGGAACAGATCCCGACTTTATTCC  
CCGTGCGCGCAGCGGACAGATGATGCGGACGCTCGCCAAAACGCTGGCCGAGAGAAGAGGGCGGCATCTGGCGATTGAAG  
CCCTACCGCGGTTGGAAAAACGCTCTCCTATTGATCCCGGCATCGCCATTTGCCCGAAGAGCAAAAACTCGCTGGT  
GTAAGTACCGCAACCGTGCAGGATTCAGATCTACAGCAAAGATTACCCTGCTGAAAAAGATCAATTTCCGATCT  
TAAATCACTGCGCTTTTGGCGTGGGCGCTACGTTTGGCCGTAATCTGACAGCGCTCGCCAGCACTGAGCCACGC  
AACAGGATCTGCTGGCGTTTCTTACGACGCAACTGACGCGCAACAATAGGAAGAGCAAAAACGTTGTGCGAAGCTGAAG  
GGCGATCTCGACACTTATAAATGGGATGGTCTGCGCGATCATACTGATATCGCTATAGATGATGATCTCTGCGCTGTTT  
GAGTACCGCAAAAGCTGCGCTCAACCGCAACTGTTTATTACTATCGGAATGCCCCGTTTTTTTGTGCTGCTGCGGAAA  
TTCAGGAAGCGAAGTGGTGGTGGCAAAACCATGCGCTGGTGTGATGGCGGATGGAAGCGAAGCGGATTTGCTGACCCG  
AAAAATTTACTGCTGGTGTGGACGAAGGTCATCACTCCCGGATGTGGCGCGGATGCGCTGGAGATGAGCGCGGAAAT  
CACTGCGCTGGTACCGCTCAACTGACCTGTTCAACAACTGGTGCACCTGCATGGAGCAGTTTCCGCGGAAAGA  
CCATCCACCGCTGGCGATCCCTGAACGTTTGAATGCGCATTTGAAAGAGCTGTATGAGCTTATCGCTGCTTAAACAAC  
ATTTCAATCTCTACATGCTGCGGGCAGGAGCAGATCACCGTTTTGCGATGGGCGAAGTGCAGATGAGTGTGCTGGA

GATCTGCCAGCGGCTGGCAAACCTACCGAGATGCTGCGTGGCCTGGCGGAGTTATTTCTAACGATTTAAGTGAGAAAA  
CCGCGCAGCCATGACATTTGACGTCTGCATCGGTTGATTTTGCAGATGAACCGGCATTGGGGATGTTCCGAGGCGCAAAGC  
AAACTCTGGCGGCTGGCGTCTCTGGCGCAATCTTCCGGTGGCGGTTAGCAAATGGGCGACGCGGGAAGAGCGGAAGG  
CGAGCTACACCTTTGGTTTCACTGCGTGGGAATACGTGTGACGCGATCAGCTGGAAAGGCTGCTGTGGCGCAGTATCCCGC  
ACATTTATCTTACCTCCGCAACCTTGGCTTCCGCTGACAGTGTTCGCTTTCGCTTTCGAGGAGATGAGTGGGTGAGCGGTA  
GCGGGTGACCGCTTGTGGCGCTGGATTGCGCCCTTAAACCACTGTGAACAGGGCAAATTTGTTATTCGCCGGAATGCGCTT  
TGAGCCTTCCATCGACAACGAAGAGCAGCACATTCGCGAAATGGCGGCTTTTCCGTGAACAGGTGGAGAGCAAAAAAC  
ATCTCGGCATGTTGGTGTGTTTGGCAGCGGGCTGCGATGACGCGCTTCTCAGACTATGTGACGGATTACGCGCTGATG  
TTGCTGTTGACGAGCGATCAGCCACGTTATCGCTTAGTTGAACGTGCACCGCAAACGCGTTGCCAACGGTGGAGCGGCTAGCCT  
GCTGGTGGGCTTACAGTCTTTGGCGAAGGCTTTGATCTGAAAGGCGATCTGCTCAGCCAGGTGCATATCCACAAGATCG  
CTTTTCCGCCCATCGACAGTCCGGTGGTGTATCACCAGAGGTGAATGGCTGAAAAGCCTCAACCCTATCCGTTTGGAGGTG  
CAAAGCCTGCCGAGCGCTTGGTTAACCTAATTCAGCAGGTGGGGGACTGATTCGAAGCCACGGTTGCTGGGGGGAAGT  
GGTTATCTACGACCAACGCTTGGTGCACAAAAATATGCGCAAGCGACTACTGGATGCATTAACCGGATTTCCGATAGAGC  
AACCGGAAGTCCCTGAAGGTATAGTTAAAAAGAAAGAAAAACGAAATCCCCACGCGCTGGCGGCGTTAA

>Cluster\_19912

ATGAGACTCAAAAAACGTTATCTCTGCACAGTATTATCACTTGCCTTTACCCAGCAAGCCGTAGCGGCTCAGGAGAGCGA  
CACGCTGACCCATGGTCCAGTCCGGTATCATCAACGACGACCCACGTTCTCGATCAACCCACCATGAAGGCCCTGGATA  
AACAGAATGTCGCTCAGGCATTAAGTGTCTGCCCGGCTGGTGTGCAAAAGTCAGGTAGCCGCAACGAAGAACAGGTC  
AAAGTTCGTGGCTTTGATAGTCTCAGGTGCGCGCTATTTTCGACGGTGTGCCATTTATGTTCCCTATGACGGCAACCT  
CGATCTGGCGGGATTCTGACCAACAATTTGGGGGAGTTGAAGTTTCCAAAGGTTATTCGCTGCTGCTCAGGGGCTTA  
ATCAGATGGCGGGACCAATTAATATCACACCCAGAAGCAACAAAAACCTTGAAGCAAAATCGGGATATCGCCAGGGA  
TGGAGCCGTAGCCAGGACAATGCCTACGATATGCATGCTTACCTGCGCCAGCAGCGATCTGGGGTATTTGCAAGTCAG  
CGGTAGCCAGTAAAGCAGGATTTCTCGCCCTGCCGATGGTGTAAATAATGATATTGCAGGCAAAACCGGCAAGATGA  
TTAATTATCGCGCTGATGATAAAACGCGGATTTGTCAGCGCTGTTTACACCAGCGAAAACGATGAATACACATTTGACT  
TACATTAAGCAGGATGGTAAAAAGATAACCCGCCATACAGTGGAAATAGTGGTCAGAAATCACGCTACTGGCAGTGGCC  
AGAGTATGACAAAGAAAGTTTTTATATCAGGGAACGACCAACTAAACGATCGTTTTACCCTGAAAAGTCCGGCTGTATC  
CGGACACCTTTGAAAATACGCTAATGATGTACAACCTCGCTGGCTGATTTGAAAATAAAAAAGGCAGCTACAGCCATTTAT  
TCCGATTAACGCGCGGTCGCGGTTACCACTGGCAGCGATGGTGTGCGTGAACGATCTGCTGTGCTGTTACCTTAACCTG  
GAAAGATGACGTACACCGGGAAGAGTGGCGCCGACGCGCTTACGATCGCTATGAAGATCGTACCTGGTCTGCTCGCCA  
GTGAATATCAATGGGCTGCTGCCGATAATGTGATGCTGCTGGCTGGAATCAGCTATGACTGGCGGATAGCGTGAAGCG  
AAAAAACATGAGAAAGATGGCAGTATCACCCATATGACGACAACAATCAGTCACTTTTAACTGGCAGGTGATGGGGAA  
ATACCCACTTGGCCATGAAGACACGCTGGCGCTTCTGCTACTATGACCGCACAGCTTTCCGACGCTGAAAAGAACGCTATA  
CCAGTCCAAACCTGCGTATAACCAGATAGCGATTGTTAACCCGAGCTCAAGCCGGAACGCGCGCGGGGTGGATTTA  
ACCTGGAATGGTGCCTTACGCGCAGCTGGGGATTTGAGGTGACGCTTACTATAACCGGCTGAGTGTGCCATCTCTC  
GCACAATATCGATGCCATACCATTCAAATCAGAACGCGGCGCAGGTGGATTACAGCGGCTGGATGCCGGTATTAAG  
GAAAATCAGCAATGATGAGATGAGTGGATGAGTACGCTTACGCTTACCGCTGATGCGCAAACGCAAGCAAGCCTAAG  
ATAACCGATCTGCCAACGCAGACAATGACCGCATGGATGACTCTCAAACCGTGGGAGCCGTTAAGCGTAACGCTGTCGGA  
AGAGGCGGCTTCCCTCAGCTACAGCAACAGTACGCGTTTCAAAAAAGCCGCGGTTTTGCGGTGACTCACATTCGAGCGC  
ATTAACCTTAGGTGATGGCTTACGCTCAATGCGTGGTCAATAACCTGTTTGTATACCAATATGCTTACAGTGAAGGG  
TTTTATGAAGAGGTCGCAATTTCTGGGCAAGTATCGATATACGTTCTGA

>Cluster\_12261

ATGGCACAAAGTCAATTAATACCAACAGCCCTCTCGCTGATCACTCAAATAATATCAACAAGAACCAGTCTGCGCTGTCCGAG  
TTCTATCGAGCGTCTGTCTTCTGGCTTGGCTATTAACAGCGCGAAGGATGACGCGCGAGGTGAGGCGGATTTGCTAACCGTT  
TTACTTCTAACATTAAGGCTGACTCAGGCTGACGTAACGCGCAACGACGGTATTTCTGTTGCGCAGACCACCGAAGGC  
GCGTGTCCGAAATCAACAACAACCTTACAGCGTATTCGTAACGACGCTTACGCGCAGCAGCCGGAACTAACCTCACCTC  
TGACCTGGACTCCATTAGGACGAAATCAAATCCCGTCTTGTGAAATGACCGCGTATCCGGCCAAACCCAGTTCAACG  
CGGTGACCTACTCTCAAAAAGATGGCTGATGAAAATTCAGGTCGCGCGAAGCATGGCGAAAACGATTAATTTGATCTG  
AAGAAAATGACTCTGATACGCTGAATCTGGCTGGTTTTAACGTTAACGGTAAAGGTTCTGTAGCGAATAACAGCTGCGAC  
AAGCGACGATTTAAACTGGCTGGTTTCACTAAGGGCACCACAGATACCAATGGCGTGAACCGCTATACAAACACAATTA  
GTAATGACAAAGCAAAGCTTCCGATCTGTTAGCTAATATCACCGATGGATCAGTGTACTGAGGAGGGGCAACCGCT  
TTTGGCTGGCTGCAAAAGATGGTTACACCTATGATGCAAGTAATACTTATAGTTTGGTGCAGATGGTGGCGGATTC  
AGCGAAGACGTTAAGCATATTAATCAAACACCGGTGATTCGTCGAGGCGACAGTACTATTTGGTGGTAAAGAGCAGA  
AAGTTAATATTTCCAGGATGAAAAATTAAGTGGCGCAGATGATAATGCGACGCTGATTTAGATAAACAGGGAACTTG  
ACAAAACGAAATGACAGTAAAGTACCCAGCGACTTGGGATGGTTTAAATTTCCAAACGAGTCTTACCGGTGCGGTTCC  
AGTTGGGGTTCACCAATTAACAATTAACAATTTCTGGTACAGTTCGCGAATGCTGTTTCACTCCAGGACGGAATTC  
AGACCTCAACAAATCTCAGATTCTTGCAGGTGGTGCATTTGCGGCTAAGGTAAGTATGAGGGAGGCGCTGTACAGAC  
ATTTTGGTAGCAAGTAATGGAAACATAACAGCGGCTGATGGTAATGCACTTTATCTTGTGACTACTGGTGGATTAC  
TACAACGGCTGGAGGAAATACAGCTGCTTGGTTAGATAATTAATGCTAACAGTAAGGATGCTTACCTAACCTAACCT  
CAGGTACCGGCCAGAACACTGTTTATAGCACAACAGGAAGTGGCGCTCAGTTCCAGTATAGCAAAAGTACAGACTGTC  
AATGTCACCAACGCATGTCAGTGCAGGATGGCAAAATTCGACAAAAGCAATTTTACCATTGATATGGCGGTTAC  
AGGTTCACTAACAGTTCACAGTTCCAATGGGGATGTGAAAGCTGCTGCAAAATGCTGATGTTATGTGCAAGATGGTGCAC  
TTTACGCCAATGCTACAAAAGATGTAACCTACTTTGAACAAAAAATGGGGCTATTAACCAACAGCACCAGGTTACCATC  
TATGAAAACAGCTGATGGTAAAGTTAAACAAGAAGTACTACTGCATCCAGTTCACCGCGGATCCCTGAAAAGCTCTGGA  
CGAAGCCATCAGCTCCATCGACAATTCGTTCTTCCCTGGGTGCGGTGCAGAACGCTGGATTCCGAGTCAACAAC  
TGAACAACACCCTACCAACCTGTCGAAGCGCAGTCCCGTATTCAGGACCGCGACTATGCGACCGAAGTGTCCAACATG  
TCGAAAGCGCAGATTATCCAGCAGGCGGTAACCTCCGTGCTGGCAAAGCCAAACAGGTACCGCAGCAGGTTCTGTCTCT  
GCTGCAGGGTTAA

>Cluster\_34503

ATGAAACTACGAACCTTTTTCGCGACTATACGGCAGAGTCCGCGCTGTTTGTGCGCCGGGCGCTGGTCCGCTTTTGGG  
GATTTTGTGCTGACTGACCGGCTGCTATCGCCAACCTGTATAATCTGCAAAATGTTTCGCTTACCGACTACCAGACCCGCT  
CTAATGAAAACCGCATTAAGCTGGTGCCTATCGCGCCAGCCGCGCATTTATCTACGATCGTAACGGTATCCCTCTGGCC  
CTCAACCGCACTATCTACAGATAGAAATGATGCGGGAAGAAAGTGCATTAACGTCAGCAACCGCTGGAGCTTTTGGCGAG  
CTGGGTAGATCTGACCGATGACGATATTGCTGCATTCGAAAAGAGCGCGCACGTTTACACCGTTTACCTCTATTCGG  
TGAAAACCTAACCTGACCGAAGTACAAGTACGTTGCTTTCGCTCAATCAGTACCGTTTTTCCGGGTGTCGAAAGTTAAAGC  
TATAACGCTGTTACTATCTTACGGTTGCGGCTGACCCAGCTCATCGGCTATGTGTGCAAAATCAACGATAAAGACGT  
CGAACCGCTGAATAATGACGGCAAACTGGCCAACCTATGCGGCAACGATGATACTGGTAAAGTGGGCAATTTGAGCGTTACT  
ATGAAGATGCTGCAGCGTACAGCCGGTATGAAAGAGTTGAAGTAAACAACCGTGGGCGGTTATTCGCGGTTAAAA  
GAAGTACCACCGCAAGCCGGACAGGATATTTACCTGACGCTGGATCTCAAACCTCCAGCAATATATGAAAACGCTGCTGCG  
GGTAGCCGCGCAGCTGTGGTAGTACCAGTCCGCTACAGGTGGGGTGTGGCGCTGTTTCCAGCCTAGTTATGACC

CAAACCTGTTTGTGACGGTATCTCCAGCAAAGATTATTCGCCCTTGTGTAACGATCCGAATACACCGCTGGTGAACCGG  
GCCACACAGGGGGTTTATCTCCCGCTACAGTTAAACCCATGTGGCGGTTTCGGCATTGAGCGCGGGGATCAC  
GCCAATACGACGCTGTTTGACCAGGCTGGTGGCACTGCCAGGTTCCGAAAAACGTTATCGTGACTGGAAAAATGGG  
GCCACGGGCTCTGAATGTCACAAGATCGCTGGAAGAACTGCGGATACCTTCTTCTATCAGGTGGCCCTACGATATGGGG  
ATCGATCCGGTACTCGGAGTGGGTAATTCGGTTATGCTTACACCGGATTCGACCTGGCGGAAGAACGTTACCGG  
CAACATGCCTACCCGCAATGGAACAGAAACGCTTTAAAAAACCGTGGTATCAGGGTACACCATTCGCGTTGGTATCG  
GTCAGGGTACTGACAGCGACCCAAATCCAGATGAGTAAAGGCACTGATGATCCTGATTAATGACGGTATCGTGAAGGTT  
CCTCATTTGCTGATGAGCACCGCGAAGACGGCAAAACAGGTGCCATGGGTACAGCCGATGAACCGCCCGTCCGGCATAT  
TCATTCGGTACTCGGAGCTGGCGAAAGACGGTATGATACGGTGTGCTAACCGCCCTAACGGTAAACGGCATAAATACT  
TTGCTAGCGCACCGTACAAAATTGCGGGGAAATCCGGTACCGCTCAGGTCTTCGGTCTGAAAGCGAACGAAACCTATAAT  
GCGCAAAAATTGCGGAGCGTTTACGTGACCACAACTGATGACCGCCTTTCGCCATACAACAAATCCGCAAGTGGCTGT  
CGCCATGATTCGGAGAAGCGGTGGTGGGGTCCGGCGTGGTACACTGATGCGCCAGATCCTCGACCACATTTATGCTGG  
GTGATAACAACACCGATTCGCTCGGAAAAATCCAGCGGTTGCCGACGCGGAGACCAATAA

>Cluster\_7212

GTGAAGGCGAACTTCACGCTGAGCGATGGCGACAAAGCGGTTACTGATGCCGATGGCAAAGCGAAAGTACCGTGAAGG  
TACAAAAGCAGGCGCTATACCGTGACAGCATCGATGGTTGGCGGTAAGAGTGAGCAGTTGGTGGTGAACCTTTACTGCGG  
ATACGCTCACTGCCAGGTTAATCTTAACTTACCGAGCAATTTCACTGCCAATAACATTGGAATGACCAAGTACAG  
GCAACAGTACTGATGGAACCGCAACCCAGTAGAAGGTATAAAAGTTAATTTCCGTGGAACCTCCGTACGCTAAGCAG  
CACCAGCGTTGAAACGGATGATCAGGTTTTCGCTGAAATTCCTGTGACAGCAGCGAGGTCGGACTAAAAACAGTTTCAG  
CCTCTTGGCAGATAAACCTACTGAAGTCTCTCGCATCTGCAATGACTGAATGCCAAGGTAGATGTTAATCTGCGCAGTAA  
AGTACAGGAGATACTGAAGGTGAGTCACTGGTGCACAAGCATAGCAGTTAAAGTCAAGTTAACGACCAAGTTGGCAA  
CCCGGTGACGCATCAACCGCGACATTCAGTGCAGCGCATCCGCAAAATGATCATCAGCCAGAATACGGTCTCTACTA  
ATACGACGGGAGTAGCCGAGGTCACCATGACGCTGAAAGAAACCGGTCGTATACTGTAAAAGCATCCCTAGCGAATGGA  
GCTTCACCTTGGAACACACTGGAGGCTATGATGAAAACTCGACTGACACTAGTCCAGTCCGCTTATCGGTTGCTTCC  
TAAAGCGCTACTCTGACGGCAACGCTAACCTTGCAAAATGGCACTCCAGTGGAGGGTCAAGTCACTACTTTAGCGTAA  
CGCTAGAAGGTGCGACGTTAAGTGGCGGAAAGTGAGAACCACTTTCAGGTGAGGTCAGTCCAGTCCGTTGACAGCAAT  
AAAGTCGGTACATATACGGTACTGATCGTTCATAACCGGCTCACAATACAGACACAGACAACCGTGAAGGTTACTGG  
CAACCCAAAGCACCACACATGTTGCTAGCTTATTCGCTGATCGCTGACATCGCCGCCACCAACAGTGAATTAAGTACCT  
TAAAGGCAACGGTTGAGGATGGCAGTGGTAACCTGATCGAAGGCTCACTGTGTACTTTCGCTTAAAAAGCGGCTCCACC  
ACATTAACGTCATTAACAGCAGTACCGATCAAAACGGAAATCGCGACAACAAGCGTGAAGAGGAGCGATAACGGGGAGCGT  
CACTGTAAGCACAGTCAACAGCGAGGTGGAATGCAACAGTAGATATATCGCTAGTGGCAGTCCAGCAGACGCTCCG  
AGTCACTCCTTAAGAACAACCAAGTCACTACTGAAAGGGGACTTTACCGATAGTCTGAGCTACATCTTTGTTTCGACAGT  
ATATCAGGCAATCCGATCAAAGTTTCTGAAGGGATGGAATTTGTGCAATCAGGTACAAACGTGCCCTATATGAAAATTAG  
CGCAATTGATTACAGTCAAAATATCAACCGTGATTACAAGCTACTGTTACAGGAGACGGAGAGGGTATCGCAACGCTGA  
TCCCGGATTTGAATGGTGTTCATCAGCGGGCTGAGTACCAGATAGAATTCATTAGCGGGAAACAGACCAATGACC  
GATACAGTGTGAGTGAATGGTGC AAACTACCGACAGTTCATTTCCCTTCGCGAGGATTTACCGGGGCTAATTCAGTT  
GAATAATGACAACCTTGCACCAGGAAAAACGGCGGCTGATTATTCGTTTTCAAGCTCGGCTCCTGGGTAGGCGTTGATG  
CTACTGGTAAAGTACATTA AAAATGACGGTGTATAGCAATACTGTAATAATCACAGCCCCCAAGATCCGGTGGTGTCT  
ATTTACCAACAGTTCTCTCTGAATCGGTTCCGGTGTGA

>Cluster\_997

ATGTTTGTGTGCTAGTTAATGAGCTTGTAGGGCTACCGGGTATGCCGGAACTGCCAAGGGGTGCGGTATTCATAAGGAA  
ACTGGCTCATCTGAGCATTTACAGGCGCAACAGTGCAGGTTTCAAAAACCATTTGAATACAGCATCGACTGCCCTCCCTCCG  
TTACACAACGGCGCTTACGTGAGCGCATGTAGCTCACTGATGGCAACCGCCCGCAGGAGATAACTACCCGCTCCCT  
GTAAGCGTGAACGCAACAAAAATGTTGTACAGCCTGTTGAGGCATATCGCGGTTCCGCCAAATTTGGTGAAGAGCGTCT  
GAATGCGCTTACGGAAAAATCAACGTAAGTGTGAGAAGCGCTATTGCTCTTGTCTGTGAAGTCTACGAATTAGCCAGG  
AGCCGGGATTCAGTTGTGCCAGCGCTATACGTTTTATTGTGTCGCGGTTAGCGCAGGGTAACTGGAAGAACGCTGGAA  
TCTTTGGTCACTACTGCTAATGCCCGTAAGGGAAAGAGCAACTCTGAGCGCAATTACGCTCAAAAGTTGGATAGCTG  
GTTTAAACAAAGCACAGAATGCCGCAAGCAGATTGCTGTTACTGGCACCAGGAAAGCGCGACGAAATAAAACGGGAAGAA  
TTAGCTGGCTGCCGAAATTTCTGGCGCAGTATCCTGAGCTAACGGCAGGCTATGTCAGAAGCATACGAGGATTTTGTG  
GCTGATTTGGCAGCGTCCCATGCGGACGAACCATATGCTGGAGGTGATGCCCTTCTATGATGTTGTCCGGTATGCCAT  
GAAAAAATCGCCGGAAGTGGTGAACAAAAAGGGCGGTTACCGCAGTGAATACCGTCAAGTTGAAGGATTAACCCGCG  
CGGACTGGACAGCTATGCCGGTGAATTAATGCTGGATTGGTGACGGTACCGGTATGAAGTGAATGTGCGCATCCGGTT  
CACGGCGTCCATTTTACCGGAAAGTTACGTTTGTGATCGACGGTGAACCCGGTTTGTGGTTGGCTGGAGTCTTGATCT  
TGCGGAGAACGTGTTGCTGTTGCGGGCGGATACAACAGGCATTCGCAATCAGGAAACCATTCCTGTATTACTCCG  
ATAATGGTTCCGGTGAACCGGAGATATGCTGGATAAAGAGATCGTCCGGATTCGCCCGGCTGGGGATTAACCCGCG  
ACTGGTATTCGGGAAATCCGACAGGACCGGCATTTATGAGCGCTGAACCGGACGTTACCGATGCGTATAGCAAGGAG  
GTATCGCACCTATTTTCGGCAAGGGGGCTGACCGGAAATCGTTGCGAGTACTTAATCGTATCTGCTTACGCTTTAATG  
CCCTGCAACAGGACAAGCACTGAGCCCGTACGAAAGCCGCAATGCGGAGCTGCCGCTTTGGTCAAGACTGATGAG  
GCTATCCGTGAGGGGGTGGAGTGGTACAACAACCGCCCATTTCTGAATTTGCCGATGAAACCAACCGGAAACATTAAG  
CCGGCAGAGTTACGAAAAAACGCTTAGCGGAAGAAGACACTGAAATGAGTGGCTGAGTGAATTTACTACGCGCCAGAGCTA  
CGTATGAACTGGTGCAGAGTACTTATCAGCTATGACATTAACGATGCGGAGCGAATACCGTACCGCTAAGGACGG  
TAGCTTTATCTGTGAGGGATATGGAACGGCAATAAACCGCGCAGCTTTCTGTTACGGCTGAATATCACAACAACAGC  
AACGTATTAAGGAAATGCGCAAGCGTGTGAGGAAAAATACGTGATGCTGAGGATGAAGGATTCAGGTTATGAAACAA  
AAAACGATAGAACCCTGGCTGGATAATGTTTATCGCCCTGTTGGTAATGTGGTACCGTTACGCGGTTGAGGTGTGAGGA  
AGAGCATGATGATGAATACGAAACTGAGCGTGTGAATATCTGAATCATTCGCTGGATATTTCTGGAACAGAACAGACGTA  
AAAAAGCCATTTAA

>Cluster\_55577

ATGTCCACAAACATATCTCAGTCTCGGAGAACCAGAGTTTAAACCAGCGGAAGATTGAGCGTCTTCACTGAGTGTCCG  
GAAAGGTTGGACACCGCCCGCGGATCAGCGTCCCGCAATGGGCCGATGACTACCGGAAGCTGGCGAAAGAAGCTGGCA  
GTACCTCCGGGAACCTGGGAAACATCAACGGTTGAAATTTGCCCGGGTCCATGCTGGCCGCGACGGAATCGGGCGTCCAC  
ATTTATCACCGTGTGTGCTGATCCAGTTAATGAAAACCGCGTGTGGAAAACTGTTTGGTTATTTTGGCGACCTCGA  
CCCATCCCGATTTTGCCTCTGCAGCCGAAGGAAGAGCCGCTGAGCAGTTTCCAAAGAACGCATCAGCCCGTGGTTA  
GGTAAACGCGAGTCTGCTGCTAACATCTAAGGTGACTCAAAGCAGAAAGAGTTCAAAGAAGAACCATTTCTGTATAAAGCTTTT  
ACCGCGGATTTCTGGCGTGGCCGGCGCGGTAGTCCAGATAACCTTGGCGCGCTCCGATCCGTGTTCTGCTGGCAGA  
TGAGGTGGATAAATATCCGATTACCCGTGAGGGCGATCCATGCTCTGGCGGAAGAGCGAACCGCCATTTGGCCTTA  
ACTGGCTGTCGGTGGGGTGTTCGCCGACGATCGAAGATGAAAGCCGGATTGCTGACAGTTACGAAGATTCAGATCAG  
CGGCGGCTCTGTAGTTTGCCTCCATTCGGGACCGGACAGTTCCTTGTATTTCTCAAACATGTTCAATGGCCAAAAGA  
AGGTGATAAGCACTGACCAAGCGCCATGATCCATTTGTAATGTTGTTGGTGTGGTGGTCCAGAGGTTGAGCGTCTGC



TGCCGCTGCAGAGTCTCAAAAAGTGTGCCGCTGCAGAGTCTCAAAAAGCGGGCAGCTACCAGTGCCAGTCCGCGA  
AAACGTACAGAAACAATGCGGCAGCGTCAAAAATCTGCAGCCACTTCTGCATCCGCGCGACCACAAAGGCGTCAGAA  
GCTGCCACCTCGGCACGGATGCGGCGGCTCAAAAGAGGCGAGGAAATCATCAGAAACGACGCATCATCAAGCGCCAG  
TAGTGCCGCTTCCGCGCAACGGCGGCGAGGAAATTCGCGGAAAGCGGCAAGAGCTCCGAGACGAACGCCAGGCTTCTC  
AAACGGCAGCGGACAGAGTGCCTCAGCTGCGGAGGCTCAAAAACAGCGGCTGCGTCTGCTGCGAGTCCGCGAAGC  
AGTGCCGGGCGAGGCTCAGCCAGTGCCACCGCCCGGAAAAATCGGCAGAAAGTGCCGCATCGTCTGCTTCAACAGCCAC  
AACGAAGGCTGGCAAGCCTGAACAGGCCAGCGCAGCAGGAGTCTGCTCCGCTGCGAAGACATCCGAAACGAACG  
CGAAAGCGTCCGAAACCCGTGCAGAATCTCAAAAACGGCAGCGCATCGTCCGCCAGTTCGGCAGCGTCAATCGGCATCA  
TCTGCGTACGCTTCAAAAGATGAGGCGACCAGACGGCTCAGCAGCGAAGGGCAGGCCACGACGCATCCGCGAAGC  
GACAGAGGCGAGTGGCAGTGCGACGGCGGACACAGAGCAAAAGTACGGCGGAATCCGCGGCAACGCGCGCCGAGACAG  
CGGCAAAACGGGACAGGATATTGCATCCGCGTGGCGCTGAGGATGCAAGTACGACGAAAAAGGGGATAGTACAGCTC  
AGCAGTGCCGCAACAGCACTCCGAGTCACTGGCGCAACGCCAAAAAGCGGTTAAGGCGGTAATGGGTGAACGAACAA  
GAAAGCCCTTAAATAGTCCCTGCAGTACCGGAAACGCCAAACACCAACTGCGCGACAGGGAAACGAATAATACCCAAA  
TCGCAAGCACGGCTTATGTTATGGCTGCGATCGCTGCCCTCGTGGACTCGTCCGCTGACGCATGAATACGCTGAACGAG  
CTGGCTGCGGCGTGGGCAACGACCCGAATTTTGGCACCACATGACTAACGCCTTGGGGTAAAGCAACCGAAAGATGC  
CACCTGACGGCGTGGCGGGTTGCTACTGCGGCGAGCAGGTTCCGATTTTACGGGGAATGATGTTGCCAGTCTGG  
CAACCTGCAAAAAGTTGGCGGGATATTCTTGGCAAACTGACACCGTGGCCGCTTATCGAATACCTCGCTCAGGAA  
ACGGTAAACAAGACTGGTAACTGCTTACGCTTCCGGCGATAAAAATGACCGGAGAACGAAAAATGGCACGGTGAATGC  
GCTGCGAATTTTCAATGATGCCCTTCGGTCTTATTTCCGCTCGTTCAGAAAGATTTTCTTCAATTTCAATCCGACGGCTGAAG  
GACAAGGCGAAACGGTGAATCGGCCATTAAGGCCATTCGCTATAAACTGAGAACAGGTGCTATATCTGTCAGCCAC  
GGGCGCAAAATTTGATGGTGGCTGGCGCTTGGTACAGATAACGCACTGGGCGGTAATTCATTTACTCTCGGAGATAACGA  
CACTGGTATTAACAGGGCGGCGAGGCTGCTTTTATTTATTAATAAGGACAACTGGCATTTGGGCTTCAACCCGCA  
CTGCTGATTTTATAAGCGGTTGCATATATTCATCAGGAAATAATTCCTGATGGAAGTGGCGCATTTGCAGACCGATTG  
AATAATGCCACCAGCGCTTTTGGTTCAGACGCGATTGCTGGAATCCACTCCGTTGGTGGTCAATGACGTCCGATGTTAA  
GGGCTTGTCCATTCGCAATGGACAGGGCTATCCCGCGCGGTCAGCTTTGGGTATTTACTGACAGAACAGTATGGATTT  
CGGTTCCATGATTCATATGCGTGGCGATGGCGGTAATAATGCTTTATGGCAGTTTAAACCGAACGATAAATCCTTTAT  
TCACCGGGTGTCTTATTTGGGGTGGCGTCCGTTATAACCCGATGGAATAATATTTGGTGGGTGCTGGGTTCAAACCT  
AAATGATTACCTGAAATGTTCTTTTATCAGAAATGTCGCGTCTGGGAGGCGAGGTTCTGACACATATATCGCGGAGG  
TTTGGCAACAGGTAATGGTCAATGACAAACAGGATGCAAAATATTTGGTGGGTTGATGGAGATGACTGGATGGTGTCA  
CGACCACTACAAAATACATTTCTGGTAACTGGTATAACGTTGAACAGGCATAG

>Cluster\_35572

GTGCAGATCAAGACTCTGTCATCACGGTACGCAGACTCTATAATGAATATTTGGTAATGGCACAGTCAATATTTCCAA  
TAATGGACTGATTAATAACAAGAATATTCATTTGGTGGGCGTTCCAGGACGGTCCACGGTGTGTCACGTCACCGATA  
AAGGGCATTTGGAATTTCCCGGAAACGGGCGAAGCTTTCCGCTATATCTATATCGGTGATGCTGGCGACGGTGAACCTAAT  
GTCTCGAGTGAAGGCAAGTAGATTTCGGGAATTAACCTGCGGGGATGAAAGAAACAGGCACAGGCAACATTAATGTTAA  
GGATAAGAACTCCGTTATCACTAATCTCGAACTAATCTTTGGTATGACGGCCACGGCGAAATGAATACTCAATACAGG  
GGCTTGTGTCAGCAACGGAGGAAGTTCACCTCGGTTATGGAGAAACCGGCGTCCGGAATGTCAGCATCACACGGGGGA  
ATGTGGGAGGTCAATAAGAAATGCTATACACCATTGGTGTGGCGGCGTCCGAAACCTCAATATAGCGATGCGCGTAA  
GTTCTGATCGCAAAATTAATTTTGGGCGATAAAGCACTCGGTATCGGCACACTGAACCTGATGGATGCGACATCAT  
CGTTTCGATCTGTGGTATCAATGTCCGTAATTTGGTACGGGTATCGTAAATGTGATGTAATGGTGCACCCCTTAATTC  
ACGGGCTATGGATTTATCGGAGGAAATGCTCCGTTAAGGGGATAGTTAATATTTCAACGGACAGTCTCTGGAATTTAA  
GACATCATCTACTAACGCACAATGTCTACAGGTCGGTGTATTAGGCACGGGTGAACCTGAATATACACCGGAGGATAG  
TTAAAGCGGCTGATACACAGATAGCTCTCAATGACAAAAGTAAAGGCGACGTGAGGGTGGATGGGCGAAGCTCTCTTCT  
GAAACATTCATATGTACGTAGGACATCTGGTACGGGTACGTTAACCCCTGACGAATAACGGTACGCTGAATGTGCAAGG  
TGGAGAAGTTTACTTAGGTGTTTTGAGCCTGCTGTAGGAACGCTAAACATTTGGTGTCTGCTCAGGGTGAAGCGCGGCG  
ATGCGGATTTATACCAATGCGACGAAAGTGGAGTTGGTCTTGGCGAAGGCGTTTTTGTCTTAAATCATACCAATAAC  
AGTGTACCGCGCTACAGGTTCGATATGCTGATTACAGGTGACGATAAAGACGGAAAGTATGATGATGACAGCCATAC  
GGTGTCAATGCAGGGAATACTTATAGCGGTAACACGCTGGTCAATGACGGCCCTCCTGACCATTTGGTCTCATACGGCAG  
ATGGGGTAAACGGGATGGGGTCGAGTGAAGTAAACCATTCGAAACCCCGGTACGCTCGACATTCGCAATCAACGAACAGT  
GCAGGAGATTCACGCTGACCAATGCGCTCAAAAGGCGATGACTTGTATGCGAGTGCAGTGTCACTCCCGCAAGATGTT  
TGGCTTTTACCCTGCAACAGGGACTGAATTCGCGGGTGTGTCGCAACTGAAAGACAGTACCTTCACTTGGAAACGCGACA  
ACACCGCTGCGCTTACTCACGGATGTTGCGAGTCTGACAGTGAATAACACATCGGTAAACGTTGGGAGAGCAATCCAT  
GGTGGACTGGCCTGAATGGCGGTACGCTCATTTTTCGATACGGATATTCCTGCTGCGACGCTCCGCGGAGGATATATCAG  
CGTTCGATACGCTGGTGTGCGGCGGAGTACTACACTGGAAGGCGGTAATCATCAGGTAACGGGACGGGCGGCGAGCTGC  
TTATCTGACGTCCCTAAACCGTGGAAATGCCATGCGGAAATAACCCCTGACGACGCTCAATTTGCTGGAACAGCAGT  
AGCCATGTGCGGCTTCAACTGGTGAAGGCGAAACGGTATTGGGTCGGGTGGTCTATTACGTTACGTTGATTTACAGGG  
CGACGAGGTGGAAGCGGCAAAAACGTTACACATTTGCGCAAAACGGAACGGTGGTCCGCGAGGGTGAATATGGATTCGCG  
TTAGCCGAACATGGCGGACCTATGGCGCAACGGCCGATATGTCGGCAAAAATCGGGTGGTGAAGGGGATCTGGCAATCAA  
TACGGTGCAGAGTTTCCGCTTCCAACGGTCAGAACGACTATCAGGGGGCAACCTACGTTGAGTGGGGACATTTACGTA  
CCGATCGGGATGGTGCATTTGGCAACACCGGGAACTGAACATCAGCAACCGGCCATCGTGCATTTAATGGATCGACG  
CAGACGGTAGAGACATTCACCGGCGAGTGGGTTGACGTTTGGTTCAAAGAGGGGGCGCTGACGGTAAATAAAGGTGG  
GATCAGTCAAGGTGAACGACAGGTGGCGGAAACCTGAATGTTACAGGGGAAACGCTGGCTATCGAGGGGCTTAAATGCAC  
GCTACAATGCGTTAACACGACTTACCCAAATGCTGAAGTCAAGCTCGATAAATCTCAGGGGTTAGGCAGAGGAAATAT  
GCCAATGACGGTCTGTTAACGCTAAAAACGCTGACTGGCGAAGTGCCTAATAGCATAAGCGGAAAGGGTATCGTGAGCGC  
AACCGCAGGACAGATGAGATTGGATGGCGATAAAGCCGCTTTGTTGGGGCAATTAACATGATACAGCAGCGCCG  
TCAGCGTCAACGAGCAGAAAACCTGGGTGATGCTTCCGTTATCAATAATGGCTGCTCACCATCTCCACTGAGCGTAGC  
TGGCGGATGACGCACAGTATCAGCGGTAGCGGTGATGTGACAAAACCTGGGTACCGGGATCCTGACTCTTAAACAACGATTC  
CGCGGCTATCAGGGTACGACGGATATCGTGGGGGGAAATGCTTTCCGTTCCGACTCTGCCATTAATATGGCAAGTCA  
ACACATTAATATCCATAACAGCGGTGTGA

>Cluster\_25052

ATGCGAAACATTTGATCTTATCCGTCAGGTTATCTAGTGCCTGAAAACAACTGGCCTCATGTGCTGGGCTGCCTGAACAT  
AAATGTCCTTACTCTCCGCGCGTCACTGCTCCCTGCCCTGCATGTGGGGCAAAAGATCGATTCGGGTTCCGATGACAACG  
GGCGCGGTAGCTTTCATCTGTAATCAGTGCAGCGCTGGTATGAGGCTGGATTTAATTAACCGGTAATAACGACACACA  
ACAGAGGCGGCGCTTCTTGGCGCTGATGTTCTGGGTATTGATTACCGGCAACGGAAACACCAGAAGCCACGACCGAGAA  
ACGGGAACAACTGGAAACCGAGCGCCAGCGACGCGAACAGGAGCGCTGAAAAGGGCAGAGAAGGACGAACAACAAAGC  
GGATACGTTTCCCGCTCAGTTTGTATGACATGCGCAGAAAGGCTGTAAACGGCAAACTGATTTATCTGGTTGCGAAAGG  
GTAGGTGATTTTACATTTCCCGTGTGGCCGATGGATCTCTGTTGCTGGCGTGGTGGATAAATCCGCGCAGTAAACAGC  
AGCACAGACTATTACCTCATGTTGAAAAAGACTCTGACAGGTTACGAAAGCGAGGGGATATCACGCCATAAAGC

CACCAGAAAACAACAGAGCATCTTAATCGCAGAAGGGCTGGCAACGGCATTATCTGCCCATTTAATGCGTCCAGAGGGC  
CTGACAGTGGCGGCGATTGATGCCGGGAACCTGTTATATGTGCGCCAGTACTGCGGGATAAAATTTCCCTTCAGCACAAAT  
CATCATTGCTGCGGATAACGACCACAGCGAAGGAGACAAAACACGGGGAGAATAGCAGCAGAAAAAGCAGCTTTATCTG  
TTTTCTGGATGGGTGGCATTACCCCGACAGATCACAAACGAGACTGGAATGATTACCACAAAAACACGGCATTAAATGC  
GCCACGAAGCGTTCAATAAGTCAATGTACCAACACAGGTAATGGCGTGAACAGGAGCCACAGACCATTTAGGAGAA  
CGATTTTAAAGTTATGGATACCGATCCACTGAAACCAAGAATAGAAAGCCGCGAGGATGGTATTTATTTGGGTATCTCCGA  
GAGCTGACAGCCAGAGTGGAGAAATCATCAATAACGAAAGCTGGTTATGTTCTCCGTTAAGCGTTATCCGTTACGCGA  
GACGATAAAGACCAGTATCTCATTCTTCGCTGGCTGTCTGGTTCTGAAACGCCGACAACCGCTGCCATTCCACTGGC  
TGATATTTGGTGAACGTGAAGGATGGCGCACACTTAAAGCTGGTGGGTAAATGTCACGACAAAAAGCAGCCTCAGAGCAA  
TACTGGCAGACTGGCTACAACGCAGTGGCTCTCGTGAATTGTGGCGTGTGCTCATGCCACTGGCTGGCAATGCGGAGCG  
TACATCATGCCTGATGGGAAATCATCGGAACCTGAAATCCTGTGCTGTTTACGCGGGAGAAGCTCAGCCGAGCCGG  
ATATACCGTCTCAGGGAGCGAGAAAAGCTGGCGTGATAACCTGGCGGCTGTCTCCTTTGGTAACTATTCAATGATGACCG  
GGATCGGCCAGCATGGCAGCGCATTTGATTGGCTGGTGGCGCTGACGGGTTCCGGCATTCAATTTCTATGACGATCG  
AGCGCAGGTAAGACCACCACGGCAACCTGGCGAGCAGCTTATACGGCAACCTGATTTACTGCGGCTGACGTGGTACGG  
AACCGCGTGGGGCTGGCAAAATGAGGCCGCCCAATGACGGACTAATGCCGCTTATGAAGTTGGTCAGGGCGCTG  
ATCCTGTACGCTCTCACAGCTGCCTATGCGTTATTTAACGGTGTAGGAAACTGCAAGGGCTAAAGATGGTGGAAAC  
CGGCATCTAAAACCTGAGCGTACAGTGGCAATTTGCGCAATTCGAGGAGAAATGGATTTAGAAACATTTATCCGCGGCG  
AAAAACAAAGCCGGGCAACTGGTGGACTGCTGAATATTCGGTTGAGTAAAGCAGTACGCTTTCACGATTACCAGAACG  
GAAAACAGCACGACGCACTGAAAGACGCTTACCAGCATCACACGGCGCTCCGGGCGTGAAGTGGATTAATGGCTG  
GCAGACCACGCAACAGGCTATTAACCCGTTCTGACTGCGAAAGCAGATGGAGAAGCCTGATCCATCCGATTATGG  
TGACAGGTTTACCGTGTAGCCGCGCATTTGCCATTCGAGGCGCATTTGTTGTTAGCGGAGGTTGTAACAGGCTGGG  
ATGCTCAGACATGCCGTGATGCGATACAGCACAGCTATAACGCATGGTTGCGCGAGTTCCGGCACAGGTAACAAAGAGCAT  
CAGCAGATTTATTGAACAAACGGAGGCATTTCTTAAATGCCTATGGGCTTAGCCGTTTGGACCAATTTCCATACAGCCCGC  
AGATTTGCCCATCAAAGATTTAGCCGGATACCGTCAGCTGAGGAAACATGACGAAAGCCAAATGTTTCTACACATTTCC  
CGGCCACATTTGAAAAGGAGATCGCATGTGGTTTCAACGCAAAACAGTTTGTGAAGTGTGAAAAAAGCCGGGATGCTA  
ACCCACCAACAGCGGTCGTGGATACCAAGAAAATCACACGATTTAGGGACGACAAATAAACGTTTATGTACTCAA  
TTACCAGCCAGGAGATTATAACTCATCTGAAGAATGA

>Cluster\_27887

ATGATCATCCACTTACTTTAAATGGCGCGCTCAGGAGCTAACCGTTAATCCAGGCGAAAACGTGCAAAAGCTGTTGTT  
TAAATGGAATGCACTCTGTACGCAACAGTATGATGTTTGGGTTTGCCTGTTGACGCAATTAATCTTTAACGGTA  
ATATCGTTAACCGCTCTTGTATCGCCGACAGTTAGAGAAGGAGATATTCGTACCGCAGAATCTCTGGGCAATGG  
AATGAGTTAAGTCTGGTTCAACAGGCCATGGTTGATGTTGGCGTGGTGCAGCTGTTTATAACGATCCAGCTGCGGCT  
GATTATCACCGATCTTCTCGATCGCATCGACGCACCTACCCGGAAGAGATCGACGACGCGCTCTCAGGTCGTTTAGCC  
GCGATGACAGTTGGCAGCAATACTATCAGGTCATGAACTGGCGGTTGACGCAAAAATAATCCGAGGCCACCATTTGAT  
ATCGCTCCGACTTCCGTCAGCAGCTTGAAGTCATGGCAAGCATTTCTTAAACTGATGCCGCAAAAATGGTGCAGGC  
AAAACCTGCTATGTTGAAGATCGCGTAAACGGCTGACGCTGCGTCAATTAATAAGTTACGTAGCCACACAGCTCAGCAC  
TGATTACTCATCTGGATGTGAGCAAGCTGAAGCCTTACCCGGGCTCGTTCACGTTATTTACTCACCTGAATTGCCGGAT  
ATTTACTATACCCGTTGGTCAGAGCGCACCGGAAACCTCACCGCTTACCGCGCAATGTTCCGGCAAGAAAATGGCTCA  
CGTCGGCGATCCGCTGCTGCGGTAGTAGCCGAAAGTGAAGACATTTGCGCTCGAAGCAGTGAAGCTCATGACGTTGAA  
ATGAAGTGTCTAAGCCGGTAAATGTCGATTTGACGAGGCAATGGCGGAAAGATGCGCTGTGTCGATGAACCGGTGGTG  
TATGTTGCTGGTGACAGATATCTGGAAGAGATAACCGTCATGCAATCCAGCGCGGAGCATATGATCATCAACTT  
CCCCATCGGTTCTCGCCACGCAAAAATATCGCTGCCAGTATTCATGGTCATATTTGGCGATATGGACAAGGCTTTGCC  
ATGCGATGTGATCTGAGCAACCTATAACTCAACGAGCGCAGCAGTGCCTGACGCAACACATATCTGCTTTACC  
CGTATGGACGGGATCGTCTGGTATCCAGCCTCCACCCAGGTACCATGGCACTTACGCGCCAGGTCGCGGCGCTCGT  
GGGATGAAAACAGCATAAAGTTCATGTCATTAAGAGCGAGTTGGCGGCGGTTTGGTTCCAAACAGGACATCTGCTGG  
AAGAAGTGTGCGCTGGGCAACCTGCGTGACCGGGGCTCCGGTACTGTTCCGCTACACCCGTGAAGAAGGTTTATTGCT  
AACACCTCTCGCCACCTGCGGAAAGTCAACCTCAACCTGGCGGCAAAAAGATGGTGCCTGACCGCAGTGAACCGTGA  
TTTTCCGCGCAACACTGGCCCTTACGGCAACCACTCACCTACCGTACCCTGTAACGGACCGGCGCTGTGCTGCCGTTAT  
ATCCGTGCGATAACGTCGATTTCCAGGTCACCACTACTACAGCAACATTTGCCCAAAATGGTGCCTTATCAGGTTATGCC  
GCACCGAAAGGTAACCTCGCTATCACCATGGCATTAGCGGAACCTGGCTGAACAGTTACAGATCGACCACTGGAATTA  
CGAACGTAACCGGATACGCAAGGGCAAGAGCTGAAAATTTCTCGGTGCAATCGGTGAAGGTAAGCGCCGACCTCCGTT  
CTTCCGCGCCAGCTGCGCACTGGAAGAGATCCGCGTCAAGGTCGCGAGATGATCCAATGGTCTTACCAAAACCACAA  
AACCGTACTGGCACATCGGTCGTCGCGCTGCGCATTATCATGCAAGAAATCAGGGATCCCGGATATCGATCAGGCTAAC  
CATGATCAAACTGGAATCAGACGGTACCTTTATCGTTTCTTGGCGTGGGATATTTGGTACTGGTCTGGATACCGTGG  
TGACGAAACTGGCAGCAGAAAGTGTGCACTGCCCCCGCAGGACGTTGTTATCTCCGCTGATACCGATACCGGTTG  
TTTGATAAAGGCGCATATGCTCGTCCGTTACTGCTTCTCGGTAACCGGCGGCTTTGGCAGCAGAAAATCTGCGGGA  
GAAAATTTCTTCCAGGTCGCAAAATGTTGGGTGAGCAGTGGCAGATGTTCCAACTAGCAACGCCGGGCGTCTACGGC  
GCAAGAAAGCGAAGTGTAGTTTTCGGGATATTGCCATAAAGGCAACCGGCAAGGCTTTGGTTCACTGGTGGGAACT  
GGCAGTTATATCACGCTGATTTCCGCTTCCCGTATGGCGCAAACTTTGCTGAAAGTTGCCGTCACACCGCGTGAAGT  
AATCCGCTGGATAAATTTACGCTTGTGATGCGGTACACCGGTCATCCAGAGTTAGCGTTAGGACAAATCTACG  
GTGCCACCTTCTGTCAATCGGCCACAGTATGAGCGAAGAAATCATTTATGACGCCGAAGGTCACCCGTTAACCGGTGAT  
TTACGCAAGTTACCGCGCACCGAAAATTTGGTACACTCCGCGTATTTCCGCGTGTGCTGGTGGCAGCGACGATAAAGT  
CGGCCATTTCCGGGCAAAATCGATCTCGGAAATCGGTGAAAATGGCGCGCTCCGGCGATGCTACCGCAATTCAGATG  
CCTGCGGCATCTGGTTACCGGAATGGCATTTACACCGGAGAAAATATCACCGGCTGGAAAAAATAA

>Cluster\_66934

ATGCCGCTGATATCCGATACCGCACCTGGCTTCCGCTGCCTGCAGATGAAATAGAAGATCTCAAAACAAGCGCATCCCC  
GATGAACGGGCACACACCCGTCCTTGGGATAAAGAGCACAACCTGTTGTTGGCCGCGGGGGGGACCTGTCATGC  
TGGACCGTGGCTGCCCGACCGAGGAAGTCTCCATGACGGCAGTATCCGCTCACCGAGTTGGCCAGGTTACTGGAA  
AATGCCGGACTGGTTCTGAAAGAATGCCGGCATGGACGGTAAATCCACCGGTTCCGACCACCGGTGACAAAAACGG  
GCAAAAAGTGGCGCATATCGCGCTTCCGCGGACGACCTGCCGCGTCCGCGTACAGGATTTATCGCAGCGGATGAT  
CGCCGGTCAACTGGACCTTCTCCGGGGAGAGCAGACAGATCCCGCGCAAGGCTTCACTGAAAGCGCATTCGCTGCAA  
CGCAGGGAGGACGACAGCGGGAACGAAAGCAGTACAACAGACAGCCGCTATGCCCGCGCTATGTCACAAATG  
GCCGACGGCCACGCATGAATACCTGACCCGAAAGCACTTCCAGCTGCGCGGGGTGCGAATAAACAACAAAATG  
AGCTGTTTATCTTTCCGCAACCGTAACCGCGCAACCTCACTACCAGCGCATTTCCGGTACCCGCGGGAAGGATGCC  
CGCATCTGAAAGATTTCCGAGAAAACCGGTAACGTTTGGCTGGGTACACCGCGCAACGGCAGCCGGTGTGTTTGC  
CGAGGGCTATGCCACTGCCGCTCCCTGACGAAAGCCACCGGCTTCCGGTGTGATGACAGTGGATCGGGCAACATGA  
TTGCCGTGGCGGAAAGATGCCCGCAAAAATGGAAGCAAGCCCTTATCTTCTGTGCGCAACAGCATATGCACGCCAG  
GTTAAACAAGGATCTGTCAGTGCACAAAAGCCGAGAACTGACAGGAGGATCGGTCATCTTTCTGCGTTCACCGATG  
CGAAAAGCGCAGGACTGACCGATTTCAATGACCTGGACGCCAGCCGGGACGGGCGCTTTTACGATGTCATCAACG



CCAGTTAGAACATATTGGGGTTTCCACCCCAACAGTAACCCCGGAAATGCGGGAGGCACCTGGTGTATCGGCAACCTC  
GTTTTTACACCGGTCACACTGAGGAAAAAACCATGACTCCGACAGAAATATCCGAAACATCACCCGGTACAGGGCAGAG  
CCATGACCAGGGACCTTCTGCGCTGCTGCCACGAGCAGGAACACCTGCTGCTTCCAGCGGTAACATGTGTGATGAAA  
CACCCGCATTTACAGTACAGCCACTGAAAAATAACGGCAAGATGAGCAGCAGCTGATAACGTTTCAGCGCAAAACGGAA  
AGCTGTAGTACAGGACCTGATGACAAAACAGCACCGGAATATCCCGGAAAGTACAAACGGCGTCTGCCCTGTAGTCCGCG  
TCATCCGGCGGAACCTCCGAAAAAGTTTCTCTGTGGCCACAGATAAAAGACTGGCGTGAATTTGAAGCCGAACCTGTAC  
AACCGAAAAAACGAGTTTACAAACAGGAATCCGGCCTTACCTGAAATACCGGCCCTGCTGCCGCCCGCCGCCCCCT  
GAAGACAGCCCCATCTGAAACCATGAATGAATCAGCCGAGCCATCACTTTCCCTGTATGCAGTCAAAGAGGAAATGAC  
CGTGATGACGGAGCTGATGACAAAACAGCACCGGAATATCCCGGAACTACTCCCGGAAAGAGGGCGTCAAGCCATGTAA  
CTGAAGACATTTCCCTTCCAGCCAGAGCCGTTCTTCTGAGTCAAGTGGCCCCGAAGAATACGAAGACTACAGCGCATAT  
CAGGAGCTGATGAAACATGAAATCCCTGAGCATCTGCAGGAAAACAGTATATGCCGTGCGAGCCGGACACAGGCCACGT  
TCAGGCAGATGAGTCAGAACTTCCAGCCACAACAGCCACTATAGAACCGGCTTCCGGATGAACCCACTCCGCGAAC  
CTGTTCCAGAGCACATCACTTCTGATAACTTTCATCGTTTCTCGACAAAAGCGCGTGGCCTTTTACCGGTAAAAAACG  
GATTCACAGGGCATGAGAACAGTATCCACGCCCTCAGCGGAAACCAGCAGCACACCGGCACCTGACAGTATTGT  
CTAGCCCCGAAACGCTGATGACCGATATCGCTCAATCTGGACGAAATCATTAATCGCTGGAAGTGAAGAACGAG  
CAGACGAAACCGCTCTGTACAACTGGATGGCAAACTGCCTTTCATTGACCGGTAACCGGCTGGAATGGTCAACGGT  
GCCAGCAATGACGATCGAGTGTCTGGTGCACCTGCTGTGGCCACTGATTTCTATGGTGGTGTCAATGGTGAAGCGG  
CAGTGTGCTTTAAGAAAAAGCGATGCACTGATCATCGAGCACAACTCAAAGTGGCGATGAAATCCCGGATCAGC  
GAGGGCGCTGAAAAATACGCAAGGAAATGGCTGTCCGTAAGGATACTGTTGTACCATAAGCCAAACCGGAACT  
AACCGGAATACCCCTGAACACACAGCAGTCCAGACCTGTTCCAGGAAAAAGAACACAAATCCCGGCCCTCCCTGC  
TGCCCTGAAAGCGTCAACCGTCAACCGCTCAGCACCCTTGCACCATACCGGCTGAACAGGCAAAACGGCAGATGTGCGC  
ACGAAGACCACAGGAAACTTCCGCCGGGAGAGCGTGTACTGCCGTAAGTGCACAAATTTGGTCTGTGTAATATGCA  
CCCGGCAAGGAGAGAGTTTCTTTGTTGAGCTTAAAAACCGCAGTGGCAGCAACTCTACTGGGGGAAACACTGGAAAG  
TCTGGTCAAAGACTCAGAAAGTGCAGTGGTACGCTGACACTTCAAGAACCGGCAACAAATTCATCTCCCGGAGAGC  
AAAAAGCAGCTTTCCGGAATAAGTGGTCCATGGAGTCACTTACCAACGGGATCTCGGTATCAGTATGATAATCCGGATA  
GGTCAAGCTATTCAGGCGATTCGGTTCGAAACCTTTATGAAAGTGGCTGCGCAATACAGCCAGGGTGGCCCGAAGAGAT  
GAAAGCGTTACGTATGCCAGAAAACGCTCGGCTCACATCTGTTTATCGGTGAGACCGACATCCGGTCTCCAGCCACAGA  
ACCGGAATCAGGTAACAGAAATAACAGCGCAGCCCTGACACTTCAAGAACCGGCAACAAATTCATCTCCCGGAGAGC  
CGTGAACCAACCTGTTACTTGTCCAGAGTGGCGATGAACATCTGCAGGGTGTGGTCCGGCTGAACGGCACATTTGATCC  
GGCACTGGCCACCCATCGGCGACAACAGTCACTGGTATCATGCTGCTGACCGACAAAGTTTACGCTTTGCAGGTT  
ATGGTGAAGCGTAAACACAGATGCTGACAGCAGAAATCGCCCGACCGGAGCTTATGAGTTCATCTGAAAAACCGG  
GAAGAACCGCTTTTGTCTGTCTACACCGCGGAAAAACAACTGATGCGTTGTACCGGAACTGGGCTTCGAGCAGTC  
ATGGCAGCAGTGGTCCAACAGCCAAAAGCCGAGGACAGGCAGGAAAAAACTGTCATCAGGATCTCTCCACAGCCCCG  
GCCGATGA

>Cluster\_27155

ATGAGACACTTTTCTATCAGGACGAAAAATCACATAAATTTGGGCGGTGAAGCAGCAAGGCAACGAGTTACATATCAG  
TTGGGGCAAAGTCCGCCTAACGGGCAAAACAGGTAAGAAAGCTTGTGATGCTGCGCGGGGAAAAAGCGGAACTGA  
AGCTGATTCGGGAGAAGGTGAAGAAAGGATATGTTGGAGCAAGCGAAGGATAATTTTTCGCACTTCCCAAACGGTAACG  
GACTCTCTCAAGTACGGACTTATCCACATTTATCAGGAACAACCTTCTTTCGATGACAGAAACCCGTCGCGTGCACAA  
AAATACAGATGCTTTTTTACCGTGGCTGGCGAAAGATAATGCTGCTGTTTTTCCGCCGAAAGTTGTACACACCGTTAA  
GTCATCGCGCTTTCCCGGAGTTCCTGTTCAGCAAGCAGACAAATGACCCAAATACGTCGCTTAGCCGTGTAGTGTGTCG  
CAACGGGATAATAAACACAGCCACATTTGACTTTCAGCGCTGTTCTTTAGAATGGCAAAACACCGTCCGCCAGGCGATCAG  
TCAGATCGACGGCTGAAAAACAACAGCTACCATCACCGTAAATGCTGTACTCACGGCACTTGAATGAAATGAAATGCAAA  
GATATAAAGAGCGTGAAGATGTTATGGATCAGATTATTCAGGAAGCGGCTGGAAATATGCTACTGATGATAAATACAT  
CTTCAACAAATATCTATTGAATGGGATTTATGTCACAAATTAATGTTTTCCTGTCGCTGGCATTACCTGATTAAT  
GCAGCAATATCCAGCTTTGAATACGCTACGTAAACATTTATCACTGGCGGAAGAGTCTCTTGGCAAAAAATGTGCAC  
AAAACTTATTTGCCCAATTTCCACATATTCAGAAATGGCGCAACCAATTAATGCTTTTGTATTAATGCTTAAAGCAAA  
ATTGCACATGAAATGCCCAGCGTCTACTGGGGCAAAAGAAATTAACCTCGCTTGTAGTGGCTAAAAATAGTGGCGACTGA  
TGAGCACATTTCTGCTCATATGAAAAATATCAGGAGCATATGCCATTTTGTATGATTAATTTGTGTGCGATATGTT  
CAGCCACCGTATTACAGGAGCAAGGTGTGAGCCCTGCCCGATTACTCCCTATGTCGCAAGTACTACTGCGCGGAT  
GTGTGCGTCAATATCAATCATCCGTTTCGATTAACACTGCTTATACGTGTAGCCGGGCATACTAAACGCTGTACACCTG  
AATGACGAAAGCTGCGCTGCGTTCCACACAGCAGCACGTCAGCAGTGGCGGAACTTCTAGTCAAAAAAGAGAGAATA  
GTTGGCGCATATGCTAATGACGATGCTTATCTCGCAACCTACTAGCAGAACAGGTCATCCCTGGCTTTCCGACACCC  
GCAGTTGCAGTGTGAAATCATGCCAGCAACACTGACACAGCCCTCAAACCATGCCAGCGCCGATCTACTGCCGCCCAT  
AGTAGTCTCCCACTAGCTTTTCGAAAAAGAAAAACCGCGATTCCGGTGGATTTAGCATAAGCACTCGAAT  
CCATATGCACAATAACCGACACAGAAGCTAAAGAGTTTCAAACCTATTGGAACGGGAACCGCATAAGCCAGGTGAAGGT  
GCTAAAAATTTCTTACTCGCTGGGGTATCGCCGCTGGGATTTGACACATAAATAATATCGCCGCTTCTGACTCGGC  
AATTGACGATGGGAACGTGAGGACTTCGCTACTCATCCAATGTTAAAGCCACATGCAACCGTACAGGGGAGT  
GGCATCTCAACTCACTTCCCTTTTACCTATGCAAAAAGCGAATTAAGCTATGGGAATTTCTCAGCAAAAGAGCCGATACC  
GCGATAAAACAGTCAATGCTTTATTTGCGACTGGCAGGTATGAGTGGTTTTCTACACTCGTTTTACAGCTACCTCAAGA  
AGGTTTTGCGGTTGCTAATTTTTCGCCAACGGAACGGCACTGCGCTGCGCCGCGCTTCAACAAACTCAAACCC  
TACGCAAAAGATGCCCGTATCTGGCTGCTGAAATACCGGAAACAGCCATTAACGGCTGCTGCTGCTGCGCTGCGCAAA  
ACCGGTGAAGCACAGGACAACGCCCGTGTGCTTGGCTATGCTTACCAGAAACGGTCACTAGCCATTGCTGCAAAAAAT  
CGCCCGCGGTTATAACAGCGCGAAGTAACCGATGCGGTGAACGCTCTACTTGGCTGATCCCTTAGATAATCACCCGA  
CAAAAAATCCCACTCTCCGACCTTTTATCAGCCATCGCTTGGACGCGCCGTTATTAAGCAAAACGCCAAATCACTG  
CCTGATAGCGCACCTCTCCCTCAGCTGAAATGCTCCGCTTCCCTCAGGAAGAGGCACGTATCCAGGATTAATGCAAGT  
GAAAGATGCTGTACCACCGACTCACTGGCTGAATTTGGCTGGGATCTGTTTACCCTGGCAGACCGCTGGCGCGCCGT  
CGAAAGAGAGTTGGGCGTCACTGCGTTAGGAGTTCTCCGTAACGATGACACCGCCGCAAACTGACGCAATTAATCCGT  
GCCTGGCTGGCGAATCTCAGCATAAACCTGCCACCGTTGGGTTGGATATCTCGCCGCTATCGGTAGTATGATCGCCCT  
GATGACGCTTAAACGATCGCCCAAGACTGAAATCAAAGCAATTAACAGGAGCGGCGAAAGAGAAAAATTTGCCGACATG  
CCGAAAGTCCGCAACTGACGGTAGCGGAGCTTGAAGATCGGTTAGCACCGGATCTCGGCTGGATGATAACGGTTCGCTG  
CTGCTGGATTTTGGCCACGGCAGTTCCAGCTAGCTTTGATGAAACCTTAAACCGTTTGTGCGCGATGTTTTCCGGCAG  
CCGCTGAAAGACTTACCTAAACCAATAAAAGCATGATGAATCACAGGCGAACGATCGGTTAACCGCTACAACCTGC  
TGAAAAAAGATGCGCGTACCGTTGCTGCCCAACAGTGGCAACAGGCTGGAATCCGCCATGTGCCGCTGCGCTGGTCA  
CCGAAAAACTTTCAGCTCTCTGTTGAGCATCCGCTGGTCCGCCACTAACCCGCTGCTGATTTGGGGGCTTTATAG  
CGCCGAAAACAGTACTGGCTTCTTTCGCTAGCGGAAAGATAACAGTACAGCACCCTGACGATGATCTTTTCAACC  
TGCCGGAAGCGGATATCTATTGGTATTTCTCAGTTTGGAAATCACCGACGATGCTGCGCCCTTCGGGACGCTT  
TTTTGCGACTACGAACTGTTACCACCGTTCGCCAGCTTGTATCGTAACAGTTACGCGTGCAGAAAGCCGAGCCACGC  
CAGCGACTGACACGCTGGACAGGCAGAAAATGCCGAGTGGTGGGTAATGGGCTGGCAATAAGGCTGGATAAAGG

GCACCCCGCAGGATGCTGGCTGGATCGGCTGGATGATCAACCCCTGGGCCGCTGGTCTTAATCATGGAATCGATGAA  
GGTTTTGGCGTAGGCATGTCGCCAGCCGAACTGAGTGGCGAGCAACTCTTAAGCAAGCTGGGCTATGGGAAGCCAAAGC  
GGAAGCTATGGCTGGGGACTAATTCAACACAGGAAGCGAGTCTCCGTACTCGATGCCATACCCGCCAGCGAGCTAA  
TTAACGATATTGAAGCCCTTTTTGAATAA

>Cluster\_39128

ATGCCAATTTCTTTATCGATCGCCGATTTTTGCGTGGGTGATCGCCATTATCATCATGTTGGCAGGGGGGCTGGCGAT  
CCTCAAACGCGCGTGGCCCAATATCCTACGATGACCGCGCCGAGTAACGATCTCCGCCTCTACCTGGCGCTGATG  
CGAAAACAGTGCAGGACACGGTGCACAGGTTATCGAACAGAAATGAACGGTATCGATAACCTGATGTACATGTCTCT  
AACAGTGACTCCACGGGTACCGTGCAGATCACCTGACCTTTGAGTCTGGTACTGATGCGGATATCGCGCAGGTTACAGT  
ACAGAACAACTGCAGTTGGCGATGCGGTTGCTGCCACAAGAAGTACAGCAGCAAGGGGTGAGCGTTGAGAAATCATCCA  
GCAGCTTCTGATGGTTGTCGGCGTTATCAACCCGATGGCACCATGACGCGAGGATATCTCCGACTACGTGGCGGGC  
AATATGAAAGATGCCATCAGCCGTACGTCGGGCGTGGTGCAGTTTACGGCCAACAGCTTACGCCTCTATTATTGCTCAGACCGCTG  
GATGATCCCGAATGAACGAAATTCAGCTAACCGCGGTTGATGTCATTACCGCCATCAAAGCACAGAACGATCCCTG  
TTGCAGCTGGTACGTCGGTGGTACGCCCGGTTGAAAGGCCAACAGCTTACGCCTCTATTATTGCTCAGACCGCTG  
ACCTCTACTGAAGAGTTCGGCAAATCCTGCTGAAAGTGAATCAGGATGGTCCCGCGTGTCTGCTGCGTATGTCGGCAA  
AATTGAGCTGGGTGGTGAAGACTACGACATCATCGCAGAGTTTAAACGGCCAACCGGCTCCGGTCTGGGGATCAAGCTGG  
CCGACCGTGCAGAACCGCTGGATACCGCTGCGGCAATCCGTGCTGAACTGGAACGCGAAGATGGAACCGTCTCCCGT  
CTGAAAATTTTACCCGATGACACCACCGTTCGTGAAAATCTCTATTACGAAGTGGTAAAACGCTGGTGAAGC  
GATCATCTCGTGTCTCGGTAATGTATCTGTTCTTGCAGAACTCCCGCGCAGCTTGTATCCGACCATTTGCCGTACCGG  
TGGTATTGCTGGGACTTTGCGCTCTTGGCGCTTTCGATAAACACGCTAACAAATGTTCCGGATGGTGGCTC  
GCCATCGGCTGTTGGTGGATGACGCCATCGTTTGGTGAAGAAACGTTGAGCGTGTGATGGCGGAAGAAGTTTGGCC  
AAAAGAAGCCACCGTAAGTGCATGGGGCAGATTACAGGGCGCTGTTGGTGGTATCGCGATGGTACTGTGGCGGTATTG  
TACCGATGGCCTTTTGGCGGTTTACTGGTGTATCTATCGTCAGTTCTCTATTACCATGTTTTCAGCAATGGCGCTG  
TCGGTATGGTGGCTGATGACTCTGACTCCGGCTTTTGGTACCATGCTGAAACCGATGCCAAAGCGCATCGGGGA  
AGGTAAAAAAGGCTTCTTCCGCTGGTTTAAACCGCATGTTGAGAAAGAGCAGCACCACTACCCGACAGCGTAGGCGGTA  
TTCGCGCAGTACGGGGCTTACCTGGTGTGATCTGATCATCGTGGTGGCAGTGGCCTATCTGTTGCTGCGTCTGCCA  
AGCTCCTTCTGCCAGATGAGGACCAGGGCGTATTTATGACCATGGTTACGCTGCCGGCAGGTGCAACGCGAGAAACGTA  
CGAAAGTGGTCTCAATGAGGTAACGAATTAATACTGACCAAGAAAGAAACAACTTTGAGTGGTGGTGGTGGTGGTGGT  
GCTTCCGCTTTCGGGACGTTGTCAGAAATACCGGATTTGCGTTCGTTTCTTGAAGGACTGGGCGGATCGTCCGGCGAA  
GAAAACAAAGTTGAGCGATTACCATGCTGCAACACGCTGCTTCTCGCAAATCAAAGATGCGATGGTPTTTCGCTTTAA  
CCTGCCCGCAATCGTGAAGTGGTACCGCAACCGGCTTTGACTTTGAGCTGATTGACCAGGCTGGCTTGGTACGAAA  
AAGTGCACCTCAGGCGGTAACCGAGCTGCTTGCAGAAAGCAGCAAGCAGCCTGATATGTTGACCAGCGTACGTCCAAACGCT  
CTGGAAGATACCCCGCAGTTAAGATTGATATCGACCAGGAAAAGCGCAGGCGCTGGGTGTTTCTATCAACGACATTAA  
CACCACCTGGGGCTGCATGGGCGGATGATATGTAACGACTTTATCGACCGCGGTCGTGTGAAGAAAGTTTACGTC  
TGTCAGAAAGCAATACCGTATGCTGCCGGATGATTCGGGACTGGTATGTTGCTGCTGCTGATGGTCAGATGGTGGC  
TTTCCGGCTTCTCTCTCGTTGGGAGTACGATTCGCGCGCTTGAACGTTACAACGGCCTGCCATCTATGGAAT  
CTTAGGCCAGGCGCACCGGTAAGTACCAGTGAAGCAATGGAGCTGATGGAACAACGTCGAGCAAACTGCCATCCG  
GTGTTGGCTATGACTGGACGGGAATGCTCTATCAGGAACGCTCTCTCGGCAACAGGCACTTCACTGACCGGATTTCCG  
TTGATTTGCTGTTCTCTGCTGCTGGTGGCTGTACGAGACTGGTTCGATTCCTGTTCTCGGTTATGCTGGTCTCGCT  
GGGGTTATCGGTCGCTTGGCTGGCTGCCACCTTCCGTGGCCTGACCAATGACGTTTACTTCCAGGTAGGCTGCTCACA  
CCATTGGTTTGTCCGGCAAGAACGCGATCTTATCGTCAATTCGCCAAAGACTTGTATGGATAAAGAAAGGTAAGGTCGT  
ATGGAAGCGACGCTTGTGCGGTGCGGATGCGTTTACGCCCAATCCTGATGACCTCGTTGGCGTTTATCCTCGCGGTT  
CCGGCTGGTTATCAGTACTGGTGTGTTCCGGCGCAGAACGCACTAGTACCGGTGTAATGGCGGGATGATGACCG  
CAACGGTACTGGCAATCTTCTCGTTCGGTATCTTTGTGGTGGTTCGCCCGCTTTAGCCGCAAGAAATGAAGATATC  
GAACACAGCCATACTGTCGATCATCATTGA

>Cluster\_59316

GTGACGGAACAACATAGCGTATTTAACAAGTATCAACGGGCACATCGAATTCATTTATTTTTAATAACGATGTCAGTAG  
CATAACAGGGTTAGTTCGCTCAATCGAATAGCACAATTAACAATGACAGCGGCATCATTTGATTTGATGGTCTGGTA  
GTGTCGGCATGCTTGTCTATAGCAGATTCACAGCAGAAAATCAGGGTAAAATTAACCTGGATTCTATGTTGGGTAGATGCA  
AATGACACTACCGCAATGCGAGATATAGCTAGCAACAGCGCCATTGACTTCGGTACAGGTGTGGGAGTTGGTACTGATAG  
TTATAGTGGTGCAGGGAATAAATGCAACAGCAATTAACCAATTTGGCGGTTGTTAATACTATTATAACCGCGGCGAGGTA  
TGGCGGCTATGGCGCCAGCAATACAGTTATTAACAGGGGACGATTAACCTCGAAAAAATGGTAATATGACGATAGT  
CTGGCAGCAAACTCTGTTAGGGATGGCTGTTTATGACGATGTTACTGCTATCAACGACCAGACGGGTGTTATCAATAT  
CAATGTTGGTACTGGTACGGGCTTTATAACGATGGCAGGAAACAATTTGTTAACTATGGTACAATTCGCACTTTCCGGC  
TGTGCCAATCGGGCAATAGTACATAAATACAGATGATTTCACTCCTCAGTATACCGGTTGCGGATACAGTATACAGCA  
AGCGGAGAACTGTAACGCTAAATAAATCTGCTGCTGACTGATAAGCTGGTGGGAATGTTGTTAATAGCGGAACGCT  
TTCCGGTGTCAAAATACCGTATCAAGCGGCTTCTTGGAAAATACCAGCGGTGGCCTATCAATAACTTAGTAAAACTTG  
ACAAGGTCGCCATTAATAAATGCCGGGTGATGACGAATAACGTCGATGTTAGCGGTGGAAATCCATAATGACCGGA  
GAAATGACTGCGCAAAATACCATGAATGCTGGTCTGATAGTTTCTGTTAGTGAACAACCGGAAACCATCAATAAATCCT  
GCAGAACCGGGGATTTCAATAATAGTGGCAGTGAACAGGGCGGATGATGTCGGCTGGCGGGTCTTTAATAATCAAA  
CTGACGGGGGATATGAGAGGTGCTGCGCTGACAGGTAAGTGGCAAAATACGAAGGAACCTGGAACTCGGAAGT  
AGTAGTGAAGGTAACAACACCGGATGCTGGAAGTTAATAAATAATTACGCTTTCAATAACCGGCGAGTTTATCTTGA  
TAACGACAAGAATGCTGTGCACATCAACAGTCCGGTACGCTTTATAATACCGGTCACATGAACATCAGTAATTTCTTCCC  
ACAACGGAGCCGTTAATAATGTTGGGGCGAAATGGTCTTTTATCAATGACGGAACGATGATGTTTCTGCGAAGTCACTG  
GTAGTCAGCGTAAATAATGCGGCGATCAGAATGCCTTCTTCTGGAACAGGATAACGGGGTCACTCACTCGATCACGA  
CAGCGCACTGCGGTAAGAGTCAACAGCAGCACTTTATTTGCCAGAAATGACGATGACGATGACGCGGACCGGCTG  
CTGTGGCTATGGAAGGTGATAAGAACGCGCAGCTGGTTAAACAATGGCACCATCAACCTCGGTACCGCAGGCACTACTGAC  
ACGGGTATGATCGGTATGCAACTCGATGCCAACGCCACGGCGGATGCGGTAATCGAAAACAACGGCACCATCAATATCT  
CGCCAAATGACTCGTTGCAATTTAGCGTACTGGTACAGTAGGTCATGTTGTTAACAACGGCACGGTGGTATGCGCGATG  
GGTTACGGCTTCTGGAATGATCAAGAGGGCGACAGCATCAATGTTGAAAGGTATGAACGTTAACAACGGTAACAACGGTACG  
GAAGTGCATTTAGCGCATAACGTTGCGGATGTCGCCAAGCCCAATACGGTTAGTGTAAACGTCGGGAAGTGTAGGGC  
TGGTGGCAGCATGAACAACCTCAACGGCTATGTCGTGCTGATACCACGTTAACGGCAGCGCCGGGAAGTGAAGGTTAACA  
ATGCCAGCATGAACCGGCTGGAGATTAACACGGGCTTTACCGCTGGTACCGCAGACACCCTGATGATTTGATTAACGTA  
GTGGAAGGTAGCAACCTGACCGCTGACCGCATCACTCAACGCTCCGTTGATGGACTGCCAAAGGCGACCGATGCG  
CAGCGGTAACGTTGACGTCACCATGAGCAAAAAATGCTTACCGGATGTTGGCAACAGATGCTCCGTTGATGACATCGCGA  
AAGCACTGGATGCGGGTTACACCAACAACGAACTGTTTACCGACTGAACTGCGGACGACTGCTGAACTGAACAGTGTCT  
CTGAAACAGGTACGCGGTAGCCAGGCGACCGGATTTCCGCGAAGCGCGCTGTAAAGCAACCGCTTTAGTATGCTGGC  
AGATGCGCGCGGAAAGTGGGTAACGGTCTGGCGTTCAACGTTTGTGCGAAAGCGATCCGCGTGGCGAGTTAGGTAATA  
ATACCGAATACGACATGCTGGCATTTGCTAAAATATCGACCTGAGCGAAAGCAGACGATGAGTCTGGAGTACGGTATC

GCTCGTCTCGATGGTGTGGTGGCGCAGAAAGCGGGTGATAATGGCGTTACAGGCGTTATAGCCAGTTTTTTGGCCTGAA  
ACATCAGATGTCTGTCGATAACCGCATGAACTGGAATAACGCCTTGGCTTACGACGTTACAACTTACAGCAGCCGCT  
CGATTGCATTTGGCAACACGAAACAAACGGCTGATACCGACGTGAAACAGCAGTACCTGGAGTTCGCCAGCGAAGGGGG  
AAGACTTTTCGAAACCGAGCGAAGGACTGAAGGTTACGCCATATGCGGGTGTAAACTGCGTACACACTGGAAGGTGGCTA  
TCAGGAGCCGAATGCCGGAGACTTAACTGAAATGAACAGTGGCAGCGAAACCGGGCGTGGACAGCATCGTCCGGCTGA  
AACTGGACTACGCAGGTAAGACGGCTGGAGCGCTAGCGCTACGCTGGAAGGCGGGCCGAACCTGAGCTACGCGAAGAC  
CAGCGTACGGCAAGCCTGGCAGGCGCAGGCAGTACGACTTAACTGCTGATGACGGTCAAGAGGGCGGGCCTCAATAG  
CCTGACAAGCGTCCGGCTGAAGTACAGCAGCAAAGAAAGTTCCGCTGAACTTGGATGCGTACAACCTGAAAAGAGGATGGCA  
TCAGCGATAAAGCGTGTGCTGAACTTCAAGAAAACGTTCTAA

>Cluster\_24272

ATGGAGAACATGACCTCGCCCGGACGCTGCTTAGTGGAGATAACCGACCTGGCTTGAAGAGTACTACCAGACTGGTT  
CGGTACGCCGGAAGAACTCCCGGAAGACTGGCGGCGTTTTTTTTCACCTGAACTGACTGTCCAAGCGTATCCGGTG  
ATAACAACGTCAGCGGTGCGACGTTAAAAAACAGGCTTAACTAATAACACTGATCAATGCCCTGGCGCACGCGCAT  
CTGCGCGCAAAGCTTGATCCACTTGGTTTGAATCCCCGGCTGACGTTCCCTCCCTCCAGCCTGGTTTTTTGGGGATTAAG  
CGAAGAAGACTTGTGACGGAATTTAGCGTACCTTTGGCGCACACACCGCAATGCCACTTAAGCAACTGCTTAACCT  
TGCTGGAGCAGCCTGGCGGGTAGCCAGGCTTATGAACTTGCATCTGGAATACTGGAATACTGGAATACTCAACTGGTTGTTA  
TCACGGATTGAGAGCAGCAATGCCCCACAGCAGATGTACAAACCTGTATTGCTGTTTTGAAAAACTGATGGCGCAGCA  
GACGTTAGAGCGTTATCTGCATACCCGTTATGTTGGGCAGAAACGGTTTTTCTGGAAGGGGGCGAAAGTGAATCCCGG  
CGCTCGATACGCTGACAAAACGCTTGCCTGGCGAAGGTGTGGAGGAAATGGTCAATGGCATGGCGCACCGGGGAAGACTT  
AATGTTCTGGTGAATCTGTTGAATAAAGACCCGGCAGCTTTTTGCTGAGTTGAAGGCAAGCAGAGCATGCGCGCTGG  
TTACGGCGATGTGAAATACACATGGGGTATTCCAGCAACTGGAACACCTGCGGTTGCTGCTGCTGCTGCTGCTGCTGCT  
ATAACCCCTCACATCTGGAGATCGTGAATCCGGTGGTGTGGGCCAGGTGCGAGCCAGGACAGGACCGCTGGTGAGGAT  
GGTCAGGCAAAAGTGGTGGGCGTACTTATTCATGGGATTCGCGGTTGGGCGGCTCGGCGTCAACCAACACAGCTTTAA  
CTTATCGCAGCTACCGGCTACGGCAGTGGCGGTACGCTACCTGTGCTGATTAACAATCAGATTGGCTTCCACTTCC  
GCTTGCAGGATATGCGTTCTTACGGTACTGCACCGATATTGCCAAAATGGTAGCGGCCCAATTATCCAGCTTAATGGC  
GATGACGTTGACGCTGTTTGGCCAGGTAATGGAACCTGGCGTGGCAATGGCGAGACACTTCCGGCGCGACATCATCGA  
TATTTGCTGCTTCCGTAAGCAGGACACAAACGAAAGCGATGAGCCAGCTTACCAGCCACAAATGTATCAGGCAGTGG  
ATGCTCACCTGGTACGCTGCGCCGTTATGGTGAATCTTGGCCGCGCGGCTGTTAACTCAGGCGCAACAAAGTGA  
ATGACGGCAGCTATCGCGACTGGCTGGATAGCTGCCAGAAACGTAACCGCAGCCTCTCAAACCTGCAATTCACTCTTT  
TAGCGCTAACTGGTATGGGTTGACCAACCTCACTGGAGCGCCCGGTATCTACGGCATTGCCTCGGCAAAAGCTGGCAG  
CGTATGGTGAATCATTTCTACACTGCCACCCGATGTGGTGGCAGATCTACCATTAAACGGCAACTGGCGTTACGCCAG  
GATATGGCCGCGAGTACTACGCCAATAGACTGGGGAATGGCTGAAATGCTGGCCTATGCGATCGCTTGTGGATGGCGGTT  
TGGTGTGCGTCTTTCTGGTGAAGACTCAGGGCGTGGCAGCTTCACTCATCGCCATGCAGTGGTACATCATCAACTGAAG  
CCTGCTGTTATCTGCCGTTACAGCATATCCGCGTGGTGGCAGATCTTTCGATGTTTTATGATTGCGTGTAAATGAAGAA  
CGCTCTTAGCTTGAATATGGCTATTTCAACGCTGCGCCCTCAGCAACTGGTTATTTGGGAAGCAGTATTGGTGACTT  
TGCCAACCGCGCTTGGTATGCTAATTTATCTGCTGCGGAAACCAAGTGGGATCGCTATAGCGGTTTAAACCA  
TTCTTCTGCCGATGGCTATGACGGACAAGGGCCGGAGCACTTCTGCGGCTCTGAGCGCTGGCTGCAACTGTGGCGA  
GAAAACAACATGCAGGTGGTGTATGCCAGTGAAGTACAGCAAAATGTTCCATTTGCTGCGCGGTGAGGATTAACGCCAAT  
GCGCAACCGTTAGTGATAATGATGAGTAAGCGTTTACTTTCGTTTTAAAGCGCGATGAGCAGCTTTCTGAAATTCATG  
ATGGCGCTTATAAACCGGTAATACCCGATCCCGCAATGGATCATGCTCCAGAAAGTAAAGCGGTTATTTTGTGTAGCGG  
CAGGCTTATACGAGCTACTGGAAGCCGTAAGCAGCGTGGAGCATGAAGACGAAAGTGGCGATTGTTCCGCTGGAGCACT  
CTACCCGTTCCCGGTCGCAAGAACTGAATGATGTTCTGGCGAGTTGGCCGAACCTGCTGCGAATGGATTTGGTGGCAGAA  
AGCCGAAAACAGGGCGGCTGGCGGAGATTCGTCATGAGCTGGCGGCACTGAAAATTAACACTCTTTACTGGCAGTAT  
GCAGGCGCCCGGCGCAGCAGCTCCGGCGCAGGGGATGGGGCTGTACATAAAACAACAAATCAGCAATTTCTGTCTG  
TGGTTTTGCAGATATTCAGCCATGA

>Cluster\_49806

ATGAGTAAACAATGTAAAATTACAGGTATGCTCAGGGCTGTTGACCAGGCATCCGCCCGTTTTAAATCCATCCGTACAGC  
GAGCAAGTCGCTGTCGGGGGATAATCCGGGACACACAAAATCACTGCGCGAGCTGAACGGTACGCGATCCCGTATTGAGG  
GATTTCCGCAAGACCAGCGCACAGCTCGCCGCTGACTGGTGCATGCACTTGAAGAGCAGCGCTGGAAGCCGAAGCCCTTGC  
ACACAGTTAAAAATACCGAACGTCGCCACCCGCTGCTCAGGCGAAAGTGTGGAATCCGTAAGCGAGCGGGGAGGACTT  
ACAGGCGAAATATAAACCGCCTGACGGATTTCCGTTAAACCGCAGCAGCGGGAGCTGGCCGCTGTGGGAATTAATACCCGCA  
ATCTTGCACATGATGAGCAGGACTGAAAAACCGTATCAGTGAACCCTACACAGCTTAACCGTACGCTGATGCGCTG  
GCGCGTGTGAGTGGCAACAGGCAAACTTAACCGCAGTAAAACAGCGTTATCAGGCGGAAAGGAACTGGCCGGAAATAT  
GGCTCGGTGGGCGCTGCCGCTGTTGGGATGCGGGCGGGAAACGATGGCGGAGTTAAGTTGCTGATGCTCCCGGTTATG  
AGTTTGGCGCAAAAACCTCAGAAATGACGGCGTGTCCGAGTGGCAAAAAGACTCCCGCGAAATGGCCCGCTCCGCAAG  
CAGGCGCGCAGCTGGCGATAATACCGCCGCTGCGCGGATGATGCGGCGGTGCGCAGATTATCATGCGAAAGCGGG  
TGGAGATGCTGCGGCTATTCAGGCGGCAACCGCGTCACTGAAATGGCACTGGCGAACCGCGCAGCATGGAAGAAA  
ACCGCCCTGCTGATGGGGATGAAATCCGCTTTCAGTTCCTAAACGATAAGGTGCTCATATCGGGGATGTTCTCTCC  
ATGACGATGAACAAAACCTGCCGCGATTTTACGGCATGACGCGATGCGCTGACCTATGCGCCAGCTGTGGCAAAAATGC  
CGTGTGACGATTGAAGAAACCGCGCAATGGTCCGGCGCTGCTGATGCAAAAATTAACCGTTCAATGGCGGGGACGG  
GAAGCCGTGCCGTGTTAAGTCCGCTGCAGGCACCGAGGAAAAGCATGGGATGCACTCAAAGAGCTTGGCGTAAAAC  
TCAGACAGCAAGGGGAATACCCGCGAGTATTTACCACTTCTGAAAGAAATGACAGGCAAGTTTTGAGAAAAACCGCTCGG  
TACTGCCAGCAGGCTGAATACATGAAAATATTTTCCGGGAGGAGGCCAGCTCAGCCGCGCTGTGCTGATGACTGCCG  
CCTCAACCGGAAAGCTGGCAAACTGACCGCTGCGTTTTAAAGCCTCAGACGAAAGACCGCAGAGCTGTAATATCATG  
CAGGACAACCTCGGCGGTGACTTTAAGGAGTTTCACTCCGCTTATGAGGCGGTGGGACTGACCTGTTTACCAGCAGGA  
AGGCGCACTGCGTAACTCAGCAGAGCGCCAAAGTATGTGTTAAACTCGACGGCTGGATCCAGAAAAATAAATCAC  
TGGCGTCAACCATCGGCATTTATGCGCGTGGTGCAGTGGCGTACTGGCATCATTTGGTGCCATTTGGCTCGTAGCCTGG  
CCGTTATCACCGCATCAATGCCATCATCGCGCAGCAGGCGCAATGGGGCAATCTCACGACGGTTGGCAGTGGCGT  
TATGACGGCATCGGGCGATTAGCTGGCCGTTGTGGCTGTGGTGGCCGCAATGTCGCGCGGGGCTGCTTATCCGTA  
AATACTGGGAGCCGTGTCAGCGCATTTTGGCGGTTGTTGTTGAAAGGCTGAAAAGCGGATTTGCGCCGCTGGGGAATG  
TTCACGCCACTTAAACCGGTGTTTACTGGCTGGTGGTGAAGTTACAGCCCGCTGGCAGTGGTTAAAACCTGATTGC  
CCCGGTCAAAAGCCACCGAGCACACTGAAACCGTTGCCGTGACAGGGCGTCAATGTTCCGGCAGGCACTGGCTGACGCC  
TGATGCTGCCGCTTAATGCTTCAACAACTGCGCAGTGGTATTGACTGGTACTGGAATACTGGTGTGCTCATCAACAAA  
GAGTCAGACACACTTGCAGCAGCCGCGCAACTCAAGCCGCAAGCTATGGCAGCAGTGGTTATATTTCCCGGCAACG  
CTCTTATGACAGGCTATCAGGCTTATCAGCCGCTCAGGCACCGCTGGTGGCTCTTATGATGACCCAGAGTAAAACGAA  
ATCACATACGCTTACGGGTGGTACTGCGCCGGGGACACAGCTTGAACCGCAATTAACAGGATGCGCTGAAAAATACGAG  
CGGATAAACGTCGCGCCCGTGCAGCATGATGATGACGGTTAA

>Cluster\_43417

ATGTCATATCTGAATTTAAGAAATTTACCCGCAACACACAATGCTTGCATATTCGTAAGCATCGTTTTGGCTGTTTTTTT

TGTCGGCTCTTTGTGCGCTGTGCTTTTGGCCGACAGGCACCTTTGTCACTGCCGAACCTATTTTAAATCCGCGCTTTT  
TAGCGGATGATCCCCAGGCTGTGGCCGATTTATCGCGTTTTGAAAATGGGCAAGAATTACCGCCAGGGACGTATCGTGTG  
GATATCTATTTGAATAATGGTTATATGGCAACGCGTGATGTCACATTTAATACGGGCGACAGTGAACAAGGGATGTTCC  
CTGGCTGACAGCCGCGAACTCGCCAGTATGGGCTGAAATACGGCTTCTGTCTCCGGTATGAATCTGCTGGCGGATGATG  
CCTGACGCTTAACTCAATGATCCATGACGCTACTGGCATTAGATGTTGGTGCAGCAGCAGCTAACCTGACGATC  
CCTCAGGCATTTATGAGTAATCGCGCGCTGGATATATTCCTCCTGAGTTGTGGGATCCCGGTATTAATGCGCGCTTGT  
CAATTTATAATTTACGCGAAATAGTGTACAGAAATCGGATTTGGTAGTAACAGCCATTATGCATATTTAAACCTACAGAGTG  
GGCTAAATATTTGGTGGCTGGCGTTTACGCGACAATACCACCTGGAGTTATAACAGTAGCGACAGTTTATCAGGTAGCAA  
AATAAATGGCAGCATATCAATACCTGGCTTGGAGCGAGACATAAATTCGTTACGTTCCCGGCTGACGCTGGGTGATGGTTA  
TACCCAGGGCGATATTTTCGACGGTATTAACCTTTCGCGGCGCACAAATGGCCTCAGATGACAATATGTTACCCGATAGCC  
AAAGAGGATTTGCCCCGGTGATCCACGGTATTGCTCGTGGTACGACAGGTCATTAACAAAATGGGTATGACATT  
TATAATAGTAGCAGTGCACCGGGGCTTTTACCATCAACGATATCTATGCCGAGGTAATAGTGGTACTGACAGGTAAC  
GATTAAGAGGCTGACGGCAGTACGCGATTTTACCCTACCTATTCGTCAGTCCCGCTCTTGCACAACTGAAAGGCATA  
CACGTTATTCCATTACGGCAGGAGAATACCGTAGTGGAAATGCGCAACAGGAAAAACCCCGCTTTTCCAGAGTACATTA  
CTCCACGGCTTCCGGCTGGCTGGACAATATATGGTGGAGCGCAACTGGCGGATCGTTATCGTCTTTAATTTCCGGTAT  
CGGAAAAAATCGGGGCGACTGGGCGCTCTGTCTGTGGATAGCAGGCTAATCCACACTTCCCGATGACAGTACG  
ATGACGGACAATCGGCTGCTTTTCTTTTAAACAATCGCTCAATGAGTACGCGCAGGCAAGTATTCAGTTAGTGGTTACCCT  
TATTCGACAGTGGGTATTTTAAATTTGCTGATACAACATACAGTCAATGAATGGCTACAACATCGAAACACAGGATGG  
TGTATTACAGGTTAAGCCGAAATTCACCGACTATTAACAATCTCGCTTAAACAACCGGGGAAATTAACACTACCGTTA  
CTCAGCAACTCGGGCGCACATCAACACTGTATTTGAGTGGTAGCCATAAATTTGGGGACGAGTAAATGTCGATGAG  
CAATTCAGGCTGAGGATTAATACTCGCTTTCGAAGATATTAAGTACGAGCTCAGCTATAGCCTGACGAAAAACCGCTGGCA  
AAAAGGACGGGATCAGATGTTAGCTCTTAACTCAATATTCCTTTCAGCCACTGGCTCCGTTTCGACAGTAAATCTCAGT  
GGCGACATGCCAGTGCACGCTACAGCATGTCACAGTCTCAACGGTTCGGATGACCAATCTGGCCGGTGTATACGGTACG  
TTGCTGGAAGCAACAACCTCAGCTATAGCGTCAACCGTGTATGCGGGGAGGCGATGAAATAGCGGAATAGTACAGG  
CTACGCCACGCTGAATATTCGCGGTGGTTACGGCAATGCCAATATCGGTTACAGCCATAGCGATGATATTAAGCAGCTCT  
ATACGGAGTACGCGGTGGGTTACTGGCTCATGCCAATGGCGTAACGCTGGGGCAGCCGTTAAACGATACGGTGGTGCCT  
GTTAAAGCGCCTGGCGCAAAAGATGCAAAAGTCAAAACAGAGAGTGGCTACCGACTGGCGGGTATGCGCGTGT  
GCCATATGCCACTGAATATCGGAAAAACAGAGTGGCGCTGGATACCAATACCCGCTGATAAAGCTGATGAGTACAGT  
CGGTGCTAACGTTGTTCCACCCGTTGGGGCGATCGTGCAGCAGAGTTTAAAGCGCGCTGGGATAAAACTGCTCATG  
ACGCTAACCCACAATAAATAGCCGCTGCGCTTTGGGGCAGTGGTACATCAGAGAGTACCCAGAGTAGCGGCATTTGTTG  
GGATAATGGTACGTTTACCTCAGCGGAATGCCCTTAGCGGAAAAAGTTCAGGTGAAATGGGGAGAGAGGAAAAATGCTC  
ACTGTGTCGCAATATCAACTGCCACAGAGAGTACGAGCAGTTATTAACCCAGCTATCAGTGAATGTCGTTAA

>Cluster\_48577

ATGATAAGCATCGTAAAACGTAACGGCCAAACAGAGCCGTTATCCGAAGAAAAATACAACCGCGCTCGTAAATGTATGGCGT  
AGAAGGCATTCGTTGGCTAAGCGCATCCGCTGTAGCAATGGGAGCTGCGGCCAGCATTTTGTATGGGATGACACCAGCCG  
AGTTGCATAGGCTTTGGTTAAATCTGCGCTGATTTGATCTCACCGGAAGCACCAAAATTAATCAAGTGGCTGCCGCC  
CTGAACATTTTAAAATCCGCAAAAGATGCCCTTCGGTTCGTTACGACTATCCGAATCTTACCAACACATTTGCAAGACGT  
TAAACAAGGCGTTTATGACAAGGATTTGCTGACACATTTATCGTTTGAAGAGATCGAAGAATTCGGCAATTAATTAAGC  
CTAAACGTGACGATCTTTTGGCTATGCGGCTACGCTGACGCTGCAAAAGCAAAATCTCGTACAAAACCGTGTACTGGT  
GAGATTACGAAGCTCGCAACATATCTATGCTGGTTGGCATGTGTCTGTTCCAGAATGGGAAGACGACTGCGCGGG  
CAAAACACGATGAGAGATGGTCAAAGGTTTCTATGACATTTACAAGTACGTTCAAACGCTCTCTGCCACACCAATCATGG  
CCGGCTCCGCTACTTCAACCCGTCAGTTCTCAGTTGTGTGCTGATTGAGTCTGGCGATAGTCTGAAAGGATATGATGCA  
GCTTCAGCCGCAAAATTAACGACTACGTTTACGCTCGTGCCTGGAATGGTATTGGTTTGGCCGATCCCGTGGCTTGGCAG  
CGAGATCCGCAATGGTGAAGCCACCCATACCGGAGTTATTCATTCCTGAAGCATTTCCAGACTGCTGTTAAATCTTGCT  
CGCAAGGTTGGTCCGTTGGTGGCGCAGCAACAGCGTTTACCCGATTTGGCATCTGAAGTTGAAAGTCTGCTGGTGGTG  
AAAAATAACCGTGGTATCGATGAAAACCGGCTTCGCCATCTTGATTACGGGCTCATGAGTAAACGCTGATGATACCGTGC  
ACTCGTCAGAAGCTGAGATCACTCCTGTTACGCCGATGATGTCCTGATATGTAAGAGCCTTTCATGACAGCAGG  
ATCTGTTTGAAGAAGCTGTACCATAAATACGAAGCCGATGATTTCAATTCGAAGAAGTCACTACCTGCCATTGAGCTGTT  
TCATCTCTGATGCAAGAACGAGCGCTCCACGGCCGAATTTATATGCGAACGTCGATCATATTAATGAGCATGGCGCTTT  
CATTCCTGCTCTTGACCTGTCCGCCAGTCAAACCTGTGTATGGAGATCACTTTACCTACTCGTCCACTGACATTTACCG  
ACGACCCGAAGCGTGGATGAGATTCGCGCTGTGCACTTTATCCGCTTTTAACTTCGAGCCATTCGTTCACTGGAGCTT  
GAGGTGGCATTCTATGCCGTTGCTGCACGATGATTCGTTACTGGATTATCAAGACTATCCGATGGAGGCAGCCGAAGTGC  
AGCCAAAGCTCGTGTAGCTGGGAATCCGTTAACAACCTTTGCTTATACCTGGCAAGAATGGCGTTCTGTTATTTCTG  
ATACCGCTGGCAATAAATGTTGATGAAACGTTCAAGCTGTCAGTATTAACCTTTCGACGCCAGCTGCGACTGCGC  
GAAGCAAAAGCTGAGTGTGACTGTTTGGAGCAGACAAATACGCAATTTGGTCACTGAGTGGCGATTCAGCTTACCTTTC  
ATTAGACGAAGCGGCAAAACCAACTTTGAGTTAAAGATGCGCTGGGAAGAATGCGTGAAGCTATTGCAAAAATACGGCC  
TTGCAACTCCACTGACGGCAAAAATGCCATGCGAGACTTCCAGCCAGATCACTAAATTCACCAACGGCATCGAACCG  
CCTCGTGGACCGGTTGCTGGTAAATCTTAAGGACGGCATTAAGATGGTGGTGGTGGTGGTGGTGGTGGTGGTGGTGGT  
GCAGTATGAATACTGTGGAATAATGCGGCAACCCGCGCTATCTGACAAAGGTTGGCGATCATCCGAAGTTCTTTGACC  
AGGCTATTTACAGCAATACCAACTATGACCCTTCTCGCTTTGAAGGCGATAAAGTCCCAATGATGACGCTACTGTCAGAT  
TTGCTTCTCGCTTACAAGATGGGAGTTAAAACGCTTTACTACCACAACACCAGAGATGGGGCAGGAAAGCGTGTGACGA  
CGAACCGAAGAATCCACTTACGCAAGCTGTAGCCGTCGAGCCAGAAGATGAGTGCAGCGGAGCCTGCAAAATCTGA

>Cluster\_49973

ATGCACGAAAAGAATCGCCCTGCTTTGTGATGAAGCCGACCGACTTTTGCAACTGAACATTAATCTGCTCCGGCAAA  
GTTTGAGGAGCCAGATGTTGTTATCTGACAGTAAGAACGAAAACAGACTGCTTTTGTATAAACAGAAAGCACTGAAAAGAA  
TTGAGGAGCTGGAGGGCGAACAATAAACAACCCGCGGAGGAGATGGTGTGCTGGCTGTTGTCGCTACGATGAAAGCAGG  
AAATCAACCACCATCAACGCCATTGTTGGGGCAGGAAATCTGCTTAAACCGTAACCGCCCATGACCTCTGTACCGACGCT  
CATCCGCCAGTTCCCGGAAAAACTGAGCCGGTCTCCATCTGGAACATATTCAGCCTGTCCGCAATTTATTAATCACAC  
TGCAGGAAAAAATCGCCCCCGGACAGCAGGTCGCACAGACCTGACAGCAACCCGGGATACCCCGCAACTGCTG  
GATATTCTGACGGATGAGGCTGGCTGCTCAAAAATGAATACCAACCGGGGAGGAGAAATCTTTACCGGACTGGCATCTGTTAAA  
CGATCTGGTTCGCTTGTGCGGCAATGGGACTGAATTTCTTTTGAATGAAATACGCAAGTGCAGAAACTGCGCGTGA  
TCGACGTTGAATTCAGCCATCTGTTGGGATGGATGATGCAAGGGAACACTACTCTGCTGGATACCCCGGCCCTAAT  
GAGGCGGACAAACCGCAGATGGAAGTGTATGATGCGGGATCAACTGCAGAAAGCCTCTGCGGTTCTGGCTGTGATGGATTA  
CACCCAGATGAACCTCAAAAGCGGATGAAGACGCTCCGTAAGAGCTTAAATGCCATTGCTGACGATATCAGCGCCGCTGT  
TTGTTACTGGTCAATAAATTTGATGAGAAAGACCGCAATGGCGATGGGGCAGATGCCGTACGCCAGAAAGTTCCGGCAATG  
CTGAACAGCGATGTTGCTGCCCGCTCCCGGCTTTATCCCGGATCCTCAGCCAGGCTACCTGGTCAACCGCTGCGCTTCA  
TGATTTACGGAATAACCGAACCCTTCTGTTGATGAAAGCTGGGTCGATGATTTTATCAGAGGTCCTTCCGTTGATGA  
AAAAAGAATACGTTCTGTAAGACAGTGAACCTGGCAACTGAAGGGGCGACAGACCTGTGGGAAGGTTCACTTATCGATCAA  
CTGATAACGGAAGTCATACAGAGCTCACATTCAGAGCTGCGGCACTGCGGTTGACTCTGCCCGCAAACTGATGCA



AGGCTCTCAAACCGTCTGATTCAGGCCCTTCCAAGATCGCTCGGCGTGATTATGAACGGAGTTCACACGTACGGTGGCGAT  
GCTGGAGGCTTTGGCGGTGGTGTAAATTGGTTTCGATTAGTGGTTTGGTTGCTGGTGGCGCGCTGAGAAAATACTGTGGCTAA  
GATTGGGGGCGACAAGAAGTGGTTCGATATGCGATAGAGAAAGCCGTTTCAGGAAGCTACAAAAGCAGTGCAGCGCAGGGGCGAT  
CACCAGCAGCGATCGCCGAGCAGAGAAAAGATTTTCGGCCAAATAAAATTGCCATGAAAGCAATTCGTGATGCCGTTGGG  
GCTGAAGAATTCGTGAACTGACAAGGGCCGGGATTGTAGTACCCTCAGTGGCATGAAAGATGTTAGCGAATGGGAATA  
G

>Cluster\_21448

ATGTGCTCAACCCCTACGAGAAGCCAGTAAGGACACGTTGCAGGCCAAAGATAAAACTTACCCTACTACAGCTTGGCCGT  
TGCTGGCAAATCACTGGGCGATATCACCCGCTCTGCCAAAGTCACTCAAAGTTTGGCTCGAAAACCTGCTGGCGTGGCAGG  
ATGGTAACTCGGTTACCGAAGAGGATATCTACGCGCTGGCGGGATGGCTGAAAAATGCCCATGCTGACCGTGAATTTGCC  
TACCGCCCGGCAAGGGTGTGATGCAGGACTTTACCGCGTACCTGCCGTTGTTGATCTGGCGGCAATGCGCGAAGCGGT  
TAAACGGCTCGCGGGCGATACTGCAAGGTTAACCCGCTCTCACCGGTCGACCTGGTCATTGACCACCTCGGTGACCGTGC  
ATCCTTTTGGTGTAGTGGCATAGGCAATTTGAAGAAAACGTGCGCTGGAAAATGGAGCGCAACCACGAACTTATGTTTCCG  
AAATGGGGAAGCAGGCGTTTTCAGTCTGTTTACGCTGCTGCCGCCAGGCACAGGCATTTGCCATCAGGTTAACCTCGAATA  
TCTCGGCAAAGCAGTGTGGAGCGAATTTGAGGACGGTGAATGGATTGCTTATCCGGATACACTCGTTGGTACTGACTCCG  
ACACCCTATGATCAACCGCTTTGGCGTGTGGGTGGGGCTTGGTGGGATCGAAGCCGAAAGCCGCAATGTTAGGCCAG  
CCTGTTTCCATGCTATCCCGGACGTAGTGGCTTTAAACTACCCGAAAATTTACGTGAAGGATTATCCGCAACGACCT  
GGTCTCACCGTTACCCTAAATGCTGCGCAAACATGGCGTGGTGGGAAAATTCGTCGAAATTTTATGGTGTGGCTGGATT  
CACTACCGCTGGCGGATCGCGCCACCATTGCCAATATGTCGCCAGAATATGGTCCACCTGTGGCTTCTCCCTATCGAT  
GCTGTACCCTGATACATGCGTTTATGCGGGCGCAGCAAGATCAGGTCGAGTTGGTCGAAAAATATGCCAAAGCGCA  
GGGATGTGGCGTAACCCGGCGATGAACCGATTTTAACTACGTTAGAACGTTGATATGAAATGACGTTGAAGCGAGCC  
TGGCAGGGCCAAAACGCCACAGGATCGCGTTGACTGCCGATGTACAAAAGCATTGCGCCAGTACGAACTGGAA  
GTAATGTCACGCATAAAGATCGCCAGCCGGTTCGATTAATGTTAAGAACGGACATCAGTATCAGTTACCTGATGGCGCGGT  
GGTATTTGTAAGGCGTATACCTGTCACCAACCTCAACCAAGTGTGCTGATGGCCGAGGTTTGGTGGCGAAAAG  
CTGTAACCTCTGGGCTCAAGCGGCAACCGTGGGTCAAAGCGTCTGCGCCAGGCTCGAAAGTCTGTTTCTGATTATTTG  
GCAAAGCGAAATGACACCGTATCTCGATGAACTGGGTTTAACTTGTGGGATACGGTGTACCACCTGTATTTGGTAA  
CTCTGGTCCATTGCCGATCCTATCGAAACGGCAATCAAAAAGGCGATTTAACCGTCCGGTGCAGTGTGTCGGCAACC  
GTAACCTTTGAAGGCGTATCCATCCGCTGGTTAAACCAACTGGCTGGCTCGCCGCGCTGGTGGTTCGCTTACGCTG  
GCGGGAATATGAATATTAACCTCGCATCTGAGCCTATCGCCATGATCGAAAGCGATCCGGTATATCTGAAAGATAT  
CTGGCCCTCGGCACAAGAAATGCCCCGTGCGGTAGAACAAGTCTCCACAGAAATGTTCCGTAAGAGATACGCAGAAGT  
TTGAAGGCACAGCAGAGTGAAGGAAATTAACGTCGCACGATCCGATACCTACGGTTGGCAGGAGGATCAACCTATATT  
CGCTTATCCGCTTTCTTTGATGAAATGCAGGCAACACCGACCTGTGGAAGATATTCACGGTGGCGGATCCCTCGCAAT  
GCTGGGGATTACGTCACCCTGACCATATCTCTCCGGCGGCGATTTAAGCCGACAGCCAGCGGTCGATATCTAC  
AAGCCCGGGTGTGAGCGCAAAGACTTTAACTCCTACGGTTCGCGCGGTGGTAACCATGAAGTGTATGATGCGCGCACC  
TTCGCCAATATTCGCATCCGTAATGAATGGTGCCTGGCGTTGAAGGGGGATGACCGCGCATTTACCTGACAGCGGAT  
CATCTCTATTTATGATGCGCGATGCGCTATAAGCAGGAAACCGCCGCTGGCGGTGATTGCGGGAAGATATGGAT  
CAGGCTCCAGCCGTGACTGGGCGGCAAAAGGTCGCGTCTACTGGCATTCGTGTGGTATTGCCGAATCGTTTGAACGA  
ATTCACCGTTTCAATTTAATTTGGCATGGGCATCTGCCCTGGAAATTTCCGCAAGCGTAAACCGTAAACCGTTAGGGCT  
AACCGGGAAGAGAAGATTGATATGCGCATCTGCAAAACCTACAACCCGCGCAGCGGTTCCGGTGCAGCTTACCGCG  
CGGATGGTAGCCAGGAGGTCGATACCTGCCGTTGCTGATCGACACCGCGAGGATTCAGCTACTACGAAACGACGCG  
ATTTTGCATATGTCATTCGTAATATGTTGAAGTAA

>Cluster\_52283

ATGGATAAAAAATTAAGTCTGCTTTTGTATCCTGGCGAGTCTCAGCCCGCAAAGGCGACATTAACCAAATTCGCCGCTGG  
TTTTGAGGTTATTGCTCAGGGACAGCAGGAGTATATCGAGGTTTATTTTGCAGGGAAAAGTCTCGGTAATATATGCGA  
TGGTAACTCTGATACCGTAACTTTCTTGTATTCAAGTTTATACAGCAAACCTGAAATGAGCAGTACGATCAAAAA  
ATCACTCATAAGTGAAGAAAACATATCGCAGCCCTAGCTCGCCACGGTGAAGTGGCTTGTGGTTTTGTACGTACTGA  
TTCAGGATCGCGTTTTTCTTAATACTGAGACAGTAGAAATAATCTACAATGATGAAGAAAGTTTCAAGCCTATTTCTTA  
ATCCGCAATGGAGTTCTGCGTTTTAACTCGAAGTCAATGTTAATTAATCCAGACAAAATAACGGTTAACGCTTTTATACAT  
CAGCAAGCATTAATGTTCTGGTACAGGACGATACCAATCGTTGTCAATTCAGGGTAACGGTGGCGTGGGAATAACAGA  
AAATAGCTATATTGGCGCACACTGGAATTTCAACGGTTATGATGCAGATGATGTCAGCGACAACAATGTCGATGTCAGCG  
ATCTCTATTACCGCTATGATTTTTTACCGCTTATTATGTCAGGCGGGCGGATGGACAACCTGCACATTAATTTACGCG  
CAAGGTGGAACTATACTTTAACTTCCGCACTCGGTGCAATAGACGGAATGCGTATCGGGTCGACACTCAGTTATTT  
AAACCAGACGCAAAGCCAGCAGGGAACCGCGTAAATGATCCTGCTTTCGCGCAATTTCTGTTGATGCTTATCGTAATG  
AGCAACTGTTGGGATCGTTTATCTCAATAGCGGTTTCGCAATTTATGATACCAAGTTCCTTTCCGCGAGGCGATAGC  
TGGCGTTAAAGTCTATGAAAAATAACCACTACCCGCAACCGAGCTTGTCCGTTTACAAAACCTGGTGTCTGACAGA  
CGAAATGCCAGTGGTTCTTACAGGCAAGTAAACACATCACAGGTTCTGATGATGAAAGTTCAGCTTATCAGCTAG  
GGGTACGCTGCCATTACATCGCAATATGAGCTCTACGAGGCTGGCGAATGCCGATGATGTAAGTCTTTTCGAGTTA  
GGTAATAACTGACGCGGATTTAGGCGAGGCGGGAACTGCGCATACGCGCAGCGTGTTCGTAACGATGACGCGCGG  
CAAAGCGGATATGCAACAGGCAACTGGAGTCACTCCGGATGGCCGACGTTGGGTTTTTATCGGTAACCTCTGACGCTG  
ATGCTTGTACAACGACAACAGAGAGCTACAACGCTTAAAGTGTATGAAAGTATTTCCGCGACGGTTTACAGAAAT  
CTTGTGGCTGGAATATGATGCTGGGTTATACCCGACGCAAAAATAACACTGATGATAGTTTGGCTGGGACAAAACGCA  
GAGCTTTGAAAATAACTATCTTCCGAGACTACGCAACAAGATTTCCGAAACCGTACAACCTTAGCGCTTCTCGCGCT  
TTGTGATGCGTACTGGATTTTGGTACTTCCCTGGGTTTTTCCATCGTAACGACAACGGCAGTGGTAGCGATGATAAC  
GGTTTGTATCTGTCAATTTTCGTTATCTGATACGCGACGATGGACAGCAATAACAACAGCCATTAACCAATGTTTCTAC  
GGATTATCGTTATAGCGATCAGGATGGCGATCAAACGTCATGGCAGTTATCGCATACCTTTTATAACGATCATTACGCC  
ATAAAGAGCTTTGGCGTACCCTGCGGTTTTGAACACCGATACATAAAACAGCGCGGTTAACCGGGCGTTGGGATGGTCAA  
TATGGAAATGCTACGCTACAGTCTCAGACAGTTATGATCGCCAGAATCATGATCATCTCTCGGCCTTACCGGGACATA  
CAGCTCCAGCTGGCGGTGAGTGCCTATGGCATCAATGTTGGGGCCAGCGGCACAGATGATTTGCTGGGGCGGTGTTGG  
TGGATGTGAAAGTTTCTCTGAACAGGATGAACAGAGTCAAGATCTGCAACTCGAAGCGGGTGGCTGGCAGCAGACA  
TTGCAGCTTGGTCAACGCGACAGCGTGTATTCCCTATCCCTGATTTTCACTGGATTTTCACTGGCTTGTGAAAGTAAACGAGATA  
TCAGGTAACCGCAAGGAACAACAACATCATTAACGGCGGGGAAATCGCGAGTTAATGCTGTTGCGGGCAAATTA  
GTTATCGGAAAGTCTGCGCAGCTTTAATTAACAATATATCGGTCGTTTGTATTTGCCCGCATCAGTAGAGAAGTTCCCG  
CTGGTGGTCTGAATAGCCCATGCTACTGGTGGTGAAGTGGCGGATTTACACTGGAGATTAACCGTAGTAAAAAGA  
ACTGATCTGTTTTCCGGCGAGCAGTTCTGAAATGTCGCTGAGTGTTTTGAAGAAAACCGCGCAGCTTTCGTTATAGCG  
GGGATGTGAATTTGAGCGTGGTGAATTTTCGCAACTGCCGAGTCTATTCAGGTTACGGCACAGTTAAACAGCCTAAA  
TTACGTGGAACGTTCCAGACGGCCAAAAGGGAGATTGCACCATGA

>Cluster\_39359

ATGGCTATCCACAACCGTGCAGGCCAACCTGCACAACAGAGTGAATTTGATTAACGTCGCCAACCTGACGGCGCAATATTA  
TGTACTGAAACGAGAAGCAGGGAATGCGGAGCACGCGGTGAAATTCGGTACTTCCGGTACCGTGGCAGTGCAGCGCGCC

ACAGCTTTAACGAGCCGCACATTCTGGCGATCGCTCAGGCAATTGCTGAAGAAGCTGCGAAAAACGGCATCCTGGCCCT  
TGCTATGTGGGTAAGATACTCACGCCCTGTCCGAGCCTGCGTTCATTTCCGTAAGTGTGGCAGCGAACGGCCT  
TGATGTCATGTGTCAGGAAAACAATGGCTTACCTCCGACACCTGCCATTTCCAATGCCATTCTGGTTCACAATAAAAAAG  
GTGGCCCGCTGGCAGACGCTATCGTGATTTACACCGTCCCATAAACCCGCGGAAGATGGTGGTATCAAGTACAATCCGCCA  
AATGGTGGCCCGCTGATAACCAACGCTACTAAAGTGGTGGGAAGACAGGCCAACGCACCTGCTGGCTGATGGCCGCTGCTGGC  
CGTGAAGCGTATCTCCGACGAAAGCGATGGCATCCGGTTCATGTGAAGAGCAGGATCTGGTGCAGCCGTTTGTGGAAG  
GGCTGGCCGATATCGTTGATATGGCGGCATTCAGAAAGCGGGCTGACGCTGGCGTGGTATCCGCTGGTGGTTCGGT  
ATCGAATACTGGAAGCGCATTTGGCGAGTATTACAACCTCAACCTGACCATCGTTAACGATCAGGTCGATCAAACCTTCCG  
CTTTATGCACCTCGATAAAGACGCTGCGATCCGATGGACTGCTCCCTCCGAGTGTGCGATGGCGGGCTGCTGGCACCATGC  
GTGATAAGTTCGATCTGGCGTTTGTCTAACGACCCGATTTATGACCGTACCGGTATCGTCACTCCGGCAGGTTTGTGTAAT  
CCGAACCACTACCTGGCGGTGGCGATCACTACCTGTTCCAGCATCGTCCGACGTTGGGCAAGATGTTGCTGTCCGTTAA  
AACGCTGGTTTTCATCTGCGATGATCGACCGTGTGGTCAATGATTTGGGCGTAAGCTGGTGAAGTACCGGTAGGTTTCA  
AATGGTTTTGTGATGCTTTGTTTCGATGGCAGCTTTCGGCTTTGGCGCGAAGAGAGTGCAGGCGCTTCCCTCCGTTTC  
GACGGCACGCCGTTGGTCCACCGATAAAGACGGCATCATTATGTGTCTGCTGGCGGGGAAATCACCGTGTCCACCGTAA  
GAACCCGACGGAACACTATAACGAACTGGCAAAACGCTTTGGTGGCGGAGCTATAACCGTTTGCAGGAGCAGCGACTT  
CCGCACAAAAGCGCGGTTGTCTAAGCTGTCTCCGAAATGGTGGCGCCAGCACCTTGGCAGGTGACCCGATCACCGCG  
CTGCTGACCGCGGCTGATAAAGCGGTAATGCTTATCCGCGGCTTGAAGTGTGATGATGACAAACCGCTGCTGTCCGCGCG  
TCCGTCAGGCACGGAAGACGCATATAAGATCTACTGCGAAAGCTTCCCTGGTGAAGAATCGCAAGCAGATTGAGAAAG  
AAGCGGTTGAGATTGTTAGCGAAGTCTTGA AAAACGCGTAA

>Cluster\_51038

ATGGCACAAAGTCATTAATAACCAACAGCCCTCTCGTGATCACTCAAATAATATCAACAAGAACCAGTCTGCGCTGTCGAG  
TTCATCGAGCGTCTGCTTCTGGCTTGGCTATTAACAGCGCGAAGGATGACGCCGCGGGTCAGGCGATTGCTAACCGTT  
TTACTTCTAACATTAAGGCCCTGACTCAGGCTGCACGTAACGCCAACGACGGTATTTCTGTTGACAGACCACTGAAGGC  
CGCTGTCCGAAATTAACAACAAGTACAGCTACGCGTTCGTAAGCGGACGTTCCAGGCTTCTACCGGGACTAATCTGATTC  
GGATCTGGACTCCATTACAGGACGAAATCAAATCCGCTCAGCAGAAATGACCGGATCCGCTCAGACCCAGTTCAACG  
GCTGAACGCTACTGGCAAAAGACGGTTCGATGAAAATTCAGGTTGGTGGCAATGACGGCCAGACTATCACTATTTGATCTG  
AAGAAAATGACTCTGATACGCTGGGGTGAATGGGTTAATGTGAACGGCAAAGGGGAAACGGCTAAATACGGCAGCAAC  
CTGAAAGATATGTTCCGATTACAGCTCAGCGGCGCACCGGGGAACGTTGGTGTAACTCAATATACTGACAAATCCG  
CTGTAGCAAGTAGCGTAGATATTCTAAATGCTGTTGCTGGCGCAGATGGAAATAAAGTTACAACCTAGCGCCGATGTTGGT  
TTTGGTACACCGCGCTGCTGTAACTTACCTACAATAAAGACACTAATTCATATTTCCGCGCTTCTGATGATATTTCT  
CAGCGTAACCTGGCTGCTTCCCTCAATCTCAGGCGGAGATACGACTAAAGCTACAGTTACAATGGTGGCAAAGATC  
AAGATGTAACATCGATAAATCCGTAATTTAACTGCTCTGATGATGGCGCAGTACTTATATGGAATGCTACCGGTAAC  
TTAACTAAAATAATGCTGGTGGTGATACACAAGCTACTTTGGCTAAACTTGTACTGCTACTGGTGTAAAGCCGCGAC  
CATCAAACCTGATAAAGGAACATTCACCAAGTACGCGTACAGCGTTTGTGTTGATGATCAATGTCCATTGATGCCAATACAT  
TTGCAAACTGCAGTAAAATAATGACACTTATACTGCCACTGTAGGTGCTAAGACTTATAGCGTAACAACAGGTTCTGTCTGCT  
CGACAACTCGCTTATATGACCAATGGGGTTCTCAGTGATGATGATGCGCAACTTACTATGCAACAAGCTGATGGTATCTAC  
AACTACTGAGGATGCGGCTGCCGTAACCTGGTCTACAAGGTTCCGATGGTAAGTTAAACAACGGATACGACTAGCAAAG  
CAGAATCAACATCAGATCCGCTGGCAGCTCTTGGACGACCTATCAGCCAGATCGCAAAATCCGCTCCCTCCCTGGGTGGC  
GTGCAAAACCGTCTGGATTCCGCACTGACCAACTGAACAACCCACTACCAACCTGTCTGAAGCGCAGTCCCGTATTTCA  
GGACCCGCTATCGCAGCGAAGTGTCCAACTGTCTGAAAGCGCAGATTATCCAGCAGGCGGTAACCTCCGCTACTGCGTAA  
AAGCAACAGGTTACCGCAGCGGTTCTGTCTCTGCTGCAGGGTTAA

>Cluster\_65609

ATGGCCAAACATCGAAATCAGACAAGAAACGCCAAGTCTGCGTTTTATATAAAAAGTTACAGACACAGATAATGTGGCAATTA  
TGTTAATGATAATGGCCTGAAAGCAGGAACCGGTTTTCCGGATGGGCTGGAATTAATTAACATATTTCCCGGGGCATA  
AAGTCGATGCTGGACATTCGGCTAAATGGTGAATTAATCGTTATGGCGAAGTGAATGGTTACGCCGTGCGTGAATTC  
CCACGCGGAAGCTGGATCGACGAATCAATGGTGTACTACCGGAAGCGCGCGGTTACACACGCTGCCACTGGGCAACCAA  
AGTCCCGCCCTTACCAGCGCTGGAAGGATACACTTTGAGGGCTATCGCAATGCCGATGGCAGCGTGGCAGCCAAAA  
ACCTGCTCGGCATCACCAACAGCGTCCACTGTGTGGCAGGCGTGGTGGACTATGTAGTAAAAATCATTTGAACGCGATCTG  
CTACCGAAATACCGAAGCTCGATGGCGTGGTGGGGCTGAATCATTGTTACCGCTGTGGCGTGGCGATTACCGCACCGGC  
GGCAGTTGTGCTATTCAGTACCATCCACAATATTTGCTGAAACCTAACTTTGGCGCGAAGTAAATGGTGAATGGTCTGG  
GTTGTGAAAAGTTGACGCTGAGCGCTGAGCGCTGCTGGTCCGCAAGGATGATGCAAGCTATTTCCAGTAGAAGCGCCGAT  
GTCAGTTTGCAGGATGAAAAGCATGTCGGTTTTTCACTCCATGGTTCGAGGATATTTTGCAGGTCGCGCAACGCCATCTACA  
AAAACCTGAATCAACGCTCAGCGAGAAACCTGTCCGGCTTCAAGACTGGTGTGCGCATGCAAGTGGCGTGGCAGCGATGCT  
TTTTCTGGCTAACGGCAAAACCGCGGTTGGCTATGCGCTGATCTACTGGTGGCTGCGCGCAACGGTGGATGTTCTCA  
GAAGTCAAGGAAAGTGGCTGACGCGATCCATCTGCTGACCAACCGCAGTGAACGAAAGAGGTTGGCAACGCTGGTGA  
GGAGATGGAGTGGTACGATAACTATCTCAATATGGGAAAACCGACCGCAGCGCAACCTTCCGCGGGCAACAAGAAAG  
GCGGTCTGGCAACGTTGGTAGAGAAAGGCACTCGGCTCCATTTGCTAAATCGGGTAAAAGCGCAATTTGTTGAAAGTCTGTG  
CCCGTCAACCGCCGACTAAACCGGGATTAATTTACGCGCGCAGCGCAGCGATTTGCTGTGGCAGCAACAGGTT  
GGCTTCGGGTATCACCTGCAAGTGTTTACGACCGGCTGGTGGTACGCGCTGATGGCGGATCCCGTCAATAAAA  
TGGCGACCGCAGCGAGCTGGCGAACCGTGGTTGATTTAATGGATATTAACGCGGGCACTATCGCCACCGCGAAGAA  
ACCATTGAAGAGGTTGGGCTGGAAGTGTTCACCTTATTTCTCGACGCTGCCAGCGGGAAGAAAGAAACCTTCTCGGATCA  
ATGGGGCTGCATAACCAAGCTGGCAGTGTAAACCGCGCACCGGTGACCTGA

>Cluster\_31517

ATGGCACAAAGTCATTAATAACCAACAGCCCTCTCGTGATCACTCAAATAATATCAACAAGAACCAGTCTGCGCTGTCGAG  
TTCATCGAGCGTCTGCTTCTGGCTTGGCTATTAACAGCGCGAAGGATGACGCCGCGGGTCAGGCGATTGCTAACCGTT  
TTACTTCTAACATTAAGGCCCTGACTCAGGCTGCACGTAACGCCAATGACGGTATTTCTGTTGACAGACCACTGAAGGC  
GCGCTGTCCGAAATCAACAACAACCTTACAGCGTATTCGTAACGACGGTTCAGGCTTCTACCGGGACTAATCTGATTC  
GGATCTGGACTCCATTACAGGACGAAATCAAATCCGCTCAGCAGAAATGACCGGATCCCGTCCAGACCCAGTTCAACG  
CGTGAACGCTACTGGCAAAAGACGGTTCGATGAAAATTCAGGTTGGTGGCAACGACCGCCAGACTATCACTATTTGATCTG  
AAGAAAATGACTCTGATACGCTGCGGCTGAGTGGGTTAACTGATAAATGGTAGCGCAGATAAAGCAAGTGTCCGCGCGAC  
AGCTGACGGAATGGTTAAAGACGGATATATCAAAGGTTAACTTCTATGACGGCAGCACTGCATATACTAAAACCTACAG  
CAAATACTGCAGCAAAAGGATCTGATATTTCTGCGCGCTTAAAGTGGCGATAAAATACCGCAACAGGTTGCAAAATGAC  
CTTGTGATAATGCGACATCGACAACCTTACTTATAATGCAACAGCAATACCTTCTCTTATACGGCTGACGGTGTAA  
CCAAACGAAATGCTGCAGCAAAATCTCATACTGCAGCAGGAAAACGACAGCTGCATCAGTTACTATTGGTGGGACAGCAC  
AGAATGTAATAATTTGATGATTCGGGCAATATTACTTCAAGTGTGGCGATCAACTTTATCTGGATTCAACAGGTAACCTG  
ACTAAAACCCAGGCGGCAACCCGAAACGAAACCGTTTCTGGGCTTCTCGGAAATACGGATGCGAAAGGTTACTGCTGT  
TAAAACAACCACTAAGACAGAGGCTGGTGAACAGTTACAGCTGAAGGTAATACAGGTTACTGTAAAATTTGAAGTGGCTA  
CTGTTTACAGCATCTGCATTTACGGGCTATGCATATTTCCGCCAACCGGTTGGGAAATCTTATGCTGTTGGCGCAATAAT  
ACTACAAATGGTTTTCTGGCGGGGATGACTTAAACCGAGGATGCTCAAACCTGTTTCAACCTACTACTGCAAGCGGATGG

CACGGTCACGAATAGCGCAGGCAAGAAATCTATAAAGACGCTGATGGTGTCTACAGCACAGAGAATAAAACATCGAAGA  
CGTCCGATCCATTGGCTGCGCTTGACGACGCAATCAGCTCCATCGACAAATTCGGTTCATCCTTGGGTGCTATCCAGAAC  
CGTCTGGATTCGCGGGTCAACACCTGAACAACACCATTACCAACCTGTCTGAAGCGCAGTCCCGTATTCAGGACGCCGA  
CTATGCTACAGAAGTGTCCAACATGTGCAAAAGCGCAGATCATCCAGCAGGCAGGTAACTCGGTGTGTCCAAAGCTAACC  
AGGTTCCGACAGGTTCTGTCTGCTGCAGGGTTAA

>Cluster\_42130

ATGGATGATATCGTTAATCTGTGCCCTCTGGATGTTTACCOCGATTATCGCCGTATGCATTCTGTTTTATTATTTGGAAT  
TATTTTCGCCAGGCTCTATCGTCCGCTTCCGCGAGAGCAAGCATTTGTTTCGTACTGGTTAAGTGGGCAAAAAGTGGTGA  
TGAGCGGTGGCGCAATCTGTGATGCCAATCTTTCATGAAATAATFCCCAATCAATATGAAATACCCGTAAGCTGGAAGTCAGC  
CGCTCAACCATTTGATAGCCTGATTACGAAAGATCGTATGCGCGTCGATGTCGTGGTTGCTTTCTTTGTGCGGGTAAAACC  
TTCAGTAGAAGGGATTGCCACCGCGCCAGACGCTGGGGCAACGCACCTGTGCGCTGAAGACTTACGTATGCTGGTGG  
AAGATAAATTTGTCGATGCCCTCCGTGCAACAGCGGCACAAATGACCATGCATGAGTTACAGGATACCCGCGAGAACCTTC  
GTGCAAGGAGTACAAAATACCGTAGCTGAAGATCTGTCCGAAAATGGCCGTAAGACTGGAAAGCGTTTCACTTCAACCT  
TAACCAGACCTCGAAAGAACATTTCAATCCGAACAATGCCTTTGACGCGGAAGGTTTAAACCAACTGACTCAGGAGACGG  
AGCGCCGTGTCGCGAAGCTAACCAGAGTGAACAGGATGTGGAAGTCGAGTGCCTGAGAAAAACCGTATGCATTTTCG  
CGCAAGTTGGAGATTGAACAACAAGAAGCGTTTATGACGCTTAGCAGGAGCAGCAGGTTAAACCCGTACCCGTGAGCA  
GAATGCGAAAATTCGGCTTTTGAAGCTGAACGTCGTCTGTGAAGCAGACGACGCGAATTTCTGGTGAACACAGATTC  
AGGAAACGGAATCGACCGCAACAGGCGTCCGCTCAAGAAAGTTGAGGCCGAACGTGAAGTTCGCATTAAGAGATC  
GAACAGCAGCAGGTCACCGAAATCGTAACAGACGAATCGATCGCTATTGCGCCAAATCAGAACAACAGTCCAGGC  
AGAAGCAGCTGTACCTTGCACTCGCAAGCAGTAAGCCCAACAAAACGTAGAAACCACTCGCCAGACTGCCGAAG  
CCGATCGTCTAAACAAGTGGCGTTGATCGCCGAGCGAGGATGCAGAAACCAGGCGTTGAAGTACCGTGCAGGCG  
AAGCAGAAAAAGAGCCGAGAGATGCAGGCGCGGCTATCGTTGAGTTAGCCGAAGCTACACGTAAAAGGGCCTGGC  
GGAAGCAGAAACCAACGTCGCTGAACGATGCTATCAACGTACTTTCTGATGAACAAACAGCCCTAAATTTCAACTGG  
CATTATTGACGGCGCTCCCTGCGTAATTGAGAAATCGTTGAGCCTATGAAATCTATCGACGCGCTAAAATTTATTCG  
GTCGATGGGCTGAATCGTGGTGGCGCTACGGGTGATGCAACACGGGTAATGTGGGGGCGGAAACCTGGCAGAAACAGC  
GTTATCAGCCGACTCTCTTACCACACAGGACCGCTGATTGACTCCTTGCCTCAATGAAATGGCGTTTCAGGCGGCT  
CACTGGCGCATGACTTCACTCTTAAGCTCAACAACCTCCCGTCAAGAAAAAGCAGAGTAA

>Cluster\_51809

ATGAAAAATATCAAGATGAGGAATATGTAGATGATTTAACTGAGCGTGTTCCTCATTAAAGCAACAACCTGGAAGCGGG  
AAAATAAAAATAGCTCATCATCTTGTAGAAGGTTTATTTGAAAGTTTAAAAGAATAAGGCTGCGACAGGATGGTAAAG  
TTGACCTTCTACTGTTGATGGCAGAATAAGGGCTATGGGAGCAGCGGTTAATCACTTTTAGAAAGAGAAGATAAAAA  
AACAAATACTCTATTCAGGACTTGCAGAGTTCCTACTTTAATATCTTTTATAGTAATTTGGCGAGTTGTTTTATCTGAT  
GAAAAAACTAATGCAACGCCACATAAAGCATCAAGTTTTTTTTCTCAACAAGAAGAATATGTTAAGCAATAGAAGATA  
TTTTCTCTGAGTTATATAATCAGTAATAGAGTTTTGGCAGGTAACATCCGATATTGGTGAATACATTTGCAGGATGTT  
TCTCAGTTTAAAGCTAATTTTCTGGTGACTTATTTCTGCATTTGATGAGAAATGCTGCTCTATTCAGGGTTGATGT  
TGATACTTACTCTATTCAGGACTTGCAGAGTTCCTAATATAAGAGTTCGCTCTCTATGAAAAGTCAGATAAAGGCTGTTT  
TACTCTGAAGCATGTCTAACATGTATGACATATAAAGAAGTAGCGTTGAAGATATAGACCAGCAATAGTATTAAT  
TTGCCGGATAGAAGAGATTTTGAAGCTGAGAGCAAAAATAATTTGATGAGTTTTTGTGAGCCTTATGCTCTGACTCATGC  
GCAATATCTATGATGACGAGCTTCGAAAGCTACGATGAATTTGAGATTTTGTAGTATTCGATGAATGATTTGATGCTG  
TTCTTAAAAAATATAAGAGAGCAGATAGACTTATTTTTGATACAGCATGGGGGCTAAAATCCAAAAACTCAATTAGAAAA  
CTACTATCTGATAAAAAAGAATATCACGTAATGTTGTTGGTGTATCATGCTGGAATGGAGGTTTTCTTTCTGCATTGG  
AAGAATCCGCCAAGCCTATTCAGCAAAATGTAATGCACAAGAAGTGGTAGTACTCCATATATAAATGAGACACATCTT  
GGCTCTATTATACCTTGGCTTATTGAGTACGAATCTCTTAAATTTGATGTCATGATATGAACTAAAAAATTCGATATG  
GTTTCATGCGTTATCTGCTGGTATGCAAGATGGTTTTTTCATGGTTAGGAAATGTACCGGTCATAAAAAATTTGAGTTGAG  
ACGTAACAAATTTGATGGAGGATGTAAGATCCATCTTATCAAAATGGTGTGACTCTTAAATCAATCTTTCGGCAGAGAGCT  
TTTTCGAGGACAACGCAAAAAGTAATGTAATGTAGACCGGGCTTTTATTTGAACATCAAAGGATTTCTTCAAAAAGCCCAA  
AAAGAAAAATGAAATTTACGGACTAGATGTCTACCATGTAATGTCGCAAAATGGTGTATAGCAATTTGCTGGAGGCTGAC  
TGGCAATACTACTTTAACGGCGTTAAGTGCAGGCTTGGAGTAATAGGATATCCGAGTATTAGTGATATCAAATCTAAAT  
TTAAGCAGAGGCAAGAGAAGCTTGTATGCCTATCAACGTCTGTACAGGTATACTCTTTAGCCATAAACTTTAA

>Cluster\_66738

ATGAGCGCAATCACATTACGTAAGCGTGGGTGACTTGCAGAGTCACTTCGTTTTCCGTCACCACCGTTACACATCG  
CCAGAAGGACGAGCTCGACCAGTTGAAAGAACAACCTCTTGTAAAACAAGAGATTGAGACTGAATGCAACGTTATTTAG  
AAATTTGCTAAACCTGGCGAAATCATTCTTGTGCGGTAGTAGTGGGGATGGGAGTCCGAGATTTTAAACCGTTGCCAA  
TCAATCCGCGTTATCAGCGCGGATTTAATTTTTCATCTGGATGCAACGCATAGCTTTGCCCGCAGCAATCAGCCATTTGA  
TGCTTTGAAATGATTTATTTGCGAATCATCAGCAGCAATCATCTCCATTTGCTCATTTGATCAATACCGGAATGCTCGTA  
ATTTTGCAGAGAAGGAGCTAAATGCCATCAGGTGATCCGATCGGCTATGTACTATTTTATCGGTGCAGCAGCAGCA  
AGCGCCCTTACCCTAACGAGAAATGTTCTTTTTTTGATTTTGAACATACCCTAAATTTTCAAGTTTAAAGAAAAATAAAA  
TTATTCACATTTATAAAACCTTATTAGATAACTTAACTCGCATGATGATAATAACTTATTTCAAGTTTATCTTTCGAC  
GCGATGAATCAGTTAATCCAGAGCTAAAAGAGGTCGTGAAATTTTAAATTTGCTTTGCAATGCTGCGTGCAGCAATGATTA  
ATTACACAACCTTTAAAGCTCGATTAATTAAGACAGGTCGTAACTACCAGAACATGCTGGATTTTTCGATCACCT  
GCTGACGGGACCTGGCTACTTATTTGATAACCTCTTACCAGGTAAGAAAAATGATTTGATGAAAAAGTTTGGCATTTT  
ATCCCGTAGATTGCACACTTATGAACCTGATCAGTTTGTGCTTATGAACTGGGACTGGTTGACCTGAGCTAGAT  
GATTTTTTAGTTCGCACTTGAAGTGTGCATATTAAGTTTGTATGCGCAGTGCCTAAGCCAGGCGATGCAACTTCAATTGAT  
CCGGCTTTTTTGGCTACTACAACAGCAATCATTGGGAAATGATTTATCATCGGAAATTTCCCGCTTCTTAAACGAGTCCG  
TGTTTGAACGTTACTCAGAAATCTGGCACTTGCATGAGAAATACACAGCAGATCCGGAGCAAAAAGATCACTGAATCGC  
TCTCATGCAATTTGAACTATTGCGGTTATGCGGTTATGCAACGCTTATGCAAAACCGCCTGAAATTAAGTATGCAAAAAGA  
GTTCTTTTTGGGTGAATTTGGTGGGGTAAAATAACCGCGCGGTTAGAGGTTAAGCCTAATTTGGGATGCCATCCGCAATA  
AACATACTGCTCATCAACCGGTTTCGATGTCTATTTAAAGTGGGGGAAAATCCACTGCCGATATCCATATCGGACTT  
AATCTTTTTGAATATTAGACAACTGAATAATGGCTATCGTCCGAATAAATGATAAAAACGCTATTGTGTTACTCGA  
TGAATTTGTTGAGTTGATTTGCAGGCGAGCTAAATTCAGCCGCAAAATTTTATGACGGCGGCAACAGGTTTATC  
GTGCAAGGCTGATGACGATATGATCATTAGCGGTATGGAGGTTAG

>Cluster\_23761

ATGAATCTTGGCAACAAAACCTACGATCCCGCGGGAATATCTGGCTTTCCAGCTGATAGCATCGCTTCCCATCTGTT  
TTTTCTTTTGGCGTGAATTAAGCTCAAACCTGAAAGGATACGTCGCCGCTCATGGACGTTGGCAATCGCCCTTGGCGTGG  
CTTTGCTGTTCTATAAAATGCGGCTCGTAACGCGCTGGCCTCGGTGTTTATGGCTTCTTACGGGTTGTGGCCATC  
GCGTGGATCATTTGACGCGGTGTTGCTCTATAAGATCTCGGTGAAAACCGGGCAGTTTGCATCATCCGCTGCTCAT  
TCTTTGATACACCTGACCGCGCTGCAATGCTGATCGGTTTCTGTTTTCGGCTTTCTTGAAGGAGCGCCAG  
GCTTTGGCGCACCGGTAGCAATTTACCGCGCATTTGCTGGTGGGCTGGGCTTTAAACCGCTGTACGCCCGGGCTGTGC  
CTGATTGTTAACCGCGCCAGTGGCATTTGGTGGGATGGGATTTCCGATTCTGGTCCGCGGCGAGGTAACAGGCATCGA



CAGCTTTGAGATTGGTCAGATGGTGGGGCGTCAGCTGCCGTTTATGACCATTATCGTGCTGTTCTGGATCATGGCGATTA  
TGGACGGCTGGCGCGGTATCAAAGAAACCTGGCCTGCGGTGCGGTTGCGGGCGGGTCGTTTGCATCGCTCAATACCTC  
AGCTCTAACTTTATTTGGCCGGAACCTGCCAGACATTATCTCTCGCTGGTATCGCTGCTGTCTGACTGTTCTCTCAA  
ACGCTGGCAACCACTTCGCGTATTCGCTTTCGGTGACTTAGGGGCGTACAGGTTGATATGACGCTGGCTCACACGGGTT  
ACACGGCAGGTAGGTCGCTGGCCTTGACACCGTTCCTGTTTCTGACCGCCACCGTAACGCTGTGGGATATCCCGCG  
TTTAAAGCCCTGTTGCTTACAGCGGTGCGCTGTATGAGTGGGTGATCAACATTCGCGTGCCGTACCTCGATAAACTGGT  
TGCCCGTATGCGCCAGTGGTCAGCGAAGCGACAGCGTATGCCCGCTGTTAAGTTTACTGTTCTCTGCCACCGGCA  
CCGCCATTCTGTTTGGCTGCCCTGCTCTGATTTGCTGGCTGAAGATGAAACCATCTGACGCTATCAGCACCTTCGGCAGC  
ACGCTGAAAAGACTGGCTTGCCTATCTACTCCATCGGCATGGCTGGCTGGCTTCCGCTTTATCTCGAACTATTCGGACT  
ATCATCAACGCTGGCGCTGGCACTGGCGCACACCGCCATGCATTCACCTTCTCTCGCCGTTCTCTCGGCTGGCTGGTG  
TCTTCCTGACCGGATCGGATACCTCATCTAACGCCCTGTTGCGCGCGTGAAGCCACTGCAGCAAAACAAATGGCGGTT  
TCTGACCTGTTGTTGGTTGCCGCCAACACCACCGGTGGTGTACCGGTAAGATGATCTCTCCGCAATCTATCGCTATCGC  
CTGTGCGCGGTAGGCTGGTAGGCAAGAGTCAAGTCTGTTTCCGCTTTACCGTCAAACACAGCCTGATCTTCACTGTA  
TGGTGGCGGTGATCACCACGCTTACGGCTTATGCTTAACTGGATGATTCCTTAA

>Cluster\_26451

ATGAAAATACGTTCCGCAAGTGGCATGGTGTCTTAACTCGATAAATGTATCGGCTGCCATACCTGTTCCGGTGACCTGTAA  
AAATGCTCGACCGGACGCGAAGGCATGGAGTACGCATGGTTTAAACAACGTCGAAACAAACCGGGCATTGGTTATCCGA  
AAAATGGGAAGATCAGGATGAGTGGCAAGGTGGCTGGGTGCGTGTGATGTAATGGCAAGATACGCCCGCTCTGGGACG  
AAGATGGCGGTAATAACAAAATTTTCGCCAACCCGGTAGTGGCGCAGATTGACGATTACTACGAACCTTTCACCTTCA  
CTACGAAATTTGCATAGCGCGCGGAAGGCAACATATTCACCGCCGCTCGCGTTCACCTGATTGACGGCAACGGA  
TGGACAAAAGTGTATGGGGCCAAACTGGGAAGAACTGTGGGCGGCAATTTGAAAAACGAGCCCGGACCGCAACTTC  
GAGGCCATGCAAAAGGAGATGTACGGGAGTTTAAAACACCTTCATGATGATATCTGCGCGCTTGTGCGAACACTGCCT  
TAACCCAGTTGTGTAGCGACCTGCCCGAGCGGCTATCTACAAACGCGAAGAACGCGCATTTGACTGATCGATCAGG  
ATAAATGCCGTGGCGTTCGCTTACAAAATGGCGATGGCAACAAAATCTACTTCAACTGGAAGCGGTAAGTCA  
GAAAAATGTATTTCTGTTATCCGCAATTGAGTCCGGTACGCAACAGTCTGCTCCGAAACCTGCGTGGGTGCGATTTCG  
TTATCTTGGCGTGTGCTTACGACGCGCAGCCATCGAAGAAGCAGCGAGTACCGAACGAGAGGTGATCTCTATGAAC  
GCCAGTGGCAAGTGTCTCTGATCCGACGATCCCTCGGTGATCGAAGAAGCCCTGAAACAAGGTATTTCCACAAAACGTTG  
ATTGACGCTGGCCAGCTTCGCTTACAAAATGGCGTTCGACTGGAAACTGGCGCTACCGCTGACCGTGAATAGCTCA  
CACCTGCGGATGGTCTGGTACGTTCTTCGCTGTACCGATTACGCTTACGCTGATGCGGGCGGCTTGCCGAAAAGCG  
AAGCGGTGCTGCCCGCATCGAAAGCCTGCGTATTCGCGTGAATATCTCGCCAAATGTTGAGTGGCGGTGATACCGGT  
CCGGTACTGCGGGCGTGAACGGATGATGGCGATGCGCCACTATATGCGTTCACAAAACCGTGGAAAGCGTACTGATAC  
TCGTGCCATCGACGAAGTGGTCTGAGCGTCCGCCAGGTCGAAGAGATGATCGTTACCTCGCCATGGCAACTATGAAG  
ATCGTTTCGTCATCCGACAAGCCATCGGGAATGGCGGGCGATGCCTTCGAGAACGCAACGGCTGCGGTTTTACCTTT  
GGCGACGGTTGCCAGGTTCCGACAGCAAAATCAACCTGTTCAACAGTAGCCGATCGATGCCATCAACATCACCAGGAT  
CGCGCAAAAGCGGAGGGCGAATAA

>Cluster\_6010

ATGAGTTGCTTAGATCAATTATCTTCAGAAAATAAAAAATCCCTATTATCATCAGTATTTTCAAAGAGCTATTTCTCTG  
GATTGGCTCTGGATTTTCGTACAATTTCCGATATCCAAGTGGGGGGCGTACTTGAAGAAATAGCAAAGCGAATAGAGT  
ACCCGTTAAAATTAGATCATCAGCCCTCTGCGTGCAGAAATTTTAAAGTTATGCGATGAGTGAATCAATA  
AAAGAATATGATTTCAAATTCGCTTCCAGGACGATTTATAGATTTAAAAACAGAACTAAAGAACCAGATGGCTTAA  
AAGATTCAAACTCTTCGCTCCCAATACAATTGTAACAATTAACGGGATGAGGTGCTTGAAGAAACATTTGAGCATATGG  
CAAATAAAATCATCAGAAAGGATCCATTTCCCTAAAGTATCAACAAAAGGGAAAAATATCTTCAAATTCATGGTGACGTC  
GGAAAACCTGATTTGTTTATAACACAAAGTCAATCTTTCTTTTTCAGCGCGAAGACACTTATCTTCCAAAATAAACTGTAA  
TTACACATTTGTTTTCAGAAATGTCCCTATATTCATCGGTTACAGCTTAAACCGACCCAAATATAGGTTTCTTTATGAAG  
AAGCATTAGCACATCTGCATGGAAGAAACCCGCGCAGCATTCATGGTAAATTCACCCAGATGCAAAACCTTTAACTTTCCGAG  
GAGACAAAGTATTTTAAATCAAAAATATACACCTGATTAAGCAACCATAGAAGACTTCTTGCAGATTTATCTCA  
GAAATATAAATCCCTTTAAAGAATCACCTCATCGTTTCAACCTTGGACGCAAGAGGTTTGGGACTTCAACTATGCTGAA  
TGGATACCGTTACGAAAGGAAAAAAAATAAAAAGCGGAACTAGAAGCCTTATGTCTCAAAGAGCTGCAAGCTGGGCC  
GTGACAAAAGCCATAATTGACATTTCAAAGAAACCAATATTTGATCAATTCGCGCGGAAACCTTCTTTCTCCAGACAA  
TATTTATCCCTACAGAGAGTTCGATGCTTTAGTTAATGTAGTCATAACACTTAGCAACAATCAGGTTTACCCTGACGAGC  
TTATACGTTCAAGATTTTCAATGCTTCTGTTGTTCAAATGTTGATCGAAACAGAGGTTTGGGACTTCAACTATGCTGAA  
GTACCTTTCTTAACTTTTAAAGATAAGCCCTAGCCCGGCACTGAAAGTTTTCGACAAAAAATATCCCATATAATAGA  
AATTTATGCGATGGTCTCCCATCTGAAATAGGGAAGTCTGGCAACATGGAATGATTTAAAGAAAAACAAGATTGGA  
TTAGCCACAGTATATTGTTGGCATTCTTTCGAAACTTGAACCGATGGTGACTTAGAATACCAACCCAGAGATAAAAA  
TGGCTAAACATCTGAAAAAATGCCCTCAGCAACGGCTCGAGATATCAAGAGAATTGATACCTCTGTAACCCAGCTTA  
G

>Cluster\_29403

TTGATAATCAGCGAAATGCAACGCAAGCTGGCCACATGGCGACGCCAGTCCGTTCCCTACGGATTCAACGGCTGCTGGC  
TCTGATAACACAACCAGAAATGGCTGGCTGAAGCGCGCGGATCAGCTTTTCATCAAAGGGGGCCATACCCCCGGCGTTG  
ATGGCGTGAACAAAACAATGCTACAGGCGAGCTGGCTGTTGAGTGCAAATCCTCAGGGATGAATTACTCTCAGGCCAC  
TACCAGCCCTTGCCCGCCAGACGGGTTTACATCCCTAAAAGCAACGGCAAACTGCGACCACTGGGTATCCCGCGTTGGC  
GGATCGTATTTGTCAGCGGGCCATGCTGTAGCGGATGGAGCCGATATGGGAGAGTGAATTTTCAACGCTCTCATATGGCT  
TCCGGCTGAGCGCAGTGTCCACCACGCGATCCGCACGGTGAATTTACAGCTCACAGACTGTGGTGAACCCGGGGACGC  
TGGGTGATGAAAGCGACCTGTCCAGTTACTTTCGACACCGTACATCATCGACTGCTGATGAAGGCTGTACGCCGAGGAT  
CAGTGACGACGTTTTCATGACTCTGTGTGGAACCAATCAAGCGGGACATATCGATGTCGGTCTCTTTTCGGGCGGCCA  
GTGAAGGTGTCGCCACAGGCGGTGTATATCGCGCGTATTTATTCGAAACATCATGCTGAATGAGTTCGATCAATACCTGCAT  
GAGCGCTACCTGAGCGGAAAGCCAGAAAAGATCGGTGGTACTGGAATAACAGTATCCAAACGGGGCCGAAAGTACGGCGGT  
CAGAGAAAACCTGGCAGTGGAAACCCGCGGTGGCGTACTGCCGCTATGCCGATGATTTTGTCTCATCGTCAAAGGCACCA  
AAGCACAGGCGGAAGCCATCAGGAGGAGTGTCCGGGTGTGCTCGAAGGCAGTCTGAAACTCAGGCTGAACATGGATAAG  
ACTAAAATCACCATTTAATGACGGCTTATCTTTCTGGGCGACAGGCTCATTCGCAACGCGAGTCTGTTATGGCGAGAT  
GCGAGTGGTCTCAACGATCCCGCAGGAGAAAGCCAGAAACTTCGCCGATCGCTGACAGCACTGTTATCAGGCAACTACA  
GTGAAAGCAAGTCGATATGGCTGAAACAATCAACCGAAAACGAAAGGCTGGGCCATGTTCTATCAGTTCTGTTGATTTT  
AAGGCCAAAGTCTTCAATATATCGACCTGTCTGTTCTGGAAGTGGCTCACTGGCTGGCCGCAAAATACCGTACAGG  
TATCGTTTCTTGTAGTGGTGTGTAATACCGAAACCGGTCAGAGCAAAACGTTGGGTTTATTTGGTAAAAACA  
AACAGGCAAGCTCAGCGGCAAAATCTGTACCGTTGGTGGGCAAGCAAGAGCTGTTCCGCTGGCGCTACCCGAA  
GGTAAATCCCTATCTGAGGACGGGACGAGAAACAGTATACATCGCGCTTACAGAAAGTGGCAATGGCGTTCCGCGAGCAT  
TTAA

>Cluster\_59832

ATGGCACAAGTCATTAATACCAACGCTCTCGCTGATCACTCAAATAATATCAACAAGACCGATCTGCGCTGTCGAG

TTCTATCGAGCGTCTGTCTTCTGGCTTGGCTATTAACAGCGCGAAGGATGACGCAGCGGGTCAGGCGATTGCTAACCGTT  
TCACCTCTAACATTAAGGCCTGACTCAGCGCGCCGTAACGCCAACGACGGTATCTCCGTTGCGCAGACCACCGAAGGC  
GCGTGTCCGAAATCAACAACAACCTTACAGCGTGTGCGTGAACGACGGTACAGGCCACTACCGGTACTAATCTGAGTC  
TGATGTCTTCTTATCCAGGACGAAATTAATCCCGTCTGGATGAAATGACCCGCTATCTGGTCAGACCCAGTTCAACG  
GCGTGAACGTGCTGGCAAAAATGGCTCCATGAAAATCAGGTGGCGCAAATGATAAACAGACTATCACTATCGATCTG  
AAGCAGATTGATGCTAAAACCTTGGCCCTGATGGTTTTAGCGTTAAAAATAACGATACAGTTACCACATAGTGTCCAGT  
AATGCTTTTTGGTGTACACCACAAACATATTAACCTTACTGGAATTACCCCTTCTACGGAAGCAGCCACTGATACG  
GCGGAACTAACCCAGCTTCAATGAGGGTGTATACTGATAATGGTAATGATTACTATGCGAAAAATACCCGGTGGTGT  
AACGATGGGAAGTATTACGCAGTAAACAGTTGCTAATGATGGTACAGTGAACAATGGCGACTGGAGCAACGGCAAAATGCAAC  
TGTAACCTGATGCAAACTACTAAAGCTACAACATCACTTACAGCGGTACACCTGTTTCAAGATTGATAACTGCAGGTT  
CCGCAACTGCCAACCTTGGTGTCTTAGCTTAGTAAAACCTGCAGGATTCCAAGGGTAATGATACCGATACATATGCGCTT  
AAAGATACAAATGGCAACTCTTACGCTGCGGATGTAATGAACTACTGGTGTCTTTCTGTTAAAACATTAACCTATAC  
TGACTCTTCCCGTCCCGCAGTTCTCAACCCGCGTCAAACCTGGCGGAGATGATGGCAAAACAGAACTGGATCGATATG  
ATGGTAAAACATACGATTCTGCGGATTTAAATGGCGGTAATCTGCAACAGGTTTACTGCTGGTGGTGGGCTCTGACT  
GCTGTTGCAAAATGGTAAAACACCGATCCGCTGAAAGCGCTGGACGATGCTATCGCATCTGTAGACAAATCCGTTCTTC  
CCTCGGTGCGGTGCAAAACCGTCTGGATTCCGCGGTTACCAACTGAACAACACCCTACCAACTGTCTGAAGCGCAGT  
CCCGTATTGAGCCCGGACTGCGACCGAAGTGTCCAATATGCTGAAAGCGCAGATCATCCAGCAGCGCGGTAACCTCC  
GTGTTGGCAAAAGCTAACAGGTACCGCAGCAGGTTCTGTCTCTGCTGCAGGGTTAA

>Cluster\_54698

ATGTTAACCTGTATACATCTTCAAGCTGGGCTTTCAGTATTGATGATGTCGCAAGCAAGCTCAATCCTTAGCCGGGAA  
AGGCTATGAGCGGCCAAAAGCAACTTGCCTCCGTTTTCCGCGATATGAAATACGCGGACTATCAGCAGATCCAGTTTA  
ATCATGACAAAGCGTACTGGAACAATCTGAAGACCCCATCAAACTCGAGTTCACCATCAGGGTATGTAATCTCGATACC  
CCGGTCAAAAATAAGTGAAGTGCAGCCACCGCAGTCAAACGAAATCAAAATACAGCCCGGATTAATTTCACTTTCGGCGATGT  
TCAGCATGACAAAGACACGGTAAAAGACTTGGTTTTGGCGGTTTAAAGTGCCTTACCAGATCAACAGCAAGATGAAA  
ACGATGAAATCGTCAGCATGCTCGGGCCAGCTATTTCCGCGTATTGGTGCAGGTCAGGTTTATGGCCTTTCTGCCCGC  
GGCTGGCAATGATACCGCCTTGCATCGGGTGAAGAATTTCCACGCTTCAAAGAGTTCGGATCGAGCGTCCAAAACC  
GACTGATAAACGTTTAAACATTTATGCATTGCTTGACTCGCGCGCGGACAGGTTTACAAATTCGTGGTTATGCCAG  
GGCGTGACACGGTTGTGGATGTGACGCTGAAAATCTATCTCGCGGATAAAGTCGGCAAACTGGGGTTGACCTTAAAC  
AGTATGTTCTGTTTGGGCCGAACCAACCGTCCGCTGCAAAATAACTATCGTCCGGAGTGCACGACTCAACGGTCTGTC  
TATCCATGCGCGTAAATGGCGAATGGATCTGGCGTCCGTTGAATAACCCGAAACATTTAGCGGTGAGCAGCTTCTCGATGG  
AGAACCAGCAAGGCTTCGGTCTGTTGACGCGCGGTCGTTTCTCCGCTTTGAAGATCTCGATGATCGTTACGATCTT  
CGTCAAAGCGCATGGGTGACTCCGAAAGGGAGTGGGGTAAAGGACGCTTGAAGTGGTAAATTCACCAACGATGA  
AACCAACGATAACATCGTCGCTTACTGGACGCCGATCAGCTGCCGAGCCGGTAAAGAGATGAACCTTAAATACACCA  
TCACCTTACAGCGTATGAAAGACAACTGCATGCGCCAGATAACGCATGGGTGCAACAACCGCTCGTTCAACGGGGAT  
GTGAAGCAGTCAACCTGATTCCGCGCAGCTGACGGTACTATCGCCTTTGTTGGTGCATTTTACCAGCGCAGGATGAAAA  
ACTGCCAAGAGATACCCCGGTACAGCGCAACAGCATTTGGTGATAAATGGTGAATAGTGAAGCAGCGGTGCGCTATA  
ACCCGGTTACCAAGGCTGGCGTCTGGTGTGCGTGTGAAAGTAAAGATGCCAAGAAAACACTGAAATGCGTGTGCG  
CTGGTGAATGCCGATCAGACGTTGAGTGAACCTGGAGTACCAGTTACTGCCAATGAATAA

>Cluster\_61880

ATGGATGTCATTAAGAAAGAAACATTTGGTGGCAAGCGACGCGTGAAATGGTCAAGTGTAGGTCGCTCGGCCTGCTGGT  
GGGTTACCTTGTGTTTTAATGTAGCACAAGGGGAATACCTGTTCCGCAATTACCACGCTGATATTGAGTTCAGCGGGGC  
TGTATATTTTCGCAATCGTAAAGCCTACGCTTGGCGCTATGTTTACCAGGAAATGGTGGAAATGAGTATTTTCGTCCT  
TTCCCTCTGGTCTGCACCATCGCCATTGCTTCAACCACTACAGCAGCATAACCAGCTGACTTTTGAACGCGCAGGA  
AGTGTGTTAGATCGCTCCTGGCAAGCAGGCAAAACCTATAACTTTGGTCTTTACCAGCGGGCGATGAGTGGCAACTGG  
CGCTCAGCGACGGCGAAACCGGCAAAAATACCTTCCGACGCTTTTAAATTTGGCGGCGAGCAAAAACCTGCAACTGAAA  
GAAACGACCGCCAGCCGAAAGCGAACGCGCAATCTGCGCGTGATTACCCAGAATCGTCAGGCGCTGAGTGACATTTAC  
CGCAATTTGCCCGATGGCAACAAGTGTATGATGAGCTCCCTCGCGCAGTTTCTGGCACGCGCCGCTTATCACACTCG  
ACGGTGACGGCACGTTGACGAATAATCAGAGCGCGGTGAAATACTGTCGGAATAACCAAAATGGCTTTTACCAGTCCATT  
ACCGCCGACGGCAACTGGGGTGTGAAAAGCTAAGCCCGGTTACACCTGACACCGGCTGGAAAAACCTTTACCAGCGCT  
CTTTACCAGCAAGGCATTCAGAAACCGTTCTCGCAATTTCTGCTGAGCCGTTGGTCTTCTCGCTGATCACTGTCTTTT  
TAACGGTGGCGGCTGGCATGGTTCTGGCGTGTCTGGTGCAGTGGGAAGCGTTGCGCGCAAGCGGCTATCGCGTCTG  
CTGATTTCTGCCCTACGCGGTGCCATCGTTCAATCTTGAATTTCAAAGGTTGTTTAAACAGAGCTTCGGTGAAT  
CAACATGATGTTGAGCGCCTGTTTGGCGTGAAGCCCGCTGGTTACAGGATCCGACCCCGCCGACGATGCTAATTA  
TCGTCAATACTGGTGGTATCCGTACATGATGATCCTTCGATGGCTTGGTGAAGCGATTCGGACGATTTGTTAT  
GAAGCTTGGCAATGGATGGCGCAGTCCGTTCCAGAATCTTAAAGATTACGCTGCGCTGTGATTTAAACCGCTGAC  
GCCGCTGATGATCGCCAGCTTCCGCTTTAACTTAAACACTTCGCTGCTGATTTCACTGTTAACCAACGGCGGCCGATC  
GCTTGGCACGACCGCCAGCGGTTATACCGACTGCTTGTAACTACACTACCGCATCGCTTTTGAAGCGCGCGG  
GGTCAGGACTTCGGTCTGGCGGACAAATGCCAGCTGATCTTCTGCTGGTGGGTCGCTGGCGATAGTGAACCTGAA  
AGCCACGCAATGAAGTTTGAATTA

>Cluster\_28611

ATGTCGGTTTCTAAAAACCTATGGTACTGGTATTCTGGATGGCTATGGCTATCGCGAAGAACAGCAGGATAACGCCAT  
TTTTAGTGTAAAACCCGGTAATGGATGCACTGTGGGCAATCGTCCGATACCCCTGATCGAGCCTCCGGTCTGGAAG  
TCGGTCTGCCTGACCGTACAGTGGGCAACTCCGAAGTAGGCCACGTTAACCTGGGTGCGCGCCGATCGTGTATCAGGAC  
CTGACTCGTCTGGACGTTGAAATCAAAGATCGCGCTTTCTTTGTAATCCGGTGTGACTGGTGCAGTATGATAAAGCGAA  
GAACGCGAAGCAAGCAGTACACATTAATGGGCTGCTCTCCGAGGTGGTGTACACAGCCACGAAGATCACATCACTGGCGA  
TGGTAGAATCTGGCAGCTGAACGCGCGCAGAAAAAATCTACTACAGCATTCCTTGAACGCTGCGGACTCCGCGCCG  
AGTGTGAAATCTCGCTGAAAAAATTCGAAGAGAAATTTGCCGCGTGGGTAAGGCCGCTAGCGTCCATCATTTGGTGTG  
TTACTACCGGATGGACCGGATAACCGTTGGGATCGCGTTGAAAAAGCTTATGACCTGCTGACTCTGGCGCAAGGTGAGT  
TCCAGCCGATACCCGCTTGGCGGTTGCGAGGCTGCTTATGCTCGCGACGAAAAACGACGAGTTCGTGAAAGCGACCGTT  
ATTCGTGCAAGAGTCAAGCCAGATGCGGCAATGGAAGCGCGGATGCGGCTGATTTTCAAGAACTTCCGTTGCTGCAACCGCC  
CGGTGAAATCACTCGTGTCTTCTGTAATGCCGATTTGACGGCTTCGCGGTAAGAAAGTGGTAAACGCTGATTTCTGTA  
TGCTGACCGAATACGCTGCGGACATCAAAACCGCAGTGCTTACCACCCGCTTCCCTGGTTAACACTTCCGCGAGTGG  
ATGGCGAAAAACGACAAAACCTCAGTCCGATTTTCCGAAACCGAAAAATAGCCACGTTACTTTCTTCTTCAACGGTGG  
CGTAGAAGAGTCTGTTCAAAGGCGAAGATCGCAATTCGATCAACTACCGAAAGTGGCTACCTACGATCTGCAACCGGAAA  
TGAGTCCCGCAGAGCTGACCGAAAAACTGGTTGGGCAATCAAGAGCGGCAAAATACGACACCATATCTGTAACATATCCG  
AAGCGGACATGGTGGTCAACCGGGTGTGGAAGCGCGGTTAAAGCGGTTGAAGCGCTGGATGCTGCTGCGTGAAGA  
AGTCCGAAAGCGGTTGATGTCGGTGGGTAACCTGCTGACTACCGCTGACCCAGCTAACGCTGAACAGTACGCGCATC  
CGGCAACGGGTCAGGCACACAGCACACCAACCTGCCAGTTCGCTGATTTACGTTGGTGTGATAAGACGTTGAAAGCG  
GTTGAAGCGGCAAACTTTCTGACATCGCGCCGACCATGTTGTCGCTGATGGGATGGAATCCCGAAGAGATGACTGG

TAAGCCGCTGTTTCATCGTGAATAA

>Cluster\_21687

ATGCGAATTGGCATAACCAAGAGAACGGTTAACCAATGAAACCCGTTGTCAGCACAGCCAAAAACAGTGGAACAGCTGCT  
GAAACTGGGTTTTACCGTCGCGGTAGAGAGCGCGCGGTCACCTGGCAAGTTTTGACGATAAAGCGTTTTGTGCAAGCGG  
CGCTGAAATGTAGAGGAAATAGCGTCTGGCAGTACAGATCATCTGAAGGTCAATGCGCGCTTAGATGATGAAAT  
CGGTTACTGAATCCTGGGACAACGCTGGTGAGTTTTATCTGGCCTGCGCAGAAATCCGGAATTAATGAAAAAATTGCGGA  
ACGTAACGTGACCGTGATGGCGATGGACCTGTGTCGCGGTATCTCACGTGCACAAATCGCTGGACGCACAAAGCTCGATGG  
CGAATATCGCGGTTATCGCGCCATTGTTGAAGCGGCACATGAATTTGGGCGCTTCTTTACCGGACAAATCACTGCGGCC  
GGAAAGTGCACCGGCAAAAGTATGGTGTGATTTGGTCCGCTGTCGAGGTCTGGCCGCCATTGGCGCAGCAAAACAGTCT  
CGGCGCGATTGTGCGTGCATTTCGACACCCGCCCCGGAAGTGAAGAACAAGTTCAAAGTATGGGCGCAGAAATCCTCGAGC  
TGGATTTTTAAAGAGGAAGCGGCGAGCGGATGGCTATGCCAAAGTATGTCGACGCGTTCATCAAAGCGGAAATGGAA  
CTCTTTGCGCCCGGCAAAAGAGGTGATATCATTTGTCACCACCGCGCTTATCCAGGCAAAACAGCGCCGAAGCTAAT  
TACCCTGTAATGGTTGACTCCATGAAGCGGGCAGTGTGATTGTCGACCTGGCAGCCAAAAACCGCGCAACTGTGAAT  
ACACCGTGCAGGTTGAAATCTTCACTACGGAAATGGTGTCAAAGTAAATGGTTACACCGATCTTCCGGGCGCTGCGG  
ACGCAATCTCACAGCTTTACCGCACTAACCTCGTTAATCTGCTGAAACTGTTGTGCAAAAGAGAAAGCGGCAACATCAC  
TGTGGATTTGATGATGGTGTGATTCGTGGCGTACCGTGTGATCCGTCGCGGCGAAATTAATCTGGCCGCGCCCGGATC  
AGGTATCAGCTCAGCCGACGGCGCAAAAAGCGCACCGGAAAGTGAATAAGTGAAGAAATGTGCCCTACCGCTCAGCTGG  
CGTAAATACGCGTTGATGGCGTTGGCAATCATCTTTTTCGGCTGGATGGCAAGCTTGGCCAAAAGAGTTCTTTGGACA  
CTTCACTGTGTTCCGCGTGGCCTGCGTTGTCGGTTATTACGTGGTGTGGAATGTATCGCACGCGCTGCATACCGCTTGA  
TGTCGGTACCAACGCGATTTACGGGATTTATGTTGTCGGAGCACTGTTGCAGATTGGCCAGGGCGGCTGGGTTAGCTTC  
CTTAGTTTTTATCGCGGTGCTTATAGCCAGCATTAATATTTTCGGTGGCTTCACCGTGACTCAGCGCATGAAAAATGTT  
CCGCAAAAATTA

>Cluster\_23744

ATGACCAATAATCCCTTCAGCACAGATTAAGCCCGGAGTATGGTTTTCTTAAAGTAAAGCCGTTATGACAA  
CTTTATCGCGCGGAGTGGGTAGCCCTGCGCAGCGGAGTATTACCAGAACCTGACGCGGTTGACCGGGCAGCTGCTGT  
GCGAAGTGGCGTCTTCGGGCAACGAGACATCGATCTGGCGCTGGATGTCGCGCAGAAAGTGAAGATAAATGGGCGCAT  
ACTTCGGTGCAGGATCGCGCGGCGATTCTGTTTAAAGATTGCGGATCGGATGGAGCAGAACCTGCAACTGTTAGCGACCGC  
TGAACCTGGGATAACCGGCAACCCATTTCGCGAAACAGTGTCTGTGATGTGCGCTGGCGATTGACCAATTTCCGCTAAT  
TTGCCCTCGTATTCGGGCGCAGGAAGTGGGATCAGTGAAGTGGATAGCGAAACCGTGGCCTATCATTTCCACGACCG  
TTAGCGTGGTGGGCGAGATTATCCCGTGAACCTCCCGCTGCTGATGGCGAGCTGGAATAAGTCTCCGCGCTGGCGCG  
GGGCAACTGTGGTGTGTAACCCGCACTTACCCCGCTTCTGTACTGCTGCTAATGGAATCGTCGGTGTATTTAC  
TGCCCGCGCGCTGGTGAACGTGGTCAACGCGCAGGTGGGAAATTTGGCGAATATCTGGCGACCTCGAAACGCATCGCC  
AAAGTGGCGTTTACCGGCTCAACGGAAGTGGGCAACAATAATGCAATACGCCACGCAAAACATTTATCCGGTGACGCT  
GGAGCTGGGTGGCAATCCGCAAAATATCTTCTTTGCTGACGTAATGGATGAAGAAGATGCCTTTTTCGATAAAGCGCTGG  
AAGGCTTTGCACTGTTTGCCTTTAACAGGGCGAAGTTGACCTGTCCAAGCCGTGCTTTAGTGCAGGAGTCTATCTAC  
GAACGCTTTATGGAACCGGCCATCCGCCGTGTCGAAAGCATTCGCAAGGTAACCCCGCTCGACAGCGTACGCAAAATGG  
GGCGCAGTTTCTCACGGGCAACTGGAACCATCTCACTACATTTGATATCGGTAAGAAAGAGGGCGCAGACGCTGCTCA  
CTGGCGGGCGCGCAAGCTGCTGGAAGGTGAACGAAAGACGGCTACTACCTGCAACCGACGATTTTGTGTTGGTCAAGA  
AATAATGCGCGTTCAGGAGGAGATTTTGGTCCGCTGCGGTTGACCACTTCAAACAGATGGAAGAAGCGCTGGA  
GCTGGCGAACGATACGCAATATGGCCTGGGCGCGGCGTCTGGAGCGCAACGGTAATCTGGCTATAAGATGGGCGCG  
GCATTCAGGCTGGGCGGCTGTGGACCACTGCTATCACGCTTACCCGGCACATCGCGGCTTTGGTGGCTACAAACAATCA  
GGTATCGGTCGCGAAACCCACAAGATGATGCTTGGATTTATCAGCAAAACCAAGTGCCTGCTGGTGGAGTACTCGGATAA  
ACCGTTGGGGCTGTTCTGA

>Cluster\_22044

ATGGCACAAAGTCATAATACCAACAGCCTCTCGCTGATCACTCAAAATAATATCAACAAGAACAGTCTGCGCTGTCGAG  
TTCTATCGAGCGTCTGTCTTCTGGCTTGGCTATTAACAGCGCAAGGATGACGCGCAGGTTCAGGCGATTGCTAACCGTT  
TTACTTCTAATAATTAAGCCCTGACTCAGGCTGCACGTAAACGCAACGACGCTATCTCTTGGCGCAGACCACTGAGG  
GCACTGTCTGAGATTAACAACAACCTTACAACGTGTGCGTGAGTTGACTGTACAGGCGACACCAGGTACTAATCTGATTC  
TGACCTGGCTTCTATTACAGGACGAAATCAATCCCGTTTGTCTGAAATGACCGGCTATCCGGGACAGCCAGTTCAACG  
CGGTGAACGATTTGCTAAAGATGGCTCCCTGAAATTCAGGTTGGCGCAATGATGGTCAAGTATCTCTATCGACCTG  
AAGAAAATGACTCTGATCTCTGGGTTTGAATGGTTTCAACGTTAATGGTTCTGGTACCATAGCAAAACAAGCGGCCAC  
AATCAGTGACTTACTGCTCAGAAAGCCGTTGACAACGGTAATGGTACTTATAAAGTTACAAC TAGCAACGCTGCACTTA  
CTGCATCTCAGGCATTAAGTAAGCTGAGTGATGGCGATCTGTAGATATGCAACCTATGCTGGTGGTACAAGTTCAACA  
GTTAGTTATAAATACGACGAGATGCAAGTAACTCAGTTATAACAATACTGCAAAACAAAACAAGTGTGCGGCTGGAAC  
TCTGGCAGATCTTCTCCCGGACGCTGGCCAGACTAAACCCGTAATCAAGCTGCTACTGTTGTTAACTTTA  
ATGTTGACGCAACTGGTAATCTGCAAAATGGCGGACAGCAAGCCTACCTGACTACTGATGGTAACTTACAACAACAAC  
TCCGGTGGTGGGCTACTGCAACTCTTAAAGAGCTGTTTACTCTTGTGTCGCGATGGTAAATCTCTGGGAAACGGCGTAC  
TGCTACCGTTACTGATAATACTACTGATAAATTTCAAAGCTGCTGCGGACGTTACTGATGGTGTGCTGCTGCTG  
CTGCTGGTGAATCTTATACAGCCACTGTTTCTAAAGATGTCTTCTGGCACAACCTGCAATCTGCAAGTCAAGCGACGCA  
ACCGCTACCGACGGTACTGTCGCAACGATCAACTATAAATCTGGTGTGATGATCGGTTCCGCTACCTTTACCAATGG  
TAAAGGTAAGTCCGATGATGACTTCTGGTACAACCTCAGCTGAGTACAGGTGCTAAAGCTGATATGTTGATGGCA  
ACAAATGAAGTACTTCCACTGCACTTACGATACGACTTACTCTGTCACGCAAGATACAGGCGCAGTAAAGTGGTATCA  
GGTACTGGTACTGGTAAATTTGAAGCTGTTGCTGGTGGGATGCTTATGTAAGCAAAGATGGCAAAATTAACGACAGAAC  
CACCAGTGCAGGCACTGCAACCAAGATCCTCTGGCTGCGCTGGATGCTGCTATCAGCTCCATCGACAATTCGGTTCAAT  
CCCTGGGTGCTATCCAGAACCGTCTGGATTCGCGCGTCAACCACTGAACAACACCACCTACCAACCTGCTGAAGCGCAG  
TCCCGTATTCAGGACCGGACTATGCGACCGAAGTGTCCAACATGTGCAAGGCGAGATTATCCAGCAGGCGCGTAACTC  
CGTGTGGCAAAAGCCAACAGGTACCGCAGCAGGTTCTGTCTGCTGCAAGGTTAA

>Cluster\_41898

ATGAAATGCAAAAGCAATTAAGTGAAGCTGTGGAGCACAAACAGCTACGCCACTGGACGTGACGTTTGGCTGACCGT  
GGCGGAGATGAACATCTGCGCTCACCTCGCGCGGCACTATAAGTCATGATGCCGAGAGGGACACGTTTGGTTTTC  
CGCTTTCAGACTGGAAAATAACGAGGCATCGCATCCGCTGTTGGCGACCTGTGTGAGTAAATCGGTGAGCTACAAAT  
TGGGAAGAAATGCTTGGCTGCTTACAAGCGGTCAGCGGGGAGATGAACCAACGCCGATGATCTCTGTTGGCGATCGTCT  
TTATTTGAAATCGCATGTGGTGAACGAGCGCACAGTGGCAGCTTTTCAACGAAAGTGAATCATGCAATGAGGTTGATG  
AAGCTCTACTGGCGCAAAACCTGGCAAACTTTTTCCAGTAAGCGATGAAATTAAGTGGCAAAAAGTTGCGGGCAGTG  
GCGCTGACGCGGCGGATTTCCGGTGAATTTCCGGCGGTCCTGGCACCGGTAACGACACCAGTACGGAAGTTGCTGGCAGC  
CTTAATCCAAATGGCCGACGGGAAACGCTGTGCTATCCGCTGCTGGCTGCAACCAAGGTAAGCTGCGCGCGCTTAAACG  
AATCTCTCGGCAAGGCTTTGCGCAAAATACCGCTGACCGATGAACAAAAGAAACGCAATTCGGGAAGATCCGAGCACTTTG  
CACCAGTTGCTGGGTGCGCAGCGGGTAGCCAGGCTTTACGTCACTATGCGGTAACCCGCTGCATCTGATGTGCTGGT  
GGTAGATGAAGCGTCAATGATCGATCTGCTATGATGTGAGACTGATCGACGCTTGGCCGATCATGCGCGAGTGTCT

TTCTCGGCGATCGTGATCAACTGGCCTCGGTTGAGGCTGGGGCTGTGCTGGGCGATATCTGCGCTTATGCCAACGCGGGC  
TTTACCAGCGAGCGTCCCGGGCAGTTGAGCCGCTGACGGGAAGCCACGTTCCAGCAGGAACGGCACAGAAGCGGCATC  
TTTGCGCGACAGCCTCTGCCTGCTGCAAAAAGCTATCGTTTCCGCGAGCGATTCTGGCATTGGTCAGTTAGCTGCGGCGA  
TTAACCGTGGTATAAAAACGGCAGTGAACACCGTTTTTTCAGCAGGATTTTACTGATATCGAAAAACGACTTTTACAGAGC  
GGCGAAGATTATTTCCGATGCTTGAGGAAGCTCTTGAGGACTTACGAGCTTATCTGGATCTGCTGCAAGCGGACGCTG  
GCCGATTTAATCATTACAGCGTTCAATGAGTACCAGCTTTTGTGCGCCCTGCGGGAAGGGCCGTTTGGCGTGGCTGGGC  
TGAATGAGCGAATGAGCAGTTTATGCAACAGAAAGCGCAAAATTCATCGCTCATCCGACTCTCGTTGGTACGAAGGCCGA  
CCGGTGTATGATTGCCCGTAATGACAGCGCGCTTGGGTTGTTAATGGCGATATCGGTATCGCTCTGGATCGTGGGCGAGG  
GACGCGCTGTGGTTCCGATGCCGAGCGGCAATTAAGTCTGTGCAACCGAGTCCGCTGCGCAGAGCACGAAACGACGT  
GGGCGATGACGGTACATAAATCGCAGGGATCGGAGTTCGACCATGCGGCGTGTATTTACCGAGCCAACGACGCGCGGTA  
GTAACACGAGAGCTGGTTTACACCGCGGTGACCGCGCGCTGCCGCTGTGCTGCTGTATGCCGATGAGCGCATATTAAG  
TGGCGCAATCGCCACTCGTACTGAGCGGCGAGTGGTCTGGCGGCGTTGTTAGTTACGCGGAATAA

>Cluster\_41298

ATGGTGAACAATATGACCGACTTAACCGCGCAAGAACCAGCGCTGGCAGACCCGCGATCATCTTGATGATCCGGTGATTGG  
CGAAGTGGCAACCGTTTTGGGCGGATGCCTTTACTGTTTACGCGGACTCGCACCGGGGTTCCCGTTGTTGGATCAAGC  
GTGAACAATTTACTGGAAGTGGGCGATTTCTTAAAGAACTTCCGAAACCTTACGTATGCTGTTTACTACCGGCATG  
GACGAACGCTTCCGCGCACACCGCGAAGGGTTACTCGCGCGGATTTTTCCGTTTTCTACCATCTGATTTCTAATCGATCG  
TAACCGGACATCATGCTGAAGGTGGCGTGGCAGAAAACGACCTGCACGTACCGACTTACCAAATTAATCCCGAACG  
CTAATGGTATGAGCGTGAACCTGGGATCTATTTGGCATTACATTCGACGGTCAACCGAACCTGCGCGCATCATGATG  
CCGCAAACTGGAAGGTACCCGCTGCTTAAAGATTACCCGGCGCGCTACCGAATTTCTCGCGTTTGGCTGACCAA  
AGCCAAACAGGATCTGGAGATGGAAGCCCTGACCTTCAAACCGGAAGAGTGGGGGATGAAGCGCGGACCCGAAATGAGG  
ACTTCATGTTCTCAACCTCGGTCCGAACACCGCTCTGCGCAGGCTGTTCCGTTATCGTTTGCAGCTTGTAGGCGAA  
GAGATTTGCTGACTGCTACAGACATCGGTTACACCACCGTGGCGCTGAGAAAATGGGCGAACGCCAGTCTTGGCACAG  
CTACATTCGATACCCGCTGCTGCTGCTGCTGCTGCTGCTGCTGCTGCTGCTGCTGCTGCTGCTGCTGCTGCTGCTGCTG  
TGGCTGGGATCACCGTCCGCGATCGCGTTAACGTCATTCGCGTAAATGCTCTCCGAACCTGTTCCGCATCAACAGTCACCTG  
CTGTATATCTCCACTTTTATTCAGGACGCTCGGCGGATGACGCGAGTGTCTTCCGCTTACCGATCGTCAGAAAATTTA  
CGATCTGGTGAAGCAATCACTGGTTTCCGATGCACCCGCGTGGTTCCGTTATGGCGGCTAGCGCACGACCTGCGCG  
GCGCTGGGATCGCTGCTGCTGCTGCTGCTGCTGCTGCTGCTGCTGCTGCTGCTGCTGCTGCTGCTGCTGCTGCTGCTG  
AACACCATTTGAAAGGTCGTTCCAGGGCGTTGCCGCTTACGGCGCGAAAGAGGGCGTGGAGTGGGGCACCCGCGCGC  
GGGCTGCGTGCCACCGGATCGACTTCGACGTGCGTAAGCGCGTCCCTTATTCTGGCTATGAAAACCTCGACTTCGAAA  
TTCCGGTGGGCGGTGTTTCTGACTGCTACACCCGCTAATGCTGAAAAGTAGAAGAGTGGCCAGAGTCTGCGTATT  
TTGAGCAGTGCCTCAACAACATCCCGGAAGGCCGTTCAAAGCGGATCACCCGCTGACCACCGCCGCGGAAAGAGCG  
CACGCTGCAACATATCGAAACCTGATCACCCACTTCCGCAAGTGTGCTGGGGTCCGGTGTGCTGCCAATGAATCCT  
TCCAGATGGTTGAGCGGACCAAGGGGATCAACAGTTACTTACCTGACAGCGACGGCAGCACCATGAGTTATCGACCCGT  
ATCCGTACGCGAGTTATGCGCATTTGACAGCAATTCGGCGGCGGATCCGCGGCGAGCTGGTGTCTGACCTGATTGTTA  
TCTGGCAGTATCGATTTTGTATGTAGATGTGACCCGCTAA

>Cluster\_5207

ATGGATAGCCATACGCTGATTACAGGCGCTGATTATCTCGGTTCCGCGAGCGCTGATTGTACCCATTGCGGTCAGTCTTGG  
TCTGGGATCGGTACTTGGCTACCTGATCGCCGCTGCATATTTGGCCCGTGGGGCTGCGACTGGTACCCGATCCGCAAT  
CTATTCTGCACTTTGCCGAGATTGGGTTGGTGTGATGCTGTTTATTTATTCGGCTCGAACTCGATCCACAAGGCTGTGG  
AAGCTGCGTGCAGGAGTGTTCGGCTGTGGCGCATTCAGATGGTGATTTCGGCGGCTGCTGGGCTGTTCTGCATGTT  
ACTTGGGCTGCGTGGCAGGTCGCGAAATGATCGGCATGACGCTGGCGCTCTCTCTACGGCGATTGCCATCGAGGCGGA  
TGAATGAAGCGAACTGATGTTGAGTGCAGCAATGGGTCGCAAGTCTTAAAGCGGATCGCTGTTCCAGGATGCTGTTCC  
CCGCTGGTGGCGATGATTCCGCTACTGGCAACGAGCAGTGCCTCGACGACGATGGGCGCATTTGCTCTCTCGCGTTAAA  
AGTGGCGGTTGCGTGGTGTGTTGCTGGGCGCTATGTCACGCGTCCGCGCTGCGTTTTGTTAGCCGCTCTG  
GCTTGGGGAAGTGTTAGTGCCGTGGCGTTATCTCTGTTTGGCTTTGGTTTGTGCTGTTGGAAGAGGTCGGCTGTGTCG  
ATGGCAGTGGGCGCTTTCTGGCGGCGTACTGCTGGCAAGTCTCGAAATACCGTATGCGCTGGAGAGGATATCGAAC  
ATTTAAAGGTTTGTGTTGGGCTGTTTTTCTATCGGTTTGGCATGTCGATAGACTTTGGCACGCTGCTGAAAACCCAT  
TGGCATTGTCTTTGCTGCTCGGTTTCTCATCATCAAAAATCGCATGCTGTTGGCTGATTGCCCGACCGTTGCAAGTG  
CCAAAATAACAGCGTCTGTTGGTTGGCGTGTGTTAGGCGAGGCGAGTGTGCTTTGTTGGTATTTGGCGCGGCGCA  
GATGGCGAATGCTGTTGAGCGGAGTGGCGAAATCGCTGACCCCTGGCGGTGGCGCTGTCGATGGCAGCAGCCGATTC  
TGCTGGTGTCTCAATCGCCTTGAGCAATCTTCTACTGAGGAAGCGCTGAAGCCGATGAGATCGACGAAGAACAGCCG  
CGCGTATATCGCCGATTCGGTCTGTTTGGGCGAGATTACCGGACGTTTACTGCTCTCCAGCGGGGTGAAAATGGTGTG  
ACTCGATCACGATCCGGACCATATCGAAACCTTCCGTAATTTGGTATGAAAGTGTTTATGGCGATGCCACGCGGATGG  
ATTTACTGGAATCTGCGGAGCGCGGAAAGCGGATGCTGATTAACGCCATCGACGATCCGCAACCCGCAACTG  
ACAGAGATGGTGAAGAACAATTTCCCGCATTTGAGATATTGCCCCGCGCCGCGATGTCGACCACTACATTCGTTTGGG  
TCAGGCAGGCGTTGAAAAGCGGAGCGTGAACCTTCGAAGGTGCGCTGAAAACCGGGCGTCTGGCACTGGAAGTTTGG  
GTCGTTGGGCGTATGAAGCGCGAGAACGTCGCGATGTTGTCGCGCTTAAATATTCAGATGGTGGAGAGATGGCAATG  
GTTGAGAACGACACCAAGCCGCGCGGCTTATAAACGACACCCAGCGGATGTTAAGTGGATCAATACCGAGGACCG  
CGAACATCTGTCTAATTAACGACATGGCTGGCAGGGAACCGAAGAAGGTAACATACCGCAACATGGCGGATGAAC  
CGAAAACGAAACCTCATCTCTAA

>Cluster\_4913

ATGAGCAAAATATCAGATTTGAATTATTTCTCAACACATTACATTAGCCGACAAATTTTAAACAAAAAATGAAGTCTTAGA  
TACCTGGTATGTTGGGAATGAATGATTTTGCCTGAAATGCGGGGGGCGAATAGCAGAAGCAATATCTTCTCTCTAGAG  
CATTTTGGGATTTTGGCAAGATATTTACTTGGGTTATGTTGGATTTTAGCAACGCTCCAACGAAGCGGTAGAAAT  
ATGATGGCTCATATGAGTCTCATCTTATTTCTAAGATACTGATGGCAATGAAAATGAAGTTTATACATAAATCC  
TGAAGGGGAGCGAGCGGATTTATCTAAGGTGAAGATAGAAATTAACCTGCTCAGTTTCTACTAAAGGGATTCGTGAAG  
GACATACAGTCTATATATTAACAATCTGATGGTTCGACTAATCGTTATGAAGGGAAGTCTTTTGAAGAAAAGATGAT  
AGTTTACTACACTGATTAACAAGATTTCCGCGTGTACCAACCGGAAGCTAACAGGAATAGCCGCTATTAATA  
TAATCATCAGAAGTTAAATAATCTACAGAAGTTAAATAATCTACAGAAGTTAAATAATTCGAGGAGTTAAATAATTCGAGGAGTTA  
AATGATTCGAGGATTTAAATGATTTCTAGGATTTAAATGATTTCTAGGATTTAAATGATTTCTAGGATTTAAATGATTT  
TCAGGAGTTAAATAACTCGCAGGACTTAAATAATTCGAGGAGTGTGTAAGGTTTCAAGTTTCAAGTTTCTAGGATTTGCGGAT  
TATTAGAAAACCTTGAATAATGCTTTATGCAATAAGGAACGAACTCTGCTATTAATGCTCATGATGTTAGTGAA  
TCGATTTCTACTTACTGGGCGAAAATGGTATACTTGAAGAAATAGATAGCTTACGAATCAAAATGATCACGGAATTTGA  
TAAATCACAAGAAAGGTAACAATGAAATTAATGACATCATGATTAACCTGTCTCATATTTCTATGATTTCTTAGATGATG  
CAAAGTTAACTTACACCGGCTCATCGATTCGATGCTGAGAGCTTTTTTAAATAATCCCATATATTTATGATGTAAGAATA  
CTGGAGTGGTGTCTTAAATAAAGCATGCAATATTTCTGATGATACAAAAAGATAAAGCATGATGCTCCGTAATAATCA  
TATTAATCTTCGACGATCAGTCTAAATAAGTGGGATTAATTTTCAATCTCGATTAAGGACCTATAAAAAATAGCC

CTGAATTACAGGGTTGATTTGGAATAAGTTGGTTGTATATGTCAATGATTTTAACTTAAAGCAATCGAGAAAAACATAT  
TTAATACAAAGGATATTTAATAAGTTGAGTCTGATTTAATAAAGTGCTGTGAGCAATTTAGTAAATGATATTTTCT  
GAAGGATTTTTTATGAAAAATCCTGAGATGATTAATTTGGTATTTCCCTCAGTTACTTAACTATGAGGGTAAAAGA  
TTTTATTTTATAAGTTGGGGTATGATTTTAAATAAAGAGCTTAATGATGAGATTTGAAAAATCAACCAAATGATGTT  
ATTAATGAAAAATTAATAATGAATTAATACTAGTTTAAAGTATGAGTAAAGTAAAGTAAAGTAAAGTAAAGTAAAGT  
ACCATATATTAATGAACAGCGTTTAAATAAACTAAATCCACCGAAAAATTACGTATAGCAATAGAAAAATTTGGGTGGA  
ATAATAAACCTTACTGACATAA

>Cluster\_53917

ATGGCCTATAGTCTGTAACAGTTGATGACGGCGTTAAGGAATGCTGATGCTGCCGGCGATACTGAGGGGGCACGTCGCAT  
TGCTCAGATGCTGTCTTCTGGTGTCAATCCACTCAAACCAATCGCAGCCGAGAAACAATCTCTGGTGGGAAAAGCTA  
CTGACTGGCTCAGTGGTGTCAAAGTGCAGGGCAAAATGCAGAACAGGCTGGCCGTGGTCTGGTAAACATACCATTTGAC  
GTATTGACAGGGTGGCCAGTCTGATTAATGCAATCAGCCAGGGTCTTGGTGGCCCAAGGTTTGGATGATGTTTATCG  
TCCAGTAGATCGACCAACAGACCCTTATCGCAAGCTGGAGAAACAATTTGGCGGGTATTTAGTTCAGGAGTTGGAACCG  
CAGGAAGCATGGCTATTGGATCACTGGCAGAGGGCCGAAATCAGAAAGGCGATTTCCGCAAAAATGCAGCCAAAATGCC  
GGAGTTAACTTGGCCGTGAGGGTCTTCCGACAGCAGAAAGGGAATAGGGCGTGAATAACGGCTATAAAAAGGTGA  
TATTGGCCAGAACTGGCCGAGAAAAATGCCACATCAGATCGATGGGCGTGCACCAATGACATCTGATGTTATCCCGC  
CGAAAAATGCTTTCACTGGCTTACTCAGGATGCGAGGGGGCTTTGCTCGGGACAGGCTCAAAGAGAGCCGAGCAAA  
TATGCAACCGGTAGTAACTGGTAAAGCAATTTTGGACCGTTTGGTGGTACAACTGATGATGTTGGTAAATCTCT  
TACCACCAGTTAAGGGGGCGGAAGGATGCCGCTGGCGCTGTTATCAATGACGTCACCAATAAAATGGGTAATGCCGAG  
TTGATACCAAAAATGCAATGCTGAATGCTCAGTACAGCGATGCAAGACAGGAAACGGCTTGGGACGCTGCCAAATCAAGC  
CTGCTTACTCTTGGCTAACCTACGTGAAGAAATTAGCAAACTGCAACTGATTTGGATGTTTACGTTTGGATCTTTGGG  
TCAGCACAGAACAGCATTTAGATCTAATGTTTACGGGAGATGCTATGGTCTTCCCAACAGGCAAAAGCAGCTACCAATA  
TGGTAGAGAAATGCAATGCTCAAAGACCTTTCGTAACGCACTTGGTAAAAAACCTCGGTGCATCAGACGCAGCAAAATCACTT  
AAAGCAAAATTCGATTTAGCAAACTGTTAATAAAGGCTTAAATAAACAATTTGCAACAAGCTCAACAAGGCAAGCAG  
TGAAGCCAGTCTTGAACCTATAAATACCGTGTATTAAAGCAGAAAAACCTGACGTAACCAAGTCTGGAGCGCACTGG  
ATGATAAAGGGAAAGATGCTATGCGTGCAGCTTACGTCAGCAAAATAGCGGAAAGGCGCGACTCTCCAGCCAAAGTTC  
ATCACTGAAGTTAATAAGCTGAAATCTCAGTCAAGGAGTGAATTTTAAACACTATTTTTTCTGGAAAGCACATGAAAGA  
ACTTGAAGCTCTTAAATGAAGTTCTACAGCAACAGCAAGGTCAGACACCGCAATGTAGTAACTCAGACGGGGCAATCCG  
AAGCCAAAGGATAAGGACGATTTGGCGCACTGCGACTCTTGGCGTATCAATGGGGCTTGGAGGCTGGTTTGGTGAATG  
ATGCGCTTGTATGAGTCCAAAGCAGCAAGGAATGCGCTCTTACGCTGCGCAAACTAAAGCTGGAACGCCAGCCTATGA  
AAGAGCGCTGAATAACCGCGCAATGCCATCAGACCAATACTTGCATGATGCAACTGATCGCTAA

>Cluster\_5794

ATGAAATGCAAAAATATTTTTATCAATAGTTAGTATTTATGAAACCATTAAATTCAGGAGGAAACTTGGTCCAAATTCAC  
TTCAAATAAAGGTTATGATGCAATGACATGCAAGTGTTCGTCAACCTCGAACCAACAGCTTCTACCTCCAGCAACCGGA  
GTATTAATTTAGCGCTTCCCAAAATGTATATCCGATAACAAGAAACGACTCCGAGCTCACTTGAACGATTTTCTTGGAT  
AATAGCTCTTCTACGCTCATTGGACTCATTAATGAATTTGGTCTTCACTGACGTTAAATGATTTTTTGACAACAT  
AAAGCAAAATGAGGTGGATAGAATGTACGGATGTGGTAAATTAATATCCCAAGAGATACAAACAATACACAGGAAA  
ATGATTTGTTATTTATCCGATAAAAATAATTCATATGCAATGAAATCGATGAAAGAAATACAAAATCTAACATGCAAG  
CAAAAATATCAACTGGACAGCATCATTTGAAATTTATACCAAAAGAGAAATGAGAGTCGAGAAACTGTTCTCTTAT  
GAGATTTCTGAACGATCAATATCATCAGGTATAATACTAGTCAAGGATGTTTTTATAAAGCCTATATGGCCATACACAATA  
AAATCGAACAGATACTTCCATATGCGTTCAGAGCGGAGGCGGAATCAGCATTCACTTGTCTATACAGGCATTTATTTT  
AATGGCGACTATAAACAATCACTTCCAGTCTCAACACCACTTTTATATACATCACCTTCTCCAACAATAAATACAGA  
AGCATCTTAAAGTAAATGATTTATCACTAGATATAACCCAGGTACGCATACTTGGTATTTACTATCAGCAAGTATTTAT  
ATGCACCAACAATATTTATCAATATCCTAACATAAGTAAAGTAAAGTAAAGTAAAGTAAAGTAAAGTAAAGTAAAGT  
TCCGTTATAGCAGGATTTACTCTATGTTTAAACAAGTACATTAACCATGTCACCACGTTAATGCTTAATGGAGCAGT  
TAAAACAGGTAGCATAGTAAAGAACTATAGGTAGGGGAGTGCCTTATGTTGATATACCAATTTGGCCTTAGCTATATAGG  
ACTCGTGGTATAAAGCTTATAAACAATGGTCTTCTGATTAACCCAAATTTCTGCTCAGAGATTTATATCGAAGAAGCGGC  
TTTTAAAACACCCAGCGGATTTAAACACAAGGATTAAGTCTGATGTCCTTTTATCGGGAGCAATCATGCGCTCTCTTGA  
GAAAGGCACACCACCAAAATGATGCTTTATTCATCGTAAACATACTAAATCTATTTATTTCAAAAATCCATATGAAG  
GGGCATCAGCAAGTGTAAATGCTTTGAAAAGATCAACTTACTCCATAATCCGGACATACTAAATACTCAGGCAATAAGCT  
CTTTGTGTTGACCTCCAGCATACAAAAATATAACCATGCCACTTTTCAAAAACAAAAGACAGGATATCTTACGCAATCAA  
TGGACAAAGAACATCCCCAGAAGACCAAAAACAATACGAAAGAAGTTATAAATCTCTGTACCCAAGGAGAAAGAGCCA  
TTTTAAATACATCAAAATCAGAAACATGCAAAACATAAATCGATGAGATTTATGAAAAAGATTTCTCAGAAACAGAACTA  
AATACATTAACAAACGAAATGAAAAATTTCTTGGATTTTTTGAACAAAACCTATGAAAAAGATATTTCCGCTTTAAGCAT  
GGTAAACGAAGTTAATGAAAAATAATTCAGGTTATAGTCAAGAGCTTAGCATATAGAGAGTCTATGTTGTGTTAG

>Cluster\_45977

ATGGCACAAAGTCAATTAATACCAACAGCCCTCGCTGATCACTCAAAAATATATCAACAAGAACCAGTCTGCGCTGTCGAG  
TTCATCGAGCGTCTGCTTCTGGCTTGGCTATTAACAGCGCGAAGGATGACGCGCAGGTCAGGCGATGCTAACCGTT  
TTACTTCTAACATTAAGGCGCTGACTCAGGCTGCACGTAACCGCAACGACGGTATTTCTGTTGCGCAGACCACCGAAGGC  
GCGTGTCCGAAATCAACAACAACCTACAGCGTATTCGTGAACGACGGTTCAGGCCACTACAGGGACTAACTCCGATTC  
TGACCTGGACTCCATCCAGGACGAAATCAAATCTGCTTGTGAAATGACCGGCTATCCGGCCAGACCCAGTTCAACG  
CGTGAACGCTGCGGAAAGACGGTTCATGAAAATTCAGGTTGGTGGCAATGACGGGAAACCATCAGATCGACCTG  
AAAAAATCGATTTCTGATACTCTGGGTCTGAATGGCTTTAACGTAAATGGTAAAGGTAATTTACCAACAAGGCTGCAAC  
GGTAAAGTATTTAACTTCTGCTGGCGCAAGTTAAACACCCAGCAGGCTTTTATGATCTGAAAACCGAAAATACCTTGT  
TAATACCAGATGCTGATTTAGGAAATAGGGAATGGCGATAAAGTCAAGTGGCGGCTAGATTTACTTACAACGCT  
AAATCTGGTGTATTTACTACCATAAATCTACTGCTGGTACGGGTGTAGACGCGCGCAGGCTGCTGATTCAGCTTC  
AAAACGTTGCTGATGCTGACCCCTTACATGCTGATGTTGGTAAATCTGTTAATGGTCTTACACCACAAAAGATGGTA  
CTGTTTCTTTCGAAACGGATTCAGCAGGTAATATCACCATCGGTGGAAGCCAGGCATAGTAGACGATGCAGGCAACTTG  
ACGACTAACACCGCTGGTAGCGCAGTAAAGCTGATATGAAAGCGTCTCAAGCAGCGAGCGAAGGTAAGTACGCGTGC  
CTCTGACATTTCAATGGCACAGAAATATACCATCGCAAAAGCAACTCTGCGACAACCACTCCAGTAGTCCGTTAATCC  
CTGGTGGGATTTATCAGGCTACAGTGAAGATGATGATTTAGCGGAAACCAAGCGGCTGCCGCGACATCTTCA  
ATTAACCTTTAATTCGGGTACTGAGCAAACTATTGGGTTTACCAGCGGTTAATCCAGTGTGCTGCGAAGTCTTATGT  
GGATGATAAAGGTTGATCACTAACGTTGCCACTATACAGTCTCTTACAGGTTAACAAAGGATAACGGCTCTGTGACTG  
TTCCCGGTTATGCTTACGCACTGATACCAATAAAGATTTATGCTCCAGCAATTTGGCACTGCTGTAAATGGCACTCCGG  
GGTAAATCACTACTGAGACTACAGTGTGGTCTGCAACAGCAACCCGCTTGGTGCCTGGACGACGCAATCAGCTC  
CATCGACAAATTCGCTTCTTCCCTGGGTGCTATCCAGAACCTGTTGATTTCCGCGGTTCCCAACCTGAAACAACCACTA  
CCAACCTGTTCCGAAAGCGCAGTCCGATTTACAGGACCGCAACTATGCGACCGAAGTGTCCAAACATGTCGAAAGCGCAGATC  
ATCCAGCAGGCGGTAATCCGTTGCTGGCAAAAGCTAACAGGTACCGCAGCAGGTTCTGCTCTGCTCAGGTTAA

>Cluster\_27990

ATGCGCTATGCCGATTTTCCAACGCTGGTTGATGCTTTGGACTACGCCGCTCTGAGTAGCGCCGAATGAATTTTTATGA  
CAGACGTTGCCAAGCTTGAAGATCAACTGGAATAATCAGACGTTTAAAGCGCGTGCCGAAGCTGGTGCGAAGCGGTTGTTAT  
CGTGGAACCTGAAAAAGGCGATCGCGTGGCGTGATTGCCGAAACAGTAGCGGGTTTGTAGAGGCTTTTTTTTCTCTGC  
CAGTATGCCGGCTTAGTCCCGCTCCCGTTGGCGATTCCAAATGGGCGTCCGTCAGCGGAATTCCTGGAGCCGCAAACTGCA  
GGGTTTACCGCAAGTGGTCCAGCCCGCAGCCATTATCATGTGTATGAGTGGTTGCCACTGGTCAATGCCCGCAGCATA  
ACAACAACCCCGAATTACATGTTTAAAGCCAGCCTGGTTTAAAGCATACCGGAAGCCGATGTTGCGCTACAGCGTCCA  
GTTCCAAACGATATCGCCTACCTCCAGTACACCTCCGGCAGCACCCGTTTCCCGTGGCGTCAATATCACCCATCACGA  
AGTGTATGGCTAATCTACGTGCTATAAGCCAGATGGCATTAAATACGCCCTGGCGACCGCTGCGTCTCTGGCTGCCTT  
TCTACCATGATATGGACTGGTGGCTTCTCCTGACCCCGTAGCCACGCGAGCTTTCAGTAGATTATTTGGCGCACTCAG  
GATTTTGGCATGCGTCTCTGCAATGGCTTAAATGATCAGTAAAAATCGTGGTACCGTTTCCGTTGCACCGCGTTTGG  
CTATGAATTTGTGCCAGCGCCGCTGAATGAAAAAGATCTCGCTGAACTGGATCTTCCCTGCTGGCGCTCGCTGGTATTG  
GAGCAGAACCAGTCTCCGCAGAACAACTCCATCAATTCGCTGAATGTTTTCGTCAGGTTAACTTTGACGATAAAAACTTC  
ATGCGCTGCTACGACTGGCAGAAAAATGCGCTGGCTGTGAGTCTCTGATGAAGCCTGCGGGGTTGTGGTAAACGAAT  
GGATCGCGACATCTCGAATACCAGGTAAGCCGCTCGCGCCGGTGTGAAACACCGCCGCTATCGACTTTCGTCAACT  
CGCGTAAAGCGTTGCCGGAACATGGCATGAAATCCGCAATGAAGCAGATATACCTGTGCGGAAACGTTGGTAGGCCAT  
ATTTGCATCTCCGCCCCGCTGATGAGCGGTACTTTGGCGACCAGGTTTCCGAAGACGAGATTGCCCGCACGGGCTG  
GTTAGACACCGCCGCTCGGTTATCTGCTGGACGGTTATCTGTATGTACCGGACGCATTAAGATATGATTATTTATTC  
GTGGCCGTAATATCTGGCCGAGGATATGAATACATTTGCGGAACAGGAACCGGAAATTCATTTGGCGATGCGATTGCT  
TTTTTTACCGCCAGGAAAAATCATTTTGCAGATCCAGTGTCCGATCAGCGACGAAGAACGTTGCCGGCAGCTTATCCA  
CGCGTGGCAGCTCGGATCCAAGCGAATTTGGCGTTACCGCGGATATCGATCTGTTGCCGCCACAGTATTTCCCGGAA  
CATCTCCGCGAAGCCTGGCTGGGAAGCGAAAAAAGCTTATCAGAAGCTTATGCTGCCAGTCTTCATGTCAGGAA  
TCCCTGGCATGA

>Cluster\_38743

ATGGCGATTGCAATTGGCCTCGATTTTGGCAGTGATTCGTGCGAGCTTTGGCGGTGGAATGTGCCACCGGTGAAGAGAT  
CGCCACCAGCGTAGAGTGGTATCCCCGTTGGCAGAACGGGCAATTTTGTGATGCCCGAATAACCAGTTCCTGCATCATC  
CGCGTGACTACATGAGTCAATGGAAGCGGCGTGAAACTGTGCTTGAGAGCTTAGCGTCGAACAGCGCGCAGCTGTG  
GTCGGGATTGGCGTTGACACAACCGGCTCGACGCCCGCACCGATTGACGCCAGCGGTAACGTGCTGGCGTGGCAGCCGA  
GTTTGGCCGAGAACCCGAAACCGCGATGTTCTGATTTGTGGAAGACACACCGCGGTTGAAAGGAGGAAAGATTACCGCT  
TATGTACACCGCCGGCAACGTTGACTACTCCCGCTATATTGGCGGATTTTATTCAGCGAATGGTTCGGGCAAAAAATC  
CTGCATGTAACCTGCCAGGACAACCGCGTGGCACAATCTGCCGATCATGGATGAGCTGTGCGACTGGGTGCCAGCTCT  
GCTTTCGGTACCACCGCCCGCAGGATATTCGTCGCGGACGTTGACGCGCGGACATAAAATCTCTGTGGCAGGAAAGCT  
GGGTGGCCTGCCCGAGCCAGTTTCTTGTGATGAGCTGGACCCGATCCCAATCGCCATTTGCCTTCCCGCTTCCCGCTT  
GATACTGGACTGCCGATATTCGGTGGGCACCTTATGCCCGAATGGGCGCAGCGTCTGGCCTGCCGAAAGCGTAGT  
GATTTCCGGCGGCGGCTTTGACTGCCATATGGGCGCAGTTGGCGCAGGCGCACAGCCTAACGCATTGGTAAAAGTTATTT  
GTACTTCGACCTGCGCATTTCTGATCGCCGACAAAACAGAGCCTTGGCGAGCGGGCAGTGAAGGATTTTGGCGTCAAGT  
GATGGCAGCGTGGTTCGGATTATTCGCTGGAAGCAGGCCAATCGCGGTTTGGGGATATCTACGCTTGGGACG  
CGTACTCGGCTGGCCGCTGGAACAGCTTCCCGCCAGCATCCGGAACGAAAGAGCAAAATCAACACCAGCCAGAAACAAC  
TGCTTCCGGCGTGCAGGAAGCATGGGCTCAAAATCCGCTCTGATCCTGATCCTGCGGTTGGTGCAGCTGGTTTAAACGGC  
CGCCGACACAGCAACGCTAACCAACCGCTGAAAGGGGTTATTAACCGATCTGAACCTACCAGCTCCGCTCCGCTGTT  
CGGCGGTTTGTGCTGTCACCGCCTTTGGCGCACGCGCAATCATGGAGTGTCTTACCAGTACAGGGGATCGCCGCTCAATA  
ACGTGATGGCGCTGGGCGCATCGCGCGAAAAACAGGTCATTATGCAAGGCTGCTGCGACGCTGCTGAATCGCCGCTG  
CAAATTTGCTGCTGACCAAGTGTGTGCGCTCGGTGCGGCGATTTTGTGCTGTGCGCGGAAAGTGCACCGCAGCAT  
CCCATAGCCCGAAGCAAAAATGGCCAGTGGGCTAGAGAAAACCTGCAACCGCGCAGCAAGGCAACAGCTTTGAAC  
AGCTTTATCGCGCTATCAGCAATGGGCGATAAGCGCCGAAACACTATCTTCCACTTCCGCCCGGCACAGACTGCC  
CAGGCGTTCCGACTCTATAA

>Cluster\_45057

ATGCTGGTTAATACCACTAATTATAATGAGGGAGTCCAAAAACAATGACCAACATCACCAAGAGAAGTTTAGTAGCAGC  
TGGCGTTCGCTGCGCTAATGGCAGGGAATGTCGCGCTGGCAGCTGATGTACCCGAGGCGTACACATGGCGGAAAAAC  
AAACACTGGTACGTAACAATGGTTCAGAAAGTTCAGTCAATAGATCCGCAACAAAATGAAAGGTTTCCGGAGTCTAATATC  
AGCCGAGACCTGTTTGAAGGCTTACTGGTCAAGGATCTTGACGGTCACTCCAGCACCTGGCGTCCGCTGAATCCTGGGATAA  
TAAAGACCGCAAGTCTGGACCTTCCATTTGCGTAAAGATGCGAAATGGTCTGATGGCACGCGCAGTACAGCAAGAACT  
TTGTGTATAGCTGGCAACGTTCTGTTGATCCGAACACTGCTTCCGATGCCAGTTATCTGCAATATGGGATATCGCC  
GGTATTGATGAAATTTCTGAAGGAAAAACCGATTACCGATCTCGCGCTGAAAGCTATTGATGATCACACATTAGAAGT  
CACCTTAAGTGAACCCGTTCCGTACTTCTATAAATTAATTTGTTTCCATCACTTACCCGTTCCACCGGTTCCAAAAGCCGCTATCG  
AGAAATTCGGCGAAAAATGGACCCAGCTGTTGTAATATCTGTTACCAACCGGCTGCTATACTTAAAGATTGGGTTAAAC  
GAACGAATCGTCTTGAACGCGAGCCGACTACTGGAACAACGCGAAAAACGTTATTAACAGGTAACCTATTTGCCCTAT  
TGCTTCTGAAGTTACCAGTGTCAACCGCTACCGTAGTGGTGAATCGACATGACTTATAACAACATGCCGATCGAATTTG  
TCCAGAAGCTGAAAAAGAGATCCCGGACGAAGTTCAGTTGATCCATACCTGTCGCTACTATTTACGAAATTAACAAC  
CAGAAACCGCCATTAACAGTGTGCGTGTGCTACCCGACTGAAACTAGGATGGACCGGATATCATTTGTTAATAAAGT  
GAAAGCGCAGGGCGACATGCCCGCTATGGTTACACTCCAGCTATATGATGGCGAAAATGACTCAGCCGGAATGGT  
TTGGCTGGAGCCAGGAAAAACGTAACGAAGAAGCGAAAAAAGCTGCTGGCTGAAGCGGGTTATACCCGACAGCAAAACCGTTG  
ACCATCAACCTGTTGTATAACACTCCGATCTGCATAAAAAGCTGGCGATTGCTGCTCTCATTTGGGAAGAAAAACAT  
TGGTGTAAACGTCAAACTGGTTAACAGGAGTGGAAAAAGCTTCCCTCGACACCCGCTACCCAGGTTACTTTGATGTGGCC  
GTGAGGCTGGTGTGCTGACTACACGAACCACTTCCCTTCCGTAACACCATGCTTTTGAACAGCTCGATGAATACCGG  
CATTATAAGAGCCCGGCTTTGACAGCATTTATGGCGAAAACGCTGAAAGTACTGACGAGGCGCAGCGCACAGCTCTGTA  
CACTAAAGCAGAAACAACAGCTGGATAAGGATTCGGCATTTGTTTCTGTTTACTACTAGTGAATGCGCGTCTGGTGAAC  
CGTGGGTTGGTGGCTATACCGCAAGATCCGCTGGATAATACCTATACCCGGAATATGTACATTTGTGAAGCACTAA

>Cluster\_25106

TTGCAATTTGACTACATCATATTATGGTGGCGGCTCAGCCGGCAACGTTCTCGCTACCCGCTGACTGAAGATCCGAACAC  
AACCGTCTGCTGCTTGAAGCAGCGCGCCGACTATCCGCTTTGACTTCCGCACCCAGATGCCCGCGGCTGGCGTTCC  
CGCTACAGGGCAACCGTATAACTGGGCTATGAGACGGAACCCGAAACGTTTATGAACAACCGCCGATGGAGTGGGA  
CGCGGCAAGGTTGCGGCGTTATCGCTGATCAACGGTATGTCTACATCCGTTGGCAATGCGCTGGATCTCGATAACTG  
GGCACAAGAACCTGGCTGGGAACTGGAGTTATCTGACTGCTCCCTACTACCGCAAGCCGAGACTCCGATGTGG  
CGGAAACGACTTACCGCTGGCGATGGCCGGTGGAGCTCATACCTCCAAACCCCGGCTCAATCCGCTGTTTGAAGCG  
ATGATTGAAGCGGGCATGACAGGAGGCTACCCGCGCACGGACGATCTCAACGGCTATCAGCAGGAAGGTTTGGCCGAT  
GGATCGCACCGCTACCGCCGATGGCCGTCGCGCAGCACCGCGGCTGATCTCGATCAGGCCAAATCGCGCCCTAAC  
TGACCATTCTGACTACCGCCATGACCATCACATCATTTTTCAGCGCAACCGCGGTTGGCGTGGAGTGGAGG  
GACAGCACCATTCGACCCCGCGCGGCGAATAAAGAAGTGTGTTATGTGACAGGCGGATTTGCTTACCAGCATCT  
GCAACGCTCCGGCTCGGCAACGCTGAACTGCTGGCGGAGTTGATATCCGCTGGTGCATGAATTACCGCGCTCGGG

AAAACTTCAGGATCACCTGGAGATGTATCTGCAATACGAGTGCAAAGAACCGGTTCCCTCTACCCGCGCTGCAGTGG  
TGGAAATCAGCCGAGAATCCGTGCGGAGTGGCTGTTGGCGGCACCGGCTTGGTGCCAGCAACCACCTTTGAAGAGGCGG  
ATTTATTCGACGCGGTGAGGAATTTGCGTGGCCGAATATTCAGTACCATTTCCGCGCAGTGGCGATTAACATAACGGCT  
CGAACGCACTGAAAGAGCACGGCTTCCAATGCCATGTCGGATCGATGCGCTCGCCAAGCCGTGGGCATGTGCGGATTA  
TCCCGCACCGCCGACAGCATCCGGGAATCTGTTAACTACATGTCGACGACGAGGACTGGCAGGATTTCCGCGACGC  
AATTCGCATCACCCGCGAGATCATGCATCAACCCGCGTGGATCAATACCGTGGCCGCGAAATCAGCCCCGGTGTGCAAT  
GCCAGACGGATGAGCAGCTCGATGAGTTGTGCGTAATCACGCCGAAACCGCTTCCACCCATGCGGTACGTGCAAAAATG  
GGGTACGACGAGATGTCGGTGTGGATGGCGAAGGCGCGTGCACGGGCTGGAAGGATACCGGTAGTCGATGCGTCAAT  
TATGCCGCAGATTTACCCGCAATCTGAACGCCACGAGCATTTGATTTGGCGAGAAAATGGCCGATATGATTTCCGCGGA  
AGGATGCGTTGCCGAGGACGCGCGGGATATTTATGTGGCAAATGGGATGCCGCTGAGAGCGAAAAAATGAGTCGTGAT  
GTGAAGTGA

>Cluster\_33728

GTGCGCTATATCCGACAGTTATGCTGTGTAAGCTTACTCTGCTTAAGCGGATCGCCGTCGCGCGAAGCTCCGCTTACA  
GGTCGAGGGTTATCGGGACAGCTGGAAGAAGCTTCCGCGCGCAGCTTCTACGATTGAAAGTGAAGTGAAGTGAAGTGAAG  
ACCGTCCGCTTTCGCGCACCGCTCGATGATGCCATCCGCGAAGGCTGAAAGCGCTGGGTTATTACCAGCCGACCATTTGA  
TTTTGATCTCCGCTCCATCCCAAGAAAGGGCGGAGTATTGATCGCCAAAGTACCGCAGGCGTGGCGGTGTTAATTTGG  
CGGACCGATGTGCTACCCGCGCGCGCGGCGGTAAGACTATTTGAAATTTGCTCGATACTCCGCGCGGCTATTTG  
GCACGGTATTGAACAGGGTGTATTTGAAAATTTCAAAAAGTCTTAACAGCATTGCGTGGCTAAAGGTTATTTTCGAT  
AGGCAATTTACCAAGCACAGCTGGGCAATTTGCGCTCGGCTGCATAAAGCCTTCTGGGATATTGATTTAACAGTGGCGA  
ACGTTACCGTGTGGGCATGTGACCTTTGAAGGATCAAAATCCGCGATGAATACCTGCAAAAATCTGGTGGCTTTAAAG  
AGGCGATGAGTACGAATCAAAAGATCTGGCAACTGAACCGTGCAGCTTTCTGCTACCGGCTGGTTTAACTCCGCTGGT  
GTGGTCCACAATTTGATAAAGCGCGCAAAAGTATTACATTGACGGGCGGCTTTCGCGCGAAGCAGAAAACAC  
CATCGAAACCGGCTCGGTTACTCTACGGACGTTGGGACCGCGCTGAAAGCGAGCTGGAAAAAGCCGTGGATGAACTCTT  
ACGGTCCAGTTTCCAGCCAGTACCAGTATTTCCGCGCGAAGCAGATCTTCGACTTACGCTATAAATGCTGCTG  
AAGAATCCGCTGGAACAATATTTATTTGGTGCAGGGCGGTTTAAAGCGCACTGACTGAACGATACCGAGTCTGACTCCAC  
TACGCTGGTGGCTTCTCGCTACTGGGATCTCTCAGCGGCTGGCAGCGTGCATTAACCTGCGCTGGAGTTTCGACCACT  
TTACCCAGGGTGAATTTACCAACACCAGATGCTGTTTTATCTGGGGTGAATGATAGCCGACCGGTTCTCGTGGTGGC  
CTGATGCCAACCCTGGGCGACTCGAACGCTACTCTATCGACTACTCCAACACGCGCTGGGGCTGGGATGTTGATTTCTC  
CGTTTTCCAGGCGCAGAAGCTCTGGATCCGCACACTGTACGATCGCATCGTTTTGTTTACACGCGGCACGCTGGGCTGGA  
TTGAAACCGGTGATTTCCGACAAAGTACCGCCGATCTGCGTTTTCTTCGCGGGGCGATCGCAGTATTCCGCGCTACAAA  
TACAAATCAATCGCTCCGAAATACGCCAACGGTACCTGAAAGGGGCTCGAAGTTGATAACCGGATCGCTGGAGTACCA  
GTACAACGTCACCGGAAAATGGTGGGCGCGGTTTGTTCGATAGCGGCAAGCGGTAAGCGATATTCCCGCGACGAGT  
TTAAAACCGGTACCGGGTGGCGTGGCTGGGAAATCGCGGTCGGGCAATCAAACTCGATTTTGGCTACCGGTGGCG  
GATAAAGACGAACACGGGTTACAGTTTTACATCGGCTGGGCGCAAAATTTATGA

>Cluster\_64368

ATGGCACAGTCAATTAATACCAACAGCCTCTCGCTGATCACTAAAATAATATCAACAAGAACCAGTCTGCGCTGTCGAG  
TTCATCGAGCGTCTGCTCTTCTGGCTTGGCTATTAACAGCGCGAAGGATGACGCCGAGGTCAGGCGATGCTAACCGTT  
TTACTTCTAACATTAAGGCTTACTCAGGCTGCACGTAACGCCAACGACGGTATTTCCGTTGACAGACCCTGAAGGC  
GCGCTGTCGAAATTAACAACAACCTTACAGCTATTCGTAACGAGTTCAGGCTTACCGGGCACTAACCCGATTC  
GGATCTGGACTCCATTCAGGACGAAATCAAAATCCCGTCTGGACGAAATGACCGCGTATCTGGCCAGACCCAGTTCAACG  
CGGTGAACGTAACGCGGAAAGACGGTTCATGAAATTCAGGTTGGTGGCAATGACGGCCAGACTATCAGGATGATCTG  
AAGAAAATGACTCAGATACGCTGGGCTGAGTGGGTTTAAATGTGAATGGTGGCGGGGCTGTGGCTAACTACGACGAC  
TAAACTGATTTGGCAGCAGCTCAACTCTGGCTTCCAGTACTGCTGATGCTAATGGTACAGTAACTACTGTTAGGC  
CAGGCTGAAAACATCTACAGTGCAGATGTAATTCGAGTTTGGCTAATAACGCAAAAGTAAATGCCACAATGCAAAAT  
GGTTTTGGATCGCAACAGCTACAGATTATACATACAACAGCGCTACAGGTGATTTTACATATAGTGCAACTATTGCAGC  
TGGTACAAATTTGGTGTAGTAACAGTCTCAGTTACAATCTTCTGACACCAAAAGCGGGCGATACTGCTAACTTAA  
ACGTTAAAATTTGGTTCTACGCTCAATTCAGTTGATTGGCTAGCGACGCGAAGGATTAACCGCAAGGATTAAGTACA  
TTTATTGACGTAGATGGTAACTCACTCAAAACAATGCTGGGACTGTCAAAGCAGCCACTCTTGTGACTGACTAAAAA  
CTGGCATAACAACGGCACACCGGCTGCGGATCTACGGTAATTAACAACGAAAGTAAACCACTTCACTCTGGCTGGCG  
GTACTGATGCTACTACTTCTGGTGAATCACTGTAGCAAAATGCAAGAAATGAGTCTGAGTCTCTTCAATCGGCAACTAAG  
TCCACAGGATTCAGGTTGATGTTGGAGTACTGTAACAGCGCAGGCGATATAAAGTTGATAGTAAAGGTTAGTACA  
ACAATACACAGGTACAGTTTTTGAAGACGCTTACACCAAAAGTGTGTTTACGACTACCGATAATACAACCAATCTGT  
TTTTGCAAAAAGACGGAACCTGTGACCAATGGTTTCAAGTAAAGCAGTCTATGTTTACGCGGATGGTAATTTTACTACTGAC  
CTGAAACTAAAGCTGAACACCAGCGGATCCACTGAAAGCTTGGACGAAGCGATCAGTCCATCGCAAAATTCGCTC  
TCCCTCGGTGGCTGAGGACCGCTTGGATTCGCGGTCACCAACTGAAACCAACACTACCAACCTGTTCTGAAGGCG  
AGTCCCGTATTACAGGACGCTGACTATGCGACCGAAGTATCAACATGTGAAAGCGCAGATCATCCAGAGCCGGTAA  
TCCGTGCTGGCAAAAGCTAACAGGTACACAGCAGGTTCTGTCTGCTGCAGGGTTAA

>Cluster\_23810

ATGAAATTTATTGGGAAGCTGCTTCTCTACATTTCTCATCGCTCTGTTAGTGGTGTATCGCTGGCCTCTATTTTCTTCTGCA  
AACCGCTGGGAGCAGAACATATCAGCGCATGGGTTCCGAGAATAGCGACTATCATCTGGCCTTCGGGGCGATGGATC  
ACCGTTTTTCCGCGCCATCTCATATCGTGTGGAGAAGCTCAGTTTGGCCGTGATGGCCAGCCCGCGACCCCTGGTAGCA  
AAAAGTGCACATTTCCGCTAAGCAGTACGCAACTGACCGAACACCGCATGTCGATACCATCTGCTGGAAAACGGGAC  
GCTGAATCTACCCGACAGACCGCGCGCTACCGTTCAAAGCCGATCGCTGCAACTGCGTGTATGGCGTTTAAATAGCC  
CGAATAGCGAATGGAACCTGAGCGCGCAGCGGTTAAATGGCGGCTGGTTCCGTTGGTACCAGAACCCGGTAAAGTGTCTG  
GGTACGAAGGCGCAGATTCAGTTTGTGCGGATCGCTTTCGCTCAATGATGTTCTGCCACCAATGTACTGATTTGAAGG  
CAGTATTGATAACGATCGGTTACGCTGACTAACTGGGTGCCGACATCGCCGCGGGACATTAACCGGACCCGCGCAGC  
GTAACGCTGACGGCAGCTGGCAAGTGGAAAACCTGGCGATGGCGGATATCCGCTTACAAAAGCGAAAAATCGCTAACCGAT  
TTCCTTGGCCATTTACGCTCTGTCCCGTGTGCGATTTGGTCCGCTGGAAGTATCGATGCTCGTTTGAAGTCCGGA  
CTGGGCGGTGACCGACCTGATCTCAGTTGCGCAACATGACCTTCAAGTAAAGATGACTGGCAGACACAGGAAGGCAAC  
TGTGATGAAACCGCAGGATTTATTTATGCTGCTGCAATTTATTTGATCCGATTTATAAAGCGCAAAATTTTCCCGCAG  
GGCGTAGCACTGCGCCAGTTTACCAGCCGCTGGGAAGGGGATGGTCCAGAACGTCAGGAACTGGCAACCGGACGGGAA  
AACCTGATCTCGATGATCGCGCAATTTGCCGGACTGGAATATACCTTGCACAAAACCTGGCAACAGTTTGGATGGAAA  
CGACACCCGGTGGTTAAACAGCTTGAACCTGAAGAGATTTAGCGCCAGCCGCAATCTGATCATTTGATATCAACCTGAC  
TTCCCGTGGCAGCTACCCGCGCTGATGGTTACGGTGCACATTTGACGCTGGTTACCGATCATAAATGGGGCTCTGGAG  
TGGCTCGGGCAATCTGAATGCGCGCGCCGAACGTTTAACTGTTGATGTCCTGCTCGCTGCGTGGCGCTAACTGCCA  
ACAGCAGCAGCTGAATATCAGCGAATGAGTGCATTTACTGAAAAGGCATTTCTGGAAGCCACCGCAGTGTTCACAA  
ACGCCCAACGCTCAGACCATATCAGCTGAATGGACGCGGTTGCGGTTGAAATTTTGCACAAATTTGGGATGGCTGTA  
ATTACCGTTGACTGGCGACGCAATATTTACGCTTACCGCCAGTGGCGATATTACAGCCAAATGTCGCTGAAACCTACCG  
TTAGCGGGCAATTTGATGCGGTGATGCGCAAAAGCAGCAAGTACTCAACCATGAATGCGGGCTAGTTTCCAGTGGT

GAAGTTACGTCGACGGAGCCGGTGCAGTAA

>Cluster\_60174

ATGCGAAATAAAAAATAATCATGTTGCTTATGAGTAGTTGATTTTGTGAGGATGTGGGCCGCAACCTGAGAATAAGGA  
AAGTCAGCAACCAACCCAGTACTCCACAGAGCAGCAAGTGTTCGCCGCGCAGCAAGCTGCAATAAAAGAGGCTGAGC  
AAAGCGCCGCGCCGCAAGCCCTGGCCCGCAGCAAGAGTGCAACAATATTCAGACAAACAGGCTTTACAGGGGCGATG  
CAGGAAGCGCAACATTTTCAAGAGCGGCTAAAGCAAAAGTACACATATCGCAAATCCAGGAACCGCTCGCTACCAGCA  
GTTTCGATGATAATCCGGTTAAGCAGGTAGCGCAAAATCCGTTGGCGACGTTTACTCTTACAGTTGACACTGGCAGTTATG  
CGAATGTAAGGCGTTTCCCTCAATCAAGGGCTGTACTCCGCCAGACGCTGTGCGGGTGGAGGAGATAGTCAATTTATTC  
CCGTCGTGATTTGGGATATCAAAAGCAAAACATCTATTCCGGCCCTTAAGCCAATACCTTTTCGCTATGCGCTACGAATTTGC  
ACCTGCACCATGGAATGAACAGCGAACATTTGCTGAAAGTTGATATCCTGGCGAAAAGTGCAAAAGTGAAGAGTTACCAG  
CTTCAATCTGGTCTTCTTATCGACACTTCTGGTTCAATGATTTCTGATGAACGTTTGCACCTTATCCAGTCTTCGTTG  
AAATTTATGGTCAAAGAACTTCGTGAGCAGGATAACATTTGCCATCGTGACCTACGCTGGCGACTCCCGTATTGCATTGCC  
TTCTATCTCCGGGATCAAAAGCGGAAATTAATGCGCAATTTGATTCGCTGGATGCCGAAGGCAGTACCAATGGCGGTG  
CCGGGCTGGAACCTGGCTTATCAGCAGCGCAGCAAGGGGTTTATTAAGGGCGGCATCAATCGCATTTTATTAGCCACTGAC  
GGTGACTTTAACGTTGGCATTGACGATCCAAAATCGATTGAATCAATGGTCAAAAACAGCGGAGTCTGGTGTACTCT  
GTCGACGTTTGGCTGGGGAATGACAAATACAACGAGGCAATGATGGTGCAAATTTGCCGATGTTGGTAAACGGCAACTCA  
GCTACATTTGATACCTCTCTGAAGCGCAGAAAGTATTAAGTGAATAAGTGAATAAGTGAATAAGTGAATAAGTGAATAAGT  
GTCAAAAGCGCAAAATGAGTTTAAACCCGCGTGGTAAACGGAATACCGTCAAGTGGTTATGAAAAGCGCAACTTCGGGT  
GGAACATTTTAAACGCAACCGTTGATGCAGGGGATAAGGGCAGGCAAAACATATAACGTTGTTATTCGAATTAACCG  
TGAACGGGCAAAAAGCATCAATGATAAGTTACGCTATGCCCTGCAAAAATAGCGAAATCGGAAATCGGCAAAAAGAA  
CTGGCCTGGTTAAAATTCGCTGGAAATACCGCAGGGAAGAAAGTCAAGTTAGTTGAATTCGCGTGGGGCAAAAT  
AAACGCGCCCTCTGAAGATATGCGTTTTTCGCGCAGCAGTAGCTGCATATGGGCAAAAGTTACGCGGTTTGAATACCTGA  
ACAATACCTCCTGGCAGCAGATCAAAACAGTGGGCTCAGCAGGCAAAAGGGGAAGATCCACAGGGTTACAGGGCGGAATTT  
ATTCCCTGATTGAACCTGGCGGATGGTGTGACTGACATCAGTCAGTGA

>Cluster\_58831

ATGCTTTTTACACTGAAAAAGTATTGGCAATATGTTGCTGCCACTTCGCTGATGTTGTTGATTATTGGCGCTGGCCCT  
GGCGCTGCTGTGGTTTAGCCGTTTTCAAAAACCGGGAAGATTTTATTAGCATTGGGTGGCTGGCGCTCTGTTATTGGA  
GTTTGGCAACCGGTAGCCCGCCTGCTGCGTCCATCCGAAAGCACCTATCCGACATGGAATAATTTCGCAAAAAGTGGC  
TATATCGTGGTGCCTGGAGGTGGTTATACCTGGAACCCGAGTGGGCACCGAGCTCTAATTTAATCAATAACAGTCTGCC  
ACGCTGAAATGAAGGTATTCGCTTATGGCGCGAAAATCCGGGATCAAAACTGATCTTACGGGAGGCGTAGCAAAAACCA  
ATACGGTGGTACAGCGGAAGTAGGTGCCAGAGTTGCGCAATCGCTGGGCGTCCGCGCGAGCAAAATATCACCTGGAT  
TTGCCAAAAGATACCGAAGAAGAGCTGCAGCAGTGAACAGGGCAGTGGTGGCAGCCCTTTCCCTGCTGGTGAACCTCCG  
ATCACATCTGCCGCGGCGATGATCTTTTTTCAGCAGGAAGGGTTAAATCCGCTACCAGCCCCGGCAATCAGTTGGCCA  
TCGACTCGCCGCTTAAACCGTGGGAACGGGCAATCCCTTCTCCGCTGCTGGTGTGATGCATAGCGATCGTGTGGCTATGAA  
ACGCTTGGCCGTATCTGGCAGTGGCTAAAAGGTTCTGTCAGGCGAGCCACGGCAAGAGTGA

>Cluster\_21066

ATGGAACGAAGCAAAAAGAGCGTATCCGACGTTTGTGGAACGCTTAAAGAAAACCGACAGAATCCATTTGAAAGACCG  
AGCGCAATGCTGGAAGTTTCTGTAATGACTATTCGTCGCGATCTCCATCAGGAAGATGAACCTTCGCCACTGACCTAC  
TGGGTGGCTATATTGTAATGGTGAATAAACCCGCGCATCCATGCCAGTAAATCCATGACGTTCCAAAATATCATCGTGAT  
GACTTACCTATTGCAATTCGCTGCGGGAATGGTTAAATGAAAATGATCTGATCTTCTTTGATAATGGTCAAGGATACC  
ACTCGTTATAAGCATGATCCCGGATGCAATCACCTTACCGGTATCTGTTACTCACATCGCGTCTTTGTTGCGTTGAATG  
AAAAGCCTAATGTAACAGCAATACTTTGTGGTGGTACGTTATCGTGCAGAAAGTATGCTTTTTACGATGCCAGTAACTCT  
TCGCCATTAGACTCTCTCAATCCGCGAAAATAATTATTTCGCGCAGCGGTGTGCATAATCACTTTGGGCTGACTGGTT  
TAACCTGAAGATCTTGGCACTAAGCGTAAAGCGATGAACCGTGGACTACGGAATAATTTGCTCGCCCGCCACGCGTTGT  
TCGATGAAGTGGCCTTCCGACGCTCGCACCGATCTCTGCATTTGACGTTCTGATTAGCGATCTCCGTTACCGGCAGAT  
TATGTTACGCACTGCCGGAATGGTTCTGTAAGATCATTACACCTGATTCAGAAGACGAATGA

>Cluster\_27128

ATGACGATGAATTCATTTCGAGCGAAGGAATAAGATCATCCAATTAGTGAATGAACAGGGAACCGTGTGTTTACGATCT  
GGCGGGATATTTGCTGCTCGGAAAGCGCAATCCGTCGCGATTTGCGCTTTCGCAAAAAGGCGTGGTTACGCGCT  
TTCATGGCGGTGCGGCGAAAATAATGTCGGTAATAGCGAAACCGAGACCCAGGAAGTCCGGTTTAAAGAGCGATTTAC  
CTGCCAGCGCGCCGAAAACAGAAATAGCGCAGCGGCAAGTCAAAATGATCCAGGAAGGATGACCGTTATTCTCGACAG  
CGGAAGTACCACAATGCTTATCGCCGAAGGATTAATGACCGCCAAAATAATCACGGTGATTTACCAACAGTCTCCCGCGG  
CGTTTGCCCTTTCGAAAATAAAGACATTAATCTGCTGCTGCGGTGGCAGCGTCCGCCATAAAAACCGGATCTATGCAT  
GGATCTATTGCTGAACGTTCCCTGCAGGATTTAATGCGGATTTAATGTTTGTGCGGTGCTGATGGTATTGATCGGGTTAA  
TGGTATTACCGCTTTAATGAAGGTTATTCCGTTAGCGGTGCGATGGTGGCAGCGCAATAAAGATGATTTGCCGTTCTCG  
ATTCATCGAAATTTAATCGTCCGCTTTAATCAGGACTGCAATCGAAAATAATGACATTAATATTACCGATGATGCT  
GTGCTGAGGTGGATAAACTGGCATTGCAAGACACGGGTAAAATTAATTACGGTGTAG

>Cluster\_29467

GTGACCATCGAAATTTGCAACCAACTATCAGAGGTGCTAAGCGTCATTGAGCGCCATCTGGAATCAACGTTGCTGGCCGT  
GCATTTGTACGGCTCCGAGTGGATGGCGGCTGAAGCATACAGCAGATTGATTTGTTGGTTACTGTGGCCGTAAAGC  
TTGATGAAACGACCGCGGAGCATTTGCTCAATGATCTTATCCGAGGCTTCGGCTTTCCCTGGCGAGAGCGAGACGCTCCG  
GCTATAGAAGTCAACCTTGTGTCATGACACATCATCCGTTGGCTTATCCGGCTAAGCGCGAGCTGCAATTTGGAGA  
ATGGCAGCGCAATGACATTTCTGCGGTTATCTCGAGCCAGCCATGATCGACATTTGATCTAGCTATCTGCTTACAAAAG  
CAAGAGAACATAGCGTTGCTTGGTAGGTCCGGCAGCGGAGGAATTTTGGACCGGTTCCCTGAACAGGATCTATTCGAT  
CGCTGAGGGAAACCTTGAAGCTATGGAACCTCGCAGCCGACTGGCCGGCGATGAGCGAAATGATGCTTACGTTGCTC  
CCGCAATTTGGTACAGCGCAATAAACCGGCAAAATCGCGCAAGGATGCTGCTGCCGATGGGCAATAAAGATGATTTGCCGTTCTCG  
CCCAGTATCAGCCGCTTACTTGAAGCTAAGCAAGCTTATCTGGGACAAAAGAAAGATCACTTGGCTCACGCGCAGAT  
CACTTGAAGAATTTATTGCTTTGTGAAAGGCGAGATCATCAAGTCAAGTGGTAAATGA

>Cluster\_58468

ATGCTGGCAAGAGTAAAGACTAACTTAAAGATCGAAGAAATACGGATGCATAAACATCATGAGATTATAGGGTTAAGCC  
TCTTATGCCAGCTTTGTGTCGATCCGTCAGGGAAGAAAGTTATCAATTTGGGAGACGCATACTTAACTGTTGATAATA  
ATCAAAATAATATTTTCTTGTGGTTATGAATTTTATATTGAGAATTTATCTGAAGCAGGGCTTTATCTTGCAGAAATG  
CTTTACTTACCATTGATTTAATGAGAGTTTCCAAAACCTTATACGGTAACATGATCAATAACGTAACAAAACAGTTT  
CTTTTTACTCAGAACTGAGTTAATAATATTGTTGGGAACTAAAAACATCTGTTTCCCGAGGCTTCTCAACTAAAA  
TTCAGGAGCACTTAGCAATGGGCTTCTACTTTGTTAGGAGTGAATCATGTTAATCATTTACTTTTATCATATAGTAAA  
CAATCATTTGATAAGTCTGTTGTTAATACCTGCTGCTATCCGAAACCGGCAAAAATGGCAGCAAAAACAGGTTGCTCGATA  
TCTCATTTCTGTTTCTTACATTCATCGCGTACAGCAAGCGAGGGGTAAGTTTCAAAAGTATACCTGGAGCTGTGA  
GGTTAAATAATGCTGTTGCTGCTATACAAACGAGGTAACCTATAAAGCGAGATTGCGAGAGAAAATGGTTAATAGTGT  
CCTTCTCGTTTTACTGAAAGATTTTATAATCGTTTTAATAATAACCAAGAGAGATAAGAAAAGCTTCCAGAGAGTAA



>Cluster\_45856

ATGATAAATGATGACACACTCATATTGGTGATTTTGTGAAAAATCAGCATGCCAGAAGATGTTTTTCTGGTATCTCTGGA  
CAAGTATAATATTTGATTTTGGCTTATGTTCCGTGATGATCTGCCGTTGAAGTTGATCATGACCAGAACCCGATTCGGGATG  
AAGATCAAGTACACAGCATGATAACAATGAACGTATGCTCAGACTTGTTCGTCAACATGCAAAGCGAATGGCGCGTTT  
ATGTGGATTAAGCTCGTCTGGAAAGTTGTGATCAAGATTTTGAAGATATGATTGCCAGCAATCGAGATATCATTTATG  
CATCAAAGTTCACCCATATCATTCAAAAATGGCTTTCAATTACAGATAAAGTTCAGGAATATATACGCCCTTGCTCAAAAAT  
ATGATCTCCCGGTAGTTAGCCATACTTCTAATGATTATGAATCCAGCCACAGTTGGTTTATGAGATGGCAGTAAATAT  
CCAAATGTGAATTTTGTATGTGTCATATGGGGCTCGCGACAGATAATCAGGAAGCGATCGAATTGATTGCAAAAATCTCC  
TAATCTCTATGGCGATACCTGCGTGGTTAGGGCGGATATGGTTTACCAGGCGATAAAAATCTGTGGTATGATAAGATTT  
TATTTGGTACCGATAATCCTATTAATGGACTAGATACTTATAATGATGATGATTTTTATAATAAGTATTTTACTGAATTA  
AAAAGTAAATTAACGCAAAAGTGAATTTGAACAACCTTATGTTTACCAATGCGAAAAACCTTTTTAAGATAAAAATATAG

>Cluster\_57882

ATGGAAAAACAGTTTAAAGCGGCGCTGAAAGCAGGCGCTCCGAGATTGGATTATGGCTGGGGCTGAGCAGCAGCTACAG  
CGCGGAGTTACTGGCCGGAGCAGGATTCGACTGGTTGTTGATCGACGGTGAGCAGCGCCGAATAACGTGCAAAACCGTGC  
TCACCCAGCTACAGCGGATTCGCGCCTACCCAGCCAGCGGTAGTACGTCGCTGGAACGATCCGGTGCAAAATCAAA  
CAACTGCTGGACCTCCGCAACAACCTTACTGGTGCCGATGGTTCAAAAACGCTGACGAAGCCGTAAGCGGATACCGGC  
CACCCGTTATCCCGCCGCGTATTCGCGGTGTGGCGTATGGCTGGCCCGCGCTCGCGCTGGAATCCTGATGATT  
ACCTGCAAAAAGCCAACGATCAAAATGTGCGTGTGGTGCAGATCGAAACGCGTGAGGCAATGAAGAATACCCGAGATT  
CTGGACGTGGAAGGAGTCGACGGCGTGTATTCGCGCCGGCGGATCTGAGCGCGGATATGGGTTATGCGGTAATCCACA  
GCACCCGGAAGTACAGCCGCGCATTTGAGCAGGCGATCTGACAGATCCGGAAGCGGGCAAGCAGCGGGGATCTGATCG  
CCAATGAGCAACTGGCAAAAACGCTATCTGGAACCTGGGCGCGTGTGGTGTGCGCGCTCGCGCTGACACCCCTGCTCGCC  
CGCGCGCTGAAGCGCTGGCAGCAGGTTTGGTGGCAGGCTACCGCGTGAAGCCGCGGTGATTTAA

>Cluster\_56089

ATGAATTTAATGTTCCGAGTGGTTTCATTACAAAGAGGGATTTTAGCCGCTAAAAAGCTTTAATAGTTCCTTTCGTGGC  
GTCGCTCATGGCATTACCGGTGAAGGCCGAATTCCTGTTATTGATGGCACTAATGTGGTTCAGACCACAATCAGTGCAG  
TTAACAATGTTCCAGGCTGTGACTAAACAATCCAGCAGTACCAGACGCAGCTGCAGCAGTATGAAAACATGCTGCAGAAC  
ACCGTAGCTCCTGCGGCTATATCTGGGATCAGGCAAAATCAACAATTAATAAATGTTGTCAGGTTGCAGGATACCCCTAA  
TTACTACAAGAATCAGCCGCGGAGTCTCGATGCGTACCTGAAACGATATCAGGATGTTAATTACTACAGGACATCACCTT  
GCTTTAACAGCAATGTTGAATGTACCGCTGTGAAATTAGTGCAGTGCCTGAAGCTGAACAGAACAGCTCAGAGGCGCGT  
AAAAAGGCTAATGACGCAGTATTTAAGGTAATGACGAACAGCAGAACACCTGCAGAGCGATGCTGATAATCTTGCCGA  
ATTACAAACTCAGGCAAGCGGCGCAAGGGCAAAATGGAAGCTATTCAGGCGGCAAAACAGCTTGCCAGTGCACAGACAA  
ATCAGTTACTGCAAAATCCGCTCACTTCTGGTAGCCCAACCAAAACGCTGTAGCAACACTGGCACAGGCTCAGGCAGATAAA  
GAATCACAACAGATAGCCGCTGATGAAAAGCGTTAGCTGGAGAGAATACACCAAGCCGAGCGAATTTGGTGA

>Cluster\_56564

ATGGATATAAGCGTTATTATTCCTGTTATAATCGTGAAGCTAGCATTCAAGGGGCTGTACTTCTGTTTTAAACCAAGT  
TGGTAATCAATAATCGAGGTTATCGTAGTTGATGATGGTTCTACAGATGGGTCTATTGATAGACTAAAAGGTTTAAATA  
TAAAAGTCTTGCATACAAATGGAAGAACCAGGGCATGCAATGCTAGAAATATAGGAATAGAAGCGCAATGAATGAGTGG  
GTTGCTTTTAAACGATAGTGTGACTTTTTGGAGAATTGATAAACTTAAATATATAGAGGGAGCTATTAATTTCAAAATG  
TAATATAGATTACATTTTCTATCTTTTATTCGTTGTTGACTAAAATCAATCATAGTGGGGTTTTATCATTTCCACAT  
CAGGTCTATTAAAAACGATTTTCTAAGAAAAATGTTAGCCAAATAATATGATCAGCACTCAATGCTTTAATTTCAAAAAA  
AATACATTAATGATTTGTTGATATTTGATATTTAATAAAGATTCGAAGATTGGGAAATTTGCATTAAGAATAGCATG  
TAAATCTCAAGGCTTCTATATATCGGAACCTTTAGCTTTATGCATTGAATCTCTGACTCAATTTGAAAAGGTTTAAAA  
AAGGTATTGCAGCAGAGATATATATTGATAAACATCAGTCTGTTTATTAATAAATAAATCATCCATGTGTAGGTTT  
TTATTTCTATTGCAACTTAGAAAGATTGTTAGTCTATTGAAGAGAGACTGA

>Cluster\_35948

GTGGCGGCAAAAGACAGGATTCAGGCAATTAAGCAAAATGGTTGCCAACGATAAAAAAGTGACAGTCTCAAAATTTGAGTGG  
GATTTTTAGGTAACCGAAGAAACCATTTCGCGCGATCTTGAGAAAGCTGGAAGATGAAGGCTTTTTGACCAGAACCTATG  
GTGGTGTGTTTTAAATACAGCGATGTTGACGGAGAATATCCATTTTTATAAGCGCGCTTCATCGTTTTATGAAGAGAAG  
CAGCTTATGACGCAAGGCACTACCTTTATCGACAATAAAACACCATGGCAGCCGATCCAGTAGTACCGTAATGGA  
ATTGCTCAAAATGTTACAGGACCGTAGTGACCTGACGTTGCTAACCAACTCGGCGGAAGCGATTCATGTTCTGGCTCAGT  
CAGAAATTAAGTCTTTCAACGGTGGGGAACATAACAAAAATACACTTTCACTGCAAGGAAGAATTAATAAGAGATC  
ATCAGCCGCTATCATGTCGATATCATGGTAATGAGTTGTAAGGCTTTGATATTAACAGCGGCGCGCTGGACTCTAATGA  
AGCGGAAGCTGAAATCAAAAAGCAATGATCCGTCAGGCGACAGAAGTTGCGTTATTGGTTGATCACTTAAGTTGATC  
GCAAAGCTTTTGTCCAGTTAGCTGATTTTAGTCATATTAATACATAAATAACTGATAAATCACCGGCTGCAGAGTGGATA  
GCATTTTTGCAAAAGCAATAATATCCAGCTGGTGTGGTAA

>Cluster\_54445

ATGGAAACCGTCCGGAAGAGCGTATCGGGCAGCTGCTGCAAGAATTA AAAACGAGCGATAAGTTACATCTTAAAGACGC  
CGCCCGCTGCTGGGTTTTCGGAGATGACGATTCGTCGCGATCTGAAACAACACAGTGCGCCGCTGTTTGTCTGGCG  
GCTATATTGTTTGGAAACCGCAGTGCAGCCATTACCTGTTAAGCGATCAAAAATCCCGCTGGTGGAAAGAAAACCG  
CGGGCGGCAAAACCTGGCTGCGACGCTGGTAGAACCCGATCAGACCCCTTTTTTTGACTGTGGCACACACGCGCTGGAT  
TATTGAAGCGATTGATAATGAAATCCCTTTTACCGCGTTTGTATTTCGCTAAATACCTTTCTGGCGCTGAAAGAGA  
AACCCATTGCGCGGCTTTCTTTGCGGTGGTGAATTTACGCCAGCAACGCAATTTTCAAAACCATCGATTTTCAGCA  
CTGAATAATTTTTGCGCGGATATCGCTTTTATTCTGCGGCGGGCGTGCATGTCAGTAAAGGCGCTACCTGTTTTAATCT  
TGAAGAGTTGCGCGTAAAACACTGGGCCATGTCGATGGCGCAAAAGCATGTGCTGGTTGTGACCCACAGTAAATTTGGCA  
AGGTGCGTCCGGCGCGATGGGTGACCTGAAACGCTTTGATATTTGTTGGTGAGCGATTGTTGCCGGAAGATGAGTATGTG  
AAGTACGCCAGACGCGAGCATTAAGTTGATGTATTTAA

>Cluster\_53205

ATGAATGACCGTGACTTTATGCGTTATAGCCGCAAAATCCTGCTCGACGATATCGCTC TGGACGGGACGCAAAAACCTGCT  
CGACAGCCAGGTGCTGATTTATGGTCTTTGGCGGCTGGATACACCTGCTGCGCTATACCTGGCGGGGGCTGGCGTCCGGA  
CGCTGACTGCGAGATACGACGATGTCATTTAAGCAATCTGCAACGACAAATCCTCTTTTACCACCTGAAGATATCGAT  
CGCCGAAATCACAGGTCAGCCAACAGCAGTGCACAGTTGAATCCCGACATCAACTGATGGCATTACAACAACGATT  
AACGGGTGAGACGTTAAAAGATGCGGTTGCACAAGCCGATGTGGTGTCTGACTGACTGACAAATATGGCGACTCGCCAGG  
AGATTAATGCCACTTGGCTGGCACTCAACACGCGCTTATCACCCGAGCAGCGGCTCGGATTTGGCGGTCAGTTGATGTTA  
CTGACCGCCGCTGGAGCAGGGATGTTACCGCTGCTGGCCAGATAAACAGGAGCAGAACCGCAACTGCGCCGCGCG  
GGCGTGGTTGGCCCGTGGTGGGTTATGGGCATTTACAGGCACTTACAGGCACTGGAAGCGATTAGTTTAAAGCGGTATAGAGA  
CGCTGCGGGGAGAACTCCGACTGTTTCGACGGTAAATCGAGCCAGTGGCCGAGCCTGACGTTGCGCCGCGCAACCGGTTTC  
CCGTTATGTTGAGGATGCAATGCAGATCCTGTTTAA

>Cluster\_27999

ATGGATGCACTACAACACAACCTGTTAATAGTACAACCGCGCGCAGCCAACTACATTCGGGGCTGATTGCGGTGGT

CGGGTGTGATGGCACCGGTAATCCACACTGACCACCGACTTGGTGAATCGCTGCAACAACACTGGCAAACCGAGCGG  
GCTATCTGGGGCTGCTCTCGGGCGAAGACGGCGCAAAAATCAAACGATTGCCGTTGGTGGCGCTGGCTCGAACGGCGA  
CTGGCGGCCAAATCTCGAAAACCCAAAGCATGAAAACCAATCTCCAGCGCTATGGGCGGGGTGATATGTACTGCTT  
CTCGCTGCGAAGAAATGGCGAATCTACGCAAGGTTACGCGACTGGCGCAAAGTGGCGTTCTGGTGGTACGCGATCGCTTCC  
CGCAGGCTGAAATTTCCGGCTTTTATTATGACGGACCGGGATCGGCGTGAACGTGCGACCGGGAAAATCAGCATGTTT  
CTGGCGCAGCGGAACGGCGCTTATACCAACAAATGGCGCAATACCGTCTGAAATTAATCATTGCTTGGGGATTGATAT  
TGATACTGCCATCTCCCGCAAGCCTGACCATGACTATGCGGAGCTGCAGGACAAAATCGGCGTATGTGACGATTGGCT  
ATAACGGCACAAAATTTCTGAGATTGATTCAGAGCGCTTACAGCGAGGTGCTGGAACAGGCACAGAAGCGGTTTCT  
CTGGTTGCCATCGTTTCTGACCGCGGAAGTTTAACTTAA

>Cluster\_30435

ATGAAGAATACTAAATTTATGCTGGCGATTGCGACCTTGCAGCCTTACTGACAGGATGTGAGAAATACGCACGGTATTAA  
TACCGATTGGCTATCAGCTCAGGCTGAAATGCTTATAAAGCCGCAACATTAAGCGATGCTGATGCTAAAGCAATCGCCA  
ATCAGGGCTGTGTGAAATGGACAGCGGCAATAAAGTGGCAAGCAAAATCCAGCAAGTACGGGAAACGTGGCAAAAATC  
GCCAAAGCATTGGGTAACAATATTAATGGCACGCCAGTCAACTATAAGGTTTATATTACCAGCGACGTCAACGCATGGGC  
GATGGCGAACGGTGTGTCTGCTACAGTGGCTGATGGACATGATGAACGACAACGAAATGAAGCGGTTCTGGGCC  
ATGAATGGGCGACGCTGCGTGGTGGTCACTGCTGGCTGAAATGAAAGCTTCTTATGCGATCGTTGCCGCACGTGATGCG  
ATTTCCGCTACCAGCGGTGGCTTCCAGCTTTCCCGCTCACAAATGGGTGATATCGCAGAAGGCGCAATCAATGCTAA  
ATACTCCCGTGATAAAGAAATCCGAAGCAGATGATTTCTTTTGTGCTGTTGAAGAAACGTGGCATCAGTACCAGGGGC  
TGGTTGGTAGCTTTGAAAACCTGGCCAGCTGGATGGCGGTGCGACCCAGTCCATGTTGATTCTACCCACCATCAACA  
GAGCGTGGCAACACATCCGTGATCGTATCGCTCTGGTAAGTAA

>Cluster\_21792

ATGTATCGCTGGTTTCTGCGCCATTTCCACGTTGGCGGTAGTTATGCGGATATTCATCATGCACTGATTGAGGAAGGATA  
TACGGACTGGCGGAGAGTCTGGTTGAGTATGCGTGGAAAAAATGGCTGGCGGATGAAAACCTTCGCGCATCAGGAAGTTT  
TTCTATGCAAAAATCGCCACAGATCCCGGAGAACACTTTTTCAGTCAAGTTTCCCGCAGCGACGATCATGCTCGC  
ATCGGCTGTTGTGAGGATAACCGCAGAATCGCAACCGTGGGTATGCCGCGCAAAATGGCAGTATGGGTTATAGCGTGGC  
GATAAGCAGCGTGGAGATAGCAGTGGATGGCAATACCGGAATGCGAGTACGCGTTTGTACATTGGGTGAAACGGTGT  
CATCTGCGCAATAATGGTGAACCTGGTGCAAAATCGCCAGCTTTGGCGCAACCGCAGAATGGCCAACTGGCGCGCAAT  
ACACATCATTGCCAGCGGTGAAAATTAACAGTAGTGAGCAGCGGGGTGGTGGTCAATATTTCTCGGGCCAGGGGGAT  
GCGCGCCTCGCATATCATGACGGCGAAAAGAGTTCCGCTTCGCGTTCGCCATTGAAGTGAAAACAATATTCGAGCCGGA  
GTCCGCTATCGTCTTAATGAACAACATCAGTTTGTGAGTGTGA

>Cluster\_46492

ATGATAACTGGTAATAAAGTTACACCTACTAGTACAGCTTGCAGGCTAGAGTCAATTCGTACCAACCAAGTCAACGTCC  
CTTGGCGCTGAAGGGGCACTGGATGGAGACTAGTTTGGTCTGTGTCGAGTTACCGGAAGACTAGGACAACTGATGCGG  
ATATTGTGAAACAATGCTCTATGTGGCCGAGAAACGTCGAGAAATTTCTGATGGAGGAATCGAGTTATTAGTAGATCCA  
GCGAAAGTGCAGCCCAACTATCCGATGCACAAATACAGTTATGATGCAATTAATAAATACTCGTTGATCTACGATGGC  
AATGTTGAAATAGTAACACCAGATTTAGAAAAAACGGTTATGTCATCTAGCGGTTTAAATGACCATGTCGTACCC  
CACCATGACAGACGTAATCTCTAACCTGGTGGTGAACGTAACCTATGGAGAGTACGCTGGGTGTTGCATTTGGTAAATG  
TTGTTGAAGCGAGATTTGCATTTTTCATCATGATCCAGTCTTATGCTCGTCCAGCATGGTATTAGCCAAGCATTTGC  
ACGTCATATTTAAACACATAAAGCAGTCTTAAAGCGCGTGGCATAATTGATACATTAATTTTAGTCTCAGTGGTGAAG  
ATACTAATAATATGACATTACGTAACATTCGCGGAGATTAAGAAGATAGCAACAATTTCTAGCGATTGGCATTGAG  
ATACAAAATTTAGGATAAAACGAGCTACAACGGCCCGGTAG

>Cluster\_39350

ATGAAGGGATATAACCGGTTAGAGCAGATCATGGATTACCTGAAAAGCCATAATCTGGTACCCTGATGAGCTGGTGGC  
GGTAACCAATGCGTCGCCGGCTACGATTCTGTCGAGACCTGATAAACTCGATGAGCAGGGTGTATCAGCCGTACACAGC  
CGGGTGTGACCTCAACCGGTTTATCTACCAACCGACTACCCATGAGAAAATGCAGCGCAGCCTGGCGGAAAAACAT  
GCCATCGCCAGCGCAGCGGCTCAATGGTCAAAGCGGGGGATTCCGCTGCTTGTGATGCGGGTACACAAATGATTAAGT  
TGCGCGGCAGATTACACATTTACCGCTTCGCGTATCACCAGCGACCTGCATATCGCGCTTTTTTTGGCTGAATTAAGC  
AAATGAAAGTACGATTTATCGCGGACGCTATCGACGACTCCAGCCAGTCTGCATTTGGCGAACATGGTGTAAATGCTG  
CAAAATACCTGGCCGGACGTGGCATTTTAAGCTGTAACAGCTGGGATCTTGAAGGGTATTACAGCACCCAGGAAGA  
GAAAGCGCAGTAAACCGGATCTTATCGCGCATGCTTCCGCGCAAAAATTCCTCGCTGACAGCTCAAAAATACGGTTCT  
GGTCTGTTTAAATATCGCGCATCTTAAATGAACGACAGAGATTTACGGATAGTACGCTTGTGAGGACAGCGGTA  
ACGCTTGGCTCTTGTGACGCGTTTAAATCATAGCCGACTAA

>Cluster\_22121

ATGAAGTATAAATTTCACTTACTTTATTTATAAAAATTTAACTTTTCATTTATTTCCACACATCATTAGATGAGAATTT  
TGATACTATGAAAAAGAAATGTTATTAATCCAGCTCATTAAGAGTATCTTTATTAATGTTTCTGTGGGAGTAAAA  
TAATATATTTATTTAACTTTCAATAAAAAATCAAACCGTATTTTGGATAAATCTAACTTCCAGTTTTTTACGAGCATAAC  
TATGATACACTTTGCCAAGAATATCGGGCACAATAATGAAGAATATGTCATGGCTATAGTCAATATATTAATCAAT  
TCTACCTAAAAGAAAGGAAGCAAGAAAGATTTTAAAGCAGCGCTTTCCGAAAAATAACGATAGTTTATCTAACTTTC  
AAAGTAAGATAACACATTTACTACTATCACTATTTGCCCTCACAGGGGAGTGGTTTATCTACAAACATTTACCATCC  
GCAATACAAATTTGCAATAAGATTTATTTCTATTTATTTTATTTTATTTGCTTGTGATATAATTAATTTATTTCT  
TTTTCTAAGAAAAGGAATGATGGTAAGTATTTTCTCAATCAAGTTTTTAAATCATTAATAATTTGATAACAGTAAATATG  
CCTTAAACGAGGCTATATATCGTACTGGATAGCAAGAAAAGATGACGTCAGATATTTTGCAGGTATAGTTAGAAATGCC  
GAAAAATATCTATACAGATCGATTTTAGTTGGAATCACGCTATACATGTTTTCCATTTCACTGCAATATTTATAGCGATA  
TCCAGTGAATGAAATCATATTCACGCGCTCAGGCATGTTTTAGCTGTAATTA

>Cluster\_58210

ATGTCTAATAGTGTACTAATTTTGGAGATGAGCAGCGTCTACCAGGAAAAAACCTTGTCAAGGCAAAAAACATGAGTC  
ACAGGTAGTACAGACTACTCCATAAAAAACACTCAGTCAGCTTCAAAAATCAATCTCATTAGGAGTAATGATCATT  
ATGCCAGACTAACAAATAAATCTCACTCTCCGTAATAGCGGAAGTTGTGGATTGGCTATCCCTATATTAAGAAAAATGC  
AATCGTCATAACTCGTCAATAAATGAAATAAATAAATGACCTGTAAAGTTCTCTATAAAAAGAAAGCAATCAAGAAACCG  
AGGTAAAACAGAAGTAACTCTGGAAAGAGTACTGTTCTGTTAATCTGAAAACGAACATCATGAGTCCATTAATAATCCCA  
TTGCAGATTACTTTCAACTGAACGCTAATGATGAATTCATGGGAAAGATGAAAACAGTTATACGTAAGGCTATCTC  
TCGCTAAGGAAAAATACGATATGAAAAAGCCATTTACATTTACAATCAAAGACATTTGATGTAAGCATCAAAGTGT  
CTCAGGATATTTCAAACTTATTTCTTATTATGAAACAACCTTTGAGGTTATTACTTTTATGATGCGGGCAGGCTACTCT  
TGTCACATCCCAATGATATATCTGGGATAAATGAAGTTCTTAGAAGAAAGGGGATGTTATGCTTATCCGGTTGTT  
TGTGGATTGATATTTACCATGTCAATGAAATGGTGGTTATGCTGCCAGTGTCCGCAAAAACAGATGTTTCAACCGTGT  
TAATGTACCGGATGACATCATTAATAACCCATACTCACAAGAGAGCAGAACCTAA

>Cluster\_4373

ATGAGTCAACATCAACCTTGAAGGCCAGTGCATTGCTGAATTCCTCGGTACCGGGTGTGATTTTCTCGGTGTGGG

TTGGCTTGCAGCACTAAAAGTCGCTGGTGCCTTTTTGGTTCAGTGGGAAATCAGTGTCAATTTGGGGACTGGGGGTGGCAA  
TGGCCATCTACCTGACCGAGGGTTTTCCGGCGGCATCTTAAATCCCGCTGTTACCATTGCATTTGGGCTGTTTTGCCCTGT  
TTCGACAAGCGCAAAGTTATTCCTTTTATCGTTTTCACAAGTTGCCGGCGCTTTCTGTGCTGCGGCTTTAGTTTACGGGCT  
TTACTTCAATTTTATTTTTCGACTTCGAGCAGACTCATCATCAATTTTGGTGCAGGCTTTTCGAGTTGAGATGGTGATTAACCGTACTGATG  
CTTTCTACTTACCCTCATATCAATTTTGGTGCAGGCTTTTCGAGTTGAGATGGTGATTAACCGTACTGATG  
GGGCTGATCTGGCGTTAACGGACGATGGCAACGGTGTACCACGCGGCCCTTTGGCTCCCTTGTGATTTGTTCTACTGAT  
TGGCGTCAATTTGGCGCATCTATGGGCCATTTGACAGGTTTTGGCCATGAACCCAGCGCTGACTTCGGTCCGAAAGTCTTTG  
CCTGGCTGGCGGGCTGGGGCAATGTCGCCTTACCGGCGGCAGAGACATTCCTTACTTCTGGTGCCTTTTTCGGCCCT  
ATCGTTGGCGGATTTGATAGGTGCATTTGCCCTACCGCCAACTGATTTGGTGCCTTTGCCATATCTGTGTTGTGGA  
AGAAAAGGAAACCACAACCTCTTTCAGAACAAGCTTCGCTGTAA

>Cluster\_27531

ATGTCCACGACATGGTTTGTAGGAGCCGACTGGCTCGCGAACATATTGATGACCCGGAAATTCAGATTAATCGATGCCCG  
CATGGCGTGCCTGGACAGGAAGATCGTAACGTGCTCAGGAGTATCTGAATGGACATATTCGCCGGCGAGTGTTTTTTG  
ATATCGAAGCGCTTTCTGATCACACTTCCCGCTTCCGCACATGCTGCCGGCGCCGAAACGTTCCGGTGGCGATGCGT  
GAATTAGGCGTTAACAGGATAAGCACCTGATTATCTATGACGAGGTAATCTTTTCTCAGCCCCACGAGCATGGTGGAT  
GCTGCGCACCTTTGGTGTAGAGAAAGTGTGATTTCTGGTGGTGGACTTGCAGGCTGGCAGCGTATGATCTGCTATTAG  
AGGAAGGCCAGTAGAGCTTCCGGAAAGGAGATTTAACGCCCGCTTTAATCCTGAAGCCGTGGTGAAAGTAAACCGATGTA  
TTATTTGGCAAGCCATGAAAATACGGCGCAAATTTATGATGCCCGCCGGCTACACGTTTTAACGCAGAAGTTGATGAACC  
TCGCCAGTTTTACTGTCGGGACATATTTCCCGTGCATTTGAAGCTTCCGTGGACGGAACCTGGTACGTGAAGGCGAACTAA  
AAACGACCGATGAATGGATGCGATATTTTGGTTCGCGGTGTACGCTACGACAAACCAATTAATCGTACGTGCGGTTCT  
GGTGAACAGCAGCGCTGTTTTTGTGGCACTTTCGACCTGGATGTGACAAACGTGAAACTGTACGACGGCGCATGGAG  
TGAATGGGGCGCACGGCAGATTTACCGTTGAGCCCGTAAATAA

>Cluster\_20387

ATGATCAGGCAGAAGATTCTACAGCAGCTCCTGGAGTGGATTGAGTGCAATCTTGAGCACCTATTTCAATCGAAGATAT  
CGCACAGAATCTGGCTACAGCAGACGCAATATCCAGCTTCTGTTCCGAAATTTTCATGCATGTGCCTTTGGGAGAATACA  
TTCGCAAAAGGAGCTTTGTCGTGCCGCAATCTTGTCCGGCTCTCCGGAAATCTATGCTTGATATTGCACTCTCTTTG  
CATTTTGATTTACAGCAGTCAATTCAGCCCGCAATTTAAAAGTTATTTCCGGTGTCTCTCCCGTGAATACCGCCACCGTGA  
TTATTTGGGATCTCCGCAAAATATCTTCCCTTTCTTTTAAATACGTCAACAGCAAAAAGCAGGATGTAGATTAGTCAACTTTC  
CTGAGACACCTATTTTGGCAATTCATTTAAATATGATATTGAAGTGTGCAATAAATACCGGATGAAGAAGTCAAACCTG  
CGAGCTCATCATTTAGTCAAGATGTATGAAGATTTTAAAGCAGGATATCTATTTTCTCCACGTTTCGAACCGTCAACAAA  
ATCGGTGATTTGCTCACAGTTGAACTTTTGGCCGTCAGGATGCAAAACAAACCGATTCAGAGATGTGAAAGAGTGGGA  
CAATTAACCGAGGACTGTATGCCCTTTTCCGCTATGAAGGTGAGTGGGAGCACATCCCTGAATGGGCGCAAAAGCTCTAT  
CTGATGGAATTACCTGCCAGGGGTTAGCCAGAGTGAACGGCAGTGTATTTAGCGATTTTATTACAATGAAAACCTTCGT  
CGAAATGATAGCAATAACATTTTGGCAATTTTTATCCCTTCCGTTTCCGTTTAG

>Cluster\_3456

ATGAGCGACGACGTAATGCAGCATGAACTGGTTGAGCGCGCGGGAGTCCGGGGCGTGACCAAGCGGATATCACCAA  
AGCGTGGTTTATCTACTGGCTGGCGCGGAAGTTTCCAGCTCCTATGAGCGTTTACAGAGCCTGATTTTTCGCGCTCGA  
TGACGCGGATTTCAAAAAGCTCTATCCGCAAAAAGGAGGAGCAGGTTGGAGCGTTAAAACGCCATCTGAATCTCTTCAAC  
TCAGACGACAGCTTTGGCGGTGATCCAGGGGATCTCCATGCCCATGGAAGAGCAAAAAGACCCGCGGCGGATGATTA  
CGATGCCCTATACCCGGGATTAACACCGGCTGATGGGGCGCTGGCGGGATGGGGGACTCCATCATCTGGGCGGGCG  
TGATGCCGCTGTTGATTTGATTTTATCCCGTTCGCCGCAATGGCAGCGCGATGGGCGGATTTTGGCGCTGATTTCT  
TACCCGGGATTTACGCTGGCAATCAGCTACGGCATGGTGCACAAGGGCTATACGCTGGGGCGGATTCGATTAATCAGCT  
CTGCAGGGAGGGCGCATCAAGGAGCTTATCTACGGCTTAACGTACTGGGGCTTATCATGATGGGCGGCTATCCGCA  
GCTTTGTCAAGATAAACCCTCACCTTTAAAATATAGCGACTGAAAGGCTCTGAAGTGGTGGTACAGCAGATTTGGACTCC  
ATCGCGCCCGGCTGCTGCCGCTGGCGGAGTGTTCGCATCTACTTCTATTTGGTGAAGGGTCCGCGTTACACCAC  
GATTTGCTGTGATTTGTTGGCTTGGAGCTGGTCTGCTCGCTGCTGGGAGTGTGTAA

>Cluster\_42274

ATGGTACTGATGATCGTACGCGGACGTTACAGTTACAGTAAATCTGTCCCGCTGCGTGGGAGATATGGGTTTTTA  
CTCGTGGGATAACCTTCCCGTAGTGTGTTACCCGATCTGGCTCGAACCTTGGCCGATCGAGAGATTTTTCGCCCGGTCA  
GCATTTGATGTTTCGTAATATGCGGGAGTCAACAGAAATATTCGAACAGGCGATGAGTAACCTGCCTGACGCTTTTCCACCG  
CAACTACTGTTTCCGATGCCGACCGTAATACCTTAAATTCGTCGTTACAGTGACACGCGCCGACTGCATCCGCTTTCCAG  
CAAAAACCTGTCGCTGGAAGTGTATCGACAAGAAAGCGATTTGCTGGAACCTCTGCGTTCGCGAGCGGATCTGATTTG  
TCGATACCTCAGAAATGTCGGTTACAGACTGGCAGAAATGCTGCGTACCCGCTGCTGGGTAACCGTGAACGTGAACCTG  
ACCATGGTCTTTGAGTCTTTCCGGCTTCAACACGGTATCCCTATCGATGGGATTTACGTTCTTTGACGTGCGCTTCTTGGC  
GAACCCGCATGGGATCCGAAACTGCGCCCAATGACAGCTCTTGATAAACCTGTCGCGGCTTCTCCAGCCGCAACAG  
AAGTACACAATTTTATCTACCAGACGCGAAGCTATCTTGGAGTATGGTTACCTATGCTGGAACCAACACCGTAGCTAC  
CTGACGGTCCGCTATGGTTGTACCGGGGGAAGCACCGTTCCGGTGTATATGACAGAGCAACTGGCAGACTACTTCCGCTC  
GCGGGTAAAACCTCCAGTACGCCATCGGACGCTGGAAAACGTAAACCATGA

>Cluster\_46485

ATGATTTGGATTGACCTTGGACACAAGCAACCCACCGATCCGACATTCGAATTTGGACACCGTGGACACAAGTGGGATG  
GGAGGCTGGTTGGCGAAATCAGCTCAACTGGTACAGATTTGGCAGCTCTAGATGAGGCGGGAAAGCGTATGAACGCA  
ACGCATGATTGACGCCAATAGTGTCTACTGGGAGCTTTGAAGGAATGGCTGCTAGCCCTTGTGCGCGGTAATGTTGG  
TTCTCAGAGGTACCGGAGCTTTACTCGCATTACGACGTAGAGCATTTCGACCTAAGAAGGAAGCTAAGGCTCTGGATAC  
CACCTACGTGATGGTTATTTGGTGGCTAGCTTTTCGATTACATGAAATTTTCGCGCTGTGGCAATGTTGGTAAACCGCAAAA  
AAGGGGCTGGTTTCCACTCAAGGATGGTTCTTTGTTCTACTTATTCAGCACCCCTGTAAGAATCTGAAACCTGTTGATATC  
CTGCTTGAACCGGATTTGATGACAATGACGTTGCGCTGATCGCTTACGCTTFCGACGAAGAAGCAAGGCTATTCCCAACCGGCTC  
TTCTGAGTGGGAGCAGGAGCGTGTCAACGAGACGGTAAAGCGCTTAAACTCAATGAACATGTACCATTAGCAGAAGCAC  
GTCGCAAAAGTATGGCAACAAAGTGGATCGGCTGATTTGACGATTTTGC CAAGGCCAAAGCCGCTGCTGTGCTGGTAAATAAC  
CCAGCCGCTAAGGCGAACTAACCGAATTCGAGCGGCTGCCCGCAATGACCAACCTACAGCAGAGCTATCTGCGGT  
CGCTGTTGGTGTGTTTAAATGCGCAACGATCCACAGCTTTCCAGATTTGGTGGGATAA

>Cluster\_19868

ATGCATTCCTCCAACGTAAGTTCTGCGTACTATTTGTCGGACAAAAAGGCTGATCGCAGCTATTACCAATATTTG  
TCAACAGCAGGTTAAATATCTGTGACAGAAATGAAATTTGTAGATCATCTGACCGGGCGCTTTTTTATGCGCACGGAAC  
TGGAAAGGATTTTTTAATGATTTCCACCTTCCGCGGATCTCGATAGCGCATTTGCCAGAAGGCTCCGTCGCTGAGCTGAAT  
CCTGCCGGTCTGTCGGGATAGTATTTGGTCACTAAAGAAGCGCATTCGCTTGGCGATTTGTTGATGAAAGCCAATTA  
CGGCGGCTGGATGTCGAAATCGCGGAGTATTTGGTAAACAGCAGTCTTTACGTTCTCTGGTTGAGCTTTTGTATATC  
CCTTTGAGCTGGTAAAGCCATGAAGGTTAAGCCCAACGAGCAGATCAAAAAGATGGCGGATGCCATTTGCTTATCAA  
CCTGACTATGTGGTGGTGGCAAGTATATCGGGTATTTAACCGCGGAATTTGTGGCACGCTTCCGAAATAAGATCATCAA  
TATTCACCATTCATCTGCCAGGTTTTATCGGCGACGCTCTATACACAGGCTATGAGCGTGGCGTGAAGATTATTTG

GCACAACCGCTACTATGTGAATGACAATCTGGACGAAGGCCAATCATCATGCAGGACGTTATTCATGTGATCATACC  
TACACAGCTGAAGATATGATGCGCGCAGGTCGTGACGTCGAGAAAAACGCTCTTAAGTCGTGCGGTATACAAAAGTACTGGC  
GCAGCGCTCTTTGTTTACGGTAATCGGACGATTTATCTTTAA  
>Cluster\_21332  
ATGAGATCGTTAGCTGATTTTCAAAATTAATAAAGCGCCATTGTGCGAAGGCATGATCCTGGCTTGCGAAGCAATCCGCCG  
CGATTTTCCCTCGCAAGATGTTTACGACGAACCTGGAGCGTCTCGTTAGTCTGGCGAAGGAAGAAATAGCCAGCTTCTGC  
CATTAGAAGAGCAGCTAGAAAAATTAATCGCGCTGTTTACGGCGAATGGGGGTTAAAGCCTCACGCGCGTATTATCGT  
CTTTCCGATGCATTATGGCTGGACCAGGTGTTAAAGAAATCGACAGGGCAGTGCGGTATCATTAGGTGCGGTTTTATTATG  
GGTCGCGAATCGTCTCGAATTTGCGCTGCTGCCGGTGAATTTCCCTACGACGCTGATATTGCGCATTTGAATGTCGGATG  
GCGAAATTTGGCTGATTAATCTTTTAAACGGTGAATCGTTAAGCGAACATATGCTGGATGTGTGGTTAAAGGGAAATATC  
AGCCCGTGGCGGAACTGTTTATGAAGACCTTGATGAAGCTGATAACATTGAGGTAATCCGCAAAATGCTGGATACACT  
CAAAGCTTCGTTGATGAAGAAATCAGATGGAGCTGGCGTTACGCACCAGCGAAGCTTTATTACAATTAACCCGGAAG  
ATCCCTATGAAATTCGCGATCGCGGTTGATTTATGCGCAACTGGATTGCGAACACGTTGCGTTGAACGATTAAGTTAT  
TTCTGTTGAACAGTGTCCGGAAGACCCGATCAGCGAAATGATCCGTGCGCAATAAATAACATCGCGCATAAACATATTGT  
GCTGCATTA  
>Cluster\_23201  
GTGGCACATAACGCAAAAGGGCAGGGGCTGATCCTCGACAATGTTTCTGCCGGTATCACAAGAAATCATTGTTGATGG  
TGTTTCTTCTCCGTTCCACAGAAAAATGACCGTTCGTGTTGGGCAACCGCTGTGAAAGTCGACGTTGCTCAGCA  
CCATTGCAGCTATCTTGCACCCATGGGCGGTTGATATTGCTTGATGGCAAGCGATTCACGAGCAACCAACGAAAGCG  
TTATCCCGTAGACTGGGATCTTCCGCGAGTCCGCAATTTACCGGAGGGCTTAAACGTTTATGAATGGTGTGCGGTTG  
GCGTTTTCCCTGGCAAAATTTCAATCACTCAATGGAGCGACCCGATGAGCAGGCGGTGGAAGAGGCCCTGAAAATTAACCG  
GTACGCGAGGATTTGCACATTTACTGTTGAAAACTTTCTGTTGGGAGCGCCAGCGTGTGGATTGCGATGGTGTGTTG  
GCGCAAAAGACGCTTATATCTGCTGGATGAACCCACAACTGGCTTGATTTACGTTTACGTTTGAATTTCTTGAGTT  
ATTAACGATTTAAGCGCTATCAGGGGCTACAGTCGTGTTGATGATGATGATGATGATGATGATGATGATGATGATGATG  
ATACGTTGATTTTTTACGCCAGGGGAAAGTGGTGCCTGTTGATGAGGGGAGCATTGCACGCTGAACGGTAAAA  
GCTGTCTTTGACGTTGATGTTACGCGATCAATAAATCTCTGACGGGAAAGCCGTTCTTCATGCCGTTTCTGTTGTAGA  
AAAAGTATGA  
>Cluster\_49005  
ATGCATCGCATAGACACTAAAACCGCGCAGAAGGATAAGTTCCGGCGGGTAAGAACGGTTTTTACCCGTGGTAACCCCA  
GACTGGCAGCCTGCTACCAGTCTGGATGATGACTACTTTGACATGTTGCAGGAAGAGCTTTGTGGCGTGGTGGAGGCAT  
CCGGTGCCAGCCTGGAGAAGGGGCGAAACGACCCAGTTCCTACCGCGCTTCATGCGCTGCTGTTAAGCCGCAAGAATCCG  
TTTTGGTATATCAAAATCGATGGCAGGTTGAAAACCGCTCTCGAAAACCTTGGTTTGGAGAAGGCTCTGCATTACCTGT  
CGGTGTGCTGTTCCGTTGGCCTTCCGCCACTCCGCCGACAGGCTGGCTGAAATGCAATGGTGCGGCTTTTTCTGCTGAAG  
AATACCCGGAACCTGGCAAAAGGCTTACCCGACAAATAAATGCTGATTTACGCGGTGAATTTATTCGTGGCTGGGATGAT  
GGGCGTAGTGGGATGGGGGAGAAATAATATCAGCTCAGGGCGATGCCATACGTAATATCTATGGTGAGTTTCAAGAA  
TGTAACCACTGAAAATTTTCAATATGGGAAACAGCAGGCTCGTTAAGGGGGCCATAGTGCCTATTGAGTCCCTACAA  
ACAATAGTTATTTCTCTTAAACAGAAGTATGGTGACAGAAAGAGCAGACGGCGCTGTTTACCCAAAAGTATTGGCCTT  
GATGCTTCAAGAATGTTTCCAATGCAAAACGAAACCGTCTCGTAACATTGCCCTTAAATATATCTGAGGGCTGCCTG  
A  
>Cluster\_26246  
ATGGCAAAATAACCGCATTTGAAACGGCTGGTGTACCCATATTAGCTGTATTGCGCTGAAAGGGGCGAGGGCTGAAAGT  
GTGCAAAATTCGCCCGCGCCTGGCTGCTGGAGTGGGCGACAAACGGTGGCTGTGGGACACAGGCTATTTCATCGTGGT  
TCCGAACTACACGCAATCTGTTGTTTCCGCTTTATCGTCAAGTACGCGGTTTATTCGATCCGCAACAGCGCTG  
GTGCGACAATTTCTGCCACCGGCTCGCAGCGAAAGATGTTGATGCGATTATCTGTGCGATTTTACGCTGATCATAT  
TGCTGGCTGCGTGTATTTCCCTGATGTTTCCCTGATCTGTTCTGGTGAAGGCTGGCGGCAAGTAAAGAACTCTGCGTGGT  
TCACTGCGCTGCGCAGGCTTTGTGCCAGGCTAATCCCGGAGAATTTGACTCCTCACTGCGCTTTATTGAAAGTTTTC  
GCATCGGTGAATTTGCGCGCGCAACTGCGCACCGTTTGAAGTGGCTGATTTGCTGCCAGAAAGCAATGGCGAAATTTCT  
CGTGCCGCTTCCAGGACATGCTGCCGACATATGGCGGCTTTGTTTAAACGACAACGGCTGGACTTTACTGGCTGGCG  
ATGCGGCATGGGCGCCAGTAACTACCGGGAGCTGCAGGGCTTACCACTGCGCATCTGTTTATGTCGAGCCAC  
GCCTACTACCACAGCTTGGGCAACTCCATCAGCTTTGGCAAAACGGTGTGGTGGAGATTGTTTGTGCCATGAGGGGGA  
TTTATGA  
>Cluster\_10616  
ATGAAAAAATTACTTTTTGCTTTAGCCCTGTTTCTGCCACCATTGGCCTTGTGCGTTGCGATCGCGTTGAGCCTGGTAA  
TGTGGGATCAAAAGTAAACAACCTGGCGACGATAAAGCGCTGGTGAAGTGGTGGTGGTGGTGGTGGTGGTGGTGGTGGT  
GGAACACTGAGGTTTACATCTTCCGACCTTTAAGCAGATGAAGACTACGATGATCATTACGTTTCCAGATGAGTGC  
GGTACAACCATCGGCTATCAGATCGGCTGGCTTACAAAGTTGATCCATCCAAAGTTACCACAGTCTTTTACAGCTTACC  
CAAAGCGTGGACGACATTTACCGACACCGACTGCGCCAGAAGATAGCCGACGACTCAACCGACTGGCCAGCAAAATGA  
CCACCGACAATTTATCGACGGCGCAAGTCTGAGCTGCTGATGCTGTTAAGCATTAGGAAGAAATGACGCC  
ATCGGTATTCAGGTAATGAGCCTCTCATATGTTGGTAAAGCGGAGTACCCGCTACTGTTATCGACAGCAATTAATGCCAA  
AGTACGGCGAACCAGAAAACCTGCAACGCGAGCAGGAAGTAAACAGCGCGAAGCGGAAGCAACATGTTGCGCGCGG  
AAGCTGCCGGACAGGAGATGCGATTGCGCAAAAAGCCAGGCGAAGCGGATGCTATTCGTTTACCGGGTGAAGCTCTG  
CGCCAGAACCCTGGTGTATGAGCTGGAAGCCATCAACAAGTGAAGCGGTACTGCGCAATACATGACCAGCGGCTG  
CAACACACCATTTATTCAGGTTAAGTAA  
>Cluster\_48641  
ATGGCGCAGATCGACTCGTATCGTAGCGGTGAAGCTGTTTCTTTTCAATTTGCTTCAACGCTGCTGGATACGAACTGTC  
CACCTACACAGTAAAGGACAGCACCGGGGCTATCTCGTTGATGGCGAGCCGCTAGAAATACAGCGCTCAAAATGTCGA  
TTCCGGTTGTCGTGTCGGCTGAATATAACCAGCTCTCTGTGAAAGAGCGAGATCTGCGGTACGTCATTGTGAAGGCTGTT  
GCATCGGGTCTGACGATGAAGAGCGGCAAAATGATGTTCTGCTGAATAGTTTGAACGTGCGATACAGAACAGTCTGTT  
TGCAACTGTCGCTGATGCTCAAAATGACAGCGATCGATATGCTGAATGGGGACACTTTGCTGTCGGATGGTGAAGGCTTAA  
TGCCCAAGCGTCTCAATTTAGGCTACCAGACGAATTAACACTTTACCGTCTCAATCCGCAAAATTTTACGATGCTT  
GACCGATACGATCGCCCTCAAAATATGCTGAATGTGATGACATTTCCGTTGGGAGCAGATGGAGCGTACCAGGCTGATTT  
AGTCGATTTGGGAAAGATGACGCGAGGAGGTTTGAAGAGTTCCTGACTACTTCAAGAAGCGTTGATGCTTGCCTGTTG  
TCAACGAAGCGTGTGAGATCGCAATGGCAATGATGAGCCGACGACGAGAGGATGGCATTTTGTGAGATCCATCGGT  
GAAACAACCAACATGTACCGTACCAGTAAAGCTGCAAAACGTCGATGTTGCTGCTAGTACTGCGCCTTCTGCTGGTCA  
CATCAACAACCGTATGATGTTTCCGCTGCGTAA  
>Cluster\_19933  
ATGGCACGATTAATGTTGTTACTTCCGGCAAAAGGGGTTGTTGGTAAAGCAACCTCCAGCGCGCCATCGCCACTGGTTT  
GGCCAGAAAGGAAAGAAACTGCTGATGATGATTTTGGATATCGGCTGCGTAATCTCGACTGATTAAGGTTGTGAAC  
GCCGGTCTTTACGATTTCTGCTAACGTCATTCAGGGCAGTACCGCTAACCGAGCGTTAATTAAGATAAACGACT

GAAAATCTCTATATCTTCCGGCATCGCAAACCTCGCGATAAAGATGCCCTCACTCGTGAAGGGTTCGCCAAAGTTCTTGA  
TGATCTGAAAGCGATGGATTTTGAATTTATCGTTTGTGACTCCCCGGCAGGGATTGAAACCGGTGCGTTAATGGCACTCT  
ATTTTGCAGACGAAGCCATTTATACCACCAACCGGAAGTCTCCTCAGTACGGCACTCGACCGTATTTTAGGCATTCCTG  
GCGTCGAAATCAGCCCGCCAGAAAATGGCGAAGAGCCGATTAAGAGCACCCTACTGTTAACCGCGTAATAACCGAGGCC  
CGTAAGCAGAGGTGACATGCTGAGCATGGAAGATGTGCTGGAGATCCTGCGCATCAAACCTCGTGGCGGTGATCCCGAGG  
ATCAATCAGTATTTGCGCGCTCTAACAGGGTGAACCGGTCAATCTCGACATTAACCGCGATGCGGGTAAAGCCTACGCA  
GATACCGTAGAACGTCTGTGGGAGAAGACGTCTTCCGCTTCATTGAAGAAGAGAAGAAAGGCTTCTCAACCGCTT  
GTTCCGGAGGATAA

>Cluster\_58431

ATGACGGAAAGTTAGACGGCGGGCAGGCCAGGACAGGGCGGAGCCTGTGGCACAGAAGGGCGCACAGGCGTTAGAGCGGGG  
AATFGCGATCTGCAATATTTGGAAAAAGTGGGGGAAGTTCGTCGGTTAGCGATATTTCTCTCAATCGGATTTGCCGC  
TCTCCACGACCTTTCCGCTTGCTGAAGTTTACAGGCAGCGGATTTTGTCTATCAGGACAGTCAATTAGGCTGGTGGCAT  
ATAGGATTAAGGTGCTTTAACGTGCGGTGCGGCTACATCCATAACCGGATGTCTCTCCGTCGCGGGCGTTTATGGC  
CCGCTGATGTTACTTTCCGGCGAAACGGTCAATGTGCGGATCCGTAACGGCAATGAAGCGGTATTAATTGGTCAGTTAG  
AGTGTAAATCGATGGTCAGGATGTGTGCCACCTGGGCACTGCTGCACTGCATGCTTCCGCTGCGGGCAAAGCGCTG  
CTTTATCCGCTGGCGGAAGAGGATTTGATGAGCATCATCTGCAACCGGTTTGCAGCAGTTTACGCCAACTACGCTTGT  
GGATATGCCACCTTGTCTGAAGGACCTGGAAACAAGCGCTGAACTGGGCTATACCGTAGATAAAGAAGAGCATTTGTAG  
GTCTGAATTCATAGCTTACGAAATTTACGATGATGTCGGTAGTGTGTTGTCGCTATCTCCATCTCCGGGCTTCATCA  
AGACTGACAGAAGATCGTTTGTGATCAGGCTGAGTGGTCAGAGACACCGCCCGGATATCAGCACGGCGTTGGGACT  
GAAAGCACATCCATAA

>Cluster\_36068

ATGAAGAAGCTCAAAAACACGGAAAATCGAATAGCCGGATGCTGAAAGCAAAGGATGGACTCAGGCTCAACTGGCCCG  
CAAGTTAGGTGTGAGTGCACAATCAGTGCAGTACTGGACAACAGGAAAAACATTTCCACGGAGTGATAAGCTCAGCGCAT  
TATCCGAGATAGCGGTTATCCACAATCTGGTTCTTAGTGAAGACTCCTCACAACCTTTTCTCGAAGAGAAACAC  
CAGACAAGAACAGATAGCGTCTGTTTAAATGTCTTGTAGTTGAGTTTGTGCGGTGATGGAACCTCATGTCCGTTGGTGA  
CTTGATAGATGTAGTGCCTCAATAGAACTTGATCCTGAATATGCCCGACGCTTGTGGAAATCGGGCATTCAAAATA  
TAGGAATAGGTAACGCCAGAGGAGACAGTATGGCTCCACAATCTCACCTGGCAGCTTCTTTTTCTTGATAAGACAGTA  
ACTTATTTGATGCGGATGGCATTTATGCAATTTGTTTGGAGAAATGCTACGTGAAAAGACTTCAAAGAAATTTGGAAG  
CAAAATCATGGTGTATCTGATAACCCCAATTAACAACATGGAGCATCGAAAAGAGGGGTTAGCTCTGCTTTATATCC  
AGTCTAAAGTGATCTCATCAGTACCATTCAATAAACAAGATTTGGTTAG

>Cluster\_21568

ATGCAGATCCTCAAAGTGTCTCGGCTGTGATGGAGTACCAGACGAGTTGTTGTGGAGTGTAAAGCAGCAGCACTGGC  
GCTTATCCACCGCAGCGCCGATGCTCACCATTGTCACCTGCACTGCAACGCCCGCTGCTGGATAAACAGGCCG  
AATGGTGTGAAGTGTGACCGCGGGCGCACCAGTCTGCTGCTGTTGAACATGTTTCATGCCGAGTCCCGCGATCCG  
GGCAGGCAATGTTGGACCTGCTGGCGGATGAAAGGTCGGTCTGCAACTGAATTTAGGGAAGTCCCGGATTTATCT  
ACCGCTGTATGGAGTATTTAAGCGTACTTCCGGACGATCAGCGGAAAGAAGGATTACTCAACGTTGCGCCGATCTCG  
CCCTGCTTGGCGGACGCTTAAAACAACCGCAGGACCGTGGTACGCTTATTTGACGCCCTGTGCAACTGGCAGGAAG  
CCTCTGTCAAGTGCAGTGTACAAAACAGATTGCGAGTGAAGAGCGTACGACACCCCGCAGGCGTGGATGCGGTGTG  
GGAAGAAGAACAGTGAAGTTTATGAAAGATAACGCCAGCGGCTGTGACAGCTCGCCGCTTAATCAATATCAGCGACGCT  
TTAGCCAGGATGTCGCGCATGATGTCAGATCAGTCCAGTCCAGTGGGAGTGGGAAATGA

>Cluster\_66958

ATGACCACGACAGAACATCCCGTGCACCAGTTGCTTGGTGTGCACTGAATGCCCTGAAAACGGCACAGGAAAACCCACAA  
TATAACCAAGTGAACCCGATACCGCATTACCTGCTTGAATGGCTTCTTGGTGCCAGCAGACATCCTGAGTTCCGTAGTCT  
TCCCTGGCGAAATCATGGCGTTAAAAGCATTGACCGAAAAGATCGCAATATTTCCCATCATCGGAACGCTGAATACGCTC  
TTTTCTCAGTCTGCCACTGTGCGGAAATGTCGTTGTTTTCGTTTTCGGGCTGCGCTGGGTAATTAACGAAAGCAGGCTG  
GCGCACTTATGCTGCCCCATGGCCTGAGAGGGTGTCAATGAATCCATGAAACGGGCTGTTCGGGAAACGCCATCTGC  
TACAACCTAAGTCCGACCGAAGAGTGTTTTACCGACAGCGGATGATGAGGGCACCGATTACGTTGACGCTGATCACC  
CTACACCGCAAACTATGCAGTCTTGGAAACGGCAGAGTTAATATTCCTCCGACGAGGATTTACGTTGGTGAGAGGATA  
CGAACATCAATTCGGGATCGAACGACAGAAACCTCTTTCACACCCTATTTATCGGGCTGCCAGCCTGCCAGAAAGATG  
TCTGGGTTGCAACACAGGAGCAGACGACTATCACATTACACTGA

>Cluster\_54366

ATGATACTGACCGATCCAGAATGGCAGGCAAGTTTATTAAGCTGAAAGTTTCTTCCCTGGCTGTGCTGTTAGCCTGCC  
GTTTGGGATCTTTTTTGCCTGGTTACTGGTGCCTTGCAGCTTTCGGGGCAAAGCTCTGCTCGACAGCGTACTGCATCTAC  
CGCTGGTGTACCAGCCGCTGGTCTGGTTACTTATTAATGCTTTCGATGGGACGGCGCGGATTTATCGGTGAACGCTCTG  
TATGACTGGTTTGGTATTTAATACCTTCGCTTTCGCTGCGCGCGGCTTCTCGTGCAGCGCTCATGTCTTTCCGCTGAT  
GGTGGCGCAATTCGCTGCGCTGGAAGGGTTGATGTCAAACTGGAACAGGCGCAAGAACACTGGGGCCGGGGCGCT  
GGCGGTTTTCTTACTATCACGTTACCCTGACCTTACCGGAAATTAATGTTGGTACGGTACTGGCTTTTGGCTGTTCT  
CTCGGTGAGTTTGGTGCACCACTACCTTGTGTGCAACTCTGTTGAAACGCGAACCAATTCCTTCCGATGATATAC  
CCTGATCCAGACCCCGCGGGGAAAGTGGAGCGGACGACTGTGCATTTATTTCTATTGCGCTGGCGATGATCTCCCTGT  
TGATTTCAAGATGGCTGGCCAGAATCAGCCGTGAACGGCGGGGGCGCTAA

>Cluster\_40829

ATGTCCCTGAAACTGGCTTTTCAAGCCTTTCGGGCTTTCATCAGAACCGAACGCTGTGAGTCCGCGCGGGACCTTTCT  
GGTTCATATGGCATGGGTATTTCTTGTGCAATGTTGCTCTGGTGTGGCGCTTTTTCAGCCAGGCTGCGCAGCACAA  
CTCCGAGGCTGCGCTGCAGTATCGCGATGATGTGATCCGTAATGCCCGGCTTGAATGGGACTGTCTGCGCCGGTGGCC  
GATTTGCGCGCAACTGCATCAGGAAAGCGGCTGGCGACTGATGCGATCTCGCCGGCTGGCGCTCAGGGACTGGCGCA  
GTTTCACTGCTGCCACTGCGACTGGATAAGCCAGTTGATTAACGATGCTGAGCAGTCTGAGCGCTTAAATCCGCGATGG  
CTATCCGGGCGCTGGTACGATGACCGCTGGCTGTGGCAGCGTGTGACGCGCCGAGTACTGCGAGCGTATGGCCATG  
ACACTGTCCGGCTATAACGGTGGTCTGGGCTGGGTACAACGGGACAGGCGGCTTGCATCACAGAAAGTCTGGACAGCAC  
CCGCTGGTTCCGACATGTGCGCACGGTGAATGCCGGACGCAATGCCGCGAGCTGGCGGGAGAACCCGCAATATCCGACG  
GCATCCTGCGCAACTGGCAGCGATATCTCACATGGGGAGGACTGTTGTTGGTATCTGGTAA

>Cluster\_34628

ATGGTTCAAGATGAAAAGTGGCGAAAGAAATTCGCCACAGCGGCTAGCGCAAGCCTGTAAGAAGAGTGGTCTTGATGAACA  
TGGTAGGGGAATGGCCATAGCCGTCGCTTCTTCTTTCGTCCAAAGCGTTAGCAAATGGTTAATGCTGAGTCTTTAC  
CAGCCAGGAAAATAAGTGAATGCGCTTGGGAAATTTCTAAACGTTGATGTTGTTGGCTTACAGCACGGCTTCTGTTAAAT  
GGAGCGAATGATGAAGATACTTTTCAATGTTGGCAAATTAAGAAAGGGTTAGTGCCTGGTGTGGTGAAGCAATTTCT  
TGGTGTGATGGTGCATGAGATGACCGAAGAGCGCGATGGGTGGCTCAAGATTTATAGCGATGATCAGATGCTTTT  
GCTTCTGTTAAAAGAGACAGCATGTGGCCAGAATTAATACAGGAGATATGACTCATTTAGCTTAACACCAAAGTA  
TTCCAGGTGATGAAGTGTTTGTGAGAACCATTGAAGGGCACAAACATGATCAAGTTCTTGGCTATGACAGAGACGGAGA  
ATACCAATTTACAAGCATCAATCAAGACCACAGGCCAATAACGTTGCTTATCATCAAGTAGCAAAGTGGAGTATGTGG

CTGGTATTTTGAAGCAATCTCGCCACCTAGATGACATCGAGGCAAGGGAATGGATTAAAAGTTCTGTGA

>Cluster\_27245

ATGTCCTGGTTCAGCGAAACCTCAAATGGTTCGCGCGCGCTTTCTGCGCGATGTCGTTTCGCACAGCAGGCGGGCTGGCTGC  
CGTGGGTGGCGCTGGGGTTACAAACAGCAAACCGCACCGCATCTGGCGTGGCGTTGCGCCCGCCGAGCCATAAACG  
AGAAGCCCTTGGCAGTGGCTGTGTGGTTCAGTGTTCAGGCTTGCCTTACGACACCTAAAACCTGAGCAGC  
CTGGCCTCTGGTCTGTGCGCGGGCAGCCATATTTTGTGCGCGGGATATTCCTTGCAGAAATGTGTGAGGACATTCCTGTG  
CGCCAAAGTGTGCCGAGCGGTGCGCTGGATCGTGAGATCGAATCGATCGACGACGCGGGATGGGGCTGGCGGTACTGG  
TGGACCAGGAAAACCTGTCTCAACTTTCAGGGGCTGCGCTGCGATGTTTTGTATCGCGAATGCCGAAAATGTATGAGGCC  
ATCACCTGGAGCTGGAGCGCAACACGCGAACCAGGTAAGCAGCCCGCTTCTGCGGACGGTTACAGCGCACCGCTGTAC  
CGGCTGCGGTAAGTGCAGAAAAGTGTGCGTGTGGAACAACCGGCAATCAAGGTGTTACCGCTGTCTACTGGCGAAAAGGG  
AGTTAGGTACCATTACCGCTTCGGCTGCGTGGAGGGGAACAATGGCAATTCGTAA

>Cluster\_67127

ATGGTGTTCAGAAAATTTTCATCATAATCATTTTGTGCTTCTTGTAAATGAGTTGTGCGCATGCGGGATTCGCCGTAACAA  
AACCCGGGTTATCTTTAATGAAAAGAAATCCCTCCACGAGCATAACGTTTTCCAATACCGGAAAGGATAATATCTGGTTG  
AGGCGGGCTTATGACCCCGGACTGAATAAAGTCAGTGACAGCTTATGTTGCATACCGCCGATATTTCTGTTCCGAAGGC  
GGGAGAGCAGCTGTGAAAATATCAGAAAAGGAGGTGAGTTAGCGTCTGATAAAGAAAGCGATTACAGGCTGGTACT  
GAATGGCCATCCCCGCAAGTGTGAGCCTAATACGAAAAGAGAGGGCGCCAGGGTTTTCTGTTTTCTCTGGTTTTCTGTGAAC  
TGTTTTACAGACCAGAGTCCCTTAAGCATAACCGGACGATGCATATAAACGTTCTGACGTTTACAGGAAAGACAGCAGC  
ACCGTTATGCAAGAAATGATTCGGAATACAACCTTACTGAGTCAGTTATTTCTGGGGAAACAACAGATAAACCTGAA  
CAACAGCCGTCATGATAAGACCCTTTCGTTCCGTTGTTTTTAAACACCGGAAAGCGGATATCTGAAGCCCGTGGAGAT  
TAATCAATGATTTTGGTGGCAAACTGAGGAGCATCTGTCCCGGATACAGCAGGGGGATTA

>Cluster\_34732

ATGTACCACATTTCCGGCGTGTATTCGCCACAGGACGTCGCTCGTTTTTCGCGAACAACGGAACAAGCCGAATGGGTGGA  
TGGACCGCTCACCAACCGGCGCAAAAGTGGCGAAGTTAAGAACAAATCAACAGGTCGACACCGCAGCAGCTTATACGCCG  
CCCTGCAAAATGAGGTGCTGAACGCGGTTAACCAACATGCTTTTATCTTTGCCGCGCCTTGCAGCGTACCCCTTCCACG  
CCGCTGTTTTAATCGCTATCAGAACAAATGAAACCTATGGTTTCCATGTGGATGGCGCAGTACGCAGCCATCCACAAAACGG  
CTGGATGCGTACTGACCTTCTGCCACGCTGTTTTTAAAGCATCCACAAAGCTACGACGGCGGCGAAGCTGGTCTGTTAATG  
ACACCTTCGGACAACATCCGGTAAAACCTCCCGCAGGCGGATCTCGTGTGTATCCCTCCAGCAGCCTGCATTTGCGTGACA  
CCCGTAACCCGCGCGTACGAGTGGCATCATTTATGTGGATCCAGTGCATGATCCGCGATGATAAAAAGCGCGCCATGCT  
GTTTGAACCTGGACAACAATATTCAGTGCCTGAAAAGCCGCTACGGCGAAAAGTGAAGAGATCCTGTCGCTGCTTAACTTT  
ATCATAATCTGCTCGGGGAATGGTCCGAGATCTGA

>Cluster\_23432

ATGGCAAAAAGAACCAGCTGAAGCCCTGAAGACCCGGCAAGAACTGATTGAACTGCCATCGCCAGTTTGGCGAGCA  
TGGCGTAAGCAAGACGACGCTCAACGACATTGCCGACGCTGCTAACGTTACGCGTGGCGCTATCTACTGGCATTTCGAAA  
ACAAGACTCAACTGTTTTAATGAGATGTGGTTGCAACAGCCTTCATGCGGGAGTTAATCCAGGATCACTTGACCGCTGGG  
TTAGAGCATGACCCGTTTTAGCAATTCGATAAATGCGTAAAGTGTGCGTTTTGCAATATATGCAAAAATTCGCCCCAGCA  
GGCGTTGCTGAAAATCTTATATCACAATGTGAATTTAATGATGAGATGCTGGCCGAGGGAGTATACCGGAAAAGATGG  
GCTTTAATCCGACAGCTCCTCCGCGAAGTATTGCAAGCGGTGTCAGCAACAGGTTGTGTAGCAATAATCTCGATTTAGAT  
GTTGTGATGATTTATGATGATGCTGCTTCAGCGGAATGTTTCAAACCTGGTTAATGAATATGGCGGGTTATGATCTTTA  
TAAACAAGCCCGCTCTGGTTCGATAACCTATTAAGAAATGTTTCCAGATGAAAACATAACGAAAATTAATTCATAAAA  
CGAATGAATTAAGTGTATATAA

>Cluster\_36125

ATGAAAACGGGACCGTTAAACGAAAAGTGTGAGTTGGAATGGCTGGACGATATCTGACAAAATACAACTGACCACGCCAT  
CCTTGATGTGGCGGAGCTGGACGGTTTTATTGACGGCGGTGTTGAGTTCCTCCGCAAGAGATGAAACCGGAAACAGTGGCTGG  
TTGCGGTGTGGGGTGGGGTGCATATGTCCGCGCTGGCGCTCAGAGAAAGAGATGACGCGCTTATGAACTCTGGCTTTT  
CAACATATGGCCGATACCCGAGAGCGTCTGAACGAATTCGCGGAGCAGTTTGGAGCCGTTATTCGGCTTGGCAGAAAGTTGA  
TGGCAGCGAGCTGACGATTTGTTGAGGAGTGGTGTCTTGGCTATATGCGGGGCGTGGCACTTTCGACTGACTCAACCTGTC  
CCGATTCTGTTAAACAGCGCTGGAGGCGATTGCGCTGCACGGTACTGAGGAAAACCTCGAGCGGGTAGAGAAAATGTGCG  
CCAGAAGCGTTTGAAGAGAGCGTATGATGCCATTGACTGGCGCGCTTATCTACATGCGTACTGGATGGCGCATCCGCA  
GAAAAAGCTGTTTACGCAACCGATCAAAAGCAGAGAAAACCGGGGCGTAACGATCCTTGCCCGTGGGTAGTGGTAAGA  
AATTTAAGCAGTGTGCTGCCTGCATTA

>Cluster\_14575

ATGTCCTGGTTTTTTCAGCGTCTGTTTGGCAAGGATAATAAGCCTGCTATCGCTCGCGGTCCGCTGGGACTTCATCTCAA  
TAGTGGCTTACGCTCGACACGTTAGCGTTTCGTTTGTGGAAGATGAATGCTGATTCGCGTGGCGGTGAGGAATTTA  
CGGTAGCCGCTGTACCCACATCGATCTGGCGCGCGTGTAGTGCATGATTTTCCGCTACTACACTTCCAGCGATGAATTTG  
CAAAATCAATACCACCGCGCGCAAGATAATGATGACATGATGATATCAAGCTCTTTGCTATGAAGAGAGCTACGGTAT  
CAGTAAAGAGAGTCACTGGCGGAGGCGATCAACGCAAAAGTGTGGGGCAATGATCTTAAACTGGCAGGAAAACCGCT  
GGCAGCGATTTTTTAAACAGCGAAGAACCGGAAATATCAACCCGCTACATGCTGAAAAAAGTAGAAAATCAAAACCAT  
GCCAAATGGGAGGTCCATAAATTTACCTAGGGCTACCAACGCCAAGTAACCCGAGATACTACGAATAATTTGCTGTTAAA  
TGGTGGAGGAATCTTTTAAAGATCTCGGCGAGCCAGAGTGGTTATTTTCGCGCGCTGGGTGTGATATCCCGCTGACAT  
CACTTCATATATTGGTTAA

>Cluster\_58267

GTGAAAGAGATTATGATGGATTCTTAAATTCAGCGCGAGGCATTTCCGAAGCGGGAAGCCTTGTTTAAACAGCTGGC  
GACACAGCAAAGCCCGCGCACACTTTTTATCTCTGCTCCGACAGCGTCTGGTCCCTGAGCTGGTGCAGCAACGTTGAGC  
CTGGCGATCTGTTGCTTATTCGCAACGCGGGCAATATCGTCCCTTCTACGGGCGGAAACCGGTGGCGTTTCTGCTCG  
GTGGAGTATGCGCGTCTGCGCTTCGGGTATCTGACATGTTGTTGTTGTTGTTGTTGTTGTTGTTGTTGTTGTTGTTGTTG  
TGCCAGCTGTGATGATGACCATATGCTGCGCTCCTCCACTGGCTGCGTTATGCCGATTCAGCCCGCTCGTTAATG  
AGGCGCGCCGATTCGATTTACCGTCAAAAGCTGCGCGGATGGTACGTTGAAAACGTCATGCTCAGTTGGCTAATTTG  
CAAATCATCCATCGTGGCCTGGCGCTCGAAGAGGGGCGGATCGCCCTGCACGGCTGGGTCTACGACATTTGAAAGCGG  
CAGCATCGCAGCTTTTTCAGCGCGCAACCCGCTTTGTCGACTGGCGCTAATCTCGCGCTTGTGTCATACCGCTAC  
GCCAACCGACCGCAGCGTAA

>Cluster\_43102

ATGGATCTCGGTCATTACGCGCTCAACAAATGAACTGGCTTCTTCTGTGATCCCGGAGGATCGACTCGATAAAGATCC  
GCCGATCTGATCGCCGGAGCCGATGTCGATTGAGCAGGGCGCGAAGTGCAGCGAGCGGCGATGGTGTCTGCTGAAAT  
ACCCCTCGCTTGGCTGGTGGAGTATAAAGTGGCCCGCATCGCCACCACCATGCTTACATTCCTGGTTTTCTCTCTCTT  
CGTGAATATCTCGCTGCTGTCGGCAGCTGGGAGATGCTGCACAAAAGCCGATTTAGTGTGTTGTCGATGGTCAATGGGAT  
CTCGCATCTCCGCTCTTGGCGTCCGACGCTTTTGGCTTATGTTGTTGTTGTTGTTGTTGTTGTTGTTGTTGTTGTTGTTG  
GGCTGCGGTAATTCGAAACCGCTCTCCAGCGAACCAGGCGCGCTGGCCCGCTGATGGATAAAGGCGAGCAGCTGGCC  
TGGTCTGGCGCAGCAAAGCGCGTGTAAACCGTTGTTTTATCGCTACCGCCATCGGGTACGCTGGACAGCGCGCTGGC

GTGGGTACAACGCTGCATGAAAGGCTATCGTCTGCCGGAGCCAACGCGCTGGGCGGACGCGGTGGCCTCGGAACGTCCGG  
CGTTTCGTGCGCTATACAGCAAATCAGCCCTAA  
>Cluster\_64447  
ATGAGTAACGAGTATTTTATGGAAATATAACCCGCATAAAACTGCGCGCTGCATTGCGGGATTTGTCTGGTGGTTCTAAGGG  
GCAACTGGGAAGCATTGTGTGGAGCACCCACCGGAGATAAAAACGCATACCCACGCAAAACATATTCATCGTGTGCAACTGG  
AGGACCGGACCGTTGATGCTCTGGTTACGCCAGTTTACGCTCTGGAAAAGTTTTAGCAGACGTCGCCCCGCGCCCGATG  
AATGATTTTGAATTTGCTGATTCATCTTGGCGGCGTTCGTGAACTCGCTGGATGCAAGTCAGCAAGCGTGGTTGCGTTA  
TTGCTACGGTGGTAACTTGGCATTCAAACACCAAACAGCTATTTGTGAGGCTGTCTGGAGTCGCTATAAAGGACACATCC  
CCGCGTCAACTCAGAGAAAAGTAGTTAAGCGCCTGCTTTCGTTGGTGTGCTGCTGCGGAGGCTGGCAGCAGCAAAT  
AAACGCGAGGATTTAAGGAGATGGCCGGTCTGCGCTAGCTGGAATGTTGTCTGTTTCTCGTTCCACCTGGTGCGAAC  
ATACTCCCGCACTGGGCAGGAATGAAAGAGGCGGTGAGAGCACTTGTATGAAATGGCACTTCTTGCACCTTTGATCACT  
ATCAGAACCATTTAGACGATGTTTGCCTATAA  
>Cluster\_48617  
ATGACCAAGATCTTTGTGGTTGGCGGCACAAAGGGCGGGCCTGGCAAATCCACCGTTGCCAGCAAATGGCGTTTGCCT  
GAAAGTCAAAAAGAGAAGAGGTTTATATTACCGATATAGATATTACGCGCACGACAACGAGCTGGTGTGAAGACCGTC  
GACAGAACGAAGACCTTGGTGTGATTCCTTTTGCATACGCTCAGGATGACATTAAGCACCATAAAATCGCTTACGGGT  
AGACTGAGCTTTGTAGTGTAGATGCTGGTGGCTTTGACTCCGAAATTCAGCGACAAGCGATGCTGAGCGCGCTTAT  
CATTTATCCCGCTTCTGCTTAAGCGTCTGATTTGAAATCTCTGCGTGACATCGATCCTATTTATCGACAATGTTCTGTAATG  
TAAACGATAAAGTGAAGGTCCGCGCGGTTCATGAACAGTCCCGGCTTTGCCATCACAAGTGTCTCGCATTTGCGCGGT  
AAGAGATTTGTCGAGACGTTTGGCATCGAGTCTGCGCCAGTCAATCTATAAACCAGCAAGCTACGATGATGCGGAAGA  
GTCTGGTCTGTTCTATCTTTCGAAATGACCGGTAGCGAGCGCACAAAAGGCTGAAGCCGAGTTTGAAGAATTTGTAGATT  
ATCTGTTGAGTCTGGAGGAAGAATAA  
>Cluster\_15961  
GTGAGCAAGATTGACTATGAGGCACTGCGTGCCAAAGGCAGAAAAGCAACGCTGTGGTGTATGGTGCCTCGAATATGGAGA  
GAGCCGATTTGATTTGTGATGATGCGCTAATTCATCGCGAGGCTGCTGGATATATTTCCCATTTGCATAATTTGAAGGAGCC  
ATCCTGAAAGCGGTTTCGATGAAGATTTCCAAATGGAACAGCAGGCAATGCTGAATTCATCGCCGACCCAGTCCAGCT  
ACCGTGTGGCGTGTGGATGAACGGGAAAGAAACAGCAATACATCAAAGCCGCTGATCAGGAGAACGAGGATATTGCG  
GTAAACGGTGAAGGAGCTGCGAGTTGAGCTGGAAGGCAAGCAAGCTGATTGTCAGAGCTTGGAAAACAAATGCCCGCAAT  
GGGAGCGAAAAGCATTAAAGTAACTTGAAGAGTGTGCTGCGATGGCTGAACGATCGAAGAGATGAGTAAGCAAAGTTGC  
GAAGCCCGGGAGCGTGAATTTGTTTGAATCATGGGTAATGCATTTCAATTTGTATTTCCAAATCGACGCTTGAAGGATTGCG  
CACCAGAACTGGATACCGTAACGCGACCTTATCAGGAACAGACTTCAACCGCATATGGGAACAATGGAATCTATCCGCG  
CCGTGGCATTTCGATCAAAGGAGAATGA  
>Cluster\_48579  
ATGTCGTTTAAATTAAGCCGCTCGCAGTTTTTGCGAGTGTGGCGGTGATGACGTCGATAAAACTGATCAATGGGCATAC  
TTCCAATGGTGGCGCTCCACGTAATTCGTGGGGCAGCAATAATATGACAAAGCACAATTCGCCCGTGTGCTTGGCTAA  
TATCCGAGACACCATTGATGCAAGATTTGAAATCACCTACCCAGTGTATTTGCGCCGATCTGATTAATCTTTTGTGTT  
GAGGGGGATATCTTCCCAACGTCGGCCTGGGTTTATGTCATCCCATGAAATGAAGATCTTAAATTAATAGCGAAGG  
GTTCTTTGGGGCAATGGATGCGCATCTCTGTATGGCTTTCACGAACTTATTCGACTTCCCAATAAGCGGGTGGATAGTT  
TGGCATGCCAGGTGATGCTTTTACTGGTTTCTTATCCTTAAAGAGGGGATAAAAAGTACAGTGGCGGCAAACTACAGTTT  
GTTGGTAAGTATGAGAAAATGGTAGAAAATCGAACTTCAGCTCCCTCATGTTTTAGCAAACGATAGTGCAGACATCGGAG  
GCTGTTGGGCATCATGCGTCATTTTCATAGCAAGTGGCGTTAAACATGCTGTAGATAAAGCTGTACGCAGGTAATAGAT  
ATTCAGACTTTGCAAACATATCCCAACCAACGTTGCAAACGGCAATAGTAGCCAAATTCGTTGGAGCGGAGATTATGGAA  
AACCTATATGGGGAACATGGTAA  
>Cluster\_5315  
ATGCATTACTGTGAGCCAGGCTGGTTTGAATTAATCCGTCACCGCCTCGCCTTTTTTAAAGACAAACGCAGCACCATTCAA  
AATCTTTTTCTGGCCGATCTCCATTACTCTCGTTTTGTTCTTTAAGCCTGATTTCTGACCGGATGCTCTTGGCATAG  
AACAAAAGCCGATTTGATATTAATTAAGTGGCGGCGATTAATTTGATATGTCGCTGAATTTTTTCGCGGTTTGTAGTGC  
GTACTCTCCCCCTTGGCGAATGTGCGCGACGTTTGGCTGCTTCGGCAACCAGATCGCCCTGTTGGTACAGAAAAAA  
TCACTTAATTTGGCGAGACGTTGAAATCAGCGGGCATCAGCGTGTGTTTAAACAGGCTACGGTGTATCGCCACGCGCA  
GGCAATTCGAACTGGTAGGCACTGGTGAATTTATGGCCGGACAATGCAAACCGCCTCCCGCCAGCGAAGCAAATCTGCCA  
AGACTGGTCTGGCGCATAATCCGACAGCAAAAGAGTCACTGCTGATGAACCTGGGATCTGATGCTGCGCGCATACT  
TCACGGCGGGCAACTGCGCGTACCGTTGGTTGGTGAACCTTTTGGCCCTGTCGAAAGATAAAGCTTACGTCGCGGATTA  
ATGCTTTTGGCGAAAGACACATCTACACAACCCGTGGCGTGGGAGTTTGTATGGTTTGCCTGAACTGCGCGCCGGAA  
GTAACGATGCTGGAACCTGGTGTAG  
>Cluster\_10081  
ATGGGGGGGCTATAGTATGAAATGCTGATTTTTTTTTCTAAGCCGAAAAATACCCTTTAAGTCAAATTAATTA  
TTATCTTAATCTCAGGCTGCATTTTTAGGTGAGACTGAGGTTGTAAGTAATTAATTAATTTGGGTGTTGATCTGGATG  
CTCGTGGGATTTGGGCGTACCACCTTCATGAGGCGTAAGTAATGGTATTTTGTATTTAGCTTTTAGTAGAA  
TCAGGAGCGGATCTTACTATAAAGGATGAATTTGGGAAAACGGCATTAGAATTTGGCTGAGGTACACCAAGAAAT  
AGTTGAATGGCTATCACATATAGAGATCATAATCCCATACCGATTTTCTGTACTTATTAATATCTACGGTAAAGCGAT  
ATTTTGGTGGAGAGATTATAGATACAGATGCAAGGACAGAACTTGGCGAGGGGTTCTTCATATAGCTGTAGAAAAGA  
AGACAATTAGATGTCAGATGTTTTTATTCACATGTTGCGGATATAAATGCTAAGGCAAAATAATGGCTTTGACTTCACTCC  
TTTGCATTTATCGATAGGATAGGGATTTTGTATGATGAAGCTTTTGTGAAATTAGGTGCTGATATTTATTTGGAGA  
GTGAGATGGGATCTCCCTATGATTTGGCTATTTTGTATGGGGATAAGAGAATTTATTTTTATTTATATGTTATATTT  
TCTCATGTTTCTGAATAA  
>Cluster\_5138  
ATGAAAAATAACTTTCCGGCGCTGCTTTTGGGCACCGCCTGATGATCACTTCGCTGTGACAGTATATGCACAGTCACC  
TGCCACACTCAGCTTTCCGACGGGGGGGAGTTCCGGCTCAGTATCAGTAATACCGATCCCAATATGATTTTTATCCGG  
GAGATAAAGTACAGCCATCACAGCTCAGAACGGGATGCTGGCAGATAAACCACTGACGCTCTGCGGTGGGCTGCTGTTT  
ACTTCCGTGGCTACCCGGCCTTACGCTGTATGTTGAAACCGCCCTGGGGCAAACTTCTCTGTGTTGGCCAGCCCT  
CAAAGGTGAGGGGCGAGTCTACCGACTGATGAGTGCAGAACCTCCCTCACGGCCAGAAACCCGCCACTGGGAAACCGCTC  
AGGCTTACGAAAACCTGCTCATCGCACTCAACCGGGCTGTGCTGACAGACAGGATACCTGATGGCTATGGCGAGGTGAAA  
CCGCTTGGCGAGGATCAACGTAACCGGTGGGTTTTCCCGCACCGCAGAAAGCATGGTGGGGCAGCAAGTTACGGGT  
CGATAGTTTATGAACCTGCGCAATGCAAAATACGTGGGAGTGGCTCTGCTGAGCAGGACTTCTGGAAGCCGAGTTCTGTG  
CCGTATGTTTACAGCAATGCACAGACCTGATGGCGGGGACGGCTGACTGTCACCGTTATCCGTGAAAACGGGGAG  
GGAACAGATGGCCAACGTTAA  
>Cluster\_39572  
ATGGCGAACTCAGCGATCAGGAGATGCTGCGCTACAACCGGCAATCATTTCTGCGGGTTTTGATTTGACGGTTCAGGA  
AGCATTGAAAGATTTCCGCTTGTGCTGCTGCGCTTGGTGGACTCGGCTGCGCAGCTTCGCAGTATCTGGCAAGCGCCG

GTGTGCGCAACCTGACGCTGCTCGACTTCGACACGGTTTTCGTCTCCAATCTGCAACGCCAGACGCTGCACAGTGATGCC  
ACGGTTCGGCAACCAAGGTGGAATCCGCCCGTACGCGCTGACGCGGATCAACCCACATATCGCGATTACGCCAGTCAA  
TGCGCTGCTTGATGACGCTGAACCTGCTGCGATGATTGCAAAAACAGATCTGGTGCTCGACTGTACGGATAACGTTGCG  
TACGTAATCAACTGAACGAGGCTGTTTTGCGCGAAGGTGCCCTGGTTCCGGCGCGGCAATTCGTAATGGAAGGCCAA  
ATCACGGTCTTACCTTAACGTTCCGATTAAAGCCGGGATGAGTGTCTTGTCTGTTTTGCGGATCGTTGTAATTTGATTTCTG  
CGTAGAAGCAGGCTGATGGCACCGTTAATCGGCGTAATTGGTTGCTGAGGCAATGGAAGCAATCAAACCTGCTGGCAG  
GTTATGGCAAACAGCCAGCGGAAAATCGTGATGTACGATGCGATGACCTGTAGTTTTCGCGAATGAAACTGATGCGC  
AATCCGGGGTGTGGGTGTGCGGGCAGTAA

>Cluster\_17480

ATGGCAGTATCTGACCAGACCCGACGCGGACCTTGCCGAAACATTCAAATCTGAACGGGAAACAACAAGAATCAGAT  
CCGAGTCCGCTTGCTGGCATTATTCAGTCATTGATCCTGATGCGGTGACGGCGGTTGTCAGCCTGCTATCCGTTCCGG  
TTGAAAAGGATAATGACGGCAACCGCATACCAAAAATTAACCATGCTGGTGGATGTTCCAGTGGTATTTCCACGTTGGC  
GGAGGATGACGCTAACGTTCCGATTAAAGCCGGGATGAGTGTCTTGTCTGTTTTGCGGATCGTTGTAATTTGATTTCTG  
GTGGCAGAGCGCGGAATACAGGAACCGGTCGATGACAGAATGCATGATTTATCGGATGCGTTTTGTATTGTAGGCCCCC  
AGTCGACGCGGAGGAAGATTAGCGGTATTAATACCAGTCCACACAGTTGCGTAGTGACGATGCGAGCACCTATTTTGG  
CTTAATCTGTATACCAGAAAATTAATAATGTCGCTCCGGTGGTCTTGTATGTTGGTTGCCCTCTGGCTGATTTTCCGA  
GAAAGTAACCATTCATGCTGTTAACCTGGATGGGGGATGCTGGGCTCTGTTGTTCTGGTGTGGCTTCAAAAATCA  
CTGGTGTGTTGAGTTTTTGGGTAGCGTTAAGGCTAACGGCAAGCCAATCGATGATACGCACACTCATGGCGGTTCAG  
CGCGTGGAAAGCAGTACCAGCGGGTAAACTGA

>Cluster\_24700

ATGAATAAAGCATTACTGCCACTGTTACTCTGCTGCTTTATTTTTCCGGCATCAGGGAAGATGCAGGCTGGCAGTGGTA  
TAACGAGAAAATAAATCCGAAGGAAAAGAAAATAAACCCTGTACTGCAGCCCCCGTACGAAACCGGATATTTATGCAGA  
AACTGGCCCGCTGCAGACGGCAACAAAGCGGGCGCTGTACGAAGCTATTCGTATCCCGCGTGGATAAATTTGTGAAA  
TATTTCCGGCTTCCAAAATTAACCTGACTCAGAGCGCGGCTTTTACCATGAGCGCCAGAAAGCCATGCTGGCACATCC  
TGAACCTGGACTATAACCTGCAGTACAGCATTACAACGGCACGGTACGGAACAGCTGCGAGCAGACCAGCGCAGCAGC  
GACAGGCCATTGCGAAACTGGCTGAACACTACGGCATCATGTTTTTTACAGGGGGCAGGACCCATTGACGGGCAGCTG  
GCGCAGGTCATTAATGGCTTCCGGGATACGATGGTCTGAGTGTATTTCCCGTTCCGTTGGATGGCGTGAATTAATCCACT  
GTTGCCGGATTCCCGGACTGACAGGGGAGCGCAGCGCCTCGCGGTGAAATATTTCCCGCCATGATGCTGGTTGACC  
CGAAAACAGGGCAGTGTTCGCGGTTATCATAACGGTTTTATTTCCGAGGACGACTGGCAAAACAGTTCTGACGTTTTCT  
GAAGATTTTAAACCGAATCTCTGA

>Cluster\_10096

ATGAGCAGGTTGCCGTTTTCCGGCAGACAGGATGTTTTATCGCGGCTGATGACGGCTTACCAGCCACTGCCGCGCC  
CGCAGAAGCATCGTCAATGGCCGTTGGCGGTCGCGTCCACCACGACCCCGCGGATGCGACAGCCACGTTACAGG  
CCATGACAGTCTGTCGGCGGAGTCCGCGCGCTGGAGCGGCTGACTGCTATGACCGCTGCTGGCACCGCTGTCCCGC  
TCAGGGTTTTGACGGGGCGCTGGTCAAAGCCGTTTTGTGGCGAGGCTGGACCCCGCCACAGAGCAGGAAAACCGCCG  
CGAGGGCAACACAGAACTGGTGTACCGAGGTCGCGGGGAGCGCCGACGCTGGTATAAACCCCGGATATCG  
GTCATGTTCCGCCACGCCGCTGCTGATGTTTCACTGCGTGGACAATATCACCCGGATGCAGGTGGCGCTGATGCACCT  
CTGGATGTCATGATATCCCGTCACTCTGAATGCCGACAACCGGCAATGCGCAGCCACTGGTTTGTGCGGAGAACCG  
CACCTGCTGGAGTCCAGCCGGGTTATCCGGATTGATGAAATTAAGCAACTGTTCCGGCGAAAACGCTGACGGTGG  
ATACCGGCGCAGACAATGCCCGGAAAAGCTGACCTTTAACATTTGACGGGCTGGCAAGGGCGATGTTCTCCCTGCGGAT  
GCCTGCCACTGGGCGGGAATAA

>Cluster\_39322

ATGACGCTGCATATGTACTGGCCGAGGTTGTCTGGTCTGTGACGGCGTCTGGGGATGGGAATGGCGCTGGCGCTCA  
CGGCAACCGCGCACCGATAAACACAATTTCTGGTACCAGTCTGGCGTACTGATTGCAGGCTGGCTGCTCTGGTGGC  
GCGGTTTTTTTAGCCAGGCAATGCCGCGAACCGCCGCTTCGCGCAACCTTACCAGCGCGAATGTTGCGTAATGCC  
CGCGCGGTATGGGGATGGATGCGCCTGTGCGGATTTCCGCGGGCAGTTCCAGCAGGAATCCGACTGGAATCCCGCCG  
CCGTTTACCCTTTGGTGGCGAGGGGATGGCGCAGTTTATGCCCCCACCACAGCGACTGGATCAGCAACTGCTTCCGAA  
TCCGCGCCGAGAGCCGTTTAAACCGCTGTTGGGCCATCCGGGCGTGGTGCAATACGACAGTGGTTGTGGCAGCGCTC  
AGCGCCCGGATGTTGCGCAGGCAATGGCATTCACCTTAAAGCGCTATACCGCGGTTAGGCTGGGTGAACCGGATAA  
AAAGTGGCGGCGCAGCGCGGCTGGATGCCGCGTCTGGTTTACGCGGTTGGCGACGGTCAACCGCGGGCGCAGCGCCG  
CCAACTGGCGCAGAAACCGGGTTATCCGCAACGCATCTGTACAGAACCGCGCGCTATCTGTCATGGGGAGGGGCT  
AATGTGTTTCGATAA

>Cluster\_25078

ATGGCGACCGCGGATTTTAAACATACGTCAGCAAACTACTCCAGAACAACAGCTTCAGGCTGTTTACAAGCAGAACA  
AGATATAAATCTCAAAAACGAAAATAGCAAAAGCAATAAAAACAAAAGGAGAAAATGTTTTGCTATTTGTTACCAGTG  
GGCTGGCATCTTCTGGTAATGACGTTTATGAAAATTAATGCGACTGGCTTTTACAGTGTAGACGATGTGAACGTAAGA  
CGTTCCGGCAGATGTTACAAGCTACCCCGTAGAGAAATGGGGCTACTGATCGGATCACGTTCAAGTGAAGAATAAAGTT  
TTCCTTAAAGGAGGACTACTGAAACCCGATTAAGCGATCCTGGCTTGTAAAGAGTGCAGGGGTGACAGGGAACA  
GAAGATCATTTGGCTATAGATTACCTGAATCAGATTATGGACAGTAGACAGCCTTTTCTTCTTGTACAGAAAATAAACT  
TTTGAGAAGCTGTTTAAACAGGATCGAATACAGAAAGAGGCAAGCAATCCCTGGTATTTGATCTTAGCTTTGAGCA  
AATCAGATTAGTTTCTTATGGCACTGTAACACTGTAGCTATCAAAACACAGCCATCTAAGAATCGGGGCTAATATGA  
AAAACGTTTAAACTGAAAATCAAGTAGTGAAGGTGAAGACACTATTACTCTGCTTTAAACAGGAATAG

>Cluster\_20806

ATGAATGAATTTTTTCCCTTAGCAAGCGCGCGGGATGACCGTCGGCCTTGGCGTTTGTGCATGATTGTTCGGGCTGGC  
GCTGGCGATGTTCTTGGCGGATGGGAGTCTGCGAAATGGCTCTCTGTCGCGTGGGACAGTTACGCGCTGGTAACCATTC  
TGGTGGCTGCCAGAAAATTTCTGGTGGTCTGTTATCTATCTTTGGCTCCTCGCAGCTGCTGCTGACGCTTTCCGATGGC  
TTCATATCAATCTTGGGTTCTGTCAGATCCCGGTGACAGATGGACATTTGAGAATTCGACGTTAGCCGTTCTTTGTGG  
TGTGATCGCTCTGTCAGTCTGTATGCCGCTATGCCCTCGCAACCGTTCGCGCGCGCTTGAAGCGGTTCCCGTGGGCG  
AGTGGGAATCTGGTCAAGCGCTGGGGCTGTGCAAACTGGCTATCTTTTTCCGCTGTTGTTGATGCGCGAGATGTGGCGTCA  
GCGCTCCGGGCTCGGTAACCAAGTGGTGGTCTGCTGAAAGATAACCGCGCTGGTCAAGTTGATTAGTGAATGATTT  
AATGCTGCAAAACAAAAGCATCGCTACCCGTACCCAGGAACCGTTTACCTGGTACATTTGTGGCGGGCAATTTACTGG  
TGATCACCTGCTCAGTACGATACATTTCAAACGCATTTGACCTGCGCGGACAGTTTTGAGCGGAGGCCAGCTAA

>Cluster\_65212

ATGGCAACCACTCAATTTGGATGTTTGGCGGTTGGCGCGCGGATTTGGCGCTGCAATGCAAAACGGAATGTCCTAA  
GCAATATCTCTCAATCGGTAATCAAACCATTTGAAACTCGGTGATGCGCTGCTGGCGCATCCCCGGTGAACCGTG  
TCGTCATTTGCCATAAGTCTGGCAGATAGCCGTTTTGCAACAATTTCTTGGCGAATCAATCCGCAATACCGCTTTGATAG  
GGCGGTGATGAGCGTCCGATTCGCTGCTGGCAGGTTTCAAAGCCGCTGGCGACGCGCAGTGGGTATTTGGCTAGACCG  
CGCTGCTCTGCTGATCAGGATGACCTGCGCGATTTGTTGGCTTGGAGGAAACAGCCGACGGGAGGGATCTTAG  
CCGACACAGTGGCGGATACGATGAAACGTCGCGAACCGGGCAAAAATGCCATTTGCTCATACCGTTGATCGCAACGGCTTA





GTCGTGATTGGCGACAATACGGCAGTTGCCGGTGGCGTCAATTATGGCGGGCAGCCTGAAAATTGGTCTGTTACTGCATGAT  
CGGCGGAGCCAGGCTAATCAACGGGCATATGGAATATGCGACAAAGTACGGTTACGGGCATGGGTATGGTGTGCGTC  
CCATCACTGAACAGCGCTATTCCTCAGGCATTCGGCTGCAACCCAAACAAAGTCTGGCGCAAACCCGCTGCACTGGTG  
ATGAACATTTGATGACATGAGCAAGCGTCTGAAATCGCTTGAGCGCAAGGTTAATCAACAAAGACTAA

>Cluster\_52019

ATGATTATCGGAAATGAAGTGGTTGATCTTGCTCCACTGTTGCAATTAACGACTCACGCAATTACCTACTGTCTACTCT  
GGATTTTACTGATCCTGTGCCTGTAGAAAGTCAAAAGTGGCTGTTTCCAGCTTATCGAGAGCAATGAATCTGTGTTCA  
ACCATCTTACAAGCCGTTTGTAGCTGTGAGCATAACGTTACTAAGCGTGAGAACGGGGAAGAATGGCTGATTGAAATCCCT  
TACTTCCCTGCGTGAAGACCTGATCAAACCCGAGGAGCTGCAAGGCAAAACGCAAAGCCGGAAGCTCTATTTGAAGAAACACT  
GCCGGATCTGTATGCGGAATATATCGCTAAACACAATGTTGCATTCCAGCGCACTAAAGAAAGCATCCTCGCGGCTTCTC  
TGTTCCTGGCAAGACATACCCCGAAACTGACGATGTTCTGATCGACTACAGCCTCTGTTCGGTGTGTCTCCAATG  
ACTGCAACCGTTGACGACTCCAGCACCACAATGACCGTATTCAGCAATTTGATCAGATGCATACGGATATGATTGC  
TAAGGCACAAGAGCCAGCTGCAACCATTTGAGCGTGTGTTGTTCTGTAAACCTGCGGCATTCAACGCTATTCTGTTACA  
GCGTTGGCATGGTTAATGCGTTCAGTATGCAAGCCCTGTAGACGATGCAACCGTGGTGTTAATGTGCGTTCCTGCTG  
CCTGGTGAATCTTCCACCATTCAGGAACATGACCTGACCTGATCAAAAGTACTGATCCGCTGCTGCTGGCACATAT  
GACCGCTGACGCTGTAGTATTCCTAACTTGTAAAGGGGCGAGTGTTCACCAAGCTATTTTGGTGGCGCTTCCAGTT  
CATTCGATCTGCTCTCAAGCGCTAAAGACTATTACAGCTATGCTTTCGAACTGAACTCGCGGCAGCAGTGCACGTA  
GTGACCGAGAATAGCTCGCTTGTGGTTAACCACGGTGTGGCTTCTCTGTGAGATCACAGTAGCGTAA

>Cluster\_67046

GTGGCTGAAAGGTACACACCCGCAAAAACACTGGAGTCAGCTTCCGCCGAAGAGCAAATTCGTTTCTGGGAGGACTATGA  
AGCGGGAAGGGGACTTCTTTCCTGGTTGAATCGGAAAGGAGCGCACGAAACGCCGTCGTGGTGGAGCACTCCACCAGAC  
CCAAATGCGAAAATCCGACCTGGTATCGTCTCGCGCTATAAGCGCTGAGCGGGCAGCTCGGGTATGCCTATAACCGT  
CTGGTGAAGAAAGGACCGGTGACCGGAGCAGAGCCTGCGTATGCGCATGTCGCGCATCTCTTTTACGTGCAAGAACG  
GACGTTTGGGCTGCGCAATATGCTTTCGTCGGAAGAACAGCACCTCTCGATGCCATTCGGCCGGTCTGGTGCAGCT  
TCAGTGTGCGGGCACACACCCGTTGGGATGAGTGTTCCTGCTGCGCAGAAAACAGCCGAAAGACAGCAAAGGG  
AAGTTTATTCGGAACTGGAGGTGACGGTCTCCCGCTTTCCTGTTGCTGGCCGAAACAGGTACGTTTTGGTGTGCTGGG  
TGTTCAGAGGAAACGATGTGGGACCGTGAACCCGCCAGCGTCTGCCAGTTACGCTGAGTAAACCCGCGAGGCTGGC  
AGATGTCGGCTGCGCAATATGTTAACTTCACGAAACAGCAGCAAGAGCGGCTTCGTAAGTGAATTCGGCAGCTC  
ATCCGGGAAGGTGTACTGCGTGAGGATGAAGATATCTCCGTACATGCGCCAGAAAACGCTGGTATCTGCAGCGCAGCCA  
GGATGCGCTGAAACATCGTCGTGAAAAGCTGACGCAAGTAAAGCGCGCAGACGCTGTAAGAAATACCCGCCGACGAC  
AGATTTACGAGATGTACAGCACATCTGAAGCGTATGCGCCGGATGAAGCCTACTGGTGCACCGCGGAACGCCCTGCAG  
CAACTGGCCATCAGGGAGTGCCTCAGCTGAACTGACGCTGGTGGCCCGCCACCCGACTAG

>Cluster\_25937

ATGTCGATGTACACAACCCCGCAGCTGCTGGCGCAAAATGAGCAGAAATTTAAGTTTGTATCCGCTGTTTCTGCGTCTCTT  
TTTCCGTGAGAGCTATCCCTTACCACGGAGAAAGTCTATCTCACAATTCGCGGGCTGGTAAACATGGCGCTGTACG  
TTTTCCCGATGTTTTCGCTGAGGTTATCCGCTCCCGTCCGCGGCTCCACCTCTGAATTTACGCCGGATATGTCAAGCCG  
AAGCATGAGGTGAATCCGCAGATGACTTGCCTGCGCTGCCGGATGAAGTCCACAGAATCTGGCGGACCCCGCTTACC  
CCGCGCTCGCATCATCTTCGAGAATCGGAGAGCAAGAGTGGCCATTTGCTCAGGTGCAAGAGATGCAGGCCCTTCTG  
CCGTGCTCAGGGCAAAACACCATGACCGGTGAAGCCTTCGATCCGGTTGAGGTGGATATGGGCCGCGCAAC  
AACATCACACAGTCCCGGCGCACGGAGTGGAGCAAGCGTGACAAGTCCAGTATGACCCGACGACGATTTGAAGCCTA  
CGCGCTGAATGCCAGCGGTGTGGTGAATATCATGTTGATCCGAAAGGCTGGCGCTGTTCCGTTCTTCAAAGCTG  
TCAGGAGAAGCTGGATACCCGTCGCGGCTCTAATTCGAGCTGGAGACAGCGGTAAGAACCTGGGTAAGCGGCTGTC  
TATAAGGGATGATGGCATGTGGCCATCGCTGCTGTTTTCGAGCAGTACGTGGAAAACGGCGCTCAAAAAGAACTCT  
GCCGGACAACAGATGGTACTGGGGAACACTCAGGCACGCGGTCTGCGCACCTATGGTGCATTCAGGATGCGGACGCAC  
AGCGGAAGGCATTAACGCTCTGCCGCTACCCGAAAACCTGGGTGACACCAGCGCATCCGCGCGTGTGATTCACCATG  
ATTCAGTCAACCCGCTGATGCTGCTGGCTGACCTGATGAGTTCTGTTCCGTACAACCTGGCGTAA

>Cluster\_12846

ATGGCTTACTCTGTTCAAAAAGTCCGCGCTGGCAAAGGTTGGGGTGTTCGCTTGTTTTATTACTCGTGCCTGTAGTTC  
TGACTCACGCTATAAGCGTCAGTTCAGTGGTGAAGCCTACCTGGAAGCGGCACCGCTTCCGCGGCTTCCATGCCCCGG  
CTGGAATGATTTTGGCGGTGACCTCCGGTATGATGCAATCCCGGTGACCAACGGTAGTGGTGTGTCGGTAAAGCGCTG  
GACATTCGTCACAGCCAGCCGCTGGCACTGGTTTTCGCGCGCTACCCAGTTTACCGGGCATACCCGCTTACTGCT  
GGTGGAAAATGGTCTGGCAATACTCTGTTGGCCGAGGTGGTTAGCGTGTGCAAGGCAAAAACACTACACCATCACC  
GTGATGATGCTGTCAGACACTGACCACCGATTGGGTACAATGGAACCGTCTGGACGAAGACGAGCAGTATCGTGGTCT  
TATCAAATCTCTGTTAAGCCGAGGTTATCAGCAGCGGTTACGTTAACTGCTGAACCTGGAACAGGCGGGCAAAC  
GGTTGACAGCCGCGCTTCCATGACGCTTACAGACCGGATGATGAACTGTTATTTCCGCGGCTGGATAAATCTGCCA  
CTGACCGCGGAACGCTGCGCAAAATCGTGCCTCCACCACTATGGACGTACAAAGTGCAGCTGATGACACCGGTTTACCA  
ATGCTGGTCTGACCGGGCCGTTCAATGTGGTTTGGCAACGCTGCGCAGCGCGCTGGAAAAGTGGGATGAAAGTGC  
CGACAGCACCCTGCGCAGGCAACATGGCCGTAACCTAAGCCGCTGCTGACAGCGACTGGCAGGACTGGGCGCGCA  
CGATCCAGGCTGGCATCCGCTGACTATAAATCAGCTGAGGTTAGATAAACCGCAGCAGCTACAGTTACATCGAT  
CCGAAAGTCACTCTGACTCAGAGTCAAGACGACGCGCTGGTGTGCTTCCAGGCTGCGTTTAGCAAGTAA

>Cluster\_31640

GTGGCTGTAATAAAGCATATAAAGTAGTCATAAATCAATATATTTGGAACAATATATTTAATAAAAATCTGTGTTAATTAG  
CATTATATGGTTTTTATTTCTCTTTATATATTTTATAAGTGAATGAAATACATCACATTTTCAAATATATTTATGGC  
TAGGTGTTAATAAACAACGAGTCTTTCAGCCTATTTGGTTTTTTCAGGGCTAGAGAAAAAGAAAATATAACGTTT  
TCTCTAATATATCAAAATCGGTTTATGTAATATTGATTTTCTGCCTTGTAAAGACAAATCACGTGGAGCGTGTTCCT  
GGCATTAGTTCTAAGTAATGTTGTAACCTTAGTATAAAGTAACTATCTTTTATATCGTAATGGTTATGCGATAGGCAC  
CTTGTATAAATATTTAGAGACGAAATAAAAAATAGTTTCCATTTTTTTTATCAAGGGCTGCTGTAGGTGTTTACT  
AGTCAAGTACCTTATTGTTGGCAGTTTTCAGGGTTAAATCAGCGGCTGTTATTTCGAGCGCTGAAAATATATATCA  
AGCAGGGCAAAATGCTTTATCGCAATATCTCAAGCATATATCCATATTTAGCAAGGCTGGCGATAAGAAAGCTTTAT  
ATAAATTTGTTGTTGTTTTTTTATTTGCTCTGTATGATATGCATATTTAGTTCGATATTATTCTAATACCAATGATG  
TTATTTTTGGTAATAAATAAATGCGGCATCTCAGGTTTTAAATGTTTTTCTCTAAGTCTTGTATTACTTTTGTAG  
TTTTAACCTTGGATATCTGCTTTTGTGCAATTAACAGAGTGCAGATTGTCATATACAGTTGTTTCGGGGGCGGAT  
TGCAGTTATGATGATTATCATTTAATAGTTAGTGAAGATCACCCCTCTGAATATGGCTCGAAGTGTGTTATTACT  
GAAACACTAGTTGTTGATTTAGATTAGTTTATTTCTATCTCAAGAATGATAAATGATATCAGTTAGTTGAAATG  
A

>Cluster\_64479

ATGAGCAGAACACGAAAAGCGCGGAAGATAAATAGCTGCCACCCCGGCTTATAAAAACAAATACAGCTATTTATTTCAA  
ACCAACGCCCCGAGAGTGTATTACGCTGGGTAAAATTAATGATCTGTCAATGCTCAGGTATGGTGAATAACGAAAGAGA  
TCTTGAATGATGCTATTGATGTCATGACGTTTCAAGTAACTCTGGAACAATTTTCTCAACAGCACCTACTATCTGGACTC

GGTCAGCGTACACAAAAGGATTATCTGCAGCACAGAGAATAACTCGCCGCTTCGGGAAAATGAAAGCCGACAACAT  
AAAACCTGCTCAGCTGCGCTGTATATGGACAAGCGGGGCTGAAAAGCAAAACACAGCGAACCATGAAAAAGCCAGTA  
TGTCGCGAGTATTCGCTGGGGATACGAACCGGATACGTAAGGGAATCCATGCCAGGCGTCAGTAAATTTCCCTC  
AAGCCCCGCTACTATTTACCGGACGAGGAATATATCGCAATTTATCAGGAGGCATCTCCGTTTTACAGTCCGCGAT  
GGAGATCGGCATCTGTGGCCACGCGGATCGGCGATACGAAGCTGACGTGGGATCAGTAAATGATGTAAGGGTTGT  
TTATCCAACAGGGTAAGACTGGCAAAAAGCAGATCAAAACAGTATTCAGAGCGACTGACGTTTCGCACTTGAGCAGGCGAAA  
TCGTTGGGAGGACAACATTTCTGGTCTGTAACAAATATGGCGGGCAATACAGCTATACCGGATTTAACGATATCTGGG  
TAAAGCCAGGCGCGGCAAGTAAAAGCTGGGCTACCGATTACGGGAACGTTTACGATTTAAAAGCGAAGGGGATCT  
CAGACTACGACGGAAAGCAGTAAAGAAAAGCAGTTGTTCTCTGGTCAAAAACAGAGGCGCAAGTGTGACGTATGATCGC  
AAACCCGACGTAACCTCAACTCTGGATATTCGCGTGTGGATGTACAGTCTTTCAGCAGAAAACCCGTGA

>Cluster\_23648

ATGAACCACTACACAGCTGGCTTGTAGTTAAAAGAACAAAATCCCGGAAAGTACGCGCGTGACATCGCAGGTTTAAATGAA  
TATCAGCGAAGCAGAACTGGCATTTGCAACGCGTACGACAGCGCGTGGCGGATGCGCGCGATATTCGTAATTTCTGG  
CGGCGCTGGAAGCGTTGGTGAACCAATGTATTTGTCGTAATGAATATGCAGTCCATGAGCAAGTTGGCTCGTTTACA  
AACCAGCATTTGAACGGACATGCCGATGATCCTCAATCCGCGCGCGTGGATTTACGCTCTGTTTCTCAATCAATGGGC  
CAGTGTTCACATCAAAAGAACACCGGCTCGTGGCGAACCGCAGAGTATTCAGTCTTTGATCATCAGGGCGATGCAT  
TACTAAAAGTTTATGCGCACCGACAAATACCGATATGGCGCATGGAGTGGAGTCTTGGCACGTTTATCCCGATGAGAAT  
ACGCGCTTGTAGTTAAAAGCGTTGTATGCGCCAGTTGTTCAAACGCGAGCCGATGCCAGTGTGGTTCGAGCAAGAGTGGCG  
GGCGATGACCGACGTTTACGATTTTTTACGTTGCTCAAGCGCCACAACCTGACGCGCAACAGGCGTTCAATCTGGTGG  
CAGACGATTTGGCTGCAAGATCAACAGTTCGCGGCAATTTGAAATCTGCAACAGCAGGATGGCAATGAAATC  
ATGGTGTGTTGGCAACCGTGGCTGCGTACAGATTTTCCAGGTTGTTGTAAGAAAAGTGGTGCAATGAAAGTTGGCT  
GAATATTTTCAACCCGACGTTTACCCTTCACTATTTAGAAGAGAGCATGCTGAAGCTGGGTACCCTAAACCGACCA  
GCGATGGTACGTAACAGTCTGGAATTTGTTGCCATGATGTTACGACAGATAGCGCAACTTTATGTTCAACGTACAGAA  
GGTGAACAGGAGCAAGCGAATGGCGTAAGCAAATGCTTCTGTTGATACCGGAAAGCGTTACTGCATAA

>Cluster\_58671

ATGAGAGTTCTGGTTACCGGTGGTAGCGGTTACATTGGAAGTCAACCTGTGTGCAATTAAGTCAAACCGGTCATGATGT  
CATCATTTCTGATAACCTCTGTAACAGTAAGCGCAGCGTACTGCTGTTATCGAGCGTTTAGGCGGCAAAACATCCACCGT  
TTGTTGAAGCGGATATTCGTAACGAAAGCGTTGATGACCGAGATCTGCGACGATCAGCTATCGACACCGTATCCACTTC  
GCCGGGCTGAAAGCGTGGGCAATCGGTACAAAACCGCTGGAATATTACGACAACAATGTCAACGGCACTCTGCGCT  
GATTAGCGCCATGCGCGCGCTAACGTCAAAACCTTTATTTTTAGCTCCTCCGCCACCGTTTATGGCGATCAGCCAAAA  
TTCCATACGTTGAAAGCTTCCCGACCGGCACACCGCAAAGCCCTTACGGCAAAGCAAGCTGATGGTGAACAGATCCTC  
ACCGATCTGCAAAAAGCCAGCGGACTGGAGCATGGCCCTGCTGCGCTACTTCAACCCGTTGGCGCGCATCCGTCGG  
CGATATGGGCGAAGATCCGCAAGGCATTCGAATAACCTGATGCCATACATCGCCAGGTTGCTGTAGGCGCTGCGACT  
CGCTGGCGATTTTTGGTAACGATTTATCCGACCGAAGATGGTACTGGCGTACCGGATTACATCCAGTAATGGATCTGGCG  
GACGGTACGCTCGTGGCGATGGA AAAAC TGGCGAACAGCCAGGCGTACACATCTACAACCTCGGCGTGGCGTAGGCAA  
CGACCGTGTGGAGTGGTTAATGCTTTCAGCAAAGCCCTCGGCAAAACCGTTAATTTATCAATTTTGCACCGCGTGGAGG  
GCGACCTTCCGCGCTACTGGGCGGACCGCAGCAAAGCCGACCGTGAACGAACGCGGTAACGCGCACACTCGATGAA  
ATGGCGCAGGACACTGGCAGTGGCAGTACGCGCATCCACAGGATATCCCGATTA

>Cluster\_23286

ATGGGTCAACTGATTTGACGGCGTCTGGCATGACACCTGGTACGATACCAAATCCACCGCGGTAATTTCAACGTTTCA  
TTCCGATTTCTGTAACCTGCTGACGCGTACTGCGGATGGCGCGCAGGCCACATGGCAAAGCGGTTTTCGCGCAGAGAAAGATC  
GTTATCATCTCTAATTTCACTCGCTGCGGCTGGGCAACCGCACGCTGATCATGCGTAAGCTCAAAGGACTGGAACCG  
TTTTATTTCCGTTTTCCGTGTAACCCGCTGATGCTGGAACACCGCTGGACTTTGATGACAGTTTTTCCGGAGCAAGCGG  
CGACACGCTCTATCAACATGAATTTCTGTATCAGCTTTATCTCCAGCGGATCCACACTACAGCGGACGAGTCACTGTTT  
CCGTGCTGTGGGCAAAAAAACACACCATCGTACGCAACGAATCAGCAGAAATCATACGATGTTCAATACCGCGTTT  
GATGCGCTGGGTGCGAAAGCTGGAGATTACTACCACAGCCCTGCAACCGAAAATGACGAACTTAACGGCTGGATTTA  
CGACACCGTTAACATGGCGGTGATAAAGCCGGTTTTGCAACCGCACAGCAAGCTTACGACGAGCGGTTGGCGAAGTGT  
TTGAATCGCTGGCGGACTGGAACAGATTTTAGGTCAGCACCGTTACCTGACCGGCAACAGCTAACCGAAGCCGATATT  
CGCTGTGGACACGCTGCTGCGTTTTGATCAGTGTATGTGACCCACTTCAAGTGTGATAAGCACCGCATCAGCGATTA  
CCTGAATCTGTATGGCTTCTGCGGATATCTACCAGATGCGGGAAATGCGGAAACAGTCAATTTTCGATCACATCCGTA  
ATCATTACTTCCGACGCATAAGACCATCAACCTACGGGAATTAATTTCAATTTGGTCCGTCGGCAGGATCTCGATGAACCG  
CATGGACGAGATGTTTCGTTCCGTTAA

>Cluster\_39623

ATGGTTAAATCGAGCTCATGTATAACCATGATTTTATGATATGTCGCGAGTAACTGAACGGACCTTTACGCCATCTGA  
ATCTCAGCAGCCTGTCACTTTTTCTTATGCTGGCACAGGACAGTGTGCGCGGGTAAATTTGCGCATCGCCGTAGTT  
TTCCGCGAAATTTTTGCTGCGCTCGTTGATTAATGCGCGTTTTAAGCTGTGAGTGGATGAACGAATTTCCACTGGCT  
AATCTCAATGTGTTGTTAACCGCGCAGCCGCGACTGCCTGTACGCTTACATCGCCCTTACCTTTCGCGGAAATCTTAGCC  
TAAGCAATTTGCTGGAGGTTTACGTTACATTTATGCGTTACTCGCGGGTGTATGTCGCGGGAAGAATTCAGCTTATATT  
TGAATACCCCGGCTGCAACTGGCAAGCTGGAAGGCAAAAACCGCGGAGCAGTTTACGCTTGGAGTACCATGATGATC  
TCAATGGATAAAGAGGTGACAGCACATCCTGTTCCGCAACAGCGAAGGTATTCCTTGGCAGAGCTCACTTTTACCCT  
GTGTGAATATCAGGGGAAAAGGACGATGTTTATGGCGGACTGCAAGGCGCAAAATGGGAAATTCACACCGAGGAAATCC  
AGAAATGCGACGAAAGCCTGCCACGGCTATTTCCCAAACGCTCGTGTGGAAGCGGCTGCTGTTTGCCTAACGTTT  
CAGGTAGAGCAGATTTTGGCGTACGCAATGAAACGATATTTACCAGCGCTGCGTTATCGCGATAAAGAGGCAAGAT  
CCATGCGGATTAACAGCTTTCTGGGAAATCGGTTGGCGCGTATGTGATGCTGAACGCCATTACCGCTTCCAGCACAGA  
TAGCACGAAAAGAGATTGCCGAAATCGCCAGTAAAACCGGGCTGAATACCGTCCGCGCTATGAGATGCTCGACGCTATT  
CAGCCACAATGGCCACGATGTTTTGTAGTTAG

>Cluster\_41533

ATGCCTAAAAAATGACAAGAACCCTGTAATTTATTTAATGGCTACGCTATTGGGTAGCGCACTATTGCGCAGGCTTC  
TGATAAAGAAATGACTATTGGCGCAATATACCTTGATACCCAGGATATTACGCGGAGTGGCTCAGGCGCTCAGGATG  
CGCAAAAAGATTTCTCAGTACAGGTACAATTAATGAACTAACGCTACGGCGATATTTGAAAAGAAAGTACTTTGTT  
GATACCTCGTGGCGGTAATGTGATGCCATTTATTTATCGGCAAGTGTGAAAATGGCAGTAGCCGTACCGTTCTGTCG  
CGCCAGTGAAGCGGGTATTCGCGTATTGCTACAACCTGTATTAATCAAAAAGGGTGTGATAAATATGCTCGGCAT  
ATCTGGTTGGTGACCCGCTGGAATTTGGTAAAACCTGGGTAACGCTGCGCGGATTTATTTATTTGCAACAAAATGAC  
GACCGGAAAATTCGCTGATCAATTTGCGAAGCTTTGAGGTTTGTGTGCAACGACGTAAGAGGTTTGAAGAAGTATTAAA  
AACCCGCTTCCGCGCGCAAAATGTCGCTAATCAGGAAGGACTGTTTTAGATAAAGCGATTTCTGCTGGTGA AAAAC  
TGATTTATCTCCACCGCGGATCTCAACGCATTTATGGGGAAATCGGCGGTTGCGACACTCGGCGGTTAAAAGCGGTACCT  
AATCAAAAATCAGGCGGAAAATTTGCTGTTTTCTGGTTCTGATATGACCACTGAAATTTGCTCAGGAACTGGAAAATACCA  
GGTGTGAAAAGCGGTAGTGGATATTTCCGGTAAGAAAATGGGCAATGCTGTTTTTACGCAACATGAAAGTTTATCAATA  
AACAGCCGACGGTGA AAAAGT GATT CAGTGC CAATCGATCTCTATACCAAACGAAAGACGGTAAACAGTGGCTGGCA

ACGCACGTTGATGGTCTGCCCTAA

>Cluster\_26795

ATGAAATGTTATAATATCACACTTCTCATATTCATTACGATGATGGTTCGCATTATGTTACATAAAAAACGCTTCTTTT  
CGCAGCATTTACCCGCGCTCTCTGGGCGGTGCAACACAGGCCGAGATGCGCGCTTGTTCGCTTCGCTTAAACCGGTTG  
GGTTCATCGCTTTCGCAATGCTGATGGGTAACAGAAACGAGGTTTACTGCTGACGCGGCTTCAGAAACCTGATGAT  
TCACTGCGTCCATCGGATGTAACACGCTTACAGAACCGGACTTAGTCTGTTGGGTTGGCCCGGAGATGGAAGCGTTCAT  
GCAAAACCGGTAAGTAAATACAGAAAGCGAAACAGGTAACGATTGCGCAGCTAGAAGATGTAAACCGCTGCTGATGA  
AAAGTATTACGACGATGATGCTGATCAGATCAGCGGAAAAAAGTACGAAGATCACCATCACGGCGATTTCAACATG  
CATCTTTGGCTTTCCGAGATAGCGCGGCTACAGCGGTTGCAATCCATGGAATAATAGTGAACCTTATGCGCAAAAG  
TCGAGCCAAACTTGACGCCAACCTGAAGGATTTTGGGACAAATAGCCTCAACCGAAACGAGGTTGGTAAACGAGCTCG  
CGCGCTCAGGGGAAAGGTTATTTCTGTTTTCACGATGCTTACGGCTACTTCAAAAAACAGTTCGGACTGACACCGCTT  
GGTCAATTTACCGTTAACCTGAGATTAACCTGGCGCGAGCGTTTACATGAAATAAGAACACAGTTGGTTGAGCAAAA  
AGCAACTGCGCTTTTGGCTGAGCCACAGTTTACGCGAGCGGTCGTTGAGAGCGTTCGACAGGAGCATCCGTTCTGATGG  
GAACGTTGGATCCCTGGGACGAATATCAACTGGGTAACAAAGCTATTACAGAAATCTGAATCAATTAGCCAACCCAG  
TATGCGAGCTGCCGAAAGGAGATTA

>Cluster\_22245

ATGAAAAACAGAACCTATTCTCGGTGCTCTTTATGGGACGCGTTAGGGGATGCGATGGGGATGCCCTCCGAGCTTTGGCC  
GCGCAGTCGCGTCAAAGCACACTTTGGCTGGATTGACCGTTTTCTGCCGCGGCAAGGAGAAATAACGAGCCTGTTAT  
TTAACCGCGCCGAATTCACCGACGATACCTCGATGGCGCTGTGTCTGGCGGATGCGTTACTGGAACGTAAGGCAAGATC  
GATCCGGATCTGATGGGCGTAATTTCTGACGTTGGCGCTGCGTTTTCGACGCTTAAACAAAAACGTAAGTCTAGGTCGAC  
CTCGAAGATTGCGTTAACCGCAATTCGCGACGCTAAACCGTTTCTGAACTGGAATAATAACCGCGTACCAACCGCGCAG  
CGATGCGCATCTCGCCATTAGTTGTTTCTCGCGCGTGTGTTGATTCCTTTATGATGATGTGGCGCTGGCCTCC  
AGCCCGACATAAATCCGATCTGGCGTTTGGCGGGCGGTAGTCAATGCGATGGCGGATTTCTCGTGCATTTGACGGGAGA  
AAGCTGGTCAGCAATTTGTTAATTCACGCTTCAATTTGGCGGACATGCTCAACAAAAACGATCACTACTTACGCGCT  
CACTGGCTGCACGCTTGGAGATTGCGCTGAAAAATGTCGCAATGCTGACGGCACCGAATCCGCCAGCGAACAGCTTTAC  
CAGTCTGTTGGCGGAGTACCAGCACTATTGAGTCCGTTCCGTCGCGCATTTGCGCTGGTTGAACTGGCACAAACCGACCC  
GAACCGTTGGCGCGTCTGTGCGCTAACCTTGGCGGCGACACAGACCCATCGGTGCTATGGCGACGGCAATTTGGCGCG  
CGTTGCAATGGCGTTAATACTATCGATCCCTGCGTTAAAGCGGAACTGATACAGTAAATCAGCTTGGTTTCAACCGCTAT  
GCCACGGCGTGGCGAAGTATCGCCAACACGGGAGGCGATATGA

>Cluster\_48611

ATGTTGTCGCTATTACTGTTTTCGGGAGTGCACATGCTATGAAATACAAAAGCTGATCGATGCGGCAAAAGCAGGCGA  
CGTTGAGTCACAGAGTCTTTAGGTATCGACTATATGAAAGGTTTATCATGGTTCGAAAAAACTACGATGAAGCCAGAA  
AATGGCTTGAACGCGACTTCTAAGGGGAACAAAGAAGCGTTTAAATGCTCTAGGTATAATGTATGCCCTTGGGTATGGG  
GTTGATAAAAAATTTCAAAAAGGCGAGAGGAACTCTTAAAGAAAGCTGGTATGCAAGCTGGAGGCAACTCTTATCAAACT  
GGGTGTTATTTATATAAAGGACTTGGCGGTAAGAAAGACCAAAACTTTCCCTGAAATATCAAAAATTTGACGATAGAG  
CTGGCGATCGTGAATCTGCGTCAATTTAGGACAGTTATATTTAGTTGGCGCAGGCGTCCAAAAAGCTACAAAAAGGCA  
ATAGAGTATATAAAAAAGGAATCGAATAGGCAGTGCATCTGCATTGGCGAATCTTGGCATTATGTATGAGTATGGTGA  
AGGGGTTAAAAAGATATAAAAAAGCAGCTGAGCTTTTATCAGGCAAGCTTGGGATAAAGAAAGTAAAAATGCTGTGAT  
ACATGCGAAGCAATAAAGAAAGCGGTAATAACCAACATCAGCAGCAAGATCTAAAGCAAAATCTCCACTCAACGACTT  
ATTTCTAAATCAATGATAAAGGCGTTAAGCAACATTTACCTGGCAGGTTGATGATGCCACTTCCACGCTAATGATGG  
CAAAATGACTGCACTTTCTTAAAGGATTTTTCAGAGAAAGGAGGCAATCTGGTACCTCGTTTGTGTTGACCGATAACG  
TTCAAATCATCTGAAGCAATTCAGAGATACCAAGAATGCTTACCTCGCGGTAATGACTGACAACCTTCAACACAGAAGTT  
AAATCATTTTCGGTCAATGTTTACGTGACTAATACTGGTTCAAACTAA

>Cluster\_41365

ATGAAAAATATCAAGAATATACCCCTTTACGGTTATAGCGTGCATCTGAGCAATTAAGTTTTGTTGATAGACTATTGAC  
CAAGTCTAAGAATGAACGACAGGTTTCTATCAAAAGGATGTTTATGAGGATTTTGTAGAGTTTTAATTTTGTAAATC  
ACGGTGATAACCAATTTTCAAGTCGAACTAACGCAAGAACTCATACGTAATAATGTTGGAAATTTACAAAGCTAGA  
TATAGGAAATACCTCGGTAGATGAAACAATACGTGAATTTGGTGGAGGAGTACGCAATCGTTGATTTGGCAAGGAACGGC  
ATACTATTTTGTTCAAAACGTTCTCTGAGCAAGAAAAATACATATTACCTCTCGGTTCTGATAATATATTTGTTTTT  
TTTCAGTGTATTTTCAATGATGTCGCGAAGCGGTGTAAGATAATTTAGAACGGGATCATGAGATGCTTCCAAGAGAATTA  
AGAACTTTGGATAAAAAACAACTAATCGCTTTTCGAAATTTCTAGGTCCTTAAAGCGGATGTTGTTCTGAACAAATCGGAC  
TTTTAAAGATCATTGACAAGCATCAATTTGGTGTACTAATTTTTATCCCAAGCAACATACGAAAATCTTACCCGAAAA  
GTCACCTTTGATTTTAGCATTTGGAAAAATACGCAAGAGCAAGCATTATTCGAGCTACGAGGAAAAACGGGTGGAATGTT  
AGAAATTAATGATTCATAAAATGTTCTGATTTCTCATTACTATCTGCTTATTCGATTTAGACGGAATCAACTTATTTT  
ACGGTATTAATATTTGTTCAATTTAGTAAAGAGCTCAAGGGTACGTCACCGATATAATGAGGATTTAATGTTGTTGA  
TTTCACCAACAAGTGTTTGCTCAAACTGATAAACTAGATGAGATGGAATCAATTAATTTCTAGGAGGAAATAGATTTT  
ACTGAGGTGTCGGATTACTATTACGAACCTTGA

>Cluster\_26860

ATGTCGGTTCGTAAGATTCCATCAGGTAATGGCTTTGCGAATGTTATCCCTACGGGCGATCGGGAAAAACGCATTCGTAA  
ACAGTTTGGGACAAAAAGTGGGCGCTCTTATGAGCGCCGTTAATGAATAGTAGAGTTGGAGACGAGTTCAAGATG  
GTTCTGGTCTCGTCTTTCTGAGTTGATGCTCGTTGGTGGTGGATGTACGGTAAAACCTTGTCTCTGGTGCAGAGCGC  
AAAGTCAAACCTGAGGCGATTTGTTTCAGGCTGGGAGATCCATTTGCTTCTCAGTTTGACAAAAATATGTTGCTACTTTA  
TCGGGAAAGAAGGCTATCAGGAGAAATGGAATCCCAAGGGGAAAGAAAAACTTAGTGAAGCAACCGTTAATCGCGAGCAGT  
CATATCTACATGCTGTTTTGCGCAACTGAAGCGCTTTGGGAGTGGTCTGGTGAACCCCTGACTGGTATTCGCAAG  
TTTTCTGAGGAAAGAAAGGAACTGGCGTTTCTGATGTAGATGAGATTGAACGCTTCTGATTCGCTGTGATGAGTCACG  
GAATAAAGATTTGGGGGTTGTTGTTCCGTTATGGGCTTGGCAGCGGTTGCTGAGGAGTGAAGCAAGGATTAAGCAAT  
CTCAAGTACTGCCCGGTCGAATCACATTTGTTAAAACATAAGGAAAGAAGAACCGCACGTACCGATTTCACCTCAATTG  
CAGGCTATGCTTCTTAAAAACGAGGAGCGCTATTTTACCATGTTATGAGGCTTTTGGAGCTGCAATTAAGAGAGCGAA  
GATCGAGCTTCTGATGGGCAATTAACCTCATGTGCTACGTACACGCTTTCGAGTCAATTTATGATGCGGGGCGGAAATA  
TTCTTGTGTTGCAAAAAATACTGGGCGATAGGATATAAAAAAGTACTATGCGGTTATGCGCATTTTGGCTCCAGGTCATTTA  
GAGGCTGCTGTTGAATTAACCTTTTGGCAATAGAGGTTAA

>Cluster\_62126

ATGATTAATATGGCGTTGTTGGTGTGGATACTTGGCGCTGAATTAGCTCGTTTTATGAATATGCATGATAATGCAAA  
AATTACATGTTATACGATCTTGAATAATGGAGAAATAATGCGCGTGAATTGCAAGTGTATCAATATGTCAAGCTTGGATG  
CTTTAGTCTCAAGTAAATAGTTCGATTGCGTGTGATGAGCCACCCAAATTTATCTGCAATAAAGAACGATTAATTAAGCA  
GCAAAAGATAAAGAGCATGTTTTTGTGAAAAACCAATTTGCAATTAAGTTATGAAGATTGTTGGTATGTTGCAAGCGGT  
TAAAGAAGCTGGTGTGACTTTTATGGCCGGGCAATTAATGAAATTTTTCAATGGGGTTCAATATGACGGAAGTAAATTA  
AAGAAGGTGTTATCGCGAAATATATCATGTCATACATAAGAGAAATGGCTGGGAAAAACAAACAGAGAGACTTTCTCGG  
AAAAAGATGAAAGAACTCTGGTGGACATCTATATCATCATATACATGAGTTAGATTGTTGAGCATTTACTTTGGAGA

AATACAGAGACGGTTACTATGATTTGGTGGAAATTTGGCCCATTTCTGGTCCAGGATTTGGCAATGAAGATGATATGTTAT  
TTATGACCTTGGAAATCCCGTCAAGAAAAGTACCAACCTTAGAGTGGGGAGTGCATTTAACTGGCCGGAACATTATGTC  
ATCATCAATGGAACATAAGGCTCTATTAATAATGATATGCAAGAAACAGCAGGCTCACATTAGGATTTGGCGGTCAAGAAA  
GCATTTTTTGGTCCATGAAACACAGAAGAAATGATGATCGTCGGAAGGCAATATGACCTCAGAAAATGGATGGCGCTA  
TAGCATATGGTCAATCCAGAAAACACCAATATGTTGCGAGTTAATAAGAAAGGAGACGTTATTTCTCCATAAT  
ATCCTCTGTGGTCAAAAACCTGAAGAAGATTATATGACCTTCTCAATGGTGAAGGCGCCATGTCGGCGATTGCTACTGC  
TGATGCTGCCACTTTTCAAGATCGCAGGACAGAAAGTGAATAACAGTGCATTTAAACATACATCAGTAATGTAA

>Cluster\_3575

ATGACTGGAGATAACACCCTCATCCATTCTCACGGCATTAACCGTCTGATTTTCATGAAGCTTTGTGCAGCATTAGCCGC  
CACCATGGGGTTAAGTAGCAAAGCCGTCAGAGATGGCCGAATCGGTTACTAACCCGACGCTCCGCGCATTATCTGGA  
TTGGCGCGCAGGAGTGCACCGGTTGTACGGAATCTCTGCTTCGTGCAACGCATCAACGGTAGAAAACCTCGTCTGGAG  
ACTATCTCTCTGGAGTATCAGGAAGTGCCTTCCGCGCCTTCGGTCAATCAGGTCGAAGAGAACAACAATAACGCATTGA  
GAAGTACAAAGGGCAGTATGTGTGGTTGTGGATGGTTCCATCCCATTTAAAGATAACGGTATTTATTGGTGTGCTG  
GTGAGCCGATTGTGGATCACATCCGCAAAGCGGCAGAAGGCGCAGCAGGATTATCGCTATCGGTTCCCTGCTCCTGCTG  
GGCGGTGTGCGCGCAGCTGGAGTTAACCCAACTGGCGCAGTCAAGGCTGCAAGAAGTTCGCGCAGGCAAAACCGTTATCAA  
TATTCGGGCTGCCCGCAACCCGCAACTTCTCCGCGCAGCTTGGCAGCATACTACTTACGGCAAAACCGCGCAAA  
TGGATGACAAAACCTCGTCCGACCTTCGCTATGGCCGCTGATTACAGAAACATGCGAACCTCGCCGCACTTCGATGCT  
GGTCTTTTGCAAAAGAGTTCGGTGTGAAGGCCACCGTGAAGGCTGGTGCCTGTACCACCTCGGCTGTAAAGGGCCAGA  
AAGTACGGCAACTGCTCAACGCTGCAATTTCTGCGATGTTGGCGCGTGTGGCGGTAGCGATTGGTCAACCGTCTACG  
GCTGTAAAGAAAGGTTATCGGTTCCATAAAGGCATCCATCAGTTGCCAAGCTGCAAAAATCAGACTCCGCGTTACAG  
AAACCGGATGTTAAAGCTTAAAGAGGGCGCAACCTCTGCAAGGCTGATTGGTTTGGTCCGCGGTGTGGTGGGTTGGT  
TGCCGGTGTGAGCTGATGGCGGTGCTGAACTGGGTCGTGAGCAAAAGAAAGATAACGCTGACTCACGGGAGATAA

>Cluster\_15287

ATGAAATCAGTGTGCTGCCGTTGCATTTGCTCCCGTAAACCGTGGAAATCGTTGAAATGACGTTGCCACCACCGAAAA  
AGGTGAAGTGTGATTAAGTCAACCATACCGGTTTGGCATAACCGACGATTTACCTCTCCGCGGATGACCCGGAAG  
GTGCTTCCCGGTGGTTCGCGTCAAGAGGGGCGGGGTTGTTGTTGAAATCGGTAAGGCGTAAACAGCGTCAAACCT  
GGCGACCATGTGATCCCGCTTACACCGCAGAGTGGCGGAGTGTGAGTTCTGTCGTTCTGGCAAAACCAACCTGTGTGT  
CGCGGTTCCGGAACCGCAGGGCAAGGCTGTGATGCCAGCAGCGCACCCGTTTCTTACAACCGGGCAGCGCTTTATC  
ACTACATGGGATGCTCAACATTCAGTGAATACACCGTGGTAGCGGAAGTGTCTCTGGCCAAAATTAATCCAGAAGCAAC  
CATGAACAGTCTGCTGCTGGGCTGTGGCGTGAACACCGGATTTGGCGCGTACACAACACAGCTAAAGTCCAGCCAGG  
TGATTTCTGTTGCCGTTTGGTCTTGGCGGATTTGGTCTGGCAGTGGTTCAGGGCGCGGTCAGGCAAAAGCGGGACGGA  
TTATCGCTATCGATACCAACCGGAAGAAATTCGAACTGGCGGCTGCTTCGGTGCACCCAGCTCAATTAACCGAATGAC  
TACGACAAACCAATTAAGATGTTCTGCTGGATATCAACAATGGGATTCGACCATACTTTGAATGCATCGGTAACGT  
CAACGTGATGCGTCTGCTGCTGGAAAGTGGCAGCCGCGCTGGGTCAGTCCGTTGATCATCGGGTAGCAGGCTCCGCT  
AGGAAATCACCCTGCTTCCAGTTGGTCAACCGTCCGCTATGAAAGGTTCCGCTGCAAAAGGTTCCGCTTGGCGCGTGA  
TCCGATTTACCGGTTAGGTTGAAGATGCGATGAAAGGTTGATATCGATCGTGAACCGTTTGTCCAGCATACCATGAGCT  
GGATGAAATTAATGACGCTTCGACCTGATGCATGAAGGTAATCCATTCGAACCGTAATTCGTTACTGA

>Cluster\_30160

ATGACGGATAATCCGAATAAAAAACATTTCTGGGATAAAGTCCATCTCGATCCCAATGCTGCTGATCTTACTGGCATT  
GCTGGTTTACAGCCCTCGTTTACTGAGCGCCAGCGTCAAGATATTTGGCATGATGGAGCGTAAAAATCGGCGAGATTG  
CGATGGGTCTGGTATCATGTTGGTGTGATGGCGCAATTCCTCCAGCGTTTATGAAGGCTGGGCCCCATCTCTATATC  
ATCTGTATATTTTGGTGGTGGCGTAGATGCTTTCGGTGCACATCTCTAAAGGCGCTCAACGCTGGCTGGACCTCGGT  
TGTTCGTTTTTCAACCGTCCGAAATTTGCAAGATAGCCGTTACCGTGTGATGGTTGATGTTTATCAACGGACGTTTGGC  
CACCTTCAATGAAGAATACAGCTATCGCGCTGGTGTGATTTATGCCCAGCTGCTGGTGGCTGCACAGCTGACCTG  
GGAACATCAATCCCTGCTTCCGCTTTCGCGCTTTCGCTGTTTGTACTGTTCCCTCTGCGCTTAGCTGGCGTCTGAT  
AGTAGTGTGGTAGCGGCTTCAATTCGATTTCTGTTGTTCTTCTGATGCATGATTAACAGCGCCAGCGGTAATGATGC  
TCTGGACCCGGAATCAGACCCACTCGGCGCAGGCTATCACATTTATTCAGTCTAAAATTTGCTATTTGGCTCCGCGGATTA  
CGCGGCAAAAGGCTGGCTGCACGGCACTCAGTCAACGTTGAAATTTCTCCCGAACCCATACCGACTTTATCTTCCGCGT  
ACTGGCGAAGAGCTGGGATTTAGTGGGCAATTTGATTTCTCTGCTCTACATTTCTGCTGATCATGCGCGGGCTGTGGA  
TAGCCGCCAGAGCGCAAAACCACTTTGGTCCGCTCATGGCTGGCGGCTTAATGCTGATATTTCTGTTTATGCTTCTGTA  
AATATGGTATGGTAAAGCGGATTTCTCCGCTTGTAGGGGTTCCGCTCCCACTGGTCAATTTGATGGAGGATCCGCGCTAAT  
TGTGCTGATGGCTGGGTTCCGGATTGTAATGTCAATCCACACCACAGGAAAATGTTGTCGAAAAGCGGTGTA

>Cluster\_588

ATGAAATTTGAACCTGGACACCACCGTCCGCGCAGCCGTTGGCCCTGGTCTTTGATCGTGGCGTAGTGGAAACGCC  
TTGTTTTTACCTTGGCACCTACGGCACCGTAAAAGGATGAGCCGGAAGAGTTGAAGCCACTGGCGCGCAAAATTA  
TCTCGGCAACACCTTCCACCTGTGGCTGCGCCGCGGCAGGAAATCATGAAACTGCACGGCGATCTGCACGATTTTATG  
CAGTGAAGGGGGCGATCTCACCGACTCCGCGGTTTTCCAGGCTTTCAGCTTGGCGATATTTGTAATAATCACCAGAAC  
GGCGGTGCATTTCCGTAACCCGATCAACGGCAGTCCGATTTCTCTGATCTGAAAAATCAATGGAGATTCAGTACGATC  
TTGGTTCCGATATCGTCAATGATCTTTGATGAGTGTACGCGGATTCCTGCTGACTGGGATACGCAAAACCGCTCCATGGAG  
ATGCTCTGCGGTTGGGCAAGCGTAGCCGTGAGCGTTTTGACAGTCTCGGAAACAAAATGCGCTGTTTGGTATCATTCA  
GGGCGCGTTTACGAAGATTTACGTGATTTCTGTTAAAGGTTCTGGTAGATACTGGTTTTGTGGTACGCTGTGCGCG  
GTCGTGGCTGTGGGTGAGCCGAAAGCAGATATGCCACCGATTTCTGGAGCATGATGCCCCGAAATTCGCGCAGACAAACCG  
CGTTACCTGATGGGCTTGGTAAACCAGAACCTGGTTGAAGGCGTACGTCGTTGATATGTTTACTGCGTAAT  
GCCAACCCGCAACGCCGAAATGTTGTTGTTGTTGACCGATGGCGTGGTGAATAATCCGCAATGCGAAGTAAAGAGCG  
ATACTGGCCACTCGATCTGAGTGTGATTTGCTACACCTGTGCAATTTACTACGCGCTTACTTGCATCATCTTACCGCT  
TGCAACGAAATATTAGGCGCGACTCAACACCTTCAAACTTCGTTACTACAGCGTTTGTATGGCGGTTTACGCAAA  
GGCTATTGAAGAGGGTAAATTAGAGAGCTTCGTAACCTGATTTTTACCAGCGTCAAGGGCGAGAAGTACCACCTTTGAACG  
TTGATTAA

>Cluster\_36361

ATGTTCCAGTTATCCGTACAGGACATCCATCCGGGCGAAAAGGCGGAGACAAAAGAGGCGATTCCGCCAGGTGCTGCG  
GGCGTGGTGCAGGCGGTAATGTAGCAGAAGGCTACGTCAATGGCATGCTGGCGCGCAACAGCAAACTCAACGTTCC  
TCGGCAATGGTATTTGCTATTTCCACACGGCACTACCGACACCCGCGATCAGGTGCTGAAAACCGCGCTTCAAGGATTTCCAG  
TTCCCGGAAAGCGCTCACCTGGGTTGACGCTCAGGTAGCTACGTGGCAATCGGTTATGCTGCCAGCTCCGATGAACATCT  
GGGCTGCTACGCGCAGTACCCACGTACTGAGCGATGATTTCCGTTGCTGAACAACTGAAGTCAAGCAACACAGCAAG  
AATTCGCGCATTTACTGATGGGCGAAAAGCAGAGTGTGAGCAGTGAAGCTGACACGAAATGCTGACACTGGATATCGTCT  
GCCAGCATCTGCTGACTTTCAGGCGCTGAACGCTGCGGCTGAAAGAGGCGGGGGCAGTTGACGCGCACTTTCTGCTCAC  
CAAAGCATCAATGAACAACCGCTGAATCTCGACAGGATTTCTGGCTGAGCGATAGCCGCAAGGCAATCTGCTGAGG  
CGATTGCGGTAAGCGCTGCGGCAATGCTTTTGTGTTGAGCGGCGAAACCGCAGCCATGCTGGTGAAGTGTGGCGATGAAT  
GACGATCAGCCATCGCGTTCTTAAGCGTCTGCTGATTTATGCTGACAAATAAGCTGACCGCTTCTGTAAGCGGGA

TGCGGCAACGTTGCTGGCGTCTGACCAGCGATGATGCGCCGACCGACGACGTGTTAAGCGGGAGTTTGTGGTGGCGA  
ATGAACACGGCCTGCATGCTCGTCCAGGTACCATGCTGCTCAATACCATTAAACAATTTAACAGTGATATTACCGTGACA  
AACCTTGATGGTACCGGCAACCGGCAACCGGACGTAGTCTGATGAAAGTTGTGGCACTTGGCGTTAAGAAGGTCATCG  
CCTACGCTTTACCGCCAGGGTGCGATGCTGAACAGGCGCTGAAAGCAATCGCGGACGCTATCGCTGCTGGTCTGGGG  
AGGGGCATAA

>Cluster\_17658

ATGCCGCGTATGAAGATGAACATTCGCGGCTTAAGCCTCGAAATTAACAAAGCAACCCACAGCGAAATCCAGCTGTTCC  
GGCAGGCGAGTTCAGTGCAGTGGATGGTCCGCCACATACCAGTGAAGTCGAAAGCGGTAATGGGTGCTGACTGCCGAAC  
TGGCCGCGCAGCTTGTGCGCACAGGTGGCAGCCGTACCACGCCCTTTTGTTCATTGATTACGAACATCAGACGCTGCGCGCC  
GTAAACAACGGCAAGCCCGCCCCGGCGGGCTGGTTACGCCAGGTGGAATGGCGTGAAGGCGGGGCTGTATGCCAT  
CGGTGTGGAGTGGACGGAGAACGGCGGCCATGATTGCGCCGGTGAAGTACAAATTTATTTCCCGGTATTTGGATACA  
ACCGGCGCGGCAAGTCACTGAACCTGTACACGCGGACTGACCAATACCCCGGCGTGGACGGTATGGACGGGTCATG  
CTGGCTGCCGCGCAGCTTGGCGAGTCTGTCAACTGAAACGGAGACCACAACAGTGGATGAAGAATGTTAAACGATTT  
GCTGTCCAGTCTGCGCTGGATGCTTAACCTCCCGGTTACCTCAACGGCGGAAGATATCAAAAACGAGCTGCAAAAAGTTCG  
TTGACATGATTTCCGAACGGTCAAGGAAACGGCGGCCATCCGTGAGCCTGCTGGCCCTGCTGAATCAGAAAGACGAGCAA  
ATCGCCAGCTGTCAACAGTGCCTATGACCCGTCAAAACACATTTCCCTTGTGCTGCTTGAAGAATCCAGGGGCGTTA  
TCCGCGACTGGCGGCAACGATCCGGTGGCGGAAAGCGGGGACTGATTCAGCGCGGCTGCTGACGCGGCTTCCCTTC  
CGGCACAGGAAGGCTGGGCGAAAGATTACGCCAGCCGCGATATCAACGGCTTTAAGTCTGGCTGGATAACGCACCGAAA  
CTTGTGGCTCAGTCAAGCCAGACCGCGGCAACCCACCAAAACGCGCTGCGCTGCCCGGCGCAGATTAAACCCG  
CGATGACGTCGATGTCGATATCGCCATTTGTTCAATGATGGCGTCGATCCAGAGGATGTCGCCGCTTACGCAGGAGATG  
AGTAA

>Cluster\_20841

ATGCTTTTGTCTGCTGGCCTGCTTTTGTGACTCTGGCGATCGCGGTGTTAAATACACTCGTGCCGCTTTGGCTCGCCCA  
GGAACACATGCTCATAGTCCAGGTAGGCGTTGTGAGTCTCATCCTATTTTACCAGCAACCTTGTGGTACATTTGCTGACAG  
GGTATGTCATTAACGCATTTGGCTTTAACCAGCAGTATATCTGGCCTCCTTCATTTTGGCGTGGCTGTGCCGCGCCTT  
GGCCTGATGATTGGATTCGAGGTTGGTGGCGTGGCGTTTGTGCGTGGCATCGGCTGTGCCATGATTTGGGTGGTGTG  
TGAGAGTGGCTGATGTGCAAGTGGGACGTCGCGTAAACCGGGCGGTTGCTTGTGCTGCTATATGATGGTTTATTACGTCG  
GAACGTTTTTAGGCGAGTFACTGGTCAAGCAAGTCTCAACCGAGTTGATGAGTGTATTCGCGTTCACAGGTTTACAGC  
TTGGCAGGAATCTTACCCTGTTGTTTACGCGTGTCTGAATCAGCAGACTGAAAACCATGATTCGACGTCATTTACGTC  
AATGCTAAAACCTCCGTCAAGCGCGGCTTGGCGTGAATGCTGCATTTATCTCAGGAATCGTCTGGGATCTCTATATGGCC  
TGATGCCGCTGTACTCAATCACAAGGGGTGAGCAATGCCAGCATTTGGTTTCTGGATGGCGGTAAGTGGTCAAGTGGG  
ATCCTCGGCAATGGCCGATTGGACGCTCTGGCGGATAAGTTTGGTGCAGCTGCTGGTGTGCGTGTTCAGGCTTTGTCC  
CATTTCCGCGAGTATTCGATGCTTAGCCAGGCGGCGATGGCCCCAGCGTTATTCATCCTCGGTGCCGCTGGCTTTACGC  
TATATCCGGTGGCGATGGCTGGCTTGTGAGAAAGTTGAACATCATCAACTGGTGGCGATGAACCAGGCTTACTGTTG  
AGCTATACCGTGGGAAGCCTGCTTGGCCGCTATTTACCCTATGCTAATGCAAGATTTCTCCGATAATTTATATTTAT  
CATGATCGCCAGGCTATCGCTTTATCTATTTGCTGATGCTGCTTCGCAACCGCGGCTATACGCCGAAACCTTCTCAGC  
TGTA

>Cluster\_42891

GTGAATTTACTGACAGTGTACTGATCTCATCAGTATTTTTTTTATTACGACACTGTTTCTGTTTTTTGGCCGAAAGGT  
AGCAAAAAAGTCCGTTTTAGTGGATAAACTTAACCTCCGCAACAGCTCACCAGGATTGATACCTCTCGTTGGGGGATTTT  
CGGTTTTATGAGGATTTGCTTACGTTCCGAAATGTCGATTTGCTATATTCGGATGCATCTCTCTATCTCGCTTGTGCC  
GGTGTGCTGTTTTTTCATTTGGCGCGCTGGATGACCGTTTTGATATCAGCGTAAAAATCCGTGCCACCATACAGGCGCGT  
TGGCATTTGTTATGATGTTGTTTCGCAAACTTTATCTGAGCCTGGGTTATATCTTTGGCTCCTGGGAGATGGTCTG  
GACCGTTTTGGTTACTTCTGACGCTATTTGGCTGCTGGCGGCCATTAATGCGTTCAACATGGTTGATGGCATTGATGGC  
TTGCTGGGCGGTTGCTCCTGCGTCTCGTTGCGCAATCGGATGATTTTGTGTTTCGACGGGCAACAGTCTCGCAAT  
CTGGTGTCTTGGATGATCGCGCCATCCTGCCATACATGCTTAACCTGGTATCCTGGGTCGCCGCTACAAAAGTCT  
TTATGGGGGATGCGGGCAGTACGCTGATTTGGTTTTACCCTATCTGGATCCTGCTCGAAACGACCAGGCGCAAAATGCT  
CCCATCAGCCCGTTACCCTTTTGGGATAATCGCCATTCGCTAATGGATATGGTGGCGATTATGTACCCTGCGCTGCG  
TAAAGGATGAGCCATTCTCTCAGACCGTCAAGCATATTCACCATTTGATCATGCGTCCCGGTTTTACTTCCCGCCAGG  
CGTTTTGTGCTGATTACCTTGGCGCAGCACTGCTCGCTTCCATTTGGCGTGGCAGAAATTTCTCATTTTGTCCCGGAG  
TGGGATGCTGGTGTCTTTTTTCTAGCATTTCTCTCTATGATATGCTCAAGCGTGGCAGGAAAGTTGCTCGCTT  
TATTAAGCGGTAACCGCAGACTGCGTAGAAATCGTGGTGGCAGCCCAATTTAACCAATAA

>Cluster\_47584

ATGAAAATTTAAAAATTTGTTGGCAGGTATGGTGTCTTTAGGACGAGCACTTTTGCTGGAAATATATGGGCTGCGGATTTG  
GGGACCATCTCAGACATCAAAATGGGGTGGCCATGAGTATAGTTTTGATTTTCGTACAGACTATCCAGGTACCTTCAGAAA  
ATAAGGCTGGGAAAATATTAACCTAGCCCTTTGCTTTAGGTACAAAATATTCGCTTATGTGATGCCCGGATCCCATT  
CCAGATAATGGAGTTGTGACTTATTTTAAAGGTGTAACGCTTCTGCTGAGCCTGGAATGTAGATGGGTACTATAAAAT  
CAATAATTAACATGATTTCTCACCAAAATATATGCTACACAAATAGATAATCCCGGTGCCTTTTACCAGTCAAGCA  
ATGGCAGCGCACAGAAAAGAAATGACGCCATATACTGCTAACAAATTTGGGGGACAGGTGGTAAAGGAAATCAGTATTTAT  
ATTTACATCTCTTTGTTGGGCAATGATTTATCTTAAACACGAGTTGCGTCCCTCTTTGGGACAAAAAGAAAGGTGT  
TTACAATGATAGTCAAGCCATGGCAATGTCAGTATTTCCGGGAGTATTACAGTTACTCAAGGCTGTGAATTTGCCGCTG  
GCACCGTACTGGATATCCATTCGGGAATATCAGGCCATGATTTTAAAGGGCGTGGCGGACACCACCAAAAATGTT  
CAGAAGGTACAAAAAGAATTAAGCTTTGACTGCAATAATTTTTCAGATGGCGTCAAAAATTTATCTCAGTATTGATGCAAC  
ACCAAATAGTCCCTATCCAGCGCAATTTAGTTTGGCAACCGCATGTTGGTGCAGTCTTGGGACGTTAAAGGTAATA  
TTCTTAAGCCGAATGACAGTAATAGCTTATTAGAAATGAACCCAGGCTCGCTGATGAAGATGCAACCGCAAAAGCGACA  
ACCACAATTACCCTTATCCCGTTAGCACTACCAGGAAAATTACCCTGCTGCCGGGATTTAGCGGATTTGCTACCATACA  
TGTCGAACCTGGAGTAA

>Cluster\_30453

ATGATGAAGCGCAATATTTGTCAGTGGTCTGCTCCTGCTCTGTTGGTAGCAGGTACCGCAACCGTGGCGAAATCTATAA  
CAAAGATGGCAACAACTGGATCTATACGGTAAAGCTGTCGGTTGCAATATTTCTCCAGGGTAATGGTGAACACAGTT  
ACGGTGGCAATGGCGATAAGACCTATGCCCGTCTGGTTTTAAAGGGGAAACTCAGATTAACCTCCGATCTGACTGGCTAC  
GGTCAAGTGGGAAATCAACTTCCAGGTAATAACTCTGAAGTGTGATGCTCAGAATGGCAATAAAACCGCTGCGCAT  
TGGTGGTCTGAAATTCGCTGATGCGGGTCTTTTCGATATGCTGTAACCTACGCGCTGGTTTATGATGCCCTGGGTTATA  
CCGATATGCTGCCTGAGTTTGGTGGTGTATCCGCTTACAGGATGACTTCTTCTGATAGTCTGCTTTCGATAGGTCGTGTTGGC  
TACCCTAATCTCAACTTCTTTGGTCTGGTTGACGGTCTGAATTTGCTGTTTCACTGACCTGGGTAACGAGCGTGACAC  
TGCAGCTGCTTCTAACGGCGACGGTGTGGCGGCTCTGCTGAGTACGAATTCGAAGGCTTTGGTATCGTTGCTGCTTTATG  
GCGCGCTGACCGTACCAACTGACGAAAGACTCTACCTTGGCAAGGCAAAAAGCTGAACAGTGGCGCTGCGGCTG  
AAGTATGATGCTAACAACATCTATCTGGCAGCTAACTACGGTGAACCCGTAATGCTACGCGGATCACTGGTGGCTTTGC  
CAACAAAACGCAAGATATCTGTTAGTTGGCAATACCAGTTCGACTTGGCTGCGTCCGCTCATCGCTATACCAAT



ATGAATGAGTTGGTGCAGATCTGAAAAATACCCGTGACGATTTAATGACGGGGCTTTCACACATGATTCCTTCGTTGGT  
ATCGGGCGTATTTTGTGCGGGTTCCTGTCATGTTGATGCGAAAGGCGAGTGCCGGATGCCGTTGCCGATCCGAATC  
TGAAAAAAGTGTGATATCGCGGTTGCAGGTTGACGCTGATGGTGCCTTTCCTCGCCGCTTACATCGGTTATTCATT  
GCAGAACGTTCTGCGCTGCCATGCGCTATCGGTGCTGGGTTGGTAACAGCTTTGGTGGGGCTTCTTTGGTGCAGT  
GATCGCCGGGATATCGGGGCACTGCTGGTGCATTACCTGAAAGAAAATCCGGTGCATAAAGTTCTGCCCTCGTGGTGC  
CTATCTTTCATCATCTTCTATCGTCCGACACTGATTACCGCAGGCATCATGATGTTGGGGCTGGGCGAGCTGTAGGGGG  
TTGACCAACAGCTGACTCAGTGGCTTACGGGGATGCAGCAGGGCAGCATTGTTATGCTGGCGGTGATCATGGGTCTGAT  
GCTGGCGTTGCATATGGGCGGTCGGGTTAAACAAAGTGGCCATGCCTTTCATGCTGATTTGGCTGCTCAGGGTGTATA  
CCGTGGTGGCCATTTGCTGCCGTGGGATTTGTGTTCCGCGCTGGGATGGGGCTGGCGACGCTGATTTGGTGGTAAAAAT  
TTCTCCGAGAAGAGCGGAAACCGGTAAGCGGGCGTGGTATGGGGTGGCTGGGCTTACTGAAGGGGCGATTCTTT  
CGCGCTGCCGATCCGCTGCGTGTATTCTTCCATCATGATCGGTTACGTTTGGTGCAGTAACTGGCGCGTGGTGG  
GTGCGCAGTGCTATGACGGTGGGGTGGTCTGATTGTGCTGCCGTTGGTGAAGGCAAGCTGGGTTATATCGCAGCAGTG  
GCTGTGGAGCAGTGGTGAACGCTGTTTGTGTGAACGCTGCTGAAAAAGTCTGGCGGTAAAAAATGGGCTTTCGACTGATGA  
AAAAAGACGACCTGGATTGGATTTGAAATTAATTA

>Cluster\_16999

ATGCTTCTGTTTCTACATCGGGTTCGGCGCACCTAAGTCTGTCATTCAGCTTCGGGCGTATCTGGGATCAGTACGGCAT  
GCTGGTGGTGTTCGCGGCTCTTTTATCGCCTGTGCCATTTTTGTCCAAATTTTGCCACCTTCATTAATATGAAAGGT  
TGGGCTGGCAATTTCCATGTCGGGGATGGTGGCTTGTGGCATGTTGTTCTGCCCTGCTTCGGGTGACTTTGACCTTTCT  
GTCCCTCCGTAATGCTGTGCGGGTGTACACCGGGCGTGGTATTAACTGACTGAAAGCTGTGGATTGGCGTGGC  
AGCGGGTGTGCTGGGCAATCTCTGTGGTCTGGTCAATGGCTTTGTTATCGCCAAACTCAAATAAATGCCCTGATCA  
CGACACTGGCAACGATGCAGATTGTTGAGGCTGGCGTACATCATTTCAGACGGTAAAGCGGTCGGTATCGAAGATGAA  
AGCTTCTTTGCCCTTGGTTACGCCAACTGGTTGGTCTGCCCTGGCCAACTGGCTCACCGTCCGGTGTGATCATCTT  
TGGCTTGGCTGTAATAAAACCACTTTGGTCTGTAATACCTGGCGATTGGCTGTCTCTTATACACAAATCCCCACCCG  
GGATTGTGATGTCTGATCTGTCTGTCTTGGGGGACTTTCCATCCGTAAGTTTCTTCTCCCGGACGCTTTT  
GAACTTTTCTCACCCTGATCTTCTTATATTTTCTTCTCGGGTCTGTTATGGTACTTTCTGATTGTTATTCA  
TGGGCTAACGAGCAGTTGGACATGCCGCTCTCGGTGATCCGCGTCTGACACGACGCTTGTGCTACTGGCCTTCTCT  
CGCTCAGCATGACGGTCTTCTATTGTGA

>Cluster\_51792

ATGGCAGTGATTGACCTTTCGAGTGGCTGCACCGCAGATTGTTGGATGTGCCGGACTTTGAGACGCTGCTTGGCGAACG  
CAAGGCAGAAATTTGTGGCGCTTCATCCGAAAGATGAGCAGGAAGCAGTGATCCGCACGCTGGAAGTGGAACTGAACCCG  
CCACTAAATTTGTGACGAGAACGCTTACCGTGAAGTGGTCTTCCGCGCAGCGCATTAACGAAGCCGCGAGGCGGTGATG  
GTGGCTTACGCGATGGGCGGCGATCTTGACAGCTCGCTGCCAACTACACGTCGACACGCTGACGGTACGGTACGGTGA  
TAATGATGCTGTGCCCGCTTGCAGCTGTGATGGAAGCGATGAAGCGTGGCGCTGCGTGTGCTGCAGCTTTGAAG  
GGCTTCTGTTGCCGGGCAACTGCAGCTTATGAAATTTTATGCCCGAAGCGCCGACGCTGGGTTGGCGGATGCCAGTGA  
ACCAGCCCGCACCTGCAGAGTGGTGTGACTGTCTTAGCCGCGAAGGCGATGGAAGTGCAGAAAAAGACCTGTGGA  
CGTGGTGGAAAAAGCTGTAACAGTGAAGACGTCGCCCGGTTGGCTGACCTCTTACGGTTCGCGGCAAGAAATCATCC  
CGTATCGCGTGAAGCCACCATTTTCTCTATCCGGGACCGGAAGCAGAGCCGTAATGGCAGCGGCAAAAGCCAGTCTG  
CAGAAGTACATTTGCCAGCCAGACGAGGCTTGGTCCGGATATTCGCCGTAGCGCATCTTTGCTGCTCTGCATGTTGAGG  
TGTTCACGTTGGAACTGGCTTCTCCGTTGGCGGATGTGGTCTGAAACAAACACAGGCGGCATCATGTACGCAAGTGA  
GCTTAACCAACGGAGGAACGGATGAATA

>Cluster\_40379

ATGATCAAGAAGCAACGGAAATGATGCCATCTTGTAAATCTCAATAAGGCTATCGATGCCCACTACCAGTGGCTGGT  
AAGTATGTTTTCACAGCGTGGTCCGAGAGATGCGAGTAAGCCAGAAATAACGGATAACCATTTCTTATGGACTGTGCCAGT  
TTGGTCCGTTGATGATCATCTGGGGCCACTCGATAACGATGAATTACCTTACGTTCCGGCTAATGGATTCTGCCCATCAA  
CATATGCATAACTGTGGTCCGGAATTAATGCTGGCTATTTGTTGAAAATCACTGGCAGGACGCGCATTTCCGACGCTTTTCA  
GGAAGGGTGTCTTTCTTTACTGCGGCATTAACCGATTACAAAATTTATTTGCTGACGATCCGTAGCAGTATGGATGTTT  
TGACGGGATTGCGGGTCTCGGGTCTTTGATGAATCCTTTCGATCATAGTTACGCAATGCTGAACTGAACTTTTAT  
TTAATGTTGTTGGATATAGACCGATTTAAATGGTTAAATGATACCTACGGGCAATTAATCGCGGATGTAGTATTACGCAC  
CCTCGCAACTTACTTAGCCAGTTGGACGCGGATACGAAACGTTTATCGCTACGGTGGCGAAGAAATTTATCATATATG  
TCAAAGCGACTAATGATGAAGAAGCATGCTGTCAGGTTGTCAGAAATTTGCCAGTTAGTCGATAACCATGCCATCACACAT  
TCTGAAGGCATATCAACATTAACGCTGACAGCAGGTTGCTCAGTCGCGCATTTCTGAAAGAGCCTCTGGATGGGTCATTTG  
AAGAGCGGACCGGCAATGATGAGGGTAAGCAAACCGGAAGGAATCGCTGCATGTTTATGACGAACAAATGTGATTA  
ACCGAGTTTAA

>Cluster\_40403

ATGAATATTGAACCTTCGTCATCTGCGTTACTTTGTGCTGTTGTCAGAAAGAGTGCATTTCCGGGCTGCCGCTGCCCGCT  
GAATATTTCCGAACCACTCTAAGTTCAGCAGATTACAGGCGCTGGAGCAACAAATGGTGGCCGACTGCTGGCAGGACCA  
ATCCAGTGTATTTGCTGACGGAAGCAGGAAAACAGTTTCTTGTAGATAGTCCGCAAAATCCTGTCTATGGTGGGTGATGCT  
GCCGCTCCGCTGAAAGCTGCATCAGGGCGAAGCGGGGATTTGCGCATTTGTTTACTTCTGTCGCTCCGCTTTTATTTATTCG  
GGCGGTGTCGATACGTTTATCGCTGTTTTGCGCGTGAATATCCGATGTCATTTTACAAACCCGCAAAATGAACACTCCG  
AGCAATCGCTCCGCTCATGAAAGAACGCTGGATATGGGATTGCTGCGTAACACAGCGTTACCGGAGACGCTTGAACAC  
CGAGTCTGCTCCATGAACCGCTTATGGCGATGATCCCGCAGCATATCCCTGGCAAATAACCCGAGTGAACCGCTGGC  
TGAAGTGGCGAAAGAACCTTTGCTTTTTTTGATCCGACGTCGGAACAGGGCTGTATGACGATATTTCCGGGTGATGA  
GACGTTACAATTTGACGCGCTCATCACTCAGGAGGTTGGTGGGCAATGACCATCATCGGCTGCTTTCCGCTGGTCTG  
GGTGTTCAAATTTGCTGCTCATTTAAACGTTGCTCAGCTCAACGAAATGCGCTGGGTGCCGATTTGCTGAAGAGGATGC  
GGTTTCTGAAATGGTGGTCTGGCCGAAACATCATGAACAAAGTCCGGCTGCGCGTAACTTTCGATTTCTGCTGTA  
ATGCTCTCAGGTGA

>Cluster\_36505

ATGAGCTGGATTGAACGAATTAAGCAACATTAATCCACCCGCAAGGCGAGCATTCCTGAAGGGGTGGACTAAGTG  
TGATAGCTGCCGTCAGGTTTATACCGCGCTGAGCTGGAACGTAATCTTGAGGCTGTCCGAAAGTGTGACCATCATATGC  
GTATGACAGCGGTAATCCGCTGCATAGCTGTTAGATGAAGGAAGCCTTGTGGAGCTGGGTAGCGAGCTTACGCGAAA  
GATGCTGTAAGTTTCTGACTCCAAGAAGTATAAAGACCGTCTGGCATCTGCCGAGAAAGAAACCGGCGAAAAGATGC  
GCTGGTGGTGAAGAGGCACTGATGGAATGCCGTTGCTGCTGCCGATTCGAGTTCCGCTTTATGGGCGGTTCAA  
TGGGCTGCTGTTGGGTGCAGTTTCTGTCGCTGCCGTTGAGCAGGCGTGAAGATAACTGCCGCTGATCTGCTTCTCC  
GCCTCTGGTGGCGCAGTATGACGGAAGCACTGATGTCGCTGATGACGATGGCGAAAACCTTCCGCGCATGGCAAAAT  
GCAGGAGCGCGGCTTGGCTACATCTCCGCTGCTGACCGACCCGAGGATGGGCGGTTTCTGCAAGTTTCCGCAATGCTGG  
CGCATCTCAACATCGTGAACCGAAAGCGTTAATCGGCTTTGGCGGTCGCGTGTATCGAACAGACCTTCCGCGAAAA  
CTGCCCGCTGGAATTCAGCGCAGTGAATTCCTGATCGAAGAAAGGCGGATCGACATGATCGTCCGCTCGTGGGAAATGG  
CCTGAAACTGGCGAGCATTTGCGGAAGTTGATGAATCTGCCAGCGCCGAATCCTGAAGCGCCGCTGAAGGCGTAGTGG  
TACCCCGGTTACCGGATCAGGAACCTGAGGCGTGA





GTACCTTGCACACGGTAATCTGGAATATAAGCACCCCTTACCTGGAAGACCGGACGTTAAACCGGTGGGCTACCTGGTG  
GTGTCGACCGACCGTGGTTTGTGCGGTGGTTTGAACATTAACCTGTTCAAAAACTGCTGGCGGAAATGAAGACCTGGAC  
CGACAAGGCGTTCAATGCGACCTCGCAATGATCGGCTCGAAAGGCGTGTCTTCAACTCCGTGGCGGCAATGTTG  
TTGCCAGGTACCGGCATGGGGGATAACCCCTTCCCTGTCGGAAGTATCGGTCGGTAAAAGTGATGTTGCGAGCCCTAC  
GACGAAGCGCGTTCGGACAGCTTACATGTGTCAGCAACAAATTTAATACACCATGTCTCAGGTTCCGACCCAGCAA  
GCTGCTGCCGTTACCGGCATCAGATGATGATGATCTGAAACATAAATCCTGGGATTACCTGTACGAACCCGATCCGAAG  
CGTTGCTGGATACCTGCTGCGTGTATGTGCAATCTCAGGTTATCAGGGCGTGGTTGAAAACCTGCCAGCGGAGCAG  
GCCGCCGTATGGTGGCGATGAAAGCCGCGACCACAATGGCGGCGAGCTGATTAAGAGCTGCAGTTGGTATACAACAA  
AGCTCGTCAAGCCAGCATTAAGCACTACCGAGATCGTCTCGGGGGCCGCGCGGTTTAA

>Cluster\_28051

ATGAATAATAAATTTAAATCATCTCTGGATGATGCTCTCTGCTCTGCTTATCTTACGCACAGGTAAAAAATAT  
AGTTACTGGCGAATATAGTGGGTCAGTAAAATATACAGAAAAGGAAACTCTCTATCCATCCGATAAGATATTTATGG  
TTTTTGACATTGATAACACGTTATTAACGAGTGCACCAACTCGCATGGCGGTGATATCTGGTATCAATGGCAAACCGATAAA  
TTGCCCTTAAAGCCGGATGACTCGCAAAAAGTTCCTTGGCTGTATGAAAATACAATCAGTATGCTTTACGAACCTAGCCC  
TATGCAGCTTACCGAGCCACAGTTACCGACAATGTTAAAACAGTGGCAACAAAAGCATACCGCTTTTGTCTGTACATCCC  
GTGCACCGGATACTCTCTTCCGACATTCGGGAATTAAGCGAAAACGGCATTTGATTTTTCGCTTCCGCACTCAGGAAG  
AAAGAGGATACTTTGCCCACCTTTGAAAAGGGAAACTCAAACGGTCAAGGCTGTACAGCCAGGGGGTATTTTTTCTTC  
CGGGCAAGATAAAGCGTAATTCGATATATGCTGGATAAAAATGGGAAACAAATATGACGGATTTGTTTTATCGATG  
ACGGGCAAGCAAAATTCATGCGATGACGAAGATGTTCTTAAGGATAAATGGTCCCTACCGATTTTACCATTATTCAC  
TATAACAGAGTGGAGGATGAGCTTATTAACAACAAGGTGCGAGTAATAAACACAGCAAGCAAAAAATGGTACGGA  
CTGAAAACCTCTGGCTGGTTCGCTGCAACACTATTTCCAGATCGTAATAAACCTGTGCCCAATAAAAAATA

>Cluster\_48545

GTGGCACAGGCGTGGGACGGCACCGGTTTTGGCCACTGGCGATACCGCGTGTGGGTCAGGAGGTGATTTGGACTTCT  
CAACGGCGATCCGACCGCCGATTTATGGGGCTACTCACACAGGAAAACCGCACACCCGCGCCTGCCGGGA  
CGAAGACGAGATGACCATTCGTTGCAAAACCTATAAGGGCAGCGGTTAATGAACGAAAGTTGACGATGCGACAGGG  
AAAGAACAGGTCATCCACGCGCAGAAACATGAACACCGAGGTGCTGAATAACCGCACCCAGGATGTGATAAACAA  
CCATGCTGAGACCATTTGGCAACAATCAGATGATTTGCGGTTACCAACAATCAGATACAGACGGTGGGCGTTAACAGATAG  
AGACGGTGGGACAGTAAACAGATCATTAAAGCTGGTCTGTTCAGGTGGAAACGATTGGACTTGTTCGTGCGCTACCGTG  
GGCGTGGCGTACAGACGACGGTAGGTGGCATTATGAACACTTCGGTGGCTCTGATGCAGTCCCGCAGATCGGTTTGA  
TAAATCGTTGAGGCTCGGCTGGGTTATGACGTCAAAGTCGGAATAACGTTACCTTACCCTTGGTAAAACGAAAAAGG  
ATGATACCGGGCAGACCGGATTTACTCCGCGGTGAGCATCTGGAGCTCTGCTGTGGTAAGGCAAGGCTGGTGTGACG  
AAGGACGGCAAAATTTTCTCAACGGCACAAAATTCATTTGACAGGTAAGGACAGGTTAATGGTACTCAGTTGATG  
TAACTGAACTGTGCAGCTCGAAATCCCACCGAAGACCCCTGATGAAAAGCAGGATACGCCGATATGAGAGAGTACT  
GA

>Cluster\_33357

ATGTCATCCCACTTACCACCATTTACGCTGAAAGATATCTCCGCCCAGGTGGTGGATTCGCCATGTTAGCTGTGCATCA  
GCGTGAGGCCATGCGCTGATGTTGCGGCAGCAGGGCAGCCAAAACCATCGCCGACAGTGTACTCACCGATTTTAAAG  
TTGCCCGCTCCGCAATCTTCCACTTATGCTTCTGCCCTTCTGGCGGATAAAACAATTTTGTCTTGGCAAAATAGTCGAG  
CAGGGCGCTGTGCTAATCTTGGCGCCTGATTTGCTGCTGCGATCTTTTATCCAGGTAATGGCATCCCGTTGATAG  
CGTTGAAATAGATATGTCGCTCAACCCGATAAAGCCCTGAAATGGGGCTAAGGCAATGAAATTAATGTTACTCTGGC  
GTGAAGATGAACCGCAGAGGACGTCGGCAATGGTTGATAAATTTGTTCTGCTGCTGCGGTAGTCCGGGCTGGTTAGC  
ATTTATGAACTGTGGTGGCTCCACCTCGTCCGCTGGGACTTTGATCGTGAAGCGCCATTTGTTGCCCGCCGCGACA  
GCTTGGTGAACAGAGCTGATCTTTACAAGCCGAGATGCCATTAAGGGGCAAGGCATGAAAAAACCCTTCTGCCG  
CCTGTGCACTTAAACGATCAGATGAAGATGCCGTTGGGTAATTTCTTCTTGGCGTTGATGCCGATATTTTTGGCCGT  
GCAGTAAATTTGCCATGAAAGGTGGTGGTTCGGCTTCTGGCTGGACGAGCGGTTTGGGCGTGGTGGTGGTGCACA  
AGATCCACAACATATGCTGCGGATGTCCTCCGTTCCACGCTTGCAACGGCTGGCTGAAATTTGTCGATGAAGGTATCGGC  
AACGCTAA

>Cluster\_61243

ATGAGTTTTGATCCGACGGGTTACACCCTCGCCATGAGCATCTGCATATTGATCTCTCCGGCTTTAAAAACAACGTGGA  
CTGCCGCTTGTAGTATGCGTTTCAATTTGCCAGGAGATGAACGACCTGATGACCCGGGGCGTGCATATGTGATGAGA  
TGACCAACCGTTACATGGGGCGCAATGGCGCAATTTATGCTTATGTTGATAATGCGCGAGACGGGGATCAACGCTGGTGCCTGT  
ACCGGTTATTACCAGGACCGGTTTTTCCCGGAACATGTGGCGACCCGACCGTGCAGGAACCTGGCGCAGGAGATGGTCCA  
TGAATTTGAACAGGGTATCGATGGCAGCGAGCTGAAAGCCGGGATCATCGCGAGATCGGCACCGAAGGAAAGATTA  
CGCCGCTGGAAGAGAAGGTATTTATGCCGCTGCGCTGGCGCATAACAGACCCGACCGCCGATCTCCACGCATACGTCG  
TTCAGACGATGGGGCTGGAGCAACTGGCGTTGCTACAAGCCACGGGGTTGATCTTTTCCGCGCTCACCGCTCAGCTG  
CGATCTGAAAGACAACCTCGACAACATTTGAAGATGATGATCTCGGCGGTACGTGCAGTTTCGACACCATCGGCAAGA  
ACAGTTACTACCCGGACGAAAAGCGTATTTGCCATGCTTTCATGCGCTACCGACCGTGGGTTGCTGAACCGCGTATGCTG  
TCGATGGATATTACCGCCGCTCCATTTAAAGCCAACGGTGGTATGGCTATGACTATTTACTAACCACTTTATTTCC  
GCAATTTGCCGAGTCAGGATTCAGTCAGCCGATGGGATGTTGTTACGTGAAAATCCCTCTCAATTTTCCAAATAA

>Cluster\_58434

ATGAAACTGGGATTTATTTGGCTTAGGCATTTATGGGTACACCGATGGCCATTAATCTGGCGCGTGGCGGTCATCAATTACA  
TGTACAGCCATTTGGACCGGTTGCTGATGAATTAAGTCTGCTGAGGTCAGTGTGAAACTGCTGCGCAGGTAAACGG  
AAGCATCGGACATCATTTTTATTTATGTTGTCGGGACACACCTCAGGTTGAAGAAGTCTTGTTCGGTGAATAATGGTTGATCC  
AAAGCCTCGCTGAAGGGCAAAACATTTGTTGATATGAGTCCATTTCCCGGATGAAACTAAGCGTTTTGCTCGTCAGGT  
GAATGAACGGGCGGATTTATCTCGATGCGCCAGTCTCCGGCGGTGAAATCGGTGCGCGTGAAGGACGTTGTGATTA  
TGGTTGGCGGTGATGAAAGCGGTTAAGCTGTTAAACCGCTGTTTGAAGTCTCGTAAATAATATCACTCCGTTGGG  
GGTAAACGGCGATGGTCAAACCTGCAAGTGGCAAAATCAGATTAATGCTGGCGCTCAATAATGAAGCGGTTTCTGAAGCCCT  
GCTATTTGCTTCAAAGCCGGTGGCGACCCGTTACGTTGCGCGAGGCGTGTGAGGCGGCTTGGCTTCCAGTATTC  
TGGAACTTCAATGGGAGCGTATGATTAACCGCACCTTTAATCCGGGCTTCAAATCGCTTGCACCAGAAAGATCTCAAC  
CTGGCACGCAAAAGTCGAAAGCACTTTCGCTGAACTGCCAAACACTGCGACCTGCCAGGAGTTATTTAATACCTGTGC  
GGCAACGGTGGCAGCCAGTTGGATCCTCTGCGTTAGTGCAGGCGTGAATTAATGGCTAACCATAACTGGCCTGA

>Cluster\_34224

ATGATTTTTATTTGCGCTCAGTATAGGAAGGTTGTTTTCGGCTACAATCAAAACATGCTCGAATGTGCACCAGGTGCA  
CAACGTTGTTTTAACTATAGAAATGTCAATTAATATGCAAGCAATGAGCAGACGGAAACAAAACCGTGGCGGCTTAA  
CCCAGGCTCAATGTTATTAATATGTTAAATAAACTTGATGGCGGTGCCAGCTCGGCTGCTGGCGGAACTCAGCGGC  
CTGCATCGCACCACTGTGCGGCGACTGCTGGAGACGCTGAGGAAAGAGGGATATGTCGCCGCTAGCCCTCCGATGACAG  
TTTTGCTGACCATCAAAGTCGGCAATTAAGCGAAGATTTCTGTCAGCAACAGTGGATTTCTTCACCTGGCGGCCAC  
TGCTGGGCGATCTGTTGGCGAAAGTGGTATGGCCGACAGATGTGTCACGCTGGATGTTGATGCAATGGTGGTACCGGAA  
ACCACCACCGTTTTAGCGGCTTATCTTTTACCGGGCAATGGTGGGCGACGTTTGGCGCTTCTGAAAACCGCCTCGGG

CCTGACCTGGCTGGCCTTTTGCCCGGAACAAGAACCGAAGGAATTAATCGAGATGTTAGCCTCCCGCCCCGGTGTACT  
ATCAACTGGCAGGAAACCGTTAAAGCTGCAAGCCATTCTGGCGCGCGCGCAAGAGGGTTACGGACAGAATACCCG  
GGCTGGGATCAGGAGGAGAAGATCGCCTTATCGCCGTACCGTGCAGTGAACAACGGGTGATTGGCTGTCTGAATCT  
GGTGTATATGGCGAGCGCAATGACCAATTGAACAGGCGCGGAAAGCACTTCCGGCGCTACAACGGGTAGCAAAACAGA  
TCGAAGAAGGGGTTGAATCGCAGGCTATTCTGGTAGCCGGAAGCGGAAGCGGCTGCATTTACGTTGA

>Cluster\_58991

ATGCGTTTTCAGTACACAGATGATGTACCAGCAAAACATGCGTGGTATCACCAATCTCAGGCAGAATGGATGAAGTACGG  
CGAACAGATGTCGACGGGTAAGCGAGTCTTAACCTTCTGACGATCCCATTTGCTGCATCACAGCCGTAGTTCTCTCCC  
AGGCACAGGCGCAAAACAGCCAGTACACGCTGGCGGCTACTTTCCGCACTCAAAAAGTGTACATGGAAGAGAGTACTT  
AGCCAGGTACCAGTGTATCCAGAATGCTCAGGAAAAAATTTGCTACGCCAGCAATGGCACCTTGGTGCAGATGACCG  
GGCCTCGCTGGCTACGGATATTCAGGGGCTTCGTGACCAAGTGTGAATCTGGCAAACACCCTGACGGTAACGGGCGCT  
ACATTTTTCGGCGTTATAAAACAGAGACTGCGCGTTTAGCGAAGAGAAAGGGAAATACGTCGGTGGAGCAGAAAGTATT  
AAACAACAGGTGCATGCTTCGCGTTCGATGGTATAGGCACACGGGTTGACAAAATTTTCGACAGTATACCAGCAACC  
GGTAGCGGAACAGACGGTAGCGCTTCTGAAACCAATCTTTTTGCCATGCTGGATAGTGCATCGCAGCCCTGAAAACGC  
CGTTCGCGGATAGCGAAGCGGATAAAGAAACCGCGCTGCGGCGTTAGATAAAACCAACCGCGGACTGAAAACCTCGCTG  
AACAAATGTGCTGACTGTTCCGCGGGAATTAGGCACGAGTGAACGAATGGAGTCCGCTGGATTCAATAGGTAGCGATCG  
CGCTTAGGGCAACAGCAGCAGATGAGCGATTTGGTTGACTGGACTGGAATGCAACTATTTACATCATGACGAGC  
AACGGCATTCGAGGCATCGATAAAGCATTACCAGATATGCAGGGATTGTCGCTTCTCCAGCTCAGCAATAA

>Cluster\_35

ATGACAGTGTTTAGTAAAGATGAAACCGGTATGCACTGGCAAATACATAAGACGGGGTAAAGCACTATAGAAAAGCAGA  
AAAAAAGGAGAAAGGTTGCCGGTAGCTGAGCTATAGGCCCTGACCCGCAATATCTATGCAGCCACAGCTCCTTTAC  
CTGAAGACATAGACGAGTTTTGTAGCAGGATTTTAAAGAGTCTCCGGTTGAACGGTAAATGTTGACTGTGCC  
CTTGAGGTGCTGCAGAAAGTACAGTCTTGAAGGATATGTAGAGCCCTCGAAAGAAAGGCTTGAAGGCCCTTTTGG  
AGATCATAGTGGTGTGACAAAAGAGTAAACGCTCAGAATTAAGTGAGGTGCTGTTTACATGTACGGCAACCA  
GAAAGGGATATCATGATAGTTAAAGGACCGGTTGATGCCCTTGACCATGCAAGCCCTTATCCAGCCTATGGGTCTAAGAT  
GTGTATCGATGCTACCAGAAAATGGAGAGAAGGGGATATTTAAGGGAATGGCAGAAAGGGGTTATGTCTGATGAAA  
TCAAAGCTAAGGTTGAAAAGGTTTGAAAAAATCGAGGAACAGATGAGGAGGTTAAATAA

>Cluster\_66779

ATGACAAACTTCACAACCAGCACCGCATGACGCATTATTTAAATCCTTTCTCACGCACCCTGACACCGCGGGGATTT  
TATGGAGATCCACTTACCCAAAGATTTACGTGAACTGTGCGATCTCGACAGCTTAAAACCTGGAATCCGCCAGCTTCGTCG  
ATGAAAAATTCGGGGCGTACACTCCGATATTTGTGGTTCGCTAAAGACCCGTAAGGTGATGGTTATATTTACGTAGTG  
ATTCACATCAGAGCCGCGGAGGATATCCATATGGCCTTTCCGCTGATGCGATATTCATGGCGGTGATGACAGCCCAT  
CGAGCATGATAAACCGCGCGCTACCGTGGTATCCGATGCTGTTTTATCACGGTAGCCGTATCCCTGTT  
CCCTGTGCTGGCTGGACGAATTTGCTGACCCGACACCGCACGGAAGCTTTATACCGCAGCGTCCCGCTGGTGGATGTC  
ACTGCTGTCGACGACGAGATTTGTGACGACCGCAGAGTGCCTGTTGGAGTTGATCCAAAAGCATATTCGCGACGG  
CGATCTGATGGGGCTTATCGATCAACTGGTAATATTACTGGTTACAGAGTGTGCTAATGACAGCCAGATAACTCGCTGT  
TAAATACATTTTACTGACTGGCGATGAAGCGGTTTTAAGAAGTTTATCAGCGAACTTACCCTCGAATGCCACACAC  
AGGGAGCGAATAATGACGATGCGAGCGAATTTATAATGATGATGGCTGTTGGGGATGGAAGGGGAAAGAAAGG  
GGAACAACGCTCCTAGATTGTTGTTGTCAGAAATGGGGCAGATCCTGAATGGATACAAAAGATTACCGGACTTTCGACAG  
AGCAAATGCAGGCATTAGAGCAGCCCTTGCTGAAATCAAGCGGATCCATGGATCGAATACTAA

>Cluster\_10628

ATGAAAACAGCAGATGCAGCGAAAGCCGCTGGCTGAAATATTAGAGCACTTCGGTCTGCGCCGATAACCGGAAAAA  
TCACTTCAAGGTTGAATGCCGGTATGCGGTGACGTTGCAAGTTCCGAATTGACGACCGCGAGGTCAGGAACTGGA  
TCTGTGTATGTGGTAGTGGCGATGTTGATGAAACTTGTACCCCTGACACAGGCGAAGCCATTTAACGAGATTTGTACCGAA  
ATAGACCGCTGATCGGTAATGATACCACGGGTTAAATCCCGGTAACAGCAGCGCCACCAGCTTACGCAACCGGT  
ATTTAGCAAGTTTTCAAACCTGGAGGCACTGCGTGGTACATCCGGCGCAGCGTATCTTAATTCGTTGGAATATTCAGTC  
TTCTGCTGAGGCGATCCGGTTCAATGCCAGGCAGAGACACAACGGGAGTGTGTTCCAGTCTCTTTATTCACCTTGTACG  
GACGATAAAGGGGAGTTGTGCTATCTGCACCAGACTCTGCTTGTGATGGTATGATAAAAAGCAGATATCGGTAGCAGTGCAAA  
GCGCCTCAAATCCCTGCAGGAAGATAACTATTTGGATCAGCTCGTTCGTAGCTATCCGATGTTCTCTGTCGCCAGCA  
CTCTGGGTATCGCGAAGGCATCGAAACAGCGCTGTGACGCGACCAGATTTATAACGTGAACACCTGGGCAACCATTAAC  
AGCGCTTTATGAAAAGTTTTCCGCTACAGCTGGTGTTCGACCTGATTAATTTTGGCGACCGTGCAGAGACAGCC  
CACCAGGCTGGCTGCGGCTTGCAGATGTGCTCATGCCAATCTGATGGCAAAGAAATGACCTGCAGCGCTGAGCGTGTACT  
GGCCGGATCACGATGATTTCAACAAATATGCTCATGAACGGTGTACAGTTCGAGAGCTGGTTTTCCATAGAAAAAGGGC  
GTTGCGTAA

>Cluster\_19908

ATGAGAACCGTAAACGGATGATTTTGTGCTGGCAGCTATCAGTATCACTTTTCCGCGCGTAAGTGGGGCTTATCATCT  
CGATATGCAGCAACTGCTGGCGCTCATTCTTCTGCAAGAAAATGTTCTGTGCAAGAAACAAATGCTTCTGGCAAATCC  
GCGTCCCGGTATTTCTGCTGCGTGTCTTGGCGCGCGCTGGCAGGGCGGAACCACTATCAGGGAATGTCCGT  
AATCCCTTAGTGTACCCGATATTTTAGCGCTCCTCCGCGGTGCCGACTTGGTGCCTGCGCGCAATCCTGTGGGAT  
ATCCATTTGTTACATCCAGCTGTACGCATTTTGGCGGGCTGATGGTGGTCCGCGGCTGCTGTTGATTACGCTGCGG  
TGACCCGCCAGATCCGATCTTAACCTGGTGTGTTAGGCAATGGCTTAGGCACGTTGTGCGGAGCGGGGATATCGCTA  
ATAAAAACGCTGGCCATCCTTACACCCAGTTACCGTCAATTAACCTTCTGGTTGCTGGGGGGCTGTCCACCCGACTT  
ACGCGATCTCTGCTATGCTGCACCGATCATTCTCATAGGCTCCTTGCCCTGTTTTTTCTCCGCTGGCGCATGAATTTAC  
TCACGCTTTCGAGCAGCAGGACCGCTTCCGCTGGGACTGAACGTGACACGCTCTGCGCTTGGATTGATTGTCTGCGCCACA  
CTCATCACCGCAGCAGGATAGCAATAGCGGCATAATTTGGTGGTGGGCTGGTCTGCTCCGCAATTCGCCGCTGTT  
GACCGTCAATAACCATCAGCAGCTGTTGCCCCATGGCAATGTGTACTGGCGCGATTTCTGCTCCTGCTTACCAGCTG  
CAGCAGCATTTGAAACAACAGAAATCCACTTGGCATTCTGACCGTTTTGTTGGCGCACCGTTTTCTCTGTTTTGTTG  
TTACCGGAGGTCGCCAGTGA

>Cluster\_8010

ATGACGCATATTCGGATCGAAAAAGGAACGGGTGGCTGGGGCGGCCGCTTGGAGTGAAGGCCAGCCGGGAAAAAAT  
CGTCTATATCACCGCGGTACCCGGCTGCGATTGTTGACAACTGGCACAGCTTACTGGCTGGCAGGCTATTGACGGAT  
TTAAAGAAAGTGAACCCGCGGAGGCGGAAATTTGGTGCAGCGGTAATCGACTGTGGCGGCACATACGCTGCGGATCTAT  
CCGAACAGCAGTATTTCCACCAATTAATATCCACTGCGCCGAAGTCCCGTCCGCTGGCGCAGTACTGTGGAAAGATAT  
TTATGTCTCTGGCGTAAAGAAGAAAACATCACTGTAGTAGGTGATGCGACACCACAACCCCTTCTCCGTGGGCGGTACT  
ATGACACCAGTAAGAAAATCACGAACAAGCGATGGTTTACTGGCGAAGGTGGGAATGGGCATGGGGTCCACCGTTGCG

GTGCTGTTTTCAATCTGGTCTGACACCATCGACTGTATTA AAAACCATTTCTGCCGTTTATGGCATTCTGCTCGGGCCT  
CATTGGCATCATTATGGCTTCTGGCCTTGGTGACTGGATTGCCACGGTCTTGCTCCGCTGGCGAGCCATCCACTGGGTC  
TGGTCATGCTGGCGCTCATCTGTTCCTTCCAC TGCTTTCACCTTTCCTCGGCCAGGCGCAGTTATCGCACAGGTTATC  
GGCTATTGATTGGCGTGAGATTGGTCTCGGCAATATTCGGCCGCATCTGGCTTTACCGGCACTGTTTGGCATAACCC  
GCAGCGGCTGGACTTTCATCCGCTCGGTTTGTCTGGCGGAAGCCGTCAGGACAGGTTCCGCTGGCTTCCCTT  
CTGTACTGGTGAGCCGCTTTTAAACCGCGCGACTGTACTGATCGCTGGTTGTCTCCGTTTTATCTATCAATAG

>Cluster\_232

ATGGTTGTACGCATTCTAACTGGTTAGGGGATGCCCTGATGGCAACCCCTGTTTACTACAACCTCAGTCAAAAAGACCAA  
AATCTATCTTTTTGGTCCACAACCTCTTGTAAACCTTTTTAAAGTTCTTCCCAAACGTAAGCCTTCTACCTTATGAAAAAG  
GTAACACCTCGCAAAAACCTTGAACCTCTAAAACCTTTAAAAACGAAACAGGGCTTCTTTTAAACCACTCTTTTTCTCA  
GCCTGGTTGTTTTTAGGCGAGGCTTAAAGAAAGATGGGGTTATGCCAAGGACTTAAAGAACTTTTTACTAACTAAGGC  
CATAAAACCACTAAACAAAAGCTCCATCAAAGGACTACTATCTATACCTTTAAAAACCTTGGGCTTCTCTGTGAGT  
ATAAAGACCTTGTCTTACCTCTGGGAGAAGAGGCTATCGAAAAAGCAAAAACCTCTTAAAACTACAGGAGAAAACTCC  
TTTTGTATCTTGCACCTGGTGCAGCCTATGGGCAAGCAAGATGTGGCTAAGGAATATTATAAGAGTCTTGCTCAAG  
GCTGGTTAAACAAGGGTTTGTGTGGTAATTGCAAGGTGGAGAAAAAGAAAGAGGTAGGTGAGTTTATCAAGAAAGATT  
TGCAAGGAGTATAACAACCTTTGTGGCAAACTGACTTAATAGCAGTTGCAGGCATGTTTGTGTAGCTAAAGCCGTTGGT  
TCTAACGACTCAGGCTTATGCACCTTGTGACGCTTAAAGGATACCTCAAGTTGCCATCTTTGGCTCAACAGATCCCCA  
AAAAACAGGGCTCTAAACCAAAGGCTATCGTATTACCCATAAAATACCTTGAATCCCTGTTTTAAAGAACCTGCC  
CGTATAACCACTATGAGTGTTTAAGATCTATTTAGTAGATGAGGTGTTAAAGCCTTAGATAAAATTTTTGGCATAAAA  
AATTAG

>Cluster\_58989

ATGATCAGCGACAGCAAACTACTGGCAAGTGGCGCTGGGATGCGCAATCACTCAACGAACTAAAGGCGAAAGCGGGCGA  
AGATCCCGCGGCAAAATATCCGTCGGTGGCCCGTCAGGTGGAAGGGATGTTCTGTCAGATGATGTTGAAAAGCATGGCG  
ACCGTTTTACCAAAAAGATGGCCTGTTAGCAGCGAGCACACTCGCTGTATACCCAGTATGTATGACAGCAGATGCCCCA  
CAGATGACGGCGGCAAAAGTCTGGGGCTTGCAGAGATGATGGTTAAACAGATGACGCCAGAACAACCTTGCAGAGGA  
GTCACCGCCAGCAGCACCATGAAATCCCGCTCGAACTGTGTGCGTTATCAAAAATCAGGCCTTTTCGAGCTGGTGC  
AAAAGCCGTCACGTAACCTACGATGATTCGTCGCGGTGACAGTAAAGCATTTCTCGCGCAACTCTCGCTGCCCGCC  
CAACTGGCAAGCCAGCAAGCGGTGTGCCACATCTTGCACCTCGCTCGCTCAGCGCGCATGGAATCTGGTTGGGGCAAC  
GCAAAATCCCGCGGCAAAAACGCGGAGCGAGCTATAACCTGTTTGGTGTCAAAGCCTCTGGCAACTGGAAGGGCCAGTTA  
CTGAAATCACCACGACTGAATATGAAAACGCGCAAGCGAAGAAAGTAAAGCGAAGTTTCGCGCTACAGCTCGTATCTG  
GAAGCCTTGTGGATTACGTTGGGCTGTAAACGCGTAACCCGCGCTACGCCGCGTGACGACCCGCGGAGTGGCGAACA  
GGGGCGCAGGCCCTACAGGACGCGGGCTATGCCACCGATCTCACTATGCCCCAAACTCACCAACATGATTGAGCAGGA  
TGAATCGATAAGCGACAAGGTGAGCAAAAACCTACAGTATGAACATTGATAATCTGTTCTGA

>Cluster\_21067

ATGGACATTGCAGTTATTGGTTCCAATATGGTGGATCTCATTACTTACACTAATCAGATGCCTAAAGAAGGAGAAACTCT  
GGAAGCACCTGCCTTCAAAATCGGATGTGGTGGAAAGTGTCTAATCAAGCGGTGGCGCGGCTAAATGAAATCAAAAAG  
TCCTGATGCTGACTAAAGTAGGTGATGATATTTTTGCGGATAACTACTATCTCGTAATCTCGAATCATGGGAATTAATACC  
ACTTATGTTGAGAAGTCCCTGTACCAGCAGTGGTGTGCACCGCTTTGTTAATGCAACTCGAGCAATAGTATATTT  
AATAATTAAGGGGAGCAATAAATTTCTTTCCCGGAAGATATCGATCGAGCTGAGAAAGATCTGAAAATGCAAAATGTA  
TCGTTTTTACAACCTGGAAGTTCAACTGGAACAGTTTACACCGGATGAGTTTGGTAAGAAAAATGGTATTGAAAGTTTA  
TTAAATCCGGCTCCGGCATTGCGTGAGTTAGATATGCTTATGCTGCAAAATGTGATTCTTTATCCCGAATGAAACAGA  
ACTGGAATATTAACCGGTATGTGCGTTGATACCTATGATCATATTCGTTTGGCCGACGTTCCGTTAGTTGATAAAGGGC  
TGAACAATATTTGTTACCATGAGCAAAAAGGGCATTATGATGACCCGCTATGAGTACAGGAAAGTCCATCTGCAATTC  
AAAGTAAATGCTGTTGATACTAGTGGCGTGGTACGCATTTATGGTTGCTTTTCCATTATATGTTCAAAGCGGTGA  
TGTGAAAGCCGCTTTGAAAAAGCCGCTCTTTGCGGCTTTCAGCGTACAGGAAAGGTACGCAATCATCTTATCCGA  
GTATTGAACAATTAATGAATTTTTAACCTTAAACGAATA

>Cluster\_20381

ATGATGAAAATAGAGCCTCAATTTTGCCTTCTCTTGCCTGGTTTGGCGTGATGTTCTGCTGGCAGTTTTTCCAGAGC  
CGCTTCTGAAATGGGTATTTACGCGGGCCGCAATTGTCCAGAAATTTAAATCTCTTGGAGAACGCTTAAACACCAAGCTGA  
TATACCGTACGACCCGCAATATGTCGCTTACTGAGGAAGGACAGCGCTGTATGAAAGTCTGGTGTGGCTTTGGGGCAA  
ATTGATGATGCTTTGAAAGATGTTGGTGATAACCAACTTGAACCTACAGGCCTGTTGAGAATAAATCTCCCGTGTTCG  
AGCAAGGATGCTTATTGAGCCTCATATTTGGCGAGTTTCTTACTCGTTACCCCAAAAACAAGATAGAATCATTATGGATG  
ACGGTTTTATCTAACATTTATGCGGACGGCTGTGATGTGGGCATACGCTTGGAGCAAGGACTGGATGAGCATATGACTGCC  
GTTCTGTTTCTCCGCTTATTAACCTGGTACTGTGGCATCGCCAGATTTTAAAAGAACACGGTATTTCTGAAACGCC  
TCAGGAACCTGAGTAAACCAATAATTTCTTCCGTTGCGGCATAAAAAGTAGCGGTGCACTCTCAGCATGGGAGTTTTGAAATG  
TTGTGGGGGTAATGAAGAGTTCGAAATAGAGGTGTGAGTAAAGTATAATTTCTAATGATGACGAAAGCATGATACGAATG  
GCGTGAATGGAACGGGTATCATTTCAACATCTGGATTTTGAATCGCTGAACATATCAATGCGGGCAAGTTACAGCCGAT  
TCTTGGAGATTGGCCGTTTCAATTTCTGGATTTTATATATATGTTTCAATCACGGGTGAGAATGCCCTTAAAGTTCTGTG  
CTTTTATTGATTTTATGGTGGAGAAAAGATAAAAATGAAAAGTTAA

>Cluster\_33979

ATGATCAAACAAGGACACTTAAACGTATCGTTACGGCGGGGTGTCGGTTTTACATACCGGCAAGAAAGTCACCCGTGAC  
GTTACGCCCTGCGCCGGCCAAACCCGGGTCACTATCTGCTCGCACCGACTTGAATCCACCGGTAGATTTCCCGCCGATG  
CCAAATCTGTGCGTGATAACCATGCTCTGTACGTGTCTGGTCAACGAGCATGATGTACGGATTTCAACCGTAGAGCACCTC  
AATGCTGCTCTCGCGGGCTTGGGCATCGATAACATTTGTTATCGAAGTTAACCGCCGGAATCCCGATCATGGACGGCAG  
CGCCGCTCCGTTTGTATACCTGCTGTCTGACGCCGTTGACGAGTTGAACTGCGCCAAAAAATTTGTTTCGATCAAAAG  
AGACTGTTCTGCTGCAAGATGGCGATAAGTGGGCTGAAATTTAAGCCGTACAATGGTTTTTCCGTTGATTTCCACCATCGAT  
TTTTAACCTCCGGCTATTGATTTCCAGCAACACGCGCTATGCGATGAACCTTCTCCGCTGATGCGTTTTATGCGCCAGATCAG  
CCGTGCGCTACGTTCCGTTTTCATGCGTGTATCGAATATCTGCACTCCCGTGGTTTGTGCTGGGCGCAGCTTCGATT  
GTGCCATCGTTGTTGACGATTATCGGCTACTGAACGAAGACGGCCTGCGTTTTGAAGCAAGTTTGTGCTCACAAAATG  
CTCGATGCCATCGGTGACTTGTTCATGCTGTGCTCAATATTTGTTGATGATTTTACCGCTTATAAATCCGGTCACTGACT  
GAATAACAACTGCTGACGGCTGCTTGGCGAAACAGGAAGCCTGGGAATATGTGACCTTCCAGGACGACGAGAATGCG  
CGTTGGCCTTCAAGCGCCTTACGCTGTACTGGCATAA

>Cluster\_20380

ATGAAAACCTGTTTTGATAAAAACACACTTACTGGGATATAGCTGCTGATATCTATTTCCCTGACGATTTTAAATAGTAAAA  
AAAGTATCTGCCATTATCAGTGCCCATCAATGGAAGCTGCAAGAACAAGACATCGGGTAGTGTGATGGTGGCGCC  
TGGCAAAAAGCTGGCTTTATCGTCAATTTGTTGATGCGAGTTTTCAGGGAAGCAGCGGTGGAGAACCGGTTATCTGGAA  
GATCAACAATCCGAGTAAAGACTTCAGCAATTTGCTGTTGATTTACCTTACCACCTTACCTTACGTTGATGTCGGGCTGAT  
TGGTGTACTGGGTATTTGTTGGTGGAGGTGGATATGCCATTAATGCCGCAATGACAGAACCTCGGATTAAGCCATGGTA  
CTGTCACGGGTGCAAACTACGGGCTCTTATGCGTGAGGGATTTACAGCGTTTTAATCTTATCGGAGCACTCGAAGCAATG

GCGCAACAAAGAACAGACGAAGCTAACGGCGCAAAACTTCGCGTAGATGATTTGCTCCCTTCTTCCGGAAGCAGCTCT  
TGAAGCGGGATTAACAGAAATAGACCTTTTGAAGCAACAGAAATATTCGTTTCGCCACGAGGCTGTGCGCTTAATGGGG  
TAAATCGTTCGCTATTTTCACATCAGACTGTTGCCGTTGGGCTGGGATGCTTTTCATCTTCGAGAGTCTGTTAACTCAA  
CCACTAATGGTTGAGTGGGCGATAGAGTGGGCGCTTTTGGTGCCATCGTGACGGCTGCGAAATATTTGGTCTGCAGC  
CTCAAACATAAAGAAGCTGGTCTGGTGAAGGTTATTACATACGACCTGTATGATAAGCCAGAACCTGTGAAACAGG  
CGCTCGATAAATTAATTCCTTTTACAAAACACATTTGATA

>Cluster\_23812

ATGCACATCTGGGGTTGGATATTGGTGGGACAAAATCGCGCCGTTGTTCATGGATGCGCATGGCTGGGAGATTGCGCG  
TTACCCGCTGCCCGACGCAAAAGTCGACATATCAACAATTTGTCTCATGCGTTGTGGCGCTTATCGAGCAGATTAGGCGGG  
ACGTTCAACGACCGATGCTGACAGGGATCGCCTTACCCGGCAGTATCTGCCACTCCTGCGCTGATTAACAAACGCGAAT  
ATTCAGGTGATTAACGGTACGCTTACAGGCTGATTTGCAGCAATGCTTGGGCAACCGGTGGTATAGCCAATGATGG  
TAACAGTTTCGCGCTATCAGAAGCTTGCAGCGTGGCGGGCAAGATTAAGCTGGTATTTGGTATTACGCTTGGTACGG  
GCTCGCGGCTGGCTGATGCTCAAGCAACGACCGTTTATAGGGGCTGGGAAATGCTGCCGAATGCCGATCATATCAGC  
TTGCCAGGCTATACGGAGCAGGAAGATGGTCCATCAGTCAGTTGCTATTGGCGCAACACAACGCGTGGAGTCTGTTGT  
TTCCGGCAGCGGTTTATGTAACGCTATCAACAGATGACTGGTAACTTCTCCTCGCGGATGTCACCCTGGCAC  
AACGTGGTATGCTTGTCCATGCAGCAGGTGGCAGCTTTTCGCCAACAGCTTGGCCGACGCTGGCAACCCTGTTAAC  
GTTGTTGACCTGGCTGATTTGTGATCGCGCGCGGCTTCTGAATGCGAACTGCTTATCACCGATGCAACGCAAGT  
CGCTCCACTGGTTTTACCGATCAATTCACCACCTCCATTTGATAAAGCACAGCAGCGGACAGTAGCGGAATGCGTGGCG  
CTGCTGGCTTGTATGCGCAACGGAGAAGCCAATGAAACGTTTCAAAATTA

>Cluster\_42141

ATGCTAAATAGCTGGCCTTAGCCAAAGACTTGCAGGTAAGTGGTGGAAATCGTCCATAGCGGGAGTTTTAGTGTGCAGC  
GGCGACGCTTGGGCAACGCGCTGCATTTGTACCAAGCGGATCCAATCCTTGAATAACGCTGGCAACAACCTGCTGA  
ACCGCTCCGCTCGCGGCTGGCGCTGACTGAAAGTGGCAGCGTGTGTTACGAACATGCGCTGGAAATCCTCACCAATAT  
CAGCGACTGCTCATGACTGACTGACCAAAACGCGCGGAGGGGATGATCCGCAATGGTTCAGTTTTGGTTTTGG  
GCGCAGCCATATTGCGCCAGCTATTACCGAACGTATGCGCAATATCCTGAGTTACAGGTGCATTTTGAATTTGTCGATC  
GACAAATGATTTAGTGCAGGATAACATGATCTGGATATTCGTATTAATGACGCAATTCCTGATATATATATGCGCAT  
CTTTTGACAAAAATAAAGAATATTATGCGCAGCACCTGAGTATCTGCAAAAATATCCGAGCCACAATCCTTACAGGA  
ATTAAGCTGCTCATGACTGCTGGTGGTACCAGGAGCGGATATGACCCAGGAAATGAGGAGTTGGGAAACGCTGAGAGA  
AAAAATCGGTGAAGGTAAGCGGACATCTTCTCCAATAGTGGTGAAGATTGTGCTGCAATGGGCGCTGGAAGGAAAAGGA  
ATTTAGTCTGCGTTCTGAGTGGGATGTGTGCGGTTTCTGGAGAGTGGCAAACTGGTGCAGATATGCGGGAGTATGCACA  
AAGCGCAATATCTGGGCTGTTTACCGGAGCGCTCTATCGCAGCATGAAATACGTGTCTGCGTGGAAATTTCTGGCGG  
CATGGTGCCAGCAACGGCTGGGCAAGCCGACGAAGGCTATCAGGTATGATA

>Cluster\_37996

ATGACTGAACAACAAATAGCCGAACCTAGCGCTGGCTGGAAAGTTTACGACCTAAAACCTCCCCCTCGCCTTTGCTGC  
AATATCGTCCGGACCGCTGGCATGGTGGCAAGGTCATTCGATCCGCTGGTCCGCTGCTGGCACTAATTACCGCCG  
GGCTATTACAGATCACTTTTAACTCGCAATGATTACGGCGATGCGGTAAAAGGCAGCGATAAACCTGACCGCATGGG  
CCGCTACGCGCATGCAAAAAGGGTCAATACCAGCAAGAGATGAAACGGGCGCTCATATTACCGTCTGCTCATCTG  
TCTCTCCGGGCTGGCCTGGTTGCACTGGCATGCCATACGCTGGCCGATTTTGTGCGTTTCTGATTTCTGGCGGGTTGT  
CGATCATGGCCGCTACCTACACCTACCGTGGCAATCGTCTTATGTTATATCGGCTCTGGGTGATATTTCCGTAAGGTT  
TTCTTTGGTGGTTGAGTGTCTATGGGAGCTGGTATTTACAGGCTCATAACATTCGCGACTTCCGGCACTGATCCTTCCGGCAG  
CGCATGCGGCTGCTGGCAACGGAGTACTGAATATTAATAACCTGCGTGATATCAATAGCGACCGCAAAATGGCAAAA  
ACACGCTGGTGGTGGCTTAGGTGAAGTGAACGCGCTGTTATCATGCTGCTGCTGCTGATGGGCTCGTGGTGTGCTG  
GCGTGTTTAATCTCTTTTCGCTGCATAGCTGTGGGCTGGCTGTTCTGCTGGCGGACCATTACCTGGTGAAGCAAGC  
CCGTTATGTGATGCGGAAATGGACCGGCTGGCGATGCGACCAATGCTGGAACGTAAGTGTCAAGGAGCGTTACTGACTA  
ACCTGCTGTTGTTTAGGGATATTCCTAAGCCAGTGGCAGCATA

>Cluster\_48149

ATGCCATATCGTGTGCCGACGAGCTACCCGCGTCAATTTCTGCGTGAAGAAAACGCTTTTGTGATGACAACCTCTCG  
TGGCTCTGGTCAGGAAATTCGTCACCTTAAGGTTCTGATCCTTAACCTGATGCCGAAGAAGATTGAAACTGAAAATCAGT  
TTCTGCGCTGCTTTCAAACCTCACTTTTCAGGTCGATATTCAGCTGTGCGCATCGATTCCCGTGAATCGCGCAACACG  
CCCCAGAGCATGCAACAACCTTACTGTAACTTGAAGATATTCAGGAACAGAACCTTGGAGGCTGATTTGTAACCGG  
TGGCGGCTGGGCTGGTGGAGTTAATGATGCTGCTTACGCGCAGATCAACAGGTGCTGGAGTGGTCCGAAAGATC  
ACGTCACCTCGACGCTGTTTGTCTGCTGGGCGTACAGGCGCGCTCAATATCCTCTACGGCATTCCTAAGCAAACTCGC  
ACCGACAACTCTCTGGCCTTACGAGCATCATATTCCTCATCTCATGCGCTTCTGACGCGTGGCTTGGATGATTCATT  
CCTGGCACCATTCGCGCTATGCTGACTTCCGGCAGCTGATTCGTTACACCGATCTGGAATTTCTGGCAGAGA  
CGGAAGAAGGGGATGATATCTGTTTGGCAGCAAGATGAGCGCATTTGCTGACGGGCTATCCGAAATATGATGCG  
CAAACGCTGGCGCAGGAATATTTCCGCGATGTGGAAGCGGACTAGGCCCGGAAGTACCGTATAACTATTTCCCGCACA  
TGATCCGCAAAATACACCGGAGCGAGCTGGCGTAGTCAGGTAATTTGCTGTTTACCAACTGGCTCAACTATACGTTCT  
ATCAGATCAGCCATACGATCTACGGCAGATGAATCCAACGCTGGATTA

>Cluster\_22846

ATGGGTCTGTTCAATTTTGTGAAAGATGCGGAGAAAACTCTGGGACGCGTTACAGGTCAGCACGATAAAGACGATCA  
GGCAAGAAGGTGACGAGCATCTGAACAAAACCGGTATACCTGATGCCGATAAAGTGAACATCAAAATGCGGACGGCA  
AAGCAGCGTCACTGGTACGCGTTAAGTCAGGAGGCGAAGGAGAAAACTCTGTTGCGGTGGGGAATATTTCCGTTAT  
GCCAGTGTGATGATCAGGTGAAAACGGCGACACCAGCCACTGCCAGCGATTTTATACCGTTAAGTCTGGCGACACTCT  
GAGTGCATTTCCAAACAGGCTACGCTAACGCTAATCTGTACATAAAATCTTGAAGCGAATAAACCGATGTAATA  
GCCCGGATAAAATTTACCGGGGCAAGTGTGCGTATTCCTGAAGAGTAG

>Cluster\_11727

ATGTTAGTCTGGTGGCGAGTTGGAGCGGTGTTATTGGTGGTGGTATAGTAATATAACAACATCGCGAGGCTGTTGGGGA  
TGGGATGAGAAAAGTATGGAGATGCGGGGTGAAGCGAATATTAATGACAAAGTCAAATGGAATTTCTGGCGAGAAC  
CCTATGGTGTCTTTTCCAGCGTGTGGAAATGATGATTCATAAAGAGAATCCAAATGTCGGAAGGATTTGACGGAT  
GAAGCAAGAAGACTGTTTGGCAGTGGCAGTACAGGAGGTTTCCGGAGGTTGGGAGCCAGATGAGGATGGCGAAATAAGAAA  
TACCTACAGGCTATTAAGGATGCTCCTCAGTATCCAGAGGGTTAGGAATGTCAAAATGGCACTACAAGGAATGTTG  
TAAAGGATCAGCAGTTATGAAACAATACGTAAGTAGATTCAGGAAAATAG

>Cluster\_61756

ATGGCAGCTCTTACTGCAAGCTGTATTGACCTGAATATTCAGGCAATGGCGCTTATTCGGTTCTGAAGCAGTTGGCGAC  
AATAGCGTTACAAAACGGTTTTATCACCGACTCACACCAGTTCCTGCAAAACCTGCTGCTGCGGAAAAAATGCACTCTA  
CTGGATTTGGTTCCGGTGTGCGGCTGCCGACGGTAAAAGCGCTGCGTTAAACAACCGTTCGTATTTTCCGCGCAAA  
CGCAGGCTATTGACTGGAAGCGCAGGATGGCGAAGCAGTCAATTTGCTGGATCTGCGGCTGCGCGTCCGCAAGCGGCA  
AGAGGATCAGGTCAAATCATCGCACACTGTGTCGCAAAATTTATCAAGGAATTTATTCATCAACTGCAACGAGGGCG  
ATACCGACAGGTTGCTTGGCTTAAATCAAACCTCAGCTCATA

>Cluster\_63761  
ATGATGAAATATTTGATGGTTTTATTGTCTCTATTTTCGTTTTCGGTACTGGGGATGGGGCGAGTGAATGAATGTGTGG  
AATAGATAGCGTGA AACGATAGAGATAATTAATCTTCCATCGTATGTTACCAGGTTAGTTCGCTTAGCAAGGAAGGTC  
TTAATGAAATATACAGATATAAAGTGGTGGTGAATGAAATGACGATCTTTATGCTGGTAAGATAATTTGATTTATGCAA  
ATGAAGTATTTTCAGAAAAGAAAATAAACAATAAAGATGGGGGTTAGTATCATTTTCGAAAAGTAATAAATATGTGA  
AATTTATTTTGTGCTTTTGGTGAATGTGGAAGTGTGAATGGCATTAACTGTGTTTTGAAAAAATGAAATGATAGGTT  
GGATTA AAAAAGAAATCCCTTTGCTGTGCGAAAAAATAGTGGGCTTTAA

>Cluster\_60538  
ATGACAACACAGACAGTACGACTCGTACCCGCTAACGGATCCGAATTTGAGTTGAGCGTAACGCAGGTACCCGATGA  
ACAGCATATCCGCTTCTGGCCGACGACTTTGGCACCATCCCGCAGTGGATAACGCTGGAACCGCGCATTTTCGCTGGA  
TGGACCGCTTCTGTGATGAGTACGCGGGGTTACTGGTCTTTTACACGCTCAGCAATGGCGGAGCGCTTTATGGCTCT  
GATGCTGACGGTGACGATAAATGGCATTGTCTCAACGGCATGAATGGCAATGGTGGGAAATGAGCGCGAAGCCGAGG  
TATCGCTGTCTGCCGTGATGAAATATAGCCATCACGCCCTGCCTCACCGAATGCGATGCCATGACGGAGCACTATTACC  
TGGCGGATTACGCTCTGCAGCACCTGAATCCAGCGCCATTATGCGCATTATTGATTA

>Cluster\_4157  
ATGAACGAACATCATCAACCTTTTGAAGAAATACGGCATTATGGCACTGAAGGGCAAGAAATTTGGTCAGCTAGAGAAT  
GGCACCGTTACTGGATTATCGGGACTGGCGCAATTTTCAAAGTACTGGCCCGCGACTCAAGCGTCCGAAGCCAGCA  
ATCAAGCTGCATCTGACCATTTCTGTGAAACCACAAAATGGTGTATTTAGGTTACAGGGCTCAACGAGAATTTGAAGAT  
GTTTCATCTCTCCGCTATGCTGTACCTGGTAGTACAAAACGGCGACCTTGCAGAACCGGCTATTGGCGCAGGGCAGAC  
TTATTTGCTATCCAGACCCGACGGCAGGAGCTTGTGCTGACGATGAAGCATTAAAGCAACTTCGTGAAGACGAAAAGCGTC  
TGTTTCTGAGAAATGAGTTGAAAGAACAATAACAAAATTTGGTTGAGGCGACAGTAA

>Cluster\_50613  
ATGACGGAGTATTTCTCAATGAAACTGTTGTAACCTTTCCCGGGAATATTATTCAGGACAGTACGATTAATATGCTGCG  
CCTCAGCGATCCCGACGCTGCACCTATTATCAGCGGGGCGAGATGCAGGAAGGAGACGACTTAACCTCCAGATTTGAA  
AGCAAAATGAAAAAATGGAGAAACAGGTAAGGATCTTCACTACACGCCGCTTACAGTAACACGGGTGGGGATTAATGAT  
GGTGAAGAAAGGGCTGAAATACAGAGCCAGTTTCTCGGGTAAACGAGCAGGTGATCCAGTGTGAGGTGGCATTTGTATT  
GCCGGGTGAGCGGGTATGATGGCTTACCTATGCCCCGAACACACCCTGACCTGGCAGATATGACGCGCTGGGCTG  
AAATTA AAAAAGAAATCTGCCCTTACAGGATGCGGCAGGAAGCCGGGACGAATTA

>Cluster\_34124  
ATGAGCGAAAAATACATCGTACCTGGGACATGTTGCAGATCCATGCACGTAACCTCGCAAGCCGACTGATGCCTTCTGA  
ACAATGGAAGGCATTTATGCGGTAAGCCGTGGCGGCTGTTACCGGGTGCCTTACTGGCGGTGAACGGGTATTCGTC  
ATGTCGATACCGTTGTGATTTCCAGCTACGATCACGACAAACGCGCGAGCTTAAAGTCTGAAACCGCGCAGAAAGCGAT  
GGCGAAGGCTTACGTTATTGATGACCTGGTGGATACCGGTGGTACTGCGGTTGCGATTTCGTGAAATGTATCCAAAAGC  
GCATTTGTCACCATCTTCGCAAAACCGGCTGGTCTGCTGCTGTTGATGACTATGTTGTTGATATCCCGCAAGATACCT  
GGATTGAACAGCCGTGGGATATGGGCGTCTATTCGCTCCGCCAATCTCCGGTCTGCTAA

>Cluster\_24225  
ATGGTTATTAGTATTCGCCGCTCACGGCATGAGGAAGGGGAGGAACTCGTTGCGATTTGGTGTGCTTCTGTCGATGCCAC  
TCACGATTTTTATCAGGAGAGTATCGGGCCGAGCTGGAAGAGCTGGTGCATTTCTTCTGCCGAAGCACCGTTGTGGG  
TCGCGGTTAATGAGCGGATCAGCCGTTGGGTTTATGTTGTTAAGTGGGAGCATATGGATGCGCTTTTGTGTCGATCCT  
GATCGCGCGGTTTGTGGCTGGGCGGATGCTGGTGAACATGCGCTCTCGATGGCAGGAACTGACAAACAAATGTTAA  
TGAGCAAAATAAGCAGGCTGTTGGGTTCTATAAGAAGATGGGTTTAAAGTTACGGGACGCTCTGAGGTGGACGATTTGG  
GAAACCGTATCCGTTGCTGAATCTGGCATATGTTGGGGCGTGA

>Cluster\_23982  
ATGACAGCACAGATAGCGGCTTACGGGCGGCTGGTGGCTGACCCGAGTTAAAGACCACCAGCAAGGGACACAAATGGC  
GATGGCGAGTATGGCGGTTCCCTGCGCATGCAGCCAGGAGATGACGGAACCGCGACGATGTGTTATCTGTCTGGCCT  
TTGGCAGACAGGCCGACGACTGGCAAAACACCACAAAGGCGAAGTGGTGGGCTGGCGGTAACATGCAAGGTGAGCCAG  
TGGACAGGCCAGAACCGGGGAAACGACGCGGGGCTGGCAGGTTATGTCAGACAGCGTAATCAGTCCGCGAACCGCGCAGC  
GGGCGCAAAAAGGTTCAACAGGGCCAGGCCACTGACGCACTGAAACAGGGCAAAAACACAGACAAGCCAGCACGATGACC  
CGTACGGGATAACATACCGTTTTAA

>Cluster\_24863  
ATGAAAATACCAACTCATTTAAAACATAAGCCTGTAATCAAGTTGAAAACTATGACCGCATAGATGGTCCATATGCAGA  
AGATACAGATGCCATGGGACTATCCGTTGGTATGCTCAATGGAACACTCCAGGATGGACAGAGCTTTTCGGCAAGGTTT  
GGCGAAATACCGCGGAAAAGTGGTCTCGGCAGTCTGAGAGCTTCCACTTACCGCGTAAATAGACCTTCTACTCTGATC  
TGCAATAACGATGGATTACAGCAAAAATGGGCGGTTATCATCTAGTGTGATGATTTCCCGTCACTGCTTCTCAGACAACA  
AGAACTCGTCTATCACACTGAGCTCATGAAAAAAGAACTAAAAGAAAACAGGAATACCTCGATGAGAGCTTAAAACGCT  
TGTCGGCTGAGTTGAAACGCTTTGGTTACTAA

>Cluster\_26141  
ATGGCAAAAGTATTTACACAAGAAGAGCGGAAAAAATTAAGGGCAGGTTGTTGAGCTAGTACGCCGAGTGGGCGCGA  
GACGTTACGCAACTGGAAGCCAAGACAGGTGCGACAAGATATCTGATGAGTGTCTCGCCAGAGAGCTGGTTGCCAGTG  
GCGATGTATACAACCTCTGGTTACGGGTTATTCGCTGTAACAGGCGGTAAGGACTGGCAAAACCGCCGCAAAAACCTC  
TCAAGGGCAAAATCTGAAGAAACCATCTGTGGTTGATCTGACCTTATCTGGCCATTACAGACGGAGAAAATACGCCGTA  
CGACAGGCTCAAAAACATAATCTGTAGCGAGTCCGGAAGAGCGAAGCTATGCAGCGTGTACTGGCTTCTATCAGGGTA  
ATTTTCAGAAGGTGCTGTTGTGA

>Cluster\_24475  
ATGCAAGAAAGCATCAAAAACCGCCTGAGTCACTTTGCGGAACACGATGCGATCACCTGTGCAAAAATGCCAGAAGTGA  
GCATCAAAAACAGGACGCAAGCACGTTGAAAGTGAAGAAATTCGACTTTCAGAAAATCCCTCGCATCTCCTGTCAAAAAG  
AAGGATTTGCGATGTATATCGGAAAGACCGTTGATGCCATCGTAAGCATGGCAAAAGCAGGAAAGCTACCTGCGGTTGAT  
ATGGCGGACCCCTCAAGCCAGGCGGAAACGCTGAACTTACATCAACAGAAAAGCGTGGGATGAAGCATGCGATCGCCT  
CATCGAAAACGCACCTCAGGAATGGCAGCACTGGGAAAACCGTCTGTTTTGTTTAAAGCAACAAGTGGCAGACGAAACA  
GAAATATCAGCGGTAAGCAGCATAA

>Cluster\_125  
ATGATAAAGGAAGTAAGTCTGAAAGGTTTTTTGGTGGGACAGAGATTAATCCTTGGGCTGGTGGTTGTTGCGACGAT  
TTTTATCCATTTAGTATGGGGTGGTTTGGTGGAAACTTTTTCTTCTTGGCAGGTTGGGATTTTAGGTTTCTAAACTTCA  
GGACCACAAAAGAAAGGAGGATGACTTTTGTAAAAAATTAAGGAAATCAGGAAATCTTTGCTTACAGACCAGAAAATCTATAAC  
AAAGAGCGCCACGCTACATAGCAAAGATTTATCTTAAACTTTTGGCAACTGCCATAGTGGTTTATTTTTGATAGCCCA  
TCTTGGGGCTCACCTGTTTTTTTTGATTTCTGCGTTTTGGTTTTGTTTATCTTAGCCTTACGGTTTATAGTTTTATCAAGT  
TTTTCTGTTTTATGAAAAAGAAAAAAGAAATTAACCTAG

>Cluster\_52957  
ATGGCAGATATCACTCTTATCAGCGCAGCACCTCGGGGTCGCAATATGTAGCAGAACACCTGGCTGAAAAGCTGGA

AGAGGCGGGTTTTACCACCGAAACGCTGCACGGTCCGCTGTTAGAAAGATTTATCTGCCTCGGGATCTGGCTGGTTATCA  
GCTCAACCCACGGTGCAGGAGATATCCGGACAACCTTTCTCCTTTCTATGAAGCATTGCAGGAACAGAGCCCGATCTT  
TCTGCGGTCCGCTTTGGCGCAATAGGTATTTGGTAGTCGTGAATATGACACCTTTGTGGGGCTATCGATAAACTCGAGGC  
AGAACTCAAAAAATCCCGTGCAGAAACAGACAGGCGAAACACTGAAGATCAACATTTCTTATCAGACATTCGGGAAGATC  
CAGCAGAAGAATGGCTGGATCGTGGATTAATTTACTCAATAA

>Cluster\_48823

GTGAAAGGGATCCCCCTGAAACTGGTACGTCAGCGTGTCCGGTGTAAAGCCAGTCCGTCAGGAAAAATGACGGCCAG  
GATCCGCGTTAACCGGGGCAATCTGCCGCCATCAAACGAAACAACACGGCGGGCTGCTGGTGAAGGACTGAGAGTGG  
GAAAAACCTTTTCCGGGGGCATTTGTTTCAGCAACTGGCGAAATGGCCGCTGGCATGTTCTGAGCGCTTCCCTGAAGCG  
CGTTTTGCAACAGGGCATGACTATCAGGGCAGGCCAAGGAAAAATCGTCTTCCGTGGAGGTAGTGAAAAATCCCGCTGTC  
CGGACCGTGCACAGGCATTTGAAGATGCCCGGACCGCATCATTTGCTGCGGAAATGCCGAAACAGCTGGGGTATGCAC  
TGAACAACAACCTGAGATTATGGCTGACCCGATGA

>Cluster\_2742

ATGTCTACCTATTTCTTTTATGGATGTCACTGCGACGCTGACGGGGCCGACAGGTTGATTTGACCTCGGGTACGGTTCCGGC  
AAGTTCTGAAGAGGGGATTTGTTGGTTCGATGGGCGGTCTAAAAACACCATGACCATCCGTTGCTGATGGCGAAGTGTATGC  
ACAGTCTCCATGCAGATAAAAGCGGGGACGATTACCGTTAACCTTCTGAAGACATCACCACAAATAAAAAATTTGTCGCTG  
CGGTATAACGCACAGAGCGAGCTTCTGCCACATGGGGGAATAACGTTTATCGTATCCGCAACAGGCTCAGCGGCAGCAT  
CATCAGGCACGCAGTGTTCGTTCCAGAAACAACCGGATAACGCCAACGCTAAAACCGGTAATACGATGCCGTGGTGT  
TTGACTGCGGCAAGATTGACCAGGTTCTCGGGGAGTTTAA

>Cluster\_66963

ATGAAAAAATCAAGAGCATTGCTCTTTCAACAATTGCTGTGGCATTGTTTGGTTTCAGCCGCGATGGCAATGCTGCTGA  
TTTAAACAGCAATACGTCGGTTACGACAACAGTTTCAGGAACGTAGCGGTTTTACAGCGTCTATAATGAAATTCGTTCAA  
TTAAGGAAACAGATTTAAAGAAAAATCGTTAAATTTGGTGGATTTACCTGAAATGGGATGACAGTGGTAAATCTCACTATA  
AGGAATCTAGAGTTTACTGATCCCAATAGAGGTGATGGTATTTTACCTTCCCTGAAAGGAAATTCATTCAGGC  
ATCTATTTACGGTGTGAAGATTAATGGTAAACATCCCTCAACCGTGGCTAGCCGACCATATATCCAATGGTCTAAATTTA  
CAGTAAGTACAGATTTCAACGACAGATTAGTTCAGGTCGTTATCTGACGTTATTACTGTTATCTGAAACGGCAATAA

>Cluster\_51776

ATGGAAGAACTTCACTTTGTTTACATCAATGCAAAATGGTTCGATGCTGTTCACTCTATACAGAGCATCAGTTATAGCGA  
AAATCATATACAGGGCATTGTAAGAACACCGATCGAATAAAAACCTTCCGAAAAGACCGCATTTTAAACAGTACGATT  
CACCAGAACAGGCATTCAGGAATGCGCGTCATTCCTCCCGAAAGCTACTCACATCTCACTAAGCAGTCTGGTCCGAAA  
AAAAATACATTCGATGTGTGTTTACCAGGATTTAAGAAAGCAGATAAAGAAAGATTTGGTTGATAAGGCGAATGAACAAG  
ATTAACCGTAAGAACCTCTATAACCCAAAGCCTTCAGATGCTCTGTTGCGGTTACAATGCAGGCCCATCAAAAGTATCCG  
CAGCCAGGATGAAGGCACAATCATATAGATGAGCCTGGCTTTATACATTTTCTTGAACGGGTGAGATCCAGATGAA  
TAA

>Cluster\_43454

ATGGGTGTGATCGAATTTCTGTTAGCGTTGGCGCAGGATATGATCCTCGCCGCCATTCCAGCGGTCCGGCTTTGCAATGGT  
GTTCAACGTTCCCGTTCCGGCGTTACGCTGGTGTGCGCTGCTTGGCTCGATAGGTCATGGTCCCGAATGATCTTAATGA  
CCAGCGGGCTGAATATTAGTGGTCAACTTTTTATGGCTTCTATCTGGTCCGACCATTTGGTATTTCAATGGTCCGCGCTG  
TATCTGGCGCATCCGAAAGTGTTTACCGTGGCGGCTGTATCCCTATGTTCCCTGGCATATCAGCTTATACCGCAATGAT  
TTCCGGCGTAAAAATCAGCCAGCTAGGTTACAGCGAACCTTGTATGATTTACCTGTTAACCAACTTTCTTACAGCTTTCAT  
CGATTGTTGGTGCCTTATCCATCGGCTTTCCATTCCTGGATTATGGTGTACCGCAAGCGCCCTCGCGTATAA

>Cluster\_33810

ATGCGTCTTTTGGCAAAGTGGCAGAATTTAGTGTGCTTTCGCGCTATTCGTTCTGGTGTGGTGACAAATGGAGCGGT  
ATTTATGCGTTATTTTCATCGCCAACCGCTTCAATGGACAGAAGAAATGTCGGGAATGCTGATGATTTGGGTGGTGTGAT  
TAGGTGGAGTGGTGGCAGAACGTGACAGGGCGCACCTGACCATTCCCTTCCCTGATGGAGATGCTTCCAGGCAAACTCAGG  
CGTGTATTTGCAGTACTGGTCCGCTTCTCTCCATCGCATGCTGCTTTATATGGCTGGCTGGGCTACCGACTAGCCGA  
AATGGCGCAAGTTTAAAGTACACAAATTTGAAAGGTTTCTGGTTCGATGATCTGCGGCTCCCTGCGGCAAGCGACTGG  
CAACGGCTATTTATACCTCTACTGGTTAATAAACGATACAAAACAATCCGATAGCGGAGACAAAATGCAATGA

>Cluster\_43326

ATGGGTAAAAAACAGCACCGTTACTCCCTTATACGAATCAGATGCTTAGTGAATTTGGTGGAGCGGCTGAAACTTGTCTG  
TTTACGACGACAGGCTTACCGCAAAGCAAGTTGCTGAACGCTGCTGGGATGTCGCAATAACATTGCGCTCTCTGGAGTCAG  
GAAGTGCAGGGGTCAGATAGGGGCATATTTGCTGTGATGCAGGTTTTGGGCTGGAAACGGATTTAAATAAGCTTGC  
GCTGAAGACGACTTAGGGCGTCACTCCAGGATTCCTGTTGATTAAGAAAGAGGGCTTTCTCGTTCATCAGTAAAAA  
TGAAGAAGGATTTACAGACAGACCTTTTCAAACGAGGTATGAGAAAGAAGGTTTACTCACACGGATTTAACAGCACTGG  
CAGAAGGCTCAACGCCATCTATTACAGGAGAAACATCAACCTCTCTTGCAGCACTATTAAAACCGATAAAAAAACCGTTA  
AAAGGAAATTA

>Cluster\_5783

ATGAAGACCAACAGGAGTCTGGTGTCTAGTGTCACTAATTACCGCCACATTACTGCTGACTGCATGGCCCAACCTGA  
ACAAATCATATTAGCTGGCGACTGGTTACTGACCCCTAAAGATAAAAACAGAGGATTAACGGGTAGCATTTGCGGTAAAAA  
TTGCACCTTTCCGGTGTAAAGACAAATGCGGTGGTGTAACTTACCTGATAATACCCCGCGTGGCAGTTGTACAGCGGG  
AACGAAAAAGAACTTACTTATCTTACATAATATGTCAGCACAAGAAAAGGTCGGTTAAATCCCGTTGGCAATGCTACAC  
CTCATTTTTTATGCGGGTTGCGAGGCAAGCCGCGACTCGACCATGATCAATGAGGATTAATGTCAGCAGAAAGCGGAT  
TTTTTGGCTCGATGATGATGCTGGGATTTAGTGTACGACGCTGCCAGTACAGAAAATGCCAGCAAGAATTTGAAAGCG  
ATAAATACACATTA

>Cluster\_52204

ATGCGAACACTCACTCATATTTCTAATAAGATCCTTGCAGGATGTTGCTGCATATTTTCGCCATTATGGTGTCTGCGT  
AACCTGGCAAGTTATGACAGTTTTATTTTTAACGCTCCAGCACTGTGCTTGTGATGAGTTACCAAAAATTTTTATTTATGT  
GGATGATTTTACTTGGCGGTGTATATATGCGGGGTTAAAAAACATCTGGCCATTGATTTGTGGCTCAAAAACCTCTCT  
GCTGCATCTGTTTGCAGCTTGCAGTTTTATCCAAATATCAATTACGGTCTTTGCGGTTATTTTCATGATCTATGGTGG  
GAATATGTTGTTGAAAAAGCACACATGTTGGCAAAATCTCCAGATTAATAAATGGCAATGGATAAAGTATTTGGG  
TTATGCTGTGATGAGGCTTATTTCTGGTCTGGTATTAGTAAATGAATAATTATTGACAACTATCGTAAACGGAAATCTCAT  
TAA

>Cluster\_21774

ATGATGATGATCTACGGCATGTTTGTGTTTTGAGCTGCGCACGCTGCCGCATCAGCAGTTACAGCAAAAACAAAGCTGGCG  
GCATGTGAAAAATGAGCGGTTAACCGTTCAGCAAGCTGGCAGTATATCGGTGCAGGTGATGATCGCATGTTCTTCTG  
GTGTGCTTTATCTGAAATTTACAGGTGGCGAAGTGTGCTGTGCTGCTGACCCAGCAGGCGTATACAGGACGACCTGG  
CCTTTGATTTGATGGCGTGGGCGAGATTTACGGCATGTATGCTCCGACCGGAACGAATACGACCCGCTTCCAGTTTGTATCG  
CTACGGTAAGCGGAAAAAGATAGAAATTTCACTGACCCTTGAACGCTGTGATGAGGATTTGCGGGAGCGCCTGCAATCT  
CATCGTTCAGCATATGCTGTCGGCTTCAAAGATAAAGTACATCATCCCTTACAGCGCGGCGAGTTCAAGTTAAAGG

CTGTTCTGA

>Cluster\_48639

ATGGGTCGAAATACGATGCGCATCAGTTCAAACGTGCGGGGAATAGACTCAACAACAGCCAGAAAGCATTTAAGCGATA  
TCATTATTCGGGACATGGAAAAGCTGGCGCGTTTTGGTTGAGCGTCTCAGCCGTGCAATGGCCCCCTGGAAAACCGGATCTC  
TGGAGACAGCCATTTTGGCAGGGTGATTAAGAAGGTTATTCAGGGCTGCGTATTGAGCTTTCTGTGTGGAGCAAAA  
CCACGTGAGGGGATCCGGGGCTAGAAGTAGGTGACTATGCTAAGTACATGGAGCTGGGTAATAACCGACTCGGTTATCT  
TTCFCGAAATGAAGAACGTGACAAACCCACCAATTCGCCGTGTTAAACCCGTGTTGGGCCACACTTTCGAAAGAGCGG  
TGGAAATAGCGAGAAGCAGTTCTCAGAAGCGATTCTTGGAGCTGCCAGAAAAGCCGGATTTACGAGAGGTTAA

>Cluster\_24841

ATGAGTAGAGTAACGCGATTCTGTCTCTCTGGTTATCTGCACCATCGTCTGCCTATCATGGGCTGTTAATCATTATCG  
TGATAACGCCATCGCCTACAAGAAGCAGCGCGATAAAGCGAAGGAAAACTCAGCCAGCGCAACGCCACCATTACTGAGA  
TGCAGCAGCGCCAGCGTGATGTTTCTGCGCTCGATGCGAAATACACCGGAGAACTTGCAATGCTAAAGCAACTATTGAA  
CAGCTTCAGCGTGATGTTTGTCTGTGGCACTAAGCGGCTGTTCCFCGCCGTAGTTGCCCGAGAGTGCAATCAACGACCAT  
TACCACCAGCCTGGATGATGCTACCGCCCCCGACTTACTGACACCGCTCAACGGGATTAATTTACCCCTCAGAGAGAGAA  
TTGAAATCAGTTATAACAGATAAGAGCATTGCAGGACTATATCTCTAGTCAGTGTGAAAAATA

>Cluster\_40816

ATGAACGTTCTGCCCTCTTGATGCGGTAAGCTGCGCGGTTACGCGAGAAGCTGCCGCAACTGCAGGTGGAGTACTTCCC  
GGAGAAACCGGCTGAATATCGCCTGAACCATCCGGTTGGCGGTTGCTGCTGAGCTATGCCGGTTCGCGCTTTGACAGGC  
CGGATGATACCGGTGCGGTGATCCAGTCTCAGACTATCCAGCTCTGCGTCACGGTGGTCTTCCGCCAGCTCAACGGTAAA  
AAAGGGCGGATTAATGTTCTTGGATGCTGTCGCCCGCATTTCTCGGTGGCCACACCCCGCGGCTGCCCGCGGATCTG  
GCTGACCCGCGAGTGTTTATCGGTGAAGTACAGGGGCTGTGGCAATACGCCCTCGACTTTCGCGACTGAAAGCATCTTTA  
TCGAAGACAGGATTTACCGTCCGGCCCGCTGTTAACGAAGTGAATATGAGGAAAGCGAGTGA

>Cluster\_35206

ATGTTTAAACCGCAGTTACCGTTGCTTGGTGGTGCACGCGAGAAGGCAAAATTTTAGTCGTTGAAGAGACGATTAATGG  
TAAAGCGTTATGGAACCAACCTGCCGGGCATCTGGAAGCCGATGAAACCTTAGTGAAGCGCCGCGCCGTTGAACTGTGGG  
AAGAAACCGGCATCAGCGCGCAGCCGCAACACTTTATTTCGTATGCATCAGTGGATTGCCCCAGATAAAACGCCGTTTTTG  
CGTTTCTCTTTGCCATTGAGCTTGAGCAAAATATGCCCGACCCAGCCTCATGACAGCGATATCGACTGCTGCCGTTGGGT  
CAGCGCCGAAAGAAATTTTACAGCGCTCAAATCTTCGTTCCGCCGTGGTGGCGGAAAGTATTCTGTTGTTATCAAAGCGGGC  
AACGTTATCCGCTGGAGATGATTGGCGATTTTAACTGGCCTTTTACAAAGGTTGTCATCTAA

>Cluster\_66532

ATGGAAAAGAAATTAACCCGCATTAAGCGCTGCTAACCCCGCGGAAGTGGCGAAACGCAGCGGTGTGGCGGTATCGGC  
GCTGCATTTCTATGAAAGTAAAGGGTTGATTACAGTATCCGTAAACAGCGGCAATCAGCGCGCATATAAACGTTGATGTT  
TGCGATATGTTGCAATTAATAAAATGCTCAGCGTATTGGCATTCCGCTGGCGACCATTTGGTGAAGCGTTTGGCGTGTG  
CCCGAAGGCATACGTTAAGTGCAGAGAGTGGAAACAGCTTTTCGTTCCCAATGGCGAGAAAGAGTTGGATCGGGCATTCA  
TACCTTAGTGGCGCTGCGTGACGAACTGGACGGATGATTGGTTGTGGCTGCCTTTCGCGCAGTGAATGCCCGTTGCGTA  
ACCCGGCGACCGCTTAGGAGAAGAAGGTACCCGGCAGCCTTGTGGAAGATGAACAAAATA

>Cluster\_13604

ATGGATATTCGTAAGATTAATAAACTGATCGAGCTGGTTGAAGAATCAGGCATCTCCGAACTGGAAATTTCTGAAGGCGA  
AGAGTCAGTACGCATTAGCCGTGCAGCTCCTGCCGCAAGTTTCCCTGTGATGCAACAAGCTTACGCTGCACCAATGATGC  
AGCAGCCAGCTCAATCTAAGCAGCCGCTCCCGCGACCTTTCCTTCATGGAAGCGCCAGCAGCAGCGGAAATCAGTGGT  
CACATCGTACGTTCCCGCATGGTTGGTACTTTTACCGCACCCCAAGCCGGAGCGCAAAAGCGTTTCATCGAAGTGGGTCA  
GAAAGTCAACGTGGGCGATACCCGTGTCATCGTTGAAGCCATGAAATGATGAACAGATCGAAGCGGACAAATCCGGTA  
CCGTGAAAGCAATTCGTGCGAAAGTGGACAACCGGTAGAATTTGACGAGCCGCTGGTGTGATCGAGTAA

>Cluster\_56386

ATGAAAACAACGTTGTTATACGCTGATTGAAACGCTGGTCCGGATGCTGATTTTGGTCATGCTAAGCGCAAGTGGACT  
CTATGGCTGGCAATACTGGCAGCAGTCCGCAACGGCTATGGCAACCCGCGAGCCAGGCGCGGACTATTTGCTCTATTTAC  
GTGAAGATGCCCACTGGCATAACCGCGACACAGTATCAGCTTATCAGGGAGGGGACGTTATGGTGCCTTGTGAGTTCC  
GCTGCTGGGGCAATACCTGTCTATGGCAGTTTACCATTGGTCTTTGTGCCACGCTGGCCCGAAGTCAAAATGAGCGACCT  
GACACCTTCGCTTCTTTTTCGCTTCCGCAATACCGCATGGCCCGGCATATTCGCTTCAAAAACCTCAACGGCGAGT  
GGTGGCTGGTGGTTTCCCGTGGGGAAGACTCCGGCTTTGTGACGAAAGGAAACAGAAGGATGCCTGTAA

>Cluster\_11216

ATGAACCGTGTCTGTGTGGTGATTATGTGTCATGGCGGTTGGCTGTGGTGGCTGTGGCTGGCAACAAACCATACCG  
TGACAACCGCTCACCTACAAGCGCAGCGCGATAAAAAGCCAGAGAGCTGGAACAGCGCAATGCCACCATTACTGACA  
TGCAGGTGCGCCAGCGTGATGTTGCTGCGCTCGATGCAAAATCTCAGGGAAATAGCCGATGCGAGAGCTGAAAATGAA  
ACTCTGCGTGTGATGTTTCCCGCTGGTCTGAAGCGCTCCGGATCAACGCCACCTGCCCGGTTACCCGCTGGAAGCCAC  
CGGCACCTCCGGCTGGGAATGATGCCCGCTCGAATCTCTCCGTTGCTGGACGAAACGTTCTCGGTATCAGAGACG  
GAATCATCAGCGACCGAGCATTTGAGAATGCTTACGGAATAATCCGCACTCAGTGTATTAAGTAA

>Cluster\_10543

ATGACAAAATCATGGAGCGTACCTTTTCTGAAATCAGAAAAGTGAACATGATGGAATGCCTGTTTCTGGAGATTCAGGC  
GACAGTTGAAGAAGATGGGATAAAAATATTCGCACTTCAATATATAGCTTTTCATCAGACAGAGCATTATGCATGGTTGG  
TTCCTGCGCATTTGGATTGTTAATTTTAAACAGCACCAATCAGTGGTTACAGGAATGGAACAAAGGAGAAATAGATAT  
GCAATTAAGAAAGTGCAAAATAATGCAGAAAGATCTTTTGCATTTCCCAACGAAGAACTTCCATTTGAGAGTTTATTGGA  
CCGGAAGAAATACCATTTAATGAGAATCAAAACAAGATTTGGCTGTGTATCAACTCTTGTGATGGGATGAAGAATATTG  
ATACATCAACACCAGATATGAAATATAACTTTTGACACAACCAAGAAACGAAAACCTGGGTGTTTATTATAG

>Cluster\_6557

GTGAGTGCACCGCAACCATTTCTGATATGTGCTGTGGCAGCCGATGTTCTGGTTTCGATAAGTCTGACGAAACGGGCGAT  
ATTCAGCGATATCAGAAAAGAAGGATACACATTACGCAATGGGAGACGCTTGAATATCAGCCCTGACATTATCGCAGATT  
TTCGTGCAATATCATTTGCGAGACGATCTTTTTCGATGGTTGATTAGACCCTCCGCATCTTGAAGTGTGGTGATAAC  
GCCTGGATGGGAAAGAAATATGGACGGCTGAATAAAGATGCCTGGCGTGATGATTCCGACAGAGATTTAAAGAAGCCTT  
TCGGGTGTTGAGGCGCACGGCCTTCTGATTTTTTAA

>Cluster\_58472

GTGAATACCTACAGCATCACATTACCCTGGCCTCCGAGCAATAATCGCTATTACCGCCATAATCGCGGGCGCACGCACGT  
CAGCGCAGAGGGGCGAGCATACCCGATACCGTCCGCCAATCAATTAAGGCAATGCTGGATATCGGCCCTGGCTATGC  
CTGTGAAAATCCGCAATTTAGTGGCAGATGCCGGATCGCCGTGCGCTGACCTGGATAATCTGCAAAAAGCCGCTTTTGAC  
GCACCTACATAAGCAGTTTCTGGCTGGATGATGCTCAGTCTGTTGATTACCGCGTTGTAAGATGCCGTTACCAAAGG  
TGGGAGGCTGGAACCTGACCATCACCGAAATGGGGAATGAATGA

>Cluster\_5579

ATGAAGTATGTTGATGGTTTGTGGTTGCCGTTCTGCGGATAAAAAGGATGCCTATCGGAAATGGCCGCTAAGGCTGC  
GCCATTGTTTAAAGAGTTTGGCGGCTTCTGATTTGTCGAATGCTGGCCAGCGATGTACCGGATGGCAAGTACCGGATT



TTCGTATGGCGGTGAAAGCGGAAGAGAATGAAGAGGTTGCTTTAGCTGGATTGAATACCCCTTCAAAGAGGTCGCGCAG  
GCTGCTAATCAAAGATGATGTCGACCCACGGATGAAAGAGTTCGGCGAGTCCATGCCGTTTGCAGCGCAAGCGAATGAT  
CTATGGCGGATTTCGAGTCAATCATCGACGAATAG  
>Cluster\_24982  
ATGAATAAAGCATCGAACATTATCACAATTAAGGTCAACCAGCGCAGTGACATTTGAAGCCGATATCAACGCATTTTCG  
CGCAAGTTCTCAATGTAACGGTTATTTGTGACTTTGTAGCCACAAGTATTGAGGCATATATATCGTGAAGGCGAAAGCG  
CGCTGGATGAGTGGATGGCGGATTGTGAAGAGGACGGTATTGCCCTTTTCGTGAAGAAGAAGAGCAAAAACGGCTGACG  
CTTCGTGTTCTCATCATTGATTCGCGGCTGACCATCGTCGCCAGACAACATTTCCATTTCAAAAAACCAGCTCATTAT  
TGATGCTTTAGAACGTGAGTTTTTCAGCCAGATGTAA  
>Cluster\_48853  
ATGCTCGTGAGTAAAAAAGTATGACTTTCTGCTCGCCCGCTACGAACAGGCGCCCTCCCGTGTGACTGCTGGAGCG  
TCAGCAGGCGAGCTGAACGGCGCGCTTAAGAAAAATGGCGGGCCGTTCAAATGTATTCTGGAGTGCCGGGAAGCGCGGA  
TAGCGCTGTCATCGCTCAGGTAGTGAACAGGTATGGCTGACACTGGAGCGTCTGGCGTTTGTGGACAGATGGATAAGCGGT  
CTGCTTCCGGTACTGAGACGGCAGATGTCAGTACGGGAACGACGCATGTGGGAGGAGATGCTGGACATTCGTTCTGCGGA  
TCGCGCCTACGGTATGGCACACCGCCCTCACAGGAGGAAACGCGATGA  
>Cluster\_60344  
ATGAAACACGTTTTTAAATATCTTGATTTTGCAGAAGACCGCAACACGCAGAATCAGTGGCGACCAAAGAGTTAAACT  
GGACCACGTAGAAAAATTCGCTATCCGCGATCTAGCCAATGATATCAAAGAGCGTGGGTGTGTGAGCTTGTCCAGCCTG  
GTGGATTTCGATGAGCTGGTTTCAGATCTATGAGGCCGGAGGCGATGGAATAGAGCCACTCAATTTGTGGAATCGAATCAAGG  
AAGGTGGCAATTTGCTCCCTGCTTCGCGTCAATCGGTGAACAGACTTTCAATGCTGGAATGGTTTCAGAAATCATAAG  
AATTGCTAGAGATTTGGAAGCGCCAGTTGACGCTCCGTTAGATTGCTAA  
>Cluster\_26547  
ATGTATATTTATTGGATTTATTAGGCCGCTGCTATTGCTACGGAAATACCAGGTACGCTGTCAATGAAATGGGCGAGCGT  
CAGTGGAGGAAATGGCGGCTTTATTTAATGCTGGTGATGATTTCTCTGCTGATATATTTCTCTTTTCGCGCTTAAAA  
AAATCGCCTTAGGCGTAGCTTATGCGCTGTGGGAAGGTATCGGTATTTTATTTATTACCTGTGTTAGCGTTTTGTATTTC  
GACGAAAGTTTATCGCTGATGAAAAATTCGCGGTTAACACCCCTGGTGGCCGGGATTGTGTTGATCAAGTCAGGTACCCG  
TAAAGCGCGTAAACCTGAACTGGAGGTGAACCATGGCGCAGTTTGA  
>Cluster\_48942  
ATGAGTTTTATTCTTTATGGCCTTTATTGCTGGCCAGGTGACAGTGATGTCAGTACAGTGATTTTCTTGTGCTGTA  
CAGGCGTTTTTTTTTCATGGGACTGTTTTGTTGTTGACCCCTGTCATGATGAGCAGAAAGTATTGTTATTATGAAAT  
ATGAATGTGGCATAATCCCTCCTGCTGCTGGGTCTGGCAGGAGGTTGTCAATGGTCTGCTGCTACTCCATACAGGA  
TATTTTTACAGACATATCAGAAGGCGTGCATAAGCGTTTTGTGGCTGCTGTTGCCACAGTGTTTCTGTTGCGGGAATGAT  
TATATTCTACTGGTTGCTCCATGCATCAGAAAAATAATAAAAAA  
>Cluster\_23520  
ATGAAAAAGATTGGCGTTGACGGCTTACAGCGTGAGCAGATTAAAAAAACCATTTGAAGCGACGGCTCTTGGCTGTTTTGA  
AGTTTTTCATTATCAACACGATGGAAGCGCGATGAAAGTGAATCCCGGCAACTGGATTACTACATCGGCGCGTGAATA  
CCGGTGGCGGCGCGCCTTTGTCGATTGCCATCGCGGTGATTGGCTATAACAAAAGTTGCACCATTTGCCAAGCCGGCATT  
AAAGCGAAAGACGAACATATCGCCAAAATGATCGCTGAAGGAAAAGTGGCGTTTTGGCCTTCCGTTGAGCACGTTGAACA  
CGCATCCGATGCTGATTAACCATCTGAATAA  
>Cluster\_63922  
ATGAAAATCACTCTCAGCAAACGATCGCCCTGCTCGCTATTCTGCTGCTTGGCCACTGGCATTGAGCACAACTGTTCA  
TGCCGAAACTAACAACTGGTGAATTGAGTCTGGCGACATGCAAAAGCCGACGACGCCGCTATGGAAAAAGAGCAAT  
GGATGACACCGCAATCTGCGCCAGAAAGTGAATAAACGCATGAAAAAGAGTGGGATAAAGCCGACCGCTTTTGAT  
AACCGGATAAATGTGAGCAAAGCGCAACATCAATGCCTACTGGGAGCCAACTACTTTGCGCTGCTGGACCGTCAAGC  
TGCCCGCTTATTACCCCTAA  
>Cluster\_25050  
ATGATTACTAAAAATTTCCGACTGAATGCGCTGGCAAATAAGTATGCGTCAAGTGTATAAACCATTACCTCCACCAG  
CGGCGGGGACTATTTTCATGATTGATGCGGACGGAGAGGCGCTCCGTGTGGAATCGTCAATGGAGTAAAAGCGGTTCCGA  
GCCTGATCGATAGTTACGCACTGGCAGCCATGAAAGTGTCTACCCGCAAGTGGGAAACCGTGGGGATCGAGCTTCTTGT  
CGTTGCGTCACTAAGGACAGATTGACTGACGCTGGGCGTGAGATATGGCAAAGCATGGTTAATGACATGGGCGCAACTGT  
AGCGGGAGGTTCTCATGCGTGA  
>Cluster\_64732  
ATGATCTGGCTAACATTAGTCTTTGCCAGCTTGCTTAGCGTTGGCGGGCAGTTGTGTCAGAAACAGGCAACCTGCTTTGT  
GGCGATAAACAACCGCGCAACATATCGTGTGCTGGGACTGGCGTGGCTGTCTTGGCTTTGCCATGGTGTCTCT  
GGCTGTGCTTTGTCAGAACCTGACCGTACCGGATGCTGCTACCCGATGCTGAAATTTGCTGTTGCTGGGTCAGCTGGCT  
GCAGTAAACTGTGGCACGAACCGGTATCGCCGCTCACTGGTGTGGGTGGCCTTCAATATTGGTGGCATTGTGATCCT  
CGGAGTACGGGTGATA  
>Cluster\_46516  
ATGCCAAAGATTGTTATTTTGCCTCATCAGGATCTCTGCCCTGATGGCGCTGTTCTGGAAGCTAATAGCGGTGAAACCAT  
TCTCGACGAGCTCTGCGTAACGGTATCGAGATTGAACACGCCCTGTGAAAAATCCTGTGCTTGACCACCTGCCACTGCA  
TCGTTCTGTAAGGTTTTGACTCGCTGCCGAAAGCTCAGAGCAGGAAGACGACATGCTGGACAAAGCCTGGGGACTGGAG  
CCGAAAGCCGTTTTAAGCTGCCAGCGCGCTCACCGAGCAAGATTTAGTGGTGAATCCCGGTTACACTATCAACCA  
TGCGCGTGAGCATTAA  
>Cluster\_66933  
ATGAACATGCATAAGTCTCTGGTTGCCGTTGCTCGCCCTTATCCTGATTTTCATCCAGGCAAGTGTGCAACCTGTGCTG  
GGTAGCGCGGCAACCGGCTAGTAATAACAGGATATGAGCGACGCTGCGAGCTGCGGATGCATGGTCAACAGTGA  
ACGATGTTTCTCATCCCTGACGCTGCTGTCACGAATCAAAAAATCAGCATAAACCTCCCCAGTTCCCCAGCCTT  
GACGACATCTGTCGACGCTGGAACACAGGCTGCGACGCGGTCGTTGCAACAGGTGAATGAAAAAGTCCCGGGAATAT  
TGATCCCTGGAAGGACTACAACCTATGA  
>Cluster\_1311  
ATGATATCTCTCCCTGCCGTTTCGCGTATCTGGCTGGTTGCCGATATCCCGATATGCGAAATGGCTTTAACGGCCTGGC  
CTCAAAAGTTTCAGAACGCTCTGAAGGATGACCCGTTCTCCGGGATCTGTTTCACTTCCCGGACGCCGGGTTGACCAGA  
TAAAAGTGTGTTGGGCTGACAGTACGGACTGTGCTTTCACCAAACGCTGGAGCGGGGCGCTTCTGCTGCGCCGCT  
ACCCGCGATGGAAAGGTTACCTTACTCCGGCTAGTTGCTTCTCGAAGGCATCGACTGGAAGCACCCGAAACG  
AACGGAACGCGCTGGCATCCGATATAA  
>Cluster\_12538  
GTGACTTCATTACAACCTCAATCGTCCATCGACTGCCGAGAACTATCGCTGGTCTGCTGGTTTCGACGTTTCAAGGT  
TGAACCGATTCCGCAAAATGGACCGTGGGTTGACAACAGCCTGGTGGCGCTTAAATGCTTAGCCGGATGGTGATAATG  
CATGGTGGTGTATGATAAACTAAGCCAGCGTTAAGCGACATCGAAGTTCCATGTTCCGTTGCTGGAGTGTGAAGGTGAG

CCGTGCCTGTTTGTAAATCGCCAGGACGAGTTTGTCTGCAACATGCCGATTGAAAAATTTGGTGTGGCAATTGCCGAACC  
CTTTTCAAACACTACAATCCTTTTTTAA  
>Cluster\_5291  
GTGCGTAATATTGAAACAAAACCTCGTCACTGGAAAAGTAGGTACTCAAAACACACAACCTGCTTGGTAATACGCTTACTGG  
AAGCACTCGCCGCAAAAGGCGTTGGCGTACTCATTTGAAGGTTTAGCAACCAGTAAAAATCCGCTAATGACATTAACCTA  
ATGATACGAATTTCTGTTTATATAGATTATGAAACCGAAGATGACACCTCCGATGGGGTTTACCCTAATCAAGGTAACGGC  
ACATCACAGCCTCTTCATTTCCAGGCAACATTAAGCAAGACGGGAATATTGTATCGAACCCGGCGAATTTAAGCCAC  
CAGTACTTTCCAGGTAACCTATCCCTGA  
>Cluster\_12691  
ATGAAGCTCTGGCCACGCTGGGCGTCTGCTTTCCTTCTGATTGCGCATGGGGAAATCCATGCGTCTGTCTGGTCTGCT  
GGGCGGGGAGAACGCCAGAAACGAGCGCAGGCGCCTGAAACGCTACCGTCGACACCCCTGAATATCATCAGCGCCG  
GGGTACAGGATATGCAGCAGGTGCTGGCGCAACCTCCGCGTGGAAAATCAACAGCGAAATCAGGACGGAGAGGCCAGACGT  
GAACAGCTACGCAACGATATTGCAAAAAGATGAATGCGCCACGCTTTGCTGACGCTCGTTTTACTGACAGGTTGCGCAG  
GCACGCAAGACGCCACGGCCAGCGCCGCTCAGTCCGGCTTATACCGCAGACGCTGACCATACCGGTAACGCCCTCCCC  
TTCCCTGA  
>Cluster\_56867  
ATGAGCATTATTAAGAATTTTCGCGAATTTGCGATGCGCGGGAACGTGGTGGATTGGCGGTGGGTGTATTATCGGTGC  
GGCATTCCGGGAAGATTGTCTTCTACTGGTTGCCGATATCATCATGCCCTCCTGCGCTTATTAATTGGCGGGATCGATT  
TTAAACAGTTTGTGTACGCTACGCGATGCGCAGGGGGATATCCCTGCTGTTGTGATGCATTACGGTCTCTTCAATCAA  
AACGTTTGTATTCTGATTGTGGCCTTTGCCATCTTTATGGCGATTAAGCTAATCAACAACTGAATCGGAAAAAAGA  
AGAACAGCAGCCGCACTGCACCAACTAAAGAAGAGTATTACTGACAGAAATTCGTGATTTGTGAAAGAGCAGAATA  
ACCGCTCTTAA  
>Cluster\_26977  
ATGAGTGAAGCTCTTAAGCACTGAACAATATTCTGATACTTCCGCGCAGGCTCGTGAACAGATCTGGCAACTCTGGA  
AGATATGTGGAACAACTCACCACAATCGTTGAAGATCGCCGTGAGGAAGAAAATTCAGCCCGTAAAGAACAAGAAAGAC  
GTCAGGCTAAACTGGAAGCCTTCCGCGCAGAACTGCTAGAAGACGGTATCGATCCTACAGAACTACTCCTCAGTTGGT  
TCATCTCAACCTAAAGCAAAATCAACTCGTCTCCTCGTCCAGCCAAATACAAATATACAAATGAAAACGGCAATGAGCA  
GACTTGGACGGGTGAGGGCGTACTCTAAAGCGATCGTGTCTGCTATCGAAGCTGGTAAAACACTGGAAGACTTCGCC  
TCTGA  
>Cluster\_23006  
GTGAACCGGCAAAAGGTTTTCGTCACCTGGCTCTGGTCTGATGCTGCTGATTTTGGGTAGCTTGTATTGCAAGGAAT  
GAGTCAGCAGGATCGCAGTTTGTCTTCTCGCGTGGCATGGAAGTCACTCATTCGCGCCGCGCAGGCCATCGTTCACTCG  
CGCTGGAGTGGGGAAAAATGCACCTCCTGGCAGACGCTGCCCGCAGTTCAGTGTACTGTATGCTGCCACCGGTGCCCGG  
GTTTGTCTCGCTTACTGGCAGATAATGAAGCCTTATTGATTGCTGGTATGAAGCGCTTTCGTTGTGGCGAACAGGCGA  
AGTCATCGATGGAACATTTTTTTTTTCGCCACGCGGCTGGAGCGATTTTTGTCCGCTGAAAGAGAGGGCGTTATGTCAG  
TTCCCTGA  
>Cluster\_26038  
ATGCGTGTCAAACATGCAGTAGTCTACTCATGCTTATTTCGCCATTAAGTTGGGCTGGAACCATGACTTCCAGTTCCG  
TAATCCAACTTTGGTGGTAAACCAAATAACGGTGTCTTTTTTATTAATAAGTAGCGCCAGGCACAAACTCTTATAAAGATC  
CGAGCTATAGCGGATGACTTTGGTATTGAAACCGCATCAGCGTTAGATAACTTTACTCAGGCCATCCAGTCAACAAATTTG  
GGTGGCTACTGTGCAATATTAATACCGGTAACCGGGCCGATGGTGAACCAAGATTAATTTGTTGATATTGCTAACCG  
CGATGGTCAATTGCAAGTTGAACGTGACAGATCGTAAACCGGACAAACCTCGACCATCCAGGTTTCGGGTTTACAAAA  
ACTCAACCGATTTTTTAA  
>Cluster\_59271  
ATGAAAATCAAGCATGAGCACATCGAATCAGTGTGTTTGCCTTAGCAGCCGAAAAAGGGCAGGCATGGGTAGCCAATGC  
AATTACTGAAGAATATCTGCGCCAGGGGGGGCGGAATGCCCCGTTCCAGGCAAGGACTGGAACAATCAGCAGAATA  
TCTATCACCGTTGGTTGAAAGGTGAAACGAAAAACGCAAGAGAAAAAATTCAGAACTGATCCAGCAATTTCTGGCAATC  
CTTCCGCGGAGCTGCGTACCGACTCTGCATCTTCGATACCCGGAACGCGCTGCATTACTGGCGGCGCAGGAAGCGTT  
AAGTACGGCAATTGATGCGCATGATGATGCAGTCCAAGCGTTTACCGGAAAGCGCATTTTCAGCGGCGCGGTTCTTCCG  
ACGATTCTGTCTATTGTTTCAATTA  
>Cluster\_60604  
ATGAGTGAAGGTTGGTGTCTAGTCAACTGAGCCGTAATTTATTTGATGAGAAGCATGCCACGCCCGCCGAGGCGCAGCA  
GGTGGTCTATTACAGCCTGGCGATTGGTCAACCTTGGGGTTATCGATTGCCGGAAGCGGCGCTCACTGCCCGTGGG  
ATGAATATCTGGCATGGATTGCCACTCTGGAGGCGAGTGAAGCCCGCCGCAAAATGGAAGCGTGGCGAAATATGGT  
GAGTCTGATCGATCGAATTAACCATGTCGCGATGCTGGCCACGCAATTCGATAAAGCCCGGCGAGCAAACTTCGCA  
GCAGGAATGGAGTACAATGCTGTTAAGTATGCTGCATGATATTATCAGGAAAACGCCATCTATTGATGGTGGAGAGAC  
TGCGTGACTGA  
>Cluster\_67021  
ATGGATAAAACACAACTACTGATTTCTCTGCCGTACACCGGAAAAATCCCCGCTAAATGCTCCCGTCCGCTCGTTA  
TCTGAAGTCTGTCCCGGTGGTGGCGGGCATAATCGTGTGATGCGGGGATCCCTGTTACTGACAGAGTGGCGCC  
AGCCGGTCAATGGTCAAGTTTGTATGTCGCGAAACCGTGAACAGTTTATGTCACAGGCTGCGGCGCAGGCACTGGATGAA  
GCTCAGATAAAGGCGCTGACTGCAGTTTTAACCGTGCACCTCTGACAGTCTGACGGCATATCAGCGTGTATCAGCGG  
CGTCAATATTGTGGCGCCGGCGTTGTGGTGGCGCAGAAGATATTACGGCAGAGATTGACAGTCACTGCGTGTGACGTA  
TGGCGGAAGGGAAGTGA  
>Cluster\_964  
ATGATCAGGATTGCGGCGTACTCTCAATACTCTTAACCTACCAGCGCCAAATTCGAATGCTGGATTGTCAAAACCTGCA  
CGGGTACGGGCAATGAATGGCGATCGTTACGAGTTTACAAAAGACAGCAGGAAAGATTCGGTTTTCAACGTAACAATA  
ATGGCGATAAATCATCAGTTTATGAATCAGTTTCTGGCGTCTATCCAGAGATGAAATACACTGCTTTGTCATCGAACACT  
ATGGTAGGAGAATACCAGTCTGGAGGAGGCATAACCGTTGAACTTGGTCAATCACTACAGACAAAAAAGCTCTTTACTC  
CAAAGTAATGAACATCCAGGATGCAACAACCTTACATCAACCAAACTCTTTGTTGGTGTATGATGTCGGAACCTGCAATC  
AGTAA  
>Cluster\_63883  
ATGATGCCGGTAAATTCAGATTACGCGCTGCGAGTGAAAAAAATCTGGAGGCGTCAAACCACAGCTGGTGTCTGCTG  
TCGCCGTGCGCTGGAGTGCAGGAGGTTGATTTTGGTATCACGGAAGGCTGCGCAGTAAGTATCGCCAGAAACAGCTGG  
TAGCGGCGAGGAAAAGCCAGACCATGAACAGCCGACCTTACAGGTGATGCGGTGGATGTTGTGGCTACATTGGCAGC  
CAGGTGTCTATGGGACTGGCTCTGTACGAGAAAATCGCCAGGCAATTAAGCAGGCTGCGCAGAGCTGGAACTGCCAT  
CGAATGGGGTGGGACTGAAAAACACTGAAAGACGGGCTCATTTCAGTTGAAACGCTGA  
>Cluster\_48547  
ATGAAACGCCCTTTCTATTGTTGCACTAATGCTTACAGCATTAACTGGCTGTACTGTTACCCGGGCGTCTATATGTCTAC

CTCGGGCAAAAATGTCGTCGACACTGGCGATCGTGATATTTCTAAATTTGTCGATATCTACCCGATCTCACAAAACCTGT  
TAGATGAGATGTACTGGCTCCAGTGATCGCCAAACCAACCCCTACCCCTGAAAAGCAACTTTCAACCTATGAATACCGT  
GTGGGAGTGGGTGACGTATTAACCATCACTGTGTGGGATCACCTGAATTAACATTCACAGCGGGTTCCTATCGTAGCGC  
TGCCGACTCAGGTAACCTGGGTTCCATCCAAATGGCACCATTACTACCTTATATCGGTAACGTGA  
>Cluster\_46684  
ATGACCGTTATTTATCAGACCACCATCACCCGATCGGCGGAGTGCCATTGACGCCCTCAGTGACCAGATGCTCATCAC  
CTTTTCGTGAAGGCGGCCCTGCGGACCTCGAAGAGTATTGCTTTCATTTCATTCGACGCGGAGTTGAAAGGTGCACTCCATC  
CCGGTTTGCAATTTTACTCGGGCAGCATCGCTATCCGGTGACCGCTGTTGGCAGCGTGGCGGAAGACAACCTTCGCGAA  
CTGGGTCATGTACCCTGCGCTTCGATGGTTTAAACGAAGCGGAATTTCCGGCACTGTCCATGTGGCAGGCCCTGTCCC  
CGACGATATCGCGCCGGGATCGGTTTTGAAGTTTGAATCTGTTAAGGAGTAA  
>Cluster\_67087  
ATGTCAAAACAATAACTCAGGCAGTGTGCCGCTTATTTCTGTTTTTCGTCGGGGTATGGACGGCGGAAGAAAACACT  
GGATATAACCCCTTCGCGCTGGAGTACAGACAGTGTTTATGGTGATAAATACTGTTTATGAAATAAATTAACCCAGACAG  
CGCTTACAAGTACATCAGAGACTGGTGTAAATACTAATAAACTGGGTGGGGTGTATTTTGAGCCATTTGCCAAAATTCCT  
TCACCAGGGGATAAACCGTGTCTAGATAATGACTGTAATATTATCTGGATATTTTCAGATATTTGGATTCATCGATTCA  
ACGTGGGGGGCAGAACGTTACTTATAATGGTGTGTGGGGGGATGGGGGATATAA  
>Cluster\_48665  
ATGACCGTTAAACCGGAAAAACTGACAGTTGATGTTTACTATGCCTCTGAAACCGCCGAGGTAAGAATGTGGCAAAAAT  
CACCGTTGTTACGTACAACACCGAAACTGGTGCCGAAAGTCCAGGCCAGTACGATCGTGCCTAAAGGTGATGCCTCCGGCG  
GCGAGTACGCGACTCAATACAGTCCATTTCTCGATGCAACTGACCCGCTGCTGCTGAAAATCGAGAACTACTCCGCGAG  
GTTGATGAAGAGGTTGTTTTGAAACCATGTAATGTTTAAACCCGATTTGCGCTCCAGCCTGAAACACGACGACACCTG  
GATTGGCCAGTACGGTCTGCGCATTACCCTGCGATTCCTGCGGCACCTTAATCCCTGAAAGCGTATTCGCTTAA  
>Cluster\_58159  
ATGCGGGTATTCAAACAAAACCTTATTTCGCTGCAACTTACAGCAGAGAACTTGATGCGTTAACGGCGGATTTTATTTCT  
CTATAAGCGTGACGGTGTTTTGGCAGATATATTTGGTCCGCGATGCACTCTACGACGACTCCTTTACCTGGCCATTAATCA  
AATTTGAGCGAGTTGCTCATATTTCTATCTGGCAAATGAGAAATAATCCATTTCCGCCACAGTTGCGCCAAATTCAGCAGAAGC  
AATGACGAAGCGCATTTGGTATATTTGTCAGGGGGCGTTTGGATGAGCAAGCATGGTGTGCTATTGCCATTTGAAAACCTGA  
ACCTCATAAACTGGCTCGAGATAACAACCAAATGCATAAAAATTTGGGAAAATGGCAGAAGCGTTTCGCATGCGTTTTTGA  
>Cluster\_33897  
ATGTACGAAGCGCAAGAAAAGGAAAAAATTTCACTCTACCTTCCACCGGAGGACTCTGCGCATGTCTTGCCTGCGCTGA  
AATCGAACTGTTCCCGGAAAAACCGGGGAGTTATATCGGCAGGCTTTGATAACCGGCCGATGATAATGCATCAGCTTG  
ATGAGCGAATTCGCGCGTGTAAACCGCTATTCACCAGAGAATTGAATGCGGATGAGGTCAATAGTCAGATGCGCAGG  
ATAACAGGCTGGAACCCCTCCTCCGGTGTATTTAAAGAGGTACTGAAGCGGTTGGGAGGGCTTCAGAGTACAGTTTACC  
AGAACACTCTCAGGATGACGGTGAACAGCCCGCTGAAAAGCGCTAGGGTGAAGATGCAAAAACCTGATCTAA  
>Cluster\_22992  
ATGACCAGCCGTTTTATGTGATTTTCGCGCCATTAGCGGCTTCATTTTTGTAGCTCTGGGCGCTTTTGGCGCGCATGT  
GTTAAGTAAAACCATGGGGGCGGTTGAGATGGGCTGGATCCAGACCGGCTCGAATACCAGGCGTTTCATACGCTGGCGA  
TCTTAGGTTCTGGCGGTGGCAATGACCGCTCGCATCAGTATCTGTTTTACTGGAGTAGCGTTTTCTCCTCGGTTAGGACAG  
GTGCTGTTACGCGGACGCTTTATTCGCTGCGCTGCTCCATTCGCTTTGTTGGGCGTTGTCACACCGTTGGCGGCGT  
GAGCTTCTTGGCGGCTGGCGTTAATGTTAGTTGGTGTATCTGTTTTAAAGCGCAAGGGCGTAAGTCAATAA  
>Cluster\_56582  
ATGCGTATTTAGTCTTAGGGTTCGGCAATATTTGCTGACCGATGAAGCCATCGGTTGCGGATTTGCGAAGCGTTAGA  
GCAACGATACATTTCCCGGATTATGTTGAGATCCTCGATGGCGGCACGGCGGAATGGAGCTGCTTGGCGACATGGCAA  
ATCGCGATCATTTGATTATTTGCGGATGCCATTGCTCGAAAAAGAACGCGCGGGAACGATGATGATCCTGCGGGATGAA  
GAAGTTCGCGGCTGTTTTACCAAAAAATCTCTCCGCATCAGCTTGGCCTGGCGGACGCTTTGTCGGCCCTGCGCTTAC  
CGCGGAGTTTCGAAAAAGCTGACCCTGGTTCGGCGTATCCCGGAATCGCTGGAGCCACACATCGGCTTAAACCGCGACG  
TTGAAGCAATGATTGAACCTGCGCTTGAGCAGGTTCTGCGTGCCTGCGTGAATCTGGCGTGGAGCCATCCCACGGGAG  
GCGATTATGACTGA  
>Cluster\_21238  
ATGAGAGACATTGATGTAAGAAAGGCTGTGCATGCCAAGATTTCTGAGAGATCATATAAAGATCCTGACACCCTAATCAT  
TGATGAGTTTACGATGAATCTAGGGGCTAGCAGAGCTGATATAGCAGTATCAATGGGCTTATACATGGTTATGAGTTGA  
AGAGCAAGAGTGATAACTTGTCTCAGATTACCAGCGCAGGTGCAACATTACTCATCAGTATGGATAAAGTAACTTGGT  
GTCTCTGATTGCCATCTTTATGATGCTTTAAGCATAGTTCCATCATGGTGGGGGATAAAGCAAGTTACGCAAGGTGCACG  
GCAAGGTATCCATTTAAAAACAATTCGAATAGCAAGTTGAATCCACAAGTGGACAACTTTCTTAAACAATGCTTCTTT  
GAAAAGATGAATTCGCTTTCCCTATTAAGTATGATGAGGAGCTACAGAATTTGAAAAATAAACCTAAACCGCTTATGG  
TCAAACCTCGCCAAATAGTATGGATGTTGGCGAGCTTCGTGAAGCTGTTTCGAGTTAAACTTAAAGCCCGTAAAGAGTGGC  
AGTTGCTCAACAACCTTAG  
>Cluster\_62843  
ATGGCCATAAAAAGGTTCTTGAGCAGGCGGTTGAAAACCTCAGCCGATCAGCAAAACGGCGGTCCTGGTGGCGCCGCAAT  
GGCCATTAACCGCGTTGCGTCATCCGCGATATCGCAGTCTGCGTCACAGGTTGCCGTTGAGACAAAGGTACGCGGAAAC  
TGGTAAAGGAAAGGGCCAGGCTGAAAAGGGCCACGGTCAAAAAATCCGAGGCCAGAATCAGGGTTAACCGGGGGGATTTG  
CCCGTAATCAAGCTGGGTAACGCGCGGGTTGCTCTTTCCCGCAGACGTCGTAAAAAGGGGAGCGTTTATCCCTGAA  
AGGTGGCGGACGCGTGTGTTGGTGGGAAACCGTCTGATTTCCCGGCGGTTTTATTTCAGCAACTGAAAAATGGCCGGTGGC  
ATGTCATGACCGTGTGGCCGGGAAAAACCGTTACCCATTGATGTTGGTGAATAATCCCGATGGCGGTTGCGCTGACCAG  
GCGTTTTAAACAGAAATATTGAACGGATACGGCGTGAACGCTTCCGAAAGAGCTGGGCTATGCGCTGCAGCATCAACTGAG  
AATGGTAAATAAAGCGATGA  
>Cluster\_49184  
ATGATAAAAACCAACCACATAAAAATAACAATACTCATGGGACTATTGTTATCGCCTTCGGTATTTGCAACGGATGTTAA  
TGTCGATTTTACCCTACTGTGAAAGCGACAACATGTAACATCACCTGACATCGTGAATGGTTCAACGCTCGTTGATA  
ATGGCAATGATAGTTATACCTGATAATCCCAATATGGGACTGGATAAAAATAGTCAATAAAGCGTCAAACTGAGGCC  
AACTTCAAAATAGTCGCCAGTGGTGTAGCAGTGAATAGCTGGATTGATACCACAATGACTGGAAATCAGTCTGGTAG  
TACATCGCTGATTTTCCACAATCTTCTGACTCTCTCAACAACAGTAATAATGGTATGGGATTTAAAGATTTAGAGA  
CTTCGGCGGATACGTTTCTGAAACCCAAATAGCGCGGAATACACTCCGCTGAAAAACACAGAAATAGCACCAGTGGTCTG  
GAAATGACTGTGCGCACTGCGGCAATAACCCAGGCAAGGATACCCGGGAAATTTCCGCGACAGGCAACCTTCAATTT  
CAGCTATCAATAA  
>Cluster\_11129  
ATGGAAAGCACAGCCTTACAGCAGGCTTTGACACCTGTGAGAATAACAAAGCAGCATGGCTGCAACGAAAAATGAGCT  
GGCTGGCGCCGAACAGGAATATCTGCGGCTTCTGTGAGGAGAAGGCAAAACGTCAGTCCGCTGGACGAAATACGCAATA  
TTATCGAAGTCAGAAAATGGCAGGTGAATCAGGCGCCGGTCTGTTATATCTGTTGCGATGAGCCGTTACGATATCAGC

ATCCGCGACCGGCTGAATGATTTTATGCAGCAGCACGGCACAGCACTGGCGGGCGACTGGCACCGGAGCTGATGGGCTA  
CAGTGAGCTGACGGCCATTTGCCGAAACTGTGCCATACAGCGTCCACAGATGCCCTGCGTGAAGCCCTTTTGTCTGC  
TTGCGAAGGGGAAAAAATAATTTATCCGACAGGATAGCGACATTTTAAACGGCCATCGGATTCAGGCTGACGCGGCT  
TCGGTGGATGACACCGCTGAAAAATTCACCCCTGCGCAGAACATGATTTTTCGCGCAAAAAGTGCGCAACTGGCATCACA  
TCAGTCTGTGTAA

>Cluster\_29460

ATGCCCGCCCCAAGCTCAAAGTCCGATGACGAGGTAAGTTCGAGGCGCCACCGTAGTGTGAAGCGTTGCGGTCCCATAGA  
GTTTCACGCTCAGCGGAGTAGCAAAGGAGGTGGGGCTCTCCCGCAGCGTTAATCCAGCGCTTACCACCGCGGATACCG  
TGCTGGTGAAGGATGATGGAGCGCGGCTGAGCAGGTGCGGCATTAACCTGAATGCGATACCGATAGGCGCAGGGCCGCAA  
GGGCTCTGGGAATTTTTCAGGTGCTCGTTGCGAGCATGAACACTCGCAACGACTTCTCGGTGAACATCTCATCTCCTG  
GTACGAGCTCCAGGTGCCGGAGCTACGCACGCTTGCATCCAGCGGAACCGCGGCTGGTGGAGGGGATCCGCAAGCGAC  
TGCCCCAGGTGCTCCTGCGGCAGCTGAGTTGCTCCTGCACCTCGGTCACTCGTGGCGCGACGATGCAGTGGGCGCTCGAT  
CCGGATGGTGAAGCTAGCTGATCATGTGCTGCGTCCAGATCGCTGCCATCCTGTGTTTAATGTTTTCCGAACACGACGATTT  
CCAACCTCCTCAGGCACATGCGTAA

>Cluster\_33067

ATGGTGGACACGCGCAGGATACCTTGCGCCGAATAACAGATTTGTCAGATATGCAGGCAACAATGGAACAAACCCAGGC  
CTTTGAAAACCGTGTCTGAGCGTCTGAATGCTGGCAAAACCGTGGCAAGCTTCTGATCACCGCCGTCGAGCTTTTGA  
CCGAGGCGGTAATCTTCTGGTGTTCAGGTATTCGCAAAAGACGATTACGCGGTGAAGTATGCTGTAGAACCCTTACTC  
GACGGCGATGGTCCGCTGGGCGATCTTTCTGTGCGTTTTAAACCTAATTACGGGTGGGCGTCAATAACCGCCAGGAATA  
CGAAGATCGGAACTGCTGATGGCATTGCGTGAAGAGCTAAATCACGACGGCAACGAGTACGCTTTTACCAGCACGAA  
TACTTGGACCTTTGGTGAACCTGCATTTGCGTGGCGGCTTACCACCGCCACAGTTTGAACACGACGATCCAGTTTGT  
TATGCAATGCAAAATTCAGGTTACCAACAGGCTGTGCGATCAACAATGGTCTTTCACGTGACAGAGCTGATTTCCAAAT  
CAGCTTAAAAAAGCCCTTCAAAGTAA

>Cluster\_31673

ATGCCATTAACTCAGGTATTAATTCATCTTCTGCTTTCAGCTTGGAAATGGAGGTTCTTCTGCTCAAGTTCAGCCAATGG  
GCGCGGAGAAATAGATTAGGTAATGAAACTGTGATTTGTGTTTGAATCAGGCGAGATGGTCCGCTTTCGCGCCAGCGGTG  
ACAACGGGGGATTAATCTACTGACTTATTTGCTAGTGGGGTTAATAGTGGACCTCAAGCTCTTGGCGAGAGAATGTTAAGT  
ATTTCTTTCAGGATCAGATGCGAGGTGAAACCAATCGAAGTACTCTCAGGATAAAAAATATCAATGTAAGTTTCTGCTGT  
TAAAAACAGAGAGCTCCAGTGTCCCTCTGATGCAACTCGATGCCCAATTAATGGAACACCAGAAGAAGGGGTATTTG  
TCAAAAATTCAGATAGTTTACGAGTATGCACCTTATTTGATGTGATGCACCTTCTCGCGTGGTAAATGACGGTTCAGTT  
CACCTCTGACACGAGCTCCAATAACCCATCAATGATTTAAACCAGAAGAGTGTAAATATGACCCGCAAGGGGAAG  
CTTTATTTAAAAAGATAGTTAA

>Cluster\_50969

ATGAATCATTAGAGTTCGACAGCAAGTTACGCCACACGGTATAAAAAATGGCAATACAACCATAGATTATGCCGAGGC  
CGTACAGCGACTTAATGATGGTGAATGATTAATCCAAATCACGCGGTTAAGAATCTTCAAGTCCCTGCTGAAGCGG  
ATGATGCCGAGTTCGAGTGGGAAAAATATCCGTCGATATGAAAGTTGCTCAATGGCGCTGGCTGTATGTTACGACGTTTATA  
AATGAAGAGGAAGTCAGGAACGGCACCGTTGATATCCCTAACGATAATGGGACTACATATCGTGCAGTTATTTATAAGGG  
GAAATATGGTTGCATGAGTATATACCTGAACCAATTCGCATTTGCCCTGCAAAACCATGTCGAATGGGGATTCATGAAA  
AATATGGCGAAGCTGAAGGCATGGGCGAGTTCTGTTTCTATCAAAAAATGCTCATCGAGATCCTGATAATGGCTTC  
ATTTCTCTGCTATGGGACGAGAAGGGCTTGAACCTTCTTGGATGAAATGATTCACGATCTGAATACTCATGTTATGCT  
AGAAACACAGTGGCACATTA

>Cluster\_28708

ATGGATAAATCAGTTACATCATCAATTTCTAGTGGGACTACTTCGACATCGATGACCTATGATTTAGGGAACATGTGCGAA  
AGATGAAGTTGTTGAGCTGTTTTAAAAAAGTTGGCGTATTTAGGCTGCGCTTATCATGTTTGTCTTATATGTACCAGGCAC  
AAAGCGAGCTATCTATTGCTACATATGCAGACATGAATGAGTCACTAAGGAATCCACCGAGGCACAAAAAATGGCCAAT  
TTGGTAGATGCCAAGATCGTGAAGTTCAGTCTAGTTCCGAAAAGGATAAAAAGGTCAAACCTTCTGACGAAGTAAATTA  
ATATATTCAGACTCACGAAATGTTATTTCCGTAAGTGAATTTGACATCACCCAAAAATTTGGGTGCTGTGACCTGCAAAA  
CCGTAAAAGCTGCTATTTACGAAAAGCCAATAACCTGACAACAACGGTGAATAATAACAGCTTACGTTGCAGCAAATG  
TCCAATACCTGAATTTATTAATAAATGCTCGTTCAGATATGCAGTCTGCAATTTTGAACATATGCAGTCAATATCTTT  
TGGTAAATAA

>Cluster\_19788

ATGACAGAGCAGAAACGACCGGTAAGTACTGACACTGAAACGGAAAACGGAAGGGGAAACACCGACCCGGAGCCGAAAACCAT  
CATCAATGTCACACGCCACCAAAATGGAAGGTGAAAAAGCAGAACTGGCGGAGAAGGCTGCCCGGGAAGCAGAGCTGG  
CGGCGAAGAAAGCACAGCCAGCAGCGCTGTCCATTTACTGACGCTGCCCTCACTGGATGAGGCGGTGAACACTCTG  
AAACCTTGTGGCTGGCGGATTTGTTGACGCTAACACGCCCGGCTTCTTCCGCTGGGTATCCGGGAAGTTTACTGGA  
GGTGTCTCAGCGAATATCCCGTCTCTCATAAAAAATGCGCAGGGCACTGAAGGCCATCACCGTTGAGAAAGCTATC  
TTGGCGCCATGAAAGCCGCTGCTGCGCTATGATACAGAAGGCTATGTGACAGAAATATCACACAGGAAGAAGAACAG  
TATGGCAGCGCGCTTGGAAAAGGTGCGCAGACAGAACCAGTCAAGGATGAGCTGCGGGCGATCCTGGCAGAAATAA

>Cluster\_48538

ATGACTGGACAGCGCATTGGGTATATCAGGGTCAACACCTTCGACCAGAACCCGGAACGGCAACTGGAAGGCGTCAAGGT  
TGATCGCGCTTTAGCGACAAGGCATCCGGCAAGGATGTCAGCGTCCGCAACTGGAAGCGTGATAAGCTTCGCCCCGCA  
CCGGCAGACCGTGGTGGTGCATAGCATGGATCGCTGGCGCAATCTCGATGATTTGCGCCGATCGTGCAAACGCTG  
ACACAACCGCGGCTGCATATCGAATTCGTAAGGAACCTCAGTTTTACTGGCGAAGACTCTCCGATGGCGAACCTGAT  
GCTCTCGGTGATGGGCGGTTCCGCGAGTTGAGCGCGCCTGATCCGCGAGCGTCAAGCGGAGGATTTGCGCTCGCCA  
AGCAACCGCGGGCTTACCGTGGCAGGAAGAAATCCCTGCTGCTGAGCGTATTGCCGAACCTGCGCAACGTTGCGAGGCT  
GGCGAGCAAAAGCAAGCTTGTCTGTGAATTCGGAATCAGTCCGCAAAACCTGTATCAATATTTGAGAACGGATCAGTA  
A

>Cluster\_229

ATGAGGAAATCAGTGTAGAGCAGGATTTAGCTCTTTGATTTAGAAAAATAAAGAAAGTGAATATGAAATACCAAAAA  
CTCTGATGTAAGTAAAAATATATAAAAAGAATGCAAGTGGTAATAATATTCAGTTGGTAATGATTTTATGTCACTTCA  
TCATCTACAGATACGATCATGAGGCATTAATTTGGTATAAGCATTTTGTCTGCAGGTGGAATTTTGTTTTCTCAGCCGTG  
TTTTCTCCCTTCTTATATCAACCTGTGACGATAATGTTGTTGATTAATGAGGTGGATAAAGGTGATTCCTTAATTTGTA  
ATTGTTAATGAGAAAGCTTAAACAGTACTGGAATTTCTGTTGTTATAAACCTGATTTATAGTGTAGGTTTACTACTCT  
CTGGTGAAGGGGTTATTTCCGGGCTTGGTTTTTTCATGGTTTGTATACATCTCATCTGATGATTTTCAATGCTGCG  
TTATCCAGATATATGACCCAGCAGTGGTCAAGTATTTATCGAAAATTAAGAGCTTATTTCCGATCCTCCGAAATAA  
A

>Cluster\_34063

GTGATTAGCGATATCAGAAAAGATGCTGAAGTACGATGGACAAATGCGTAGAAGCGTTCAAAACCCAAATCAGCAAAAT  
ACGCACGGGCTGCTTCTCCAGCCTGCTGGATGGCATTTGCTGTTGAATATTTACGGCAGCCGACGCGCTGCGTCAAG  
TGGCAAGCGTACGGTAGAAGATTCCTGACACTGAAAATCAACGTGTTGATCGTTCATGTCTCCGGCGTTGAAAAA

GCGATTATGGCGTCCGATCTTGGCTGAACCCGAACCTCTGCGGGTAGCGACATCCGTGTTCCGCTGCCGCGCTGACGGA  
AGAACGTCGTAAGATCTGACCAAAATCGTTTCGGTGAAGCAGAACAGCGCGTGTTCAGTACGTAACGTCGCTCGTG  
ACGCGAACGACAAAGTGAAGCACTGTTGAAAGATAAAGAGATCAGCGAAGACGACGATCGCCGTTCTCAGGACGATGTA  
CAGAACTGACTGATGCTGCAATCAAGAAAATGAAGCGCGCTGGCAGACAAAGAAGCAGAACTGATGCAGTTCGTA  
>Cluster\_59373  
ATGAGCCGATTCATCCCCATAGAATTACACCATGCCAGCCGCTGTTAAATCATGGCCCAACGGTCTTGATCACCAGTTT  
CGATGAGCAATCCAGCGCGGTAAACATTATGGCTGCAGCCTGGTCAATGCCGGTGGAGTTTGAACCTCCACGCGTGGCGA  
TTGTGGTAGATAAATCGACATGGACCAGGGAGTTGATTGAACATAACGGTAAATTTGGCATCGTTATCCCGGGCGTTGCA  
GCAACTAACTGGACGTGGGCGGTGGAAAGTGTGTTCGGGCGGTGATGAAGATAAATTTAATGCTATGGCATTCCGGTTGT  
GAGAGGCCCGGATTTGGTTGCTCTGGTCGAGGAAAAATGTCTGGCGTGGATGGAGTGTGATGCTACCTGCGACTT  
CTGCGCAAGAAGAAATACGACACGCTGTTTGGCGAAGTAGTATCAGCAGCGGCAGCAGCGGTTATTTGTCGAAGCCGC  
TGGCAGTTTGTATGATGATAAGCTCAATACGTTGCATCATTTAGGTGCTGGGACGTTTGTACCAGCGGCAAGCGTGTAC  
GGCGGGTTAA  
>Cluster\_9697  
ATGAAAAGAGTTTGTTCTTTTGCTGATGATATTTGTAGTTTGGTGTATAGCTGATTGCGAAATACAAGCTAAAGA  
TCATGATGTTTTACTATTTTCGCTAAGGGTACTATTTTTCCGCGTTCTCTGCTTAAATAAATAAAGCCATGTGGAGAT  
GGTATCAGAAATGAGCAGCTCGGTGAGTATATTTGCAAGCAACTGGGTACATGTAAAAATAAATAAATTTACACCAAGC  
GGGCGGAGACTCTTAATTCGCGTGGGTCACTACGCCCTTAATGAAAATCATGCCATCAAAGGAACGTTGCAGGAGTTGAT  
AAATACAGCAGAAAAACGGCGTTCTCGCGCATCGGTTTAGAAGTTATATAAGAGCGGGTATCTATCAAAAAAGAGCA  
GTGATCCAGTTCAAGTTGTCGAGTCTTGATAATCAATCATGGTAAATATTTAAAGATGAGAAACCAACTTATGCT  
CGAATGACAGCACATCTCCCGAACAAAAATGAGTCTTAGCAATGTTTAAATAAAGATACAGCATGAACTAATTCGTAGTGA  
AGAGAAATAA  
>Cluster\_57945  
ATGGGCAACACTAAGTTGGCTAATCCGGCACCGCTGGGCTGATGGGCTTCGGCATGACCACCATTCTGCTTAACTGCA  
CAACGTGGGTTATTTTCGCTCGGACGGTATTATTTCCGCTGGGCAATTTCTACGGCGGCATCGCGCAAAATTTTGCTG  
GTCGCTGGAGTACAAAAAGGCAACACTTTCCGTTTAAACCGCATCACCTCTTACGGTTCTTTCTGGCTGACGCTGGTT  
CGGATTTCTGCTGATGCCGAAACTGGGTCTGACCGATGCCCAATGCACAGTTCTTGGTGTCTACCTGGGTCTGTGGGG  
CGTATTTAGCTGTGTTATGCTTTCGCGCATGAAAGCGCACGCGTCTGCAATTCGTTTTCTTTAGCCTGACCGTGC  
TGTTTGCCTGCTGGCGATCGGTAAACATGCGCGTAACGCCGAATCATCCACTTTGCGCGTGGATTGGGCTGATCTGC  
GGTGCCAGCGCAATCTATCTGGCGATGGGTGAAGTACTGAACGAGCAGTTTGGTCGCACCGTTCTGCCATTGTTGAATC  
CCACTAA  
>Cluster\_26170  
ATGCCATTTGCTCGTATTTCTGCATTTTCATAAACGTTGGTTTGGGAGAAGGTGCTCCAGCTATTGGCGTCCGTTCTT  
CTGGCCGTCGCGCAATGCCAAATACTGTAATCGACAGTTGGTCCAGTATGGTGTGTTTGAAGTTCAACGGCGCGAAAT  
TCTCTGGCAGTATACCTGTGCTGGCGAAAGTGTTCGCGCTAGCATTACCTGACGCACGGGTGATTTCAATTCGCT  
ATCTGGGATGATGGGCGGGGATGATGTCGGACGTACCTACTTTGAGGCAATCACACAAATATGACACACACA  
CAATATGGAATTTGGACGGGGGACGGCTTGGCCGAGGAAGTGCACGGGAAGGAGTAAACCCAGGAATACTGGCTACAT  
ACGGTGACGGGGGAATAGTTAAACGGACGAAACCGGCTTAAATGTGCCTTCCCTACTACGAGCTCTTAGCTCTCGTAGT  
GTTAAACGTTATGGTGAATTAGTGAATGTAGATACAGAAACCCGTCACGAAATATGCAATCAACTTCTGTTGAG  
GGCTAAATAA  
>Cluster\_53597  
ATGACCACATTTACCGACAAAAGAACTGATTAAGAAATCAAAGAGCGCATAGGCAGTCTGGATGTGCGAGACAATATTGA  
GCGCGTGTCTTATGAAATGCTTTGGTATCGCTGAAGCAGAACCGGTGGCATGGCTGCATTCAGACAATGGCTTAGGTA  
TTCCGGCAATAACACGGAGTAAAAACATTTGCTGACAGTTGGTTATCAAAGGGCTGGTATGTTACAGCGCTATATAGCC  
AAGCCAGTCCGGTGGTGCAGATGCTCGTCCGTTTAAATAATGGCATAGTCCGGCTTTGATGAAGGTGGAACGCCCTG  
CCGCGCCGATGCTTAATGGTGCAGAACTGTAAGCCAGACTTACAAGTTGAACGAGCTGTCCGGCAACTCTCCGGTAA  
CTCCGATGGTTGGATAAGCTGTAGTGAAGCAATGCCGAAACAGTAAACAGTATGTTTGGTGTGGGGGAAGTTTACCGC  
TGGGCTGAGTGCATACCTTCAAGGGTATTACGATTTGGTCAAAAAACAAATGGTGGGCACTTACTGACGATGTGAAGA  
ATCGGCATCGAAAGTAAACCACTGGATGCGCTACAGGAACCGCCGATGAGGTGAAGTAA  
>Cluster\_12994  
ATGCGGCATTTATACGGACCATTTTATCTGGACCGACTGCTGACAGGCATTTCCCTTCCCTGCACAGGCTGAAAGCGG  
ACACGGTGCATTTTCCGTTGGATATGCTCAGGTTACCCGGCGGGCTACCGCATTTGTCGGTACCGGTGCGCTGCAG  
GTGATTTAAAGGGATTAATGTGAAATACCGTTATGAGTTACCGATCACCTGGGCGGATTTGTCGCGCTGAGTTATGCA  
TCGGTGAAGAAAGTGCACGATGAAGACGGGTGAAAAACTTCCATTAAGAAAGCTGCGCGGTCGTTATGTCAGTCT  
GATGGCCGCGCTGTCTGCGCAGCTCAGTGAAGCGGGTCACTCTATGGCATGGCCGGGATGGGCTACACCCGCTGCTG  
ACAGTGTTCAGGATACCGCGTGTGTAAGTGAACCGGGTATGTGAAGGAGACCACCAGCCAGTGTGTCATACT  
GCGGCTACTCTGTCGCGGCTTGAATGCGGGATTCAGTTCACTCCGTTAGAGACGGTGGTTATTGACCTTGTCTATGA  
AGGCTCCGGCAGTGGCAGTGGCGCACTGACGGTTTCACTGGTGGTGTGCGTTATAAATCTGA  
>Cluster\_66742  
ATGGAATTTACTTTTCGATCAGATTAAGAACTAACAGAAATAGTTACCAGCAAAGATTGGGTAGATTACGTGACCTCCAT  
AGGGAGTTTAAATAGCTCCGTTGGCAATAACTTTTAACTGTTATATTTTTTAAACACCTAATCAAACGCTCGTA  
GCAAAGTTTATGAAAAGAAAGTAGATCTATTATATAAAGCCTCGATTGTTTGTCTATTTTCCGATGCTGTAGGATTA  
TATGCCTCGAACAAACACAGAAAGTATAACAATTGAGCGATCCTGGTAGTAAACCATAGAGGAAGGCTTTAGTGATAA  
AGAAAACAGTCTCTGAAAAGGTTTACCTGCTTTTGAAAAACAAAACATGGCTTCCAGCCTTACAAATCAATAGGCG  
CTTTTGAACCTAAAAATGTGTAGATAGTTATAAGGAAAAACCGTAGAGCTAAGGAACTTATAATAGATTTTGAACA  
AGCGATGAAAAGTCCAAATACTGAAAAATGCAAGGAGATTTTCAGTAAAATGAAAAATAAGAAACGAATTAGACAGAT  
AAAGGACAGTTTTTTCAATAAGATAAGAGATTTTAAAGGACGAGATAAAAAACAAATTTAA  
>Cluster\_65015  
GTGAAATTTACGGAACGAAAACGACCAGGTAGAAGCGGTTAAACGCTTTTTTGTGAAAATGGCAAAGCAGCTGGCTGT  
TGGGTTGATTTTGGCGTTCGCGCACTGATTTGGCTGGCGCTACTGGAACAGCCATCAGGTTGATTTCTGACAGCTCCGCTT  
CTCTTGCTATCAAAATGCGGTTACCGCAGTGAAGCAAGGCAACCCGGATAGCATCCCGCGGCGGAAAAATTTGCTGCT  
GAAAATAAAAAATCTTATGGTGCCTGGCTTCTTTGGAACCTGCGCAGCAATTTGTTGACAAAATGAACTAGAGAAACG  
TGCCGCCCAGTTACAACAGGGGCTGGCAGACAGCAGCGATGAAAATCTCAAAGCCGTGATAAATCTGCGTCTGCTGCGG  
TTCAGGTACAGTCAAGCAGGCTGATGCGCGCTGAAAACCTTTGATACCATCAAAGGTGAAGGGTGGGCTGGCATTGTT  
GCCGACCTGCGTGGTGAAGCATTGCTGAGCAAAGGTGATAAGCAAGGTGCGCTAGTGCATGGGAAGCAGGCGTGA  
CGATGTTACTCCGCACTGAGCGAAATGATGCAGATGAAAATTAATAATTTGTTCCATCTGA  
>Cluster\_61712  
ATGAAAAGATTTGGCTGGCGTGGCTGGTTAGTTTTAGCGTTTAGCGCATCGCGCGCAGTATGAAGATGGTAAACA  
GTACTACTACCTGAAAAACCGGTAGCTGGCGCGCGCAAGTGTGGAGTTTTTCTCTTCTTCTGCCGCACTGCTATC

AGTTTGAAGAAGTTCTGCATATTTCTGATAATGTGAAGAAAAAAGCTGCCGGAAGGCGTGAAGATGACTAAATACCACGCT  
AACTTCATGGGTGGTACTGGGCAAAGATCTGACTCAGGCATGGGCTGTGGCGATGGCGCTGGGCGTGAAGACAAAGT  
GACTGTTCCGCTGTTTGAAGGCGTACAGAAAACCCAGACCATTGCTTCGCTTCTGATATCCGCGATGATTTTATCAACG  
CAGGTATTTAAAGGTGAAGAGTACGACGCGGCGTGAAGACAGCTTCGTTGGTGAATCTCTGGTCCGCTCAGCAGGAAAAAGCT  
GCAGCTGACGTCAATTCGCGTGGCGTTCGCGCGATGTTTGTAAACGTTAAATATCAGCTGAATCCGCGAGGATGAGTAC  
CAGCAATATGGATGTTTTTGTTCAGCAGTATGCTGATACAGTGAATACTGTCCGAGAAAAATAA

>Cluster\_4016

ATGCTTTGGTCTGTTATCGTGTCTGCTTTCCGCGATGGCTATCTGTGGATGCATCGTATCGTGGGCCAACCTGGCAACG  
CTGGGTGTTTAAACCGTTAACCTTCTCTCTGCTGTTACTGGCTGGCAAGCGCCGATGTTTCGACGCCATTAGCTATC  
TGGTGTGGCAGGCGTGTGCGCCTCACTGCTGGGCGATGCGCTAACCTGTTGGCCACGTCAACGTCTGATGTACGCCATC  
GGCGCGTTTTCTCTCGCACCTGCTGTACACCATCTATTTCCGCCAGTCAGATGACGCTCTCTTTCTTCTGGCCTCTGCC  
ACTGGTGTGTGGTCTGGGCGCGCTTACTGGCGATTATCTGGACGCGGCTGGAAGAGTATCGTTGGCCTATCTGCA  
CGTTTATCCGCTACGCTGCTGTTGTTGTTGCTGGCTGGCAAGCTGTTGTTCTCCGTCGCCAGCCGCTCCGGCCTCTCT  
GCGTTTGTGGCGCTTCACTGCTGTTTATCAGTAACTTTGCTGGCTGGGTAGCCACTATCGCCGCGCTTCCGGGCGA  
TAACGCGATTGCTGCGGCGCTGCTACTTTGCCGCTCATTTCCTCATCTGCTCCGCTCGCTGTATCTCTGA

>Cluster\_46079

ATGACCAGTCAACTCATCCCGTATTCAACGGCCTATCGCCAACGAAACAGCCCTACTCTGCAATGCCCGCGATCTGCA  
TGCTTTTTTAGGCGTGAAGAAAGGTGTTTGGCGCATGGATTACAAATCGCATTTTCAGAAATACGAATTCATTGAAAATCAAG  
ACTATATTTTGTCTTCAATTTGGGAAAGCAAAACATCTGGTAGAGGCGGTACACCCGCAAGGATTACACCCTCACCTC  
GACACAGCAAAGAGCTGGCAATGCTCAGCGCAACGAAAAGCCGCGCAGATACGCCGATCTCATCGAGTCCGAAAA  
GAAACTTCCGACGATGCAACCAGCGCAGCAATTCACAGACGAGGAAATCATCTCTCTGCTACATGCAGGTACAGATTG  
AGAAAGCACAGGACATCAGCAAACGCTGTATCCGATATGAAGGAACGAACATCATACTCGAGCAGCTGTATGAC  
ATCCGCTTTGAGACTTTCTACACGGTGACGAAAAACAGAGACGCACTGCTCAGGGAGGCGACAGCTTGACCAGACAAG  
CGCCTTTTGAACGGGCAAGACCAATGCTGAAAAGCCTTCGGGCGAGACAATTCGAATTTTAA

>Cluster\_65208

ATGGTAAGCAGACGCGTACAAGCACTTCTGGATCAATTACGTGCGCAAGGTATTCAGGATGAGCAGGTGCTGAATGCACT  
TGCCGCGGTGCGCGTGAAGAAATTCGTTGATGAAGCGTTTGAACAAAAAGCCTGGGACAAATATCGCCTTGCCGATAGGTC  
AGGGCAGACAAATTTCCGACGCGTATATGTTGGCGCAATGACCGAAATTAATCGAGCTGACGCGCGAGTCGCGGGTGC  
GAAATTTGGCACTGGTTCGGGATATCAAACGGCAATCTTGGCGCATCTTGTCCAGCATGTTGCTCGGTGCAACGGATTAA  
AGGTTTGCAGTGGCAGGCGCGTCCGCCCTGAAAAATCTTGTATTTACATAATGTTTCAACCCGTCATGGCGATGGATGGC  
AAGGTTGGCAGGACGCGCGCGTGTGACGCTATCATTTGTTACGGCGGACCCGCGGAAATTCCAACTGCGCTAATGACG  
CAGCTGGACGAAGCGGGATTTCTGCTCTTACCCTAGGGAGGAGCACCAAGTATTTGAACGGGTGCTCGTCCGGGGAGG  
CGAATTTATATCGATACCGTGGAGGCGTGGCTTTGTCCCTTTAGTGAAGGTGAGCTGGCTTAA

>Cluster\_64882

ATGAACGCAATAATTTATGATGACCATCTCTTGTCTATCGCAGCAATTCGTAATTTATGATCAAAAACGATATTGAAAT  
CTTAGCGGATTTGACTGAAGGGGGAAGCGCCTTACGCGGGTGAAGAACCTTAAGCCTGATATCGTCACTCATTGATGTCG  
ATATCCCCGGAGTTAACGGTATCCAGGTGTTAGAAACGCTGAGGAAGCGCAATATAGCGGAATTTATTTATTTGCTCC  
CTAAAAATGACCATTTTTTACGGGAAACATTTGCTGATGCTGGCGCTAATGGATTCTGAGTAAAAAGAAAGGCAATGAA  
CAATCATTTCCGGCTATTGAAGCTGCAAAAAATGGCTACTGCTATTTCCCTCTCTCAACCGGTTTGTGGAAGTT  
TAACCTCCGACCAAAAACTCGACTCCTTATCGAAACAGAAATTAGTGTCTATGCGGTATATTTCTTGTGAGGAAAGGAT  
AATAATGACATTTGCTGAAAAAATGTTTATCAGCAACAAAATGCTCAGCACTTATAAAAGTCCGCTGATGAAAAAATGAA  
ATGTAATCACTGATGGATCTTTACACATTCGCGCAACGTAACAAAATCGGCTAA

>Cluster\_62387

ATGACATTTAAAAATTTACGTTATGGATTATCCAGCAGTGTGCTTTTGGTGCCTCATGTTTACGCGTACCCTCTTATGC  
GGCAACAGACAGCATTTGGGCTGACCGGTATACFACCGTAGAAATAGGTACTTGTACTGCTACATTAGTAAATGACTCTG  
ATCAGGACATTTCTGTTGTTGACTTTGGCGATGATATATTTCTGAAATCAATGCCAAGACCAAAGTTAAAACATTTCAA  
CTCAAATTTCAAAGACTGTGCGGGTATCCCAAATAAAAAAGCACAAATAAAATTAACCAAGCGAGCCACATGCCAGGTAC  
TGCTAATGACGGTGGGGGTTCCGCAATGGATCCACAGCCGAGATAAAGCAAGTGGCGTCCGCGTGAAGTCTGGAGCA  
CCGAAACTCCGGCAACAGGGAGCGCAACACAATTTAGTTGTGTGACACCAGCATCTCAAGAGGTCACATCTCCAATGCA  
GCCAACCGGGTTGTTTATATCCGATGAGTGTCTGACTGGTCTCGAAAAAATAAAACCGTAAGCAATGCTACTGCGGG  
TAAATTTTCTGCACCTGCCACATTTACAGTAACATATAACTAA

>Cluster\_22930

ATGGCGCTGCATGACGAAAAACGTCGCTTGGCATAGCCACCCAGTAACTCCGCAACAACGGAACAGCACCACGGTCACTG  
TGGTGTGTGCTGTGGTTTACCGCCTCTCTGGTTCCGGTAAATCAACCGTCGCGGGGCGCTGGAGGAGGCGTTACATA  
AACTTTGGCTCAGTACGATCTGCTGATGAGTGGCAGCAACCTTCGCCACGATTAAGCAGCATCTCGGTTTATAGCATGCC  
GACCGTAAAGAGAAATATCCGTCGCGTGGTGAAGTGGCAATTTGATGTTTGAAGCCGACTGGTGGTGTGACCCGATTT  
TATCTCGCCACACCGCGCGAACGCCAGATGGTTCCGCAACCGTAGGAGAAGGGCGCTTTATCGAAGTGTGTTGCTGATA  
CGCCGCTGGCGATTTCGGAAGCCCGCATCCAAAAGTTTATAAAGAAAGCGGTGCGCGTGAAGTCAAGCAACTTTACG  
GAAATAGATTTCCGTTTACGAAAGCGCTGAATCCGCAAGAAATTCATCTCAATGGTGAACAAATTAGTAAACAAATTTGGTACA  
GCAATTTATGATCTGTTGAGACAGACGATATTTATCAGATCTGTA

>Cluster\_59641

ATGACGGCGGAAGGTACCTTCTCTTTTCTATTGCTTGTGCGGATTTTGCAAAAATGCCGAGCTGACGCCCGTGTGGC  
ACAGGGTACTGGTGGCATATTTGCCCTTCCGCAATCTGACGTGTTTGTACCGGACATCGATCACCCAAAGTCTGTTT  
TTGGGCAGCGATTTAAATGGATATCAAAACCGATCGCCCGCGCTTTTGGGCATCGTGGTTTTACCACAGTCTGCTGGCG  
GTATTTGGCGTGTGGCAACCTTTTACCTAAGGTTCCGGAAGGCTGGTTTATCCGGCTGATGCGCTACAAGGAATGGT  
GCTGGGTTATTTGAGCCACATACTTGGCGATATGCTGACACCCGCGTGTTCCTCTGCTCTGCGCCATGCCGCTGGCGTT  
TCCGCTTGGCTATCTGGTTCCCAAAAAGGGCAACCAACTGGAACGTTTATCTGATGGCATATTTGCTGCTGGTGGT  
TGGATGCCCATTCATTACCCGAGAACGCGCTGTTCTGGTTCATCGCAATGATCAATACCTTGCAGATCCAGTTTCA  
TCGGCTTATTAAGCATCAGTTGAATACTAA

>Cluster\_53003

ATGCGCACACCGTCCCGTATATTTCCGCTTACCATCACATGAAATTAATCTTTTCCGGCAACGCTCTGCTGATTTT  
GTTGATATGTCGCTTCTGGCTGGCGTAAGTTGGCTGATTTCTGCTTCTGATACGATACAGGCAATACATTCATCTCTGTT  
TAATACTTTTATTTGGGTATCTGATAGCCATTGCGAAGCAGGAAAAATCAAGCTCATCGAGAAGCGCCAGATTATGGCT  
GATAAACGTCAGGACTTTCCATTTGTCAGTTCCGACGCAATTTTCCCCACACCGTAGATACATGGGTGATTCGGCG  
TGTGTGGAATACCTTACAAGGAAAGCGCTATATCGATTATCCATTACCCTGAAAGCCAGTGATAAATGAGCAGTATC  
TGGATTTAGTAAACGATGACAGCAGTTAGAAGAGCTGGTCAAGATAATGCGCCTGCTGTTGGGCGCGATCTACCGGGA  
ATAGAAGATAATCCGTTTCTTCCATCACACGGTATGTTCTTGTAAAGTGTATTAACGCACAACCGATGACCCAAGA  
CGGACGTAGCCTGTTGTTTACTCGGTCATAA

>Cluster\_7959

ATGAGTGATAACCGCTGTGGCCGTTGGCTCGTGGTGGTGGAGGTTGCCGCCGCCCGCGCGCCGAGATATCGAGCG  
TGTGCCGGTTCGCGTTCGACATTTGTGGAACCTGGCGCACTGCCCGGTGCGGGTGTGCTGCCCTACTGGCGTGGCGTTTT  
CGTTGACCGGTTGGGATGAGAACGGCCGAGGGGACAAAACGCAGCGTCATCGCCTCGCGGTTTTTCATCCATGCCAC  
AAAGGCATATCGCCGCTTACGGCCGTTGGTGGAGCCCTGGGCTATCTGATGAGGTTAAGGAGTGGTGGGAACTCAA  
CGAAGAGCCGGAACCTTCGCGCTTGTGTTGGCGTACTCGAGCCGATACCGGATGAGATGTACCTCGAAGCTCGAGC  
GCCTGATAGAAGGGGCAAAACCGCAAGCCGACACCTGACCGGGCTAGTATCAGCCTGAGCACCCTGGCGCGCTTAT  
GTGGGCGCAAGCTGCTATGACGGCGACCTGTTAACGTTTATCCCTATGCCCGGGGAAATTGTCGTGGTGGTGGT  
TTATCCCGCTTCGCGCATTCATCTGATTGATAACCTGCGAGTAAGCGCATGA

>Cluster\_59502

ATGACCCATTTTTACAGCAAGATAATTTTTCTGTGCGGGCGCGGTGTTGGGCGCGCTGTTTTATTACGCTCCAGAGAG  
TGGGGAAGCGCACTCTGGTTGCGGTACTCACAGTACGGCTGGGAAACTAGTGGCTCTACCAGAACGCTCATTAG  
CGCCGCTGGTGCAGGCTTTTCAGACACAGTGTGAAGAGACTCACGCCAGGCTGGCAGCGTTTTGTTGTCGGCCGTTGG  
GCATCGCTCTCCGCTGGGGTTCGGTCTGGCTGGATCGCGAATCTGTGCTGTTTGGCGATTCAACATTCGCACTTCG  
TCAGTGGATGCGCGAAGGCATTAGTTGAAATGAAGCAAAACGAACCGGAAGATCATTTTGGTTCAGTCTGTTGA  
TGGCTGCGTGGTTGGCGGAGAATGGTCGCCAGACAGAATGCGAAGAATGCTGGCATGGCACCTTTTTCCGTGGTCAACA  
CGTTTTCTTGATGTTTTTATCGAAAAGCAGAACCCCTTCTACCGTGCAGTGGTGAACCTGGCTCGCTTAACGCTGGC  
GCAATGGCAATCAACAACCTGTTAATCTCTGTCGCGGTTAAACCGCTGTTTCGATAG

>Cluster\_7095

GTGATAGGCAGACTCAGAGGCATCATCATTTGAAAAACAACCCCGCTGGTGTAAATTGAAGTGGGCGCGTAGGCTATGA  
AGTGCATATGCGCATGACCTGTTTTTATGAATCCCTGAAGCGGTCAGGAAGCGATCGTTTTTACCCACTTTTGTGGTGC  
GTGAAGACCGCAACTGCTGTACGTTTTTAAACAATAAACAAGAGCGCACATTTGTTCAAAGAGTTGATCAAAAACCAACGCG  
GTCGCGCCGAAGTTGGCGCTGGCGATCCCTCCGGAATGTCAGCGCAGCAGTTGTTAATGCCGTTGAGCGTGAAGAAGT  
GGGGCACTGGTGAACCTGCCGGTATTGGCAAAAAACCGCGCAACGCTGATTTGTTGAAATGAAAGACCGATTAAAG  
GTTTTGCATGGCGATCTCTTTACGCCAGCCGCGACCTGTACTCAGTCTCCTGCCAGCCCGCGCAGCAGTGTGA  
CAAGAAGCGGTTGCCGCGTGGTGGCGTGGGTATAAAACCAAGAAGCAAGCCGATGGTGGAGCAAAATCGCTCGCC  
TGACGCCAGCAGTAAACTTTAATTCGCGAAGCCCTACGCGCCGCTTATGA

>Cluster\_21307

GTGAAATTGAGATGGTTTGCCTTTTTGATTGTGTTATTAGCGGTTGTTTCATCAAAGCATGACTATACGAACCCCGCTG  
GAACGCGAAAGTTCCGGTGAACGTGCGATGCAAGTGGATGCCAATAAGCCAGAAAGCCGGTGCAGCTGGGGCGTGCATC  
CACAAATTGATCACGGCGATTATCGCTATCGAATCGGGTGGTAATCCGAACCGGTTGAGTAAATCGAATGCCATTGGTTTG  
ATGCAGATAAAAGCTTAACTCCGGACGTGATGATATCGTCTGATGGGCTGGAGCGGTGAGCCGACGACGAGCGAGCT  
GAAAAATCCGGAGCGTAATATTTCAATGGGGCGGCTTAACTGAAATATCTGGAACCCCGCCCGCTGGCAGCATTTGAAG  
ATCCGAAGGTACTGCAATATGCGCTGGTGGTGTACACGCTAACGGGGCAGGTGCGCTGCTACGGACTTCTCGTCAGAT  
CGGAAAAAGCGATCAGCAAAATCAACGATCTGGATGCTGACGAGTTCCTCGACCATGTAGCAGCAAAATCATCTCGCC  
GCAGGCACCGCTATATCTACAACTTGAAGCAGGCTGACGCGGATGTA

>Cluster\_39663

ATGATGACGCTGATTATCCCGAAAGGAGGCTCCCGTGTCCGGTGGGGTACGGTGGTATCCCGCAACCGGCAGGCGA  
CCGCTCGGTTGATTAACCAACGTTCTTTTTTCCCGATATCGACCCGAAGCGGTCGCGGAACGCTATGCGCTTGAAGCAG  
CAGTCCGCCCCCGCTGCGGTGAGGCTCAAGTCAGGATGGCGGAACAAATGCGGAGCTGACGAGTACCGCGAA  
CAGAAAAATTGCCCGGTTTTACGCGTCTGGCGGACGCTCCCGCGGACGACATCGACGGTGAAGCATCAAAAGTTTTTTA  
CTACGAGCGCGCGTGTGTGCGATGGCGACCGCTGCTGCTTTATGAGCGTTACCGCGCGTGGATGCCAGTGGCAAGGGG  
ACAAGAAGCCGACAGCATTTGACAGCACCATTGATGAGCTGTGGCGGGATATGCGCTGGGCGATGGCGCGCATCCAGGAC  
AAGCCGCGTGCATCGTGAGTCAAACTGA

>Cluster\_58694

ATGAGTCAGGTAAGCACTGAATTTATCCCGACCCGATTTGCTATCTTACGGTTTCTAATCGTCCGGTGAAGAAGACGA  
TACCTCCGGTCACTATCTGCGCGATTCCGGCGAAGAAGCGGGCCATCAGTTGTCGATAAAGCCATTGTAAGAAAAACC  
GCTACGCTATTCCGCGCTCAGGTATCTGCTGGATCGCCAGCAGATGTACAAGTGGTATTGATTACGGGTGGTACTGGC  
CTGACGGAAGGTGATCAGGCTCCCGAAGCATTTGCTGCCGTTGTTGACCGTGAAGTTGAAGGTTTTGGTGAAGTGTCCG  
GATGTTGCTGTTTTGAAGAGATTGGCACTTCCACGTTGCAATCTCGTGGGTAGCGGGCTCGCCAACAAACCGTGTATTT  
TCGCCATGCCGGTTCCGACCAAGCGTCCCGTACCGCATGGGAAAAATATCATCGCGCCGACGCTGGATGCCCGTACCGGT  
CCGTGTAATTTCCATCCACATTTGAAGAAATA

>Cluster\_10871

GTGGCTACGCAGACTGAAGTTGCCAGGCATTTAAGTCTGACCGATCGCCAGCTTCGCAGATTGCAGAAATTGCCGGGTGC  
CCCGATATCGAATAAGCGAGGGCAACTGGATCTGGATGCCTGGCGCATTTTTACATATCGTATCGAGGAAGTAA  
ACGATGTGCTGATGGCGTATAGCGAAGACGACTATGAGGAGAAATTGCTTATTGCCAGATGGGAACTGACAGCAGAACAG  
GCTGTTACACAGCAGTTAAAAATGAGGTGTCAAAGGAAACATTATGACACCGGTTCTGTATTTTGGCCCTCAGTAA  
GCTGGCAATGGCGTTATCCAGTACGCTTGTATCCATCCCTTTATCCATGCAGCGACAGTTTCCGATTTAACACCGCGCC  
ATCTTGACCATCTGAAAACCCCTTATTGCTAAGGGGGCAAAATCAGTGTGCGCGGGCAGGGGATAAATTACCGGATTTACTC  
GATGAATATATCAGAGCAACAACCTGAATA

>Cluster\_19633

ATGGTTAATGATGCTTACGCCCTGAGCTGTTGCGATCCCTTTTCTGTATGACCCGGTGCAGGTCGCTGCACCATAA  
AGCTAGCCGATGCCGGGTTACGGCTGCGTCTTATGCTGACTCCACCCGGCGAGCTGATGGCTATCGTCAAGTTCCCTGC  
GACTGGATGGCAAGCAGTACCAGCTAAAAGCCATCGCGTAGCGTGGATTCTTGCATGTTGCTATTTCCCCACGGTATG  
CAGATCGATCACATCAACGGTACCGGTGACGATAACCGCTTATGCAATCTGCGATTGGTTACGAGCGGGAAACGACCA  
GAACCGACGCAAGGCAAGGGGTATAGCTGGAATAAGGGCTGTAGCAAAATGGGAGGCTTACATACGCGTTGGTGGTGTAC  
TCCGTACCTTGGCTTATTCACATCCGAAGCGCAGCTCGTGTGTGTACTGAAAGCTAAAGCCAGATACACCCCTCA  
ACGCTGACGATTTATTGACGGCTGCCTAA

>Cluster\_17894

ATGGCATTACCGCGCAAGCTCAAACTCATGAACCTGTTTTATCGATGGGGTGGATTATCTCGCGCTCGTGCAGTCCGTCAC  
GCTGCCGAAATTAACCCGCAAGCTCGAGAACTATCGCGCGCGGGGATGAATGGTTCCGCAACCGGTCGACCTCGCCCTCG  
ATGACGATGCGCTGTGCGCTGAAATCTCTCTCGCGGCTTCCCGATGACGCTATCTGGTCTGTTATACGCTGCCACCGGC  
GCGGCTTCCGTACCGCTACGTTTTGCGGGTCTTACCAGCGTGTGACACCGCGGAGACCGTCCGGTTGAGGTTGTTCT  
CCGTGGCCGTCAGAAAGAAATCGACCTCGGTGAAGCAAAACGGGCAAGCACCAGTCCGAAATCGCTCTCGCGTGT  
CCTATTTCAAGCTGACGATGAATGGCTCGAACTGGTGGAAATCGACACCCGTTAACTCATCGAAAGTGAACGGCCACC  
GACATGCTCGAGGCGCACCGCAAAAATATCGGCTGTAA

>Cluster\_2756

ATGAAGCTGACTTATAAGATTGTTCATCGCGCATTTTTCTTCTGCTTTGGGGCGCTGCTGCTGGTCTGCAAACCATTA  
CCACAGCAAGTATCAGGCAGAAAGTTGCGGGTGTATAAAGCGGAAGTGAAGCTGAATATCAAGGAAAGTGTAGCTA  
ATCAGGCATTAACCTTCAATCGTTTTAACAGATAGCAGAAAACGCAAGCCGATTAATTTCTCTGGTGCATCGGCTCAC

GAGAAGACAGTCATCAAATACCGTGAGGTTCTGCTCCGTGAAAAGAACGTGATTTCCCTGTTCTGTTGATATTGCTGT  
CGGTTTGCTCAACTACGCGAACCGTTTACGCGCAGCGCATTGCACGCGGATTCCGGGGACATTGACTCAGCCGGTGATC  
GTGCCACTACCACGAGAAGCTTGACATATGCCAGGCTGTTCTGTGGATTAACCCACTGTTGGCAGCCATCGAGAAGGG  
ATAAACAGTGTGGCTGGTGTCCGACAAATAGAACAGTCCCGGTAA  
>Cluster\_24672  
ATGAATATCCAGGAAGCATTAACCGTTTTTGGATTATCCGGCGAATTAAGTGAAGAGATATCAAAGCAGCATACAGAAA  
AGCCGCTTTAAAAATATCATCCAGATCGTAACCCGTTAGGGGCTGAACGATGAAAGCGGTAATGACAGCTTTTGTATGCT  
TGATGGCAAATATTGATAAAAATAAATCAGTCCAGAGCGCTGATGAACATGCACGATAAATACGGTGTGACTGGAA  
AAAGTATTAAACGTTCTTCTGGTTTATCTGGTCTGGTATTGAAAGTGAAGTAACTGGGTATGGATTAGTGGAGAAA  
TATTACACATAAGGAACTTTAAAAGAAATCGGGTGTAAATGGGCGCAAGAAAAACAATGGTTTTATCGTCCAGACG  
AACATAAAAGTTACTGGAATCGTGAAGAACACAGATAGAAGAAATCCGCGCAAAATACGGTACACCCGGACAGCGCAG  
GCGACAGGGTGGCAACCGGTGGAACACAGAGCGTAA  
>Cluster\_51689  
ATGGATTACTTACCCTCTTTGGCTTGCTGCCCCTTATCAACTCGATACCCAGGCGCTGAGCCTGCGTTTTCCAGGATCT  
ACAACGTCAGTATCATCTGATAAATTCGCCAGCGGAAGCCAGCGGAAACAACTCGCCGCGTACAGCAATCCGCGACCA  
TTAACAGGCTGGCAACCGCTGCGTCACTCCGTTAATGCGCGCGGAATATTGCTTCTTTGCACGGTTTTGATCTCGCC  
AGCGAGCAGCATACTGTGCGCGACACCGCTTCTGTGATGGAACAGCTGGAACACTGCGGGAAGAACTGGACGAGATCGAACA  
GGCGAAAGATGAAGCGCGCTGGAAGCTTTATCAAACGTGTGAAAAGATGTTTGTATACCCGCCATCAGTTGATGGTTG  
AACAGTTAGACAACGAGAGCTGGGACGCGCGCGGATACCGTGCCTAAGCTGCGTTTTCTCGATAAACTGCGGAGCAGT  
GCCGAACAACCTCGAAGAAAACCTGCTCGATTTTTAA  
>Cluster\_58869  
ATGTACACTTCAGGCTATGCACATCGTTCTTCCGCTGTTCTCATCCGACGAAAGTAAATGCGCGTGTCTTACGGAAAA  
CACTACAGCCGGGCTTATCAGTGAAGTTGTCTATCGCGAAGATCAGCCCATGATGACGCAACTTCTACTGTTGCCATTGT  
TACAGCAACTCGGTCAGCAATCGCGCTGGCAACTCTGGTTAACACCGCAACAAAAACTGAGTCGGGAATGGGTTAGGCA  
TCTGGGCTACCCTTAACGAAAATGATGCAGATTAGCCAGCTCTCCCTTGCCACACTGTGGAGTCAATGGTTCGCGCTTT  
ACGCACGGGCAATTAACAGTGTGGTGTATCGGTTGGTGGCAGATGATTTGACTGAAAGAGCATGCTGAACTTGTGATG  
CGGCAATGAAGTAAACGCTATGGGTTTTATTATGCGTCCGGTAAAGCGCATCTCTCACGCCACGAGACAACCTTCCGGG  
CTAAAAATTCACCTAATTTGTATCATTAA  
>Cluster\_46680  
ATGACTGACAGTGAAGTATGACGTTAAGTGAACAGGTTGGGCGAGCGCTGAAAGCCCGTGGCGCAACCGTAACAACCTGC  
CGAGTCTTGTACCCTGGTGGTGGTAGCGAAAGTATTACCGATATTGCCGGTAGCTCCGCTGGTTTGAACCGCGGATTTG  
TCACCTACAGTAACGAAGCAAAAGCCGAGATGATCGCGCTACCGAAGAGACGCTGGCGCAGCATGGCGCGGTGAGTGAA  
CCCGTCTGGTGGAAATGGCGATAGGCGCACTGAAAGCGGCTCGTGTGATTAAGCCGTGTCTATTAGTGGTATCGCCGG  
GCCGGATGGCGGAGTGAAGAGAAGCCTGTCCGACCGTCTGGTTTGTCTTTGCCACTGCCCGCGGTGAAGGCATTACCC  
GGCGGAAATGCTTACGCGCGCAGCGTGTGCGGTGCGTCTGAGGCTACTGCGTATGCATTGCAGACCTTGTGGCAACAA  
TTTTCTACAAAACACTTGA  
>Cluster\_23390  
ATGGATTTGTCACAGTAAACACCAGTCTGCCCTATCTGCTGCGTGCATTCTATGAGTGGTTGCTGGATAAACAGCTCAC  
GCCGACCTGGTGGTGGATGTGACGCTCCAGGCTGACGTTCTTATGGAATATGCGCGTACGCGGCAATCGTACTCA  
ACATTGCGCGCGTGTCTGCGCAATCTGGAACCTGGCGAATGATGAGTGGCTTTAACCGCGCTTTGGTGGCATTCCG  
CGTACGTTTCTGTGCCGTGGCTGCGGTGCTGCTATCTACGCCGTGAAAATGGCGAGGCACGATGTTCCAGCCTGA  
AGTGCCTACGATGAAGATGCCAGCATCATGAATGATGAAGAGGCATCGCGAGACAACGAAACCGTTATGTCGGTTATCG  
ATGGCGACAAGCCAGATCAGATGAAACTATCTGACGATGAACCTCCGAGCCACCACGCGGTGGTTCGACCGGCA  
TTACGCGTGTGAAGTAA  
>Cluster\_3992  
ATGATGACTAAAACCCAAATAAAATTAATAAAAAATGATGAATGATTTAGACTATCCATTTGAAGCACCGCTCAAGGA  
ATCATTTTATGAAAGTATAATCCAAATAGAATTTAATTTCAATTAACATAATGCTGGAAGTATGTAATGAAGTTA  
GTATTTCTTTTAAAGAAATCAACCTGATTAATCTTACTTTTTTAAAGAGCAATGGATGGATTGAAAGTAAATGGATTACGATTA  
TTTAGCCTCTCGATTCCAGAACCCTCAGTTAAAACCTTTTTGCGGTAATGAATTTTATAGAATAATGATGATTTCAAT  
AAACCCGATCTACAAGAACGGTTAGTGTGATCGGGGATGATAGCATTCAATATTTACTTATGACATTAAGAAAGTAACTTTT  
TTGAAATTAAGAGATAAATATTGGCACAGAAAATATATTACGTTCTGTTAGTGTATTTCTTCTTCAATTTAAACGAAATCATG  
GACAGTTGTTCAATA  
>Cluster\_48765  
ATGGCGGGCACAGTATGGCGTGACATAAGAACGGGAGAGACTGTTTTTCTATGGGGCACCTGCACCCCTCAGAGGTGCTG  
TGTGATGTAAGCCGTAACCTCTGTAGATATAGAAATTAAGTTTTGGTTTTTCTGTTTACTGATGAAAACAAACCGGAA  
TGCTGATGAAATTTAAGGAGAACAGAGTTTTTTTTGTAGGGAACGCTATGAGGGCAGCAAACTATCGTTTACAGAAATA  
CTTACAGCGATAGAAAACGGTGAATACATTAACAGCATTATTTCAAAGGGGACAGGGGACGGGATATTACCATCTTAGCCA  
TCATGATGACTTCAATTTGATGGAATAAAGAAAGCCTCAAGATAGAAATAATTTCTTGGTATTCATGTTGTTACAGCTT  
ACACGCTTGTGATGAAATGGGGGACTGTAATAAAGGACGTAACCTGCGGTTTAGATATGTGCTGGAACAGCGCATGCAAGGA  
AAGAGATTGTGTAA  
>Cluster\_26364  
ATGTCACAAACCGTTTCATTTCCAGGGCAACCCGGTTACAGTCCGCAATTCATCCCGCAGGCGGGTAGCAAAGCGCAGAC  
TTTTACTCTCGTGGCAAAAGATCTGTCTGACGTCACCCCTCGGTGAGTTTGGGGTAAACGCAAAGTGTGAACATTTTCC  
CGAGTATTGATACCGGTGTTTGGCCGCATCAGTACGTAAGTTTAAACCACTGGCAACCGAGATCGACAAACACCGTTGTG  
CTGTGATCTCTGCCGATCTGCCGTTCCGCCAGTCTCGTTTTCTGCGGCGCAGAAAGGCTGAACAACGTTATCACCCCTC  
CACTTTTCCGTAACGCTGAATTTCTGCAAGCCTACGGTGTGGCAATTTGCTGATGCGCCACTGAAAGGTCGTGCAGCGCTG  
CCGTTGTGGTTATTGATGAAAATGACAAATGTGATTTTACGCCAGCTGGTGGATGAAATCACCCAGGCGGATTACGAA  
GCAGCTCTGGCTGTACTGAAAGCATAA  
>Cluster\_12722  
ATGAAAGGATCTTGTCTGTCTGGGCGTAACTGGGTTACTGATATGTTGTGTTGGTAGCGGCTTTCAGTTGCACGGAG  
TAAGTCAGTAAGTATGAATTTACGGGTGCTTGTGATGCCCCCTCTCTTGTACGGTAAATGGTGGCGAGTTGAGTTT  
GTAATGATTTCAATTAATAAGATCAATGGGGTTGATTAATAACGTCCTATGACTACTCGCTTGTGTTAACAATCTGGCA  
ATGGATGACCTCGCTCACAGATGCAGCGCAACCGTCTGATTAACGGTGAACAGTTATCAGCAGGGGATTCCTGG  
GTTTTCCGTAACGCTGAATTTCTGCAAGCCTACGGTGTGGCAATTTGCTGATGCGCCACTGAAAGGTCGTGCAGCGCTG  
CCGTTGTGGTTATTGATGAAAATGACAAATGTGATTTTACGCCAGCTGGTGGATGAAATCACCCAGGCGGATTACGAA  
GCAGCTCTGGCTGTACTGAAAGCATAA  
>Cluster\_17005  
ATGCTGAAAACCGAATGATGAAAACCTAATGAGCAGATGAACCTGGAACCTGACTCTTCACTGCTTTATCAGCAAT  
GAGCGCTGGTGCAGCTATCATACCTTCAAGGTGCTGCGCGTCTCTGCGCCGTACGCCAGGAGAGATGACGCATA



TGCAGCGTCTGTTTATTACCTGACTGATACCGGCAACTTACCGCGTATTAATACCGTTGAATCTCCGTTTGCTGAATAT  
TCCTCACTTGATGAATTTATCCAGGAAACCTATAAACACGAAACAAATTAATCACGCAGAAAATTAACGAACTGGCTCATGC  
TGCAATGACCAATCAGGACTACCAACATTTAATTTCCGCAATGGTATGTTTCTGAGCAGCATGAAGAAGAGAACTGT  
TCAAAATCGATTATTGATAAATTAAGCCTGGCAGGCAAAAAGTGGCGAAGGCTGTATTTTATCGACAAAAGAACTCTTACC  
CTCGACACAAAACTAA

>Cluster\_53839

ATGAGCAAAAATTTGAAGGCAGCGTCGCGCCTCGCGAGCGTATTAATATATCGTATGTCCAAAAACAGATGGCCAGAC  
GGCTGAAGTGAACCTCCGCTTAACATGCTCGTTGTGCGCGATACCGGAAATACGCAGGAAACATCCCACTGGATGAAC  
GTCAGGCAGTTTCCGTTAAACAAGCACAATTTCCGTGCGATGATGGCTGAAGCAGCCATTTGGCCCTCAATTTTACTGTCCCC  
GCCACGCTGAAGGGAAGCACAACAGACGATGAACTGAAATGTGGCGCTGAATATCAAACTCACTGGATGATTTTTACCAGA  
TAGCGTGGCCCGGAGGTTCCGGAGTGAATAAATGCTGGAACCTGCGTGAAGCACTGACTGCCTGAAGGGGCGGATGG  
GTAACCTTCCGGCATTCCGTACCAGCTCCAGGCATTGCTGAAAAATGAAGAGTCCCGCGAGCAGTTGCTCAAAGAAATC  
GGTCTGGTGAACAATAATAA

>Cluster\_66935

ATGTCAGGTAAAAAACTATCGTTACTCTGCTCCGGGTATCGCTACTGGCATGCCCGTACTGTTTACGACACCATCGTT  
TGCAATGATCGACACGCCATCCGTGAAGTCCGCTTTTCTCTGAAGGAAGCGCATCCGCTCTGGTGTGACACAATCA  
ACAGTCGGGAAACCTCATCAGGATATGGCATATTCCTTACCCGACCCGATGTAATGCATGCGCTGGCAAAAAGGAAAA  
AACCGGGAGTGGACGCTCCGTATTTGTTGTTGATGACAAGGGAATACGAACCGGGCAAGTCAGGAAGCGATGAAATATAT  
CAACTGCTGGACATTCCCTGCGGACTGTAGATGCCCTTCCCATCCATCAGCAAAAGTCATCATTTGTTGACGGAAAA  
CGGTTGAAACCGGCTCCTATAACTTCTCTGCTGCTGCACGCAAGAATTCAGAGAAATGTCGTTGTCAGGAATATG  
CCGGATGTAGCCGCAAAATATCTTGAACACTGGCAGGATCGCTGGAATAAGGGTACAGACTGGAGACCTGA

>Cluster\_11447

ATGAATGCAAGCTCAATCATCTTTGGATGAGGGAAGCTAGTAATGCTTACTCTGATAAGAATGGCTCTACAGTAGGGCT  
GGAATTTTCTTCTGTAGCATCAAGCCAAGCAACGCTCTTGATGAAAGCTGTTCTGTTGCTGCTTCAGATAAAGAAAAAC  
GGATTGTACATCGGTTGTGATGGATGATACTGAGATCATCAAAACAAGTGTGATGAGGCGCAGCATGGATAAG  
CGATTAGCAGTTCTTGAAGCTGAAGTTGCGCACATCAAGAGCAGCATGGCAGGAATTAAGAGGATACCCGAAAAATATC  
TTCTGATTTACTGACGCCAAAAGAGACACCGCTGTACTTTTACAGAAGAGCCTGGATTTTGATGCTTCAATATCTAAGA  
AACCATCGTTGACTACTTCTTGAAGCTAAATTTTCCGCTTTGGAAACCAAGATAGCAGATGTAAGAAAGTATGGATGCTCGGG  
GTTCTCTGGCCTCGCTTGTATGCCAACTATATTTTTCTTAATAAACCTGTACTTAAAGAAAGGTCAGTAA

>Cluster\_24538

ATGAAAATTAAACTCTGGCAATCGTTGTTCTGTGCGCTCTGTCCCTCAGTTCCACAGCGGCTCTGGCCGCTGTCAAC  
GGTTAATGTTGGGACCGTTCACTTTAAAGGGGAAGTTGTTAACGCCGCTTGGCAGTTGATGCAGGCTCTGTTGATCAAA  
CCGTTTCAAGTAGGACAGGTTCTGACCGCATCGCTGGACCAGGATGGAGCGACCAGCTCTGCTGTGCGTTTAAACATTC  
CTGAATGATTGCGATACCGATGTTGCAAGCAAAAGCTGCTGTTGCCCTTCTAGGTACAACAATTTGACACGAATCATACCA  
CGTACTGGCTCTGCAAAAGTTCTGCTGCGGGTAGCGCAACAAACGTTGGTGTGCAGATCCTGGAATAAACAGGGGACTGCGT  
TGGCTTTGGATGGTGGCTATTTAGTGCACAAACCCACTGAATAACCGGAACAAACACCATTTCCGTTCCAGGCGGCTTAT  
TATGCCATTGGTGGCAGCAACCCAGGTTGCTGCTAATGCGGATGCGACCTTCAAGGTTCAAGTATCAATAA

>Cluster\_27096

ATGCAAGATTTAAGCGGTTTCTCGGTGCGGAAAGGTTCCGGGGCGGCAACGCTATTAAGTGAATTTATGTTGGGCGAGT  
ACAGGCAACAATATTTGCTGCTGCGCCACAAGTATTTGATCGCTGGCGGGCTTTTATTTACGTTTATTCGGAGCAAAAA  
TAGGAAAAACGTAAGTTATTCGTCCGTCAGTAAAAATTAACCTATCCGTTGGAAATTAACCTTAGGTGATACCGGTTGGGTC  
GGCGATGACGTCAAATTTATATACCTCGGTGAAATAACCAATTTGGCGCACATTCGTTGATATCGCAAAAAAGTTATTTATG  
CACCGGTAGCCGACCATTTGCAAGTCAACATTTTACCATTAAACGCCACGCTATTTGATTTGGCGAGAAATGCTGGCTGG  
CAACCGATGCTTTTGTGGCCAGGCGTCAAAACGCGGACCGGCTGTTGGTGCACGAAGCAGTGTTTTTAAATCG  
CTTCCGGCAAAATGTTGGTTTCCGGGGGAATCCCGCAGTGGTATACCGGAACGCGTTGAAACTGAATAA

>Cluster\_44794

ATGAACGAGTTTTTCTATCCTCTGCTGCTGCTGGGTTGCTCTATTACCGCAACCGCAAGATCCTTTACTGGTGCCGCT  
GTTTACCCTGATTCGTGAGGGGAAACTGGCTGCGAACTGGCCACTGGAGCAGGATGAGTTACTGACGCGTTTACAGAAAA  
GCTGTGATATGGCGCAAGTCTCTGCCGATTACAATGCGTTGTTTATCGCGCATGAATGTGCCGTGCCCGCATATCGTACG  
GCATGGGTTGAGGACGCAACCGGAAGGAGTGCAGGCTTTTCTTTCCGAACGAGGATGCCACTGGCGGATACGCCAGC  
CGATCACATCGGACCATTTGCTGCTGCTGCGGCTTCCGCTGCTGCGGATGATGAGTCAAGTCAAGTCAAGTCAAGTCAAGT  
CACTGTTCACTGAGTATCTGTTACCCTGGTGTGGTGCCTTCCGCAAAAGTGGAGGCCCATGCAACACCGCTTTCTGG  
CGCACCATGGCACCCTAACCCGTGATGCCATTAGTGCATGTTGGGACGAGCTGGAAGAGATTTCTGAAGAGTAA

>Cluster\_61068

ATGAAAATTAACAACAACAACTCAGCCTAATCTTGTGCTTGCAGCTCACTTCTGGCCGCCAGCATTTCCGGCATTTGC  
CGTAACCGGAGACTGATCAGCCGATCCACATGAATCGGACAGCAATCTCTGATATGCAAGGCAACGTTGTTTACCT  
TTACCCTGTAATGTCATCGTCAACCAGGGCACCAATAAATTAATGCGGACAAAGTGGTCTTACCCTCCGGGCGGCGAA  
CAAGTAAAGAGTGAATGACGGTACGGTAAACCGGCAACGTTCTTACAGATGCAGGACAACGGTAAACCGTTGAAG  
TCACGCTTCCAGATGACATACGAACTACGAACTGGCAAAAAGATTTTGTGCTTCTGACGGGTAATGCTTATCTGCAAGCAGT  
GCAACATTAAGGGCGATAAGATCACTTACTGGTGAAGAGCAGAAAAATGCAAGGCTTTAGCGCAAAAGGCAAGCGCGTA  
ACAACCGTTCTGGTGGCCGCTGCGAGCTGCAGGACAAAAACAACAAAGGCGAGACCCCGGCACAGAAGAAGGTAATTA

>Cluster\_66957

ATGAAAAACAACCACTACTCTGGATGACGATAGCCGCGCACTGCTGTCCGGCTGCACAGGCCACAGGGAACATCACCC  
GCAGGTGACATTCAGGTCGATACCGTGCAGAACAGACACAACCGCCAGCAACCAATCTGCCCTGGCGGAAAAATACGGAA  
GCCTTCTTAATGAGCGCCATCCGGACCTGTTTGGCGGTGCTCAGGGGAGTATTTACGCGAGTGCATTTTTTAAATGACAGC  
CTGACGCTGACACCTGAAACGCTCCACGGGATGATACAGAAATACGCCCTGTGTTGAATCACTGTAACGCTCCGTTAGTCC  
GGATACCTTCACTGCAGATGCTCTCCCGGTGTCAGAAATGCAAGTATCACCGGATATTTACGGTGGCCCGGAAATATCA  
CTCTGCGACTCTCGACACAGACAGAAACGAAACAGACTGTGAACAAAGCATTCTCTCAGACCGGAACAGTCCCTT  
GTCGTGAATGATTCACCGGAGCAGGAGTGGCGAAAAGCGGCTGTTTCTCATCACACCTCACGTGCGTTAA

>Cluster\_40285

ATGCGGCTGGCGCAGGAGAACAGGCCGAGGGAATAAGCAGCTGTATATCTACAGCGACCCGGGAAGTTATGAACCGCT  
GGCGCGTTGGATAAGGCGGGGAAAGAGGACCGAACCGGATGATGATTTTACACCGGATGTGAACGCTGCGCGGAAAG  
AGATGATGACAGCAACCGGAAAAATGTTGGGAGACTGGGATCAGGTTGCGGTTACAGGATAACAGGAGAGGACCA  
GGCGGGTGGAGCAACCTGCGATACAGGGGAGTACTCGACAGGGGAAACGGGGTGCACATAAATCTGCACAGGTA  
CTATGATCCGGATGTCGGGCGGTTTATGTTAACGGACCGATAGGGCTGCGGGGCGGTTAAACTTATATGCTTATGCGC  
CGAATCCGTTAAAGTATATTTGATCCACTTGGTCTTTGTAATTAAGGGGAAAGTAAAGGGCGCTTTAGAAAGTGCACAGAAT  
ATTCAGGAAGAAATAGCGGCGCTGCCAATTTTTACAGGAAAAACCCAGGGCAATACGGCAACTTTGCGTTAA

>Cluster\_38874

ATGGCGCTTAAAGCGCAATTTATAAGCGACGTTAATGTGGCGGATCTCGACCGCAACAGTTTCTCGATGCTCTCT

GACGCTGGCGGCCACCCTTTCAGAAACCAGGAGCGCATGATGCTGCGCCTGCTGGCGTGGCTAAAATATGCCGATGAAC  
GTCTGCAATTTACCGTGGTTTTGTGCGGATGATGAGCCGGAAGCGTGGCTGCGTAACGATCATTTGGGCATTGATTTG  
TGGATTGAACTGGGGCTGCCGATGAGCGACGGATTAAGAAAGCTGCACCCAGGCCGAGAAGTGGCGCTGTTTGCCCTA  
TAATAGTCGGGGCGCAAACTCGTGGCAGCAAACTAGAGCAAAATGCGCGCAGTTTTCCAATCTTTCCATCTGGTATC  
TGGACGATGAACAACCTGGCGAAGTGGAGCGCTTTGCCATCGTACCATGACGCTGCAGGCAACGATTCAGGATGGCGTG  
ATCTGGTTATCGGATGATAAGAAATAATCTGGAAGTGAACCTAACCCCTGGCAACAACCTTCATGA

>Cluster\_39924

ATGATTATCTATTACACGGTTTTGACTCTAACAGTCCGGGTAACCACGAGAAAGTCTTACAATTGCAGTTTTATTGACCC  
GGATGTACGCTTGATAAGCTACAGTACGCGGCATCCGAAACATGATATGCAGCATCTGCTCAAAGAAGTGGACAAAATGT  
TGCAACTGAACGTCGACGAGCGTCCGCTGATTTGCGGCGTTGGTCTGGGCGGATACTGGGCGGAACGGATTGGTTTTCTT  
TGGCATATCCGCCAGGTGATCTTCAACCCTAATTTGTTCCCTTATGAGAACATGGAAGCAAGATTGATCGCCCGGAAGA  
GTATGCCGATATTGCCACTAAGTGTGTGACCAACTTCCGCGAAAAGAAATCGCGATCGTTGTTGGTGAATTTGTCGCGTA  
ATGATGAAGCGCTTAACAGCCAGCGGACATCTGAAGAGCTGCATCATTTATTACGAGATGTCTGGGACGAAGACGAGACG  
CACAAATCAAGAATATCTCCCGCATTTGACGCGCATTAAGCGGTTCAAACCCCTCGGGTAA

>Cluster\_22133

ATGATTTTGGTGACAGGTGGGGCACGGAGCGGGAAGAGTCCGCCACGAGAGGCGCTTATTGGGACTCTTTCACAGGTTCT  
GTATATCGCTACCTCGCAAACTTGTATGATGAGATGGCTGCAGGATAGAACATCATCGCAAGGCCCGCCGGAGCACT  
GGCGCACAGTGGAGCGTGGCAACATCTTGTGATGAATTAATTCATGCAGACATTAACCCGAATGAGGCTGTGTTGCTGGAA  
TGGCTTACCACAATGGTGTACTAATCTGTTGTTGATTAAGCGCGGATAAAGACCCCTGATGAATGGGATATCAGGCGAT  
GAAACAGGCGATTAATGCTGAGATTCAGTCTGATTGCTGCCACAGCTTCCCGCAAGGTTGATTTAGTGACTA  
ACGAAGTGGGAATGGGATTTGTGCGGAGAGTCTGTCGACGACATTTTCGTGATATTGCGCGGGTAAATCAGCAG  
TTGGCCGCTGCGCAAAATGAAGTATGGCTGGTGGTTTCGGGTATGGAGTAAAATCAAATGA

>Cluster\_67019

ATGAAACCTGCATTAAGTACTGATGGTTCTTGGCGGTGGCTGATGCTGACAGGCTGTGCCGCATGAAAAGTGAATTTGACTG  
CAATGATACGCCAGCAATGGCTGTATGACGATGGACGAGGCGAATAACAAGGCCGTACCATGACTGAAAATCAGAAAG  
GAAAAGCCGCTGAAGGTGCGCGCATCTGCCACCACTGCTGCTGTGCCGCTGATTAAGGCGAGCGCGACGCTGCGGGG  
GGATCACCTGTGACAAAAACGCGCAGCAGCTGTACTCCGGGGGCAACAGCCCGCAATCCGTTCCGGGGGAGCGTTGC  
GGGAACAGGAGGTGCTCGTGTACATCCGGTGGCGCTCAGATTTCCCGGCTGTGCTGATATCGGCATGACGCGTCCCG  
TTCGTCTGCCGTCACACGCGCAGGATGTGGATAGCGGCTGGTGGATGATCAGGCGGCTGGCATCAGCCGTCAGTC  
GTGTCCTTTGAAGTGGAGCTGCGCGTGGCAGCACCAGGAGTGAAGGGTGA

>Cluster\_25416

ATGATGGAGATTAAGCTGGAGGATAATGCGTTACAGCAGCGCTGAAGAGCCTGGAGATCGGCTGTAAGATTTAACCC  
GGCGATGCGCAAAATGCGCGGATCGTTACAGACGGAACGCGGAAACCTTCGAGGCTGAAGGTGCGCCGGCATGGGTGC  
CGTCTGCGCGGCAAGAAACGCGGTGGCCGACGCTGCGCGATACCGGTGCGCTGGCGCGGTGAGTACCACGCAATG  
GACGCGCAGCAGCGGTAGTAGGATCTAATCTGGCCTATGCCCATTCACCAGCTCGGCGGTGAAGTGAAGCGTAAAG  
CCGCAAAAGTCTACTTTAAGCAGGCTGGAATGGCCGCTTGGTCTGCTGAGTTTGTGAAGAAAGAAAACAGCAACTTTGAAC  
AGAACGCTGCCGACCATAACCGCCACTTATCCGGCAGTCCGTTTTTGCCTGTTGATAGCGACGGCAACCTGACCACCCG  
GCAAAACGGGTGGTCTGCGCAGCATTCGCGCATCTTGAATCAGCGCCCGTAGATAA

>Cluster\_45858

ATGATTACAGTTAGTTCTGTTAAACACTCAGCAAAAAGTGAAGATAGCTATGCCTATGATAACGAAACTTTGCATGTACG  
GTTACGCACATTAAGAGGAGAAGTTGATAAAGTTATTCCTGGATAGGCGATCCATATAATTGGGCTGAAGGTGGTCTTG  
ACGGCGTTAAACATGGCCGGGACAGCGCTTCCGGTGGATTGGCGGCAACGAGATCGAGATGGAACAAGAAGCTGTCACC  
GAATTTCAATGATCCTGGTTGAGTTCACAACTCAAAAACGCGCTTCCCGTTACGGTTTTTATACTTTGGGAAAGA  
GGGAGAGAAGTTCTTTTTGGTGAGAAAAGGTGTGTTGATATCAGTTCACCGGAGTGCAGAAACGAGAGTTAAGCCGCT  
TAAATAACTTTTTTGCCTCCCTTATCTTAATAAAATGACGTTCTAATAACGCCCTCCTGGGTAAAAATACGGTATGG  
TACCAATTTTTCCAGACCGTTTTCTGTAATGGCAGACCTGAAATGATCTTACCAGCAATAG

>Cluster\_62694

ATGGTTCGACAAGCATGAAGAGATTACTCTGCCATAGTCTCTCTCTGTAATTATCAGTCTGATATTACTTATCTGGGCA  
AAAACAGTTTGTATGCGGTAACCTGTTATCGATAAATTTGTACGCGCATCGCTAAAGAAAAGTGTGCGTAATAGCGACT  
GTGCGGCTAAAGCACTTATGACAGCAAAAGTGGTGAATGATCGGCATCTGTACTTTTACGGCATATTCGCTGGAAAAA  
CAACGCGTTTCTGCGGCTTTCAGGGTTCAAACTTCAAGAAATGGTGTGTCAGATTAGTCAATGTTGGGGGTAGCAG  
GAAGTATCAAAGCGGGCTTTGGTTCAGGACCTACTATGTGATTTTTTGAACATGTAATAAATATTCACCAGGCATTAC  
CAATTAAGGGGTTTATCTGATGCTGACCCCTGCGCCATTAATTTTTATGCTGCTCGGCTTTGTTGAGCTTTCAGCG  
ACACCAATGCTTTTGGTGTGTACCTATGTTTTGGCGATTACAGCATATCTCGCGGCTTAG

>Cluster\_12598

ATGAAAAAATTTGCGCTAGCAGGCTGCGCGGAATGCTGTTGGTTTTCTGCATCGGTCATGCAATGAGCATCAGCGGCCA  
GGCGGGTAAAGAATACCAATAATTTGTTGCTGGTTTTGGGACTGAATCAGCGGCTGGCTTTAAGCGGTAACCTGGACAC  
ATAACGACGACGACGCTGAGTTCGCGGCTGGGCTGGGTTGAATCTGCCTCTCGGCGCTTAATGGCGACCGTTGGC  
GAAAAGGCGTTTTACACCAACCCGAATTCAGGCGATGAAGGTTATGCCGAGCGGTAGGAGGTTTTGCAGTGGAAAAAT  
TGGCAACAGCTTCCGTTTTGTTGGGAGTATTACTACTCTCCGATTCGCTCTCCAGCGGTATCAAAGTTATGAGGAAG  
CGAATGCTGGCGCGGTTACACCATATGCGTCCAGTCAATGAGGCGGTTATCGCTACCTGAATCTGTCGGGTA  
GACGGTAAACCGGACACGCGGTGGCTGACGGCCGATGTTGGGTTAACGCCAGTTTCTGA

>Cluster\_36855

ATGGTGGTTTATCCCGCTGGCGCGGGGAACACCTGTTTTTCGCAAACTATGACTATGCTATTCGGTTTATCCCGCT  
GGCGCGGGGAACACGGCGCACGGAATACAAAGCCGTGATCTGCTCGGTTTATCCCGCTGGCGCGGGGAACACTGGCT  
CTGCAACAGCAGCACCTGACACGCTCGGTTTTATCCCGCTGGCGCGGGGAACACGAAATGCTGGTGGAGCGTTAATGCC  
GCAAAACAGGTTTATCCCGCTGGCGCGGGGAACACATTCAGCCTTTTTGCGATTGCGCGGTTTTGCGGTTTTATCCC  
CGCTGGCGCGGGGAACACGCGTGTGCGCAAACTCCGAGGAAATAGAACCCCGTTTTATCCCGCTGGCGCGGGGAACACA  
CATATGATCAGGCGTGGCGGCTGGCACTCGGTTTTATCCCGCTGGCGCGGGGAACACCGAATCACGCCCGCTTTTT  
ACCGCTCAGCGCGGTTTTATCCCGCTGGCGCGGGGAACACTTATTTAA

>Cluster\_37508

ATGAGTAGAACACAGAATATAAATTCATAAATGAAATGTTAATATTCGCTGATGAAATATTACCTTCAA  
CTATTTGTTACAGATCGTTTTGTGGATATTTTCAGAAATATTTTCGCGGGTAATTTTAAAAAGTTGGTGAATAT  
AA

>Cluster\_19979

ATGCAGCTGTCCCTGAAGGCGTGAATCAGGTACCAGAATCACCCGACGCCCCGAGGCGCTGCGGGGTTGCTGTTCCAT  
TTCTGATGATGACCTGTGACCTGGTGTACCCGCTGCTTTACCGTTCCGAGAGCTCAGCCTGTGACAGTGAATACAG  
GCAATGGCATCTGA

>Cluster\_2930

ATGTCCCACGCTGTGGACGGTACTTACATTAAGGCACAACAGGACAAAATGGTCAATTCTTCGTTATGTAAAAAGCGTC  
AGTGGATACATATTTTAATGTTATGGAAGTTAATTTAATTTACAAATGATGATGTAATAATGATGAATTAA  
>Cluster\_64284  
ATGCCGCGAACGGCGGCGAAATGGGCACCTGGTAGCGATACTGGTGCCTTTTTTATGGTGGGATGCGTCAGCCTGGATAA  
GGCGCGCAGCTTTTCGATACGGCTTCTCAGGTCTGCCAGCTTATCGATGGCGTTCGGCAGTGTCTGCAGAACTGA  
>Cluster\_19626  
ATGACCCCTGAACAATTCAGACAATGGTTCGCCACGCTGCCACCGAATATCAGAGCGCGCAGCACCATGTACGACAA  
CGCCCGCAAGTCGGGCATACATACCGCGTCAAGCCTTGCCTGATTCACACGTTGGTTACTGACCAGATCAAATTTGATT  
CGGAGTTTAATTTATGA  
>Cluster\_64259  
ATGGGACAGAAATGTCTGTTTGGGACATTTGGGGCATGGTGGGACACTGTAAACACATACGAACTTTGCCGAATTACG  
TATGATATATTTTTTAACGCATGAATACACTAGAGAAAAGCGAGTGCCTTGGGCGATCTTTAGTGAATTTTAAATGG  
CCCTGTACGCAGTTAA  
>Cluster\_45238  
GTGTTTCCCTGACTCCGAAAAGTCAAAGGAGAAAGTGTGTTTATTTAGCAAATGATTCGGGAGATTCGAGTGTGGC  
TGAAAAATATCCACTGGAAAGTTCATCTTATCTGGCTGGTGTGTTGATTAATGGCCCTCCGGTATTTTATCCGGTCAGA  
TACGCTGGTGGTGA  
>Cluster\_12349  
GTGGCAGCCCGTAATACGTCAGGAGACGCGGAAAAGTGAATCCCACACGCGTTATAAACTTACCCTTGGCGAGCTGGA  
AGCCTTTAACTCTGCCGTTGACAACCGGCTGGCAGAACTGACAATGAACAACTTTACGATCGCGCGCCGGCTTCCGCT  
GGAATATGTACCTGA  
>Cluster\_42600  
ATGACCCGCGAGCTGGAAGTGCCTGTCTGTATTGCTCACAATCAATCCCAGCCTTGTTCGGACAGGGAATGAAGTATTG  
CTGCCGATGGCGTGCACGCAGAGGCACAGCCACCGGATGCGCTTTAATTTATTCGATAG  
>Cluster\_35636  
ATGTGGAAACCTACAGGTGATAAGTTAATCACCGGTTGATTGACGGCAAGCCACAATACTTACGCATGAAATGAGCGG  
TCAACATGTTGAAATGAGCGGTCAACATGCTCGATTGATTCGTGAGTAA  
>Cluster\_22796  
ATGACCAGTACCGGGCCGACACTGAATCTCAACTATGACCAGCTGCTTACGAAATCAAAGGCATCTTTCGCGTACTCTG  
CCGCACAACAGTAAATCCCCAGGATTACGCTTCCCTCACGGATGCCATGA  
>Cluster\_62127  
ATGATCAAGAATTTTATCTTCGATAATCTCATAATTTTACGAGTGCCTTTATGATAAAAAACCTCCCTTAAAACCAATCT  
AATCTTTTTCTTCTCTGTGATTTGTTCCCATATGGCGTCATAA  
>Cluster\_14043  
ATGTGCGGGGGCCAGAAAAAGCGGATCTTCCGCTCAAATGCAGGTAGCGAAGGTGGTAAAAATGCGCCGGGAGAAGCA  
GAAGATTTGCCCGGATGTCGCTTGGAGAAACACGAGTTGATTA  
>Cluster\_30881  
ATGTTAACTGGGGCTTTTCTCTATCTGCCGTTGGTGTTCATGCCCGAGGCAGATAGCCTCAAGCACCCGAGCTATTCTA  
CTTAACTTCCCATTACCTCGCAATATGAAATCGGTGAGAAAGACAGACGCTCCATAA  
>Cluster\_14973  
ATGAAAAAGGGCTTATCTCCGTTTTTTTTAAAGTATTGTTACGCTTATGCTCCGGGCTGGAAGGTAATGACTCCAATTT  
ACTGATAGTGTTTTATGTTTCAGATAATGCCGATGACATTTGTCATGACGCTCCACCGATTTTGA  
>Cluster\_22301  
ATGAATAAAGCATTGAAACGATGGGTCCACCAGCGTTACGGCAATCGCTATGACCTGACGCGAGATGTTGACGGCTTCTA  
CTGTCGTGAAGTTGTAAGCGAATGTTTGAAGTGTGGTCCACTGCCGTTGGATGA  
>Cluster\_50634  
ATGAAATCGAACCCTCAGGCACGTCATATCTTGGACTGGACCATAAAATTTCTAACAGCGCAAATAGTTACCGAAGG  
TGACAAATCCAGCGTGGTAAATAATCCAACCGGCAGAAAACGCCCGCTGAAAAGTAA  
>Cluster\_64015  
ATGGGAAATCGGACAAAAGAGGATGAACCTGTACCAGAAAATGTGCAGAGTTGTCGGTAAAGTTGTGCTGGAAATGCGCGA  
TCTGGGGCAGGAACCAAAGCATAATGTTTATCGCAGGCGTATTACGTACAGCATAGCCAATAAACGCATTCAGCGCAGTG  
AGCTGAAAAGCAGGCGATGAAAACCGTCAATTAACGCACTGGTAAAATGA  
>Cluster\_64418  
ATGATTACATACGACGCGGGACGGTGACCGTCTCGATCAAATCTGCTTTGCGGCTACGGGAGAGCGTCAAAAACGAC  
AGAGACTGTTTTTATATCAGGTTTCGAATACCGCGTAACTGATATGTGTGCGGCTTTTCTGCTGAGAAAAAATGTTT  
TACCCGATATCGAACAGAACCGGTTAAAAAAGAAACGAATTTATGGGATTGA  
>Cluster\_49911  
ATGATGTTGCAACTTTGTGCAACCGTGTAAATGTGACCTGCGTAGCAAGCTTAAAAATGAATGAAATGTTAATAAACGA  
AATCGATATGACAGGGATTAAAAAAATAACTCAGACTTTTCTCTGCGGAGTTAACATTTTTGAAAGGTGCAACCGCAA  
AAAAATGTGAGAGGTGCAACCTGATGAAAAATAGTGTCTGCTGAGCACTAA  
>Cluster\_10567  
ATGTTTGTCTTGAAGTGTAAATGGAAGATAAGGACAACAAAGGATGGGTTAAAGGTTGGGCTGTGGTAAAGAGCTCGCC  
CTGGCATCTGTTGGGGTTTTTGGCAGAGGAAAGACGAGAAATGGAAGCAAGAAAGATGGGAGATAAGTACGAGGTTT  
ACTATGGCTCGCATCGAACAGGAAGTATGATTTTGTCTGGGGGAGTAA  
>Cluster\_5689  
ATGGCATTGAGTAACTCCCTTCGATGATCCCGAGGAGCGTTTTACATATTCGCAATGCGCAGGGGCAATTCAGTCTGTG  
GCCGCAACAATGCGTCTTACCAGGACGGTGGGACATTTGTGTGTCAGCCGAGTACAGGCGTCTGCCAGCAGTGGCTGG  
AAGCCACTGGCGTACTCTGACACCGACGAATTTACCAGTTGCAGGAGGCACAATGA  
>Cluster\_37738  
ATGAAACCAACGACACTACTGCTATTTTCACTTTTTTCGCTATGCCAGGCATCGTATACGCCGAGTGCCTTTTAGCTC  
ACTGCAGTCCGAAAAGAGAAAACACCGTATTTACAAGATTTACGTAATAATTTGCACGCCACAGGCGTCAATATCAGATG  
AAGCGTGGGAAAAGTTAATGTTGTCAGATGAAAACAATAAACCTAAGCGCATCATTTAA  
>Cluster\_64478  
ATGAACGACCTGCTAACAGACCAGGAACGGTGAACCTGACCGGTTACCAGTTCCCGTCAAAAACAATGCGGTTGCCCTGAC  
CCGTGCCGGGATCTTTATGTAACCGCGCAGGGGACCTCGCGTACGTTGGACGATGTAACGCCCGCGCTGTCCG  
GAGCAAGTCCGTCAGATTTGCCGAAGAAGAACACCTAATTTTATGCAATCTGA  
>Cluster\_25045  
ATGATTAACCTACGATGTGCATATGGATCCCTCGAACGCACAAGCCAGATCATCACACTGACAGAAGTGAATTAACGA  
CATCTGGTGGCAACTCTCCCTCACGAGACGAAAGACTGAAGCGGTTACTCGCGATATTTGATCTCGCGGTTCTGTGACG

TTCAATTCCTGCTGGAAGGTGGACAAATGCCATGCAAAACGGGGGCAACCAATGAATAA  
>Cluster\_4600  
ATGAATAAAGATGAAGCCGGCGGTAAC TGGAACAGTTTAAAGGTAAGTGAAAGAGCAATGGGGCAAAC TGACCGATGA  
TGATATGACGATCATTTGAAGGTAACAGTGTATCAACTGGTTCGGTAAAAATCCAGGAACGTATGGTTATCAGAAAGATCAGG  
CAGAAAAAGAGTCTGGATTGGGAAACCCGCAATGAATATCGCTGGTAA  
>Cluster\_1451  
ATGAATACAGCATTTGCACTTGTCTGACAGTTTTTCTGTTTCCGGAGAGCCAGTTGATATTGCAGTCAGTGTTCACAG  
GACAATGCAGGAGTGTGTGACTGCGCAACCCGAAACAGAAAAATCCCGGTAACGTGTACCCGGTCGATAAAGTTATTCACC  
AGGATAAATAACGAAATCCCGCAGGTCTTTAA  
>Cluster\_32372  
ATGGCTATGATTGACCCACGCAC TCCCGAAGGCCGTTTACCC TGCGTTACCCGGGGCTTCCCACTTCTATTCTATTGTC  
GATGCTTGGCGTGGATAAAGCCGCTACGAATGACCCGACATTTTATTCGTAATGAGCTAATAGAACAGTTGGTCATTC  
GCAATATGTCAGTTAACCAGAAAAATAAGTAA  
>Cluster\_39059  
ATGTCGTTAACAACACCCGGAGTATGTGCGTTGTGCAATGCCGTTGGCGCAAATGATCATTGGCACTTTCAGCAATGCA  
CACCACCATTCATCATCTGATTTATCTTTTATCGTCCGAGTTCCGCAACAATATCTGGAGATCTTCGCTGATATTTATA  
TCAACCTTGATGAATTAATGA  
>Cluster\_11369  
ATGGCCGAACATCGTGGTGGTTCAGGAAATTTCCGCCAAGACCGTGAGAAGGCATCCGACGCAGGCCGTAAGGCCGTC  
GCATAGCCGGCGTAATTTTAAAAATGATCCGCAACCGCATCTGAAGCGGGTAAAAAGGCCGTCACAAAGCCGTTGGTA  
ATAAATCAGGCAAAATCCTGA  
>Cluster\_41193  
ATGGAAGCAATCAGAAAAATTTCTTTCCGCCAGGAAAGTAAAAAAATTTACACATCAAGGCAGACAGCACGCTGCAAG  
CATGATCAACGCCCGGAGAAATTTCCGCAGGTTTTCGCGTTGGTTACGCCGTCGCGGATGGTATGAGGATGATGTGTTGG  
CCTGGCAGAAAGAACCGCAACAGGAACGCGGAAACGGCTGCTTAA  
>Cluster\_64212  
ATGGCAAAGATTAAGGTCAGGTTAAGTGGTCAACAGAGTCTAAAGGTTTGGCTTCTACTCCGGCTGATGGCAGCAA  
AGATGTGTTFCGTACACTTCTCCGCTATCCAGGTAATGGCTTCAAAAAC TCTGGCTGAAGGTCAGAACGTTGAGTTCGAAA  
TTCAGGACGGCCAGAAAGGTCGGCAGCTGTTAACGTAACAGCTATCTGA  
>Cluster\_49745  
ATGAACGCCAATGAACCGAGCACCAGTTGCTGCGTGTGCTGCAAGGAAATCCCGCTCGATGCCGCTTCACGCCGGAAGG  
GGCCGAGTACGTGGAGCATTTCTGCGGGTGGAGTGTATCAGCGCTTCCAGGCGGGCCAGCACTGCGACCGAAACCA  
GCGTCAAACCGGACGCTTGTGATTCGCCCGCTCAGGTTGA  
>Cluster\_19683  
ATGTTTGGTAACCTAGGACAGGCAAAAAATATCTCGGCCAGGCGGCAAGATGTTGATTGGCATTCCAGACTACGACAA  
CTACGTCGAGCATATGAAGACCAACCATCCCGACAAGCCGTACATGAGCTATGAAGAAATCTTCCGCGAACGCCAGAACG  
CGCGCTACGGCGGCGATGGTAAAGCGGATGCGCTGTTGTTAA  
>Cluster\_33659  
ATGTTACAGATAGTCCGGCGCTGCTCCTGCTGATCGCAGGATTTGCCATTCTTCGCCCTTTTGTTCAGAGCATTAAACAG  
CACGGCGTCTGCGTGGCAGGATTCGTAATGCTGTGCTGTTTCGCCCGGCTTTACTGGCTGGCTATATCACTGAACGCA  
TAAACCCGGTTATTCATATTCGCTGGCTGGCAGGCGTATTTCTAACGATTCGCCGAATGATCATCAGCTTCATGTGGGGA  
CTTGATGGTAAACATATCGCACTGGAGGCTCATACTTTGACTCTGTAATAATTTATTCGACCACCGCTCTCGCCGCTGG  
TCTGCTGGCTTCTCCGTCAGATAAAGAAGCATTCAGCAGAGGCTCACACCTGAAGATATCAGCAAGGAAATTAACG  
GGTATTACTGCTGTTTTTATACTGCTTTTTTCTTATGGCGTGTCTGTCATACGCACCATTGATCGCATTGCAGTTCGAT  
ATTTACCCCTCACGATGTTGGTGGGCGGGTGTGTTGACTGGCTGCATTAGTGACGCTGCTATGGCGGGCCAGCCA  
GATCCAGGCGCTGAAAGACTGACCAGTCCCATCCGCCAGACACTGGAAGAACAACCGGTGCTCAACAGTAAATCGTGGC  
TGAGCAGTTTGCAAAACGATTAACGCC TTTCCCTGAAAACGCTGACGGAGCGCATCTGGCTGACACTCATTTTCAACAAGT  
TCCCGGGGAGAACTGAGGGAATTTGAAC TGGCAGACGGAACTGGCTACTGGACAATGCCGTTGATGAAAGAAACATGGC  
GGGTTTCAACAAAAGCTGAGAGAGAGCCTGTCATTTACCCCTGATGAACTGAAACCCCTCTTCCGGAACCCGCTGAAT  
TATCACCGGAAGCGAATGACGATTTTCTCGATCGTTGCC TGGACGGCGGTGACTGGTACCCTTTTCAAGAACCGCCGCT  
TTTTGATCATTTCCACCAGTGGATGAGCTTCGTAATCTGTGCTTCTGCGGGCTGACAGAAAGTACATCATGACCGGAAA  
TCATAAGCCGGATCCGGAATGGTACTGCTCCTCTCTTTGTCCGAAACAGAAACACTGTGTCAGGACATTTATGAACGTT  
CTTACACCCGTTTTTATTTCCGATGCAACGGCGAATGGTCTGATTTCTCATGAAACTGCCGGAACCTGGAGTACAAATGAG  
AAAATGTTTGTTCGCGGAGGGCAGGACATGGGTTTGGCGTGAACGTTGAAACCATGAAAGATAAGATCCGCGAAGGTAAGT  
AACCGCACGGATCCCGTGGTATAATAATGCCAGAAAATGGAGCAGACAGACTGGTCAGCGGAACAGAAATCCAGACGAAAT  
ATTTGTTCAACTGCAGCCGTAGCGTCCGTTGCGGATTCGACGGACAAAACGGACAGTATCGTTACATGGGAAATCATGGT  
CCCATGCAACTGGAAGTCCCCCGTATCAGTATGCCGGCGCTGGGAAACCATGAAAGATAAGATCCGCGAAGGTAAGT  
ACCCGGTGAACCATCCCGCAGAGCGTCCCGGCTGATTCGTCGGGGACATCTGACTTATACCCAGGCCGTAATATCA  
CCCGGTTCCGGACCATCGAATCGGTCACCTTATGATATTGCCGAGGGTCCGTTGTCAGTCTGGCGGGCAGGAGGATCAGT  
TTTTGCCCTGACGGATCGGCTTCTGCGTACGACCCGGGATCCGATGCTGCGCTGCAGACAGCTGCTGTCAGGCAGG  
AAAAACCTTACC CGCACACTGGCTGTCTACGTCAACCCAGCAACTTACC GGCTCAGTGTGTTTCAAGGTTATGCTGA  
AGCATATTGATTTTTCGACGGCCAGCCGACTGTCCGGCAGGCGCTTCAAGAGGGGACCGGTGACGAAATATCAGTGGC  
CTGAACAAAGTGAAGGGTACGCTGGTGACATCTCTGGCACTGGTAGCTGTCAACCCGGCCCTGACATGATCAAAAT  
GTTGCGGGGACGGATCTCCGGTGCAGTTCATCAGGAATCTTCCCGTGGCATCTCCGGTGTGGCAGTGGTGTGCTGTCG  
GGTCAGTGGCGGGCGGATATTGTTTCACTGGACACTTTGGTGCAGTGCAGGGCGTGTGGTTGGCGGTGTTCTG  
GGGGAATGATATTGCTCCGCTGATCAGGAAAAATTTGCCGAGCGCTGTTGAAAGAAGATCCGCTCAAAATCTGGCAAT  
GATTCAGGAGCAGGTGACATGGCTTGGCGGAGTTTCTGCTGACCGGACATGAGATTGAAAACTGAAACCGGAATCTGG  
CCCGTGTATCGATCAGAAATGCTCTGGAGATCATTTTCCGCCGCGGATATAACAACCGGGCCGACCAATATGTTAATC  
AAACCACTGGTGGTCAATCATCAGGCAACGCCCGCTCATGGAATATGATGCATCCCATCTCGGCAATATGGTTAACCG  
ACTGGAAGAAGCATTACC CGGAGTTACCGGCATAA  
>Cluster\_20372  
ATGCCTTTACGACGGTTCTCCCGAGGACTGAAAGCCAGTTTGCCTTCCGGCATGGTCTTTTTGTTTCGTTACGCCGATGC  
CAGCGCTGCTGACATAAGTGGCAGCAATAGTGGGGTATTTATCCGAGGCCCTCAGTCAGGCGCTTACAGGACGGCA  
TGAGCGTCCCGCTTATATTTCACTCTCGCGGTAGCCAGGTCGCCAGGACGATCAGCGAATCCGACGCCCTTTTATCTGG  
TTGGATGATGGACAGTTACGCATCCGGAATAACAGCTGGAAGAGAGTGAAGATAACGCCAGTGTGACGCAACAACTCG  
ACAGCAACTGATGACTCTGGCCAAACCCCGTTCAATGAGGCCCTTACCATCCCCCTGACTGACAACCGCAGTTGGATC  
TCAGTTTGGCCCACTGCTGCTGACGCTGGTGGTCAAGCGCAAGCGCTGGGCACTACTACGCTCAGTACGGAAGAC  
ATCGGGCAGTCCAGTGTAAACCCCTCAGCAGTAATCTGAGCTATAACTTCGCGCTCTATAACACCAAGTGTGCGTAACCG  
CGGGAGTAACACCTCCAGCTATCTGCTGCTGAATAACGTTACTGCGCTGCGGCAACATCAGTGGTGTGACGGCTCAC

TGTACGGGATTTGGTAGCGGTCAACAGGACAGTGAATTATATAAAGCGATGTATGAACGCGATTTTGTGCGTACCAGTTT  
GCCGGTGGAAATGCTCGACACCTGGAACCTGTCAGTCCCTTAGGGCCGATGACCGCCATTTTTCAGCAGGGAAGATTTACGGCCT  
TTCTTGGGAAACCAGGCCAGCTCCACCATCTTCGACAGCAGCCAGTCCGGCCAGCCAGTGATCGCCTTTTACCAGCGG  
CGGGCGAAGTACATCTCACCCGTGATGGGCGGCTACTAAGCGTTTCAGAACTTCCACATGGGCAATCATGAAGTGGATACC  
GGGGCGTACCGTAACTTACGATGTGGAAGTTGAGGTAATCGTTAACGGTTCGGGTGATCAGCAACCGTACCGCAGCATC  
GGTCAATAAGCTGTTTAGCCGGGGCGTGGCGTCCGCTGACCCGCTGGCGTGGCAGATATGGGGCGGTAGCTTTTCATATGG  
ATCGCTGGTTCGAAAACGGGAAAAGACGCGACAGCCAAAGAGAGTTGGCTGGCAGGTGCTCGACCTCCGGCTCACATG  
AGTACGTTTAGCTGGGCGGCAACGGGATATGGATACGATAATCAGGCGGTGGGTGAAACCCGCTGACGCTGGCGCTTGG  
GGGGCGTACCACTGTAACCTGCAAAACATGCTGGCCAGTACAGCTCATGGAGCAACATCGCCAGCATCGCCAGCTC  
TACCTGGAGGCTTTCAGTTCGCTGTGGTTAACCCAGGAAAAACCCGCATTGGCAATCAATGCGACGTAGCGATGCCGAC  
AACCGTGCATCGCGGACACTCAACCTGAACCTACTGTTGCGAAGCTGGGTACGTTTCAGCATCAGCTACAATGATGA  
CCGCGCTACAACAGCCATTATTACACGGCAGATTACTATCAAGTGTCTACAGCGGTACCTTTGGTTCCGTTGGCTTGC  
GGGGCGTATTCCAGCTTAACTGCAAAACATGCTGGCCAGCAGCAGCCAAATACAGGAAAATATATCGCTCTCGATCTC  
CTGGGCAACTGGTTTAGCGCAGGGATGACCCATCAAAACGGCTACCCATGGCAAACTGTCAGCAGCAACAGTTTGA  
TGAAGGAACCATTCGCACCTGTTGGTGCCAACTCTGTACAGGCACTCTCCGGCGATACCGGTGATGACAAAACCTCAGCG  
GTGGGCGTATGACACAGTTCGACGCTCGTTAGCCAGCGGAACGCTGAACGTCATAGCGGGCGGACGGCTACATCAAT  
ACCAATTTGACCGCAACGGCAGCGTTCGCTGCGGAGGTTAAAACATCGCTGCGCAGCGGGCGGACCGATGCGCAACG  
GGTGATATTCGACACTGGCTGGAGAACGATGGTCAGATCAGCGCCAAAATCAACGGGCGGATTTTCCGCTTAAACGGCA  
AGCGTAACCTATCTCCCGTCTCTCCCTATGGAAGATATGAGGTGGAGTTACAGAACAGCAAAAATTCCTCGACAGTTAC  
GATATCTGACGCTGCAAAAAGTTCATGACTCTCTATCCAGGCAATGTCGTCATGAGCCAGAGGTGAAGCAGAT  
GGTTACCGTCTCCGGTTCGTTCCGTTGCGGAAGACGGCACACTGGCTGAGTAAACGACCGGATTAACAACCATCTCCGCGAA  
CCCGAACCGATGAAAACGGCGAGTTTGTATGGACGTGATAAGAAATACCCACTATCGATTTTCCGTACAGTGGCAAT  
AAAACCTGCGAAGTGGCACTGGAACCTCAACAGCGCGCGGTGCGCTGCGGTGCGGTGATGTGGTCTGACAGCGCCTCTC  
ATCGTGGGCGGCGGTGACGAGACAGGAGAAGAAATGAGAGTTAA

>Cluster\_61749

ATGACCAACCACTGGGTGACATCAAGAAGCCAACTCGTCTGGTGTATGGGCGGTAACGCCGCTGAAGCTCACCCGGT  
CGGGTTCGCTGGGCGATGGAAGCCAAAATTCACAACGGCGGGAAGCTGATTTGTGATCGATCCCTCGCTTACCGGTACGG  
CGGCGGTAGCTGACTATGCCCCTATTCGTTCCGGTACTGACATGCTTTTCTGTCAGGCGTATTGCTGTGATCGTGTG  
AACAAATGAAAATTCACCGCGAATACACCGAAGCCTATACCAACGCCAGCCTGATCGTGGTGGAGATTACGGCTTTGA  
AGATGGCCTGTTACCGGCTACGACGCGGAAAACGCAAGTACGATAAATCCTCCTGGACTTATGAACGAGCAAAAACG  
GCTTCGCCAAACCGGATACACCGCTGCAACATCCGGCTGCGTGTGGAAGTGTGTAACAGCAGCGTTTCCCGCTACACG  
CCAGATGTGGTTGAAAACATCTGTGGTACGCCAAAAGAGCGCTTCTGAAAGTCTCGGAATACATCGCAGAAACCGATG  
TCACGATAAAACTGCCTCGTTCCTGTATGCCCTCGGCTGGACGCAACACTCCGTTGGTGGCAAAAACATTCGTACGATGG  
CGATGATCCAGCTGCTGCTCGGCAATATGGGGATGGCAGCGCGGCGGTTAACGCCCTCGCGGCTCACCTCAATATTCAG  
GGGCTGACGGACCTGGGGCTGCTGTGCGCAGAGCCTGCCAGTTACATGACGCTGCCAAGCAGAGAAGCAGACCGATCTGCA  
AACCTACCTTACCGCAACACCGCAAAACCGCTGCTGGAAGGCCAGGTTAACTACTGGGGCAACTACCCGAAATCTTCTG  
TCTCTATGATGAAGGCTTCTTTGGTGAATAAGCGACGGCGGAAAATAGCTGGGGCTTTGACTGGTTGCCGAAGTGGGAT  
AAAGGCTACGACGCTCTGCAATACTTTCGAGATGATGAAAGAGGGCAAGGTCATGGCTATATCTGCCAGGGCTTTAAACC  
TGTTGCCTCATTCGCAACAAAACAAAGTGTATCGGTTGTCTGTGCAAACTGAAGTTCCTCGTACCATCGCAACCACTGA  
ACACTGAAAACCTCTAACTTCTGGCAGAACCCAGGCTGAGCTGAAACGAAAGTTGACTCGTCAAGATCCAGACCGAAGTGTTC  
CGTCTGCCATCGACTGCTTTCGCGGAAGAGAACGGTTCATCGTTAACCTCAGGTCGCTGGTTACAGTGGCACTGGAAAGG  
TGCGGACGCCCCGGGGATTCGCGTACTGACGGCGAGATCCTCTCCGGTATCTTCTCGCCTTGGCAGAGATGATGCCG  
AACAGGGTGGCGGCAACCCGGACAGGCTGCTGAACATGACATGGAACACTACGCCATTCGCGATGAGCCATTCAGAAAG  
GTGGCGATGGAGAACCGGTAAGCGCGTGGCCGATATTACCGATCCGGCAACCGGTCGCGTTATCGTCAAGAAAGGCCA  
ACAACCTAGTTCGTTTCGCCAATTCGCGGATGACGGTACAACCTCCTGTGGCTGCTGGATTTTCCGCGGTAGCTGGACCG  
CGGAAGGCAACAGATGGCAGCGCGTGATAACGCGGATCCGCTCGGCTCGGTAACACGCTGGGCTGGGATGGGATGGC  
CCGCTTAAACCGGCACTTCTGTATAACCGCGCTCCCGCAGATCCGCGAGATCCGCAAGGTAACCCGTTGGGATCCGAAGCGTCA  
GAAATGGGACGGCACTAAGTGGACCGGCTGGGATATTCGGACTACAGCGCAGCGCTCCGGGTAGCGGCGTCCGGCCGT  
TTATCATGACGAGGAAGCATGGGCGCTCTGTTTGCCTCGATAAGATGGCGGAAGGTCCTTCCCGGAACACTACGAG  
CCGTTTGAACCGCGCTGGGAACTAACCGCTGCATCAAACTGTTATCTCGAACCCGGCTGCACGTATCTTAAAGACGA  
CCGCTTAAACCGGCACTTCTGTATAACCGCGCTCCCGCAGATCCGCAAGGTAACCCGTTGGGATCCGAAGCGTCAAGTGT  
GAAATGGGACGGCACTAAGTGGACCGGCTGGGATATTCGGACTACAGCGCAGCGCTCCGGGTAGCGGCGTCCGGCCGT  
TTATCATGACGAGGAAGCATGGGCGCTCTGTTTGCCTCGATAAGATGGCGGAAGGTCCTTCCCGGAACACTACGAG  
CCGTTTGAACCGCGCTGGGAACTAACCGCTGCATCAAACTGTTATCTCGAACCCGGCTGCACGTATCTTAAAGACGA  
CCGCTTAAACCGGCACTTCTGTATAACCGCGCTCCCGCAGATCCGCGAGATCCGCAAGGTAACCCGTTGGGATCCGAAGCGTCA  
GAAATGGGACGGCACTAAGTGGACCGGCTGGGATATTCGGACTACAGCGCAGCGCTCCGGGTAGCGGCGTCCGGCCGT  
ATTCGCCAGGGCGATACCGTGAAGTCTCCTCCAACCGTGGCTATATCAAGCCAAAGCGGTTGGTACCAACCGTATTCG  
CACGCTGAAAGCGAACGGCAAGATATCGATACCATCGGATTTCCGATTCCTGGGCTATGAAGCGGTAGCTAAAAAAG  
GCTTTATTGCCAATCTTAAACCGCATTTGTTGGTGTATGCGAACACGCGACGCGCGGAGTTTAAAGTCTTCTTGTGAAAT  
GTGAAAAGGTGTA

>Cluster\_17743

ATGCCAACAGTACCAACAGTACCAGGCTGCTCAGTTCGAAAGCAGAGGTTTTCAGTCTCTGGTTTTCAGGCATTCGATCA  
GCCAAATATCGGAGATGCCCTGACGCGAGTTGGTGGTAAAGCACTTGTATGTTTTTGTCTCAGGCAAAAACAGCGCGCGATG  
TTGCTCAGGCTCAGGATGATCATTTGCAACTCAGCCAGATTTCCAGTGTATCTGCTAACCAACCCGGATACCGGCTTCTA  
AACATGCAGGGTAAGAAGCTCTTTGGCAAGGGGCGAGTTTATACCCAGCAATTCGATGCTCAGGCAGAGCAGATCGCGAT  
GACATTTCCGGAAGGTGCCCGGGCTGGATTTATACAGCAGGCTCAGCAGCAGCGCATTTCAGTTCAACCCAGCCAGGCTGGGA  
GGCATGAGATAAGCCAACCTCAATGCCTATGAAGAAGGTCAGTTCCAGGCGACTCTGGCGAACAACGGAAAACCTGGCTGCT  
GCCGCTATGGTGTAAATGCCAATATGTTCTCTACAACAGCAGACTTTCAGCAGATCGAAGATTAAGGCTCCGCTCA  
TGGCTGGAGTTCTGAACAGATTCAGGCCAAAAGATTGAGTTCAAAGAGAAGGTCGCCGATGCTTCCCTTTCTCAGTGGT  
GGCAAAATAATTCCAGTTCATCCAGAGCAATGGCGAGTTTAAAGCGATACAGTTACTGGTTCCCGCGTGCAGATCA  
GAAGGTGGTTCTGGTGTAGCGCCCGTGGCATTGCAACAACAACCCAGGAAACCTCGAATACAGCAAAAACCAATCCGTG  
GGTGGGCCAGACCGGTGATGATGGTTCGATTTGCAAAAATTCGAAACGCCAGAACACGGCATTCCGGCGCTTGGACGCAACC  
TGCTGTATACAGAGACAGGATTTGATCTGTAACGAGCATTTAATCGCTGGGCACCGCGCTGACAAATAACAAC  
ACTGACCCCTATATTCAGGCAGTATGTGCTCAACTCGGTTGTGACGCTGACCGCGCTGATGCTCAACCGCTGATGCTCA  
GCTAAAGGCTTTGTGTGCTCCATTATCCAACATGAGAACGGCAGTACGCGTACAGCGATCAGCAACTGCTACCGGTG  
TTAGCGCGCAATTTGGCTCTCTCAACTTCCAACAGCACAAGCGCTATACCGGCAATGCGGCAATTCGATGACGATCT  
CCGGAGCCCAAGCGACATTCCTTCGCGAGGCTGACAGATCCGTAACAGCAGCAGGCTGAATACCGCACCAATATCGA  
CAGCGCGCTACGCGATGCCAGCGCGCATACATGCGCGGAGTTGATTTCCGCAACGCGCTACGCAAGACGACTTCTCTG  
CCGCTACGGCTGCGGGAGGAAATCTACGCTATACCGAGTTTTCGCAACACGAGATCGCAGGGCAGTACATAGGATCG  
TTTCGCAACATGCCAGCAGCAGCATTCAGGCAGCAGTAAAGAAATCTGAAGCCAGATACTGGTGAACCTGGCGAAGGATA  
TGCAAGCGCGCCAAACCTATGACCGCTTGTCTGTGTCAGTACGTTCTTTCGCGCAACGTAAGCAGACGCAACCTATC  
AGTTTTCAGTTCTTCCGGTCAAAACAAAGCCTATTGATATGACCAACAGAACAAATTTCCGGCCAGACGATTTCCCTTCG  
GCTTCTCAGGCTGTAGATCTGGCTAAGTCAACGGTACGCGCTGACGTTCTTTTCCAAGAAAGAGGCAATCAGATCGG

GGCTTCTTCCGCGATGCACCAGTTCCTCAGCAGACTGCATATCTCGACACCATTCCGGCAGAGCACCGGGGGCGGTCCAGG  
TATATATGTCAGCCCTTCAGCAGATAAGCACCAATGCGCCATCAGCAGCAGTAGCTGGGATCCGATGGATAAGCCAGGA  
GGAGTGGTAGCTGAGAAAACTGGTTTAAACCTGATGTTTCTGTATCACCAGAAACAGCAGCGCAACCATCTGTCCGG  
TGCCGCGGCTCGTAAAGGAACTGATGATGCTAAGGGCAGTACCAATGCCGAAGGATAACGATCTCGACTAGAGTTTCTG  
ACATGGTGAAGGATTTGCGCGGTGACGCGCAGGGTGCATCAATGGCCATGAGATAGCAAAGGACTTATACGCTGGG  
GTGATGGCGAAGAAGGTTGGTTTCCGGTGAAGTTGACAGTGCACATGGAAGCAGGCTGTTAACGTAGCTACTGGTGG  
CGTGCACGATTATAACGGGATGGGAAGTGTCTTTTGGCTTGGGGGATGTCTGCCGAACAATTGATAAACAAGTTGATC  
AGGCATGGAAAACTCAGGTGACTGGCGCAGGAATTAAGCACCGCCAGGCCAGTACGGTCTGCAAAGCTATGGAGATAGC  
CAGTATCTGGTGAACCTCGGCACCTGGTATTTGCTGAAAGATGATGGAACCTCTGTCTCATCGACCTTACCCAACAGCC  
CCAGAGATTCTCAGAGGGGATCCCGCAATGA

>Cluster\_21513

ATGCTGGGTAAATAAAGCCGTTCTCGCGCTGTTATTACTGATTATTCTTGTGCCGTTGACGCTGCTGATGACGCTCGG  
GCTGTGGGTTCCACGCTGGCGGCATCTGGCTACCGCTCGGGACAGTATTGCATTAGATGAAAGCCACGCAATTACCG  
GTAAAGTTTAAATCATCCCCGATCTCCGTTATCTGGTGGGAGATTGTGAGCTTGGCATAATCACCACGCCAGCCTTTCA  
CATCCAGCCGCTGGTTATTGAACGTCGGCAGCGTAGAAGTATTCTGCTTGTCTGGCGAAATTGCCGAGACGGGAGCA  
ATCCGCAAGCCGCTCAAAAAACCTCGCGCAGTGGCAGTCCATGCTGCCAACACCTGGATCAATATCGATAAACTGATTT  
TTTTCTCCCTGGCAGGAATGGCAGGAAACTCTCTCCGATTAACCTCCGATATCCAGCAACTGTGTTATCAGGCGAA  
AAAGTTAAATTTCAAGGCCAGTGAAGGGCAACAACCTTACAGTACGCAACTGGATGTGCCGCGTTTGAANAATCAGCC  
GCCGGTAAAACTGGTGGGGAAATTTACTATGCCCTCGTGGCGGATGGACTTCCGGTAAGTGGTCATGCTACTGCGACGT  
TAAACTTGGCCGAGCAACCGTCTGCTGATTTGCGGTGGCAAAATTACTGTCACCAATTGACCGTAAGCGATGGTCTGGAG  
CGGATAACCGCGCAACCGTGTCTGATTTGCGGTGGCAAAATTACTGTCACCAATTGACCGTAAGCGATGGTCTGGAG  
CTGGCGTATGACAGTTTTCTTTAAGTGGCCGACTGGGTGTCAAAGTGCACAACCTGGCAGGCAGGGCTCGAGAACGCTC  
TGGTACGCGGGGACTGAGTGTGCTGACCCAGGGGCAAGCGGGTAAAGGCAACGCGGTGTTAAATTTTGGCCAGGAAAA  
TTAAGCATGGCAACAACAGCAGCTGCTCTGACAGTGCAGGTTAGCGTGAAGCGAAACAGCGGACCTCATTTTATATGCCGTT  
ACCTGGCAGCTAAGCGGGAGTCTGTCTGACCCAACGCTGACCTTTGAGCCAGGCGGTTATTACGTTGCAAGGGAAGAG  
TCATCGATTTCGCTGGACATCGATGAAATCCGCTGGCTTTAGCGGGGGTAAAGTACCCACAGTGGTGTGATGGACGT  
TTGACGGCCATTTTTCAGGCGCATGAAAATGAACTGGGCGATTTCTGTGCTGCATATGGATGGGCTGGCGAATGATTTCT  
CCCTGACGCTGGCCGCTGGCAGTGGCGCTACTGGGAAAGGGAGTTTACACCGATGATGCAAGTGGCCTGGGATGTCGAG  
GAAAAGTGTAGTGGCATGACAGCAGGATTACGCTGACCGATCTCTCCACCGGTTTCGACCAGTTACAATACGGTACGATG  
ACGGTAGAAAAGCCGCGATTAATTTCTCGACAAGCCGTCGTCTGGGACGTCAGCAGCAGCATCCCTCTTCAGCGGTGC  
GCTGTACTGGACGCGGGCAACCGCTTCTACTGGCGGCAAGTGTGTTACCGCCATCAACCTTAAATTTAGCGTGCATG  
GGCGGATCCGACGATTTCTCTCTTTAAAGCGGATTTACATGCTGGTGAAGATTGGCCCGGTTCCGGTAAATGGTCTGG  
GACGGTATTCGCTGCGCGGTAACGCTGGTGGCTAAACAATCACTGACTGTATCCAGCCGCTGGTGCACCCGACTG  
GAAGATGAACTTACGCGATGGTGAACCTGATGCTCAGGTCGCATTTTACGACGCGCCGAAACAAGGATTCGCGCGGGAG  
GACACGGCGTGTGAAGGCGGTAGTGCCTGGATGCCAGATAATCAGGTTAACGGTGTGATTTTGTCTCGCTTTCCGTT  
TTTTCCGATGGAGCTGGCAGTCTGGGACTCGCGGCCGTTTACTGTTGCGAATTGCGGAAGTGAATTAATCTGGTACAGC  
GAAAATATTTACGGCTGATTTGCAAGTCTGTTAATCCGTTGACTGAAGAAGAACATTGCTGTTGACTGATGTTAGCGTGC  
ATGTGTTAGCGGTAAACGCTGATGAAACAATTACGTTGCGCAACATGACCCGGCGCTGTGCGGCTGAATAATCTTT  
TCCTCCAGCAACTGGTTAGCGCCGCTCAATCCGAAACAATTGCCATGTCGGGGCATTTAGTGGTGCATTTCCGCTTATG  
GCTAAACAACGAAAATGGATAGTGAAGACGGCTGGCTGGCTAATAGCGGGCGATGACCTTCCGGCTGGATAAAGACA  
CCGAGATGCGGTGGTGAAGACAAATGACCGCGGTTTCAGCAATTAAGTGGTTCGCTATATGGAATTAGCGGTTCA  
TCGACAAAATTAATTTAGATAATCTCGGTTTATTAACCATGCAAGCCAAATATACAGGTACCAGTCCGCTGATGGTAA  
AAGCGTACGGTAAATTTAATACCATCATGAAGAGAATATTTTACGCTGTGGCGAGTTTACGCTTTGGGATAAATTC  
TCCAGGCATGGCTGGAGCAGAACGCGCTGCTGCCGGAAATGACTGTCCGCAAGGAAAAGAGTGTGAGGATAAACAATGA

>Cluster\_36865

ATGACCAACTACAGCCTGCGCGCACGCATGATGATTTCTGATCCTGGCACCGCTCCTTATTGGTTTATGTGAGTAT  
CTTTTTCGTCGTGATCGTATAACGACTTGCAGCGTCAACTGGAAGATGCGCGTGCCAGCATTTAGAGCCGCTTGCAG  
TTTCTACTGAATATGGCATGAGCCTGCAAAAATCGGAACTATCGGTGAGTTAATAAGCGTACTGCATCGTCCGCTTCC  
GATATTGTCGCGGATTTCCGGTTATGATGAAAATAACCGACTCTTTGTACCTCCAATTTTTCATCTGATCCCTCATC  
AATGCAGCTCGGCAGCAACGTCGCGTTTCTCGCCAGCTCACTGTCACGTCGTCAGCGGATATATGATCTCCCGCACGC  
CGATTAATTTCTGAGAGTTACTCCCCAGCAAACTCGCCAGTACGCGATGCAAAAATAGTCAAAAATATGTTGGGATATAT  
GCGCTGGAGCTGGATCTTAAATCGGTTCCGTTGACGAAATATAAAGAGATCTTTATTTCCAGCGTATGATGCTGTTTTG  
TATCGGATTTGCGCTTATTTTGGCTGGCGCTTAAATGCGCGATGTAACCGGTCGCAACATGGTGAATACCGTGC  
ACCGCATCCGTCGCGGCAACTCGACGCGGGTGAAGGATTTATGCTCGGCGAGCTGGATATGCTGAAAACCGGATC  
AACTCGATGGCAATGTCGCTGGCTGCTTATCACGAAGAGATGCAGCACAAATACGACAGCGGCTGCGATGCGTGA  
AACGCTGGAGCAGATGGAATTCAGAACGTTGAGTTAGATCTGGCGAAAAGCGCGCCAGGAAGCGGCGCTATTAAT  
CCGAGTTTCTGGCAATATGTCACACGAGCTGCGTACACCCTGAATGGTGTATTTGGCTTTACCCGCTGACGCTGAAA  
ACAGAATTAACACCAACGAGCGGATCACCTGAATACGATTAAGCTTTCGGCAATAATTTGCTGGCAATTAATTAATGA  
TGTCTCGACTTCTCGAAACTGGAAAGCAGGTAAGCTGATTTCTGGAAAGTATTCCATTCCACTACGACAGCAGCTGGATG  
AAGTCTGTTACTCTGCTGGCAGATTTCTTTCACGATAAAGGGTTAGAATGACGCTCAATATTAAGGACGCTGCTGAT  
AACGTGATCGCGGACCGCTGCGATTACAGCAATCATCACTAACCTGGTGGGAAATGCAATTAATTTACCGAGAATGG  
CAACATTGATATTCTGGTGAAAAACGCTGCGCTGAGTAATACCAAGTGCAGATTGAAGTGCAGATTCCGGATCCGGCA  
TTGGTATTCTGAACGCGATCAATCGCGCTTATTCAGGCCTTCCGACAGGCTGATGCCAGTATTTCCCGCGTCAATGGT  
GGCACCGGGCTGGGGCTGGTGTATACACAAAACCTGGTTAATGAAATGGGCGGCGATATTTCTGTTCCATAGCCAGCCGAA  
TCGCGGTTCAACTTCTGGTTCCACATTAATCTCGATCGAACCCGAACATTAATATCGAAGGGCCATCCACCCAGTGC  
TCGACGGTAAAGCGCTGGCCTATGTCGAACCAACTCGCAGCAGCGCAATGCACGCTGGATATTTTAAAGTAAACCGCC  
CTGGAAGTGGTTTATAGCCCAACGTTCTCCGCGTGCCTCCCGCGCATACGACATGATGTTGTTAGGCATCGCGGTGAC  
CTTCCGCGAGCCGTAACAATGCACATGAGCGATTAGCGAAAGCGGATCGATGACCGATTTCTGATGCTGGCACTTC  
CTTGCCATGCACAAGTCAATGCTGAAAACCTCAAGCAAGATGGATCGGCGGCTGCTGCTGAAAACCTTAACACCTACA  
CGCTGTTGCGCTGACCGGATTTTGTCTATCAACAACAACCGCTTTTGCCTGTAACCGATGAAAGTAACTGGC  
AATGACAGTATGGCGGTTGATGACAACCCGCTAACCTGAACTTATCGGCGCATTTGCTGGAAGATATGGTGAACATG  
TGGAACTTTGCGATAGCGGGCATCAGGCGGTTGAACGGGCAACAGATGCGGCTTCGATTTGATCTTAATGGATATTCAA  
ATGCCGACATGGATGGCAATTCGGGCTCGCAACTCCACCACTCCCGCATCAGCAACAACCGCGGTTATTCGCGGT  
AACGGCGCATGCAATAGCCCGGGCAAAAAGAGAAGCTGCTTGGCGCAGGATGAGCGATTATCTGGCGAAACCGATGGAAG  
AAGAGCATGTCATAATTTGTTGTGCGCTACAAGCTGGCAGCGGATTTCTCTCGGTCGTGACGCCGAAGTCAAC  
GAAATTTGGTGAACCGAATGCAACCTGCACTGGCAACTGGCACTACCGCAGGCGAGGAAAACCGATTTAGCGCG  
CGATATGCTGCAAAATGTTACTCGATTTCTGCTGAAAGTTTCGCAACAAGTTGAGGAACAGCTGGTTGAGAAAACCGG  
AAGGCTGGTGTGATTTGATTTCAATAACTGCATGGCAGTTGGCGTATAGCGGTTGCCAGTATGAAGAACTCTGCCAA  
CTGATCGAACACAGCTACGTAGCGGTAATAAGAAGAAGATTTGGAACCGGAGCTGCTGGAACCTGTTGGACGAGATGGA

TAATGTGCGCGCGGAAGCCAGCAAATTTCTCGGGTAA

>Cluster\_46586

ATGCGTCTGGATCGTCTTACTAATAAATTCAGCTTGCCTTGGCCGATGCCAATCACTTGCCTCGGGCAGCACAACCA  
ATTTTACGAAACCCTTCATTTAATGAGCGCCCTGCTGAATCAGGAAAGGGGTTTCGGTTAGTCCCTTTATTAACATCCCGTGC  
GCATAAATGCTGGCCAGTTGCGCACAGATATCAATCAGGCATTAATTCGTTTACCGCAGGTGGAAGGTACTGGTGGTGAAT  
GTCACGCCATCACAGGATCTGGTGCCTGTTCTTAATCTTTGCGACAAGCTGGCGCAAAAACGTTGGTGATAACTTTATCTC  
GTCAGAACCTGTTCTTCTGGCGGCACTTGAATCTGCGCGCACGCTGGCGGACATCCTGAAAGCAGCAGGGGCGACCCG  
CCAACATTTACTCAAGCGATTGAACAAATGCGTGGAGGTGAAAGCGTGAACGATCAAGGTGCTGAAGACCAACGTCAGGCT  
TTGAAAAATATACCATCGACCTTACCGAACGACGCCAAGCGCAAACTCGATCCGGTGAATGGTGGTGGTGAAGAAAT  
TCGCCGTACCATTTCAGGTGCTGCAACGTCGACTAAAAATAACCCGGTACTGATTGGTGAACCCGGCGTGGTAAAACTG  
CCATCGTTGAAGGTCTGGCGCAGCGTATATCAACGGCGAAGTCCCGGAGGATGAAAGGCCGCCGCTACTGGCGCTG  
GATATGGGCGCGCTGGTGGCTGGGGCGAAATATCGCGGTGAGTTTGAAGAAGCTTTAAAGGCCGCTTAACGATCTTGC  
CAACACGAAAGCCAGCTCCTCGTTTATCGACGAATACATACCATGGTTCGGCGCGGTTAAAGCCGATGGCGCAATGG  
ACGCCGAAACATGCTGAAACCGCGCTGGCGGCTGGTGAATTGCACTGCGTAGGTGCCACGACGCTTACGCAATATCGC  
CAGTACATCGAAAAGATGCTGCGCTGGAACGCTGTTCCAGAAAGTGTGGTGGCGGAGCCTTCTGTGAAGATACCAT  
TGGCATTCTGCGTGGCTGAAAGAAGCTTACGAATTGCACCACCATGTGCAAAATTAAGTACCCGGCAATTTGTCAGCGG  
CGACGTTGCTCATCTGCTACCTGCTGACCTGCTGACCTGCGGATAAAGCCATGACCTGATCGATGAAGCAGCAATCGC  
ATTCGTATGCAGATTGACTCAAAACGAGAAGACTCGACCGACTCGATCGTCTGATCATCCAGCTCAAACGGAACAACA  
GGCGTTAATGAAAGAGTCTGATGAAGCCAGTAAAAAACGCTTGGATATGCTCAACGAAAGAACTGAGCGCAAAAGAACGTC  
AGTAACTCCGAGTTAGAAGAAGTGAAGAGCAGAGAAGGCAATCGCTTTCTGGTACGACAGCAATAAAGCGAACTGGAA  
CAGCGCAAAATCGTATTGAACAGGCTCGCCGTGGGGGACCTGGCGCGGATGCTGAACTGCAATACGGCAAAATCCC  
GAACTGGAAGCAACTGGAAGCCGCAACGACGCTCGAAGGCAAACTATGCGTCTGTTGCGTAATAAAGTGACCGACG  
CCGAAATGCTGAAAGTCTGGCGGTTGGACGGGGATTCCGGTTCTCGCATGATGAAAGCGAGCGGAAAAACTGGCTG  
CGTATGGAGCAAGAACCTCACCATCGCTGATGGTGAAGCGCAAGCGGTTGATGCGGATCTAACGCTATTGCGCGTAG  
CCGTGGGGGTTGGCGGATCCAAATCGCCGATTTGGTTCATCTGTTCTCGGCCAACGGGTGGGGAAAACTGAGC  
TTTGTAAAGCGCTGGCGAACTTTATGTTTGAATAGCGACGAGGCGATGGTCCGATCGATATGTCGAGTTTATGGAGAAA  
CACTCGGTGCTCTGCTGGTGGTGGTGGCCTCGGGATATGTCGGTTATGAAGAAGGTGGCTACCTGACCGAAGCTGTGGC  
TCGTCCGCTGATTTCCGTATCCTGCTGGATGAAGTGAAGCGCAATCCGGATGCTTCAACATTTCTGAGGTTAC  
TGGATGATGGTCTGACTGACGGGAGGAGAACGGTTCGACTTCCGTAATACGGTGTGCTATTATGACCTCAACCTC  
GGTCCGATTTGATTCAGGAACGCTTCCGTGAACTGGATTATGCGCACATGAAAGAGCTGGTGTCTGGTGTGGTAAAGCCA  
TAATCTCCGTCGGAAATTCATTAACCGTATTGATGAAGTGGTGGTCTTCCATCCGCTGGGTGAACAGCACATTTGCTCGA  
TTGCGCAGATTCAGTTGAACGCTGTGACAAACGCTCGGAAGAACGCTGGTGTATGAAATCCACATTTCTGACGAGCGCTG  
AAACTGCTGAGCGAGAACGGTTACGATCCAGCTATGTTGACGCTCTTTGAAACGCTGCTATCCAGCAGCAGATCGAAAA  
CCCCTGGCACAGCAAACTACTGCTGGTGAATTTGGTTCGGGTAAAGTATTCGCTGGAAGTTAATGAAGACCGGATTC  
TCGCCGTCAGTAA

>Cluster\_41703

GTGAATAACCCATTTGAGGCCGTCCTCAGGCGGTTAACTCCCTCGTACAGCACTGAAACTGCCTGACGAATCCGCAAA  
GGCCAATGAAGTTCTGGGCGAAATGAGCTTCCCGCAGTTTCAGCCGCTGCTGCGGTACCGTGAATACAAACGGAATCCG  
GTCGTGTTCAATGACACACAGATGGGCTTTATGCTGGAAGCCATCCCATCAATGGGGCGAATGATCCATTTGTGGAG  
GCCCTCGATCACATGCTGCGCACAAACTGCGCGCGGTTATCCGTTGTGATCCATCTGATGTCAGTCAACTGGTTGG  
TGACAGGATTGAATACGGGCTGCGTGAATCTCCTGGTCAAGTGAACAGGCTGAACGGTTTAAAGCCATTACCCGGGCT  
ATTTATGAAAGCGGCGACGACAGTTTCCGCTGCGGAGGGGATGAATCTGCCCTGACCTGCGCCATACCCGGGTTG  
TTTATCTCGTACTGTTCTCCTTTCGAAGAAAAAAGCCGGGCGACATTTCTGAAATGGAACCTGGTGAATACTCCG  
GGCGTCTTACAGGGGCGAGTACACACAGCAGGTTGATGACAGGCTTTATCGATATTTGTCGGGGAGATGATTA  
ACCATAACCCGACTCCTGTAACCGGAAAGACGCTGAGCTGGACCCGATTTCTGATCTGAATTTACAGTGTGGAGGAC  
AGTTTTGATCTGAAAGTCCAGGCTGATTACCTGACGCTGGGCTGCGTGAAGACGGCAGGACAGCAGCGCCGCTCCT  
GAATTTCCATCTGGCCGTTAACCGGAAATCGCTTCCGTGGAAACATGGCCGACAACTACAGCAACCTGCTGAACCCG  
AACTGTCCATCTCCTGTCGCTTATCTGACGCTGACTCTGGTGGTGAAGACAGGTTGAAACCCACAGCGAAGCCAA  
CTGAAGTACATGGACCTGGAGAAAAAGTGAAGACCTCCTATGCCAAATGGTTTCCGTCGGTGGAGAAAGAGGCGAAGGA  
GTGGGGGAACTGCGTACGCGGCTGGGCTCCGGTCACTCCTGGTGTCTTACTTCTCAACATCACAGCTTCTGCA  
AGGCAATTAATGAAACCGGCACTGGAAGTGAAGCAGGACATCTTCAACAGCTTCCGTAATAAAGCGTTTGGTGAATTC  
CCGCGCTTTAACACATGCGCAATTTCTGACCTGCTGCTGCTTTATGGCCGGAAAGGGTTGTTTAAACAGCTGAAAGA  
GGCCGAGTGGTACAGCGCGCAGAGGCTTTAATGTGGCAACCTGATGCCGTTAGTGGCGGATAACCCCTGACACCCG  
CAGGTCTGCTGGCACCCACTACCGTAACAGCTGGCGTTTATCGATATTTCTTCCGGGGATGAATAACCAACTAT  
AACATAGCCGGCTGCTGGCACCTCGGGGCGGTAACCCGGCTGATACAGCCACTTATCCGCGACGCTGCGGACTCCG  
GGCTTTGCGGTTGTTGCGACATGGGGATGGCTACAAGTCCCTGTTGAGAACATGGGGGCGTATATCTGGACGGTG  
AAACCTGCGCTTTAACCCGTTTTCGAACATCACCGATATTGACCACTGAGCGGAGCGTTCGCGGACAGCAGCTGCTG  
ATGGCAGCCCAACGGTAACTGGATGAAGTGCATGAAGTCTGCTGTCGAGGCTCAGGCGATCATGGCTGGCCAA  
AGAGAACAGAGCAGTATTGATGACGTTGGATTTCTTGAAGAACCGCAGTACAGCGAGCAGTATGCGGATCACCGA  
CTATCCGAGCCGCTGGAGCAAAATGATGTTGCTGCTGACAGTACACTGCCAACGGCACTTACGGCAGTATTTTAA  
TCTGATGAGCCGCTCCTGCGGATGACGCAAAATGGTGGTGTGGAGCTGGGCGGACTGGAAGACCGTCCGTCAGTGT  
GGTTGCGGTGATGTTCTCCCTGATTTACTACATCGAGAACAGGATGACCGCAGCGGTAACCTCAAGAACTGAAGC  
TTATTTGATGAAGGCTGGCGTCTGCTGGACTTCAAAAATCACAAGTTCGGTGAATTTATGAGAAAGGCTACCGTACGGCC  
CGCCGTCATACCGGTGCCTATATCACCATCACAAAAACATCGTGCATTTGACTCTGACAAGGCTTCCAGTGTGCCG  
CGCGCATGGGGCAACTCCTCTACAAAATTTCTCAAAACAGAGTGCAGAGGAGTTCGCGAAATACAAACAGCTGTATC  
CGACAGTTCCAGCCACTGACGCTGACATGATGTTGGTGGTGGCGGCAAGACAGTGGTTCAGTTCTTCTCCTG  
CTGACGTTGAAACCATTTCTCCTGGCATGCTGTTTGGTGGACCCGTTAAGCCGCGCATGTACAGCTCTGACGGCC  
GGATTTTGAAGTTTGTGACGAGAAACGTAAGAGGGGCTGAGTATTATGAGGCGGTTGGCAGCTGGCGTGGAAAGT  
CAGGGCCGAGATGGCTTCGCTGGAAGCCTGGCTGGAAGAACATGAGAAATACAGGAGTGTTCATGA

>Cluster\_39486

ATGGCTAATTACCGTGAATTTGTTAGAGCAGGCTGGCGCACGTTACGGTGTGCCAGAAGGGTTGATGACTGCCTGGGTGC  
CAAGGAGTCTTCTTACAACCTGCGCAGTAAGCTCCGCGGGGCTGTAGGATGACTCAGGTCATGCTGGGACATGGC  
GTGATATGGGTTATACCATGAGCAATGCAAAAACCCGAATATCAGGCTGACGCTGGCGCGGCTATCTGGCAAGATG  
TACCAGCAGTTTGGTAACTGGCGTGAAGCTTCTCAGGCTTATCACAGCGTCCCGCAACGTTATGAAGGCAAGCGTGG  
TGAATATACTCCAGGACCTGAAGCCCGGTTACGTTGATGATCGCTTTGCTCAATGGGCGGGTGACCCGGTACAGACT  
CAACAGTCCGAACAGCGCGCCACTCTGCAAGGTACATCTCAGCAAGACCCTAACCAACCCGTTTGCACAACCTGGAAGCA  
CAGTACCTCGAACAACTGCGCATCAGGCGTGCAGTACAGCCAAATATCCATTGCTCAGATTGACGAGCAGCAGCA  
CAGTACAGCAGCCACTAACCCGTAAGTTCTGTACACCGAAACCTGTTACAGCAGCAAGCGGAAATAATGCTGACCTTG  
GTAATGGACTTGTGAAACCGGGCGCGGTTACTACAGGCAAGTCAACGATAGCAACATACCTGCTGAACCTACTGAT

GCTGTAACAAGCGCGGGCGCTTGGGCTGGCGGTAAACTCGGTATTGGCGATGGTACATATCAACCAGCACCACGAGTAAC  
AACCGAGGATTAGAGCAGGACTTTGGCCCTTACAGCAAGCGCGCTGACTCCACAAACGACAGAGGGAAGGGTATTGCTG  
AAGCATTGCCCTTACTCTACTCTGCTGGCGTTGAGAGAAGCGCAACACAGGCACCAACTTGTGTTGCGAATGCTCAT  
GGGCAACACGACTTCTCCGAGAAAACGAGTTGGATCACTTGTGCAAAATAGTGCAGAAAGATGATGCGGAAGCACTCC  
CACCGATTAGGCTTTAAGCGAAAACATCAGAAATTCGGCGTCCGCGGTAATCGACTGGAGCAGGTTAGAAATGCTATG  
TTCGTTGCTATGCGCCAGAAGCGCAGCAGGCTATCAGATTGCGAGAGCGTGAAGGAGTTCCTCTGCACACCACAGAC  
CTGTTACAGCCTACTTCCCGCTCGGAAAATGGCGCAGACTACAGCAGAAAATATCCCTGCTGGCACAAGCGGAAT  
GAGAGCAACGCAACAGGAAGCGAGAAGTCAAGTTGGTGCAGAGATTGCTGATAAAATTCGGCGAGTACGATCCGCGAGTTG  
TTATTGACAGCCTTAAAGCGAAAACATCAGAAATTCGGCGTCCGCGGTAATCGACTGGAGCAGGTTAGAAATGCTATG  
GCGGGAATAAACATTCAGCCTGCAAGAGCAATTCAGCAGATTGATACAGAAAATATCTAACCTGCAGAAGCTTGGTAAGGT  
TGCTGATAACGAGACTATTTCAAACCTTCAAGTCTATCGTATGAGCTTGTTCGCAATGCTGTTCTGATGGCCCGGTA  
ATCTGGATTGGAAGCAATTAAGCGATCTGCGCAGCCAGTTGCAATGGACGTGAAGGGGGAGCGACAGTGTACCAAC  
CGTTCGATGCTTCAAGCCTTACAGCGCTTTACAAGCGATGACAGACGATATCAATGGTGCCATTGGTCAAAATGCTA  
CGATACTCTCCGTAATAATCAGCAGGCCAATGCGCTTACGCTGACGAAGCGGCGAACTAAAGAATACCAGGCTGAAGA  
ATGTTCTCATGAAAGCGCACTGACGCCGGAAGTTGTCACCAACATGCTATTCAGCAAGCAAAATCGGAAATTAAGAGC  
CTGTATAACTCAGTTGCTGTTGGCAGGGCGCAATGCGCAATGGCATCATGGAAGGGGATGGAAATCAGGTTG  
TTCCCTGACAGTTCCTTTCAGCAGCTTAAACATGCTCCGAAAACAGACTGGCATTACATTTAAAGTTCAGGATGCTG  
ATCTGAAAGGATTGAAAACCTACCTTCAATCCAGCAGCAGGCTGCAAAAGCGGCAAGTAAACAACCAACAGGGCAGCAA  
ACCATCCCGTTTATTCGGATAAGGACAGCAATGAACCTGCGCAACTGGCGCAGCAGTAAGCTACGGACTTCTGAC  
TCGCGCTATGAGAGCGACCAATTCAGAAATGCAATGCTCCGAATGGCAACACCCCGGATCAACAGCTTTGAGA  
AAGCCATGACAGCGCACAAAAGGCCATTAACGCCCTGACTCAGGGGGCTAAGTCTGATGCGTTGCTGAGTAATG

>Cluster\_2999

ATGTTCAATATATATGCGGCGACCTGGAAACCTATTGCGAAAATCCCTATTACGAACGGTACCATGCGTATGCGGAAGG  
CGTTGAAGTATGATGCTTTTCGCATGGCTTACACGACGGCCAGTAAACGTGTGGGATATCACGTCGCTGGTGGTATTC  
CACACGGCTTATACGAAGCAATCGCAGACCCTGAAACCTGCTTATTTCATAACTCTCACTTCGACCGCACCGTCTCC  
CGTTATGCAATGCGCGCCTGGCACCAGTCAAGCTTGGCGGACACAATGGTGCAGGCGCTGGCGCACGGTCTCC  
GGGTCTCTGGGGAACTCTGCGAAGTACTAGGCGTCCCGCAAGCAAAAGCGAAGGACAAAGAAGGTAAGGCGCTGATCC  
AGCTGTTCTGTAAGCCACGCCGAAAACAGCAAACTGGCCGGCCACCAGCAAAACCCACCGGAAGAATGGCGCGC  
TTTGTGCTTACGCCGACTGGATATCGAGGCAATGCGCGAAGTCTATAAACGCTGCGCAAGTGAATATCAGGGGAC  
AGAAGTGGCGCTTGGCATCGTATCAGCAGATCAATGACCGGGCGTCTGCAATGGACGTGGAAGTTCGACCGCTGCGA  
TCGACGCGGTAGACCAGGAACAAAAGCGCTGGCAAAGCGTACACAGGAAATGACTGATGGCGAAGTGCAGGCAGCCACA  
CAACGAGACGCGTTGATTAAGCACATTTGTAATCCTACGGTGTGGAGCTACCAGACATGCAACCGCAGTACTCTGGAACG  
TCGTATTGCCGACCCCGATTACCATCTGCCGTGAAAGAACTGCTGGCTATCCGCTGCAGGCCAGTACTACCAGCACA  
GTAATAACAGGCACTGATGAAAGCGTAAAGCCACGACGGCGCTTACCGGTCAGCTACAGTCTGCGGGGCTCACGT  
ACCGTCTGTTGGGCGGACGGCTATTCAGCCCGAAGCTTCCCGCCCTTCACTAAAACAGGAACAAATAGACGAGG  
CATCGAAGCACTGAAAGCCGATGTCAGACCTGCTGTTGCAATATCATGGAACCAACAGTTCAGGCTCAGGTTGCGGCT  
GCATATCGCGCCAAACAGGCAAAAAGCTGGTGGTAAGTACTTGTGCAACATTGAAGGCCGATGCTGGCATGGCTGGCG  
GGAGAAGAATGGAACATGATGCAATTCAGAGAGTACGACCGGCAACGGTCCGGACTTATATAAATGGCGTATGCAAA  
AGCTTTCGATATTGCAACCAAGATGTTGATAAACACATGCTGCTAGATCGGTAAGTCAATGGAACCTGCTGGTATG  
GTGTTGTTGCTGTCGCCCTTTCATCTCTTTGCACTGGTTTACGGTCTCGATCTCGACGAGCTGGCGAACCCGCACTACCA  
AACATTCCCGCGATGTTATTCGCGAGGCGAAAAGCTGTTACGACGAATCGGTTAAACGCAAGTCAACCTACGGGCTTTC  
TGAACGGGTATTTATCGCCTGCGACTCACTTAAACGCTCTGCGCGCGGGCGCATCCCGGACCTGTGATTTCTGTTACG  
AATCGGAGCGCACCTGCGCACTGCAATCGCCACCGCAAAAACATGTTATGCGGTTATCTTAAATCCCGCGGAT  
GGCGGCTGGCTGCGCATAACAGTACCATCCGGACGCGTGTATGCTACCCGCTCCTCGGTTATCGAAAAAGGGAATATCAC  
CTACATGGGGTTAACTCTTATTTCGCGTAAATGGCAACGACTCAAAACCTACGCGGAAAGCTGGTGGAGAATCACC  
AGGCGGCGCCCGCGACATTCGCGCGGAAAACATGCGCGTTATCGAAGATGCGGTTACAGCATTTGTGCTGACGGTACAC  
AACGAGGTGATCACCCGAAGCACCTGACACAGAAAGATTTCAACAGATAAAGCGCTTTCGCGCTTCTCCTCACTGACCCCGA  
ATGGGCGCCGATATCCCACTGAACGCTGGCGGTTTTGAGGCGTACCCTACAAAAAGATTGA

>Cluster\_39757

ATGACAACATAAAATATGAATACGCCACCAGGCAGCAGCTCAGGAAAATGAGATCGATCTGCTTCTGCTGGTCCGGGATT  
ATGGGATCACCGTAAGTTTATTATCAGCGTGCACGCGTGTTCACGCTGATCGCTGTCGCTTACTCGTGTAAAGCACCG  
CAATTTATCAGGCAGATACTCTGGTCCAGTTGAGCAGAAACAGGGCAACGCCATTCTCAGCGGCTGAGCGATATGATC  
CCTAACTCATCGCCGAGTCAAGCACCAGGATCCAACTGCTGCAATCGCGCATGATTCGCGTAAAACCAATTGCTGAAC  
GAATCTGCGGCAGATAGTTGAGCAAAAGTATTTCCGATTGTTGGTTCGCGGCTGGGCGAGATTAACCAAGAGAAACAG  
GTGAGTGGCGATCAGCTGGATGCAATACCAACTGAAATGGTCAAGTATGCAACTGACACTCACGTTGGGGAATAAC  
GGCCTATACGCTGGAAGGTGAAGGTTACCGTCAATGGTATGGTTCGCGCAGCGTCTGGAAGGACGCGGCTTGGCGT  
GACTATCGCGGACATTAAGGCCAAACAGGAACGCAAGTTTGTCTGAGCCAGCGTACCGAACCTGGAAGCGATTAAACGCT  
TGCAGGAAACCTTACCCTTAGCGAACGCAAGTAAAGAAAGCGGATGCTGGAACCTTACATGACCGGTGATGATCCCGAG  
TTGATTACTCGTATTCGTAACAGCATCGTAACAACTATTGCAACAGAAATATCGCTCGCCAGGCGCGCAGGATTCACA  
AAGCCTTGAATTCCTACAGCGCCAGTTGCCAGAAAGTGCAGCAGGAGTGGACAGGCGGAAAGAAAACCAACGTTTATC  
GCCAGCAGCGGATTCGGTTGACCTTAACTGGAAGCCAAAGCGTTCCTGAGCAGATTGTTAACGTTGATAATCAACTC  
AATGAGCTGACCTTCCCGGAGGCGGAGATCTCCAGCTGTATAAGAAAGATCACCCAACTTATCGTGGCTGCTGGAAAA  
ACGCCAGACGCTGGAGCAAGAACGCAACGCTGAATAAGCGGATTCGGCAATGCCCTTCACTCAACAGGAAGTATTGC  
GTTTAAAGCCGTGACGTAGAAGCGGGCGTGGGTTATATCTGCAATTAACCGCCAGCAGGAGTTGAGTATTTGAAA  
TCCAGTGGCATTTGGTAACTGCGGATTAACGACCCGCGACTCAGCCGACGCGTGAACCCGAAAAAAGCGTTGAA  
TGGTGGCTTGGTTTATTCTTGGCTGTTTATTCTGGTGGTGGTGGTGGTGGTGGTGGTGGTGGTGGTGGTGGTGGTGG  
AAGCACCGGAACAACTGGAAGAGCAGGCAATCAGCGTTTATGCCACTATCCGATGTCGAGTGGCTGGATAAGCGTACC  
CGTCTGCGTAAGAAAAATTTATTCTTAATCAGCAGCGCATGCTACTAAAAATATCCCTTCTGCGGTTGGATAACCC  
GGCGGATTCGCTGTGGAAGCCGTACGTCGCTACGAACAGCTGCACTTCTGCTATGATGGAGACAGAGAATAACATTC  
TGATGATCACCCGTCGACCGCAGACAGTGGTAAAACGTTCTGCTAGTTCAACTCTGGCGCGGTTGATCCGCCGAT  
CAAAAAGTGTATTATTATGATGCCGACTTACGTCGTTTATTCGATAACCTGTTTACCCTGAGTAATGAACATGGCTT  
GTCGGAATATCTGCGAGGAAAGATGAGCTCAACAAAGTATCCAGCATTTTGGCAAAAGGAGGCTTTGATGATGATCTC  
CGGCTCAGGTGCCACCTAACCCGCTGAACTGCTGATGCGCGATCGAATGCGTCAATTAAGGAAATGGGCAAGCACCAT  
TACGATCTGGTATTTGTCGATACGCGCGGATGCTGGCGGATGAGCAGTCTGCGGTCGTTGGGGCGCTCTGTCGCGCACG  
CCTGCTGGTTGCGGTTTTGGCTGAACACCGCAAGAGGTGAGCTTGTCAATGCGAGCTTGGAACAGGCTGGCGTTA  
ATATTAAAGCGCAATCTCAATGGTGTGATTAACAGCGCCAGCAGCGCTTACAGTTACGGCTATAACTATTACGGTTA  
AGTTACTCCGAAAGAGTAA

>Cluster\_7210

ATGAAAATGACACGGCTTTATCTCTGGCTTGGGGGATTATTGCTCCCGCATGCTAATGCCAGACTTACAGCA



AGACGAAAGCACGCTGGTGGTTACCGCCAGTAAACAATCTTCCGCTCGGCATCAGCCAACAACGCTCTCGTCTACTGTTG  
TCAGCGCGCCGGAATTAAGCGACGCCGGCTCACCGCCAGCGACAAAACCCCCAGAGTCTTGCCCGGGCTCAATATTGAA  
AATAGCGCAACATGCTTTTTTCGACGATCTCGCTACGGCGCTCTCTCAGCGCAGGACTTCTATAACCCCGCCGCTCAC  
CCTGTATGTCGATGGCGTCCCTCAGCTTTCCACCAACCCATCCAGGCGCTTACCAGTGTGCAAAAGCGTGGAGTTGCTCG  
GAGGCCACAGGAACTGATATGGCAAAGCGCTCAGGCGGGATCATCAACATCGTACCAGCAGCGGACAGCAGC  
CCGCGCGCTATATTGAAGCGCGCTCAGTAGCCGCGACAGTTTATCGAAGTAAGTTCAACCTGAGCGGCCCATTCAGGA  
TGGCTGCTGTACGGCAGGCTCACCCTGTACGCCAGGTTGATGACGGCGACATGATTAAACCCGCGAGCGGAAGCGATG  
ACTTAGGCGGCACCCGCGCCAGCATAGGGAATGTAAACTGCGCTGCGCGCGGACGATCAGCCCTGGGAAATGGGCTTT  
GCCGCTCACGCGAATGACCAGCGCCACCCAGGATGCCATGTGGGATGGAATGATATAAAGGGCCGTAAGCTGTCGAT  
CAGCGATGGTTACCAGACCCGTACATGCGCGCTGCACTGACAGCCAGACCTGAGTGGGAAATACACCACCGATGACT  
GGTTTTCAACCTGATCAGCGCTGGCAGCAGCAGCATTTATCGCGCGCTTCCCTTCCGGTTGTTAATCGTCAATATG  
CCTCAGCGCTGGAATCAGGATGTGAGGAGTGGCGCGCAACCTGGGCGATGCGCGTACCCTGATATGGTGTGTTGG  
GCTGTACCAGGCAACCCGCGAGAAGTTAAATTCAGCTACGACATGCCACAATGCTTTATTAAGCAATACCCTGGT  
ATACCACCGCTGAAACGCTGGCCGATACAGTACCTGACCTGGCATTAAACCGATCGTTTTGATATCGCGCGCGCGTG  
CGCTTCTCGCATGATAAATCCAGTACACAAATACAGCGCAGCATGCTCGGCAACCCGTTGGCGACAGGGTAAGAGCAA  
TGACGATCAGGTTCTCGGCGCATCCGCGCTATATGCTGACCGTATATGCTGACCGATGACTGGAGAGTGTATACCCGTGTAGCCAG  
GATATAAACCTTCCGGTACAACATCGCGCTTACTGCGGCTTGTAGTCCAAACCCGTTTCTGCGCGCGAGATAAAC  
TATGAACCTGGCACCCGCTACGAAACCGCTGACGTCACGCTGCAAGCCGCGACGTTTTATACCACACCAAAGACATGCA  
GCTTTACTCTGGCCCGGTCGGATGTCAGACATTAAGCAATGCGGGTAAAGCCGACGCCACCGCGTTGAGCTTGAAGCGA  
AGTGGCGGTTTGGCGAGGCTGGTTCATGGGATATCAATGGCAACGCTGATCCGTCCGAATTCACCAATGACAGTGAAGT  
TATCAGGTAACCCGGTGGCTTCTGATACAGCTTATGGCGCGGGAAGCAGCGTGAACGGCGTGTATGATACGCGCTATGG  
CGCACTGATGCCCGACTGGCGGTTAATCTGGTGGCGCGCATTTATTCGATGGCGACACCAGTTGGCGCAAGGCACCT  
ATGCCACCTGGACAGCAGCCTGGGCTGGCAGGCGACTGAACGGATGAACATTTCCGCTATGTGCGATAACTGTTCGAC  
CGCTGTACCCTACCTATGGCTACATGAACGGCAGCAGCGCTGCGCAGGTCAATATGGGTGCGACCGTGGTATCAA  
TACCGCAATTGATTTCTTCTGA

>Cluster\_25542

ATGAGTAAACCGTTCAAACCTGAACTCCGCTTTTAAACCTTCTGGCGATCAGCCAGAGGCGATTCCGACGCTCGAAGAGGG  
GCTGGAAGATGGCTGGCCAGCCAGACGCTTACTTGGCGTACTTGGCGTACTGCGTCCGGGAAAACCTTCCACATGCAATGTCATG  
CTGACCTTACGCGCCCAACCATGGTACTTGGCCCAACAAAACGCTGGCGGCCAACTGTACGGCGAAATGAAAGAGTTC  
TTCCCGGAAAACCGGTTGGAATATTTCTGCTCCACTACGACTACTATCAGCCGGAAGCCTATGTACCAGGTTCCGACAC  
TTTCATTTGAGAAAGATGCTCGGTAACGAACATATTGAGCAGATGCGTTTGTCCGCTACCAAGCGATGTGGAGCGCG  
GTGATGTGTTGTGGTGGCGTCTTTCCGCGATTTATGGTCTGGCGGATCCGATTTATATCTCAAGATGATGCTCCAT  
CTCAGGTCGGCATGATTATCGATCAGCGCGCATCTTGGCGGACTGGCGGAGCTGCAATACGCTCGTAATGATCAGGC  
ATTCAGCGCGGTTACTTTCCGCGTCTGTTGGTGGGTTAGATATCTTCCCGGAGAACTGGATGACATTCACCTTCCGCG  
TGGAACTGTTTACGAGGAAGTGAACGATTTGCTGTTATTTGACCCGCTAACCGGGCAGATTGTTCCACTATTCACGCT  
TTTACCATCTACCCGAAACGCACTACGTCACGCGCACGTTAGCGCATCTGACGGCATCGTACAGGCGATGGAGGAGATCAAAGAAAGACT  
GGCCGCCAGACGCAAGTGTCTTGGAAAACAACAACCTGCTGGAAGAGCAGCGGCTGACCCAGCGTACCAGTTTGATC  
TGGAGATGATGAACGAGTGGGCTACTGTTTGGGGATGAAAACCTACTCGCGCTTCTCTCCGCTCGTGGACCGGCTGAG  
CCACCGCCGATCTTTGATTACCTGCTGCGGATGGGCTGCTGCTCGCAATCTCACGTCACCATTCACCAAAAT  
TGGTGGCATGTCGCGGTGACCGGGCGTAAAGAGACTCTGGTGGAGTACGGCTTCCGCTGCCATCAGCGCTGGATA  
ACCGTCCGCTGAAATTTGAAGAGTTCGAAGCATTAGCGCGCAACCACTATGTTCCGGCAGCGCGGTAATACGAG  
CTGGAAAAATCCGGTGGTGTATGTTGGTGGATCAGGTGGTGGCTCACAACAGGCTTACTCGACCCGATATCGAAGTGGCGCC  
GGTACCAACAGGTGGATGATCTTCTTTCGGAGATTCGCTCAGCGAGCGGCAATTAACGAACCGCTACGTTACAACCT  
TGACCAAGCGGATGGCGGAAGATCTCAGTGAATATCTCGAAGAACCGGTTGAGCGCGTGGCTTCTTCACTCAGATATC  
GACACCGTGAACGATGAGGATATCCGCGACTTGGCTGCTGGTGGATTCGAGTATGGTGGGATCAACTTACTGGC  
CGAAGGCTCGGATATGCCGGAAGTGTGCTGGTGGGATCTCTGACGCTGACAAAAGAGGCTTCTTGGCTTCCGACGTT  
CGTTGATCCAGACATGTTGCTGTCGCGCACGTAACGTTAAAGCGATTCTCTACGGCGATAAGATCACCCATCA  
ATGGCGAAAGCGATTGGCGAAACCGAAGCTGCGCGGAGAAACAGCAGAAAGTACAACGAGGAACCGGATACCGCGCA  
AGGCTTGAACAAGAAAGTGGTGGATATCTTGGCGCTGGGCGAGAACTTGCAAAACCAAGCGAAGGCGAGAGGAAAT  
CGCGCCGATTTGTTGAGCCGGATAATGTGCCGATGGATATGTCGCTTAAAGCGTTGACGAGAAAGATCCATGAACGGA  
GGTTGATGATGCAACACCGCGCAGAATCGGAGTTCGAAGAAGCGCGCAAAATTCGTGACCAAGTTCATCAGCTGCGTGA  
GCTGTTTATTTGCCGCGTCTGTA

>Cluster\_67092

ATGAGCATTAGTCGCCGTTCTTTTTGACGGGATGGGCTATGGCTGTTCTGCTGTCAGTGGGCTTTTTTCGCCCGG  
AACGCTGGCGCGCAATCCGGTTGCCGGAATTAAGGGTAAACCCACCTGACACCAACTTTGTGTGAAATGTGTTCTTTTC  
GTTGCTCTGTTACAGGCCAGGTAGTCAATAACAAGACGTTTTTATACAGGGCAATCTTCCGGCTCACACCAGGGGACG  
CGCTTTTGGCCAGGGGGGGAGCGGCTCAGTCTGGTCAATGATCCGCAACGGATCGTGAACCCATGAAACGACCCGG  
ACCGCGCGCAGCGGTGAGTGGCAGGTGATAGCTGGCAACAGGCTTATCAGGAAATCGCGCGGAAATGAAATGCCATCA  
AAGCGCAGTATGGCCCGGAGAGCGTGGTTTTCTTCTTCCAAAGCCGTTTCTGCTCCAGCCATCTTTCCATCTGGCCACA  
GCTTTTGGTTACCCAATACCTTTACTCATGTTCAACCTGCCCTGCGGGAAAGCCATGCGCGCAAAAGTGTATGATGG  
CGCGCATCTGGCGATGGATATCGCCAATACAGCTATCTGTTTCTGTTGGTCAAAATTTGTATGAAGGCATTGAAGTCCG  
CGGATCCCATGAATTAATGGCCGACAGGAGAAAGCGCCAGAAATGGTTCAGCTTCCGATCCGCGCTTGTGATATTTTCA  
AGTAAGGCGGATGAGTGGCATGCGATTCTGCTCCGGTGGAGATTTGGCGGTGCTGCTGGCGATGTGCCAGTCAATGGA  
CGAACAGCTCTATGATGGGATTTGTTGAGCGTTACACCACCGGATTTGAACAGTTAGCACTGGCGGTAAAAGACGCA  
CGCCGGAATGGGCCGACAGCGGCTGATGTCCTGCTGATGTCATTTGTTGTTGACTCGTGAACCTGGCTGCTGTCG  
CCATGCTTATTTGTCAGCCCGGTCATCTTCAACGTTCTCGCAGGAAGAGATCGATATGCGCGGATGATTTTACGCT  
TAATGCACTGCTCGGTAATATTGAACGTAAGGAGGGCTGTATCAGAAAAAGGCGCGGCGTTTACAACAACCTGGCCG  
GGGAAAAGTGCGCCGACGCTGGCGAAAATCGACGTTAAAAATATGCCGAAACCGACGGCGCAGCGTATCGATCTGGTC  
GCACCGCAGTTAGATACATCGCCGAGGTGGCGGCTGGTGCAAAAGCATTATGATGCTGCGTTAACCCGGAAGCCTTA  
CCCAATAAAGCGGTGATATATGTCACGGCAATAACCTTCCAGACAGTCACTGCCGCTCCGGATGGTTAAAACGGTTG  
AGCGACTGGATCTGGTGGTCACTTGGATGTTTTATTGAGCGAGAGCGCAGCATATGCCGACTATCTGCTGCCGGAATGC  
ACCTACCTTGGAGCTGATGAAGATGTAACGGACATGTCGGGCTGCATCCGGCGTATGGCCTGCTGCTCAGCAGGTGGTGA  
ACCCGTTGGCGAGGCTCGCCACGCTGGCAAATCGAAGGAGCTGGAAGGCAACAGTTAGGCTTGGGCAATACTCCGT  
GGAGGATATGCAAAACCGGACGCTGATACGCTAAGCAGGCAATCAGCAGTACCGCGCGAGACTTCTGTGAAACAGGCTAC  
CTTGAATGGGCGTTTCATGTTGCTGCGGAGGCGAGTCTGTGTCAGCAGTTTACCGCCGTTACCTAATGCGTTGGC  
AGCGGACAGCGATAAATCTTATGGCGAACAGCTGCTTTTAAATCCCGCTCAGGAAAAATGAACTCTGTTCGGAAGTGC  
TGGAAAGATTTGTTACCCGCTACCGCTACCGCTGCGCGACTTTACTCTGAAACCGGATGATGAACCTGTATTCATA  
CAGGGCAAGGTGGCGGTGCATACCAATGGCGCGACCCAGTATGCTCTTGTCTCAGTGAACCTGATGTTGGGATAATGCGGT  
CTGGATCCACCGCAACCGCGCAGAAAAGGGAATTAACCCGCGATGAGATCTGGCTGGAATGCCACGGGTAAG

AAAAAGGTAAGGCACCTGGTACGCCCGGCATTCGTCGGACACCGCTATTTGCTACATGGGATTTGGCGCCCGGGCCGGT  
GCAAAAACGGCGGCAACACACCGGTATCCATTCGGGTAATTTACTTCCGCACGTTACCAGCCGGTTCCGGAACAGT  
GGTGATACCGCGGGTGTACGCTCAGCCGCGCATGA

>Cluster\_59413

ATGAAGAAAAAAATGAATCCTACCAGGGTGCAGGTTGGTGGGGTCTGTTAAATCCGTAGCGAATGCAGTACGTAA  
GCAGATGGATATACGCCAGGATGTTATTTGCCATGTTTGACATGAATAAGCCAGAGGGCTTTGACTGTCGGGGTTGTGCAT  
GGCCAGATCCTAAGCACAGTGCCTCATTGACATTTGTGAAAACGGCGCAAAAGCAATCGCCTGGGAAGTCACGGATAAG  
CAGGTAACAGCCCTTTCTTTGCTGAGAATACGGTTCAATCATTACTTACCTGGGGAGACCACGAGCTTGAGGCTGCGGG  
GCGACTCCTCAGCCCTTTGAAAATATGATGCCCTCAGCGACTGTTACAAGCCATTAAGCTGGCAACAAGCTTTCCGACGAAA  
TTGGCGCACGCCCTCAAAGCTATAGTGATCCCAATCAGGTTGAATTTCTATACTTCCGGCCGCACTTCCAATGAAGCTGCC  
TTTTCTTTATCAGCTTTTTGCCCCGTAATACGGGAGCAATAACTTTCCCGACTGCTCCAACATGTGCCATGAACCGACAAG  
CGTGGGTTGGCAGCGAGTATCGGTGTAGGTAAGGGACCGGTGTTGCTGGAAGACTTTGAGAAGTGGCATTAGTCATTT  
GCATTTGGGCATAACCTTGAACCAACCACTCGCATGCTGACTTCCGTTGCGCGCTTTAGTGAACGGGAGCGCAAAAT  
ATCGCCATCAATCCTCTACAGGAACGTGGCCTGGAGCGATTTACCGCACCGCAAAACCGTTTGAATGCTGACGAACTC  
TGAGACTCAGTTGGCCAGTGCCTACTATAACGTGCGCATTTGGTGGCGATATGGCGTTGCTCAAGGGGATGATGCGCCTGT  
TAATTTAGCGCGATGATGCTGAAGCGCCGAGGTCGGCTTCAATGCTTGTGATGACGAGTTTATTCAAACGCATACCGCTC  
GGCTTTGACGAGCTACGCCGTGACGTTCTCAATTTCCGACTGGAAGATATCGAACGATTTCTGGACTTCCGAGCAACA  
AATCGCGAAGTGGCTGACGCATATGCCGCTGCCGAACGCACCATTTATCTGTTACGGAATGGGATCACTCAGCACGAAC  
ATGGTACCCAGAAGCTACAGCAACTGGTCAATCTGCTGTTGATGAAAGGTAACATTTGGCAAGCCTGGTCCGGGTATCTCC  
CCACTACGTGGACACTCTAATGTACAGGGCGACGAACCGTCCGGTATCACCGAAGAACCGTCTGCAGAGTTTCTGGCTCG  
TCTGGGTGAGCGCTATGGCTTCAACCCACCTCATGACCTGGACATGCTGCAATTTGCCAGCATGCAAGCAATATGTACGG  
GGCAGGCTCGAGCATTTGATCTGCATGGGGGCAATTTTGGCTGGCAATGCCAGATCGGGAAGCGAGCGCTGTACCGTTA  
ACGCAATTAGATTTGGCGGTACACGTAGCCACTAAGCTTAAACCGCTCTCATCTGTTGACCGCACGGCATAGCTATATTTCT  
GCCGGTCTGGCGCTGAGGATTTGACATGCAAAAACCGTGGCGAGCGGTAACCGTTGAGGATTTAGGATTTGATGATGA  
TTTATGCTCGCTGGCTGGCTGTTAAAACCGCGGTGTAATGCTGAAATCAGAGTGTGCAGTGGTCCGGGAATCGCGCAG  
GCAGCACTACCCAGAGCGTGGTAGCCTGGGAGTATCTGGTGAAGATTTATGATCGCATTCGCAATGACATTTGAGCTGT  
GCTGCCAGAGTTCGCGACTATAACAGCGCATCCGTCATCCCGTGGTTTTACCTGATAAATGCAGCTGCTGAAAGGC  
GCTGGATGACGCGCTGAGGATTTGCAATTTTCAATTAACAGGAGGCTGTTAGAAGATCCCTCTTACGCTTTAACAGT  
AAGCTGGTCAATGGCGACAGTACGCGACGATCAGTACAACAGCAGATTTATGGTATGGATGATCGCTATCGAGGGGT  
ATTCGGTCAACGAGATGTTGCTTTATGAGTGCATAACAGCTAAAATTTGCCGTGTAAAAACCGCGAAGAGTAAATC  
TTATTTGCGCTTACGCCAGCGGTAAGCGCAGCTCACGCCGATGGATAGATTTAAAAGTGGTCAATTTACCTATGGCTGAC  
CGCTCACTGGTACCTATTTTCCAGAATCGAATCACATGCTAACACTTGATAACACAGATCCATTAAGTGGCATTCCTGG  
CTATAAAGTATTTCCGGTTGAATTAGAACCATCAAATTA

>Cluster\_60524

ATGACAGAGATCTATGAACAGCGAACAATAGCCTGCAGGGTGGAGACTTCTCATCGTTCAATTAATCTGTTTGGGGTAA  
CAAGCTGTTGCTTAACCCCTGTTTTCGTATGACTTTGGGACGGGACTTGATCGTGCAGCTCTCGATTCGCGCGAGCGGTTTT  
CCGAGCACACCACAATTTTGA AAAATATGGTGAGAAAATCAGGTTTGTCCCGTATCTCAAAAAGGAGTTCACCAGCCTG  
ACACCGGATGACCTGAGGGTGTCTGAGCTATACCGGACGCCATTTCTCGGATGGTTATGTTTTCCACTCAATGCAGTTCCA  
CATATTCGATCTGCTCAAGTCTGGTCAAACACGTTGGTGCAGTGCACCTACAAGCATGGGCAAAAGTGCATCTCGAT  
CATTTGCTCGCATGGGAACCTTTGAAAACGGCTTGTCTGTTGTTCCAAACCGTGGCTCTTTGCCGACGAAACCCGTCGCGCA  
CTGCAAGAGCGATTCGGTACCGATATCAGATCATCCACCACAGTTCCCAAGTGTGCCATTCGATCAGGCTGTTTATGT  
GTTAACTCAGGAGCGAGTGAACGAGCGTACGACATCGTCGACATTTGACCTCTTCGTCATTTGACGAGTTTACAAAGTTGG  
CGTTCCGACAACCTGA AAAAGCGGGACATTTGATCATCAAGACGAAAGAGTGCATCGAGCTCAACATTTGCGTTAAGCGATG  
CTTAAAGTCTCCAGGCGAGTTTACTGACGGGACCGTTTCGTTAACAGCATTCGCGGCTCGAAAAACTTGGATATCCGCA  
TACTTTCCGTTTCTACCGACTTCAATACAGTGCCTGCTAGATGTTAAGACGTTCCGCATCAAGCGAATGACGACAAAGCCA  
AGCTCAAAGCGCTGGGGGAAATCGCGCACGATGTGTCGACGCAACGATCATTTATTTGCAAGTCAACACTGTTGGGGC  
CTGGTGGCGCGGAGTATCAGCTTGGGATGGCCTCCGACTGAGAAATCCCATGTCGACTGGGTGCAAGAGGTT  
CGATGCCGACTGGGATTACACAGTCCGCTTAGAAAACGGTATTGGCTTGCATTTTGGCGCGCTACCGAGGGCACTGCAGC  
AATACACTGCCGACCAATTCATGCTGGA AAACTGCGCTTTTTGCTCTGCACCTCCACGATCATTTGAAGGAGTCAACACT  
ATCGCTAAGAACGTTGTGATCTACGCAACCGCATGGAACCTCGCAGCATTGACAATTCACCATGGGAACATCAAAGG  
TCCGCGCGCGGCGATGGCGCTTCACTTCCGTCGGCAAAATCTTTTGCCTGGAGGAAATCCCGGAAGCAATCTCAATCAAG  
AGGTGGATATTCGCTCGGTATTACAGGCAATTGATACCCCAATCAACCTGTTAGCCAGCGTTCAACAGACCCTTGTCC  
GAGTTTCCAGAGGATCGCTTTGATGAGGTTTTCATAAACGACCGTGTTCATCGACCTTGTGAAAGAACATTCGATCT  
CCGTGTCGAGCAGTTCGAAATGCTGCAAAAGCATGTTGAGATGATGGACGATAACGAAATTTTCTCGTTAGTGTTCATC  
GGACTCCCGCACAAAATTTCTCAAGACTTTTGC AAAAGATCATTTCCAGACTGGTTCGCCATACGCTGCAAGGATGG  
GTCCTGTTAAGCTACGGATGTATGATCGCAAAAATTTGCCGCTATTTAAGTGTGAAAGTATTCCGGAATATCTGAA  
AAATCAGATCGATTTATGACGACAGTGGATTTCTGAAGGGGAGAAACGTACTCTTTCCATTTGCCCTCAACAATGATTTGA  
AGCTATAAACCAATACCTTCGGCTATACCTACCTAAGTGTCTCAGCTGATGGAGGATGATGATTAACACACCGCTGTA  
AAGCGTGGTATACGCAAGCAAGTTCGATTTACACACATGTCAAAATTTGGCGTTGCAAAAGTTTCCATCTACCCACAGGTCAA  
TGCCTTAGAAGAGATTGGATTTCCATTGACGCTTACACCGACTGGTAGACTTGTGGAATTTTCCGACGAGGCTGATG  
TGGATGAGTTGAGCCAGTATCTTCCGGATACTCAGGACATTTGGAGTAGATCGATTGGGTACGTTGATCAGATGTTTATC  
AGCGCGCGCTCGTATTAGACGACATTTGA

>Cluster\_35856

ATGGAAAGGAACCTACTTTTAGGTAACGGTTCATGTTCTGACAAAAAGGAACCTTTGCCTAAAGGAAGGGATGGTAAGCG  
CTATCCCTATACCTTTGAAGAAGTAAGGGAGCATTTAAACCCAGAGATTGATACTTTACTCTCAGCTTTTCGAGTTTGG  
ATGATGCGGCTAAGCCAAAGGGGGAGAGTGTATTCATTTAACCTTTACACCCAGCGCTTTTGGGTA AAAAGTCACTTTCCG  
GAAGGATTGCTTAGAGCGACAGGTTTACGGGATGTCGGTAGCCGTCAGGTAATCATTCGCCCACGAAAGCGGCACGTCA  
GTGCGATCAGAATAAGGACTTAGTAACGGCGCAACTGTTGTTAGCGGTGATGATGATGCCGTATAAGATTTAAGGAAA  
TTTTAAATTTCCCTACAGCTCCGAAGGGCGTACAAAAGGATTTGATCGAAATTTGAAAGTGTAGCTTTTTTGAAGGAAA  
GAGAGACGCAACTTTTGGAGCATGCGAAAAGTGAATTTGATAAAAATTTGAAGTGGTTCTCATGCTGGGTTGAAGACGA  
TGATATCGTTAAAGCCTATATTAGCTATCGGCACAATATGATGCTCTGTTGATTACAAAAGTAGAATCCAAGTGGTGT  
GGCTGACTTTTCATGTTGACACGCGGACCTGAAGATATGAAAAAACACTCGATTTTTCATTAATCCGCGTTGTGGCG  
CCGATGCCGCTCTCAGGTGACTCAGCCGAACATTTGTCAGAAAGTATCTAAATAGTTACACGAGCTCCCTAAATTC  
TAAAGCTGTTCTTGAATCCGAACGATTTGCCATTTTGGATGGTGGTGGGACAGCTGACTTGAGTAATTTGGTTACGG  
AATACGTTATCCAGACACCAAGAAACAGCGGATTTATTTGACGACCGGTAATGAAGTGCATCCACTTTCTTATTC  
GGAGTGTGAGGAAAATGCACCTTTCTTTAAAAGACCTTTATGAATGTAGATCATTATAGAGTCTTTTCCAGCAGATC  
AGGTGCAATGGCAATTTGGGATTTATTTGATGCTTAAAGAAAATACAGTCCGTTCTTGTATGAGTGTACTAAGTTCC  
CTAATCTAAGTATTTGGTCTCATCTTCCAAATTTGGTGTGATGAGGTTTCAATGATGAGTGTGTTTAGACAAAATCTGT  
GCTAAGCATGGGATATTACTTACTGTTGCTGTTGGGAATGATGGCAATGAGGACGGTGTGACGCGAGATACAACTCC

TTCCGATATGGTAAACCGCTAGCGATTGGTGTCTGATCGTAGCGGTGAAAAATGGGGGCGGCACCATATAGCTGTA  
TTGGGCCAGGCAGAACCCCGGATTTCGTTAAACCTGATGGTGTATTTTTTGGTGAAGCGACGACGAGCCTTTTTTACT  
TACAACCTCTGCTTGGTCTATAGTTGGAGTTCAAGGAACAGTTATGCCTCCATAGCATGAGAACGGCCGCTGG  
AGTTGCGGCTCTATCAGGAACCTCATTGAACACCATTTGATGAAAGCGTTGCTTGTTCATCATGCTGAAACATCAAGAA  
AATATTCGGGTGAACATATCGGTTGGGGACGGTTAGTAGGATCCCTAACGTTTAAATCGATTGTCCTAATGATACGCT  
ACAGTAATTTACTATGGTTTCATTAGCAAAAAATAAATATTTAAGGGCACCGATCCCATCCCTGATGTTCCCTTTGACGA  
AGCATTTGAGCTTACCGTACTTTATGCATTCAAACCCAGTAGATCCGTAACATTAGTAACTATACAAGGGCCGGTA  
TGCAGGTAACCTTTCCGCCAAGATTCCGGCTTACGATACCGATACAGATGATTTCTTTGGTCAAAAAAGCCAGTATAAG  
ACTGAAAGGGAGTGTAGGAGTGAAGGTCATAAGTGGGAACTTTGTTGACAGAAAGCAAAAAAGTTCAAGTGTATACAT  
ATTAAGCGATCCAGTTTTTGTATACCGTATCATGCCGAGATTCTTCGCCCATGTTAAGGGAGTTTCAGCCCTGATA  
TGCAATATGCGATGGTAAGCGTAAGGGTAAAGACTTTGATTTATATAATGTTATTCGCCAGCGATATACAATTCG  
AATCTATTAACCTGCGCACAAAAATTTCTCTGCACACGTA  
>Cluster\_46451  
ATGAAAACTTGTCTGACGACGTTAATGCTGCCTTTTATCGGGCAGCTGGTGTTCGTTTTGCCACAACGTCGGGC  
CGCGAATGGGGTTTTGTTCCGCCACTGA  
>Cluster\_63857  
ATGAATATGCCGTGGCAGGGTGGTTTTGATCCGTGCGTATGGGGTGTAGAAGCCTTATGGATTTGCGATGCCGGTTGT  
AGCATGTCTGTTAAGTCTGGCTGTTGGTTAA  
>Cluster\_34622  
ATGCTGTCAATGGTAATATCATATTTATCTAAAAGTCTTTCCACTTTTAAAGCTAGATATATTTCTGTTGACAACGTCAT  
TCTCCGCAATATGTGAAATAG  
>Cluster\_25991  
ATGTGGCTGCTTATATCAGCCTGGAAATGATGATGTCATGGGAAATCATCCGTGTGACAGAAGCAGGGTTGTGCTGCG  
CGTATCATTAATCTGCGTACTATTGA  
>Cluster\_11551  
ATGTTGAAAGACAGATGATGGAACATAAAGGCAGCATCAGCGAACAGTGCCAACTCAGAGAGAGCTGGAGAAGAAAT  
TGCCACGGCTGCGGTGAGCATACAGCTAGAGACGTTATGA  
>Cluster\_50414  
ATGAGCGAGGTTAATATCAGGAAGGGCATGAAACGGCGGGCAAGCAAAACAGTGGCATGGCGATATCGCTACGTGAA  
AAAAAGGCGTTACGGACTTTCAGGGGAAGTAGTGGTCTGGTGA  
>Cluster\_48692  
ATGATTCAGGATTTACTGATCGAAGCAATTAGTCACGATAGGATGCATAAAAAGTTAAATGAACTGAATGGCTACTTCTA  
CAATCGCAAAATGAAACAAAAACGTTGATGAGTGA  
>Cluster\_67085  
ATGAGTAGTGAGTGCAGGAAATGTCATGAATTCAGTATTGTTGGGCTGTAATGGCAGATTTACATTTCCGGGGG  
CTGGGGAGGGGATATATCTGTGTCTGAAATACAATAG  
>Cluster\_6842  
ATGCGCTACGCTTATCAGGCCTACCTTTTCTGCAACACTTTTGAATTTATGAGTTTTTGTAGGCTGGATAAGCGTTTTAC  
GCCGATCCGGCATAA  
>Cluster\_14729  
ATGAGTCTCTTTTCAGTGAAGCAAAATAGAACAAAGCATCATGAACTGTTACAGGATCAGGGATATCAACACCTGAT  
CGCGATAATGTCCCACGTTTCGACTCTCGATCAGGTCATTTATCGAAGCAGATCCTCCGTCATTTTAGCGGCACGCTACC  
AGCCTGATGGCATTACTGAAAGAGAGATTACAGCAGTCAACAGCTTACCACGCTTCCGGCTCCGATCTTTATGAA  
AGCAACAAAAATTTTGTGCTGGCTGGCAAAATGGTTTTCTGTTCAAACGCGACGATCGGCAAAAAAGATCTCTATAT  
TGAATGCTCGACACCCGCGATCTACCTGCCGACTGCGCCAGATATTGACGCTGAAGATGTCCCGTTGCAACAGGCGG  
CGGAACTCCCGCTCTATATTAATCCGCCGTTAACCGGATTAAGATTGGTTAACAGCTTAAAAATCTCCGGTAAAGAT  
AATCAGACTCGTATTTCTGACGGCATTTCTATATCAACGGTCTGCGACTGGTGTGCTTTGAAATTTAAAGCGCGGTGG  
CGAGCAGGAAGCAATATAGGGATGCTGGAAGCAGCTGCAAAACGCTATCGCCGGGATATTCGCCAACTGTTTATCT  
ACAACGCGCTCTGATTTATAGCGATGGTGAATAACCGGATGGGCAACCTGTTGCGCCCTATGAATACTTTTACTCA  
TGGCGCAAAGTCAACCGTAAATGAAAACCGTGAACAGGACGGAAATTCATCATTTGCACTCAATGATTCAGGACTGTTTCA  
TCCGTTACATTTGGCGATGACACCATCGTTCCCGTTACCAGCGTGAAGATTGCGTAAATCAACTGGCGGGACGCAATAGT  
GATATCCGAGTACTATGCCGCCGCAAACTCTATTACAGCATCAAGCAAGCGGTAACCTTTCCGGTAGCGGTAAGGC  
GGTACCTACTTTGGCGCAACGGGCTGCGGAAAAAGCTACACCATGCAATTTTTAACCCGCTGTTAATGAAAAGCGTGA  
GTTTGCAGCCGACCATTTGTTTATGATCACCAGCCGATCCGATCTGGACGATCAGCTTTCTGCGCAAAATGTCACGCCA  
AAAATTTACATTTGGCGATGACACCATCGTTCCCGTTACCAGCGTGAAGATTGCGTAAATCAACTGGCGGGACGCAATAGT  
GGCGGTGATTTCTGACAACGATCCATAAATTCACCGAAGACACCGAACTCTTTCTGAAACGACGCAATATCATTTGCAT  
CTCGGACGAAAGCAGATCGAGTCAAGTTAACCTCGACAGAAAGTTCATCGTGAATAAGAAAGCGGAAAGTGGCAGAAA  
ACACTCGATGCTTTCGGTGGAGTGCAGATCGACAGTTACACCATGACCGAATCCGTTCCAGGATGAAATCACTGTACGCA  
GTACGAAAGCCGTTGCGGCTAAAGTATCTGGACTCCAGCAAACTGGAAGAGTGCAGAAAGTATACGAAAGTGGCAGAA  
ACGCAGGCACCAATGAGTGGCAATCGACGAAAGCAAAAAAGCCACCGCAACCATGAATGGGCTACTGGGTGATGAGAT  
CGGTTAAAAGCCCTCGCGGAAGATTTTGGCAAAACATTATGAAAAACCGGTAGCCGAAGGTTCCACCGTAAAAGGCAAGC  
CATGTTTGTGTTGTCAGCCGTTGAAATTCGCTGGGATTTCTACCGCCAGCTTAAAGTTATTCGCCCTGCCTGGTTGAAG  
TGAAGCAAGCCCGATGGCGTCTGCTTACGGAACAGGAGCAGAAAGATTACCGCTTCTGAAATGTTGAAGATGGTTC  
ATGACCGCGGTAAGATGACGACGAGCGGCTTTATGATTTACTGGGCACAAAAGAATATCGCAAGAGCTGGATAAGCA  
GTTCAAAAACGCTAAATCGAATTTCAAAAATGCAATTTGTTGATATGTGGCTGACCGGTTTTGATGTTCTTCCGAACTGG  
ATACCATCTATTTGATAAGCCCTTACAAAAACATAACCTTATCCAGACTATTTCTCGCGTTAACCGTAACTGGAAGGC  
AAAAGCAAGGGTTAGTAGTGGACTACATCGGCATTAAGAGTCAAGATGAACAGGCACGCGCAATGATTTCCCGCATTGA  
TGCCACCAACTTTGAAGATATTCAGCAATCGGTAATAGAAGTTAAAAACCATCTCGATTTGTTGGGCAAGTATTTATG  
AATTCAGACAGTCCGGGATTTTTAGTGGTGAAGCACAACCGCAATTTATCTGCGCTCAACCGCGCGGCAATTTGTTCTG  
CGCACTCAGAAAGTTGAACGTCGTTTTATGGGACTGGTTAAACGCATGAAAGCCGCTACGACGCTGCTGCGGCAGTGA  
AGCACTATCAGACAGAACGTTGATCATATTTACTATTTCTGCTGTTCGTTCAATTTGTTTTCAACTGACGAAAGGTT  
ACGCACCGGATGTCACCAAGATGAATGCACGCTTCTGAAATGATGCAAGAGCGCTAAAAGCTGATGGCGTAGAAGAA  
ATTTATTTTTTGGCGATAAAAAAGCGGAATCCATGATATTTTTTGACGAAGATTATCTGGCGCGAATTAACAAGATCAA  
ACTTCCGGCAACGAAGATCCAGTTATTACAAAAATTTACTGAAAAAGCGATCAGCGACTTCAAGAAAGTGAACAGTTGC  
AAGGGATTAACCTTCCCGGCTTCCAGGCGATTATAGATCGTTATAATGAGCGGCGAGAAGATGATGACTCAACCGT  
GAAGAATTCGATACATTTAGTACGGAATGACCGATATTTATCTATGATATTAACCGAAATGGGCACATGGCCGATTT  
AGGTATTGATTTGAAGAAAAAGCGTTTTTTCGACATTTCTGCTCATATGCGCGATAAATATCAGTTCCCTATGACGATG  
AAAAATGCTGTCTACTGGCAAAAGAGATGAAAAGCGTGGTTGACAACACATCGAATATCTGACTGGAGTAAACGCGAT



AATACCAGTATCGCGACTGTTGATGCATCGGGGAAAGTACCTTGAATGGTAAAGGCAGTGTCTGTAATTAAGCCACTTC  
TGTTGATAAGCAAACAGTAAAGCTACACTGTTAAAACCTCCAAAATATATGATAAAGGTAGGCCAAAAGCTTATATGATG  
AGTCCATGACTATTTGTAAGGCTCTCTGCCATCTCACAGACTGATATATCTGACATCTTAAACGCATGGGGGGCAGCA  
AATAAATATAGCCATTATAACACTATGAGCTCAATAACGGCTTGGATTAAACAAACTGAAAAAGATAAAGCATCTGGAGT  
ATCAAGTACTTATAACTTAATAACACAAAACCTCTCCCGGGGTTAACGTAAAACCTCCAAAATGCTATGCGGTTTGTG  
TAGAATAA

>Cluster\_20423

ATGACTATGATTACCGGATTCACCTGGCCGTCGTATTACAACGTCGTGACTGGGAAAACCTGGCGTTACCCCACTTAATCG  
CCTTGGCGCACATCCCCCTTTCGCCAGCTGGCGTAATAGCGAAGAGGCCCGCACCGATCGCCCTTCCCAACAGTTGCCGA  
GCCTGAATGGTGAGTGGCAATTTGTCTGGTTTCCGGCACCAGAAGCGGTGCCGAAAAGCTGGCTGGAGTGCATCTTCCCT  
GACGCCGACTGTCGTCTGCCCTCAAACCTGGCAGATCCACGCTTACGACGCCCACTACACCAACGTGACCTATCC  
CATTACGGTCAATCCCGCTTGTTCGCCGGAGAATCCGACAGGTTACTCGCTCACATTTAATATTGATGAATGCT  
GGCTACAGGAAGGCAGACGCGAATTAATTTGATGGTAACTCGCGCTTTCATCTGTGGTCAACGGCGCTGGGT  
GGTTACGGCCAGGACAGCCGTTTCCGCTGTAATTTGACCTGAGCGCATTTTTACGCGCCGAAAAAACCGCTCGCGGT  
GATGGTGCCTGCGCTGGAGTGACGCTAGCTATCTGGAAGATCAGGATATGTGGCGGATGAGCGGATTTTCCGTGACGCT  
CGTTGCTGCACAAACCCACCAAAATCAGCGATTTCCATGTTGCCACTCGCTTAAATGATGATTTACGCGCGCGGTA  
CTGGAGGCAAGTTTCAGATGTACGCGGAGCTGCGCGAGCTGCGGGTACGCGGTTCTTTGTGGCGGGAACCGCA  
GGTCGCCAGCGCCACCGCCCATTCGGCGGTGAAATTAATGATGAGCGTGGTGGTTATGCCGATCGCGTCACGCTACGTC  
TGAACGTCGAAAACCCCGCGCTGTGGAGCGCCGAAATCCCGAATATCTATCGTCCGGTGGTTGAACTGCACACCGCCGAC  
GGCAGCTGATTAAGCAGAACCTGCGATGTCGGTTTCCGCGAGGTGCCGATTGAAAATGGTCTGCTGCTGCTGACGCG  
CAAGCCGTTGCTGATTCGCGCGCTTAAACGCTCACGAGCATCTCTGCTGATGGTCAGGTCATGGATGAGCAGACGATGG  
TGCAGGATACTCTGCTGATGAAGCAGAACAATTTAACGCCGTGCGCTGTTCCGATTAATCCGAACCATCCGCTGTGGTAC  
ACCTGTGTCGACCGCTACGGCTGTATGTTGGTGGATGAAGCATAATTTGAAACCCACGGCATGGTGCATGAAATCGTCT  
GACCGATGATCCCGCTGGTTACCGCCATGAGCGAACGCTTGGCGGCTTCGCTAAATACTGGCAGCATTTCCGCTGATC  
TGATCATCTGGTCTGCGTGGGAAATGAATCGGGCCACGGCGCTAATCACGACGCGCTATATCGCTGGATCAAATCTGTCGAT  
CCTTCCCGCCCGTGCAGTATGAAGCGCGCGGAGCCGACACCGGCCACCGATATTATTTGCCCGATGACGCGCGCT  
GGATGAAGACCCAGCCCTTCCCGGCTGTGCCGAAATGGTCCATCAAAAAATGGCTTTCGCTGCCTGGAGAACTCGCGCCG  
TGATCTTTTGGCAATATGCCACGCGATGGGTAACAGTCTTGGCGGCTTCGCTAAATACTGGCAGCATTTCCGCTGATC  
CCCCGTTTACAGGGCGGCTTCTGCTGGGACTGGGTGGATCAGTCTGATTAATATGATGAAAACGGCAACCCGTGGTCT  
AGCTTACGGCGGTGATTTTGGCGATACGCCAAACGATCCGAGTCTGATGAACGGTCTGGTCTTTGCCGACCGCACCG  
CGCATCCGGCGTGCAGGAAGCAAAACACCGAGCAGCTTTTCCAGTCCGTTTATCCGGCGAACCATCGAAGTGACC  
AGCGAATACCTGTTCCGCTATAGCGATAACGAGCTCCTGCACCTGGACGGTGGCAGTGGATGGCAAGCCCTGGCAAGCG  
TGAAGTGCTCTGGATGTCGCTCCACAAGGTAACAGGTAATGAACTGCCTGAACTCCCGCAGCCGGAGAGCGCCGGAC  
AATCTGGCTTACCGTACACGTAGTACAACCGAAGCGACCGCATGGTCAGAAGCCGGACACATCAGCGCCTGGCAGCAG  
TGGCGTCTGGCAGAAAACCTCAGCGTGACACTCCCGCGCGCTCCACGCCATCCCGCATCTGACCACCGGAAATGGA  
TTTTTGCATCGAGCTGGGTGTAATAGCGTTGGCAATTTAAACCCGAGTCAAGCTTTCTTTTACAGCTGGATGGCAGCTG  
AAAAACAACCTGCTGACCGCGCTGCGCGATCAGTTCACCCGTGCACCGCTGGATAACGACATTTGGCGTAAGTGAAGCGACC  
CGCATTTGACCTTACCGCTGGGTGCAACGCTGGAAGCGCGCGGCCATTACCAGGCCGAGCAGCGTTGTTGCAAGTGCAC  
GGCAGATACACTTGGCCAGCGGCTGCTGATTACGACCGCTACCGCTGGCAGCATCAGGGGAAAACCTTATTTATTCAGCC  
GGAAAACCTTACCGGATGATGTTAGTGGTCAAAATGGCGATTACCGTTGATGTTGAAAGTAGCGAGCGATACACCCGATCCG  
GCACGGATTTGGCTGACCTGCGCAGCTGGCGCAGTCTGCAGAGCGGGTAAACTGGCTCGGATTAGGGCCGCAAGAAAACCTA  
TCCCGAACCCCTTACTGCGGCTGTTTTGACCGCTGGGATCTGCCATTTGTCAGACATGTATACCCCGTACCGCTCTTCCCGA  
GCGAAAACCGTCTGCGCTGCGGGACGCGGAATGAATTTAGTGGCCACACCGTGGCGCGGCGACTTCCAGTTCAATATC  
AGTCGCTACAGCCAACAACAACCTGATGGAACCAGCCATCGCCATCTGCTGCACGCGGAAGAAGGCACATGGCTGAATAT  
CGACGGTTTCCATATGGGGATTGGTGGCGACGACTCCTGGAGCCGTCAGTGTGCGCGGAATTCAGCTGAGCGCCGGT  
GCTACCATTACAGTTGGTCTGGTGTCAAAAATAA

>Cluster\_67041

ATGCTGAGTATTGCACCCATTGCCGGTGGTGGCGCAGGCTATTACACATCGCAGGATAACTACTATTTTCTGGGCAGCAT  
GCAGTCCCGGTGGTTAGGGGAAGCGCAAAATCGCTGCAACTGGAAGGGCCGGTGGATGCTTTCCGGCTGGATGAGCTGA  
TTGCCGGACGCTGCCCAATGGCGTCACTCTGGAGAGAAATGGAAGGGCCATTAATGTGCATCGCAGCGGTTATGATCTG  
ACATTTTCTGCCCAAAAAGTGTGTCTGACTGATGCTGATGAGTGGTGGTGGTGGTGGTGGTGGTGGTGGTGGTGGTGGT  
AGTAAGTGAACGCTAAAAGAAGTTGAATCGCTGGTTTCCAGTCCGGTGGTGAAGAGGGGAGAGACAGAGACACAACCTGA  
CACAGAAAGCGGTTATTGCCACATTTAATCATGACACTTCACGGAATCTGGATCCGCAACTTCATACCCATGCTTTGTTC  
CTGAATATGACACCAACGGAAGTGGCTGGCAGCGCTGGCAAGCGGTACGGTACGGAAGACGGATTTATTGAAGCTGT  
TTATGCGAACAGTGTAGCTTCTGGGGCAGATACAACCTGAAATTTATGCGCCCTAGGTTGAGGCGATGGGCTGAGACGG  
TGGATACCGGAAAATGGTCTGTGGGAGATTAAGGTGTTCCGGTGCATATTTTCTCAACCCGAGTACGAAAATCCGG  
GAAGCGGTCCGGGACGATGCATCGTTAAATCCCGCAGCGTGGCTGCGCTGGAATACCCGCTGCTGCCAAACAGAAAAGGCC  
GGCAGAGAAGAGTTGCTGACAGAGTGGCATGAGCGTATGACCGGACAGGATTCAGTTACCGGCAATTCGCGGAGAAAAG  
CGGCAGAACGGGAAGCCCTGCAGCAGTCTACCCGTTCTGTTTCTGAACCGGAAAAGGCCGTTTGTGAGGAGAAAGCCGGA  
GGTATTCTCAGCGGGAGAAATCGTCTTCACTCCACTTCGCGCAGCGTGAAGGCGTGCCTGACCCGCTGCTGCCAAACAGAAAAGGCC  
TGCTGTGTACAGGCCATTTCCCTGCTGAGCGACCGCAGAGCGGAGTTTACTACTCTGATGCTCTGAGCAGGACGCTGG  
CACTGGTGGAGGCTGAACCGGGCAGTATTGCCCTGGCCGCGGATGAGCAGGCCATCAGCAGCGGCAACTGAGTGGT  
CCACTTGATAAGGAAAAGGGCTTTTCACTCCTCTATTCATCTGCTCGATGAGCTGAGTGTGCAGCAACTGGCACAGCA  
GGCGATGCGTGAAAACAGGTAATGGTGACCATGCGACCTGAAATGCCCTGCAGGGCGCGGCTGCGGTTCTGGCTGACA  
CCCTGCTGCGGTGGCCATTATCAGCACCGGGCGGGGAATGACGACACAGCGGGAGCAGATACAGGCTGTTGTGGCGATG  
GCAGAAGGTCAGGACCGGACGGTGCAGGTGATGCGCAGCGGACGGAAGGATGACCGCTTTCTTGCAGGACAGCAGGCGCT  
GAGCGGAAAAGTGAAGCGGAAAGAAATTTACTGACCGGAGAAGGGCTGAAGCATGACAGCAGCGTGGTATTGCCGGCGCGG  
AGAAACTGCTGTAAAGGAGACGGTACCGCTGCTGACCGGCTTGCATAACATGTGCAGGTGGTGTGATGGATGGC  
GGTGGTCTGACGGCAGCGGAAATGGCTGGCCACGCTGGAAGATGCCGGCTGGTGGCGCTTACGGGGGAAACCGGACAG  
GGCGTAAGGGTATCGGTGTAAGTCAAGCTGACCGCGGACCGGCTTATGAAACAGCTGGCCCTGGATTTGCTGTCTC  
ACACACAGGGCGAGAGTGTGGTGGCGCAGGCTCCCGCTGCTGAGCAGCGGGCGCTGACGGAGGCCATCCGGAAGTCACTG  
AAAGCGACCGGAGAGTGGGCGACAGGGATGTAACGATATCCAGCTGACCGCGGTTCTCCTGCACAGTAAAACCGGACG  
ACTGACGGACAGTACCGGGAAGGACAGATCTGGAGCGGTATGATGACAGAACGTCGGACGCTGAGCGTTACACCATTTG  
ACCGGTTGACCGGCCCGCAGCTGACAGCTGACCGTGAAGGAGGCAAGGTCAGCTGATGAAAAGTCCGGGACATG  
GACAGCAGTGGCGGTTGATCAGCCCGGATGCTTCCGGTGGTGAAGGTGAAAAGCTGATGCTGCTCGGCAGTACCGG  
AAAACCTGCTTCAAGTGCAGTGTACCGTTGAAACACATCACAGACCGGACGCTGACGGTCCGGCAGGGGGAGCGCCGGC  
ATCGTCTCCGGTTGCAAGCGGACTGAAAATCAGTCAAGGATATGTCAGCACCGCCGAAAACCGCTGAGTGAACAGGCT  
GTTGTTCTGGCGGCTGCTCTGCGCGTGCACGCGAGGCACAGCGCTTAAACAGCTGGCCACCGTGGCGACCGGGTGA  
GATTTATACGTCAGTGTGAGAAGAGCGCACATGCGCGCTTTGCCGCTTCTCACTGTACCGGACGCGCCGGGAGCAGG

TCAGTCCGGAGGGTAAGCCGCTGGATACGGCCATGACAGCAGGCCCGTGACAGTCTGATGCCGGTAACCGAAAAAGCGGTG  
CGTCAGGCCATAACGCTGGCTCAGGGCAGCAGTGTGGTCTTTTCTCGTCAGGATGTGGTACTGGAGGCGACTGAAGCGCA  
TCCGTCAGTGACACCATAACGGTATTCACCACACATTTGCTGAACTGGTTCAGCGCGGGAAATCCTGTCCGTGCCGGGTG  
ACGGGAGTCCAGTCTGTTATGTGTCCGGCTGAAACCTGGCTCAGGAAAAAGCCATCCTTCGCACAATGGCAGAGGAAAG  
AGCACACAACCTCCACTGGAACCTGTGGAACTGTCTCTCCAGTGTGACGTAGCCAGCAGCAGACACTGG  
ACTGATTCTTGAAGCACGGACGTTTTGTGGCCATTCAGGGCTATGCCGGTGTGGGGAAAAACACACAGTTTTCGCAGTG  
TCCTGGCGGGCGCTGGAAACCTGCCTGAAGCTGACAGACCGGTTGTGGTGGGGTGGCCGCCACGCACCGGGCGTCACT  
GAAATGCAGGGTGTGGGGGTGAAAGCGCAGACCATCGCTTCTTTCTGATGGATACGGAGCGAGTACAGCAGAGCGGTGA  
ACAGCTTAACCTTCCAAAAACGCTGTTTTCTTATGATGAAAGCTCCATGGTAGGCAACCGGATATGGCTGACACACTGG  
CCCGTATTGCCGCGCAGGTGGTCTGTCTTCTGTCCGGTGACAGTCTGCAGTTACAGCCGGTGGCCAGTGGTGGCCCC  
TTTTACCTGTATGCAGCAGCGCAGCGCCATCGATGTGGCGGTGATGAAAGACATTTGTGCGTCAGTCACCGGAACTCGCGAC  
AGCGGTGTATGACTGCTGGAAGGGCGTACCGGCGAGGGCGTGGACACGATACGCCGCTTTCACCGGAACAGGTGCCCC  
GGGATAATGGTGCATATGTACCGCATCATCGGTGATAAAATTCGCCAGACCAGCAACAGAGAAACAGCGGGAGAC  
AGGGTGATATCTGCCATCGTGGATGATTACACCGGGCGCACCAGCAGAGCCCGGGCTCAGACGCTGATTGTCACCCAGAC  
AAACCGGGATGCAATGGCCATCAATGCCGGCATTCATGACCGTCTGCATGAGGAGGAAAAACCGGTGGGTATGAGCTTC  
CTGTAACGGTGTGGTTCAGGGAGAAAAACGACGAGCCGAAACCTGAAATCCGTGGCAGGACTGGCGCAGCAGCGCCAC  
ATTCGCCGTGATAAACACAGCAGTATTACACCATTACAGCCCTGATGCAGCAAAACCGGTGTGGTGTGATGTCGTCAGAG  
AGGCCGGGACCATCTGCTTTCGGCTTTTGAAGCAGTCTGCGGGATATTGCGGTATTTTCCGGCGTGAATCCGGCTGT  
CAGAAGGTGACCTGGTGGCTTCCACTCGTCAGGACCGGGAGCAGGGACGGGATACCCAGGTGCTGTGGGAGGTTCACCGG  
GTGGCAGATAACGGCGATAATCAGCTGAAGCAGGTGAACATACACGGTGTGATTACCGGGGGCGTGGATGTCGGATAT  
GCATCTGGATTACGGCTATGCGGTCAGGCACACCGTGTTCAGGGGGCAGCGAGGCCCTTTGTGATAGCCCTGGCCGGTG  
CAACCGGCGCAGCCAGCGGCTTGCCCTCCCTCAGTGATGCGTATGTGGCGCTTCGAGGATGAAGCAGCATGTGCAAGTG  
TATACCGATGATATCGGGAAATGGCAGGATCCGTGGCGGCCAGTAAAAGCAGGGAGACAGCCATGATGTGCTGGACGT  
TCAACAGGATTTTCTGTGCCACAAACAGCAGAACTGTGCTGAGCAGTGCCTGGCCAGCCTTAATCAGAATGGCGTGGCGGG  
CGTTGCTGCGGGAAACCGGGTTACTGACACAGCGAAGCCCGTTTTATCAGTGGCAGCCGAAATATCCGGCACCAGCAT  
GTGGCCTGGCCGGCTTACGACCGGAACGGCAGGCAACAGGGTATCTGGTTGCAGGAAATCCGTATGGATGAAGAGGGCCG  
AATGCAGGGACTGGATGAGCAGGGAGATGGCTGGGGCAGATGATGCCGGCTTGTGGTCTGCAGCAGAGCCATAATG  
GCCTAACCGTGCAGGCTCAGACCCGGCATCTGCATGGCGCTGGCCGACAGCACCCGAGAGTGGTGTGTGCTGCA  
CAGGATACCGGCCACTTCCCGGCTGGCTGCTCAGAAGTTAACGAGGGACAGGGAGAAACGACACCTGAAGCCATAAA  
AATGTGACAGCTGCACAGAATACCGACGCAAGAACTGCTCAGTCTGCAGACGTCGGAAGCAGCGGGCAGCCAGGAGCAG  
AAAAAGCCGTGAGGAAACCTGCGCAGGATGAAACGCGGAACATCTGCGGCAGAGAGTGAAGCCCTGCAGGCTGCA  
GAAAACGTGGTGGCAGAACAGGAAATCAGGGCAGCCGGCAGCGCCGCTGAAGAGAAAGAAAAAGCGCCCAATTACT  
TCAGCATGAAGTGGCTGCCCTGAAACACATAAACCGACAGGAGCAACTGCGGCAGATGGAGAAAGAACGTTGATGACA  
GAGAGAAGACGCTCTGA

>Cluster\_67132

ATGGGGCTTGAGAAAACACCTCAAACATACGTTTTAAATTAATTAAGTGAAGCGAATCACTCCTTCTGCTTTATTAATTA  
CTCGATTGGAATTTGA

>Cluster\_40294

ATGAGTAAACTTTTGGATCGCTTTCGCTACTTCAAACAAAAGGGCGAAACCTTTGCCGATGGTACCGACAGGTGATGCA  
TAGCAACCAGCACTGGGAGGACAGCTATCGCCAGCGTTGGCAGTTTCGACAAAAATCGTGGCTTCCACCCACGGTGTAACT  
GTACAGGCTCCTGTAGCTGGAAATCTACGTTAAAATGGTCTGGTGACTGGGAAATCCAACAGACCAGTACCCGCGC  
ACTCGCCCTGACCTCCAAATCATGAACCTCGCGGCTGCCCGCTGGCGCAAGTTACTCCTGGTATCTCTACAGCGCTAA  
CCGCTGAAATACCCGCTCATTCGTAACAGCAATTTGAACTGTGGCGGAGCCCTCAAGCAACACAGCAGCTCCGGTAC  
TGGCGTGGGCATCGATTATGAACGATCCGCAAAAGTGCCTGAGCTACAAAAGTGCCTGGACCGGGTGGCTTTATCCGC  
TCCAACTGGCAGGAGTAAATCAGCTGATGCGCGTGTACGCTGCTGGACCATCAAAACCTATGGCCGGATCGCGTTGC  
CGGTTTCTCGCCGATTCGGCGATGTGATGGTCTTACGCCCGCGGAAACACGCTATCTGTGCTGTAGGTGGCACCT  
GTTTAAGCTTCTACGACTGGTATTTGCGACTGCGCGCCGCTACAGCGACATGCCGATGACCTGGGGCGAGCAACCCGGA  
TCTGCCGACTGGTATAACTCCAGTTACATCATCGCTGGGGTCTAACGTACCAGCAGACAGTACGCCGAGCCCATTT  
CTTTACCGAAGTACGCTACAAGGCACTAAAACCATCGCCATTACCCCTGACTACTCTGAAGTGGCCAAATTTGCGGACC  
AGTGGCTGGCACCGAAACAGGCACTGATAGTCCCTGGCAATGGCAATGGGCCATGTCAATTTAAAAGAGTTTCACTC  
GATAAATCCAGCGATTATTTTATCAACTACTGCCCGCTCAGCGCATACAGCGACATGCCGATGCTGGTAATGCTGGAACCTCGCA  
CGACGGCAGCTACGTTCCCGGGCGCATGGTCCGCGCATCTGATCTGGTGGATGGACTGGGCGAAAGCAATAATCCGAGT  
GGAAAACCGTGGCAGTTAATACCGCAGGTGAATTTGGTGGTGGCGAACGGTTCCGATTTGCTGGGGAGAAAAAGGC  
AAATGGAACCTGGAATCCATTCGCGCGGATACGGAACCGAATTTGCTGTTAACCTGCTCGGTCAACAGCAGACCCGCTCG  
AGGCGTGGCCCTTCCCTACTTTGGCGGATTTGAAATTCGCACTTTTCGAGCGTAAACATGATCCGGTACTGGTGGCC  
AGCTTCCGGTGA AAAATCTGACGCTCGCGATGGCACTGTCTGTCCGGTGGTACGCTTTATGATTTGGTACTGGCGAAT  
TACGGCTCGATCGCGGGTGAAGATGAAAACAGCGCAAGGATTAACCTGAAATCAAACCTTATACCCCGGCTGGGG  
CGAGCAAAATACCGGCTTCCGCGCAGTATATTGAAACCATCGCCGTTGAATTTGCCATACCGCCATAAAACGCAATG  
GGCGCTCGATGATTTATTCGCGCGCAGGTGTTAACCACTGGTATCACATGGACATGAACCTACCGGGATGATCAATATG  
CTGATCTTCTGCGGTTGTGTGGGCAAGCGGTGGCGGTGGGCACACATGTGCGGTAGGAAAAACTGCGCCGCAAAAC  
CGGCTGGCTGCTTGGCCTTTGCGCTCGACTGGAACCGGCCAGCGCCAGATGAACAGCACCTCGTTTTTCTACAATC  
ACTCCAGTCAGTGGCGTATGAAAAGTCAACCGCAGGAATTTGCTCACCCTCGCGCAGCCAGTAAATACAGCGGT  
CATCTGATTGATTTCAACGTTCCGCGCAGAGCGCATGGGCTGGCTACCTTCTGCGCCGAGCTGGGGCGTAAACCGCTCTC  
CCTGAAAGCGAAGCCGACAAGCGGATTTGTCACCGCGCAATTTACCGCCAGGCACTGAAGTCAGCGCAATTACGCA  
TGGCCTGGCAACAGCCGGAACAGGCAACCATCCGCGTAACCTGTTGTCTGGCGTTCAAACCTGCTGGCTCTCTCC  
GGCAAAAGCCACAGATATATGCAAGTATCTGTGCGGACCGAAAGGGGATTCAGGGCGAGGAACCTCGGTGCGGCA  
CGGGATCAAACAGAGAAGTTCGAGTGGCAACGCGGCGATTGAAGGCAAGCTCGATCTGTGGTGCAGCTCGACTTCC  
GCATGTCCAGTACCTGCTTCCGATATCGTTCTGCCACCGCCACTGGTACGAAAAAGACGATATGAATACCTCG  
GATATGCATCCGTTTATTCATCCGCTTTCTGCGCGGTCGATCCGGCTGGGAATCACGCAGGACTGGGAACATCTACAA  
AGGTATCCGTAAGCCCTTTTCCGCAAGTGTGCGGCGATCTCGGCAAAAGAAACCGGACTGGTATTACAACTGCTGCTC  
ATGACTCCCCGGCAGAGCTTTCACAGCCGTGTGAAGTGTCTGACTGGCGCAAAGGCGAATGCGATCTGATCCAGGCAAA  
ACCGCGCCGAATATTTGTTGGCGGTGGAGCGGACTACCTGCTACTATGAACGCTTTACTCTCGCTCGGGCCATTTGATGGA  
CAAATTTGGCAACGGCGTAAAGGGATTTCTGGAATACCCAGGATGAAATCGATTTCTCGTAACTCAATTAACCA  
AGCGTGTAGTGGCCCGGCAAGGGCGTCCGCTGATTGATACCGGATTTGATGCTCAGAAAGTATTTCTGGCGTGGCACCG  
GAAACCAACGGCCATGTTGCACTCAAGCGTGGCAAGCGTGGCGGAGATCACCGACCGCAACATACCCATCTGGCGCT  
GCATAAAGAGGACGAGAAGATTCGCTTTTCGCGATATTTCAGGCGCAGCGCTGATAAAATTTCTCCAGCCCACTGGTCTG  
GTCTGGAAGCGATCACGTTTCTATAACCGGGATACACCAAGTTCATGAGTTAATTCCTGGCGCAGCTGTCCGGA  
CGCCAGCAACTCTATCAGGATCATCCGTGGATGCGTGTCTTTGGTGAAGTCTGGTGGCTTATCGCCCGCTATCGACAC  
CCGAGTGTGATGAAATGCGCCAGATACCGCAACCGCTTCCGGAGAAAGCCCTTAACCTCTGACACCGCACAGAG

AATGGGGCATTCACTCAACCTACAGTGAAAACCTGCTAATGCTGACGCTCTCTCGCGGTGGACCGATTGTCTGGCTCAGC  
GAAACCGATGCCCGTGAACCTGACCATTTGCGATAACGACTGGGGTGAAGTGTTTAACGCCAATGGCGCGCTGACTGCCCG  
CGCGGTGGTCAGCCAGCGTGTACCGCGGGGCATGACCATGATGTATCACGCTCAGGAACGCATATGAATATCCAGGTT  
CGGAAGTAACGGGATGCCCGGGGCATTCATAACTCGGTACCCGCGTTTGTCCGAAACCAACGCATATGATTTGGCGGT  
TACCGCGAGCTGGCGCTTAACTACTACGGCACGTTCGGCTTAACCGCGACGAATTCATCATGATCCGCAAGAT  
GAAGAACGTTAACTGGCTGGATGATGAAGTTCGCGATCAGGTTTCAGGAGCGAAAAAATGA

>Cluster\_53508

ATGAGTTTTGAATTAACGAACAGATGGTTGATAGCCTGGCAAAAACACATCGCTGGGCGGACGGGTGTATCAGATTA  
TCCACCTCGCGACCCGTTAGTGGGCCAGAGCCGCTTTTTTAAACGCTTTCAAACCTTTTTGCATACGGTGGATCACGACG  
ATGATCGCTTTGCCCATGTGTTTGGCGTGAAGCCGAATGGGGTGGGGTAAATCACGTTTAGGCCATGAATTTGGTCGCA  
CAAATTAACGACTGCTCCAGGGGCTGGTTTGTCCGCGACGAACAGGCCAACTGCACGATAAGCAGCTGTTAATCGCGA  
CACGCAAGACAAAATACCTGGCGCTACACATTCGCTACTCGCAAGTGGCATCAGATTATCAAACCTCGGATAACTGGTTG  
CTTTTGGTTTATATACAGGCGCTATTAACCTAGCCACCCAACTTTGATGGATTCGATTCAAAGTGAATTTGCCAAACA  
GCCTATGAACGCTTAATGCCATTTGGCTTTAAATCTGAACTGTTAGCAGATGCCCTACAGCTGAATGCCAACCCACAGCGA  
AGAAGACCTCTATACTGACCAACGCTGGTAGTCAGTTTGGTGAAGCCGCTATAAAGTATTAAAGAGTTTTGGCGTGC  
AGTATATGTTGGTGGTGGATGGATGAGCTGGAACCGTTGCAAGAAGCCGCACTTTTGGCTGGAAGATGAACAAGATAAA  
CGCTCGATGGCCAGGCCATTCGCTGATTTGGTAAAGCAATTAAGAGGAAGACCCCTCGCCGTAACCTTCCATGTTGGC  
CTATGTTGCACTGTGCTCACCACACTTTGGCCAGCAATTCGCGGAAATCAATCTGTCGACGCGCTTTGAGTTAGTAG  
AACTTGAGCATAATGCCCTTTGCCGATGTATCAGACTATGTGGCAAGCCCTTAAAGAGACGGCAAGCTGGGTTTTAATTC  
CCTGCTGGTTTGTAGTGAAGCTGCATACGCCATGAGTGGTGCACAACTTCGGTTGGTTTAACTGGTGGTGAAGTGA  
TGCAGTGTGGTGAAGCAATCAACAGCAGCGCGAGTATCAAGGATGTGGCGATTTAATTTGAAGTGTGCTGGCAGGCT  
CTGGCCGCTGGCCAGGCATGTGCTGGATAAAGGTGCGATAGAAGGCATTCAAACCCGCGACAGGCATTTGACCGAA  
TGCCGTACTTTGCTATACGGCCAATTAACCGTGCCTTAACTGAAAGTGAAGCATTGCCACAGAAATTAACGGCGTGAAAA  
CGAAGACTCGAAGCCAGCAGCGCTCATTACCGCAACCTAAGCATTGACCGCTACAGTGCAGCAAGCCCTGGAGCAAG  
CCAAATTCGCGCGGATAAAGATGAATGGTACTACCCTGCAGTAGATCAAGCGCTGAACTTAGATACTTTGCTGGATAAC  
CTGCGTACTTTTTGATTAAGAACAAGCCGCAAGCGGTGATAAAGGCGCAGTATTACTGCCTCTGTCAAAGGTGAGTT  
TAAATACTTACTCAGCTTGTGTATGACCACCCAGCGATTGAATTCGCTGCCGATGCCTTATGGCACAAGCTAGTGGGTG  
AACTACCGAACCTGGCAGCGCAGCAAGCAGCATATTGGCCCACTGAGTGGCGATGTTACTGCCCTGATTTGCTGAGCAAT  
CGCAGTGGCCAGCAGAATCACTGATTTTTAAAGATCCCGCCTAGGGCAGCGTCATGAACAGGCAATGAGTGAACCTTAG  
CAAACAAAGTAGCCAGAAGCCGCTCATCAAGCTATTAGCTCGTGAACGGGTTTTGTGAGATTACTGGATAACAACCTGGA  
CCTATGATGAAAACCTACTGAGTAATAAAGCGGGCAGCGACGATGCACCTTTGGCCATTTTAAACCGAGCCCGTGGCCGC  
CAGGTTGGTTTACTTACCCTGGATGGATTTAAGCTTCAACGAAAGGTAAGCCTTGTGCTGGCTGGCAGCAACTAAT  
TGAGCTGAACAATCTCACACCTTTGCGGCAAAACACAGCCACCAAAATGGTTCGACGCGCAGTATTAGCGTTAACTGCTT  
CTGCACATCTCATGGAGCAATACAGCCGACTGGATGAAAGAAATGAGTTGCGTGTATGCATATGCTGCAATATGTCAC  
CCAAGCGAAGCAGCAGCTTAGAGCGTATTGGCTTAAGTTTGGCAGCATGTGAGTGCACGCGGTGAATTTAACTGCCGA  
CAGCTTTTACCGCAAAATTCAAAACAAGCTGCATGCCCTTACCAACCTTTGCGCAGGACCCATTCAAGTGGCGCCAGC  
GTTTACAGCAGCGCGGTTTTAATGCTGGCCGTTAAAGGTAGATGGTAAATTAATCATCGAATGACCGAGACCTGTTGTTT  
AAAGGCTGTATACAGTGGCCATTTGCTCACCTTCCAGTTAAATGGCATTCTCGATTTACAGCAGCAACCGCGGTGCCAGT  
GAATGAGCTGAGCAGCTTGTGGATAAACTTAAGTGCAGGCGCAGTATATTTGCCAAAGGCTACACGGCCGATGAACATG  
CCGGGCTATTACTGAACTTAATAATGTGCAGCGAAGCCAGGCGCAGATCCCATTAATTTTAGCCGTTATGCTCACCT  
AATAAAAAGCACAAGTGGCAATTCGAAGGTTTTAAGCAACAGTTTTATTTCCGCTATGTTGGCTGAAACGAGTGTACCGC  
CAAAGCGTGTTTAATGACTGGATGTGGTGGTGTGGAGAGCTGAACTTACTACTTTAAACCAATCCAACAGAAAAACAGG  
CAATTTGGGAGCAGTACCCGCTCCCGCTTAGAAAATGCCATTAGAGAAGCGCAAACTGGTTCCCGGTAACGATATG  
GGCAGCTATGCAGCAATGTGGAAGTCAATGAGCCGCTGTATGGTTATGCACGATTAATGAAATGTTGCGCGCTCTGGG  
TAAAAATAAGCTGGGTTTCGTCACCGTGAAGCTAAAGAGCAGCTGGAAGCAACATCGCTATTTAACGCTGTCAAAC  
AGCAAGAAGAACAACCTGGCTGATATGGTTCGAGGCCAACGACAGCAAGATTTGGCAGGGCTTATCCACAAACCGCTGAA  
GTGCTGGAGCTGGTAGCAAGGTTAAACCGCTTAAATAGTTTCCAGGCTATGCTAAAAGATGCCATATTTCTACGCTTGA  
AGCAAAAACGACCTCGCTTTATCAACGGATGAAACAGGCTGTTTATTTGCGGAGTTTGTGAGTACAGCGCTGAGCGTA  
TCAACAACCGACTCGTTGATTTAATCATAGATGTTGAAACAGAGTGTGCCCGCTGACGAATTTCCGAAACGCTGTGAC  
ACCAACACGCTGCGCACCATAGGTCATATTTAGATGGAGCGTTAAAAGACGATACAGCAGTGCACCTGGCCGAAAGA  
GCAGCAAGCAGATAGCGATACCTTACTGCAATTAACCTGCATAAAGCTGATTTAGTGAAGCAGCGCATGCAAGCTTTCAGCCT  
TAGCGCAAGAAGTGGTTTTAAACCTGCACAATGATCAACAGTTGCCGATAGCGGAGATTCAGGTGCATATTTTGTCCAGC  
TACCAGCACTGCAAGAAGCAGATTAGTAAGCTGGTTAATAACCTCACAGAGCAAAAACCTACGTCACACAACCTGCAAGA  
ATGGCTTAGTAGCGCCACGGCTGAGTATCAGTTACCGATGACATGACAGCTACCAAACTGGTAATGAAATTAACAGC  
TCATTTGAAGTGTATTGGCCGATCTCCCAACGATGCCGAGCAGCAAGCTCAAAGTATGCAAAAACAGTTTTCGCAATGGG  
CAGTTTTCATCTGTTACGGGATTTACCAGAAGAGCTTTTAAACCGGCACGCGTCAACTTACACCGATTCAGGCCAGCT  
ACTTAAAAATTGAAGAGCGCTAAACCAAGTAAGACGCAACTCTATCGCGCAGGTAAACAGCTGGCTGGCGTTATTA  
CGCTATTGGCTTCTCAAAGCAAGCGGAACAGCAGCGTTGACTCTGGAGGATGTGAGCAATTTGGGTGCAGAGCACTT  
CAACAGGTGTGTAAAGCAACCGGCAAAATGGCAGAGTCAAGGTGAGCAAAATTAATGATACAGGCTTAAACCTGAGC  
GGATTTGGCAACCGATTTATCAGGCTTTGAGCAAAATCAGGAACCCGTTTAAACCTGAGCAACAGAAAGGACTTGTAG  
ACAAAGGCATTTGAAAAATGCGCCTTACCTTTGCCACTGGTTTTATAG

>Cluster\_23985

ATGCGAAATAAACATGATATTGAAGGCTGGCATTGGAAGCCCTGCACCTGCGAAAAAATCAGGGAAGTCTGCAATAT  
GTGGATGAACAGCCTTAGCACCGATAAATCCGATAGCAGAGAAGAAATCTTATTTCTTTGTTGTTAGACCTGGCAAAAT  
CACAGGTTTCTCTGACATCTGATATTGAGCTCGCCGCTAAAAGCTGCCTCTGGAGTAA

>Cluster\_8438

ATGAATCTGAGTACTAAACAAAACAGCACCTGAAAGGCTGGCAGATCCGCTCAAGCCAGTTGTTCTGCTTGGCAGTAA  
TGGTTTGACCGAAGGGGTGCTGGCCGAGATTGAACAAGCGTTAGAGCACCATGAATCTCATCAAGGTGAAAATCGCCACCG  
AAGATCGCGAAACTAAACCTTGATCGTGAAGCTATCGTGGCGAAACCGCGCCTGTAATGTACAGGTATCATCGGTAAA  
ACGCTGGTCTTTATCGCCAACTAAAGAACGTTAACTCTGCTGCGCACGCTAA

>Cluster\_46742

ATGAGCATGGTCTGGTTGTACAGAAAATGTCCCGCCGCTTACGTTGGACGGCTCGCAATCTGGCTACTGGAAGTGGC  
TGCCGGTGTGTATGTTGGTGATACATAAAACGCTATTCGGGAGATGATCTGGCAGCAAAATACCAACTGGCTGGTTGGC  
GAAATGTGGTGTAGGCTGGCGCAAAATACCGGATCGGGTTTTGAATTTTCAGACCTGGGGAGAAAAACAGACGATTTCCG  
GTGGATTTGGATGGGTTACGTTTGGTTTTCTTTCTTCCGTTGATAATCAATAA

>Cluster\_21994

ATGACTCACAGTACTACGCGCTTTTGGCAGAGCATTGGAACGACTGGCAGCAATCAAAGCCAAATACCTGATATGAA  
GCATACGGCGCTTGTGGAGAGCTTCTAAAAGAGCCGGTAAACCTTAGCCCTTTCGATAACGTTAAGGGCGTTGCAGAA  
GTTCTAAGGCCATCAGAATCACAACGAACCAACTGGAACCTACTCAAAGCACAGTCCGAGTAGCAGGTTGCTCAATGATT

CAAGTGTAAAGTACCAAGGTTTCATCAACTGGCGGATAAATTGGGGTTTAA  
>Cluster\_40508  
ATGAGCCAGAACGCTACGGTTAACGTCGACATCAAATTAGCGCTCAATAAATCCATGTTGATGAGGGCCACCCGCATAT  
CATTTTGGCGGAAATCCCGATAAATGAATCCGTAATAATGAAAGCTTCCCTGCCGGACTTTATAAGCAGGATG  
ACGCAGGAAACATTCATTTCCGATTCCGCCGTTGCTGGAGTGGCGGACCTGTCGGGTGCTGTGCGGCAACACTATTC  
GAACAGTGGCAATATCCCGCAGGCACCTTCGGTATTGAATTCGCTACGGCTAA  
>Cluster\_48669  
ATGTTGAACATTACCAAGCCTACCAGGTGGCATTGATCAGTTTATCTCATACATCAGAGGAAGATGCTCGCCGATT  
GATCGCAAGCAATGAGCTGGATTGGGTTTCACAAATTGATGGCGGTTGATTTGTCACGCCGGTTACAGGATGATGCT  
GGAAAGACGACTTGGCTCGATATGGTATATCCGAAGGCGGATTGCTAACATTGAGAAAGTACTTGTAGGCTTTGAC  
TCTGTACATTTTGTATTGGTGCCTGATCGTTGAAGGCTTGTAGTGTGGTGTGGTAG  
>Cluster\_34014  
ATGTTGAAAATCAAGATATCCGCAATATATACAAAAAGAATACGCTGGTTTTTTCAGGAAGATCCATTGAGAATCT  
TGAAGATGTAATAAATGTTATTGCGCTCCTTTCAGCATTGACAGGTGAAATTAATACCAGTGAGAGAATGCCAGTGCAA  
TTAATGAAATGGAATCATTAACATACTTTATCGGGAATTACGAGCGATTAAAGTCAGGAATGCATACTTTCGGCGGA  
ATTTTTTCATGGCATAAGTCCGAAACCCCGGATTGCCAAAGCAATAAGTAACGAGTAA  
>Cluster\_43529  
ATGGCAGAACAGCGTACCAGGAGTGGTTACGTTTTGTCGACCTGCTTAAAGAATGCCTACCAAAACGATCTCCATTTACC  
GTTGTTAAACTTGTATGCTGACGCGAGATGAGCGCGAAGCGTTGGGGACTCGCGTGCCTATTGTCGAAGAGCTGTTGCGCG  
CGAAATGAGCCAGCTGAGTTAAAAATGAACTCGGCGCGGCATCGCGCAGATTACGCGTGGATCTAATAGTCTGAAA  
GCCGCGCCGTCGAGCTGCGCCAGTGGCTGGAAGACGTTGCTGAAAAGCGATTGA  
>Cluster\_56608  
ATGGAAAAACGCACACCACATACACGTTTGTAGTCAAGTTAAAAAATTGTCAATGCCGGGCAAGTTCGTACAACACGTAG  
TGCCCTGTTAAATGCAGATGAGTTAGGTTGGATTGATGGTATGTTGTAATGTTATCATTGGATTATCAGAGAGCGACT  
TTTATAAAAGCATGACCACCTACTCTGATCATACTATCTGGCAGGATGTTTACAGACCAGGCTTGTTCAGGCCAGGTT  
TATCTTAAATACGGTAATTCATGACGTAAGTATGCTGCTCGTTTAAAGGAGAAGTAA  
>Cluster\_44462  
ATGCGCGCGATCGGTAATGCTTAAAGCGTGTGATACTGGAAATTTATCGGAATGATGCTACTGGCGGTGGCGCTGCT  
GTCGGTAAGCGACTCCCTGTCGCTGCTGAGCCATTTTCTCGGCCAGAAGTGCAGATTCTGATGATTTTTCTCGGTGTTT  
TGCTCATGCTTCCCGCTGCGGTGGTGGTTATTTCTCAGGTGGCAAAACGCTTTCGCCCCACAGTGTATGAACCGTCCACCG  
CAATATTCACGTTTCAGAAAGAGAAAAAGATAATGACGCCAACCATTA  
>Cluster\_17642  
ATGAAGATTGAACAAATCGGAATGGCAGCTTTCAGGCAACAGGCTGAAAGCGGTGGCGTGGATGAGTTCGTCGTGACGG  
GTTCCGGTGGTGTATCATCTATTCGCTGTGAATCGCCGCGCGGGGTGCTCTATTTTCTACAGGAACGCTCGTGGCGATT  
ACAAGACATGGCTGCTCTTACCGTGGCGTGGTTCCTGTCAGGATTTGGCGTTTACGTTTTACCCTGCGTTTTGAG  
GATAACAACATGCTGAAAAAGATGATCGGGGCCATTAA  
>Cluster\_20747  
ATGAAAAATTTGCTACTGTTGGGCGCGCTTTTAAATGGGCTTTACTGGTGTGGCGATGGCGCAAAGTGTACCGTCCGATGT  
GCCAGTGGATACAAGAGTGGTTGTGGTTCCCTGATTCAGTCAAGCTTCCACAAGCGGTGAGCTGCGGACTGTGCGCGAAA  
CCGCTATGTTGGCTCCTGCGCCAGCTCCGGCTTACCGCCGATCCTTTATGTTCCGCATCTTGGCAGCTAGGTGAAGGG  
ATGTTTATCGAACACCAGATTGACGACCATCACCATTAA  
>Cluster\_23804  
ATGGCACGCTAACTGTTTACGAGCAGCTGTAGAGAAAATGGTAACCGTTTTGACTGGTACTGGTTCGCGCGCGCTGCGCG  
TCGTCAGATGCAGGTAGGCGGAAAGGATCCGCTGGTACCGGAAGAAAACGATAAAAACACTGTAATCGCGCTGCGCGAAA  
TCGAAGAAGGCTGTATCAACAACAGATCCTCGACGTTCCGCAACGCCAGGAACAGCAAGAGCAGGAACCGCTGAATTA  
CAAGCCGTTACCGCTATTGCTGAAGGTCGTCGTTAA  
>Cluster\_54616  
ATGTCGAAAGTCTGCATAATGCTGGGTTTACGGGCGAGTTCAGGGCGTAGGATTTCCGTACACCACACAGTACGAAGC  
GAAAAGACTGGGTTTAAACCGGTTACGCCAAAAATCTTACGATGGCAGCGTGGAAAGTGGTTGCTTGGCGTGAAGAAGGGC  
AGGTGGAATAATGACAGTGGTTAAAGAGTGGCGGCCCGGCTTCTGCGCGTGTAGAACGGGTGCTCAGCGAGCCGAT  
CATCCCTCGGGGAATTAACCGATTTTCTATCCGTTAA  
>Cluster\_20  
GTGGTAAACGAACGTTTTTAAACCTGTAACCTTAGAATTTTACTTAAAGAGGTTATTTACTTCCACAAGAAACCGAAAT  
GGGTAAGCTCAAATAAGGATCCCGGAGAATATGAAGGAAACCTATGGTGGTTAATATAACGCTGACTACTACTTTG  
ATGCTTACAAATAATGAGTCCGAAGAAGTAGAGATGAAATAGGTTAGGAAAAACCCCTGCTATTTTAAACCGGTTAT  
AGAGACGAAGGTTTTTGTATTTACTAATGCCTATGGTTTTATAG  
>Cluster\_11882  
ATGGCGTATTTTCTGGATTTTACGAGCGGGCACTAAAGGAATGGCGAAAGCTGGGCTCGACGTTACGTAACAGTTGAA  
AAAGAAGCTGGTTGAAGTACTTGTAGTCAACCCCGGATTGAGCAAAACAAGCTCCGTTGGTATGCTGATTGTTACAGATTA  
AGCTCCGGTCTTACGGCTATCGCTTGTATACCAGGTTATAGACGAGAAAGTTGTCGTTTTCGTGATTCTGTTGGGAAA  
AGAGAACGCTCGGAAGTATATAGCGAGGCGGTCAAACGCATTTCTGTA  
>Cluster\_6777  
ATGACATTTGTTTTCAGGTGGTTCCAGTGGTCTCCGGGAAGTGGATCACCTGATTATTCTAAATACAGTGTAACTTCT  
TTCTGACGCGCTCATACGACTCTGTATCGGGTACTGCTGCAAGCGCAGGTGCACACGCACATACTGTCGGTATTGGTG  
CTCATACGCACTCCGTTGGCATTGGTTACATGGACATACCATTACCGTTAACGCTGCTGGTAACGCGGAAAACACCGTC  
AAAAACATCGCATTTAACTATATTGTGAGGCTTTCGCTAA  
>Cluster\_5143  
ATGGCTATCATCGATCCTATCCGATGGAATTTACGCAAGGTTTTTCTGAAATTAATGATATCAAGATCGAGGTTTT  
CACACTTTTTGCTTTTGGTATGACTATCAGGGAGATTTCTGTTTACAGGAATACAACCTCATCAGGCGGTGATAAAACGC  
TAAAAGAGTTATGTGATCAATACAAATCCCTCAAATGAGGCACTTAAACTTTGTACATTACAAGGCTGGCCTTACAT  
TCCTTTCTGAACTAAGAATTGAACTCACCCCTGAACAGTAA  
>Cluster\_48413  
ATGAAATCACGCACTCTCTCCCTTTCACCTTCGGGTAGCTTTGTATCGCGCGCGGTAGCTGCGCCTGGCTGAGTGTCTG  
CCATCAGCAAAACCGCCACCCGAGCTCACTCTGGATGAAATGAAAGCCGCTATTGCTTGTGAGCTTGAAGGGTTTTAT  
TGGCACAACACGGGCAAAACAAAAGGCATGGAATCGCTGCGCCTGCTTTCAGACCTGATGGAATCCGGCACCTAATG  
CCCTGTCCCGCACTCTCCAGCTCGAAATAGCCGTAATGGATGAGTTATGCGTCCGTCACATTAATAAAGCCGGTTTTACA  
CTGA  
>Cluster\_54306  
ATGAAATATATATTTTTTTTATTCAGAGCTATATGGCTGGCTTTATCGCTTTTAACTATTTCTTTCCATGCATAGACT



TTCACTATTAGACTCCACTCGTGATGTGAGCGAGTTAATTAGTCTCATGTCTTATGGAATGATGGTAATATGTTTTCCAA  
CAGGCATAGTATTCTTTTATGCTCTAATATTTATAGGGACTGTATCAGACATTATGGCGTAAGGATTGATAGTAAGTAT  
ATTATGGCGATAAATAATATGGCTTTATTTCTGTGTCAGGAGGTATATTCATGTTTGTATTAAGTAAGCGCATATAAA  
CAAATAA  
>Cluster\_43182  
ATGTCCCATCAGAAAATTTATTCAGGATCTTATCGCATGGATTGACGAGCATATGACCAGCCGCTTAACATTGATGTCGT  
CGCAAAAAATCTGGCTATTTCAAAGTGGTACTTGAACGGATGTTCCGACGGTGACGCATCAGACGCTTGGCGATTACA  
TTCCGACGCGCTGTACTGTCGCGCGTGGAGTTGCGCACCCAGGCGTCCGATTTTGGATATCGCAATGGACCTG  
GGTTATGTCTCTCAGCAGACCTTCTCCCGGTTTCCGTCGGCAGTTTGTATCGCACTCCAGCGATTATCGCCACCGCCT  
GTAG  
>Cluster\_3324  
ATGTCAGCTTCCCTGAAGAATCAACAAGGCTTTAGCCTGCCGGAGGTAATGGTTGCGATGGTGTGATGGTGTGATGTTG  
CACTGCGTTATCGGGTATCCAGCGAACATTAATGAACAGTCTCGCCAGCAGAAAACAGTACCAACAGCTCTGGCGGCATG  
GTTGGCAGCAAACGCAACTGCGCGCATTTCCGCCACTGCCAAGTGGCAGGTCAACCGAATGCAGACATCGCAGGCGGGA  
TGTGTGATCATCAGCGTTACGCTAGTTTACCCGGGGCAGAGAAGGCAGATGACCCGCTGCATTGCCCAGTTCGTC  
GTAG  
>Cluster\_35621  
ATGAGCGTTGCAGAAATGTTTTAAAGAAACCGGTGACAGCGCATAACGAAACGCTGCATGTGCTGGAGTTGCGTGAGCC  
CACGTATGACGAAATCGAGGCGCTGGGTTTCCCTTTCATATTTCCCGTGAGGCGAGTATAAAGTGGACAGCCAGGTGG  
CACTGAAATATATCCCGTGTGTCGGGAGATCCCGGTTTCATCGCGGCGCAGATGGCAAACTGGATATTTTAAAGACC  
AGCATGCAGATCCGCTTGTGTTTTTACCCAGTCCGAGACGGGAAGCACCTCCGGAAACGACTCTACAATGTTGCTGGTTC  
TGAAACTGA  
>Cluster\_33846  
ATGGGTAAGCGATAAATTTATAGAGACGCCAATGTTTACGCGTCAGATCAAGCAGATTGCAACCGATGATGAATTA  
GGAATTACAAAAAGAACTCATCGGAACCTCCGATAAAGGTGATCTCATTCAGCAGACTGGTGGATTGCGTAAAGTCCGAA  
TGGCTGCGGGTTCACAGGGAAAAAGTGGCAGTGTGAGAATAATTTACTTCTGCGCAGGAAAGAGATTATTTATTTGATT  
ATGGCCTATCCGAAAAATGCCAAAGATAGTCTGACAGATACGGAAAAAGCTCAACTAAAGAAGTTGACGAACTGCTCAA  
AGCGGAGATATAA  
>Cluster\_28354  
ATGAGCCAGTGGAAAGACATCTGCAAAATCGATGACATCCTGCCTGAAACCGCGTCTGCGCGTGTAGGTGACGAACA  
AGTAGCAATTTCCGCCCCGATCACAGCGATCAGGTGTTTGGCATCAGCAACATCGACCCGTTCTTCGAGTCCAGCGTGC  
TGTACGCGGGTTGATTCGCGAACACCCAGGCGAGCTGTGGTTCGCGCAGTCCGCTGAAAAAGCAGCGTTCGCTTAAGC  
GACGGCTTGTGATGGAAGACGAACAGTTTCCGTCAGCATTACGACGCGGAGTGAAGACGGCGTGGTACAGCTGCG  
CGTTAA  
>Cluster\_30549  
ATGGAGACGTTTTCACTGGAAAGTGCGCCGGATATGAATGTGGTATCAGAGCCGAAAGTGGTACAGTGAAGTGGGCGA  
TGGTTATGAACAGCGTCTGCGCGGGACTGAATAACAGTTGTGCGATTACAGCGTGACGATACGTTGCTGTAATGTG  
AACCCATCTTTAAAAGCCTTTCTGGAACGGCAGGTGGCGTCCGCGCATTTCAAGTGGACGCCACCTTATGACTGGAAG  
CCGATCAGGTGGTGTGTCGTAATGTTGTCGGCAAGCGTGGGGCGTGTGGGTAAACATAACGGCAGATTTTGACAGGT  
CGTGGCATA  
>Cluster\_2254  
ATGGCACTGACTCACAACCTAACCATAGAAAACGGCCCTGAATGTGCGCTGGCGCTCCTTGGTTATTTTTACATCGTGT  
CTGCAGCGGAGGTGGCTGTGCTGTGTTCTGAAAAAATGGAATAAACGCGTAAGCAGGATGAACGCCAGAAAGGCAA  
TGAATGCGTTTTCCGAAGCCTTCGGAATGACGGCATGGAACAGGGGATCCAGCTCGCGCAATCAGCAGAGGGGGTGA  
GTAATCCTTGTATATCGGAGTGAAGAGAAAAATGACGATCACAACAACAGAGTAGAAAAAATCATATATCGCCATGA  
>Cluster\_60266  
ATGACCACATTTACCAATAAAGAACTGATTAAGAAATCAAAGAACGAATCAGCAGCCTAGAGGTTGAGACGATATTGA  
GCGCGTGTCTTATGAAATCGCACCTGATCTCTGGAAGTAGAGCCAGATGAACGCGAAGCCTATGAATATTCATGGAAA  
AGCGTTTCCGTTGACTTAGTAGATCGTCCGAGAGCAAAAAACGGCGATAACGAATACATGGCATGGGATATGACTCTCGT  
TGGATCATCTGGCAGCAACGAGCTGGTATCCATTTTCAACAATGTCAACAACAGAGGTGAATAA  
>Cluster\_67062  
ATGCACCGCTGGGGAAATCAGAGACCGGGACTGGAAAACAGAGTACCGGGCCAGCGGGTGCATTTGCTGACTGC  
GGCGATCTCACTGTGGAATATGTTATATAGAAAAGAGCCATAGATTTCTGAAAGCAAAAGGATCCCACTAAATGAAC  
AGCTGATTTCTCATCTGTCCCGCTGGGATGGGAACACATCAACTGAGTGGAGATTACGCTTGGCGAACAACCTCAAG  
CTGGAACAGGGAAATAACCGTTCGTTACGCTCAGTAGATAGCAGTCTGTATAAAAAACAGGCTTAA  
>Cluster\_39646  
ATGTCAAGTGAACAAAGTAAAAACTAAAGCTCATCCGTGAATCCGAACGCCCTAAAACTAAGGAACTTGTGAAATTAAT  
TGGAAATTAATTAACATATCATGGAATGAATCAGGAAATCAAAAATGCCTATGGAAGCAGGTATGAAGCTGTTTA  
AGCATCCACGCTTTTCGCAAGTATCGTACTGGTTCATGTTTGAATGAAACAGATCCAGCAGCTGGACAAATAGCCCCGGCT  
CTGCACACATTTGGCAAGACTCAACAACCTTGCACCCTCAGACCAGAAAACCTGGCTGA  
>Cluster\_59869  
ATGGAATACGGTTTCGACAAAGATGGAAGAGAGACTCTCTCGCAGCCCTGGCGGCAAACTGGCTTTGTGGGCTTTCTATAC  
ATGGTGTGGCTATTTCTGCTGGGCAATGGCGGTTACATCTGGGTGATGAGCCGATTCGCCGATGCCCGCTGTCGGGAT  
TTGAAAGCGATTTAGGCTCTACCGCGGAAAGTGGTGGGGACTGGTCCGATTTTTATTTATGGCTCTGGTCCGGGCA  
TTGTTAGGCGATTTGCCGTTACACCCGACTCGTCCCGCAGTAGCAGACGCTATGAATAA  
>Cluster\_24388  
ATGTCTGGATTATCTTAGTTATTGCTGGTCTGCTGGAAGTGGTATGGGCCGTTGGCCTGAAATATACCTACGGCTTTAG  
TCCGTTGACGCCAAGTGTATTACCGTGCAGGCGATGATGTCAGTATGGCGTACTTGCCTGGGCGATGAAATCGGTTAC  
CAGTAGGACCGCTTATGCCGTGAGTGGTATTGGCGCAGTCCGCGGCCATCACCGCATTTGTGCTGCTCGGTGAG  
TCCGCTAACCCGATGCGCTGGCGAGTCTGGCGTAAATGCTATTGGGGATTATTGGTCTGAAACTCAGCACTCATTA  
>Cluster\_44218  
TTGCAGGTTAAAGCACTCCAGGATTTTGTATCGCAAAAATGATGACCTCAAAGGTCAGGACATCATCGCCTTAGACAGT  
TCAGGCAAAATCCAGCATCACCGACTGCATGATCATCTGACGGGTACGTCAGCCGTCATGTTATGTCATTTGCTGACC  
ACGTTGTGCAAGGAGTCTCGCGCAGCGGCTGTTACCGCTCGGCGTAGAAGTGAAAAACAGCGCCGACTGGATTGTCGTT  
GATTTGGCGATGTGATTGTCATGTCAGGAAGAGACCGTCCGCTGTATGAACGGAATACTGGAGTTAA  
>Cluster\_66350  
ATGCTCTTCACTGAAACGAAAAATTTTACTGAAGATGTTCAAAAACGCTGACCGACGATGAATTCAGTGGTTTTTCAGTT  
TTTCTGGCCTTGAATCTGACTATGGTGGAGTAAATACCTGAAACTGGTGGGTTAAGAAAGGTTTCGATGGGTTTCAGGAG  
GAAAGGGAAACGCTGCTGGTGTGACGGTTATTTACTTTTCATCAGGTTAAACATTTATGAGATCAGATTACTGCTATTTTAT

CGTAAGGGTATTAAGATGATCTGTCTCCCCAGGAAAAAGCAATGCTCCGGTTGTTAAATACGAGGTGGTAA  
>Cluster\_66700  
GTGCTGGTTGGCTTTGATCCAGCAAGCGGCCATGAACAGCAAGGTGCTGGTCGACCTCGCCTTGTGCTCTCCGTTCAAGC  
CTTTAATCAACTGGGAATGACGCTGGTGGCCCCATTACGCAGGGCGGAAATTTGCCCCGTTATGCGGGATTTAGCGTTTC  
CTTTACATFGCGAAGAGCGATGTGCAGGCGTGGTGTGTAATCAGGTGCGGATGATGGATCTACGCGCCCGGCTG  
GCAAAGCGTATTGGTCTGGCTGCGGATGAGGTGGTGAAGAGCGTTATTACGCTGCGAGGCGGTGGGAATAA  
>Cluster\_26134  
ATGACGGCAGGGTTCAACTTTAATAACTATGCAGCAGGTTTTTTGTTCCGCTACCCCGGCGTTAAGGGGAAATGAGGTGAG  
CATGGATATCTCGATCTTGGCAACAGCGAATCTCTGGTATGTGGCGTGTTCCTCAACAGGACGGTACGTTCCACCGCAA  
TGACGTATACCAAAGCAAAACGTTTAAAACCGAATCTGGAGCGCTGCTGGCTGGAAAGAAATTCAGTGGGGTGA  
>Cluster\_16936  
ATGAAAACAGTGTGCGCATAGGCGCTTTTGAATCGACGATGGCGAATACACGGCGAATCGCCGGGTGATCGAACGTT  
AACCATTCCTTGTAAATCAGACCCGATTTATGTATGCAACTGGATGCCTGGGATGCTGAAACAGTATCCCTGCCCTGC  
TAAATGGCGAACACTCTGTCTTTACCGTACCCGTTACGATCAACAATCTGATGCCTGGATTATGCGTCTGCGCTGA  
>Cluster\_29454  
ATGAAAAATATTTGGTCTGATAACAATGCTCCTGAATTAACACCTGCAGGCTATGTTAAAGTTGCCCTCACACACAATCT  
ACCTGTTTTCTCGTGTGTGTACAGGCGCAATACATAAATAGTCTGGCCATTAAGTTCGTAACCGATTTCGTACTCGCCA  
GCAAAAATCCGCTGACATCCCTGGTTTCAAACGAAACAACCTGTTTATCCCATACGTTGGATGAGTTAACAGAATGA  
>Cluster\_49951  
ATGCTACAACAATGCTGCTCTTCTTATTTCTCCGGAGATCCGAAAACCCCAAGTTCAGGAGCTTCCCTCCCCCACA  
CAACGCCACCTCCTGTAAGCACAACATGTTGGTGTGCAATTAAGTGTGATGACACTATATGTTGTGTTATTTCCCTTGC  
CTGTGATGCGCCGCGAGGGGCGGAAAACAGCGATATGATGATTTCTCAGCGTGGTACACTTCCGAAAGTTGTGA  
>Cluster\_43934  
ATGGCGGTCCAACTTTCAAACCTTCTGAATCAGATCCCTTATTATCATCCCTGCAAAGTGGAAACATTGCCATTGTT  
TGGCTATTCAGGACGGGTGAGCCCAATGAAAAAGCCACACAGGGGAGAGTGGGCTGAAATGGGAAGCTAAAGACTCAA  
GTAAACTTATCGGAAATAAGGACCACGCATTACGGGGCTATCATCGCCGATGCGCGGATTCGGCAAATCAGGTTGATT  
ACGTAG  
>Cluster\_44693  
ATGGACGAAATAAACTCAAAGCGCTGGCGGCTGAACGGCTTAAACCGAAGCTGATCTTAACAGTTTTC  
CCGTATGCTGACTAAGCTGACCGTCGAAACGGCGCTCAATGCAGAGCTGACTGACCATCTCGGTATGAGAAAAATGCAC  
CTAAAAAAGGCTTAATACCCGCAATGGCTACTCGTCAAAAACGCTACTTTGCGATGACGGCGAGATTGAGCTGAACACA  
CCGTGA  
>Cluster\_49071  
GTGAAAGGCATGACGCAGAAAGTATGCGTCATACCCTCTGTCATTATGCCTGGTCTTGTGACTTTGACGGCAGGCAGCA  
CAGTATAAGCAGAATTACGCCGTAACAGGGATCAACAGCACAATGGTAAACCCACCACCCTGAATATCCGATATCGTGCA  
TCCCTTCTGACGGCTAATACGCTATCGCCGGTATGGCAAAAATCAACGTTAAAATAAATGACGCGGCGAGCCAAAAAATGA  
>Cluster\_51316  
ATGTGCAATAACCCCGTCCGGAGCAGCCGCCGAAGCTATCAGAACGCTGATGCACGCGCTGATTGATATTTTATGCAC  
GGCAGCAACCCGAGAAAAACACATTAACAGAGCCGGGAATATACAGGGGCAATAATCCCGCATTCGCTGGCCTACGCAC  
AGCTTACCCTGATATGGCACTGAATGAGCGAGGCGTATCTGATGCTGATGTAATAAATGGGGGGTTATGCGTGA  
>Cluster\_48836  
ATGGACTCAGACGAAGTTTACGAAATGCGCAGTGCAGGAAATTAACAGCAAGCCGGGAGTCCAGGCGGTGAGCTGGGGTTC  
AGAGGCGGATGGAGAGGCTGCCGAGATGGCGTCCGGCGGCACACATGGCTTCCGACCAGAATGGCAACAGTTTGC  
CCTGCAAAGAGCGGAGCATTTGCCGGCGGCTGACGGGGAACGTAGCGAAAGACAGCGGTGATCATTAATGA  
>Cluster\_11177  
ATGAAAATCAGATATCATGATTTCCGCCCGTGTACATATGCTTATTTCCAGTACGGTGTGGAAACAAGAAAAATATA  
TCACATACTGGATATGCTGCGTCTTGTCTGACCCGATCTGGTAATAAACACAGTGGAAATTTTCTTTCTGAGAAGCACTG  
TGTGAGGAAAAACATCGCATGTGCTTCCGGCATATAAACAGCAGTGCAGGAGGAAGGAGAATGA  
>Cluster\_49405  
ATGGTAAAACCTACTTACTATATCACTCTATTGTAATTGCGCCAGTTCATCAGCAAAAACCTGGATCCCTCCCGCAAG  
CACTATAACTTTTCAATCGCACAAATGAGCATGTTGAGCTAAATAAAACAGCATTATCTCATGATATGAAAACCTATTCTTG  
CCGATCGTTTTTATTTCAAGACCAGTAATCCTTGTGAAACAAATTCAAATTTCCGCTCGACCATAA  
>Cluster\_34013  
ATGAAAAGCCGTTCAATATCCCGTAAAAATAATGGCAGTGGTGAAAAACGTTTCTTTGTGTTGGGTTATGCCGTTAATAA  
ACGTGGGTTAAACCAACATGCACATGCAACGGTATACGGAACGGGACCGGCGAAGCCATACGCGCGCAGCCGAAGGGC  
TGGAAAGCTGGGAATGACACATTTCAAAGCGTTGAAGGTGACGCAGCTTCCGCTGA  
>Cluster\_63576  
ATGAATACTCGCTGGCAACAGGCGGGGCAAAGGTAAGCCTGGTTTCAAATAGCAGGCAAGCTGGTACTTCTTACCAG  
ACTGCGCTATGGCCCGCGGGTGTGGCGGGCTGGCGGATAAAAATCAGTTGCTCGCCGACCGCTGAAAAATGTTGCTGGCTG  
TGGCGCTGGAACCGCTGTTAAGTCCGGCTGCTAATAAACTGGCACAGCGTTATAAAAGGTGA  
>Cluster\_44716  
ATGAGAAGCTGATATCCATTTTAAAAACGGCAATAACCGCGCCATCCATCTGCCCGCGATTTGGATTTGAGCGGGTGA  
AGAGCTGGAGATCGTCCGCGAAGGAGACAGCATCATCTGCGTCCCGTCCAGCCGAACTGGGGCTCATTCGCGCAGCTCG  
AAAAAGCCGATCCGGATTTTATGCGGAGCGCGAGAATGTTGTGAGCAGCAAGGTCGATTTGACCTGTGA  
>Cluster\_40099  
ATGCCGTATAAAAACGAAAGCGATCTGCCGGAAGCGTAAAGCAGTGTCTCCGCTCATGCCAGGATATCTATAAAGA  
AGCGTTCAACAGCGCATGGGATCAATATAAAGATAAAGAAGATCGGCGTATGACGCCAGTCCGGAAGAAACAGCGCATA  
AAGTGGCTGGGCTGCGGTGAAGCATGAATATGCCAAAGGGGATGATGATAAATGGCATAAAAAATCGTAA  
>Cluster\_31788  
ATGAGCCAGGAAATCACACTACAACAGGCGAGCAAGCGCCACCAAATCGAAGTTATTTGCGCACTGGCAGAGGATTA  
CCCTGGCATGATGACCGACAGCGAATCAGGGGCAATCATCGGCTTACTTAAACGCCTTAGCGGTGAGGTCTGCGTATTC  
TGATCGATGAACAGGAAAGAAGACGCTTATTTCTAACGAAAAAATCGGGAGGGGTACATGTGCAATAA  
>Cluster\_62544  
ATGCCTGAACTCACTGAACTACCAGAGGACCGTTTTCTCGCCAGCAGGCGAGGCGGTTGCGGCTCAATATGCCAACAT  
TGCTATAGAGGACGACAGGGTACGCATTTCCGCTGTTATCCGTCATGAGCGTTGCATGGTTGGCGAGCTGGAAC  
TTGAGCCGGATGCCGTTACTGGCTGAACCGGTATATCACTCGTTATGGCATCCGCAAAATTTCTGCAATAA  
>Cluster\_23400  
ATGAAAATCAAAACCACTGTTGCTGCATTAAGTGTGCTTCTGTTCTCTTTCCGGTGCATTGCTGCGGACTCCATTGA  
TGCTGCACAAGCACAATACTGTAAGCAATCGGACCGTATCCGTAAGTGGTGTGGCGCTTCCGCAATGGATATGCGGTG

AAATGCTGAACAAAAAGCGGAAGAGAAAGGCGCAACGGCCTACCAGATTACTGAAGCTCGTAGTGGTGACACCTGGCAC  
GCTACGGCTGAACTGTACAAATAA  
>Cluster\_35752  
ATGGCAAAAAGTAATTATTGAAATAAAAATACAGTATCTGGAATTAAGGACGGAATTTGCGCACACAGCATTGCGGTGGA  
CGGTAGTGGGAACTGGACGGGTGATGAGGGTACACTTGTGGCATGGTGGCTTACTGGTGTAAATAAAGCCAGAAAG  
TAATTAATGAGTCAGCCATGAAGCTATGAGATTTTGA AAAACGATGGTGTACATCACCGGTGGCCGTGCTACTGAAATG  
GCTTTGAAAAACATGCCACTGA  
>Cluster\_17739  
ATGCAACGGCAGTATCACCATCCGCTGGAAGAAGGATTGAGGAAAGAATACACACGCGGTAGGCGTTAGATCCCTGGT  
GGAGGAATCGCACCTGATGAAGTTGCTGCGGAACTCGATAAAGATGGCTCAATGTTGATGGCCACTTGTGAACTGG  
TTGCTCTTGTGAACCTACGTCACAAGTTCTCAAATGACCATGCAGGATCTGCAAACCTCATCTCGATTACTGTGCGGAACAG  
TTACGTAAGCAAAACCACTTAA  
>Cluster\_53638  
TTGGCTAATATCAAATCAGCTAAGAAGCGGCCATTTCAGTCTGAAAAGGCTCGTAAGCACAACGCAAGCCGTGCTCTAT  
GATGCGTACTTTTCATCAAGAAAGTATACGCAGCTATCGAAGCTGGCGACAAAGCTGCTGCACAGAAAGCATTTAACGAAA  
TGCAACCGATCGTGGACCGTCAAGCTGCTAAAGGTTGATCCAAAAACAAAGCTGCACGTCATAAGGCTAACCTGACT  
GCACAGATCAACAAACTGGCTTAA  
>Cluster\_40843  
ATGATTACCCACAGGAAGCAGCAGCGCACCCGAAACCTTGTGAAACACTATGTCAACGAGTGTGAATGCCGCGACCT  
CACCGATGTGAAGCAGTCTGACGGCGTAATCAGCATGACCGCTCAAGCCATGTGGCGACCAACGAAAGCGGCTG  
CCCTGCAGGTACTGGTGAACACACTAACCCACAGCGCATGAGGTGCCGTACCGGATGGA AACCCTGCAGAAAGC  
GGCTGCACATCACCGTCAAGCCGGAAGCACTGA  
>Cluster\_40987  
ATGAACAACGCACCTAGGACTGGTTGAAACAAAAGGTTAGTTGGCGCAATTGAAGCTGCAGATGCCATGGTTAAATCCGC  
CAACGTGCAGCTGGTTGGCTATGAAAAGATTGGTTCGGGTCTGATTACGGTGTGGTCCGTGGCGATGTTGGCGCAGTAA  
AAGCCCGCTTGTATGCAGGAAGCGCCGCGCAAGCGCCGTTGGCGAAGTGAATCCTGCCATGTCATCCGCGCCACAC  
AGTGATGTTGAGGCTATTTTACCTAAATCAGCATAA  
>Cluster\_4035  
ATGTTGAATAAAACCGTGGAGGTCAGAAACAGTACTGGCTGCATGCACGTCCGGCGGCTGTCTGGCGAAAGCCGCCAA  
AAAATATAGCTGTAAAGTACGCTGCACATGAGGGTAATGATATTAATGCCACAGCATGATGAATATATGCGCGCCG  
GAATAAAGCGGAAAAACGGTGGAAATACGCTGCGACGGTGTATGATAAAGCAGGCCATACAGACTCTCACCGACTTA  
TTTCGCGACCGCTTCGGTGAAGCTGAATAA  
>Cluster\_48635  
GTGTCGCCATTAGAGCTACTGAACGTTCTCTCACGATGTTCTGGATGCTCAGTCGCAATATAGACCGTCTGCGTGGGA  
AGAGGATGTCGCAACTTACAAGTCGCTCGTGCCTCCAGGCGGATGGCGAGGCTGTGAAGCGCTTATGGAGGGTTTGC  
AACTCAGGATTGGAAGACCAAGTCTTAACAGATAAAGTCTACGATCCAAGCCAGGATAAGGCAGACCCCTGACGCCAAAGAG  
CAACTGATGCAAAATATTTGGCAGAGGATGA  
>Cluster\_50426  
ATGAAATCGAAGAATTACGTGAAATTTTATGTAAGATGGCCCTCTATACTGTGCGCGTTGAGAAATGGCGCTATTTGTGAG  
CCACTGCCGATTTAAATGTTTACAGTCTCAACAAAGGAAGAGTGGAGCTGCGTTAATTCATTTTGTGGATGGGCTTGTGA  
CGGTGGTTTTATCTGCGTGAAATGAATTTGTACATCATTGCCGCTCTGAAAGAAGCTGAGCTTAAAGGCTGGTTTT  
TCTGCTTTTGAAGATGAGTGA  
>Cluster\_59327  
GTGACTGCCGAAAGAGGTGAATAACGCACCTAAACAAGCAACCACCAATAACGAGTCATTTGGTTATACCGATGAAGAAAT  
AGTCTCTCCGATATCATTTGGCAGCCATTTCCGGTTCGGTGTGTTGATGCCACGCAACGAAATACCGCGTGGGCGATT  
TACAACCTGGTGA A A A A C G G T C G C C T G G T A C G A T A A C G A A T A T G G C T C G C A C A G C T T A T T C G A C C C T C G A A A A T T C  
GCTAAACTCTGA  
>Cluster\_41997  
GTGGTAGCGGATCCTACCACGACTCTGCAGGTTAAAAACACTGGCAGTCTGAGTGTAAATCGGTATGGATGGATTAACAT  
CTGGATGGCTATTTTAGGTCAGTCTTCCACCAATTTCCACTTTTTTTGAAATCGTGTCTCATCTGTTAAAAACGTGGC  
TGGAAATTTTCTCCGATGCAATGCTGGCATCTGCGTATTATCTTTTCAATTTTCTGCCATTGTGGGTTATAA A A C G C G G  
CGCGCGGCTTAA  
>Cluster\_23980  
ATGCCAGTGACATTTGAAGAAGTTCAGCAACATAAAAAGCTGCATGGTTTTGATGATCTGGA A A C C G A C A G C A A A A A  
ATATCGTCCGTTGCTTTCTCCGATGCGTATTTTTTTGGATCATCATGATTTCTGCGTAGCTCACGACCGGGGAAA  
TTTTCGCAACCAACCGTGAAGCAGGTTGAAGCGATGATCGAATAATTTGTTGAAAATAAGACGCAATGCGGGAGCCAGTG  
AAACAATAA  
>Cluster\_56566  
ATGGTAAATCGTGA A A T A G T A A T G G A T T A C A T C T T T C C T G T T A C A G A T T T G G T C G A A A C G G T G T G G A A T T A A G C C  
CGACAGCATCTCGTCAACGATCTTGGCTGGAGTCGATCAAAGTGTGGATCTCTTAATGATGCTGGAAGACAGATTCCG  
ATATTTCCATTCTTATTAATATTTCTGCTGGATGTCAA A A C C C T G C G C A A T T A A T G G A A A C T C A C T T C C A T G G T G G A G  
AATAAATAA  
>Cluster\_14940  
ATGGAACGAAACATAGTATTAGTGATTATACCAGGCTGAATTTCTGGAGTTTGTAAAAAATATGTAGAGCTGAAGG  
TGCTACTGAAGAGGATGACAATAAATAGTGAGAGAGTTGAGCGATTAACGAGCACCAGATGGTTCAGATCTGATTT  
ATTATCTCGCGATGACAGGGAAGATAGTCTG A A G G G A T T G T C A A G G A A A T T A A G A A T G G C G A G C T G C T A A C G G T A A G  
TCAGGATTTAAACAGGGCTGA  
>Cluster\_38442  
ATGCTTGAACATTTTGGAGCCGAAGCTTCGGTATTAGACATGACGATTATGTTCTGTTCAAATCCGAGTAAAGCCGCTAT  
TCTTGAAGAGTTTTTACATGGTACACAAGAACTAGGAATAGCTGAAAAATAGGACGTTATGGACTAGGGAGTGCAG  
AAACGCACGTTAAGGATTTTATGATAAGACAAAAAATGCTTGGGTTATCTGATGAGGATGTAGCAATACTCAAATA  
TTGAAAGACAAGGGTTGTGA  
>Cluster\_17917  
ATGTGGCAACTTCTTACTATTACCCGCCCTGCCGAAGCGCTGAAAGCTCGCTGGGAAGAGATAGACATAGAAGCACAAGA  
GTGGAAGATCTCTGCAGCAGCATGAAAACGAACCGCACCATACTGTCCATGTGTCAGATGAAGCAATTCGATACTGG  
AGATGATGAAGCCGTTAAGTGGAAATCGAGAATTTATCTTTCCAGCCCATCAAGCCAAACAGCCGATGAACAGTCAAG  
ACGTAACGCATAG  
>Cluster\_18032  
ATGCTGTAGCCGTAATCTCTGCGCGCTGCCGATGCCCGCACATTGTTCCGGCTGACTCCGTTGAGCGCCAGACGGC

ACAACGGTTGATTAACGCCCTGTCCAGCAGGTCTTTTTTCGCTCACACCTGAAGTGGCTTACGTGTTGATATACAGGCT  
GCCTGGAGTGTGGCGCCTGCCGTTTGTGTGCGACGAATCAACACTACAAAGTGGCGCTATCCGCCCTCCGGATTCCGGC  
ATCACCTACCGCTTTGGATAA

>Cluster\_3500

ATGGCACTCTGTATACAGACAAGTATCAGCCAGTAAATCGCCAGGCGTATTGGTGTGTCAGTCTGCGGTATTGTATAAATG  
GAAAGATAAAATTTATCGGCAACAGTGTCTTACCAGACTATGCGTAAACATAACGAACCTTCCCTGGAGGCGAAGCCGATG  
CGTTGCGGGAGGAAAGTCCGCCACTGAATCAGGAAATACGCCCGGCGAGATGGAGCTGGATATTTCTGAAAAAGGCGGAG  
GAAATCATAAAAAAGACCCGGGCATCAGTATCAGTCACTGAACAACAGAGAAAAAGAGATCGTGTATGCCCTGAG  
ACAAACATATCCCTGACAGAAATFACTGCATGTTCTGGGCTTCCCGTAGCAGTTATTTTATCACCCGGCTGCACCTGA  
AAGCCGGTGATAAATACGCCACGATACGTACGATGCTGACAGATATATTTAACAGTAATTACCAGTGTATTGGCTATCGT  
CGCTGCATGCGATGCTCAGGCATGAGGGGGGGCGGCTATCAGAAAAGGTTGTACGCAGACTTATGGTGGAAAGACAGCT  
TGTGCTCAGCCGTAACCGTCTGCGCGCTACAGTCTATTTGCGGAGAAATCGGACCGGCTCCGGATAACCTTATCGCCA  
GAGATTTTAAAGCCGAGCAACCTAATCAGAAATGGCTGACAGATATCAGCGAGTTCACCTCCCTCGAGGTAAGTCTGG  
CTATCATCGGTGGTGGACTGCTTCGATGAAAAAGTGTGAGCTGGTCTCTCAGTACACGCCCCGATGCTGAACGGTCAA  
CACATATGCTGGATAGCGCTGTGAAACGTTAAATGCTGGCGAACGACCGGTGATACACAGTGCAGAGGTGGGCATTATC  
GCTGGTCAAGGCTGGTGGAAAGAGTGAATGCAGAAGTCTTATTCGCTCAATGTCGCCAAAGGATGTTACCTGATAAT  
GCGCATGCGAAGCCTTTTTCGGCAGACTGAAAACGGAATGTATCATGGCGCTAAATGGTCCGGCATCACGCCGAAAA  
GTTTATGCAGCAAGTGGATACTTACATCAGATGGTATAACGAGCGGCTATAAAATTTATCGCCGGGTGCAGTCAAGCCCA  
AAATGTACCGCAACATGCGGGCTGGAATGA

>Cluster\_41508

ATGTTCTGAACAATTAGTACACCTGAAAACGTCACCACGAAAGATGAAAAATCAACCTGCTGGATCTCAACCGTCAGCA  
GATGCGGGAGTTTTTAAAGATTTAGGTGAAAAACCTTCCCGCGCGATCAGGTGATGAAGTGGATGTATCACATTGCT  
GCGACAACCTTTGATGAGATGACCGACATCAATAAAGTGTTCGCGCGGCAAACTGAAAGAGGTGGCGGAAATCCGTGCACCG  
GAAGTGGTTGGAAGAACAGCGTTCATCTGACGGCACCAATTAATGGCGGATCGCGTGGCGATCAGCGGTTGAAACCGT  
GTATATCCCGGAAGACGACCGTGCACGCTCTGCGTCTCTTCGCGAGTGGGGTGTGCGCTGGAGTGTAAATTTCTGTTCCA  
CCGCCAGCAGGGCTTTAACCGCAACCTGCGGGTATCGGAAATTTATCGCCAGGTGTGCGGTGCGGCGAAAAATTTGTCGGC  
GCAGCAAAAGTACCGGTGAGCGCCCACTAACGTAAGTGTGATGGGTATGGGCGAGCGGCTGCTCAACCTGAACAA  
CGTGTTCGCGGATGAAATCATGCTTGTATGATTTTCGGTTTTGGCCTGTCAAACGTCGCGTCAACGCTTCCACTTCGG  
GTGTGGTTCCGGCGCTGGATAAACTGGGCGATATGATCGAGCTTGGCTGCGCTATCTCCCTGCACGCGCCGAACGACGAA  
ATTCGTGACGAAATTTGTGCGGATCAACAAAAAGTACAATATCGAAACGTTCTTTCGCGCGGTGCGCCGTTATCTGGAGAA  
ATCCAACGCCAATCAGGGCCGAGTCACTATTGAATACGTGATGCTTGACCAGCTTAACGACGGCACTGAACACGCGCACC  
AATGGCAGAACTGCTGAAAGATACGCCGTGTAAGATCAACCTGATCCCGTGGAAACCGTTCGCCGGCGCCGATGGA  
CGCAGTTCGAACAGCCGATACGACCGTTTCTCAAAGTGTGATGAGCTACGGTTTACCACCTATTGTGCGTAAACGCG  
TGGTGTGATGACATTGATGCTGCCTGTGGTCAAGTGGCGGCGATGTTATCGACCTACGAAACGTACCCGCGTAAACGGA  
TGCAGGTGAAGCATCGACATTAAGCGGTCTGA

>Cluster\_45390

ATGAAAAGCAAAGTACTGGCACTTTTAAATTCCTGCCCTGCTCGCCGAGGTGTCACATGCAGCCGAAGTTTATAATAA  
AGACGGCAACAAATTAGATCTGTATGGCAAGTTGATGGCTGCATTAATTTTTCTGATAATTCGGCGAAGATGGCGACC  
AGAGCTATGCGCGTCTGGTTTTTAAAGGCGAAACCAAATTAACGATCAACTACTGGTCAAGTCAATGGGAATAACAAT  
ATTCAGGCAAAACAACTGAATCTTCAAACAAACAGTCAATGACCCGCTTGGCATTGCGCGGCTGAAATTTGCAAGATTA  
CGTTCTTTTCGATTAACGGACGTAATATGGCGTAATGTACGACATCGAAGGCTGGACGATATGCTGCCTGAAATTTGGCG  
GTGACTCTTATCAATGCAGACAACTTTATGACTGGTTCGAGCAATGGCGTCCGACTTATCGTAATACTGATTTCTC  
TGTCTGGTAAATGGTCTGAACTTCGCGGTGCAATTAACGATAACGAAAGTGCAGTAATGGTCAGGAAGCACCA  
CAACGGACGTGATGTTCCGCATGAAAACGGTGCAGCGTGGGGTCTTTCCACAACATATGATTTAGGCATGGGCTTTAGCG  
CTGGTGGCGCATACCTCTTCTGACCGCACCAATGATCAGGTTAACCTACTGCGCGGGTGGTGTAAAGCAGACGCG  
TGGACTGCTGGGCTAAAATACGATGCTAACAATATTTACCTGGCAACCTATTTAGAAACGCGTAATATGACCCCGTT  
TGGCGACAGCGAATTTATGCTGTTGCAACAAACCCAGACTTTGAAAGTCACTGCACAGTACCAGTTTGTATTTGCTG  
GTCCGGCAGTCTCTTTCTGATGCTAAAGCCGTGACCTGCACGCTGCGCGTGGTGCAGACAACCCGGCAGGTGTTGAT  
GATAAAGATCTGGTTAAATACGCCGATGTTGGCGGACTTACTATTTCAATAAAAAACATGTCCACTTATGTTGACTATAA  
AATCAACCTGTTGGATGAAGATGACAGTTTCTACGCTGCCAATGGCATCTTACCAGTATATGTCGCTTTAGGTCTGG  
TTTTATCAGTTCTAA

>Cluster\_30496

ATGAAAAAGAACATTTTTTAAAGTTTTTCGTTACTGACATTGGCTGTTCTGTTTACAGCATGTACCCTTGTTCCTGGTCA  
GAATTTATCGACCAGTAACAAGGATGTCATGAACTACCTGACAATCAGTATGACCTGGACAAAATGGTCAATATCTATC  
CCGTACCGCGAGGATTTGATGATCAGCTGCGCGCTAAACCGGATTTATGTCGACGCTAACCCGGAGCTGGAGCAGCAATC  
GCGAATATGAATATCGTATCGGCATTTGGGATGTTGATGTTACGGTCTGGGATCACCCGAACTAACTACCCCGC  
AGGGCAATACCGTAGCGCAGTGTATCCGGCAACTGGGTTAACGCCGATGGTGCAGATTTTCTACCCCTATATTTGGTCCGC  
TGAAGTGGCCGGGAAACGCTTACCAGGTACGCAACGAGATACAGCGCTGCGACTCAGTGTGAAAGCCGCA  
GTCGATGTCAGCGTCCGCGGCTCCGATCGCAAAAAGCGTACGTCACCGCGAAGTGCAGCAAACTCGGGTACAGCCGAT  
TACCAATATCTCTGACCATCATGGATGCGATTAACGCCGCGGGCGTCTGACCGCAGATGCAGACTGGCGCAACGTTG  
TGCTACCCAGAATGGCGTAAAGACCAAAGTGAACCTCTATGCGCTGATGCAGCGTGGCGACTTGGCGCAGAAACAACTG  
CTGCACCCGGCGAATTTTATTTATTTTCGCGCAACGATGATCTGAAAGTCTTCTGATGGGTGAAGTGGGTAACAGAG  
CACGCTGAAAATGGACCGCAGCGGATGACCTTGGCGGAAAGCGTGGGTAACGCTGAGGGTATGAATCAGGATGTCGCTG  
ATGCGACGGGATTTTGTGTTATTCGTGCAACGCAAAACAGCAGAAATGGCAAAATCGCAATATTTATCAGCTGAATGG  
AAGGACGATCGGCAATGATCTCGGAACGGAATTCAGCTTGAACCTTACGACATGTTTATGTCACCTACCGCGCCGCT  
GGCTCGTTGGAACCGTGTGATTTCTGCTGGTACCGACGATTTCCGGGGTGCATGACCTGACAGAGACTTCCAGGTGGA  
TTCAAACATGGCCCAACTAA

>Cluster\_53869

ATGTCAATCAAACAGCGGTGGCAGTGGCACCTGCGAATTTCTGTCGCGCCAGATGGATCAAGAGTTAGACGCTCTCTTGA  
AACATCGGCAAAAAGCGCAAGCGCAAGAACTTACGATCCTCTGAAAGCAGAAGCGTGGAGAGTAAAAAATCTCGGGGAAT  
CACCGAAAAGCTATTTCAAGGAAGCCTGCATACGGTGGCTGCGTGAGAAATCGGATAAGAAGTCCATTGATGATGACAAG  
AGCATTATATCTGTTCTGGATGTTGCACCTCAGAGAAACCAATCTCTCAGACATAACAACAGAAAAAATATGGAGGCGGT  
AGACGGGATGGAACAAACCGCCATCGCTGAACTGGGAAATGAGCCGGGACAGGTGTTTGGCGCTTGGCAAGCCAGTGC  
CGGATATAAACAAAGCTGGCAAGCAAAAGGAACGAAAGCGGCATCTGGCAATACTTCGCGCTATTCTCAATTTGGCT  
GTTGAATGGGATGGCTTGACAGGGCGCCAAAATATCAACACACGCGTTAAGAATGGACGAATCAGATGGCTTACAGA  
GGGGAATCGAAGCGCTGTTTGCAGAAATGCTCCTCATTTCTTCCCTGTTGGTCAATGTTGCAATCAGCAGCGCCCTTC  
CCGTTCCAACTTACAGACTTACAGCTTACAGGTCATCTGGATAAGAAATGGCATGGATGATGATGCAAGCA  
AAAGCTGGCAATGCGATCGGAGTTCCTCTTAAAGAAACCGCATGCCAGATATTAAGAAAACAGCAGGGTCTCCATAAGAG  
ATGGGTGTTTGTCCACCAACCTGCCCTACCGAAGCGACGGAACAAAACAGCAGCGGTAAGGAAGATGAGAACCAGCA



GAAACAGGTGGCGGAATATGCAGATGGTATTTGGTCCGGATTACCATATGTTGATTGAGGAGACATCGCAGCCGGGTAATA  
TCAAACCTACTGGCATGGTGCAAGATGCTCAGCAGAATAAACTGGTAGTCATCCTTATACCGTGGCGGCAGATAAACTG  
CCTGAATACACTCCTGATGTGAATCAGTTATATGATGCTCTGTATAACAAAGCGGGTGTAAATGGGCTGTTTACTGATTT  
CCCTGATAAGCGATAAAATTTCTTAATAAAGAGTAA

>Cluster\_64522

ATGTTAGAGACTTATTTTATCTATAATTTTATAATGTTATGCGGTATTTTTTTTGGCTTTTGTCAAACAAAATACCCATTC  
AATAATATTCAAAGTCGCTAGTTCATTTGATGTTGGTTTTTGTCTATATGGATCCCGTCCGGGAATACGATACGGCATTGGAA  
CAGATTATTTAGTTATTTAAGAATTTTTCAAAGTGCCTGGAGGGAAGAGTAACACTGAGATCGGCATTATATCTAATT  
AATTTTTGGTGGTTTGTACAGGCGGGGAGGGTATTATATTTTTTAATCTCAAGTCTGATTATTGGCTTAGTCATTGTT  
GATTAATATGCCAAGGCATTTATAGTTGCCTTTATGTTTTGATCTTTTTTGCATGATTATCTTCTCTCTTTTCTCTTAG  
TAAGCAATCCTTGGCTGTGGTGTTTTTGCTAGTGAGCATAAAGCATGCAATAGAAAAATAAATATTGTTGTCTTATTTT  
TTTGCAATTAGTTGCAATTTCAATTCACCTTTCACTCGTTACTCATACTTCCATTCAATAATCTTAGAAAAAGTTAGAGTTCC  
ACCTTTTTTAGCATTTGTTGATGATCGTATTTTGTATAATCTTTTTTTTGGTACTAATAATCTTCCAAAGATATAAATAA  
GTTCTTTTTATGTCATCTACAAAATATGGTTTTTATGCTGATACAAAAGTTCCGGTGGCGAAGCGATAATTGGAACGGTGGG  
GGAGTATTAATAAAGCATTACTTCCATTAATGATACTTTTACAGTCTAGTAAAAATAGTCAAGTCTCAGCCAAATTTGTA  
CATAATAATCCTGTTGAGCATTTGTTGCTATTTGTCAGTATAGCATCGTTAAGAATACATATATTTAGTCGAGTCAGTG  
ATCTTTTTATGTTTTTGGCTTTTGGCTTTTACGTATTTAATGAACCTATTCTCAAAAAAAAATCACAAGCAAAATCTGT  
GCTTGTGTTGATTTTTTTTATCAATGATAGTTTTATTTGAAAGAATTTTGAACAAATCTTCTGAAAAATAATCCGGACT  
TGGAGTTAGTCCATATACTACAATATTTGATGTTAGGTAA

>Cluster\_57461

ATGAACATTGAGTTACTGCAACAGTTGTGCGAAGCCAGCGCCGTCAGCGGCGATGAACAGGAAGTTCCGCGACATTTCTGAT  
AAACACGCTGGAACCTTGGCTGAATGAAATCACCTTCGATGGTCTGGGCAGCTTTGTTGCCCGTAAGGGGAATAAAGGTC  
CAAAAGTTGCCGTTGTCCGACATATGGAATGAAGTCGGCTTTATGGTCAACCCACATCGACGAGAGCGGTTTTCTCGCTTTT  
ACCACATTTGGCGGATCCCGAAATCAGTCGATGCTCAACCCGGGTAACCATACGCACACACCAAGGAGTGAATCC  
TGGTGTGATTGGTTCCGTCGCGCTCATGCGTTAACGGAAAAGCAAAAGCAACACCGCTGTCATTTGATGAGATGTTCA  
TTGATATTTGGCGCAACAGTCGCGAAGAGGTGGAAGCGCGGCGTGGAAATTTGTAATTTAGCCCGGAAGCCAAAT  
TTTGCTGCTGGGGCGAAGATAAAGTGGTCGGCAAGGCGTTGGATAACCGCATCGGCTGCGCAATGATGGCTGAACTATT  
GCAGCGGTGAATAATCCCGAAATTCGCTGTATGGCGTTGGCAGTGTGAAGAAGAAGTTGGCTACGCGGGCGCAAA  
CCTCGGGCAACACATTAACCCGGACGTCGTGATCGTGTGGATAACCGCGTAGCGGGCGATGTTCCGGGCATTGATAAC  
ATTAATAACCCGCTGAAACTGGGCCAGGGCGGGGCTGATGCTGTTTGAACAAGCGTACTTCCCAACCCAGAAACTGTT  
AGCAGCGTTAAAAGCTGTGCCGCACATAACGATTTACCGTGCATTTTTCCACCATGAAAACCGGTGCGACGGATGGCG  
GGCCTACAACTGATGGCGGGCGGGCTCCGGTTGTCGCCGCTGTGCTGCCAACTCGTTATCTGCACGCCAACAGCGGT  
ATGATTTCAAAGCCGATTACGAAGCTCTGCTCAGCTGATACGGGTTTTCTGACGACCTTAACTGCGGAGAAAGTCAA  
CGGTTTTAGCCAGTTCCGTCAGGTGATTA

>Cluster\_25785

ATGGCAGAGAAAAAAGAACCCGCTGGCAGCGCGGCCAGGCACGACGGCGGCAAAATACCGTGAATGACTGGCGCAA  
TGCCACGACCTGGCGTAAAGCGACACAATTAATTTACTGTTGGCAATTAATATTTATATTGCCATCACGTTCTGGTATTGGG  
TGGCTATTTACGAAACCGGAGGTAGTACGACATTTGTCACGACCGGGAGGTATCGAAGGCTGGTACCGGATTTGCCGTT  
CTGCAATCTGAAATATAGCTTGCACAGGTCACTACCGTCCGTCACCGCGCGGATGCTGTTATTTGGTCTGCTTT  
TATCGTCACTAGTCTATTTACTCAAAAAGCCTTTTTGTTTATGTTATGCCCCGTTGGTACGCTTTCCGAAATTAATCGGGC  
ATCTCGGTAACAACCTGTTGGTCCGCAATTTGTCCTTCCCGCTGGCTGGATATCTCTGCGGGCGTGAAGTATTTG  
CTGTTGAGTTTTTTCTCTATATCGCTTATTGATGCCCGCTCAGGCGATTCACTATTTTATGTTGTCGCCCTACAGCGCT  
GGTATGGAGCTTAAAATGCTCGATTTCTTTCGTCATATGGGGACCGGACATTAATCAGCATCGTTTGGTGTATTG  
CCAGCCTGTTTATTCGCCATGCCGTTGTTGCTTATCTTTGCCCATATGGCGCGCTGATGGCGGTTGGTTTCGCTATTATCG  
CCGTTAAGATTCTGTCGCAATGCCGAAAGTTGATCGATTGTGGCAAAATGCGCAAAAAGTTGCCCATCACGGATCCCGGT  
CGATAAATAAATTCAGGTACGAACAGTGAATGTACCGGCTGTATGACTTGGCTAGAGTCATGTCGGTAGCCTCAACAT  
TGACCTTTTCACTGCAAAAACCTGCGGCAATAAAAAGCCTTTGCGTTGCTGGCTGGTTAATGACGATCTGGTTATG  
GGGATTATGTTTGGCGCTATTGGTTACGCAATGTATGCGGGAGTATGGCAAAGCCCGTGGCGGAGGAATTTGACCAACG  
CTTAATCCGCAATCGCAATGATTTGGTCACTAA

>Cluster\_19870

ATGAGTGATTTTATTTATTTCCCATCATATCGATGGTGTCTGTTGGTGTAGCCGAAGCAGCGGTTGCAATTCACCGGGCG  
GCAAAAAGTGGACTGGCTGGACGTTATTTTTAATATCAACTCCGGTCAATATGATGCTGTGGTTATTTCCGCTGCCTGGAAG  
TGCTCTGCTATGGCCTGGTGGTCAATCACTTACGCTTTGGACTGTTTGATAATGCGCCGGTATCCTGCTGTGGTTGTTT  
ACTATCTTGGCTGGGATTTCCGCTTTTACTGGCTGCATCGCTGGCATCACGAAATGCGCCCGCTGTGGGCGGTACATGT  
GGTCACTATCAGGGGAAACACTACAACCTGCTATTAGGCTGCGGAACTCGTGGTACTTTCGTTAACTCAATCCGCT  
TTTTTATGCTGCTGGCGATGCTTGGTGTGCCGTTGCAGATCTTTTTGGCGGTTTCTATATTCACTATAGTTGGCAATTT  
TTTTAACCTAACGCACTAACCGCGAAACTGGGCTGGCTGGAAAAGTGTGATCACGCTTCCGATCATCGCGTCCATCA  
TCTGAATCAAAAAGCAATATGCCGATACCAATACGGTGGCACCCTTTTTGTTGTTGGGATAAATTTTCGTTTCGTTAGTG  
CCGGCCCGGAATACGACCTAGGCTACGGCTAAAAAATAGTCCGCTTGTCTGTAACCCGATGCGCGAGAGTAATCTGCCA  
TTTTTACGCTTAATGGGCTTTCCGCTCATTTGGCAAAAGCATTGAAGTTCGCTACCAGAGTCTCCATGGGCGGTAGGGGC  
AGGGGTGATCCTGCTGTTTATGCTGGTGTGCTGCTACATTTCAACAATATGGCTATGGCATGAGTTTATACCAGCGAGC  
AAGCCGATATTTGTTCTGCTGGCGGACGCTCCGTTGCTGGGGGATGAGCGACGGGACGATTTGGGTTATGATT  
TTGTTGGTCTTTGTGACGTTGCTACTGCTCTATTTTATGCTATATGTTTTCATGGAGTACTGCTCTGGAAGGGATT  
AGTGGGTATCTGCTGGCCCATTTGCTGTTATTTGTAATCGGCGTAGGACGTAATTCGCTAAGGAAACAGTATGAACCTG  
TTTTAA

>Cluster\_11408

ATGCGGATGAAAGAAATAAATAAATTCAGAGTGATAGACCTCTTTTGTGGGCGAGGTGGATTATCTTATGGTTTTCTTCA  
TGGAGAGATGCTGACTACTTTGAAAGTATCCTTGCTATTTGATAATAATGCTGAGCTATAAATACCTACAATGCCAATT  
TTGGTTTTGCTAGGATTTACGGCAAAATATGAGGAGTGGGCATCCAGCAATACTGTTCCGAGGCTGATGTGGCTACATAGT  
GGCCCCCGCTGAGGATTTAGTTTATGAAATAAGAATCGTTTATGGTGTATCAGGAAAGAGCATTTGGGGACCTATAT  
GGATGTCATTGAGCGTTCAAGGGCTTGTATGTTGCTCATGAAAATGTCCCGGATTGCTGATAAGCGATGAGTTGCGG  
ACATTACGTTTAGAGCGAAATCCATGGGCTTTATCTGCTTAAATCCAAATGGTGTGAAACTGCTGACTATGGAGTACCT  
CAGACAAGAAAACGAACGATAGCAATCGGTATCAAAACGAGAATCTTCGATGTGCATAGTATTTCCGGCTTCCCGCAGC  
ACCAACGCATGTTTCCCTGATAAGGATGTCGCTTTGCTGAAATGGGCTGTACGCGCTGATGCAATTTGTTGACTTACCTG  
CTCCTGTTGGAATGATATCTGTAATGAACTTCTCCGCTGAACTTACATTTTGGGCGTAATCCACACCTGTTTCTCTG  
GAGCGATAAAAAGCGGTTCCACCAGGAGGTAACCGTTTCGATTTACAGAAAAAAGACCTGATATAACCCCGGCTGCTG  
GCTAAAAAAGAAATCTGGAGGACCGATTGTTTGGAGCTCTGGTGGGCAAACTTCAGTAAACGATTTCTGACTGAGT  
TTTTCAAACCGGAGAAAAGGGCGATATTTACATCCGGAAGAGGATCGGCAATAAATCACTGAGGACGAGATTAATG  
TCTTTTCTGATAATTTCAATTTTTACCGGTTCAAAAACGAGATTGCAAAAGCAGATCGGGAATGCTGTTCCACCGCTATT

TGCGGCAAAAATCGCACAAATATGTGTATGGAGTTTTGCAGGGACGGTATAAGAATAACATCAGTAAGAATAGTCAAGCAG  
CCTGA

>Cluster\_22882

ATGTTCAAGCGCTGTTATGTAGCACTACTTCCATTTTTGTATTACTTCCGCGCTGTAGCAGCAAGCCAAAACCTACTGA  
GACTGAAACGACCCGAAACCGCGTCTGGCGGTTCCFGCTTGAGCCGACGACAATGTGATGCAGATGGGGGGTGACT  
TCGCCAATAACCCGAATGCCAGCAGTTTCATCGACAAAATGGTGAACAAACACGGTTTTCGATCGTCAGCAGTTGCAGGAA  
ATTCTCTCCAGGCGAAACGTCTGGATTGGTACTGCGGCTGATGGATAACCAGGCACCAACCACATCCGTGAAACCCGC  
ATCAGGTCGAAACGGCGCATGGTGCCTTATCGCAAAAATTTATTACGCCGGACAACGTGCAGAATGGTGTGGTTTTCT  
GGAATCAGTATGAAGATGCGTTGAATCGCGCATGGCAGGTGATGGCGTACCAGCCGAAATTAFCGTGGGATTCGGC  
GTTGAAACCCGTTGGGGGCGGTGATGGGAAAACCCGTATCCTCGATGCGCTGGCAACGCTGTCAATTAACACCCAGC  
CCGCGCGAGTATTTCTGCGGAGCTGGAACCTTCCGCTGATGGCGCGCATGAGCAGGACGATCCGCTCAATCTGA  
AAGTTCCCTTGGCCGGGCGATGGGCTACGGACAGTTTATGCGCTGCTTACAAACAATATGCGGTAGATTTACGCGGC  
GACGGGCATATCAACTGTTGGGATCCGGTTGATGCCATTTGGTAGTGTGGCGAACTATTTCAAAGCGCACGGGTGAA  
AGGCGATCAGGTCGCGGTAATGGCAAACGGTACGGCGCAGGCTTGCCAAATGGCTTCAAACAGGTACAGCATTTCCG  
AGCTTGCCCGGCGAGGTTTAAACGCCACAGCAGCGCTGGGCAACCATCAACAAGCCAGCTGCTGCGTCTGGATGTTGGC  
ACCGGCTACCAGTACTGGTACGGTCTGCCGAACCTTACACCAATTACCCGTTATAACACAGCACCCATTACGCAATGGC  
GGTCTGGCAGTTAGGACAAGCCGTGGCGCTGGCGCGTCGAGTAA

>Cluster\_54187

ATGAGTGAAGGACAGGCGGGCCACAGGGAGCGACCGCAGGCGGTACGCTGGCAATGCGAATGCTGTACAGCAGGCGAT  
GGTCGCAGCCAGATGAAACGGGCGCCACGACAAAGCCATTGCACAGATGCTGGCAGAAAGAAGTCCGGCCACCTG  
CCGCCAGGTGGGCGATGAAATTCAGCATAAAAGTTTTCTGGGGCACTGGCAGGGGCGTGTGGGGCGATAGTGACC  
ATCGCAGAAGGTTGCTGATTTATGGCCGCTGCGCCACCGGCCCTTATGCGCTGGTTCGGTCTGCGCTGATGATGC  
CAGCTATAAGCGGATGATTTATGTTGGAGGAGAAACAGAACGCTTGAATCATGGATAAACAGCTTTTTGTGACACGGAGC  
GCGCCATCAATCCGTTCTGAAAATGTAACATTAACGGAAAGCCGCTGCAAGGGCCGCTCACCCCTCCCTCCCTCT  
CCCCACCTGGAGCAATACCTGAAATCCACAGGGGAAACCTCATGGGGTATATTGCCACTGACCTGCTTGAATCGGC  
AGCGGAAAAGCAGTACCCTGGCGAAGCCTGGGGAAACGCTGTTATCACCTGACGAAAGCAATGCCGTTTTATGG  
ATCTCGTCAGCGCCGCGCATCGCTTCTGTTCCCGCCGGTCCGGTATTAATGGAGTTTGCCACCATGGTGGGCGGGCGT  
GGCGAAATCAAAAAGATGTTGATTTCCCGAAAGCCGGTGGAGGACACGGCGCTCTGCGACAAGGAGAAACAACACCGAG  
GATAGCCAGGGCAGTAGCAACGCTTTTATCAACAATCAGCCTGCCGCGCGCAAGGGCGACAACTGGAGTGCAGTGGC  
CGATCGTGAAGGTTCCGCGGACGCTTTTATGGGGGTGAGCAGGTCACTATCTGGATATCCAGCCGAGTTCCCGCCA  
TGGCAGAGAATGATCCTGGGAGGAATAACGATAGCCAGCTATCTTCTGCCCGCAGCAGGACTGCTGGGAAAACGGGGAA  
TCTGGCGAAACTGGGCAAACTGGGAAACCTGCTGGGAAAAGCAGCACCAATAAATCTGA

>Cluster\_34472

ATGTCTATTTATAAAATTCCTCTCCGCTCAATATTCTGGAAGCTGCACGAGAGCGTATTACCTGGACACTCAACACCCCT  
ACCCCGCTTTGTGCTCATTTTTCTGGCGGCAAGACTCTGGTTAATGCTGCATCTGACAGCCGAACCTGGCCCAAAA  
TGGGCAAAAATCTGCGTTTTGTTTATCGCACTGGGAGCGCAATTTCTTGCACCAATTAATATGATGCTCCGCGC  
GAGTTGTACACCGATGTCATCGAAGAGTTTACTGGGTTGCGCTCCCGCTTACGACGCAAAATCCCTTTCACAAATCCA  
ACCCGAATGGCAGTGTGGGAACCTGATGTCGAATGGGTACGTCACCTCCCAAGATGCGATAACCGACCTGACTTTTT  
TCTCTTTTACAGCCAGGATGACCTTCGAACAATTTGTACGTGAGTTTGCCGAATGGTTTTTACAAAACCTGCGGG  
CGATGATGATCGGCATCCGTGCGGATGAGTCCATAACCGTTTTGTCGCCATCGCCAGTTTAAATAAACAACCTTTTTCC  
CGAGATAAACCTGGACTACGGCGCACAGGCGGTCTATAGCTGGTACATTTACCCATTTAGACTGGAAAGTGGCTG  
ATATCTGGACCTGGTATGCAAAATCATCAAAGCTCTGCAACCCACTGTATAACCTAATGTATCAGGCAGGCTTCCCTCTG  
CGTCATATGGCAATTTGGCAACCTTTTGGCCCGGCAACAGGATTAATGGCTCTATCACGTTATGCACTGCTGTTAGC  
CTGGGCTGCTATGTGCGCACGATCAGCGGGTAAAAAGTGGCGGATTTACGCGGACATGACAATCATTTCTATGGGC  
ATCGGAAAATCCTCAAGCCAGAACATTTAGACTGGCAAGAATATGCATTTATTGCTGCTCAATAGCATGCCGAAAAACA  
GCTGAGCATTACCGAATAAAATCGCCATTTATTTGCACTGGTATCAGAAAAAGGCATCGAGGTTCCACAACCCAGCA  
AGGGACATTTGGCGGAAAGATAATCCCTCTGGCGCGGATATGCAAAAGTTTTACTCAATAACGATTTACTGTTGGC  
CATTTATCATTTAGCCCAAAAATCGAAGAATATCAGCGTTATAACGAAACGGATAAAAAGGAAAACGTCAGGAATGGGGA  
ATACTATGCAACAACGATTA

>Cluster\_25389

ATGACACCAGGCGGACAAGCTCAGATAGGTAATGTTGATCTCGTAAAACAGCTTAAACAGCGCGCAGTTTATCGCCTGAT  
TGACCAGTACGGGCAATCTCGCGGATTCAGATTGCCGAGCAAAGTCAGCTTGCCCCCGCAGCGTAACCAAAATACGC  
GTCAGCTTATCGAACCGGGCTGATCAAAGAAGTTGATCAGCAGCCCTCCACCGGGGGCCGCCGCTATCTCCATCGTC  
ACCGAAACCCGCAATTTCCATGCAATCGGCGTACGGCTGGTCTCACGACGCCACCACTACTCTGTTGATCTTAGTAG  
CAAAGTGTCTGGCAGAAACATTTACCCGCTGCCGGAACCTACCCAGCAGACGCTGGAACATGCCCTGCTTAAACCCATTG  
ATCAGTTTATGATAGTACCAGCGCAAACTGCGCGAGCTGATCGGATTTCCGTTGATCTGCGAGGGCTTGTAGACCCG  
GACAGCGGCAAAATTCATTTACATGCCGATATTTAGGTAAGAACTGGGGCTGGTTGAGCACTGGAAGAGCGTTTTAA  
AGTGACCTGTTTTGTGCGCCAGATATCCGAGTCTGGCGCTGGCAGAGCACTACTTCCGTTGCAAGTACAGGATTCGAA  
ACTCCATTTGGTGCCTGCCATCGCGGAAACCGGGCGGATTTATCTTAAACGGCGAATTTTTATCGGGCGCAACGCG  
AACGTCGGTGAATTTGGCCATATTCAGGTCGAACCGCTGGGTGAACGCTGCCACTGCGGCAACTTTGGCTGCCGGAAC  
TATCGCGCAATGCTGCCATTTGAACAACGGGTGTTGAATCTGTTAAAGCAGGGCTACAGAGCCGTGTGCCACTGGACG  
ACTGCACCAATAAAACTATCTGCAAGCGCGAACAAGCGGATAGCCTGGCCTCGGAAGTGAATGAATATGTCGGTCTG  
CATCTGGGTAACCACTCGCCATTTGCTATCAACTTATTTAATCCGCAAAAATTTGTTATTGCTGGAGAAATCACCGAAGC  
CGATAAAGTGTGCTCCTGCTATTTGAAAGCTGCATTAATACCAGGCGCTGAAGCGCTTCTACTAATCTACCGGTTGG  
TACGTTCTGAGTTGGATCACCGCTCGGCAATCGGCGTTTTGCGCTGGTAAAACGCGCCATGCTCAACGGTATTTGCTC  
CAGCATTTGCTGAAAAATTA

>Cluster\_66972

ATGAGACGTGATTACGGTAGTGTGGCACCATAGCTCTCAGAGCAAGTGCCTTACTTACAGGCTATGAGCAGGGATATTGA  
GGCTCAGAGAAAAGAAATTAATCTGACTCAATATCATCAGACATATACCAGAAATGCTGTGGCAAACTGCCTAAGTTAA  
GCCGTCGCATCGTTGAACTTGCTGTAAGAAGATGGAGAGCAGCGGTTACGAATTAATAAAAAGCAGGCTGGCAGCACTGA  
GAGCAATACGCTCTCACTATTCAGAACGTTATCGACATTTACGCCACCGTCAAATACCTAAGTACCGCGATATTCACAA  
AGAACCATACGTGATTTTTGTGCTCAATCTTAAAGGCGGTGATCAAAAACAGTCACGACAGTCACTCTCGCACATGAT  
TACGAGTACATCCGGACTTGTCTGCTCATGATCTCCGCATCTGGTATTGACTTGTATCCGACGATCCGATCACTATG  
TTTTCTTGATCACACTATAGCATTTGGTACTGTTCTTGAACAACAGCCAGCCAAAGTGTGAATGATCTCGAGCAAAAC  
GTTGAGAGAAGCTGTAATTCGCCAACTATTTATCCAGGCGTCGATATCATCCCTGCGTGCATCGACGACGGCTTTGTGCG  
CCAGCCAGTGGGAGTCAATTAGTTACAGAACATTTACCAGGCTGAAACCTTCTGAGGTCCTCAAAAACAAATTTATGAC  
CGTATCGCAGGTTGATATGATTTTTGCTTTATTGATACAGCCCTCACCTTGATCCGTTCTCTCAATGACCTGGCCG  
GAGCGATTTGCTCTTACCCCTACTCCACCGGCACAGGTTGATTTTCACTCCAGCTTGAATACTGACACGTTTACCGG  
AGATGCTGGAACGCCTTGAAGAAGAAGGTGTGGAACCCAGGCTCAGCGCCAGTATTGGGTTTATGTCAAAATGACCGGC

AAACGTGACCACGAGACGTACATAGTCTGGCGGTGAAGTGTACGCAAGTAACATTCCTTGTATGCGTCACTGCCGCGACT  
TGACGGATTCGAACGGTGTGGTGTAGTCTGTTGACACCATTATTAGTGCAAACCCGTTTCCTACCCTGGAAGTGTGAAG  
CACTGAAAAAGCCCGAACTGAAGCTGAACGATTTACTAAGGCTGTTTTGTATCGAATGAATATATCCGTGGAGCATCA  
AAATGA

>Cluster\_27286

ATGACCCFACAAAAATCAAACAGGTTCCGCGCTGGTTTACTGGCGGTGCGACAGCAGAAAAAGGCGCTGGCGGGCGTGA  
TTATCACGACCAGGGGGCAATCACTGGATTGATGATCATATTGCCACCCGATGAGTAAATACCGCGAATACGAGCAGT  
CCCAGCAGTATTTGGCATTAACTGTTCTTGGCAGCTTGGTGTGAAGTTGAAGCAGAAAAACGGCCAGACCGGATTCGCG  
GTTTCGACAGCCGGTGAATGGGCTGTTTTATTGTGCAAAAAACATCTTAACCGTTTCATTGAGGGTAAATGCGTCAGTGA  
TATCAAATGATCCACGATCAAATGCTCAATGCCACCCTGTATTACTCCGGCTCTGGTGGCTGGTGTGAATACGATTT  
CCTGTGTGATCTGGCTCTGTGGGATCTGTTCCGCAAAAGTGGTCCGGCTTCGGTTTATAAACTTTTAGGTGGCGCAGTT  
CGTGTGAATTCAGTTCTACGCCACAGGTGCGCGTCCGGATCTGGCAAAAGAGATGGGCTTTATTGGTGGCAAAATGCC  
GACGCATGGGGGGCACATGATGATGATGCGGGGATCCCAAAAGATGCCGCTATGGTCCGCGATATGCGTGAATAATGCG  
GTGAGGATTTCTGGTTAATGCTCGACTGCTGGATGAGTCAAGCAGTGAATATGCCATCAAATGGCCACCGCTTGGCGG  
CCCTATAACCTGAAATGGATCGAAGAGTGCCTGCGGCCACAGCAGTATGAAGTTATCCGCAACTGAAACACAACGCACC  
AGCGGGGATGATGGTCAACGCGGTGAGCACCACGGCACACTGCAATCTTCCGTACGCTTTCAGAAACCGGTATCGACA  
TTATGACGCGGATGTTGGCTGGTGGCTTAAACACGCTTAAACACGCTGGTGGAAATTCGCCCAATCGCCAAATCCAGGGGGCAA  
CTGGTGGTCCACACGGTTCTGCTGTTTTACTCCACCATGCGGTGATCACCTTCAACCAATACGCCATTACGCGAATTCCT  
GATGACAGCCCGGATTTGTTCAACGATGCGTCCGCAATTTGATCCGATCTGCTTAAATGAGCCAGTACCGGTGAATGGTC  
GTATTCATAAATCAGTGTGATAAACCCTGTTCCGGCTGCAACTCAATCGTACTGCAATTTGAAACGCCCTTACAGC  
CACTAA

>Cluster\_14724

ATGCCACGTTTTTTTGGCCCGCATGCGCGCCAGCTGTTTTTCCCGATGGCGTTGATTTGTATGACTTTGCTGCGTATCT  
GTCCAGCGACCTGATCCAGCCAGGGATCAATAAGTGGTCCGTTGATTTAATGCGGATGTCAGTCTGGCCCTGCTGCCG  
TCAGTCTCTATCTTGCTGGCGGTATGGCGTTACAGTGGCTGCTGGGGCGCTTCCGACAGAATTGGCCGAGCCGGTG  
CTGATTACCGGGCGTTAATTTTTACCCCTGCGCGCGACAATGTTCCACACGTCAATGACACAATTTCTTATCCG  
CGGTGCAATTCAGGGCACCAGTATCTGTTTTATTGCCACCGTTGGTATGTCACGGTGCAGGAGGGCTTCGGCAGACAA  
AAGCGATCAAGTTGATGGCGATTACACCTCCATCGTATGTCGCGGATTATCGGCCCGCTTTCGGCGCAGCTCTG  
ATGCACCTTTGTGCACTGGAAGTCTTTTTGCCATCATGCGGTTATGGGTTTTATCTCAATTTGTTGGCTTACTGCTGGC  
GATGCCAGAGACGTTGAAGCGCGCGCGGTTCCATTTAGCGCCAAAAGCGTCTGCGCGATTTTCGTAATGCTTTTTGTA  
ATCGGCTGTTCTCTTTGGCGCAGCAACCATCTTTAAGCTATATCCCATGATGAGTTGGGTGGCTGTCTCGCCGGTG  
ATCCTGATCGACCGGGCGGCTTAAACAACCTTCGAGTTCCGCTGGACACAGGTTCCGGTGTTCGGCGCGGTGATTTGCC  
GAATGCCATCGTGGCGGTTTTCGTTAAAGATCCGACCGAACCGCGTTTTATGTGGCGTCCGTACCCCTTCAACTGGTTG  
GCCTCGCGCTGTTGATATTCGGCAATCTGCTGTACCGCACGCTGGCTGTGGTCCGGTCTGGGCACCAGTCTGTATGCT  
TTCCGGATTGGTTTTGATTTTCCGACCTTATTCGCTTTACGCTGTTTTCCAACTAACCTTACCGAAAGGGACCGCTCCCG  
ATCGTGAATATGGTATGCTGATGTTGCTGCTCGCTGAAATCGCCGCTGGCTGTGTTTTAACCGCGGCTGGCT  
TGCCGTTTTACTATTTAGCCGCTGTTGGCGGGCTTATCGTCTGTTTTACCCCTGGCGGGATGCTCAATCGCGTCCGCCAA  
CATCAGGCTGCCGAGCTGGCGGAGGAGCGGTGA

>Cluster\_27118

ATGAAAGGCAGTTTATAAATCCCGTTGGGTAATCGTAATCGTGGTGGTTATCGCCGCCATCGCCGCAATTCGGTTCTGGCA  
AGGCCGCAATGACTCCAGAGTGCAGCCCTGGGGCGAGAAACAAGCCAGCAATCGCCAGCGGGTGGTCCGCGTGGTA  
TGGCTGCCGGCCATTAAGTCTCGGTTACAGCGCGACCCGAGTAGAACAGGCTGTTCCGCGTTACCTCACCGGGCTGGC  
ACCATTACCGCCGCTAATAACTGTTACGGTGCAGCCGCGTGGAGCGTCAACTGATGGCGTTACTTTCCAGGAAGCCCA  
GCAGGTCAAAGCAGGCGATTTACTGGCAGAAATGACCCAAAGCAGTTCAAAGTTGCATTAGCACAAAGCCAGGGCCAA  
TGGCAAAAGATAAAGCCAGCTCGCCAAAGCCCGGCTGACCTGGCGGTTATCAACAACCTGGCAAAAACCAATCTCGTA  
TCTCGTCAGGAAGTGGATGCCAACAGGCGCTGGTCAAGAACCGAAGGCACCATTAAGGCTGATGAAGCAAGCGTCCG  
CAGCGCCAAATGCAACTCGACTGGAGCTGATACCCGCACTGATGATGGTGCAGTTGATGGTCCGTTGGTCTCAAGCAGTGTG  
GTAACCAATCTCCAGTGGCGACACCACGGGATTTGTTGGTATCACCCAAACACATCTTATCGATCTGGTCTTTACTTTG  
CCGAAAGCGATATCGCCACCGTTGTACAGGCACAAAAAGCCGAAACCGCTGGTGGTAGAAGCCTGGGATCCGACCAA  
CTCGAAGAAGTTAAGTGAAGGCAGCTGTTAAGCCTTGATAACCAATCGATGCCACTACCGGTACGATTAAGTGAAG  
CACGCTTTAATAATCAGGATGATGCGCTTTTCCCTAATCAGTTTGTAAACGCTCGCATGTTAGTTCGATACCGAAACAA  
GCCGTTGGTATCCCAACCGCCACTGCAATGGGCAACGAGGCCATTTGTCTGGGTACTGAAATAGCGAAACAAAGT  
CAGCAACATCTGGTACACCGGCATTGAGGACAGTCAAGAAAGTGGTATCCGCGCAGGATTTCTGCGGGCCAGCCGG  
TAGTGACAGACGGAATGATCGCTGACCGAAGGGCGAAAGTGAAGTGGTGAAGCCAGAGCGCCACTACTCCGGAA  
GAGAAAGCCACCGCGCAATACCGCAAAAAAGGAGCAGCTCTCTGA

>Cluster\_45857

ATGGGTGGGGATCTGTGGGGGTTATTGATAAACTCGATTATCTGGAAGATCTGGGATTTGATGGGATTTATTTTTGTCC  
TATTTTTACTCAGCTTCCAAACATAAATGACACACTGATCATTTTTAGTGTGATCCACATTTAGCGGGGAATATTG  
CTTTCCATACTTTGATTGAAGAAGCGCATAAGCGTGAATAAAAAATTAAGTTGGATGCGAGTATTAATCATTATAGGAGCT  
GATTCCTCAATATGGCTTACGCTGTACGCAATGGTGCATTTACGTTACGCGGATGGTTCGGATTCATAAATTTCC  
TGTTTTATCCCGATACTCCAAAAGTGAATGGGATTTTTAAAACTTAACTATGAAACCTTTGGCAATGTTATTGAAATGC  
CCAAAGTAAATCTGAGAATGAAGAGTCCGCTGAATACCTACTTAGTATAGTTGCTATTTGGACGCAAAATTTTGATAT  
GATGGTTGGCGTCTGGATGTTGCGAATGAAGTGGATCATCATTTCTGGCGAGATTTTCAGAAAGGTGATTAAGATATCAA  
ACCTGAATGTTATTTTTGGGTGAGATATGGCATGAGGGCACCCCTGGTTGCGTGGTATCAGTTTGGATTCATTAATGA  
ATTTATCCCTAACAATATGGGATTTGATTTATTTGCGTTACAGGATACAAACAAAACAAGATTTATGACATCCCGTTACA  
CGTCTTATCTTTGTTATCCTAAAAATAAATCAAGTATGTTAATCTTCTGGATAGTCAATGACACCGCGCTATTTT  
AAGCGTTTTGTTGAATGATAAACGAAAGTTAACTCGCCTATTTATTTATGTTAACTCAAGCGGGCTCTCTCTGTATCT  
ACTACGGTAGCAGAAATAGGAATGATGGTTTTAAATCAATGACGCTTGAAGAAATAGTAAATGATGATATGGGATGAA  
AACAAACAAGATCTTGAATACGGCAATTTATACGTTGGTTAATACGTTACGTTAAAAAAACATCCCAATGGTGTGAGGC  
ATCAATCAATGGAAAGATGTTGAACATCTACCGGTGATCGCTTATCAACGCGATAACATCACTTCTTCTTAAAAATAA  
GTGAAGATACTGCCAATTTATTTATGACGGAAAGATATGGAGATCTCCGGTTTACGTTATGAAATTAAGGTTTACCT  
GCTGCTGATCTTTATGATTTTTAA

>Cluster\_19640

ATGAGCGATTAAAGTTATCTGGGAAAAATGCTGGATGGGGTTGAGGTTGAGTGGAAAGTGGTGGGAGAAGTTATCCATTC  
CTTAAAAACGGGATGAAACCCAGCCAAAATTTAGCTTAAATACATTTAGATGCCAAGGATATACGTAACCTGTTGCTG  
AGATCCAGAAATGGCAAAAGTTGCTTTCTTGATAAAAAACAGCAGAGTAAATGATAGAGCATAAAAATAAATGGTCTGT  
TCTAATTTAGAAGCTGGAGATATATTGTTCTCCGAAACCGGACCGGTTGGACGATCGCGGTAATTAAGAAATCCTAT  
AAATTTGAATATCAAAGAAGCGTTTACACTATCAAACCAATTAAGGAAAAAATTCGCCCTAGATTTTTATCGTATTTAT  
TACAATCAAGTAAATAGTTAAAGACTATAGCAAAAAAATTTGCGCAACCCGGTAATTAGTCTACCAATGGGCGACCTA



AAAAAGCTCTTAATCCCCATCCCTGCCGGATAATCCGGAGAAATCCCTTGCCATCCAGTCTGAAATCGTTCGGATTCT  
GGATAAAATTTACTGCACCTTACCGCTGAGCTTACCGCTGAGCTTACCGCTGAGCTTAAACATGCGTAAAAAAGTACAAC  
ACTATCGTGACCAGTTGTTGAGTTTAAAGAGGGTGGAGTTGAGTGGAAAGACTTTGGGGGAAGTGGCTGTTATAGGAACA  
GGTAACCATGATACGCAAGATGCTATAGAACATGGCAAAATATATTTTTATGCACGTGGACGTGAGCCATAAAGTTAAA  
TGTTATTTGATTTTATGAAACAGCAATCATACAGCTGGAGATGGTCCGGGGTGGGAAGGTATTTTACCTACCGCTAAAG  
GTAAATATGCTTTGCATCAGAGACATATCGTATTGTCCCAAATGCATTTATGAATCCCGGATTTGTATATCACTATATA  
ACAGCATATTTTTTACCTATATCAAAAAGCATCAGTAAAGTTTATCGGTTACCTCACCTCGTACGACCAATGTTTTTAAA  
ATTTCCCAATACCTGTACCACCTTCAAGAAACAAGCTCGCATTTGTCGAAATACCTCGATAAATTCGACACCCCTGACCAACT  
CCATCACTGAAGGTCTCCCGCTGAAATCGAGTTGCGCCAGAAACAATACGAATACTACCGTGATTTACTGTTTCACTTTC  
CCGAAACCTGAAACTGTGAGTAATTA

>Cluster\_28548

ATGACACCTCAAAATATCAGCGTACTCGCTGGCTGACACTCATCGGTACTATCATTACCAGTTTGGCTTGGGGTCCGGT  
TTATACCTGGAGTCTGTTTAAACGGTGGCTTTCTGCAAGCTGGGGGCTCCTGTAAGCAGGTTGCTTCTCTTTCCGGCT  
TGTTAAGTCTGGGGCTGGCAATTTCTGCTTCTGTTGCGGGCAAAATGCAGGAACGTTTTGGTGTAAACCGCTCACTATG  
GCTTCCGGCATTTTGGCTGGGATTAGGTTTCTTCTGACAGCACATTCCAAACCTGATGATGCTGTGGTTAAGCGCCGG  
TGTGTTGGTCTGGCTGGGATGGTGGGGTTACCTGTTGACGCTCTCTAACTGCGTGAAGTGGTTTCCGGGAGCGTAAG  
GACTTATCTGCTGCTTTTGGTATCGGTTCTTATGGTCTGAGCAGCTCGGTTTTTAAATTTATCGACACCGCACCTCGAA  
ACGGTGGGCTGGAAAAACCTTTGTTATTTGGGGCGGATTTGACTGGTGATGATTGCTTTTGGCGAACGTTAATGAA  
AGATGCGCGAAGCAGGAAGTGAACCAGCAATGGTGTAGTGGAGAAGGACTACACCTGGCAGAGTGCATGCGTAAAC  
CGCAGTACTGGATTAGCGATTATGTTCTGACTGCGTGATGAGTGGTCTGTATGTGATTGGTGTAGCGAAAGATATC  
GCTCAAAGCTGGCGCATTTGATGCAATTTCCGAGCAATGCTGTGACGGTTATTTCCATCGCAACCTTTTGGTGG  
CCTGGTGGTGGGCTTCTGCTGACAAAATCGCCGATCCGTTTATCACCATTGGTCAAGTATTGGCTGGTGGGTA  
TGGCGCCCTGCTGTTTGGCACCATTGAAATGCAGTACGCTTCTTTGCGAGGATTGCCTGTGTGGCATTAACTTTGGTGGC  
ACGATTACTGTGTTTCCCGTCACTGGTCACTGGTCTTCCGGCTCAATAACCTGGCGAAAACACGCGTGTGATTATCT  
CGGTTTCCGATCGGCGCATTTTGGTGGTGGTATCGCTCACTGTTTGGCGGCTTCTATGTGACCTTCTACGTGATTT  
TCGCCCTGCTGATTTCTGCTACTGGCGCTCTTACGACGATTGCTGAGCAGAAACGAAAATGTTGCGTGAGGCTCACATA  
TAA

>Cluster\_21541

ATGCGTCTGTTTTCTATTCTCCACCCACGCTACTGGCGGGTCTTGGCGGTATTAATTGGCTACGCCAGTTCAGCGGC  
AATAATCTGGCAAGCAGGATTGTCGCCGAGCCACTGCACAAATCTCTGGCTGGATGACGGCGCTGGGGCTGGCAA  
TGGGGCTCAGTACGCTGACTCTGACATTATGGTATCGTGTACCTGTTCTACCCGATGGTCAACGCCCTGGTGGCGCTTTG  
TTGGTCAACGGATTACAGGGACTAACACTTAAACGAAGCCATCGGCGTTTTTATGTCACCAACGTTTAAATAGTCCCTCG  
CGGCATAACGGGACTCTTTGCTCGTCTGATGCGCATTTTCCGCACTCGCTTGGCGGCAATGCTTGGCGGATTTTAT  
TACGTTTTGGTTTACAGGCGTTTCCAGTCTGGATGGTCAATTTACGTTGTGTGGCAGTATGTTGCTGGCATGGCTGGCA  
GCCAAGCCGTTGCGCCGCTATGCGGTAATGCGCCGATGATTATTTGGGATCGTATCGTTATCGCGCAAGGTGACCT  
TGTCAACACTGATATTGCTTTTAAACCCGTTCTCCCACTTATATTACCCTGATTTTTCTGTTTTGCTTGGCTACAGCTGAGCG  
TTGCACTCCCTTTTCTGGTGGATGGCATCGAAAACGACCGGTTATCGCAGCAATGAAAGCAGCCGGTATTTCG  
GCTCCTGTTTTCGCGTTGATTTGTTTACTGGATTGCTGGCATGTTTTTTTCCCTTTTCGGGCTTTATTTCCGTCGGTAT  
TGGCGCAATCACCGCGCTATTGTCAAAAGCCGGAAGCGCATCCGATAAAGATCAACGTTGGCTGGCCGCTGCCCTTG  
CGGCATTTTCTATTGCTCGCAGGCTCTTTGGTAGTGCATTTACCGGGATGATGGCTGCCCTGCCCTGAAGTTGGATC  
CAGATGCTGGCAGTCTGGCGCTTTGAGTACCATTTGGCGGAGTTTGTATCAGCGCTGCATAATGAGCGTGAGCGCGA  
CGCGGCGTGGTGGCATTCTGTTAACGGCAAGTGGATTGACGCTGTTTGGGATTTGATCTGCGTTTTGGGATTAATTG  
CCGAGGCGTTTTGTTACATGGTGTGAATTTAATCGCTAACAGAAACCGATAA

>Cluster\_66980

ATGGCAGCCAAAATACTTTTTTCCAAGTCGGCAACGGTGATATGACACTGGTACGTTTTGGCCGACACCCGGGCGACATC  
CATTTCTGATTGATGATACATATTCGCTCTGCTGATAACCCCAATGATGACACACCTGATGTTGCCTCGGCATTACGTA  
GCAGATTGAAGTATGATGAAAAGATCGTCCCTTTATTGATGTTTTTATGCTCAGTCATCCCGATCAGGATCATTTGGCT  
GGCTTGGCTAAACATTTCTGGCTGGCCGCTCTGAAGATTATCCAGATGACGATGTGAAACGTTTCAAGAAAGCGTATCAT  
TATTCGAGAAATTTGGTCAATCACCATTGATTTTTCGGCGCTCGTCCAAAAGTCAACACTTTGCGAAGATGCTCAGGCAT  
TTAATACAGAAGCAGCGCCGAGTAAAATACTGGCGGAAACATGGTTATGATCTAGCGGTAATCGAATCCTTATCATATG  
GGTGAAGATATTAATGGCAAAAACAGATGATCTGAGTGCCTTCTATCAAAAGCTGGAGATACATTTACCAGAAATTCAGCG  
GCAATTTTCAAGTGTCTCCGCACAGCTTCTGGCGCCGACCCACATGAAGATGATGAATAATTTGGAAGAAGCTCTTT  
CTAAAACCAATCCAGTATCATATGAACATGAAAATAGTCCCTCTGCATATTCCTGTAATCCTATGCATTTCTATTA  
GGTGGAGACGCAAGTTCTCATCTGGGAGCGATTATGGGACTCGTTACAAAAGCAATGCTGAGGCACTAGAATATGATCT  
TCTCCACACCGCATTTGTTTCTAGTCTTCTTCTTCTTCTTCTTCTTCTTCTTCTTCTTCTTCTTCTTCTTCTTCTTCTTCT  
GTGATGGCGCCGTAATGCTTTAGTTCAGGCTCGTTCCGGGGCAACAATGATATCGAGTAGCAATCAGATACTTGTGATGAT  
GATTTATGATCCACCGTGCATCCGGGCTAAGCGTGTGATGAGGATATTTGACAGTGTGATGGTGGTGTAGCTGTAC  
GGGGATCTTAAAGATACAGCTTCTTGAATTTGAAGTAGCTGGAGACGGGAAGTTAATACCCGCTATTTGTTGGTGTG  
TTTTCAGCTGCGGTAAGTGTCTGACGGCCGCTCTTACGGGCTGATCAAAACCAATGA

>Cluster\_40839

ATGCTGGTACTGAAGCAGCAACTGAAAGAGGCCGATTTCCACAGGCGGTTGGTGGCGAGAGCTGTGATGTTTTCTGAGGC  
CACGCTGGCCAGATTGTGAATCATAACCGCTGGCCCGCACCCAGCCCGGAGAAGTGGCCCGGCTCTTGGCTTCTGGC  
TGGAAAGTCAGGGGATTGATACAAACGAAGATTTTGTGCTGTACAGGGCGCGCCACGCCCTGACAGCGGTTACCACA  
GATAAAACGAGCTCAGTGGGAAGAGAATATGTTACTCAAAAACAGGTTTATTTCCAGCAACCAAAAAGCGTTTTGG  
TCTTTTCCGTTGACCCGTTCCGCGACGAAGCCATGCAGGGTTCTGATGATGTTTACCACCCCGGCAATTCGCTACGTCG  
GTGAGGCGCTGTACAGACAGCCCGTCACTGGTGGTTTTATGGCCGCTCATCGGTGAGTCCGGTGGGTAATCCACGCTG  
CGCCGCGACTGACTGAACGTATCAACCGGAGAAATGCGCCGTAATTTGTTATCGAGCCATACATCATCGCTATGGAAGA  
CAACGATGTGAAAGGGAAAACCTGAAAGCAGCAGCTATTGCGGAAGCCATTATCAGTACCATCGCACCTGGAAGCA  
TCAGACGAGTCAAGACGCCGTTTTCGCGAGTTGCATCGGCTCTGAAAGACAGCAGCCAGGCGGGTTTTCAGCCAGCTT  
CTGCTGATTGAGGAGGCCACAGCTGCCACTTCCGACACTGAAACACTCAAACGCTTTTTTGGAGCTGGAGTCCGGTTTT  
CAAAAACCTGCTGCTCATCTGCTGATTGGCCAGCCGGAATGGCGACAAAACCTGCTGAACGCAATATGGAAGTCCGTTG  
AAGTCTGTTACGCGCTGTGAGGTTGTCGAACTTCTGCTTGGCAATAACCTTGAAGAATTTCTGACGTTCAAACCTGCAA  
CGGGCCGTTAAACAGTGCAGGACATTAATGGACGCGGTCAGTGGATGCCATACGTCGCCCTGAGCAATCCGGGAAG  
TCACCGTAAAATATGTTGCTAGCTGATATCCGCTGGCCGCTCAGTAACTGTAATAGCCCGCATGAATCTGCGCGCTG  
AAATCGGGTTCCACAGTCAACGCTGACGTTGTTCAAAGGGTTTTAA

>Cluster\_35692

ATGTTTCGATTTTTCAAAAGTCTGGATCGTATGGCAGTGGTGTACACAGTGGGATTTATGTCGCTGACCGTTTCCGGCAC  
TGCTGACCTGTTACCGTTTACAGATTTTACAGATGGATTTTGGCACTGCCCTTGCATTTATCGAGGCGCTGAATCAGCGCC  
TGATGCACGGCTATTTGGCTACAGCGCTGAAAAACGATGAGTTTCTGCGGCTATTTGCCACTGTTTCCACCCAG

CATTACACGCCATCGATTCTCAGACGGTGGTGTATGGCCCTTCTGTCACTATATGGTTTCAGAACTGATTCGTAGTG  
GTCGAAACAGGTAAGGCGTGGTATCCACACACCCCGCTATGACGCATTTTACAAGCCATTGAAGGTAACACGCGCA  
CAGTAATGCCCGTTGCTTTAGAGAAGCAGGCTGATGGTTGGTTTTGCGATATGGGCAAGTTGGAAGCCGTGTTGGCGAAA  
CCAGAATGTAATAATGATGCTCCTGTGTAGCCACAGAACTCACCAGGAAAGTGTGGAGCTGCATGAGCTGGAGATCAT  
GGCTGACCTGTGCGAGCTATGTCGAGATAAAATGAACCGCCGCTTCCCTGAACCTCAACTGGCAGATCCCACAATCC  
ATATTCCTGGAGTAATGTGGCTCGCGGAGACTGGCGTTGCTAACGTCGGGTCGAAAAAGTTTCAATATTCGCCCTG  
ACCGGTGCTTACGGGATTATAGAAAATAGCAGTAGCCGGATGCTATTTATCGGCACGAAAGGCCGTGATGGGCTTTC  
TTCCCTTCCGGTACTGGCGTTAACTGCCATATCGCCGCTATCAGCAAGGCGCGCGTGGCTGGATGCTTACGCATCT  
ATCTGAAAGATAAACCCTGACGTATATCGCAGATAAAATGAACCGCCGCTTCCCTGAACCTCAACTGGCAGATCCCACAATCC  
ACTTATCTGGCATGGCTTGATTTACGTCGTTGAATATGACGACAACCGCTTGCAAAAAGCACTTATCGAACAAAGAAA  
AGTCGCGATCATGCCGGGTATACCTACGGTGAAGAAGTCTGGTTTTGTCCCTCTCAATGCCGGCTGCCACGTTCCA  
AACTGAAAAAGGTGGCTGGATTAATTAACGCCATCCGGCTGTTCTGTTAA

>Cluster\_13197

ATGAGTGAAGTCACTGACACTAACACTTCTGTTGGTTCGAAAGGGGATGAAAGCGGTTATCGTGGCGCAGTTTCTCTCTGC  
GTTTGGCGATAATGCCCTAGTGTGGCCACTCTGGCGTTACTGAAAGCGCAGTTCTATCCGGAGTGGAGCCAGCCCATCC  
TGCAAAATGGTGTGTTAGTGTACTTACATTTCTTTTGGCCGCTTGTGCGGCGAGTGGCGGATAGCTTCGCAAGCCCGG  
GTGATGATGTTTGGCAACGCCCTGAAGCTGCTGGGCGCAGCAGTATCTGCTTTGGTATCAATCCGTTTACGGCTATAC  
GCTGGTGGTGTGGTGTGTCAGCCTATTCACCGCGCAAAATACGGTATTCGCGCAATTAACACGGGTAGTAAGTTAG  
TGAAGACTAACCGTTTAAATGGAAGCTTCTACCATAGCGCGGATTTTGTGCGGTTCCGTAGCCGGTGGTGTGCTGGCTGAC  
TGGCATGCTCCTGTCGCCCTGGCCGATGCGCACTACGGTGGTGGCGGCTGTTGCCAATATCTACATTTCCCAAAC  
GGCGCGCGCGCTCGGGGCGAGTCTGGAATCTCATCAACATGACCCGAGTTTCTGAAATGCCTGCACCTCGCTATGGC  
GCAATGGTGAACCGGTTTTTCTGCTGGTGGGCACAGTTTATTCGGGAGCGGGTGTACGCTGCGTTTCTGTTGGT  
CTGTGGGTACCGGTGGCGCTGGGCATTACCGATAACGCTACGCCACCTATCTCAACCGGATGGTAGCGATTGGTATCTGT  
GGTTGGCGCAGTGGCGGAGCAAGTTAGTTACGTTGGAACCGTGTACGCTGATGCGAGCCGGGATTTGATGGGG  
TGGTGGTACTGATTTTTTCCCTGCAACACGAGCTGCTGCCAGCCTATGCTTGTGATGCTGATTGGCGTATGGGGGC  
TTTTTTGTGCTTCGCTCAATGCGTTGCTACAGGAGCGGGTAAAAAAGCGTGGGGCGGGGATGCGATTGCGAGTACA  
AAACCTTGGCGAAAAACAGCGCATGTTGTTGATGCTGGGCATTTACTGCTGGCGGTAATGATAGGCATCCCGGTGCTGC  
CCATGGCATTTGGCTTCGGTGCCTGTTTGGCTGGCAATAACGGCGCTGTGGATCTGGCAGCGCCGTCAATTA

>Cluster\_34238

ATGAAAACCTGGATATTTATCTGTATGTCCATAGCAATGTTGCTATGGTTTTTAAAGTACGCTAAGACGTAAACCCAGTCA  
AAAGAAAGGCTGTATTGACGCCATTATACCTGCGTATAACGAAGGCCCGTGTCTGGCGCAGTCACTGGATAATCTACTGC  
GTAACCTTATTTTGGCCGGTAATTTGCGTTAACGACGGCTCCACGGACAATACCGAAGCGGTCATGGCGGAAGTCAAA  
CGCAATGGGGGACCGCTTGTGCGCTCACAAAAAATACCGGTAAGGTGGTGGCGCTGATGAATGGCCCAATTA  
CGCCACCTGCGACAGGTTTTTTAAGTATGCGGACACCTATGTTCCGCCGATCAAGACGGAATGGCTATATGCTGG  
CAGAAATGAGCGCGGTGCAGATGCCGTAGCGGCATTTCCCTACTGCGTTGAAAGGCGCGGGTCTGTTACCGCACATC  
CGCGCAGCTAAGATTGCGGATGATTTGTTATGAAGCGCAGCTACAGCAGCTCTGGGCGGGCACCGTTTATATACAG  
CGGTGCTGCGGGATGTTCCGTACTGATGATTTGCGTAAGTTCCGGTTCTCGGATCGTACTAAAGTCGAAGACCTTGATC  
TCACCTGGACATTAGTGGCAACCGCTACCGTATTCGGCAGGCAATCGCTGCATCGTATACCCACAGGAATGCAACAGT  
CCGCTGAGGAGTGGCGCTGCGTGGCGGCTTGGATTGTTGGCTACGCGGCTGATGCGCCTGCATAAAAGGCTTTTTAT  
TAGCCGTTCCGTTACTTTCAGTATATTTTCTATGCTGTTGGTTGATTTATGGCGTTGGGATTTATCTCACTACCTGCT  
TTAATGAATTCATCACCCGGGCGCATGGTGTGGTGTGGCAATGTTCCGCTTATCTGGAATGCGGCTAGTTTGTGTT  
ATTTGGTCTTTTAGCGCTGTTTTCATCGTTGCTGGTTGTTGGTGCCTTTAGCGCCCTTCCGTTGTGATGATTTAT  
AGCTTATGCCATCTGGATTTATGACTTATGCTTTTACTGGACGCAACTCAGCGCGCAAAACCCCGCT  
ATTCGCACTGGTGAAGCGTCAACCGTTATTTCCCACTTCTGTACAGGAATGAAAACTATCTGAAGCTTAA

>Cluster\_2626

ATGAACGACACCAGCTTCGAAAACGATTAAGTGCACCGCTGACACCAGCCGCTGCCCGGTGAGCGGGTGAATCCCGG  
TTATCCAGGGCAAACAAGCGGGCGGATGGCGAGCTCTGCGTTTTGAAAGATGGCGCACTGATGACGAGCGCTGA  
AATATTGCATCAACTGCAACCGTTGTGAAGTGGCTGCGGCTCCGATGTAAGATTGGCGATAATATCCAGCGCGCGCG  
GCAAAATATGACACCCAGCGCCGCTGCTGCGTAATTTGTGTGAGTCAACCGACCTGATGGGTAGCGTTTTCCACGCC  
GTTCCGACCAATCCGTAACACCGCTACCTCGCTGAAACCGGTGGCGAGCTGCTTGGATGCGCGGTTAAAAATCGATCATC  
GCCGACGCTACCGAAATACCTCCTCGGCACGTTCCGCTGCTGGTATCGCAGCATAGCGGCTCAGCAAGCACAATAAA  
GACCAGGTCGCTTTCTTTCAGGCTGCTTCTGTTAACTACAACCATCCGAGTTAGGTAAGATTTAATTAAGTGTCTCAA  
CGCAATGGGTACCGGTGTAACCTGCTCAGCAAGAAAAATGCTGCGGCGTACCGCTAATCGCCAACCGCTTTACCGATA  
AAGCAGCAAAACAGGCAATACGAATGTAGAGTGCATCCGCAAGCTGTGGGAGTAAAAGGCAATTCGGTGTGTTGCCACC  
TCTCAACCTGTACATTTGCCCTGCGGACGAAATCCCGGAAGTGTGAAATGTCGACACAAGGCTTCCGCGATCATAT  
CGAACTGGCAACCCGCTGGCTGTGGCGCAAGCTGGACGAAGGCAAAACGTTACCGCTGAAACCGCTGCGGCTGAAAGTGG  
TTTTATCACACTCCGTGCCATATGAAAAAATGGGCTGGACGCTTACACCCCTGGAGCTGTGCGTAAAAATCCCGGGCTT  
GAGTTAACGGTGTGGATTTCCAGTGTGCTGCGTATTTGCGGGTACTTACGGTTTCAAAAAAGAGAATCCCACTCACA  
AGCCATCGTGGCCACTGTTCCGCGAGATAGAAGAGAGCGCGGATCTGGTTCATCACCAGCTGCGAAACCTGCAAAAT  
GGCAGATTGAGATGCCACGAGCTTCTGCTGCGAACATCCGATTACGCTACTGGCCAGCGCTGGCTTAA

>Cluster\_33534

ATGAAAATAAAAAACAGGTGCACGCATCCTCGCATTATCCGCATTAACGACGATGATGTTTTCCGCTCGGCTCTCGCCAA  
AATCGAAGAAGGTAACCTGGTAATCTGGATTAACGGCGATAAAGGCTATAACGGTCTCGTGAAGTGGTAAGAAATTCG  
AGAAAGATACCGGAATTAAGATCACCGTTGAGCATCCGGATAAACTGGAAGAGAAATCCCTCAGGTTGCGGCAACTGGC  
GATGGCCCTGACATTTACTTCTGGGGCAGCAGCCGCTTTGGTGGCTACGCTCAATCTGGCCTGTTGGCTGAAATCACCCC  
GGATAAAGCGTTCACGACAAGCTGATATCCGTTTACCTGGGATGCCGTAACGTTACAACGGCAAGCTGATTTACCCGA  
TCGCTGTGCAAGCGTTATCACTGATTTATAACAAAGATCTGCTACCGAACCCGCCAAAAAACCCTGGGAAGAGATCCCGCG  
CTGGATAAAGAACGAAAGCGAAAGGTAAGAGCGCGCTGATGTTCAACCTGCAAGAACCATACTTACCTGGCGCTAAT  
TGGCGGTGACGGGGTTATGCGTTCAAGTATGAAAAAGGCAAGTACGACATTAAGACGTTAGGCTGGATACCGTGGCG  
CGAAAGCGGCTGCTGACCTTCCGTTGATCTGATTAATAAACAACACATGAATGCAAGACACCGATTACTTCCATCGCAGA  
GCTGCTTTAATAAAGGCGAAACAGCGATGACTATCAACGGCCGTTGGCATGGTCCAACATCGACACCAGTAAAGTGAA  
TTATGGTGTAAACGCTACTGCCAACCTTCAAGGTCAACCATCTAAACCGTTGCTTGGCGTGTGAGCGCAGGATTAACG  
CCGCCAGTCCGAACAAGAGCTGGCGAAAGAGTTCTCGAAACTACTGTGACTGACGAAGGCTGGAAGCGGCTCAAT  
AAGACAACCGCTGGGTCAGTAGCCGTAAGTCTTACAGGATGAACTTGGCAAGATCCACGATTTGGCCGACCAT  
GGATAACGCTCAGAAAGGTGAAATATGCGCAACATCCCGCAGATGCTCGCTTCTGTTGATGCGTGTACTGCGGTGA  
TCAACCGCCGACGGCTGCTGAGACTGTGGATGCTGCGCTGAAAGATGCAACAGACTCGTATCACAAGTAA

>Cluster\_36807

GTGAATAATATCCAACCTCGCCACGGTAGCGGCGGCCAGGCGATGACGCAATTAATCAACAGCCTGTTTATGGAAGCCTT  
TGCAACCCGTGGCTGGCAGAGCAGGAAGATCAGGCACGCTTGTATCTGGCGAGCTGTTAGCGGAAGCGACCGTCTGG

CGTTCACCCGACAGTTACGTTATTGACCCGCTGTTCTTCCCTGGCGGTAATATCGGCAAGCTGGCGATTTGGCGCACA  
GCCAATGACGTTTGGCGTACGTGGCGCTATTCGCGCTATCTCTCCTGTGGCTTTATCCCGAAGAAGGATTGGCGATGGA  
GACTGAAAGCCGTAGTGACCAGCATGGCAGAAACCGCCGCGGCGAGGATGCCATCGTACTGGCGATACTAAAG  
TGGTGCAGCGCGCGGTAGATAAACTGTTTATCAACACCGCTGGCATGGGCGCAATTCGGCGAATATCACTGGGGC  
GCACAGACGTTAACCGCGGCGATGTATTGCTGGTGAGCGGTACACTCGGCGACCAGGGCGACTATCCTTAACCTGGC  
TGAGCAGCTGGGGCTGGATGGCGAACTGGTCAGCGACTGCGCGGTGCTGACGCGCTTATTCAGACGCTGCGTGACATTC  
CCGGCGTGAAGCGCTGCGTGATGCCACCGTGGTGGTGTAAACGCGGTGGTTCATGAGTTCGGCGCAGCCTGCGGTTGT  
GGTATTGAATTTTCAAAGCGGCACTGCTGTTAAACCTGCGGTGGTGGCGTTTGGCAATTGCTGGGACTGGACGCCCT  
GAACCTTTGCCAACGAAGCAAACGTAGTAATAGCTGTTGAACGCAACGCGCGAGAGCAAGTGTGGCAGCTTACATCC  
ATCCACTGGGAAAGACGCGCGCTGATTGGTGAAGTGGTGAACGTAAGGTGTTGCTTGGCGGTCTGTATGGCGTG  
AAACGAACCTCGATTTACCACACGCGGACCGCTTCCGCGTATATGCTAA

>Cluster\_57117

ATGTTGCAGTTTATCTCCGACGTTTGGGACTCGTCATCCCCAGTTTATCGGTATTACCTTCTCACATTTGCCTTTTGT  
CCACATGATCCCGGGCGATCCGGTGATGATCATGGCGGGCAACGTGGGATCTCCCAGAGCGTCACGCGAGCTGCTGG  
CTGAACCTCGGCTTAGATAAACCGATGTGGCAGCAGTATCTCATTACATTTGGGGCGTTATGCATGGCGATCTAGGCATT  
TCAATGAAAAGCCGCATCCGGTTTGGGAAGATTCGTGCGCGCTTCCAGGCCACGCTGGAACCTGGCGTCTGCGGAT  
GATTTTGTCTACGCGAGTCCGTTTCCGGTCCGCTGCTGGCTGCGGTTAAACGCGGTTCCATTTTCGATCACACGCGG  
TTGGCTGGCGCTGACAGGTTATCAATGCCTATCTTCTGGTGGGCAATGATGCTGATCATGCTGGTTCCGGTGCCTGG  
AACCTGACGCCCGCTTCCGGTCCGCTGAGCGATATGGTGTTCCTCGATGACTCCAATCCGTTAACCGGTTTTATGCTAAT  
CGACACCCCATCTGGGGTGAAGACGCGCAACTTTATCGATGCGCTGCGCCATATGATCTGGCTGCAATGCTGGT  
CTATTCCGCTGGCGTCAATGTCGATGACACGCTCCCTCGATGCTGGAAGTGTGGGCGAGGATTACATCCGACCGCG  
CGCGCAAAGGGTAACCGCATGCGGGTGATTATCTGCTCCATGCGCTGCGTAACGCGATGCTGCGCGTGGTGACCGTTAT  
CGGCTGCAAGTGGGAACATTTGCTGGCGGGGGCATTCGACGGAAACCATCTTCTGCTGGCCCGGTCTGGGACGCTGGT  
TGATTGACCACTGCAACCGCGGACTATCCGGTAGTGCAGGGCGGCTATTGCTGGTGGCGAGCATGATTATCCTCGTC  
AACTTGTGGTCTGATCTGCTGATCGCGGTGGTGAACCCGCTATTCGTATAAGAAAGTAA

>Cluster\_64416

ATGGCAATTAATATCGGGTGTATACGCAAAATGGGGTCCGCGAGCCGTTGTGCGCGTTCAGTTAGTATTAAACGACCGGGT  
CACGATTTACCGGTAGTAAATGACCACTGTTGTAGAGCAAGAAACAGGCGCGCGGGTGGTACAAATTTGATATGAATC  
CCGGAGTTTACGTTGTCAGTGTAGTGCAGCATATCTCGCGGTGATTAACGTTAACCCGGACAGTGTGACGGCAGGTTA  
AACGACTATTTGACTAATTTTAGCGCAGACGAACTGACGCCAGCTGCGTTGGCGGAGATTCAAAGCTAGTATCGGCTGC  
GAAAAATGCTGCAGCAGCAGCAGACGCCAGCGCGGCGCACACATCTGAAACTAACAGCGCAACAGCGCAGCAG  
CAGCGCAGCCGCGAGTCTGACTCGTCAAAAATTCGCAAAACTCGATAAGGAAAATGAATTTTCGAAAAAAACAATTC  
AAAAAATGGCGACATTTTGTGGTGGCGCACGTTTACTCACCGCGACATTTAATAACAATATCCAGATAGGGAAAA  
TTCAGCAGGCAACACAAATACAGCATCATGCTATACTGACTTTGATTTATACTTCGGTCTGTCGCAATTTATTCCA  
CTACAGTTGACGGGTCAAAAAAACGGTCAATTAGCATTTTGGAGTCCCGGAGGAATATTTCTGACGCATATATAGAA  
CCCAAGGAAAAATCTTATTGTCAGATTTACGATCAACCGCTTAGCCTTAAAGTTGACTTTCCCTACGCTGCTGCAAA  
TGGTCTGCAATACGTTGGGGTGTATAGGATTGCCCGATCAATATTTTCAATGATGGGCATCTCCCGCCGACGAGCTGTAG  
TGAGTAAACTACCACAGGAGCAGAACTAAGACCGCGTTTTACTTTCATCAGCGGAGACGAAAACTTTATTTTGCATAC  
GAAAATAAAAAATATATATACCCGTGATCATTGATGATGATTGA

>Cluster\_27041

ATGGCAATTTATACCCGAACAGGTGATTAGGAAAGTACGCTTTTATTTACCGGACAGCGGTCAGCAAACTCATCTACG  
TGTGCAAACTATGGCAGCGTGGATGAACTGAAACGCGCACTCAGTATGTGTTATGCGCCACCAGCATCGAAAGCCATC  
GCATCTTACCTGGAAGCCATTCAACAACAGATATTTTGGTTTATGCGCCGAACTGCCAGTGAAGGCGCAACCGCTCAG  
CAGCAGGTTTACATCGGTACGGAAGAAATGGCCGCTGGAAAACGCGATCGATAGCGCAATGAACGCGTCCCGCCAGT  
TCACAGCTTCATTTGCTGCGTGGCGGATGTGAAGCGCAAGCCGATGCAATTCGCCCGCAGCGTGGCTGACGGGCTGAAA  
GACGCTTGGTTGAACTGACAACGAAACCCCGTCCGGAATGTTTGTGTCATATATCAACCGACTTTCCGATTTGCTG  
TATGCCCTCGCCCGCGTGGGAAGACAACCGTGTCTCATCAAACTGATGATTGAGGAAATCAAAAACGTTATCACGAAGC  
CAACCACACACCAGCATTTGAAGGAACGCACAATGCCGCTCACTTTTACAGGATCTTACCAGCTCATTCGTAGTGGGCAA  
TGGCGCAGATGAACTGCATATTTCCCGTGTGATCAGCATTTGTTGATGCAACGGAACAGAAAGTGTACCTGCGCGGATG  
CCTGATGCCCTGTTGGTGCAGTGAAGTGGCACCGAAAGCCTGGACCGCGTGGCGATGAAAACGGCAACCCACAA  
ACTGTGATGATACCTGCAACCCCGCGCGCGCTTTACCGGCTCGAAAGCCATATGCAAGGCAAGTCTGCTACTTTGGTG  
GCGGCTTCCCGCTGCGGTGACGGAATAATGCTGGCGGGCTTGGCATCAGCGCGGTAGCGTTGAACAAGACATGGAT  
ATTGCCAAAGCGCAATGGCGGCAATTAACGTGGGAGTAAACCAATGA

>Cluster\_59425

ATGCTGAAGTTTATTCAGAACAACCGTGAATACCGGACTGCTGGCGGTGGTGTGCTGTTTTGTATTACCGGTTTTCT  
CGACCGCAGTATTTAAGTGTGCAACCGTACCATGTTTATAGCAGCGCAAACTCCTGATCCTGCTGGCAATGGGGC  
CGACGCTGTTAATGCTTACGCGCAATATTTGATGTTTACGTTGGGTTTCGATTAACCGAATGTGCGCGGTGCTGTTGGGATG  
TTACTGAACCGAGGATTTACTACCTGTTGCTTGTGCTGCGCACTTTACTGCTGGTTGCTGCGGATTTTTCAACGG  
GTCTGGTGGTGGCTGGCTAAAGATCCCTGCCATTTGTTGCCACCTTGGCAGCTTAGGGTTGTACAGAGGCATTCATGTTG  
TGTGGACTGGCGGCAATGGATTGAAGGTTACCGCGCAACTGAAACAGCTCCTCCGCGCGCTGCTGCTGGCGTTTTCA  
GCAATTTGGTTGGTTGACGATAATTTCTGGTGGCATTTATGGCTGGCTGCTGGCAAGACGCGGTTTTGGACGAGTTTTTA  
TGGCAGGGCGATAATTTACAGGGCGCTGCTCACTGGCGTTTCTGACTGAAGCCATTGCAATTTGTTGGCATTTTTGTTGA  
ACGGCTGCATGGCGGCACTGGCGGGAATTTGTTGCTTCCGAGATTGGTTTTATCCCAACAGACCGGTACCGGGCTG  
GAGATGAAAGCAATGACGCTGCGTGGCGGCAATTTGTTGCTCGGTGGTTCCGGTGGCATTTGGTGGGTTACT  
CGGCGCATGTTTCTGACGAGATCGATAGCGTACTGGTGTGTTGCGCATTCGGCATGGTGGAAATGATTTTTATCGCGG  
GTCGTGTTCTGCTGGCGGTGCTGGTGTTTTGAAGGACGCTGCTGCTGCTGCGTGAACCTAATCCTCGCGGCAAAAAAT  
GCCCGTTTTATGACGCCACCGCATCCGTTAAACCGCTTCTGTCAGGTAAAAAACGGGAGGCCGATAA

>Cluster\_29377

ATGAATGATTTATCAACATATTTTGGTGTAAATACTGCGGTAGTAACTCCATTTGCTTATGAGAAATGCACTTAATACCC  
GATTAATAATCTCGATCTGTTGATGTGCAATATCATAAGAAACAGCATTTCTTACCAGCTGATGATGATGATTTG  
TGCAGGTAGCTGGGAAACCTCGCTTACGCTCAAAGCGACTGGAACCGCTCTAAACGTCAGGAATGGTCAAACAACCTT  
TTCAGATGAAACAGCTGCGGATATTAACGCTGTTACTTCTGCTGACTGGAACAATACAGCGCCCAATATCAAACCG  
TTCTGATGCTATGCTGGTAGCGGTTAATGATTTCTGAGGCTCATACCGTTACACGCAACCGGTTGAAGTGGATC  
TGATTAACCGCTGCTGGGACTGAAAGTTGAATCTGAAATATGCGGACAGGTTGATCTGCACTTCCCTGACGCTGAGGCT  
AAAACCGGTACCGCTATCGACTTTGATCGACTACTGTTAAACCGTCTCTTGTATCTGTAAGCGGTGCGCTTACA  
GAGTGAAGGTTGGGCTGTTGCTGCAAGCGCACTGGTGAATTTATCTTGTGCTGCGGCTGCTGCTGATGGTT  
TGTATCTAACCGCTGATCAGTACATGGTGAATATGAGGATGATGCGAGTGTACGCGCTGTTTACCGCTGAGTT  
GATTTCAACCCAGCTATGACTCTTTCCAGATTGGCGGATCACTGTTTATGATGTTGTTTCTGAGATTGTTGCT  
TCACATCGGAGAGACGGTTTTGCAATTTTCCGGTAATGGATAAAGCGCACAGTGTACCAGCTTCATAGCGCGTTG

GTGTGCGTCACTGCTGAGTTAGTCAAGATGCCGTGTTACATACCAATATCTAATCAAGGATGAATTCCAATTCCCATCT  
GTGGTTACTGAGACATCTTATCTGCCAGTAAACAACATTCGCGAAGCTATCATCTTCGGATCTGCTGCGTAA

>Cluster\_21192

ATGAAAAAAGTGTATTGATAATCTTGTATTGCTGGTGGTACTGGGTATCGCCGCTGGTGTGGGCGTCTGGAAGGTTCC  
CCATCTTGGCAGACAAATGCTTATCAAGAAGAGAGATATTTACCTGAAGCCAGGACCGGACGTCTGGCGCTAG  
GTGAACAGCTTTATGCGGATAAGATCATCAATCGCCACGGGTTTTTCAATGGTTGCTGCGTATCGAACCGGATCTTTCT  
CACTTTAAAGCCGGACTTACCGCTTTACACCGCAGATGACCGTGCAGGATGCTGAAATGTTGGAAGCGGTAAAGA  
AGCACAGTTCGCGCTGCGACTGGTAGAAGGGATGCGCTGAGCGACTACCTCAAGCAATTGCGTGAGGCTCCGTATATCA  
AGCACACGCTGAGCGACGATAAGTACGCCACCGTAGCGCAGGCACTTGAAGTGGAAAAACCCGGAGTGGATTGAAGTTGG  
TTCTGGCCAGACACTGGATGTATACCGCAATACCACCGATGTCGCGTTACTCAAGCGAGCGCACAAGAAAAATGGTAA  
AGCGGTGATAGCGCTGGGAAGGGCGTGCAGGCGGCTGCGCTTATAAAGATAAAAAACAGTTGGTGACGATGGCATCAA  
TTATCGAAAAAGAAACCCGCTTGCAGTGAACCGCATCAGGTTGCGCTCGGATTTATCAACCGGTTACGCATTTGGTATG  
CGCTGACGACCGCAACCGCTGATTTACGGGATGGGAGCGTTATAATGGCAAACTTCTCGTGACGACCTTGAAGTTGG  
GCCGACAGCGTATAACACCTATACCATTACCGGTTTGCAGGCGAGTGAATAGCTACGCCGGGGCGGATTTCGCTGAAGG  
CTGCTGCGCATCCGGCAAAAACCGCGTATCTCTATTTTGTGGCCGATGTTAAAGGTGGTACACGTTTTAATACCAATCTT  
GCCAGTCAATAACAAGCTGTGACGAGATTATCTGAAAGTGTAAAGAAAAAATGCGCAGTAA

>Cluster\_18544

ATGAAAAAGATGATGATAGCCACACTGGCTGCCCGCAGCGTGTGCTTGCCTTGCAAAATCAGGCGCATGCTGGCGCGAC  
GCTTGATGCGCTTCAAAAAAAGGTTTTTGTGCAATGCGGGATCAGTGAAGGATACCTGGGTTCTCTTATGCGGATGCTG  
ACGGTAAGTTTTCAGGTATGATGATGATGTTTGTGCTGGTGTGCGCTGCTGATATTCGGTGACGATACGAAAGTGAAA  
TATAACCCCGCTCACTGCAAAAAGAACGCTTACCCTTTACAGTCAAGGGAGGTTGGATTGCTCTCCCGTAATACGACCTG  
GACTTCATCTCGCGATGCCGGGATGGGAATGGCATTACTGCGCTCACATTATACGACGGCATGGCTTCTGACGCAG  
ATAAAGCGGGGCTAAAAAGCGCAAAAGAACTGGATGGCGCTACCGTCTGTATTAGGCGGGGACTGATACCGAACTCAAC  
GTCGCCGATTAACCTCAAGGCAAAATAATATGAAGTACACGCCGATTAACCTTCGATCGCTCAGACGAATCAGCGAAGGCTCT  
GGAATCTGGCCGCTGCGATACTTGCCTCGGATCAATCACAACCTGTATGCCCTGCGCATCAAATTAAGCAACCCAGCTG  
AATGGATTGCTTACCAGGATTTATCTCTAAAGAACCTTGGCCGGTAGTTGCTGCTGGCGATGATGAATGTTCTCG  
ATTGTACGCTGGACGCTTTTTCGCGCATGCTGAATGCTGAAGAGATGGGCATCAATTCAGAACGCTCGATGAAAAAGCGGC  
TAATCCAGCAACACCTGATATGGCACATCTGCTGGGTAAGAGGCGATTACCGCAAGGATCTGAAGCTGGATAATAAAT  
GGGCTTTAACATCATCAAAACAGGTGGGTAACCTACTCGGAAATTTTCGAGCGTAACGTAGGTTCAAGAACCCCGCTGAAA  
ATTAACGTTGGGCAAAATAATCTCTGGAATAACGGCGGTTATTCAGTACGCGCCGCCGCTGCGTTAA

>Cluster\_293

GTGAAACTGGATGAAATCGCTCGCTGGCGGAGTGTGCGGACCACCTGCAAGCTATGTTATTAAACGCAAGCGAAGCA  
ATACCGTGTGAGCGACAAAACCGTTGAAAAAGTCAATGGCTGTGGTGGTGAGCACAATACCACCCGAAACCGCTGGCAG  
CTGGGCTTCTGCTGCGACCGCACAGTTCTATTGGTCTTGTGATCCCGATCTGGAGAACCAGCTATACCAGCATCGCT  
AATATCTTGGAGCGCCAGGCGGCAACGGGTTATCAACTGCTGATTTGCCTGCTCAGAAGATCAGCCAGACAACTGAAAT  
CGCTGCAATGAGCACCTTTTACAGCGTCAAGTTGATGCGCATTATTGTTTCGACGCTGCTTGCACCTGAGCACTTTT  
ATCAACGCTGGGTAACGACCCGTTCCCGATTGTCGCGTGGACCGCGCCCTCGATCGTGAACATTCACCAGCGTGGTT  
GGTCCGATCAGGATGATGCCGAAATGCTGGCGGAAAGTTACGTAAGTTTCCCGCGAGACGGTGTCTTATCTTGGCGC  
GCTGCGGAGCTTTCTGTAGCTTCCGCTGGAACAAGGTTTCCGCTACGCTGGAAGATGATCCGCGCGAAGTGCATTT  
TCCTGTATGCCAACAGCTATGAGCGGAGCGGCTGCCAGTTATTCGAAAAATGGCTGGAACCGCATCCGATCCGCGCAG  
GCGTGTTCACAACGTCGTTTGGCTTGTGCAAGGGGTGATGGATGTCACGCTACGCTGCGGATGGTAAACTGCCTTCTGA  
CCTGGCAATTGCACCTTTGGCGATAACGAACCTGCTCGACTTCTACAGTGCCTGGTGTGGCAGTGGCTCAACGTCACC  
CGATGTCGACAGCGTGTGCTGGAGATTGCTGGCAAGCTGGACGAAACCGGTAAGCCAAAACCTGGTTTTAACCGCG  
ATTAACGTAATCTCTATCGCGCGGTGTGCTCAGCCGTAGCTAA

>Cluster\_25838

ATGGTTAAAACCAACGTTGTGATCACTCCCGCGAGCCGCGGGATTTGGCCGGACTTAATTTGTCAGCTTGCACA  
GCGTGAGTGGCCAGTGCAACTGGTTGTTTGTGCGATGCCACTCTCTTACCAGCCGGCAGCGATGCTCGGTTTGGCGC  
TCACCTCCGCCCTTATTTCCCAACTCCCTGCACAACCGCAAACTGCGGGCACATTAACGCTACTTCTGTGCGGCTA  
CGTGAATCTGTACTGTGGGCGAGTTAGCAGTTGAAAAAGGCGACTATGTTGGTGGAAACGCTGCGCGAGCGTGTGATGG  
CTGTCTGAACGGTGAATTTGCTGCGCTGATCACAGGCCCGTGCATAAAGGCGTCAATTAACGACGCGAGGATTCGGTTA  
CAGCTCATAACCGAGTTTTCGAAGAGCGTTTCGACGGCGAAAAAGTGGTGTGATGATGCTGGCGACCGAAGAACTTCGCGTG  
GCGCTGGCAACGACGATTTACCCTGCGCGATATCGCAGATGCTATCACCCCTGCCCTTTTGCACGAAGTATGCTAT  
TTTTGCATCAGATTTGCGCACCAAAATTTGGTATGCGGAAACCGCGATTTCTGGTCTGCGGGCTGAATCCGACCGCGGGC  
AAGCGGCTCATATGGTACGGAAGAGATAGACACCATTTATCCGGTACTCAACGAGCTGCGGGAACAGGGGATGAACTC  
AACGGGCGGCTGCTGCCGATACCTGTTTTCAGCCGAAATATCTCGATAACGCGCGAGCGCTGCTGCAACACGACG  
TCAAGGCTTCTCCGTTGCTAAAATACCAGGGCTTCGGGCGCGGTGTAACATTTACGCTGGGCTGCCCTTTATTCGCACAT  
CAGTGGACACCGGACCGCGCTTGAACCTGGCGGACGTTGTAAGCCGATGTCGCGAGTTTATTTACGCGCTTAATCTC  
GCCATCAAAATGATTTGTTAACACCCAATGA

>Cluster\_1459

ATGAGTCTTCTTTTGTGTAACGCCACTGGTTATAAACACGCGAGCTGGCAATGAAATTTGGCTTAAACGAAGCCATTGT  
TTTGAACAACACTGCACTACTGGTTGAGAGATACCAACTCCGGCATGGAATGTGATGGTGTTCGCTGGATTTATAACACAA  
CGGAACAATGGCTGGAACAGTTCCATTTCTGGTCAAGTCAACGTTAAAGCGCGGTTTGAAGTCTGAAAACCGCTGGGG  
CTTTTGGCTTGTGAAAAGCTCAATAAATCAAAGCGGATATGACCAATTTCTACACGATCAACTACGGGAGCGAGCTTTT  
AGATGGTGGCAAAATGAGCGAATCCATCGGTTTAAAATGCGCCGCTCCATCAGGTCAAAATGACACGATGGAAGAGGTCA  
AAATGAAACGCTCCATGGTTCAAAACGACTCAATGTCAATCGGGTCAAAATGGCCTGATGATCTTACAGAAACATAACA  
GAGATTACTACAGAAATACAACAGAGATTACTACAGAGAAATAAAAAGACTTTCGCTCGGAAGCTTCCGAAACCGACCC  
GCAGACGGTTGAACAGGATTTTTTAACCCGACACCCGACGCGGTTGTTTTCAGTGCAGAAAAACGCCAGTGGGGCAGCC  
AGGAAGATTTGGCGTGTGCGCAGTGGATCTGGGGCGAATCTGAGTCTTTACGAGCAGGCGCCAGCGATGATGGCGAG  
ATTTCCGACCGAAAGAACCCAACTGACCCGCAATGGGCAACGACGCTGCGCACAATGCGGATGCTGGATGGCAGAATCA  
CAGCAAAATTTGTAAGTGTGGTGGGTCAGCGGGATCTTCTGGGTAAAAAATATCATGATCCGCTCAAGCTC  
GCGAAAAATGGGATGAATGGTTATCCGCTGGGGCTTCTGCTGTACAGCGTGTGTTGATCATATTTCTGAGCCGGAT  
ACCGAAATTCGCGCGGGCTTACGGGGTAA

>Cluster\_32711

ATGCTTTTAGCTACGGCACTGTTAATGTTGGTTACTTTTGGTCTTTACAGTGCAGCCGCGCTGGTTTTTGGCGGCT  
TATTTCTTGGCGAACCTTTGGCATCCCGCGTTGATCATCGGCATGACGGTGGTCAATTTGGTACATCGTTACCAGAAA  
TCATCGTCTCGCTTGGCGGCTTTTGCACGAACACCGCATTTAGCCGTTGGTACAGCCCTCGGCTCAAAACATTTACAT  
ATATTTGCTGATCCGCTGGCTGGCTGCGCTGGTTCTGCTTACCTGCTCATTCTGATGTTCTACGCGGTAATACCTT  
AATGTTGTTGGTCAAGCTGGTGGCGGTTCCGTTACTCTATGACGGAACCTTAGTGCAGCGATGGTATCTTTCTCTCT  
TTCTGGCTGTGCTATGGTGTGTTTCAATGTTAACTTGCACGTCAGGCTGAACGTCAGGGGACTGACAGCTGACCGA

GAGCAGCTTGCGAGCTGCCGCGTGACGGCGGATTGCCGCTCGCGTTTTTATGGCTCGGCATTGCGCTTATCATCATGCC  
AGTGGCCACGCGGATGGTGGTTGATAACGCCACGGTGC TGGCGAATTACTTTGCCATCAGCGAGTTGACGATGGGTCTGA  
CGGAATTGCTATCGGAACCAGCTTGCCGGAAC TGGCAACCGCAATAGCGGGGTTTCGCAAGGTGAAAACGACATTGCG  
GTCGGAAATATCATTTGGCCCAAACATTTTAAATATTGTTCATCGTGTGGGTTTACCCGCGCTGATAACGCCAGGAGAT  
TGATCCACGTGACGTGCTGACTACAGCTGATGTTGCTGGTGGAGCATTATTTTGGCTTGTGCTGGCGCGCT  
CCCGCAACCGGGCGTGGTGTAGGGTATTATTAACCTGGCGGATTTATCGTATGGCTGGCGATGTTGACTGTTATCG  
CCAATACTCGTTGAATAA

>Cluster\_48406

ATGGCCAGAGCGAATTAATGAAGAAAC TTTGGCTAGCTACGGTAATGATGATGAATTCGTTCTGTGCTGAACGAAT  
CATAAATGAAGAAGAAAAAAGAATAATAAAGTTTGGCTAATAGCCTAAGAAGGACGCTTGAAAATAGCCGAGCTATAG  
GTTTCGAATTACTCATAAAGGATTTGGAGCGATTTCTCTCCCATGAACGAGGCCACTAATGATTTTGTGGAACGAGTTGAA  
CCAAGCCATTTCCATAAAGATTTAGTTTTATCTTTTCGATAACGTTAGAATCCTTAAAGGGTAAATAGAGGAGTATCGTTT  
TGCTGAAGCTATTTCGGAAGAAATGGTCTATCATTACGCACGAAACTTCTTTTTTGGGACCTCCCGCTTGGTAAAGACTC  
TAACAGCAGAAGTGTTCATCCACGTTAGGCTTGCCTATGTTTATCGTAAAAATTAGATAAAATGATGTCATCATATCTA  
GGCGAAACTGCGACCAATATACGCTCAATTTTTGAGTTTCGCAACAATAGCCCTTGCCTCTTTTTTGGATGAGTTTGA  
TGCTATTGCTCGCTAGAGAGATAGCAATGAACACAATGAACCTTAAACGAGTTGTGAACAGCTTGCATTTATTTATG  
AAAGTTTATCCGCAAGGTTTTATGATGACGCCAACCTTATAGATAAAAGCATTGATCCAGCTGTATGGAGCGTTTT  
GATGAAGTCAATGTTTTAAAAACCTGATAAAGGAATGATTAGGAGATTTTTAAAAAGCAGATTAATAAATAATTAATA  
TAATTTTAAATCCAGATGATTTATGTTTAAAGTTAGAAAAATGAGTTTTTCAAGCTAGAGAGAGTGCCTAATCAAGCAA  
TAAATCAATGATTTTGGAAAAACATAAAGTTTTGAATGAGCGTATTTTGTCTGATGCGATAAATGATGAACATCGAAGA  
AATAGTGGTGTGAACAAATGCGATAA

>Cluster\_25578

ATGAAAAAACCTGTCGTGATCGGACTGGCGGTAGTAGTACTTGGCCCGTGGTTGCGGAGGCTACTGGTGGTATCAAAG  
CCGCCAGGATAACGGCTGACGC TGTATGGCAACGTGGATATTTCGTACGGTGAATCTTAGTTTCCGTGTTGGGGGCGCG  
TTGAGTTCGCTGGCGGTGGACGAAGGTGATGCGATCAAAGCGGGCCAGGTGCTGGGCGAAGTGGATCACAAGCCGATGAG  
ATTGCCCTGATGACGGCGAAAGCGGGCGTTTCGGTGGCTCAGGCGCAGTATGACTGATGCTTCCCGGTATCCGCGATGA  
AGAAATCGCTCAGGCCGCGCAGCGGTGAAACAGGCGCAAGCTGCCTATGACTATGCGCAGAAGTCTTATAACCGCCAGC  
AAGGACTGTGGAAGAACCGCACCATTTTCGCAAAATGACCTGGAATAATGCCCTCCTCGCGCAGCAGGCGCAGGCGCAG  
CTGAAATCAGCGCAGGATAAATTCGCTCAGTACCGTTCCGGTAACCGCGAACAGGACATCGCCAGGCGAAAGCCAGCCT  
CGAACAAGCGCAGGCGCAACTGGCGCAGCGGAGCTGAATTTGAGGACTCAACGTTGATAGCACCGTCTGATGGCACCG  
TGTAAACGCGCGGTAGAGCCCGCACGGTGTAAATGAAGGTGGCACGGTATTTACCGTCTCGCTGACCGTCCGGTG  
TGGTACCGCCCTATGTTGATGAACGTAATCTTACGACCGCCAGCCGCGGCGCAAAAGTGTCTGTTTTATACCGATGGTGC  
TCCGAACAAACCGTATCACGGGCAGATTGGTTTTCGTTTCGCGACTGCTGAATTTACCCCGAAACCGTCGAAACACCGG  
ATCTGCGTACCGACTCGTCTATCGCTCGCTATTTGTTGACCGACGCGGATGATGCGTTACGCCAGGGAATCCCGGTA  
ACGGTGAATTCGGTGACGAGGCAGGACATGAATGA

>Cluster\_59590

ATGAAACGCGCTCTTTGCTTACACTCACGCTTATCGCGCTTTTAGCGCCATCCAGGCTGCC TGGGCGGTGATATATCC  
GCTACCACCAACCGGACTGCGCTGTTGGGCAAAATCAAACGTATACGGTGC AAGAAGGGATAAAAAACCTTACGGCTA  
TTGCCCGACGTTTGTAGACTGCGCAATGTTGATCCTTGAAGCCAATAACACTATCGCCCGGTGCCAAAACCTTGTATCG  
ACGATAACTATTCTTCAACAATGTTATTACCTGATGCACCGCTCAGGGGATTATCGTTAACCTTGCAGAGCTGCGCCT  
TTATTATTATCCGCGGGAGAAAATATTGTCAGGTTTATCCAATAGGTATTGGATTGAGGGGCTGGAACCGCGGTGA  
TGGAAACCGGTGTTGGGCAGAAAATCCTTAACCAACCTGGACGCTACGGCAGGCATTCGCTACGCGTTCGGTGGAGCGT  
GGCATTAATTAATCCGCGAGTCTTCTCGCGACCAATAACCCGCTAGGACGTTACGCACTGCGCATGGTAA  
TGGCGAATACCTCATTCATGTTACCAGTGCAGCGGACAGCGTTCGGTTTTCGCGCTCAGTTACGGGTGATTTGCGATGAATG  
CACCAGATATAAAGCCTTGTTCFCCAGCGTGCAGGACGCGGAAACGCCGTTGAAAGTATCAACGAAACCGGTGAAATATTC  
GTGGAGCCTAACGGGATGCGTTATGTTGAAGTACATCGACCATATCGGCAGAGAAGACAGCAGAACGTTTACAGCAATGCC  
ATACACACTGCGCAGGCTTTACGCAATTTAAAGACAATAAGGCTGTAGATCAGAAGTTAGTCGATAAAGCCTGTTGATC  
GTCGGGCAGGGTATCCGGTTTCGGTGGAGCAGTGGAGCAACTCCCGCAGCCAGCAATGCGCCTTACAGTAGAGTACAGCGCAG  
AATGGTGAACAGAGCAAGGGAATATGTTACGCTGACCCAGTAG

>Cluster\_9711

ATGAAGCGAAGCCTGTGGCTGCTGATATATTCTTCTCGCGCTCATGTCCCTGCAGCGTCTCGGATTCTGCCTGTGA  
GGGGCGTTTTGTAAACCCGATCACGGATATCTGCTGGAGCTGATTTTTCCCGCTCTCGCTGGGCAGTATCAAAGTCAGTC  
AGGTAAGGTCCCGACACGCGCAACCCGCTGATGCCCATTCAGATTTGTCGGCACCCGCGCGCTGTTACGGCGTATC  
GGACTGGCCATTTGGTTACTGGGAGCCGATGGCGCTGACGGACGTCACCCGCTCACC GGATGATGTTGAACTGGGCTT  
CAGCTGCCCGCTTTTGGTAAACCGCACAGGGAACCGCGCAAAAAGATGAGAAGCAGGTGAACGGGGCTTCTTACAGC  
TTCCTGTTACAAAATACCGCTGACGTTACTGGCTTAAACATCATCATCGCTGGGCTGCTGGAAGGTGGTGACCTGGAT  
ATCGCTTATCTTTCTGAAATCGACCCCACTGGACGGACAGCAGCCTGGCCACCATTCATCCGGAAGCGCTCATCTT  
TGCCAAATCCGATAGCACAGGGGCTGTGCTGCAGATGCCATTTGCCAGCGCTTAAACATGCCATCGATCTGTTCT  
GGTGTCCGGTTCCGAGGGAAGTATGTACCCGTTCAATGGCTGGGTGAGTAATGAGTCCAGTCCGCTTGCAGTCTCCCTG  
CTGGTCAGTGAACGATGGCGTTCAAGCTGCACCGTACGGCATGATTATGGAACCATCGGGAAAAATACCGCGTCTG  
TAATGAATATCCGTTCCCAATCTGCCCCAAGACGCTGGCGTTACCAGATGGTGAATATGTACCCGGACAGCGGACAGT  
GCCACCGTTCCGGCGCAGTGTGACCCGCTGGGAAACCGGAAAAATCCGCCAATACAAAGAAAAATTCGGCTACCTG  
ATGTGGCGTAAACGTAACGTGTCTTCTCTGTGA

>Cluster\_42488

ATGAAAAAGAAAAGACCCGCTACTTCAAGGATGTGGCTGACCGTGTAGGCGTGACCAAAAATGACGGTCAGCGTTTTTTACG  
CAACCCGGAGCAGGTTTTCCGTGCTCTACGCGGCAAGATTGCCCGCTCTTGTGATGAAGTGGTTATATTTCCCAATCGCG  
CGCCCGATATACTCTTAACGCCACCCAGCGGGCGATTGGCGTCTGTTACCTTCTCTCAACCAACAGGTTTTTCGGGAA  
GTATTACGCGGAATCGAAAGCGTACCGACGCGCACGGTTATCAAACCATGCTGGCGCACTACGGTTATAAACCGGAAAT  
GGAGCAAGAAGCGCTCAATCAATGCTCTCATGGAATATCGACGGCTGATCTCACCGAACGTAACCAACCGCGGTA  
CCTTAAAGATGATTGAAGTGGCGGGGATTTCCGGTGGAGTTGATGGACAGTAAGTCCCGCTCGATATCCCGCTC  
GGTTTTGATAACTTTGAAGCGGCACGCCAGATGACCACCGCAATTTATGCTCGCGGGCATCGCCACATTCGCTATCTCGG  
CGCACGCTCGACGAACGTAATCATCAACAGAAAGGATACGAACAGGCGATGCTGGATGACAGGCTGGTGGCGTATA  
GCTGATGGTTGAGCAATCTTCTTACTTCTCCGCTATTGAACTGATTCGCGCAGCGCGGGGAAATACCGCAGCTG  
GATGGCGTCTTCTGACTAATGATGACCTGGCGCTCGCGCGGTTTTGAATGTCAGCTCTGGGTTTTAAAGTTCTCTGA  
CGATATGGCGATTGCGGTTTCCACGGTATGACATTTGGTTCAGGTGATGGAGCACGGCTGGCGAGTGTGCTGACGCCG  
GTGAGCGGATGGGACGATTTGGCGCTGAGCGCTGCTGGCGGATTTCTGGCGAATCTGTGACACCGAAAAATTTAGAT  
TTAGGTTTACCTTGTACCGGGCGGATCTATTTAA

>Cluster\_27049

GTGCGTGGCGATAAGTCATTAAGCCGTTTGAATCCGGGTATACCGCATTACCGCATTTGTCATGTTACTCGGGTCCG

GCTGGCATTCTGCTCACTTTCTCATTATCCGCCCTGTTTACTATCCCGAAAGCACCTGGCCGTGGTACCATGGTGG  
TGATTATGGGGCCAACTCGTTCTGGGGTAACGTTGTCCCTCGTGCCCTCGAACGATATTGGCGGTACGGTGTGGGCTCG  
ATTTTAGGCTTTATCGCTCGCAACTGGAGTTAATCTCGTTACCGCTGATGTTAGTCTGGTGC GCGGGCTATGTTTCT  
TTGCGGTTGGCTGGCGCTGGGCAAGAAACCGTATCAAGTTTTATGATTGGGGTGACGCTGGCAATGTTGTGGGTTCC  
CGACAGGTAAATGGATACGGCGTTATGGCGAAGCGGATGTGATCCTCGGCTCTTTACTGGCAATGTTGTTTACCGGT  
ATCTGGCCCAACGGCGCTTCACTCCACTGGCGCATTCAACTGGCGAAAAGTCTGACCGAGTATAATCGGGTCTATCAATC  
TGCATTCTCACGAACTTACTCGAACGCCACGCTTGGAAAGCATCTACAAAACCTCTGACCGATGCGGTGAAAATGC  
GTGCGCTGATTGGCCCGCCAGCAAGAAACCCGATTTCCCAATCGATATATGAAGGTATCCAGACCATTAATCGCAAT  
CTGGTTTGTATGCTGGAAATGCAATCAATGCATACTGGGCCACGCGCCAGCCATTTCTGTTTATTGAAACCGCAAAA  
ACTTCGTGATACCCAGCACATGATGCAGCAAACTACTGCTGAGCCTTGTTCATGCGCTGTACGAAGGTAATCCGCGCCGG  
TTTTTGCCAAATACGAAAAATGAAACGATGCTGTGGAAGAGCTGCGTCAAGTGTCTGATAACCCACCATGACCTGAAAGTC  
GTGAAACACCAATCTATGGTTATGTGTGGCTGAACATGGAACACGCGCATCAGCTTGAATGCTATCGAATCTGATTTG  
CCGGCCCTGGCCAAATAA

>Cluster\_24771

ATGAAAGAGAAATTAACAGGCTGCTATTCACGTCGAAAACGAGAATGCGTGTTTTAGCAAATATCCAGGTATCTAAG  
TAATGGTGTCCAGTACGTTTGCCTAGCTGAGCTTTATAAGTTTACGTTGATGAGGGAAGAAAAAGATAATCCGG  
ATGCATTTGCCCTCAAGATGGTTAATGCTGTAAAGAACGGAAAAACATTGGCTGAAGCGATGAGGGGCTGGGTACCT  
TTTGACGAACGTCAATAATTTCCGCCGGGAAATCTCAGGTAATGTTACCAGGCGTTGGATGATATCATTTATATGAA  
TGATACAAAAAGAAAGTAAAGGCGCACTGGCAGGGATTTATTTATCCGTAGTCTGCTTCTGACGACATGCTGTATT  
TGCAATATATTGGAACCTCAGTTTTCGGCATTTTCAGGCATCTGCTGTAGAGAAATGGCAGGGCGCAGGAGACT  
ATGTAATTTCTTGTGTTATTCGTTTCAGGATTTCTGTCTATTACACTGCTGTCTTTTATGATGGTATATTAATACT  
GGCACTTTGTCAAGATGGACCGAAGTTGCGTCTCTTTTACAGATTTATTCCTGGTGCATATACAAAACCATTA  
TAGGATGTGGTTTCTGTTTACTGCGCATCGCTTATTAATGCAGGTAATCCCTGTACCGGAAGCCTTACGAATAATAATG  
AAAACGGCAAGTCCGTGGTATAAGGAAAGATTAGTTGCTATAAGATACAGGTTATAAATGGAGAGAAATCTTGGGGA  
GGCCCTTAATTCATCTGGTTACATTTCCCATCCAAACAGATGATAATGGATCCTCGTCTTATGCTGCACTTGGAGGCT  
TTGATGAAATGCTTAATAAACTTTCAGTTCAATGGCAGGATGACAGTGTGCTTATATAACGAAACAAATGACTGTCTG  
AAAAATGTTGCTATCATTATATGGGGCTGTATTTATGTGGATAGTATCAGGAATGTTTTCATTACAACAACAAATTAG  
TGATGCAGCAAGATTCTGA

>Cluster\_33017

ATGATAAAAAATTAAGCTATTTGTTTCTGGAGCATATTTGTTTACGGCCAATAATGTTATGGCTGCAGATTGGGGACC  
CTGTACATCTACATCTGGGGTACATGACTACCCAGTAAATTTGATGTTAAAAATAGCAGATTCAGTAAAAACTGCGAG  
GTACAGAATTAAGCTTATTTATTCATGGAATGGAGTTGGGCAACCTTTAGCTTTTATTTGTGAGTGCCTGATACCTAT  
AAAACGAAAAGACACATATGTTAAAGTTGAGAGTGGGTTATCGACTAAAACACGAAAAATAAATAGTGAGCAATACTA  
CCAGTTGACACCCGAACCTGGAAGTGATGACCATGATTCAGGTCAGATGTTGTTCCCGCTTCCGGAGGCCAATGCC  
AGGTTCCCAATTTAAATAATGCTTCTCAAGACTGTAAGGCAATAAATCTGGGGCAATTTGGCAGTAATGGTATCTGTCA  
TTCTGATATAGCAAGCTTTCAGGTTGAGGTGAAAATTTCCCTACACGCTTATTGCAACACTGTATGGCTCAAGAAAA  
AAATACATACAGGATCCACTTTCTACGGTCTGATTTGCAGGAAAATGACCTTTACACAAGGTTGTAATAATGACGCCG  
GTACGGTATTTGGATGTCCCTTCCGAGGATACCCATCTTCCGGCTTTAAAAATAAAAAAGGAACCATTCAGTTGGAGGA  
ACTGAAAAGAGATTAATCTCCAGTTTCGATTTGTAATAATTAACAATGGCATTCAGGATCTCTAAGGATTTGAGGAAA  
CACAAAGTCAAGCTGACGAGCGGGCCATCGATATGGGTAACCCAGACACTTGGTGTGTTGGTTATGGATCCAAACGGCAATG  
TCTTAAAGCTTAACGATACCAACAGCAGTGTAACTTAAACCTCGGTCGATCGATTTCCAAACACATCGCGATGCAACA  
ATTAACCTGAAAGCAGCACCAATCAGCACGACCGGAAATGCTCCAGCTGCAGGCAATATAGTGGGGTTGCAACAATCTT  
TCTGGATATGGATTAG

>Cluster\_28628

GTGGATAAGCCATTTTCGAAGAATTTGCTCATTAAAGATGCGTTTTCATGGGGATATGTTATTAACACTCCCGTCATTAG  
TTCGCTGAAAAAAAATACCCCTGACGCAAAAATCGATGTGCTGTTTACAGGACACCATCCCGATCTGTCTGAAAAATC  
CAGAGATTAACGCGCTCTACGGCATAAAAAATAAAAAAGCAAAAGCTCAGAAAAAATGCGCAACTTTTTCACATCTCATC  
AAGGTATTACGTGCCAATAAGTATGACCTTATCGTTAATCTTACCAGTCAATGGATGATGCTATACTGGTTCGCTTATT  
AAATGCCCGTGTGAAAAATTTCCAGGATTTATCATCATCGGCAGTCTGCTTTTTGGCGTAAATAGTTTCACTCATTTGGTGC  
CGTTGCAGGGTAGAAATGTTGGTGAAGTAACTTATCCGTGCTATCGCCATTGAGACTTGAATCGTTGGTGAAGCAGACA  
ACCATGAGTTACCCGCTGCAAGCTGGAACGTTATGCGTTCGCGAACTTATGATCATGCAAGTGTGGCAAAAATTTATGTTG  
TATCCAACCTACGGCGCGGCAAACTTCAAAATGCTGGGACAACGCCAAGTTTTCCGCTGTGATGATGCCTTACATGCTC  
GTGGTTATGAAGTCTGCTGACGTCGCGCCAGATAAAGACGATCTGGCTGCGTCAATGAAATTTGCCAGGGATGCCAG  
ACGCTACAGTAACGCGCTGGCCGAAAGGTGACCTTCCCGAACTTGGTGCCTTAAATCGATATGCCAGCTGTTTAT  
TGGCTTGTATTCCGCAACCGGCGCATATTGCCGCTGAGTTAATACGCGCTGATATCGCTGTTTGGTGCAGACCAATA  
TTTTCTGGCGTCCCTGTTCAAAATACATGATTCATTTCCGGCGGGAGATTACCGGAAATGCCAACGCGGATCAGCGT  
GACCGAAATGAGATGATCTTTCCGTTATTCGCGCGGAGATGCTATTGCTGCTGCTGATAAAATACTGCCCTCCCTCCAC  
GACAGTACGTCGTTATGA

>Cluster\_8859

GTGAAAAGCCATTTTCGAAAATCCTGGTCATAAAGATGCGATATCACGGAGATATGTTATTAACACTCCTGTAATCAG  
TACACTAAGCAGAAATTTCCCGACGCAAAAATCGATATGCTGCTTTACCAGGATACAATTCGGATTTTATCTGAAAACC  
CAGAAATTAATGCATCTATGGTATAAGCAATAAAGGTACGGGAACATTCGATAAAAATTAATAATGCATTTTCTACTGATA  
AAAACCTCTGCGTGCGAATAATTACGACCTGGTCATTAATCTTACGGATCAGTGGATGGTGGCCCTGCTGGTACGTTGTTT  
ACCTGCTCGTATGAAAATATCGCAGCTTTATGGTTCATCGGCAGCATGGCATTGGAAAAAAGCTTTACACACTTAGCCG  
CTATACACGGTACACATATTTGTTGAGCGTAATTTGTCGGTCTTGAGCCATTAGGTATTACCGATTTTATACATGAAACA  
ACCATGAGTTACCGCAGGATTTGCTGGAAGAAAATGCGCAGGAAATAGATGCCTGGCGGTGAAAGATCATTATGCTCT  
CATCCAGCCGACAGCCAGACAGATATTTAAGTGTGGGACAACGATAAATTTTCTATGGTTATCGATGCGTTGCAACATC  
GTGGTTATCAGGTTGTGCTGACTTGTGGCCCTTCGGCAGATGATCTCGCTGCGTAGATGAAATTTGCACGAGGCTGCCAA  
ACAAAACCTATTACCGCCCTTGGCCGTAACACGCTTTTCTGAACTGGGGCATTAAATGATCATGCAGTGCCTTTTAT  
TGGTGGATTCTGCGCCGGGATTTGACGCGGCTGTGAAAGACCCAGTTATTAGCCCTGTTTGGGGCCAGTCAATGCTCATG  
TATTTCTGGCGTCCATGGACCGAGAATATTTACGTTCTGGCGGGGAATTTACAAAATAATGCTTACCGGCACGACTT  
GACCGCAACAAAAATATCTTTCTGTTATTCAGCGGAAGATGCTATTGCCGCTACGGAAAAGCTGTTCCGCAAGATG  
ACCTTCAGCTGACAGGAATGGCAATATATGA

>Cluster\_36717

ATGAAAAAGACGCGCTGAATAACGTACATATTACCAGCAACAGGTTTTAATGACTCCGGAACACTGAAGGCCGCTTT  
TCCATTGAGCTGCAACAAGAGCCAGATTGCTGACTCGCTAAAAGCATTTTCAAGATATTTACCGCCGGCGCATCTCT  
GTCTGTGGTAGTATGTGGTCTTTGTTCCATTCATGATCCGGAACACTGCTTGAATAATGCTGCTCGATTTAAAGCCCTT  
GCCGAGAGGTACGCGATAGCCTCTATCTGGTAATGCGCGTCTATTTTAAAAACCCCGTACCCTGTGCGGTGGAAAGG  
GTTAATTAACGATCCCATATGGATGGCTTTTTGATGTAAGACCGGGCTGCAGATCGCGGTAATTTGCTGCTTGAGC

TGGTGAATATGGGACTGCCACTGGCGACGGAAGCGTTAGATCCGAATAGCCCGCAATACCTGGGCGATCTGTTTGTAGCTGG  
TCAGCAATTTGGTGCCTCGTACAACGGAATCGCAAACCTACCGTGAATGGCCTCCGGGCTTCCATGCCGGTTGGTTTTTAA  
AAACGGCACCGCAGCGCAGTCTGGCAACAGCAATTAACGCTATGCGCGCCGCGCCAGCCGACCGCTTTTGTGGCATT  
ACCAGGACGGGACGGTTGGCTTGTACAAAACCTAGGGGAATCCGGACGGCCATGTGATCCTGCGCGTGGTAAAGCGCCG  
AACTATAGCCCTGGCGATTTGGCAATGTGAAAAAGAGATGGAACAGGCGGGACTGCCCGCTCTGTATGGTAGATTG  
CAGCCACGGTAATTCCAATAAAGATTATCGCCGTCAGCCTGCGGTGGCAGAATCCGTGGTTGCTCAAAATCAAAGATGGCA  
ATCGCTCAATTATTTGGTCTGATGATCGAAAAGTAATATCCACGAGGGCAATCAGTCTTCCGAGCAACCGCGCAGTGAATG  
AAATACGGTGTATCCGTAACCGATGCCTGCATTAGCTGGGAAATGACCATGCCTTGCCTGCGTGAATTCATCAGGATCT  
GAACGGGACGCTGACGGCTCGCGTGGCTTAA

>Cluster\_24427

ATGAGTAAAGTGAAGTATCACCCGTGAGTCCGATCCTGAGCATTTCGCCGAGTGGGGTAGCTGGCTGAATGAAGA  
AATTGAGCAAGAGCAGGTCGCACCTGGCATTTCGCAATGTGGTGGCTCGGCTGTACCGGGATCTGGTTGAAATCAGAAG  
GCGGTGCCAACGCTTTGTGTGATTTTGTGCTGGTACTGGCAACAAAGCCACGGTAACCCGTTTCATGAAACAGGGTCA  
CAGATGCAGCGCATGGCTGGCGTAAAAAACTGCAGCCAAACCTGGCCACCACCCGTTTGTCTTGATCCGTTTGGCAT  
TCGCCAGATCGACGCGGTACTGGCGACTCACGATCACAAACGATCATATCGACGTTAACGTCGCTGCTGCGGTGATGCAGA  
ACTGTGCTGATGACGTCACCGTTCATTGGACCGAAAACCTGGCTTGAATTTGTGGATTGGCTGGGGCGTACCGAAAGAGCGT  
TGCAATCGTGTAAACCGGGCAGCTAGTGAAGTAAAAAGACATTTGAAATTCATGCACCTTGATGCTTTTCCGCTACGGC  
ACTGATCACCTGCCTGCCGATCAAAAAGCGGTGGCGTACTGCCGACGGCATGGACGATCGCGGGTGAACATCTGT  
TCAAAACCCAGGCGGTACCTGTATCACAGCGCGACTCCCACTACTTAACACTATGCAAAAATGGTAAATGAGCAT  
CAGATGCAGCTGGCTTTAGTTTCATACGGCGAAAACCCAGCGGTATTACCGCAAAAATGACCAGTGTGATATCTTGG  
TATGGGCGAAGCGTGAATGCGAAAAGTAGTATCCCGTTCACACGATATCTGGTCAAACCTCCAGGCGGATCCGCAAG  
AGATCCGCGTGTCTGGGAGATGAAAAAGATCGCCTGAAGTATGGCTTCAAGCGTTTATCTGGCAGTCCGGCGCAA  
TTTTACTGGCCGCTGGATAAAGCAAACTTCGAGTACCCTATCCCGTGGTTTCGATGATGCTTCACTATTGAACCAGA  
TCTGCCGTTCAAGTCTTCCGTAA

>Cluster\_57773

GTGGCTATATTACATCCACAGGAGTGTGGTTGCTGGAAGAATAATGTGCCGGAATATTATCGGCGTGGTTTTGAGGG  
CTGGCAGGAGTTTGTGAGCTGTGCGAGCGACAGGTGGCAGAGTGGAGCAAGACCATGCCGCTGGATGTGCGCCGCTGCT  
CGCTGTGCCAGCAGATTGACGCTGTCTGGGGCGGCGAGTGTTCGCCAATATCCGAGTACTTTAAAGTCCGTCAGTAT  
GACTTTATTCAGCTACAGCAGGGGACCTGGCGGTACTGCAATCCGGGGCAATATTAGCAGTGTATGAAAGGACTAAT  
TGATTTATCCGTCGACTGGATGTCACTCGCCGCCAAAACAGTATGACAGACTGAAATGGCGAGGTGCATTTATAATA  
ATTTAATCAGACGTACCTCGGGCGGATACTGGTATGACGGCGAACTGACTTATTTATGAGGAAAGTCTGCACGGCCCG  
CTGGCCCTGCCGATGCAATACCGTTGTATGAGCTGATAGTACGCTATACCTGCGTAGGATGACTCGGTAACGGTGGC  
TGGCCTGTATCTGCCGATATCCAGATGCCAGCGCCAACTGTGTACCGGAGTGAACATATCCCGAGGCTTGGCAGG  
GGCGGATCAGAACGAAGTATGTCACAGGCTGGGATACAAGAATATTACTGGGAAAGCGGGCGTGGCAAAAATGCAAT  
TGGAAACGTATACGGCGGTGGCAAAACCGATTATCAATGTGCCCGGAGGGATTTTTCCACAGGCGATGCCGGAGGA  
TTTGTCAACTACCGCACAGCGCGAAGCGCAGTATGTTACAGACCGCGGATAGCGCCCTTTAGCGTGAACGTTGTC  
CTCATAGCGGGAGTGGTCTGATTTTGTAGAAGTAGACAAGCGACGGTGCACCTGGAGCAGGAGAGCAGATGCCAGAA  
TGGACGGACAGGAAATGGAGGGGGAGTATAAAGAGGGGAGAAATTCATGTCTGTGGTGGTGTGATGACCCGATGA  
TGGCGGTCGGTGTGGTGGAGCGTAG

>Cluster\_4630

ATGAAAAACTGTAAAAATAAACAGTGTGATTTAATCAACGCTGATTCGCTGCATTTTATTAGTCCCTGCCTGATGA  
TTCCATTGACCTGATTTACCGATCCGCGTACTTCAAGGTGAAACCCAAACGGTGGGACAATCAGTGGAAAGGGGACG  
AAGATTACCTTAAGTGGCTGGACCACTGTCTGGCCAGTTCCTGGCGGGTGTAAACCTGCGCGAAGCCTTTATCTGTCT  
TGTGGGCATCGCTGGCATCTGATATTGAGATCATGATGCGTGAACGTTTCAACGTGCTTAACCATATCATCTGGCGGAA  
GCCGTCGGACGTTGGAATGGGTGTAATAAAGAAAGTCTGCGCGCATATTTTCTGCCACAGAGCGGCTTCTGTTTGTCTG  
AACATTACAGGGGCCATATCGCGGCAAAAGTGAAGGCTATGCAGCAAAAAGGGAACCTCAACAGCACATAATGGCA  
CCGCTGATATCTGATTTTCCAGGATGCTCTGGTAACTGGGTAACCGGCAAAAACAAATGCGGAAAGCCACAGTAAAGAA  
AAATATGGTTTCCACTGGTTTGGTGCCAGTCACTGGCAGTGGCGAATGAGGCTGACTATCGGAAAGTACAGGCACTGT  
TTTCCCGTATAGCGGCAGAGAAGTTTCCAGAACAACTGGAACAACACACCAGCTGGTGGCATCTTATGATTCA  
CTGAATCGCAATATCTGAATTTGCTGGATGAGTTAAATCTCCTCCGGCTATTTCTCCGATCAGTCTCCGTGCTTAA  
TACCGATGCTTGGACGCAATAAACCCGTTTCACTTACCGGGTAAACATCCGTCGCGAGAAACCGGCGGATATGCTCCGCG  
AAATAATCAATGCCAGTAGTCCGCTGGTGTATGTTGCTGATTTCTTTATGGGATCCGGTCCACAATAAAGCAGCA  
ATGGCGCTGGGGCTCGGGCTTGGTGTGAACCTTGAAGTGTGAGTACAGCGGTTTAAATCAGACGGTGAAGAGGTAAGTGAAC  
GGTGGGAAATAA

>Cluster\_39493

ATGGCTCACGCCACCGTGGACATTTGTCGCAAGTACAGAAATTTTAAAAACCGTTGCTGGATCTGCTGTTTGAAGC  
GCAGCAGGTGCATCGTCAGCATTTCGATCCTCGTCAGGTGCAGGTCAGACTTTGCTGTGATTAAGACCGGAGCTTGTG  
CGGAAGATTGCAAAATTTGCCGAAAGTCTGCCTACAAAACCGGCTGGAAGCCGAGCGGTGATGGAAGTTGAACAG  
GTGCTGGAGTCCGGCCGAAAGCGAAAGCGGGGATCGACGCTTTCTGTATGGGCGCGGCTGGAAGAATCCCAAGCA  
ACGTGATATGCCGTAACCTGGAACAAATGGTGCAGGGGGTAAAGCGGATGGGGCTGGAGGCGGTGATGACGCTGGGCACGT  
TGAGTGAATCTCAGGCGCAGCGCTGGCAATGCGGGGCTGGATTACTACAACCAACCTCGACACCTCGCCGGAGTTT  
TACGGCAATATCATCACACAGCACTTATCAGGAACGCTCGATACGCTGAAAAAGTGGCGATGCCGGGATCAAAGT  
CTGCTCAGGTGGCATTGTGGGCTTAGGGCAACCGTGAAGATCGCGCGGATTTATGCTGCAACTGGCAACCTGCCGA  
CGCCGCGGAAAGCGTGCCAATCAACATGCTGGTTAAGGTGAAAGGCACACCGTGGCGGATAACGATGATGTCGATGCC  
TTTGAATTTATTCGCACCAATGCGGTAGCGGGATCATGATGCCGACCTCATACTGCGCCTTTCTGCGGACGCGGAGCA  
GATGAATGAACAGACTCAGGCGATGTGCTTTATGGCCGGGCTAACTGATTTTCTACGGTTGCAAACTGCTGACCCG  
CGAATCCGGAAGAAGATAAAGACCTGCAACTGTTCGCAAACTGGGGTAAATCCGACGAACTGCCGTGCTGGCGGGC  
GATAACGAACAACAGCAGCGTCTGGAGCAGGCGTGTGACCCCGGACTGACGAATATTACACCGCGCAGCACTATG  
A

>Cluster\_44894

ATGAGTATCGATGCACTACGATGGGCTAAAAAGGTGAAAACCGGCACTTATCCAGTAAGTCTGTATTGACCTGGCTTGC  
TGATATGTGCGGTGCCGATTTGTGTGATACCCGCTGTGATCTGCACCTGGCAGAAAGTAAACGGAATGAAACAAAAGACTG  
TGCAGGACAGCTTACGACACCTGATGGAGATTGGTTAATTTGTGATACCGGTGAGAGAAAAGGCAGAAACAAAGCAAAAT  
GTGGTGTACCGACTTATCCGTTGTAAGAAAGTGTTCGCGAGCCTGAATACACCCAAAACGGGAGCTTTAAAGTTGGG  
TAAAATCGGTGCTGTTAATAAAAACAGTACCGAAAATGGTTATGTTTACGACAAAACAGACCAAAACGGAACTCTTA  
GCTGCATGAAAAATAACCAAAAGCACCCAAATTTTCAATCAAAAGACCCAAAACGGATCACGGAACCCAAAAGGAACCC  
AAAGAGCTAAACCCCAACATAACGACCGGAGAGTGTCTCCGACAGTGCAGGAGTGTGCTGCTTACGGTGGCAACTGCTGACCCG  
TCCTGTATTCCTGGATGGCTGAGCGAACCCATCGAAAAATTTCCGATGACCGATAGCTGGTATCCGTCACGGGATTTTC  
GACGACGGGCTGCGTTGTGGGGATGGCTTTGCCGGAGACAGAATTCACACCTGCTGAACTTGGCCCTTCCGGGACTAC

TGGGCTGCTGAGGGGAAAGTGTTCACGCAGATTCAGTGGGAGCAGAAATTCGCCCGTACAGTAAATCAGTCAGGGCGCA  
GGTTAAACCAGCTAGCAAGGGGGTAAACCATGCAGCAGACCAGGTGACACCGCATCAGGGCAGTTACGTTAAACGC  
CAGCAGTGAGCAGTGGGAACTGAAAACGGATTTATCAGCGACGAAACGGCTGGAAGCTGTGGAACTCATGGGGGA  
GGTTTATTCGAACCGCTGGACCCAGAAGAACGGGGCCGACCTTCGAAGCTCTGGATTGCACAGATTGGTGGCATGACTG  
A

>Cluster\_39656

ATGAGCAAGAAAAAGGGAAACACCGCAACCTGCGGCAAAAAACAATCACCGCAGCGCCCGAAAAATGGAGGCATTCAC  
CTTTGGTGAGCCGGTACCAGTACTGACCCGCGTGACATTTCTGAATTACGTGCAATGCATCAGTAACGGCAGATGGTATG  
AGCCACCGGTACGCTTTACCGGTCTGGCGAAAAGCCTGCGTGCCTGCCGATCAGAGCTCACCAGTTTACGTTAAACGC  
AATATTCGGCTCGACATTTATCCCGCATCCGTGGCTTTCGCAACAGGATTTTCAGCCGCTTTGTGCTGGATTTCTGGT  
GTTCCGGTAATGCGTTTCTGGAAAAGCGTTACAGCACCACCGGTAAAGTTCATCAGACTGAAAACCTCACCGGCAAAATATA  
CCCCGCTGGCGTGGAGGAGGATGTTACTGGTGGGTGCGCTCTTCAACGAGCCGACAGCTTCGCGCCCGCTCCGCT  
TTTCACTGCTGGAGCCGATGTTAATCAGGAGCTGTACAGGCTGCCGGAATATCTCAGCGCCCTAACTTAACTGGCTGGT  
GAATGAGTCGGCCACGCTGTTCCGCGCAAGTATTACGAAAACGGCGCACATGCCGGATACATCATGTACGTCACCGATG  
CCGTGCAGGACCGCAACGATATCGAAAATGCTTCCGCGAAAACATGGTGAAGTCGAAAGCCGCAACAACCTTAAACACCTG  
TTTCTCTATGCCCCACAGGGGAAAGCCGACGGCATTAATAATTAACCGCTCAGTGAAGTGGCGACGAAGGACGATTTTTT  
TAATATCAAAAAGCCAGCGCCGACAGCTGCTGGACGCGCACCGCATCCCTTTTTCAGTTGATGGCGCGCAAGCCGGAGA  
ACGTCGGGTGCTGGGTGATATTGAGAAAGTGGCAAAGTCTTTTGTCCGCAATGAGCTTATCCCGTTACAGGACAGGATC  
CGCGAGATAAACCGCTGGCTAGGTACAGGAGTTCATCCGCTTTAAACACTACTGAGACTGACAAACCGGCTGA

>Cluster\_27742

ATGTTTTCCGCATTCGCGCCACCGTACCCTGCGCTGCGGCTATGCTTTATTCCTCCCGTACACCGCTCGTCACC  
TAAACCTGGCGATTTTGCTAATACCCAGGCACGACATATGCTACTTTCTTCCGGGACGATGACCGGAACCTCTGCAG  
AAATGTTATCTGCGGATTTATTCGCAACAGTTTCAGCAAAATGGGTTATCGCAGTGAATTCGGACATTTAATAGTCCG  
TATATTTATACCGCCCGGATAAATCGAAAGAGCTGGCATAACGTGACCGGGAAGTACGGTGAATTCGCGCTATGAAGGCA  
AGCGCCGACGAGATCATCATTTATGGCGCATCTGGATACTTACGCCCCGCTGAGCGATGCTGACGCGGATGCCAATCTCG  
GCGGGCTAACGTTACAAGGAATGGATGATAACGCGCAGGTTTGGTGTTCATGCTGGAAGTGGTGAACGCTGAAAAAT  
ACGCTTACCGAGTATGGTATTCGATTTGTGGCGACGAGCGGGAAGAGGAAAGGAAAAATAGGCGCTGAGAATTTACTCAA  
GCGGATGAGTACGCGCCGATAAATCGAAAGAGCTGGCATAACGTGCTGGTGAATTAATCTCGATAACTTAATGTTGGCGT  
TCAACAGTGGCGTAAAAACACCTGAAGCAGTAAGGAAATTAACGCGGACCGGGCGCTGGCAATTGCCCGCAGCCATGGA  
ATTTCCCGCCACCAAAATCCAGGTTTGAATAAAAACTATCCGAAAGGCACCGGCTGTTGTAATGACGCGAGAAATATTCGA  
CAAAGCCGGTATTTGCTGTACTTTCCGGTGAAGCGACTAAGTGAATCTTGGCAATAAGGATGGTTATCAGCAACGCGCAA  
AAACAGCCGATTCCTGCGAGGAAATAGCTGGCATGACGTAAGACTGGATAATCAACAGCATAATGATAAGGCACTTCCCT  
GGAAGAATAGAACCGCTGCGGTGATGTTATGCGGATAATGCTACCCTGGTGAAGGAGCTGGCGAAGGCATCTTAA

>Cluster\_33275

ATGACACAACCAATGCTGGAAACCGGCCGAAAGACGCTGAAAATGAACTGGATATTCGTTGGGTTGTTTCGTACCTTGTG  
GGCTGGGAAGCTTGGATTTATGGCATGGGGCTGGCGTTTGGCTAATCGCGTGGCGTATACTTTTTTTGCTCGCCAGG  
AGTGGAGCTCGACAGCGATTACCAGTCCGTTCCACCGGTGAATATGCTGGGGGATATTACTCACAGCAGCAATTTTTCGCT  
AACCTGGATGTCGCTTAAACATGGCTTCTGCCGACCAACCATCGGTCATGGACGAAGCCTATAAAGAGTTTGTATGCA  
ACTGGCTCGTGGGATACCCGAGAGAGTTCCTGGCTGCAAAACCGACTATTAACAACAGCGGATGGTGGGCAATAGCAAAG  
CCGATGCGGCGTTGCTGGATGAAATGATCAACAACATCGTGTATTATTCGCGGTGACTTCAACCGCGGCTCAATGACAGC  
GTGAAGCTGATTCGCGAAACTGCGCTGAGCCTAATAAAGTGTACGTCAGTATGTTGCTTTTCCGAGCCAGCGTGCAGC  
CAGCCATGAAATGATGAGCTGAAAGGCGCATGGGCGGACCGCACCATCCAGATGAAAGCTCAGGTGAAGCGTCAAGGAG  
AGGTGGCGAAAGCCATCTACGATCGCGGATGAACAGTATGTTAAACAGGCGCTGAAAATGCTGAGCAGCAGATAAATTTG  
CGCAGTGGCAGAGATGTCCTGCGGAGGAAATACCTGATTCAGAAATGTTCTGCTGGGCGTCCAATGCTCCAGGCTCG  
ACTGGAATAATTTACAGGCGCTCGGTCGCGCTTTGATCTCGACTATGATCAAAATCGGGCCATGTTAAACACCTGAAATG  
TTGGTCCAACCTGGATCCGCGTTTTCAGACCTATCGCTATTTGCGTACGCGGGAAGAACCGGTAAAACCGGATAGCCCA  
CGTCTGCTTCCCTGATGATTATGTTGGGCATTGCTGGGGGCTGATCGGGGCTGGTGTGCGCATTAAACCGCCGTTGCTC  
GAAATAG

>Cluster\_16221

ATGATTAATACTGTAAAAATATCCAGTTGTGAGTTAATCAACGCTGATTGCTGGAATTTATCCAGACCTTACCAGAAAA  
CTCTGTCGATCTGATAGTACAGACCCGCCATACTTTAAAGTGAAGCCGAGGCTGGGATAAACCAGTGGGAGGGCGAGC  
ATGATTACCTGAAATGGCTGGACCAGTGTCTGGCGCAGTTCGGCGGGTACTGAAGCTGCGGAAAGTCTTTACCTGTTT  
TGTGGTCACTGCGCTGGCATCTGACACCGAAATCATGATGCGTGAAGCGCTTAAATGTGCTGAACCAATTTATCTGGCGAA  
GCCGTCCGGACGCTGGAACCGGTGCAATAAGGAAAGTCTGCGGGCGTATTTCCGGAACAGAGCGCATTCGTTTGCAG  
AACATTTACAGGGACCGTATCGCCGAAAGATGATGGCTATGTTGGCACAGGGGCGCGAGCTAAAACAGCAGCTGATGGC  
CCGCTGATTTCTTACTTTCTGATGCGCGTAAATCACTGGGAATAACGTCAAAACAGATAGCGGAAGCCACCGGAAAGAA  
AAACATGGCTTCGCACTGGTTTGGTACCAGTCACTGGCAGTTACCAGGAGGTAATTAACAACAAATTCAGGCGGTTGT  
TTGCGCGTGTTCGCGCAGAAAAACATCAGCGCGGGAACTGAAAAGCCACACACAGCTGGTTCAGCACATACAGTGA  
CTGAAACCGGCGATACCGGAACCTGCTGAGTGAATATAAAAAATTTGCGGCGGTTATTTCCGCTGACGCGGCGAGTTCCGTA  
CACCAGTGTCTGGAGCATAAACCGGTGAGTACTATCCAGGGAACATCCGTCGGAACCGGCGAGAAATGCTGCAGC  
AGATAATCAACGCGAGCAGTCTCGGGGAGACCTGGTTGCAGATTTTTTTATGGGTTCAAGGTTCAACGGTAAAAGCGGCG  
ATGGCACTGGGCGGTTGTGCGATTGGTGTGAGCTGGAGACAGGACGTTTGAACAGACAGTCAAGGAAAGTTCAGGATTT  
AATCGTTTGA

>Cluster\_63039

ATGAGCGTAATGTTTGTATCCAGACACCGGATTTATCTTTCCCGCCGAAAGCCGACCGGTTAAGCATTGATAAAAAGC  
GTATTACCAGGAGAAAGATAAAACGCTGCTGTAAGAAGACGTAATGCGGTGATGGTTGCCACTACTATACCGATCCCGAAA  
TTCAACAACCTGGCAGAAAGAACCGGTGGCTGTATTTCTGATTCCTGGAAATGGCGCGCTTCGGTGCAGAAAGCATCCCGCT  
TCTACTTTGTTAGTCTGGGTTGAGATTTATGGGAGAAACCGCAAAATTTCTCAGTCCGGAACCAATTTCTGATGCC  
GACACTTCAGGCTGAATGTTTCACTGGATCTCGGCTGCCCTGTTGAAGAATTTAACGCAATTTGCGATGCCCATCCCGATC  
GTACTGTCTGCTGCTACGCGCAACACTTCTGCTGCGGTAAGAACCGCGCAGATGGGTTGTAACCTTCAAGCATTCGCGCT  
GAATTTATGATCATCTTGTAGTTTGGGTGAAAAATCATCTGGGCACCCGACAACATCTGGGGGTTACGTGCAAAA  
ACAGACGGGTGGAGACATTTCTATGCTGGCAGGGTGCCTGATTTGTCATGATGAATTTAAGACTCAGGCGTTAACCCGCT  
TGCAAGAAGATAACCGGATGCTGCCATACTGGTGCATCCAGAAATCACCAAGCTATTTGTCGATATGGCGGATGGCGGTC  
GGTTCCACCAGTCAACTGATCTGCTGCGAAAACATTCGCCACATCAGCGGCTTATCGTGGCAACCGATCGGGGCAATTTT  
CTACAAAATGCAGCAGGCTGCGAGATAAAGAGTTTACGGAAGCACCACCGAGGTGAGGGTGCACCTGCGCGAGCT  
GCGCGCATTTGCTGGATGGCCATGAATGGCTTTCAGTCCATCGCAGAGGCAATGAAACAGGAAAGGAAATCAGGAG  
GTTCATGTTGATGAAAGGCTGCGAGAGAGGGCGCTGGTCCGCTCAATCGTATGCTGGATTTTCCGGCTACACTACGTTG  
ATAA

>Cluster\_21828





TCTTGGGGAATATGACCCGTGCCTACCGACTGGCTGGGGATCGCTGAAATCAATCACGCCCTGCCCGCTGTTGTGCGGAT  
CTGCCGAAATCTGCGGGGAGATCACCGCTCAGACAGCCGCCCTGACCGGTCTGAAAGCGGGTACGCCCGTTGTTGGCGGC  
CTGTTTGTATGTGGTTTCCACCGCACTCTGCGCCGGGATCGAAGACGAATTTACCTCAATGCGGTGATGGGGACCTGGGC  
GGTGACACAGCGGCAATCCCGCGGTTTACTGTACGGTGAAGCGCATCCGTATGTCATGGTCGTACGTTAACGATGGTG  
AATTTATCGTTACAGAAAGCCAGCCCTACTCTTCCGGCAACCTCGAATGGTTTACCGCACAGTGGGGAAAATCTCGTTT  
GATGAGATCAATCAGGCCGTTGCCAGCTTGCCGAAGGCTGGGGGCGATCTCTTTTCCGCGCTTCTGTACGGCAGCAA  
CGCCGGACTCGAGATGACCAGTGGTTTCTACGGGATGCAGGCCATTACACCCCGCGCACCTGTTGCAGGCCATCTATG  
AAGGGTGGTGTTCAGCCATATGACCCACTCAACCGAATGCGCGAACGTTTTACTGATGTTACACCCCTACGCGTCACT  
GGCGCCCGGGCGCATCCGATGCTGGATGCAAAATGCTGGCGGACGTCAGCGGTCTGCGTATCGAGCTGCCCGCAGGTGGA  
AGAAACCGGCTGCTTGGTGGCGCCCTTGCCGCCCGCGTGGCACCGGGGTTTATCACAACTTCAGCGAAGCCCAACGTG  
ACTTGGCAGACCCGGTGGCACCCTGCTGCCAGATATGACCGCCATCAGCTTACCAAAAAAATATCAACGTTATCAG  
CATCTCATTTGCCGCACTTACAGGGCTTTCACGCCCGATTAAGGAGCACACATTATGA

>Cluster\_42511

ATGGCGAAAGAAAAAAGCTGGCTTTTTTTTCCGCTGGCTGGGCTTTGGTCAAAAAGAGCAGACCCCGAAAAAGAGACAGA  
AGTTCAGAAATGAACAACAGTTGTAGAAGAAATCGTTCAGGCGCAAGAGCCTGGAAGGCTTTCGAACACGCCGTTGAAG  
AGCAGCCGAGGCGCACTACTGAGGCCGAGGCGGAAACTTTGCTGCCGACGTTGTGAAGTTACTGAACAGGTTGTCTGAA  
AGTGAAAAAGCGCAGCTTGAAGCGGATCGTTTGCACAGCAGCGGTAACCGGTAAGAGAAACCGCCGAGGCGAGTGGTAT  
CGAACGTGAAGAACTGCCGTTGCCGGAAGACGTTCAACGCCGAGCGGTTTCCGAGAGAGTGGCAGGCCGAGCGGAA  
CCGTAGAGATTTGCGAAGCGGCGGAAGAAGAAGCGGCTAAAGAAAGAAATCACCGACGAAGAGCCGAGGCCAGGCGCTG  
GCTGCCGAAAGTGGCAGAAGAGCGGTAATGGTGGTTTCTCCGGCAGAAGAAGCAGCGGTGGAAGAAATTCGTTAGGAA  
GCAGGAAAAACCGACAAAGAAGGTTTCTTCCGCGCCGTAACACGCGAGCTGTTAAAAACCAAGAAAAATCTCGTTTCCG  
GATTTATCAGCCTGTTCCGCGGTAAAAAATCGACGATGATCTGTTTGAAGAGCTGGAAGAACAGCTGTTGATCGCCGAT  
GTGGGCGTGGAAACCACTCGTAAATATACCAATCTGACAGAAGGCGCATCCCGCAAGCAGCTTCCGTGATGCCGAGGC  
GCTCTAATGGCTGAGTGAAGAGAGATGGCGGAGATTCGCGGAAAGTGCATGAGCCGCTGAAATGTTGAAGTTAAACCG  
CGTTCGTGATCTGATGGTGGGCGTCAACGGTGTGGGTAACACGACGATTGGTAAGTGGCGCGTCACTTTGAGCAG  
CAGGGTAAATCGGTGATGCTGGCGGAGGCGATCTTCCGCTGGCGCAGCGGTTGAACAGCTTCAAGTCTGGGGTCAAGC  
CAACAATATTCGCGTATGTCAGCAGTACCGGTGCGGATTCGCTTCTGTTATCTTCGATGCCATTCAGGCCGCTAAAG  
CGCGTAACATCGCTGATGCGTCCGTTGTCGATACCGCGGACGCTGCAGAAACAAATCGCACTGATGGAAGTTAAACGAA  
ATCGTCCGCGTATGAAGAACTCGACGTTGAAGTCCGCGATGAAGTTATGCTGACTATTGATGCCAGCACCGGGCAGAA  
TGGCGTAAAGCCAGGCCAAACTGTTCCACGAAGCGTGGCTTAAACCGCATCAGCTAACGAAACTGGACGGCACGGCGA  
AAGGGGGGTAATTTTCCGCGTGGCTGACAGTTTGGTATCCCTATCCGCTACATTGGTGTGGCGAAGCTATTGAGGAT  
TTGCGTCCGTTTAAAGCGGACGACTTTATAGAGCAGCTTTTTCGCCGAGAGGATTA

>Cluster\_37538

ATGAAGAGATCGATATCGTTTCGCTCCACATTTGCTCGCGCTCGTCTTCCACAACTTCCCGGTTGGCGACGCCGCCGCT  
ACCGAAAGATATGCTGGTGATTTGGTAAGGCCGCGATCCACAACCCCTCGACCCGCGGTAACAATAGATAAATACGACT  
GGACAGTGACTACCCGCTTATCAGCGCTGGTTTTCAGTACAACCGGACCGGTGATAAAGGCTCAACCCGACGTAAGGCG  
GATCTGGCAAGTAGCTGGAAGCGTCTGACGATCAAAAAGAGTGGACGTTTCCCTGAAAGGACATGCTAAATTTGCCGA  
TGGCACACCCGCTACTGCCGAAGCAGTAAACTTTCTTTTGGAGCGGCTACTAAAAATCGGCCAGGGGCCAGCAGAAGCAT  
TTCCCAAGATTTAAAGATGATGCTCCCGACGAACATACGTTGAGTGAAGTTTACCCTTAGCCAACATTCGCAACCTTCCCT  
TACACGCTGGCGAATGACGCTGATCCTTATATCATTCCGCGGTTTAAAGGAAACATGCAGCGGATGATGCTCGCGGCTT  
CCTCGCGCAAAATACCGCGGTTCCGGACATTTATGCTGAAAAGCTGGCAAAAAGGTGAGCAATTAGTTCTGGTGCCAA  
ATCCGCAATTTACTCCGGCAATAAACCGAACTTTAAGCGAGTATCCGGTAAAAATTTATCGGTGAAAAGTGCCTCCCGTCCGCT  
GAGCTCTCCCGTGGCGACTTTCGATTTGCGGATGCGCTGCGGTTGATCAACTCAACCGCTGAAAGCGGAAATAAAGT  
CAATGTGGCAGAGTATCCGCTACTGCGGCTCACCTATCTGATCTGAATAACAGCAAAGCGCCACTTAATCAGGCGGATC  
TGGCTCGGGCCATTTCTCGGCTTACCGATTATCAGGGCATGGTTAACGGCATTCTGAGTGGTAACGGAACAAATGCGC  
GGCCGATTTCCGGAAGGCATGTGGGGTACGATGCGACGGCAATGCAATAACAACATGACGAAACGAAAGCCAAAGCCGA  
ATGGGATAAAGTGAAGAGCAAACCCAGCCTGACGTTTCTTCTACTCGATAACGATCCGAACTGGGAGCCTATTGCT  
TGGCGACACAATCCAGTCTCAACAAGCTGGGCATCAATGTGAAGTGGAAAAGCTGGCGAACGCCACCATGCGCGACAGA  
GTGGGTAAGGTTGATTACGACATTCGCGATTGGCAACTGGAGTCCGGATTTCGCCGACCCGATATGTTTATGAATACG  
GTTTGAAGTCAAGAAAAGGCTGCGGGTAAACCGCTCGTTCTATGAAAACAGTGAAGTTCGATAAGTTACTGCGCAATG  
CGCTTGGCACCACCGACAGCGCAGCTTACCCGGGACTTACAGCAGGCACAGAAAATCGTCATTGATGACGCTGTTTAT  
GTGACTCTGTTCCAGAAAACCTACCAACTGGCGATGAACAAGAGGTGAAAGGCTTTGTGTTCAATCCATGCTGGAACA  
GGTCTTCAATATCAATACCATGAGTAAATAA

>Cluster\_12325

ATGAATTTCTCCTTTGAATCTCTGATTGAACAGTATCCCTTACCATTGCCGAACAGTTGCGCCACTGGGCGGCCCGTTA  
TGCTTCGCGAATTTGCCGCTGTTGATGCAAAGGGTCTGTTAACCACAGCGCGTTGATGCACAAGTTGACGAACTTGCCG  
CAGGCTGTGTCATCTGGGTTTGGCTTCCGGGGAGCATGTAATTTGTGACGTTTCCCAACGACAACCGGTTTGTACCCCTG  
CTGTTGCTGCTGTTAAGACTGGGCTTATCCCGTGTGGGATGCCCCGCAACGGGCTCTGGATATCGACCGGCTGAT  
TGAGCTGGCGCAACCCGCTTACGTTTATTCAGGGGAAACACCGCAGAGCTGGCCCGACAGATGGCGCACAAACACG  
CCTGCTTGGCTCATGTTCTGGTCTGGAGAGACCGGTGAGCAGCAGTTTACGCGGCTCTTCTCCCTTACGGTGGAGCGA  
CAGGCATGGCCGAGCCTGATGTTTCCGCCACCGGCTTGTGTTGCTCTCAGGCGGCACAACCGGCACGCCAAACTCAT  
CCCGCCGACATGCGGACTATAGCTATAACTTCAGCGCTTCTGCTGAACTGTGCGGATCAGCCAAACAGAGCGTGTATC  
TCGCCGCTCTCCCGTGGCGCATAACTTCCGCTGGCTGCCCGGATTTCTGGGAACGCTTGCCTGGCGGAAAAGTG  
GTGCTGACCGACAGCGCCAGCTGTGATGAGGTGATGCCTTTAAATCGCGCAGGAAAGAGTGAAGTCAAGTGCAGCTG  
GGCGCTGGCGCAATTAAGGTTGACAGGCCAGGAGTGGGAAGACAGCGACCTTTCTGCTGCGTGGCGCTATTACAGCAGCG  
CGCCCGGCTGACCCGACGCTTGTGACGAGTTATCGCCACCTTTGACTGTACCTGCAACAGGTTTTCGGTATGGCG  
GAAGGCTGCTCTGTTTTACCGGCTGGACGATCCGCATGCCACCATTTCTCCACAGCCAGGGCGCCGTTGTCCCTCT  
GGATGAAATCCGCTATGTTGATCAAGACGAGAAGCAGCTGCGCGGGCGAAACCGGGCAATTTGTAACGCGCGGCCCTT  
ATACCATTTCCGGCTATTTACCGCGCCCTGCCACAACGGCAGGCTTTACCGCGCAAGGTTTACCGCAGAGCGGAC  
AATGTCAAGCTGGATGAGTGGGAACCTCAGCTTACCGGACGATATAAAGAGCAGATCAACCGCGCCGCAAAAAAT  
AGCCGCGGCTGAAGTGAATCGGCACTGCTGCGTTTAGCGGAAGTGAAGATTGCGCGGTTGGTGGCGCGCGGACACGC  
TGCTTGGCGAGCGGATTTGCGCGTTTATCATCGCGCAGAGGTGCCAACTGACTATCAGCTGTTGCGTCAACAACGAC  
CGTATGGGCTCAGCGCTGGAAAATTCCTGACCAACTCGAATTTCTGGACCACTGGCCGCTCACCGCGTCCGGCAAGAT  
AGCAAAAAACCGCTGACGGCTCTCGCCCTGACCCGTTATCGCATTTGCCCAATAA

>Cluster\_1689

ATGAGGAGCGTAATTACATACCTTCGGTACAGTTTCAGCCATACAAAGCGCTGAAGGTGACGATTCACACAGACGACAAAA  
GACCTGTTCAAGCAGTGCTGAAGAAGATGGCGATGCTCAAAATAGTAGCGCTTTCAGTGATGAAGGGTTGATGGTT  
ACAAAGGTAACACCTTACTGGTCAAGTTTGGTGAATGTTAGCCCGTATTTAGGCTGGGGAGTTTCCAGAAAGTACAAT  
CTGCTAGTTGAGATATCGACCGTATAGCCGATTAGAGCATCTTGAACAGAAGCCTTGTGATGACCGCATCTTAGGCAA

CGGGATAGAGATTACACATATGCAAGATGGCCCTTATCTACACAAAGGATGCTTTAGCCGATGACCTTGGCATAAGCATCA  
TCCAGCGTGTCAAAGCCTACATAGCGCATCAGGAATCTAAGCAGAAAGTCTTTCCGTGTTCTCAGAAAAGGGGGCAACCT  
GCAAACCTTGCCCTTGCTGGTGAACAACGTCTTACAAAGATGGTTCGCCGATGGATTGACCCCTGAGACTTTTAAACTCAA  
TGAACACCGTGTAGACTGTGAGATTGATATTCAAACTGCTGCTAGATGGTGAAAGTCTGCATAACATTGACCGTCACTTC  
AAAGCAGCGTATAAAGCTGTTAGTCCGCGTAAAGATGCTAAATGGGTCTCTGTCTCACTCTGTACGCACCATTTCTAAGG  
TCAGAGACAACAATAGGCACGTTACCAGCATCAACAAGTAATGACCGCCCGCTATACCGAACTACTCGAAGGTGTTGT  
AGATATACCAACGTTCAATAAAGCTCAAGAGATTCTCGACAAGATCGTAAAGCCGTACACCTGCAAGTGATAACCCAT  
TAACGATTAACATCTTCAAGGGATTATTCGGGTGTGAGTGTGGGGCTAGTGTCCATCTACCGGAACCAAGAATAAGTAT  
GCAGGGGTCTACAGGTGCAATAAACCACTTAGACGGTCCGTGTGATGTTCCACCGTGAAGCGTAAACCGTTTGGCCGATG  
GATGATTGATAATTTCTGGGGATGATTGACGTGGGGAATGATGGAGAATCAGAGAGGAAGATTGCAGCGTTACAGCATG  
AGGTGAAATTTGTACAGCCAGAATCAAGAAAGCTACCGCCCTACTTCTTGAATGGATGACATTACAGAGTTGAAAGCA  
CAGGTGAAGGGGTTAACCAAGCGTACAGAAATCAAACTACTATCGACACTCTGAAGCGTAAAACCTTCACTCACTGA  
TAAAGGAATCAACCGTCTTAAAGATATTGACCTGACAACTAAAGCGGGTCTGTGTCGAGTGTGAGTTGATTTTAAAGC  
ATCTAAAAGGGCTTACATTGGGTAAAGATTCCGTAACGTGTAACGCTACAGAACGACACTGAAATCACCATACCTACAAC  
CCGTTACCGCTAAATGATGGGTACCAATCTTTGAAATGCTGATAAAGAGCTACTGGATATTGACGCTTATCAACTGTA  
A

>Cluster\_56249

ATGCAACAGCAAAAACCGCTGGAAGGCGCGCAACTGGTCAATTATGACGATTGGCGTGTACTGGCGACATTATGCGAGGT  
GCTGGACTCCACCATTGCTAACGTGGCGATCCCCACTATCGCCGGGAACTGGGCTCAGCTCAGCCAGGGAACGTGGG  
TAATCACTTCTTTCGGGGTGGCGAATGCCATCTCGATCCCGCTTACCGGTGGCTGGCAAGCGCTCGGGGAAGTGA  
CTGTTCCTTTGGTCCACCATCGCCTTTGCTATTGCGTGTGGGCGTGTGGTGTCTCCAGCAGCCTGAAATATGCTGATCTT  
CTTCCGCTGATTACAGGGATTGTGCGCCGGCCGTTGATCCCGCTTTCGCAAAGTCTATGCTGAATAACTACCCGCCAG  
CCAAACGCTCGATCGCGTGGCGTGTGGTGTGATGACGGTGTGTCGCGCCAAATTTGGCGCCGATCTCGCGGGTAT  
ATCAGCGATAAATTACCACTGGGGTGGATATTCATCAACGTCAACGATGGCGTGGCGTGGTGTGTTGATGACCTGCA  
AACTCTGCGCGGACGTGAAACCCGACCGAACGCGCGGATTGATGCGGTGGGGCTGGCACTGCTGGTTATTGGTATCG  
GCAGCCTGAGATTATGCTCGACCGCGTAAAGAGCTGACTGTTTTTATCAGAGAAATTATCATCTTACCGTGGTGTG  
CGGTGGTGGTATCTGCTTCTGATTGTCTGGGAGCTGACCGACGATAACCCGATAGTGCATCTGCTGTGTTAAGTC  
GCGCAACTTCACCATCGCTGCTGTGATATCAGCTCGGCTGCTCTACTTCGCGGCTATGTTTCTGGCGGATGTTG  
TGTGTCAGGAGTCTACGGTTACACGGCGACCTGGGCAGGTTTGGCTCTGCGCCGGTAGGGATTATTCGGGTGATCTG  
TCGCGGATATCGCCCGCTTCGCGCATAAACTGGATATGCGCGGCTGTAACCTTACGCTTTTATGATGATCGGCTCG  
CTTCTACTGGCGTGCCTATACCTTTGAACCAGGTATGGATTTTGGCGCGTGGCCCTGGCCGAGTTTATCCAGGGGTTG  
CGGTGGCCTGCTTTTATGCGCGTGCACCACTTACCGTGTCTGGTTTGCACCGGAACGACTGGCGCGGATCGAGC  
CTCTTAACCTTACGCGAACGCTGGCGGGTCTATCGGCACGTCGATAACCACGACCATGTTGGACCAACCGGAGTGCAT  
GCACCATGCGCAGTTGACTGAGTCGGTAAACCCGTTCAACCCGAAATGCCAGGCGATGTACAGTCAACTGGAAGGGCTTG  
GGATGACGCAACAGCAGGCATCAGGCTGGATTGCCAGCAGATACCAATCAGGGGCTGATTTTCCGCCAATGAGATC  
TTCTGGATGTACGCGGGATATTCCTGCTGCTGGGGCTGGTGTGGTTTGTAAACCGCATTTGGCGCAGGTGGCGG  
CGGAGGCGGTGGCCTAA

>Cluster\_51149

ATGGTGATTTCTAAATAAAGCGAACATAGCCTCAAACCTATTTGTCAAAATGTTGGGGTGTTTTATCTATATATATATTCAT  
TCCTTTTTTATATATCTATTTTAAAGTGAAGAAAACCTATGCGCTAATAGCTTTTCCAGTCCGTGATATATCATTTGTTTTCA  
TCGCGGATGGTGGATTAGGGGCAGCATTTTCAAGAGAAATGTGCGAAAGAAAAAATAGAGACTGTTTAAAGCCCTCCTT  
TTCAGCGTGGAAAAAGTGTATTTTATTTTGTGATAAATGCAATGATTTTTTATTTTGTCTAAATTTGATTGCAATC  
AAAATGGCTGAAGATTGAAAATAATAGATTTTTTATCATCGGCAGTTATATCTTTAAATAAATGCAATATGATATTC  
CACAAGTAATGCTGACGCTGATTTATGGAGGATAATGGGCTAGAAAAACAGGTTTTAGCAAATACAATTAATTTTGC  
TATACTTTTGTCTGCTCAGGATTAGTACTTGTACCAATTTTTTTTTTAAAGATGTGGTTTTGATTTTGGCTGGTATTT  
AATTGTGTCATTTCTATTTGTTTTATTTTATGATGGTGTGTTGTTGCGACAATAAATTTGGTAAAAAAAACGGCCATTTG  
TTGATAATGCTGATGCTATTTGACGGATTAGTATATTAAGGGATTGCTCTCTTTTCTTTTGGAAATGTTTGTCTTTCT  
ATTTGATCAGCTGTTAAACAATCAACTCGATAAACTATATGTGAGTTACGAATTTAGTTTAAATGATTTTACATTTTATAA  
TATTTCTGCAATACTGGGCAATCTGCTTTCCTGTTAGTACTACCATTAGCTGCACAGTTTTACCTGCTTTGACAAAAT  
TAGTTGGTGGTGGGGGATGGCGGGCTACGTGATTATACGTACGAACGGTTTTCGTATATTTGATACGGCATTATCATCG  
ATTTGTGATTTCTCGTTGATATATATCTTAAATGATATAAATAAATAATGGTTAGGTGATGTTTACTTAAATTCATCCAT  
TGAAGATTTGGTTCCTTTATATCTATTGGCACCTCTTTCTTTGCTTTCAGTTAATACCATTCAACTTAGTATGCAA  
ATGGTTATAAATAAATCTGTTAGATTGGGATTTTTCAGCTTGGCCATATATCCGTTGCTTTTGGTCTGCTTTTGTAAAG  
GTACTGGGGTTACAGGGGCAACAATACCTTGGGTGGTTAATAACCGTAAATTTTCTAGTGTAACTTCTTTGTAATA  
TACACGGTTTTTACGGGATTTAAGAAATGGATGCTACTATGTGTTTTGCTTCTGTAACAATAAAGCTTATCTTCAATAA  
GTTTAGGGTGTTTACTTGCAAATATATTGCAACTGATATGATTTACATTTTCAATGGGGTAATTTTGGTGTGTTGT  
GCAATTTCTATTAATTTGTTTGTATTAATTAATGATTCACATATGA

>Cluster\_34517

ATGAAAACATGTTGGCAAACTCCGAAATGAAAGCACGACGCAAAATAGACATATCCGCCAGGCTTATCTTGCTCGCTT  
ACCGTTGTGTCATCCGAAACCGATCCGCAAGGGTTTAAAGCATTACGCCAGGCTTATGAAGAGGCCCTGCGACTGGCGG  
TAAATCTGTGCGAGGAAGCAGATGATGAAGAAAAAGATGCTGCCGCTGAACATGAAATACTACGTGCATTCAGGACATTA  
CTGGATTCAGAAAGTGTGCTTTTTCAGCCTTCCGCTGGCAGAAATTTATTCAGCAATTAATACTGGAACATGGAGGA  
TGTCGATCAATTACGCTGGCCGCTGTGTGCAATCGCCATAGAAGCGGATATCTTTCAATTAATTTGTGCTTCTTTGCTGG  
CAGAGCCTTTGAACCTGGCATTCAATTAATGACAGCGAAGGAATGGATGAGGAAGAAAGGGAGGCTTTTCTTGAGGCCATT  
CAGGCTGGTGTGTTGTTTCGATTTCTTAGCCTTCTGGAATATCCCATTTGCGTTGCAGAACAGACTGTTGAGTATCATCT  
CGCCTGGAAACGTTGCTGCTTACCATCTGACTATGCTACCTGCTGCTTTTGGCGATGGAAGGTCCTGGTAAATCTCTG  
ATGATGCAAAAGTTACATCGCAAACGTTGCGCTGGTACAGCTCGGTCGCAACAGGTATGGCGGAACTCATCTGTCGCT  
CAACAGTGGCAAAACGGAAGAACAGAAAGCGAAGATGCCCGGTTACTTGTGTCACACAGTTTGTACTGCGCGGAGGG  
GGAAGCCTGCTTGGCGATCTCTGCGCTACTGGGAAGTACCACATCTACACAAGCTGATAATTTGTTGTTGCAAGTGA  
GCAAGCCTCAATGGCCGATTTATGAGTATGTTGATGTTTATCGAAGCGCGGAGCATGGTAGATGCGCAAGGTCAA  
CCGCTGAAATATGTTCTGGTGGAGCGCCCGGACCGGCTGTTATGGCGGAGATTTTACATAGCGGAAAATTAACGCC  
GTTAGGTCATCGTTTATGAGTCTGTTATCTTCAAGCGCAAAGCATGGGCGTGGTGGAAATCGAGAGTCGGTAGCGGAGA  
CAGAGCAAGATTACCCGTTCTGGATTGTTATCGGGTAGCGGAAACAGGTAGTACTTGAAGCCTTCCGAAACAGAGATG  
CTGGCCCGCTTAAATCAAGGCTGGAAGGCGGAGATGCTCATCCATTAGAGGCCATTGTCACCCCGGCTTTTTCAGGAA  
AGTGAACCTGAGCCGAGGATGAAGATGTCGATGAGCAACACCTGAAATCATGAAGAAAAAATGATGAGGGTGAAA  
AACCACAGAGCATTACCAGCATTATCAAAATCAGTTTAAACGGTCTGGTGTATAGGTTATGCTCAGGCAAAATCGCGATG  
TTGTTTAGCTGA

>Cluster\_40137

ATGACAACCGTTTATACGTTGGTGGATTGGTTGGCCATCTGGGATACGTTGCTCATTTGCAGGCGTAACTTTACGCAT

TCTAATGAAACGACGCGCAGTTCCTCCGCGATGGCCCTGGCTGTTGATTATTTACATTCTGCCGTTAGTCGGAATATTG  
CCTATCTTCCCGTTGGCGAGCTCCATTTAGGCAACCGCGCGTGAGCGGCCAGAGCGATGTGGCCTTCCACCGCAAAA  
TGGCTTAAACGACCTTAAAGCCTGTAAGCATATCTTCGCGGAAGAAAATAGCAGTGTGCGTTCGCCCATTTATCAAGCTTTG  
CGAGCGTCTGACGGGATCGTGGGGTCAAAGGAAATAGTACAACCTGATGACCGAGTCAGATGATGTTATGCAGGCGCT  
TAATFGGCGACATCCAGCTCGCTACTTCAAACAAGATGCGGGCGTAGGGCAATGGATFGATGTCGCGCGCTATGGAAGCCAG  
GTGGCTGAATCATTAATGGCCGCTGCACGGCGTGGTATTCATTGCCGATTGATGCTCGACTCCGCCGGGAGTGTGGCTTT  
TTCCGCGAGCCGTTGGCCGAGCTAATGCGTAAATGCGCGTATTGAAAGTGTGCGAAGCCTTAAAGGTCAATCTGATGCGTG  
TGTTTTTACGCGCTATGGACCTGCGCAACATCGCAAGATGATCATGATCGATAATTACATCGCGTACACCGGCGAGCATG  
AATATGGTCCGACCTCGCTACTTCAAACAAGATGCGGGCGTAGGGCAATGGATFGATGTCGCGCGCTATGGAAGCCAG  
CATCGCCACCGCGATGGGGATTATTTATCTCGCGACTGGGAGATTGAAACCGGGAACGATTTCTGCCGCGGCCACCG  
ATGTCAAATATTATGCCGTTTGGAGAGGCGAGCGGTACACCATTCACACAATTGCTTCCGCCCGCGCTTCCGGAAGAT  
CTCATTACCAGGCATTTAGCTGCTTATTCGGCTCGTGAATATTTGATCATGACAACGCCCTATTTTGTGCCAAG  
CGATGTTTACTCATGATTTGACAGGCTGACAGCGCGAGCGGTGAGTGTGATGTCAGTATTATCCTTCCCGCAAAAATGACT  
CGATGCTGGTGGCTGGGCCAGTCCGCGATTCTTTACGGAAGTGTGGCTGCTGGGGTAAAAATTTATCAGTTTGAAGGC  
GGGTTACTGCATACCAAGAGCGTCTGGTGCATGGTGAAGTCTGGTGGCACCGTTAACCTTGATATGCGTAGTCT  
GTGGCTAAATTTCCGATTTACCTGGCAATCGACGATAAAGGTTTGGTGCAGACCTCGCCGCGTTCAGGACGATTATA  
TTTCGCGTTCCTCGTCTGCTGATGCCCTTTATGGCTAAAACGCTCATATATGGCAACGTTGTCGCCGAGCGACTGTTTTAC

>Cluster\_24492

ATGATGAGCAAAAATAACCAACCGGATATCGATCGGTTGATTGAACTGGTTCGGCGGGCGCGCAATATTGCGACGGTGAG  
CCACTGTATTACTCGCCTCGCTTTGTCTCAACCAACCGGCCAATGCGAGACCGAAAGAAAATGAGCAACTCCCCATGG  
TGAAGGCTGTTTACCAATGCGCGGCAATTTCAAGTGGTGTATGGCACCACGTTGGGTGATTACTATCAAGCACTGATT  
GCGTCAACCGGACAGGCGAGGTTGATAAAGAGCAGGTAAGAAAAGCCCGCCGCGAGAATATGAAATGGCATGAGCAGTT  
GATCTCTAATTTCCGGGATCTTCTTCCGTTGCTCCGCGTTGATTAGTGGTGGTTGATCCTCGTTTTCGCGAATG  
TGATCGGCGATTGCCCCATGAGCAACGGTCAGACGCTGGCGCAAAATGTACCCTTCCCTGCAACAGATCTACGATTTTCTG  
TGGTGTATCGGTGAAAGCATCTTCTTCTACCTGCGCGTGGGATTGCTGGTCAAGCGGTAAGAAAATGGGCGGTACACC  
GATCCTCGGTATCGTGTGGCGTAACGCTGGTTTCTCCACAGCTGATGAACGCTTATCTGCTCGGGCAGCAGCTGCCGG  
AAGTATGGGACTTTGGCATGTTTCCAGATCGCCAAAGTGGCTATCAGGCGCAGGTCACTCCCGCATGTTAGCGCATG  
GCGCTGGGCGTTATTGAAACTCGTCTTAAGCGCATCGTCCGGATTACCTCTATCTGGTGGTGGTCCCGTCTGTTCCGCT  
GATCCTCGCGGTGTTCTCGCCATGCGCTGATGGTCCGTTTGGTCCGATGATGGCGATGGCGTTGCTTTGCGGTAC  
GTCACCTGATGACCGGACGCTTTGCTCCTATTGGCGCGGCATGTTGGTCTCCTGTACGCCCGCTGGTGTACCCGGC  
GTACACCAGACCAGCTTGCATTTGATTTGCGAGATGATTCAAAGCATGGGTGGCAGCCAGTGTGGCCGCTGATGTCAC  
GTCGAATATCGCTCAGGGCTCCGCCGTGATAGGTATTTATCATTCCAGCGCAAGCACAATGAACGCGAGATCTCCGTGC  
CTGCCGCTATCTCCGCTGGCTTGGAGTCACTGAGCCTGCTATGTACGGCATCAACCTGAAATATCGTTTCCCGATGCTG  
TGGCGATGATGGTCTGGCTGGCAGGATGCTATGCGGCTGAACGGCGTTATGGCGAATGGCATCGGCGTAGGCGG  
CCTGCCGGGAATTTCTCGATTCAACCGAGCTACTGGCAGGTTTGGCTGGCAATGGCATTCGCCATCATCCCGA  
TTGTAATCACTCGTTTATCTATCAGCGGAAATACCGCTGGGACCGTGGACATTGTTTAA

>Cluster\_27393

ATGACGCAATCTCGATTACATGCGGCGCAAAACGCACTAGCAAACTTACAGAGCGCGAGGTAACACTTCTATCCCCA  
TTTTACCTCGCGCTTCTGCGGGTGGATGAACGATCCAAACGGCCTGATCTGGTTTAAAGATCGTTTATCACCGTTTTT  
ATCAACATCACCCGATGAGCGAACACTGGGGCCAAATGCACTGGGGACATGCCACCAGCGACGATATGATCCACTGGCAG  
CATGAGCCTATTGCGCTAGCGCCAGGAGACGAGAATGACAAAGACGGGTGTTTTTTCAGGTAGTGTGTCGATGACAATGG  
TGCTCTCACTTACTTACACCGGACACGCTTGGCTCAGTGTGTCAGGTAATGACGATGCAATTCGCGAAGTACATGCT  
TGGCTACCAGTCCGGATGGTATTCATTTGAGAAAACAGGGTGTGATCCTCACTCCACCAGAAGGCATCATGCACTTCCGC  
GATCCTAAAGTGTGGCGTGAAGCGACATGGTGGATGGTAGTGGGGCGAAAGATCCAGGCAACACGGGGCAGATCCT  
GCTTTATCGCGGCGAGTTCATTGCGTGAATGGACTTTCGATCGCGTACTGGCCACGCTGATGCGGGTGAAGCTATATGT  
GGAAATGTCGGACTTTTTTCAGCCTTGGCGATCAGCATTTACTGATGTTTTTCCCGCAGGGAATGAAATGAGGATAC  
AGTTATCGAAATCGCTTTCAAAGTGGCGTAATACCCGGAATGTGGTCCGACAGGACGCTTTTTGCACAATCCGGGCATTT  
TACTGAACCTGATAGCGGCATGACTTTTATGCACCACAAAGCTTTTTAGCGAAGGATGGTCCGCGTATGTTTATCGGCT  
GGATGGATATGTGGGAATCGCAATGCCCTCAAACGTTGAAGGCTGGGCGAGGTCATGACGCTGGCGCGGAGCATCA  
GAGAGCAATGGCAAACTTCAACCGCCGCTACAGAAAGTACAGAAAGTACGAGTTCAGTTCACGCCAGCAGCATCAATCTCTCCCG  
CACAATCAGCAATAAATATGTTTTGAGGAAAACCGCAAGCAGTTGAGATTCAGTTGCAAGTGGGCGTGAAGAACAGTG  
ATGCCGAACATTACGGATTACAGCTCGGCACTGGAATGCGGCTGATATTTGATAACCAATCTGAGCGACTTGTTTTGTGG  
CGGATTTACCACACGAGAATTTAGATGGCTACCGTAGTATTTCCCTCCCGCAGGGTGACATGCTCGCCCTAAGGATATT  
TATCGATACATCATCTCGTGGAAATTTATTTAAACGAGGGGAGGCGGTGATGAGTACCGCAATATATCCGACCGAGAAG  
AACGGAACTGTCGCTCTATGCTCCACGAGTGGCTGTGCTGCAATATGGAGCACTTGGCAACTGGGTTAA

>Cluster\_62861

ATGCGAATAAATAACTACTATTTCAAAGTGTTTTTAACGTTACTTCTACCAGTAACCGTATCTGCCAGCAGATACAGTG  
GCAATCTGTATGGCCAGTCAATTCACCACTGGTTTGGTGGAGAAAAACCGTCTCCTGACTTACTATGTTGTTATTTGT  
CTGTTCCATTAATAATACAGACACAGGCGGAGATGCTTCTTATGAAAAAAAATCACAAGTCAAACCTAGCGTTGACAAAA  
TTGCCGGCAAAAAGCAAGCATAAAGGAAGTATCCTGATAAATAGTGGTGGTCCCGGGTTACCAGGCATAAATCCTTATAT  
TAACCTTGTACTGGCCAGTCAAAATCTTCTGAGTCAAGGATATTTATGGATTGATCCTCGAGGCGTCCGAGGATCCCA  
CTCCGACAATAAATGCGCGCAATCAGATACAGAGACTCAGGAAAAATAAATGAAAAGCAACAGTATTAATAAATAAAT  
AATGCTGTATCCATAATACCGGAGCGAAGTCAATCGCCATATCGGCTTAAACGAGGCTGTATACGATATTGATCGTAT  
TAGGCAAGCCTTGGGGGATAAACAACCTGACAGCGTGGCGTATTCGATGGAACCTCAAATGACGCTTATATGCAGAAC  
GTTTTCCCTACAACGTAAGATCTATCTGTTCTTGGATGGATCTGATGATGACTTCAAGGAGCAACTTCCACATGGCA  
CTCAAACAGGCACAGAGTTATCAGGAAACGTTTGTGCTTGGTGTGCGGTACAAAAGTTGCCGCTTCT  
TTCAGACAGAGATAAGGCAATAACTCAGTTCCATGAGCTATTTACAAAATACATCACAAACCTTTATAGACAGTAAGG  
GAGAAAATATATCTTCAGATGAATCATATCAATAACAGACCTTCTGCTATGGCGTTTATCATGGCCACCTTGGCA  
ACTGCCATACGCTTCTCAGGGGATGTCAGTAAATGAAAATGAAAACGCGCTCAGTGTCCGATGCGCAGAGAA  
GTCAGGCGATGCTTCCGGGGTAACTCTGTGTAGATCAGGGGATGAGCAATTAACACCAGAAGAGCGAAAATCCCGAA  
AAGACGCTTGGCAATGCTTCCCGGCTATTAACCTTTGACAAATGGACGTTCCGATTCACCTGATTTTTGTGAATATG  
CCAATACATAGCGACTGAACAAAACCTCGCTGAAAAATACTGTTCTGCCCTGGTTTACTGTTTGTAGCACACAAAATA  
CGACCAACAACGCTTGGATTAATGCCCAGTAAAGTGGCAGAGAAAATTTCCAGCCGTTACTAACAAATAAATGGTGTG  
GGCATACATAGCTCTCAGCGAGTTAATTTATGTGTAGATAAAGCAGTTGTACATCACCTGATCACTCCACAATAATA  
GAAAATATATACTGCCAGGAAATCTGAAAGCAGAAAATACAATAA

>Cluster\_40490

ATGTCCTGTAATACTGAAGCAACTGACGATGTCAAACCTGGACCGGCGCGCCGCTGAATATAAAGAAGGATTTCTTAC  
CCAGTTAGCCACCGATGAGCTGGCAAGGGGATAAACGAAGAGTGGTGGCGCAATTTCCGGCAAGCGTAAATGAGCCGG

AGTGGATGCTGGAGTTTCGTCTCAACGCCATACCGCATGGCTGGAGATGGAAGAACCGCCTGGTTGAAAGCGCACTAC  
GACAACTGAATTTACAGGATTACAGCTACTACTCGGCACCATCGTGCCTGTAATTTGTGACGACAACTGCGCGTCTGAACC  
CGGCGCGTGCAGCAAACTGGCGGCAACGCCTTTTAAAGTAAAGAGTGGAGGCGCGTGTGAGCAGTTGGGCGTTCCCG  
TGGGGAAAGGCAAGAGTGGCAGTGGATGCCATTTTCGACTGTGTTTCGTTGCCACTACTTTACGCGAAAACTGGCG  
GAGAGGGAATTAATTTTGTTCCTTTGGCGGAGGATCCACGATCACCGGAACTGGTGCCTAAATATCTGGCAGCACT  
GGTCCGGGGAATGACAACCTTCTTTGCCGCACTTAATGCGCGGTAGCCTCTGACGGTACGTTTATTTATGTGCCATAAG  
GCGTGCCTGGCCGATGGAACCTTCCACCTATTTTCGCATTAACGCGGAAAAACCGGCGAGTTTGGAGCGACCATTCG  
GTGGCCGACGAAGACAGTACGTTAGCTACATTTGAAGGCTGTTCCGCTCCGGTGCCTGACAGCTATCAGTTACACGGCG  
GGTGGTGGAACTCTCGCCGACATAGTCAGAACGATTAATCGCGCTTAGTGAATAATCATGCCGACGCAACATGTCGCG  
AATTTACTCAGTGCAGTCAATGTTGATTGGCGCTAATTTGGGGCGCATACCTTCCCGTATGTCGAATGTCGCAATAA  
CAGCGCTCAGCTGGAGCAGGCAACGACATCAGTATTTGGTGAAGTCAACTGTTTACTGCTGCACGCGGGATCA  
CGAAGAAGATGCCATCTCGATGATTGTTAACGGTTTTTGCAGAACGTTTCTCGGAAGTGCCTGGAAATTTGCCGTT  
GAAGCACAAAACTCTCCGATCAGTCTTGAACACAGCGTCCGATAA

>Cluster\_53460

ATGAAAAATCTCTTCTGGCTGTAATGCTGACAGGACTGTTTGTCTCTGTTTCTTCCGCTCTGGGAAATGTCATCT  
CGAACAAATTAAGCAAAAGCTGAAAGTGGAGAAGCTAAAGCACAGTTGGAGCTGGGATATCGTATTTTCAGGGTAATG  
AAACGACAAAGGATCTCACCCAGCGATGGACTGTTTTCGCGTGCAGAGCAGGGATACACCCGCGCAGAATATGTA  
CTGGGTTACGCTATATGAACGGTGAAGTGTGCCGAAGATTATGCTCAGGCAGTTATCTGGTACAAAAAGCGGCACT  
GAAGGGGCTTCGCAAGCGCAGCAGAATCTGGGTGTAATGTACCATGAAGGTAATGGCGTGAAGGTTGATAAAGCGGAAT  
CTGTGAAATGGTTTCGCTTGGCAGCAGAGCAAGTGTGACAGCGCCAGCAAGTATGGGAGCATATTTTGAAGGC  
GATGGTGTGACGCGGATACGTTATGGCAGCTGAGTGGTATAGCAAAGCAGCGGAACAGGTAACGTTCTGGTCTGTAA  
CCAGCTTGGTTATATGATTTCCAGAGGTTTAGGCGTTGAAAGAACGATGCCATATCGGCACAATGGTATCGAAAATCAG  
CGACATCAGGCGCAGGTTGGGGCAGCTTCAATTTAGCCGATATGTACTATTTCCGTTATCGGTTACTCAGGATTACACT  
CAGTCACGGGTATTAATTTCCAGCTCGGACAGCAGGTAATTTCTATTGCGCAGTTTTCGTTGGGATATATTTGAGCA  
AGGTTTAGCGGGAGCGAAAGAGCGTTAAAGCACTGGAGTGGTACCCTAAATCGGCAGAACAGGAAATTCGATGGTC  
AGTATTAATTTGGCACATCTGTATGATAAAGCGCAGAAAGTGTAGCAAAAAATCGAGAACAAGCCATCTCCTGTACACG  
AAATCGGCAGAACAGGGGATGCTACCGCACAGGCTAATCTCGGCGCTATTTACTTCAGACTTGGTTCAGAAGAAGAAC  
TAAAAAGCGGTTGAATGTTTCCCAAGCCCGCCGCAAAAGGTTGAGAAAGCGCGCAATTTAAATTTGGTAAATGCTTTAC  
TCCAGGGCAAGGTTTAAAAAAGATGAGCAACAGGCCAATCTGGATGCGAAAAGCCGAGAGCAAGGATTAAGTGA  
GCACAGGTACAATTAGGTAATCTATTTATGCTTGGCGTAGAACGTTGATGTCAGGCTGGCGTGGTTCGA  
TACCGCATCGCAATGATATGAATCTTTTGGTACAGAAAACCGCAACATTACAGAGAAAAACTGCAGCCAAAC  
TGCACAGGCTGAATTAATCGCAACAAATATAGAAAAATATGCCCGGAAAGCCTGGGCGAGAATGCAAAAGCTTAA  
GCGCAATCAGCGTAAAGACGGTAATAAATAA

>Cluster\_52200

ATGTCAGGGAACGAAAGTATCGCTGCGCCACTATGATCAGGTAACCACCTGGCCTCGGACGGGTTACAGGCAGATAT  
TGTCCATATTTGGTTTGGCGCTTTCATCGCGGACACCAGGCTGTCTACACGGATCTCCTAATCAACTTTCGGACACCC  
GCTGGGGATCTTTGAGATCAACTGTTTGGTGTGCTCAACTGATCGAAAATTAATGCGCAAAATGGGCTGTTTTCG  
GTTGTGAAACATCTGCATCGCAATCTACTCAGCCCTGTGCGTTCGGTGGCTGGCGGATTTATCATACCCCGAGATGG  
CATTCGCGCAGCAATCAATAAAGCTGGCTGAACCTCAGGTAAGAAATCGTTTCAATTAACATCACCGGAAAGGCTATTGTC  
TCGATCCGCAACCGGATCGCTTGTATCTACCAATGGATTAATCAACCAGATCTACAAAATCCGGATGCGCCTCAGTGC  
GCTATTGGCGTATCGCTCTGTGCTTTGCAACAACGTAAGCGGCGAGGACTCGCGCTTTAGTGTGCTCTCCTGTGACAA  
CTTGCCAGACAATGGGCTCTGACGCGCAATGCCGTTCTCGGTTTGGCCGCAACTGGACCAGCCCTAGCTCAGTGG  
TCGAAGAAAATGCTCATTTCTTAGCCAGATGGTTCGATGCTGCAATTTGTCGCGCAATGACTGAATCGCAATTCGCTTACTG  
GAACTAAAACCGGTTATGCGCATCCCTGCGGGATCGTCTGCGAATCATTTCTGTCAGTGGGTGATCGAAGATAATTTTGT  
GCGCGGACCGGAATGGGATAAAGCCGCGCGATGTTTGTACAGCAATGTTACGCTTATGAAGAGATGAAGTTACGCA  
TGTTAAATGGTAGCCATTTCTGGCTTATAACGGCTCACTGGCTGGCTATGAGTTTACTTGGCAATGCATGGAAGAC  
GCTAATTTTCGTTTCAATACCACCACTGATGATTAATGAACAAAGCCGCAACTTAATCCAGACTAATATCAACAT  
CCAGGAATACCGGACCTGTTAATGAAAGCTTTAGCAACCGTAAAGTGCACACCGTACCAGGCAAAATAGCCATGGACG  
GTTCAAAAAGCTTCCCGAGCTGCACTGACGCGCTGGCTGAAATGCTATCAGCAAAAACAAAACAAATGCTGTTCTGTCA  
CTGCTCGTTGCTGGTTGGTTGATATGTCATTTGATGCTGTTGAGAAAAGCCAGTCTGTCGCTGATCCAATGAATGACCA  
ATTTACGGCTTAATAAAGGAACAACAAGCAGCTGCAACAGCGCTCGCATTTACTGCACTTACCGCATATTTGGT  
ATTTAAGCAACCATCAGCATTATAAATGAAATAAAAACTCGCTTTGCGAATATAAAAAACAAGGCATCAAGGCCACC  
ATCAGCCAATTAATATCGGATGAGCAGAAATGA

>Cluster\_17755

ATGGCGAAACCGAAAAAGAGCGCTGCTGAAGCAGCTCGCACAGCTGAAGAAATGAGCGCACATCGTTGCAATCGCATTC  
GCGTATCTTAGTGACTTCAATCAATCCGCGTGGCTCCCGCTTTCTGACATCTGATGTAACCGTGATGATCGCGTAACA  
CCAAGATTGTTGATCCCACTGGCTCAATGGCTCAGCGAATTTCTGTCCAGCGCATGATGTCAGGCATCACAGTCCGGCA  
CGACCGTGGTTCAAACCTGGCAACCGCTGACCTGACATGATGGACTATGGCCAGTGAATACTGGCTGGAAGTCTGTGCA  
GCGCGCATGAACGAAGTGTCAACAAATCGAATTTGTATCAGTCACTGCCTGTTATGTACGCAAGTCTGGGTACTTTTCG  
GCACCGGCGCTATGGCTGTTCTGGAAGATGACAGGAGCTGATCCGCACAATGCTTTCCCTATTTGGCAGTTACTACCTG  
GCTAACAGTCCGCGGCTAGCGTAGACACCTGCATTCGCGAGTTCTCCATGACCGTGCAGGATGGTGCAGAAATTCGG  
TCTGGATAACGTCAGCATCCGTAAGAGCACTGGGAAACAGGCAACGATGTAAGAACTGGTGAAGGTTAAACCACTGCA  
TCACACCTAACGTCACCCGACAGCGGAAGATGGACAGCAAGAACAAGCCTTACCCTCTGCTATTTTCGAGTCTGGC  
GGGACTCCGCAAGCTGCTGCGTGAATCCGGATTTGATGAATCCCTATTCTGGCGCGCGCTGGGAAGTGAATGGCGA  
AGACGTTTACGCTCATCTTGCCTGGTATGCTGGCCTCGGCTCAGGTTAAAGCACTTACGCTTGGAGCAGAGCGCAAG  
CTCAGTGTATCGATAAAGCCACTAACCCGCGATGGTCCCGCAACATCGCTCAAGAATCAGCGTGTTCCTCTGTCCT  
GGCGATGTGACATATCTCGAGCTGTTGACCGGTCAGGATGGTTTCAAACCTGCATACCCTGGTAAACCCGAATACC  
CCTGCTGGCTGACATTCAGGACTAGGACAGCATCAACAGCGCTTCTGCTGACCTTCTCATGATGCTGCAAAAAA  
TCAACACCCGATTAAGCCGTTGAAGCGGTTGATCGAGATGAAGGAAGAACTGCTGATGCTTGGCCGCTGCTGAG  
CGCTGAAAGACGAGCGCTTAAACCGCTTATCGATCGCGTGTCTCAATCATGCGCCGCAAGAATCATGTTGCGCAACC  
TCTGACGTTCTTACGGGATGCGGCTGCTATCGAGTACATCTCTGTGATGGCTCAGGCTCAGAAATCTATCGGCTCA  
CCAGCTTGTGCGCAGAGTGGATTTATCGGGCACTGGCGAGTTCAAACCTGAAGCGCTCGACAAGCTTGTATGGAT  
CAGGATCGACGCGCTTCTGTAATGTGAGGATGCAACCGCTATCGTTCGCGAGGAGCAGGATCAAGGTTATCG  
TGAAGAGCAGCTAAACAGGCTCAGGCGCACAGGCAATGGCTATGGGTCAGGCGCAGCGCAGGGGCAAGACTCTCA  
GCAACGACGACAGCAGCCGAGCGCATTAACGCTATCGTAAATGACGAGCAGGACCGCAGCAATGA

>Cluster\_21593

ATGAAGTCTGCATTAAAGAAAAGTGTGCGTAAGTACCTCGATATCTTTGATACTGGCATCTGGTATGGTGCATTTGCTGC  
TCATGCGGCAGATGATGTGAAGCTGAAAGCAACAAAAACAACGTTGCTTTCTCAGACTTTACGCCGACTGAATACAGTA  
CCAAAGGAAAGCCAAATATATCTGACTGACCATGATGATCTTTGGTTATGGCAACTTCCTTTTGATAAGGGATCTTTT  
GACCCAAAACAATGGAAAATCGTGAAGTTGTCGATACCTACAAAACCGCTGACTATCATGACAACCTCACCTTTCTTCTGCGGAA  
ATCAACGCGCAGCTCCTTTTCATTAATGGATGAAGCGGTACGTTTACTAACGGCTATGTGGCGCAGCGTGTTCGGCC  
CCTCCGCGCCGCAATAATGACCGGTGAGCGCCGCGCTTTGGTGTCTATTTCAACTACTGATGCTCAGGATGGTAT  
CCGCTAACAGAACTTTCTGCTGAATTTATCCAGAATCATGGTTATTACACTGCAGCAGTAGGTAATGGCACTTATC  
AAAAATCAGTAATGTGCCGGTGCAGGATAAAACAACCGCTGACTATCATGACAACCTCACCTTTCTTCTGCGGAA  
AATGGCAACCGCAAAACCGTGGCTTTGATTACTTTATGGGATTCATGCTGCAGGAACGGCATATTACAACCTCCCTTCA  
CTGTTCAAAAACCGTGAACGCGTCCCGCAAAAGGTTATATCAGCGATCAGTTAACCGATGAGGCAATTTGGCGTGTGTA  
TCGTGCCAAAACCTTGACCAGCCTTTTATGCTTTACCTGGCTATAATGCTCCGACCTGCCAAATGATAATCCTGCTC  
CGGAGCAATATCAGAAGCAATTTAATACCGGTAGTCAAACAGCAGATAAATACCTACGCTTCCGTTTATTTCTGTTGATCAG  
GGTGTAAAACGCATTTCTCGAACAACCTGAAGAAAAACGGACAGTACGAAAAACAATTTATCTCTTTACCTCCGATAATGG  
TGCAGTTATCGATGGTCTCTGCGCTGACCGGGCGCAAAAAGGCTATAAAAAGTCAAGCTATCCTGCGCGTACTCACA  
CCCCAATGTTTATGTGGTGAAGGAAACTTCAACCCGGTAAATATGACAAGCTGATTTCCGCAATGGATTTTCTACCCG  
ACAGCTCTGTAGTGCAGGATATCAGCATTCAAAAGACCTTAAAGCTGGATGGCGTTTTCTTGTCTGCTGCAAAAA  
TAAGAAACAAGGCGAGCCACATAAAAATCTGACCTGGATAACATCTTATTTCTACTGGTTGATGAGGAAAATATCCAT  
TCTGGGATAATTACACAAAATTTGCTCGCCATCAGTACAGCATTACCCGCATAACCCCAACCCGAGGACTTTAAGCCAA  
TTCTCTTATACGGTGAAGAAATACGATTTATTCGCTTGTCTATACAGTAGAAAAATAATCAGTTAGGCTATACAAAAGTAC  
GGATCTACAGCAAAAAGATAAACCTTGCCTCCGCAATCCGAGGCTGTTAAAGAGATGCAAGGCGTGGTAAAGAGTTTA  
TCGACAACAGCCAGCCACCCTTAGCGAGGTAATCAGGAGAAGTTTAAACAATATCAAGAAAGCACTAAGCGAAGCGAAA  
TAA

>Cluster\_819

ATGTTGCACTTAACGAGAATAAACAGTTTGCATTTTTCCAAAGACTGGCATTTCGCTGCGTATCTTTTTGCTGATTCT  
GGTGTCTCAATATTTGTGATTTGCGCCCTGGCGCAATATTTTACGGCCAGTTTGTGAGACTATTTAAACGCTTTCATGTAC  
CGGACATGGCAATGAATCAGGCGAAAATTTATGGCTCCAATGACAGTGTCTATCTGCGGTGAAAACCGGTGACTACAAA  
CGGTGGCGACCATTCGCTAACAAATACAAAGAGATACCGATTTTGATTTATGTGGTGAATGGGACCGCGCATCGATCCG  
CCTTTACCATCTTAATCCGGAGAAAATTTGGTTATCCTATGCGAGTTCACCAAACAGGGCGCGTGGAGAAAAGGGGAGAGCT  
ACTTCATTACCGGAAAGGGTCAATGGGGATGGCGATGCGCGCAAAACGCGCAATCTTTGATGACGATGGAAGGATCATC  
GGCGTGGTGTGATTTGGCTACCTGGTGAAGTAAATCGATAGCTGGCGGGCTGAGTTTTTATTACCGATGGCAGGCGTGT  
TGTGCTGCTGTTAGGGATTTCTGATGTTGCTGCTGCTGGTTCCTGGCAGCCATATCCGCTCGGCAATGATGGGCATGGAG  
CAAAGCAATCGCACGCGTGGTCCGTCAGCAAGAGGCGCTGTTTAGTTGCTGTTTATGAAGGGCTGATTGCGGTGGATCCG  
CATGGTTACATTACCGCCATCAATCGTAACGCAAGAAAGATGCTGGGGCTGAGCTCTCCCGGACGGCAATGGTTGGGTA  
ACCCATTGCTGAAGTGGTCAAGCCCGCGGATTTCTTTACCGAACAGATGATGAAAAACGTCAGGATGTGGTGGCTAACT  
TTAACGGTCTGAGGTTTATGGCCAAATCGGGAAGCTATTTCGTTAGGTTGATGATTTGCTGGGGCCATTTACAGCTTTCT  
AGTAAAGACGAAATTTCCACCTCAATGCGCAACTGACGCAAAATAACAATACGTCGAGAGCCTTCGTACATTGCGACA  
CGAGCATCTCAATTTGGATTCGACGCTCAATGGTCTGTTGCGAGATGAAAGAGTATGATCGCGTCTGGCGATGGTGCAGG  
GGGAGTCTCAGGCCGACGAACAGCTTATGACAGCCTGCTGAGGCGTTTGGCGATCGCCAGGTGGCGGGCTGCTTTTT  
GGTAAAGTGCAGCCGCGCCGGAACTGGGGCTAAAAATGATCATTTGCTCCCGGTAGCCAGCTTTTCGCAACTGCCCCAGG  
ACTGGATAGCACCAGTTTTCGAGCCATTGTTGGCAATTTACTTGATAACGCCCTTCGAAGCCAGCTGCGTAGCGATGAAG  
GAAACAAGATCGTTGAATTTATCCTCAGCGATGAAGGCGATGATGTGGTGAATGAAAGTCCCGGATCAGGGCTGCGCGT  
CCAGACTCTACGAGACAAAATTTAGCAGGGGGTCACTACGCTGCTGACGAGCCCGGTGAACATGGCATTTGGGTT  
GTACTTGATTGCCAGCTACGTAACGCGCTGCGGTGGTGTATCTACTCTCGAAGATAATGATCCCTGCGGTACCTGTTTT  
CAATCTATATTCCGAAAGTGAACCTAATGACAGCTCCATTAACCTATTTGATCGTTGA

>Cluster\_8897

ATGCCATTTGGTAATCTTTGGTCAATAATCCAAATGTGAATAATCAATTTCTCCTGCACCTCCATTGCCTTCACAAACCGA  
CGGTGCCGGGGGGCGTGGTCAAGCCATTAACCTACGGGGCGTTGGGATCTCGTGGCTATTTACGCTGTAAAGGAAT  
CTATGGCTGATTTGCGGCAATCGTGCAGTGTGTTCTGGACTTCCTGTAATCCGATGCGCCTGCGCGCTCTGAG  
ATAACACTGAATGATGGATTTGAAGTCTTCATGATCATGGTCCGCTCGATATCTTAAACAGGAGATTTGGCTCTTCGGT  
ATTTTCGAGTTGAAACTCAGGAAGATGGTAAACATATTTGCTGCTCGGTGAGAGAAATGGTGTGAGACCTCTGTTGTTTAA  
GTGATCAAGAGTACGCTCGCTTGCAGTCCATTGATCTGAAGTAAAGACAAATTTGATTTACTGGAGGCGGTGGTGGT  
GCTGGGATGCTATGGTCAACCTTGCCTCAGATATCACGGAAGCTCGCCAAAGGATACGAGGCTGTTAGAGCCAAAGG  
GACCGGGAGTCCAAAGCGTTGGGGAGTTGAGGGAGTCAAATAGCGGTGCGGAAAACACCACAGAACTCAGACTCA  
CCTCAACTTCAACTTCACTTCCAGCTTCCGCTTTCGTTTTCAGATCCATAACTTTGGTTGGCTTGGGGACTGTTGCTACAGTCTG  
ATAGGTTTGGCGGCGACGGTATTTGACAGGCGTTGCAATGACGCGGAGCCGATAGCCCAACACGACCGACCTGA  
TGCAGTGAAGTCAACTGAAACTGCGACAAGAGATCAGTTAACGAAAGAAGCGTTCCAGAACCCAGATAATCAAAAAG  
TTAATATCGATAAGCTCGGAAATCGGATTCCTGTCAGGGTATTGAAAGATGATGTTGTTGCGAATATGAAAGAGCAGGCT  
AAAGCAGCAGGCGAAGAGGCAAAACAGCAAGCCATTGAAAATAATGCTCAGGCGCAAAAAAATATGATGAAACAACAGC  
TAAAGCCAGGAGGAGCTGAAAGTTTATCGGGGGCTGCTACGGTCTTAGTGGCGCATGATTTCTGGTGGGGGAAATG  
GTGTTGCCGCTACCGCTGCGCTTCATCGAAAAAATCAGCCAGTGAACAAACAACAACACTACTACTACAACATAAAGC  
GCAGTACGGTAGAGATAAAGCCTGCAATAATACACCTGCACAGGGCAATGTAGATAACCCCTGGGTCAGAAGATACCAT  
GGAGAGCAGAGTACGCTCGATGGCTAGCACCTCGTCACTTTCTGACACTTCCAGCATAGGGACCGTGCAGAAATCCGT  
ATGCTGATGTTAAAACATCGCTGCATGATTCGCAAGGTGCGGACTTCTAATTTCTAATACATCTGTTTCAAGATATGGGAA  
ACAGATTTCTGTTGATATAGCACCTTCAACATCTCCCGGGTACTACTGATAACGGCGCACGGTTATTAGGAAATCC  
AGGTGCGGAGATTCAAAGCACTTATGCGCGTCTGGCGCTAAGTGGTGGATTACGCCATGACATGGGAGATTAACGGGG  
GGAGTAATAGCGCTGTAATACTTCAATAAACCACAGCGTGGGGTCCCATCGTTTCTGCTAA

>Cluster\_20248

ATGCGTACTAGCAATACCTGCTCTCCACTCTCAAGGAGACCTTCCGACGCGGAGGTGATCAGCCATCAGCTGATGCT  
CGCGCCGGGATGATCCGCAAGCTGGCCCTCCGGTTATATACCTGGCTGCCGACCGCGCTGCGGTTTGAAAAAAGTGC  
AAAACATCGTGGTGAAGAGATGAACAACCGCGGTGCGATCGAGGTGTTAATGCCGTTGGTTCAGCCATCTGAACGTGG  
CAAGAGAGTGGTCTGTTGGGAACAGTATGGCCCGAATTTCTGCTGCTATTGCTGACCGTGGTACCGTCCGTTCTGCT  
CCCAACTCATGAAGAAGTATTACAGACTGATTCGTAACGAGCTGAGCTCTTACAACAGCTGCCCTGAACCTTCTATC  
AGATCCAGCAAGTTCGCGCAGGAAGTGCCTGCGCTTTTCGGGCTCATGCGTTCCCGGCAATTTCTGATGAAAGATGCT  
TACTCTTTCCATACTTCTCAGGAATCCCTGCAGGAACTACGATGCAATGTATGCGGCTACAGCAAACTTTCAGCCG  
CATGGGGCTGGATTTCCGCGCGGTACAGGCCGATACCGGTTCTATCGGCGGTAGCGCTCTCAGCAATTTTCAGGTGCTG  
CGCAGGCGGAGAAAGACAGATGGTCTTCTCCGATATCTGACTATGACAGCAACATGAACTGGCAGAACTTTCAGG  
CCGAAAGAACCAGCGCTGCTGCTACCCAGGAAATGACGCTGGTTGATACGCCGAAACCGGAAACCATCGCGAACTGGT  
TGAACAGATCAATCTGCCGATTGAGAAAACGGTTAAGACTCTGCTGGTTAAAGCGGTTGAAGGAGTAGCTTCCGCTGG

TTGGCTGCTGGTGC GCGGTGACCACGAGCTGAACGAAGTTAAAGCAGAAAACTGCCGAGGTTGCCAGCCCGTGACT  
TTTGCGACCGAAGAAATAATTCGTGCGGTGTTAAAGCCGGTCCGGGTTCACTGGGTCCGGTAAACATGCCGATTCCGGT  
GGTGATTGACCGTACCGTTGCGGGGATGAGTGATTTCCGTGCTGGTGCFAACATCGATGGTAAACACTACTTCCGTATCA  
ACTGGGATCGCGATGTCGTACCCCGGAAATGCTGATATCCGCAACGTTGGTGGCTGGCGATCCAAGCCCGGATGGTCAAG  
GGTACCTGCTGATCAAAAGCGTGGTATCGAAGTCGGTACATCTCCAGCTGGGTACCAAGTACGCCAGCGGAAAGC  
CTCCGTACAGGGTGAAGATGGCCGTAACCAAATCCTGACGATGGGTTGCTACGGTATCGCGTAACCGGTGTGGTAGCAG  
CGGGGATTGAGCAGAATACGACGAACGCGGCATCGTATGGCCGACGCTATCGCGCCGTCCAGGTGGCGATTCTGCCA  
ATGAACATGCACAAATCCTCCGCGTACAGGAATGCTGAAAAAAGTACAGCGAAGTGGTACACAAGGTATCGAAGT  
GCTGCTGGATGACCGAAAGAGCGTCCGGGCGTATGTTGCTGATATGGAACGATCGGTATTCGCCACACTATGTTGC  
TGGGCGACCGTAACCTCGACAACGATGATATCGAATAATAAATATCGTCTGTAACGGCGAGAAACAGTTAATTAAGACTGGT  
GACATCGTCGATTATCTGTTGAAACAGATTAAAGGCTGA

>Cluster\_27899

GTGAAACAACAGATACAACCTTCGTGCGCGTGAAGTCGATGAAACGGCCGACTTGCCCGTGAATTGCCCTCCCTTGCTGCG  
CCGTTTATATGCCAGCCGGGGTGTGCGTAGCGCGCAGGAAGTGAACGCAGTGTAAAGGCATACTGCCCTGGCAGCAAC  
TGAGCGGCGTCAAAAAGCCGTTGAGATCCTTTACAACGCTTTTCGCGAAGGCACGCGGATTATGTGGTCCGGTATTTC  
GACCGCCGCGTCCACAGCAGCGGCTCTAAGCGTCTGGCGATGGCGTCGCTGGTTGCAGCAATATCGACTACCTGGT  
TCCAAACCGTTTCCGAAGCGGTTACGGCTTAAGCCCGGAAGTAGTCGATCAGGCTCATGCCCGTGGCGCAGTTAATG  
TCACGGTGGATAACGGTATTTCCCTCCATGCGGGGGTTGAACACGCTCGTTCGTTGGCATCCCGTTATGTTACCGAT  
CACATTTGCCAGCGACACATTACCCGCGAGCGGAAGCGATCATTAACCTAACTTGGCGGACTGTAATTTCCCGTCAAA  
ATCACTGGCAGCGTGGTGTGGGCTTTATCTGATGCTGGCGTGGCACCTTTTGGCGGATCAGGCTGGTTGATG  
AGCGCGCATCGCAATTCCTAATCTGGCAGAACTGCTGGATCTGGTAGCGTTGGGGACAGTGGCGGAGCTCGTCCGCGT  
GACGCTAATAATCGCATTTGACCTGGCAGGGGATGAGTCGATCCGTGCCGGAAGTCCGTCGGGGATTAAGCGCT  
GCTGGAAGTGGCAATCGCGATCCACAAAACTCGCCGCGCAGGATTTAGGTTTTCGCGTGGGGCCAGCTCTCAATGCTG  
CCGGCGACTGAGCGGATGATGTCGTTGGCGTGGCGTGTGTTGTTGTGACAACTTGGCGAAGCGCGTGGCGAAT  
GAACTCGATGCACTAAACCAAACACGTAAGAGATCGAACAGGGAATGCAGGTTGAAGCGCTACTCTGTGCGAGAAGCT  
GGAACGTAGCCGCGACACGCTGCCAGGTGGGCTGGCAATGATCACCCGAATGGCATCAGGGCGTGTGGCATTTCCG  
CATCGCGTATCAAGAGCGTTTTTACCGTCCGGTTATCGCTTTGGCGCAGCTGGTGTGATGATCAGCTGAAAGGTTCCGGT  
CGCTCCATTCAGGGGCTGATATGCTGATGCGTGGAGCGATAGACACACTTACCCGCGCATGATGCGGCGAAT  
CGGTATGCGATGGCGCGGGTGTGCTGCGTGAAGAGGAGAAATCGAACTCTTCAACAACGGTTGGCGAACTGGTTA  
CTGAGTGGCTGGACCTTCGCTATGCAAGCGAAGTGTGTCGGACGCTCCGTTAAGTCCCGCGGAAATGACCATGGA  
GTGGCGCAGCTGTGCGCGATGCTGGCCGTTGGGGCAGATGTTCCCGGAGCCGCTGTTGATGGTCAATTTCCGTCTGCT  
GCAACAGCGGCTGTGGGCGAAGCTCATTTGAAAGTCAAGTTCGAAACCGGTCGCGCGGCTCCGCTGCTGGACGGTATG  
CTTTAATGTCGATACCGCCCTCGCCGATAACGGCGTGGCGAAGTGCAACTGGCTTACAAGCTCGATATCAACGAG  
TTTCGCGCAACCCGAGCTGCAAAATTATCATCGCAATATCTGGCAATTTAG

>Cluster\_34162

ATGCAAGGCTTGGTCCGCACTACTAATCCTGCTGGCGCTTGCAGCCTGGCGGCGATGGCGACGGCGGCTTCAGAGT  
GCCCGCTTGTGGGATATCTCTGTCGGGCTGTACTGGGCCCTCAGTCATCGGCGTATCGCGCGGGGAGACGC  
TGAGCTTTCTGTCCGAGCTGGGCGTGGCGCTGCTGTTGTTTCATGGTCGGACTGGAATTTCCCTCGGAGACTTCCGGCT  
GCCCGCAGGACGGTGTGATGGCGGGCGTCTGTCAGATGATCCGCTAGCCCGCGTATGCTCTGATGTTGCT  
GGGCGAGCCGGCAGAGCGCGCGCTGCTCGGCACTGGCGCGCATGTCGTCACAGCGCTGGTTCAGCCGCAACTGG  
CCGACCAAGGTGAGCTCACACCCGCGCAGGACGAGTGCATCGCGTGTGCTTTTCAGGACTGGCCAGCGTGGCC  
CTGCTGGCCTTGTGGCGATCTGGCGCGCGGAGTCCGGAAGATCGAGCATGTGCTGCTCGAAATATCCGGTGTGCT  
GCTGCTGTTTCGCGGCGAGCGCCCTCGCTCGCGCGCTGCTGTCATGCGCTGCTGGGCTGGGTGGCGGCGGCGCAG  
AGGAATCGTTCGTGCTGCTCCTTGTGCGTGGTGGTGGCTGCGCGCGCGCTGCGCACGCGGTCGGCGTATCCGCGCC  
CTGGGGCCTTCCCTCGCGGGATGGTGTGGGCGAGAGCGACTTCCGGCACCATGGAAGCCACTCAGGCGTTTTCC  
CGATGTGTTGTCGGGCGTGTCTTTCGTGACCATCGGCTGCAACTGGACGCGACAGATTTCTTCGGCACCGCTGGCGG  
TGCTGGCGTGGCTGGTGGTGTGCTGATCCGTTCAAGATCCTGCTCAATACGCTGCGCTTGGCGGCGAGCGTGGCTGACAGT  
CTCGATGCTTGGCGACGGGATAGCGTTGGGGCAGGCGCGAGTTCGCGCTGCTGTTGTTGGGACGGTCTTGCAGCA  
GCATCTGATCCCCGCGACCGTCTCAACCCATGCTGGTTCGCGCTGGTCTCAGCATGGCCCTGGCACCGCTACTGATCC  
GCCATCAGATGTACTTCCCGGTTCTTGGCCGACCGCGGCGTCACTGAGCCACCCAGGCTGAAGAAGTTCGAGATC  
GCCGCGCAGACGACGCGATATCGAGACCATGTCATCATTTGCGCGCGGGCGAGCTTGGCTGACAGTCAAGGATTTCT  
TCGCCACGCGCGGCTGGCGCATCTGCTGCTGGAGGGGACGCGCAGAAGTTCGAGGCGCGGCTGGCGCGGCGCGCGG  
TGTTCATGCCATGCGAGTCCGCGCCGATCCTTGTGCTGCGGCTTGACGATGCAACTTGGTGGTGTGCTGACGTT  
GCCATGCCAGCAAGCGTTGCGCATCGCCAGGCGATTGCGGAGCAGCTCCGGCGCTGACCTTGTGGGTGTATGCA  
AAGTACGACCGCGCGATGCAATTTGCGCCATGCCCAGCTGCGCGTGTATAGCAATCCTTTGCCGCGACTATGGGCG  
TGGGGAACAGGTGATGTCGACGCTTGGCATGTCGACCGAGCTGATTGAAGGACACATCAGCGCAATGCGCGCGCTCT  
GACAGCAGCGTTTCCAGGGAGTTCATGCTCATGA

>Cluster\_25677

ATGAAACAACCGTTGACGCTTATATCGCCAAAACACTCGAATCGGCAGGCGTGAACGCATCTGGGGAGTACGGGCGCA  
CTCTGTAACGGTCTTAGTGACAGTCTTAATCGCATGGGCACCATCGAGTGGATGTCACCCGGCATGAAGAAGTGGCGG  
CGTTTGGCGCTGGCGTGAAGCAACAATAGCGGAGAAGTGGCGGCTGTGCGGGATCGTGGGTTCCCGGCAACCTGCAC  
TTAATCAACGGCTGTTCGATTGCCAACCGCAATCACGTTCCGGTACTGGCGATTGCGCGTCAATTCCTCCAGCGAAAT  
TGGCAGCGGCTATTTCCAGGAAACCCACCCACAAGAGTTATTCGCGAATGTAGTCACTATTGCGAGCTGGTTTCCAGCC  
CAGAGCAGATCCACAAGTGTGCAATTTGCTATGCGCAAGCGGTTAAACCGTGGCGTTTCCGTTGTTGTTACCG  
GGCGAGGTGGCGTTAAAACCTGCGCCAGAAGGGGCAACTACCCACTGGTATCATGCGCCACAGCCGGTAGTAACACCGGA  
AGAAGAAGAGTTACGCAAACTGGCGCAACTGCTGCGTTATTCAGCAATATCGCCCTGATGTGCGCGGCTGGCGCGG  
GGGCGCATAAAGAGTTAGTTGAGTTTGGCGGAAAATTAAGCGCCTATTTGTTTACGCTGCGCGGTAAGAGCATGTC  
GAATACGATAATCCATATGATGTCGGAATGACGGGATTAATCGGCTTCGCTCAGGTTTCCATACCATGATGAATGCCGA  
TACGTTAGTGTGCTGCGCACGCAATTTCCCTACCGCGCTTACCCGACCGATGCCAAAATATTAGATTTGATATCA  
ACCCAGCCAGCTCGCGCGCATAGCAAGTATGCGCGCTGGTGGCGGATATCAAATCAACCTGCGGGCATTTGCTG  
CCACTGGTGAAGAAAAACCGATCGCAAGTTTTCGATAAAGCGCTGGAAGATTACCGCGACCCCGCAAGGGCTGGA  
TGATTTAGCTAAACCGAGCGAGAAGCCATTACCCGCAATATCTGGCGCAGCAAAATAGTCAATTTGCGCGCATGAGC  
CCATCTTACCTGTGACGTTGTCACGCAACGGTGTGGCGGCGCAGTTATCTGAAAATGAACGGCAAGCGCTGCTGTTA  
GGTTCGTTTAAACCGGTTTCGATGGCTAACGCCATGCCGAGCGCTGGTGGCGCAGGCAACCCGAGCGGCACTGAGT  
GGTCCCATGTGCGGCGATGGCGTTTTAGCATGTTGATGGGCGATTTCTCTCGGTAGTGCAGATGAAGCTGCCAGTGA  
AAATATCTGCTTTAATAACAGCGTGTGGGCTTTGTTGGCGATGGAGATGAAAGCTGGTGGCTATTTGACTGACGCGACC  
GAATTACAGCAGCCAACTTTGCCGAATTTGCCGAAGCTGCGGCTTACGGGTTATTCGTTGATAAAGAAAGCTGAAAT  
CGATGAAGCTCTGCAACGCGCTTCTCCATCGACGGTCCGGTGTGGTGGATGTTGGTGGTGGCGAAAGAAAGATTAGCCA  
TTCCACCGCAGATCAACTCGAACAGGCCAAGGTTTACGCTGTATATGCTGCGCGCAATCATCAGCGGGCGGCGGTGAT

GAAGTGATCGAACTGGCGAAAACGAACTGGCTAAGGTAA

>Cluster\_21626

ATGAGTTTTTTGAAAAATATTTCTGTGTGCTATTTGTACGTTTTGTTAACAAATCACGCCCTGTGCTGAAACAGCGGACT  
GACTACCACAACATTTTCTTCTGAATTTGCCGGTATTTAATCGCAAATATCTGCAATGGGGGCCAGCCCTCATCTA  
TTTTCCGCAACGTTATCAGGATATTCACGTCGCGGACGCGTCTTTTGCATCAAATATGCTGCATCTGCCGGGCTTCTGCT  
TCAGCAATGTCGTGGAGTACTCTGGCTTACGGTCTTGGTGTAACACTACAGTCAGTCTTGGAAATTTATGCCGAGGAAAAAC  
TTTTGCTGAGGAGGTGGCAAAATGGTTTTAGATAAAAACGGCTATAACGCGTTTTATACACGCCAGCATGAGTGGCG  
GTGTCAAGGCTGGCATGGCGGGTTTTGATAATTTGCTACGTTACCAGTACTTCCCGTTTTCTGCTGCTGCGCGGGTTATT  
CAGTGGTTACCTCCTGAAGATAAAAGCCTCGCTTACGTCGCTTTATATATACTCCCGAAGAGTATCGTTGATAATGAGTG  
GTACAGTTTTCTACTACGCTTATTTATTTTCGAGGTTCTTGGTCCAGAGTTCGTTTGTATTTCTGGTCTAGTAACTTAAAGTG  
AGGATCTGTTTTTTGTGATAACGGTCAGGTTCTGTTTTATTTCTGATGTAATTTCTACTTGGCAGGCAGCAACCACTGAA  
AATCCATTTCTCATCTCTCCACGTCGCATCTTCTCTGGAATAATCTGGCATCTCAGGATATTCAGATATTTCTTAA  
CGGCTGACTGAAACAATAGATGGCCTCTCTGAATATCGCGGATATCTCGTTTTTATGAAATATTCTCTCTGCTGACG  
TAGACAATATCGTTCTACGGTAGATCTCCGCATCGGTGATTCGCAAGTTTTACAGAATCTGGTGTATTGCTATTCTCT  
CCGACACAGGTTGGTATACAGCAATTTCTGGAGGTAATATACCCCTCTGTTATTGACCCCGTTTTAAGCCCGTTGG  
AGGTACGGGCAGCGGTACGGGTACAGGCAGTGGTACGGGTACAGGCAGTGGTACGGGTACAGGCAGTGGTACGGGTACAG  
GCAGTGGTACGGGTACAGGCAGCGGTACGGGTACGGGTACGGGTACGGGTACGGGTACGGGTACGGGTACGGGTACGGGT  
ACGGGTACAGGCAGCGGTACGGGTACAGGCAGTGGTACGGGTACGGGTACGGGTACGGGTACGGGTACGGGTACGGGTAC  
CGGTACAGGAGCTGGAGTCGGAACAGGTTCTGGCAGTACCAGTGAACAGGTAATGCTACGGTAAATGTTAAGCTGACT  
TGTCAAATGACTTTGGCAGTCCACTTTCAGTGGATACGCTGATATTTCTATCTCTGAGCCTTCTATCATTTCTTCTCA  
TTGTGGAATATGTGGCTTTCTGCGCGTGTATTTTCTGCTGATAATTTCTCACGGGGCAGTCTCTGCTTTTACATTTCAAT  
CTGGAATAAAGATTTCAACTGGATACTTTTGTGTGCTGCTTGATACCGATGAAGTCAGGGCCTTTCTAGGTTGATTA  
TGACGCTGATTTGGCTCCATGCTTTTCTTATTTGTTCTTGGTCTCTGA

>Cluster\_37695

ATGCCATTTGGTAATCTTGGCCACAATCCCAATGTGAGAGCTTTAATTCACCTGCACCGCCATTACCTTCACAAACCGA  
CGGTGCAGGAGGTGCCGTAATCAGCTCATAACTCAAATGGCCCGATGGGGTCTCGTTTGTCTATTTAGCCCTATAAGGA  
ATTTCTGTTGCTGATGCTGCTGATTTCTCGTGCCAGTGTATTTCCCGACTTCTTACAAATCCACTGCGCTTTGCTGCGTCC  
GAGGTATCTTTGCAATGGTGGCTTGAAGTTCTTTCATGATAAAGGGGGCTTGAFACTCTTAACTCTGCTGCTATTTGCTCT  
GTTATTTCCGTGTTGAAACTCGGGATGATGGCAGCCATGTTGCTATCGGGCAAAAAAATGGCCTCGAGACCCTGTTGTTT  
TAAGTGATCAAGAGTTTTCTAGCTTACAGTCCCTTGATCCTGAAGGTAATAAACAATTTGTATTTACTGGAGGCCGCGT  
GGCGCAGGCATGCTATGGTCACGGTTGCTTCAGATATCGCGAAGCCGTCAGAGGATAATAGATAAATAGAACCAA  
GGATACAAAGGAGACGAAGGAGCCAGGGATCCAATATGTTGGCAGGAAAAAATCATTGAAATTCATACCTCAACCTCAA  
CTTCTAGCTCCGTCAGATCTTAACTTTGGTTGCTATTGGGGACTATTGCTGCAGGCTGATAGGGATGGCTGCGACG  
GGTATTGCACAGGCTGTTGCGTTGACTCCAGAGCCGGATGATCCAACACTACTACCGATCCTGATACTGCAGCAAGCACAGC  
TGAAGCTGCACAAAAGATCGGTTAACCGAGGAGGATTCAGGATCCAGATAAACAAGTTAATACTGATGAGAACC  
GAAATGCAATTTCCGTAGGGAATTAATAGATGATGTTGTTGCGCAAAATAGCAGAACAAGTAAAGCCGGGGGGAACAG  
GCCAGACAGGAAGCTATTGAAAGTAATTTCTAGGCGCAGAAAAAATATGATGAGCAGCATGCTAAACGCAACAGGAAAT  
GTCTCTTTTCTATCGGGGTTGGCTACGGTATTAGTGGGGCGCTGATTTCTTGGCGGGGGAATTTGGTCCGCTGTTACTGCTG  
CTCTCTATCGGAAAAAATAACCGCAGAACAAACAATCACTACAGTACAGTACGATAATCAGCTACGATAATCAGCAATAACGCA  
TCTGCACAGGGCAATACTGACACAAGTGGGGCAGAAAGTCTCCCGCGAGCAGGCGCAATTCGAATGCCAGCTTGCATC  
GAACGGGTCTGATACCTCCAGTACGGGCAGGTTAGAGAATCCGTATGCTGACGTTGGAATGCCAGAAATGATTTCACTGG  
CTCGTATTTCCAGAGGAACCTATTTATGATGAGGTCGCTGCAGATCCTAATTTATAGCCTATTCAACATTTTCTAGGGAAC  
AGCCAGTTTACCGGAAGGTTAGTGGGAACCCAGGGCAATCCAAAGTACTTATGCGCTTCTGGCAAGCAGCGGGCGG  
ATTGCGTTTAGGTATGGGAGGATTAACGGGGGGGGCAGAGCGCAGTAAAGTACTGCCAATGCCTCACCAACCGGGGAC  
CCGACGTTTCGTTTAA

>Cluster\_14731

ATGGCCAAAGCACCAACTAAAAAGCCAAAGCAAGAAAGGCTTTGAAGAAACATTATGGGATACCGCAAAACCAACTTCG  
CGGTAGCGTTGAGTCTCCGAATACAAGCAGTGGTGTGAGCCTCGTGTCTCTGAAATTCATCAGCGACAAATTTGAAG  
CACGCCGCAAAAAATGATTTGCCGATGGCAAGCTGACTTCTTGAAGTGAAGTGTCTACCAGCAGGACAAATTTTCT  
TACCTGCCGGAAGAGGCGCGCTGGTCTTTTATCAAAACAAATGCCAAACAGGACGATATTTGGGTCGCTATTGACACCGC  
CCTCTGCACCAATTTGAGAAACGTAACCCACCTTGAAGCGCGCTGCCAGCAACTCTCAGCCTGATGATTTGGA  
CCAAAAACTGGCGTCACTGATTGATACCATCGACAACATCGAAACGCTGGCACAGAACTGACGTTGAAACGTTATCG  
AAAGAAGCCTGGTGGGACGCGTTTACGAAATCTTCTCGGCAAGTTTCCCGCAACCGAAGGCAAGGCGGTGGTGAAT  
CTACAGCCAAAATGTGTGGTTACTGTTAACTGAAATGCTCGAACCTTCCAGGGCAAAATTTATGACCCGCTGCTGCG  
GCTCGCGAGGATTTCTGTCAGTGGTGAAGTTTGTGAGAGCCATAGGTTAAAGCCGTGATATGCGCTTATGCTGATG  
CAGGAATGACAGCCACGAGTATAAATGGCAAAATGAACCTCGCCATTCGGGGTCTTTCAGTAACTCGGCGAACG  
CCCGCAGACACCTTCTTTAGCGACAGCACCCGGACCTGAAAGCCGACTACATTTCTGGCAACCCGCGTTCAACCTGA  
AAGACTGGCGTAAATGAAGCCGAATTAACCAAAGATCCAGTTTTGGCGGTTATCGTATCCGCAACCGGTAACGCCAAC  
TACGGCTGGATTTTGCATATGCTCTCAAGCTGTTCGGCTAACCGCACAGCAGGTTTTGTGCTGGCAACCGGTTCCGATGAG  
TTCTAACACCAGCGGTGAAGCGAGATCCGTGCGCAGATGATCGAAATGATCTGATCGACTGATGATGCGCCTACCTG  
GACAGTTGTTCTACACCACGAGATCCCGGTGTGTTTATGTTTATGACCAAAATCGAAGGCTGCCGACCCGGCCAAAGGT  
TATCGTATCGTACGGCAGGACGCTGTTTATTTGATGCGGTAACCTCGGCAGCATGATAGCCGCAACTAAAGAGTT  
AACAGCGGAAGATATTGCCACCATCGCCGATACCTACCATGCTGGCGCAGCAGCGCGGAAGAACTGGCTGCACGGATTG  
CGCGTGGTACAGCAAGCTGGAAAAATGAAGACCAGGCAAGTCTTGCAAAGTCCGACCCGCAAGATATTAAGAT  
AACGACTATGTGCTGACGCGGGCCGCTATGTTGGTGCAGCCGAGCAGGAAGAGGACGGCGTGGCATTGAGACGAAAT  
GCGCAATTTGTCGAAGACGTTGTTGAGCAGATGAAGCAGGCGGAAGAACTGGATCGTCCGATTCGCCAGAATCTGGAGG  
GGTTAGTTATGGGAAGTAA

>Cluster\_6740

ATGGCTCGACTCTTTACCTTTTCAAGTAACTACTCTGATGGCGCTGGATGACAGGCACCGGAAGTATTCGGGCTGT  
GATATTGACCTTGAAGGCAATCAAATAGCAGTGGGACAGGCGGAGTGGCGGATCTGGCAGTACCGGACGTTCTTGGTT  
CTATGGAATTTGATCTCAACAAAACTGGCACTGGCGTGTGAGTGTATGCGCCAGGCGCTGCACACCGCGCATAGCC  
CCGGAGTATATCGCTGCCGTTTTCGGCATGTTGATGCGTGAAGGCATTTGTTTTATATAATAATGAAGGAGCCCGATCTG  
GGCTTACCGCAATGTGGATGCCAGAGCGGCAGCGAAGTTACGGAATTAAGAACTGCACAACAATACCTTTGAAACG  
AAGTTTATCGCGGACCGGCAAAACACTGGCTTTAAGTGGCATCCCAAGATTTCTTAAAGTGGCTTGGCTGGCGACCATCTTCCGAT  
ATTTACCGTCAAGCATCAACCATCACCATGATCAGCAGTGGCTGGCTATATGCTCAGCGGCAACTGGCGTGGATCC  
CTCTAACCGTGGCACCCAGGACTTCTTGTATCTAACCCGCTGACTGGAACCTGCAATTTGCTGGATATGGCTGGCTG  
GTGGCAGATATTTCTCTCTCAAGAAACCGGCATTTGCTGGCGTGGTAAAGTTACAAGCGCGCAACTCTGCGGT  
CTGAAGGCGGCACTCCGGTGGTGGTGGAGGAGGCGAGTGCAGCTTGGTTGCTTGGGTTAGGCGTTGTGCGTCCGGC  
ACAAACCGCGGTTCTTGGCGGCACATTTGGCAGCAAGTTGTAATTTAGCCGCGCGGTGACAGACCAGAAATGAAGC



TGCGCGTTAATCCTCATGTTATTCTCGCATGGTACAAGCTGAATCTATAAGCTTTTTTACCGGACTCACCATGCGCTGG  
TTCCGCGATGCTTTCTGTGCCGAAAGAAAACCTGATTGCCGAACTTTAGGCATCGACACCTATACGCTGCTGGAAAGAGAT  
GGCCAGTCGGGTGCCGCTGGGTGCTGGGGCGTAAATGCCGATCTTCTCCGACAGAATGCGCTTTAAAACCTGGTATCAGC  
CTGCGCCTTCCTTTATTAACCTTGTCCATTGACCCGGATAAATGTAACAAAGCGACATTTGCTCCGCTGGGAGAAAAT  
CGCGGATGTATACGGGTGTAACCTGCAGCAAATTTGCTGAAATTTCTCGAATATTCATCCTTCACTGTTAGCTTTGCGAG  
CGGAGGTTCAAAGGAAAATTTAGGAGTCAAATTTCTCGCTGATGTTCTCGGATACCCGTCAAATATTCGGGTGGTCAAAG  
AAGCCACTGCATTAGGATGTGCCATTGCAGCTGGCGTGGTGCAGAAATTTTTTCATCAATGGCAGAAACCGGAGAACCC  
CTGGTTCGCTGGGAAACGGACGCACACCCAGACCCGAAAAGCATGAACCTTTATCAGGATTCACGCGATAAGTGGCAGGC  
AGTTTATCAGGATCAGCTGGGGCTGGTTGATCATGGACTGACGACGCTGTTATGGAAAAGCGCTGGGTTATAG

>Cluster\_3662

ATGGTAACAAAAAGGTA AAAACAAACCACCCGTA CTATCGTGTTTTATCTGGCACCTCCATGCGGTTTCCCCACATACA  
TGAAGCTGTTTCCGAACAGTTGCTTCTACTCATTTTCAAAGCAGCAGATTGTATCTGGATCCAGAATATCGTCCCTGGT  
TTGATGAACAACATCGGATTTCTCTCGGCATTACCGCTAACACAAAAC TACAAAATATTTTAGAGCAAAAATAGAGAGAC  
TACTCCATAGGTGAGACCGATAATCCACTATCTAAAGAGCTGTATGCTGCTTTTCAGGTTATGTGCCATTTATACAATGG  
TTTTGATAACAGACTCGTCAAGCTGAAAACCTGGGGAGATATGAACAGGGAACCAACAGCAAAAATTTGTCGGCCAAAATA  
GTGGTGGCTGAAAACCTGAGATGGAAGAATTCGTGAGAAACGATTTGTTCAAATATCTGCACAGATTGCAAAGCTCAT  
TGCTCAACCATTTCCCGCTGCTGGTTGCGACAGGATATTGCCATCAAGATCTTTCTGTTGCGCACTCATGTACTAAAGAAT  
ACTGGAACAACCTGAACCGATACCATCAAATGATGAATCAGCGATACTTGCCAGAACCTTGGTTGGCTATTTAAACAAC  
GCTATCACTCAGAAAACAGAGGTTCTGAAATGGCTTTCTCCTTTTGA AAAATGAATACAAAAGTCCCTGGAAATTTGAGAAA  
CCAGATACTAACGATGTGAGTAACTTAGAAAACAATTGACTAACATCGGGCGTACAGAAATTCGTGGACAAAATGTTTTCT  
GCTAGCTCAAAAATGCAACAAGATAATATATGATGGATACGTTAAACTTTTATGCTCTGAAAATATATGAATGTTTTAA  
ATAAATTAGTGCAATATTTTAAAGGAAATGATTTTATTCGTTACACCTGGAAATTCACAACAATATTTCCGATGAAAGT  
GACACGATTTGAAAACCCACCGCATGGGAAAAGACTATTTGCTAAACTACTATACAGCGCGATGAACCTCTGAAAAGTAT  
TTATACCAATACCCCTGCAGGATGCAGCAATGAATCTTGTGCTGCTGCAACAGGCATACATAGACTTAAAAGGG  
AAATAAATTTATCCAGGAATAAACATTTGATGCAAAAAGAGCGTGAATTTAGAAAATCTATTTGAATTCAGGAGCGAACTGAAT  
AATCTCACAAACATCATGAAAACAACCTGGAACATTTGAAAATGGTATAACGCCAATAAAAATTTCTGTTGGTAAGTAAACA  
AAAGAAAACGTACAGAAAAGATTGACGTGAATATTCGCTTTGCAAGGACTGAAAGGCTATGATCTGAATGAAGGTATACCTG  
ATGGTCAGGGACCGCAAAAATTAAGATGGTGTGAATGAATCTGTCAGAGCAGATGGCAGTCTACAACTCCACAGATAATC  
AGTGACACTTCGCTTAAACGTTACCGTCAAGCAGTTCAACACATTTAAGGATGAGATCGACACGTTGCTGATAGCACA  
GAGGGAAAAAATAAAATAAATCATATAGCGAAGATAGATACCGATACGACCTTTATGGGGAAAATGCTGCTGTCGAAC  
AGTAA

>Cluster\_61996

ATGGCAGCTAAAGACGTA AAAATTCGGTAACGACGCTCGTGTGAAAATGCTGCGCGCGTAAACGTA CTGGCAGATGCAGT  
GAAAGTTACCCCTCGTCCAAAAGCCGTAACGTAAGTTCTGGATAAATCTTTCCGTTGCACCGACCATCACCAAAGATGGTG  
TTTTCCGTTGCTCGTGA AATCGA ACTGGAAGCAAGTTGCAAAAATATGGGTGCGCAGATGGTGAAGAAGTTCCTCTAAA  
GCAAAACGACCTGACGGCAGGTAACACCTGCAACCTGCTGGCTCAGGCTATCATCACTGAAAGGCTGCT  
TGCTGCGGGCATGAACCCGATGGACCTGAAACGTTGTTATCGACAAGCGGTTACCGCTGCAGTTGAAGAACTGAAAGCGC  
TGTCCTGATACCTGCTGACTCTAAAGCGATTGCTCAGTTGGTACCACTCTCCGCTAACTCCGACGAAACCGTAGTAAA  
CTGATCGCTGAAGCGATGGACAAAGTCGGTAAAGAGCGTTATACCCGTTGAAGACGTTACCCGCTGCAGCGCAACT  
GGACGTGGTTGAAGGTATCGAGTTTCGACCGTGGCTACCTGTCTCTTACTTCA TCAACAAGCCGAAACTGGCGCAGTAG  
AATGGAAGCCCGTTTATCTGCTGGCTGACAAAGAAATCTCCAACATCCCGGAAATGCTGCGGTTCTGGAAGCTGTT  
GCCAAAGCAGGCAAAACCGTGTGATCATCGCTGAAGATGTAGAAGCGAAGCGCTGGCAACTCTGGTTGTTAACCCAT  
CGCTGCGCATCGTGA AAGTTCGCTGCGGTTAAAGCACCGGGCTTCGGCGATCGTGAAGCTATGCTGCGGATATCCGA  
CCCTGACTGGCGGTACCGTGATCTCTGAAGAGATCGGTATGGAGCTGGAAAAGCAACCTGGAAAGCTGGGTGAGGCT  
AAACGTGTTGTGATCAACAAGACACCACCTATCATCGATGGCGTGGGTGAAGAAGCTGCAATCCAGGGCCGTGTTGC  
TCAGATCCGTCAGCAGATTGAAGAAGCAACTTCTGACTACGACCGTGA AAAACTGCAGGAACCGTAGCGAACTGGCAG  
CGCGCTTGCAGTTATCAAAGTGGGTGCTGCTACCGAAGTTGAAATGAAAGAGAAAAAAGCACGCGTTGAAGATGCCCTG  
CACGCGACCCGCTGCTGCGGTAGAAGAAGCGGTGGTTGCTGGTGGTGGTGGTGGCTGATCCGCTAGCGTCTAAACTGGC  
TGACCTGCGTGGT CAGAACGAAGACCAGAACCTGGGTATCAAAGTTGCACTGCGTGAATGGAAGCTCCGCTGCGT CAGA  
TCGATTTGA ACTGCGGCGAAGAACCCTGTTGTTGCTAACACCCGTTAAAGGCGGCGACGGCAACTACGGTTACAACGCA  
GCAACCGAAGAATACGGCAACATGATCGACATGGGATCTCTGGATCAACCAAAGTAACTCGTCTGCTGCTGACGACCG  
AGCTTCTGTGGCTGGCTGATGATCACCACCGAATGATGTTACCGACTGCGGAAAACGATGCAGCTGACTTAGCGC  
CTGCTGGCGGATGGCGCATGGGTGGCATGGCGGCATGATGTA

>Cluster\_23918

ATGGATTGCAACGCAATCTTTTGTATCATCGCTTTGCTGTTGCTGCTTTTATGATCTGGCAAGCCTGGGAGCAGGATAA  
AAACCCGCAACCTCAGGCCAACAGACCAGCAGACAACGACCACCGCAGCGGTAGCGCCGCGACAGGGCGTACCGG  
CCAGTGGCCAGGGGAAACTGATCTCGGTTAAGACCGACTGCTTTGATCTGACCATCAACACCCGTTGGTGGTGTGTTGAG  
CAAGCCCTGCTGCTGCTTACCCGAAAGAGCTGA ACTTACCCAGCCGTTCCAGCTGCTGGA AACTTCAACCGATTTAT  
TTATCAGGCACAGAGCGGTTGACCCGCTGATGAGCCGATAACCCGCTAACCGCCGCTCCGCTGATTAACCTG  
AAAAAGACGCTTATGTGCTGGCTGAAGGTCAAACGAAGTGCAGGTGCGGATGACGTATACCGACGCGGACAGCAACAG  
TTTACAAAACGTTTGTCTGAAACGTTGGTATTACGCTGTCAACGCTCAACTACAACGTCGAGAACGCTGGCGAGAAACC  
GCTGGAATCTCCACCTTTGGTCAAGTTGAAGCAATCCTATCACTGACCACCGCATCTCGATACCGGAAGCAGCAACTTCG  
CACTGCACACCTTCCGTTGGTGGCGGCTACTCCACGCTGACGAGAAAGTACGAGAAATACAAGTTGATACCATTTGCCGAT  
AACGAAAACCTGAACATCTCTTCAAAGGTGGTTGGGTGGCAATGCTGCAACAGTATTTCCGCGACGGCTGGATCCCACA  
TAACGACGGTACCAACAACCTTCTACACCGCTAACTGGGTAACCGCATCGCCGCTATCGGCTATAAATCTCAGCCGGTAC  
TGGTTACGCTGGTGCAGACTGGCGCGATGAACAGCACCCCTGTGGGTTGGCCGAAAATTCAGGCAAAAATGGCAGCTGTT  
GCTCCGCACTGGATCTGACCGTTGATTACGGTTGGTTGTTGTTTCTCTCAGCCACTGTTCAAACCTGCTGAAATGGAT  
CCATAGCTTTGTGGGTA ACTGGGCTTCTCCATATCATCATCACTTTATCGTTCTGTCGATCATGTACCCGCTGACCA  
AAGCGCAGTACACCTCCATGGCGAAGATGCGTATGCTGACGCGAAGATTCAGGCAATGCGTGAGCGCTGGCGCATGAC  
AAACGCGCATCACTCAGGAAATGATGGCGCTGTACAAGCTGTAGAAGGTTAAACCCGCTGGGCGCTGCTTCCGCTGCT  
GATCCAGATGCCAATCTTCTGGCGTTGACTACATGCTGATGGGTTCCGTTGAACTGCGTCAAGCACCGTTTGCAGTGT  
GGATCCACGACCTGCTGCAAGACCCGTA CTACATCTGCCGATCCGATGGGCGTAACGATGTTCTTCAATTCAGAAG  
ATGTCGCGACCACTGTGACCCGACCCGATGCAGCAGAAGATCATGACCTTTATGCCGCTATCTTCACTGTGTTCTTCT  
TGGTTCCCGCTCAGGCTGGTGTGATATATCTGCAACACCTGGTAAACCTATTTACGACGACGATGATTTACCGGT  
GCTGGA AAAACGTTGCCCTGCATAGCCGCGAGAAGAAAAATCTGTA

>Cluster\_29171

TTGCGCTGGCCTGCATGATGCGACTCACTTGCATCGGCATCTTGGCGAGTTGCGGCTCCTGCTGCTCGCCTTTGGCGT  
ACTGACGTTATGTTTCTCATCAGGATTTCTCGGTCATTTATGTGCGCCAACATAGCTATAGCTGCTGCTGGGAAAC  
TCAAACCTGGCGCGGTGTGGGGCGTCAAGGTTGCTGCTGCTTTGGGTGCTGCTGCTTTCCGCTGGAGCGCGCTG

TTTGCTGGCATTACCGGCAGCAAACCGATCCGCTATTTCCGCTGACGCTAGCCGTTTATCTCTCATGCTCGCCGACT  
GCTACTGTTTGTGGTGTCTGGTCCGATCCCTTCTGACGGATAATTTCCGCGAGCAATCGAAGGCCGCGATCTCAATCCGA  
TGCTGCAACATCCCGGCTTATCTTTTATCCACCGCTGCTTTATCTCGGCTACGGCGGTTGATGGTGGCGGCGAGCGTG  
GCGTGGCCGAGTTTACTGCGCGGCGAGTTTGTAGGTACTGCGCCGAATTTGCTGGCGTGGGCACCTACCTGGCTGGAG  
CGCATTAACAGCGGGATCATCTCGGTTCCCTGGTGGGCTATGCGAACTGGGCTGGGCGGCTGGGCTTCTGGGAAATG  
CGGTGAAAACGCTCTTTACTACCTGGCTTTCTGCCACAGCGCTGCTGCACAGTTTATCCCTGACACGCCAGCGGGGG  
ATTTTCTCGCCACTGGTGGTGTGCTGGCGATAGTTACTCTGATGCTGCTGCTGGCACGTTGATGTCCGTTCTGG  
CATTTCTGGTTTCCGTTTATGCGTTCGCGCTGGATAACGCTCCGCGCCGTTGCCGTTGTTCCGCTGTTTGCACCTGATAGCC  
TTGCGTCTCTGGCTCTGATGGCTGGCGAGCGCGGAGCGGTGGCCGCGGCTGGCTTTTCCGGGTTATCGCGGAAATG  
TTAATCTCTGCTACGCTGTTGCTGTTTTGCACAGTGTACTGATGCTGCTGGTGGAAACGCTTTATCCGATGATTTACGG  
CCTGCTGGGCTGGGACGCTCTCCGTTGGCGGCCGATTTTAAACCGCGCAGCTTACCCTTTGCTCTGTTGATGCTGG  
TTTCCGCGGGGATCGTGGTTTTCCAGCGTCCAGCTCAGCAGATCAGCCTGAATTTACAGCCGGGTACGCGGATCGCT  
GGCAGGATACACCTTCCGTTTTGAGCGCTCGATCTGCAAGCCAAAAGCAATTACACCAGCGAAAAGCGATAGTGGCAC  
TGTATTGACCATCAGCAACCGATTGGTGAATTAACGCGGAGCGCGGTTTTTACGAAGCAGCTGCTCAGCAAATGATGGAA  
CCGTCAATTCGCTGGAATGGCATCCATGACTGGTATGCGGCTATGGGCGAGAAAACCGGAGCGGATCGTTACGCTTTTCG  
TTTGTATGTACAAAAGCGGTGTCCGCTGGATCTGGGGGGAGGATTTGTTGATGATTTCCGGCGCATTTGTTAAGCGGATGGC  
GGGAAGGAAGCGGATGAATAA

>Cluster\_55575

ATGAATAAAGTGCAAATCTTGGTCTGACGGGAGACCTTATCAGGCACCAAAACCCAGCATGTTGACGGGCGGTAGCCG  
GGTCCATATGACCGCGGGGATTCTTCCAGCGATCAACTGGCGAACTGGCAGCCCGCACTATGGTACCGGATAACGAAA  
TTAATATCTACCGTGACCGTATAGTTTCCCGTGGCGGGATCTGGTCCGAAATGATGGATGGGCAATGGTGCATAACT  
CGCTGCTTGAATAATGCGGTGGCGCCAAATTTCCGTCGATCATGAAGCCTGACTATCGTGTATTTACGGATGATGACAG  
TAATAAAAAGTTTGGACGATGATGGCGGAAAGTACGGAAAGCAATCGCTTCCACATGGAGAACCTGGGATACGAGA  
CAGGCCGTTATTGTGACGTTGAGCGCAAGCTAACCGTTCCACAATGTTGCGTCTGGCCTTTCCGCACAAGCTGATTGAT  
GGCGATGCCCTGATGGTGTCTCAGTATCGCACCAGTACGCTTGGACAGGTAAGGGGCGTTATGCCACGACGGTGCAGGT  
TGTGATCCCGACAGACTCAGTAACCCGAGCAGAATTTGATATGCCGAATATCCGCGGGCGGTTGAAATGATGCTG  
ACGGCGCACTGTGGCTTATCACATACGTGAAGCAGATATCGGTGACTGGTGGAGTGGCGCAAAACCAATGATGATGCG  
CGAATCCCGCGCAAAACCGCATGGGGGCGCCGACGTTGTGCAGACTTTGACCATGAGCGTGGAGCTCAGCATCGGGG  
GAATGGCATCTGACTCCAGTAGTGAACGCTCTGAAGATGCTGTAAGTACGACCAGAGCGAGCTGGAAGCAGCAATTC  
TGAATGCTATCTTCGCGCGTATATTGAGTCTCCATACGATCCGGAATGATCCAGTCCGCGCTGGGGGAAAACCTCGAA  
GAGGATTTGGGAGCATACCAGGATGGTCTGCGAGTTTACATAATGATCGCCGTTTTGACGCTGCAGAAATGGCGCCGCT  
GCCGATCTTTATCCAGGGGAGAGAATAACAACGGTCAACGCTGCCGCCCTTACAGCAACTTTGAGGTTTTTCGAGTCTG  
CAGTATTGCGTAATTTCTCATCCGTTACGGGTTATCTCTCAGCAGGTTACACAGGACTGGTCTGATGTAATTACAGC  
TCTGCGGATCTTCTTCTGGAGGACTGAAAACCGCTCACCCGCGCAGTGTGATGATTTCTCCATGGGTACCGCTCAGCC  
GCTTTCGACGGCCTTTGTGAGGAAAGTTTACGATAACGAGGATTTACCTACCTAATGATGCCCTGATTTTGTGATG  
CCCGGCGAGCGTATTTCCGTTGCGCGCTGGATGGGGCGGGGCGAGGATGGGTTGATCCGGTGGCAGAGAAAAAGGCGCC  
ATTTCTCGGCTCGATGCCGGCTTTTCCACTCTCGAAATTTGAAGTGGGTGAAAACGTTGGGTGAGGACTGGGAAGAGATACT  
TGATCAGCGCCAGCGGAAATTTGAGTCTGCCTGAAGCGCGGACTTCCATTACCTAGCTGGGCGCAGGCGGACAGTTCC  
CCAGCCAGCAAAATACCAGTCCGAGGAAAAGTGA

>Cluster\_27136

ATGAAAACACAGCAAAGCTGCTGTTTATGATGTTTGTGATGTTTATCTGGGGCGCGTGGTTTTGTGCCATTGTGGTT  
TGTTTAAAGTAAAAGCGGTTTTAGTGCCGAGAAAATGGCTGGTGCATGCTTACCCTGATGGCGGATCTGTGCG  
CGATTCTGGTTGGCTCCATCACTGACCGCTTTTTCTCGGCGCAGAAAAGTGGTGGCGGATTTGATGTTCCGCTGGTGGG  
CTGATGATTTTCCGCGCGCAACAGACCACTTTTCCCGGTTTCTCCGTTACTGCTGGCTACFCGCTAACCTATATGCC  
GACCATTTGCGCTGACTAACAGTATCGCTTTTGGCAACGTGCGGATGTGGAGCGTGATTTCCCGCGCATTCGTGTGATGG  
GCATATCGGCTGAGATTGGCTCTGGTCTGGCATGTGGTTTTCTGCGCAAAATGCTGGGATGATGCCGATATCCACCGG  
AACATCCCGCTGCTGATTACTGCGGAAAGTTCTGCTCTGCTTGGTGTGTTTTGCATTTTTCTGCGCCGACACCCGCCAAA  
AAGCACCGCAAAATGGATATTAAGATCATGCTCGGCCGATGCGCTGATCCGCTGCGCGATAAGAACTTCTCTGCT  
TTTTCTTCTGTTTCTTCTGTTTGGCATGCCACTGGCGTTCTATTACATCTTTGCCAACGGTTATCTGACCGAAAGTTGGC  
ATGAAAACCGCCACTGGCTGGATGACGCTCGGCCAGTTCTCTGAAATCTTCTTTATGCTGGCATTTGCCGTTTTTACCAA  
ACGCTTTGGTATCAAAAAGGATATTGCTTGGTCTGGTACCGCCGATCCGTTATGGCTTTTATTTACGGCAGTG  
CGGATGAATATTTCACTTACGCTCTTCTGTTCCCGGATTTTCTGCTGACGGCGTAAGTTACGATTTTTACTACGTTACC  
GCTTACATCTATTCGATAAAAAAGCCCGTGCATATGCGTACTGCGCGCAGGGGCTGATCAGGCTCTGCTGCCAGGG  
CTTCCGCGATTTGCTCGCTATCTGCTTGGCGGTTGATGATGGAAGAGATGTTCCGTTATCAGGAACCGGTAACCGGAC  
TGACTTTCAACTGGGCGGGATGTGGACTTTCCGCGCGGTTGATGATGGCATTATCGCGCTGCTGTTATGATTTTTTTC  
CGGAATCCGACAAGAAATACGGCTATCAAGTCTGATGATCCGATATTGCGTTGACACAAGGGGAAGTTAAATGA

>Cluster\_20954

ATGAAAGCGATCTTGATCCATTCTTATCTCTTCTGATTCGTTAACACCGAAATCTGCATTGCTCAGAGTGAGCCGGA  
GCTGAAGCTGGAAAGCGTGGTGTGTCAGTCTGACGGTGTGGTGCACCAACCAAGGCCACGCAACTGATGAGGATG  
TCACCCAGACGATGGCAACCTGGCCGTAACAACTGGGTTGGCTGACACCGCGCGGTTGGTGGTAAATCGCCTATCTC  
GGACATTACCAACCGCAGCTCTGGTGGCGACGGATTGCTGGCAAAAGAGGGCTGCCCGAGCCAGGTCAGGTCCGGT  
TATTGCTGATGTCGACGAACTACCGTAAAACAGGCGAAGCCTTCCGCGCGGGCTGGCACCTGACTGTGCAATAACCG  
TACATAACCGAGGATACGTCAGTCCGATCCGTTATTTAACTCTTAAAACCTGGCGTTTGCACCTGGATAACCGG  
AATGTGACTGACGCGATCCTCAGCAGGGCAGGAGGTTCAATGCTGACTTTACCGGGCATCGGCAACCGGCTTTCCGGA  
ACTGGAACGGGTCTTAAATTTCCGCAATCAAACTTTGCTGCTTAAACGTAAGAAACAGGACGAAAGCTGTTCATTAACCG  
AGGCATTACCATCGAACTCAAGGTGAGCGCGCAATGTCTCATTAACCGGTGCGGTAAGCCTCGCATCAATGCTGACG  
GAGATATTTCTCTGCAACAGCACAGGAAATCGCGGAGCCGGGTTGGGAAGGATCACCATTACACCCAGTGGAAAC  
CTTGCTAAGCTGCATAACGCGCAGTTTTATTGCTACAACGACCGCAGAGGTTGCCCGAGTCTGCCACCCGTTGT  
TGGATTTGATCATGACAGCGTTGATGCCCATCCACCGCAAAACAGGATGATGGTGTGACATTACCCATCTCAGCTG  
TTTTATCGCCGGACAGATACTAATCTGGCAATCTCGGCGGCGACTGGAGCTCAACTGGACGCTTCCAGGTCAGCCGGA  
TAACACACCGCCAGGGGTTGAATGGTGTTTGAACGCTGGCGTAGGCTAAGTGATAACAGCCATTGGATTGAGTTTCCG  
TGGTCTTCCAGACTTTACAGCAGATGCGTGATAAAAACCGCCCTATCATTAATAACGCGCCGAGAGGTGAAACTGACC  
CTGGCAGGATGTGAAGAGCGAAAACCGCGAGGATGTGTTTTGTTGGCCGTTTTATGCAAACTGTAATGCAATCGTGAATGACATCGCAT  
ACCGCGTGCAGTTGTAA

>Cluster\_18224

ATGGCACTGACTGACGCAAAAATCCGGGCTGCAAGCCACTGCAAGGCTTATAAACTCACTGACGGGGCTGGCATGTT  
CCTGCTGGTACATCTAATGGTTCCCGTTACTGGCGTCTCCGTTATCGTATTTCTGGGTAAAGAGAAAGACTCTGGCACTTG  
GTGTTATCCAGAAGTATCTCTCCGAAGCTCGTACAAAACGGGATGAGGCCGAAAACGATTTCCGAGGGGGTTGAC

CCTTGCGAACAGAAAAGAGCTAAAAAGTAGTCCCTGATTTACAACCTCTCTTTTGAACATATTGCACGACGCTGGCATGC  
CAGTAATAAACAATGGGGACAATCACACAGCGATAAAGTACTCAAAGCCTCGAGACACAGTATTCCCTTTTATCGGCA  
ATCGGGATATCACAACACTCAATACCCCGGACCTGCTTATCCCTGTTCTGCTGCAGAAAGCTAAACAAATTTATGAAATC  
GCCAGTCGCTGCGAGCAAAGAATATCTGCCGTAATGCGTTATGCCGTACAGTCTGGCATCATCAGATAAATCTGCTCT  
GGATATGGCTGACAGATGGCTGACTACGGTAAAACGCCAGCATCGCCCGCTTGTGATCTTTCTCGCTGCTGAACTTTTGT  
CGCGTATTGGCAGTTACAAGGGGCAACCTGTCAACCCAGCTTGCCTTATGCTGAAATTTACTGGTTTTTATTCGTTCCAGT  
GAACCTCAGATACGCCCGCTGGTCTGAAATGATATTGACAATGCCATGTGGACTATTCCAGCCGAACGGGACCTCTGCC  
AGGCGTAAAAATTTACACCCGGGGATCCAAGATGCGAACACACATCTTGTGCCACTCAGCAAACAGGTTGTAGCCATAC  
TGGCAGAACTTCAGACATGGCTGTTGAAAATGGTCTGATCTTTACGGGAGACATGACCACGTAACCAATCAGTAA  
AACACCGTAAATAAAGCCCTGAGGGTTATGGGGTATGACACAACCCAGGATGTCTGTGGTTCATGGATTCCGGGCGATGGC  
ATGTAGTGCCTTAATAGAAATCAGGTTTGTGGTCCCGCATGCACTGAAACGTCAGATGAGCCATCAGGAACGTAACGGTG  
TACGTGCTGCTTACATTCATAAAGCAGAATCTGGAAGAACGGCGACTGATGCTACAGTGGTGGGCCGATTTTCTGGAT  
GCAAACAGAGAAAGATTTACAGTCCATTTGAATATGCAAGATAAATATCCATTAACACAGTAA

>Cluster\_21804

ATGGCTGGCTTACCGAACAGCAGTAACGCACTGCAACAGTGGCATCATTTGTTTGAAGCTGAAGGGGCGAAACGCTCCAC  
GCAAGCAGCAGCAGATTTACAACAATGCTGCTACCGGACTGCCGACAGTAAACATGAAACTGGAATATACGCCGC  
TGGACGGCTGACCAATAGCCAGTTTGTGAGCATGTCGGGGGAGATATCCCCACAGCAGCGTATGCTTACGCTTAACA  
TTAGACGGCTGCGGCTGGTGTGTCGATGGACGTTACGTGCCCGCACTGAGCGATGCAACTGAAGGACGGGATATGA  
AGTGAAGCATTAAACAGCAGCGTCAAGGGTTACCCGACGCTATTGAGCGGAAGTGTTCGATTTGACGGAAGCCCTGG  
CACAAGCGTACGCATATCGCGTGAAGCGCGTCAACGGCCGCAAGCCATGCTGTTAATGCAATACCCAGGCG  
GTGGCAGGTGAAGAGGTAATACTGCCATTTACCGGCATCATCTGGATCTGGCGGAAGGTGCCGAAGCAACGGTATCGA  
ACATTTTGTGACGCTTAATGATGCTGCTCACTTACCAGCGCACGGTTCACTATCAACGTCGACGGAACGCCATTTGC  
AGCATATCAAGCTGGCGTTGAAAACCCGCTCAGTTACCACTTTGCTCATAACGATTTGTGCTGGCTGACGATGCCACC  
GCATTTAGCCACAGTTTCCCTGCTGGTGGCGCAGTGTGTAACGACAACACCAGTACGCAACTCAATGGCGAAAACAGCA  
GGTGGCGGATCAATAGCCTGGCGATGCCGTTGAAAACGAGGTTGTGTGATACTGCTACCTGGCTGGAACACAATAAAGGTT  
TTTGTAAACAGCCGACAGTTGCACAAAATATCGTCAAGCAGCAAAAGCCGCGGATTTAACGGTTTGTATCAACGTCGGC  
CAGCAGCCATCAAAACGGATGGTCAAGTGAACAATAATCTGCTGATGGGCAACTGGCGGAAGTGGATACGAAACC  
GCAGTTGGAAATCTATGCAAGATGATGTAATGCAACGCGCAGCGTGGGCGTATTGATGACGCAAGATGATTTT  
ATCTGCGCTCGCGCGGATCAATCAGCAAGATGCCAGCAGATGATCATTTACGCTTTGCTGCCGAACGACGGAAGCA  
CTGCGTATGAGGGGCTTAAACAGCAGGTGCTGCCCCAATCGTCAACGACTGCCAGGAGGTGCAAGATGA

>Cluster\_11030

ATGAAAAAAGTGTGATTTTATGGGTGTCGGGACAGGGCCATTAATCTCAGTATTGCTGCATTGTCACATCAGATCGA  
AGAAGTGAAGTGTCTTCTTTGACGAACATCCCTATTTTCCGCGATGCTGGTACCGGATGTCATATGC  
AGACTGTCTTTCTGAAAGATCTGGTCACTGCACTTACCAATCCCTACAGCTTTGTTAACTATCTGGTGAAGCAC  
AAAAAGTTCTATCGCTTCCCTACAAGCAGACTACGTACAGTATCCCGTGAAGAGTTTCTGACTATCTCCGCTGGGCTGC  
TGAAGATATGAATAACCTGATTTTACGTCATACCGTGAACAAATATTGATTTGACAAAAAAGTCAAGTGTGTTTCTGGTTC  
AGACCAGTCGGGAGAATAATTTGCCGCAATATCTGCCTGGTACAGGAAAACACCTTATTTACCACCTGTGTGAAG  
CATGTGACACAATCCTGTTTCCATGCCAGTGAATGAATCTTCTGCTGGCCGGACTGAGTGGAAAACGGATAACTGTGTT  
TGGTGGAGCAGAGTGGTGCAGACCTGTTCTTAATGCTATACGCGGGGAATGGGGAAGAGCGGCGAAATAAATCAGG  
TCTCAGCGGTAATAATTTTAAACGCACTGGATGAGGCTCTTTTGGTGTGATGATTTTACACCTGAAATATAATTTACGGC  
TTCTCCGGACTGAAGGAAGATATTCGCCATCAGTTACTGGATGAGCAGAAAATGACATCGGATGGCATCACTGCCGATTC  
TTTACTGACCATTTATCGTGAGTTGTACACCGTTTGAAGTTCTGAGAAAACCAAGAAATATCCGCTGCTACCCAGCC  
GCTCGGTAACAACCTGGAAGTAGTGGTCCGGGTCGGAAGTTATTGATGGAACATCACTGGATCGGGGACAGAGAGC  
CTGAAAAGTATGTTGGTATTTTCGCCACAGGTTACCGTTCTGCATTTGCCACAATACTTCCCTCACTGATGCCCTTGT  
CACCATGCAGATAAGAACACCTTTAAAGTGGCTGATGACTTCACTCTGGAATGGAGTGGCCGAAAGAAAATAACATCT  
TTGCGGTCAACGCCAGCATGCAAACTCATGGCATCGCCGAAACCCAGCTCAGCCTGATGGCTGGAGATCTGCACGATTT  
CTTAACTCGCTACTTGGGCGTATTTATTCGATCTCAGTATGCGCCGCACTGATTTAGTGGGCGCAGCGGACGCCGAA  
AAAACCGCAGCCGAGGCTGCTGCTTAACTCACTATACAACAATAATTCAGGAATAA

>Cluster\_48613

ATGACCGAATTTGCCATACAGGACGCGGGCTGTCCGAAGAGTTTGTGATGAAGATTTCCAGAACAGACTGACGGCATTTTT  
TTGTCGTGATCACGAGTTTCTTACTCGTCCGGGAGATCTGGTTGTGCCATAGCCAAATTTGCCAATGCGGCAATGCCATAT  
TGGTAAATATGGTTTCGGGCTATTACCGTATGTACAAGAGCGGCCCTTCTCATCTGCGATTCGGATATGCTTAAGCGT  
GCGAAACCGGATAAGACTATCCGTGAGGAACTATTCGCCGATGTTGTTGCTGCGTTTAAAGCGCATCTTGCAGAAAAAT  
GTCCGATACCTCGTACATGGTTGACCAAGTATCAACCTTCCGAAAAGCGTAGCGTTTGTATGATGCTCTGATTTAAGCTG  
CTGAACTGAAAGAGAAAGCGCACTTTCAGGGGCGATGCCAATCATGGCCAAAGTTTACGACAGATTTGATGCAACGAGC  
ACCGGAATCTATGACTACTACCTCCGCAAGTGAAGCGGTGAATATGAGGCTTACAGAGGAGTATGTGCC  
AAACAGCATTACAACCTGGACTCCCTCTGCTGATAGGTTGCTGTACAAAAAGGCTGGGCGAAGCGAGAAATGGTGTCT  
TCATGGGTTTCGCTAAATCCGGTAAATGACCGCAATGGGTGAGTTTCCATAAACGCAACGCTTGGCTGGCTACAATGTT  
CTGTATCTCTCGTGGAGGTTACACACCATTATTCGACCGTTTGTGATGCAAGATTTGTCGGAGACGAAATGTCCAA  
GCTGGTGAACGGCGGATGAGGTTTCATCGTAAGTTGGCAGAGTTGGGAGCCAGAAAGGGATTTGGTAGTTTGTGGGTGG  
TTGAGCGTCCGTGAGGAGTATGTCACCGGAGATCTGGACGTTATGCTTAAACAGCATGAAAGCCAAACGGCATGGTGCCT  
GACATGGTTGTTGTCGACTACGAGATTTGATGCGTGCCTTTATGACCTTCTGATGATGATCGCCAAACATTCGTAGTAT  
CTACACCGATTTACGTGCTCTTTATGACAAAATAACGTTGCTGGAATCACGGCATCGCAGACAAACCGTGAAGGTGGCG  
CGTCAGAAGTTGCCCAATGATGACGCGCGGACAACATCGAAAAGTACGTTATGCTGACCTGGTAATAACGATCAAC  
AAAACCGAAGAAGAAGAGCGAAAGGAGGCTCGTCTACTTTGCTGGTTACGTAACCAAGCAGGGAGGGATCAGCAT  
TCGTGTTAAACAAAACCTCGAACAAATGCGCTTCAATGAGCGAATCTTAGACGTTACCTAA

>Cluster\_66675

ATGGATTACTGGTTACCGATTTATGTTGTTATTTGGTGCCTTCTTTTTTATGTTGGCATTAGGTGTACCTATTGTTTATGC  
CATTGGTTTATCGACACTGGCATCAATTTCCACAACACTGATTTCAACTCAGCATTTGAGTGTGGTTTCCCAAAAGTTAG  
CCTCCGGGTAGATAGTTTACGTTGTTGGCAATCCATTTTTTATCTTGTCTGGCAACATTAATGAATCAGGAGAAATA  
GCGCGACGATTAATCAACTTTGCCCGTATTTCTCGGGGTCGCTGCCAGGCTCACTTGCCACTGTAATAATCTCGCCAA  
TATGCTGTTCCGGGCAATTTCTGGTTACGCGTGGCTTCCGGCGCTGCGATGGGCGGCGTCACTGCATCCGCAACAGGTTA  
AAGAGGCTACGACCCGCATTCAGTACTGCGGTTAACGTTGCTCTGCCCGACGGGTTGCTTATTTCCAAACAGTAAT  
ACGTTAATCGCTATTCTCACTGGTCACTGGTGGTACTCTTATGCGCAGCTGTTCTCGCGGGTTATGTTTCCGGGATTTT  
GCTGGGCTGGCACTGATGGTAAAGCCGTTATTCGCTGTACGTCGCGGTTATCCAAAACAGACGTCGACTTTTGC  
GCCAGGCTGGCGTTGCGATATGGATGGCTATCCCAAGTATTTTCTGATTTGTTTAAATATGGGTGGCGTACTAAGCGGT  
ATTTTTACTCCAACCGAAGCCTCCGCAATTCGGTAAATTAACCTTTTCTTTCCTGACGTTGTTCTTATGTTGTTCTTCGATGG  
AGTTAAAGATTTACCTAAAATAATTTCTGGAATCCGTTATTAACACTGCAATTTGCTTGTATTAATTTGGTCTTCGATGG  
GAATGTCATGGGCAATGTCAACGCTGACGTTCCCTTCTGATTTCTGATTTGCTTAAACTATTTCTGACAACCCAATA

ATAATCTGCTTATATCAATATATATCTGTTGATTATCGGCACCTTTTATGGATATGACACCGCGGTACTGATTTTTAC  
GCCGATATTTTTACCGGTTGTACCGAACTGGGCATGGACCGATTACTTTGGTATTGTATGGTGCAGCAATGTGTA  
TCGGTATTTGTACTCCGCTGTAGGCAGTGTGTTATTTGTCGGTGTAGTGTATCTAAATACCGATTATAAAATTTATC  
AAACCTATGCTGCCATTTCTATGCCGTGATGGTATTTGGTCTGGCAATGGTGACCTATATTTCCGCAAAATCAGTATGGCATT  
GCCAAGAGCACTGGGCTACTGA

>Cluster\_45194

GTGATAACFGAACGTCGGAACGATTGCTACAAGGCGCTGGCTGGTATTGTTGCTGGCCCGTTTTCTTCTCACCTA  
TGGATCTCTTAATCAGTTCACCGCGGTTTACGACCTTAACAGCCATGATATCCCAGTCAGGTATTCGGTTGGGAAACGG  
CGATCCCTTTTCTTCCCTGGACTATTGTTCCCTACTGGAGTCTGGATCTTTTATATGGATTTTCGCTGTTCGTTGTAGC  
ACGACATTCGAACAGCGCCGACTTGTCCACCGGCTTATCTGGCAACGGTAATGGCCTGCTGCGGTTTTTGTCTATCC  
GCTGAAGTTAGTTTTATCCGCTCTGAAGTGTGGGTGACGGGATGGCTATTTTCGCAACTFGAACGTTTTGATCTGC  
CTTATAACCACTCTCTTCGCTGCATATTTCTCTGCTGGCTACTTTGGCGTCACTTTGCTGAGCATCTGGCTGAGAGG  
TGGCGTAAAGCTCTGTGGCGGATGTTTTTACTCATCTGATTTTCTACTCTGACGACCTGGCAGCATCATTTTATGATGT  
CATCACAGGGCTGGCGGTAGGTATGTTGATTGACTGGATGGTGCCCGTGCATCGTCTGGAAATTATCAGAAACCTGATC  
AACGTCGAATCAAAATAGCACTGCCATATGTCTGAGGCGGGCTCGTGCATTGTGTTGATGGAGCTAATGGTGTGATT  
CAGTTAAGGTGGTCAGTCTGGTTATGTTGGCCAGTATTTACTCTACTCATTTATGGCCGTGGGTACGGTGGGCTTGGCCG  
GATAACAACAGCGAAAGATAGTCAAGGAAACTCCCGCCCGTTTTACTGGCTGACATTTGCCCTGCCCATCCGGATGT  
GGCTGTCTATGCGTTGGTTTTGCTGCTGCGCTGGAGCCGGTGGAGCAAAATGACTGCTGGTGTATTTAGGGGCGTTTTCCA  
CGACATATTCGGGCACAGAAATGCGGTTCTGGACGCTCACTTTGAATTCCTCGCGGACGAGCGACAAAAGATCGACTCTA  
TTTTCTGTACCGATGCTGGATCTGGTGTTCGGAAGAGGGGAGCTCCGACAGGCGCTGGCGATGCTGGAAACATTAC  
GCGAAGAGCAAGGAGCGCTTCTGGTCTAATGCGCGTTGGGATTATCGCGCAGTGGCTGGTAGTGGCGCATGTTGTTA  
TGTTACGGACACTGTAACCCGTTGATGAAGCATTAGTTATATTCGAGCCAGACGTTGCGATATTTGCTTAAAGGAAGA  
TCACAAAGCGATGCTGAAATTTATGGGAAACAGGTAA

>Cluster\_62520

ATGGATATATCAACAGCATTATTAGTCTGGGGGCATCAGTCAATGATGCCAGTAATATCTTTTATTATCGCACCTTGCTT  
TGGGGTAAAAATCCGTACGGCATTAAAGCGGGGATGCTGGTCCGATTTGGGTTGCAAGGCGTCGGCCGTTGTAATGGCC  
TGCTGTGACGAACATTTGGCCCTGCATCACAGGCAATGGTCGAGCGCATCGGCCCTGCAGTGAATGCTGCTGCACACCGGG  
TGGCCGACCGCTTCAACGATTGGCTGGGGCTCTCCGCTGATGCTGCGCTGTCTGGTCCGTTTTATTGTATCAATCAAT  
CATGCTACTGCTCAAATTAACAAAACGGTGAATATCGATATCTCAACTACTGGATATTTCTGATCATGGGCTCGGTGCG  
TATATGCCGGAACCGGTAACACTGCGCTTCTGTTGGCATAACATTTGTTGATTTTGTCTTAAACGTTACTGGCAGCAGAT  
TTAACCCCGCTTATTTACAAAAAATATAATCTCAAAGGATTTCTTTCCCTCACCTTACCTGTATAGCTACGTCCTCC  
CTTTGGCATAGCTGTAATTTACATTTATGATAAGATCCCGCTTATCAATAAAATTAATTTTGTTCGGAAAGCATTAATA  
AAAAGTTCGGTGTATTTGGTGGAGCGTTAACGCTGGGTTTCGTTACTGGGATTGCTGCTGGCATTCTTCCCGGATGAC  
GTATCGGCTGCGGTTTCGCTGGCAATCAAGGCTCCCGCGCGATGCTGCTGTTGCCAAAAATGATTTGAAATACGTTGCA  
GGGATTACTAATCGTCCGTGATGCCGAGAAGCAAAATGAAGGCAAAATCCCTGACCGTGAATTTTATATCGGCATGG  
ATACCGCGTTATTGATTGGCGAACCTTTCAGCTCCGGCCAGGACTGCTGTTGATCCGGATGGCGGCTAGTCTGCTTACT  
ATTTGCGCCGTAACCGGTTCTGCCATTTGTCGACCTCGCTTATTGATGTTCTTACGCTATGGTACACCATTTCTG  
TAAACGCAATATGTTCCGATGTTCAATAGCGGCGACGCTGATGCTGAGTGCATTTTGTACGTCGGAACGGACATTTCTA  
AGGAATACACTCAGGCGCGGTTAATTCAGCATTCGCTTCCGGAGGGGATGCTGAAATTAACCAATATTTGCTGGGGGG  
GCGACACACAGTGGCTGGCTGGAAGTTTGGGGAGTTTTTTCAGTACTGCGCCGTA

>Cluster\_41536

ATGTTAAAGCGTGAATGAACATTCGCCGATTATGATGCCGAACCTGTGGCAGGCTATGGAGCAGGAAAAAGTACGTCAGGA  
AGGCACATFCGAACCTGATCGCCTCCGAAAACACACAGCCCTCGCGTAAATGCAGGCGCAGGGTTCTCAGTCCACCAACA  
AATATGCTGAAGGTTATCCGGGCAACGCTACTACGGCGGTTGCGAGTATGTTGATATCGTTGAAACACTGGCGATCGAT  
CGTGCGAAAGAACGTTCCGGCGTGAATACGCTAACGTCAGCGCACGCCGCTCCAGGCTAACTTTGCGGTTCTACAC  
CGCGCTGCTGGAACAGGCGGATACCGTTCTGGGTATGAACCTGGCGCATGGCGGTTACCTGACTCAGGTTCTCCGGTTA  
ACTTCTCCGGTAACTTACAACATCTGTTTCCCTTACGGTATCGATGCTACCGGTCATATCGACTACGCGCCCTGGAAAAA  
CAAGCCAAAGAACACAAGCCGAAATGATTTATCGGTGGTTTTCTGTCATATTCGGCGGTGGTTGACTGGGCGAAAAATGCG  
TGAATCGCTGACAGCATCGGTGCTTACCTGTTGATGATGCGCGCAGTTCGGGCGCTGGTTGCTGCTGGCCTTACC  
CGAACCGGTTCTCATGCTCACGTTGTTACTACCACCACTCACAAAACCTGGCGGGTCCGCGCGGCGGCTGATCTCTG  
CGAAAGGTGGTAGCAGGAGCTGTATAAAAACTGAACTCTGCGGTTTTCCCTGGTGGTTCAGGCGCGCCGTTGATGCA  
CGTAATCGCTGGTAAAGCGGTTGCTCTGAAAGAAGCGATGGAGCCTGAGTTCAAACTTACCAACAGCAGGTTGCGAAAA  
ACGCTAAAGCGATGGTAGAAGTATCTCTGGAGCGCGTTACAAAGTGGTTTTCCGGCGTACTGATAACCACTGTTCTCTG  
GTTGATCTGGTTGATAAAAACTGACCGGTAAGAAGCTGACGCGGCTCTGGCGGCTGCTAACATCACCGTCAACAAAAA  
CAGCGTACGACGATCCGAAAGAGCCGTTTGTGACCTCCGTTATCGTGTAGTACTCCGGGATTAACCCGTTGCGGCT  
TTAAGAAGCCGAAAGCAAGAACTGGCTGGCTGGATGTTGACGCTGCTGGACAGCATCAATGATGAAGCTGTTATCGAG  
CGCATCAAGGTAAGGTTCTCGACATCTCGCAGCTTATCCGGTTTACGCATA

>Cluster\_22558

ATGAGCATCGCTTTGCGCTTAAAGGTAATGTCCTTTTTGCAATATTTTATCTGGGGGAGCTGGCTGGTTACCCCTCGGTT  
TTACATGATTAATACCTTTCATTTACCGGCGCTAATGTTGGCATGGTTTACAGTTCCAAAGGATCGCCGCGATTATTA  
TGCCTGGTATAATGGGATCATCGCAGCAAAATGGCTGCGTGCAGAACGTCATACATGCTGTGTACCTGGTGTGTGCG  
GGCGTACTTTTTATGCGGCATCCGTAACCTGATCTCGATATGATGTTTTGGGTGATGTTAGTCAATGGCATGGGTTTTAT  
GCCGACTATTGCGTTATCGAACAGCGTCTCTTATTTCTGCTTTGCCAGGCGAGGCTTGACCCGGTGACCGCTTTCCCGC  
CCATTCGCGTTTTTGGTACGGTGGGTTTCAATGTCGCCATGTTGGGAGTAAGCCTGCTGCATCTGAAATGAGTAGTCTG  
CAACTGTATATCGCGTCCGGTGCCTATTTGCTGCTGCTGGCTATGCGCTGACTTTGCCGAAGATCCCGTTGCGGAGAA  
AAAAGCGACTACATCTGCTTTCGCGCAGCAAGCTGGGCTGATGCTTTCGCTGCTTTAAAAATCCAGCATGGCTATCTTT  
TTCTCTTCGCGATGATGCTGGGTGCGGTGCTGCAAAATTAACCAACGTTTTTGGCAACCCGTTCTGCTGATTTTCGCGG  
AATCCTGAGTTGCTGATAGCTTCTGTTGAAATATCCGCTCATTTTACTGTCAGTTTTACAGATGGCTGAAGTCCGTTT  
CATTTGACGATACCGTTCTTTTTGAAGCGTTTTCCGTTAATAACCGTATGCTGATGATGATGGTGGCGTGGACGCTG  
GCTTTGGCTTCTTTGCTTATGGCGATCCATCACCAACCGGTTTTATTTGCTGTTGCTGCTGATGATGTTTACGTTTT  
GCATTCGATTTCTCAATATTTCTGGTTCCGTTCTTGTGCAACAGGAAGTTGATTTCCAGCATTCGTCAGCGCCAGGG  
CCTTTTTATGACGATGGTAAATGGCGTCCGCGCATGGGTTGGCTCGATTTGAGCGGATGGCAGTGGATTTCTCTCG  
TGGATGGCGTAAAAATGGCATAACATTTGGCTGATGTTTCCAGGATGCTCTTTCTCCGAGTGAATTTTTCTTT  
GGTTTTAAATATAACCATGACCCTGAAAAGATAACGATCGCTTGCATGATTTACACATTA

>Cluster\_57201

ATGTCGTTTTGTTGGAATGAAATTAATTTCTGGTATAAAGCTTTAATTTCTCATATTTATGATTTTTTCTTTAATGACTTT  
GTCTTTATGGGATGATGTTGCAACAAGTTTCTTCATGCGAGCTGGAATTAATATCTGCATTTGATTTTTCTTGTGACACCA  
AAAAACAATAAATAAATCTTACTTTTGTAAATTTTCTATCTCATTTATGCTTTTTGGGTATCGTAAATATCATCTGGTAT  
TCACATTAATAAATTTACGGCTCTGTTTTATACCAATGCATATCTGTGCCCAATGGAACTGAAAAATTCGCTTGTGTAG

CGCTTTTATTTCTTAGTTCCTTTTTGCTAAAAATGAGATGAGAACAAAAATAAAATTTGGGAACTAATCTGTTCGCAT  
CCCTGGCAACGCGTACTTTTTTTTTGCGCATGCCATGCGCAACATTTCTATTAAACGTCGACCGTGTGCATATATCA  
GCTTCCCACGCTACAACAGCAGGCTACATCATCTTTTTCTTCTTTACTGGCATCAATCTCATTTTTAAATCCGACTT  
TAGACATAAAAAACAATTTATATACAATTAACCTTCATGCTTAGCTTATGTGCTGTCATAGTAAC TGAGACGCGTGCAGCA  
TATTAGTGTTCCTTTCATTTGCGTAAATATAATCGTAATGAGTAGTTATATTAATAAGCGAATAAATATAAGTTATAT  
TGTTTTATACGATTGCATTATTAGCAGGTGATTTTTCTTTTTAAAGATACATTGCTTATGAGAATGAATGACTTAAATAA  
CGATTTAGTTAATATTTCGCATGATAACACCAGAACTTCAGTCGGTGCCTGTCGGCAATGTAATGAGTTGGCTTAAAAA  
CATATTTCTCAATAGGACAATCACTGGAAAAACGTCGGGAAAAAATACATGAACTAGAGAAGAAAAGAGCCTAGATTGAGT  
GGCGCTTTACCTATGATAGATTCTCATTTCGATAAACGATCTCATAGATACGTTTATCAACGCGTGGTATTCCTGGAGTTGT  
ATTAACAATTTTAGCATTTTCAGCAATACTCATATATGCTTAAAGAACTGCTAAAGAACCCTTATATTTAATCTTGCTTT  
TTTCACTACTGGTAGTAGGACTAAGTAGCATAACTCTTTTCTAAACCGGTTCCGACTGCTGTGTTTTATCACCATAATA  
TTGCTTTGTGCTTATTTTAAAGCACAATCGGACCAATGTTTATTAGAGAAGTAA

>Cluster\_1217

ATGTGCGAACATCATCATGCGCGAAGCACATCTGTGCTCGCAGTGTGACATGCTGGTGGCGTTACCGCGCTTGAGCA  
TGTTGAGAAAGCGCATGTCCTCCGCTGGCACACGTTAACCGTGGCGTGGGATGCCCTCGGCAGCGTCCCACCGCT  
ATGCGTTGGCTGCATGCTTATGCTGTGCTCAACTTGTTCCTTTGTGAATATGAACGTTGCAGGATTTACCAGT  
GAAATACATTACTGGAATTTCCGCGTGTCTTTTTCTGAGGACTACGCCAGCTCCGACCTTTTTCTGTGTTTTGT  
GCAACTGGTTCCTCGCTTTGCTGATAACCATCTGTACTGGTGAATCGCGCGAATTACCGGTCCTTTAAAGAGC  
AACTGGCAGCGGTCTTTTTCAACTCAAACCTGGGGAATGGCGGAGATTTCTCGCTGGTGTGCTGTGCTCAGTTCCGT  
AACTGATGGCTTACGGCAGCATGGGGTAGGCAGCAGCTTTCCTCCCTGGTGTATTTGTGTCTGCAACTGCGCGC  
TTTTCAGTGCCTGATCGTCGCTGGTTATGGGACGACATCGCCCCGATGCCAGAACTGGCCAGCCGCTAAACACCGGCG  
TCACGGGATACGTCAGGGGCTGCGTTCGTGCTCCTGTGTACGGCAATCCTTCTGCTGATGAAACCGTGTGCCCGCT  
TGTAGTACAAAGGGTACGTTCCGCGTAGAAACAGCCTGCAGTGGACACTCGCGCTGCTTGTAAACGTCATCATGCTGTA  
TCTTCCGGTAAATTTTTGCCATCATGTTGACGATTTATAGGCTCGAAGATGCCGTCGACGATTTCCGCTGGGCTCA  
TTCTGTTATGAGCGAAGGCTCTTATCCCGTGCCTGCGGTGATCTTCTGCGCAGTATTATGGTGCCAACGTTAAAGATG  
ATCGCCATCGCGTGGCTGTGTTGGGATGCCAAAGGGCATGGCAAGCGGACAGTGAAGAATGCAATTTGATTTATGAAGT  
TGTTGAGTTTGTAGGCGCTGGTGCATGATTGACGTTTTCTGTTATCGCGGTGCTCTCGGCGCTGGTGCATGGGAGGTT  
TAATGAGTATTTAATCCGCAATGGGTGCATTAATGTTTGTAGTCTGATGCAATGTTTCTGCTATGACGTTTT  
GACCCGCTTTGTCGTGGGATCGTCAACTGAATCAGAGCATGAGGAGTCTGA

>Cluster\_24409

ATGGCGTGGAAATCAGCCGGTAATAACGGACAAGACCGGACCCGTTGGGGAAGCAGCAAACTGGCGGCAACTCTGAGGG  
AAATGGAACAAGCGCGTTCGCGATCAAGGGCCACCTGATTTAGATGATATCTTCCGCAAACTGAGCAAAAAGCTCGGTG  
GTCGCGGCGGCGTAAAGGCACCGGATCGCGGTGGCAGTTCATCGCAAGGCCCGCGCCGAGCTTGGCGGTGCGCTC  
GTTACCATCGCAGCGGACGCGATGTCATATCTGGGCGCGCAGTGGTTCTATACCATTAAAGAAGCGAAGCGCGCT  
GGTAAACCGCTTTGGTAAATCAGCCATCTGGTTGAGCGGGCTGAACTGGAACCGGACGTTTATTGACGAACTCAAA  
CGGTGAACCTGGAAGCTGCGTGAACCTGGCAGCTTCTGGTGTGATGCTGACGCTGACGAGAAGCTAGTGCCTGGT  
ATGAACGTGCAGTACCGGTCACCGATCCGAAAAATATCTGTATAGCGTGACCAGCCGGATGACAGTCTGCGTCAGGC  
TACCGACAGCGCCCTGCGCGGGTTATCGGTAATAACACCATGGACCGCATTCGACGGAAGGTCGTACCGTGTATCGTA  
CGGATACTCAGCGGCAACTGGAAGAGACATTCGTCGATGACATGGGCATCACTCTGCTGGACGCTCAACTCCAGGCT  
GCTCGTCCGCGGAAGAAGTAAAGCGCGTTTTGACGATGCGATTTGCCGCGGTGAAAACGAACAGCAATACATTCGTGA  
AGCAGAAGCGTATACCAAGAAAGTTCAGCGCGTGCAGCGGTGAGGCAACGATCTCAGAGAGGCGCGTGGGTACA  
AGGCCAGACCTCCTGGAAGCTCAGGGTGAAGTGGCGCGCTTTGCTAAACTTCTGCCGAATATAAAGCCGCGCGGAA  
ATTACTCGGAGCGTCTGTATATCGAGACGATGGAAAAAGTGTGGGCAACCCGCAAGTGTGCTGGTAAACGATAAAGG  
TGGCAACCTGATGGTTCTGCGCATAGACAGATGCTGAAAGGTGGTAACGCCCTGCGGCGAAGAGCGATAACGGTGCCA  
GCAATCTGCTGCGTCTGCGCCAGCCTCTTCTCCACAACAGTGGAGCAAGCAACACGTCGTCCACCAGTACAGGCGAT  
ATTTATGGACCAACCGCGCCCAACCGCAGCGTAACTACAGCTACAGCGTACAGGGGAATAA

>Cluster\_12315

ATGTTCTTACCAGCAGCAAAAATCCGACCCCTCAAGCCTTCTGATAAACCCCTTTAAAGTCTCCGATTCACGGTCTGTA  
TCTGCTGTTCAAGCCGGTGGCTCCCGCACTGGTATCTCAAATACCGTATTAGCGGTAAAGAATCCCGCATTGCGCTGG  
GTGCTATCAAGCATCTCCCTGCTGATGCGCGACAGCAACGTAAGGTATCCGTAAATGCTGGCGTGAATATCAAC  
CCGCTACAGCAGCGGCTGCTGAACGTGGCTCAGCAACACCGGAGAAAGTTTTTAAAAACTTGGCGCTGGCGTGGCATAA  
AAGTAACAGGAAATGGTCGAGAACACCCGCGACCGTCTGCTTCCAGCTGAAACATCATCTTTCCGGTTCATCGGGA  
ACCTACCTGATCAGAACTTAAACCCCGTCAATTTCACTTACCTGCTGAAAGGGATCGAGGAAAAGGTTGCTGGAGGTT  
CGTCCCGCACACCGGACCTGAGTAAATAATGCGCCATGCGGTCATCAGGAGTTAATCGATACGAACCTGACG  
AAACCTTGGCGGCGGCTGACCAACCTCTGTCAGCGGCACTACTCTGCGCTGCGCTGGAGCGGCTGAACTGCTTGG  
AACGATTTGGGGCATATCATCAGGGCGTGAACGACCGGATGCGGTTCTGCTGATGCTGATGTTTCTTCTGCTCC  
AGTGAACCTGCGTTTTCGCGCTGGTTCAGAGATTGATTTCAAAACCGAGTCTGGACGATACCCGCGACCGGAGAACCCAT  
TATTGGCTGCGTTATTTCGCGCGCGGGCAAAAATGCGAATGCGCATATCGTCCCTCTCAGAACAGTCCATCGCCA  
TTCTGAAACAGATTAAGGATATCACCCTGTAATAATGAATGATCTTCCCGGCGACCAAAACCGTATAAGCCAAATGTT  
GAAAACAGGTCATAAAGCACTGCGGGTATGGGTTAGCAGCAGAAAAGGATATCTGCGGTACGGGTTCCGGGCAAT  
GGCATGCACTGCGCTGATGGAATCGGGTTATGGGCAAGGACGAGTGAAGCCAGATGAGTCATCAGGAGCGCAATA  
CCGTGCGCATGGCTTATATTCATAAGGCAGACCTAGAAGCCGCAAGCGATGATGCAAGTGGTGGTGGATTATCTG  
GAAGCATGCCGAGAACTTATGACCGCCTTATACAATTTGGTAAAAATAAGTTTATCCCATAG

>Cluster\_48508

ATGACATTAGTTAAAACATCACTACTAAGCCTGATAGCTACATTTTTTAAAAATGCTATCAGGATFAGTGATTAATAAGGC  
AGTCTCTGTATATACGGTCTGTTGGCTTGCAGTCACTCGGCAATTTCAAACCTTTAGCCTTGTATTGATTGCTG  
CGCAAGGAGCTATAAATAATGGTGTAGTAAAATACACGGCTGAATATGGTAAAGAAAGTGAAGGCTTCTTCACTATTT  
AGTACTAGTATTCGATATTAGTTTACTACATCCATTGTGTGCGTTGTATATTAGCAATATTTCTAACTTCTTTCTCT  
TAAAAATATTAGATGATGCCAGTATCAATTTATTTTTATAATAATTTGGTTTTACAATTTATTTATTTGTTTTAAATGGCT  
GTTTTTTATCTATTAATGCGCTTAAAGAAAATAAGAAAGTTATATAAAGATAAATAATAACAAAGTATATCTACAACTATGATGAT  
ATTTTCACTAGCTTACTGATTTATTTCTTTGGACTAAATGGTGTCTTAAATGCGTTAGCGACTAACAGTCTATAAATAT  
TTTTATTACATTTATCTGCTAAGAAAACATGAAGTAAATAACGTAAGAAAAGTTACTTTCATCTTTTGACAGAAAATAT  
CTAAAAACCTTTTTTCTTACTCAGCAATGGCTATCACCCTGCGATATGTTTCTTACCTCACAGTTTATCATTCGTGAT  
TATATTGGAACGACTCAAGGATTCGATCAAGCTGGTTATTGGCAAGGTTTGGTATATATCTACAACCTACTGATGAT  
AGTACTACAGCTTAAAGTACCTATTACTTACCAAGGCTGTCAGAAATCACTAGTAAGCAAGAAATTAAGAAAAGAGATTC  
TACAGGCTATAAAAATCACTTCCAATAGTTATTTGATGTTGATGTAATCTACCTATACGTTATTTATTTATTTAT  
TTACTTTCTCTGATAGTTTACACCAATGAAACCTAGTTTTCATAGGCAAAATTAAGGAGATGATTTTCTCTGTAACCT  
ATGGTTATTAGCATATGTAATGCTAGCAAGGCTATGACGAGAATTTTTATCATTAGTGAAATATTTTTCTCTGTAACCT  
TTGTGCTGCTTCTTATTTTTTTTATAAAAATCCGAGGACTATAGCGTAACATATGCTTATTGTTGAAATATTCTTTA

TATATGATTGTTTTCATATTTGTCAATTAATAAATATTCAGTGAAAATTTAAAATGA

>Cluster\_34158

ATGCTTGGTTCCTTTCTAAGCGGCTTGAGGACTTGAGTTGGTCCAGCGGAGAGGTTGGCTTACATCGATTTTCGGCT  
CTATTTCTTCGGTGGAGATCGGACGCCCTGATCTGATTTGAGCGCTTCGGTGTGGCTCCGGCAGGGGCGACAGGATTTGG  
CTTTGATACCGGCAATTCGGCCGCATAACATCACCTTCAGTGGTAGCAACAAGATTTATCGCATCCGGGACGGATTTCTCA  
CCGTTGTTTCGAGCACGCATCGCTGCGCGTTCTGTGCGGCTGTCTCTCGGTTTTGGCGATGGCGTGAACGGCTCAATGCA  
GGCGCTGCTACCATGCGAATCCCGCGACGCCCTAAGCATTCCTCAAGATGGATGTTGTTAGCCACGATTTGCCGAGGCATCC  
ACGCTAAGCGACCCGTCGCCATCCGCTACTACTCGATGAGCAGCGGAGTCCGAGCGGGTAATTGTGCCCTTTGCTTTG  
GTTGATACCGGCAATTCGGCTGCGCAGCTCCCTTTGATCGCAAGAGTGTAGAGATTTCCGGGATTTCTGTCGTCACCGCATCGAA  
GCACCAACATTTGCTGACGAGGAGCCACAAGCCAAACGAACGACAGGATAACGACATCCAGTGGACGCGCATCGTCGAGCT  
GGATTTCTGTCGCTACCCGAGCGTTGAGCGGCCGATATATCAAGATGGACTATCGTCGATGCCACGCTGATCCACGCG  
CCCAGTTCATCCAAGAACCAGGACGGCAAGCGCGACCCGAAAATGCACCAGACCAAGAAGGGGAACAGTATTACTTTGG  
CATGAAGCGCACATTCGGCTGAGTGAATCGGGGCTGGTACACAGCGTGGTGGGCACGGCAGCCACCGTGGCGGATG  
TCACCCAGGTCGACAAGCTGCTGCACGGCGACGAGAACGTCGTCGCGCGATGCCGGCTACACCGCGCTCGAAAAGCGC  
TCCGGGATGCGCGACCGAGAAGTGTATGTCGAGGTCGACAGCAGCCGACGACCTACAAGATGCTCGATAAACCGCAGCC  
CCTGTACAAAAGCCAAAGCAAGATCGAGAAGGCCAAGCGCAAGTGGCAGCGAAGGTAGAGCCCCGTTTCGCGTGTATCA  
AGCGCAGTTTCGGCTACCCGATACCAAGGTCGTTCCGAGGCTGGTGGAGAACATGCACAACTGGTGGACGCTGTTGCCCTG  
TCGAACCTATGGATGGCCCGCGACATTTGCTGGCAAGCGCAGGAGAGGTGCGCTGTAA

>Cluster\_22690

ATGCTGGCATTTTTGCTGATTTCTGTACCCCTGTTGGTGTGGCATGGCAAGCCTGGCAAGCCTGAATGCGCTTAGCGA  
TCAGGCGCGCTGGTTAACCGCACTACGCTTATTTGATGCCCGCGCAGTGAAGCGATGACCAACCGCGCGCTGGAGATGG  
AGCGTAGCTACCGTCACTATTTGCTGTGTCGGACGCCCTACGCTTGCAGGTTTATCAAAAGCCAGCGCAAGCGTTACAGC  
GAAATGCTCGATGCCACGCGAGCGTGTCCGCGGACGATAAACTCTACAGGCATTTAGCTCAGGATTTGAACAATCTGGC  
TCAACTTCAGTTGGCAACAGCGTCCGATGCTGCTGCGCCGACGCTTTGAAGCCTTTGCCAGTCCAAATTTTAAAGA  
TGGTGCAGGCCACCGCACAGTGGTGTCTCTCGTGGGCGCAACTTACGCGTGAATTCGCGAACGTTGGGCAATATTTTT  
GGTTGGCAATCGCTGGTGTATTTCTGGTGTGAGTCTGGTGTGTTACTGCTTTTACGCGGATGATATCGGTCGCGGTAA  
AAATATCGAGCGCATGATCAACCGGCTGGGGGAAGGGCTTCTCTGGGCAATAGCGTCTCGTTTTCAGTGGACCGAGCGAGT  
TAGCCTCGGTTGGCAACAGTATTTCTTGTAAAGTGTGCGCTGTCTGATGGTGAATCCAAACGCCATCAATTTTAAAGA  
CATTTATCTCATGAATTAATAACGCCACTGCGGAGTATGCGCGAGGGCACTGAATTACTGGCTGATCAGGTTGTGCGGCC  
GCTTACGCGCAGAGCAAAAAGAGGTGGTGTGAGCATTTCTGTATGACAGCAGCCGCAATTTGCAAAAATGATCGAAACACTGC  
TTGATTACAACCGTAAACAGGCGGACAGTGGGTTGAACTGGAGAATGTTGAGTTAGCACCGCTGGTGGAGACTGTGGTT  
TCTGCTCATAGCCTGCCCGCACGGGCTAAAATGATGCATACCGACGTTGATCTCAAAGCAACAGCTTGCCTGGCGGAGCC  
AATGCTGCTGATGAGCGTACTGGATAATCTTTACTCCAATGCGGTGCACCTACGGGGCTGAATCCGGTAACATTTGCCCTC  
GCAGCAGTTTACATGGTGCAGCGGTTTATATTGATGTCATCAATACAGGCACACCCATTCGCGAAGAGGAACGGCCATG  
ATCTTCGAACCTTTTTTCAAGGAAGCCACCAGCGAAAAGGGCGGTGAAGGGCAGCGGTCTGGGATTAAGCATTTGCCAG  
GGATTTGATTTCCGCTATGCAAGGGAACTGTAATCTGGTGCAGGAGAGCGGGCAAGACGTTTTGTTTCCCATGTAATTA  
CGTCTCGAAAACACGAAATAA

>Cluster\_59516

ATGGAAGAAACTGGGACTGAGCGCACTACCCGCGTGGTATTAAGCTCAATGCTGGGCGGGGTGTTTTTTCAGTCTGCC  
GCAAAATATGGCGCGAGTTGCCAGCCCGCAGCACTGCTCATCGGCTGGGGTATTACTGGCGCTGGCATTTTTATTTGCTGG  
CCTTTGCCATGCTGATCCFCACGCGCATTCGCTCCGAACTTGACGGCGGTATCTTTACCTATGCCCGGAAGGTTTGGC  
GAGCTAATCGGCTTTTGTTCGCGATGGGATACTGGCTGTGCGCAGTCACTCGCAACGCTCTCCTATCTGGTGTGCTTTT  
TTCCGCGTTAAGCTTTTTTACGGACACGCGGAATTCGCGCTGTTTGGCGATGGTAATACCTGGCAATCGGATGCTGGTG  
CATCGGCTTTATTTGTTGATTGTTTCACTTTTTGATCCTGCGCGGGTGCAAAACCGCTGCCAGCATTAACCTGGTGGCGACA  
CTGGCAAAATTTGTCGCGTGGGCTGTTGTTGTTGCTGGCGATGATGATGTTCAAACGGATACCTTCAAGCTCGACAT  
CACCGGACTTGCACCTGGCGTACCCGTTTTGGGAACAGGTGAAAACACCATGCTGATCACCCCTGGGGTTTTTTCATTTGGTG  
TGGAAAGTGGCGTGGTTGTTTTCTGCGCGTGGCGTAAATAACAGTGTGTTGGCAAGCGACACTGCTGGCGGTCTCTCC  
GCTCTGGGCGTTTTACTTGTGTTAAGCTGCTTTTCTGCTGGGTGTTGGTGGCAGCTCCTGAACTGGCTGAAATTCGTAACCC  
GTCATAGCGCGTCTGATGGTGGAAATGATGGGACCATGGGCGAAATCATCATCGCTGCCGTTTTGATCGTTTTCCGTTT  
CGGCGCGCTACTTAAGCTGGACCATCATGGCAGCAGAAGTACCCTTCCGCGCCACTCATAAAGCATTTCCCGCGCAT  
TTTTGCGCGCAGAACCGCACAAAGCTGCGCCATCCGCTCATCTGTTGGTTGACCAACATCTGCGTGCAAAATTTGCTGGTACT  
CATCTGGCTGACCGGTTCCGATTACAACACGTTGCTGACCATCGCCTCAGAAATGATTTCTGGTGCCTATTTCTTGGTGC  
GCGCGTTCTTCTGCTGAAAATCGCAACCCGTCACATGCAATAAGCGGTAGGTGTCGGTGCCTGCAATTTATGGCTTATGGTTA  
TTGTACGCTCTGGTCCAATGCACTTGTGTTATCCGTTGTTCTGTATGCACCGGGGCTGTGGTTTTCTGTACGCGCG  
CAAAACGCATACCCATGATAATGTACTGAACCGTAGGAAATGTTGCTGATTTGGCATGCTGTTAATTGGCTCAGTTCCCG  
CGACTGGATGCTGGTGGGATAA

>Cluster\_17519

ATGAGACAGGATATCGAAGCGAGTGTATTCGGTGGCCTGCTGATTTGGTGGATTAACCTCAACCGCCAGCGACGTTCTGGC  
AACACTGGAGCCGGAAGCGTTTTTCAATTCGCTCTACCGGAAAGCCTTCGAGGTTATCCGCAAGCAGGCGAGAAAACAGAA  
ACCTAATCGACGCGCTGATGGTTGCCGAGGCGTGGGAGAGGAGCATTTCACCTCAATCCTGATGACCAGCAAAAACCTGC  
CCGAGCGCGCAAACTGAAGGGATATGCCGGAATGGTGGCGGATAACTATCACCGCGCTGGTGTGGAAATCATGGA  
TGAATGCGTGAACCAATTCAGAGCGGAACCTCGACGCTCGAGTCAGGCGATGGATGAACCTGTAAAGCGTCTCTCAG  
CCATCAGAAAGCCCGTACGAGGTTAAACCTGTACGGTTAGGGGAAATCATTACTGACTACACTGACACGCTTGACAGG  
CGTCTGAGGAACGGAGAGGAATCAGATACCTGAAAGCCGAAATCGAAGAATTTGACGCCATCACCGGAGGATGAACCG  
GGAAGACCTGGTATAATCGCGCTGCTCTGGTATGGGGAAAACCGAACTGGCGCTAAAAGATTGCCGAGCGGTTGCAA  
CCGCGCTTCTTCTGTTTCTGACGCTCAGGCGCGGGGATTTGATTTTCTCAATGAAAATGAGCGCATTGCAAGATTCGAG  
CGAAGCATTTGCCAACCGCGGAGGATGTCGGTTAGCGTGTGCGAAATCCTGCATCGATGGATGACGAAGGCTGGGCGCG  
CGTTGCTAACGGCATGAATCAGCTTGCAGATTTGGATGTTGGTGTAGTGCATGCTCGCGGTTATCGGTCGAAGAAATAC  
GCTCAATCGCAGAACCGCACAAACAGGAAAATCCAACCTGCTACTCATCATGGCGGATTTATCTTGGCTGATTTGAGAAG  
CCGAAAAGCAGACCCCAACGACCTTGCATTTGCTTCCGGAAGCCTGAAGCGGATGGCGAAAAGACCTGAAAGCCGCG  
TGTTATCTCCCTGAGTCACTTTTCCGCGATGTTGAGAAGCGACCAAAACAAACGCCGACAAACGAGATTTGCGTGTATT  
CAGGAAGCATTTAAACAGGATGACAGCTCAATCATGCTCTATCGGGAAAGCGGTATATGACGAGAACAGTAGCGCCGCG  
CCATTTGCTGAAATCATCGTGCAGAAAACCGTTTTGGCTGCTGGTACGGTTTTACCAGCGGTTCTGCAACGGACACTT  
TGTGTCATGTGACCAGGATGAAGCCAGACAGATTTGCACAGCATCAAATGACACTGCTGCGCGTGGCAGACGATATGCAC  
AAGGGCGGACGATGTA

>Cluster\_3316

ATGGCAAGTAACCGGAAATTTATCAGCCAGTTCGTCATGGGCGGGATCCCTGTACTTATAAGGAATCCGGTGAACATA  
GGCTGAAATGAGTAAACTGACTCACCCGCGCCGACCTGATGTGGACTGGCGTCCGGTGGAAAAACTCAGCCTCGCGCTGT  
TCCGGCAAAATGGCGTGGAAATACAGACGCGAGGCTGTACTGACTGGCGATAACAGACGGCAGGGGCTGGCAGGGATG

GCAGACGGACTCGGTTCACTGGACATACTGCTCCAGCGCTGGGCTGACTTCTGGCCGGTACAGGTACATTCAGAATATC  
ACTGCTCAGTTGGGTACAGAAAAAATGCAGCAGGCACAGAGAACGCTGGATATTCAGTATCAGGATTCGCCGAGATTT  
ACCGTTGTGTACAGCATCTTCCGCCATCGAAACCACGCTGCAACAGTGTGAAGTGTGGCATAATGACGAACTGGATGTG  
CTGGCCGGGACGTTTCGTAATACGGCGTACGCTCGGAGCGGCTGGCACCACAGGGAGCGGAAACCATATCACTCCCC  
TGAATACCCCGGAAATGAAGAACCCAGAAAAGTCCAGAAAAGTCCACAGCCGGTTTTTGAACCTAGACCACCCGCT  
AGCAAAACGATAAGGATGCCAGTCCATCCGCGCCATCCCTGAAATCTCTGGCAGCGGACATGGCCGATATTTATGGCC  
GGAATGGTGTGTAGGCTGTCTCGGCGAACAGGATTTATGGGCTGGTTCGACGCTTAATCAGCCGGAGCAGTAAATCCA  
CGGAATAAATGCTGTGTATGCGCATTACCGCAGTCCGCTGGAGAGCGGCGAGCTGGCAAAGCTGGATGTAAGGATAAGG  
CGCTGCTGGCTCAGGACAGAACCAATTGGCGAACGTGAGTCAACTGGAGCAGTTAAACAAATTCGCTGCCCGCTGGCCA  
CTGGAGCAGGGATATCGCCAGCTACGCCAGCTTGTATGCCCTGTGGCCGGATAATCCTCAGGTCAGAGCGCTGAACCGGCA  
GTGGCGTAAACAGCGGGAGCTGAGCGCCCTGTCCACAGAGGCATTGAATGGCTACGCACAGGCGCAGAGCCAGCTACAGC  
GCCTGTCCGCGCAGCTGGATGCACTGGATGAGCGTAAGGGGAGATATCTGACCGGTTCCGAACTAAACACGGCGGTGTAC  
GGCATCCGCGCAGTCTTAAAGGAGCGCCGCTGGAAAGACTTCCGCAACTGGAAGAGCAAAAAACAGACCGGAGAGGT  
TTCGCGCAGCTGTTGACGCAAAATTGATACCCGGTTAAATCAGTTGCTGAATCGCTATGTAATTTACTGGATACGAAGG  
TGGAAACAAAGTCAGTAA

>Cluster\_67034

ATGAACCGAAAACTTCTTCTGCTCCGGCGGTAACGTTGTATGTCTGGTGTCTGCTGGCTGGCCTGCGCA  
GGCTGACGTCAATAACGACCTGAACAAATCTTCAACAAGCTGGGCTTCGAGGGGAATGCCACCCGCGCAGCTGTCTGGC  
AGGGGCGAGCGGCGAGGCTATGCCACCGCGGCAACCTGTTCTTACGCAATCAGGTGAATAATCTGCAGATAGCCTCCTTC  
ACTCCACCGCATATACCGCCGGTGTGGTGGTATTGATGCCCTATCTGGGCTCCTTTTCCCTTATCAACAGCAGAACAGAT  
TGAGCGTTTTGTGAAGCAGCTGATGGGGAATGCCGTGGGGTACTTTTTTGACCTGGCGTTGCAGACAGCGGTGCCGGGCA  
TGAAGTCAGTGAAGGATTTATGCAAGAGCTGGCCAGTGAAGTGAATAACATGAATATCTCTCTGTGAGCCGCGCAG  
GGCATCATTTGGCGGTCTGTGGCCGAAAGAACCCGTACAGTCCGAGAAAATCTGTTCAGGACATTCGCCGTTGAAACCAAT  
GTTCTCTGACTGGCCGCTCAGGCGAGGATGACGGTCCGCAAGAACAGTCTGAATCAGCGTGTGCAGAACATGATAAAGAA  
ACATGAAAGACCAGGTGATGCGTAATAAGAATCTGATGTGGGAGATTTGAAGAAGAAGCAGATGATGAACGGTAAACCC  
GAGCTGATGGAGCTGGTGAACGTTACCGGAACGCTGATTTTGTATGATAAAGGTGAATCCAGTTTATCGGGCCACA  
GGTAATACACAGGGGCTTATCCGGCGCTGATGTATGGCGGACAGGCCACTATCTTTGGCTGTACATCCAGGGGGACT  
GTCTCAAGACACGCAACCCGACAGTACGGTCCGCAAGAACAGTCTGAATCAGCGTGTGCAGAACATGATAAAGAA  
ATCTCTGACAACTGGTCACTGATGACCCGCTGACCAGCCAGGAAAAAGGTTTATTGAAAGCACCAGTGTGCCATTTCT  
GCGTTACCTGGTGGACCCGAGATGCTGAACATCTCCACTTTCACCCGTCACCTCTGATTACATGCTATGACATCC  
TGCTGACGTACCTGAACGAACTGCTGAGTCAGGCGCGGCTGCAGGCTGGCAGTAAAAACTTCCCGGAAGAAGCAGATGAAG  
ATGTTACGGGAGAAATTTCTGTAAGCCTCCCGCAGCTGGAAGGCTGCAGGCTCAGGTGGATGTGAAGCGAACACACT  
GATGGAGCTGGAGCAGCGCATGGGCTATCTGCGTCAGCAGGATCCACGCACTGATGAGTCGTTATGAGCAGAACCTGA  
ACTATACATCTGTATCTTCTGCACAGCTGACGACAGGAGGTAACCTGA

>Cluster\_25409

GTGGCAGCTAATTTTACACGGCGTCGAGACTATCGAGATCGAACCGGCGCCGCGCCGGTACCGTTAAGTCGGC  
GGTGATGGTCTTGTAGGAACGGCTCCGGCTGGCCGATTAACACATCGGTATTGTGCTGTGAGAGAAAGACCGGGCGC  
AGTTCCGGCTCGCAGGTTTTCCGGGTTCAATATCCCGCAGCAGCTGGATTCGATTTATGACCACGGCGCGGAAACCGTGGTG  
GTAATTAAGCTGGCCGATCCGCAAGCACAGCTAACGGCCTTACCATCGCACGTCGGGTTGATGATAATCATCAGAT  
CAGGCTGGACTATGGCGCGTCACTGCTGTTTTGAAGGTGTCCGGCGCAGTTTCAATTTAAGCCCGGCAAAATTTATA  
CCGTTGATGCGGAACTGGCGTTGTTACATGCCCGACGGTTAACGCAAGCGCACAGCTGTTTGCACATATCGTTATATC  
GATCCGACAAAAATCACCCGTCGATATCATCGGCGCATCAATGCCGAGGCGGATATCCGGGATGAAGCTGCTGGA  
GGATACCTATAGTCTCTATFGTTTTAAACCGAAAATCCCTGATGCCCGCGGTGTTCTGTACGCAAAAATCGGTCAGTCCG  
AGCTGATTGCCCTGGCGGAAAAGCTGGACGCTATCACCTATATCGATGCGCCAGTTGGCACGACCTTCAGCCAGGTGCTG  
GCAGGCGGTGGCGCATCCGGGACTATCAACTTCAATACAGTTCCGAAACGCGCCGCTGTGTGCTACCCGACGCTTAAGGT  
GTATGACTCTGTCAACGACAGGAAACGGCTGGAGCCGCTTCTCCCGCGCGCTGGCCTGCGTGCCAAAAGTGGATCTGG  
ATAACGGTTTTCTGTGGTGGGCAACTCCAACAGGAGATCTCGGCATCACTGGTGTGGAACGTTTCGCTGCGGCATGATT  
GATGACCCGCAAGCGAGGTGAATCAACTGAACGAAACGGCATCACACCGTTTTCAACAGCTACGGCACCGGGATGCG  
ACTGTGGGCAACCGTACCGCGCTGGCCGACGTTACCCATATGCGCAACTTTGAAAATGTGCGGCGCACCGGGGATG  
TGATTAACGAGTCGATCCGTTACTTCACTGAGCAGTATCTGGATATGCCGATTAACAGGCGCTGATTGACCGCTAAC  
GAATCGGTGAATGCTATGGCCGCAAGCTGATTGGCGACGGCGCATTTGCTGGCTTCGAGTGTGTTATGACCCGCGCG  
TAATGAGCAGACCGAGCTGGCCGCTGGCCATCTGCTGCTCAGTTACAAATATACGCGCCCTCCGCGCTGGAACGGCTGA  
CGTTTGAGACGGAATCACTTCGGAATATCTGGTTAATCTGGAAGGTAACCGCTGA

>Cluster\_41237

ATGACTGCTATTAATCGCATCCTTATTGTGGATGATGAAGATAATGTTTCGCCGTATGCTGAGCACCGCTTTTGCCTACA  
AGGATTCGAAACACATTTGTGCGAAACAGGGCGCACAGCATTACACCTGTTTGCAGATATTCACCCCTGACGTGGTGTGTA  
TGGATATCCGCATGCCAGAGATGGACGGCATCAAGGCACTAAAGGAGATGCGCAGCCTAGAGACCCGGACACCCGTTATT  
CTGATGACGGCCTATGCTGAAGTGGAAACCGCCTCAAGCAGTACGCTGCGGAGCCTTCGACTATGTTATCAACCCGTT  
TGATCTCGATGAGTTGAATTTAATCGTTTACGCGCCTTTACAACCTCCAGTCAATGAAAAAAGAGATCCGTCATCTGCACC  
AGGCACTGAGCACAGCTGGCAATGGGGCACATTTCTCAACCAAGCCGCGCATGATGGACATCTGCAAAAGACACCGCC  
AAAATGGCCCTTCTCAGGCCAGCGTCTTATTAGCGGTGAAAGCGGCACTGGGAAAGAGTTGATGCCAGAGCGGATTC  
CTACAATTCGCGCGCGGCAAGGGGCGTTTCAATTAAGTCAACTGCGCGGCGCTGCGGAATCTGTGCTGAAAGTGAAC  
TGTTTTGGTTCATGAAAAGGTGCACTTTACTGGTGCAAAAACCTTGGCTCAGGGATTTATTGAACGTTGCCAACGAAGTACT  
CTGCTCCTCGACGAAATTTGGCGAAATGCCGCTGGTACTGCAAGCCAAATTAATACGATCTGTGAGGAAACGGGAAATTTGA  
ACGGATTTGGCGCCATCAGACCAATAAAGTTGATATCCGCATCATGCTGCCACCAACCGGCACTTGCAGGCAATGGTGA  
AAGAAGGCACTTCCGTTGAGATCTCTTTTATCCGCTTAACTGTTTATTAATTAATACTGCCGCTCTGCGCATCGCCGG  
GAAGATATTTCCCTGTAGCTAATCACTTTTGGCAAAAATTCAGTGTGAGAAATCAGCGCGATATATCGACATCGATCC  
GATGGCAATGCTACTGCTTACCGCTGGTCAATGGCCGGGAAATATTCGAGAGCTTCCAACGTTATTGAACGCGCCGCTG  
TGATGAATTCAGGCCGATCATTTTCTGAGGATCTTCCGCGCAGATTCGTCAGCCAGTCTGTAATGCTGGTGAAGCA  
AAAAACCCCTGTCGGTGAAGTAAATTTAAAGAGGAAATTAACCGCTGAAAAACGCATATTAAGAAAGTCTGGA  
ACAACAAGAAGGAAACCGAACCCGCACTGCTTTAATGCTGGGCATCAGTCGCCGTGCAATGATGATAAACTCCAGGAAT  
ACGGTATCGATCCGGCGGATGATAA

>Cluster\_35669

ATGCTGGAGGATAGTTACAGCTGCATACATTTGTCGCCGATCCTGTTTATCTTACGTCGGCCGGCTTTTCGAAACA  
TGAACGCTTCGCCAGGTAACAACTTCGGTATCGCCGGATGGCGATTGCGTTAATCGCAACATTTTGGACCGGATA  
CGGGTAAATGTTGGCTGGATCTTGTCTGGCGATGGTCAATTTGGTGGGCAATTTGGTATCCGCTGGCGAAGAAAGTTGAAAT  
ACCGAAATGCCAGACTGGTGGCATCTGCAATAGCTTGGTGGTTCGGCGCAGTGTGTTGGCTTTAACAGCTATCT  
GCATCATGACCGGGAATGGCACGATTTGTTCAATATTCACCTGACGGAAGTTCCTCGGTATCTTACGCGGGCGG  
TAACGTTACGGGTTCCGTTGGTGGCGTTCCGCAAACTGTGTGGCAAGATTTGCTTAAACCATGATGCTGCCAACCGT

CACAAAATGAACCTGGCGGCTCTGGTCTTTCCTTCTGCTGCTGATTGTATTTGTTCCGACGGACAGCGTCGGCCTGCA  
AGTCTGGCATTGCTGATAATGACCGCAATTGGCTGGTATTCCGCTGGCATTAGTCCCTCCATCGGTGGTCAGATA  
TGCCAGTGGTGGTGTGATGCTGAACTGCTACTCCGGTGGGGGGCTGCGGCTGCGGGCTTTATGCTCAGCAACGACCTG  
CTGATTTGACCGGTGGCTGGTTCGGTCTTCCGGGGGCTATCCCTTTCTTACATATATGTGAAGCGATGAACCTTCCTT  
TATCAGCGTATTGGCTGGTGGTTCGGCACCGGCTCTTCTACTGGCGATGATCAGGAAGTGGGTGAGCCGCGAA  
TCACCGCAGAAGAGACAGCGAACTGCTGAAAACTCCATTTCACTGATCATTACTCCGGGGTACGGCATGGCAGTCCGG  
CAGGGCAATATCTGTCTGCTGAAATTACTGAGAAATTCGGCGCTGCTGGTATTAATGTGCGTTTCGGTATCCACCGGT  
CGCGGGGCGTTTGGCTGGACATAGAACGATTTGCTGGCTGAAGCAAAAGTACCGTATGACATCGTGTGAAATGGACG  
AGATCAATGATCACTTTGGCTGATACCGATACCGTACTGGTGTATGGTGTAAACGATACGGTTAACCCGGCGCGCAGGAT  
GATCCGAAGAGTCCGATTGCTGGTATGCTGTGCTGGAAGTGTGAAAGCGCAGAACGATGATTGCTTTAAACGTTGAT  
GAACACTGGCTATGCTGGTGTGCAAAACCGCTTCTTCAAGAAAAACCCACATGCTGTTTGGTGTAGCCAAAGCCA  
CGTGGATGCAATCTGAAAGCTCTGTAA

>Cluster\_9218

ATGGCACTTTGGGGGGGGCTTTTACCAGGCAGCAGATCAACGGTTCAAACAATTCAACGACTACTGCGCTTTGATTA  
CCGTCTGGCGGAGCAGGATATGTTGGCTCTGTGGCCTGGTCCAAAGCCTGGTACCGTAGGCGTGTAAACCGCAGAA  
AGCAGGGCAACTGGAAGAGGGCTGAACTGTTGCTGGAAGATGTTCCGGCCAGGCCACAACAATCTGAAAGCGGAC  
GCCAAGATATCCATAGCTGGGTGGAAGCAAACTGATGACAAAAGTGGGCCAGTTAGGCAAAAAGCTGCATACCGGGC  
TAGCCGTAATGATCAGGTAGCGACTGACCTGAAACTGTGGTGCAGAAATACCGTTAGCGAGTTACTGACGGCTAACGGC  
AGCTGCAATCGGGCTGGTGGAAACCGCACAAAACAATCAGGACCGGTAATGCCAGGTTACACTCACCTGCAACCGCC  
CAGCCGGTACGTTCCGCGACTGGTGGCTATGTTGAGATGCTGGCGCTGATGAAAGCCGTTTGCAGGATGCGCT  
TAAGCGTCTGGATGTCAGCCCGTAGGCTGTGGCGCGCTGGCGGGAACGGCCTATGAAATCGACCGTGAACAGTTAGCAG  
GCTGGCTGGGCTTTGCTTCCGGCAGCCGTAACAGTCTCGACAGCGTTTCTGACCGTGACCATGTTTGAAGTCTTTCT  
GCTGCCCTTACCGCATGTTGCTGCTGCTGCTGCTGCTGCTGCTGCTGCTGCTGCTGCTGCTGCTGCTGCTGCTGCTGCT  
GGAGCTTATCGACCGTACTTCCGGTTCATCATTAAATGCGCGAGAAGAAAAACCGGATGCGCTGGAGTATCCGG  
GTAATGCGGGCGGGTGCAGGGGCGTTAACCGCATGATGATGACGCTGAAAGGTTTCCCGTGGCTTACAACAAGAT  
ATGAGGAAGACAAGAAGGCTGTTCCGACCGCTCGATACCTGGCTGGACTGCTGCATATGGCGGCGCTGGTGTGGA  
CGGCATTCAGGTGAAACGTTCCAGTGGCAGGAAGCGGCTCAGCAGGTTACGCCAACGCCACCGAAGTGGCGGATATC  
TGGTGGCGAAAGCGCTACCGTTCGCGAGGCGCACCATATGTTGGTGAAGCGGTTGGTGAAGCGTTCGCTCAGGGCAA  
CCGCTGGAAGATCGCGCTCAGTGAGTGCAGAAATCAGTCAAGGATGACGAGATGCTATCCGATTCGTGCGCT  
GCAATCGTGCCTCGACAAGCGTGCAGCAAAAGCGCGCTCACCGCAGCAGGTGGCGCAGGCATTGCTTTTCCGCGAG  
CTCGGTTAGGGTAA

>Cluster\_17669

ATGGGCTGGGCTGAAAACCTGCAAAACGCTTCCCTTTCGTTGGCGTGCAGTTTGAGGTGCTGAATACTGACGAACAATCAG  
CCGCGACCATGCGGCTATGAAATACCGCTTGTGACGGGGCGGATTTGCACGACCTCGGACGCAAGGCGCAGCGCTTCC  
GCATGACCGGCTTCTGTGGGGCGATGACTATGAATATAAACTCGGAAACTGACCGCGCCCTGGATGAAGCGCGGAT  
GGTAACCTGATTCATCCGTTTTATGGCTCTGTGCGCTAGCGTATGTTGACCGGCTACAGCATCCGCGATGACGCAAG  
CCCGACAGCTGCACCATGACATGAGTTTTCTGGAACCCGACCGGTAGCGGCTTGTTCAGCACCCGTTACCGGAGC  
TGTTCGCGCAACAGTTGTTTGTGAACTGGACACTTTACAGCGCGGTTAAGTGAATTTTGTGATGCGCTTACTGCACCT  
TTAAATACCGTTAAACAGCATGATTAAAAAGCCAGACAGTGCCTGCCACACTGGTGAATACCTGCTGCTGCTCAAAAG  
TGATTTTGTCTCCACTGTCGATAATCTGTCTACTGGCAGGCGAAACCGGAAAAATTTATCAATGAACTGGCAGAGTGC  
TGGAATCCACACATCAGATGTCGGGCAACCGGTGCAGTTCGCAACGTTGATTCGCCACCGGACCGGTTGGCA  
GGAGAGCAGCCAGTTCGCCAGTTCGCGACAGTGAATGCTGGAATAAGGTATCACTGATATGGATGAATTTGTTGCG  
GTTGCTGTTACCTGTCAGTGGCGATAAAGTAGCGGAGTGGCATTCTCTGTTGATGCTCCGACAGCAGTGCAGG  
ATGTGAAAGCAGTTTACGCAACACAGGCGCATCTGAACTGGCCAGTGTGCAATGGCGATACTGGTTGATGATGCGCAG  
TCAGAACAGCTTATACCGCGGATATCGGGCGACTGGTGGGGATGTCGCGCACCGCTTACAGGCTGTATCAGCTGTT  
CCGTGAACGCTATGAAGCGAACCGCAACCGGATAACCGAAACCGCATCACACTGGGGCTGATGTACCAGAAATCATTC  
AGAGCATGAAGAAGCTGGCGGCAATCCGTGCAGGATGTCGCGCTGCTGGTTCGTCACGCGCCACCGTGCAGCAAAA  
CAGGTGCAGGCGGACAGCTGCTGCTGTTGCTGGCGTGTGAGTGTACGGTGAATACAGCGCTGCGGCGAGCTGCAACG  
TCTGAACCCGAGCTGCTGACCGAACACATAACCGCGGGATGGTGAATATGCTACGCAAAAATA

>Cluster\_29162

ATGTTACGCCATCAGCGCTACCGGCGGTTCACTCGACGCTGGTTTAAAATTTACAACTGGAAGCACTGCTCCGTC  
GGAAGTGGTTGCCGGTTAAACAACGTTTCTGGCGATGGTCTACTCGGTTATCGTCTGTTCCAGGCATGCTGGGTAAGCGG  
GCTTCCCGCTGCCGAGTTTTCGTTGCAACCTGTCTGGTTCGCGGACTCGGTTCTATCGTATGGGTCTGTGGGCTAAT  
CTGCCGTTGGCGATGTTGTTGCGCCATCTCTGACGGCTTTACCGCATTCAGTCTGGTGTGGGGCAACATATAGCGT  
ACCTGTCCGCTGGGTGGCTGCTGCTTCTGATGGGTGCTGCTGTTTACGGTAATTTCTGCCACGGGATATCCGTCAGG  
TGCGCAACTTGGCGACGGTGTGGCGCACGGCACGGGATGGTATCGGTTCTGCTGCTGCTGCTGCTGCTGCTGCTGCTGCT  
GTCGGTCTGGTGAATAAAACCCACTTGTGTTGCTGCTGCTGCTGCTGCTGCTGCTGCTGCTGCTGCTGCTGCTGCTGCT  
GTTGGTGGGCTGGCAGTGAATATCGGCTGGAACCTGAAAGTCCCTGGTGGCATTCTGCTGACCATATCCGGTATCT  
CAATGTGCGGTTTGCATCTCGATCCTAACGTCATTTCTCCGGCTTTTCGCCATGCTTCAATGAGCGATGAAAACGGC  
AATCACTGATTTGCGAGCTGGACATATGGGTGCGCTGAATCCTGTAGTCTGCCAAGTGTCTGGCAGTGGTATGAC  
GGCAGTATTTGATGCCACCGAACTATCCGTGCGCTGCGCGGTGAGCGAACCTGCTGGATAAAGATGGGCGATCATCG  
ACGGCGGAAAGCACTGACCAACCGACTCCATGAGCAGGTTTTTCTGGCTCGTGGGTGCAGCTCCGCGAGCGGTATAC  
ATCGAGTCTGCGGCGGTTACGGCGGCGGCGTAAAACCGGTTTACGGCTATCACCGTTGGCGTGTGTTCTGCTGAT  
TCTGTTCTCTCTCCGCTCTTACCTCGTTCGGGGTACGCAACGGCTCCGGCGCTGATGATGCTGCGCTGCTGATGCT  
TGAGCAACGTTGGCAAAATCGACTTTGCTGATTTTGTGATGCGATGGCGGGTCTGGTTACGGCGGTTATCATCGTCTG  
ACCTGTAACATCGTAACAGGCATCATGATCGGCTTCGCGACTCTGGTATTTGTTGCTGCTGCTGCTGCTGCTGCTGCTGCT  
GTTGAACATCGGTACGGTCTGTTATGCGGTTGGCTGGTACCCTTCTATGCGGGTGGCTGGCTATCTAA

>Cluster\_67018

GTGGCTAATGCTCAATCAGTGGTTCGCGCAAAACAAACCTGCGTATGGCTGTGATTGCGCTGGGTATCAGTGTGTTGG  
TGCGGCTGGCTGGTATATGTCACCGGTTAAATCTTCCGGGAAAGCAGCACAGACAGCAGAAAGCGCTCCGCCAATA  
TGACCGGTGTGGTGTACAGAGCTTTGACAAGAAGGCTCCGATGCTGCGGTCGCGGATATTCAGCATAACCGCAGTGAG  
GCGGAGAAAAAGCTCAAAGCCTTCAATCCCGCTGGCAAGAGTGAACAGCGGGAACAGGACTACCGGGCAAGATGGA  
AGACAGGAGAATGAACCTGGCATTTCTGCGGCTGAACAGGAGGCCATGAAAGAGAATGGCGTCTGAAATACCCGCA  
GCAACCGGTGCTCTTTTGGCACTGGTCTTCTGTTCTCCCGGACCGGCTTTTACCAGCGCGGAGCGGTTGGTGA  
GCGAATAATCTGGCACCTGTACACAGTATCAGGTGACACCGCAGCGGAAAAAAGGCTGCTCCTGATGACGGTGGATTA  
TGGTGAAGAAATCTGCTGTACGCGATAAACCGCTTCTGCGCTATATTCGCTCGGCAAGTTTGGCGCGGCGGTTGGT  
AAGGGCCGATGCAATGCTCCGTACCGGTAACAGCATCCGCTCCCGATGACGTTCCGCTGAGTTCGCGCTGAGGCTCAGG  
ATGCCAACGATAAAACGATGATCTGACAGGCTGATGGTCACTGCGGGGCTATGGCGATATCTCCAGTGTAGCGGGC  
GCTGATCCGTACCGATGCTTTCTGCGATAAAAACGGGCTGATGATTGATATGCTTTTAAAGCCATGTTCTTTTA



AAGGGAAGAACGGCATCAAAGGTGAGCCGGTGATGCGCAATGGCAAAAATTATCGGCTGGGCGTTTGGCGGGGGGCGAGTG  
GACGGTATCGGCAGTGGTGTAGCCAAAATTGGCCAGGAGACACCGGGTCCGGCGCTGTGGCCCTCTGTCTCTGGCAGTAC  
GGTATGAACGGTGGCGTGGGTGGAGGGGCATCTCAGGTGGTAAAACACTGAGTGATTAACATATAAAACGTGCCGAAC  
AGTATCACCCCGTATCCCGGTTGGTGCAGGAACCGGAAGTGCAGGGTGGTGTTCAGGAAGGTTTTTTCAGCTGAAGTACACG  
GACGAGGACAACGATCCACCGCGCGCTCAGCGGAAAGCTGGTGGATAACCGCATTCAGGTGTCGCGACGATGCT  
CGGGAACTGAATCTGGGTGATGACGTCGCCAGCTCAGCGGGTTCAGAGCGGAGACAACAACAATGA

>Cluster\_66860

ATGCCAATGATACTTGTAAAAGAAGAATCCCGGGGCAAAGTGATTCGGGAGCTTAGCAGTGAGGAAGAGACTGCAGTAAA  
AGCGGTCTGTGGACTGAAAAAGCCAGCAACCATGGTACTACATAAACCTGGCCAATGATATCTCCGGGAAATGCGTGAGT  
ATGATGCATGGTTACAGTGTGACTGTATTCGGGAGATTCGCCGGCCATGAATTTGCTGCTCTTAAAAACAATACGGGT  
ACTCTTTATCTGTCCAGTTTAAATCATGAGCATGCACCTGAATGCCCATGTATCGTCACTTACCGGAAATGAAGAGGA  
AACATCTTCCGGAGCAAGCCGGCATCCCGTTAGCACCCGTATAAATTACAGAAACTTTTTACCACCTGATGACAGTAAT  
CTGTATACGACTCAGGCCCCGCTCTGCTTACCATAAATGGTGAGAGCTCCTCCGTTTCGCAAGAAACGTCCGGCGCTTGGC  
CGTTTACTCTGTCTCTTATTGACGATGCTGGGCTGAATAAACGGATTCCCTGGCTAGTCCCGTATCCGGACTAATTA  
TCGTGAGTGTCTTGTATGCCATACGGCAGGTTACTACTGCAGCAGAGTATATTCGGGGAAGATCCTTATCTGAAATATCC  
ATTTCCGGCTGGAATGTCTGAAAGGTCCTCAGGAGCGGTTAATGAAACCGTGGAGAAATTCAGAACGCACTGGCCTGCC  
AGAAGAAGCATAATGTTCTTTCAGATTTTATGGCGCAGCACATCTGTGCTGATGCTGTGAAATTCAGTGGCGGACCG  
TAATATTCAGGTCATCAGACCTGTGGGGGATCAGTATTAATGGTGAAGCCAGGGCGGAATACGTCCCCCTTACTGGG  
TTATCTTCTGCTTTTTTGGCCGAGTCCCGATGGCAGAATCATCTGCAGTGAAGGGTATGCTCATGCTCTTTATCAACTGACA  
TGTCGGGTGCTGTGGACAGCAAACTGGAACGAAACCGTCACTGCTCTTCTGAATGTGGCCAGCTGGCTCAAAAAGAAA  
GCCAAGTACCGGAAATTAAGTCTGGAAGGCCCTGTGTTGATACAGAAGTTTATGTTAATGGTGAAGAAAGAAAATATGTCC  
TGCCGGATTTTATGTCACAGCAAGGGCTCCTGACGGAAGACGGCCAGAGTGGTTCATCGAAACGATGGGATATGAAGAC  
AGTGATTACTGCGCGAGAAAATCCAGGCAGCATACCGGATGAAGCAGATGGTGTTCGATACCGATCCACCGAAAATG  
GCTGGATAACGATATCCCCCTTTGAGAAACATATGTACGGTGTTTTTATGCATCTCAGGTACTGA

>Cluster\_23516

GTGGATCATTGGCTATATTTTGCCAATACCGGATCGCGACTGTCTGATGTGCGCGGTGGTGTGTCGCGGAACGCAA  
AGCAAGGTTGCTGTAGACGCAGGCGCTCGCTTAAACGGTGAATGCATTAGCGTTTATTCACAGTTCACCGCATGGGCGAG  
ATGCAGGCATGTTAACCTCGTCAAGGGCCATTTGATGAAAGCCTTCFCGACACCTGCTGGCTGGCGATTCGACGCA  
GATGATGACGCGCTTAAACAGCGCTCAGCGAAGCCGCTGAAGTCTGTCGATCTTCTGTAACGTGGTTCGATGCGCCGAA  
AGCCGCCAGCTTTTATGACCGTTCGATTTGACCGCTCGCCGCTCATGGTAGCGGTCCTCTGCGCGCACCTCTCCGG  
TTCTGGCGCGCTGTGGCGGAAAACTCGAATCACTGCTGCCGTTACATCTGGGCGAGGTAGCGAAAATACCGCCGGCAA  
TTACGCGGCGAGTGAACAACAGTTCGCCACGATGGTGGTGAAGCTGCGCGTTTTCTGGGAGAAAATATTCTGTTAACGACC  
CCTGGCGCAGTCTGGCCAACAACGATCAGAAAGCCATTACTGAAACCACCGAACAGTTAATCAACGAACCGCTCGACC  
ATCGCGGTGAAGTGGTGTGTTGGTGCAGGTCGCGGGCATGCCGGGCTGCTGACACTGAAAGGTCTGCAACAATTCAG  
CAGGCAGATGTGGTGGTCTACGACCGCTGGTTTCTGACGATATTAATGAACTGGTACGCCGATGCTGATCGCGTTTT  
GTGCGCAAAACCGGGATACCACTGCTACCGGAGAGATTAACCAGATTCCTGCTGCGGGAAGCGCAAAAAGGTA  
AACCGGTGGTGGCTGAAAGGCGGCGATCCGTTTATTTTGGCGGTGGCGGAGAAGAGCTGGAAACACTGTGCAACGCG  
GGTATTCATTTCTGGTGGTTCGGGTTATACCGCAGCTTCTGGTTGCTGCTTATTCGGGTATTCGCTCAGCGATCG  
CGATATGCCCCAGCTACGCTTAATTACTGGACACTTAAAAACCGGTGGCGAGCTGGACTGGGAAAACCTGGCGGCGAG  
AAAAACAGACGCTGGTGTTTTATATGGGCTGAATCAGGCTGCAACTATTCAGCAAAAGCTGATGAAATACGGTATGCT  
GGTGAATGCCGGTGGCAATTTGTCGAAAACGGAACGGCAGTACGCGAGCGCTGATGACGGTACGCTCACACAGCTGGG  
CGAACTGGCGCAGCAAAATGAACAGTCCATCGCTAATTAATTTGGTGGGTTGTTGGCCCTGCGCGATAAATGAACTGGT  
TCTTAACCATTA

>Cluster\_43017

ATGATAGGCAGCTTAACCGCGCGCATCTTCGCCATCTTCTGGCTGACGCTGGCGCTGGTGTGATGTTGGTTTTGATGTT  
ACCAAGCTCGATTACCGCCAGATGACCAGCTTCTGGATAGCGAACAGCGCTCAGGGTCTGATGATTGAGCAGCATGTCC  
AAGCGGAGCTGGCGAACGATCCGCCAACGATTTAATGTGGTGGCGGCTGTGTTCCGGCGATGATGAAATGGGCGACCG  
CCAGGACAACGTTTGTATTGGTGACACCAGGAGCGCGTGTGCGGCTGAACGCAGCGAAATGCAGATCATTCGTAA  
CTTTATTTGGTTCAGCCGATAACCGCGATCATCCGAGAGAAAAGTATGGCCGCGTGGAACTGGTCCGTTCTCCG  
TGCGTGTGGCGAAGATAAATACCACTTATCTGATTCGTCGGCCAGCAGTCTCAATCCGATTTCACTCACTTACTG  
TTTGACCGCCGCTATTACTGCTGATTTGTCACCATGCTGGTCACTGACGCGCTGCTGTGTGGTGGGTTGGCTGGC  
AAAACCGGCGGTAAGCTGAAAAACGCTGCCGATGAAGTTGCCAGGGAACCTACGCCAGCACCCGGAACCTGGAAGCGG  
GGCCACAGGAATTCCTTGGCGCCGTTGCGAGTTTAAACAGATGGTCAACCGCGTGGAGCGCATGATGACCTCTCAGCAG  
CGTCTACTTTCTGATATCTCAGCAACTGCGCACCCCGCTGACGCGCTGCAACTGGGTACGGCGTTACTGCGCGTTCG  
TAGCGGTGAAAGCAAGGAACCTGGAGCGTATTGAAACCGAAGCGCAACGCTGGAACAGCATGATCAACGATCTGTTGGTA  
TGTCAGTAAATCAGCAGAAAATGCGCTGGTTAGCGAGACCATCAAAGCCAACAGTTGTGGAGTGAAGTGTGGATAAC  
GCGCGCTTGAAGCCGAGCAAAATGGGCAAGTCTGTGACGGTTAATTCACCTAGGCGTGGCGCTGATGCGCAACCC  
GAACCGCTGGAAGAGCTGCTGGAAAACATTTGTCGTAATGCTCTGCGTATTCCCATACGAAATGAAAGTGGCTTTG  
CGGTAGATAAAGACGGTATCACCATACCGTGGACGACGATGTCCTGGCGTTAGCCCCGGAAGATCGCGAACAGATTTTC  
CGTCCATTCTATCGGACGATGAAGCACGGATCGTGAATCTGGCGGTACAGGTTTGGGGCTGGCGATGTGAGAAACCGC  
CATTCAGCAGCATCGTGGCTGGGTGAAGGCAGAAGACAGCCCGCTGGGCGGTTTACGGCTGGTGTGTTGGTTCGGCTGT  
ATAAGCGGAGTTAA

>Cluster\_22198

ATGAAAAAATTAACCTGCTTTAAAGCCTATGATATTCGCGGGAATTAGCGGAAGAACTGAATGAAGATATCGCTGGCG  
CATTTGGTCCGCTATGGCGAATTTCTCAAACCGAAAACCATTTGTTAGGCGGTGATGTCCTCACCGGAAACCT  
TAAAATCGCGCTGGCAAAAAGTTTACAGGATCGGGCGTTGACGTGCTGGATATCGGTATGTCGCGACCGAAGAGATC  
TATTTGCCACGTTCCATCTCGGCGTGGATGGCGGCTTGAAGTACTGCCAGCCATAATCCGATGGATTACAACGGCAT  
GAAGCTGGTGCAGGAGGGGCTCGCCGATCAGCGGTGATACCGGACTGCGCGATGTCAGCGCCTGGCAGAACGCAACG  
ACTTTCTCCCGTGCATGAAACCAACCGGCTCGCTATCAGCAAACTAACCTGCGTGCAGCTTACGTTGATCACTGTTT  
GGTTATCAATGTCAAAATCTCACCGCCTCAAGCTGGTGAATCAACTCCGGGAATGGCGAGCGGGTGGTGGGA  
CGCCATTGAAGCCGCTTTAAAGCCCTCGGCGCCCGTGGAAATTAATCAAAGTACACAACACACCGGACGGCAATTTCC  
CCAACGGTATTTCTAACCGCTGCTGCCGGAATGTGCGGACGACACCCGCAATCGGGTATCAAAACGCGCGGATATG  
GGCATGCTTTGATGGCGATTTTGAACCGCTGTTTTCTGTTGACGAAAAGGGCAGTTTATCGAGGCTACTACATTTG  
CGCCCTGCTGGCAGAAAGTTCCTCGAAAAAATCCCGCGCGCAAGATCATCCATGATCCGCGCTCTCTGGAACACTA  
TTGATGTTGGTGTGCTGACAGGCGGACGCGGTAATGTGAAAACCGGACACGCTTTTATTAAGAACGGATGCGCAAG  
GAAGACGGCATCTACGGTGGCGAAATGAGCGCCACCATTTACTTCCGTGATTTTCGTTACTGCGACAGCGGCATCTCC  
ATGGTCTGCTGGTCCGCAACTGGTGTGCTGAAAGGAAAACCGTGGCGAACCTGGTACGCGACCGGCTGGCGGCTTTTC  
CAGCAAGCGGTGAGATCAACAGCAAACTGGCGCAACCCGTTGAGGCGATTAACCGCTGGAACAGCACTTTAGCCGTGAG  
GCGTGGCGGTGGATGCGACCGATGGTATCAGCATGACCTTGGCGACTGGCGTTTTAACCTGCGCTCTCCAACACCGA

ACCGGTGGTGCCTGAATGTGGAATCGCGGGTGTATGTCCGCTGATGGAAGCGGAACCGGAACCTCTGCTGACGTTGC  
TGAAACGAGTAA

>Cluster\_16536

ATGGTACTTCTGATTTGTTATTCATGGGCTAACGAGCAGTGTGGACATGCCCGTCTCGGTGATCCGCGTCTGACACGACG  
CCTTGTGTCACTGGCTCTTCTCTCGCTCAGCATGCGAGTCTTTCTATGTGAAATCATCCAGTCCACTGCTCAGGTTG  
AAGGTGCGTACCGCTGATACGTAACCCGCTCTGTGTCCCGCAAGCCATTGCCGAAGCCGGATTACCGCCACTGTAAGG  
GCATGTGAGGCTCATCCGCTGCTCCTCGCGCTGGAAGACACCACCATTAACTTCAGTCACAGTACGGCATCTGATGA  
CCTGGGGAATACCACCTAACCCGAAGACGCGGGGCTGCTGGCTCACTCTGTCTGATGTACGCCCCGACAGCGCCC  
TGCAGTCCGCTTATCGAAACAGCAGCGCTGGAGTCTGCCACGGACACCTACGGTGTAAAGCACAGCGAAAGAACGT  
CCCTATGAAGAAAAAGTACCCTGGCAGCAGGCTTCGGAGCGCATGGCCGAACGGCTGGGGGAGATACAGAAACG  
GGTAACTACTGTCTGTGACCGGGGAGCGGATATCTGGCATTACCTGCATTATAAAGTCAGCCACGGGACGCGTTCGTGG  
TGCGTGCAGCACAGAATCGCCGGCTGGAAGAAGCACCCGGCAAGCTCTCGAAGTCCGGAAGTCTGGCAACCGCGGGA  
AGCCACACGCTGAATGTGATGCAAAAAGCGGGCGGGCAGCCGCCAGGCGCGATGTCATCAGTTACAGCGAAAGTACG  
CATAAAAAATCCCGACAACAGCGGCCAGGCGCTCCCGTCACTGATGTCTGTTGCCGGGAGCAGGACAGGACGGCGCT  
GCTGGCATCTGCTGACGTCAGAAAAAGTGGCGAGTCCGCCGATGCGCGACGATCTGTCAGCCATTACGAGCGACGCTGG  
CTGATAGGAAATACCACAAGCGTGGAAAAAGTGGTGGTACATGTGTGGAATCGTGGCAATGCAGACCCGGGATAACCT  
CGAGCGCATGGTGGTTATCAAGGCGTTTTATCGCGTGGGCTGCTGGGCTCGCGCAGGCGGTTACGTTGAAGAACAC  
AAAATGACAGCTGTGAGAAAATACTGACCGCACAGAGTGGAAACTGCTGTGGTTAAGCTGGAAGGAAAACCGCTTCCG  
TCACAGATCCCGACACTGAAATGGGCTGTCTGAAACTGGCGAACTGGGGCGATGGCATGACAGCAAACGACCGGTCG  
CCCCGTTGGGTAGTCTATGTGGATGGCTGGTTACAGACTTCAGGATATGGTTGAGGTTACCTGGTGTGAAGTCTCTTG  
ATCAGGAGATCTGA

>Cluster\_47108

ATGCGCTACTTAAACACAAAAGTCTCATTTGCAGCAGGAGTATTACTCGCTGCATGAGCAGCATTGCCTGGGGTGCAT  
CATCCCGGACCGTACCCTATCATAATGAATGAGTCAGATAAAGGGGAAGCATTAAAACTTACTAATCAAAGCAAAAAATC  
TACCCTATCTGGCGCAAACATGGATAGAAGATACGAAAGGCAATAAATCACGTGACTTTATTGTACAGGTTCCCCCTATG  
GTACGTTTTAAATCCAGTGAAGCAATTCATAAAGAAATGATAAGTCAGAAAAAATGCTCAACTGCCAATGACAGAGA  
AACGCTCTTCTATTTAACGTGCGAGAAATACCGCCAAAAACAGATAAAAAAATGTGATGCAAGTCACTATGCAGCAGC  
CATTCGAAACTATTCTGGCCACAAAAGCTATTGAAATTAGAAGATGATGGGGTAATGCTTACGAAAAAGTTGAAATCATC  
CGTAGAAATGATGGTTGATCCGCTTTAACAATAAGATGCCTTATCACGTTACGCTGGGTTATATCGGAACAAACGGAAT  
CACAAATGTGCCACAAACGCAAGTTTAATGGTAACCCCTTATAGCCATGCAGATACGAGTTAAAAATGTTCCGTCAG  
CTTTTCAGGTTGGTTATATCAATGATTTTGGTGGATTAAGTTTTTATGAAATAAACTGCCCGACGGTTAATAACTCTTGT  
AATGTTTTCCGTAGCCAAACGAGATAAATAA

>Cluster\_29290

ATGATTGAAATAGAAATCACGCGAGCTGGCAGATATCCCGTCTTCATGCTTATCCTGTCCGGCAAAAAGATACTCCGTT  
ACCGTGTGTGATTTTTTATCACGGCTTTACTTCGTCCAGTCTGGTGTATAGCTATTTTCCGTTGGCGTGGCGCAGGCTG  
GTTTTGCGGTGATCATGCCGGATGCCCGGATCACGGTACCGTTCAGCGTTTTAGTGGCGACGCGAGCGCGGTTAAATCAATC  
TGGCAATCTTGCTACAAAGTATGCAGGAATTCACTACCTTACGTGCGGCAATAGCCGAAGAAAAGTGGCTGCTGATGA  
CCGCTTGGCAGTCCGTTGGCGCTCGATGGGCGCATGACGGCACTGGGAATTACCCTCGCCACCCACGGTAAAAATGTA  
CCGCCAGCATGATGGGATCGGCTATTTTACATCGCTCCCGTTCACGTTTTCCACCCTGATACCTGAAACGGCAGCA  
CAGCAGAAATGAAATCAATAACATTTGTCGCGCGCTGGCAGAGTGGGAAGCGACAAACCTGGAACAACCTGGTGCAG  
ACCTCTACTGCTGTTGGCATGGCTTGGCAGTACGTCGCTGCCGACGAATCACTAGCTTTGCAGCAGGCTTAAGCG  
AGACGGGGCGGATAAACTGCTAACCTGTTCATGGCAGCCAGGCTGCGTACCGCATACGCTGAGGCGTTAGATGCT  
GCCGTGACATTTTTCCGCCAGCATCTTTAA

>Cluster\_443

GTGAGTATCAAAGTTTGTGTTGATTATATTTTCACTGATCCCTGATATACGACAACAAGGAAAGGTTAAACATAAATATC  
TGCTATTTTGTCTTCCAGCTATGTGCAGTAATTCAGGTCGCGATGAGTGGCAGGAAATGAAGATTTTGGACATGAAA  
GACTTGAATGGCTAAAGAAATATGGTGAATTTTGAATGGCATTCGCGTFCGATGACACCAATGACAGCTTGTGAGTAA  
ATTGACAGTTTGGCTTTGAAAAGATGTTTATTGAATGGATGCAGGAGTGCCATGAAATCACTGATGGTGAATTTATAGC  
AATAGATGAAAAGACCATTAAGAGGCTCCCTTTGATAAGGAAAAAGAAAAGGAGCAATCCATATGGTGAATGCTCTCGA  
ACGAAAATGGTGTGTACTGGGGCAGGTGAAAACGGAAGCCAAAAGTAAATGAGATTACAGCCATTCAGAGTTGCTTAA  
CTACTGTATTTAAAGAAAATTTGATAACCATTGATGCTATGGGCTGTGAGAAAGATATCGCTTCAAGATCAAAGATA  
AAAAGCAGATTATCTTCTGGCAGTAAAAGGCAATCAGGGGAAATTACATCATGCTTTCGAGGAAAATTTCTGTAATG  
TGTCTTCTAATTAATAAGGCGATTCGTTTTAGTACGAGGAGATAAGTCATGGAAGAAAAGAAACAGTTTGCATATTGT  
AGTAACGTAACGCCGTAACCTTTTGTGA

>Cluster\_40489

ATGTTAAGTATTAAGATTTACACGTCAGCGTGAAGATAAAGCTATCCTGCGTGGATTAAGCCTCGACGTTCCGTCGCGG  
CGAAGTTCACGCCATTTATGGGGCCAATGGTTCGGGCAAAAGTACCTTATCGGCAACGCTTGCAGGCGGAGAAAGATG  
AAGTGCAGGCGGCGCAGGTTGAGTTTAAAGCAAGATTGCTTGCCTGCGCGAGATGTCGCGGAAAGATGTCAGGTTGAA  
TTTTATGGCTTCCAGTATCCGTTGGAAATTTCCCGCGTCAAGTACAGTTTCTTCCGCAACCGCACCTAATGCGGTCG  
CAGCTATCGCGGCGAGGAAACGCTCGACCGCTTTGATTTTACAGATTTGATGGAAGAGAAAATCGCTCTCCTGAAAGATG  
CGGAAGATTTATTAACCCGTTCCGGTAAACGTTGGTTTTTCCGGCGGAGAAAAGCGCAACGATTTTTGCAAAATGGCG  
GTGCTGGAACCGGATGATGCAATCTTGTGATGAGTCAGACTCGGGCTGGATTTGACGCAATTAAGAGTGGTTGCCGATG  
CGTGAACCTCGCTGCGTGACGGCAAGCGTTTATTTCATCATTTGTTACGCACTACCAACGATTTCTCGACTACATCAAGCCTG  
ATTACGTTCCATGTGCTGATCAGGGACGAATTTGAAATCCGGCGATTTACAGTTGGTCAAACAACTGGAGGACGAGGTT  
TATGGCTGGCTTACCGAACAGCAGTAA

>Cluster\_21171

ATGGATCAAGCAATTTATACCGCGATGGGAGCAGCCAGCAGCTGAAATCAACAGGCGGTAACCGCCAGTAATCTGGC  
CAATGCCCTACGCCCCGTTTTTCGCGCGCAGTTAAACGCTTGCAGCGAGTGCAGGTTGGAAGGCTTTCACTGCCACCG  
GCACGCTGGTAACCGCGTCAACGCGGGTGCAGACATGACGCCCGCAAGATGGATTACACCTCGGCCCGCTGGACGTT  
GCGTGCAGCAGGATGGCTGGCTGGCGTGCAGACCGTGCAGGTTAGCGGTAAGGATTAACGCGTAAATGGCAGCATTCAGT  
TGATCCTACCGGCAACTGCAATTCAGGGACATCCGGTGGTAGGCGAGGCGGGGCAATGCTGTGCCGGAAGGGCGG  
AAATCACTATTGCTGCCGATGGCAATCTCGCGCTGAAATCCGGCGATCCGGCAAAATACGGTTGCGCCAGTGGGGCT  
CTGAAGCTGGTGAAGCCACGGGACGGAAGTCCAGCGGTTGACGATGGCATTTTCTGTTAAGCGCAGAAAGCCAGG  
TACGCGTGGGCGGTTACTGAGGAGATCCAACCTTGCCTGCTGCTGCGGGGTTCTGGAAGGCAAGTAACTGATGCGG  
TTGGGCAATGAGCGACATGATTGCCAGCGCACGGCTTTTGAATGCAGATGAAGGTGATCAGCAGCTCGATGATAAC  
GCAGGCGGTGCCAACCAACTGCTGTCGATGAGTTAA

>Cluster\_7226

ATGAATAACACAAAAAATCACTAAAAGTGTCTTTTATGGGGAATCCTGGCATATTTCATATGATTTCAAAAAGGATA  
TGACAGTTTTTACCTCAAGTAAATATGAAGAAGGTGCGACCTGGTTACTCCAGTGTCTGAAAAATGATCAGGTAGATGTCA

CCTATATGCCAGCACATACGGTACAAATTCCTTCCCTGAAGATGTGGCAGAGTTAGAACAATATGATGCCATCGTTATT  
AGTGATATTTGGTAGTAATACTTTCTGCTACAAAATGATACTTTTATCAGCTTCGCATAAAAACCAACGCTCTCGAACT  
GATTAAGAATATGTGAATAACGGTGGTGGGTTATTGATGATTGGCGGTATCTCTCATTCATGGGAATGAAGCAAAAG  
CCAATATAAAAATACAGTTCTGGCTGATGTGCTCCCGGTTACGATGTTAGATGGTGACGATCGTGTGCAAAAACGAGAG  
GGTGTATTGACAGCCATCACAACTGAACATCCAGTTATTAAGGGTTCTCTGAATATCCTTTTCCAGGACTCTGGGCGA  
CCGGCGATCGCTAAAGAAAATGCTGAGTGGTATTAACAATAAAAACGCTCCATTACTGGTCTTTAGTAACATACACA  
ACGGGAAAATAGCTGCTTTATGAGTACTGTTACCAGCAGTGGGTACACAGAGTTTATGTCTGGCCGTTCTATACC  
CGTTGTGGGTAATACTACTGACTCATATTGCAAGATAA

>Cluster\_21456

ATGAATTCCTGACAACTATTTCTACAGATGGTCATTGACCAGGGTCAGGTTAGCGTAACCGATCTGGCAAAAGCCAC  
TGGAGTTTCTGAAGTTACCATTTCCGACGATCTCAACACCTCGAAAACTGAGTTACCTCCGACGTGCACATGGTTTTG  
CAGTTTCGCTTGATAGTGTAGCAGTCAAAACCCGATGATGAGCAACTATACGCTGAAGCGTGAACCTCGCCGAGTTTGGC  
GCTCAGTGGTTCAACCGGGCAAAACCACTTTTATCGAAAATGGTAGCAGCAATGCCCTGCTCGCCAGGACTCTGGGCGA  
GCAGAAGAAAATGTCACATATCATCACGGTCAGCAGCTACATCGCGCATTTGCTGAAAGACGGCCTTGTGAAGTCATTT  
TGCTCGGTGGCGTACCAGAAAAAAGCGAAAGTATGGTTGGCCCTTGACACGCCAGTGCATCCAACAGGTCATTTTC  
AGCAAAGCATTTATGGTATTGATGGCTGGCAACCTGAACTGGGTTTACCGGTCGCGATATGATGCGTACCGATGTGGT  
CAATGCGGTGGTGAAGAAAGTGCAGACGATAGTCCCTGACTGACAGCTCGAAAATTTGGTGTGTACATTCATACTCCA  
TCGGCCCCGTTGAGCGATTCAATCGCGTATTACCATTGCAAAAACGCGCCAGCGATCTGATGCATCTTGAGCACAGT  
AAACTCACGTTCCAGTCTGTTGACATTTAA

>Cluster\_6410

ATGAACCTTGAAGCCTTACCAAAATATTACTCCCCAAAATCTCCAAAATTTAGCGATGACGCTCCAGCGACAGGCACCGG  
TTGTTTAAACATTTACGGATGTAATGGCAGCGCAGGGGATGGTGCAGTCAAAGCACCACTTGGGTTGGCCTTATTTCTGG  
CAAAAGTTGGTGTTCAGGACCTCAGTTTGGCATTTGAAGGCCCTGCTAAATACGCGATGGCACTGGATAACCCGACATTTG  
AACAAATTTGAGTAGAAGAAATCCGGTTACGATTTATCCCTACCGTCGTGAGTTTGGCCTTGGCTGATTACTCCAGGCTCG  
GGCAAGTAAGGCTCGCTGTGAGCATTTGTTACAGTACGGGATTTTATAATGATTTGCGCGAAGTGGTGAACACTACAGAC  
GCGGGGAATCTGTAATCAAGGAAGAAATGGGTGAAGGAATATGTCAGCATTTGCATGGTAAGGCGAAGCCAGCACAGCG  
TGCAGAGGGTGAAGGGTAAAGGGATGTTCTGGATGAAAAAAGAACCCGGTTTCATGGCGTACCCGTTATATAAGATTTG  
TGGCGTTTGAATGAAGAAACCGGTTTGTGCTTTACCAGCACCGTGGCAGCAGCTCATGTCCGAAGCTCCAGACGACG  
TGACCGATTATCAGTGGTATAAGGGGATGCGGACGTCATTGGTAACTGGTAACAAAGTGTGGCAGGAAGAAGCATA  
GCGGAAGCGCAATGAGGAAGGTGACGAGATAA

>Cluster\_20984

ATGTTATCATCTTTGATTTGGGGTGGTTATGAAGGATGGTGCCTGCTCAGGAGTCTTCACTTTTATGCTTACATGGG  
ATGCCCTGGATGGGGAGTGCTTATTTCTATGGATGGGGTACTTCTTTTACTACGGCTTCCCATGGTGGATTGTAGGTG  
CAGGTGTTGATGATGTTGCCAGAAAGTTTATTTTTCAGTATTCGTCATTTGCTATATTTCTTATCGGTTGGGGTATTGGT  
GTTGATCTTTTTCGCAAGTGAAGAAACATTTCTATGCAAGAGCTAAATGTATTTGCTCTTATTTTGTCTGGAAAT  
ATTTGTTTGGCCGCAATTTAGTGTTTTCTATATTTGACAGAAAGATTACAGTACCTTTTGTCTACTGTCAGCAGCGA  
TTGCGCTGGCGGTTACAATTTGATAAGATCTTATGGCGGATTTTATCGGTATCATGCTTCTATGATAAGCCATTTATA  
AAAAAACATTTTTCGATTTGTGATGATGCTTTTGTGGCATATTTCTGGCTTTTTCATTTCTGACAGGATATACAA  
ACCGCAGTTAAGAAAGAAATGAAATGATTAATATAATGATGGTGGTATTTATGTTCTTGTCTGTTATGATAATTGTC  
TGGTTTTGCTACTTCTTTCAATGCAGGTAGTAAAAGGTTTGTCAATTTATCAATCAGCACAAAGATAAGAAATCTCAGGTT  
GATATTGTAAGACCAGAATTTAA

>Cluster\_24581

ATGTTGCCAGGATGCTGCAAAAATGGAATGTTTATCAGTAAAATACCTGTTATGCAAGCAGGGTAAAAGAGATCATGAG  
GACTCACTTCCCTGAATATGAAATAATATCCAGCGCCTCTGCGGAGGACCTTACCTTATTACAATTACGTCGTTCCGGAT  
TAGTCACTTCTGATTTAGCCGGTGAAGTGAAGATCCAGTTCCTGTTTGTGAACATTATTTCTTTAATCTCGCAATAT  
CGGGAAATTCAGTGGGTTTTCATGGTGTACGCTCCTGGTATTTCCAGGCAGTGAACCTGCTCATGTGCCCTACGGCGC  
GTTATTGCTGATGTTGAACCCATTTGAAATCTGGTCAAGACCGTACGTTCCGGCAATACGACGACGACGATCATCAGC  
CCATGCTGACCTCTCCGGCAATGACTGAACTCATGATTTAGCTATCGCTCAGTCACTTCTCACTCTTTTCAGAGCGCAAG  
GTACTGCGCTATTTAGGTAAGGATGGGCAATCAACAGATAGCTTCACTGCTTAAGAAAAGTAAATAAACTATCAGCC  
CCAAAAAACAGTGCATGCGTGCAGTGGCAATTCACAGTAACGCTGAAATGTATGATGGAATAATAGCCGCGAGGGTG  
CAAGAGAACTTAACTTCCCTTCTGTTTATGGAGATGGCCGAGAATGGAACACAGCCGAATTAAGAAGAGAAATGTCCGAC  
TCATAG

>Cluster\_22699

ATGGAAGGCTGGCAGCGCGCATTGTCTGCTAGTTCGCGGTTGGAGCAGAACACGCTGATGCTGGACGCTTTCACGGA  
GGAATCGGGTCCGCTGCGTCTGGTTGCCAAAGGCGCACGCTCTAAACGCTCTACTCTGAAAGGGGCAATACAGCCTTTCA  
CCCCTCTCTGCTACGTTTTCGCGGGGCTGGCGAAGTCAAACGCTGCGCAGTGTGAAAGTGTCTGCTGGCGCTGCCA  
TTAAGCGGTATCAGCTTTTACAGCGGCTGTACATCAACGAATTTCTCTCCCGGCTACTGGAATACGAGACGCGCTTCT  
TGAACCTTTTTCGATTACTTGCAGTTCATGCTCTTGGCGGGTCACTGGTACGCCAGAACCCTGGCGGCTGGCGGCT  
TTGAACTGGCAGTCTCGGCGCATCTGGGCTATGGCGTCAATTTTACCATTGTGCGGGTAGCGCGGAGCCGGTGTAGATGAC  
ACCATGACGATCTGTTATCGCGAAGAAAAGGGTTTATCGCAAGCGTCTGTTATCGACAATAAAAGCTTACCAGGAGGCA  
GTTAAAAGCGTTAAACGCGCGGGAATTTCTGACGACAGACACTGCGCGCGCGAAGCCTTTACCAGCATGGCGCTTA  
AGCGTATCTTGGCGGTAACCATTAAGAGCAGGGAAGTGTTCGGCAGTTTATGCCAAGCAAGGTTGAAAACACAT  
TATGAATGA

>Cluster\_16073

ATGCCAATCATGCAAAATAGGCTCGTTACACTTGTGGTCAACCGTAAAGCGATTAAGAATCTGCATATCAGCGTGTGCC  
CCCTGATGGCAAAAGTCCGCTTTTTCAGCGCGGAAACATATGACGAGACGGCGATTCGTATGGCGGTTGCTTTCAGCTTTC  
GCTGGATCAGAAAACAGCAGCAGGATTTCCGACAGACGCTCGTCAATCAGAGAGGGAATGGTACGCGGAGAGTGGCAC  
TATCTTTGGGGCCGAAGATATCGCTACTTGTGATTGAGCGTCAACGGGCTCAGCAAGTAAAAGTTGCAAGGAAATAATA  
GCTCCAGCTTTATGTTCAACCGGAAACCGTGTGAAAATAAGGCAATTTGGCGTTAAGTGAATTTTATCGACATGAACTAA  
AACAGCAGTGGCTTAAAGCTTTTACCTGAATGGCAGGACCGAATCGGTGTTCCCTAACATTTCTGGGGCATCAAAAAGATG  
AAAACCTTTTGGGCACTGTAACTACAACAAAACGAATCTGGCTCAATCTGGAGCTAATTAAGAAGCCGCGGAGTG  
TCTGGAGTATATCTGGTGCATGAACTGGTTCATCTTCTGGAACGTCACCATAATGCTCGCTTCCGGTTGCATATGGATC  
GGTTTATCTGACTGGCGTGGCGTGGGATTTGTTAAATAATATGCCGTTAGCGTTTGGAGCATGGGAGTATTGA

>Cluster\_41118

ATGATTAAGTCTTAATTTGTCGATGATGAACCGTTAGCACGGGAGAACCTGCGGCTATTTTTCAGGAGCAGAGCGGATAT  
TGAATCGTTGGAGAGTGTTCAAACCGCTGAGAAGGATCGGCGCGGTCATAAACTGCGCCCGGATGTGCTTCTCTCG  
ATATCCAGATCCCGCGCATTCAGTGGTCTGGAAATGGTGGGATGCTTGACCCGGAACATCGCCCGTATATTTGTTTCTC  
ACCGGTTTTCAGCAATACGCCATTAAGCCTTTGAAGAATGCTTTGATTAATCTGCTGAAGCAATTTGATGAAGCGCG  
ACTGGAGAAAACGCTGGCGGATTTGCTCAGGAGCGCAGCAAGCAGGATGTTTCTGCTGTACCAGAAAATCAACAGGCGC

TGAAATTTATCCCTTGTACGGGACATAGTCGGATTTATTTGCTGCAAATGAAAGATGTGGCATTGTGTCAGCAGTCGGATG  
AGCGGTGTCTACGTTACCACTACGAAAGGAAAGAGGGCTTTACCGAACTGACATTACGTACCCTGAAAAGTCGTACACC  
ATTACTGCGCTGCCATCGTCAGTATCTGGTTAACCTCGCGCATTTACAGGAGATCCGTCTGGAAGATAACGGCCAGGCCG  
AGTTGATTTTGCCTAATGGCTTAACCGTCCCGGTACGCCCGCTTATCTGAAAAGCTTAAAAGAGGCGATTGGCCGTGTA  
>Cluster\_65326  
ATGAAATATATATCATTATTTATGTTTTATCCTGCTGTTGTGCGGCTGCAAGCAGCAGGAATTTGAACCATCTTGATCA  
ACAGCAAGCTAATGATGTCTTGTGTTTTACAAAGACATAAATTTAAATGCTGAAAAGAGGATCAAGGCAAAACAGGAT  
TTTTCAATATTTGTGCAACCAACGGATTTTGCTTCTGCGGTGGATTGGCTAAAAATCTACAATCTACCGGGTAAGCCTGAT  
ATTTCAAATATCGCAGATGTTCCCTGCAGATGCACCTGTTTACCTCCACGAGCGGAAAAGCAAGGCTATATTTCTGCTAT  
TGAGCAGCGGTTAGAGCAATCTCTCAAATTTATGGATGGCATTATTTCTTCGAGAGTACATGTTAGTTACGATGTTGATA  
ATGGCGATAGTGGTAAAACCTGCTTTACCAATTCATATTTCTGTACTTGCAGTATATGAAAAGATATCAACCCAGAAATA  
AAAATAAATGATATCAAGAGATTTATGTTAATAGCTCTGCAAGCGTACAATAAGAAAATATTTCTGTTGATTTGTCAA  
ACGAAGAGACATTATTGAGCAAGCACAACATATGAAATTTAGCGAACTGTTTTTGGCTTATGATAAGGCTATGGCCGTT  
CTATCTTACTTGCATTAATATCCGTAGCGACTTGTGGCTGTTATGGAAGTATAGGGCCATTTAACTAATTTAGTCAGG  
TTGAAAATTAAGTAG  
>Cluster\_46060  
ATGATTATTCGGCATTAGATTTAATCGACGGCACCGTGGTGCCTCTCCATCAGGGCGATTATGGCAAACAACCGGATTA  
CGGTAACGACCCGCTGCCACGTTACAGGATTACGCTGCGCAAGGTGCCGAAGTGTTCACCTTGTGGATCTGACCGGGG  
CAAAGATCCGGCTAAACCTCAAATCCCGTTGATTAACCCCTGGTCCGCGGGCTTAACTTCCGGTGCAGGTTGGCGCG  
GGCTGCGTAGCAGAAGACGTTGGCGGCTTACTGGAAGCAGGCGTGTCTGCGGTGGTGGTTGGCTCCACCGCGTGAA  
ATCACAGAAATGTTGAAAGGCTGGTTTTGAACGTTTCGCTGCCGATGCCTTAGTGTGCGCTGGATGTCCTGATTTGACG  
AGCAAGGCAACAAGCAGGTGGCGGTACGCGCTGGCAAGAGAATCTGGCGGTGTGCTGGAACAATGTTGGAACCTAT  
CTGCCCGTCCGGCTGAAACATGTCTGTGTACCGATATCTCACCGCAGCGCACGCTGGCAGGTTCTAACTGCTCTTTATA  
TGAAGAAGTGTGCCCGAGATATCCGAGGTGGCATTTCAGTCTACCGCGGCATTTGGCAGATTAACGATGTTGCTGCC  
TGCGTGGTACTGGCGTGGCGGCTAATAGTTGGTGTGCATTTACTGGAAGTAAATTTACCGTGAAGGAGGCATCGCA  
TGCTGGCAAACGCATAA  
>Cluster\_54957  
ATGACCGTAAACCCGCCACGCGCGAAGCGGGCATTTCGCGCGGAACAGAACATTACGGACGTTCTATTATGGGCGC  
GCCGTTAATCTGGTTTCCCTGCCCTGCAGCCAGCCGGAAGTGGTTGATTTGCTGGCTGGCCTCACGGTGTGAAAAC  
CTTCGGTCTGCACGCTCTCTGTGCTCTGCGGAGTTGACACCTTCTTTGCGCGCTCATCATGTGGTGTGTGTGTAAT  
CCTGACGGCTGCCAGTTGGGGTTACGGGCAATGCTAATGGTGTGGATTTAAACAGAACTTTCCGGCGGCAACTGGAA  
GAAAGGTGAAACCGTTTTATCGCTGGAACACGCGCTGAAGAACCGCATGTCTGATTTACTGACAGGTGACAAACCTGGCT  
CCGAACCTGAAACCCAGGCGCTGTGCCAGCTTATACACCGCATTAACCTGCCGTTGGTGGTCTCATTTCCAGATCCACTG  
GCCTGTATGAAAGATCCAGACACAGCGAATTAGCGAATGGCTGGCTCAGGCGTTTGAATGGCTCTGGTAAACAGCGT  
CGGTTATGAAACGCTGGCTCTTTCCGCGAGTTGGTGTGCAGATCTGAACTTGCATGTCATCACCGCAGAGTTTCCGCCA  
TCTCCTCCGACGAAGCCAGCGAAAATACTCTTTGCGATGGCAAACTTGTGCTGGCATCTTAAAGATGCAATTTCCG  
CCGCTGTGA  
>Cluster\_36884  
ATGAAAGCGGCACGCCAGCAAGCGATAGTCGACCTGTGCTGAACCATACCAGCTGACCACGGAAGCTCTCTCTGAACA  
GCTAAAGGTGAGTAAAGAAACCATTTCTGTCGCAATCTCAATGAAATACAGACGCAGGGTAAAAATTTGCGCAATCATGGAC  
GCGTAAATATATCCACCGTCAAATCAAGACAGTGGCGATCCCTTTCACATCCGGCTGAAAAGCCATTTATGGCATAAA  
GCAGATATCGCCGCGGAGGCGCTCGCGTGGATTGAAGAAGGGATGGTGTATAGCCTTAGACGCCAGTTCAACTTGTCTGGTA  
TCTGGCACGCGAGTTGCCGTGACATCAACATTCAGGCTTTCAACCAATAGCCATCCGATTTGCCATGAACTCGGTAACCGG  
AACGCATTTCAACTGATCAGTTCCGGCGGCACACTTGGAGCGAAATATGGCTGTACGTTCAATCCCTCGCTGATTTCCCAA  
CTTAAATCGCTGGAAATCGATCTGTTTATTTTTCTTGTGAAAGGATCGATAGCAGCGCGCACTGTGGGACTCCAATGC  
CATCAACGCTGATTACAATCGATGCTATTAACACGTTGCCGCGCAATCGTTGTTATTTGATGATAAAAGTAAATTTAATC  
GTTTCAAGGGAAGCCCGCATCGGGCATCTGGATGAGGTAACGCACATTAATTTCTGATGACGCCAGGTTGCAACTCTTTG  
GTAACAGCCTGA  
>Cluster\_41095  
ATGCAAGTCGACCTGTGAGTTCCGCGCAATCTGCGCACGCGTTACACCTTTTTTCAACCAATTTCCCTCTTGTGCACGT  
TATGACCAACGATGTGGTCAAAACCTTTTACTGCCAATACCTTGTGGCGCTCGGTGCATCGCCAGCAATGGTTATCGAAA  
CCGAAGAGGCCAGTCAGTTTGGCGCTATCGCCAGTGCCTTGTTGATTAACTTGGCACGCTGACGCGGCCACGAGCGCAA  
GCGATGAGTGTGCGGTTGAGCAAGCAACGATCACAACCGCCTGGACGCTTGATCCGGTTGCGGTTGGTGCCTCGA  
TTATCGCCCGCTTTTGTCTGGAATTTCTGCCATAAGCACAACCGCATACGTTGGTAAATGCTTCGGAATCATGGCAT  
TAGCTGGCATTTGCTAATGGTGGACGGGAGTGGATACCACTTACAGCAGCGAGTAAACCGCATACCGGATACCGCAACACTG  
GCACGGGAAACTGGCGCAATCTGCTGTGCTACTGGCGAGGTGGATTATGTTACCGATGTTGCTGCGCACCGTTGGCATTCA  
CGTGGCGATCCGCTAATGACCAAAGTGGTAGGAACTGCTGTGCACTATCGCGGTTGTGCTGCTGCTGCTGCTGCTGCTG  
CAGCGGATACGCTGGAAAATATCGCATTTGCTGTCTACGTTGAAAGCAAGCGGAGAACGCGCAGCTCCGCAAGCGGAG  
GGCCAGGCAGTTTTGTTCCACATTTCCCTTGTAGCGCTTGGCAATTTGACGAGGTTGACGAGGTTGACGAGGTTGCAACTCTTTG  
>Cluster\_33355  
ATGAGTATCATCGAAGTGACAGGTAATCCACGCCATGACCAACTCGTTTCACTAATCGCAGAACGCGGTTATATGAATAT  
TGAAGAACTGCGCAACTGTGGATGTTTTCAACGCAAAACCGTGGCGGGATATCCGAAAACCTGAGTGCAGGCGGTTGA  
TCACCCGTCATCATGAGGGGGCCGGGCGCTCTCCAGCGTCATGAATACCGCTTTTGGAGCACGGAACTTTCTGCTCACC  
GCCGAGAAAACGGCGATCGCTGAGGAGTCCGCGATTACCTTCCGGAACGCTGTACCGTCTTTATCACCATCGGTACAAC  
CTTAGAAGCCGTTGCCAGGGCATTACTCAACCGCGGTGATTTACGATTTACTAATAGCTGCGTGTGGCAGACAGATT  
TTTTAAGAATCAGGATATTTAAGTGTAGTGGTCCGCGGAGGCACTTTACCGCTCATAACCGGTGGGATTTATCGGCCAGGA  
GCCGTTGATTTTTATTGAAGGCTTCCGCGCAGATTATTTAATCACCAGTATAGGTGCCATTGAACATGACGGCACCCCTGCT  
GGAATTTGATGTCAATGAAGCGTTAGTCCGCGAGAACGATGATTAAACATGCGCGGAATACATTGTTAGTGGCCGATCATA  
CGAAGTTTACCGCTGCTGCTGCCGTTTCAATTTGGCAATGCACGGAATGTCAGGCTTTTTTTACTGATGCCCCACCTCCC  
AATCTTTCTGCCAGTTGTTAAGTGAAGAGAATGTTGAACCTGGTGGTGGTTCCGAGCAAGAAGTATCTCTGA  
>Cluster\_62148  
ATGAGCCAAACAGACCTGACCGTATCAAAACAGATGCTGCATACCTTGTGGCAACATCGTCACCTCTCCACACAGCAGGC  
CATGGAGCTTTTTGGCTATGCGGAAGCGACTGTCCGCTGATTTCCAGTATATTTGTCAACAGTATCCAGGCATGATCC  
GCGGTACGGTTGCTCCGACTTCCAGCAGACATACAGCAGCAAAAGAGTACGTCTTCGACGTGAAAACGTCATTTGCAATCT  
GTGGCGAAAAGAAAATAGCTGCCCTTGCCTGAAACAAATGATCAAAGATGGCGACTGCTTTTTTCTGACTCCGGCTCAAC  
CTGCCCTGAACTGGCGAAATGCTTGGCCGATGCGCGGGTAAAGGTCATCTGCAACGACATTAATAATCGCAATGAATGCTG  
GCTGTTTTCCCACTGGGAAAAGTTACATTTATCGGAGGACTGATTTCCCGCAGGTTATTTTTCTGGTAGGAGAGTCTGGCG  
CTGGAGATGATCAATGCCTTTTTCCGTAGAACGTCGCTTTATCTCTGCGATGCGCTGTGCTGGAGACGGGGATCACCAA  
TGCCACCATGTTTGGAGTGGGGTGAACACGGAATTTCAACGCTCGCGTGAAGTTATTTCTCATGGCCGATCACTCAA

AATTTGATGCCGTTGAGCCGATGCTGTAGCAACACTATCATGTATTAACAGCATCATCAGTGACAGCGGTTACCTGAG  
ACTATTGCCACAGCGTTATCAGCGAGCCGGATGTGAGTTGTTTTTACCTCATTCATAAAGTGA  
>Cluster\_39176  
ATGGGATATTTAAATAACGTCACCGGTTACCGCGAAGATTTACTGGCTAACCGTGCGATTGTTAAACACGGTAATTTTCGC  
ACTGTTAAACACAGCGCTGGTAAATAATTTATCCGGCTTTGTAATTTGTGACGCGACAACTCTCCACGCCAA  
AGCTGGGTGCCTCTTTTGTGATATCTGGTACACTGCATCAAAACGGCGGCAACCAACAGGCTTCGGTGGCGAAGGC  
ATTGAAACGTTCCGTGATGTGATCTCTGAAAATATCACGCAAGCCGAAAGGAAAACATTTGCCTTAAAGCGAAGGTGG  
CTATCTTTTATGCCCCCAGGCTCCTTAATGACGTTTGTAAACGCCAGGCGAAGACAGCCAAATCTTTTATATAAAGC  
GTGCTATATTTCCGGTAGAAGGTATCGCCGCTGGCTGTTTCTGGCAATGCCAGTGAACGCAACGATTCATTTATGAA  
GGCATGGACGATGTTATCTGCTGGATTTCTGCCCAAAGAGTTAGGTTTGTATGAACATGCATATCTCTCTTTTGC  
GCCAGGTGCCAGCCATGGTTATATCGAAACACAGTTCAGGAACACGGTGCCTATATTCTTCCGGTCAAGGGGTTTATA  
ACCTCGACAATAACTGGATCCCGGTGAAAAAGGCGATTACATCTTTATGGGCGCTTATCTTACAGGCGGTTATGGC  
GTGGGCGTGGTGAAGCGTTCAGCTATATTTACTCGAAAGATTGCAACCGCGACGTAGAGATTAA  
>Cluster\_40236  
ATGAATATACCCCGTTTCCGACGCTTTCCGCGCAACCATAGATGCCATAAATGTTATCGGACAGTGCTGGCGCAGGA  
TGATTTCTCCGGTGAGGTGCCGATCAGGCCGATTGCGTGATCTTGCAGGCAATGCGGTTATGCCGACTATCGATGCCG  
CATGTAAGATTCCGGTACGCAAAAATTCCTTTACTGATAGTGGTATCGGTCACCTCGACAACATTTTTTGTATACG  
GCCATCGCACAGCATCCACTACAACACTATCCGCACCCTGGCAGAGCTGAAGCTACCATCTGGCGGATATCGCTCA  
TCAGTTCTGGCATAATCCGCATGAAAAATCTGGATTGAGAACAGATCAACAACTGGCGTAAAAACGACCGCTTAGCA  
TCGGCTATGAAATCAGGCGTAGAACGAGTTCATACGGCTATCGTTGTTACGAGCCCAACATGCGAGCGGCGACATG  
GCGACGTTCCGCGTATAAACCGGGGATAATCCGATGCACCACCGTGGTTAAGTTATCCCGGATTCGTTCTCAGTTAG  
AAATAACGCAGACAGTGAATCTTTGTTAATCCGTTGCAAGGATATGGCCGGTTGAGCGTTATCTATCGCTACTCAGT  
GCGAGCTGCCCGCTTTACCGGATGATAGCGATGGCTACGGCCCGCGGGCGAGATTTTATCGTTACGTTGATTTTCCG  
GCAGAAGTCATCCAGGCATGGCAACGCTGAAACACGATGCGGTGCTCATCGAGCGATGAAAGTCGCTCGTTACGTTA  
A  
>Cluster\_6961  
ATGTTTTTACAACTTAATACAGAGTAATTTGGTATTTAAATATTAAGCCTGGCTTTCGACTCTTTTAAAGAAAG  
GCTGCAGTCTACTATGACAGCAGTCACTTCTTTATATCAACGGGTCATGTGACTGCGATGAAATAGCAGAATCAAACT  
TTAATTATATGATTGCCATATATGCTAACATTAACATGATGCCTCAAAGCCAGGAGCGCCAGCACTAGTTTTGATACA  
TATCTGCAGGACAATGTTAAATATAGAGTAATAATTAATAATCTTTATGGTAGTGAATTCGGATAAGAGGTATAAATA  
AGATTTTTATTGGAATGGATGTCACCTTCTGTATTTCCGCCAGAAAAATGACCAATTTGATCAGTATAAAAAACAGGTTGG  
TTATCTACTATTTAAGGATATAACTATGAACAATAATATATACATCTGTCGGGAGCATTTTGCTCGCATCAAAAA  
AATGAGAGTCTCCTAAAGTTCCCTCGATAATAATCAATGCTTAATATCAATCTCTTTTAAATCCACTAAATCTCCGGG  
AATGGGAAGTGGTGTGCTGGAAGATATTATGATATCCAGATAGTTCACCTAGAAAAAGCTCTCGGGTATGAGTTTTAA  
GCTTCTCGCTACAGGCACATTCAATTGAGCCAGGAATGTATTGATAAGTTGGACATTTTTTTCGCTGACGATCTGTTTAA  
TATGAGTCAGTATGCATCGCCGATGGAACATTTAAAAAGTAAGGCAACGGCCCTATACAAAACGGACCGTTGCCAG  
ATAA  
>Cluster\_21942  
ATGGCTAACGCAGATCTGGATAAACAGCCTGATTTCTGTATCTTCCGTGCTAAAAGTTTTTGGCATTTCGAGGCGCTGGG  
TGAAGAGCCGAAATAGGATAACCGAGTTGTGCGAGCCGCTCATGATGTCAAAAAGCACCCTTATCGCTTTTTTACAGA  
CCATGAAAACCTTAGGTTATGTGGCGCAGGAAGGGAGTCCGAGAAAATATCGCTGACCTGAAATGTTTGAAGTGGGC  
GCTCGCGCTTACAAAACGTCGATTTAATTCGTAGCGCAGATATCCAGATGCGTGAGATCTCCCGCTGACCAAGAAAC  
TATCCACCTCGCGCAGTGGACGAAGACAGTATTTGTTTACATTCACAAAATGACTCTATGTACAATTTGGCATGTATT  
CACGGATTGGGCGTCTGTAATCCGCTGTACAGCACCGGATTTGGTAAGTACTGCTGGCATGGCGGATCGCGATGAAGTG  
AAGCAAAATCTTGAAGGCGTGGAGTATAAACGCAGTACCGAGCGGACCATCACAGTACAGAAGCGTTTATACCGTTCT  
GGACCAGGTGCGCGAGCAGGGGTATGGCGAAGATAACGAAGAGCAGGAAGAAGGGTGGCATGCAATGGCGTTCCGGTAT  
TTGATCGCTTTGGCGTGGTTCATTGCCGTTGAGCATCTCTTCCGACGTTACGTTTTCTGAGAAGGCGTTTACAGGAA  
TATGTGCAATGTTGCATACCGCGCGCGCAAAATTTCTGCCAAATGGGTTATCACGACTATCCGTTCTGA  
>Cluster\_61095  
ATGGCCCTTATGAACGCATTTGATTCGCAAAACCGAAGATTTCTCACCTGCAATTTGGTTCGCAACTTGGTAGCCGCCGCT  
GGCGCGTAAAAAATCTCCGAAATGGTGAAGAAGAGCTGGAACAGATGATCCGCCGTCGTGAATTTGGCGAAGGTGAAC  
AATTACCGTCTGAACCGGAAGTATGGCGTTCTTTAACGTCGGGCGTCTTCCGTTGCGTGAAGCGTGGCAGCGTTAAAA  
CGCAAAAGTCTGGTGAATAAAACACCGCGAAGCGCTCGCGTCTCGCGTCTTCTCGCGACACTATCATCGGTGAGCT  
TTCCGGCATGGCGAAGATTTCTTCTCATCCCGTGGGATTTGCCAATTCGAACAATACGTTCTGTTCTTTGAATCCA  
GCTGTGGTTCGCTATGCGCTGAACATGCCAGTATGAGCAAAATCGATTTGCTGGCAAAAGCAATGGAATCAACAGTACG  
TCGCTGGATAAACACCGCGCATTCATTCGTTTACAGCTGATTTCCACCGGCTGCTGGCGGAGATCCCGGTAACCCAA  
CTTTCATGGCGATCCAGTTGCCCTGCTCGACTGGCTTATTTGCCGACGCCCAACGGTTACCGATCAGGCACTGCACGAAC  
ATAACAACGTTAGTTATCAACAGCATATGCGATCGTTGATCGGCTGATCCGCTCATGATCTGACGAGCCGATCGTGG  
TTGCAATCGCATCTCAACAGCTCTCTGTACTGGCAGCTTTCGGTTCAGACCACCAAAAAAGAAATAA  
>Cluster\_39977  
ATGACTTCGCTTCCCGCTAACTGTATACCAGTAAGCAACACATCATTACCTGTGCGCATAGACTACCCAGCAGCGCTGGC  
ACTTCGCCAGATGGCTCTCGTTCCAGGACGAACCTCCGAAATACCTGCTGGCGCGGAAGTCAAGCGCTGCTCCACTACG  
TGCCGGATCTTACCAGCAAGATGCTGCTGGCGACGCTCGGAACACGGGCGCGGAATTAACGAAGCGCTGGCGCTGACA  
AGGGGGATTTTTCTTGGCGCCGCATATCCGTTCTGACAGCTGGCCAGCTCAAACACGGACTGAAAAAGCGACCAAG  
AACGGCAGGCGGTGCTCCCTGTGGCAGTCAAGTGCATCGCTGGTTCCCTGTCCGATACACAATACGTCAGCAACATGC  
AGATGATGGTGGTCAACGCTGAAAAATCCACTGGAGCGCAAGAAACAAACGAACGGAAGAAATGGAGAAGCGCGCATCTGG  
GGAATCACCGACCGCACAGTTTCGCACCTGGCTGAATGAAGCTGTAGAGCCGCTGGCGCGACGGCGTGACGTTCTCTGT  
TCCGGTTACCCACATATCTTCCGCCATTCCTACGCGATGCATATGCTGTATGCTGGTATCCGCTGAAGGTGCTGCAGA  
GCCTGATGGGCAACAGTCAATAGTTCCGACAGAGGTACACGAAGGTGTTTGGCGTGGATGTTGGCTGCACGGCACCGG  
GTGCAGTTTTCTGATGCTGAGTCCGATGCTGCTCAACTGCAAGCTGAAAAACAGACACGCATAA  
>Cluster\_16831  
ATGAAGCTTTTGAAGACAGTTCCGCTGCTTATGTTGGCGGGGGCATGTTTGGCTCACTGAATGCAGTGCAGTGCAGTGA  
TTCCGTTTTACTGTATGACGATCTGCTGCCAGCGTAAAAACCTTTTCAAGTAATCTGAACGCAAGTATCTGAC  
AATCAGGCAATAACAAAAGCTCCTCACTTACGGCTGACACCACATGACCTGGTATGGACAAAACCACTGCTGCTGCTG  
TGGGGAAACGCCAGTAATACTTCTTCTAATGATGAGGCTTCTTACAGAAAATAATGCGGCGGGCGGGCTGAGCGTTTTAA  
TTTTAATGATTAATGACTATTTATTTGGTCAAGCAAGCTGGCTGACAGACCGTTATAACGGCTATCGAGAGCGGATGCTG  
TGACCGGGTTAGGTTAGGTTAGGTTAGGTTAGGTTAGGTTAGGTTAGGTTAGGTTAGGTTAGGTTAGGTTAGGTTAGGTTAG  
GACAAAATATACCGCAATGCCAGTGAACCCAGCGCTGGGCTATGCCCTCCGGGGCTTATGCATGGCAGTTGACTGACAA  
CGCTAAATTTACGAGGGTGTTCGGTCTTTGGCGCGGAAGACACACGCTGAACTCCGAAAGTGCATTAATGTTGCTA

TTAATGAACATTTTGGACTGAAGGTGGCTTACAACGTTACATGGAACCTTGAACCTCCAGAGTCTGCACCGGAACATACC  
GATCGTCGGACAACCTTATCGTTGGGTTACAGCATGTAA  
>Cluster\_21391  
ATGCATTACAGCCAAAACAAGATTTACTCAATGATCGCATTATCCTGGTGACGGGAGCCAGCGATGGAATTGGTCTGTGA  
AGCAGCGATGACGATGACAGCTATGGTGGGACAGTGATTCTTTGGGCGGTAATGAAGAAAAATACGTCAGGTAGCCA  
GCCACATAAACGAAGAACTGGACGCTACGCCACAGTGGTTTATCTCGATTTGCTAACCTGCACGTCGGAAGATTGCCAA  
CAACTGGCACAGTGCATTGCCGTTAATTTACCGGCTCGGATGGTGGTTTGCATAATGCCGGATTGCTCGGCGATGTTTG  
CCCAATGAGCGAACAAAGTCCGCAAGTCTGGCAGGACGTCATGCAGGTCACCGTTAATGCCACCTTTATGCTCACACAGG  
CACTGCTTCTTTTACTCTCAAAATCGGACGCGGTTCACTGGTCTTACCCTCAACAAGCGTTGGACGTCAGGGGCGTGCA  
AACTGGGGCGCATATGCAGCGTCGAAATTTGCCACCGAAGGATGATGCAGGTAAGTGGCCGATGAATATCAGCAGCGCT  
GCGTGTCAACTGCATTAACCCAGGCGGTACGCGCACCGCAATGCGGGCAGCGCTTCCCGACCGAAGATCCACAGAAAC  
TTAAAACCCCGCTGATATCATGCGCTTACCTCTGGCTGATGGGCGATGACAGCCCGTAAAACCGGATGACCTTT  
GACGCCAACCGGCGGTAACCGAATTTCCCAATGA  
>Cluster\_43218  
ATGAGCCTGACCCTCACGCTACCCGGCACCGGGCGCACAGGGCGTTCCGGCATGGGGCTGCGAGTGCAGCGCTGGCG  
CAGAGCACGAGCCTGCCCGCATATCGCCGCGACCCATGCAGCGGGCTAGTAAAGTTTAAACGACGCAATCACCTGATCG  
ACGCGGGCTTACGATCTCGCCGATCGCTGGTCTCCCGCATCGTTTTCAGCAGTATTTTGTGACGCAATCATATGATGAT  
CACGTCACAGGGCTGTTTCCGCTGCGCTGGGGCTGGGCGATCAGATCCCGGCTACGGCCCGCGGATGAACAGGGCTG  
CGACGATCTGTTTAAACATCCGGGCTGCTGATTTACGCCACACGATGGAACCGTTTGTGGTGGTGGTATTTACAGGGGT  
TACAGGTCACGCCCTCGGCTCAACCCTCAAACTGACCTTCGGTTATCTGCTGGAACCGCACACAGCCGGGTTGGG  
TGGTGTCTGACACCTGCGCTTCCGGAAAAACGTTCAAAATTTTACGCAATAATCAGCCGAGGTAATGGTGGATTGA  
TTGCAGCCACCCCGCGCGGAGGATGCACCGCTAATCACTGTGATTTAAATACCGTGTGCGCTGAATCAGGTTATCC  
GCTCGCCACGGGTGATTTGACCCATATCAACCACAGTTTGTGCGTGGCTGATGGAACCGCACTGCGCTCGGGGTTT  
GAGGCGGGTTTGTGGATGGATGGGGTGGCGTGA  
>Cluster\_50263  
ATGAGGAACATAATGGCAGGTTTTTAAATATTCCTGTCTTCTGTGCTTATGCTGATATCAATCTGTATGGTCTGGTGG  
CCCGCATAACAGCCTTGTCTGATGACGCAAACTTTATGCGCAAAAACAGGATTTATAGTGAACGTTTACCTACGGCCAC  
AGAACAATAAGGATGAGATGCCCCAAAAATGAGATATCTTGTGGCGCATCAGAACAATCTGCTGCTGATCATTT  
CGGGACATAAAGACAGCTTCAAGTGAAGAAATATTCAGCCTCTTATCTGCGAAAAAGTATTTTACTGGTAAAGAAAGG  
TAATCCTAAAAATATCCGGAGTATTTGACGACCTGACGACACCGGGATGGCGTAATTTGTAATGATGTTGGTGGTACCA  
GTAATACATCAGGCACTGGCGTCTGGGAAGATATTGCCGGACGTAAGGGAATATAGAAACTGTCGCCCAATCCGAAAA  
AATATTTATTTATAGCGCCCAATAGCGGAACCTGACCTAAGGCTCTTGAGAATCAGCCTGAAGCAGATGCTCGGATAAC  
CTGGGCTGACTGGCAGCCAGTAATCCAGAAATGGTGTGCTGCGTGAAGTAGCGCCAGACTACGTGATATGGCGTGATA  
TGAACATTACAGTACGTCAGGATGCAAAATGATGAAACCGTCTGATTTGCAAGATGGCTACAAAACCGATGAAGCGCGCT  
GCATTTCAAAAAATATGGCTGGACCAGGAAAGGCACTTGA  
>Cluster\_15662  
ATGAGCATGAATCTTATGGCTAAGGCCATGAATATAAAGTTGGCAACCCACTGAGAAAACCTGGTCTGTATTAACCTTGC  
CGATAACGCCAATGATAATGGCGAATGCTGGCCTTCATATCAACATGTCGCTGACCAAGTGTGAGGTGAGCAGATCGACAG  
TAAAAGCTCACATTAGGCGCTGGAAGATGGGGCTTTTAAAAGGGAATTCAGAAGAAAAGGAGAGCTTAACCACTCA  
AACGTTTTTTATCTGACGCTGGAATAATGCACAACAAATACACAGAAATCAGGTGGGGCAGGAGCTGCCCGGGTGGGGC  
AGGAGCTGACCTAGGGGGTGGGGCAGGAGCTGCCCCAGAACCCTATCACTCTTTTGAACCAAGTCAATGAACCTAAAAACA  
TTATGTTCAACATGTCGGAACAGAGTGTGAAAAAACTCCTGACCGCTCACGAAGAAAACCGACAAGGCAATTCGAGGAAATA  
TTCTGGTGTGACAGGCATGCGGAAAGCGGGAAGAAAAACCGCAGCTTGGCATTGAGAACAAGTTCAGGAAATGGCGTAA  
AACTACCAGGGGTACGGCAAGCGAGTTTGCACGATGCTGGCAGAAAGCATCGCATGCAGGAATGGTAAGCAGTTCCGGAT  
TCGACAGGTTGTTACCATCGAGCTACCTGAACGCTGAGCGCTGGAACGACGAAAAGCCAGAAAACCTTCAACCACAATCC  
AAACCATCATCCGCAATCACCGTATCGAAAACCTGGCTACGTGTTTTTCGACAGGTGA  
>Cluster\_33836  
ATGACTGATCTGAAAGCAAGCAGCCTGCGTGCCTGAAATGATGGACCTGACCACCTGAAATGACGACGACACCGATGA  
GAAAGTGTGCGCCTGTGTCATCAGGCCAAAACCTCCGGTCCGGCAATACCGCCGCTATCTGTATCTATCTCGCTTTATCC  
CGATTGCTCGCAAACTGAAAGAGCAGGGCACCCCGGAAATCCGTAACGCTACGGTAACTAATCTCCACACCGTAAAC  
GACGACATCGACATTTGCGCTGGCAGAAAACCCGTCGCGCAATCGCCTACGGTGGCGATGAAGTTGACGTGGTGTTCGCGTA  
CCGCGCGCTGATGGCGGGTAAACGAGCAGGTTGGTTTTGACCTGGTGAAGCCTGTAAGAGGCTTGGCTGCGCGCAACG  
TACTGCTGAAAGTGAATTTGAAACCGGCAACTGAAAGACGAAAGCGCTGATCCGTAAGCGCTGAAATCTCCATCAAA  
CGGGTGTGACTTATCAAAACCTTACCGGTAAGTGAATGATGAAATGCGACGCGGAAAGCGCGCATCATGATGGA  
AGTGAATCGGATGAGGCGTGAAGAAACCGTTGGTTTTCAAAACCGCGCGCGCTGCTGCTGCGGAAATGGCGCAGTA  
AATATCTCGCCATCGCCGATGAACTGTTCCGGTGTGACTGGGCTGATGCGCGTCACTACCGCTTTGGTGTCTCCAGCTTG  
CTGGCAAGCTGCTGAAAGCTCTGGGCCAGGCGACGGTAAGAGCGCCAGCAGCTACTAA  
>Cluster\_23601  
ATGAGTCAGCCATTATTATCTGTAAACGGCCTGATGATGCGCTTCGGCGCCTGCTGGCGGTGAACAACGTCATCTTGA  
ACTGTACCCGAGGAAATCGTCTCGTTAATCGGCCCTAACGGTCCGGGAAAAACCGGCTTCAACTGCCTGACCGGAT  
TCTATAAACCCACCGCGGCACTATTTTACTGCGCATCAGCATCTGGAAGGTTTGGCGGGCAGCAAAATGCCCCGATG  
GGCGTGGTGGCAACCTCCAGCATGTGCGTCTGTTCCGTAAGATGACCGGTGATTGAAAACCTGCTGTAGCGCAGCATCA  
GCAACTGAAAACCGGGCTGTTCTTGGCCTGTTGAAAACCGCTTCTTTCCGCTGCGCCAGAGCGAAGCGCTCAGCCGCG  
CCGCCACCTGGCTTGAGCGCATTGGTTTGTGGAACACGCCAACCGTCAAGCGAGTAACCTGGCCTATGGCGACCGGCT  
CGTCTGGAGATCGCCCGCTGCATGGTGCAGCAGCGGAGATTTAATGCTCGACGAAACCGGACGAGGCTTAAACCGGAA  
AGAGACGAAAAGAGCTGGAATGAGCTGATTGCCGAACCTGCTAATCATCAACAACCCACTATCTTGTGATGAAACAGATA  
TGAAGCTGGTGTGGGATTTACAGACAGAAATTTACGTGGTCAATCAGGGGACGCGCTGGCAACCGTACACCGGAGCAG  
ATCCGTAATAACCGGACGCTGATCCGTGCTATTTAGGTGAGGCATAA  
>Cluster\_30880  
ATGACTAAAACATATGGACATTCAATGTCAAAACGCAATTTTAACTCAATTAACCATGACACCAAAATATAAAATATGTAT  
TTTTACTCCAAAAACATTAAAAAAATAATGCAACTCTTTATATACTTGTGGAATAGTGCAACAATTACATTTCTG  
ATATTTCTGCTGTTATTTGATGCACTACCCAATCCACAGTGTAGTTACACTTGGTTATGAATCTTGGAAATACCTTTAGC  
ATTCATCGCCGCTTACGATTAATACTCTGATGGTGAATGCTATTTGTGATAACTTAACACGATGGATGATCTACTT  
TACTGGTGGAGGAAACCGCTTTTCCGAGAATTTACTAATCTCAGATCAGATCATGCGCATGGGTAGTACTATTTGCTCCGAA  
GTTCCAGAACTCGGATATGGGGCCTGCTAGGTGCTATTTTGTGCTGATTTGCTTAAAAAATAATTCATGCTTTAAC  
TATTTATATATATGCTACCATCACTTCTATGGCAGAAATGAAAGAAATCATAGATAATTAAGATGATATATCAGAAATC  
AAGCAGCAATAAAGATATGCTTTGCTTAAACGAAATCTTAGCCTGATTACTCCGCACTTTTATATGTAAGCAGCATCA  
AAGCGAATCTGTTTTGAGAAATATTTTACAGAAAAATACAGTAATTTTCTATTTGTAACAATTTCCAGAGCTCAATCAT  
CAGGAGACTTCTGCTGCACTCTGGAATAGCATTATTCATTTACAGCATATAA

>Cluster\_39709

ATGAACTATCGTATTATTCCGGTCACCGCATCTCCAGAACTGTTTCATGATCTGGTGTGAACAAACCCGCTCTGGCCGC  
ACTGGTCGATCTCGCGCGGATGCGGAAAAAATCAAACAGGAAGTTGATGCCAGCGGCTGACACTGATGAGATCTCTGC  
TGACTCATGGTCACTCGGACCACGTTGGCGCAGCGGCGAACTGGCGCAACATTACGGCGTGGCGGTTTTGGCCCGGAA  
AAAGAAGATGAGTTTCGGTGCAGGCTGCTCGCAAGTCTGATGTTGGTCTGGAAGAGTGCACGCCGCTGACGCC  
AGATCGTTGGCTGAACGAAGCGGATACCATCAGCATAGGGAATGATGACTTTACAGGTGTTACATTTGCCCTGGGCATACGC  
CGGTCATGTCGTTTTTTGATGATCGGGCAAGGCTGCTGATTTCTGGCGACGTTATTTCAAAGGTGGAGTAGGGCCG  
AGTGACTTCCCGCGTGGCGATCAATCAACTGATTTATTTCAATCAAAGATAAATGCTGCCACTGGGGGATGACGTGAC  
ATTTATTCGGGTACGGACCATATCCACACTTGGTTATGAGCGCCTGCATAATCCCTTCTGCAAGACGAAATGCCCG  
TCTGGTAA

>Cluster\_2680

ATGATCGATCTCTATTTTCGCCCCGACCCCAATGGTCAAAAAATTACGCTGTTTCTCGAAGAAGCAGAGCTTGATATCG  
CTTGATTAAGGTAGACCTGGGAAAGGCGGTGAGTTTCGTCGGAAATTTTGGCATTTCGCCCAACAACAAAATTCGG  
CAATTGTTGATCATTTCTCTGCGGATGGCGGCAACCGTTAAGCCTCTTTGAGTCTGGTGCCATTTTGTGTATCTGGCT  
GAGAAAACAGGACTCTTTTTCGATGATGAAACGCGTGAAGCGCGCCACATTACAGTGGTTATTTCTGGCAGGTAGGGCG  
ACTGGGCGGATGCTTGGGCAAAATCATATTTAATCAGCGAGCCCCCAACCATTTCTTACGCTATTGAACGTTATC  
AGGTTGAAAATCAGCGTCTTTTACCATGCTTACCAAGCGGCTGGAACACTCGCCCTGGCTGGGAGGCGGAACATCAGC  
ATTTGCGGATATTGCTGCTGGCCGTGGGTTAATGCTGGACTGCCAGCGAATGACCTCGCAATGTATCCGGCAGTCAA  
GAACTGGCATGAGCGGATCCGTTTCGCGCCTGCCACCGGGCAGGCACTGCTAAAAGCAAACTCGGTGATGAGCGTTCCG  
ATAGTTAA

>Cluster\_67051

ATGGCCGTAATTTGTATCTCCATACCGCATGGCCGGTAAATCAGGGAAAAATGATGCAGCTGATGCTCAGGCTATCTG  
CGAAGCAGTTTCGTCGCCACATAAGCGGTTTGTTCAGTTAAGGACGAGAGTCAAGCAGGCGATGAGTGTCTGCATCGTA  
CCGACGCGGTTTTTATCGAAGAGAAAACAGCAACATATAATCGTCTTCGAGGTTGATATCAGAAATTCGGCGTATTGGC  
CCACAAAGTACAGATGCTCTGTGGCAGATGTTTCTGGCAGAAAGAGCTTTTACCTCTCAGGTTACGCAATGTGTAGA  
TGATTTACTGGAACAGCTTGTGATGCAATTAAGCTAACATCACTGAATATGACCGAATTTTGTCCCGCATAGCCAAAACAG  
ATCACCGCAGTCAAGCGGCTGATGAAGCTAAAAGGAGTTGGTCCCAACTGCCTGTGCTCTGGTTGCCTGTATCGGTAAT  
GCACATGATTTTAAATTTGAGCGCAACTGGCGCCTGGGTTGACTCCATCACAATACAGTAGCGCGGAAAGCT  
GAAGTTAGGCAGGATAACAAAAGCGGTGATTCGATATCGCAACGCTTCTGGTACAGGGGGCTCGTTACGACTGATT  
GGCGCTGA

>Cluster\_80

GTGTGGAAGGTGTAACCACAACTTTAAAGAGGACTTACTATACTTTTTTTTCGAAAAAGAAAACTTAAAGTTGGGAGGT  
CGACCTAAATAAAAAAGTAAAAGATACCCTTTTCGTTGATAGACACCGAAACCACAGGCTTGATTTAAAAAAGACG  
AGGTTATCTCTGTAGGTGCTTATAAGATGTTGATCTTACCCTTTCTTTTCTGAAAACTAATTTTATACTTAAAAACA  
GACCTGTGTAGAATTGAAGACTCTATCAAGATTACGGGATTACACAGACAACTTAAAAACGGTCTTGAAGAAAGGA  
GGCCTTGCATCAATTTTTTGAAGTTTACCAGGGTGCAGTATTGGTAGGATTTTTTTAGAGTTTGACTTGAAGAAAGCTAA  
AAAAACATCTCAAAGAAGAACTAAACCTTAACTCTCTTTTATGGGTTTGTATGCTTTAGACCTTTATCTTAAAAAGACC  
TTAGATAGAAATTCCTAAGCTTAAAGAACTGTTAGAAGATATGATTTACTACCACAGTTTTCAAAATGCTTTAGAAGA  
TGCTTACATGACTGCTTTGCTTTTTTAAAAATTAGTTTATCTTACAGGAATAAAAACTGAAACAACACCGCTAAAAA  
TTATTTAA

>Cluster\_26775

ATGAAACAGACTGCGCCGTTTTATCAGAGAATTGCGGGTCACTCAATGGCGACATATCTGGCTTTCAGGCGATATACACGG  
TTGTTTGGAGCAGTTGCGCCGCAAAATTTGGCATTGTCGTTTTGATCCGTTGGCGAGATTACTTATCTCAGTGGGAGACG  
TTATCGATCGTGGGAGCAAAAGTTTACGTTGCTGCGAGTTACTGGAACAACTTGGGTTGCTGCGGTAAGAGGCAATCAT  
GAACAGATGGCGATGGATGCGCTGGCATCCAGCAGATGCTGTTGTTGTTGATGAATGGCGGCGACTGTTTTATGCGCT  
GGCAGATTATCAACAGAAAACAGCGAAAACGGCGCTGGAAAAATGTCAGTATTTGCCCTTTATCTTGAAGTACACAGTC  
GCACCGCAAAACATGTTTATGCCCATGCGGATTATCCGATGATGTTTTATGAATGGCAAAAGGACGTTGATTTGCATCAG  
GTCCTGTGGAGCCGCTCGCGATTAGGTGAACGCCAAAAGGGCAGGGAATTACAGGTGCTGATCTTTCTGGTTTGGTCA  
TACACCGTTGCGCCATCGGTTGGATATTGGCAACCTGCATTATATTGATACCGGTGCTGTCTTTGGGGGAGAAGTGCATC  
TTGTGCAATTGCAATAA

>Cluster\_11100

ATGCTGACAATAAAACGTAGCGTGGCGATCATCGGATCTGTTTCAGTCCGTTAAGTACGGCGAGCAATCTCACATCGCA  
ATTCACAACTTTTTTAGCGCCAACTCGCGGGGTAAGTGTGAGGTTTCGTTTCTATTCTGACAGCGCCCAATCTAC  
TACCGCATGCGGAGCAGCATTTGCTTTCGATGAGCAATAATCCCGCTGTGGGGCAATGTAATGTTGTCAGCGCTGC  
GGTAAACGCAAAACGATTTTACAGGTTAATGTGCAAGCCACAGGAAATATGTTGTTGCGCGATGCCATTTGTCGGGG  
AGGAAAGCTGGAAGCTGGCAATGTCAAATAAAACGGGACGGTGGATACCTGCCACCGCTACGGTGTGGATATCA  
ATCAACTTGTGATGCCATTAGCCTGCGCGATCTATCACCCGATCAACCTATCCAGTTAACCCAGTTTCCGCGGATG  
CGGTAAGGCGGCAACCGCTCAATGTGATGCCAGCGGTTAGGTTTACGCGCAACGCAAGGTTACGCGGATGAA  
CAATGCGAGCGTGCACAGAAATGCGGGTGCATGTTATCGGACAGGTAGTACGCGGCTGTTGATGAGTGGGA  
ATATCTTTATAAACTGTAA

>Cluster\_17155

ATGAATATAATAAAAGAATATACTGTACCTATATGCTATTTAATTAATAAAACATTATCTATGTTTTCAAGCGTTAG  
TGTTTATCCCGGAGCGAGAATAAGGCATGTAACATTTGAGGAGAATAATAAAAGTGTATAACAATACATTGCTTTATAATT  
CAAATATTGGACGTCATACTTATATTCAGAGGAATGTACAATATTGAACACGTCAACTCGGTCGGTATGTTCTATTGCA  
GAAAGTGTGAAAATGGGATTAGGTAACATCTGTGTCGGAATATATAACGACGATCCATTCGTTATGGGAAAAATTC  
AATACATTTGGCTTTCTAAAAGCTGTCACCTCCGATACATACATTTGAAGAAACAAAAGAAATTAATGATTTGGTCA  
ATGATGTTTGGGTGCGAATACGGTTATATTGGATGGAGTAACGTAGGTAATGGCGCTATTATTTGGGGTGGCTCAGTT  
GTTACTAAGAATATACCTCCTTATGCTGTTGCTGCAGGGGTTCTTGTAAAGTACTTTTATATCGTTTTAATGATGATAC  
AAGAAATAAGTTGGAATAAAATGAAATGGTGGAAAAAGATTATGAAGAACTAGAACTGATCTTTTCAAGATTTAAATATC  
CAGACTCGGAATAA

>Cluster\_21274

ATGCGCAATTCATAATCTCTGAAAATACCATGCAAAAACTTTCTTTAGAAATCACAAAGTTAAGCGATTACGCTCGCA  
ACGTTCTACAGCGGTAACCTGAAAACAGCCAGCGGTGATCTGTTCAATAAACCTACGATGTTCTTCCGCA  
TCACCGATGAAGCGGAGCAAAACATTAAGAAATTCATCCGGTTACAGGGGTTGATGCGGCGAGGTCGCTCTCGACCC  
GACAGCGAAGGTTACTGTTGCTGACCAATAACGGCGCTTGCAGGCGGTTTAAACCGCGGTAACCGCACCGGAA  
AATCTATTTATGTCAGGTGGAAGTATTTCCACACAAGACGCACTTGAAGCCTTGGCGAATGGCGTAACCTTAAATGAT  
GCCCTACCTGCCGAGCGGCGGAGCTGGTTGAAGAACCCGCGGTTTATGGCCGCGAATCCGCGGATTCGTTGAGCG  
AAAAGTATTTCCACAGCTGGCTGAAGATCACCTTATATGAGGAGCTAATCGCCAGGTGCGCGCATGACCGCCATG  
TGGTTTCCCGCGCTGCGACTGATTCGCTATGCGATGGGGATTACTCTTTGGATAATCTTGCATGCGCAATGGCGAATGGCGAG

ACGCGACAGATTAA

>Cluster\_34371

ATGCGTATCATTCGCTTGGCGCTCCGGGCGCGGGAAAGGGACTCAGGCTCAGTTCATCATGGAGAAATATGGTATTC  
GCAAAATCTCCACTGGCGATATGCTGCGTCTGCGGTCAAATCTGGCTCCGAGCTGGGTAAACAAGCAAAAGACATATGG  
ATGCTGGCAACTGGTACCCGACGAACCTGGTATCGCGCTGGTTAAAGAGCGCATTGCTCAGGAAGACTGCGGTAATGGT  
TTCCTGTTGGACGGCTTCCCGCTACCATTCGCGAGGACAGCGGATGAAAGAAGCGGCATCAATGTGATTACGTTCT  
GGAATTCGACGTACCGGACGAACGTATCGTTGACCGTATCGTCCGTCGCGCGTTCATGCGCCGCTGCTGCTGTTATC  
ACGTTAAATTCATCCGCGAAAGTAGAAGGCAAAAGACGACGTTACCGGTGAAGAAGTACTACCCGTAAGATGATCAG  
GAAGAGACCGTACGTTAAACGCTGCTGGTTGAATACCATCAGTATGACAGCACCGCTGATCGGCTACTCTCAAAGAACGAGA  
AGCGGGTAATACCAAATACGCGAAAGTTGACGGCACCAAGCGGTTGCTGAGTTCGCGCTGATCTGGAAAAATCCTCG  
GCTAA

>Cluster\_13208

ATGGGGCTTTGTAGTCGTATATAAAGTCTTACATGCAATAGTTGCTCAATGCATTGCCAAATAATGCCAGAAGAGTCACC  
GCGTTTGCAGTACTGCGCAAACCTCGTGTGTTTGTATGTGGCCGAAGAAAGTTCATATTTAATCGTGGTGTGGTAGAAG  
GTATCTTAAACAAAACCAACATGCGAGATTAAGCGGATATATTTTGTGCGATTTTTCAGTAAGTTTTTACGCTATATC  
CTTGA AAAAGACTGGATTGACTATCTTGCAGTACTGACATGGGGATTGTTTGTAGTCAGCGACCGCAATATGCAATCGTT  
AGCTAATTAATGCGGCAAAACACAACACTACGAATATCTGCTGTCATATAATAATGATGATGGTCTGATGTTGCCAATGAAA  
AGATCAGACAACATTTATTTGGTCTGTTATTTATCATTTACCAGAGGTAACACATTAACTCAGATGGAATTCACCAATATG  
GGGTATATGTTTTCTGGTTATAATCCATATCAGATTGCTGAAAGTCTGGATATGGATACCCGTAGCATCTACGCGTACAA  
GCAACGAATCGAAAAGAGAAATGGGTGGTAAAATAACGAATTAATTTATCGTTTACATTCGGTCCAACATTGA

>Cluster\_42224

ATGAGCCAGGTTTTAATTACAGGCGCAACGGGGCTGGTGGCGGCTACCTGCTCGGATGTTGATTAATGAACCGAAAGT  
TAACGCCATTGCTGCGCCGACGCGACGCGCGTGGGCGATATGCCAGGGGTGTTAATCCCATGATCCGCAACTGACCG  
ACGGCTGCGCGCAGTACCCGATCCCATGACATTTGTGTTTTGTTGTTGTCGGCACACGCGGCGAGAAGCGGGGACAAA  
GAGGCGTTTTTATTCATGCGGATTACACGCTGGTGGTGGATACCGCATTAACCGGCGCGGCTCGGTGCGCAGCATATGCT  
GGTGGTCAGTGTATGGTGTCTAATGCCCACTGCGCGTTTTTCTATAACCGCGTCAAAGGGGAGATGGAAGAAGCATTAA  
TCGCCAGAACTGGCCGAAATGACCATTTGCTCGCCGTCGATGTTACTGGGCGATCGTAGCAAAACAGCGGATGAACGAA  
ACGCTTTTTGCGCGCTGTTCCGTTTTGTTTACCCTGTAACCGGTAACGTTGAAATCCATTGATGCGGAGAGACGTGGCGGCTGCT  
GGCAGAGGCGATGCGCCCTGAGCATGAAGGTGTGACGATTTTAAAGCTCTCAGAATTACGCAAAAAGAGCTGAATAA

>Cluster\_18335

ATGCTTAAAGCCAGACAACCTGCCGTTACATTTGGCAAAAACGATGTAGAAATTAATGCACGAGAAACACTTTTATCGCG  
CTTTTTTTCATTAGATCTTATAGATTTTCGTCATCGTCTATTCAACGGCAAAATGAGTCATGAGGTACGGCGGAAATTT  
TTGAGCGCGGTCACGCCGAGCTTTGCTACCTTTGACCCAGTGGTGTGATGAAGTGTGCTGATTGAGCAGATTCGGATT  
GCCGCGTACGACACCAGCGAAACCCCTGGCTACTGGAGATGGTTGCCGGGATGATTGAAGAGGGTGAAGTGTGGAAGA  
TGTGCGCGTCGCGAAGCGATTGAAGAGGCGGGACTGATAGTCAAACGGACCAAAACCGGTGTTAAGTTTCTGGCAAGCC  
CGGGGGCACCAAGTGGAGCTTTCGTCAAATATGGTGGCGAAGTGGACCGCCACGACCGCAAGCGGTATTACCGGTCGGCT  
GATGAAAACGAAGATATTCGCGTTCATGTGGTAAGCCGGGAACAGGCATACCAGTGGGTAGAAGGGGAAAATCGACAA  
CGCAGCGTCGGTCAATCGCTTTGCAATGGCTGCAGCTGCATCATCAAGCTTAAAAAATGAGTGGGCATAA

>Cluster\_46496

GTGCTGAGTTGCTGTGTAATATACAATGGATGAATCAATACCCTAAGACCGGCTGGCTATTGCTGTGTATCTATATTGC  
ACTCGGTGTAGTTGCTCAGAGTAATTAATGCTGAATCTGGAAGTGTATTTCGTTGGACTACTCAATCTTAGGAAGCGAC  
GGCTAGAGCAAATGCTGACACAGCCATAATTAATAAAAATGCCGTCGCTGGCAAAAGCGTGAAGCTTCGTCAGCGCAGC  
CTTTATCGGCTCAGCAGCTTGTATAAATATCGGCTGCAGGATTTGGCTGTAATAATGTGTGATCGTTGGTGTGGCGG  
TGGTTATCTCAAGCCGTGGCGTAACTGGCTCGAAGAACGGGATGGACGGATTGTGTTCAACAGGAAATGGCATTGTTTT  
GCTGGCGTCTTTTCTGGTAGGTGAGATTGTAACACAGTCTTACTAATAATTAATTCATATGATATAGTTTCTCATTCT  
TCGGCCGAAATGATCGCACCGCTTATGTTACTCTTCATGCTTGTATGGTGGTTTTCTTGGCTAATGATCACCTCGGTACC  
TACCCCTAGGTGGACTCGCAAAATGGAAGTCTACTTTGAGAAATTTAACGCTGACAGACCATGGTTTTAA

>Cluster\_44722

ATGATTACTGTAGTTGGTGGGAACAAGGTGGTTCAGGAAAACCTACCATTGCATCAAACCTGGCTATTGCTCTCGCAAA  
TAAAGGAAGGGAAGTCTGCTGTTAAACGGAGATCTACAACGAACAGCCGCAAAACATCATGCGGAACGAGAAGCTGCAG  
GACTGTTTACCAGCAATAAACCTTGTGAGAAATTTGATAAACCCTGACACAAACACTACAGGCTCTGAATGAAAAGTTTCGAT  
GATGTAATAGTGGATGTCGCGAGGAAGAACTCAAAGGAATTCATAACGAGTGGAGTTGTCGCACATCAAATAATTCGCC  
ACTACAGTGTCTCAACAGATCTGGATACTCTTACAGAACTAGAAACAACAGATAGACGCAATCGGTAACCTTAAACCCG  
AATTAAGTTTATTTTCAAAGTATGGCAACAACCAATCCGGTTTTGAGGGGAAATGAGAGAAAAGAAATCTCTTGAA  
TATCTTGAAGAAATTCCAAACAATCAAGTCTTGTGATTCAGTTATTTGTTTTGAGAAAAGTCTATCGCATTCGAGGAA  
CGCACCGGTTGATGAGAAACGAACAATACAGCAGCAAAAGCAGAAATGAACATTTAATGAATGAGGATTTTGGCCCAT  
GGTGA

>Cluster\_39454

ATGACATACGAAAATGACAAATCCAGGTTCTGAAGAGCATGAAGGTGCCAGATGATTTTAAATCAAATGGCTTTGTTTA  
TGTGCTTTTGAATGAGTGCATGCCAGGAATTTATAAGATTGGGATGACTAAGCATTACCAGAAAGTTAGGGCTAAAGAAA  
TTTTAGCCTTACTGGCGTTCTTAAGCCATTTAAGGTGATAGCAGCTTTTCAATCAAATAATCCCGCATCAGATGAAAAA  
CTCATTCAAAGGCTTTGCAAAAAGAGAGGCTTAGTGATAATCGAGAGTTTTTCAAGCTTGAAGATAATGATCTTTCTGA  
ATCTCTAAATGAAATAAGGGCGCTGGTTGGCCCTGAAAGAAATGGCGAGACGGCAGAATACGCAATTTACGACTCATTCA  
TTTTTTTTCGCCATGAAAATGAGCTTGAATTAATGAGGAGCTTATAGAGCAAGGCTGGGTAGTGTAGTTGGTTCATCTT  
CCTGCGGTGAAAAATTTCTTATTCGCGCCGGAATGCTTACGCGAAGCAACTGATAAGCAAAATAAATCATCGATAGT  
TATTAATACAGATGGCAGTGTGGTGTATGTTAAGTCTCTTGAAGCCCAATGCTTTGATGCGGGGTTGAAAATGAGCCTG  
GCTGA

>Cluster\_49995

ATGAAAAAATAGATATATATAGCGATACATCAGCCTATGTCATAGGCTCATTGGGTTTTTTAATTTTTTTTTGTTTGGCA  
GTACCAGTCACTATCTCCAGGATGGAGATTTTTGGGGATGCTTTGATATCATTGGTGCAGGAATAGCAACGAGGTTG  
TGATGTATCTTTAATGGATGGATCTCAAAAAGAGTTGAGAAAAAAGAGCTACTTCAATATGTAGAAGCCTAGCTATT  
CCAGAAGACTCTACAGATCAGGATGATATGCAAAAATGTTGGCGGATATGATTGCAAGATATCAAATGAGTTACTGGC  
AAACAGACTGTCCGACTTAATCGGGATCGTAGTTACCTCTGTTGGAACAATCATCAGTATAGGGATATCAATTTGGTATG  
TCGGGATGATTTCTATTTTTGTTTGGAAATAGAGACTTCAATGAACCTTCCCTTCTTTTTTATACTTTTATTTTTCAGGGTA  
TTAGCATTCATATGTGAGTTATTTGCTCTTTTTTCTGCAATGTTTTGTTCAACAGATACCAGGTGAAGCAAGAAAGTT  
TAATAAAAATATGATGAGTTAAGGAGAACAGTCTTTTCTATCAAGCAAAGAGTTCCGCGATTCGCAATTTCAATTTAA  
>Cluster\_8046

>Cluster\_8046

ATGAGCGATTTTCGCAAAAGTAGAGCAGTCTTTGCGAGAGGAGATGACGCGGATGGCAGTTCATTTCTTACGCGCGGCTA  
TGCACCGGTTCCGCTGGCAATCTGTCGCTGCTTTTACCTGACGGAAATTTACTGGCGACACCAGGTTTCATGCTCG



GCAATCTCGATCCGACGGCTTTCCAAGTCGCCGGATGGCGAATGGTTAAGTGGTGACAAACCCCGAAAGAGGTG  
CTCTTTTCATCTGGCGCTGTATCGCAACAATCCGCGTTGTAAGCGGTGGTGCATTTGCACAGCACATGGTCGACGGCGCT  
TTCTTGCTGCAAGGGCTGGACAGCAGCAACGTTATTCGTCGCTTACACCATACGTGGTGATGCGGATGGGAAATGTCC  
CGCTGGTGCCATATACCGACCGGGCGATAAACGCATCGCAGGATCTGGCGGAACTGGCAGCAGACATCAGGCTTTT  
TTACTGGCAAATCATGGCCAGTGGTTTGGCGTAAAGCTGCAAGAAGCCGCAACAATATGGAAGAGCTGGAGGAAAC  
GGCAAAGCTGATTTTTATCTCGGTGACCGCCGATCCGTTATCTGACCGAGGTGAAATGCGGAATTAAGGAGTTAA

>Cluster\_20691

ATGGACAGATTTCCACGTTCTGATTCAATCGTACAACCCCGGGCTGGCTTGCAAACCTTATATGGCGCAAGTCTATGGCTG  
GATGACCGTTGGCTTGGTTGCTGACAGCATTTGTGCTGGTATGCGGCTAATTCGCGGCGGTGATGGAGCTGTGTTTFA  
CTAACCGTGTCTTTTAAATCGGTCTGATCATCGCGCAATAGCATTGGTTATTGTGTTATCAGCGATGATTCAAAGCTG  
AGCGCAGGTGTAACGACGATGCTCTTTATGCTTTATTCGGCGCTGACGGGTCTTACGCTTTCCAGTATTTTCATGTCTA  
TACGGCTGCTTCTATCGCCAGTACTTTCGTCGTTACTGCGGGATGTTGCGGCAATGAGCCTGTACGGTTACACCACGA  
AGCCGATCTAAGCGCTTTGGAATATGCTGTATTGCTGTTAATCGCATTTGTGCTGGCATCGCTGGTTAACTTCTCT  
CTGAAAAGCGAAGCATTGATGTGGGCGTACCTACATCGCGGTGATTGTCTTTGTCGGATTGACGGCGTATGACACCCA  
GAAACTGAAAAATATGGGTGAGCAGATTGATACTCGCGACACGTCGAACCTGCGCAAAATATCCATTCCTGGCGGTTAA  
CCTTGATCTGGACTTCAACCTGTTCTGATGTTGCTGCGGATCTTCGGCAACCGCGTTAA

>Cluster\_33298

ATGAAGCAACCAGGGGAAGAGCTGCAGGAAACACTCACGGAGCTTGTGACCGGGCGGTTGTCGATTATCTGATTAAAA  
TCCTGAGTTTTTTTATCCGAATGCGCGCGCAGTTGAAGCGATACGTGTCCGCATCCGGTACGCGGCACCGTTTCGTTGG  
TCGAATGGCACATGGCCGTGACGTAATCATATTCATGTTCTGGAAGAGAACAATGGCGCTGTGATGGAACAGGCTATC  
GCCAACGAAGGCTGTTTTTATCGCTTACTCTACCTGACGCGCATCTCACCGCCGACGAGTCTCGACGATATGCTGAT  
GCGTTTTACCGCTGGGCGCGGATCTCGGCTGGCAGGTGCGAGTCTCGGCTGTTTCCAGATCGCTGGCGCTTAGGTG  
CGCGCTGAAACCACTCATCTGGCATTAAAGCCGTGAGTCTTTGAAACCGCTGCGTATTCAGCGCTGGGGCAGGAACAG  
CACTATCTGGGACCGCTTAAAGCGACCGAGCTGCTGGTGTGCTTACCGGAAGCGAAAGCGGTGGGATCGTGGCGGATGTC  
GATGCTGGGAAGCGATGCTGATTGGGTGTTGCTGTTTACCAGTCCGATGCCAGTCACTATCAACAGGGCAGGGAA  
CGCAGTTACTTATGAAATGCACTGATGTTGCGGAGCTTCTGGCGGTTGGATTGAACGCGTATGA

>Cluster\_60530

ATGACACAGGCAGAACCGCCATGACCGGCTGGCTGTGAGGCTGTACTGATAATCAGCCGTCTGGTTGCGGGTGAAC  
GTTGAGCGTGGCAGAACTGGCGGCTGAGTTGGCGTGTGAGTGCACGCTGCGGCGTGAATTTTCGTGAACGACTGATGT  
ATCTGGACCTGGAGTATCAGTCCGATACTGCCGCTTACGCACGTGCTGCGAGTGAATGCAGATGGTGCAGGCTGCTT  
ATCTTTGCCACCGCAGCGGGCTGGCGGGCTTTTCCCGGCTTACCGCGCTGCTGGTGAATGCACTGCTGATGTGCGA  
TGAGTCTCCCTGCGGTGATAGCACAGCAATCCGGTTCCTTCCGCTTACAGGAGCATTTCTTTCTGGAGACTGATTCAGG  
CCATTACCGGGCGCAGCGGGGTGACGCTGATTGACAGAGGGGCGAGCTGTGAGCGCTAGCTCCCTGCCGTTACTCATC  
CACCAGCAGACCTGGTATCTGGTGGCTGAACACGAAGGCATATCGCCGATTTACACTTGTGAAATCCATCTGATTCA  
GCCTTTGCAGGAGACTTTTCCGCGCAATGACAGTCTGTGTCCGCTGGTTGAAGACCGGCTTTCATTCAGGCTTACCCC  
ATTTTCGCTTTTATCCAGCATTCAGCTTACTGCTTTCGCTTTCGCGGCGACAGCCACCGGAATAG

>Cluster\_48682

ATGAACAACCTCCAGTTAGAGCATTTTTAACGTCACAGGCCATTTCTGATTTTCCCTTCAAGTTTACATTGAAAGGTTATGC  
AGAGGATCGGTTAGGCGAGATCATTTATGATAAAGGCATCGTTAAGTTTGGAGGGAATTTGATGAATCCGCGAAACAT  
TCATAGACTTCGTTTGCCAAACGTTGGAGCGAGCAATGGAAGAACCTGGAAGAGCGCGTAGTGAGTTTTCATCGGTTTATG  
GATGCAATGGATACAGCAAAGAGGCTCTTGTCTCCGGGACTCCGTTAGATCTTGAGTCACTTTTCAACGCGCAAGTGGC  
CTCTGCGATGTTCCGCCACCATGTTCCGCGGTGAGTTCGTCGCGAGCGGTGCCAAAACTACCTTGAGCTGGATTACAACG  
TCTCTGCAATTTGGCGATTTTCGTCGTTACCATCCAAACGCAAAAGTGAAGAGCCAGGTTGAACGCGTCCGAGGCTGAG  
GCCGTTGTGGATCAGCGTAACGGAGAGTGTGACCGTTTGTATCAACGAGCTTCAATGCACTTCCGGAAGAAAGAAATATGTC  
GGGTAGCAATACAGTAAATGACGCGGATATCTACTTCCAGTTAGTTGAGGAATGCCAGATCCACCAGGTGGCTCTCTTG  
TCGATTACGTCAGACATTTAATGGCGGAAGTTAATCCAGCCATAAAGATGGTGGGTTGCGCTGA

>Cluster\_38392

GTGGATAAAAACATAATGCAATTTTTGTGCACACTTATAATTACTGGTTGCTCGAATGGGATCGGTGATTACCTTCACC  
TCCGGGAAAAAATGTAGAATTTGGTGGAAATCCCTGGACAGGTTATGCAAGTACTTCAACCGTGCACCTCCAACACTTG  
GAGCCAACAACACTGAGTTTCTGAAAGTTTCAATAATGAGCACGGTGGGGCGCTGCTTACTATTTGGCCAGACCTGTT  
CGTAACTGGCTTTTGGGGTATACFCCTTTGATTCAGTAAATTTGGTGAAGTTCGGAACGGAAGGTTGGGATGGGAA  
AGATGCCGGCACAGTGAATTTGTTAATGTTGCCAGGGGACTTGCATGGAGGCTTTAAAAACGGGGTGATACATAATA  
CCTGTGATGATAACTCGTTATCTCAGGAGTTTCAAGTACTGCCTTCTACTAATGGTAAATGTGCTTATAAGAAAGTAGTGC  
TTGCAGCGTGTATAAGAGCAGACTTTAAGCAGAATATATGTCACCGTTTGTCTTACAATCACCTTGGAAATG  
CCCTGGTGAAGAAAGAAACGCAAGAAATGCTATGGGCAATTAAGTCCACCTGTCAGAGCGGCAAAACAAATCTGATTA  
AGCCAGAGTTAAGACCATTCAGACCATTTGCCAATTCACCTCATGACAAACCTGATGGAATGGAGGGAGTATGA

>Cluster\_39534

ATGGAATCATACTCGCAAAATAGCAATAAATTAGATTTTACGACAGGACCGAGTATTAACAGCATATGGCTCATTAC  
CGCTTTGGGTTTGGTGGCAACCGCAGGACTGGCTGGGGCGCTAAGTATCTCGAAATACGGCAACAAATATGATTCAC  
CGCAAATGTATGTTGCTATAGGATATTTATCTTCTATGATGGCTTAAAGTAAAGATATCAACAAGATAAATACCGCC  
ATCGCGGGCGTAATATTTGTTTTTAACTCTTTGGTGGCGATTGCTGTTGCGAGTTTAGCGCTGTATCTGCCATTAT  
CGTGTGTTTACGACTGCGGGATCGATGTTTTTAAATCAGTATGCTGGCAGGCTATTGTTTAAATTTGATCTCTGTTCT  
ACCGTTTTTATCATTATGATGACGTTGACAGGGTTGGCCCTGGTAAATCATCGTGAATGCCACATTAATGAGTGAACGACC  
ATTTGGGTAATAAGTTGCTTAATGATGTTCTTATGGTCAAGGATATCTCGCATGGACGAAATAGCTCCTTGAAGTGC  
AGGAAAAAGCCATAGTGAAGAATATGGAGTTCGGTTCGTTGCTTTTATAGGTGCAATTAACACTCTATTACTATTTTA  
TCGGCTTCTTTGGGATTTGCGGCTATAGCTATAACGCTTGTCTGGCAAGGATACGCGTTTTTTTTATTAG

>Cluster\_34516

ATGAATAAGGAAGAAACAATATCTCTTTTTCGCGTTTCTGCGCCATGGAATACTTAATCAGGGTTGCAAACCCGCGCA  
TGACTCGCCAAAAATGTACTGGGATAAAGAAATTCGAGCTCTCATCATCTGGGGAATAAATAATCGTATGATTTAA  
TTACAGATTTTATCAGATGACTGATGTTTCCATGCTAATGATTTAGCTGCTTATATCTGACATGGCATCGCTTCTCC  
CCTGAAGAGTGAAGACATTAATGCTGGTGGCTCGGAGAGAGGGTTGATTTATACCAATTCGTTGCCCAACCGCTAT  
GTGCTGTGGGGAAGGGGAAATCAAGCCGCGGATATGTTTCAATGGGGTTTCTGTACGGGTGCGTGTGCTCAACAAGT  
GGCTGACGGAAGAAGAGATTTATGGCTGCAATCGCGCTCATGTACGAGCTACCAATTAATCAGCTGGATGAC  
TATTTTTCGCTTATCGTTAGGACGCTCTACTGGCAATCTTCTCAGTGCAGAACAAACACTTCGCTACCGGAGCGCT  
AACCTGTACAAATACGATAGCGCGGGAGTCTGATGTTTCAAGAGCTGGCAGCGGGAAGCGATCGTTTCTATGCCACGC  
TTCCCTGGCAGCCATTAATCTGTCAGTCTGAATGCCCGGTAACGCTTAAAGGATGTGAGCGACCTATGA

>Cluster\_35928

ATGAACGCTGAGCGTAAATTTCTTTTGGCTGTCTTATTTTGGCTGGTCAATTTACGCTATCCACGCTTTCGGTTTTATT  
CGATCTGCTACCGATTTACCCACTTACAGACTCATCCGCGAGAGCGGATTTTCGGCTATAGCTCTATATTTCTGT

TATTCATCATTTGCCACCCTCTTGTGTTACCAGGAAGCATACTGGTGATCGCGGGAGGAATAGTTTTGGCCCGCTCTTA  
GGGACACTACTCTCATTAATTGCGCCACGCTGGCCTCCTCGTCTCATTCCTGCTGGCGCGTGGCTGGGACGTGATTT  
ACTGCTGAAATACGTTGGCCATAGCAATACCTCCAGGCCATTGAAAAAGGCATTCGCGGTAACGGTATGTGATTTCTTA  
TTCTGACCCCGCTTAATCCCGTTGTTTCCTTACAATATTTCAAAATACGCTTACGGATTAAACCAATCGCCTTCTGGCCT  
TATACCCCTTATTTCCGCACTACGACCCTACCGGTATGTTTATTTATACCGTGATGGCAAGCATCTCGCAATGAAG  
CATTACGCTGCGCTTATTTTACAACCTGTCTGGCGGCTGGCGTGTATTTCTCGTCCAGCTCGCAAACTCTACG  
CCCACACAAACATGTGGATCTGTCTGCTTCGCGCCGAGCCACTTACTCACCCAAAAATGAAGGATAG

>Cluster\_67147

ATGTCGGATCTAAATGGCTATAAAATCCAATGCGCTGGTTGAAGCCAGTTATAAAATGACCCTACAGGAACAGCGTTTTTT  
GTTACTTTGCATCGGTCGATTGAAGTCTGGGGCTGATGCAGAATCTCCAAAATGCAAAAGACAATGACCATTACAGCTG  
CGGAATATTTTCGATTCATTCCTGACATGGGGCGAAAAATGCCGAGGTTTCAGTTACAGGAAGCAATTGATCGTTTGTGG  
GACAGGTCAATCATTTCTCAAGGATGACGAGAAACGTGAGGAGTTCCGCTGGATCCAGTATCGGGCACAGTACGCTAAAG  
CGAGGCCAGAAAAAATAACATTTCTGACGCAAGTATGTTTATTTGACACAATAAAGGCAATTTACTAGAGTTG  
TAATCAAGAATATATCTAGATTATCAAGAAGTTACAGTATAAGGATATACGAACCTCCAGCAGTTCGCGAGTACTGGC  
GAACGTATATCGCTCTCGATGATTTTCGCTCAATGCTTGATATAGAGCATAAAATATCAAAACATAAAATCACTTAACCA  
GCAATTTAAGACCTGCATTTGACGAACCTGAACAAAAAAGCGACCTGGCTGTAACGGTTGAGACGATCAAAAAGGGGC  
GCACGGTTGTAGCCCTGCATTTTCGCTTCAAGGAAGCAAAACAAATCAAGATGACGATCTAA

>Cluster\_32021

ATGAAAACCACCCTCCCCCTCATCGCCAGCATCTCTGTGATGAACAGAAAAACAGATTGATCGAATGCTTCCGGGAATA  
TTGGGCTACAGCAGATTAACGACCCGATGACAACATGCACTCCGCGTAGGCAAGGTAAACATGCTTGCACCTTTA  
TCTGGTCAGAAAAAATAATTCGATATTTACTGTGACCGTGAATGTCGCTCAGGAATGGTCAAGATCGTGACG  
GTGATGACCGTCCGCTGGATACCCCATACCGCCTATTTATCTTGATAGAGATGAGAAAAGACATCGTACCCTTTGGC  
GAAAACACATCGCCGGGAGACAATAGTATTTGATGTTTTATCTACCCCTACAAAAGAGAGGCAAAATGTTGGGTGGGAT  
ATAATGTTGAAAGTCTTTTCATTTACGAATGCGATTTACGATACTGGCGGAGGCATTAAGCGTGCATCCGCTCAAT  
AATGGTGAACGCGCTTTGATTATACGAGCTGGAATGAATTTACCGTTGCTGAATGTGAGAGAATAATTTCTGCTGGCT  
GGATGCAGGGCAAGAAAATGAGAGCTACAGCCATTCAATCAATACGTTGATGATGACGCCCCATATGCGGGAAT  
ATGACACGATTATGATTGAAGGTAATCTCTAA

>Cluster\_28546

ATGAAAAAAAATTCATTGCGTTAACTCTTTGGGTGTTAATTTGCGAGTCTGCACTAGCGAGTGGGGTTGGGCTTAGTTC  
TACTCGGGTGTATTTATGACGGTAATAAGAAAGAACATCGCTAACCGTACAAAACAAAAATAAATCAGAGAATTTCTTA  
TTCAGTCAATGGTTGATGATGCAACGGGTAGTAAAAAACACCATTCATCATTACTCCGCATTTATCAAACTGAGCCA  
GGAAAAACAACATCTTACGATATCGTAAATGTGAATCCGCTTACCTCAGGATCGTGAATCTGTTTACTGGTAAACGT  
CAAAGCGATTCTTCTCAAAATGAAGAAAATGAAGGAAAAATGCTTTCAGATTGCAGTTCGTACTCGCATCAAGCTTT  
TTTTATCGTCCAGCAGGTCTAAAAGGGGATATTAATCTTCGCCAGGAGAACTACGTTTTACCGGAAACGGTAAACAGATA  
AAAGTTGACAATCCAATGTTTTAACATCAGTTCAGTGTATTTATTAACGGACACGAAATGAAAAGTCCGGTAT  
GTTGCCAGTAAAGGGCTTTGAATATCAATTTGCTTGCAGGTGTAACAGTGTTCGCAAAATAAATAAATAAATAA  
ATGATTTTGGCTCTTACGGTGAATATCTGACTCGGAAATTAATTA

>Cluster\_5282

ATGAAAGACATAGATACACTCATCAGCAACAATGCACATATGGTCAAAAATGCTGGTGAAGAGGATCCCGGGTTTTTTGA  
GAAACTGGCACAAAGCGAAAAACCGCGCTTTCTATGGAATGGAATGTTCCGACAGTTCGCTTCCGAGAACGTTTAAACCG  
GTCCTGAGCCGGGGAACCTTTGTTTACCGTAATGTTGCTAACCTGGTCAATCACACGACCTGACCTGCTTTCCGGT  
GTTTCAAGTATGCAAGTGTACTCGAAGTTGAACACATTTATTTCTGTGGCCACTACGGTTGCGGGCGGATCAAGCCCG  
AGTTGAAAACCCGGAACCTGGGCTTATCAACAACCTGGCTGATATCCGCGATATCTGGTTCAAACATAGCTTCTG  
TCGGCGAAATGCCCAAGAGCGCGTCTGGATACCTTGTGTAAGTGAACGTCATGGAACAGGTGTATAACCTGGGCCAC  
TCCACCATATGCAATCAGCGTGAAGCAGCGGGCAGAAAGTTACCATTACCGGCTGGGCTACGGCATTCACGACGGCTT  
GCTGCGTATCTGGATGTTACCGCCACCAACCGGAAACCTTTCAGCAACGTTACCGTACGGGATTTCCACCTCAAGC  
TGAACACGCAACCAATAA

>Cluster\_27194

ATGCCATCACTCAGTAAAGAACGGCCCTGGTTTATGAAGCGTTAGTTGCGCGAGGACTGGAACACCCGCTGCGCCCGCC  
CGTGATGAAATGGATAACGAAACCGCAAAAGCCTTATTGCTGGTCAATGACCGAAATCATGCAGCTGTGATGATCTCG  
ACCTGGCTGATGACAGTTTGTATGGAACCGCCGATCGCATCGCTAAAATGATATGTCGATGAAATTTTCTCCGGTCTGGAT  
TACGCCAATTTCCCGAAATCACCTCATTTGAAAACAAAATGAAGGTCGATGAAATGGTCAACCGTTCGCGGATATCACTCT  
GACCAGCCTGTGAACACCATTTTGTACCATCGATGCAAAAGCGACGGTGGCTATATCCCGAAAGATTCGGTCAATG  
GTCGTCAAAAATTAACCGTATTTGTGCAAGTCTTTGCCACGCTCCGAGGTACAGGAACGTCGACGACGAAATTTCTC  
ATTGCGCTACAAACGCTTGGGCAACATAATGTGGCTGCTCTATTCAGCAGCGGTGCATTTACTGCGTGAAGGCGGTGG  
CATCCGATGCAACAGTGCACGACAACGACCTCTCTTGGTGGATTGTTCAAATCCAGTCAAGATACGCGCCACGAGT  
TTCTGCGCGCTGTGCGTCACTCAACTGA

>Cluster\_49010

ATGAAAAAGGAAATACTCAAGGCTCTTTGCCCTACATGCGGTGGGTTACGTAACCTGCACTGTGATGGGAAGCTAACCCAC  
TAGCTGGGAGGATFCCCAATATCCAGTTTATGGGTACCATACCATCACTTCCAATGCAATGGCTGTGATGATGTCCT  
TCTATACCCACAACGAACTTCAAGTACGATACCTACCCAGCAATATCGTATGGTGAATTTGTAGAAACGCCATAGAT  
ATGATCACTACCTATCTGCGCGTGAACATTTCAAGCTCCGATATGGTTATCCAAGCTTGAATCAGTTGATCGTCAAT  
CTTTCAAATATTTAATGAAATGATTTCTTACATATACTTCTGACCATTTTCAATTTCTGCTCATCGGTTTACGGACGATTT  
TTGATCGAACTGCTGAACGTTTCAAAATTCACCCCGGTTTGGCGCTTGGTGAAGAAATGAAAAATTAACAAAGATGGA  
GTCATAGGCGCACTGAGGCATGCGTTATATCTTCAAGTATGATGCAAGAAACGCGCCGACATCGCAGTTGGAGCCC  
GAAATAAAGTGAAGTTGCAACAAATGCTAGAAGCTATAGAAGTTTGTCCAAAAGAACTATCTTTGGGCAAAAGATCACTTG  
AACATATAACCAAACTCCACCTCGGGTTACAAGACCTAAAAATAATGCATAA

>Cluster\_8369

ATGATTACTACCCGAACCTGCCAGCAGTGTGGACAAGCAGACTACGGATGGTTGCAGGCCCGGTATACCTTTTTCTTTGG  
ACACTACTTCGACCCGAAATTTAGGCTATGCGCTCCCTGCGTGTCTAACCCAGGAAGTGTGGCCCCAGGTGCCGCT  
TTCAGCCGGAACCTATCCCAAAGTCAATTTTAAATGTGATTTGATGGATGGAGAAGCAGAGTATCGCGATAGCGAAGGC  
AATCATGTTACAGCCAGCAGCGGAGAGGCGTTGCTGCTCTTACCCAGCCGGTGTGACGATATAGCCAAACAAATCTCAG  
CAAAGCAAAACCGTTAACCGGAATGCAGCTTTGGCTGGACGCTGCCCGCAGCAGAGAAATCCGCTGATTCAAAAGCTGG  
CGCTTAAATATGGGCAAGCAGCAATTAATCGCTCGCCAGAGGGTTCGATGGGAAGCTGCAATTACGCCAGCAAGTGTGG  
CTGCACATATCGTGTGCAAAAGGCGAAAGTGGCAATTTCCAGTTGATGGGCCACGCGGTATTTGCAATCGATTCA  
CGGAAAATTTTATGCGCTTACGATCATGAAGGAAAGCGGCGTGCCTGCGGTGATGGGGCTTTATTTCTGACGAGG  
CTAACATTACGCTGGTTGCCGATTTCCCACTGCGCGCTTGGCTGATAGATTTGCTGTCTAG

>Cluster\_8481

ATGTCGTTACTTGCACAACCTGGATCAAAAATCGCTGCTAACGGTGGCCTGATTTGCTCTTCCGACCGGGTCCGGACAG

CCCGCTCGATAAACCCGAAATCGTCGCCGCCATGGCATTAGCGGCAGAACAGGGCGGCGGTTGCCATTGCGATTGAAG  
GTGTGGCAAATCTGCAAGCCACGCGTGGGTGGTGGAGCGTCCGATTATTGGAATTGTGAAACCGCATCTGGAGGATTCT  
CCGGTACGCATCACGGCCATATATGAAGATGTTGATGCGCTGGCGCAGGCGGGCGGGACATTATCGCCATTGACGGCAC  
CGACCGCCCGCGTCCGGTGCCTGTTGAAACGCTGCTGGCAGCTATTACCATCACGGTTACTGGCGATGACCGACTGCT  
CAACGCGGAGAAAGCGCTGGCATGCCAAAAGCTGGGAGCCGAAATATTGGCACTACCGTTTCTGGCTATACCACCGCT  
GAAACGCCAAGAGCGGATCTGGCGTGGTGAACCTTGAGCGACGCCGGATGTCGGGTGATTGCCGAAGGGCGTTA  
CAACAGCCTGCTCAGGCGGGGATGCGATGCGCCACGGCGGTGGGCGGTGACGGTTCGCAATCACGGCTCTTG  
AGCACATTTGTCAGTGGTACAACACAGCGATGAAAAAGGGGTGCTATGA

>Cluster\_37937

ATGAAAAAGATTAATGCAATAATTTTATTATCTTCTGACCTCTGCCCTGGTATTGCTGGCGCATACGTCGAAAACAG  
GGAGGCATAAATCTTGCCTCCGATCAGGGCGAGGTTATGCTACGTGTGGGTTATAACTTCGATATGGGCGCGGGTATTA  
TGTTAAACCAATACCTACAACCTTTCAGCGAGAAGATGAACATAAACAATGGATATAACGAAATGAAGGCCTGGTATCCGTTA  
TTTAAACCAACCGTAAATTAACCATCCAGCCCGGTGGCTTAATTAATGATAAGAGTATCGGTTCCGGTGGTGCAGTTA  
TCTGGACGTAACATAAATTTGTACCATGGTTAATCTGACAGTACGAAATCGCTATAACCATAAATACTATAAGTTCAA  
CAGATTTGAGCGGGAACTGGATAATAATGACACCTATGAAATGGCACCTACGGAATTTTAAATCACCGATAAATTT  
TCCTATACATTTGAGCCACTTACTTCAATGCGAGTGAATGACTTAAATAGTAGCAACGGGAAAGATCATCATTGGGAAAT  
CACTAACACCTTCCGTTACCGTATTAATGAACACTGCTCCCTTATTTCGAATTGCGCTGGTTAGACCGCAACGTCGAAC  
CGTACCACCGGAGCAAAACCAGATCCGATCGGGACGAAGTATTTCTTCTGA

>Cluster\_12905

ATGCATCCGATGCTGAACATCGCCGTGCGCGCAGCGCGCAAGGCGGTAATTTAATTGCCAAAACATGAAACCCCGGA  
CGCTGTAGAACGAGCCAGAAAGCAGTAACGATTTCTGACCAACGTAAGATAAAGCTGCCGAAGCGGTGATTATCGACA  
CGATTCGTAATCTTACCACAGCACACCATCATCACCAAGAAAGCGGTGAACCTGAAAGGTACTGATCAGGATGTTCAA  
TGGGTTATCGATCCACTGGATGGTACTACCAACTTTATCAAACTGCTGCGCACTTCGCGGATCTATCGCCGTTCTGAT  
CAAAAGCGCCAGCGAAGTTGCTGTGTATACGATCCTATGCGTAACGAACCTGTTACCAGCCACCTCGCGGTGCGGCGCAC  
AGTGAACGGCTACCGTCTGCGCGGTAGCACCGCTCGCGATCTCGACGGTACCATTCTGGCGACCGGCTTCCCGTTCAA  
GCAAAACAGTACGCCACTACCTACATCAACATCGTCGGCAACCTGTTCAACGAATGTGCAGACTTCGCTCGTACCGGTTCT  
TGCGGGCGTGGATCTGGCTTACGTCGCTGCGGGTCTGTTGACGGTTTCTTTGAAATCGGCTGCGCTCCGTTGGGATTTCCG  
CGCAGCGCGACTGCTGGTTCTGTAAGCGGGCGGATCTGACGCACTTCACCGGTGGTCAATAATATGCTGACCGGTT  
AACATCGTTGCTGGTAACCCACGTTGTGAAAGCCATGCTGGCGAACATGCTGACGAGTTAAGCGACGCTCGAAGCG  
TTAA

>Cluster\_29854

ATGAGAAAGACGGGCAACCGCGGAGCGTGGGGCAAAAACACCATCGTCGGCGGCGAGATCAAAAAGAATCATGCCGG  
GCATCACGGCGGGCGTGGAAAGTGGCGTTCCGCCACTTACTTTGGCAATGATGGCGCTATTTATGACGCTGTGGATTG  
TCAACAGCGCTCAGTAAATCCGAGCGTGAAGCATTATCCCGCGCTGCACGGGAGTCCGATTTTAAACGGTGGTGGGTTG  
TCGCCGTTAAATAAAATCAGCCCGTCTCATTCGCAAAACCTGCCACCGTGGCGGTGCCGGAAGAGACGGGAAAAAAGC  
GCGCGACTCAACAGAGAAAACCGCGCTGTTGAAGAAAGAAATCCGCCACCGAGCTGGCGAGCTGGCGACCAAGTATA  
CCATCGCCCGTATGCGCATATGGAAGCGAATCTGGAGATGGAGATTGTTCCCGAGGATACCGGCTGCTGATTAAGAC  
GACCAGAACCAGCAATATGTTGAACCGCGCAGCGCAAGATAATGCGGTTCTTTAAACCGCTGCTGGTGGAGCTTGGCGC  
GGTGTTCGACTCGCTCGATAACAAAATTTATTTACCGGCACTACTGATGCGATGGCCTATAAAAACAATATCTACAACA  
ACTGTAACCGCTTTCGGCGATTCGCGCTTTCGGCTGCTGGGTTGCTGGAAGAGGCTGGAAATGCCGGAAGATAATGATG  
CAGGTAAGCGCAATGGCGGACAGATGCTGCTGGATGCCAAAATCCGCAAGCGCGGCAACCGCGCATTTGAGATTAT  
GGTGTGACCAAAAGTGCCTCCGATACGCTGATCAATACTTTGGTGCAGCATGGGGATAAAGTGGTGCAGCCGCTGGTGC  
AAAAGCTGGATAAGCAGCAGGTGCTTTCGACGCGAGCGGTTAA

>Cluster\_38804

ATGACCATGCACTGGAACCTCAACAGCTTAAAAAACCTATCCAGGCGGCTTCAGGCGCTTCGTGGAATCGATTGCA  
GGTGAAGCGGGTGAATTTTATGCGCTTCTCGGGCCGAACGGGGCCGAAAAATCGACCCTATCGGATTTATCAGCTCTC  
TGGTAAATAAAACCTCCGGCGGGTACGCGTATTTGGTTACGATCTCGAGAAAAGATGTCGTAACCGCTAACCGTCAAGTTG  
GGTCTGGTGCCACAGGAATTTAACTTCAACCCGTTTGAACCGTGCAGCAAAATGTTGGTGAATCAGGCAGGGTACTACGG  
TGTGGAGCGTAAAGAAGCGTACATTCGCAGCGAAAAGTATCTTAAACAACCTCGATCTATGGGGAAAACGCAACGCAACGTC  
CGCGTATGTTATCTGGCGGGATGAAGCGCCGTTAATGATTGCCCGTGGCTTAATGATGAACCTAACTACTGATTTCTC  
GACGAACCGGACCGCGGATGATTTGAACCTTCGCCGCTCAATGTGGGGCTTTTGAAGGATTTAAACGCAACAAAGGCAC  
CACCATCATTTCTACCACACACTACCTGGAAGAAGCAGAAATGCTGTGCCGAATATCGGCATTTTCAACACGGTGAGC  
TGGTGGAAAATACCTTCGATGAAGCGCTGCTGGCGAAGCTGAAATCAGAAACCTTTATTTCTCGATCTCCACCGAAAAGT  
CCGTTACCGAAGCTCGATGGCTATCAGTATCGACTGGTGCATACCGCGACGCTGGAAGTTGAAGTGTGCGTGGCAGGG  
GATCAACAGCGTATTTACGCAAGTTAAGTGAGCAGGGCATTCAGGTATTAAGTATGCGTAAACAAAGCTAACCGCTGGAAG  
AGCTGTTTGTTCCTGTTAATGAAAAACAAGGAGATCGCACATGA

>Cluster\_64458

ATGAGATTAATAACTCAGTACTTACTTCGCCATTGCCCTTACAGGCTGTGATAACAAAAGATGAGATCGGTTGTTCT  
TTCGAAATGACCAATCAGCTCTCATGGATTTATAAAAAACTGCTTATGAAAGACTCTCTGAACAGGTCGATAAAT  
ACCCTGATGTCATTAATCAGACCAACGAGCACACTGGACAAGATCAAACCTAGCCGCTCTGAAATCTCCACAACATCA  
AGTGACACGGGACGACCAATGAAAACCTTGTGAAGGGACCGTGCAGATGACTCTACCTGCGAACGAGTACGTCACGCTTCT  
TGATGTTACAGAAAAGAAATTTAATCGTAATCTCGATAAAGCAAAATGAAAATCTGTTTTGAGAGAACAACGCAACCGCT  
TTTCAAAACGATCACCTACACCGTGCAGGCGACCGACGATCAGAAAAACGTTTTTGTAAAAACCTTCTTGATAATCCG  
ATATCAGTGGGCGCGCTTACTGACATCGCTTCCATTTATCAACCCGATCGTTGAGCAGCAGAAAATCCAGCAGGCTAA  
GGATGCCAACAGAGTCAAATGAAGCGGAACAACAGGTGCAACTCAGGGCACAGGAACAGGCGAGGATGAGGGCGGAGA  
AGCAAAAAGCAGAGGCGAGGCAACCTTCAAGCGCAAAAATCTGAAAAGCTTGTATCAGTCCGGAATGGCAATGCT  
GACTCTGATTTGAATACCGTCTGGAGCAAGTTAACCCCGGCAAGAAAAGAGTTGCTGCTTCTCAGCGCCAGTGGAT  
CAAAACTAAGGATGCTATGTGCGTAAAGTTTCAATGCAGGGAACAGATGCTGAAGTCAAGAAAATGGTGCATGCCAGA  
CGCAATGACCCCTTCAAGAATCGCTTTCCTCAGAAAACCAATA

>Cluster\_41801

ATGAGTGTTTTATATCCGTTAATTCAGGCGCTGGTGTATTTGCCGTTGCGCCGCTGCTCCTCCGGTATACCCGTGTGGC  
GCGTGGCCGCTGCTGATAAACCGTGCAGGGCGGGCGTGTTCAGGAGTATCGCGACATTATCAAACCTGCTGGGGCGTCAGA  
CGCTGGCCCGGATGCCCTCCGGTGGGTGTTCCGCTGACGCGTATGATGGTGGGCGTATGCTGACTATCCGCACCT  
CGCTGCGGGTGGTACCCTGCGCTCCGCTGCGCACTGGGCGATTGATCACCTTACTGTATCTCTCGCCATCCG  
GCGTTCTTCTTTGCCATTTCTGGTCTGGATATCGGTAGCCGTTTACCGCTATCGGCGGAGCCGTTGAAGCGATGCTTG  
GCGTGTGGTTGAACCGATGCTGCTGCTTGGTCTGTGGTCTGCGCCACAGGTTGCCGTTCCACCAACATCAGCAACATC  
ACCGACCGGTTTATCAGTGGCCACTGAGCCAGCATCCCGTGGTGTGCTGGGCTTTGTGCCCTGTCGCTTCCGCACTTT  
TATCGAAATGGGCAAACTGCCGTTGACCTGGCGGAAGCCGAGCAGGAGTTGCAGGAAGGTCGCTCTGATATAGCG  
GCAGCGGCTTTGGCGTCATGAAATGGGCGATCAGCCTGAAACAGCTGGTGGTGTGCAGATGTTGCTGCGGGTGTATTAT

CCGTGGGACAAATGAAACCTTCACCGTCGGTGGGCTGCTGCTGGCGTGGTGATTGCCATCGTCAAACCTGGTGGTTGG  
CGTCTGGTTATCCGCGTGTTCGAAAACAGCATGGCCCGTCTGCGTCTTGATATTACTCCGCGCATTACCTGGGCTGGGT  
TTGGCTTTGCATTTTTAGCGTTCGTCCTTGTGCGCGCGTGA

>Cluster\_21694

ATGGCACGTTACGATCTCGTAGACCGACTCAACACTACTTTTCGCCAGATGGAACAAGAGCTGGCTGCATTTGCGCGTGA  
GCTAGAACAGCACAAATTTGCTGGTTGCCCGCGTGTCTCTTTGCGGAGGTAAGGATGAGCATAATCCGCTTA  
ATCGTATTGAGGTAACAAACATCTCGGCAACGACGCGGAGTCTGGCGTTGGCTCATTTTCGTCATTTATTTATTCAA  
CAACAGTCCGAAAATCGCAGCAGCAAGGCCGCTGTCCGCTGCGCTGGCGTGTGTGTTACCAGGTCGATAACTTTTCGCA  
AGCAGCGTTGGTTCAGTCAATTCAGCACATCAATAAACCTCAAGACCACGTTTCGAGCATATCGTACGCGTTGAATCAGAAC  
TCCCCTCCGCGGCACGTTTTGAATGGGTGCATCGTCATTTACCAGGCTGATTACCTTAATGCTTACCAGCAGCTCACC  
GTTCTGCACGACCCCGCCACTTTACGTTTTGGCTGGGCTAATAAACATATCATTAATAATTTGCATCGTGATGAAGTCTC  
GGCACAGCTGGAATAAGCCTGAAATCACCACGAGTGCACCGCTGGAGCGCGAGGAGTGGCAAAGAAAACCTGGAGC  
GAGAATCAGGATATCGTGCCTGCCACAGAACGCGAATTAATAAACCTCAACCGTCCGGTGAAGGTGACCGGATGCTC  
CGCGTCTGGTACAAAGGAGATCAAAAACAAGTACAACACGCTGCCCTACGCCGCTGATTGCACTGATTAATAGGGATAA  
TGGCGCGGCGTGCAGGAGTGGTGGTGGTAAATACGATGCCGACAATGTCAGCACCGTTATAAACACAGGCGC  
AGCCGCTTCGTTAATCATTTCCACGGCTGCACCTGTATGTTGCAGATTA

>Cluster\_45144

ATGAAACATATTCAAATCCGCAATAGTGATATGGCCTGGCATAATGCTGCCAATATTCAGTTTCCACCAAATTTTGATGA  
GTCAAAACAGTATCCGGCATTATCAGCGTCCATCTTTTGGCAGTTGTAAGGAGCAGACGCTGGCAATATCTATGGCA  
AAGCATTTGGTGAAGAGCTATCTCGTTTCGCTTATGACGCGAGTTTCCAGGGAGAATCTGGTGGGAGCCCTCGCTGG  
ATAGAAGATCCGACACAGCGCTAGAGGATATTAGCCGTTTATCGATTATGCAGTAACCTCTGCCATATGTTAATGCTGA  
ACGTATTGGCGTGTGGGAGTGTGGGGTGGTGGCTATGCCATTAATGCCGCGTGCAGAAAAACGAATTAAGCAG  
TAGTGAGTATTACGGGTGTTAATATCGGGCGTCTTTTTCGGGAAGTTTCAGCAATTACGATCCGATTTGGCGCATTTGAAT  
GCAATGGCTTCGCAACGAAACCAAGAGGCTCGTGGTGGAGAAATACAGATCAACGAAATTAATCCCGCAGCCGATGCG  
AGCAAAAGCCCATGGACTGACCGAACGCGATGTTTATGAAGCAACTGACTACTATAAAACACCACGCGGGCAACAACCGG  
GAGGTGCGACAAAATGTTGTTTCACATGCACAGAAAACGCTGGCCTGGGATGCCTTCGATTTACTGAAGTGTACTG  
ACTCAGCCGGTGTAGTGTAGTTGGTGAAGGAGTGGTGGCTTCGGTGTCTTATCGTGATGGACTGGAAGTCTATGGCCG  
GGCGATGGTTTCGCAAGGATCGTCAAGTTTTCATTACCCGATTTCTACATATGAACGTGTATGACAACCCGGAAGCAG  
TTCAGGAGCGCTGGAATAAGTTATTCCTTTTTTCAACACCCATCTGGGATAA

>Cluster\_39166

ATGTTCCGATCCAGAAACCTTGGCGACTTTTCATTGCGGTTGCTGAAACAGGTAGTTTTTCAAAGCGGCAGAACGATTATG  
TAAAACACGCGCAGCATCAGTTATCGCATTAACCTTCGGAAGAGAATACCGGAGTGGCGCTTTTTTCCGACGACTC  
GCAGCGTGACGTTGACGGCGGCTGGCGAGCATCTACTTTGTCAGGCCAGAGACTGGCTGAGCTGGCTGGAAAGTATGCC  
AGCGAGTTACAACAGGTGAATGATGGCGTGAACGCGCAGGTGAATATCGTCATCAACAACCTGCTCTATAACCCCGAGGC  
CGTTGCCAGGCTGCTGGCGTGGCTAAATGAACGTTACCCGTTTACCCTTTCACATCTCCCGACAAATCTATATGGCGG  
TCTGGGACTCGCTATGTCAGAAAGGTTTTTTCACGCTGCTACGGGACCGGAAACCGAGGCGCTGGCAAATACCTTTAGT  
CTTGATCCCTTAGGATCGGTGCAATGGCGCTTTGTCATGGCGGCGATCATCCGCTGGCGAACGTTGAAGAGCCGCTAAC  
AGAAGCAGAGTTGGCGCGCTTTCCGCGGCTCAATATTGAAGCAGCGCCGTACATTAACCAAACGCGTCCGCTGGCGAT  
TGCCGCGGCAAAAAGAGATATTGTTCCCGATATGGAACGAAATCGCCGCTATCGCGGGCTGGCGGGCTGGCATTTGTTT  
TTGCCAAAATCACTTTGGCAGTCAATGCTCGATAATCAACAACCTGGTCAAGCCGGTAAATCCCAACGATCCGCTCTC  
GCCATTGAGTCTGGCATGGCGCAATTTGGCAGCGGCAAGCGGTAGAAGATATGTTGACCTTGTTTACCAGCGCAGGC  
CGGAAATCAGCGGATTTTGAATAATTTTCGGCAACCCAGCAGTTAA

>Cluster\_17888

ATGAGTGAGCCAACCATCGAAACACCTCAAGAATGACCGAGGCCAAAGTCATTAGGGTACGCACTCGTGGTTTTTATAA  
TTTAGTTGAGATAGGTGCAGTCTTTCTAGTTGCAAAATGTAATTTTGTGACAGGGATATAGACTCAACCTTTTATTATF  
TATTTCCAGTGCGAGGACGATCTTACACATTTGCGGAGCTTTATCAGGTCAATATTCGAGTGTCAATTTGTAATCGTT  
TACACCATATCTATGGTGTGCTCCAAATCCAAAGAAATGTTATGAGAATTACAGGGAGTGAATTCAGTCGACAAATCATC  
GATGTTTAAATATGTCGATATTAATAATGAGATAAACTACTCAAGAAGGCTCAAGAGGAAAGGGCTGCTGCTGATGAAG  
ATGAATCTCTGGATTTTTATCTTAAAGGTTTGATTAATAGCTCTGAAGTCTTTCGCAAAAACATATATCTCGCGGTAGT  
CTTTATTTATAGTCGGTGTGTTGTTTGAATAGTTGGATTAGGTTCTTCTATTTCTCAATCACAATGTAATGATGCTAA  
GGATGATGCGGTAACCAAGGTAATGTATCTTCCCTAAATTTTGGCGTGTGATTTTCTGGAGTTAATCGCATTTTCT  
TTTTGAAGCAATATCGGGTACGATGATGAGTTTCGCTATTACGAGGCAATAAAAACGTTACGCTGAGGAAAGCTATGCC  
ATTTAAAAGCTTGTAAATGGCTAGCCAGAAAGATATCGATATGATAGACCTTCTGGATAAAATTAATTTAGCTCAAGAGT  
TGGAAAATAGAATCAGGCGAGACTACTGAAATTTTGAAGCAAGAAAATTAGACAAAATGAACCTTGAACCTTAGTAA  
AGCTTACCAGGCGAGTTGGCGGTAAGATTGGACAGGGAATAAGTAG

>Cluster\_36972

ATGAGCACCTTAGGTCATCAATACGATAACTACTGTTTCCCAATGCCCTTTGGTTTTTTACGCTGCCGATGAACTTCCA  
CCGATATGACAGCATGACAGACTGGGTGATTACTGGCGTTCGCTGATATGGCCACTTCTGGTCTGCGGGTGGTCCG  
ACGGTCCGCGCAGCATCCGTCAGGTTTCGACGATCTGGCCTGGGAACACAACCGCTTCCCGTGAATTTTCGACATGCGT  
GAGCGTCTGAACGTCGTTGGACTGCGCGCATCTGTTATATGCTTTGGCGATGCCGCTGAGATGAGCGAAAAGCTGCAGGC  
GCACGCGGAGAAGCTGCTGGCTGCGCGTAAAGCTATGCTCTCTTTCGGTGGTGACCACCTTGTACGCTGCGCGTCTG  
GTGCTCATGCGAAGCATTTTCGCAAAATGGCGCTGGTACACTTTCAGCGCCACACCGATACCTATGCGAACGGTTGTGAA  
TTTTGACCACGGCACTATGTTCTATACCGCGCGAAAGAAGGCTGATGACCCGAATCATTCGCTGCAGATTGGTATTTCG  
TACCAGTTTGTATAAAGACAACGGCTTTACCGTGTGGACGCTGCCAGGTGAACGATCGCAGCGTGGATGACGTTATTCG  
CCCAAGTGAACAGATTTGGGTGATATGCCGGTTTACCTGACTTTTGTATATCGACTGCTGGATCTGCTTTTTCACCA  
GGCACCGTACGCGCAGTATTGGCGGCTGACCTCCGCTAATTAACCTGGTACGCGGCTGAAAGATCTCAACAT  
TGTTGGGATGGACGTAGTGAAGTGGCTCCGGCATAACGATCAGTCGGAATCACTGCTCTGGCAGCGGCAACGCTGGCGC  
TGGAAATGCTGTATATTCAGGCGCGCAAAAAGGCGAGTAA

>Cluster\_66904

GTGAGTAAGAAGAAAACACCACGACGCCACGCGCATGATGCGCGTTCCGGTCTCCTGGCGAATCCCGACGCTCGC  
CAGAGATTTTCTGGAACGTCATCTCCGCGGAGTACCAGGAGTGTGCGGACCTGTCACGCTGAAGCTGGAACCCGCCA  
CCTTTGTTGAGCCGACCTGCATCAGTACGCCAGCGATATCTCTGGAGCGTGAACACCCGGGGTGAAGACGGCTAT  
GTTTATACGCTCATCGACACGAGCAGCAGCAAAATCTGTACATGCTTTTTCGATGTTACGTTACAGTGTGGCGCGAT  
CGAGAGACATCTGGAGCAGCACAAAACGTTGCCACTGGTGTATTCTCTGCTGTTCTATCATGGTGGAGCGCAGCCGAC  
CGTACAGCATGAACGTTGGCTGGACTGTTTTGAGAATCCGGCACTTGGCGTAAAATATACAAAAGCCGTTTCCGCTGGT  
GATACACTGTGCTGTGATGACAAATGAAATCAATGATCACTGCCGGATGGCCGCACTGACGCTGCTGATGAAGCATCCG  
CCATCGTGACATGATGGAGTGGACTGCGCAAACTCCCGAGGTCATGGTGGAAATTTTCAGACGAGCAGGTCGCTGTCTGA  
TTCAATACATCGTTAACGCGAGGAGCTCTGTATCACCAGGAAATTTATGCGGGCGCTGGCTGAGCGCTGCGCGCATGAG  
GATAAATGATGACTATCGCAGAACGCTTTGAGCAAAAAGGTCGCCAGGAAGGAGGATGGAAGGACGATGGAAGGAGC

GCTTGAAAAAGCCCTGGCTATTGCGTGCCAGCTTACAGAAAATGGGGATGACGCCGGAGCAGATTAAGCAGGCTACCCGGAC  
TTTCCGATGACGAACTGAAGAAAATAACTACTGA  
>Cluster\_53823  
ATGGCTGGTTTAAAGGAATAACAACAACACACAGAATGCACAGTGGGCTGATTATGTGGGTGACATTTCTCGGGGGGCTCA  
GCCGATAAACACCTAGTACTCAGCACCTTATCTTAACGACCTCCACTCATGATGAGTTAAGGCATCAGAACACATC  
ATCATGTTATTTCTTGGACACTTGTATGTTGCAAAAAATACTCAGCCCAATAACATCATTTGATTACATTTATTTATC  
ACTACACATCTTTCAGGTATAAAAGATACACTCGCTGGTGTAGTTAACGCGGGTAAATTAATGACTGAGTTTGTATGACAA  
TGGGAAAAATATATTTAACTTAAATGCCTTAAAGTATACAAAAGCAAGTTACTTTGAAATACTTGGAGAGAAATATATAA  
AAATCACAACATCCAGCCCTGGCTTTTATAGAAAAGCTCGGTAAATATATTTTCTTCCACGAGCGCCTCAAGTTCTGGAA  
CTCGCTATTGGCTGGCGAGGAGCTTTATCTGAATCAATAAAAGGAGTTAAGTTCTGTATCTGGTTTTTCAGTAGCCTGGAG  
AACCATAGAAATTTATGAGTTTCAAGCGAGATCTGGTAAATTTTCTTGGCGATTTTCAATGGATGTGGCCAAAGCAG  
TTATAGCCGGTGGTGTGCAACCCGCTATTGGAAGCCTGGCTTCTTTGCTGTGTAGCTTTGGCTTTCCAGTAATTTCTT  
GTCCGCAAGAAATTTTACTGACAGGAGATAGTGTGTACAGTTGTTTAAATGAAATCGATGCTCAATGCCATTTATCAGA  
AAAATTAATAATGCAATTAGAGATGGACTAAAACGGCAACAGGAACTTGATAAATGGAAAAGGGAAAACATGACTCCAT  
TTATGTATGTTCTTAACACTCCACCCGTGATATGA  
>Cluster\_27723  
ATGAAAACGGGATCGGAGTTTCACTGTGCGTATCGTTGGCTTAGGGTCAATGGGAATGGGAGCAGCACTGTCATGTGTCCG  
CGCAGGCTTCTTACCTGGGGCGCAGACCTGAACAGCAATGCCGCGCTACGTTGAAAGAGGCTGGTGTGTGGGAGTTT  
CTGATAACGCCCGCAGCTTTGCGGAAAACTGGACGCTTCTGCTGGTGTGGTGTCAATGCGGCCAGGTTAAACAGGTTG  
CTGTTTGGTGA AAAAGGCTTGCACAACATCTAAAACCCGGTACGGCAGTAATGGTTTCTTCCACTATCGCCAGTCTGA  
TGGCGAAGAAATTTGCTACCCTCTGGCTGGATTGATCTGATAATGCTGGAATGCTGGATGCGCCAGTTTCTGGTGTGCA  
CCGCTAACGGTGAATGACTGTCTATGGCTTCCGGTAGCGATATGCTTGAACGACTGGCACCCGCTGTTGGAAGCCGTT  
GCCGAAAAGTTTATCGCATAGGTGCAGAACCCGGGACTAGTTTCGACCGTAAAAATTAATTCACAGTTGTAGCGGGCT  
ACATATTGCTGCGCGCGGAGCGATGGCATTGCGAGCCGTCGCGGGATCCCGCTGGATGTGATGTATGATGCGGTGA  
CCAATGCCCGGAAAATTTCTGGATGTTGCAAAAACCGGATGCGTCAATGTTGGTGGATGGCGATTACACCCCGCATTCAGCC  
GTCGATATTTTGGTTAAGGATCTTGGTCTGGTTGCCGATACCGCCAAAGCCCTGCACCTCCCGCTGCCATTGGCTCAAC  
AGCATTGAATATGTTTACAGCGCCAGTAAACGGGTTACGGGAAAAGACGATAGCGCAGTTATCAAGATTTTCTCTG  
GCATCACTTACCAGGAGCGAAATCATGA  
>Cluster\_24108  
ATGGCACTGGAAAAGGAATTCAGAGTGTAGTCAAGAGTTTATCGCTGCGGGTCCGCTCATCGCGCAACAAAGTAT  
TACGACGCGCAGAGAGGGCTATATCGCCAGCGCTGTCTTGGGGTGAGACAGAAACCGGGTAGATATTCAGACTATCG  
AACTGAAGGGATGACCTTACGAATAGTGTACCGCTGAATGCCCGACATTACTCCGACGATAAATTTATTACTACGTT  
GGCTGTTTTGTTAGCGCGGGTTCGCAACTCAGCACAACAGCTGCGCCAGTTAGCCTATACGGCAATGTCGGATTAT  
TGCCGTCAGATATCAGCTGGCACCGGAACATACTTTCCCGCCGCCATGATGATGCAACAACGAGGTGCAAGATTAGTCC  
GGCAACACGCCGCAACGACTCGGCTGTATAAACCAACGAATAACTCTTGGCGGTGACAGTGGGGAGGGCATCTGGCGCTG  
GTAACCTGCTTTGGCAATGAAGCGTGTGGCGAGTGGCAACGACCAACTCATCTTAATTTATCCTATGCTTGTATGCGAC  
TGGCATTTCGAAAAGCTACATACGCAATGGTCAAGATTACATCATCACACGCGACACTTACTGAGCGGCTTTGAGATGT  
ACCTGCCAGGCATGAACCGAGGCATCTGAAGCCAGCCCTATTTGGCGCAATGATTTCAATGGCTTGGCCACCTGTACAT  
ATCATTACCGCTGAATCAGACCCACTTTGCGATGAAGTGAAGCGTTGATCACCGCATGACAGGGCAAGGATGCAATG  
CACCTGCCAACGCTACCTTGGCGTTATCCACGGATTTTTTTCAGTTAGGTGGTATCAGTGAGGCTGCGCGATCGCGCTAC  
GGGATGTTGCTTGGAGAGCGGGAAGGTA  
>Cluster\_22955  
ATGAGCACAAAGATATGGGTACTCGGTGATGCGGTTGTTGATTTATTACCCGAAAGCCAGGGGAGACTACTACAGTGTCC  
TGGTGGGGCGCTGCTAATGTTGAGTCCGATCGCAAGGCTGGGGGGAAAAGTGCCTTTATTGGCAAAGTTGGCGATG  
ATCCTTTCCGGTCGCTTTATGATCAGACACTGAGTAAAGAAAATGTTGATACAGCTTATATGTCTTGTATCCCAACAT  
CGCACCTCAATTTGGCTGTAGGACTTGTATGAGCAAGGAGAAAAGAACTTTACCTTTATGGTACGCCCAAGTCCGATCT  
TTTTTTACAACTGATGACCTTCTGCAATTTGGGGCGGGTAAAGTGGCTCCATCTTTGTTCCATTGGCTCAGTGCAGAA  
CTTCCCGAAGTACCGCATTTCTGGCTATGGAGAAAATACGTCAGGCTGGCGGAAAACATCAGTTTGTATCCCAATAACCGC  
AGCGATCTCTGGCAGAGTGAAGCGCTATTAAGGAAATACCTTGATCGCCACTTTCCGCTGGCGAATATCGCTAAATTTGTC  
CGAAGAAGAGTTGCTATTCATCAGTGGCGAAAGCCAGTTTCAGCAAGGCGCATATTCATTAGTACAACCTTTATTCGTTGA  
CTTTATTGCTTATTAACAAAGGAAAATAAGCGTACTTGTGATTTTTCAGGGGAGTTTATCCACTTCCGCCAAACCT  
GTTTCTGTCGTCGATACGACCGGGCAGGAGATGCTTTTGTGCTGGATTACTTGGCGGCTGGCTGATTTCTGGAATACC  
AACAAATACAGACAGCTTGAACGAATCATTGCAACAAGCTCAGATTTGTGGTGTCTGGCGACACCGGTAAGGCGCGA  
TGACCGCTTACCCGACAAACAGATCTCCCTTCAACAATG  
>Cluster\_54646  
ATGGAATTAAGGATTTATACGCCATCATGGGCGTGAACCCGACGAGCATCTCAAGACAATCAAGACCGCTATCGTGC  
ACTTGCCTGCAATACCTTCTGATGTCAGCAAGAACCGGATGCCGAAGCCGCTTCAAGAGGTCGTTGAAGCCTGGG  
AAGTGTAAAGTATGAACAACGTCGCGCTGAGTATGATCAGATGTGGCAACATCGCAACGATCCGCAATTTAACCGTCAG  
TTCCACCATGGCGAGGTCAGAGTTTAAACCGCAAGATTTTGGACGATATCTTCTGCTCAATTTTCCGTCAGCATGCCC  
CCAGAGCGCTCAACGCCCGCCACACGCGGCCAGGATTTGAAATCGAAGTGGCGGATTTCTCGAAGAAACGCTTACTG  
AGCATAAGCGTACCATCAGTATAAACCCTGCCGTTTATAACGCTTTGGCATGATCGAACAGGAAATTCGAAAACGCTG  
AATGTGAAGATCCCGCGGGCGTGGCAATGGTCAACGCATCCGCTGAAAGGCCAGGGGACCGCGGGCAAAACCGCGG  
TCCAAATGGCGATTGTTGGCTGGTATTCATATGCGCCACATCCGCTGTTTGTATTTGTCGGCCAGGATCTGAAAATTG  
TGGTGGCGGTTAGCCGTTGGGAAGCGCGCTGGGTGCTAAAGTCAACGCTTCAACACTGAAAGAAAGCATTTTGTGCTGACT  
ATCCCGCCAGGACGAGCCGGGCAACGATGCGCGTTAAAGGCAAGGCTGGTGGAGCAAAAACAGACCGGGGATCT  
GTATGCGGTAAGTGAATCGTATGCGCGCAACCGGATGAAAACACTGCGCGCTGTGGCAGCAACTGGCAGACGCCCC  
AGTCTGCTTTTGTATCCAGTAAAGATTGGGGGAAAAGCATA  
>Cluster\_50094  
ATGAATATGAAATGAAAACATTTATCGCAGCGGCTTCCGCTGTGTGCGGCTTTTGCAGTACCCTCTGCGGTAACCTTA  
TCCTTGCACCAACCGAGGAGTCCGCTGGTTGGTCAAGATCAGGTGATCACCATTCTGAAGGTAACACTCAGCCGCTGG  
AGTATTTTGGCGCGAGTACCAGATGGGACTTTCCAATATGATGGAAGCGAACCCGGGTGGATACCTTCTGCGGAAA  
GGCGGTACTGTACTGAACATTTCCGACGAGCTGATCTGCCGGATACCGTTCAATGAAGGCATCGTCATTAACAGTGCAGA  
GATGCGCTGTATTTACTATCCGAAAGGGACCAACCCGTTACTGCTGCCGATCGGCATGGTCAAGTGGTACGCAAGACA  
CGCTATACCACTGGACCAACAAAGTTGAGCGTAAAAAAGCAGGCCCCGACTGGACGCCAGCCGTAATAATGACAGGAG  
TACCGGCTGCGGGCGAACCGCTTCCGGCGGCTGTTCCGGCTGGTCCGATAACCCGATGGGGCTGTATGACCTTACAT  
CGTTCGCTGTACGCTATCCATGGCACCACGCAACTTCCGTTCCGTTCCGCTGCTGCTGTAAGTCAATGGTTGTGGCTGCT  
GTAACGAGACATCAAAATTCCTGTTGAGAAAAGTACCGGTCGGTACCGGCTACAGTTTATTGATGAGCGGTTAAAGCG  
ACCACCGACAGCAGCGGCTTATATTTGAAGTCCATAACCCGCTGCTACCACTGAAGCCAGTTTGAAGGTCAGGA  
AATGTGCCAATTTACCTGACGAAGAGCGTGCAGACAGTGACCGGTCAGCCAGATGTTGACCAGTTGTTCTGGATGAAG

CGATCAAAAATCGTTCGGGATGCCGGTTCGTCTGAATTA

>Cluster\_60254

ATGAAGATATCTCTGTAGTTCCTGTCTTCAATGAAGAAGAAGCGATACCAATTTTTTATAAAACGGTACGTGAATTCGA  
AGAATTGAAGTCATATGAAGTGGAAATCGTTTTTATAAATGACGGCAGCAAAGACGCTACGGAGTCAATCATTAAATGCCT  
TGGCTGTTTTCAGATCTAGTTTCCGCTGTCAATTTACACGCAACTTTGGTAAAGAACCAGCATTTGTTGCGAGGGTTA  
GACCATGCAACCGGGGATGCGATAATCCCAATTGATGTTGACCTGCAAGACCCGATTGAGGTTATTCCTCATCTTATTGA  
AAAATGGCAAGCAGGTGCTGATATGGTCTTGTCTAAAAGATCTGACCGCTCAACTGATGGACGCTGAAGCGAAAACGG  
CTGAGTGGTCTATAAGCTCCACAATAAAAATAAGCAATCCTAAAATGAAAGAGAATGTTGGTGAATTCAGGCTGATGAGC  
CGTGATGTTGTCGAAAATATAAACTTATGCCAGAACGAAACCTTTTCATGAAAGGTATCTGAGCTGGGTAGGAGGAAA  
GACAGATATGTTGAATACGTGCGGAGCGGAAAGAATGCTGGAGATACAAAATTAATGGATGGAAACTTTGGAAATTTAG  
CACTTGAGGGTATFACAAGCTTTTCCACATTCCTCTTCGCATCTGGACATACATAGGGTTAGTGGTAGCCAGTGTAGCA  
TTTTATTTAGGGCGTGGATGATTTTAGATACTATCATATTTGGAATGCTGTTAGGGGATATCCTTCACTACTTGTTC  
AATACTGTTTTTTAGGTGGAAATTCAGATGATTTGGAATAGGAGTATAGTGAATATATTGGACGCACATACATTGAAACCA  
AAAAACGCCCGAAATACATCATCAAGAGAGTCAAAAAATGA

>Cluster\_21234

ATGAGCAGCAAGCTTCATGTTCTTGTCTGGGAAGGGTGCCTTACCAGGATGATCTTATCCAGGGTGGCGGTTATGGC  
CCGTCTTGCAGACTACAGCAATGACGAGGGCTGTATGCGCTGCCATTGAAACTATCCGGCGTCAGATCGGTGCAAGAA  
GTGAATCCACAGTGAATCGGCTATTGCAGAACGCGGAAAGAGGGCTGGCTGACGAAGGAGAGCGTAAGGTCGGTGGG  
CGTAATGTAAGCAATATCTATCGGCTTAATGTGAAAAACTCGAAGCAGCTGCGGCGGCGGCGGTGAGTCATATAAAC  
AAAAAGAAAATAGCCCGCAAAAATGACCCGTTAACAGTTGACCCGTTCAAAATATTGACCCCTCAACGGTTGACCCGT  
CAAAATTTTGTGATGGAATCAACTGTTGATAAAAACTGCCGATTAGGGGGCGATGATTGACCCCGATCCGTGAGTATAAAA  
CCTGATCCGTCAGATAAAAGATCTTCTTGTCCGGACGCTTCGCAACCGGACCCGAGACGGCTGAACAGGATTTTTTAAC  
CCGACACCTGACCGGTTGTGTTCAGTCCGAAAAACGCCAGTGGGGAAAGTCAGGAAGATTTGGTGTGCGCACAGTGGAA  
TCTGGGGAGCAATCGTGAATCTTTACGAGCAGGGCCGACGATGATGGCGAGATCACTAGACCGAAAGCAACCACTGG  
ACAGCATGGGCCAATGACGTTCCGACAATGCGGATGCTGGATGGCAGAACTCACAGACAAATTTGTGAAATGTTTGGGCG  
TCTCCAGCGGGATTCGTTCTGGGTAAAAACATCATGAGTCCGGCAAACTCCGGGAAAAATGGGATGAACTGGTTATCC  
GCCTGGGGCGTTCGCTGCGCAGCGTTGCGTGAATCACATTTCTGAACCGGACACTGAAATTCGCGGGGCTTACAGGGG  
TAA

>Cluster\_27301

ATGCGTAGCGCGCAGGTATACCGCTGGCAGATCCCATGGACGCGGGGGTGGTCTGCGCGACAGGCGGTTAAAAACCG  
CGACGGGCTGTATGTTTGCCTGCGTGAGGGCGAGCGGAAGGGTGGGGGGAGATCTCCCACCTGCCGGGCTTCACTCAGG  
AAACCTGGGAAGATGCGCAAAAGTGTCTGCTTGGCTGGTAAATAACTGGCTGGCAGGCGATTGCGAATTAACCCAGATG  
CCTTCCGTTGCCCTTTGGCGTAAGTTGTGCATTTGGCGGAGCTGGCAGAGACGCTCCCGCAGGCGGCAATTACCGTGGCG  
ACCGCTGTGTAATGGCGATCCTGACGATCTGATCCTCAAACTTCCGATATGCTTGGCGAGAAAGTGGCGAAGGTCAAAG  
TGGGATTTGACGAAGCCGTGCGGACGGCATGGTGGTGAATTTGTGCTGGAGCAATTCGGATCTGCATTTGCGTCTT  
GACCGAAACCGCGCTGGACACCGCTGAAAGCCAGCATTTTGC AAAATACGTTAACCCGATTATCGCCACCGCATTC  
TTTTCTCGAAGAGCCGTGCAAAACCCGCGATGATTCGCGTGGCTTTGCCCGTGAACCCGACATTTGCCATTTGCCGATG  
AAAGCTTGGCGGACCGGATTTTTGCTTTGTAGCTGAAGAGGGCGTGGCGCGGTAGTTATCAAAACCCAGCTCACGGCG  
AGCTTGGAGAAAGTACGCGAGCAGGTGAAGCGCGCATGCGCTGGGGTGGCTGACGGCGGTGATCAGTTCTTCCATTTGATC  
GAGCTTAGCTTAAACGCAACTGGCGGATTTGCTGCTGTTAAGCCAGACCACTTCCGGGATGGACACGCTGGATC  
TGATGCAGGCGCAGCAGGTTCTGCTGCTGGCGGGGAGCCACTGCCGTTAGTGGACGTTGATGCACTGGAGCGCTGTTA  
TGA

>Cluster\_23996

TTGCGAAAATTGATATATTACAAACGTCACATTTGCAATTTCTGCAACGTCACATTAAGGGCTGCGCCATTGGATTTACG  
CGATCTGAAAACCTTCTGTCATCTGGCGGAAAGCCGCAATTTTGGCGCAGCGCGCGGCAATGCACGTTAGCCCGTCCA  
CGCTCTCTCGGCAGATTCAGCGCCTGGAAGACGATCTCGGTGACGCGCTGTTTGTGCGCGATAACCGCAGGTAACGCTA  
ACCGAAGCAGGCGAAGAACTGCGGCTTTTCGCCCAGCAAACTGTTGTCAGTATCAACAGCTGCGCCACCACTGATCA  
GCAAGGACCGTCTCTCTGGCGAATTACATATCTTCTGCTCGGTGACCGCTGCCACAGCACTGCGCGCGGATTTCTCG  
ATCGCTTCCCGCGGGAACACCCGTCGGTGGAGATTAACCTCACGACTGTTGATGCAGCCGATGCGATGAAAAAGGTGGTC  
ACTGGCGAAGCGGATCTGGCGATTGCCGGAAACCGGAAACCTTGGCGGGCGCAGTGGCGTTTTTCGATGCTGGAGAATCT  
GGCGGTGGTGTGATTGCTTCCCGCGCTGCCCTGCCGTTGCGTAACTAGGTTCTCTGCGAAAAGCCCGCATTTGCTACAG  
TGCCGTTTTATCATGGCCGATCAGGGACCGGTACGCCGCGCATTTGAACGTGGTTTTCGGCGTAACAAAATCAGCAACCCA  
ATGATTTAGCCACCGGTTGGCGGCATGAAGCGATGTTATCGATGGTGGCGCTCGGCTGTGGCGTGGCGCTGTTGCCGGA  
AGTGGTGTGATAACAGCCCGAACCAGGTCGCTAACCCGCTGATGATTTAGAGCGCAGTGAATAAAACCGGCTTTG  
AGCTGGGCGTGTGCGTACAAAAAAGCGCTTTCATGAGCCGCTGATTGAGCGTCTTGAAGATTTTTGCCGAACCACTAA

>Cluster\_11507

ATGAAAAAGGTTTTAGCTCGAGGGCGAGTTCCTGGCAATGACAAATTCAGAAATTCGCTCGCATGTTGAAGGTGACGGAGA  
GATCAAAACGTTTTACTCTTAAGTCTGGGAACAAGCAAAATCATTAAAACGGTTGATATAAGCGGAGATATAGAATCTA  
AAACGTTTTGTTGATCTGTTAATGGACCGGATCAGACAATGCTTTTCGCGTGAATCAGTTAGTGAACATAAATCGCACG  
ATTAACCTCAGCAATTTTTTCCGGCTATTTGGTGGGAAAGTAGATGGACGAATGAAGTATTAGACGGTACGCGTCTGTCG  
CGTGCCTGTATCTATAACAACGTAATAATTCGAAATCTGTTTACAAAAGACAGTATTGATATTGCCGACGCGAGACAAC  
TTGCAAAAAGATATACAGACAGCCAGAGAGCATAGCCCTCCGAGAACTAGGAAAACGCCCTTGAAGTTACTTATGGGGCAAGT  
ATGACAAAAGAAGAGATCGCTCAGGCTGAAAGCATCTCTCCGGCAAAAAGTAACACGCGCATTTTCAGGGCGCATCAGTACC  
GGATGAAATGATCTCTGTATTTCCGGTAATCAATGATATTTCTGTTGTCGGACTATCAATTTTTGTTGAAACTGCTGAAA  
AGGCAACCAAAAAAATAATCAGTGGAAAGGTTTATGGATGAGTTCGCCAAAAACTGATGGCTTTACCTGACTATCCA  
ACAATTTGCAAAAAGCAAAATCTTGGCGGTTCTCAGGCTCGAAGGAAATTTGCTTACAGACCGGCTGTAACCAAGTTGA  
AACTGAGAAGTTGAAAGAGTTTTCTGATCGTAACCAATTTGCCAGAAAGAAGACTGACCCAGAAAGCGTCTTGTGTTTT  
ATGAGTTCTCCCGCATATCTAATGAGGTGCAGTTAGAAATCGATGAGGCTATAAAAAACATTTCAAGAAAACCTGCTGAA  
TAG

>Cluster\_23356

ATGAATTTAGAAAAATCAATGAGTTAACCGCGCAAGATATGGCGGGTGTAAATGCGGCAATCCTTGAGCAGCTTAATTC  
CGAGCTCCAACTGATCAATCAGTTAGGCTATTACATCGTCAGCGCGGGCGGTAACAGTATTCGTCGATGATTGCTGTAC  
TGGCTGCACGAGCTGTTGGCTATGAGGAAATGCGCATGTCCACATTTGCTGCCCTGATCGAGTTTATCCACACGGCGACT  
CTGCTACACGACGCTGTTGTTGATGAATGAGATATGCGCAGGGGTAAGACTACCGCAACGCCGATTTTGGCAATGCCCG  
CAGCGTCTGGTAGGCGATTTTATTTATACCCGCGCTTCCAGATGATGACCAGCCTCGGTTCACTCAAAGTGTGGAAG  
TCATGTGCAAGCCGTAACGCTCATCGCAGAAGGTGAAGTTCTGCAACTGATGAACGTTAACGATCCGGACATCACTGAA  
GAAAACATACCGCGGTTATCTACAGCAAGACTGGCGCTGTTGAGGCTGCGCGCAGTGTTCGGGATTTGCTGCTGG  
CTGTACGCGGAGGAGGAAAGCTTGCAGGATTTATGGGCGTATCTCGGCACTGCTTTCCAGTTGATCGACGATTTAC  
TCGATTACAAATGCCGATGGCGAACGCTAGGTA AAAACGTCGGCGACGATCTGACGAAGGTAACCGACGCTGCCGCTG

CTGCATGCGATGCATCATGGCACACCAGAACAGGCACAAATGATTCGTACCGCCATCGAACAGGGTAACGGTCGCCATCT  
TCTGGAACCGGTTCTGGAAGCAATGAACCTTTGGGCTCTCTTGAATGGACGCGTCAGCGTGGCAGGGAAGAAGCAGACA  
AAGCCATCGCAGCGTTACAGGTGCTCCCGGACACCCCGTGGAGAGAAGCACTTATCGGCTCGGCACATCGTGTTCAA  
CGCGATCGTTAA

>Cluster\_37581

ATGAAGCCGTCGGTTATCTCTACAAAGCCTTACTGTGATTTACTGCAACGCTGCAAGAGCATTTACCCGTTACCA  
GGTGGCAAACCTCAGCCACAAACCGTGCAGCAAAATGAGCAATTTTGGCCGAGCTGAAGGTTTACGCGGTTCAAACG  
AGAATGTAATGCGCATTGCTGGAATAAATGCGAACTGCGTGCCACATCAACGATCTCCGTCGGCTATGACAATTTT  
GATGTCGATGCGCTTACCGCCGAAAAATCTGCTGATGCACACGCCAACCGTATTAACAGAAACCGTCGCCGATACGCT  
GATGGCGTGGTGTGTCTACCGCTCGTGGGTTGTGGAGGTAGCAGAACGGGTAAGAGCAGGCGAATGGACCGGAGCA  
TAGGCCCGGACTGGTACGGCACTGACGTTACCCATAAAACACTGGGCATTTGTCGGGATGGGACGGATGGCATGGCGTG  
GCACAACGTGGCCTTTGGCTTCAACATGCCCATCTCTATAACGCGCGCCGCCACCATAAAGAAGCAGAGAAGCAGCTT  
CAACGCCCTGCTGCGATTTGGTACTCTGTTACAAGAGTCAGATTTGCTTTGCTGATCCTCGCGTAACTGATGAGA  
CGCATCATCTGTTTGGCGCAGAACAAATCGCAAAATGAAATCTCCGCCATTTTCATTAATGCCGACGTTGGCCCGGTG  
GTTGACGAAAATGCACTGATCGCAGCATTCGAGAAAGCGAAATTCACGCTGCCGGGCTGGATGTCTTGAACAGAGCC  
ACTGTCCGTAGATTCGCCGTTGCTCTCAATGGCCAACGTCGTCGACGATCCGCATATTTGGATCGCCACCATGAGACGC  
GTTATGGCATGGCCCGCTGCGCTGGATAATTTGATTGATGCGTTACAAGGAAAGTTGAGAAGAAGCTGTGTGAATCCG  
CACGTCGGGACTAA

>Cluster\_43339

ATGATTAGCGGCGTGTGACGCCCTGTTAGCAGGTTGATGTGGGGCTTATTTTGTGGGCGCTGATCGTACCGGA  
ATACCCGCGATGTTGACGTCGATGGGGCGTTACTGGCGCTAGGGTTAATTGCGCTGCCATTGCCCTGGCTGGGACGG  
TGCGTCTGCGTCAGTTGGCGGCTCGGACTGGCTTACCGCTTATGATGTCACCATGATGGGCAACCTTATCTATTACTTC  
TGCTTGGCAGTGGCATTCAACGCTACTGGCGCGCTGTTTCCACGATGATTTACCGCACCCCTGCCGTTGGTGAATTC  
TTTTGCAATCTGCTTTATAGCCAGCGCAGGCAAACTTCGATGGGGAAAACTCGCCCGGCTGGTTGTTGATTGGCA  
TCGGCCTGGCGTGTGTAATATTGCTGAGTTAAACCACGGACTCCCGATTTTACTGGGACGTTATACCTCAGGCATC  
GTGTAGCGTGTGTTCCGTTGGTCTGCTGGGCATGGTATGCCCTGCGCAACGCCCGCTGGCTGCGGAAAATCCCGACAA  
ACATCCGATGATGTGGGCGACGGCGCAGGCGCTGGTACGCTGCCGTTTCTCTCATCGGCTATCTCGTCGCCTGTTACT  
GGCTGCAATATGCAAAACCGCGACTTCTCCTTACCCCTTGGCCCGCTCGCTGGTGTATTAGTCTGATGCGGATA  
GCCGTGCTTGTCTATGGGTTGGCGCACCTGCTGGAACGTCGCCAGCCAGCGATTACCGACAGTGTCTCGGGCGCT  
GATGTTTTGCAAAACGCTGGCAGTTTGTCTGACACTTTTTACTCCGCCAGCAAAATGCCGCCCTAATGACGCTGAGCG  
GTATCGCGCTGTAGTGTGCGTGGTATCGCGGTGATGCGGTTACAAGGAAAGTTGAGAAGAAGCTGTGTGAATCCG  
AGTTGA

>Cluster\_23842

ATGAATACTATCGATAATAACAATGCGGCAATCGCAGTTAATCTGTTTTGAGCAGCAGGACTGACAGCACCAGTTCAAC  
AATACATCAACTCGTCAATCAGTTCACTTTACTTACTGATGGCAGAGTGGATATTTCTAAACTCTGCTGGAGGTTTC  
AAAACTGTTGCGTGAGATGGTCCACCATTTGCAAGATTATCTTCAAGAACCAATGGCCGAAAGCTATGACATCCAAAA  
GCCGTTTTGAGAGCCAAAAATAAGCTATTTGATGAGAAAAAGCCGTCGACAGCCGCTCTGATTGGTGGTGTATCTC  
ATCTGTCTAGGGATTTTAGGCTCTTTTGTGCTGCAATTAATAGCGCAACTAAAGGCGGAGTGTGCTCAGCAAGCG  
GTTCTACTTCTGCGAATCTACGCTACAGTCTCAACTAAAGCACTGGCGAAGGCTTCCGAAGGTTATGGCA  
GATCGACAGATGATGTCAGCTGGCGCAATGCGACAACTATCGCGACAGCTGCAAAAGCGGCCAGTCTGATCCGCTAT  
CACTGATGATGTTGCTACTTCCGGCTCAGAAAGCTTCTCAGGTAGCTGAAGAGGCTGCTGATGCTGCTCAAGAATTAGCAC  
AGAAGGCAGGATTTAAAGTTCGCTTACTGCTGCTGCCGAAGGATTTCTGGTCTACGCCATTTATTTGTTGTTACCCAGC  
CTTGTGAAAGTACGAAAACATTTGCCAACAGATATCTGGAATCTGTAAGTCAATCATGATATCAATGACAGCGCTGCG  
TAAATCTGTAGAAAATCTTACGGCGTCGAATTTAGATACCTACAAACAGGATGTTGCGAGAGCGCAGGATGATATCTCTA  
GCCGCTACGTGATATGACAACGACAGCCGCTGATCTTACTGACCTTATTAATCGCATGGGGCAAGCGCTCGCTTAGCT  
GGGTAA

>Cluster\_21181

ATGAAAACAGAGACTCCATCCGTAATAAATGTTGCTATCACCGCTGACGAAGCGGGGCAACGTATCGATAACTTTTTGCG  
TACCCAAATGAAAGGTGTACCAAAAAGTATGATTTACCCTATTTTGGCTAAAGCGCAAGTGGCGGTGAACAAAAACGTA  
TTAAGCCTGAATAAACAACCGAAGCGGGTGTAGGTTACGATCCACCGGTTGCGGTTGCTGAACCGGAAGAAGAGGCG  
GTTTCGCCACATCTGCAAAAAGGTGGCAGCGCTGGCGGAGTCACTTATATGAAGATGACTATATCTGGTGTGAATAA  
ACCTTCCGGTACGGCGGTACATGGCGGCGAGTGGTTAAGCTTCCGGCTTATCGAAGGTTTGGCGGCTTGGCCCGGAAG  
CGCGGTTCCCTGAACTGGTTCATGCTCTGACCCGGGACTTCCAGGTGTTGCTGTTGCTGAGCAAAAAACGCTCGCGGTTG  
CGTTCTCTGCATGAGCAATACGTTGAAAAAGGATGCAAAAAGATTTACTGGCGCTGGTGGCGGTCAGTGGCAGTCGCA  
TGTGAAGAGCGTTCAAGGCCGTTATTTGAAAAATTTTTGAAAGCGGCAAGCTATCGTGGTGTGCTGAGGAGGCA  
AACCGTCGAAACACGCTTTAAAGTGAAGAAGCTATGCATTTGCCACCCCTGGTGGCTGTAGCCCGGTAACAGGGCGT  
ACTCATCAGATCCGTGTGATACACAGTATGCGGGTCACTCCGATTTGCCCTTTGACGATCGCTACGGTGACCGTGAATTTGA  
CAGACAGTCACTGAAGCGGACGGGATTAATCGTTTGTCTGACGCGCAGCTTGAAGTTTACCATCCGCGGA  
CCGGAGAGGTGATCGCTATCGAAGCGCCGATGGATGAAGTTTGAAGCTTGTGTTGAAAAGCTGCTAACCGCCGCTAA

>Cluster\_34596

ATGGCCGACTCACACTCACACGCTCTCACACCTGCCAGAAGATAAATGCTCGTCTGCTTGTGTATGCTTTTCGGCGT  
GACTGCCGGGTTATGCTGGTAGAAGTCTGGTGGTTTCTTTCTGGTTCTCTGGCATGCTGGCCGATGCGGGTCATA  
TGTTGACCGATACTGCGGCCCTGCTTTTCGCCCTACTCGCGTGAATTTTACGTCGTCCTCCACCATTCGCCACACT  
TTCCGTTGGCTAAGACTGACCACGCTCGCGGCTTTGTGAATGCCATAGCCCTCGTGGTAATACCATTGTTGATGTCTG  
GGAGGCGATAGAACGCTTCCGACGCGCGCTCCGGTCGAGGCGGCGCATGATGATGGCAATGGCGTGGCTGGGTTGTG  
CAAAATACCTTTCTTCTGGTTACTTCACTACCGCAGGCAAGAGAAAAACCTCAACGTACGAGCAGCGCATGCTATGT  
CTCGGGACCTGCTGGGTTGGTGGGCTATTTATGCGCGTGTGATTATATCTGGACTGGCTGGACACCTGCTGACCC  
CATCTCTCGATACTGGTGTGCTTCTGTTCTGCGTACGCGCTGGCGACTGTGAAAGATAGCGTGAATGAATTTACTTG  
AAGGTGACCCGGTATCGTGGATATCGTGAACGTAAGCGTGTGATGTGCCGGGAAATCCCGAAGTCCGCAATGTGCAC  
CATGTACATGTATGGATGGTAGGCGAAGCGGATGATGATGATGATGATGATGATGATGATGATGATGATGATGATGATGAT  
CTTGTGGATCAGATCAACACTACCTGATGGATCACTATCAGATTGAGCAGCCACCATTCAGATGGAATATCAACCTT  
GTCATGGGCCAGACTGCCACCTGAATGAAGGGTGTCTGGCCATTCACATCATCACCATTAA

>Cluster\_37288

GTGTCAGAACTACACTACGTTATTTTTCGGGTTACACCTGACTTTGACGCGCTCATCTCGACGCGCTGTTGTCTTCTGG  
TCATAACGTCGTTGGCGTGTTCACCCAGCCAGACCGGCGAGGACCGGTAATAAAGCTGATGCCAGCCCGGTTAAAG  
TTCTGGCTGAGGAAAAAGGTCGCCCCGTTTTCACCTGTTTCCCTGCGTCCACAAGAAAACAGCACTGGTCCCGGAA  
CTCGAGGCTGATGTTATGGTCTGCTGCTGCTGCTGCTGCTGCTGCTGCTGCTGCTGCTGCTGCTGCTGCTGCTGCTG  
TATCAACGTTTATGTTTCACTGCTGCCACGCTGGCGCGTGTGTCACCAATCCACGCTCACTATGGCGGGTGTGTCAG  
AAACTGGTGTGACCATTTATGCAAAATGGATGTCGGTTTACACCGGTTGATGCTCTATAAGCTCTCTGCCGATTACT

GCAGAAGATACCAGTGGTACGCTGTACGACAAGCTGGCAGAGCTTGGCCACAAGGGCTTATCACCACGTTGAAACAAC  
GGCAGACGGCAGCGCAAACAGAAAGTTTACAGGACGAAACTCTTTGTACTTACGCCGAGAAAGTTGAGTAAAGAAGAAGCC  
GTATGTACTGGTCACTTTCCGGCAGCACAGCTTGAACGCTGCATTCGCGCTTTCAATCCATGGCCAATGAGCTGGCTGGAA  
ATTTGAAGGACAGCCGGTTAAAGTCTGGAAGCACTCGGTCATTGATACGGCAACCAACGCTGCACCAGGAAACGATCCTTTGA  
AGCCAAACAAGCAAGCTCAGGTTGCGACTGGTATGATGCACTCTGAACCTGCCTCGTTACAACCTGCGGGTAAAGAAAG  
CGATGAGCGCGAAGACCTCCTGAACTCTCGTCGGGAATGGTTTGTTCGGGCAACCGCTTGGTCTGA

>Cluster\_223

ATGTTGGTCTTGAAGATCTTTCACTTTTAAAGGACAAATCTCTTTTCTGGCTCAATTTGGAATGGATTTCAATTTTAGG  
CAACAGCCCGCTATTTTAAAAATAAAAGAAATGTACTATTTTGGCAACTTAACGCCACTCTCTTGATAGAGGGAG  
AAACAGGCACAGGAAAAGATTTGTAGCAGAGGTAATACATAAACTTTCTCCGAGGGCAAACCATCTTTTCATCAAAGTA  
AATTTGGGGCTCTTCCGGAGCCCTGTGTAGAGTCAGAACTTTTGGCCACGTAAGAGGTGCCCTTACCGGAGCTAATGC  
TGACAAACCAGGAATGATAAAATAGCCAATGGAGGACTCTTTCTTACAGAAATAGGAGACCTACCCCTTTACCCCTC  
AGGTAACACTACTAACTTTTGTAGCAGATAAAGAGTTTATCCGTTAGGTAGTTCCCAAAAAGTAAAAGTAAAGCTAAGG  
GTGATTGTGGCAACCAATAAAAAATTAAGACAGATGGTTAAAGAGGAAAATTTAGAGAAGATTTGTTTTATAGACTGAA  
TGTGTTAAAAGTACAACCTCCCCCTCTTAGAGAAAAGGGGAGATGACATATTGATTTTAGCTGACTATTTCTCAAGAAAT  
TTTTGAAAAGCTCATAAAAAAATCAAAGGCTTTTCGGAACAAGTTTAAAGGTGCTAAGGTCTTATAAATACCCCTGGA  
AACATAAGAGAGCTTAAAAAATAGTGAATATGCTGTTCACTGTTTGTTCAGATGAATGATTACAGATAAAACATCTCCC  
AGAATATTTATTTACTGCCATAAAAGAAGAGGAAGAAGACCAACAACAACCTTTAGCTAAAGATTGGTCTGCTATAAGAA  
CTCAAAAATTTGAAGTTTACCTGGGCTGAGATCGAAAAAAAAGAAATATTTGA

>Cluster\_17105

ATGATGCGTCTGTAATAATTTCTTGTCTATTTGCTCTGCTTTTTGCCAGCCATACTAGCCTGGCGGTAACCTTATCCATT  
ACCTCCAGAGGGTAGCCGTTTAGTGGGGCAGTCGCTTACTGTAAGTGTCTGATCACAATACAGCCGCTGGAGACTT  
TTGCCGCAACAATACGGGCAAGGGTTAAGTAATAAGTGAAGCGAATCCGGGCGCTGATGTTTTTTGGCCGAAGCCTGGC  
TCACAATCCACCTCAGCAGCACTGATTTTGGCCGCACTGCTCCGTAAGAGGATTTGGTTAACGCTCGCTGAATGGG  
TCTTTATTTACTATCCGCCAGACAGTAATACAGTGAAGTCTTTCTTATTTGGTATCGGCCAGGCTGGGCGAGAAACCCCGC  
GTAACCTGGGTGACTACCGTTGAACGTAACAAGAGCACAACCTGGAGCCCAACGCCGAACACTCGGCGGAATATGGG  
AAACGAGGGGAGAGTTTGGCCGCTTTGTTCTTGGGGGCGGATAACCCCATGGGGCTGTACGCGATTTATATTGGCAG  
GTTGTATGCCATCCAGCAGCACTCAATGCCAATTTTGGTATTTGGGCTCGGGTAAGTCAGGGCTGATTTCTGCTGAATGG  
ACGATATCAAATATCTGTTGATAATGTTCTGTAGGCACTCGGTACAAATTTATGATCAGCCAGTGAATACACAACG  
GAACCGGATGGTTCAAAGTGGCTGGAAGTTCATGAGCCGCTGTGCGCAATCGTGCAGAAATGAGTCTGACCAGAAAGT  
GCCATTGGCCGTAACCCCATCTTTGGGGGCTTTATCAACGGGCAAGAAGTTGATGTAATTCGCGCAATGCTGCGTTGC  
AACATCGATCGGGATGCCGTGTGCAAAATGAGTTCTGGTCAAGACAGATGTTTTAA

>Cluster\_58215

ATGTCATACCCGCTTTTTGACAAAGACGAACACTGGCATAAGCCAGAGCAGGCGTTTCTCACCATGACCACCGGACCAT  
TCTGCGCTTCGCGTAGAGGGCTAATGTCCGGTAAAGGAGCGGTGCTGGTGCAGCTGGTGGAGATACGCGGGCGGCGGG  
CGGCGCCGCTCGGGCGCAGATGGTGGTCCGAAAGATGGTCCGTTACTGCGGTTTTGTCTCTGCGGCGGCTGGCTGGC  
GCTGCGCTTTTGAAGCGCTGGAGATGATGGGCTCAGGCCGATCGCGAAATTCGCTATGGCGAAGTTCCGCTGGT  
TGACATCGTTTGCCTTCGCGCGGTGGGATCACGCTGACGCTCCATAAACTACGCTCGGCACAGCCTCTGCTCGCCGCT  
TGAACCGCTTGGAAACAGAAAACCGGCTGGGGTGGCTGACGATCCGCAAGCAACTGCTGGTGTGCTGCCACGCA  
ACCCGGACGGGCTGGAATCTCAATGGCTTTGAGGTGGGTTTCAGGCCATGCGCTCAGGCTGATGATTTACGGACTTCTCT  
TGAGGCGCAGGCAACCGGAGTCTTGCAGCAGCCACAGGCTATGACAGCCATACTTCGATCTTTTCCGCGCTCAGCCA  
CGGCTCAGATCGATACCGGATACGGCGGTCAATTTGCTGTGCCATGATCTCAACCGGAGCTGCCAGTGTTCAGGCGCGG  
CGAGAAGCAAAACCTTTTATCTCGGCGATTTGGGCGATCTGCAACCCACAGCTTACGCTCGCAAAAGCTCCACAGAT  
GGGATGGTCCAGGAGGAAAACAACGCAATTCGGGACCCGCTGGGATATCCCAAAGCCGGGATGCGCATACTCTGG  
CACTCTCGTGTGGCAGAGTGCCTCTGTACGCTCCATCAGGAGGAGATTATGCTGCCCCGCTGCTCTGA

>Cluster\_19665

ATGGACGTAGAATGCCCCGAAAGGCGGCTGGCAGAGTATAACGTAATGGATGACTGTGGTGGCGTTTTGCATAACATTGA  
AACCAAAATGGCTTTATGATTTTCTGACCTGGAAAAATGTGCGCAATTTTCCAGGCGGCGAGTCAGTCGCAACGCTCTCGC  
AACCAGCATTCAGCCGCCCATCCGTGCAGTGGAAACAGCGGATGGTGTGAATATTTAACGCCAGGTAACGCCGCTG  
CAACTCTCAGAACAAAGGAAAATCTCCATTCCGAGATCCGCCATCTGTTGCAACAGTTAGAGAGCAATCGGCAGAGCT  
GCGTGGCGCGCAGCGATTACGCGCAACGTAATAATCAAGATAGCCGCTGCACACTCTTTCCCTCGGTCTGTTACCGTCCA  
TTATCAGCCAGATGCCGCGATCTTACCTGGCAATTTGAAGCATTGATGTCGATGAAGCGGTCGATAAACTGCGCGAA  
GGGCAAGTGAAGTATTTTCTTTCACGACGAAGATTTGCTGGAAGCGCGCTTTGACCACATCCGCTATTTGAATC  
TCAATTTGTTCCCGCTGCGCCAGTGCAGAAACGGAAGACTTTTTAACCTCGCTCAGCCACACTTTCCGTTACTGA  
ATTTACAGTCCCAACTCTTACATGGGAGATTGATTAATCGCACTGACGCGCCACAGTGAAGTTGAGTTGAGCTTT  
TTTTGCTCTTCGATGAGCGAGCTTTTAAAGCAGTTGCCCTCGAGCGCTGTTGGGATTGCTGCTACCGGAGTACGCCAT  
ACAACAAGAAATTCGACGCGGCGAGCTCGTTGACTGAATCGGGACGAAGTGAATCCCGATTACGGCTATGCATACC  
GGATGAATACCCGATGAATCCAGTTGCCGAACGCTTCTGGCGTGAATGCGCGAGCTGGAGATTGAACCTGGCTGA

>Cluster\_43366

ATGCAAAATCGGCTGACCATCAAAGACATCGCGCGCTTAAAGCGGCTGGGAAAATCTACAGTTTCCCGGGTGTGAATAA  
CGAAAGCGGCGTAGCCAGCGCACGCGCGAGCGTGTGAAGCAGTGTGAATCAGCATGGATTTTCCCTTCCCGCTCCG  
CGCGCTATGCGTGGGCAAGCGATAAAGTGGTCCGCTCATTTGTTACCCGCTGGATTCTGTTGTCAGAAAACTCGCC  
GTTCAAACCATGCTGCCAGGCTTCTATGAACAAGGTTACGATCCAATCATGATGGAAAGTCAGTTTCCCCACAATTAGT  
TGCCGAACATTTGGGGTGTGAAACGGCGTAATATCGACGGCTAGTGTGTTCCGTTTACCGGCAATAACAGAAGAAA  
TGTAGCCCACTGGCAGTATCGCTGGTCTGCTGGCGGCTGACGCAAAAGGCTTTGCTTCCGCTGTTATGACGACGAA  
GGGCAACTCAAGACCTGATGCAACGGCTGTATGGCAGGCAATCGTAATATCAGTATCTCGGCTGCGCCAGTGA  
CGTGACAACCGGTAAGCGAGCTCACGAAGCCTACCTTGGCTTTCGAAAAACGATAAATGCAATCCGCTTGGCGCTGTC  
CAGGGCTTCTATGAAGCAAGGCTATGAGAAGCTAGCAAAAGTATTACGCTGAAACTACCGGCTTACTGTGCGCAACC  
GACAGCTGGCACTTGGCGCAAGTAAATACCTGCAAGAGCAACGCACTGCACCTTGCACCTGGCAGGCTCGGTAATAC  
ACCGTTAATGAAATTTCCATCCGAGATCTGACCGTATGATCCCGTTATGCGGAAGCTGGAGCCAGCGGCTGCC  
AGTTGATCGCGCAGGTAACCGGCGCAGCGAACCGCAACAATCATCATCCCCGCCACCTGTCTGA

>Cluster\_67060

ATGAAAAAGATAGCCATTTTGTATAACCGATGATATCAGTGCATTTTCATCTCTCCGTACCCTGGCAATTTTGCAGATAT  
TATCCCGGACCATTCATTTTAACTTTGTTTTATGCTCCGTGACGGGAAAGACTATAAAAACCTCACATGGTATGCATA  
TTACACCGAATATGACTTATCGGTTTACGTACTGCTGACATGGTTATAGTTCTTTTGGCCATCGCTGACATTTGTA  
CCGGAGCCACAGTTAACGGAAGCACTCCGGAAGCTGCACAGCATAATGCCACCATTTGGGTTTGTGCTTTGGTGCCTA  
TGCTTGGCCATTCAGGACTACTGGATGCAAGAAACGGCTGCACACACTGGTTGATGAGAGTGAATTTTTCAGTACCGGT  
TTCCGAATACCCACCTGGATATGAATGCGCTCTATGTAGCTGACGATAATATTTACTTCTGCGGTTACAGGTGCGGGT  
ATGGACTGCTGCTGTATCTGGTCAAGGAGTTGTACGGGAGCAATATTGCCAATCAGATAGCAAGCGCAATGGTATCCC



GCCTCATCGGGACGGGGGACAGGCTCAGTATATTCAGATGCCTTTTCCATCTGCAACAAAGGATCGCCAGATAATCTGCTG  
TGGTTGAAACCGTCCGCCAGGACCTGGCCAGACGCTGGACGCTGGATGAACTTTGTGAAGTCGTTAGCATGAGCCGACGA  
ACCTTTACACGCCGCTTCCGACAGTCCGACGCTGACGCTGGTGGTAAACAGGAGCGTCTGAGAGAGCGCA  
GGTATTACTGGAATCTACAGCCACTCTGTACAGAAGGTATCTGAGCTAGTTGGTTTTAGTTCCGCAACATCTTTACGGG  
AAAAGTTTATCGCAAAATTTGGCGTATCGCCGTCGGTATGGCGAAAAACATTCAGGGGTTGAGAGCGATATA

>Cluster\_47615

ATGGGGAAAGAAGTGATGGGAAAAAAGAGAACGAGATGGCGCAGGAAAAAGAGCGTCCAGCCGGAAGCCAGAGTCTGTT  
TCGGGGTTGATGCTGATTGAGATTTTGGAGCAACTATCCAAACGGTTGTCGTTGGCGCATCTTCCGGAGCTGGCTGGTT  
TAAATAAGAGTACCGTCCATCGCTTATTGACGGGATTACAGTCTGCGGCTATGTGACCACCGCCGCGCCAGGGGAT  
TACCGCTGACTACCAAATTTATTGCGCTGGGCGAGAAGGCGTGTCTTCGCTGAATATCATTCATATCGCCGCTCCGCA  
TCTTGAGGCACTGAACATCGCCACTGGTGAACCATTAACCTTCCAGCCGCAAGACGATCAGCTATTTTGTATTTATA  
AGCTGGAACCCACAACCCGGGATGCTGCGAACCCGTCCTATATTGGCCAGCATATGCCGCTCTACTGTTCCGCAATGGGC  
AAGATCTACATGGCAATTTGGTCAACCGGACTACGTGAAGTCACTGGGAAAAACCATCAGCATGAGATGAGATCCAGCGTTA  
CCGCAATACCATTACCGAGCTGCCCGGATGTTGACGAACTGGCGCACATTCGTGAAAGCGGAGCGGCGATGGACAGAG  
AAGAAAACGAACTCGCGCTCTCCGTATGCTGTTCCGCTGTTTAATATTCATGGGCGGGTGGCGTACGCCGCTCGATT  
TCGCTTTCGACATCAGCTCTGAAACAGGTGGGGGAGAAAAATCTCCTGAAACCACTGCCGTGAAACCGCGCAGGCTATTT  
TAATGAACTGGGATTTACTGTGAGGACGACAGGGCGCGATCACATA

>Cluster\_66979

ATGAGTGAATAAAATGGTGAGAATGGTCAATGGAGCCAAGAAAGACGGCTTGAATTCATCGATTTTCGCTACTGTGGGA  
AGGTCGGCTTAACCGTGCAGATCTCACGACATTTTTCAGAATTTTCAGTTCGCCAAGCCATCATTAGATTTGGCAAAATATC  
AAGAAATTCGCGCAACACATGGTGTATGATCGAACTCAGAAGGCTTACATTCAGACTCCTGATTTCAAACCTGTTTTT  
ACAAGCTTTGACAGTAATCATTACCTGAATGAACTACTTGGGCGAGAAAAAGAAATAGTGGATCCTGATGATAGTTTCAT  
TGGGTGGGTACCCCGGTAGCCAGCCTTCTCTCCCTGCCAGGAAAGTACAACCTGAAATATTGATTGATTTAATTCGAG  
CCATGCAAAAGAAACAGGCTTTGGTGTGTTGATTATCGCTTCAATGACTAATGAACAGCAATTCGTACGTTAATCCGAA  
GCATTTGCACATGATGGGCATCGGTGGCATGTTGCTGCTTATTGTTTTAAGTCTACAATGTTTAAAGATTTTGTCTTGG  
TAGGTTTTTAAATCGTTGAAATTTGTTTCCCCACCGACATCAATCCACAAGATGTGGACTGGAATACATTTATTGAGC  
TGTAATAGGTCCAAACCTAACACGATATGAATAAACGGCTATCTATTGAACATGATTATCAAATGGTAAAAGGAGAA  
GCAAAAACACATGAACTGAAAGCGCAATATATATCTTAACTCGTGAATTTGGATGTAATAGCGATGTTTCAAT  
AGATGACAAAACAGCAGATCATCATGCTCAGAATAGACGAGTCTAAAACCTATTA

>Cluster\_16473

ATGGCAACAAATAAACGCACACTCAGTCGCATCGGTTTTTACTGCGGGCTGGCGCTGTTTCTCATCATCAGCCTGTTTCC  
GTTTTTTGTGATGCTGATGACCTCGTTCAGAGCGCAAGAGCGATCTCGTGCATCCTACGCTGCTGCCACAGCAGT  
GGACGCTGGAGCATTACGTCGACATTTTAAACCGGTGATTTTCCGTTTGTGATTTATTTCCGTAACAGCATGGTGGTG  
TCGGTAGTTTCATCGGTGGTGGCGGTTTTTCTCGGCATTCCTCGGGCTTACGCGCTTTCGCCCTGCGCTTTAAAGGGCG  
GATGACCATCAACGCCAGCTTTTACACGGTGTACATGTTCTCCGGCATTTTGTGGTGGTGGCGCTGTTCAAATCATCA  
CCCGCTTGGCATATACGACACCGAGATGGCGCTGATCCACCATGGTAAACGCAAAACCTGCCACCGCTTTTATG  
CTGAAAAGCTACTTTCGACACCATCCCTGATGAGATCGAAGAAGCGGCGATGATGGATGGTCTCAACCGCTGCAATCAT  
CTTCCGATCACCGTGGCCCTGGCGATGTCGGGCTGATATCCGATTTCTGCTACTGCTTATGGTGGCATGGAACGACT  
ATCTGTTTGGCTGATTTTCTCTCCAGCGCACGAATTCACCTTACCACTGCGCTGACGCTGACGCGCTGACGCGCTGTT  
GATTACATCTGGGACGGATGATGGCGCTCGCTGGTACCAGCATTCGCGGTTGATGATGATGATGCTTTTCGGAGCG  
TTTTATTAAGAGTGGTTGACCGCGGTGGCGTGAAGGCTAA

>Cluster\_24337

ATGGCTAACTGAGCGGCTACAACCTTGTCTACCTCGACGAGCAGACCAACGCATGATCCGCGCGCCATCTTAAAGC  
GGTAGCGATCCCCGGTTATCAGGTACCTTTTGGCGGGCGGAGATGCCGATGCCGTACGGCTGGGAACTGGTGGTATCC  
AGCTTACCGCCAGCGTATGGCGAAAGCGACGTTGTTAAGGTGATGACAGGGTGCAGGATGACACCACCAACGCCGCT  
TCGATTCGCAACTCTTTAAGCGCGTGACCGGGGTAACACCACTGAACGTACGGACGATGCGACGCTTATCCAGACGCG  
TCACCGCATACCCGAAACGCCGCTGACCGAAGATCAGATAGTTTACTTCCAGGTGCCGATCCCGAACCGCTTTA  
TTGAGCCGCGAGAGACGGAAACGCGCACCATGACGCGCTGGAGGAGTACGGCGTATGACAGGTGAAACTGTATGAGAT  
ATCGCCCGCTTCCGTCATATCGCCACCCTACGCTTACCGTGAAGGTGAACGGGCGCTACGTAATGGACCGCTCGCC  
GATCCGAAATTCGATAACCCGAAATGGACATGATGCCCGCTGCAACTGTTTGGCGGGGCGGAGAGCGCATCT  
ATGCGCTGCCACCGTTTTACCCGCGTGGAAAGCCTCGATTTCCGATGATCATCCGTTACCGTCCAGCAGTGGGATGAACCA  
TGCGCCATCTGCGGATCGACCCACAGCTATCTTGTGAAAGTGGTGTGGATGACGCGGAAACCGCATGTTTGTCTGCTC  
CGATACCGATTATTCGCGCAACAGAGCGAGGCCAAAAACCAATGA

>Cluster\_4036

ATGCCATTAAGTTAATGGACGGATACTGCTCGACCGCATTCAGGAAAAACGGGTATTAGCGGGCGCATTTAATACCACCAA  
TCTGGAGACGACAATTTCAATTTTAAACGCTATGAGCGTTCGGGATTACCCAATTCATTCAGATTGCGCAACCAATG  
CACAACTCTCGGGATACGATTACATTTATGAAATCGTGAACGTCACGCGGATAAAATGGATGTTCCGGTCACTTTTCAT  
CTGGATCACGGGAAAACTGAGGATGTGAACAGCGGCTGCGCGGGCTTTACCTCGGTATGATGACGGTGGCTTTA  
ATTCTCTTTTGAAGAGAATATCGCTTTTACCCAGGAAGCTGTCGATTTCTGTAATCCATGGTGTACCGGTTGAAGCGG  
AGCTGGGGGCGATTCGCGCAAGAAAGATGATCATGTCAGCGAAGCCGATGCAAAACGGAACCGGAAAGGTGAAGACC  
TTTGTGAGCGTACCGGTTGCGACATGCTGGCAGTTTCTATTGGCAACGTTTATGCGCTGGACGATATACCGGATTCGA  
TATCCCCCTGTGAGAGCGATTTGCCGAAGTCTGTCCGCTGCGGTTGGTTATTCAGGGCGCTCCGGTATCCCGCGGAGA  
TATTACGACGCTTTGTTAATATCGCGTTCGCTAAAGTAAATATCGCCAGCGATCTGCGCAAGCGTTTATCACCGCGTC  
GGCAAAGCGTATGTGAATAATCAACAGGCGAATCTGGCACGATCATGGCATCAGCAAAAACCGCGTCGAGGAAGA  
TGTGTATAGCAAAATCCTGATGATGAATGAGGGCATCGGTTGGTTAGAAAGGCATCTTAA

>Cluster\_39012

GTGTTGGCGCTAACTGCGGATGCTGATTTTCTGGCGCAGCGGGGCAAGGACAGGTTGAACAGGCTTTTGGCAGAGCGGT  
AAATATCGCACTTCCGGCCCGCCAGCAGTTGCTGACGCTGCTTGTGAAGAGTACGACAAATGCCCAACAGTTGTCGCT  
TGGCACTCACTCACTTAAATGGTCTGTTCCGGCATGGTGATAAGGTTTCACTTTGACGATCAAGGCATTCAGGTTGGTCA  
CATCATATAGATAGTATGATGCTGCTGCTGCTGCTGCTGCTGCTGCTGCTGCTGCTGCTGCTGCTGCTGCTGCTGCTGCT  
CGCTTGGCAACAGTGGCACGACATTTATCATCAGCACCCTGGGGAAAAAGAAACCTGTTTAAATATCGCGGCGATAATC  
CGTTTTATCAGGCGTTAAATAAAGAACTACATATTAACGACGCGGCGATTATCTGGCGTAAACGATAAACAAAAATATC  
GCCGTAGCGGTGCGCAATGATGGGCTTAGGGATTGGCTTACGCCATCAGCCGATGATATCTGACCGGACTGGTACT  
TATTTTATTTATTTCCGGACATCCGGCGGAAAAATAAAGAGGAATTTTATCTCGGTTTGAACGCGCGGCAAAATAA  
CCAGTTATTAAGTGCATCACGCTGGAAGCCGATTAACAACAGCTGCGGGAAAAATTCATCGTTTTATTCACAAC  
ATTTATTTATGACATCCCTGGGAACGCAACTCAGCAATAGAAAAAATTAACAATATTGGCTCCAGTTCCGGCTGCGACAT  
GCTGATGGCATGGCCGATGTTGTGCGCTGAGTCAAACCTACGGAGGAATTTATGTCAGTTAA

>Cluster\_41391

ATGAAAGCACAGGCTTGGCCGCGATCAACAATTTTTCGCGATCTGTTTCAGCGGCTGGTGTAAACCGCAACTACT

GGGGCGGCTTGGTTTGGCAGCCAGCCTGCCTCATTTGCCAGTGGGCGAGTTTATGTATTGATTTTCCCCGCTGGATATCG  
TGCTACGGCGGAATACGGCAACCTGCTGGAAGCAAAGCAGCAGCGTATGGTGAAGGAGAAATGCTGTTTATTCAGCG  
CGCGCGGCTAATTTACCGGTCAACAACAACCCGGTAATGCTGTTAAGCCTGGTATTCGCGCCGACCTGGCTTGGGTTATC  
GTTTACGATAGCCGCACACGTCGTTGTCATCCTGCTCGCCAGATCCAACCTCCAGCCTGCAACCGCGGGAAGATG  
AAGCAATGATGCTTACCGCTACCCATCTTAGCCGTTGCGCTGAAGCAAAAATATCATTCAGCAGCTGGTGTAAAGTTG  
CTGCATCTTTGCCGCAACGTTGGTGAATATGCCACCGGGCAATTCGCAGCCGCGCGGATTTTCTCTATCACAGCATTG  
TAACCTGGGTTTACGATAAATATGCGCAACCGCTTACTGCGGAGAGCGTGGCGCAGTTTAAATATCACGCCAAATCATC  
TGTCAAAACCTGTTTGGCTCAGCATGGAACAATGCCTTTTATCGAGTATGTTTCGCTGGGTACGAATGGCAAAAGCGAGGATG  
ATTTTGCAAAATATCATCTGTCGATTCATGAAGTGGCGCAGCCTGCGGGTTTCCGGATAGCGACTATTTTTGTGCGCT  
TTTCCGGCTCAGTTGGTCTGACGCGGGAGAGTATAGCGCACGTTTTCAGGGCTAA

>Cluster\_6865

ATGAAAATATTCGCTATCCAGTCTCACGTTGTTTATGGTCATGCGGGTAAACAGTGGCGCAGAGTTTCCGATGCGCGC  
CCTGGGCGGCAACGCTGCGCCGCTGAACACCGTTCAATTTTCTAATCACACCCAAATACGGCAAATGGACTGGCTGCGTGA  
TGCCGCCAGCCATTTAACCGAAATTTGCAAGGCATTGCCGCCATTGATAAATACACACCTGTGATGCCGTATTAAGT  
GGCTATCTGGGATCGCGGAGCAGGGTGAACATATCCTCGGTATCGTCCGTCAGGTGAAAGCCGCGAATCCCGAGGCGAA  
ATATTTTGGCGATCCGGTAATGGGTATCCGGAAGGCTGTATCGTTGCACCGGGTGTCCGAGAGTTTTCATGTGCGGC  
ACGTTTGGCTCCGACGATATCATTTGCCGCAAAATCTGGTTGAGCTGGAAATACTCTGTGAGCATGCGGTAAATTAACGTC  
GAAGAAGCGGTTCTGGCAGCGCGCAACTCATTTGCCAAGGGCCAAAATTTGTGTTGGTTAAACACCTGGCGCGAGCTGG  
CTACAGCCGTGACCGTTTGAATGCTGCTGGTCAACCGCGATGAAGCCTGGCATATCAGCCGTCGCTGGTGGATTTTG  
GTATGCGCAGCCGATAGTGTGGTGTGATGTGACGAGCGGTTACTGCTGGTGAACCTGCTTCAGGGGGCAACGCTGCAG  
GAGGCGTGAACATGTGACCGCTGCACTTACGAAATCATGGTTGACCAACAAAGCAATGCAGGAATATGAGCTGCAAGT  
GGTGGCTGCTCAGGATCGTATTGCCAAACCAGAACATTACTTCAGCGCAACAAAGCTCTGA

>Cluster\_33394

ATGCAAGGTAAAGTTGACGAACAGCAATCCAATGATATGAAGCTGAGTTGGATACTATCCAGTAGAAGTTAACGTTGA  
AACTGATGATTTTTCTTTACTTACTTTACCCGGTCTAGCGGAAAAACAAATCTTATAAAACAATCACAGAAATGTTATTA  
ACGGTTGGATATACCCAGGAAACCAAGAAGTATATAACCTCAATGGAGGCATATCCACAAATGCCTTTTAGCCAACGAGTA  
TTTGGCTTACCAAAAACACTACTATAAAATTAATAAAATACATCTTACTAGAAAACCTCAATTTTGTGTGGTGTCT  
GTCCTTTTCAAAGGGATAAGATTAACAACACTACGATGCGGGTFTTTTAGACGCAACCCAAATAAACCCAGCAAAATTA  
CTGACTTTTATCTGGTCAAGTGCCTGAAAAAGAGGTTATAGAATTAGCACTCAAATACATGTCTAGCGGAGAAAAAAC  
AAACACGCACCAATAAATATCGCAGCAATAGTGCATGCACTATTTTATCCCAAAACCCACAATACCTTAGCTTCGAAAA  
ATTCAGTATCTTTATATGGCACGATAGTTGCTTTTAAACATGGGCAGAAAAGAAAGTGTACAGAAAAAGACTC  
TAAATCACCTCCAGGCGTTGAAGTGGATCTGCAAAACTATGGCATACCCAGCACCATCATGGGTACAGGCAAAAAACA  
TTACAACATCCGAATGAAACCTTTCATGAAGCTATGTTTTCATGGTCAACCACTTGGCTTTACCACTATTAACAATTA  
CAATATGGAGATGACATATTACAACAAATGCAGGCTTTAA

>Cluster\_5999

ATGACAGTGAAGCAAGCGTTTTTCGCATCGGGGTGGAAGGTGCCACCACCGACGCGGAAATCCAGCGTGAATGGCT  
GGAACAGATGGCAGCCAGCTACAACCCGGCGGTATACCCGCGTGTATTAACCTGAGCACATCAAGTCTTATCTGCCGG  
ACAGCGCTTTAACCGCTACGGCAAGGTGACGGCGCTGTTTGCAGGAAATCAGGAAAGTCCGCTGGCAGGCAAGATG  
GCGCTGTATGCGCAGCTGAGCCAACGGAGTCCCTGGTGAATGTTGAAAGGCAAGAAATATTACCTCTATGGA  
AGTCAGCCCGAACTTTGCTGATACGGGCAAGCCCTACCTGGTTCGCGCTGGCTGCCACTGATGACCTGCCAGCTGGGCA  
CTGAAATGCTGACATTCAGCGCCAGTGCAGCCATAACCGCTGGCAACCCGCAAGCAGAATCCCGCCAACTTTTACC  
GCTGCAGAGGAAACGGTGTGCAACTGGAAGAAATCCAGGAGGACAAACCGTCCCTGTTTCCCGTGTACGGCGCTGTT  
TACCAAAAAAGAGCAGTCCGATGACCCCGTTCTGTGATGTCATAAGGCGTGGAGCTGGTGCCTGCGCAATGAGCAAAA  
ACCTGAGTGTGCTACCGAAAAATCCCTGTCTGAGCTGGAGACTGCCCTGCAGGCACAGCAGACCGCTTAAACGAACTG  
GTGAATAAGCTGAGTTCATGAAGACAGCCGCCAGGACTACCGCCAGCGTGCACAGGCGGTACGCCCCGCTGACACTCT  
GACCAATTTGCTGA

>Cluster\_41098

ATGACCGAATTTACAACACTTCTTACAGCAAGGAAACCGCTGGTCTTTCATCCCAGCGCCATCTTACTTGGTGGCGTTCA  
TGGCTTGGAAACCGGGCCTCAAAAACGATGATGGCGCGTATTCATCGCCATCAAAGGCACCATTAACACAGCGGTTGA  
TGCTCGGATGGCAGCACTATTTTCGCATACCCAGTGGTCTGGTTAATTTGCCCTTGGCGGATGGTGTATCAGCAACCG  
TTTACTGCTCAATCAGCAGAACCGTGGCTCCAGTTGATTTTCCGAGTGTATCATTATAGCACCCGCTTGGATGGTCTG  
GCTACCTGGCGCGGCAACCGCAACTGGCTGGAGAATAATGCACGAGCATGATCATGAGCATCATCACCAGCATCAGAA  
ATCACCACGACCATGGACATCATCACCATCAGCAACATGGCGAGTATCAGGATGCCATGCACGAGCCATGCCAATGAC  
ATTAACGACGCTTTGATGGTAGAGAGTCAACCACTGGCAAAATTTGCTATTTGGCTTAAACCGTGGCTTATCCCCTG  
CCGGCAGCAATATCGGGCAATCGGATACTGTTTTCAGTTGATTTGAAAGCCCTGACACTGGGCGCAACACTGGCTGCTC  
GCCTGGCTTGGCTTAAACGCTTGTACCGTAGGCGTTGGCGCAGCAATCAGCGTTTACGAGGTCGCAAAACGCTGGAGC  
GGATTTAACACTCTCGCTAAACGCGCCCTATTTTCCAGTCTGTTGATTTGGCTTAGTTGGTGTGATATGGGCGTACA  
TGGCTTCAATGGCATAATGCGATAA

>Cluster\_62151

ATGAGTTGGCTGAAAGAGGTTATTTGGGACGGAAAAAGCGTCAATCGCCATGTGCCATCTACGTGCATTGCCGGCGACCC  
GAGTTTGGATGCGCAGTTGGGGATGAACTGGGTTATCGACAAAGCCTGGGACGATCTGATGGCGCTCCAAAATGGTGGGG  
TGGATGCAGTATGTTCTCCAACGAGTTTAGTCTTCCCTATCTACGAAGGTGCGTCCGGAACCACTGCGGCAATGGCA  
CGAATCATCGGGCAATTAATGAGCGATATCCGCATCCCGTTTGGCGTGAATGTTCTGTGGGATCCGGTCCGCTCATTCGA  
CCTGGCGATGGCTACCGGCGCTAAGTTTATCCGCGAGATATTTACCGTGCCTATGCCAGCGACTTTGGCGTCTGGGACA  
CTAACGTCGGTGAAGCACTCCGTCATCAACCCGATTTGGTGCAGGCGAAGTGAACCTTGTTCATATCGTCCAGAG  
GCCCGCTGATCTGGGCAATCGGATACTGTTTCTATGTTTCAATCGACAGTATTTAAACAACCATCCGTGATGCGCTG  
TGTTTCTGGCCTGACCGCGGGACGCGTACCGACAGCGCGTGTAAACGGGTCAAAGAAACGGTGCCTGACACCGTGC  
TGTGGCCAAACCGGCGTCTGCTTGAACCGTGGAGGAAACCACTCAGTATCGCCGATGGCTGTGTGACCGCAACCC  
TTTTAAAAGGACGGCGTTTTTGGCAATTTCTGTTGACAGGCGCGAGTCACTAGTTTATGGAGAAAGTGCATCATATACG  
CCGATAA

>Cluster\_27980

ATGCTTTTTGATGTTTTTTCAGCAATACCCCTGCGCGATGCCCACTGGCAACCGTCCGAGGATGATCATCGGCAGTTT  
TTTGAATGTGGTATTTGGCGTTACCCCATCATGCTGCGCAACAAATGGCGGAGTTTTCATGGTGAATGGCGAGTGGC  
AGTCAAAAATAAGCCTTGGCTTCCGCTACCGCTTCCGACTGTCCGCAATGGCAGCAGACCATCCGCGTTCTGTGACAA  
TATTCGCTCTCATGTTGATGCTCAAAGGGCGTGCAGGACTGTCCAGCGAAAATCAGCAAGCGTTATCCGCTGGTTGAGTT  
ATTTGACAGCACTTCTTTTGGCTGGCGAGTCTGGTGTGGCCAGAAAGTGGATGGGACTGGCGGTGATGATATTTACCG  
CGTGGCTGATTTCCGCGAGCATCATCGACTCGACAACCAATGGCTGCCGATGTTTTTACTCAGGCGCTATTTGACG  
GGGCTGATTTGGCGATGGGCGCAACAGAGTCCGTTAACCTACAGACGAGTACCCGCGTTCTGGTGGGTTTATTTAC  
GTTTTACTCCCTGCGCTGGATAGCCGAAATAGTTCTGCGTAAAGAAGCATTAGGCATGGCGATGATTACTCTTCGCTG

CGTTAGTGGCTGGGTGGGGCCGTTGTCGTTACCCAATGTGGCTTTAATCGCATCATGCTGCGGCCTGATATATGCCGTT  
ATTACAAAAGAGGATCAACCACACTGCCTTTTTGGACCGTGTTAAGTCTGGCGGTATGGCAACACTTTATCTACAGGC  
ATTGTTTTAA  
>Cluster\_38771  
ATGTCGCGAGCTGCTTGAACACGCGAAACAGCGAAGAAGAGGTTTCTTCTCGCGCAATAATGGAACCGCTCTGGCGG  
GATCCTTTTCTGCTGACCGTTTTAACGACAGTGTGGTGAGCGGCTGGGTGCTGTTGGGCTGGATGGAAGATGCGCAAC  
GCCTGCGCGTCTCAAAGCTGGTGTGACCGGTGAACGCCATTACACGCGTAATGACGATATCCGGCAGTCGATCCTGGCA  
TTGGGTGAGCCAGGTACCTTTATGACCCAGGATGTCAACATCATCCAGACGCAAAATAGAAACAACGCTGCCGTGGATTAA  
GCAGGTGAGCGTCAAGAAAGCAGTGGCCTGATGAATTGAAGATTCACTCTGGTTGAATATGTGCCGATTGCGCGGTGGAATG  
ATCAACATATGGTAGACGCGGAAGGAAACACCTTCAGCGTGCCGCCAGATCGCACAGCAAGCAGGTGCTTCCAATGCTG  
TATGGCCCGAAGGCAGCGCCAATGAAGTGTGACAGGCTATCGCGAAATGGGCGAGATGCTGGCAAAGGACAGATTTAC  
TCTGAAGGAAGCGCGATGACCGCGCAGCTTCTGGCAGTTGACGCTGAATAACGATATTAAGCTCAATCTTGGCCGGG  
GCGATACGATGAAACGTTTTGGCTGCTTTGTAGAACTTTATCCGGTTTTACAGCAGCAGGCGCAAAACCGATGGCAAACGG  
ATTAGCTACGTTGATTTGCGTTATGACTCTGGAGCGCAGTAGGCTGGGCGCCCTTGGCCGACAGGAATCTACTCAGCA  
ACAAAATCAGGCACAGGCAGAACAACAATGA  
>Cluster\_7004  
ATGCTCGCAGATATCAGATATTGGGAAAACGATGCCACAATAAACATATGCAATTGCCATTTTAACTATGGAATGC  
AGAAATGTTGATGGGCGTTATCGACGCGCGAAGAAGCGAAATCCCCGTTATATTTCTTTTGGTACAGGTTTTGTGCG  
GTAACACCTCATTTGAAGATTTCTCTCATATGATGTTAATGGCACAAAAGCAACGGTGGCGGTAATAACTCATTGG  
GATCATGTCGAGATGAGATTTATTCATAACGCTGGACTCATGGTATGAATTCATTAATGGCTGATGCTCCCGGTT  
TGATTTGGAAGAAAATATTCGTTTTAACCAAGAGGCTGTCGATTTCTTCCATCCGCTGGGTATTCGGGTAGAGCGGAAT  
TAGGGCATGTCGGTAATGAAACCGTTTTATGAGGAAGCGTGGCGGGCTATCACATACCGATCTGACCAGGCGGCTGAA  
TTTTGTTGAACGTACGGGCTGTGATTCATTTGGCTGTGCGCATCGGCAACAGCATGGGGTTTTATACGTCAGAGCCAAAT  
GACGTTTTGAGGTCGTAACAGCGTACCGATGCGGTTTTGTTCCGTTGTTTTCAGCGGTGCATCGGGGATGATG  
CCGACATTTAAACTGCAATTTGTTGGGTATCGCGAAAATCAACATTCATACGAGCTCTGTCAGGCCCAATGGTTGCA  
GTGAAAGAAAACAGGATCAGCCTTTCCGTCATTTAGAACGTGAAGTACGTAAGCTGTAAGAAACGGGCATTTGAAAA  
AATTTAACTGTTCCGTTCTGATGGCAAAGCGGAATA  
>Cluster\_24928  
ATGCAGCAGTTACAGAACATTATTGAAACCGCTTTTGAACCGCTGCCGAGATCAGCCAGCCAATGCAGACACCGTTAC  
CCGCGAAGCGGTAATCAGGTGATCGCCCTGCTGGATTCCGGCGCACTGCGGTGAGCGGAAAAAATTGACGGTCAGTGGG  
TGACGCATCAGTGGTTGAAAAAGCGGTGCTGCTCTTTCCGTTAATGATAATCAGGTGATCGAAGGGGCGAAGC  
CGCTACTTCGACAAAAGTCCGATGAAATTCGCTAACTACGATGAAGCACGTTTTCCGAAAGAAAGGCTTCCGCGTCTGTC  
ACCAGCGCAGTGCCTCAGGGCGCTTCATTTGCCGTAACACCGTGTGATGCGCTTACGTCACATCGGCGCATATG  
TTGATGAAGGCACCATGTTGATACCTGGCGACCGTCCGTTCTGTGCGCAGATTGGTAAAAACGTCACCTTTCCGGT  
GGCGTGGGTATCGGCGCGTGTGGAGCCGTCGAGGCTAACCCGACCATTTGAAAGATAACGCTTCATCGGCGCACG  
CTCTGAAGTGGTTGAAGGGGTGATTTGCGAAGAGGTTCCGTCATCTATGGCGGTATACATTGGTCAGAGCACCGTA  
TTTTATGACCGTGAACCGCGGAAATCCACTACGGTCCGCTTCCGGCAGGCTCTGTGGTTGTTTTCAGGTAATCTGCCGTCG  
AAAGATGGCAAAATACAGCCTTACTGTGCAAGTTATCGTTAAGAAAGTTGACGCGAAAACCTCGCGGCAAAGTTGGTATTTAA  
CGAACTGCTGCGTACCATCGACTAA  
>Cluster\_5435  
ATGACTGTGTACATTGGAATTGATATTGCCAGAAAAGTTGATGACGCTGAACTCTGTGACGGGGCTTACAGGTGTA  
GACATTTGAAAACACCCCTGCTGGATTTACAGCGCTATACGACTGGCTTAAAGCGGGCAGCATCCGGACATTCATGAT  
GTCTTTGAAGCAACAGGCAACTATGGTACTGCGCTACTGCTTTTTCTGTACGAAAAGAACTGAAAGTGAGCGTAGTTAAT  
CCCGCAAGAAATCAAGGGATTGCGGGCTTCTGAACTTACCCGAACAAAACCGACAAAAGCTGACTCCAGACTGATTGCACG  
CTTTTGTAAAGCCGCGCAGCCAGATCCATGGAGACCTGTGCCCGCCCGTCAGAAAACCTCAGGCTCTAGTGAGACGTA  
TCGGTGGCTGAAACGGCATGCTCAGAATGGAATGCAACCGTGTGAAAATGCAGATATTGACGCTCAGGAATCGGTTGAA  
CGCATGATCAACCATTTAAAGATGGAGTTGAAATCGGTCGCGGGCAATAAAAAGAGCATATCAGTAATGTTCTGAGCT  
GAAAAACAGAACGACCTCCTGCTGTCTATTCCGGGATTGGCACTGTTTTCAGCCAGCTGATACTGTCTTCATGGCCA  
GTAAGAGTTTACAAAAGCTAAGGAAGTACCGCTTTTTCTGGGCTCAATCCCGCCATCACCAGTCCGGAACGTCGTT  
AGGGTGAAGTGGCACACTGAATTTGGCCACCTGAACAGAGGTGATATGCTCACCTCAGAACACACAGGTGCTCCAATGA  
AAAAAGAAATTTACGCGCAGAGTTAA  
>Cluster\_45192  
ATGCTGAAAAATCTCTGGCAACACTTTTCGCGTGTGTTAATTTTAGCAACGCTGATAAACCGTTTTCTGCTATGGCGGTT  
ACCGGAGAGAAAAGGGGTGAGGTTACATTACGTAATTCGTAACCTGGTGGGGCATCGTCAATTTGTTTTCACTGGTGATTT  
CAGGTCACGCTGAGTACGTTGACGTTTTTTGCGCTAGATAAGTTTTCTGGCATGAAAGAAATATTGTACGCTTATATCC  
ATACATTTTCCGCGGTGTTATATGTTGTTATTCCTCTAACTATTTGCTTATCGGTTTTAATGCTTTGAGCTGTTCT  
GTTATTTTATACCTTTGCTGCGGTTCTGATATCAGCCACTGGCGAGTTTTTGGGTTGAACCTCCGGTTTTCTGCATA  
CCGTGAGCGCTATTTTTGGGGCTGGATAATGACCGTTTTTCGCTTGAATGATGCGGCTGGTTATTAATGTTTCCATCC  
ATGAATATCCAGGGCGGGGCTTACTGGTGTATTTCTTTGGCATTAAACCGAGTCAAACGATATTGCACAGTATTTATG  
GGAAAATCCTGCGGCAGAAAGAAAGTGGTCCCAAAGTACGCGGGGAAAAACGCTGGAAGGTCGTTGGGGGGCGTCA  
TCACCACCATGATTGCGTCACTGATTTGACCGTGTGACACCGCTAAATACATTTACAGGCATTTATAGCGGGTTT  
TTAATTGGTATTAGTGGTTTTTGGCGGATGCTGATGTCAGCCATCAACAGAGATATTGGTGTAAAGATAGTGAAAA  
ACTATTACCAGGACATGGCGGACTCCTTGACAGGATTGACTCATTAATTTTACCAGCTCCGGTATTTTTTTATTTATTC  
GCTACAGCTGTTACTGA  
>Cluster\_1298  
TTGGAGTCATTACCGGGAGAAGGAGTTGCTCTGACGTCAGTTTCGGATTAATATAAAAATGGCGGATTTTTTTATCG  
TTCAGCCCGTGTAGGTTATGTTTGAAGCCGACTGGTCCGAATTTTACACCACCACCAGAAAACCTTCAGCAGGAGATG  
TTGGTGGCTTTGCTTAGGGAAAACAGGAAAGCAGCGTTGCGAATGATAAAGCAGTTGGATGGAAGTGGAGTAGCGGAC  
TATAACGCAACTATTAGTGGTGCATCAACGTTAATTTATTTATTTTATATGGGAGAAGGAAAGTGTCTGACGCTCAGTT  
CCGATTAATATAAAAATGGCGGATTTTTTATGCTTACGCCGTCAGGTTATGTTTGAAGCGGTTTGAAGCGGCTCCGAAT  
TTTTACACCACCAGAAAACCTTCAGCAGGAGATGTTGGTGCCTGCGGTTATCTGGTGGTCAACTGAAATGGTGCCTG  
GGTATCGGAACATCCAGTCTCTTGGCGGTAATTCGATTTGATTTGGGATGATAATGACACGGGCTTTAAACAAAATGGCGA  
TGGTAATCTGGATGTTATGCTAATAACGTCATGTTATGCGCTTTGCTCCTCCGGAAGCATCAAAGTAATAAACCATAA  
ATATTACAGGGCGGTTTTAACCCCTCGGATACGTTAAGTAACTTTGATTTCCGTTATGTGAAAGATGTTTCGACTGGTTACAG  
CAATATTATGGAGTGAACAACCTGGCAACATGGAATTTCCGGTCCCTTCAGGTCATGATTGCTGGTATTAATGTTCA  
GGATACAGGGTCTAACTCTGCCGATAATATAGCGGGCTTTATTTACAGACCCGTTCAAAGATATAAATGGCACCTGGT  
ATAATGTAGCGGCGTTTTAA  
>Cluster\_613  
ATGATGTTTTAAGCAATACCTGCAAGTAAACGAAACAGGATCATCTTTGGCAACCTGATCTCGGTGATTTGGGGATTCCT

GCTGGCCTCAAAGGCGAGCATTGATATATCCCTGTTTATCTACACGCTGGTTGGGGTGTCTACTGGTTGTGGCGTCGGGTT  
GTGTGTTTTAACAACTACATCGACAGGGATATCGACAGAAAGATGGAAAGGACGAAATCGGGTGCTGGTTAAAGGCCTG  
ATCTCTCCTGCTGTCTCGCTGGTGTACGCCACCTTGCTGGGTATGTCTGGCTTTATGCTGCTGTGGTTTGGCGGAATCC  
GCTGGCCTGCTGGCTGGGGGTGATGGGCTTTGTGGTTTTATGTGCGGCTATATAGCCTGTACATGAAACGCCACTCAGTCT  
ACGGCAGCATTGATTTGGTTCGCTCTCCGGCTGCGCCGGTATTTGGCTACTGTGTCAGTAAACGGCAGTTCGATAGC  
GGCGCAGCGATCTGCTGGCTATCTTACGCTGTGGCAGATGCCTACTCCTATGCCATCGCCATTTTCCGCTTTAAGGA  
TTACCAGGCGGCAACATTCGGGTATTGCCAGTGGTAAAGGCATTTCGGTGGCGAAGATACATACAGCTGTATATCA  
TCGCCCTTGGCGTTGCCACGCTGATGCTCTCTTGGCGGTTACGCTGGATATAAATATCTGGTGGTCCGGCGGGCGGTT  
AGCGTCTGGTGGTTAGGTTAGGCTCTGCGCGGTTATAAAGTTGCTGATGACAGAACTCTGGGCGCGCAAGCTGTTCCGCTT  
CTCTATCATCGCCATCACTGCCCTCTCGGTGATGATGTCGGTTGATTTTATGGTACCGGACTCGCATACGCTGCTGGCTG  
CTGTGTGGTAA

>Cluster\_758

ATGCGTAAAGTTCATTTTCGTATTGCTGACACTGCTTTTGGTACGCCCTTTTTCCTTTGCGATGAAAGTATTATCTGGCA  
ACCACAAAACCGAGATAGTACAGGTTACCGATACCCAGTGGCAGGGGCTGATGAGTACGTTACGTTTGCAGGCTTCGATA  
CCCTGGTTTTGCAATGGACCCGTTACGGCGATGCATTCACCGCAGAACAGCGCGCTTATGTTTTAAGCGTGGCCGA  
GCTGCGCAACAGCTGGCTGAAGCTGATTTGTCGGGCTGCAACCGCATCCGGAATTTTTATGCACCAAGAACAGCTGCTC  
CGCAGCGCTGGAAGACTTCTTAATCGCTGCTGGCTGGCATCTCCAGCAAGCCAGATTATGGAGCGCCGCGCTGGCG  
TAACGCCGGATGGCTGGTACATCAGCGCGGAAATGACGACCTGAACTGGCGCAGCGAAGCTGCCCGTACGCTTTGCTA  
ACATGGTTAAACAACCGCGCAGCGCTGATAGCGATGTTTTACGAAAACCGGTTTATATCAGTAGTTTTTTCGCCGGAAA  
CATGTCGCCCGATGGCTATCGCAACTGCTGGAACAAGTTAAAGCAACCGGCTTAATGCTGGGTACAGGATGGCAGCG  
CGGTGGATAAACTTACCGTGAACAGCGTGAACGTTATCTACAGCCAGCGGATTGCCAAAGTCCCAGCTTCCGCGG  
GGCATTGTTTTATGAACTGTTTGTGCGCGCAAGGCAAACTTTACAGCGAAACCGAAGCTGCAGAGATCGCCTC  
GCTGTTAGCGAAACGTTCTTTCGCGTAAAGACACTCTCTATTTCTCTGCGCTATTTGCCCGTGGCGACGGCATTC  
TCGAGTATTAA

>Cluster\_12041

ATGATTACGCTCATTTCTTTCGACCAGTAACAGAAATGGCTGAAGCATTAAAGCAGGTTTTCGAAATGCAGATAGTGT  
GAATATTTGTCGGAAGCCATTTGAAACAATCAGAGAATTTGACTGCATGGTAAGTGGCGCAAAATAGTTTCCGCGCTGATGG  
ATGGTGGCGTTGATGGCCGCTTACCGCATTTCTCGGTACTCAGTTACAGTCCCGCTCAGAAATCATATTTCTCGTAA  
TATCTCGGCGAACAGCCTGTAGGTTCTGCATTTGTCATTGAAACGGGGCATAATCATCACCCCTGGCTGGTACATGCGCC  
AACAAATGCGTGTTCGTTGACAATGACGGAACAGACGCTGTATATAACGCAACCTGGCCGCTCTGCTGGCATCTTTTC  
AGCACAATAAAAACGCAACGACAGACATGAAAAATAAACAGTGGTATTTCCCTGCAATGGGGGCGGATGTGGTACAGGTC  
CCGTTTGAAGTGTTCGCCGACAGATGAAGCAGGCATGGGATAACTTTAATAAAAAAACAGAAATCAATTAACCTGGGAATA  
CGCACAATCTCGCCAGTCGGCAGTATTTGGCACATATGCATACGTCCGGGTAATTCGTTTGGCGTTATGCGGATACATA  
AATATATTTGGATGCGCGGATTTACGACGTTGCTCTGTTCCGGGCAAACTGATTAACCTGAACATCAGGCTGAT  
GATGTACTGATACAACATCAGGCTAATAACCGTTTTCCGCTGGTTCGATATACACCGGATTAATCCAGAAAATCCCGT  
AGGTAATGTCACCTCTGGCGCACATAGCCAGGAAGTAGCATCGTTATTTGCTACTCTACCCATACGCTCAATAAACAAAT  
ATTTCTGCTCTGATATTAAGTAG

>Cluster\_14510

ATGAATACAGATAACGTTTATGTGCAGCAGCGACGAAAAACAGACCCGACCCGCTGTGCTGTATTCCGGAATACCAGCG  
GATGGAGATTGAGTTTCGCGCACCCGATATCATGCCACCAGCCACTGGCATGGTACAGTTCGAAAGTGAATGTGCCTTTTCG  
ATGGCGATGTGGAATACCTGATCAACAATGAAAAGTGAATATCAATCAGGGTCAATACAGCTGTTTCGGGCTGTACA  
CCGACCAACTAACAGATACCCGAACTTGTACAGCATGGCGATTTTTAATCTGCCGATGCATCTGTTTCTCTCCTGGCC  
GCTGGATAAAGACTGATTAACCACGCTACTACGGCATGGTGTATCAAACTACCTGGCCACACAGCAACTTAGCCGTTTGG  
AAGTGGCGCGCTGGCAGCAGGAATTAACAGCTCCGAAACGAGCAAAATTCGCCAGCTCGCCATTGATGAAATGGCGTGTG  
CTCAAGCGATTTAGCCTCTCTGGCTGGGAAACCGATTCTGGTCAATAAAACCTCGCGCACACAAAAACAGCGTCTCGGG  
CCATGGCAAAATTTATGTTAGCCAGATGCTGGGCTTTATTTGCCGAAACTATGATCAGGCGCTGACCAATCAACGATGTGG  
CTGAGCAGCTCAAACTTAAACGCCAATAATGCAATGGGGATATTCCAGCGGGCTCATGCAATTTAGCAGATGAAACGATTA  
ACCGCGATGCGCATCAACCACGTTTCGCGGTTACTGAGCGATACCGATAAAAGTATTTCTGATATTTGCCCTGACGGCAGG  
CTTTCGTTCAAGTAGTCTGTTTTTACAGCAGCTTCGGCAAAATATGTCGGCATGTGCGCCGCAACAATACCCAAACTTAGCC  
AACAGCGCCGACAGCTTTCCCGGCTAA

>Cluster\_59941

ATGAATATCTCCTTTTTGGCAAAAACAGGGCAGGTAGGTTGGGAACACAGCGTGTCTGGCACCTTTGGGTAATTTGAT  
TGCTTTTGTGTTTCACTCTACTGATATTTGCGGTGATTTTAGTAAATCCGAAAGTGTAGCTGAAACCGTAAAGAAGCATTC  
GGCCGATATTTATGTCAAATGCAGCCGCTCACACCGCAGTAGACAAAGCAGAAATCAGAACCGGAGTTTGCACAATTAAT  
AACGCAACAAAGTGTGAAAGCGATTGCGAAAGCAGCAAAATGAAAGTGGAGCTGGGTTATCCATTACTGACTGATTAACCT  
CTTCCCTGGAATGGCGATATGCCATGGCTGGAGACGGATGCAACCCGACCACTAAATGTTTACGGTGAACCAAGTTAG  
CCGGAGAAAAAGCCTTACAGGAATATTGCGCGAAGCATCTTATTTCCGGACAGCTGGGCTATGACAGGAAAAGGAAAT  
AATCTCGCAAAACGATGTTACGTTCTGGCAAAAGAGCGTGAAGAATTTAGCGGTTATTAACGATCAGTTTGGTCGGCCAAC  
AGGTGCTGAACTGCTGGCTGATTGTACAGCACATGCCATTTCTGTCGCACTGAATAAACCGGATGTCGCGAGGCTGTACC  
ATTTGGTAGCCAGTGGTACCACAACCTGGTACGATATGCTGCGCTGGTTTTTGAAGAGGCGCGCAAAAGCAGGATTCCT  
CTTGCCTCAACAAGCTCAACGACGATCAACAACAGCCTATCTACACAGCTCGTCTGTCACATAACTCTCGCCTTAA  
TACAGAAAATTTTACGAGCAACTTTGCGCTTGTCTTGCCTGACTGGCAGGTTGGCGTGAACGAATGCTCAATGAATTAAT  
TTACGACTACAGCAATTTAA

>Cluster\_2995

ATGAGTTTGAACACAGTCTCGAACTTAATAATCAACTTCTGGCACAACATAATGCGCTGTTGAACGCTTTATCCGCAC  
AATGGCATCAGGTATTGTTATGCATCTTACACGATTTTACGAGTGCAGGAATGTCGGGATACAGCAACTGAAACTGAAA  
ATATGTCAGCGGCAATGACACTGGATGATCTGGAGTTACAGCGAGTTATCGCACTGGCTGGTTTCTACCCGGTAGCCACC  
CCTATCACAGAAGACATGCTGCAACGCTGCTGTTGCTTACCGTGTGCTGAAGGCGATAAACGAGTAGTTCAGATTGATCC  
TCTCGACAGCGCATTTGACGGGCGTCAACAGGCGAGGCACTGCATAAACCCGCTCTTCTGGACCTGTCCCGTAACATTC  
TTAAGTTCTGGGAGCAGCTTGCACCACTCGCGGAGCGAGCTGTTTTGCGGCAACTACTTGTGATGCACTGCACTGAGG  
CGTGATGAAGTTAAGCCGAAAAGGCCAGTAACAAGATGGAGAACGACGGGCGGTTTTACGTTCAAAAATGATACCGG  
CACAGCAGCCAGTGAACCTCACACTTACGCAAGTTGAACGAGATGCTTAAAAAGGCCATATCGAGATCAACCGTGTGTT  
AGTACCTTTCAGTGCAGGAAGAATTTGCACGAGACGCAAAATTTCCAGCAGAAATGACGTTCAAGGATGACCAAT  
ACAATTTGATTTTCGCGCCTACGCAAAAGCTGAAGGTTGATCTTCCAGTTAGCAAAAAGGGGTTTACCCGGGCAAGC  
TATTGCAATCTGGAAAAACAGGAGCCAGGAACTTGGTGAAGTAAACGATGAAATCTCGTGAAGTAACTCACCTGG  
CTGAAAAGCACTGGAGGTTAA

>Cluster\_57880

ATGTGTGACCGTCAGATTGCCAATATTGATATCAGCAAAAGATACGATGAAAGCTGGGCACGGACGATGTGCATTAATCA  
GTCCTTCGCCCGCATGGCGCATTTTTTGGCGCCATATGCTGCCACATCGCCAGCAACGACTTTTCAGATGCATTTCC

TCAATAGCGGACAGATTGAGCTACAGCTTGACGATCATCGCTACTCGGTGGAAGCGCCCTGTTTGTCTGACGCCGCCG  
TCAGTACCTCATGCGTTTTATTACGAGTCTGACGCCGACGGTCAATGTGTTGACGGTACGGGAAGATCTGATCTGGCCCT  
GCTGGAAGTCTTTATCCAGGCCTCGGAAACCTTCGGCCTGCCGGGATTTGCCTGTCACTGGCAGATAAACCCGACG  
AACTGGCCGCGCTGGAACACTATTGGCAACTGATAGAGCGGGAATCGGTAGAACAACTGCCTGGACGGGAACACACCCT  
ACGTTACTGGCACAGGAGTGTTCACCTACTGTGCTGCTAACGCCAAAACCTCGACGACCATGCCCGACGGAAATCGCCGG  
AGAATTAANAAGTGTTCAGCGTTTTTATATGCTGATTGAAAGCATTTCATCAGCACTGGACAGTACCGGATTACGCTA  
ACGAACTGCATATCACCGAATCAGCCCTCACGGACATCTGCGCCGGCTTTGCCAACCGTCCGCCAAAACGGTTGATTTTC  
GACAGGCAGCTGCGAGAAGCAAGCGGCTGCTGCTGTTTTCTGATAACGCCGTGAACAATATTGCCTGGCAACTCGGTTT  
TAAGGATCCAGCTTATTTTTCGCGCTTTTTTAAATCGCTTAGTCCGTTGCTCGCCAGTCTTATCGTGCCAAAAAAGTAC  
CTGTGACGTGA

>Cluster\_43163

ATGAGCGTTTGTATCAACAACACACCGCGGACTGCTGTCAGGGCATTACCGGCAAAAACGGCACATTTTCATACAGACGA  
GGCTATTGCGTATGCGACGAGATGTGGTGGAGTGACGCCAGGTAAGGGCGGGCAACGGCATCTGGATCGCCCGTTT  
TTGATTCAATGAAAGAAGCGATGCGACAACTGAGGCTGATGCCAGCGTGATTTATGTGCTGCACCGTTTGTGCTGGAT  
TCTGTTGTGAGGCTATTGAAGCTGGCGTCAAATTTGGTGTGGTGATCACTGAAGGTGTACCGACACTGGATATGGTGAA  
AGTTCGTGGCTGCTTGACTGCCACCCGGATGTGCGGCTGATTTGGCCAACTGCCAGGAGTTATCACGCCGGGTGAGT  
GCAAAAATCGGGATATAGCCTGGTGAATCCACCCGACGGCGTATTGGGATTTGTTCCCGCTCCGGTACATTAACTAC  
GAAGCTGTAGCGCAAACCACGGCGTGGGGCTTTGGCAATCCACTGTATTGGTATTGGCGCGGATCCGGTCCGGGGAC  
TAACTTTTATGATGCGCTGCGTTTTATTCGAAAATGATCCGCAACAGACGCGGTAATTTATGATCGGTGAAATTTGGTGGTA  
ATCGGGAAGAACGGCGCGGAAATTTATTCGCCATGAAATGAAATAAACCGGTCGTAGTATATATGCGGGTCTACTGCA  
CAAAAGGAAAACCATGGGACACGCTGGAGCCATTATTTCTGGCGTAGCGGAGTGGGAGGATAAATTCGGGGCTT  
CGATAAAGCAGGCATGGCATGGACAAGAAACCCGGCTTGGTTCGGCAACGTTATGGATGTTATTAAGTAA

>Cluster\_6282

ATGAATCCGCTGTGATGCCATTGAGGCAATTGAAAACCGCTCTCTCCCTGCCTTACTCGCTTTCCCGTCACATCCTGGA  
ACATCTGCGCAAACCTCACAGTACGAACCCGTTGATTTGGCTAAAGCGGGGCGGTAATCCTCACTCTGTA  
ATGCACTGTTTTCAGGGGGAGGTCACCCCGGTGAGTGTTCAGCGCCGACCCCGGGAAGTGCAGGCGCTTCCGCTGAGT  
GGCATTGGTACAGCATGGTTTACTGACTGCTGCCGGGGTGGGCGAGAGCCGGGACAGGGATGCAGAGTATGAAGCCCT  
GTACCCTGACATTTGACCCTGACCTGGAACCTGGACTGCTGCTGATTAAGCCGATGACCGTGCCTGTCTGTGGATGAGT  
ATTTCTGGCGACACATACTGCACCGGGACATCAGCAGGTGCTGTTTGTGGTACGCGAGGCGACAAAACAGAGCCCTGC  
CATGAATGGGATATGGCAGGTATTCAGCCTTCTCCCGCACAGGAACAGAACATTCGCGCAAAAACAGATGCGGTATTCCG  
GCTGTTCCGGCCCGTACATCCGGTTGTTGCCGTATCGGCCCGCACCAGGCTGGGAACTGGATACGCTGGTCACTGCGCTCA  
TGACAGCGCTTCCCGACCATGCGCCAGTCCCTTGATGACCCCGCTGCAGGACGAGCTGTGCAGGAATCTGTCCGGGG  
CAGGCCGTGAACAGTTTACCGGTGCGGTGGACCGGATATTGACACGGTGGAGAGCGTCTGTGTGCCCTCTGTTGCACG  
CACAGTTCTGCGTCCGCTCCGTGACACGGTGGTCTCTGTTGCCCGCGGATGGAACGATTTTCTCTGTA

>Cluster\_41476

ATGCGTTGGCAAGGGCGAGCTGAAAGTGACAATGTTGAAGACAGGCGCAACAGCTCTGGTGGTCCGCTATGGGCGGTTCC  
CGGTTTTCGCCTGCCAAGTGGTAAAGCGGGCTGATTTTACTGATAGTCTGCTGGTTCAGGCTACTATGGTGTGATT  
TAACCGGGTTGATGACCGGACCGCGGTTTCCAAACAGCAATTAACACGGTCAATTAGTCTAATGAAGACGAAGCCGCA  
AAATTCACCTCGGTGATTTGCGCAACCGGAAGACACTGGGACAGCAGTTCGAGAAAATGGGTAAAGACTTACAGCA  
ACCGAAGCTGGTAAATGTACCGTGAATGACCGCGACCGGCTGCGGGGGCGGCACTCCATTTGGGACCGTTCTATTGCC  
CGGCGGATGGCAGGTTTATATCGATCTCTTCTTATGATGACATGAAAGACAACTTGGCGCGGATGGCGATTTTGGC  
CAGGGTACGTTATCGCCCATGAAGTCCGTCATCATGTGCAGAAACTGTTAGGCATCGAGCCGAAAGTTCGCTCAACTGCA  
ACAAAACGCGGACGCGAGCGGAAAGTGAACCGCTTATCTGTCGATGGAAGTCCAGGCGACTGTTTGGCCGTCTGGG  
GGCATAGTATGACAGCAAGGCGTTCTGGAAACCGGCGATCTGGAAGAGGCGCTGAATGCGGCGCAGGCCATCGCGGAT  
GACCGTTTACAACAGCAAAAGTCAAGGGCGAGTAGTACCAGACAGTTTCACTCATGGTACTTCTCAGCAACGCTACAGCTG  
GTTTAAACGTTGGTTTCGACAGCGGCGATCCGGCACAAATGCAATACTTTTGGTAAAGCATTTAA

>Cluster\_18280

ATGACAGACAATACTTATCAGCCCGGAAAGTCTGGACGTGGGATAAAATCCGCTGGCGGCGGTTCCGCCAGTATCAATCG  
CCCATTCTGGTCCGACGATGAAAAACGCTGCCGTTGGGCAACATCCATTCGCACTTTATTCGCTGGGAACGCCGA  
ACGGTCAGAAAGTACGATTATGCTCGAAGAATACTCGCACTGGGCGTTACTGGTGCAGAGTACGACGCTGGCTGATT  
CGCATTTGGCGATGGCGATCAATTTCTCAGCGGCTTTGTCGAAGTGAACCCGAAATTCGAAGATCCCGGATTCGCCGATCA  
TACCCATAATCCGCCGATCCGCGTGTGTTGAGTCAAGGCTCGATTCTGCTTTATCTGGCGGAGAAATTTGGCTACTTCTTGC  
CGCAGGATCTGGCAAGCGTACTGAAACGATGAGCTGGCTGTTCTGTTTACAGGGCGCGCACCGTTCCTCGGCGGTGTT  
TTTTGGTCACTTTTACCATACGCACCGGTGAAAATGAGTACGCCATCAACCGCTTTACTATGGAAGCCAAGCGCTTCT  
CGACGTGGTGGATAAGCAACTGGCGCAGCATAAAGTTGTTTGGGCGATGAGTACACCATTCGCGGATATGGCGATATGGC  
CGTGGTTTGGCAATGTTGTTAGGCGGCTATATGATGCCGAGAGTCTTCTGATGCGGGCAGTTATAAGCATGTACAA  
CGCTGGGGCAAAAGTGGGCAACGCTCCGGCAGTGAAGCGTGGGCGTATGTTAACCAGCATCAACGGACCGTGAACGA  
GCAGTTGCATGAACGCCATGACGCCAGTATTTGAGACGAATACGGAAGATAAGCGTCAAGGGTAA

>Cluster\_3034

ATGGATCTGCGCGGTTTTATTACGCTTAAACCGTGGTGGAAAGGGTTCCTTTTTTCGAGCTTCGCAAAAATTTGTGCTG  
TACACAATCGACGGTACTTTTCATATTCAGCAGCTTGAGCAGGAGTTTTTCAGTCCAGTTATTTGAGAAAAATTTGGCCGAC  
GGATGTGCTTACC CGCGAAGGAAAAAAGTTGCTGCCGACATTTATGAACTTACCCGAGTGGATACGCTTCGTTGAG  
GCTGCCAAAAAGGAGTACAGTCCGGACGGGAACTACGCGTTGTTTTCGGGCAAAACGTTGCTCTTACC GAATGCCGCA  
GGTGTGACGCTTTTCGGCAACGCGCACAAAAGTGCCTTATCGTTGCAGTGCCTGAACTGTTACGTGATCCGTTGATG  
CGCTACTGAATGATGAGGCGGATGTCGGCGTCTTTTATCGCGTAGGGAATGATGATGCCCTGAACCGACGAGAGTTGGGT  
GAACAATCCGCTGGTGGCTTTCACCGCAAAATGCAAAATTCGATTTTACTGAGCGGGAAGACATAACCGCTGATG  
CTTTATTTACACGAACCGCAATGTGCTTCCGGCAGATATTTGAGAGCACGCTGCGTCAGCGGCGGATCACGGTGGAAA  
ACACCATTGAGCTGTTAAGCATTGAAAGTATCAACGTTGTGTGCGCGGAATATCGGTGTGAGTTACCTGCCCCGCTTT  
CGGTTGAAAAAGAGCTTGAGAGCGGAGAAATTAATGAAATGCTTTTTGGCGAACAGTCCGAGACATTTACGGCCATGTG  
CGCACCATGCTGGAAAAGCGGTTACCCGCGGATGACACACTTTTATTCAGTGTGTTGAAGAGATTTTGGCTGGAT

>Cluster\_55647

ATGAAGATTTTACTGATTGGCAAGAATGGCCAGTGGGCTGGGAACTGCAGCGTTTCACTGTCACCCTCGGCGACGTGGT  
CGCGTGGACTACTTTGACAAAAGAGCTGTGCGCGACCTGACTAATCTGGAAGGCATCGCGCAGACCGTGGCTACCGTCC  
GCCGGATGTGGTGGTGAATGCCCGCGCACACGGCGTGGACAAGGCAGAAAGCGAGCGGGAGCTTCCGACCTGCTG  
AACGACAAAAGGGTGGCGGTGCTAGCGGACAGTCCGGCGAAGCTGGGTGCCCTGATGGTGCATTTTCCACGGATTTATG  
GTTCCGACCGCGCGGCGGAAAGATGAGGCAACAGCCCGTGAACGCTTACGCGGAAACCAACCGG  
CCGGTGAACCTGGCCCTGGAGCAGGTAACCCGCGTACCTGATTTTCCGTTACCAGTGGGTGTATGCCACCCGCGCGCC  
AATTTGCCAAAACCATGCTCCGCTGGCGGTTGAGAAAAGAGACGCTTCCATCATTTAGCAGCACGACGGGGCGCCAC

CGGCGCTGAGCTGCTGGCAGACTGCACGGCGATGGCAATCCGTGAAACGTTGCGTAATCCGGCGCTGGCCGGTACCTATC  
ATCTGGTGGCCAGCGCGAGACCAGCTGGTGGCAGCTACGCCCGCTATGTTTGGAGGTGGCGAGGGCGCACGGTGCAGAG  
CTGGCGGTTCCAGGAAGTGAAGGGCATTCCGACGACGGCCTATCCGACGCGCGGAAGCGTCCGCTCAACTCACGCCTGTC  
GAATGAAAAATCCAGCAGGCATTTGGGGTGACTCTCCGGACTGGCGTCAGGGTGTGGCTCGCGTGGTAACAGAAGTCC  
TGGGCAATAA

>Cluster\_9305

ATGTTTAGCATAAAGAACCTACTACCTATTAGCGCCAGCGTATCAGTTCGGACAAAACATCTCAATCCATCCCAATAAC  
TTTAGCAGGGAGAACAATCGAAAAAGCGCAAGAGAAAGAGGATTACTTGTGTTTTTAGGAATGAAATCCGTTAATGACT  
ATACTCTTAATATCTTGGCCAAAATGTTCAAGAGTCACAACGGGGAAAAAACCGTATGATTTATTATCTCGTAATGAT  
GCTACAAAACAAGATTTTGATAAAAAGGAAAAATGGAGTTTACATATCTTGGAGCAAATAAAAGCCATCTACAATCAAGTAA  
TAGCGATGTTGTTGCTGCTGCAGCTATAAGTATTACAGCGACAGAGATGAAAACCATCTGCCAGATGATTTAACACCCAG  
GAAAATACAACAAAATTTATCTGCTGGGCATGGTTCTGCTGGTCTACCTCTTCTAAGTGGCGAGATGAATTTTATCA  
CCGTCAGATATTGTCGACCGCATGTTTCAACATAAATCTCATGAAATAGATGATATCAGATTAACATCCTGTAATCAGC  
CAACATAATAAAAAACAAGACTTCTCTCTGATGAAATAGAAAAATCCGCAATATGAATAACGGCTGGTTGGCCAGGG  
CATTTATTTGGTCAAAAGAGGTCTTTAGCAGAACACGTCATGCCGAGTTTGAACGTCGCGGAATTAACGTTTCTATATCA  
GGTTACCATGGCACTGGCGTTTTTTATGTACCAGAGCATGGTAAACCAACAACGCATCTACGCTCCACAACCTGTGCCTGC  
AACACCTGAACATACTGAAGAAGAAGCGACTACAGAGCCACTTTGGGTAGAACTCAACCCATAGATATTGAGTAA

>Cluster\_32889

ATGAGCAAAAAGCAGAGTTCACCCACATGATGCACCTGTTCAAACCTCTTTTTACGCCAACCGGACACGGCAGCGGATTT  
TCTTGGCTTCATTTACCGGCACCTATTACCGCCTCTGTGATATGAAAACCTCAAGCTGGAGTCGAGCAGCTTTATTTG  
ATGATGATCTGCGTGAAGCTATTCCGACGTGCTGTGGTGGTGAACCGGAACAAGGACCGGATATATCTATTGCTG  
ATTGAACATCAAAGCACCTCAAACAACGATCGCATTTGCGATGATGCGTTACGCTATGCGCAATGCAAAAATCACCT  
GGATGCCGGATACAAAACGTTGCCGATGGTGGTCCATTTGTTGTTTTTACCACGGCATTGAAAGCCCTATCCCTATTAC  
TGTGTTGGCTGATTTGTTTCCGCGATCCCAAACGCGAAGGAGCTTTATGCCCTGTCATTTCCGCTGATGATGTCAC  
GTCATGCTGATGATGAAATCATGCAGCACCGGCGCATGGCGTCTGGAGCTAATTAACAAAACATATACGTCACACCGGA  
CCTGATGGGGCTGTTAGAGCAAAATGGCCTGCTTATTAAGTAGTGGATACGCTAATGACAGACAATAAAGGGCTGTTT  
ATTACATACTACAAACGGCGATGCGGTACGTTTAAACGATTTTATCGACGGCGTTGCCGAACGTTCCCGAAACACAAG  
GAGAGTTTAAAGGATTTGCGGAAAGATTTGCGGAAAGATTTGCGGAAAGGTTTTCAGAAAGGTATACGAGCTATCGCCAAACCG  
GGATGCCGGAGTCCCTCTTGAGGACGTTCTGCGATTTACCAGCCTGACGGTTGAAGACCTTGTGAAATAAATCATCAAT  
AA

>Cluster\_48573

ATGGCAAGAGGTATGTATGCTTATGCGAAATTGAAGGTGTGCTGGCAATAACAGCCATCGTAAATCTGTATCTGACGC  
GGATGCAGGCCAGCTCATTTGCCGGTGTGAACTCATTTTCCCACCAGCCGATGTTGCGTGGTTTTGCTCGCTCAGGGG  
CTGAAGTGGTGTATATCAGTAGCCGCTCGAAACTCTTGAAGCGCCACTAAACGATGGCTGAAAGATTTTGGCGTTGAT  
TACGACTGGCTTCATCTCGTACCGAATGGCACCAGTTATGAGAAGCATATTAAGCGCACATTAGCGGAGCATAAAGGGCA  
TCTGCTTATCGCTGCGTGGTGCACGATCCTCGACTCCGCTTTAGCTGACTCTCATCATAGACCGGCTCATCTATG  
AGGTGAGCAAATGA

>Cluster\_173

ATGCCGCGGCTGGCATTGTACAGATAAAGGACCTACCTATTGTTTTAGAAGAGAAAAGGGGATTCAGACATAGATAA  
ATATAAATTTCTGTAGGGCTACTCATGCTGAGGCCTAACGCGATCGCTCAGGCCGCAAGATTTGGAATTCAGTAGAAGGAG  
CCAGTCTTTACTGTACGCTTGTCTCTTGTATGTTGTCTAAAATTAATCGCCCTGCTGGAATCAAAGAAGTCTACTAT  
GAATATGACTACGAAAGCAGAGATTTTGAAGGGACCTTTTTTGGAAAGAGGCTATAAAGGAAGCAGGGATCAAAGTTTT  
TAAACAAAATTTGGTATCCGAAGAACTATGAAAGCTTTTCAACCATCTACCTACCTACCTCTCAAAGAAGACTCC  
CTCTACAGAATAA

>Cluster\_22772

ATGAAAATTCGTAGGCGCAGACCAGCGCAACCTACATTTGCGCGACCCCGGTGAACCTGAATAAACCGCTCCTGATCCG  
CCAGCGGGTGGATATGCCCGCGGATAAATTTGGCGTGGAGCCTCAATACCCGGTTACGTTCCGACATGGGCGAAGGTTA  
TCCAGACCAGTGCACCACCTGGCAGGAAACCGCGCAGACCGGGGACGCCATCACCCATTACATCACCATTCGTTACCGC  
CGGGGGATCACCGCTGATATGAGGTGGTCTGTGATGACAGTGTGTACCGGGTGAACGTCAGCGTGTGTAACGGGGC  
CGGGCGTTTTCTGCTGCTGGAGTGTACGGAGCTGGGCGAATGTAGGCAGAGTACGGAGGCAGCAATGGCGACTCCCTTT  
TTTACAGTTGA

>Cluster\_56890

ATGTTACAAACAAAGCGTACAAAATTCGGTAAAATGCACAAAGCCGTAACCGCGGCTGGCGCAGGGTACGGATGTTAG  
CTTCGGCAGCTTCGGTCTGAAAGCTGTTGGCGTGGTCTGTACTGCCCGTCCAGTCAAGCAGCAGCTCGTGCCTATGA  
CCCGTGCAGTTAAGCGCTCAAGGTAAAGTATGATTCGGTGTGTTCCCGGACAAAACCGATCACTGAAAAGCCGCTGGCAGT  
CGTATGGGTAAAGGTAAGGTAACGTGGAGTATGGGTTGCTTGTATTCAGCCGGGTAAGTCTGTATGAAATGGACGG  
TGTTCGGGAAGAGCTGGCCCGTGAAGCATTCAGCTGGCAGCAGGAACTGCCGATTAACACACCTTTGTAACATAAGA  
CGGTGATGTAA

>Cluster\_60909

ATGAAGCGTTACACACCTGACTTTCTGAAATGATGCGCCTGTGCGAGATGAACTTTTCACAATTCGCGCGTTTGTACC  
CGCAATGACGCACCCGGCGAAACTGTAAGCTATCAGGTGGCAACGCACAATATCGGCTGACGATTTGGAATCGACCC  
GATACACTACCTGGTGAACAATAGAACAGACTGCGCCCGGATCAGTTACTGGAGCCTTCCGTCATGACGGTGCCTG  
TATCATGACGCGATGGTGGCTGAAGTGTGTTCAAGCCAGCAGATTTTTGCTTCAAAGCGCGGTATGATTTATCCTAATAA  
AAAGTTGCATCAACGCGACGAAAAGCATCAAATTAATCAGTTTTTACGGGACTGGTTGCGATCTGTTTACGACATGGAG  
CGATGGCGATTCCGGTTTATTAG

>Cluster\_53279

ATGTTGATCAAAAAGACGCTCACGCTTAGCGCCAAATCTGTTGGGTTTCACTGGTAACGGATGAAATCTGAAATCAGCT  
GGCTGATATGCCCGCGCTTAACATCGGCTTACTGCATCTGTTGCTGCAACATACCTCCGCCTCTGACACTTAAATGAGA  
ACTGCGATCCCACCGTACGCCACGACATGGAGCGTTTTTCTCCGCGCGTCCCGATAACGGAAATTAAGACATGAC  
TATGAGGGAGCAGACGATATGCCCTTCTCATATCAATCCCTCAATGCTGGGAACATCGCTGATGATGCGCGGTAAGG  
GCGTATTCAGACCGGCACCTGGCAAGGCATCTGGCTGGGGAACTCGCATCCACGGCGGATCGCGTGCATCATCGCGA  
CACTACAAGGGGAGTGA

>Cluster\_2747

ATGGGGCTAAAGATGTCAAAGAAATCAAAGTCTGCCAGCGGTAAGTGAATTTCCGCGGACTTCCCGAGTTTGTGACCC  
GGCAAAATATCCGACGCCCAATCGGGTTCGCTGAAATCTGGCCGATGAACGCTGAGCGAAAATGTCACCGGCAAAA  
AGTTGTTTTCCGTACTTTGCGGGTGTGTTGCTGCTCACTACATGACGCTTGGCGGGTGCAGCAGAGCGATCGCTGGCT  
GGTGGTCCGGGCGGTTCAACCAATGGTGTTCAGTCCCTAAAGTCCGTTGGATAAGGTAAGCGTACGATGACCCAGCGC  
GACGCTGAATCTGATGACGTTTCTGGAATAACACCCGATATGGCGTGAATTTTATCAGTTGATCAGATGTTCCGGT  
CAGGCGGTCGCCAGTATGA

>Cluster\_1456  
ATGGATACAGAACCCTAGGCCAGCGAGTTCTGGCAGCAGAAAAGAAATTACGCCAACAACGAGAAGCTGCACGCCCT  
CGCTGGGGTAGCTCAGCTCACAAATTCACAATGGGAAAGAGACGAAACCAACCGGTCGGGAAGCGGTTATTTGCTTTAG  
CTGATGCGCTGAAGTGCCTGCCTACATGGCTAAATGTTTGGTGACGAAAGACAAGGCACCAAGTGCAGCACAAGAATTCAT  
GTGAAACCGGATTAACCTCCAGCCACAAGAATTGATCGAATTTTCGATGCTCTCCCTCCCTCCGAGCAGGAAGCCTT  
ACTGTCTGAAATGCGCGCAAGAGTAGAGAATTTCAATAAACTCTTCGAAGAAATGCTTAAAGCACGTAATAAACAAATCAA  
TAAATAA  
>Cluster\_9302  
ATGTGGGTCAATAAGTATATTGACGATTGCACCTGATGAGGATTTAAACGATCGTGACTTTATTGCATCAGTTGTGACCG  
GGCTATTTTTCATTTTCGGGATTAATAGTATATGTAATCCTGGGGATAATAAGATGCAATGCCCATTTGAACAATGTACTT  
TTGATGTAGAACTAAGAATGACCTCCCTCCACGGTTTTCAGCTATTTTATGAGGAATCTAAGGATAATGAACCTTTAGCG  
AATATACATTTTCAAGCAATAGGTTCTGGTTTTTAAACGTTTGTAAATGCCTGCCAGGAACATGATGACAACAGCGGTAG  
TGACTCCAACCTTACTGATAGTGTTTTATGTTTCAGATAATGCCCGATGACCTTGTTCATGCAGCTCCACCGATTTTGA  
>Cluster\_17659  
ATGGATCGCAATACCCCTATCGTGACGGCAACTGAACCCGGTGCCTGGTTCGGCTGCGACCGAAATTTTGGTGGTCA  
TATGGTGGCGTTAACGCATCCGTTATGCGGTTCCGGCCAGTCCACGGCTCACAGATTACGCTGGGCGGTCTGTGATG  
CTGGGTGGATAACAGCAAGGCGACGATGGCGCAACCCGTTCTGGTGCCTTGGCGAAAGATTTTCTGATGGCGAAC  
AGCACCTCAGACCTGTACACAATCGCAGGTCGGCAAGCTGTGCTACGTGGAAGACAGCGTGACCGTGGCAAAAACCGA  
CAACAGCAGCGCCGTCCTGTGCGAGGAAAGTATCGGCATCTGTGGCGATGGCGTCTGGGTTCATTTTCAGTTAA  
>Cluster\_40754  
ATGAGCAACACATTTAAATTCAGCAGCCGGAGCAGAAAAGAAATTTGAGGGCGTAAATCCTGATCTGGTGAAGTGACCCG  
ACGGGCATGGAATTTCCGGAAGTGGATTTTGGTATCACCGAAGGGTTGCGCAGCCGTTACCGCCAGAAGCAACTGGTGG  
CCACGGGTAAAGAGCCAGACCATGAACAGCCGCCACCTTACCGGGACATGCGCTGGATGTTTGGGCTTATATCGGCAGCCAG  
GTGTCATGGGAATGGCCGCTGTACGAAAAAATCGCAGCAGCAATTCAGACAGGCGAGCCGGAACTGAATTTCCGGTGA  
ATGGGGCGGCGACTGGAAGACCTGAAAGACGGACCGCATTTTTCAGTTTACCACACGGAGCCTATCCGGCATGA  
>Cluster\_43322  
ATGCGTCAATACGAAATCGTTTTTATGGTCCATCCTGACCAGAGCGAACAGGTTCCGGGCATGATCGAGCGCTACACTGC  
TGCCATCACTGGTGCAGAAAGGCAAGATCACCCGCTGGGAAGACTGGGGCCGCCGTCAGCTGGCTTACCAGGATCAACAAAC  
TGCACAAAGCACACTACGTTCTGATGAACGTTGAAGCTCCGAGGAAGTATCGATGAGCTGGAACTACCTTCCGCTTC  
AACGATGCCGTTATCCGCGACATGGTTATGCGTACCAAGCAGCTGTTACCAGCAATCTCCGATGGTTAAAGCGAAAGA  
CGAGCGCCGTGAGCGTCGCGATGATTTCCGAAACGAAACCGCTGATGATGCTGAAGCTGGGGATTCTGAAGAGTAA  
>Cluster\_42819  
ATGGGGCTTTTTGATGACGTTGTCGGTGCCTTTTCTGAAAGGCGATGCGGGGAAATATCAGGCGATTTTGGAGCTGGGTTGA  
GGAGCAGGGCGGCATTACAGTGCCTGCTGAAAAAAGTGCAGGCTGGCGGCTTAGGGGCCATTCTCTCAACCTGGTTGAGTA  
ATCAACAGAGCAATCAGCCGGTTAGCGGCGAGCAACTGGAATCAGCGCTCGGCACAAACCGGGTGTCCGATCTCCGGCAA  
AAACTTGGCGTGGATACAGTACAGCTTCCAGTTTACTGGCAGAAACAATTTGCCGAAGATATTGATGCCCTCCACCGCA  
AGGTGAAGTGTACCACAAGCCAATAACGATCTGCTTTCCGAGGATGGAACGCTGAAAGGAAACTTTTCCGCTAA  
>Cluster\_20324  
ATGACGTTACCGAGTGGACACCCGAAGAGCAGATTGATCAAAAAATTTACCGCACTAGGCCCGTATATTCGTGAAGGTAA  
GTGCGAAGATAAATCGATTCTTTTTTCGATTTGCTGGCTGTATGCGTCAACGTGAAACCGGCACCGGAAGTGCCTGAGTTCT  
GGGCTGGTGGATGGAACGGAAGCGCAGGAATCCCGTTTTACCTACAGTTACAGTTTGGTCTGTTTCGATAAAGCAGGC  
GACTGGACGAGTGTTCGGGTAAGACACTGAAAGTGGTTGAACGACTGGAGCACACCCGCGTGGATTTTCATGAGAACT  
GCGTGAGCTGCTGGCAGCGTGAATCTGAAGCTGGAACCGCGGATGATTTTCGTGATGAACCGGTGAAGTTAACGGCGT  
GA  
>Cluster\_40688  
ATGGTAAGCGCGCTGATGCGGTTTTAAGTGCCTGTTTATTAATGAAGTTCTTTTTGATGTCGTTCCGCTGCGAATGCA  
GTACCGGTTGCCCTATGCGGACGCTGGTTTTAGCGAACGCAAAAGCGCTATTCGCATTATGGTAAACGCGGTGGAATATA  
TTCCCATCGGATTTGTTGATGCTGTTTATGGAATGAATGGCGCAGAAACCTGGATGGTGCATATTTGCGGCATCGTT  
TTGCTTGGTGGTCTGATGCAATATTACGGTTTTTATCACCGCTCTGTTCCGCTGGCGACGTTCTGGCATGAGCGCCAC  
CTGGTGTGCGCTGTGCTGATGGTACTGGCGAATCTTTGGTATATGCCCTGGGAGTTGGTTTTCTCCCTGCGTTAG  
>Cluster\_18238  
ATGGACGAAAAACAGTTGCAGGCTCTGGCTAACGAACTGGCAAAAATCTCAAAACCCCTGAAGATCTCAGCCAGTTCTGA  
TCGCCTGCTGAAGAAAATCAGCGTTGAGGCAGCTCTCAACGCTGAAATGTCCACCATCTGGGCTACGATAAAAAACAGC  
CTAAACCGGGTCCCACTCCCGCAATGGCTATTCACAAAGACCGTTATCATCGGTGATGGCCCCCTGGAATCAGCCACT  
CCGCGCATCTGATGGCTTTTTGAACCGCAACTTGTGAAAGAAAAACAGACCCGGATCACCGGATCGGATAACAGAT  
CCTGTCTGTGACGCAAAAGGCTGACAACCGTAAAGCTACAGCTGAAACCGTCTGGTCAAGATCTGACGAATTAG  
>Cluster\_53914  
ATGATTCAGTTCAAACCAACGCAAACTCAGACTGATAGAAGCGTGGGAAATCACCCTGACATTTACCCGGGAGCAA  
CAACGGTGTGATGATACGACTACAAGCCTGAATGCGGTTACTTCGAGGTGAACGTCACGGGAGTTCCGCGCATTTGTTT  
ACTATCAGGAGATTCAGCCGCTGACATTCGATTGCCACGCCATGTACCTGCCAGAGGTTTCGTGGATTCAGCAAGGAAATC  
GGGCTGGCGTTCTGGCGATACATTTCTGACTAACACCACCGTTTTCAGTGCCTAACATCGTTTCGCTGCACGCAAAATCCGCA  
CGTTCAGATGACTGCGCAATGATGCGCTTAAGCGTGTAGGAACAATCAAGAAATACCTCAAAGCGGTGGATGACGTGA  
CTTTTTACAGCGCCACAGCGAAGAATAATCGACTTCTGAATCAGGGAGATAG  
>Cluster\_7924  
ATGTTTGAATTTTCCAGCCGGTGGATTTACCGTTCTGCGGTTTTTCCGATGTGGCCGGTGGTCCGCAATCTGGAAGA  
CGGTATTCGTTGGGAAATGCCGTACCGTGCCTGGACATTTGCTGGAACCCGTACCGCGTAAATTCAGTATCCTTGTGC  
GTATCCTCGCTGACGGGCGCACACAGACATCCCGTGGGGGTTTTCTGCGGGAATTTACCTGTGACCGTCTTGACCTG  
TTCAAACCGCAGCCCGTAAACCGCATGCGGTTACTGAAAGAAATGGCCGGAGACCCGGAATTACAGAAATGGCGGGAGAA  
ATATCTGGATATTTACCCGACAGGACACTGTTCCGGTACGCGGGCGCACCGGTGGCGGGAATGGCGGGAAATTTCCC  
GCACGGAGCCTGACCCGAAATCACCAGTAACAGTTACCGCAATTTCTGTAA  
>Cluster\_34153  
ATGAAACGTAACCACTGCCTCTGCTGGCGTGGTTGCCACCACTCTGTTTCTCATCGCATGCGATGACAGAAAGTGTAGCA  
CTGAAGGCCATCAGTAAATTAAGGACCTCACCCACCGCTTTCAGTGTGTTGGTCCAGCCAGGATGATGTCAGCG  
AAGAATGGTTCACAGTTGACTACTTATCCGTTCCACCTTGCAGGTTTTTACGTACCCGCGCAGTCCGCGGATGGCTGCGAG  
GATGGCAGTTACTACTCTGTTGATATGACGAAAAAACCGTCCAGCCACTGATGAATGCGCTGTGTATTGCGGATAA  
CATCAAACTGGAATACAGGAGGTGACGGACCCGATATACCAAGAAAAAATACTTTGATGACGCCATGACGGCAAACTGA  
TGGGCGACTGCTGATACCTCAAACCTGACAATCAGGAATAA  
>Cluster\_51795  
GTGGCTGAACTGCAGAAGGTGGACGACTGGCTGAGTGCCTTGTGCGCAATCTGGAACAGCCACGAGAAGCCGATGAT

GCGCCAGCTGGCGCAGGAACTGCGCCGGACACAGCAGCAGAATATCAGGATGCAGCGCAATCCAGATGGCAGCAGTTATG  
AACCGCGCAGGGTAAACAGCACGCAGCAAGAAGGGGCGCATCAAACGTCAGATGTTTGCAAAGCTGCGCACCAAAAATAC  
CTGAAAACCTGCCCGCAGCGCCGACTCTGCCAGCGTACAGTTTGAAGGCAAGGTCAGCGTATTGCCCGTGTTCACCATTA  
CGGCCTGCGTGATCGCGTCAGTCGCAAAAGGACCGAGGTCCTTACGCAGAGCGCCGCTGCTGGGTGTAATGATGATG  
TTGAGGCAATGACCCGCGACATGATTCTGCAATGGCTGGCGGGTGA

>Cluster\_20506

ATGTTAGATAAAAATTGACCGTAAGCTGCTGGCCTTACTACAGCAGGATTCACCCCTCTCTTTGCAGGCACTGGCTGAAGC  
CGTTAATCTGACAACCTACCCCTGCTGGAAAGCGTCTGAAACCGGCTGGAGGACGACGGTATTCTTATCGGCAAAGTCGCCC  
TGCTGGATCCGGAATAAATAGGCCTCGGCCTGACCGCCTTTGTGCTGATAAAAACGCAACATCACAGCAGCGAATGGTAT  
TGCCGCTTTGTCACGGTGGTTACCGAAATGCCAGAAGTGTGGGGTCTGGCGCATGGCCGGTGAATACGATTATCTGAT  
GCGCGTCCAGGTTGCCGACATGAAACGCTACGACGAGTTTATTAAGCGTCTGGTAAACAGTGTACCGGGGCTGTCGGACG  
TCACTTCCAGCTTCCGATGGAACAGATTAAATACACCACTTCTTTACCCATCGAATAA

>Cluster\_40821

ATGGCTTCCGATAACCTGGTCAGTATCACCATTAACGATAAATCCCTGCGCCGGAGCCTCCGTGCGCTGGATCTTGCTGC  
CACAGACCTGGAGCCCGCATGCGCAAAATCGCCGGAACCTGCTGGCGGAAACACAGTTAACTTCTTGTGATGAGGGGC  
GTCCGGGGTGGATCCCTCGTGGCAGCGGAAGAACGTGACGGGCAGACACTGCAGGATACCGGGCGTCTGATGGGGTCA  
GTATCAACCGACCATGACACCGGACCGGAGGCTGTTGTGGGACCAACGCTTGTTTACGCTGCCATTCAACAGTTCGGGGTAA  
AACGGGGCGTAAATGAGTCTGTTGAACCTCCGGCCCGCCGTTCTTCCGCTGACAGGGGATGGAGAATACAGCTGAAG  
TGTAATCCCATCCCTCGATACCATTTGTCGGCATCTTGAATCAGCGCCCGTCTGCTGA

>Cluster\_35173

GTGTGCAAGACTAATTACCAGGCATTACGTGAACGTTATTACCAATTGAGGTGCCGGAATGTCTGTTTGGCGCATGA  
AATGTCGATACAGCGCATATTTCCAGAAGCATATTTGTTGATGCTTGGCAGGTGAGGGGATGATGGATATTTAAAA  
CTGGTCGAACTTTTGGCGATGAGCATTACTGAAATCGCGCGTAACCGTCTGTTGATGTTAGCGATCCTGACGACTGGCT  
TTACTGAAAAGAGCTGGAAGTTAAAGATAAACGCATTGCAAGATGACAGAGCGCTTACACAAATGATTAAATGCGCACAA  
AACCACAATTCGTTTGGTCAATGAAACGATAACTGAATGGTGGTGGTATTGCGACTCGCCGAAAAGATGATTTCAGAAA  
ATCCGGATATCAGAAATGGCAGAGGCTGTTTGGAGCAGGAATAAAAATGAAATAA

>Cluster\_8911

ATGAGCAGGAAATTTAGCTCTCTAGAGGATATTTATGATTTCTACCAGGATGGTGGCATTAGCGTCAATTAACAAATCT  
GACACAACAAGATCTCAATGACCTTCATCTTATGCTTATACAGCATAATCAATCTGGTGTGTTATAACCGCAAGAAATC  
TATTCATTTGCTCACATATCTGAAACCTGGAATATGACTACACTTATCTCTGGGCTTATGCCATCAGCGTTTATCA  
AATCATGAAGATGCACAACCTGTGTTTCGCACGCTGTGCAACTTTAGTTATGCAAGATCCAGGGCATCTTATTATCTGG  
AATAGCTACTTACTCTGTCGGAATAAGAAAATGGCCAAAGCCTTTAAGGCTTGTAAATGTGGTGAATGAAAAAG  
AAAAATACACTACATATAAAGAAAATATTA AAAAATGTTAGGTAATACAGAGTAA

>Cluster\_64791

ATGGACGAAATGAATTTAAGTCTGAGCAGCAAGAACTGCGTGACAGTATTTGGCGGAGCTTCAGTCCGGTGGGCTGAA  
ACTGAAAAGACGGCTGCCGTTCCGCAACCGGTGACGAGACTGAAATGCAGTATGACGTGACACTGCGTGAAGTACCGCTG  
GCGATCTGATTTGATGCCAGCGGCTGCTGAAAAGCTGGTAAATGAGCAAGGAAGTCCGGTGTGGTCACTTCCCGTCC  
CGGATGGGACTGGAATGCTGCGCCGACAGATTGCCAGCGTGGGTTGCATCAAAGCCCGTTATCGCTGGCGCTGATGCG  
CAAGCTGTCTGTTGATGACTTCCAGCCTGCTGCTGCTGCTACAGAGATGCACGACATGGCTGTGGCGCATCGCTGACGC  
AAGAACGGGGCGAGTGGCTGCCGTGCCGAATGA

>Cluster\_10390

ATGTATAAGACAATCATTTAGCCAGTTGATGTTTGAATGGAATGAGCGACAAAGCTGTTCCGCCACGCTGAATTCCT  
CGCCAGGATGACGGGTTTATTCATCTACTTACGTACTACCGGGTCAAGCAGCTGAGCCTGACCGTTCACCGTTCGCGCTG  
ATGTGCGTCTGTTTGAAGAGCATCTGCAACATGAAAGCAGAAAGCTGCAAAACGATGGTCAAGCCTTACCATCGAT  
CCTTCCCGCATTAACAACAATGTCGTTTGGTAGCGTGGGGATGAAAGTCAATGAGTTGGCAGAAAGACTGGGGCTGA  
TGTTGTAGTTATTTGGTCTCGCAACCCATCGATTTCCAGCCATCTGTTAGGTTCTAACGCTCGAGCGTATCCGCCATG  
CCAATCTGCCGTTGCTGGTTGTGCGTTAA

>Cluster\_56086

ATGTCCAGAACTCCAGATTCACGGTTACGCCATGAGGGCTTTCGCAAAGCAGAGGCTTCCCTGAGACTTGAAGGAATGGA  
CCCCAGTGGTACGCTCTGTACAAGTCCGTTAAGGCAGTATTTTTCAGGCGAGCTGACGTATGAGCAGGGGCGTTCG  
AGATTTTTTCATATACACAAAATCAGATACCGCCGGGCTGTGACCGTGGGAGAAATGCTGACAGAGGATTTTTAAAA  
CCGCTGAGTATGCTCATGATGAACTGGCGGAAGCTATTTGGTGTGCAAGCAGGATAATGAAGATATTAATCTGTGGTTT  
GCGTCTGCTTACGGATGATGAGGCTCGCCTTCTGCTGACATATTTGGGACTGATGAGGATTTCTGGAGTAATCTGCAGA  
AGTTGCAAGATCGGAAGAAACGACGGTAG

>Cluster\_26393

ATGAAGAAAGTAGCCGCTTGTGTCGCTAAGCCTGCTGATGGCGGATGTTGTAAGTAAATGACAAAATGCTGTAACCC  
AGAACAGCTACAGCATCATCGCTTTGTGCTGAAAAGCGTAAACCGTAAGCCCGTGACCAGCGATAAAAATCCGCCAGAAA  
TCAGCTTTGGTGAAGAAGATGATGATTTCCGGCAGCATGTTAACCCTTTAGCGGTGAAGGAACTGCTAATGTTGAA  
CTGACCGCCAAAGGGCTGGCAATGACCCGATGATGTTGCTGACCGTAAACCGCAGTTAATGAACTCGATAACACCATTTAGCGA  
AATGCTGAAAGAAGGTGCACAAGTGATCTGACCGCAACAGTTAACGCTGGCGACCGGAAACAGACATTAACCTTATA  
AGCTGGCGGATTTAATGAATTA

>Cluster\_6426

ATGAAAATCAAACATGAGCACATCCGCATGGCGATGAATGCTGGGCATACCCCTGATGGTGAAGAAAGTTCTGCAGCTGA  
AATAGCCCGGACTTATTTGCAACTGGGGATGACGTTCCCTGAACTGTACGACGACAGCCATCCGGAAGCCCTGGCCCGTA  
ATACCCAGAAAATTTCCGTTGGCTGGATAAAGACACCCCTGATGCTGTTGAAAAATGCAGGCTCTGTTACCGGCGATC  
GAAAAGGCGATGGCCGCTTTGCTGGTGGCCGCTATGCGCAGCCACAGTTCTGAATATTTACCGTGAATACACCATTTAGCGA  
GGATCGGCTGGTGAAGGATGTCGATGATTTGTTGCTGACGCGTGTGTTTGTATGACCAGATGAATCGCGCGGCCCGG  
CAGGGAATGCTGTGGTATGCACATA

>Cluster\_17662

ATGTCTTACGCCACACCGGAACAGTTTATCAGGGCGTTTCACTGAAACGCGAGGCGTGCACACTGACGGATGAAGAGATGAC  
CGGGCTTATCAACGAGGAAAAGCTGGCCCTCCGCGCTTGGCGGTGCCAGTGCCAGATTGATGGCTATCTGGTGGGGCGTT  
ACCGGACCCCGTGGCCTGACAGCCCGGGGATTTGTTGGGTTACTGCTGCGATATCGCCGTTTACCTGGCGACCGAT  
TACCGTATCTGCTCAGAAGAAATCAGATGCGCTACCGGGACGCCATCCGCTTTCTGGAGAAAGTCCGCGCAGGACAAAT  
CAACCTCGGGCGGATACGTTCCGCGAGCGTATCCAGTATCTGACAGGTCAGTATCCGCTGCGCTCCGCTCCCGTCACTG  
GGCGTGTGTTCCAGCGGGGAGGTGCATTCTGA

>Cluster\_32963

ATGGCTTATAAACACATTTCTCATCGCGTGCACCTCTCCCGGAAAGCAAAGTTCTGGTAGAGAAAGCAGTCTCTATGGC  
TCGCCCTFACAATCGAAAAGTTTCTCTGATCCAGTAGATGTAACACTACTCTGACCTATACACCGGGCTTATTGATGTGA  
ATCTGGGTGATATGCAGAAACGCATCTCTGAAGAGACACATCATGCACTGACCGAGCTTCCACTAATGCAGGCTACCCA



ATCACTGAAACCCCTGAGTGGCAGCGGCGACCTGGGCCAGGTTCTGGTGCATGCAATCAAGAAATACGATATGGATTTGGT  
GGTTTGTGGTACCACCAGGACTTCTGGAGCAAAGTGTCTTCCGCACGCTGATCAACACCGTTACGTTGATA  
TGCTGATTGTTCCGCTGCGCGACGAAGAAGATAA  
>Cluster\_27665  
ATGACTACATTACGTCAGCCTTACTACGAACTTAGCCCGCAGTGTATAACGCACTAGTGCAGGCCAAAACGGCACTGGA  
AAATAGCACGCTGGATACCACGTTGATGGAGTTAGTTTATTTGCGCATCTCGCAAATCAACGGCTGCGCATTTTGTCTGG  
AGATGCACAGCAAAGCATTGCGCAAATCCGGCGTGCCACAGCACAACATGGACGCCCTGGCAGTTGGCGCGTAAAGCCAT  
CATTTTGTAGAACCGGAGCGGGCGGCGTGGCATGGGGGGAATCGGTAACCGAAATGGCCAGAACCCATGCGGAAGACGA  
GGTTTATCAGCCTTTGCTTGGAGCATTTCAGCGCAGCAGATCAGCAGCTTAAAGTTTCCATCGGGCTGATGAAATGTT  
TTAACCGTCTGGCCGTTTCCATGCGGATGTA  
>Cluster\_46918  
ATGATGACATTGCCCTACCATATTTCTTCTCCGACGCTTTTACGCACTGCGCTCCTCCCCGGGCAGGAAGTTTTTTC  
CCAGCTACACGCTTTTGCACAGCAGCATCAACTTCATGCGCCCTGGATTGCAGGCTGTACCGGTAGCCGACTGACGTCG  
CCTTGGCTATGCCGGGCAAGAAGGCACCACGCTCCTGAACGGTACATTCGAAGTGATCTCACAAACGGCACGCTGGAA  
CAGAGTGGTGAGCATCTTTCATCTCTGCGTTTCCGATCCACAGCGCAGATGCTTGGCGGTCATATGATGCCCGCTGTAC  
CGTGGCAGCACGCTTGAAGTGGTATCGGTAGCCTTGAGGAAGTGGCGTTTAGCCGCAACCTTGGCGCTTTCTGGTT  
ACGACGAGTTGCATATTTCCCGCTTAAATAA  
>Cluster\_17118  
ATGGAAGTAAAGAGCGTGCACCAGCCATCGTTTGTATGGAGATCGGTGACTGTATCACTACATGGGATGAAGTGTCTT  
TGGCATTGAAGAGGATTTCCCTTTCCGATTCACACATTTCCGTCAGTGAAGTTATCGATAGCCCTGGCTGGCGG  
CTCGTCAATCTCCCTGTTGGTTGGCATTCGCTGCGATCAGGAAAAATGATTGTGCATTAACAAAACTTACCAGCATCA  
GCGCCACTGTTTACGCTGATGTATCAACAAGATAACCATGCCAGGCGCAGCATCGGCACTAACGCTGCCCGCTGTGAAA  
AGGGATTCCCTTCCGGGAAGTCCACTCATAA  
>Cluster\_27386  
ATGCCATCAGCAATCCCAGAGCCTGCCGTAAGCGTGGATGCGCAGGTACAACCACAGACAGTTCTGGTTACTGCGATAA  
ACATCGTGGCGAAGGATGGGTACAGCATCAGCGCGGACTGAGTGCACCAGCGTGGCTATGGCTCGAAATGGGATGCCA  
TACGTGCGCGCATACTGAAGCGTATAATCATCTGTGTGAGAAGTGCCTGCGCAATGGGAGAGCCGTTGAAGCCAGAAGT  
GTGGACCATCATTTCCGAAAGCTCATTGGTGGCAGGATGCAGACAGTAACTGCAGAGTCTGTGCTGGCCCTGCCATAA  
AGCAAAAAGTGGCGCGAACGCATCAACTGA  
>Cluster\_12999  
GTGGCTGAGATAAAAACGCTGCATCTGGTCCCGCTGAAGGGATGCAGGTGAGTGAAGCCGTCGGTGGTGAGGGTGGC  
GTTTGGTGCAGGTTATGAACAGCGCCCGCCACAGGGCTGAATCCTCAACTGAAGACGTTTCCAGGCGGTGTTCCGGGTGA  
CGGATGAGTCAACCCGGCGCTGGCTGGAAGAGTTTTATCGTGGCATGGTGGTTACCGTGCCTTTTGGGCGACCGCG  
AAACATAACCGGACGCTGAGGGTGTGTGCCGTGAGTGGAGTGTACAGGATAATGCCCGGTACAGTATTTACGTTGCAC  
GATAGAGCAGGTGGTGAAGTGA  
>Cluster\_64066  
ATGAAAATGGCAAAATTTATATAGATTTCAATAAATTAGTTAAAGATGGCGCAAGAAATTTATTTGCTGGGCTGATAA  
TGGTTCGCAAGGCATATAGTTTCTTTGGCATAGATCGCTTTACTTTTGAATAACAATGATAGGATTTTCTATCAATCCGA  
ATGGTGTGGTTGTGTCAAGCTCATACTTTTGGGTATGCTAGAGAATAATTTGCCCTCTTTTTCATCTCCGAATGAATTT  
TATAGCAGAAACATCTTTAGATGGAGTGAATTTAATAAAGAAAGTGTCTTCTGAGCTGGATAGGGCTGTGAGAAGAGGATTT  
ACATCGAAATGTTCCGTTCTTCTGA  
>Cluster\_10614  
ATGATCATCCAGTCAAAAATTTTCGCGCGCTCTGGTGTGCGTGTCAAAAACGACGTTCTGTTATTACCTGAACGGTCT  
TCACATCACGCCAAAACATATTGAGGCAACCAATGGTTTTCGTAGCACTGCGCATGACTCACGGCATCCGGACGAAGAAAA  
ACATCATTGTCCAGTTCGAAGGTGGCGTCCCGGCCAAAGCCGAAACGACAGAGCTGATTTTATGAAAGGCCGATCCTG  
TTCATCGCGACAGTTTCAGCGCGGCTGTCCATTACCGGCATTAATTTGGTGACGGTGTGTTTCCGGATTTGGAACGC  
ATCATTCCGAAAAAATTTGACCTCTGTACACACCCGGTGA  
>Cluster\_14546  
ATGATTAATCCAAATCCAAAGCGTTCTGACGAACCGGTATTCTGGGCGCTCTTCCGGGCGGTTGATGTGGAGCGCAAT  
TATTGGCGCGGTGATGATCTGCTGGTGGGTATTCTGCTGCCACTGGGGCTGTTTCCGGGTGATGCGCTGAGCTACGAGC  
GCGTTCTGGCGTTTCGCGCAGAGCTTCATTGGTCCGCTATTTCTGTTCCGTGATGATCTGCTGCCGCTGTGGTGGTTTA  
CACCGTATGCACCACGCGATGCACGATCTGAAAATTCACGTGCTGCGGGCAAAATGGGTTTCTACGGTCTGGCTGCTAT  
CCTGACAGTTGTACGCTGATGGTATCGTTACAACTCAA  
>Cluster\_39799  
GTGGCTGATTTTCGATAAACCTGTTTCGATGCTGCCATTGCCCGCGCGGATGAAACGATACCGGGTACATGGGAACGTCAGC  
CACCATGACATCCGGTGGAGCTCCGGCGCAGTAATACGTGGTGTGTTTGGATGACCTGAAAAATACAGCTATGCCGGAC  
AGGGCGTACGTGTTGAAGGCTCCGCGCTCCGTTTGTCCGGACTGATGATGTGCGGCAGCTGCGGCGCGGCGACAGC  
CTGACCATCGGTGAGGAAAATTTGATAGACCGGATTTACCGGATGATGGCGGAAGCTGTATCTCTGGCTTGGGG  
TGGCGTGCCCGCTGCGGTTAACCGTCTGCTGTA  
>Cluster\_24283  
ATGACCATTTCCGGAGTTGCTACAATATTGCATGGCAAAACAGGCGCAGGACAGAGCGTGCATAACGACTGGAAAGCGAC  
GCAGATCAAAGTGAAGATGTGCTGTTTGGCATGGTGAAGAAGTAGAAAATCGCCAGCTGTTTTCGCTGAAAACAGCC  
CGGAGCTGGCGGAGCTGCTACGTCAGCAGCACAGCGATGTGCGTCCAAGCCGCTATCGAATAAAGCGCACTGGAGCACC  
GTGATCTCGACGGTTCCGTCGCCGATTTCGCAAATCTATTATCTGGTGGATGCGTCTTATCAGCAGCGGTGAATTTGCT  
GCCGGAAGAAAACGTAATTTGCTGGTGAACCTCTGA  
>Cluster\_10975  
ATGAGCAGAAAACCCAACGTTACTCTAAAGAGTTCAAAGCCGAAGCTGTGAGAACGGTCTTGAATAACATTTTCGAT  
CAGTGAAGGCGCTTCCCGATTATCTCTTCTGAAAGCACTTTAGGACAATGGGTTACCGCCGCGAGAAAAGGGCTCGGTA  
CTCCTGGTTCCCGCAGGTTGGCTGAACTGGAATCTGAAATCTGCAACTGCGTAAGGCGTTAAATGAAGCTCGCCTTGAG  
CGAGATATATTAATAAAGCAGCTGTAGATTCAATCTGTCAATGCAACACCCCTTTCAATATCTCTTCACTGCCCGCG  
ACGGTATCGGTTATCAGTTTGA  
>Cluster\_54438  
ATAGCGATAAATACAAATGATGCTGGAAGATGCAAGGAACCTGAATGCATTGGGCTGATGCTGATAGTGGAGTTGA  
TGCCATTGCCGCTATGGTCAAAGCCCGTGAAGTCAAGCGCCGATAGCCAAAAGTCAAAATCAATGACGGGTGAAGAGATCA  
AAGCCATCCGCACCCGATACGGCATGTCACAATCCGTGCTGGCACATAAATGGGAATGTCAAAGAAAAGTGTCTCGAAA  
TGGGAACGTAATGAAATAAAACCGAGCGGCCCGGCACTACGTAATTTGAAATACATGGCAATAAAGGGCCGGAAGTTT  
TGCAAAGTAA  
>Cluster\_51505  
ATGGCATTAAATCAATGTCTGAAATGCCAGAAAGAGGTGAGCGATTACGATTTGATTTGCCCTGCTTGGGTAACAAAT

AAAAAACTTAAGCGTTCATTTTTTGGAAAGCTCATTAAAGTGATATTTATATTTAATATTTTTATGATCTATACGC  
TTTTAGTTGGACTGGGAGCACTAGTGAATAATAAATAATGCTACATCCGATGCCGAAAAAGCCGGTGCAGTTATTGGT  
ACAGGCTTAGGTTAATTAACCATGGAAGTTTATGGGTATTGGCGATATCATATCGGAATTTAGTATTTCTACTAA  
ACCAAAAGGATAA  
>Cluster\_11794  
ATGACTAAAAATACTCGTTTTTCCCTGAAAGTCCGTCACCGGCGAGTCCGATGGTTCGAAAGTCAGGGCGAATATGA  
CTCACAAATGGGCGCAAAATTTGTTCCATTGCTCCAAAGATTGGCTGTACGCCGAGACTCTGCGTGTCTGGGTTCCGACG  
ATGAGCGGGATACCGGGGGCGGTGATGGAGGGCTACCACCGTGAACGTCAGCGTCTGAAAGAGCTGGAGCGTGAAAT  
CGTGAACGCGCCGAGTAACGATATCCTTCGCCAGGCTTCGGTTATTTTGGGAAGGCGAGTTCGACCGCCCTCTGGAA  
AAAATGA  
>Cluster\_22156  
ATGGAAACTACCAAGCCTTCATTCCAGGACGTAAGTTCGTTCTGTTCCGTCGTAAGAACAACCTGCAACGTCGA  
AATTCAGGACGTTGAGAAAAAGATCCGTGACAACCAGAAGCGCTCCTGTTGCTGGACAACCTGAGCGATTACATCAAGC  
CAGGGATGAGCGTTGAAGCAATCCAGGGCATCATCGCCAGCATGAAAGGTGACTATGAAGATCGCGTTGACGATTACATC  
ATCAAAAATGCCGAGCTCTCCAAAGAAGCCCGCATATCTCAAAAAGCTGAAAGCTATGGGCAGAAATGAAAAACGGCGA  
AGCGAAGTAA  
>Cluster\_24873  
ATGAACAGTTTAAACAACACTACCGTCCGTCGCAACTGATTGCGCTTCTGTACCGGTGAAAAGCGAAGGTGGAGTA  
TTGCTATGCAAGTAAATGTACCAGGTGACAGGAAATTTGTAACCCACAGCTTTGTCAGAGTGGGCTGTGGGTGATTTCAACC  
GGCAGAAGGAGACAGTCTTTGCGACAAGTTAACCGCTGGTTCAAAGATCACTACGGAGTCCCGCTCAGAGTCATTTCGTT  
GGGAGCCGGAACACCAACGGGTTATCTACCTCCGCGAAGGCTATGAGCATGAATGCTTTCAGTCCGCTCGAACAGTTTCTG  
CGTAAATTCAGGGAATAG  
>Cluster\_44656  
ATGACGGTAACTCGGTACCGGAAATCAACATTTGCAGGAAATGCCAAAACCTCGCGTCTATGAGCGGCGAGAAAGCTGGC  
TATCGAGCGTGTATGCTATATGCAACATCATCGATTGATCTTCGGCACAGACAGTGAAGAACCTGTTCAAGAACCCCGA  
GAAAACGTTTAAAGCTTTTCTGAAAAAGCAATATCACTCGGAAGCCTTCGCTGCCAGAAAGCAGAAAGTTCGAGCGTAA  
CAGAACCGTATTTACTACCGCAAGCCACGAGTGAATGGGTGTGACTTGTCTCAGGCCCGCAGAAAGCAACCGGAAAAATC  
AATTCAGCTTATTACGATTGA  
>Cluster\_27479  
ATGGATAAAGAACGCATCATTAGGAATTTGTGCCCGGTAAACAGGTCACACTGGCGCATCTCATCGCGCATCCCGGCGA  
GGAATCGGCGAAGAAAATCGGCGTTCCGGATGCGGGCGCAATCGGCATTTATGACGCTAATCCCGGAGAAACGGCGATGA  
TCGCCGGTATTAAAGCTTTGAAAGCCGCGATGTGCATATCGGTTTTTCFCAGCGTTTTAGCGCGCGGTGGTATTAT  
GGTTCGGTGGGCGAGTAGAAGAAGCGTTATCACAAACCGTCAAGTGGTTTAGGACGCTTATTAATTTATACGCTTTGTGA  
AATGACCAAAAGTTAA  
>Cluster\_24375  
ATGCTTGATGAAAAAGTTCGAATACCAGTCTGTGCTGGTGTATGTACGGCACCGGATGAAGCGACAGCCAGGATTT  
AGCCGCCAAAGTGTGGCGGAAAAACTGGCGGCTGCGCGACCTTGATCCCGGCGCTACCTCTCTTACTGGAAG  
GTAAGCTGGAGCAAGAATACGAAGTGCAGATGATTTTAAAAACTACCGTATCTCACCAGCAGGCACTGCTGGAATGCCTG  
AAGTCTCATCATCCATATCAAAACCCGGAACCTTCTGGTTTTACTGTTACACAGGAGACACAGATTACCTCTCATGGCT  
CAACGCATCTTTACGCTGA  
>Cluster\_17817  
ATGGCTTACAGCGAAAAAGTTATCGACCATTACGAGAATCCCGCTAACGTTGGGTTCTTTGACAACAACGACGAGAACGTC  
CGGACCGGCATGGTGGGTFGCACCGCCCTGTGGCGACGTFATGAAGTTGCAGATTAAGTCAACGATGAAGGTATCATTTG  
AAGACCGCGTTTTTAAAACTTACGGCTGCGGTTCCGCTATCGCTTCCAGCTCCCTGGTCCAGCAATGGGTGAAAGGGAAG  
TCTCTCGACGAAGCGCAGGCGATCAAAAACACCGATATTTGCTGAAAGAACTGAACTGCCGCGCGGTGAAAATTCAGTGTTC  
TATTTGCGCAGAAAGACCGGATCAAAAGCCGCATTTGCGGACTATAAAAGCAAACGTTGAAGCAAAATAA  
>Cluster\_370  
ATGTACGACAATCTGAAAAGTCTGGGTATTACCAATCCTGAAGAAATGATCGTTACAGCCTCCGGCAGGAAGCCAACAA  
CGATATTTGAAAATCTATTTCCAGAAAGACAAAGGCGAGTTTTTCGCGCAAGAGCGTTAAGTTTAAATATCCGCGTCAGC  
GTAACACGGTCTGCTGATGGTGTGGGTCAGGTTATAAAGAAGTCCAGGAAATCAGCCGAATCTACGGTATATCATT  
GATGAGCTTGATCAAAATCTGCCAGCGTACCGCAGCGAAGTTGATCTTAAAGCTAAGATCCTCGACGACTTACGTCACCT  
GGAGTCAGTCGTAACCAATAAGATCAGCGAGATTGAAGCCGATCTGAAAAACTAACGCGTAAATAA  
>Cluster\_43591  
ATGTACGCAAAATCTTTTCTCGCACTTGTATGGCAACGGACGCTCTGACCGGTGCCCGTACCACAGACTGCACCTTATGA  
TCGCTACACCTGCCACCTTTGCGCGAGTGCACCTCAGATACCACCGCAATACGACACTGAACGTTCCCTGGTTTGAACACA  
CTGACGACGGGCTGACAGCGCACGGTCAAGTGTCTTATGTACAGCGGAACGAGGGAGGTACGCTTGTATCAGCGT  
CTGAGCAATTTGCTACCGGATGCCTTACCCTGGTGGCTAAAGCCAGCTGGCACTGCAGACAATGTCACCACGATTTATTA  
TGGGAGCGGTACTGCACACTGCCAGACCGGCGCTTCAAGTGAAGGAGTGGTAGCAGGATGA  
>Cluster\_30151  
GTGTTACAACCTCTTTTAGCAGTTTTTATCGGCGGTGGTACGGGAAGCGTGGCGAGATGGCTGTTAAGTATGCGATTTAA  
CCCCTGCATCAGGCGATTCGTTGGGGACGCTGGCAGCAACCTGATTTGGGGCATTCATCATAGGAATGGGATTCGCTT  
GGTTACGCAAGATGACGAACATTGATCCAGTGTGGAAAGTATTAATCACCACCGGATTTGTTGGCGGTCAACAACTTC  
TCAACATTTTTCGGCAGAAGTGGTGTGTTTTGTTACAAGAGGGCCGCTTTGGCTGGGCGTTACTGAACGTTTTCTGCAATCT  
TTTGGGCTCTTTGCCATGACCGCACTGCTTTTCTGGCTGTTTTGCGCCTCAACCGCACACTAA  
>Cluster\_43368  
ATGAGCAAAACTATCGCGACGAAAAATGCACCGCAGCTATCGGTCCTTACGTTACAGGCGGTTGATCTGGGCAATATGAT  
CATCACCTCCGGTGCAGATCCCGTAAATCCGAAAAAGCGGCAAGTCCCGGCGAGCGTCTGTCACAGGCGCGTCAAGTCCG  
TGGATAACGTAAGAGCGATCGCTGCAAGCGCTGGCCTGAAAGTGGGCGACATCGTTAAAACCTACCGGTTTGTGAAAGAT  
CTGAACGACTTCGCAACCGTTAATGCTACCTACGAAGCCTTCTTACCAGCAACAATGCCACCTTCCCGGACGTTCTTTG  
CGTTGAAGTTGCCGCTTCGCCAAGAGCGTGAAGATTGAGATCGAAGCGATCGCTGTTCTGCTCGCTAA  
>Cluster\_65379  
ATGAGCAACGTAACAGCAGAATGAAATACAGCAAGAAACAGCAATGGCTGCGTAAAGAAGCCGACGGCACTTACACCGT  
TGGTATAACCGAATGCCCAGGAGCTGTTAGGCGATATGGTGTGTTGTTGACCTGCCGGAAGTGGGCGCAACGGTTAGCG  
CGGGCGATGACTGCGCGGTTGCCGAATCAGTAAAAGCGGCGTACAGACATTTATGCGCCAGTAAGCGGTGAAATCTGGCG  
GTAACGACGCACTGAGCGATTCCCGGAACTGGTGAACAGCGAACCGTATGCAGGTGGCTGGATCTTTAAAATCAAAGC  
CAGCGATGAAAGCGAATGGAATCACTGCTGGAATGCGACCGCATACGAAGCATGTTAGAAAGCAGGATTA  
>Cluster\_5144  
ATGCCACGTATACAACTTTTGTGACGAATCAGGTTCTGTAAGAAATGAGAACTGGAAGTGAAGGAGGCGAGGAGGG  
GGTACGGAAATGATGCTACGGTATCATCTGTTACTTCAATGCTTATAGAGCTTGGCCTCAGAGTATACAGAATTCAGA

GAGAAAAAAGGAAAGTGGATTAAATCAGATGGAGTACAACAACTCATGCTAGATAATATATCAAGAGTGGATTTATG  
TGTAGTGAATTTAGAGCATGAGCATGCTCAATCAGGAGTCTGTTGCCAGCGGTATTTTACAGATTGAAAAGATTAAGCC  
CGCTATGGAAAAATTCGTTAATGAGCAGGTGGGTATTTTTTTTTCATGACGATGAGGAGACAGACTGA  
>Cluster\_22435  
GTGGGCTGATGTGGGATTATTTACGCGTCATTATCGCCTCCGCTGCGCAATTAAGCCTGGGTTTTGCGGCGAGTCATCT  
GCCGCCAATGACGCACTTATGGGATTTTATCGCGGCGCTGTTAGCTTTTGGCCTGGATGCCCGGATACGTACTCGGGC  
TGCTGGGTTATCTGCTTTCCGTTTTTTGTGGTATAAAACACTACATAAACTTGGCCTAAGCAAAGCCTATGCCTTGCTC  
AGTATGAGTTATGTGCTGGTATGGATTGCTTCAATGGTACTTCCAGGCTGGGAAGGGACTTTTTTCGCTGAAAGCACTACT  
GGAGTAGCCTGTATTATGAGCGGGTTGATGCTGATTTTCTGCCACAACAAAACAACGTTACTGA  
>Cluster\_26513  
ATGTCCAGACGCAACTACTGACGCTATTACCATTATAGCATTTTGGACTGGATCGAGGACAACCTGGAATCGCCACTGTC  
ACTGGAGAAAGTGCAGAGCGTTCCGGTTACTCCAATGGCACCTGCAACGGATGTTTAAAAAGAAACCGGTCATTCAT  
TAGGTCAATACATCCGTAGCCGTAAGATGACGGAAATCCGCGCAAAAGCTGAAGGAAAGTAAACGAGCCGATCTATCTG  
GCAGAACGATATGGCTTCGAGTCCCAACAACTCTGACCCGAACCTTCAAAAATTACTTTGATGTTCCGCCGATAAATA  
CCGGATGACCAATATGACGGGTGAATCGCGCTTTTACATCCATTAATCATTACAACAACACTAG  
>Cluster\_64053  
GTGAAGTTTCATTTAGATGAACTTAAAAGAATGGCAACGCTCGATAATTTGCGCGTTTTCTCAATGAGTCGTCTACGAA  
TGAAAATGTTTGTGCTGTTGGCGATACGGATATGTACATGTATTTGACGAATATGTTGAGGTGGGCGCTGAGCCGAAAA  
CTGCTGAGGAGTGTGATTTAGGCACTTTTGTATGCTTGTATTACATCGGTCATTTACTGGGTATCCGGGATATGAGGGA  
CATGATCGGGAATAATCCATAACTATGAATCCGACTTACCTGTAACAGATGTTGGGTTGTTTATCGTTACTCGGCCG  
GGCCTTTATGAACTGGGTAGGCAAGCAGGGTGTAGAGAAGTGA  
>Cluster\_41640  
ATGCGTGTATTTAGATGGTTCCTGGAGCGTTGGGGAGCATGGGCGGCGAGTGTAGTCTGGAGTAGACTATTCGCCTAT  
AGCTGCTGGGTTAAGGGCTTCTTCCACAAAGCAACAGCAACAGTCCAGGCTTGTTCAGATAGTGTATTAATTTATG  
AAGGTTGCTTGTCTGCTTAAAGCAAAAAAGCCAGATGAGCACTCGCTGCTTGTGGCACATTTTATACAGAAATATCC  
AAGCGTAAGATTGCAAAGTGGTGGAAAGGATGAAAATTTGGTACGCATAGAAATACAACACTAGCCGAAGGATTTATTGA  
TGTTGCTTTTCAATGTTGGATTTTAACTTGAATGGACGCTTAG  
>Cluster\_12767  
ATGTTCAAGGAGAGGATGACACCAGATGAACTTCCAGACTGACCGGCTATAGCCGCCAGACCATTAATAAATGGGTACG  
CAAGGAAGGCTGGACAACGCTCACAAAACCTGGCGTCCAGGGTGGCAAAGCCGACTGTTTCCAGTCAATGAACAGGTTT  
GTGAATATATTCGCAATGCTGAACGCTCCAGAAGGTCAGGGAGAAGCGCTGCCCTTCTGGTGTGCGCCGCTGAAGTA  
TTGCTGGTGACACTGGCGAAAGAGATGACGCCAGTTGAACAAAAACAGTTTACATCCTTGTCTTCCGCGGAAGGGATTAT  
CGGATTGTTACAACGCTTAGGGATTCCGCGATAGCAAATA  
>Cluster\_41693  
ATGAATGCTGTTTTAAGTGTTCAGGGTGTCTTCCGCGGCTCAAAAAGAAGTCTTTTTTCTAAATTACTCGTCTGAA  
TATGCTTCCGCTGCTCGCGCTGTGATCCCGGCTGCTGTTTGTGATGATGTTTCCCGCAACTGGCAATGGCAGCACAGG  
GCCAGGACCTGATGGCAAGCGGTAAACACCAGGTTAAGGCGACTTCCGTAAGGACTCCAGTGTGTTAAATGGGTCGTT  
CTGGCTGAAGTTCTGGTCCGCTGCTGATGATGATGACCAAAAACGTCAGTTCCGCGGTTTTGCCATCATCTC  
TGTATTTATGCTGTGGGTATGGCCGCTGTTGGCCTCTGA  
>Cluster\_49093  
ATGATCAATTCGCCCGAGTGTGTATTCAGGTTCAAAGCGTCTACATTGAGGCCAATCTTCACTGATAATGAACGTTA  
CGTTTTTGTCTTATACCGTAAACCATACGCAATCTGGGGCGAGCGCCAGTGCAGTTGTTGGGCGTTACTGGCTGATCACC  
ATGGCAATGGCCCGTGAACCGAAGTCCAGGGCCGAAGGATGTTGGCGTCCAGCCACTTATCGCGCTGGCAGAGGATAC  
CAGTACACCAGCGGTGCAATCATTTGAAACCCCGCTGGGACCATGACAGGGTCACTACGAAATGATCGATGAAAATGGCGT  
CCCTTTCAGCATGACATTTCCCGTATTCGACTCGCCGTTCCACACTCATTCATTAA  
>Cluster\_84  
ATGTTTTTGTGGAAAGATAACCGTGGTGTGTTTTCATATTAATAACGGTTCAGATGGTGGTGGTATTTCATTTTTTAA  
AACAGATGGGGGATTTGCGCTGGGAAGTGGTGCAGTTCGCTTAGTGGCGATATTTATGGTTAGTGTGGGGAAACA  
ACTGGTTAAGCACATGGCTGCATAATCATGTGCTTCCGGATATTCGCTTGGCAGCATGAAATATAAAAACGATGGCGC  
GACTACGGCTTTGGCGATGCGTCAAGTTATGTTTTAACAGCCGCAATTAACGGCAATGCGGATGATCTTGTGACACTGT  
TGCCAGAAGGCCAATTCAGAAATGATTTGGGGGAATATGGTACAACTGGGGAGTGTTTAA  
>Cluster\_38658  
ATGTTTATTTCCCTGATGACAGGACAAAACAGAAACAACGGAGATAAAAATGAACATACGTAATATTAATGTTATTACTGA  
CCGCTCTGTACCGGATAAAAAGCGTATCAGATGATTTTATGATGCTGTTCTCAGTATGCACCACAAGAATCGTACTTC  
CTGCACCGAAGAAATTCGGTTCTGAATCATTTGTCGCACAAATTTAATAATGCGTCTGCTGCTGTTGATGAAGAAGGATG  
TCGATGAACCTATTTTCTTCCCGGGCATAATTTGGTTGCGGCAACATCCGGTGACGAAAACTGTTCCGGTGAAAGA  
ACTAATCGACAGAATTTATCAGAAATATAAGGAACCCCTTCGATGAATA  
>Cluster\_40926  
ATGAAAAAATTTACTTGTATTTTTATCATATTACCCTTGGTGGCTGTACCGTTCATGGTAATAAATCCCTAACTGA  
TGAAAATCATCAGACGGTTAAAGTTAAATCGTCAATGAAAAACAACCAACAGAAATCTTGTGCTGCCCTGGGAGAGC  
CTCAGACACGCGCTACGAATGATGGACAGGAGATGTGGAACTACTCAAGTATGACGGGAGAAAGCCAACTATCTAACTAC  
ATACCGGGCTTGTCTGTTGACCAATAGCAGCACGGCACACATTAATCACTGGATATCTGGTTTAAAGGTGATGTTGT  
GGAACGTTATGATTTTCTGCTCAGACCCGAAAGTAACTTCTCGCGGTTTTGATGGATTAA  
>Cluster\_20342  
ATGGAACATAAATTTATTGATAACCCCTGTGCGATTACAGGCTTTCTTAAACGATCCTGGCAATACCGAAAATATTGTTGA  
GCCGGGACACGCTACTACATCAAGCCTGATGCGGTATATCTCGGCATCTACGAAGGATGGTGTGCTGGCTGGCGTTTATG  
AAGTGCCTAACTTCTGGCATAGCGTTGTTGAATGCCATGCGGTGTATGACCCCGGATTCGGTGGTGAATATGCACTGCAA  
GGGCATCGACTATCTGCAAAATGGCTTCTCGAAAATCAACATTCCTTAAACAGCATCACTATGTTCCGACACCACGAA  
ATACGGACGGGCAATTTCCGTTTGTGCTGCGCTACCCGTTGGTCACTTGGATGATGCTTTATATCAGATGTGGTAAAC  
CCGTCGGCCTAACGCTTTATCAGTTAACTCGGCAACAATATAAGGAATTCAGCAATGTTAA  
>Cluster\_46654  
ATGGCTTTGACAACCATTTCCGCCGATGATGCACAAGAATTAATCGCACGCGGCGCAAAGTTAATCGATATTCGTGACGC  
TGATGAATATCTTCGTGAACATATTCCTGAAGCAGATCTGGCTCCATTAATCCGTGCTGGAACAGTCAAGTCTTCCACCTA  
AATFACGTCGCGAGCAAAATATATTTCACTGCGAGGCAAGGTAACAGCCAGCAACCAAGTAATAACCGGATAAATTAGCAGC  
GCTGCCCCCGCAGAAATATTTTACTCGAAGATGGGATGATGGCTGGAAAAGAGCTGGATTGCCAGTAGCGGTAATAA  
ATCTCAACCTTGGCGTTAATGCGCCAGGTGCAGATCGCTGCGGGTGGTTAATATTAATCGCGGTTGACTGGGTTATA  
CCGTAAATAGCGGTTCTTCTTATTAAGTGGCTTGTGGTGGTACTGTTTGCAGGAATCAGCGGTTTTTGTGGA  
ATGGCAAGGTTGTTAGATAAAGTGGCTGGAACCAACGAACTTGA  
>Cluster\_34170

ATGGA A A A A A A A A A A A T C A A T G G A A T A C C G G C T A C T G G A T C G T T G C C C T C C T G C T G T T G T T G A G T T T G C A G A G C T A C T G G C A  
G A C G G C G A A A A C C C T C G A G C C G G T G C C C T A C A G C G A G T T C G A G A A G G C G T G G C C G A G G G C G C T G G C C G A A G T G C T G G  
T G T C G G A T C G T A C G G T G A C C G G G C C T G A A G T C G C C G A C A G C C G G G C A A G A C G A C G A T C G T G G C A A C G A G G G T C G A A  
C C C G A T C T T G C C G A T C G C C T G T C G A A G T A C G A C G T G C C C A T A T G C C C G C G T G T T G G A G A G C A C C T G G C T G C G C G A T G T G C T  
G T C G T G G A T C T G C C A G C G G T A G C C T T C T T T G G C G T C T G T T C T C T G T T C C C C G C T T C C C G A G A A C C C G G T A G C G G C A T G G  
G C G G G T T T C T C A A C A T C G G T A A G A C C G C G C C A A G G T G T T C G T G G A A A A A A C A C C G G T G T G A C G T T C C C G A T G T C G C G  
G G G G G A T G A G C C A A G G C G A G C T G G T C G A G A T C G T C G A T T T C C T G A

>Cluster\_39851

A T G G C C G C G T T T T C T G C T A T C A T G C G C G C A T G A A C A T A C T T C T C T A T T G C A A T C A C A A C A G G C A T T C T C T C C G G T A T  
C T G G G G A T G G G T G G C T G T T T C C C T G G G C T A C T A A G C T G G G C G G G C T T C C T G G G C T G T A C G G C T A C T T T G C C T G C C C G C  
A A G G T G G G C T G A A A G G G C T G G C G A T C T C C G C T G C A A C C C T G C T T A G T G G C G T G G T G T G G G C G A T G G T C A T T A T T T A C G G T  
A G T G C A T T G G C A C C A T C T G G A A A T A C T C G G T T A T G C C A T A A C C G G T A T T G T C G C G T T T C T G A T G T G T A T C C A G G C C A A  
A C A G C T G C T G C T T T C A T T T G T T C C G G G A C G T T A T A G C G C A T G C G C G A C G T T G C C G G G C A G G G T A G C T G G A A A C A C  
T G T T A C C T T C G T G G C G C T T G A C T G G T A T T T G G T T A C G C A A T G A A A A C A G C G G C C T G T G G T T G G C G G C G G T A G T G C A  
A A G A C G G C T A C C C T G A G C A G A A A T C A A A A A T A A A G C G T G A

>Cluster\_44677

A T G A A T A A T C A T T C A G T T A T T C C A G C C T T C G A C T T C C G A G A A A T G G T G C A A G C C A A A A A C G G A G A G G T C G T T A C C A C A T C  
C A G A A A A A T T G C C A A G T A C T T C G G C A A G C G A C A C G G T G A T G T T C T C A G G A A A A T C G A G C A G G T T A A G G C T G A T T G C T C G C  
G T G A G T T T A G C C A A C G C A A T T T T G C G T C G G C T G A T T A T A T C G A T G A G C A G G G C A A G G T T C G C C G A T G T A C A G C C T G A G C  
A A A G A T G G C T G G A T C A T G G T T G T A T G G G G T T C A C C G G A A A G C T G C T G C G C A A T C A A G G A G A G C T A T A T C C A G C A A T T  
C A A C T G G A T G G C A G A G C A A C T G A C C C G C G C A A T G G C A A T T G G C G A A G A A A T G C A G C A C C G C T A C G C C A T C A A A G A A A C A C  
G C T C A A A G C T G A A A G G T A C G A T C G C G A G T C G G T T A A T G A C G A A C G G A A G A G A G A G A A G C G T G T C C T G G C T G T C G A G C A T  
G A A T A C A T T T T G C A G G T G A C A C A G C C T G A A C T G C T G A T T A A T T G A

>Cluster\_30758

A T G A T A T A T C C G G A A A T T A C A G G C A A A A G C G G C G A A C A T T T A C G C C T G A A C A C G C T G G A A G C A G T C T G G A T C C A G G G G A A  
A T T A C G G A T G T G G G G C G G T G G T C G T A T A T C G G T G G G G A T A A A T C C G G A A A T A T G T T T A A C C G G T T A C T G G T T T C G A A A A  
A G C T G A C G A A A A C A G C A G T T A A T G A G G T T T T A C G C A G C A T G A A G A A A T C C G G G C T G G A A A A C C G G A A C T T G A G G C A T T T  
T T T C G G A T A T G A C C A G A G G G A A G C A G A A G C T G G T T G T C A C A T T G T A C A G A C A C A G A G G C G T T G A T T A T T G A T C G C G T  
T A T C A G T G A G G T G C T T G G G G A A T A T C C C G G G C T A A T C A A T A T T C T C C G G C A A A G G T A C G A A G G A C G G G G A A T G A G T A A G A  
G A A A A T G C C A G A A T G T T T A A A T C G T A C T A C C C G G A A T G G T G T T C A G C A C A T G T G A A A A C G T A T T G C A G G T T G G T T A  
G C C G T G G C T G A A C A C A T G C T T T A T G T A C C T A T G C A G A T T C A T T T C G A T A A

>Cluster\_11681

A T G G A A A A T A A A T A C T C A A G G T T A C A A A T C A G C A T T A C T G G C T G G T C T T T T T G C T G G T T A T C G C A G C G T A T T G C G C A A T  
G G A G T T T C G T G G T T T C T T C C C A C G T A G C G A T C G G C C A C T A C A A C A T G G T T C A T G T T T C C T G T G G T A T C T C A A T T C T C G  
T G C T G A T G G T G G T T C G T C T T T T G T T A A G A C T G A A A T C C C A A C C C C G C G A T T A T A C C T A A G C C A A A C C G A T G A T G A C G  
G G A C T G G C C A T T T G G G A C A T T T G G T A T T A T C T C C T G T T A T T G C G C T G C C A G T G G T T G G T T A T T G A T G A T G A T A A  
C C G G G C A A C C C G T G G T T T G C G T T T G G T T T G A C A T G C C T T A C G C T T C A G A G G C C A A T T T C G A A C G G G T T G A T A G C T T A A  
A G T C G T G G C A T G A G A C G C T G G C G A A T C T G G G A T A T T T T G T C A T C G G G T T G C A C G C T G C G G C T G C A C T G G C A C A C C A C T A T  
T T C T G G A A G G A C A A C A C A C T T C T A C G C A T G A T G C C G G T A A A C G T T C C T G A

>Cluster\_65173

A T G A A C C G T T T C A T C A T T G C T G A C G C G A G T A A A T G T A T T G G T T G C C G T A C C T G T G A A G T G G C G T G C G T G G T T T C T A T C A  
G G A A A A T C A G G A C T G T G C A T C G C T G A C C C G G A A A C C T T T T T A C C G G A A T C C A T G C A T T A A A G G T G T G A A C A T T T C C A  
G C G C A C A G T C T G C C G T C A G T G T G A A G A T G C A C C G T G C G G A A G T G C T G C C C G A A T G G T G C T A T C A G C C G T A A A A G G  
T T T G T T C A T G T A T G C A G A A C G T T G C A T T G G T T G C A A A A C C T G C G T G G T G G C T T G C C G T A T G G C G C G A T G G A A G T G G T  
G G T A C G T C C G G T G A T C C G C A A C A G C G G C G C G G G C T G A A T G T A C G G G C T G A C A A A G C T G A A G C A A T A A A T G C G A C C T G T  
G C A A C C A T C G C G A A G A C G G C C G G C G T G T A T G G C G G C T T G C C C G A C C A T G C G C T G A T T G T G T C G A T C G T A A A A A C T T  
G A A C A A C T G A G C G C A G A A A A C G T C G C C T A C G C G C T G A T G T T C T A A

>Cluster\_24747

A T G G C A G T T C G T G G C A T T A A C A A G G T C A T T C T T G T C G G T C G T C T G G G A A A A G A T C C G G A A G T C C G T T A C A T C C C A A A C G G  
G G G C G A G T G G C A A A C C T G C A G G T G G C C A C G T C A G A A A G C T G G C G C G A C A A A C A G A C G G G G A G A T A C G G G A G C A G A C A G  
A A T G G C A T C G C T G G T G C T G T T C G G C A A G C T C G C G G A A G T G C T G G T G A G T A T C T G C C A A G G C G C G A G T T A C A T C  
G A A G G T C A G C T T C G C A C C C G T A G C T G G G A G G A T A A C G G T A T C A C C C G T A C G T C A C C G A A A T T C T G T T A A G A C C A C G G G  
C A C C A T G C A G A T G C T G G G A C G T G C C G C A G G T A C T A G A C T C A G C C G G A A G A G G C G C A A C A G T T C A G C G G T C A G C C T C A G C  
C A G A A T C A C A G C C G A A C C G A A A A A A G G A G G C G C G A A A A C G A A A G G C C T G G A C G T A A G G C C G C A G C C G G A G C C T C A G  
C A G C C G T C T G A A C C C G C G T A T G A C T T C G A T G A C G A C A T T C C G T T C T A A

>Cluster\_53965

A T G G A T G C A G C C C A G A G T A T G T C C T T T C T G A A A G A A A T C G C T G T C T A A T T A T G A T G G C T T T C A T T C A C G G T T T T A G G G C  
C A G T G A C T T C T T G A T T A C G T T T A T C G G A T A T T G A T G A T C A T T G G A A A C A C T T A A T A T T C G G C G T A T T A A A A T G G T T  
T C T C G A C A A C A C A T C C T C T T C T T C C T G A T G A A T A A A T T T G A T C A A G T T G T G G C T T A A G C A G A G G A A G T T A A T T G A A A A C  
G G A G T T G A A G G A G A C T G G C T T T T T C T C C C G G A A A C G C G C C C A T A C A G C A G A C A A C A T T T T T T T C T A T C A T T C G T G A  
G G C T G A A A A C G T G C A G G A T T A G C T G T A A A A G C A C A T C C T A T A T G T T A C G T C A T G C C T G T G G T T T T G C T C T G G C T G A C A  
A T G G T T C G A T A C C C G A C T A C T T C A G G A T T A T C T G G G T C A T C G A A A T A T T C A G A T A C T G T C A G A T A C A G C C A G T A A T  
G C T G C T C G T T T T A A A G G G T G T G G A A A A A A A G C C T C G T T A A

>Cluster\_63880

A T G G C C T T T T T A T T G A A T A A A A G C G A T A T G G C C T C C T C A T C G G T A T A T C C G T T C A G G C A T T T G A T A A A T G G G G C G T T C C  
T C C T G T T G A C C G T C G G G G A G G G A A G T T T T T A T G A C G T T A A A A C C G T A C T G G A G A T A G A T C G C G A A A G G C G A C A A C A A A  
A T C A G A A A A C A C G T G A T G A C G A G A G T G A T C T G G A G G A A A G A T T G C T C C G C C C A G A G C T G A A C T G A C T G A A G A A C A G A C C  
G T A G C G C A A A A A C T T A A A A A T C A G G T A A C A G A A G G A A A C T G T T G A T C A G A G T T C T G T T T T T G C T C A G T A A G C T  
G G C G A T G G C A T T G T C C A G T A C G C T T G A T T C C A T T C C T T A T C C A T G C A A C G A C A G T T C C C T G A T T T A A C T C C G C G T C A C A  
T T G A T C A T C T G A A A A C C C T A T T C G A A A G G A G A A A T C A G T G C C A C G G C A G G G G A T A A A T T A C C G G A T T A C T T G A T  
G A G T A T A T C C A G A C A A A C T G A A T A A

>Cluster\_5984

A T G T T G A T T A C C A A G T T T C C A A A C A T C C A C A T T T T G A T G A A G C C T G T C G T G C A T T C G C A C T G C C C A C A A C T G G T G C A  
A C T G G C A G A A C G T C G G G G A G G A T G T G C A G A T T C T G C G G A A C A A G C T G A A C C A G C T C A A C C A T T T A T T A A C C G C A C  
C A G A A A T C G G C T G C T T A C C G A T C T G A C T G A A G A T T C A A C G T T G G T A G A T G G T T T T C T G G C A C A G A T T C A T T G T C T G C C A  
T G T T A C C G A T T A A T G A G T A G C A A A A G A A A C T G C C C A T T A C G T C A T G A G C G C A A C T G C A G A G A T C G G G C G T G T T G C  
A G C A G G T G C G G T A F C T G G T G A T G T A A A A A C T A G T C G C G T C G T C G T G A T G C T A T C A G C A G A T T A A C T C T G T A A C A C G A C  
T G A T G G C G T G G C T G C T G T T T C A T T G C A A G C C C G T T T A C A G G C T A A T C C T G C G A T G G C G A G T G C A G T T G A T A C C A T G A C T  
G C C T T G G T G C T T C A T T C G G T T T G C T G T G A

>Cluster\_33783

ATGAAATGGCGCAAACGTTGGGTATTTATGGCGGCAATGTTGGCGTTCGCAAGTGCAGCAGATACAGGCAGCCGATGTCAC  
CATCACGGTTAACGGTAAGGTCGTCGCCAAACCGTGTACGGTTCCACCACCAATGCCACGGTAGATCTCGGCGATCTTT  
ATTTCTTTCAGTCTGATGTCGCCGGGGCGGCATCGGCCTGGCATGATGTTGCGCTTGAGTTGACTAATTTGTCGGTGGGA  
ACGTCGAGGGTCACTCCAGCTTTCAGCGGGGACGCCAGCAGTACCGGATATTATAAAAAACAGGGGACCGCGCAAAACAT  
CCAGTTAGAGTACAGGATGACAGTGGCAACACATTGAATACTGGCGCAACAAAAACAGTTCCAGGTGGATGATTTCTCAC  
AATCAGCGCACTTCCCGTTACAGGTCAGAGCATTGACGGTAAATGGCGGAGCCACTCAGGGAACCATTCAGGCAGTGATT  
AGCATCACCTATACCTACAGCTGA

>Cluster\_53049

ATGAACACAAAACAGTCTGTTGCTCAACTCGCCGTACCGCACCGAAGCGCCTTTCATCAACGATGGTGGTGGCGCTGTT  
ACTTTGTTGGTGTGCTGGCGCGGTGATGATTAATGCCCGTGTATTTCCAGCAACTGCCATTGAAACCGGATCCCGGTGCAA  
GTGCCCTCCCTACCTTCTATGCCGTGTCCTGATTTGTCCTGCTGCTTTGCTGGTGATACGGGATCTTTTGCAGGCAAAA  
CCAGCCTCTTGGCGCAACGCACAGGAAAAACCGGCATTTCAGGAAAAACAGCAACAGGAATGCGGCAACCGCGTTTATAT  
TGTGGCGATGAGTACTGCGGTTATCTCATTACTACTCTGTTTTCTCATCGTCATTATGACGTTGATGGGTACAGGC  
GATGGGTACTCACACCGGATTTGCGCTGCTGTAAACGCAATCCTCTGGTTGCTGTTTGTGCAAGCGTTACAGGTGCCA  
TTGCCCTGTCCGCACATTTTTCGAATAA

>Cluster\_29492

ATGAGCAATCTTTTACAGACGGGCGGGAGTTCGAGAAAAAGCTGAAAGAGAGAGCCGAATCTACAGAGACAATGCTGAA  
CGACGAGTTCAGCAAGCTCGAAAAATCTGTAAGCAAGGCTGTGACATCAACAGAGACGAAAAATCAAAGACGCTATAGCCC  
TGTTACAGCTTCGACAGGAATCACTGAAAAACACCGGGAAGGGTGAAGAGGGCATGATGACGACAGGAAGGAC  
GTGTTAAAGCTGGCAGGGAATACGGGCATGATGTTACTGGGATGGTCAATTTTCTGTTTACCGTGAGTGGCGGACGCT  
CTGGTATCTTGGCGGGATGATACAGACGAACCTGGAAGAAATCAGGATACAGGAAGAAACATTGCAGAACTGACCGGA  
AGACATGGGGCTGGAGTTTGTGAGGACGGGAGAAAGAAATTTCTGGTCATCCCGCAGGGGAAATCGGCAACCGGTGATT  
CCCTATCAGGGGAAGGACTGGGTACAACGACGGAGTGA

>Cluster\_40664

ATGGCTATTTATTCGCGCATTTGACCCGGGTTCCGCGCTGACCGGCTATGGCGTATCCGTCAGGTAGGCAGGCAACTGTC  
CTACTGGGTAGCGGATGCATACGCACCAAAAGTGGATGATTTACCGTCTCGTCTGAAGCTCATCTATGCGGGCGTGACGG  
AAATCATACCCCAATCCAGCTGATTTATTCGCCATTGATGTTGAAACAGGCTTTTATGGCGAAGAACGCTGACCTGCGGCAAA  
CTGGGGCAGGCGCGCGGCTGGCGATTGTTGGCGCGGTGAATCAGGAATTGCCGGTATTTGAATAATGCGGCACGTCAGGT  
AAAGCAAAACAGTGTAGGTATTGTTAGTGCAGAAAAAGCCAGGTGCAGCATAAGGTCGCGCACCTTGCAGAACTGCCCG  
CTAATCCACAGGCGGATGCCCGGATGCGCTGGCGATTGCCATCACCCTGCCACGTTAGTCAGAATGCGATGCAAAATG  
AGCAATCCGCACTGAACCTGGCGAGAGGGCGACTGCGTTAA

>Cluster\_48766

ATGTCCGCAAGAGCAAGAAAAGCAGGTAAGAGAAAATCAGTCAGAACGACGTCAGGATTTGATTGAAAAATTGTGGGAAGA  
CGACGAAATCGATCTTGGCCTGACTTGAATAATGATGGGTACTCAACAGTTCACGTTATTTGCCTTTGATAGGCGGATC  
TCATGTGATGGTCTGCTCAAAGGATCACCATTATCAACAACCTACTTGGCTTTATGTTTCAGGGTTTCTGATAGGGGTTG  
ATTGAAATAAGAGATAAAGCAGCACTGGCTTTTGAATCAGGGTTCGCTAGTGAAGAGGCGTAACTACATGGGCAGGGAG  
AATGAAAAAGCTAAAAGAAGTGGGGTTCATATCTGCTGTAAGGCAGCACCGGTGAATTTCAATACGTTAATTTGTTTC  
ACCATTAGTTGCACTCAAAGCTGCTTGTATGAAGGATTTATCCCTAAAGGAAAGACTTATAACATTTTGTCCGAGCGT  
GTAATTTAGGTTGGAGCCTCTTGGGAGGTTAA

>Cluster\_217

TTGGTTTCTGGCCCTATAGGAGACCATGGGGCTGTATTTTGGCAGAAAGAGAAGGTATAAAAGTAGACATAGAGTTAGA  
AAGTGACTGCGAAACCTTTTGGCTGTGTTAAACCCCTTTTGAAGTGGGATGAAATCCATGCGATGAGAGACCCAA  
CCCGTGGAGGATTAGCCGCTAATCTTCAATGAAATGGGCTTATAGTTCTCAGGTAATCTGGTGGTAGAGGAAGAAAAAAT  
CCTGTGAGGCTCAGGTAAGGCTTTTGTGAGGCTTTGGATTGAGCTTATCATTAGCCGTGTAAGGAAGAGTAGT  
AATAGCCTTACCAGAAAAAGATGCCGAAAGGCTTTAGAAATTTAAGGTCTCATCCATCTGCAGCTGAAGCTAACATCA  
TAGGACAGGTGTTGGACCATAGTTCCCTCCTCAAGTATATCTCAAAACACTGTATGGCACTCATAGGTTTTAGAAAAAT  
ACCTCAGGAGAACTTCCCGAGGATTTGTTAG

>Cluster\_53500

ATGGCGGGTGAAGCTTTATTTTGTAGGGCGTATCAGGGATGGTAAACATTAATTGGTAGCAAGGTTGCCGGTTAAT  
GTCGCGAAATTTATTGATGGTGCAGATCTTCACTCCAGCAAAAAATATAGATAAAATGTCGCAAGGCATTCATTATCTG  
ATGAAGATCGACTTCCCTGGCTGGAACGCTTAAATGATGCTTCATACAGTCTTTATAAAAAGAAATGAAACAGGATTTAT  
GTCGTTTCATATTAAAAAACAGTATCGTGATATTTTACGCAAGGGTAGCCCCATGTTCAATTTCTCTGGTTAGATGG  
CGACTATGAAACTATCTCGCGCAATGCAGCGTGGGCTGGGCATTTTATGCGGTTAGCGTTACTAAAAAGTCAGTTT  
AGGCACTGGAGCGTCCACAGAAGATAGCAGGATTTGTCGCGCATTTGATATTAACCATGATATTGCCAATGATGCAACCGGA  
CAATGTCGGCAGGCTGTGCTGGCATAACGACAAAAACAGAAATATGTCGAAAGAGGGCAGCGCTCAGATCAGCGCTGCCA  
ATGA

>Cluster\_52591

ATGAATTTAATATCTCTAAATATCTGTATTTTATTTCTTTTCTGTTTTTTTGGCTTTTCCGCTCTCAGGGCAGGCCAA  
TGATTCAGTTGTTGTACTATTTACTGGGATTTTGTGGCAAAAAGCTGTGACATTAACCGGAAGTAAAGATCAGTCGG  
TAAAAATGGGCTCTTATGATGCTAATGAATTTTAAATGTAGGTGATGTTTCTCCGAGTCAAACGTTTACGATTAATGTA  
CAAGGATGCCGACTGCAAAAAGTACAGTTTATAGTTCGTGGTGTGAGCGCAATGTGCGGTTTACTGGTGTGATGACAGATGC  
CATTAATAGCGCATTACTGCGTCTCTCCGCGGTGACAGATAGTGCAGTGGACTGGGAATAGAAATATTGGATAACAATG  
ATGTGGCGATTGCCATTAATGGTGAATCAGGTTTTCGTGATTTAGTGTAAATGAAAACGGGTGATGCTAATTTGACGTTT  
AACTTCGCTATAAATCAACTCAGGAAAATGTACATGCCGGGCAAGCAAAATGCTCTGTTGATTTTGTATTCGATTATCA  
GTGA

>Cluster\_31116

ATGCCAAGCGCCACAGTGTAAAGCTACGCCCGTGGAGCGTGAAGATTTACGCTATGTACATCAACTCGACAATAACGC  
CAGTGTGATGCGTTACTGGTTTGGAGAACCTACGAAGCCTTTGTTGAACTCTCTGATCTGTATGATAAGCATATTCAG  
ATCAGAGCGCAACCGCGCTTTGTTGGTGAATGTGACGGGCAAAAAGCGGCTGGTGGAGCTGGTGGAAATTAACGGGTT  
CATCGCCGCGCAGAAATTCAGATAAATATCTCCCGGAGTATCAGGGGAAAGGCTGGCAACCCGTGCCGCAAAATTAGC  
AATGGACTATGGCTTTACCGTTCTCAATCTCTATAAGCTGTATCTGATGTTGATAAAGAGAAATGAAAAGCGGATTCACA  
TTTACCGAAGCTTTGGCTTTTCGGTTGAAGGTGAATGATGCACGAGTCTTTATTAATGGTCAATATCGTAATGCCATT  
CGCATGTGATATATTCAGCATCAGTATCTGGCAGAGCAAAAACACCGGGTCAGACTCTCCTGAAGCCGACCAATA  
G

>Cluster\_46682

ATGATAGAACCATTACTCATGGTGCAGAGTGGTTTATCGGGCTGTTCCAAAAGGGCGGAGAGGTGTTTACCGGGATGGT  
GACCGCATCTTCCGCTGTTGATTAGCCTGCTGGTTATCATGAACGCACTGATTAATTTTATCGGTCAGCATCGTATTC  
AACGTTTTGCTCAACGTTGGCGGGTAACCGTGTTCGCTTACCTACTGTTACCGTGCATTGGCAGCTTTGTCTTTTGC

AATCCGATGACCCTAAGCCTGGGTGCGTTTATGCCGAAAAGTACAAACCAGCTACTACGGCGGCGCTCTTATAGCTG  
CCACTCAATGAATGGCCTCTTCCCCATATCAACCCTGGCGAACTGTTTGGTTTATCTTGGCATTGCCAGCGGTGACAA  
CGCTGAACCTGCCACTTGGCCACTGGCGGTGAGTTATCTGCTGGTTGGTCTGGTACCAATTTCTCCGCGGCTGGGTG  
ACCGATCTGACCACCGCCATTTTTGAGAAAAAGATGGGCATTCACCTTGAACAAAAAGTTACCTGGCAGGAGCAACATC  
ATGA

>Cluster\_54455

ATGAATTTGGAGAAAGCGGACGAGGCGCTATAGAGCGCATGGTAGAAGCTTATGGATTCAAGACTCGACAGGCGTTGTG  
CGATCATTTAGGAATCTCTAAAAGTACACTCGCCACACGCTACATGCGTGACTCATTTCCAGCAGAATGGGTAATCCAGT  
GCGCCCTTGAACACAGGCCTCGCTTAAATGGCTCACAAACCGGCGCATGGTTCAAAGCAAACCTCAGGTAAATACAATACT  
ATGGAAAGTTGCTAAATATGTATTATCTGATGGGGCCTTGTGTGAAGACGGTTTTTATATTTTCGATAGAGAATTTCTACC  
GTCGGCATCAAGAACTTTTTGTAATCACAGATAATAATCTGAATTTATTTGTGATAAGGAATTTGATGATATACGTG  
ATGGTAAATGGGTAATAAGTATTGATGGCGAAATAACGATCCGTGACATTACTCGTTTACCCGGTGAAGAATCTTCGTC  
GAGGTTGGAAACAGAGCCTTCGAATGCAAGATAGAAGCATTGAAATAATTGGTAAAAATATAAGCTTAAACAGTCAAGTA  
TGTTAAATAG

>Cluster\_38394

ATGAAAACAGTTTATGTGTTTTTTGTTTTACTGCTGACAGGTTGTGCTTCTGAACCTGCAAATCAGCGTAATCTTCTTAC  
TCAGTTTTGTGGCAACAATGCCCCGTGTAGACCCGTAACCCAGTCCAGTATTGGTTAATATCAGAAACGTTCTTACAGGGG  
GGATAATCCGAAATCCTGTGGCAGTGACTTTAATGTAATAAATGGGTTATATCTGAAGTAAAGACTAATGATTTGGAT  
TTGATATCGGCACCGGGAGGCGATGTTTCAGATTAATAAATCCTGATGGCAATGAATGCTTTGCTATTCTAAACGGGCAAT  
GGCAGTGGCTAAGCAGTGTCTGAAAGTGACCGTAAACGATTGTTTACATTTATAACCAAGTACTGAGGCTGTGCAAAA  
TCAAAGTCAATAGGAAGCGGTCAATGCCCTAGGGAATGGAGAGCATTACAGATTTTCAGGTAAAAAATGTGTTGATGAT  
CTTGGGCGTCTTTTGATACGGTGGCCGGGGTACTCTGGATGCTGAATCCACCATTATCTCCGGCAATAATGTCTCC  
ATTAACGAGCTGA

>Cluster\_28207

ATGAGCAAAGCAGGTGCGTCTGCGACTGTACGGCCCTGTACGGCCGAGCTTATGGCAAAGCAGAGAACATTCCG  
TCTGCTGATCCTCGACGTTGATGGCGTACTGTACAGATGCGCTGATTTATATGGCAATAACCGGGAAGAGCTGAAAGCGT  
TCAATGTTCTGACGCTTATGGCATTGCTTGTGCGCTCACCTCTGATATTGAAGTCTGATATTACCGGGCGAAAGGCT  
AAACTGGTAGAAGATCGTTGTGCCACATTAGGATCACCTTGTATCAGGGGCGAGTCAAACAAACTCGCTCCGCTTTAG  
CGATCTGCTGGAATAATGGCGATTGCCCGGAAAATGTGGCTTATGTGCGCGATGATCTCATCGACTGGCCGGTAAATGG  
AAAAAGTGGGTTTTAAGCGTCGCGCTGGCGATGCGCATCCACTGTTGATCCCGCGCGCGATTACGTGACGCGCATTTGCT  
GGCGGTGCTGGCGAGTGGCAGAGTGGGACTTATTACTCTGGCGAGGGCAAATGGATGAAGCAAAGGGCAATC  
GATATGA

>Cluster\_18751

ATGAACATGACAAAAGGTGCACTCATCCACGCTTTTCAATTTTGCTTCCCGCATGTAGTTCAATTCGCAAAAATATCAA  
AGGCAATAACCAACCTGATATCAAAAAGTTTTGTTGCTGTTTCATAACCAGCCGGGTTATATGTTGGTCAACAAGCGC  
GCTTTGGCGGAAGGTTATCAACGTTATCAATGGCAAACGGATACGTTGTTAGAAATCGCTGTATTACCCTGGGATAGC  
TATGCGAAGCCTGATATTGAAGCAACTATCAGGGCCGACTGCTCGCCAGACAAAGCGGCTTCTTGATCCAGTGAAC TA  
TCGTAATCACTTTTGTACCATCCCGGTACCATTACAGGTGAACAACCTGGCTTTATCAATAAAGTCCCGTATAAATCTCC  
TGGAAAGTGAATATGCAGGCAATCCAGGTGCGCATTTGAGAGAAAGTGGTAAATACCACCTATAACTTGTGGGATTACGGC  
TATGGTGCATTTCTGGCGGAACCGGCTGGGGCTCCTTACTACCAATGCGGTGAGTCAAGTAAACCTGAGCTGGTGGT  
CAAATAA

>Cluster\_21157

ATGAACAAGTTTTTATTTGCGCTGCATTTGATCGTCAAGTGGCTGCTCGTTGGTGTAAATCAACTCACCAATACACCAT  
CACCGAACAAAGAAATTAACCAAGTCCGTTGCGAAACATAATAATTTCTCAAAGATATCGGTTTACCCGGCGTGGCTGACG  
CCCATATTTGTTCTGACAAACCTGACCAGCCAAATTTGGTCCGGAAGAGCGAATAAGGTTACCCTAACCGGAGACGCCAAT  
CTGGACATGAACCTCCCTGTTCCGGTAGCCAGAAAGCGACCATGAAACTGAAAGCTGAAAGCGCTGCCCGTGTGATAAAGA  
AAAAGCGCGGATCTTCTGAAAGAGATGGAAGTGGTCCGATGCGACGCTTACAACCGGAAAAAATGCAAAACGGTATGCAAA  
CGTTGCTTCCCTATTTAAACAGGCATTACGCAATTACTTTAAACAGCAACCTGCTTACGTCCTGCGCGAAGATGGCAGC  
CAGGGCGAAGCAATGGCGAAGAACTGGCGAAAGGCATGAAAGTGAAGCCAGGCGAAATTTGCTATTCCGTTTACTGATTA  
A

>Cluster\_3883

ATGGCGAAACTGCATGATTACTACAAAGACGAAGTAGTTAAAAAATCATGACTGAGTTTAACTACAATTTCTGTCATGCA  
AGTCCCTCGGGTCGAGAAGATCACCCCTGAACATGGGTGTTGGTGAAGCGATCGCTGACAAAAAATGCTGGATAACCGCA  
CAGCAGACCTGGCAGCAATCTCCGGTCAAAAACCGCTGATCACCAAGCAGCAAACTGTTGCGAGCTTCAAAATCCGCT  
CAGGGCTATCCGATCCGCTCGGCTGTAAGATTAACCTCTGCGTGGCGAAGCAGCATTTGGGAGTTCTTTGAGCCCTGATCATTTCC  
TGTACCTCGTATCCGTGACTTCCGTTGGCTGTCCGCTAAGTCTTTCGACGGTCTGTTGTTACTACAGCATGGGTGTCCGCTG  
AGCAGATCATTTCCAGAAATCGACTACGATAAAGTCCAGCGGTTCTGTTGTTGGAATATTACCATTACCCTACTGCG  
AAATCTGACGAAGAAGGCCGCGCTCTGCTGGCTGCCTTTGACTTCCCGTCCGCAAGTAA

>Cluster\_44924

ATGATATACCCGGAAATTAACAGGCAAAGCGGCGAGCATTACGCTTAAAAACGCTGGAAGCCGCTGGATCCAGGGGAA  
ATTACGGATGTGGGGCGCTTGGTCTGATATAGTTGGTGGCAAACAGGAAATATGTTCAATCAGTTGCTGGCATCCAAAA  
AAGTGCACAAAACCGCAATCAATGAAGCCCTGGTAGAATCAGGGAGTCAAGGATTGATAAACAGAGTGGAAAGCATTC  
TTGCGAGAGATGATCGCTGGCAGACAGAAGAGCTGTTTGTCTACTGTACTGATGCAGAGGCGTTACGCATTGATGGGGT  
GATAAGTAAAGCGCTTGCACGTTATCCTGGATTGATTGATATCTGCGGCAAAGGTACGAAGGCGGGGGATGAGTAAAC  
GCAAAATGGCTGAATTTGTAATGAGGTGCACCCGGAATGGTGTTTTAGTACATGCGAAAAGCGAATTTGCTAATTTGGTTG  
GCTGTTGCTGAATATGCGCTATACATCCCTATGCGAGAATCGTTGCTCAAAAATGTCTTGA

>Cluster\_55559

ATGAACCGATTCTCAAAAATCAAATTTATTTACATTGGATAACGCTGCTTTTTCGTTGCAATAACCTATGCCGCGATGGA  
ACTCCGTTGGCTGGTTTCCATAAGGTAGTAGTACTTATCTGTGATGCGAGAAACACATTACAATGCGGGTATATTTCTGTTT  
GGGTGTTAATGTTTTTACGCCCTGATTAATAAACACCTGATATAGTACTTCTTATTGTCGCCACCCACCTGCTGGCAA  
ATGAAAGCGGCTTCGCTAATGCACATCATGCTTTATATAACCTTCCCTGCACTTCCCTGCTGGGATTTGCTTTGATGGC  
TTACAGTGGAAAACTCGTGGAGTTTCCCTTGGTTTTCAATGTGCTCCCTTTGTTACCCCAAACAGCGAAATTAAGCACTGA  
TAAAAAATATTCAGAAACCTGGGCAAAATATAGGTTACTTTTTAATCGCAGCTCACGCTGGCGCAGCACTCTTTTATCAC  
TACATTCAGAAAAGATAAATCTGTTACGAATGATGCTTCCGCCCAATAA

>Cluster\_64430

ATGAGCGGACTTGTGATGCAATTTGACGAATACCTCGATCGCGTTAAAGGCGCGGTTTTACAAATACCGTTTATCAAAAACATT  
CGGTATTTATCCAGAAATTCGGCAGGATTTGAAACCGCAGCTCTGTTCTGGAAATCAGAAACTGGTCAAAAGTGACG  
AAGCGGTTCCAGGCTCAATTCAGTCAGTCGAGCTGTCGTTGTAATTTGATTTGCTGCGTGAGTTTGTGTCAGATCAGTAC  
GGACTGAAATCGCAGAAATGCAGCGCTCTATATGACGAGCTGGATTAATGGGAGGATGTTCCGTTCCCGGAACTAAACCGGC

AAAAATTCAGCGACGCGGAACCCGTGCGACTGGATTA AAAACCGGCAGTCAGTCGGTTTCGCATTCAGTTCAGTGCCTGTCGT  
TCACGCAGGTTGTAGCGGTTGGTCAAGATATTTTCGATATCCCTCACAGGGGACCCGAAAAATATATACGTCGGAATA  
GCGCCAGATATCGGCGCAGAACACGAGAGCGACTACTATGGCCCAATCGGACGATGA  
>Cluster\_66668  
ATGGCTATCAAAGGATTGTTTGTGAGAACGGATCCGACGCGTCGCCGCTATGGCGTTGCGTACTTGTGGGTGACTTTC  
AGGCATTATTTACGACTTTGTTAAATGGGGAGCGGAAGTCCCTTGCCACCGCGCACATTTCCGGTGGTTCGGATGAAT  
TTAACCCCGGTATATCTTTCTACGAGATATTTAGGTATCGACCCAAACCAACTGTGTACACATTCFCGGAACATAT  
ATCAACCCGGTGTGGTACGCATATCATCTTCTACTGGTTTTTTCGATAGGGTATTTGTTGTGCGGAAATTTTTCC  
GAAAGTGAATTAAGCGGGGATATTAGCAGGGCTTATTTGTGACAGTGGCAGTCCACGGTATATTTTCGCCGCGCTGA  
ATTTAACGCCCGCTCACTCAATTGCCTTTTGACGAATATGCGTCTGAAATCCTGGGGCATAATTTCTGGTTCTGGATA  
ATAGAGATTATGCGCCGCACTTACGTAATCGCATTACTCATGAGCCAGATCCGGAAGTCGCAATTCGGTGA  
>Cluster\_9810  
GTGCAGGGGACCCGCATCGGCTACGTCGCCGGTACGAGCTTTGACCAGAACCCGGAACGCCAGCTGGAACAAACCCAGGT  
GAGCAAGGTGTTACCGACAAGGCATCGGGCAAGGACACCCAGCGCCCCAGCTCGAAGCGCTGCTGAGCTTCGTCGCCG  
AAGCGGATACAGTGGTGGTGCACAGCATGGATCGGCTGCCCCGCAACCTCGATGACCTGCGTCTGGTACAGAAGCTG  
ACTCAGCGCGGCTGGCCTCGAGTTCCTGAAGGAGGGCTGGTGTCTACTGGCGAGGACTCGCCGATGGCCAACCTGAT  
GCTGTGGTGGTGGGCTTCGCTGAGTTCGAGCGCGCTGATCGCGAGCGCGCAGCGTGAAGGGCATTTGGCCA  
AGCAGCGTGGCGCTACCGGGCCGCAAGAAAGCCCTGTCGATGAGCAGGCTGCTACCTGCGGCAGCGAGCGACGGCC  
GGGAGCCCAAGCGCAGCTTGGCCGAGTTCAACATCAGCCGGAAACCCCTTACCAGTACCTCCGCACGGACGACTG  
A  
>Cluster\_20907  
ATGGACAAATTCGAGCTAATCGCCGAAACTGCTGGCGCTTGGTGGCGTTGCACTCGGTGCCGCATCCTGCCGACCC  
GGCGTTTGCACACTCTCTACCCACGCCCGCGCATTTTGCACACTCAATAATCTTCATACCGGAGATCAATCAAAGCGG  
AGTTTTTCGATGGCAGGCTATATTAGGAAGAATTGGCAAACTTAACCATTTTTTCCGCGATTACCGCCGGAACAAA  
ATAAAGTCCATCGACCCAGGATTATTCGACCAGTTGTATCGCTGCAAGGGTTGTAGGCACCCGAAACCGGTGCAACT  
CATTTCCGGTTATCGTTCATTGATACCAACAATGAACATACGCCCGCGAGCGTGGAGTAGCGAAGAAAAGCTATCACA  
CTAAAGGCCAGGCGATGGATTTCCACATGAAGGTATCGGTTAAGCAATATTCGAAAGCCGCTTATCTATGCGCGCA  
GGTGGTGTAGGATATTACCCAGTAGTAACCTTTGTGCATATTGATACCGGGCCAGCACGGCACCTGGTAG  
>Cluster\_30034  
ATGACCGGACTGACAGCAGCTTGAGTATCTCAAAAATAGCATCAAAAAGCATTCAGGACTACCCAAAACCCGGCATTCT  
TTTCCGCGATGTACCAGCTTACTGGAAGACCCGAAAGCTTACGCTCTCAGCATCGACTTGTGGTTGAGCGTTACAAAA  
ATCGCGGCATTACCAAAAGTGGTCCGCACCGAAGCGCGTGGCTTCTTGTGTTGGCGCTCCGGTAGCTCTGGGTTCGGCGT  
GGCTTTGTACCGTCCGTAACCCGGGCAAACTGCCGCTGAAACCATCAGTGAACCTTACGACTGGAATACGGCACCGA  
TCAGCTGGAAATCCACGTTGATGCCATCAAAACCGGCGATAAAGTTCTGGTGGTGGACGATCTGCTGGCAACCCGGCGCA  
CTATCGAAGCGACCGTTAAACTGATCCGTCGCTGGGTGGTGAAGTAGCTGACGCTGCGTTCATTATCAACCTGTTTCGAT  
CTCGCGGTGAACAGGCTTCCGAAAAACAGGGCATTACCAGCTACAGCCTTGTCCCGTTCGCCGCAATTA  
>Cluster\_13011  
ATGAATATCTTCTGCTACATAAAAAATCACACAATAAATTTGAGATCGCAGATTTCTTTTACTTTTACAGCATTCGTCCCC  
CCATTTGGGCAAATATAGATTGGCCAGAGCACGAAAGTTAATACACGTTTGCACAGCTCCTCCAACAGCACGACAAA  
GATGCCACATACCTCGCCCAAGTCCGTTTTCGTTTACAGACTACCCGTGCGTCCACCGCGATAATGTCTGAGCAGTTTT  
TTCAGTCCGGACCTCCTGCCACGTTTTATGTTGAAGAGGTAACCTGAGCACGCAGTTCATCAGTCAGGCGTGGTGTAC  
CGTAACCTTATTATGATGGGTAAGATCAAAAAAATTTTCAGGCGACTAAGGAAAGTTGAACAGACATTAGAATAAATA  
TTTCAACCAATTACAGCACCAATTACAGACCCGCGAGCTCAACAAATAAATCAAGGGTTACGTGAAAGCGTAG  
>Cluster\_34694  
ATGAAACTCATCAGTAACGATCTGCGCGATGGCGATAAATGGCCGATCGTCAATGCTTTAACGGCATGGGTTACGATGG  
CGATAATATTTACCCGCTCTGGCGTGGGATGATGTTCTCGCGGAACGAAAGTTTTGTTGTACCTGCTACGACCCGG  
ATGCGCCAAACCGGCTCCGCTGGTGGCACTGGGTAGTTGTTAACTTACCCTGATACCCGCTATTACCGCAAGGTTT  
GGCTCTGGTCTGGTAGCAATGCCAGACGGCGTTTTGACAGCGCTACCGACTTTGGTAAAACCCGGTACGATGGCGCAGC  
ACCGCCGAAAGGCCGAAACTCATCGCTACATTTTACCGTTACCGCGCTGGATATAGAAGCTATGATGTCGATGAAGGTG  
CCAGCGCGCGATGGTCCGGTTTTAACGTTTACCTCTCTGGCAAGCGCCCGATTACTGCGATGTTTAGTTAA  
>Cluster\_64442  
ATGAATGAACTGGTTTTGACAATACTCAAACCTCGCAGCAACAACCTGCTACCTCGAATATCATTGGTTTTGACGTTAGAGA  
TATTAGTGTTCGCGATACAGAAATCCTACATTTCCAGTAGAGAGCGAGGAGATTACAGCTGAGGCTCTACATTCCTATT  
CAAAAATCGAGCAAGAACTTGCCATCGCCAGACGCATTTAATCTCTGAAACTGTGCAAAATAGAAGAAATATTACGGCAAC  
TCGCTGAAGGGCGAGCTAGGCGGAAAGTTAGCCCTACCGATGTCGGTCTGGCAGCAAGCGCTGAAAAAAGGAAAGTTAC  
GAAACGATATCAAAATCACTGGATTTAACTCTGAAACCGAATCAATACTTAATGCAATGGAAGCATCTCTCTTTTCGA  
AGTTGAAAGCTGAGCTTTCTGCCAAGAAAGATAGCGAAGCAGCAGAGTCGAGCATTATCGTCAAAAGAAATA  
>Cluster\_59932  
ATGGTATATATAAATCGTTTTCCACGGACATGAAGACTACATCAAAAAATTAATCGAAAACTTAATGCTGACGATGA  
GCACTACAAGATTATCGTACGCGACAACAAGACTCTCTATTATGAAACAAATATGCGAGCATTATGAGGCTGGACT  
ATATTAGTGGAGGTGATACGGCTTTGGTCAATAAATAATATTGCGGTGGCGTATGTAAGGAAAAATATAGACCCGCA  
GATGATGATACATTTGTTTTGAAATCCGATATCATATGAAGCATGATGATTTGCTGACATATATTAATATGTCGA  
AAGTAAGCGTTATGCTTTTAGTACATTTAGCTGTTCCGAGATGAAGCGAAATCTTTACATGATTTATCCGTAAGAAAT  
TTCTGTGCTTTCTGATTTTATTGTGCTATTTATGTTAGGATTAAAGGAGGTGCGAACAAGTCCCTGATGATGA  
>Cluster\_27385  
ATGTCAGGACCTCCGAAACCCGCCACGCTGCATTTGATTCAGGCAACCCCTCAAAGCGCCCGTTAAAGACCACAA  
AAAAACCGCTAAAAGGATGAAAAGGTTCTTCAAATTCGCGCAGCATTTAGGGGCTCAGGGGAAAGTACTGGTTACGGC  
GAATGGCGGAAGAGCTGAATGCGGAAGGATCATTTCTCAGCTGATGCGCGTCCGCTCGAGTTGCTGGTGAAGCCCTAC  
ACCGAATATCGGCATCACTGCGAAACACTCGATGTTGAGGGGTATACCTACCGCACGGAAACCGAGAGCGGTGATGTACT  
GATTAAGGCGCACCCCGCGGCAATGAAAGCGGATGCTGGAAAGCGGATCCGGGCAATGCTTCGAGAGTTGGTATGT  
CACCGCAAGCCGGGCTAAAGTAAATATCGCCGACCGGATGATGTTGATCCGCTGGCGGAGCTTTTAAAGCGAGAGAC  
TGA  
>Cluster\_42185  
ATGATTCCTCCATCGACAGCAACGACGCTAATAGCGCCCTTGACAAAAAACAATCAGCAGCCTGAGCGGCGCAGT  
GGAGAGTATGATGAAAAAATTAGAAGATGTTGGTGTACTGGTAGCGGTAATTTAATGCCGATCTGTTTATTACAGCAG  
GCTGGGAAAAAATTAAGTACGCGGTTACCCAAACAATATATGGAAGCAATGGGCGTCCCGGCTTTATGCTCCCGCTG  
GTGATTTCTGCTGAGTTGGTGGTGGTCTGGCAATCCTGTTCCGTTTCCCTGACACGTAACACAGCCCTTTACTGCGGG  
CTTTACGCTGCTGACGGCATTTTTTATTTACAGCAACTTTGCAAGGATGAACTCGCTGATGTTTATGAAAAACCTGA  
CTATTTCTGGCGGATTTCTGCTGCTGGCAATTACCGGTCAGGCGCATTCAGCATCGACCGCTGCTGAATAAAAGTGG

TAA

>Cluster\_20882

ATGATGCTCGCGTTAGGTATGTTTGTGTTTTATGCGCCAGACGCTGCCACACCAGACCATGCAGCGTGAATCAGATTATCG  
CTGGCCGTCAAAATTCGCCGTATCGGTAAACGGGATGCCCTTTCAGTTTCTCGGTGTTGGCGAGGAAAATATCACGCTTGCCG  
GTGTGGCTTATCCGGAACCTGACCGCGCAAGCTGACGATGACACCGCTCAGGCTGATGGCTGAGGAAGCGCGCGGTGG  
CCGTTGCTGGATGGCACAGGCATGATTTACGGCATGTATGTATCAGCAGGGTGTGAGTAAACAGGGAGTATTTTCTTTGC  
AGACGGCACACCCGGAAAATGATTTTACGCTGTCACCTTACCGCGTTGATGAATCACTGGCCGCGCTTATGGCGATA  
TCGGTAAACAGGCGAATCGCTCATCGGTAAGGCGGCGAGTATGGCACTAAATTCACGGGTATGACGGGGCGGGATAA

>Cluster\_24840

ATGCAGGTAATAATCCACAGCTAAAGCTTTCCTCGATATGGTGGCATGGTCTAGAAGGAACGGATAACGGGGGACAACC  
GACACGTAACACGGTTATGACGTTATTGTCGGAGGTGAACCTGTTACGATTACTCCGATCACCTCGAAAACCTGTCA  
CGCTAAACCCGAACTTAAATCAACAGCCGAGGACGTTATCAGCTTCTTTCACGCTGGTGGGATGCTTACCGTAAGCAG  
CTTGGGCTGAAAGACTTCTCTCCAAAAGCCAGGATGCTGTGGCATTGACGAGATTAAGAGCGTGGTGTCTTACCGAT  
GATTGATCGCGCGATATCCGTCAGGCTATTGATCGTTGACGCAATATCTGGGCGTCAATGCGGGGCGTGGTTATGGTC  
AGTTCGAACATAAGGTTGACAGCCTGATGAAAAATTCAAAGAATCGGGCGGAACGGTCAAGAAATTCAGCTATATGAG  
TAG

>Cluster\_10545

ATGGACGAAACGGGTTTGGCCCAAGTAAGGAAGATGTAGCGATGAAGAGTGATACCTGGAGGTAAGCGTGAGCGGAAT  
GTCCAGAGAAAGACTTGACGCAAGCTTTCACAAAACAAATCAGAGGTAGAGTCTATTGCTGCGGAAATGCGTCCGGAAT  
CAGCTGACTTTAAAACCTTATACTACGCAATTTTCTTCTATGAGAGGATTTGCTGAAATTAAGGTGAAATCGCG  
GGTTTGAACAGCGGACTTACAACGACTCAGTGGGCGATGGCCGTTGGCTTGACTTTAGTTACTGTGATTTACCGT  
GATGTTAGCTCAAGTTGGATTATCTCCGGCAATGACAAGTACCATCAGTAACCAGCCGGCTCCAATATAATACAGG  
TACCGACACAGCAACATTAACGAGCGCTCCAACCTAACCAATCGTATCAACAAGCTCCTAAGCAATAA

>Cluster\_31534

ATGACTGATTACGCGATAAGCAAGAAAAGCAAGCGATCGCTTTGGATCCGATTTCTGGTATTCATTACCTCGCGGCTG  
TGCCAGCGCAGGTTACAGTACTGGCATTCGCATCAGGTTTGGCGCTGACGACAAGCGCAGCAACCGCTGCTGCCCTCCC  
CGGTCTTCTATGCGCTGGATACCTTTACGGTCAATTTGGGCGATGCGGATCGCGTGTCTTATATCGGCATAACCTGCGA  
CTGAAAGATGAAGCAACCCGCTCGCGCTGAGTGAGTATTTGGCGGAAAGTCCGTAGTGCCTTGTCTGTTACTGTTCCGG  
TCAGGATGCTGCCGTACTGGCGACAGAAGAAGGCAAGAAAACCTGATTGCGGAGATTAACACACACTTCCACCCCGC  
TTGTTGCCGGCAACCGAAACAGGATGTCACCGACGTGCTGTATACCGCTTTTATTCTGCGATAA

>Cluster\_17645

ATGCAGACCTTCAGTGAACAGATCTTCGCGATGCGCAGGCACGTCTGCCGATTCGCTGCAGCAACTGATTAGCGTGTAT  
TGGCTTCCCCGCGCTGACCCGGTTGATTCGTTCTTTGGTGGCGTGACGTTAAGCGGTAACCCGGCTACACGCCGAAC  
GCACCGGGCGGTGTCATGCCCTGTACATGACGTGCTCACCGAAGACGAAATCAACAACTGATCCGCTTCTTGGCGGT  
GCTCCGTTTACATTTCCCGTTGCGATCATCGCTTACGTGCCCTGCGTAAACCCGTTTATGGCTGATTTACAGCAGCA  
TGTAAAAGACCGGATGCTCACACCGCGAGGCGCTGGCAGTCTGTCTGTCCCGCTTACGGCATTTACAGCCGGTACGATGGC  
AGCTGATACACCGACGACAAAACAGACTTCGCTGAAAAGCCCCACCGAGTGGGGCTTTTGGATTAA

>Cluster\_12616

ATGATTGAATGGCAAGATCTGCATCACTCTGAATATCGGTTTCCAGCTTTATGCTTATTACAACGCGTTGCGCGGT  
GTTTGTGTCGAGAGAAATGCCCCTTATCAGGATATCGATGGTGTGATGATTTGACGGGGGATAATCGCCATATTCTCGGTT  
GGAAAATGATGAACTGGTGGCGTATGCGAGGATTTCTGAAAAGTATGATGATCTTGAGCCGGTCTGTTATAGGTGCGGGT  
ATTTGTCAGTGAAGCGTTGCGTGGCGAAAAGTGGGGCAGCAGCTGATGAGTAAAACACTCGAAACATGTACGCATCACTG  
GCCGATAAGCCTTTTACCTCGGGCGCAGGCGCATCTGCAAAAACCTTACCAGAGTTTCCGTTTATCCCTGTGACGG  
AGGCTATGAAGAAGATGGTATCCACACATTTGGGATGGCAGCGAGGTAATTCAGGCGTAA

>Cluster\_35440

TTGTTAAATTTCCGGCGCTACAGAGTCTGAGGCTCTACTCTTGTGCGCACGGCGGCAAACTCACTGGATTTTATTGATTG  
TGTATTGAAGAAATGCCCTTCCGATACAGCGCTCTCAGACAGACCGGGGAAGAGAAATTTTTCGCCGTTAAAGTGCAGG  
AAAGATTAAGAATAACGGCATCAAGTTTCGTCAAAATAAGCCAGCGTCACTCATCTTAACGAAAGGTTGAACGTTCC  
CAAAAGACAGACAAGCAGAGTCTTACGCTACCGTAGATCTTTCTGCTGATGACCTGAAGGAACTGCAGGCAGAAATGGCA  
GCATTAATAACTGGGAGCGTCTCATAGCGCTCACAAACGGTAAAACCCGATGGAACACTACTTTGAACTTGTGAGA  
AAACACCACTACTCCGATGCCGTTTATGCAAAATTTGTCAGCCCAATGAAGGTAACCGTCTCATTTAA

>Cluster\_29512

GTGCCTGCTCCAAACAATTACGGTGTAGCTGGTTCACCTAACAGCGCTATAGCTCACCTGATGGGCTTGATTGCTATGG  
CCGTGTCCTGAAATTAATCTAAAGGTGATGTTATTCCTGTGGCGACATCTTCTTGGTGTGGTGGTGGTGGTGGTGGT  
CTAACCGGGGCTTTGGTGTTCGCGCATATCTGGGCTGAGCAGCAGGAACTGGTTAAGCTGGGATATACGACCGTAAAT  
GATGTGGCTGTTTTGTCCGGGATATTAATCTGCTGCTGGGCTACCAATAATTTGCGAGTCAACAGTACAGCGGTAACA  
TCGGCCTGCAAGTGTAAAGTCTGCTGGTATGAGCATCGTAAATCTTTCGAGCCAGAGAGCGCTGAAACTGAGTCAAGTTGGA  
TCTATGCTGTTGTGACTGCGTACACAGGACGCGCACGGTACTTTGGTGGTCAATTTGAATAA

>Cluster\_5741

GTGAAGCTGCAACTTGTGCGCGTGGGAACGAAAATGCCGGACTGGGTACAACCGGTTTACCAGTACTGCGTCTGTTT  
TCCGAAAGATATGCCCTTCGAGCTGATTGAAATTCGGCGCGAAAACCGGCAAGAATGCGGACATCAAGCGCATACTCG  
ACAAAAGGGTGAAGCAGATGTTGGCGGCGCAGGCAAAAACCGATTTGACCCCTCGATATTCAGGCAAGCCCTGGGAT  
ACGCGCAGTTAGCCGCTGAGCTGGAACGCTGGAAGCTGGATGGTGGCGACGTCAGTCTACTGATTGGCGGGCTGAAGG  
GTTGTCGCTGCCGTGTAAGCGGGCGGCTGAGCAGAGCTGGTGGTGTGCGGCGCTTACCCTCCCCATCCGCTGGTTCCGG  
TGCTGGTGCAGAGAGTCTGTACCGGGCGTGGAGCATCACCAACCATCTTATCACCGTGGTGA

>Cluster\_38947

ATGAAGAAAATCGTGGTGGCGGGCGTGGTACGCGCGTCTTGGCGTTGGGGTGGGGGCGGAGCTGGATGGGGGGGCTG  
GCATCATTATGCCGAAAAGGAAAACCGACTGCCGTTGCGCGGACGGAAGCGGTGGAACCCCTGGATGAAGCAAAAAGCG  
TGTTTGTGACGCTGCCGAAAACCATGTCACGCTGCATGACAACAACGGCGGACCAATTTTGTGCGCGGAAATTAGTG  
ATGGTGGTCCGCAAGGCGGAAAATAAGGCAATCAGGAGCCGCTGTATCAAAAGTATTGCGGCTTGAATGCCCT  
GACGAAAATGAAATTTGAAGATTTGCGTGGCATGAAAATATCCGCCATCCGAAAACCTGATTTCTGACGCATTAAGAAG  
ATCTTCAGCGTCGCAAAATGACCGCACCTATAAGGATTTGCTGGTGAAAAAGTGGTCTTCCAGTAA

>Cluster\_26890

ATGCTGAAAACCTGATTCCTTGCCTGAAGCCATGACCCGTTTATGCCGATGGTGTGACGGCAACCCGAAAATAATCACCAT  
TTTCGTGGAAGCGGCAACATTTAAACGACCGGAGAAACGCCCTCGTTTGTGTTTACCGTATCAGATGGTGTGTTGTTCA  
TGGATTACGCGGGGAGCTGGACGACCTCACGCTCGCGCTACTGGCGTGGTTTCCGAAAATCAGCCACAGTTGTGCTC  
AATCCGGAGGCTAATCAGGACATCAAAATCTCCGCCGTTATCAATGACGATGACAGCGCGGATCTCCTGTTTACGCTCCC  
CCTGCGGGACCGGTTCCGATCACGCGCAGCAGTACGGGCAACCCGAGCAGAACACCTGCCGTGAGCCAAAACCCCGCC  
TGCCATCTTCCGAAGCGACTGGTGCATGTATTCAGGATGTGACGTGGGGTGAAGCGATGGATAA



>Cluster\_47833

ATGACAGGAAGTCAGGTCATTGATGCTGAAGAGGACAGGCATAAACTGGTTGTAGAGTACAAGGATGCTTGCAACCTGC  
CGATTTTTATCACAATTTCAACAGCGGGGCATCCGCTCCGTACAGCTCATCCCTATCTTGAATTTGATGACCGGGGGC  
ATCTGACGGCCCGCTTCGGTGACAGCAGAGCTGTGGGGAAATTTTAAATTTGCCCTGTTTCGAGTGTGGGTGCGGGCAGAT  
ATCAGCTCGTATCTCGATTGAGCTTTTGTAGCCACCTTACAAAATGGTGTGGCAGCGAAAACCCGCAACGGCCGTGA  
CTGCCAGGCGTGCAGCTGCATCGCCTGTGCCCGCAGCTCGCCAGGAGACGCGAGCAGCGTCTTTGTGCGGGCTATC  
AGCGTTTTTATTCCTACTCCGCACCGCATATGCGGGTGTGCGTGATCTGATAAAGCAGCATCGTTCTCCCATGGAGCTG  
ATGACGATGCTGCGGTGA

>Cluster\_25112

ATGAACGGACTCACGGCAACGGGTGTCACCGTCGGTATTTGTGCAGGGCTTTGGCAGTTAGTGTCTTCACATGTCGGGCT  
CTCTAATGGATGGGAATTTAGGAACCTTGGCTTCGTCGCCCTTTGTCAGTTTTTATGCCGCAGGCGCGGTAATCGG  
GGTTTATCAGAAGCTGGCGGTTAATTTCCGGGATGGTGTGGGCGTTTTTCGCCGCGCTGGCTGCCGGTTGGCTGGCC  
CCGGTGAAGTGGGATTTCCGGGCTCGGGCAGCCTAATACACTGTACCCTTCTCGGCGGTGGTGGTCTGGCAAGGGCG  
TTTTCTGGTACTGTCTTTTATTTCCGGGGGCTTTCTCAGCATGACGCTATTTTTTGCAGCGGGATGAAGTGGACGGTGA  
CATTACTGGGTTTTCTGGCGGTAACCTGCGTGGGGATAATTTACAAGTACGGCGGACAAAATTAAGCGAATCGACGACT  
AACCGCACGGGTATTA

>Cluster\_62280

ATGAGTCAATCGATCTGTTCAACAGGGCTACGCTGGCTGTGGCTGGTGGTAGTGTGCTGATTCGATCTGGGCAGCAA  
ATACCTGATCCTCCAGAATTTGCTCTGGGGGATACGGTCCCGCTGTTCCCGTCGCTTAACTGCATTATGCGCGTAAC  
ATGGCCGGCGTTTGTAGTTTCTGGCCGATAGCGCGGCTGGCAGCGTTGGTTCTTTGCCGTTATGCGATTGGTATTAGC  
GTGATCCTGGCAGTGTATGATGTAATCGCTCGAAGGCCACGCAAGCTAAAACAATATCGCTTATGCGCTATTATGGCGG  
CGCGCTGGGCAACCTGTTCCGACCGCTGTGGCAGCGCTCGTTGTCGATATGATCGACTTCTACGTCGGCGACTGGCACT  
TCGCCACCTTCAACCTTGGCGATACTGCCATTTGTGTCGGTGCAGCAGTATTGTGCTGGAAGTTTTTTGCCCTTCTAAA  
CGAAAAACAATA

>Cluster\_24844

ATGGCTGGAACGGCGGGCGTTCGGGGCTCGCCCAAGCCAACGGCGCGCAAGGCGCAGGCCGAAACCCGGCAAGCG  
AGCCCTGAATAAAGATGAACCTGTTTTACGCCCATCAAAGGTGTGAGCCACCGGAGTGGTTCGCTGAAGAAGATCTCC  
CTCTCGCTACGATCATGTGGCAACTGACAATAAGAACTCTGCGGTCAGGACCTGTGCGCTGACCTCGCGGCTGCGG  
CTTGAGCGGTGGTGGTGGCCTACGAGTCTGGCGACGTGCGGTGAAAAATTTGCCAGACAGGGCAACACCATCACCGG  
TGCAATGGCGGATGGTCAAAAATCCGAGCTGACCGCAAAAAAAGAACAGGAGTCCGAGATGAGCAGTACGGGGGCAA  
TGCTCGGACTCGACCCAGCAGCCGACGCTGATTGGCTGGCGGGCAGAAAGCCACTAACCCGTTTTCTGAAA  
ATCATCGAATCATGA

>Cluster\_7948

ATGACCATGATTTGATGAATAACCCGGCGCAACAGCGGACCCGATGGTCATCCCGCGGTGCCGGTTCGACGAGCCGGT  
GATTAANAACACCGCTTTTTTCCCGGATTTGACCCGAAGCGCATGCGCGAAGAAATGCCCTCGAGCAGACTGTGACGC  
CGGCGCTCGCGCGGGGATTAANAACCGCGATGGCGGAGACCAACCGCGGTTAACCGACTGGCGCGGACTTACGCT  
GCCCGCGTTACGCGGACTTGAGGATGTGCCGACGGATGAACTCGACGGCGAAAGTGTGCGGTTTTTACTACTTCAA  
CGCTGTTTTCTCGATGACGACCGCGACGCTGTACGAGCGTTACCGGGCGTTGATGCCAGCGCAAAGGTGACAAAAGG  
CCGACAGCATCGATGACACCATCGATGAATGTGGCGTGACATGCGCTGGTTCGGTTGCCCGCATCCAGGACAAAGCGCGC  
TGCACTCGTGGGGCAAACTGA

>Cluster\_22287

ATGATCAATAAAGCTACAACCTTTGACTGTCTCGAAGAAGTGAAAAACCTCGGCAGCCTCATTACACTAATAGCAAAGC  
AACACTGATGCTACGCTCTTAGCGATATAGAGTTCATGCGCAGGACTGGCATGGGATATGACAAAATAGCATATCCAGAA  
AGCTATCGTCAGCAATGCTTTTACAGAACAAAAATTTGCAATCAACAACCGTCTTCGCACCCAACCGGAAAGCTGCGGC  
TTAACAACCGCGAAGCTGCCAGGCTGCTCGATCTCGATGAAGAAATTTATCATCCAGTGGGAGAGCGGAGAGTATGAACC  
AACTATCAGTATGCTTATCCACTGGCAAAATTTCTTGGCTGCGATCCGATGTGCCTGTTAACTGGTGGAGTTACTCCTC  
CGGAGCAACCAAAAAGTGGAGAGCAGCAACACCATGACGCATCTCAACAAGTTTGGCCCTTATCTCGCAAGCTTTCTG  
CGGAAGAACAATACCAATGGTGA

>Cluster\_17639

GTGAGCGAGATTAACATATCAGGCACTGCGTGAGGTGGCAGAGGCGCGAAGGGGATACGACGTGGCAGAGACTACAGGC  
TTTTTCATGCTCGCGCTACGCGGAGGTTGTGCAGGCGTTGCTGGATGAAAACGAAAGACTGTGTCGCGATCTGATAGCTC  
GTAATGGTGGATGAAGGGCTTCGGGAGTGGCAGAGAAGTGGAGGCAGGAGGTTGGCTTTGCCAGTAGCGTCATGC  
ATTTGTTGAAGATGGATGCATGTGTGTTGATGGGTTCACTGAGTATGATAGTCACTCGCTACCTGATGGAATGCATGAGCT  
TTATGCTGCCCGCCAGCGTCCGTAGTCCGGAAGGACTAGTTAAAGCAGTGCCTTCTATGAACAGGTAAGTGTGAGA  
ATCCGCCAGTCAAAACCGGAGCATGGAAGACCGCGGTTGACTGGGTACTCAACAGGCTTGCCAGGCTGTAATATTGAC  
GCCAAGGAGGTGCGTAA

>Cluster\_56017

ATGATCAATGCACTGGGATGCTGGAAGTGGACGGCATGGTCCCGCGATAGATGACGCGGATGCCATGCTCAAAGCAGC  
TAACGTTTCGCTGCTCAGTCACGAAAGTGTGACCCCTGGTTCGCTTAAACGCTGGTGGTGGAAAGGCGATCTGGCGCGGCTGTC  
GTGCCGCGCTGGACGCGAGGTTGTGCTGCCGCGATGCGTACCAGGCGGTGTCATCAGCCGCAAGGAGATCGGTCCGCCAGAC  
GATGACACCAGTGGCTGGTTACTGGCTTTAACCGCCAGCCGAAGCAACCCGTAAGGGAAACCGACGCCAGTTATCGT  
CGCGAATCTGCTGACGAGTGTGGCGCTGTTAATCATCAGTACGTCAGGGAATGACGGCAGGAGAAAGTGGCTGCCACT  
TTGGCTGGCGCTGGAAAAAGCCAGAAATGCGCTCGAACAGCTTTTTCTGCCGGGACGTACGTAACCGCAGTAGTCTG  
TATCGTCTCAAGCCCATTA

>Cluster\_15993

ATGGATCGAGAGTTAAAAAATCTGACGCTGAATATCAGTCAACTGGCGGCACGTGTGAGGTGTACATCGCCAGACTGCTGC  
GGCAAGGCTGCAAAAATCTACCCGTTGCAGGGGGCATGAAAGCAACCTCAAGCTTTATCGGGTGGTTGATATTGTGTCGG  
CATTTCTGGCATTGCCACCAGCGGTTGCGAGAAGCGGAAATGGACGCGCATGAGCGCAAAGCCTGGTATCAGCTGAACCT  
GAGCGCTTAAAGTTGCAACAGGAAACGGCACAACTCATTCGGCCAGTGTGATGCTGACGAGGAGTTGCCATCTGGGCAAA  
AGCCGCTCGTCAAGTGGAGACATTACCGGATATTCGGAACGTCAGTGGCGGTCTGCAGCGTTCGCCGCTGTGAGCCGCTG  
TTCAGTCCATTATTGATGATCTGCCGATCAGATAGCCCTGCGGGTACTGAAGCAGGTGCGGATGATGAGGAGGAATTA  
CAGCAGGAGGAGTAA

>Cluster\_51779

ATGATGATGGTGTGGGATGATGCTGTTATGCTGCGCACCGTTCCGATACAGGAACTGACGATCAACCGCAGCTGGCG  
ACATGCGGCAACAGTCCGGTAAACCGAGCTCCGTCACGCGTTCCTGGGACCGGAAACGACATGCTGACGCTTCCCG  
GTGTTCTTATGCGGAAATAACAGCGCGGACGCTGTCGTTGCTGGCACTGGAGCAGATGGCAGAACAGGGGAAAGCATGG  
CCCTGATTTGAAGGACGGCCACGATTTACGGCATGTAATGATGAGGACTGAATCAGACTAAAACGGAGTTTTTCCG  
CGACGGATGTCGGCGCGGATTTAGTTCACCTGTGCTCAAACAGGATGGATGAATCCCTGTCCGATATGTTCCGTTGATC  
TCAGTGCACACTGAATAATTTGACAGGACAGGCAACGCTGCTTAAAGCGATATCAGTAAAACGGTGGGAGGCTGCTG

TCGTGA

>Cluster\_67025

ATGACAGTAAAAACGATACTGAAATGGCTGGATACACTGACAGCCTGGGGATTTGTGATCGGATAGCCTGCCGGGCATA  
CGATCTCTTTATGGTCCAGTCTCCTGCCGGTTTCGTGTTTTTTGGGCAGGGGGAGATTATGGGGGATTTTACGGGGGTGC  
AGTTTGTGATGATGCCTTACATAACATGTGTAATCATTCTCTTTCATCTCTGGGGCAGCTTAGTGGCTGGCCGGGAGAG  
CGAATATGCTGGAGAATGCTTATCTGGATGCACACTCGTCTCCTTGGCCGACGCTTTTTAGTATTACTCAGCGTATGT  
CCTGTTTCGATAATGCAGAAAGACFCGTTAATGCCTCATTTATCTTAAAAATGATGAATCTTCTTCGGTGATAGTTATG  
TATTTTTCTGCTATTTCTTTCTGCAGAGAAATATTATCAGTATAGAAACAGAAACCAACAACATGAGGATATTACCCCA  
GATTGA

>Cluster\_27093

ATGATGTTTTTACGTCAGGAAGACTTTGCCACGGTAGTGCCTCCACCCCGCTTGTCTCTCTCGACTTTATTGTCGAGAA  
CAGTCGGCGGAGTTTCTGCTGGCAAAGAACCACCCGCGGCGCAGGGTTACTGGTTTGTGCCGGGAGGGCGCGTGC  
AGAAAGACGAAACGCTGGAAGCCGATTTGAGCGGCTGACGATGGCGGAAGCTGGGGCTGCGTCTGCCGATAACAGCAGGC  
CAGTTTTACGGTGTCTGGCAGCACTTTTATGACGATAACTTCTCCGGCAGGATTTACCACACTCACTATGTGGTGTCTCGG  
TTTTTCGCTTCAGAGTAGCGGAAGAAGAACTGTTACTGCCGGATGAGCAGCATGACGATACCCGCTGGCTGACGCCGAGC  
CACTGCTCGCCAGTGACAATGTTACGCTAACAGCCGCGCTATTTCTCGCTGAGAAGCGTGGCGGAGTACCCGGATTA  
TGA

>Cluster\_58108

GTGAAAAAGTGGTTATTAGCTGCAGGCTCGGTTTAGCACTGGCAACTTCTGCTCAGGCGGCTGACAAAAATGCAATCGT  
CAACATGGGCGAGCTGTTCCAGCAGGTAGCGCAGAAAACCCGGTGTTCCTAACACGCTGGAAAAATGAGTTCAAAGGCCGTG  
CCAGCGAAGCTGCAGCGTATGGAACCGATCTGCAGGCTAAAAATGAAAAAGCTGACGATCCATGAAAGCGGGCAGCGATCCG  
ACTAAGCTGGAAAAAGACGTGATGGCTCAGCGCAGACTTTTGTCTCAGAAAGCGCAGGCTTTTGGCAGGATCGCGCAGC  
TCGTTCCAACGAAGAAGCGGCAAACTGGTTACTCGTATCCAGACTGCTGTGAAATCCGTTGCCAACAGCCAGGATATCG  
ATCTGGTTGTTGATGCAACCGCGTGTACAACAGCAGCGATGTAAGACATCACTGCCGAGTACTGAAACAGGTT  
AAATAA

>Cluster\_45864

ATGAAAAATAAATGCTTATTGCGGCTGTGTTGACTGGTCTTCTTTCAGGATGCGTTGATGGCAATTCACCCCTGGCAG  
TCAGGAAGGTGTCGTGAAAGCGGATCCTCGCTATTCAGAAATGTAACCTCCCTGATGTAATGAAAGAGGGCCAATTGCTG  
CGGGTCTTTACATTTCCGGAACCTCCCGAAGGCTATTGGTTAATGAAGCCAGAGCGTAAAAATGCATTATAAGGGAGAT  
GGTATTTATCAGCTTATTTATTCGAAAAAGCAGGTGCGGTAACAATGCAATTTGCGACTATGAACTGGAACCCGAGTT  
CACTGTAACAGGTCTTGAATGGCATTAAATCAGGCTAAAACACTCAAGAAAGGAGGCATGGATAAAAAATACAAAAGTCG  
TTATTCCTGCCGATGGAAGATGTTTGACAGATTCAAATTTGGTCTGATAAAAAAGCAATAGCCGCCATGGTAGCACA  
TGTAATAAG

>Cluster\_39299

ATGAAAGGCGTCACCCGACAGCCGGGATTATCAGCGATATCGACAGGTGAAGGTGTGCGTGGCGCTCACCCCTGCCGA  
ATGCGACGATCTGCGCACCAACTGGCTCCCATCCTGCACGCAATACGACAGGACAATAAGGACTACTGGCTGCCGGATA  
TCGGCGAGCAGGTGGAGGTGCTGCTGGATGATAACGGCGAGGATGGCGTGGTGTGGGGCGGCTATTCGCTCGGTGGAT  
ACGCCACCCGTGACGGACAAGACAAGCGCTATGTGCGGTTCTCCGATAAGGCCGCGAATTGAGTACGACCCGCAACAGCA  
CCAGTTGACCATTAATGGCGGCATGAAAAAATCGTGTGATGAGGTGAAAACACGCGTCAGCATCACCGCGCCGAGGTGG  
TCATCACTGGTAATGTCCGCGTCCCGGCAATATCAGTGCCTCAGGCTCTATCATCGACGCTGGCGGCAATAACCAACCAT  
CACTCTCATTA

>Cluster\_7865

ATGATTTTTGAAGACGCTCAGCAAAAAGGACTGTGCTTATTGAAATAGCGATGGTAATTATTTTGTCTGTGGTATTTAT  
TTCTGGCGGGAGTTATATATATCTCTTTTCAAGGTTTTTGTCTCAATCTTGTGTTGTAGCAACAGATATGAATCTGTCA  
GAAATATAATCATCAGTTCCGGATGTTGAATATAAACTGGAAAATATGATGATATCATCAATAACAAATGACAATCGATTT  
AATAAATATCAGGTGATTTTGGAAATGATGGTTATACTTAATATCAGGAAGTTCTCTGTTAGTGTGGATGTGTTTTT  
TATFACCTGCTATTTGGCAAAATATAACTGTGTATGGATTCTCAATACCAACAATAAAATATACCGCAAAACATATGTCTG  
CTGTTCTCCCGTTAGAGTTATTAAGTGCATATGGCCTTAATTAATTCAGGAGAGAGTGGTGTACAGGGCTTCTGTTTAA  
CGTACTAG

>Cluster\_27100

ATGCTGGAAGATCTGCGTGCCAACAGCTGGAGTTACGCCCGTGTGCTGATGGTCTTGCCTATCGTGTGCTCATTTTTG  
TTCGGTGTGGCGCAAAAAGAACCTCCTCAACAATCTGTGGCGGCCCGCTGCTGGTGTGTATCGCATTTATCCCGAAT  
GCTTTTTCCGTTATGAAATCCAGCCCGCGCAGCATTGGCCGCGCTTACTATCCATCACGGTTACGCCGTAGTGATC  
AATAAAAACGTTGGTAGCGGGGGATGATTTACCATTCGCCACGCGCTCACTATCGGCAATCGTGGTGGCGATAACATGGC  
ATGTCACACATTTGGCAACCGCGTGAACCTCGGTGCAACGCTATTATTTCTGGTATATCACGCTTACCGTTAACACGTC  
CCGTGGTGGCGCAGCGTGGTGTGACTCTGCTCCCGACAACGCGTGGTGGTGGGAGAAAAGCGCGAGTGAAGGTA  
ATTAATGA

>Cluster\_18538

ATGATTCGCAAGTATTGGTGGCTCGTCTGTTTTCTGCTGTCTTCTGTTTTTCTGTTTGGATACTTTACTGATGCAGTGGATTGA  
ACTGCTGGCAACGAAACAGACAATGCCGCAATGAACTCAGTTAATCCACTAAAACCTGGTTAACTGTGACGAACTGA  
ATTTTCAGGACAGAATGTGA

>Cluster\_30882

ATGAAAAACGATTCAGTTTTTGTTTGTGCTTCTGGTGTTCGCATCATGTATGCCATCATCTTACAGCAAGGTA  
TATGGAAAAGTTGATGTTTTGATATTAATGTTTGGACATATAAATGCCCTTTTTTTAGGGGTGTTTATGGCGGTCATGT  
GCATTGAATACTGGCGGTA

>Cluster\_17783

ATGACAATGTTCAATGAGGCGGAGTTAATCCGCCAAGTGAAGAACAGCGCGCTGTGATTGTGCAGAAAAGTGTCAAGT  
TAACCTGGTTCGAACTGAAACAGTGTTTTGCACAAGAAATGTGAAGAACTGCAATGACAGTTGATCTACAGCGAGAAT  
TTATACAATCCAGAAATTA

>Cluster\_56879

ATGGCAAAGACTATTAATAATTAACAACCCGAGTGCATCGGTCTGCTGCCGAAACACAAGGCAACGCTGCTTGGCCT  
GGGTCTGCGTCTGATTTGGTACACCCGTAGAGCGGAGGATACTCTGCTATTCGCGGTATGATCAACGCGGTTTTCTTCA  
TGTTAAAGTTGAGGAGTAA

>Cluster\_1680

ATGGTAAATCTCCCTCCTGAACTGGGGTCACTGATGTATGGGCTGGTGGAGGTGTTGGGCTGATTGCAGGCTGCTACT  
TCGCTATTTTCATCTGTTCCGGTGTGTTGCTGTTTTCAGACTGTTTTGGTCTGTAATGGTCAATTTGACCTCAAGGACAGGACCA  
GAACAGACAACACAGACCCCGTTAA

>Cluster\_40835

ATGACTTCGGAACAAGTTAAAAATCTCTTCCGTGAGCGTGGTATCACGTTTTACCCGCTGGGCCGAAAGAACAGCGCTACAG

CCGCAATGAGGTCTATCGTGTCTCAATGGACAGACCAAAGCTCGTTACGGCAAAGCCCATGAAATTGCCGTAAAAC TGG  
GATTA AAAACCCACGTCAAATGCGGCATAA  
>Cluster\_34017  
ATGTCTTTCCCTTGCCCGGCTGTGGCGCTTCAGCCCGCACCCGTGGTTCGTTGGAAGAACACGAACAAAACATCTA  
CAAAACGTATTACACGTGCAATAATATTGAGTGGGGGCTGTTTTGTACGTTGAGTCGTTGTACGCATCTAAGC  
GCAGGAAGTCGAAAACCTCATAG  
>Cluster\_53078  
ATGAGTTTTTCACCGCTTTTCGTGAAAACTTTTTGTAGATCTTCTGGATCGCTCGAAAATCGTCATGTGGATAACTTTGT  
GCATAAATFATTTACATCGCTTTTAATTTATTATCATGCTTTTTACAGCATGGTGTATCTTTGTTTTTCATGCAGTTA  
AAAATAAAGCCATCCCTAATAATTGA  
>Cluster\_63656  
ATGGCCGGATTAACATAAGAGCAAAGAGCACAGCGTGAAGCCGCACAAAAACGCAAATGAGTTAGTGGTTATGGTGAC  
CGATTATCAGATGTTTTCCGGCGCACCAACTATCGCTAATGTTTATCCTGATGAAGTTGACAACTGGAAGGCTATGGGCT  
GAAAACTCAGGAGTAA  
>Cluster\_38513  
ATGCAATCTCTAGTGTCTGTCTATCTGCATTATCTCAGCATTATCTCAGCATTATCTCAGCATTATCTCAGCAT  
TATCTCAGCATTATCTCAGCTTGCCAACTCGACACCAATGCAGGATAGACAATCCGATGTCAAATGTTAA  
>Cluster\_56336  
ATGAAAAACATGATTGCGGAGTTCCTCCGCGCTGCGGGGATAAACCGCGCGGCAATGGATGCGCAGGTACGCGAATTAAG  
AGTTCCTCCGCGCTGCGGGGATAAACCGGTGTTGAGGTGCGCGACCAATCTGTACGTCGAGTTCCTCCGCGCCAGCGGG  
GATAA  
>Cluster\_55678  
ATGACTAAGAGCACCATGATGAGTAGCTTCATCATGACCCCTTCTTATTTATGGCCCTTCTCCTGGGAGGGCTTT  
CCGTTTTCAGCGTCCCGTGAAATCGTCCGCTTACCTCTTCCGCATGCAAGCAGTCTATCGCTAA  
>Cluster\_36031  
ATGACGATTTCCGCACTGAAAGAAATCGAAATGCGATTTTGTGCAGATATTACGCTGTGTGCCGTGTTAATGACAAAAGC  
AGATAAAAAAGTTGTTATTTTTTTTCATAACATGATCAGTGTGATGATTTTACCCAATGGAAAACGATGA  
>Cluster\_62824  
ATGGCTACACCGCTTATTCGTGTGCATGAACGGACACATCTACAGAGTATCAAATCGTCGTAAGCGTAAGCCTGAGCCGAA  
GCCATCCGAAATACCAACTGCTCGGATATACGCTAGCCTGTTGATAAAAAATGGTTGCGACTGGCAGCAAGGAGGA  
ATCATGGCTGA  
>Cluster\_63295  
ATGGCAAACCATCGAGGCGGTTCCGGCAATTTTGCAGAAGACCGGAAAGAGCATCAGAAGCAGGTAAAAAGGTGGACA  
GCACAGCGGGGTAAATTTCAAGAATGACCCGACGCGCATCTGAAGCAGGTAAAAAGGTGGCAAGAGCAGTACCGCA  
AAAGCGACAACCTAG  
>Cluster\_52027  
ATGAGCGAAACCAAGAAACCAATTCACGCACTTACCTACAGCTTGACCTGAAATTTTCAAGATTTTATTTGCTGAAGC  
CAAGAAAAGGCAATTTATGGTCACTGATTTGATGTTAGAAATCATTACTGAAGCAGCAGAGAATCAAAACAAAAAAGG  
GTAAGTGA  
>Cluster\_17539  
ATGAGAGGACTTGATACAAATCCCGCATCTTCCGGCAGAAATGATTATTCGCCAACCGGTAAGCCAAATGCCATCGAG  
AGAGGAATTGCTTAAAGAGAAATCTTCTCCGTCAGTGAATCAAAACAAATATCTGAATGCGATGTGGCCAAAGGAGGCA  
ACCACTGA  
>Cluster\_64819  
ATGTACAAAAACGTTATCCCAATGAGATTTTTTATTGCGAGGAAGTATTACGAAATGAATAACGTAACGAAAAGCAGGA  
ATGCCCGACTGCGGTAATGAAGCACCTGAATATCTGAAAGAGTGTCCCATTGTGGCGGACAGAAATGCAACCACTGCG  
ATATGGGCGATGACACGGCGTGCATGAATGTTGTAAGGTGAACAGAATGAATAA  
>Cluster\_60941  
ATGCCGGTAAATTAAGTACGTGAAAACGAGCCGTTTCGAGTAGCTCTGCGTTCGCTTCAAGCGTTCCTGCGAAAAGCAGG  
TGTTCTGGCGGAAGTTCGTCGTCGTGAGTTCTATGAAAACCGACTACCGAACGTAAGCGCGCTAAAGCTTCTGCAGTGA  
AACGTCACGCGAAGAAAACGCGCTCGGAAAACGACGCGCCTCGTCTGTACTAA  
>Cluster\_51462  
ATGACCAGCCATATCATCAGCGCCATTCGACCCTTGTTTTTATTGAGATAGGCGTAATAGAGATCTATTTGTTTCGCAA  
GTTAACGGGACATAAAGAACGCTTTATTTGAACCTCAGCATTTGAATATATCGCCGCTTATACCAAAGGACTTTTCCCGCAG  
CTATTTGGGCGATGTTGATAGCGTTTGTATCTGGTTTTATCGGGTGA  
>Cluster\_21992  
ATGAAGAAAGTATTCACCCTCAAACCTAAAAACAGATAAAGCCTTCAAATATTTTCGAAATCTAATTTGATGTACATAATGG  
ATGGGTTGACATTTGATAATGATGACATCTATCTGATTATGCAATCCCATCTTTACAGTTAAAAACCTCAGTAACAAAA  
GCTGGTTTAGCCAAATTTTATAGTGAATGGGTTAATAGTCTCAGACTAA  
>Cluster\_11753  
ATGTTTACTTATATCAGGCAGAAAATTC AACAGCAGAACCCGCTCTGGTTAATGCCATTGAGCAAGGCTTCGGGCAGA  
GCACGGTGTGTCACTGAAGATGACATTTCTATGGAGCTGACCAAAATGGGTGGAAGCTTCTGATAACGACATCCTCAGTG  
ATATCTACCAGCAAACGATCAATTTATGTTGAGTGGCCAGCACCCCTACGCTTTAA  
>Cluster\_16618  
ATGCGCGGCAAGGAACTGGACACACTGATCGAGCAGCAATTAACAATGATGCTGGTTGAAGGCTTTGACAAGTCCCCTAT  
TTCCGCCAAGGCCCTGCATATTCGGCTCAAGGCAAAAGGTATCGTTAACGGTGGTTTTAAAAACTTATCTTGGGTTCAA  
TTGAGGTGTCAGCGCAGATGACATTTCAATGCACCCCAAAAAATGCTGGTGTAA  
>Cluster\_27639  
ATGAGCGTGATAAAAACCTACACAGGAATTTGTTATCACCCGAGACGGTGAAGCGGATGAAATTTACATTTCCACTGAAAC  
GTCTGGGTTGCCCGACGTTGTGAATCTTACGACAAAAAGACTGGTTACCGTTGGGGGACCTAACATGCGTCCCGCTC  
TGCTACTGGACAGCATCAGGCCAATAAAACAGGTAGCAACCAGGGAACAAAATTA  
>Cluster\_10554  
ATGAGTACGATAGCTGAGCTTGTGTCAGGCTAATTTTTCTGTAAGAGTGGTGGCTGGTATCGGTATCGTTTATCGTCCAG  
TTTGGCGCTTGATGAGTTGATGAGCATTCACCTGCGCGACGACGCTATCCGCGTACCGTGTCTTTCGACGGTTGTTCA  
AACTCAACAATGAGTTTTCAGCGCAACAGAAATTAACCGAGTCTGGATTTAAAGTGA  
>Cluster\_49070  
ATGACGTATGGAGAAGCGTATCTGGAAGGTTGAAAAACATCTTAAATATGAAGGTGTTTCCAAATCGCTTCGAGTCTG  
GTCGTTTTATGATTGGTAGTGGCGTTATCTGCTCTCCTCCGCTTTTATGTTGGTGGTTAGCGGTAACAAATTAACAATGACT  
ATGGTGTTTTCATTTTTTTGCGCTGCCCGCTCATTTATTTAA

>Cluster\_39452

ATGATTTCGAATGACACTTGGCCGATTACGCCAAAATCCATGGACAGGCTAAAGCAGCCAGTGACTTTGGTGTAAATCCAGTG  
CGCTATCAGCAAGGCCATTTCTGGCAGGCCGTAACATCATGTTACGGTAAAGCCTGATGGCAGTGTGATGGAGAGGAAG  
TTCGTCTTTCCCAAGCAACAAGAAAAACAAATAG

>Cluster\_20365

ATGGAAAGTATTCTGAAATCAAAAAATGGTGTACACGTTTCATTTAGATGCTAATGATTCTAGAGGCTTGTAAATCTGAA  
ATAFCTCTGTCTCTCTTAGATGTTCCATATGAAGGAGTAAAAGCCCGTATGTTCCAGATTAACGAGAGTATTGATCAGG  
CTCTACACCATTTCTTAAGTAAAGAAGGTGGTAAAAATGATTAA

>Cluster\_8762

ATGAATAACAATGAACCAGATACTCTGCCTGATCCCGCATAGGCTATATCTTCCAGAATGATATTGTGGCGTTAAAGCA  
GGCATTTTCACTGCCTGATATTGATTATGCCGATATTTCCCAACGCGAACAGTTGGCCCGGCATTAAACCGTGGCCGT  
TGCTGGCAGAGTTTGGCCAAACAAAGTAG

>Cluster\_35133

ATGAATACTACTATTGCCCTCACTCTGACTGTTTTTCTTAATACTGGCGAGCCTGTTGACATGGTTATTGACATTTACGG  
TTCATGAAAGAAATGCATGGCTGCCGACGACAGAACAAAAATCCCGGTAACCTGCTATCCGGTCGATAAAGTTATTACA  
TGGATAATAACGAAATCCCGGCAGGTCCTTAA

>Cluster\_27488

ATGAACAGAACTTACAACATTTGCTGGAATGCCCGCGTAATATGTACGTCGTTGCTTCCGAACCTCCGCGCGGCAGC  
TCGGATGAAAACCGAGGTCCGGTCCGGTGGCGGCATGGTGCTCTGGCGTTAAGCCCGCTCAGTGGCAGGCGGAATTCA  
CATCTGAGGTGACGAATGCAATGGTTACCGGGAAACGGTATGA

>Cluster\_47957

ATGAAAAACGTGTTAAGGCACTCACTGTATTACTTACTCTCTTACGCTGACGGCTGCGGTCTGAAAGGTCGGCTCTA  
TTTTCCCGCTGCAGATAAAAAACGACCCGCCGCCACAAACCGGTAGAGACGCAACGCAATCCACGGTGGCCGATAAAA  
ACGATCGCGCCACTGGCGATGGTCCATCCAGGTGAATTACTAA

>Cluster\_40735

ATGGCAATTAAGCATTTTCCCGTCATTCGCTTTACCTCCAGAGGGCGCAATACGAGGTGACGAAACGCTGATTACCAC  
TATCGACAAAACATCGTTCGGAAGGATGCACACCACATCTACCTCACTGACGGCACTTACTTCTGCGCCACCAACGTGG  
CGCGGGTGAATCTTATCCGACAGGTACAGGACCCACGCAATGA

>Cluster\_20329

ATGGCTAATTACAATTCATTAATTCGCTCTCTTGAAGTCAAAGGCGAACTGGTTATAGCAAAGCATGGATTTATCGTCT  
TATTAGTCAGGGGAGGTTCCCTAAACAGGTAATAATGGAAAGTCGGGCAATGCTTTTGTGAGTCTGAAATAGATGAAT  
GGATTGAGAAGTATATATAGAATCTAGAGACGAGGTGCCTGA

>Cluster\_558

ATGCACTCTGAAAAAGAACTTGTAGTATCACAAATAGCAATGGCTTGCACCTCTGGCTATCACCTCTCAGGCTAATGC  
AATACTTATGACACTGGACTTATTACGACAATCCAATACCCTCTTACTGGAGCAATATGGATGCACCGGGTACTG  
TAGATGGTAACTATGTGAATTTATAGTGGCTTTTGTCTACTATAACAACACAAACGGTGATTTTCGATACCACCTTTAATGGT  
GACACTGTTAACGGGACTATCTCTACATATTACCTGAATCATGACTTTACTGATGGAACAACAACAGTGAACATCAG  
CAACTCCCTGATTCATGGTTCAATCACTTCAATGCTGCTATGGGTGAAAGCAGTGTGATGTTATGTTCTATCAGTTCT  
CTGAATACGGTACTGATCGTGAATTTGATGATAATGGCATGATGGTGTATTCACCTTAAATATTGCTAATTTACATA  
ATTTGATGACGATTTATGAAGTTTTTACTTCACTGATTCATATCTGGACGGTGACGTTACCAAAATATACTAACGAAACCTT  
CCATACCCAGCTGGTGAAGGTGAAGAATACGCCGTTTGTGTTGCAACCGGTGGTGTGGCCTTGGGCTGGCAGTGAATC  
TTGATGTCGAAAGTAACATCAATATTTCTAACAACCTCCCGCTGCTGGTATCAGCTGACTCAGGGTAATACCGTAAAC  
AATACTTCACTAGCTGAATCTCATCTTGGGATAACAATATCTCAGTTACCGATTCACAGTGAATTCAGGTTCTGTAAAC  
TACTCTGGAAGACAGTGGTTTCTATGGTAACTCTGCGGAACCTAGTGAATCTCTGGTAAACGGCGAAGCTAATGATGTAG  
CTCTGTATTTCACTGATAGTGGCTTCAAAATTAATCTCCATGAAAAACAATGTTTATTTTCAAGCAATTTACTCTGCTGGGT  
GATGTTGTTTTCGCAAGTACTTTCAACGCAAACTTCTATCTCAAGGTGATGACAGTAATGCCGATGGCGTACTGGACAC  
CAATGGTGGCTGGCTGATGACTCACTTAATGTTGATGAACTGAATATCACTCTGGATAATGGTTCTAAGTGGGTAGGCT  
CAGCTACTACATCAGCAAAATGTTGATGATGAATCTACTGCTTCGACTGACTGGTATGATGTTACAGGTAATAGCCTGTAT  
CCGGCGTGTGTAACAGAAGCAAAATGCTTGGGGTCTGATGATGATCAAGTATTCAGAGCGGTGTGTTTAAACGCTAC  
TCTGAATAATGGTTCTGAATGGAATACCGTTAACGCTTCAAACATGATACTTTAGCTGTGAATAATGGCTCTCAGGTTA  
ATGTTCTGAATCTAGCTTGTATTCTGATAGCATCGCTGACCAATGGTTCTTCTTTGAACATTTGGAGATGAAGGTTAT  
GTTGGAACGATCATCTGACAGTTGATAGCTACAGTACTGTAGCGCTGTCTAGTGTGACAATCAAGTATCTATAATGG  
TTATTACACTCCGTCGCTGTTAGCAAATACAATAACTGTGACTAACGGTGGTTTACTGGATATTAATGTAGACCAGTTCCG  
ATGATAATCCGTTCCAGACTGATACTTTGGAACCTGACCGCGCAACATCGCTGACCAATAACGGCAACGTAAGTGTCTGGT  
GTATTCTGATATCCACAGCAGCGAATATGTTCTGAAACGCTGATTTGGTGAACGACCGTACCTGGGATACTTCCAAGCTAA  
CTACGGCTACGGTATTTGTTGCTATGAACCTGATGGTCACTGACTATCAACGGTAACGGTGACATGAACAACGGCGACG  
AATGGATAACAGCTCTGTTGACAACTGTTGCTGCAACCGGTAACACAAAGTTCGTATCGACAACGCAACAGGCGCT  
GGCGCTATCGCTGATTACAAGATAAAGAAATATCTACGTAACAGCAGTCAACACCAACGCGACCTTCTGTGCTGATA  
CAAAGCTGACCTGGGTGCATACACCTATCAGGCTGAACAGCGCGTAACACCGTTGTTCTGCAACAGCTGGAGGTGACCG  
ACTACGCTAACATGGCGCTGAGCATCCGCTCTGCGAACCAATATCTGGAACCTGGAACAAGACACCGTTGGTACTCGT  
CTGACCAACTCTCGTCATGGCTGGCTGATAACGGCGCGCATGGGTAAGTACTTCCGGTGGTAACTTCAACGGCGACAA  
CGCACCATCAACTATGATCAGGATGTTAACGGCATCATGGTGGTGTGATACCAAAATGACGGTAAACACGCTAAGT  
GGATCGTCCGGTGGCGTGCAGGCTTCGCTAAAGGTGACATGAATGACCGTTCTGGTCAAGTGGATCAAGACAGCCAGACT  
GCCTACATCTACTCTTCTGCTCACTTCGCGAACACGCTTTGTTGATGGTAGCTTGAGTTACTCTCACTTCAACAACGCA  
CCTGTCTGCAACCATGAGCAACGGTACTTACGTTGACGGTAGCACAACCTCCGACGCTTGGGGCTTCGGTTTGAAGCCG  
GTTACGACTTCAAACCTGGTGTGATGCTGGTTACGTTACTCCTTACGGCAGCATTTCTGGTCTGTTCAGTCTGGTGTGAC  
TACCAGCTGAGCAACGACATGAAAGTTGACGGTCACTTACGACAGCATGCGTTATGAACTGGGTGTAGATGCAGGTTA  
TACCTTCACTACAGCAGGACAGGCTCTGACTCCGTAATCAAACTGGCTTACGCTACGACGACTTAAACACGATA  
ACGATGTGAACGGTGAATCCATCGATAACGGTACTGAAGGCTTGGGTACGTTGTTGGTCTGGGTACTCAGTTCACTTCA  
ACCAAGAACTTACGCGCTATACCGATGCTAACTACCTGGTGGTGCAGTATGATCAAGACGTTCCGCGCAACGCTGGG  
TGTTAAATATACCTGGTAA

>Cluster\_46235

ATGAATATGCGGATATCTTTCTACGCAAGGATATTTATCTCTACTCCCGTCAATGATGATCTCTTTTCTCTGCTAA  
CGGTTTCCGCGCGCCATTGATTTATGCGAGGATATGATATCAAGCGAGTTGTACGCCAGCAGGCAAGCCCTTTCAG  
GCATTACGCAAGGACTGGAGTGTCCCGATGGGCAATGGCTGGTTTTTTTCGGATATGACCAATAACGCCAGCGGAGGACC  
GTATTTTTTCAACAAGGAGCGGAATTTTCACTATTTACCAGAAAATGAAACTGGAAATGACTCTGTTTGGCAATAACACCT  
TACAGAGATAATAAACAAGCGCGGGCCATATTTGCTAAAGAAAATCAACGCTGAATCTTACTGATGTTATTTTTCGG  
GTAACGCTCGCAGGCTGATGGTGGCGCAATCTATCTTCTGGTACTAATGATACTGGTGGCGTGCATTTACGTGTCACT  
AACGCCATGTTTTCGCAATAACATCGCTAATGATGGCAAGGTGGCGCAATTTATACCATTAATATGACGCTTATTTAAG

TGATGTTATTTTTGATAACAACCCAGGTATATACATCAACAAGTTACAGTGATGGCGATGGCGGGCAATCGATGTTACCG  
ATAATAATAGCGACAGCAAGCATCCTTCAGGTTATACGATAAATAAATAACACCCCTTTACAAATAACACTGCCGAAGGT  
TATGGCGGGGCGATATATACCAATAGCGCGACGGCTCCCTATCTTATTGATATTTCTGTGTGATGACAGCTACAGCCAGAA  
CGCGGGCGTGTAGTGGATGAGAAACAACAGCGCAGCAGCTATGGAGATGGTCTTCCACTGCCGCGGTGGCTTTATGT  
ATCTCGGCTTAAGTAACTTACCTTTGATATTGCCAGCGAAACCGCTGGTTATTGGCAATACAGAGAAATGACGGAGCT  
GTTGACTCTATTGCTGGTACCGGTTGATCACCAAAAACAGGTTCCGGCGATCTGGTACTTAATGCAGATAACAATGACTT  
TACTGGTGGATGAGATGAGAAACGGTGAAGTTACCCTGGGTCGCAGCAACTCACTGATGAATGTCGGCGATACGCATT  
GCCAGGACGATCCGCAAGACTGCTACGGTCTGACGATAGGGAGTATTGATAAGTACCAGAATCAGGCAGAGCTAAACGTT  
GGCTCCACCAACAACCTTTGTGACTCATTGACGGGCTTTCAGAATGGCACTTAAATATCGATGCTGGTGGCAATGT  
TACTGTTAATCAAGGTAGTTTTGCTGGCACCATCGAAGGTGCTGGTCACTCACCATTGCGCAAAAACGGCAGCTACGTGC  
TGTCGGGGGCGCAGCTCGATGGCGCTAACCGCGATATAGTCGTGATGATGGTGCCTTTTCGCTGGAAAGCGACGGC  
GCAGATCTCGCGCTCTCCAGGACGATCCGAGTCGATCGTGTAAACGGCGGTGTCGATCTCTCGATTCTCCAC  
CTGGCAGATGGCACATACACAACGATGGCCTTGAAGTCAACCGCGCAGCAGCGAAACGGTTATCGGCAGTCAGGATGG  
TAGATCTTGCAGGTGAAACGATATGCATATCGGGGTGACGGGAAAGATGGCGTCTACGTGGTGGTGCATGCGGGCGAC  
GGGCGAGTAACTGCGCAACAATAATAGTTATTTGGGCACAACAACAATCGCCTCCGGTATGCTGGAGGTGACGGCACA  
CTCGCAGCTGGAGATACCCACTATAACCGCAGGTTACTTTACCGATAAGCAACAAGAAAGCGTGAATGGAGATTACTG  
CCAATGTCGATCTCGCTCAGCAGCTGAGCATGGGCTGATATTGAAATGCGCCGCGGCGTGAAGTGGCATTGAT  
GCGGGGTAGACACGAGTGGGGCGCAGTGGTGCACAGCAGCGGGCAGCATCAGGATGAGGGTAGCACATTTACTAA  
AACGGGGGCGGGTACGCTGGAGCTGACCGCCAGCGGTACAACGAGTCGCGAGTACGTTGCGAAGAAGCCACCTGAAAG  
CGATGTTGGCGATATCTTCTTATGCTTCTGCTACTGTCGGTGGTGGTGGGCGACGTTCTGTTACGGCGGGATCAG  
GATATTGCTTATCGATCTACTTCCAGCGGCATCTCGATATCAGCGATGGTACGGTTTTCGCTCTGACCGGGCAGGA  
TACTTCCGTCGCCCTTAATGCTCATTTGTTAACGGCGATGGGACGCTGGTGAATGCTACCGATGGCGTGACGTTGACAG  
GTGAGCTTAAATACCAACCTTGAACCTGACGCTGACCTATCTTGGCGAGCTGACGGTTAATGGTGTATGACCAATACG  
TCCGGTGGCGTTAGCCTGCAAAAAGGGCTGCGTGGCGTAAACGGTAAACGGTAAACGGTAAACGGTAAACGGTAAACGG  
ACTGTTCCGACAGCAATTAACGGCGATGACTCGGTAAGCGATCAATTTGGTGAACGGTAAACTGCTGGCAACACAA  
CTGTGGTGGTAACTCCATTACAGGGATTTGGTGGAGCGACATCGACAGGCATTAAAGTGGTGAATTCGACGCTGATCCC  
ACGCAGTTTCAAAAACAATGCACAGTTTCACTGGCTGGCAGTGGCTACGTTCAACATGGGAGCGTATGACTACCCGATGT  
GGAAGATAACAACCGCTGATCTGCGATCGCAAGAAGTAAACCGCGCATCGCAGCTGATCCAGACCTGACCAACAC  
CCGATCTGACCAACACCCGATCCAATCCCGCTTACCAGCGGTGCTGAATGCCAAAGTTGGCGGTTATCTCAATAAT  
CTGCGGGCGCAAAATCAGCGGTTTATGATGGAGCGACGATCATGACGGTGGCAATGGTCCAGCGCTGAATTTACGTT  
TATCGGGGACGTTATCATACACGGCGCAGGGCAACTGGCTCAGCATGAAGACACTTCTACGGTGCAGCTTAGCGGTG  
ACCTGTTTAGCGGGCGCTGA

>Cluster\_62196

GTGTATGTGAACAGCGACAAAATTTGTGACTGTGGAAGCCCTGTATACGAAGTGCATCTGTGATGTTGTAATGAGCC  
TCATCTTTCGGCAGGGACAAAAGGGCAAACTAGTCCAGTGGGAAAATAAAGGTGGCGATGAATTTCTTTTGGAGAT  
AAGTACCTTTGAAACTGACGCTACAGAAGAAAAGTCAAAAAGAGAACAAGTTTTCAGCCTCCGTTGATTAATTTGGCGA  
GGAGAGACCAGCGAGGCAGGTTATACCTTACAACGCCCTCGACGTCAGACGCGCGTATTTGGCGTTATTAACAATGACAG  
CATTTCCGCTGATTAATTAATGATATTTGACAGGTTTGTAGTGCCAGTGGCTGTGGCTACAGAGGATGAGTGGGAAACAGC  
CCTTCCGGCGTACTATTAGTGGGCCATTTTACGTTACTAATAATCGTGCCCAACCGTTCTAGAGTATTTGTCAGGACTTT  
ACCAGTGATGAAGGCAAAAGAGGGCGTCGGACAGATTTCTTGGCAGGACGAGGTCGTCGACTCATCACCTTACAGACAG  
TCGACAAGGGACAGCCGAAATGGCGGTGCGTATGACGCAAGAAGCAGACGAGTCGCTTACCGGGAAGCGTATCGAAA  
TTCTCAGCTGGCATCAAAGGACGCAACGCTTACAGCGCGCAATGCCAATGCCGATCTGGAAAAATAGCGGCCAGGGCG  
AAGCAAGCCCGTGAAGCAGGCGAAGAATATCGAAGCTGGGGAATGCGCAGACAGGCGAAATTTGTCACACAGCTGA  
ACAGCTTGAACAGGCTTATCAGGCTGCAACCGGTGGGAAAGCCGCGACTATCTGGTATCCCGAACCTGGACGGAGATGG  
TTAACGAGCTTAAAGAGAGACCGATATCCGCGGGCGGTTCTGCAATATAACATTATCTTAAGCCTGAAGTGTAAAT  
GAAAACGGCGGCCCTTAAAGCTTTCTGAAATGTTGTTGTTCCGGGAATTCATGCGTCCGCTTAAACGGACTAACAGCCT  
GGAAACACAGGGCTGGTTTCAGGTTGGTTACAGGGGCTGGAGAAAATACATAAGAGCCCTTGCACCTACAGGAAAAAG  
GATTAACGCTGGATGACTGGCGGATTTTCTCAAGGTTACGTTGGATCATTACGTTCCGAGAGCACTTACACAGCTG  
GATGATGAGCTGAAAACCTGGATTTGGTAGCCGTTTTTTCATCAAAATTCGTCGTAACCGGAATCAAAAAGATCTGAAGA  
TAATCAGAACAGCAGCTGGCCCTCAAATTCGTAATGGCAACGTAATCCATCGTTTAGCGAAGTTGCTGATGCTGGGGCTG  
GATTTCAAAAACCGTCAATGCGGCAACTATGATATATCAATACATGCGTGAAGAAGCATGGGCGCAACTTACCGGACCG  
CTTGCAGTACTGAAACCCGATGGCAACCGTTTTTATTTACCAGAAAGCATATGACTTTTTCTTAAATCACGGATGCCG  
GATTTGCCCGGTAACCAATAAAATCCTGGATACGGCTTTTAAAGGCTTAAACCCCTTATCTGCCATCCCATATTTCTG  
AGCATTTACCTGGCGCAATATGACACTTTTGTGCGCGAGAAAGTCAATGCCGAAATCTGGAAGCTGGATCGTTCA  
CAGGAAGACTACGCAAGGGCTTGGCAAAAGCAGCGACTGGGTCAGCCATGATCCGCTGATCGCAAAATGGGCGCGA  
AAACGCTCGGACAGACATTAACGATCGTGTGCTGGAAGGGGCTTCTACTATCGTACTGCCGAGCACTTGGCCAGCAGT  
CGTCAGAAGCTTCAAAAGCTATGAAAAGATGTTCAAGAAATGGGCAACTAAATGTTCTCAACTGTTCCACCACATGGAA  
ATGGGGTTGATACCGATCGCGTATGACGCTGGCCTTCGACGCGAGCAGCAACGATTCGGGGCGGATGGCACCT  
GAATGACGAACTGGTGGTGCATGCTCGGTTAATAAACCGGTGAGAACTGAAACGAGTTTATCTGCCGCTAAAGCCACA  
ACGCTGTCGAGCGGGTCAAAGACATTCAGATCCACAAACAGTTGAATGGACCACTGTCGAGTTTGGGCAACGCTTCTGG  
GACGTGCTGTTAACGACCATGAAGAAGCGCAGTCACTGATGAATAACACGCGAATACCGGGCTTACTATACCGATCG  
CTATCTGCAAAAACCGGTTGCGCTGGCGTTGTTGGGATCAATTTGAGACCGCTAAAAACAAAGCTGACCGATGGCGCTG  
AAGTGACGCTGGATACGCTATTTAAAGATAAAGATCGCCCGGTAACCGGCTTTCCATGACTGGATGAGCATAGCGGAT  
TTTCAGGATTTTCGCTGATCAGTGGTTTGTGCTGCGCTGGGACGGCGGTAGAACTGACGGTGTTCGACTCGCGCGCGA  
TATCCCTCACCATCGTAAACTGACGGTACTTTTGGAGGATGGTCAGGATTTGAAGATCCGCTTCGATCAGGATGGGCT  
ACTGGCGCATCAACTTTTTCTCATCGCAATGGCATTACTTTGATTTTCCGGATGACGTTTCTTCCAGTTGCAAAATGGCT  
CAGGCTGCAAGGAAGGGAATGTCGCCAACAGCGAAGAGGTTGGGCAACGGATGTCGTTGGTGGAGGTGATCGCTCTCTG  
A

>Cluster\_25488

ATGCAGAACAGCGCTTTGAAAGCCTGGTGGACTCTTCTTACCTCTTGGCGCAAAACAGAGCTGGATAGAACAGCTCTA  
TGAAGACTTCTTAAACGATCCTGACTCGGTTGACGCTAACTGGCGTTCGACGTTCCAGCAGTTACCTGGTACGGGAGTCA  
AACCAGGATCAATTCACCTCTCAAACCGTGAATATTTCCGCGGCTGGCGAAAGACGCTTACGTTACTCTTCAACGATC  
TCCGACCTGACACCAATGTAAGCAGGTTAAAGTCTCGACCTCATTAAACGATACCGCTTCCGTTGTCACCAAGTCA  
GAATCTCGATCCGCTGGGACTGTGGCAGCAAGATAAAGTGGCCGATCTGGATCCGCTTTTCCACGATCTGACCAAGCAG  
ACTTCCAGGAGACCTTCAACGTCGGTTCAATTTGCCAGCGGCAAGAGACCATGAAACTCGGCGAAGTGTGGAAGCCCTC  
AAGCAAACTACTCGGGCCGATTTGGTGGCAGTATATGCATACACAGCAGCAGCAAGAAAAACGCTGGATGAAACAGG  
TATCGAGTCTGGTCCGCGACTTTCAATAGCGAAGAGAAAAACGCTTCTTAAAGCAACTGACCGCGCTGAAAGCCCTTG  
AACGTTACTTCCGCGCAAAATTCCTGGCGCAAAACGCTTCTCGCTGGAAGGGGTCAGCGTTAATCCCGATGCTTAA  
GAGATGATCCGACGCTGGCAACAGCGCACCCGCAAGTGGTCTCGGGATGGCGACCGTGGTCTGTAACGTTGCT

GGTGAACGTGCTGGGTA AAAAACCGCAAGACTTGTTCGACGAGTTTGGCGGTAAACATAAAGAACACCTCGGCACGGGGC  
ACGTGAAATACCATATGGGCTTCTCGTCTGACTTCCAGACCGATGGCGGCTGGTGCACCTGGCGCTGGCGTTTAAACCCG  
TCTCACCTTGAGATGTAAAGCCCGTTCGTTATCGGTTCTGTTCTGTCGCGCTGGACAGACTCGATGAGCCGAGCAGCAA  
CAAAGTGTGCCAATACCATTCATGGTACGCGCAGTGACCGGGCAGGGCGTGGTTTCAAGAAACCCGAAACATGTGCA  
AAGCCGCTGGTTAGAAAGTTGGCGGTACGGTACGTATCGTTATCAACAACAGGTTGGCTTACCACCTTAAACCCGCTG  
GATGCCCGTTTCGACGCGCTACTGTACTGATATCGGTAAGATGGTTTACAGCACCAGATTTTCCACGTTAATGCGGATGATCC  
GGAAGCCGTTGCCCTTGTACCCGCTTGGCGCTCGATTTCCTTAACACCTTAAACGTTGATGTCTTACATCGACCTGGTAT  
GCTACCGCGTACAGGCCACAACGAAGCGAGCGAGCGCAACCCAGCCGCTGATGTATCAGAAAATCAAAAACAT  
CCGACCGCGCAAAAATCTACGCTGACAAGCTGGAGCAGGAAAAAGTCCGACGCTGGAAAGATGCCACCGAGATGGTTAA  
CCTGTACCAGGATGCGCTGGATGCTGGCGATTGGCTTGTAGCAGAGTGGCGTCCGATGAACATGCACCTTTTACCTGGT  
CGCGTACCTCAACCACGAATGGGACGAAGAGTACCCGAACAAAGTTGAGATGAAGCGCTGCAGGAACCTGGCTAAACGC  
ATCAGCACGTTGCCGAAGCAGTTGAAATGCAGTCTCGCGTTGCCAAGATTTATGGCGATCGCCAGGCGATGGCAGCCGG  
TGAAAACTGGTTCCGCTGGGCGCGCGAAAACTCCTGCTTACGCCACGTTGGTTGACGAAGGCATTCGGTTCCGCTT  
CGGGTGAAGACTCCGGTCCGGTACCTTCTTCCACCGCCACCGGTTGATCCACAACAGTCTAACGGTTCCACTTACACG  
CCGCTGCAACATATCCATAACGGCCAGGCGCGTTCGCGCTCTGGGACTCTGTACTGTCTGAAGAAGCCGCTACGGCGTT  
TGAATACGGTTATGCCACCGCAGAACCACGCACCCTGACCATCGGGAAGCACAGTTCGGTGCATTCGCCAACGGTGCAC  
AGGTGGTTATCGACAGTTTCATCTCTCTCGCGAACAGAAAATGGGCGCGGATGTGTGGCTGGTGTATGTTCTGCCGCAC  
GGTTACGAAGGGCAGGGCCGGAGCACTCTCCGCGCTTGGAACTTATCTGCACTTTCGCTGAGCAAAACATGCA  
GGTTTTCGCTACCTTCTACCCCGGCACAGGTTTACCACATGCTGCTGCTCAGGCGTTGCGCGGATGCTCGTCCACTGG  
TCGTGATGTCGCCGAAATCCCTGCTGCTCATCCGCTGGCGGATATCCAGCTCGAAGAACTGGCGAACGGCACCCTTCTG  
CCAGCATCGGTGAAATCGACGAGCTTGTATCGAAGGGCGTGAAGCGCTAGTGTATGTTCTGGTAAAGGTTTATACGA  
CCTGCTGGAACAACGTCGTAAGAACAATCAACAGATGTGCCATTGTGCGTATCGAGCACTTACCCTTCCCGCATA  
AAGCGATGCAAGGAGTGTTCGAGCAGTTTGTCTACGTCAGGATTTTGTCTGGTGGCAGGAAGAGCCGCTCAACCCAGGGC  
GCATGGTACTGACCGCAGCATATTTCCGTAAGTGTATTTCCGTTGGGCTTCTGCTGTTATGCAAGCCGCTCAGCCCTC  
CGCTCTCCGCGGTAGGTTATATGCTCCGTTACCAGAAACAGCAACAAGATCTGGTTAATGACGCGCTGACGCTGCAAT  
AA

>Cluster\_41072

ATGCAGGTGTTACCCCGAGCAGCACAGGCGGCCGCTGCGCCGTTTTATTATGCGTCTGTGCCCACCACGCTGCTGAT  
GGTGGCGATCTTACTCGCCGGGATTATCGGTTATCGCGCCCTGCCGTTTTCGGCGCTGCCGGAAGTGGACTATCCAACA  
TTCAGGTGCTACGCTTTTATCCAGGTGCGAGCCGGATGTCATGACCTCTGCCGTTACCGCGCCGCTCGAACGCCAGTTC  
GGGAGATGTCGGCCTGAAACAGATGTCGTCGCAAGTTCCGGCGGTGCGTCAGTTATCACTTTACAGTTCCAGCTAAC  
CTTACCGCTGGATGTCGCCGAGCAGGAAGTGCAGGCGCGATTAAACGCTGACCACTAACCTGTTGCCGAGCGATTCGCTA  
ACCCGCGGTTTACAGCAAAGTGAACCCGGCAGATCCGCGATCATGACGCTCGCCGTCACCTCAACCGCCATGCCGATG  
ACGCAGGTGGAAGATATGTTGGAACCCCGCTCGCGCAGAAAACTCGCAGATTTCCGGCGTCCGCTGGTGCAGCTTTC  
CGGCGGCGAGGCTCCGCTGTTCCGCTCAAACTTAAAGCTCAAGCAGTTGCGCCCTCGGCTGACAGCAGCAACCCGCTAC  
CCCGCTATTAACCGCGCTAACGTTAACTCGGCAAAAGGATGCTCGACGCGCCCTTCCGCGCGCTACGCTTTCGCT  
AACGACCAGATGCAATCCGCCGAAGAGTATCGCCAGTAACTATCGCTACCAGAACGGCGCACCGATTCGCTGGGCGA  
TGTGCAACCGTAGAGCAGGAGCAGAAAAACAGTGGCTCGGCGCATGGGCTAACAAAGAACAGGCCATTTGTGATGAATG  
TCCAGCGCCAGTCCCGGCTAACATTTCTTCCACCGCGACAGCATCCGGCAGATGCTACCACAGCTCACCCAGAGTCTG  
CCGAAATCGGTGAAGGTGACGCTTCTGACCGTACCACCAATATCCGCGCATCGGTCGACGATACCAGTTTGTAGCT  
GATGATGGTATTCGCGCTGGTAGTCATGATTTATCTACCTGTTTTTGGCGAATATTCGCGGACCATATTCGCGGTGTTG  
CTGTACCGCTGTCGTTAATCGGCACCTTTGCGGTCATGGTGTCTCGATTTTCAATCAATAACCTGACGTTGATGGCG  
TTAATCTCGCCAGGATTTGTTGTCGATGACGCGCATTCGCGGTGATGCAAAAAAGGCTTATCCGCTAATATCGAAAAAGCGA  
AAAACCGTGGCGGCGGCTCAAAGGCGCAGGTGAAATCGGTTTACCATTATCTCGCTGACCTTCTCGCTGATGCGAG  
TGCTGATCCCGCTACTGTTTATGGCGATATCGTCGGGCGACTGTTCCGCGAATTTGCTATTACTCTGGCAGTCGCGATT  
TTGATCTCAGCCGTGGTGTGCTGACCCGACCCGATGATGTCGCGCGGATGCTCAGCCAGGAGTCCGTCGCGTAAACA  
GAACCCCTTCTCCCGTCCCTCGGAGAAAAATGTTTCGACAGCAATAATCCGCGCTATGGTTCGTTGGTGGCAGGATGCTGA  
ATCATCCGTGGCTGACCTTAAAGCGTGGCGCTCAGCAGCTGCTGCTTAGCGTGTGCTGTTGGGTTTTCATTCCGAAAGGT  
TCTTCCCGGTGACAGCAACCGCATTTATCAGGGCATTTCAGGACCCGCAATCCAGCTCCCTTGCATATGCCCCA  
CGGCAACCGCAGGTCCGGGACGTGATTTTGCAGGATCCGGCAGTGCAAAAGTTGACCTCATTGTTGGCGTTGATGGCA  
CTAACCCGTCGCTGAACAGTGGCGGTTTACAGATCAATCTCAAAACCTGGATGAACGAGATGCAAAAAGTTC  
ATCGCCGCTGCAAACTGCGGTAGATAAAGTCCGGGCGTGCATCTTCTTCAACCAACGACGAGCCTGACTATTGA  
TACTCAGGTCAGCCGACCCAGTACCAGTTTACCTTGCAGGCCAGCTACTGGATGCGCTCAGTACCTGGTGCACAGT  
TGATGGA AAAACTCCAGCAACTGCCACAGCTTTTCTGATGTCCTCAGGACTGGCAGCAAAAAGGCTGGTGGCTATGTC  
AATGTCGACAGGACAGCCGACGCTGTTTACAGATCAATCTCAAAACCTGGATGAACGAGATGCAAAAAGTTC  
CGGACTGATTTCCACTATTTATACTCAGGCTAACAGTATCGCGTGGTGTGGAACACACACCGAAAAATACCCAGGCC  
TCGCGGCGTGGATACCATTCGCTGACAGCAGCAGCGTGGCGTGGTGGCGTTAAGCTCAATTGCCAAAATGAGCAG  
CGTTTTGCGCCGCTTCCATCAACCATCTGGATCAGTTCCCGGTAACGACTATCTCTTAACTGCGCGGATAACTATT  
GCTGGCGGATGGGTCAGGCGATTTAGACACAGAGAAGACGCTGAATCTGCCGGTGGATATCACCACGAGTTCCAGG  
GCAGCACCTCGCTTCCAGTCGGCATTGGGCAGCACTGCTGGCTGATGTCGCGGCGGTGGTGGCGATGATATCGTG  
CTCGGCTTCTGTACGAGAGCTTTATTCACCGATCACCATCTCTCGACGCTACCCACCGCAGGGGTGGCGCGCTGCT  
GGGTTAATGATGGCGGTAGCGAAGTGGATGATGATGGCATTATCGGCAATTTTGTGATCGGTATCGTGAAGAAGA  
ACGCCATCATGATGATCGACTTCGCGCTGGCTGCTGAGCGGAGCAAGGCATGTCGCCGCGGAAGCTATTTACCAGGCT  
TGTCTGTTGGCTTTTCGTCGATCCTGATGACCACTCTGGCGGCTCTGCTGGTGGCTGGCGCTGATGTTGAGTACCGG  
GGTCGGCGCGAACTGCGTCTCGCTTAGGTATCGGCATGGTCCGGGCTGATTTGTGACGCAAGGTCGACGCTGTTTA  
CCAGCCGCTGATTTATCTGCTGTTTCGACCGTCTGGCATTTGTGACCAAAAAGCGCTTTGCCCTCATGAAGGAGGGCC  
TAA

>Cluster\_29262

GTGCGCTGATTACTCTTTCTGATGGCTGGTGCCTCAGTTGGGGGCGTACGCGCGACGGCCCCCGATAGCAACA  
AATCTCACAAAGACTGGAGCAGGCAAAAAGCGGCAAAACCCGCGCAACCGGAAGTCTGAGAGGCGCTCCAGTCTGCCTTAA  
ATGCGCTTGAGGAACGGAAGGTTCCCTTGAGCGCATCAAGCAATATCAAGAAGTCATTGATAATATCCGAAACTCTCC  
GCTACTCTCGCGCGCAATTAACAACAATGCGTACGAGCCGCGCAGCGTGTACCAGGGAATGCTACCGACGCGCTGAA  
TCAGGAAATCTCCAGGTCAGCAGCCAGTTGCTGGATAAAAAGCCGTCAGGCCAGCAAGAGCAGGACCGCCGCGGAGA  
TTGCGGATTCGCTGAATCAACTGCGCAACAGCAAAACCGCCGCTCAGTTAAATGAAATGAAATGAGCGCGCGCTGGG  
ACGCTTACCGGCAATTCGCGCTCAATCAGGCACAAAATTTCCGCTTGCAGCTGACTCCGACGCGCTGAAAGCGCTCGT  
CGATGAACTGGAATCGGCGAGCTGTCCGCAATAACCCGCGGAATAGCGCGCTTACGCTCAGAGCTGGCGGAAAAAG  
AGAGCCAGCAACTGAGTGCATATTTGACGCGCTTACGTAATCAGTTGAACAGCACAACGTCAGCTTGAAGCGGAGGGG  
CTGAAAGTACCGAATTAATGCGAGAAAACAGTCCGATTTGCGGAAAGATATCGTCGCGCAATTCAAAATTAACCCGGA  
ACTATCGGACGCGTGAATCAACAGGCGCAGCGGATGGATCTCGTTGCCCTCGCAACAGCGTCAGGCTGCCAGCCAGCGT

TACAGGTCGGCAGGCGTTGAATACGCTGCGTGAACAGTCGCAATGGCTGGGCTCGTCCAACCTGCTCGGCGAAGCGTTG  
CGGGCGCAGGTGGACCGGCTGCCGGAATGCCCCAAACCAACAACTTGATACCGAAAATGGCGCAGTTGCGTGTGCAACG  
GTTACGTTATGAGGATCTGCTTAATAAACAGCCGACGTAAGGCAAAATTCATCAGGCCGACGGTCAGCCGCTGACCGCGG  
AGCAAAAACCGTATTTCTGGAAAGCAGACTACGCACTCAGCGTGAAGTGTGAACTCATTGTTGCAAGGTTGGAGACACGTA  
CGCTGGAACTGACTCAGGACTGAAAGTCTCCAACGGGCAACTCGAGGATGCGCTGAAAGAGGTGAATGAAGCAGCAGC  
CTATCTGTTCTGGACCTCTGACGTGCGCCGATGACCATCGCCTGGCCGCTGGAAATCGCCAGGATCTGCGTGTCTCA  
TTTTGCTGGACACCTTCAGTCAGTTGGGCAAAGCCAGTGTGATGATGCTGACCAGTAAAGAGACAATTTTACCCTGTTT  
GGCGGTTGATTTCTGGTTCGTTGAGTATTTACTACGCGCGCTATTTACCCGTTTCTTGAACGTTCCGGCGGAAAGT  
CGGCAAAAGTACTCAGGACTCATTCTGGCTGACGTTACGCACTCTTTTCTGGTTCGATTCTCGTCCGCTCACCGCTACC  
TGCTGTGGATGACGCTGGGTTACGGCTTGGCGAGGCGTGGCCTTATCCGCTGGCGGTGCGGATTTGGCGATGGTGAACG  
GCCACCGTCCGCTGCTGTTGGGTAGTGATGATTGGCCACCTTTGCCCGCCGAACGGCTTGTATTATCGCTCATTTTGG  
CTGGCCGCGGAACGGGTTCCCGTGGGATGCGCTACTACCTGATGAGCATCGGGCTTATTGTGCCACTGATTATGGCGC  
TGTGATGTTTCGATAACCTCGACGACCGTGAATTTCTCCGTTTCGCTGGGACGGCTTTGCTTTATCTCCTAATTTGGG  
CTGGCGGTGGTCACTCTCAGTCTGAAAAAGCCGGGATCCCGTGTATCTCAACAAAGAGGGCAGCGGCGACAACATTAC  
CAACCATAATGCTGTGGAACATGATGATTAGCGCACCGCTGGTTCGCTATTTCTGGCGTCCGCGGTTGGTTATCTGCAACGG  
CGCAGGCGCTGTTAGCGGCTTGAACCTCGGTTGCCATCGGTTCCCTGCTACTGGTGGTTTATACGTTATCCGCGC  
TGGATGCTGATCCGACGCGCAGGCTGGGCTTTCAGCGGCAAGCATCGCCGGCAGAGATGTTAGCCCACTGCGCTGACG  
TGGCGAAGAGGAAGCGCATCATCACAGTAGCCCGAAGGGCAATGAAGTCGATGAAAGCGAAGTCGATCTCGATGCTA  
TCAGTGGCAATCTTGGCGCTGGTGGCTCAATTTTGATGTTGATCGCCCTGCTTTCCGTTATGTTGCTGTGGTCAGAA  
ATCCATTCCGCTTTCGGCTTCTGAAAAATTTCTCTGTGGGATGTCACCTTCCACGGTACAGGGCGTGAAGCGGGA  
GCCGATTACCCCTCGGTGGGTTGCTGATTGCCAATTTCTGGTGTATCATCACACACAGCTGGTGGCAACCTCCCGCGC  
TGCTGGAACCTGGCGATTCGACGACCTGGATTTAACGCGGGTACGGGCTACGCCATCACCCATCACCAATATCTG  
CTGATGCTGATTGGCGGGTGGTCCGCTTCTCGATGATTGGTATTGAGTGGTGAAGTGCAGTGGTGGTCCGGCGCGCT  
CCGTGTTGCTCGCTCGCTGGTGGTGCAGGAAATTTCCGGCAAGTATTATCTCTGGCTGATATCTGTTCCGAAACCGA  
TTCCGATTGGCGATACGGTAACGATCCGCGATCTTACCCTGATGTGACGAAAATTAACACCCGCGCCACCACCATCAGC  
GACTGGGACCGCAAGAAATATCGTGCCGAAACAGGCGTTTATACCAGCAGTTTATCACTGGTCCGCTCTCTGACTC  
GGTCACGCGCGTGGTGTGACGATTCGCGCCCTGCGGATGCCAACAGTGAAGAGTGCAGGAAATCTGCTCAGCCGAG  
CGGCTGCTGCTCGCTGGTGGTGCAGAACCCCGCACCGGAACTCTCCGTTGGTGGATCTGCAACAGGCGATTCAGTTTC  
GAGCTGCGTATTTACGCCGAGAAATGGGTCACCGCATGCCGCTACGCCATGAGATTCACCAGCTAATTTGGCAGGCTT  
CCATGCCACCGTATCGATATGCCATTCCCGCCCTCCAGATGCGTCTGGAAAGCCTGAATGGTAAACAAACGGGAGAA  
CATTAACCTTCTGCGGCAAGGTCGTCAGGCGGGAAGTTGTAA

>Cluster\_16074

TTGAGTACCGTGGCCAGCGCAACCGGCCACACAGCAGCGTCTGATTACGTTTTTTGTTGAAGATTTAGGTTACCGCCA  
TCTGAGTACCCGACCCGGGTACACCGGGAACAGCAACATCGACACTAATATACGAGCGCGTGGCTAAAACCGCGCGGGC  
TTAATGATACGTTGATCACCCGGGCTTCCGGCAACTGGATTTCCGCGCGGCTTGGCGAAGGCAAAAACTCTATTAC  
GCCAATAAAGAGGTTACTACCTGCTGCTTACGGCTGAAAGACAAAAGAGCGCAGGCGAGCAGCAACCAACCTGGT  
GCTGATTGACTGGCCAAACCCACAAGCCATGATTTCCGCTACGCTGATGAGGTGACGGTCAAAGCGGAGTACTGCAAGC  
GCCCGGATCTGGTCTGTACGTTAACGGCATTCGCTGGGCGTATTGAACTTAAAGCGTTCTGTCAGTACAGTCAAGG  
GCAATCCGCGCAAAATCTGATAATCAAAAAGAAAACCTTATCCGCGATTCTTACCACATATGCACTAGTATGAGG  
CAACGATACGCAAGGCTTCGCTACGGCACCATCGAAAACCCCGGAAAAATACTATCTGGAGTGAAGAAAGATAATCCTG  
GCGACTATACATAAACCTGACCTTTCATTTAAGTCTGTGTGAGCAATCCAGGCTGTTGGATATCTGCTCATAATTAC  
ATTTGCTTTGATGTCGGGGTGAAAAACTCTGCCGCCATAATCAGTTCTTCCGCGTCCGAGGCGGCTAAACAACATATTG  
CCGTGCTGAAGGCGGATATTATCTGGCACACACAGGATCGGGTAAAAGCCTGACGATGGTCTGGCTGGCGAAGTGGATC  
GTGAAAAATGTCCAAACTCCCGGCTTTGATTTGACTGACCGCACCGAACTGGATGAACAGATCGAAAGCGTGTATTATG  
GGCGTGAATGAAGATATTATCGCACCTCCAGCGGCAACGATCTTATCGCAACGCTCAATCATCTAACCCGTTGGCTTAT  
TTGCTCGCTGGTGCATAAATTTGGTCTGCGAGCGAAGCTGAAGCAATGCGGGTACCAGCGCTTTATCACCGAATTTAC  
AGCAGTCCCTGACCAAAAACCTTTCGCGCAAAGCGCATCTGTTTGTGTTTGTGGATGAGTGCACCGCACCAATCCG  
AAGCTGCATAACGCCATGACTGCCATTTCCGCGGATGCCCTGTTTATCGGTTTTTACCAGCACACCGCTGATGAAGAAAG  
TAAGAAGAAGTCCGTTGAGGTGTTCGGCCCTTATATCCATACTATAAATTTGATGAAGCGGTGGCCGACGGTGTGGTGC  
TGGATCTGCGCTATGAGGCGCGCATTTGACCACTGATCTGACATCAGAGAAAAGGTCGATGACTGGTTTGAAGCAAG  
ACTCGCGCTTGTGAAATTTAGCTAGGACCCAGCTTAAAGCAAAAGTGGGATCAATGCAGAAGCTGCTCTCCAGCAAGT  
CGGCTGGAGCAGATCGTTAACGACATTTTGTGGATAAGGATACCCGTCACGCTGATGGACGGGCGGGCAACGCCA  
TGCTGGTATGCAGCAGTATCTATCAAGCCTGCAAGGTTTACGAGATGTTACGCGAGACCGAGCTGGCAGGAAAAGTAGG  
ATTTGACCAGCTATGCCCCGATGCCCGCAGCATCAAAGCGAAGAAAACAGGCGAAGGTTAACGGAGAAACTCTCTAA  
ACACGCCACTATGCTAAAATTTGGCTGACTATTTTGAACAAGTGAAGAGAAGCGCCCGCACGATTTACCAGATTCC  
AGCGGAAAGTGAACAGCGTTTTTATGAAGAGCGGGGCAATGCGCTGCTTATCTGTTGGTGAAGTGTGACTGGC  
TTTTGACGCGCGCTCCGCCACTATCTCTACATTTGATAAAAACATGACCAGCATACGCTGTTTTAGGCGATTTGCTGG  
GAACCGCTGGACGGTGAAGATAAAGATATGGCTATATTTACTGATTAAGAATCTGTTCCGTTCCGTTCCGTTGAGCA  
TTACCGATTACACCGCGCGCTTTGATGATTACGATCGGGACGATGTGGCCGGGTTGCTGAAAAGACAGGCTGGAGCAG  
GCGCAACTGGATCTCGACAGCGCTGGAGATGGTTCCGAGCTTATGTGAACCGTCAAACCCCGCGAGCCTGCGAGGA  
CTATCAGCACTATTTTGGCGTAAATCAGGAGAGAATCAGACTTCTGTTAAACGAAAAGAGGCGCTACGCTGACATTTT  
ACCAGTGGCTGCCCGCTGCTACGCGCTTATGCGCAGCATGCGCAATGAAATGCGGAAAGCAGGCTACACTGCGGAAGAG  
GTAGAGAGCATTCGCGCCGAAAGTCGCTGAATTCGAAAACTACGCTATGAGATTAAGCTGGCCAGCGCGATCTTCTGGA  
TATGAAGCGCTTTGAACCGCTATGCGTCAATTTACTGGATATGATGTTTCGCGCGGATGGTAGCGAAGTGTGATGGATT  
TTGAAGAGTTAAGTCTGATTTGAACCTGATTTGTCGAGAAAGGCTTGGCGGCGACCGTCCGCTGCGGATGATATCCGTAAT  
AATCAGGATGCGATGCGGGAACCATCGAAAACACGTCGCGCAAAAACCTCTGTTGATGAAAACCCGGTTAACCCAAAATA  
CTATGGACGATGTCGACGCTGCTGGATGAACCTGATTACCCTTCCGCGACAAAATGCGCTCAATTTATCAGCAGTATCTGG  
AACGATATCCGCGATTTGTGTAACAGGTCATCCGCCGAGCAACCGCGGAGCGTGTACCCTGCCACCATGGATACA  
CAAGCAAGCGCGCTTCTATGATAACTTCGGCCACGACGAGGTTACTGGCGACCCGATAGATACGACGATTCGCTATAC  
CAAAGGGCAGAGTGGATTTGGCGATCGTTTTAAAGAACGGAAATTCACACGCTTACGTAAGAGACCCAGCTATA  
ATATTGATATTGATGAGGTGATAGCGCTTGCCTGACGAGAAGGAATATCACTGA

>Cluster\_40178

ATGTTTTCCGCTTTTTTTGTTCCGCGCCGGCTTTTGCCTGGGTTATCGCCATTTTGAATATGTTGGCGGGATCTGGC  
TATTCGCACATTACCCTGCGCAATATCCTGACGTTGACCGCGCACCATTAATAATTTACAGCACTTATCTGTTGCTT  
CTGCCGAAACCGTGGAGAACAGTGTGACTCAGGTTATCGAGCAACAACCTACTGGGCTTGATAATTTACTCTATTTACG  
TCAACCACTAGCTCTGATGGTTCGTTGATTAATGTTGACTTTGAAACAAGGTACCGATCCAGATATGCAAGGTTCA  
GGTGCAGAAATAAATTCAGCAGGCGGAGTCCGCGCTACCAGCGAAGTGCAGCAACCGGGTGTACGGTAGAGAAATCAC  
AAAGCAACTTTTTGCTGATGCTGCGCTGATGACACCACTGACAAAGCCTCCAGTTCCGATATCGCCGACTGGTGGT  
AGTACGTTACAGGACCCGCTGGCGGCTGTGAAGGTGTGGGAGTCTGCAAGTCTTGGCGCGGAATACGCTATGCGCAT

CTGGCTTGACCCGGCCAAACTGGCGTCTTACTCGCTGATGCCTTCAGACGTGCAAAGTCTATTGAAGCGCAAAACGTGC  
AGGTTACTGCCGGGAAAAATAGGGGCATTGCCTTACCAGGATACACAGCACTGACCGCAACGGTACGTCGCGAGTCTCGT  
TTGCAGACGGTGGATCAGTTCAAAAATATATCGTGAAAAGCCAGTCAGACGGCGCAGTTGTTGATATAAAGATGTGGC  
TCGGCTTGAGATGGCAGTGAAGATTATACCGCTATCGGCACAACTTAACGGTCAACCGTCTGCGGGGTTGCTGTAATC  
TTTTCCGCCCCGCTGCAATCGCGTGAATACCGGCACGCTGGTGAAGATAAGATTGCCAATTCCAGCGTGAAGAGGTTGCC  
GGATACGACATCGCATACCCGAAAGACAGCAGTGAATTTATTAATAATCCTCGTAGAGGACGTAATTCAGACGCTGTTTGA  
AGCCATCGTATTGGTGGTTTGGCTGATGATTTATCCGCAAACTGCGTGCACACTGATTCGGCGTTAGCTGTCC  
CCGTCGTTTTGCTGGGCACATTCGGCGTCTTGGCTGTTGGCTATTGATTAATACCTGACGTTGTTTGCATGGTG  
CTGGCAGTCGGCTTGTGCTGGACGATGCCATTGTTGGTGGTAGAGAACGTCGAACGATATTGCGTGACGAAGGTTGCC  
CGCGCGTGAAGCCACGAAAAATCAATGGGCGAGATTTCTGGCGCACTGGTTGCCATTGCGCTGGTGTGTCAGCCGAT  
TCCTGCGCATGGCCTTCTTTGGGGGATCTACGGGCGTAATTTATCGTCACTTCCATCACCATCATCTCTGCAATGCTG  
CTTTCCGTTGGTGGCATTGACCTTGACTCCCGCCCTGTGCGGTTCCGTCCTCCAGCATGTTCCGCCACATAAAAAAGG  
TTTTTTCCGCGCATTTAACCCTTTTACCCTGCTACTGAATAAATAATACAGCGAGGCTAATTTATGTCCTGCGCCG  
CAGCCGAACGATGGGGCTTTATGTCGTGCTGGTGGTGAATGGCCGATGATGTGGAACGCGGGCAGTTTCTTA  
CCCACTGAAGACAGGGGCAAAATCATGGTGCAGTACACGCTGCCGCGGGGGCAGCCGTCGCCGTACAGCAGAAGTGA  
TCGCCAGATTGTTGACTGGTCTGATTAACGAGAAGCAAATACCGATGTCATCTTTACCGTTGATGGTTTTCAGTTTGA  
CGCGCAGCGGCAGCAACACCGGGATGGCTTTGTTTGGTTGAAAAACTGGTCTCAACGTAAGGGGCGCAACCCGCGC  
CAGGCTATCGCCCTACGGGCAACCAAGAGCTGGGCACAATTCGTGATGCCACGGTATTGCGATGACGCCGCGCAGCCGT  
TGATGGGCTGGGGCAAGCAATGGTTTTACGTTTGAATTTGTTAGCTAACGGTGAACCGATCGTGAAACACTGCTGCAAA  
TGCGTAATCAGTTGATAGAAAAGCGAATCAAAGTCCGGATTACATTTCTGACGCGCAATGATTTGCCACAAATGGCG  
CAATTCAGGCTAGATTTGATAGTAATAAAGCGGTGCTCATTTAGGGTTGAGCTTGAATGATGTCACCGACACCTGCTCCAG  
TGCGTGGGGCGTACTTATGTAATGACTTTATGACCGTGGTGTGTAAGAAAGTCTACATTCAGGTTGACAGCGAAT  
TTCGTTCCGCGCGCTCAGACTTAGGTAAATGGTTTGTGCGCGGTAGCGATAACGCCATGACACCATTCTCTGCTTTTGGC  
ACCACCTGGCGCCCTGGATGGACCGGAAAGACTGGTGGCTTACACGGCTCGCGAGCCTATGAAATTCAGGCGAAACCG  
GACTGGCTTTAGTTCCGGCGATGCAATGACAAAAATGGAGAACTGGCAACAGTCTTCTGCGGGAACAACTGGGCT  
GGAGTGGTTTGTCTATGCAAGGAAACTGGCCAGCGGTGAGGCTAAGTCTGTATGCAAGTTTCTATTCTGGTGGTTTTCT  
CTCTGCTTTCAGCACTGTACGAAAGCTGGTCACTCCGTTCTCGGTCATTTCTGGTATCCCTCTGGGGCTTCTTGGCGC  
GGCCTGGCGCCCTGGATGGCTGATTTAAACAACGATGTTTACATTCACAGGTAGCGCTATTAACCTATCTGCTTGGCT  
CGAAAAACGCCATTCTGATTTGGAATTTGCTGAAGCGCGGTTGACAGGGCTATTCCTTGAGTCTGCGGCATTACGC  
GCGCGCAGACTCGTTTACGCCCAATCATCATGACCTCGCTGGCGTTTATTGCGGGGTAATGCGCTGGCGATGACAA  
CGGCGCAGGGGCAACAGCCGATCGCCATTGGTACGGGCAATTTGCGGCGCAGCTGACCGCTACATTACTGGCCATTT  
TCTTCGTTCTCTGTTTTTTGTAGTGGTGAACGTTTTGTTTGGCGGTAACCCGCGCCCTCAGGAGTAA

>Cluster\_27373

ATGCCATACTCAAAATTTTCGGCTGCGGGGAATCGCCTGCTATATTGCGCTGGCAATCTCTGGTGGATCAGTCAATGC  
ATGGGCTAGGATCAATCAATTTGACCCCGTTTCTTTGAGTTAAAGGGGATACGAAAATGATCTCGGTAAAGTTTT  
CAAAAAAGGGTTATGTCGACGCGGGTATAAATTTACGTTGATTTTATAAATAAACAACCCCTTTCTGATGATAACGAC  
ATTAAGTGGTACGCTCTGAAAACGATCCAACAAAAACTATGCCTGCCTGACACCTGAGTTAGTGGCGGCTGGGGCT  
GAAAGAAGGGATAGCAAAAAGCCTGCAGTGGACGCACAAGTGAATGCCTTAAACCAGGTCAATTAGACGGGATGGAAG  
TCGAGAATGATTTAAGCAGTCGGCGTTGCTGCTGACAGTGGCACAGGCTTACTCGAATATACCAGCAGCAGTGGGAC  
CTCCCTGACGCTGGGACAGCGGTTATTCCTGGCTGATTTGCGGACTACAGCCTCAATGCGCAAACTCGCCACAGGAGA  
GGGGGGCAGGACTCACATGATATCAGCGGCAACGGTACCGTTGGGGCAACCTGGGGCATGGCGTTTCCGTGACAGCT  
GGCAAAAGTATATCAGCACACCCGAGCAACGATGACGACGATGACAGCAGTAAACAGCAACAGGTAACACTGGGAC  
TGGAGTCGTTATTACGCTGGCGAGCTTTGCCCTTTTAAAGAGCAAGCTGCTGCTGGGGGAAGATTATCTCAATTCGGA  
TATTTTCGACGGCTTAACTATATCGGCAGCAGCGTACGACCGATGACCAGATGCTGCGCCCAACCTGCGCGGCTATG  
CACCAGATGTTTCCGGCTGGCGCACAGAGTGCAAAAGTACCAATTAGCCAGATGGGCGGGTACTTTACGAAACCCAG  
GTTCCCGCCGGGCCATTTCCGATTCAGGATATCGGCGACTCCGCTCCTCCGGCACACTGCACGCTCCGCTGGAAGAACGAA  
TGGTCAAGTGCAGGAATATGACGTTACCCAGCATCTATGCTTCCCTCACGCGCCAGGGGAGGTCGCTTACAAAGTGA  
TGATGGGGCTCCGGAAGACTGGAACCAAGACCGAAGGCGGCTTTTTTCCGGCGGAGAAGCGTATGGGGGGTGGCA  
GATGGCTGCTGCTTACGGTGGTGCCTGGCAGATAAACAATATCAGTCGGCGCGATGGGGGTGGGCGCGATCTCCG  
ACAGTTTGGCGCGCTGGCGTTGATGTGACTCACTCGCAGTCAACCTGGATCATGACAGCGCATACGGCAAGGAAAC  
TGGACGGCAACTCTTTCCGCTGAGCTATGCAAGACTTTGACGAACTCAACAGCCGCTCACCTTTGCAAGTACCGT  
TTCTCCGAAAAGAACTTCATGACCATGAGCGATCTGGACGCAACAGTCCGACATGGCGCGGACCGGTAACGACAA  
AGAGATGATACGATACCTATAACCAAGACTTTGCGGCTGCGGGTGTTCGATCTATCTCAACTACTCCCATCGTACTT  
ACTGGGATCGCCGAAACAGCAAACTATACTGATGTTTCCCACTATTTAATATGGGAGCATTCGCAACATGAGC  
ATCTCGGTGACCGGCTACGCTACGAAATATGACGATAAGGGGATGATACCTCAGTATGAGATTCGTTGGAG  
CGACAGCAGCAGCTGACCTACAACGGTTTCTACGGCAGCGGGTGGACAGCAGCAGGTCGTTACTTTAAGCGTGTG  
ATGACGCAACGCACTACCAAGTTAACGTTGGCACCAGCAGCAGCAGCGCAGCTGGATGGTTATCTGAGCCACGAGCT  
TCGCTGGCGAAGTTGATCTCAGCGCAACTACCATGAAGGGAACTCGTTCCGCGGGGATCGCTTACAGGCGGGG  
AACGCTGACCGCATGTTGGGGCGCTGCACCTACCCAGAACATGGGCGGCACGCGCTGCTGATGACCGGACGGGA  
TTGCCAACGTCGGGTCGAAAGCAACGGCGCGCGGTGACCAATAATGTTTGGCAAGGCGGTGGTCCCGATATTAAC  
AACTACTATCGCAATCAGGCGTATATAGATTTAAACAACCTGCGGAAGATGCGGAAGCCACCCAGTCCGTTGGTGGAGG  
GACTCTGACGGAAGGCGCAATCGCTATCGTAAATCAAAGTATCAGCGGCAAAAAGCGATGGCGGTTACGCGTTG  
GTGACGGCAGCTACCCGCGTTTGGCGGGAAGTGAAAAACGACGAGCAGCAGGTTGGCATTGTGGATGATGAAGGC  
AATGTCTATCTGGCGGGGTCAATGCGGGTGGATATGATGGTGTTCGGGAAGGCAGCGCAACATGCGAGATCGTATT  
GCCGAAGCCGCTACTGCGGATTTGTTACGCGGCTGTTGTTACCGTGTGAACAAAAGGGAACGGCAGCCCTGATTTCT  
CAGCGCCAGAAATTAAGCCTGTTATTCAGGACAGACGCGCAAGTCAACCAACGGAAGCGCGACGCTCAATTTACGCA  
ACTCAATAA

>Cluster\_41392

ATGTTAACGATCAATTTCTGTCCTTTGCTTAAACGGTATTTCATGCTCGTCCGGCGTGGGAACCTAAAGAACAGTGCAG  
CCAGTGGCAAGGCAAACTCACTTTTAACTACCGCAAGCAAGGCGGATGCGAAAAGCTCGTGGCGCTGATG  
GCACTGGCACTTTATTAATGACAGTTGACGCTGAACATTAGCGGTAGCGATGAAGAGCAGGCGGGCGAGTGTGGAA  
GAGTATATCCAGTGGCTTTATCGACAGCGATAGCGTCCAGCGACGCTGGCAGAACGACGCGCATCCGCTGCGCGG  
TTCATTAAGCCGCTGAACCCGATTTACTGTACGGCAACGCTGCTGGCAAGCGGCTTTGGCTGGTACACTGACCTG  
TACAGAGCGACAGCTGACAGTTATCGGGTATCCCTCGAGTGGCGCAAGATTCCACCTACTGGAGTACAGTCTGGCA  
ACGCTTGGCGAGCACTGAACAGCAATTCGCTGAGCTGACGGGAAAGCAAACTATCTCAGCGCCATTTGTCGCT  
GATTCAGGATGATGAATTTGACGCAATATCCGTCACCTGATGGCAGAACAGCATCAGGGGCTGGGGCGGCGATCATCA  
GCAATATGGAGCAGATTTGTGCCAAACTTCTGCTTCTGCCAGCAGTATCTGCGCGAGCGGGTACGCGACATTCGCGAT  
ATCAGCGAACAGTTGCTGCATATCACCTGGCGGAACTAAAACCGCGCAATAATCTGGTGGCTTGAAAAACCGACCTTCT  
GGTGGCTGAAGATTTAACCCAGCAGTTTTTGGACCTGATTTAAAAATCTTGGGGCATGATTCGGAGAAACCG



GGCGCACCTCGCATACCTGATTTGCGCCGCGCTTCGGCGATCCCGGTACTGAGCGGCTGCCGCTGGATGCGATTGCC  
CGTTATGCCGGGCAACCTGCAGTCTTGATGCCAGTGGCGGCTACTGGCAATTAATCCCAACGATGCCGTGAGCGGTTA  
TTACCAGGTGGCGCAGACGCTGGCGGATAAACGCCAAAAACAACAGGCGCAAGCTGCCGCGCAGCTGGCTATTTCCCGTG  
ATAAAAAGCGTATTTGATATTGCGCGCAATATTGGCACAGCTCTGGAAGCCCCAGGCGGCTTTGCCAACGGAGGGAAGG  
GTTGGGCTGTTTTCGATACCGAAATGCTCTATATGATCGCGCAGCGCGCGGACGAGCAGGAACAAGTTTGAAGCGTACCA  
GCAGGTGCTACTGGCGGGGGCGCAAGCCGATATCTTCCGACGATGGACATCGGCGGCGATAAAAAGCATTCTCTTACC  
TCAACATTCCCAGGAAGAGAACCCTTCTCGGCTATCGCGCGTACGTATTTACCCGGAATTTGCTGGCCTGTTTCCG  
ACTCAACTGGGGCCATTTTGGCGCGCGCAGTTTCGGCAACGCCAGTTGATGATCCCGATGGTTCACAGCCTCGATCA  
GATCTTATGGGTGAAGCGAGATCCAAAAAGCGATCGTTGAGCTTAAGCGCGATGGCTGCGTTCATGCAGAGACGATTA  
CGCTGGGTATCATGGTGGAAAGTGGCGTGGTGTCTACATCATCGATCACTTCTGCGATGAGGTCGATTTCTTTCAGTATC  
GGCTCCAACGATATGACCCAGTATCTGTATGCGGTCGATCGTAATAACCCGCGGATCGCCGCTGTATAACCCGATTAC  
GCCATCGTTCTCGGCATGTGTCAGCAGATTTGTTACACTGGCGCATCAGCGCGCAAAATGGGTAGGATTTTGGCGTGAAC  
TGGCGGTTAAGGTCGTTATCTGCGCTACTGCTTGGACTGGGCTGGATGAGCTGAGTATGAGTATGAGTATGAGTATGAGTATG  
GCGGTGAAAAGCCAGCTTCTGCAACTGGATAGCGAGGCGTGTGCGGAATTTGGCGGCTCAGGCATGTGAATGCCGAGTGC  
GCAGGAAATTTGAAGCGTTACTCACCGCCTTTACGCCGGAAGAAGACGTTTCGCCACTGCTGGCGCTGGAGAATATCTTTG  
TTGATCAGGACTTTAGTAATAAAGAGCAGGCGATCCAGTTCTCTGTGCGCAACCTTGGTGTAAACGGCGTACTGAACAT  
CCGTTTGAAGCTGGAAAGAGTCTGGCAGCGGGAAGGATTTTACCACCGGCTTTGGTTTTGGCGTACCCGCA  
CACCAATCTCAGTGGATCCGTCATTCAGTATCAGCATTTGCCCGGCTGGTGAACCTGGTTGACTGGCAGTCAGAATGG  
GCGAAGTCCGACTGGTATCATGCTGACACTGGGCGCTAACGAAGGATGAATCATGTGAAAGTCTTTCGCGAGCTGGCG  
CGCAACTGGTGAATAAAAACCTCCGCCAGTCTGTTTGGCGCGCAAGATGCACAAAGTATTTCTGACGCTGCTGGAAC  
GGAATTAACCTTCTGA

>Cluster\_66782

ATGAAAAATAGAAATCGTATGATCGTGAACCTGTGTACTGCTTCCCTGATGTATTATTGGAGCTTACCTGCAGTGGCTGA  
GCAGTCTCAAGTGAAGATAAAGATTTGTTCCGATGAATACCGCATGCGGCATATTTATGCCAATGATACATGGACCTAT  
TTTTATGGCTATGGCTATGTAGTAGCACAAGATCGCCTTTTTCAGATGGAAATGGCACGTCGACGACTCAAGGGACTGTC  
GCGGAAGTCTTGGCAAAAGATTTTGTGAAATTTGATAAAGATATCCGTCGTAACACTGGCCGGATGCTATCCGGGCGCA  
AATTGCTGCCCTTTCCAGAGGATATGTCATTTCTGCAAGGCTACGCTGATGGAATGAATGCCTGGATTGATAAGGTAA  
ATACCAATCCAGAGCAGCTTTTACCAAAACAGTTTAAATCTTGGCTTTACTCCTAAGCGCTGGGAACCGTTGATGCT  
GCGATGATATTTGTGGCCACCATGGCAACCGCTTCTCTGATAGCACTAGCGAAATGATAATCTGGCAGTCTAACGGC  
TTTTAAAAGATAAATATGGTGTATCACAAGGCATGGCGGTTATTTAATCAGTTGAAATGGTGGTAAACCATCAGCGCAA  
CCACTATTGGCGTACAAGAGAGTAACTACCACTTAAATTTAATCAGCAAAACCGCAAAACAGCAGCTCTGTTGCCACGC  
TACGATTTACCTGCACCAATGCTTGCACGAGCAGCAAAAGGGGCGGATGGCGCACTGCTGGCGTTAACAGCAGGGAAGA  
CCGGGAAACTATTGCTGCACAATTTGCACAGGGTGGTCCCAATGGTCTGGCGGGTATCCAACGACCAATATGTGGG  
TGATCGGCAAAAGCAAAGCCAGGATGCCAAAGCAATCATGTTAAATGGTCCGCGATTTGGCTGGTATGCGCCTGCGTAT  
ACTTATGGTATGGTCTGCACGGTGTGGTATGATGTCACTGGCAATACACCATTTGCCCTATCCTGGGCTGGTTTTGGT  
TCATAAATGGTGTGATTTCTCGGGATCAACGGCAGGTTTTCGCGGATGATGTCGATATTTTTTGTGAAGCGCTGGCGAG  
AGAAACAGGCTACTACTTGCATAATGGTAAGTGGTGAATTTAAGCCGTGAGGAAACCAATTACGGTGAATAATGGT  
CAGGACAGACCTTTACTGCTTGGCTACGGTGCATGGCAACATTTCTCAAACTGACAGCAGCAAAACCGGCTTACCG  
TAAATCCCGGCTAGGGATGGTAAGAGTGGCTTTTGGCTGGCTGGACTCATCAGATGAAGGCCAAAATTTGGCAGG  
AGTGGACACAGCAGCGAGCGAAACAAGCACTGACCATCAACTGGTACTGCTGATGTAACCGCAATATTTGGTTATGTT  
CATACTGGTGTCTTACAGATCGTCAATCAGGCATGATCCCGGATTAACCCGTTCTGTTACGGGAAATGGGACTGGAA  
AGGGCTATTGCCCTTTTGAATGAACCTAAGGTGTATAACCCCGAGTCCGGATATATTGCTAACTGGAACAATTTCTCCC  
AAAAAGATTAACCCGCTTACAGATCTGTTTTCGCTTTTGGTGGTGGTGCAGATCGCGTTACGGGATCGCCAGCTGCT  
GAGCAAAAGCCAGCTTAACTGCTGATCAGGCATGGGATGTTATTCGCAAAACAGTCTGAGGATCTTAACTGAGGCT  
TTTTTTACCTACTCTGCAAGCAGCGACATCTGGTTTGACAGAGCGATCCCGCTCGTCAAGTTGGTAGAAACATTAACAC  
GTTGGGATGGCATCAATTTGCTTAAATGATGATGGTAAACCTGGCAGCAGCAGGCTCTGCCATCTTGAACGTTTGGCTG  
ACCAATGTTGAAGCGTACCGTACTGCTGCGCTGCGCTATGCACTTTGATAAGTGGTACAGCGGCTAGGCTACGCAAA  
AACCCAGGACGGCCCAACTGGTTCGCTGAATATAAGTGTGGAGCAAAATTTTGTATGAGGCGGTCAGGGAGACAAAT  
CACCAATCCACAGCGGCTTGTATCTGTTTGTCTGGGAAACACAGCAGGAGGTTGTGTTGGCTGCGCTGGAAGATACCTGG  
GAGACTTTTCAAAACGCTATGGCAATAATGTGAGTAACTGGAACACCTGCAATGGCTTAACTGTTCCGGGCAATAA  
TTTTCTTGGTGTACCGCAGCGCGGCAAGAAACCGCTCATCAGGCGGATATCAAAACCGTGAACAGAAACGATA  
TGATTTGTTTTCTCAACACGACAAGCGATCGTCTGTGCTTGGCTGGGATGTGGTCCGACCCGGTCAAGTGGGTTAT  
GCTCCCGATGGAACAGTTGATAAGCACTATGAAGATCAGCTGAAATGTACGAAATTTTGGCCGTAAGTCTGCTGTT  
AACGAAGCAGGATGTGGAGGCGCATAAGGAGTCCGAGGAAGTGTGCACGTTCCAGAGATAA

>Cluster\_22514

ATGGAATGGCATCAGCGTTTACTCTTAATGTTGCTCTGGACAACATTTGCTATCATCACCATCAGCTACCGGTTGAGAA  
AATGAATACCTTGAAGGCGGAATTTGCCTCGCAGGTACCGCCATTATTAAGCAACTCCGTGAAAAACAAGAGTTGCGGT  
GCGTGGTGTGTTCTCGGAAACAGCAACTTATTGCTGGCGCAGACATCAACATGATCGGCAACTGCAAAACGGGG  
CAAGAAGCGGAAGTACTGGCGCGCAGGGGCAACAGTTAATGGCGGAGATTCATGCTTTGCCATTTCCGGTTATCGCGC  
TATTCATGGCGCTTGCCTGGGCGGCGGCTGGAGTTGGCGCTGGCGTGCACGGTCTGTTGTTACTGACGATCCTAAAA  
CGGTGCTCGGTTTGCCTGAAGTACAACCTGGATTTACCCGGTTACGGCGGTACCCAGCGTTTACCGCGCTGATAGGT  
GTCAGCACAGCATTAGAGATGATCTCACCGAAAAACAATCTGGCGCAAAACAGCGGTAAGCTGGGTTGGTGGATGA  
CGTCTTCCGCACTCCATATGCTGGAAGCGCTGTTGAGCTGGCAAAGCAGGATCGCCATCTTACGCCCCCTACCTG  
TTGCGGAGGATTTCTGGCGGGCGGTTAGGTCGTCGCTGCTGTTCAAAATGGTTCGCAAGAAAAACAGAACCAAAACG  
CAAGGTAACATCCGCGCAGACAACGATCTCGGAGTTGTCGAAACGGGATTTAGCGCAGGGCACAGCAGGGCTATGA  
CGCTGAAGCAGGGCGTTTGGCGAATGGCGATGACCGCGAATTCGCAAGCGCTGCGCAATATCTTTTTTGGCAGTTCG  
AAGTGA AAAAAGATCCCGGCACTGATGCGCCGCTGCGCCATTAACAGCGTGGGATTTTAGGTGGTGGCTGATGGGC  
GGCGGTATGCTTATGCTACTGCTGTAAGACGGGGCTTCCGGTCAGAATTAAGATATCAACCCGCGGGGCAATAATCA  
TGGCTGAAGTACAGTTGGGATCAGCTTAGGGCAAAGTTGCGGCTCGTCATCTCAAAGCCAGCAACGTCGCAAAACAGC  
TGGCATTAATCTCCGAAACGACGACTATTGCGGCTTTGCCATTCGCAATCGCATCTGATTAATGAAGCGGTTGTTG  
GAATTA AAACAACAGATGGTGGCGAAGTGGAGCAAAATTTGCGCTACTCATACCATCTTTGCTTCAACACGTCATCTTT  
ACCGATTGGCGATATCTCCGCTCACGCCGCGGACTGAGCAAGTTATTTGGCTGCAATTTCTTCACTCGGTTGAAAA  
TGGCGTGGTGGAGATTAATCTCATGCGAGTACTCGGCGCAAAACATCGCCACCACGGTAAAACTGGCGAAAAACAG  
GGCAAAACCGCAATTTGCTGCTGCGTGACAAAAGCGGGTTTTACGTCAATCGCATCTTAGCGCTTACATCAATGAAGCT  
CCGCATGTTGACCGAAGGCGAGCTATTGAGCATATCGATGCCGCGTACTGAAATTTGGTTTTCCGGTAGGCCAATCC  
AATTTTGGATGAGGTAGGAATCGACACCGGATAAAATATGCTGTTACTGGAAGCGCTTATGGAGAAGCTTTTACG  
GCGCTCAAAATGTTGTTTTCTTCAATTTTGAACGACGATTCGAAAGGCAAGAAATGGCGGGGTTTTCTATCTTTATGG  
TCAGAAAGGGCGTAAAAGCAAAAACAGGTCATCCCGCATTTACCCGCTGATTTGGCGCACAAAGGCGAGGGCAGCTCT  
CCGACCGCAGGTTGCTGAACGGTGTGATGTTGATGCTGAATGAAGCAGTACGTTGCTGGACGAGCAGGTTATCCGT

AGCGTGCCTGACGGGATATAGGCGGGTATTTGGCATTGGTTTTCCGCCATTTCTCGGTGGACCGTCCCGCTATATCGA  
TTCTCTCGCGCAGGCGAAGTGGTTGCAATAATGCAACGACTGGCCACGAGTATGGTTCCCGTTTTACCCCTTGCGAGC  
GTTTAGTCGAGATGAGCAAGCGTGGGAAAGTTTTGGAAACAACCTGCAACTGACCTGCAATAA

>Cluster\_7965

ATGAGTAATAACCTCAAACCTGAAAGTGCCTGAAAGCTGTCGACCAGGCGACACGACCTTTAAAGCATCCAGACGGC  
GAGTAAATCGCTGCTGTTGATCTCCGCATGACTCAGCAATCCCTGCGTGATTTGAATGGTCAGGCATCGAAAATAGACG  
GTTTTCTGTA AAAACAGTGGCCAACTGGCGGTAAACGGCCAGTCACTGGA AAAAGCAAAACAGGAAAGCTGAAGCGCTGGCG  
GTGCAGTTTTAAAAACACGGAAACGGCAACAGCGGCACAGGCCAGAGTGTGGAGTCAGCGAAACGGCGGCTGATGGGTT  
GCAGACGAAATATAACAGCCTCAGCAGTCTGTAAAGCGGCAACAGCGGAGCTCGGTAAAGCGGGGATTAATACCCGCA  
ACCTGACGAATGATGAAAATCGCCTGAAAAATAATATCAGCGAAACGACCGCACAGCTTAACCGCCAGCGTGAAGCACTG  
GCGCGCTGAGCGCGCAACAGGCGAACTGAGAGCAGTACAAAACGCTATCAGGCAGGGAAGGCTCTGGCAGGGAATGC  
CGCTCGATGGGCGTGCCTGGGGTAGGTATGGCAACAACAGGTA CTCTCGCCGGTGTGCACTAATGAAAACCCGGTTATG  
ATTTTGTTCAGAAAACCTGAGCTTCAGGCTGTTCAGGCTCGAAAAAGATTCAGCTGATATGGTGGCTTCGCAAA  
CAGGCGCTCAACTCGGTGATAACACAGCCGCTCGGCTGATGATGCTGCCGGTGTGCACTAATGAAAACCCGGTTATG  
TGGTGATACCGCTGCTATTCAGGCGGCTACGCCAGTGCCTGATATGGCGCTCGCAAAACCGTCGAACGATGGAAGAGA  
ACGCCGGTTATTTGATGGGATGCGCTCTGCATTTCCAGTCTCAAACGATAAGGTCGCCCATATCGGTGATGTTCTGTCTG  
ATGACGATGAAACAAAACCCCGCCGCTTTGACGGCTGCTGATGATGCGCTGACCTATGCCGCGCCGGTGCAAAAATGC  
TGGGGTCACTATCGAAGAAACAGCCGAATGGTCGGCGCACTGCATGACGCCAAAATTAACAGGTTGATGGCGGGTACGG  
GGAGCCGCTGTGTTAAGTCGCTACAGGCTCTACGGGAAAAGCGTATGACCTATTAAGAGCTCGCGTAAAAACG  
CTGATGGTAAAGGGAACACGCGCCAAATTTTACCCTCTGAAAGAAATGCAGCGGAGCTTTGAGAAAATAATCTCGG  
TACCCTGACGCGCTGAAATACATGAAAACCTATTCGGTGAAGAGGCAAGCTCAGCTGCTGTGATTAATGACTGCGAG  
CCTCAAACGGTAAGCTGGACAGCTTACCGCCAGCTTAAAGCATCTGACGGTAAAACGGCTGAGCTTGTCAAGGTCATG  
CAGGACAACCTCGCGCGGCACTTTAAAGAGTTCAGTCACTGTTATGAGCGGTCGGAACAGACCTGTTTGACAGCAAGA  
TCTATCTTGGTGAAGCTGTGTCAGCGCTTTTTCAGGCGGCTGATGAGCGCTTTGCGCCGCTCGGGAATG  
TGGCGACGACGCTTGGGGTATTTTACGCGCGGCTATCGGTGTTGTGGGGTTATAGGGCAATCGGCCTGTTGCGTGG  
CCGTTATTTATCGGTATTAACGCATCATCGCTGCTGCTGCGGCACTTGGTGTGCTTTACGACAATCAGTGGCGGGT  
TATCGCGCTATCGGTGCGATTACATGGCCGGTCTGTCGGCGCACTTGGTGTGCTTTACGACAATCAGTGGCGGGT  
AATACCTGGAGCCTGTGTCAGCGCTTTTTCAGGCGGCTGATGAGCGCTTTGCGCCGCTCGGGAATG  
TTCGCGCCGCTGGCACCCGCTTTGACGGCCTCAGCGAGAACTTCGCGGTGTCTGGCAGTGGTTAAAGACCTGATAGC  
GCCGGTAAAAGCGACTCAGGACAGCTTAAACAGTTGCCGTAACGCTCGGTGTCATGTTCCGTCAGGCGCTGGCTGATGCTT  
TGCTGATGCGCCTTAATGCCTTTAAACAAGTGCAGAGCGGGATTTGAGGTTGCTGGA AAAAGCTCGGGATTTCAACAAA  
GAATCCAGCTCGCTGACACAGACCGCGGCAAGCCAGTGCAGCGACGAGAGCGGTTACAGCCCGCTATCAGCTTTA  
CAACAGCTATCAGCCAGTTACGGCACCCCGGTA AAACCTACATCGACCAGAGTCCGCCAACCTATCAAATCAACGTC  
CGGCAACCGTATGCCGGCGGTCGGTTAGGTAATGATTTGACAGGATGCCTTAGAAAAATATGAGCGTGAGAAACCGCC  
AAAGCCCGCAAGCATGATGATGACTAA

>Cluster\_839

ATGCAAGAGCAATACCGCCCGAAGAGATAGAATCCAAAGTACAGCTTCATTGGGATGAGAAGCGCACATTTGAAGTAA  
CGAAGACGAGAGCAAGAGAGAATATTACTGCTGTCTATGCTTCCCTATCCTTCTGGTCGACTACACATGGGCCACGTA  
GTAACCTACACCTCGGTGACGTGATCGCCGCTACAGCTATGCTGGGCAAAAACCTGCGACCGCATCGGTGGGAC  
GCGTTTGGTGTGCTGCGGAAGGCGCGGCGGTGAAAAACAACCCGCTCCGGCACCGTGGACGTACGACAACATCGCGTA  
TATGAAAACAGCTCAAATGCTGGGCTTTGGTTATGACTGGAGCCGAGCTGGCAACCTGTACGCGGAATACTACC  
GTTGGGAACAGAAATTTTACCAGCTGTATAAAAAAGGCTGGTATATAAGAAGACTTCTGCGGTCAACTGGTGGCCG  
AACGCACAGACCGTACTGGCGAAGCAACAGTTATCGAGCGTGTGCTGGCGCTGCGATACCAAAGTTGAACGAAAGA  
GATCCCGCAGTGGTTTATCAAAATCACTGCTTACGCTGACGAGCTGCTCAACGATCTGGATAAACTGGATCACTGGCCAG  
ACACCGTTAAAACCATGCAGCTAAGTGGATCGGTGCTTCCGAAGCGCTGGAGATCACCTTCAACGTTAACGACTATGAC  
AACACGCTGACCGTTTACTACTACCCGCGGACACCTTTATGGGTTGTACTACTTGGCGGTAGCTGGCGGCTATCCGCT  
GGCGCAGAAAAGCGCGAAAATAATCTGAACTGGCGGCTTTATTGACGAATGCCGTAAACACCAAAGTTGCCGAAGCTG  
AAATGGCGACGATGGAGAAAAGGCGTCGATACTGGCTTTAAAGCTGTTACCCATTAACGGGCGAAGAAATTTCCGTT  
TGGCAGCAAACTTCGATTTGATGGAGTACGGCACGGGCGAGTTATGCGGTTCCGGGTACGACACGCGGACTACGA  
GTTTGCCTCTAAATACCGCCTGAACATCAAAACAGTTATCTGGCTGCTGACGGCTCTGAGCCAGATCTTCTCAGCAAG  
CCCTGACTGAAAAGGCGTGTCTGTTCAACTCTGGCGAATTTCAACGGTCTTGACCATGAAGCGGCTTCAACGCTCCG  
GATAAACTGACTGCGATGGGCGTTGGCGAGCGTAAAGTGAACCTACCGCTGCGGACTGGGTTGTTCTCGTACGCGTTA  
CTGGGCGCGCGGATTCGATGGTGACGCTGGAAGACGCTACCGTAATGCCGACCCCGGACGACCGCTGCGGCTGATCC  
TGCCGGAAGATGTTGGTGTGACGGCATTTACAGCCGATTAAGCAGATCCGAGTGGGCAAAAACCTACCGTTAACGTT  
ATGCCAGCCTGCGTGAACCGGACTTTGACACCTTTATGGAGTCCCTGCTACTATGCGCTACATGCGCGCTACACTCC  
GTACAAAAGAGTATGCTGGATTCGAAGCGGCTAACTACTGGCTGCCGTTGGATATCTACATTTGGTGGTATCGAACAG  
CCATTTATGACTGCTCTACTTCCGCTTCTTCCAAAACCTGATGCGTGTGACGCGATGGTGAACCTCTGACGAACAGG  
AAACAGTTGCTGTCTCAGGTTATGGTGTGGCAGATGCTTCTACTATGTTGGGCAAAAACGGCGAACCTAAGTTGATGCG  
CCCGTTGATGCTATCGTTGAACGTGACGAGAAAAGCGCTATCGTGAAGCGAAAAGATCGGCGAGCCATGAACCTGGTT  
ATACCGGATGAGCAAAATGTCAGTGAAGAACACGGTATCGACCGCAGGTGATGGTTGAACGTTACGGCGCGGAC  
ACCGTTCGCTGTTTATGATGTTTGGCTTCTCGGCTGATGACTCTGAAATGGCAGGAATCCGGTGTGGAAGGGGCTAA  
CCGTTCCGTAACGCTGTCTGAAAACCTGGTTTACGAGCACACAGCAAAAAGGTGATGTTGCGGCTGAACTGAACTGATGCG  
TGACTGAAGATCAGAAAAGCGCTGCGTGGGATGTCATAAAAACGATCGCTAAAGTGAACGATGATATCGGCGCTGCTCAG  
ACCTTCAACACCGCAATTTGCGGCTGATGAGAGCTGATGAACAACTGGCGAAAAGCACCAACCGATGGCGAGCAGGATGCG  
CGCTCTGATGACGGAAGCGCTGCTGGCGGTTGTCGCTGATGCTTAAACCGGTTACCCCGCACATCTGCTTCAACGCTGTGGC  
AGAACTGAAAAGCGAAGCGGATATCGAACAACCGCGGTTGGCCGTTGCTGACGAAAAGCGATGGTGAAGACTCCACG  
CTGGTCTGGTGCAGGTTAAACGGTAAAGTCCGTTGCCAAAATCACCGTTCCGGTGGACGCAACGGAAAGACAGGTTCCGGA  
ACGTGCTGGCCAGCAACTCTGGTAGCAAAAATATCTGATGGCCTTACCCTGCGTAAAGTATTTACGTACACAGGTAAC  
TCCTCAATCTGGCTGGCTAA

>Cluster\_39714

ATGACTCAACAGCCACAAGCAAATACCGTACAGATTATCGTGGCGGGATTACCAGATTACTGATATTGACTTGACCTT  
TGACCTGGACGCGCAAAAGACGGTCTGTTACCGCGGTCAGCCAGGCTGTCCGTCATGGTGCATCAGATGTTCCGCTTCGCT  
TCAACGGCGAAGACCTCAAACCTGGTTTCTGTTCAATTAATGATGAGCCGTTGGACCGCTGGAAGAAGAAGAGGCGCA  
CTGTCTATCAGTAATTTGCGGAGCGTTTTACGCTTAAAGCTGTTAATGAAATTAGCCCGCGGCAATACGCTGGA  
AGGGCTTTATCAGTACGGGATGCGCTTTGACCCAGTGTGAAGCCGAAGGTTCCGCTATTTACGATTTATCTCGACC  
GCCCGGACGCTGCTGGCGGTTTTACCACAAAATTAATCCGATAAAACCAAAATATCCCTTCCGCTTTCCACGGCTAAC  
CGGTTGCACAAGGCGAAGCTGGAACCGGACTGATGGGTACAGTGGCAGGACCCGTTCCCTAAACCGTGTCTACCTGTT  
TGGCTGGTTGACGGCGACTTTCAGCTGCTGCGGACACCTTACCACCGGTTCTGGTGGCAAGTGTGCTGGAGCTGT  
ACGTGATCGCGCAACCTGACCGCGCGGTTGGCGATGACCTGCTGAAAACCTCATGAAATGGGATGAAGACGC

TTCGGCCTGGAGTATGACCTCGACATCTATATGATCGTCGCGGTGGACTTCTTTAATATGGGCGCAATGGAGAATAAAGG  
TCTGAATATCTTTAACTCCAAATATGTGCTGGCCCGCACCACCGCCACCGACAAAGATTACCTCGATATTGAACGGC  
TTATCGGCCATGAATATTTCCATAACTGGACCGCAACCGTGTCACTGTCGCGACTGGTTCCAGCTCAGTCTGAAAGAA  
GGTTTAAACCGTCTCCCGCATCAGGAATTCAGCTCTGACCTTGGTTCCCGCGCGGTAAACCGTATCAACAACGTCGCGCAC  
CATCGCGGATTTGAGTTTGGCGAAGACGCGCCGATCGCCGACCCGATCGCCCGGATATGGTCATTGAGATGAATA  
ACTTCTACACCTGACCGTTTACGAGAAGGGCGCGGAAGTGATTCGCATGATCCACACCTGCTGGGCGAAGAAAACCTC  
CAGAAAGGATGACGCTTTATTTTCGAGCGTCATGATGGTAGTGACGACCTGTGACGACTTTGTGACGGCGATGGAAGA  
TGCATCGAATGTCGATCTCCCATTTCCCGCGTTGGTACAGCCAGTCCGGTACGCGGTTGTGACCGTCAAAGACGACT  
ACAATCCGAAACTGAGCAGTACACCTGACCATCAGCCAGCCAGCCAGCTACGCGGATCAGGCAGAAAACAGCCG  
CTGCATATTCGGTTTGCATCGAAGTGTATGATAACGAAGGCAAGTGATCCCGTTGCAGAAAGGGGTCATCCGGTCAA  
TTCGGTGCAGACCTCACCCAGGCGGAACAGACCTTTGTCTTTGATAAATGCTACTTCCAGCCGGTGCCTGCGCTGTTGT  
GCGAATTTCTGCGCCAGTGAACCTGGAATATAAGTGGAGCATCAGCAACTGACCTTCTGATGCGTCAATGCGCGTAAT  
GATTTCTCCCGTGGGATCGCGCCAAAGCCTGCTGGCAACTACATCAAGCTGAACGTCGCGCGTCAATCAGCAAGTCA  
GCCGCTGTCTGCGCGTGCATGTGGCTGATGCTTTCCCGCGGTACTGCTTGTGAGAAAGATTGATCCGGCACTGGCGG  
CAGAAATCCTGACGCTGCTTCCGCTCAATGAAATGGCAGAACTGTTGATATCATCGACCCGATGCTATTGCTGAAGTA  
CGCAAGCACTCCTGACTTGGCGACTGAACTGGCGGATGAGTACTGCTATTTACAACGCGAATTACCAGAGCGA  
CTCTTCTTGGATGAGATGAAGTATTTGCAAAAACGCACTTGCCTAATGCTGCTGCGCTTCTTGTGCTGAAACCC  
ATCTGGCTGACGCTGCTGGTGGCAGCAATACCATGAAGCAACAATATGACCGATGCGCTGGCAGCGCTTTCTGCGGG  
GTTGCTGCACAGCTGCCTTGCGGTGACGCGCTGATGACGAGTACGACGACAAGTGGCATCAGGATGGTGTGGTATGGA  
TAAATGGTTTACTCTGCAAGCCAGCCAGCCGCGGCAATGCTGCTGGAGACGGTGCCTGGCCTGTTGACGATCGCTCAT  
TTACCATGAGCAACCCGAACCGTATTCGTTGCTGCTGGTGGCTTTGCGGGCAGCAACCCGGGAGCGTTCATGCGCGAA  
GATGGCAGCGGTTACAGTTCCTGGTGGAAATGCTTACCGACTCAACAGCCGTAACCCGAGGTGGCTTACGCGCTGAT  
TGAGCCGCTGATTCGCTGAAACGTTACGATGCCAAACGTCAGGAGAAAATGCGCGCGCGCTGGAGCAGTTGAAAGGGC  
TGGAAAATCTCTGCGCATCTGACGAGAAGATAACTAAAGCACTGGCTTGA

>Cluster\_8595

ATGAGCAAAGTCAGACTCGCAATATTCGGTAACGGTATGGTGGCCATCGCTTATCGAAGATCTTCTTGATAAATCTGA  
TGGGCGCAACTTTGATATTACCGTTTCTGTGAAGAACCAGCGCATCGCTTATGACCGGTACACCTCTCGTCTTACTTCT  
CTCACACACCGCGAAGAGCTGTCGCTGGTGGCGAAGGCTTACGAGAAAACAGCGCATCAAAGTTCTGGTGGCGGAA  
CGCGCTATCACCATCAACCGTCAGGAGAAGGTGATTAAGTCCAGCGCCGACGTACCGTTTTTTATGACAAGCTGATCAT  
GGCAACCGGTTCCCTACCGGTGATCCCGCAATCAAAGTCTTATGATATCAGGACTGCTTGTCTATCGCACTATTGAAG  
ACCTCAACGCCATTGAATCTGCGCCCGTCGACGAAACCGCGTGGCTGTTGTTGGTGGCGGCCGTTAGGCTTGAAGCC  
CGAGCGCGCTGAAAACCTTAGGTATTGAAAACCCACGTTATCGAATTTGCCCTATGCTGATGGCAGAACAGCTGATCA  
GATGGGCGGCGAGCAGTGCCTGCAAAATCGAAAGTATGGGCGTGGCGTTCACACCAGCAAAAACACCCCTTGAGATTG  
TGCAGGAAGGTGTTGAAGCGCGTAAAACCATGCGTTTTGCCGACGGCAGCGAAGTGAAGTGCAGCTTTATCGTCTTCTCT  
ACCGGTATCCGTCGCGGATAAGCTGGCAACCCAGTGTGGTCTGGACGTTGCTCCGCGTGGGGTATTGTCATTAATGA  
TTCTGCGCAGACTTCCGATCCGGATATCTACCGCATCGTGAATGCGCAAGTGAACAAACCGTGTATTTGGTGGTGG  
CACCTGGCTACAAAATGGCGCAGGTGCGCTTGACCATATCTCGGTAGCGAAAACCGCTTTGAAGGTGCTGACCTTAGC  
GCCAAGCTGAAACTGCTGGGCGTAGACGTAGGCGGTATTTGGTGTATGCGCACGGTGCACGCGCTGGCGCAGTACCT  
TTACTCGACGAAAGTAAAGAGATCTACAAAACCGCTGATTTGTCAGCGAAGCAAAAACCCCTGCTCGGCTGGTACTGG  
TGGCGGATACAGCGACTACGTTAACCTGCTGCAACTGCTGCTGAACGCTATCGAACTGCCGGAACCCGGAATTCCTG  
ATCCTGCCAGCAGCTCGGGTAGCGGCAAGCGGCTATCGGTGTTGATAAAGTCCCGGACAGCGCGCAAACTGCTCCTG  
CTTCGACGTCACCAAGGTGATCTGATTGCTGCCATCAACAAGGCTGCCACAGATTGCGGCGCTGAAAGCTGAAACCA  
AAGCGGGTACTGGCTGCGGTGGCTGTATCCCGTGGTCACTAGGTACGTAACGCGGAACTGGCGAAAACAGGCAATCGAA  
GTTAAACAACAACCTGTGCGAAACCTTTGCTTATTCGCGTCAGGAACTGTTCCATTTGATCCGCGTGAAGGCATTA  
CTTCGAAGAACTGCTGGCGAAACAGGCAAGGCTACGCTTGTGAAGTTTGTAAACCAACCGTCCGTTGCTGCTGGCCT  
CCTGCTGGAACGAATACATTTCTGAAGCCGGAACATACTCCGCTGCAGGATTTCAACGACAACCTTCTCGCTAACATCCAG  
AAAGACGGCAGCTTACTCGGTGATCCCGGTTCTCCGCGGCTGAAATCACC CGGAAGGCTGATGGCGTAAAGCTGAT  
CGCGCGTGAATTTAATCTCTACACCAAGATCACTGGCTCCAGCGTCTGGCGATGTTTGGCGCACAGAAAGACGATCTGC  
CGGAGATCTGGCGTACGCTGATTGAAGCCGCTTCGAAACCGTCAATGCTATGCGAAAGCACGCGTATGGCGAAAAC  
TGCGTGGGTAGCACCTGGTGGCGTACGGCGTTGGCGACAGCTGCGCTCGGCGTGGAAACCCGCTACAAAGG  
CATCCGTACGCGCACAAAATGAAGTTCCGCTGCTCCGCGTGTACCCGTTGAATGTTTGAAGCTCAGGCTAAGGACGCTGG  
GTATTTATCGCCACTGAAAAGGCTGGAACCTGTATGTTTGGGTAACGGCGCATGAAACCGGCTCATGCGGATCTGCTG  
GCGCGGATATCGATCGCGAAACGCTGATCAAAATATCTCGACCGCTTCAATGATGTTCTACATCCGTACTGCCGACAACT  
GACCGTACCAGCAGGCTGGTTAGAAAACCTCGAAGCGCGCATCGATTACCTGAAAGCAGTGAATCATTGACGCAAACTGG  
GGCTGAAACGCACTTGGGAAGAGAGATGGCGCGCTTGTGACAGCAATAAATAATTTCTGACTGAAACGCTGAAACGCT  
CCGCTGCGCAGACTCGCTTCAAACACTTCAATCAACAGCGACAAGCGTACCCGAACTGCAGATGGTCCAGAGCGCGA  
ACAGCACCGTCCGCAACCCGATGAACGATCCAGTAACTCTGGTGGAGGACAACGCATGA

>Cluster\_27755

GTGAATGAAGTTTATGTGATTGCGGGTGGTGGTGGTGGCGAATAACCTGAACGCCATTGCCGCTTTATGGGAACCAG  
GACGTGGGATTTCAATGAAAAAATGCGCTCACATTGTCTGTTCTCGCGGTGGCGGTGATGTTGGGTACAGCGGCACAACG  
TGATGGATTTGCTGGGCTGGGTGGCTGTGTTGTGCTTATCAGCCTGCTGGTTAATGTCCGCACATCGGTGACAGATTATT  
GATAACAGTGAACCTGGTCAAAGTTCAACCGGTGGATAATGTACCGGTGCGGATGCGCATGCACTTTCTACTGACGCGCG  
TATCGGGCATGCAATGGTGGCCAGTTACGAGATGATCTTACGCAACCCGACAGTGTACCTACAGCAAAAACGGGATGCT  
TGTGGGCGCAGAACTGGTATCAAAAAGCACCGACTTTTGTCCCGCAATCCGAAATCGCCAATCTTTCCAGGATTAT  
GTGCAAGACTGCGTATGGGGGATTTACTGAAACCAAAATACAGCTGGAGGAGCTGATGGCCTCCGCTGATCCCTA  
CACGCTGATTTTTCGCGCCAGCCGCTGCGGGCGTTTATGACAGCAATAAATAATTTCTGACTGAAAGCAGCGCT  
CGGTTTCCGCTGAAAGACAAGCTGAATCTGGATAACAGAGTGGCGGAAAACCTGGCATTATTATGCCAGCAGCTATTT  
GGTGGACGCCCTGATCCGAACTGTTGTTACGATACGCTGATGGCGACAGTTACAGTTACTTCTATGGCTCAAGTAAATC  
AGCCAGCCAGATCATCCGCAAGATGTCACCATCAATGCGCTGAAGGAGGGATCACCAGTTATGCCGCGGCTAATGGTG  
ATTCAGCCAGCTGGTGAATCTGGCCACAGCTCATCGATGGGAAGCAACGCTGCGACATGTTCCCATGCTGCTGATG  
GCGATGGGACACTGCCATGACGACAGCCATCTGACGGGATCGCCATCGGATTTTCCGCTTCTGGTACTGGCGG  
TGTCTTAAACAACCTGACGCTGCTGCTGAAAGGCTATGTTTGGCCTGATGTTGGTTCAGTCAATGGCCAATGTTGT  
ACGCCATTTCTGAACAGCCCATGACATTTTATGCGAAGCAGAAATGGTGCACCGGTGGTCTCTCGGAAATTTACAGATA  
CAGCTGAAATACCTCGACTGGCTTCCACTGCGGGTATCTTTTCCATGATGATCCCGCATTATCTGGATGTTGCTGAC  
GGGACTCGGGGCGGATTTTCCAGTGTGACAGCCATTTCTGCTTCTCTGCTATCAGCCGACGTCAGTGGCGGAGGTA  
GTGTTGGTTGACGGTAAATTAATCTTACGGCAACATGACAGCGGAAAACGTTGACGGATTTAGCTGGAGCACAACAGC  
ACGTCGTTTGGTACAGATGATGACAGACCGGAGTGGCGCAACCGCACAGACCCGTCGACGGTAAATGTTGATGGA  
TGCAAGCGGAGGATGCTCCGTTTACCGGTGCGTATCAATGCAACCGCTCAGATTGCGGCGGCAACAGGAAATGGCC  
GGGAGCGCTGCAACAGAGCAGAAAAGCGCCTGCATGGGTTACAGCAGTATTGCCAGTGCCTGGACTGCTCAGTCA

TTTGGTTCTAACCGGGGAGCAGTGTATCTGTCCACCGGTGGTGTGACAGCAGATGAGCGCACAGGACTCCATGATGGC  
CAGCCGTATGCGCAGCGCAGTGGAAAGCTATGCGAAGGCGCATAATATCAGTAATGAGCAGGCGACAAGAGAAGTGGCAT  
CAAGAAGTACGAGAGGTTCTGCGGGGATGTATGGCGATGCTCATGCTGAATGGGGGTTAAACCTAAAATCTTGGTGT  
GGTGGTGGCGTAGGTGTTAGAGGTGGTGGTGGGCAAGTATTGACTGGAGTGAAGGATGCGCATCAGGCCAGCAGTGG  
TTCACGGCCAGCCATGATGCTCCGCATGATATCGATGCCAGGGCTACACAAGACTTTAAAGAGCCAGCGATTACTTTA  
CCAGTCGCAAGGTCAGTGAATCCGGCAGCATAACGACAATAATGCCGATTCGCCGTGGACCAGCTGTCTGCAGCCCTG  
AATCAGCAAAAACAGAGTTACGACCAGTACACGACGAATATGACCCGACGCAATGAAATATGCTGAAATGGCATCCCGTAC  
TGAAAGCATGAGTGGCAGATGAGTGAAGACCTGTGCAACAGTTTGCACAGTATGTGATGAAACACGCGCCGAGGATG  
CCGAAGCTATTCTGACAAAACCCAGTTCACCGGAGATTGCAGAACCCTCGGGCTATGGCGTGGTCTTTTGGTTCAGGAA  
CAGGTGCAGCCTGGTGTGATAATGCCCTGGCGTGAATCCCGTGGGACATCGGTAAAGGAATGGAGAGCGTACCTTCGGG  
GGGGCAGCCAGGATATTATTGTGATCATCAGGGGCATCAGGCCATTATTGAGCAAAGAACGAGGACGTAATATCCG  
TAATGATGTAA  
>Cluster\_34585  
ATGTGGTATTTTCGATGGATTCTGGGAACGCTTCTGCTGTTCGTTTGGGGTAAACACCGCGTGGCGCTTGAACACGT  
CGAATCAGCAAAAGCCGGTCAAGAAGACATCTGA  
>Cluster\_35610  
ATGGTGCAGACTCAGGTCGAACGTAATGACGAGATTTATCGCCGTCGGAGGGAGATGAAGGAAGAAGTGAATAATCTTGA  
TGATTTACGCTTAATCCGAGCGTTTACGCTTACGCAATAA  
>Cluster\_26509  
ATGAAATTGCTGATGCTTACTGGTGTAAACCATATTTGCCCATATAGTCATAAGTCATCGGAACATCACTATATAGCA  
TATTAGCCGCATGAACTATCAAAAATAG  
>Cluster\_49778  
ATGAAGAAGTGTCTATTACTGCATCTCTGTTCTGGCCCTCTTTGGCTATCCATATGGTAGTCCAAGTGGTTTGTGAGTAA  
CGTCAGTAATATCCATGTAAGTATTATCTTTAG  
>Cluster\_6217  
ATGAATTACAATGGTACCCCCATAGAATTAACTTAAGGAAGCACAATCAATCAGCCTGACATTCACAAAAGTCAGTA  
TCAGGTAGCCACAGGCAACATCGCTATTAACTACTGTGCCATTAAGTAAAAACTGA  
>Cluster\_65315  
ATGGATTTGCACCAGATGTTGTTGATACATGATATTTTACATTGCAAGGAGATGTCTAAAATGAAAGATGTTGATCAAAA  
CTTTGATGCTTTAGACTGCCATATACTGCGAGAATATTTAATTTTATTGTTTTATGATTA  
>Cluster\_18314  
ATGGACCAATTCAATGCCCCACAGAGTGGTGGGCAATTGAAAATTACTCAGTATGCAGTCTTCATTGTGTATCAGGTGCA  
AAATAATCTGGCAACATCAGACTAAGTGGGGAATAA  
>Cluster\_27066  
ATGCGCAAGCTTATCGGGCCTACTATTGCTCTGCACATGTTGGCTGGATAAGATGCGTCAGCATCGCATCCGGCAAAAA  
AAACGGGCAAGGTGTACCACCCGGAACCCCGGGAATCCTGGAGACTAA  
>Cluster\_51463  
ATGTTGGCATGGACAAATTGGACCTTATGTTAATTTGTAATATCAATTAACCTTCGGTTACCTCTTAAGCGGCGCAAT  
TCTCATGTGCGGAGGCAAAACGAAAATGA  
>Cluster\_52587  
ATGCAAAACAAAAAATATTTTTAATTTACAGGGGAAAAACCTGGTGGAAAATGTAGGTTATGTGCCGATGGATAAAAT  
GTTGCATTA  
>Cluster\_39755  
ATGTGGTATTTACTTTGGTTCGTCGGCATTTTTGTTGATGTGTTGCTCTCCACCCCTTGTGTTGGTATGGTGGACCCGGC  
TCTGAAAAGTTAA  
>Cluster\_38527  
ATGGCTAAAAAACCGACCACCGGTAAAGCAGTTAAAAAGAGACTAACAGCAAGCTGAGCTTTTATAAGCAGTTGGTTTT  
AAACCGCTTTATGTTCCATTTTTTTAAAGATGGCACATGCAAGGTTTGAAGAATCGGTTAGGCGAGGATCGCTTTGAAG  
GCATCCATGAAGATGGCCAAAGCTTATTCTTCCATGAGCTGAGTAACTATTTATTCGAGGTCGATCTTATCGATCTCGAT  
GAATCGCGTGGTACGATCTCAATATCGTGCAGCAGTGGCAGCAGATAACCGAGCACCCTAATCGTAAAGAAGACACAGT  
GCTGAACATGAAATATTTTTCAGTACTTGTGCTTCTGTTTACCAGAGATCTACCCTGGACTGGTACTTCAACCGTAAACAG  
AATTAATCGATGGCTAAATAACGAGCTGGCAGCATAAATGCTGAAAATGATAAAACAGCAAAAAGCCGGCTAATCAG  
TTCAAATCATACGTTCTGGATGATTTGAATAAACTGGCATACTGGAACGCTACTGGTTCTGGTAAAGACTGCTATTACA  
TGTCATAATTTTGAATATTTACATTTTCCAGAACGGTAATAGCCATCATTACCCGGATAAAAATCATCTGCTTACGC  
CGGATGAACGCCCTATCGAAGCAACATTTAGATGAACCTGGAACACTCAGGATTTACCAATACCAGTTATTCGATAAGAGT  
AAATCCGCGCATTTAAAGGCAGATTGAAGTTATGATATCAATAAACTTGGCGATGAAATGGGTGACAAAACCTGTTGC  
CGTTGAGGATTTGAAGGCAACATCTGGTCTTGTGATGATGAAGGGCAATAAGGCACAGGAAGTGTGCTGGTGGTCTGGA  
TGCCGCTCGTGACAAATTAACCGGTGACGGATTTGCGTTTGAATATTCAGCAACTTTGGCCAGGCAAGTGGCCGGTGGC  
AATAATGTTGAGGCAAGTTGAAACAGAAATTCAGAAAGAAAAAGCAAGCTGCTTTTTGAAACAAGTGCCTTAGTAAACT  
GAGCGAAGAACAGTTAGCGCAAAATAGCATTAACAGCGAAGAAACAGCTGATGCGCGTATTACGGCGACACGAGAAGTCT  
ATGGGAAATCGATTCTGTTTCGATTACTCTATAAAATCTTCTATGAGGATGGTTATGGTAAAGAAATCACTGATCTTAA  
CTTAATCCTGAAGAGGATAAAAAAGATGAGCGTCGGTATGAGTATTTTACCAGGTTTGTCTGCTTTTATCAGCAACA  
ATATTTATTCAATAAGAATAAAGAAAAATTAATGAATTAATATCGAAAAACCGCTATGGGTTTTTGTGCGTAAACCCG  
TAAGTGGTGAAGATTCAGACATTCACGCAGTACTGCGTTTTTTAGCATGGTTTTTAAATCATGAAATCGCAGGCAAAATCG  
TGGATTAAGATCTCATTGAAAAAAGCGCAATTTTGTATACAAAGAGCGTAACATTTTTGAAAAATCGCTTTACCGC  
ACTAATGAACGGCCCGAAGATATCTACGAGATATCTTCTCGTTTTGTTTAAACCACTCACTCAGGTCAGAGACTGC  
GAGTCTGAATTTAATAGGCAGTAAAGTGAACGCGATTACAGGTTGGTGGGCGAACCCTTTGGTCTTATCAATATT  
GGTGTGACCCGCTCTTTTACAAAATGTGTGAAGAGGATACGACATTTGATATCAGAGAGATGATTTGCGAAGTCACT  
CTTTCACTACGTTAAATGACAAAGACTCGCAACTACATTTTTGATCGGCTCGCGAAAAATTTACTGAAGGCTGGAGCAGTT  
GGCGCTCTCAACAGATGGGATTGCTCAATATGGCCGTGGAGAAAGTTACAGATCAATCAGTATTTTGGTGGTGGCGTT  
CGCCTTAAAGGTCGCAATTTATCTTTGAAACGCGTACACCCGTTGAGCGTCCGAAAGGTTGCATCTGGAAAAATTAGA  
GACACTGAATGATTTGCGGTGACGTCGGGATTACATGGCAACCTTTAAACAATACCTGGAAGATGAAGGGATTACGCCAA  
GTGACGAGATCCTTGAGCTGAATTTGAAACTCGGCCAAATATGCCAGCAACCAGCTTAAACACTTAAAGCTTAAAGAT  
GGTTATAAAGATAAATCAAGACTCGGCTTTAAACGCTGTCTATTTTCCGAAATGTAAGTTCCTGCTGATTTTCAGG  
GAAAATTAAGCAGCCGATATTAAGCTGGACCTATACCCGAACTTGAGTCGATGATACCAGCAGAAAAGGGGACAATA  
CTCCGGTTAACGTCGTAATGAAGCGAAGTTAGATTAATAAATCATTAGTGCCTTTGATTTTGTATCGGCTTTATCTCGCC  
ATTCAGAAATTTAAACATCAACCGCGCTGTCAAATTTACGTTGGATTAACAACGTTTGTATCGACTTTTGTACCGGTTAA  
GACAAAAGATCGGAAATAGTTGGTATACCCCTTTTGTATCCAGCTTCAGAGCTTGGATTAAGCAATATGAGATATGCTA  
AGCAGGAAGATATTATGCTTCGTCGCTGACTGATTTACTGATCGCTTTTACACACATGAAAAATGCTTATGAGGT

CAGTTTTATGAAGTCACGCAGGTGAAAGAAGATGATCCTGGTATGATCAAATGTACCATTTTCGAGATCGAAGAACTGA  
TGATGGGTTGGCATAATGCCAGTCGGCTGGAAACAATTACACAATTGGTTCATCGACGGCGAAATCGGTAAGCAAAAATCCT  
GGAGTGCATCCGGGATGGTGTCTATTACCTTTGATAAACATCTCTATTATCCACTTCTTTCGATGAAAAAATGCCAAC  
ATACCGCTAAAAATGCCAGCCGGCAGCAGTGGGTGCATCAAGTGAGATTACTTTTGTCCATGATCTTCAGTCTTTTGTGA  
TTCCGACAAAAGGAGAAAATTTATGGTGATAAAAAGTTTATATCTGCTAAGAAATGGGATTTCAAATAAGAGCCCTGG  
GCTTTGCTACTGCGGGTAATTTTTATCCGGATTCTTTATTTGTGGTTAGTCGATGATAAAAGTGGTAAACAATGGTTAAGT  
CTTATTGATCCAAAAGGCATCCGCAATCTTAATCTTGATGATCCAAAGTTCGGATTATATAAAGAAATCAAGAATCTTGA  
ACATAAATATCGGATGATAACTTATCATTAAGTGCATTTATTGTTTCTGAAACTTGTATGTTGACTTAGTAAACGTTAC  
CTGATTCAAAGAGAATCTGGAAGCCAGAAATGTGCTTTTTATTGAGGATACTGGCTCATTGTATCTGAGAAAATTTATTC  
AGTAAAGATGGTTAGCGAGTAA

>Cluster\_28521

ATGCGCAAATTCACACTAAACATATTCACGCTTTCCCTCGGTCTGGCCGTCATGCCGATGGTTCGAGGCAGCACCAACCCG  
TCAGCAACAGTTTGTGGAGCAAGTTCGGTTAGGCGAAGCGACCCATCGTGAAGACCTGGTGCACAGTCGTTGTATCGT  
TGGAACTTATTGATCCGAATAACCCGGACGTCGTTGCCGCCGTTTCCGTTCTCTGTTACGTCAGGGCGATATTGATGGC  
GCGCAAAAACAGCTCGATCGGCTGTCGAGTTCAGCGCCGAGTTCAAATGCGTATAAATCGTCGCGGACCACAATGTTGCT  
TTCCACGCGGATGGTTCGTCAGGCATGCAACAGGCAAGATTCAGGCGACGACCCGTCATGCAAGAAGCTGTGGCGA  
GTTACAAACAACTGTTCAACGGTTCGCCCGCGAAGTGCATTTGCCGTCGAGTACTGGAGTACGTTGCGAAAATTCG  
GCTCGCGTGGCGAAGCGATTAATCAGCTAAAACGCATTAATGCGGATACGCCGGCAACACGGGCTGCAAAAACATCT  
GGCGCTATTGCTGTTTAGTAGCGATCGCCGTGACGAAGCTTTGCCGCTTGGAAACAATGGCGAAATCGAACCGCGGGC  
GCGAGGGCCCTTAAAATCTGGTACGGGAGATTAAGACATGCCGTCAGCATGTCAGTGTGTCGGCGCTGAAAAA  
TATCTCTCGATTTTAGTATGGGATAGCGTAGCTAGCTGCGCGCAATCGCAACTGGCAGAACAGCAAAAACAGCTGGCCGA  
CCCTGCTTTCCGCGCTCGTGCAGAGTTTAGCGCGGTGGACCTGTTGATGGCGGTAAGCATTCCCGAATACAAC  
AGGCGAGTGGCGGCAACCCGAAAGACAGTGGAGTCTGGGGGCGCTGGCCAGGCGTATCTCAGAAAGGCGATCGCGCC  
AATGCGGTCGCGAATCTGGAAAAGCCCTCGCCCTGGACCCGACAGCAGCAACAACGACAAAATGGAAACAGTCTGTGA  
AGTAAACCGCTACTGGCTGGCGATCCAGCAGGGTGTGCTGCGCTGAAAGCCAATAATCTGACCGGGCGGAACGGTTGT  
TCCAGCAGGCAGTAAATGTCGATAACACCGACAGCTATGCGGTGCTGGGGCTGGCGATGTGGCGATGCGACGCAAGAT  
TACCCCGCCACTGAACGCTATTACCAGCAGACGCTGCGTATGGACAGTAGCAACTAACGCCGTGCGCGGGCTGGCGAA  
TATTTACCGCCAGCAGTTCGCAAAAAGCCCGAAGCGTTTATCGCTCGCTCTCTGCGAGTCAGCGGCGCAGCATTTGATG  
ATATCGAACCGCAGCTGCAAAAACGACCGTCTGGCACAGCAGGCGAGGCACTGGAAAACAGGGGAAATGGGCGCAGGCG  
GCAGCATTTCAGCGGCAACGACTGGCGCTGGACCCCGGAGTGTATGGATTACTTACCAGTTCGCGAGGATCTCTGGCA  
AGCCGGACAACGCGCAGGCGGATACGTTAATGCGCAATCTGGCGCAGCAGAAGCCGAACGACCCGGAGCAGGTTTACG  
CTTACGGGCTGTACTCTCGGTACGACCAGGACAGAGCGCGCTGGCGCATATCAACAGCCGTCGCCGCGCGCAGTGG  
AACAGCAATATTCAGGAGTGGTTAATCGACTGCAAAAACGATCAGGTGCTGGAAACCGCTAATCGCTGCGAGAAAACGG  
TAAAGAGGCGAAGCGGAAGCGATGCTGCGCCAGCAACCCGCTTCTCGCGTATTGACCTCACGCTGGCTGACTGGGCGC  
AGCAGCGACTGATTACACCGCCCGCGCTGCATATCAGAAATGTTCTGGCGGGGAGCCAACTAACGCCGATGCCATT  
CTTGGCTGACGGAAGTGGATATTGCTGCCGTTGACAAAGCGCGCGCAGTACGCGAATCAACAGCCGTCGCCAACTGA  
TAACGCCCTCGCTGAACACACAGCGCGCGTGGCGCTGGCACAGGCGCAGCTTGGCGATACCGCAGCGCGCAGCAGCAT  
TTAATAAGTTGATCCCGCAGGCAAAAATCTCAGCCACCGTCGATGGAAAGCGCGATGGTACTGCGTGTGGTGGCAAGTTT  
GAAGCGCAGGCGCGGATCCAACCGCAGGCGCTGAAACCTACAAGACGCTATGGTTGCATCCGGTGTGACACGACGCG  
TCCGCAAGATAACGACACTTTTACCCGGCTGACCCGTAACGACGAGAAAAGATGACTGGCTGAAACCGCGCGTGCAGCG  
ATGTTGGCGGACCTCTATCGCCAGCAGGATCTTAACGCTACTCTCGAGCAGGATTAAGTGGGTTGAGCGGCGACCGGTG  
TACTCCGATCTGAAAGCGCACACACTATGTTGACGTTGGACGCGCCCTATTCTGACGGGCGGATGTTCTTTCGAGTGA  
TTTTGCTCAATATGAAACGTCGCGAGTTTCTCCACTAATGCGCATGGCAATGGGATGACAACCTGGGCGACTGTACATTAC  
AGGACTGTAGCGGCAACCGCAGCAGTCCGATTCCGGTCCAGCGTGGCGGCTGGCTGGGAAATGACGCTGTGGAGCTGG  
GATATCGGTACCAGCCGATGGGCTTCAACGTTGGTGGATGTTGGTTCGCGGCGCATCAGTTACAACGATGATATCGGGCCG  
GGGTTACACCGTTAACGCCACCGCTCGGCCATCTCAGTTCTTTGCTGGCTTTGGTGGGCAAAAAGACTCTCCGAGCA  
ATACCGGAAAAAATGGGCGCGCGCTGCGTGGCGACGCGCTGGGCTAAGTCTGAGCTACGATAAAGGTTGAAGCAAACCGC  
GTCGCGCATCGCTTAGCGGTGATCAGTTAACCGGTAAAAATGTCGAAGATAACTGGCGCGTGGCGTGGATGACGGGCTA  
TTACTATAAGGTCATCAACCAGAAACAATCGACGCGTCAACAATCGCCCTGAACAACATGATCTGGCATTATGACAAAGACC  
TGAGTGGCTACTACTCGGACAGGGCGGTTACTACAGTCCGAGGAATACCTGCTGTTTGGCATAACCGGTGATGTGGCGG  
GAGCGCACGGAAAAATGCTGCTGGGAGCTGGGGGCGCTGGCTCGTGGTTCGCAATTCAGCAGCAAAAACCATCCGCTTA  
TCCGCTGATGAATCTGATCCGACCGACTGGCAGGAAGAAGCTGCGCGCAATCCAACGATGGCGGCGCAGCTCAGGGCT  
TTGGCTACACGGCGCGGCTTACTTGAACGAGCTGTTACTTCCAACCTGGTTTGTGCGCACGGCAATTGATATCCAGCAG  
GCAAAAAGATTACGACCCAGCCATTTCTGCTTACGTACGTTATTCCGCCCGCGGATGGCAGGGTGCATGGATTACC  
GCCGACCGCTGATACCTTACGCCGACTGGTAA

>Cluster\_24728

ATGCATAAGTTCAGTCGAGAACATAGTGATTTAATTCGGATGAACATGAGTGATATTCAGAAAACGAAAATCTTTGTA  
TATGCGCTGGGAAATGGCGGTTAA

>Cluster\_53880

ATGAGTTTACAGATAACTGGTCAGACGAAGAATTCATTGCTCAGATGAACAAAATGCTCAATCAGCACAAGAACAGGA  
GAAAGATGATGATCTGACTCTGAATGA

>Cluster\_24059

ATGACGAATGTGAAGGGAGTCAAAGAGTGGCATAACAGCAACAAAATTTTTTGTGCTGTATGGTTTTGAGATTAAAAAAAT  
CGTTGAAATGTGTGA

>Cluster\_20185

ATGAGTGTGTTTTGGTGGTTCGCGAAAAGATAAAAACCGTTACAGATGTCACCGCGGATTTTACCCTCCGGCAACATT  
TACTGTGACTTATAACTAA

>Cluster\_36577

ATGAAAAAAGAGCAGCTGATTGAAATAGCCAATACGATAATGCCGTTTGGCAATAACAAGGGCGTGGCTTAATCGACCT  
GCCGAGGATATCTGCTGTGGTTTGCCTGCAAAAGATGAGTTCCCGCAGGGAAGCTCGGTGAGCTAATGCAAAATCACGC  
TGCTGATTAACCCGAGGGGCTGACGCAACTGGTCCAGCCCTGAAGCGTCCGCTTAA

>Cluster\_60356

ATGGAAGCATTAGGAATGATCGAAACCCGGGCGCTGGTTCGACTGATTGAGGCTTCTGACCGGATGGTGAAGCTGCGCG  
CGTCAAGCTGGTTGGTGTAAAGCAGATTGGCGCGCGCTGTGTACTGCCATGGTTCTGGTGTATGTTGACGCTGTAAAG  
CCGCGACCGATGCAGGTGCCGACGCGGACAGCGTATCGCGGAGCTGGTATCTGTACAGCTTATCCGCGTCCGACGGC  
GACCTGGAAGAAGTCTTCCGATCGGCTGAAAGGCGATAGCAGCAACCTGTA

>Cluster\_26084

ATGCCAGCAGCAATAACATTCAGCCAGGCGCAATCTTAAACTTGGCATAAAAACCCGAGAACCGGATCTTATTGA  
CCGGCGCTAAAGCCGAGAAAAATCGCACCGAATTTGCTTTGAGCGCGCAGAGCCGAGCTGAAGAGGCGCTCA

TTGAGCAGAGAATTTTCAGGATCGATTCTGATGATTACCAGTATTTTTGAATCGTCTGGATCAGCCCCCGGCCAAAT  
GCTGCATTACGCAAAACCATGCAAAACCCCGCGCTGGGAGCAAAAAAATGA  
>Cluster\_34586  
ATGAGTAAGATTATCGCGACTTTTGTATGCGGTAATGGACAAGCGCCCCCTGCGGGCGCTTCCCTTCGTGATGGCGCTTCT  
GTTAGCAGGATGATGTTTTGGGACCCATCTCGTTTTGCGCGAAGACAGTGAACCTGGCAATCTGGCATGGTTTTATTGC  
TGATGTGGCCGTCTGTGCTGGTGTGATTCACGGCGTGGGCTTTCGTCCGAGAAAGTTCTTTGGCAAGGGATTTTTTGC  
CCATTGCTTGCCGATATTGTTCTCATTGTGGGCTGATTTCTTCTTCTTTAA  
>Cluster\_64304  
ATGAAAGTTCAGGCGCTTGGTTTTATTCTGGTTTCGCGATGCGATTGATATCATGAGCTCAAAAAATTTTTACTGATGC  
TGATGTGCTCTCCGACAGTTACACCGAGTGGAAACACGACGCTGAAAAATGATTAAGCGTGTGAAAGAAGCGGGCAAC  
GAGTTATTAAAGTTGAAGCGGATACAGCCGAGTTCATCACCTGGTGTACAAGCGAAGGCATTGGAATCAATGCCGAGGT  
AGAATGCAGTTCGCATCTTTAAGGCTTACCAACAACCTTCTCAGCGAACGCTAA  
>Cluster\_62259  
GTGAAAAAGATGCAATCTATCGTACTCGCACTTTCCCTGGTTCGGTCTGCCATGGCAGCACAGGCTGCGGAAATTAC  
GTTAGTCCCGTCAGTAAAATTACAGATAGGCGATCGTGATAAATCGTGGCTATTACTGGGATGGAGGTCCTGCGCGAC  
ACGGCTGGTGGAAACAACATTATGAATGGCGAGGCAATCGTGGCACCACACGGACCCGCGCCACCGCCGCGCCACCAT  
AAGAAAGCTCCTCATGATCATCAGCGCGTCTGGTCCAGGCAAAACATCACCCGCTAA  
>Cluster\_14919  
ATGAAACTTAAATATTCTGGCTTAACTGCTAGTGGCAAACTCGCACTAAATTCATGCGCGGTGATATTTACCGCGACCA  
TACGCGCGCACGGTAATGATTAAGGGCTGGAGAACGGCGCTAACCTACCGTCTGGAAGCTACGAATATGATTTGG  
TGATGCTGTTTTTATCAGTTTCAGCTGATTTTTCTGTGTGACGCTGTACCAGTAACTTCAACAGCGAGGAGAAA  
GCACGCGCAATATTTCAGAAATAAGAAAGATGTTGAATGATTCAGGGGTAAAAAATGA  
>Cluster\_5722  
ATGAAAAATAAACCGCCGCTGTCAGGCACCCTTGGTCTGGGGATGTGATGATACGCATCGCCCACTCGATACGCA  
GGATATCGACCTGCAAAATCAATAGCAGCGTTGAGAAACAGTTTGGCGATGCAATTCGCACCACCATTTGACGTTCTCG  
CCCCTACAACTGCGCGCGCTACAGCTGAATGTCGATGACAAAGCGCACTGGACTGATTTTACGTGCACGACTGGAA  
GCCCTGCTGGCAGCGCCAGCGGTATCCCGCTCTGCCATGGGAGGATGCGCAATGA  
>Cluster\_40844  
ATGACACGGAACACCATACTCACCCGACCCGCTTACCCTGCGCCCTGCGAGCTTTCGGGCGGACGCACAGGCCCT  
GAAACTGACAGAAAGGCGCTGAACTGGCGCGCAGTGTGCCCGCAATCTGAACGAGACGGGAGCGAAAGCGACCTCG  
CGGCAGAGCTGGCAGACGTTGAAATCATGACAGAGCAATTGCGCTTCAGGGGATGGACCGGCTGATTGACTTCCACAAA  
CAGAAAAAATGGAACTGCGTGGCTGCACGACTGGGCGTGAATTTACACGAACGAGTAA  
>Cluster\_6018  
ATGTCAGGGAATGGCTACATCTACATTCATGCAATTGCGACGACAGGAAACCCGGTGAACCTTATGTTGCAGTGGGAAAC  
GGTGGCAACAAAAAGGAGCTGATGCTGGATATGCCTTACCAATTTGCTTTCCCTATGCAGGCTTATTTGCGACCGGAA  
ACCGTGGAACTTGGCTACAATGCGCATGAATGTCGATATTGCGTATTGCGACGAAACGCATATCAGTATTGAACTGGTTCG  
CCATCCGGAGAGGCGACCGAAGATGTTGTTTTATCGCGCTGGGGTATTTAA  
>Cluster\_64056  
ATGGCAAAAGTCCCTGAACACACAGCAACAGGCAGACTTTGAGCGTTTAGCAGCGTTCATCCCTACCGGATGAGCATGG  
GTTACCAGTACTTTGAAGAAAGCCTGAAAGATTACGCAAAAGCGTACCAACCAAGCTGTTAACACAGTGAAGAAAGACAGGCTG  
ACAGAGTTCAATTTCCATCAACCAAGATGAAAGAACTCAAGACGCACAGTAAATCTCTTCGCTCTTTTCTGAAACA  
ATCAGGAGCGCAGAAAAATACGTGCAGATGACAAAAATA  
>Cluster\_31793  
ATGCACACTTCAGGGAAATTTAATAAATCACTCAAAAAACGCAGAGACAGAACAGAACCGAAATATCGCGGTTAGACAT  
TACAGAGCACGCTTTAAAGGTGGCAATCAGAACGATAGACCGCACGCGGGGAAAGGATACGCGAAAGCACATCCCGAAC  
TGATAAGCGCATTCATGACCACGACGGCGGCAATTTTGCACGCTGACAGAGCGGGAGATTGCCGAAGCGGAACAGGTA  
ACAACCATCAACGTTAAAACCGGAGAGGTGGAATCATGA  
>Cluster\_29299  
ATGTTTCAGTCTGTTTTTAGCCCTTCTGGCTGTGTTTTGCTAAGTGCAAAATACATGGGAGCCATTGAAATTAATAACCA  
CCAGGCCAGAAATATGGATGATGTGCAAGCTTAGCGGTGATTTATATCAACCATAACTTCGCCACTGAAAGTGAAGCTC  
GTCAGGCATTTAAATGAAGAGACAGATGCGCAAGCGCACTACCATGTGATTTCTGATGCGGGAAACCGGGAGTAAC  
GGCAATATGCACGCCAGCGGATATTTATCGCTAG  
>Cluster\_40991  
ATGCATCTGGCTCGAGTCACTGGCGGGTAGTATCCACGCAAAATCACCTTCTGATCGGGAAAAAATGCTGCTGGT  
TCGCGGGTCACTGCTGACGGCGAACTGCCTCTCACGCCATTAACCGCGACGAAAGTTGCCGTTGATTCCGCTCGCGCGAG  
GCGTTGGTGAAGTTGGTACTCCTCAGCAGTGGTCCAGCGCCAGACATGTTTTCCGGCCCTAACGAAGCCATCGACCTG  
GCAGTGGTCCGATTTGTCGATACGTTTTCGCGCTAA  
>Cluster\_2701  
ATGAGCGAATCAGAGCTTGGGGGTTTCAATTCAGGTAGCACCATATCCACTTGAAGCGGTGCCATATCAACTATTCGCCAA  
GATGATCGGCCGCAAGGAATCCACAGTCAAGACCATGATTGACGAGCAAGCTACCGACAATTGACTTTGTGAAACCAG  
GTTTCAGTAAAGACCGGTGCATCAGAAAACCTGGGTATATCTGCCAGCATTTAACGAAGGCATGCCAAAGCGTTTTTTGAG  
CAACCGAAAGAACCGCGGACGCATGGTTGTTGGCTGGGACTTTAG  
>Cluster\_10963  
ATGAATTTATCTGCCAGTATGAATGATGCGGGGACGGTTTTGAACTCCTGATGTCGGGTAATATGCAGGATTTAATAT  
TTGTTGTCGTGGGATAATCATTATCTGAACATAAACTGATACCTTTATCAGAGTATTTGACGTTAATTTAGGACTGA  
ATCTTGAGCTGAATAAACTGGAGAAAGATTTCTCAGGATTAATTTGTTTCAAGAACCTCAAAAAAATATGGCGTCTCC  
GCCAGGTTAAATTAAGATGGTATTAGTCCATGCCAGCAGCTGTGTTAA  
>Cluster\_59930  
ATGCTGGTACGTTTTTTCAGATTTTGTGCGTGTAAATGGCTTCGATCAAGGTTACTTTATGTACTGTGAAGATATTGACCT  
GTGCTTGAAGCTTAGCCCTGGCTGGTGTGACACTTCAATGTTTCCCGTTTTTCATGCGATACATTTATGCTCATGACA  
ATCGAAGTTTTTTTTCAAAAGCCTTCAGATGGCACTTAAAAGTACTTTTATAGATATTTAGCCAGAAAACGATTTTATCA  
AATCGCAACTTTGATCGAATTTTCATCAGTTTTTCCACCCGTA  
>Cluster\_24666  
ATGATTAATGAAGCTAAAAAATGCTGTGAAATGATTTTTGGACAGCTTGTCTGTGGATGATGATAATGTTTTGA  
TGCTATTATTAATGCATCAAAAAATGACAGAGAATTTGAAGATAAACATGCGATTTATCTTCATCCGATTTACAGGGATT  
TATTTATCAACAGATCAAAATAAAAGTGTCTGAAAAAGAGAGCAATAAAAAATAATTTCTTCAAGTGTGATATTAATGAG  
GATTCGGCAAGAAAAATTTAATGCAAAACCATATAAGAGCGGTTTAA  
>Cluster\_67004  
GTGAAGTGGCGTTACTCACTGCGCTGAAACTGCCTTCTCCCTGCTGGCGAGCATGAACTGGTTTTCAGAAGTAGTCA

GGCGGGGAGCCGACCGGCATCCGTTATGTCACGCTGGGTTGCCGGAGCAGGGTATGCGGCTGTCTGGATTTTATTT  
CTGACCGCCAGGTGCGCCCTGGAGCGAAGAACCTAAGCTGCGGTACGGCGGCGAACTGGAGAAATGTATCAACAGG  
CATGCACCACTGTTTGGGATGAACTGATGCCCGTGAACGGCTGAACGACCGGATTATTTTTCAGGGAAGTGA  
>Cluster\_224  
ATGAAAATATTGATTACTCTAGAAAAAGACCATGTAGCCCCAAGTGTGACCTTACCAGAGAAGTACTTATCGCAGAAAA  
CAAAGGGGAAAAAGTAAAGACAGTTATTCTGCCAGTTCTTCTCCTGAAGAACCTTGCAGTTTATTTTAGCAGAAAAACG  
TTGACCTTGTAGTTTGGCGGGGATAGAAAGAACTTATATCAGTATCTTTTATGGAAAAAGATAAGAGTAATAGATAGG  
GTCATAGGCCCTGCAAAGGAAGTCTTAAAAAGAGTTATCGAAAATAATTTAAAAAGAGGAGAAATCGTAAAAATA  
>Cluster\_10344  
ATGGAAATAGTGATATACATCACTATTTCCATCCTGATTTTAGATATCGCATTAATAAAAACAGCGGATGTAGCCAATAT  
CGAAACCAGTAACCCGATACACGCCAGTACATCTGCGCCGCGCGATGATTACCTGGTGTCTGACCGGTGATGCC  
TGAGCTGCCGCTTCTTTTATGACGCTTTCGGGAATGCGTCTGCGCCACCAGGTGACCGGCGATACCAGCATGACCGC  
CTGGCACACAGCCCGCAGCCGGATGTATACAGGGAAGATCATCAGAAGTACACTTTTGTACTAAATA  
>Cluster\_22937  
ATGAACAAGAAAAACAAACGAACCTTACCCTGAGTTGAGGCTGGAATGTGCACAGCTGATTGTTGATAAGGGCTACTC  
ATATCGACAGGCCAGTGAAGCGATGAATGTCGGTCAACCACGCTTGAGAGCTGGGTACGCCAGCTCAGGCGAGAGCGCC  
AGGTATTACGCCCTTGGCCACACCCATTAACGACAGCAACGTATCCGCGAGCTGAAAAAGCAAGTTCGCGCTG  
GAGGAACAAAATACGATATTAATAAAGGCTACCAGCTTAAATGTCCGACTCGTGAACGGTTCACGATG  
>Cluster\_29515  
ATGCTCACCATGTGGGTGACCGAAGATGAGCACCGCTGCTGCGAAGCTGCGACGTTAACAGCTTGCAGCTGGAT  
GCGCCAGACGTGCTGGCCGAGAAACCCGCCGCGCGCAAGCTTCCCTCAATCTCGCCGCGCTGCTTCGTGAGCTTG  
CCGGCATGGGAATAACCTCAACAGATTGCCCGCAGGTTAACGCCGTTGGCGGAGCGGGCAGCGGCAGCGCTGACGGT  
GTCGCCGCTGATGGCCATAGATGCGGACTCGAGCGCTGCGGCATGCCGTCTGAAAAAGGTTGACAGCATGATCG  
TTAA  
>Cluster\_66051  
ATGTTCCCTGGACTATTTTGCACCTGGGAGTGCTTATTTTGTATTTCTGGTGATCTTCTATGGGATCATATTTTACATGA  
TATTCCTTACCTGATTGCCAAAAACGTAATCATCCTCATGCCGACGCCATTCATGTTGCTGGTGGGTGAGTCTTTTAA  
CGTTACATGTTATCTGGCCGTTTGTGGATTGGGCCACGCTTACCGCCGAGCGGGATGGGGAATGCAAGCCAT  
GATTCATCCGTTATGCAACTGCAACAGCGCATTTGCCGGCTGGAGAAACAGCTCGCCGACATCAAATCCTTCTGCGGA  
GTAA  
>Cluster\_4995  
ATGCAACTAATCTTATCTATATATCATGTGATATGTTCTGTAACAAGTAAAATCAACATAAAAAATTCAGCAAAATTTAA  
TATTCGTTCAACTAGCCGCTCACATATGACATTAATAGTCAACTCCATTTGCCCAAAAATGGCTATTTTATGGAACGCA  
GTAATTTCTTAGTGGCTATATCATGCTAATCTTAGGTCCCTAGCGATATTTCTGGCTGGTTCGTCAGTTTAGGCCAT  
GAGATTGTTACATTCCTTTTATCCTGGAGATAGGGGAAACGAGGAGATGATTTTTTATCTACATTCGTTGGTAA  
>Cluster\_57648  
ATGCAACCGGTGTTCTTTTAAAAAACGTACCGGAGCAATGGCGGTGATGTCGCTGGCACCAGGATCTGCGTGGC  
TGTGCCAGCTTTTATTCATGGTCAATGAGTGGGTGATGATGATAAAGACACCAGGTCGTCAGAGCGCACTGATTATCCCG  
ATTATGCCAGTGAAGTTGACTGGCTTTTGGTTACAGAGTGGCTGGCCTCGAACTGGCAAAAATGATTTGTGGATGCGTGG  
CTGGCGCACAGTACGAAGCGGCTGCTCATCAACAACCGCTGGAGCGATACGGCAATAGAGCAGCGGAGAAATTTGA  
>Cluster\_17734  
ATGACAACCTCATGAGCTGATTTTACTCGTCGCCAATGCGGTTATCTGTTCTGCGATAGCAATCCGCGTGGAACTTCCG  
GCGTAATGGATCGCAACACCCGCTGGGTGGGTGGATAGCTTACTTCTTATCGTGGCGTCAAGCAGCATCCCGTCC  
GCGCCGATATGCAATCTGGTATCACACACCAATGGCCGCTGATTTATCAGAGGTCATCATCAATGCTGTCATGCTTGGC  
GCCGCTTGAAGACGCGCGGTAACGTCGTCAGATATTTAAAAATTCGAGGTCACACATGGACATTTAA  
>Cluster\_10968  
ATGGAACCTGACTCCAAGAAAAAGACAACTATTACTGTTTACCCTGCACTGCTGGCAGAGCGTCTGCGCCGCGG  
CCTGAAACTTAACATCCCGAATCCGTTGGCCCTGATTAGCGCTTTTATAATGGAGGGCCTCGCGACGGCAAAAGCGTGC  
CTGCGCTGATGGAAGAAGGACGGCATGCTCCTGAGTGCAGCAGGTCATGGAAGGCATACCAGAAATGATCCCGATATC  
CAGGTCGAAGCCACTTTCCGGACGGCTCCAAGCTGGTTACCGTCCATAATCCGATAATCTGA  
>Cluster\_38526  
ATGAAATTTAAATACTTATGATGATAAAGAAACAGCTGAAATATTTTTTGAAGAATAGAAGGAGAGAAAAGATTAGC  
AAGTGAACGAGATGCTACGGAAACAGTCTATAAACCCTTTCGGGCAACCACCTGGAAAAATTTATATCTTCTTATATGT  
TTAACCTAAAAGAAATACAAGGGATTATAGAGTGTAGAAAAATGGACAGTCTTTCGACCAGGAACGACACCGGGAAATA  
ATAAAAAATGCTTGAATATGCAGCAAAAATCGTTTACTTAATTTCTTCACATTTGGCGATAA  
>Cluster\_8906  
ATGGAAGCAGCAATTTAAGTCTTCTGGTGCAGTAATGCCGCTGGCGACCTCACTCAGTGGAAAAATAACTCAGTGGATGA  
GAAGACGAGGTGATTAACACGAAAAATGGAACAATGCACCCGTTAGAGTTATAGCCGGATTAGCATTACCCTACCG  
CTCTGGCAGCTTAGGTACAGGTTATGACGCGCATGCTCGGAGACGACGACAGATACTTAGCCCTGGGTATTACT  
TCTGGCTACTAGTACTTACTGCGGTTGGCGGTGCATTAGCGATGAAATATGCCTAA  
>Cluster\_2737  
ATGGCAATTCAGGAAATTCGCTGACAGCGGACAAACAGCAGTTCAGCATCGTCTGGGTGGTGTACCTGGCGGATTAG  
CATCATATGGCGCATCTGTACTGGATTATGGACCTGCAGAACGACAGAGGGGAGCCGTAATCTCCGGTATTCTCTCG  
TCACTGGTGTGCTGACCTGCTGGCGAGTACGCCGTATGGGGCTTGGTTTAAAGCTGGTGGTGTCTGTGATGACAACACA  
CAGGATTACCCCAAAAAACTGACCTGGGCGGTGCGAGCCATTTACTGGTATCAACGGAGTAA  
>Cluster\_26544  
ATGAAAAAAGTATTAGCTCTGGTTGTTGCCGCTGCTATGGGTCGTCTGTGCTGCCTTTGCTGCAGAGACTGCGACCAC  
ACCTGCTCCGACTGCGACGACCACAAAGCAGCGCCTGGGAAAACACACATCAAAAAACAGCATAAAGCAGCACCTG  
CCCAGAAAGCGCAGGCGGCTAAAAAGCATCAAAAAATGCCAAAGCTGAACAGAAAGCCCTGAACAAAAAGCGCAGGCG  
GCGAAGAAACACGCGCAGGAAACACAGCCATCGCAACCGGCAAACTCTGCAACCCGACGCTAA  
>Cluster\_53879  
ATGATTTCTGACTCTGAATGATAAGCGTGAATAATCGCAATAATCGCAAGTTTACTGATGAAGATTACGAACGAATCAA  
CAGTGAAGTTGATCGTCTCTGCAACGTTGCGACCCAAATAGCGAAATGCTTCCGCTCATATAAACCAGATGAACACACTA  
AGGACGCTATCGACTGGCTGGAGAGATGACTGTAACATGATCAGGAAAAAGCCGCTGAATGGTTCTGGGATGCAATAAAC  
GAAAGAGTTAAGGCTGAATATGCTTTCGAATAATCAAAACGACAGACATTTATGGAGAGCAGCATGA  
>Cluster\_20776  
ATGCAGGAACATGAAAAAGCCTTTATTACTGCTGATTTATGGGGCGCTCATTTGCTGTTGCGAAGGTGCTGGCCAGTGA  
TGATCCCATTACACCGCGCTGTTTATCAGCCGTGATCCTGGGCGCTTTGTTTTCAGTTCATCGCTGGCGCGGTGCTGA  
TTCAATCCCGGAGGCCAGCCGCTGGCAATTCAGGACTGGGGCAGCGCTGGGTATTCAGGTTATCAGGCTGTTGAA

ATGTGGCTGCGCAGACGTGCAGCGGGAAAGAAGAACGGGAGCGTGACAAATGACCCTGAGTGA  
>Cluster\_35172  
GTGAGGGTGAGGGTTTATATCGCCGGTCCAATGACGGGGTATGAAATTTCAACCGTGAGGCGTTTCAACAGGCAGAAGA  
GGAATGAAACCGGAAGGCATACCGTCTTAAACCCGGGAGTACTTCCGGACGGGCTGCACACGCCGACTACATGGATA  
TTTGCATGGCAATGCTTGTGTGGATGCGATTTACATGCTGAAAGGCTGGCAGCGGTGAGCAGCGCTAAGGCAGAA  
CTGGCGCTGGCCGAGAACTGGGCATGCGGTGATTTTTTCAGGAGACAGCCAGTGTGCAAGACTAA  
>Cluster\_14646  
ATGAAGCAACCTGATTTTGTCTAAGTGGTATTTCTATCAATTACTTAAAGATTATGAGGGCGAACAGCTGTATCTTAATGA  
GTTAGGATATGTTTATGGTAATGAAGAAAAACAAATGAAATTTGTAACAAACAAATCCGGGTTATGTCGTTAAGATTTTTG  
AAGAAAAGATGGTTAATGAATTAATAATAGAACAAAGAAATGATGAAAACTCTCCGGAAGATTTACGTATAG  
>Cluster\_55515  
ATGAAAAATATCGTTCCTGATTACCGTCTTGATATGGTGGGTGAACCTGCCCCATCCGGCAGTCCGCAACCTTGAGGC  
GATGCCCGCAGTTAAAAAGGGGAGATCCTGGAAGTGGTGGAGCAGTCTCCCGCAGTCGATCAATAATATCCACTGGATG  
CGCGTAATCACGGCTATACGGTGTGATATTCAGCAAGACGGGCCACCATTGTTATTTAATTCAGAAGTAA  
>Cluster\_7937  
ATGCGTAATACCGAGTCCCGTAGTTTAAAGGCTGATGCCGAAGCGCTGGCCGATTTGCTGACCGATGCAAAAAAGAGGA  
GCGTAAAGACGCTGCTCTCGCCGTTCAATCCGCTTGGAGCGCTGGCTATCCATATCACAAAGAGGGGATGAGCGGTA  
CCGAAGCGGCCAACTACTGCGCGTGAAGCCATCCGCTTTGAGAATGAATCACAGGAGCTGCACTAA  
>Cluster\_36018  
ATGCTGAAGAATCTGGCTAAACTGGATCAAAACAGAAATGGATAAAGTGAATGTCGATTTGGCGCGCGGGGGTGGCATT  
TAAAGAACGCTACAAATATCCCGGTGATCCTGGAAGCGTTGAAAGTGAACAGCCTGAACATTTGCGCAGCTGGTTTCGCG  
AGCGGCTTATGCCCACCGTTTGGCTTCGGTCAATCTGTCACGTTTACCTTACGAGCCAAACTTAAATAA  
>Cluster\_29590  
ATGAATAATAACACATCAGAAGATCGCCCTGATTTTTCATTACAGTTACATGGACAATCAGAGAGCAGATGAAATAAAGGC  
TTTAAAAATATTATTATTCAGTATCATCAGAAATATGCCTCATGATACAGCCATCAGCATTTAATAACATCGTAAATA  
CTGATAATAATGAGCGCTCAATAGATTATGCCGAGATAACTGACGCCATGTTAAACACAACGAGAATCGTTGATTAG  
>Cluster\_4252  
ATGGAAAACTGAAATATGGATCTGCTGTACATGGCTGCCGCTGTGATGATGGGTCTGGCGGCAATCGGTGCTGCGATCGG  
TATCGGCATCCTCGGGGTAAATTCCTGGAAGGCGCAGCGCTCAACCTGATCTGATTTCTGCTGCGTACTCAGTTCT  
TTATCGTTATGGGTCTGGTGGATGCTATCCCGATGATCCTGTAGGTCGCGGTCTGTACGTGATGTTGCTGTGCGGTAG  
>Cluster\_5987  
ATGCGTAATATTGAAACCTCACGACTAAAACCGGACCGGATGACGCGAGGCTTAATATTTTACTGACAGAGGCTCGTCT  
GGAAGAACCGCGGCAAGGGCTGAAGCAATGGCTGCTCGCCTTGATAGCCTGGCGTGTATATCTCATCCCGCAGCTAA  
ACCACGTGAAGCGGCAGAACTGCTGCGCGTACTGCTGAAGCAATCCAGAACGAAGCAGGAGATCCACTAA  
>Cluster\_5992  
ATGCGCATGAAATAATGATCGATAAAGAGCAGAAGATTAGCCAGTCTACCCTAGACGCCCTTGAATCCGAGCTTTACCG  
TAATCTGCGCCCCCTGTATCCCAAACGGTAATTCGTATCCGCAAGGTAGCTCTAACGGTGTGGAACGACCGGACTGC  
AATGAGCAAGAAAGGAAGCAAGTATGAAAAATTATGCAAGAAGGTGTGGAAAGACGACAGCTGGCTGCATTAA  
>Cluster\_14594  
ATGGCACGTTATTTCCGTCGTCGCAAGTCTGCGGTTTTACCGCGGAAGGCGTTCAAGAGATCGACTATAAAGATATCGC  
TACGCTGAAAACCTACATACCGAAAGCGGTAAGATTGTCCTAACCGGTATCACCGGTACCGGTGCAAAATACAGCGTCT  
AGCTGGCTCGCGCTATCAAACGCGCTCGCTACCTGTCCCTGCTGCCGTACACTGATCGCCATCAGTAA  
>Cluster\_6158  
ATGCTGCTTGTATTTCGCGATGAATGGCGGCGAGTTACAGGAGGGATTTTTTCTGCTGGGTTTTTTCAGTGTGCTGTGCGGTTG  
GCTTTGGCGCGGGCAAGATCAACAAACAGACGCTGATTTTCCAGTCTCTTTGCGCTCTGCGTCCGCGGTTTTTTCAGTT  
ACGTAATTCAGCCTGAATTTTCGGGCCATTTGGGGTGTGCTGCCAACTTACTGATTTAG  
>Cluster\_41701  
GTGAGTAATGAAGCCGATGAAGCATATTCAGTGACAGAACAACGACCATGACAGGAATAAACCTGATACGCCAGAAAAT  
AAATGCTCATGGTATTCCGTGTTATCTCTGTGAAGCATGCGAAAATCCATTCGGAAGCCCGCGGAAAAATATTTCCCG  
GTGTGACGTTGTGCGTTGAATGTGAGGCGTATCAGGAAAGACAGAGAAAACATTTATGCATAA  
>Cluster\_65320  
ATGACTAATCCAATCGGTATCAATAATTTATCTCAAAGTTCAAATATAGCGAATGCAACGGGTGATGAAGTCGTATCATT  
AGATAAACACATCAACACCAGTGTACTGATACAGATCAAAATACAAGCATTTATAGTTTCAACATGGATGGCGCCTTTTC  
AAAATGATATGATTCAGAAGATAATCCTATCTCACCTTACTATAAAATGAAATGGTAG  
>Cluster\_61219  
ATGTTGATTCCTGGCAAGACCTCTCCCGGAAACGCTGGAAAATTTAATGAAAGCTTTGTGTTACGTGAAGGCACCGA  
TTATGGTGAACATGAGCGTACACTTGAACAGAAAGTCCGCGACGCTCAAACGCCAGCTACAGTGGCGGAGAGCGGTGCTGG  
TATGGTCGGAGCTGCACGAAACGGTCAATATTTAGCCGCGCAGTCAAGTTTCGCGAATAA  
>Cluster\_45121  
ATGAGCGCGCTATTTCTGGCTATCCGTTAACCATTTTTTGTGCTGTTGTTTTACCGATCTGGTTATGGCTGCATTACAG  
CAATCGTTCTGGTCCGAGTGAATTTGTCGCAAGTGAAGCAGCAGCGATTAGCGCAACTGGCTGATGAAGCAAAACGGATGC  
CGAACGTATTCAGGCGTGAATCTATTTGATGCAAGAACATCCGAACTGGAGGGATCGCTAA  
>Cluster\_50259  
ATGTTGAAAATGATGCTATAGCGTTTTTTGGCAGCAAAACAAAGCTTGCCTGCGGAGGATTTAGGTTGGCAAGCAT  
TGCTGCATGGGGGAACTGGTTCCTGAAGTTCGCGCATGCGCCTGCAAGAGGCATCCGGCGGGGAACTTACGTACGACC  
CCAAAGTTTATGACGAATATCGTAAGGCAAGCGGGCGGGCGGTTGAACAATGAAAAACACCCTGA  
>Cluster\_22223  
ATGAGCGAACAATCACGTTTGGCCACCAGCGATTTTGGCAGTAACCCGGAACCTCGTTGCCCTGCATTTTGTGCTGGA  
TGTTTCTGGCTCGATGAGCGGACAGCCATTAATGAACTTAACCCGGATTGGTTACCTTTCGCGATGAGCTGCTTGGCC  
ATTCGCTGGCCCTTAAAAAGAGTGAACCTGGCATTTGTGACGTTTCCGCCCGGTCATGTTGTA  
>Cluster\_51817  
ATGTATGACGCGGAAAGTGAAGTGGTTTTATCAGTTTCCGTTACAGAGGGGAGAGTTATTACGACTCTGAAGATGATTTGCT  
GTGTTGTTATCCGTCGTTGCTGCGCATGGCAGTTACTTTTTCACGCTAAATGATGGGACGTTTTTACGGGGAGAGCAGG  
TTAAAGAGACGATACGAAAAAATGATATCCCTTGAACGTTTACCCTAAGCAACAAAGAACGATAG  
>Cluster\_23336  
ATGCTCTAAGTACTGAAGCAACAGCTAAAATCGTTTCTGAGTTGGTCTGACGCAACGACACCGGTTCTACCGAAGT  
TCAGGTAGCACTGCTGACTGCACAGATCAACCACCTGCAGGGCACTTTGCAGAGCACAAAAAGATACCACAGCCGTC  
GTGGTCTGCTGCGCATGGTTTCTCAGCGTCGTAACCTGCTGACTACCTGAAACGTAAGACGTTAGCAGCTTACACCCAG  
CTCATCGAGCGCTGGGTCTGCGTGCCTAA



>Cluster\_48996  
ATGAAAGAGCTTGGATTAAAGAAACCGATTACCGCTCATGGCGAGACTCTCCGTACTGGAGTTTGATGAGCCACCGG  
GAAGGATGTCGGCGAGCTGGGGTATCCCTACCAGATGAATCAGGATGAGTCAGTCAAACCTCTGGCGCATGTGGTGTCTGA  
AATACATTTGTCGGCTGGCGAAAGTGCCGCAAAGCTCTGTGACCAGATGTCTCCGGCAGACCTGAATGCAGCGCGTGG  
CTTGTGGCTGGTTTTTCCCTCCAGGCCTGA  
>Cluster\_7875  
ATGGTGAAACCATGTGCTCTGAAATCCAGCATCCGTGACAATAATAACTCTGGCATCGGGGGGAGGGATTGAGCAAGGG  
AATCAAGGAAATCATGATGTATCAATGGATTATTTTGTTTTTTCAGAAGGAACAACCTTACTCAATAACGGAATGGAACG  
CCCGTACACAGAAAGCTGGCACGAAGGACATGATGCTCCTAGGACGGATAGCCACTCCAGTCTACGGCTATTACACATA  
AAGATAACTGCCGTGTCAGCATTGAAGTGA  
>Cluster\_26388  
ATGAACCAACGCAATGTTTCCCTGGCATAGTTCTAGCCTGGATTATAGGTATGCCGCTGGGAATTGGTGCATTTATTGTAGG  
ACTGTCTTTGTGCAATTGCAACTGGCTATCTGAAAGATAATAGCATCATAAAAGAAAGATACCATATATAGGTATCGTTTTTT  
CAGGAATTTTTGTCTTACTATCAACAGGCACAAGTCAGCGGATTACAGATATCATTATTACATTACAGTTTACTCTGCA  
TGGTATCGCTACCATTTTTTGCCACATTA  
>Cluster\_51542  
ATGGCGCTGAAATGTCTGAATGCGGCACCGTTGCACACGCCAGAACCACCGCTATGAAGCACCGCTCGGTTAAACGCTC  
ATGGTATCAGTGCAGAAATCTTGAATGTTCTGCACATTTACCCTCTGGAAAGTGTGGATAAGATAAATTATGAAGCCCC  
GGCCCAATGAACAGGAATCAGACAAAGCACAAATGCCGAAAAACAACAGCAAACGCTCAATCGCTATGGCTCTGCATCA  
AAGTTATCAAGCCCGCAGCAAATCCCTGTCTGA  
>Cluster\_62040  
ATGAAACAATTACTTGCCTCACCTCGCTGCAATTAGTGACTTATCTCGGAGCGCCACGGCACAGTCTGCAGAAATTCGC  
CAGTGTGACTGCGTGCAGGGCTGAATGAAATAGGTCTAGATCTCAGTTAGCAATATTTTCAGGGGATCCCGAGGACGTGG  
AACGTATCGTGGCGTTAAAGGCCGATGAACAAGGTGCGTCATGGTACCGCATTATTACCATGTACGAAGACCAGCAGCCT  
GATAACTGGCGCTACAGGCGTACTGTATGCATGA  
>Cluster\_993  
ATGGCAAAAGTTATCTTTGAGTTTACATGGCTGGAAAGTAGTGACGGTTGCAATGGGCGCAGAGAAGTTCTGGATGCAAA  
AGCATGTCTTGCAGATATCTGCCAACGAAAAATATCGGGCTCATGATTTACTGGCAAAATATCGTCCGACTATGGCTC  
CTGAAATTTATAAAAAGGCCAAAGATGAGATGCTGACCCTATGAAGAAAGTGGGTATGGAAGCTGAATGTGATTTAGTA  
CCCATCCGGTGAATGCGGTTAAACATTA  
>Cluster\_2714  
GTGCGGGCTAAAACAGGTATTTGCAAGAACCCTCATCGTTATAATCCAACATTTCTGTCTCTCCCTGAATATCAAGGACA  
AGAAGGTCCGCACAAATGCGCTGCCTGTGCTTTTTGAGCTAGGCATAAAAGATGCGCTTGAAGGACGCGCTATGGCTCAGA  
ATGATTTAGTTTTAGCTAACATTCGGTTTAGCCAGGCTGGAACGTAAAGGCACAGAGATGCCCTATGAAGCATATGTTCTGT  
GGTTGGCGATTAAATAACAGCAACAATTGA  
>Cluster\_21433  
ATGAACAATATTAATAATGATCACACTCTCCATCCACATGACAAAACACCATTATGATCTCTATTGTATGCAAAGTAGA  
AGATACAGAACTTGGATTGAAATTAACCTTGAAAAACGGCAACAACTTTGTGTCAATATTTAGTCAATATCTGTTAT  
CAGAGTCTGCAAGTCGTTGCGATAAACACAGGTTAAAGAATATTTATATTCGATGTTGTTCTGAACTCACGAGATGAGT  
GATGAAACTATAAAATCGCAAAATGTTATA  
>Cluster\_41008  
ATGCGTACAATTAGCTACAGCGAAGCGCTCAGAATTTGTGGCAACAATGATGAAAGCCGTTGAAGATCATGCCCCGAT  
CCTCATTTACTCGTACAGAAFGAGAGGCTTGTGTTCTGATGTCACTCTGAAGAATACAACCTCGCTGGAAGAGACGGCTTATC  
TACTGCGTTCCCCCGCTAACGCCGGAGATTGATGGACTCAATCGATAGCCTGAAATCAGGCAAAGGAACGGAAGGAC  
ATTATTGAGTGA  
>Cluster\_11148  
ATGAAAAACGTA AAAACCCCTCATCGCTGCGCGGATTTTTAAGCTCCATGTCATTTGCCAGCTTTGCGGCTGTGCAAGTTCA  
GTCAACGCCAGAAGGCCAACAAAAGTCCGTACAATCAGTGTCAACGCCGGGACAAATCTGGGATCGCTGGAAGAGCAGC  
TGGCGCAAAAAGCGGATGAGATGGCGCAAAATCTTCCGATATTACTTCTGTAACCGTCCGAATACCCCTCCATGGAACA  
GCAGTAATTTATAAATA  
>Cluster\_64441  
ATGAACAAAGAAAAATCGAAGCCTTAATGAGCGTAATATTAAGAAGCTGACCCCAAAAAATTTCCCTGAGAAGTTATC  
AGAGGACGCCATCGTATCTTTTTATCGTCCGAACCTCTTACCTACATTTGTCCAACCTTAAGAGAATGGTTAAGCGGGC  
AAGCAGAGCCTTCAGATGAGATACTTGAGGAGATTATGATTGAGAACAACTGGCGTGCACCTAAATGGTCAAAATCGGTTA  
CCTTAA  
>Cluster\_6537  
ATGATTAATAATGGCGGAACATCTGAAAGGTTACTGGCCGAATCAACTGAGTTTCTCAGAATCATGCGGAATGGTGATGAG  
AATGCTGATGACATTTGACGGGCGTTCCACGGGACGTATACCGGAGCTGATGCACGATCTTGCAGTATGGAAGACACTTG  
TGAATTTACCGACAGAAGGGAAAGGGCTTCCCGAGAGTGGTAAAGGAGAGGCTTGAATAACCCACAGCCCGAAA  
AAGAGCCAGTCAGTTGCTTAA  
>Cluster\_48649  
ATGACGTTAACCGATAAAACAAAGGACATCATCAAACGCTCAATCTCGGTTATGAGCGAGGTCTACTTGTATCTGGA  
CGAATTGCTTGAAGTTTTGCGGTACAAGACAACCAAGCAAAGTATCCAGTCTCAATTCGCGCTCTGATAAAAAAGGGGC  
TTGTGGAGAAAGGCATACGCGCAACGAGTGAACATCGCTATCACCGCCGAACCTTGGGTTAACCACTTTAGGTGCA  
GCCAAAGCGAAGTTACTGGTGATGTA  
>Cluster\_33886  
ATGCATACCACCCGACTGAAGAGGGTTGGCGGCTCAGTTATGCTGACCCTCCACCGGCACTGCTGAATGGCTGTCTCT  
GGGCACAGATAATGAAGTTGGCATGGTCTATTGATAATGCCCGGCTGATTTGTTGAGCCGTACAGACGCCCGCAATATTCAC  
TGGCTGAGCTACTGGCACAGTGTGATCCGAATGCTGAAATATCAGTGAAGAACGAGAATGGCTGGATGCACCGGCACT  
GGTCAGGAGGAAATCTGA  
>Cluster\_45466  
ATGCACAGTGATTTATAATATGGTTTTTGGTAAAAATGGCCAATTTTTATATGAAGCTAACTCAATTTTTTTA  
CGAGAGAAATGTCATAGAAGAGGCAGTCAACGCTTTATCTGTGAGCGTGAATAATAAACAACAAGAACATAATAAAGA  
AGCTGATGTTCTTTTTTGTCTCAGATGTTAATCACACCAAGAAAGATGTTGTTTCAGAGCGCACTTAATATTTATCATTTGACAT  
ACATCAGGTGATATTTGA  
>Cluster\_17898  
ATGCTGGATATTAATCACCGCGCGGGTGCACGCTGACGCCGACTTTATGCTGACACTGGAAAGCAAAGATATCACCGG  
CAATATCAGTACCGGCTGATTAACCTCTCGATGACGGACAATCGGGGTTTTGAGGCCGACGCTCTACATCAGGCTCG  
ACGATACTGACGGTCTGGTGCATTTGCCGATTCGCGGTGCGGTGCTGTGCTGTATCTCGGGTGGAAAGGTTTTCTCTCTG

GTCAGCAAGGGGCGATTTACCGTCGATGAGGTAGAGCACCGGGGGCGCCGGATACGGTAACCATTCGCGCCCGGGTGC  
GGATTTTCGCGGGACGCTTAATTCCTCGTGTGAGGAGTATGGCATGACACCACGCTCGCGCAATCGTCAGCTCGATAG  
CTGAGCGGAACAAGTTAACGGCCAGCGTCACTGATTTCTTTCGGGGATCCAGATTCCGCATATCGACCAGTCTCAGGAA  
TCCGACCGGCTTTTCTGACTCGCTCGCAGAACGCAACGGCGGTGCGGTCTCAGTGAAGCGGGTAGATTGCTGATGCT  
CAAAGCGGGAAGCGGACCTACCGTGCACGAAAGGCTAATTCCTCAAATTACCATCCAGCGCGGTGACCGTACCGCATC  
AGTTTGCCATTGCGGACCGTGGCGCTTACACCGCGTAACCGTAAAGTGGCTGCACACATAAGACCCGAAACCGCGGAAA  
CAAAAGCAGACAGTGAAGCTGAAACGTAAGCCCAAAGAGCAACACCTCGGGGCTACAGCACCGGAAAGCAAACAGT  
GAGCAGTAAAGTACGGCCAAAAGCAAAGAGCAGGAAGCCCGGAGGGTGAATACATGGCCGGTGGAGCTGACAACG  
TTTTFCGGCTGACGACCATTTACGCGACAAAAGGCGAAGCGATCGCTGCAGCTCAGGCGAAGTGGGATAAATTCGAGCT  
GGGGTTGCGGAGTTCTCCATTATGTTAGCGACCGCGCGAGGATATTTACCCGAAACCGCGGTGAGGGTCTCAGGCTT  
TAAGAGCGTTATAGACGAGCAAGCATGGATAATCAGCAGGGTACCATAATTCGGTGGGAAATGGCTTCACAACGGCTG  
TAGAGCTTAGGATGCTTTCGGATGTAGAATATGACACCAGCAATCTTGA

>Cluster\_66443

ATGTCTAAAGAAAAGTTTGAACGTACAAAACCGCAGTTAACGTCGGTACTATCGGCCAGTTGACCATGGTAAAACAAC  
GCTGACCGCTGCAATCACCCTACTGCTAAAACCTACGGCGGTGCTGCTCGCGCATTCGACCAGATCGATAACCGCC  
CGGAAGAAAAGCTCGTGGTATCACCATCAACACTTCTCAGCTTGAATACGACACCCCGACCCGTCATCGCACACGTA  
GACTGCGCCGGGACCGGACTATGTTAAAACATGATCACCGGTGCTGCTCAGATGGACGGCGGATCCTGGTGTTCG  
TGGACTGACGGCCCGATGCGCGAGACTCGTGACACATCTGCTGGTGTGCTCAGGTAGGCGTTCCGTACATCATCGTGT  
TCTGAAACAAATGCGACATGGTGTGATGACGAAGAGTGTGGAAGTGGTGAATGGAAGTTCGTGAATCTCTGCTCAG  
TAGACTTCCGGGCGACGACACCTCCGATCGTTCTGCTGCTGAAAGCGCTGGAAGGCGACGAGAGTGGGAAGC  
GAAAATCCTGGAACCTGGCTGGCTTCTGATTTACATTTCCGGAACCGAGCGTGGATGACAAGCGTTCCTGCTGC  
CGATGGAAGAGTATTCCTCATCTCCGGTGTGGTACCCTGTTACCCTGCTGTAGAACCGGTATCATCAAAGTTGGT  
GAAGAAGTTGAAATCGTGGTATCAAAGAGACTCAGAAGTCTACTGCTGCTGCGGTTGAAATGTTCCGCAAACTGCTGGA  
CAAGGCGGTGCTGGTGAACAGTAGGTGTTCTGCTGCGTGGTATCAAACGTGAAGAAATCGAACGTGCTCAGTACTGG  
CTAAGCCGGGACCATCAAGCCGACACCAAGTTCGAATCTGAAGTGTACATTTCTGCTCAAAGATGAAGGCGGCGTCTAT  
ACTCCGTTCTCAAAGGCTACCGTCCGCAAGTCTACTTCCGTACTACTGACGTGACTGTTACCATCGAAGTCCGGAAGG  
CGTAGAGATGGTAATGCCGGGCGACAACATCAAATGGTGTGTACCCTGATCCACCGGATCGCGATGGACGACGGTCTGC  
GTTTCGCAATCCGTGAAGCGGCGGTACCCTGGCGGGCGTGTGTAGCAAAAAGTTCTGAGCTAA

>Cluster\_28794

ATGAATATAAAAATGCTGCTTTAACGCTGGCTATTGCGAGCGGATTTCTGCTCAATGGGCCATAGCAGCGGATATGCC  
AGCCAGCCCGGACCCACTATTCGGGTGAAACAGTATGTGACTCAGGTCATACCAGATAACAGCGTGACCTTTCGCTACT  
TTGCCCTTGGGGCAAAAATGCTCCGTAGTGGTGGTTCCTGGTTCGGGACAAATATCACCCGATGACCAAAAGATGAA  
GCGGGAGTCTGGTGTGGCGCACGCTGTCTGAAAGGCAATCTGTACGAGTATTTTTCAATGTGATGGTGTACGCGAG  
CATGTGATACAGGACGGCAATGACTAAGCCTCAGCGTCAAGTTAACTCCAGTATGATTCTGGTACCGGGCGAGTTATCTGG  
ATACAGCTTCTGTTGTCATGGTGTGATTTGATCGCCATAACTTACCCTCAACGCATTCGAATCCGAACGTCAGATGTAT  
GCTGTGACCTCCGTCAGGATACACCGGATAGGCGAGCCTTTGGCAGTGTCTATTTCTATCACGGCTTTGGTGAACCGG  
ACGTTCCGCTATTGATCAGGGGCGTATCCCGCAAATCATGGATAACCTGCTGGCTGAAGGAAAAATTAACCGATGCTGG  
TGGTGTATCCCGGATACCGAAACCGATGCGAAGGCGATTTACCAGGATTTCCGTCAGGAGAGAGCTAAAGCTTTT  
TATCCGTTAAATGCTAAAGCGGACAGTACCGGAACTGATGAACGATATTTCCGCTGATGACGAGCGTAAAGTGTCCG  
TAAAGATCCCGATGGTCCGCACTGGCAGGGCTTTTACAAAGTGGGATTCAGGCACTGGTATCGGGAATGAATCATCTGG  
AAAGCTTTGGCTGGCTGGCCACATTCAGTGGTGTACCACGACACCGTACCAGATGAAGGGGTCGCTGCCCGCTGAAC  
GAGCCGGCAGCTATTAACAGCAACTACGTAATTTACTGTGGTGTGGTGGGATAAAGATGTTGTAACCGGCAAGGATAT  
CGCTGGCTGAAAACCTGAGCTTGAGCAGAAAAAATTAAGTTGATTTGATTAACAGGAATATCCCGTCTGAACCATGAAATGG  
ATGTCTGGCGACCGCTATGACGCTTTGTACAGAAATATTTAAATAA

>Cluster\_29140

ATGAATTTACATGAGTATCAGGCCAAATCGTTACTGGCTGGCATGGGGATGCCGTGTCCAAAAGAGATAGCCATCCAACA  
GATTTTCGCAACTGGCAGATGCTTGGCAACATATGCTTGGCCGAGTAAAGGCGCGGTAATAAGCGCAGGTACATGCTG  
GTGGGCGCGGTAAGCTGGCGGCTAAAAGTGTCTAAGCAGCTGCCGGAAGCACAGGCTTTTGTACAGCAATGTTGGGA  
TCGCAACTGGTGAATATCAGACCGGGCAGAAAGGCGATATGTCAGCAGTATTTTGTGTGCGAAAACATCTATCCGCT  
ACGCCAGGAATCTATTTCCGCAATGGTGGTGGATCGTGAAGACCGGCGGTACGTTTATGTCAGCCGGAAGGTTGGT  
TGAAATTTGAAAAGATCGCCCATGAGACACCGGAGAAAATCAGCAGTGTGACGATTTGATCCACTGACAGCGCTGACGCT  
TGCCATATCCGGAATGTTGCTGTTCGCAACTGGAACACGGGCTATTTGCTGCTTTAGTGCCTTGTGCTGCTTAAATCAGGC  
GTGGAAGGCTTTAACGAACTGGATTTCCGCTGCTGGAATTAACCTCTGGTGTGGCGGAAACCGGCGAATTTATGT  
GTGAGACCGGAAAGTATCGTGGATGATAACCGCTGTATCGTACCCGGAATCCAGGTGCTACGTGATGAAACCCAG  
GAAGATCCAGCGGAAAGCAGGACGCGAAGCTTGTATCTAATTTATGCTCAGCTGGAGCGGAAATATCGGCTGATGCTCAA  
TGGTGCAGGGCTGGCTATGGCAACCATGGACATCATCAAGCTATACGGTGAACACCCGAAACTTCCGATGTTGGCG  
GTGGCGAACCCAGGAGCGCTCAGTGAAGCTTTCCGGTGTGTTTCCGACAGCAAAGTGAAGCCATTTCTGGTAAAT  
ATTTTTGGTGGGATGTTCCGTTGGCATGATGCGCAGAGCATTATTCATGCTGAAATGAGGCCGCTATCACCCCTGCC  
GTCTGGTGGCTCTCTCCGTAATAACCTGACCGGAGGCGGATTTACTGGCAGAAAAGTGGCTGATGGTGAAGCGCT  
TCAATTTCTGATGATGCGCTAAACGCATCATTCGCTTACTGAATTA

>Cluster\_39932

ATGTACCAACTGTCGCTATTTTATTGGCTGCTTACATGCGTGGCGGTGACGCGGATCGCTTCGGTGTGTTTCGCTCTC  
CTGGCTTTCTACCATCGGCATTACCCTCGGGTGTGGCGTGGTACAGTATTTGTCAGTGTGAAACGGCTTTGAGCGCG  
AGCTGCAAAAACATCCTTGGCTGATGCCACAGGCAATTTCTCTTCTGAGCATGGCTCTCTTAAACCCGACGCAACTC  
CCGGAACCGGAGTCAAACCTGGACGGCTTAACTCGCTCGCACTTACTACCGGTGATGTGGTACTGCAAAAGCGCGG  
CAGCTGGCGGCTGGGATGCTGGGTATCGACCCGGCGCAAAAAGATCCACTAACCGCGTATCTGGTCAATGTGAAAC  
AACTGACCTCGAGCCGGGAAATATAATGTCACTCCGTTGAAACAGCTTGCCTCACAGTTGGGCGTCAATCGCGGTGAT  
CAAATCCGCTGATGGTGCATCTGCGACCCAGTTACGCCGATGGGGCGTATCCAAGTCAAGCGCTGTTCAATGTGAT  
TGGCATTTCGCCCAACAGTGAAGTGTGATGAAATGCTGGTGAATTTGAGGATGCTTCGCTGATGATGCGGTT  
ATCCGCGAGCAATATTTACCAGGCTGGCGTGTGGCTGATGAGCCGCTGAAAGTCAACTCAATAAGTCAAGCAAAAACCTG  
CCTGAAGGACGAAATGGCAGGACTGGCGTACCGTAAAGGCGAGCTTTTCCAGGCGGTACGCATGGAATAAATATGAT  
GGGCTTACTGCTGAGCTGATTTGCGCGTGGCGGCTTAACTTAACTTACCTCGCTAGGGCTGATGGTGTGAGGAGC  
AGGCGAAGTACGATCTTCAACCGAAGGCTTAACTCCGCAAAAATCATGATGGTCTTTATGGTGAAGGCGGCAAGC  
GCGCGGATTTACGCTGCGATCTCCGAGCGGCTTGGTGCACCTGTTTCCAGCCAGTAAATAATCTGATGCGGCAATA  
CGGCTCTGCTTGTGAGCGCGGCTGCGGCTGCTATCGAACCTTTACAGGTCATTTGTTATGCGCTGGTGGCGATGG  
CTATCGCGTGTCTTACGCTTTACCTTCTATGGCGCTGCGGCCACACAACCTGCTGAGGCTTTACGTTATGAATAA

>Cluster\_25645

ATGACGCAATACCTCTCTCTCTCTGCTGGTCTTGCAGCGGTTCTGCATTTTTATTCCTTTTTGCCCAACCGCATTCGC  
GGCGAACAAACCGTTGAAGCGCGAGCGTGGATGCGCGTGCATGGATTTTAAATGATACCGCAGCGGTAAGTGTCTGG

CAGAAGGCAATGCGGATGAGAACTGGATCCCGGAGCCTGACTAAAATCATGACCAGCTATGTGGTTGGGCAGGCGCTT  
AAGCCGATAAAGATTAAACTCACCGATAAGGTGACGGTGGTAAAGATGCCTGGGCGACGGGAAATCCGGCACTGCGGTG  
TTCATCGGTAATGTTCCTTAAACCGGGCGATCAGGTTTCGGTGGCAGACCTGAACAAAGGTGTGATTAATCCAGTCCGGTA  
ATGACGCCTGTATTGCGCTGGCTGATTACGTTGCCGGGAGCCAGGAGTCAATTTATGGTTTGATGAATGGTTATGCCAAA  
AAACTGGGTTGACCAACTACCTTCCAGACGGTGCACGGCCGATGGATGCGCGGGGACAGTTCAGTACCGCGCGGATAT  
GGCATTGCTGGGTAAGCATTGATCCACGATGTGCCGGAAGAGTACGCCATTCCATAAAGAGAAAGAGTTCACCTTCAACA  
AAATTCGTAGCCTAACCGTAATCGTCTGCTGTGGAGCAGCAATCTGAATGTTGATGGATGAAGACAGGACACCGGCA  
GGCGGGGATATAATCTGGTTGCTTCGGCTACCCAGGGCGATATGCGTTTAAATCTCCGTAGTGTGGGGGCGAAAACCTGA  
CCGTATCCGTTTTAATGAGTCTGAGAAAATTATTGACCTGGGGTTCCGCTTCTTTGAAACCGTGACGCCAATTAACCTG  
ATGCCACATTTGTGACTCAGCGCTGTGGTTGGTGATAAGAGCGAAGTGAATCTCGGGGCGGCGAAGCGGGCTCAGTG  
ACCATACCGCGTGGGCGAGTGA AAAACCTGAAGCGGAGTTATACGTTAATGAAACCGCAGCTTACCGCACCGCTGAAAA  
AGGTACAGTTGTCCGACCATGATTTCAGCTAACGGTAAATCCATTGAGCAGCGTCCGCTGATCGTGATGAAAAATG  
TGAAGAGGGCGGATTTTGGTCCGATGTGGGATTTCTGTGATGATGAAATTCATCAGTGGTTCGGCAGCTGTTCTCT  
TAA

>Cluster\_6757

ATGACAACAAACACTGTTTTCCCGCAAAGTGGCGTGGCTACGGGTGCTTACGCTGGCAGTCCGGCCTTCACTTCAACAC  
CACCGAATTTGTCCCTGTTGGCTGCTCTCTGACATTGCGCAAAGTTTTACATGCAAACCGCTCAGGTCCGGCATCATGT  
TGACCATTTACGCATGGGTAGTAGCGCTAATGTCAATTCGCTTTTATGTTAATGACCAGTCAAGTTGAACGGCGCAATTA  
CTGATCTGCTGTTTGTGGTGTATTGTCAGCCACGACTGTGCTTTTGTGCTGGAGCTTTACCGTCTGGTGATCAG  
TCGCATTGGTGGCTTTTGCACATGCGATTTTCTGGTCGATTACGGCTCTCTGGCGATCCGATAGGCTCCGGCCGGA  
AGCGAGCACAGGCAATTGAGTTTAAATGGCACCGGTACAGCACTGGCGATGGTCTTAGGTTTACCTCTCGGGCGCATTTG  
GGCAGTATTTCCGTTGGCGAATGACCTTCTTCGCGATTGGTATTTGGGGCGCTTATCACCTTTTGTGCTGATTAAGTT  
ACTTCCCTTACTGCCAGTGAGCATTCCGGTTCAGTAAAAGCCTCCCGCTATTTGTTCCGGCGCCGGCATTGATGAGCA  
TTTATTTGTTAACGTGGTGGTGTGCTACCGCCATTACACGGCATAACAGCTATATCGAGCCTTTGTACAAAACATTGG  
GGATTACGCGCAACTTTGCCACGGCATTACTGTTATTACTCGGTGGTGGGGCATTATTGGCAGCGTATTTCGGTAA  
ACTGGGTAATCAGTATGCGTCTGCGTTGGTGAGTACGGCGATTGCGCTGTGCTGGTGTGCTGGCATTGCTGTACCTG  
CGGCGAACAGTGAATAACCTCGGGTGTGAGTATTTCTGGGGATCGCGATGATGATCATCGGGCTTGGTATGCGAG  
GTTAAAGTGTGGCGCTGGCCACAGATACCGAGCTCGCGATGGCGCTATTCTCCGCATATTAATATTGGAATCCG  
GGCGGGTGGCTGGTAGTAATCAGGTGAGTTTGCACCTGGTCAATGTCGATGATTGGTTATGTTGGGCGGGTCCCTGCTT  
TTGCCGCTTAAATTTGGTCAATCATTATATTTCCGCGTGGCCAGTGACACTCGAAGAACAGACGCAATAG

>Cluster\_23182

ATGAACAACCTTTAATCTGCACACCCCAACCCGATTCTGTTTGGTAAAGGCGCAATCGCTGGTTACGCGAACAAATTC  
TCACGATGCTCGGATTTGATTACCTACGGCGGGCAGCGTGA AAAAACCGGCTTCTCGATCAAGTTCTGGATGCC  
TGAAGGCGATGGACGTGCTGGAATTTGGCGGATTTGAACCAAACCCGGCTTATGAAACGCTGATGAACCGCGTGAACCTG  
GTTCCGGAACAGAAAGTACTTTCTGCTGGCGGTTGGCGCGGTTCTGTACTGGACGGCACCAATTTATCCGCGCAGC  
GGCTAACATCTCCGAAAGATATCGATCCGTTGGCACATTTGCAAAACGGCGGCAAGAGATTAAAAGCGCCGATCCCGATG  
GCTGTGTGCTGACGCTGCCAGCAACCGGTTCCAGAAATCCACCGCAGGCGCGGTGATCTCCCGTAAAACACAGGCGACA  
CAGGCGTTCCATTTCTGCCATGTTACGCCGTTATTTGCCGTGCTCGATCCGGTTTATACCTACACCTTCCCGCGCGCTCA  
GGTGGCTAACCGCGTATGGATGCTTTGTACACACCGTGAACAGTATGTTACCAAACCGGTTGATGCCAAAATTCAG  
ACCGTTTCCGAGAAAGCATTTTGTGCTGACCTGATCGAAGATGGTCCGAAAGCCTGAAAGAGCCAGAAAACACTCAGATGTG  
CGCGCAACGCTCAGTGGGGCGGCACTCAGGCGTGAACGGTTTGTATCGGCGTGGCGTACCGCAGGACTGGGCAACGCA  
TATGCTGGGCCACGAACCTGACGGCGATGACCGGCTGGATCAGCGCAAAACACTGGCTATCGTCTGCTGCCTGCACTGTGGA  
ATGAAAACCGGATACCAAGCGCTAAGCTGCTCAATATGCTGAACCGCTGGAACATCACTGAAGGTTACAGAGCT  
GAGCGTATTGACGCGCGATAGCCGCAACCCGCAATTTCTTTGAGCAATTAGGCGTGGCGACCCACTCTCCGACTACGG  
TCTGGACGCGAGCTCCATCCCGGCTTGTGTA AAAAACCTGGAAGAGCACGGCATGACCAACTGGGCGAAAATCATGACA  
TTACGCTGGATGTCAGCCGCGTATATACGAAGCCGCGCTAA

>Cluster\_34159

ATGGCCTATCTCGACCCGTACCAACGCCCGCGCGGACCGCTTCTGTCGGCGCGGGCTTTCATCACCGCTGCATTGC  
CGCGCTCATGCTGCTGTGGCAGTTTCTGCCCGCATCGAGGATGGTTTCACTCCGCGGAGGCAGCAGAACGCACCGTGA  
TGGCGCGTGGCGATCTGGCGGGCAGGAGAAAACCCATCGAAGTTTCGAAAACCTCCGCGCCTCGGTGGTCTACATC  
ACCACCGCCCAATTAGTACGCGATGCTTGGACGCGCAACGCTGTTCTCCGTGCCGCGGCACTGGCTCGGGCTTCATCT  
GGACGACGCGCGCCAGCTGCTACCAACTTCCACGCTATCCAGGGCGGTCGGAAGCCACCGTCAAACCTGGCCGACGGCC  
CGGACTACAGGCGCGCTGGTGGGGACGAGCCCGCGCAGCATCGCGTGTCAAGATCGGCGTCCGTTTCAAGCCG  
CCGCGCGCTGCCGCTGGCACCAGTCCGCACTCAAGTGGGTCAGAAGGTGTTGCTATCCGGCAACCCCTTCGGCT  
GGACTGGACTCACTCACTGTTATGCTTCCGCGCTGACCGCTGCTTTGCCGGGAGAAGCGGGCGCCGCGCATCGATC  
ACCTGATCCAGACCGGCGCATCAACCCCGCAATTCGGTGGCCGCTGCTCGATTCGGCTGGGCGGCTGATCGGA  
ATCAATACCGCATCTACAGTCCGCTTGGCGCTCGGGCGGATAGGCTTTGGCGTGGCGGCTGATACCGTCAATCGCGCT  
GGTCCGCAACTATAAAGACCGCAAGTACATCCGCTCGGCACTGGGATCGAGGTGGATGAGCAGATCAACCGCGCT  
TGCAGGCGCTGACCGGCAAGGCGTATTCTGATTGCGGCTGACGCGCGGCTGGGCGGCGCACAGGCGCGGCTCGCT  
GGGCTCAGGTCACCGCAGGCGGATCGTCCCGGCGATCGCGTTATCAGCATCGACGCTATCGCGTGGACGAGCTCAC  
CACATTACAGGCCCGCTAGACGACAAGACGTTGGAGATGTTGTGGTCTGTTAGTGAGCGGGCGGCAAGACTCGCG  
AGATGCTTGTGGAATCAACCGGGAGTTTGA

>Cluster\_35004

GTGGGAAAGGAACCTGGATGATATCTGCACCAGCTGTCCGTATATCGATGCTGTAAAACGGCACAAACAACAGCTCGGTGC  
CATAGAGGAATATACAGTGGTTAAAAAAGAACCACGGGCATCTGTTTTTTTCTGTTCCAGCTGTATACCCGCAATTC  
ACAATACATTTTTCTCCAAAAGCAACAACCTCCGTTCACTCCCGTGGCAGTCACTGCCCGGAACCTGATGTACCCCTT  
CGGGACTTAAACGCTTTCCCTGGCTACCACAGTATTATGCCCTCAACCCATTCGGGAGATGGACAGTTCTGCTGTTGT  
TCCCCCAACTAATGAAAACACTCGCCTCCGGAAGATACTCCGACAACACTCCGGCCGGAGGCAATACCGGCAAGCGG  
AAAAGACCAGAACCGCAGGACTCACACCATTCTGAAAACGTTTCAAGAAATGCCCCGGAACATCTCGGTTTGGCAGC  
GGTTTTCCATCGCAACCGAAGATTGCGGTTCCAGAAAACCGGATGCGCAGCAGCTGATCCGGATAAAATCTACTGTGA  
AATTAATATGGTTCTGCTCCAGTTACTGCTGAAATCCGGACAGAGGCTACGAGGACGATTAATCAACTCAGTATTTCTG  
AATGGGCCAGCATAAACAATGATTACCCCTCCCGTTTTTCTGGTGGACAGCAGGGACAGTGAACAGTGTGACTGGTTA  
TGGAACCGCATGACGCTCCGGTGTGGGAACCCGCTGAATCCCTTACCCCGGAGAGAAATCACTGTTGCTGCGC  
ACGTTTTGATAAATGGGAGGGCTGGAATGAGCAACAGGTACAGTTTTTACTGGAAGTAAATCCAGAGCGGAACAGGCA  
AGTTTACGCAAGTCTCTTCCAGGCCCCAGGATTCAGATAAAGCGATCTTCTTGAATGAGCTGAAAAGTGCCTGGGAG  
CAACAAAAGAGGCGTGAACGCTGCTGATGGTTCCGTTCCCTGAAAACCTGTCGGGAAAATCCACAACAGCTTGAAG  
TATTGCCGGAAGTCTGGGGTCCCTCCAAAACACTGCTGAATGAAATGATTGAGCAGGCTACCATGATTTGGTGGCA  
CCAGGCAAGACGCAAAATCGATTCCAGATA

>Cluster\_23979

ATGAAGAAATTAATCGAACTCCGCCAGCAAAAAACCCCTGAAAAACCAGATGCGATCCCTGCTGAAAAAGCCGACAG  
TGAAAAACCCGAGTCTAACCGATGACGAAGGCAAAACAGTTTGTGAACTGCGTGCAAAAAGCCGATTCCCTCGACACAGAAA  
TTTCCCGCTCGAGTCTGTGGCTGATGAAGAACGTAACAGCCTGGTGTCCCGTCAAGATAAAAATCACCAAAATGAG  
CTACGCTCTTACATTCTGACCGGGGAAACCCGCAACCTGTCCGGCAGTGTCCGGCTGATGGTGGTTATACGGTTATCCC  
GGAACTGAACAGAGAAAATATGCGTCACTTTCTGATGAGCGGTGATGCGTAAAATCTGTACTGTAAACACCATCACA  
GTAATGAATTTAAGCAACTGGTTTCTGCGGGGGTGGCGTGTGGGACACGGCGAAAGAAGGTGCGGCACGTAACCAAGC  
GCAACCCAAAACGAAATGAAGTGAAGTACGATACCCGCTGTATCCGATCTACGCTTACCCGAAAACACTCAGGAAATATCGA  
TTTTTCCGAAAGTCGATATATGGGCTGGTTATCTTCTGAAATTTGGCGACACTTTCGTTGATACCGAAGAAAACGGATCTGG  
TTTTCCGGTGTGGCGAGAAAAAGCCAAAAGGTTTCCCTGACTTTCCCGCGCTACGGATAATGACAAAACCCGCTCTTTC  
GGTACGCTCCAGACGAAAAAGTACTGGCAGTCTCAGCGCCGATATGCTGATTGACCTGAAATTTACGCTGCGCAATAA  
GTACCGCAAAAAAGCTGTATGGGTGATGAACCTCAAAATACAGCCGCTCCGACAAAACCTGAAAAATGCCACTGGTGATT  
ACATCTGGCGCGATCGTTTACAGGCTGGTGATCCTGATCTCTGCTGGGGCTCCGGTTGAATATCTGGAATTTATGCCA  
GACGGTGTGATGGCGAGAAAAAGCTTAAAGCGCGTTTATTTCACTGTTGACCAATAAACCCGGTACGGCTACGGCTCCGGA  
TTTACAGCGAGCCTGGATTCAATTAACATCTATACCCAGAAATATCTGGCGGGTGGTGTGGTGGATTGAAACGCCATCAAGA  
TTCGGAATTCAGGCTGGCAAGTAA

>Cluster\_27401

ATGACAAATAATGAATGCAAGGCGCTTTGAAGGCTTATTAGTTATCGATATGACACATGTCCTTAATGGACCTTTCCG  
AACTCAACTTCTTTGTAATATGGGCGCAAGGTAATTAAGTTGAGCCGCGGGTCATGGTGATGATACCCGCACATTTG  
GTCCCTATGTGGATGGACAGTCACTCTATACAGTTTTTATTAATCATGGCAAGAGAGTGTGGTTCTTGATTTAAAGAAT  
GATCACGATAAAGCATATTTATAAATATGCTTAAACAAGCGGATGATATAGCTGAGAATTTTCGCCACATCAATGGA  
AAAACCTGGGGTTTTTCATGGGAAACGCTACAAGAAATCAACCCGCGCTCATCTATGCTTCATCGTCAGGTTTCGGACATA  
CCGGTCCGCTAAAAGATGCTCCTGCTACGATACCATCAATCAGGCAATGAGCGGGATAATGATGAAAACGGGATACCT  
GATGCTCCGCCAGTGGCGGTGGGTACCTCTTTCGGGATCTATGTTGGCGGTGTCTATTTATTCAGTGGAAATGATGAGTGC  
ACTTTATGGCCGCGGAAAAAGAGCCAACAGGGGGCAGTGTGATATAGCGATGTTGATGCCACTGTGAGTTTCTGGGAG  
ATGGACTGATGGCATATATCGCGACTGGGAAAGTCAACCAACCGCTGGGAAATCGCCATCCCTACATGGCACCTTTTGAT  
GTTTTCTGATACTCAGGATAAGCCGATTACGATTTGTTGTTGGTAATGACAAAGCTTTTTTCTGCGTTATGCCAGGCACTGGA  
GCTTACGGAACCTGGTTAATGATCCCGATTTAGCAGCAATATTTACGCGTACAAAACAGGTTATTTCTTAAACAATATA  
TTGAGCGGACGTTTAAAAACGCGAGCAGCTGAAGTTTGGTTAGCCAGAAATACATGAAGTTGGTGTGCGCGCTCCGCTGGA  
TTAAGTGTGGCTGAGGCCATTAATTTACCACAACTCAGGCGAGAAATATGTTGATTGAAGCCGGGGAAATATGATGCC  
GGGTAATCCGATAAAAATCAGCGCTGCGCGGACCCGATGTTATGCGGGGAGCGGCAACGCTCGACCAGCATGGGGAAC  
AAATTCGCCAGGATTTCTCATCATAA

>Cluster\_53506

ATGAATGAGAACAAAACGATGAATTTAGCGCAATCGCTCGCCATCGATAGCCAGCTTCGCTTACCGGGAAGTGCAGGACG  
CTTGCTTAAACAGGTCCTGATATTTAGCAAGTGGCGCGCTATTCCTGATGCTGGCTTAGTGAAGCGGTCCCAAGC  
CCACAATTTGTAATTTACCGGTAGCCGGTATTTGCGACTAAATCGTGTAGACAAGGATTTGGTGGTTTTATTTATGCC  
AGTCAGCAGTGGCCACAGATTTGTTAATAGATGACAAATAAAGTCAGTACGGTGGGTAGCGACTCGGATACGAGCTGGA  
TGATATTGATTTGAAGCTCAGCGTAAACGGCTTGATTTAATTTGAAATTCGTCAGGCTTATCAGTTAGTTGAGAAAAAC  
TTTTAAGTTATGAGCCAGGCGATTTAATTTTGTGGATACGCGCTGTTTTTACGCGGGATAATGGCTCCGCTGGAGAGA  
AATGTCCTCATAAAACAGAGTACGAAAAACAGACAAAGTATAGAAACTTTTTGGCAAACCATCGCTCCAGAATTTTT  
TCCGTGGAAATCAAAATGGTGTAGTACTTTGCGAGCACTTTTGGCTGAGCGCTTTAGTGCCATTTGAAGTATGCAACAAAG  
ATTTACGTAACGAAACAGCCGCAAAACAATTTTAGCATCTGATGGGTTTTCTAAAGAGTTGATGCAAAATCTGGAAGGA  
CTGGATGAAAAGTTTGGTTGGTGTGGGGGATTTGCGATTTCAATGCGATTTTAGGCAACTATTCGCGCACCATCGCAT  
TCTGTTGTCTGAAACGAAAAAGCGCATTTGAACCAACATTTGAAGTAAACAAGGCTCAATTTGGTTTTCTACTCCGATG  
CCCAGGCGGACAGATAAAAAATGGTGAATTTAGCGGGTACGAAACAGAAATGGAAAAGTGTGATCTCGATTTAGTTGCC  
TCTCGCTGATGGTGTGATATGCAAAACAAAGGTAATGCAATGCGCGTTGCCACAATTACTTGGCTATCAACAGCTTGG  
TATTTTACCTAAATTTGCTACGTTTTATCGCCAGGTTTTACACAGGCACTAAAGAATAATGATATTGAGGCAGGGTGGT  
TGGCAGGCTCGATGAGGATTGAATAATGGCTTATAA

>Cluster\_3008

ATGCCGCGCACTGTAACACATAATCCGGATAGCCCAATAATGACGATTTTTAGCCGCTTCTGAAAAATGGGACGCCCTG  
TAAACCCCTTACTAGCGCACACATGAAAATCTGTGTTGCTGCCGCAAAATCATCTCGCTGCTCCGCGGTGGCT  
GCCGTTCCAAATACGAAAAAGAGAATACTCTCCGTATCTTTTCTGATTTAGCAAAAGCCGGTAAAGTTACATTTTACGCCGCT  
CCAAAAAGATGGCCCTCAAAGGTA AAAAGCTCGCGAGTGGCGGAGCTCGCTATCCAGCTGGCGCGGAAAAAGCGCT  
AGGTATGGCTGACCGTGGCTGCGGGCAGAGTCCGTACATGACGCGCTGGAAATGTACCGGGATGACCTCAAAGCCAAAG  
TCGCCCGGCAAGAGTGAAGCCGGACAGTTTCAACACTACGGGGTGCATGACCGGATTAAGCAACGTTTCGGCGAG  
CGCGAGGTTTCAAGCAGCAATAACATAACATCGGCTGGTGAAGTGTGACGAGTGGATCGCTACTCGCTCAACAAATAA  
CGCCCTGGAGTTGTTGCGGAGCTCCGTGCGTTTCTGGAAGTTCGCGCACCTACTCTTTGCAACGCGCCGAATGTTGCCG  
CCAGTCTGCCAGATGATTAATGTTTCCCTCCCGCTACAGAAACCTACCCCCACAGCGCTTTTACCAGATATTGAATCAATC  
GCCGACTGCGCTCAATGTTGCTGCCCTGCACCTCTGTACACCAGAAGATGCTGTTCCGTTCAATGATCATCACTGGTGT  
TCGTCGATTAATGTCAATAACCTGCGCTGGGACTACGTTTACGAGGAGGCTGGTGAATTTGTTATCTCCGGAAGGGTTA  
TCGGCATGGGAGGGCTATGAAAACACAAAAGGCTTCCGCTGCGGATAACCCCTGAGATCCGGCGGATATCGACGAG  
CAGAAAAGCCTGGCGTATTGATTTCTGAGTGAACAGGGATTTATGATTTTTGACGACCGTGTATCCAAATGCAGCCATT  
TTCAAACGATCACTGGATAAGCTGGTGAACATACAGCCGCGGCTGTA AAAAGGAATAAACATGATGGGACTG  
TTAAAGGGAAGACGGTGCATTTGATCTTACCCAGCAATAG

>Cluster\_35166

ATGGATTATTTATCAGAAGTGTAAAAATCATTTGAAGGTGCAACAAAGGCAAAATGCTTCGATGGCTAGTAATTTAGCTGG  
TTGCTGGCAGATAAGCTCGAACAAAAAGGGGAGGTCAAGCAAGCCAGAAATGATAAGAGAAAAGGTTGCTTAGAGCTCCCC  
AGGCGTTGGCAGGAGCTCAAAGGCTGGAGGTGGGATATCTCTGGGCTCATTACCGGTAGATAATTGATAGTCTGACTCAAC  
ACTGTTGATGTGAGTTATCCTAAATTAGACAGTTCAGAGATTTTCTGCTGACAGCAATCAGTACCCGTTGTTGAAGAGTT  
TATCACTAATGTTCAACGTTATGATGAGTTTGTAAAGCTGATGCAGCATTTCCCGAGTCTGATGCTCGTGTATGGAAGC  
CAGGAACAGGTAAGCATGTTTATCTAAGTACATGCTACCTAGCTTATGATTTTTCCACTTCTTACAGTGGCTGCGATACT  
TTGATTAGTAGTTTATTGGGACAAACAGCAAAAATCTTAGACAGGTTTTCGATTATGTAATGACAGAGCCATCAGTGCT  
TTTTTTAGACGAATTTGATGCTTTAGCTGGAGCAAGAGTAAATGAGAGAGATATAGGTGAGCTTACGCGAGTTGCTCATTT  
CACTATTGCAAGAAATGATGATGCGGCATCAGAGGATACGGTAATTTAGCTCAACTAACCATGAGCAACTCTGGATCCT  
GCAATCTGGAGGCGATTTAGCTTCAAGATTTCAATGCTTTCGCTGACATACATCAGAGAGAGTTAAATTTGGA AAAATCG  
TTTTAAGAAATATGATATGTAGCATCTAGATTTAAGTGAATTTAACAAGAAATCGGAGGGATTATCCGGAGCAATAATG  
AACAGGTGAGCTTTGGATGCACTAGGGAATGAGTTATTTAAGAGGTGCAAGTGTGATAAAATCACCATAAAATGATATGAACTG  
TTGTTATCTTCGCGCAATCGCTTATGGAAGGTGTAATTTAAGCACTTACGAAGATGAAAATTCGTTGTTACGTTACGGA  
TAAAAAATATTCTTATCAGAGTTCTTCTGCTAATTTGTACAACTTACATCAAGAGTAATTTCAAACATTTCTGAAGGAGT  
CAGGAGCATATGACGAGAAGGGTACACAGTTTTAG

>Cluster\_39347

GTGGTAATATCAATAGCAGCATACTGAGCGGGCAGGCGCTATCCCTTCCCTGACGTCGCTCTTACCCGACATCAGAAA  
AATGCTGCTGGTCACTGACCGTAATATTGCGCAGCTCGACGGTGTGCAGCAGATTCGCGCCTTACTGGAAAAGCACTGCC  
CGCAGGTTAACGTTATCGATAATGTGCCCGCAGAGCCACGCATCATGATGTGCGCCAGCTAATGGATGCCCTTGGCGAT  
GCCCTTTTGGATGTTGGATCGGGATCGGGGTTGGATGTGGCGAAGCTGCTATCGCGTGGCTTTGCCATCC  
ACAATCACCGGGGCTGGATGCGCTGCTTTCGGGGTGA AAAACCGACTCAGCGGGTGAATCATGGTTGATTCCTCAACCCG  
CCGGAACCGGCTCAGAAGCCACGCGAATGCGATTCTGGCAATCCCTGAGCAAAGCACGAAGTGGGTATTATTTCCAG  
GTGCTGTTACCAGACTATGTGGCGCTTTTCCCGGAACTGACCACCAGCATGCCCGGCATATTGCGGGCTCCACGGGCAT  
TGATGCTCTTTGCCACTTACTGGAGTGTTTTACCGCGACCGTGGCAAAATCCGGTCAAGCATAACCGCGGCTGACTGGGT  
TAAGTAACTTTTCCGGCACATTC AACCCGCGTGAACGATCCTCAGGATCTGCGCGCAAACTGAAATGCTGTGGGCG  
TCTTACTATGGCGCGTAGCGATAACCCATGCGGGCACGCATCTCGTTTATGCGCTCTCTTACCCGTTAGGTGGCAAAATA  
TCATCTGCCGATGGCGTCCGCAATGCCATCTTGTGCGCGCGTGCATGGCGTTTGTTCGCCCTGGGCGGTGCGAAAT  
TTGCCCGGTCTGGGATTCGATTCCCGATGCGGAAACCGCCCTGAGCGCGAAGAAAATCTCATGCCCTGGTGACCTGG  
TTACAGGCATTAGTCAATCAACTCAAGTACCCAACTCTCGCGGCTCTCGGCGTACCGCCAGAGGATATTGCCCTCTCT  
GAGCGAGGCGGCACTGAACGTGAAGCGCTTATGAACAATGTGCGGTGCCAGCTTGATCTACAGGACGTACAGGCCATTT  
ACCAAACACTGTTTCCGCAACATCAATTTAAGGAATAA

>Cluster\_7907

ATGGTGGTCAATTCAGCCTATTTTTCCGGGTCCGAAACCGGAATGATGACCCTCAACCCTATCGTCTGCGACATATGGC  
GAAACAGGTAATCGCTCGGCCAAACCGCTCGAAAAATGCTGCGTAAGCCAGACCGCTGATAAGCCTGGTGTAAATCG  
GCAATAACCTGGTCAATATCTTGGCTCCGCGCTCGGCATATGTTGGGATGCGTTTGTACGGCGATCGGGCGTGGCA  
ATTCGCACTGGTGTGCTGACTTTTGTCTGACTGTTTGTGAGGATTTGCCGAAACCAATTTGCCCGCTGTACCCGGA  
AAAAGTCCCTTATCCGAGTAGTTTTCTGCTGGCTCCGCTGCAAAATTTGATGATGCCGCTGGTCTGGTGTGCTGAATGCTA  
TCACCCGATAGCTGATGCCGATGATGGGTATCAAAACCGATATCGTGGTTAGCGGCTCTTTGAGCAAAGAGTGGCC  
ACTATCTGTCAGCAATCAGCTCAACAAATTTCCGTCGCAATCAGGATATGCTGCTGCGGTGCTCGTCAACGAAAT  
GACCGTTGATGACATCATGGTCCGCGCAGTGAATTTACGGTATTGATATCAACGATGACTGGAAATCGATTCTGCGCC  
AATCTCCCACTCACTCAGCGGCGCATCGTGCCTACCGTATTCGCTGGACGACGCATCAGTATGCTGCGAGTACGT  
GAAGCCTGGCGGTTGATGTCGGGAAAAAGAGTTCCACAAAGAAACCATGCTGCGCGCCGCGGACGAGATCTATTTGT  
GCCGGAAGTACCGCTCAGCAGCGAGTTGGTAAAGTTTTCAGCGCAACAAAAAGAAAGTCCGCTGGTCTGCAACGAT  
ATGGAGACATTCAGGGGCTGGTACGCGTTGAAGATATCTGGAAGAGATTGCTGCGGATTTCACTACGTCGATGTCGCCA  
ACACTTGGCGAAGAGGTCACGCCGCAAAACGACGGTTCGGTGAATATCATGATGGCACCGCAACGTCGCGGAAATCAACAA  
AGCCTTTAACTGGCATCTACCGGAAGATGATGCCCGCAGGTTAATGGCGTCAATCTTGGGCACTGGAAAGAGATCCCTG  
TCGAGGCAACCGCGTGGCTATTGGCGAGTACGATATCGATATTTCTCGACGTACAGGACAATATGATTAAGCAGGTA AAAA  
GTTTTTCTGTGAAACCGCTGCGCGAGAGTGTGGCGGAGTAA

>Cluster\_53502

ATGGCCCTAACGGATACTAAAGTTCGCTCTGCGAAACCTGAGGAGAAAGAGTATTCACCTGTTGACGGCGACGGCATGTC  
CTTACTTGTAAACCTGGCGGTTCAAAGTATTGGCGATTTCTGTTCCGTTTTGGCGGTAAACAACATTTGATGGCGTTTCG  
CGCTTACCCGGATGTTTACTGGCGGATGCGCGGAAGAAAAGGGAAGAGGCCAGAAAGCTGGTAGCTGCTGGTATCGAT  
CCACGCGAACAATAAGCGTCTGTGAAAGAAAGAGCAGGCGAAAGAGATTATTACTTTTCGAGAAGGTTGCCAGAGAGTGGCT  
CGTAACTAACCAAAAATGGTTCGGAAGATCATGCTAATCTGTGTA AAAAAGAGCCTGGAGGACAATATCTTCCCGCAATTTG  
GTTCTCGCAATAATTTGCTGAACTGGGCACCCGATCTGTTTAAATTCCTAATTAAGCCGTTGGAGAAATCCGGATGCTTTGAA  
GTGGCTTCCCGCTTCAACAGCGCACCCAGGCCATCATGGTTATGCAAGTGAACGCGGTTAATGATTACAATCCGGC  
GCAAGAGATGGCGGGGCGGTTGCTTCTAGTAACTGACACGATCGTCCGGCGCTGGAGTTAAAGCGTATCCCGGAATTA  
TCCAGAAAATCATGATGAATAACCCGCGCAGCCACTAACCCGTTGGCAACCGCACTTACTCTGCTTATTTTTTATTCGATCC  
AGTGAGCTGCGTTTTGCTCGCTGGTTCAGAAATCGATTTTGAACGTCATGTTGGACATCCCGCCGAGCGAGAGCCTAT  
TCCCGCGGTGAAACATTTCTCAGCGAGGATCAAAGATGCGTACACCGCATCTGGTGGCACTTTCAAAGCAGGCGTGGCGA  
TCCTGAAGCAGATAAAAACAGTTCGTGGCGAACATGAGCTGATTTTTAATTTGGCGATCAGATCCCGGTAAGCCCATGAGC  
GAGAACACGGTAAACAGTCACTACGGGTGATGGGTTATGACACTAAGGTTGAAGTTTGGCGGCACCGCTTCCGTAACAT  
GGCCTGTAGTTCCGTTAATTTAGTACAGGACTATGGTTCGAAGGATGCGGTGGAACGACAGATGAGTCATATGGAACGCAAT  
CGGTGAGGCGGCGATATATCCATAAAGCGGAACATCTGGATGAGCGCAAGCTGATGTTGCAGTGGTGGCTGATTTCTG  
GATGCGAATAGAATGGCGGCTATCACTCCATTTGACTATGCAAAGATTAATAGTTCTTTTCGATAA

>Cluster\_63616

ATGTCTAAATTACCAACAGGTGTCGAGATTAGAGGTAGATACATTCGCATCTGGTTTATGTTTTCGAGGAAAACGATGTCG  
GAAAACATTAAGAGGCTGGGAGATTACAACAGTAATATTA AAAAAGCCGGAATTTAAGAGCGCTGATGTTTATGAAA  
TAACTCCGGTGAATTTGAGTATTTAAGACGTTTTCCCGTCCAGCAGTGGGCAAAAATGGTGACAACGAGAGTCAATA  
AAAACGTTCCGAGAGCTTTGTGATATCTGGAACAAAATTAAGAGACAGAGTTAACAACAAACACAATGAAGAAAACGAA  
ATCACAATTA AAAACACTCAGAATAATAATTTGTGAAAGTACCCGATATCACATATTCGTTATAGCGATATCTTAAACT  
ACCGGAATGAACCTGCTGCATGGAGAAACGCTTTTACCTGGATAATCCAAGATCCAACAAAAAGGAAAGAACCGTCCGCGACA  
GTTGATAACTATAATCGCCTGCTCTGTTTCGCTGTGCGTTTTTTCGTTATCAGTGGGATTTATATCAACCAAACATTTGA  
AGGAGTAAAAAATAACAGCGAACAAGATAAAGCCTGATCCGTTATCTAAAACAGAAATCAATGCAATTAATGGAAAGTG  
AAAAGGACAGAGCCAGAACTTGTGAAATTTGCGGTTTACTCAGGACTTCGTCACGGGGAACGGCAGCTCTGGCGTGG  
GAGGATGTTGGATCTCGAAAAGGGAATAGTGAATGTCAGAAGAAACCTGACGATACTTGATATGTTTCGGTCCCCAAAAAC  
AAATGCGGGATCCGAACAGTAACACTACTGACGCTGCTTTGAAGCACTGAAGGAGCAATACAACCTGACCGGCACT  
ATCGCAAAAGCGAAATCACCTTTTATCATCGGGAGTACGGCAGAACCGAAAAGCAAAAACCTGCATTTTGTTCATGCCC  
AGGTTGTTAACGAAAAACAAACCTTATTAATCTCGGTAAAGCAGTTTGGGGGCAAGGTGGAATGCAGCAGTAAACGTCG  
TGGTATTCGCGCCGTAATCCGTACCATACGCGGCATACTTTTGCCTGCTGGCTGTTGACGGCAGGAGCGAACCCGGCAT  
TTATAGCCAGCCAAATGGGGCATGAAACTGCGCAGATGTTGATAAAAATTTACGGTATGTGGATTGATGACATGAACGAC  
GAACAGATAGCCATGTTGAATGCGCGGTTATCGTAG

>Cluster\_28081

GTGAAGATTTATCTGGTGGTGGTGTGTTTCCGGATGCAATGTTAGGGCTACCGGTCAAAGACAGAGATTGGGTGGTGGT  
CGCGAGTACGCCACAGGAGATGCTCGACCGGGCTACCGCAGGTAGGCGCGATTTTCTGTGTTTTGTCATCCGCAAA  
CGCATGAAGAGTATGCACCTGGCAGTACCGAACGGAATCCGGTTCCGGTTACACCGGTTTTACCTGCTATGCCGACCG  
GATGTCACGCTGGAAGATGATCTTAAAGCTCGGCATCTGACCAATTAATCGCTGGCCAGGACGATAACCGCGAGATTAT  
CGACCCGTAACAACGGTCTGGGCGATGCAAAATCGTCTGTGCGCCATGTTTCCCGCTTTTGGCGAAGATCCGTTAC  
CGGTTTTCGCGTACGCGCTTTTGTCTGCGGTTTATGCCACCTCGGTTTTCTGATTTGCCGATGAAACTCTGGCGTATG  
CGCGAGATGACCCACGCGGGTGAACGGAACCTGACGCTGACCGGTTATGGAAGAGACGGAAGCGCCCTACTAC  
CCGCAATCCCGAGTGTTCCTCCAGTACTGCGCGATTGCGGCGACTGCGCGTTTTTATTTCCCGGAAATGACGCCCTGT  
TTGGCGTTCCGGCCCTGCCAGTCCGGAATCAGACGGGATTTCACTACCTTAAATGACGCTCTCAATGGCGGGG  
ATGCTGAGTCCGAGGTCGATGTCGTTTTCGCAACGTTATGCCAGATCTCGGTAAAGGACTGACGCCACCAGAACTTTG  
GCCGATCATCATGGTATGCCCCGGCGGGTGTGAAGTTAGTGAACAACTATGCCAGGCTCTGCGGTGCCAAATGAAA

TTCCGCGATTTAGCCAGACTGGTGGCTGAGTTTCCAGCATCTCATCCACACCTTCCCAATGCTGAACCCAAAAACCATCGTC  
AAACTATTTGATTCCATCGACGCTGGCGTAAACCGCAGCGTGTGAGCAACTGGCGCTGACCGAGGCTGATGTGGC  
CGGAGAACCAGTTTGAATCAGCCGACTACCCGCAAGCCGCTGGTTGCGCGAAGCTGGGAAGTGGCAGTCACTGTC  
CGACAAAAGCCGCTGTTGAGCGGGATTTAAAGGTGTGGAGATTCGCGAGGAGCTGACCCGACGGCGGATTCGCGCGGTA  
GCCAGCTGGAAGGAACAACGTTGTCAAAAGCCTGATTA

>Cluster\_37379

ATGGATCTGTATATTCAGATTATCGTGGTGGCGTGCCTGACGGGTATGACATCGCTTCTGGCGCATCGCTCGGGCGTGT  
TTTTTCATGACGGCATCCGCCCAGTCTGCGCCTGATTGAAGGCTATATGAACCGTGGCGAGGCGGGGAGTATCGCTT  
TTGGTCTGAGCATTTGGTTTGTGGCCTCGGTGGGGATCTCTTTTACCCGAAAACCGGGCTGCTCAACGCATGGTTACTC  
TTTCTTCTACCGATATCTCGGCGTCTGGCGATAAACAGCCTGATGGCGTTTGGTCTTGGCGCTATCTGGGGCGTGT  
GATCTTACTTGCCTGTTGCCAGTAAACAGCTGCTGACCGCGCTGCCGGTGGATGTATAGGTAGCTGGGGGAATTA  
GCTCGCCGGTGGTTTACGCTTTTGCACCTGTTCCCGTGGTGGCGGATTTTCTACAGTTTGGCTGGAAGCAAAGTCTGATC  
GCCCGCTGAGTGGTACTGATGACCCGCTGGTGGTATGCTGCGCTATTTCCACATCTTAACCTGAATCCATCGAACTCT  
TATTGGCATGGTGTGCTGCTGGGGATCGCGATAAATCAGCCTGCGTCACTGATGAAAAAGACATTGATGCCAGCG  
GGCTTTTCGCTGTTTGAAGAACGCAGTCAAGGATATCAAAAACCTTACCTATATCGCCATCGTGGGAGCATTGATGGC  
GCCGTTGCCAGCATGAAGATTTTGTGGCAGTGAAGTGTGATCTTCCACATGGAGAAGCATATTCGCGAGCGGTAAAC  
GCCGACAACTCGAAACGCTGATTAATCAGCGCGCTGTCGGCAGAATTTATGCGCGGACTGGGTTTTGCGCGTATTG  
CCACCACCGCTTAGCAACGGGTGTGATGACGTTGCGGGCTTACCTTTGTTTATGCGGTGGGCTATCTCTCGCGAAT  
CCGATGGTTGACGCGGATTAGGCGCAGTGGTTATTTCCGGCGAAGTCTTGTCTTCTGATCGGCAAACTGGCTGGG  
ACGCTAACCGTGGTTCGTAATGCGTGGGATAAATCAGCCTGACCCATGAATATGCTGATGGAAGTGGCGCTGGTGGC  
GTTTCGATTTTCGAGCAATTAAGATGGCGGGTTATACCGGATTTCTTATGCGGGTGGCATTACTTCTCAACGAATCC  
CTGGCGCTCCGTTACAGAAAATGGCGCACCGGCTGTCGAGTAAATGATCACCGGATTTCTGCTGAATGTTCTTTACTG  
GCTTGGCTGTTTCCGCTTCCGCTTAA

>Cluster\_26701

ATGAAACGTGTTTCTCAAATGACCGCGTGGCAATGGCTTTAGGGCTGGCTTGGCGTCTCTCGTGGGCGCTGAACTGGC  
GAAGCCTCTTACACTTGACCGAGCTTCAACAACAAAATGGCAAAGCGATTGATACTCGCCAGCGCTTTTATAACGGCT  
GGCCACAAACCTTAAATGGCCCTTCTGGTCAATGAACTGCCGCTTAAACCTCTCTGCTAGCTGGCTCGACAAAATGAGC  
ACCGAACGCTCAACGAGTGGATCAAGCAACATAAACCCTGAAAGCGGATGCCCGGTGGCGCTATACCGTAAATGGCAAGA  
TGTCGACGCGCTCAAACCGGACTGCAAAAAGCAGGTTTTACGCATATCTCCATTCTGAGTACGCGCTAAGCGAACCTT  
CCCGTCTGCAAAAACCTGCCGCTTTTGAAGCAGCTGGTTTATCCGCAATGGCTGCACGACTGCAACAAGGTAAAGAGGTT  
ACGGCGAAACCTGCCGCTGACTGAAAGTCAATGAAGCGGCTGGGCGCTCCTAAGCTTACCTTATCAGCCATATTC  
CGGCGCTGACTACATCGATACCAACGAAGTGGAAAGCAACCGCTGTGGAACAAAGTTTCTGATGAACAACTGAAAGCGA  
TGCTGGCAAAAACCGGCTTTCGCTATGACACCAGGCTCATTCTGACGGGCTGACGTATACGCTGCAGCGCTGTGGCA  
CAAATATGCTCTACGCTGGCGTAAAGATGTCGCGCTGCTGGACGGCGCTGGCAAAACCTGGTCCGACGCGGGACTGCC  
CGTTGAGCGCGAAGCCCAAGGATAAAGGAAACGGAACCGGATTTCCGCGTGAAGATCCCGGCACAACCGCAACTGATGC  
TTGATATGGAACAGGCGGCTGGACTGCTGCATCGCCAGGACCGCTCGTGGTGAATTTCTGATGAGTATTCGTTCTGTTGCG  
GGTACGACAGTGGTTACAGCTATATTAACAAAAGGTGAAATAGCCGGAGCACGTTGGGGACACGCTGGTAGCGACTC  
GACGCATATGGAAGATTTCCATAACCGGATGGCACCATGCGCAGCGCGATGATATTTATGGCTATGTGGAAGCATGGA  
ATATCAGACAGATCAGCAAGTTTCAATCTACTGCGGCACCGGCTGGCGCGCTCCGAAACCTTATGCTACGCACGAGCA  
ATGGGCTGGAATAACGCTCCCGTTTACGACGGCGCTGGTACGAATGGAGCAGCGATCCAAAAAATCCGGTAGCAACCGG  
TGAACGGCGCCCGACAGCAGCAATAA

>Cluster\_26263

ATGTCACCTACTGATACTAAAGTAAAAAATGCCAGACCAGCGAAAAAGCGTCAAGCTCACTGATGGATTGGTCTCTA  
CCTTCTTTTGCATCCCAATGGTTCAAAAATCTGGCAGTTAGGCTATCGCTTCGATGGTAAACGAAAGTGTTTTCCATTG  
GTGTTTACCTGCGGTTTTCTTCTGCTGATGCCAGACAACGAGCTGATGAAGCAAAAAGCTGCTTGTCTCAGGGATCGAT  
CCTAACGCTAAAAAAGCGCTGATGAAAAAATCTGCAGGAAAAAGCGGGATAAAAACCGTTCGTTCCGTTGCTGCGCCAG  
AAGCTGGTTTGGCCACAAAACAAAATGGTCTGAAAGATTACGCCGATACGGTATGGAAGCGCTTGAAGCTATGTATTTCC  
CGGATATTTGGTGACAGCAACGTTTTCAGATCTGGATACGGGTGATCTGCTTGTTCGGTAAAAAAGCAGAAACGCTTGGC  
TATCTTGAATATGCCATGCGGATCAAGCAATACATCACGCACTCCTGCGTCAAGCGCTCCAGCAAAAACCTTATGCGCCA  
TAATCTGCTTACGATATGGAAGTGTGTGAGAAACAGAGACTGAGCACCCTCCGCACTGGAGCTGGAAGAGATCC  
CCCTGCTTGAACGATTTGATGCTTACAAAGCCGCTGGACTTACCACTAGCGGATTAACCTGATCTGTTGATTTTCT  
ATTCGTTCCAGTGAACCTCCGCTATGACAGTGGTCAAGAACTGACTTCAACAGTAAGTTATGGGTGATACCAGAAAAGCG  
TGAAGTGAATTGAGCGCTCAAAATATCCAGCGTGGCGCAAAAATGAAACGCCAGCATTGTTTCCCTTTGCAAGGACG  
CTCTTAAGATACTGAAAGATCCGTCAGCTTACCTATGAAGAAGGTAATGACGCCGATTAATTTTACTGGATGTTAT  
GACTCATTCAAAACCATGAGTGAAAAACCCATCAACAAGCGCTGCGTAAGATGGCTATGACACCAGCAGGACATCTG  
CGGTATGGTTTCCGAACACTGGCATGTAGTCTGATGAAATCAGGCTATGGTCTAAAGATGCGGTAGAACTTCAGA  
TGACCCAAAGGAAAGCAACAGTGTGCGTGTGCTTATACCAATAAGGCCAAACATCTGAAACAGAGAAGATTGATGTTA  
CAGTGGTGGCAGATTATCTTGTGCAAAATCGGATGGGATGGTACAGCCGTTTGAATTTGCTCAATAA

>Cluster\_28768

ATGGATATTCGCTTAATGCAGCAAGCGGGCGTGGCGTTATCTGACGCTGGTGTGATGATCTTATACGGTGGTCAAT  
TTGTTATGTTGACCGCGTAACTGGCCGTTCTGCCCATATTCAGGAAGAGTTTGGTATTAATAAAGCGCAAAATGG  
GCTATGTAATTTTCGGCTTCGCTTATACGCTATGTCAGATCCCGGTGGTGGTTTTTATGATCGCGTAGGTTCA  
CGCGTACTTATTTTATTCGATATTTGGTGGTCACTGGCGACGTTATTCAGGGCTTTGCCACGGGCTTAATGTCATT  
AATGGTCTGCGCGGATAAACCAGTATTTTTCGAAGCGCGCGTTCGCCACCAATAACCGGATGGTAAACAGTGGTTCC  
CGGAACATGAACGTGCTTCTGCGGTTGGTTTTTATACGCTGCTGCTGCTGCTGCTGCTGCTGCTGCTGCTGCTGCTGCT  
ATTTGGATTCAGGAGATGTTGAGTGGCTGGCTGTTTCAATGTTACCGGTGGTATCGGCATTAATCTGCTGCTGCTGCT  
GTTTAAAGTTTATCAGCCCGCGCTGACCAAGGCATCAGCAAGCTGAACGATGATATCTGCTGATGGCGGGGCTC  
TGGTGGATGGCGATGCGCGGTTGAAGAAAGAGGCGCTGAGCCGTTAAGCCAAAGACTGGAAACTGGTGTCCATCTG  
AACTGATCGGTGCTATCTTGGCAATTTGCGGTGGCTTACACTGTTGTTTTTCTTAACTGGTCCCAGACTATTT  
AACCAGGAAAAGGAATCACAGCCTGAAAGCAGGCTTATGACCAAGGCTGGCTTCTCGCGGCTTAAATGGCGCTC  
TGCTCTTGGCTGGTGGTGGTGGTGGTGGTGGTGGTGGTGGTGGTGGTGGTGGTGGTGGTGGTGGTGGTGGTGGTGGT  
GGCTTGTGATCTCCACTGCATTTATGGCGCTAATACACCAACGATCCGATGATGATGATGATGATGATGATGATGATGAT  
ATCTCTGGCAACGTTTTGCTTCCGATTAACCTGGTGGTGGTGGTGGTGGTGGTGGTGGTGGTGGTGGTGGTGGTGGT  
GCGGCGGTTTTAACTTTTGGCGTGGCTGGCGGCATCATGTTCCGCTGGTGGTGGTGGTGGTGGTGGTGGTGGTGGTGGT  
TTCCGACCTGACTGTTTTATATCTCCGCGTGGCTGGTGGTGGTGGTGGTGGTGGTGGTGGTGGTGGTGGTGGTGGTGGT  
GCGGTTGGATAA

>Cluster\_45158

ATGATTACGCACAACCTTCAATACCTGGACTTACTCACAGTCTGCTGATGTTTTCGCCCCTTGGAGAACAGTTAAT  
TTATGCCAATAGCGGGCGGACTGTTGATGCAAGACCTCACGTTTATGTCAGTACGAACCGGACCTATTCCGCTCTCT

CACAAAAAGAACTGCCGAAATACCTCTCCGATCTGCAAAAACCAACACGATATTATCGAAATCCTCACTGTTACGCGTAA  
GAAGAGGAAACAGCATTAAGCTGTCGGCTGTTTTGCGAGAGCTGACAGAAACAGAACCAGGTGATTATTTTCGAAGGTAT  
CGAAGCGCCGGCAACGCTGGGTTTTAAAAGCCAGTCGCTCGGCAAAATATCAGCGCAAAAAACAAGGTTTTTATGCGCGCT  
TTTTTCTGACTAATCTGACCAATGTTTGTGATGACCCCTCAGGATGGCCAAATCGTCGATGCTAACCTCGCCGCG  
CTCAATTTCTATGTTATAACCATGAAACGATGTGCGCAAAACATACCCTGGGAAATTAATATGCTCGGCGCTCAT  
GCCTATCATGTCATGAAATTTTCGCATTTACCCGGCGGTCATAAACTTTTGAATTTTGTTCATAAACTGGCGGATGGATCTA  
CTCGTCATGTCAGACCTATGCGGGCCGATTGAAATTTATGGCGACAAGCTCATGTTATGTAATGTCATGATATTACT  
GAGCAAAAATGCTGGAGGAGCAGCTGGAACATGCTGCTCACCATGACGCGATGACCGGATTACTGAAATCGGCGACAGTT  
TTATCACATTTACCGAGCCAGGCCAAATGACGATCTCGCCATCGCTCAGGATTACAGCTTGTGCTCATGACACCGATC  
GTTTTAAACACATTAACGATCTCTATGGGCATTTAAAGGTGATGAGGTGTTATGCGCCCTCGCCCGCACCTTGAAAGT  
TGCGCTCGCAAAGCGGATTTGGTGTTCGTTGGGGAGGCGAAGAGTTTGTCTTATGCTACCAAGAACCCACTGGATAC  
CGCGCTTTCGCTGGCTGAAACTATCCGTGTAAGCGTGGCAAAAGTGAATTTTCGGGCTTACCACGCTTACCCTGACGA  
TTGGTGTGGCGCATACGAAGGAAATGAAAGCATCGATGAACCTGTTTAAACGCGTTGATGATGCTTTGTATCGGGCGAAA  
AATGATGGACGCAACCCGCTGCTGGCGGCATAA

>Cluster\_190

ATGAATTAATCTTCGTCGGTATTGATGCTCTAAAGACACTTTTAAATATCGCTGTCTCCATCAACAATCCTTTATCCTCTC  
CAAACACCTCCCTATGCTCAAGAGGTTTCTCTCAGCTTCTCTCCATCCTTAAACAATACCTTAAACCTATCGTAGTCA  
TGGAATCTACTGGAAGATTTCTCTCCACTTTATCACTTCTCTTGTAAATGATATCAAGCTTTTGTATCAACCCA  
AAAATCCTTACAGGTTCTTCCAGTTCTCTCGCAAAACAACCCCTTAAAGTCTGATACCAAGACGCTAAACTCCTTTC  
TCTTTTGTCTAAGCTAACCCCTCAATTCCTTAAACCCCTTCCACCTGACCATCCTGAGAAACCTCCCGCTTATCC  
AAAACTCAAAAAAGAACTCTCTGAAGCTAAACCCAAATCAAAATACGTCCTCTCTGTCTCTTCCCGGAAAGTTGAAAA  
CACTTAAACATCTTCTCTTTCTTCTCAACATACTCTTAAATACCCCGTGTCTCTACCTCAAAAAGGCTTCTAC  
AGATGATATCGCTCTATCATCAATTTCTACCTCAAAGCAAGAAAAACCTCTCTCTCCCTCAAGAGATCATAAACCTTG  
CTAAAAATCTTCCGCAAAACCTTCCAAACCTTCTTCCAAACCTTCTTCTTATATGAAAAAATATCTCTTCTCGAA  
CCAAGAATCAAAAACTTGAATAATGCTCCTTGAAGAAATAGATCACGACCAAAACCAAAATAAGCTCATTTCTCTC  
TATCAGGGGAATTTCTCCAAAACCTGACGTTTATTTATCGCTGAAGTTAAGGATGTGAACAGATTTTCCAATGCCAAA  
AACTTATAAAATATGCTGGCACTGACCCAGTAATAAACAGCTCGGAAAAATTTAGGATAAAATGAGTATTTCTAAACAA  
GGAACTCCCTGGCTCGCAAAACCTTTCTTTCAGATGAGGATGAGTAACTGGAATTTCTTATTTTCAGGATTTT  
TTTTCGCAAGAAGAAGGAGTTTAAAGAGCTATAAGAAAGCAATGGTAGCGGTGATGAATAAGCTCATAAGGGTATCTATG  
GACTTTGCAAGAAAGGAGTTATTTTAACTTTGCTTGGAGTTTAACTCTAAAAATTTTATTTCTATTTGCGAGGGTTCT  
CATGCTTAA

>Cluster\_26527

ATGAAGATCGTAAAGGCTGAAGTTTTTGTACCTGTCGGGGCGTAATTTCTGTCATTAATAATCACCCTGAGGACGG  
TATACCGGCTTGGGGATGCCACCTAAATGGAGCTGAGCTTCCCGTGGCCTCTTATTTGACAGGATCACCTTTGTCCCG  
AGCTTATTTGCTCGCATGACACCGTATCGAAGATATCGGAGTTTCTTATAAAGGTGCTTACTGGCGTCCGGCTCCG  
GTTACGATCTCGGCAATTTACCGGTTGATATGGCGCTTGGGATATTAAGCCAAAGCTGCCAACCTCCGCTTTATCA  
GTTACTCGGCGGCGCTCTCGTGAAGGGTGTATGGTTTTATGGCATAACACCGGTCACAGTATGATGAAGCTCTGGATG  
ATTTATGCCGCTATCAGGAGCTGGGATTCAAAGCCATCCGCTGACGTCGGAATCCCTGGTATGAAAACCCACTACGGC  
ATGTCGAAAGGCAAGCTTGGCTTATGAACCCGCAACCAAGGACAGTGGCCGGAAGAGCAGCTGTGCTCGAGGAGAA  
ATACCTCGATTTTATGCGGAAATTTGTTTACGCGGTACCTAACAAAGTTTGGTTTTGATGAACATCTGCTGATGACATG  
ACCATCGCTTAAACGCTTATGAAGCGGCGGCTTTGGTAAAGAGATTAAGATTTATCGATGTTCTGGATGGAAGACCG  
ACGCTGCGGAAAACAGGAATGCTTCCGCTCATTCGCCAACATACCGTACACCCATCGCGGTGGGTGAAGCTTTCAA  
CAGCATCTGGGATCGCAAAACCTGATTGAAGAGCACTCATCGATTAATATCCGACACCGCTGACCCATGCAAGGCGAA  
TTACCGGTATGCGTGGATTTGCGATTTTGGCTTTCGCTGTATCAGGTACGTACTGGCTCACACGGTCTTCCGATTTGTCA  
CCAGTCTGATGCTGCGGCGCTGACCTTTGATCTGTGGTCCCAATTTCCGGTGTCCAGGAATACATGGGTTATCCGA  
ACAAATGCTCGAAGTCTTCCGCAACCTGGACTTTGATAACGGCTATATGATCAGGAGACAAACCGGCTTGGCA  
TCGAATTCGATGAAAAGCTGGCGGCAAAATATCCCTATGAACCTGCTTATCTGCCAGTCCGACGCTCTGGAAGATGGCACG  
CTGTGGAAGTGGTAA

>Cluster\_60152

ATGTTAAAAGTGGAAATGTTATCCACCGGGGATGAAGTGTACACGGGCAAACTGTTGACACTAACGCTGCTGGCTGGC  
CGATTTTTTCTTTTATCAGGGGTTGCTTATATCTCGCCCAATACGGTGGGGGATAACCTTGTGACTTAGTCAACATTC  
TTCGCGAAGCTAGTACAGCAGCCGATGTGCTGATCGTTAACGGCGGGCTGGGACCGACAGCGATGATTTAAGCGCAC  
GCCGCTGCGACAGCAAAAGGTGAAGGCTTGGTGTGATGAAAGCTGGCTCAAAGAGATGGAACGCTATTTCCACGAACG  
TGGACGATTAATGGCAGCAGCAACCTTAAACAAAGCGGAGTGCCTGCCAGTGTGAATTTATCAATAACCCGATAGGCA  
CCGCTGTGGTTTTTTCGCTGACGCTTAACTGCTTGCCTGATGTTTCTTACTCCGCGTACCGTCAATAATTAAGGTGATG  
GTCGAGCAGAAATCCTGCGCGCTGCGGAGGCTTTTCTTTACCAGCGCCGCTTGTCTGCTGTTGACTACTTT  
TGGTCTGTTGCGAAAGCGATCTGGCACAAGCCTGGACACTCTACAACCTGCCGCGGGCTAACAAATGGGCTATCGCTCT  
CAATGCTATCATCGAATGAACTCACCGGACCGGCAAGCAGCAACAGGCGATGAAAAACCTGTTGGTGTGATTTAAA  
CGTGTGCGGACAGAGCTGATTTTCGAAGGCACTGAAGGACTGCCCGCGCAGATCAGTCCGAAATGCAAAACCGCA  
GTTACGCTGACGTTGAGCGAGCAATTCACCGTGGTTTTATTGGCTTTCGCACTTCTCGCGCAGGTGCTCCATTGCTGG  
CGTGTGAAGTGGTTCTTACAGGAGGAAACCTTGGCGCAAACTGCGCACTGGATTACAGAACGGCGGGCAACCATTTT  
GCCGGCTGGCACTGGCTGTTTCGGTTTTTCGAGAACGAGCATCTAACCTTTCGCTAGCCAGCCAGCGCACTTTCCG  
TCTGCGTGTGCTTTACGACTACGCGCTACAGCTGGCTATCCGTCAGGAAGTGTGCGCAATGATGGCACTGAATATGC  
TGGCCGTTGGTTAACCGCCAGGATATCGCCAGTGGATGAGTTGAGTTGTTGAGTCCATGACCTTATCTGTC  
TGA

>Cluster\_41763

ATGGCAATTAATAAGAAATTAATAATCTTTATAAAATATTTGGTGAGCATCCACAGCGAGCTTTCAAATATATCGAACA  
AGGACTTTCAAAGAAACAAATTCGGAATAAACCTGGGCTATCGCTTGGCGTAAAAGACGCCAGTCTGGCCATTGAAGAAG  
CGGAGATATTTGTCATCATGGGATTAATCCGGTTCCGGTAAATCCAAATGGTACGCTTCTCAATCGCTGATGAAACCC  
ACCCGCGGCAAGTGTCTGATTTGATGGTATGCGCAAAATATCCGACCGCAATCCGCTGAGGTGCGCAAAAAA  
GATTGGATGGTCTTCCAGTCTTTGCCTTAATGCCGATATGACCGTGTGGACAATACTGCGTTCGGTATGGAAGTGG  
CCGAAATTAATGCCGAAGAACCGCGGAAAAAGCCCTTGTATGACTGCGTCAAGTCCGGCTGGAAAAATATGCCACAGC  
TACCCGATGAATCTCTGGCGGATGCTCAACGTGTGGATTAGCCCGCGCTTAGCGATTAATCCGGATATATTTAT  
AATGGACGAAGCCTTCTCGCACTCGATCCATTAATTCGACCGAGATGAGCTGGTAAAAATACAGCGCAAAAC  
ATCAGCGCACCATTTGCTTTATTTCCACGATCTCGATGAAGCTATGCGTATTTGGCGACCGAATGGCATTATGCAAAAT  
GGTGAAGTGGTGCAGTTGGTACACCGGATGAAATTTCTTAATAATCCGCGAATGATTTATGTTCTGACTCTTCTCCGTT  
CGTCGATATTTAGCAAGGTTTCACTGCAAGATATTCGCTGATACCCGACCGGCTTAAATTCGTAATAACCCCGGCT  
TCGGCCGCTTCCGCACTGAAATTTATTTGCAAGATGAAGATCGTGAATATGGTACGTCATCGAACCGGTAATAAGTAT  
GTCGGCGCTGTGCTATCGATTCGCTTAAAGCCGATTAACGACAGCAAGGCTTGTATGCGCGCTGATGATGCGCC

GTTAGCGGTGATGCACAAACGCCCTCTTAGCGAGTTGCTCTCTCATGTGCGACAGGCACCCTGTGCGGTGCCCGTGGTTCG  
ACGAGGACCAACAGTATGTCGGCATCATTTGAAAGGAATGCTGCTGCGCGCTTTAGATCGTGAGGGGGTAAATAATGGC  
TGA

>Cluster\_39386

ATGAGTAGCGTAGATATTCTGGTCCCTGACCTGCCTGAATCCGTAGCCGATGCCACCCTGCGAACCTGGCATAAAAAACC  
CGGCGACGCGAGTCTACGTGATGAAGTGTGGTAGAAAACGAAACTGACAAAGTGGTACTGGAAGTACCGGCATCAGCAG  
ACGGCATTCTGGATGCGGTTCTGGAAGATGAAGGTACAACGGTAACTGCTCGTACGATCCTTGGTTCGCTGCGTGAAGGC  
AACAGCGCGGGTAAAGAAACCAGCGCCTAACTCTGAAGAAAGCGTCCACTCCGGCGCAACGCCAGCAGGCGTCTCTGGA  
AGGCAAAAACAACAGTACCGTTAAAGCCCGCGCATCCGTCGCTGCGTGGCTGGAACATAACCTCGACGCCAGCGCCATTAAG  
GCACCGGTGTGGGTGGTCTGACCCGTGAAGATGTGAAAAACATCTGGCGAAAGCCCGCGAAAGAGTCTGCTCCG  
GCAGCGCTGCTCCGGCGCGCAACCGCCCTGGCTGCACGTAGCGAAAAACGTGTGCGGATGACTCGCTGCGTAAGCG  
TGTGGCAGAGCGTCTGCTGGAAGCGAAAACTCCACCGCCATGCTGACCACGTCAACGAAGTCAACATGAAGCCGATTA  
TGGATCTGCGTAAGCAGTACCGTGAAGCCTTTGAAAAACGCCACCGGCATCCGCTGTTATGTCCCTTCTACGTGAAA  
GCGGTGGTTGAAGCCCTGAAACGTTACCCGGAAGTGAATGCGTCTATCGACGGTGTATGTGGTCTACCACAATATTT  
CGAGCTCAGTATGCGGTTTCTACGCGCGCGGTCTGGTGAACCGCGTCTGCGTGTATGCTGATACCCCTCGGCATGGCAG  
ACATCGAGAAAGAAATCAAAGAGTGGCTGTTAAAGCCGCTGACGGCAAGCTGACGGTGAAGATCTGACCGGTGGTAACT  
TTCACCATCAACAGCGTGGTGTGTTCCGTGATGCTCAACCGCTATCATCAACCCACCGCAGAGCGTCTGGG  
TATGCACGCTATCAAAGATCGTCCGATGGCAGTGAATGGTCAAGTGTGAGATCCGCGATGATGTACCTGGCGTGTCCCT  
ACGATCACCGTTTGTATCGATGGTCCGAAATCCGTGGGCTTCTTGTAAACGATCAAGAGTTGCTGGAAGATCCGACGCGT  
CTGCTGCTGGACGTTTAG

>Cluster\_41045

ATGAAAATACTGGTCTACGGCATTAACTACTCGCCGAGTTAACCGGCATCGGCAAAATACACCGGAGAAATGGTGGAAATG  
GCTGGCGCGCAAGGTCATGAGGTGCGGGTTATTACCGCACCGCCTTACTACCCGAGTGGCAGGTGGCGGAGAACTATT  
CCGCTGGCCACGGCGTTCCGAACGTGACCGACTGCATAACGTGCGCTGCGGCTGACGTGCGCAAAACAGCCGAGCACC  
CTGAAACCGCTGTTCATCTCGGCGAGTTTGGCGTCAAGGTTTTCCTCCGTTGATGGCGCAACGTGCGTGGAAAGCCGGA  
TCGATTTATCGGCGTGGTCCCAACGCTGTTTTCGACGCGGGAATGCGCCTGCTGGCGAAACTCTGCTGTCGCGTACCG  
TGCTGCATATTACGATTACGAAGTGGACGCCATGCTGGGGCTGGGCTTGGCGAAAAGGCAAAAGCGGCAAGTGGCA  
ACGCTGGCCACGGCGTTCCGAACGTGACCGACTGCATAACGTGCGCTGCGTCAACGATTTCCGCTGCTGATGATGAATA  
AGCCATCGAAAAGGCGTGGCGCGGATAACATCATTTTCTCCCAACTGGTCGGAATCGCCCGTTTTCAGCATGTTG  
CAGACGCCGATGTTGATGCCCTTCTGTAACGAGCTTGGCCTGCCGATAACAAAAAATCATTTCTTACCTCCGCAATATT  
GGTGAAGCAGGAGTGGAAAACGTTATTGAAGTGCAGTGCCTGCGCGATGAACCGTGAATTTTGGCATTGTCCGG  
CGAGGGCGCGCAAAAGCGCGCTGGAAAAAATGGCGCAGCAGCGTGGACTGCGCAACATGCAATTTTTCCTCCGTCGAA  
CGTATGACGCTTTACCCGACTGCTGAAGATGGCGATGGCACTGCTGGTGGTGAACAAACCGCGCGCGCAGATGCCGTA  
TTGCCGTCGAAACTGACCAATATTCTGGCGGTAGCGGTAACGCGGTGATTACCGCAGAGCCACACAGAATCGGGCA  
GCTTTCGAAACCTTTCGGGCAATTGCGGTTTGGCTAGAGCCGAAATCGGTCGAGGCGCTGGTGGCGGGGATTCGTCAGG  
CGTCTGCTGCCAAAACAACACCGTGGCACGTAATATGCCAACGCACGCTCGATAAAGAGAACGTTGTTACGCTCAA  
TTTGTAAATGATATTCGGGGATAA

>Cluster\_20328

GTGAAACTCAATGCCCGTCAAAATAGACACAGCCAAAGCAAAAGAGAAGGCTTACAAGCTGACCGATGGTGGCGGTTTGT  
TCTCTTGGTAAAACCTAATGGAGGTAATACTGCGCAGCTTAAATATCGTGTAGCTGGTAAAGAGAAGCTATTGGCACTAG  
GTGTTGATCCTGAGGTACTCTAGCCGATGCTCGGGCAAAACGTAAGATGCGAAAAGAGGATGCGCTGGTGGTATCGAT  
CCGATGGAAGCGAAACGAGAGGAAAAGATTTGCCCGGAAACGCAAGTAAACAACACTTCAAAGATATGCGCTTGGATG  
GCACAGCAGCAAAATTAATAAATGGTCTGATGGTTATGCTTCAGACATCCTCGAAGCTTCAAACAAGATGCTTCCCTT  
ACATTTGGCAAAAAACCCATCGCCGAAATCAAACCACTTGAACCTTCTGAATGTGCTGCGTCGCATCGAGGGCGCGGTGCT  
ACGAAAAAGCCAAAAAGTGGAGCAACGGTGCAGGGAAGTTTCCGCTATGCAATAGTCACTGGTCCGCGCAGAGTATA  
CCCTGCACCAGACCTTACTAGCGGATGCAAGGCCATGAATTAATCAATACCCTTTCCTTACAGCAAAAGAAATACCTG  
ATTTTTCAGGCAATGTCAGTTACTCAGGAAGCGCATTTGGTTGTTATGGCGGCTCGTCTACTGATTTACCCGCTTGG  
CGGACTGGCGAATACGTGGCGCATTATGGGATGAAATGATTTCAACAAGGCTATCTGGGAGATACCCGCTTACGAT  
GAAAATGCCGCGGCTCATATTGTCATGTCGAGCAGGCTTTCCTGCTTATTTGGGAAAGATAGAGAAATAACAGGCA  
ATTACCCTCTTATGTTTCCCGGGCGCAATGATCCAAGAAAACAAATGAGCGAGGCCAGCATAAACCAAGTGTTTAAGCGC  
ATTGGCTACGCTGGAGTAACTGGTCAATGGTTCGCGCACACTATGAGTACGATTTTGCATGAGCAGGCTATAACAC  
CGCGTGGATAGAAACGAGCTCGCTCACGTTGATAAGAATCAATTCGTTGGCACATACAACCAATGCGCAATATCTGGATG  
GAAGGCGGAGATGCTTCAATGGTATGCCGACTATATGGATTCCTCGAGCATGGCGGAAATGTTGGTGCATATGGTGT  
GAAAAACACGCGATGA

>Cluster\_26635

ATGAAAAATCCCTATTACCCTACCGCATTGGGTTGATTTTAAATACCTGGTGCATGGTATGGGCGTCAATTTGATGAG  
CCTGAATATGGCTCGCTGGAGACGCTTTGGCAGACTAATGCCCGGGCGTCTCGATAGTTATCTCATCACTGGGCATTTG  
GTGATTAAGTGTCTTGGCTTTTGGCAGGATTTATCCGATCGCTTTGGTTCGCGCCCTTTTATCATGCTCGGGATGTGC  
TGCTATATGGCTTTCTTTTGGCATCCTGCACACCAATAACATCATTATCGCTTATGTTTGGCTTTTGGCGGGAAT  
GGCAACAGTTTTCTCGATGACGACCTATCCAGTTTGGATGGAAGCTTTCCACGCTCACCGGGTACAGCCAAATATTT  
TAATTAAGCATTGTTTCCAGCGGACAATTTTATTACCCTAATTAATCAGCCTGTTAGTGTGGGCTGAACGTGGTTC  
GGTTGGCTCTTATGATTGCCGAGGCATATGTTTATTAAACGCTGTTTTTATACCGTTGTACGTTCCACCCCATCC  
GGTCTGCTACTTACCTGTCTATAAAGAAAACCCAGCTCTACGGAACATCGCTGTTCAATATCGATTTAGCCAGTTATT  
CCCTATATGGCTATATCTCAATGGCAACGTTTTATCTGGTTAGCCAGTGGCTGGCACAATACGGCAAAATTTGTCGCTGGC  
ATGTCATACACCATGTCGATCAAAATACCTAGTATCTACACCTGGGTTTCGCTGCTGTGTGATTTATTAAGTCTCCACT  
CATTCGTAATACCGTTCCGCCAAACAACATTAATGATGCTGACAGCTTATCTCATTATCGCCCTGCTGCTGCTGCTG  
TGCAATCCACATTTTATGTTGGTATAATATTGCTTTCGTCATCGGTTTTACCCTCCGAGGCGGTTGTGACAAATGGC  
CTGAGCTTAAATGGCGGAACGTTTTCCCTACGCTAAAGGAAAAGCAACGGGATCTATTACAGTGGCGGAGCATTGCAAC  
ATTTACCATTCCGTTGATACGGCTCATCTTTCGCAAGAAGTATGCCGATAATTATGTTGGTTCGATACCGCCATCGCTG  
CTATCGGCTTTTACTGGCATGTTTATTGGCTTACCGAGTCCGAAAGAACCGGCGCATCACAGCTAAAGAAAATATC  
GCTCCGGTGGGTAA

>Cluster\_41364

ATGGAATATACGATAAAGACGCGAGTCTATCCCAAAAATCACAAGCCGTAATCAATCACATCAATGGTCCGACATTAGC  
TTATGTGAGATCAGTTACGCACAAACGTAATGAATTAAGGCGGAGAAATAAACGCCAATCATCAAGGCTAAACCACTGCA  
TACCACGCTTGGACAAAAGAAATGGCGTACAATGAGGCGAGCTTTGTTTACTCTGGATGTCGAATCAACTAGTGGT  
ATCCCTACTCTTTACCTTACAGCCGTTAAAGGAAACAACGCGAGAAATCAACAAGCGTTAAAGGCACTTACCAG  
ATGGTTGACTTCGAAAGGCAACTAGTGGTTTACGTCATGAGTGGGCTCAACACCGTCAACAGGCTGACAGCCGATGTA  
TAATCATGGTGAACGAAAGAAAGCATTAATGGGCAAGCAGGCAAAATGTCAGCAAAATGGGTAACACTGGCAAAACAA  
ATCCCATCAATGTTCTCCCGAGTGGATCTAGATTTGAAAGGTCAGCAATATCTAGAGCTACAGGTGTATAGGTA



ACAGATTGATTACATGGCAAACCCGAAACTAAGTTAAATGACTTTAATAGAGAGGCGAGCAAGACCTATATGATTGGT  
CAGATGCCAACGTTTGGGGTTATTCGAATGGCTGGGCGCGCATGAGATAAAAAAAGAAACACTTCTATCACGGCTTT  
CATGCTGTAAGACGCATACTAAAAGCCATTCAGGCATCAGGAAAGACAACACTACAAGTTAAGCGACAGATACAGCGCAC  
ATTGAAACGACAGACATAAATCGCTACCCAATCACCCGTTCCAAGCACCGTTAATTAGCAACACGATTTGGGATTTAT  
CAGTGAAACCGGTACCAAAGAGGCGAGAGCGAGCGAGGGAGTTACTATCCFCACAGACAATAAACFCGAAACAAAGTA  
CAAACCCACCGTGTAAAGGATGTTAAGAAAAGCAGGAGTACAGATCCAGAGCCAGAAGAGAAAGCGGAGGTTATGA  
CCATTACTACTAG

>Cluster\_37961

ATGAAAAGGAATTTATTATCTTCCGCTATTATAGTCGCCATCATGTCCCTCGGTCTGACGGGTTGTGATGATAAAAAAGC  
CGAAACAGAAACGCTCCCGCTGCCAATAGTCAACCTGCCGCACCAGCTCCTGAAGCGAAACCTACTGAAGCTCCCGTTG  
CAAAGCAGAAAGCTAAACCTGAAACACCTGCGCAACCGGTGGTCGATGAACAAGCGGTTTCGACGAAAAAATGGATGTC  
TATATCAAGTGTACAACAAGTTACAGATCCCGGTACAGCGCAGTCTGGCGGTTATGCTGACTGGCTGAAAGATTTTAA  
ACAGGGCCCTACCGGTGAAGAGCGTACTGTTTATGGCATCTACGGCATTAGTGAATCCAACCTCGCTGAGTGTGAAAAAG  
GCGTAAAAAGTGTGTGGCGTTAACGCCGCGCTGCAACCAATGATGGCGTGGCGGTGAGTTATATCGATGCTGCCGTG  
GCGTTGGGTAATACCATTAAAGAAATGGATAAATATTACACCCAGGAAAAATTAAGAAGACGATGCGTTTCGAAAGGGAA  
AACGCTGCACCAGACATCTTAAAAAATCTGGAAGCCTTTGAACCTGTAGCCGAATCTTATCATGCGGCGATTCAGGAAA  
TTAATGATAAGCGTACGCTTGGGAATTTGGAATAATTAAGAAAAGAGAAGGAAAAACATTCCACTACTCTCGTGGCA  
GTCATGATTTTCAGCGAAACAATTAATAACCTGATATCGCAAGATAAGTTGATGCGAAGCGGCAATGAAGAAAGTGT  
TGAACCTGGAACCGTACTGGCGCAGGCCAAAGAGCGGATAAAGCGGCGATGAATTTCTCGTTTATTAATTCGGCAGGCC  
AGTATCAACTCGAGGCTAAAAAATACGTTCCGCCATCAGAGATAAAGTCCCGTACTCTGACTGGGATAAAGAGCAACT  
CAGGACGCAAACTCAAGCTGGATGGTTCGAAGACTCTTTCCCGAGAGCATTACGCGAGTACAACGAAATGGTTGATGACTA  
TAATAGCTTCGCTTAA

>Cluster\_34008

ATGACGTTACCACCTAAGAGATTACTATCTTATTGAGCGCGCGCAAAGTTATTAGACTGCGATATTGATGATCTTATTCA  
TTGGGCTGTGACAGGCTGCATTCGATTTGTATAAAAAATTGAATCTGCATATGGAGTATTAATATCCAGATGAAAAAG  
ATGTTGGTTAATTTTCGATTGTCTGCGTAAGTTTATGGATTTCAGAACCATGTAATTCACGGTTATCTGACCTTGATGCCATT  
TCAGAAAGGGCGGCGAGAACCATTGGTTTAAATATATAAAAAACCAAGTCGAGAATTATATTTGATTCATGTGCGAATC  
TCTAAGCCATTCAATGTAGCGCCAAAATTTGGTGACATAGCAATTGACTGCAATTTGCTTTTGTAAATTTATATAACA  
GGGGGTTATATTATGGGGAAAATATCACATATATAGTGTATATCGAATAGCAACGGATGAAAGAGCTGTGGCAGTTGTA  
CCACCAGTATTTAAAGGTATTCAAGAAAAATACATAAGTATTTTGTGAAATAGGCGCATTTTCGCTTTGGGGGGAAG  
TTTTTTTGGCAACTATGATTTTAAATAAGAAGTTAAAGCCAACCGAATAATTAATAGCAATATATAAATTGCTTCTGACG  
TTGATATACATATAGGAGTAATTTGTTACTGAGGATGTTTCTTTTGTATATGGTGTATTTATATATCTTAAAGAAATGATTT  
TTAAAAATACAAAATGCTACAACTCCAATAGCGAGTTAAGAAAAGATTATGTTAGTCCATTGGCAGATACTTTATATTT  
GTGTGCGGGTAACAAATATATAAGTCTTCTGAGGATGGAGAGAAAGATATATGCACCAATAAAAACAATATAGAAGCATTAT  
CTAAAACAATGAAGGATTTTTTTCTGTCGATGCTTGTATTCTATAAAGAACTCGAAAACAATCCGGTAAAACCTTGGCT  
GATATATTGACCGCGGAAGCAAGAGAGGACTCAATATGCGCTTTGATATAAAGTACTATATAAAGATGGATTAAGGC  
ATCATCTCAGTAA

>Cluster\_41210

ATGAGGTTTTTATTGGGCGTGTGATGCTGATGATCTCCGGCTCAGCGTGGCGACCATCGACGTTGTCAGTTTAAAGA  
TGAAGCACAGGAACAACAGTTCCTGTCAGCTCACTGAAGAACTGCGCTGCCGAAATGCCAGAAACAACAGCATTGCCGATT  
CCAACCTCGATGATTTGCCACCGACTGCGCCAGAAAGTGTATGAACTGATGCGAGAAAGGCAAAAGTAAGAAAGAGATTGTC  
GATATATGTTGGCGGCTTACGGCAACTTCGCTCACTTACGATCCGCGGTTAACGCCGCTGACCGTGTCTGTGGGTGCT  
GCCAGTAGTGGCTATTGGCATTTGGCGTTGGGTCATATACGCCCTGCTCGCGGCTCGGGTACGCGTGGTGAACCGAAGCGT  
TTCCAGAACAAAGCGTGCAGGAAAGGTAAGCGTGCAGGATATGTTGTTTATCTGCCGGTATTGTTGGTGGCGTTAATTTGTG  
GCTGGCGTCACTACTACAGACTGGCAATATCAGCAGGTGAAAATCTGGCAGCAGGCCACGGCACAGGCTCCGGCGTT  
ACTGGACAGGGCGTGGATCCGAAAGCCGATCCGCTCAACGAAGAAGAGATGTCGCGCCTTGGCTGGGGATGCGTACTC  
AAGTCAGAAAAAATCCGGGAGATATAGAAGCTGGATTGTTGTTGGCGCGCTTTGGCATGGCGCTGGGTAAACCGCAGTATC  
GCCACCGATGCATACGCCACTGCGTATCGCCTCGATCCGAAAAACAGCGATGCTGACCTGGGATACGCTGAAGCGTTGAC  
ACGTTTCTGATCCCAACGACAACCGCTCGCGCGCAACTGCTGCGCCAGTTGGTGAAGACGGACCATAGCAATATCC  
GTGTGTTAAGCATGATGATTTAATGCTTTGAGCAGCAACGATTGGCGAAGCGGTTGCCGCTGGGAGATGATGTTG  
AAACTCTTACCTGCGCAACGATATCGCCCTGGCGTATCGAAGCTGATCGCCAGGCGATGCAACATTTGTCGCGCGCA  
GGAGAGTAAATAA

>Cluster\_33096

ATGAAAATAGCATTTTATCGGCGAAGCTGTTTCTGGATTTGGCGCATGGAACCGTCATTCGTGATGTTATTACTACCTT  
CAGGCAACACATATCTATAGTGAATGTTTTCTTTTTCTGTAATGATAAAAAAGGATGGCTGGAAGGTATTATTA  
AGTACTCGTGTTCATTTTCCAATATTCGCTTAGGTTTTTTCGCTCGGGCGAAACATATTCATGCTTTAAGCAAAATGGCTT  
CAAGATATCAGCCAGATGTTGTTATTTGATTTGACGTTATCTCGTGTGTTGATGCGGCCAAAGCACGTAATAAATCAGG  
AATTGATGTCCAGTATTTTCATGGCCGATTTTCTTTAGATCACAAAAACATGCTGAATATATCACCCTGTGCAGACT  
ATCATTTAGCCATCAGCTCTGGCATTAACAGCAAAATGATTAATCGGGGTGTACCAGAAATCGACGATAAATGTTATTTTT  
AATCCAGTCGAAGCTAAAGACACAGTCAATCTCGGCTGAGGAAAGTGAACGGCAACGTTTATTTATGTTGGGCGTAT  
GAAATTCGAGGGCCAGAAGAGGGTTAAAGACCTGCTTGTGTTTATCACAAAGCGAAGGTGACTGGAACCTCCATGTAC  
TGGGTGATGTTCTGATTTTGAATAATGCCAGGCATATGGTAGAAGTTGAAGATTGATAATCGAATTTGCTGGCATGGT  
TGGCAAAAACATCCATGGGAGGTAGTGCCTCAGGATATTAAGAAAGTCAAGTGCATGTTATTAACCTCATTTTTGAAGG  
TTTTCCAATGACCTTACTTTGAATCAATGTCATGGGGATTCGCTGATCAGTGCAGTGTGTCTCCGCTCCTGGTGACA  
TTATTTCAACCTGATGTCATTTGATCAACCGGAGATATTGCTGGTTTTGTTACTCTTTAAAATAAATATATA  
GCAGGTGAAATTCATATCGAACATGAAAAAATCTCGCTCGATGAGTTTATCAATCTAAGTATTATGATAGATT  
ACATAATATAAATTTCTGCTATTTCCCGGAGGAAATAA

>Cluster\_52282

ATGATAAATCGATTGATTCGCTGGTTTTATGCTTATTTGGCATGGTCCGCTGGGTTCCAGGCAACACCCAATGTGACGGC  
TGAATTTACTATGATTTGGCGTGGTGGGCTGATTATTACTTCTGGAACGAGGAAGAGTCCGCTGGGAATAATGCAT  
ATATGTTGGTATGAATGTTCTGACCCCAATCTCCAGCAACCTGTACGAATCTGGAAATATCTCGACAGTACAAATTTAT  
TTAACGGAGCAACCTAGTGGTATGCGCTGGCCACTTAAAGCTCAAAGGATTTAAAGAAGCTCATGTCATGAATCAGGTACC  
TGGGTGCGAAGGATATGTTGCAAAAACGCACCTTCGGGAATCTAATCGGTATAAATGCATGGCAACTGGTTCACCA  
TATATTTACTGTGATAAAAAAGTTTTCTTACCTTTACTTTGAAACAGCGCAGAAATGAAGAAGCTGCAAAATGGTGGTCTCG  
AAAGGGCAGGTTAAACTGCATTTCAATAGTCTCTCAGGACTATTTTGGGATATTACCTGAACACCTCGATCCCAA  
CCATATTGACGATTTCTTCCCGAGTTCCGCCAGCTACGCCAGGGTACAACCTGGATTGCAACCAACAGCGAGCGTGA  
ATGCCAGTAAATATGCGCAGGATCTGACAACTGGATGTTGCTGTACGAGGTTTTAACGGTAATGCCATCAGTTAT  
GAAATTTACTTAAAGATGAAGGGTACCCGCGCAGGGCGCAGAGATGGTTATTTTTCCATTTATCTCAGGGAAGAAC  
AACGACTGACGATGATAGCGTATCGATTACAGAGTAAAAATGATAAACCAGGAAACAGGTGGGCAATCGACGTACGCA

ATAATGAAAAATATGGTCTGGAACAGCATCAACCTGAAGCGAGTTCGTCGGTGGTATTGCCGGCATTTCGTTACGCCGTA  
ATGTGTGTGCTTACGCCACTAACCTGGCGGTCGATAAATTCAGCGTGTATGGATAAACAGGCGGGATATTACATGGGTAA  
ATTGTCGGTCATTTTACCCCGTCATTGCCGACGATCAATTAG  
>Cluster\_27995  
ATGAAGCTGGTTGAACACTACATCATGCGTGGTACGCGCGCTTGGTGTGATTATCGTCGGTTTTCTGATCTTTATTTT  
CGCCAGCTACTCCGCACAGCGTTATCTGACCGAAGCGGCAATGGGACATTAGCTCTTGTATGTTGTGCTGGATATCGTTT  
TCTACAAAGTGTGATTGCACTGGAGATGCTGTACCTGTTGGACTATATGCTTCAGTTGGCGTGACGCTAGGGCAAATG  
TATACCGACTCGGAAATACCGCTATCTCCGCGCGGGGGCAGTCCGGGACGTTTGTACAAAGCCGTTCTTTATCTGGC  
GATACCGCTAAGTATTTTGTACCCTTCTGTCGATGATGGTCCCTGGGCTTATGCGCAGATTTATCAACTGGAGC  
AACAAATCGCAGTCGGAGCTGGATGTTCTGTCAGTTGCGGGCAAAGAAATTAACACTAACGATAACGGACGAATGATTC  
TCCGACAGCGTTGATCAGGATAAATAATCGCTGACTGACGCGCTGATTATACTTCTACTGCCAATCGAACCCGCTTTT  
CCGCGCCCGTTGGTGTGATGTTGGTTGACCCATCCTCCAGAAACCGGACCGTTATGTTGCATAACGGTACCGCTATCTT  
TCCGATCATCAGGGCGTGCAGCAACGAACAGATCTACCGTAATCTGCAATTGCATCTGAATCGGATCAACAGCCCT  
AACGTCAAACGCAAAGCAAATCGGTCACGGAGCTGGCGCGCTCCGCTTTCCAGCCGATCATGCCAAGTCAATGGCG  
ACAAAGCCGTTGGCTGACAGCATGTTGATGGCGCTGCTGGCCATTTCATTAAGTCGGTAAAACCGCGCAGGGCGCAT  
TTTCAACGCTACTGCCACTGACGTTGCTGTTGTTGCCATTTTATGGCGCGCAGCTCTGTCGTACGCTGGTGGCTAAC  
GGTGGCATTCCTCCCTCATTCTGGTTGTGGTTAGTACCCGGACTCATGTATAATGGGCCCTGCTGATGCTGGTCCGACGCA  
CTTCTCTTTGCTGCAGAAATTTTCCGATGA  
>Cluster\_28046  
GTGAACAAAATAGAACAAGCTGTAATTTATAACAAAATATTAGGTTCTTTAGCTTCCGCGAGTATGGCGGATGCATTAGG  
CGCAGCGACTGAACCTTACAGCATTTGATGAAATAAAAGCTCAATGGGGAGGTTTTTTAAATGCCTTTGTTCTCTCCTCCTG  
CCGATACATTCGCTGGCTCATTAATATGGTATTGCGGGACTTATCACCGACGATTCAGCCAAATGTATGTTTTCAGAA  
GGGTTAAATGAGGCTGGATTTGATAACTTCACCAATAATGACTGGTTAGCTTGTCTTCCGTTGGGCGGATATGCAGCC  
CTACGCAAAATATAAAGGCCCAACAGCAAAATCGTCAAGGCACATAAAGAAGGTAGACCAACAAACACCATTTGGCG  
GTATTGGAACATCTTCTCGTCAGGCACCAATGTCGGCACCAAGTGGCGCAGGAATGCGTGTAGCCCGGCAGGATTG  
ATCTGGCCAGGCAAGAAAGAAAAGCGTGTACCTGGCCGTAATAACTTGCCTACCTTGCATGACACCAATATTGCGAT  
TGCCAGCGCTTGGCCATCGCTGCGCGACATACAAGCTATGTTACCAGAAGCTTCCGCTCACATCTACTGGACGCCG  
CAATCTGGGGAGCCAAATTCAGCGCAACGCTGCGCAAACTATGCACGATGTTGTCAGGGCCATCTATCGCCATGGCG  
ATCCAACCTGCAGCGGACATCGCCAGACGCAATGACCTGGAGTCTTGTCTGCGAGAAATGGAAGGTTGGTTGGTAA  
CTCTGTTGCCGCCATGAATCCATTCCTGCGGCAATCGTCTATGCTGTACTGCAAAGGAGAACCCTGGGAAACCATTC  
ATGCCCTGCCCAATATTGGCAATGACACCGATAGCATCGCTACGATGGCAGGCGCAATTCAGGGACATGGCGCGGTTTT  
GATCGCTCCCTGAAGATAAATAATGCTTTTCCGCGCGTAATAATAAAGATTTTCGATATTGAAGCGATCCGATCGGG  
TCTGACATTGCTTGCATTACAGGCACAGGAGAAATA  
>Cluster\_8478  
ATGGAATCGCTCTCAGAAGAACACAGCAGGCTACCAGCAAATCCAGCAGGTAATTATTCATCTGGTCGATAGCCCGG  
GACGGAAACGTTACGTAGCGTTAACCGGTAATGACCGGACGTTACCAGGAAATGGCCGACGAATTTGCAATTTGAAC  
AAGGTGGCGAGGCCAGGCTGCGTATGGTGGCAGCTAATCAAGCGACTATCAAAGGATTTATGCTAAGGATAAAGCGT  
GGGTTCTCTGCAAAAATACGCCAAATGAGGCTTTTTTACCTTTTTTCAACATGTTGAAATTCGCCAGCAATGTC  
TGGCAATTAACACCATTGCCAGTCCACCTACGTCCTTTACTTTCCGTTAAAAACGCTGACGCCCGCAGCTTTTATG  
AAAAAGAGACGCTCCGCTTGGCTGGTCTGTTCCGAGCTAGAGCGGCAAAATTCGACCCAGTTTATGAGCGGACACTA  
CTGTCACATGACAATACGCCATGCTGCAACAACAGCTCCTGCGGAGACGATATTCCTCCGCAACAGGCGATACGCGA  
TCCCTTTGTGCTCGAATTTCTGGAATGAAAGATGAATATTCAGAATCCGATTTTGGAGAGGCGCTGATCAACCCACTGA  
TGGATTTTCATGCTGGAACCTGGGGATGATTTTGCCTTTGTTGGTGGCAGCGAAGGTTACGCATGATGACAACTGGTTT  
CGTGTGATCTGCTGTTTTTCCACCGCGTTTACGCTGCCTGCTAATCGTCGATCTAAAAGTGGGCAAAATCAGCTATAG  
CGATGCCGACAGATGAATATGATCTCAACTACGCCAAAGAGCACTGGACGCTACCGGATGAAAATCCGCCATCGGT  
TGGTTCTCTGTGCAGAGAAAGGAGCCGGAGAGCGCATATGCTCTGGCAGGTTTGCCTAACACCGGTTCTGGCAAGCGAA  
TATAAGATGCAACTACCTGATGAAAACGACTCGCAGATGAACTCGTTTCAACACAGGCGGTGCTAGAGGAAGGCTATAG  
ACGCCGTTAA  
>Cluster\_43176  
ATGAGCCTGGAAAGCGAAGAAAAGACCAACAGAAAAGCTGATCACCATGCGTGACGTGGCGAATGCTGCCGGGGT  
GAGTATTTCTACCGTTTCCGCTATCCTGGATGAAAGATTACCGCCATCTAAAAGCGCTTCTGCCGAAAAGTACGCCAGG  
TCGCACCGAATTTGGCTATCGTCGGGATTTATGTTGCCCTCAGTCTCCGTCGCGGGCGCACCGGGACACTTGGTGTATTA  
GTTCCACGCTGACTGATGCAGTTACTGCAATGTTGTTGAAAGAAATCGCTAAAAGCAGCGTCGATCGTGGTTACTTCCG  
AGTGGTCGCGACTTGTGGAGCAGTCCCAGCAAGAGCAGAACTCTGTAGAATCACTTCTCGACAGGCGGTCGACGGCT  
TGATTTATGTCACCTGCTCCGCTCGGCAATCCCCACCGCAACTTTGCGTGAAGGGATATTCCCATGCTCGCCCTG  
CGTACTGATGGTGTAGCCCATCATCAATCGGCGATGATGAACGGGTGGTTACCTTGTACTCGCCATCTTATGATTT  
AGGACATAAAAACATCGGTTTGTAGGTTGGCCGGATTTTGCCTCAAAATGCGCTTAAATCGCCGTAAGGTTTTGAAAAGG  
CAATGCGCAAGCCGACTAATACAGCCGCAATGGTGTCTGTCATCAGACTTTAACAATCCAGTCGGGAGAAAGCA  
GGGATGAAACTCTCAGAACGACTCCTGCTCCAACCGTATTTTGGCGTAAATGACGAAATAGCGATTTGGTGTGGTGC  
TGCCGCTCACATTTGGGGATAACAATCGGCCAAGAGTTGTCGTTAGTGGGTTATAACGACATTCCTCTGGTACGCCGAC  
TTCCTGTGGCGCTCACTTCCGTAAGAAGCCGCTAGAGCATATCGCCAGTAATGCTGTGGACATGTTGATTAATGCCGAC  
AGTGGCCGCTTTTGGCTACAACCATACCGACTTAAATACCAAGAAAATCAACGAGTTACCCAAAGTAA  
>Cluster\_38883  
ATGATAAACTTTGCAATATCACAAAGTGTTCACCAGGGCACCCGACCATCCAGGCGTTGAACAATGTCAGCCTGCA  
TGTGCCAGCTGGACAAATTTATGGCGTTATCGGTGCCCTCTGGCGCGGGTAAGAGTACGCTTATACGTTGTGCTCAACCTGC  
TGGAGCGCCCAACCGAGGTTAGCGTGTCTGGTTCGATGGCCAGGAACTGACCCAGCTGTCAGAATCCGAGTTGACCAAGCT  
CGTCGCCAGATTGGTATGATTTTCCAGCATTTTAACTGCTCTTCTCGGCTACTGTTTTTGGCAACGTGGCTCTGCCGCT  
GGAGCTGGACAACACACCGAAAGACGAGATCAAACGCTCCGCTGACGGAATGCTGTGATGTTGGTCTGGGCTGGCGATAAGC  
ATGATAGCTACCGTCAATCTTTCCGGTGGGCAAGAACGCTGTGGCGATTGCCCGTGCATTAGCCAGCAATCCCAA  
GTATTGCTGTGATGATGAAAGCCACCGCGCTGGACCCGCAACGACACGCTTCTATTCTGAACTGCTGAAAGCAATTA  
CCGCCGCTGGGTTTACGATTTCTGTTGATCACCCAGAAATGGACGTTGTGAAGCGCATTTGTGATTTGGTGGCGGTTA  
TCAGTAATGGCGAATCTGAGCAGGACACGGTAAGTGAAGTGTCTCGCATCCGAAACCGCGCTGGCGCAGAAAGTTT  
ATTCAGTCGACCTGATCTGGATATCCCGAAGATTACCAGGAAGCTTCAAGCGGAGCCATTTATGACTGCGTGGC  
GATGCTGGCTGTGGATTTACCGGTTAATCGGTCGATGCCACTGCTTTCTGAAAACCGCGCTGTTTTCAACGTCAACA  
ACAACATTTATAGCGCGCAGATGGATTACGCCGTTGGCTTAAAGTTCGGCATCATGCTGACTGAAATGCACGGCACACAA  
CAAGATACGCAAGCCGCTATGCTGGCTGACGGAACACCATGTAAGAAGTAGAGGTTACGGGTTATGCTGTA  
>Cluster\_17163  
ATGGTGAATTTCTGTAACAGGCGGTGACGAGATATATTGGATCCCATACCATACTTGAATTAATAATGGTCATGATGT  
CGTTTCGATAGATAATTTTGTCAATTCCTCTATAGAATCATTAAGAAGAGTAGAGCAATAACTAATAAGAAAATTTATTT

CTTATCAAGTGATATCCGTGATAAAAAATCTACTTGTAGAGATTTTTTCAAGACACCATATCGATGCTGTAATTCACTTT  
GCATCGTTAAAAATCTGTAGGTGAGTCTAAGTTAAAGCCCTTAGAGTATATTCTAATAATGTTGGTGGAACTTTAGTATT  
ACTTGAATGCATGAAGAGATATAACATTAATAAAATGATATTTAGCTCTTCTGCTACTGTTTATGGAATAACAGTATCC  
CTCCCATACGGAAAGATAGACGAATTTGGTGAACACTCAAAACCCATATGGGACATCGAAATTTAATAAGAAAATAATTTTG  
AGTGATATTTGTGATAGTATAATAAATAAATCAGTAATTCAGTACGCTGCTTACTTTAATCAATCGGACATAAGCTCCGG  
GATGATTGGTGA AAAATCCTAACGGGATTCTTAATAATCTGGTTCTTATATCTAAAAGTTGCACAAAATCAACTTCCTG  
TATTAAATATTTATGGCAACGATATCCAACTAAAGATGGTACAGGAGTAAGAGACTATATACATGCTGTGATTTGGCT  
AAAGGGCATGTTAAAGCATTAGAATATATGTTTTTAAATGATGTCATTTATGAAGCTTTAATTTAGGCACTGGTCAAGG  
TTATTTCTGTTTTAGAGATTTGTA AAAATGTTTGGATAGTACACTAAAAGAGTATACCTGTTGCTATTTGTAATAGACGTTG  
AGGGGGATGTTGCGGAGTATGGGCGTCTGCTGATTTAGCACATAAAAAGCTTTCTGGAAGCGGAAAAAAAATTGAAA  
GAAATGATCGAAGATGTATGGCGTTGGCAACAACAATCCAAATGGATATAAAAAATAA

>Cluster\_47386

ATGGCGCAGATAACGACGACCGATGCCAATGAATTTAGCAGCAGTGTGAATTCACCCCTATGCGCGGCTTTAGCAATTG  
TCATCTACAAACTATGCTGCCGCTTTGTTTCGTCGTGAGGTGAAATTCACCCGCTACTGGCAGCGGCTGGAGTTGCCCG  
ACGGCGATTTTGTGATCTCGCGTGGAGTGAAGACCCCGCACAGGCGAAACATAAACCGGCTTAGTGGTGTTCACGGG  
CTGGAAGGCAGTCTCAATAGCCCTTACGCCACGGTCTGGTTAGGGCGGCGAAAAGCGCGGCTGGCTGGGCGTGGTGAT  
GCATTTTCCGCGGATCGCGGTGAACCAACCGTATGCACCCGCTTTTACCATTTCGGGCGAAACCGAAGACGCCAGTTGGT  
TTTTACGCTGGCTGCAACCGCAATTTGGTCAATGCGCAACCGCTGCCGCTGGCTATTCGCTCGCGGTAATATGCTGGCC  
TGTTTGTGCGAAAGGAAGGCAATGATCTCCCGGTTGATGCGGCGGTTGATGCTCTGCGCGGTTTATGCTGGAAGCCTG  
TAGCTATCATATGAAAAGGGCTTTTCCGCGTTTATCAGCGTTACTTGTGTAACCTGTTAAAAGCCAATGCCCGCGCA  
AGCTGGCAGCCTACCCCGGAACGCTGCCGATTAATCTCGCGCAGTTAAAATCGGTACGCTCCGTAATTTGACGAT  
CTCATACCGCCAGAATTCACGGCTACGCCGACGCTATCGACTATTATCGTCAGTGTAGCGCCATGCCGATGCTGAACCG  
GATCGCCAAACCGACGCTGATTTACGCCAAAGACGATCCGTTTATGGATCATCAGGTGATCCCGAAACCGGAAAGTC  
TCCCGCGAGGTGGAGTATCAACTGACTGAACATGGCGGTATGTTGGCTTTATTTGGCGGTACATTACTTCATCCGCAA  
ATGTGGCTGGAGTACGCAATTCCTGACTGGTTAAACAACGATATCTGGAGCGAAATCATGTTGA

>Cluster\_26124

ATGAAAAAATGGTCACGCCACCTGCTCGCGGGGGTGTCTGGCACTGGGCGATGAGCGCCGCTCACGCCGATGACAACAA  
ACGCTGTATTTCTACAACTGGACCGAGTACTGCCCGCAGGACTGCTTGAACAGTTTACCAAAGAAACCGGTTAAGG  
TTATCTATTCGACTTACGAGTGAACGAAACATGTACGCGAAGCTGAAAACGTACAAAGACGGTGCCTATGACCTGGTG  
GTTCTTCAACCTATTACGTCGATAAAAATGCGTAAAGAAAGGATGATCAGAAAGTACGACAAGTCAAGTAAAGCAATTT  
CAGCAACCTCGATCCAGCATGCTCAACAAGCCGTTTACCCGAAATAACGACTATCCATTCGGTATATCTGGGGTGCAA  
CGCGATTGGCGTTAACCGTGTGCGGTGATCGGATCGAAATCTGTACCAGCTGGCCGATCTGTGGAAGCCTGAGTACAAA  
GGCAGCCTGCTGCTGACCGACGATGCCCGTGAAGTGTCCAGATGGCGCTGCGTAAGCTGGGCTACTCCGGTAACACCAC  
CGATCCGAAAGAGATTGAAGCTGCATACACGAGCTGAAAAGCTGATGCCAAACGCTCGCGCGGTTTAACTCCGATAACC  
CCGCTAACCCGATATGGAAGGCGAAGTTAACCTCGGCATGATCTGGAACGGTCTGCTTTGCTTGCACCGCAGGCGGGT  
ACGCCAATTTGATTTGGTGGCCGAAAGAAAGGCGCAATTTTCTGGATGGACAGCTGGCGGATCCCGCAATGGCAAAA  
CAAAGAAGGCGCGTGAATTTGATTAACCTTCTGCTGCGCCCGGATGTGGCAAAAAGGTTGCTGAACTATCGGTTATC  
CAACGCCAAACCTTGGCGCGCTAAGCTGTTAAGTCCGGAAGTGGCGAAGCATAAAACGCTCTACCCGGATGCTGAAACC  
ATTA AAAATGGTGAATGGCAGAAATGACGTTGGCGCAGCAGCAGCATTATGAAGAGTATTATCAGAAGCTGAAAGCAGG  
ACGTTAA

>Cluster\_58192

ATGACTCAGAAAAATTTCTGTTGAACCTGCGCAACCTGCTACTAAACGATTTGGCAGTAATACGGTAATCGACAATATCAACCT  
CACCATCCCGCAGGGGCAAAATGGTGAAGCTGCTCGGCCGCTCCGGCTGCGGCAAAAACCTATTTTGGCCTGGTTGCCG  
GGCTGGA AAAACCGAGCGAAGGGCAAAATTTTCAATTGATGGCGAAGACGTCACCCATCGCTCTATTCAGCAGCGGATATC  
TGTATGGTGTTCAGTCCATGACCTGTTCGCGATATGTCGCTGGGAGAGAAATGTCGGTTATGGCCTGAAAATGCTCGG  
CGTACC CGCGCAGAGCTGAAAGCCCGCTCAAAAGAGGCGTTGGCGATGGTGGATCTGGAAGGATTCGAAGACCCGCTTTG  
TCGATCAGATCTCCGCGGGCAGCAGCAGCGCGTGGCGCTGGCCCGCGCTGATCCTCAAGCCGAAAGTGTCTGTTT  
GATGAGCCGTTGAGTAACTCGACGCCAACCTGCGTCGCGCAGTATGCGGCAAGATCCCGGAGTTGCAAAAAGCAGTTTGA  
TATCACCTCGCTTACGTCACCCAGCATCAGAGCGAAGCCTTTGCGGTTTCTGATACTGTGCTGGTGAACAAAGGGAC  
ACATCATGCAATCGGCTCACCGCAGGATCTTTACCGCCAGCCCGCTCCCGCTTTATGGCGAGCTTTATGGGCGATGCC  
AACCTGTTCCCGCAACCTTCAGCGCAGGATACGTTGATATCTACGGCTATCATCTGCGCGCCCGCTGCATCTTGGTGA  
ACAGGGTGAAGGATGGTGGTGTGCGCCCGAAGCGATCAGCTCAGCGATCGCGGCAAGAGAGCCAGCGCTGCGTGA  
TCCGCCATGTCGCTATATGGGGCCGAGTATGAAGTGAAGTGGCAATGGCACGGGCAAGAGATATTTATGCAAGTCAAC  
GCTACCGCTTGCACCCGACGCTCGCGGAGCAGTATTAATCTTGAATCCATCCGTACGGCATGTTGTTCTGGCGGATGC  
GGCATAA

>Cluster\_42674

ATGATGAACAGCACAATAAACTTAGTGTTATTTATCCGTTATATAATGCGGGCGATGATTTCCGCACTTGTATGGAATC  
TTTAAATTACGCAAACTGGACTGCTCTGAAAATCATTATTTAACGATGGTTCAACGATAAATCTGTTGAAATGACAA  
AGCATTACGCAAGAACTATCCGCACTGCTGTTTGGTTGATCAGCGCAATGCTGGCGCATCGTTGGCGGTAATCGTGGG  
ATCGAGGTGGCGAGGGGCAAAATATGTCGCTTTTGTGATGCTGACGATGAGGTCTATCCACCATGTAGCAAAAGCTGAT  
GACCATGGCGTTAGAGGATGACCTCGACGTTGGCGCAGTGAACGCTGATTTGGTGTTTTCTGTAACCGGTTGAAACCTGGC  
AATCCATCCCGCAGGCTTTCGCTCAACCGGTGATTAACCGGTCGCGACTGGCTGCGGATGGGACTTTCTTCCCGC  
CGTTGGACACACGTTGCTGATGGGGTTTATCGCGCGATGTTATTTGTTAAAATAACATTAATTTATTTGCGGAT  
ACATCATCAGGATATGCTGGAACAACGAAATTTATGTTTAAACGCGCTGCGTGGCGATATACCGAGCAATCATATATA  
AATATTTATCTGATAATACGTCAGTGAAGTGAACAGCAAGGAAACAAAACCTTAATTTATCAACGCTCACTATAT  
AAGATTTCCCGCTGCTGGAGAAATTAATCGAAATTTAGCCGCAAAAATACGATTTATCCGGAATTTTCATCAGCAAA  
AATTTACGAAGCATTTGCGTGTGTTGCCATGCGGTGCGCAAAAGAGCCGATATTTACCCGCAACGGATGATTTGCCGAGA  
TATTTACTTCCCGTATGATAAGCGCTGATTAACAATGTCGCGAGCTGAAGGTGGGTTACCGGCTTACTGTGGTCT  
TTCCGCTTATGGCAATGGCGGCAAAAACCGGTCGCACCATCGCATTACCGGTAGCGCTTTAATTTGCGCTAG

>Cluster\_45862

ATGGTTTTAATAAAAAGAAATGCTTTATCGGCTTCAATTGCAACAGTCTTTTATAGGCTCAACAGGAGCCTTTGCGGCAAA  
CGATCGCGGCTTTTACCTCCGACACTGACTGGTCAAGAAACAAGCGGGCTTTAATGGACATGTTGGTACTACATTTGAAAT  
ATGAGACAAAAGCACTGATAACTATTTAGGTAAAACGATAAAGGAATATACTAAAACACAGAGATTTTCCAGGCCTAT  
TTACGCAACTAATTTGGCAATTTGCGCAATCTATGGCCTTAAAGTCTATCGATCGCCGACAAAGAAAGGCAATCA  
CGAAAATGAAACAAGTCTGCAAACTATATATCACTAAAACAAACGTTCACTATTTGGTAAAGGTTTCCGACTTCACTCTGG  
TATACGCACTGATGATAACCGAGCAAAATATAGATAGCCCTTATGTTACAGGCTTGCATACTGTAACCTGTTGACACAGT  
TTTCCCGCTTACCTGACTTAACTTAACTGACTGGAACGAGGTTTTTATTTCAACGTTGAAATTAATTAACAGCTGAAA  
TGATAAGAGCTCCTGGGGCTACCGGAAGAAAGGTTCAAAGTATACTATTTACGCCCTATAAACGTTTGGTGCATGGG  
AGTTTGGTATTGAAATTTTCTACGAAAAAGCATAACGATGAATTTAATCACGGTAAAATAAATGATCGTAGTATTTAT

ACCGAACTTACTACGAGCCAATTATCAAAATATGCTTTTGAAAACGCGAGTAATCTGTATCTACGCACCCCGCTTCGGACA  
CGGAAAAACAGAAAACGCGAGATAGTTTGAACAATAAGCAAAACAGAACCTATTTCAAAAACAATTCGAAAAGCCACTCTAG  
GTTATGAACAAAACATAGGTGACGACTGGATAGCCAAGATTGAATATAAACATGCCTGGGAAAAAGAGCACAAAACCTTT  
TATGATCCAAGAGATGAAGAAAAATATAATGTGCTCAATCAGGATAATATTTATGTTTCATGCTTTCTATCGCTTTTGA

>Cluster\_28627

ATGATCGTTGCTTTTTGTTTATATAAAATATTTTCCCTTTGGCGGTTTGCAGCGGATTTATGCGTATGCTCAGACAGT  
CGCCGCCCGAGGTTCATCATGTTCCGGTTTATACCCAGTCTGGGAAAGCGAATGCCCTGATGATTTGAACTGATCAAAG  
TGCCGGTTAAATCGCATACCAATCACGGGCGCAATGCGGAGTATTTGCTGGGTGCAAAAACATTTACGCGAACATCCC  
GTCGATAAAGTCTGTTGGATTCAACAAAATGCCGGGGCTGGACGTTTATGTCGCTGATGTTGCTATGCGGAAAGT  
AGCGCAGGAAAAAGGCTTTTCTATCGCTGACGTACGTTATCGCCATTATGCGCCCTTTGAGCGGGCAACCTTCGAAC  
AGGGTAAGCCGACACAGTGTGCTGATGCTGACAGATAAGCAAATCGCCGATTTCCAGAAACATTATCAGACTGAAGCGGAG  
CGTTTTATATTCGACCCGGGATTTACCTGATCGTAAATATAGCCAGCAGCCAGCAATAGCCGTGAAATCTTCCG  
TAAGAAGAAATGGAATAACCGAACAACAATATTTATGTTGGAGTCCGTTTCAGACTTCACGCGTAAAGGTGTCGATCGTT  
CCATTGAAGCACTGCTTACATTACCGGATTCGCTGCGCCACAACATGCTATATGTTGTTGGGAGGATAAACCGCGA  
AAATTTGAGGCGCTGGCAGAAAAACGCGCGCTGCGCAGTAATGTTTCTTCTCGGGCGCAACGATGCTCAGGAATT  
AATGGCGGCGGATTTATACCTGCTGCTTACCAGGAAGCGGGGAAATGTTGCTGCTGGAAGCGATTACTGACAG  
GATTACCGTACTAACAACAGCCGTTTGGCTATGCGCTTATGTTGCTGAGGCAATGCGCGGAGGCTTTCGCTGAG  
CCATTCCGCCAGGAAACATTGAATGAGATTTTACGCAAAGCGTTAACGCAATCTTCTGCGCCAGGCTGGGCGAAAA  
TGCGCGACATTATGCTGATACACAAGATTTATACAGTCTGCCAGAAAAAGCGGGATATCATACGGGTGGTCTGGATG  
GTTGA

>Cluster\_39843

ATGACCATTAACTTCCGCGTAAACGATTCGAGTTGAGCGTGGCTGCGCTGTTTTCTTCTGCTTTTATGGCTAACGCCG  
TGATGTGCCGAGGTCAAAGTGACCGTGCAGGATAAGCAGTGCAGAACCCGATGACCATTACGGTTAACGCCGGGAAAAAC  
AGTTTCAATTTATCAGAACCACAGCCAGGAGCGTGGAGATCTCAAAGGCGTATGGTGGAGTGAAGCGGAA  
AATATCGCCCTGGTTTTAGCCAGAAAAAGCAGCGCAATTTACAGCTTGGCAATACGAAATGACCTGCGGTCTGCTGAC  
TAACCCGAAAGGGAAGTTGATCGTCAAAGGTGAAGCAACGCGGATGCGGCGCAAGTATGCGCTGTTAAGTCTGGTG  
GGCAATTTACTGCATATAAAGCGTATGTCATGGCGAAACCGCAGCTGGTGCAGCACCAAAAGCCTTTACCGACGCG  
ATTTAAAGCAGGCGATATCGAAAAAGCAGCACTGTATGCGCGCAGCGCAGCACTATGAGCGTGAAGCGGATTCG  
TGAAGTGTCTCCGATCTGGATGGCAGCATTGACGCGCTGAAGATGATTACGAGCAAAAAGCGCGGATCCGAAATTC  
CCGTTTTCCACCGTCTGGAAAAAGCATTGTTTGGCGATAACACCAAAAGGAATGGATAAGTATGCTGACCGCTTTAT  
AGCGATGTGGTTCGATTTGCAAAAACGCAATCAGTGAACCTGGCTTCCCTCCTCAAAGTGGTGGCGGTCAGCGGACT  
GATTGAGGAAGTGGCAGCCAGCAAAATCAGCGGTGAAGAAATCGCTACAGCCACACCGATCTGTGGGATTTCCAGGCTA  
ACGTTGAAGGCTCGCAGAAAATGTCGATCTGCTGCGTCCACAACACAAAAGCGAAATCCGGAATGTTGGCAAAAGTC  
GATGCCAATTTCAAAGGTCGATACCATTTCTGGCGAAATACCGTACTAAAGCGGTTTTGAAAATTACGACAAACTGAC  
CGATGCTGACCGTAAATGCACTGAAAGGACCGATTACTGCGCTGGCGGAAGATCTGGCGCAACTTCCGGTGTGCTGGGC  
TGGACTAA

>Cluster\_23208

ATGAAAATAAGATATGCCGCTATTTTTCTGGCATTACCGCTGTTATGCACAACAGCGCAGGCAAAACGTTTTCTCATTA  
TGCTGGGGAGTTTAACTTCCGAGCGGAGAAAAGCAGAAACAATGTCACAATCGCGGGGCTATCAGCCATCACATTTGATG  
CAAAAAAATAATTTTTCTATGCTATTAACGATAGCAGAAACAATAATAAAGAGGAGATGCCAGTCTTTATACACTAAAA  
ATACAGGTATCATCCAGGGGATGAGCAAGTGAATTTTCTCAACAGCGTCCACTGCTTGATGCAAAACAGCAACCTTT  
CGTGACCAATACGGTGGATGCGCAAGGCTGCGCCCTGACACCAATGGTAAATCATTACTCTGGAGTTCCGGAGTTAGGTG  
CTCCACTCGCTGACGACTCTGATGGCGTAAAGGAAAGATTTACGCTCTTTATTTCTGCTCGTTTATTAATGATG  
TCTGACAAAAGAGAGCAGCAATGGTATTCGACGCGGCAACGCTGGGAGGGCTGACAGTTACACCAGATGAAAAATCACT  
TTTTATCGCGTTGAAAGCAGCTTAAACAGGATGGGCTATTGCAAGTCCAAATAAATTCAGGCACATCACGCTTACTGC  
AATTTTTCTATAGATGCAGCGGTCGACCTTCAAAGCAATTGCAATGATATCTCTATATTAATGATCTGTTCCGCAAGTG  
AGTAAGTTCCGGTATTAATGATAATGGCGTATCCGAGGCTTGGCGTGAATGATCACCAAATGTTGGTATCGAACGTT  
CGGCAGAAACGTCAGTGTGGTTCAATGACTGGGATTTACTCTGTCAGAGTTTATATGGTTCGATTTAACTGCTGCCAGCG  
ATATCAAGAAATATGACAGTCTGCAAGATGGTCCAATAAATCCACGTTACAACCCGTCAGTAAAAAATTAATTAATGAT  
TTTTGCTGATTACACTTCCCTGCGGATTTGATTTGAAGGGGTAACCTTCCGTCCTGATTTGATGGGCATACATCGTTAAT  
ATTTGATCTGATAATAAATTTCCAGCCCATCAACAGAGCAAAATTTTATCTATTCATTGATAAGGAAAAACAACTTAAAA  
TTTTAA

>Cluster\_61501

ATGATCGTGGCGTTTGTATATAAAATATTTCCATTTGGTGGGCTTCAACGTGACTTTATGCGCATTCATCAACAGT  
TGCCGCACGGGGCCACCATGTTCCGGTATATACACAGTCTGGGAAAGCGGATTTGCCGAAAGCATTGAGCTTATTCAGG  
TGCCAGTTAAGTCCCATACCAACCATGGACGCAATGCAGAATAATATGCTGGGTACAAAATCATCTCAAAGAGCATCCC  
GCAGATCGCGTTGTTGGGTTAATAAAGATGCCCTGGCTGGATGTTTATTTGCGCTGATGTTTGTACGCGGAGAAAGT  
TGCGCAAGAAAAAGGTTTTTATATCGTTAACATCACGATATCGCCATATGCGGCAATTTGAGCGGCGACTTTCGAGC  
AGGGTAAATCGACGAAACTTATGATGCTGACCGATAAGCAAAATCGCCGATTTCCAGAAGCATTATCAAACCTGAACTGAA  
CGTTTTCAAATTCCTCCCGGATTTATCAGGACAGAAAAACAGTGAAGCAATCCCAAACAGCCGTGAAATTTATCG  
CCAGAAAAATGGCATAAAAGAGCAACAAAACCTTACTGACAGTTGGATCAGATTTTGGCCGTAAAGGTGATAGTCCGT  
CAATTTGAAGCTTTGGCATCGTTACCGGAATCATTCGTCACAATACGCTTTTATTTGTTGTTGGTCAGGATAAGCCGCGA  
AAATTTGAAGCGTGGCAGAAAAACTCGCGCTGCGGAGCAATGTGCAATTTCTTCCGGTTCGCAATGATGTGTCAGAATT  
AATGGCAGCGCTGATTTTACTGCACTCCGCTTATCAGGAAGCCGCGGATTCGTTCTTCTAGAAGCGATCAGTGTG  
GTTACTCTGTTTAAACAACAGCGGATGTTGGGTACGCGCATTATTTGCGGATGCCAAATTTGGAAGCGGTCATCGCTGAA  
CCTTTCTCAGGAAACAATAAATGAAGTTTACGTAAGCGTTAACTCAGTCAGCCGATGCGCAATGCGGATGGCCTGGCGGAGAA  
TGCTCGCCATTATGCCGATACTCAGGATTTGATAGCTTGGCAGAAAAAGCGCGGATATCATACAGGTGGTTTAGATG  
GTTGA

>Cluster\_8815

ATGGATTTACTGATTATTTTACCTATGTTGCTTTTGCATGGGCAATGTTTAAAGATCTCAAATTTCCGTAATAAATG  
GACCATTTCCACAGCGGCCCTGGGTGGAATATTTATGTCAGCGGTCTAATTCGTTAATGAACTATAACCATCCGATATA  
CCTTTAAAGCGCAAAAAGCGGTTATTTCTATTCCTGTTTCTCCACAGGTGACTGGTGTGGTGAATGAAAGTACGGGATAAG  
AAAAATACGCTGATTAATAAAGGTGAGGTGCTATTTTCGACTGACCCGACGCTTATCAGGCGGGGATGGATCCGGT  
GGCGGATATCGTTTCCAGAAACAATAAAGCGGGGCTTTGGGCGCAGAGTTAGATGAGATGGCGGCAATACACTCAGCAGG  
CAAAGGCCAGCGGGATAAATTCGCTAAAGAGTATCAGCGTTACGACGTTGGCAGCCAGGCGAAAGTAACCCGTTTTCA  
GAACGCGATATCGATGTTGGCGCGCAAAATTTCTGCGCAGGAAGCCCTCCGTGAAAGTATCAGGCGGCGGAAACAAAACA  
GATCCAGAGCCAGCTGGATAGCTGGTGTGGGTGAACATCTCAAATCGCCAGCTGAAAGCACAGCTGCGGCAAGCAA  
AATATAACCTTGAGCAGACGATAGTGGTGGCGGAGCGATGGTTATGTTGACCGAGTACTGATTCGTTCCGGGTACCTAT  
GCCGCTGCTGCGCTACGCTCCGGTATGGTGTTTATACCCGATCAGAAACGACAAATCGTGGCGAGTTCCGTCAGAA

CTCCTTGCTGCGACTGGCTCCTGGCGACGATGCGGAAGTGGTGTAAATGCTCTGCCAGGTAAGGTATTACGCGTAAGC  
TGGCAGCCATTAGTCCAGCGCTTCCCGGCGAGCTTATCAGTCGACCGCACCTTACAGACGTTAAACACAGCCCGGGT  
TCAGATGGCGTTATCGCGACCATGAACTGGATGAGCACACTGATTTGAGCGCTTACAGACGGTATTACGCCAGGT  
GGCGGTTTACTCTGATCATTTACGCCATGTCTCGGTGATGCGCAAAGTCTATACGCATGACCAGCTGGGTGCATTACC  
TTTATCTCGATCATTAA

>Cluster\_42044

ATGGAATGCGATCTGCTGATGATAAAAATTGAAAAAGTAAATTAATAAAAAATGACCTTAAGGCATTATCGCTTTTCCGTC  
ATCACTTTATCCCGATGATCCAACTGGGATACCCCTTTTATTCATTGAACGCAGCGAGCATTTGTCTGCGAAGAATCCGG  
GGACGGACCATATCATCTGGCAGCGTGGTGGGCAAAAAAGCGGGGCAGATAGTTGGGCGTATTACCCGCGCAATAGAT  
ACCTTGCACCGTGGCGTTACGGTGAAGATACCGGTCAATTCGGCATGATTGACGCCATTGATGATCCGAGGTTTTTGC  
CGCGTTGTTTGGTACAGCGGAAGCGTGGTAAAGTACACAGGTGCAGGTAAGATCAGCGGGCTTTCAGCCTGAATATCA  
ATCAGGAAAGCGGATTACTGATTGAAGGTTTTGACACACCTCCTGTGCGATGATGCCACAGGCAACCGTGGTATGCC  
GCGCATATGAAACAATTGGGTTATCACAAAGCATTGATTTACTAGCGTGGTGGATGCAGCGAACCGATCTCACTTTCTC  
TCCGGCGCTAAAAAACTGATGGATCAGGTGCGTAAGAAGGTGACCATTGCTGCATCAATCGCCAGCGGTTTTGCCGAG  
AGATGCAGATCCTGCGTGAGATTTCAACTCTGCTGGCAGCACAACTGGGATTTGTGCCGTTTACCGAACATGAAATTC  
CGCATATGGCGGATCACTTAAATATCTGGTGGCGGACGATATGATCTACATCGCTGAGATTGATTTGCACCTGCGC  
GTTTATTGTCGGCTTCCGCAACATCAACAGGCGATTGCGGATCTGAACCGATCGCTCTTTCCCTTCCGCTGGCGGCAAT  
TGCTGTGGCGTTTTGAAAGTACGCGGTGTGCGAACTGCGCGAGTCCCGTGTATGGGCGTGGGACGAGTATCAGTTTACG  
CGCATCGGCCCGGTGATTGCGCTGTTATTGATTGAAGCCTTACCGCATCCGTTTGGCCCGCGGAGATCGATGCGTTGGA  
AATGTCATGGATCCTCGAAACCAATACAGGCATGAATAACATGCTGGAACGCATTTGGGCGGAGTCTGACAAGCGTTACC  
GATTGTATGAAAAGCAGATTGA

>Cluster\_12399

TTGTCGAACGGTATTCTGATTGCCAGCACGAAAGTGGTGGCTCTGGATATCGTTCCAACGAAGGTCGAGATGCTGAA  
TCAGAAAAAATCGCCGATCGTTGATAAGGAAATCGAAGAAATATCTGGCGACAAAACAGCTGAATTTCCGTCGAACGACCG  
ATAAGTATGATGCTTACCAGCGACCGGACTACGTTATCATCGCGACACCGACTGATTACGATCCGAAAACCTAACTACTTT  
AACACCTCGAGCGTCGAGTCACTGATCCGCGATGTTGGTGCACATCAACCCAAATGCGGTGATGTAATTAATCAACAAT  
TCCGGTTGGCTTTACAACTTACTTAAAGAACGGTTAGGTATCGCAATATATTTCTTTTCCGCAAGATTCCTCGGTGAAG  
TCCGTGCACCTGACGCAACTTGCATCCCTCCGATCCGTTATTTGGTGAACGTTCCGAAACGAGCCGGGTTTTGCGCGG  
TTGCTGCAGGAAGGTGCGGTTAAAAAAGACATTCGACGCTGTTTACTGACTCGACTGAAGCCGAAGCCATCAAGCTGTT  
CGCTAACACCTATCTGGCGTTACGTTGTCCTACTTTAACGAGCTGGATAGCTATGCGAAGGCTTGGCTTGAAGTACAC  
GGCAGATTTATGAAGGTGTGTCCTGGATCCGCGTATCCGTAATCACTACAACAACCCGTCATTCGGTTATGGTGGCTAC  
TGCTGCGGAAAGATACCTAAGCAGTTGCTGGCTAACTACGCGCTGTACCGAATAACATATTGGCGCGATCGTTGATGC  
GAACCGTACGCGTAAGGACTTCAATGACAGATTCATTTGCGCGTAAGCCTAAGGTGGTGGCGGTGTACCGTTTGTATCA  
TGAAAAGTGGTTCCGATAATTTCCGGGCATCATCTATTAGGGCATTATGAAGCGTATTAAGCCAAAGGGGTACCTGTT  
ATTTATTTATGAACCCGTCATGGTAGAGGATGAGTTTTTCCATTTCTCGGTAAGTGGTGGTATCTTACTGCGTTCAAAAATGA  
AGCAGATATTTATTTTAAACCCCATGACGTCAGAAATAGCTGATGTTGCCGATAAAGTGTATACCCGCTGGTTTTGTTG  
GTAGTGATTAA

>Cluster\_42651

ATGGATCTATTGATGTTTTAACTTACGTGGCGTGGCTGGGCGGCTTTAAAAATCTTCCGATTCGGTGAATCAGTG  
GACGCTGGCGACGGCGGCTGGGAGGCGTGTTCCTGGTGAAGTGGTTTTGATTTTGGTGAAGTACAACACCCCTTACA  
CTTTTACCAGCGCAAAAGGAGTGATAGCGATCCCATCACGCCACAGGTGACGGGAATGTTACTGAAGTACCCGACAAA  
AATAATCAGCTTATTCAGAAAGGGCGAGGTGCTTTTAAAGTCCGACCCGGTTCGTTACCAGGCGGAGTTGACAGGCTTCA  
GGCTGACCTGATGACGACGACGCAATAATAAAGACGCTGCGCGCGAGCTCACTGAAGCGCAGCCAACACCCAGG  
TTTTAGCGGAGCGGACCGTCTGTTTAAAAAATTAACAAGTATCTGAAAGGAGCCAGGCGGCGGTGAATCCGTTCTCG  
GAACGTGACATCGACGATGCGCGCAAAATTTCTCGCGCAGGATGCGCTGGTGAAGGCTCGGTGGCGGAGCAGGCGCA  
GATCCAGAGCCAGCTCGACGATGTTTAAAGGCGAGCAATCGCAGATTGTGAGCTTAAGAGCGCAACTTACTGAAGCAA  
AATAAACCCTTGAAGGAGCTGTCATTCGCGCACGAGCAATGGCTACGTCACCTAGGACTGATGTCGCCCAATTTCCGCAAAA  
GCAGCTGCTTGGCGTGGCTCCGGTGTATGGTCTTATCCCGAGCAAAAACGGCAAAATTTGTCGCCCAATTTCCGCAAAA  
CTCGCTGTACGCTGAAACCCGCGCATGATGCGGAAGTGGTGTAAACGCGCTACCTGGGCGAGGTGTTTACGGCAAA  
TGACCAGTATTTTACCTGCTGCCAGGCGGTTCTTATCAGGCGCAGGGGGTATTGCAATCATTAACGGTTCGTTGCCCTGC  
AAGGACGGTGTGCTGGGAAACCATGAACTGGACCCCTAACGCTGATATCGATGCTTACCAGCGCATCTACGCCAGGT  
GGCAGTTTACTCCGACCATTTACGCCATGTTTCCGTTGATGCGGAAAGTCTGCTAAGAATGACCAGTTGGATGCATTATC  
TTTTTTGGATCATTGA

>Cluster\_17795

ATGGCCAACAGCATCAGGACGATCGGATAAAAAATTTATGGGATGCGACATATGATCCTAACATTAATCTGGAAGAGTT  
CATCAATGGGACTTGGACGACTAAATATTAACGGGAAAAACAATCTGGACCTCGAAAGGTAGCGATAGACTTAACATA  
TTCTTGAGCATATAGCTACTCTAAAGACTATGAAGGAAAAATGATTTTATCAAAAGAAACATAAACTGAAAAATTTTAAA  
AATAAATCTTTTTCAGGATATGATTTTACAGAGTGTGATATATATGGTGAACAAGGAATAAGAATAACATTAAGAG  
TTGTGAGTTCAGGAAGGTTTGGCTTTGGTTATGCAAAATTTCAAAAAATTAATTTTGTAGATTGTACTTTATCGAATGCA  
GTTTTTCAATGGCATCATTTGAAAACCTGTCAGTTTAAATATGATACATATAAGGATATATCTTATCCGGTAAAGAAACA  
AAGTTAAATAATACATATATCGAGCCAAGTAAATTTATGGTGGCGTATTTGTAAATCAAGATAAAGATATTTGTGAGAA  
AGAAAGTACAACACCTGAGTACCAAAAATACAGGTCCTATGGAACATAAAACAAAGTGCCTAAGATATTGCTTAAATTCAT  
TATCTACAATTCGGATGATGAAGTGTATATCAGGCGGTAGAGGTTCACTTCAAATGCAAAACAAAAATCAAGCAGAAA  
TCTTACTCTTCCGAGCTAGTAATTCAAAAGTAACAAAAAGCTATGGTACAGCATACTGCTGTTAAATCAGTGAATGA  
GAATTTTATAAATAATACATCAGGTCTCATTAATGGTGGGAGGGGATTTATTCAGATGATATTTGTTGGTTTATTTA  
TCATGATTTGATTTTACGATATCTATGCAATAACATCATCCGTTGATGTTATTTGGGCGATTCAAGAGCGATTGATATA  
ACTCTTCTTACAGGTTACACGAAGTATTAACAGAGCGCACGACCAGTGGTATTGGGCGAGTATGAAACAATAACCT  
GATTAACATGATGATGGTGTATGGTGGTATGGTATATTAATACCAACTTTAATAAATAAATAATATGTACATCAAGGCTCT  
AG

>Cluster\_36352

ATGAATAACCGGAAAAGGAGATCCTTGAATTTTACGGCGTAACCCGCTGATTACGAGAACGAAATGCGGACATGCT  
GCAAAATCAGTCTGTCGCGGTTGCGGCGCATATATGGATTTAATGCGCAAGGCCGATTAAGGCAAAAGTTACATTC  
TCACCGAGCAGAACTGCGGTAGTGGTGGGACAATCAATATGGATATTCGCGGGATGGCGGATATCCATTACCCGCAA  
GCGGCTTCTCATCCCGTACAATTCATTTGCTCGGACCGCGGCTTGGACGCAATATCGCCCAACATTCGCGCTTGGCGG  
CCGGATGTCATTTGCTTTCAGTATTGGCGATGACTTTTATGGCGAAATGCTCCTGGAAGAACCGCGCTGCGGGG  
TGAATGCTCCTGGCTGCGTTCTGTTTGCATGGTCAAGACATCAGCCTATCGGCAATTCGCAATTCGAGACGATCAACCC  
TGCTGGCGGATTAACGATACCCATCTGCTGGAACAGTTGACACCGCAACTACTGAACGGGTGCGCGGATTTACTTCCGCA  
TGCGGGCGTGGTACTGGCTGATTGCAACCTGACAGCGGAGCGGCTGGAATGGGCTTTTACCCTCGCTGGTGGATCCCGG  
TGTTTGTGATACCGTTTCAAGATTCAAAAGCGGCAAAATCAAACTGGCTGGCGCATATTCACACCCGTAACCCACT

TTACCGGAGCTGGAAATTTTATGGGGACAGGCGATACCAGCGATGCTGACCGTAATGCCGAGTGAATGCGTTGCATCA  
GCAAGGTGTTTACGATCTTTTTGTTTATTGCCCGATGAGTCAAGTTTATGACGCGAAAAGGATGGAGAACAATTTTTC  
TGACTGCACCAGCGCATAACGACGTTAGACAGTTTGGTGTGACGATGTTTATGCGGGGTCGGTATATAGCTTTCCTG  
GAGGGAAACAATTTCCGTGACAGCGCCGTTTTGCGATGGCTGCGCGCAATTTACGCGCCAGCGGAGCTTAAACAA  
CCCTACCTGTCTGCCGATAACGCGCTTTCATTAGTGCCAATGGTGTA

>Cluster\_39313

ATGCCCGACCTATTCATATCTTTAAATCCGGCAGCATAACCGGATGAACGGTACGCGGATGCGGTTACATCGGCGGA  
GCTGGCTGCTGTGCCGCCGCTACGATCCGGCGGTGCATGAAGCGCCGCTGGTTATCGGCCATCCGGCGCATGACGCTC  
CGCCCTACGGCTGGGTGAAGTCTTAACCGCTCGCAGGATGATTGCAAGCCGAGCCTGACCAGGTTGATCCGGCCTTT  
GCCGAACGGTGGAGCCGACGTTACAAGAAATCTCCGCTCGTTCTATCTGCCTGACTCCCTAATAACCCAAAGCC  
CGGCGGTTGTATCTGCGCCACGTGGGTTTTCTCGGTGCGCAGCCGCTGCCGTAAGGCTTAAAGCCGCTCGAGTTCA  
GCGAGCAGGAAGGCGTGGTTCGAGTTCCGCGACTGGGACTTTCAACCAGCGCAGGGATGTTTGGCCGCTGCGCGAT  
TTCCTGATCAGCAAGTTACGCTCGACGAGGCGACAGCGTTTTGCGCGCTGGCAAAATCGATGCGTTACGCGATGAGCG  
GCAGCGTATGACCTAAACCCGATCCGGCTTTCAGTGAGCAAAACCTGAACCAAAGGAGAAATCCGTGACTGAAGAAG  
AAATTAAGCGCATGCGCGAAGAGAAATGCCCGCTGAAAGCCGACGCTGCTGACCGCGCAAGGCTGATGTAACCGCTT  
GCCGCAACTGCGACACTAACGTTCTCTTTGCGGAGCACTGGTGACCGCGGCAAGCTGACGCTGCGGCTAAAGG  
CTGGTTGTCGCGCTGCTGGATGAAGTAAGCAAAGCGGATGCGCGCTGGAGTTTCGCCGAGGGCGATGTAAGAAACCA  
TGGCGATGGCCTTAAAGAACTATTGACAGGCGCTGCGCGGTTGCTGGATTTCAGCGAAGTTGCCAGCAAAGACCGGCC  
AACCAGCGCTGCTGCGCACCGTTCGATTTTGCAGCGCGACCGGAGCAACTGGCGGTGCATAACAAGCCGCTGGCGCT  
AGCGAAGGCTGAAGCATCAGTTACGAAGCTGCCGTTAAACGCTGCTTATA

>Cluster\_45360

ATGGCTCAGCTTTCGTTACAACATATTCAAAAATCTACGATAAACAGGTGCATGTGGTGAAGGACTTCAACCTGGAAAT  
TGCCGATAAAGAGTTTATCGTGTGTTGTCGCGCCGTCGGGCTGCGGTAAGTCGACCACCCTGCGCATGATTTGCCGGCTTG  
AGGATCAGCGCGGCGGATCTGTGATCGACGGCAACGAATGAATGACGTTCCAGCCAAAGCAGCAATATGACGATG  
GTGTTCCAGAATACGCGTTGTATCCGCATATGACGGTTTACGACAACATGGCGTTTGGCCTGAAGATGCAAAAAATCGC  
CAAAGAGGTGATTGATGAGCGGGTGAACGCGGCGGCAAAATCTCGGCTGCGTGAGTACCTGAAACGCAAGCCGGGG  
CGCTTCCGGCGGGCAAGCCGAGCGTGTGGCGCTCGGGCGGGCGATTGTGCGGAAAGCGGGCGTGTTTTAAATGGATGAA  
CCGCTCTTAACCTTGAATGCGCAAGCTGCGCGTGAACCTGCGCGCAGAGATCAGCAAGCTGCACAGAAGCTTACACCA  
CATGATCTACGTGACCCACGATCAGACCGAAGCGATGACCATGGCGACCGGATTGTGATTATGAAGGATGGGATGTTTC  
AGCAAGTTGGTGCGCCAAAACGTTTATAACCAACGCGAATATGTTGTTGCCGATTTATTTGGATCACCAGCGGATG  
AATTTTATTCGTGGCAGCATCGATGGCGATAAATTCGTTACGGAAACGCTTAAATTAACCATTTCCGAAGAGAAATTAG  
GGTTCTGAAAACACAGGGAAGTTTGCATAAGCCCATCGTGATGGGAATACGCTCCGGAAGATATTCATCCGGACCGCAAG  
AGGAAAATAACATTTCCGCCAAAATTAGCGTGGCAGAATTAACCGGTGCGAAATTTATGCTCTACACCAGGTTAGGGGG  
CAGGATTTAGTGGTCCGTGCTGGTGCCTTAAATGATTATCATGCAAGGAAAAATACACTATTTTATGATGACGAA  
ATGTCATTTCTTTGATGCAGAAACGGAATAGCACTTCGCTAA

>Cluster\_62475

ATGGACGGAAAGAACCGGGCAGCATCTCTTATCTGAGTCCGGAAATCCCTCGGCAGATAAAGAGCAGAATGAGCCGCT  
GGCACAGGTTTTTTCATAACGCTGCTCTTACAATTTTTTTGCGATGGCGGAGCTGTTGCAACCGCTGGCACAGGGTGAA  
AGGGGACGCCAGAATATCCCTGCGGACGATCCGACAGAAACCTGCGTTTCAGCGCCGATGCCAGCTTCGCTTT  
CCCTGAGTGATATCAGTCCGCTGAAACGGGATACGTCAGGGGCAATTCAGGATGACACCACCCTTTATGGGGTTACAGGG  
GAGCCAGTCCGCTCTCCCGGTTTATACCTCGATCACCCTGGCCGTAAGAGCGGTACATGAACAAAGTCCGGTAGGTGATT  
TTCTGGATATGTTTACGACCAGCCGCTGACCCAGTTTGTCTGGCATATCTGGCGTAAAGTACCGCTATCACATCAGTTTTCGT  
AACCGCGGTGGGATGCGTTCTCGCAGCGCATGTACTCCTGCTGGGCTGGGCCACCAGCTTCGCGGATTCGCGGATGGC  
GATTAATCACAGCAAAATGCTGGCGTATTCGGGATCCTGGCAAAACCGGGGCGATCCCGGAAATTAATCTGTGGCCTGG  
TGTCCACTGCTTTGATTTGTGAGAAGTACGCTGCAAAACTGGCAGCGTGCAGAGGTGGATATGAAACCGGATCAGCAA  
AATAGTCTGGGGAGCTATTCACCTAAAAATGGCGAAAACCTGGCGGAAAGTACGGTACTGGGCAACTTTGTTCTGGGTAC  
ACGGTGGCCGATCTCAGCGGAAATTCAGCTCAGTATTAACAGCTGACCCGAAACAGTTCTCTCTCTCTGCTGCTG  
CCGGCGAAAACCTTCTGCCACTGACGATGTTTGTGCTTTCATCTGCGGATCAGCTTGCCTGGGACTTACATCTGGGG  
CTGGCGCCGAGCAGGTGGGCGCAATGCGCTGGGCGATAACAAAGTCCGCTGCTGGGCTGGACCAGCTTCCTCGGCAC  
ACCGAAGAACGACCCTCAGTACCATCAGGATACGGTTCGCTAA

>Cluster\_35612

ATGCACAGAATTGACACTCCGACAGCAGTTAAAGATAAATTTGGCCCGGGCAAGAACGGATTTACTGACGGGAATATTCG  
TACAGGGCGCTCATGCCACCTGGCTGAACAGTGCATGTGGGATGCCCTTCAGGAGGAAATCTGTGGTGTCAATTGAGAAAG  
CCGGGATAAAAATGAATAAAGAGGAACAACACAGTTATATAAAGCCATATTTACTGGTTGGCGGTGCGATTAAACGAA  
GAGCATTTCCTGATTAATAAATAAATCTTTTCGGATATCGAAGACAGTGTGAGGCTGTTGAAAACCTCGGATTAACCCAC  
GGTGGATAAAGCAAAAAATGCCGTTTCAGCGTATGGAGACACCATGACCGGGAGCTGAAAATCCGTGGCGTTAATGCAC  
TGAGGATTTTCAACGAAGCCTTTGGTCTGATTTTTCGTTCCGTAAGAGTGTCTGTACTTCAATCTTACCAGGAAAT  
CAGGGCGAGAGTGGTATATTTGGCCGCTACGCCCTTTACGCTTAAATCTCAGGACCGGTCGATAAATATGAGGATG  
TCTGGATGTTACAGAAGATGATTTTGCAGGCGGTTTTGCGGATTAACAGCAGTAACCGGAACCTGGATTCAGATGCGTGACA  
ACAACGTTATTTTCCGGAAAACAGGATAAATACTGATGCTGCTCAGGCGCTTCTGCGTCAAGGATCATGCAGACAGAAAG  
TATTTCTGGCTGGTCTTTGGAAATAAGCAGTTTGGCATTTACATGATAAATAAAGCCGATACGGATGATGTTACGGACGG  
TCAGCGTATATGGATGATGCGGGAACCTGGCGATGTTGGGATCAGGTTATCCCGTACAGACTACGGAACCTTTGATACCC  
GCTACCAGACAAAACAGGTGGCGTACAGAATTTTTCAGTATACCAGTGGGTTTTCACAACCCGGCGGGAACGAGCAC  
AGCTGGACGTTTCGAGCACCTTCTGGTTGTTTGTGTCAGGCATTAATGTTTCAAGGATGCTGGCGTAACTCTGACAGCAA  
TATCGGTGGCGTATTAACAACAGGCTCAGATTTATATTAATGGTGCATGGCGATCTGTATCAGGTTAA

>Cluster\_63903

ATGCGTGATTACGCAAAAGTTTCTCCGCGATTCGCTGGGAGAAAACGGGGAGAGAACTTAGAAAAGCGGGTGCAGAAGC  
GCAAGTTGTTGCTTTTACCTGATGACATCCCTCAGCGAAATATGCTGGGTTTGTATACCTGCCAGTTTATACCTTG  
CTCATGAAACCGGGCTTGGTCTGGAAGGGGCTTCAAAGGGCTTAAAGGGCTGTTGAAGCTGGTTTTTGTAGCTATGAC  
CATGATGCCGAGATGGTCTGGGCTCATGAAATGGCAGCCTGCGAGTTGGGAAAACCTGGAAGCTGGCGATAACCGTTG  
TGCAGGTGTCAAGATGAGTATGATCATTAACGAAAACGCTTTTCTGTGAGCTTTTACGACAGATATAAAGCGATT  
TCCATCTGGATGTGAGGCGGAATAATAGCCGAAATTCGGTAAGGGGCTTTCGAAGGGGCTTTTAAAGGGGCTTCGAAGCCAA  
GAACAGGACAGGAGAAAGAAACAGGAACAGGACAAAACACTATGGTTTATGGCGAAAACACCCAGCAACAGGACGG  
GGATTTACAGCCGTTAATCTTGGTACGCCAGGACAGCACACCGGAAAGCCGATTCAGCGTATGCGGTAAGCCGAT  
CGGGCGCTGTGACGAGGTGATGACCCAAAGCCGAGCAATCACACCACTGACAGCAGCTTGAAGCCGATTCGGCCATT  
CAGCGGAAAGCCGATCGGGTAGTCCCGGAAAACACCGGGCTGTGTTGGGACGAGTGGATTTCCGGATGTTGTTGAAACA  
GGTCTGGCGGGAGTACCCGTTGCGTGGCGGGCAACCCGAAAGAAATCCGCTTTCAGTGCCTGGAAGCCGAGATACGTTG  
AGGGGTTGCCACCAGAGGCTGCTGGATGGCGTGAGGCGTTACGCAAGATACCTGGCAGCTACCGGAAAACCGGAAACG  
GAATTTGTTTACGCGAGCAGCAGCTTTTTTGGACCGGACCGGAATTTTAAAACCCCTGGTTGCTCCCGTAAGCGGCAC

GAACAACCAGCGTTGTGTGAATCATATTTCTGAACCGGACACCGAAATTCGCCGGGGTTCAGGGGGTAA

>Cluster\_10565

TTGTTCTATGTGAGCACAGGCTCGCTTATCTCCTCAGGAAGATTTAAACCAGGCAAAATCAAACGTGTTTCAGCAAAGAG  
CGATCAAAAACGGTATCATCGGAGAGTTTGTATCCGAGTTTATGGATGATGCAAGGCATTTATGAAAATTTTATAAGCGTTA  
ATTTTTTTGGAGATFGCTTTTTATCATCTTTATTTGTGCCAGGTAGAAAATGAAGGTGCAATGTTCTTACATTTAAAATCAAGT  
AAGTCCGACTTTAATGCAAAGCGCGGACTGTATGTTGCCAGTATGATTAATAAAGCTTTAAAGGGGCGTTTTAATATATGG  
TCAACAGTTATCGAGTTCCAAACFCAGAGATGGAGAATATTTCACTCATTACAGTGAATAAATGAAATGACTGGT  
TTTTTATGGATAATATATAGAAGAGCTGGAAGCGGCCATATAGAAGAGCTGGAAGCATAACCTGATAGCTGCTGGGCTG  
AGTGATTAACAACCTAACCGGAAAAGATTATCTTATCTTGGCAACATTTTAAAAATTTGAATTTTCAGGCTTTCCTGTTAC  
TGAGTTATTTCTCAGTGTGAACATACAGGAAACATATTTGTCTAGAGACATCATAGAAAATAGTGGGGATGTTCTTATCTTT  
GTGCTAGCCGTGATAAATACTCTGTAGTTCTTATATCGCCTATGATGACTCCTTGGAAAAAGGGAAGTGTATTTTTT  
ATTGGTGGTAAAGACATTCGTTGTAACCTTATCAGGAGCGAGACTTTTTTCAAACGACAGTCATAATTTGCGACTCTATGT  
TAAACAATGAGGATGGAAGGACAAAAGTTTGTCTTATTTGGCATTATTTTCATGTATTTATAGGTCATTTTCAATAAATAT  
CATGGGGGATAGTGTAGTAAATAGAAAATTAAGAACGATGTTATTTGGTTGCCAGTGAATAAAGTACCTGACTTT  
TGTATATAAATGACCTTATTTCAAGTTGTTTCAAGCTTGTTCATTAAGATGTTGTTTCAGTACGCAGAACGCAAAATGAA  
CGCATAACAGGCAAGCTATAACAAGTTCGCGGTTATGATGATTCTGGTGTCACTTAA

>Cluster\_15822

ATGAATTTGAGTCTGAACTGCTTAAACAAAGGCAACAAAACCTCCCGCATTCAGCATCAGTATTGAGGGCAGGGATATCAC  
CAGTGTGCTGGATAAACCGCTAAATGAGTTTACGCTGACGGACAAATCGGGGCTTTGAAGCGGACACAGCTTGTATGGAGC  
TGGACGACGCCGACGGAATACTGTCTGCCGCGCTGGTGGCTTATTACGCTGGCGCTGGGATGGAAGGGGCGACG  
CTTTTCCGAAAAGGGGCAATTCACGTTGAGATTTGAACACACTGGCGCACCGGACCGCTGACTATCCGGGCGCAAG  
TGCTGATTTTCTGTAACGCTGAATACCGCGCTGAAAAGTCTGGCACAAGACCACCTCGGGGAAGTGGTGAAGGAAA  
TAGCTGTGGCGCAAACTGAAGATGGCATTGGGTAAGACCTGTGAGATAAACCCGTGGAACATATAGACAGACCAAT  
GAGAGTACGAGCAATTTTCTGATGCGGCTGGCGCGCAGTACCGTGTATTGCGTGGTGAATAAATGGCAATCTGTTAT  
CATCCGGCAGGGACAGGGTAAAAGCGCCAGCGTAAACCCTACCGGTTATCACTATCACAGTAAAGGACGGGACAGTC  
ACCGCTTTACCCTGGCAGATCGCGGAGCCTACCGGGGTAATTTGCCAGCTGGTTCATACCCGCAACCCGCAAGAAAT  
GAAAGCACCGGTAAGCGTAAGCGCAGGACTAAGAAGCAGAAGAAAGCCGGAAGCGAAGCAGGGCGATTACCTGGT  
GGGTACAGATGAAAACGCTGCTGGTACTTAACTCGCACTATGCCAACCGGAGAACGCCGAACGGGCGGCAAAATGCAAT  
GGGAACGCTGCAACGCGGCTTGGCTATTCTCGCTACAACCTGGCAGAAGGTCGGGCAGATCTTACACGAAAATGCCA  
GTGAAAGTCAGTGGCTTTAAACAGCCGATAGATGATGCGGAATGGACCTTACGACTCTGACGCATACCGTACGCCCCGA  
TAACGGTTTTACAACAGCTTGGAGCTTGAAGTGAGGATTTGATGATTTGAAATGGAATGA

>Cluster\_14200

ATGAAAGTGATAAAAAAAGTATCTCAGTGGCGCTCATCTGTTGGGGTACACGGTGGCAATTCGGGCGTCCAGGCTGA  
AGGTCACGAATACTACTCTAACCCAGGGTCCCTGGTTTACGGTTCAAACCTTCGGGGGACAAAAGAAAATCATTGCCAAGT  
TTACGGGAATTAACAGCCGCGATTTGTACCTGTGGAAAATATCTCTGGCAGCAGGAAACGATATATTTAAGAGATGAA  
GTCACCACAATTAAGAGGAGTACCACCTGGATAACGGACGCTACGCTACCTTCTGGCAGGGAAAATCGTGAATACTC  
TCCCGGTACGCCAACGGTGCATGTTGCCAGCTTTAAGGCTCTGGGCGCTTCGCCGTCGATAAATACAGTCTCTATTTTTG  
ACGGTCAGCGCACCGAAAGCAATAGCGGCGCTTCGAAGTGGAGCTGGCAACCTTAAAGCTATCGAAGATAACAGCAGC  
ACGCTGGTTGACGACATAACCTTTATTTATTGGGACGAGGACAGCCAGTACGACAGATTTTACGCTACTACAAGTAA  
ATTTGGGGGATATCGAGCGGTTCCGCCACGCAATGAAGGGCTACCTCCCGCAGCTGCTTATTCGTCATCCGCGAG  
ATGTTGTTCTCAATGGTACGCGATTGACAGCCTTGTGATGCTGACACCTTTCACATCATTCGATGGATCCCAATTCATTA  
TTGGTCTACCGCGCAAAACATGGTGAGCACCCTTACGCTATGGCAATCCGGCAGGAAAATGGCAACGACCGATGATGC  
GAATTCGTTTTGAAATCGGTTGAAAACCGTCCGCTGGCGCAGGCAACTCCGCGGGATGACGCTGGCACAACGCAACT  
CGTGGGATGTCATATGGGGGGCTGGCAGGATAATCCCAATGTTGATCCGGAACAGTTCATTTGATCACTGACCGCATC  
GCGCAGTATCAGGATCGTCTGTATATCAAACTGTGCCAGTTGGCGAAGACCAGCTTAAAGCTTATCACCTGGGATAC  
CCCTGATTTAGTGGTTGATCAGCTCTCAATGGTGGGAAAAGCACATTTATATTTATCAAGGACAGAAGCTGGGTGACAG  
ATGTTATGTTGATTTGCTACCCACGGTCCACTCACCATGGCTGAGGGTTTCGCCCTGGGACGATGCTATGTATATACCTGG  
TGGGGCCAGCGTCTTCCAGAACGAGTCCGATGTCGCGGAGCAACCGTTGAGCAGGATGATGGCATAGTCAATTAAGAC  
CGAAGCATCAGAGTGCCACCGCTCGCCGTA

>Cluster\_40982

ATGAGATCGAAAAGATTTGAAGCACTGGCAAAACGCCCGTCAACCAGGACGGTTTCGTTAAAGAGTGGATTGAAGAAGG  
CTTCATTGCGATGGAAGGCCGAACGATCCTAAACCGTCAATCAAATTTGTTAACGGCGTCTGTACCGAAGTGGATGGAA  
AACCCGCCAGTCACTTTGACCTGATCGACCACTTTATCGCCCGCTACGGCATCAATCTCGCGCGCAGAAAGAGTCACT  
CGGATGGATTCGGTAAAACCTGCAATATGTTGTGCGATGCAAAATGTCAAACGATAGCGATATCGTTCCCTTTACCACAGC  
AATGACCGCTCGAAAACCTCGTCAAGATGTTTTCGAGATGAAACGCTGGTAGAGATGATGATGGCGATGCAAGAAATCGCG  
CCGTCGAACACCAATCACAACAGGCTCAGTCCCAACATCAAAGATAACCCGGTACAATTTGCCCGGACGACGCTGAA  
GGCGCATGGCGCGGGTTTTGATGAACAGGAAACCTGTAGCCGTTGCTCGCTATGACCGTTCAACGCATCGCCCTGCT  
GGTCGGCTCACAGTGGGACGTCGGGCTCTTGACCCAGTGTTCACCTGGAAGAAGCCGAACTGGAATCGGATGTTGAT  
TAGGCCACACCTGTTACGCCGGAACAAATTTCTGTATGTTACAGACAGAACTGTTTTTACCGATGGCGATGATACCCCTGG  
TCAAAGGATTTCTCGCGTCACTCTATGCTTCTCGCGGCTTAAAATGCGCTTTACTTCCGGCTCCGGCTCTGAAGTACA  
GATGGGTTACGCGGAAGGCAAAATCAATGCTTTATCTCGAGGCTCGATGATTTTACATCAACAAAGCCGAGGCGTTCAGG  
GTCGTCAGAAATGGTTCCGTTAAGCTGATCGGTTTCCATCAGCTGTGCCATCAGGCATCCGCGCAGTATTAGCGGAAAAC  
TTAATTTGCTCATCGCTGGATCTGGAATGCGCTCCAGTAATGACAGACCTTTACCCACTCGGATATGCGCCGTACCGC  
ACGTTTCTGATGAATTTCTGCGAGTACCGACTTTATCTCTTCCGGTTTTTCCGCTGTGCCGAACCTACGACAAATGAT  
TTGCTGGTTCAAACGAAGATGCTGAAGACTTCGATGATTAACAGCTATTACAGCTGACCTGAAGGTTGATGGCGGGCTG  
CGACCACTACGCGAAGAGATGTTATCGCAATTAAGCCGCTCGCGCTTTACAGGCTGCTTTGCGCGTATGGG  
ACTACCGCAATTTACCGATGAAGAAGTCAAGCGGCAACCTATGCCACGGTTCGAAAGATATGCTGAGCGCAATATTTG  
TGGAAACATCAAGTTCCGCCAGGAGATCATCAATAAAAACCGTAAACAGCCTGGAAGTGGTGAAGCCCTGGCGCAAGGC  
GGTTTTACCGATGTCGCCAGGACATGCTCAACATGAAAAAGCAAAACTGACCGGCGATTTCTCCATACCTCAGCCAT  
CATCGTCGATACGCGAAGTGCCTCAGCGCTCAATGACGCTCAATGATTACCGCGGACAGGATCAAGTTACCGCCTGC  
AAGGGAACGCTGGGAAGAGATCAAAAATATTTCCCGGTGCACTTGTATCCCAACGAAATGACTAA

>Cluster\_40080

ATGAAATCCCCGACCTTTATCGCCCGCAAAAATGGCGTTAATTCAGCCTGCATCTTTTTGTGTTTCGCTGCGCTATC  
GGTCCAGGACAGAAAACATCGGTAACCCACAACCGCTGATATTTTTATTAGGGCGCTGTTTAAATGATGTGCAAAAACG  
CCAACTTTTTCCGGACCAAAAACCTTTGCCGATGCCGTGCCGAACAGCGATCCGCTGATGATCCTTGTGATTTATCGG  
ATGCAGCAACACAGAGCGGATTTGATCTACGCCATTTTCGTTAAGCTCAATTTACCTTCCGCAAGAGGGCGAGAAAATA  
TGTTCGCGCAGAGGGCAATCCTGCGGCAACATATTGACGACTTTGGCGGTTATTAACGCGTTTCCGCAAAAACCG  
AAAAATGGGATTTCTATTTACCGCTGCCAAAACCTTATGTCGTGCCAGGCGGACGTTTTTCGCGAGGATATTTACTGGGAC  
AGTTACTTACCATGTTAGGACTTGGCGAAGCGGCTACTGGGATAAAGTCCGCGATATGGTGGCCAAATTTGCTCATGA

AATAGACACTTACGGTCATATTTCCCAACGGCAACCGCAGTTACTATTTAAGCCGCTCGCAGCCGCCCTTTCTTTGCCCTGA  
TGGTAGAGTTACTGGCGCAGCATGAAGGCGACGCCGCTTGAACAATACCTGCCGCAATGCAAAAAGAATATGCTTAC  
TGGATGGACGGTGTGAAAACCTGCAAGCCGGACAACAGGAAAAACGCGTTGTA AACCTCAGGATGGTACCTTCTCAA  
CCGCTACTGGGACGATCCGCGATACGCCACAGACAGATCATGGGTGGAAGATAATGGCCACTGCCAAAAGCAATCCGAAT  
GACCTGCCACTGAAATTTACCGCAGCTGCGCTGCTGCTGGCTGGGATTTAGCTCGCGCAAAATGGCGACGGCGACGAA  
CCGCGACGTTAAACACCTTACGGACCACAGCATCGTACTCGGTCGATCTGAAACAGCTTGATGTTCAAATGGAAAAAT  
CCTCTCCGGCCAGCAAAGCTGCGGAGATAACCGCATGGCAAACAGTACGAAACGCTGGCAAATGCCCGTCAAAAAG  
GGATCGAAAAAATCTGTGGAACGATCAACAAGGCTGGTATGCCGATTACGACCTGAAAAGTCATAAAGTGGCGAATCAG  
TTAACCGCGGCCGCTTCCCGCTGTACGTCAATGCCGCGAGCGAAAAGATCGCGCCAGCAAAATGGCGACGGCGACGAA  
AACACATCTGCTGCAACCAGGCGGCTGAAACACCGTCCGTTGAAAAGTGGGCAACAATGGGATGGCCAAACGGCTGGG  
CACCGTTGCAAGTGGTCCGCGACAGAAGGATTACAAAACCTACGGGCAAAAAGAGGTAGCGATGGACATTAGCTGGCCTTC  
CTGACCAATGTTACAGCACCTATGACCGGGAGAAAAGCTGGTGGAAAAATATGATGTCAGCACCCGGAACAGGGGG  
CGCGCTGGCAATATCCATTACAGGATGGCTTGGCTTGGCAATGGCGTACGCTGAAAATGCTGGATTTGATCTGCC  
CGAAAAGCAACCGTGTGACAATGTTCCGGCGACGCTCCACTCAGTGAATCAACAACACAGCCGCTAAAACAAAAGAG  
GCGGAACCTACGCCTTAA

>Cluster\_17655

ATGGCACAGCTTGTGATATTTACGGACGCCGCTGAAATGTGAGGCACTCAAACCACGAGTCGGTCAGAGTGGCGGA  
ACGGCTGGCATTATTCAGACCACCGCTCGGCTGGTCTGAACATCAGAAAACCTGCCGCGATTCTGGAAGCTGCCGAAC  
GCGCTATCTCCGGCGCAGGCGATGCTGTTTCCGGACATGGAAGAAGCTGATGGCCATCTGTTCCGCGAGATGGAAAAG  
CGCAAAAAGCCTTGCTGACACTGGACTGGTGGAGCCGCCCAATGCCCTGAAGGCAAAAAGGAGCTGACTGC  
CGCCGTGGATGAGTGGTTCACCGCATCCGCGACATGGAGACATCATCTCAACGGGATGACCAGTGTCCGTTATGGCT  
TCAGTTGTCAGAAATCAGCTGGGCGTTCGTTGATAAAAACGTTTACCGGATCGGTCAGCTGCGCCGCATAACTGG  
TTTTATTACCTGCCGGAACAATGACGAACTCCGGCTGGATGACGGCAACCGTGGGGAAAGACGGTAAGGACGGTTCCCG  
ATTTGGCCATCCGCTGGCTGGTTCACCGTTACAACGCCGCTGGGTTCCGCGGTCATCCGCGCTGTTCCGCGTAC  
TGGTCTGGCCGATCTGTTTAAAAACTTTCGCTGCGTGTATGGCGAATTTCTGGAGATTTACGGCCTCCGCGCGC  
ATTTGCCATCTATGACAGGGCACAGTACGAAGACCGGATAACATTCTTGAGGCGCTGGTCAATCTGGGGCATGAAGC  
GGTGGCAGCCCTGCCGACGGTAACGAGATTGAGTTCAAGGAAGCCGATCCGCGGACCGGAGGCGTTCATGTCGATGG  
TGGAATGGCGCGGACGCTACCCACTCAAAGTGATTTGGCGAGTACGCTGACAGCCAGGCGGCAAAAACCTCCACC  
AACGCACTGGGTAATGTCCATAACGAGGTCGGGACGACATTCGACCGCTGATGACGCCAGCTGTCCGGCATGTTTACG  
CAGTCTGATACAGATGATGGCCAGTCTCAACGGCTGGCAGGATATCCGCTCACGCCGCTTCCGCGCCTGGTGTGATG  
TGCAGCAGGAAGCTGACATTAAGGGCGTGGCGGAAGCCGTCAGCGTGTGCTCAACAATGTTGGGGATGAAGGATATCCCG  
GCGTCTGGGTGGCAAAAACACCGCATCCCCACCCGAAAGACGGGGAAGAGGTGCTGGTGGCGGTCAGCTCT  
CCCTGTGACAGCCGACTCAGCCAGCTGCGTGAGCGGCTGAATGTTGCCGCGCTCAGTCAGCAGGATAACGGGGAGGACG  
ACCCGGCACAGAACGCTACGACCGGGCAGAACTTCGGCAGAGGTCATCGCGCAGGGGATGAACGAACCTGGTGGCCCA  
CTGGTGCAGGCCATACAGGAAGCCGGGATGACAGCAGGGCATAACGTAAGCTGTTGGCGAAGCTGGCCGGAGCTGCCGGA  
TGACACACTGGCGGAGTTGCTGACGACAGGCATCTTTTGGTGGGATATCTGGGGCGGACTGAAATCCCGCACTGA

>Cluster\_47735

ATGCTCAGTCAAATTCACCGCTTTGGCGGCGGATGTTCAACGCACTGCTGCTGTTTCCCTTCGCGGGGATTTGGTGGG  
TCTTGGCATCTTGTGCAAAAACCCGATGTTTTCGGGGAATCACTGACCGATCCGAACAGTTTATTCGCGCAAACTCGTAC  
ACATTAATGAAGAGGGCGGTTGGACGGTATTCGTAATATGCCCTGATTTTTGCTGTGCGTTTACCCATGGCCCTGGT  
AAGCAAGCCGAGGACGCTGCTTGTCTGGCGGTGATGGTGAAGTTTCTGACCTGGAACATTTTATCAATGCGATGGGAAT  
GACCTGGGGAAGCTACTTCCGCGTCGATTTCACTCAGGACCGGTTGGCAGGTAGCGGCTGACAAATGATGGCTGGGATTA  
AAACCCTGATACGCAATTAATCGGCAATTAATCATTTCGCGGATTTGACGCGGCTGCATAACCGCTGTTGAGCGCAAAA  
AAACTGCCGGTTTTTCTCGGCATTTTCCAGGGGACGCTTATGTTGGTGAATATCGCCTTCCCTGGTGTGATCCCTGTGC  
CTGGCTGACGTTGCTCGGCTGGCAAAAGTACAATGGGGATTGAATCTCTGCAAGCGTTCTTCCGCTTCCGCGGGTGCAC  
TTGGGCTCGGGTTTACACCTTCCCTGCAACGTAATCTGATCCCAACCGGTTTACACCCTTCACTACGGACAGTTTATC  
TTTTGGTCCGGCAGCTGTTGAAGGCGGCAATTCAGATGATCTGGGCGCAGCATCTGCAAGAGTTTCAAGTTGAGCGCCGAGC  
GCTGAAATCGTTGTTCCCGGAAGCGGTTTTTGGCCTGCACGGTAACCTCAAATACTTTGGTGGCGTGGGCAATTTCTTTAG  
CGATGTACTTCACTGCCGACCCGAAAATCGGGTAAAAGTGGCGGGCTGCTGATTTCCCGCAACCTTAAACCGCATGCTG  
GTGGGAATTAACGAACCGCTGGAATTTACCTTCTGTTTCACTTCCGTTGCTGTTTGGCGGTACACCGCTGCTGGCGGC  
CTCAATGTGACCGTGAATATCTCTTTTGGTGGTGGGCAACATGGGCGGAGGTCGATTGACAGGTTTACCGCAAAA  
ACTGGATCCCGATGTTACAGCAACACCGGATAATGATGCTGACCCAAATCGCCATTTGGGTTGTGCTTTACCTGCTGTAC  
TTCGTTGGTTTTCCGCACACTGATTTCTGCAAGTTCACATGTCACGCGGGGACGTAAGATGCGGAAGTGAACCTTACTC  
AAAAGCCGAATACAAGCCTCGCGAGGCCAAACACCGCGGACAGCCAAAAGAGCTGGATCAGGCTGCCGGTATCC  
TGCAGCCCTGGCGGGGTCGGCAATATCTCCAGCATTAACAATGGCGGACCGGTTTACGTAATGCTGCTGATGATG  
TCACAACCGCTGGATGACGAAGTCTTAAAAGCTGGGAGCGCACGGCTTCTCCGTAGTGGCGATGCCATTCAGGTGAT  
CATTTGGTCTGCATGATCCAGCTGCGTGAACAGCTCGATAGCTTAATTAATTTCTCATCAATCAGCAGAAAATGTTGCCA  
TTACGGAGGCAGTATAA

>Cluster\_12319

ATGGCGCTGGCGGGGCTGGCGGCATTAACCAGCCTGGGGGCGCTCCTTTTTCTGGCGTGGAGCCTGCGTGACATTCGCGC  
GACGCCGTGACGCTATTCGGCCCTGGCGGCTGGGCGGCTGATCGGCTGCGTGGTCTTAACTTTTGTCTGCGCTTACAGG  
CGTTCAACACCTCTCATTACGCGGCTTTTATCTGAGAAACATTTGCGCAGCAGGTTAGCCCGTAAAGCATTGACGCTT  
CCGCTGGCGTGTACAGCAAAATGGGACGCGGTCAGTGGCGAAAAGTGAATGCTGGATGACGTGAAGTCTGATATTTTT  
TGTGGCCGACAGCAGCCGCTCTATGCCCGCGCATCATGCGGCTGGCGCAATCTGTTCTGTTCTGGCTGGACT  
GGCGGCTGGCAATCGCAGCCTGGGGTACTGGCGTTTGGATCGGTTATTTCTGCTGCTCGCCGCCAGCGTTCGGAAT  
ATGGCTCAGCGTTATCATAAGGCGCGGAGCAGTGTAGCGCGGCTTATTGAGTTCTGTCAGGCCATGCCGCTGGGTAG  
AACGTTTGTATAGCGGACGACAGTTTTTTGGCGTATCAACGCGCCCTGAAGAGTGGGTCGATGCTCAAAAACCTGGT  
ATCGCAAAGCCGTTTTTTCAGCGGTTTTTCTTCTCGATTTGAATCTCTCCGACCTGTTGTCCTGATCTGGTCCG  
GGATACCGCCTGTTGCAATGAGCAGTTTCGATTTTATCGCGTGGTGGCCGTTTTAACGCTGGGACGCGAATGGCCGA  
AGCCGTAATGCTCAATGATGCTCAATAACCTGGTGGCGCAACCGTTTAAAGCATTGACGCTATTTATCAGTTCTG  
CGATGCCGAGTTATCGATGCCGAGCTGACAGCAGCCGAAGAGGCGAGCATTACCTTTGAGCAGGTGAGCTTTCAT  
TATCCGCAAGCGCTACTGGCGCGCGTTCAGGAGGTGAGCTTTCATGTCGCTGCCGGGCAAAATGTTGGCGCTGGTCCG  
GCCAAGCGCGCCGAAAAGCACCGGCGGCTGCTGCTGCTGCTTACGCGACCCGCAAAAAGGCAATACCGTATTTG  
GCGCGCTGATCTGCGTGTATGACAGCAGCACCTGATGAAGCAACTCTCGTTGTTTTCAGGCAACTTCTTTTTT  
GCCGACAGATAGCAATAACATCTGCTGCGGCGCCGATACGCGCTGGAGGCGGTTATAGCGGCGCCAGAGTGGC  
GCAGGCCATGATTTTATAGCGCTCTGCCAGAAGTTACAACACTCGAGTCCGGGAACGTTGGGGATTTCTCTCCGGC  
GCCAGGCGGCAATATGATCTAGCTCCGCGGCTTTTGGAGATGCGCCATCTGGTCTGATGAGGCGGCTTT  
GCTGACCCGAAAACGAAGCGGCTTATCAAGGCGCTCGCGGCGCCATGCTGGCCGAGGTCATCATGTTGCGCGCA  
TCGCTCTCAATGGTGAATCAGGCGGATGATGATTTGCTGTTTTCCGACGGACAGCTCAGGAAAATGGGGACCATACGC



AAC TGT TGG CGC AGG GCG CCT GT AT CAAC GGC TCT GGC AAC ACT AT CAG CAG GCG CAG CATT GGG T GCC GGG T GGA ACA  
CAG GAAG AGG TGG TGG AAA TGA AGA CAATA A

>Cluster\_27486

GTGATTGTTAAACGACCCGCTCTCGGCCAGTCTGGCCGGGCCCTTTTTTACATTTGTGCTGCTGTGCATTTTCCACGGG  
TATCGCTCTGCTAACGCTGGCAGCAGTTTACGCGACGCTGAGGCTATCAATATGCGCGATCGCTGCGTATGCAGAGTT  
ACCGCTGGGCTACGACTTGC AAAGTGGCAGTCCACA ACTCAATGCACATCGCCAGTTATTTACGAGCAGCTGCATTCA  
CCGGTATTAACCAATCTCAACGCTCTGGTATGTGCCAGAGGCAGTAAAAACCCGCTATGCGCATCTGAATGCCAACTGGCT  
GGAGATGAATAATCGGCTCAGCAAGGGGACTTGGCCGTGGTATCAGGCCAATAATTAATAATTAATGTTAATCAGATAGACC  
TGTTCTGCTGGCTTTACAGCAGTACGCTGGAACGCAAAATGCTGCTGGTGGTGGCAATTTCCCTGGCTGGCGCATCGGT  
ATTTTACGCTGGTCTTTTTTACTTTGCGCCGCATACGCCATCAGGTGGTGGCCCGCTGAATCAGCTGGTTACCGCCAG  
TCAGCGTATGAACACGGGCAGTTCGAC TCGCCGCCGCTGGATACCCAGCTGCGGAATGAGCTTGGCC TGCTTGC AAAA  
CCTTTAACAGATGTCGAGCGAGCTGCATAAATGTACCGTTCGCTGGAGGCGTCAGTAGAAGAAAAGACCCGCGATCTC  
CAGGAGCCAAAGCTCTGGAGGTGTGTATCAGTGTTCGCGAGGCGCTAAACACCGCAGATTTGATGGCATTTGTT  
CCGCCATATTTGCAGATTTGTCGCGACAATGAAGCGGCTGAATATCTGGAGTTAAATGTCGGTGACA ACTGGCGGATTA  
GCGAAGGGCAGCCAAACCCGGAATTTGCCGATGCAGATTTTACCGGTCAACATGCAAGAGACGGTTTACGGCGAACTGCAC  
TGGCAAAATAGTACGTTTACATCATCAGAACCCTGCTTAAACAGCGTTTCGTCGATGCTGGACGCGGTTTGTACTTTAA  
TGACGCGCAAGCAAGCTTTTACGACGTTTGTGTGATGGAAGAACGCTGGCACCATCGCCCGCAATTCGCGCAAGCTGG  
CTCAGGTACTTTCTTACTTACGTATCCAGTTGACGTTACTGAAGCGTTTCGATACCGGAAGATAATGCCACCGCACAAAGT  
ATCATGGCCGATTTTCCAGGCGTTGAATGATGCTTATCGGCAGTTACGCGAGCTGTAACTACTTTCCGCTGACGCT  
GCAGCAGCGGATCTCCCTCGCGTTGAGGAAATGCTGGATACGTTACAAAATCAAACAGCGCAACTGACCTCG  
ACTGCGCTTGCACACCTTGGCGTGGATGCGCAAAATGCAGGTGCATTTGTTGCAAAATATTTCGCAAGCGGCTGTAAT  
GCGATGAAGCACGCCAACGCCAGCGAAATCGCCGTTAGCTGCGTCACCGCGCCGATGGCAATCACACAGTCTATATTTCG  
CGACAACGGGATTTGGCATCGGTGAACCGAAAGAACCGAAGGCCATTATGGTCTGAATATCATCGCGAACCGCGCGAAA  
GATTTGGGTGGGACCTGACTTTTTCACAACCTTCGGCGCGGCAGCTTAGTAAGTATTAGCTTTCGCTCTGCGGAGGGT  
GAGGAAAGTCAGCTTATTTGGCATCCATGCTCGAAATAA

>Cluster\_56583

ATGAGCCAGAGAATTACTATTGATCCGGTAAACCCGATTGAGGGGCATTTACGCATCGATTGCGAAATCGAAATGGCGT  
CGTTTCGAAAGCATGGGCTTC CGGTACCATTGTCGCGCGCATGGAAGAGATCGTGAAAACCCGCGATCCGCGCATGCAT  
GGATGATTGTGCAACGTATCTGTGGCGTATGTACTACCCTACGCGCTGTCTCCGTTCTGTCGCGCAGAAAGTGGCGT  
AATATCGAGCTTCCGTTAACGCGCAATACATCCGTAAACATCATTTCTGGCTGCGCACACCACGATGACCATATTTGTTCA  
TTTTATCAGCTTTCCGCGCTGGACTGGGTGGACATCACTTCTGCAC TGAAGCTGACCAACCAAAGCTCCGAAATGC  
TGAAGGCGTTTCGACCTGGCACCTGAACAGTCCGGAAGAGTTTACC AAAGTTCAGAACAAAGATCAAAGATCTGGTTGCC  
AGCGGTACGTTGGTATTTTCGTAATGGCTACTGGGGTATCCGCGCATGAAACTGCCGCGGAAAGTGAACCTGATTTC  
GGTAGCGCACTACCTGCAAGCGTTGGAGTGCACGCGTACGCTAACCGGCTCGTGGCGCTGCTGGCGGTAAAACGCCCG  
ACATTCAGAACCCTGGCGTAGTGGTGTTCGCAACCCGATCAACCTCGACGGTTTGGGCGTGTGAACCTTGAGCGCTG  
ATGTACATCAAGCTTTTTCATCGACAAACTGAGGCACTTTGTTGAGCAGGTTTATAAGGTTGATACCTGATTTGCCCG  
GTTCTACCCGAAATGGCTGACACCGGTAAGGTGCGGTGAAC TACTGAGCGTGCCGAAATCCCGACCGACAGTAAAA  
ACGGCAGCTTCCCTGTTCCCGGGCGGCTACATTTGAGAATCGCGATCTGTCTCGTATCGTCCGATCACTTCTCATTTCCGAT  
GAATACTGATCAAAGCATTCAGGAAAGCGCGAAGCACTCTGGTATAAAGCAAGCGCGCAGCGCGGAAAGG  
CAACCACTTCCGCTTATGATGGTTGGTCTGACGACGGGAAATATTTCTGGTGAAATCACCGACTTTCTACGGCAAAA  
CGGTAGAAGTGGGGCCATGGCTAATATGCTGGTGAACCTGGCGCAGGTGCGGAATCTACCCAGAACAACCTGAATGAA  
ATCGTTGGCATTATCAGAACTGACTGGCAACACGCTGGAAGTGGCACAGCTGCACCTCCAGCTGGGCGGTATTTATGG  
TCGTACCGTTCACTGCTGGAATTCAGGATATCTGCAAAAACCAATACAGTGCATGATCACCAATTCGGTCAAGGGG  
ATCACACCACCTTTGTAAGCGCAACATTCGGCAACGGGTGAATCAAAGGTGTTGGCTTCTCGAAGCGCGCGCGGT  
ATGCTCTCTCACTGGATGGTATTAAGACGGTATCATCAGCAACTACAGGCGGTTGTTCCATCAACCTGGAACCTCTGG  
TCCGCGTAACTTCAATGATGACGTCGGTCTTACGAGCAGTCTGGTGGGTACACCGGTTGCCGATCCGAATAAACCCG  
TGAAGTGGTGGCTACCATTCACCTCTTTCGACCCGTCATGGCTGTGCGGTACACGTAAGTGGATGCTGACGGCAACGAA  
GTGGTTTTCAGTGAAGTTCTGTAA

>Cluster\_27781

ATGAGCGAAAACATCCAGGGCCTTTAGTGGTTCGAAAGAAAAC TGACAGACGCCGAGCGCATGAAGCTTGAAGCAACTA  
CCTGCGCGCACCATTTGCGGAAGATTTAAACGACGGTCTGACCGCGGCTTTAAGGGCGATAACTTCC TGCTGATCCGCT  
TCCACGGCATGTATCAGCAGGATGACCGCGACATTCGCGCCGAACGTGCTGAACAGAAGCTGGAGCCGCGCCACGCGATG  
CTGCTTCCGCTGCTGCTGCGCGGGTGGGGTGATTACCCTAAACAGTGGCAGGCGATCGACAAATTTGCCGTTGAAAACAC  
CATCTATGGCAGCATTCGCTGACCAACCGCCAGACATTCAGGTTCCACGGCATTTCTGAAAAGAAGCTCAAACCCGGTGC  
ATCAGATGCTGCATTCGGTCTGATGTCGCTGGCGACGCCAACGACATGAACCGTAACTGACTCTGCACTCTGCAAC  
CCTTACGAGTTCGAGCTGCACGCGGAAGCATATGAATGGCGAAGAAAATTTCTGAACATCTGCTGCTGCTACCCGCGC  
GTATGCGGAGATCTGGCTCGATCAGGAAAAGTCCGCACTACTGATGAAGAGCCGATCCTTGGTTCAGACCTACTTGCAC  
GTAAGTTCAAACACGGTAGTGTATCCGCCGAGACGATATCGATCTGCACGCCAACGACATGCACTTCGTTGGCGATC  
GCCGAAAACCGCAAGCTGGTGGGCTTTAACCTGCTGGTGGCGGTTGGGCTTTCCATTGAAACACGGCAACAAGAAAACCTA  
CGCCCGCAGCGGAGTGAGTTGGTTATTTACCGCTGGAACATACGCTGGCGGTAGCGGAAGCGGTTGGACGACTCAGC  
CGGACTGGGGTAATCGTACCGATCGTAAAAATGCCAAAACCAATACACGCTGGAGCGGGTGGGGGTTGAGACATTTAAA  
GCGGAAGTCGAACGTCGCGCGGGATCAAATTCGAGCCGATTCGCCGATGAGTTTACC GGACGCGCGATCGTATTGG  
CTGGGTTAAGGGCATTGATGATAACTGGCACCTGACGCTGTTTATCGAAAATGGTTCGATCTTTGATTATCCGGGACGTC  
CGCTGAAAACCGGCTTGTGAGATCGCGAAGATCCACAAGGTGATTTCCGCTATACGGCGAACAGAACTGATCATC  
GCCGGCTGCGGAAAGCGAGAAAGCGAAGATCGAGAAGATCGCCAAAGAAAGCGGGTTAATGAATGCCGCTCACGGCA  
GCTGAAAACCTCAATGGCTGCGTGTCACTTCCGACTTCCGCGTGGCGGATGGCGGAAGCGGAGCGGCTTCTGCGCTCT  
TTATCGACAACATCGATAATTTAATGGCGAAACATGGTGTGACGATGAGCATATCGTATGCGTGTAAACAGGCTGCCCG  
AACGGTTGTGGTCCGCGGATGCTGGCGGAAGTGGCCCTGGTGGTAAAGCGCGGGTCTGCTACAACTGCATCTTGGCGG  
CAACCGCATTTGGGACAGTATCCACGGATGATAAAGAAAACATCACCGAGCCGGAATCTGGCGTCTGATGAACT  
TGATAGGGCTGGCGAAAAGAGCGCCAAAGTGGGTGAAGCTTCCGCGACTTTACGGCTGCGCGGATCATTCGCGCGC  
GTGCTCGATCCGGCGCGGATTTGTGGGATTA

>Cluster\_25627

GTGTTAGTTTCCAGTAACTGACATGACGTTCCGCGAGTAAAGCGTGTGTTGAAAACATTTCCGTTCAAATTCGGCGCGG  
CAACCGTTACCGCTGATTTGGCGCGAACCGTAGTGGTAAATCCACTTTATGAAGATCCTCGCGCGGACTTAGAGCCGA  
CGTTGGGTAACTTTCCCTGATCCCAACGAGCGCATTTGGTAAAGTGCCTGAGATCAGTTTGGCTTTGAAGAGTTCACT  
GTGCTGGATACGGTATGATGGGCGATAAAGAGTTGTGGGAAGTGAAGCAGGAACCTGACCGCATATGCTTTGGCCGA  
AATGAGTGAAGAACGCGCTATAAAGTGGCGGATCTGGAAGTGAATAACGCGAAATGGACGGTTACTCTGCGGAACTC  
GCGCTGGTGAAC TGTGCTTGGCGTGGGAAATCCAGTGGAAACGACACTACGGCCCGATGAGTGAAGTTGCTCTGGCTGG  
AAGCTGCGTGTGCTGTCGCGCAGCGCTGTTTGTGATCCGGACATTTCTCTGCTGACGAACCGACCAACAACCTCGA

CATCGACACCATTGCTGGCTGGAACAGGTGCTGAACGAGCGTGACAGCACCATGATCATCATCTCGCACGACCGTCACT  
TCCTTAACATGGTTTGTACCACATGGCGGATCTGGATTACGGCGAGCTGCGCGTTTATCCGGCAACACACGATGAGTAC  
ATGACGGCGGCGACTCAGGCGCTGAACGCTCTGCTGGCTGATAACGCCAAGAAGAAAGCGCAGATTGCTGAGTTGCAATC  
TTTTGTTAGCCGCTTTAGCGCCAAACGCTCGAAATCTCCAGGCAACTTCGCGCGCGCCAGATTGATAAAAATCAAA  
TGGAAAGAGTGAAGCTCCAGCGCTCAGAACCCTGATCCGTTTGAACAGGATAAGAAACGTTCGTCGTAACGCGCTG  
GAAGTGAAGGTCTGACTAAAGGTTTGTAAACGGTCTACTGTTTAAAAATCTCAACCTGCTGCTGGAAGTGGGTGAAAA  
ACTGGCTGTACTGGGTACCAACGGCTCGGTAAATCAACGCTGCTGAAAAACGCTGGTGGGCGATCTGCAACCGGACATCG  
GCACCGTAAAAATGGTCTGAGAACGCGCGCATGGTTACTACGCCAGGACCATGAATATGAGTTGAAAAATGATCTGACC  
GTGTTGCAATGGATGAGCCAGTGGAAAGCAGGAAGCGCATGACGAGCAGGCGGTACGCAGCATTCTCGGTGTTACTGTT  
CAGCCAGGACGACATCAAAAAGCCAGCGAAAGTGTCTTCCGGTGGGAGAAAGGGCGGATGCTGTTGGTAAAGTAAATGA  
TGCAGAAGCCGAACATCTGATCATGGACGAACCGACCAACCCTGGATATGGAATCCATCGAGTCGCTGAACATGGCG  
CTGGAACCTGATCAGGGCAGCTGATCTTGTCTTCTACGACCGTGAGTTTGTAAAGTCCCTGGCGACCCGATTTCTGGA  
AATCACCCTGGAACCGGTGATCGACTTTAGCGGTAATTACGAAGATTACCTGCGTAGTAAAGGATCGAGTAA

>Cluster\_56320

ATGAATTTGCTTATTGATAACTGGATCCCTGTACGCCCCGAAAGTGGGGGAAAGTCCAAATCATAAATCTGCAATCGCT  
ATTTCTGCAGTAAAAATCAGTGGCGGTTAAGTTTGCCTGACGATATGGAATGGCCGCTTTAGCTCTGCTGGTTTGCA  
TCGGGCAAAATATCGCCCTGCAAAAAGTACGCTTGAATTTGGCATTCCGATATGAAATCCGCTCAGTGAAGATGAGTTT  
CAACGACTCATCGCGCGGTGATAGATATGTTCTACCTTAATCAGCAGAACATCCCTTTATGCAGACCAAAGGTGTTAA  
AGCAAAATGATGTACTCCAAATGGA AAAACTGTTGGCTGGGGTAAGCGCGCGAGCAATTTGTGCATTTGTCAATCAACCGG  
GTCAGGCTGAAGCATTATGTGGTGGATGCACTGCGATTGCGTTTATCAACAGGCGAATCAGGCACCTGGTTTGGTGGT  
GGCTTTAAAAGCGGTTTACGTGGAGAACACCTATAACCACCTTCGTACGTGGGATCGATCTTCGCTCGACGGTGTACT  
CAATGTCTCACAATACCTCGTCTCCAAAACAATTTCCCAATGAATCACAACGAAAACCAACCTACCTGGATTAAGC  
CTGTCAAGCCCAATGAATCTGTGCCAGCTTCGTCAATTTGGCTTTTGTCCGTGGCTTATTTCTGGCAACCGCAGCATATTTGAA  
TTATGCGATATCGTATGGATTGGTAAATGTTCTTGTGCTGGACAGGAAAGCAATTTGCGTTATACCGGTTTCTTAAGGA  
AAAATTTACCTTTACAGTTAATGGGCTATGGCCCCATCCGATTTCCCTTGTCTGGTAACAGTCAAGAAAGGGGAGGTTG  
AGGAAAAATTTCTTGCTTTCACCACTCCGACCATCATGGACACAAATCAGCCGAGTTGTGGTAGATAAAAATTTATTTCAA  
AATGAAAAATGAAATCGCGTGGCGGGGTTGTGAATCAATTCAGAAATATTTGCGTCCGAAAGTCTCTTGAATTTGATTTA  
GGGGGATATCGTAAATAAACAAGCATCTATTTCTTGAACCGGCTCATGATGTGCTGATGTTTAAATCAGGATGGCAACAT  
ACGGCAATGTGATAAACGAAATAGTGACTGTTGGTTGGGATATAAACAGCCTTACGCAAGGCGTTATATACCTTTGCA  
GAAGGGTTTAAAAATAAAGACTTCAAAGGGCCGGAGTCTCTGTTTATGAGACTGCAGAAAGGCAATTTCTATCCCGCAGAG  
TGAATTTAATTTCTCGATGTACTGGCGAATATTAATTTTCCAGGCTGATGAGGTAATAGCTGATTTACGAGACAAAC  
TTCATCAATGTGTGAAATGCTATTTAATCAACTGTAGCGCCCTATGCACATCATCTAAATTAATAAGCACATTAGCG  
CTTGGCCGCGCCACGCTATACAAACATTTACGGGAGTTAAAACCGCAAGGAGGCCATCAATGGCTGA

>Cluster\_3298

ATGCTGTACAACAAGAATGCCACCTCTGAAACTGCAACACTGACCACCCTGAGTCCGGCGGCTTTATCAGTCCCT  
GTTTGTATAAAAATTAATTTAACCCGGTGTCTTCCATTCAGAAATAGATTTATGGCAAAACAGCGAAACACTGGCGGATG  
CCTCACCCGATGAGCGGCTGACAGCGGCGATTACGTTCTGCTTTCCTGCTGGCGAAATCAGCGGAGAACGTTGGTCAAG  
CTCGACAAGAGCTGTGATTTTCATATCGACGATTTGGATAGAAAATCAGTAAGCAGCTTGTATGCGCATATGACCA  
TCCTGAAATTCAGAAAGTCCAGTCCGCTGTGGCGGACATGTTCTGCTGACAGCGCACTGATTTTCGCAAAAATGCTCA  
GAATTTGAATTTGCTGGATATCAGCAAAAGAGCATCTGCGTCAAGATTTTCGACGACTCCCCGGAAATCATTTCAGAGTGGTTTA  
TATCGTACATATATTTACAGGATACGATACGCGGGTGGCGAACCTGTTGCTCATTAATTTCCAGCTATGAAATTTGA  
TAACAGCCCGCAGGATATGCCCCGCTGCTGCGCAATATTTCCAGTGTGCTGCGCGCTTCCCATATGCCTTTTATCGGTTCTG  
TCGGCCGAAATTTCTTCTTAAAATTCGATGGAAGAATTCAGCCGCAATTAAGATATCGGCAACTACTTTACCGCGCA  
GAATATATTAATGGAATCGTTTTCGTGATACCGATGACAGCCGCTATGTGGGATTAGTGATGCGCGAGTGTGGGCCG  
TCTGCCCTATGGGCGGACACGGTGCCTGACGCTTTAACTATGTGGAAGAGTCAAAGGCCGGATCACGAAAAGT  
ATCTCTGGACAACCGCTCGTTCGCTTTGCGGCAATATGGTGAAGAGCTTTGTGAATAATGGCTGGTGCCTGCAGATC  
CGCGTCCCAACAGCAGTGGCGAGTGGCCGATCTGCCATCTCTTTACGATCTCGGCACCAGCAATCGGCAATCGGCA  
TCCGTCGGAAGTGTATGATCCCGGAAACCGGCAATTTGAATTTTCCAACCTTGGCTTTATTCGCTCTCTTATTAAGA  
ATCGCGATTTACGCTGCTTCTTCGCGCAACTCTGCCAGAAACCGGCTTGTATGATACCGCTGACGCCACCGCCAAC  
AGCCGATTTAACGCCCGTCTGCCCTATATCTTCTGCTGTCCGCAATTCGCAATTTACCTGAAAATCATCCAGCGCGAGAA  
TATCGGTACCACCAAGACCGCCGCTACTGGAACCTGGAACCTGAAACCTGCAACCTGGTCCGCACACTGGTGAAGGATGACCG  
ATCCGGGTGATGAACTGCAGGCTCTCACCCGCTGCGGACGGTAAGGTTATCGTGAAGATAATTGAGGACAATCCGGGC  
TTCTTCCGCTGACACTCTTTGCGTGCCTATTTCCAGATTAAGGGATGATATCAACCTGTCACTGGTTTCCAGAT  
GCCGAAAGCGAAAGCTGA

>Cluster\_28414

ATGGAACCAAGATCTGATTTGTGATAGGTGGCGGCATCAATGGTGTGGTATCGCGGACAGCCGCTGGACCGGTTT  
ATCCGTGCTGATGCTGGAGGCGCAGGATCTGCTTTCGCGGACCTTTCCGCCAGTTCAAAACTCATTACGCTGGCCTGC  
GCTACTTTGACACTATGAATTTCCGCTGGTCAAGCGGCGCTGGCTGACGTAAGTGTACTGAAAAATGGCCCGCAT  
ATCGCTTCCCGATGCGTTTTCTGCTGCGCATCGCCCCATCGCGCCGGCGTGGATGATTGCGATTGGTCTGTTTTAT  
GTAGATCATCTGGGTAAGCGCACAGCTGCGGGATCAATCGGTTTGGCTTTTGGCGCAAACTCAGTGTAAAACCGG  
AAATTAAGCGGGATTCGAATATTTCTGACTGTTGGGTAGACGACGCGCCGCTGGTACTCGCAACGCCAGATGGTGGTG  
CGTAAAGGCGGTGAAGTCTTACTGACTCTGTCACGCTGCTGCGCGGAAAAGGCTGTGGATTGTTGGAAAGCGGA  
AGATATCGATAACGGCAAAAAATATACATGGCAGGCGCGCGCTGGTTAATGCTACCGGCCGTTGGGTAACAATTTT  
TCGACGAGGGATGCATCTGCCCTTACCTTATGGCATTGCGCTGATCAAAAGCAGCCATATTTGGTGGCGCGTGTGCAT  
ACCCAGAAGCAAGCTTACTTTCGAAAACGAAGATAAAGCTATTGCTTTCGTGATCCCGTGGATGGACGAGTTTTCAT  
CATCGCCACCCAGTGTGAAATACAAAGCGGATCCAAAAGCAGTGAAGATTGAAGAGAGTGAATCAATCAATCTGTTGA  
AAGTGTATAACACGCACTTTAAAAGCAGTTAAGCCGGGACGATATCGTCTGGACCTACTCCGGCGTGGTCCGCTATGT  
GATGATGAGTCCGATCGCGCAGGCAATACCCGTTGATATCCATGATGAAAACCGGCAAAGCCCGCT  
GCTGTGGTATTTCGGCGGTAAGCTGACCACCTACCGAAAACCTGGCAGAACATCGCTGAAAAAATGACGCCGATTTATC  
AGGCATTTGGTCCGGCTGGACGAAAGAGAGCGTGTCTCGGGGGTGGCATTGAAGGCGACCCGACGATACCGCAAC  
TGCTTGGCGCCGTTACCCGTTCTGACCGAATCGCTGGCACGCTACACGCGCACTTACGGCAGCAACAGCGAACT  
GTTGCTCGCAATGCAGGGGCGATAAGGCACTCGGTGAAGATTTCCGTCATGAGTTCTACGAAGCGGAGCTGAAATATC  
TGGTCGACCAGAAATGGTCCGCGCGCCGACGATGCCCTGCGGCTGCGACGAAACAAAGGCATGTTGGCTAAATGGGAT  
CAACAATCTGCTGTGAGTCACTGGTGGAAATATACGACAGAAAGTTGTCGACGCGCTCGTAA

>Cluster\_24048

ATGAGCAAAAAAATAACCTCTTGTTTAACTTCAAGAAGTTGCAGAAATTTCTTCTGCTGCTGATGTTACCAATCGCCAT  
TCTCCGGCGCGGTTGATTTTACCTCGGATTTCAATTTAATTTGAGCTGCTGGCGAAATTCGGCGGCTGATTT  
TCGCCAACCTTCTTGTGTTTTGTGTGCGTATTTGTGATTTGGCTGACAGGTTGATGTTTCTTCTCACTTTACGCGATT  
ATCAGCTACATGATCATGAATGCCACGATGGGTACGCAACTTGGCATTACCGCGGAGTCCGTTGACGCCAGTAAACGGTGA

CTATGCGATGATCCTCGGGTACCGACGTTACAAACGGGAGTGTGGCGGTTGATTGTCCCATCTTTGTTTATCTGC  
TCTATACCCGCTCCACAATATTGAATTGCCTCAGTTTCTGGTTTCTTCGGTGGAAAACGCTTTGTACCGATTATTACG  
GCGGTGGCGCAATATTGTTCGGCTATTTATTGCCGTGGCTGTGGATACCGGTACAAAAGGCTGGCGTCCGTTCAAC  
GCTGGTGACCACTGGGCAATAACGCGAACCTTCGCGCCCTTTATTACCGCGTTGGCGAACGTTCCGTTGGCC  
TGCATCATATCGAACGTTCCGTTTATTACAACTTTGGCGACTACATGACCAAACTCGGGCAACTGGTGCAGCGGAT  
ATTCGGGTGTTCTTTGCCCAATTGCGCGACGGTGTCCGTTGACGCGGGGCTGTTTATGACAGGTCCGTTCCCGATCAT  
GATGTTTGGGTTACTGCGCGCGGTTGGCGATGTATCAGGAAGCAAAACCGGAACGTAAGGCCTGATTAAAGGCCTTT  
TACTCTCCGGTGGCTGACCACATTTGTTACCGGGATTACGGAGCCGCTGGAATATGCATTTTGTGTTGCAGCTCCGGTT  
CTCTACATCATTCACATCTTCTTATATGCCACTTCATTTGTGCTGATGAACATCCTGAATGTGCACATTTGGTCCATCTTT  
TGCTGGCGGTTTATTGATTTTCGTAAGTGGCGTTATGCCAAACCGCACGCGTGGTATCTGGTGTCTCCGCGAGGCG  
CGGGCTATGCAGCGATTTACTACACCGTATTTCCGGTACTGATCCGCAAGTTGAATCTGAAAACACCGGGACGTGAGGAT  
GAAGAGATTGCGGTTGCAACCACATTAACGCGCGAAGAAGCTCCATACCAATCATCGAAGCAGTAGGTGGTTTCGACAA  
TATCGAAGATGCTGCTGCGCAACACGCTTCGCGGCTGGTAGACGATAAGAAAAGTGAATGAAATGAAATGAAATGAAATGAA  
AGGAGTTGGGGGCTGCGGTTTAGTGAAACTGGGTGATGGCGGTGACAGGTGATTTGGCGGCAAAATCGAAAATCTG  
CGCGACGAAATCAAACCGTAATGAGCAGACCGCGCCGACAGAAATGACAGTGGCCTGTGCTAACTAA

>Cluster\_54417

ATGAATTTAACCCCTCAAAGAATCGCTTGTATACCCGTAGCCGGTATTTAGCCCGTGGACTGCGTTCTACTTTTTACAGTC  
GCTATTAATTAACCTCGGCTTAGGTTACCCCTCAGTTTGTCTACACCGCTCGGTTTACGGCTATTTTGTCTTTGCTAT  
GGGCAACATTTGCCGCTACAAAAGTTCTGGTCCGCTCAGTTCCGCTGGTGGCGGCTGTTTATTTCCCTTTTGTCTCAG  
GCCTACGGCGGCTAATTTCAATACATTTGCTGGCATTGCATCCACCAATATGGAAGAGTCGACCGAAATCCCTGACGAT  
TTTTCCGTTGGTACAGTACTCTGGTCCGCTTATTTATTTTTCGCGTCCGCGTAAATAGCAATCAGCGCAAAAAGAGAAATG  
AAAAGCGCGCTGGAATACCTTCGACAGCCTGTGTCTGGTATTAGTGTGGCGACATTTTGTGTTGCTCCCGTCAAAAAC  
CTGGCCTGGGGTGGCGTATTTAAACTGAAAGATACTGGCTATCCGGTATTTCCGTTTGGTAAAGGATGTATCGTCAATAA  
TAACGAGGTTGGTGGTTTTTCCAACAGGGTCAAAATCGCGCAAACTTTCCGGAATGAAAGATACCTGGACGGTCACTGCCATTAAG  
CGAAGTATCAGACCTATGTTGGTGGTATCGGTGAAAGCGCGCTCGCGATGCCCTCGGTGCCCTTTGGCGGCTACTGGGAC  
AATACCCGTTTGGCAGCAGCGTTAACGGTTGATATTTGCTGACTACATTGCCGCGAGTGGCTCCACGCAGAAATCGCT  
TGGCTTAACGCTCAATCGCGTTGTCGATGGCAAACACAGTTTTCAGGATAACTTTGTCCACCTGGCAAATCGCGCGGGCT  
TCCAGACCTGGTGGTTTTTCCAACAGGGTCAAAATCGCGCAAACTTTCCGGAATGAAAGATACCTGGACGGTCACTGCCATTAAG  
GAAGTGTACTTCTGAAAGAAGGTAATTTGAAGCAGATAAAAACACCAAGCAGGCGTTACTGGATATGACCGCTCA  
AGTGTGGCGCAAGCAGCTCGCAACCGCAGCTGATGTTTCTACATCTGATGGCTCAGTCCGACGCGCTGCGACAGGA  
CACAAGGAAAATACGAAACCTTTGTGCAATCGAAAGAAACGTCGTGCTATCTCTATACCATGACGCAAAACGGACGATTTA  
CTGCGCAAGCTGTACGATCAGTTACGCAACAGCGCGCAGCAGCTTCTCGCTGGTTACTTTTCTGACCAGGCTTGGCCTT  
TAAAGAGCGCGTAAAGACGTGCAATACCTTGCCCATGATGATAAATATCAGCAAAATTTCCAGGTGCCCTTTTATGGTCA  
TTTTCCAGCGACGATAAAGCGCATCGTGTGATTAAGGCCGCGCTCAGCCAATGACTTCTTAGGCTTTTTCTCCAGTGG  
ACGGGGATTAAGCGAAGGAAATTAACATCAAAATACCCGTTTATATCTGAGAAGAAAGCCGGCCGATATACATCACCAA  
CTTCCAGTTACAGAAGGTGATTACAACCATCTCGGAAACGATATTTTCGACCCGAAACCTTAA

>Cluster\_59533

ATGACGGCGAAAACAGCAGCCGAAAGTCAAGCTGTGGGAGTTCTCCAGCAGTTAGGCAAAAACCTTCATGTTACCCGTGGC  
ATTAATGTCTGTTCTGCGCATTAATGCTCCGCATTTGGTAGTTCCTTAGCAGCCATGATGTATACCAACCTGATCCCGTCC  
TGGCAACCCGTTTGGAGGCTATCTTTACCTGGATGAGTAAGATTGGCTCGTTTGGCTTTTAGTTTTCTGCCTGTCTATG  
TTCTGTATCGCCATCCCGCTGGGCTGGCACGCAAAATAAAGCGGTAGCGGCTTCCGTTGGCTTTCATCGGTTATGCGGT  
AATGAACCTCGCGGTAACCTTCTGGTTGACCAATAAAGCGATTTCCGCAACCGGATGCCGCGGTTCTGAAAGCCAATA  
ACATCCAGAGCATTCTTGGGATCCAGTCATCGATACCGGATCCTCGGTGCGGTGATCGCGGTTATTAATCGTGTGATG  
CTGCATGAGCGTTTCCATAATATCCGCTGCGGATGCGCTGGCATTTCTCGCGGTACGCGCTTCGTACCAATATATCTC  
CTCGCTGGTGTGGGCTTGTGCGCCTGGTGTATCCATGATCTGGCCGATTTTCGCCATGGGTATTAGCGGCTTGGGCT  
ATATGATAAAACAGCGCGGTTGATTTCCGACCGATGCTGTTGGTACCGGTTGAAAGCTGCTGTTGCGGTTTGGTCTGCAT  
CACATCTGGTGGCATTAAATTCGCTTTTACCAGCAGCGCGCAGCAGGAAAGTCTGCGGTCAAACCTGACCGGCTCACT  
GACCATCTTCCAGGCGCAATGAGTTGCCCCGACCTCACGGTTTTTCTGAAAGCGCCAGCGTTTTCTTTCGCAAGGTA  
AAATGCCCTCGGTTTCTCGCGGCTGCGCAGGTGACGCTTATGATCACGCGCGCCCGGAAATCGCCATAAA  
ATTAAGGCTGCTGATTTCTGGCCTGATCGCCTGCGCTGTTGGCGGCTACCGAACCGTGGAAATTCCTGTTCTGCTGT  
CGTAGCGCCAGTTCTGTATGTCATCCAGCGCTGTTAACCGGCTCGGCTTCCCGCTCATGCTGTGCTGCGCTGCGGCTCACCA  
TCGGTAATACCGACGCAATATCATCGACTTCGTTGGTGTTCGGTATTTTGCATGGTCTGTCAACCAAGTGGTACATGGTG  
CCAGTGGTGGCGCAATCTGGTTTGTGCTTACTACGTCATCTCCGTTTTCGCTATCACCCGCTTCAATCTGAAAACCC  
GGGCGCGATGCAAGGTTGCCAGCTCAATCGAAAAGCCGTTGCCGTTGCCGCGGTTAAATCAGGTTACAACGTTCTCTG  
CAATCTCGAAGCATTAGCGGTTAGCGGCTGCGCAATAATGTCAGCTCGATAACTGATTAACCGCTGCGGTTTGTGAAA  
GATATGTCGCTTGTAAATGTGACGACGCAAGGACAATCGGCAATTTGGCTAGTACAATTAATCAACATAACCTGCA  
GTTGTTATCGGGCCACAAGTTCAGTCAAGATAAAGATGAAATGCGCGGCTGTATGATGCTACTGTCCAGGCATAA

>Cluster\_20951

ATGTGGGATGTCAATGATTATCGCGCTGGCAGTTTGCAGTACCGCGCTGTATCACTTTTTATTTGTACCCCTTACCCT  
GGGCTGATTTTTTGTGGCTATCATGAAACCATTTACGTGGTACCGGCAAAACAATCTACCGAGATATGACGTGCT  
TCTGGGTAAGCTCTTCGGTATCAACTTTGCTCTTGGCGTGGCTACCGGCTGACGATGGAGTTTCACTTTGGTACTAAC  
TGGTCAATTTTCAACTATGTGGCGATATTTTGGCGACCGCTGGCGATGGAAGCATTAAATGGCTTCTTCCGCA  
ATCCACCTTGTCCGGCTGTTCTTCTCCGCTGGCAGCGGCTGAATAAATACCAGCACCTGCTGGTGCAGTGGCTGGTGG  
CGTTCGGTTCAAATCTCTGCTGATGTTGATATGAAATGCCAAGGTTGGATGCAATACCCGACCGGTCGCAATTTGAT  
ATCGACACCCCTGCGTATGGAGATGACAGTTTTCAGCGAGCTGGTCTTAAATCCGGTACGCGAGGTGAAATTTGTGCAC  
CGTAATAGCGGGCTACGTGACCGGGGCTGTTTATTAATGGCGATCAGCGCTGGTATTTACTGCGCGGACGGCGCG  
ATGTCGATACGCTCGTTTGCATCGGTTCCGCTTCCGTTACTTGGCGATTATCGGTACGCTGCAACTCGGAGACAGT  
TCTGCGTATGAAGTCGCGCAAGTACAACCGGTAACCTGGCGCAATGGAAGGGGAGTGGCAAACGGAACCTGCACCTGC  
ACCGTCCATGTGGTTGCTTGGCCGGAACAGGATCAAGAGCTAACGCTTTGGCATCAAATTTCCCGCTGCTAGGGA  
TCCCTGCCACTCACTATTAGATAAAACCCGTCGCGGCTGAAAGAAATTTGATGGCTGAAACCTACCCAGCTTGCACCG  
GGCAGTATGGCTGGCTGTTAATGCAGGAAATATCGCAAGGCAATCGAGAGCCGATGTTGTCAGGCATTTCCGGAGCT  
GGAAGGCGACCTGGGTTACGGCATGTTGCTCTCCGCTATGCGCGGATATGAATCATGTACAGCCGACAGTACCAG  
CGCGATGCGTGGCGGATACCTCAGTTGCGCCGTTATTCGAGTTTCCGATCATGGTGGGCTGTGGTTCCCTGCTG  
CTACTGGTGTGCTGATTCCGCTTGTTCAGACGCTGCGTGGCAAAATCGACAGCATGCTGGGTGCTGAAAATGGCGCT  
CTGGAGTTTCCGCTGCGGTTGATGCGATTGAAAGCCGATGTTTATGACCGAGTTTGGTCTGACCGTGGCGGATAC  
AGGACATCTTACCACATACTCCGCGACTCCGCTTAAACACAGGACAACCTGGCTTTTCTCACTGATCATGATGATGAGG  
CTTTACACCTGTTCTTAAATCGCGAAGTCTACTGATGCAGAAATATGCCGCTTGGGGCCGAGCGGATGCAGAGTGA  
ACAACCGACGCAACAGGGGTAA

>Cluster\_22692

TTGAAAAAATTAAGATTAATTATCTGTTTCATCGGCATTTCTGGCACTGCTGCTCGCGGTGCTCTCTGGCCATCCATTCC  
CTGGTTTTGGTAAAGCCGACAAACCGTATCGCCGCCATTCAGCGGGGAGAGTTGCGTGTGAGCACCATTTCATACCCCC  
TGACTTATAACGAAATCAACGGGAAACCTTTTGGCCTGGATTACGAACTGGCGAAACAGTTTGCCTGATACCTCGGGCTA  
AACTGAAAGTACCGTGGCGCAGAATATCAGCCAGCTGTTTGGACACCTCGATAATGGTAACGCCGACCTGCGCGCG  
AGGCTGGTCTATAACGTGAGCGGGTAAAAAATTTATCAGCTGGCCCTACCTATTATTCCTGTCACACAACTGGTTT  
ATAAAGTCGGTCACTATCGCCACGTACGCTGGGCAACCTGACGGCAGAGCAACTCACCGTTGCACCGGGTCACTGGTG  
GTTAACGATCTCCAGACCTGAAAGACAAAAATTCGGGAATTAAGCTGGAAGGTAGACGACAAAAAGGCTCTGCGGA  
ATTAATGGAAGATGTCATCGAAGAAAACTCGATTACACCATTGCTGATTTCTGTCGCCATCAGCCTGTTTACGCGCTTC  
ACCCGAACTCGCGTAGCGCTCGATATCACCGATGAACAACCGGTGACCTGGTTAGCCCGTTAGATGGCGATTAATACC  
CTTTCCGCGCCCTGCTCGACTTCTTCAACGAAATGAATGAAGACGGTACACTGGCACGCATTGAAGAGAAATACCTGGG  
GCATGGCGATGATTTGATACGTCGATACGCGCACATTTTACGCGCGCTCGATGCGGTACTGCCGAGTTAAAGCCCC  
TGTTTGAGAAATACGCGGAAGAAATGACTGGCGTTTGGCTGGCCGCTATTGCTTATCAGGAATCGCACGTTGGATGCTCAG  
GCCATTCACCTGCGGTGCGCGCATGATGATGTTAACCAAAAACACCGCGCAAAAGCCTCGCATACGGATCTGATC  
CGATGCCGAACAGAGCATCAGCGCGCGGTGCGTTATTTACAGGATATGATGAGTAAAGTCCGGAAGTGTGCCGAGA  
ACGAACGGATCTGGTTTGCCTCGCCGCTACAATATGGGCTATGCGCATATGCTGGATGCCCGGCCCTGACGGCAAAA  
ACCAAAGGTAATCCTGACAGTTGGGCTGACGTAACACAGCGCTGCGCTTACTTAGCCAGAAACCTATTACAGCAAGCT  
GACTTACCGCTACCGTGGGCTAGAGCTTACGCTTATGTCGAAAAATATTCGTAAGTATCAGATTAGCCCTGGGGTT  
ATCTGCAGGAGAAAGAGAAGCAGGCTACAGAAGCGCGATGCAACTGGCGCAGGATTAATCCGCGGATCAGCTACGGAG  
TTGGGCAAGAGAAATTTCTTTCTCTGTTTCTTTCCAGTCTCATCAAACCTATTGACCACCTCCTCTCTGCT  
ATTTTCCAGAAAAGGAGTGAAGAGAAACAAAAATTA

>Cluster\_43442

ATGGCAACAATAATCCCAACAATCAGTAGCTGCAACGATAAAAATTAAGCTGGCGAGAGAAAAGGCTGGCAAGAATCTGGA  
AAGAGACTAGGGCAAGAGTGTCTGTTGGTATGACATTTCCACGGGTGATAAGCATCTTACCCAGATTTTATGATAC  
TTTCGCGAAGAAAGCATTTTTCGAGGTAAAGATGGTTTATTCAAAAAATAAAAAAAGCCAAAGTCTAAT  
GTGTTGATGAGACACAAAATGGTATTCATCTTAAAGAATCCGATAGAAACAAGTTAGGCGATATGCTTTCGAAGCTGT  
AAACCAGTTAAAAAAGACCCCTATTGTCGAACAGGATGATCGTTACAATGGCAATCTTCTTTCCCTATGGATATG  
CGGTCTACTTTAGTAATATTACACGAGAAGCATTAATAATAAATTTACTCAAGAAGAGCTGCTCGGGATCTTCCCATCA  
GATCTCATCATCTCGCAAGACGAAATAAATGAATTCATGTCAAAAGAGGATGTTTCATCCAAAATACATTCGTTGATTA  
ATATGACTTCAAATGTATGCTACACAAGAACAGTTGAACAGGGTTAGATGGCACTTATACCCGATGTCAGAATAGAAA  
GGGAAAAGAGAAGTAAAAACCGTATGAATTTAGTGTCCATGCAACCAATCATTTCTATCCGATACTCAACAGGAA  
CAACTTGGCAGAAGTATGAGAGATGGCCACCGGATCATTCATGGTGTGACAGTTAGGGAAGACATTGATCCTCTATCA  
TCGCTGTACAGAAATTAGCGAAAAAATAATGACAGCGAAAAAGCCAAATCTGTCAATTTGCTACAATATTACTTTAGCCAAA  
AACTTCGGTGCATGTTTCAATCATCCCTTTCAGAGAAAATAAAGGTTAAAAACTTTCATGCTGGTGTTCACAA  
ATTAAGAAAAACAAGATCACTATTTCCAGAGGGGATAAATTTTGAATAATGGAGCTAGCGTTGACTGATGGTTTCAA  
GACAGAAAAATAAAACGAGAACAATACAGCGCTGATTAATTTGATGAAGGACATGATTTAGCCCGAATGGTTAAAA  
TCTGGCAAAAATGACTGACTCTCAGGACGAGAATTTGCTATTCTTTATGATGATGCTCAGTCAATTTACCAAAAAAG  
AAGCATTAGACTTTACTGTCAGCGTAGATATTAAGCGACAGGACGCAACCAATCTTAAATATAAATTAAGAAA  
CACACAGCAAACTTACCTTTGCCAGTTGCATTTGATTAATTTATCTTAATAGCCATATCGATAGTTCTTTAACCTATC  
ATAAACCTGCTGCGGGAGAAATGAATGGCGATTTACCAACTTGAACATTTGACACACAGGACGAAAGAAATAGCAAG  
CGACTCGAATGGATTTACAGAGCAAAAATGAACAAGGGATTTCCATGGTCTGAAATTTGCTATACTAAGTCCATCACTCAC  
CCTTCTAATCTCTAAGTTCTGTAATGAAATCGAAAAACATCCCTTTAATCTTATTGTAAGCTCTGAGATAAAAAGT  
CCTGGACGCCAGAAGAGCGTATTTCTGTTATGCCATTAACCCAGCAGCAAAAGGACTTGAGTTTCACTCAGTTGCTCAT  
ATTGATGACAGCAAGGATAAATAGCGATGATTTGAGTGAGGATATAAAGAGACTCTATGATGGTTTACCGGAGC  
ACGTTGCAATCTCTGGTAACTTGCACGGTGAAGGTGGGTTAAATGAGCATCTACTAAAAACCTATGAGCAAAATCCAC  
AATATATGTAA

>Cluster\_21059

ATGAAGAAAAGTGTCTCACTCTCTACTGCTGGCTCTCTGCGTTTCTCATGGTGCAGCGGAGCAAACTACGCGCTCAATAA  
CGACAATATTGCCCTCTTGTGTTGATGATACAACTCAACGGTCTGGTGAAGGACAACAAGGCTAACCATCCGCTCACGC  
CGCAGGAGTTGTTCTTTCGACGCTGCCGGATGAGAGTAAAATCCACACCGCGGATTTCAAAAATCAAGCACGTCGAAAAG  
CAGGATAACCGGATTTGTCATCGACTTTACGACCCCGGATTTTAACTGACGGTGAAGCTGAACCTGGTGAAGGAAAAA  
CGCCAACTCGGCTTACACCATTTGCCGCTGGGCGAGCCGCGGACGTCGCTAAAATCACTTCTTCCGACCCAAAAAC  
AGTCTCAGGCCCCTTACGTAGACGGCGCAATCAATAGCTCTCCGATCGTTGCGGACTCGTTCTTTATCTTCCGCGATAAA  
CCGATCGTGAATACCTACGCTTGAAGCCACCACCAATCTCAACGTAGAGCTGAAAACGCGGATTCAGCCAGAGGCGCC  
GGTCACTTTACTACCTGGTTCGGCACTTTCCGGAACACAGCAGCTGCGCCGACGCTGAACCACTTATTAATGACG  
TAGCTCCAGCCCTTACAGCCTTATCTGCATCAACAGCTGATGATGATGATGATGATGATGATGATGATGATGATGATGAT  
GATGTTGCTGGGCGTATGGACGAGTGAACAAGGATTCATTACGGGCGCGGCTGGCGCTGGACGCTTCTGCTGGA  
TGATGGCTGGGACGATCTGACCGGACGCTGGCTATTTGGCACGGCATTCAGAAACGGTTTTCGAAAGTACGGGAGAAAG  
CCGACAGCTGCACAGCTCCGTTGGCTATGGCTTTCCCGTGGGTTGCTACACAAAACCGCGGACTTTCGGCTTTCG  
CATGCAAAAAGATATGGTTTCAAAACCGTGGACCGCAAACTGGCGCTGTCGGGAGCGAACTACTTTAAAAACTTCAATGA  
GCGGATCATCAAGCTTATCAAAAACGAGCACATCACTCGTTTAAACTCGACGGGATGGGTAACGCCAGTTCGATATCA  
AAGCAGCTCGTTCCGCTCAGATTTGATGATCAATCGCCCTGCTGCACAATATGCGCAGCGCAACCCCGAATCTGTTT  
ATCAACTGACCCCGCACCGGACCGCGCTCCGCTGTTTACGCTGATTTCTATCTGGGTCAGGAGATGACAT  
CAACTGTATGGTTCCGGTACGCGGTCAGCAGTGGATGACCTACCGGATGCGGAGACGTACCGCTCCATTGTCCGTA  
AAGGCCCTCTGTTCCCGTGAACTCGCTGATGTACCACGGGATAGTACGCGCGGAGAAATGCTTATACGGTTAGAGAAG  
GTGCAAAACGACAGCGACTTTGCCGATCAGGCTGAGCTACTTCCGACCGGACCCAGCTGCAGGAGCTGTATATTAC  
CCGCTCAATGCTGAACAAGGTGAAGTGGGATACGCTGGCGAAGCTGCAAAAATGGTGAAGGAAAAATGCCAGCTGCTGG  
TTGATACCACTGGATTGGCGGCGACCAACGGCGCTTGGCTGACGGCTGGGCATCTGGAGCAAGACAAAGCCATT  
CTCGGTTTGGCAACCATCGGATAAGCCACAGGCTACTATCTGGATTTGGCTAAGGATTTGAAATACCGACAGGAGA  
CGTGGCGCAGTTTACTGTAAGCGGATACGGCAGCAATAAAACCGTGGCTGAGTATAAAAAACCGCAGCGGTGATTA  
CGTTGACCGCTGGAACCGTGGTTTGGCGGTCCTTAACTAA

>Cluster\_13120

GTGCTGGATCTGGATATCAGCCAGCAAGGACCGCAGTTATTTATTTCTGGAAGATGTGACTGGCGCAGGTAACCAAGAGC  
GGCGCTTATCTGGCGCACAGTTGATAGCTGCGGGGAAAGCTCAGGGCTGTTTGGTCTGCCAACAAATGGCAACCG  
CCAAATGCTATGTAACCGTGGTCAAAACCTGGCTTCTTCTATTTCGCCAGAATCCCGCCAGCTGGTCTGGCA  
CATAGTCCCGCACATTAATGGACCGCTTAAATGAATCACTCTGGTCTGGTATTTAGTGGGTCAGAAGAACCGGATGA  
ACAAACGTTCACTCAGGATGTGCGGCTGGTTTGGCGCAGTAAACAAGAGGCGTTGCTGGCTGAAATTTGGCTCCGCA  
CGTGGATCAGCGGATGATGGCGGTGATGCCCTTCAACATAAATATCTGCGGCTCTGGGGCTGAGTAAACAACTCCG  
CTGGCTGATGAGATCCACGCTGTGACGCTTACATGTCGTCATTTCTGAAGGTTGATCGAGCGGACGGCGCTGGCGG  
AAACAGCGTTATTTGCTTCTGCCAGTTATCTCAACAGCAGCGGACAACTGCTGCTGCTTTCGCGGGGTACAG

AGGGCCAGCAAGAAGCTCCGTTCTCGAAAAGGATGATTACCCTGGCTGACGCATGTCACGAAATCCGATGTGAACCA  
CACCGGGTAGCGACGCGCAAAAGCAGTTGAGCGTAGCGTCAGCGTGGGTTGGCTTCATAGTGAACAAGAGTGTATTGCGCG  
TATCGAATCGGGCGTAAGTCAGGGGAAATGCATCGCCTGGATCCGGAATCTCTGTCGATGACGCTATTAAGGTTTACATCGTC  
AGCTGCTTCCCGCGCGGCTCATTCTGCTTCCAGCCTTTTACATTTTTCATAGCCGCTTTGCTTTTAGCGATCGCCAGCGA  
ATTTGAAACGGAAACCGCTGCACGCTTTGGTAAATATTGATTACAGAGAGCGTCGCAAGTCATTGTTTGTACACAAGT  
AATTGAGCAAAGCGTGGATATTGACCTGGACGAAATGATCTCCGACCTGGCCCTGTTGATTTGCTGATTCAGCGAGCAG  
GACGATTACAGCGGCATATCCGCGATATTAATGGTCAGTTAAAGCGTGCAGGAAAGGACGAGCGTCCCCCGTGAATTC  
CTGATTTCTGGCTCCCGTCTGGGACGACTCTCTGGCGACGAAATGGTTTGGCAGTGCATGCGTAAACAGTGCATTTGCTA  
TCCCGATCATGGGCGAATCTGGCTGACGACGCTGTCGTCAGAGTGCAGTGCAGGTCGCAAGTGCATTTAGATGCCACACGCGCCGGC  
TTCTTATTGAATCCGCTACGGTGGAGCAGTGGTAATGCCGGAAGGATTTGCCCGCAGCGAGCAGGAGCAAGTGGGCAAA  
TATTAAGTGTGATCGCGCAATGGCTAAAAAGTTTGTGCTGAACCTCAGGCGCCGCTATGCGCCAAATATCAACGATTACCT  
CCCGGAAAAAATCTGCACAGCTGCGCTGAGGAGTCTGTTCCCTGTGGCTGGCTACCTGATTTGACGGTGTGGTGAAGC  
CTTATGCGCCACCGGTCTACGCATGGGAAATGAGCGTTTGCAGAGTGCAGGTCGCGCAAGCTGGTGGAAAAAATCAGCGATGAG  
TTTTCTTTACTGGAGGAGAGCGGTTAGGCTGTGGTGCATTTGAACAGCGACAAGATCCGGAGATGGCAAACTGATTTT  
AGTCAACGATGACGAAAGTTGCGGGTATTCGGCTACGGAAGGATTTGATTTGGCAAGGTTGGTTGA

>Cluster\_22765

ATGGCTGAATTTGAGCTTAAAGCGTTGATCACCGGTGTCGACAGGCTTCTCCCGCGCTGTCGAAAATGCAAAAAGAAAAT  
CCGGGGATTTAAACGCCAGGCGGAAGAAGCGTACAGGTTGGCTGGCGCTTGGTGGAGGACTGGCAGCGGGGCTGACGC  
TTTCCCTGAAATCTTATGCGCATCAGGAAAACCGCGCTACCGGGCTGAAAGTCCGCATGATGGATGCGAACCGCGAGGTT  
GAAAGAGCTTTCAGGACATCAATAAACCTGGCTATTGGCCTGGTAAACAGCTACCCGGTACAACCGGCTGATTTCCAGAA  
CATGATGCAGATGCTGTTGTCGCGGAGGGATCCCGCAGAAAACATTTCTGGGTGGTGTGGGTAAAGCGACAGCTTATCTTG  
CGGTACAACGAAAAAACACCGGAAGCGGCTGCTGAGTTTGCAGCAAGATGCAGGATGCTACCGGAACCGGCTCAGAA  
GACATGATGGGGCTGTTCCGACATATCCAGAAGCGTTTATCTGGGCGTTGACGATACCAACATGTTTCTCTCTTCCAC  
TAAAACCGTATGTTCTGAAGATGGTGAACAAGGACGCTTTCAGGCTGCACAGAGCCTTGCCTCCATCAGATCAGATCCAG  
TGGATCAGATGGGGATGAACGGGAGTCCGCGAGTAATGCCCTGCGAAAAGTTATCCAGTCCGGATTAAGTGTAAAGAAA  
ATCAGGGAGCTCAATAAAGTCATGGCCCGCAGAACTCGGGTACAGCTCGATTTTACTGACGGCAAGGAAGTTTTGG  
CGGTCTTGATAACATGTTCCAGCAACTGGCAAAGTTGCGAAAACCTGACCGAGCTTAAAGCGAACAGGCGTACTTAAAGCAA  
TATTTGGTGTGATGTTCCGAAACCTTCAGGTGGTCAAGTCCCTGATCGATAAAGGAAAGGATGGCTACGATCAGATCCAG  
CAGAAGATGAATAAACAGGCCAGCTGAATAAACGTTTTCAGGCTCAGCTTGGTACGCTGTCACCTGTGGGAGGCAAT  
GACGGGACCGCAACTAACCGTCTGCTGCTATTTGGCGCGCATTTTCTGGTGCAGCTAAAAATATCAGCAATGGCTGG  
GGGAGTTGGGGGAAAAATTCACGAAGTTTGGCGATGAAAATCCCGGGTTATTCGCGCGCTGCTGCGGGCTGCTGCGCGT  
CTTCCGATTTCTGAAACTGGGATGATGGCGTTGGCGGTGCCATCAGTATTGTCAGCAGGATCATGTCGATGACGCGCAT  
TGGCATGATTTGCGACGGCGATAGCCCTGGCTGCGGGATTAATTAACACTAAGTGGGATGTTGTCGGACCTTATTTAAGA  
AATCTGCGAAACCATTTGGTCTTATTTTGGAGGCTGGCTGGGAACTCCCTAAGAAAGTTTTGGCTGGTCCGCGCTGGGG  
ATGGTGTATCAATAACTGGGGGCGGTTGTTAAGTGGTTTTCAGGATATGTTGGCAAGCTGAAGCAATTTATGAGTGGTT  
TACCGACAGTTCTGAACTGGGATGATGGCGTTGGCGGTGCCATCAGTATTGTCAGCAGGATCATGTCGATGACGCGCAT  
GAAATACCGGCACGGGATACACTCTTATCCGGCGGTGGATCCGGCTCAGGCAAAACAGCCTCCGATGCCACAGGCTCG  
AATCCCTTATGATTAATAAAGCTACCGCGCAAAAGTTGATGGTGGATCAAGGTATCATTTATAAATATGCCATCAGG  
TATGCGGGTTACGGAACACGCTCCAGTGGCATGATAAATACAGATGTTGGCTATACCCGATTTTGGTAG

>Cluster\_43342

ATGATTAAGTTTAGCGCAACGCTCCTGGCCACGCTGATTGCCCGCAGTGTGAATGCAGCGACGGTTCGATTCGCGTATCAT  
GGAAACCACTGATCTGCATAGCAACATGATGGATTTTCGATTAATACAAAGACACCGCCACGGAAAAATTCGGACTGGTAC  
GTACGGCAAGCTGATTAACGATGCCGCAATGAAGTGAACAAACAGCTACTGGTTCGATAACGGCGATTTGATTCAGGGG  
AGTCCGCTGGCAGATTACATGTCGGCGAAAGGATTAAGAGCAGGTTGATTTACCCCGTCTATAAGGCATTAATAACGCT  
GGACTATACCGCTGGCAGCTTGGCAACACAGGTTTAACTACGGTCTGGATTTATCTGAAAAATGCGCTGGCGGGAGCGA  
AATTCCTTATGTAATGCCAACGTCATTTGACGCCAGAACCAACAGCCTAATGTTTACACCGTATTTAATTAAGACACC  
GAAGTGGTTCGATACAGCGGAAAAAACAGACGCTGAAGATTTGGCTATATTGGCGTCCCGCCCAACAACTGCGGGCTG  
GGATAAAGCTAATTTATCCGGGAAAGTACGGTGAATGATATTACCGAAACCGTACGCAAAATACGTGCTGAAATGCGCG  
AGAAAGGTGCCGATGTCGTTGCTGTTCTGGCGCATTCGGGCTGCTGCGCGATCCGTAATAAGTATGCGGAAAAACTCA  
GTTTATTAACCTCAGTGAATTCGGGCGTTAACGCCATTAATGTTTGGCCATGCTACGCGCTTTTCCAGGTAAGATTT  
TGCTGATATCGAAAGGGCTGATATCGCGAAAGGCAAGCTGAATGGTGTTCGGCGGTAATGCCAGGCAATTCGGGCGATC  
ATCTTGGTGTGGTGCATTAACAACCTCAGTAATGACAGCGGTAATGGCAGGTGACGCAAGGCAAAAGCGGAAGCAGCGCG  
ATTTACGACATCGCTAATAAAAAATCCCTCGCGCGGAAAGACAGCAAGCTGGTAGAAACACTCAAGCGCATCAGATGC  
CACACGCCAGTTCGTCAGCAAGCAACTCGGTAATCTGCCGCAATATGATAGCTATCTGGCGCTTGTGCAGGACGATC  
CGACCGTGCAGGTGGAACAACCGCAAAAAGCGTATCTCAGCATTACATTCAGGGCGATCCGATTCGGCAAACTG  
CCAGTGTCTTACGCTGCGCACCGTTTAAAGTTGGTGGTGCAGAAAATGACCCGGCAAGCTATGTTGGAGGTGAAAAAGG  
CCAGTTGACCTTCCGTAATGCGCGCATCTTTATCTTACCCCAATACGCTGATTTGTTGGTGAAGCCAGCGGTAAGAGG  
TGAAGAGTGGCTGGAGTCTCCGCGGACAGTTAACAGATTTGATCTAACAGCACGAAACACAGTCACTCATCAAC  
TGGGATGGTTTCCGACCTATAACTTTGATGTTTATGATGGTGTGAATTTATCAGATTGATTTACCCAGCCCGCCGTTA  
TGACGGCAGTGCAGATGATTAATGCCAATGCGGAAAGGATTAAGAACTGACCTTTAACGGCAAGCGATTGATCCGA  
ACGCCATGTTCTCGTTGCCACCAATAACTATCGCGCTTACGGCGGCAAAATTTGCCGGTACGGGCGACAGCCATATCGCT  
TTTGGTTCCACCGGATGGAACCGCTCGGTGCTGGCAGCGTGGATTTGCTGATGAGTGCAGAACGTCGCGGGGAAATTCACCC  
GGCGGAGATAACAACCTGGCGTTAGCACCGATAGCTGGCGATAAGAACTGGATATCCGTTTCGAAACCTCTCCGTCAG  
ATAAAGCCGACGCTTTATTAAGAGAAAGGCGATATCCGATGAATAAAGTCCGACCGATGATATCGGGTTTGGGATT  
TATCAGGTGGATCTGAGTAAGTAA

>Cluster\_18687

ATGACACAACCTCGCCATTGGCAAAACCACTCCCTCGGCGCGCATACGACGGTCAAGGGCTCAACTTCACACTTTTCTC  
CGCTCATGCCGAGCGGGTAGAGCTGTGTCTTTGATGCCAATGGCCAGGAACATCGCTATGACTTGCAGGGCAGAGTG  
GCGAATTTGGCAGGTTATCTGCCGATGCGCGCCCGGTTTGGCTTATGGTTATCGGTTTATGCGCTTATGCGCCCTGGCAACCC  
GCGGAGGCGATCCGCTTAAACCGCGCAAGTTGTTGATCCTTGGCGCGCGCAAAATGACGGGGAGTTTAAAGATAA  
CCCGCTGCTGCACCGGTCATAATGAACCTGACTATCGCGACAACCGCCCAATTCGCGCGAAATGCGTAGTGGTGGTTG  
ATCACTATGACTGGGAGGATGATCCCGCGCGCAGCGCTGGGGCAGCACCATCATTTATGAAGCCATGTCAAAGGA  
TTAACGTATGTCACCCGGAGATCCCGTGCAGATCCGTTGCACTTATAAAGCCCTGGGGCATCCGTTGATGATCAACTA  
TTTGAACAGCTTTGGCCATTACAGCGCTGGAACCTGCTGGTGGCACAATTTGGCCAGCAAAATTTGCCAGCAACCCGCTG  
GGCTTAGTAACCTACTGGGGTTACAAACCGGTGGCGATGTTTGGCTGCATCCGGCGTATGCTGCTCGCCAGAACCGGG  
CTGGATGAGTTTCCGACTGCAATCAAAGCACTGCAATAAAGCGGTTATCGAAGTCAATCTTGTATATCGTCTCAACCATG  
TGCGGAACCTGGCTCAGCGCCGTTATTTCTCGTGGGATCGACAACCGTAGCTATTATTTGGATAAAGAAAGAGC  
GCGATTATCAACAACCTGGACCGGTTGTGGTAAACAGCTCAATTTGAGTCACTCCGGCGTGGTAGATTATGCCAGCGCTGC  
CTGCGTTATTTGGTGAAGAACTGCCACGTCGATGGTTTCCGCTTGTGATCTGGCGCAGTCAATGGCCGTCAGCGAGTT

TCGTGAGGATGCGCCGTTGTTTACCGCTATCCAGAAGTCCCGGTTGCTCTCGCAGGTGAAGTTAATTGCTGAACCGTGGG  
ATATCGCTCCTGGTGGTTTATCAGGTGGGAAATTTCCCGCCGCTGTTTGGCCAGTGGAAACGATCATTTCCCGCATGCGAGCC  
CGTCGTTTCTGGTGCATTTATGATTTACCTCTGGGAGTGTGGCCGGGCTTTGCTGCCCTCCAGCGATGTTTTAAACG  
TAATGGTCTCTGCGGAGTGCAGCGATTAATCTCGTCAACCGCGATGACGGTTTTACGCTCGCGCATCGCTGTTGCTTCA  
ACCATAAACCAATGAGGAAACCGGAGAAAGAAATCGCAGCGGACCAACAACAAATTAACAGTAACAATATGTTAAAGAA  
GGTTAGGCGGTTACTCTTGATCTGGTTGAAACGGCGGCGACAGCATTACGCGCTGTTAAACAACGTTGTTGCTCTCCCA  
GGGTACGCGGATGTTACTGGCCGGTACGAAACATGGTACAGCCAGCATGGCAATAACATGCCTACTGTCAGGATAACC  
AATTAACCTGGTTGGACTGGTCCGAGGCAAGCAGTGGTTAAACCGCATTTACCGCCGCTTAATCCATCTGCGCAAGCGC  
ATTTCCCGCTTTGATGGAGAAATCGTGGTGGAAAGAGCGGCAATGTCGGTTGGCTAAATCGATATGCTCAACCTTT  
AAGCACGGATGAGTGGCAAAACGGGCGGAAACAGCTGCAAAATCTGCTCTCGGATCGCTTTTTGATCGCAATTAACGCCA  
CGCTTGAGGTAACAGAGATGTTTTACCTGCTGGGAGTGGCAGCCATTTCCCCATTGCTGGAGAGATAAACCCAGTG  
ATTACGGCTGCTGCGAGGGACCTGCACACGGATTGTGTGTGTTCCAGAGATGA

>Cluster\_20990

GTGAATATATCGAACAGTCAAGTTGACAGGCTGCGGCATTTTGTCCGCGCCGGGCTTCGTGCCCTGTTACGGCCGGAGCC  
ACAGACCGCGTTGAATGGGCGGATGCTAATTAATCTATCTCCCGAAAGAATCCGCATACAGGAAGGGCCTGGGAAACAC  
TGCCCTTTCCAGGGGCCATCATGAATGCGATGGGCAGCAGTACATCCGTGAGGTGAATGTGGTGAAGTCTGCCCGTCTC  
GGTTATTTCAAAATGCTGCTGGTGGTTTATGCCACTTTCATAGAGCATAAGCAACGCAACACTTATCTGGTTCCGAC  
GGATGGTGTATGCCGAGAATTCATGAAACTCACGTTGAGCAACCATCCGCGATATTCCGCTGCTGCTGGCGTGGCC  
CGTGGTATGGCAAAAGCACC GGGAATAACACGCTACCATGAAGCGTTTACC AATGGTCTGGCTTCGTTGCTGGCC  
GGTAAAGCGGCAAAAAC TACCGTGA AAGTCA GTGGATGTGGCGGTTATGATGAAC TGTGCTGCCTTTGATGATGATA T  
TGAACAGGAAGGCTCTCCGACATTCCTGGGCGATAAGCGTATTGAAGGCTCGGCTGGCCAAAGTCCA TCCGTGGCTCCA  
CGCCAAAGTGTAGAGGCACCTGT CAGATTGAGCGTGCAGCCAGTGAATCCCGCATTTTATGCGTTTTTATGTTGCTGCTG  
CCGCACTGCGGGGAGGAGCAGTACCTTAAATTTGGCGCAAAAGAGACGCGCTTTGGCTCAAAATGGACGCCGGATGACCC  
CTCCGCGTGTTTTATCTGCGAGCATAATGCCTGCGCTACCTGCTCAGCAGGAGCTGACTTCACTGATGCTGGCTTATA  
TCTGCGAAAAGACCGGGATCTGGACCGTGATGGCATTCTCTGGTTTTCTGCTATCCGGTGAAGAGATTGAGCCGCGGAC  
AGTGTGACCTTTACATCTGAGACAGCGTACAGCCGTTACCACCTGGGTGCAGATTGTCAAAGACTGGATGAAAACGAA  
AGGGGATACGGGAAAACGTA AAACCTTCGTGAACACCACGCTCGGTGAGACGTTGGGAGGCGAAAATGGCGAACGTCGCG  
ATGCTGAAGTGTATGGCAGAACGGAAAGAGCATTATTCAGCGCCGTTCTGACCGTGTGGCTTACCTGACCGGTTATC  
GACTCCAGCTGGACCGTACGAAATGCGCGTATGGGGATGGGGCGGGTGAGGAAAGCTGGCTGATTGACCGGAGAT  
TATTTATGGCCCGCACGACGACGAGCAGCAGCTGCTGCTGTGTGATGAGGCCATCAATAAAACCTACACCCGCGGAATG  
GTGCAGAAATGTCGGTATCCCGTATCTGCTGGGATACTGGCGGGATTGACCCGACCATGTGTATGAACGCTCGAAAAA  
CATGGGCTGTTCCGGGTGATCCCATTAAGGGGCATCCGCTACGGAAGCGGGTGGCCAGCATGCCACGTAAGCGAAA  
CAAAAACGGGTTTTACCTTACC GAAATCGGTACGGATACCGGAAAGAGCAGATTTATAACCGCTTACACTGACGCCGG  
AAGGGGATGAACCCTTCCCGGTGCCGTTCACTTCCCGAATAACCCGGATATTTTTGATCTGACCGAAGCGCAGCAGCTG  
ACGGCTGAAGAGCAGTTCGAAAAATGGGTGGATGGCAGGAAAAAATACTGTGGGACAGCAAAAAGCGCAGCAATGAGGC  
GCTCGCTTCCGTTTATGCGCTGGCGCGCTGCGCATCAGTATTTCCCGCTGGCAGCTGGATCTCAGTCCGCTGCG  
CGAGCTGCAGGAAGAGGATGGTGCAGCAACCAACAAGAAAACACTGGCAGATTACGCCCGTGCCTTATCCGGAGAGGAT  
GAATGA

>Cluster\_21842

ATGCTGTTATAACTCTTCTGATGGCAGCCAACGCCATTACGACCACGCTGTAAGCCCCATGGATGTTGCGCTGGACAT  
TGGTCCAGGTCTGGCGAAAAGCCTGTATCGCAGGGCGGTTAATGGTGAAGTGGTGTGATGCTTGGCATCTGATTGAAAACG  
ATGCACAACCTGTCGATCATTAACGCCAAAGACGAAAGAGTCTGGAGATCATTGCTCACTCCTGTGCGCACCTGTTAGGG  
TACCGGATTAACAACACTTTGGCCGCATACCAAAATGGCAATCCGCGCTTATTGACAACGGTTTTTATTACGACGTTGA  
TCTTGACCGCACGTTAACCCAGGAAGATGTCGAAGCACTCGAGAAGCGGATGCATGAGCTGCTGAGAAAACTACGACG  
TCATTAAGAAAGAAAGTCACTGGCACGAAGCGCTGAAACTTTCCGCAACCGTGGGAGAGCTACAAAAGTCTCCATTTCT  
GACGAAAACATCGCCATGATGACAAGCCAGGTTCTGACTTCCATGAAGAATATGTCGATATGTGCCGCGTCCGACGCT  
ACCGAACATGCGTTTTCTGCGCATCTTTCAAACATAATGAAAACGGCAGGGCTTACTGGCGTGGCGACGCAATAACAAAA  
TGTGTCAACGATTTACGGTACGGCGTGGCGAGCAAAAAGCGCTTAAACGCTTACCTGCAACGCTGGAAGAAGCGCG  
AAACGCGACACCCTAAAATCGGTAAACAGCTCGACCTGTACCATATGACGGAAGAAGCGCCGGTATGGTATTTCTGGCA  
CAACGACGGCTGGACCATCTCCGTGAAC TGAAGTGTGTTGTTCTGTTCAAAC TGAAGAGTACCAGTATCAGGAAGTTA  
AAGTCCGTTTCAATGATGGACCGTCTCTGTGGGAAAAAACCGGTTCACTGGGCAACTACAAAAGATGCAATGTTCAACCG  
TCTTCTGAGAACCCTGAATACTGCATTAAGCCGATGAAC TGGCCGGGACGTAACAAATTTCAAACAGGGGCTGAAGTC  
TTATCGCGATCTGCCGCTGCGTATGGCCGAGTTTGGTAGCTGCCACCGTAAACGAGCCGTCAGGTTTCGCTGCATGGCCTGA  
TGCCGCTGCGTGGTTTTACCCAGGATGACGCGCATATCTCTGTACTGAAGAACAATTCGCGATGAAGTTAACGGATGT  
ATCCGTTTGTGCTGATGATGATGACAGCACTTTTGGCTTCGAGAAGATCGTCTCAAACCTCCACTCGCTGAAAACG  
TATTTGGCAGCGACGAAATGTGGGATCGTCTGAGCGGACCTGGCGTTGCGCTGGAAGAAAACAACATCCGCTTTGAAT  
ATCAACTGGGTGAAGCGCTTTCTACGGTCCGAAAATTAATTTACCTGATGACTGCCCTGATCGTGCATGGCAGTGC  
GGTACAGTACAGCTGGACTTCTCTTTGCTTCTGCTGAGCGCTTCTATGTAAGCGAAGACAATGAACGTAAGTACC  
GGTAATGATTTACCGCGCAATTTCTGGGGTGCATGGAACGTTTCACTCGGTATCCTGACCGAAGAATTTGCTGGTTTTCTCC  
CGACTGGCTTGGCCAGTTTCAAGTGTATCATGAATATTACCGATTCTCAGTCTGAATACGTTAACGAACGACGCAA  
AAACTATCAAATGCGGGCATTCTGTTAAAGCAGACTTGAGAAATGAGAAGATTGGCTTTAAAATCCGCGAGCACACTT  
GCGTCCGCTCCATATATGCTGGTCTGTGGTATAAAGAGTGAAGTGAATACAGGCAAAAGTTGCCGTTCCGACCCCGCTGGTA  
AAGACCTGGGAAGCATGGACGTAATGAAGTATCGAGAAGCTGCAACAAGAGATTCCGAGCCGAGTCTTAAACAATTG  
GAGGAATAA

>Cluster\_13125

ATGACGACACAGGTGCCACCTTCCGCGTGTGCTTCCGTTGAACCCGGAGCAACTGGCACGCTTACAGGCGGCCACGACCGA  
TTTAAACGCTTACCAGCTTGCCTGGGTTTCTGGCTATTTCTGGGGGCTACTCAATCAGCAGCCTGCTGCGCTTGCAGCGA  
CGCCAGCGCCAGCCGAGAAATCGCGGTTATAACTATTATCTCCGCTCGCAAACCGGCAATGCGCGCGGGTTGCTGAA  
GCATTAACGCGATGATTTATAGCAGCAAACTGAACGTTAAGCTGGTGAACCGGGGCGACTATAAATCAAACAATCGC  
GACGAAAACACTGCTTATCGTAGTGCAGCTCAACGGAAGGGAAGGGAACCCGGAAGAAGCGCTGCGCTGCAATAAGT  
TCTGTTCTCAA AAAAGCGCAAAGCTGGAAAACACC GCTTTGCGCTATTTAGCTCGCGATAGCTCTTATGAATTT  
TTCTGCCAGTCCGGGAAAGATTTGACAGCAAGCTGGCGGAAC TGGGTGGTGAACGCTGCTGACCGGTGCTGACCGT  
TGTGAATAACAGGCTGCTGACGAGGAGTGGCGCGCCGCTGGTTGATGCGCTTAAATCGCGTGGCGCTGTCGCGGCAC  
CTTCGCAATCCGTTACTGGCGCGTAAATGAAATCCACACGCGCTACAGCAAAGACGCGCGCTGGTGGCTAGC  
CTCTCTGTTAACAGAAAATTACCGGGCTAACCTGAAAAGAGCTTCCGCTATTCGAAATTGACTTAGGTGACTCGGG  
CCTGCGTTACCAGCCGGTACGCGCTGGGCGTCTGGTATCAGAACGATCCCGCACTGGTGAAGAATTTGCTCAACTGC  
TGTGGCTGAAAGCGGATGAACCTGTACCGTGGGGCAAAACGTTGCTCTGAAACGAGCGCTACAGTGGCACTCGAA  
CTGACCGTCAACACCGCCAAACATGTTGAGAATTACGCCACGCTTACC CGCAGCGAAAACACTGCTGCCGCTGGTGGCGA  
TAAAGCGAAGTTACAGCATTACGCCGCGACGACGCGGATGTTGACATGGTGCCTTTCCCGGCGACAGCTTGTATGCCG

AATCGCTAATTAATCTGCTGCGCCCGCTGACGCCGCTGTGATTTCCATCGCCTCCTCGCAGGCGGAAGTCGAGAACGAA  
GTACACGTCACCGTTGGTGTGGTGCCTTACGACGTGGAAGGCCGCCCGTGGCGGTGGTGCCTCCAGCTTCCTCGCTGA  
CCGCGTGGAGAAGAGGGCGAAGTCCGCGTATTTATCGAACATAACGATAACTTCCGCTGCCAGCCAATCCAGAAACCC  
CGGTGATTAATGTTGGCCAGGCACCGGATTCGCGCCTTTCGCGCCTTATGTCAGCAACGCGCCGCCAGCAAGCCCA  
GGTAAAAACTGGCTTCTTTGGTAATCCGCACTTACGGAAAGACTTCTGTATCAGGTGGAGTGGCAGCGCTACGCTCA  
AGAGGGTGTGCTGACGCGGATCGATCTCGCCTGGTGCGCACAAAAAGAAAAAGTTTACGTACAAGCAAACTGCGCG  
AACAGGGTGGGAGCTGTGGCGTGGATCAATGATGGTGCACATTTATGTCGCGCGACGCTAATCGCATGGCGAAA  
GACGTTGAGCAGGCATTTCTGGAAGTATTGCCAATTTGGTGGCATGGACACCGAAGCGCGGATGAATTTTTAAGTGA  
GCTGCGCGTAGAGCGCGTTATCAGCGAGATGTCTACTAA

>Cluster\_31792

ATGAACTGGCACCAGCTAAAAAACACACCGCGGAATAAACACAAAGACACAGAGGTAATATTTTCGCGGGTAG  
TGATGCGTGGGCATGCAAAACAGTGGCAGGAGCAGGACGCCCGCATCCGCGGATAATGTGCCGCTGTGTGGCTTG  
GGCCAACTCAGCTTGCAGCACTTATGACACTGAAAATTTTCGCGGATGGAAGAAACCGCTAAGGCTGTACCAGGCCGA  
GAACTGGATTTGGTGGAGACAAAAAGATTGGTCAAGAGTGGCGCGGAGATATTCAGGACGCAAAATTTTACCACGA  
AGGAATGCACGTCAGAAAGTGTGAAAACGGCGCGCTATCTGAAATGTCGAGCGTGAATAATGCGCGAGGGCTTACCA  
TGCCGGAGCAGAAAAATCGCAACTGGCACAATGGCAGCAGTGGCGCGCGAGTGTCCGCGAGCGCTTGTGATGGC  
GTTTGTGTCATCAGGAAAGTGAATCGTTACGTGACGCGCGGGGTATGGTGTCCGCTACGACACATGGAATTTAG  
CCGCGAAATGGTGGCGATCTATTCAGAGCACAGGGCCACTTTCAGCAAGCGGTAATCAATAACGCGTGAAGCGTTAA  
AAGTTATTTGCCGAACCAATGGGGCAGCGCTCCGCGGATTTGCTGCCGTTGCCAATGGTGGCGTTGACCTGAAAACGGGG  
GAATTTCCCGGATAACCGCCAAACTTTCATAAATGGCTTAAGCACGACGCGGAAAGAACCGCGCAAGATGATGCGTAT  
GTGCCGCGTGTACATGATATGGCGAACCGGTACGACTGGCAGATGTTTATTGAGGCCACCGGAGACGGCGGAGCGGT  
AAAAGTACATTCAGCAGATAGCCAGCCTTCTGGCAGGAAACAGAACACGCTAAGCGCTGAAATGACATCGCTTGTATGA  
TGCTGGTGGCGGCAACTTACCAGCCCTGAGAAGGCAGCGGCTTACTACTGGAACAGCGTGACGCTGAGCAAGGACCG  
GCATCAAGAAAATCACGGCGGTGACCCCGTGGAAATTAACCGAAATACGAAAAGCGTTTACCGCTGTAATCAGGGCG  
GTGGTGTGGCGACCAACATAACCCGATGATATTCACGAAACGGCGGAGGTGGTGGCAGCTGTCGCGTGAATTTCCG  
TTTCGACAATATCGTCAGTGGGCGGAAAAGACAGGGAGTACCAGAAAAGATCGCGGCTGAAATCCCTGTCTATATCC  
CGCGATTTGGTGGCGCACTTACCAGCCCTGAGAAGGCAGCGGCTTACTACTGGAACAGCGTGACGCTGAGCAAGGACCG  
GCAATAAAGCAACAGACGGATCCGGTTATTGAGTTTGGCAGTTCCTGAATTTCTGGAGGAAGCAGCGCGCTGATGAT  
GGGCGCGGTGGCGATTCAGTGAAGTACAGCAGGAAACAGCCTTACCAGCTCTATCTGGCTTTATGGCATACGACG  
GCAGGAGCAAAACCGCTAAACGTAATGACTTTGGCAAGGCTATGAAGCCTGCCGCAAAAGTTTACGGACATGAATATATT  
ACCGGAAAAGTTAAGGGGTAAACGCACTAACGCAATAACAACAGACGAGTGGCAGCGTTTTTATAA

>Cluster\_67053

ATGAGCAAAAGTTAACGGTTAACATTAAGGACGTTAAGTCAATATCTGAATGTCTCATTTGATTTAAAAACCTGG  
GCTTATTTGTTTTGTTGAGGCTAATGGTCTGGTAAGTCACTATATTAATGTGTTATCTCAAGTGGTTGAAGGGGGG  
GGATAGATAAATATTTCTGATGAAAAAGGAACACTTCTGAAATTTAATAAAGCTGGGCGATGAACAATGTTTTG  
GGGAAAGTTAATAACAAGTGGTTACGCAAGGTAGTATTAACAGTATAAGGGCTTTTTAGAGTCTGGGGTTGTGATGG  
GAATAGGTTTAAATAATTCATCTTAAATGTAATTAATAAGTATGCGATATTTACGCACTCTTTGATGAGAAGTTGATGA  
CTAATGCGAGTGAATTTATGTTGAAAATCTAGGAAAATTAAGAGGAAATAAAGACTATTACCGGTTTGAACAA  
CTAACAAAAAGATGTTCTGTTTCAACGTCAGAAAATAAAGTAAAGAGCTAGAGTGTGACGGGAGACTAAATCAAAG  
CAAAACAAAAGACACTGATTTTTTAAATAAGAAAAGTGGCAGCATTCTGTTGTTAAAAGATAGTGGTTATATCACGC  
AGTACCAATGAGCTCTGGGGATTTTTACTCCTAATATAGTATGATTTATTTATTACAGAAATAACCTACCATCCAAG  
CAGATTTTGAATAGCAATGATCCTTTTATCATCATATATAGTATGAGATTGAAATAGCCCTCATCCATCATCAAAAAAG  
GCTAATACAATTTTGAATGAGATGTCAAAAAAAACAACATCTGCATATATTTCTCAACACATAGTCGAGAGATTTT  
CAAGCCTAAAACAGAACAAATATGTTTAAATAGATTCCGCACTTAAATACCGGTAAAGTTAACTATAACTACTCCATGTTAT  
CCTTATTACGCAATAAGAGGTGTATACGAAGCTGCTGGATATGATTACATGTTTGGCTTGGAGTGGATGAGCTAGCAAAAA  
AATCGTCACGGAACAATAAAAAAACTGAATTTATCAAAAAACAGCGAGTGAATGTTTGGCTTTAGTGGTGGTGGCGAG  
AGGTGTTACGTTTCGCTAACGAGTTTAAAGTTAATGGGCTATTTTATAACACAAAGATAGTTATTTGTTCTGTGATGGT  
ATAAAAAGTAAATTTCTATAGGAATTTGGTCTCCATGTAGAACTTGCATTAATCATGTTGTTTATAGACGAATCAAGA  
AATCGTTAGACAACATTCGATAAAGTACCGCAGTTAAATAAAAAATATAGTAAAAGATCCGTAACCAATTTACCAAGATG  
TTACATTTTGGCTATATCAAGTTTAGAGAAAAGTTAGGAATCGAATTTGACTTAATTTCTGATTTATGATGATTAATAGCG  
TCATTTGAATTTGCTTGTATTTTGGTGGTAAAGCTGTTTCTGAATTTGATTTGAATATGAATGCAAGTCTCAAGACTA  
CTTTTCAACCGAAAATTTTAAAAGAAAAGGCAAGAAAGCTAAATTAATTAATTTTATACAGATGGAATAATTTATGGA  
GACTACTGACATCTAATCTTCTGAATAATTTGGCTATAAGTGAATTTAGTTGCTTACTTCTGTAACGCTCTCCGCGGATG  
GAAGAGCGCACGACAGATTCATGGTCTCAGTTTGAACGGAATTTACAATCTTCTACAGAAGCCAGCTTGA

>Cluster\_29094

ATGCGCGTGGCTGGAATTAATGATGACAAACCATTTGCAAGGTTTCGACGCTCAGTATGGTTCGATTTCCCGAAGT  
GACTTCGGGCGCAGCAGCGTTTCGAGCAAGCGCATGTCGAGCAGCGATGAAAACCGTATTCATCTTT  
ACGATCATCAGTGGGTCTGGTCTGGGCAACTGCGCTGCATTAATAACCGCAAGACGCGACCGGATTTTACTG  
CGGCTCAAAGAGCATTACAGCGGCTGTGGCGGATTAACCGCGCTTCGAGATTGCGGAGAGCTTTTTTAACTCCGTGTA  
CTGTGCGTTATTTGACCACCGCTCGCTTACTCCGAGCGGCTTTTATCTTTAGTCCAGCCAGAGCGCGTTTTCGTA  
CCATTCGGCGCCGCTGGCGAAAAGACTTTCACCCGATCACGGCTGGGAATCTCTGCTGATGCGTGTATCAGCGACCTG  
CCGTTGCGCTGCGCTGGCAGAAATAAAGCGGTGACATTCATTACATCGTTCGCCATCTGACGAAAACGCTGGGGACAGA  
CAACCTCGCGAAAAGTCAATTTACAGGTGGCGAAGCACTGTTTACCGCAATAAAGCCGCTGGCTGGTGGGCAACTGA  
TCACGCTTCCCGCACATTTGCCATTTTGTGCTCCGATCCAGCAGCGGACGAGCGGAGTATTTATTGATACCTGCTG  
ACGACCGCCGAGACGAGCATTTGTTTTGGCTTTGCGGCTTCTATTTTATGGTTTTATGCAACCGCTCCCGCGCGCT  
GGTCGAGTGGCTACGGAAAATTCGCCAGGTAACCACCGCTGAATTTGATATGGCTATCGGCTGCCAGAAGCAGCTA  
AAACCGAAAAGTACCGCGAATATCTGTTATCTACAGGGCTGAATGAGCAGTTCAATGAAGCGCGGGTATTCGTGGA  
ATGGTGTGTTGGTGTTTACGTTGCCGGTTTTGATCGGGTATTTAAAGTCAATCAAGACAGGTTCCGCGCCAGAAAAGA  
GATGCTGCGCATCAGTTCTGCTGCTCAATTTGGTGAAGAGCAGCATCGCTGGGCGGAATGGCGCACACCCAGG  
AGTTTGAACACTTTGCTGCGGAGAGCGGCATATTTCCCGGCATTAATGGCATTACTGCTCCAGGAAGCAGCGGAAAA  
ATCACCGATCTCGCGCAACAAATTTGTGATTCGCCATCTTTATATTTGAGCGCGGATGGTCCGCTCAATATCTGGCTGGA  
GCAAGTGAAGGTCAGAGTTGCGCGACGCCATTTGAAGATAACGGTAAACGCTATTCGCCAGCTTGGCGCTGTAACATTT  
TCCCTGGCGACCTGCTGTTTTAAAAAATTCGGGTGTCACCCGCTACCGGCGGTGGTGTTTTTATGATACGATGAAAATTTCC  
TACATGACGGAAGTGAATTTCCGCGACATCCCGCGCGCGCTACCCGAGGACGCACTTGGCAGCAACCGTGGTACAG  
CGTCTCGCGGGGATGTTTTCCCGGAAGGTTTCCGCACTGGCTATGTCGCGACCCGCTATTTGGGCACTGCTGTAAG  
AGATGCACCGGACTGTTCCCGCGGACTACTGGCGCGCTACAAAACCGTATCCGTGACGGGCATGTGGAAGATGTT  
TATGCGTATCGGCGCAGGACGGGTTTACGTTTCGATTCGTATAA

>Cluster\_41419

ATGATTTTCAGGCATTTTAGCATCCCGGGTATCGCTTTCCGGTAAAGCTCTGCTTCTGAAAGAAGACGAAATTTGTCATTGA  
CCGGAAAAAATTTCTGCCGACCAAGTTTATCAGGAAGTTGAAAGCTTTTCTGAGCGGTCTGCAAGGCATCAGCCAGC  
TGAAACGATCAAAAACGAAAGCTGGTGAACGTTTCGGTGAAGAAAAGAGCCATCTTTGAAGGGCATATTTATGCTGCTC  
GAAGATGAGGAGCTGGAGCAGGAAATCATAGCCCTGATTAAGAGATAAGCACATGACAGCTGACGCAGCTGCTCATGAAGT  
TATCGAAGCTTACGATTTCTGCCCCTGGAAGAGCTGGATGATAAATACCTGAAAGAACCTGCGGCTGACGATGATATCG  
GTAAGCGCTGCTGCGCAACATCTGGGCTGAAGATTATCGACCTGAGCGCTATTCAGGATGAAGTCATTCTGGTTGCC  
GCTGACCTGACGCGTCCGAAACCGCACAGCTGAACCTGAAGAAGGTGCTGGGTTTTCATCACCAGCGGGTGGCCGTAC  
TTCCACACCTCTATCATGGCGCTTCTCTGGAAGTGCCTGCTATCGTGGGTACCGGTAGTGTACCTCTCAGGTGAAAA  
ATGACAGCTATCTGATTTCTCAGGCGTTTATCGTTCTGATCCATGAGACATCGCGCGGACAAAGAGCTGCCATACATGAAC  
GCTGTTTCCAGGAGCAAGTGGCTTCTGAAAAAGCAGAGCTTGCTAAACTGAAAGATCTGCCAGCTATTACGCTGGACGGTCA  
CCAGGTAGAAAGTGTGCGCTAACATTTGGTACGGTTTCGTGACGTTGAAGGTGACAGAGCTAACCGGCTGAAGGCGTTGGT  
TGTATCGTACTGAGTTCCTGTTTTCATGGACCGGACCGCTGCCACTGAAGAAGAACAGTTTGCAGCTTACAAAGCAGTG  
CTGTAAGCTGTGGCTTCTCAGGCGTTTATCGTTCTGATCCATGAGACATCGCGCGGACAAAGAGCTGCCATACATGAAC  
CCCCGAAAGAGAAACCCGTTTCTCGGCTGGCGGCTATCCGTATCGCGATGGATCGTAAAGAGATCTGCCGATCAGC  
TCCGCGCTATCTCGCTGCTCTGCTTTTCGGTAAATTCGCGCATCATGTTCCCGATGATCATCTGTTGAAGAAGTGCCT  
GCACTGCGCAAAGAGATCGAACTCTACAAACAGGAAGTCCGCGACGAAAGGTAAGCGTTTGCAGGTCATTTGAAATCGG  
CGTAAGTGGTGAACACCGGCTGCCGCAACATTCGACCTCATTTAGCCAAAGAAAGTTGATTTCTTTAGTACCGCACCA  
ATGATTTAACCGAGTACACTCTGGCAGTTGACCGTGGTAAATGATATGATTTTACACCTTTACCAGCCAATGTCACCGTCC  
GTGCTGAACCTTGATCAAGCAAGTTATTTGATGCTTCTCATGCTGAGAGGCAAAATGGACTGGCATGTTGGTGGAGCTTCTG  
CGATGAACGCTGACACTTCTGTTGCTGGGATGGGTTCGGACGAATCTCTATGAGCGCCATTTCTATCCCGCGCATTA  
AGAAAGATTTACCGTAAACGAACTTCGAAGATGCGAAGGTTTACGAGAGCAGGCTCTTCTCAACCGCAACCGGACGAG  
TTAATGACGCTGGTTAACAGTTTATTGAAGAAAAACAACTCTGCTAA

>Cluster\_19882

ATGCTTAAAGCTTGTCTCTCTCCGCTCACCTGGTTAATCAGGTTGCGCTTATTTGTTGCTTTTCTACTGCTATTGGACT  
GGCAGGGATGGCGGTTTCTGGCTGGCTGGTGAAGGCGTTTCCAGGCGAGCGCCATGCGATCAACAAAGCGGGATCGCTGC  
GCATGCAAAAGTTACCGTCTGTTGGCAGCAGTGCATTAAGCGAGAAAGACAAGCCCTTAAATTAAGAGATGGAACAAACA  
GCATTTAGCGCGGAGTTGACTCGAGCAGCAGAACGAGACGGGCAACTGGCGCAATTACAGGGTTTACAAGATTTACTGGCG  
TAATGAACCTGATCCCTGCATGATCGTGCACAAACCGGAAACGGTGTGAGCGGATGTGAGCGGATTTGTTGGCCGGC  
TTGATCAGCTGGTATCTGGTTTTGATCGCACACGAAATGCGCATTTGAGACAGTGGTGTGGTCCATCGGGTAAATGGCG  
GTATTTATGGCATTCTTACTGGTATTCACTATTATCTGTTTGGCGGAGATTGCTACAAACCGTGGCGCAACTGCTGGC  
AATGGCGAGTGGCGTACGCCATCGGATTTTACCAACCGGCAAAACATCAGCGGGCGCAACGAAATGGCGATGCTTGGAA  
CTGCGTTGAACAATATGCTGCAAGACTGGCGGAAAGTTATGCCGTACTTTGAGCAGCGGGTTCAGGAGAAAACCGCCGG  
CTGGAGCATAAAAAATCAGATCTCTCTTTTTTATGGCAGGCCAACCGCGATTGCATTTCCCGCCCCGCTGTGTGAACG  
CCTGTACCTGTACTCAACGGATTACAGAAATTTAACCTGCTACGTGATATCGAACTGCGGGTGTATGACACTGATGATG  
AAGAGATCATCAGGAGTTTACCCTGACGACGATATGCTTGTGATGATAAAGGCTGCCAGCTTGCCTGGCGGCGGTA  
TTACCCGTTGGCGATCGCGCACAAACCTGAAAGTGGCGCTGGCTGACACTCATACGAGTACGGTATTTTGGTGGCGG  
CCTGCCGAGGGGCTCATCTTAGCCATGATCAACAACAAGTGGTGGATACCCGTTGAACAACCTCACCGCCACGCTGG  
CGTGGATGCCCATCAGGAACGTCAGCAACAGTTGATCGTGTGGAAGAGCGTCCACCATTTGCGCGCAACTGCATGAT  
TCTATTTGCCAATCTCTCTTTCATGAAGATGACAGTGGTGTGCTTACAGATGCAGGGCGATGCGCTCCGAGAAAGCAG  
CCGCGAACTGTTTAAAGTTCAGATCCGTAACGAACCTGAATGCACTCCGGTGCAGTTGCGTGAATTTGCTCACCCACATTCGGT  
TGCAGCTCACCGAGCCTGGATTACGTCGCGGCTGGAGGCGAGTTGCGAAGAGTACAGCGCAAAATTTGGCTTCCCGGTG  
AAGCTGGATTATCAATTTGCCCTCGCTGTTGCTTCCGATCAGGCAATCCACTTGTGCAAAATTTGCCCGTGGAGCATT  
AAGTAAACCGCTCAAAACATTTGCAAGCAGTGGTGGTGGTGGTGGTGGTGGTGGTGGTGGTGGTGGTGGTGGTGGTGGT  
TCCAGGATAACCGGCTGCGGCGTGCCTGAAAATGCCATCCGAGCAATCACTACGGCATGATAAATAATGCGCGACCGTGGC  
CAAAGTTTACGAGCGATTGCGCGCTCCGCCGTGTAATCAGGTGGCACCGAAGTGGTGGTACCTTTATTCCCGAAAA  
AACTTTCACAGCGTCCAAGGAGATACCCATGAGTAA

>Cluster\_36690

ATGAAGAATATACGTAACTTTTTCGATCATAGCTCACATTGACCAGGTAATCGACGCTGTCTGACCGTATTATCCAGAT  
CTGCGGTGGCCTTCTGACCGTGAATGGAGGCGCAGGTTCTCGATTCCATGGATCTTGGAGCTGAGCGTGGCATTACCA  
TCAAAGCGCAAAGCTGACGCTGGACTACAAAGCGTCTGACGGCGAAACCTATCAGCTTAACTTTATCGACACCCCGGGC  
CACGTAGCTTCTCCTAATGAAGTTTCCGTTTCGCTGGCTGCTTGAAGGTGCATTGCTGGTGGTGGTGGTGGTGGTGGT  
CGTAGAAGCGCAAACCTTGGCAACTGCTACACCGCATGGAATGGATCTCGAAGTTTGGCCGTACGAACAAGATTG  
ACCTGCCGCGCAGCGATCTGAAACGCGTGGCGGAAAGAAATGAAGATATGCTCGGCATCGACGCCACCGACCGGTTGCC  
TGTTACGCGAAAACCGCGTGGTGTGCAGGACGTTCTCGAACGCTGTTGCGCGACATTTCCCGCGCGGAAGGGGATCC  
GGAAGCCGCTTCCGACTAATTAATCGACTATGGTTTCGACAACTACCTGGCGCTTGTCTTACTTATCTCGTATAAAA  
ACGGCACCTGCGTAAGGGCGCAAAGTGAAGTATGATGACCGGCGAGCTATAACGCCGACCGTCTGGGATCTTTC  
ACGCCGAAACAGGTTGACCGCACGAACTGAAATGTGGCGAAGTAGGCTGGCTCGTATGTGCGATTAAGATATCCACGG  
CGCTCCAGTCCGCGATACCTTAACGCTGGCGCTAATCCGCGAGAAAAGGCGCTGCCTGGCTTTAAGAAGTCAACCCG  
AGGTATACGCCGCTGTTCCCGTAAAGTTCCGACGACTATGAAGCCTTCCGTTGACGCGCTGGGTAACCTCAGCCTGAAC  
GATGCTCACTGTTCTATGAGCGGAAAGCTCCAGCGCTGGGCTTTGGTTTCCGCTGCGGCTTCTCGGCCGCTGCA  
CATGGAGATCATCCAGGAAGCTCTGGAACGTTGAATACGATCTGGATCTGATCACCCTGCGCCGACCGTAGTGTATGAAG  
TTGAAACCAAGTCAAGAGAAAGTTATCTAGCTCGACAGCCATCAAGCTGCTGCGGTAATAACATCTACGAACCTGCC  
GAGCCGATTGACAGTGTACATGCTGCTGCGCAGGCATATCTCGGCAACGTTATTACGTTTGGTGGTGGTGGTGGTGGTGGT  
CGTGCAGACCAATATGGTTTACCACGGTAAATCAGGTGGCGCTGACGTACGAGATCCCGATGGCGGAAGTGGTGTCTGACT  
TCTTCGATCGCTGAAATCTACCTCGCGTGGTTATGCTCTCTGGATTACAACCTCAAGCGCTTCCAGGCGTCCGACATG  
GTACGCTGAGCAGTATTAATCAACCGTGAACGTTGATGGCTGGCTGGCTGGCTGGCTGGCTGGCTGGCTGGCTGGCTGGCT  
CGGTGCGGAGTTGGTGGAGAAGATGAAGATCTGATCCACCGCAGCAGTTTGGATATCGCCATTCAGGACGCGATTGGTA  
CGCACATCATTTGCCGATCCACCGTGAACAGCTGCGTAAAAACGTAACGCTAAATGTTATGGCGGCGATATCAGCCGT  
AAGAAAAAGCTGCTGCAAGAGCAAGAAAGGTAAGAAACGATGAAGCAGATCGGTAACGCTGAGCTGCCGAGGAAGC  
GTTCTCGCCATTCTGCACGCTCGCAAGCAACAATAA

>Cluster\_25707

ATGACGCAAAACATTTATCCCGGCAAGATGCCGCTCTGGAAGATTCCATCGCAGCTTCCAGCAAAAACCTTTCCAGCC  
CGTTTTTCAGATTGAAGAGGCTCCTGGCTGAATCCGGTGCCTAACCTGCTGTTGTTGATATTTCCGCAAAAGAGTGGC  
CACTGTGTTTTTAAACCGTAAAGGCGCAACAAAAAAGCGCGCTGGCTTCTGCCCTCGGTGAATATTTTCGAGCGTCTC  
TCAACCAACTACTTTTTTGGGACTTCTGGCTGGCGGAAACATCGCCAACCGCCATTCGTGATTTATCCCAACGAAAA  
ATGGTTCCCACTGACGAAAAATGACGATGATACAGAGAGGCTGCTGATGACCGTCTGCGCGCATTTTACGATCCGAGGA  
ATGAATGACCGGATGATGCTGATTTGACTGCAATCCGGTAAACGAGATCGTGGTATTTGCGGCTTACCGGTTACCGCG  
CAGTCCGACAATCAGACATTTATATTCCGATGAATATCATTTGGTAACTTGTACGTTTTTCAACGGTATGTTGCTGGCAA  
TACCGTAAACGAGCAGCGTTCAGGGTTGTCCGAAGTTTTCGAACGTTACGTTGAAAAACCGCATTTATGCTGAAGCA



TCAGCTTGGCCGAAATCCCGGCAGACGTGCTGGCAGCTTATCCAGCAGTAGTTGAAGCGATCGAAACGCTGGAAGCGGAA  
GGTTTCCCGATCTTCGCTTATGACGGTTTCGCTTGGCGGCCAGTATCCGGTGATTTCGCTGGTACTGTTCAATCCTGCTAA  
CGGTACCTGCTTTGCCTCATTCGGTGGCGATCCGATTTTGGCGTTGCACTGGACGTACCGTGACCGAGCTGCTGCAAG  
GTGCTGGCCCTGAAAGATCTGGATGTGTTTACTCCACCAACCTTCGATGATGAAGAAGTCGCTGAACATACCAACCTCGAA  
ACGCACTTTATCGATTCCAGCGGTTAACTCTCTGGGACCTGTTCAAGCAGGATGCCGATTATCCGTTTGGTTGAGCGAG  
CTTCTCCGGCACCACGGAAGAAGAGTTCGCCACGCTGATGGCTATCTTCAAAAAGGAAGATAAAGAAGTTTATATTGCCG  
ATTACGAGCATCTGGGTGCTACGCTTGGCGTATATCTGCTGCCGCGCATGTCCGATATTTATCCGGCTGAAGATCTGTGG  
CTGGCGAATAACAGTATGGGCAGCCATTTACGTGAAACGATTCCTTTCGCTACCGAGGTAGCGAGTGGGAAAAGGAAGATTA  
CCTGAACCTCATCGACCACTGGATGAAGAAGGTTTGTATGACTTACCCGCTGCGTGAACCTGTTGGGTGCTGGCGACCG  
GGTCGGATAACGGCTGGTACACTCTGCGTATCGGTGAATTAAGCCATGCTGGCGCTGGCTGGTGGCGATCTGGAACAG  
GCTCTGGTCTGGACCGAATGGACGATGGAGTTTAACTCATCAGTATTCAGCCCGAACGCGCAATTATATCTGCTGCGCT  
GCAAACTGTTGTTATCTGGCGCAGGAAGAATCGCCAGCCGCTGCAATATCTGAATGCGTTTGTTCGATGTACGGCG  
CAGATGCGTGGAAAGCAGTGCAGTGCAGCAATGAGCGGCAATGAGCGGCGTTTTATGGCTTGAACACAGTATGATGCTG  
CACGCTTTGCTGCACATCAGTCTGTTGTAAGGCTACGAAAAGCTGCAACGCGCAAAAGCAGCATTTCTGGGCAAAATA  
A

>Cluster\_7944

ATGACCACTACCAACGACACATCACTACTCAGCGACCCGCGACGACAGCCGCGCTTTTGTTCGGCAGGGCTATTCCGT  
GCCACAAATCGCGGAGCAGTTACAGGTCAAGCGCCCTACGGTGCAGAGCTGGAACAGCGTGATAAATGGGAAGAACCG  
CCCGTTAAACCGGGTCGAGTTCACGCTCGAGGCGCGGTGATTCAGCTCTATGCCAAGCCTGACCTGACGGCTCACGAC  
TTTAAAGTCCGAGATTTTCTGGCGCCAGATGGAGCGCTCGCGGGTAAACCGCTACGGCCAGACCGGCAACGAAAGC  
GGATTTAAACCGGATTCGGCAACCGCAACAAAGGGGAAAGAAAGCCGAAAAGAACTTTTTCAGCGAAGAGGCTA  
TCGGGAAACTCGAAGAGATTTCTCFCGAACAGTCTTTCGACTATCAGCTCGAGTGGTGGCGCGGGGCTGGCGCACCGC  
ATCAGGCACATCTGAAATCGCGACAGATTTGGCGCGACTTCTATTTTGCACGTGAGGCACTGTTACAGGCACCTGAAGAC  
CGCCACAACCCAGATATTTTGTGGCCAGTAAGACGCAAGCCTATGATTCGTAATAATACATTTACGCTTTGGCCGAC  
AGGCTGGCGTCGAGCTTACCGGCGACCCGATTTGCTCGGCAACAATGGCGGAGCTGATGTTTCTCGGTACCAATGCC  
AACACGGCACAGAGTACAAACGGTACCTGTATGTCGACGAAATTTCTGGATCCCAACTTTTCAAGAACTGAAGCGCT  
CGTGGGGGATGTCGTACAGGAGCATTACGCACGACCTATTTTTCGACCCCTCATCGCTGGCGCACGGCGCTTACC  
CGTTCTGGTCCGGTGGAGCAGTTTCAACAAGGGGCGCTCAGACAAGAGCGAGCGCTCGATATCGATATCAGCCACGCGCA  
CTCGCAAAGGGCGTCGCCGTGCTGACGGCCAGTGGCGGAGATTTGTCACCATCGAGGACGCACTCGCCAAAGGGTGCAC  
CCTGTTCAACATCGATACGCTGAAGCGCAGAAACAGTGTGATGATTTCCGCAACCTGTTTATGTGCGAGTTCGCTGACG  
ATAAAGCGTCGGTATTTCCGTTTCGAAGAGCTACAGCGTTCATGGTTCGACAGCCTCGAAGAAATGGGAGGACTACGCGCCA  
TTCCGCGACCGGCACTTCGGTACCGCCCGGTGGATTTGGCTACGACCCGCTATTACGTGGCGACAGCGCGGGTGGCT  
CGTTATCGCGCCCGGCTGTTGCCGTTGGCAATTTCCGCATCTCAGCGCCACCAGTGGAAAGGGATGGACTTCGCTC  
AACAGGCCAATCCATTCGCGAGCTCACGCAAGAAATATACCGTGAATATATCGGCATCGATGCGACCGGGCTCGGTACG  
GGCGTCTTCCAGCTCGTGGCTCGTCTTACCCTGGCAGCGGGAAATCCGCTACACCGCGAAATGAAAACCGCGATGGT  
GCTCAAAGCAAAGACACCAATTCGCGGGTGGCTCAGTACGACGCTCAGCAGCAGCCGATATCAGCGAAGCTTATGT  
CAATCCGCAAACCATGACCAGCAGTGGTGCAGCTCGACCTATGAGGCCAGCCGACCGAGGAGCCAGTACGCGCAT  
CTGCGCTGGGCAACCATGCACGTATTAATCAATGAGCCGTTAAACCGCCGCCACCGGTGAGCAGTATCCAGCATCATGGA  
GTGGAACATA

>Cluster\_64465

ATGAATCCAGAAGAACTGGAAGCGATCGTTCCTGCTGGTCTGATTAACGGTGGCGCGACGCTGACCGCTTGTATGTGAT  
TGCCACTACTCCGGAGGAAGCCTTCAGCATCGTGTTCACCCCTCGCGCTTTCAGCGAAATCAAAAAGCAGGCACTGGCGCA  
ACGGCATGATCGACATGTTGTTTATCAGCGAAGCGCTGGCGGTTCCAGCCTTGGCGATCTGTCTCAATATCCCGGATC  
CCGGCAACGGTACCGAATCTGAAAGGCTATGCCGGGAAATGGTGGCGCATGGCGGAGCCGCAAAATGGCGGCATTGTT  
GCAATCTGGCGCGGATGGTATCCGTAACGCTGTAAACCAGAGTCAAGCGTATGAGGTTATGAATCTCATGTTGCTCAGG  
TGCTGGATATGAGCGCCGCTACCGGCACAGTCCAGCCGGTACACATCAAAAGAGCTGTTACCGCTCTACATGACACCGTT  
GATAAACCGGATGCTCTGGTGGACGCGCAGGAAATGATGCTGAAAACCGGAGTCAAGGATCTGGATGTCGCCCTGGCGGAT  
CAACATGACCGACCTTGTGTTGGTTGCCGCTGTCAGGCATGGGGAAAACCGAATTTACCTGAAGATTATCGATGGCG  
TTACCGCAGATGGTGGCGCGCACTGTTTTCAGCATGGAATGGCGCTCAGCAGATGTTGTAACGTACCGTTGCCGGG  
GCTGGGAATATGCTCTCATCGCGTCTGCGTAAATCAAAAAGAAATGGACGATGAGGACTGGTCTCGATTAACCGCCGCGCT  
TGCAATCATGACGATCGGATATCTGGATTTGATGCGCACTGATTTGACGATTGAGCAGATCCGCGCCATTGGCAGAGA  
CTCATAAACCGCGTTATCCGCACCTGAAGCTGATGGTGTGATTACATGGGCTGATCAAAAACCGAAGCCGAGCGC  
CAGCATCTCGCTGGGGCATATCTCCGCAACATGAAGACTATGGCCATGCGCTGCAATACCCCTGTTTGTCTTTAG  
CCAGCTTTCCCGCAGGTGGATTCTCGACCTGCTGGCCAGCTCGCCGGTGTGTCGGACCTGCGCGATCCGGCAGTG  
TTGAGCAGGATGCTGACGACATTTGTTTGTATCGCATGACGTTTACACACCTGATTCACCTGAAAAGGGTATCGCT  
GAGGTGATTAATGGTAAAACCGTTCTGGCGGGCAGGTGAAATATTTATCAGGAATCAGGAATGGGCATTTCTGCTGCC  
AGTTGATCAACACGTAGCGCGGAAAATAACGCATCCAGAAGGAGGCAGAGCAACCGGAAAACGTTGAAAACCGGTGTT  
CAAAAACCACTTAAATACCGACCCATTTTAA

>Cluster\_35619

ATGGATTTTCCCTCCTTACCTTCTTGTCTCTTGTCTTCTTATCTTCCGGAACGACCTGGCGGATAATCTTTATGA  
CGTTCATTTCTGGCGTTCGTTTTCGGTGGAGAGCGACGAGGGGTTGTCGGACGTCGCGTTCAGGTCCATGAATATC  
CAAAACCGTATAAACCGTACACGGAGGATCTCGGGCTGCCACGCGACGCTGACGATTAATGCGTATCTCGTTGGTGT  
GATTACGCAGAGCAGCGGACAGGCTGATTACAGCGATTGAAAACCGCCGGGCGGGGACGCTGATCCATCCGACGTTCCGG  
TGAAATGCAGGGCTGTATGACGGGCGAGGTGACCGTTTCTCACCTCCGCACTGAAGGCGTATGTCGGGTTTCATTTTC  
AGTTTGTGAGAGCGGGAACTGTCAATTTCCGGTCGCCGAGCTGCAACCGCCAGAAAACCTGGAGGAGTCTGTCGATTC  
CTGGATGATGATTGATGAAGACATGTTCCGCGATTTTGTGATCTCGCGGAAATGCCGGACTTTATTTCAGAACGATTTATTC  
CCGGACGACCGATATGCTGGGAACCGTTACAGCAGCTTTCAAAATGGTTAATTCGGCTGTTTCTGCGGAGCGGACTAC  
TGCAGGGCGATTTATCCGTCATTCTGATGCCGCGTGGTGGCAGTATTTTGTGATATGTTGACGATATGTTGACGATACCTGGCGG  
GCCGGAACCGACTGGTGGATAACACACAGGATCTGGTGCAGTCCATAACAACAATGTCGGTATACGCTGGATCCAGG  
ACTGGCACCGCGTGGCTGGCCACAGATTTCCGCATCGCTGCTAGGCAAAAACAGCAGACAAAATCTGGTGGCAGCGC  
TCATCCGGACGACGGCAATCAGCGAGGCTGTAAGGGCGTATCTTACCTGCGCAACCCGGAAGTCTGGTGAATAATCAG  
CAGGCGGTTGTTGGCTGTTGGTGGTTCCTGAACTGACGCTCAGTCCGATATTTATCATGTTTCTCATCCGGCGCTTGGCAGCT  
GGCAGCCAGCACAGAAGATAAACAAGCAGCAACCCACCGCGGAAAACCTTACCATCATACCGAATCGCTGAATG  
CGCGGATTTGAACAGGAGCTCAGACGCACTGGAACGACCGGGCTGTTTTTTCAGCTGACGCTCATTCGTAACGAGTGAAC  
CGGATATTCAGGCGCTGCTGGTTACAGACGGAGAAACCGCAGAGCGCAACCGCAGCGGAGGTGCTGCCGACCTGTTCT  
GGCTGCGTATGTTACGACGATGCTCCGTTGAAACAGATATCTGGATCGAAATGCCATCTCCATCCGGGCTTGGTTC  
CGTACGACATTAAGGTTACCGTCCAGATGA

>Cluster\_27879

ATGCGCGTATTGATAAAAACCGCATTTGTTGTTAATGCAGATGGACAGCGAAGCAGGATTTGCTGATTGAAAGCGGGAT

TGTTCCGAGTTGGGTACCGATATTTCCGCCGCACTCCCTTGCGAAGAAATTGATGCCCTGGCTGTTACGTTTTCCCTG  
CGCGCGTGGATGTCATACGCATTTCAATATTGATGTCGGCATCGCGCGAGTTGTGATGATTTTTTTACCGGTACCCCG  
GCTGCTGCGTGTGGCGGTACAACAACCATATTGACCATATGGGATTTGGCCCAATGGCTGCCGTTACGCCATCAACT  
GGAAGTTTTATCGCGGTTATGCCGCCCAAGCAGTCACTGACAGCTTTCACGGTGTCAATCAACATATTAATCAGC  
CTATCTCCGACGAAATTCGCATGATGGTTGAGGAAGGATGACAGCTTTTAAACTCTATTTAACTATCAATATAAATC  
AACGATGATGAAGTGTGGCAGGCTTACGCCGCTTGCATGAGTCCGGCGCGTACCACCGTACACCCGAAAAATGACGC  
AGCTATCGCCAGCAAGCGGGCGAGTTTATCGCCGAGGGTAAACCGCCGCGTATCATGCCTGAGTGCACCTCTGG  
AATGCGAAGCGGAAGCCATCGCCCGCATGATTAACCTGGCACAATTTGCCGTTAACGCCCGCTCTATATCGTGCACCTG  
TCTAACCGCTTAGGTTAGGATTAATCTGCCGCTTTGCCGTTGCCAATCACAGCCAGTCTGGGTTGAAACCTGCCCAAA  
TCTCTGTTGGACGAACGCAGTTACGATACAGAAGATGGCATGAAGTTCAATTTAGCCACCCTGCGTAACGTACGCG  
AGCAGGACAACTGTTGGTGTGGCATCAGCGATGTTGCGATGAGTGGTGGCAACCGATCACTGCACCTTCTCGATGGCT  
CAACGCCGCAAAATTTCAAAGGCGATTTACGCCGCTGCCAAATGGCTTACCCTGGTGGAGAACCGCATGCAACTGCT  
GTTCTCCAGTGGCTGATGACGGGACGTATCTCACCGGAGCTTTTGTGAGTAAACAGTGCATGCGCCGCGCTGT  
TTGGCCTGTGGCCACAAAAGGATTTAGCGCCCGGTTCCGATGGCGACGTGGTATATAGACCCAGCTCAGAGCCAA  
CAAATTCAGCATCGCCATCTCCAGGACAACGCTGACTACTCGCCATGGGAGGGTTTTACTGTGAGGGCGCGATGTGCA  
AACCTTATCCCGTGGTGAACGATTTCTGCGACGGCACCTTTACAGGCAAAGCCGGGCGAGGTCGTTTCTGCGACGCA  
AACGTTTTGTCCTCCCGTCTCTAA

>Cluster\_54467

ATGAACGAAAACTAACTGAATTAAGAGAACTAGATAATTTACATACAACACTTAATGGTCTTGTATTTCCCTGTGGA  
AGATTTTATAAACCCTGGGCGTACACATTTCCTTTTTACATAAAGATGATCTGATAGAACTACAAAATGTTATCTG  
ATAGAATTAATCAGATGACGAAATTTGTACCATCTTCAGATGACATGACAGTAATGATGCGCTCATTTACACTCTGGAT  
CATGCTCAGCAAAATATTAATCATATAAACAATGGTAACGCATCAGTTCAACAGACCGCTATACCATCTTATGTTATTT  
AATGTTATATCTCTCATAGGATTAATGACCTTTTTTCACTTTGAGAGGCTGAAAGATAGAAAATTTATACCAAAGCAA  
TTTTACGAGCTCAGGTTATATAAATTCAGGATATCTGCAATTCAGCTGAAACTGGTAATATAAGAGGAAATTA  
ACTATAAATGAAGCATATGATGCAGCCGAGAATCTACCACAACAGTAAAAATGCTTCTGTAACAAAATGATGAAGTTAA  
AAATGTTTACAATAGCGCAGTTGAGCATTCAGAAATATAATGGCATGCTTAAAGAGACTGAAGAGAACTCCAAAATCG  
TAGATGAGGCCAGACAAGAAATTTGGCGCTGAAACAGAAATGCAAGCAAGGATGCAAAAGATTTATTTACAATCTCTCCGT  
GAAGAAGCTCAGGTTATATAAATTCAGGATGAAAGAGGCTTTTGAAGCTACTACTTCAAAGGTTTGGCTGGGCAATTA  
AGATAAAGCAGAAAAATTAACCCGAGCATACTGTTGGTGGGATGTTGGACTAATAGGTGCTTTGGTTGCAGGTGCTGCTG  
TTGGTTATACCGCTTACATGCTCTCGAAGCATATCTGTCAAACCTGACGCATCAGGTATAAAGTTAGCTATCAACTT  
TACTCTCCATTTAAGTGTGGAGCACCATTATGGTTTGGTTAGCAACGAAACAAATTTGGTACAGGATTCAGAT  
GGCAGAGGATTAATGAATTCAGGCTCAGTATCCAAAGCTTATGAGGGATATAAGAAAGAAAGCTGTCACAACTGATAGC  
ACTTTACCAAAGGTTATTTGGTAATGCCTTACTCGACTGGAGGAGCCGCAATTAAGATTTGTTGAAGAAGCTACCCAT  
TCATCGCCTATAATGGAATGTTATCATCGGAAATTTAAGCATTTCTAGCTAATGGTGGCGATAAAATCGATTCAT  
TTTGAAGGTGCAGGCCCTTCTAGAAAAGGTAAGTCGAACAAACCGCCATTTAATAAGGATGTGATCCAGCCTGTAA  
ATGAAACTTCAAACAAACAGAAAATGATTA

>Cluster\_27085

ATGCCATTTAAAAAATCTCCCGACGCACTTCTGACGGCAAGCTCCGCGCTTGCCTTCCTCCATACCCTTTCCCGCG  
CGCGTTCCTCCCGCAGCAAGCGTTAACATTAACGACTACAACCCACAGCCTGGATCGCCTCATTTAAACAAGCCTTCA  
CGAAGGGCAACAGCTGCTGCTGCTGCGGATTTGGTTTGTGACAATATAACACCCGCGCATTTTATCCTCCCGGTAAA  
ACGTTACACATTTCTGGAAGCTTGGCGGCAACGGCAGAGGGCATTTGTCTTACAGGACGGCAACAGGTAACAGGGGA  
GGAGGGCGCAGTATGATAACATCACCTTGGATGTGCGTGGTCTGACTGCACCATCAAAGGCTGGCAATGAGCGGCT  
TTGGTCCGCTAACCGCAGATTTATTTGAGGCAAAAACAACAGCAGTCAATGCGTAACTGACCATCACTGCAACTGACG  
AGCCACGCTAATTACGCCATCTTACGCCAGGATTTTATAACAGATTTATCGTGGCAACATCACTGTAAGTTTACG  
CGACTTACAGGGCAGCCTATTGAATGGAACTGGCGATTAACGACCATGATATTTGATATCTGACCATGCTATCGAGC  
GCATCAACTGTACTAACGGCAAAATCAACTGGGGCATTGGCATAGGCCCTGCGGGAAGCACTTACGATAAATAATACCCG  
GAAGATCAGGCAGTGAAAAACTTTGTGCTGGCGAATATCACGGGATCGGATTTGCGGAGTTGATGATGAAATGG  
CAAACATTTGTTATCCGTAATAATAAGCCCGCAATATCACGCGGATTTTCAAGTAAAGCAGGCAATGATAACGCGA  
CAGTCGCTATTTACGGTTGTGACATTTCTGATGATGATAATATGAAATGATTAATAGCGCGGGATGTAATCGGCTAT  
GGGTAATTAAGGCAAAATCTCTCGATACCGCAAAATTTCCGATGAAATAATTTCAACTGGATAATACCCACCTTGC  
TTATAAATTTGCGCGGATCCAAATCTCCGCGGGAATGCTGCTCCTTTGTGGCACTGACTAACATTTGAGATGAAAGCTG  
CGTCGCTGGAGTTACACAACAGCCGCAACACCTTTTTATGCGTAATAATAAGGTGATGCAGGAATCTCTGTTGGACCA  
GCATTGAGCATGAATTTGACATCGCAGAACGCTTCCGCGGCTCTTTATGGCGAAAAAGAAACACTGCTGTCTCTTGC  
AAATGTTATCGGTTGAATGAAAAAGGCAAGCTCCGTCGATATCGACAGGATAAATCACCATATTTGTTAATGTGAAA  
AGATTAACCTTATGATTTGCCGGAACGGAGGGAGT

>Cluster\_29293

ATGGAGATCCTCTACAACATCTTTACCGTGTTTTTTAACCGAGTTCATGACCAATGCCCGTTGTTGCTGGGTATTTGTGAC  
CTGTCTGGGTTACATCTCTACTGCGCAAAAGTGTACGCTTATTTAAAGTACGATTAACCAATGTTGGTTTATGTTTATG  
TGTGACAGCAGGGTCCGGTATCTGACGACCTTCAAACCGGTTGGCGAAAAATGTCGGAAGTCTACGGCATTAAC  
GGCGCAATTTCCGATACCTTACGCGTCTGATGATGGAACCATTAACGCATGGGCGATGCTTATAGCTGGTGGGTACCG  
GGTGTGTTAGCGCTGGCGCTGAACATCTGTTACGTGCTGCTGCGTCGCTTACCGGTATTCGTACCATCATGCTGACTG  
GTCACATCATGTTCCAGCAGCGGGGCTGATTGCCGTTACGCTGTTTATCTTCCGCTACTCCATGTTGGACGACCATTAAT  
TGCACCGCGCTTCTGTTTCTGCTACTTGGGCAATTAACCTCAAACATGATGTACAAGCCGACACAGGAAGTGACCGG  
CTGTGGTTTCTCCATTTGTCACCAAGCTTTGTCATCATGGATGCTTATAAAGTTGCGCCGTTCCGCGCAAAAAAG  
AGGAAAGCGTTGAAGACTCAAACCTGCCAGGCTGGTGAATTTTCCAGCACAACCTGCTTCCAGCAGGATTTGTCATG  
ACTATCTTCTTTGGTGCATTTCTGCTCTCTTTGTTGATGATGATGATGATGATGATGATGATGATGATGATGATGATGAT  
GTACATCTGCAACCGGTTTCTCTTTGCGGTGGCGATTTTTCATCATCACTCAGGGCTGCGCATGTTTGTGGCGGAGC  
TCTCTGAAGCATTCAACGGTATCTCCAGCGCTGATCCCGGTTGCGGTTCTGCGGATGACTGTGCGGCTATTTATAGC  
TTCCGCGCAACCGCTGGTCTGGGTTTTATGTTGGGGCAACCTGCGGCAACTGATTCGGGTTGGCATCTGTTGCTGCTG  
TGGCTTTCAATCTGATTAATTCAGGCTTATCCGATGTTCTTCTTCCACCGCCATATCGGCGGTTCTGCTAACCACT  
TCCGCGGCTGGCGCGGGGCTGAAGATTTGCCGTTGATGGGATGATCGAAATCTTTGGTTGCGTCTGGCGGTTGAA  
CTCACCGGTTATGAGCGCTGGATGGGATGGCGGACTGCTGATTTCTGACCGCCGATGATGAGGGCTTCTTCTCCAT  
CGGTATCGCCTTTATGGCCGTCATCATTTGCTATGCTGCTGCTGCTGCTGCTGCTGCTGCTGCTGCTGCTGCTGCTGCT  
AAGATGCAAAAAACAACCTGGCAGAACAACTGCTTAA

>Cluster\_22197

ATGACAAATCTAAAAAGCGGAGCGAGCGAAAAACCAATGCATCGTTAATCTCTATGGTGAACCGCTTTTTCAGATATCAC  
CATCATGTTTCCCGGACTATGGCTGGTTTGGCAAGTGAGCGGACTGCTATCTCTACATGACCTGTTGGTGGCGTTGA  
TTACGCTGGTGGTGTCCAGATGCTGGCGGCACTACCGATTTTATCGCTCATGGCGGGTGTTCGGCGAGCAGAGAA  
TTTTGCCCTGTTGCTACAAAACCTGACCTTAAGCGTATTTTACGCGCGGACTGGTGGCGTTCATAAATGATTTGACAC

GCAACTGAAAATCTGGCTTGGCTGGTATGGGCTGACCAGTATCGGACTGGTGGTTGCCGTTTCATGTATTCGTATTTGGT  
CGGGCTGGCTGCGTAATCATGGCTATAACAAGCCATGGTCGCGGTGGCGGGGATTTAGCCGCGGACAAAATGTTGATG  
GAGAGCTTCCGTAATCAGCCGTGGTTAGGGTTTGAAGTGGTGGCGTATACCACGACCCAAAACCGGGCGCGCTTCTAA  
CGACTGGGCGGGCAATCTCAACAGCTGGTTCGAGGATCGGAAAGCGGGCAAGATTCATAACGCTATATCGCGATGCAAA  
TGTGACCGCGGGAGTGGAAAGTGGAAAACTGGTCCATCAATTTGGCGGATACCACCTGTTCCGTTGCTGCTGATGCT  
TTTACCTTCAATATTTCTCCATTCACGTCTCGAAGAGATGAACGGCGTTCTGTGGTGGCGCTGATGACACGCGCTTTC  
CGGGTTAACCCGCTGATAAAACGTGCGGAAGACATTTGCTGGCGACGCTTATTTCTGTGCTGATCTCCCCGTGCTGT  
GCTGTATTTGGCTGGCGATAAAACTCAGTTCACAGGGCCGGTTATTTCCGCGAGACTCGCTACGGCATGGATGGCAAG  
CCGATCAAAGTGTGGAGTTCGTTCCATGAAAGTGTGGGAAACGACAAAAGTGGTGAACCGAGCGACGACGACGATCC  
CGCGCTACCAAAGTGGGAACTTTCTGCGCGCACCTCGCTGGATGAACTGCGCGAGTTTATCAATGTGCTGACCGGGG  
GGATGTGCGATTTGGGTCCACGTCCGCACGCGGTGGCGCATAACGAACAGTATCGCCAGCTCATTTGAAGGCTACATGCTG  
CGCCATAAAGTGAACCGGGCATTTACGGCTGGGCGCAGATTAACGGCTGGCGCGGCAACCGACACACTGGAGAAAAT  
GGAAAACCGCTCGAGTTTCGACCTTGAGTACATCCGGGAATGGAGCGTCTGGTTCGATATCAAATCGTTTTCCTGACGG  
TGTTCAAAGTTTCGTTAAACAAAGCGGCATATTGA

>Cluster\_43006

ATGAAAAAATCGACATTATCTTTAGCCATCGGTTTATTATTGGCATGTAGTACCGGTATGGCAAAAACACAGCATTTAAC  
GCTGGAACAAACGATGGCATTGCTGGAAGAAGCCCTGGAAGCGCAGAAATGCCGGCAGCAAAAAGCAGAGGGGAGGTTA  
AACAGCTTCAGACACAACAAGCCGCGAGATCCGCGAAATTAAGATCGCACAGGGCAACACCGCGGTAAACGGTCAATCA  
ACGACGGAGTCAGAGAAGAAAAACGCCACCCCGCTAATCTCTGCTTTCAGGGTATGGCGATTTAAAAATCTACGGTGA  
CGTAGAATTTAATATGGATGCGGAAGTAACTCATGGCTGCTGGCAATGACCAACGCTGATGTGAATACGGATCCCACAT  
ATGAAACAGTGGAACTCTCAATGGTCTGATTTCTGTAGGTTTGGATGGTATGCGAAAACTGGATAATGGCTATTTTCGTTGGG  
TTCCTCGTACAACCGCTGGGGGATATGCAGGTTTCAAGTAAATATCGATGATGCGGTTTCTTCTTTGGCAAAGAAAACGA  
CTGGAAGGTCAAAGTAGGCGCTTTTGAAGCTACGATAATGTTCCCGCTGAATCAGGATACCTTTGTTGAAACATTCGCGTA  
ATACTTGTGACGATCTTTATGACGATGGCAGCTGATATATATGATGAAAGAGGGCGCGGACGTTCTAACGTTGCG  
GGTAATTTCTCGTCAGCAAACTCGATAACTGGTATTTTGAATTAACACGTTACTGGAAGATGGAACATCTTTATA  
TAACGACGGTAAATATCATGACGCGATATGGAACAGCAGAAAAATGTTGCTTATCTGCGTCCGGTAAATGCTGTTGCTCGC  
CGACGGAAGAATTCACCGTTTCCGCGAGCATGGAAGCGAATATGGTAAATAATGCTTATGGTTATACCGATAGCAAGGGT  
AATTTTGTGACGATCTCCGATCCGATCCGCTATGGTATGATGACGATGACCTGGAATGGCCGTAAGAAACGATTCGGA  
CGTGTGGTTAATCTTAATACCGCTATTTAGATGCTAATAATGAGAAAGATTTCACTGCGGGATTAACCGCTGTGGA  
AACGTTTCCGAGCTGGGTTATATCTACGCGCACAATAAGATTTGATGAAATTCAGCGGTGTAGTTTGTGATAACGACTGCTGG  
ATTGATGATGAAGGGACGTACACCATTCACACCATTCATGCGTCTTATCAGTTGCTAATGTGATGGATATGGAGAACCT  
TAATATTTACCTTGGTACTTATTACTCCATTCTGATACCGGATGATAAAAAACACGGTATGATGATGATGACCGCTT  
ACGGCGCACGCGTTCCGTTTAAATACTTCTTCTGA

>Cluster\_39017

ATGAAAGAAAAAATAGCCGCGTGAATTTCTGAGCCAGAGCGGTAAGATGGTTACCGCCGCGCGCTGTTTGGTACCTC  
AGTCCGCTCGCCATGCGGGGGTAGCTGGCACCTAAACTGCGAAGCGAACAACACCATGAAAACTACTGACCCGCAATT  
ACTATCTCGATAACGTGCTGCTGGAACCGGTTTGTACTACGAAAATGGCGTGGCGGTACAGACCCGACGGCGCGCCAG  
ACCGTGGAGATTCAGGACGGTAAATTTGTTGCCCTCGCGGAGAAACAGCAGCATCCGGACGCCACGCTGCCGCACTATGA  
CGCTGGGCTAAGCTGATGCTGCCACACCGCGCAGATGATATTCATCTCGAACAACCTTCTACGGAGGGCGGGCGG  
GCTCGCTCAATTTGTCGGGAGGCAACACTATCCAGGACATGATCAAACTCGAGCAGAAAATGCTGCGGAACTGCAACCG  
TACACGACGGAACGGGCGAAAAACTGATCGATTTATTTGAGTGCAGAAAGCCACCATTTGCCGCGAGCCACTGCAATAT  
CGAACCGGTTTCCGGCTGAAAAATCTGAAAAATTTGCAAGCGGTTGCTGGCGCGACGTCAGGCGGGCTTCGAGTGTGAAA  
TCTGCGCTTCCCGCAGCAGGTTTGTCTGTGCGAAATCAGAACTCTTAATGCGCGAAGCGATGACGGCGGGCGCAT  
TACGTCGGCGGGTGGACCCGACAGTGTGATGGCGCGATGGAAAAAATCCCTCGACACCATGTTCCAGATTTGCGCTGGA  
CTATGACAAAGGCGTCAATATTCACCTGCAGAAACACTCCGCGAGGTTGGCAGCCATCAATATATGTTGAAACCGG  
TAGAGAAAACGCCACAGCTGAAGGGCAAGCTGACCATCAGTCAAGCCTTTGCGTTGGCAACGCTCAACGAACAACAGGTA  
GATGAACCTGGCGCACCGGATGGCGGCGCAGCAATTTCTATCGCTCGACGGTGGCGATTTGGCACGATGATGATGATG  
CAACAGTTGCACGACAAAGGCGTAAAGTTCATGACCGGAACTGACAGCGTTATTTGACCACTGGTTCGCTTACGGCTGG  
GCGACATGCTGGA AAAAGCAATCTCTACGCGCAGCTCTATATTCGCCCTAACGAACAGAAATTTATCCGCTCGCTGTTT  
TTAGCCACCGGTGATGTTATGCGCTCAACGAAAAGGCGGATGCGGCTGGCCCAAAGCGCAGGATGATGCGACGCTTGT  
GCTGGTGGACGCCCTCCTGTTCCGCGGAGGCGGATGCTCGCCGAGAACCGCAACGTTCCATAAAGGGCAACTGG  
TGTGGGGAGTGTGGCAGGTTGA

>Cluster\_22719

ATGTTGTCAAATTTAAGCGTAATAAACATCAACAACACCTTGCCEACTACCCAAGATTTCTCAATCAGTTGATGATGT  
CGATTTCTTTTACGCTCCCGCGACTTCCGGGAGACGCTGCTGGA AAAAATAGCCAGCGCGAAGCAGCGCATTTGCAATTG  
TCGCCCTGTATCTCGAACAGGATGACGGTGGCAAAGGCATTTCTGAACGCGTTGTATGAGGCTAAAAGGCAGCGTCCGGAA  
CTGGATGTCGGGTGCTGCTGACTGGCATCTGTCACAACTGGACGATTTGGCGCTGCGGCATCTAACACTAACGCTGA  
CTGGTACTGCCCATGCGCAGGAAAATCCGGGCGTAGATGTTCCGGTTTATGGCGTGCCAATCAATACCCGTAAGCCC  
TTGGTGTCTGCATTTAAAGGCTTTATCATCGACGATAGCGTACTTTTATAGCGGTGCCAGCTGAACGATGTTTACCTG  
CATCAGCAGGATAAATATCGCTACGACCGTTATCATCTGATCCGTAACGTAAGATGTGAGACATTTATGTTGAAATGGGT  
TACACAGAATATTTAATGATGGCCGCGGCTTAATCGTCTGGATGATGTTAATCGGCCAAAAGCCCGGAAATCAAGAACC  
ACATTCGCTGTTCCGACAGGAGCTGCGTATGCGGCTTATCATTTCCAGGGGATGCCGACACGATCAGCTTTCGCTGA  
ACGCGCTAGTGGGGCTGGGAAAATCGAGTCTGTTGAACAAGACCATTTTCCATCTTATGCTTGTGCGGAGCAGAACT  
AACCATCTGCACACCTTACTTCAACCTACAGCAATCTTGTGCGCAATATCAATCCAGTTGCTGCGGAGGGAAAAAGG  
TCGAAATTTATTTGGTGATAAAAACCGGAATGACTTCTACATTCGGAAGATGAACCTTTCAAGATAATTTGGCGCATG  
CCTTATCTATGATGATCAATCTGCGCTTTCTGAGTCTTTACAGTATTACGTTCAACACTGACCACTTTGGTACGTTG  
GTTATGGAAGATGACGACAACACCTATCACCTGAAAGGGATGTTGGTTGATGATAAGTGGATGTTGATCACCGGTAATA  
ACCTGAACCCGCGCCTGGCGTCTGGATCTGGAAAACGCCATTTTGTACACGATCCGCAACTGGAGCTTGGCCACAG  
CGAGAGAAAAGAACTGGATCTGATCCGCGAGCATACCACATCTAAGCACTACCGGATCTGCAAAGTATTTCCGGATTA  
TCCCGTGAAGGTTCCGTAACCTATCCCGCTTTGCGCCATTCGCAATCCGATTAATTAGCCGATCTCTGTA

>Cluster\_45809

GTGATTAGTCTATTCGACATGTTTAAAGTGGGGATTTGGTCCCTCATCTTCCATACCGTAGGGCTATGAAGGCGGGTAA  
ACAGTTCGTCGATGATCTGGTCGAAAAGGCTTACTGGATAGCGTTACTCGCGTTGCCGTTGGACGTTTATGGTTCACTGT  
CGCTGACGGGTAAGGCCACCAACCGATATCGCCATTTATGTTGCTTTCAGGTAACGAACCTGCCACGGTATATC  
GACAGTATTTCCGGTTTTTATTCGCGACGTAGAAGAGCGCAACGCTGCTGCTGGCACAGGGACGGCATGAAGTGGATTT  
CCGCGCGCAACGGGATCGGTTTTTATAACGGCAACCTGCGCGTGCATGAAAACGGTATGCAAAATCCACCGCTATAACG  
CGATGAAGTCTGCTACAGCAAACTTATTTATCCATCGCGGGGTTTTATCGTCTGATGAAGAACACTTTGGTACGAT  
GCTGCCAACGAAGTGAAGCTGCGGATCTCCGTTCAAATCTGCCACCGAACTGCTCGCGTACTGTAATGAAAACCGGCTATTC  
GCTGTCTGTTCTCGTATGACAGAACAACTGGCGCTGCACAGCAAGAAAGAGATGACGAGTATTTCCGCGATGCTGCG

AAACCATGCAGGCATGTATCGATCGCGGGATGAACACCGAAGGTGACTGCCAGGCCCGTGCAGCGTCCACGTCGTGCC  
TCTGCCCTCGCCGGATGTTAGTTTCCAGCGATAAACTGTCTAACGATCCGATGAATGTCATTGACTGGGTAAACATGTT  
TGGCTGGCAGTTAACGAAGAAAACGCCCGGTTGGTCTGTGGTAACTGCCCAACCGTGCCTGCGGTATCGTTC  
CGGAGTGTGGCTTACTATGACCACTTTATTGAATCGGTAGCCCGGACATCTATACCCGTTACTTTTGGCAGCGGG  
CGGATTGGTGCATGTGATAAAAATGAACGCTCTATTCCGGTGGCGAAGTTGGTTGCCAGGGCGAAGTGGGTGTTGCC  
TTCAATGGCTGTGCGGGTCTTGCAGAACTGCTGGCGGTAGCCCGGAACAGGTTTGGCTGGCGGGGAAATGGCATGG  
AACACAACCTTGGTTAACTGCGACCCGGTTGAGGGCAGGTTGAGGTGCGGTGCATTGAGCGTAATGCCATTGCCCTCT  
GTGAAGGCATTAAACCGCCACGGATGGCTCTGCGCCGACCAGTGCACCGCGGTCTCGCTGGATAAGGTATCGAAAC  
GATGTACGAAACCGGTAAGGACATGAACGCCAAATACCGGAAACCTCACGCGGTGGTCTGGCAATCAAAGTCCAGTGTG  
ACTAA

>Cluster\_66586

ATGTCCTCGGATGCTGATGCTCACAAAGTGGGCTTAATCCCCGTACCCCTGATGGTGTGGGGAATATTAATGGGGTCAGG  
TGTTTTCTGTTACTGCAAACTGGCCCTACTGGCGGGATTGCCATTATGGATGGTGGTGGTGGTGGTGGTGGTGGTGGT  
TGGGGCTCTCGATGGTATACGCCAAAATGTCGTTCCCGACCAAGTCTGGTGGTCTTACGCTTACGCCCGCCGCTGC  
TTTTGGCCGTTTCTCGGTATCAAACCAACGCTCTACTGGCTGGCCGTGGTGGTGGTGGTGGTGGTGGTGGTGGTGGT  
TGGCGTAGGATATTTAAGTACTTCTTCCCGATCTGAAAGATCCATTGGTATTAACCATCACCTGCGTGGTGGTGGT  
GGATCTCGTCTCTGCTGAACATTGTCGGTCCGAAATGATCACCCGTGTGCAGGCAGTTGCCACCGTGGCTGGCTGATC  
CCCATCGTCGGGATTGCCGTTTGGTGGTCTGGTCCGTGGTGAACCTATATGGCGGCATGGAACGTCAGCGGCCCT  
GGGCACCTTGGGTGCAATTCAAAGTACCCCTAACGTTAGCCTGTGGTGGTGGTGGTGGTGGTGGTGGTGGTGGTGGT  
CAGGTGGTGGTGGTGGTGGTGGTGGTGGTGGTGGTGGTGGTGGTGGTGGTGGTGGTGGTGGTGGTGGTGGTGGTGGT  
CTTTCTACACCGCGATTATGGGGATGATCCCTAATGCCGCACTGCGCGTTTCTGCTTCCGCTTCCGTTGGTGGTGGT  
GATGGCTGGGTCACACCGCGGGGCCATTGTTCTTCTGCGCAGCTGCGGGTGGTGGTGGTGGTGGTGGTGGTGGTGGT  
CGTTGCTGGCGGGTCAAACCGCGAAAGCGCTGGCGATGACGGACTGTTCCCAACCAATTTTGGCCGTGTAATAAAGG  
GGTACGCCAGTGGCGGGGCTGATTTATCGTGGGTTTGGTGGTGGTGGTGGTGGTGGTGGTGGTGGTGGTGGTGGTGGT  
CAAAGAGTTCGGTCTGGTCTTCTCCGCTCCTGGTGGTGGTGGTGGTGGTGGTGGTGGTGGTGGTGGTGGTGGTGGT  
TGCTCGGACACGGTCACTTTGGTAAAGCAGCCCGGCATATCTGGCAGTTACTACCATTGCCCTTCCCTTACTGCATCTGG  
GCCGTGGTGGGTTCCGGAGCGAAAGAGGTTATGTGGTCAATTTGTACCCTGATGGTCAATCACCGCCATGTATGCGCTGAA  
TTACAACCGGCTACATAAAAACCGGATCCCTTAGATGCACCAATAAGCAAAGATTAA

>Cluster\_56095

ATGGCATATATCGAAAGTAAAAGGATGTAAGTATCGCTTAGGTATGTACTTTATCTCTGTCGGGAAGATTGCGATAC  
CGTTGTTGCCGCTGGCATACGGGAATTCGAGAGCGATGGGCAAACTACACCGTACATTCAAAAGAAAGGACCAAGAA  
GCCATTTGAAGGTTATTTTATCCTTACGCAAAACGAGAAGCGGATAAGCGTCTTATGGAGAACCTATCTTAGAGGTGATT  
GATCCTAAAGTTTACGATTCCTTAACTCTTCTCTGAGAGTCAATTTCAATTTCTTCTATCCCTATACGAATATTGC  
TCACTCTCCCTTACCACGTTCAAATGATAAATTTACCAGTACTGAAAGCGTTCCTAGTTTTTCGCTATTAATATGGTT  
CTAAATTTAAAGAAGTACTCCGATAACCAATCTAGTGTATGGTATGAAAGTGGTGGTGGTGGTGGTGGTGGTGGTGGT  
CAACTAAGCGTAAATTTGAAAACCGAACATCAATATCGACTTATGATCTTAAAGTTTCAAGCAACCTGGGCTGATCTGT  
TGAGCTATTTATGGCAGTTTACCCTTACACCGACCGCTTCAAGCAACACAGTGCAGACAAAACTCAATGCCGCGACGAA  
AGCAAACTTTCTGCGAGCTGTGTGGCAAAAGAAATGAACCTTGCAGAAATTTCTATAAGCTAGATAACAAATGCTAGAA  
CTGGAAGATGAGATAAGAACTCAACAGCAAGAAATCTGATAATCAGAAAAAACAACACTCAGCCAGGATTTGTTCT  
TTACATAAACCAGTAACCAAAATGGCTGTACTGGAACTCCGCTTACAAGAGTGTCTGCACTCAAAGCAACCAATTCG  
AGAATGAATGTCAGAGATTGCAACTTCAATTTGTCAAAGTGCAGAGCTTAAAGTCAATTTCTAGAGATGAACAGTTGAC  
CTTTATTTCTATCAATTTCTTCAAGATAAATGCCTCACTCAGAAACAAAGTGCAGCATTTTCTCATTTAGTTAGGATAA  
TTTTAATTAACCAATCGTAATTAAGGAAGAACAGAAAGACTCATTCATGAAGCAGCGCTGGCTTGAAGTGGAGTGGTA  
CGACTCTTGGAGCTGATGATGTCGGAAGAACTGCAGATATCGCTCGCCACATGGTTGACTCAGGATTAACAGATAGTAAG  
AAACGAATGCTCGTTCTTAAAGAAACAAGGATTCATCAGAGACACATTGCAGATAAGTTAACGGAAATGAGGGAAGAAC  
TATTTACCCAGCGGTTTCTAAAGCTTTGAAAAGTGTAGATAGTAACCTTAATATTTAA

>Cluster\_26386

GTGACCGCTTTTCTACCTGAATGTTTTGGCTCCCGCCAACTCACAAACCTTAATGAGTTGGGTTATTTAACCATGAC  
GCCGGTGCAGGCCCGCGCTTCCGCGCATCTTGGCGGAAAAGATGTCGCGTGCAGCGGAAAACCGCGACGGCGAAAA  
CGGCGGCTTTGGCCCTGGCTTGTACAGCAAAATGATGTGTCGCTATTTCAAACCCAGGGTTTAGTGCTGTGCTCTACG  
CGTGAACCTGGCGGATCAGGTGGCAGGTGAATGTCGCTGGCGCGCTTTTCTGCTAAATACCCAAAATTTTGACGCTGTG  
CGGTGGTCAACCGTTCCGTTATGCAGCGTGTTCGTTGCAACATGCGCCGATATTTATCGTGGCAACCGCGGGCGTTTGC  
TGGATCACCTGAAAAAGGCACTGTATCACTGGATGCGTTGAATACGCTGGTGGTGGTGGTGGTGGTGGTGGTGGTGGT  
ATGGGATTTAGTGACGCCATGTATGATGTCATCCGTTTTTGGCCAGCATCTCGGCAGACACTTCTGTTTTGGCAACCTG  
CCGGAAGCCATTTGCCAATCAGCGGAAGAGTGCACCGCATCTTTTAGCGATTGAAATGACTCAACAGATCTCTCC  
CACCTATGAACAACAATTTATGAGACATCCAGCAAAGGCAAAATTCCTCTGTGCAACGGTTATTAAGCTTGCATCAG  
CCATCTCTGCGTGGTGTTTTGAATACCAAAAAGATTTGCCAGGCTGTCTGTGACGCGCTGAATGAAGTAGGGCAAAG  
TGCAATTTGCTGTACAGCGGATCTGGAGCAACCGGATCCGATCAGACCTGGTACGTTTGTGTAACGCTAGCCGCGCTG  
TACTGGTCCGCTGATGTTGCTGCGCGTGGTGGTGGTGGTGGTGGTGGTGGTGGTGGTGGTGGTGGTGGTGGTGGTGGT  
GACCTGAAGTTCATGTATACATCGATCGGTCGTACAGCTCGTGCAGGAAATAGCGGTCGGCGATCAGTTCTGTGCCCC  
GGAAGAAGCACAGCGGGCAATATCATTCTGACATGTTGAGATAAACTTAACTGGCAAACGCCGAGCAAAATAGTT  
CCATTTGCGCGTGAAGCAGAAATGGCAACGTTGTGATCAGTGGCGGAAAAGCAAAATGCGCCCGGGTGGTGGTGGT  
TTAGGTGGCTGACAGGAGACATCGGGCTGATGGCGCAGATATGGCAAAATGCGGTCATCCGGCGCATGCTATGT  
CGCGGTGCGTCAAGCTGTGCTCATAAAGCATGAAACAGCTACAGGGTGGGAAGATTAAAGGAAAACGTCGCGGGTGC  
GTTATTAATAATAA

>Cluster\_21465

ATGTTGCGTCTTCTTATTTTTCTGGTGTGGTGTAGTGGGGATGTGCTCGCTCGATCCTCACTACAGTACGCTGA  
ATCCCAATCCCGCGCACCTTGGCGGAGCACAGGGCCAGGGGAAGGCATCAGCCATGACTGGCAGCAGGTGATCCAGC  
ATCCCGATTTGACGAGGTAGTAACCATGCACTGAACAGTAAACCGGATGTGCAAAAAGCGATTGCTGATATGACTCA  
GCACGGGCGCTCTATGGGCAAACTAATGCTGGTCTTATTTCCGAGCGTGAATGCGGCTTAAAGTTCGACTGCGATGCTTC  
GCTGGCAATGGTACGGGAACAACCTGCCAGGCTGACGGCACGGTGTCCAGTTATACGCTAGATCTGTTTGGTGGTGGT  
AGAGTTTATCTCGGGCGCGGGGAAACCTGGCTTGCAGTGAATTTACAGCCGAGAACACTGTTTAAACGCTGATTTGT  
GAAATCAGCACCGCTGGCTGACACTGCGCGCCGATAACAGCAACCTGGCCCTGGCAAAGAAACGATGGCCAGTGCAGA  
AAACTCATTTGAAAATATCCAGCCGCAACAGGTTTGGCACCGCGGACGACAGATGTGACTGAGGCGATGATGTTTT  
ATCAGCAAGCGCGCCAGGTTGCCAGTATCAGACACAAGTATGACAGGATAAAAATGCGCTGAACCTTACTGGCAGGT  
ACAACGCTTGGGAAAATCTGCTACCGGAAACCTGGAAGGCTGCGGGAACAAATGATAAGTCTGGTCTCGGGGAGT  
ATCATCTGATGTTCTGCTGGCTCGCCGATTCAGGAAAGCTGAACATAAATTTGAAGAGCGCAATGACAGATGTTGGG  
CGGCGGGGTAACCTTTTCCGACGATTTGCTGACTGCCAGTGCAGGTTGGTGGTGGTGGTGGTGGTGGTGGTGGTGGT  
AGCCATGGAATGCAGATCTGGTCAATTTGGCCATCGGTCATTTACCGCTGTTTACTGGCGGAAGTAATCGGCGAGCT

TCGTTACGCAGAAGCACAAAAGCGTGGACTCATTTGCCACCTATGAAAAAACCGTTTCAGAGCGCATTTAAAGATGTCGCTA  
ACGCACTGGCGCGCGGACCACCGTTTGAAGAGCAACTGGATGCACAGCGCCAGTATGTTAAAGCTGAACAACAACCGGTC  
GATGTTGGCTTGGCTGCTATCAGGCGGGTGTGGTGATACCTGACCGTGTGACGGCGCAGCGCAGCTTGTGGAGCGC  
ACAGCAGGAGCTGCTGGCACTGCAACTGACTGATTTTACAATAACGATCACGCTTGGCAGTCTGGCGGGCGGTATGT  
CATCACTCAAGTAA

>Cluster\_17212

ATGAAAGAAAAATACACATGGCTGCATATTTGGTTTAGGTTCTTTCCACCGCGCACACCAGCGTGGTATCTGCATCGCCT  
GCTGGTGGGGGGGATCGCGCTGGAGTATTGCAGCGGCAATATTCGTAACGATGCCGAACATGTTGTGCAGGCGTTGA  
TGACGCAAAAAGGCGGTTATGTGCTGGAACCGGTTAGCCCGGAAGGGAGAGCGTATATGAAGAAATCACTCAATTCAG  
AAATGTTGCCCTGGCAGGTCGATTTACAACCGCTGATTTGCCGAAGGTGCTGACCCGAAAACCAAGTATTGCTTTTAC  
GGTGACCGAAGGTGGCTACTACCTGAACACCAGCCATAAGCTGGAAGTTACAAACCTGATTTAGCTGCTGACCTCAAGG  
CGCAATGCAAAACCATTTATGGTGTATTACCCGCATTTGAAGCAGTATGGCAAAACGCGCGGACCGTTGACTCTT  
CTGAACCTGCGATAACCTGCGGCATAACCGCGAGCGTTCATGATGGCTGGTGGAGTCTTTACAACCTACGGGTAAACA  
GACCGTTATCGACTGGTTAAGCGCAATGCGACCTGCCGAATACTATGGTGGATCGTATTACGCCCCGTCGCTGCACAG  
AATCTCCGGAACGCTATCAAAGCGCAAACCGGTATGAGTGACAAAGCCCGGTCATGGCGGAAACCTTTATCCAGTGGGTA  
GTGGAAGATAATTTCCCGCATGTGCGCCCGCACTGGAGAATGTCGGCGTGGAGCTGGTGGAGTCCGTTATTCCTTATGA  
AGAAGCGAAAATTCGATTTCTTAACCTTCTCATAGCTATCGCTATCGCTGGCGAGTACGCTGGTTGGTGAAGAAATATCC  
ACGAAAGTACGCTGACTGATTTTATTTATCAGATTGCCGATCGCTACGTAACGGAAGATGTCATTCCTTGTCTGGGTGAC  
AATGGCATTTGATCTTGAACCTTACCGTGTATGTTGCTCAGGCGTTTTACCAACCCGATATTTCAGGACATAACACCGG  
CGTTGGCCCGGATGGCTTCTCAAATTTCCGGCAGTATGTCGCCAACTTGCGTGAATGTTACCAGCGCGGCTCCGTC  
CAAATGCTACCGTATGTTTACCGCATTTCTTATGTTTATGAGCAGTGGCATCTCGGCAAACTGCCGATGAATAC  
CAGGACGGTATTTGATGCGCCAGCGGTACATGCGATGTTGCAATCCGACAGCCGATGCGCTTTATGCCAGCGACAA  
GGCACTGTTCCGGCATTTAACCGACTGTCCGATTTTCCGCGCTGCTGCGCGAAAAAATGCTGACGCTTACCGCTGA  
TTAATTAA

>Cluster\_22982

ATGATTAGCGTATTCGATATTTTCAAATCGGCATTGGCCCTTCCAGTCTTCATACCGTTGGACCAATGAAAGCGGGTAA  
ACAATTTACCGACGATCTGATTGCCGTAACCTGCTTAAAGACGCTGACCCGCTGGTGGTGGAGTGTACGGCTCGCTCT  
CTCTGACCGGTAAGGCCACCACACAGATATCGCCATAATATGAGGCTGCGCGGTAACCTGCCGATACCGTGGATAATC  
GATTCATCCCTGGTTTTATTCAGGATGTAATACTCATGGTCGCTGATGCTGGCAACCGGTCAGCATGAAGTGGAGTT  
CCCGGTTGATCAGTGCATGAACCTCCATGCCGACAACCTTCTCTGCATGAAAACGGTATGCGCATTACCGCGCTGGCGG  
GCGATAAAGTCGTTTACAGCCAGACTTATTACTATCGCGCGTGGCTTATTGTTGATGAAGAACATTTGGTACGACG  
GATAGCGCACCGGTTGAAGTTCTTATCCGTCACAGTTCAGCAGCCGATCTGCAAAAACATTGTCAGGAAACCGGGCTGC  
ACTCTCTGGCCTGATGATGAAAAACGAGCTGGCGCTGCACAGCAAGAAGAGCTGGAACAGCACCTGGCGAACGCTGCGG  
AAGTCATGCGTGGCGGATTTGAGCGCGGTTATTTCTACCGAAGCGGTGTACCTGGCAAACCTGCCGCTTCCACCGCGTGT  
CGGCACTACCGCGGATGCTGGTCAGCCAGGATAAAACCACTGACCCGATGGCGGTTGTTGACTGGATTAACATGTT  
TGCATGGCAGTGAACGAAGAGAAATGCTGCTGGCGGTCGCTGGTGGTGCATGCGCGCAGTAAACGGTCCGTCGGGATATCC  
CGGCTGTGCTGGCGTACTACGATAAGTTTATCCGGAAGTGAACGCTAACTACTGCTGCTTATCTGCTGGTAGCCAGC  
GCCATTTGGTTCTCTTTAAGATGAACCGGTCGATTTCTGGTGGCAAGTGGGTTGCCAGGGTGAAGTTGGCGTGGCGTG  
CTCTATGGCGGCGAGCTGGTCTGGCAGAAGTGTAGGCGCAAGCCCGCGCAGGTGTGCATCGCGGCGAAATCCGCAATGG  
AGCATAACCTCGGCTGACGCTGTGACCCGTTGCTGGACAGGTGCAGGTACCGTGCATCGAGCGTAACGCCATTTCCGCGA  
GTGAAAGCGGTGAACCGCGCGCTATGGCGCTGCGCCGTACCAGGAGCGCGCGTCTGCCTCGATAAAGTTATCGAGAC  
CATGTACGAAACAGGTAAGATATGAACGCCAAGTACCAGCAACCTCTCGCGCGGCGCTGGCAATGAAGATCGTTGCC  
CGGATTAA

>Cluster\_27790

ATGCTTTTATCTCGCGTAGCGATTTGTCGACCAGCTAAAGGAAATGTTGGTGCAGATCGCGTAATTACCGATGAAACAGT  
ATTAAGAAGAACAGTATTTGACCGTTTTTCGTAATTTCCGGATATTCATGGCATTTTATCTTTGCCAATTCGGGACGCG  
TCGTAACACTCGGTTCCACAGAAACAGTATCCCGTGTGCTGATGATTTTATGAATGCGCACAATAAAGCTGTGCCACT  
ACCGGTCCTCCGCCACCAGGTTGGGCTGGAACCGTTGTGGAAACCTGGTGGTGCCTGACGGCTCCGCCATGATCA  
AATCATTAATATTTGATATGAGAATATGAGGCGCACGGCGCAATGTGGCGTCCGCTGGAGGTGCTGGAACCGGCTTGC  
GTGAAAAGGTTACACCACGGGGCATTTCCGCACTCAAAGCCGCTGGCGCAGATGGGCGGCTGGTGGCGACCCGCAAT  
ATTTGGCAGTTTTTCCACACTCTACCGCGCAATCGAGGATATGGTGGTGGTCTGGAAGCGGTAAGTGGCAGTACCAT  
CACACGATTAATAAAGCTGCCACGTCGCGCGGCTGGCCGGACATTCGTCATATCATCATCGGCAACGAAGGTGCACTGT  
GCTATATCACTGAAGTACAGTGAATACTTCAAATTTACCGCGAAAACAATCTCTTCTACGGCTATATCTGGAAAGAG  
ATGAAAACCGGTTCAACATCTCGCTGAAATCATGGTGAAGGTTATCGTCCGTCGATGCTGCTGTTGATGATGCTGA  
AGTTGGCACCTTCCACACTTACCCATTTGCGGACGCGTAAATGTTGATGATGATGATGATGATGATGATGATGATGATG  
CGAAGGCGACGGGCAAGGGATTGCGGAAATCGTTGCCGTTACCCGCAATGCCAGCGGCTGGACAGCAAGCTGATCGAA  
ACCTGGTTTAAACAACCTGAACTGGGGACCGGATAAAGTGGCTGCCGAACGCTGTGCAGATCTTCAAACCGGCAACATGGG  
CTTTACACCGCAAGTGTCCGGCTGCTGGAGCTGCATTCAGAAATCAGAAAGCGTTATTAACCGTATTCGACCGAGT  
TCCCGCACCGCGACGATCACCATGCTGGGCGGTCACCTCTCATAGCTATCAGAACCGGCAACCAATGACTTCTGCT  
TACGACTACAACGCTGTTGACTGTAAGCGGAAGGAAATCGACAAGTACCACAATCCGCTCAACAAAATCATCTGCGA  
AGAAACCATTCGTTCTCGGCGGTTGATGGTGCACCACCAGGTTATCGGTAACATCGCGTCACTGGAGCAAACTGGAA  
ACGGCAGCGCTGGAGGTTGCTGGAAGGCTGAAAAACAGTTGATCCTAACGGCATTTAATAACGGGTACTATCTAT  
CCGATTGAAAAATAA

>Cluster\_6310

ATGATGAAGAAAACGCCACCTCTACGAAAGACTCCTTACCCAACAAGGAGATGAATGATTTGCCCGGCTGGCGAGCGC  
GGTCTGCCACTGFTTCCGAACATCCCGTCACTGCTGGCCTTTTCCCTGGAGAAAAGTCTGGATGCGTTTTGCCGCCC  
GGTATCGTCTGGCCGAAATGGCAGAGCATAACGTCGATGTTTCAATTTACATCTGGCAGGACGATATGTCGGGTCGGTTA  
CTGTTTTCCGCGCTGTAGCCGAGCAAAGCGTGGCGTTCGCGTCCGTTGTTGCTGGACGACAAACAATACGCGCGGACT  
TGACGACATTTTACGCTTGTGACAGTCAACACGCTTGAAGTCCGGCTTTTAAATCTTTCTCGTTTCTGCTTGTGCTG  
GTCCGCTGGTTATATCACCGACTTTTCCGCTCTTAATCCCGGTATGCAACAATAAAGTTTCACTGATGGCGGGTGGT  
ACCTTGGTGGGAGGACGAAATATTTGGTGTGCTATTTTGGAGCAGGGGAGGACCTTTTTTCCGATTTAGATGTCAT  
GGCAATAGGACCGGTTAGAGGAGCTTCCGATGATTTCCGCGCTACTGGTATTGCAAACTCGGTTTCACTTACAGC  
AGTGTGGATGCTCCCGAGGGTGAATGGCGGATCGCATCGAGTTACCCGCTCTGGCATAAAGTGCATGACGCAAT  
CGTTATTTACGCAAAATGGAATCGAGTCCATTTAATAATCATCTGGTTGATGGAACATTTCCGCTTACTGGGCGAAGAC  
ACGTTTATTAAGTGTGATCGCGGAAAGGGGAGGGCAAAGGCAAACCGCATTCAGTGTACCAGCGCCTGCTGCTGATA  
TCATGGGCTCACCCAGTGAACGATCAGATATTTCTCTTCTTCTTTGTTACCGACACGCGCAGGTGTGGCGCAACTTTA  
CGGATGGTGAAGAAAAGGGTAAAGATTGGATCCTAACCAATCTCTTGGCGTAAACGATGTTGCTGTGCTGCTGCTGCGG  
ATACGCGCGCTGGCGCAAAAATTTGCTCCGCTATGGCGTGAATTTATATGAATCAAGCCGACCGGTGAACAAAGTAGTA  
CGTTACAGCATCGCGCATAACCGGTAATTCGGAGCCAGCCTGCATGCTAAAACCTTTAGCATCGATGGTAAACCGGTG

TTTATCGGCTCTTTCAATTTTCGATCCGCGTTCAACATTGCTCAATACTGAAATGGGCTTCGTGATAGAGAGCGAAACGCT  
GGCACAGTTAATTTGATAAACGCTTTATTTAGAGCCAGTATGATCGCGCTGGCAGCTCCGCTCGGACAGGTGGGGACGGA  
TCAACTGGGTTGATCGTCAATGCAAGAAAGAGATTTATTTCTCAAAAAGAACCCGCCACCAGTTTCTGGAGCGGGTTATG  
GTCAGACTGGCGTCGATATTGCCCGTGAATGGTTATTGTAA

>Cluster\_63646

ATGTGTGGGTTCCCTGGTTTGGCTCTATAGTCTTTCAATGTTGCCACCAATGGTTGTAGCATTGTTTTTATAAAGAAAAAAG  
CCTGTTTCGTTTTCCTTATAACTTTTCGTTTATATTTTTTGCATTGGTGGCGGAGCGTGGTATACAACTAAGAAATCTGGCA  
TTCAATTACGTACCCGTCATGGGTTTATATAAATTGTAATGTTTTGGATTTTGTCTGTTATTAGTGCATTCCCTTTA  
TGGATTGACTCAGAACTTAATTTAACGTTTCATTGATGCTCTGTTGAAGGGGTTCTGGAAATAACAACACAGGAGCAAC  
TGTAATTGATGATGTTAGTTCATTACCTCGGCATATTTGTACTATCGGTACACAGTTAAATTTATAGGTGGTTTAGGAG  
TTATGTTTTCGGCGGTTGCTGTATTTGCCATTATTTGGGTATTTGGTGGTCAAAGCTTTATCAGTCAGAAATGCCGGGGCA  
TTTTAAGGATGCAAACTCACTCCCGCTGGCCGATACGTCACGGACACTGTGGATAACTTATCTTTTATTAGGTATTGCT  
TTGATTGCTGTTTATAGACTTGCAGGAATGCCTTTGTGTTGATGCTATTTGTCACGGGATTTCCACAGTTTCTGGTG  
GTTTCTCAACTCATAGCGAGAGTATCGGATATTTTAATAACTATTTGGTTGAGCTGGTGGCTGGTTCTTTTTCCCTGCTA  
TCGGCTTTCAACTCACTCTTGGTATATTTGTTATTAGCAGGAAAACGATAAAAACCTTTAATCAGAGATATTGAACCTCG  
TTTTCTTCTGTTAATAGCTTACGGGTGATCATTTACCTCTTCCAGGTCATGGCATATAGGTATGTATGACTTGCATG  
GAAGTTTTTATTCACTTCTGTTTTTTTTCTTGGCAGCTCCATGCTCAGTATAATGTTTACGTACGCAGGATATGCAAGTTG  
CCCACGCACAGTATAGTGTTTTTGCTGTGTCAAGTTTCTTTGGGGATGTATAGGTTCAACTTGTGGTGAATTAAGTC  
ACTTCGATTTCTTATACTTTTCAACAAGCAACAGAGATAAATCAGCTTTCTCATCCAGAGCGTTGTTGAGTGTAA  
ATGTAGGAGGAAAGATAGTTACAGATCGTGTAAATGAGGCTGTATGAGGTTCTTTTTTCTTTTACTCTCTTACGGTG  
TTTTTTTACTGGTGTAAATGGTATGGGATGATGTTTTCTTACATCATTTGCAACAGTGGCTGGCTGATTAATAATAT  
GGGATTAGGTTTTGGGGCTACTGCATCGTCAATCGAGTGCTTAAATGACATTGCAAAATGTTTAAATGTGCATAGCTATGA  
TTCTTGGTCGCTTGAATTTATCCTGTATTATATTGTTTTTCAGGTTTTTTTTGGCGCTCCTAA

>Cluster\_38562

ATGTTTGTGCGTTACTTTGTTTCATATCCACACCATTGATAAGGTTAAGTGCAGCGTGTTCATACTTACACAACCTCAATAT  
CAACCAACGGCAGCGTTTATGGGCACTGATGGATACTACACCGCCAGCCGCTTTTATATCCGTTAATATATCTTATCG  
ACCATCTTGCCTTTGCGTTTACATCAGCCAGCAATCCGCTTCACTTCAAGCGCTCAAGTTTTTCTATGAATTTCTGGCACCAG  
AAACATGGTGTGACTTTTTGCTTTCAGTTTCTATTTCCCTGAACCAACCAATCCATTGATGGCATTGATGAACCTTACAGCCTT  
TTTTCATTTATCTGGAAAATACGCATTTATATGTACCAGCGTTAACCATAAAGGTTACTACGCAGACCAGCCCTCAACGTT  
GTACAAAATATCAGGCATGTACATTCGGTTATTCGTTTTATCAGATATTTGATTAAACAGTATACTCGCCGAGATATATA  
GATGGCACGCTAAAGAGCTTACAGACTTGCACGAGTAAACGGGACGTTTATCGATACATAAGGCAGAATTCGGTAC  
CTTACCATTCTCGTCAGATGAACAATGGCACAGCCATAAACCCTTTCGAAGTCTGACTGTCGAGATGGTCATGGCT  
TTTTACCAATCATTACCCCGTTCAATTTCAAGAAAACCCACTCAATCCCTTCCCGCTGGTGAATCCAGCTACGT  
AATTTTCTGATTTGCAGATTGCTTTTAAATACGGATTGCGTGTGAGTGAATTTACTGCTTTTGGAGTGTCAATTCGATCAA  
ACCAATCTCCGAGGGGATCAGTTACGCTGATTTGACCACAGTAGATGACGACGTTTCCGGTCAACGAAAAGATTTGC  
CTTCAATAAAACCTGTTTTATGCAAAACGGGTGGCATTTAGATAAAACCTGGACTTTTCAATTTTTTAAATATATATATCCAT  
AAAATCCGCCCTCAAGCTCCCATAGTTTTCTGTTTCACTTCCACCCAAAGACTACATCCGCCACTGTCTATACCATGCAGT  
CTATGATATCTTTACCGTATTGATGACATTATGAGTGTGCGATATCCGAAATATAAAAAGATGAATATATGATGCCA  
TTGAAAGCATCTCGCTCATATAACCGGCATACTTGGGCTTATTTAACACTTCAACGTTATTTATCTGATAAAACTTCAA  
AAAATTAAGGCCAACTCAGCTTGGCAGCCATAGACTTTTCTATCGTTGGATTGATGGATGAAGCCAAAGGATGAATACG  
GCTACTTGGCGGTTGGAGTACAAATAGCCATATGCCTGATCTTTACGCTAAAAGATTTCTATCTCAGCAGGCTAATACGG  
CCAATCTTCCAGCAATTTGATTGATAACGAAGCCCTGAAATCAACCTTTTCCCATGTATGCGATGAATGGAGTGCATAT  
GAGTCGAATCAATAA

>Cluster\_39475

GTGGAACCTGGACGCGATTCTTGATAACCTGAGCGACGAAGAGCAAATCGAATTGCTCGAGCTACTCGAAGAAGAAGAGAA  
CTACCGGAACACACACCTGCTATATGAATTTACGCCATACAGCAAAACAGCGTGTGATTCATCGACGCGGGGATGACTATC  
CAGAGCGCTGTTTTTATGGCTGGTAAACAGCTTGGTAAAGCTATTACTGGTGTGCTGAAGTCCGCTTTCACCTTACAGC  
CGTTATCCGGGCACAAAAGGCTATCCTGCTGATGGTAAATATGGCGGTGAGTGGAAAGGTAAGCGTTTTCTATGAGCCTGT  
TGTCTTCTGGATTGGCGGCGAGACAAACGAGACTGTAACCAAAACGACTCAACGCATCCTGTGCGGTCGTATCGAAGAGA  
ATGATGAGCTGGCTACGGTTCCATACCGAAAGAAGACATCATTAGCTGGAAGAAGTCTCCTTTCTTTCCGAACCTTGT  
GATCATCTTCTGGTTAAGCATCACAGCTGATGGCTTGAAGATGGCATTTCATCTGCTACTTCAACCATACCTCGCA  
AGGCCGCGCTCGCTGGCAGGGTGCACAAATCCACGGCGTGTGGTTTGACGAAGAGCCACCATAACAGCATTTATGGCGAAG  
GTCCTTACCCGTACCAACAATACGGGCAATTTCTCAATTTGACGTTTACCCCGCTGATGGGGATGCTGACGTTGTTACC  
AAGTCTTGAAGAATCCAGCAAGTCCGAGAAAGTGGTCAACATGACCATCTATGACGCTGAGCACTACACCGACGAGCA  
GAAAGGCAAAATCATATCGCATATCTGAGCATGAGAGAGAGGCGGCTGCTCGCGGTTATCCATGAGTGGTGGGCG  
GAATCTTCCAGATACCGGAAGAGACGATTAAGTGTGAGCGGTTGAGTGCCTGATCACTTCTACGTAATTTGGCGGGATG  
GATTTCCGGATGGGATCACCCGACGGCGCAGGTTTCACTTTGTTGGGATAAGGACGCGAGACACAATCTACGTTTACGCGT  
GTGGAAGCGAAAGAAAACAGCCGTTACGGCATGGGAGCTGTTAAATCATGGGCGATAAAGTGCACACAGCATGGC  
CTCATGACGGAACCCAGCATGAGAAGGGCGGCGGTGAGCAGCTCAAAGGGCAGTATGCAAGATGCTGGTTTTATGATGTTG  
CAGGAGCATGCGACATGGCTGATGGCGGTAATGCTGTTGAGCTGGCATCACTGAATTTGCGAGACATGATGCTTGTATGG  
TCGCTTCAAAGTATTTCAACACTTGTGAGCCATTTCTTGGAGGATTTCCGCTCTATCACCGTATGAAAACGGGAAGATCG  
TCAAGCTTAAACGATGACGTTCTCTCCCGCTTCGCTATGCATACATGATGCGCGCTTCGCCAAAATGATGCGCGACATC  
AAAAAACCAAAAGAGAAAAGATACCAGCCCAATCAGGCCATCGCACGGAGAACTTAA

>Cluster\_64424

ATGAGCACTAATTTTTGACAGGCCACGACGCTAGAATACGACGACGACAAAAGAGATCAGCGCGGTAGATATTTCT  
AGTTATCGGGATTTTGGTACTGCACCGGATTCCGCGCAATCAACAGTTCCGAGTTAATAACAGGGAGTGCATTTTTAA  
AAAACCGCTTAAATTCACGGCGACGGGACAGGGGGTGAAGGGCAATTTATGGAGCGTAGAGATTTCTGAAACCGATCCG  
GACGGCTGCACGGCACTGTGGAGTGATATGCCGACGGGAGTGCAGCTTATCAATATCAGTCCACCGGCATCCGGCTC  
GCACGGATACACCCAGCAGAAATCGTGCAGGCAGTCAACAATAGCAAAACCCGCTCCGGACCAATATTTTTAACAATTA  
CGGCAGTAACTTTAGCCAAATTTGATGCCATAGCCCTGAGCTTGGTGGTTCGCAATAAATTAAGTGGCGGAGTGTGAGGCG  
TTCCCAATTAATACCCCGTACTTGTGGCGGGAGTCCAAAAAAGCCGCTTTACTGGGTGAGCGGGCAGCTTGGCGAA  
AGATATTGCCGATATTTCAATCAGGACACGCTTGTGTTGTTGTTGACGATGAAAAGATGCAAAAGACACAACAAAAC  
AACAGCAAAATATTTACGACGGTGTCAAACAGCTGGAATAACGAAACAGTTAACCGAAGTCAACCGGATTTATTTAT  
GCACAGATTTTATGCAATTTGATGCCATAGCCCTGAGCTTGGTGGTTCGCAATAAATCCGCGGGGCTGTGTATAT  
AGACTCTCCGCGCGCAGTACCCCTGCAGAGCTTGTGAATCGCGGCAAAAACCGCGGACGCTGAGTTGTGCGCTC  
CCGCTGTTTTATTAACCTAGCAGCTAGGCGGGCAATCAAGACCATATTTAGCCATTTGCTGCTGGTTTACGAGCCAGAAAT  
GATAATGAAAAGGGTTTTGGTGGAGTAAGTCAATCAAAATATTTATGGAATAACAGGGCTTGAAGGCTGATGATTT  
CATTTATGGCGAGCAAACTGTACGGCAACCTGCTGAACGCCAGCGTCAACACCATTTATTCGCTACGATGGATTCC  
GGCACTGGGGTAACTATCTGTGAGTCTGGATCCAAATGGTCTTTGATGCGTTCTGTCGAGCAGTGCATTTGAA

GATTCATATAGCCCGGCAATGATGACAGATTTTATTGATCGCCGATAGACCTGCATCTCGAACAGACGTTGTGCGATC  
GATAAACGCATATCTGCACAAAATTAGAGGAGCAGGGGGCGATTAAACGGAGGGCAGCGTGGTTAGACGGTGAAGTGAATA  
CAAAAGAAAGTCTGGCCGCTGGTAATCTTTATATTAATGTTGATTTTGGTCCGAAATCTCCAGCACAAAACATACGTTA  
ATGTACCGCGTTAATAATGACTATACAGTTGAAGCGCTGGCCCTCCCTTTTAAAGAAACAGCCTGA

>Cluster\_23216

ATGAAGAAAATTGCTCCCCATTCTTATCGGCCTGAGCCTCTCTGGGTTCACTTCGTTGAGCCAGGCCGAGAACCCTGATGCA  
AGTTTATCAGCAAGCAGCCTTAGTAACCGGAATTGCGTAAGTCTGCCGCGATCGTGATGCTGCCTTTGAAAAAATTA  
ATGAAGCGCGCAGTCCATTACTGCCACAGTAGGTTTAGGTGCAGATTACACCTATAGCAACGGCTACCGCGACGCGAAC  
GGTATCAACTCTAACCGCAGTGCCTCCCTGCAGTTAACTCAATCCATTTTGGATATGTCGAAATGGCGTGGCTTAAAC  
GTTGACAGGAAAAAGCAGCTGGGATTCAGGACGTCACGTATCAGACCGATCAACAAAACCTTGGATCTCAACACCGCGACCG  
CTTATTTCAACGTGTTGAATGCTATTGACGTTCTTTCCATACACAGCGCAAAAAGAGCGATCTACCGTCAATTAGAT  
CAAAACCCCAACGTTTAAACGTGGGCCCTGGTAGCGATCAGCGACGTCAGAACGCCCCGCGCACAGTACGATACCGTGCCT  
GGCGAACGAAAGTAAACGCTAATAAACCTTGATAACGCGGTAGAGCAGCTGCCAGATCACCGTAACTATCCCGG  
AACTGGCGCGCTGAATGTCGAAAACCTTAAAACCGCAAAACACAGCCGGTTAACACGCTGCTGAAAGAAGCCGAAAA  
CGCAACCTGCTGTTGTTACAGGCGCGCTGAGCCAGGACCTGGCGCGCAGCAAAATCCGCGAGCGCAGGATGGTCACTT  
ACCGACTCTGGATTTAACGGCTTCTACCGGGATTTCTGACACCTCTTATAGCGGTTGCAAAAACCCGGTGGCTGGCTGGTA  
CCGAGTATGAGATGATCAATAGGCTAGGCGCAAGAACTGGCCCTGAGCTTCTCGCTGCCGATTTATCAGCGGAATGGTT  
AACTCGCAGGTGAAAACAGGCCAGTACAACCTTTGTTGGTGCCAGCGAGCAACTGGAAGCGCGCATCGTAGCGTCTGCA  
AACCCTAGCTTCTCTTCAACAACATTAATGCTTCTATCAGTAGCATTAACGCTTACAAACAGCCGAGTTTCCGCT  
AAGCTCATAGACGCGATGGAAGCGGGTACTCGGTTGGTACGCGTACCATTGTTGATGTTGTTGGATGCGCACCCACG  
CTGTACAACGTTAAGCAAGAGCTGGCAAACTGCGGTTAAGCTTACCTGATTAACCAAGTTGAATATTAAGTCTAGCTCTGGG  
TACGTTGAAACGAGCAGGATCTGCTGGCAGTGAACAATGCGCTGAGCAAAACCGGTTTCCACTAATCCGGAACGTTGCC  
CGCAACCGCCGGAACAGAAATGCTATTGCTGATGGTTATGCGCTGATAGCCCGCACAGTCTGCTCAGCAAAACATCCGCA  
CGCACTACCACAGTAAACGCTATAACCTTTCCGTAACCTGA

>Cluster\_42803

ATGAACGCCCCAATTTTCTGTTTATCATGACCGATACCCAGGCCACCAATATGGTCGGTTGCTATAGCGGTAAGCCGCT  
GAATACGCAAAAATATTGATAGTCTGGCGGCGAAGGATTTGCTTAAATTTCTGCTACACCTGTTACCGGTTTGTACAC  
CTGCACGCGCCGGACTATTACCCGGTATACGCTAACCGCTCCGCGCCGTTGGACCAACAACGTCGCGCGGGCAAAAAC  
ATCTCCACGATGGGGCGTACTTTAAGGATGCGGGCTATCACACCTGTTACATCGGCAAAATGGCATCTCGATGGACATGA  
CTATTTCCGCACTGGCGAGTGTCCGCGGAGTGGGACGCTGATTAAGTCTGATGGAGCGAACTATCTTAGTGAACCTGA  
CGGAGAAAGAGATTAGCTGTGGCGCAATGGCCATAACAGCCTTGAGGATTTACAGCGCAACCATATTGACGAAACCTTC  
ACCTGGGCGCACCCATACGCAATCGGGCGGTGGATTTCTGCAACAGCCCGCGCGCGGAGAACCTTTCTGATGGT  
GGTTTCTGATGATGAGCCGATCACCCGTTACCTGTCCGGTGGAGTATTTAGAGAAATAACTGATTTTACTACGAAC  
TGAGTGAGAAAGCAGAGGATGACCTGGCGAACAACCGGAACATCACCGCTTATGGGCGCAGGCGATGCCATCCCGAGTC  
GGTGTAGCAGGGCTTTATCACCATCCGCTCTATTTGCTGCAATGACCTTTGTTGATGACCAAAATCGGACGGCTATCAA  
TTCCTTAAACGCGCACGCAACCTGAAAATACGTGGGTTTATTAATCTCCGATACCGCGGAAATGATGGCCGACATCAAC  
TGATCAGTAAAGGAGCGCGATGATGACGACATCACCCGATTCACATGATCATCCGTTCCGCGCAAGGGGAGCGGCGA  
CAGTCTGATACGCGCAGTCAATGATTTACTGCCGCAATGATGGCGCTGGCAGATTTGAAAAACCGAGATTTCT  
GCCGGGGAAAAATCTTTGCCGTAAGAACAACCGTGGCGTGGTGGAAATTTAATCGTACGAGATGAGCATGACA  
GCTTTGGCGGTTTATTCCGGTGGTGGTAAACGATGACTTTAAACGTTGGTCTCAACCTTCCACCGATGATGAA  
CTTTACGATCGCGGTAATGACCCAAATGAAATGATAAAGTATGATGATGATCCATTTTCCGCGAGCTTCGCGAGCAAAAT  
GCATGACGCTTATTTGATTTACATGGACAAAATTCGCGATCCGTTCCGCGAGTTATCAATGGAACCTGCGTCCGTTGGCGCA  
AAGATGCACAACCGCGCTGGATGGGGCGTTTCGCTCACGCCCCAGGATGGTATTTCCAGTGGTACGCGACTATGAC  
ACCGGTTTACCGACACAAGGGGTGAAAGTGAAGAGAAAAAACAGAAAGTTCTGA

>Cluster\_20215

ATGAAAAAAACCACATTAGCACTGAGTGCCTGGCTCTGAGTTTAGGTTGGCGTTATCTCCGCTCTCTGCAACGGCGCG  
TGAGACTTCTTCAGCAACGACAGCCAGCAGATGCCAAGCCTTGACCGATGCTCGAAAAGGTGATGCTTCAGTGGTCA  
GCATTAACGTAGAAGGTAGCACAAACCGTTAATACGCGCGTATGCCGCTAATTTCCAGCAGTCTTCCGGTATGATTTCT  
CCGTTCTGCCAGGAGGGTCTCCGTTCCAGAGCTCTCCGTTCTGCCAGGGGGCTGGCGGTAATGGCGCGGCCAGCA  
ACAGAAATTCATGGCGCTGGGTTCCGGCTTATCATTTGATGCCGATAAAGGCTATGCTGTCACCAACAACCCGTTGTTG  
ATAACCGCAGCGTGAATTAAGTCCAACCTGAGCGATGGTCTGAAGTTGTCAGCGCAAGATGGTTGGCAAAAGATCCGCTCT  
GATATCGCGCTGATCCAGATCCAGAACCCGAAAAACCTGACCGCAATTAAGATGGCGGATTTCTGATGCGCTGCCGCTGGG  
TGATTAACCGTACCAATTTGGTAACCCGTTCCGGCTGGCGGAGACAGTAACTCCGGGATTTGCTCTGCGCTGGGACGTA  
CGCGCTGAACGCTGAAAACCTACGAAAACCTCATCCAGCTGATGCAGCGATCAACCGGGGTAACCTCAGGTGGTGGCTG  
GTTAACTGAACCGCGCAACTGATTTGGTATCAACCCGCTTTCGCAACCGCGCGGAAACATCCGTTATCCGTTTTC  
TATCCGAGCAACATGGTGA AAAACCTGACCTCGCAGATGGTGAATACGGCCAGGTGAACCTGGTGGTGGTGGTATTA  
TGGCACTGAGCTGAACCTCCGATCTGGCGAAAGCGATGAAAGTTGACGCTCAGCGCGGTTGTTTCTGTAAGCCAGGTTCTG  
CCGAATCTTCCGCGCGAAAGCGGGCATTAAAGCGGGTATGATGATGATCACTGAAACGTTAGCCAAATCAGCAGCTT  
TGCCGCACTGCGTCTCAGGTGGGCACTATGCCGCTAGGTAGCAAACTGACCTTGGGCTTACTCGCGCGAGGAAAGCAGG  
TTAAGCTGAACCTGGAACCTCAGCAGAGCAGCCAGAATCAGTTGATTCAGCACCATCTTCAACGGCATTGAAGGCGCT  
GAGATGAGCAAAAGGTAAGATCAGGGCGTGGTGGTGAACAACGTTGAAAACGGGCACTCCGGCTGCCGAGATCGGCT  
GAAGAAAGTGGTATGATTTATGGCGGAAACAGCAGGATGAAAAACATCGCTGAACTGCGTAAAGTTCTCGACAGCA  
AACCCTCTGCTGGCACTGAACATTCAGCGCGGCGACAGCACCATCTACCTGTTAATGACGATA

>Cluster\_12400

ATGTCCAAGCAACAGATCGGCGTCTGCGTATGGCAGTATGGGCGCAACCTGGCGCTCAACATCGAAAGCCGCGGTTA  
TACCGTCTCCATCTTCAACCGCTCCCGCGAGAAAACCTGAAGAAGTTGTTGCCGAGAACCCGGATAAGAAAACGTTCTCT  
ATTACACGGTGAAGAGTTCTGTCGAGTCTCTTGA AACCCACGTCGATCTCTGTTAATGGTAAAAGCAGGGGCGGGAAC  
GATGCTGCTATCGATTCCCTGAAGCCGATCTGGATAAAGGCGACATCATTATGATGGTGGCAACACCTTCTTCCAGGA  
CACTATCCGTCGTAACCTGAACTGTCCGCGGAAGGCTTAACTTATCGGTACCGCGTGTCCGGCGGTGAAGAGGGCG  
CCCTGAAGGCCCATCTATCATGCCAGGTGGCCAGAAAGAGCGTATGAGCTGGTGGCTGCGCTATCTGACCAAGATGGT  
CGGTTGCTGAAGATGGCGAACCATGTAATAACTTACATCGGTGCTGACGGTGGCGGCTACTACGTAAGATGGTGCACAA  
CGGTATCGAATATGGCGATATGACGCTGATTTGCTGAAGCCTATTTCTGCTTAAAGGCGGCTTAACTGCTTAAACGAA  
AGCTGGCAACCACTTTTACCGAGTGAATGAAGCGGAGTAACTAGTACTTACATGATGACATCAACAAAGACATCTTACC  
AAAAAGATGAAGAGGTTAAATACCTGGTTGATGATGATCTGAGCAAGCTGCGAACAAAGGCCACCGTAAATGGACCAG  
CCAGAGCTCTCTGGATCTGGGTGAACCGTGTCTGCTGATCACCGAATCCGATTCGCTCGCTACATCTTCTCTGAAAG  
ACCAAGCGATTTGGCATCTAAAGTGTCTGTTGCTCGGAGGCTAAACTGGCTGGTGAATAAGCAGAGTTCTGTTGAGAAA  
GTCCGCTCGCGCGCTGCTACTGGTAAATACTGCTCTTACGCCCAGGCTTCTCTCAACTGCGTGGCGGCTGTGACAAATA  
CAACTGGGATCTGAACTACGGCAAACTCGGAAGATCTTCCGCGGGGCTGCATCATTCTGTCGCGAGTTCTGCGAAAA  
TTACTGACGCGTATGCTGAAAACAAAGGATTTGCTAACCTGTTGCTGGCTCCGTACTTCAAAAATATCGCTGATGATAT

CAGCAAGCGTGCGTGTAGTGGCTTATGCTGTGCAGAACGGTATTCGGGTACCGACCTTCTGTCAGCGGTAGCCTA  
CTACGACAGCTACCGTTCTGCGGTACTGCGGCTAATCTGATTACGGCACAGCGTGTACTTTCGGTGCGCACACGTATA  
AACGCACTGATAAAGAAGGTGTGTCCACACCGAATGGCTGGATTAA  
>Cluster\_60522  
ATGTTCAATGGTCTGCTTTCCCTGTAGATGCATTTCCCTAAAATTATCAGGAATGCAATTTATGAAGTGAACAGCATA  
GCAGGCCCTCAAGGTTTGTGCTGCTTCTGCTCTTGGGGTAATTTCTTTCCTGCTGTGAGAACCGGATTGATGTTTGC  
GATTGAATAATCTACGTGGCCCGGTATCACTTTCTTAATGACTCTGGGTGAATCAGGTGACGTAAGAGTACGGTGTAT  
AACTGCTGATGAAGCCATTATATCAACTGGAAGAGGATTTATTTGAAAAATACACCCACGATCTTACCGCATGGAGAAA  
TGATGAAGCAATTTTAAATATTGAAAAAAGCACTGATGTCAAACCTTAAATCAGATATTCGACGTAACAAAGATCACT  
TGGCAACAAATGAAAGACTTAAAGAACTACTTACGACAAACCCGAAAGCTCCAGTGAGATTCAAATTTTATTTAACGAT  
GCCACACCTGCAGCTATTAAAGCTCATCTCTGTGGGCACTGGCGATCAGTCGGCATCATGCTGATGAAGCTGGGATCAT  
TTTTAATGTTTACACACTTAAAGAGCTGCCGTTTATCAATAAGATGTGGGATGGTTCAATATTTACGGTGGAAAGGAAAA  
ACGAGCCCGAGAAATTAATATAGAGATGCAAGATAAACCTGCTGCTGATGGTCCAGCCTAATGTTTTTAAAGGGTATATC  
GACAGGAAAGGAGATATGGCAAAGGGGATTGGATTTTTTGCACGGTGCCTCATGTGCCAGCCTGCTTCAACACAAGGTAA  
CAGAAAAATTTCCAAACCAATTTTTCAAATGAACATTTGCCGGTATTTCACCAACGCTTATGGAAATGTTTAAATGAGA  
GCATCATTAAATTAATGAAATAATCGCATCTGCCCTCCGATTTCTGCGAAGCAGAAAGACATTTGGATCGAATTTCTAC  
AACCGGTCGAGTCAGAAATGAGAAATGATTTGCCCTTCTTATGATTTTTAAGGATATGCTTCTAAAATGGCGGATCAAT  
GGCGAGGCTTGTGCTTACTTTCATTACTTACAGCGGTGATGGAGGCGATATATCTGTTACCGCAGTAAAAGCAGCAGTGG  
AGATAGTGGCTTGTATATTTGAAGAATACATCCGCTTGTCTCTAAAAAAGAGAGTTTTCTTTAGATGTTTTCAGAAAGCA  
GATGAGCTTTATGTTGGATAAAAGATTACTGCACGCAAAAATTTCTTCTGATCAAGAAAAATATATCTTACAAAT  
TGGCCAAATAAATTTAGAAATCTGACAAAGCAAAATTAATTAATTAATTAATTAATTAATTAATTAATTAATTAATTAAT  
CTTATGCGGTAAAACAAAAATAATAACATAACTCATTGTGTTTTTGA  
>Cluster\_7883  
TTGTCATTCAATTTGATGTTTTTAGACAGCATTAGAGGTAAAAATAAGAATGTTACAAGATAAGTAAATTTACATG  
GGAAACGTATGGTGTATCGTTGTATCACTGAAGATAGAATTTCTCATCTGGAGTTAGATGGGTTAATTTTTCAC  
ACCCGAGTTAGATACTCCAATATCTGACTCATTTTCATATTTATATGATAATTTTCAGATCGTTGATAGTGTGTCAT  
ATTAAGCTTCTTCATCTCAACAGAGAAACAAAGCAAAATACACACATCGTATTTATTTAAAAGATACTTTATAGACTC  
ATTTGCTAAAACAAGTATCACTGACAGAGAAAGAATATATATCTGTGATTTGTGATTCACCTGATCATTCCAGAGG  
ACATATATAGGCATCCATTTAGAATAGTTCTCGGGAATAAGTCAATGTTATCCATCAGAAGAACTTGTAATAATTCATAAGC  
ACCTCAAAAGAATATTTAAGCAATATGGATATGATTAACAATGTTATTTGTTCCCAAAAAACAACAAAGAAAAACAAAT  
ATCCATAGTTAGTTAAATAGCAATATCAAAAAATGATATTTGATTTGTCGGGAGTAATGACCGGAACATCAAAGATTTTT  
ATCTAAAATAATTCAGGTGATTTATGTTTAAACAACCTCAAAAACCTCATGTTGGTGGGTTGTGGTTATTTTAAAGATTT  
ATAAATAACTGGTGGAAATAAATCTTACTTTAATAACAGTTCCTATTGATAAATAATGTCAGACAATAGGATAAATAT  
AACCCCAATGGGGATAAAGATACAGGAAACAGTCAATGAAATGACAGGTTGTTTTTACCCACTCCATTAATAAATG  
GAAGTTTTTACTTGCATAAATCCACTTTACTTAACTCAATCCCTTCTTATATTCACATGAATATTTGATTTGATTTG  
GCATATAAGAAATCAACAGTATTTCTGTTTACAGAAACAATATTAACAATAGATATATACATACTGTTTTCTGAGTATCG  
AAAAGACGGTGTGGCAATATGTCATTAATCTATATATGCATATCGACATGTCGTTTTCGGTCAAAGAAAGTGTGGCTG  
TAGGAGATACAATAAATTTGCTAATTAAGAGCATGTTGAGTTTAGCTTTAATTCATTTAGTAAGGATTACTTTCTGTA  
CAAAAATAGTATATATAAATAATTTTAAATTTGCTTCTCGAGTAATTCGGTTGTTGTTGATAAAAAATACGCTCAC  
TCAAAAAAACCTCTCGAAAAACAATCAATTTTTTTCAGTATTAACAGGTATAGATGAGTCTCTTATGAAAAGCATATAATCT  
TTATCACTCTAAGGTTATGTCCTCCCTCAAAAAAGTAG  
>Cluster\_23915  
GTGTCACCTTTCGCTTTGGCAGCAGTGTCTTGGCCGATTGCAGGATGAGTTACCAGCCACAGAATTGATGTTGGATACG  
CCCATTGCAGGCGGAACCTGAGCGATAACACGCTGGCCCTGTACGCGCCAAACCGTTTTGTCCTCGATTGGGTACGGGACA  
AGTACCTTAATAATATCAATGGACTGCTAACAGTTTCTGCGGAGCGGATGCCCCACAGCTGCGTTTTGAAAGTCCGCACC  
AAACCGGTGACGCAACCGCCACAAGCGGCACTGACGAGCAACGTCGCGGCCCTGCACAGGTGGCGCAACCGCAGCGCA  
ACGTTGCTGCGCTTCTACCGCGCTCGGGTTGGGATAACGCTCCCGCTCGCGCAGAACCGACTATCGTTTCAACGTAAC  
TCAAAACACAGCTTTGATAACTTCGTTGAAGGTAATCTAACCAACTGGCGCGCGCGGCTCGCCAGGTGGCAGATAAC  
CCTGGCGGTGCTTATAACCGGTTGTTCCCTTATGGCGGACGGGTTGGGTAATACTACCTGCTGCATGCGGTGGGTA  
CGGCATTAATGGCGCGCAAGCCGAATGCCAAAGTGGTTTATATGCACTCCGAGCGCTTTGTTTCAAGGACATGGTTAAAGCCC  
TGCAAAACAACCGCATCGAAGAGTTTAAACGCTACTACGCTCCGATGATGCACTGCTGATCGAGTATTAACGTTT  
GCTAATAAAGAAGCATCTCAGGAAGAGTTTTTTCACACCTTCAACGCCCTGCTGGAAGGTAATCAACAGATCATTTCTCAC  
CTCCGATCCGATCCGAAAGAGATCAACGGCGTTGAGGATCGTTTGAATCCCGCTTCGGCTGGGGACTGACTGTGGCGA  
TCGAACCGCCAGAGCTGGAACCCCGCTGGCGATCTGATGAAAAAGCCGACGAAACGACATTCGTTTGGCGGCGAA  
GTGGCGTTCTTTTATCGCCAGCGCTACGATCTAACGCTGAGTGTGAGTTGGAAGGCGCGTGAACCGGTTTCCGAGCTT  
CAACTTTACCGGACGGGCGATCACCATCGACTTCGTGCTGAGGCGCTGCGGACTTGTGGCATTGCAGGAAAACTGG  
TCACCATCGACAATATTCAGAAGACGGTGGCGGAGTACTACAAGATCAAAGTCCGGATCTCTTTCCAAAGCGTGCATCC  
CGCTCGTGGCGCTCGCGCCAGATGGCGATGGCGTGGCGAAAGAGTACTAACCAAGTTCGCGGAGATTCGGCGA  
TGCCTTTGGTGGTGGTACACACAGCGGTGCTTTCATGCTGCGGAAAGATCGAGCAGTTGCGTGAAGAGGACGCGATA  
TCAAAGAAGATTTTCTAATTTAATCAGAACATTTGTCATCGTAA  
>Cluster\_8105  
ATGAAACAAGAAGTTATCTGTTACTCGACTGTGGCGCACCAATGTCAGGGCATTGCGGTTAATCGCGAGGCAAAAT  
TGTTGCCCGCGCTCAACGCCTAATGCCAGCGATATCGCGATGGAAAAACAACCTGGCACCAGTGGTCTTTAGACGCCA  
TTTTGCAACGCTTTGCTGATGCTGTGCGCAAAATCAATAGTGAAGTACTGAAATGCCACATCCGCGGTATCGCGCTCAC  
ACCTTTGGTGTGGATGGCGCTCTGGTAGATAAGCAAGGCAATCTGCTCTATCCGATTAATAGCTGAAATGTCCGCGAAC  
AGCAGCGGTTATGAGCAATATTTGAACGGTTAATCTCCGACAGCGGTTGCGAGGCTAATTTCTGGCGCTCGAGCTTTAGTT  
TCAATACGTTATATAAGTTGGTGTGGTTGAAAGAAAATCATCCACAACGCTGGAACCGCGCACGCTGGCTCTTTAT  
TCGTGCTGATTAACACCGCTTTAACCGCGAATTCATCTACTGATATCAGATGGCCGGAACAGCCAGATGCTGGATAT  
CCAGCAACCGGATTTAGTCCGCAAAATTTACAAGCCACCGGATTTCCACGCGACTTCCCTCGCTGTTGGGAAGCGG  
GTGAACAGATTTGGTACGCTACAGAACAGCGCAGCAATGCTCGGCTTACCCGTTGGCATAACCGGTGATTTCCGAGCT  
CACGATACCCAGTTCCGCTTTTTGGCGCTGGTGTGAACAAAATGAACCCGCTCTCTTCCGGTACATGGGAAATTTT  
AATGGTTCCGAGGCCCGAGTTGATCTTCGCTGTTAAGTCACTACGCGGTTCCACCTGCGAAGTGGATAGCCAGGCA  
GGTTGATAAACCAGGATGCAATGGCTGGCATCCGCGCTGCTGGAATGGGTGAGAAAACTGTTCTGGACGGTGAACA  
CCCTGGCAAAATGTTGATTGAAGAAGCTCTGATCGCGCTGGCGCGGATGGCGTAAAAATGCAATGTTGATTTATGTC  
GTGTCAGAACGCTGGCTGGCAAGGAGTACGCTTAAATACCACGCGGGGCAATTTCTATCGCGCGCGCTGGAAGGTTAA  
CTGCGCAATTCACGCGCAATCTACAGATGCTGGAAAAAATCGGGCACTTTAAGGCTCTGAAATTTAGTGTAGTGGTGA  
GAAAGTCGCAACACATTTGGAAATCAGATTAAGCCAAATGATGATTTCCGGTAAAAGTTCTCGACGCGCGAAAC  
GACCGTCGAGGACTGCGCTGTTCCGTTGGTATGGCGTAGGGAAATTTAACAGCCCGGAAGAAGCCCGCGCACAGATTC  
ATTATCAGTACCGTTATTTCTACCGCAAACTGAACCTGAATTTATAGAGGAAGTGTGA



>Cluster\_21641

ATGCATGTACAGCCATTTCACACTTCCGATGTTCAGGAAGGTCATCTGCTACGTAATAGCATCGTATTTTTGTGCT  
AACACCGTGTCTATTTTTATTGGTGCAGAGTTACGGCTGGTTACAGAACTTTCTTTTCTGGCCGCTGAATGGCGTAA  
TGGCGGGGTGTTTTGCCCGCTATGTCTGGCTTAATCGACTGCAATCTACTATGCGATCAGTTATGTGGCGATGCTGGTTTTAT  
GATGCAATAACAGCAAGTGGGGCTGGTTCACTGGCTCAATTTTCCAAATAGATGTTTTATTGTTACCGTGCCTTT  
ACTGGTCCGCGGGGATAAGCGTCTGGGAAAAAATAAGTATGAGCCAGTAAAGTGCCTTACGGCTATTTAATTAAGTCTGC  
TTGCCGATTTATGCGCTATTGTCTGGGGCGATTGGTTCGGTCAAGTATGATAGTCTGGATTCTGGCTTTGCTTGGC  
GACTGGTTTGTAGTAGCAATTTCTAACGGGCGTGTGATCGTGCCTGTATGCTGACGTTGGCAATTCCTGGAGTGTGCC  
GCGCTTTAAAGCAGAGCATGATGCTCTGCTATCGCGCTTATTGTGTGGTTATTGCTCGGTTAGTCCGCTAGTCAATGGCGGAGCG  
GGAGTCTGGCGTTTCCGCTCCTTGCATTAATCTGGTGTGAGTGGCTATACGCCGAGATAACATGTCTGTTGACCTTT  
GTCACCGTGGCGTGAAGTCTGACTGGTGGCAATTCGGTGAATGATATCTCGGTCGGTTCGCCGTTCTCCATTCGCA  
AATGTTCTCCGCACGCTCTCGGATTTGCCACGATGGCGATATGCCCAATTAATGGTTTCCCTTAGCGTGGCAGCGATCAAT  
CGCTAATGAAGCAAGTTGCGCTGCGAGCCGACTTTGATTTCTGACTCAGTTTACTCACGGTCTGGTCTTTATGAGGCG  
CTGAAAAGTCCATCGCTGAAAACAGACACAACATCTGACGGTCACTGCTGCTGATATCGACTATTTCAAAGCATTAACGA  
TAACATATGACATGAATGTGGCGATAAAGTGTAAAGCGTGTTCGCCAGCATATTCAGAAATGTGCGGTGATAAGGGCG  
TGGTGGCAGCAATGGGCGGCAAGAAATTTGCTGTGAGTGGCTGGTGAATCCTGTGATGGCTGCTAATGGCGGAA  
AAAATCCGTAAGCGTTGAACCTGCAACCGTTCACCTGCAACAAAAACGCTTTATCTCACGGTAAGTATTGGCGTCCG  
TAGTGGTTGCGCATCGTACCGAACGCTGACCGATGACTTTAATAAATGATGGTGAAGCCGATACGTTCTGTATCGCT  
CGAAGAAAGATGGCGCAACCGTACCAGCACTATGCGTTACGGTGAAGGATTTGCTGA

>Cluster\_40483

ATGAAAAAGACAAAATTTGTTGCACCATCGGACCGAAAACCGAATCTGAAGAGATGTTAGCTAAAATGCTGGACGCTGG  
CATGAACGTTATGCGTCTGAACCTCTCTCATGGTACTATGCAGAACACGGTCAAGCATTCAGAATCTGCGCAACGTTGA  
TGAGCAAAACTGGTAAAACCGCCGCTATCCTGCTTGATACAAAAGGTCGGAAATCCGCACCATGAAAATGGAAGGCGGT  
AACGACGTTTCTTGAAGCGGGTTCAGACCTTTACTTTGACTACTGATAAATCTGTTATCGGCAACAGCGAAATGGCTGC  
GGTAACGATGAAGGTTTCACTACTGACCTGTCTGTTGGCAACACCGTACTGGTTGACGACGGTCTGATCGGTATGGAAG  
TTACCGCCATTGAAGGTAACAAAGTATCTGTAAGTGTGAAACACGGCGACCTGGGCGAAAACAAAGGTGTGAACCTG  
CCTGGCGTTTCCATTTGCCCTGCCAGCACTGGCTGAAAAAGACAAAACAGGACCTGATCTTTGGTTGCGAACAAGGCGTAGA  
CTTTGGTTGCTGCTTCTTCTTATTCGTAAGCGTTCTGACGCTTATCGAAATCCGTGAGCAGCTGAAAGCGCACGCGAAA  
ACATCCACATCATCTCCAAAATCGAAAACAGGAAGGCTCAACAACCTGACGAAATCCTCGAAGCCTCTGACGGCATC  
ATGGTTGCGCGTGGCGACCTGGGTGTAGAAATCCCGGTAGAAGAGTTATCTTCCGCCAGAAGATGATGATCGAAAATG  
TATCCGTGCACGTAAGTTGTTATCACTGCGACACAGATGCTGGATTCATGATCAAAAACCCAGCCGACTCGCGCAG  
AAGCCGGTGCAGTTGCAAAACGCCATCCTCGACGCTACTGACGCAAGTATGCTGCTGCTGTAATCCGCAAAAGTAAATC  
CCGCTGGAAGCGGTTTCTATCATGGCGACCATCTGCGAACGTACCGACCGGCTGATGAACAGCCGCTCTCGAGTTCAACAA  
TGACAACCGTAAACTGCGTATTACCGAAGCGGTATGCCGTGGTCCGTTGAAACTGCTGAAAACCTGGATGCTCCACTGA  
TCGTGGTTGCTACTCAGGCGGTAATCTGCTCGCGCAGTACGTAATACTTCCCGGATGCCACCATCCTGGCACTGACC  
ACCAAGGAAAGCGGCTCACAGTTAGTACTGAGCAAGGTTGTGCGCCAGCTGGTTAAAGAGATCACTTCTACTGA  
TGACTTCTACCGTCTGGGTAAGAAGTGGCTCTGACAGCGGCTTGGCACAAAAGGTGATGTCGTAGTTATGGTTTCTG  
GTGCACTGTTACCGGCGCACTACTAACACCGCATCTGTTACGTTCTGTA

>Cluster\_27121

ATGACAGATCTTCCCGACAGCACCCGCTGGCAATTGTGGATTGTGGCTTTCGGCTTCTTTATGCAGTCTGCGACACCAC  
CATCGTTAACACCGCGCTTCCCTCAATGGCGCAAAGCTCGGGGAAAGTCCGTTGCATATGCACATGGTCAATGCTCTCT  
ATGTGCTGACCGTGGCGGTGATGCTGCCCGCACGCGGCTGGCTGGCGGACAAAGTCCGCGTGGCAATATTTTCTTTACC  
GCCATCGTCTGTTTACTCTCGGTTACGTTTTTGGCGGCTTTCGGCACGCTGAACGAACTGTTGCTGGCAGCGCGGTT  
ACAGGGCGTTGGCGGCGGATAAATGGTTCGGGTCGGCAGGTTGACGGTATGAAAATCGTACCAGCGGAGCAATATATGG  
CGGCGATGACCTTTGTACGCTGCCCGTCAAGTTCGGGCGGTTGCTTGGCCCGCGCTCGGCGGCTGCTGGTGGAGTAC  
GCATCGTGGCAGTGGATCTTTTTGATCAACATTCGGTGGGATTTATGGCGGATCGCCACACTGATGTTAATGCCGAA  
CTACACCATGACAGACGCGCGCTTTGATCTCTCCGCTTCTGTTGCTGGCGGTTGGCATGGCGGTTAATGAGGTTGGCG  
TGGACGGCAGTAAAGGTACAGGTTTATCGCGCTGGCGATTGCTGGCTGGTTCGAGTGGCGTGGTAGCACTGGTGTCT  
TATCTGCTGCACGCCAAAATAACAACCGCGCCTGTTGAGTCTGAAACTGTTCCGCACTCGTACCTTTCTCGTGGGCT  
GGCGGGAGCTTTGGCGGAGTATTGGCAGTGGCATGTTGCCCTTTATGACACCGGTTTCTTCAAAATGGCCTCGGTT  
TCTCGCGTTTTCATGCGGACTGATGATGATCCCGATGCTCTCGCACGATGGGATGAAGCGAATTTGTTGATGAGTAA  
GTGAATCGCTTTGGTTATCTGCGGTTGTTGGCGACACCGTGGGTTCTGCTGCTGGTACCCCTGTTGTTATGACTAC  
TGCTCTGCTGGGCTGGTACTACGTTTTCGGCTTCTGCTTGTGTTTACAAGGATGGTCAACTCGACCCGTTTCTCTTCA  
TGAACACCTGACGCTGAAAGATCTCCCGGCAATCTGGCGAGCAGCGCAACAGTCTGCTGTCATGATGATGCAATG  
TCGATGATCGCGCTCACTATCGCGGCTGTTGCTGGACTTTTTGGTTACAGCATGTCAGCATCGACGCGGCGAC  
CACAAAACCGCTTTATGTACACCTGGCTTAGCATGGGCTTTATCATCGCCCTCCGGCGGTTGCTTTGCCAGAGTGC  
CGAGCGATACGATCAAAATGTAGTATTTACGGCGAAAAGGAGCGCGCAATGA

>Cluster\_58209

ATGAGAGGTAAAACTACTACTTTACCAGTTAAAGTATCGCTGGCAATCACTCTCTATTTTTGGTTGTTTTTTATGCAAAAT  
GACATTTACAGGTATCAAAAAATAATTTATGACACCGGAGTGCATCAGATGCGTTCAATTTTTTACACCATATGCAGTA  
CGGAACAGCAAGAAAGCATTACAGATCATCACTCACTTCTGATGATATGCCAAAAATTAATATTTCTACCTGAACATGTT  
GTGATCGAGCAGGTAGATATTAAGAGGTTGTTTCAGAGCAACGTTTACTCAGACAATGATGATCATGAAATGACCCG  
GCAGGACACGCTTGTCTTCCAGATCTAAGCTGTCTTGGCAGAAGTGTGGAGGACTTACAGAATATTTTATTTTTTTGGC  
TTCAAAAAGAAATGTTTATCTACAGCTACCATCCAGCTCAAGGATAGAGCTTCTGCTGAAAGTGTGCTTGTCTTTTTG  
ATTGCTCGTACAGGATACGATTCACAACTGAAATCAACTAAAAGCCGATATCGACATGTTAAGAAAAAATTAGG  
ACGAAAGGAGGAAAGCAAAATACCGAGTATCAAACTACTTTAAGAAAGGTGATTTACTCAGGCTGAGATTGCAAGA  
AATTGAGTATCAGTTTATCGACTGTGAAGCGGCACTGGAATAACGGAATCATCGGTTAA

>Cluster\_16931

ATGAAAAATCAACCTAAGTTGAATAGCAGTAAAGAAGTAAATCGCGTTTCTGGCCGAACTTTTCCCCTGTTTCTAGTGC  
GGAAGGTGAAGCGGCTCCGCTGAAAATCCGATTTTTTTCAGGATTTGGTTCGATCGTGTTCGCCGGGAAATGAACCTGAGCA  
AAACGCAATTTGCATCCGCTTTACGCTCTTACACTTCGAGCTGGCGTTATCTTTACGGTGTAAACCCGGCGCAACCGT  
GTCGATCTTGACGGCAACCCATGCGGTGAGCTGGACGACAACATGTCGAGCATGCTCGCAAGCAGCTGGAAGAAAGCGAA  
AGCCGCTGTTTCAGGACAGCGTGTGACAGCAAGCGAAAAACCGGAAGTGCCTGCGGAGCTGCTGGTGAAGAAAGAGACG  
CACCGCGCTCGCAAGCGAACGCAAGCCAGCCAGCCGCAAGGAAAGGCGCTGAACTGAACTTCCGAAAGCGAAAG  
CCGGTAGAAGAAAGCGCAAAAACAGTAAAGACCTCGCGAAGAACAGCACACCCGGTTCTGACATTTAGCTCTGAC  
TGTGCGACAAAGCCCTGAAGGTGAAAGCGGGTCAAAAACCGGATGATGACCCGTTATTAGAAATCACAAAAGACGCGGCTC  
CGTCCAGCTGAATTCGGGATGCTTTGATTTGTCGCGCAGAACACCTGGTGTCTGA

>Cluster\_54346

GTGACTGACATGAATATCCTTGAATTTGTTCTGAAAGGCTAGCCTTCTGGTTAAACTTATCATGTTGATTTGATTTGGTTT

TTCAATCGCATCTTTGGGCCATTATATCCAGCGGACCCGTTATTCTTAACGCGAGCGGCGCGGAAGCCGAAGCGTTTGAAG  
ATAAATTCGGTCTGGAATCGAACTCTCTCGCCCTATCAAGAGAGCCAGGGGAAACGGGATAATCTGACTGGTTTCGGAA  
CAAATCTTTTACAGCGGGTTCAAAGAGTTTGTGCGCCTGCATCGTGCCAAATAGCCATGCGCCGAAGCCGTAGTGGAAAG  
GGCGTCGCGTGCATAGCGTATCTCCATGAACCGTGAACCTTGAAATCTGGAAACGCACATTCGGTTCCTCGGTACGGTTG  
GCTCCATCAGCCCGTATATTTGGTCTGTTTGGTACGGTCTGGGGGATCATGACGCGCTTTATCGCCCTCGGGCCGCTAAAA  
CAAGCAACTGCAAAATGGTTGCGCCCGGTATCGCAGAAGCGTTGATTGCGACTGCAATTGGTCTGTTTGGCCGTATCCC  
GGCAGTTATGGCCCTACAACCGCCCAACAGCGCGTAAACAACTGGAAGTGAATTACGACAACCTTTATGGAAGAGTTTA  
CCGCGATTCTGCACCCGAGCGTTTACCGTTAGCGAGAGCAACAAGGGGTAA

>Cluster\_57158

ATGTTAGAGCAACTGAAAGCCGACGTGCTGGCGGCAATCTGGCGCTTCCCGCTACCATCTGGTGACGTTACCTGGGG  
CAATGTCAGCGCGGTAGACGAAACGCGCAATGGATGGTAATCAAACCTTCCGGCGTGCAGTACGACGTGATGACCGCC  
ACGATATGGTGGTGGTGGATAGATAGCCAGCGGTAAGGTGGTGGAAAGCAGCAAAAAACCTCTTCCGATACACCAACGCAT  
CTGGCGCTTACCCTCGCTATGCCGAAATGGCGGTATGTGTCATACCCACTCGCGCCACGCCACCATCTGGTGCACAGC  
CGGGCTGGATCTCCCGCCTGGGGCACCACCCACGCGGATTATTTTTACGGTGCATCCCTGCACCGACAGATGACCG  
CAGAGGAGATTAACGGCGAATATGAATATCAGACCGCGGAAGTATGATGAAACCTTGAAGAACGTTGGCAGGAGTCCG  
GCACAAATCCCGCGGTGCTGGTGCATTTCTACGGCCGCTTCGCATGGGGTAAAAACGCGCCGATGCCGTGCATAACGC  
CGTAGACTCGCAAGAATGCGCTATATGGTCTATTCTCGCGCAGCTTGCGCCGACGCTCCCGCGATGCAAAACGAAC  
TGCTGGATAAGCACTACCTGCGTAAGCATGGGGCAATGCCTATTACGGGCAGTAA

>Cluster\_24281

ATGCGCAAGATCACACAGGCATTGAGTGCCGTTTGGCTTATGTTTCGCTCTAACAGTTCCGCTGTTGCCCTGGCTCATC  
TCCTTACCGCTTAACTCCGGGTACTAACGTAGCCAAACCTCGCTGAACAGCGCCAAATTCATTGGGTTTCGGTTGCACAAA  
TTGAAATAGCCTCGCAGGACGTCGCCAATGGCGGTGGGGTTGATATCGATGATACGGTACTTTTTCCAGTCCGGGT  
TTCCTGGCGCGGCAAAAAACCTTCTCGCCAGAAAGCGAAGATTATCTGAAAAATCCTGTGTTCTGGGAAAAATGAACAA  
TGGCTGGGATGAATTCAGCATTTCCAAAAGAGTTCGCTGCCAGCTGATTGATGATGATGATGATGATGATGATGATGATGAT  
TCTTTGTGACTGGTCTGATGCGCCGACCAAAACAGAAACGGTTTCAAAAACGCTGGCGGATAATTTTCATATCTGCCACC  
AACATGAATCCGGTGCATCTTTCGGCGGATAAACAGGTCAAAATACAAAATCGCAATGGCTGCAGGATAAAAAATATCCG  
AATTTTTTATGGTGCATTCGATAACGATATTACCGCGCACGCGATGTCGGTGCCTGTTGGTATCCGCATTTCTGCGCGCT  
CCAACCTACCTACAAACCTTGGCCACAAGCGGGTGCCTTTGGTGAAGAGGTGATCGTCAATTCAGAACTACTGA

>Cluster\_14887

ATGAAGCGTGTAAAAACATTTATGCTGATATCATTATTGACGGCTTCATTTTATAGTAGCGCAGGAATCCCGTGTGCTAT  
TGATGCCAGTCCGGAATGGGCTGTTGAAGCCGCAAGATGGACGAGAAGCACTCAAACAATGGTCCGAACTGCGCAACAT  
ATCAGAGTCAGATTCAGGCATATAAAGACCAAGTTAGCCACGCAACAGGTATAAGGAATATTGCGGCATTCACAAATGAA  
CTAAGTAATCTACAATCAGAATGACAAATATTTATAAGCAGGGGAACAGTTATATTTCTGATTTTACCAGTAATCCCGA  
AGGTGCATTTGAGCAGCCAGGCTAAAAATCTGTTTCAAGTATGGAGCCTTCGATATGTTAATACGGCTATGAACGTA  
ATGATAATCTCTGAAGCAGGATTTGTGTTCAACGGCTGCCAGTATTGAACAGGGAAATGAGATCAATAAGCAGTTATCA  
AATCAATCTCTCAGATTCAGAGTTTAACTAGTAGGCTTCAAGGCTTCAAGGATATCAAAAGAAATCCAGGATTTGGCTAA  
CGCATTACAGGCGCAGTCTTAAAAATGCAGCGATAAAAAATGCAGTATGATGCTGGATAAATAAAAAATAAGCAGATC  
ATGAGATGTTGATCACACAAGAACAAGAGCCCTTTATTAACAGCAGAAAAGAGTGAACCATTAACCTTTTGATTA

>Cluster\_984

GTGGGAAAAGAGAAAAATCACGCATTTGACGAAACCGTGCCTTATTGAGTATGAAGGCCAGATTGTTGGCTATGGTTC  
AAAGGAGCTGCGGCTTGAACCATATCCCTGCTGGTGGCCGCAATTTATTCAGACAAGCACTATTCCCGCGTTCGTTG  
TGAATAACTCTTACTCCACTGGGAGTATTCAGCGGACGCGATCTGGTTGGCGTCTCCAGTGGGGATATGCCCTTAAAC  
CCCAACTCAGATTCGCTGCTGCTTGAACCGATAACCGGGCTATATGGAGTTGAACCGCATGTTGGCTACACGACAA  
CATGCCCCGCAACTCTGAATCTCGGGCCATCAGTTATGCACTGAAAACATAAGGTTACTGTATCCGTCAGTGGAGTGGG  
TTCAGTCCCTTGTGACGAAACGCTGCGGACGCGCAGGCGTGTGTATCAGGCGTCAATTTGATTTTATGGCAGCCAT  
GAAAGCACGTTCTACGAGCTGGATGGTGGTATCAGGAGATAACGATGAACGCGATTAAGCGAGGTGGACAACGAGG  
CGTGTATTTACGGGCTAATAAAGAGCGTCCCTGGTGCACAAAATTAATCAGTATCGCTACATCAGGTTTCCCTGAACAAGC  
GAGCAAGGAAGCGGCTAAATACTAAGCTATTACAGGTTCAACCATACCTAAAAGCACCTCCGATTAG

>Cluster\_58884

ATGCAACAGAAAAGCGACAACGTTGTCAGCCACTATGCTTTTGAAGCGCCAGTGCATCTGGCACTGGTTGACGGTGT  
ATGCATGGCGGTGTTGATGGTCAACCGTACTTTATCGCAAGCCGCTACCTTCCGTCAGCGCGAGGCGACGTATCTGT  
TCTATATGGGCTACATCAGGTTAATCACTTACGCGCCGGATGGTTTTTACCCTGGTTTTGCTGATGCGGATCTACTGG  
GCTTTTGTGGCAATCGATACTCCCGGAGCTGTTTATCGTCCGCTATGGCGTAAAAGCTGGTGGCAGGCGCTGTGGTA  
TGAATCCGCTGGTATCTGTTTTCGGCAAAACGTCAGGTTGCCGATATAGGCCATAATCCATCGCCAGGCGCGGATGT  
TCGGCTATTTCTGATGTCGCTTTTATGATCATCACTGGTTTTTGGCGTGTACAGCGAACAACAGCCAGTACGCTATTTTT  
GCGCGTTCCGTTATGTTGGTGAATTTTTCTACTGGACGGGTGGCAACTCAATGGACATTCACAGCTGGCATCGGCTGGG  
GATGTGGCTGATTGGCGCTTTGTGATCGGTATGCTACATGCGCTGCGTGAAGACATCATGTCGACGACACGGTGA  
TCTCCACATGGTCAACGGCTACCGTAGCCAAAATTTGGCAAAATAAGTAACAAGGAGCGTTTATGA

>Cluster\_41565

ATGGCTAACGAATTAACCTGGCATGATGCTGGTGAAGAGAAGCAGCAACCTATTTTCTTAAATACCTTCAGACCGT  
CGCCAGCGAGCGGAGTCCGGCGTCACTATCTATCCACCACAAAAAGATGCTTTAACCGGTTCCGCTTACGGAGTTGG  
GTGACGTTAAAGTGGTGAATCTCGGTAGGATCTTATCAGGACAGGACAGGCGCATGGTCTGGCATTTCCGTTCCG  
CCCGCATTTGCGACACCACCGTCACTGCTGAATATGATAAAGAGCTGGAAAAACTATTTCCCGGTTTACCCGCCCTAA  
TCATGGTTATCTTGAAGCTGGGCGCTCAGGGTGTCTGCTGCTCAATACTGCTTACGCGTTCGCGCTGGTCAAGCGC  
ATTTCCACCGCAGCCTCGGCTGGGAGACGTTTACTGATAAAGTATCAGCCTCATAAATCAGCATCGCGAAGGCGTGGT  
TTTTTGTGGGATCAGATGCATGCGCAAAAGAAAGGGGCGATTATAGATAAGCAACGCCATCATGTACTGAAAGCAGCGCA  
TCCGTCGCGCTTTCCGGCAGTCTGGATTCTTTGGCTGCAACCATTTTGTGCTGGCAATCAGTGGCTGGAACAACGCTG  
CGGAGACCGGATGACTGGATGCCAGTATTACCGGCAGAGAGTGAAGTAA

>Cluster\_4453

ATGAGCCGACACTTCTGCAACTGGCACTCGACCACTCATCACTTGAAGCCGACAGCGGACGTTGACGAGTAAAAGA  
CAGCGTCGATATTTGTCGAAGCGGCAACCTTCTCTGTTTAAACGAAGGGCTTGGCGCGGTGAAAGCCTTGGCGAACAGT  
GCCCTGACAAAATCATCGTTGCCGACTGGAAGGTCGCCGACGCTGGTGAACCGCTCGCGCAACAGGCAATTTGGCGCAGGC  
GCTAATGGATGACCATCATCTGCGCCGACCGCTCGCAGCGTGGAAAAAGGCCACGCGATGGCGCAACGCTGCGGTGG  
TGAATTCAGATCAGCTGTTTTCGTAACCTGGACGCGGACGCGCGGACTGGCATCGTATTTGGCGTGGCGGAGGCA  
TTTTATCATCGGCTGTTGATGACAGGCGAGCGGCAACAGTGGGGCAAGCCGATCTGGCACGATGAAGGCGCTTTCC  
GATATCGGCTTGGCTTTCCATTAACCGCGGGATTACCCCTGCTGACCTGCCGCTGTTTAAAGATATTCGCGTGAAGC  
GTTTATTTGGCGGAGCAGCTGGCAGGCTCAGCAATCCGCGCAGGTGGCTGGCGATTTCCATGCGCAATTCAGCAGCTA  
TCTGGGGAGGCAAGCGTGCCTAA

>Cluster\_28061

ATGTCGAAATTAGGGATCTCATCACTATTTAAAGCATACTGCTTACCGCAGCTTTGGCTGTTTCATTTACCGCTTCTGC  
ATTTACCGAAGGCACGGATTACATGGTTCTGGAAAAACCTATTCCGAAATGCGCACAAAACGCTGATTAAGGTATTTCAGCT  
ACGCTGCCCGTTCGTGTACAAGTACGACAAGCGGTTACCGGTCCGGTATCGGAAAAAGTGAAGATATCGTTGCTTTC  
ACGCCGTTCCATCTGGAAACCAAAGGTGAATACGGCAACAAGCAAGCGAAAGTCTTTGGCGTCTTGATCAATAAAGATAA  
AGCAGCAGGCATTTCTGATTTAGTGTACTCTCAGTTTAAAGAAAGCAAGTTTGGCTACTACGCGGTTATCACGACA  
AAAAAGAACGCTGGTCTGACGGTAAAGATCCGGCTGCTTTTATCAAAACCGGTCTGGATGCGCGAGGTATGAGTCAGGCG  
GATTTTGAAGCGGCACTGAAGAACCAGCGGTTCAAGAAACACGGAATAATGAAAGCCTCTATGATGTCGCCAAAAT  
CCAGGGGTTCCAGCCTATGTCGTTAATGGTAAGTACTTGATCTACACCAAGAGCATCAAATCCATCGACGCGATGGCAG  
ACCTTATCCGTGAGTTAGCAAGCAATAA

>Cluster\_66944

ATGCAGACAATCGTAGGCATAAGCCTATCCCCTGTTTATATACTGCCATTTGATGTTTCCATTTATTGGACGAAC  
TCTGCTATTCAGAGTTCGTTATTTTATCTGATACGGGACATCTCTGGTATAAGACACACCCCTGCTGTTCTGTCAGGAA  
TATGGCTATACAGTATAGCTGTGGCGTTAATTAATTTTATCATCATCACCACTGCTCTACCGTATTCATGCTGTCCCTTAT  
CTTTCGTTTACATGCAAAATGGCGGTAACGGATGCACTGACAGGTTTATACCAGGAACATTCACCCGACGTTTTTTAAT  
TGCAGGAATGCTATCACAAATCACGACTGATATATGGTGGTTCCTGACAAAGAAATTTGCCACTGCTGCAATTTGCTTAT  
TCTGCTTCATAAATAGTTTACCCGCACTGCTCTAATATGGCACTGGAGACCTGTTGGCTTATTGACAGGTATTACCGCA  
TGGTCAGGTTATATAACCCCATATGGTGTGTGTGCTGGGACAGGAGGATTTGCTCTATGGCATTCACATGGTGGCAT  
AAAAGGCATAAAGAAGGCCCTCTGGGTCATGGCTATGTTTTGGCATTGCTTTTGGCTGCTGGATAATCTTTATCAAC  
CACTATGGGTAATCTGA

>Cluster\_42076

ATGGCTGTTATTCAAGATATCATCGCTGCGCTCTGGCAACACGACTTTGCCGCGCTGGCGGATCCTCATATTGTTAGCGT  
TGTTTACTTTGTCATGTTTGGCCAGCTGTTTTAGAAAAGCGCTGCTGCCCGCTCATTTTTGCCAGGCGACAGCTTGT  
TAATATTGGCAGGCGCATTTGATTGCCAGGGGTTATGGATTTCTGCTACGATTGCGATTCTGACCCCGCAGCAAGT  
CTGGCTGCTGGCTAAGTTATATTCAGGGCGCTGGTTAGGAAATACAAAACGGTGAAGGCCTGGCTGGCAGCACTTCC  
TGCTAAATATCACAGCGCGCCACTGCTGTTTACCACCGGCTGCTGGCGCTGCTGGCTGGACGTTTTCTTGCAT  
TTGTCCGTACGTTGCTGCCAACCATGGCGGAAATTTCCGGTCTGCCAACCCGCGCTCCAGTTTTCAACTGGTTAAGC  
GGATTGCTGTGGGTCAGCGTGGTAAACAGTTTCGGCTATGCTTAAAGTATGATTCCTGTTAAACGCCATGAAGATCA  
GGTAATGACGTTCTGATGATCCTGCCAGTTGCCCTGTTAACCCGCTGGCTGTTGGGCACGCTGTTTGTGGTGAATAAAA  
AAAAATACTGTAACCGCTGA

>Cluster\_26449

ATGATTCAGTATCTGAACGCTTTTTTTTACGATATCTACCCGTAATTGTTGGCAGGTTTTTTATCCTTGAAGCTGGCT  
GCGTACGACTACGGGCGTACACCTGGCGCGCGCCTCCAGCCAGATGCTGGATAAAACGCGGATGGTGTGCTGTTGGTCAA  
ACTTGTTCATATCGGCATTTTGGGGATTTCTTCCGGCACCTGTTCCGCTGTTAACGCCACACTGGATGTACGCGTGG  
TTTTCTGCCCGTGGCGGTAACACAGCAGATGGCGATGATCCTCGCGGAATATGCGGGGTTATTGACGCTGATTGGCGGTC  
GGGCTACTGGTGGTCTGTTAACAATCCGCGTATCAGGGCGACGCTTCTGGTGGGATATCCTGATCCTCGCCATTT  
TGTTAATTCAGTCTTCCGTTGGGTTAACCACTTCTTTTTCAGCACAAATCCGGACGCGGATGAAATGATGAAGTTG  
GTGGGCTGGGCGCAAAGCATCTGCTACTTTCCAGGGCGTGCATCTACGCATCTTGATGTTGCTGCTTTATATCCGCGT  
TCATCTGGTCTTGAATGACCATCTTCTGCTTCCCGTTCCAGGCTGCTGATGTTGGAGCGCGCGCTTTGAGT  
ACTTTACTCGTCGGTATCAGATTGTGCGTTCGCGCGTTAA

>Cluster\_24433

ATGCAAAAGCTGAAACAGCAGGTTTGGAGCCAAATGGAGCTGCCGCTTACGGGTTGGTGACCTTTACCTGGGGCAA  
CGTCAGCGCTATTTGACCGTGAACCGGGCTGGTGGTGTACGAGCCAGCGGTTGCGCTACGAAACCATGAAACGCGAGC  
ATATGGTGTGGTGCATATGAGCGGCAACGTTGGTGGAAAGGAGTATCTGCTCGTCTCCGACACTGCGACGATCTCGAA  
CTCTACCGTCTGTTATCCGTCGTTGGTGGCATTGTCCATACCCACTCCACTCATGCCACCGCATGGGCGCAGGCGGGCT  
GGCGATCCCGCGTTAGGCACACGCGACCGGATTTCTTTCGGCGACATCCCGTGCACGCGGATTAAGCGAAGAAAG  
AGGTGCAGGGTGAAGTACGAACTGAATACCGGCAAAAGTATTATCGAAACGCTGGGTGACGCGGAGCGGCTGCATACGCC  
GAAATTTGGTGTATACGACCGGACCGTTCCGCTGGGGGAAAGATGCCACGACGCGGTTGCATAAACCGGTTGGTATGGA  
AGAAGTGGCGAAATGGCGTGGATTGCGCGCAGTATTAATCCACAACCTCAATCACATCGACAGCTTCTGATGAATAAAC  
ACTTCATGCGTAAGCACGGTCCCAACGCCTATTACGGGCGAAGTAA

>Cluster\_42429

ATGAAACAGTATTTGATTGCCCCCTCAATTCTGTCGGCTGATTTTGGCCGCTGGGTTGAAGATACCGCAAAAGCCCTGGC  
AGCTGGCGCTGATGTCGTGCATTTTGTATGTCATGGATAACCACATGTTCCCAATCTGACGATTGGGCCAATGGTGTGA  
AATCCTTGGCTAATACGGCATTACCAGCCCTATCGCAGTACATCTGATGGTGAACCCGTCGATCGCATTTGCTGCTGAT  
TTCCGCTGCCGCTGGTGCCAGCATCATTACCTTTATCCAGCAAGCCTCCGAGCATGTTGACCGCACGCTGCAACTGATTA  
AGAAAATGGCTGTAAAGCGGGCTGGTATTTAACCCGGGACACCTCTGAGTTATCTGGATTACGCTGATGATGAAGCTG  
ATGTGATCTGCTGATGTCGGTCAATCTGGTTTCCGGCGTCACTTTTCAATCTCACAACCTGGATAAATGCGCGAA  
GTACGTCGCTGATGTCAGCAGATCTGGCTTTGACATTCGATTTGAAAGTGGACGGTGGCGTGAAGGTGAACAACATTTGGCGA  
AATCGTGGCGCGGCGGATATGTTTTGTTGCTGGTTCGGCAATCTTCGACCAGCAGACTCAAAAAAGTCAATGATG  
AAATGCGCAGTGAACCTGGCAAGGTAAGTCAATGAATAA

>Cluster\_28652

ATGAAACGTTACAAATTAATATGTTATTGATAAAGCACATGCCATTGCGCAGACCTTCCGCGTTTGTTTGCCAGAGTT  
CGCTATTTTACCGTGGATGACTGGCTGCGCGGGAACGGGATAACTGGCAAGAAAGTGGTTCGACTTACAGCTCGGTTGGG  
ATATCACCGATTTTGGTCTGGTGTATTTCAACCAACCGGACTAACACTGCTAACGATGCGCAACGGCGCGCTGGGGTCCG  
GCGGCATATCCAAAACCGTATGCTGAGAAAATGTTGCGAGATCCAAAGATCAGCAGACTCCCTGGCATTTTACACCCCA  
CAAAATGGAAGATATCTCAATCGGGCGGTTGGAGACTTATGCTATGCAAGTTGGCTGGGCAACGAAAGCAATCTCTGTG  
ATGATCAACCGACTCATTACCGTGGTGTGATGTTGCTGAGGCTGACCAAGAACTGGTGAAGCGCTGATGATGAAGCGG  
GGGCGAGGCAATTTGCTGCCCGCGCTGATCATCGCTTCTGGCGGAAAAAGCGTTTGTCTCGGCTGGGAAATCTC  
GATGGTAAATGATGACCAACACGATAATATTTTCTTGGAGCGGGAGGAGCTTTTCCGCGATAGAAGAAGATGAACCGG  
TGAATGGTTATTGTCAGTGTGATGGAATTTTGGCTAA

>Cluster\_51694

ATGCTGCAAAAATATTCGAATTTGCTGTTGGTGGAGACGTCACACACCGGCAATATGGGTTCTGTTGCCCGTGCCATGAAAC  
AATGGGATTAACCAATCTGTGGCTGGTTAATCCACTAGTGAACCTGACTCCAGGCGATTGCGCTGGCAGCAGGGGCA  
CGGATGATATGGTAAATGCTACATCTGATACGCTGACGCAAGCGTTAGCCGTTGATGCTGGTGGTGGGACCAGC  
GCTCGCTCCCGCAGCTGCTGCGCGATGCTGACCCCGCAAGTGGGCTGAAAGCGCTGCTGAAAGCGCTGCTGAAAGCGCAATAC  
CCCGTGGCGCTGGTGTGGTGGTGGGAGCGCTGGCTTGACCAATGAAGAGTTCAGAAATGCCATTTATCATGTCGCGA  
TTGGCGTAAACCGGAATACAGTTCCGTTGAACCTGGCGATGGCGGTTACAGTTATGGCTATGAAGTGGCAGTGGCTGG  
CTGGCAACTCAGGAAATGGCGAGCAGGTCAGCATGAAGACGCGGATACCGCTGGTGCATGATCTGGAGGCTTTTFA  
TGGTCATCTGGAGCAACGCTGCTGGCAACCGGTTTTATCCGTTGAAAACCATCCGGGCGAGGTTGATGAATAAATTTGCC  
GTCGTTTTACCGTGCACGCGCGAAAGCCAGGAATGAAATATCTGCGCGGATTTCTGGCTTCTATTGAGCAGCAGAAT

AAAGGTAACAAGGCCGAATAA

>Cluster\_40382

ATGATCGTTTTAGTAACTGGAGCAACGGCAGGTTTTGGTGAATGCATTACTCGTCGTTTTATTCAACAAGGGCATAAAGT  
TATCGCCACTGGCCGTCGCCAGGAACGGTTGCAGGAGTTAAAGACGAAGTGGGAGATAATCTGTATATCGCCCAACTGG  
ACGTTTCGCAACCGCGCTATTGAAGAGATGCTGGCATTCTCCGCGAGTGGTGAATATGATATCTCCCTGGTAAAT  
AATGCCGGTCTGGCGTTGGGCATGGAGCCTGCGCATAAAGCCAGCGTTGAAGACTGGGAAACGATGATTGATACCAACAA  
CAAAGCCCTGGTATATGACGCGCGCTCTTACCGGTATGGTTGAACGTAATCATGGTCATATTATTAACATTGGCT  
CAACGGCAGGCAGCTGGCCGATGCCGGTGGTAACGTTTACGGTGCAGCAAAGCGTTTGTTCGTCAGTTTAGCCTGAAT  
CTGCGTACGGACCTGCATGGTACGGCGGTGCGCTCACCAACATCGAACCAGGTTGGTGGGTGGCACCGAGTTTCCAA  
TGTCCGCTTAAAGGCGATGACGGTAAAGCGGAAAAAACCATCAAAATACCGTTGCATTGACGCCAGAAAGTGTGAGCG  
AAGCCGCTGGTGGTGTCAACGCTGCCGCTCAGCTCAATATCAATACCTGGAATGATGCCGGTTACCCAAGCTAT  
GCCGACTGAATGTCCACCGTCAGTAA

>Cluster\_50982

ATGTCTATCCGTGATGAACATGAAGCGATTGTTGATAGAAAACCTTGTGCATATGATTTGCATTTTACTGATGAAGGAGA  
TGAGTATGACATATGAACCTTATCACAAAATATTGCAAGCTTGCAGATGAAGAGGCCAAAAAGAAAGGCTGCGAA  
AGATTGTTCCAGCAATAATCTGAATATATCAATCTGAGCCTCGGAAATGACTGATGTTTGAAGACAGAAAGCTCTG  
ATTCGACTTGAGAGCGAAGTACTATCCACTTAAAGAGCAGCCGCTCAAGCTTGATAATGCTTATGATGTTTCAAAAA  
CTTCGAGAAACTCAGAAACCTTCAGAAATATGATATTGAATATGAGCTTAAAGACAAACCCGTTTATCTATTACGAAGGAA  
ATTACAACAAATGGTTTCCGTACAGCAAGAGAGAATGTTCCAAAAGTGCCTCAAAGTATTCCTGACGGTTTTCGATTAATG  
GATGTCAGACAAGCTTACGTGGTACAGGCTCATATCTGATGACTAACAAAACAGATGAAGAGATCTTTCAGTTAGC  
TGAAGCTAATCTGACTAAGCATTACTCCGATAAGCTGGATAAGTTAAAGCAAAAAGCTTAAAAAAGAGCTTGAATCATGA  
AAGAGCTTGTAGTGAATATGAATCACAGAAGAAAATTGCTATGCAGGCTGATATTGAGCAGTTAGTGAAGATTTCTCAG  
AAATATGCAAAAGCACTTTAA

>Cluster\_25378

ATGTCTATAGACTGGAACGAGGTTATTTTTTACAACAAGCCCGTTTGGCAACACCACCTATCTGGTTGGATCTGGAG  
TGGCTTTCAGGTGACGATCGCTTGTGCGATCTGCGCCTGGATTATCGCTTCCGTCGCTGGTTCATTTTCGGCATTTCAC  
GTACCGTTCCAAACCGTTTCTCTCCGGTCTGGGTACGTTGTATGTGCAACTGTTCCGCAACGTGCGCTTGGTTGTGCAA  
TTCTTTACCTGGTACCTGGTATCCCGGAGCTGCTGCCAGAGAAAATCGGCATGTGGTTAAGCGAGAGCTGGATCCCTAA  
TATTCATTTTCTTTCATCCATGCTCTGCTTGGGGCTGTTTACCGCCGCGCTGTTTGGCAACAGGTACGCGCCGCTA  
TTCAGTCTGCTGCCGCGTGGGCAAAAAATGCGCGCTGCGCATGGGTCGACGCTACCGCAGGCTTACCGCTACGTACTG  
CTGCCATAATGCTTATCGCGTTATCGTCCCGGATGACCTCCGAGATGATGAACCTGGTGAAAAACTCGGCCATCGCCTC  
GACTATCGCCTGGTAGATATGGCGCGCAGGCGGTAATTACTCGATTACTCCGCTCACGCTGGGAGTCGTTTACCG  
CCATTACGCTTGGTATGTTGATTACGCTTTTATCATGCTGGTATGACGCTGGTTGACGTAAGTTTCGCTGCC  
GGCAACATGGGGGCAATAA

>Cluster\_48409

ATGACTACTGTTAAACAGATCTCTGATGCAAAACATTACATCTCCCTCCACCAGAAAATTCGCGAAGCGGTGAAAAAGT  
TAAGGCAGCAAAAGCTGTCTGGCAGGAAGAACGGCGAAAACAACTGAAGCTGTGCAATGATTGAACTATCCGTAAC  
GTCAGGAAGATACAAAACCGAAACGCAGGCGCTTAATGATGAATGGCGAAACCTGTTTCGTGAGAATCAGGGAATATG  
ACACCACGCATGAAAAAATCGCGGCGAATACTGCCCTCGGACGCAAAACACTGGATGAGTTTGAAGATTTGCGCAGC  
TCAGCGCGGCAAAAATGAAATTCCTGCCCCGAAAACCTGCGGATGCTGCAAAACACTACATCAGCGAACAATATTCGCTGA  
TTGAAACTCATGCAAGTGTGGCTCTGGAATGAGTTTATGAAAGAACACGCGCAGAACTTATTCAGATCTTGGACTGTTG  
AAAATGACTCTGGGCGGAAGCGCTTCTGCTGTTATCGGTGATGTTTATACCGTAAACGACCCCGAAAAGTGTGCTGAAGCA  
ATTTATCAGCGAGCACTCACCACTCCGGCACTGCTTCAACAGTATCTTCAACGATGATATTACCTGCGGATCA  
GCATTTATGCGGACGATAAAGCCATCCAGGATGCCAGACAATCCCCAGCCCTGCAGCGGTTACCGGATGCTTAAACAG  
CGTGACATGGTTAAAGGGGCGAGAAGAAATGA

>Cluster\_55939

ATGTTTAACTGACTAACACTGCAAAAATCGTTTGTCCCGCACGCGCTGCTGGCGACAGCGGTGAGTTTCTCCAGCCA  
CGCTTCGGTGACGCCGACAGGACACGGCTGGTGTTTAACGAAAGCGACAAGTCCATCAGCGTACGCTGCGCAACAACG  
ATCCCAAACCTGCCTTATCTGGCGCAGAGCTGGATAGAGATGCAAAAGGCAACAAAATCAGCTCGCCGCTTGGCGTCT  
CCGCCAGTGCAGCGCATGATGCGATGATGAACGGCCAGGTGAAGGTGACGGGCTGCGGATATCAACAAACTGCGCGC  
CGACCCGAGAGCGTGTCTTATTTCAACCTGCGCGAATTTCCGCGAATCAAAATAAACCGCAACGTCAGATTTGGCC  
TGCAGACGCTATCAACTGTTCTGCGGACCGAAGGCGCTGGAGAACCAGCATGAAAAGTCCGTTGGCAGCATAAAGGTG  
ACGCTCATCCGTAACGGCCAGGACTTCAACGCTCAATAACCCGACGCGCTACTACGTGATCATCAGCAACGCCAGCGCTAA  
AAAAGGCGCAACCCGCGGCGGATTCACACCGCTGATGATGAGCGCAAAACCTCCGCAACCGCTGAATGCGAAGATGG  
ACAGCGTGGCGGTGCTGACTACATCAACGACTACGGCGCGGATGCGCTGTACTTCAAATGCACCGGCAACAACCTGC  
CAGGTGGATGAAGAGCAGAGCCGCAAGGCTGA

>Cluster\_4030

ATGAAATCATTAAGTAACTGCTCAAAAATACCGCTCTATCAACAAGTGGTGGAGTGGATAAGAGAAAGTATTTATACCGG  
AGATCTGGTGAAGACGATCGCATTCCTTCGGAATACCAGATTATGGATATGCTGGAAGTGAAGTGGGGAACCGTTAAAA  
AAGCGGTGCGCCAACTGGTAAAAGAGGCGTGTAAATACAGGTCAGGGTAAGGGAACATTTGTCAAAAAAGAGAACGTTG  
GCATATCCGTTAGGTGAAGGATTTATGTCATTCGCGGAATCGCTGGAAGCCAGAAAAATACATTTTACCACTGAAGTTAT  
TACGTACGGATTGAATCGGCTAATCGTTATGTTGCGAGAGAAATTAAGAAATAACGCCGCTCAGGATATCTTTACCTTG  
AACGCTTACGCTCAATCGGTGATGAAAAAGCGATGCTGATAGAGAACCCTATCAATATTGAGCTATGCCCGGTTATTGCG  
GAAATCGATTTTAAATCAACAAATTTATTTCCAACAATAGAAAGTTTGTGCGAAAGAAAATTCGTTACTCGGAAAGTGC  
CTATGCGCGCGATTAATTTGGTAAATGAACGTGGTCAATTTTTAGATATCAGTGAAGACGACCCGTTTTGCATCTGGAGC  
AGTTAGTCTTTTTTCTCCGAGGATTAACCATTTGAGTTTTGGCAACGCTCTGGTTAAAGGAAATAAATATATCTTTGGCACC  
GTACTGCAACGGCGGAAGTGAATTA

>Cluster\_21833

ATGTCTATTGTGATGCAGTTACAGGATGTTGCGGAATCCACCCGCTGGGGCCGCTTTCTGGCGAGGTTCCGGCTGGGGA  
GATCCTGCATGTTGGGCGCAATGCGCGGGTAAGAGTACCTTACTGGCGCAATGGCCGGAATGACCAGCGGTAAGG  
GAAGCATTCAGTTCCGGGGCAACCACTGGAAGCATGGTCTGCAACAAAGCTCGCGCTGCATCGCGCTATCTTTACAA  
CAGCAGACGCCGCGTTTTGCAATGCCGGTCTGGCACTACTGACACTGCATCAGCAGGATAAAACGCTACCGAACTACT  
GAATGATGTCGCAAGGCGCTGGCTTTGATGACAAACTCGGACGTAGCACCATCAACTTCCGCGGTTGAATGGCAAC  
CGGTACGCTTGTGCTGGTGGTGTGCAAAATCACCAACCAAGCAATCCCGCAGGCAATTTGCTTCTGATGAGCGC  
ATGAACAGTCTTGAATTTGCGCAACAAAGCGCTTAGACAAAATCTGAGCGCGCTGTGTGAGCAAGGACTGGCGATTGT  
GATGAGCAGTACGATCTCAACCACATTTGCGTATGCGCATCGGGCGTGGTTGCTAAAAGTTGAAAAATGCTGGCCA  
GTGGACGCAAGAGAGGTTGCTCACGCGGCAAAATCTGGCGCAGGCTATGGGATGAATTTCCGCGCTGGATATCGAA  
GGTACAGAAATGCTGATTTGACCATCTGA

>Cluster\_36390

ATGTGGAAAACACTGCATCAACTGGCGATCCCACCACGGCTGTATCAAATCTGTGGCTGGTTTATACCGTGGCTGGCAAT  
TGCCAGTGTGGTCTGCTTACCGTCGGCTGGATCTGGGGATTCCGCTTTGCTCCGGCTGATTATCAGCAGGGAAATAGCT  
ACCGCATTTACTACCTGCATGTGCTGCGGCGATCTGGTCGATGGGCATTTATGCATCAATGGCAGTGGCAGCGTTTAT  
GGCTTGTCTGGCAGATGAAAATGGCCAACTGGCGGTGGCGGCGATGGCCCCATTGGTGGCGTGTTTACCTTTATTTC  
CCTGGTTACCGGCTCTGCATGGGAAAACCGATGTGGGGACCTTGGTGGTATGGGATGCACGCTGACTTCTGAACCTGG  
TGCTGCTGTTTTTGTATGTGGGTGTGATGCCCCGTGGCAGCGCTTCGACGACCGCGCTGGCGGGCGTGGCGAGGT  
ATCCTGGTGTGATGGCGTGGTGAATCTGCCGATTATTCATTAATCCGTTGGAGTGGTGGAACCCCTGCATCAGGGATC  
AACCGGATGCAGCAAATGATCGATCCGGCGATGCGTTCCGCGCTGGCTGGTGGATTTTGGCTTCCGTCTGTCTG  
CCACGCTGACGCTGATGCGGATGCGTAATTTGATTTTGTGATGGAAAACCGCTCCGTTGGTGGTGAAGTGAACGATACTG  
AAAAGAGGCGTAATGA

>Cluster\_8459

ATGGCAACATTAACATGCAAGAACCCTTGCAAAAGCCTATAAAGGCGCTCGCGTGGTAGAAGACGTGACCTGACCGTCAA  
CTCCGGGAAATTTGCTGCTGCTGGGGCCAAACGGTGCCTGTAAGACCACCACTTTCTACATGGTTGTAGGCATTTGTC  
CGCGGATGCGGGCAACATCATTATTGATGATGACGATATCAGTCTGCTGCTGCTGCTGATGCACGCGCGCGCGGTATC  
GGCTATCTGCCACAGGAAGCCTCCATTTTCCGTCGCTCAGCGTTTACGATAAACCCTGATGGCGGTAAGTCAAAATTCGTGA  
CGACTTGTCTGCTGAACAACGCTGAAGACCGCGCAACGAGCTGATGGAAGAGTTTACATGAGCACCCTGCGGACAGCA  
TGGGGCAGTCACTCTCCGGGGTGAACGCTGCGCTGTAAGAAATGCCCCGCACTGGCTGCGAATCCGAAATTTATTCTG  
CTCGACAAACCGTTTCCGGGGTGGACCGATCTCGGTTATCGACATTAACGCATCAATTGAGCACCTGCGGACAGCGG  
CCTGGGCGTGTGATCACTGACCAACGCTGCGTGAACACTGGCGGTTTGTGAACGCGCTTATATCGTCAGTCAGGGGC  
ATTTGATCGCCCACGGCACGCTACAGAAATCTTACAAGACGAACGTTAAGCGTGTATACCTTGGGAAGACTTCAGA  
CTCTGA

>Cluster\_22698

ATGGCTGAATTAACGTTAGGCGTCAACATTTGACCATATTTGCAACGCTGCGTAACGCGCGGTAAGTGTACCCGGATCC  
GGTGCAGGCGCGGTTTATTGCTGAGCAGCGGGAGCGGATACCGTGCATTTACGTGAAGACCAGCGCCACATTA  
CCGACCGGATGTGTGCATCCTGCGCCAGACGCTGGATACCGCATGAATCTGGAGATGGCGGTGACCGAAGAGATGCTG  
GCGATCGCGTGGAGACGAGCCACATTTTGCCTGCTGGTACCGGAAAGCGTCAAGGAGTAAACACCGAAGCGCGCT  
GGAGTGCAGGGCAGCGTGAATAAATGCGCGATGCTGCAACGCTTGGCAGATGCCGGATCCAGGTTTCTCTGTTTA  
TCCAGCCGATGAAGAGCAGATCAAGCTGCGGAGAGTTGGCGACCGTTTATCGAGATCCACCCGTTGCTATGCT  
GATGCCAAAACGACCGCAACAGGCGCAAGAGTTGGCGGATTCGCCAAAGCGCGACCTTTGCCACTAGTCTCGGTC  
GAAAGTTAACCGCGACAGGCTGACCTATCAACAACGTAAGGCAATGCGCGCATCCCTGAGATGCATGAACGTAATA  
TCGGTATGCCATTAATGGTCTGTCAGTGTGACCGGACTGAAAGATGCGGTGGCAGAAATGAAACGCTGATGCTGGAA  
GCGGTGGCTAA

>Cluster\_8237

ATGAAAAACGACGTCATTTACCCGGAATTTGATGAAAAACGCGCCCACTGCGCGTATCCGTAAGTTTGTGCGCCGCA  
GGGCGACTGACCAAGCCAGGAACATGCGCTGGAACACTGCGCGGTGATGGGCGTGAAGTTCAGCGAAGATATGC  
TGGATTTCCCGCCTTTTGGCGTGAAGCGCGTGAACGCTTGAAGATTTGGTTTGGCATGGGGCGCTGCTGGTGGCA  
ATGGCTAAAGATCGCCCTGAGCAGGACTTCTCCGCTGAAGTGCATTCACCGGCGTGGTGGTGGCTTCTGCTG  
CATGAAGAGGTTTAAAGCAACCTGCGCGTGTGTCACGATGCGGTTGAAGTGTGCTGATAAAATGATTTCTGCAAAAT  
CAATGCGCATGTGTCAGCTCTTTTCCCTGACCCGTTGGCAGCAAAAGCGCGCATAAATAAACCGCTATCTGAGTCCG  
TTTTCCGAACTGTTAAAGCAAACTGACCTGAGCTGGGGGCGTATTTCCATATGGCAGCCGACTGGGAACCTTATGCG  
TATGCTTGAAGTGTGCTTCTATTTGACGGTTATAAAACCTGTCAGAGAGCAATGATTACGTACCGGCTCCGGCATC  
GTCGGTGAAGAAATTTGAACAACGTTGTCATCGCTTTGGTCAAGGATATGGGACTTAATGTTTCGAGAGGTTGAAATAA  
>Cluster\_18215

ATGATGCGCAAAATGCTGCTGGCGGAGCACTTTCAGTACGGCAATGACCGCTCACGCGGACTACAGTGCAGCGTAC  
GCCGCGTACGATGTGATTTGTCAGCCCGCAAACCGTGCAGGTGAAGGGCGAAAACGGCAATCTGGTGTACAGCCAGAG  
GCAACGATGATGATAACGGTAAGCAATATTCCTGAAATGCGCGCCAGCGGAGCAGGGCAAGGATTTACAGGCTGAAC  
CGTAGCACCTGCGCTGGATTGATGAAGGCGGAAAAGCGCGTTCGAGAAAGCCGATTTGCGCTGGATAAAATTTATCCT  
TCAGGAGATGGGCGAAGCAGCAAAATGCGCAGCGCTGACCAAACTGATGCGCAGCTGAAAGAGCAGATGAACCGCA  
TTATCGAAACCGCGAGCGATGGCTGACGTTTCCACTATAAAGCATTGATCAGGTTCCGCGCGAAGGCGAGCAATAGTG  
AATCAGGCAATGGGCGAAATTTTACAGGACAGCATTAATGAAATGGGCGGAAAGCGGTGCTGAAAAGCGGCGGTAA  
ATTAAGAAACGCTGCTGGGAAGCCCTGGGCGGCTGCAATCTCAATCAAAACCGAGTGGAAAAGCAGGAAAAGATTTCC  
AGCAGTTTGGCAAGATGTTTGTAGCCGCTTGTGACTCTGGAAGATAGCCGCAAGCCCTGGTGGGAAATTTAAATAA  
>Cluster\_60885

GTGGGTAATAATTAATGCAGACGGACCTTCCGCTGCGGGTATGATATCAGCACGCGATATTTGCTTAAAGTGCCTGAT  
GATTTGGCTTATTTGGCTCCGTAAGTCACTGCGCAATCTTCTCAGTAAGAGCGTAGAGTTCTTCAATCAGAACGCTC  
GCCTTAAAGCGGAGCAGCAACTGCTGGCTGAAGCGGTTCTTAAACAGGCCAACGATATCGCCGCTGATTTGGTAGC  
AAAAGCTTAAAGCTGCAATTTGCTCAATGAAGCGGAGAAATGAGCTGGAACCTGTCAGAAGCAGCGACGATAACGAAGG  
TAAAGAACCTACAGCTCCGCTGCGTGGAGCTGCGGCTGCGGCTGCGGCTGCGTCAATGGGCGCGGTAACGGTATCTGG  
CAACCATCGGCGGATTTCTCCGTTCTGTTGGTCTGTTTGGTACGCTTGGGCGCATGAAACAGCTTTTATGGTATCGCG  
CAAACGACAGCAGTAACTGCGAGTCTGCGCGGGTATCGCAGAAGCTCTGTAGCAACGGCAATCGGCCCTGCTGGC  
AGCGATTTCTGCGGCTGTTATCTATAACGATTTTGCACGCCAGATTTGGCGGCTTAAAGCGATGCTGGGTGATGTTG  
CGCAGGATTTGTTGCTGCAAGCCGCTGACCTGGATCTGAAGCAGCGCGCTGCGCATCCGGTTCGTGTCGCACAAAA  
TTACGCGCAGGATAA

>Cluster\_24577

ATGAAAAACGTTGGCGACCTGATGCAACGCTGCAAAAAATGATGCTGCCATATCAAACCTGCGTTCAAACCGGGTGA  
AGAACTACTGGCTGGCAGAAAGAAAGAGGAGCAGTCCGCTCCGCCGCTCTCGAACGTAAGAAATCGGGCGATGAAATGC  
AGCGCACCTTAAACCGCTCCGGTATTCTCCACTGCATCAGAATGCTCCTTTGAGAATATCGCGTTGAGTGTGAAGGG  
CAGATGAATGCGTTAAGCAAGCGCGCCAGTATGTCGAAGAATTTGACGGCAACATCGCCAGCTTTCATCTTTTCTGGCAA  
CCCCGAAACCGGCAAAACCACTGCGGCGGCAATCTGCAACGAACTGCTGCTACGCGGTAATCCGTTATGATCATCA  
CCGTGGCTGATATTTGCTGCGCGATGAAAGATACCTTCAAGAAATAGCGGTACCAAGCAAGAAACCACTGTTAGCGTCTG  
AGCAACGTTGATCTGCTGGTGTGATGAGATCGGCGTGCAGACCGAATCGAAATACGAAAAGTGTATCAACAGAT  
CGTCGATCGCGCTTCTTCTCAAACGCGCAACCGGATGCTGACCAACAGTAATATGGAAGAGATGACCAAGTTGCTGG  
GCAACCGCTGATGGACCGTATGCGCTGGGTAACAGTTTGTGGTGTATTTCAACTGGGATAGCTACCGTAGCCGGTAA  
ACGGTAAAGAGTATTA

>Cluster\_66198

ATGTCCAGAAAAGTTGTTAATCAGGCTCTTTAAAACAACAGTTTTCATGTAAGTTATTTACCGGATATACTCAGCGT  
TTTTTTAGGCCAACCCATTAACCTTATGACAGGCTTGTCTTGGTGGTACGCGGGTGGTTTACTTAAGTAATAATGCTG  
ATAAATCTATTTCTGATTTAGCAAGAAAGAAAAATACCTTATCTCATCCAGGCTGGGTAGATCCATTTAATAAAGAG  
GATAAAGCAAGCGCGTTTACCGTTATCCGCCAGTATCAGATTAGAACCCTCGCAAGAAAAATATTACGCATTAT

TCACACAAAGGTGTGTCATTTGCTGATGATCGCGAGTCAGTCTTCTGGCTGAATATTAATAATTCGCCCATCAGCGA  
GCAACAAAGCGACGAACCTGCTGAAAATAGCAGTAAAAACCGGTATCAAGCTGTTCTGGCGACCAGCAAAATATCCGCCTT  
ATTCCCGAAGATGCTGCGCCGAAAGTGAATGGCGCCGGGAAGGGCGAAATCTGATAGCAGAGATCCCAACCAATTCA  
TATCAGTGTGATGGATGTCATCGTTGATGGCCATGATGTGCCCTCAATATGATCCGTCTTTTGAACCGCTCACGTTAC  
CTTTACCTGCTAATCTGCGGGAGGCCAAATGACCTGGCGATTATTAATGATTACGGCGCAGTCAGTGACCCGATAAAA  
ATGACGCTGTAA

>Cluster\_13123

ATGTCCAAACTCGATCTAAACGCCCTGAACGAACCTGCCGAAGGTAGATCGCATTTCTGGCGCTGGCAGAAAATAACGCCGA  
ACTGGAAAACCTGGACGCTGAAGGCCGCTTGGCTGGCGCTGGATAAATCTGCCCGGTGAATATGTACTTTCTTCCAGCT  
TTGGCATTTCAGGCGGCGGTGAGCCTGCATCTGGTGAATCAGATTCACCCGGATATTCGGGTGATCCTCACCGACACCGGC  
TATCTGTTCCCGAAACCTACCGCTTTATGACGAGTTAACGGACAAACTCAAGCTCAACCTGAAAGTGTACCGCGCTAC  
CGAAAGCGCCGCTGGCAGGAAGCAGCTACGGCAAACCTGTGGGAACAGGGCGTTGAAGGCATTGAAAAGTACAATGACA  
TCAACAAAGCTGAAACCGATGAACCGGGCCTGAAAAGAACTGAAATGCGCAAAACCTGGTTTGTGCTGCGCCGCGCAAC  
TCCGGCAGCCGCAATTTACCGGTGCTGGCAATTCAGCGTGGCGTATTTAAAGTGTGCCGATTATCGACTGGGATAA  
CCGAACTATTTATCAGTACTGCAAAAACATGGCCTGAAATATCACCCATTATGGGATGAAGGATATTTATCGGTCCGGT  
ATACCCATAACAACCCGTAATGGGAACCTGGCATGTGCGAAGAAGAAACACGTTTCTTTGGCTTAAAAAGGGAATGTGGA  
TTGCACGAAGGGTAA

>Cluster\_5982

ATGTCAACATCAAAGTACCAAGTGAGATCAAAATAAAATCCCAATAAAGGTGGTAAGGCTGCGATTGAGCGATTAGTCGA  
AGCCTATGGCTTTACGACACGACAGGCTTTAGCTGATCACTTGGAAATATCAAAAAGCACACTAGCGAACAGGATTTTGC  
GGGATACATTTCCCTGCTGACTGGATAATCCAATGTGCTCTGAAAACAGGAACCTCCCTCAAATGGTTAACTACCGGACAA  
GGCTTAAGCAAAGCTCGCTGACAGCAGCTACAGAAGAGCTTGTAAAGTTTCGCCCTTGGCGCAGGCAAAATGATGAAGA  
CGGTTTCATATGCTCTCGATTTCATTTCTTCCGCAACCTTTCATCACCAATTTGTTGTTCCAGGATGGACTCCTCAGAT  
ACATTTGTGATCAAAAATTTCTGAAGTACTTGTATGGAACCTGGTTAAATCAATATCGACGGAACCTATTTCCATTGCAAAA  
ATCACAAGGCTTCTTAAAGGAAGGATTAATAATTAACAACAGCAGAGAATAGCTTTGAATGTGCATTTTCTGATATTTGAAGT  
GGTTGCTTGTATAAGAAGTACAATAGTCTCGAATTA

>Cluster\_29173

ATGAAACAGCCCCAAATACCGGTGAAAATGCTGACAACACTCACGATTTTTATGGTATTTCTCTGTGTGGCAGTTATCT  
GTTAAGTCCAAAATGGCAGGCGGTACGTGCGGAGTATCAGCGTCAGCGGATCCGCTGCATCAGTTTGGCAGCCAGCAAAA  
CCCCGGAAGCGCAGCTTACGGCATTGCAGGATAAAAATCCGTGCTAATCCACAAAACAGCGAACAGTGGCGGTTACTGGGC  
GAGTATTATCTGTGGCAAAACGATTACAGCAATTCGCTGCTGGCGTACCGTCAGGCGTTGCAACTACGGGGTGAAGACGC  
TGAACCTGTATGCGCGCTGGCGACGCTGTGATTAACAGGCCAGCCAAACATATGACCGCTCCAGGCTCCGCGCAATGATCG  
ACAAAAGCCTCGCGCTGGACTCTAACGAAATCACCGCTCTGATGCTGCTGGCTTCCGATGCGTTTATGCAGGCGAATTA  
GCGCAAGCCATCGAATATGGCAAAAAGTATGATGATCTCAACTCACCCGGATCAACCGGACACAGCTGGTCCGAGTCCGAT  
TAATATGGCGAAATGTTGACGCGGAGATCAGATTA

>Cluster\_17676

ATGAAACCTGTTTTGATGAAAATGGACTGGCTACAGTGCCGGGTGATATGCGTGTGTTTTATATGATGCAGTAACGTC  
TGAATATACGGGGCTGATGAAATATTAATACTGGCGTAAGTATGCCCGCTGTTCCACTGGTATTTACCCGGGGG  
AAAACATTTCCGGGGCAAGTGGCAGTATTCACGGTAAAGGATGAGCCATGAAGAGACCACCGCAATGAGACTGTTTAC  
TCAATCGAAAATGGCGCAGCTGTACAGTGGATTATATCGGTGCCATCAAGAGCGGTTATGTCACGCTTTACCGTTAAC  
GCCATACGATAAATGGGATGGTGAGAAATGGGTGACGGATACCGAGGCACAGCATAGCGCCGAGTAGACGGCGGAGAA  
CACAGCGCAGTTGCTGATGATGCTGCAATGGCTTCCATTAGTCTGACTCAGCTGAAATACAGGCCGGGGGAAACCTG  
ACGAGGCAGAAAACACCCGGCTTAACGCTGTGCTGGATTACATGACGCGGTGACGGCAACAGATACACAGCAGCCGCGC  
GGATATCAATGGCCTGCTCCCCGGAGGCGTAG

>Cluster\_42512

ATGAAAAAACCGAATCATTTCCGGCAGCGGCCAAAATCCGCATTATTTGGCGGGCAGTGGCGAGGCGTAAACTCCCGGTTCC  
TGATAGTCCAGGCTGCGCCCCACCACCACCGCTACCGGAAACGTTGTTAACTGGCTGGCTCCGGTCAATTGTTGACG  
CCCAATGTCTGGATTGCTTCCCGGGAGCGCGCTGGGGCTGGAAGCGTTATCGCGCTACGCTGCGGGGGCCACGTTG  
ATTGAGATGGATCGTGGCTTTCACGAGTAAATTAAGAATCTGGCGACACTAAAAGCAGGCATGCACGCTGGTGA  
CAGCAACCGGATGTCATTTCCGGCAAAAGGCACACCGCATAATATCGTGTGTTGTCGATCCACCGTTCCCGCTGGCT  
TGTGAAAGAGACGATAAAATTTACTGGAAGATAACCGCTGGCTGGCTGACGAAGCCCTGATTTATGTCGAAAGGAGTC  
GAAAAGGGTCTGCCCACTGTTCCGGCAAACCTGGTCAATACATCGGAAAAGTGGCGGTCAGGTGGCTTATCGGCTGTA  
TCAACGCGAAGCAACAAGGAGAAAGTATGCTGATTA

>Cluster\_11720

ATGAGCGGAAAACCGCGCGCTCAGGAGATATGACTCAGTATGGCGGTCCCATTGTCAGGGTTCCGCGAGGTGTAAG  
AATTGGCGCGCAACTGGCGTGGCGTGCCTGGTGTGTCGGGCGGGATGACTTCGGGCAACCCGGTAAATCCGCTGCTGG  
GGCGAAGGTGCTGCCCGCGAGACGGACCTTGGCTGCGCCGGCCGCTGCCGTTCAATCTCTCCCGCACTACAGCAGC  
TACCGGACGAAGACGCTGCACCCGGTGGGGATTTTGGCCCCGCTGGAAGCGCCTTCTGATATCCGCTTACAGATACG  
CGATGATGCATGTTACTCAACGACAACGGCGGACGGAGCATTCACTTTGAGCCGCTGCTGCCGGGGAGGCGGTGATA  
GCCGAGTGAGTCAATGTGGCTGGTGGCTGAGCGGTAAGGCAGCGCAGCCGACGGCCACACGCTGGCAGGCTGTGGGG  
TCGCTGCCACCGGATATCCGGTTAAGCCCGCATCTTTACCTGGCGACCAACAGCGCACAGGGGCGGTGGTGGATACTGG  
GTGCTTGAGCGGGTCCGGCGCTGGCGTACCGCGTGA

>Cluster\_17792

ATGATTCGCAACACATTTTCCATCCGAATATGATATTGAAGAAGCCAGAGAAGCGTTAACTTACCAGCTTCGGGG  
GCAGCAGTCAGAACACTCGAAATAACAAGCGCAGAAATGGACAAGTTGTTTAGATTTGGGGTACTGGAACACTACGCCCG  
ATCTGAAAACAAATGAGTTACGGTGTACTGACACAGAAAGATTTAGTAGGGCTTACTATTAATTTAACACCAAGCCG  
ACGCCGTGAGCCACGCAAAAACCTCCTTTAAGATACAAAAAGCTCAGGATCGAGTCTTACTCTGTAAGAGATAA  
AGCGCGGGAGAGACCGCTTAAAATACCTTCAAAGAAGGCTGGTTTTCATGAAGAGGCAAGGATAGAACGGGAGATGATG  
TCAACAGCTCTGATTTTCAAAGCAAGGATATGTGAGTGTGAAAAGGTAGCCGATTTTCTTGGCTGTTAGCAAAAGCACA  
TTACAGCGATGGAAGATGAGACCCGATTTTCAAACAACTTAAGATGGGTGAGAGGCGAGTAATGTTGATGCCGCGAGA  
GATTTTGGCATGGAGCAAAAACAGCAAAAATTCGATAA

>Cluster\_9863

ATGGCTGACTATTTGAAATACGTGCTGATTAACAATCAGCACACCATCACGATTTATCAGGCTTACAATGATGCAATCGC  
TGACGTCGCGTACGTGACGGGCGATTTGGCGCACCTTTTTCATTCACCCGATGACCTGGATTAAACCCCTTTTATG  
GGATGATGGAGCGTAGCAACTGGGGACTGAAAAAGATCAACAACACATCTCTCGCAATCCGAATCAAACGCACCTTCTTT  
GATACATTTGCTGGAACAAGCGGTGCTAACACCGCCGGAAGCCATGTTGATCCACATGCAAGAAATTTGGGAAACGTTAT  
TGCAACAGCAAAATGTTATGTTCTCAGTGGACCCAGAACCGACATAAAATGGTAAAACCTGGAGCACCAGTACAGC  
TTGGTATTTCTCGTAACCTGATCAGTCAATTTAACGAAGACGCGATTGTTGCTATTTGATGATCTGACGCGCTGGTGGCA  
AAGTGTCAATACCTTTTGATAAACGGCAAAAACAACACAGCGGAAATCTTCTGCCCGCAGAAAAAATTTACCCAGTTAG

TGCAGCAGCGAGAAAGGCTTTGGGAATGAAAAATTCCTGA

>Cluster\_56316

ATGTATCTCAGTAAATCATCATTTGCCAGGGCTGGAGCAGGGATCTTTACCAACTTACCAGGAATTTATGGCATTATTTAT  
TCCAAACAGACCGGATGCTGCTCGTATTTTCTTTTTCATGTTGAGAAGCGAAACACACCAGAGGCTTCACTGTTTTAT  
TGCAGTCAGCGCAATGCTGTTTCAACTGCCGTTGCCAGCATTAATAACTAAACAGGTTGAATTTCAACTCAGGTT  
GGTGTCCACTCTATTTTTCGGCTTCGGGCAAAATCCGATCAAAACTATTTCTCGACAATCAAAGCGCCTGGACAGTAAAGG  
GAATATTAACAGCTGTGCGGTTCCGTTAATAAAAAGAGCAGAACTAAATCGCGTGGTTGCAACGTAATTTGGGCAATGCGG  
CGCGCGTTGAAGATGTGCATCCCATATCGGAACGGCCACAGATTTTTCTGGGGAAGGTAATAATGAAAAATCCAAACG  
GTTTGTCTTGAAGTGTGCTCACCATTAACTGATCGCCAGCCTTAAATAGATCTTTTACAGCAAGGATTTGGGCCAGCCAA  
ATCGATGGGATGTGGTTTGTCTATCTTTGGCTCCACTGTGA

>Cluster\_45936

ATGAGCGAAATCAACTATCAGGCATTACGTGAACGTTATTTACCTGTGCCAGTACCGAAATGCCCTATTTGGGGCGAGGA  
AATGTCATTTACGCAATATCTGGAGCACAGGTTGTTTTATGCCGTGCTCCGTTATGGTGATGATGGAGATTTCAAATTTG  
GCCAAACTCTTGGCCAGCAACATTTAATAAAATCACGCGTAACAGTGTGGATGTGGGGATCTGAAGTATTTGGCGCTA  
CTTGATTTGGCTGGAAACCAAGCAACCGAATCGCTGAACTGGAAAAATCGCCACTGACTATGCACCTAAATTTCCAGAA  
AGCACAGGACGCAATAAAGTATGCCGCTTTGCTGCATAGCAGGACGGCGCAACAAATAAATTTGCAGTATCGCTTC  
CGGCATAAGCGAATATTTTCAATTAACGATTTTCCGATTTGCGACTTGCAGTACGCGGGATGTTGAAAGAGCCCATATAAG  
GCTGGCGGAAAAGCATTTGTGGCAGGAGAAACACGAGGACAGAACGCATCAGTCTCGCATGTAATTCGTGGATGTTTTAG  
CCCCTGACGACGATAAAAAATAACACCTGA

>Cluster\_24978

ATGTACCAGGATCTTATTCGTAATGAACGAACGAAGCGGGGAAACGCTGGCTAACTTTTTAAAAGATGACGCCAATAT  
TCACGCCATTCAGCGCGCGGCTCTGTTAGCAGACAGCTTTAAAGCGGTGGCAAAGTGTCTTCCGTGGCAACGGCG  
GCTCCCATTTGCGACGCCATGCACCTTTGCCGAAAGTTGACCGGTCGCTACCGTGAATAATCGTCCGGGCTACCCGGCGAT  
GCCATTTCCGACGTTAGTCATATTTCTGCGTCCGTAACGATTTGGTTTCAATGATATTTTCCCGTTACGTTGAAGC  
GGTAGGTCGCGAAGGCGATGTACTGCTGGGGATCTCCACTCCGGTAACTCTGCAACGTCATCAAAGCGATCGCAGCGG  
CGCGCGAGAGGGGATGAAAGTGTACACCTGACGGGTAAAGACGGCGCAAAATGGCTGGCAGCGCGGATTTGAAATTT  
CGCGTCCGCACCTTGGTTATGCGACCGCATTGAGGATCCACATTAAGTGTATCCATATCTGATCCAGTTAATTTGA  
AAAAGAGATGGTTAAGTAA

>Cluster\_20189

TTGCTGGTTCAGAGTTGGTTAGATACTGGAGATGATAACGCTGAACAGGCGATATTACTGTCCCTTTACCGCTACGCC  
GCCAGTATCAGCTATTGATGCTAAACGTTGGCAAAACAATAAATGATGTACACCGCCAGCAGTGTCTGCAAAAAGACA  
GAGAAAGTGTGTTCTGGTTTAACTGACTGGAAGTACCTCCAAAACAGATGCAGCAAAAAGCATCAAATCAAAGCCTGCTA  
CAACTGGCATTTCGCACACGATATAAAGCTGTTCTATCGCCCGGAAGGATTGAGTGGAAATGCCATCTGATGCACCATTTGGC  
TCTGAAGTGGTCTTGGGCAACATCTGAAGGCAAAAGCAGCATTACGCGTTGATAACCTACGCCCTACTATGCTCTTTTA  
GCAGTGGTGTATTTAGAAGCAATGGCAACGCTATCCCTGGATATGACAATGATGCGCCGTTGAGTAAACGACGCTATC  
AAGTAAATGGGATGAGTGGCAGAAACAGCTCTGCAAAAAGTGCATTTTTTTCGCCATTAATGATTTTGGTGGATCTATTGA  
AGGCAACGCCAACCTTTAA

>Cluster\_14832

TTGCTGTACACCAATGACAATCTCATTGGTCACTCAATCTATCACTACCTTATTTGATAGCCATGAAAATGCCACCCGCTC  
GAGTTATGCCGATGTCATCCATGAGAAACATCTGCCACTGGCCAGACGATTAATTTCAATTTAATTAATAAGGATATTT  
CTGCCATCAGAATCGTCGATCTGCTGAATGCGCTCCGCTTTCCCTGCTGCGCTGCCAGCAGCGGTTAATGGTGAAA  
AGCGACATTTGTCGGGCTGTGCAGAGAGTTGATAAACTTTGACAACGCTATGATTTATTAGTGAGAAATCTCCGCTAACTCT  
TTTTTCACTATCTGACCGCGCAAAAGGCGTCAGCGAATGGGAGAAACCAAAAGCTGATTCTGAAATGGCCAGGCTG  
AGTGTGAGATCTCGAAGTGTCTATGCGCAACAATAAATAAGCGTATTTGCCCCCTGCTCGGCATTGCTCATAAAACG  
GTTCAATAGCCACCGCATCCATATCATGCAAAAACCTGGGTTATTGATAATTTCCCGCACTATGAATCAGCGTATTGCCACTCT  
CCATCAATGCTAA

>Cluster\_35773

ATGGACAGGAAAACACGGGGCCGGGCTTCAAAGTGGATTTATTGCCGAAAACGCTACGTAACCGCTGCATGAAATGCT  
GCGTGATAAAGCGATCCACAGGCCCGCTTCTGGAAGAAATTAACGCCTGATTTGAAGACGCTGGCCGCGCGATGAGA  
TGAACCTCTCCCGTTCCGGTCTGAACCGTTACGCGACGAACGTCGAGCAGGATAGGCCATAACCTGGCAGAGTGCCTGAA  
ATGACGTCAGCACTGACCGCGCAAAAGGCGTCAGCGAATGGGAGAAACCAAAAGCTGATTCTGAAATGGCCAGGCTG  
CCAGCTTTTTAAGGCCATGATGCGGCAAAATCGAAAACCGGAATCTGACGTGGATATTGACCTGCTGAAAATGCCATGC  
TGGCGGCACAGCGTCTGGAATCCACGGCAATGTCCAGCCACCGCGCGAGAAAGAAATCCGCCAGGCATTCGCGAAGAA  
CGGCAAAACCGCTCAGTGAAGAACTGCGCGGGCAGGATGGCATCAGCGAAGAGCTGGAGCAGCGTATCCGTGATGTGCT  
GCTGGGTAAGGCATGA

>Cluster\_63893

ATGATTAATCGAACCAAACTGGAGCACATTTCTGAAATAGCCAGGCAGCAGAAATGATTTGGGCAACTTTGTAATAATTC  
ACCAGGAGATATGGTTGGAATTTGGAATGGCATGCGTAAGGTTGGCACTCTCCGTTAATCCGGCTTGCCTGCTG  
GTGTTTTACCATTTGAGGATGCGAAGGAATTAACGAACTTGGTTTCGACGCCACATAAGCCAGGCTTTAAGTGGCGAA  
AAGATGAAAAGAAAGATCGCGAGGCTGATTTGCGCTGGATTCATGACGTAATAGTTTCAAGCCGCGTGGTTTGTAAAAGC  
ATCACTGGAGCAGACCGGCTTATCGGGCACCCCTCCGGTAACTACGGATGGCTGGATAAGCTGTAGTGAGCGAATGCCCG  
AAAAGAACGAGAAGCTGCTTATTTTCGGTGAATTTTCGATAGCTCTGTTGTTGAACCGCTAATATGCTCCGACCGTATACC  
GGAAGCACATTTCCGGCGAGGAGATGCAACGATTAAGCCGGGTAATGGTATTGAGCAGGCAACTCACTGGATGCCGCTACC  
GGAACCACCGCGGAGGTGAATCAATGA

>Cluster\_251

GTGAGCTATTACGCCCTTTGAGGGTTAATTCGGTGGTTACCCGACGCGGTTTGTCCATCCAGTGCCTCTTGATTGG  
CGATGTGATTTGGGAGCCGGTGTCTACATCGGCCACTCGCCCTACTGCGTGGTGACTACGGGCGGTTGATCGTGCAAG  
CGGGAGCCAAATTCAGGATGGCTGCATTTATGCATGGCTACTGCGACACTGACACCATCGTTGGGGAAAACCGGCATATC  
GGGCACGGAGCGATCTGCATGGTTGTGTGATTTGGTCGCGATGCATTTGGTCCGGATGAACAGCGTGATTTGATGGATGGCG  
GGTCAATGGCGAAGAGAGCATTTGTTGCCCATGAGCTTTGTCAAAAGCAGGCTTTCCAGCGGAGAAAACCGCATTTGTTGA  
TGGGTACGCCAGCCCGCTGTACGCGAGTGTAGTGACGACGAGTTTACTGGAACCGGTTGAATACCAAGAGTATCAG  
GATCTTGTGCGGCGCTGTATGCATCGTTACATGAAACACAGCCACTGAGGCAAAATGGAGAAAATCGCCCCGTTTGA  
GGGACGACGAGTGTGACGCCTAAACGGTGA

>Cluster\_40758

GTGAGCGCAGAACTCATGGACTGCTGAGCAACATCATCCGTACCGGGATCATCTCTGAAGTTGATGAGGAATCCTGGTG  
CGTCCGCGTTTCGACAGCGCGAACTGGAACAGGCTGGCTGCGCTGGAACACCACCGCGCGGGAGCCTTCAATGTGTGCG  
TGCCGCAATCACAGCGAAGAGGTTAATTTGCTGCAATTTGGCGGCAACCCGAAACCGCATGATAATTTGGCAGCTGT  
TGGAGTGTGCCAGTCCGCGCCCGGCAAAAGCCTGAAACGAAATCGTGTATCAGCGCGCGGACGGCGCGGTTTCCGCTA  
CGACGTGGACGACGCGCACTGAGCGCCAGCGCATGAAAACGGCCACTTTACAGGCATCCGTGACGTTGAACTGGATA

CGCCCGTCGTGGAATGCACAAACCTTCTGAGAACGGCGACGCTTGACGTCATAAAAGGAGGAAAGATGAGCGGCAATATC  
ACGCACAGCGCGGCAACTTACCTCAAACGGCATTACCGTGCATACGCATAAACACGGTGGCGTAAAGCGCGCAGCGA  
TTCGACAGGAGGCCCGCAGTGA  
>Cluster\_40086  
GTGACGATTAAATGATTGTGCGCCTGGCGAACCCCGTGTCTGAATACGCCGCAACGCGACATAATGCTGGTGCCTGGTT  
CGTTGACTTACTGGCAGAGCGATTGCGCGCTCCGCTGCGCGAAGAGGCTAAATTTCTTTGGTTACTTTCGCGAGTCAACC  
TTGGAGGCGAAGATGTCCGCTGTAGTCCCGACTACATTTATGAATCTCAGCGGCAAGCCGTTGCGCGGATGGCCAGT  
TTTTTCCGCATTAATCCGGACGAAATTTCTGGTGGCCACGACGAACTGGATCTGCCTCTGGCGTCCGCAAAATTAAGTT  
GGTGGCGGTCAATGGTGGTCAATGGACTGAAAGACATCATCAGTAAATGGGTAATAACCTTAACCTTACCGCTTAC  
GCATCGGAATCGGTCATCCGGGCGATAAAAAATAAAGTTGTGCGCTTTGTGTTAGGCAAACCGCTGTTAGTGAACAGAAG  
TTAATTGATGAAGCCATCGACGAAGCGCGCTGTACTGAAATGTGGTTTACAGATGGCTTGACCAAAGCGACGAAACCG  
ATTGCACGCCCTTAAAGCGCAATAA  
>Cluster\_29325  
ATGAGTTTATTTGATAAAAAAGCATCTGGTTTCCCCCGCGATGCCCTGCCTGGACGTAACACCCCGATGCCCGTAGCCAC  
ACTGCATGCGGTCAACGGTCACTCAATGACCAATGTACTGACGGAATGGAGATTGCCATTTTTCGCGATGGGTTGTTTCT  
GGGTGTGGAGCTGTGTTCTGGCAGTTACCCGGCGTTTACAGCACCCGCGGAGGCTATACCGGTGGCTATACGCCAAAT  
CCGACTTATCGGGAAAGTGTCTCCGCGACTGCGCAATGCGCAAGCGGTGCGCATGTTTACGATCCATCCGCTATCAG  
CTATGAGCAGTTGCTACAAGTATTTGGGAGAATCAGCATCCCGCCAGGGAATGCGTCAGGGCAATGACCACGGCACGC  
AGTATCGTTCAGCGATTTTACCGCTGACCCAGAACAGGATGCCGCGCTGCGCCAGTCTGGAACGTTTTCAGCGCGGC  
ATGCTTCCGCGATGACGATCGTCGCATCACCACGGAATCGCTAACGCCACACCGTTTATTTATGCCGAAGATGACCA  
CCAGCAATATCTGCATAAAAAACCGTATGGTTACTGTGGAATTTGGCGAATTTGGCGTCTGCTCCGCGGAAACGATG  
>Cluster\_39921  
ATGACAAAAATGAGTTCGCTACGCTTGTATACCAGCGCTGGCGATGTTTCTTGGCGGTGTGTGGGGCAACGTGAACCTGC  
ACCGGTAGAAAGTGAACCAGCGCCGGAACAACCGTGTAGCCGCAACAGCCTGCCACAGTGCCTCGGTGCCG  
CGATACCGCAGCAGCCAGGCCAATGAGCAGGAAGATCAAATGCACCGCTGCACCGCATATTCGCCATTATGACTGG  
AATGGCGCAATGCAGCGATGTTGAGTAAAGTGTGGGGTGCAGCGGTGACTGCGGGTAGCGTCTGCTGGTTGATAG  
CGTTAAACACCGTACTAACGGTTGTTGAAATGCCGAGAACGCGAACCGTGCAGAAATGCGCTGGCTAATAACGGTA  
AATTTACCTGGTTTCCGCGCAGCAGCTGTCGATGGCCAGCAACAATAGGTTTATCGCCGAGGACAGTTCAGGCACC  
CGTAGTAAAGCCATAGGCATTGCCCGCAATGTTGGCGCTCATTACGTGCTGTACTCCAGCGCTTGGCAACGTTAACGC  
TCCGACCTTACAAATGCAGCTGATGCTGTGTCAGACGGCGAAATTTATCTGGTCAAGTAAAGTGCCTTTTCGACGAAAT  
AA  
>Cluster\_9242  
ATGTATCAGCCTGATTTTCTCCTGTACTTTTTCTGTTCCAGGACTGTACCCGGTGGTGGACAGCGTACAGTGGATCGAACG  
TCTGTTGGATGCAGCGTACGTACTCTCCAGCTACGCATCAAAGATCGCGCGATGAAGAGGTGGAAGCCGATGCTGTGG  
CGGCAATTCGCTGGCGCCGCTATAACCGCGGATGTTTATCAACGATTTACGCGGCTGGCGATCAAGCATCAGCGG  
TATGGCGTATGGGGCAGGAAGATTTGCAAGCCACCGATCTCAATGCCATCCGCGCGCAGGCTTGGCGCTTGGCGCT  
TTCGACATGACGATATGGAATCGACGTCGCGCTGGCAGCACGCCCTCTTATATCGCGCTGGGACATGTGTTCCCGA  
CGCAAAACCAACAGATGCCTTCTGCACCCAGGGGCTGGAACAGCTGGCACCGCATGTTGAGCGACTGGCGGATTTCC  
ACCGTGGCGATTTGGCGGTATCAGTCTGGCACGCGCTGCGGTGATAGCAACGGGTGTCGGCAGTATCGCCGCTGTCTAG  
CGCATTACTCAAGCCGACAGCTGGCGTTGGCAACCGCACAGTTGCTGGAATTTGACGAGTGGCGATGAATGA  
>Cluster\_55304  
ATGGCTACAGGCCAGACTCAACAGCTTATTTACATTTATCAACAGCTTGGCCATACTCCCTGAAAAAGAAATCATTTGAAAT  
AATAACCGCGCAGATAAGCGTTGGTACACTGCTTTATTTTGGCTATGATGAACGGACATACGACAACTGAAAAATAT  
TTATGCAAGAAATTCAGTCACTGGTAGAATAACATCATCTATGAAGATAATCTGGTTAAATTTACTGCAAACTAAAAGT  
GCTAACGAAACACCTGGACTTTATATCTCCATGTTGATGGAATTCGATGAAATTAATCGATATCTTTCTGAATGCATTAAC  
CACTCCAATAGCACAAGAGCTTTTAAACAAAAAAGCTGGTATGAGTATTTTAGCCATGAAAAACATGATGGTGGCCAG  
GATTTATACGCCAATGGAAAAATCACTTCTGTTGTTGTCACAGCTGACAGGTTCCCTCTCTAAAATTAATGGCATCGCTTTAAA  
TACAAGTTGAGCAAAGCTAACATCATGGATTTATTTAAAGGAGCTACAGCACAGGGAACCCCTGCATTTATACATCGCCAT  
GAGCAAGGTAATGAAGCGTCTGTTATCTTATATATCTGACGCTGGGTGCTTTTGCAAAAAAAACATTTCTTTTAG  
>Cluster\_40881  
TTGGCGATTGCTCTTCATAAACTGACTGTTGCTTTAGTGTCTTTATTGTTAGCGCTCCTGCCTTTTTCGCATGGTTCATCA  
TTCATGCGCAACCCCTTAAACAGAGGTCGAACAAAAGCTGCTAATGGTGTGTTTTGATGATACCAATGTACAAAACCGAA  
CGCTCAGTACTGGGATGGAGTCTGGCAATCCGTTTACTGCAAAAGTGGCAAACTTGATCCCGCTTTTCAGAAAG  
AAAGCGATGCAGATAAAACCAAAACATTTGCTGAAATTAAGATTTATTCGCAAGGTTATGCGACAGATATCGAAAT  
GATGGCATTTGAGGACGGCATTGTCGAAATTCATGAAATAAGTAAACAAACATCTGTAATAATGATTACGATGATGATG  
AAATACTCACTATAAATCAGGCAAGAAAGCGTTCGTTACTTATTCGAAATGTAAGATCCTGAAAGCAAGCCCTTAA  
TATATACAAATTTAGCGATCATATAATGACCACGAAATCATCTCATTTTTCATATTTTATGGGTAATGATTTCCCAACA  
GTCCTTATTTGAATGAAATGGAACCTGGCAACGATTTATCTTATCATGTTGAGTACGAAAGTGGTTCGAGGAGATGA  
TGTCTCATGTA  
>Cluster\_14971  
ATGATCAAATCAAAAAAGTAGTGGTTATTTTTGTTGCTTTGAGTTCATTTCTGCTGGCAGGGTGTGATTTACCAAAGA  
TGCTAATAAGCAAAACTTTGAAAAAGCTATTAATACTGCAGTAGAGAAGGAATGCATTTACCATTTAGTCCGCTGGGAATGT  
TTGATAGTAAGCCTTATCCGGTTAGATAGCTGTGGCTCAGGCTAATCGATACACATCTCAGGAACGGGAGATGAAATA  
AATTTCTCGACAGTTTCCGCGCTGGATGTTACTGGTCAAAGCCGATTTATTTGACAGTAAAAAATACCCTGGTTGATGACGT  
TATTTGGTTTTACTAAGACGGGTAAGAAAGTGCAGGTCGTGAAATATGCTCTGACAGATGAGGGGAAAAAATATCTGAAGT  
CTCCGGAACGACCTGATTTTGGCTCGGTCATTTAAGAGTGGATGAGATGAGTATGATTTTACCGAACCTGGTATG  
GGAATGAAGATCAGCAGGTGAATACACATTCAGTCCACCAGTATCGCTGAATGGGCGAAACCGGATGATGTTCCGGC  
TGCATTTTATGAGCTGATTTGAAAGGAAACAAACAAACATATTACTGTTTGTGAAAAATGATGGATGTT  
CTGCTGAACGGTAT  
>cluster\_40461  
ATGTCGATAACGCTCAACTTACCGGCTGTGCGACCGTTTTCTGTTGTTTTATCCTGTTGTGATCGATGTTGAAACAGC  
CGGATTTAAACGCAAAACCGATGCGCTGCTTGGATTTGGCGCATCACCTGAAAAATGGATGAAACAAGGCTGGCTGATGC  
CGGACCAACATTAACATTTCCAGCTGCAACATTTGTCGGCGCAAAATTTGCAACCAGAGGCTTGGCTTCAACGGTATTT  
GACCCGAACGATCCGATCCGCGCGGGTCAGGCAATCAGAGGCTGCACGAAATTTTAAAGTTGTACGTAAGGTTAT  
TAAAGCGAGCGGCTGTAACCGCGCATTTAGTGGCGCACAAACGCAATTTTCGATCACAGCTTTATGATGGCCGCGCAG  
AACCGCTCCTGAAACGTAACCCGTTCCACCTTTCCGCACTTTTGGACACTGCTGCACTGGCCGGCTGGCCTCGGAC  
CAACCGTATTTGTAAGGCTTGCAGACAGTGGCTGGACTTCGACAGCACCCAGGCGCACCTCCGCGCTGTACGACAC  
CGAACGCACTGCTGTGCTTTTTGTTGAAATCGTCAACCGCTGGAACGCTGAGGAGGCTGGCCACTACTGCGCCGCGAG  
AGGTGTA



>Cluster\_17671

ATGTGGGACAAAGTTAATCAACGCGTACAGCAGGCACTGGCCGCGCTTCGCCAGGCATTCAGGGTGGTACCGGTACGGT  
GGACAGTTCGACCAAAGTACAGCTGCTTACGCTTAAACGGGCTGGCTGGCGAACAGCTGGACGGTGGGAGTATTTTCAGC  
ATTACGGCTCACCACATCCCCGCGCCCGGCTCAATGGGTATTTGCCGTTCCGCTGAACGGCAATACCTCCCACTACTGTC  
TGTGTGGCCACAGGACGGCGCATATCGTCTGACGGAATGAAACCCGGGGAAGTGGCCCTGTATACCGATGAAGGGCCG  
GAAATCGTACTGAAGCGCGGACGGGTTATTGAAACCGAATGTGACGTTTATCGCGTGAATGCAAACGCTACGAGGTTG  
AGGCAGAGGAGAACGCCACATTCACGACACCGTACTGACAGCAGTACAGGGTGGAGGCAAAATCACCGGC  
AACGGTGGCATGGCCATCAGTGGAGGCAAGGGATACACTGCCACCTTTGAAGGCAATATCAACCATGTGGGTGGAGTGAT  
TACCTCCGTTGACGTCACCATTAATGGCGTTAAATCGGAACGCACAAACATCCAACCCACACGGCATGTCTGACACGC  
CGGTTAATTA

>Cluster\_40989

GTGGATAAAACAAACCTGCAGGAAACAGTGAGCCAGATTTGGATGAGATGCGCGAGCGCCCTATCCCACTGGGCGTTTC  
CAGTCGCCATATTTCATCTTCAACAGCGGATTAATTTGCGTCTTTTCCGTAACACCGATTAGCGAGAAAAAGCCGTTAA  
TGCAACCGGGCAATTTCGCTGCTGAACAGGTTGTTACGCTGGAGGGACAAAAGGCAATTCACACACGTTTCGCTTGTG  
GGGCGCTACGCAATGCAAGCCAGGTGGAAATTTCCCGGACGGACGCCAGAAGCTTAGGGATCACCGCCCGCTACGCA  
GTCAGGCGATCTCAGCGCATCCGGGATTCGTTGTAAGCCATTTGCGGAACTGGAGATCACATCTGGCGTTCATG  
TCGCGCAACCGCATATTTCATGTCTCCGCTGGATGCCCTGATTTATGGTGTACGCAACGGGATAAAGTGGCGTTGCC  
ATTAAGGTGATGAGCGACGACTGATATTCGAAACGTCGCTGTTCCGCTCTCCGGATATGCGTCTTGAATGCATAT  
TGATACCGATGAAGCCACCGCGAGGGGCTGATAGCCCTGACGTTTTTGCCACACTGGTGTGCTAGTGCATGA

>Cluster\_41217

ATGCTTGAAGCCAGAGATTACTTTGCGAGCGGGATGAACGAACCTTATTTAGTGGTTTATCATTTACGCTGAACGAGG  
AGAGTGGGTACAAATCACCGGTAGCAACGGCGCGGGGAAGACAACGCTTCTCCGTTTGTGACGGGTTGTCTCGCCCTG  
ATGCAAGCGGAGTTCTCTGGCAAGGGCAGCCCTTGCATCAGGTACGCGACAGCTACCATCAAAACCTGTTATGGATAGGC  
CATCAGCCGGGATCAAAACCCGGCTGACGGCTTAGAAAATCTGCACTTTTATCATCGCGATGGCGATACCGCAAAATG  
TCTGGAAGCCCTGGCGCAGGCGGGCTTCCGGATTCGAAGATATTCGGTAAATCAACTTCTGCGGGCAACAACGCC  
GCGTCGCTTTAGCGGCTCTGTGGCTGACCGTGCACGTTATGGATATCGACGAGCCTTTACCGCGATTGACGTTAAC  
GGCGTCGATCGTCTGACCCAGCGTATGGCGCAGCATACGGAGCAGGGGGGATGTGATTTCTGACTACCCACCAGCCGCT  
CAACGTTGCTGAAAGTAAATTCGCCGATTTCACTGACGCAACGGGGCCGATGA

>Cluster\_38567

ATGATAAAAAGAAATAGATAAAAATCGCCATAACTAATGTTAAGGGAATCGAAAACCTCTGTTTTGATGTCAGCTTATTCC  
AAACAAGCCGACACTCGTTGTAGCTCCCAACGGTTTCGGAAAAAGCTCCATTACTGCCGCTTTCCGGTCCCTGCGTTCGA  
AAAAGATGGATTTGGATAAGGATGAATACCACAGGGGCGATGAAGAACGTCATCCATCCCTAAAATCAGTTATACCATG  
CAGGATGGGAGCAAGATTGATAAAGAAGCAAATCATACAAAAATGATCTGGCAGCGACATTTGGCGTTCATGTAATTA  
TAGCCAGTTGGTTTCAAAAAGCAAAAAACTCAAAATTCGGGGCCTAACATCGTTACTTCAGCAATTGAAGTCACTCCAG  
TCGTAATAATAAAGTATTTCTCCAAAAGAAAAATTTTCGTTACTCTTCGACAGCAGTAAAAGGTGACTTCGGAAAAAC  
GAAAAGGCATTTGCCAAACATTTCAAGCATTTCTCGCTGATAACCGGTTGATGGCCAAAAATTTGGAATCAGGTTCGATTTTAC  
TAAACAGGGTCAGGCCGTTAATAAGGCTATAAGAGCGCTACAAGATGAGATCTGA

>Cluster\_45191

ATGACGCTTACCAGATAAAACCGCTCTTTTCAGTCGCTGTTAAGCGCGACGATGTTTTGGCTTTACAAGCACCGTTAC  
AGCGAATCACACTACTCTTTGCTGCACTGGCGCTTTCTCTTTCTTACCGGATTTGCTGTTGGTGGTGGTGGGACAAACCCATCC  
TCTTTTTGCTATTGCCCATCGTGTCTTTTATCCGATGAGCGCTCAATGCGCTGGATGGCATGTTGGCGGTGAGTGCAAT  
CAGCAACACGCTGCGGGCGATTTTGAATGAAACTGGCGATGTTATTTCCGATATTGCGCTCTATTTACCGTTTTTAT  
TTTTACCGAAAGTAAAGCATACACTCGTAATACTCATGTTATTTTGCACATATTGACTGAGTTTGTGGTGTTCATCGCGC  
AGACAATTAACGGTATTTCGAGTTATGCCGGTCCATTCGGCAAAAGCGATCGTGCCTTAATATTTGGTGTGGGGGCTG  
GCCGTTTCCATTTTATCCAGTGGATGCATGGAATAAATCTTTTATGGAGCATGCTTCAATTTCTGCTTCTCGACTGC  
GATTAATCGTTGTCGGAGTGTGCTTTTTATGAGTGTGAAAGATA

>Cluster\_13077

GTGAATCGTTTTGTAATTTGCTGACTCCACGCTCTGTATCGGCTGCCACACTTGTGAGGCGCCTGTTCCAGAGACGCATCG  
CCAGCACGGCCTGCAATCAATGCCGCGCCTGAGAGTGTGCTAAATGAAAAGAAATCTGCGCCGACGCTCTGTACCACCT  
GTGAAGATGCACCTGACCGGTTGGTCTGCCCGTTAACGCCATCACCCGCTTGTGAGGGGCGTGCAGTTGAATGAAAGC  
CTGTGCGTAAAGTCAAGCTGTGCGGCATCGCCTGCCGTTTGGCGCAATTTTCCGGCAGCCGCTGCGTGGATAT  
TCCTGCAAAATGCCAATACCCGAAAGCGCCACCGCCCTGCTCCGGCGCTATCAGTACGCTGCTTACTGGGTGC  
CGGTATTTCGCGCATCGCGCTCAAAATGTGACCTTTGCAAGTTTGTGATGAACAAGTCCGGCCTGCGTGGGATGTGCCG  
ACCAAAGCCCTGCATCTGGTGGATAACACCGATATCGCCCGCTCAGCAACGTAAGCGTGGAGTGCATTTAATACGGA  
CTTTGGCGATCTCACCTTTTTCAGCAGGCTCAAAGTGGAGAGGCTAAATGA

>Cluster\_41368

ATGAACGTTAGGATTTACTGCGGAGCATCAACTGAGGGCAACACGCTGATCGAGCACTTACCAGCCTACGTGAATTTTC  
AAAATAAAAGCTGGCAGATTGCAGGAGATATAGAAAATGCTAGCGGGCGAAGCTTGAGCGCATAGAGCTTATGC  
GGCTATTGTTCTGAAGCCAGCCCGCGCATCTGTTGCTAGTGAAGCTATAGATCGTCTGAGTCCGCTAGAACAATAGCGCA  
TGGGTTGAACTGAAAGATACGCTCAACCGAAAAGGGTTAATCATCGTATCAATGGATTGCCAACGAGCTGGCAGATGGT  
CGAGATGGCAGGCAATGACCTAACCGAGCGCATCTGAGAGCTGTAATGCCATGTTGATAGATATCCTTGCCACAATGG  
CGGACAGGATTATGAAACACGCGTAAACGCCAACAGCAAGGCATAGAGCGGGCTAAAAGCGAAGCGGTATACATTTGGC  
AGGAGAAAAATCAGGAAGCCGTTGAGATCGTTCAAGAGATGTTGGAGCGAGGAGTAAAACCTGAACTCATCATGAAGGC  
AGCAGGAATCAGCCGAGGCACTTACTACCGTATAAAAAGCGAGCTGTGCTAGTCAATAAAATCAGAATAA

>Cluster\_53535

ATGAAAAATCAAAAACAAACATGTTATTGCTGGCTGGAGAGTTGTGCTGCACATCTTACTGAACAACAAGATTTTCTAAC  
CGCACTTGACAGAGATATTGGTGTGCGGACACCGCCCTCAATATGAATCGTGGTTTTCAGTGGCGTGAAGCGACGTTGC  
CCGACATTGAACGTCAGCATATTGGCAATATCCTTAAAAATACGGCATGAAACTACTTTCCAGCGTTGGCGGTGCCAGT  
GGTCTCTTTACGGCACATTTATTTATTCGCGCTTCTGCGGACAGTGGGAGCCAGAACAAGTAAAGTCTGGAAGAGTGGCT  
GGCTGTCTGGAAGAAGGATTCAGCGCTTATCGCACGAAAAAGCAAGGATAAAAACCTGTGTGATGCT  
GGGTTCCAGTCTCCACGAAGCCAAAAGAACCTGCAAGCCGGAATGTGCGCTTCCCTTCTGCTGAATACGATGGTGCAA  
GATCGGGCAACAGCGCTCGATAACCAATCAATATGACGGCGAAAAAGGACGTGCCAGTTATCTCGGCGCTCCGAGTGT  
GGCCATCAGGATCCAGGCGGACCTCTCTGGCTGATGATTAAGGCTATGCAGGAAGGATTCGCGGGATAA

>Cluster\_45586

ATGACCACACAATATGGATTTTTATCGATTCACGCGCTGTACTGGCTGTAACACCTGCGAAGTGGCGTGAAGAGTTT  
TAAAGATCTTGGCCGGAAAGTCACTTTCGCGGATTTTATGAAATACGCTGGCGCGCATGGCAGGAAGAAATGGCGTCT  
GGCACAGAACGTTTCGCTTATATCTCTCACTCCGCAACCATTGCGATGACCCCGCATGTACAAAAGTGTCCGCC  
AGCGGCGCAATGCATAAGCGTGAAGATGGCTTTGTGGTGGTGTGATGAAGATGTTGATCGGCTGCCGCTACTGCCACAT  
GGCTGTCCGTACGGCGGCCACAGTACATGCTGAAAAGGGCAGATGACGAAGTGCATGGTGTATTTCGCGCGTGC

CCGAGGGGAAACAACCCATATGTGTGCAATCTGCCCGCTGCGTGCACCTTGTAGTTCGGTCCAATTGAAGAGCTGCCCGAG  
AAGCACGGCACTCTTGTCTGCCGTCGCGCCACTGCCGCGCGCATTTTCAAAAACCAATATCGTTATCAAACCTAACGC  
CAACAGCCGCCGACCGGCGATACCCTGTTATCTGGCTAATCCGGAGGAAGTGTA  
>Cluster\_21715  
ATGCTGAAAACATFCCGAAAACACGGCATTACGTTGGCGCTCTTTCAGCGGGTTCAACAGGGTTAATGCGGCCATCAA  
CCAGATGACCAAAACGACAAATTGCTGAACAGGCCAGTCTGCAACAAAAGCGTTATTTGATCAGGTGCTGCCAGCTGAAC  
GCTATAACAAATGCGCTGGCAGAGTGTCTATCTGGTCACTGCCAGAGTTAGGTAAAGGTGAGCATCGGGTTTACATC  
GCCAAAACAGGATGACAAAACCGGTAGCTGCCGTTCTGGAAGCAACCGCGCCAGATGGCTATTCCGGTGCATTACAGTGTCT  
GGTGGGAGCGAATTTAACGGCACGGTACTTGGCACGCGCTGACTGAGCACCCAGAAACTCCAGGGCTTGGCGGATAAAA  
TCGAACTGCGCCTTTCTGACTGGATCACCCATTTTGGGGTAAAAAAATCGGTGGTGCAGGATGATGCGAACTGGGCGGTG  
AAGAAAGATGGTGGTGAATTTGACCCAGTTCACCGCGCGACGATTACTCCCGCGCGGTGGTTAATGCGGTAAAACGCCG  
CGGATTGTACGCTCAGACGTTACCGGCACAACCTTCTCAACTTCTGCCTGTGGAGAATA  
>Cluster\_61689  
ATGTCGAAGTCTGATGTTTTTTCATCTCGGCCTCACTAAAAACGATTTACAAGGGGCTACGCTTGCATCGTCCCTGGCGA  
CCCGGATCGTGTGAAAAGATCGCCGCGTGTATGGATAAGCCGGTTAAGCTGGCATCTCACCGGAATTCACCTACCTGGC  
GTGCAGAGCTGGATGGTAAACCTGTTATCGTCTGCTTACCGGTATCGGCGCCCGCTACCTCTATTGCTGTTGAAGAG  
CTGCGCACAGCTGGCATTCCGCACTTCTCGTATCGGTACAACGGCGCTATTTCAGCCGATATTAATGTTGGGTGATGT  
CCTGGTTACCACGGCGTCTGCTCGTCTGGATGGCGGAGCCTGCACCTTCGACCCGCTGGAATTCGCGCTGCTCGTGTAT  
TCGAATGTACGACTGCGCTGGTGAAGCTGCGAAATCCATTGGCGCGACAACCTCACGTTGGCGTGACAGCTTCTTCTGAT  
ACCTTCTACCAGGTAGGAACGTTACGATACTTACTTGGTCCGCTAGTTCGTCACCTTAAAGGTTCTATGGAAGAGTG  
GCAGGCGATGGGCTAATGAACATGAAATGAAATCTGCAACCTGCTGACCATGTGTGCAAGTCAGGCGTCCGCTGCGG  
GTATGGTAGCGGTGTTATCGTTAACCCGACCCAGCAAGATCCCGAATGCTGAGACGATGAAACAAAACCGAAAGCCAT  
CGGTGAAAATCGTGGTGAAGCGCGCTCGTCTGCTGTAA  
>Cluster\_21822  
ATGAGTCAATTAACAGCGTCTGGGTCTTTAGCGATAATCCTGAACGTTATGCTGAACGTTTGGCGCGCTCAGCAATG  
GGGCAACAGGTGTATGCCATTTGTACAAAATACCGACAGCGCAGACAGTTATGCCCTTATGGCCAAAATGCATTTATG  
TTCTTGAGCAAAACGACGCGCTGCAACGCTACTGAAAATACCGCGAAAGCATTGCTGCCCTGCTGAAAGATAAACACCCC  
GCTATGTTTCTATTTGGCCGCGACGAAACGTTGTAAGCTCTGGCAGCACGGTTAAGTGTGCAACTGAATGCGCGCTGGT  
GAACGATGCCACGGCGGTGGATATTGTCGATGGTCAATTTGCGCCGAACACCGGATGTATGGCGGGTTAGCGTTGCTC  
AGGAAAAGATCAACAGCCGCTGGCGATCATTTGCCCTTGGCGCGGTTCAGGAACCGTGCACCCGATATCTCTCAT  
CAGTGCCTACAGAAACGGTACCTTATGTTGCCCGCTCATGAAATCTCTGTCGCGAACCGCTGCGAAAGCGGCAAG  
CAGCGTGGACCTGAGCAAAAGCAAAACGTTGGTGGTGGCGTCTGGCGCGCAGGATGACCTGAAAATGGTCC  
ACGAACTGGCGGCGTGTGAATGCTGAAGTTGGCTGTTACGTCCTAATTTGCCGAAGGCGAGAACTGGATGGAGCGTGAA  
CGTTATATCGGTGCTCCGGTGTGTTGCTGAAATCCGATCTCTACCTGACGCTGGGGATCTCCGGGCAGATCCAGCATAT  
GGTTGGCGCAACGGCGCAAAAGTATGTTGCTGCCATTAATAAAGATAAAAAATGCGCAATCTTCAACTATGCCGACTACG  
GTCTGGTGGCGATATCTCAAAAGTCTCCCTGATTAGCCAGTGGAGTCCGCTAA  
>Cluster\_55738  
ATGCGTGTGTTACTGGCACCGATGGAGGGAGTGTGCTTACTCTCTGGTGCCTGAATTTGCTGACCGAAAGTTAACGACTACGA  
TCTGTGCATACCGAGTTTGTCCGCTGGTGGATCAACTGCTGCCGTTAAAAGTCTTTTCATCGCATTTGCCCTGAGCTAC  
AAAACGCCAGCCGACACCATCTGGTACGCTGGTGGCGCTGCAGTGTGTTAGGTGAGTTCCACAAATGGCTGGCAGAGAAC  
GCCGCCGCTGCGGTGGAGTTAGGTTCTGGGGCTGGATCTCAATTGCGGCTGCCCGTGGAAAACGGTTAACGGTAGCGG  
CGGCGGGGCGACGTTACTCAAAGATCTGAACTCATCTACCAGGGTGCAAAAGCGATGCGTGAAGCTGTACCGCGCAT  
TGCCCGTACGCTGAAAAGTGGCTCTGGGCTGGGACAGCGGTGAGAAGAAATTTGAAATCGCCGATGCGGTTTCAACGTT  
GGCGCTACGGAGCTGGTGGTGCATGGGCGGACGAAAAGAGCAGGGTTACCGCGCGGAGCATATTGACTGGCAGGCGATTGG  
CGATATTGCCAGCGGCTGAATATCTCGGTGATTTGCCAACGGTGAATCTGGGACTGGCAGAGCGCGCAACAATGCATGG  
CGATCAGCGGCTGCGACGAGTGTGATTTGGTCCGCGGGCGCTCAATATTTCCCAACCTGAGCCGGGTGTAATAATAAAC  
GAACCCGAAATGCGTGGCGCGGAGGTGGTTGCTTTGCTGCAAAAATATACCCGTTGGAAAAGCAGGGCGATCCGGGTT  
ATATCACGTTGCGCGGATTAACAGTGGTTGAGTTATTTGCGTAAAGAATACGATGAAGCAACGGAATTAATTTACGATG  
TTCGGGTGTTGAATAATTTCCCTGATATTGCAAGGGCTATTACGGCAATTGATATCGAGAAACTCTAA  
>Cluster\_169  
ATGCATCACCATCATCATGGCCATGATGAAAAACTGAGATTAGAGGGAAAAATCTCTTTTACGTAGCCCTTTTAAACCT  
TTTGATACTGTTTTTGAATTTATCGGTGGTTTAAATTTACGGAAGTATGGCTCTTTTGTCTGATGCCTTTCATAATTTAG  
GTGACGTAATGTCTGTGGTGAATTTTGGCCATAAAAATTTCTTTAAGAAATCCTAACGAAAGAAAGACCTTCGGT  
TATAAACGCATAACCATTTTAGCAAGTCTTTTAACTCGGTTACGCTGTTAATAATATGTTTTTCTGATTAATAAAGT  
TATCGAAAGCATGCTTACCCCATCTCTTATAGACTGGTAAACCGTGTGTTGGTGGTAGGAAGTATAGGGTTTTTAGGTAATC  
TTTTGAGTTTGAATTTTTAAAAGTTCTGCCAAAGAAGACTTAAACGTAAAAGTGCATTATCTACACATGTTAGGGGAT  
GCTTTATCTCTTTGGCTGTGATGACAGGGGCTGTTTTTATTTATTTTGGGTGGGTAAGAGTTGACTCTGTTATTAG  
TATATTGATAGCCTTTTATATTGCTAAGAGAGTTTAGAGGTTTTGTTAAAGTCACTGACATCATCTGCAAGCAACCC  
CTTTTCAATGTGGAATCCCTAAGATAGTAGAGGAACCTGTTGAAAATTCAGACATACAAGATGTTCCATCATATACATGTA  
TGGAGTCTTGACGATAAAAACCATTTTTTTGAGGGCATTGTTAACCTAAAGTCTGACATGACGTAAGTGAACGGGAAA  
AGTTTTGCAAAAATATCAAAAAGGAATTAAAAAAGTTTGATATTTACCATAAACCATACAGTTTGAATATCAGGGAGTAT  
GCCAGAATGTGAGGTGTTTCAATAAATTTTTAAAAAGGCAAAAGATGGTTAG  
>Cluster\_32651  
ATGAGCACTATCTTCTTCCGAAAACGCAGCACCTGGTAGTCTTTCAGGAAGTTATTAGAAGTGGTTCATCGGCTCGGC  
TGCAAAAGAGTTAGGGTTAACTCAACCGCCGTCAGTAAAATCATTAACGATATTGAAGATTAATTTGGTGTGGAGTTAG  
TGGTGGGAAAATAACCGGTGTAACATTAACACCTGCCGGTCAATTGTTACTCTCCCGTCCCGATCCATACCGGTTAG  
ATGAAAATAATGGTTAATGAGATAAGCGGTATGCTTCTGAGGCGGTGGTGAAGTCTCATTTGGTTTTCTTCAATTGAT  
TGGTTTTACTTTTTATGTCAGGGATGATCAACAAGTTCAAAAGAGGTGTTCCCGAAAAGCGCAGGTTCTATGATGAAGCC  
AATGCTTCTGTTCTTACCGGCAATCCGCGACGGTGCAGTGGATTTGCGATTTGGTACGTTAAGCGCAAAATGAAGCTT  
CAGGATTTACATCTGTTAGCCGCTGTTGAGTGGTGGTGGTGGTGGTGGTGGTGGTGGTGGTGGTGGTGGTGGTGGTGGT  
CACGCTGGAGTCTGTTGAAGAACGAACAGTGGGTGTTGCCACAACCAATATGGGGTACTACAGCGAATCTTACTACGTT  
TACAAAAGAAATGGCATCAGTATTGAAAACATCGTTAAAACCGACTCAGTCTGACAAATTTATAATCTTGTCTCAATGCT  
GATTTCTTAACTGAATTTCTGTGATATGACATCACTTTTGGTCTAATCAATTTACTATCCGGTTGAAGAAAC  
ATTAACCTGGTGAACAATATGCCGCGGATGCGGCAAAAATATCTGATTAATAAAGCAGCATCGGTTTTGGTGAATTTAG  
CCAAAGAGTATTCATCTTATAATGGGTGATAGCAAGGCAATTAATTGAAGTTGATTAG  
>Cluster\_42679  
ATGCGGGTCTGATCGTTAAAACATCGTCGATGGGCGATGTTCTCCACACGCTGCCCGCACTACTGATGCCAGCAGGC  
AATCCAGGGATTAAGTTTACTGCGGTGGTGGAGAAGGGTTCGCACAGATTCCTTCTGCGCACGCTGCCGTTGAGCGAG  
TTATCTCTGTGGCAATACGTCGCTGGCTAAAGCTGGTCTCGGCTCCATAAAGCTGACGCAAAAGCGTTTTGCTGAA

GCGCTACAAGCAAAGAACTATGACGCGATTATCGACGCCAGGGGCTGGTAAAAAGCGGGCGCTGGTGACGCGTCTGGC  
GCATGGCGTAAAGCATGGAAATGGACTGGCAAACCGCTCCGCAACCGTTAGCCAGCCTGTTTTACAATCGTAAACATCATA  
TTGCAAAACAGCAGCAGCCGCTAGAACGCACCCGGAAGTGTTCGCCAAAAGTCTGGGCTATAGCAAACCCACAACCCAG  
GGCGATTATGCTATCGCACAGCATTTCCCTGACGAACTCCCTACAGATGCTGGCGAATATGCCGATTTCTTTCATGCAAC  
AACCCGAGATGATAAAGCACTGGCCGGAAGAAGCTGGCGAAGAAATGATGGTTTACTGGCTGATTCAGAAATACGGATTA  
AACTTCCGTGGGGCGCGCCGATGAGGAAGAAGCGGCGAAGCACTGGCGGAAGGATTGGCTTATGTTGAAAGTATTGCCG  
AAGATGAGTCTGGAAGGCGTTGCCCGCTACTGGCTGGGGCTAAATTTGTAGTGTCCGGTGGATACGGGGTAAAGCCATTT  
AACGGCGGCACTGGATAGACCAATATCACGGTTTATGGACCTACCGATCCGGGATTAATTTGGTGGGTATGGGAAGAATC  
AGATGGTTTGTAGGGCTCCGCTAAAGAGTTTAAATAAATTTAGAAGCAGCGGCTGTTTATAAAGAAATTACATTGATTTAA  
>Cluster\_35614

ATGGATTTCGTTACAGGATGATTATACAAAGCTGTGTACGGACTGATGCGCCGGGGCTGCATGGAGCGATACCGACGG  
CGTGTCTGATGGTCTGGCACCATCGCTTGTACGTGTTCATCAGCGGACTGATGAACTGATGGCTGAAATCGATCCCTGGTC  
AGTCAACAGAGCTGATGTAACGTTATGAAGAATGTATGGTTTACTGCACACCTGCTCTCCTGTTGGAGCCAGACATTA  
CGCCAGCGTCAGCAACGGCTGGAAGCAAAGCCAAATGTGGCTGGTGGCATAAATGAGCAGTTCCTTCCGGAGCAGCTTGA  
GGCGCTGGGATATACCGCGTGCAGATCGAACAGTTCAGCAGCCTGGATGCAAGCCCGATCCGGAATGGGGTATCGCT  
GGCGTTATTTCTGGCGTGTGACGTTGGCGGTGGATGCCGGTGCCTCAGTGGCAGACATGTTCCGGACACTGTAACACACCG  
ATCCGGATGATGGCTGATACGGTTGCGGAGTGCCTGATTAATAAATTAATGTCCGCTCGCATACTGTTGCTCTTTTGCATA  
TCCGGATGAGTCTGGTGAAGGGCAACAAGCCGCTGACTATAAAGCAGCTCTCCTTTCCAGGCCGACACAAGACGACTG  
AGCCATTAGCGATTAATCATACAGGTGTTCAATTTTGGCGTGTTCCTGGCACTGACAGGTAAGCCGCTGACAATTAACCG  
ATTAACTTTATGCGCCGCTCCGATGGCAGAACCACTGGTACTCAGCAGGGCGCAATGACATCAGTCTGAGTCTGGCCGACA  
GGACCCATGACCATGAACAGCGCACAGTTGCAGAGCGGATACAGGACCCGCTCCCGCTACCGTTAACAGTATGCAAT  
TGCAGACAGCCAGACAACCGTGAACCGTTATGATTAATCACCCGGGACTGCATTTTGTGTGGTACGTCGCGAATGA  
>Cluster\_39016

ATGAAAGAACTTGGTCTGGTCCATTGGTGGCAACAGCATTATCAAAGATAACGCCAGCCAGTGCATTGAGCATCAGGC  
GGAGGCGGTGAAGCCGTCGCGGATACGGTGTGGAAATGCTGGCTTCGATTACGACATGTTGCTGACCCACGGCAACG  
GGCCGAGGTCGGGCTGGATTTACGCGCGCGGAGATTGCCACAGGCGCGAAGGGTTGCCCTTAACGCGCTGGCGAAC  
TGTGTGGCGGATACGCAAGGCGGCTATGGCTATCTGATCCAGCAGGCGCTGAATAACCGGCTGGCGGTCACGGCGAGAA  
AAAAGCCGTCACCGTGGTACTCAGGTGGAGTGGATAAAAACGATCCGGGATTTGCTCATCCCAAGCCCTACCGCG  
CATTTCTTAATGACAGCCAGCGTACGCAATTACAAAAGGCAAACTCCTGACTGGCGTTTTGTTGAAGATGCCGGACGGGGC  
TATCGCCGCTGGTFCGCTCGCCGGAACGAAACGATTTGTGGAAGCAGCTGCATTAAGCGCTGATCCAACAAAGCCTT  
TGTGGTAAATGGCGCGGGCGGGTGAATTCGGTGGTGTGCAAGTGAAGCGGGGATACCAAAGCGTGGACGCGGTTA  
TCGACAAAGATCTCTCTACCGCGTACTGGCTCCGCAAAATTCAGCCGACATTTCTGGTATCACCACCTGGCGTGA  
GTGTGATTTCACTTTGGCAAACCGCAGCAGCAGGCGCTCGATCGCGTAGATATTGCCACCATGCCCGCTATATGCAGGA  
AGGACATTTCCCGCCCGGAGCATGTTGCCAAAATCATCGCCAGCCTGACGTTCTGGAACAAGCGCGCAAAGAAGTGA  
TTATCACACGCGGAAATGCCCTGCCGCGTACGCGCGCAACCGGCACCATATTTAAACCCTAA  
>Cluster\_49719

ATGAAAAAAGTGTATCGCTGGCGTCTTTATTTGCTCTGTCAATTTACCAGTGTTCAGCTATCGGCAACAGCCTTGCATT  
ATCATTAGCAAAATGATGTCAGGGAAGTTTCAACCAATCTTAAATGATATTTATGGCAATAAACATGAAAACAGAGATG  
ATTTACTCAACAGCTTATTTCTGGGATATAGCCAGTATCTCAGACTCGAGCCAAATATCTCTCCATATTGGCGAAGAT  
ATTTACTCTCCATGAGCAAGTAAATAAAGCACAACACAGCTGTAACCTGGAGACAGAGCTTTTTAGTGCATACACTCAC  
TGGTATTGAATGGAATCCCTTGGCAATGACTGGATTCGCTATCGATTAGGTACTGACATAGGTGTTGTTGGCCCGGAGC  
CAGGCGGTGAGAAAGTACAAAATAAAGCTCATGAGATTTATGGGCGAGAAAAATATCATGATGGGATGATCAAAATAGAG  
AATCGCTACGCTTACTGTAAGGGATGCTATTCATGACCAAGTATGGATATTTAGGTGCTAATGTTGGTATATA  
CCCTGAAGTTTCTGCTGTTACTGAAAACCTATTTCAATATGTAGCATAATGGCGCAACCATGGCCATTGGTAAATGATAAAA  
CCTTCAATTCGGATAATGGCTTTGGTCTGCTGGCTCCCGTGGTTAAATGCATATGTCGGATACAAGCGGATTCAAATAC  
AAGATTTTTCAGGTATGGAAGACGAGATGTCATCGCAACTACTCTCGAAGGAAAAACAATACAGACGAAAACAAC  
AACAGTATCGCTAAACAACCTGTTGATGAATATCAAGTTGGCGCAACAAATGGGTATGACCTGTAGCTTCCACACTAG  
CATTTAATAAAGTAAACATCAGAAATCAAGACAGGGGATGACTATTCATTTATAAATGGAGCAATCACCTTCTTTTTTTAA  
>Cluster\_2093

ATGGTACGTATCTATACGTTGACACTTGGCCCTCTCTCGATAGCGCAACAATTAACCCGCAAAATTTATCCCGAAGGAAA  
ACTGCGCTGTACCGCACCCGGTGTTCGAACCCGGGGCGCGCGCATCAACGTCGCCCAGCCATTCGCCATCTTGGAGGCA  
GTGCCACAGCGATCTTCCCGCGGGTGGCGGACCCGGCAACACTGGTTCTCTGTTGGCGGATGAAAATGTCCCGCTC  
GCTACTGTAGAAGCCAAAGACTGGACCCGGCAGAAATTTACAGTACATGTGGAAGCAAGCGGTGAGCAGTATCGTTTTGT  
TATGCCAGGCGGGCAATTAATGAAGATGAGTTTCGCCAGCTTGAAGAGCAAGTCTTGAATTTGAATCCGGGGCCATCC  
TGGTCATAAAGCGGAACCTGCGCGCAGGTGTGAAGTGGGAAATTAACCCCAACTGATTTCCGCTGCGCAAAACCAAGG  
ATCCGCTGCATCATCGACAGTTCGGCGAAGCCTAAGTGCAGCACTGGCGATTGGTAAACATCGAGTTGGTTAAGCCTAA  
CCAAAAAGAACTCAGTGCCTGGTGAATCGCAACTACCCAGCCAGACGATGTCGCGAAAGCCGCGCAGGAAATCGTTA  
ATAGCGCAAGGCCAAACGGTTGCTTCCCTGGTCCACAAGGAGCGCTGGTGTGATAGTGAAGAACTGCATTCAG  
GTGGTCCACACCGGTGAAAAGCCAGAGTACCCTTGGCGCTGGTGCAGCATGGTCCGCGCATGACACTGAAACTGCG  
AGAAAATGCCCTCTTGAAGAGATGGTCCGTTTTGGCGTAGCTGCGGGGAGTGCAGCCACACTCAATCAGGGAACACGTC  
TGTGCTCCCATGACGATACGCAAAAATTTACGCTTACCTTTCCCGCTAA  
>Cluster\_61735

ATGGCAGCAATCGCGTTTATCGGTTTAGGACAAAATGGGTTCCGCAATGGCGAGCAATTTATTGCAGCAAGGGCATCAACT  
TCGCGTCTTTGATGTGAACCGCGAAGCTGTGCGGCATCTGGTACAGAAAGGTGCGACTCCCGCGCAACCCGGCGCAGG  
CCGCTAAAGATGCCGAATTTATCATTACCATGTTTGGCGAATGGCGATCTGGTGCAGCAACGCTGTTGTTCCGTTGAAAACGGC  
GTTTGGCAAGGCTTATCTACCGATGCGCTAGTTCATTTGATATGTTCCACCTCCATCCGCTGCAAAACCGATAAATGATTGC  
CGATATGCAAGCCAAAGGCTTACGATGATGGATGTTCCGGTAGGCGCTACTTCTGCAAAATGCCATTACCGGTACTCTGT  
TACTGCTGGCTGGCGCACCGCTGAACAAGTTGAACGTGCCACACCGATCCTGATGGCGATGGCAGTGGATTGATCAAC  
GCTGGCGGTCGGGATGGGATCCGCTTAAAGTCACTCAACAACACTACATGAGCATCGCGCTCAATGCGCTTTCCGCGAGA  
AGCCCGCTTTTGTGCGAAGCCCTGAATCTTCCCTTCCGATGTTTCCGCTCAAAAGTGAAGGAGCGGTTACCGCCGCTGAAAG  
GTCATTTACCACCTTCTGGCCAAACAAGTCCCTCAGCGGAGATCTTTCTCCCGCTTATGATCGATCTTGCCATAAG  
GATCTGGCATCGCCCTTGTATGTCGCAACAGCTGATGTGCAATGCGGCTGGGGGCGGCTCACGGGAGGTTTATAG  
CCAGGCGCGCAGCGGTCGCGGTGCGCAGGACTGGTCCGCAATCTGGAACAGGTCGCTGTCAGTCCGGGATGACTG  
CCAAAGTAAAAATGTAA  
>Cluster\_11757

ATGATGCTAAGCGAGGAAACGTCGCGCTACGCCCAAAAACAACCGGATTTAACGGTGCAAAACCTGGTATGGATGCT  
GAAAGCGAGTCCGCTACCGTACCGGCGCAGTCACTGTTGATTAATGCTATTTGATGATGATTTTTTACCCTGGCTGG  
CGACGATGATCCCAACGCCATTTGATTTAACCGCCCGCTTTTGGCGCTTCTGCGGCGCACTGGTTTGGCACCGATGAA  
GTGGGACGCGATCTGTTACCGCGTACTGGTGGCAGTACGCAATCAATTTCTCGCGGATTAAGTCTGGTGGCATTGGC

GGGTATGATTTGGTTCGCTACTCGGATGTCTATCCGGTGTGCTTGGCGGACGCGCAGACGCCATCATCATGCGCATCATGG  
ACATTATGCTGTCCGATTCCTTCGTTGGTACTGACAATGGCACTGGCTGCCGCTCTCGGGCCGAGTTTATTTAACGCCATG  
CTGGCGATTTGCTATTTGTGCGAATTCCTTTTATGTGCGCTGGCGGGGGCAAGCATTAGTTGTACGCCAGTATACCTA  
TGTTCAGGCGGGCAAACTTTGGTGGCTGCGGTTGGCATGTGATCAGCTGGCATATTTTACGTAACCTCCCTGGCCGCC  
TGATCGTGCAGGATCGCTGGATATCGGTAGCGGATTTAATAGCGCGCAGCTGGGATTTATTTGGCTGGCTGCTCAA  
CAACCGAGTGTGAATGGGGCGGATGGTAGCGAATGGTCGCAACTATGTACTCGATCAGTGGTGGTATTTGCGCATTTCC  
GGGGCAGCGATTTGCTTACCGCGGTTGGGTTAATCTCTTTGGTGTGGTATTTGCGGATCTGCTTGACCCGAAAGCAG  
GAGGAAAGCAGTCATGA

>Cluster\_24035

ATGGATGCAAAACAAACGCGGCGAGGGGCTATTACTCGCTCTTGGCGCTTATTTTATTTGGGGTATTGCGCCAGCGTACTT  
CAAGCTGATTTACTACGTGCCCGCGGATGAGATCCTGACGCATCGCGTGTGCTGGTCTTTTCTTTATGGTGGTGTGCTGA  
TGAGCATTTGCGCGCAGTGGTCTTATTTAAAAACGCTGATTCAGACGCCACAGAAAATTTTATGCTGGCAGTCTCTGCC  
GTGCTGATGGTGGCAACTGGCTACTGTATTATCTGGGCGGCTGAACAATCACCATATGCTGGAAGCGAGCTTGGTACTT  
TATTAACCCGCTGGTGAACATTTGTGCTGGGGATGATTTTCTCGGCGAGCGATTCGCGCGGATGCAATGGCTGGCGGTGA  
TTCTGGCGATATGTTGGAGTGTGTTGCTGAGTGTGGACTTTTGGTTCACGCGGATCATCGCGCTGGGGCTGGCGTTTGT  
TTTGTCTTCTACGGCTGGTGGCGAAGAAGATTGCTGTTGAAGCGCAAACCGGATGTTAATCGAAACATGTTGGTGGTGGT  
CCCGTGGCGGCTTTTACTGCTTTTACCTGCTTTGCTATTGCGGACGCTCAACAGTGCATATGGGGCAAAAATCCGATGTGCTGAATT  
TACTGCTGATCGCCGCGGATTTGTCCACCCTGCGACTGTTGTGTTTTACTGCAGCTGCGACACGCTGCGTCTCTCA  
ACGTTAGGCTTTTTCAGTACATTTGGTCCGACGCTGATGTTCTGCTGGCTGTGACGTTTATGGTGAAAAACCGGGTGC  
CGATAAGATGGTAACTTTGCGCTTATTTGGGTGGCGTGGCAATTTTGTGATGGATGCGATTTATACGCGAGCTAGAA  
AAGTTAA

>Cluster\_36448

ATGACCAAAGTAGGCTTACGCATTTGATGTCGATACCTTTCTGGTGCACCCGTAAGGCGTGGCGGCTGCTGGAATCTT  
GAGTAAAGCATAAATTCAGGCGAGCATTTTTCAGCGTCCGCGGACAATAAGGGCCGCAATCTCTGGCAGTGGTGA  
AGCCACAGTTTTGTGGAAGATGCTGCGCTCAAATGCGGCATCGCTTTATGGCTGGGATATTTTACTGGCAGGTACGGCC  
TGGCCAGGTAAAGAGATTGGTCAATGCGCAATGCGGATATCATTCGTAAGCGGCTAAACATCACGAAGTCCGCTGCGC  
CTGGGATCACCATGCTGGCAAGCCGTTAGCGGTAACCTGGGATCGGCAAAACAATGATCGACGATATTGACGCGGTCTTC  
GCACCTGGAAGAGATTTGCTGCAACCGTAACCTGTTCTGCGCTGGCGGCTGGCGGCTGGCGGATGAGGATCGAA  
GCAAAAGAAGCGTTCATTTGCGCTACAACAGCGATTGCTGTTGGGGCCATGCGGTTCCGTTCCGTTGCTCGAATCAGGAAA  
CCCTGGCAGTGGCAAAATTCGCTGACCTTACCACCTGGGATGAAATGATGTTGCTGGGATGTAAGCAGAAAGATTTTA  
ACGTTGGTACTCAACCGCATCTGCGAGATAAAGGCGCGGCTTTATACCATTATGCGAAGTTGAAGGCTGCGCT  
TATCAGCATAAATTTGTGGATCTCTCAACCGCGCAGCTCAGGAAGCGTGCATTTTGCCTTTAAGCGAAGTGTATC  
AGAGACGTTGCCGCTCGGACAAGTTGTTGCGGAAATATTTGCCGACGTAAGGCTGGCTGGGTTGCCAACAAATGCGG  
GTAGTCCGCTGA

>Cluster\_46135

ATGCCACTCTTAAAGCTCTGGGCGAGTTCACTGGTTATGTTGGCAGCCGTTAGCTGCGCTACAGGCGGCTTCCCCCGT  
TAAAGTGGTTCAAAATCGATACCGAAGTGCCTACTCGGCAATATCATTTTGCAGGTGCTGGAAGCCACGGCGTAC  
CGACGGTGAATAAAGTGCCTGGAACGACTCTGTGTTGCGCGGGGCGATTACTTCCGTTGAACTGGATATCTATCCG  
GAATATACCGCAATGCGCTTTCTTCTTAAAGATGAAAACGATGACGCTGGAAGGCAAGGTTACGAGAA  
AGTCAAAAAGCTCGATTGCGAGCAACAAGTTAATCTGGCTGACCGCGCTGCAAAATAACACCTGGACTTCCGCG  
TGGCTCAGGATGTTGGCAGAGAAAATAAATCACTTCCGTTGCGGACCTGAGTGTGTTATCTGCAAGAGGGCGGACCTTC  
AACTGGCAGCTCGGAGAGTTTATCGAACGCGCGATGCGTTACCCGCTTTGAAAAGGCTATGGCTTTAAGCTCGG  
TCAGGATCAGTTGCTGCTACTGGTGGTGGCGACGCGGTTGACGATCAAAGCCGCTGCCAGCAAACTGCGGCTTA  
ATGCTGCAATGGCTTACGGCACTGACGGCCGTTAGCGGCGTGGGGCTGCAAACTTAAAGCGATCCGCAAGGCGTGC  
CCTATCTATGCGCTGCAACAGTGGTGCCTGAAATCGGTTGTAAGGAGTATCCGCAAAATGGCAGAGTGGCTACAGCCAGT  
CTTCCGCGCTCGATGCAAAAACATTTGCGCAACTGAAATGCCAGCATTTGAGTGAAGGACTGGATGCCAAAAAAGTGG  
CTGCCGACTACCTGAAACAAAAGGGTGGCGAAGTAA

>Cluster\_42637

ATGAAAACGAATAATGCGGTTATATTTATCGGCGGATTCCTGTGCACCTTCTTTTACCAAAGAAGTGAAGAGGAAGA  
GAAGGATTTCTGGCGACAATTTATCTGAGACTCCAGACATTTTGGGGCTGGAACAACCTTGCCTGGAATTTTACCCCG  
TGGCGATCAATGGTTTACTCCGTCATACGCCAGAGAGCTTGGAAATTTGTCGTCACCGCAGTGAAGGAAACCTGCGTCC  
CGCAGCGAAAACAGCGGGTTGGTCTCGCTCCAGTGAAGAACAGCGCCAGGCTGCGTGGCGTACTATCGCCACCT  
GTTCAATAAAATCAACGCTTGCAGGCTAATAAAGTGCCTGCACTGGAGCTCCAGGCTGCACCTTAGCAACGAATCCTA  
ATGTTATGCAAGCGCAGGACGCTTTTGGCCGCTATTGAAAGAAATCGCCAGTTGGGACTGGCGTGCAGCTGGTGC  
GAACACTCGCAGCGCATGACATCTTCTTCCCCCGAAAAGGCTTTTGGCTTTAGAAAATGTCGTTGAAAGTTATTACCGA  
TTATGACATCAGCATCTGTATCAACTGGGCGGCTCTGCCATTGAAGGGCGCAATACAACGCTGCGCTGACCCACACC  
AAATGGCGAAAACAGCGGAAAACCTCGGCGGTTAATGTTCTCTGGTACGACGCTAAACGGGGCATAAGCGAATGGCAG  
GATTTACACGACCGTTTGCACCATCTGCGCAGAAAGCTGATGACCACAGATCATGTTCCGAGTTATTTAATGTAGC  
AGAAATCGTCAACATTTGCTGGCTGCAATCAAGCTACTGGAATAAATGCGACGCGTGTGTCACCCATCGCATCGAA  
TATTACGCAACGGATTCCTCTGAAATGATCTCGTTAA

>Cluster\_49593

ATGCAATTACGTAACCTGCCACAGCAATCCTGGCCCTGGCGCTTCCGCGAGGACTGGCACAGGCAGATGACGCGCCCC  
GGCAGCAGGCAGCAGCTGGACAAAATCGCAAAAACGGCGTGTATGTCGTCGGTACCGTGAATCTTACGATCTTTCT  
CTTATACGACAATCAGCAAAAAGTGGTGGGCTACTCGCAGGATTAACCAACGCAATTTGTTGAGCAGTGAAAAGAAA  
CTCAAAAACAGCAGTTACAGGTGAAATGATTCGATCACCTCACAACAAACGTTATTCACCTGCTGAAAACGGCCTTT  
CGATTTTGAATGCGGTTCTTACCACCAACATGTCGAAACGCAAAAACAGCGGCTTTCTGACACTATTTTCTGGTGC  
GTACGCGCTGCTGACAAAAGGGCGGATATCAAAGATTTTGGCGACTGAAAGGCAAGCCGATGTCGTCACCTTCC  
GGCACACCTCTGAGATTTTGTCTCAACAACTGAAATGAAGAGCAAAAATGAAATGCGCATCATCAGCGCAAAAGATCA  
CGGTGACTCTTCCGTACCCTGGAAAAGCGGTCGTCGCTGCTTTATGATGGATGATGCTCTGCTGGCGGCTGACGCTG  
CGAAAGCGAAGAAAACCTGGGAAATCGTGGCAAGCCGAGTCTCAGGAAGCCATGTTGGTGCATGTTGCTGATAAA  
GACGATCCGAGTTCAAAAAGCTGATGGATGATACCATCGCTCAGGTGCAGACCTCCGTTGAAAGCGAAAATGGTTTGA  
TAAGTGGTTCAAAAATCCAAATTCGCGGAAAACCTGAACATGAATTTGAACTGTCAGACGAAATGAAAGCACTGTTCA  
AAGAACCAGATGCAAGGCACTGAACCTAA

>Cluster\_62203

ATGACGGTCTTACCTATGACAAAATTTATGAACTGTTCTGCGTTATCTGGCAACAAAACCGGAAGTGCAGCCGCGG  
TGATGTTTCAATGAGCTGCCGCGGATGCAATTAGGACTGGATGACAGCCAGCGAGCGAAAGTCAATACCGCGCAACCTT  
TTTATAAAAATCGTGCAGGCTGGCGCATGACCGTTTAAACAGTGGCGGTTGTCGCAAAAGTTGTCGCGGCAAAATGG  
TGCTGACTCCTGCGGTTTGTACTGGGTTGCTCTCATCCCCAGCAATGACGGAGCAGGAGACGAACCATCTGGCTT  
CGCTTTTGTGAATGTCAAAATTAAGTACGCGCCGATGCGCTGATTTAGATCGAAAGCCGACTCTCCGATCATGAAG

AACCTGCAAAGAGCAGCCGGACGATCGGTTAGATCAGGCGCTAAAAGAGCTTCGTGATGCGGTGGCTGATGAGGTTCTG  
GAAAACCTTATTGCAAGTTTCTCCCTCGCGCTTTGAAAGTCAATTGTTCTGGATGTTTTGCATCGCCTGGGGTATGGCGGCCA  
CCGTGATGATTTGCAGCGTGTGGCGGTACTGGAGATGGTGGCATCGATGGTGTGATATCGCTTGATAAACTTGGCCTGG  
AGAAAAGTTTATGTTTCAGGCAAAACGTTGGCAGAAATACTCTAGGAGCCAGAAATACAGGCATTTTACGGCGCATGGCT  
GGGCAAAAAGAGCAAGCTGGGGTGTATTATAACACTCTGAGATTTACTTCTCAGCGCGGTGACTTTGGCCAACTCCGTCGA  
GGGTATGGTGTGGTTGATGGGGAACGCTGGTGCATTAATGATCGAAAACGAAGTAGGGGTTCTTTCACGTTGTTGA  
AGGTGCCGAAACTGGATATGGACTATTTTGGAGTGA

>Cluster\_1368

ATGATTCCTGATTATTTAACTTTTATTTCGCTTTTTCAGGATAAACGAAATCTGATATACATTTATGCTATTTGGACTTATTCT  
GATAGGCTTTTATTGGAAGAATGCAGGGTTTACTTTTCCATCAGAGGATATTTGGTGTAGTTAGTGGGATTTCTGGCCCTGG  
TGCTGTATAATTTTATTTTGTATCTCAAGGCGTACTGGGCTTATAAATGCGTCCAGGAATAATCGATTTTTCGTGGTGT  
AAGAAAAAGCAGAACCCAAAATAGAATTAATTTCTTACACAACCTCTGGTGGCAGGATTTCTGTCGTTAATCATGTTGAG  
TGCAATGAGTTGGGGCTATACCAGCTTCTACCCTCGTTATATGCGCTGTTCCGATTTTCGTTACTTGGGCCGTTGGTCA  
TCTTTCTGCTGTTTTCGGATGATCCGACCAGTTATGTCAAGCAGGTGCTATTTTCAGTAGCGAAAAAGTAAAATATAAA  
AGTCTGACCTCGCTATGTGCTGCTTTCGGTGTGCATCTCAACGGTGTAACTGCTTACTATCAGCCGTTGCGTAACAG  
TGATTTCTTTGTGACAGGGGCGAGTGGTTAACGTTAAATCGATAATGTCATTGCTCATTTCTTTGTGGCGTAGTGTGG  
CGATTAATCTGTTTTTTCTCGCTTCTCCAAGCGGTACCTTTTCTGGGCAAGCTTTTTTTGCGAGAAATCGATCTGTTTT  
TTCTCCAGTGAATAAGCGTTGTCGACCTTTTTTGGCAAGCCGCTTTGGCTTCGGTTATTCATATGCTGGTTATTGAAAT  
GATGTGGATTACGCTGGTGTGGTATTGGCAACGCTTGTGGAATGGCGGATTTGGTTTGAAGCTATTTTTTACTCTGCT  
ATGTACCGTCTAATTTACTATTTTTTCCATTGTCGATTCCTTGGCATAACGATTTTATGATGGCATGTGACATGTAT  
TTCCGTTGGGGGCAATTTAATAAGTGA

>Cluster\_23783

ATGAATGAATTTTAAAAGAACAGTTTTTCGTATTTAGCAGATAATAAAAAAGAAAACGCCAGAGCTAAATGTTTCCCTA  
CGGTATCGATAAGAAATTTTGTATGGTGTGGGTTTCAATTTCTCCGTTTTGATTAATAAATTCAGATATTAATTTTG  
TCTTTTCATGTTTTTCACTGATTATGTGGATGATGATTATTTAAAGTCAATTAATGAAACAGCAAAAATTTAATACCTCA  
ATTTATGTATATTTAATTGACCCAAATACTTTGCTGATCTGCGGACGTCACAGTTTTGGTCTGACGCGACATACTTCAG  
GGTATTGTCTTTTGAATATCTGAGTGAAGTATTTCCACACTGCTGTATCTGGATGCCGATGTTGTTGTAAAGGAGGCC  
TGAACCTCTCACAGAAATTTAATAAGATGAGTTTGTCTGGGTCATTTCTGATAATGATAGTACTCAGGCGCATGT  
GCAAAACGCCCTCAACATTTCCGAAATGAATGGACGTTATTTCAATGCAGGCGTTATCTATGTCAATCTTAAAAATGGCA  
TGAAGCAAAATTTGACACCCTATTTACTCAAACTTTTACGAGGGGAGACTAAATATGGCTCTCTTAAATATTTAGATCAGG  
ATGCGTTGAATATCGCATTTAATATGAATAATACTACCTTGGCAAGGATTTTGTATACATTTTATACCTGAAAAACGAA  
CTTTATGATCGTAGTCAATCGAAAGTATCAGCAAACTTACCGATAAAAACAGTGTGATTCACATATACAGGGATAACTAA  
ACCATGGCATAGCTGGGCTGGATATCCGCTGTCATCATACTTTAATATCGCGGTGAACAATCTCCCTGGAAGAAATATC  
CTCTTAAAGAGGCGCGGACTGTTGCAGAAATGCAGAAACAATAAAGCATCTGTTTGGCCATGGTGTAGTATATAAAGGT  
ATAACTTCATTAATTAAGTACAAGCTTAAAGAAATA

>Cluster\_26914

ATGCCACTGCATAAATTAACCCGTTTTCCACGGCTGGAGTTTATCGGCGGCCAACGCCGCTCGAATATCTGCCGCGCTT  
TTCGTGATTATCTTGGACGGGAAATTTTCCATCAACGGGATGACGCTCACGCCATGGCAATGGGCGGCAATAAATTTACGTA  
AGCTGGAAATTTCTCGCGCGAGATGCTCTGCTGAGGTGCGCATACGCTGATTAAGTACTGCGGGGCGATCAACAT  
GTGCGCCAGACTGAACTGCGCTGCGAAACTGCGTGCATGCGTGGCGCTGCTGGAATAATCCTATTTGGTACAACCCG  
GGAAACTATTTAACCAACGGCAATCGTTTGTGCTGGATCTGTTCAATACCCAGATTGAAATGTGCGACGCACTGACCG  
ATCCCAATGCCAACTGGGAAGAGCTGGCGACGCGAGTCAAGGACAAGGCTTTTCGCCCCTATGTCATTTCCGGTTGGCGGT  
TCTAATGCTTTTGGGCGCGTGGGTTATGTTGGAGAGTGGCTGGAAATCGCGCAACAGTGTGAAGGGGCGGTTAATATTT  
GTCGGTGGTGGTTCGATCGGCGAGTCCGGAACCTACGCGGACTGGCTGTTGGGCTGGAAACCTGATGCTGAAAGCG  
AGCTGATTGGCGTACCGTGTGCGGTTCTGTTGGCGATCAATTTGCCGAAAGTGGTTAACTCCAACAGCGGATTCGGA  
GAACTGGAGCTGACCGCATCAGCGGAAATTTTACTCTGGGATGACTATTTGACACCTGGCTACGGCGTCCGGAACGACGA  
AGGCATGGAAGCAGTGAATTTGCTGGCGCGCTGGAAGCATTCTGCTTGATCTGTGATACCGGAAAGCGATGGCGG  
GGCTGATTGACGGTATCAGTCAGAAACGCTTCAAAGATGAAGGGCCGATTTTGTATTATCATAACCGCGGCGCGCTGCG  
CTGTTCCGCTATCATCCCCACGTTTAA

>Cluster\_2428

ATGTTCCGGCAATCTCGACAAGCTATATCGCACGGTTACCCGCACTGCGGCCGCTGGTACTGCATTTCCATGTTGGA  
CAGCTACTGGTTGAACCTGGAAGAGGTGGTACCTTTTGCAAAAAGTGAAGGCGCATAAACCGGATATCACCTTCGTCT  
GGACCTGCACGATCACTGGAGCGTACCGGGCGCTGTGCTTTTACCGATGGCTGCGAAGGCTGGAGAACGGGCTGTGAG  
AAATGCCCAACGCTCAGCAACTATCCCGGTAAGAAAGTCGATAAAGCCATCAGCAGTTGCCCGTAAGCGGATGTT  
CCGTGCCATGCTGGCGCTGGGCTGCCAGTTTATCTCGCCAGTCAACATGTGGCCGACGCAATCAACATCTGATGGCG  
TGGGACGCTGCCGCTTATCAATAATGGCATTGATGTGGCAACCGAAGCCATTTGCGCAACTACCCGCGATGCTGCG  
GAGAGCGTGGCGGAAATTTGCGTGGTGGCTCATGACCTGCGCTATGACGGCAAAACAGTCAACAACCTGGTGGCAGC  
GATTTAGCGGCTTTGGGCAAAAATGAGTGCATACCTTCGGCAAATTTTCGCAATTTGCGGGAGATAACGCTCATCAAC  
ACGGTTTTGAGAGCGGATAAGCGCACGTTGATGAGTGGCTTAAACAGATGGATGGATGGTGTTCAGCTCCTGTGCGAT  
AATACCCGCTGATTTGTTGTAAGCGCTTCCATCGCGTACCGGTAATGCGCACGACAGCGATGCGCGCAGGAAGT  
GCTGGCAAAATCAGGCGGCAAAACGTTACGCAAGCGGACGATTTGACGCTGGTGCAGCTGAAAAATCAGACATTTGCC  
AAGCGGATTTTGAACGCTCCCTTACCGATTGATCAGCGCAGTGGGTTGGCATAAGTGGCAACAGATGCTGGAGGAA  
TATGCTCTGTTCTATCAGAACTGTAG

>Cluster\_67069

ATGATGAGTGTGGATATTGATATCATTAAAGACCCGGGCAAAACATGAATAATCGCTGTCCAAAGTCCGTGGCGAAGCCAT  
GATAAGTGTTCGTATACCAAGCGGCAATTTCTGCCGCTCACTGCTGACGGTGGCACGCGAGATTTGCGGAAACATGGGGAA  
ATGGTCAGATCCATCTGACCACCCGCCAGAAACTGGCCATGCCGGGATCCGTTATGAAGATAATCGACAAAGTGAATGCC  
GCACTGGAACCTTTTCAATTCGAGAAATGAAATGGAGCTGTGTGATGTTTCAAGTTGATGATCCGAAAGCGGATACCTTCC  
GATTGGCGGACGCAACATTTGTCGCTGCCAAGGTAACCGGATTTGTCAGAAAGCAATACAGACACCACAGGTTTATCCC  
GGCGATGGAAGGCTGATTTTATCCAGTCCCTATCACCTGAAACCGTTAATGCGGGGTGTCGGAATGACTGTGCCAAA  
GCATCCATGTCAGACTTTGGCATTTATGGTGTGGCCAGAAATGCGTTTTTACGGCAGAACGTTGCATCGGATGTGGCGCTG  
TGTGAAAGCTGTGCTCACACGCGTGGGGTGCCTGTGATTAAGAAACGGAAGGCCAAAGGAGGAAATCGCTCTGTA  
TCGGGTGGGAGAAATGTGTTCTGGCATGTCCACCTCGCTGGCAGCGTACGCCACAGGATTTCTGGCAGGTCCTGCTG  
GGCGGAGAAACCGTAAAAAACCGCCCGCATGGGTAATATTTCTTAACTGGGTTACAGAGGATGTTATCAGACAGT  
CATCACAACTGTTGCAATTTGAAAAAGAAATGCTGGATGGAACCGGTTTACCTCCATATGGGACATCTTATTGATA  
AAGCGGTTATCTGTGTTTTCAGGAAAGGGTATTGCGTGTGTAAGCTTAAACCCGAAAGCCATGGTCCCGAACGCATA  
TACTGGGCGGAAGATGAATCCATCGCTCGTATTTACCTTCGACCCCGGGCATTA

>Cluster\_18309

ATGAAACATTAATTTGTCAGCAGCCTGGCGTTATGGAATATGTGAAAAGGATATTTCCACACCAGCAGATAATGAAGT

GCTGTTAAAAATCAAAGCTGTGGTATTTGTGGTACGGATATTCACGCTTTTGCCGGCAGACAGCCTTTTTTTAGCTACC  
CACGTGATATTAGGTCATGAAATAATGCGCGAAGCGTTTCGCTAGGCAGCCAGTGCCAAACAGCACAGCCAGGCCAGGCC  
TATTCCTGATCCCATGCATTCCTGTGGCGAGTGCAGCCTGTCGGGAAGAGAAAAAGCAATGCTGCGAACGTGTTTC  
GCTGATGGCGTGCATCAGGATGGAGGTTTGTAGTACCTTTCGGTACGTAAGACAACTGGTGCCGCTCCCTGAGC  
AGGTAAGCTCAGGATGTAATACTTATTCGTCATGGCGCAAAATGTTTCCATTTGGTGACATGCCGTTTCGTCGGGCTGAGATCAAGGCT  
GAACAAAACGTACTGGTATTTGGCGCGGGCCAAATAGGCTGCTACCGCAGCCATCGCCAGGGCTAAAGGGGCGCATGT  
TGTGTTGTGATGATTTGATTGTC AACGTGCGCAGCAGCTTGTGGGTAATCTGGATATTAATGCCTTCGATCCACACAGA  
AAGATTTTATGCGCCGCTTCGTGAGGCTTTGGAGGGCAACTGGCTTTCGCTAGTACTGGATGCGACGGGAAATAAAGCT  
TCAATGAGTCAAGGATGTAATACTTATTCGTCATGGCGCAAAATGTTTTCATCGGTTTATACATTTGGTGAACCTGTTAT  
TGACGATCCGACCTTCCATAAAAAAGAGACAACGTTACTCAGCAGTGCATGCCACACGGGAAGATTTTGCCTTGGTGA  
TTGAACTGATGCGCAGCAATAAAATTCAGGAAATTTAATGAAAAACAGCGCTTCGATTTCTTTAGTGTGGCGAAGAT  
TACCAGCGTAACGTTGTAGAAAAATAAATATGGTCAAGGGTGTGATCACTTTTTAA

>Cluster\_24913

ATGAAGCCAGGATTTGCCTTTATATACGAGCATTATTGACCATAATATTTCTTAGCTGGGGCGTCATTCCTGCGGTTTT  
CGCCAGTTGCAATATTTCTGGAAATGGAGGAAATCCGGCAACAGTACAATTTCTCCGCGCTGCCTTGGTTGTTAATAGGC  
ATGCCGTTCCGGAACGATTTATTCGACAGTAATGCGAACAGTCTTCAATTTCACTTCTGTACGGCAATGGTGAG  
ATCTGGCAAGATATACCGTATTGCAAAACGGTATAAGCCTACTGATAACCCACTTACAGATGTGTTTCCAGATTAATGT  
GCCAGGAATCGGTTTTCTGTCGCGCTGGGCGAATAACACCAGTGCCTACCGCCGGATCTTAAATGACGCCCTGGC  
ATAAAGGCTCGTCAACAGTGAATTAAGGATATGTTTATCCGATTACAATACATGCAGCTATTCAGTTTATTTGTCACAGGA  
CCTGTTGGTATGGGACCAATGATACAGCAACTGATGCTGACTGGAAGTATGACAATCGTGTATTTGGAGAGCTTCG  
TTTTAGTTCCGTTCCGGTCAATATTTCAACCGGGCAGTGCAGCTTATAGAAAAAATATACCGTTCCGCTCAACGATA  
TTGGCACAGATGATTTGATGTTAACAATGTGTACCTGTAGTTCTGACGATAGGTTTAAAAATCAGATTGAAAAATGC  
TCGCAGGATGTAAGAGTTGATTACCGCTTTACTTTCATCAGGCTTACGGGGATAACGGGTAATAGTATTTCTTAATATTGA  
GTCCGGTTCCGGAATGGCAAGAGTGTGGTCTGCAGATCTCGGACAGTAGAACAATGTAATGGTATTTGATTTGATCAGACT  
ATACAGCCATTCAAAAAACGACGTTGAATCAAAATATTACTATTCCTTTAAAAGCAGCTTACATCAAAAACGGGTAGCGTT  
AAAAGTGGTGCCTTAATTTCTGTGCTACCTTCAAGTGTATTACCGATAA

>Cluster\_6060

ATGATGACGACGATGCTGGAAGTGGCGAAGCGCCGGGTTTTCAAAGCGACCGTTTCCCGCTGCTTTTCAGGTAATGG  
CTACGTCAGCCAGGAGACTAAAGATCGCGTGTTCAGGCGGTAGAAGAGAGCGGTTACCGTCCAACTTGCTGGCGCGCA  
ATCTGTGCGCGAAGAGTACTCAGACGCTGGGGCTGGTAGTGACCAACCGCTTACCACGGCATTTATTTTAGTGAATTA  
CTCTTTTATGCGCGCGAATGGCGGAAGAGAAAGGGCGGAGTGTGCTATTTGGCAGATGGTAAACACAGCGCAGAAGA  
GCGCCAGGCGATTCAGTATCTGCTGGATCTGCGCTGCGACCGCATCATGATTTACCCGCTTTTTTAAAGCGTGATGAGA  
TCGATGACATCATTTGACGCGCACAGTACGCGGATAATGGTGTAAATCGCGCTGCGCAAAAACAGCAGCCATAGCGTC  
TGGTGCATCATAAACAGACCAGTTTTAACCGCGTGGCAGAGTTGATAAACCGCGGGCATCAGGAGATTGCTTTCTTAC  
CGGCTCGATGGATTTCCCAACAGCATTGAACGCTTTCCGGGTATAAAGACGCGCTGGCGCAGCATGTTTCCGCTCA  
ATGAAAAAATCTTACGTTAACCCTAAATGGACGCTGCCAGCGGGCGAAGGGTAAAGATGTTGCTCGAAGCTGGGGCT  
AAATTTAGCGCTTGTGTCAGTACGACGATATGGCGATAGGTGCGATGAAAGCGTTACACGAGCGCGGCTAGCGGT  
GCCAGAGCAGGTGTCAGTTATCGGATTCGATGATATCGCTATTTGCCCTTACACCGCTTCCGGCGCTTCCAGCGTAAAA  
TTCCGCTGACTGAGATGATTCAGGAAATTTATGGACGGTGTATTTTATGCTCGATGGCGGGGATTTTCACCGCCGAAA  
ACCTTACGCGGAAATGATCCGCGACTACTCTTCCGCTTCCGCGATAA

>Cluster\_59254

GTGGAAGCGATTAAGGGATCGGACGTTAATGTCCCGATGACGATTTTGCCTGGATGCTGGATGGTAGAGGGCGGCTTAA  
ACCGCTGGAAAAATACAGATGTTGATGATGAAGCGCATCCTGTGGCTCCACTTAATATGATACACCATGATAGCGCCC  
AATGGCTGGCGACAACACCGCTGCTTCCCAATAACGTACGTGATGCGCTGGCGGGCGAGAGCAGCGCTCCCGAGTCAGC  
CGTCTCGGTGAAGGCACGCTGATACATTCGCGCTGATATAACCGCAGCACCGATGAACGCCCGATCACTGGTCCGCT  
CGGTGATATATGGGCGGGCGGTTAATTTGTTTCGACCCGACAACGCAAGTGTGCGGCTGGCAGATGTTGGTGAAGGATC  
TGGAAAGGGCACGGGTTCCGACCGATTGCGGGGATGGCTGGTGGATGTTGCGGATGCGTTGACCATCATTCAGTGA  
TTTTATCGAGCAGCTGCACGATAAAATATCGACCTTGAAGATAATCTCCTTGATCAGCAAAATCCACCGCGTGGATTCCT  
GGCTCTGCTGCGCAACAATTAATGTTGATGCGTGCCTATATGGCACCCCAACGCTGATGTTTATGCTCGCTTTCGCGAGT  
AACGTTTCCGCTGGATGAGCGATGACCAACCGCTGGATGAGGATATTTGCCGATCGCTTGGGCGCGGCTTGCAGGAA  
ATCGACGCTGATATAGCAGGACTGGCGTGTATGGCGGATGAAATCGCTCAGGTGATGCAAGGAAATTTAGCTCGTCTGATC  
CTATACAATGTCGTTGATGGCAATGGTCTTTTTACCAGTACCCTTCTGACCGGGTATTTGGCGTCAACCTTGGTGGGA  
TCCCTGGCGGGGTTGCAATTCGGATTTTCAATTTTTTGTATCTGTAGTTGTTCTTATTGGTGGTGTGCTTTATGG  
TTGCATCGTAGTAAATGGTTGTAA

>Cluster\_20753

ATGATTTTAGGCAATCTTGAATAAGAAAAAGCAGAAACCAATAGTCAACTAATAAGAGAGTTAACATATAAAAACT  
AGATGAGTTTCGACGATGAATATCAATCTTATATACAACTAGCCGAAATACAAAAAGAAAGAAATAAAGTCGATTT  
ATGCATATGTTTAGCAAGGCATTCAGTTCAAACCACTCAAAATGATGATGCTATTTTCAGCAGCTTATCAAGCAGC  
CAAAATGCCATTTCTGAAATCAATAGCCATATCCAACCTACAGCCTTTTAAATAATCTCTTACCAGAAACAGACTCTGTTAT  
TAATAACCTTGGCGTAGCCGCAAAACAGTAAATTTAAAAATCATTTGCATGTTGATTTACCTGAAAGCTAAGGGATTA  
ACAGTTCCATCTCGTTTTCAAACTTAGGGTATAAGCTTCTGTGCTGGTGTGCTAAAGAGCCGAAGAACTTGCATCT  
TATGCAATTAATACCAATCCAGATAAAAAATAATTACGAATTTGCTGGCAAAAAATAAAAAAGAGTCAAGAAAGAGCA  
AGATAAGTGGAGTAAAGTACAAAGCAAAATCAATCGAAAAGCAGAAAAATAACGGGATTAATTTGATAAAAAATACACCT  
CCAAAATTTCAATTTCCGAGAGATGATTTTGGAACTTAAATATCAACCACTAATGTAACGTTGATATTACCGCAATGAC  
ATTCATATTTTCAATGAAAGATAACAATAAAGAAATAAATATATGAAACGATAGAGAAATTTGATTTTCTGGTGTATA  
CAGTTCAAAACCTATAAACAGCAGGCACATTTACTAGGTGTTTCAATAACCTCAATTTCCGCTCATTTGGTATTTACG  
ATGAACCTAAAGATCAAAATTAATCGTAAGCACCGATGTAGAGAAAGATGTTAATCATGCTTACGAAAAGAAATGGAT  
GTTTAA

>Cluster\_34728

ATGTCAGACAGTGTAAACAGTTGGTATCGATGATCAAAACTACTCTTGTATGTTTCATGTTCTCTGACAGCTTCATCA  
GACTGTATCAACAACGAGTCAGGCTTTGCTGAGCTGAAAACGTTGCTTTCCATGACGAGGTTTCTCTGTTCTGCTCG  
AATCCACGGGCGGTTATGAAAGTCTGTTGCTGTTTCTGACGCTCTTGGCTATGACGTTTCTGTCATTAATCCGCT  
CAGGCTCGTGTATTTGCCCCTCCATGGGCGTCTGGCTAAAACCGACAGAATGATGCTGAGCTGCTTGGCGAGCTTGC  
TTCTGTTATTCATCCCGACCTGACCGTGGCTTTTGTGCAAAAAAATTAAGTATGACAGACGTCGCAAACTGCGCTGTA  
TGGTGGCCCGTCGCCAGGTTGTGAATATGATTTCCACTGACGAGCAGCGTAAATTCGCCCGAGTAACTATTTCCACT  
GACAGTATTAATAAGATTTATCTTTCCCTGCGTCTGAGTTGAAAAGTATGATGACGATATTTCACTGCATGCTCCGCTC  
ACATTTGCGAGATATATCCGGTCTTCTTGGCTCATTTAAGGGGATTTGGTCCCGCCAAATGGCGTCTGGTGAAG  
TTCTGAACTGGGCGAGCTGAACCGCGTCAAGTATGTTGCCCTGATTGGTTGGCTCCGTTTAAACCGGACTCCGGAAT  
ATGCGCGTCCGCTACTGATGGGCGGCTGTCGAATGGTCAAGATGCGCTTTATATGCCGACACTTCTGCGGCTGCG

TTTTAACCCGGCTATCCGGGTGTTTTATATGCGACTGATTTCTCAGGGTAAGCCAGAAAACCTGGCTCAGGTTGCTGCCA  
TGGCTAAATTACTCTGCATCATTAAATGCCATGCTTTCATCAGGGCAATGTTTTAACCCGCCCCGCATCCCGGTCGGGG  
GCTTAA

>Cluster\_39036

ATGGCAATTTTCATCGCGTAACACACTTCTTGGCCGACTGGCATTTCATCGCTTTTCAGGCGCAGGGGTGAACGTCACCGT  
GGCGTATCAAACCTCCGCGAACCGGCGAAAAGTGGCTCAGGCCGACAAACCTTTGCTAAAGAAAAGCGGAGCAACCGTGG  
ACTGGCGTAAGTTTGACAGTGGAGCCAGCATCGTGGCGGGCTGGCTTCGGGGCATGTGCAAAATCGGCAACCTCGGTTCC  
AGCCCGTTAGCCGGTTGCAACAGCCAAACAGGTGCGGATGAAGTCTTCTTGGTGGCGTCAAAACTGGGTAACCTCCGAAGC  
GCTGGTGGTAAAGAAAACATCAGTAAACCGGAAGACTTGATTGGTAAACGCATCGCCGTACCCTTTATCTCCACCAACC  
ACTACAGCCTGCTGGCGGCTGAAACACTGGGGTATTAACCTGGGCAAGTTGAGATTGTGAACCTGCAGCCGCCCGCA  
ATTTATCGCCGCATGGCAGCGGGAGATATGATGGTGCATTATGCTGGGCACCGCGGTTAACGCCCTGGAAAAGATTTTG  
CAAGGTGCTGACGATTTGTAACAGGTCCGGCAGTGGGGCGCCGACACTGGACGTAATGGTTCGTGCGGAAAGATTTTG  
CTGAAACATCCCTGATTCGTGAAAGCTTCGCTAAAGCGCCATCGATGCTCAGCAACCTACATTTGTTGTCACCCGAG  
GCGTGGCTGAAACAGCCGAAAACATCAGCAAACTGGCGGGTTAAGCGGGTGCAGGAGGTGACGTTCCGGGGCTGGT  
GAAGGGGAATACCTATCTGACGCGAAGCAAAACGGCAGAAGTACCGGACCGGTGAACAAAGCGATCATCGACACCG  
CGCAGTTTTGAAAGAGCAGGGCAAAGTCCCGCTGTAGCGAATGATTACAGCCAGTACGTTACTTCGCGCTTCGTGCAA  
TAA

>Cluster\_48813

ATGAAAAAGAATAAGTACTCAACTCCCTTATGGATGCTTGCCACGATTCTTGGGGTATGCTCTCCCTATGCAATCAGC  
GGTGAATGGTCAATTAGTCACTGGTTACAGACGGTAATGCATGCGCAGTTATCTCCTTTGCGAGTGGTTAGTCTGTA  
TGTTTTTTTATTTATGCGCGGAAAAGAACCCGGCAACAATTTGCGGCAATTCCTTCTCTGATTAATAAACCGAAAAGTT  
CCTCTCTGGAACCTGGTTTGGCGGCTCTCTGTGGAGCGATGGTGGTATTTTCTGAAGGCGCATCAGCCAGCGCACTCGGGGT  
CGCAACGTTTCAGACCGCACTGATCTCCGCGCTATTGCTGTCTGGTTTACTTTTGCATCGCTTTGATATCGGTTGTCGAGC  
AGAAAATAACTTTTACCGCTTATCGCATCATCGGTGCATTTTGGGTTATTGCTACGATTTTGTGTGTCACCCGAG  
TGGCATTCTACCTCTTTCATTTTACTTGGCATTCTCCGTTCTTAGCTGGTTTGTGTCAGGATGGCAGCCCGCTGGAAA  
TGCAAAAGTAGCTGAAGTACGGGATCCATGCTGGTTCAATCCTGGAATTCATCGTTGGATTTTGTGTTTTAGGCA  
CAGCGTAGCTATTCGTGTCGCATTTAGGGCAGTCACTGTTCAATTACAGATGTCTGGTGGATGTATCTTGGCCGCCCCG  
CTTGGACTAATGTTTACCGTTTAAATGGCCATTTGGTCAAGAGCTTTGGGTTACTGATGCTGGGGTCAACCGG  
GGCCAGTTACTGGGATCAGTATTGATTGACGTATTAATTCATCGCTGGGCAATACCCTTTATCTGGTACGATCATCG  
GAACACTGTTTGCAGTGGTGCATGCAATGTTTACCACATTTCCGGAATACAGAGCCTCGAAAACAATGAAGAAAATGGAG  
GTATAA

>Cluster\_27970

ATGATCACCTCACCAAAAACCGGAAATGGCACTGGTCTGGTGGTATTGCTGGCGGTTATGATGCTGGTGACCAT  
CACGCTTTCCAGTCGATCGAGCAGCAACTTGGCGCAACGCGCAGCCAGCAGGAGTACCAGCAGGCGCTGTGGTACAGCC  
CCAGTGCAGAAAGCGCTGGCGCTGAGCGCACTAGTCTGAGCCTGAAAAATGAAAAGCGTGTGCATCTGGCAACCCGTTGG  
GCTTTCGGCCCGCTTTTTTCCACTGCGCAGGGGCAATCGCCCTACTCTGCGTGACGCACAGGCTGCTTAACT  
GAATGCCCTCGCTCAGCCGACGACGGGCTCGGTCGCGTCCGCTCGCGGTACAACAACGATTGCCCTGATCTCGCCCTGATG  
TACCTGCTTATCGGGCGAACTGATAGCCGAAAGCCTGTGGGAGTTTATGACGAAGACCGCAGCGCTGCAGACCGCTG  
GGCTGTAAGACAGCGAGTATCTCGCCGCTCGGTTCTTACGCCCTAATCAACCGCTGGCTGATACAGCGGAT  
GCGCGTGGTGCAGGAAATGGACGCGGGCTTTATCAAAAATGAAAACCGTTGGTCTGTGCGCTGCCGATGGCCGCGACG  
AAATCAACATCAATACATTAGATGTCACGCAAAAGTGTGATTTCTTGAGGCGCTGTTTGACCCGTTGGTAAAGCCCTGTTGAG  
GCGCGGGCTTATTAACAACACCTCCCGCGAAGGGCTGGGAAGATGTCGATCAGTTTCTTGTCTCAGCCGCTACTTGCAGA  
GCTGACTGAGCTACTAAAACACGCTAAAACATCCTGAGCGTGAGCAGCAATTAATCTGGTGCCTTCAGATATCA  
CCGTGAATGAGATTGAACTGACGATGAATTCGTTAATTTGTCGCGATGGGTCCACAACACTTTTCTGTTCTCTGCGATCAG  
ACAGGAGAAAGTGAAGTGA

>Cluster\_43409

ATGAACGCGATAAATATCGCCGATTATTACTATGTTCTTACCCTGCTGGTCACTAATGCCATGGCGTATGGCGAAGG  
ACTGCCATTACCGGACGGGGAAGATGCGCCTCATCCCAGAATTAACAATTAGCGAGATTGCGCATAACATCCCGGAG  
GCCCGTCACTGCTTTAACGACATTATTCACCTGACTCACTGCCACACGATGTTACAGGATATGCAGGGTTATCACCAT  
CCTCTGGCAACGAATCATCAACACAGTACGGCACCTTGGCCAGGCACTGCATATGACAGGAAATTAATGCCCCCTTAT  
TCCGTGATAATGACGGGTTTCTCATCGTTCCGTTGCGTGGCGGATCGGCTTTTACCAGCGGCGAGGAAAGGATATT  
CAGAACGGCAGGAGCCAGCCATGATGCTTGTGCTGGGAGAACGGATACTCCGCTATACCAGGATTTAGTCTCAGCAGAACG  
CGAGCCGCACTGGCAAAAATCCGCAAGCAAAATTCCTCGCGTATGCTGGATGCAAGCGAAATTTGACTTAATGACCCAG  
TGACTACCGCTCACACCTCAACACTTTAATCATATGGTTGACGCTTTCGTAAGGATCTAAAACAATACCATTCTCAGC  
TTAATAATATTAATGACCGCGCTGGTTTTCGCGGATACACACTGGTACTGGAAGAAAATTTCCCTCATGCGTATGAA  
GCTATTTATGGCAATTTATCAAAAATGTTTATAGCCAAATATTAATTTCTGCTGACTTCCAGCAACAGGTGCAAGAGGACT  
GACGAACGCGCTTAATGAAGACCCGACGATTTAAGCAGCGGATATTACGGTTTACCGGTACCGGTCACCGGAGAACTGGA  
CGACGGCACTGCGAAGCAGTCAATTCAGCGCGGACCCGTCGGGAAATATTTCTGACAGGTTTGTAGAAGCTATTTTG  
CAGTTTTGCGCGAAAAGGTA

>Cluster\_5018

ATGGTGGCTGGCGCTGCATTGCACATTACGGGATTTCTCCGCGTTAAGGATTCATTAAGATCGCTACGTATACTTCTCGA  
TATCTTATTGATTTGCCTTAAAGGATTTACCGTACAAAAGTATTTCGTTAAGTAAACGCATCTTCGTTATTGTGATTC  
TTTTTGTCTATTGTGGCAGTGTGACTTTCTTCTGTCGCAATCTTGGCCCGTAAAAGCAATCATGCAGCATCATTTTCAGAAT  
TACCACGCCACCATTTGACGGCAAAAGAAATGACAGGCATAACGAATAATATCTCTTCGCTGACCTGGTGGCACAAGGCAA  
TACTCTTTTATGCACTATCAACAAACCTGCCGCCATTTGAAATGACCACCAATGGTGAATTTGATCCGCACAATTCCTC  
TGGATTTTTGTTAAGGATCTCGAGACGATCGAATACATTTGGCGATAACACTGGTACTGGAAGAAAATTTCCCTCATGCGTATGAA  
ATTTATGTTGATTTCACTGACCCCAAACTCGGAAGTAAAATCCTCAAAAAAATAAAAAATCCCGCTGCAGGAATCCCAAC  
CAATTGCGGTTTTGAAGGATTTGGCCTATTTCTCGCCAGGATCACACTTTCTGGTTTTTTAAAGGAAAAACCCGATTTGAG  
TCTACAAAGTTAACGGGCTATTAAGTAGCAATGAATGACATCAGCAAAAGCAAGGCACTACAACGGCAATTTACTTTTA  
GATGATGCTGTCGGCGCAGAAATTTAACCAACAAAAAATACGCTTCTGTTGCTGTCTCATGAATGATGAGCGCATTTAGG  
AGTAACGCTGGTTGGCGAGGTTATCGGTGAAATGTCACTAACCAAGGACGTCGAGGTTTGTGCGATAACATCAACAGG  
CCGAAGGGGTTGGATGGATGCCCTCTGGTAATATTTATATCTGTTAGCGAACCAATCGTTTTTATCGCTTTACCCCTCAA  
TCATCGCATTA

>Cluster\_53050

ATGATAAAAACATCTTACCTTACCAGAAAAAATGGCTGCAATGGTACTTCTTGCAGGCGTGCCTCAGCATTTGGTCTGT  
ACAGGCGGCTTCTTGGCCAAACACAGATCGAGTTAGTCTACCTACGCTGCGGAGGCGGTACGGATCTGGTTGCC  
GAGCTTTTGTGATGTCGCGCAAAAACATTTACCGTACAGCATCGGGTTATCAATAAACCTGGCGGAGGCGTCTATC  
GGCCTGAGTGAATCGCCGCTGCCCGCCCTAACGGTTACAAAATTTGGTTTAGGACCGTTGAACATAACCCCTTCCAG  
CCTCGAATGGTGGCTTTTAAAACAGCGACTTTAAACCCATTGCCGCTGTAATGCGGATCCGGCTGCTATCACAGTCC

GTGCCGATGCGCCGTGGAATAGCTATGAAGAATTTATGACTTACGCCAAAGCGAATCCCGGAAAAGTACGCATTGGTAACTCAGGCACCGGAGCTATCTGGCATCTGGCGGCGACTGCGACTGGAAACAAAACGGGCGCAAAGTTTTCTCATGTCCCGTATGACGGCGCAGCCCTGCCATTACAGGCTGTTAGGTGGGCACATTGAAGCGGTTCCGTAAGCCAGGAGAAGTTATCAACCATGTGAATGGCGGCAAGCTGAAGACACTGGTAGTGTAGGCGGATGAGCGAATGAAAACCATGCTGACGTCCCGACGTTAAAAGAGAAAAGCGGTTGATCTTCCATCGGCACCTGGCGCGGCTGATTGTGTGCGAAAAACCGCCGAGGATGGTGGATGTTCTGGCAAAGGCAGCAAAAGAGACGGCTGAAGAGCCTGCATTCCAGGATGCACTGCAAAAAGTTGAATCTCAACTATGCATGGCTTACGCTGCCAGCTTCCAGACCCAAATCAGCGAACAGGAAAAGTACTTTGACGAGTTGCTGACTCGCCTGGCCTGAAAAATAA

>Cluster\_49739

ATGATGCAGCATGAAGGCCATGTGAGAACTCTCAAATCCTTGAACCTCTTTGGCATGGCACACGCCATTGAGGAGTTGGGCAATCAGAAATCACCAGCATTTAATCAAGCCTTGGCCATGCTGGACAGCTTGATTAAGCTGAAGTGGCAGAGCGTGAAGTACGTTCCGGTGAACATCAATTCGGGTTGGCCAAAGTTCGCCGTGATCGGGACTTGGTGGGCTTTGACTTCAGTCAAAGCTGGTTAATGAGCCACCGTCAAACAATGACACCGGTGCGACTTCATGGAAACAAGCCAGAACCTGGTGGTGGGCCAGGCACAGGCAAGACTCACCTGGCCACAGCCATTGGTACACAAGCAGTGTGACTTGAACCGACGGGTGCGTTTTCTTCTCCACCGTGGATTTGGTCAATGCACTGGAGCAAGAGAAATCATCTGGGCGTCAAGGACAAAACCGTCTGTGTTATGCCGATTTGGTGAATTCGAGTGGGATATTTGCCCTTTAGCCAAACCGGTGGGCACTGCTGTTTACCTGCTCTCAAAGCTGTGACGCAAAAACAGCCAGCTGATACCCAACTTGAGCTTCTCGGAAATGGAGCCGAGTGGTGGTGGGAAAAGATGACAACAGCGTTGTTGGACCGACTAACCCACTGCCACATCTGGAACCGGCAATGAAAGTTACCGCTTCAAACAGTTCAACTCAGAATAAGCAGGAGGAAAAACAGACCCGCAAACTGAAAATCGAGACATAA

>Cluster\_53964

ATGAAGAAGCCTCTGGTTATTATCAGTGCTGTGAGTTACCAGGCTGGCACTGGAGTCTCTCATCCAGCGGACAGGTAATATCGTGGGTTGACAGCAACGCTACTACAGAGGTTGAATTCGTTTTAAAGACCTCCGTGGTACCTGTTGGCTGATAATCCCTTCGTTCCCTCGGGGAGTTAGTTCTTCTGGCTTGTCTTGTCCGCTTGGGAGTGTGCGGGCAATGGCAAGCTGGCTGACCGGTGACTCCGACTGGTTCGATAATGCTCCGCTTCAAGTCTGTATAACCGCTTCCACATATCCGACCTGCTGAAAGCGAGTCTTATCAGAATCAAATATCCGCTGGTACTACGTCCTTTACCCGGCGATATGAGTGAATTTCTGGCTCCTGACTGCACGGGAGTTAAGCGTGTAAAGATTCTGATGACAGGCAATGAGTTTCAAGTGAATTTGCCGTTATGAACAAACGAGTTCAAAGACTCTGCATGCGATTGCCACACAGGCATTAAGGAACTTGGACTGGGAACTAAGCGATTTACAGGCTGCTTATACAGGATGCGGTGACAGCAGTCAAACCGGATAACCGCTACATGCAAGATATGTCGGACAACTCCGCTATCGACTCACTCAGTATGTGACAGCAATGGTGTCCGGAATCTTTATCCAGAGAAAGTTATCGTTGGTAAATCAATAATCTGACGCATATCCGAAAAGTCTTTCCGGGCAAAGAAAACATATGTTCTAAAAAAGACCAGGAGTGTATGA

>Cluster\_40877

ATGAGTTTTGAGGATAGCGAAAAACGTCAGGTAACCTTACAGAAGTATTACAATTTGTAATGAACCAGGCTGTTTTCTATAACATATGATTTATGGCATAATATTTTTCATGAAGATTCTACTTATTGAAGATAATCAAAGACCCAGGAATGGGTAAACCCAGGGCTTTCCGAAGCGGTTATGTCATTGATGCCGTTTCTGATGGCAGAGATGGGCTTTATCTTCCGCTGAAGGATGATTATGCATTCATCTGGAATTTATGCTTCCGGTATGGATGGCTGGCAGATCTTACAACGTTAAGAACGGCAAAACGAAACCCCTGTTATTTGCCCTTACTGCAAGGGATCTGTCGATGACAGAGTCAAGGGTTGGACAGGAAATGATTTATCTGGTAAAACCTTTTTCTGAGTTGCTGGCAAGGGTTCCGGCACAATTAAGGCAACATCACGCTCTGAATTCACATTAGAAAATCAGTGGCTTAAAAATGGACTCTGTGAGTCAAAGTGTGAGCAGGGACAATATCAGTATTACATGACGGCACAAGGATTTCAAGTTACTTTGGCTACTGGCTCCAGAGCTGGGAGATTATACCCAGAAGGTTATTGGAGTGAATTTGGGAAATCAACTTTGATAGTATACCAATACGGTGGATCTGCGCAATCCGAGGCTCCGCGCAAAAAGTTGATGATCTTTCTGAAAAGCTAATCGCCACAATCCGGGGATGGGCTATTCATTCGTAGCGGTAAAAATAA

>Cluster\_9848

ATGAGTGAATCATTACATCTGACCCGCAATGGATCAATCTGGAATTAACCTTGATCGTCCAAAAGCAATGCTATTGATGCAAAAACAGCTTTGAAATGGGCGAAGTATTTCTAAATTTCCGTGACGATCCGCAATTACGTGTCGCCATTATTACCGGTGCGGAGAGAAGTTCTTTCCGCGGGCTGGGATTTAAAAGCGGCAGAGAAAGCGAAGCACCGGATGCTGACTTTGGCCGGGTGGATTTGGCGGATTAACCGAAATTTCAATCTCGAAAAACCGGTTATCGCAGCTGTGAACGGCTATGCCCTTTGGCGGCTTTTCGAACTGGGCTGGCGGCGAGATTTATTGTTTGTGCCGATAACGCCAGCTTCGCCCTGGCGGAAAGCAAGCTGGGCATCGTTCCGACAGCGGCGGCTGCTGCGTCTACCGAAGATCCGCGGCTGCCATCGTCAATGAAATGGTATGACCGGCAGACGAATGGGCGCAGAAAGAGCGCTGCGTGGGGATGATCAACCGCGTGGTTAGCCAGGCGGAACGTATGGAATAACGCCCGCAATGGGCGCAGAGCTGGTTAACAGCGCCCGCTGGCGATTGGCGGCTGAAAGAGATCTTCCGCACCAACCGGAAATGCGCGTAGAAGAAGCGTATCGCTATATTCCGACCGGCTGTTGAAAACACTATCCGTCGTTCTGCATTCCGAGGATGCCATTGAAGGGCCGCTGGGCTTTGCCGAGAAGCGGATCCGGTGTGAAAGGACGTTAA

>Cluster\_23910

ATGGCTATCAAACCTATTGCTATCGATATGGATGGCACCCCTTCTGCTGCCGATCACACCATTTACCAGCTGTTAAAAATGGATTGCCGACGCTCGTCTCGCGGTGTAATGTCGTGCTGACGACGGGTCGCCCTTATGCAGGTGTTACAAATTACCTGAAAAGAGCTGCATATGGAACAGCCGGGCGACTACTGCATTACTTATAACGGCGCGTGGTACAGAAGCCGCTGATGGTAGCACCGTGGCGAAACCGCTCTCAGCTATGACGACTACCGTTTCTTGGAAAACTCTCTCGGAAAGTCCGTTCTCATTTCCACGCTGGCAGCACAGCTGTATACAGCAAACTCCGATATCAGTACTACCGTGCATGATGATCTTCTGTTGCCACCATTTCCGCTGGTGTCTGCGAAGCGGAGAAAAATGGACCCAAATACCCAGTTCTGAAAAGTGTATGATGATGATGAAACCCGCCATCTCGACAGGCGATCGCGGATTTCCGAGGAAGTGAAGAGAAATATACCGTGTGAAAAGTGGCGGTACTTCTCGAAATCCTCGATAAACCGGTTAACAAAGGTACGGGTGTGAAATCACTGGCCGACGTTAGGATTAACCCGGAAGAAATCGCGGATTTGGCGATCAGGAAACGACATTGCAATGATTAAGTATGCAAGGCTCGGTGGCGATGGAATACCGCTATTCTTCCGTTGAAAGAAGTGGCGAACTTTGTACCAAATCTAACCTTGAAGATGGTGTGGGCTTTGCCATTGAAAAGTATGTTGCTGAATTA

>Cluster\_50529

ATGACAATCACACTGCAACCCAAAGCATCACAGGGCATCACATTATCGGACTGGATTGGAACATCTGAATGGAGGCACAGTTCCCTGGCATAAACATCTCTATGCCAGTTGCTTTACCCGGCTGAAGGAGTGGTTCGTATATGGGCTGGAGAAAGCGTCTGGCTAGTGCATGCCAGCAGCGCGCTTTGGCTGCCCCACAATGCCGCATAAGTTTGTGCGACAGGCAACGTACTTTAAAACCGTACTGGTTTCCAGAAAGCGGAAAGTGAACCGTGGGAAAAGTTTGGCTTCAATGACGGGTATTTACCCCTGTTAAGGAAATTTCAATTAACCAACTTCCACCGTCCGAAAGTACCAAGATAAAACAACAGTTACGTTTTCTAGCCCTCGAGACTGATACTTCCAGGAAATAAAAATGGGGTGAATGTCACCTTGAACCTCCCTGGCCAAATGATGAGCGGCTACAGAGCTTTGTGAGAAATTTGCTAAACAACCAAGGTTACTGCAACACTGGAATAATCTAGCGGATAAAAATTAACGCTAGTAGCCGTACACTCATGCGCTTATTTGTTAAAGAGACGGGATTAACATTTCCGCACTGGGTTACGAAAATGCACGTTATTTCTGCAGTGCAGCTTTCTTGTGATGATGATGATAATCTGTTGACCAAAAATGGCCATCTGTTGGGCTATGCTCAGCTGAATCTTGGCAATATGTTTAAAGCGTCAACGGGCTACTCACCCGGTAAATTTACTCGTCGATTAAACGATGCATGATATGCAATCACAAAGCAATGATTTAA

>Cluster\_43773

ATGAAACCGACCCATTGCTTCACTTCCAGAAATGTAAGCAGGATAAAAAGCGTTTCCGCGACCATCACCGCTTACGACTACAGCTTCCGGAACATTTTGTGATGAAGGACTTAACGTCATGCTGGTAGCGGATTCGCTGGGATGACGGTTACAGGGCC



ACGACTCCACCCCTTCCCGTTACCGTCGAGGATATCGCCTATCATACCGCCCGGTACGTCGCGGCGGCCAAACTGCCTG  
CTGTTGGCTGACCTGCCGTTTATGGCGTATGCCACGCCGAACAGCCCTTGAACACGCCGCAACGGTTATGCGTGCCGG  
TGCCAATATGGTCAAATGAGGGCGGTGAGTGGCTGGTGCAGAACCTAAAAATGCTGACCGAACGTCGCCGTTCTCTGTAT  
GTGGTCACTTAGGTTAAACCCACAGTCACTGAAATATTTTCGGTGGCTACAAAGTTACAGGGGCGCGGCATGAAGCGGGC  
GATCAACTGCTCAGCGATGCATAGCCTTAGAAGCCGCTGGGCGACAGCTGCTGGTGCAGAAATGCGTCCGGTTGAAC  
GGCAAAACGATATTACCGAAGCAGTGGCGATCCCGGTTATTTGGCATTGGCGCAGCAACGTCAGTACGCGGGCAGATCCTCG  
TGATGCACGACGCCCTCCGCGATTACCGCGGTCACATTCCTAAATTCGCTAAAAATTTCTCGCGAAACGGGCGACATC  
CGCGCGGTGTGCGGCGATATATGGCTGAAGTGGAGTCCGGCGTTTATCCGGCGAAGAACACAGTTTCCATTAA

>Cluster\_57883

ATGTTTCGATAAACATACCCACACCTGATCGCCACGCTTGGATCAGGCAGAAAAACAGCGGAACAGATCCGCGCGAT  
CTCGCTGGATTACCCGGAGATCACCATCGAAGACGCTTACGCGGTGCAGCGTGAATGGGTTCCGCTGAAAATAGCCGAAG  
GTCGCACGCTGAAAGGCCAAAAATCGGCTGACCTCGAAAGCGATGCAGGCCAGCTCAGCAATCAGCGAGCCGGATTAC  
GGTGCCCTGCTGGATGACATGTTCTCCACGATGGCAGCATATCCCGACCGATCGCTTTATCGTGCCCGCATGAAAGT  
GGAGCTGGCTTTCGTGCTGGCAAAACCGCTGCGTGGGCCAAACGCACGCTGTTTCGACGCTTACAACGCCACGGACTACG  
TGATCCCGCGCGTGGAGCTGATCGACGCTCGCTGCCACAAATCGATCCGGAACCCAGCGCCCGCGCAAGTGTTCGAC  
ACCATTTCCGATAACCGCCCAACCGCGGGTGTCTCCGCGGTGCTCCGATCAAACAGCAACGATGGATTCGCGTTG  
GATCTCCGCGCTGATTCGCAATGCTGAAAGAACCCGCGCTGCGCGTGGTGTGCTGAATCATCCGCGCAAAAC  
GCGTGGCTGGTGGCAACAACTCGCACCGTATGACGTACAACGGAAGCCGGGCAAAATCATTTCCGCGGTTCGTTT  
ACCCGCCCGGTTCCGCGCGTAAAGGGCGACACCTTCCACGTCGATTACGGCAACATGGGCTCCATTAGCTGCCGCTTTGT  
TTAA

>Cluster\_7265

ATGAAAGAATCACTAACAGATATATATTTGTCAATAAAATCGTGGCATCTTTGGACCACATTAGGTTGGTTAGAGTTAAG  
ACAGAGATATAAAGATCCATTGTTGGACCATTTTGGATTACACTAAGATATGGCGGTCCTTATTTATGGCTTAGGGGTGA  
TTTATGGGAACATTTTAACTAGAAGTTAAAGAAATATCTCCGATGCTGCAATTGGTTGGTTTGGTTTTCGAGGCTTAT  
AGTGGCGTTATAAATGAAGGATGTGTTACTTTCATATCGTCCAGCTCCTTTATAAGCCAATTGGCACTAAAAAATTCAT  
ATATATTTATGCAATGCTATGGCGAAATTTTATGATGCTTTGCATAAATAAATAGTGATGGTGTGGTTGATATAT  
TCAACGTTTTTTCGTTGAGGAATTTCCCTCTTTTATACTTGGCTTTATGATCGTAGCTGTTAACTTGATCTGGATTGCA  
ACTTTGGTCGAGATTTTCTGTACGTTTGTAGAGATTTCCGCAAAATGGTCACTGAGCTTTATGCAAGTTGCTGTTTACAT  
AACTCCAATATATTTTTCGGAACAATGCTGGCTAAATATAGTTTACTGCTGAAGTTAAATCCATTGCTTGGTTTATTTG  
AGATTTATTCGATCGCCTTTAGTGGGCAAAATGCCAGAGCTATACTGCTATTATAATTCATTATCTTTGCATGCGTAGGA  
ACAATTATCTCTAATTTACATTTGCAAAATGTAGAACCAGCATTCATATTTGGGTGTAA

>Cluster\_39037

ATGCTGCAAAATTTCTCATCTTTACGCCGATTATGGCGGCAAAACCGGCACTGGAAGATATCAACCTGACGCTGGAAAGCGG  
CGAGCTTCTGGTAGTCTTCCGGGCGTCTGGCTGCGGCAAAACTACGTTGTTGAATTTGATGCTGGTTTTGTGCCCTTATC  
AGCATGGCAGCATTCACACTGGCGGGTAAGGGTATTCAGGAGCCGGGAGCAGAGCGTGGCGTAGTTTTTCAGAAATGAAGG  
CTGTTACCGTGGCCCAATGAAAGGACAACCTGGCGTTCCGCTGCAACTGGCAGGTGTAGAGAAAAATCCAGCAGTGGAA  
AATCGCACACCAGATGGTGA AAAAAGTCCGGCTGGAAGGCGCAGAAAAACGCTACATCTGGCAGCTTTCCGGTGGTCAAC  
GTCAGCGGTGGGGATTTCCCGCGCTTTGGCGGCAAAATCCCGAGCTGTTATTACTCGACGAACCGTTTGGTGGCTGGAC  
GCCTTTACCCGACAGATGCAAAACCTGCTGCTGAACTCTGGCAGGAGAGGGCAAGCAGTGTGATTTGATTTACCA  
CGATATAGAAGAAGCGGTTTATTTGCGGACTGAACTGGTTCTGCTTTTCCGCTTCCGCGTGGCGGTGTGCTGGAGCGGCTC  
CGCTCAACTTTGCTCGCGCTTTGTTGCGGGAGAGTCGAGCCGAGCATCAAGTCCGATCCACAAATTCATCGCCATGCGC  
GAATATGTTTAAAGCCGCTATTGAGCAGCGGAGGCGTTCTCATGA

>Cluster\_60505

ATGTGGATTGGCATAATTAGCCTGTTTCTGAAATGTTCCGCGCAATTACCGATTACGGGGTAACTGGCCGGGCAAGTTAA  
AAATGGCCCTGCTGAGCATCCAGAGCTGGAGTCCFCGCGACTTCCAGCATGACCGGCACCGTACCGTGGACGATCGTCCCT  
ACGGCGGGCGGACCGGGATGTTAATGATGGTGC AACCTTCCGGGACGCCATTTCATGCAGCAAAAAGCCGCGGGGGTGA  
GGCGCAAAAGGTGATTTTATCTGTCCACACAGGGAGCGAACTTGATCAAGCGGGCGTCAGCGAACTGGCAACGAATCAAAA  
ATTGATTTCTGGTGTGCGGTCGCTACGAAGGTATAGATGAGCGCGTGTATCCAAACCGAAATGACGAAGAATGGTCAATCG  
GCGATTACGTTCTCAGTGGTGGTGTGAGTTACCAGCAATGACGCTGATGACTCCGTTTCCCGGTTTATTCCGGGAGTACG  
GGCATGAAGCCTCGGCAACGGAAGATTCCTTTGCTGAAGGATTTGCTGGATTGCCCGCACTATACGCGGCTGAGGTGTT  
AGAAGGGATGGAAGTTCCGCGAGTGTACTGTCCGGCAACATGCCAGATACGTCGCTGGCGTTTGAACAGCTCGCTGG  
GCCGTACCTGGCTTAGAAGACCTGAACTTCTGGAAAACCTGGCTCTGACTGAAGAGCAAGCAAGTTGCTGGCGGAGTTC  
AAAACGGAACACGCAACAACGCAACATAAATGATGGGATGGCGTAA

>Cluster\_42043

ATGAAAGATGAACCTCGCCCTATTGCGAAGTGGTTGCAGAGATATCGAACGGTTAATTATCGACGGGCTACTGAAGGT  
CGGTCAGCCACTTCCCTCGGAACGTCGACTGTGTGAAAAGCTCGGCTTCTCACGCTCCGCACTGCGTGAAGGGCTGACCG  
TGCTGCGCGGGCGCGGATTTATTTGAAACAGCGCAGGGTTCGCGATTCTCGTGTGCGACGGCTTAACTCGGTTGCAGGACCC  
AGCCGCTAATTCATCTGTTACGACGACGCGGCAACGCTGACGATCTGCTCGACGCTTCGCGCATTTGCTGGAGGGCGA  
ATCCGCAAGGCTGGCGGCAACGCTGGGAACCCAGGCTGATTTTGTGTTGATAAACCCTGTTATGAAAAAATGCTCGCGC  
CCAGTGAGAACAAAGAGATTTCCGCTGATCGAACATGCACAACCTGGATCACGCTTTCCATCTCGCCATTGCGCAGGCT  
TCTCAAAATCAGGTGTTGGTGTTACACTGCAATCATTGACCGATCTGATGTTAATTCAGTGTTTGCGCAGGCTAAATAA  
TCTTACCATCGACCAAGCAAAAAAGCAGATCGATCGCGGATCTACAAACCGGCTTTGAAACAGCTCGCTGGCAGCGCTG  
CGCAGCTCGCCAGCGCGCAGCAGCGATCATGTGCGGACCGTAAAAAGAAATCTCCACGATATCGAGCTGGAAGGCCAC  
CATTTGATTCGCTCGCGGTGCCGCTGGAGATGAAGCAGGGGTGA

>Cluster\_38745

ATGCAAGCATTTGCTGGAACACTTTATTACCCAATCCACCGTGTATTCAATGATGGCGGTGTTATTGGTGGCCTTTCTGGA  
GTCGCTGGCGCTGGTTCGTTTATTCTGCCCGGTACGGTGTGATGGCGGGGCTGGGAGCACTGATTGGCAGCGGGGAGT  
TAAGTTTCTGGCAGCCCTGGCTGGCAGGATCGTCGGTTGCCTGCTGGCGGACGTTGATCTCCTTCTGGCTGGGCTGGCT  
TTTTAAAAGCCGTTGCATCTGCTGGTCAATTTCTGAAGAAGAACAAGCATTTACTCGATAAAAACCTGAACATGCGCTGCATCA  
ACACAGCATGTTCCACTTCTGGTGGTCTGTTTCTGCCCGGACGCGTCCGCTGGTGAACATGGTGGCGGGAATGCTGG  
ATCTCCCGGTGGCGAAATTTATTACGCCAAATATTTACGGCTGCCTGTTATGGCCACCCTTTTACTTCTGCCGGGATTT  
CTGGCGGGTGGCGGATCGATATTTCTGCCGGGATGACAGCGGTGAGTTAAATGGTTGCTGCTGGTGGCAGCGGATTT  
GTTGTGGTGGTGGTGGTGTGCTGGCGGTTATGGCCGACCGGCAAAAGCAACCGATCGTTAAGTCAATTTATTTGTCG  
CGGCTGCTTTGTTGTTGGCTGACGCTGATTTCTGCCATCGCGGTTGGCGTGGTGGTGAATTCGCCACCCGTTG  
ATGCCGTTGATATCGATATTTTGGCTAAAGTGGTTGGGGTTAG

>Cluster\_10990

ATGAATAAACCCGTTGTTCTGAGCGACCTTACGACACGCTCTTTCAGACCCGTCGTAATAATGGTGGACGAGCTGGCCCT  
GGAGCCATTCCGTACCGGTGCCGTTGATCGCACCTGAATCCAGAAAGCTTTATGACGGAAAGAACAGTCCATGTTGGTGG  
ACTGGCTCCTGGAGCAGGCTGAACCTCATACCCGTTACCGCACGGGAACTGAAGAAATCAGCCGCTACGGATCCCTTTC

CACTCCTGGGCAATCACAACGCACGGGGCCGTCATTCTCACGCCGTAAGGCAAACCCGACGAGGAGTGGAAAGGCCATAT  
GCTCGGCCAGCTGGCTCCCTACCGAAAAGCTGACATCGATGCGCGTCTGATCACTGAAATGATGGACGCAAAAGGAA  
TCAATGCCTGGGCAAGGCTGAACCTCGAATACGGTGAAACGGCGGTTTATATGGTGATGAAACACCGGCACAGCACCCGC  
CTTGACGAGCTCAATGCCATTGCGAGATGAGATGAAAACGGTGTTCGACCCGAGGGCTTCTACATCCACCGCAACAGTAA  
TAACGTGGCTGGCTCCACCCCGGTTGAGAAAAGGGCTGGCAGTCAGCTGGCTGCTTGA AAAACTCGGCAACGAG  
GAGTTTTCCCGTAATTGGTTTGGGCGACGCTGAGCGATCATCGTTTTATGAAACTGTGCAGCTGGTTGGCATCCCG  
CGTCAGAGTCAGTTGCGAGATGCCATTTACAGCGAATTTTTGGAGAAAATTA

>Cluster\_52589

ATGCGTCAGTATCGTTTTATGTACCTATGATTAAAGGTAGTCATAGTATTATTTCCCTTTTATCTCTACAGCAACG  
AGGCTTAGTGATCGGTGGAACGCGTTTTGCGTATCCGGAAAATCAGTCTCAATATCTGTTGAACTCAAAAACACTTCAA  
ACAGAGATATGTTAGTCAAGGTTGCAGTCTCCCTGATGATGCTCGTCACTGACGGGACCGTTGAATCTTTGCCCTCA  
TATTTGGAACCGTATTTATCGCAACTCCGCCACTGTTTGTGTTGAAAGCTGACAAAAATACAAAAATAAGAAATTAATCG  
TGTGGGGGCGAGTTTACCCTACCGACCGGAAAAGTTTATTTATATACTGAATGTTGAGCATTACCAACGTTGGAAAATAGTC  
ATTCAGTCAAACTGATAATCAATTGCAAAATAGCAGTCCGCAATCGTATGAAAATATTTCTATCGGCCATCAAATTTGTCT  
GAAGACCCGAATATGTCATATCAAAAATACGCTGGGCACGAAAAATGAAATGTTACCGTTTATAATCCAGGCCCCAG  
ATATGTGACACTATAACCTACATGTTGATGGTAAAGTTATAGATGGTGGTATGGTGCACCATTTAGCCATCGCCAAC  
AATCATGGTGAATAATCGCAAGGGTTTGTGAAAATAGCATGGCAGACATTTGACATTTATAATAATGATTTGCCAATTTTG  
AAAGTAAAATTAATCCTTACAGTTGGATTTTACTGGCTTTCATTTAGTCAATA

>Cluster\_19673

GTGACATATTCGATTTGGCATTGATTCGGCTCAACCGCCACCAAGGGATCTTACTGGCTGACGGCGTGATTACGCGCCG  
TTTTCTCGTTCCAAACCCCTTTCCCGCGCAACAGCAATTAAGGCTGGGAAAATCTGCGCGAAGGGTTAGAGACAA  
CGCGTTTTCTGACGCTCACCGGCTACGGACGGCAACTGGTGGATTTTCCGATAAACAAGTGACGAAAATCTCTGTCTAC  
GGGTGGGCGCACGGTTTTCTTGACCCAGCAACGCGCGCGTAAATCGACATCGGTGGTCAAGGACGAAAGTGTATGAGT  
TGATGATGACGGTAACTGTGCGATTTCTGTGATGAATGACAAATGCGCGCGGGCACCAGGGCGTTTCCGGAGTGATCT  
CGCGCACGCTTGGCACCAGCGTGCAGCAACTCGACAGCATTTACCGAAAATGTCATACCGCACGCCATCACAAGTATGTGC  
ACAGTGTGCTGAAATCAGAAGTATGACGCTCGGCTCTGCGGGCGTAGCGCCAGAAGCGATTCTCGCGGAGTGATTA  
CGCGATGGCGCGGGGAGCGCAATTTTCATTGCTCGTCTCTCTGTGAAAGCGCGATTCTGTTTACTGGTGGCGTTAGCC  
ACTGTCAAAGTTTACCACATGCTGGAAAGCCATTCGGAAATGCGGATGCAAACTCACCTGATGCGCAATTCGCTGGT  
GCAATTTGGCGCGGGTGTGCGTACGCGCAGGAGAAAACGCGCATGA

>Cluster\_22479

ATGTCCGAGAATAAATAACGTTATCGATTTGCACAACCGCTACGGCGAACACGAAGTGTGAAAGGGGCTCATTGCA  
AGCGAATGCCGAGATGTCATAAGCATCATCGGATCGTGGGATAAGGTTAAAGTACCTTTCTGCGCTGCATTAACCTCC  
TCGAAAACCGGAGCAAGGATCGATCGTGGTCAATGGCCAGACGATCAATCTGGTGGCGGATAAAGACGGTCAACTCAA  
GTCGCCGATAAAAATCAGCTGCGCTTATGCGCACACGCGCTGACGATGTTTCCAGCCTTCAATCTCTGGAGCCATAT  
GACGGTGTGGA AAAACGTCATGGAAGCGCGGATTCAGGTGTTGGGCTGAGCAAGCAGGAGCGCGGAGCGGGCGGTGA  
AGTATCTGGCAAAAAGTCGGGATAGACGAACTGCGCAGGGGAAAATAACCGGTGACCTGTCCGGTGGTCAAGACGCT  
GTTCTATCGCGCGGGCTAGCGATGGAACCGGAAGTTTACTGTTGATGAACCTACTTCAGCGCTCGATCTGAACT  
GGTAGGCGAAGTGTGCGTATTAATGACGCAACTGGCAGAAAGGGGAAAACCATGGTGGTAGTGACTCACGAAATGGGCT  
TTGCTCTCATGTTTCTACTCACGTATTTCTCCATCAGGGGAAAATAGAAGAAGAAGGGGCGCGGAGCAGTTATTC  
GGTAAACCCGCAAAAGCCCTGCTCTGCAACAGTTCTTAAAGGTTCTGCAAAAATA

>Cluster\_11555

ATGGCTTTTCAGGCGAGTTCGCGAGAAAATCAAAATACACAAGAGAGAAAATACATTAACAAAAGAACTATCGGTAGTCAA  
GACAGCTCATCACTTAATCATTCCGGTGTATTGAATCATGACCTGTGTATCAGTTTCTTCTTAAAACAATACCTCATC  
AGGATAAAAAGGGGGTATGGTCTTTCTTGAAAAGAGGGGGTAGGTGAACAGGCATTGAATAATTTCTGGTCAACAAATA  
CCCCGACCTTTGAAAGGTAAGAGCCGTATGATATCTTTTATAGTCAATCCTAAGGCTGATTAAGAAA AAAAGC  
ACAACAATATGTTATGATAGCTGAGTGTGATGATTTGAAAAGTAAAGATGTAATCTGGCTATTGGAGCGGCAGTAA  
AAACGGCATATAAAAACAACAGACTGCTTACACCTGAAGAGTTTAAATGTTGATTCATACAAAAAGTTTATATTTCTGGT  
CATGGTAGTGCAGGTGATAACCATATCACTTGTGGAAGTGAATCTTTGGGCTCGTGAATAATATCAAGAATGGAGAG  
TGTAGGCTTATTAGGCATGAGAGATATCCGGCTTCTTCCGTGTATTCGCGAGATGCACAAAATAACGTCACCTCTC  
CATTTCCGAGTAAATGCAGAAGTGGTATGAGTCTGCTGGAATACACAGTAAATGAGTTAACAGACAGAGGGTATACTAAT  
ATTAAGTGGTGGCTTATAATGGTGTGGAGTGTGTTGTTTACCAGATAAAAAAGTACCTTTGACGCATTTAAGGGCGCT  
TCCGATAATGGCAGAGAAATGTTTGGCCGAAAGCAGAGAAAAGTATCAGTTAAGACCGGATA

>Cluster\_33662

ATGGTTAAGTGTGGAAGATGAAAGAAGCAGAATACGATATCTTGAAGACGCTTAAATGAAAATGGGTTTTATTTACC  
ATCAAGCTGGCCGATAAAGATTATTTATCGTATCAGAAACGGATTTTAAACACTCTTATTTACAGGGTATTGACACCC  
TAAAATAAATAAATTTCTGGCTGAAACAGACCAGCTTACTTCGATTCCTTACCATCGAGAATGATCTTAAGTGGTAT  
CGTAATGATGCCCCGCCAGTTTATGGCTGACTTGTGAATATATGAAATGATTAAGATAAACGGTTATGAAAATACCT  
TACCTGTTTATCCTCGGATCACTACTTTCTCACCACGCGTAGGGTAGATGCCATACGCAAGTGTATGATAACTGGC  
CTTTCATTTTATACACACCATCAAATTACCTGAACAGAAAAGTATTGAATGGACCACTGCTCGAAAAAAGATGATAT  
TTCAGAGAGGTTAAGGCCAGAAATGTTGATATCTGCTCATGGCTCAAAAATAATATTCAGGAAAAGACGAATATTTCCCT  
GAACTATGCTGTGGAGAATCATCTGAAGAGATTATGGCTGGTGTATGCGAGTTACTTACATGGA AAAAACAACC  
AGAAATCCAGACTCAGTGAAGTGTTCACCGGAAGTTTAAAAGCGCTGGCTACCCAAAAACAGAAATAAAAAAC  
AGGGTTGATAAAAAGCTGCGCCCTGAACTGAAATATTTACAGGAGCATAAGCAAACTGAGAAAATATCCATGAA  
CGAGGATATCTCAATGATCGGGTTATTTGAAAGTGTCTGACATGATTTACCCTAGTAAAATAAAAAATA

>Cluster\_48512

GTGAAAGGTATTTATTTAGCGGGTGGTTCTGGTACAAGGTTATATCCAATAACCATGGGAGTATCTAAACAGTTACTTCC  
TATTTACGATAAACCTATGATTTATATCCGCTGTCAGTACTTATGTTAGCGGGGATCCACGAAATACCTTATTTACAA  
CACCTGAAGATCAAAGCAGCTTCGAACGTTTATAGGTGACGGTCTCAGTTTGGTATTTCAATACAAATATGCAATACAA  
CCAAAACCGGAAGGTTAGCACAAAGCTTTTATTTATCGGCGAAGAGTTTATGGTTCCGATAGTGTATGTTGGGTTGG  
GGATAATATTTCTGGGGTCAAGGTTTCTCGCCAAAACCTACTAAAAGCAGCAGCACAACAGCGCTGACCTGCTTTCCG  
GTTATGAAGTACAAGACCTGAAAGATTTGGTGTGTGAGAAATTTGATGCAGACTATAACGCTGTATCTATAGAAGAAA  
CCTCTAAAACCAAATCAAATAATGACGTCACCTGGCTTATATTTCTATGATAACGATGTTATTTGAGATAGCAAAAAT  
CCAGCCATCAGATCGTGGCAACTGAAATCACCACAGTAAACCAAATTTACTTAAAAATAAGAACCTCAAAGTTGAACT  
GTTTAGGTCGAGGTTTTGCTTGGTTAGATACAGGAACCTACGATAGCTTTGCTTGAAGCCTCTAGCTTTGTTGAAACATA  
GAAAACCGCAAGGTTTTAAATGCTTGTGTTAGAAAGAAATAGCTTATCGCCAGCAATGGTTAACAGCAGAACAGTGT  
AGAAACAGCAAAATAATGTAAGAAAATAGTTACGGCGAGTATTTGATTAATCTTATAGGAAAATA

>Cluster\_26401

ATGAGTAGCAACACATTTACTCTCGGTACAAAATCCGTTAACCGTCTTGGTTATGGCGGATGCAACTGGCTGGTCTGG  
GGTTTTGGCCCCCAAGAGATCGCCACGTCGTATAACCGTGTGCGGAGGGCGCTGCATTTGGGCTCAATCATATTTG

ATACCAGCGACTTTTATGGTCCGACGTCACCAATCAGATTATCCGGAAGCGCTTTATCCATACTCTGACGACCTGACA  
ATTGTCACTAAAAATTGGTGCAGCGCGTGGAGAGGACGCTTCTGGTTACCCGATTTTCTCCGGCAGAGCTGCAAAAAGC  
GGTACACGATAATCTACGTAATCTCGGCTTGGACGTACGATGTGGTTAACCTGCGCGTTATGATGGGGGATGGTCATG  
GCCCGACGGAAGGATCGATTGAGCCAGCTGACAGTGTGGCGGAGATGCAACAACAAGGCTGGTAAAAACATATTGGC  
CTGATTAACCTCACACGACGAGGTGGAGAGCGGCAAGATTGCCAAAATCGTCTCGGTGAGAACGAAATCAACAT  
TGCCACCCTGCTGATGACGCAATGATTGATGCTTTGGCTCGTGTGATGGCATTGCTACGTCGCAATTTCTCCGCTCGGG  
GCTTTACGCGCTGCAATCTCCAGCTTTCCGATGTTGCTGCGAACCTTAATGCGACACCAATGCGAGTGGCGCTGGG  
TGGCTGTTACAGCGTTCACCGAATATTTGCTGATTCTGGCACCTCTCCGTTGGGACATCTGCGGGAGAATATGGCGTC  
CGATGAATTAGTGTAAACGGATGACGTGTGGCAACGCTGGACAGTATTTCGCAAAAGCGGGTTAA

>Cluster\_5718

ATGTCGATGCCTGCAACGTCACATAAAACCACAAGCTTGGCAGCTCATTAATCGATGAGTACGCCCTGCTGGGCTGGG  
CGCCATGCTGACTGAAGTCAATCTGTACCCGAAACCAGGCTCGTGGATCGCATTAACGCGGTGGCACAAGATATGG  
CGCTGGAAGATTTCCACCGCAGCGCTGGCGATTACAGGCTGGCTACCCCGTTTCATGAAATTTGGTGCCTGTAGTGG  
GAAATGGCACCAGAAGCGGTACTCCACGGATTACGCCAATTTGGTATGGCTTGGCAAGGTGATATGTTCCGCGCCACTGC  
GGGCGTAAACACGCTAAAGGCAGCATTTTTCTTTAGGGCTGCTATGTGCGGCAATTTGGCGTTTCACTCAACC  
AACCGGTAACGCCAACACCGTTTGTCTACGGCGGCAAGTTTCTGCGTGGCTGACCGATCGCGAATCGGCTGCAAC  
AATTCACAACTGACGGCAGCTCAACGGTTGTACCAACAGCTTGGCTTACCGGCGCAGCGGTGAAGCGAAGCGGGTTA  
TCCACTGGTGATCAATCACGCTTGGCGATTACTCACTCTGCTGGATCAGGGTTAGATCCTGAACGGCATTGCTCG  
ATACCTTGTCTTACTGATGGCGATCAACGGCGATACCACGTTGCATCGCGGTTGGCGAGGGGGGCTGCGCTGGGTA  
CAGCGGAGGCGCAAACTTATTGCAAAAAGGGGATTCGACCCCGCCGATCTCGATTATCTCCGGCAGTTCGACAG  
GGAGTGTATCGAACGAAATCTAGTCCAGCGCGGATGTGACACTACTGATCTTACCTGGTTTTTAGCACAGATTTAA

>Cluster\_53289

ATGGATATCAGAACGCTGCGTTATTTGTGCAAGTCTGCGCCAGCAAAGCTTACCCGCGCAGCGGAGAAAGTTGTTTTGT  
CACCCAACCAACTACAGCAAGATGCTGAAGAATCTCGAAGATGAGCTGAATGTATATGTTGATCCGCGATGCTCGT  
GGCTGCTTCTCACTGATACTGGTCCGCTCGTATTTGAGCGCGGCTGGCTTTACTGGCTGAGTTTCGGCAACTGGAAGCT  
GAGCTTAGCGATATCAATCAGCTTAAACCCGCGCTTTTCCGCGTGGGAATCCCGCCGATGGTTGGGATGTGATGGCCGG  
GCCGATTGGCCTTTTTCGCCAGCGTTACCCCGCGTAGAATGAAAATTTCCGGAGTTTGGTGGTCTGACGGTACAACAAG  
CGGTGATGACCGTGAACCTGGATATGGCATGACGCCCTGCCAGTAGAAGAAAGCGGCTGACAACTGTTCCGCTGTT  
AGTCATCCACTATGTGACTGACGCCACATTCAGGTAATGGCTTGAATGTGATGCGCTCACCGGAGACATTTGGCGGA  
ACATCCTCTACTTATCTATAACGAAATTTTGCCTTAAGTAAGCAATTTGATGAAGTTATTCGATGAACATGGCGTTAAGC  
CGAAGATTGCAAGTTCGACGCGGGCAATGGGATTTTCTCCGCGGATGGTTGAGCCGGTGTGCGAATAGCCATATTGCCG  
GAACCCATTTCGCAAGCATTAGATAAAAACACCTTAAATGCTTACCGTGGAAAGCGAACTAAGCTGGAAATTAGGAAT  
GATTTGGCGTAGGGCGTTTACCTTTCCACTCTGCCACGCGTGGCTGAGCTGTTGTGAAGGATACTGGTTAACGCCAG  
AGTAA

>Cluster\_31586

ATGGGTGAGTTAGCGGTGAAATGAAAGCGCTGGCAAAGCACTGTGGCGTAGCCATAAAAACGGTGAACGATCGTATCCA  
TATTTGTGCAACGTTTCGATCATCACTTACGGCGTTAAACGCTCAGATCCAGCGGTTTGGCAGATTAAGGTTCCGCCACA  
TTGAAAACACTACATTCATGAAAGGCTGGCGCAGGGGATCGGCAAGCGCACGCTACAAAAATGAAATGGCCCTCGCTCGCCG  
GTTCTGCAACAGCCCGGGCTAAGCAGGTGGCAGAGCATGAGCGGCTGACTAATAAATCGTGGGTTTTGCTGGTGCATC  
GCGCAATGTTACGCGCAGGCAATTACGCGGTTTCAATACCGCATGTTGGAAACGCGCGCAAAAGATCCGGGTC  
TGGCGGACGCGGTGGAACGCGCGGCTGATGGGTTGCGCTCACAGGAGCAGTACAAGCGTACAGTTCGCTGAAGAGC  
TGGAAACAGCCGTTGAGCATGGCGATAACGCTTAAACGTTGTTTTCCGACCAAAGCGGACGCTCTCCGCGAAACGGT  
AGTTCTGGATTCTGGTGCAGTCAAAAAGCGCTGGATAATGCGCTGGCTATTGCAAGAAAGTCTAATAATCTGCTGATCG  
ACAAGCCGGATCTTAAAGCGCGATGGATTACTGGCACAATCAGGTGGCGGCTATTGGCTCACTGGCGCATACTCTCCA  
CATTCGCTGCGTTATGCGTGGGCGCAGGATGCGATCCGTCATCTTTCGCAAGGGGTTTAAACAGAAAGAGGCGTTAGC  
CATGGTGGCGATGGATCTGGGGCATGGTACGGGCGTGGGCGGTATGTGGCACAGGTGATGGGCTAATTTGA

>Cluster\_61962

TTGACCAAGACGTTACTTGACGGCCCCGGTCCGCTGCTGGAGTCGGTTTTATCCCGCTTTTTTAGTGGATCTGGCGCAGGG  
TGATGATGCCCGCTTCCACAAGCCCATCAGCAGCAGTTTCGTGAACGACTGATGACGAACTTCTTTTCGCGTGTGCAGC  
TTCAGACATGGACGAACGGCGCATGTTAAATGCGCGCTTAGCTGCGTCTGACATTTGGTGGAAAAACTGGCGTCGATG  
CTGGATCCCGGCTCATCTGCACTGACGCAGATCCGCGCAGCATCTGGCGCTGCTGCAAAAAATGGATCACCGCCAGCATC  
TGCTTTCCGGAGCTCCCCAGCAAATTTGCCGCTTGTATGATGAGTGGTTTTTCAGCCGTTGTCGCTGGAAGGAAAAGCGT  
TAACGCAACGAGGCTACTGGTGCAGGCAGGTGATCAGAGCAGCAAAATTTTACCCTGCGCTGCTGGGCGTATAAC  
GCCTGGTCTGCTGGCGCTGTTTTATCGTTCTGGAGGATTCGCTGGGGGCAATTTGGCGATGCTTGGCGTCTGGG  
AAGCCGCAAGCTCCCGGCAAGTCTGTTGCTGGTGAATTTGCTCGAGAAAGCGACACAACATCTGGCAGAGATATCAATGCGG  
CACCGACCAGCGTCACTATTACCATCAGTGGTTGCTCTTCGACCGTTCGACGGGGGGGAGCATGCTGATTTTTTA  
AGTTGGCTGGGAAAGTGGACCAGGCAGATAAAACAACCGTTTTGCTGGTCACTGACCCAACGCTGGCAAACTGTCGCGCT  
GGGATGCCACGACTCTGTTACGCGCAGCTTGGCGGGGCAATGCTCGAGGAAATCTCTCTGTAATTTGGCGTAA

>Cluster\_38798

ATGGCCGAAAAAAGACAGTGGCATGAAACGCTACACGACAGTTTGGGAGTACTTTGGGAGTATGAGTTCGTTCTGATCA  
TGAAAAGACCGATCACCAGGATCTGATCATTTTTGAGAAGCTGCATTTGGTTCGCGTAATGGCGCTGGATGGCGTAGTAC  
AAACCACCGCAGCGACGATTTATCTATCATGAGATGATGACCCATGTTCCGCTACTGGCCACGGTCAACGGAACAT  
GTGCTGATTATCGCGCGGGCGACGGTGCATGCTGCGTGAAGTAACCCGACATAAAAAAGCTTGGTCAATCAGGATGGT  
GGAATCGATGCGGGTGTGATCTGCTTCCGCTCAATATCTACCAACCATACGCCGTTAGTACGACGATCCGCGCT  
TTAACTGGTGTGATCGACGATGGCGTCAATTTCTGTTAATCAAACAGCCAGACTTTGATGTCATTATCTCCGACTGCACC  
GATCCATCGCTCCCGGCAAGTCTGTTCCACCTCAGCATTTTATGAAGGCTGCAAAAGCTTGCCTGAATCTGGCGGAT  
CTTCGTCGCACAAAACGGCGTCTGCTTTTTACAGCAGGAAAGAGCCATCGACAGTCACTGCAAACTCAGCCATTACTTCA  
GCGATGTTGGCTTTATCAGGCGCGATCCCGACTTATACGGCGGCATCATGACCTTTCGATGGGCGCAGATAACGAC  
GCCTTACGCCATCTCAACCGAATATTACAGCGCGTTTTCTCGCTTCTGGCTGAAATGGCGTTATTACAATCCGGC  
AGTCCATACGGCAGCTTTTGCCTTACCCGATCTGCAAGATGCTCTGGCTTACAGCCGCTCCTAA

>Cluster\_26004

ATGCTTACATCTAAAAAAGAAATGCAGAGTCTTGAATAAACAAGAGGAAATTTAGCGTTATGTTAACTAATTACAT  
TTCATATCAGAAATAGTTATATTTACGGGGGGAATCAGTTTAAAGATAAGAAACAAGAAAGAAATTCACCGAATACACAA  
TAGAATCCAACTCTTGTTTTTTTTAGCAAAAACACTATTGGGACATGGAAATTTGTCGGAATCGATAAATGTAATCCG  
TACAGAAAAATTATAATTGATGATGATTAATTAAGTTGCTGCATTCAATATCATCTGATGACTCTTGTATGTAAAAA  
AAAAATATTACTCGCAACCTCAATGAAATGCAATGAAATTAATTTCCAATAAATACAGACATAAAAAATCCTCAGGTA  
ACAACAAAAAATATTAAAAATTTGATTTATTAATCTTTTTTAAAGATTATAATGATATAGTTAATGTCATCTCTTAGT  
GCTTCACTAAGAGCATCGTAGACAGGGTTATAAAAGTAATGAGTTGGATATATCAAAAACTGAAACTAGGCGATGT  
CAGTAGTTCAATGTTTATGATGATTTCTGCTGAGAAAAACAATAAACAAGAGACTTAACTTTAAAAAATCATGT

TAGATATAAAAAATGAAACATGCTTCTTTATTTTTAAGAACTACTGATAAAAAACATAGATGAAATATCTTGTGGTGGG  
TTTTAATCCACATCATATTTTATTAAGGTATTTAAGGAATATTACAACACAACACCAAAAAATATAGTGGCGTTTATTC  
TATTACACAAGGAACATTGCCATAA  
>Cluster\_27364  
ATGAACAAAACCGGATTGGCGTCTGGCTCTGGTCCAGTAGCGCCAGCCTGGCAGCGACGCGTGGCAAAAAATAAC  
CCAACTGTGCGGGTAGCGCACAAATCGATAGGCGATTTTTCTAATGGCTGTATCGTCCGTGCTGACACGTTGCCGATAC  
AGTCCGAACATTATCAGGTCATGCGTACCGATCAGCGTCTGATTTCCGGGCACCGGATCTGGTGATGTTTATCCAGCGT  
CTGAGTCGCCAGGTGAGCAATCTGGGCATGGGTACGGTCTGATTTGGCGATATGGGGATGCCCTGCTGGTGGTCTTTCAA  
CGCGGCTCACGCCAGCCAGCCAGACCGGACTGGATGTCGATATCTTCCGCAACGCAAAAAACACGCTGGACCTCCGCGC  
AGCTCTTGGCCTCCGCAAGCTCTGGACTTAGTTTCCGCGACGGTAAACACGTTGTCCCGCGCTGTGGAAAGCCAGAAAT  
TTCAGCTTGATCAAACTCGCCGCCAGGACAAAGACGTCACGCGCATTTTTGTAAATCCGGCGATTAACAACAACCTTTG  
TCTTGATGCGGGCAGCAGTCCGCGACTGGTTGCGCAAAGTGGCAGCCCTGGTCCAGCATCGCGCGCATATGCATGTACGAT  
TACGTTGCTCTCCGATAGTCTGGAGTGTGAGGATCAACCTTTACCGCCACCGGCGATGGTTGCGGGCAGAACTGCCAA  
AGCTGGTTTGAACCTCAAAAACCGGGAACAACAAGCCTGAGAAGAAGACACCGCTCCGTTGCCGCTTCTGCCAGGC  
GCTACTGGATGAGCAGTGTATCTAA  
>Cluster\_22248  
ATGCAGTTGAGAATCACCAGTCGAAAAAATTCACCCTTTATATGCGCTCTGGGCTAATTTCCATCGTTGCAATTTA  
TCCGCGTCAGACGGTGAACTTTTCTATTCGACAGCAATTCAGATTAAGACTACATTCATTTCTACGGTTATCGCCCG  
TTAAATCTTTTCGCTATTTCGATTCCTGCGAGTTACACCATTCACGGAATAGATTTTCCGCGTGGCAGGAGCGGATCGAC  
TGGCAGCGGTGGCAAAAAATGCGCGATAACGGTATTTCGCTTACAATTTGCCTTTATTAAGGCGACGGAAGCCGAAAGCT  
GGTGGACCCCTATTTTTCCGCTAAGTGGCAACTAAGCCCGCAAAATGGCTGCTGCGCGGGCGTATCATATTTTTTCC  
CGTCCGTTATCTGCTTCAGTTCAGGCGAGATTATTTCTGCAACCGTGGATTTCACAAAGCGATTCCCTGCGGTGCTG  
GACGTAGAAGAAGCGGAAAAATTCGCGCAAAAGAAATTCGCAAGCGGGTAAAGTCAAGTGGCTAAAAATGGTCAAAAAACG  
TACGGGAAAAAGCAATTTATTTACTAGGAGCGTTTTTTTACTACACCAATTCGCGGGCTATTTCAATGAATATCCCT  
GGTGGGTGGCTCACTATTATCAACGTCGCGCGGACAATGACGGCATGGCTGGCGCTTCTGGCAGCATTCGACCGTGG  
CAGGTCGATGGCATTAAATGGTCCGGTGGATTTTAAATGTGTTTAAATGGCAGGTTGGAGGAGTTGCAGGCATTCTGTGATGG  
GATTAAGAAACGCCCTAA  
>Cluster\_48546  
ATGAAAATTAATGACATCGCTGTTATAATGAGTATTTATAAAAAATGACAAGTTAGAACATATAAAATTCGCTATCTTAA  
TATCCTTCAGCAAACTGATATATCACCTTTATATATATATATATTGATGGTACTGTATCTCTTGACGCTATATAATTTAT  
TAGACTCTCTTAATGAAAATACAAATATTCATGTAACCTAAGGTGAATGAAAATAAAGGCTAGCTTATGCATTAATTTAC  
TTGATTTGATAAAATCTTCTAGATAAGAAATATTAAGTATATTGCTAGAATGGATAGCGATGATATTTCAATGCCATCTAG  
GCTGAATACTCAAAGAAATTTTTAGAGAATAACTTAAGTATTGATATTTTGGAACTGGGTGCGAAGAAATTCGGAACCT  
CATATGCATTTGAAAAAAAATACTTCCCATATCACATGATGAAGTAAATTTAGTATAACTAGATGTCCATTTATTT  
CATCCCTCCGTCATGTTTGAAGACGTGATTTGAACAAGGAAACCGGTATCCAACCTCACACTTGCTTTACAGAAGATAT  
GGCTTTTTGTTAAGCACTTTTTATAAAAACTATAAATTTCCATAATTTACCTGATGTTTTACTACGATATAGACTGGAAG  
AAAATACTATGGCTCGTCGAGCTGGCTTTCAAAGGCTAAAAGCGAAGTATCCCTAAGATTAGGCTATATGTTTTTGCTC  
GATAAGTTTAGCTTAAAAAATATGCTGTAAATATACAGTCGCTATTGTTTTTCACTTTGTTACCCCTAAGATAATGAGCTT  
AGCTTATAAATACTTAAGATAA  
>Cluster\_48514  
ATGAAGTATGCTTTTATTGAAAAACATCAGGCTGAGTTCAGCATTAAAGCCATGTGTCGGGTGCTTAAAGATTGCCGAAG  
TGGCTGGTATGCTGGCTTAAACGTCGTCATCAGTCAGCCCGCGCCGACAGTTCGCGGCTCATCTGTGATACTGCTGTCC  
GTCAGGCATTTACTGAGGCAAAACAGCGTTATGGTGGCGCCGCTCCGCGGAGTACTGCTGAAATACAAATCAAAACT  
ATCGCGGACAGCCTGCGTCTGTCAGGCGTTGCGGGCAAAAGCCAGTTCGAGGTTTACCCCGGTCAGCTACCGTGGCATGG  
TCTGCGGGTATCAGAGAAATCTGCTGAAGCAGGATTTTTATGCCAGTGGTCCGAACCGGAAAGTGGTCCGAGATATCACGT  
GTCTTCGTACGGATGAGGGCTGGTTGTATCTGGCGGTGGTGTGATGATCTGTGGTCCCGTGTGTCATTTGGTGGTTCGATG  
TCCCGCGAATGACAGCAAAACTGGTCTGTGATGCGTTACAGATGGCGCTTTGGCGCGGTAGACATCCGGAAGATGTTAT  
TGTTACACCGGATCGTGGCGGCGAGTATGCTCAGCAGATTATCAGGCATTACTGCAGCGGCAATAATCTTCGCGGAGCA  
TGAGTGCAAAGGGCTGCTGTTACGATAATGCCTGTGCGGAAAGCTTCTTTCATTCAGTGAAGTGCATCCACGGT  
GAACGTTTTATCAGTCGGGAAAAGATGCGGAGGGCGGTATTTAATATATCGAGTGGGATTAACAATAGATGGCGCCGTC  
CAGTGCCTGTGGAGCTTCAGCCCGCACAGTTTGAATAACAGCAACTCGCTTAG  
>Cluster\_22178  
ATGCGTGAAGTTCATTCAGATGATAAAGACGTCATTCGCAATTGATGGAAAAACGCTCCGGCACTCTTATGACAAGAG  
TCGCGCAGGGGAGCGATTCATTCATTTAGTGCCTTCAACAATGAACAGTCTGGTCACTCGGACGATCAAGACGGATG  
AGAAATCTAATGAGATAGACGCTATCCAGAACTCTTAAACATGCTGGATATTAGAGGAAAAATCATCAAAACTGATGCG  
ATGGGTTGCCAGAAAGATATTCAGAGAAAGATACAAAAACAGGTTGGTGTATCTTATTCGCGGTTAAAAGGAAACAGGG  
GCGCTAAATAAAGCCTTTGAGGAAAAATTTCCGCTGAAAGAAATTAATAATCCAGAGCATGACAGTTACGCAATTAGTG  
AAAAGAGTCACGGCAGAGAAGAAATCGTCTTCAATTTGTTGCGATTTCCCTGATGAACTTATGATTTACGATTTGAA  
TGGAAAGGGCTGAAGAAATATGCGTGGCAGTTTCTTTCCGTTCCATAATAGCAGAGCAAAAGAAAGACGAAATGATG  
GGTCAAGATATATATCAGTTCGCTGATTTAACCGCAGAGAAGTTCGCCACAGCAATCCGAAACCACTGGCAGCTGGAGA  
ATAAGCTGCAGTGGCGTCTGGACGTTGATGAATGAAGACGACTGCAAAAATAAGAAAAGGAAATGCAGCAGAAATATTT  
TCAGGGATACGGCATTGCTATTAATAATTTGACGAATGATAAGGATTTCAAGGCAGGTTAAGACGTAAGATGAGAAA  
AGCAGCCATGACAGAGACTATCTCGCTCAGTCTTCCGCGGAGCGGCTTTTCGTAA  
>Cluster\_6971  
ATGACATTGCAACAACAAATAAAGGCGTGGGCGCAAAACCGCAGATTAATGCTGAAGAGGAAATTCGTCGTAAGTGT  
CGATTTTTCGAAAAGCTACCTGCAAACTTATCCGTTCAATAAATCACTGGTGCFCGGGATCAGCGCGGTGACGACTCCA  
CGCTTGGCGGAAAGCTGTGCCAGATGGCGATTAATGAGCTGCGCTGGAAACCGCAACGATCACTGCAATTTATGCCC  
GTACGCTTCCCTATGGTGTTCAGGCGGACGAACAAGATTGCCAGGATGCCATTCGCTTTATTAACCCGGATCCGCTATT  
AACCCTTAATATCAAGGCGCGGTATTGGCCAGCAACAGGCAATTGGCGGAAGCAGGCATTGAACTGACGCGATTTGTCC  
GTGCAATGAAAAAGCGGCTGAGCGGATGAAAGCAATATAGCATTGCGGGTATGACGAGCGGTGTCGTTGGGCGACC  
GATCATGCAGCAGAAGCCATTACCGGATTTCTCACTAAATATGGTGACGGCGGTACGGACATTAATCCGCTGTATCGTCT  
CAACAACGCTCAGGGTAAACAGTTACTGGCGGCTTAGCTTGGCCGGAACACCTTTATAAGAAAAGCGCAACGCGCGATC  
TGGAAAGATGATCGCCCTTCTGCGCAGATGAAGTGGCACTGGCGGTGACCTATGACAAATATCGACGACTATCTGGAAGGG  
AAAAACGTACTCAACAGTCCGCAAGCAATAGAGAAGTGTATCTGAAAACCGCAACATAAACCGCTGCCCAATTAAC  
CGTTTTGATGATTTCTGAAAAAAGTAA  
>Cluster\_55955  
ATGGACCGCAACCTATTGAAGATGTGATCTTCAAAATTAATAACTTTATCTCGCTCGGTGGTGCACCATTTGTTGATGC  
CACAGGCTGTAGTCTATCGGACGAGATGCGCAGGCATTACGAGAAGTGCATTAAAAACAGGCTGAATATTGTTGCTT  
CCTCCGGTCCCTACCTGGAAAAATTTGAAAGCCAGAGAATTCATAAAACGGTTGATGAACTGGCGGCAACGATTGATAAA

GAATGAATCAAGGGATTGGCGATACGGATATTCGTGCCGGAATGATCGGTGAAATAGGTGTCACCCGACATTTACCGA  
AGCCGAGCATAACAGCTTCCGGGCTGCCCTCGCTGGCACAGATTAAACAATCCTCATGTGGCGATGAATATTCACATGCCGG  
GCTGGCTTCGTCCGGTGATGAAGTACTCGACATTTGTGTAGGTGAAATGGGGCTCTCCGCAAATAAAGTCTCTCAGCA  
CACTCGGATCCGTACAGAAAAGAGCTGGCGTATCAGCGGAAAATGCTTGTATAAGGGTGTCTGGCTGGAATTCGACATGAT  
TGGCCAGCCGAAAGCCATGTTGACCGTTTATTGACGGCCCGGAGCGTATTATGAAACCAACATTTGTCGGGACTTATAC  
AGTTGGGATACGCCGATCAGCTTGTCTCAGCCACGATGCTTCTTAAACAATGTGGGCTAAAAATGGCGGTAATGGC  
TGGGGATTGTTCAGATGTTTTCTGGCTATCTGGCGAGCGGGCTCGATAAACGATCCTCAAAAACCTGTAT  
CGATAATCCCGACGATTATTGACCGCATAA

>Cluster\_42895

ATGAGAAAGATTCTGATAACAGGTGGTGGCGGTTTATTGGCTCAGCGCTGGTGCCTTATATCATCAACGAAACGAGCGA  
CGCGGTGATAGTGGTCGATAAGCTGACCTACGCCGAAATCTGATGTCGTGGCACCGGTCGCGCAAAGCGAGCGCTTTG  
CCTTTGAGAAAGTTGATATCTGCGATCGGGCAGAACTGGCGCGGCTATTCACCTGAGCATCAGCCAGACTGTGTATGCAT  
CTGGCAGCCGAAAGCCATGTTGACCGTTTATTGACGGCCCGGAGCGTATTATGAAACCAACATTTGTCGGGACTTATAC  
ATTGCTTGAAGCGCGGGCTTACTGGAATGCGCTAACGGAAGATAAAAAATCAGCGTTCGGTTTTTCATCATATCTCTA  
CCGACGAAGTATATGGTGAACCTGCACCTCAGCGGATGATTTCTTACCGAAACCGCGCTATGCGCCGAGCAGTCCCTAT  
TCCGCTTCAAAGCCAGCAGCAGCACCCTGGTGGCGCTGGCTGGGACCTATGGTCTGCCGACGCTTATCACCACCTG  
CTCGAATAACTACGCCCTTACCCTTCCGAAAAAATGATCCCGCTGATGATCTCAACCGCTGGCGGTAACCCG  
TGCCGGTATATGGCAACGGGCGAGCAATCCGTGACTGGCTGTATGTTGAAGATCAGCCCGCGCGCTGTATTGCGTGGCG  
ACCACCGGAAAGTCCGGTAAACCTATAATATTGGTGGTCAACAACGAGCGTAAGAATCTCGATGTTGTGGAAACCATTTG  
CGAGTGTGGAAGAATGGCTCCGAACAAGCCGACGGCTGGCGCCTACTGTCGCTGATCACCTGATCACCTTTGTCGCTGACC  
GTCCGGGGCATGATCTGCGTTATGCGATTGATGCTTCCGAAAAATGGCCGTGAACTGGCTGGCTGGCGGAGAAACCTTT  
GAAAGTGGATGCGTAAACGGTTCAGTGGTATCTGGCTAATGAAAGCTGGTGAAGCAGGTGCAGGACGGCAGCTATCA  
GGCGGAGCGTTTAGGCTGAAAGGCTAA

>Cluster\_42808

ATGCGTAACTTTGATTTATCCCCGCTTTACCGTCTGCTATTGGATTGACCGTTTGTTTAACCACTTAGAAAACAACCA  
GAGCCAGAGTAATGGCGGTACCCCTCCGTATAACGTTGAACTGGTAGACGAAAACCATTTACCGCATGCTATCGCTGTGG  
CTGGTTTTGCTGAGAGCGAACTGGAATTTACCGCCAGGATAATCTGCTGGTGGTGAAGGTGCTCACGCCGAGCAACAA  
AAGAGCCGACCTATCTGTACCGGCACTGCTGAACGCAACTTTGAACGTAATTCAGTTAGCTGAGAACAATTCATGT  
TCGTGGTGTAACTGGTGAATGGTCTGCTGTATATCGATCTCGAACCGGTGATTCGGAAAGCAAAAAACCGCGCCGA  
TCGAAATCAACTAA

>Cluster\_49957

GTGAACAAGACTTATATGCTTGATACCTGTATCTGCTCGTTATCATGCGTGAACAGCCAGAAGCCGCTCTGAAGCGTCT  
GGAGCAGGCGGTGTACGCGCCACCCTATAGTGGTCTCGCCATCACCTACTCTGAAATGCGCTTCGGGGCTACCGGCC  
CAAAGCCCTACCCAGCTCAGCTCAACTGGTCGATGAATTTCTGCGCCCGCTCGATGCCATCCGCCCCGGGATCGCGCC  
GCAGTAGACGCCACCACGAAGATTAAGTGGCACTGCGGCTGGCCGGGACGCCGATCGGCCGAAACGACACGGCGATTGC  
CGGCACCGCATCGCCCGGGCGATACTGGTAAACGAATAATACAAGAAATTTGAGCGAGTGCCTGACCTGGTGTGG  
AAGACTGGGTGAAGTAA

>Cluster\_29482

ATGACCCTATTACCAAAGACGTAATTGAATGTTTCATTAATAATCCGCTTGAAACGGGCTTACTCGTGACGAACAAT  
GGAAGTGGCAGCAATGGCACTGGCATCGCTGGAAGCAGAGGCACTTATGTTCTGTATATCAGGACAAAATGTAGATTGAG  
AAGAACATGTATCAACCAGCAAAGCGGTTGTTGATGCCGTTGAAGATGGAATCAGTTGACGGAAGTCCGCGCA  
CCACTGTACAAAATATGCCACTTACTATACGCTGCTTGGCAGCGCGGTAGTGGCGGATGAAATGTATTGGCAGGA  
TGGCCAGTTGAAGGCAGCAGCAAAGCGGCTGCATACGCTACAGGCTGGAACCGCTGCCGCGCGCTATGCTTCATGGGA  
AAGGAGAGTGA

>Cluster\_31797

ATGGCAACGAATGAAAGCATCATGACGCTACCGCTGGCGAGTAAATTTAAAGCCGAGCGGGCAATGGCTGACAGAGG  
TTTTATCAACCTATGAGCCGATATATCAACTAAACAACCTGGAAGAGCAGGACAAAGCCGCGCTGATGCGATTATGGCGC  
TTCATGAGCATAAAGACTATCAGCCGCTGTTGCGTGCAATGGCAAACGTCCTTGTATCGATGTTGGTACGGCTAAAAGC  
ATCCTTAGCATGACCATAGAGCAGGAACGCCAGAGGTTGCACAGAGCTTACCGCAGCCTTTGAAAACCTTTATGGACAT  
GCACAGCCCGCAAGCCGTATCAGCTGGCATGGCATACGATGGCAGAAACAGGGCGATGACGGCGACATCGATCGCATA  
TGAAAACCATCTGA

>Cluster\_23942

ATGGCAATGACTTACCACCTGGACGCTCGTCAGCGCAGAGCAACAATGTTCTCTGGTCTGGTCTGAGAAAATCCAGGTAAC  
GGTAGCGAAGGTGAATGGGATCTACCCTGGCCACGCAACCGCTGCTCACCGCCATTAAGCTGGTATGATTCGATCG  
TGAAAACAGCAGCGTACGAAAGGTTTATCTATCTGCTGCGCGCATCTTGAAGTGCAGCCTGGCAACCTGACCTTCTG  
GCCACACCGCAATTCGCGGCCAGGATCTCGACGAAGCGGAGCCATGGAAGCGAAACGTAAGGCTGAAGAGCACATTAG  
CAGCTCTACGGCGACGTAGATTACGCTCAGGCTCTGCGAACTGGCCAAAGCGATCGCGCAGCTGCGGCTTATCGAGT  
TGACCAAAAAGCGATGTAA

>Cluster\_27626

ATGAAAATGAAATGGTCCCCTATCTGTTACGGGATTTTCTCTGAAAACAACAGCGATATTCGCCATGATGCTTTTCGATAT  
TGAAGATGCTCTTTATTTATGAACCTATGAATGGTACAGGATACGGGAAAAATTTATCAATAGCCCGGATAACTACCCTA  
TACTTACTGAATATCCAGCGAAGACACAGGAACAGGAAATAGCTGAAGCGGAGGGAATGAAAAATATACTTATTGAAACG  
GCCAACGATTTATGAACAGTAAACAATGGCTGGTAAAGCGGCTATTGGCCGGCTGAAAGGTGAGGAACTGGCACAATA  
TAATTTGTGGCTGGATTACTGGACGCACTGGAAGTGGTGCATCTCCGGTGGCCAGATATGAATGGCTACACCTC  
CGGTAACCTCAGGCCAGCTAA

>Cluster\_42005

ATGAGTGGAACTTACTCGCTTCGACTTCGGCACAAAAGCATTGGCGTAGCGGTGGCCAAACGATTAACGGCACCGC  
TCGTCCTTTGCGCTCAATTAAGCGCAGGACGGTACGCCGACGGAACATTAATCGAGCGTTTACTGAAAGAGTGGCAGC  
CGGACGAAATCATCTGCGTTTGGCGCTGAATAATGGACGGCACCGAACAGCCGTTAACCGCCAGAGCGGTAATTTGCC  
AACCGTATCTGCTGCTGTTTGGTGTGAAGTAAAGCTCCATGACGAGCGCTTTAGCACCGGTGGAGGCACTTCCGGCT  
GTTTGAACAGGGCGGCTATCGAGCGCTCAACAAGGCAAGTGCAGCTGCTCTGCGGTTATTTATTCGAAAGCTATT  
TCGAGCAGGGATATTA

>Cluster\_33251

ATGAAAAAAGGCACCGTTCTTAATTTCTGATATTTTCATCGGTGATCTCCCGTCTGGGACATACCGATACGCTGGTGGTGTG  
TGATGCTGGTTTACCATCCCAAAAGTACAACCGGTATCGATATGGCATTAAACCGGGTGTACCTTCTTTTATGCAGG  
TGCTGGGCGTCTCACAATGAAATGCAGGTGAGGCTGTCTATTCGCGGAAGAGATCAAACAACATAATCCGCAACTC  
CAGGAAACGTTGCTCACCCTGAGCACCTGCAAAAACACAGGAAACACCATTTGAAATTCGTTACACACGCAATGA  
ACAATTCAAAACAACAACCGCAGAAAGTCAAGGCGTAATTCGACGCGGAGAAATGTTCTCCGTATGCGAATATCTCTCT  
GTGCTGGCGTGACCTTCTGA

>Cluster\_18950  
ATGGTTCGATACGTTTAAATGATGAAGTGTAAATTAATACTACTTGAACAAAAAGGGTACACAATACAGAAGGAGTTCTTTG  
TGGCAGTGCCTTTTTTATCGGATGGCGGATTGAGACACCTTTTTTTTCATTAGCGTACAGACTGGATGAACAAGAACTGA  
TTTTGTGCTCTTTTGAAGACAGTAACCAAAACGGGCTTAAACGGCCCTGTTTTATCACTGACTCGTTTGTCTGAAGAGTTG  
TATCACCACTTTTTCGGTATTAAGAAAAATCAGTGGGATGAAATCTAAGATTGGTTCAGATTTCAGAACGTTCAAAAGCGGA  
AGAGTTGTTTAAATTACTTTCATCAGAAAAGGGTGCCTGCAGCAAGAAAACAGAAGACGGAATTTGGTTCGTAATGAACGTAA  
ATAGTTAA  
>Cluster\_11124  
ATGCAGAAAAAATGTGACTCCCGCAGGGCAAAAAGGCTGCCTAATATCTCCCGAATTTAAACAGCAGCTCGTGTCTGC  
CTCCTGTGAACCCGGGATATCCATCTCAAAACTTGTCTTGAATAAGGCATTAACGCCAATCTGTGTTCAAATGGCGAC  
AACAAATGGCGCGAGGAAAGCTGCTATTACCTTCTCAGAGAGCCCCAGCTACTTCCGTGACTCTCGATGCAGCTGCC  
GAACAGCCAGAATCGCTCGCAGAGGACCCGAAAACCTCAGTATCAGCTGTGAGGTAACGTTCCGGCACGGGACGCTCCG  
CTTCAATGGCAATGTGAGCAAAAAGCTCCTGACTCTGTGATACAGGAACCTGAAGCGATGA  
>Cluster\_25515  
ATGAAAATGACAAAACCTGGCCACACTATTTTTGACTGCCACTTAAGCCTTGGCAGCGGTGCCGCACTGGCTGCCGATAG  
CGGAGCGCAAAGCAATAACCGCCAGGCAAAACGCCGAGCTGATGCGGGCCAGGTAGCCCTGACGCGCTGAAAATGTCTG  
CGCCAAATAACGCTGACCAATAACCGGGTAAATACCGGTTCTGGTGGCAAAATGCTGCATTCGGATGGTTTCAATGAAC  
AATGACGGAATGACCAAAAGATGAAGAGCACAAGAACCACATGTGCAAAAGATGGCCGCTGCCGGATATCAATAAAAAAGT  
CCAAACCGGTGATGGCATCAACAATGATGTCGATACCAAAAACCGGATACCACGCACTAA  
>Cluster\_49654  
ATGGGTATAAAATTCGGACGTTTTATGCGGCCGATGTAATATCGATATTTTAAAGTGCAGACAGTGAAGATAAACGCATTGA  
GGGAGCATCGGTGACGCTGCAACACAATGGCGCACAACTGTGTTTCTGGAACCAAAATGCATCGGGCAGCGTTAATCTGG  
GTTCTACATTTGCTGATGATCAAGATGCTTTATTTGATCTGTAAGAAAAGAGGGCTATTCTAATCTGGTGTCAAAATGTCCG  
TGTGCTGGCATGACTATGCGATTAGTCTCGGTAATGACTAGCTGAGTGGATGGCATGCGTGTAGTTTGGAGCTGGGGCGAAA  
GCCTTTTGTATCTTGATTCACATTTGATCTTCCCTGGCGGACATATCTATTTTGATAGTTAA  
>Cluster\_33723  
ATGAGTCAAGTTAGCCTGTGCAACAACCTGAAAGAGGGAAATCTCTTTGCGGAACAGTGCCCGTCCGCGGAGGTGTTGAA  
ACAGCTCACCGCCTGGGGGGTGTGATTTCTGGTGGCGCTACGCGAAGGTACTCATCGCTTTAGCGACCTGCGGCGCA  
AAATGGGCGGGTGTAGTGAAGATGCTTGGCGAGTCTTACAGGCATTAAGAACAGGATGGTTTTCTTAAACCGTATCGCG  
TATCCGGTGGTGC CGCCGATGTGGAATATAGCCTCACGCCGCTGGGCGAGCAGGTGAGCGAAAAGGTTGCTGCACTGCC  
GGACTGGATTGAGTTGAAATTTGCCCGAGGTGTTAGCGGTGCGGGATGAACGTGCGGCATAA  
>Cluster\_43371  
ATGGTAGAAGAACCCTGTTTTCTCTGCTGGCCGACATTCACGTATGCTGAGCATCGTTATTTGCGGCTATTCGTTT  
CGCGGATTTGCTGTTTTGTTTTCCGGCAAGTAGGAAAGTCCGAGAGGACGGAACACCAGAACCCGATTTTACGCAACAAGTCA  
GACTGGCATTGTAATTTGCATGCGACCTGGCTGCTGCGGGATGCACTTTTACGATATCATTTGATGTTACGAGCTTT  
CATACGATTCAGAAAAACAATTTGAAGACATCATGACGCTGAAAAATGAAATATTTAGCGCGCCACCTTAAAGAACCTG  
GACGGCGGCGGCTTACATGGCTGGCAGGCTTTGATTTTGAATTAAGTATAGCGCGCATCCCTGCGCAGTAA  
>Cluster\_26174  
ATGGATCAGTCTGTTTTTTTTCAAAGATGTTTTGAGCAAGTGAGAAAAGAGCAAAACTTCTCTGGTTTTTATTCAGAATT  
AAAACATCACCGTATTGACATTTACATTTATTTATCTGGTACGGATAACATCAGAATTTATTAATCAGCATGACACGGTTT  
TATTATTAAGAGGAACAGGAACCTGTTAAAAGTTAGTACAACCAAGAACCTGCTAAAATAAAAGAGCCGCTATGCTTT  
CATATTCGCGAAAATCTACATTTCCGGGAATACGTTTCAACACTGGCAGGCGCTGGCGTTTTCCGGTGGGTTACTGATGT  
TAATTATAAACAACGAGTTACTACGCCATTGATAATACGCTTTTATATATTGAAGATGTAGAAAATAATAAACCATTA  
TCTAG  
>Cluster\_51539  
ATGAACCAAGCCGAGGTTTTCTATTTTTCCGGCAGAAAATGACCCTGCGCTTTACC GGCGGGCTATTGCATCGGCCGCGG  
CCAGAAAGCGCTGACCGAAACCGCTGCGATCCTATGTTCCGACAGCCTGACGGTTGAACGTTATTGAAATGGCCATTTG  
CCCTGCATATCGAGTGGCAGCTGATTAACGAATATGGCGAAGCACAGGAGCAGCGGCTGCACGCGCTGCTGACTGAC  
ATGCTGGAGCCATCATTTGCTGACCGCGCCACCGGTAAGTACTGCTGCGCGGCTGGAAGTATGGCGGAGCTGTACCGCAC  
ACTTCCGGCGGCAATTTGATGACTTCTGCAGCTCGGGTGTATCGCTGTATCAGGGGAAATATGA  
>Cluster\_60348  
ATGAAAGTGTAGGTAATATTTTATGGTGGGCTTTTGTGGTTTTATGGCTTACGCCACTTTGATTAAGCCGGACAACAC  
TGATCCAGCTGTTTGAACATATGAAGAGCCTTTGCCTATGGAGCTTGCCAACATATGGCGAACCAGGTGAAGGGGCGAAAA  
TCATGAATGCCGCAAAAATAATGGTTCGCGACTACGCATGGAACATGTAAAAGAAGACAGGTTGCCATGCTGTTTGGC  
GCCGGGTTGTTGCTGATGATAACATCTGGTAAAATAACCATTTTACGCAATGAAACTGAGTTCAAACCTTAAAGCGGAGCGGT  
CAGAGAATGCCCAACGTAGCAGAAAACAACGGCTTTGTTTTGTTAGGTAGAGTATTTGAAAAACGTAATTGA  
>Cluster\_42923  
ATGCTGCGTACTGACCGCTGAACAAGCCCTCAAATTAAGTGGGTGAAATGTTTTGTTTTATCATATGCCATTTAAACCGCG  
ATTGGGGATGGAACCTGGAGCGTTACGAAAAAGAGTTTCGCACAGCTGGCCCTTAAAAATCAGCCGATGATGGTGGGCAACT  
GGGCGCAAAGCATTTTACAGGCGGGGTCATTTGCTGCGGCTGGATGTCGCCGAGGTTCTGGTGTGCGTGGGAGTACC  
TTAACCCGCCACGAAACCATCAGTGAAGATGAACTACGCCAGCGGCTATCGCGGATGGGGACCATGATCTTCCGCTCGA  
TTATCTGGCCACAGGCGAGGCGAGCGTTTTACTGCTACAGTAGCCTGTTGCTGCGGCAATAAAGTTCGCGCTCGCCC  
CGGTTGAATTACACAATGAAGAACAGCTTTATATTGCCAGTGCACCGCCACCTATATGGTAGGTTGA  
>Cluster\_34692  
ATGCTTCCCGTTTTGCGGATATTTTTTCCAGAGGTAACCGCTGGCTTAACTGGCTGGAGAAACAGCCGGAAGGTTTCA  
GCTCCGGTGGTACTGAGTCAAGAAAAATCATGGCATGCGGGACACGCTGATGGGCTACACACAAATGGTGTGTT  
CGTACCGGACTGTTGCCACACCAAAAAGGCTGCTTCCGGTGTAAAAGCCGCTCCTGTCGCGACTGCGGGGTGAAGGCT  
GGGCGACAGTGGATACAGTATCTGCTGAGCCTGGTCCCGACTGCCGTTGGCAGCATATTTGTTTCACTTCCCTGCCA  
GTACTGGTCCCTGGTGTCCACAACCGGTGTTACTGGCAGAGATGAGCCGATTTGACGCTGATGTGATGACTGGAATCT  
GCCATCAGGCAGATGTTGAGCCGGGATATTACGGTGTATCAGCAATGGGGGCGTGACCGAGCATGA  
>Cluster\_27132  
ATGACTAACCTGTTTGTTCGTAGCGGAATTTCTTTTGTGATCGTAGCGAAGTTTTAAACCATATCGGTAATGAGATGCT  
CGCGAAAGGTGGTTCATGATACCTGGCCACAGGCATTAATTAACAGAGAAGCAGAATTTCCCTACCGGGATTAATGCTTG  
AGCAGACGCCAATTGCAATACCGCATTTGAGGCGATTTCATGCTAAGTCTGACGCAATTTATCTGTTAAGGCCAACAAAT  
AAAGTTCAATTTTACGAAGCGGATGATGATAACGACGTGGCGGTATCGTTGGTTATTGCGTTGATTTGGAAAAATCCGCA  
GCAGCAATGAAACTTTTACGCTGTTTATTTGGCAAGTTACAACAGCCGATATCGCTGAGACACTAAACCTCTTCCCTG  
AAACCCAGTTAAAGGAATACTTCAAAAGTATGTTTTAGATTCAGACGAATAA  
>Cluster\_43558  
GTGAGCAGAGTCTGCGATTATTTATGCTCTGGTTATCTGCATAATCGTCTGCTGTGCTGGGCGGTCAATCATTACCG

TGATAACGCCATCGCCTACAAGAACAGCGTGATAAAAAAGTCAGTGAGCTGAAGCAGGCGACCGCCACCATTACTGACA  
TGCAGCGGCCAGCGCGATGTTGCTGCACTGGATGAAAAATACTCAAGGGAGTTAGCTGATGCAAAAAGCTGAAAATGAT  
GCTCTGCGTGATGATATTGCGCGTGGTCTGCTCGGTTGCGCATCAGAGCAGTCTGTGAGCCGGACGTGAAGCCACCGC  
CGCCCCGGCGTGGGTAATGCAGCCGCCCCCGACTGGCAGACACCGCTGAACGGGATATTTTCACTCTCAGAGAGCGGC  
TGATAATAATGCAAAAACACTGGAAGGGGCACAGCTATACATTCGTGAGCAATGCCTCAGATAA  
>Cluster\_7257  
ATGGCAAAGCCAAAATATTTCTCTCGAAACCAGATTAGCTGTGCTTACTCATTATCTTGCCGGACAGATGGCGCAGCTG  
TACCCTGTAACGTTTTGGTGTGAAGAAACATCAGTGCAGCAGGGTAAAGAGCCTGGCAACTCCACGGTATTGATGGTA  
TTACATGGAAAAATGACCGCCATTTCTCCTGAGTTTCGACTGACGGTTGCTGAAAGTCTCTGAGTGAAGAACTTACCATG  
CGGGAAGCCCGCGCAGGTTAATATCTCCAATGAATCCGTTGTCCGGCACTGGGTGAAGTTTACAAAGACACTAGTGA  
AGCAGGACTTCTGAACATAAAACCAGGCGGAGCAAGGACATGACAAAACCTTAAAAACACCTCCACTTACGATGAAGA  
ATTGGAAAAGTTATCTCCGAAGAACTGCGGGCGGAACCCGTTACCTTCGCGCAGAGAAATGCCTATCTAA  
>Cluster\_42755  
ATGTCATCAAGATCTGAACTTTTATTAGATAGGTTTGCAGAAAAAATGGTGTGGATCTATTTCTTTAATGAAAATAG  
ATTTGTTCTTTTTGCTATGATGAAATTTATTTATTTTCTGTTACTGATGCCAATGACGAATATATGATGATTATGGCG  
TCTGTGAAAAATTTCCGACAGATAACCCTAACCTTCGCTCTTGAGATTTTGAATGCAAACTTATGGTTTGCAGAGAATGGT  
GGCCATGACCTGTGTATGAGTCAAGGACCAATTCGCTTTGTTAGCGTTACGTTTCCCGCTCGATGATGATGATGATG  
AAAACCTGAGAATGAAATAGAAGTCGCTGTTAAGTCGATGGAAAACCTGTATTTGGTATTACATAATCAGGGAATAACAT  
TAGAAAACGAACATATGAAAATAGAGGAAATTAGCCCAAGCGATAATAAACATTTATTACGCCGGAAGATAA  
>Cluster\_17536  
ATGTCCTCACTTGGACGGAATTATTAAGATTCAGAGTCCAGCTACAAAGTTAATGAAACAACAGGTTGCTGGGAGTCTAC  
CTATTCAAAAACAAGGAGGATACACAAAATTTGTAGCCTTTGGCGTAACAATGCTTTCTCATCGGGTTGCTTTTGAGC  
TTTTACTCTCCCATTTCCATCTGGGAAGATGGTTTGCACAAATGCGATAACCAATGCTGCGTTAATCCTGAACATCTC  
TTTTTAGGTAGCGCGCAAGAAAACATGGACGACAAGATAGCAAAAAGGAAGCATCGTGGAGCCAAAGAAAGGTCATGCTCA  
TCATGGTGCAAAAATTAACAGAGTGGCAGGTTATAGAAAATAGGAAAAGACTCTCTGAAAAAGAGAGTCAAGATAG  
CAAAAGACATGGGTGATCTCAATCAATATAAGCAACATAAAAACTGGCAAGAGGTGGAGCAAAATGA  
>Cluster\_46640  
ATGAACAGGACCCAGTCCCATTTATGTCGCGCTCAGTACTTTCTTATGATATCTGCCTTGATATATGCCCCGCTGG  
GATGACGGCCTTCACTCCTGATGTTATTGGTGTGGTAAACGATGAGACTGTAGATGGCAGCCAAAGAGTAGATGAACGAG  
GTACAACAATAACACTCATATTTATCAACCATGCCCAGCAGAAATGTTTCATGGCGGGTATCTAATGGAAGTCTTATTGAA  
TCGGGTGGATATCAAGATGTAGGAAGTCATAACAATTTTGTGGGGCAGGCTAATAATACAACCATTAACGGAGGAAGACA  
GACAATTCATGACGGGGGCAATTTCCACCGGTACGATAAATCGACAGTGGCAATCAGGACGTTTATACAGTGGTATCAGCA  
ATGGAACGACAATTAAGGTGGTAAATTCACACTGTAGTGGTCAAGTAATATTGGCCACGGTTTTACAGTAA  
>Cluster\_53485  
ATGATTGTTGGCAACATCCATCACTTACAATCCTGGCTGCCGGAAGAAGTTCGCGAAGCAATTGAGTACATCAATCACA  
TGTACGCGATGAGACAGCAAAAGGTAAGCACGCTATTGACGGCGACCGCTGTGTTTTATCTGATTTCTGAGGATACGACTG  
AACAGGTGAACGCGTCTGCTGAGTATCATGCTGTTATCTCGATAATCCAGATTGTATAAAAGGGCAGGAAGGGATG  
ACATTTAGCACGCAACAGCAGGCGTACAGAGACTGACTGGCTGGCAGATAAAGATAATGCTTTTATCGGGCAGGGGAT  
CGATGAAAAACAGTGTATCTTAATGAAGGGGATTTTGTGCTTTTCTATCTCTGGCGAAGTTCACAACCGCTTTGTGCGG  
TGGGACCCCGCTCAGGTACGGAAAGCAGTAGTTAAGCTATTAATAAATCGTAA  
>Cluster\_44306  
ATGGCCAGAGCGCTGGACGAGGTCGTCGCGATCTCAAGTCCGAAATCAACATGTACCCTGCTGGACGTAAGTGGT  
GCTGTTGCTGATGTTTATGGCGACAGCGCCATCATCACAGAGCGTGGAGGTCGATCTGCCAGACGCTACTGAATCAC  
AGGCGGTGAGCAGTAACGATAATCCGCCAGTGAATGTTGAAAGTGTCTGGTATTGGTCACTACCGTGGTGGTGGAGAAA  
GATCGCCTGGAGCGTTTACCACCAGAGCAGGTTGGTGGCGGAAGTGTCCAGCCGTTTCAAGGCCAACCCGAAACCGGCTTT  
TCTGATCGGTGGCGCAAAAGATGTGCTTACGATGAAATAATTAAGCACTGAACTTGTACATAGTGGCGGTGTGAAAT  
CGGTTGGTTAATGACGCAGCCTATCTAA  
>Cluster\_32223  
GTGAGTGAAGCGTTATCGCTTTTCTGTTGTTGCCAGTAGTTTCTCAGCGCTACACTATTACCAGCAACTCCGAAGT  
CGTGTGGTGGCAATGTTGCTTTCCGGAGTGAATCCTCGGGTGGTGGTGGTGGTGGTGGTGGTGGTGGTGGTGGTGGTGG  
GAGGGTTAACTAACGTTATCCTTGGCGTTTCTCATTGCGTAAACATCGCGCTGGCAAGAGAAAGCTACCGGCTGG  
CTGAAACGCTATGGTGCAGTACGCTATTTAAGCTGGATGCCCGTGGTGGCGATTACTGTGCTGTTAGCGGGATG  
GATCGCATCTCGTGGGGACCGGTAATCTTTTTTTTGTGCTTGGTAAAGCGTTACGCTATGTTGCAGTTGCAGCAGCTA  
CCGTTACGGCATGATGTTGGTGGCACTAA  
>Cluster\_26083  
ATGGATAACTGGCTAAAGCAGAGAGCCATAAAAAATCAGCTTGCCGGCGCATCAGTACATTTGTTAGCTGTGATACGTA  
TAGCAACGTTTTTGGCATAATATTTCGCTTCTCAGCGCGCTTGAACGATATGTCGCGACAGGACGATTTCCGCCGAAATA  
TGCCAGAACCAGTCCCTGTTGAGTACTGGTCTGCTGGCAATAGATAAATCATACAGGTCAGGCACTCGGTCGGTGG  
ATGGTCAGAGATGCCGCTACGAGTACTACAGCGCGTGAAGTCAATGGTATTCGCGGAATGTTGGTCCATCGGTTATC  
AGACCAGGCCCGTGAAGTTTATCTGCGAGTGGGTTTGAACCATCGCTGTCGATTCTATGATACTGATGGCAACATTGG  
CTGATTTGCAGGAATGCTTAAATAG  
>Cluster\_22427  
GTGCGACAACGGACTATTGATGTCCTTTGATTCAAAAATGATGGTGTATTATTGCTGTGTAATAATGGCCGACGATCGCGG  
CGTTTTCCCGGTCATGGGCGCTTTCCGGTGGCGCGTGGAGCCTGGCGAACGAATTGAAGAGGCATACGCGCGGAAA  
TTCCGGAAGAATGGGAGAACAGCTGCTTTTGACAGAAATCACGCCGTTGACCTTACGCGATGATATTCGACCAAGACG  
TATCGAGATGGTCCCAAGGAAGAGATTTATATGATTTACTGATTTTTGACTGCGTTTTCTGCCAACCGAGATGAAAAAT  
AAACGAAGAGTTTACGACTACGCGTGGGTAACCTGAAGATCTGGTGCATTATGATTTGAATGTTGCCACCCGAAAAA  
CGTTACGTTTGAAGGTTCTCTTTAA  
>Cluster\_32017  
ATGAAGAGTACTGAGTTTATCCTGTCATTATGATGCGCAGGTCGCTGCGTTTACCTTGTCTTCTGGCTTGTGCT  
ATTGCTTACAGCGCGAACCTGGGTGCTGTTTGTCAATGCGCGAGCGTCCGCGAGCAGGGTACTGCGCTGCTAAATCTGT  
TTTTATCCCGATCAGGATAATTTCTGGCTGGGGTTGATTCCCGGTTATCCGCGCGTGTGGCATTTTTGTGAGTGGTCCG  
CGGGCTTCAATTTCCCGTATCTGGCATGTGCTCTATTTTCTGTTGCTGTTGGCGCAAGTGGTTTTACTTTGTTGGCAAC  
CTGGCTGTGGCTGAACGGTGAATCCGTTAGCGGTATCGGTTAGCGCTGGTGGTGGGATATCGTGGGTTAATCTGCG  
TGCTGACCAATCAGCTTTACGCGCTGTTTTAATGAAGAAAAAAGATAA  
>Cluster\_5145  
ATGACAAACTTCTTCTTATTGGATTACTCACTCTTCTCATCTCATGTTATTGCTCAGGACTGTTTTGAACTGGCTGGTAG  
AGATTACAAAATCGATCCCGATTACTGAGAGCAGTTTTCATGGCATGAATCCCGTAACAGGGTTAATGCTATCGGCATTA  
ACCTGTTACGGGATATGGCTCCGGCTGATGCAATCGACTCCAGCATTTTAAAGAACTGTCCCGTTATGGAAATAGAA

C CGGAACACCTAGTAACAGATCCTTGCATGAATATTTATACCGGTGCGTATTACCTGGCAATACCGTTCAAAAAATGGGG  
AGTAACATGGAGACGGTTCGGCGCTTACATGCTGGTTTTTCGCAACACAGAGGAACAGGATCGCGCAGGAAAACCTTATG  
CAGAAAAATACAGAACATTTATCGAAATATAAAAAACAGCAAGGGCAATGA  
>Cluster\_20155  
ATGGACAAGCAACGGGTTTTACTTATCGAACTGATGGTGGTTATTGGCATCATGGCATTTTAAGCGCCATTGGTAT  
TCCCGCTTATCAAAACTACTGCGCAAAGCCGCACTCACCGACATGCTACAAAACCTTTGTGCCATTACCGTACCGCCGTAG  
AGTTGTGCGCGCTGGAACATGGTGGATTAGATACTGCGACGGTGGCAGTAATGGCATCCCTCGCCTACCACFACCCGC  
TATGTTTTAGCCATGAGTGTGGCAAAGGGCGTGGTGTCTGCTGACCGGGCAAGAAAGTCTCAATGGGCTAAGCGTGTCTAT  
GACGCCGGGTTGGGATAACGCAAAACGGCGTACCGGTTGGACGGCAACTGCAATATTTCAAAGTGACAGCGCATTGACG  
AAGCCTGTGAAGATGTCTTCCGCTTTGATGACGCCAACTAA  
>Cluster\_5537  
ATGCATTGCCCATTTCTGTTTTCGCCGTGGACACTAAGGTAATTGACTCTCGTCTCGTGGGCGAGGGTTCCATCCGTACGCCG  
CCGTCGGCAGTGTCTGGTGTGTAATGAACGTTTTACCACCTTTTGAAGTGGCGGAGCTGGTTATGCCCGGTGTTGTA  
GCAACGACGTGCGTGAACCGTTTTAATGAAGAGAAATTCGCTAGCGGAATGCTGCGGGCGTGGAAAAACGTCGGGTGAGT  
TCCGATGACGTGCAAAATGCAATCAATCATATTTAAATCGCAGCTGCGCGCCACCGGTGAGCGCGAAGTCCCGAGCAAGAT  
GATTGGCAATCTGGTGTGAGGCAATGAAAAAGCTCGATAAAGTGCCTATATCCGTTTTGCCTCTGTCTACCGCAGTT  
TCGAAGATATCAAGAATTTGGCGAAGAGATCGCGCGCTGGAGGACTAA  
>Cluster\_52215  
ATGATTACAGTAATCGCAGAAATCCGTACTCGTCTGGTCAACATCACCGTCAGGCAGTGTGGATCAGTTTGTCTAAAT  
CGTTCCAACCGTACTGAAAGAAGAGTTGCCACGGCTATGCGCCAATGGTGGATTGCGCTGCTGGCGTGAGTTCCAGT  
CTATGGCACCCGATTTCTATCGTGTGATTGAGCAGTGGGAAAGCATCGCGCATTTGAAGCGCATCTGCAAAACCCCGCAC  
ATGAAAGCATATAGCGAAGCCGTAAGAGTGTGCTGGAGATGAATATTCGTATCCGTCAGCCGGGCTTTGA  
>Cluster\_41440  
ATGTCAGACACATACATAAAGAAAGTAAATGGCACCCCTATCTGGATATGAGTTTTCTGGGATGCGTGTGGCATTGTC  
TATGGAAGTTTATTTGAAGAACACATTTTTATTTCCACCGGTGGAGGAGCAAGTTTTGGATTGATAGCACTCATCGTTA  
TTAATTTTTATGACTATCCCGATAGTGTGATCGTGGTAAACAACACTATTTTGTATTTATTTGAAATTTCCGAAAGCGTGT  
AATCGTATTTGATATTTCTGTTGGCATGTATTTTGTGACTATTTATCGGTTTGTATTCGCATATCCCGTCGGGCAATA  
>Cluster\_35843  
ATGTCAAGTGGGTACGAAAAAACTGAAAGAGATACGAAAAAGTGAAGGGTTAACTCAAGCTGAGTTTGCAGATGTTAC  
TGGGATAAATCTCGGAACATATAAAGAAATATGAGAGCGTAAAAGAGAGGTTGGTTTTAAGCGTTGTTGATCGCGTAATTA  
ATTTCAAGGATTTGAAAAATACACTATATGGCTTATGACGGGAAAAACAATGAGGCTGTGGGCGAGTACGTCCTCT  
CTCTCCCGTGTGATGGGCCGAAAAACACATCGTCTTCTCAAAAATCCCGCAAGACTGGTACACAGCCCGGCTAA  
>Cluster\_27700  
ATGCACATCATTTCTAAAGCGCCATTTGAAAGTCTGCGCGTAAATATCCTAACGACGCTCTGGCTCTCAGGCATTGTA  
TCGGGTTATTAAGGAAACGGATTTTCTACGCCAGAAGAAATCGCAACGGCGTTTCCCAACCTCGACAATTTTAAATATC  
GCAAAATGTTAGTACGTTCTGGATGTAGTGGGAAACACCTAAGGGTATGCTTACATAAACTTTGTTAATAAGCGGTT  
TTTTGTAAGCACATAACTAATCACGCCGAGTATGACAACTGACACGTTACTACAGAGAGAACAAAGAATGA  
>Cluster\_27960  
ATGGCAAAGAACCGTAGCCGTCTGCTGCGTAAAAAAATGCACATCGACGAATTCAGGAATTAGGATTTTTCGGTGGCATG  
GCGATTTCCGGAAGGTACATCGGAAGAACAGATTGATAAAACCGTTGATGACTTTATTAACGAGGTTATCGAACCGAACA  
AATGGCCCTTTGACGGCAGCGGTTATCTGGCCTGGGAAGTCTGATCTGCATGCAGGAATCGGCAATGACCGAAGAA  
CATCAGGCGATTGTGCTAAGTGGCTGGAAGAACGCAAACTGGAAGAGGTACGCACCAGCGAACTTTTCGACGTTTGGT  
GGACTAA  
>Cluster\_40679  
ATGAGAGAATTAACCTCCCGCTACAGATTTTCTGTTGATAACGACACTGCTATGATGATTCAGGCTTTCACTGATGTAGG  
TGTTAGCATTGACTTTGATAAGTTGTTAGAGTTAATGACTGATAATGCGGAAAGCATCTGACTTTATTCAGTCGGTGG  
AGTTTAAACGAGCCTCGAATGATGCTACCAATTAAGACAGCAACATGAAAAGATTGGTTATCGAGCAAAACGAAATTC  
AGCGTTAGCCCTGAAAAATATCTCAAGGCGCTATAGCAATTTTGTACGCTGACAATGTTTTGGTGACGGATGCTGTGAG  
GGTCACTAA  
>Cluster\_48981  
ATGAAAGATGGTATCTATTTTGTGTTTTTCAGAAGCAATCAGCGTGTATTTGGTAATGGTACCGTAGTTGTCAAAAACAA  
TGCAGTAAACGGCGGAGATTTTGGTTTTACGATACAGGAAAAGTTGACGGTAGCCAATTTATCTGCGCGTATCGCAGC  
ATGATTTAAATGCCACCTCGGTTTTCCCTGGGGTAAAGAACTTTGAAATGAGTCTTTCTTTGCAAGAAACGAGGACGTGAT  
TACCTGTTAAATGGATCTGTGGTGGAAATGCCTCAGATGCAAAATTTCAATTAGTGCAAAATACATTTGGTGATCTGATTTA  
G  
>Cluster\_15654  
ATGGAAGCATTAGTAGTAGAGCGAAGCGAGGATGGCTACTGGACGCACCCAGAATACGCCAACCTGTTTGGGGATAGAGA  
GGTAATTTACGCTGATGAGTTGATGCTTCTTTCGCAAGCAGCATGGCATTGAATCATCAATTTGTTGAAATGAAAAACGACA  
ACAATCAAACGGTAAATGACGCGTATTTTGAAGATGGGAATCCAAACATCAGTGGATGGGAGCAAGCATGCCAGATGGA  
GAAGGATGGTTTTGTCGGTTGATTCACGATACAGAAGACGGTCCGATCTGCGTTTGGTTGAGAAATGTAGATAAGGCCG  
ATAG  
>Cluster\_10626  
ATGTCACAGAAATACGTTACAGACAGAGATGCCATCTAGGACTGCCAGGCAGACGAAGAGTGGATTACAGCAGCAGTTACA  
GGGCTGCGCTCCGTCACCTGAGACGGAAGGTTGCCCTGAAATATGCGGAGGTATACGAAATCACTTTTCGACGCTGAGCCTG  
TTTCATTTCCGCAAGGAGAACAGAGCAAGGCACGAAGCAAAACACAAGGCCTCCGCTGTTTTGTAAGAAATCAGGGCAGAGCT  
TTACAGGGGTATACAGCCGAACCTCCCTGGCTGGATCGCAATCGCGCTCCTCATTGTTTCGGGTTTTAA  
>Cluster\_30591  
ATGGAAGTTGAGATCCTGAAAGAAGCCTAGGATGACGGCTGTGCGGAAAATGGATAGCGCACACGCCCTTTGTGCCCCAA  
GGACGGGAAACCGCAGAAGGATGCACAGAGTGCAGACAAAAAGCCGCTGATATGCTTAAATATGAGCGCAGAAAAAG  
GTATTTGTTGAGTGGTGTCTCGAGATTTGCGGTACGATAAAAATCACCAGAACTCGGTATCGATAAACCTGTCGAAAC  
CTGAATTTATCTTCTGACTCATTTCTGTCTGGACTATACATGTAATATTTCTGAGTACTGA  
>Cluster\_32674  
ATGACACCTGGTTCTTTACTTGTATCCGTACCGCCGACAATAAGCTTTATACCGGGATCACCGGATGTCGAAACGCCG  
CTATCAGCAGCACCAAGCGGCAAGGGCGGAAAGCACTGCGCGGGAAGGGAGAACTAACGCTGGCGTTTTCCGCAACG  
TGGCAATCGTTGCTGGGTTACGGGCAAGATATCGCGTTAAGCAACTGACCAACGGCAAAAAGAGCGTCTGGTAGCG  
GAAGGTGACGTTGTTGCAAGCTGTTGAACAGCCTGCAAAACCCGGAGATTAAGCGATTGA  
>Cluster\_7309  
GTGCGTATTTAATAACTCATGCCAAAAGCAATGAGGATTTAGAAGGCATCTGGTATTACAGCTATCACCATTTCCGGCA  
ACCACAAGCCGACAGATATGTGGAACATCTTTCAGACGTTCTCCAGATCTGAGTAAATAATATAGGTACGCCAGAC



CTGAATTAGCGGAAGGTATTTTTGTTCTTCTTTTGAACGCCACGTCAATTTATTTCTGCAATCACCAGGGGAAATTATC  
GTCATTCGTATCCTTAACCAAAACCAGGACGCCACCAGACATTTACACTGGAGCTAA  
>Cluster\_39332  
ATGATCCGGCACATTAGTTATTGATTTTCGCTAAGGCTCCGAGGAGCCGAGTTACCACCTTAACGCCGATATCCTCGGTGG  
CCGACTGCTGAGAGTGCCTTTAAGGATGCGCTGGCCTCACCGTGGATAGCCACTGACGCAAACTGCCTGGTGACTATG  
ACCTTGTGCTGGTCTGTGATGGCTACGGCGTGGAAACCCTAACTATATTTGATGGCGAGTTTCACTGCACCAGTGAAACG  
TACCCGGCAAACAGATCACCCTGATGTTAGTTCCCGAACCTACCGGAAGGATGCTGA  
>Cluster\_23  
ATGATTGTACCCGTTGATGTAACCCTGATGAACACGGATACTGGACGCATCCGACCTGACCCGAGCGGCTGTGAAAC  
TCCGGCAGAACTTCGCTACTGGCTGAGAACCCACGGACTGGAGTGCTTCGTGATGACCATGTGGGATGAGGCTCCTGAAG  
CCTTTGCTGCCGGATTTACTGACGAGGTACCGGATGCGCGCGGCTGGCTGCCGGAACCCGGGATCTGATGGCTGGTTC  
CTGGGCTCTGTCCATGATACCCGGCTACGGACCTGTCTGCTACTGGTTCGGTAATACCATAAAGGCTGA  
>Cluster\_2063  
ATGCTTATCGGTGAAAAAATTAGAGTGATTCGTGAATCAGAGGATTTAACCGCGGAAGAATTTTGGCGCTGATTGATGT  
GCCTATCGGCACCTTTGCGCTGTTTATGAAACGGGGCGGATTTGAAAAATAGGGGGCGAAGTGCTTATCAAGATTGTTAATC  
ACCTCGCTTTTTAAGTACATGAATGGCTTATGACGGGAAAAACAATGAGGCTGCTGGGCAGATCAGTCCCTCTCTC  
TCCCTGATGGGGCCAGAAAAACATCTCTTCTCAAAAAATCCCGCAAGACTGGTACACAGCCCGGCTAA  
>Cluster\_50615  
ATGGTTGATTTGCTTATTGAAAAATTAATGTTGCTATAGAGAATGGTAAAGTTAGAGGTTTTGATGAGATAAAGGAAAT  
AAATGGTGAATAATTTTTTCCAAATATGCCATTAACAAACAGGATGAAAAATACAATACCTATTTTTCAAAAATACCAG  
AAAAATAAATGGAAGTGTTCGAAGATTATGCAACTGAAGAAATAGTGCCTTTTCCAAATATAGAAAGATGCTTTTAATTC  
TTTTAATTACAAGGATTTGATATTAACAAAATTTCTCCTATTAGAGGATTTATACCTTTTTAG  
>Cluster\_27306  
ATGTCTAATCAGTTTGGTGATACACGTATTGATGATGACCTGACGCTGCTTAGTGAAACACTGGAAGGTTGCTCCGCTC  
CTCTGGCGATCCCGCCGATCAGAAATATGTTGAGCTGAAAGCGCGTGCAGAAAAAGCGCTGGATGATGAAAAAACGGG  
TTAGCCAGGCTTCAGACAGTTTACTATCGGGCGAAGCAGGCTGTTTATCGTCTGATGACTACGCTCACGAAAAACCC  
TGGCAAGGAATGGTGTGGGTGGCGGCTGGGCTGGTCTAGGACTGTTGCTGGCACGCCGTTAA  
>Cluster\_37697  
ATGAATGAACAATTTCCGACAGATCTTGCACATACGTTCCGAATAACTCTTGAAGAACAACCTAACGCCCTCTCTTTCCA  
TGATCACGATGGTCAATGAAATGACTGAGAGTGTGCGCCTCAATCTGAGGTCCTGTTTTTTTATGTTATTTATCAATA  
ATGAACCTTCAAAAATGATAAAATGCTAGAAATAAATAGCAATCGAGATCTACTCGGTATGTTTTTTCTATCATTA  
GAAGATAGCGTGCCTTTTGAATATGCAATCCCTGCAGATAAGGTTAACATTACAGAGTTTATCAATTTAATGGAAACCG  
TTATTTATTAAGAATGAAGTAATAGTTTATTGTCGTA  
>Cluster\_18863  
ATGAAAGAAGTCGAAAAAACGAAATCAACAGTCTCAGCGATCGTCTGGACGCCATCCGTCACCAGCAGGCGGATCTATC  
GCTGGTTGAAGCCGACAGAAATATGCCAGCTGGAAAAAGAGAAAGCCACTCTGGAAGCCGAAATTTGCTCGACTGCGCG  
AAGTTCACAGCCAGAACTCAGCAAGAAGCGCAGAACTGATGAAGATGCCGTTCCAGCGTGAATCACCAAAAAGAG  
CAGGCTGATATGGCAAGCTGAAAAAAGTGTTCGCGGACTGGTGGTTGTGCACCAATGACCAGGCTGGGCCGTGAAAT  
GGCCTGCAAGAGATGACAGGTTCTCAAGACTGCGTTTTAA  
>Cluster\_45259  
ATGGCAATATCTGCAGGTCGTCTGACACAGATGATAAGTGTTCGAACCCGGTGTAAACCCGTAATGCTGCCGGAGAAAT  
GACGGAAGAAATGGGTGTCTATGCGGGAAATTCATGCGGATATCCGTTGGCAGGAGCAGCCGGGAGCGGATGCAATGCCG  
CGAAATGGCGCAGGCGGAAATCCGCATCTGGGTGCGCGGTGAGTCAAGTCAAGTCAAGGCGGAAATGACGCGCAGCTCA  
GTGCTGAGTGGTCCATGGCGTACCGGATCCTGAAAGTGTGCGGGCTGCCGTTGCCGATGCGACCGGCGGGCTGGA  
AATTTCTGCTCGGCTGGGAGGGGAAAAATGA  
>Cluster\_35622  
ATGGCAAAAGATCGCCGGAACCTGTTTTTTTAAAGTGGATGGTCAAGGTTATCGCTGACTGGTGGCATGAAAGTCCGAT  
GAACACCAATGTCGGGATGATGTTGTCGGCATGGCAGGGGATGGGATTACAAGGAGACCTGGCGGTACCTTACGTTA  
AAGGCACGTTTAAAGTGCCCAAAACTTTCCGGTGCACAAAATACCACATCAGACCAGATGACGATTACCGTGAACG  
GCAACCGCATGGTGTATGCTTTCCGGTGCATGGCTGCACGGAGAGGCTAACCATAAATGCCGAAGAAGGCACGGCAGA  
TCTTGAATTTCCACGGCGAAGAGGGAGGATATCAGTAA  
>Cluster\_63895  
ATGACTATTAACCCATGAGCAGCGGAGATACAGTAAACAAGATTTAGGAGACGCTCTGGATTTTTATCTTTTTTGAAGG  
TGATTTGGTGGCCATTCGATATGAGTTATCGAATAAAATCGTTACCTCTCGCGGTGAATATACATGCCACATATGCG  
CCGAAAAAATTTCAAAGGTGAAAGTACCCGACGACCAACATCGAATAAAATTTGACGGCGAGCTTATGTTCTATAGATGCTC  
AATGAGTGTGTGATGCGATGGTTAAAAGCGTCAATTAAGAATATGAAGACAAAGACCCGGTAGAAGCACGTTATGCGCT  
TGGGGAAGAGCGCAGGAGAGCAAAACCGTGGAAAAATCACTTCCGCTACTAA  
>Cluster\_59061  
ATGGATGGCTGTGGCGTCAATCCGCCAGATTTCAAAGAAATAACGGCAGAACTGGCAGTCAATTTAAAAATCTCAAGC  
TGAAGGAGGCGTATCGATTTTTCTGTTTTTCTCCTCTATTAAGAGGTTATCCGTAATCATGATGATGAAGTCCGAG  
ATGCGAACTTTCAAAGCAGATGCTTATCTCTGATGCAACTGATTTTATCAATAGCAGACAGTGGCAGGGTAAGGCTGCA  
TTGGGAAGACTTAAAGAAGATGAGCTGAAACAATAAATTTGTGGCTGGATTAATCTGGAGCACTGGAAGTGGTTGATAC  
ATCCAGTGCAGATATTTGAATGGCTACGCCCTCCGGCAGTTACAGCCAGATGA  
>Cluster\_34191  
TTGGAGTCAATACCGGGCAAATCGATAAATCGTCTGATGAAGCCTCACTCAGCCTGCGCGCCGGTTCCCTGCGTACCAT  
TACGCACATCCTGCTGCCGCTGCTGCGCCGGGATCCTCTCGGCGTGAATTTACAGCTTTGTGCGCGCATTACCACCG  
TCAGCGCCATTGTGTTCCCTGCTCAGCCGGATACCCGCTAGCAGCGGTTACATCCTCAACCGGTGGAAGATGGCGAA  
TACGGTGTAGCGATTGCTTACCGTTCCATCTGATCGTGGTGTGCTGGCGATTAATTTTATCTTTGACTGGCTGATCGG  
TGAATCACGTACCTCCCGTTCAAAGCCAAAAACCAGGCGTAA  
>Cluster\_296  
ATGATCAGCAGAGTGACAGAAGCTTAAGCAAAGTTAAAGGATCGATGGGAAGCCACGAGCGCATGCAATGCTTGGTGT  
TATCGGTGACGATCTTTTCCGATTTGGGAAAGTGCACCTCTGCTGTTTCAATTTGACATTTTACGCGGTTGACTGTGG  
TAACCACGGCGCACCAATACCCGTTACTGACCGCTCAGCGCAACAACCTGGTGTGGAGCGAGATGCTTTAGACATTGAA  
TGGCGCAACCTGATCTTTTGAAGAGAATGCTCTCGCGCACCATGACCCGGTGGAAAGGATCGCCACGGAAAAAGCTGCA  
GCAGCATGTTGATCCGTCACAAGAAATATCGTAGTCAAAAAATA  
>Cluster\_137  
ATGTCTGAACCACAAACGGGCGGGTGCCTCTTCCGGCGGGGCTGGCCGCAATCTTGCATCGACCTGTGCTGGG  
GCCGCTAGTACTGGTCCGCTGGGCTTCTCCGGTGTGGATCGGCAACCTGACGGTGTGGAACCTTATCGACCGTTGT  
TCATCGGCGGGCGCTAGTGGCGTGTCTTCCGCTGGAAGCGGATTTACCGCCGTCAGGATGCAAGCCAGGTGAG

GTCTGCGGATTCCGCGAGGTGCGCGCCACCTACAAGCTGATTTTCTGGATCGTGGCCGTGCTGGTCTGGTTCGCGCTTGG  
ATTTCCCTATGTCTGTTCCATTTTTCTATATA  
>Cluster\_19975  
ATGCAACACATTGACAGAAAAAGCACAGCGACTGATGAGCGGATGGAAGCGCTGGCGAAAAGAAAAATGTCAACAT  
CCAAAAAATAGCTGAATGTGGCCAGATAGTTCTTCGTCTGAAAAAGACCTCAAACAACCTGATGTCTGGCGAAACAGCA  
AGACATGGACTTCAGGCGAGAAGACGGTTTATTGACGTTTCTGCAATAAATCCAGTACGAAGTCACAAAAGGTGATTGCC  
GGACCGTCTGTTTACATCTGCAATGAGTGGTGGATTTGTGCAATGAAATATCAGGAAAAGAGTGACAGACAAAAGGA  
AAAAAACGCGATGA  
>Cluster\_31796  
ATGGACACTCCATACATTGAGTTATTTGACGGCAGTACGAGGTCGCCACGACGCTGGTACATTTTGGCCGTGATGCTGG  
CTTTATTCAGGAATTTACCCCGCTGATGCTGGCGGACAATGGCGAGTTTAAAGCCGTGGGATGGTAAGGAATCTGGCAAGG  
CTGTTTATCTGACCTCGTACCCTGTGGACACGTCAAAGCAGAAATCAGCACAGTGTACAAAGACGGGGATTTCAATATT  
GCCGCCGTAACTGGCCTGAGAGCGTCGACACCCGATGCCAAAAAATGCCGCCCTTTGCGGGTTCGGCGGTATCCGTTCA  
GCCGCTGGCCGATAA  
>Cluster\_10985  
ATGTCAAACCCCGATGGACGCTTGTATCAGAAAAAATCAGCTTGGCCGATGGCGGCCAGCGGCTTACCCGTGAACA  
GTACTGTGAACCTTACGACATTCGTTTTAAATCCTGCGCCAGTGGCCGAGGATGTCGCAAAAGCCGAAAAACGAGCCA  
GAGCACAGAAATATTCTGTTTCACTATCTGGCTCTTCCGGAATGACTGATGGCAGACCATGTCGGATGAGCCTGTC  
ACTCTCTTCTGCCCCGTTGGTATCCGGATGTGCTGCCAGCCTTCTCAGTTAACCGATGTTTTCCGGGCTTTCGCCATGC  
TGACGCCTGA  
>Cluster\_54061  
ATGAGCTTTTTTATTTCTGATGCGGTAGCGGCAACGGGTGCACCGGCGCAAGGTAGCCGATGCTTTTGTATTTGATGCT  
GGTGGTATTCGGTCTGATTTTCTATTTTCATGATCCTGCGTCCACAGCAGAAAGCCACCAAAGAACAAAAAGCTGATGG  
ACTCCATTGCCAAAGGTGATGAAGTTCTGACGAACGGTGGCCTGGTTGGTCAACAAAGTAGCCGAAAACGGCTAC  
ATTGCTATCGCGCTGAATGACACCCTGAAGTAGTTATTAACGCTGACTTCGTAGCTGCCGCTCTGCCAAAAGCCACAT  
GAAGGCGCTGTAA  
>Cluster\_7957  
ATGACGACCCGTTTATATCGGTATGAACAGGGAGACCGGCTCGCCATCCTGACGCGGATCACATCCGTCAGAGCTGTGG  
CGATATTTGCGAACGCCAGTCCGCTCTCGCGTATGCGCCGATTAAGGCTCGCTGCTGTTCTCCCTGATTGATATGC  
CGCAGACCAGCCGCTGAGGCTGCAAAATATGTGCGCCTGTTATATGGCGCTGCTGAAGTGGGAGCCGCGCATCAGCATC  
AGCTCGCTGACGGTCAACGCTCAGTTTAAACGGTCAGATGATTGTTGAGCTGACCGGCGAGACCCGGACACCGGCAAAAC  
CCTGTCACTGACTATTTCTGTGAGTTGA  
>Cluster\_39382  
ATGGTAAGCAACGCCCTCCGATTAGGACGCAATGGCGTACATGATTTTCATCCTCGTTCGCTACCCGCTATCGTCTGAC  
GCTCTACATCATTTATATGGTTCGGTTTTTTTCGCTACCAAGTGGCGAATGACATATGAAGTCTGGATTGGTTTTCTCGCCT  
CTGCGTTCCAAAAGGTGTTACCCCTGCTGGCGTGGTTTTCTATCTTGAATCCATGCTGGATCGGCATGTGGCAGGTGTTG  
ACCGACTACGTTAAACCGCTGGCCTTGGCCTGATGCTGCAACTGGTGTATGCTGTTGACTGGTGGTTTACGTGATTTA  
TGGATTGCTGTGGTGTGGGGTGTGTGA  
>Cluster\_22746  
ATGCGCTGTAAAACGCTGACTGCTGCAGCAGCAGTACTATTGATGTTGACCGCAGGCTGTTCCTCTGGAGCGAGTGGT  
TTACCGTCTGACATCAACCAGGGGAATCTGACCGCTAACGACGATCCAAAATACGTGTTGGCATGACGCAACAAC  
AAGTTGCGTACGCATTGGGTACACCGCTGATGTCGATCCATTTGGTACAAAATACCTGGTTCATGCTTTCGCCAGCAA  
CCTGGTCATGAAGGTGTAACGCAGCAAAACGCTGACGCTGACCTTAAACAGTAGCGGTGTTGACCAACATTGATAACAA  
ACCTGCGCTGAGTGGTAACATA  
>Cluster\_6883  
ATGAGCACACTATCGAAAAAATCCAACGCCAGATTTGCTGAAAACCCGATCCTGCTGTACATGAAAGGTTACCCGAACT  
GCCGAGCTGCGGTTTTCTCTGCCAGGCAGTCCAGGCGCTTGGCGCATGTGGCGAACGTTTTGCTATGTTGATATTCTGC  
AGAATCCGGACATTCGTGCGGAACGCGGAAATATGCTAACTGGCCGACCTTCCCGCAACTGTGGGTTGACGGCGAGCTG  
GTCGGCGGTTGTGATATCTGATCGAAATGATCAGCGTGGCGAACTGCAGCAGCTGATCAAAGAAACTGCCGCTAAATA  
CAAGTCTGAAGAGCCGGACGCGGAATAA  
>Cluster\_12345  
ATGAGTACGCCAGGTTCACTTTGTTGGATATCGATGTTTCGAAAGCGATACTGGATATTGCCGCCAGCAGCGCTATTGA  
ACAATTTTTCTGTCGGCAATGACAGTGTGGCTTTGACGCCATCATTGCTGAGTTGAGAATGTACGCCATTGCGCTGGTTT  
TAATGAAAGCCACTGGAGGACTTGAACCCGCCATAGTCTGTGCGCTTCCAGGCAGAAGGTTTGGAGCTTCCCGTGGTTAAC  
CCCAGCAAGCTCGTACTTTGCCCCGCGCATGGGATACCTCGCGAAAACGATGATGATTTGATGCCAGAGTGCCTTCCCA  
GATGGCTGAGGTTCTCAACCGCATCCGGAGCGGGAACGCTTTATCAGAGCACGCGGATATGAAATGTCAGGTTCTCA  
CTGCAATGGTAGTTCTGATAGGCGGAGTTGATTACGATGCTGGTTGCCGAGAGAAACCGGTTGCCACCTCTCATCCATAG  
>Cluster\_41970  
ATGTCTATACAGAACGAAATGCCGTTTACAACGAAATGAACAGTATCTGAACCAACAGGGACGGGCTGACCCCTGC  
TGAGATGCATGGTTTAAATCAGTGGGATGATATGTGGCGGTAACGATGACAGCTCATGGCTGCCGCTACTTACGACCTGA  
CGAACGAAGGCATGGCTTTCGGTTCATGAGCTGGCACAGGCACTGCGCAAAATGCACTCTGCCACCAGCGATGCCCTGCAG  
GATGACGGCTTCCTTTTTTCAGCTTATCTGCTGATGGCGATGATGTCAGCCTTTTCGATCGGGCTGATGCGCTGGCTGG  
TTGGGTCAATCACTTCTGCTTGGTCTTGGCGTTACGCAACCGAAGCTGGACAAAAGTACCGGCGAAACCGGTTGAAGCCA  
TCGACGATCTGCGTAACTCAGCGAGTTGGGTTACGACGAAAGCAAGATCAGGAAAGAGCTTGAATGTCGCTTGAAGAG  
ATCATGAGTACGTCCTGTTGCCGCGCTGTTATGCCACGACACCTTTACTCATCCGCAACCGACTGCCCCAGAAAGTACA  
AAAACCGACTCTACACTAA  
>Cluster\_15814  
ATGAATGCACAACCTAACCGAAATCATGCGCCTTATCACCAACCTGATCCGCACCTGGTGTAGTACGGAAGTGGACAGGGA  
AACTGGCTTTGCCGGGTGAAAACAGGCGACTTAGAACAACCTGGATCAGCTGGCTGACCTGCGTGGCGGGAATGCC  
GGACATGGTGGCGACCATCGAAAGGTGACGAGGTGGTCTGCTGAGTCTGGGCGGCAACTGAGAGACCCCTTTGCGCTG  
CCCCTGTCTATTCAATCAGTTCCGACCACCGTGCAGCTGGCGGACGCTGCGTGACAGAACATCTGACGGTGGCTG  
GTTTGAATACGAACCCGCCACCGGCGCTGGTATGTCAGGGGATCAAATCATTGGTTATTGAGGCTGCCGACAAATATCA  
CCCTGAAAACAGTGAAGTTGTGCTGGAGGCTGACCGCACGCTATTAATAGTGAAGTAGTATCAATGGCGGCGTTACC  
CAGGGCGGCGGTCGATGAGTTCTAACGGGATCGTGGTTGATGTGTCATGACACTGCTGCGCTGAAAGGCGGCGATAC  
AACCGGAGGCCCGGTATGA  
>Cluster\_38189  
GTGCAACGTGAAGATGACTGGGAGAAGCCGTAATTTATAGAATTACAAGGATGTCACACACCACGCTGGAGATGGT  
TGCTGAACGTGGATTATCCACTGGACGAGCTACGCCCTTCTGGCCAGACAAAGAGGCAATCCTCTACGATGCGCTGC  
GTTATCTTAGCCAACAGATAGATGCTGCGCTGCTCAGCTGATGCTGGACGAAACGCAACCCGCCGAAACAAAGCTGCTG

GCACGTTATCAGGCGTTATCGGAGTGCCTTAAAAACAACCGCTATCCGGGCTGTCTATTTATCGCTGCCTGTACGTTTTTA  
TCCCGATCCTGGCCACCCTATTCACTCAACTGGCCGATCAGCAAAAAGCGCGGCTACGATTTACCCACGAACCTGTTAA  
CCACTGGAAGTTGACGATCCGGCGATGGTAGCAAGCAGATGGAACGGTGTGGAAGGCTGTTTAAAGCCGATGCTG  
GTGAATCGTAGCCAGGCGGATGTCGACACTGCACATCGGCTGGCGGAAGATATCTGCGCTTCGCCCGCTGCCCGAGGG  
TGGTGCATTGACCTGA

>Cluster\_32893

ATGATCCGTTATTTCCGATGCTGCACAAGCGCACTTTGCCAAATGCTGGCAAATCAGGAAGAAGGGACACAAATCCGCGT  
ATTTGTGATTAACCTGGCACGCTAACGCTGAATGTGGTGTTCCTTATTGCCCGCGGACGCTGTGGAAGCCACCGACA  
CCGCCCTGAAATTTGACCTGTGACCCGCTATGTTGATGAGTTAAGCGCTCCTTACCTGGAAGATGCAGAGATCGATTTT  
GTTACCGACCAGTTGGGTTGCGAGCTGACGCTGAAAGCGCCTAACGCCAAAATGCGTAAAGTGGCTGACGATGCGCGCT  
GATGGAGCGCTGGAGTATATGCTGCAATCACAGATCAACCCACAGCTTGCTGGTACGCTGGTTCGCTGATGG  
AAATCACCGAAGACGGTTACGCCATTTTGAATTTGGCGGGGCTGTAAACGGTTGTTCCATGGTTCGATGTAACGCTGAAA  
GAGGGATCGAAGAAGCAGTTGCTGAACGAATTCGCCGAGCTGAAAGGTGTACGCGATCTACCGAACCAACCGCGCGA  
GCACTCTTACTACTAA

>Cluster\_43103

ATGTTACAAAACCAATTCATCTGCGCTGGAGCGCTGGAAAGCTGGCAGCAGTCACTTTTATGGCTGCTTATGCGA  
ACGTATGTACCCCAATTACGCGTATTCTGTGACGAAAACCGGCTTCGGCGATGGGAGATTTACCGCCGATTCTCGATC  
TCATTTGGGAAACGCTGACCGTCAAAGACGAAAAGTAAATTTGACAGCCAACTGGAGAAATTTGAGAAGCGATTCCCT  
TCAGCCGACGATTTGATCTGTACGGCTTTATCCGGCAATCGATGCTTGCTGGCGTTAAGTGAACCTGGTCCATTCCGG  
TTTAAAGTGGCAAAACGCTGCAACACGCGGTGGAAGTGAAGTAACTTCCATCACGACCGTGGCAGTGTGGAATGACTC  
AGGCTGGTCCGAAATGAGCGATGAAGAGCTCAAAGAAAACCCAGCTGTAGAGCAAGAATGGGACATTCAGTGGGAAATA  
TTCCGACTTTTAGCTGAGTGCAGAAACGCGATATCGAGCTGATAAAAGGCTTAGGGACAGCTGCGTGAGGCGGGTGA  
GAGCAATATTTGGTATAATTTTTCAGCAATA

>Cluster\_66954

ATGAAAAATAATAACGTACCATTATATCTATGGTTACTTTGGTGTACGTTTTGGCTGTACATCACTACCCCGTGGCAATA  
CTTCCGTTATCTATACACTGACCACATACACTATCTTATATATATATTTCTGTATAGTGGTATTATTGCTTTTCCC  
CACTACTTTTTCAGATGCGTGCTTCTTATCGTAAGATCTGTATCTAAATACAACCTTACATCTTTTCCGAAAAAAAAGGGC  
ACTAAAGAAATCAAGCATACTCTTAGCCCTATGCCGATACACCTGGAGTCAATGAGGAAACACTGGGATGGTGT  
ACTTTCTCTGATATCAAAAGCAATTAATAATGATGAAACCATTTGTTATGCATTCACATCTCTTTACTCTGCAAGAATA  
ATAAACTTATAAAGAGACTGGAATCTTATGGTTGAAATTTCTCTGTTATACATGCCACGGAAAAACAAGTCTGTATGAA  
AAATATCAATTCCTTTTGTATATCTCTTATTTTTCAGTGGTCTCTCCCGCATTTGCATTCGGACGGAATGACAGTGTCTAT  
TCGTCTCTCCAGCCGCTCACACCAATTA

>Cluster\_22833

ATGGTTTCTAAAATCATGAATAAGAAATACGAAAAAGGCTGTCTTTGATTGAATCTGCAATGGTGTGCGCTTGCTGC  
CACCGTTACCGCAGGTGTGATGTTTACTACAGTCTGCGTCTGATTTCCAATAAGGCGCAGAAATGCTATTTTCAGAAAGTAA  
TGAGCGCAACGCTGCAATTAATGGTTTTGTATATTTGGCGACAGCAATTAATGGATTTGAACCTCAAAATGTTTCTTAA  
ACATCTGCAATTCGGATAAATTACAAGATACAACAAACCAAAAAATAACCAACCCATTTGGGGGGAAATTAACGTTAGG  
TGCAGCAGTAACACCTCGTTTGGTTACTATCTGACACTTACCGGGCTGGATAAAGCAGCATGTTTAGTCTTTCGCAACCT  
TGAATTTAGTACTTACGCGAAAGGCTACGGTGTAAATATCAGTTCCAGCTTCTACTACTTCAATTTAATCTTACAGCC  
ACTAGTGGTAACGCTAAATTTGTCAGCTATTTACTCTCTGCTGAGCGGCAACTGTATGTGCGAAGACTGATTTCAACTAATAC  
CGTAACGTATTTTATGAAGTAA

>Cluster\_2739

GTGGATATTTCTCTACACTTTTTTCATCAGCAGAGCAGAAAAATAGGAATGATGTTCCCTGTGTTGTTATTTTCAGAGAA  
GCATACAGATATGCTTGAATAACAGAGCATCCGGTAGAGGCTCGGGGCGCTGTGCTGATCATGCCTATAAAAAACCGT  
CAGAAAGTGTGATGGAGGTTGGTTTCGCGGTTGGTGGCGCATTGCTGGATTTTCCAGTAAACCTGACGCGCTACAGCCCTG  
CTCGGCTGAGTCTCAGCAGAGCTATCAGGAGTACTGGATCTGAGGAAAGCCGTAATCCCTTCGATGTGGTAAACCGG  
TAAACGACTGTACAGCAACATGTTGATCCGGGCGCTGGAAGTACGACGAGCAAGACAACCGAAAAACGTTCTGTCGCGCG  
TCCTCACCTGAGGGAGGTCCTTATCTCCCGACACAGCAGATTTCCGTCGCGGATAAAACCAACATGAAGGAAGGGGCC  
AGCAGCTCGCGGTACAGAACAGCGGCAACAAACCAACCGCTCCAGATATTCATGCTGAAAAGCATCACGGGTTAA  
CGTGGCGTCACTTACGGGGGGCGCTAA

>Cluster\_2755

ATGACTAAGAAGCTGAAAGCAAAACACGAGGTGTTTTGTGCGGAGTTTCTTGTGATCTGAATGCTACACAAGCAGCTAT  
TCGCGCAGCTACGCTCCAGGCGAGCAGATGTTACGGGGCTGAACTATAACGTTAAACCTGAGATACCGCCCGTATTA  
ACGAGCTAAAGCAGGAGCCTATTGATCAACTGGCATTGATGCTAATTTATGCTGATGCGACTGGTTGAGATCGACAGG  
CTCGATGTGGCTGACATCTGGAGGACGATTTAAGTATTAAGCCTCTGCTGCGTGGCGGAAATCGGTGCGCTGCGTACCT  
GAGTGGATTTAACCTCGTGAATGTTTGGGGCGGAGGAGATGACAGAGAAATGGTTCGGATCCTTAAAAAGATTAAGT  
GGCTGATAAGGTTAAAAACCTTGTGATTTGGGCGTCAATGTTCTGTTTCAGGCGTTTAAAGACAACGCTCAAAAATGAA  
GTGACTGGCGTGTGAGGAGCCGTCAGAACGAAATTAACCACTTAAACCGGAGCAGGCTGCAGAGGCGTATAGAAA  
AATGATGGGCTAA

>Cluster\_45383

ATGAACCTTGACGACAAATCGCTGTTTCTTGACGCCATGGAAGATGTCAGCCGCTGAAACGCTGCTACCGATGTCCACTG  
GCATCCAACGCGTAACAACGCTGCGCCGAGCTATCGACAGCTGACGCTTGATAATTTCTCACACCGGATTTCTCG  
ACATCATCCCACTAAGTCAGCCGCTGGAGTTTTCGGCGGAAAGGTTGCAACATGGGGTGTGGATAAGCTGCGCAGTGGT  
AAATATCCGCAACAGGCGAGCCTGAATCTTTTGGCCAGCCGGTGAAGAGTGCAGCAAAATGATGTTTCAATTTCA  
ACAAGCCTAGGCTGATGGTTTGCCTAACGCTGATTAATTCATGGCAAAGGACGGGATGATAAATCGCATGCCAATATG  
TCCGACGCTATGTCGGCGCTGGCTGACCGAATTTGATGATGTTTTCAGGATATGACATGTCAGCTGCGCTACCGCATCAAAAGGCG  
AGCGGGCGTGTACGTCGCACTACGTAACAAACGGCGAGGCAAGCAAGAAAACCTGGGAGCGCCACGCTAAGCGCAGTGC  
TTGA

>Cluster\_27849

ATGCCTGTAAAAGAGCAAGGTTTTTCTCTGCTGGAAGTGTGATTGCTATGGCGATCAGTAGCGTATTGTTGCTGGGAGC  
TGCACGCTTTCTGCTGCGTTACAGCGTAAAGCTTAAACGAGCACCAGCTGGCGTGAAGATGAAATCTGGCTGC  
GGGATTTTACCGTCCGGAAGCATCTCCAGAGAGCAGGTTATTTGTCATGGAACCTGCCCTGGTGAAGGCTGAAAATTTGTT  
GGGAGGGTGCATCATTTGTGACAGTGGGATGCGAACAGTAATGGTATCTGGGATCCGGAACCGGTAAGAGTCCGA  
CCGATTTGATTTCTGCTGGAAGGAGCATGTGCTGGAACGCTACGCGGTGCGACATCTGTTGAAGTAAAGGCTGGGATA  
AAGTCACTAATCCGGATGCCATCATTTACGACACTTTTTCAGTCTGACGTCAGGATGTCAGCGCTTCTGCGCGTGTG  
ACGGTTAATATGCACGCTCCAGCAAGGCTGATCCGCAACCGTGGTGGATGCGAGCTATAGCTGACAGGATCCAACCT  
GTGA

>Cluster\_17493

ATGAGTTTCAAAGCGGTGTAACAACGAGGGTGGATAACGCTCAGGCCATTCTGGATGCGCTCAGGCTGTTAACCAAAAA

AGATGTGCTGGTCGGCATCCCTTCGGAAGACAGCGAGCGGGATGATGTTCCGTTTGGTAATGCGGGCATCGGTTACCTCA  
ACGAATACGGCTCACCGGCGCAAAACATCCCGCCACGACTCAGCTGGTCCCGGGCGTTAAATCGGTAGAAGAACAGACA  
GTGCCGACGCTCAAAGCAGCGGCGCAGGCTGCGCTTGATGGTAATGCGGCGGGTGGGAAAGAGCGCTCAACCGTGCCGG  
AACGCTGGCCGCTAATGGCGTCAGGCGTTACATGACCAATACCGGGCTTTACGCGCGCTTGTGACAGTACTGTTGAAGCCC  
GGGCTCGCGGGCGCAAGGGGCAACACTGGAACCTACCGGGCTGCTGCTGGCAATCCCGGGCAACCGAACTGGCG  
AAACCATTAAATGGACACCGGGCAATATCGCAGAGCGATTACCCATGTAGTGAGGGATAAAGATGCCGACTCTTTGA  
>Cluster\_11221  
GTGCTGACAAACGCAAAATTTGCGCTGGCGCTCATGTCCGGGAAAAACAAAACAGCGTCAGCCATTGCCGCCGG  
TTATTCGGCGAAGACCGGAGGTTAAAGGCTCGCAGCTGGCAAAAAGATCCGGAGGTGCTCGCGTTTATAGCCCGTAAAC  
AGTGCGAAACGGTGGAGGTGGATGAGGTTCTGTTTACCGGCAGAAAAAATCAGAGCAGGAGGATAAACCCCGTGCCTGT  
GAGGTGGCTGCAATACCACGCGGACGAAAACATCCGGAGATGCTCCGCCGCGGTGATATCTCATGGTATTTGAATA  
TATGGAGGATGGTCTTCCCGATCCGGTGAAGCTATGGGGCAGATCCTGGTGGAAAACCTGATAATTGACCCGAACTGG  
CACTGGATGCGGGCTGCGCACTGGCGCAGTTACACACCATAAAAAAGCGATGCCGGTAAAAAATCGGCAACCGAACTGGT  
GCCGTGAAAAAGCGGCTAACCGTTTTCGGGTGCCACCACCTCCCGGCTGGTGGTGAATAACCAGAATGAGGAAAGCGG  
ATGA  
>Cluster\_35029  
ATGCTGAAATCACAGTCTCCCGTCCGGAAGTGGTCAACGAGAATACGACGCTTATCTGCTCCACCTCAGTCAGGTACAG  
GTCACCTGGAATATGATAATTTCCGGAATCAGCGAAGCGAACATTTGAGCACATTTGAACAACTGCACCAGAACAAG  
ATGAAGTGTTTGAACGGGAGTGATCAACGCTTTCAAAGGGCTGAGCTGGGATTAACAACCAACTCACCTGTAAATTT  
GGCAGTAAATTTACGTCACAATCTGGTGAAGTGGGACCGATGGGATTTCACTTTATCAGTGAATGCAGGCAGATCG  
CCTGGCTGACCTGGAAAGAAATGTCATCTGCTCAGCGTAAACCGATCCCGGACAACCGAGGGAATACACCATTAATC  
TGGATGACCACATACAGTCCGTTACGGTAAAGGACGCTATGAAGATGAGATGTTTCATCATTAATAATCTTAAAGAGGA  
TCTGCACACATCACTTTCAAAGGCTGGAGCTGATTGACAGAAATTAACGATATAATAGCCAGGCACTTTCTTCTGTGCT  
CTCAGCCTGA  
>Cluster\_23659  
ATGTTATATATAGATAAGGCAACAATTTGAAGTTTGAATCTGGAGATGCTTAAAAACATCGCAGAGCAATCCAGTTTAT  
TGCCGTGCTGCTGTTTATCGTCGGGTTGCTGTGTATCAGTTTTCCGTTCTGCTCTGGCGACATTTAAGCACAGTAGTGG  
GTGCATTTAATTCGCTCGGGCATTTGCGCTTATGTCGGGCTATTACGCAACCGCAGTCATAATTTTCGGCCGGTATTA  
TCCGGTTTCTCGTCGAGTCGCTATTTATTGATCGGCTATTTCTTCATCCGTCACCAGAGCTGGGCATTTTGGCCAT  
TGGCGCATTTATTCGGGTTTGTCTGTGTGGCAGGGGTTATTCGCTGATGAGTTGGTATCGTCAGCGTTCAATGAAAG  
GCAGTTGGCTACAGCTCGTTATTTGGTGTGCTGGATATCGTCATTTGCTGGATATTCCTTGGTGTACGCCGATGGTGTG  
GTAACGCTGGTTTCCACACTGGTGGAAATGAACTGATATTTAGCGCCCGCAGTCTGTTACAGTTCGCCAGTTTGTTCGT  
TAAAAAGCAATAA  
>Cluster\_17466  
ATGAGTAACTTTGTAAGCAAGCAGCTTGCACGGCAATGCTCATGGGGCGCTGACTTCAAGTATCAGTCGTTGCCGCGAG  
GAACAACGTCACAGTGGATTTTACGGCACAATGAAAGATTCCCGTGTCAATTTGTTCTGACGATCATAAACTGGAAG  
TGGATATGGGCAGCATCGGTACGGGTTCTTTAACCGGCGGCAAAACAACCACACCAAAAGATTTCCAGATTCGTTTACAG  
GACTGTAATTTCAATACGAAACGACAAATGGCTACCACATTCACCGGTTAATCCGTACTCCACTAACCGAGATAACTATTC  
TCTGTCTAACATGGATAATGGAACCTGAAATTTCAACAGCTTAGCTGTTAGCTGGTATCGGTGACGACGACGTTACAGTTATGCTC  
TGGGAGCAGAGATTAAGCAACCTATCTGTAAGGACAGTTCAACCGGAAAAGGCAAGCCATAAACAACTCTGAACCTTTAAA  
GCATGGTTAGTGGGTGAAACGGATGCTGTAACCAACACCGGCACCGTTTGAACGCTGACGATGTTCCAGATCACGTA  
TCTCTAA  
>Cluster\_3656  
ATGTATACAGAATCAAACATTAAGCTTTCTGTAACTGCTCTGGCAAAAGTGTGCTTGAACCTCTGTATCGGGCTGC  
AGCTACACATCTTAAATTTAAATTTATTACAATTTAAATTTAATACCTTGCCAGGTATGATAAAGGCAATTTCCCTCTCTGA  
TGGCTGATTTTACTGGTGAACCTGCATAGACTAATTTCTGAATATTTGCAGTGCAGGACGTAAGATAAATCTGTTGAG  
CCCGCCCTTTATATATCTCTGGAGTAGGGAAGCTGTGGCTAACGATACCACCTCTTATCTTATGTTAGTCTTAA  
TAACGATGCTGTTGTAAGAGTCTGAGGTTGGTTCCTCAGAAATCTGATTGAGCAGGCGTGGGAAAAGTATTGGACG  
AAGATAACTCAGTTACACATCTGTTGTATCTGAAGTGTCTGTTGGTATTTGATGACGCTAACACATATAACGCT  
GAGCCTGGTGTACTGGAACAGACGGCCAAAGCTTACATTAATCGCATGGTGCATTTGAACGCTCATCTGGATGTAGTGA  
CTTTTAA  
>Cluster\_57500  
ATGAAAAAATAATTTCCCGCGTAGTCTGTTTGTGCTTTGATGTTGCTCGACCTTTCCGCAAGCTGTGCTCCGGTAAA  
CAATGACTTTGCAGGTCAGCATAATATTTATATTTGTCAGTCACGGCTGGCATAACCGGAATTTGGTGGCCCGCCGCAATCG  
TTAATCGTGTTTTACCGCAACTCGACGGGAGATTTGCGCAACCAAAATGGTATGAAATCGGCTGGGGCGATAAAGGCTTT  
TATCAGGCACAGGAAATTAACAGTCGCTGACATTTGCAGGCGATGTTCTGGTCTACTGGCGCAGTAATGCATGTGGTGGC  
GTTCTCTGCCCACTGAAACGCTATTTTCTGGCAGTGAAGTTAAGCCACTGACAATTAACAACGGTCAACTTGGCAGCT  
TAATGCTATTTATTTGGCCGAGTTTTCCTGAGCAGGCGGAAATGTTATTTCCACTCAAAAAGGCAATTTATGGTGC  
AGCCAGTTTATGCGCCCAATGGTTCGCTATGGGATTTTAAATACCTGTAATAAATGACGCGCAAAAGGTTTACAAAGCGC  
GGGATAGAGATTGAACCGGCTTTAAATGACGGCGGGAGTGTGATAAGCGCAATGCCTAA  
>Cluster\_30427  
ATGACCAAACCGTATGTTCTGCTTTGATAAAAAATGATGCTGCGGTTTGTGTTGATCACCAGGCTGGTTTACTTTCCCT  
TGTACGGGATATCGAACCCGATAAGTTTAAAAATAACGCTGCTGGCGCTGGGTGACCTGGCTAAGTATTTCAACTTACCAA  
CTATTTCTTACCACAGTTTGTAAACCGGTCCTAACGGCCATTAGTTCCAGAATGAAAGCACAAATTTCCCGATGCACCT  
TACATTTGCTCGCCGGGAAATATTAACGCTGGGATAACGAAGATTTTGTAAAGCTGCAAAAGCAGGTAACAAAACA  
GTTAATTTATGCGGGTGTGGTAACCGAAGTTTGGCTGGCATTCCCGGCTTTTTCAGCCATTGAAGAAGGTTTTCAGCTCT  
TTGCTGCTGACTGACGCGTACGGGACCTTAAATGAAATTTACCGGCAATTCGGCATGGGATCGCATGTCGCAAGCTGGTGGC  
CAATTTGATGACATGGTTCGGCGTGGCGTGCAGCTGCATCGCGACTGGCGTAATGATATTTGAAGGACTGGCGAGCTTGT  
CTCTAACACATTTCTGATTTATCGTAACCTGATGACAGTTTATGACAGCTTACGAAGCAGAAATAA  
>Cluster\_60931  
ATGCCAAAATTACGCTGATCGGATTAACCTTTACTCGCACTTAGCGGACTGCGCTCTCACCGCTGAAGAACGCGGCTA  
TGTTTCCGACGAACCTGAATACCTGGGTCGCGAGCGGTCGGGAGATCATTTATCGCTCGTGGGACCGGTTAACGCCGGCG  
AGGAAGTGACCTTTATACAACCTGACGCAACACCAATTTAGCCAGGTGAAAGACAGCTTGGCCGTACCCGCTGGATC  
CCGTTGAAACAACCTTAGCACTGAGCCAAGCCTGCGCTCCGTTGCTGGCAGATCTGGAATAACAGTCAAAAACCTGACCGA  
TAACTCACCAATATCGATAACACCTGGATCAGCGCACCGCAGAAATGCAGCAAAAAGTGGCGCAGAGCGACAGCGTGA  
TCAACGGGTTAAAAGAGAAAATCAGAACTGAAAAACAGAGCTGATTGTCGCGCAGAAAAGGTCGATGCCCGCAGCGTA  
CAGCTGGATGACAAACAGCGCACCATCATGCAATGTTTATGATGCGGAGTGGCGTGGGCTTGGCTTGTGCTGCT  
CGGCTGGTACTGCCGCACTGATCCCAAGCGCAACCGCAAAAGATCGCTGGATGAACATA  
>Cluster\_26319

ATGAGCCAGTTTTTTATATTCATCCTGATAACCCGACGCAACGCTGATCAACCAGGCGGTGGAGATCGTGCCTAAAGG  
CGGGGTGATTGTTTTATCCAACTGATTCCGGCTATGCGCTCGGCTGTAATAATTGAAGATAAAAAACGCCATGGAGCGTATTT  
GTCGTATTCGCCAGCTGCCGGACGGTCAACAACCTTACCTGATGTGTCGGCATCTTTCGAGCTCTCGACCTATTCATTC  
GTGGATAACGTTGCGTTTTGTTTTGATGAAAAACAACACCGCGGCAACACACCTTCACTGAAAGGAGCGAAGGAGGT  
GCCACGCGCTGTGTTGACGAGAAAACGCAAAACCATCGTATGCGTGTGCTTCTAACCGGATGCGCGACGCGTGTG  
AAGCATTTGGGCGAACCGATGCTTCCACATCACTGATGCTGCCAGGCAGCGAATTTACCGAATCCGATCCGGAAGAAAT  
AAAGACCGTCTGGAACAAACAGGTGGACTTGATTATTCAGGCGGCTATCTCGGCAGAAACCAACACGGTTATTGATCT  
CACCAGTATACGCGCGTGTGGTGCCTGAAGCGTAGGTGATGTGAAGCCTTCTTTATAA

>Cluster\_13581

ATGGCTGTGCTGCCAACAAACGTTCCGGTAATGACGCTGTTTTCCGGTCTACTGACATCTATAGCCATCAGGTCCGCAT  
TGTGCTGGCTGAGAAAGGTGTAAGTTTCAGATCGAACACGCTGAAAAAGGACAATCCGCCTCAGGATCTGATTGACCTCA  
ACCCGAATCAGAGCGTTCGACCCCTGGTGGATCGTGAGCTGACCTGTGGAAATCTCGCATCATTATGGAATATCTGGAT  
GAGCGTTTTCCGCATCCGCGCACTGATGCCTGTTTACCCGGTAGCTCGCGGTGAAAGCCGCTCTGTACATCGCATCGCA  
AAAAGACTGGTACACGCTGATGAACACCATCATCAACGGTTCAGCTTCTGAAGCAGATGCCGCAGTAAGCAACTGCGCG  
AAGAACTGCTGGCGATTGCGCGGCTCTCGGTCAGAAGCCGACTTCCGAGCGATGAGTTACGCTGCTGATGCTAT  
CTTGCTCCGCTGCTGTGGCGTCTGCCGCACTGGGCATCGAGTTACGCGGCCCGGGTGCAGAAAGAGCTGAAAGGCTATAT  
GACCCGCGTCTTTGACGCTGACTCTTCTCTGCTCTTTTAACTGAAGCAGAACCTGAAATGCGTCTGGCCGGAGTTAA

>Cluster\_11987

ATGTTTACGGGATTTGACAGGGCACCGCAAACTGGTGTGATGACGAGAAACCAATTTTCTGACGATGTGGTGGGA  
GTTACCCGACACATGCTGGACGGCTGAAACAGGTGCTTCCGTGGCGATAACGGTGTGCTGACCGTGACGGGAA  
TTAACGGCAACCATGTGAGTTTTGACCTGATGAAAGAAACGTTACGCATTACCAATCTTGGCGATTTAAAGTGGGGAT  
TGGTAAACGTTGAGCGTGGCGGAAATTCAGTATGAAATTTGGCGGACACTTAATGTGAGGTATATATGACCACCGC  
TGAAGTGGCGAAAATATTAACCTCGGAAAATAATCGCCAGATCTGGTTTAAAGTCCAGGATAGTCAGTTGATGAAATATA  
TCCGTACAAAGGATTTATTTGGCATCGACGGTATTAGCCTGACCGTGGCGAAGTCACGCCAAGCGTTTTTGGCTCCAT  
TTAATTCGGAAACTCTGGAAACGACGACTCTTGGGAAGAAAAAACTCGGCGCACGCTCAACATTGAAATGATCCACA  
AATCAGGCAGTGTAGATACGGTAGAACGTGTGCTGGCGCACGAGAAAATGCCATGATCAACCAGGTACAGAAGCCT  
GA

>Cluster\_2998

ATGCATATGATCCAATACTTGATTGACCATACAGAGCATCTGGAGAAAATAGCTGGATATATTTTTTCATGTTTGATTGT  
TATGGGAGTCTGGATAAGAAAGATCATTTTTAAATATAAGTATAAAGAGCCTAAATATGTTAAGAAATTAATTTATAT  
TAGTTAAGTATGAACGTTATCTGGATGAGGAGGATAAGAGTGCATAGAAAAAAGAATAAATGATAAAATATTCGTGAT  
GCGCTGAAATTCGAATCATCTTATAACCGAAGAGATGTTATTTACATTTGCAATAGATTAGAAAAAAGACAGATATAAAA  
TCAGTTGATTAGCTTCAGAATTTATATAGAGAAAGATAACGGAGTGTTTTTTATTAATGTTGATTTTTTCAGGTTTTTAT  
TTATTTAGTCTGCTGTTTTCTTTCTGTTTTGTTGCTGTTTTACCTTTTTTCTATATCTGCATTATTTCCATAGGG  
CAAAATGAAGCCTTTTAAATTAATCTTGTGATATGTTTATGATAATAGTTTTAGAGACTGTTGGTTTTTGGATGATGA  
TACTTTCCGCTTAAGAAAAAGATCTGTGAACATAAATAAGAAATGAGAAAAGATAAAGATTTCCAGTGA

>Cluster\_10529

ATGAGCACTCAACTTGTATTTCCACAATGTTCAATTCAGACCGTTCAACGAGATGGTCTACTGTGTTGTCTGCCCCCA  
AATAGCCAGCGCTTACAATATGCAGATCAAAGCTCGGTAACACGCATCTATGCCCTCACGCAGATGAATTCACAAACG  
GTATGACAGCCTCGCTCAAATTTGACCGATCCTAAAGGGGCAAGCAAGAGACTCGCATCTTCTCATTACGCGGCTCAC  
CTAATAGCGATGTTTGTCTGAACCTCAATAGCAAAAGAGTTTCTGCTGCTGGGTATTGGATATTCTGGACCGTGAAGCTGA  
AAAAAGCGCTATACCGCCACAACCTCATATTCAGCCTCAATTCACAGCAGAAGAAATCATCTCTCTTTGCTACATGCAGC  
TCTGGATGAAAAAGCCAGGACTCAGCAAAACCTGTATCCATTATGAAAAGAGCTGAACCTCTCATACGAAACAG  
CTGTATGACATTGCGTTTTGAGACCATCTACATGGTGACGAAGAACAGAGACGCGCTACTAAGGAGGTAACACGCTCTCGA  
CATGTCAAGTTCATTTATCCAGCGGGCCATGCCAATGCTGAAAAGCCTGCGGGCAAGCAATTTGAATTTCTGA

>Cluster\_67023

GTGAAGTGGATGTGGTGGCGGCTGCTGATCAGCCTGCCGCTGGCGGCAAGGATCTGGGTGTGCAGGGTGACCTCTGGCC  
GGTGCAGGAGCAGAGCATGCTTTCCCTGATCCATCAACGGCTGGAGAGCATGGAGGCCAGCGGCAACTGGCAGAGATGC  
AGACGCAGTTTAAAGAACGGGTGTGTCAGAACACGCTGCGTCCGAAGCCGGTGGAGGGCTGCAGACGACACCCGGTGC  
CACACACACCGTGTGATCCGACAGTGAGCGTGACAGCCGATATGGCAGATCAGAACGGGCGCATTTTTGCCCGTAAAGG  
ACAGCGTATTAACCCGCTGGATACCGTGTCAATAGCCGCTCGTGTGATTTTTCTGGATGCGGATGATGAACGACAGGTGG  
CATGGTTTTAAGCAACAGCCGGCAGAACTGAACCGTAAGGTGATACTGGTGGGGGAAATATCCGTGATGCCACAAAGCG  
CTGAACACCGCAATTTATTTGATCAGGATGGCACCCTGAGCCGCTGCTTCCGGCTGACCTGGATACCGCAGTGGTGGC  
TCAGGACGGGAGTTCATGTTGTCACATCGGCAGCTATGCCGGAGGGAAAATCGTGA

>Cluster\_39321

GTGTTTCGATAAATCAAAACGGCGGGTTAGCCGCCACGCTGATACTGCTATTCGTCGTGTTGGCGGATTTTTGCGGTG  
GCTGCAAGGCCACAAACACGGCTACGAGAAAGGCGCAGACTGAAATGCTTCCGCTGCAAAAAACAGCAGGCCAAGGCCGGG  
AACGGGCTGTGAGGAGAAATAAACCGCAGCAGCAGTTCATTCACATCGGGGAAAACAGCAGCAGCTACTCTCGCC  
CGGACAGAGGAACTGACCGCCGCAACCGCAACTCAGAGGAAAAATTAACGATGTTACGCGAGCATTACGTTGACGAAAA  
AGGCAAGGCTCATACTGTGGCTGCGTGTTTACTCGCGGCTTCGTCAGCAGTACAACGCCTCCTCGGGGTGTCGGCC  
CGGATGTTGCCCGCTACCCGCGACGCTGGCGCGGCCGCCGAGCCGTTACGGGCGCTGACGCCCGGTTACGCGCCTCC  
GGGCTCAGCCAGCGGACATCTCTCGCAATCTCGCGACAACGGCCAGCGCTGCCAGCAGTTAGCGCTCCAGGTGCGTGG  
CTTGACAGAACTATATCGCGGAGGTGTCGCGATGA

>Cluster\_42697

ATGGCAGAAAACAACTCGGAAAAGAACCGTCCGAGGAAATACTTCAGTCTCTGGCGCTGATGCTGGAATCCAGCGA  
TGGAAAGCCAACTATCACGACGGCAAACTGGCGCCTCTGTGCGGCTTCCGAAAGCGGCTCTGTATCGCCACTTCCCA  
GTAAGACCCGATGTTTCGATAGCCTGATTGAGTTTATCGAAGATAGCCTGATTACTCGTATCAACCTGATTCTGAAAGAT  
GAGAAAGACACAGCGCGCTGCGTCTGATCCTGTTGTTGCTCCTCGGTTTTGGTGGAGCGTAACTCCGCGCTGACTCG  
CATCTCACTGGTATGCGCTAATGTTTCAACAGGATCGTCTCAAGGGCGCATCAACAGCTGTTTCGAGCGTATTGAAG  
CGCAGTTGCGTACGATTTGCGTGAAGAGAAATGCGTGAAGGTTAACCCAGGATGAAACCCCTGCGGCAAGC  
CAGATCTGGCCTTCTGTGAAGGTATGCTGTACGTTTTGTCGCGAGCGATTTAAATACCGCCGACGGATGATTTTTGA  
CGCCGCTGGCCGCTAATTCGCGCACAGTTGCAGTAA

>Cluster\_38508

ATGAATCAGAGCCCGACCGCTGCCACTGCAGCGGAGAGTGTGATTGTGCTGGCTGCCCTTGTGAAAAACGGCCGGG  
ACCCGTGCTGACCGGGACATAGAACGGGTGCTGGTGCAGCGGGGAAAGCCCGGCTACGGGCCAAACCTGCGCGCT  
CCTGCCGCTGCTGAGGATGCCGGCTGGCTGCGTATCTGCGCGCTCCGAGCTGCACTGAGTTGGCAGTGGAACTGACGGAC  
GCCGCGGGCGGCTGCGCACAGCCTCTGCTGCTGGCAGAACAGCCGCTCGGGCAGAACAGCGTGGCGGAGAGTCTG  
CGTACTGCGGCTGGTCCCGCAGCAGGTTGCGCGCAGACGGCCTTCTGCCACTGATCTGGCGGTGGAGCTGAACGGCA  
TAACGTATCAGGCTGCCGTTGGGATTTTGTGGTGGTCTCGACGGCAGCACCCTGCTGAGTTATGGAATAAAGAGGC

AGGGTGGTACGTCGGGAGGGCGATCCGCTGGAAGTGGCGCAGTGGCTGCAGGCCTGTCACGATGCAGGAATGGAGGTTCC  
TGTGCAGGTTAATGAAAGCATCACCCCATAA  
>Cluster\_48565  
ATGACAGCAAGAACCCAGCCCGATCGCAAGCAAAAACCTCGCAAAAAGACAAAAACAAAAATCTCCCCGCACCAATCC  
CACAAACGCCTGTCTAGAGTTCAATCCACAGTAAAAACCGTGAATAATCTTATGATGAGGCTCTTGCCCTTAAAAATCCGG  
GTGGCCAGGGCGGTTACGGTATCGTTCTCCAGTATCGTGGTGAGGAACCGGAGTTCTCAGATGGTTTTTCATAGACCACC  
AATAACCCGATGGAGATGATGGGGGCATATCCGGCTGGAGCGTTTGAATAATCCATGCAACGTTATTTGCACTCTGA  
TAGCCAGTATCTGAAAAACGGCATGACACAGTGGATGAAATGGTGAACCGCAATGGATGGATGACTTCTGACAAAAAC  
CGGTAAAGAAATGTTGATCTGTGGAAAGCGTCTGGATGAGGCCGCAAGTCGACATAATGTTTCGCTGGAAGTGGGTTAAAGGT  
CACGCCGGGCATCGTGAATAATGATGATCGACTCGCAAGATCGCAGCTTTTTTCAGCAGCAGATATGCCTCACAA  
GAAAGATATGGTTTTGTTTATAACAAATAG  
>Cluster\_36043  
GTGAATATAAATTACCTTCTGCTGAATATGAAATGGAGATATCGTCTTTACATGTATAGGTGCTGCCTTATTTGGTCAAAT  
ATCAGCTGCATCAAATTTGCTGGAGTAATCACGTCGGGATCATTATCGGTCATAACGGTGAAGACTTCCCTGGTTGCAGAAA  
GCCGGGTTCCCTTTCAACCATCACACGCTATCTCGTTTTATTAACGTTTCGCTAATAACGCTATGCTATAAAGCGA  
TTAGACGCTGGGCTGACAGAACGCAAAAACCAAGCAATTTGTTGAACAGGTTCCCTCCCCGGCTACGCAAACTTTACCACAC  
CGGTTTTAAATACGAATCTTCGCCGCGTCTGTTCAAATTTGTTTTGATATTTATAAAGAAAGCGCTATGTTATCCGG  
TGGGTGAAATAGAGACGTTTGGAGAATTTGTTAAATAGCAATCCGAATGCAAAAACCTCACTTCTGGAAATTTCTGGTTCCCTG  
GGTCTATTTCCGTTGGGAGCGTAAACCGTCACGCCAGCCAGTTTGTGGCATCATCCGGGTTTGGTGTGATTCATGCGGA  
GGGAGTGGAAACGCTCAGCCGGAACGACCGAGGCGGTATAA  
>Cluster\_48979  
ATGAACCAACAATTTATTTCAAAGGCGGCTGGTATTAGCGCCGGGCTGGCTGCGCGCTGGTTTTCCGCACATTGATGCGGC  
GATGAAGGAATTCGGCATTACAGCACCAGCGGATCAGGCAATGTTTATCGCTCAGGTAGGCCATGAGTCGATGGGGTTTTA  
GCGCCGTAGTTGAAATTTTAACTACGCCATCTGCGCTGGTGGCGACGTTCCGAAAGAGGATCACACAGCAGCAGGCT  
GATGCCCTTGGCAGAACATCCGGACATGACGCTCGCCAGGATGCTATTGCCAATCTGGTGTATAGCAACCGGCTGGGTAA  
CAAAGCACCCGGTATGGCTGGAATAATCGCGGTAGAGGATTAATCAAATCACTGGCCTCCATAATTTATCGCATCTGTG  
GCGCGCGCTGAAGTTAGATCTGGTGACTTACCTGAACAACCTGGAACAGGAACACTACAGGCTGCGCGCTCAGCTGCATGG  
TTCTACACTTAAAGTTGTCATGATCTACGGTCCGATTTAAACCGTGTACGCGCATATTACGGCGGTTTGAACGG  
TATTGAGGATCGTAAAGTCCGATACAACAAGGCGCGGCGCGCTGCTGGTATGA  
>Cluster\_11782  
ATGGCAAATAGAAAAGCTTTAGAGGCTGGAGCCCTTATTGATAATGGGTTTTAGTAGAAAAAAAAGGGGCTGGCGGTAA  
CGGAGAAGTTTGGCATGCAAAAAATGAGACGGGTCAAAAGCTGCCAATTAAGTTCTAAAAAGTGGAGGTGAGAAAAA  
TTGAGCGGTTTCCGGCTGAAATAGAAATAATCAACTTCAATAATTTACAGGCGTAGTGCCTGTTATCGACTTTTCATATA  
CCTGATGATTTTAAATCGAAATTTCTCGGTATAGTATGCCATTAGCTACTTCAATTTGAAATTTTCAATAAGATATAAC  
AATACAGAAAATTTGCTAAAGAATTTCTAGGGCTAATGAAACTTTAAAAAGTTACATGAGTTAGGAGTATCTCATAGAG  
ATATTAACCCCGATTTCTTATATTAACGAAAGACTTTGTTTACGCTGATTTGGATTGGCTAAAACATGATAGT  
GAAATCTCACACAGAGAGAAGAGATGTTGGTCTAAATTTACAATGGCACCTGAAATGAGAAGGACAGCATCCACTGC  
AGATGGAATATTTGCAAGGGGCTTTTTGTTTTTCTGTAA  
>Cluster\_46203  
ATGGGAAATTTCTGACCGTAAGCCTGGTCTGATTAAGCGCCTGTGGAAATGGTGGCGTACCCCCAGCCGCTGGCGCTGGG  
GACGCTGCTGTGATCGGTTTTGTTGGCGGCATCGTCTTCTGGGGTGGCTTAAACACCCGGGATGGAAAAAGCCAAATCCG  
AAGAGTTCTGCTTAGCTGCCACGAAATGCGCAACACGGTGTATCAGGAATACATGGATTCCGTCACATAACAACCCGT  
AGCGCGGTACACGAACTGTCGGGATTTGTCAGCTTCCGACAGTGTGTCGCGAAGATGATACGCAAGCTCAAAGCAAG  
TAAAGAGCTGTATGGTAAATTTTGGCGTTATTGACACGCGCGAGAAATTTGAAAGCTCATCGCTGACGATGGCACAGA  
ATGAGTGGCGCGCATGAAGGACATAAAGCTGCGAGGAGTGGCGTAACTGTACAACTTTCGAGTATATGGATACACCCGCC  
CAGAAATCGGTTGGCGGAAGATGATGACAGGCGGTGAAAGATGGGCAACCTGTATTTGATTTGCCATAAAGGGATAGC  
GCACAAGCTGCCCGATATCGGTGAAGTCCGAGCCAGGTTTTTAA  
>Cluster\_6226  
GTGCAAATAACCGAAGCCTTAATTTTCAGAGCCGGGGGAAATCCGGCGTTTTGTTTCAGCAGGCGGTGGACCCTGGCCAAA  
TCTGTTGGCATTTCACTTCCAGCTCTATTCGGCAGAAGAACTATGGTCAACAGATTCAGACATTTTGTAGTTCTTTTC  
ACCGACGGTACACGAACTGATTAACGGAGCATAATCACACGGTCAAGCCATCAGCGCCGGTGGTATTACGCTGGTTGCCG  
GAACAACATGAAGGAGCACAGATACGATGCTGTGCTGCTCAGCCAGACGAGTATTTGCCATCCGGAGTCCGGCTCAT  
GGCTGATGAAGAAATGTGCCAACCTGGTGGATTTACTGCAACAGACCTGGTCCGTTGATAAGTGTGGCGGACAAATGCCGGG  
TGGAAAGATGTTTTCCGGTGGCCCGGCTGGTTTATCAGGGCAATACGTTGGCGTAAAAACCGCTGTTTCACTCTTATG  
TCGCAGGTTATTGCAACAATCATCCGGTGA  
>Cluster\_55938  
ATGAGTCAACAAGTTTTTAGCGGGCGCGGGGCTACTGGTACTGGCCGGATGGGGTGTTCAGCGGTTTAGCCGTTGCTGGCAG  
CGATATCAAACAGGTGGATCTGACGCTGCGAATCCTGGTFCATGGCCCGCCGCTGCTCCGTGAAGGGAAGCGCGGTGG  
AATTTGGCAATGTGGTGAATCAACAGGATCGATGGTACCAATTAACAACAGGATCGGAAATACACCCCTCAACTGCGGTAAT  
AAAGTCAGCGATGACTTACGGATGCAGCTCAAAGGCAATACCCCGTGTATCAACGGAGAAACGGTTCTCAGCAGGATAT  
CGCCGGCTGGGGTGGCGATAGAAAACGCCCGGCAACTCCCTGTTTTCAGTGGTGAATAAATTTGACGCGCTTTTA  
ATGTCACACACAGCCTCAGCTGAAAGCGGTGCGGTAACAAGAGAGATCTGACCGCCGCTTCCGACCTGGATAAATTTACGCC  
ACGATGACCATGGTGGTGGATTACCAATGA  
>Cluster\_58724  
ATGAGTACCGCTAAATAGTTAAATCAAAGCGACCAATCTGCTTTATACCCGCAACGATGCTCCGACAGCGAGAAAA  
AGCAACAGTAGAGTTGCTGAATCGCCAGGTTATCCAGTTTATTGATCTTCTTTGATTACCAACAAGCGCACATGGAACA  
TGGCGGGCGCTAACTTCAATGCGGTACATGAAATGCTGGATGGCTTCCGCACCCGACTGATCGATCATCTGGATACCATG  
GCAGAACGTGCAGTGCAGCTGGGCGGTGTAGCTCTGGGACCACTCAAGTTATCAACAGCAAAACCCCTGAAAAGTTA  
CCCCTGGACATCCACAACGTTTCAAGATCACCTGAAAGAACTGGCTGACCGTTACGCAATCGTCTGCTAATGACGTACGCA  
AAGCGATTGGCGAAGCGAAAGATGACGACACCGAGATATCTGACCGCCGCTTCCGACCTGGATAAATTTCTGTGG  
TTTATCGAGTCTAACATCGAATAA  
>Cluster\_14254  
ATGAAACCATCATCTTCAAACCTCACGACGAAAGGTCATGCAAAAAGCGCTCGAAAAACACCGGAGGACTGGATCAGGA  
AGCTCGTGTATCGCAAGCGTCAGAAAAACCGTGGTTCATGCGCCGGGCGAGCCGCGCAGCGGGCGGAAACACCACGTCAG  
GCAGCAAAGGCCAGAACGCACAAAAGATCCACGATTTGGCAGTAAAACCCCTATTCCATTTGGCGGTGACTGAAAAGTC  
ACCAAACAGCACAACCGAAGAGTGGAGAACCTTACTGCTTTCCAGCGAGCGGAGTTGAAATTTACTGGAACAGTATGAGCG  
TCTGGATGCGCTGAGTGGAACTCTGGAAGCAGGCAACCCCTGAGTGCAGAGAGCAATCTGGGTGGATGCTAACTGG  
ATCGTATTGATGAGTTGATGACAGAACTCGCCCTCTCTTATGACGATGACGAAGAAGGGAAGAAGACGAGAAGCAAGAA  
GACATGATGCGCTGCTGCGGGGCAACTAA

>Cluster\_51120

ATGTTGAATTCTACAACATCTTCGGGAAAAAGAACCGGCATTTTAGCAATTGGTGCCCATCTGATGATATAGAATTAGG  
ATGTGGTGCATCTCTTTCATATTTCTAATGAAAAAGTATATATATATCTGTGTGCATGACACCTGGTTGCTGTGGCG  
CAGAGTATATGATCGTCAACAAGGAATCAACAAGAGCATATCAATATGTTAGGATGCAATAAACTAATTCCTCTCAAAATTTT  
GAAGATACACAGATATATTTGCAATAAAGAGATGATATCATCTCTGGAATACATAAATGAGAAATGAACGCCAAAGG  
TGTGGAAATTAACTCGAGTTTACACCATGAATAACTGACAGGCATCAGGATCACATTGCTGTTTATCAGGCATCAATGG  
TTGCTGTGCTTATATTCCTCAAACTAGGATACGAAACACCAAGTACATGTCTGTCATTTTACCTCAAGTTTTTGAA  
TCTGTAGATGAGGTCATTTAATAAAAAATATTAG

>Cluster\_29592

ATGAGTTTTTTATCATTTTTTACGAAAGATAAGTAATAAAGAAAAAGAAATTTTTATCAGTGAGGAGCGTTTTTCTCCCT  
GCTGGAAAGGGTGTGCTTTTGTATGTGGTTCAGAGAATGGGCTGAAAAATGGTGGAGCATATTAATCCTCTGCTGGAGTGC  
GTCGGCTTACAGATATTGAAGATGTCAGGAAATCAGAGGATATACTGAACCGACTGGAGTTTATTGACAGAAGATTCGG  
GAATTTATCAGCATATGCTGAATATAATCGTAATGATAAATCTAAAAACAGTGGGAGAGGGAATTTCTGTAATATCC  
ACCGGAAAAATATACCAGGTCGGGAGAGAGGAAACCATCTGTCATTAATAAATTTACGGTGTGATTTTTACTCTGGACA  
GAGATACTGCCGTGGCTACGGTGCAGATTAAGTTCAGCAGAAAAATGCATTACTCAGGAAGAAATGGATGAATTATATGCA  
TTGCTGAGAGACTGAAAGAAAAGTGCGCCGGTAATTA

>Cluster\_22871

ATGCCGTTGTTAGATAGCTTACAGTCGATCATACCCGGATGGAAGCGCTGCAGTTCGGGTGGCAAAAAAATGAACAC  
CCCGCATGGCGACCAATCACCGTTCGATCTGCGTCTTTCGCTGCCGAAACAAGAAGTGTATGCCAGAAAGGGGATCC  
ATACCTGGAGCACCTGTTGCTGGTTTTATGCGTAACCATCTAACGGTAATGGCGTAGAGATATCGATATCTCGCA  
ATGGGCTGCCCGCAGTGTTTTATATGAGTCTGATTGGGACCGCAGATGAGCAGCGTGTGCTGATGCTGGAAAGCGGC  
AATGGAAGAGCTGTGAAAGTGCAGGATCAGAATCAGATCCCGAACTGAACGCTTACAGTGTGGCATTACAGATGC  
ACTCGTTGAGGAAAGCGCAGGATATTGCGCGTAACATTTCTGGAACGTGACGTGCGCATCAACAGCAACGAAGAAGTGGC  
CTGCCGAAAGAGAAGTTGAGGAACTGCACATTTAG

>Cluster\_6021

ATGGCTTTACCACGCAAAATTAACACCTGAACTGTTTAAACGACGGGAACAAGTGGCAGGGGATCGTTGAGTCGCTGAC  
GCTGCCGAAATTCACCCGCAAAATATGAGAAGTATCGCGCGCGGGAATGCCGGGGCAGTGGATGTGGATGTGGGGCTTG  
ATGACAGTGCCTGGACACAGAATTTCCATTTGGTGGTACTGAACTGCTGCTGTTTAAAGCAGATGGGCAAGCGCAGGTG  
GATGGCATCCAGCTGCGCTTTACCGCTCTATCCAGCGTGACGATACCGGGGAAGTGCAGGCCGTGGAGCTTGTGGTGGC  
TGGACGTCAAAAGAAAGTGGATTCCGGTGTGAGTGAAGACGGGCAAGCAACACCACCAAGTACCAGTACCAGAGT  
ACGCGAAGCTGACCATCAATGGTGTGAGTGTCTATGAAGTGGACCTTATCAACATGGTGGAAATGTGGACGGTGTGGAC  
CTGATGGAAGCGCACCGCAACGCCCTCGCCCTCTGA

>Cluster\_17652

ATGGCGTGGTACAGGATATCAGGGACAAGTCCGTAACGGGTACATCTTTGACCAGCTTCCGCTGGATATCGTCGCCAT  
GAAGTACGCCCTGCCGACAGTACCGCGCGCGCTGGAACACGAGCGGATGAAGAACGGCGACGACTGGGCAAGCTGC  
GGCGCCTCAGCGCTGCCCGGTGACGGGTGGAAGTGTCTCGCCGACCGTACTTATCAGTCTGGTGGTGAAGTGTGAC  
ACGACGCTTGAACGGCTGAACAGAACCCGGACATCCCGCCGAGGAGTCCGTCGAACGCTGGCGAGTCTGTCTGACAG  
TCTCAGTAAGGCGGTGTCCAGCAGTAAAAAATCCTGCCGAAACCGACCGGCTGGCCACGGCCTGGAAGTGGTGCAGC  
GGCTCGGCGGCTTCAATCAAGGAGCGTCAACCGGACAGTATGCCCGTCTTCTGAGGTGCTCGAAGGCTTCGCTAAAGAG  
CTTGAGGATAAATTCAGTTAA

>Cluster\_62813

ATGAGAAATGACGGTCAACAATCAGGGAAGCCTGCTGTGACGCCATTCCAAATACTTCAAATTTGACGTTCTTGATATAGA  
AGTACAGTGCCTGGCGGGTGTAACTAACCGTGTGTTGTAGAAGTCTACGCTCGGTTGAATACTCGTTGACGATGCTC  
GTCACATGTTGATGGCAGGAAGCGGAAAAATATCCGCATCATTAACGTGCGTGGTGCAGCATGTGACGAAACGATCGAA  
CCAGGTGATCTGCTGTTGCTGATATCAGGTTAAATCTTTGACGGTGTGATGTTATCTATGCGTTTCTGTATGACGAC  
CGCCATGTAAGCGCTGCAAAATGATGAAGGATAAGCTACTGGTATCTCTGATAACAAGAGCTACTCACCGTGGGACC  
CGATCGAGAAAGACGAGATGAACCGGTTATTCATATTCGGTAAGGTTATTGGGAGCATGCCGACAGCTACAGAAAACAC  
GGATAA

>Cluster\_3458

ATGGCAAACATCTGCTTATGTGCGATTTGACAGCCGCTTATCCACGGACAGGTGGTGCAGAGTGGGTAGGGCAGCTCA  
GGCCAAACCTATTGCGGTGGTCAAGCAGGAGCTGGACGCGGATCCGTTTATGAAAAATATCTACTGATGGCCGCGCCG  
CGAATATCAAAGTGGACTGCTTTAGCAACCAGAGCTTCCGGCGCGGTGGAAGAGAACCAGCTGGGCGACGGCAACGTG  
CTGGTGTCTTCCCGTGGTGGCGGATTCAGGAAGCGGTGCAGCAGGGCTTTGACGTGGCTGATATTCAGGTTGGCGG  
TTTAGGCGGGCGGCAACCGTAAAGCGGTGTTCCAGAAATAACGCTGGATGAAAAAGACGTTGGCATCTTAAACGATT  
TGAAAAATCGCGGATTAAGGCTGTTTTCCAGACCATCCGGAAGATAAACCAGCAGTCTGGACGATATCTGAAAAAA  
TTCTGA

>Cluster\_10563

ATGTCGCCAGACCAGCAGCAGCAGCAGCAGCAGCAGCAGCAGCAGCAGCAGCAGCAGCAGCAGCAGCAGCAGCAGCAGC  
ACCAGCAGCAGCAGCAGCAGCAGCAGCAGCAGCAGCAGCAGCAGCAGCAGCAGCAGCAGCAGCAGCAGCAGCAGCAGC  
AGCAGCAGCAGCAGCAGCAGCAGCAGCAGCAGCAGCAGCAGCAGCAGCAGCAGCAGCAGCAGCAGCAGCAGCAGCAGC  
GACCAGCAGCAGCAGCAGCAGCAGCAGCAGCAGCAGCAGCAGCAGCAGCAGCAGCAGCAGCAGCAGCAGCAGCAGCAGC  
CAGGACCAAGCAGCAGCAGCAGCAGCAGCAGCAGCAGCAGCAGCAGCAGCAGCAGCAGCAGCAGCAGCAGCAGCAGCAGC  
CGACCAGCAGCAGCAGCAGCAGCAGCAGCAGCAGCAGCAGCAGCAGCAGCAGCAGCAGCAGCAGCAGCAGCAGCAGCAGC  
TAA

>Cluster\_27605

ATGATAAAGCACCTGCTAGCACCCCTGATTTTACCTCGCTAATACTTACTGGCTGCCAGTCCCTCAGGGAAGTTTAC  
TCTGAGCAAGTCGCGCTATGCAATCTTATGGATTTACTGAAATCCGCGCGGACTGGTGGCTTATCAGATGCCA  
TTCGTGTCGCAAAAAATGACTACAAATGCTCCCGGAAAGCAGCAACAAATCCAAACCATGGCAGCCAAATTTGGCCTCG  
ACAGGGCTAACACATGCCCCGATGGATGGACACACCGCAACTATGGTGAAGCAGTTACAACGAAGTCTTATCATTTAA  
ACGGCGAATGCTGCGGATGATGGCTATGGGTGAGCAAAATTCGCGCAGCAATCTCACCACAGGGTTTAGGAA  
AAAAATATCCATAGCCAGTAAACAGCCCGCCAGGGCGCGGAGAACCGCGGCTGCGAGTGGTGTATCTGCCCCCT  
TAA

>Cluster\_66849

ATGTGTGATTCAGAAGCGGAGAAGATTTTATTCATCTGAATAAATGAACGGGCATACAGACGCTGATCCCCGTATA  
TATTTTTTATAGTATAGTATTTATGGATTTTACCTATTCCTGATGTTATACCTGATTTCTGTATAGTTGACAAATGAGT  
TTCCTCAGAAATCGGTTTCTGATTTGATGACAGCATACTATTTCTTTCTGCTTTTCAAGTATTTTGTAAAAATCTCTTT  
CCTCTGATGCTGAAAGATTTGCTTAACTGATGATCTCGCAAAAGATTTCTCCTGATGCGAAACAGGACTCTTGAGGG  
TCTTTTGTCCGAAAAAGAAATGACCGGGCGGGATGAAATGGATATCAAGCGCATTTCTAAAAACAAAGGAACTTGATA  
ACATCAGGAATTTTATTGATAAACAGCAGTTAACGAATAGTGATACTCGAAGAAAGACGGTCCCAATGAAGATAAA

AAAGGCATAAGATGA

>Cluster\_35452

GTGTTTTTTGGGGGAGAGCTTAGTTTGAAAAAATATTTGTTTACTTTTTTGTTTTTTCGTTTCTTCAGTCGTGAATGCTGA  
GGTCAATAACAAGTGTGTGATGTTTTCCGGTAAAGAAAGACTCTAGAAAAAGAAAATAAAATGCCGTGATGTTGATTTAGAAA  
AGTATAAAGATGAATGCTTCCATCAGGAATCCAGCGTAAGAATAATGATGCTTAAATTACAGTCTGAAAAATCAGAAA  
CTGGAGAGTGAATAAAAAAAGTGGATCATTTATCTCATATGATACAAAAGAAAACAGATATACTTAAATGCTATAAAT  
GACAACTCCTAAAAAAGGATTATGTGCAACCATATTTAATGGGGCTATAAGCAGAGTCTGTAAGGGCGATATCATTAACG  
AACATTCTGGTGGTACATTTACCGGTAATTTATGTGGAGATCAGGAGTATTAATGACATATCCGATCCCGTGCAGAAA  
ATTTTTCTGAGATAG

>Cluster\_23166

ATGACTGAAGAGATAGCAGGTTTCCAGACTCCCGAAGGCGCAAGTACAGGTAGCTTTTGAAGAAAATGCCCCGGCTTC  
GATGCATGATCTCTCTTTTCTGCATCTTCAATGCCGGTGTATGTTTCTGACTTTACGCTGTTTGAAGGTCAGTGGACGG  
GGTGTGTGATCACCCTGGATGCTGAGTGCAGTTATCTCCCGCCCGGATCAACTCTGGCCGCTGCGCAAAAGTGAAT  
GAAAAAATTTGGTCTGCAACTGCCGTATGGCACTATGACCTTTACTGTTGGTGAAGTGGACGGTGTTCGCAATACCTCTC  
CTGCTCGCTGATGTCGCCCTTTTCGCACAGCATGTCGATTGAAGAGGGCAACGGCTGACGGATGACTGCGCCGAATGA  
TCCTTTCCGTCGCCAGTACCAATCCGGATGTACCACACGCAAGGCGCTGTCCTGCTATTTGGCCGCAAGGAGTGGCGAA  
AATGCATGA

>Cluster\_31606

ATGAATAACATGCTGATGCAACGTTATGTTGACGAAGTGGTTTTTCGCCTTAAACAACGTCGGGGAAAAACACTCGTGCT  
GACTGTTTTTCACTGCGAGCCAGCTTCAAGAGATAGTTTATCATGATGATCATATAAATCCGATATGTCGAT  
TGCCGTTGTTACGCAACTTGGCGAGAACAAAACGTCAGATCGAGCAGCAATTGAGATACACGAAGCGTTAGCCTGGGGA  
TTGCACATTCATTTGCTGTCGAGCGTCAATTTCTGAACGCCATGAAATGAAGACTCTGCCCGTCTACCGTAAGCTG  
GTGCGACGAGCAAGGGCAACCGATCTACCTTCACTCGTGTGACTTTTTAAGTTATGCCGATATGACAGTAAAGCTCGG  
GAATACTGGTGTACAGCGAAAAATGTTGTGACCGCACTGGCTGTAAGCGGCAATTACCCGAAATATTCAGTTAATC  
AGGCAGGAGTAA

>Cluster\_41293

ATGACCTTAAAAGAAATGTTAGTGGTTTTCCGCCACCCAGGTTCTGATGATCTGGATGATCGCCCTGCACGCGTTCCGCAA  
ACCGGAAACCGCAATGTACCCGGAGAGCCGGTATCTGCGCCCGTTATCGTGGTGGTATCGTTCTGACCCCGCATC  
CGGACGGCGAAGAGCGTTGCGTAGCCTGTAACCTCTGCGCGGTAGCCTGCCCGGTGGCTGTATCTCGCTGCAAAAAGCA  
GAAACCAAGACGCTCGCTGGTATCCGGAAATTTTCCGATCAACTTCTCACGCTGCAATTTCTGTGGTTTGTGCGAAGA  
AGCCTGTCCGACCCAGCGGATTCAGTTAACCCCGGATTTGCAAAATGGGGGAATACAAGCGCCAGGATCTGGTTACGAGA  
AAGAGGATCTGCTGATCTCCGGTCCGGCAAAATCCCGGAATAAATCAACTTCTACCGGATGGCAGGTATGGCAATCGACCGC  
AAAGATAAGGGCGAAGCAGAGAACGAGCAAGCCTATCGACGTCAGAGCCTGTTACCGTAA

>Cluster\_41670

ATGTTTATATGAGAAATAAAGAAAAGAGTCAGGTTTTGTCTGATTTGAAGCGTCATTAGTGATATTTTTATCTGGCCT  
GGTTATTTGCTTTTTCAGTCAGCAATTTCAAAAATTAATAAGTATGCTGTTTCATGAAAATGCCTGCATGATGTTTCTG  
ATGTAATGCTTTACATTCAGGATACATTTACAGACATCATGCTATGAAAAGAAAATATGTTTGTGATGGAGTGATAAGT  
TCAGTAAATCAACATTAACCTGTTAATAAATAAAGGTTGATGTTAAAAAGACGGAAAAATATGATCTGTGATATAT  
TTTTATACACCCTGTGAGGAAACGAATATTTGGCAGAAATGAAGATTTCCGTTAGCATGTTATTTACGATGTAAGCCCTT  
ATTTGCGGAAATGGATACAGTACAGGAGTTGTAAGTTTCCGTTTCCGGATGGTGAAGTAAATTTCTGATGACACAAAT  
TTTTTAGTGGGGATAATAAATAAATCTTTTCTTTTACAATAATTTCCGGGTGGATGTTTTATGA

>Cluster\_7571

ATGAATAAATCAATGATTAGTCAGTCCGGTGGTTACGCTCTGTTAGCGGGGCTGATATGGCAATGAGTAGCACGTTATTCCG  
GGCAGATAAATACTGCATTTCTCCGGTAATTTATTAAGTAAATCCTGTGCGCTGGTGGTGGATGGCCAAATCTGGCAG  
AGGTGCGCTTTCCACGGTTCAGTCTGATGATGATGAACTTTTACCGGTAAGAATCAGATTAATGACGGCCAGGCG  
AAAGATTGCAAAGGGCGGGGATACAACGTAAGTACGCTCACGGGGGTAGAAGACAGCGAAACACCCGGTTTTCT  
GGCACTGGATACGTCATCAACCGCTCAGGGAGTGGAAATGGCATGGAAGAAACCGACGGAATGCAGGTTGCCATCAACA  
ATACAAATGGGGCGACCTTTGCGCTAACCAATGGCAATAACGATATCAATTTACAGGCTGGCTACAGGCGAAAAGCGGC  
CGTGTGATGACGATCGGTGAATTTACCGCTCTTTAACGCGACATTTGAGTATATTTAA

>Cluster\_11635

ATGAAAATCGCACCTGATGAACAAAAAATATGGCGCAAAGCTGCCGCTAAGTGCAGACGCTTCGACAAGTGGGGAGT  
AATCCCGTTGAGCGTAAAGGCCGTGAGGCGTTTTATGATGTTGCTAGCGTATAGACAAATAGGGTTAACAATGCAATTA  
ACAGCTTACAAACGACAAAGGCCGAGATGATGATGATGAACTTTTACCGGTAAGAATCAGATTAATGACGGCCAGGCG  
GAAGCGCAGGAATTAATAACGAGCGGACCGCGGAGGTGATGATACAAAGTTTTGCATCTACGGATCTCAAAAAT  
AGCCAGTCAGATTTCAATCATCTAGGACAGCTCCCGCTCACAAATGCAAAGGCGCTTTCCCGATATAAGGCTTATATC  
TGGATGAACATAAAGGGAAATAGCCAAAGCATGTAACGCATGTGCAAGACTTGACGAAAACCTGCCACAGATACTGGCT  
GATTACCTGATGGAACCTACCGGAAGCGCGCTGAGAAGTTGCTACAGAACAAAGCGGAGTAA

>Cluster\_32266

ATGCAAAACATAGCTGTGGTTTTATTATTCAGGATATGGTACACTAAACTGGTTGCTGAAAAAGTGGCACAAGGGCCCCA  
TGCAGATTTAATTTGATGATAACGAAGGAAATATCACTGAGCAGGAGTGGGAAAAACTGGACGCAGCCGATGCCATTA  
TCTTCCGGTCTCCACCCTATATGGGCGGTGCGCCATGGCAATTAAGAAAATTTGCTGATGCCAGTTCCAAAGCGTGGTTT  
ACAGTAAATGGCAGGATAAAGTCTTCGGGGTTTTACCAACAGCGCCAGCCTGAATGGCGATAAACAAGTTACGCTGAT  
CTATCTGCAACCGCTGGCTTACAGCATGGCGGTCTGTGGGTGAGTTTAGGTCAGGCTCCTGCCAATGTGCTTGGCTCAA  
CCAGGGAAGATGTAACAATCTGGGCGGTTGCTGGTGCATCTCCAGCCGATGCGGGTGCAGACCAAAATC  
CCTACGGGCGATCTGGATACAGCCGTGAAATATGGTGAACCGTGGCGACAATTAAGTGGCGCTTAAATGA

>Cluster\_7537

ATGAAACTGATGTTTGCATCGGACATTCATGGGTCGTTACCGGCGACGGAACGTTCTGGAGTTGTTTGGCCAAAGCGG  
TGCCAGTGGCTGGTGTATCTTGGCGACGCTGTTGAATCACGGCCCGCTAATGCTTTACCGGAGGGTTACGCGCCAGCCA  
AAGTCTGTAACCGCTTAATGAAGTGGCACATAAGGTTATCGTGTGCGCGGCAACTGCGACAGCGAAGTGGATCAAAATG  
CTGCTGCAATTTCCCGATAACCGCGCTGGCAACAGGTTATACGAAAAACAACCTGTTTTTGGCAGCAGTGTCTATCT  
TTTTGGCCCGGAAAAATCTGCTGCTTTAAACCAGAACGATGTGCTGGTGTACGGTCATACCCATCTGCCAGTGGCAGAAC  
AGCGGGGGGAGATTTTCCACTTCAACCCCGCTCGGTGAGTATCCGAAAGCGGTAATCCCGGAGTTATGGCATGCTG  
GATAATGACGTAATGATGTAATCGCACTCAATGATCAAGTATCATTGGCAGGTCGCGATTAATCCGTAA

>Cluster\_38037

ATGCTGAAAGCTCTAAAAAGCGTGGTACGCTGTTTCCGGTTTTGAAGCCCGCTAGCAACGTCGCTGCG  
TGAGCATATCAAAATACACAACATGGAAGATTTGTTGGTGAAGTCAATGGTACCAACCGAAGAGTGGTTGAAATCCGTT  
GCGGTACGCTCGCAAAAGCGAAGCTAAATTTCCCTGGTACGTCCTCGTTAGATGGTGAAGACGACGCGAGCTGG  
CACCTGGTGGCAGCGTACCGCGTGTGATGGGCTTTCATCGCGGTACTTCCGATCGTCTGCGCAATCAGCGATAAAGA  
AGTGCATGCGATTAAGAACCGCTGCAGCAGGTTGGTGAAGCCGCTCCGAAACGCTGTTTGAACCGGGTGAATGG



TCCGTGTTAATGATGGTCCGTTCCGCTGACTTCAACGGTGTGTTGAAGAAGTGGATTACGAGAAATCTCGTCTGAAAGTG  
TCTGTTTTCTATCTTCGGTCTGCGACCCCGGTAGAGCTGGACTTCAGCCAGGTTGAAAAGCCATA  
>Cluster\_4610  
GTGACCCAAATTAACATCAGGCACCTGCGTGAAAAGGCAGAGAAAGCACTAAAGGAAGCTACATCGTAGGGCATAACATC  
TGTTAACCAGGCAAAATTAACAGGAGTTTGTGTTGCCAAAAATGAAAAGGAGAACCCGGTGGCGTGATTGCGGAAT  
GTCATGTTAACTGCCTGATTGAATCAGATGCTCAGGCTTATGCAAAACGCTGAATTCATAGCAGAGGCTAACCCGGCTACC  
GTGCTGGCAGCTGCTGGATGAACAGGAAAGAAACCTGCAATACATCAAAAGCCGGATCAGGAGAACGAGGATATTGCGCT  
AACGGTAGGGAAGCTGCGCGTTGAGCTTGAAGCAGAAAAACAGCGGGCAAAAGTTCTATTTATGGAAAATGCTCGGCTTA  
AGTCAGGCATAGCCGGTCTGATACACCTCGGTATTCGATATGCAGATGTTGAGTTCATGAAAATGCTGGAGATGCCAG  
CTTTCTACCCATGCACTGACAGCATATAAACAGCATTGCAACAGGCATTCGCATCAAAGGAGAGTGA  
>Cluster\_24822  
ATGAAAGGCTATATCACAGCAAGTGAATTTCTGGAGCAGCGGCTATTTTTTCATCTCTCATAATCTCTGGCAACATCTC  
CTTTAAAGATGAACATATATTCAGTTATCTGGAGGAGCCATAAACTTGGTGATGTTTATAAGAAAAATAAATGATAA  
GTGCAAGATTATTTTTCCAGATAATCAGGGTGAACAGATTCTTGTGTCGACGGCAATCCTGAAAACTTAAGGAGGAT  
TTTTAGGAGAAATTAATAAAGTATAAAAACTTAAATGCGTCAAAGAAAAAGATGAAGAGAAAGTTAGCCTGGATAA  
TTTTAAGTGTATTGAAGAGTCTAACTAGAGCTCGTTTCTGCGGTGCGTTACTCTGCTCAGTATGTTCCATGTTTACTC  
TGACGCTGACAAAAAGAAAATACCATGCCTAAAAATACGGTAAATATTTCCATTTGCCAGCGATGAAAACAGTAAAGTAT  
TTAAATGAACAACAGCAAAAGTATAAAGATTGCTGTTTCTGACTCGCTAA  
>Cluster\_16371  
ATGGGAATAACTAAAGAACGATTGTTGGAAATAGCAAACCTTAGTGATTGGGCATTAAGTGATGAGAGAAATTGTTTCTCC  
TCATGCTTATGAGTCAGTTACAAGTATAGAAAATAACAACAATGGCTAGAATGCTGCTTGGTTATTTCAAAATAGAAAAATA  
AAAAACAGATGGATAGTAATGTTGATATATGTGAGATTTAGACGATTGGGGGCTTGGGTTGTCGCTGGTAATAGTTCT  
ATTTGATTGGCAGGAAATAGCTGATAAATAAATAAATGTTGTTCTCATGGTAAAAAATCACGTCGTCAGTGCAGCAATGA  
TGAAGGGCAATTTATGACATTAGTATCTTGGTTAGAAAGATATAAGCAACAAAGAAATAGATTAAATGTTGCTCAT  
TCGTGATTGGTTTATCTCTCTGCTATTTGCAAGCAACAAGGATGTTTCAAGTGAACAAATTCGTAAGAAATTGCAAAAA  
GCCTTAGGTTTTTGGACTGGATATATAGCAATTACCAGTTAA  
>Cluster\_39306  
ATGGGCGGAAAAATGAAGTTAACCGTATTACCAACGCCAATACTATATCAATGGTAATAACCTGCTGGGCCGCGCGGA  
GGAGATTAAAGCTGCCGATATCAGCATGATTATGCAGGAGCATAAGGCCGCTGGGGATGGTCCGCAAGATTGAGTTGCCCG  
CTGGGTTCCGACAACTGGAGGGCAAAATCAAGTGAACAGCTTCTATCAGCAAGTATGTCGCCATGTCGCTAACCCGAT  
AAGTCGCTGGCGTTGAGTGCCTTCTGCTATCGACCGCTATAACTCAACGGGGCGTATCGATGAAATCCCGCTGGTGC  
GCACCTGACGGTAAATGTTCAAGAAGAATCCGCTGGGACGTTTAAAGCAACATGAGAACCAGGATTTTTCCAGTGCCTTTA  
GCTGCACCTATATCAAGCAGGTGGTGGACGGCAGACGCTGCTGGAACGGATTATCTGGCAATATCTTCAAAGTGAAT  
GGCGTGGATCAGTTGAGCACCTATCGCGCAATATCGCGGTTAA  
>Cluster\_34722  
TTGAATAAAGATATTTTTATTTGGCTAACAGAATTACCACATATTCACCTAATGTTTTGTATACCTTCATGCAAAAATG  
CTACATGAATGAAACGATGCTCTATAATTTCAAGTTTAAACCTTTATGATTTTCAAGTCAAATAAATAACTTAGAGCTTGGTG  
TGCTATTAATAATCGTGACGATGATGATGTTTAAATGACTGTAAATATGAGTTGAACGCTACTACTAGAGCAAGCTCA  
GAGAAAATTTAGAAGTTCCAAACAAGCCCTACCAGCAAAAATAACTATTTTCAAGGCTATCCCAAAAATAAATTTAAA  
ACAAAAGATGTTATTTCCCGCTTATTAGACTCTCGGCTATTTAACTAAGGGGGATTTCTGTTTTCTTTCGACACCGTTAG  
GTCAAAAGCAGGGGGGAGTTTTAAACCTGATAAATTCAGAAAAGGGGAGTATATTTCTTATCCCTGCCGATATTTCT  
GATAAAAAAGAGGTTTTCTTTGATATCTTATTGGGAAATAA  
>Cluster\_40813  
ATGTCAAAGATTGAGATAAACCGCATCAGCAATGCCAACATCTATCTGGATGGTACTAACCTGCTGGGACGGGCTGAGGA  
AGTTAAACFCCCGATGCTCCATGATTATGCAGGAACAAGCGCTGGGGATGGTGGGTAAGTTGGAACCTCCCGCTG  
GTTTTGACAACTGGAAGCGCAATCAATGGAACAGCTTTTACCGGATGCGATGCTGTCTGCGCGAACCCGTACAGG  
TCCGTGGCAGTGCAGTGTCTGTTCCAGCGTCCAGCGCTACAGCTCGCAGGGGCTGATTGACGAAATCCCGCTGGTACCTT  
CCTGACGATTTATGTTCAAGAAGAACCCTGCGGGACGTTCAAACAGCAGCAGAGAACCAGGTTCTCCAGTACCTTACCT  
GCACGTATATCAGACAGGTTACTGGATGGTGAAGAGCTGCTGCAACTGGACTATCTGGCCAACATCTTCCGGGTCGGCGG  
GTTGATCAACTGACTGACTACCGTATCAATATCGGGGGCTGA  
>Cluster\_46808  
GTGATTGATGACGATGGCTACCGCCAAACGTAGGTATCGTATTTGTAATCGCCAGGGGCAGGTAATGTGGGCCCGGGC  
ATTTGGTCAAGCTCCTGGCAATTTCCGCAAGCGGAATCAACCCCGGAGAATCCGCAGAGCAGGCGATGACCGTGAAT  
TGTTTGAAGAAGTAGGATTAAGCCGAAAGCGTTTCAACTGCTTGGCTTCAACGCTAAGTGGTGGCTACAAATTACCG  
AAACGTTTTGGTGGCTTGGGACACGAAGCCGTTTGTATCGGCCAAAAACAATAATGTTTCTCTGACGCTGGTGGCGG  
CGATGCAGAAATCAATATGCAAAACAGCAGTACACCAGAGTTTACGCGCTGGCGATGGGTAAGTTACTGGTATCCGGTCA  
GACAGGTGGTGTCTATTTAAACGTGATGCTACCGTAGGTAATGAAAGAGTTCCGAGTGTGGTATGCTACTGCAGGAA  
AATACGCCAAAACCAAAACGCATCTGCTTATCGACGTAAGAGGTTAA  
>Cluster\_11508  
ATGGTTCACTGGAGGCGTGGCACCGCGGTTGAGCAGTACTCGATTGACGAGATGTTTCTCTACGTGCGAGGATTTGA  
CAGCTGCATCGATTTTCGAGGATTTCCGGCCATCAGCTGCGTGAACACGTCAGGAACGGGACTGGCCTGACTATCCGGTGTG  
GAATGGGGCAACCAAAACGTTGGCAAGTCAACAATGGGCTTCCAAAGAGTGGCCACAGTTTGGTGGCGTGTGGCA  
TTAACGCCGACAATATCCGCGTGGGAAAAACTGCTGCTACTGCGCGGTTGGAGGTAATCTGGGGTGTAGGCCGAG  
GATATCAAAGAAGCTGAACACAATAGAGATAACTACTGCACTGCAAGTGGCGCACGAACCTATATTTATCAGGAAGAAC  
TTCAATGTGGTTCGAGAGAAAGTCCGGAACTCAATGGAGAAAGCTGATTTTCACTGGAGGAAGAACCAGCCCCCAA  
ACAGCAGATAGTCTGACGCGGTCCTTTGGAGAGCGGCTCACGACATATGA  
>Cluster\_49279  
ATGAGTTTTCTTTGCGGTTGTTGGAATATGAATAATATAGATTTATTAATAAATAAATAAATAAATAAATAAATAA  
AAATCCGGCATCCCGGCTCAGGAGAGCTGTTAATACACTATATATATTAGAGTAAATGACAAAATCCAGAGTATATAT  
AAAATGAATTGAGCAGTATAGAATAAACAATTAACATTTAGTGTAGTTTCAATATATATATGCTGATGATTATTC  
CAGTCCCTTCTGATTTTACAAGGAGTTACAATTTCTCCAAAACAACATCACACACATCATAGACAAATAGAAAAAAA  
GAATATTGCCAAAAGAAATTAATAATAAACAATGCTGCAAGCAAAAGTATTTGCTTAAACCCCTGACGGAGTTACACTTG  
CTCAAAAATAAATAAACAATAAATAAATAAATAAATAAATAAATAAATAAATAAATAAATAAATAAATAAATAAATAA  
GAACCTGCCAACAAAAAATTTATTAACAACCTTAAATTTGA  
>Cluster\_66928  
ATGAACATGGATGCCCTGACCCGATTTGAGAATTTGGCAGCAGTATTTTCACTGCGGAAATGGATTTCCTGTTTACCTG  
GGGAAATTCATCGGGTCTCAGCATGATTACCTGTTTGGCCGCGGCTTCAAGCGGTCAGCGGTCGGTAAAAATGCTCCCG  
GAAATTTTATGACGGGATTTTACCAGCTCCATGCTGCTACTCCCGCAATGATTAACCGCGGAGGCGTACAAATG  
GGATTACGGGCTGACTCATTTGGTCCGATGTCATATGTACAACCTCAGACGTTTGGCGTGTCTGCTGGCGCAGCAATGC

AGTTCTGTCGCTGGCCAAGCTGGCCGGTGTGGGATTTGTTCATGAACGGGATATCCATCTGGCGCAAGGCCGGACTCGATG  
GACATACCCCACTGAGTGCAGTGAATCCGTGACGAAGGAAACGTCAAATTTATTGCCGGCGTCTGCTGGTCTTTATC  
GATCGTGTCTCAATGCCCTGCTGGCAAGCATTGGAATCGTCTTCTGA

>Cluster\_24231

GTGAGCAGCAAAGTGGAAACAACCTGCGTGCAGTAAATGAACGTATTCTGGTGTGGACGGCGGTATGGGCACCATGAT  
CCAGAGCTATCGACTGAACGAAGCCGATTTTCGTGGTGAACGCTTTGCCGACTGGCCATGCGATCTCAAAGGCAACAACG  
ACCTGCTGGTGTCTAGCAAACCCGGAAGTATCGCCGCTATCCACAACGCTACTTTGAAGCGGGTGGCGATATCATCGAA  
ACCAACACCTTCACTCCACGACCATTTGCGATGGCGGATTTACCAGATGGAAATCCCTGTGGCGGAAATCAACTTTGCAGC  
GGCGAAACTGGCGCGCGCTGTGCCAGAGTGGCTGCCACGCGGAGAAACCCGCGTACGTTGGCGGCTTCTCG  
GCCGACCAACCGCACGGCGTCTATTTCTCCGGACGTCAACGATCCGGCATTCGCAACATCACTTTTGACCAGTTGGTG  
GCGGCTTATCGAGAAATCCACAAAGCGCTGGTGGAAAGTGGCGCGGACCTGATCTGATTTGAAACCGTTTTCGACACCC  
TAACGCAAAAGCGCGCTTTTCCGGTGAACCGGAGTTTGAAGCGCTGGGCGTTGAACTGGCGATTAATGATCTCCGGCA  
CCATCACCGACGCTCCGGGCGCACGCTCTCCGGGACAGCCACTGAAGCGTTTACAACTCCCTGCGCCACCGCGAAGCG  
CTGACCTTTGGCCTGAACGTGCGCTGGGGCCAGACGAACCTGCCAGTACGTACAGGAACTGTCGCGTATTGCGGAATG  
CTACGTACCCGCCACCCGAAACCGCGGCTGCCCAACGCTTTGGTGAATACGATCTCGACGCGACAGATGGCAAAAC  
AGATACGTGAATGGGCAAGACGCTTTCTCAATATCGTGGCGGCTGCTGGCGCACCGCCACAACATATTGACGCG  
ATGAGTCGTGAGTAGAAGGATTAGCGCGCGCAAACTCCCGGAAATTTCCCGTAGCCTGCGCTTGTCCGCGCTGGAGCC  
GCTGAACATTTGGCGAAGATAGCCTGTTTGTGAACGTGGTGAACGACCAACGTCACCGTTCCGCTAAGTTCAAGCGCC  
TGATCAAAGAAGGAAATACAGCGAGGCGCTGGATGTGGCGCTCAGCAGGTGAAACCGGTGCGCAGATTAATGATATC  
AACATGGATGAAGGATGCTGATGCGGAAGCGGATGGTGCCTTTTCTCAATCTGATGCGCGTGAACCGGATATCGC  
TCCGCTGCGGATTAATGATCGACTCCTCAAATGGGACGTTATTGAAAAGTCTGAAGTGTATCCAGGCAAAAGCATTG  
TTAACTCTATCTCGATGAAAGAGGGTGTGACGCTTTATCCATCACGCGAAACTGTTGCGTGCCTACGGTGGCGAGTC  
GTGGTAATGGCTTTTGACGAACAGGGCCAGGCCGATCCCGCGCACGGAATAACGAGATTTGGCGTGGCGGTACAAAAT  
CCTCAACGAAGGATTTGGCTTCCGGCTGAAGATATCATCTTCCGCGCAACATCTTCCGGGTGCGCAACTGGCATGGAAG  
AGCACAACAATTACGCGCAGGATTTTATCGCGCGTGTGAAGACATCAAACGTGAACCTGCCGACGCACTGATTTCCGGC  
GGCGTTTCTAACGTGTCGTTCTCGTTTCTGTTGGCAACGATCCGGTGGCGGAAAGCATTACGCGGTGTTCTCTACTACGC  
TATTGCGAATGGCATGGATATGGGGATCGTCAACCGCGGCAACTGGCGATTTACGACGACCTGCCTACCGAACTACGGC  
ACGCGGTGGAGGATGTGATCTTCCACCGTCCGACAGATGGTGGCAGCAGGCTTACTCGAGCTTGGCAGAGAATAFCGCGC  
AGCAAAACCGACGATACCGCTAACCCAGCAGCGGAGTGGCGCTCGTGGAAAGTGAATAAACGCTTGAATACTCGCT  
GGTCAAAGGCATTAACGAGTTTATCGAGCAGGATACCGAAGAAGCCCGCAGCAGGCTACGCGTCCGATGAAGTGAATG  
AAGGCCGTTGATGGACGGCATGAACGTGGTGGCGACCTGTTGGCGAGGGCAAAATGTTCCGCTCAGGTGGTGA  
TCCGCGCGCTCATGAACAGCGCGTGGCTATCTCGAACCGTTATTGAAAGCAGCAAAAGAGCAGGGTAAACCAACCG  
CAAGATGGTATCGCCACCGTGAAGGGCATGTCCAGACATCGGTAAAAATACTGTTGGCGTGGTGTGCAATGTAACA  
ACTACGAAATTTGATCGATCTCGCGCTGATGGTGCCTGCGGAAAAAATTTCCGTAACCGTAAAGAGTGAATGCTGATTTG  
ATTTGGCCTTTGGGGTGTACGCGCTCGTGGACGAGATGGTTAACGTGGCGAAAGAGATGGAGCGTACAGGCTTCC  
CATTCCGCTATTGATTTGGCGCGCGCACCTCAAAGCGTAAAGCGTAAAGCGTAAAGCGTAAAGCGTAAAGCGTAAAGCG  
CAAGATGGTATCGCCACCGTGAAGGGCATGTCCAGACATCGGTAAAAATACTGTTGGCGTGGTGTGCAATGTAACA  
ACTACGAAATTTGATCGATCTCGCGCTGATGGTGCCTGCGGAAAAAATTTCCGTAACCGTAAAGAGTGAATGCTGATTTG  
ATTTGGCCTTTGGGGTGTACGCGCTCGTGGACGAGATGGTTAACGTGGCGAAAGAGATGGAGCGTACAGGCTTCC  
CATTCCGCTATTGATTTGGCGCGCGCACCTCAAAGCGTAAAGCGTAAAGCGTAAAGCGTAAAGCGTAAAGCGTAAAGCG  
CGGTGATGTGCAGAACGCATCGCGCACCGTGGTGTGGTGGCGGCTTGTCTTCCGACACTCAGCGCATGATTTCTGTT  
GCTCGTACCGCAAGGATGACGAAACCGTGGCTATTACGACCGGACGAAAGAAACACGACACCCAGCGTACGCTGGA  
AGCGGCGCTGATAACGACTTTCGTTTGGTGGCAGGCTTACACGCGCGGTTGGCGCACCGTCTCGGTCAGGAAG  
TCGAAGCCAGCATCGAAACGCTGCGTAATACATCGACTGGACCGCTTTCTTTATGACCTGGTGGTGGCGGGAAGTAT  
CCGCGCATTTGGAAGATGAAGTGGTAGGTGTTGAGGCGCAGCGGCTGTTTAAAGACGCCAACGACATGCTGGATAAAT  
AAGCGCGAAAAAATGCTGAACCCGCTGGTGTGGTGGGCTGTTCCCGGCAACCGTGTGGGCGATGACATGAAATCT  
ACCGTGCAGAAACCGGTACCCATGTGATTAATGTCAGCCACTATCGCCAACAGACCGAAAAAACCGGCTACCGTAACT  
TACTGTCTCGTACTTTCGTTGCGCCGAAGGTTTCCCGCAAAGCGGATACATCGCGCATTTGCGCTGACTGGCGGGCT  
GGAAGAGGACGCACTGGCTGATGCTTTCCGAAGCAGCATGATGATTACAACAAATCATGGTGAAGCGCTTCCCGACC  
GCCTGGCGGAAGCCTTTGGCGGATATCTCCATGAGCGTGTGCGTAAAGTCTACTGGGGTATGCGCCAAACGAGAACCTC  
AGCAACGAAGAGCTGATCCGCGAAAACTACAGGGCATCCCTGCGCACCGGCTACCCCTGCGCTGCGGCAACATACGGA  
AAAAGCCACAATCTGGGAGTGTGGAAGTGGAAAAACATACCGGTATGAAACTCACGGAATCTTCCGCTGCGCATGTGGCGG  
GTGCATCGTGTTCGGGTTGGTACTTCAATCATCCAGACAGCAAGTATTACGCGGTGGCGCAAAATTCAGCGCATCAGGTT  
GAAGACTATGCCCGCTAAAGGAATGAGCGTTACCGAAGTCGAGCGTTGGTTGGCACCGAATCTGGGGTATGATGCCGA  
GTAA

>Cluster\_6243

ATGAATAAAATATACGCGCTTAAATATAGTCCCTTACTGGTGGGCTTATAGCTGTGTGAGAATTAAGTAAGAAGGTCAC  
AGGAAAAACCGCAGAAGATTAATGACGGTTTCCCTGGTATTAATCAGTGACTTCTTCTGCTTTACCGGGTAAAGCATCAA  
CGGTCAGCGCAGAAATACCATATCAGACTTTTCTGACTTTTGTGAAAATAAAGGTGTGTTTACCCCGGAGTACAGGA  
ATTGAAATAAACGACAACAATGGAATAAAGTTGGGGTCTTGTATGTTCCCATGCTTGATTTTCCAGTCTTTCTCGTGA  
TGGTCATACACATTTGATTCATCTGTTTATGTTGATCGGCTAAACATAGTGGTTTACAAGGTGTTTTCATCAGCAACTT  
TTGGTTATGACAGATATAAAATAGTTGATAAATAATCTGCTGGTATAGATTTTTCGCCACGATTAATAAGCTT  
GTTACAGAAGTAAATCCCGCAGATATACAGGAAAGGATAAATTAATAATAACCGTTTATACGCTTTTACCGTGGCGG  
CGTTGGCTCTCAATATATCGGTTATGCAAAATGGCACAGATAAACTACTGCAGGCTTACTCCAGACAAGGCTTATCTGA  
CCGGCGGAACAGTGGGAAAACCTTATTATACTACTATAACGGTATGAAGATGATTTACGAAACCCGGGAAATACCTTT  
GATAAAAACCGAGGACTTGGCAGTTATGGACAGATTTGGAGACAGTGGTTCGCCGTTATATGCCTGGGATAACATTTGA  
CAAAAAATGGGTATTAACCTGGAGTTACTCTGCATAATTTATGGAGTAAAAGGTGCACGAAATGACTGGCTCCTGATACCTC  
ATGACTTTTATCAGTCAAAAATTAACAGGATGACCTTAAACCAATATTGTTGCTTCTCCGGAGGAGAATATCTTACGCTGG  
GAATTTGATCGTTCCAGAGGTACAGGTACTCTCAGTCAGGAGAGAGAAGATTTTCCATGACTGGTAGTGAACGGAAA  
TGCAAATACCGGGAACAATCTTGTGTTCTCAGGTAATGAAGGAAAAATCGAACGTTGATCCAGTGTGGAGGAGGACCG  
GATATCTCAGTTTGTATAAAGACTACACTGTACTGACAAATAAACAGTACATGGACTGGTGGCGGAATTTATGTCGGT  
GACGAGGCAAAATGCAAAATGGGGAGTAAATGGCATTGCCGCTGATTTATCTGCATAAAGTTGGTTCGGGACATTAACGTT  
TAATGGTCATGGTGAATAAAGGTGGCTTAAAGTTGGGGAGCGGCTTGTGTTCTTGGACAAACAGCCAGATGCAAAAC  
AGAAACAACAGCGCTTTAGCCATATCAATGACCTGGTGGCGGCAACAGTTAAACTTAAACGGGCAACAGGTAAGAT  
GCAGATAATATCAGTTGGGGATATCGGGTGGGAACTGGATTTAAATGGGTATGATTTTACCCTTTCCCGCTTTCAGGC  
TGCAGATTTATGGTCTGAAATCAGCAACGATAATCAGACAGATAAATCCATAGTCACACTTTCGTTATCTCCTCTGAAAG  
CAGAAGAAATAAATGTGGTTGTTAATAAATAAATAAATGGGGGGGCGGCAAAACAGGTTATCTGATTAATACAGC  
TTTGACGGAAATTTATCTGTTGAAAAGTAAACCGATAATGGCAGCGCTTTGTTTGGCGCGCTGAATAATCAGAGCAATG  
GCAAGGCTGGGTAAGAATAAAGAAAAAGCAATTTGGGTTATATACACAGATGAAATGCAGGAAAGCGTCTTTTATCAT  
ATATATATCATGAAAAATAACCGGTAATACCAGTGTGGAAATACCCAACTGGCAGGCAATGATATTTTAAACGCTTGTG  
GGCTGTGATATCAGGAGATATGTCAAACAGGAGGTGCTTATCTTCCAGGACACCGGTTATTTTAACTCATGCAAG  
GCAAACTGTTTCTGCATCGCAGAGTACTGGGAAACAGGAGTTCTCACTCAACAATCTGAATCTTAATAATCGCGACT  
TCAGTCTGTCCGTAATGATTTATGAACGGAAATATCAGGGCGTTAACAGAGCAGTGTATTTATCGCGGAGATACA

GTCTTTACTGATAAAAAATGACGGAACAGGTAATGATGTCATCAGTGTGAAGGAAATCTGCTGCCGAGGAACATCCTC  
CTATACAGGGCATATCCTCTGGAGCAAAAATCAGCACGGATATCCGCGATAATTTTCGTGGCGGGTTACGCTGAAAG  
ACAGTCATATCAATGTTTCTTCATCTTCAGTCTGTTCTCAGATGCATCGTCAATTTATAAACAGCTCCCTGAATATTCAT  
AAAGGAGGTGGCGTGACCCTCAGGGAGGGCTGTTTACAGTGAAGCATGATATTTGGTGACCTCCCTTCTGCTTAC  
CGGTATACAGTGAATCAAGATGATGCTTTTTTACCGACCATCAATATGGCTGATGGCGGATTTAAACATGATCTG  
ATTCATCAGTACTGAAAGCCAGAGACCAGGCATCTGTTGTTGGTGATAATATTTCTGATAAACAGGCCACAATCAGCTTC  
GAACTGAATCAGGTAAGAGGGCATATGCTCTGAGAAGGCATCCCGGGGACTCGCGGTAGGATTAAGTGGTGTAAAA  
TACGGCATACCGGGTGAATTCATGCCCGCTCAGCATCTGCCACTATGAACAACACCTGGTGGCACTGACAGGAGACT  
CCTCATCTCGCTCGTTAAAAAATACCGAAGCATGACATATTTTACAGGAAGTGCAGGAAATAAAGCAATTCATACACTG  
ACGGTTGATGAGCTGACGACGAATGGCACTGCGTATGCCATGCGTACGGACCTGAAAAATGCGGATAAGCTGGTAGTAAA  
CCAAAAGCTGTCAGGTAAGGATAATATTTCTGCTGGTGTATTTTCTGAACAAACCACCGGAGAAAAATCGGATATGAAC  
TGGTGAGTGCACCGGGGAACAGCAGTAAGGATGTTTTAAAGGAAGTGAACGGCAATAGGTTTCAGCAATGTCACACCT  
GTTATTACAGCTATAGGACCCGAGATAAAAACAACATCAACCTGACCTGACGGGTACAGGATGGCAGAAAAATCGCCCAAC  
CCAAAGTGCTCAGGCCCTGCATCTGTGGGGTACAATCATTTTTGAGTGAGGTCAACAACCTGAATAAACGTATGGGTG  
ACCTGCGTGACATCAATGGTGAAGCTGGCGCATGGGCAGTATCATGAGCGGAACCGGCTCTGCCGGTGGTGGTTTACGT  
GACAACACACACATGTTTCCAGTCCGTTGTCGACAAAAAACAATGAGCTGGACGGACTGGATTTGTTTACCGGCTTACTGT  
CACACACACTGACAGCAGTCCCTCCGCCATGCTTCAAAGTAAAAAATAAATCTGTGGGGCCGCGATCTATGCTTCCG  
CCATGTTTGTATCCGGTGCCTATATCGACCTGATTTGGTAAAGTATGTTTCATCATGATAATGAGTACACCGCAACCTTTGCC  
GGACTCGGAACCCGTAATTAACAGTACGCATTTAGGTAATGCGGTGCTGAAGCAGGCTACCGCTGTCAATGCTAGTGAAGA  
TACCTGGATGAGCCACAGGCAGACTGGTCTACGGTGTGATATCCGGTAAACAGTTTGCATGGAAGGACCCAGGGGATGC  
ATCTGTCCATGAAGGACAGGGACTACAATCCGCTGATTGGTGTGACCGGTGTGGATGTTGGTAAATCCTTCTCAGGTAAG  
GACTGGAAGTGACAGCCGCTGCCGGTCTGGGCTACCAGTTTCAGCTGCTGGCTAACCGCGAAACCGTATTGCCGGACGC  
ATCTGGTGAAGAACGCATCAAAGTGAAGAGCAGCCGATGCTGATGCTCCGTTGGCCTGAATGCAGAAATCAGGGATA  
ACGTCCGCTTTGGACTGGAGTTTGAAGAAATCCGCTTTGGTAAAGTACAACGTTGATAATGCTGTCAACGCTAACTTCCGT  
TACTCGTTCTGA

>Cluster\_34362

ATGACTATGTTCCAGTATTACAACGATCAGGCCATTTTGTTTTTTTCAGCATTATTTGCTTTTTGTTTTGTCTTGTATG  
CCGAAACACGGCGTTTGGCGGGCGTCAFCGAATGGTGTCTGCGGACAAAAGCGGACCTGCAGGCGCAACTTGAATCAC  
TAAATAACAACAAAAGATCTTTCTGCTCAGGACAACTGGTGCAGCAGGATCTGACAGATACATTAGCCACCTCGATAAA  
ATCGATCGCATAAAAGAGAGACAGTTCAGCTACGGCAAAAAGTCCGTTGAAGCGCCGGAATAATGCGCCAGGCGACCC  
GGCGTTAACAGCACTTAGCGATGTCGATAACGACGAAGAAACCGCAAAAATTCGAGCAGCTGTGTTGGCCAGCTGG  
AAACTCCGCTTGGCCAGGCGCTGGACGATTTGCAAAAACGCACAAAACGATCTGGCGCTTATAACAGCCAGCTGGTTTCG  
TTACAGACGAGCCGAACGCGTCAAAAATGCGATGTATAACGCTTCGACGAGCTGCAACAAATTCGACGTCGTCTGGA  
TGGGACTGATGTCGGCGAGACAGCCTTACGTCACGAGCAAGAAAGTGTAAATGCAGGCCAGCAGGCGTGTGATGCGG  
AGATTGACGAGCAGCTGAAAAGCCTGGAAGGAAACCCGCTTTCAGGATACCTTGAAGCAACCGTATTACGTGACG  
GCGAAACAGCGCTTCTGAGACACCACTTACAACCTGTTCAAGAAAGCGGTAACAGCAAGCGCCTGAACTTAAACGAAA  
AACGGCGCAGGAAGCGCTCTCCCGGATGAAGCCGCGCTATTACGCTAATCCGCTGGTGAAGCAGGAACCTGGAATTA  
ACCAGCATTAAGTTCAGCGCTGATTTACCGGACTGAAAACCGTAAATCAGTTGATGCAGCAAAACATTAAGCTCAAAAAC  
TGGCTGGAGCGGCGCTGCAATCGGAACGCAATATAAAGAGCAGATTTGCCGCTCTGAAGGCGAGCTGTGTTGCTCTG  
TATCCTTTACAGCAACAAACAAACGCTGCCCTGCCGGATGAACTGGAACAACTGACCAACCGCATCGCGGATTTGCGT  
TCGAACAGTTTGAAGTTAACAGCAGCGTGTGATGCACTTCTCAGAGCGATGCGTTCGTAACAACTGGAAGAAAGGTCAC  
ACCAACGAAGTCAACAGCGAAGTTCACGATGCGTTATTGCAAGTGGTTGATATGCGTCCGCAATGCTGGATCAACTCAA  
CAACAGTTGGGTAACACGCTGATGATGGCCATTAACCTGCAAAATCAACAGCAGCAGTAAATGAGTGTGTCGAAACAA  
TGAAATCCATCTGACTCAGCAAACTTTTGGGTGAACAGTAACCGTCCAATGGACTGGGACTGGATCAAGCGTTCCCG  
CAAGCCTGAAAGATGAATTTAAGTCAATGAAAATCAGCGTGAACCTGCAAAAAGCCTGGCCCGCTTTTATCGCTTT  
CCTCGTGGTTTGGCGTGTGTTGATTGCCGGGTGATCCACTGGCGTCTGGGCTGGCTGAAAGCGTATCAACAAAAAC  
TGGCTTCCGCTGTGGGTTCCCTGCGTAACGACAGCCGCTCAACACACCAAAAGCGATCCTTATCGACCTGATCCGTGG  
CTGCCGTTGTGCTGATTTATCTCGCGTGGCTGATTTCTGTTGACCATGCAGCTCAACATCAGCGAACTGCTATGGT  
GTTGAGCAAAAACCTGGCGATATTTGCTGGTGGTGGTGGCTGTGCTGGAAGTACTGGAGAAAAACGCGGTTGCCGTAC  
GTCATCTCGGCATGCGGGAACAGCAGACCCACTGGCGTGGCAAAATGTCGCGCATCAGTCTCGCATTTGCTGCTATC  
CATTTCTGCTGTGGTGGCAGAACTTTCCCGCTGCATCTGATGGATGATGTGCTGGGGCAAGCGATGATTTTCTTCAA  
CCTGCTGCTGATTGCTTCTCGGTATGGCCGATGTCGCGGAAAGCTGGCGTGATAAAGAGTGCACACCATGCGACTGG  
TCACCATTTACCGTCTGTCGATAATCCCGATTGCGCTGATGGTCTGACTGCTACAGGCTACTTCTACACTACCGTGGCT  
CTGGCAGGACGCTGGATTGAAACCGTTTATCTGGTGTATCATCTGGAACCTGCTGTACCAGCGGATCTGCTGGCTGAA  
GCTAGCGGCGCGGCTGATCCGCTGGCGTGGCGCTGCGGAGAAATGTTGAAAGAGGGCGCGCAAGAGGTTGCTG  
AACCGCGGAAGAACCACCATTTGCACTGGAGCAAGTTAACAGCAGACGCTGCGTATTAACATGTTGCTGATGTTGGC  
CTGTTCCGTTGCTATGTTCTGGGCAATTTGGTCCGATTTGATCACCCTGTTTACGCTATCTCGACAGCATCAGCTCTGGCA  
TTACAACCGCATGAAGTGGCGTGGCTGCGTGAACAACTGCTGCGTGGTGGTGGTGGTGGTGGTGGTGGTGGTGGTGGT  
TGGTGGCTGGGCTGATTTGCTGCAACCTGCGCTGGTGGTGGTGGTGGTGGTGGTGGTGGTGGTGGTGGTGGTGGTGGT  
GCGTGGTATGCCATTAACCATCTTAACATACATCATTAATGCTGTTGGTGGTGGTGGTGGTGGTGGTGGTGGTGGTGGT  
CTCTTGGGATAAACTCCAGTGGCTGGCCGAGCATTATCCGTAAGTCTTGGTGGTGGTGGTGGTGGTGGTGGTGGTGGTGGT  
TCGTTCCGCTTTGATCATTTCTATTCGAACGTCGCGTGGTGGTGGTGGTGGTGGTGGTGGTGGTGGTGGTGGTGGTGGT  
GTAAGTAAGATCCGATTTCTGTCGACAAACGATTTACCGATTTGATCGCAAGAAAGTATCATCCGAACAAAGCGTTTGT  
TACCGAGCGTCTGATCAACTGGTGGTGGTGGTGGTGGTGGTGGTGGTGGTGGTGGTGGTGGTGGTGGTGGTGGTGGTGGT  
ATCTGGAAGAAAGTGGTAAAGTGTACTGAAAGCGGCGACTGAGCACCAGGGTGGTGGTGGTGGTGGTGGTGGTGGTGGTGGT  
TCTTTACGGCATTTGGTGGCAGCAGCTGGATCATGAGCTGCGTCTGATGCTGCGTGAACCTGCGTGGTGGTGGTGGTGGT  
TGTCGATGAGCTGAACCGTACTATCGATCAGCTGTGCCGTGAAAACGACATCAACATTTGCTTTAACAGCTTTGAAAGTGC  
ATCTGCACAACGAGAAGGCGATGAGGTGACGGAAGTAAAACGCGACTCAAAAGGCGATGACCGACGCGAGCGGATGGG  
TAA

>Cluster\_21210

ATGCCCTCATATGTTGAGGCATATCCTAACGAGAATCTGACAACCGTTATGCCGTAACAATATCGTTATACGCTGCCCGT  
CAAAGCGGTGAGCAGCGTCTGCTGGGCGAGTTAACCGCGCTGCCGCGAGCTGGTAGCGGAAATTTGCCGAACGTC  
ACGCGGTCGGTGGTACTCATTTGACACAGATATGCAAAATGCTCTGCGTTGCAATGAAATCAGCAGTTCACCGAT  
CAGATGGTGAATCTGCGGACTGGGAAACCTCCCTTACGACAGTTTTCGCTCATCAGGACATTAATCTCCGCGG  
TCTTTCCACCTTTTACCAGTTACCATCGATGCAGCGTGGCGTACTGATTTCCGGTGAATACGCTTATGACGCGGTTT  
GCCCGACAGCTTTTCTCCACGCTCATGCGCTGGTGGTGGTGGTGGTGGTGGTGGTGGTGGTGGTGGTGGTGGTGGTGGT  
CTGGACAGCGCGGTTATCGCCATGTTGACAGGTGATGAGCAGCGGCAATACGCAACGCGCGGCTGGTGGTGGTGGTGGT  
CTTCCCTATGGGAGTGGAGTGCCTTATCGTCTTATTGATTTCTTTGATGATGAAATCGACAGCTTGGGGTGGTGGTGGTGGT  
ATAGCCAGCGCAGCTGGAGGAAGTGAAGAGATCAATCTGCTTCCGCGCACGAATTTCCGACCGATAAAGCGCAAT

GAACTGTTCCGCGAGCCAGTGGCGTGATACCTTCGAAGTGAAGCGGACCCGGAACATATTTATCAGCAAGTGAGTAAAGG  
CACATTACCTGCCGGATCGAGTACTGGCAGCCGCTATTTCTTCAGCAACCGCTGCCGCCACTGTTTCAGTTATTTCCCTG  
CCAATACGCTGTTGGTGAATACTGGCGATCTGGAAAACAGTGCAGAACGTTTCCAGGCTGACACGCTGGCGCGTTTTGAA  
AATCGCGGCTCGATCCGATGCGTCCACTGTTGGCCACCACAATCGCTCCTGGCTGCGGGTAGACGAGCTCTTTTCAGAGCT  
GAAAAACTGGCCGCTGATTTGGCAAAGCGATCTGCTCGGTGAACGATTTACCGATAAAAAGCAGCGAATGCCAATTTCCGCAAA  
TGCCAGACCTGGCCATTCAGGCACAACAAAAGCGCGCTGGATGCGCTGCGTAAAGTTCTCGAGACTTTTCGACGGTCCG  
GTGGTGTCTCGGTAGAAAAGTGAAGGCCCGCGGAAGCGTTGGTGAAGTGTGCTGCGCGAATTTAAAATGCTCGCAACG  
CATTATCGCTCTTGATGAAGCCAGCGACCGTGGCGTTATCTGATGATTGGCGCTGCAGAGCATGGTTTTGTGCGATACGG  
TACGTAATCTGGCGCTGATTTGGCAAAGCGATCTGCTCGGTGAACGCTTGCCCGTCTGTCAGGATTTCTCGCCGCGC  
ATCAACCCCGATACTGATCCGTAACCTTGGCGAGCTGCATATTTGGTTCAGCCGGTGGTCCATCTGGAGCACGGCGTCCG  
TCGTTATGCGGGAATGACCACGCTCGAAGCTGGAGGCATTAAGTGGCGATTTGATGCTCACCTATGCCAACGACGCCA  
AAGTGTATGTTCCGGTGTCTGCTACTGCTGCTGATTAGCCGTTACGCGGGTGGCGCAGAAGAAAACGCACCACCTGCATAAA  
CTTGGTGGCGATCTGGTACGCGCGCAGAAAAGCGGCAAAAAGTGGCTGATTTGGCGCGGAAATTTGCGATAT  
CTACGCGCAACGCGCGCAAGAGGGCTTCCGCTTTAAACATGATCTGAGCAGTATCAGTTATTTCTGCGACAGCTTCC  
CGTTTGAACACGCGCGGATCAGGCTCAAGCATAATGCGGTGCTTAGCGACATGTTGTCAGCCGCTGGCAATGGATCCT  
CTGGTGTGCGCGGATGTTGGCTTTGGTAAAACAGAAGTGGCGATGCGCGCCGCTTCCGCGAGTAGATAACCAAGCA  
GGTGGCGGTGCTGGTCCCAACCCCTTCTCGCGCAGCAGCATTACGACAACCTTCCGCGACCGTTTCCGCAACTGGCCGG  
TACGATCGAAATGATCTCCGTTTCCGCGAGCCAAAGAGCAGACGCAATCCTTGGCGAAGTAGCGGAAGGAAAAATC  
GATATTTCTGATCGGTACGCACAAACTGCTGCAAGTGAAGTCAAGTTTAAAGATTTAGGCTGCTGATTTGTCGATGAAGA  
ACACCGCTTCGGGTGCTCATAAAGAGCGCATTAAGCGATGCGCGCAACGTTGATATTTCTGACGCTTACTGCAACG  
CGATCCCACGTACGCTGAAATATGGCAATGAGCGGAATGCGGTGACCTGTGATTTATCGCCACGCGCCCGCTGCTGTG  
GCAGTTAAAACCTTTGTCCGTGAGTATGACAGTCTGGTGGTCCGGGAGCGGATCTGCGTGAATTTTTCGCGGAGGACA  
GGTTTATTTACTCTACAATGATGTTGAAAACATCCAGAAGCCGCGCAACGGCTGGCAGAAGTGGTACCTGAAGCGGGA  
TTGCCAATCGGTGAGATCCGCGCGCAAGTGAAGTGAAGTGGTGAAGTGAATGATTTCCATCATCAACGCAACGCTG  
CTGGTTTTGTACCACATTTATCGAAACCGGGATCGACATTTCTACCGCAACACCATTTATCATTGAACGCGGGATCACTT  
CGGTCTGGCAGTTCACACAGTTGCGCGGTGCGGTGCGGGCTTGCACACCAGGCATATGCATGGCTGCTGACGCCGC  
ATCAAAAGCGATGACTACCGATGCGCAAAAACGCTTTGAAGCGATTGCTCGCTGGAAGATCTCGGGGACGGTTTTGGC  
CTGGCAACGCGCATCTGGAGATCCGCGCGCAGGTGAAGTGAAGTGGTGAAGAACAAAGCGGCTCAATGGAAACGCACTG  
TTTTCTCGCTGATATGAGTGTGCTGAAAACGCGCTGATGCGCTGAAAGCCGCGAGCGGAGCCGCTGCTGGAAGATCTCA  
CCAGCCAGCAACAGAAGTFCGAGCTGCGGATGCGCTGCTATTTGCCGATGATTTCCATCCCTGACGTGAACACGCGCTG  
TCGTTCTACAACGATTTGCCAGCGCAAAAACGAAAACGAAGTGAAGAGATCAAAGTTGAGCTTATCGATCGCTTCGG  
CCTGCTGCCGATCCGGCCGCTACCCCTGCTGGAATTTGCCGCTGCGCCAGCAAGCGCAGAAAACCTGGGATCAGGAAGC  
TGGAAAGTAAAGAAAAGCGCGGTGATCGAATTTGCCGAGAAGATCACGTTAATCCGCGCTGGTTGATTTGGTTGCTG  
CAAAAACGCGCGAGCATTACCGCTCGATGGTCCGACCGCCTGAAGTTTATTCAGGATTTGAGTGACGGAAAACGCG  
TATCGAATGGGTACGCCAGTTTATGCGTGAAGTGAAGAGAACGCGATCGCTTAA

>Cluster\_66140

ATGAGCCTGGTGGATATCGCCATTTTATCTCAAACTCATTGTTGACGACTGCAACTGCTTGTGCTGTTCTGAAATA  
CCTGAAGTAA

>Cluster\_62917

ATGGCAGAAGCATTTTACATCTGATAGGATTTCTGATATGCGCGGATTTATCGTATGGCTGTCTTTACCTCGAAAA  
CCACTCCTGA

>Cluster\_38491

ATGAATAAAGTGTCTCTCTTAAGTATAGTTTTTTAGCCAAAGGTTTTATGCTGTTTCTGAACTTGCCCGTCCGCTTTC  
TGTAAAGGGAAACTGAAGAGTGTCTCATCAATAATTTTACCAATAACATTTGCTATGTTTCTTATGCTCCCCCAT  
CTCTTGTCTCAACAGTTAATGCAGATATATCGTATCAAACTTTTCGGGATTTTCCGAAAATAAAGGAGCTTTTATAGTT  
GGCGCATCAAAATAAATAATCTACGATAAGAATGGAGTGTAGTTGGAGTGTGATAAAGCTCCAATGCCTGATTTTGTAG  
TAGCGCCACGATGAATAACAGGGACATTAACACCAGGAGCATAACACTGATCTGCTCAATATGTTGTCACAGCAAGC  
ATGTTAATGGATCAGATATAATGAGTTTTGGACATATTTCAAAATAATTTACTGTAGTAGGAGAGAACAACATAATAGC  
CTTGATATTAACACGAGCTTTAATAAGATTGTCACGGAGTTCGCCCTGCAGAAGTCTCCAGTGTGGAGCTGTAA  
TGGCGCTTATCAAGAAGGGGGCGTTTTACAGCCTTTTATAGGCTTGGAGGTGGATTGCAATATAAAGGATAAAAAATG  
GAAATCTTACACCGGTATATACAAATGGTGGTTTTTCTAACCAGGAGTACTATCAGTGTTTAACTCATATAACAACTGGC  
CAAAATGATTACCGCACCTACAGGCGATATATTTAATCCAGCTAATGGGCTCTTGCAAACTATCTAAATAAAGGTGATAG  
TGGCTCTCTTTATTTGCGTATGACTCTCTGAAAAAAAATGGTTTTAGTTGGCGTTCTTTCATCAGGAAGTGAAGCATG  
GTAATAACTGGGTTGTACAACCTCAAGATTTTCTTATCAGCAACTAAAAATGATTTTGTATAAACAATATCATATGAC  
TCTAAAAAGGGGAGCTTCAATGGAGATGATGATAAAGCCAGGAGTGGGAATTAAGTCAAGAGGGAGTTGTGGGA  
CATGCATGAAAAAAGGGGAAGACCTAAATGCAGGTAATAATCTCAATTTACAGGAATAATGGAGAGGTTATTTTAC  
ACGACTCTATAGATCAAGGGGCTGGCTATTTGCAAGTTTTTGGCAACTACACAGTTACATCTTAAACGGACCAACATGG  
ACCGGAGTGGTATCATTACTGAAAAGGTGTAATGTGCTTTTGGCAGGTTAATGGTGTAAATGATGATAACTTACATAA  
AGTTGGTGAAGGCAATTAACCGTTAATGGAAAAGGGTCAATAATGGAGGACTGAAAAGTCCGTGATGGAACCGTAATTC  
TGAATCAACGCCCTGATGATAATGGACACAAGCAAGCCTTTAGCTCTATTAACATTTCCAGTGGTCTGCAACAGTTATA  
CTTTTCAGATGCTAATCAAGTTAACCAGATAAAATATCATGGGATATAGAGGCGGCACTCTTGTATTTAAATGAAAATAA  
TGTAACCTTACTCGCTTTCAGGCTGCAGACTATGGCTATTTATTTCTAATAATAACAAAAATAAATCTGAATTAACAC  
TTAAATTAACAACACTAAATGAAAATGACATTAGTGTGATGTGAAGACATATGAAGTTTTTGGGGGCGATGGTAGTCTCT  
GGTACTTATATATGTTTCTGATCAATACTTACTTTATCTGAAATCAAAAGCGTACGGTCCATTTTTCAGTGTATTT  
AAACAATAACCAATGTCTGGCAAAATGTTGGTCAAGATCGTGATAAAGCGATTCAAATCGTGAACAGCAGAAGATGAGG  
AAAGCTCTCAACCTTATATGTTTTCATGGACAACCTAATGGTTATATGGATGTAATAATACATCCACTCTCTGGTAAAGAT  
GTGCTGACTCTTGTGTTCTGTAAATCTGCTGAAGGGGTGATAACGAAAAGTCAAGTACTCTGATATTCAGGGGCA  
TCCGGTGTATCATGAGGAATGACAACCTCAGCCGCGCAGAGTGTGGGAAAACCGTCAAGTTACAATGGATAAACTGA  
AGCTTGTATGCAAGCAACATCTCCTCAGAAATGCTCGTATGCAAGGAGATATAGTGTGCCAACGGAAGTACCGTCT  
ATTTCCGGGAAGTCTCGGTCTTTACTGACAAGAAATGATGGAACCGGTAATGCAAGTATCTTCTGTTGAAGGAGTCCAC  
TGCAACAACAGCTGCTGACCAAGTTATTAACAGTGGTAATGTGCTGCTGAAAACCATTCATCTTAGAGGTCAGGGAGA  
ATTTTACTGGTGTATTGAGGCTTATGACAGTTCTGTTAGTGTGACCTCTCAGAAATGCTATTTGACCATGTTGGTACG  
TTTATTAATAGTAGCTGCTTCTCGAAAAGGAGCAAACTGACTGACAGAGTGGTATTTTCAAAAATAACACTATGGA  
AATAAAAAGAAAACCCCTCTCTGACTCTGACAGGAACTTCTGTAGGAAAAGCGGGGATTTATTTCACTGTGATCTCGA  
CTACAGAAGGAATTCATCTCGGTGAGCGGGCCAGCCTTTCAGTGAATAATGGGCTATCTGAGTTCAAATATTTATAGCA  
GAGGACTCTGCAGCAATTAATCTGGGAGACAGTAATGCAACTATCGGGAAGACGGACTCTCCATTTCAATCACTCT  
AATGAAGGATATAATGCTGTTTTTCAGGGCAATATTTAGGGGCCACAGAGCTCAGTGAATATGAAATATGCTGTGGC  
ACTCTGATAGAAATTCGGAATCAAGAGCTGAAAAGCCAGACTCCCAATAGAGTTAGGTGGAAGAGGGCATTTTGA  
AACTGCGGGTAAAAGAGCTTATGCGTCTAATCAGTGTTCCTGTACATGTAACAATGGCAGGCTGACCAAGTTGAA

TGTTACCGCAAACCTGCAGGGCAGCAATAATACTATTCTTGTAACTTTTTTAAACAAAGCAGCAATGGTACAAATGTGA  
CGTTAATCACTGCACAAAAGGCAGTGATGAAAATACATTCAAGGCCGGAACCCAGCAGATTGGATTACGTAATATCACG  
CCAGAAATCAGGACAGAAAATACGGATACAGCCAAAAGTGGGTGCTGACTGGATATCAGTCTGTCGTGATGCCAGAGC  
CTCGAAAATCGCAACGGACTTTATGGATTTCAGGTTATAAATCCCTTCTGACGGAAATCAATAATCTGAAACAAAGCTATGG  
GGGATTACGGGATAGCTAGGGAGATGCTGGAGGGTGGGGGGATCATGAATGGTACCGGTTACAGGTAGAGATGTCAG  
AGAGATAACTATACCACGTTTCAGATTGGTGCAGACAGAAAAGCATGAGCTGAACGGTCTAAATTTATTACCAGGTTGCATT  
ACTGACCTATACAGACAGCAATGCCAGCAGCCAGGCTTTCAGCGGTAAAACAAAATCGTAGGGGGAGGGGTGTATGCAT  
CAGGTCTCTTTGAGTCTGGAGCTTATTTGACCTGATTGGTAAATATCTCCATCATGATAATCGGTATACGTTGAATTTT  
GCCCTCTGGGGAAAAGACTATACCACCCATTCTTTGTATGCTGGAGCTGAAATCGGGTATCGTTATCACAATGTCAG  
AAATACATGGGTGGAACACAGATGGAAGTGGTTATGGTTCGGTATCAGGAAAGTCAATTAAGTGGAAAAGCCAGGGAA  
TGCAATTGAGTATGAAAGCAAAGACTATACCACCTAATTTGGTGCAAAGCGGTGGATGTAGGTAGAGTGTTCCTCTGGA  
GATACCTGGAAAATACAGCAGCTGCAGGACTGAGTTACCAGTTCGATTTGCTGGCAATGGAGAAATGTTTTACAGGA  
TGCTTCTGGTAAAACACTTCAAAGTGA AAAAGACAGCAGGATGCTAATGAACGTGGAAACGAATGTGGAAAGTAAAG  
ACAATATGCGTTTTTGGTCTGGAGTTGGAGAAGTCGGCGTTTTGGGAGATATAATATAGACAACCTATAAATGCTAACTTC  
CGTTATTTATTTCTGA

>Cluster\_21056

ATGTGGGATGGTGGCTTACAAGAACAGGAAGTATTGGCTATCGAGAAAATAAAAGCTGCTTTTTTCAGTCAACGTATCTAA  
GCCTGACAAGCCTTTCCGTAGCGGTTCAATTAGTGAGCAGCTAAAAGCTATGGTTTTATCGGCAATGAAATGTTCCCTT  
GGAAAGTTTATGCAGGTTTTTCGATTTGTTGAGGGCAAAAAGAGGGGGAAATTCGATTTAGTTAATGTAACACACTGCAAC  
GTGATCATTTGTAACAGACTGAAAGACTGGAACCATCAGCTGTAAACCCGACGCGGAGACTTGGTTAAAGGCGATAAGAA  
CATGGGGCGCTTCGACAGTAAGCGTGACTCGTAGCAAAAATTCATGCTGGACAAAACACTCAAGCGCTCTGGTAGACGCTT  
TTACGAACAAGGCTATATCCCATTGTTTCTTTTTTGTGTGATGACCGGCAATGCAGATTTACAGCGCTGCCGGAG  
GAACAACGGCGCCATACGATCTCGTTAAAAGATTTCTGAAAGTTTGGCGATCGCGGAGCTTCAATAGCTATTTCAAACC  
GCACCCAGCTCAAGGTTCTTAAACAGGATTTCCATCTTTTCGATGATTTGTTCTTAGGGCTTCAGAGCGCCAAAAG  
CCTTGAGAGTAAATGGCTATGAAGCTAATGATATGATTTTCGAACATCTAAAAGGTGTATCGAGAAATATCTGGCAAAA  
TCTGAGATATCAACGAACAGCGAAGCGCTACTCAGAGTATGGAATTTTAAAGAAATAACGGGAACGAAAGCGAATACCCC  
GGAAGGACGAGCTCAGATTGTTTTCAGTGCAGCGAAGTGTACAGCAGATCAATCACCAGAATCGTGACCTGTATAACC  
ACTGTCTCAGGCTTTTACGAGTTTTTCAGAAAGACAGGTTGACGGCGAGTATAGCGAAGTCTACGAAGTCCCGCGGT  
CATGTCCGGTTTTAATGAGTTTTATCGGAAAATATGGTAAGAATTTTCTGATATGGACCGCTTGAATGTGGTGAACCTGCT  
CATGCAAAAGTTTTAGTGTCTCCATGAGATGAAAATGCGCACAGGGATGTCGCGCATCACAGTCTGTGGATTTACCTT  
CAAAAAGAGTTGCTCTTTGCAACTTTATTTCCGGCTTACCACCAGCCGCGAAGCGTTGGCGATTACCGTAAGCTTTTA  
TCCGTAGGTGCAGTCCACGTA AAAAGACATGCTTTGATAAAGGGCGAGCTTACGCCTTTTTACGAAGATGTCATACTCTGG  
CCTTGTGCGCTGGCACTTATTTAGCGGTATGCGCATGTCGCCAAAAGAGTCTGGAGAAAGTACAGGACAACATGCTAAACA  
GCCAGCACTGGTATTCATCTGTATACGGGATGCCGTTGCCGCAAAAATCACTTCTGCAACAGAAATCTTTGATGCCCTG  
AAACAAGCCGAACCTGCTGGCAAGGATAATCCAACATTTGATGATACTGAGCTTGACCTTACCGACATGCTATCAATCA  
CGCTCGTCAATAACCCGGAAGACGATGGCTTTTCAGTTTTCAGGTCGAAACAGTCGACAAAAGAAAGTCTATATCTCGAAAGAA  
GGCTCGTGAAGCTTGGCTGAATGTTGGGGACAGGGATACGATCCGTCATTAATTTCCAGGTTCTGAAGTTTTTAAAG  
CAGTTTGTAGCGGCTTTCTTCAGTTAAAACAACGCTATCTACTCTAAATTCGTGAATTCGGTATCGCATAAAATCATCAAG  
CCTATATATGTTCAAGGATCAGGTACAGGAGAACCTGGGATAAAAATAGCGGTTCCCGATGATGAAAACACTCGACTCA  
TTGGTAAGTTTTGTCGCGCGCTTTCAGCACTTACATGTTCTGGGTGTTTTCTCACGGGACATCCACCTGGCAATGTGATA  
TTTGAGACACAGAGCGGTTTTGCTTTTCTCAGATATCCCGATTTTTCACCGTCCGGTACGAACTTAAAATCAGCAG  
TTACAGCCCTGAATACATGATAATTTGACTTCTTTTGAACGTGACAACATATGCAAGTATGAAAGTGTCTGCGAGTTGC  
TAGGCATGTTCAATGGGGCTTGAATCAGACATTTATCCGAACTCGCAATCGCAATGCTATCCGAGCAGAGTGAAGATGCGGTT  
TTTTGGTTTTAAGGATTTAGGCGCTTTAAAAGAGCGATAGATAGTAATGACCTGGTGCAGAAACAGCTGTAGAGAT  
TACTGCAAGAAATGCCGATGAAATAATCTCTATCTGCTGATTAACGGGCATCTGTATGTCAAAGTTAAGTCAATCTTA  
AAGCGCCAGCTGAAGTAAATGTGACTTTCTCTGGGATTTGGTGGCAGTTTTACTGCGGTGTCAACAAAGATCAGAAAGC  
CTGGTTCATGGCTTCAGGCGCACGGCTCGGTCACAAATTCGTAAGCAAGATATTGATGAAAGCCAGTTTCAAAATGATAC  
TGGTATCAAGATTTATCCCGCAGTCCGCAAGATCTGTCGGCGTTGACAGTATTGCTTAATGAAGAAGAACTTTTGGCG  
GGGCAATCGAGTTGATGCGCAACTGAAGATGTTTCAGTACAAGAGCCACTTACGCTTCAGCTAAAAGATACCTTTGCA  
AGGCTTGATAAGCAGACGCTTGAACCTTTTAAAGAGAAGTGTGAAATCCCAACAGTGAACCTGTGGCGGCCACTTCT  
GATCTGAAAACAGAACTTTATCCAAACTTGAATCAGCGGTGAAGTGGTCCCGGTTGCAGATGCTCATGGAGAGCTTC  
TTCTCCCTTACTCTGCTGATGTTGATCCACTCGGTGCTTTCAGAAAGTAGTATGAAAGTCAAGCCTTACAGGTCGATCAG  
GAAGGTGTTGAGCAGATTTTATGGTGAAGTGTCACTTAAAGAAGTCAAGAGCTCAAAGAGATTCGTTCTGTAAGTTAGTTC  
AGCAGCTTCAAGCTGAAGGATTTCTGATATGTTCTTCTCCGTAACAAGACCGACTCGTGCATCTTATCAGAAACGTAAC  
CGCAGCTGGAACGTTCTCCTAGATCGAGAAGTGTGGCTGCACTTAAATGACTTTGCTGATTCATCCCTGCAACAGCGG  
GCTCAAAAATATGGTATCACTCTCAGCGATACCGATTTTGCCAGATACGACCGTGAAGATCAGCACGGAACAAGATCAG  
TCTGAATGAACAGCAAAGAAAGCGTTTTAACAACTGGTCAATTAATGGCCCTCTCCTCTGCTTACGGGGCCACGGGGA  
CCGGTAAAACGAGTTTCATCGCGCTTTGTTCTACTACTGATCGAATAACAGAAATACCAAACGCAATTTTACTGGTCAGC  
CAGTCACACAGAGGCTGTGAATACAGCGGCGAGCTATCAAAAAGCATTTGTTCCCGCTTGGTACAGAGTTGGAGCTTGT  
CAGGTTACAGCAACGAGAGGGAGCGGTTCCCTTGGCTTAAAAGATGTGACTCACACGCAATCACAAAGAGAAAGCGG  
AACTCTTCAATGCTGAAATTAAGTACCGTGTGAAGCATTTGAGTGAAGCTATTGGTCTGGAGCCGGATTTATTTCCGGGT  
GTTGTTCTTTCAGAGCTCAATTTGTTTCAGACAAATCGATCACTTGGAGAAATGCTCTATCAGGTTAAACAATTTAACGG  
TTCAAATGAGAGCAATGAACTGAAAGATATTGCAGTCAACTCGATTTTTCCATCCGCTTAAGCTGAGTCAGGAGTATG  
GGATTAACCTGGACAATGGCGTGAAGTCTCAGCAGCAAAAAGCATTTGATTTCAAAGCTATGTACAGAGTATGGTGTG  
AGACCTGATGAGGCAAGACAGTAAAAGCATTAGCTAAAATATCCCGTATATGCAGGATGCTATGTCGGGAGAGCGAGT  
GAACTGGACAGGTTTTTATTCGCGCTCCAGGCACTTAGTGGCTGGCACATGCGTTGTTATGGACAAGGGCACATGGCA  
TTCAGGAGAATATCTATGACTGGGTGATTTATGATGAGGCGGCGCTCGATTTCAAGTGAAGTGGCCATTGCAATGCGAG  
TCAGCCCGCGCTGCTGTTGGTGGGTGACCACATGCACTTCTCTCATTGTACTCAGATGCCACAAGGCGGATTTAGC  
GAGGAAGCTGGGTATCAATAACTCCGCACTGAAATGACGAGGATTTACGAAGTGAATTTGCCCCGAGCTTCAACTCTG  
CTTATGGTTCGACAGAGTGCAGCTTTGATGATCAACCATGATGCTATGGCTCACCGGATTTGGTAATTCGAAGACG  
TTTTATGACGGGAAGCTTCTGAATGGAGTACGGCAATTCGGATGCTATCAGCAAGCTCCGGAAGCGTTACGTAGCGT  
GTGAAGCTGACGAGATTTTCTGTTCTTAAACAGGTGTGACAGAAATGAAGAATTTGTAGCTAAGCTTCAAACATTTGTT  
AGCAAAAGTGAAGCCGCTATCGCGGTGATATGATGATGTCGCAAAAAGCGGTTACTCCGTCAGAAATTTCAATCAGGA  
AATCTGGAGCGAGGATTTAAGGACATTTGTTAAAATTGACACTGTTGACAGTTATCAGGGAAGGAAAATCGGATCATTA  
TCCTGTACTGACGCTTTCGGATAAGCAGCATAGCCAGGTTTTCTACGCTTCAAACCGGATAAAAATGTCGCGATGTC  
CGCCAAATGGATCGACTGATTTGATTTGGGTAATGCCGATATCTGGAAGGGAAAACAATAAAGAAATTTAGGCTACGT  
TGTAAGTTTATATGCTGAGCGAGGTCAGGAAGCTGGATACAGGTTCTCTCTGCTCAGCAGGGAGGCAAAAAGAAATGA

>Cluster\_21180

ATGAAAAGAATGTTAATCAACGCAACTCAGCAGGAAGAGTTGCCGTTGCCCTTGATAGTGGGCAGCGTCTGTATGACCT  
GGATATCGAAAGTCCAGGCACGAGCAGAAAAGGCAACATCTACAAAGGTAATAATCACCCGCATTGAAACCGAGTCTCG  
AAGCTGCTTTTGTGATTACGGCGCTGAACGTCACGGTTTCTCCACATAAAAGAAATGCCCCGGAATATTTCCCTGCT  
AATCTACAGTGCATGGTTCCTCCCAACATTAAGAGTGTGTCGCGTGAAGGTCAGGAAGTCAATTTGTTTCAGATCGATAAAGA  
AGAGCCGGCAACAAAGGCGGCAATTAACACCTTTATFACGTCGCGGGTAGCTATCTGGTTCTGTATGCCGAACAAC  
CGCGCGGGCGGTATTTCTCGTGCATCGAAGCGCAGCAGCTACCGAATTAAGAAAGCACTGGCAAGCCTTGAACG  
CCGGAAGGATGGGGCTTATCTGTGCGCAGCGTGGCGTCGCAAAATCTGCTGAGGCGCTGCAATGGGATTTAAGCTTCCG  
TCTGAAACACTGGGAAGCCATCAAAAAAGCCGCTGAAAGCCGCCGCGCTCCGTTCTGTATCATCAGGAGAGCAACGTA  
TCGTTCCGGCATTCCGGATTACTTACGCCAGGACATCGGTAATCCTTATCGATAAACCAGAAAGTCTCGAATGGCA  
CGTACGATATCGCTGCATTAGTTCGCCGGATTTCAGCAGCAAAATCAAACGTACACCGCGGAGATCCCGTGTTCAG  
CCACTACCAGATCGAGTACAGATTGAGTCCGCCTTCCAGCGTGAAGTTCGCTGCCCCATCCGCTGGTTCATTGTATCG  
ACAGCACCAGAGCCTAACCCGCATCGACATTAACCTCCGACGCGCAGCCGCGGGCGGATATCGAAGAAACCGCTTT  
AACACCAACTCGAAGTCCGCAATGCCGATGAGATTGCTCGTCAAGCTGCCCTGCGTGAACCTCGCGCGCTGATGTTATCG  
CATCGACATGACGCCAGTACGCCACCAGCGTGCCTGAGAAAACCGTCTGCGTGAAGCGGTGCGTACAGACCGTGC  
TTCAAAATCAGCATTATTTCTCGCTTTGGCTGCTGGAAATGTCGCCGTACGCGCTGAGCCCATCACTGGGTGAATCCAGC  
CATCAGCTGCGCCGCGTGTCCGGTACCGGTACCGTGCCTGCGTGAACAAGAAATCGTGTGCTGTCTTATCTGCGCTGT  
CGAAGAGAAAGCGCTGAAAGAGAACACCCAGGATTCAGCCATTGTTCTCTGTGCAATCGCGTCTTATCTGTCTGAA  
AAAAACGTTCTGCAGTGAATGCGATTGAGACTCGTCAGGACGGTGTGCCGCTGTGTGATTGTGCAACGATCAGATGGAA  
ACCCCTCACTACCATGTGCTGCGCGTTCGCAAAAGGGAAGAAACCCCAACCTTAAGCTACATGCTGCCAAGTGCATGA  
AGAAGCATGGCGTCCGCTGAGAAGAGATTTCGCTGAACGTAAGCTTTCGCAACACTGCGTGGCAACCTTGGCA  
TGCCGGATTGCGCCAGTCCAAACCCAGCTGAACCTCGCGCCTGTTGTAGCCCCAGCACCTAAAGCTGCACAGGCA  
ACACCAGCATCTCTGCACAACAGGTTATTGAGCCGCTTCTTCGGCAGCTGAAAGCGCTGTTACAGCGGTGTTAAGA  
AACCAACCGCCGAGCAACAGCAGCAAGGCAAGAGCAAGAGCAAGGAAACCGCAACGCTAACAGGATCGTCGCAAGCCTCGT  
ACAACCGCTGAGCTCAATAGAGCGGACTCCCGTAACTGAGCTACAGAAAGTACAGAAAGCAGGATAATCGCAAGAACCC  
CGTAATCGTCGCCAGGCACAGCAGCAGACTGTCGAGACCGTGAAGCGTACAGCAGGCTGAGGTAAAGGAAAGCGCG  
TACCACCGCAGCAGCAAGCGCGCTGTCGCAAGCTGAGCAGCGCGTAAACGATGATAACGCTCAGGCGCAACAAAGAG  
CGAAGCGCTGAATTTGAAGAGCAATCTGTTTACGAAACCGAAGAGAAAGCAAGCTGTACGCTCCGGTTCAGCCGCTCG  
AAACAGCGTCACTCAATCAGAAAGTGCCTTACGAGCAAGCTGAGCCGAAAGCGGTAGTGCACCGGTTGAAGA  
AATGTGCTGCCAACCATTGTTTACGAAAGCGCAGCTCCAGCACAGAACTGGTGAAGTCCCGTGCAGTCTGTAG  
CGCAAGCTGCACCAAGCAAGCAAGAAAGCAAGCAATGCCGATTAACCGTGAACCGTGGCATGCCGCTGTTCTCGCC  
TCGCCCTCGTACCTGCGCGTAAAGTGGTACGCTGCTGCTGCTATCGTACGAGCGTATCCAACCAATCGCAATGCC  
GTTGACCGTAGCTTGCGCATCTCCGAACTGGCTTCCGCAAAAGTCTGGATCCGCTATCCAATGTACGCTCCGCAAGAT  
TACAGGTGCAAGAGCAGCGCAACAGGAAGTACAAGTGCAGCCGATGGTACTGAGGTCCCTGTCGCCGCGCTGCC  
GAAACCGGTTGTTAGCGCAGCGGTTGTTGAAGAAGTGGCTGAAGTGTGTAAGCCCGGTTCAAGTTGCCGAACCGCAAC  
GAAAGTGGCTGAACAGCAGCCTCTGAAGTTATGCGCGCGGTAACGAACAGCCGAGGATTACCGAGTCTGATG  
TTGCGTAGCCACCGAAGTTGCAAGACAGCAGAAACCGTGGTGGTGAACCGCAGGAAGAGACGGTATGATTTGAAGAAGT  
GCCGAACTGCTGAGGTTGTTGTTGCTGAACCTGAAGTGTGTTGCTCAACCTGCCGACACAGTCTGCTGAGTCCGAG  
AGAAGTTGAACCGTAGCTGCGGTTGAACCTGAGGTACCGGTTGAGCATAAACCAGCTACCAGCGGATGACGCGCGCT  
CGCACCGGAATATGTTCCGGAAGCAGCGCTACAGTACTGGCAGCCTACTTTGCGCTTCCGAAAGGTAAGGTGCC  
GCAGGTGCTACATCGCAACGCATCATCTCCCGCTCCTGCGCGTCCGCAACCTGTTGAGTAA

>Cluster\_29345

ATGTTTAAAGAAATTTTACCAGGTTTCATTCGCCATTACCTTCCCGTCTGGTTCATCTGTATCCATTGCCCTGGCGCGCA  
GCAGACAGTGAATGGCGGCTCCCGCTTCTTTAAGTGCAGTTCGCTGAAAAATGGCGGTGATGCCCGAAGAAAGAAATTTG  
GGAAACGTTTCGACACCCATCCGGAAGGTTAAATCTGGCGAAGTGGAAATCTGCCCGCAACACATGGTGAATAAATA  
TTACCCGCAACAACCCGTCGCCGTGGTGGGTACATTTATGGTCTGCTATCGCAACCCTTTAATATTTGTACCAT  
TCTCGGTGCTATTTCTTACGCCACGGAAGATTTATTTGCCGAGGTTATCGCGCTAATGGTTCGCTATTTCTACGTTGC  
TGAACCTTTATTCGAAAGCAGTTCACACTAAAGCGGCAAGTCCCTGAAAGCGATGGTCAGCAATACTGCACCGTCTG  
CGCGTAATTAACGACAAAGGCGAAGATGGCTGGTGGAGATCCCGATCGACAGCTGGTGCAGGCGGATATTATAAACT  
GGCGCGGGGATATGATCCCGCAGATTTACGTTATCTGCAAGCGCGGATCTGTTGCTGCTCAGCGTCTGTTAACCG  
GTGAGTCTTCCCGCTGGAAAAAGCCGCTACTACTGCCAGCCGAGCAGCAATCCGCTGGAGTGCAGACCCCTGTT  
TTTATGGCACCCTGGTGGTGCAGCGGTACGGCACAAGCAATGGTGAATTGCCACAGGGGCAATACCTGGTTGGTCAACT  
GGCGGGCGGTTAGTGAGCAGGAAGCGAGCCGAAATGCCTTTACGAAAGGATAGCGCGCTCAGTATGCTGCTGATT  
GCTTTATGCTGGTGGTTCGGTGGTGTGCTTATCAACGGTTACACCAAGGTGACTGGTGGAAAGCTGCAGCTGTTT  
CGCTTTCCGTCGCGGTAGGTTTAAACCCAGAAATGTTCCGATGATTGTTACTCGACGCTGGCGCGTGGCGAGTCAA  
GTTTTCGAAACAGAAAGTGCATCGTCAAACATCTGGATGCAATCAGAACTTTGGCGCAATGGATATTTGTGACTGAA  
AAACCGCACCCGACACAGGATAAAATGTTGCTGGAGATCATACCAGATATCTCCGTAACACGCAACCGGTGCTG  
CATAGCGCTGGTTGAACAGTCAATTACAGACCCGACTTAAAAACCTGCTTGAACCGCGGTGCTCGAAGTACGGATGA  
AGAGTCCGCGCTCCGCTGGCAGCCGTTGGCAAAAATGATGAGATTCCGTTGATTTCGAGCGCTGCTCGGATCGCG  
TGTTGTTGGCAGAAAATCCGAACCACTCAGTTGGTTGGCAAAGGTGCATTGCAAGAAATCCCAATGTGTTTCGCA  
GTGCGTCAAAATGGCGAGATTGTTACCGTCGATGACACATGCTGCGTAAAGTTAAGCGGTTACTGATACGCTGAATCG  
TCAGGGGCTGCGCGTGGTTCGGTGGCGACGAAATACCTGCCAGCGTGAAGGAGATTACAGCGGGCGGATGAATCCG  
ACCTGATCTCGAAGGATAATTGCTTTCTTTGATCCGCAAAAAGAGACAACCGCTCCGCGCAATGAAGGCTTAAAGCG  
AGTGAATTAACGTAATAATCTTACTGGCAGCAGTGAAGTGTGCGAGGAAAGTGTCCATGAAGTGGGGCTGGATGC  
GGGAGAGGTGGTCAATGGTGTGATATTTGAAACGCTATCTGACGATGAAGTGGCAAAATCTCGCACAGCGCACACGCT  
TTGCCCGCTGACCGCAGTGCATAAAGAACGCAATTTGACCTTACTGAAGCGCGAAGGCGATGTTGGTGGCTTTATGGGC  
GATGGTATTAATGATGCGCCCGCTTACCGGCTGCGGATATCGGCATTTCTGTGGAGCGCGGCTAGATGATTTCCCGTGA  
AGCGGCTGATATCATCTGCTGGAAAAAGCCTGATGGTGTGGAAGAGGGGTTATTTAGGGACGCTGCAGCTTTCGCCA  
ACATGCTGAAATACATCAAAATGACGGCGAGCTAACTTCGGTAATGTGTTACGCGTCTGGTGGCGAGTCTTCTTTC  
CCCTTCTGCCGATGTTGCCGTTACACTTGTATTCAAGAACTGCTGTACGATGTTGTACAGGTGGCGATCCCGTTCG  
TAACGTCGACGCAAAATTCAAAAGCCGAGCGTTGGAATCCGCGGATCGGGCGCTTATGGTCTTCGGAC  
CGATCAGTCTGATTTTCGATATTTGACGTTTTCGCTGATGTGGTGGGTTATCCATGCCAACAGCGGAAACGCAACG  
CTGTTCCAGTCCGCGTGGTTTGTGGTGGCTTACTGTCCAAACGCTGATTTGTCATATGATCCGACCCGCTGCTG  
GTTTATTCAGAGCTGTGCATCTGGCCGTTAATGATCATGACCCGCTGATGATGATGATGATGATGATGATGATGATGAT  
CACCGTGGCAGTATCTGCAAGCTGACGGCGTCCGTTAAGCTATTTCCCGTGGTGGTGGTGGTGGTGGTGGTGGTGGT  
ATGAGCTTAACCCAGTGGTGAAGGGTCTATAGCCGCTGTTACGGCTGGCAGTAA

>Cluster\_38776

ATGCTAATCAAAATTATTAATAAAGTTTTCGGTAGTCGTAACGATCGCACCCCTGCGCCGATGCGCAAGTGGTCAACAT  
CATCAATGCCATGGAACCGGAGATTGAAAACTCTCCGACGAAGAACTGAAAGGAAAAAGCGCAGAGTTCGCCGCGCTC  
TGGAAAAAGCGAAGTGTGAAAACTTGTATCCCGAAGCCTTCCGCGTGGTGGTGGTGAAGCCAGTAAAGCGTGTGTTGGC

ATGCCACTTCGACGTACAGCTGCTCGCGGTATGGTCTTAAACGAACGCTGCATCGCCGAAATGCGTACCGGTGAAGG  
TAAACCCCTGACCCCAACCGCTGCTTACCTGAACGCACTAACCGGTAAAGCGGTACACGTCGTTACCGTCAACGACT  
ACCTGGCGCAACGTGACGCCGAAACAACCGCTCGCTGTTTGAATCCCTGGCTGACGTGTCGGTATCAACCTGCCGGGC  
ATGCCAGCACCGGCAAGCGTGAAGCTACGCTGCTGACACTACTACGGTACGAACAACGAATACGGCTTTGACTACTCT  
GCCGGAACAACATGGCGTCTAGTCTGAAGAACGTGACAGCTAAACTACACTATGCGCTGGTGGACGAAGTCCCA  
TCCTGATCGATGAAGCGGTACACCGCTGATCATTTCTGGTCCGGCAGAAGACAGCTCGGAAATGTATAAACCGGTGAAT  
AAAATATTCGCCACCTGATCCGTCAGGAAAAAGAACTCCGAAACCTTCCAGGGCGAAGGCCACTTCTCGGTGGATGA  
AAAATCTCGCCAGGTGAACCTGACCGAACCTGGTCTGGTCTGATTGAAGAACTGCTTGTAAAGAAGGCATCATGGATG  
AAGGGAGTCTCTACTCTCCGCGCAACATCATGCTGATGCACCACGTAACCGCGCCGCTGCCGCTCATCGCTGTTT  
ACCCGTGACGTCGACTACATCGTTAAAGATGGTGAAGTATCATCGTTGACGAACACACCGGTGCTACCATGCAGGGCCG  
TCGCTGGTCCGATGGTCTGCACCAGGCTGTGGAAGCGAAAGAAAGTGTGCAGATCCAGAACGAAACAGACGCTGGCTT  
CGATCACCTTCCGAACTACTTCCGCTGTGATAAAAACTGGCGGGATGACTGGTACTGCTGATACCGAAGCTTTCGAA  
TTACAGTCCATCTATAAGCTGGATACTGCTGTTTCCGAAACCGTCCAATGATTTCGTAAGAGATCTGCCGAGCTGCT  
CTACATGACTGAAGCGAAAAAATTCAGGCGATCATTTGAAGATATCAAGAAGCTACTGCGAAAGGCCAGCCGGTCTGG  
TGGGTACAATCTCCATCGAAAAATCGGAGCTGGTGTCAAAAGAAATGACCAAGCCGCTATTAAGCACACGCTCCTGAAC  
GCCAAATTCATGCCAACGAGCGGCAATTTGTTGCTCAGGAGGTTACCCGGCTGCGGTGACTATCGCGACCAACATGGC  
GGTCTGGTACCGTATTTGCTGCTGGTGGTAGCTGGCAGAAAGTTCGCGCTGGAATAATCCGCTCATCGACGAAAA  
TTGAAAAAATTAAGCCGACTGGCAGGTACGTCACGATGCGGTACTGGCAGCAGGTGGCTGCATATCATCGTACTGAA  
CGTCACGAAATCCGCTGATCGATAACAGCTGCGCGGTCGTTCTGGTCTGAGGGGATGCTGGTCTTCCGTTTCTA  
CCTGTCGATGGAAGATGCGCTGATGCGTATTTTGGTCCGACCGAGTATCCGCGATGATGCGTAACTGGGTATGAAG  
CAGCGAAGCCATTGAGCACCGTGGGTGACCAAGCGATTGCCAACGCCAGCCAGCTAAAGTTGAAAGCCGTAACCTCGAC  
ATTCGTAAGCAACTGCTGGAATATGATGACGTGGCTAACGATCAGCTGCGCCATTTACTCCAGCGTAAACGACTGCT  
GGATGTCAGCGATGTGAGCGAAACCATCAACAGCATTCGTGAAGATGTGTTCAAAGCGACCATTTGATGCCATACCTCCG  
CACAGTCTGTAAGCGAAATGTTGGATATTCGCGGGCTGACGAAAGCTCTGAAGAAGCAATTCGACTGATTTGCCAAT  
GCCGAGTGGCTGGATAAAGAACCAGAATGCATGAAGAGACGCTGCGTGAAGCGCATTTGGCACAGTCCATCGAAGTGA  
TCAGCGTAAAGAAGAGTGGTGGTGTGCTGAGATGATGCGTCACTTCGAAAGCGCTCATGCTGCAAAAGCCTTACTCTC  
TGTGGAAGAGACCTGGCTGCGATGCACTATCTGCGTCAAGGATCCACCTGCGTGGCTATGCACAGAAAGCTCCGAAG  
CAGGAATCAAAAGCGAAATCGTTCTCAATGTTTGCAGCGCTGAGGAAGCTGAGTGGAGTCTTAAATATGAAGTATACAGC  
CAAAGTTCAGGTACGTATGCTGAAAGAGTTGAGGAGCTGGAACAACAGCGCTGATGGAAGCCGAGCGTTTAGCGCAAA  
TGCAGCAGCTTAGCCATCAGGATGACGACTCTGCTGCCGAGCTGCACGCGCGCAAAACCGGTGAACGCAAAAGTAGGA  
CGTAACGATCCTTCCCGTGTGGTCTGGTAAAAAATACAAGCAGTGCCATGGCCGCTGCAATAA

>Cluster\_20969

ATGAACAATAACGATCTCTTTACGCGATCAGCTCGCGCTTTTCGGCACAACCTCGCGGCTTAAACCGTCGCCGGGATGCT  
GGGCGCTCATTTGTAACGCCGCGCCGTCGACTGCGCGCAAGCGGCGACTGAGGCTGTCTCGAAAGAGGGCATTC  
TTACCGGGTCCGACTGGGAGCTATCCGCGCGACGGTGAAGGATGGTCTGTTTGGCAGCAAAACCGTTCCGATGGAT  
AAATATCCGTCGAAATGATCGCGGATCACTGCGGATCACTGACACAACCGCGCGCTATTCGTTACCCGATGGAGCGCT  
GGACTGGCTGCGTAAAGCGCCATCTGAGCGACACCTCCAGCGCGGTGATAACCGTTTTGTGCGCTGAGCTGGGATGAAG  
CCCTCGACATGTTTATGAAGAATGGAACCGGTACAGAAAATCAGCGGCGAGTGCCTTGGTGACCGCCAGTGTGCTGG  
CAATCGACGGGATGTTCCATAACGCTTCGGGATGCTGGCAGAAAGCTATTGCTTGCATGGTAAATAGCGTTGGTACGGG  
CGGAGATTACTCTACCGGTGCTGCGCAGTGTCTTGGCAGCGCTGGTGGCTCAATGGAAGTGTATGAACAGCAAAACCT  
CCTGGCCGCTGGTATGCAAGAACAGCAAAACCTTGTGCTGTGGGGCTCCGATTTGCTGAAAAACAGCAGGCGAACTGG  
TGGTGGCCGATCAGATGTTTATGAATATTACGAGCAGTGAAGCGAAAGTCCGCGCGGTGAAATGAGGTCATCAG  
CATCGATCCGTTTGTATCCACCATGAGTATCTGGGCGCGAGCATGTGAAGCACATTGCGGTTAACCCGCAAACTG  
ACGTGCGCTGCAACTGGCGCTGGCGCATACGCTGTACTGTGAAAACTGTACGACAAAAACTTCTCGTAACACTACTGT  
GTGGGTTTGGAGCAGTTCCTGCGGATATCTGCTGGGTGAGAAAGACGGTCAAGCCGAAAGATGCCGATGGCAGAAAACT  
GACCGCATTTGATGCCGAAACCAATTCGTTGGCTGGCAGGCGAGATGGCGGCAACAGAACGCAGATTTTGGTGGTGGT  
GCGTACAGCGTATGCAAGCAGCTGAAACAGTGGCGGTGGATGATTTGCTGTTCTGGCGGATGCTGGGGCAAAATGGCCCTG  
CCAGGTGGTGGTTTTGGTTTTGGCTGGCAGTATAACGGCGCAGGACGCGCGGGCGTAAAGCGGTTATTTGAGTGGT  
CTCCGGCTTACGTCGATTCGCGCTGTTACGACAACAGTGTACAAAGGCTACAGCAGCACCATTCGATTGCCCGT  
TTATCGATGCGATCTCGAACCGGGAAAGTGAATCAACTGGAACGGTAAATCGGTAACCTGCGCGCTGAAATGTTG  
ATTTTGGCGGAACCTAACCGTTCCATCCCATCAGCAGTCAACCGCATTAATGGAAGGCTGGCGCAAGCTGGAACCGT  
TATCGCCATAGATAACAGTGGACCTCAACCTGCGCTTTGCGGATATCGTGTGCTGCGACACCGAGTTTGGAGCGTA  
ACGATCTCGACAGTACGGCAACCACTCCAATCGTGGCATCATCGCATGAAACAGGTCGTGCGCGCGGATTCGAGGGC  
CGCAACGACTTTGATATTTTCCGCGAGCTGTGCCGCGCTTTAATCGGAAGAAGCCTTACCGAAGGGCTGGACGAGAT  
GGCTGGCTGAAAGCAGTATGCGAGGAAGTGAACAAGGCAAGGACCGCGGCTTCAATTTGCGAGCTTTGAGTACT  
TCTGGAATAACAAAGAGTACGTCGAGTTGACCATCCGAGATGTTTGTTCGCCACCAGGCTTCCGCGAAGATCCGGAT  
CTGAAACCGCTGGGCAAGCGGAGTGGCTGATTGAGATCTACTCAAAACCATCGCGCATGAACTACGACGATTTGTA  
GGGATCCGATGTTGTTGAGAAAACTGAACGCTCCACGTTGGGCTGGCTGCGAGATACCGTGCATTCGTTGCAAT  
CTGTGATCCGGATTTCCGACTTCACTGCGAGTTATGTGAGTGGGAACTCTGCGTCAGCAATATACCGTACGCGGTA  
GAGCCAGTATTTATAGCCCGCAGGATGCCAGCGCGCGGATTCGTCACGGTGTGTTGTTAGCGCTTTAACGTTG  
TGGTACGGTGTGGTGGAGCAGTGGTTCGACCGTTATGACCCCGGCTGGCGGCAATTCAGGAGGGGATGTTGACG  
ATCCGACAAGGCGCGGAGCCAGGGCGCTGTGCAAAATACGTAACCCCAACGTTGACCAATCGACATCGGATTTG  
CAGCTGGCGCAGGCGACAGTGGCAGCACTACGCTGGTGGAAATGAGAAAGTACAACGGAAACAGTGGAGCAGGTGACGGC  
GTTTAAAGCGCCCGTGGAGATGGTGGCGAGTGCGAATATGTTCCCGCTGCGAGGTGAATCATGA

>Cluster\_52592

ATGAACCTAAAGCTCAAAAGATGCGAATATTGGATGGCGGCACAAAAGCAGATGAAACGGGTTGTGCCCTTCTTCTGGT  
TATTATGCTGCAATGTTCAATCGCGGAAATGCGCTTTAACCCCTGCTTTTCTGTCGGGTGATGAGCTGTTGCTGACT  
TATCCCGCTTCGAAAGGGATGACTTATCTTCTCGGTAGCTATGAAGTCGAAGTTGGGTCAATGATTCCTTACTCT  
TCTCGTACTGTAACCTTTAAAGCAGACGATGAGAATCAACTGATTCCTGCTTTCATTTGCTGACTTATTAAGCTTTGG  
AATTAACAATAAGTCCGCTGCCAGAGCGCTTTGGCTTCACTGAAAAATAGTTGCTTGTATTTGCTATTTTCTGTTTCTG  
ATGTGATACATGCGGAGCTGGATGCACAGAGACTTAAACTGACCTTTCCGAGGCGATAAATAAACGTCAGCCCGC  
GGATATATTCACCAAGACAGTGGGATAACGGTATTACAGCTTTTGTGTAATGACTTTTCTGGTAAATAACGATCG  
TGGTGAATGACTCTTCAAACTAATATTTAAATCTTCGCGCTGGGATCAATATGGTGCATGGCGTTTTCCGATTAAT  
CAACCTGGAGTCTGGGATTAATTCAGCAGGTAACCTGGAGCATATCAGTAGTACTTTGACGCGCTTATTTCTGTTTCT  
AGAAGTGAATTAACGCTAGGAGATACATGGTCACTCATCAGATGTTTTCGACAGTGTAGTATTCGTTGCAATAAACTGGA  
ATCTGACGAAAAATGTTGCCGATAGTCAAAGTGGTTCGCTCCACCGGTGCGCGGAAATGCGAAAGTCCGCTCAGG  
TAAACATCAAAAGCAAGTATGTCATTTATCAAACTTATATGCCCGCGGACCGTTGAGATTAAGCAGCTTTAACCCG  
ACATCATCTGCGGAGATCTGGAAGTTACCATCAAGAGTCTGATAATTCAGAAACTGTCTATACCGTACCTTATGCCG  
TGTCCCATCCTGCAACGAGAAGTCAATCAAAATATTTACTACGGTTGGCCAAATATCGAGCAATAGCTATAACGAGA

AAAGTCCCTTATATATTTTCAGGGGAATTAATTTGGGGTTTACCCTGGGATATTACGGCTTATGGTGGGGCACAATTTCTCT  
GAGGATTACCGGGCGTTGGCGCTCGGCCTGGCCTGAACTGGGTGTATTTGGTGCAACATCGTTTGAAGTTACTCAGGC  
TAACAGTTCGCTTGTGGATGGGAGCAAACATCAAGGGCAATCTTATCGTTTCTTTATTCAAATCGTTAGTTCAGACAG  
GAACAGCATTCATATTTATTTGGCTATCGTTATTTCAACCCAGGGCTTTTACACTTTAAGTGATACGACATAACCAACAAATG  
TCAGGGACTGTGTGGTATGATCAAAAACGTTAGATGATAAAGATTACGTTTATAACTGGAATGATTTTTATAACTTCGGCTTA  
TAGCAAACGTTGAAAATTTTCAGGCTAGTGTATCGCAACCTTTCCGGTAACTACGGGCTATGTATTTATTCGGCTAGTCAGC  
AAACATACGGAATCTGATAAAAAAGATTCTTTATACCAAGTTGGTTATAACACCAGTATTAAGGGTATCTATCTAAAT  
GTTTCGGTGGAAATACAGTAAATCACCAGGGACAATGCAGATAAAAATTTGTCTCGCTAAATGTCTCATTACCTATAAGTAA  
TTGGTTATCTTCCACGAATGATGGGCGCTCATCATCGAATGCCATGACTGCAACGTTATGGTTATAGTCAGGATAACCACG  
GACAGGTAACCAATATACGGGGTATCTGGTTCTGTGGAGCAGCATAATCTCAGTTATAACATAACAATGGTTTTT  
GCTAATCAGGATAATAGCAGTAGTGGTTCTGTTGGTGTAAATATCTGGGGCATATGGTTCCCTTGAATTCGGCTACAG  
TTACGATAATGAAGGTAATCAACAAATAAACTATGGCATCAGTGGTGTCTTGTGTACATGAAAAATGGTCTTACGTTGA  
GTC AACCATTAGGTGAACTAATGTTTTGATAAAAAGCGCTGGAGCAAATAATGTGGATGTCCAGCGGGGACAGGAATA  
TCCACTGACTGGCGTGGATATGCAGTTGTTCTTATGCAACAGAAATATAGACGTAATAACATTTTATTAGATCCTATGTC  
AATGAATATGCATACTGAACTGGATATCACTTCCACTGAAAGTTATTCGGGAAAAGGTGCGTTAGTTCGTGCAGAGTTTG  
CTGCTCATATCGGTATTCGTGGTTTGTTCACAGTTCGTTATCGTAATAAATCAGTCCCATTGGTGTACAGCCAGCGCA  
CAGATTAAACAATAGTCAAAATACCGGGATTTCTGGCGATAATGGCAACAATTTATCTCAGGATTCCTTTAGAACG  
TGTTATTAATATCCAGTGGGAGACGGTGTTCAGCAAAAATGTCCAGGCTAATTAACAGCTCCCAGAACAGAACTGGATA  
ATCTCTGTAGCTATGCAACTCTGGAGTCCGGCTAA

>Cluster\_1327

ATGAAACGACATCTGAACACCAGCTACAGGCTGGTATGGAATCACATTACGGGCACCCCTGGTGGTGGCTTCCGAACTGGC  
GCGCTACCGGGGAAAACGCACCGGTGTGGCGGTTCGCTGTCTTGTGCTGTACAGTCCCGTACTGGCTGCTG  
ACACGGTCTGACAGCGGGGAAAACCGTGTGGCGGGCAACTGACAAATCATGACAAACAGATTGTTCTCGGTACGGCC  
AACGGAATACCGGCGGGAAGGGGACAGATGGCGGATGAGCAAAATGAGTATACCGGGGCAATGGATGCAAAAATGG  
CGGTATCGCAACAACTACTGTACCGGTGGTGGTCTTCAGAGAGTGAATGCCGGAGGAGCGTTTCAGACACGGTTA  
TCAGTCCGGAGGCGGACAGAGCCTTACGGGGCAGGCAAGTACCCTCTGAAACGGCGGTGAGCAGTGGGTACATGAA  
GGCGGATGCAACGGGTACCGTCAATTAATGAGAAGGGTGGCAGGCGTCAAATCCGGCGCAATGGCAACCGACACGGT  
TGTGAATACCGGCGGGAAGGGGACAGATGCAAGAAATGGTATACCGGGCAGTTTGTTCGGGAAATGCAAAATCGCA  
CCACCATCAATAAAAATGGTGTGATGTTGGTGTGAAAGGAAACGGCAATACCCTGTGGTTTATGCCGGCGGCGAC  
CAGACTGTACATGTTACGCACTGGATACACGCTGAAATGGGGGTACAGTATGTGCACAACGGCGTACGGCGTCTGG  
CACTGTTGTAACAGTGCAGGCTGGCAGATTATCAAGGAAGGTGGTCTGGCGGATTTACCACCGTTAACAGAAAGGCA  
AAGTGCAGGTGAACCGGTGGTACCAGCACATGTCACTGAAACAGGGTGGAGCAGTGGTTACCAGTACTCGCGCA  
ACGGTCTTGGCAGCAACCGTCTGGCAATTTACCGGTGAAAACGGTAAGGCTGACGGCGTTGTTCTGGAGTCCGGCG  
TCGCTGGATGTACTGGAAGGCCATTACAGCGCAGAAAACACGGGTGGATGACGGCGGAAACCTGGCAGTGTCTCCGGT  
GTAAGGCAACAGATGTACCATGACATCCGGTAGTCCCTGATGTCAGACAGTGGTGCCTGTTGAGGGGCAAAATGCC  
AGCGTAAGTTTCAGTATTGATGGCACATCCGGTACGGCAGCGGACTGCTGTGAAAATGGCGGCACTTTACGGTTAA  
TGCCGGAGGACTGGCCAGCAACACCCTGTCCGACATCTGGAACACTGACGCTGGCTGCCGGGGAAAGTCTGAGTGGCA  
GAACACAGCTCAGTAAAGGTGCCAGCATGGTACTGAAATGGCGATGTGGTCACTACCGCGGATATTTGTTAACCGAGGGGA  
ATTCGCTTTGATAAATCAGACAACACAGGATGCCGTGCTGAGCCTGTGTTGCAAAAGGCGACTCCCGGTAACGTTTCA  
TAACTGACCAACAGTAACTCACCGGTGAGGGTGGCACCATCAATATCGCTGTTTCGCTTGTATGGCAGCAATACCTCTG  
ACAGCTGTGTATTAATGGTGGTCAAGCAACCGGCAAAACCTGGCTTGGCTTTACAAATGTCCGAAACAGTAACTCCGG  
GTGGCAACCTCCGGACAGGGTATCCGGTGTGGTATGCAAGAAATGGCCACCACAGAAAGAGGTGCGTTTGCCTGAG  
TCGCCCGCTTACAGCGGTGGTTCCTTAACACACCTGAAACCTGACAGCGATGAAGACTGGTATCTGCCGCAAAAATG  
CTTATCGTGCAGAAAGTCCCTGTATGCCTCATGCTGACACAGGCAATGGACTATGACCGGATTTCTGGCAGGCTCCCGC  
AGCCATCAGACCGGTGTAACCGGTGAAAATAACAGCGTCCGCTCAGCATTCAGGCGGTGATCTCGGCACGATAACAA  
CGGTGGTATTTGCCGTGGGGCCACGCGGAAAGCAACGGCAGCTATGGCTTCGTCCTGTTGGAGGGTACCTGCTCAGAA  
CAGAGTTGCCCGGTATGTCACTGACAGCAGGAGTGTATGGTGTGACAGGCAATTTCTTCGTTGATGTTAAGGATGATG  
GGCTCCCGCGCCGGCACGGTCCGGGATGATGCCGGCAGCCTGGGGGATACCTGAAATGACACACAGTCTCCGGCCT  
GTGGGCTGACATTTGGCACAGGGAACCGCCACAGCATGAAAGCGTCACTCGGCAATAACGACTCCCGCGCCGGGGT  
GGGTTGGCTGGCTCACTGGAACCGGTCTGCCTTTTCAGTATCACTGACAACGTTGATGCTGGAGCCACAACCTGCAGTAC  
ACCTGGCAGGGGCTCTCCCTGGATGACGCGCAGGATAACCGCGGTTATGTGAAGTTCCGGCATGGCAGTCAACATGT  
CGGTGCCGTTTCCGCTTGGGCAGCCACAACGATATGAGCTTTGGTGAAGGCACCTCATCCCGTACACCTGCGCGACA  
GTGCAAAACACCGTGTGCGTGAACCTGCCGTGAACTGGTGGTACAGCCTTCTGTTATCCGCACTTACGTTCCCGGGT  
GACATGAGCATGGGTACAGCCGCGCGGCAAGTAACTGACCTTCTCACCGTCCCGGAAATGGCAGTCACTGGACCTGCA  
GGCCGATGGAAGCCCGTGTCCGGGAAAATATCACCTGGGCGTTACGGCCGTTATGCCACAGCGTCAAGCGGACGCA  
GCGTGAAGGTTATAACGGTCAAGCCACGCTGAATGTGACTTTCTGA

>Cluster\_4890

ATGCCGTTGACTTCTGACCCTGAGCAGACTGAAAGCTATGGCAGATTCACCGGTGAACCGGATGAGCTTACGCTGGC  
ACGATATTTTACCTTGAAGCAGACAAGGAATTTATCGGAAAAGCAGAGGTGATCACAACCGTCTGGGCATTTGCC  
TGCAAAATGGATGTGTCCGTTTTCTGGGCACCTTCCCTACCGATATGAATCATATCTTCCGGCGTCCGGCATTTTACC  
GCCAGACAGCTCGGGATTCGTGATATCACCGTTCTTGCAGAAATACGGTCAAGGGGAAAATACCGCGGTGAGCATGCAGC  
GCTGATACGTGACCATCAGTATCGTGAATTTGCTGGCCCTGGACATTTCCGCTTACCGCTTTTATATACCCGGA  
GCTGGATAAGCAACGACTCTGGCTGCTTTTCGATCTGGGACAGGGTGGCTTATGCAACATCGTATTTATCTCCCC  
GGAGCCACTACGCTGACCCGTTGATTTTCAAGGTAAGGGAAAAGCGCAGTTGCGCCTGTGGAAACAACTGGCACTGAT  
ACCGTCAAGCGAACAGCTTACAGCTGGAGATGCTGCTGGGGCAACTGATTGACAGCCGCTGTCTTTACTGGAATCAC  
TGAAAAGGGCCCTGTGACCATCAGTGGTCCGGGTTTTAATGAAGCAATGAAACGCTGAAAACCTCTGAAACGATTTTGG  
CTGCATGCTGAAAACCTGAGTACACTCCCGGCTGTGGCCCTGAAAATCTCGCACGTTATGCTGGTATGACTTCGGTGT  
CAATATGTCAGGATGTCAACCGCAGAAAAGGATGGCGTTCTGGTTGCTTTGTCCTTGCATGGGAAACGCTGGCGCTG  
ATGATGCATTTGGACGTTCTGGACGCCATGCTGGCCGTTATCATCCGTGACCCAGAAAAGATTGGGAGAAAACCGGCTC  
CGCTCGTGAAGGATCTGGATAAATCTGCAATGGCCTGACAGCGCATGTTTCGTAACCTGTAAGAAAGAAAACCGGA  
CGAATCGATTCGTGCTGAGGTGTTACGTACATCCCAAGGAAAAGCTGGCTGAAATCATCACGCTTGTCCGTGAAATG  
CCCGGCCCTCAGACGATAATTTTTCATGAAGAAATGGTGGAGCAGTACGGGCGGCTTCCGCTTCTGCCCATCTGTG  
AATACCGTTAAATTTTCTACCGCACCTGCCGGGTTACCCTGAAATGCTGACTACCTCAGCCGGGATTTACGCTC  
ACCGCGGCAAGTTTTTTGACGACGCAACCAACGAAATTTACGTCGGTCAATGAAAACCGGCTGGTATTAACAGGAAAAC  
ATATCACCGCAGGGGATACAGCTCTGCTTTCTCAGTAACTGCAGGATAGTCTGAGCGGAGGGATGCTACGTTACC  
GGCAGTAAACCGGTGGGAGATCTCGTCAAGATTTACTACAGGTTGCTGACTGGCAGGCAACCGGATTAAGGTTTATCG  
TCTTTTGGGCAACCGGACAGCCGAGGAAAGCAATAAATCTCTGGTTCATCAGTCTGATAGTCTGATAGTCTGACGAGGTTG  
CTGCACGTTCTTGGCAAAATGAGGCTGTGAACTCAGTGTTCGTCGAAAGCCCGGTTGACAATTTCTCCCGCTGCC  
AGTCTTGTGAGCGGACAGTCTGAAACGACTGAGCAAAATGATCAGTGTACTCCCTCCGGTGGATTTAAGGAGTT



GCTGCTCGAAATTAACGCCATACCCGATTGCTGATGAGTTTTTCCATGCTAGTGAAGCCAGTGCCAGAGTTGATGATC  
TGCCCGCTAGCATCAGCGCCGTGCTGATGGCTGAAGCCTGCAATATCGGTCTGGAACCACTGATCAGATCAAAATGTTCCCT  
GCACTGACCCGACACCGGCTGAACTGGACAAAAGCGAACTATCTGCGGGCTGAACTATCACCAGCGCTAATGCCAGACT  
GGTTGATTTTTAGGCAACCGCTGCCACTGGCAGCATATGGGGTGGAGGAGAAGTGGCATCTGCAGATGGAATCGCCTTTG  
TTACGCGCAGTCAAGCAATCAATGCGGACCGCAACTCAATCTTTGGTAATAACAGAGGGATCACCTGGTCAACTTT  
GTGTCCGATCAGTATCCGGCTTTCATGGCATCGTTATACCCGGGACGCTGAGGGACTCTATCTTTGTGCTGGAAGGTTCT  
TCTGGAACAGGAGACCGGCTGAATCAACCGAAATTAAGACCATACAGCAGGTGCCAGCGAACTTGTCTTTGGCCTTT  
TCTGGCTGCTGGGATACAGTTTTCTCCACGCCCTGGCTGATGCCGGTGTCTCGGTTTTCTGGCGAATGGACCATGATGCC  
GACTATGGCTGCTGAATGATATGCGCAGGGCAATCAGATCCCGAAAAATAGTCCCTCAGTGGGACGAAATGATCCG  
GACCGCTGGCTCCCTGAAGCTGGGCAAAGTACAGGTTTTCAGTGTGGTCCGTTTCTGCTGAAAAAGTGAACGCTCTCCG  
GACTGACTCAGGCAATCATGAAAGTGGGGCGCATCAACAAAACGCTGTATCTGCTTAATATATGATGATGAAGATTAC  
CGCCGGCGCATTCGACCAGCTTAATCGGGGAGAAAGTCGCCATGCCGTTGCCAGAGCCATCTGTCACGGTCAAAAAGG  
TGAGATAAGAAAAAATATACCCGACGCTCAGGAAGATCAGATCCCGAAAAATAGTCCCTCAGTGGGACGAAATGATCCG  
GAACTACTATTTATATGACAGGACGCTTGGATCATCTCCGGGCGCAGGTTGAAACTGAAATGATGAAGATATCGCACGC  
CTCTCCCGCTTTGCCACGGACATATCAATATGCTCGGCCATTATCCCTCACGCTGGCAGAACTGGTACCAAAAGGACA  
TCTGAGACCATTAAGAGGGCTCAGAGGCAGAAAACTGCTTAA

>cluster\_25405

GTGGCTGCTGAATTTTCAATCGGTGTTCTTATTAGTGGCGCAGTCACTGGCGCATTTCTGTTCTGCTATTGGAGGAACCCA  
GCGAGCGTTAAACGATCTCCAATCCACCACGACGCGATTGCAAAACCGTCAGGCCGCGCTGACGACGGCGATGACACGTT  
ACGGCAGGCGAGTATTAGCAGTACATCCCGGCTCAACACGAATACAGCAAGTCACTGCGCAATGGCGCGGTTGGAA  
AGCCAGCAAAAATAAATATCCAGCGCAACCGCGCGTAGCCAGGCGATGCGTTTCGACGCGGATGGATCTTTACGCCAGGG  
TGCAGAGACCTACGCGCTGGCCAGAACGATGTCGGCCCTCTGTTGCTGCTCAGTGA AAAACCTATGCCGGGTTTGAATCAG  
GGCTGCCGGATATTGCCGTGACCGGGGATCTGGACAGTAAACAGGAAGCGGCGATCGATAACGCCATCCGTCAGGCAGCG  
GGTAAAGTCAACCAAGTTGTCGCTCTCTCGAAGCTGCAAAAGGCTTGGTTCCGCGAAGAAGAAGCCGTCGACCAATGA  
CCAACTGGATGGGCGCAATGACGCGCGGCGATACCGTCAAGAAATATGAAAAGCGGGCGTAAATATGAAGCGTCGATG  
AAAGATTTATGTCGCAAAAGTTATTCGCAATATGAAGCTCTGCTGATGATGCTGACCGCTTTTATTAAGGTTAAAGGCGA  
TGCCTTTATAAAACAGTGGCAGGAAGCGGGGCGCAGTGGCGACGCTGAGTCCGCAACAGAAAGTTGATGGAGTCGTTGGTC  
TGTCGGAGGTTTTTACCGATATCAACCGTCAATCATCTGCTTTCATGCGTCAAGCTGGGATCAATATCAGTCAAT  
AAAGCCAAAATGGGTGACCCGGCATCACAGAATGTGCTGGATACTGATTTAATAAGCAAAACGATACCCGGAAGCCCG  
CTGGCGAAGCTCGCAGGTAGCGATGAATGAGATGGCAATCAGTATCGGTAGTTCTCTACGCCCGGCACGTTGCGAATTA  
CGGAAAGCTGCTGCCAGTAAATGAGTTCTTTGCAAAATGGCTTTCAGTAAACCGGAGATGGTGGCGAATATAGCCAAA  
CTACTGGCGGTTTTTACCGATATCAAAAGCGGCGGCGTAGCAGTGGTCAAGCTGGCTGTAATATGATGTTTCTCGCTG  
GGATGATTAAGCGGTAACGTTGCTTAAACGAAATGGCTGCTTCTGAAAACAGCCTTTCTGCTGCGCGGCAAACTGG  
CAGGCATCACTAAGTTGTTCCGGCTCGCTAGCGCGTGGTGCCTTGTCTTAGGCAAAATCCTTCCGGTGGATTAATGCGT  
GGCTGATGATGAGCCCGCTGCGTAAATGTTTCTGGGCGTGGCTGCTGATGAATCCATCCGGTGGATTAATCACTGG  
CATCGCGGACGCGGCTATCTGATTTATCGTACTGGGGCCCATTTCCGGCTTTTAAACGGCTGTGGGCGCAGGTCA  
CGGTAGCGTTTCCGGGGCGTGGAGCGGATCAAGGTATCTGGAGTGGCGTTCGCGGCTGGTCTCTGGTATCTGGGG  
CAAACTCAAAAGCTTACGCGGTGGGATTTGGCGGCTGGCAAGCTGATTAACCACTGGTCCGCGCTGGGCGTGTCTTA  
TAAAGTTTTCCGGAGTATGAAATCACTCGGATGATGATGCGAAGAACTTACCAGTTTTGGCGGTAATCTGATTA  
ACGGTCTGATGAACGGTATCGGCAATGCGCTGACTGCTGCGAAAGAGACGGTCTGTAACCTTTGGTAACTCGATTTACGGC  
TGGTTAAGGAGACGCTGGGCATCACTCCCGAGCCAGGTGTTGCGGGGTTCCGCGCAAAATATCGCGCAAGGGGCCG  
TATCGGTATCAACCGCACCCCGGATGCGATTTCCGCGAGCCAAACAGATGGCGGCGGCTTAATTTCCCGCTTGTCTGG  
ATATCCCGCTTCCGGGCTGATGATGTTGCGCAATACCAAGCAGCCACCTGTTGCGGGTGGCATCGCGCTCAACTCAAC  
CCACTGCTGCCGAAAGTCGACCCGCCACCATTGTGCCAGCCCCACTGCGGCGGGTATGGCGCTGGCTGGGGCGGCGGG  
CGCGGTGTTATCTCGCGCAAACCGCTGCGGCCAGTGCACAAAACCGCGCTACCTGCCGTTCCCTGAACTGCCGAAAA  
GTACCGCACAGCCGCAAAGGCGCAATGCCAGTGGCGGTGTCGCGGGGCGAGTCACTCCGGGTGAATGTGACCTTTGCG  
CGCAAAATTACCATAAAGGCGCGGCATCGACGACCGGCGAAATCACTCTGCGTGAACCTGAGCTGCACGAACT  
TGAAGAATGATGGAGCGGATTAAGCGGCTGTAACCGCGGAGTATGCATAA

>cluster\_25810

ATGAGTGACTATAAATCAACCCGTAATTTGCCGGAACAGGGTCCCGATGCGTGGCGATCTCGCAAGCGGCAACCGGG  
AATGCTGGCGGTTGGACTGATGATGATCTGTACGGCATCATCCGTGCGGCTAAAAAAGGCAAAAAAACCCTTTATTTCTC  
ATGATGGCCCTCTTATGCGAATGGCAGCATTCATATTTGGTCACTCGGTTAACAGATCTGAAAGACATTTATCGTGAAG  
TCCAAAGGGCTTTCCGGTTATGACTCGCGTATGTGCCCTGGCTGGGACTGCCATGGTCTGCCGATCGAGCTGAAAGTGA  
GCAAGAATACGGTAAAGCGGGGAGAAATTCACCGCGTGGTTCGCGCAAGTGGCGGCAATGCGGCGGACTGCGACCCAGG  
TTGACGGTACGCGCAAGACTTTTATCCGCTGCGGCTGCTGGGCGACTGGTCCGACCCCTACCTGACCATGGACTTCAAA  
ACTGAAGCAACATCATCTCGCGCTGGGCAAAATCATCGGCAACGGTCACTGCACAAGGCGGAAAGCGGTCGACTG  
GTGCGTTGACTGCGCTTCTGACTGGCAGAAGCGGAAGTTGATATTACGACAAAACTTCTCCGCTCACTGACGCTGCTT  
TCCAGGCGCTGATCAGGATGCACTGAAAGCAAAATTTGCGGTAAGCAACGTTAACGGCCAACTCTCGTGGTATCTGG  
ACCACTACGCGTGGACTCTGCTGCCAACCGGCAATCTCTATTGCACCTGATTTGACTATGCGCTGGTGCAGATCGA  
CGGTACGGCGGTTATCTGGCGAAAGATCTGGTTGAAAGCGTAAATGCAGCGTATCGGCGTACCGGATACACCATCTCG  
GCACGGTAAAGGTTGGGAGCTTGGAGTCTGCGCTTTACCAATCCGTTTATGGGCTTCGATGTTCCGGCAATTTCTCGG  
GACCACTTACCGTGGATGCGGTTACCGGTTACCGGTTCAATACCGCGCACAGGCTCCGACGACTATGTTGCTCGGTC  
AAAAACGGCCTGGAACCGCTAACCCGGTTGGCCGGACGGCACTTATCTGCGGGTACTTACCCGACGCTGGATGGCG  
TGAACGTTTTCAAGCGAACGACATCTGTTGCTGCTGTCAGGAAAAAGGCGCGCTGTTGACGTTGAGAAAAATGACG  
CACAGTATCCGTGCTGCTGGCTCACAAAACCGCATCTTCCGTCGACGCGCAGTGGTTCTGCTGACATGGATGATG  
GAAAGCTGCTGCGTGCACCTGAAAGAGATCAAAAGCGTGCAGTGGATCCCGGACTGGGGCAAGGCGGCTATCGAGT  
CGATGGTTGCTAACCGTCTGACTGGTGTATCTCCGTCAGCGCACCTGGGGCTACCGATGCTACTGTTCTGCTGATAA  
GACACGGAAGAGCTGCATCCGCTACCTCGAATGATGGAAGAGTGGCTAAACCGTGAAGTTGACGGCATCCAGGC  
GTGGTGGGATCTCGATGCGAAAGAGATCTCGGCGATGAAGCTGATCAGTACGTGAAAGTGGCGGATCTCGACGATCTCG  
GTTTTGACTCCGGCTTACCACTCTTCCGTTGTTGACTGCGTCCGGAAATTTGCCGGTACGCTGCGGACATGTATCTG  
GAAGTTACAGACCAGCCGTGGTGGTTCATGCTCTCTGATGATCTCTACCGGATGAAGGGCAAAGCAGCTATCG  
TCAGGTACTGACCCAGGCTTTACCGTGGATGGTCAGGCGGCAAGATCTAAATCCATCGGCAACCGCTTTCCCGCC  
AGGATGTGATGAAACAACTGGGCGGATATCTGCTGTTGGTGGATCAACTGACTACACTGGTGAATGGTCCGCTT  
TCTGACGAAATCTGAAACGCTGCTGCGGACAGTATCGTGTATCCGTAACACCGCGGCTTCTGCTGGCAACCTGAA  
CGTTTTGATCCGCAAAAGATATGGTGAACCGGAAGAGATGGTGGTACTGGATCGTGGGCGTAGGTTGTGCGAAAG

CGGCACAGGAAGACATCCTCAAGCGGTACGAAGCATACGATTTCCACGAAGTGGTACAGCGTCTGATGCGCTTCTGCTCC  
GTTGAGATGGGTTCTTCTACCTCGACATCATCAAAGACCGTCACTATACCGCAAAGCGGACAGCGTGGCGCTCGTAG  
CTGCCAGACTGCGCTGTATCACATCGCAGAAGCGCTGGTTCGCTGGATGGCACCATCTCTCTCCACCCTGATGAAG  
TGTGGGTTACCTCCCGGGCGAAGCTGAAAAATACGCTTCCACCGGCGAGTGGTACGAAGGCCGTTTTGGTCTGGCAGAC  
AGTGAAGCAATGAACGCTTCTGGGACGAGCTGTTGAAAGTGGCTGGCGAAGTGAACAAAGTCATTGAGCAAGCGCG  
TGCCGATAAGAAAGTGGGCGGCTCGCTGGAAGCGGAGTAACTTGTATGCGAACCAGGAACTGGCGGCGAAACTGACCG  
CGCTGGGCGATGAATTACGATTTGCTCTGTTGACTCCGGCGTACCGTTGCAGACTATAACGACGCACTGCTGATGCC  
CAGCAGAGCGAAGTCTCAAAGGCTGAAAGTCCGCTTGGTAAAGCCGAAGTGAAGTGCCTCGCTGCTGGCAGTCA  
CACCCAGGATGTCGGCAAGGTGGCGGAACACGCAGAACTTGGCGCGCTGTGTACGCAACGTCGCGGCTGACGGTGA  
AACGTAAGTTGCTGA  
>Cluster\_63640  
ATGCTGCTAGTTGGGCAACTGGTCTTTCTGCTCCAAATTATAACAGAGACCAATTATAGTTTCGGTGTGTGTTTTTTTT  
ACAATATTGTGATAACACATTGCTGGCGGGAGTTTTGATATTTCTTGGCAGGGGCTGA  
>Cluster\_25586  
ATGAAGTATGTGAATCTGGGTCGTAGCGGTTTGAAGTCTCCCGTCTTTCGCTCGGTTGTATGAGCTATGGTGAACCTGA  
ACGCTTCTCAATGTCACGACGGATGAAAAGTATCCACTTATATCTCCACCAACGGCCCAATATTGA  
>Cluster\_56521  
ATGCTGATGCGACGCTAACCGCTTTATCAGACCTACAGCCGCTGCCAGATGTGTGCTGGATAAGGTGTTACCGCAGCA  
TCCGGCAAATGGCCGGATGACGGTAACGACTATCCGCCAGGCTTTTAA  
>Cluster\_51117  
ATGGAATTTCTGATGACAAAAAATCGTTATGGAATTTCTTGTCTGATCTGCCCGCTTTCGCGGCGAGGCTAACGAACG  
TATTGTGTTGTTGAAGTTTTTCGACGTTGTTTTCCATCTGGGGTGA  
>Cluster\_63441  
GTGGCTTTCTGCTGCGTAAATCCGGCGCGGCTTTTTCGCGGGGGATTACTTATAAAGGGGCATGGACTCAACA  
AACCGTAGAAATCTACAGCTGGCTGGCTTGTGGCGCGGTTTCATTGATGTTAGCTTATGCCAAAACCTGGCATCTTAA  
>Cluster\_21242  
ATGAACTACCACGAAGTTCCTTGTCTGGTGTGTGTTGATCGTGTCTCACACTGTTGATATTCACCTATCTGACACG  
AAAATCGCTGTGGCAGATTCGTTACAGAGACGGACACAGGAGGTGGCGGCTTTCATGCTTACGAATCCGGTAAAGTGA  
>Cluster\_49681  
ATGTTAGAGTTAATAAAAAGTCTGGTATTCGCCGTAATCATGGTACCTGTCGTGATGGCCATCATCTGGGCTGATTTA  
CGGCTTGGTGAAGTATTAACAATCTTTTCTGGTGTGGTAAAAAAGACCAGCCCGGACAAAAATCATTGA  
>Cluster\_48605  
ATGATCCATACATCTCATTAGCTTTTATGGGTGGCTTCTTATCGGCTTCGGCATCTGTCGTGATTTGATTAAGCAGGA  
ACTTAAAACCAAAACACTGTGCATAGGAAAGCGGCTGTATCGGCTAGTTCATGAAACAAGGTGAAAAAATGA  
>Cluster\_11004  
ATGGGAGCGGATGTTACAGAGTTCGCTGACAGGGGAAAAGTGGTACCTGTGCGCAGTCTCCGATCTGTTTAAACGGGA  
AATTATCTCTACAGCTTGTGAGAAAGTGGTGTGAGCATCGTTAA  
>Cluster\_66282  
ATGAAAAAATGTGAAATGTACTTCTTTTTTAAATATTTTTTTTACCTAGCATTGTTCTCGAATTGACATTGAGCTTAAA  
TATAACCAAGGCAATGCAATGAATAA  
>Cluster\_6265  
ATGAGAGAGAACCCTGCGTCTGATGAAAGCATGTGAGGCAGTAACACTGGCAAAAATGCACCGCATGGTACAGGGTATGTT  
CGGTATAAAACCGCGGCTCACTTAA  
>Cluster\_47085  
ATGCCGAGTGGTGTGGCATGGGCGCAACCTTGTGCTGCCCTCTATGCCGATCAAGTCTACAGCAAAGAGTTGTATATCAA  
GGCACATTGA  
>Cluster\_37981  
ATGGCGGTATTTTTATACAAAAATGGGGTCTGGCTCTTTTTTACTGATTATGAAAGCATAGACCGTTTACCCTCCCT  
GGTACGACGGAACAGGGTCTCTGA  
>Cluster\_50539  
ATGTTTTATAAAGGAGCAATGCCTCAGCATCAGGTTACGGGGTACTCACGTAAGGGACAGGAGATGGCAGCTCAGCC  
ACAGGCAGCACTGCAGGAACTGAATATAAACTGCAGTGA  
>Cluster\_62977  
ATGATTGATGAAAAAAGCGGCAGAGAAGATCTCCACCGCTTGTCTGTTGGATGCGACGCTCAAGCGTCCGATCAG  
GCATAAAGCAGATTACTTTTTGATTTTCATACAGCGGTGTTGA  
>Cluster\_14719  
ATGATTACCGGTTGGTAAATGATAAAGATAAGTTTTCAGTGTGAAGCTTATCTTTACCACACCCCCGATTATTTTGA  
TTTAGAAGAATTTTCAATTCAGGATAA  
>Cluster\_64310  
ATGACCTTCTGAAACATAAGGCATCGTATAAACTGCCTGCCTCATTGCACAACATGAAGATTCTTATCTTCATATAGC  
CAACCTGTATTTGCGCAAAGCATATGGGAGATAA  
>Cluster\_32574  
ATGTTTGAATAATATAGAAAAACTCGTAGCCGGAACGTGGCGATAACCCCTGGGTTTGTGACATCGGGGGTATGGC  
TGCGGGTTTTAAACAGCGCCGCTGCCGGCAACTGGGTGCGGTCATGTCGATCCCTACGGCAATGCACCACTGACCG  
CTTTGGTTGACTTAGATGCCATGTTATTTCTGACGTCAAAGTTACCGTCCATGGGAAGGGCGAAAAAGGGCTAGAAATC  
AGCTATCCCGTGGTTCAGGAATCAATAAACTTACGATGGTGTACCGATTTTTGGTCTTTATCAGAAAATTTGCTAACAA  
AGTGACCGTTGAGTGAAGAAAACGGCAAGGTCATGAAAGATGATTAATGTTGGTGCACACTTCGGCCATCGTCAATAAT  
ACATGGATAACCGCTCTATCTCCGATTTACAACAGACCAAGTATATAAAGTCCGACCGGGTTTTGAAGATCGCTCTAT  
CTGGTTAATACCCACACTTTACCGCCAAAGTTCCGATCTCCACTGGCATGGTGAAGAAATGAAAAATGCGGGTATCCT  
TGATGCGGTTCCGGCAACTGGCGCACTCCCTTTGATATCGCGCCCTTTACTTTCATCGTCGATACCGAAGGTGAATACC  
GCTGGTGGCTGGATCAAGACACTTCTACGATGGTCTGACCGGATATCAACAAGCGTGGTTATCTGATGGGTATCCGC  
GAAACGCCACGGCACCTTTACCGCTGTACAAGGTCAGCAGCTGGTACGAGTTCGACATGATGGGCGAGGTGCTGGAAGA  
TCACAAACTACCGCGGATTTGCTGACGCTACTCATGAATCCATTGAGACGCCAAATGGCACGGTACTGTTGCGCGTAG  
GTAAGAGCAATTTACCGTCCGATGACGGGCTACACGTCACCACTTCGTCGACCATATCTTCGAAAGTGAATAATCTGGT  
CGCGTTGTAGATGTATGGGATCTGACGAAAGATCTCGATCCGAAACCGGATGCACTGCTCGGCGCGCTGGATGCAAGTGC  
AGTTTGGCTTAAAGTTGACTTTGCCATGCAGGACAACAGGCAAACTGGAACAGATACACCGTTCCGGCAGCGCTGCG  
GTGTTAGGGCGAGCGGTAATCCGCTGATGCTGATGAGCAAGTGAATGGATCTTGGCGCCCTTAAAGGTTGGGAAAAACC  
GCTGGCCAGCAAGCTGCTGAAACCGGTTGATGCTAACGGTAAGCAATACCTGTACGAAAAATGGCTGTGCGAAAACT

CAGACTTCGACTTTACCTACACCCAGCATACCGCTGGATTTCCAGCAAAGAACGCTCACCATTTTTGATAATGGCGAT  
GGGCGTCACTCGGAACAACCTGCCTTACCAACCATGAAATACTCCCGCTTTGTGGAATAAAGATTGATGAGAAGAAAGG  
CACCGTTCAGCAAGTGTGGGAATACGGTAAAGAACGTGGCTACGATTTCTATAGCCCGATTACCTCCATCATGAAATATC  
AAGCCGACCGTAACACCATGTTTGGCTTCGGTGGTTCATTCATTTGTTCGATGTCGGGCAGCCAAACCTCGGTAAGTTG  
AACGAAATCGATTACAAAACCAAGAAGTGAAGTGAAGATCGACGTGCTGTCAGATAAACCAATCAGACTCACTATCG  
TGCCTGTAGTCCGTCACACAGATGTTCAAATAA

>Cluster\_10956

ATGTATAATTTTATACATAATGTATGATGTCTTTTTCATGTTTTGGTGTTCGGCTAAAAACCAGAAATAGCCGTGACAT  
CCGAAATATAAAAATTTTTCCCTCACATCAACATTCACATGGGCGACATGTTGATGAATTAATAAACATTTATTGATAAAG  
AACAAAGTATTGAGTAAAGAACAACGAAAAGTTATATTTAGGAGATATGAAGATCTCTATGTTAAGCTAATGCACTATTCT  
GTTTTTACAGACAAAACACATCAATAATAAAAACAAAATATTTAATGACATTTGTACCAATGATTTCTCGCACTCGACAT  
CAGGAACACATATCGCCCGGATAATGAGATGGCATTCTACTATCATATTCATTTCTTTCTCACTCAGATACCGGATAATG  
AGGATGATATATATCATGCTGCAAGGACATATCTGCGAAATACGTTAAGTTAAGTTTTATCCGATACACCGCCAGCAAT  
GCGCATTTCAAAGATATCTTTGATGGCGTATATGAATTCATTCGTAATATTCGCAAAAACAGTACACCAGGAAAAACAAA  
ACTTATCGCAACTATCAACACATGCAAGAAACCTGTAACATCTGCTTTAATTAAGTAAATGAAGACAAGGAAAAATAA  
TTTTCTGATAGATAAAGTTAGGTTGATGTTATATCTCACATATTTACTGGCTTTGAAAGACGAACTTCATTAACA  
AGCATCTCGCAACTTTTTATATAAAATGCTGATAAGCAAGAAAGTTTCAGAATATGAATGCCAGTATATATTTAAT  
CAACCAATAGATGTAATGAATATACTGAACAATAACATATATTTACTTTCTAATGAGAATCACCATTTTATACACTGA  
AAATTTGACAGTGCATTTATCGTGGGATGCCATTTGACGCAATACGAGACTATAGTATTTCTGATATTTATCTTTTCTGAA  
CAAAAACAATAAATTTGTGCTGTTGAGATGAAAACATTTGCTTTGGCGGTTACATTTATACATGCAACACGGCGTCAC  
ATTTACAAAACATAGAAAACCTTTTTAAAAGATTTCTATGCCATTTATGTTCTTTAATGGCTATACAGAAATTTGTTAACTGTT  
TGAGACAACCTTACTTCAGGAAAGACTGAAAGTGTTCATCGCACATCAATAAATGAACTATGAGAAATACCTTTTGGGA  
TTTTATCATTTGCGCGTTTTGCTATACTAAAGATAGCATTTAAAAATAAAATTCAGTAAAAATCATGTAATACCGAGCAT  
ATTAATAGCAGCAATAATTTATTTATGACTTATCAGGCGAGTCCATTAACCTTATTTCTACTGGATCAGCAATACCGAGT  
CCTGTCTTTCAAAATGACACAAAACACATATTTATAGGAAGAGTAAATTTCTGTATAACTCAATGATTTATAAGTTCATA  
AATGTCAGGAACATGAAACCAATAACATTCACATCAGCTATGATAAATAACCTATTACAGGAAGTTGATATAGCCCTGG  
TAAAAATAATGACATTTATAGACAGCAGAAAACATATCAGCCCCCATGAACTGGCAAAATATTTTACCCGCAAAAAATAC  
TTACAACACCGGAAAAAAAAGGAAACCTGATAAGCCTGTTGATGGAATTCATTTTATCCATTTGTTGGAATGATAAC  
TTTTCTATCCATTTATCTCAGAACACCTGAAGAAAAAGTTGAAAATATAATTTATGTTATATGGTGCAGATAAAAAACAATA  
ACTACGCAAGACTGATTTATGACGCACTAGGAATAAATTCAGTCTCAGCAGGAGTGA

>Cluster\_42804

ATGAATTCGTTACAAATCTGAGTTTTGTCGGTTTTACGCTGCTGGTAGCGGTTCATCACTGGTGAAGGTCGGTAAAC  
AGATACCGGATCGCAACAAGGCTATTTTCTGCGGACGTTCACTAAAAGCGCCGGTTATGCGGCTTCGTTAATGCTAA  
CCAACCTTTCCACGGAACAACCTGGTCCGGCTTTCCGGGCGAGGCTACAAAAGTGGCATGTCGGTGATGGGCTGGGAAGTC  
ACCTCTGCAGTGCAGCTGATCTTCTCCGCGTAACTTTTTTACCGTGCATCTGAAGCGCGGCATGCCACCATCCCCGA  
TTTTCTGGGGAACGTTATGATAAAAACGACGCGTATTTTATCCGACTTCTGCTTCCCTCATTTGCCACCGCGCTCTGTTCT  
TGCCGATTTGTTCTTATTTCCGGCGGTTGGCGTCAACAGCCTGTTTCATGTTGGGTGAGTCCGTAACAATTTCCGATGGT  
GCGGCTATCGGTTACTGGTTATTTTGGCTGGGCTGCGGGAAATTTTTGATGCGGTGATGCGGCGCATGCGCGCAATGGC  
AGTGGCGGACTCCATTAACCGTATTTGGGCTGGTTATTGGCGGTTGATGGTGCAGGTAATTTGGCCTGATCGCGATGGCA  
AGGCGAGCTTTATGCAAGGCAATTTGAGCAACTCACACCTTTCACGCGAGAAATTAACACTCAGTGGCGGCGCCGACCGAT  
CCCTTGGCGATTTGGCGCGCATTTACCGGTTGATTTCTGGTGAACACCTTTTACTGGTGTACAATAACAGGCGATCGTGCA  
ACGACGCTGGCGTCAAAAAGCCTGGCGGAAGGGCAAAAAGGGGGCGTGTAAACGGCGGTGCTGAAAAATGCTCGACCCCG  
TGGTACTGTGCTGCCAGGTTGATTCGTTTCTCATCTGATCAGGATTTACCGAAAGCGACATGCCCTTACCCGACGCTG  
GTCAATAACGTTCTGCCGGTGCCTGTTGGGCTTCTTCCGGTGCAGGTTATTTGGTGCAGGTTGATCAGTACCTTCAACGG  
CTTTCTGAATAGCGCCAGTACGTTATTCAGTATGGGTAATTTACCGCGCATCATTAACAGAAATGCCGAGCCGCAACAGC  
TGGTCAACCGTCCGGCGCAAAATTTGGTTCTTTATCGCCATCGTTTCCGGTGTGGTGCAGGCGGATCGCAACCGCGCC  
CAGGGCTGTATAGCTGGATGAAACAGCTCAACGGTATTTTACAACGTTGCGGTTGCTGTTACCATCATCATTTATGGGCTTTTT  
CTTCCCGCATTTCCGGCGTGGCGGCAAAAAGTGGCGATGGGGATTTGGCATAATCAGCTACATCACCAATCAACTATCTGG  
TGAAGTTCGACTTCCATTTCCCTATGTCGCTGGCTGTACGTTCTGCACTAACGTTGGTGTGATGCTGGTGTGATCGGTTTT  
ATCAAAACCGCGCCACGCGGTTTCACTTCAAAGATGCGTTTGGCGTGGACATGAAACCGTGGAAAAACGTCAGATTTGC  
GTCAATTTGATATCCCTGTTTCGCGATGATTTGGCGTCTATGCGGGTGGCTGAATTCGGTGGCTACCGGTACCGCGTGGTTAG  
CGATGATCAGTTATTTATCGCCGCGTAGTGAATGTCACCTGATTTTTGACAGTGGCGGCATCGTACGACCCAGCC  
GTAACCTTTACTCCGATCGGAAGGATACCCATGATG

>Cluster\_3134

ATGATTTTTAGGGATAGCTTGAGAGTATTACCTTATGGTGCAGTAGATAATGATTTCTTCCAGATAGAAGAAAGACGTTT  
ATGGAATGCAGGGCGATATATTTGGTCTAATAGAAGGATTTTTGGTTATATTGGAATTAATCAATCCAGTAATAAAGAGC  
TGAAGAATAAGTCCGGGAGAGAGGATTCATAAGAACAAGGCTGCAAGAGAATGAAAACATATATATCTAATTTGTTA  
ACTGAACCTTGCTGATAGATTTTTTGGTTACGTTCTGATGACCGTAAAGAGCTTTTAGAACAGTTAAGCGTAAAAAGA  
GTTAAGAAAAATCTGCTCAACAACAGCTCGAAAATCAACACAAAAAAGTTTTTTCAGAAGCTTTGAAAGAAATCAGACCCAG  
TTCTTGTATGCTTCCCTGGAGGCTGTTAAAAGGCTGAAAACAAAGCTTGTATAAAAACGATGTTGTTGATTTAATTAAT  
CTTAAAAATATAGACAGTATGATTTCAAAAATAGATGCGTTGCGCAGTGAATTAAAAACGCTTATCAAACTCCAAAAC  
TGGAATGATGAAGAGAAAATATAGAGACTACAGAGATAAATTAATGAGTCTCTGCGTATATTTACAAAATGAAATGAAATG  
CAATTAATAAACTTGATTTCTGAATTAATAAACTTGAGCCTTCATTTGTCAGCGAAAAATCACCTTGAAAAAATCAAGGT  
ATTTAATAATCTAAACTAACTAAGTTTAATAACAGATAGAGGAGAAGATACATTTCTTTTTAAAAAATGGGCGGATGA  
AATAAAGTTGATCGAAGTGAATTTATGCTAAAACTATATCAGTTGTTGATTTCAATAGATAATGATTTCAAAAATGAAA  
ATGTTGTTAATTTGCTCGATAGTTATATGTTGAGTCACTGATACCCAACTTTCAAATATCAATTAATAAAGGTT  
CTCGATAGATTTTGAAGGTATAAACTTAGATTCAGCATTCTCATTTATCTGAAGAAGAACGCTCATATTTTGAAGAAAA  
AGCTAAAAGTTTAAACGCGCTTGCACAGTTAGGTATTTAGTGTGAGATAATATCTCATGAACTGAAAGAAATGGATTTCTA  
TGGTAAACAGAGGATAAATCTCTTCTACTTTCTGTAAGAAGAACACCTTGGTTTTTCATTTGGCGTAAATGCTCACAGA  
TCGCTTACTCAACAATAACGTTTCTTATCACCTTTGAAAATATCAGGTTATCAATCAGGCGAGAAATTAATGAAATGAA  
TATCATGGATTTATGTCCTGAAGTTCTTTGGGAGCGTTTTCGAAACGCAACGAATAACTATTGAATTTAGTGAAGAGTTTA  
AGCAAAATCGCAATAACAGATATACCATCAAGGATCTATCCTGTTTTTACTAATATTTCAACAATGCAATGATTTGGGTC  
AGTCTGTCAAATAATAGGCTCATAAAGATGTTGTTTTGTGAATTTCTTGGTTATCATAGCAAATCTGGTCTGGCAATTTGA  
TACCGATGATATCCCGGACTATTTGAACATTTTTATAGCAAAAAGAAATGGACATGGGTTAGGTTGAGTCTGCTATGTC  
GAGAAAACCTTGTGTTGCACATATAAAATATGGTATTCAGAACCTGATGAAGGCGATAACTATTTAATAAAGATGGC  
GCTAATTTTGTGATCCAGTTCAATGGAGTGGAGTTCTAA

>Cluster\_41711

ATGAAACGTATTTTACCTCTGATACTGGCTCTGGTTGCCGGCATGGCACAGGCTGACAGCAACAGTGAATACCGGGACGG  
CTCTGATTTTGTCTACCAGATCAAAGGACAGGGAAGCAGCAGTATTCAGGCTTTAAGCCACAGGAGATCTCCCGGCT

ATAACCGGAATCCGGACGAGACAAAATACTACGGTGGCGTGACTGCCGGCGGGATGGCGGCTGAAAAATGACGGCACC  
ACGGAATGGGCGACCGGTGAAACCGGAAAAACCATCACAGAGTCAATTCATGAAACAAGCCGAAAGACATTCCTTTACC  
TGCACCGTTTATCCAGACCGGCAGGGATGTGGTGAACCGGCTGACAGCATTTGTTGGGAAACACCGGGCAGCAGTGCAGTG  
CGCAGGAGATTAGCCGGAGTGAATACACGAATTAACCTGTGTAGCGGGATTTACAGGTGGAGCAGTACTGCACACGAAC  
GCCAGGATCACCGGAGTGAATAACACAGATGAATAFCGTGAGGTGACGATACCGCACTCACAGTCCGATTCAGTAT  
GAACGGGCTGAAACTGGTGTTCAGTGTACAGGCTCCGGTAAACCGGTACAGTGGAAAGTGCATCATTTGTCTGTATACGCC  
CTTTTTCCTCCTGAACCTCCTGTATACCTTATGAAATTAACGTTCAATGTTGGCCTGGTAAACGGGAGTCCGGTACT  
TTCCCCCTGTCCGGGGCAGAGTGTGACGGTGCACAAAGGGCAGGTTCTGACCGGCAGTGGCTGTACTGCTAACGGTAA  
CTGTCTTTCCGGGGAACCGGTGACCGACAGGTTTATGAGAACTGGCCAGCGCGCTCCACCTTTACAGTGAACCTCA  
GGATGAAGGTCCGTGATAAAGAAATGGGTTCCACGGGTGGAGTGGTGGAGAGTGTCCGTTTAAATAAAGCGGATGGCGTG  
CTGAAAGGCACTGAGTGTTCAGAGCCGGTGGTACGAAACTGGTGTGATGGAAGGTAACCCCTGGAGCATCACACTGGC  
GTGCTGGGCATACCGGATAAATATGTACACAGTCCGAGATAATGGTACCTGTGAGAAATATGTCGATAATCCGGCCT  
GTACGCTGGCCTACCGGTACGTGCGGTTTATTCCGATGAGGAACTGTCTGCATGAGTATGCCACCTACTCTGCGAG  
TCAAAAACATCAGGAAAGTGTGTTGTGGTGTGATGTCTTCTGCCTTGACGGTGAATGCGATAAGGGCAGAGCGG  
AAAAACAGTGATTTTGGTGCAGCGTATCACAGCTGGCTGCGCTGCGCTGCTGGTAAAGGATGTTGCCGCCCTGAATG  
GTGTGGATGTCCAGGCTTTCCACCGGCGAGGCAAAATTCGCGTAAGGCCGACGCGGCTTACGTAACGTGTGAAGGAT  
GGTGGCTGGGTCAGGATGTGGTCTGGCGAAGTGTAAAGCAAGGAAAGCGCTGGGAAAGGCAAAAGGCAAAACT  
GACGGTGAAGTGTGGCAGTCTCTGTTCGAAAAGGTACTCGGTGTCTGCCTGCAGAAAAGCGCAGCTACTGCCAGTTT  
ATTCGAAACTGGCCAGATAGTCCAGCAGCAGGGCGTAACGGGCAGCTGCGTATCGGGTTTGGCAGCGCCAAAAGTCT  
GACTGTGTTGAAATAACCTGGATGAACGTGACGTATTAAGTTCGACAGCTGGACTTCACTAATTTACGAGACCT  
GATGAATAACAGAAAATCCCGGACAGTGGTGTCTGACAGAAAAGTGAAGAACAGATTTGCTGACCGATGAAACAGG  
CAGGACAGTAA

>Cluster\_39278

ATGCTGCATCTTCGGTTAAGCGTTAAATGTTCAATTACCGCAATAACCCGATCCTTTTGGCCTCTGTGTGGGAT  
ATTTTGTACCTCGCACAATGGATGAGTTACGAAGAAGTCGATCAATCCGCACTCATCCATCTCGGCGTAACGTTGCCT  
CTCTCACGTTGTCCGGTGAACCCCTGGCGCTTATGAGCAGTGTCTTCTGCACAGTAGTTTTCCCATTTGCTGATGAAT  
ATGTTTGCCTCTTCGGGTGGGACAGTAGCGGAAACGGATACCTGGGAAATGGCGACTCCTGATATCTGGTTATTCTC  
CGGCATCTTTGGTGGGCTGATCAGCGCTTATGCGTTACGCGAAAGTGAAGCAGATAGTCACTCAGCGTTGGGCACTCG  
GGGCAATTTAGGGAATAGCGGGCTGCGATAGCAACACAGCTTGTTCAGGTGCGGGCACACACCATAAAAACAGCGG  
CGAGTATTTCCCTGTTGGGTATGGTGGCGCTGACACTGTTGTATGGTACCGGCAAAAGGAAATAGATAACGCTTGCCA  
CATTTGGCGCCTGATTCGGGGGGCGGCTGGGTTGGCTGAGTGGCGGTTAGTTGGGCAAAATCGGCTCGTTACGGAAG  
GCGGATTTATTTGTCGGTCACTCTTCTGACCGGACTATCTGGCTGTGTGAGCAGCAGATTTGATGAATCAGTTT  
CAGGTGAGCAAAAGCCTGCGTGAAGCCTTTATCCGAGGAGATTGAACAAGAGCGACGCAAAAAAGCAGCAGTTAGT  
GGAGGAGCCAAACCCCTCAGGGAACATATCCGCTCCGGTAAAGTGGTGGCAGGAGGAGTGGTACTCGCTGAGA  
TTGCCGATATCCATGATAAGGCGATCAGTCGGGATGCTAATACGTTGTATGCGCAATGAAAACAGCAACAGCATTGTT  
GTTTTCGACCTGCGCAAAAAGAAAATCCCTGATACCTTTTACAGCGCCATAGCGAAAGAAAAGTCACTCAACATTTG  
TGGCTGTAAGATCAGGGCTCAGATCGCTGGCATTAAAGCCGGATGAAACGTTGCTTTATGCACTTCAATTTGAAGCGA  
ATGCATTTACGGTCAATTAACGTTGGCAGCGGGGAGATTATTCAGTCAATACCACCGGTCACATCTGACGCTTTATC  
CTCTCGCGTGGACCAAAAAGCCTGGGTGATGAATCGCACAGTAATAGTGTGTGAGCATTGATCTGGTACTTATCA  
GCATGTGGCGGATATCCACTGGAGAAAATACGACGGGACGGGAGCGGTAACACAGGCGCTGGGTTATGACACTTT  
CCCCGATGAAAAACATTTGTTGATACCGGTTAGGTCAGAGGCGACATTTGATAGCATCAATACCATCAGCATCAGAAA  
GAAGACTTTCCACAGGTGATGCGCGTGGTGTCTTCTGCGATGGGATTCGACCAAAAAATGGCGAGATTTATTTTGC  
CGATAGCCAGGGATTTTCAAGTATAAAGGATCAAGAGCAGCATTATGACGCAATGGTGTAGCAGGAGCGTTT  
ATTCGGTTGAGGGTATTAGCCGGACGGTCAATATTTAGCGTTGGTGTGATATGGCCTGCAAGGTTATGTCATCTGCTC  
AATATTAATGCGGGCAGATTTATGGCGTTTATCCTGCGAGCTACGTTAATCACTTCTGTTTTTCAGCGGATGTTAGAAA  
GATATTTGTTATGGCGAAGAACGGGTTAATCCAACAGGACAGGACGGCTCGCTGATCCGAGGCAATTTATCCGGCATC  
CCCAATATGGTGAATGGCTTGTATCCCTGAACCGTAA

>Cluster\_24280

ATGAAAATATCGTGGAAATATATATTTAAGAACAATGGCGATTTACATTAACAGCATTTCACCTTTTCTTATCATGCT  
CGCGGTTTCAATCGCTTTTTCGACTTGGCTTTTAAATACCTTGTCCGGTACCGATAAAAATGGCGCTTGAATGTATAAGT  
CCACATTAATTTCCACCATCGAGCAATTTATGTTTACCCTATATGCTCTCAACAGCACCATATCATCGCTCAGGCGGTA  
ATTACGCTGACGATATGACGTCACGGAACCTCAATCAACGAATGACATTTCAATACTCAACTCAAAAACCGCAGCAAT  
ATTTATTTCCGATAAACCAAGGTAAGGCCATCGCTTCTAGCAACTGGCAGGACCCCGGAGCTATGTAGGGCAAAATATA  
GCTATCTCCCTTATATAAACACGCCATGTCGGCTTAAATGGACGCTTTTACGGTATTTGGTAGCATACAAAATACCCG  
GAAATCTCCCTCTCAAGATATAAAGATAAAGGAAATTTGCGGTGTTGTAGTATAAAAATAAAGTAAATGAAAT  
TGA AAAAGCATGGGCCGAAGGCTCTGAAAATATATCGTGAATGATGAGCATGGGATTTATTTTAAAGTCAAAATCGC  
CATGGCGAATGCGAACACTGCAACCGTTACCTGTTGAGCAAAAACAAAACACTACAATCTACCCGTCATATAGTCTCGAC  
AATCTTTTACCGGGGATTTATATCTTTTATACCGTGGCAATTTTACTTTTCTGAAAGATAAAAAGAACAACTCTGT  
TTTTATTTCCGCAATATATACGCAACAAATAGCCATTTCCAGAAATTAACCTGGAAAATGACAAATTTATGGTCCCTAGATA  
ACCTGTACTGGTCAATGGGCTATTTGTTAGTCAATACACTAATTTATTTATCTGCTGTTTTTGTATTTTAAATACTGG  
AGAATGCGATCTCATGCACAACAATTTAAACTGGCGAATGAAACATTTAGAAAACAGGTTAAAGAGCGTACATCTGC  
CCTGGAATTTGATCAATCAAAAATTAATACAGGAGATAAAAAGGCGAGTCAGGCTGAACAAGTATTACAAATTTACGCGTA  
GTGAACTGGCAGAGTCCAGCAAACTGGCGGCGCTGGACAGATGGCAACCGAAATGCCCCATGAACAAAATCAACCGTTA  
GCCGCCATTCACGCACTTACTGATAACGCGCTACTATGCTAAAAAAGAGATGATCCGCGAGGTTGAACAGAACTGTA  
ACATATTTATTTAGTGTGAGCGGATGACGAGCTCAATTTCCGAACTTAAAGCAATTTGCTCGGCCATCGCGTACCTA  
AAGTCTTCCGATGTCATCAAAAGTGTATGATAGCGCGCTTACCTAATCACAGCATGGAGAAAATAAACAATTTAG  
CGACGAATAAAAAGCCCCATCCATGCCGTTATTTGTCAATTTGCGATGAGCTCGGCTTGAACAGATATTCAGTAATTTAAT  
TAGCAACGCTTAGATTTCTATGGAAGGTAGCTCTTACAACGACTGGATATCGCCATTCGCCAGGCAATAACAAAGTTA  
TTATTTACCAATAAAGACAGCGGTTGGCGTTTTCGACCTGAAGTTGTGATCGCATATTTGAACATTTTACCCTAAA  
CGTAGGAAATGGGTTGGGACTGGCAATAGTCAAGCAATTTGCCAAAATTTGCAAAATTTGCAAGGCGCACTCCAGCCAGTAA  
TCCTGAGGCGGCGCAGTAATGACATTAACCTGGCCTGAATGGGGAAGAACATGAATAA

>Cluster\_19219

ATGAGTACATTACAGTTACCTGGCAGTTTCAATTTCTACTGAAGTTAATTTAAACGGCTTAAATGAGGTCGCTAGCA  
CCTTTACTCTACCCCGTGGTGGCGTGGCGAGCTGGTGCAGAACGGACAGATGCGATCGTGGCCGAGGATTTAGC  
AGCCGATGCGCCAAAGGATAACCAATTCGTTGGTGGCAGACGTTGGCGAAGTCCACCATCACCATTTACCGATACCGGT  
CGGGTTTGCAGAAAAGGCAAAATTCACGGCTTCTTGGCAACAGTGGGCGTGGGTTATACCCGAATGTTGCGCCAGCAGGA  
TGCAACACCGGTTTAAATGGTATGTTCCGGCTTGGTTTCTGTCAGCATTTGTTACTTGAACAAAAGAGGTCAGGTTGA  
CCACATCTGGCAACCGCGGATCAGAGCTGGAATAACCACTTACCGACGGGCAAAAATATACCGTTACGCCGATCAG  
TCTCGAAAACGGGAACGAGGATTTCTGACGCTCAAAGAAGAGTACAGCCATCTGGCGAGTAACAATTTGCTGACCG

CGTTCCTTTCCCGCTACTGTGTATTGCTGCACGAACCGGCTCTATGTCGGCGATGCCAGCGAGCCGGTAAATAAACTTCAAC  
CACCGTGGCGTGAAGTTGCCCGGAAAGCGTAACCATACACCGCGCGTGGTACAGCGTAAAAATCTCGCCTTTGCCCGC  
CAGTTTGAATCTCCTTCGAACCGATTTGCACCATTCGGTGGTGCCAGCGGGAATGAGCGACGCGGTTGGGATTTTATG  
GATTCAGGATGGCCGACCTACGGCACCAGCGATAACCGCAACCTGTCGTGTTTTCGCGCGGATGTTACTGGATGATG  
AAGCGCGTGAAGTTTACCGCCCTGGCCGGATTATTGGCGCGGTGATTGAGTCATCGAAAC TGACCGCCAGCGCGGAGC  
AGGGAAGATCTCCAGCGGGATGCAACCTGGGTTGCGGTACAGGAGCGGTTAAAAGAGGCGCTGATTTCTGGTTTGTCCGA  
TCTCGCAGAAAATCAGCCAGAAAATCTGGCGCGGGTATTAAATGCGCCACAACGAGCGTTGCTGGGTGGCGCCTTGTGTG  
ATGACCGTCTGTTGATTTGCTCAAAGATCGCTTGCAAGTGCAGGTGCCAACGTCAAAAGGGGCGCTGCTGGCGAAGGATTTACGC  
GTTAAATAACAGCATTCATATTCTGTAAAGCCGACAGCGCGGTTTGAAGAGATGTTGTTCCATATTCTGCAACCGCCTGT  
AGCCCGTGGCGATCGCTATGCGGTGGTGCCATTTTACGCCGTTGGGCGCTGTATATCACTGCCGGATTGTCGAAGTGC  
GTACGCAAAACGGTAATGAGCAGTTGTTAGCCCTGGCAGAAATACCCAAAGAGCAGGTGGCTTATCTGGAAGAGCATCTC  
TGCGAGCGGCAAAATTAATATCTCACGCTCGAACCCGCGGTTTACCGTTAGTGGTTACACCAGACCGCGAAGCAGA  
ATTAACCAACAAATTTCAACAGGATGACCGAGATAAACCGCATCAGTACCGCAGCGTTAATGCTGGCGCGCAATTTACT  
CGCAATCCAAAATCTAAAATCTAAGTCTGTATATCAACCTTAATAACCCCTGTGTATGCAACTGGTGACGGCCTTA  
CAACACCATCAACAGCCAGCGGCGAGCATACCGTTATTAAAATCGCTGAAAGTATTTGTGTCCAGCGGTAATAAAGA  
ACAGCAGTGGGATTTACACCAGGCATGGAAGATTTTACTCAGGTTATCTCTGTCTTAATTAATCAAGGAAAAATA

>cluster\_20788

ATGATGAAACAGTTAAACGCTGTACCTTTCAACGGATGAAGTTCACCTGGCGGATGCCAGCCTGGTGTGGAGCTGAA  
CAGCTGCGCGCGGGGATTTATCACTGTACAGACAGCCAGGATACACCGGAAACTGGTGGCGCTGGATGTGGGGTATT  
CCGATCTGCTTTTGGCGGTTACTGGTTATGTTGGAACGCTACAACCCGCGGAAACCGGTTTTCAGCGCTGTTTGTG  
CGCGAGCTGGTGGCGGTGTTGAAAGGATGTGGCCATGTTCAATTTACAGCACCCACTTTGCGCAAGGTAGCCAGCTGGCT  
GGAGGAAAACAGCGGAATGCTGTCACTGTGCGCGATGCCCTTACAGCGATAAACCGATCCCCATTTACCCACAACG  
GCACAGGCTATCAGTTGCTGAATAATCTGGGACGGGCGTTACGATACCCGGATACATCTGGTACCAGCTGCCGGATGTT  
TCCGACGATGTGGCGGCGGAAAAGCGATGTTGCGGTCGCGTCCCGCGGCTGATGCGCGGAGAGTTAGCTTGGGGG  
GGTGGCGGTAATTCATGACGCTGCGGCTGATCCAGAGTCTGCGCGCGGGTGTGGAGCTGAAACGGGAGCGTGTGACCA  
AAGTTCACTGACCAATGACACAATGGCTGTACTGGACACCAGAAACCGTCAACAGGTCAGCCATTACAGAAAACA  
CCTGCACAGCGCCAGATTGAAAGCAATACCCGGAACCTGGCTTCCGGGCTGCATCTGCCAAAACCTGGCCAGAGTGGTGGC  
ACCCAGCGAGGCTGTGAAAAGTGGTAATTTGCGGATCCGTTCCCGCGCGCTATGCGGTTGATGTGACGCTGTGATG  
CAGACGGCAACCCGACAAACAGACACCGGTTTATTCTGCGGTGCCGCTGCGGTTACCTATGGCCGGGAATGACTCTGGC  
ATGTTCCAGTTCGCCGCGAGAAGGACGCTGGTTGAAAGTGGCGTTTACCGGAGGTCGCCCGGATAAACCGTTTATCAGGCA  
GACGTTGCCAGATGTTACCAGTCTGCGGATGTTAAACCCGCGGAGCAGCTGCAACAGCAACGGGCGGAAGTGTGCAAC  
GTGTTACCCAGGCTGGCGATTGGTACGCGACAGCCGATCAGCCATCAGCGAAACATCGATGGCGCGGACGGTTAAAGCC  
GATACGGAACAGCGTATTGGTCAAGCCTGAAACACGGTTAAAGCCACCGACAAAACACCGGTTCTGGGTACCGCCAC  
CCTGTTGGCGGTTGCCATCCAGCAGGTCAGCGCGGGGATTTTACCGAGCCGTTGAAGGGCAACAGACTGGCCAGCATTT  
AAGGCAATGACGAAAACGATATTTCCGGGAAACAGTCCATCAGGTTGGCGGAGCCGCTGGATGTTGATGTGGGGGAAAC  
CTGACTGAAAAGATTTCTGCATTAACGTAATCGTGGCGCGGCGGCTCAGCAGATTATGGGACCAACCGGTTAAAGCC  
CAGTGAGAGCGTCAACACGCTGACTATGATGCTGGACACTATTGATTTACTGGCCGAGCTGGCGCAGCAGTGTGCGAGCC  
ATTCACACCCAGTGTGGTACGCCAACCAATGCGGGGCATTCACACAGACGCGGAGAAGGCGGACAGCCCGAAGT  
AAGTACCAGAAAATAATCGCCTGA

>cluster\_40509

ATGAAAGTGACATTAACGTTCAACGAACACGTCGTGCGCGTATCTGTCAGCAAGGGTTATGGGGCGATGCTTCGCTGGC  
CGATTACTGCGCAGCAGCCGCTCGTGGATGCCAGACAAAATGCCGTTGGTCGATAATCATGGTGCAACGCTACCCATA  
GCGCGCTCGATCAGCCGCGAGCTGTCTGGCAAATGGATGTTAGCGAAGGGTATTGAATCAGCGGATCCGATCCGATTT  
CAACTGCCAGGCTGGTGTGAATTTACCGTTATCTATCTTGCCTGCCTGAAAACCGGTTGCGGTTTCCGTTGCCGCTGTTACC  
TTCTTGGCGGGAAGCAGAGATGGTGTGGGTGCTCAATAAGTGTGAGGCAAAAATGTTCTTTCGACCGAGCTGTTTAAAC  
AAACCGGCTCCAGTAACTTAATCTGCGGCTGCAAAAATCAGCTTCCACAACACTACAACAAAATGTCGGCGTGGCAAACTG  
TCTCCCGCACCTCTTCCCTCTCATTAAGTCAAGTCTGCTGCGGACAAATACCCCTCTGACCACCGCGATAACCGAACCG  
CGATGAATTAGCCGCTGTGCTATTTACCCTCCGGAACCGAGGGTCTGCCAAAGGGCGTGTGCTAACGCATAACAAATATTC  
TCGCCAGTGGCGGGCTTATTGCGCGCGCTAAATCTGACCTGGCAGGATGCTTTTATGATGCTGCGCCACTTGGTCAAC  
GCAACGGGCTTTCGATGGCGTAAACAGCACCTTTTGTGATGGTGTGCTGCGAGCGTGTGTTAGATATTTTACTCTCTGA  
TGCGTGTCTGCGCTGCTTGGAGCAGCAGCGTGTGCACTGTATGCTGCGCGCAACGCGGTTTGTCTATGATCTTTGAAT  
TACTAGAGAAAACAACCCGACAGCTTTCAGCGCTGCGCTTCTTTTTCGGGAGGTACCACAATCCCCAAAAAGTGGCG  
CGAGAATGCCAGCAGCGCGCATTAATTAAGTGTATTGTTCCACAGAAAGTTCCCGCATGCCGTTGGTGAATCT  
CGACGATCCTTTCCCGCGCTTATGACACCGGAGGTTACGCTGCCAGGTGTAGAGATTAAGTGGTTCGATGACGCAC  
GCAAGACTTTACCAGGTTGCGAAGGTTGAAGAAAGCTGCGGTTGGCCCAATGTTTATGGGGTATTTTGAATGAACCT  
GAATTAACCGCCGTTGCGTGGATGAAGAAGGCTGGTATTACAGCGGCGATCTCTGCCGATGGATGAGGCTGGCTATAT  
AAAAATAACCGGGCGCAAGAAAGATATTTATGTCGCGCGCGGCAAAAATATTAGCAGCCGTAAGTAGAAGATATTTTAT  
TGCAGACTCTAAAATCAGATGCTGTTGTTGTTGCGGATGACGTTTGGTGAACGTTTCAAGCTTATGATGCT  
GTGCTGAAAGCGCCGATCATTCTATTCGCTGGAAGAGGTGGTGGCTTTTTCGAGCGTAAACCGGTCGCAAAAATATA  
ATATCTGAAACATATCTGGTAAATCGAAAACCTACCGGCACTGTCTCAGGTAATAACAAAAGTTTTTGTAAAGAAAG  
ATATTATGCGCGGATTAACCTCAGGATGCTGTGAAAGAGATTGAATA

>cluster\_40802

ATGGGAAACCTGAATGAAACAGAAAAGTGGGAAGAAAATATCTATCAACTGGAGACATCAGATCCGGTTCTGGGTGGTGC  
AGACGGGATATCAATCGAGCCCGCGCAACTGGCAACAGGACGAAATGGCTGAAGAAAAAACCGAGGAAGCCGCAC  
AGTCACTGGTGAACAGTACGTTCCCGTAACACCCGAGCGGACACTGACAGCTAAGGGGTTACCCCACTGAGCAGT  
GCCACCAACAGCACTCTGAAAACGCTGGCCGCAACCAAGGCGCTCAAGGCTGCATATGACCTGCTGCCGCGCAAGGC  
CCCCGTCAGCCATACTACCCGTTGGAGTCAGATAACGGGAGTGCTGCTGCTGCTGACGGCAAAAGGCACCGTACAAC  
TGAGCAGCGCCACGGACAGTCAATCAGAAAATGAGGCTGCCACGCCGAAAGGCGGTCAGGCTGCATACGACCTTGCAGCC  
GGCAAGGCGCTGCCAGCCACACTCACCCGTTGGAGTCAGATAACGGGAGTGCCAGGAGTGGCTGCGGCTTCACTGACGGCAAAAGGCAC  
GCTACAACCTGAGCAGCGCCACGGACGTAATCAGAAAATGAGGCTGCCACCGGAAGGCGGTCAGGCTGCATACGACC  
TTGCAGCCGGAAGGCGCCGTCAGCCACACTCACCCGTTGGAGTCAGATAACGGGAGTGCTGCTGCTGCTGACGGCA  
AAAGGCACCGTACAAATGAGCAGTGACATCAACAGCAGCTGTAATACTGGCCGCCACCGAAGGCGGTCAGGCTGC  
ATACGACCTTGCAGCGCGCAAGGCGCCGTCAGCCACACTCACCCGTTGGAGTCAGATAACGGGAGTGCTGCTGCTGCTG  
TGACGGCAAAAAGCCTGACAAATGAGCAGTGACATCAACAGCAGCTGAAAATACTGGCCGCCACCGGCAAGGCGGTC  
AAGGCTGCATACGATCTGGCAACCGGAAAACAACCGGAGATGCCAGCTCACGCTGCTGGCAGGACTTGGCACTGCAGC  
AGATCGGTTGCCCTTATTTTACCGGAGCAGACCGCGAGCGCTGCAACCCCTACAGCTATGGTGGCGCTATTTATCGCTA  
TGGGCGTATAAAAAGAGTCCCTCAATTAACCTGGTTTGGGGAAAGCTGCGGCTGCCGCTGGTGTGGCGGTTCCATGG  
CCTTCAGCCACCGCCCAACGGGTTGGTGAATGTAACGTTGAGCAGTATTTCTTCTGAAATGTACCCCAATCTGGCAAA  
GGCTACCCCGCAATAAATTAACCGGATTTACGGGGAGATTTATTCGCGGCTGGGATGATGGCGCGGGGTTGATGACG

GCCGCGCTTTGCTTAATTTGGCAGCCACACACAATTTTGGATCATGCACACTATATGGAATTTATGGACCGGGATGGACTT  
GCCGTGGGAAGCACACGGGAAGGAGTAAACCCTGGAATACTGGCTACATACGGGGACGGGGGAATAGTTAAAAACAGACA  
ACCGGTTTTAAGGTGCTTCTCCTACTACGAGCATTAGCTCTCGTAAATGTAACCGTTTGGTGAATAGTGGAAATG  
TAGGTACAGAACTCGCCCTCGCAACGTTGCATTTAATACATCGTAAGAGCCGATGA

>Cluster\_5800

ATGGCAACGCGCGCTCAGCCGTTAATTCGCCGCTGGTTAATTCAGGTGTAAGCGCCACCACGCTGGTGGTAGCGGTTGC  
GCTGGCGCGTTCCTCGCCTGTGGTGGAACGCCGAGGATGACTGGTGGCAGTCFGGCAGGACAGCTATCTGTGGC  
ATGTGGTGGCCTTCTCCTTCTGGCAGGCCTTCTCCTCGGACTGCTCTGTGCATACCCCGGATATTCCTCGCCCGCGC  
CTCTATCGCAGGCCTTCCGGGTCGGCTGGCGCTGTTGCGTCTGTGTGCAATGACCTGTATCTCCCGGTTGGTTCGC  
TGTTCCTGGCATTTCTAGCGTCTATGGTGCAGGCTGGCTGGCAACACTCTGCCAATCGCTCGGCTGAGTGGACCT  
TTTTCCGCTTACGGCTGCAAGGTATTTTGTGGCCCATGTGTTTTAATCTGCCGATGGCGAGCCGCTTATTACTCCAG  
GCACTGGAAAATCCCGGGCAACAGCGTCAACTTGGCGCCAGCTTGGGATGCGTAGCTGGCATTTCCTCGCTTCGT  
CGAATGGCCGTTGGTACGGCGACAATAACCGCCGTTGTGCGCTTATCTTTATGCTCTGTTTTCCGACCTCCACCC  
TGCTATCGCTGGGGGGGCTCCGACGGCAGCACTATCGAGCTGGCAATCTATCAGGCGCTGAGTTACGACTACGATCCT  
GCCCGCGCGCAATGCTGGCGCTGCTCCAGATGGTGTGCTGCCCGGGCTGGTCTGTGAGTCAAGGATGAGTAAGC  
CATTTGGCCCGGCAACCGCTGCAGGCTGCAAGGCTGGCGGACCCGACGATCGTCTGCATAGCCGATTTGCGACACGGTGT  
TAATTTGCTGTGGCGCTGCTGTGCTGCTGCCACCTTACTGGCGGTTGATCGTGCATGGGGTAAATCGCCAGTTCCGCAAC  
GTGCTGGCACAACCGGCTGCTGTGGCAGGCGCTGTGGACCTCGTTGCGTATTGCGCTGGCGGCAAGTGTATTGTGCGTGT  
GCTGACCATGATGCTGCTATGGAGCAGTCCGCAACTGGCGCGCGCAGAAAATGCTGGCGGGTCAAGGTGCTGGAGATGA  
GCGGCATGTTGATCCTCCGATGCGGGGATTTGCTGCTACCGGCTTCTTTTACTGCTCAACAACACTACTCGCCCTG  
CCACAATCTGCTGACGGCATTTGTGATTTTACCACATGCTTAATGGCGATCCTTATGCGCTGAAAAGTCTGGAAAACCC  
GATGCGGATATCACCGCCGCTACAGCATGTTATGTGCTAGTGGGATTGAGGCTGGTCAAGCTTAAAAGTGGTGG  
AGCTGGCGCCCTGAAAAGTCTACTGGCGAGGCGCTGGCCTTTGCTGCTGCTGTGCTGATTGTTGGCGTGGT  
CGGTTTTCGGTAACGATTTCCGACCCCTGGCGTTTATCTTACCAGCAATGGCTCCTATCGCAGCCAGGACCG  
TGCGGTACCGGCTAATTTCTGCTGCTGCTGTTTTCTGCTGTTTACCGTATTGAAAACTACCGGGCGAAAATGTTA  
AAACTGACTGA

>Cluster\_42839

ATGTTTAGACGAAATATTATTACCTCTGCCATCTTATTAATGGCACCGTTAGCCTTTTCCGCACAATCATTTGGTGAATC  
ATTAACAGTGAACAACCGCTTGGAGCTATTAGAAAAGCGTAAAGAGAAACGCAAGCGAAGCTGAAAAAATAAAGATG  
AAGAGAAGAAAAGTATACGCCACGCGAGCGTGAATCGTAGCCTAAGTACGAAATGATCAAGGGTATGCCCAATCCATTC  
CCGACCACTCGTCGCCAAAAGCTGATGCTGTACTGGTTAAAAATGAAGAGAAAATGCCAGTGAAGACAGGCTCGATTTA  
TTCTTCATGACTCTGAAAGATTTACGATAAATTTGTGAAAGATGAAATCGGCTTTAGTTACAACCGCTACTACCGTTCTG  
GTTGGGAAACAGCCTCTCATGGTTACCATAATCATGGCAATTTGGTTCTGGGCCGCTTGGTAACGAATACTCCGGC  
TGTTTTGATTTGACGTTAAAACAACGTTCTACAAACGAAAACGGCAACCGGGTGTATGCCATCGTGTGATGATGATGGTAA  
CGTGGGTCAAGGACTCTACTGGCTGGTTGGCGATAACCGCGGTTGGTGAAGTCTTATGCACTTCTGTGATGATGTACG  
TTACCCCAAGGGTTTCCGCTTGGCCGACAGGCTGATTTCTGGGTTGGTAAAACAGGCTGCGCCGAAAATGGAAATC  
CAGATGCTTACTGGAACCGCAGGCTACCGATGCTGCCGAGGTTAGGCTGGAAAATGGAAAAGTCCGGTCCGGGTAA  
AATGATATCGCGTGGTTTCTGTAAGATGCTGATGATTACGATCGCAGCTGCAAAACAAAACAGCAGATTAATACCAATA  
CCATGATTTACGCTATAAAGATACTCCGTTATGGGATAAAGCACCTTAATGGTGGAGGCTGCTTATGCTCAGCAAT  
GAAAGCGCATCGGAAAAGATAATCAGGATAAATAACGGTATTTAGTACGAAAAGATACTGGATGTTTTGGTACATCTTT  
AACGCAAAATTTGATAAAGGTTGGCTTCAACGAATTTCTCTCTGGTTGCGAATAACCTATCGCCAGTAACCTTTGGT  
GTTATGCTGGTGCAGCTCAATTTACTACCTTAAATGGTGGTTATTTATGGTGTACACAGGCGGAACGCAAGTCTGCTGT  
ACTTCGCGGGGCAAGCTTATATCGGCGATCTTTCATTTGTTGGCTAACCGGATTTGTTTACTCCTTCGGTAACGATTTA  
TAGCTACGAAAACAGGCGCACATTTCTGATTTGCAATCTATTCTGCGGTTGTTCCGCGCCCTATATTTGGACCAATATA  
ACCAGACAGGTGTTGAACCTGGGCTATTTCAACCAAGCAAAAGATGCGAATAAGCAATAAATAATGATGCTGGTTAT  
AAAACCGCTCTTCCATACCTTAAAGTCAATACCAGTATGTTGACCCTGGCGCCGAAAATTCGTTTCTACGCTACATA  
TATCAAAGCTCTGGAACGAACTGGATGGCTTACCTTTGAAAGCAATAAAGACGACAGTTTGTCTGCGGTGCCAGG  
CTGAAATCTGGTGGTAA

>Cluster\_36552

GTGCAGAAAT36552  
TATCCGCTGTTTTGCGGAACTGTGCACAGTCCGGCGACTCCCAAAAAGAAATGCTCGCCGTTACCGCATTTCCTCGC  
TGTTCGCCCTGTTACGACACTGGTCCGGCTTCCCGTAGAAGGCTCGTGGTGAACGTACGATTTATCGCGGTGATGTC  
GGCGGATTCGTTTGGCCCGTGGGTAGGCATATTACCGCGTGGATTGCGGGTATTCACCGGTTATTTAATGATATCCG  
CGCGGTGACCGGATCCCTGCTTATCACCAGCATTCTGGCGGTTGATATCGGGCTGGATCAACCTGAAAATCCCA  
AAGCACAGCGTGGCGCTGGTATTCTCGCGGCATGTTGTTGTGAGACGTTGACCATGATTCTGGTAATTTGCTGGCA  
CCAACTACCGCTTGGGGATCGATATCGTCTCTAAAATCGGCATTCCAATGATCCTCGGTAGCGTCTGTATCGGCTTTAT  
TGTGCTTCTGGTGAAGCGTTGAGGGGAAAAAGAGGCGAGCGCCGCGGCGAGCCAGCTGGCGTGGATATCGCCA  
ACAAAACGCTACCGCTGTTTCGCATGCTCAATAGCGAGTTCATTACGCAAGGCTTCGCAAAATTAATCCGATGACATTC  
CCGATGCGGTTGGCGATTAATAATACCGATCATGCTGGCTGCTTATGTTGGCGTGGGTGAAACATAACTATCAGAATGGCA  
TGACTTCATTAGCCGACTACCGCTCAGGCGATGAATACGAAAATCATCAATAAAAACAATGATGAAGCCACCAGCA  
CACCAGAGATTCATTCATGCTGGTGTATCCATTTGGGAGAAAGGGTCTGACCGGAAACGCTGAAAATTTACTACTGC  
CACGCGATCAGATCACCTCGTATTACAGGAAATGGCGCTCGGCTGTCGCAAAATCATCTCCACGCACTGGAGGTTTC  
ACGCGCGAGCAGCTACGTGAAATGGCAATAAGGCGAGGCTTCGCGCCCTGCAAGCAAAATTAATCCCATTTCTGT  
TTAACGCTCTGAACGCTATTTCATCGTCAATCCGCTGTAATCCGATACCGCTCGCCAGTTGATCTTTAATCTGTGCGGT  
TATCTGCGCTATAACATTTGAATTTAAAAGACGATGAGCAATCGATATCAAAAAGAGCTGATCAAATTTAAAGACTATAT  
TGCCATTTAGCAGGCGCTTTGGTGCAGGCTGACGGTATCTATGATTTGATGAAGAGGTGAATTTGCTGATTTCCCA  
GCCTGCTGATCCAGCGTTGGTGGAGAAGCCATTGCTCACGGTATTCAGCTTGCAAAAGGTAAGGCGTTGTACCATC  
AGCGTTGCAGAGTGGGAAATCCGGTACGATTCGGCTGCGAGATACCGGCGACGGCATCGATCCAAAGGTGATTTGAGCG  
GGTCAAGCGAATGAAATGCCGGGCAATAAATTTGGCTGCTGAATGTCCATCATCGGTTGAAGTATTGTATGGCGAGG  
GGCTGCATATCCGCGCCCTGGAGCCGGGCAAGAAATTTACATCTTAACTAACCAACGACCCAGCTCCCTCACAG  
GCTACGTTATTGCTTTGA

>Cluster\_29239

ATGGCTCAACGCTATCTTACGCTGATCCTGCTACTTTGACAGCTTCCGTTTTTGGCCGATTATTCGACGCGCCGGGACG  
TTCAACAATTTGTCGCCGCGATCAAGCCTTTGCTTTTGTATTTTTCAGCAAAATCAACATGATCTGAATCTGACCTGGCAGA  
TCAAAGACGGTTACTACCTTACCGTAAACAGATCCGCAATACCGCGAACACGCAAAATGGCCGACTGCAGCTGCCG  
CAAGGCGCTGCGCATGAAGATGAGTTTTACGGCAAAAGCGAGATTTATCGCATCAGCTGACGCTTCCCGTAAACATCAA  
CCAGGCGACTGCGGGGCAACGTTAACTGTCACAGGCTGTGCTGATGCGGGTTCTGTTATCCGCGCAAAACCA  
AAACCGTTTCCGTTAAGCGAAGTGGTTCGTAACAACGAAGCGTACAGCCTGTGCTGTTCCGCGAGCAAGAGCAGCCACC  
GCGCAATTTCCCTTTTCCGCGCTCTGGCGTTGTGATCGGATTTGGTATCGCCTTTACGCCATGCGTCTGCCAATGTA

CCCACTGATTTCTGGCATCGTGCTGGGCGGTAACACGGCTTTCCACTGCCAGAGCATTTGTTGCTGACCTTTATTTATG  
TGCAGGGGATGGCGCTGACTTACACGGCGCTGGGTCTGGTGGTTGCCGCGCAGGGTTACAGTTCAGCGCGGCTACAG  
CACCATACTGCTCATTGGCCCTCGCCATCGTCTTTACCTTGGCGATGTCAATGTTGGCTGTTTACTCTGCAACT  
CCCCTTTTCGCTGCAACACGCTCACGCTGATGAGCAATCGCCAAACAGGGCGGCTCACCCTGGCGGTGTTTTATTTATG  
GGCTTTATCACCAGCTGATCTGTTACCATGCACCCTAGCCCTTAGCGGATTTCTGCTGTATATCCGCAACAGCGGG  
AACATGTGGCTGGGCGGCGCACGCTTTATCTTTATGCGCTGGGCATGGGCTGCCGCTGATGCTAATACCCGCTTTTGG  
TAACCGCTTGGCTGCGGAAAAGCGCCGCTGGATGGAACAAAGTCAAAACACGTTTGGTTTTGTGATCCFCGCACTGCCG  
TCTTCTGCTGGAGCGAGTATTGGTGTATATGGGATTACGCTTGTGGTGGCGCTGGTGTGCAATCTTTGGCTGG  
GCCTTTATCACCAGCTCAGGCAACAGCGCGCTGGATGCGCGTGGTGCAAAATAATCCTGCTGGCAGCGCGCTGGTTAG  
TGTACGCCCACTTACAGGATTGGGCATTTGGTGTGACGCATACCGCGCAAACTCAGACGCATCTCAACTTTACACAATCA  
AAACGGTAGACGAGTTAAATCAGCGCTCGTTGAGCCAAAGGCAAACCGGTGATGTTAGATCTCTATGCCGACTGGTGC  
GTCGCTGTAAAGAGTTTGAAGAAATACACCTTACAGCACCCGAGGTGCAAAAAGCGTTAGCAGACACGGCTTACTTCA  
GGCAACCGTCACTTCAACAGCAGCACAAGATGTCGCGCTGTTAAAGCATCTTAATGTCCTTGGCTTACCGCAATCTCT  
TTTTTACGGACAAGGCCAGGAGCATCCACAAGCACGCGTACGGGCTTTATGGATGCTGAAACCTTACAGCGCATTTG  
CGGATCGCAACCGTGA

>Cluster\_10970

ATGTTCCGGCCTACACCAGGTGATAAAATTCGTCTGGCAGACTGAGCTGTGGATCGAGGTCGAAGATGATTTAACTAC  
CTACGGCGAAGAGGTCAAATTCGGCGCGGTAAGTAATCCGCGACGGTATGGGACAGGGGCAATGCTCTCCGCGGCT  
CGCTGATCTGGTCTGACCAATGCCCTGATCATCGATTACTGGGGATCGTTAAAGCCGATATCGGCGCTCAAAGATGGA  
AGGATTTTGGCTATCGGCAAGCCGGTAATCTGATATAACAACCAACCTACATCCCAATCGGCGTATCCAGGAAAT  
TATTGCCGCGAGAAGCGAGGATCGTTACCGCAGGTGGCGTGCATACGCATATTCCTACTGGATCTGCCACAGCAGGCTGAAG  
AAGCGCTGACATCCGGCATTACCACCATGATCGGTGGCGGTACTGGCCGACAGCGGGTCTAACGCCACAACCTGTACC  
CCAGGACCATGGTACATTTATCAAAATGCTGCAGGCTGCAGACGCTGCCGCTCAATACTGGGTTGCTGGGTAAGGCA  
TTGCTCAACACTCCGATGAGCATCTGAGCAGGTCCGCGCGGGGTTATCGGCTCAAAATTCAGGAGTGGGAGCTA  
CACCTGCGGTAATCAACTGCGCACTGACTGTAGCCGACGAAATGGACGTTTCAAGTTGCGCTACACAGTATACGCTTAA  
GAATCAGGATTCGTTGAGGATACCTGACTGCCATCGGCGGGCGCACTATCCATACCTTCCATACAGAAAGGTGCAAGTGG  
TGGTCACTGCTCCGGATATATCACCGCTGCGCGCACCCCAATATCTGCCTTCTCAACCAATCCGACGCTACCCCTATA  
CCGTCAACACTATGATGAGCATCTGAGCATGCTGATGTTGGCATCATCTTGAACCCGATATCGCCGAGGACGTAGCC  
TTTTGCCGAATCGCGCATTCGCCAGGAAACCATTTGCCGCGGAAGACGCTCTGCACGACCTTGGCGGTTCTCCCTCACCTC  
GTCGATTCGCAGGCCATGGGACGCGTCCGAGAAAGTAGTGTACGAACTGGCAGGTGCAACCCGATGAAAGTTCAGC  
CGGCGCGCTTACCGGAAGAAAGTGGTGAACGACAACGTCGCGTGAAGCGCTATATCGCTAAAATACACCATTAATCCG  
GCATTAACCCACCGTATTGCTCATGAAGTCGGCTCGATTGAAGTGGGAAAACCTGGCGGATCTGGTCTTGGTCCCGCG  
GTTCTTTGGCGTAAAACCGCGACTATCGTCAAAGCGGAATGATAGCCATGGCGCCGATGGGTGATATCAACGGCTCTA  
TCCCCACACCGCAGCCGCTGACTATCGCCCAATGTTCCCTGCATTGGCAGTCCCGCTCACCGCTGTGCTGACTTTC  
CTGTGCGAGGACGAGCAAAAGTGGCTGCTGAAACGCTTAACTGCACAGCAACTGCTGTGGTAAAAGGCTGGCG  
CACAGTACAAAAGCCGATATGCGCCACAAACGCTGTTGCCATGATATAACCGTGGATTCACAAAACCTACGAAGTGCCTA  
TCAACGGCGAAGTGAACAGTGAACCGCGGACATTTGCCAATGGCGCAACGTTATTTCCGTTTTAA

>Cluster\_41382

ATGTCAGATCAACTTCAAAATGACAGATGGTATGCATATCATCGTTGAAGCATTAAACAGAATAATATTGACACTATTTA  
TGGTGTGTTAGGATATTCCTGTGACGGATATGGCGCGCCATGCCAGCGGGAAGGCATTGCTTATATTGGTTTTCTGCTATG  
AGCAGTCCGCGAGGTATGCGCGTGCAGCAAGCGTTTTCTTACCAAAAACAGGGATCTGCCGACAGTGTCTGCGCCA  
GGATTCCTCAACGGTTTGAAGTGCATTTGGCAATGCAACAGGTAATGGTTTTCCGATGATCATGATTAGCGGCTCCAGCGCA  
CCGCGGATCTGCTGATCTCCAGCAAGGTGATTTAAGAGCTGGACCAAAATGAATGCGGCAAAAACCTGATGCAAAAGCAG  
CATTTCCGCTTAACTCAGCCGAGGATCTTGGCATTGCAATTGGCAGCGCTATCCGGTCTCAGTATCGGGTCTGCTTGGC  
GGTGTATTTCTGATTTGCCAGCAAAATGTCCTGGCGCGACGATGGAAGAAAGCAAGCGTTAACACGATTTGTTAAAGT  
TGAAAATCCGTCGCGCAGCATTATGGCAATGCCGGAAGTCACTAGCGCAATTTCCGCTTTTAGCAAAAAGTGAACGAC  
CATTAATTTCTTGGCAAAAGCGCGGCTATTCAAAAATCTGATGAACAGCTTCTGTAATTTATGAAATGGCCGAGAT  
CCATTTCTGCCAATGCTATGGCGAAAGGATCCTCGAAGATACGCATCCACTTCTGCGGCGAGTGGCGGTTCTGTTTGC  
CCTGGCAATGCTGACGTTGTGCTGCTTGTGGTGCACGACTGAATTGGTTACTGGCACACGTTAAAAGGATGGGCGG  
CAGATACACAGTTTATCAACTGGATATGAAACCGCGGAAATGACAGCAACCGCCCATTTGCTGTGCCAGTCTGTTGGC  
GATATTGCACTCCAGTATGCAAGGTATGCTGGCAGAATTGAAACAAAACACTTACGACTCCACTGCTGAAATTTGAAATGG  
TTTTAAATATCCACAAGCAGCAAAATGCACAAAATGCATGAAAAGTTAAGTACAGATACCAACCATTAATTAATTTA  
ATGATTTGAGTGTGTCGCGATGTTTTGCGCGAGAACCAGGATATTTATTTAGTTAATGAAGGGGCAAAATACCTGGAT  
AATGCAGAAATATATTGATATGTATAAACACGCTCGTCTGCTGATTTGTTGGCACCTGGGTTGTCATGGGCTCGGAT  
GGCTATGCGCATCGGTGCTAGCGTACCTTGGTCTCGGTTTCTCGGCTTGGCATTGAAGGTGATAGTGTGTTGGTTGTTG  
GGATGGAATTTAAACGATTTGTCGATATAACCTGCCGCTGACGATCGTTATTTTAAATAATGGCGGCATCTACAGGGA  
GACGGTGTGATCTCAGTGGCGCTGGTGCACCATCACCAACGGATCTGCTGCACCATGCAAGGTATGACAAAATTAATGGA  
TGGCTTCTGTTGGCTATAACGTCACCCAGCAGATGAACTTCTGCTATTTAACACCGGATTTCACTGCGCGCA  
AACCGACCATTTAATGTTGGTATCGACCTGACAGGATGAAAGTGGCCATATTACCAAACTTAAACCAAAAACAA  
GTCGTTGTAATTTAA

>Cluster\_35426

ATGACCAGGCCAGTAAACGTTATCAGAACCCATTTACAGCAGCATACCTGAACAAGTATGCATCGCTGATGGCGCAGGG  
GAACGGCTATCTTGGGCTTCCGCGCAGCCATGAAGAAGATTACACGCGCAGACGCGAGGGATGATCTGGCGGGGCTGT  
ATCATCGGGCGGAAAAGGTGAAATCAACGAACCTGGTGAACCTGCCTGATGCTGTTGGGATGGAGATTGCCATAAATGTT  
GAGGTTTTCTCGTTATCCACGAAGCCTGGCAGCGTGAAGTGTACTTTGCCAGTGGCGAATACGCGCAATGTTGCTG  
CGTACCAGCAACGGTACAGTTACACCATCGCCAGCGCTCGCTTTGTTTCCGCGAGACCACTGCCGCTCATTGGCGCTG  
AAATCACTATTACGCCACTGGACCGCAGCGCTCAGTGTGATTTCAACAGGCATTGACGCCACGCAACCAATCACGGT  
CGCCAACTCTCGACGAAACCCAGGTGCGGGTGTGGTGCAGCATCTGATGACGGGGAGCTACACCACCCAGGATGGAGC  
CAGTGTATGGCCATCAGCTGTTGCTGTAAGGTGAGCGGTGATGTGACGAATGCTATACCGCCAAAGAGCGCGCTTTAC  
TGCAACATACCAAGTGCAGGCTCATGACGCGAGACAACTGACGTTGCAAAAACCTGGTGGATGCAAGTGCAGTGGCGGATGAC  
AGGCAAGCTGCTTTAGACGAGTGGGCGAGCGCTGCTTCCGAGCTTGAATGTGCGCGCAGCAGAGTTACGACCAACT  
TCTTGCAGCATCAACAGAAAACCTGGCGTCAATGGTGGCAGAAACGTCGATACCGGTAATGGCGGCGAAGCGCACGAT  
AGCAAGCGTTAGATATGCGCTTTATCATCTGCGCATCATGACGCTGCCACGACGAGCGCAGCAGCATGCGGCAAAA  
GGCTTAAACCGCGAAGGCTACAAAAGGCCAGTTTTCTGGGATACAGAAAGTATTTTTGTTTACCGTTTCACTGTTTAGGCA  
TCCGACGGTTGCCGAAGTTTACGCGTTATCGCTGGCACAACCTGGCAGCGCGCAGGAGAAAAGCGCGACGCAACGGCT  
GGCAGGGCGCGCTATTTCCGTTGGGAAAGCGCGCGCAGCGCAAGAAAGAGACGCGGAAATTTGCCGCAATTAACATTCGC  
ACCGGCTGCGGCAAAAAGTGGCTCGGCGCAGGCGAACCATCATCTGGTGGCGGATATCGCCCTGGCGGTTATTTCAATA  
CTGGCAGACCAGGGGATGAAAGTTTCAATGCGCATGAAGGCATGGCGCTACTTCTGGAGACGGCAAGTTCTGGATTA  
GCCGCGGTTGAGAGTTAACGATCGTCTGAAATTCATGATGTTATTGGCCAGCAGAAATATACCGAACATGTCAATAAT

AATGCATACACCAGTATATGGCCCGCTACAACGTTCAACAGGCGCTGAATATTGCCCGCAGTTCCGGCTGTAGCCGCA  
TGGCTTTATCCATCGCGCGAAAATGTTCCCTCAAAGAGCTATGGATGCCAGAAAATTCAGCCCGACGGCGTTTTGCCGCAAG  
ATGATTCGTTTATGGCTAAGCCGGCGATTAATCTGGCGAAATACAAGCGGGCGGGGAAGCAACCATACTGCTGGAT  
TATTCACGGCAGAAAGTGAACGAGATGCAGATCTCAAACAAGCTGATGTGGTGTATGCTCAATACATGCTCGCCGGAGCA  
GTTCTCAGCGCATCGTGTCTTGGCAATCTGCAATTTATGAACCGCGCACTATTCACGACTCGTCATTAAGTAAAGCAA  
TCCACGGCATTGTTGCCGCGACGCTGTGGCTGTGACCCAAAGTTATCAGTTCTGGCGGAGGGGACTGAAATCGATCTT  
GGTGTGATCCGCATAGTGTGTGATGATGATCATGCTGCGCAACTGGCGCTATCTGGCTGGGGGCGATTCAGGGTTT  
TGCCGGGGTGAGCGTGCCTGACGGTGAATTCATCTCAATCCGGCGTTACCTGAGCAGTGGCAACAGTGTCTTTCCCTC  
TGTTCGGCAGGGTCCGAATTACAGGTCACCTTTGACGCGCAGCGTATTCGGATTCCGAATCTGCGCCGTTTACCTG  
CGTTTGAACGGTCACTTATAACCGTGGCTGAAGAATCTGTTTCTGTTGGTGTATTTATTTTGCCTTCAATGGGAC  
CGCTACCAACATCAGGAGGATGAATGA

>Cluster\_43243

ATGATGAAAAGTATTAATTGTTGAAAGCGAGTTTCTCCATCAAGACACCTGGGTCCGTAACGCCGTTGAGCGCTGGCAGA  
TGCTTTAAGCCAGCAAAAATGTTACCGTGATTAATCCACCTCCCTTGTATGATGGTTTTGCCATTCTCTCTTCAAACGAAG  
CCATTGACTGCCTGATGTTACAGCTATCAAAATGGAACATCCGGAGCAACATCAAACCGTCAAGCAATGATCGGTAAGCTT  
CATGAGCCCAACAAAACGTCGGCTCTTCTGTTGGGCGATCGGGAAAAAGCCCTCGCCGCAATGGACCGGGATCTGCT  
GGAGCTTGTGATGAAATCGCTGGATTCTGGAAGATGACCCGACTTTATCGCCGAGCGCCCGTTGCCGCGATGACCC  
GCTACCGCCAGCAGCTGTTGCCGCCACTGTTACGCGCGCTGATGAAATATAGCGACATCCATGAATATCTGGGCGAGCG  
CCAGGCCACAGGGCGGGCTTGGTTTTACAAAACACCCCGCGGACGTTTCTACCATGACTACTATGGTGAATAATCTGTT  
CCGCACGACATGGGCATCGAACGCACTTCCCTCGGTTCTTGTCTGACCATACTGGCGCATTGGCGAAGCGAAAAAT  
ATGCCGCGACGCTATTTGGTGCCGATCGCTCCTGGTTCGCTAGTCTGCTGCTACTTCCGGCTCTAACCGCACCATGCGAG  
GCTTGCATGACCGATAACGATGTGCTGGTGGTGGACCGTAACGCCATAAATCCATCGAACAAAGGCTTGTATGCTGACCGG  
CGCGAAACGGCTTACATGGTGCAGCGCAACCGCTACGGCATTATCGGGCAATCTATCCGAGGAAATGCAACCTG  
AAACCTTGAGAGGAAATCAATGAAAGCCCGCTGACTAAAGCAAAAGCGGGCAAAAACCGCTTACTGCGCTGATGAC  
AACTGCACCTATGACGGCGTGTGTTATAACGCTAAAGAAGCGCAGGATCTGCTGGAAAAAACCTCCGATGCTGCTGACTT  
TGACGAAGCTGTTACGGCTATGACAGTTTCAACCCGATCTATGCCGATCACTATGCCATGCGCGGCGAACCTGGCGATC  
ACAACGGCCCTACCGTTTTCCGCCACCCACTCCACCCACAACTGCTGAATGCGCTGTACAGGCTCTTATATTCATGTA  
CGTGAAGGTCGTGGGGCGATTAACCTTCTCCGCTTCAACCGGCTACATGATGATGCCACCCACTCCCGCGTATGCG  
CATCTGCGCATCCAACGACGCTGGCGGTGTCGATGATGGACGGCAACAGCGGCCGTGACTGACTCAGGAAGTGTATGACG  
AAGCGGTTGATTTCCGTCAGGCGATGGCGCGCTGTATAAAGAGTTACCGCTGACGGTAGCTGGTCTTCAAACCGTGG  
AACAAAGAAGTCTCACCAGCCACAACCGGCAAAACCTATGACTTTGCTGACGACCAACCAAACTGCTGACCCCGT  
TCAGGACTGCTGGTCTATGCATCCGCGGCAAGCTGCGACGCTTCAAGATATTTCCGATAACTGGAGTATGCTGATGCTG  
CGATTAAGTTCAGCATCTTGTCCGGGAATGGGTGAAGATGGTGAACGGAAGAACCAGGTTTCCGGCGGCGCTGGTC  
ACAGCCTGGCTTGGTCCGCCAGCGATTTGTCCTACCCGCTACCACTGACTTCCAGATTATGTTCTCTATGGGCGT  
GACCCGTGGGAAATGGGGAACCTGTTAAACCCCTTTGCTCCTTCAAACGCCACTATGATGCCAACACCCGCTGGCGC  
AGGTGATGCCGGAATGTTGAACAATATCTTGACACTTACGCGAACAATGGGGATTACAGTATGACACCACTATGTT  
GCCTGGCTGAAAGAAAACAACCCGCGCACGGTTGAATGAAGCTATTCGGCTGCGGTTGGCGGAAATCACTCCGCG  
TGAAGCGTACAACCGGATTTGTCGACAACATGTCGAACGTTATCCATGAAAATCTGCCAGGACGATTCGCGGCAAACT  
CAGTTATCCGCTATCCGCCAGAAATCCGATGCTGCTGCTGGTGAAAACTTCCGCGATAAAAAACAGTCCGCAAGTAA  
TATTTACGCTCGCTGCAATCTTCCGCTGGGACCATTTCCCTGGATTTGAACACGAAACGAAAGGGACAGAAATTTATGACG  
TATTTACCAGTTATGTTGTGTAAGCGTAA

>Cluster\_33448

ATGAGCACGTCAGACGATATCCATAACACGACAGCCACCGCAAAATGCCGTTCCATCAGGGCGGTCACGACCAGAGCGC  
AGGTGGGGCACAACCACGCGGACTGGTGGCCAAATCAACTCCGTGTTGACCTGTTAAACCAACATTTCTAATCGTTCTA  
ACCCGCTGGGTGAGGACTTTGACTACCGCAAAGAAATTCAGCAAATTAGATTACTACGGCTGAAAAAAGATCTGAAAGCC  
CTGCTGACAGAATCTCAACCGTGGTGGCCAGCCGACTGGGGGAGCTACGCCGCTGTTTATTCGATGGCTGGCAGCG  
CGCGGTACTTACCGTTCAATCGACGCTGCGGGCGGGTGGTGGTTCAGCAACGTTTTGCAACCGCTGAACTTCCTGGC  
CGGATAACGTAAGCCTCGATAAAGCGCTGCGCTGTTGTTGGCCAAATCAAACGGAAATATGGCCAGAAATCTCTGGGCC  
GACCTGTTTATCTCGCGGTAACGTTGGCGCTGAAAACTCCGGCTTCCGTACTCTCGGTTTTGGTGGCGGTCGTAAGA  
CGTCTGGGAACCGGATCTGGATGTTAACTGGGGTGTGAAAAAGCTGGCTGACTCACCGTCACTCCGGAAGCGCTGGCGA  
AAGCAACCGTGGTTCGCAACCGAGATGGGCTGATTTACGTTAAACCGGAAGGCCGGATCACAGCGGCAACCCGTTTTG  
GCAGCAGCAGCTATCCGCGGACCTTCCGCAACATGGGCATGAATGACGAAGAAACCGTGGCGCTGATTCGGGTGGTCA  
TACGCTGGTAAAACCCAGGTCGGCTCCGACATCAAACGTAAGTCCGATCCAGAAGCAGCACCATTGAAGAACAAG  
GTTTAGGCTGGGCGGACTTACGGCAGCGGCTGGCGCAGATGCCATTACCTTGGTCTGGAAGTGGTCTGGACCCAG  
ACGCGACCCGATGGTTCGCAACCACTATTTCTGAGAACCTTTCAAGTATGAGTGGGTACAGACCCGCGGCTGGTGC  
AATCCAGTTTGAAGCGGTAGACGCACCGAAATATCCCGGATCCGTTGATCCGTCGAAGAAACGTAACCGACGATGC  
TGGTGACCGACTGACGCTGCGTTTTGATCCTGAGTTTCGAGAAGATCTCTCGTCTTTCTCAACGATCCGACGGCTTC  
AACGAAGCATTGCTGCTGGCTGTTCAAACCTGACGCAGGATATGGGGCCAAATCTGTTACATCGGCGGGAAGT  
ACCGAAAGAAAGATCTGATCTGGCAAGATCCCGTCCCGCAGCCGATCTACAACCCGACCGAGCAGGACATATCGATCTGA  
AATTCGCGATTCGGGATTTGGTCTGCTGTTAGTGAGCTGGTATCGGTGGCCGCGGCTGCTGCTTCTACCTTCCGTTGGT  
GGGCAAAACGTTGGTGGTGCACCGGTGCGGCTGGCATTAATGCCGCGAGCTGACTGGGATGTGAACCGCGCAGCCGT  
TCGTGCTCTGCCAGTTCTGGAGAAAATTCAGAAAGAGTCTGGCAAGCTTCCGTCGGCGGATATCATCTGCTGGCAGGTG  
TGGTTGGCGTTGAGAAAGCCGCAAGCGCCGAGGTTTGGCATTATGATACCGTTTGGCCGGGCGCGGTTGATGCGGCT  
CAGGATCAGACTGACATTTGAGATGTTGAACTGCTGGAGCCAATGCTGACGGTTTCCGTAACATTCGCGCTGCTGTTGA  
CGTTTCCACCACCGAGTCACTGTTGATTGATAAAGCCAGCAACTGACGCTGACCGCGCGGAAATGACTGCGCTGGTGG  
GCGGATGCGCGTACGTTGGTGCACACTTTCGATGGCAGCAAAAACCGGTGCTTCACTGACCGCGTTGGTGTATGAGCAAT  
GACTTCTTCTGTAACCTGCTGGATATGCGTTACGAGTGGAAAGCGACCGACGAATCGAAAGAGCTGTTGAGAGCCGTTGA  
CCGCGAAACTGGCGAAGTGAATACACAGCCAGCCGCTGCGGATCTGGTCTTTGGTCTTAACTCTGCTCCGCTGCGGTTG  
CGGAAGTTTACGCCAGCAGCATGCCACGAGAAGTTTGTAAAGACTTCTGGCAGCGTGGGTGAAAGTGTATGAACCTC  
GACCGTTTCCGACCTGCTGTAA

>Cluster\_42085

ATGAGCGATATGGCAGAGCGCCTTGGCTACATGAATTTACGGAAAACGCTACTTAAACTACTCCATGTACGTGATCAT  
GACCGCTGCTGCGCTTATTTGGTGTATGGTCTGAAACCTGTTACGCGCCGATTTGTTGATGCGATGCTGAGCTGGCC  
TGAATGCCAGCTGCCAAAATTTAAAAAATCCGCCCTACCGTTGACGCTACTGGGTAATAACCATCCGACGGCGATAGT  
GCCTGTTATGAAGCGATGGTCTGATGGCGCAGCCGTTCTTACCCTTATCCGCTGGTGTATGGTCAAGGAACTGGGG  
GGCGCCGAGCATCCGAAATCTGTCGCGCAATGCGTTACACCGAATCCCGGTTGTCGAAATATTCGAGCTGCTATTTGA  
CGAGCTGGGGCAGGCGGCTGACTGGGTGCAAACTTCGACGCGCACTTTGACAGGACCGGAAATGCTGCTGCGCCGT  
CTGCCAAACATTTTGGTTAACCGGACCCAGGTTTGGCTGGCATGGCGACCGATATTCACCGCATAACTGCGTGA  
AGTGGCTCAGGCGTAATTCCTTAACTGACCGCAAGAACCGCTCGATCAGCTGCTGATATCGTGCAGGGGCGCG



ATTATCCGACTGAAGCGGAAATTATCACCTTCGCGCCGAGATTTCGTAATACTACGAGAACGGACGTGGTTCAGTGCCT  
ATGCGCGCGGTTTTGGAAGAAAGAGATGGCGCGGTGGTTATCAGCGCATTGCCGCATCAGGTTTCAGGTGCGCGCTACT  
GGAGCAAATGCTGCGCAAATGCGCAACAAAAGCTGCCGATGGTTGACGATCGCGCATGAATCTGACCACGAGAACC  
CGACCCGCTGGTGGTGGTGGCGGTTCCAAACCGCGTGGATATGGATCAGGTGATGAACACCTCTTTTCTCAACCGAT  
CTGGAAGAGATGAAGATTCGCAATTAACCTCAATATGATCGGTTGGATGGTCTCGCGCGGTGAAAAACCTCTGGAACCTCT  
CTCCGAATGGCTGGTGGTTCGCGCCGATACCGTTCGCGCCGACTGAACTATCGTCTGGAGAAAAGTTCTCAAGCGCCTGC  
ATATCCTCGAAGGTTTGGTGGCGGTTTCTCAATATCGACGAAGTATGAGATCATTCGTAATGAAGATGAACCGAAA  
CCGGCGCTGATGTCGCGGTTTGGCCTTACGGAACCCAGCGGAAAGCGATCCTCGAAGTGAACCTGCGTCATCTTGCCAA  
ACTGGAAGAGATGAAGATTCGCGGTGAGCAGAGTGGAGTGGAGTGGAAAAAGAGCGCGACAGTTGCAGGGCATTTTGGCTCCG  
AGCGTAAATGAATAACCTGCTGAAGAAAGAACTGCAGGCAGACGCGCAAGCCTACGGTGACGAAACGTCGTTCCGCGTTG  
CATGAACGCGAAGAGCGAAAGCGATGAGCGAGCACGACATGCTGCCGTTCGAACTGTCACCATTTGTCTGTGCGCAGAT  
GGGTGGGTACGACGCGCTAAAGGCCATGATATCGACGCGCGGGCTGAATTTAAAGCGGGCGATAGCTTCAAAGCGG  
CCGTGAAAGTAAAGACCAACCAACCGGTAGTGTGTTGTTGATTCACCGTCTGAGTATGCCATCGACCCGATTAACGCTG  
CCGTGCGCGGTGGTTCAGGGCGAGCGCTCACCAGCAATTAACGTTGCCGCTGGAGCGACCGTTGACCATATGCTGAT  
GGAAAGCGCAGATCAGAACTGCTGATGGCTTCCGATCGGGTTACGGTTTCGCTGCACCTTTAGCGATCTGGTGGCC  
GTAACCGTGCAGTAAAGCTTTGATCACCTTACCGGAAATGCCATGTTATGCCCGGGTGGTGAATGAAGATGCTTCC  
GATATGCTGCTGCAATCACTCAGCGAGCCGCTATGTTGATGTTTCCCGTAAAGCGATTCGCGAGCCTTGAAGAGCA  
AGGCAACAAGATTATCAACATTCATCGGCAGAAAGCGCGGTGGCGAGGATGGTCTTCCGCAACTGTACGTTTCCGCG  
CGCAAGCAGCTGACCATTCATGTTGGGAAACGCAAAATTAACCTGCGTCCGGAAGAGCTACAGAAAGTCACTGGCGAA  
CGTGGACGCGCGGTACGTTGATGCGCGGTTTGCAGCGTATCGATCGTGTGAGATCGACTCTCTCGCGGTGCCAGCAG  
CGGTGATAGCGAAGAGTAA

>Cluster\_40947

ATGAGCACTGATAAAGAAGAATTTGCACATATTTGCGAAGCAAAAAATGACAAAGTAAGAAAACGCTAGGAATTAAGG  
TGGTTTTTACTGGACTACGCAAAAAAATATCTGTTGCAATCTCCCGTGCATTAACCGAATGGATGACAACGATTAATG  
ATGAAGACGACTTTAAAAAACCCGTCGCGTCAATTTGCCGTTGTTGACGACCTTCCGCCAGAAAGCGGTTTGGATACT  
GAATCTGCAACCCGCTATGAAAAAGCGGGAAAGATGGATCACAATGACATTTATCGCCCTTCCCTCTGTTCAGGA  
CAAACGAGCCAGCACTGACAATACCAACATCAACGCGGAAGACATGACTGAGATTGAGGAGAGCATGCTTCTGCCTGTCT  
CCGTCAGGAACCTGCCATTCGTTGGCTTGCCTCAACGCGCAGCGAAAAACCGTAACGACAGCTTTCAGCGCAATTC  
CAGGCATTACACATTGCACGGGCTGAAGAACTACCGGCTGTTACTGCCCTGGCTATTTTCGCATAAAAACGATCTGCTCGA  
CTCGCTGGAGATTGCGGACCTCCACAACTGGTTCGCTGACACTGACAAAGTTTCCCTAATCCGTTGTAATTCAGACCTGG  
GACTAATAACTGCTTTTTTCGAAGCATACTGGACGCTGACTACACTGATCGGGGCTGCTGACAAAAGAGTGGATGAAA  
GAAATCGTGTTCACGCATCACCAGCGGCTTCCCGTGAATGCTGGCGTGGGAACAAAACCGATCGCAATCCGAA  
TTTTAGTACACACCTCGACACACTGGATGTGGAGATTGCAGCAGCCACACTTCCGATGGATTTAATATTTATGAATTC  
CGGCAGCGTTTATCGTCCGCAAAAAGAGTAGTCTGAAACAAAAGAAAGTCCGTTCAAAGAATGGTCCGACGACTTCT  
GCAACCCGGGTATTTGGACTATTTCCGCGCGCTATTTTGCACCTTATCCGAAGCGCACACCCTGAATTTTATCACAT  
CCCGGGGCGCTTTCAGGGTATATCAACGCTATTTTCCGGAACCTGATCAGGAAACCCAGCAAGAAAACCTCAG  
CTGCCCGCATACGCGGAAAAAGATATCTGGAAAAAATTAACCGGAGGTGGTTACTGAGCGTGAACAGAAAGAA  
AAACCACAACCATTCGACCAATGGCAGGTGAACAGGCAACAACCTGAAACAATGGAACCGGATACAATGAACATGGCCA  
GAACGCGCAGCTCGTGGATGCTCAGTCAGTCAGGTGAGTCCGCTAACCAAGTAAAGTACCCGTCGACGAAAGTAAACAAA  
TTATGTCAGCGCAGCAATATCAGCCAGCCTGACGCGGATAAGTTACTTGTGCTGATCGCGTGGTGAATTTTGGAGGAAAT  
AGGACCCCTAATGATCCGAAATGGTCAAGGGATCCAGACTCGGATTTCTGTGAACAGAACGAGCATGAATCGGAACG  
GAACGACCAAAAAGCGGAACAAAACGCCAAAATGCGTTACAAAACGAGCCAGAAACGAAACAATCCGAAACAGTAGCGC  
AACAGAAACCGGAAAGTCTGCACCGCTGCGGTGAGCGGTTGGCGGCAACTGCCCTGATTGTGGCGGTTGATGGG  
GACGCAACATACAGGAAACATTCGATGAAGAGAAATCAGGTTGAAAGTTCAGGAAAAATGATCCGAGGAAATGGAAGGCGC  
TGAACATCCACACAGGAGAACCTGGCGGCAATCAGCATCACGCCAGCGATAATAAACTGGCGAGGCGACAGATCCCT  
TAATTAAGGTGAATGGTCAATCAATAGCTCACATCCACCAGCAGAGCGGGGATTCATCTGATGATCGACCTGAAAACCATG  
GGAAAAAATCCCGATCCCGGATTAATCTCAATAGGCGCAATATTTTTCGATCCACAAAACCGGAGATGGGACCGAAAT  
TAGCAAGACCATCGATCTGGATACTGCTGGCGGAGTCAATGATCGTACGCTCAATTAATGGTGGTGAAGCAATCACGTG  
AAGCGCAGTCTGCCATTAATGACCGATGAATCCCGTTAGATGATGCACACTGCAATTCGCGGAAATTTATCGACGAAAC  
TCCGGTGAATTTTTGTTGAGTCTGGGGTAAATGGGGCAACTTCGACAACGTTGATTTACGCGGTTACGAAACGCA  
GGTATCCCTGCCATGGCGCTACTGCAACGATCGCGATGATCAGCACAATCGTTGAGCTGGGAAAGCATAGACTTGC  
ATGCCAGAACTGCTATCCATTCGAAGGTGAGCGCCATAATGCACCTTGTGACGCTCGTTACCAGGCAAAAATACGTTTCA  
GCTATCTGGCAAAAACCTGATCCCGAGTCAAGCTGATTTTTAA

>Cluster\_28067

ATGAACAATAAAAAACAGTTTTTCCGGGATAAGTTATCCCATGCAATTAATAATGCCCCGCTGCTGGCGTGTGTGTTCCCT  
ACTCTTCGTTTTTACCAGTCCACGCGGTAGAATTAACGTCGATATGATGACGAGAAGACCGTGAGAATATCGACATCT  
CTCGTTTTGAGAAAAAGGCTATATCCCTTGGTAGATACCTCGTTCTGTGTGCAAAATAAATAAAAAATATGTTGCCACAA  
ACGTTAATACTGGAATGGTAAAAGCCGATAATGAAAGTGGTTCGTTACTCTGCTTAACCAAGAAAAATTTGACTAATTT  
CGTCTTAATACGGAATTTATTTGAATTTGCAAAAACATAGTTCGCGAGCGAATGTCTCGATTTAAGCCAACTCGGGAGT  
TAACGACACGACTTGATAAAGCTACGATGATATATCGCTAAGTGTCCCGAGGCATGGTTAAAAATACAGGCAACAAC  
TGGAGCCACAGAGTTTTGGGATACTGGTATCGCCGGGTTTATCTTGTATTACAACGTTGACGCCAGCCAGTATGCCCC  
ACATACGGAGACAGCCCAAAACCTGACCTCCTATGGTACGTTAGGCTTTAACCTCGCGCATGGCGCTTACGTTAGG  
ATTACCAATATAATCAGAATTTTGTGATGGACGCCGGTAAACCGGACAGCGAATTTGCGGAACTTATCTGTTCCG  
CCTATCCCTCCTGGTCTCAAAATCACTATGGGCCAGTACGACCTGAGCTCAATCTTACGATACCTTCCACTTTAC  
TGGCGCATCACTGGAAGTGAAGGATGCTGCCCGAGATTTACAGGGTTATGCGCCACAAAATACCGCCATCGCGC  
AGACCAACCGGAAAGTAACTGTGGCACAATAATGGTCTGACTTTATCAAAACCTGTCGCGCCAGGCGCTTTACTAAT  
TCTGATTTGGGGCAATCGTTTTCAGGGCAGCTGGATGTCACAGTGAAGAAAGAGATGGCCGACCAGCACCTTCCAGGT  
TGGCTCCGATCCATTTCCCTATTTAACCCGTAAGGGCAAGTGGCTATAAAAACGTCCTGGGAAAACCGACATCCGTCG  
GGCATAACGATATCAATAATCCCTTTTTCTGGACGGCGGAAGCCTCTGGGGTGGCTGAACAATGTGCTGCTGATGGT  
GGTGCATGTTTCCCGTATGATGATTAACGCTATCACTACCGGATTTGGCTTTAACCTTAACCAATTTGCGGTTCCGTT  
TTTTGATGTCACCGGAGCAGACGCTTTTACAGCAACAAAATAGCGCAATCTGCGTGGTTACAGCTATCGCTTCACT  
ATGCAAAAGCATTTGCAATCGACAGGCAGTACAGTACCTTCCGCGGTTATCGCTTCTCAGATAAAGATTAACGTTGATG  
AGTGAGTACCTCAGTCCGTAATGGCGATGAGTCAATCGATAATGAAAAAGAGATTATGTCATTTCTTGAACCAAGTA  
CTTTGAAACGCTGGAAATTAACCTTATCTCAACGTTACAGCAATACTTATTGGGACAGCGCCAGCAATAACCACTACT  
CCGTATCTGTAAGCAAAAATTTGATATGGCGATTTCAAAGGTATATCTGCATCGCTGGCAGTAAGTCAATCCGCTGG  
GATGACGACGAAAGAAATCAATATTTACTTCTCTTCTCTACTTTACAACAAAACCGCAACATCTCTACAGTATGCA  
CGCAACGGAAAGCAGTAATACTTCGAGATGATTTCTCGTACGATTCATCAGATCGCAACAATACTCGGAATTTTCAG  
CGTCCGCAACGGACGACAATATACGTTGAGGAAACCAACACTGCGCGGACGCTACCAGCACATTTCCGCGTGGGACG  
CTGAACATTAATGGCAGTGTACAGCCGAATCAGTACAATCTGTTACCGCAGGCTGGTACGGTTCCTTACCGCTACAG

TCATGGTGTCCGCTTACGATTATAGCTATGGCGATAACGCCCGCATGATGGTCGATACCGATGGCATCTCCGGCATTTG  
AAATCAACTCTAACCGTACCGTTACCAACGGGGTGGGCATCGCCGTGATGCCCTTCGTTATCGAACTACACCACCTCCATG  
TTGGGGTGAACAATAACGATCTGCCAGAGGTGTCGATGTCGAAAACTCGGTATTTCGCACCACGCTCACCCAGGGTGC  
CATCGGCTACGAAAACTGAATGCCACCACCGGTTACCAAACTGTCGGCGTTATTCGTGAGGAAAATGGGCGCTCCCTC  
CAGTAGGTGAAAGTACCGGATAAAGCAGAGGTAAGATGTGGCGTGGTCGGGAAAGACGGCTTCTTTACTCAGC  
GGTATTACGAAAAATAGTACTCTGCATTTAACCTGGGGTGATAATACCTGTGAAGTACGCGCCAAACCAAGTAAACAT  
TAGCGAAAGCGCAATAATTTTACCTTGTAAACAGTCAATAA

>Cluster\_39579

ATGCTGAGTTTATACGAAAAGATAAAGATAAAGCTGATAATTTTATTTTATTGGCAGCACTGCATTATTGGTCTTTT  
TTTCATCATTAACATCAACTGGTATCGGAAACGCGGGTAAAACGTGCCGATAGCCGCTTTGAACTTATTTCAGAAAAACG  
TTGGCTATTCTTTAAAGATATTGAACGCTCGGCCGTGACATTAAAGGACTCACTGTATTATTAATAAATACAGAGGAG  
ATTCACACGTGCCGTGATCTGAAAATGGAAATGATGCCATTTTATGACTCGGTGGGACTGGTACTTGATGATAATAAATA  
TTATCTCTTTTCGGGAGGGCAATGATAAAAATCGTTTATTTATCATCAGGAACAAAGTAAATGGACCGCTTGTCCGACGAT  
CAGGGCGGGTTATTTTGGCGATTTAACCCATCGAAACGACCGTGGTCGATGGCTTCAGATGACTCTAACACAGCTGG  
AATCCGGCATACAATTGCTTTGATCGTCCGGGTAATAAATGATCTCTTTTACGCTACACATCAACGGCAAAGATCATGA  
TTTGTAGCGGTAGATAAAAATTCATGTCGATTTAACTGGCGATATCTGAACGAGTACTTGATCACATCAGCGCTAATG  
ATGAAGTTCTATTTTTAAAGCAAGGTATGAGATCATTGCTAAGAATCAACTCGCTCGTAAAAAATGGATTATTATAAAT  
AGCGAAGGTAATTATAATATTATTGATTTCTGTCGATACGGAATATATTGAAAAAATCAGCGGTGCCAAACAACGCATT  
ATTCGAAATCTATTTTTATATCTCGTGGTAAATTTATGAAACGATCAGATAAACTTTTATCTGCGCTTTGCTTTTCA  
TTATATCGTATTGCTGGTGGTTTATTTAATGACCACCTCGAGTGTTCGGTCCGCAATTTCTGAAATGACAGATTGGTC  
AATACGCTGGCGTTTTCGGCCGACTCTACGGATCAAACTGAGGCTCTGAAGATTTCGTGAAGGCGATGCGAAAGAGATTAT  
CAGCATCAAAAATTCGATCGCGGAAATGAAAGATGCTGAAATGAAACGGGCAATAAATGCTCTCGCTGATCTTTACG  
ATCAGGAAAGCGGTTTATTAATAAATATGGCGATTATTGAGTCCAAACAACATCAGTATCTGGCTGTGGGGATCATCAA  
CTGTGTGGTCTCGAAGTTTATTTCTGTGATGATGCGAAATCAACGAAATGAAAGAGAAATCTGGATTGCGCGTAAATA  
TGCCGAGAAATATGCGCAATGCTGCGATATCGTACATTTAATGCCGATCTCTATTTACTCTGTGCCGGGAAATGTAC  
AGCGTTTACCCGTAAGATAGCGACGGTAAACGATTTTACAGCAGGTTTGGCTACCGCAATCTGCGCATCCATAAGTCT  
GCTATTTGTGAACCTTTGACGGGGAAACGCCGAGTTACGAGAAAAGCTGAAACTGGCGATTTCAGTATCCGCAA  
CCATATGTTCTCGAAGTTTATTTCTGTGATGATGCGAAATCAACGAAATGAAAGAGAAATCTGGATTGCGCGTAAATA  
TTCCGCATGCAATGAAATTTGGCGAACTATTCTGGTCTATCAACCGATTGTTGATATTAACACCCGCACCATTTTGGGC  
GCGGAGGCTTGTGCCGTTGGGTGTCTGCGGAGCGGGGATTAATTCACCGCTGAAAGTTCATTACCATGCTGAAGATAT  
CGGTTTATCAATGAGCTGGGCTATCAAAATTAATAAACCAGGATGGGTGAATTCAGACATTTTAGCGAGCGTGGCTCC  
TGAAAGACGGTTTCTTACTGCATATTAATGTTTCGCCCTGGCAGTTAAACGAACACACTTTTCATGAGCGTTTACTACC  
ATCATGAAAGAAAATGGCTGAAGGCGAACAGCCTTTGTGTTGAGATCACTGAAACCGTATCGAGCGAATTAATGAACA  
TTTCTATCTCAATATTGAACAACGCGTAAACAAGGGGTACGGGTATCGATTGATGACTTTGGCACCGGTTTGTCAAACC  
TGAACCGTTTATGAAATGAATCCAGACAGTATAAAGTTGGATTTCGCAATTTACCGCGATATTTCCGGTACTGCGGGA  
AAAATTTGTCGCTTATTTTCTGATCTGGCAGCTATAAACCCTGATTCGCGAAGGCGTAGAGAGCAAGACCT  
TGCGCGTGAATTAATCAAAATAGGATGTGTTACGGCTCAGGGGTATCTGTACCAGAAACCCATGCCATTCTCCGCTGGG  
ATAAAAGTGGAAAATTAGTAAAAGAGTAG

>Cluster\_24999

ATGCAAAACCTCATCAAAACACTCGCCACCGCGCGTAAAACCGTTTGTGACGCTCGTCACGCCAACCTGGAACCGCGG  
CGCATTCCTGCGGTACCTGCTTTATATGATACCGCTATCAGGATTACCCGGCAGACCGCGCGAACTCATCATCTCGAGC  
ACTCCCGCAAAGCCATCAACACATCATCGACCCTGACCAATGGCAGCAGCGGGATCCTTCAACATCCGCTACATCCAT  
CACCCGAAACACTGCGCGTGGGCAAAAACGCAATATGCTCAACGAACTGGCGCGCGGCAATACATCCCTCGATCGTGA  
CGATGACGACTACTACTCGCCAGATAAAAATCTCTTACTCCATCGCCATGATGCAAAAACACCGGGCGCTACTCTCGGTT  
CCGACCAGATCCCATCTGGTACAGCCATCAACCGCATTTTCAAAGCCGAGCTTTGGCCACATAACATCCTCAAT  
GGCACCTTTGCTATCACCGTAACTACCTGAAAAGCACCGTTACGACGACGATTGTAATTTAGGCGAGGAGAAAAGTTT  
CACCGCAATTTACGCTTAAACCGCTGCAACTGCCCGCGAGCGCACGATTCTGTTGATCTCGCACAGCCACAAACCT  
TTGATAAAGACTTTATCTCGGGCCAGCAGCCTGTAAACGCGCGCTTACGGATATCGTCAGCGATCCGCTGCTACGC  
AACGCTTATCTGGTCTGCATAACGCCACTCATATCAGCGGATCCAGCATCAGCGATCGATCAGATCGTTCTGCTGAA  
TCTGGATAAAGCCCGGATCGCTTACAGCAGATCCGTGAAGAACTCACATTGCTGCATATCTCTGAGAAGATCACCC  
GCCTTGCCGCCAGTGAATAATGAAAACGTTCAACCGGGGCGCAAGTCAAGTCAAGTCCGACTGCGACTGCGAGCAACA  
CGCGGCTGGCAAACTACCTGTTGCTGGAAGATGACCGGTTATTTCAAACAGGAGAAAATATTCAGGTGCTGAACGC  
GCTGCTGGCGAGCCTGGCGAAAATTCCTGGCAGGTGATGATCTCGTGGCGAAATTTGCGAGGAAACGATGCTAAAAA  
GTTTGTAGGGCTGGTGCACGCACGGACTGCCGAAAGTGTGCGCTTATCTGGTGAACAGCCGCTACTACCCGACGCTG  
CGCAGCAGATGAACAACGATGAGCCTCGCTGGAAGACGGCTGGCAGCCGCTGCTGCGCACCGCAAAATGGCTGCGCTG  
TTACCCGAGCCTTTGTTATCAGCGACAGGGCTTTAGTGATATCGAGAAAAAGCGACTGATAACATTAACCCTACTTCA  
ATAAGTTACCCGTAGCCACCAAGCCATCTACATTACCTATCGCCGATACCATCGGCTTTTATGGAACCTCATCTCCAC  
TAGCGCTTACCGCCAAATCATCTACCTGCCCTACGGCGCAAGGACAAAGCTGCACGCTGGTGATCAACGACCGGTT  
TAAACCGTTTCTGGATGAAATGCTGAAAACGTTAAAAGCCTACGACATCCACAGCTCAAAGGAATGCCCTTATCTGAAA  
TGCAGGCACACGGTACGCGAGTGAATGCTGGTACGCGCTATCACAGCCCGGCTCAATGGCCTTCAACCTGAAC  
ATTCGCGCATAGTACGGCTTAGCCAAAGAAACGTTGAACACCGCGACTGGAACCGTTTATCAGCGCATTTTGTGTTA  
CAGCCACTACAGCAGCGGGCGTGGCACATTTCCGCGAGCAGCAAAAGTGGTCGCAATCCGCGCTTCGACCGCTGCGATA  
ACGGCACGTTTCGACCGCGCTCTGCCGAAAAATCCAACCCGATTACCGTAAACCTACGGTGCCTACGCCCCACGTTT  
GGCGCATTAAAGCTCCCTGCCCACTGGGCGAAAAATTTGGGGCTTGGAGCGGTAATGTAACCTGATTTGCAAACTGCA  
CCATGGCACACGCTCGCGCCGGAAGAGCGCATCGTGAACCTGGCAGCAGACATTTAAAACAGCGCACCAGCTCCG  
CCGCGCACGCTGGCGCTGCTGGCAAGGCGGATACGCTGCTGACCGATAACAGCGGCTTTATTTTCTGATCTATCCAT  
GTCGATAAGCGGTTGATCTGCTGACTTTCCAGGCATGAGTGAATGCTCGACGGCGAGAAAAGCTACTCCACGCCGGA  
GAGCGCGATCAGCAAACTCCGCGAAATATGCGCGTGGCTCATGATATGGCAGAGTTGCGTTACTTGTGTGTCAGAGCGCT  
TTGACTGGGGGGCGTGCAGGCGCGCTTACGAAGATTCGTCACTATTCGATGCGTTTATGGATGGCAAGGCGGGA  
GAACGGCGCGCATGTTGATTGTTGGAGGCTTGGGTTAA

>Cluster\_39488

ATGTCAGATATCACCGCAAAATGTTGTGGTAAGCATGCCCTTCGCAACTCTTCACTATGGCGGCTCTTTTAAAGCCGTAGC  
CAATGGCAAAAATTTATATCGTAAAATGACACTGACCTGTAAATTCGAAAACAGATCAGGTTTATGTGGAGAACG  
AAGATGGCTCTCACGTTCTGTATCGAAACCAATCATCATTAACGCTGCTGGTTACCCGGTATATAACAGGACAGATTGCC  
AAATTCGTTACCGTGAAGGCCATCAATGCTGTTTATGATGCGTATGGTGCAGCAGTTCATTTTCTTAATGTGCT  
GAAGTATGACCTGACCAACTAAGACAGGATTTAGATGCTGTTGGTGGGGTTAATTTAGTAAATGGGGCATTTACATGGT  
CCATGGATTCCAGATCCAATGTTGGTTTAAAATCACCACATCTCAGGTGAGATTACGAATATGCTCCGCGGAAATACA  
GGTCTTGGCGATGGGTTTTCGGTATCAGCATCACAGTTATATTAAACAAGGAATGGCTATCTTATAAATACTCTTACC  
TCATAACACACTGGTTTGGCCATCTCAGTATATCGATACGAGTGTGATGCGAAATATCAATGAATCTATTATGGCGC

ACGGATTGAATGTGGACCTTAACGGAACACAGCTTAAAGCCAGCACCATTAAATATTACGAAAGATTTGATTAATGGTGAA  
ATTTGGTTCATCGGAGATGAAGGATCAATTTATAACAGTAAACTCATGCATGCTTAAACAATATTAAAGTTAACTGCAATAT  
GATGGCAATAGAAAGGCTTTCATATCAAACAGGGGCTGTTAATCCAGTAGTAAAGATGTGATGTTTTGATAGTA  
ATGGTTCTCAACTAATTTATGGTATTTTCATAGATGCAAATTCGTATGAAATTTGTCGTTGATAACATATCAATACAT  
AATATTACCACTTGGAAATGGTATTCAGGGTATGTAATGGCCATGTCGAGGGAATTCCTGTGAGGACCTTGA  
TCCAGTACCATAAATGATGATGAGGTATCAAGTGGAGTTATAAGTAACGTAAGGATTTACAAGCTAAACCCCTGGGAAG  
ATGCTGATGGTGTGTTATTCAGATTTACAACCTCATCATCAAAATATGCTCAGCGGGGAAAGAAAATAAGGTTGATGGCGTT  
TATACTTACAATGCACCTTAAGCGGACAGTCAAAGTTCAGGCAATGATGTTACAGTAACAAAATGATTTGCGGTTTGTGA  
TGACGCCCTCAGCAACTAAACCCTATGTAATAGTTGTGTTAGTGTATGTTATGGTAGTTCCTGTGTGTGTCGTGGTTAGTGGGC  
GAGGAAGGATTGGCAATGGTGTGATTCATCTGATGGGTTCAATACTATCAGTGATGTTTATCTTAAAGACGACAGCAACC  
TATGAGCTAAGCGCAGGTCACAGATAAACCCTCCGGGCAGGTAAACGCGAATAAATTCCTACTCTGAAGGATCAAGATACAT  
AGTCGCAATTCGGGCGAGTTAATAACACAACACCGTATGTAAATATTAATGGCATAATATGGGCAAGGTTATGACGGGGCGA  
TTTTGTGTAGAAATCAGATACGGATTTAATATTGGTAATGTTACTTAAAGTATATTTACAGTATCAAGTTCAAATCCCACA  
AGGTCTTCACTTCTTGTATATATTATCAGGTGGAAGTATATCTCTGATCAGCGTGTGACAGCTCAAGAGAAATCAGTCA  
GGCATTAAACGGGACAGATATAAACATTTCTGGTGGGGTTGCAAAAGCTATGTTAAAAAATTCAGTTTTGAGAGTGGTT  
CGTCAAGCGTTGGTGTATCAATGACAACCTGGTACTTTAGTTGCATCAAATATAATCAGCACAAAGTAAATCTTATGTCTGTC  
AACCCTGTACAAACCAAAATTCACCTTATAAATAACATTTAGTGAATCCTTAGGGTTGATAGCACAAACCAACAGTAATGT  
CGGCCCTTACAGAGGGATTACCTCTGTTGGGACTAACACAGGACTGAAAACCTGTTTTCTATCAATAA

>Cluster\_40394

ATGTCCAAAATGAACAAATGGTGGGCATCAGCCGAGAACACTCGTTAAATCTACCGGATAGGTTCTTGGCGCTGGC  
TGCAGGGCGTTTTCTTTACCGTTACCCCTGCGCAGTGCAGCGCAGCGGTACAAACAGCCAGCGAAAAAGTGGTCTGGG  
GTGCCGTTCGGTCAACTGTGGTAGCCGCTGTGCACCTCGTCTACATGTTAAAGATAATGAAGTGACCTGGGTGGAACT  
GACAACACCGGCAACGACGAGTATGGCAATCATCAAGTACGTGCTGTTTGGCGGGTGCCTCCATCCGTCGGCTATTTAA  
TCATCCCGAACGATTTGAATACCAATGAACCGGTGGGCAACCGCGGCGAAGCAAAATTCGAACGATTAGCGGGTATG  
AAGCCCTGGATATATCGCCAGTAGCCCTGAAAAAAACCGTCAACAATATGGCAATGAGGCTGTATATATTCAGTACTCT  
TCAGGGATCGTTGGCGCAATATGACCCGCTCTTCGCCATCCGCTCGCGGTCAAACGCCTGATGAAGTGTACGGCGG  
TTCACTCAACAGTATGGCTCCTACAGCACCGCGCAAACTCTCTGTGCCATGCCCTACACCTACGGCAGTAATGATGGCA  
ACAGCACAAACGATATTGAAACAGCAAGCTGGTGGTATGTTTGGTAACAACCCGGCAGAAAACCCGCATGAGCGGGTGT  
GGCATTACCTTATCTTCTTAAAAAGCGCGGAGAAATCGAACGCAAAAATGATGTTATCGATCCGCGATATACCGATAC  
GGCTGCCGCTGCTGAAGCAATGGCTTCTATTCGCCCGGGCACCATGCGCGCTGGTTGCGGGTATTTGCCGTTGGTAT  
TGATTAACGAAAATCTCGTTGATCAACCTTTTCTCGATAAATACTGCGTCGGCTATGACGAAAAAACCTTACCAGCAGAT  
GCACAAAAAATGCTCACTATAAAGCGTATATTCTTGGTGAAGTGCAGATAAAAACAGCGAAAAACGCCGAGTGGCCTTC  
GCAAAATACCGGTATCCCGGTGGACCGTATCATCAAACGGCGGTGAAATTGGCACAGCAAAACCCGCTTATATCTGCC  
AGGCTGGGGACCGCAACGCCAGGCAAAACGCGAGTGTACGACGCGTATTGCGATGTTGCCATTTCTGACGGGCAAT  
GTCGGCATCAGCGCGCGGAAATAGTGGCGCGGTGAATGCACCTATACCATTACATAGAACGCTGCCGGTACTGGATAA  
TCCGGTCAAAAACGTTCACTATAAAGCGTATATTCTTGGTGAAGTGCAGATAAAAACAGCGAAAAACGCCGAGTGGCCTTC  
GCAAAATACCGGTATCCCGGTGGACCGTATCATCAAACGGCGGTGAAATTGGCACAGCAAAACCCGCTTATATCTGCC  
AGGCTGGGGACCGCAACGCCAGGCAAAACGCGAGTGTACGACGCGTATTGCGATGTTGCCATTTCTGACGGGCAAT  
GTCGGCATCAGCGCGCGGAAATAGTGGCGCGGTGAATGCACCTATACCATTACATAGAACGCTGCCGGTACTGGATAA  
TCCGGTCAAAAACGTTCACTATAAAGCGTATATTCTTGGTGAAGTGCAGATAAAAACAGCGAAAAACGCCGAGTGGCCTTC  
GCAAAATACCGGTATCCCGGTGGACCGTATCATCAAACGGCGGTGAAATTGGCACAGCAAAACCCGCTTATATCTGCC  
AGGCTGGGGACCGCAACGCCAGGCAAAACGCGAGTGTACGACGCGTATTGCGATGTTGCCATTTCTGACGGGCAAT  
GTCGGCATCAGCGCGCGGAAATAGTGGCGCGGTGAATGCACCTATACCATTACATAGAACGCTGCCGGTACTGGATAA  
TCCGGTCAAAAACGTTCACTATAAAGCGTATATTCTTGGTGAAGTGCAGATAAAAACAGCGAAAAACGCCGAGTGGCCTTC  
GCAAAATACCGGTATCCCGGTGGACCGTATCATCAAACGGCGGTGAAATTGGCACAGCAAAACCCGCTTATATCTGCC  
AGGCTGGGGACCGCAACGCCAGGCAAAACGCGAGTGTACGACGCGTATTGCGATGTTGCCATTTCTGACGGGCAAT  
GTCGGCATCAGCGCGCGGAAATAGTGGCGCGGTGAATGCACCTATACCATTACATAGAACGCTGCCGGTACTGGATAA  
TCCGGTCAAAAACGTTCACTATAAAGCGTATATTCTTGGTGAAGTGCAGATAAAAACAGCGAAAAACGCCGAGTGGCCTTC

>Cluster\_34329

ATGTTCCGGAATATCACTTGTGATGCGAGTCCCCTTCATGAACCTATCGTCATGGTTACGATCGCTGGCATTATTTGGG  
AGGTCTGGCGCTCGTTGGCCTGATCACTTACTTCCGGTAAAGTGGACCTACCTGTGGAAGAGTGGCTGACCTCCGTCGACC  
ATAAACGCCCTCGGTATCATGATATCATCGTGGCGATTGTGATGTTGCTGCGTGGTTTTGCTGACGCCATTATGATGCGT  
AGCCAGCAGGCTCTTGGCTCGGGCGGCGAAGCGGGCTTCTGCCACCTCACCACTACGATCAGATCTTTACCGCGCACGG  
CGTGATATGATCTTCTCGTGGCGATGCCCTTCGTTACGGTCTGATGAACCTGGTGGTTCCGCTGCAGATCGGGCGC  
GTGACGTTGCGTTCCGCTTCCCTCAACAACCTTAAGCTTCTGGTTTACCGTGTGTTGGTGTATTCGGTTAACGTTCTCTC  
GGCGTGGGCAATTTGCGCAGACCGGCTGGCTGGCCTATCCACCGCTATCGGGAATAGAGTACAGTCCGGGAGTGGTGT  
CGATTACTGGATATGGAGTCTCCAGTATCCGGTATAGGTACGACGCTTACCAGTATCAACTTCTCGTTACCATCTGA  
AGATGCGCGCACCGGCGATGACCATGTTCAAGATGCCAGTATTTACCTGGGATCACTGTGCGGCAACGTACTGATTTAT  
GCTTTCCTTCCCAATTTCTGACGGTTACCGTCCGGTTGTTGACCTTGGATCGTATCTGGGCACCACTTTCTTACCAACA  
TATGGGTGGCAACATGATGATGATCAACCTGATTTGGGCTGGGGCCACCAGGATTTACATCTGATCTGCCTG  
TTTTCGGTGTGTTCTCCGAAATTCGGCAACCTTCTCGGTAACGCTGTTTTGGTTATACCTCGTGTATGGGCAACC  
GTCGTATCACCGTGTGCTTATCGTTCGACCACTTCTTACGATGGTGGCGCGGCGAAGCTAAACGCCCTT  
CTTTGGTATCACCAATGATTTACGCTTCCGACCGGGGTAAGATCTTCAACTGGCTGTTACCATGATATCAGGGCC  
GCATCGTGTTCATCTGCGATGCTGTGACCATCGGTTTTATCGTCACTTTCGGTGGCGGGATGACTGGCGTGCCTG  
CTGGCCGTACCGGGCGGCACTTCTGCTGATAACAGCCTGTTCTGATGCGCACCTCCATAACGTTGATCATCGGGCG  
CGTGGCTTTCGGCTGCTTCGCGAGGATGACCTACTGGTGGCTAAAGCGTTCCGTTTCAACTGAACGAAACCTGGGTA  
AACCGCGTCTGGTTCGGATCATCGGCTTCTCGTTGCTTTATGCCACTGTATGCGTGGGCTTTCATGGGCATGACC  
CGTGGTTGAGCCAGCAGATTGACCCGAGTTCACACCATGCTGATGATGACGCGCGGTGAGTACTGATTTGCGGT  
GGGTATCTCTGCTGCTTATTCAGATGTACGTTTTCTATTCGCGACCGGACAGAACGCTGACCTGACTGGCGACCGCT  
GGGTGGCGTACCGTGGAGTGGCAACCTCTTCCCGCTCCGTTCTATAAATTTGCGGATGTCGCGCAGCTTTCACGAA  
CGTGATGCATTCTGGAAATGAAAGAGAAAGGCGAAGCGTATAAAAAGCTGACCACTATGAAGAAATTCATATGCCGAA  
AAACAGCGGTGCAGGATCGTATGACGCTTTCTCACCATCTTCGGTTTCGCCATGATCTGGCATATCTGGTGGCTGG  
CGATTGTTGGCTTCGACGATGATCATCACCTGGATCGTGAAGCTTCGACGAGGACGTGGATTACTACGTCGGGTG  
CGAGAAATCGAAAAACGAGCAATTTCCGATGATGATTAATAAGCTGAGGCTGAAAAATGGCAACTGA

>Cluster\_48580

ATGAAGTTTTTAAAGCTCCAGTTGAGAAATTTATGGCTATCGCCAGCGCGGAGGTCGAGTTAGAGCAGCGTGGTTTTAGT  
GCTCATTCAGGGTGTAAATAGTATGATGATAGCTCCGATCAAGTAAATGGCTTGGAAAGTCAACGCTAAATGAATAGCTGA  
TGTGGTCTTTTATGGCGAAGACGCTATGGTGTGAATGGTACGAGATGTTGTTGCTACCCAGCATGAAAAAGCACTGTCTGT  
GTTGCAGTAAACATCGAGGATGAAGGCAAGAGATATGCGATCATCTGTCACCGTAAACCAAAAGATTCAAAAATCGGCT  
TATCGTTCTGTTGAAAGCGGCGATATGCAAAAGGCAAAGATGCGCTGACGCAAGAGTTCGTCGAACGCTGTGATCGGTT  
CATCTAAAGAGGTTTTTATGCTTCCATCTATGCAAGCGAAGAGATGCGAGATCTACCTGGAATGTTCCGCAAAAC  
CTCAAAACCATCGTAGAAGAGCGGCTGGCGTTGACAGACTGACACGCGCTACGCTATTTGTCGTGAAAGGCTAACGC  
AGTCCGCGACGATGACGAGTGGTTAAACCAAAATGGAGTGCACAACTCTCGACCATTTAGGCAACACAGTCAAGAAATTG

AGTCCGCGAAAGCCTCCTCTGAATCATGGGAACAAGAGCGTTCTAAACGTTATGACGATGCCCTGGCCGGCTGGCAAGT  
GCCGAAGTTGAGTTAACGGAAGTTGAACTTGAGATCCGCACTCTCCCGAACAGATCCGTGATACCGAGAAGGCAATCGA  
AAGTGAGCGCAAAAAGTTAGCCTCAAAGAAGAACATGACGCCAAGTTGCTCAAAGTCCGTGGTGGGATAACTGATATTC  
GGGCAAGCATCAAAGCTACAGAAAATAGTCAGGCTGATGCAATGAGCCGCGCGCAATTTAAAGACCAAAGCAGAAGAG  
GTTGGTACTAAAGTAGGATCACCATGCCCTACTTTGGGCAAAGCTACTGCGAAGAAGATCTATCAACCGGTGAAGGAGAA  
TTTTATTGAACAAGCACGTCAGGAAATTTGGTCAGGCGAAGACACTTGCAGAGGCAATGGCTAAACACAAAACGAATCTTG  
AGAAGCGCTTAAGCATGAGTCTGCCCTTGTAAAACGACACCTGATGTAACGCTATCATTTGCCGGATTGAAGAACCT  
ACTAAACAACCTCTCATCTTTCGCTCATCTGTGAGAAGGAGGTTGTGCTATTGAGTCTCTTGTACTCGTGCTCGTACTGA  
GGTCGATCGTATATCAAAGAGATTAATCCGTTTATTGCTCTTATCGCCAGACAGAAATAAACCCTGGTATCCAGTAAGT  
CTACCTTCAAGTCTTAAAAGATGAGTTGAAGGCTATTTCAGGAACAACGTTGCTATTGGAAAAAGCTCGTCAGGCTACT  
TCTCCTGCCGGGGTGGTCTCATATTTTGACCTCTGTACGCTTCTCTGAATACACGCACAGCCGAGTATCTCAATAC  
GTTGTCTGACGGGAATTAATCTGCTGAGTGGTCGACGATGGATGTCACAAAAAGGTGAGTATCGCGCAAAATTCACAA  
TTAGTGTGACGAAGAAATTAATCTGCTGAGTGGTCGACGATGATCCAGACCTCTCTGGTGGTGAAGCGGAAGTTCGATTCGCTGT  
TCTTTGGCATTGCAAGATCTGGTCAGTAACCGGGCAGTAAAAACATCGATTTGTTTATCGCGGACGAAATGACGATGC  
ACTCGATACAGCCGCTTGAACGCTCATGGGTATTCGAGTCCAAAGCTCGCGAACGGGGCACTGTGCTGATATCT  
CCATAAAGAGATGAAGTATGTTCCGCGAACTATTACTCTGGAAGTTAAAGAGGGGCGCAGCTATGTCGTTAA

>Cluster\_50858

ATGAACTGCTGGGAAATATAGCTTTACAACAGGTCGCGGAAGAACGAGATATTAAGCGTCGTTATGCGCAACTGGTAAA  
AAATTTGCCCGCCGGAAGATGATCCTGCAGCCTGGCAACAAATGACAGATGCTTATGAACAGGCTTTACGTTATGACGACG  
AAGATCTGCGCAAGAAGAGGAAGAAGAGCAGCAATCAATATGCCATGGGTATTGTTATCTCTCGTCTCGTATGAC  
TTTTCGCGCACCAACCTTTTTCTGGTCACTTCTCTGATGTCGCTGTTAAACAGAGGGGAATTCACCTGGCAAGC  
CGTGTGGATATGCTCTGTGAGGAGAATGAAGTACCCCGAACAGCCCAATGCAACTTCTAAGGCGTTATCTTTCC  
TTGAGAAAAAGATCTCAGCTCAGCAATGTGCTTTGAAGAAGCGTTATACAGTATCTTCATCGGGTATTTCCGCCATTA  
TTAACTCTCGCTGTCTCGCAAACTTTTAGATGGCAATTTAGTGGCAGTTCGTAACCCGTAATCATGACAGCAATTA  
CGAAAGTTGCTCTTTTATATCGCATCGAAAAACAAATACCCTTTCTTTGCCAGTAACTTGTCTCCACTGGAAAGAA  
TGGAAAACGGGAAGGAAATGGCTACGATTTATCAATCATTAAGGATAATGAAGAGAGCTGAAATGGTTGATATCGCA  
GTATTAATAAAGTTGCTGAATTTGAACATATCAGACAATATATGGCATTGTTAATAGAGTGTATATCATATTTCCATGCG  
AAAAGAAAAAATGATTTCCGAAGTGGAAAATTAACAGAACCTTCAATAAATTTAGCAATGCAACATCATAGTGGATATA  
AGCTGCTAAATGCCATAAAATTAAGGCTCTTTTTTATATCCATCTTCTGTATACCAGTCTGCTTACATGCTGCAGAG  
CAAGGCTATTCACAGCTGGTATCTCTTTGGCAAAATGATTTACGAAGGTGATGAGGTTTCACAGGATCTAAAATTAGC  
CTTTAACTGGTTTACCCTGGCGCGCAGCATAATGTTATCGATGCTCTGTATGCGCTGGGTATCATGTATAGCGATGGAA  
AGTGCAGGATTTCCACAGGACCGAAAAAGCGCTACTTTTACTTGTGCTGCCAAAAATGGCAACACATCTGCCCAAT  
GAGCTTGCCCGTATCTCAGCTTTGCTGTTGAGCCATTACGAATATGAAGAAGCATTGCAGTGGTATTTATCTGCCGC  
CACACAAGGACATGAGGTTGCCAGTATGAGTTGGGACAAATGATATACAAGGGATTGGCGTGGAGCGCGATGAGGTT  
AGGCCCATCTGTTGGTTTGAATCAGCAGAACAGGGAATTTACATGCGCAATATCACTGCGCAATATCACTGCGAGTTGTA  
AGTGCAGGATTTCCACAGGACCGAAAAAGCGCTACTTTTACC AAAAGCAGCAAAAAATGGGCAACACATCTGCCCAAT  
GGATGCCATGATGAATTTGGGAAATATTTAACAACAATGATGATCCTGAAAATACCGCAGAGGCTACTCAATGGC  
TTACTGGTGCAGCCAGCGTGGTGAATAGAGGCGATATTTTTGTTAGCCGAAATGATCTGTACGGTACAAAATATATC  
GCAAAAGATGAAAAATCATGCGCTGCATGGTACGAAAAAGCTGCGCTTTAGGGGCGACCGAAGCGCAACACAGACTGC  
GGCAATGATGCTCAGGGGACAGGCACTAAAATGATAATAAACAAGCATGGATGTTGGTTAACAAATCGCCGGAATAACA  
ACCCTGGATTGAAAAGATGACTTGCATGCTTAATGCTGAAACAGGATATTCAGGATGCAGAACAAACGGCTGCAAA  
TGCAACCTGCTGTAAGGATTTAA

>Cluster\_20763

ATGCTGGAGCCTGGCCAACACCAGTCTGTCATGCTGGCGGCTGAAACCTTTGCGCTGGCACTCCTTCAGATGCAAC  
GATCACAGAACCGCTTTTGGGGTGTAAACCCACTGGATATGAATGGCGTTCCAGTACCTGCATGAAATACCCGACT  
GGTTAGCCGGGTATTTGGCAACCGTTACGAAAAGCTGCTGGCTGGTCTTGACGGGCGTCGCCGTGCCAATACATCTCTG  
CGCAAACTATCGCGGGAAATGATTTGCCACGCTGCGCAAGTGGCTGCACGTTACAAAGCTGGCCGTGACATCTTGA  
TCTTCTTTTCGGTAAAGTCTGGAGCGACTGCCGTCACTTGACCGCCCGAACCAAAAACTGGCTGGCCAGATATCTG  
GCTGGATCTCCAGCTCATTATGACTTACCGATCAGTTTGTGGGACGACTGACGATGCCGAGAGCTGCGCGCCCT  
ACGCTGGAGTCTTACGGCATTATGACAGTGCCTGATGCTGAACAATCAACCGCGTACTGGCTGAACATGAAGC  
CAATGGCCGACAACCTGGAACCGCTAAGGCTGAATCCGGGATTCTTCGATGATGGCACTGAATGGTGGTATCGCGT  
TTAAGCGGGCGGTGATATGCAGCGTGAGCATAAGGCCATTGCCGTAGGGCAGGTACAGAAAGCCGACAGTGTATGTG  
TCACGTAACCCCTGGGTGAATGGATAGACCAGAAAAAGCGGAACCTTGAATCTTTAAAAGTTTGACTGCTGAATGA  
TGAAGGCTGCGTATGCACTGGACAGTATGTTGACCCGACGCTGCTAATCCGGGATCCGTCGCTGTGAGCTAATGG  
TAAGAATGAGAGGTTTGAAGATATGGCAATGAAGAAGGCTGGCCGCTGAGTTTACACCAACCCGCGCCATCAGCA  
TTCCATGCGGTACACAGCAAAGGAGGCTTTGTTTACAAATGGGATGGCTGCACCCCGAGGACACCAGCGCTACTTATG  
TGGCGTATGGGCGAAAGCCGCGCGCTATTTCCCGCGAGGATCCTATGTTTTTGGTTTTTGGTGTGGTAGAGCTCACC  
ACGATGGGACACCAGCCTGGCATAATGCTGCTTTTTATGCTCTGCTGGTACGCTGGATACCGTGCAGGATATCTTTGCT  
CAAGCCAGAAATTCAGCTCCGAAAGAACTGCAAAACGCAACCGCTAAAGGACGCTTCCATGTTGAAGCCATCGATCC  
CGTAAAGGTTCCGCTACAGGTTATATCGCAAAATACATATCCAAAACATGATGGAATTTGCGCTGGATGGTGAAGCAG  
ATGATGAAACAGGGGAAAATCTGCGGATATGGCCAAATCCGTTTCTGATGGGCTTACGCTGGCGCATTCGCCAGTTT  
CAGCAGATTGGTGTGCGCGGTGACAGTGTGGCTGAGCTGCTGGTGGTGGTGGTGGTGGTGGTGGTGGTGGTGGTGGT  
GGATGCGGTTCTGGCTGCTGCGGATGTTGGGACTGGGCTGCATACCCAGGCACAGGGTGGCGCACTGGTTGCCCGCC  
GTGATCTGGTGTGCTGCTGGCTTATGAAATACAGAGCAGGGCAATGAATATGCAGAGGACGTCAGCGCTCAGGCT  
GTCATTTCTCATTGGTTCAGATTCAGCGGATGTCAGCGCTGTTGAAAGTGGCAGAAAGGTCGGAAGTTGGCCGAAAGC  
GCCAGCGAGGCGGTTTTTTGCGCGGCAACCGCCCTTGGAGTCTGTCAATAACGTACGGAGGTTGGAACCGGCAACCGCA  
GACGGTAAAACCTGGAATTCGGAAGCCGGGTTTTGAAGGTTCTGACGATGAAATAGCCATTCATGCGGGGTAGTGGT  
TTGAGATTTGGCCAGGCGCGGTTGATTTACCCTAATGGCAGGTTACAGGAGACAGAAACAGGCAATGCACGAGCTGTG  
GCCGGGTGGTTGTAG

>Cluster\_27510

ATGGGTCAGGAAAAGCTATACATCGAAAAAGAGCTCAGTTGGTTATCGTTCAATGAACCGGCTGCTTCAGGAAGCGGGGA  
CAAATCTAACCCGCTGATTTGAAAGGATGCGTTTTCTGGGGATCTATTCCAATAACCTTGTATGAGTTCTATAAAGTCCGCT  
TCGCTGAACTGAAGCGCAGCATATATTTAGCGAAGAACAAGTTCAACTCTCATTTCCCGCATTTACTGGGCAAAAT  
CAGTCCCGGCTGCTGAAAGCCGATCAGGAATTCAGGCGCTTACAGGCGCTTACAAAGCAGCTGTTGGTGGAGATGGCGCGCAACGAT  
CTTCTGATTAATGAACGCCAGCTCTCCGCTCAATCAACAAAACGGCTGCGCTATTTAAGCAGTATCTGCGTCAGC  
ACATACGCGCATTTAATCAATCCTGACACTGATTTAGTGCAGTTCTGAAAGATGATTTACACCTATTCGGCGGTGGAA  
ATTTACTCGTGGCGATACCATCCGTTACCGCTGCTGGATCCCATGATAAAGTGCAGCGCTTTGTGAATTTACCGC  
AGAAGCGCCAGCTGACGCAAGCCGATGATTTCTTGGATAACATTTCTGCTTACTGCTCGATGATATTTTCAAAGGCT  
TCTTTGATTTAGCGCGTGAATGCCTATTTCAATGAAGATGACCCGCGATGCCAATACGATTTAGTGCATGAGATGGAA

GCCAGCCTGATGGAGTTGATGTCCTCCAGTCTCAAGCAGCGTTTAACTGCTGAGCCGGTGCCTTTGTTTTATCAGCGGA  
TATGCCAATGCGTGGTTGAAGTGTACGCGAAAAACGACTATTTCCCGCTACGACTCCATCGTCCCCGGCGTGGT  
ATCATAATTTTAAAGACTTTATTAATTTCCCAATGTCCGCAAAAGCCAATCTGGTGAACAACCCTGCCACGTTTACGC  
CACATTTGGTTTGTATAAAGCCAGTTCGCCAATGGTTTTGATGCTATTTCGCGAACGCGATGTTGTTGCTATATTACCTTA  
TCATACTTTGAGGATGTAAGGAACTGCTGCGTACGCTTTCGTTGACCCGAGCGTACTGGCATATAAATTAACATTT  
ACCGCGTGGCGAAAGATTACGCATCATCGACTCGATGATCCACGCGCACACAACGGTAAGAAAAGTACCCTGATGGTT  
GAGTTACAGCGCGCTTTCGACGAAGAAGCCAACATTACTGGGCGAAGCGCTGACCGAAGCAGCGTGCACGTTATCTT  
CTCTGCGCGGGGCTGAAAATTCAGCCAACTGTTCTGATTTACAGTAAAGAAAACGGTGAAGTGGTGCCTTACGCAC  
ACATCGGGACCGGGAACTTTAACGAAAAACCGCGCTTTTACTGACTATTCGTTGCTGACCGCCGATGCCGCAAT  
ACCAACGAAGTACGGCGGGTGTCAACTTTATTGAAAACCCATACCGTCCGGTGACATTTGATTTTAAATGGTGTGCGC  
GCAAACTCCCGCGCTTGTGTATGAAATGGTGGACCGCAAAATCGCAACGCGCAGCAAGGGCTGCCAGCGGTATCA  
CCCTGAAGTAAATAACCTTGTGATAAAGGCCGTTGATGCTGCTGATGCGGCCTCCAGCTCCGGCGTACCGGTTAAT  
CTGCTGGTTCGCGGAACTGTGTTCTGATCCCCAATCTGGAAGCATTAGCGACAACATTCGTGCCATCAGTATTTGTA  
CCGTTACCTTGAACATGACCGGGTTTATATTTTGAATGGCGCGATAAAAAGGCTACCTTTCTCCGCCGACTGGA  
TGACGCGCAATATGATTATCGTATTGAAGTGGCGACGCGCTGCTCGATCCGCGCTGAAGCAGCGGGTGTGGACATT  
ATCGACATATGTTTACGCGATACAGTCAAAGCAGTTATATCGATAAAGAACTCAGTAATCGTACGTTCCCCGGCAA  
TCGCGCAAGTACGGCGGACTTGGCGATTTACGACTACATCAATCACTCGAACAATCTGAATAA

>Cluster\_24049

ATGAATTCACAACTACTGGCTAATGCCATCCGGATGTTAAGTGTGATGCGATCCAGAAAGCGAACTCCGGTCACTCCGG  
CGCGCGATGGGATGGCGGATAATGCCGAAGTGGTCTGGCGCTGCCTGACCTGCCTATAACCCAAAAATCCGCGTGGT  
TTAACCGCGACCGTATGTTTTCAGTCAAGCGGTACCGCTCCATGTTGATTTACGCTTTTCTGTCATCTTACAGGTACGAC  
CTGTGATGGATGATATTCGCGACTTTCGTCAGCTCCACTCCCGCACGCCAGGTCATCCAGAATATGGTTATACGCCGG  
TGTGAAACCACCCCGGCTTGGGGCAGGGCGTAGCTAATGCGGTGGGATGGCGATGGCGGAAAGGCGCTGGCGG  
CAGAAATTTAACAAACCCGGCTTTAATATTTGTTGATCATCACACATGGCTATTTTGGGTGATGGCTGCTGATGGAAGG  
ATCTCCACGAGGCTGTGGTCTGTCAGGAACGCTGAAGCTCGGCAATCTGATTGCTATCTGGGACGATAACGGTATTTT  
GATCGATGCTACGTAGAAGGCTGGTTTGTGTAAGATAGCGCTGCCGTTTTCGTGCCACGCGTGGCATGTCATTGAAG  
CGCTTGTGGTACGATCCAGAAGCGGTAGATGCTGCGGTGCGTGAAGCGAAAAGTGTACGGATAAGCCAGTCTGCTG  
TGCTGCAAAAACGATATCCGTTTGGTTTCGCGCAATAAAGCCAACAGCCAGATGGCCACGGCTCGGCGCTGGGCTGCA  
TGAAGTGGCGCTGGTGCCTGACGCTGCAATGGCCGTATGCCCTTTCGAAATTCCTGGTGAATTTATGCCGATGGG  
ATGCGACCGAAGGCGCGCAGGTTCAACAGGAATGGGATGCACTGTTGCTGACTACGCGAAGCAGTGGCCGGAACG  
GCGCGGAGTTTACTCGTCGATGAAGGGTGAATTTGCCGTGGTGGCCGAGAATAATGCAAAATATGTCACGATCT  
GCAATCCCATCCGCGGCGCTGGCAACCGCTCAGGTGACGCGAAGAAATGCCATCAATCACTTCGCGGATATGCTGGCG  
TGATGGCGGCTCGGCGGACTTGTGCGCTTAACTGACTCGCCATCAGAAATCGGTTGATTTACCAGGGGAAAATCCG  
GCGGGAAATACATCTCCTATGGCGTGCCTGAATTTGGTATGTCGCGCATCATGAACGGTCTTTCGCTGCATGTTGG  
TATCCCTTACGGCGTACTTTCCTGATGTTTATGGAATATGCGCGTAAATGCAATGGCGATGGCGGCGTGTGAAGATCC  
CTCGGTGTTTGGTTTATATACCCACGATACTATCGGCTGGCGAAGACCGCCGACACATCAGCCCTTGGCAACTGGCG  
TCGCTGCGCTGACGCGCAATATGGAACCTGGCGCGTGGCATCAGGTGGAAGTGGCGGTAGCCTGGCAACAGGCGAT  
TGAGCGCAAAAGATGGCCAACGTCGTTGTTTAAACGCGCAACCGCTGGCGCAACAGCGCGCACCGCTGACAGTTGG  
CAGAGATTGCGCGTGGTGGTTATGTAAGTGTGACGCTGAGTGCAGCTGAGATGATCCTCATTTCTGCGGGTTTCAGAG  
ATTTGAGTTAGTGGTTCAGCCCGCAAAAAGCGTTAACGGAAGAGGGCGTAAAGTTCGCGTGGTTTCCATCCCGTTACCGA  
GCGTTTCGATAATCAGGATGCGCGTACAAAGAATCGGTTATGGCAAAAAGCTGTACGCAACGCTGCGCGGTAGAAGCCA  
GCATCGCCGGATTCGGGAACGCTACGTTGGGCTGGACGGTAAAGTATCGGCGATGACGAGCTTTGGTGGTCTGCTCCG  
CGAATGTTGTTTCAAAACATTTGGTTTACGCGGAAAAATGCTTGGCGAGCGCGTGGTACTGAAACAGCTAA

>Cluster\_26592

ATGAACGCATCGTATGGTCTTGGCAATTTGCCCTGGTTTACGGCCACGCTGGCGCAATGGCGTTATGCGTTACGCAA  
TACCATTGCCATGTTCTGGCGCTGACGGTGGCTATTTAATTTGAATCTTGATGAGCCCTATTTGGGCGATGACCTCGGCTG  
CCGTGGTTAGCTTTCCACCGTTGGCGGTGTCACTCAGCAAAAAGCCTCGGACGCATCGCTGGCAGTTTGGCTCGGAGCCATT  
GCGGCACCTGCTTCTTCCCGGACATACGCTCAATGAGCCGTGGTTTTTTCTATTGAGCATGTCGGCGTGGCTTGGCTTTTG  
TACCTGGGCTGTGCGCACTTACGAAATATGTCGCGTATGCAATTTCACTGGCGGGTACACAGCTGCCATCATCGCT  
TTCCGATGGTTAATATTACTGAGGCCAGCCAGCTGTGGGATATCGCTCAGGCGCGCTTTGGCAGGTGATTGTCGGTAT  
TTGTGCGCGCATGATGATGATGATCCTGCGAGCAGTTCCGATGCTACAGCCCTTTTAAACCGATTGAAAAACATGCA  
CGCCGATTACTGGAACATGCCAGTTTACTTGGCGGCTGAAACAACCGATGCCATTCGTGCAGCACATGAAGGGTGA  
TTGGGCGATACTGACCATGAATTTGCTGCGTATCCAGGCTTTCTGGAGCCATATCGTTTTCGCCAGCAAAACGCGCT  
CTTAATGCGCTACTCCACCAGCAATACGATGACCAAGTGTCACTCCAGCTGCGAGCTGCGCAGTTGCTCACTGGCCCTC  
ACCGCAGATGCTCCAGCAAAATTTCTGAAACAGCTGCTGACGCGCTGCGCAGTTCCGCAAAACAGATGTTTACACCTG  
CACGATTTATCTCCCGCTACGCGGACCAACGTCGCGACTACCGGCAGCTGCGCTTCTGGCAGCGACTACGTTATTTT  
TGCGCCCTTATCTGCAAGTAGTCAGGAATTACATCGTCTGCAAAAGCGGTGATGATGATGATGCCAGATCCACGGAC  
ATCCGGCTGCTGCTCATACCGATAACGCCAAGCTATGTTGGAGCGGGCTGCGTACATTTGTACGTTGATGATG  
GCGCATGGAGTATGCTTCGCAATGGGATGCGCGTGCATGCTTAAACGCTGGCAGCAATTAGCTGCGTACTTACTCC  
GCGCTGCGGACCGTTAAGTCTGTTGCTGCTGATGCGCAGCGTGGTGTACTTTGCTATTCAGCTTTGTGGTCAA  
ATTTGGCTGATGGTGCAGATTAGCGATCTGTGGCAATTTTACTGTTTCTCTTCCACTGCTGGCGACGATGCGACTT  
TTAAATTCAGATGTCAAAATTTGCCGACTGTGGGGCAACTGATGTTTATGCGTTCGTTTATCGCTGTGACTAAT  
CCCCGGTGTATGATTTTGTGATTTTCTTAAAGATAATCTGGCAAAAATTTGTTGGCGTGGCTTTGGCGTGGTGGT  
CGCCATTCGCGTCCAGGATCGGATGCTCGTAAAGCCGCGCATATTCGCGCGCTGCGCGGGATTGTGCTGATCAAC  
TAAGCCGCATCAACACTGAGTGAAGCGAATTTGAATCGCTCACTTATCATCACGTCAGTCACTTGGTGAACAGCCAG  
GATGCGCTGGCTCCCGCTTGGTTATTACGCTGGGGTGTAGTGTGCTGAACTGTTCTCATGTTGTCTGGCAATTCGCGCA  
CTGGGAATCGGTTCCGATCCGTTATCGCGAGTACGGGATAACTGATTTTACGTTGCGGGGAGTGTAGTGGAGCGTG  
GCGTTACGCAAAAATCACTGGCGCCACACTGAAGAATTACAGCGGATTTGCGACAGCTTGGCCGTCATCATCAACCT  
GCCGCCGAGAGCTGGCGCAATTTGCTGGCGGTGTACTGCTGCTTTCGCAACTTGGCAAGCACCAGCGCAAGGTAC  
GCTGGCTTCTTAA

>Cluster\_21607

ATGTTTACGCCAGTGACCAGAACCAGAAGTGGGCGGAGACATCACGTAATACGTACGATGAAGGCTGGCTGTATCT  
GGGAGTGGTCAATGTCGCCACATATGTCGGCATAAGAGACCCCGAAGCAATGCTACCGCACGTCATTTGCAAAAATGA

>Cluster\_53927

ATGACTTACATGAAAGGTGATTACATATCGACGAACCTCGCTATGGCGAATCGAAGGTAGGATGTTTTGCTTACATAGA  
TGACACCGTGAAAGATGGAGATCTTTATATCAGTGTATTCGGAATTTATGATGGAGAGGGCAAGGAAAAATAAATATTCG  
ATTTCAACGTAGTAACTCTCAGTGGAGAACCTGATGATGTTTCTTTCGCTTAAAGAAACATACCTGAGCAATTTCTCA  
ATAATTGATTAA

>Cluster\_53883

ATGGAATTTTCATGAAAGTGCAGATTTATGATTTTCGCGCTAACGCAAATTCAGTAAAACCACAGCCAATTCGAGTCTTTTT  
TAAAACAATGGGTGCGTGGGCTGTTTTATGCTTCGCGCTGATGACACGACGCAAGAATGGCAATAGCCAAAGATGG  
AGATGGACCCGACAAACGATGAATTCATAATTTATGGCGCTCCATCTAATTACTTACTTGATACCTGCACATTTACAAC  
AAGGCTGCCTGA  
>Cluster\_27634  
ATGACTTTTGATGAAAAAGAACTTGATAATGCAATTAATAAAATCATCGTAACGTCGCTTTTTCTGCTCAGCGACAC  
TCAGCAGAAACAGTTCTACGAATCGGCTTTCAACATGATCGAGCGTTGTTGTTCTGCGATGCGGACGAGTTACTGAAA  
AAATCAGGAAACAGTTGGCTGATGCTCTTCGAGTGCAGCTTTCTGACCAATTTCTGAAATGTGCTCTCCGAATTTGGAC  
AAATAG  
>Cluster\_62885  
ATGAAACACCCCTTTAGAAACCTTGACTACCGCAGCAGGCAATTTGCTGATGGCTTTCCCTCTCTGCTGCTGCCCCG  
CCCCGACTGGGGCTGACGCTGGCACAACAACTGGTGACCATGTTCCATCTGATGGATCTTAGCCAGCTTTACTACTTTAT  
TGTTTTGCTGTGTTTTTAGTGCTGGGCGCTATTGAGTATTTGTTCTGCGCTTTATCTGGCGACGCTGGTTCTCGCTG  
GCGGATTA  
>Cluster\_41007  
GTGAAACTAATCTGGTCTGAGGAATCATGGGATGATTATCTGTACTGGCAGGAAACAGATAAGCGAATTTGTTAAAAGAT  
CAATGAACTTATCAAAGATACCCGACAGAACACCTTTGAAGGTAAAGGGAAACAGAGCCCTGAAACATAATTTGTCAG  
GTTTCTGGTCCCAGCATTACAGAGGACACCGCTGGTATACGCGGTTACTGATGATTCACGCTCATTGCAGCATGT  
CGTTATCATTTATGA  
>Cluster\_43583  
TTGAAACAACAGAGCAATCACTGTTTCACCGGAACAACCTTCGTCGCGAGGCGCAGGAGATGCTTCGTTGTGCTGAACAGAT  
GGAAAAACGAGCGTGGCAAAGGATACGCTCCGCAAGCAGCTTACTCCGGCGCTGCGTATCTGCTGCTGGCAAACACC  
GCACACAAAGGCGGTGGATGAGCTGGTGGATTGCGTGGCGGAACCTGGAAGGCGAGTTAAGCCAGTTTGAATACTGGTG  
AAGGATTTACTGCGTGA  
>Cluster\_62580  
ATGCTAACCGTGAGCGGGAGTGAACAAGTCACCATAGCCAGGAACACTAGCGCGTAATCTTAAAGCTGAGTGGCATTTC  
ACCTGCGGTTTATCAGTGCAATTCATAGCACCTTCATCAGCCAGATTGAACGAGTCCGCTTAGAATTTGCTGGCGAGGTTG  
TCACTATGAAGCATGAGAGTTACCCCTATGTTTTATATAACGATTCGTGCCCATACCTGGAACGGTAACCTCAATCAG  
ATCGGTTCTTGA  
>Cluster\_23473  
ATGACCGATAAAATCCGTACTCTGCAAGTTCGCGTTGTTAGCGACAAAATGGAGAAATCCATTGTTGTTGCTATCGAACG  
TTTTGTGAAACACCCGATCTACGCTAAATTCATCAAGCGTACGACAAAACCTGCAGTACATGACGAGAAACAACGAATGCG  
GTATCGGTGACGTTGGTTGAAATCCGCAATGCGCTCCGCTGTCCAAGACTAAATCCTGGACGCTGGTTGCGTTGTAGAG  
AAAGCGGTTCTGTAA  
>Cluster\_16787  
ATGACCAATCTGGACTACATCGCTGCCAATCCGGTTGTAGCGGTGGAGAAATCGCCGACGACTGAATACACCAACCAC  
AACATTAATGCGGAGCTACGCCCTCTCGGCGCAGCGTTTCACTCATAAGAAAAGAGCGAAAACAGGCGGTCGCTTTT  
CTTATCAGGTAACCCGATGCGCTTTGGGTGTAGCAACCCACTAACCCAGATGTTCAACCAGCTACTGAGGGAATCAGA  
GCATGA  
>Cluster\_26177  
ATGCATCAAATTCAGTGACTTCAGATTTGCAAGGAGCAATCACTTGTACTTTGCAAAAGCTAACTTGCTACTCAGCT  
GGAAACTCTCGGGGAAATTTGTGACTGAGATTTTGAAGATGGACGTAATCTGAGTCGAAAAGTCCGCTTTGTGCCAACTTC  
TTTGCCGACTGGAACAAGCGACAGGGGAAGAGGAACAGAAACATTATAATGCACTAATTTGGGTTGCTTTTGAATAA  
>Cluster\_21217  
ATGCGCTACGCTTATCAGGCCTACAAGGGGACGCAATTAATGAAATTTGCGGGTTTTGTTGGGCGAGATAAGGCGTTCGCG  
CCGCATCCGGCATAATACATGCGAATTTACTGCTCTTTTACCGTTTACTCGTCCATAGTAACGCGGCAATAAACGTAC  
AGACACCAATCAGCCCTGCCAGAGTGGCGATAATCTGTAATCGCAAAGCTGTTATCGATATACAAAACATAAAGCCCTGA  
>Cluster\_95  
ATGGGTAAGGGTGGGATGCGTCTTTTCAGTTCCGCGAGCGTGAACGTTTACGACAGGAGGTATTACATCGGGAGGCCGG  
AGGCCACCACCAAAGCAATGGATTACACAGGACAGATGGCACCCACGGCAGTTATTACATGAAAGGCTGGCAGTCAG  
TTGATATGCCGGAATTTCTCACCCTGTCAACGTTATAAGGAAAAATATTGTTGTACAGAAAATTCAGTGA  
>Cluster\_17483  
ATGGACATGATTAACGGTGAACGCGTACATCTCAGAAAATTACAAATCTTGGTGCTGATGGCATTAAAGATTGATATGGG  
GCTTATGCCTGCCAAAGACGGTAACAACCTACGGCTTTGAATACATTCGTCGCCCTGGCACCGAAACCGGTTTCTCTGAACG  
TCCAGCTTCTGCAAGACAGCATGGATGCACCGAAAATCATCGGCTTTTCCCGTGAAGGTTGATGGTTGA  
>Cluster\_16079  
ATGAATATGGATGAAGACGAGATTTATCGCCATATCCGGCAGGCACTTTCCAGTGCGCCTCGTAACCAGTACACCGTCA  
GCTGCACCTGCAATGATTAATATGCCGACAACTGGAACACATTACGGCAAAGCCTTTTGGCAAGGCACTGGTCTGA  
GCCAGAGCCTCGGTACCGAATTCAGCAAAATGCGTAACCTAACCCGTCGTTAAAGGCCCGGCTCTGAATACCGATCTG  
CTGTAA  
>Cluster\_37264  
ATGGACACTCGTTTTGTTTACAGGCCATAAAGAGGCGCGTGGGCGCTGGGCTGACCCTTTTGTATCTGGCAGTTGGTT  
AGTAGCCGCTTACTTATCTGGCGTTGCCCGGTTTTACCGGCTTCCGCGCTGGTTTGGATGGCTGCATCTGACGC  
CGCTGCTGTTTATTTGACTGTGCTGGGCGATGGTGAATTTATCTATCGCATATCCACTGGAGGATGACGATGACGCT  
TGA  
>Cluster\_48872  
ATGGGATATATCACATATGTTACAGATCAACGACCCGGTGAATCAGATATCCTGAGCGGGAATGCTTTTGTGATCTGGA  
GATTCGCTGATTTCTGATGGCATAATCTGCTGAAAATGCCTGCTCCTGAAAAGCGCTGGACACATGAAAAGCCTCAGTCTTG  
TTCAGCCACAGAAGGTGCGGGATGGGGAAGAAGCATTGATGCTTATCTGAATGGTATGTGATCGGATCGACAGAAGTC  
TGA  
>Cluster\_48604  
ATGAGCAAGCTAACTTCTTGGGAATGGTGGTTGGCCACCTATTCTTAGCGGCGGAGTGCATTCGCTTTTACGTAGG  
TCAGTTAGTCGTAACCTGTTGCTGATTAATTTGCTAGTACATAAACGTAATCGATGATGGTCTGTGGCGCTTTGGCACCC  
TGGTGGAAACTCGCTACGGGCACTTAAGGAGAACGAAACCTTACTATCCAGGCGAAACGATTCACCTGCCACCATCACA  
AGAACACCTAGTCTGATAGTGGCTTTGATCAAAAAAGTCAACCCGAATAA  
>Cluster\_59760  
ATGGCGTTGAAGTTAAATACGTAGTCATTCGTGAGGGCGAAGAGAAAATGTCGTTTACCAGCAAAAAGGAAGCCGATGC  
TTATGACAAAATGCTTATACGGCGGATCTGCTTGACACCTGGCTGACAAATTTCTCAGTGCAAAATGGAAGACGAGCAAC  
GTGAAGCCCTTTCGCTATGGCTGGCAGAACAAAAGATGTGCTGAGCACCATTTCTGAAAACCGGCAAAATACCGTCCCA

CAGGTCGTCGGTGTGAATCCGAAGAGGAAGATGCCTCACACGGCCCTGA  
>Cluster\_32897  
ATGAAACCGGAAAGCAAAGAAACACCAATCAATATCAGGGCGAAAGCCTCACAGCGTGACCTGATTTGATATGGCAGCGAA  
TCTGGTCGCAAAATCGCGCACTGATTTTTATGCTGGATGCCCGATGCCGCGTGAAGCGCAAGACATCTTATAGATCAACGCAC  
TATTCATCCTTGATGACGAGCAATACGATGCGTTTCTGGCTGCCCTGGACGCCCCATCACTGCTGAGCGTCAGGCCAAA  
ATTAACCGCTTGATGAATCGTAAATCGCCATGGGAATAA  
>Cluster\_3100  
ATGGACAGTCACCCTAATGATATTTACTGGTTGAGCAGATAGACCCGCTGACTTGTCTTAGCAACAGCGACTGGATAAC  
GCTGAAAAAGCAAATTTGAACAACATGAATTCGGAATTTGTCAGTCTGGATGTTTCAACATCATGGCAAGCCCTGTCAGATA  
AAGAGCCTTACCAATCAGATCCGATTACCCGCACAGTCATAACTGCAATAAATAATATGCTTATAGACCTGATGTCGGCG  
ATGTCGCATAAGGACTGGCTGAGTCGTCGCCAACGCCAAAAATAG  
>Cluster\_63664  
ATGAAAAACAGAAAAATAAACCATCGATAAAAACTGTAAGATTTGGCGATGGTTATGAGCAACGAAGTCCAAATGGACTTAA  
TCATTCTCTGCGCGTTTTACCTGTGATTTCAAAGTTGAGGCGAATGAACGTGATTCATTTGAAAAATTTTTAGCCCGGC  
ATGAAGGCTATAAATCTTTTTTTTGGCGCCCGCGGTATTAACAGAAAAATCAGAGTGGTGTGTCGAACGTGGTCAGCG  
ACAGAATATACCTATACCGATTTTTCTGTGTGAGTTGACGAAGTGGTGTATCTGA  
>Cluster\_17216  
GTGCCAGTTATCTGGAACTTATCTACACCGTGTCAAATTTGGCGTTTACGGCTTCTGTCACACAACCTGCCGCCAGGT  
TTCACAATATGGCATCCGCGTTGGCGCGGTGTTGCCGGTCCGGTGGTTACCGCTCTGCACGACGACTGGCCGAAAGCCA  
AAATGGATGAGCTCTGGCAAACGGCAGCCTGATGACCGCATCGAAGTAGCGGAGTGGTGTGTTTATGTTACCCCGT  
TCAAAAAATGTCACCGTGCAGTCTGGTGTATCTGCCAACAGCGTTGATCTGTAA  
>Cluster\_49955  
ATGAGCGTCAAAATCACAGGTTTACAGAAAAATGCAGAAACAGCTAAAAGAGGTTGAGAGAGCAACAGAGGCATTAACCG  
AAGTTATGATGTCACCTTCGATGCTAACGATCCTGTGACGATTGAGAACCGGATTCAGGAAGCCTATTCATGGTGTAG  
AACGCGCTTCTGGTTATGCCACTAATCCGATGGTCAGCCATTAATCGAACACATGAAAGAAAATCTGCGCCAACAGATT  
CTGGACAGAGCAGAACAAACAAAGACAGGAGAGCGGGCAGGATGGCAATGA  
>Cluster\_44938  
ATGGCTGATTTGAGAAAAGCAGCGCGTGGTTCGGGAATGCCAGGTAAGAATCCCTGGCGTATGTAATGGCAATTTGAAAC  
GTCTGTACTGGCACAATATCCGGCTGGCTGGATTGTGCGGTACCGGTATCAAACCGCCAGACCTGATGGCCACCATTGCAT  
GTTCTGCCGCGCACGACGAAATCAGCCGCGCACACATTTTGTGATGCTGCATATGCAAAAAGATGCGCGCTGGAAGGT  
ATGGCGAGAACACAGGTTATCTGGCTGAAAGAGGGGTTATTAAGCGGTGA  
>Cluster\_24983  
ATGATTAAGGTCAGCGCGTAGGCTCTCGTCATAGAAAAATTCGACGATGTAATGACGGAGCCGCCAAAATCTGGAAT  
TAAATGGGATGATGTTGTTGCACATTAAGGCTGTGGTGGAAACAATAAAAAATAACACCGCTCCAGACGAAAAATTC  
AGATTGGAACGACCAATTCAGCACACATGAGCCACATCCAAAGAATGTGATGGATAAAGGCGCAGTAGCAGGCTTAAAG  
GAGTGGTTTGTAACTGTGTAGGGGTAGATTATGAATAA  
>Cluster\_14164  
ATGATGCAACATCAGGTCATATGATCGGCTCGCTTCAATCCAGAAACCTTAGAACGTTTACGCGTGGTGCCTCATCG  
TGGTTTCCACGCTGCTCAATGAATATGGCCGCGCCAGCGATGCACAAAATAAATAATCGAATTGACCGTTGCCAGCC  
CACGGTCCGTCGACTTACTGTTTGTAGTCAATTAATAAACTGGTGGACGTCGCACACGTTGCCATCTGCCAGAGCAACAC  
ACATCACAACAAATCCGCGCCTGA  
>Cluster\_27840  
ATGAAATCAGGTGTTTCAGCTCAATCTCAGAGCAAGAGAATCTCAGCGGATACTCATTGACACCCTGCAGAAATCTTCA  
TAAGTCGCGTACAGACTTCAATCTGAAATGGCTTGTAAAGCTGCTGAAGATGTTATCTCGACCCGACGGGTGTTAATT  
TTAATGACAGACAATATGAAAGATTTCATCGAAATGCTTGTGATGCTCCGGTGTGCTGATGACCTGCCATCGAAAAATGCTG  
GCAAGGAAACCTCAATGGGATGTGTA  
>Cluster\_50434  
ATGGATTAACAAATCTACCAAAACAACTTTTGTGATTTAATCGCACTCAGGCAAGCAGTCGTAGCTCTAATCAACTT  
GTTGCCGGAGAAAGAAAAGGAATAGTTAAAGCGGCTTAAACAGAACGTCGCGCGGATTTTTCATCATTCCCACTGACAG  
ATGACCTTGGCGACTTCCAGAAATTAATGTCAGCGTCCGCCATTAAGCTTACTGAAGAGATTTACCCTCCTCAAAAATCT  
TCACAAAATTCCTGCGAGTAA  
>Cluster\_14850  
ATGTCGCAGACAGAAAATGCAGTGACTTCTCATTTAGTCAAAAAGCGGTTTGTGCGCAGAGGTAAGCCATGACTGACTC  
TGAGAAACAAATGGCCGCTGTTGCAAGAAAACGCTTACACACAAAGAGATAAAAAGTTTTTGTCAAAAATCCTCTGAAAG  
ATCTCATGGTTGAGTACTTCCGAGAGAGAGGGGATAACACAGGCTCAGTTCGTTGAGAAAAATCATCAAAAGATGAATGCA  
AGACTGGATATACTAAAGTAA  
>Cluster\_32955  
ATGAGAACCAGGTACAGGCTTTGCGGAAGAAACAAAAAATACATTGGATCAAAATTTAAATCTCCTGTTCTCAAGG  
GATTAAGTGGTCTGATATAGAGTCACTGGTTAAAGCATTAGGCGGAGAAATTAAGGAAGGAAGAGGTTGCGGTTGTAAGT  
TCATACTAAATATGAGCGTTGCGTGTTCATCGCCCTCATCCGTCGCCAGATACCGATAAAGGCGCTGTAGAAGCGGTG  
CGTACTGGTTACTAAGTATAGGGGTAAAACCATGA  
>Cluster\_20358  
ATGATTCATATTTAGTAAAAAATCAAGTAGACAGAATTCAGTGTAAATGACACAGGAAAACGCATCTACGAAACACTTGC  
TTACCTCTATAAAGGAAAGCCAAACCGCTAAAATATAGCGATGTGTTACATCGAGCAGGGTGTCTGAAAGATGGTTTAA  
AATCTGGCTTAAACAGCTATCAAATCTCGGTGTTATAGAAAATTAAGAATTAATCTTTCTCTACATTCATCTCAAAAAG  
CTAGATAAAGAAATAGAATTCATCTATTTCCACTCTCTAA  
>Cluster\_52387  
ATGACCGTCAAGCAAACTGTTGAAATCAAAAACAGCTGGGCATGCATGCCCGCCTGCAATGAAGCTGTTTGAATTAAT  
GCAGGGTTTTGACGCTGAAGTGTGTTACGTAATGACGAAGGCACCGAGGCTGAAGCCAAACAGCGTTATTTGCGCTGTGA  
TGTGGATTCTGCCAAAGGACGGCAGATTGAAGTTGAAGGACCGGTTCCACAGGAAGGAAGCACTGCCCGCGGTTATC  
GCCCTCTTAACTCTGGTTTTGATGAAGATTA  
>Cluster\_64455  
ATGACCTGCACTCTGTCTCATTAATGCCAATGCAATTAATCTGTCTGATGCTGGCACCTGCGGTTGATGTTTTTTCAAAA  
AACAGGCCGCTATCGTTTTTTCATCTCACTAATGCTTACCTGGCGATTCTGTCTGCTGCGTGGATAGCCCTACGAATTT  
TTTACGGGAAATATACGCAAGTTGATCCCGCAGAGTCTTTCTCAATCTACCATCTGATTGCTGCTGCGGGGCACGA  
GGGAATATTTCAAAAATAACAGGAGACAGGTA  
>Cluster\_26943  
ATGAAGGTGAATGATCGGGTAACAGTCAAAAACGGATGGCGGTCGCGTCTGCGGTTGGTACTGGCAGTTGAGGAGTT  
TAGTGAAGGCACAATGTACTGGTTTTGCTGGAAGACTACCCGCTCGGCATCTGGTTCTTAAATGAAGCAGGGCATCAGG

ACGGTATCTTTGTTGAGAAAGCAGAGTAA  
>Cluster\_59842  
ATGCTGAGACTACTAAGCTGTTAATTTGTGGCGATAATAAGATAAAAGAAATCAACTTCCCAAATCATCTGGAGAA  
AGCACGTAATGGAGTGTGATATTGAGGTTGTCTCGCATATATAGCAATAAAGAAATTACTTTTTAAAGAAATGTAATTCCT  
TTGAAGAGACATTTTATATCATGGACTTTGA  
>Cluster\_18922  
ATGTATGACGCCTACCTGAACCCAAAGGACGCACTCCGTCCGATCGCCGTTGCACTCGAGGCTGCGCAGTTTATCGCGCT  
TGACCCGGGAGAAATACCGATTTAGCCCATGAGCTGATCGCTGGGCACCTGAAACAGCCGCGCTGCTCAGCTGCGCAAC  
GTAACACCCCGAGGTGGACAATGCTTAA  
>Cluster\_48314  
ATGAATTCGACAATCTGGCTGGCGCTTGCCCTGGTTTTTGGTACTGGAAGGTTTAGGGCCGATGCTTTACCCGAAGGCATG  
GAAGAAGATGATCTCTGCGATGACCAATTTGCCGATAAATTTTACGTCGTTTTGGCCGGTGGACTTGTGGTTGCGGGCG  
TTGTGGTCTACTACATGTTGAGGAAAACGATTGGCTGA  
>Cluster\_43589  
ATGGTGATACGCAAAACGGTGTGACGGGATTGTAGTAACGCAATTACTCATAAATACGGAATGCTGCCCGAGCTGCGCGTC  
AACAGCTTCTCAGGCTATTACCGAAATACCGATCGTCTGCTCTTTCTACTGACGTTACTGCCGTGCTGATTCTGGCTG  
TCGTTTCAGACGTCAGTGATTTTGTACTGTTGCAGTAG  
>Cluster\_35135  
ATGACACAGAAGAAAAAGTAATGTTTCTTATGCGCCTGGCTGTGAAACCTTTAACGCCCATTGCCAGGTGCCCTTTC  
ACTATCTCAGTTATTTCTCTTGTCTACCGAGCAATGGGGAAATTGACGCCATTTACAATACATTTGAAGCATCTCTGG  
ATAAGAAGCTTATGGCAGAGAAGCGTCAATAA  
>Cluster\_41360  
ATGAAAAAGTCGCTGATTTCGGCTATCTGAGGTTTTGAAACGCACTGGCTATAGCAAGGCGTGGTATATGCTCTGATGAG  
CCGAGGCAATTCGCCCAATCAGTCAAGATTGGTCTCGCGCAATAGCTTTTATTGAAAGCGAGATCGATGACTGGATCG  
ATCAACGTATAGCCGAATCGCGTAGCAACTAA  
>Cluster\_24591  
ATGAATGTAATAGCATTTAATGAAATAGAATCGAGCATCGCCGCAATGATCAGGTTGATTCTATCTGCATTGAATTAAC  
AACATTTAATCAAGATAATGTCATTTCAATTTGAAAGTAAAAAGAAAAATAAAGAAATCTTGATGCATTTTTTGAATAA  
TAAATACTGATATAGTTTTCGACTAG  
>Cluster\_11698  
ATGGCAGGGCACAAAGGACATGAATTTGTGTGGGTAAGAATGTGGATCATCAGCTGCGTCATGAAGCGGACAGCGATGA  
ATTGCGTGTCTGTGGCGAAGAGTCGGCGGAAGTTTGCAGGATTTTACTGGCAAAAATCGCGCAAAACGAGAAGCGG  
GACAACGTTGA  
>Cluster\_16529  
ATGAAAAAAGTGGCACTTATCTCGGTTATGGGAACGCTTGTTCCTTTTATGCCGATGCCGGGCGCAAAACCTGTTCTGG  
TTCGAAAGGGGGGATCTCACACTGTACGGCAGGCGCAAAATTTGTCTGTAATGATGGTCTATATAGTGATCGAAAAAAA  
CATGCACTAACTGA  
>Cluster\_3908  
GTGAAGAAACTCACCGATAAGCAAAAGTCCCGTCTCTGGGAGCTTCAGCGTAATCGTAATTTCCAGGCCAGTCGCGTCT  
TGAAGCGTCGAGATGCCCTTAGTCACTCTTACTGCCGAGAGGCTTTAGCGCGCTTGAAGAGCTGAGGAGGCACTATG  
AGCGATAA  
>Cluster\_6580  
ATGGTCCGTCGCCCCCTGTGGTATGTGAGCAAAATCAGCCACTGCGCGAACCAATAGCCCGGGAAGATGCTGAAGA  
TCACCAGGTAAAGCTATCAGCGCAGAAACTGGAAGAACTGCTCGCATCAATGGTTAAGGATGAGGTTGATCGCAATGATG  
GGATTTATTGA  
>Cluster\_88  
ATGGAAAAACAATGAACATCGTATTCGTGGCTGGGGAAATTTACCACGGTGAACAGGAATGCCCGACCTGCGGTAATGA  
ATCCCTGAATATCTGAAAGAGTGCCCTCATTTGCGGGGAGAAATGTAACCACTGCGATATGGGCGATGACACGGCGT  
GCATGAATGTGAAGGTGAGTGA  
>Cluster\_6669  
ATGAAAAATTTACTGGCTGCGTTGACGTCATCTTTTATGCTGGCTGCCGTACGCCGCTATTGAAGTCGCTGCGCCCAA  
GGAACCGATCACTATCAATATGAACGTTAAAATGAGCATGAGATCATCATCAAGGCAGACAAAGATGTCGAAGAGCTGC  
TTGAAACTCGTAGCGATCTTTTCTGA  
>Cluster\_50535  
ATGACGACACTTATTTATTGCAAAATCCTGTCCCTGAACCGATTCTGGCGATCCTGTTCCAGTACCTGATCCGATCCC  
TCGCCCGCAACCCATGCCGTGACCACCACCCGATGAAGAACCGATTAAATTTGTCGATCGTGAGCGTAGATCTGCGAGGA  
TACGCGCTGCTGA  
>Cluster\_11699  
GTGAAACAAAGCGAGTTGAGCAGTTGGCTCGAATCTCAGGCGCTGATGTAGCGAATGGCAGCAACCAATTTGAAACTCAG  
GTTTCATGGGAGGCGAGTGTATGCCGCTCACCCCTGCGATGAGATTAAGAACCATTGCGTAAAGCAATCCTGAAAC  
AACTCGGTTTGAATTA  
>Cluster\_42747  
ATGAATTTATCTGAAATTAACAACAAATGGGTGAAGTAGGTAACGCTGAGCGATTCTGTGCCAGAGTTACTTAATAG  
CACCGATTTGGTTAATGACCCGTGAAAAATGTTAGAGTTGCGGTTGCGGTTAGCAATATCTGCTTATGTTAACGTAG  
AAAGTGAATGTTGAAAACGATAAAAGATCTGGTCTCAACCATTTCTAACCGTAGTTTTTAA  
>Cluster\_24803  
ATGTGGACTAGACATAGGATGCTCGTGGTGGTTAATGAAAATTAACCTACTACGGGGCTATCTTCTTTCTGCCACACA  
ACACGGCAACAAACCACTTACGTCATGAGGCAGAAAGCCTCAAGCGCGGGCACATCATAGCCCATATACCTGCACGC  
TGACCACACTCACTTTCCCTGAAAATAATCCGCTCATTAGACCGTTACGGGAAATCCGTGTGA  
>Cluster\_6905  
ATGAGAACCAGCAAGCCCGGCAAAATCCCGGGCTTTTTTGGCAGCAGGAGCAGAGCAACAGCATGACGATTGCAGAAGC  
TCTTATTCAAAAAGGCGCTTTGAAAGTGGCGGGGAAATAGCCTGCCGCTGCGGGATATGGGCTGGCCCGGCAACGGA  
TTCAGGAGGCTACCGACTTTCCGGTGAAGAACTGAAAAAATGTTTCTGATGAGCAGTAG  
>Cluster\_35165  
ATGAATAGAACGATGAAGGATGGAAGCTACATAATCTCGGTACTAAGATTTATTTTCTGACACAAAAAGACATTTGGC  
GTTACATAATCCAAAAAACGATCAAAAATCTCAAAATGCGTTACGATTAGAGAGTATTTTGATTCGTGTCTCATTT  
TTTTGATTCGTGGCTTTTGTGTGGGAGTTGAAATGATTTTATCAGAAGTGTAA  
>Cluster\_10638  
ATGTCATCGAAAAACCGCCCGCAGAACAAACCCGCAACATCCGATTTCCAAACAGATGATTGAACAAATTAACAT



CGCTCTTGACCAGAAAGGTTTCAGAAAATTTTCTGCGTGGGTCATGAATCTTGCCGCCGGGAGCTGGCAGCAGACATAA  
AATATGCCCGTCAGTTGACTATAAAAAAGAATGATACACAGTATGCTCTGCGATGGCTGTTTCATATAA  
>Cluster\_21408  
ATGAAAAATCAGAAGTATTAGGCTATTTTGGCGGAGTTGTTAAAAACAGCCGAGCTCTAGGAACGTCAAAAACACAGT  
CAGCATGTGGGGAAAGGTTCCGTGGAAATGGGCGTTGCTAATTCAGGCAGTCACTGCCGGGGCGTCAAAATATGAGT  
TACACATACCAGGTTGTCATTTCCCGTTCTGATCATAATCCGCCTTCTAACCAAGGGGAGGATTCATGA  
>Cluster\_39649  
ATGCATACAGTTTCTGAAAATCAGTGGGTAATAACGCATTACTGCTGCAACAGGGCCAGAACCAGGACAGGCGGACGC  
GGCGACGGCTTTTCTTTCATCTTGACGCCATGATTCGCCACATCACAAAGCGGAGTTATCCCGCTGGAGATAGTCCG  
AGCTGCTCAGTCAGGAGTCGAAAAATTTACAAATATCGGATTGCTCTCGGGGAGGTTACTTTGA  
>Cluster\_31074  
ATGAAATTTGATGGGTTACAGCAATTTGGTGATGACTGGCCTTCGGTTTTTCATCAGTCTGATAACAGTGGCATAATGT  
ATATATGTTAAATTTGCCATGAAGGTCCTTTACTTACCATTACATCCACACAGATAAAATCAATACGTTGTGATTT  
CTGACTTCCCTCCGTTTCGGTAGAAAAATTAACCTCTGTTTCACTGATGGCACACCATAGACCATGA  
>Cluster\_58175  
ATGAAAATTTATCAGTAAACGCAGGGCAATGACGATATACGCCAGCATCTGAGTCCCGAATCTTTCCGCTACTGCACCGG  
CAAATACCAGTGGCAGGTAGCGTCTGTATTACACCGCAGGACGTTCCGGATATCCCGGAGTCCCGCGGTATACG  
CCGAACGCCGCCAGGACCGCAATGGGCCATACCTGCCTGATGAGCATCACCTGAACCTGA  
>Cluster\_203  
ATGCCGCAAACTCTCTTAACTTCAAAATCCTAAAACTAACGAACCTATCACCCCTCGTTCAGGACTTGCTCTTGTGTA  
TGCCCTTCCCTCAAAAACCTCTGGAATAAAAACCTTAAATAGACCAACATATGCCTTTACCTGGTTCAAACAGAGGTTACATCT  
CCTGGCAATATATCAACTTATCTTCTTATGCTTATCGGTTGA  
>Cluster\_35011  
ATGGAAACGGGAGGCTTTGGTGACAGTAATGCCACGCAACCACAGCAGCATTCTGGAACGGAGTGGCTGGAAAATGT  
CGCCACAACCGAAATCATTAAGCAACTGAAGAAAGTAACGGCCATCGTGTGAGTCTGCCGTTTATCGGTTTTCAATCCCC  
AGGACTACCATCCACTGCTGATTACCGTTTCCGAAAAACGTTAACTGA  
>Cluster\_9764  
ATGTCATCGAAAAACCGGACCCGCAAGAACCAACCGCAATATCCGTTTCCCAATCACATGATTGAACAGATCAACAT  
CGCCCTTGGAGCATAAAGGTTCCAGTAACTTTTCAGCGTGGGTTATTGAAGCCTGCAGGAGAAGGCTGGCAACAGATGCAA  
CGCATCTGCGTACGGCCAGCATGACAAATAACGAGAAATGA  
>Cluster\_3094  
ATGGCGAAACGCTGGGGGAGCAATATGGCCCGTACTGCCATCCGCACTGCGCCAGTCTTCAGCCCGTAACCGCAAGAA  
CTGGCTGTTGCGCGCTTCCGACAGTGGCTGCGAACAGCCGGCGTACTGTATTGCGAGATCGGCACGTTGCCGCTGAACA  
ATGTGGAGCCGAAAAATGGCTGAGTTACGTCATTGAGAATATCCAGGACTGA  
>Cluster\_48776  
ATGACTAAAACTATGAAGTATGTAAGGGACCCGCAATTTGAGAATAAAGTTACGGTAATCTTAACTTACAGGA  
CAAAGAACGTTTTGCGGTTGAAATTTTTGATCTGAACATCAACCTGAGCGACTTGAAGGAGCTGGTTGGATTATTATG  
AAGTTACTGCGGTAAAACATGCCAAACAGTTCTTGAGAGATTTGGCTGAAAAAATATAA  
>Cluster\_58608  
ATGCGTGAATGAATCAGTTAGTAAATACTGAAGATTCAGCCTGGCCAATAATCCAGAACTGGTTAAAAGACGCCACAAA  
CCATACCGAACTCTTACCGGTTAATAAAGATTTAGCCGAAACCGCACTTATCAATTACAGGTGACAAACAAATCACCGA  
TGGGTGCGCTTGTCTATGGCTCCGGAGGCTGCTGATTGATAATGGTTAG  
>Cluster\_29506  
ATGCCAGTTATCACCGAAATCTGGGTCAGGGTAAAGGCATTGTTGCAGCTTATTTTGCCCTCACTTTATTTATCGCCGTGG  
ATTACGGGTTGCGGCAAAATATCCGCTTAACTGAAATATATGTCCTCAGGGTCCGATAACCCCGTTACGGTTATCCCG  
CCATGCCCCGATTAAGACTTTGAGCTTCTTGGTCTGATGCTCCTGAAAATGAAAAACACGCTTCCGGGCGTTATTT  
CTTGATGAGTGTGCGACATGGCTGAATACCCGTTGTTGCCCCGTAAGGACAGATTACCGTTAATTGACTGGCTGATACA  
TTCCCGTAAGCTGGGCTGGGATGTTTATCTGATTGCACAGCATGAAGATATGATTGATTCCAGATAAATTAAGGCGATGG  
GGGCTAAAATATTCGCTGCCCGCTCTGATGAATTACGTTGCTGATTACGCCACTGATGGAATATTTCAGACCA  
GAAAAACAGGGGTTGCATCAGGTAAAAGGGGATTTCTCATTACGTTGGCTGCCAGTACGTTTCTTTATGACGGCAC  
GATTCACGCGGCACGCTCGTCCCGTAGATAAAATCATTTACAGGCTGCGGATTTACAACTGTTTACGACACTAATTTCA  
TTTTCTCTGACGGAATGGAGCTGCTTAAATGGCCGTTTTGTGGAATATGCGTGTCTTTATTCGTTTTGCCCGGGCGACA  
CTTAAAACCATGAATCCGTTATCTCAACAAACCCGAAAAAAGGCCACCCACAGAAAAAGCCGTGGGGCAAGTTGATTGC  
CTTCTTTTCTCGTACCAGGATGATTGCCGTTACCCGACATTTATTTCTCCGCGATCGGGAGGTTAGTGGCGCTGTCC  
CTCCTGTGCTGAAAGCACCCGTCACACCTGACATCTTTGCTGCGTCAACGGTTGATCAGAGCTGAGACAGAAAAAA  
CCGGATGTGCTTCCGGTATCAAAGGAGTGGCGGCTTGCAGGATATGTCAGGGGGCAAGTCTTATTTGTGCTGTTGGG  
TCCGTCCGGTTCAGTGGCAGCTTATACCGCTTTTTCAGCCATGGAACGGCAGCGCCACGAACTGAATGTTGACGGTGA  
GGTGGAGCTTCTGGTTCAGGCCGTCGGGACGGCATCAAAGGGGATACTCTGACTGACAAAAATGCTTTCGTTTGTGATGTG  
AAGGTAATAA  
>Cluster\_17670  
ATGCCATGCAAAAATAACGACGACAAAACTCAGCCTGGTCAATGCGGAAAGGTCGCATTTGACTGGAGCAGTTATCGTAT  
TGACAGCGATTTCTGAAAAGCCGCGCAGGCTGGCAGCTTTCAGTGGGACTGCCTGAAAAGGTGTTCCCGGCGGATATCG  
TCCGGGGCGCGCGGTTCCGGTTGACAGTGGGAGACGAGACGGTCTCAGTGGTGGCTGGACAGCGTGGCGCGCAGTGT  
TCCCGTACAGCTGCACGCTGGCCCTGTCCGGGCGTATGATGCTGCCATTTCTGGTGGACTGTGCCGCGCCGGTGTTCAG  
CGCAATCAGTGCAGCTGGACGAGGTCATCGACAGGATAGTCAGACCACTGGGGATACAGCGCATCCGTATACAGCGCT  
CCGGCGTGTACGTAATGACAAAAGTTGTTATTGAGCTTGGGATCGCTGCGTGGGATGCACTGGCCAAAGCTCCCGCGGT  
CGCGGCTTATGGCCGTGGTTTGGAGCTGACGGGACGCTGGTTGTTGGGTTGGCCGACTACACCACCGCCGGTGGATAC  
GCTGATTTGAAAGCTGAACGGCACCGGGAAACAGTGTGAGGCTGGACGATACCCGTTCCATTAACGGCTGTTTCTCCG  
AACTACTGTGCTGGCCAGAGCCAGCCCGCCGCGCAGACAGCAAGAAACAGGTGGCCGTGGTGGCGCTGGATATCTGG  
AACGAGGACCGCAGCTGCGCACATTTGTCGGGCGAGGACGGTAATACGGACAGTGGCCAGACAGGATTCATAACAT  
GAAAGCCGTTGCCACCGACCCACCGTGGATTTATACCAGCCGAGATAATCACCCAGGGCGACACCGCAATCTGGAGC  
AGGTGAATGGCGCGCAAAAAAATGATGAGTGTATGCCGCTGTCCGGGCTGGATATCGTCCGCTGGTTGCAGGTCAT  
CGCACGGCAGATGGTGTCTGTGGCAGCCCGCCAGCGGTTGCGGATTTGTCAGCAACTCCACGGCATTGATGCCATCTT  
TTTTCTGATGGGGCTGAGTTTTCAGCGGAGCCGGAACGGGACAGCAACCCGCTCCGCTTAAAGGAGGACGGCTGTGGA  
TACCTGATGCTTCCCGCGGAGAAAGAACCCATCACCGAGGGCAAAAAGAAAAAGAGGTCGCCATTTGTTAAGGTC  
TGGGAGAAATGA  
>Cluster\_53931  
ATGAACAGTAACTATATGCCATTACACAAACGAGATAGTCTCGGAAGATACTATACAAAAAGATCCATAAAGTGCATTAT  
GGTTCTCAGATGAAAGCTGAAAAAGTCAATAATATTATGATTAGCTTCTGGTGGGGGAGCTTAACCTATGCTGCTT

TAGACCGATGGAAGAATGCAGAAGCATATCTTTGGATATAGAATCTCGGATGTCAAAAAAGTATGTGATAATCTTACT  
CATATTGTAACAGATGCCCTTGTTCATTTCTGAAATGCTTGCCGACATCAAGGAAATTTGATGTTGACGATG  
TAATCCTCCATTCCTCTCCCTGAATGGAGGATGATTATTTTAAATCATTAGTGAGATTGGCGCAGATAAAATATATAT  
CTGTCTCAAAAATATGTCAGCAGAGATAATATTTATATCTCAAGTCAACAGGTTTCTTAAAAAGGGCGGTGAGGCTGGA  
ATAAATTTTACCTGATATTTTACAGCAAGAAAGTTTATAGGTTAAGACGATATTTATTGAATGAACATCAATTA  
AAAAGTCATTGAATTGCCTAGGAATATCTTCAAAAGGACAGAGGCTAAAAACATATTTTAAATTTTAAATAAAAAAATTA  
TGCCTCATATAAAAATACAAATTACATTTGATAAATAAGATGGGGAATGTGCGCTCCGTGTTTAAATAGAAAAGAAGAT  
CGGTTGAGAGAATGGACTACTCTTATCATTATAATAAAAAATGAAGGTAAGGGTTTAGCACAATAGGGATGCTTAAAAA  
TATTTCAATTTTAGAGGTAGGTTAAATTCAAAGGAAATACGGAACATGTTTTTCATACGACAAAAATTTAGTGGTGATG  
AAAAGTACATTAATTTCCACTGCAACTCTGTAGAAGAATTGAAGCCATCAAAATTAGATGTCAATTGCTAAGCCTGGTGAT  
ATATTAATAGCAAGGTTGGGCGAAATTTTCATAAAAAAATATGTTTTGTTGAGAGCGGCTATTTCTTATATCAGTGACTG  
TATTTTCTGATACGAGCCTCTGGTGGAGATAAGAAAAAATAATTTGATTTTCTTTGTTCTCAAGATGGGCAAGAGGAAT  
TATCTCGAGCGAGTAGTGGTGTAGCCGCACAACATATTACAATGGATGCATTAAAAAAATACATCTTTGTAAGGATTA  
CATGACTGA

>Cluster\_39879

ATGTCCCCTGCTCGCAGGCGAGGAACCTGGGTAATAATTTCTGCTCATCGATAATATGCTGGTCTGCTGGGTTCTT  
TGTGTCTTCCCGCTGATCTCTATCCGCTTCGTTGATCAAAATGGGCTGGGCGCCGCTCATGGTGGTATTGCCCTCGGTC  
TACGCCAGTTTATTACGCAAGGCTCTGGGATTTTTCGGCGGCGCAATTGCCGACCGCTTGGTGCCAACTGATGATTGTC  
ACCGGTATGCTGATGCGTCCGCGGATTCGCCACAATGGGATTCGCCACAGAACCGTGGCTACTGTGTTTTTCATGCT  
GCTTTCGGGACTCGGCGCACGTTGTTGATCCTCCGCTTCGGCGTGGTGGTGAACATAATCCGTCACACAGCAGCTG  
GTCGTTTTTTCTCGCTGTTGATGATGACAGACAGTCCGCTGCGGTCATTGGCGCATTGTGGGGAGCTGGCTGTGCAA  
TACGACTTTGCTGCTGCGCCACAGGGGACGTTTTGTTGCTGTGTGCAGCTCAATGCGTGGTGTGTTACCGGC  
ATGGAACCTCTCCACCGTACGCACGCGCTTCGCGAAGGCATGACCCGCTGATGCGCGACAAGCGTTTTGTCACCTATG  
TCTGACGCTGGCGGGTTACTACATGCTGGCTGTACAAGTATGCTGATGCTGCAATATGGTCAACGACGCTGGCGGC  
GCGCCTCTGCGGTTAAATGGATGATGCCATTGAAGCGTGTCTGTGCTTAACTGCTACCTATCGCCGCTGGAG  
TGAAAAGCATTTTCGCTGGAACACCGGTTAAATGGCTGGGCTGTGATAATGTCAATTAAGCATGATGCCAGTAGGCATGG  
TCAGCGGCTGCAACAACCTTTACCCCTGATTTGTCTGTTTTATATCGGGTCGATCATTGCCGAGCTGCGCGTGAAACC  
TTAAGTGCCTGCGTGGGTTACTACAGCTCGCGGCAAGAGCTATGCGGTTTAGCCGCTGGGTTCGGCATGGCGGCGC  
TATTTGGTTATATCGGTGGCGGCTGGCTGTTGACCTGGGCAATCGGCGCACCAGCCAGAGCTTCCGTGGATGATGCTGG  
GCATTTTGGCATCTTCACTTTCTTTCGCTGGGTTGGCAGTTTAGCCAGAAACGCGCGCGCTCGTTGCTTGAACCG  
GACGCTGA

>Cluster\_58827

ATGTGCTGCGCACCTCTCCCTGCTGATGCGCGTAATCTTACCTTCCGCGACAAGGCTGTTAAACAACCCCGCGC  
TCGAGCGTCTGGAGGATATTCGCGCAACGATCTCCCGCATGTCCTTCTGCAAAATCGATACCATCAATATTGTTGCC  
GTAGTCCATATCTGGTCTTTTACGCTGCTGGAAATATCTGCCCAGTGGCTGGATGAGTCTCTGGCGCTGGCGAA  
TTAATGGAAATCTGGGCGCATGAAGCTGTTTTATGCGCGCTAGCCGATTTTCGCTTTATTCGCAACCGCATGGCAC  
TGAAAAATGGGCTGAAATACAAGACGCTGGATGCAGGAACATGAGGCGGAAATGCACAGTTAATTCAGCATATTC  
ATGATAAGGGGCGGTCAGTTTACGCGATTTTGAAGCTTCTGTAAGGTCGAAAGGCTGGTGGGAAATGGAAGCCGAT  
AACCGCATCTGGAAGTTTTTACTGCGGAAAGGTGATGGTGAATGAACGGCGCAACTTCCAGCGGTTTTATGATTT  
AACCCACCTGCTCATGCTGACTGGGATGATGAGCGCATCTGCTTTCGCAACAGAAAGCAGAAATCATATCTGGATA  
ACAGTGGCGTAGCCTGGGAATATTCGCGAAGCAGTGGCTGGCAGATTACTATCGGCTGAAACGCTCCGCGACTGGCGGG  
TGGCGGAAGCGAGGGCTGAACAGCAGCAATCATGCTGTGCATGTTGAAAAATGGGCAATCTTTGGCTGCATGATGA  
TTTTGCTGCGCTACTCTGAGCGAGCCTGGCCGAAAGCTACTGCAACGCACAGCGGCTACTTTCGCTTTTTGATCCTG  
TTGCTGCGGATCGCAACCGCGCAGAGCAGCTTTTTGATTTTAGCTACCGGCTGGAGTGTATACCCAGCGCGAAACGC  
CAGTATGGCTATTTTGTCTGCGCTTATACATCGTGGCAATTAGTTGGGCGAATGGATGCCAAAATGCATCGCCAGAC  
AGGCATCTTGAAGTTATCTCTCTGTGGTTACAGGAAGGATTAACCAACGCAACGCTGCAAAAAGGGCTACGTCAGG  
CGATTAAGTTCGCTAAGTGGCAGCAGGCAACGCGGTTGACATTAGGATGCTGCCCCAAGGCTCTTTACTGATTG  
CGCACCGGCTGGGAAATAGACCCGTCGCATAA

>Cluster\_64456

ATGACTAAGCGAAATAAAACCCCAAATTTAATTTGGACAAGCTCGCAAAAAGAGATTGCGCAGCCTTAACGAGCGT  
GGGTATGACCCCTCAACATGATGCTGGCGGATTTGTTTATGTACGCTTATACAGATGGCAGCAATTTAAACGGTTTTGC  
AATTGGCCAAAGCCTTATCAGTGCATCCAACACGATAAATGGTTTATCGCGCGCATCAATTTAAACAGAGAAAGCG  
CTCTCAAAAACAGCATTCAAAACCTAGCCTGGCCGATAAACGCCGCGAGGCCAAACAGAAGGTCATATGGCTGGGA  
AGCGCTGATTCGCATATGCTTATGCAAAAGCCAGGCGCACGCAAAAACCTGAAACAGAAAGCCTTTGGGAGAAATGCC  
GTGCGCTGGCAGCTCCAGCCAGCACGCGCATTTACGCGCAATTCATCCGCGCAAGGTTTCCGCTTTTCCGATCAAC  
ACCGAATTAACAGGCTGCAATCAACGCAGATGAAACACCGAACCGTATGATCTGTGAGCATGACATCAAAAGTTAC  
GACAAAGCTGGATAATCGGCTTACAGGATTTTCTGGCAAAACATTTCCAGCCAGCCAGCGTGTGATGTTGAGCTTT  
ATATCCACAACACAGCATGAAGCCACACGACCATTTGAATGCTGAGCGGTACCTGGATGATCAGGAAGAAAGCAA  
ATCATCCGAGAAGCCGAGAAGCTGGCCGACGTTGTTCCGGAACCTGGTAGCCGATGATCGAATCATATGTCGAGGAAGT  
AGTGGTCTGCTGGAGGAAGAGAAACCCGCGCCGCGCTTGGCAACCTGTCAAACCTCACAGTACCCGAACCGCGCAGC  
GCATCGTTGAGCAGCGGACACGAGCGCATATGCAAGTTGTTGAATGGGATGGAATAATTTGCTGGCGGTTGCGCG  
GTGACTGGCTGGCAGAAGCCGCAACGATTTGCAAGCGCGCACATTTGAGCCAGCTACCTGAGCAATTTTAGCGGTGATA  
TGGCCTGTTGTTGACTCCAACGATACACGACTTACTAGACGAGAGCTGATGGCCGTAACCCGAAACAATGACCGTAC  
ATTTTGGCCAGGTTATTGAGCTCGGCGGATGTTTGAAGGCAAGTATTGAGCTTAAATTTAGCCGCTGAAACATGGCC  
CGGTTGGTTAAACGCTGGAAAGAAGGAAATTTCTGA

>Cluster\_14360

ATGAAAATATTGCTGCAGATGTTTTGTTACTTGGCCAGGCGTAATTTCTGTACGCTTAAATAAACCACTGAAAGCGG  
ACTTTGTTGATAGGAGATGCCAGCTTAAATGGTCGCGAATTTGCGGTCGCTTCTTATCTGAAAGATCATCTTTGTCAC  
AACTAATTTGGCCGATGCCAGCCGATCGAAGATATCTGGCAATTTTATAAAGGTGCTTACTGGCGACGCTGGCCCC  
CTCACGATGTCAGCCATTTCTGCCATTTGATATGCGCTTGGGATATCAAAAGTAAAGCGGCAAAATATGCCATGATCA  
ACTGCTTGGTGGTCTTCTCGTGAAGCGTGTGTTTATGCCACACCAGGGCGGACGATGATGAAGTCTTGAAG  
ACTATGCAAAAGCACAGCAGATGGGCTTTAAGCGGATTCGTTGCAAGTGGGTTACCGGTTATGCAAACTACTTATGCG  
CTGGCAAGGGCAAAGGCTGGCGTATGAACCGCAACCAAGGCTGTTGGCCAGAAGAGCAGTTGTGGTCTTCAAAAA  
GTATCTCGATTTTACGCGCAAGTTATTTGAAGCGGTCGTAATAAGTTTCGTTTTTAAAGCAACATCTGTTGCTACATGC  
ACCATGCGCTGACCCCATCGAAGCGGCGGCTTTGGGAAGAGCATTGAGGATTAACCGCTGTTCTGGATGGAAGATCCG  
ACGCTGCAAGAGAACGGAATGTTTTCTGCTGATTCGCGAGCATAACCGTACGCGGATTTGCGGTGGTGAAGTGTTTAA  
CAGTATCTGGGACGCAAGCAGTTAATCGAAGAGCAGCTGATTTGACTATATTCGACAGCATACCCATGACGGCGGCA  
TTACCGGGATGCGGACAGATTGCCGATTTGCACTGCTTTATCAGGTACGTTACCGGTTCCGATGGCCCTCAGATTTATCG  
CCTGTTGTCATGCGGCGGCTGCATTTTACCTATGGGTACCAATTTTGGCGTTCAGGAGTACATGGGCTATTCCGA

ACAAATGCTTGAAGTTTTCCCGCACAGCTGGCGCTTCGAGGAAGGTTATATGCACCCAGGCGATGAACCGGGGCTGGGTA  
TTTTTTTTCGATGAGAAACTGGCGGCGAAATATCCGTATGACCCCGGCTATCTCCCGTCGCACGACTGGAAGATGGCACA  
TTGTGGAAGTGGTAA

>Cluster\_67116

GTGACTCAGCCTGTGAAAGCAGAGAAACCCCGTCGGAACCGATTTTCACCGGAGTTTAAATGGAGACTTGTTCAGCAAAC  
TCTTTTACCCGGTGCCTGTGTGCGACAAATAGCTCGTGAGAATGGAATCAACGATAACCTGCTCTTTAACTGGCGGCATC  
TCTGGCGTAACGGCGGCCGTCAGCCGCCCGCGCAACATGAAACATCGCTATTTCCCGTGACGTTAACCGCGGAGCCGGAT  
AATAAAATCCCGGACCCCGTGCAGGTTGAGCAGATAAAATACACCGACCAGCAGTCTGTGCTGCGAGCTGGTTCTGCCGGC  
CGGAACCTCTCAGGCTTAAAGGTAACACAGCATCTCAGCTATGGAGAACGGAACGCTTTTGCATGTGTATTTCATGTATG  
AATGCCTGTCAAAAAACCCGGGGCTGATATCCTTGATGATCCCATATCTTCTTTTGATAAAAAACAAGAAGTTTGGCATT  
CTTGAAATGCTGTTCAGACGTGCAGTGGTGAATGCCTGAAGAACCGGACTGTACTTATGCTGACGCATGACGTGGAGCC  
TGTGATTGACACGCTCAAGTCAAGTCAAGGTTGTTTCAGTAATCAGGTGACCGCTCCTGCTGCGCTGTCTGTGGAG  
TCATAGAAGAAATTAACCTGTTAACGACGGGATATCATGACATTTCATGACAGATTCGAAAATCCATCACCCTGCGCAGCAG  
TGTGAGGAGATCATTAAGCTCATCTATCTTCGTCGCTACTTTGAAATCGTTGACGAACGTGGTGTATGCTTATCAGCTTCT  
ATCCAATCTATTCATCGACGCGTCGCCCGCTGGATTATCGCGAGCCTGCCGCTGCGGGCTCGGGCTATCCCAAAATGG  
CTCCTGAGAAAATCAGCAGGCTTGGCGGATATCCGGGAGTATGTGGACAGTTTGAATTACCCGCGACTTCAGGCTCTC  
GTCAGCAGCCAGATGAAATAAAAAACCTGATCCGCTCGTCTGTAACCGCTATGAAAAATCGAGGATTTCCGTTACT  
GGAAGTGGATCAGGACATCCGGTAATACGAAAATTCGTTAACGAAACGTACCACATTGAAAATGAGTTTCATCTGTCAAC  
TAGATCCGTCAGATTTCATCTCATCCCGGAGTACGTGATTATGGAATGTGACAACTCATCGCCTGCCACCGCGCAGCA  
ACCAGAGCTCGGTTGCCGTATCGCTGA

>Cluster\_23238

ATGTTAATCCAGAAAGCATATAAATACAGGCTTACCCACTGACCAGCAGGCGCAAAGTTGCGTCAGTTGTGGGTTG  
CGCTCGCTTTGCTGGAACATGACTGAATGAAACACTGAGCATTCATGACGCGGGCGGAAAAATTCGCTCAGCTTTTCG  
ACCTGGAATAAACGATACGGGCTGGAAAAACCTCCCTGAGCTGGCTTTCTTTGAGGTTTACACTGACAACTCCAG  
CAGAAACTGAAAGACCTGCGGAGCGCATGGGATCGCTGTTTTGATAAAATCCCTGACGGCTGAAAAGCCGTTTTCAAAAA  
GAAAACCAAAGGCTGCGACTCTATCCGGTTCGTCAATTCAGCAAAATATGTTGGGCTGGAATTATGGCCGTGTGAAACTCC  
CGTCAGGACTGGGCTGGGTTAAATTTTCGTCAGTCCCGGAAGATTGAAGGCGTCATAAAAATTCAGCCATCAGCCAGCAT  
GCCGGACATCGGTATGTGCTTTTCAGGTCGAAATAGCTGTTACCAGATCCGATTCAGCATCGACCGCAATAGCCCT  
GGATGACAGGTATAACGAAGTGGCAACACTTTTCAGACGGCAGGCTTTGAAACCGGTAACAGCTTTAAAAAAAATCAGG  
ATAAGCTGGCTCGCTTACAGCGCGCTTCGGCTCGGATGTTAAATTCCTCCGCAACTGAAAAAGCAGAAAGCGAAGATT  
TCCCGTTTACACTCTCATATCGCAAAATCCGCGCGGATTACCTTCATAAAACACGACGACGATCAGCAAAAACACCGC  
GATGATAGTCATTGAGGATTTAAAGGTTTCGAACATGTCAAAATCAGCAGCGGGTACGGTAGACCAAGCCGGGCGCAACG  
TCGCGGCAAAATCAGGCTTAAACCGGGCAGTACGGATCAGGGCTGGGCAGAAATGCGCGCCAGCTCGAATATAAGCAG  
GCATGGCGCGGGCGGTGATGTGCTGGCGATTAATCCGGCTACACCAGTCAGAAATGCGCATGTTGTGGGCATACATCGAA  
AAATAACCGCAGGACGCGAGGCGAGCTTTATCTGTACCGGCTGCGGCTATACGGCAACGCCGATGTAACCGCGCTCGCA  
ATATATTAACAGCAGGTTTTTGAAGTCATGGCGGCGGACGAAATATTGCGCTCAGTCCGTAAGGACCGCGGTAAGGGC  
GCGTAA

>Cluster\_9777

ATGGCAAAAACGGGTTGCGGGCGGGAGCGTACCTGACGGGGTGGATGTGCTGTGCGTAAACCGGAGGTGACGTGGTA  
TGGCTGGGACGGAGACAGCTGACGACGGTGCAGACTGACACCACAGCTATCCAGACGGTATACGAGCGGGAAAGCTTCA  
CGCCGCTCATCCGGTTCGAGACAGAGAACGGCGAGCGGAAAAAGCGCAGCGCGCAGCTGGCAGAGACGCTCCAGCAG  
GAAGGGAGTGAGAACCGGCCACGGTGTGGTGTTCGCCGCTGGAATGGTGTGCGGCTGCTGGACAGACTGGAGGAAGAAATCCG  
GGCAGACCCCGGTGAGCAGTGTGAAAGCCGTCAGTGGCTGCGAGTGCGGGCTGACGGTGGAGCAACTGGCCAGCAGGTTG  
AGCCGGAATACACACCGCGCGGAAAAGTTTCAATTTTACCAGTGCAGACCACCGGGGCTGCCGCTGCGGCTCATCAGCGAA  
GAAGGCAATACGGTGTGGAGCGCGGAATATGATGAATGGGGCAACCTGCTGAATGAGGAGAACCAGCATCACCTGCACCA  
GCCATACCGTCTGCCGGGCGAGCAGCATGATGAGGAATCAGGGCTGTACTATAACCGTACCGGTTACTACGATCCGTTG  
AGGGCGGTATATTAACACAGACCCCAATGGGCTGGAGGGGGATGGAACCTGTATAAATACCACATGAAATCCGATAATA  
AGGATGGATCCTTTGGGTTTGTATAATTTATATCAATTTATATGATGTTTGGCATGATGATTCATATGGAACATCATC  
AATTAATATTAAGTGGCAGTGGAGATCTAATATCATTAGGTGGTATGCAAGACTTGGCGTTGCGTTTGTAAAAAGAAAG  
GTGAAATGTTATCTGATATTTGTATTTATGCTACAGCATGCGGACATGCGGAATGGTGGTGGGATAAATGCGGCTATC  
ACATATCTGAGACCAAGTCTTTTACCTACATCGGGAGTCAGCAATTCAGTAGGTTGTAACGGTTTGGCGGGGAGTTGGGG  
GCATTTTGGCTATACTTATGTAGTGGATGTTGATAATCCAGAATCATCGACAGAACTCTGTGGTATCGGTGACAGGTTG  
ACGCTTACGTTATGACTCTGGCTTGTAGAACCTGGCAAGAATGCTGGGTCAATTA

>Cluster\_42075

ATGGCGGCAAAAAGCTTGATACTCAACTGGTGAATGCAGGACGACGCAAAAAATACACTCTCGCGCGGTAATAGCGT  
GATTCAGCGCGCTTCTTCGCTGGTCTTTGACAGTGTAGAAGCCAAAAACACGCGACGCGCAATCGCGCAATGGCGAGT  
TGTTTTATGGACGGCGCGGAACGTTAACCCATTTCTCCTTACAAGAGGCGATGTGCGAACTGGAAGGTGGCGCAGGCTCG  
GTGCTGTCCCTCGGGGCGCGCGGGTGGTGAATTCATTTGCTTTTGTGCAACAGGGCATCATGTGTTGATGAC  
CAACACCGCTATGAACCGAGTCAGGATTTCTGTAGCAAAATCCTCAGCAAACTGGGGCTAACGACATCGTGGTTGATC  
CGCTGATGGTGGCGATATCGTTAAGCATCTGCAGCAAAACATAAAATCGTGTCTTGGAAATCGCCAGGTTCCATCACC  
ATGGAAGTCCAGATGTTCCGGCGATTGTTGCCCGCTACGACGTGTGGTCCGAAATGCCATCATATGATCGACAACAC  
CTGGCAGCCGCTGTGTTTAAAGCGCTGATTTTGGCATGATGTTTCTATTCAGGCCGCGCAAAATATCTGGTTG  
GGCATTAGATGCGATGATTGGCACTGCGGTGTGCAATGCCCGTTGCTGGGAGCAGCTGCGAGAGAATGCCTATCTGATG  
GGCAGATGGTGCATGCCGATACCGCTATATAACAGCGCTGGCCTGCGCATTGGGGGTTGCGCTGCGTCAACATCG  
TGAAGAGCTGTGAAAGTGGCTGAATGGCTGGCAGAACATCCCAAGTAGCGCGAGTTAACACCCCTGCTTCGCTGGCA  
TAAAGGTCAGAAATCTGGAACGAGACTTTACAGGACGAGCGGGCTATTTCTTTTGTGCTTAAAGAAAACCTCAAT  
AACGAAGAGCTGGCGAATATCTGGATAACTTCAGTTTATTCAGCATGGCCTACTCGTGGGGCGGGTATGAATCGTTGAT  
CCTGGCAAAATCAACGAGAAATATCGCCGCCATTCGCCCAAGGCGAGATCGATTTTACGCGGACCTTGATTGCGCTGC  
ATATTTGGTCTGGAAGATGTCGACGATCTGATTGCCGATCTGGACCGCGTTTTTGGCGAATTTGATAA

>Cluster\_28937

ATGGAACAGGTTGTCATTTGTCGATGCAATTCGACCCCGATGGGCCGTTTGAAGGGCGGTGCTTTTCGTAACGTGGCGC  
GGAAGATCTCTCCGCTCATTTAATGCGTAGCCTGCTGGCGCGTAACCCGGCACTGGAAGCGGGCGCCCTTGACGATATTT  
ACTGGGTTGTGTCGACGCAAACTGGAGCAGGTTTTAATATCGCCGTAACCGCGCACTGTGGCTGAAGTGGCGCAC  
TCTGTCCGCGGTTACCGTTAATCGTTGTTGGTTTCAATTCATGACGAGCAGTGCATGACGACGACGCAATGATCATGAC  
CGCGATGCGCAGGATGCTGTTGGCGGCTGGAGCATATGGGCCATGTGCCAATGAGTCACGGCGTGGATTTTACC  
CGGCTTTAGCCGTAATGTCGCCAAAGCGGGCGGATGATGGGCTTAAACCGCAGAAATGCTGGCGGATGACCGGTTATC  
AGCCGTGAAATGCAAGTGCCTTTGCGCGCGGTCACAGCTCGCGGCTGGCGCGCACGAGTCAGGCGGATTTAAAAA  
TGAATCATCCGACCGGTTGTCAGATGCCGACGGCTATTGAAAGCAGTTAATTCAGCAGAAAGTGTATTCGCCCGGAAA  
CCACCGTGAAGCCCTCGCCACACTGCTCCGGCTTTGATCCCGTACGGTACGGTACGGCGGTTACATCTCTGCG



TCTGGTACGGCCTGCAAGCATAGCGAAATTTGAGCCTCGAGACAGGGCATTGACGCCAATTGAAATTTGGTCTGATGTATC  
GATACATGGAACGGGTAGGAACGACGCCATCAATCAGAGCAGCGGTTAAACTTTTGTCTTAACGATGGTACGTAAGT  
GAGCTTACTAACGCAACCTGGAACGAGATCAATTTTAGTAAGGCATTAAGGACATACCAAAGGAGAGGATGAAACGACG  
TAATCCACATTTGGTTTTTCTTTCCAGACAGGCAATGGATATTAATGATGCTCATAAAACCTTTGCGCGTAGCTGTGAT  
TTAFCTTCCCTTCCGGGTACGATTCAGATGCGGCAATGAGTAGCGCTACTTTAAACCGGGTTTTGACACTGACGCTACCT  
CTGGCTCAGAAAAGAGGGGAGTTGTTGCTAAGTTTGGTCCCATGACTTACGGCGTACTGCCAGCACCTTGCTACATGA  
GGCCGGGTACAATAGTACTGGATTGAGAAGTGCTTGGCCATGAACAAAAGGGGTACGAGCTGTTTATAACAGGCAG  
AATATCGCGAGCAGAGGGCTGAGATGCTACAAGATTGGGCGAATATGATTGATGAATGGACTAGTAAGTAG

>Cluster\_4448

ATGGCTGTGCTGATTTTTCTGGGCTGTCTGTTGGGTGGTATTGCTATCGGTTTGCCTATTGCCTGGGCACTGTTGTTGTG  
CGGGGCGCGTAAATGTTCTGGCTGGACATGTTTGGATGTCAGATCATGGCACAAACGCTGGTGAACGGAGCCGATAGCT  
TCTCCCTGCTGGCGATCCCGTTCCTTGTGCTGGCGGGTGAATCATGAATGCGGGCGGCTTGTCAAACGCATTTGTTGAC  
CTGCCGATGAACTGGTGGGGCATAAACACGGCGGCTGGCTACGTCGGCGTGTGGCAGCTATGATATATGGCGAGCCT  
TCTGTTTCTGCCGTTGGGATACCGCCCGCTTGGCGCTTACTGGTCCGATGATGCGCAGCGCAACTACCCGGTCA  
ACGGGGCGCGGGGCTGATGCTTCTGGCGGCATATCGCGCAATTAATCCCCCTTCCATTCGTTTTATATCTTCCG  
GTTTCCAGCGGATATCCATCAGTAAGCTGTTTATGGCGGGCATTTGCCCTGGCATGATGATGGGCGCAACGCTGATGCT  
TACCTGGTGGTGGCAGGCGAGTCCGCTTAATTTACCCCGCAGCAAAAAGCAACGATGCAGGAAATCTGGCACTTTG  
TCTCCGATCTGGGCGCTGTTTCTCCAGTCACTATTATGGCGGGTTTCGCTCCGGTCTGTTTACCCTACCGAAGCC  
GGGGCGTTGCTGCTTCTATGCGCTGTTTGTCCGCACAGTTATTTACCGTGAATGACTTCCGCACACTTTGGCATGT  
ACTATTGGCGGGGAAAACCACTCAGTGGTTATGTTCTGGTGGCTCGGCACAAGTTTCCGCTGGCTGATTACCA  
TTGCTGAACCTGCCGATGATGGTTTCTGATTTACTGCAACCGTTGGTGGTTCACCGGCTGCTGCTGTTTTATCGTATTG  
GTGGCTATCTGATGTCGGCATGGTCAATGATTTAACCGCGACGGTATTAATCTTACCCTGATTAATGCCTTTAGT  
TAAAGAGGAGGAACTCGATCCGATTTATTTCCGGTGTGATGTTTATCATTAACCTGCTCAATCGGCTTAAATACACCGCCTA  
TCGGTAATGATTAACGTTATTTCCAGGGTGGCAAACTCAAAATTCGATGATGCAGTCAAGGCGGTTTTCCCTTACGCT  
CTGGTTTTATATTCAATTATAGTCTGATTTGTTTTTATCCCGATCTCATCTCCCTTTGAAATGGATTAATTA

>Cluster\_29050

ATGGACATGATGTGCAACCAGTGTGGCGGTAATAAACCGCAACGGATTGCTGCTATTGACAGTACGCTTGGTTTT  
ATTTATTTAGGCGGGATCGTTAATTTTCTGACCGTTTATCATTTAGCGTGGCAGGTGAAGCATTCTGGCGAGTTAG  
GATTATCGGCTACAGAGTTGGTGTGTTTCTGCTTCTGCTTATGGTTTTTACAACTTCTTCCGGTATT  
TTGCTAGACCGCTTTGGCCACGAAATAGTTTAGCGCAGGTTAATAATCTGCTCATTAATGAGGCATTAACAGGAAT  
GGTAAATCTTTAGCACTTTATTTAATGCGTATCGGCTGGGATTTGGCGAAGCGCCATTTATGCTGCGGGAGTAA  
AGTCGATCACCGACTGGTATGCGCAAAAAGAACCGCGCACGGCGCTGGGGATTTTAACTCATCTACCGTTATCGGTCAG  
GCTATCGCGCTCCTGCTTGTATTGATGCAACTGGCATGGGCTGGCGGGCAATGTTGCTCATCATCGCGTGGCGGG  
GATCTGTTGGGATCTGTTGGTACGCGTGGTATCGCAACCGGCGCAGTTTGTCTGACCGAGCAAGAACCGACCTATC  
TCTCCGCGCGGTTAAACCGCTCCACAGTTACAATTTAGCAGTGGCTGGCGCTGTTTAAAGCATCGGACAACCTGGGG  
ATGTTTTAGGTTTCTCTGGCTCAATTTACCGTTGGCTCTACATCGCTGGTTTACCCTGTTTATTTCCAGCGCAAA  
AGGTTTCACTGCTGGGCAAAACCGGTTGGTGGCGCAATTCCTTCTCGCGCGCGGCTCGGATGTGGGTTAACGGTA  
TTGTTGCTGATCGGCTGGCGAAAAGGCTATGACCTGGCGAAGACGCGTAAAACGGCGATTGCTGCGGTTTATGATG  
TCGGCATTTAGCGACGTTGCTGCTGCAATCTTCTCGCCAGCCAGCGGCTAGCGTTTATCTCAATCGCGCTGTTCTG  
CGTGCATTTCCGCGGAAACTCTGCAATGGGGCTGGTGCAGGTTGTTGTCAGAAAACAAAAGTGGCTTCCATCGCCGGGA  
TTCAAACCTTTGGAGTTTTGTTTTGCTTCTTGGCTCGGATCGTAACCGGTTGGGTCGTGGATACCACACACTCGTTT  
AATCTGGCGCTGGTATCGCGGCTGTGTGACGTTACCGGGCGCTGTGTTACTTCTTATTGTCAAAGATCGGATTGA  
GTAA

>Cluster\_33809

ATGAGTTGGTTATGATTATTCGCTAATGATCGTCTGTTGTTTCTCAACATTCGGGCTATCTGGCGATGTTATTGG  
CATCATCGCTTACTTTTTATCTTCTCCAGCGTACCGATTGAAATTCGGTGCAGAAAGACTAATCGCGCAACGCAAGCC  
CATCATTTGGCAATTCGGTTTTTATCTTGTCTGGCACACTAATGAGCTACACCGGATTTGCGAAGCGATCTGCAC  
ATTGCCAACGTTCTGGTGGGGAAAATGCGCGGCGGACTGGGCGTGGCAAAACATCTCGTCAGCACCATGATGGGCGGCT  
CAGCGCTTAACTTGTGACGCGCGGATGCTGTGCGCATGATGGTCCCGGAGATGGAGCGTAAAGGCTACAAACCGG  
CGTTTGGCGCGCCATACCGCTGGTGGCTCGTTAGTCAACCGGATCATACCGCTGGAATAGCCCTGATTTATACGGT  
CTGTTTGGCGACGCTCTCTATCGGAAAATGTTTTATCGCCGACACTGGTACCTGGTTTTGCTATGCGCAGTCTGATGTT  
TACCGTCTACTTGTGCGCCGAAAACCTAACGTAACCCCTCGCGTAAAGCTGGCCTACGTGCAAGAGGTTGGTGTCT  
CGCTGGGACAGGCTTGGCTGCGCTGTTCTCATTTTTGCTGTGGTGGTGGTATTGCGGCTAACATTTTACCCCAACA  
GAAGCAGGTGCAGTAGCGGTGCTAATCGTGTGCGGATTTGGCTTTTTATCTATCGTGAATGCGGATTTCTCATGTCGT  
CAAGCATTTGGGCAACCGCACCGCAACCGCATCGGTGATGCTGGTAAATCATGGCCAGCGCGCATTTGGGATGATTT  
TCTCAATGAAACATGCTGGTGTGCGAGTGGCGAATTTTGTGACTTCGCTGACCGAAAACAAATACATGTTCTGTTGATT  
ATCAACATATTGCTACTGACGCTGGGATGTTTTCTGGAAGAAAACCGCATTTTGTGATCCTGGTACCATAATAAAACC  
GGTGGTGAACACTTTGGCATCGATCCGGTGCATTTTGGCATCATGATCTTCAACCTGTCGATTTGGCGCATTTACGC  
CACCCTAGGTACCGTGTGCTGTTGATGTAATATCACGCAAGTTTCCGGTGGGAAATTTCTTTAAACAATCCCTGCC  
CTACTGGCGGCTCTACTGTTAATGCTAATGCTGGTGCATATATCCCGGCGATTTCACGTTCCTGTTGTTAA

>Cluster\_61406

ATGCAGCAACAACACTATCGAAACACAATCAGAAATGCCGTTTACACGCTACGACTTCGGCTGGGTTTTATTATGCAT  
AGGCATGGCGATTGGTGGCGGAACCGTGTGATGCCAGTACAAAATGGCTTGAAGGGAATTTGGGATTTATTACCGCAG  
CGATCATTGCTTATCTTCCACCTGGGTAGTGCAGGACATTTATTTAAAACCTTTCTGAAAGCGATTCCTGTAATGAC  
TACACCGATATTACAGTCACTTACCTGGGGAAGAATGGGGAATTTTCTCGGGGTTATCTACTTTTTGATGATTATCCA  
CGGGATTTTTATCTACTCTCTCCGTGTTTTTCGACAGCGCTCGTACCTGAAAACCTTCGGTTTAAACCGATGCCGAT  
TTTCAACAATCTACTTTATAAAGTGCCTATTTTCGCCGACTGGTGGCGATTGCGTCTGGTGGTGAACGATTACTGTTT  
AAGATTTCCGGGCAATGGTGGTGGTCAAAGTAGGGATTTATGTCGTGTTCCGGTTTTGCGATGATCCCGCATGGAATTT  
CGCAATAATAACCGCTTCCCGCAAGCTCCGCTTTTTTCCGGGATGCTTGTGTTACCATTCCATTTGCTTCTTTCTG  
CAGTATTTATTCAGGCTTAAACCAATGAATATGCTTAAACCGGAAAGCGGATAAAGTACTGGCAACCCGGCTC  
GCGCTGCGTACCACCGAATTAGTTATATCACGCTCATCGGGTATCCTGTTTTTGGCTTTTCTGTTTACCTTCTCAAT  
TAGCCACGAAAGCGGTTTTCTGCTTTTGAACAAAATCTCAGCACTGGCGCTGGCCGCGCAGGTGATCCCTGGGCATA  
TCATTCATATCACTCTACGGTGTCTAATCTTTGGCTGACTGACCGCATTCCTTTGGCATTTATCTCGGTTTTCCACGAG  
GCCATTAAGGCAATTTCTCAATCTGTTAAGCGAATTTATGATACCAAGAAAATTAACCTACCGCTGCTGATCTGCG  
GATCTGCGTTTTATCGTCACTTACGTTGAGGATTTGGGTTTCGTTTCGTGATCGGTGCTGGTGTCTTTTCTGTTGGAA  
GCCCGTTATGTTGTTGTCGCTCATTCGGTTTTTCTGATCTATAAAGTGCACAACTGGAAAACCTTCGCGGA  
TTTTAAGCCTGGGCTGATTCGCTGATCGGCATTTGCTATGCTGTGCGCACTGTTGAAGCTGATTGAGTAA

>Cluster\_18313

ATGGAATTTGAATATATCTACCCGCTTAATTTTTATTTGGCAGTTTTGCGCTCATGCTGGCAATAGGTGTGCCAATTAAC

TTTTGCGATTGGTCTTCTTCGCTGTTATCTATTATTACTGCCTTGCCACCCGACGCTGCCATTTCTGTTATTTACAAA  
AAATGACTGTAGGCTGGATGGCTTTACCTATTAGCCATTCCTTCTTCGTTAGCCGAAACATTATGAATACCGGT  
GGTATAGCCAGCAGACTGGTTAACTGGCGCAAGCATTAGTTGGGCGTCTCCGCTACTGGCTCATGTGAATATCCT  
CGGAATACACTGTTTGGTGGCATTTACAGTTACGCGTTGCGTCAGCCGACGCGGTAGGTGGGATTAATGTCACCACGC  
AAGAAAAGAGGATATGATCCGCGGTTTTACAGAGCGGTAATATAGTTTACGCTTCCGCCATTTGGCTGATCCCGAAC  
AGCAATGTGTTGATTGTTTATTCCCTCGCCAGTGGCGGACTTCTGTGCTGCGTTGTTCTTAGCTGGATATCTGCCGGG  
CATCTCACCCTGTTGCTTAAATGTTGTAGCTGCACATTTATGCACGACGTCACCATACCCAGTGGCCGAAGCATCA  
ATTACCGTCAGTTTTTACAGGATTTCCGCGAATCAATTCCTAGCTGATGCTTATTTTATCATTTATTTGGCGGTTATTC  
GCAGGGGATTTTACGCCCAAGCAAGCATCAGCAATAGCGGTAATTTATAGTTTACGCTTGGCGATGATTTACCGGAAC  
CACTCTTAAGAACTCAATGATATTTCTGTTAGATTCCGTTAGTAACAGTTCAATTTGTTCTGTTACTGGTAGGCTGTTCAA  
TGGGAATGTCATGGGCCATGACGAATGCTGATGTTCTGAGTTGATCAACGAAGTATACCCGCGTTTCGGATAACAAA  
TGGGTCATTTCTGTTTATTAATCAATATCATTTCTGTTGATGCTGCGTACCTTTATGGATATCACGCCGGCGATCTGATATT  
TACACCTATTTTCTGCTGACGATCGCCGATCTGGGATTTGATCCGATTCACCTTCGGCATCATATAGTTTTCACCTTAA  
CCATTGGCTTTGCACACCCTGTCCGACCACTTTCTGTTTGTGGGTGCAGCATTGGTAAGGTCAGTATCGACAGGGCA  
ATAAAACCATTTACGCGATGTTTCTGGCATTTGTTGTAGTAATGGCAATTATTTGTTATTTCCCGCAGCTTAGTCTGAT  
GTTGCCAGGATTTTTCGACCTGA

>Cluster\_23291

ATGTTTGATTTCGACTTTAAATCCGTTATGGCAGCGTTACATCTCGCCGTTTACAGGAGGAAGTAAACCCGGCGTGGGGT  
TACTGAACCGATTTCAGTGGCGCTGGCGCGCGGTTGCTGCGCTGAACTGGAAGGTCGCGTTGAACGTGTAGAAGCCT  
GGGTTTCGCCAAATCTGATGAAGAAGGTTCTGGTGTCCAGCTTCCCGGTACAGGAATGGTGGGGCTGCCAATTTGCGGG  
GCGCTGGGAGCGTTAGTTGGAAATGCTAACCGCGGCTGGAAGTGTCTGAAAGACGCAACTGCGCAGGCAATTTCCGATGC  
CAAAGCCTGCTGGCGCGGGGAAAGTCTCAGTTAAGATCCAGGAACCTGCGATGAAATCCTTCTCACGCGCAAAG  
TCTGGAACGGTGAGAAGTGGGCGTGTGTACCATCTGTCGGCGGCATACCAACATTTGTGCATATTTAGACGCAACATGTT  
GTGGTGTTTTACCCAGCGCTGGTGTACAGAGGGCGAGCAAGTCCCGCTGACGGTGTCTTCCAGGACGATTTCCGGAGCG  
TGAGATCTGAAGTTCGTCAATGAAGTCCCGTTTGGCGGATCCGCTTTATTTCTGATTTCTGCGAAGTAAATTTGTGCGT  
TATCGCAGGAAGTTTGGCGGTAACCTGGGGCTGCATATTTGGTGCAGCGCTGGAAGAACAGTGCAGCGCGGTTTGCCTG  
CGAAAGATCTCTCTTATCCATTTGTGATTTCTGACCAGCGCGCATCTGATGCGCGTATGGGCGGCGTACGCTTCCGGC  
AATGAGTAACTCCGGCTCGGGTAAACAGGGGATCACCGCAACATGCCCCTGGTGGTGTAGCAGAACACTTCGGAGCGG  
ATGATGAACGGCTGGCGCGTGCCTGATGCTTTTCGATTTGAGCGGATTTACATCCATAACCAGTTACCGCGTTTGTCT  
GCGCTGTGTGCGGCAACGACCGCAGCAATGGGGCCGCTGCGCGGATGCGATGCTGTTGGATGGGCGTTATGAACCAT  
CTCGATGGCGATCAGCAGTATGATCGCGGATGTCAGTGGCATGATTTGCGATGGTGCATCGAACAGCTGCGCGATGAAG  
TTTTCGACAGTGTCTCGGCTGCGTGGAAAGCGGTTAATGCGCGCTGGATGATACCCGCTAACCGGTAATGAAGGGATT  
GTGGCGCATGATGTTGAGCAGTCGATTTGCCAACCTGTGTGCGTTAGCAAGCCATTCGATGCAGCAACGGATCGCGAGAT  
TATCGAGATTATGGCGAGCAAGGCCAGATA

>Cluster\_41866

ATGGCGCAATTTCTACTCTGCAAAACGACGACGACGCGTCAAGTATCAACCGTTTTCAGTCAACGACCTCGACTCTTT  
TGGTCAGGGCGTGGCGGACATAACGGCAAACGTTGTTTATCCCGGATTTATGCGCGAGGAAACGCGGAAGTTACTG  
TTACTGAAGATAAAAAACAGTATGCCCGCGTAAAGTCTGACGTCGCTTAAAGGATAGCCCGGAACGCGAAACGCCACCG  
TGCTCTCATTTTGGCTATGCGCGGCTGTACAGCAACACCGCAGTGTGGATTTACAGCAGCGAAGCAAAAGTGGCG  
ACTCGCCGATTTAATGAAACACGAAAGTCTCTGAAGTCACTCGCGGATTTCCCTGGGGTATCGCGCTGCGCGCGTTTAA  
GTCGTAACCTACTTACGAAACACAGCAACTTACAGATGGGTTTTCGCAAGCGGGCTCCAGTGACATTTGTCGAGCTGAAA  
CAATGCCCCATTTAGTGCCCCAACTTGAAGCATTTGCTGCCAAAGTCAAGGCATGCTGGGCAGCTTACAAGCTATGCG  
CCATCTTGGTCATGTTGAATTTGTTACAGGCAACAGCGCACGCTGATGATTTTGGCCATACCCGACAGGTTACCGCTCG  
CAGATCGCGAAAACTGGAATGCTTTTCGATTTCTGAAGGCTGGATCTGATCTCGCCCCGATAGTGAAGTACTCGAA  
ACCGTCTCTGGTGAAGTGCCTGATGACTCAATGGGTTGCGCTTAACTTTTAGCCCGCGGATTTTATTCAGGTCAA  
TGGGGGTGTGAACAGAAATGGTAGCGGCTGCGTTGGAATGGCTGGATGTGGAACCTGAAGATCGCGTACTGGATCTGT  
TCTGCGGATGCGCAACTTTTACACTGCCATTTGGCGACCAAGCTGCGCAGTGTGGTGGGTTGAGAAAGTGTGCGCTG  
GTGAAAAAGGCCAGCAGAAATGCGCGCTTAAATGGCTTACAGAAATGTGACGTTTATCACGAAAACTTGAAGAAGATGT  
CACAAAGCAGCCGTGGGCGAAAAACGGCTTCGATAAAGTGTGTTGGACCCGCGCGAGCAGGTGCGCGAGGTTATGC  
AGCAAAATTAATAAAGTGAACCTATTCGATATAGTTTATGTATCTGTAAACCTGCAACGCTGGCTCGGGATAGCGAAGCG  
TTATTAAGCAGGATATACCATTTGCGCGACTGGCGATGCTGGATATGTTCCACACACGCGGACATCTGGAATCGATGTT  
ACTTTTCTCGCGGTTAAATAG

>Cluster\_48445

ATGGGGAGTAAGTGGTATATATCGCTTAGTGTATATAGCTGAATTTTATACGAAAAATGCCAAAAAGGAGTTTGT  
TGGTACAGGTGACTATGTCATTTTTCAGGATATAAATACACAGAAAGCTACCCTGAAAAAATACTTCGGCAGGTGAGT  
TAATGTTGTTGCCCCGAGGTGTTGGTGGAACTGGCGATGTTAAATAACGACTAGAGATGTTTATTTAAACAAATTTGTCC  
ATTAATAATAAATTTGGATGAAACAAAAGTAAGAAAAAATATTTTATATCTGTTTACAGAGTAATTTACGATATCT  
TGATAGCGGTTCTGCTCAAAGCCAAATAACCATCAATGATCTAGCGAATGTAGAAATATCTGCTCCCTCGCTAAATGTTT  
AAGATTTAATAGTCAAGAGTCTCAAAGCTTTTGGATGACAAAAATCACAACACTTTTACATCCATGAACCAACCTTTGGAACAA  
ATGTCCAAACCCGTTCAAATCTGTTTGTGGATTTTGTATCCAGTGTATGATAACGCTCTGGATGCAGGAAATCCAAT  
CCCAGGAGCCCTGCAAACTCGCGCCAAATTCGCTCAAAAAGTACGTAATAGTGCAGATTTTAAACCGCTTCCGGCGGAAA  
TTCGCTCGCTTTTCCAAAGTGAATTTGAAGAAACGGAGTTGGGTTGGGTTGCCAAAGGGGTGAAAGAGGGGACGCTTCCA  
GAGATAGCTTTTATAAATCCACATCTGGACTAATAAAAAATCAACCAGATTTATCAATATGTAGATCTCTCTAATGC  
GAAAGATGGCAGAAATATACTCAATTTGAAAAATTTATCAATTAATGATGCTCCAAGTTCGAGCTCGAAGAAATTAATAAAAG  
ATGATCTGATTTTGGCTTGTGACAGCTGCTAACAGATCAATTTGCATATGTACATGTTGATGGTCTAACGGGTAGCACA  
GGCTTTGCGGTTAATAGAGCCCAAAAGAGGATATAAAAAATTTCAATTTATTACTTTTGTGACATATGATAAAAAATATAGA  
AGAAGTACGAGAAATGCTGATGGTGGAGCATACTGCTATAAAAACCTGATGATATTTGTACATTACCTCTAATTTATTC  
CATCAATAAATATAATGAGAAATTTGATGAATTAACAAGCAATTTACAGAGATGATGAATAACTCATTAATTCAAAAC  
GAATATCTCAACCACTCCGAGGCACCTTTGCTCCGAAACTCATCTCCGGCAGCTATCCCTGGAAGATCTTCCGGATCT  
CACCACGATACAGAAGCCGATATA

>Cluster\_29458

ATGGCGACGGACACCCACGGATTCAGAAACAGGCGTGGCCACTCTGCTGATGAGGCTTGGGAGCGTGGCGCGTGGCT  
TGGCGAGATCATCAGTCCGTTGGCGCAGTCCGAGACGCTGGGACGCGGACGAAAGCGCGGATATGGCGGCTCAGGCGCTGGCT  
TGTCTCGCGCCAGGTATACGTTCTGATCCGGCGTCCCGGCAAGCGAGCGGCTCGTACGGATCTGCTGCGCGGCCAG  
TCCGGTGGAGGTAAGGTAAGGGGCGCTTGGCGGAACCGGTCGAGCGCTCATCCACGAGCTACTGCAAAAGCGGTTCTT  
GACCAAGCAGAAGCGCAGCTAGCGGCTTTTACCGCGAAGTCACTCAGGTTGTCAAGGCTCAAAAACTGCGAGTGGCGG  
CGCGCAATACCGTGGCTTACGGATCGTAGCTTGCACCGCGAAGGTCATCCGCGCGGGGAGGCGCAGGATGCGGCT  
CGTGACCTACAAGGTTGGGCGGCGAGCTCTGCGCTGACCGCGCGGCTGGAGCAGGTGAGATAGACCATACGGTCTAT  
CGACCTGATCGTGGTGCATGACCGGACCGGCAACCTATTTGGCGCCGTTACCTGACCTCGCATCGAGCTGTTACCC

GCTGCGTGTCTGGCATGGTCTGTCACGCTGGAAGCGCGCTGTCGCGTTTCGGTTGGCCTGTGCTCGTGCATGTGCGCTGC  
GAC AAGCGCCCTTGGCTGGAAGGACTGAACTGGAAGATGGATTGGCAGATGAGCGGCAAGCCCTTGTCTCTACCTAGA  
CAACGCGCGGAGTTCAAGAGCGAGGCCCTGCGCGGGGTTGCGAGCAGCATGGCATCCGGCTGGACTATCGCCCGCTGG  
GACAGCCGACTATGGCGGCATCGTGGAAACGGATCATCGGACCGCGATGTCAGATGATTCACGACGAATCGCCGGAAAC  
ACCTTCTCCAACCTGACAGCGCGGCTACGATTCGGAACAAAGCCCGCTGACGCTGCGCGAGTGCAGCGCTG  
GCTCACATGGCGGTGCGGACCTACCACGGTTCGGTGCACAACGGCCTGCTCCAACCGCGCGCGCGCTGGCCGAGG  
CCGTGGCGGTGTGCGGCTACCGCCGCTGTCACACGCGCTACTTCGTTCTGCTGATTTTCGCGCATCTCCGGCGC  
ACGCTGACCCGACCGGCTTGTGTCATCGACCACATCCACTACTACGCCGATGGGCACCTGTTGCAAAATG

>Cluster\_22533

ATGTCAACTCCACTTCAAGGAATTAAGTTCTCGATTTACCCGGTGTGCAATCTGGCCCATCTTGTACTCAGATGCTGGC  
CTGGTTTGGCGCTGACGTCATTAATAATTGAACGTCGCCGGCTTGGTACGTAACGCGTACCAGCTGCGAGATATCCCG  
ATATCGATGGCGTTTACTTCCACATGCTTAACAGTAACAAACGTTCTATTGAATTAATAACAAAACAGCGGAAGGCAAA  
GAGGTAATGGAAGGACTGATCCGCGAAGCTGATATCTTACGTGAGAACCTTTCATCCAGGGGCCATTGATCATATGGCGTT  
CACCTGGGAGCATATTAAGAAATCAATCCACGCTGATTTTTGGTTCGATCAAAGGGTTTGATGAGTGTTCGCCCTTATG  
TGAATGTAAGGCTATGAAAACGTTGCTCAGGCGCGGGTGGCGCGGATCTACTACAGGTTTTTGGGACGGTCCGCGC  
CTGGTAAGCGCTGACGCTTGGGTGACAGCAACACCGGAATGCTGATCGGTTACTTGTGCTTGTGTCATCTGTCATCG  
CGAAAAACCGGGCGTGGCAACAGATCCACATGTCAATGCAGGATGCGCGTGTGAACCTTTGCGCGGTAATTAACGG  
ACCAGCAGCTCTCGATAAGTTGGGATCTGGAAGAATACCCGAGTATCCGAATGGCACATTTGGTGTGACGTTCCC  
CGCGGTGGTAATGAGGTTGGGGCGGTCAGCCTGGCTGGATCCGAAATGTAAGGCTGGGAAACCGATCCTAACGCCTA  
TATTTTACTTCACTTACAGGACAAAACCTGGGAAAACCGCTGTAAGCCATCGGCAAAACGAATGGATACCGATCCCG  
CATACAGTACAGCCATGCCCCGACAGCCACATATTTTCCGATATTTTGTGTAATTCGAAATCGAAAAATACACTTACCATTGAT  
AAACATGAAGCTGTGGCCTATTTGACTCAGTTTGTATTCCTTGTGCACCGGTTTTAAGTATGAAAGAAATTTCACTTGA  
TCCCTCGTTGCGCCAAAGTGGCAGTGTGTCGAAAGTGGAAACCGGTTGCGTGGAAAAATATCTGACAGTTGGTTGTCCAA  
TGAAGTTCCTGCTTACGCGGATATTAAGCTGCTCCGCTATTAGTGAACATACCGCTGCTGTATTGACAGGAGCTG  
GGTTATAGCGACGATGAAATGCTGCAATGAAGCAAAACCGCCATCTGA

>Cluster\_55653

ATGGCTATATGAAATGCTATAAAAAATTTTCAATACACAAGGGAAAAATTAACATCACCATATTTATGTTTTGCTTTAT  
ATGGTTTLAGTGTGTTTTATCTCTACTCTAAGTTTATCAGATTTATTGATATTTCTTATTAGTGAATTTGCGGTTACAG  
TAACAATCATTATTTGTCCTTTCTTGGTGGGTTATCTCTTTTACTTCAATAAAATAAGTTGGCACCTAAGACGAAAAATA  
GATGTGAAGTATAGCGTTTGTGATTTCAACTTGGAGCTGAAAAGGTTTTAAGGAAAACGAGAAATTTGACTTTCATTTT  
TTTTTCTCTCGTATAGTTGAAATGCAATGCTGGTTATATACCATTAATATCAATGGCCACAGGACGCACAGTTTCCC  
AATTCGCATTTGGGATTCATCATGTCATGGTTTTGTTCTTGCATTTGGTTGTCTTTTTGGTTGCATCAATTAATATGAT  
TATATATGTTTTAAAAATAAAAAGTCATATGGTTTTCTTTTTTATTTATTTCTATTTTTGTTCTGCTCGTTACTAGAAA  
AATGATATGTTATCTTTCATACAAATAGGAATGATACATCTAATCACAAACAAAATTAAGCCAAAAACAATTTTTTTAG  
TTGTTTTGCTGTTTTGTTAGTATTTTTATGTTGGATATATGGTGATATAGAACGGTAGACAATTTATATACAA  
TTGGCTCATCAAGTTTTGAATTCCTGACTGGATGCCAATGGGTTTATGTGGCGTATATTTACATTTGACACCAAT  
AGTAAATTAACATAATGCTATTCATATGGGACAAAACAGATACAAACCTTAATTTCTTATGACGCTTTTTGCCAAAAGTTG  
CACGGGGGCAATAGAATGTTGTAACAGATGAAGATGCAATTTGCTAGATCTTATCAATAAGTGGTGGCTTAAATGTT  
GGAAGTGGATATATGAAATTTTCTATCCCAGGAATCTGGAATGGTTGTTTTAGCTTTGTATGCTGACCTAATCTC  
ATCTTATGTTTTAATCGTGTAAAAAAGAAAAATCAGCAATTTTGTCTTTTCTCTGTTATAAGCCAGATAAAATTTGCTCT  
TAAATTTTGGAAATGGATATTTCAATCTCAATGTATTAGCACAGATTCCTATGGCAGTTTTATCTTCAATAAAAAA  
TTGAATTAATTTATGACTCTAATAACCTTGATGGAGTGTATTCGTAATA

>Cluster\_39910

GTGTCTAAGCGTGTAGTTGTGACCGGACTGGGCATGTTGTCTCTGTGCGCAATACCGTAGAGTCTACCTGGAAAAAC  
TCTGCTTGGCGGTGAGAGTGGCATCAGCCTAATCGACCATTTGATACATAGCGCCTATGCAACGAAATTTGCTGGCTTAG  
TAAAGGATTTAACTGTGAGGACATTTCTCGCGCAAAGAACAGCGCAAGATGGATGCCTTCAATTAATGGAATTTGCT  
GCTGGCGTTCAGGCCATGCAAGGATTTGCGCTTGAATTAACGGAAAGAGAACGCAACCCGATTTGGTGGCGCAATGGCTC  
CGGGATTGGCGGCTCGGACTGATCGAAGAAAACACACATCTCTGATGAACGGTGGTCCACGTAAGATCAGCCATTTCT  
TCGTTCCGTCACGATTTGAAACATGGTGGCAGGTCATCTGACTATCATGTATGGCCTGCGTGGCCCAAGCATCTCTATC  
CGACCGCCTGTACTTCCGGGTGCACAACATTTGGCCTGCTGCGCGTATTATCGCGTATGGCGATGCTGACGATGATGGT  
TGACAGTTGGCGCAGGCAAGGCAAGCAGTACCGCGTGGCGGTTGGTGGTTTTGGCGCGGACGCTGCATTAATCTACCGCAATG  
ATAACCCGCAAGCGGCGAGCCGCGCGTGGGATAAAGAGCGTGTGTTTTGTACTGGCGGATGGTGGCGGATGCTGGTA  
CTTGAAGAGTACGAAACACCGGAAAAACCGGTCGCAAAATTTACGCTGAACTCGTGGCTTTGGTATGAGCAGCGATGC  
TTATCATATGACGTCACCGCCAGAAAATGGCGAGGCGAGCTCTGGCAATGGCAATGCTCTGCGTGTGACAGGCAATG  
AAGCGAGTCAATTTGGCTACGTTAACGCTACCGTACTTACCGCGGCTGGCGATAAAGCTGAAGCGCAGGCGGTGAAA  
ACCATCTTCGGTGAAGCTGCAAGCGGTGTTGGTAAGCTCCAGAAATCTATGACCGGTCACCTGTTAGGTGCGGCGGG  
TGCAGTAGAATCTATCTACTCCTTCCGCGCTGCGCGATCAGGCTGTTCCCGCAACCATCAACCTGGATAACCCGGATG  
AAGTTGCGATCTGGATTTGCTACCGCAGAACAGCTCAGTACGCGAATGGAATACACGCTGTGTAACCTCTCGGC  
TTGGTGGCACTAATGGTTCTTTGATCTTTAAAAAGATCTAA

>Cluster\_61733

ATGAAATGGTTTAAACCCCTAAGCCACAACCGTTGGCTGGAACAGGAAACCGACCGCATCTTTGATTTTTGGTAAAAATTC  
CGTAGTCCGACTGGTTTTGGCTGGTTAGGCAATAAAGGGCAAAATCAAAGAAGAGATGGGCACCCATCTGTGGATCACCG  
CTCGTATGTTGCACGTTTTATCCGTTGCTGCGCGGATGGGTCGACCTGGCGTTACTCGTTGGTTGATCACGGTATCAAA  
GCCATGAACGGCGCACTGCGTGATAAAAAATATGGCGGTGGTATGCCGCGTGAATGACGAGGGCGTGGTGGATGCCTC  
CAACAGGGCTATCAACACTTCTTTGCTCTGCTGGTGGTGGCGCCAGCGCGTCAACAACGGGTCACCCGGAAGCGCGCAAGC  
TGCTCGATFACACCTTGAATTAATTCGAGAAATTTTCTGAGCGAAGAAAGAGCAGATGTGCCGTAATTTGGGACGAA  
GCCCTCAGCAAAACCGAAGAGTACCGCGGCGCAATGCCAATAATGACGCGGTGGAAGCTTCTTGTATGTTTATGACGCT  
CACTCAGCACAAAAATGGCTGGATCGCGGATTCGCGTGGCTTCCGTTGATTAACACGACGTCGCCGAAATTAATCATT  
ATCGCGTTAACGAACACTTCGATACCCAGTGGAAATCCGCTGCCGATTAACAACAAGATAACCCGGCGCATCGCTTCCG  
CGCTTCGGAGGTACACAGCCACTGGATCGAATGGGGCGCTTTAATGCTGCACATCCATGCTGCCCTGGAAGCCCGTTG  
CGAACACCACAGCATGGCTGCTAGAAGATGCCAAAGGCTGTTTAAACGCCACCGTGGCGGATGCTGGCACCCGATG  
GCGCGGACGGGATTTTATACCGTTGACTGGGAAAGAAAACCGGTTGGTCCCGCAACGCTGACGTTGGCCTATCGTCGAA  
GCAATGGTACCGCTACCGCTCTACCCGCTACTGGCGATCGCCAGTATGAAACCTGGTATCAAACATGCTGGGAGTA  
CTGCATTAAGTACCTGATGACATGAAATGGTTCTTGGTGGCAGGAGCTGGATGCGGACAAATAAGGTCACCCACAAAG  
TCTGGGACGGCAACAGGATTTATCACTGCTGATTCGCTGGTGTATCCCGGATCCCGTTAGCGCCCGCATGGCT  
CCAGCGGTTGACGCGGTTCTGCTGGATATTAATGCGAAATA

>Cluster\_26636

ATGTCTCAAAATAAGGCTTTCAGCAGCCATTTATCTGGCTGTTCTTTGTATTTACTTCAGTATTTCTGACGCGCAT  
TAGTGTATTTACGTTGCCCAAAACATGACATCTTTGGCAGAAAAGTTTTCCACTGACACCGGGCATTTGCTATTTAA

TTTCCGGTATCGGATGGGGCGATTGATCAGTATTTTATCTTCCGGAGTGATCTCCGATAAGTTTGGTCGTCGGGCGGTG  
ATATTAATGGCAGTAATAATGTAATCTGCTATTTCTTTGGTATTCCTGCTTGCCCGAATTTAACTCTCGCCTACTGTCT  
GGCAGTGTGCGTAGGTATCGCTAACTCAGCGCTGGATACGGGTGGCTACCCCGCGCTCATGGAATGCTTTCCGAAAGCCT  
CTGGTTCGGCGCTCATACTGGTTAAAGCGATGGTGTCAATTCGGGCAAAATGTTCTACCCAAATGCTGGTGTAGTATATGTTG  
CTCAATAACACTAGCGCTGCGTAAAGAAATGGTCCGCGCCATCTGGGCTAAATGTAATTAACCTGCTGACCGTGGCAACAATAACAG  
CAAATTTCCCGCCAGCTTGGTGGACGCCAGCGTAGCTAATGAATTACCGCAAAATGAACAGCAAACCGTTAGTCTGGCTGG  
AAGGTGTTTCATCAGTACGTTCGGTGTAGCCGATTCFCGACCTTTTATGTGATGTGGTGTGGATGCCAAATATGCG  
ATGGCTTTTGTGCTGATGTCAGAAGCTGAGGCATTAATAAACCTCTCTTATTACAGTATGGGTTCGCTGGTCTGTGTCTT  
TATTTTGGCCGCTGCTGAAAAAATGGTCCGCGCCATCTGGGCTAAATGTAATTAACCTGCTGACCGTGGCAACAATAACAG  
CTGCCATTATCTACCTGTACCCATCTCCATTGGTGTGTAATGCCGGAGCCTTTGTATCGGTTTCTCAGCAGCTGGCGGC  
ATTTTACAGCTCGCGCTTTCGGTGTAGTGTAGTGTTCCTCCAAAAAGCAAAGCACCAGTATATATATGATGAT  
GGGTGGACTGGCTAACTTTGTTATTCGGCTGATACCGGTTATCTGTGCAACATCGGCCTGCAATATATCATTTGTTCTCG  
ATTTTACTTTTCGCGCTGCTGGCCCTGATACCGCAATTAATGTTTATTTTATCCGCTATTACCGCGTTTTCATTATTCCTGAA  
AATGATGTGCGGTTTGGCGAGCATAAATTTAGCACCCGGTTAAACACAATTAAGCATAGAGGTTAA

>Cluster\_27651

ATGATATGATTTTGTGATTATTTGGCGGGCGCATCATCGGCATGTGACCGCCATGCAACTGATTGATATCTATCTTACCGC  
CCGCATAGCGTTGCTGAAAAAGAGCCCGCCCGCCTGTACCAGACGGGCCACAACAGCGCGTAATCCATGCCGGGG  
TCTATTACACGCCCGGACGCTGAAGGCGCAGTTTTCCTTGGCAGGAAACCGCGCCACCAAAGCCTTTTGGCATCAAAC  
GGCATTTCGCTACGACAACCTGCGGCAAGATGCTGGTTCGCGCAGCTGAACTCGAAATGGAACGGATGCGCGCCTTATGGGA  
ACGCACGGCGGCAACGGAATCGATCGCGAGTGGTTAAACCGCGAAGAGCTGCGGAGCGCAACCAAATATCACCGGGC  
TGGCGGTTATTTTGTGCGTCCAGCGCATTTGTCAGCTACCAGCAAGTACGCGGCAATGGCAAAAAATTTTTCAGGCC  
AGAGGCGGTGAGATTATCTATAACGCCGAAGTGTGCTCTCAGTGTGAGATAAAAACCGCGTGGTCTGCTCCGTACCCGTC  
GGGTAGCGAATACGAAGCGTCAACGCTGATTAGCTGTTCCGGGTTAATGGCTGACCGGCTGGTGAATAATGCTCGGACGGC  
AACCGGGCTTTTATCTGCTGCCGTTCCGTTGGCGAGTATTTCCGCTTGGCGGAGCATAACAGATTTGTTAAACCGCTG  
ATTTACCCCATTTCCGACCCGGCAATGCCGTTTGGGCGTGCATCTACCCGATGATCGACGGCAGCGTGACCGTCCGG  
GCCAAACGGGTGCTGGCTTTCAAACGCCGAAGCTATCGCAAGCGGACTTCTCATTTAGCGACACGCTGGAGATTTTAG  
GCTCGTGGGGATTGCCGGGTGCTGAAAACCTACTACGCTCAGGACTGGGCGAGATAAAAACTCGCTGTGCAAAAGC  
GGCTATCTGCGGCTGGTGCAAAAGTATTTCGCCGCTTTTCGTTAAAGCATCTCCAGCCCTGGCCTCCCGGTGCGGGC  
GCAGGCGATATCGCCGACGGCAAGCTGATTGACGATTTTCTGTTTGTACCACCCCGCGCACGATCCACACCTGTAATG  
CGCCCTCCCGGACGACATCAGCAATTCCTATTTGGTGGCATAATGTCAGCAAGGTACAAAACGCTGTTGGCAAGCCAG  
AGTAACCCCGGACGACGCTGCGAGCGGCACATAGTGTGGATGCCCTACAGCCGCATTTAATCAATAA

>Cluster\_37602

ATGACATTTCCCTTTTTGGTGACAAATTTACCCGCCACTCCGGCATTACGCTGTTGATGGAAGATCTGAACGACGGTTT  
ACGCACGCTTGGCGGATATGCTCGGCGCGGTAATCCGCGCGAGATCCCGGAAATGCAGGACTACTTCCAGACGCTAC  
TGACCGACATCGCTGGAAGTGGCAAGGACTGATGCACTGTGTAACACGAGGTCACAGGGGAAACCGGAGCTACTC  
ACACTGCTTGGCGGAAATGCTGCGCGAGAAGTTGGTTGGGATAAAGCAACACAGAATAATGCACTAACAAACGCGACCA  
GAGCGGTTTTTCTACTTATTTAACTGTTTGGCGGACGCCGTCGCGATGGTTCGGGTCAAAAAGTGTGTTCCCGCTTG  
CACCAGAAATACATTTGGCTATGCTGACCGCGACTGGAAGAAGATCTGTTTGTCTTGCCTCGCAATATTTGAACTGCTG  
CCGGAAGGCCAGTTTAAATACACGCTCGATTTTGTGATATTTGGCGAAGAAACCGGGATGATTTGCGTCTCCCG  
GCCGACGAACTCAACAGGCAATGTGATTACTGACGAAGAGTTGCTGAAGCTTGGCGGCTGGGAAATCAACACGGCATTC  
CGCTGGTGTATGATAACGCTTATGGCGTCCCGTTCGCGGTATCATCTCAGTGAAGCGCGCCGCTATGGAATCCGAAAT  
ATCGTGTGTGATGAGTCTTTCAAGCTGGGCTACCTGGCTCCCGCTGCGGATTAATCATCGCAATGAAAAAATCAT  
CACCGCCATCACCAATATGAACGGCATTATCAGCTGGCACTGGCGGATTTGGTTCGCGGATGATGTTGAAATGATTA  
AGCGTAACGATCTGCTGCGCCTGTCTGAAAACGTCATCAAAACGTTTTTACTACAGCGTGTTCAGGAACTATCGCCATC  
ATTCGCGCTATTTACCGGAAATCGCTGCTGATTCATAAACCGGAAGGAGCATTTCCTCTGGCTATGGTTTAAAGGA  
TTTTGCCATTACGACCGAGCAGCTCTATCAGCGCTGAAAGCACGCGGCGTGTGATGGTGGCGGGGCAACCTTCTTCC  
CAGGGCTGGAATAAACGCTGGCCGATACGCATCAATGATGCGCATGAACACTACAGAGCCGAGAAAAATGAGGGC  
GGGTGAAAGATTTGCGGGAAGAGATAGAAAGAGCCTGGGCTGAAAGTCACTAA

>Cluster\_40346

ATGAAACTGATCACCGTATTTCTTTTATTTGCTTTTTATCATTTTTTTTCTCCGGCTTATGCCGTTTCAGAAAGTGAGGC  
ACGACGTTGGAGATGTCATAGGACAATGCGCCTTTACTCTCAGGTTATCAGCATGGCTTGGCAACGGGTTTTTAAATCGCC  
CTTATCAGTTGTCGCGGATATTTGCAGGAGACACAAGACTTGTGAGTTTCTATCTGAGTAAAAATCAGGAGCCCGAAGC  
TTTTTTATTTTACATCTTAAACGCTGAATATCAGCGTACGCTGATGAAGGATGGCGTGGATTACATTTTTCAGTGATAAA  
GCAGACTGAGCAGAAAGTCCCTGATGTTGTTTTACTTATTCGCCCTAAATACCGCAGCGTGGTATTTTATCGGCAATGC  
TTAACTCTGTGTTTTCTTCCGGGCTTTTTCAGTAACTTTCAGTCCGTCGATTTTGTCTGCGGCTGTCAGGATA  
ACCAGCAGACAGTGCATCGACCGGATGTCGATCGCAACGGATGCCGAAGTGTGTTTATTCGGTCCGGCAGCATC  
CGTCCGGCAGATAGAAAAAATATGCGCGTATTTGACGTTTCGCGCAGAGCAGGTAACGGTGGCGGCTATGTTCTGAA  
TCCAGACGACAGCCGCAATGCAACCGGACTGCAATTTATGCTGATTTGTTCCGTAATAAACGCGGATGCTGTGGGG  
GCTCGTCTGATGGGGTAAATTCGTTTACGCTGAAATGTTGGAGGCTGAAATGCGTTTACAGTCTGATCAAGAGGATTC  
ACGCTTAAATGTCGTTGATTAATCCGCGTCTACGGTGTCTCCGGCAGTAAGTGCAGTTTACTGTGGGTGAGGAGTTC  
CGGTGCTGGACAGTGTGATCAGGGCAGCAGCGGAACGCCAGTCCAGTCTGTGACATACAGGAACAGCGGGGCGATT  
TTTTACAGTAACGCCGTTTGTGCTTGGACGGATGATAACACTGGATATCAGCAGCACTGAGCGATTTTGTAAAGACAAC  
GACAGGCTTAACTCCAGCCGACACTGACGAAGCGGAAATCAGCACAAAGTTGATGTTAAGGACGGTGAATTACTTG  
TGCTTGGTGGCTTGGCAGCAGTAACTGACGCACTGCGGACAGGTTTTTCATTTTTCCGGGTTTTTACAGGCAATCA  
GACGAAATAACCGGACGGATATAATTTGTTGCTTTCAGGCTCGCAGGTTGGCAATGA

>Cluster\_49779

ATGCTTGGAACTTATCACAAAGAGCTATTTTTCAGTACAACATGTTGATTTAAATGTAAGTGTGGGTCGTTAGACCTGG  
GATTAAGTATAGATATTTTGCAGACTTCTTGAACGCAATATGTTGCTACTGCTCACCTGGATAGGTTAAGTCCAGATC  
AAATGACTTTTAAATGATGAAATTAACCATGAAATATTAATCAAAAGTTGATGGGTTAGATACTATTTGGTTCAAGAAAT  
ATTCATACCCAAATTTGAAATTTCTCATAGATATGTCAGGTCGGTGTGTTTCTACTTTTGTGCAAGGTTGTTGTT  
TCTTGGGATTTATGATCTTCCGCTATTTTGGCGTGAATGTTTGGTAAATAATGAAGGTTTTATGTAAGACGTAGAG  
TCACATGGGGAGAGCCAGTTCCGACAGCAGAGATTCATTAGCTTTCAGAAATCGTTTACTGCATACAGACCGTATTC  
TCTTTGGCGGGAAGTCAAGAAGTACTGCATTGGTTAATGTCATTTTATAACGGATAATATTTCTGTACTAGCTT  
AAGAGTCGAGCAAGCAGAAAGCCATTCGGCATCACTCTTAAAGCAGCTGGCTGAGCTGGTGCATAGAGTGCAGCTT  
CGCTATTAATTTGGCAAGAGTTTGTGCGGAGTATACAACGAAGTTGTCAGTTTGGATGGAAGACTTCTAATAAT  
GGAGAGTTATCTTTCGCTCAACAAATGTTGATGTCCTCCGGGGATGTTGGCTACAAATTTAAACAAATAATAGAAA  
TGCGCAATTTGGTTTATGTTAATTTATGGGGCCATTTTAAATCATGATGATGCTTCCGTTCAACGGTTGATACTCGTA  
TAAGTGGAACTTGCATCTCATATGAAAGGAAAAAAGAGGTTGCAATGGATGGATTTAACTTTGATAGAGTTTCTCAA  
GTTCTAGAGTTGCGTTTTAAAAGACAAAATAGAGGCTTTGTTTCTGCTCGTCCACGAACCGTGGATCGGACAGGGAT



CAATTTCCCTGAAGATGGTGATGCGAGGCATGCGAGTGACTAA

>Cluster\_5934

ATGAAAGTGGTCATCGCTTTGATGCTCAGACGCTGCACAGTTTTATTTCAGGCTGTATTTTCGTAGATGGGTAGCGAGGA  
ACAAGAATCGAAATAGTTTGGCCGATCATTTAATCGCGGCAAACTGGCAGGGCATGATTCACATGGTATTTGGCATGATC  
CAAGCTATGATCGCTCGTGGAGTCAAGGCGACCTGCAAAATACCATCATGCCAAAACCGTTAAAGAGGCGGGCGGG  
GTCACGCTCGATGGCGATCGCGCATTGGTTCAGGTCGCGGCACATGAAGCGATGGCGTGGGGATTGAGAAAAGCGCATCA  
GCACGGTATTTGCCCGCGTGGCGCTACATAACTCGCATCATATCGCCGCTATCGGTTACGGGGGAGCAGTGTGCAGCGG  
CGGGGTTTGTCTCTATCCACTTTGTTAGCGTGGTTCGATTTCCAATGGTTCGCGCGCTTCCACGGTTCGCGACAGCGCTTT  
GGCACCATAACCGTTCGTGTGGTTCCTCCCTCGTAAAGATAAATTTCCCGCTGTTTGGTTGATTACGCCACAGCGGCATTGC  
ATTTGGCAAAAACCGCGTTCGCTGGCATAAAGCGTCCCGTGGCCAGGTTGCCTGATTGACGTTAACGGCGTGCCGA  
CGACCAATCCGGCGGTAATGCAGGAGTCCCGTGGGTTTCGCTGTTGACCTTTGCCGAACATAAAGGCTACGCCCTTGCA  
CGCATGTGTGAAATTTTGGCGGGGCGCTTCCGGCGGTAAACAGCGCATCAGGAAACGTTACAACACAGTCCCGATGC  
CATCTTAACTGCATGACCACATATCATCAACCCGGAACCTTTCGGCGCGCGGATGTAACGCCAGACCGGAAGCT  
TTGCCGAGTGGGTGAAAGCCTCGCCGATGATGATGATAAGCCGATTTTGTACCGGGCGAGTGGGAAGTGAACACCGGT  
CGCGAACGCCAGAACGAGGGGATTCACATGGATGCGGGGAGCTGGCAGCCATTTGTGATGCAGCGCGCAGATTGGTAT  
GCCGAAGAGACGTTGACGGCTTTCTGTGACGATTAGCCAGCTAA

>Cluster\_42495

ATGGCAGGACTGAAATTACAGGCAGTAACCAAAAGCTGGGATGGCAAAACCCAGGTCATTAACCGCTGACCCTTGATGT  
GGCGGATGGCGAATTTATCGTGTGGTTCGGGCGCTCTGGCTGGCGGAAATCGACGTTATTTGCGAATGGTGGCGGACTGG  
AGCGGGTAAAGCAGCGGCGATATCTGGATCGACCGCAAGCGTGTACCCGAAATGGAGCCGAAAGATCGCGGGATTGCGATG  
GTGTTCCAGAATACCGCGCTTATCCGCATATGAGCGTAGAGGAGAACATGGCGTGGGGCTGAAAAATTCGCGCGCATGGG  
CAAGCAACAATTTGCCGAACGTTAAAGAAGCGCGCGCATTTGAGGCTGGACGGCTGCTTAAGCGCCGCGCGGTG  
AGCTATCTGGCGGTGAGCGTTCAGCGTGTGGCGATGGGGCGTGGCATTTGCGGTGAGCCGGCAGTGTTCCTGTTTGGATGAG  
CCGCTCTCAACTCGCGGCGTAAATGCGTGTGGATCGGCTTGAACGTAACAGCTGCACCGTGGCGTAAACGGT  
TTCACTCTACGTTACCCAGCATCAGGTTGAGGCGATGACGCTCGCCAGCGAGTAATGGTGTGAACGGCGCGCTCGCCG  
AACAGATTGGCAGCCAGTTGAAGTGTACGAAAAGCCCGCAGCTGTTGTGGCGAGTTTATCGCGCAGCCGGCGATG  
AACCTACTGGCTGGCGCGTGAATAACGAAGGTACGCATTTGAACTGGATGGTGGTATTACGCTGCCGCTAAACGGTGG  
CTACCGCTCAGTATCGCGGCGTAAATGACCTCGGCATTCGCGGAACATATAGCGTAAGCTCGCAGGCGAAACGGT  
GTGTGCCGCTGGTGTGAGACGCTGGAGATCCTCGCGCAGATAAACCAGCGCAGGACGCTGGGGCAACAGAAGCTG  
GTGGTGGCAGTGGCGCATCAGGAGCGCCGACGCGAGCAGCAGCTGTGGCTGCATCTGCCAGAAAATCAGCTGCATCT  
TTTTGATGGTGAACAGGACAACGAGTATGA

>Cluster\_61493

ATGCGCTTAGGAACTTTTACAAAAAGAAAAGATTTTTATATAAACAATAAATCAAGATTAATTTCCCTTCTTTTTTATTTTCG  
TAATAAAATAAATAATCAAAATTACAGATCCAGCACAAGTTAAATCATGCCTTATTTATCATGATAATAAATAAATTTGGTG  
ATCTAATTTGATTAAGTTTCGATTTATCGTGAACCTTTATAGTAAAGGGTTAAATAAATCTTTCACAAAATAGAAAGGGT  
GGGGAATTTCTCTCAATAAATAAATAAATAAATTTTTCGATTTGATTTAAAGAATCAACCGTTTTCTTGAATGCTTACTCT  
ATGTAAGCATCTGCGGGATTTACAGTTCGATATTTGATTTAGACCCCTTTGAAACTATGCCCTCATTTAAGCATAGCTTAA  
TATTTATCAAGTTTAAAGATTTCTTACATTTCTGGTTTTGATCATTTGGTATAAGCGTTACTATTTACATTTTACCATCCCCAC  
GATGAATGTTTAAAGAACAATATGAGTACACGACAATAAGAAATACTGAAGCATTTTATGGTGAAGGTAATTTTCCAC  
CAACTACGACTTGGCATTTTACCAGTAGATTTGAAAGATAAATAAATAAATAAATAAATAAATAAATAAATAAATAAATAAATAA  
ATCCATTAGGTGCAAAAAAATAATGCGGCTTACGTTTGGAGCAATAAAGTTATATAATCAAGAGTGAACACACACTTT  
GAAAATTTACGGATTATATTTACCGGTTACCGCAAGATTTATGACAATACCAATCTTGAATCGAAACACACTACCATTT  
TGATGAGTTTATTTATACGTTGCGTTGACCAAGTATAGTGTGATTTTGTATTCTGTTGATACAGCTCTTGTTCATATCG  
CTGCGGCTTATCATAAACCAACGCTTGCATTTTACCCTAATTCAGTACTCCGGAATAATCCCTCGCATTTAATTTGGTCC  
CCGAATCATATAAATCTATACAATAGTATCCCAACATATACGGTAAAGATATCGATACTGAAACTTTAACTAATTC  
AGTAAAGAGATTAAGTTGTATAGATAAGAAGTGA

>Cluster\_37161

ATGAAAAGAGCGCTCTTATAACAGGTCTTTTGTTGATATCCACATCTCGCGTTATGCCTCCTCAGGAGGGTGTGGAGC  
CGACAGCACTAGCGGTGCGACAAATTACAGCAGTGTGGTTGATGATGTACCGTGAACAGACAGATAACGTGACAGGAC  
GGGAGTTTACCTCGCAACGCTAAGTAGCACTAAGTGGCAATACCGCTGTTCCGCTCGCGGTAAGGCAGTTAAACTT  
GTCATATGGTTCAGCCCGTACTTACCACCACTGGACATCAGACAGGATATTACAAAATCAATGACAGCTGGATTTAA  
AACACATTTACAGGCAACGACATTTCCAGGACTCAACCCAGCAGGTTGCTCTGTTAACACCCGATTCACACAGATAA  
AAAACAACACGGTATATTTCTGCTCAACCCAAACCGGTTGTTGCCAGGTTGATACGCTCGGTTATGGACCCGTTAATATT  
GGTGGCAACACCTTTTACCCTGATGTCACCAAGCCATTTCTCGGCTCGATGACCATTCGAAAACGGATATTGCCGT  
CATTAAGGCGCGTGGGTCGATGGAATGGGAAGCCGCTACAGGTTGACTTCCATGATTTAGTCAAGTTATCGATTTACG  
GAAATCTCACCGCCACAGTCTGCAAAAATTAATCAGGGCGATGTTATTAAGTTAATTTGGATTCAATGATGTCAG  
AAGTTTACACCCGCAATGCCATGCCAGCGGTTTACTCCAGTAGACTTTGATATCACTTATGACTGTGGTGTACTTTC  
AAAGATTAATAAATCTGTTGCAAAATGCGCATCGCAGTCAACTGGGTTAGTACCAGTACAACCTGGTTCGCCAGCGAA  
GAAGTTTCAGACAATGTGCCGATGTCGGTATTCTGATTTGAAAATCTCGCGCGCGGAGTTGCAAAATATTCTTTTCAGAAC  
GGTATCTTCCCGTTGATCTTCCGGGATGGCACCGTCAATATGCGCGCCTGGCCAGTAACTGGTGGTGGTGGAGCT  
GAAAACAGGAAAATTTACGGGCACAGCCACCATTACCGTCACTCGTGGGTTAA

>Cluster\_26597

ATGTCATCTGAAAAACTGTATTTCCCACTGAAAGTGGGCGCAATAACTGCGGCAAAACCGTATTTTTATGGCACCGCTGAC  
GCGTCTGCGCAGTATTGAACCGGTTGACATCCCTACCCCGTTGATGGCGGAATACTATCGCCAACGTGCCAGTGGCGGTT  
TGATTTATAGCGAAGCCACGCAAAATTTTCGCCAGGCAAAAGGGTATGCTGGTGCACCTGGCATCCATAGTCCGGAACA  
ATTTGCCGATGGAAAAAAATACCGCTGGCGTTTATGCTGAAAATGGTTCATATGCGGCTACAGCTGTGGCACACCCGAGC  
CATTTCTCACGCCAGCTTCAACCTGGCGGTCAGGACCGGTAGCGCTTCCGCACTTAGCGCGGGAACAGTACTTCTC  
TGGCGGATGAAAATGGTCAAGCGCATCGGTTGAAACATCCATCCCGCGTGGCGTTGAACTGGAAGAGATTCCGGGTATC  
GTCATGATTTCCGTCAGGCCATTGCTAACCGCGTGAAGCCGTTTTGATCTGGTAGAGCTCCACTCTGCTCATGGTTA  
TTTGGTGCATCAGTTCTTTCTCCTTCTTCAAAACCATCTGATCCAGTACGCGCGGACGCGTGAAGAAATCGCCACAGCT  
TGGTGTGGAAGTGGTGCATGACAGGATGAAAGATGGGGTGGCGATCGCATTTGGCATTCGCGTTTCGCCAATCGGTACT  
TTCCAGAACAACAGATAACGGCCGAATGAAGAAGCCGATGCACTGTATCTGATGAAACAACTGGGTAACCGCGCATTCG  
TTACTGTCATATGTCAGAACAGATTTGGCGGGGGTGGCCGTATACATGATGCGTTCCCGGAAAAGTACCGCCCGGTT  
TCCACGGTCCGATTTATCGCGCAGGTCATACCGGTTAGAAAAGCCGAAACCGTGTATCGGCAAAAGGGTTAATTTGATGCG  
GTGGCATTTGGTCTGACTGGATTGCGAACCCGGATCTGGTGGCCGCTTGAACGCAAGCTGAGCTTAAACCCACAGCG  
TGCCGAAAGTTTTACGGTGGCGCGCGGAAGGCTACACTGATTACCCGACGCTGTA

>Cluster\_7955

ATGGGAAACTCAAACGCATTTGCTTTTGAATAGTTATACGCTCAACAACAACCTCAGCAACCGCTGATCCTGAATGTCA  
TAATTTAAAAATATAAGTTCTCAGAAATCACACTGACAAACTAGAAATCACTGGAGATACCATCAATAATCCGGTAGCC

GTTCGAAAGCCTAATTTTCGATGAAATATTCACCAATAATCAAAGCGAGGTTTATTTTCAGGTAATTAATCATATATTT  
TATTACTGCGTCGCGAATGGCAACATATTTAAAATATTTGAAAAAGAAATGTCATAATAACGACGACGCATCGATAAAGT  
ATACTCTGGTGTATGAGATACGAAATCTCAACGTGTCAAACAATGCACCAATATAAGAAAGATAACAAGGCAAAGCGG  
CAATAAATTTTGGAGCCACGCCTGAAAGTAATAAATCTGTACGCTATGAGCACATTAATCCGTTACTTTGTAGTGC  
GACAATAACGACATTTTTCGAAAAAATATGGAAGTCTTAATACTCAATTTACCGAGTCAFCAGCAATGAAAGCAAGGTT  
TGAATGTCTTAATGAAATGGGGAGGAGATAAAGCAACCCTGCAAACTACCCTCTTTCTGTAAATGCGCTCAAGCCA  
TTTCGGGTAATGATATATCGGATTCACFCGGTGGTGGAGGATTTAGAGAATAAATTCATCATACGAGGAAATAAAAA  
ACTCGAAAAATAATTTCTTACCTTCTTACTCAATATCAAGACTTTTCGATTAATGAAGTATCTCAGAGGAACGTTGA  
TATTCGAAAAAACCTTTTGGACCAACTCCAACCTAAAAACCACAACAATAAATGACATTTGCAAAAATAAATAACAACC  
AAAGAAATGATGCCGAAGTAGTTGATGCAATTTGTAATCATTACGCTACTTCTTAGAAAATAAAACCCTGCATGGAGAT  
CAAACAGATCATTCTTTCAGGTTTATACCTTAAACAAAGAGAGAAACATTTGAAATTCACCTCGAATATTTTGTGTTTT  
ACTGGTGTGCGACCTGATAAATAGCCACACACTCCAGACAAGTTAA

>Cluster\_59942

GTGAAAATACTTGTACTGGTGGCGCAGGATTTATGGTTCAGCTGTAGTTTCGTCACATTATAAATAATACGCAGGATAG  
TGTGTTAATGTCGATAAATAACGTACGCCGGAACCGGGAATCACTTGCTGATGTTTCTGATTTCTGAAACGCTATGTTT  
TTGAACATGCGGATATTTGCGATGCACCTGCAATGGCAGCGATTTTGTCTCAGCATCAGCCGGATGCAGTGTGCACCTG  
CGCTGTGAAAGCATTGTTGACCGTTCAATTAACGGCCCTCGCGCATTTTATGAAACCAATATTTGTTGGTATGTTCTCT  
TTTGAAGCCGCTCGCAATTAAGTCTGCTCTTGTATAGCGACAAGAAAAATAGCTTCCGTTTTTCATCATATTTCTACTG  
ACGAAGTCTATGGTGTATTTGCCCTCATCCAGATGAAGTAAATAATACAGAAATAATACCCTTATTTACTGAGACGACGCT  
TACGCGCAAGCAGCCCTTATTTCCGCATCCAAGCATCCAGCATCATTTAGTCCGCGGTGGAACGTTACATATGGTTT  
ACCGACAATTTGTGACTAATTTGCTCGAACACTATGGTCTTATCATTTTCCGAAAAGCTTATTCACCTGGTTATTTCTTA  
ATGCACTGGAAGTAAGGCATTACCTATTTATGGCAAAGGAGATCAGATCCGCGACTGGTTGTATGTTGAAGATCATGGC  
CGTGCCTTATATACCTCGTAACCGAAGTAAAGCGGGTGAACCTTATAACATTTGGTGGGCACACGAAAAGAAAAACAT  
CGATGTAGTCTACTATTTGTGATTTGCTGGATGAGATTTGTCAGGAAAGAGAAATCTTATCGTGAGCAAACTATG  
TTGCTGATCGTCCGGACAGCATCGCCGCTATGCTATTTGATGCTGAGAAGATTGGTCCGCGATTGGGATGAAAACCACAG  
GAAACGTTTGGAGCGGGATTCGTAAAACGGTGAATGTTACCTGTCCAATACAAAATGGGTTGATAATGTGAAAAGTGG  
TGCCTATCAATCGTGATTTGAACAGAATATGAGGGCCGCGAGTAA

>Cluster\_32958

ATGGATAAGAGTAAGCGCCATCTGGCGTGGTGGTGTTCGGGGCACTGGCGGTGGCTGCCGTCGTCGGCGTGGTGGCTGTT  
GCGCCCGCGGGTGTGCCGGAAGGCTTTGCTGTGAGCAATGGGCGCATGGAAGCGACGGAAGTGGATAFCGCCAGCAAAA  
TTGCCGGCGGATCGACACCATTTCTGGTGAAGAAGGCCAGTTTGTTCGAGAAGGTGAAGTGCCTGGCAAGATGGATACT  
CGCGTGTTCGAGGAACAGCGACTGGAAGCCATCCGCGCAATCAAAGAAGCACAAAGTGCCTTCCCGCGCGCAGGCTTT  
GCTGGAGCAACGCCAAAGCGAACTCGTGCCGCACAGTCTGGTTAATCAACGCCAGGCAGAACTGGACTCCGTAGCAA  
AACGTCATACGCGTTCCCGCTCACTGGCACAACGGGGGCAATTTCTGCGCAACAGCTGGATGACGACCGCGCCGCGCT  
GAGAGCGCCGAGCTCGCTGGAATCGGCAAAAGCTCAGGTTCTGCTTCAAAGCCGTATAGAGCGGGCAGCGCACCA  
TATCATTTCCGCGCAAACTCGCGTCAAGCGGCAACAGCCACTGAACCGCGCATTTGCCGAGATATCGATGACAGCGAAC  
TGAAGCCCCGCGTGACGGACCGCTGCAGTATCGGGTGTGAGCCAGCGAAGTGTGGCAGCAGCGGTCGGGTGCTG  
AATATGGTGCATCTCAGGACGCTTATATGACCTTTCTTTCGCAACCGCAACAGCGGGCAGCGTGAACCTGGCGGTTCA  
AGCAAGGCTGATCTCTGATGCGCGCAGATCTGCGTATTCGCCGACCATCAGTTTGTTCGCCAGCTCGCCAGTTCA  
CGCCAAAACCGTCAAAACAGCGATGAACGACTGAAACTAATGTTCCGTGTCAAAGCCGCTATCCCACCGGAAATTACTC  
CAGCAGCATCTGGAATATGTCAAACCGGATTTCCGGGCGTAGCGTGGTTCGGGTGAATGAAGAATCTCCGTGCGCTGA  
CGACTGGTGGTAGGTTGCCGCAATGA

>Cluster\_426

TTGCTGGTTTCCCGCACGTCGATAAAAAACAGATTGCGGGGTGATTGCCGAATGGACCGCGTGGCGTTAACCGCT  
GTCGAGAAATGAAATGTCGGTCAACACCCTGCCAAAATGGCTCGCGGACACCATCAAAGGCCAGGACTGGCGATTG  
CCAGCTTGCAAAAACCTGCTGACCGCACGCGCGGACTGCGCGCTCCGGACGCGCCGCTGGGCGGTTCTTCTGCTGGCT  
GGCCCAAGCGCGGTGGGTAACCTGAAACCGTCTGCAACTGGCAGAGCTGCTACGCGCGTCCGCAATGACCTACCTGACCA  
CATCAATATGTCAGGTTCCAGGAGAAACATACCGTCTCGGACTGATTTGGTTCCGCTCCGGGTACGTTGGCTACGGTG  
AAGCGCGCTACTGACCGAAGCGATTCCGCCAGAAACCTACTCGGTAGTACTGCTCGATGAAGTGAAGAAAGCGCACCCG  
GATGTGCTCAACCTGTTTACCAGCGCTCGATAAGGGCGAAATGGCAGACGGTGAAGCCGCTGATTGACTGCAAAAA  
TATCGCTTCTTCCCTGACGTCACACCTCGCTACCAGGTAATAGTGCAGCATGCCGATGACCCGAAACCATGCAGGAAG  
TACTGTATCCGGTGCAGGCGGACTTCTTCAAACCTGCCCTGCTGGCGGTATGGAAGTGGTGCCTACCTGCCGCTGTCG  
AAAGAGACGCTCGCCACCATCATTTGCCGGGAACTGGCCCGCTGGATAACGCTGCTGCCAGCCGCTTTGGCGCGGAGGT  
GATTATAGAACCAGGAGTGACGGACGAAATCATGAGCCGCTCACC CGCGGAAAACGGCGGAGGATGCTGGAATCGG  
TCAATCGACGGCAATATTCGCGCGCTCTCCCTGCTGCTGTTGCAAGAAATGGCGGCAATACGCGCGTGGCCGGATT  
CGGTTGTCGCGAGTGACGGCGCATTTACGGCAGACTGGAAGATGCTCAGAACGACGAGTCCGTACAAAGGATGAAAC  
GTTTTTATGA

>Cluster\_42752

ATGGCTAATGGTATTTGAATTTAATCAAAACCCCGCATCTGTTTTAATTTCAATTTCAATTAATTTTGAATTAGAATCTCA  
GCAATTAACGCAAAAAATCCTTCTAATACTTCTTCGCCATTAATAAATTTGCAAAATGAATTAGCAATGATTACTAGTT  
CATCGCTTTCTGAAACGATTTGAAGGGCTAAGCCTGGGATATCGCAAAGGTAGCGCAAGGAAAGAGGAAAGGACGACA  
ATCGAGAAGCTGCTCAATGATATGCAAGAGCTGCTTACTCTACCAGTATGATGATAAATAAAGAACTCATTTAAAAA  
CAGTGGGCTGCTGGAACAACACGATCTTACTTTGGCGATGTTTGGCAACATGCCAAAGGGGAAATTTGTTGCGCTAATAT  
CTTCTTTATGCAATCTAAGTTTGTAAAGATTGAATTAAAAAAGAAATATGCCAGGTTATATATAGATTATTAGCGGAA  
GATGATGGGAGCTGGCTCTGCTTCTTCTGGTTAGGGTGGGTGAGTTAAATCAGGAAGGTATCCAGAAGATCAAGAAGCT  
TTATGAAAAGCTAAGGACGAGGACTCTGAAAACGGAGCCCTTTACTTACTGACTGGTTTATGGAGATCAAGGATCTTCCG  
AGCGTGAAGAACCTTAAAGGTTATATATAGGGCGCTATCGTTCGATCTGCTTATATGCTTCTTTTGAAGACAAGGTA  
AGAACATCTTCAATTTATGATGATTTATGTCGAATAATCATTTTATCACTTAATAACTATACGGATATTTATGCAAT  
CTCCATTAAGAAAGATAAAGATGTCATTTTAAATGAAGTGTATCTATTTAAGCATGTATGGTTAACAGAAGACTGGC  
TACTGGAGAGCCCTTCTCGGATATCGATTTGCGAAGATAAACAATGTTTTTATTTCCATTTATGAAAAGAAATTTTGA  
TCATTAACAGATGCTTGTATTTATGATAACGAACATAGGGATAATACATTTATTAATGATTTGGTAAAGTATAGATTATAA  
GGAGGATGTTATGTA

>Cluster\_20595

ATGCCAGTCTACAGTGGGGAATGTTATGTTCTGTCACCTTCTCTTTCTATTTGGCTTCTCTGCTTTTACATCTCCCGG  
GGCACTCTGCTTGGCCCGATGATGCCGGGATCATCTTACGATGCGCGGAGTCACTTGCACCTTCCCGCTCCGCTT  
TTCTCGCTGCCAAGCATTTCTTGGCTGCATGATGCAAAAACCTCACTGGTTGATTTCTCACCAGTCCGCGCTCAAC  
TGGCCAGTCTGCTTGCATTTTACTGGTGCAGCTGCTTTTCCAGCGCCATCGTGGTGGTATTTGGTGGCTTACGCTC  
ACTGCTTGAAGAACCGGTGCTTGGGTTCTTCTCTGCGCGCGCGCGGCAATGGTTCGCTATGGCGCAAGATTACGGC  
CAGATATTCGCTGGTGGGCTTTATGCAATATCTGCGAGTGTCTGCTGCGGGGGCGCTGTTCTGCTCACCCGATG

ATGCTGGGCGATAACCGTGAAGCGGTTAACACGAGATCGTCTGGTCCCGCCAGTGAGCATTAACTCCTCGTTACGAT  
TTTGCTCGCGGTCTGGTCCGGTACGCGGGATGCTTGCCTTCCCTCCGGCACGATGCTCATCCCGATGCTGGCGG  
GCGCAGTGTCCAGTCTGGTCTAGCTCATACGATTTGAACCTCCCGAATGGCTGCTGGCGATGGCATATATGGCAATTGGC  
TGCGGATTTGGTCTTGGTTTCGATAAAGCAAAATTACTCGGGGCAATTGGCGCCACTGCCACAAATCCTCTGCTCGATTTT  
TGCTCTGGCTAGCTATTTGGCGGGTATGGCGTGGGGGCTGACCCGGTTTATGCATATTTGATTTTATGACCCGCTACTCG  
CCACCAGCCCGCGGGCTTGATACCGTGGCGGTCATCGCCGAGGAGCAATGCCGATATGGCGCTCATTATGGCGATG  
CAAACCTGCGCTTTCAGTATTTGCTGACGGGGCTGCCATCGCAGGTTTATTTCAACCTATGCGCCGAAGCGTTC  
GGCCTAG

>Cluster\_39178

ATGAAAATCAGTCGGAACACTCCACCAGCTAATCGAGAATAAACTCTGCCAGGCTGGGTTAAAACGTGAGCAGCGTGC  
AACCGTGGCTGAAGTATTGGTTTACGCCGATGCCAGAGGGATCCACTCTCATGGCGCGGTGCGCGTTGAATACACGCCG  
AACGCATTTCAAAGCGGCGACCAACCGGAACCGGAGTTTCGCTTGGAGAAACCGGACCGTCTCGGCAATTTTACAT  
GCCGCAATGCGCGCGGACAGTGCAGGTCGCGCGGAAAATGGTATGGAAACATGCCATCAAAAACCGCCAGCAAAAAGCGTTG  
GGTGGTGGTATCAGCCGGATGGGTCACAGCGGCGCAATCTCTTATTTTGTGCAGCAGGCTGCCCGCGCGGATTGATTG  
GCATTTTCGTGTGCCAGTCCGATCCAATGGTGGTGCCTTTGGCGGCGGAAAATTTACTACGGCACTAACCCACTGGCC  
TTTGCCGCGCGGGAAGGCGACGAGATCCTTACCTTTGATATGGCGACTACCGTACAGGCAATGGGAAAAGTGTCCGA  
CGCCGCTCGCGCAATATGCTATCTATCCGGATACCTGGGCGATCGATAAAAACCGGTGCACCAACACCCGATCCGTTCCGCG  
TACATGCTCTGCTCCCGCGCTGGGCCGAAAGGGTATGGCTGATGATGATGATGACGCTCTCAGGCGTCTGCTC  
GGCTTACCGTTCCGGCGACAGGTTAGTTCGATGATGACGATTTACACGCCGGCGTAATTTGGGGCAATTACATATAGT  
TATTAACCGCAATTTTCTCCTCCAGCAATTTATCCGTCACACATCTTAGCCAGACCATGCGCGAATTAATACCATTA  
CCCCGCGCCGGTTTAAATCAGTTTTATTTATCCCGGACAGGATCAGGATATTAACAACGCAAAAGCCCGTGAAGGC  
ATCGAAATGTTGATGATATTTACCAGTATTTAATTTCCGACGCGCTTATAACACGCTATACGAAACGAAAATCCCTT  
TGCGCAATAA

>Cluster\_64466

ATGAGTCTGTTGCTGATTAACGAAAACCCCTTCAGGTCCTGCCACGTTGGCATGCACTATAGGGTTGAATGAAGCCAT  
CGTCTACAGCAATCCACTACTGGCTGAATTCATCTCAAAATTTCTTCGAAAATCGCCACTGGGTGTACAACAGTGTGA  
CCGATTGGCAAGAACAATCCCGTTCTGGAGCGAGTCGACAATAAAACCGGTGCTGGCAATCTGGAAAATTTGAATGTG  
GTATTTACTGGGAACCTTTAACAGTGTAGTCTGGGATAAAACCAAGTGGTATTCATCAATATGCCAGTATGTAAGT  
TGAAGAGACAACATTTCCCTGTGGCAATCGATTAGGTCAAGTTGACCAATCGAAGAGGTCAATGTGACCCAAGCATCAG  
GTCAGATTGACCCATGCGCTAGGGTCAAAATGACCAATCTCTTACAGAGAATACAACAGAGACTACTACAGAGATAAAA  
GATCCCCCTTACCCCAAAGGGGGAGGGCGAGAAATCATTCGCTGACGCTCAAAAAGCTCTGAACTACTACAACGA  
GAAAGTCGCTACGCTGCGCGACGTTAAACCTTTGTCATGCTGACTGCCACCCACCCCGCTGGTTACAGGG  
TGGCTGAGATTAGTTAGTAATTCGTTGGGTTATTTGCGACATGGCGCGTCTGAGCGGAAGCGTGCCGAAACCTGCGAAC  
ATTTGCGCGTAAACCGTTTACGCGATATCTGGCTGACGCTGAGGCGTGGGCCACTGCTGAGGCTGCCGTTGACCCCTGC  
TGAAGTTGTAAGGGCTACAACGAGATTTCTGGCGACCTGTCTACCTATAGCTGAAATGATACGACCGCGTGGGCAA  
TCCCTGCGCTGCTACGCTGCGCGACATATGCGCACGCAAACTTTGGCGCATTTATTCGGCTACTTCGAAAATTTCCGCGATAACGCC  
CCAGACTTCTATTTCCGCGCGAATATCGCACCCGGTGGCGGGCAGGTTTGATTTACCTGATGAAAGCCAGAAACACTGCG  
TAAAACCGGGAAGGAGCATTATGA

>Cluster\_24214

ATGACCGAACTTAAAACGATCGTTATCTGCGGGCGTCTGCGCCAGCCGTTGATGTCACCTCCAGTATGGATGATGCG  
CCAGCGGGTCTGCTATCTACCGGAATATAAAGCCACGCGGCCAGGCGGGCGATTTTATGTCGCTGTGCAAAAATGCCG  
AGCTGGCGTGCGAAGTGACTTTGCAACCCTGCTGCTGCTATCCGCTGGATGCGGCGATCCTCTTTTCCGATATCCTCACC  
GTGCCGACGCGGATGGGTTTAGGGCTCTATTTTGAAGCCGGAAGGATCCGCGTTTTACCTCGCCAGTCACTCGCAAGC  
CGACGTCGATAAACTGCCAATTCGCGACCCAGAAGATGAGCTGGGTTACGTGATGAACCGGTCGCTACCATTCTGTCGCG  
AACTGAAAGGCGAAGTGCCTGATTGGTTTTTCCGGCAGCCGTTGGACGCTGCGGACCTACATGGTGAAGGCGGCGAGC  
AGCAAAGCGTTACCGTGATCAAAAAATGATGATGCGGATCCACAGGCGTGCACGCGCTACTCGATAAACTGGCGAA  
AAGCGTCACTTTGTTATCTGAATGCGCAGATTAAGCCGCTGCTCAGGCAGTCATGATTTTCGACACTGGGGCGCGTGC  
TTACCGGGCGGATTTATCAACAGTTCTGCTTTTATACATGCATAAAAATGTTGATGGTTTACTGCGTGAACACGCGGT  
CGCCGCGTACCGTACGCTGTTTACCAAGGTGGCGGACAGTGGCTGGAAGCGATGGCAGAAACCGTTGCGATGCGCT  
GGGCTCGACTGGACAACGGACATCGCCGATGCGCGCCGTCGCGTGGGCAATAAAGTCCGCGTGCAGGGTAATATGGACC  
CTCGATGCTGTACGCGCCGCTGCCCGCATTTGAAGAAGGATGGCTGCTATACTTCCGCGTTTCGGTTCGCGTAAAGGC  
CATGCTTTAACCTTGGTACGGCATTCATCAGGATGTGCCGCGAGAATGCAGGCGTGTGTTGAGGCGAGTGCATCG  
CTTGTCTGAACAGTATACCCGCTAA

>Cluster\_10992

ATGAACAAGAAAATTTGGTTTATGGAAGGTTTATCCTCCAGCGAGATATTTATCAGGGGTTAAAATCATTGTCACAAAA  
AAATAATTTTGCCATTACCGTTTGGCTCCACCGTAACGAAAGAAATGAAATCCTTTCCGTTGCCGATTTATCTTTGA  
CTGAACCTGAAGATCCTCAAAAACGCTTTCAGTTTATCCAGGAAACATTCAGACCTACGGCATCCACCATATTCATACT  
GGCCGTAACAGCAGTGGTTTGAAGAACACCGTTACGACATTAACCGACCGGTTGCCACCCTTACTACCGGTGCAACGG  
CGTCCAGCTGGTTAACTCTGGCTGACGAAAAAGTTACTTTTGTCTCAGTTTATGGAGCAAAAAGGTTCTCCCGGTCTACCAT  
CCTGGCGGGTGAATACGCTGGCAGAATTAAGACCCACCTCGCGGCCCGCGTTACATGACAGCCCGGTATGCGTGAAG  
CCGGTGCAGGGTATCTATGGCATGGGATTTGCGGCTTTGATGACAGTGTCTGCGCTATGGCCGCTTTAATCATCCCGA  
ACATCGTCTGGTCACTCCGCAACAGTATATTGACAGCAGCATAGCTGCTGAGTGTGTTTTAAACCCCTGTTTGTGATCCGCT  
ACCTGCCAGGCCCCGAATTTTCCGTCGATATCTCGCGGATAAGGGCGAAATACTCGCAGCCGTGGGACGCGGTAAGGAA  
GGGGCTATCCAGTATCTGGTAAACGAAGGAAGCGCTGGGAACCTGGCGTGTGACTGCGCCGTTGATGAAGGCGGACGG  
GCTGGTGAATGTTACAGCGGAAACGATGTGAATGGCAACCCGGTGTCTGCTTGAACCAACATGCGTCCGTCAGGGGGG  
TGGTTATACCTTTCACAGCGGTGTGAACCTTCTGGGTTATTTGCTGCTTTTAAAGTCCGCTGATGATGATGATG  
GTACGCCAGAGCGTAAAACACCTTTTCTCCGGTGGCGTGGATCCATTACGGATGTAATGTCATACCCGGAATCACT  
CTCTAACCTTCTGAATTA

>Cluster\_53536

ATGAAGAAAATTAATTAACAGATGATTCTGTTGTCACAGAACAATGGAAGGACTCATGCCACCTGGCCACACCTGCA  
GGCAAATTAACGACCCCGATATGTTGGTGAACAACACCGATAATGCAGTGGCGCTGATTTACGGCGCGGCTCAGGCC  
ATGAACCACTGCATGCAAGTTTTGTCGGTATGGGAATGTTAACCGGTGCATGCTCTGGTGAATCTTACATCGCCACA  
CCAGACCAATGATCGAATGTGCAAGCGGTTGATAATGGTCTGCGCTCTGTTTTTATCAAAAATTAACACTGGCGA  
TATTTGAAATTTCAAAACCGCAGTCAGATGTTACACGAAGAAGCAGTCCGCTGGGACCTGATTTATGATGATGATG  
TAGCGGTAAGAATAGCTGTATACAGCGGACGTCGCGGTGTGCGGTTACAGTTTTTGTGAAAAGATTGTCGGTGGC  
GCTGCATTTACAGGATATAAACCCTGGGCGAGTGCAGCAACTGGCAAAGATGTTAAACAATGCCACCCGTTCTTTTGGCAT  
CGCATGTCAACCCTGACCGTTCGCGCGGGGAAACCTCATTGAACTGGCTGATAATGAAATCGAATTTGGTGTCA  
GGATCCACCGTGAACCCGCAATTAACGCGCACTTTGCAAGATCTGAACACTTTAATCGACAGCGTGTATAGCGCAATTA  
CTGGATAATACCCCTGGCGACGCATTTACGCCATTGGGATCGCCATGCGGGGGGATGGATTGACGCATCATCAATGAA

TGAGTCATTCGATCAAAATGCCGAATATATGTGTAAATTAACGGACTTGGCAGCACGCCGTAATCAGAGTTATATGGTG  
TAGCCAGGATATTTATGTGCGCCGCACAGCGCCAGGGAATAAAATTAGCCGCCAGTTGGTCGGTAATATTGTTACATCA  
TTAGATATGGCCGATTTTCCATTAGCCTACTGAAATGTACCCAGAGTTTTTGAACATTGGGATGCCCCAGTCAATAC  
GCCAGCGCTTCGTTGGGGATGTTAA

>Cluster\_59417

ATGAGTGGTTACACCGTCAAGCCCTCCTACCGGAGACACCAATGAGCAGACACAATTTATGATATTTTAATCTGTTCTA  
CAGTAAGCGTGGTCAGGAACAAATAAGCATCTCTCAGCAGCTTGGAAATACGGTACGACATTTTTCAGTGCCAGTCCGC  
AAAGTTACTGGAACACGTCACGCAGCGACCAGCAAAATATCATTGGATTAATGTGCCGTTGGTGATATTACGACTTCCG  
CTGAATTACAGCTATTTCCAATAATATATGGCAAACGATCGGGATCATTTACTCGCTTTACGCTTAATGTTCCCTCAG  
TCATTGGATGCGTACAGACAGTCAGTCGGCATTTCGTAATTCAAACGCCAGTTACAGTATGTCAAACGATTTGAAAGGCG  
GCATGACCAATCTATCGGGGTTTATGGCACTCTGCTGCCGTAATAACCTGAATTAAGCGTTACGTTCCGTTAACACC  
CACGGAGGTAATACATCGTCTGGCACCAGTGGTTACAGTTCTTAATATCGTGGAGCTTATGGTAATACTAATGTCCGG  
TTACAGTCGGAGTGGTGACAGCAGCCAGATTTATACGGAATGAGTGGTGGGATTAATTGCTCATGCTGATGGCATCACCT  
TTGGACAGCCGCTGGGCGACACAATGGTTCTGGTTAAGGCTCCTGGTGTGATAATGTCAAATAAGAGAACAGACCGGA  
ATTCATACCGACTGGCGTGGCTATGCCATATTACCATTTCGCAGACAATAAGAGAAAACCGTGTTCCTTAACCGCAA  
TTCCCTTGAGATAATGTTGAACCTGGATGAAACCGTGGTCACTGTCTATCCAACTCACGGTGTATTGCCAGAGCAACAT  
TTAATGCACAAATCGGCGAAAGTATTAAATGACGTTGAAGTACGCTAATAAGAGCGTTCCATTCGGTCAAAATGTCACA  
CACGGAGAGAATAAAAATGGCAGCATTTGTCGGGAAAATGGTCAGGTTTATCTGACTGGACTTCCACAGTCAGGGCAAT  
ACAGGTTTCATGGGGCAAGATAAAAATCAAACCTGATTTGTGCGAGTACAAGCTTCTGAAGTTCTCCTGGTACCTTAC  
TGAACCAGCAGACGCAATCTGTGCGTAA

>Cluster\_34169

TTGCTGGTGGCCACCAGGACACCGGCAAGACATTTGCTGGCCAAAGGCTGTTCGCGGAGGGCGGCTGCCCTTCTTCTC  
CATCTCCGGATCAGAGTTTGTGCGAGATGTTCTGTCGGCGTGGGTGCGGGCCGCACGCGCGGCTCGGCGCCACGACGAGA  
GCGAGCAGACCTCAACCAACTGCTCAGGAGATGGACGGCTTCGACAGCTCGGTGATCATCTCCGCGCCACC  
AACCGCCCGAAATCCTCGACCAGGCTCTGCTGCGTGGCGCCGCTTCGACCGCCAGGTGCTGGTGGACCGGCCGACAA  
GAAGGGGGGCTGGACATCCTGAAGGTTTATGTCAAGAAGGTGACGCTGGCCAGGATGTAGGCTCGAACAGGTAGCAG  
CACTGACCACGGGCTTTCCGGCGCGACCTCGCAATAGGGTCAACGAGGGCGGCGTGGCGGCGAGGAGACGCGCTGCG  
TCCGCGTGGAAATTCAGGACTTCACCGGACCTCAGCGCATCTGTCGGCGCTGGAAAAGAGAGCGCTGCTCAA  
TCCCAAGGAGCGGAAACCGTGGCCATCAGAGATGGCCATGCGCTGGTGGCGCTGGCGTGGCCGAAACCGACCCCG  
TACACAAGATCTCGATCATCCGCGCGGATCGCGCGCTGGGTACACCTTGCAGCGCCCAACCGAAGACCGCTTCCG  
ATGACCGGTACCGATCTCGAGCACAAGATCGCCGACTGCTGGGCGGGCGTGGCGCGAAAAGCTGGTGTTCGGCGAGTT  
GTCACCGGGCGCGGACGATCTGCGCGAGCCACCGACATCCCGCGACATGATCACCCGCTTTGGCATGGACGAGG  
GCCTGGGTACATCGCTTCGAGGCGCAGCGCCCGCTTCTCGATACACCGGAACTGGCCACGGCGGTTGCCGGGTG  
GCCGAATCGACCCAGGCGCGCATCGATCAGGCTATCGCGACATCGTGTGGGCGTGTTCGAGCGCGCTACCGGATTCT  
CGACATCAACCGCGGCTGCTGGAGCGCTGGCGCGGAGCTGCTGGCGGGGAAACGCTCGACGAAAGCGATATCCGTC  
AATTGACTCAAGGACTTGTTCGGAATGA

>Cluster\_53542

ATGAAGATAGTTATCTCCCCGACTCCTTAAAGAATGCCTTCTGTCATGGAAAGTCGCGAAGCGCTGGCAATCGGCTG  
GCGCAAGGTCTCCCTCCGACCAACTGGTGTGTTTGCCTGGTGCAGCGCGCGAAGGCACGCTCGAAACACTCATTC  
ATGCGACTGACGGTACGTTTACACTAAAAAGTCAACCGACCGCTTGGCGAATCAATACATGCGCAATACGGTATTTTFA  
GGCAACCAACCACCGCAGTGATAGAATGGCACAAGCTTCAGGGCTGGAACCTGGTTTCTCCTGTCCAGCGTTCTCCCT  
TTATACGACGTCGTTTGGCACTGGCGAATTTATCTCGCCGCTTGAACACAATATTGATACCGTTATTTATGCTGG  
TGGCAGTGTCTACAAATGATGGCGGTATTTGGGTTGATGTTCGCGCTTGGCGCATCGTTTACAGACGCGAAGGGCTATCA  
GTCTCTGTTAATGGGATGGGCTGGCGGCAATTCACCACATTTGACTTACAGCACCTCGATCCAGGATTGAAAAATGTGAA  
ATTTATTGCGAGCTGCGATGTCAACAACCCACTAACCGCGATAACGGCGGACCCCGGTTTTTCGGTCAACAAAAGGGG  
CCAGTGTGACGACCTTGAGCAACTGGAACAGGGAATGAAAACTATGCCGTTGCATCTACCTTTGTTGTGGTAAAGAA  
GTGATACGATACCCCGTTCTGGGCGGCTGGCGGCTTGGCGCGGCTTGGTGGCTTTCTCGATGCTCGCTTCAAC  
GGGTATTTGCTCGTGTGGAAGCGATTCAAATATACCAACATTTAAAATACGCGCATTTGGCCATTTGCGGTGAAGGGA  
AATTAGATAGTCAGAGCTGAATGGCAAAGCGCCGATAGCGCAGCCAAAGTTGCCAGATGATGGGCTTCCGGTTATC  
GCAATTGCCGGGTATATCGATGATCAACTTGATCTGAATGAGTTACGCCAGTGTGGAATAGAAGCCTGTTTTCCGCTCGT  
CAATGGTCTCTTGTGATTTACCCACCGCGTGTGATCAGGAGAAAATAATTTAATTCGCTTGGGGAAAATCTGGCGGGAT  
ATTTCTGTCGATCTCGAGTTAA

>Cluster\_41405

ATGAGGCGCTTCGACGGCGATGTCGTTTCTGTTTCAATCGTGTCTGGCAGCTCAGAATGAGAATCATGAGCCCGTAA  
TAAATACATCCCTTACGGGAAAAATGGCTTCTGCTGGTGGTGTGAGTGGAAAAATGCCACTGAAACGCAATGGCTTAGAGATT  
CGCCCTCACAGCCATTGCAACAGTCACTGAAAGACCTTGAGCGGGCTTACAAAACCTTCTCCAGAAGCGGGCTGCTTTT  
CCCGGATTCAAAAGCGGGGACAGAATGATGCAATTCGCTACCCGACGGGCTTAAGCTCGATCAGGAAAAACAGCCGAT  
TTTTCTCGGAAACTGGGCTGGATGCGCTACCGGAACGCGCTCAGTACGGTATTTGAAAAATGTCATGCTGCC  
AGTCTGCGGTAAGTGGTACATCAGTATTCAGACAGAAAATGAAATCAACTCCCGCTTACCCCTTACGCTCAATGATC  
GGGCTGGATGCTGGCGTGGCTAAACTCGCCACGCTGTCTAGATGGCACAGTCTTTGGGCTGTAAACAGTTTTCAGAAAA  
CCAGAAGACGCTGGCGAGACTTCAGCGACAGTTAAGCCGCAAGGTCAAATTCAGCAATAACTGGCAGAAAGCAGAAACGCA  
AAATACAGCGACTGCATTCCTGATCGCAAAATATCCGAGGACTACCTTCAAAAAGTCAACAACCGCTCAGCAAAAAC  
CACGCAATGATAGTCATTGAGGATTTGAAGGTCAGCAACATGTCAAAGTCAGCAGCGGTTACGGTACGCCAGCCGGGCG  
CAATGTCCGGGCAAAATCAGGTTTAAACCGTTCGATCTGAATCAGGGCTGGTATGAAATGCGCGCCAGCTTGAATACA  
AGCAGCTCTGGCGTGGCGGTGAGTGTCTGTTCCGCGCAGCTACACAAGCCAGCGTTGCGCGTGTGTTGTTGTCATA  
CGAAAAGAAAATCCGCTGTCACAAAGTAAATTCAGATGCCAGATATGTTGGATATACAGCGAAGCCGCGTGAACGGCG  
TCGTAACATTTTAGCGCGGGGACGCGCTTCTGCTGTGGAGAGATGGTGCAGTATGCGCCCGTTGAGCAGGAAC  
CCACCGAAATGATTCAGGCGACAGCCTGA

>Cluster\_62324

ATGGCTCGCGTATGAACGGTGTTCACGCGCATTTATGCTGGTGGCTTTTATGATGGGGTGGCCGGGGCGCTACAGGC  
TCTTACATTTAGCTTATTTCTGAGTCTGAGGTTGGCGCGCAACCTTTCTGGATCGGACTTTTATACGGTGAATGCTA  
TTGCTGGGATCGGCGTAAGCCTCTGGTTGGCAAACGTTCTGACAGTCAGGGCGATCGGCGAAAACCTGATATATTTTCT  
TGTTGATGGCTATCGGCAATCGCTATTTGTTGCAATTAATCGTCAATATCTGACGCTATCACCTGTGGTGTGCTTCT  
GGCATCTCTGGCCAAATACGGCAATGCACAGTTATTTGCTTGGCGCGGAAATATGCGGATAAATCGGCGCGGAAATGG  
TGATGTTTAGCTCGGTGATGCGTGGCAGCTTTCTGCGCATGGGTTATCGGTCCACCTTGGCTTTTATGCTGGCGTTG  
AATACCGGCTTACGGTGTGTTTCTGATTTGCCGCGGGATATTCACACTCAGTCTGGTATTGATGCAATTTATGCTTCC  
GTCTGCGCGGGTGAAGTGAAGTGCCTGCGGAAAATGCTTTTCAATGCAAGGTGGTGGCAGGATAGTAACTGAGTAT  
TATTTGTCGCTCGAGCTTAATGTGGACCTGCAACACCATGTACATTTATGATGCGGTTGTGGATCAGTAGCAGGTTA  
GGATTGCCAGAAAATGGCGGGTTCTGATGGGACGGCAGCTGGACTGGAATACAGCAATGATTTGCTGGCTGGCTA

CTATGTCAAACGTTATGGTAAGCGGCAATGATGGTCATAGCAGTGGCGGAGGAGTACTGTTTTACACCGGATTGATTT  
TCFTTTCATAGCCGATGGCGTTGATGACCTGCAACTTTTTAAACGCTGATTTTATCGGCATTGTTGCGGGTATTTGGGATG  
CTATGGTTTCAGGATTTAATGCTGGAAGAGCGGGGCGAGCTACCACCTTATTTACTAACAGTATTTCTACCGGGGTAAT  
TCTGGCTGGCGTTTATTCAGGGAGCAATTCACAAAAGTTGGGGCAGCTTTGCTGTCTACTGGGTAAATTCGGGTTATTTCTG  
TTGTGCGATTATTTTAAACCGCAAAGGTTAAAGACGTTTGA

>Cluster\_33692

ATGCTGAGACACAACGTTCTCTGTGCGGCGGGATCTGGACCGGATTGCGCCGATAACGGATTTGACTTTCATATCATCGA  
CAATGAAATCTATTGGGATGAGAGTCCGGCTTACCCTTACTTTGCGCCAGATTGAAGAGCAGATCGAAAAACCGACTG  
CGGAACCTGCATCAGATGTCCTTACAGTTCGGGACCGTTTATTTTTCGCTGTGTGAGGACCGGATCCTGACGCACTGGCGATCCCG  
CCGTTGTACTGGGATGTGATCGCCGAAAGCTGGCGCGCACGCGATCCTTCTGTTGTATGGCCGATGGATTTTGCTGGTG  
TGGTAATGCACCGTTAAGTTGCTGGAGTACAACGCGGATACGCCAATTCATTTGTACGAGTCCGGCTTATTTCCAGTGGT  
TGTGGCTGGAAGACGCCCGGCGTGGCGGATTTTCCGCGTGTGCGGATCAGTACAATGCCATTCAGGAACCGCTGAT  
TCCGCGCTTTAGTGTAGCTTTACAGTTCGGGACCGTTTATTTTTCGCTGTGTGAGGACCGGATGAAGACAGGATACCTG  
GCTGTACTTGCAGGACTGCGCCAGCAGGCGAGGAGTCCGCGTTTATCTACATTGAAGATCTCGGTTTGGGCGTGC  
GCGCGTACTGACCGATCTTGTATGATAATGTATCCAGCGTGCATTTAAGCTGTATCCGCTAGAGTGGATGATGCGGTGAC  
GATAACGGTCCGCTGCGCGCAAGCTGCGGAGCAATGGTGGAGCCGTTATGGAAAAGTATCTTGTAGTAATAAGGGCT  
AATGCCGCTGCTTTGGCGCTTCTTCCCTTACCTTAACTTCTTGCATCCTGGTTCGATGGTGAAGAAACCGGATG  
CCGCTGGCGAAAGCTATGTGCGTAAACCGATTTACTCGCGGAAAGCGGAAACGTCACCATTTTTCGACGGTCAAGATAAC  
GTCGTTGACACCGTGTAGGTGATACGCCGATGAACCGATGATCTACAGGCGTTTCACTTCCGCGGATTTGGCGA  
TAGCTACACACTCATCGGTAGCTGGATTTGCTGATGATGAAGCTGCGGAAATGGGGATCCGTGAAGATAACACGCTGATCA  
CCAAAGACACCTCACGTTTCCGTTCCGATTTGCTGGATA

>Cluster\_10236

ATGAATAAAATATATCCGGTAAAGTGAACAGGTCCTGTAACCTGTTGGAGCGTCTGCTCTGAGCTGGGAGCAGAGTAAA  
AGGAAAAAGTCCCGGCTGTTTTAATTAAGCCGATAAGTTTTATATTCATCTCGGTATTCGCGGATGATGTCATCGTAA  
ACCAGGATAAAATATTGATTTTGGCAAAGAGAACAGAGCATCGATTACCCTATTACGGTACTGACAAATGCCAATCTG  
GTAATCAATACGACAGATACTCCCGTCCGCGTCTGACCTCTCGCTTCTGGTGGTGGGTTGGATATTACCGGAGGAAAGGT  
AACAATCAATGGCCCGCTTAACTTTTGTGTAAGGATACGGGGTCTTGAATGTCTCCAATGCTGGCAGCGAGTTATATG  
CTGATGATTTGTATGAGTCAAACCTCAGGATGAGACATGACATCAAGCTATTTTTAATGTCTCCAATGGCGGAAATTCAT  
GTTAAGGGCACCAGTCTGCTGACTTATACGCGAGGGAATGTAAGCGGCAAGGTAGTCAAGTAAATGCAGGGACCTTCTT  
TATGGCGCTTACGGCGGATATGCGCGTAAATCAGTTCCTGTCGTTAATAACGCTGGTGAAGTAAATGCTCGTGAACATA  
TTAGCCTGGGTTATACGACCAACGTTCTGATACAACATTAGTCTGATCAGATGGAGGTAATAATCCGCACCGAAAAAT  
AGTTAAGCACCAACTCTGAGTTAGCGTTAGTGCACAGGAAGGAGTCTGCGAAGGCTGCAGGGATATTGATGCGGA  
AAAAATTGAGTTTGTGTTGGGCAAGACATCCGATAAGAAAATCACCTTAAACCACCGGATAAAAACCGGACTATTTCCG  
CGGATATTGTCAGTGGCAGCGAGGGCTGGGCTATATCAATGCCTCAATGGCAGACTTACTTAAACCGGTGATAACTCT  
GCCTTAGCGGTAAGTCAAATGAGCAAAATGGCGCTTAGGGATCACCAAAAATAAGGTACAGCAGAGATCAACAA  
CCGCGGAAATTAACCTGAAGGCTGACGATAGCATGACCTTTGCCAATAAGATTTCCGGCAATGGTACAATAAGTATCG  
ACAGTGGGACAGTGGGACAGTGGACTGA

>Cluster\_27943

ATGGCAAAAACACTTTTTACGTCGAGTCCGCTCTCTGAAGGCACTCTGACAAAATTTGCTGACCAATCTCTGATGCCGT  
TTTTAGACGCGATCTCGAACAGGATCCGAAAGCAGCGTTGCTTTCGAAAACCTACGTAAAAACCGGATGGTTTTAGTTG  
GCGGCAAAATCACACACGCGCTGGGTAGACATCGAAGAGATCACCGTAATACCCTTCCGCAAAATGGCTATGTGCAT  
TCCGACATGGGCTTTGACGCTAACTCTCTGTGCGGTTCTGAGCGCCATCGGTAACAGTCTCTGACATCAACACGGGCGCT  
TGACCGTGGCAGTCTCGTGGACAGGGCGCGGACAGGTTCTGATGTTTGGCTACGCAACTAATGAACAGGCTGCTG  
TGATGCCAGCACCTATCACTTATGCACACCGTCTGGTACAGCGTCAAGGCTGAAGTGGCTAAAAACGGCAGTCTGCGGTTG  
CTGCGCCCGGACGCGAAAAGCCAGGTGACTTTCAGTATGACGACGGCAAAATCGTTGGCATTGATGCTGTCGCTGCTTTC  
CACTCAGCACTCTGAAGAGATCGACCAGAAATCGTGCAGAAGCGGTAATGGAAAGAGATCATCAAGCCGATTTGCCCCG  
CTGAATGGCTGACTTCTGACCACAAATTTCTCATTAACCCGACCGGCTGTTTTCGTTATCGGTGGCCGATGGGTACTG  
GGTCTGACTGGTCTGTAATAATCATCGTTGATACCTACGGCGGATGGCGGCTCACGGTGGCGGTTGATTTCTCCGGTAAAGA  
TCCATCAAAAGTGGACCGTTCCGAGCCTACGCAGCAGCTTATGTCGCGAAAACATTGTTGCTGCTGGCCTGGCCGATC  
GTTGTGAATTCAGGTTTCTACGCAATCGGCGTGGCTGAACCGACTTCCATCATGGTAGAACTTTCCGGTACTGAGAAA  
GTGCTTCTGAAACAACTGACTCTGCTGGTACGTGAATTTCTGACCTGCGCCATACCGTCTGATTGATGATGAGTCTG  
GCTGCACCCGATCTACAAAGAAACCGCAGCATAACGGTCACTTTGGTCTGTAACATTTCCCGTGGGAAAAAACCGACAAG  
CGCAGCTGCTGCGTATGTTGCCGCTGAAGTAA

>Cluster\_60137

ATGGCATAATACCACCTTTTTCACAGACGAAAAATGATCAGTCAAAGAACCAGTGTCTTTTGGTCAGCCGGTCAACGTGGC  
TCGCTACGATCAGCAAAAATATGACATCTTCGAAAAGCTGATCGAAAAGCAGCTCTCTTCTTCTGGCGTCCGGAAGAAG  
TTGACGCTTCCCGCGACCGTATAGATTACCAGGCGCTGCGGAGCAGCAAAAACACATCTTTATCAGCAACCTGAAATAT  
CAGACGCTGCTGGATTCCATTCAGGCTAGCCCGAACGTCGGGCTATGCGGCTTATTTCTATTTCCGGAACCTGAAAC  
CTGGGTCGAAAACCTGGGCGTTCAGAAAACGATTCATTTCCGTTCTACTCATATCTGTAATAATCGTTAACGATCG  
CGTCTGTTGTTGTTGACGATATCTGTCACCAACGAGCAGATCCAGAAACGTCGCGAAGGGATCTCCAGCTATTAGCATGAG  
CTGATCGAAATGACCAGCTACTGGCATCTGCTGGGCGAAGTACCACACCGTTAACGGTAAAACCTGTGACCGTTAGCCT  
GCGGAGCTGAAGAAAAAATGATCTCTGCTGATGAGCGTTAACGCGTGAAGCGATTCGTTTCTACGCTAGCTGTTG  
CTTGTCTCTTCGATTTGCGAAGCAGCAATGATGGAAGGCAACCGCAAAATTTATCGCTGATTGCCCGGACGAGCC  
CTGCACCTGACCGGACCCAGCATATGCTGAATCTGCTGCGCAGCGGCGGAGCAGATCCTGAGATGGCGGAAATTTGCCGA  
AGAGTGTAAAGCAGGATGCTATGACCTGTTGTTTCAGGACGCTCAACAGGAGAAAAGACTGGGCGGATTTATCTGTTCCGCG  
ACGGTTCGATGATTTGGTCTGAATAAAGACATTTCTGCGCAGTACGTTGAATACATCACCAATAATCCGATGACGCGATC  
GGTTTGGATCTGCGGTTCCAGACGCGCTCAACCCGATCCCGTGGATCAACACTTGGCTGGTCTGATAACGTCAGGTT  
TGCCTCCGAGGAAGTGAAGTCACTTCTATCTGGTGGCGAGATTGACTCGGAAGTGGACACCGACGATTTGAGTAACT  
TCCAGCTCTGA

>Cluster\_6756

ATGGTTACGCCAGTAAGCATCAGCAATTACATATCTCTTCTGATGATTTTCCCGTACGTAATATTGCACCGCAGGTAAA  
AGAAGTTTTAAAGGATTTTATTGATGCACTTAGTACAATAATATGTAATGAAGAGTGGCGCACGCTTTTAAACATCAACT  
CAGCCACAAAAAGATATTTAATAACCTTGACAACCTATCATATATTTAGAGGACTTCTTTCCGGGTAACGACACGCTA  
TACAATGAAAAGGTTTCACTTTAACTCACTTATCCCGCAGGATGGAAGACACAAAAGAAAAATATTGAATTTCAAGTAGT  
AATAAATTTAAGCCCTATTTATTTAGATAATTTTCGCCATGATGGAGAAATTAATATTTTTCGCTCCCAACCCAAAGC  
CTGTCATATGGGCGCGTATTTTTCAGACCGGCTGAGCGTGTACTTCTGTTTCTGAATGATTTTATGAACAAATTT  
CCAATGACAAACCTGGTGTCCATCAAAAGAGGCAATACACACATATTTGAACCCCTGCCTTCGGATCACCAACCGC  
TGCAGATTACTTACGCCAGTTGATTTGCTGTTGCTGATTTTATCTCTGCGGTAATTTTGTGATACCTCCCGGATTTAT  
GGAATAACTCTGAGGTTACAGATGTTTCTCAATAAAGATCTCACTTGTATCACCGCATTTCTGACATAACGGACAGC

GAATTA AAAAGAGGATTTGTTGCAAAGCCTGATGGATTTCATAGGTTCTAACAAACATGTACTACCCGAAGTCTGCATCTG  
CTTTTTATCCCTTTTAGCAGAACAGAAATCTCCCATTTTTTCAGAACTGTTTTATTTTTTCGCCAATAATGTTATGCACT  
ATCACCAATTTATGAATCCCAATGAAAGTGATTTGAATGACGTGTTGATGCCAGCATCATTAAGTGATGATAAAAATTATC  
AAACATATGGCGCCAGGACCTCAAACGTGTTTGTAAAAAATGAAACCCGCCAAAAGTTACTCACGAAGACCTGGTGAA  
AAACAGGCTCGCTCCCTGTGACAGCACCTATACCCGCAACCCGCAAAACGCCAGACCTCCCTGACGTCATTA

>Cluster\_22905

ATGCGTTTTGTTGATGAATATCGCGCGCGGAACAGGTGATGCAGTTAATTGAGCATCTGCGCGAACGTGCTTACATCT  
CTCTTACACCCGCCGAACGCCCTCTGCGGATTATGGAAGTGTGTGGCGGTCATACCCACGCCATTTTTAAATTCGCGCTCG  
ACCAAGTTGCTGCGGGAACAGTTGAGTTTATCCACGGTCCGGGTTGCCCGGTGCGTACTGCGCATGGGTAGAATCGAC  
ACCTGCGTGGAGATTGCCAGCCATCAGGAAGTCATCTTCTGTACCTTTGGCGATGCCATGCGCGTACCAGGGAACAGGG  
GTCGCTGTGTCAGGCAAAAGCACGCGGTGCCGATGTGCCATCGTTTACTCGCAATGGATGCGTTAAAACCTGGCGCAGG  
AGAATCCAACCCGTAAAGTGGTATTCTTCGGCTTAGGTTTTGAAACCACCATGCCGACCACCGCCATCACTCTGCAACAG  
GCAAAAGCCCGCATGTGTCAGAAATTTTTACTTCTTCTGCGCAGCACATTACGCTCATCCCAACACTGCGCAGTTTGTGGA  
ACAGCCAGATAACGGTATCGACGCGTTCCTGCGCGCGGCCACGTCAGTATGGTTATCGGCATGATGCCTATAATTTTA  
TCGCCAGCGATTTTCATCGTCCGCTGGTGGTGGTTCGAAACCCCTGATCTACTCAAGCGGTGGTGGTGGTGGTGGT  
GAGCAGAAAATACGGCCACAGCAAGGTAGAGAAATCAGTATCGTCCGGTGGTACCAGGATGCCGGTAACTGCTGGCGCA  
ACAGCAATTTGCTGATGTCGATGTCACACGGGACAGTGAATGGCGCGGCTTAGGCGTGATGAATCTTCTGCGCTGC  
ACCTGACGCCGATTTATCAACGATTCGATGCCGAAGCACATTTCCGCCCGCACCGCAGCAGGTCTGCGATGACCCGCGT  
GCGCGTTGTCGCGAAGTCTTACGGGCAAAATGTAAGCCGATCAATGCCCGCTGTTTGGTAACACCTGTAATCTCAAAC  
CGGTTTGGTGGCTGATGGTTCTCCGAAGGAGCGTGCGCCGCTGGTATCAGTATCGTACGAGGAGTGAAGCGT  
GA

>Cluster\_26633

ATGGTAAATGTTTCGTCAGCCAGGGATGTCGCACAAAATCTGCTTTCGGTGTGTTTTAGCCATCATGATTGTGGCATG  
TCTGTGGATTGTGTAACCTTTATCTCGCTTTGCATGGCCGCTAGTGGTTATCGCCACCTGGCCGATTTGTTTAC  
GTTTGCAAAAGATCATGTTTGGTTCGCGCTCTCTCGCGTTCGTTGATGACGCTGTTATAGTGATGGTGGTTATCATC  
CCTATTGCTTTGCTGGTTAACAGTATCGTCGACGGCAGCGGCCGCTAATTAAGCCATTTCCAGTGGTGACATGACGTT  
ACCCGATCTGGCGTGGCTTAATACCATTCCGGTGGTGGCGGAAGCTATATGTCAGGCTGGCACAATTTGCTGGATATGG  
GGGGGACGGCGCATGTCAGGCAAAAGTCCGCTTATATTGGCCACCACCCTGGTTTCGTTGGCGAGCGCGCATATC  
GGGCGCTTATGTTGTCATGTCAGTGTCTTCTTTCAGCGCCCTGCTGTACTGGCGCGGTGAACAGGTGGCACAAGG  
CATTCGCCATTTTCAACCCGCTGCGCAGGCGTTCGCGGAGATGCCCGCTGCTGCTGCGCGCACAGGCTATCCGCGCG  
TGGCGCTGGGTGTGGTGGTACGCGCTTAGTACAGGCAAGTGGTGGCGGTATCGGCCCTCGCGTATCCGGCTACCTTAT  
GCAACTTTGCTAACCGGTGTTAATGATCCTCTCCGCTTGTCCAGCTTGGACCGTTGCCGCTACTGATTCGCGGATTA  
CTGGCTCTACTGGACTGGGATACCACCTGGGGAACGGTATTGTTAGTTTGGAGCGGTGGTGGCAGCTCGATAACG  
TCATCCGCCAATGTTAATTCGCATGGTGGCGATTTACCGCTGATCCGATCCTCTCGCGCTTATTGGTGGTTGATT  
GCTTTCGGGATGATCGGCTGTTTATTGGTCCGGTCTGTTAGCCGTTTCTGCGGCTGTTTGGCGCTGTTTGGCGGTGGGGA  
AGTCCACCGCGACCGCAACCGGAAGAAATCTCGAAGAACTTGGCGAAAATCGAGAAATCGAATAAGTAA

>Cluster\_25399

ATGGCGTTAGCTGAACCCGATTTTATCGACCGCGACCCGCGCAAAATACCAGTGAGATGATTGCGCAGTATGAAGCGGT  
GAGCGGTAAAACGCTTATCCGGCGCAGGCGCGCTGCTGATTGATGTTATGCTATCGTGAAAATCTGCTGCGCA  
TCGCCATTCAGGAGCGCGCAAGCAGAAATCTGGTGGCGTTTTCCCGTGCGCCAATGCTCGATTACCTCGCGCAATGGT  
GGCGTGAAGCGCTGCTGCGCAGGCGGACAGACCAGTTGCGGTTTTCCGTTGCCAGCGCGCAAAAGCGCAATGTGCT  
GATCCCGGAGGGCACCCGCGCACGCGGCCAACAGCGTGTATTTGCGCACGATGACGATGTCTGCTGCGCAGCGGAA  
GTCGAGCGTCAATGTCAGGCGCACATGTCACCGCTGGCGTTGTTGGGTAATGGCTGGCAACCGCGCAGATTAGCGCA  
CTGGTGGACAGCTGGCAGGTGTCGATTTGAGGTTGACGAACATTACCAGCTCCGCGCGCGGCTGCGCGATGAAAGCGA  
CGACGCCCTGCGCGAGCGTATCCGGCTGGCTCCGAAAGTTTCAGTAACCGCGGGAGTTATGGCGCATACCGCTTTCATG  
CGCTGTCACTGACGCGAGGCGATTTATCGAGTGGCCATCCTCGGCCCGGATGAGGGGCTGGATGAAGGTTGCGTGGAGAT  
TACCCTGACGCGCAGGAGGCTGTCGCGCGCATGATGTTGCTGCGCACAGGTGGTGCAGGATGTCAGTAAAGAGTAAAGC  
CCCGTTGACCGATAAGGTAAGCGCGAAGAAACACTGCGCGTGGCATAATCAGATTAAACGCGCAACTCACGCTATTTACTA  
AAGCGGATCAGGACTCGACGCTGCTGGCGCGCGTAAGGCCATCGCGACTGGACGGCAGAGCGCGAGCGCCATCTGGGG  
CGGGATATCGTCCCAATCAAATCATCAAAGTGTTCAGGTTGGCGGGTGTCTATGACGTTGGCGCTGGAACACCTGCCAA  
ACGAGTGTGCGCGCACATGAGTGGCGCATGTCACCTGATGTTGATGTTGACCCATCGCGGGGTGAGCGGATGATA

>Cluster\_8890

ATGCTTAATGTAATAACGATACCTGTCTGTAACGCTGCGGGTAAATACCGCTCGGGTACTTCTGGTATTACTCAATC  
TGAACCGGTTTATCGCTGGATTTACAATGTTAAATCCAGCAACTGCTCAGCAGGCTGGACAGAAATAGCCCTTTTAC  
CGACCGCGCCGCGCATCTATAGTACGCGCCCTCTGCTGCGTGGATGTCCTTAGTAAATGTTTTGGTGGTATTAGT  
GGTGAGTTACAAGTGCAGTGGAGGAGGAGCCACAGTGCACAAGCTATCCCTATCTCTCAGGTGAATACCGTTGA  
CCCTCAGCAAAATGATGATGATGGTCACTCTGTTATCTTTGGATACTTCCGCGCAGAAAGTCTCGAGTCTGAAAACCTTA  
ACGAGATTTATATGGATGGCAAACTAAAGCGCTGGAGATAAAACGCAGGATATAAAAAACAGCTCAAGAAACACAG  
AAAGCCGAAAGAGAAATCACAAAAAAGTAAATTTGTTGGCCAGGTTCTTTGGTTGGTTGGGCGTGCATTAACAGCCGTTG  
CGTGTTTTTTAACCCAGCACTCTGGGCTGTTGTTGCCATTTGGTGAACAGCAATGGCACTGCAAAACGGCAGTCAATGTA  
TGGGGGAAAATGGCCCTCAGGGATTAAGACTGACGACAGGTTCTTTGGCGGAATATCTATGGCCGCAAGCATTTCTGACA  
GCCGCGTTGGCGGGGTGCTTCACTGTTATCTAAATTTGGTAATGTTGCTAATAAAAAATGGCTCAAGCGTTGTAAGG  
CGTTGAGAAGCGCGCAGAAGCGCTGGTTAAAAACGTTTTTGCAAAAATTTGACAGTGGCAGAGGGCGTTACGAACGGTA  
TTCGTTCTGCGGGGCAACTGCGTTGAATAATGAGGCTGCGCAACTCCAAATGTTGCTCAGTTAGCTGCTTTTCGCGGTG  
CAAACTTAACCTCGACAGAGTGAAGCTTAGGTTGAGAGTGCAGGCTCGAGCTGGATAAAGCGGCAAGCGAGTTACAAAA  
TCAGGCGAGCTATTTACAAGTGTTCCTCAACTGATGTCGATTTAGCACGGGTAAATAGTCTATTGTTAGTGGCCGAA  
TCTAA

>Cluster\_57578

ATGATTA AAAAATAAGCCTAAGAAAAGATCAGTGGCATTACTTCCAGAAACGGCGATTACTCAAAGTGCTACATGC  
AGGCGAGCATCTTTTACCCTGGTTAAATACGCCAGAAGTCTTGCTGATTACGCTCGATGGCAGCGAAGTTCCCGACGTCG  
TGGCGGATTTATTTGCGCCGCTTTTCAGCTGATTTGGGTGGAGAAATATTGCTGGTGGCAGACTTGTGCGGAGATTGAGCC  
GGGCGGTTGATATGAGCGGATTTTTCAGGAGATCTGCCGCCATCAACCGCGCGGTTTGTACTGGCGGTGATAGGATGA  
TTTGACACTGGTGGGATGAATACGACAGTCCAGGTACAAACCGGAGGTGATGAATCGGTTATGCAACACCGCGCA  
AAGGGCGAGTTAAAGCCCGCATGCAATACTAACCGGTGACGTTCCCGGCTGGCATGTAGGCGTGTGCAAAATCGATGGT  
GAAACGCAGGCGCTGTTACCGCGGGGCTGACCGCATACTGGAATAATTAACCATCTGGTTGACGCTGAAGTGGTTGACAC  
CCGCTTGCAGGTTCTGGAAGTCAAGCGGCAAGAAATCTTAACGAAAGTAAAGTCAATCTGCGGATTAACCTCCCGCTTA  
ACTGGCGCTACAGCGAGTGTGCTGGCATTAGTCAGTTAACGAAAGCGATTGATCAATTTGATCGGGAATTCGCAATTT  
GCCCTGCGTGAAGCGGTAGTACTCGTACGCTGGATGAACTGCTGGAAGATAAACAGGTCATTGATGACGTTGTCAGCGA  
ACAGGTGAAATCGCGCATGTTGCCATTTGGTATGGAGATTGCCATTTAGGGGTGAAAGATATCGTCTGCTGGTGGATA

TGAAAAATATCTCGCGCAGCTGGTTGAGGCAGAGAAATCTGCGCAGGCGAATGTGATTGCGCGACGTGAAGAAACGGCA  
GCGACGCGCTCGTTACTGAAACCGCCAAAGTCAATGGAGAAACAATCCGGTAGCGTTGCGTTTAAAAGAGCTAGAAACGCT  
GGAGAGAGTGGCTGAGCGGATCGATAACATCTCTGTATTTGGCGGTCTGGATCAGGTTCTGCATGGTTGGTTAATATCA  
AAGGGTGA

>Cluster\_62154

ATGTCATTTTCTGTGTCAGGAAACCTGTCTCGCTTTTGCAGCACAATGCGATTTTCAGGACACGAAAACGCTGTGCTGTA  
CGTATGCTGTGCGAATTTCAGGCGTCAGGCAAAAGAGGTTCTGGCGAGACAGGCTTGGGAATGTGCTCGCGCGCTACGGTA  
GTGATAAACCCGATGCGCTGCGACTGATGATTTTTCGCGCATATGGATGAAGTCGGTTTTATGGTGGCAGAAAATAGAGCCG  
TCTGGATTTTACGCTTTGAACCGGTAGCGGCTCTGCGCAGGTCACATGCGCTGGTTCCATCGTACCCTCACCAGGGGA  
CAAAGGGCCAGTCATGGGGTGTATCGGCATTAAGTCTACCACCTTGGCAAAGGCGACGAGCGCACGCAGTCACCTTCTG  
TCGACAAACTGTGGATTGATATTGGTGC AAAAGACAAAGACGACGCTATACGGATGGGCATTCAGGTCGGTACGCCTGTC  
ACTCTGTATAACCCGCGCAACTCTGGCAAACGATCTGGTGTGACGTAAGCACTAGACGATCGTCTAGGCTGTACTGTC  
CCTGCTCGTGTAGCGGATGCTATCAGTACTATGGAGCTTGATATCGCCGTTTTATCTGGTGGCTTCGGTACAGGAAGAAT  
TTAATATCCGCGGCATTTGTTCCCGTATTACGCCGTGTA AAAACCTGACCTGGCGATTGGTATTGATATCACTCCATCGTGT  
GACACCCCTGATTTACACGATTATTCGAGGTCAGGATTAATCAGGGCGTTGGGATCAGCTGCCTGAACCTACCATGGTGC  
GGGAACGCTGGCCGATTAATCAGCCCTCTCGCTGATACGGATGTTGGAACAGACGGCTCTTGAACACAACATCCCGG  
TGCAGCGAGAAGTGGCTCCCGCGTGATAACAGAAACCGGTTATATCAGGTTGAGCAGGATGGTATTCCCTGCGCCAGT  
CTCTCTATCTTGTGCTATACCCATTTCTCGCGGAGGTTGCCAGCCTGCGTGATTTGACTGATTGCATCCGCTATTT  
GACCGCTCTGGCAGGATGTCAGCAGCACATTTCCCGTTGAGCCTGATTCAGGCACTACACAAGAGGCACATCCATTAT  
GA

>Cluster\_40032

ATGGAATACCAACTCACTCTTAACCTGGCCGATTTTCTTGAACGTCAC TGGCAGAAACGCCCGTGGTGTAAAACGCGG  
CTTTAATAATTTTTATTGACCCAACTCTCTCCAGACGAGTTGGCGGGTCTGGCGATGGAAAGCGAAGTCGACAGTCAGCTGG  
TCAGTCACTCAGGATGGCAATGGCAGGTCAGCCAGGCTTCGATTCGAAAGCTACGATCACTCGGTGAACTACCTGGTCA  
TTGTTAGTGAAGCAGTGAACCACTGGCATGAACCGACCGCTGCGCTAATGCGACCGTTCCGTGAACCTACCGGACTGGCG  
TATTGATGATCTGATGATCTCTTTTCTGTACCGGGCGCGCGGCTCGGCCGATCTCGATCAGTACGACGTTTATCA  
TTCAGGGTACCGGTCGTCGCTGGCGAGTGGGCGAAAAGCTGCAAAATGAAACAGCACTGCCCGCACCCGGATCTGTGA  
CAGGCTCATCGGTTTCGAAAGCCATCATCGATGAAGAGCTGGAGCCTGGCGGATATCTTTTATATTCCGCCAGTATCCGCA  
TGAAGGCTACGCGCTGGA AAAATGCGATGAACCTATTCGCTAGGTTTTCGCGCGCAAATACGCGGGAACGATTAGCGGAT  
TTGCCGATTTATGCTGCAACGTAACCTGGCGGCAACTACTACAGCGATCTCTGATGTTCCACCTCGCCTCATCTTGGC  
GACGTTCTGCCGCAAGAGATGGATAAACTGCGTGAGATGATGCTCGAATTGATCAACAGCCGGAACACTTTAAAACAATG  
GTTTGGCGAGTTTATATCCAGTACGTCACGTCATGAACCTGGATATCGCCCGCCAGAGCCGCTTATCAGCCGGATGAAATCT  
ACGATGCGCTGAAACAAGGTGATGCTGCTGGTGGCCTGGGGGCTGCGCGTATTGCGCATTTGGCGACGACGTTGATGCC  
AATGGTGAGAAGATCGATTTCCCGCACCGCTCGGCACCTGGATGCGCTCGCCAGCAACATTTGCGCTGACCGCGGAGAAATTT  
TGGCGATGCGCTGGAAGATCCGTCATTTCTCGCGATGCTCGCGCGCTGGTCAATAGCCGATACTGGTTCTTCGAAGGGT  
AA

>Cluster\_6261

ATGATCAAAGAGACTGTTACGATGAGTCAATAAGGAACTCCACCGACTTCAGATTATTCAGGAACAAGCTGCGGCACGCAT  
TGGCATTTCTATTCGCGAGGTTAAACGTCGTGGTGCAACGGTATAGAAAATGAAGGGCCTTCTGGTCTGGTTTCCACCGCAG  
GTGGAAAAGCTCTTAATAATTTCTTTCTACTGAATTCAGAGCAACAGTAATTTCACTCTC TAAAGGCGTTACGCTGAT  
TTTGGACCTACGTTTTCGCTGCGAAAATTCGCGGAGATACACGGTTTATCTTTTATCCGTTGAAACTCTCAGAAAAGTGGAT  
GATAGAAGAGGGGTTATGGCGTGAACCCGCTCGTAAAAATTTGCCGATATATATCAACGCCGATGCGACGACCACTTTACG  
GTGAATGATCCAGATTGATGGCTCACCTCATGACTGGTTTAAAAATCAGAGCCAGATGTACACTGATCGTTTCTTATT  
GATGATGCCACCAGTGGCTTGTGGCGTTGCGTTTTGTGCTGCTGAAAACAACCCGGGCTTACATGGA AAACCTCCGGGG  
TTACCTTAATGATCATGGCGTACCGCTCGCTCTACTCTGATAGACACAGTATATTCAGGGTAAATAACCCAGAGCGGG  
AAGGTGAGCTGACCCAGTTCACTCGTGCGATAAAGACACTGGGCATCGAGCCAATCCATGCCAACAGCCCGCAGGCAAAA  
GGCGGGTAGAGCGCCCAATCAGACACTACAGGACAGGCTGGTCAAAGAAAATGCGGCTTCAGAAATATACGATGATTTGA  
AACAGCAAAATGCATGGTTGCCGACCTTTATTGAAGCCTATAACAACCGGTTTCGCTACGCTCGCTACTACTGATAATG  
CTCATCTTGTATGTCACCACTTTCTGAAGAGGAAC TGGGTTATATCTTACGCTACAGGCGAAGCGGTTCTGTCTAAAAAT  
CTCACTTTCCAGTACAAAAGCAGTGCCTTTAGGTACGAGTGGGGCCGGGATATCGACTTAGGCATTCGGTTGTTTAC  
TGATGCGGAGAACTTTTACCGGTGAAAATTAACGTTCTGTATGACGGGAAAAGCGCTGGGGTGGGAAAAGTATGTTGATGGCC  
CGGAGCCTATACCACTGGATGATGAAAAGAGTGTCCATGAACGAGTGGATAATGCCGCTATTGATTTACGCTCAAATAAC  
TATGTTAAACCTAAAAGCTGACCATCCCTGGCTTACGCGCCGAACGCAAAGTCAACAGCAAGTTAAGCCCGCAAGTTAC  
TAAAAAGAAGCCTGATCCCGATAAAAAAGATTGA

>Cluster\_64008

ATGAAAAAATTTGCTATTTGTTGGTGC GGGGCTACGGGATCTACACCTTATTTCTCGTCTTACAGCAACAACTCCACT  
TTCTATTTCTATCTTCGAGCAGGCTGACGAGGCGGGTTCGGGATGCCATACAGTGTAGGAAAACCTCAAAAATGATGTC  
TGGCAAATATTCAGTATTTGAAATACCGCCGATTAATTTGATCAGTATCTCGAATGGCTACAAAAGCAAGACAGCAGCAT  
CTCCAGCGTTATGGCGTTAAAAAAGAAAACCTTGCACGATCTGCTAGTTTTTACCAGCAATTTCTGCTGGGCGAATTTCCG  
CGATCAATTTTACGATTAGTAGACCAGGCACGACAGCAAAAATTTGCAAGTGGCTGTTTATGAATCATGCCAGGTTACCG  
ATCTGCAAAATACAAATGCTGGCGTATGCTCGCTACAAATCAGGATTTACCCAGCGAGACGTTTGTATTAGCGGTGATT  
GCCAGGGTCACGCTCGGCTGATGAAGAAGAAGCAACAGAACGATTTTCCAGTCCGTTGGTTCAGGCTGATGGAAGC  
AAAGGTCGATGCGTGAACGTTGGGATTTATGGGAACATCTTGGAGCGGACTGGATGCGGCAATGGCAGTGGCTATTACGC  
ATGGTTCCGTTCAATGAAGATGATAAACAACAGCTGCTTTTAAACCGCGATAACGCAAGTGA AAAAGCTAAATATTACGTTG  
ATGTCGCGCAGGGTATTTTACCAGAGCCGATTTCTATTGGCCTATTTCCCTACGAGCCCTTACACATCGTCAACCGATCA  
GGCATTAATGCTGAGATTCAAAAGGTTGAAGAGGGCCTTTTGGATCGGGTATTTAGATTGATAGTAGAGAAATCAAGT  
TTGCTGATCCAGACTGGAGCCAACGCATAGCCTTAGAGAGCCTGAATGCGATTCCTTTGCTCAAGCCTGGTTTGGCGAG  
CGCAAAACAACCGCACCATTTGACTGGGCGA AAAAATCTCCAGGAAGTCAACGCAATAAAACGAGAAAAACATACTGT  
TCCCTGGCGTTATGTCATTTCTGCGCTGCATGAAGCCGTACAGGAAATTTCTCTCATCTGAATGAACACGACCAATAAAC  
GGTTCAGTAAAGGCTTGCAGGTTTCTATCGATAAATTTACCGGCAATCCCTCAGAGTCTATTCTGCTCGCTTATGGC  
TTACGTGAAGCGGAAATCATTCATATTTCTCGCCCTCGGTGAAGACTACAAAATGGAATTAATGAGTCCGCGCACCGCTCT  
GAAAACGGGAAGACAAACGCTACTCGTTTACGTTTATTTGATGCCCAGGAGCAGCGTCCGCTTAAAGTGAAGATATTT  
CTTTCCCTGGCTACGCGAGCAATACAGAAAACAGGGGATGAAATCCCTGATGTTGGCGAAGATTATACGTTACAGCAA  
CCGGAAGATATTCTGGACCGCTAGCGTTCCGCGCGTTGCCCTGGTTGATGACAGCAAGCCTTTCTGCTCAGGCAATAC  
GGCATGTGAGAAAATTTGGTGGGCGATGGCTCGGGCGTCTGTAAGCCTGCATCCCGTCTGCTCGGCTCTTTCTGTTT  
ATTTAA

>Cluster\_6645

ATGAAGCACTCTGTTTTCAGTACAGTGTGTTGCGCTGTTGGTCAAGCAGCATTTCTTTTCTGATGCTGCAGAAAGTTCGGAG  
CGGCACAGTACTGGCAGAGAAGCAGGAGTGGTGGCCACATTAAGATGAGCCTGCGTCTGGATCCCGCTAAGCCG

TGGCCTGCCAGAGATTCAGGTCATTCGCGATCTGTTGAAGGCTGGTGAATCAGAACGAAAAAGGGGAGATTGTCGCC  
GGCGTTGGCACTCAGTGGAAAAGTAATGACAACCGTATCTGGACTTTTACCCTGCGCGATAACGCAAAATGGGCGGATGG  
CACACCGGTACGGCGCAAGATTTGTCTACAGCTGGCAACGCTGGTGGACCAAAAAACATTTGTCGCCATTTGCATGGT  
TTGCCCGGCTGGCGGGAATCAACACGACAGCGGATTTATGATGGTAAAGCTACGCCGACCGAGCTTTGGCGTCAACGCA  
TTGATGGCCCACTTTGAAAAATCAGCTGTGAAACCGTTCCGCGGCTTTGTGAATTTAACCGCTAACCTTGGCCTCTT  
CCCGGTGCAAAAAAGCAACGCTAGAAAGCGGTAAAGAGTGGACGAAACCCGAAATCTGATCGGCAATGGCGCTTATGTTT  
TTAAAGAGCGCTAGTCAATGAAAACTGGTCTGGTACCGAATACCCATTATTTGGGATAACGCCAAAAACGGTACTGCAA  
AAAGTGACCTTCTGCAATTAATCAGGAATCCGACGCACTAAGCGTTACCTCGCGGGGATATGATATCACCGAATC  
CTTCCCGAAAAATATGATACAGAACTGTGAAAGGATATTCGGGGCAGGTTTATACCGCCGCGAGCTCGGGACCTATT  
ATTATGCGTTTAAACGCAAAAAAGGGCCGACGGCAGATCAGCGCTTCTGCTGGCATTAAGTATGACGATAGATCGCCGC  
CTGATGACCGAAAAAGTATTAGGACGGGCGAAAAAGCCAGCGTGGCATTTTACACAGATGTTACCGCGGATTTACGCC  
GGAACCTTCCGCTTTGAACAAATGAGTCAGGAAGAATGAAATGCGCAGGCAAAAACTTTGTTGAGCGCAGCTGGTTATG  
GTCGCAAAAAACCGCTGAAGCTGACGCTTTTGTATAACACTTCAGAAAAACCATCAAAAAATTTGCGATTCTGTAGCATCG  
ATGTGAAAAAGAACCTTGGCGTAGATGTTAAATTTGCAAAATCAGGAATGAAAAACCTATATCGATAGCCGTAACACCGG  
CAATTTTGTATGTTATCCGCGCTTCTGGGTGGGGGATTATAATGAACCTCCACTTTCCTGACATTATTAACGTCACCG  
ATTCAGGAAATTTTACGCTTTAAACAATCCGGCATATGACAAAGTTCGGCCAGGCATCGACGAAAAATCCGTTAAA  
GCGCGTAATGCTCGATACAAACCGCGCAAAAAATCTCATGGAGCAAGCAACCGATTGCACCAATTTATCAATATACCAA  
TGGACGATTAATCAAGCCGTGGCTGAAAGGTTATCCCATTAATAATCTGAAGATGTGGCGTACAGTCGGACTATGTATA  
TTGTGAAGCATTTGA

>Cluster\_48646

ATGGAATTTGAACGCAAAAAACAAATTAAGGATCTGGTGGCGGACGCCACCCGGAATACGAAAAAGAAAAAGAACATTGGGA  
CTTCTCCGCGCAGCACTTACGCTGGCGGGCGTGGTTGGTTTACAGACAATATCTTTCGTTACTTTAAAGAGGGAGATCAGG  
AGTTTAAAGGAGCGAGTTGAGCGTCTTATCGCTTCAACACACACTCGTGGAGGTGGTAAACCTCAACAAATATCTCTTTT  
AAAGAAGACATTTCAAGGATGAAATATCGAAGGCAACGACGAGCAGATCCGCAATTTCTGGAAACGTGGACGAGGATG  
CTCTATTGACTCATTTATGGCGCTATTGATTTGCAGTCTGCTATTACGGTTCGATATGGGTTGTTGTCGATAGCACGA  
TGAGTGGTATGTTGAGTCAGTAGCTGACGAGAAAAAGAAAGTGTCTCGCCCTACGCTACTGGATTTCACCTCAGCAA  
ATGCTGGATGTGGCATGGGACGACGACGGGAATATGTTGTGGCGTAAATTTGTTGGAAGTCTGCTGATGACGAGATCC  
TTTTACTTACAGGTGAGGAATACCACTTATCGCTGTGGACACAAAAACGAGTGGTATCTGTTCCGTGGGAAAGTGA  
AGAAGGGCGCTGGTGGAGCAGGTCGCGTCAGGCAAAAGTATTTTAGAGGATAGCGGTGAGCATAATCTCGCGTAGTT  
CCTGTGTTTCCCTGTTGATTTGATTTGGAGAAAGTGAATCACCCTATTTACGCCATCGTTGATCGATGATATCGCTTATCT  
TGATCGTGGGTTGCAAACTATCTGTCAAACCTTGATGCCATTATCAGGATCAGACATTTAGCCAGTTGGCTATACCCG  
TACAGTCGCTTTTAACTGTTGATGAAAAACCACTAAAGTGTCTGAAAATGGGCACAAAGCGAGTCTTCACTACGATTT  
GAAGTGGAAACAGCCGTTTTATTTGTACCAGACCCGAAACAAGCTCAGATGATCATCACTACGATTAAGACGGTGTAT  
TAACGAAATCTACCATTCAGTTGGTGTCTGCTGGTGGAGCAACGAGCAGGACAACGCACAGGGAAATGATAACTCATCTG  
GTGCCGAAAAATGATGACTTCCAGCGTGAATAAGTGTGCTTGTGTCACAAAAGCAGAGCGTCTGGAAAGGGCTGAACGC  
CAATCGCTACTTGGTTGCGAAATGATGAAAGGATGGGAGTAGATCTGGACGAAGACCACTCTTAAATTCGATTCAGAACTT  
CGATATTCGTTGGCTTACAGATGAATTTCTGTTGCCGAGAACTGTCTATTACTTACGGCACCCGACTCTGTACGTCGTC  
ACAGATGAAAAATGCTTATTTAGAAAGATTTTCCGAACTTACTGAGGCGATGAAAAAGGAATTTGATAAAGATCTCTTG  
AATTTTCCGCAAAAAATGATCTAAATACCCCTGAAAAATAGTCACTACTTATGATCGTGGTGCAGCCCAAGAAAG  
CGGCAAGATCAACCCGAGGGAATGGGACTACTACTCAAGAGAACGAGTGA

>Cluster\_24590

ATGGCTGAAAGCAGCAAAAAAACCCACAAAAGCTGAAATGAAAAAAAAGGCTCAACATCGGCATCATCACTTGTATTTGT  
GAATTCACGACAATCAAAAGGATATTTATCTTGGATTGTGTGGATATGTTGGATGTGGCATGAGAAACGATAAACAATAA  
TCGAAAGAGATATCCAAAGAAATGGGGTATAATGTTGTACACATCCGCAATAAGTGGCTTATGGAAAACCCATTATATTTT  
GAGCCAGCAGCACTGAAGGTATCCGAAAGCACAAGTTAATAGACATTTAAACTCCAGGATATGCAATAAAACTTCG  
TAAACATTTACAAAAAAATGAGTTGCTTGCAGAAGCTGCTAATTCAGCAATCGCAGCAGAGAAAAATAATATTTGTTTATA  
ATAATGATGAATAAAGGTACTGTCTTATCATCATTTGATGATCAATCAAAAAGGCGAAGAAATAGAGTTATTCAGATTATA  
TATCAGCATAAATTTCTATTTGTTAGGAGTTTGGCGGATTTAGATTACCGAATTCAGAAATCTCATTGATGACGAATCGAC  
AAAGAACGATCTTCAATTTAATTAATAATATTGATAATAAATCCCTGATCCGATGGAACAAAGAACCGGGGAAACCATTC  
TTGATTCAGATTTTTTTATTAATAAATCACTTACGCAAAAAAGTGAATTAAGAAGAAGATTGATCGGTTTTTCCGGTCTT  
ATTCATGGCAAAAAATGGTTTAAACCAACTTTTTAACGAGAAAGTATGTTATGCTGCTTTTTCAACTCATATCAAAACAGC  
TTGTTTATCAGTCAAGTAGGGCTGCACTGTTTGTGATGATGAAGGAAATTTGCTTGGCGTGGGTAAGAACGACGTACCTA  
AAGCTGGTGGCGGTTGTATAGCAGTGTGATTTTGTAAACGATCATCGATGCGTTACAAAAAGTGGTAAAGTGTATAAT  
GATGCAAAACAGATAAAAATTAAGACCGTAAAAAAGCATATTTCAACCGAAGTAAAGACTGTATTTAGGATTTCCCG  
AGGCAAACTGTTGCCGATATTAATAATAACAGCACTTCTTAAACAAATTTAGATAATATTCGAAAGGCAATTTACAAAGACA  
GCAAAATATCAAGTGAATGAATACTCCAGATCAATTCATGCTGAAATGGACGTCATTACATCAATGGCTAGAAAACAA  
AACGGCGATACTAAAGATAAAATCTTTTTTACGACAACCTATCCCTGCCACAACCTGTGCAAGGCATATTTGTCGAGCTGG  
AATAAAAAAAGTAGTATATATAGAGCATTGATAAAAGCCTTGCTCTTGTATCTGCAATATGATGCAATAACAAGAAGC  
AAGAATCTTCCAAAGTAAATATTTTGTGATTTTGGAGGGGTATCACCCCGCGTACCAATAAAATTTTACAGACCAACGGAT  
GAACGTAAAGATGATAAAACAGGGGCTGCAAAATAAATTTAATGCTCGCTACGAAAATCATATAGATGTTCAATATCTTGA  
TGATATAGAAAGTATGAGACTGTTGTAGCTAAGAAATTTATAAACGAGATTGCTAAACAGAGTCTCAGCCATAA

>Cluster\_22404

GTGAACTGGTACAGAATCGTCTGGCTATTGGCGTTGGTAACTCTGCCAACGCTTGGCGAGGAGACGCCGTTACAACTGGC  
GCTGCGTGGTGGCGAGCAGCATCACTGTATCAGCTGTGCTCATCAGGCGTGACCAAGTCTCGGATTTACCTGACACGC  
TCACCACGCCATTAGGGAGTTTGTGAAACTGTATGTTTACCGCTGGGAGGATACCCATCAACCGGACGACCCATA  
CAGTGTCCGCGCACTCCCGAAGAGGTTTATTTGTTGTCAGGCTGGGAGAGCATAACCGCGCATTTCCGCGCTGGTACG  
TTCTGTGGACTCTATTTTGGCGCGCAGCGGTTGCATATTTGGCGCAGATAATGTTGGGGCAATACTGGCAACAGCGTCAGG  
CACCTGCGTGGTTAGCGTCTTACTACACTGAAGCAGAAACCTCGTAAACGTTAAATCGCTGCTTGTATTCATTAGCG  
ACATTAACCTGGCAAAAACAAAGCTCAGGAAGCTTACTGGATGTTGGTGTGACGAGGCTAAAATCGGTGTCGCATCCAT  
GCTCGGTAGTCCGCTACGGGTGAAAAACCTGAGCTGGTTTGGCATGATAAACAGGAAATCCGCGAGGTTGGTTTGGCG  
GCTGGTTAACCGATGGTACACCGCTGTGGGTTACTGGCAGTGGCACCAGCAAAACGGTACTGACCCGTTATGCGACGGTG  
CTTAAATCGGGTTTTGCCAGTGGCGACGCAAGTTGCCAGTGGGCAATGTGATAGAGTGGAGCTGTTTGGCCGCTATCCGCT  
GAAGAAATCACAGCGGAAAAAGTACGACGGCAGTAAAAACCCGGCTACTTAAATGGGCGCTATCGTGTGACGATTTACTA  
ATGGTAAACCACTTACGTTTTGTCAGCCAGGTTGAGACACTTACTGAGCGAAAAAGGGCAAACTGAAAATTTGCGATTGCGAT  
CTCGATCGTGAAGAGTACGTTGCCAGAGTCTGGATCGCGAGGCGAAAAAGTACGCCCTGAGGCAGCGAAAGCCATGAC  
CGTGGCGATTCGCACTTTTTTACAGCAAAACCGCAATCGGGAAGGCGATTTGCCGACCATCCCGACAGCAGCCACCG  
AGCGTTTTCTGCTTCCGACGCGACCCAGGGGACAGACGATGACCGCTGGACGAGGATCTCATCTATGCGGGCGAT  
CCGGTTCAATATCATGCGACCGCGCTATCGAAGGACGCTTTCTGGCGGCAAGCCAGCGCCAGGCGGGGAGGAGGAG  
GCGTTACGACAGATACTCGGTTTGTCTTATCCGACAACAGCCTTAGCCGCTGGGGAGCGCCGCTCAACCTGCCAGT



TATTACCCAAAGCGAAAGCCTGGCTGGCGAAAAAATGCCGAGTGGCGGCGTATGTTACAAGCGGAGACGGGGTACAAT  
GAACCAGACGTGTTTGGCGTCTGTCGTTTAGTCTCAGGTTTCCCTATACCGATCGGCAGCTGAAACGGCTGTTTATTTCG  
TAACCTCTTTACGCTTACAGGATCGGCTGGATTTAACCCATGAGTATCTGCACCTGGCCCTTGTATGTTATCCCACCGGC  
TTGATGAGAACTATATCGAAACGCTGACCCGACAATTAATTAATGGACTAA

>Cluster\_22433

ATGAAATCGGTACGTTACCTTATCGGCCCTTTCGCAATTTATTGCTGCTATTACCTGTTACCGATCAGCACGCGTCTGCT  
CTGGCAACAGATGAAACGGTATTGCGGAAATCAGTCCGGAAATGCTGGCATCCGGCAGCTGGATTGTTCCCCATCTGT  
TAGGGCTACGTTATTTGAAAAACCCATTGCCGGATACCTGGATTAACAGCATTGGGCAATGGCTATTTGGCGGAATAAC  
TTTGGTGTGCGGGCAGCGGTTACTTTGCGACCTGTTAACTGGCCGCTGGTACCTGGTTACTCTCGCTTATGGCG  
CGATAAACGCTCTGGCTTTACTCGCCACAGTAATTTATCTCTCATTGTTTATTGCTATGCCATCGGCACTTATGCCGTGC  
TCGATCCGTTTATGCGCTTCTGGCTGGTGGCGGAATGTCAGCTTCTGGCTGGCAATGCAGGCACAGACGTGAAAGGC  
AAAAGCGCAGGATTTTACTGCTGGGAATCACCCTGGCGATGGGGGTGATGACCAAAGGTTTTCTCGCCCTGGCGTGC  
AATTAAGCGTGTGCTGCCATGGGTAGCAACGCACAAAACGCTGGAAAGATCTCTTTATTACGGCTGGCTGGCGTTATCA  
GTTGCGTACTGACGGTTCCTCCCTGGGACTGGCGATAGCGCAGCGGAGCCTGACTTCTGGCATTATTTTTCTGGGT  
GAGCATATCAACGCTTTGCACTGGATGATGCCCAACATAGAGCGCGTCTGGTACTACTTGGCGGTGCTCATTTGCCG  
TAGCTCCGCTGGCTGGGATTAACCTCCCGGTGCCTGACTGCTGGTGGAAAAACCGCAAGCATTCCGCAACCGTCTATT  
TGTGAGCTCACAGATAAATGCGCTGTTTCTCCGCTCGCTAAAGGCAAAATGGCCACCTATATTCTTCTCGCTTT  
GCACCTCTGGCAATGCTGATGGCGCATTACGCGTTGCTGGCTGCAAAAAATAATCCTCTGGCGTTGGGATTAATGGCTG  
GATTAATATCGCTTTTGGCGTCACTGGCATTATGCCACATTTGTTGGTCTCCCGCTGGGGACCAATGAACACACCGGT  
GACCAACCTTCGAGAGCTATAAAGTCTTTTGTGCTGGCTTATTTTTCTCGTATGGGCATTTTTCTGGCTCACCTTA  
ACAAACGTCGAAAAGACCTGGCCCTTTTGGCGCTTTGGCCGCTGGGGCTGGCGTTGCTGGTAGGATTTTCAATTTCTGA  
CAGAGTCATGGAAGGAAAACATCCGCAATTTTTTGTGCGAGATGACACAAGAATCACTTACGCCAAGCCGCTATATCTTA  
CTGATAGCGCTGGTGTGGCGCAGGCTGGCATGGAGCTGCAACCGATGACATCATATGATCGCCAGACAGCGGTGAG  
TTGAAATATGGCTTTAATTTACCGATGCAAAAGGAGATTTGTCAGCGGTGATGAGTTGCAAACTGGCTAATCAACA  
TCGTCAGGAGGGGATTTACACTCGTGTCTTCCGTTGACCGCGATGAAGATATCAATAGCCTCGCCATTTCCGCCGAG  
ATGTCATCGATCGTCAGGAGCGTCTGGTCTAATTCAGTATCGGCCAAATGA

>Cluster\_60525

ATGGAGTCGAACGATTCAGGCGGAGTAGCCGCAAGCAGGTTTCTTATTTCAGGACTGCGTAGCCGCTTACCATGTCAC  
CCGAATGCTTCGTGACAAGACTATCCGCACTGTCGCTGCGAGGTCACAGACGATATCGACATGATCTGATGGATAACA  
TCGACTTCGTTACAGTAAAAGCACCAGCAAAACACGTTGGAACATTTCCGACATCGTTCAGAAATCAAAGGTGCTGAT  
AAAAGACGATCCCTGCACTCAATTTGCAAAATCAATGCAGTGTGAGTCTGACCTGTCCTTGGACGTAGGTACTC  
CATCGTACAGAGGAAAAGGTCAACAAAACCTTGGAGTACTGACGATCAGCCAAACGCCGACTAGATAAGCCAGGTC  
GACAGGAATCATCGATGACCTCAACAAACGCACAGACAATTTTTAACAGACTCAGGTATAAGCGTTTCAGATTGGATC  
GATCGCGCTACATGGGAAGTGTTCATCCCTGCGCGAAGTGGAACTTCTAGGATCAAGAATACGCGCTGGCCCTCCA  
AGGGCAGCATTTTCGACCGATTCACAGTGTGATGACAACTTACTTACGACAGACCTACTTGGTGGTTCAAGCGAG  
CGTGTGAAAGATGACCAATCTCGGTCAGGCCGCAAAATCTACGTCAAACGGGACTTACCCACATCTTACGCCATTTAG  
AGCCCTATGGCTTCGCTGCGCTAAGCGTAAAGCGTAAAGGCTAGTTCTACATCAGCAGTACTCATTAAAGAAATACCGCTACA  
AGCACATCGCGGATAACGCTGTCATGTTGGATGAGTGTTCCTCCGACAAAAGAAATGTCTGATATTCATAAACTG  
ACATTTCAATTTGAAAAGCGGAAACGATAAAGAAATCCGCTTCAAAATCGCTCCTAGCGTCAGCGAAATTTTGGGTGAGT  
GCTGTTGACGCAACGATCCGGCAGCACAGAAAGCCAGCCTATTCTTGCATGCTATACGTTGAAAAGCAGGGGCGC  
AAAAAATTTCTGAAAACGTCATATCGTTTCGCGCGATCCGAAAGGTGATCAGCTTTGGATTGGCTTACGCGATTTGGT  
ACTGATATTAACATTTGCGCTCAGATTGCGGAGATACGGGACTAGTTGTACGAGGACATTTCCGATGATGATGACCGC  
GCGCAAAAAAATCTCGACATTAAGAGCATAACTACCTGCTTCGCCACGACATTTGACGAAATTTGATGGCAGCCAAC  
CTTTCGATGCTCAGCTCGATCGTTTACGTTTCTGTTCTGTTGGGCTACGACTCTAATCTACTAACCGAGCCTGAAACG  
CCGGGTTTCGAGGATGACCTGGAGAAAAGAACAGCGGTGCTGTTGAAAAATTCGCGGCTGACCTCATCGAGGATTCGCC  
GTTTGCGAATCTTTGCATCCACGATTTCAATTTATCCAGCCCGAGTCTTGGAGCGGTTAACCAATTAGTTGATGAGAAG  
TGAGAGAGGTCGTATGA

>Cluster\_40258

ATGGCCGCGTGGTGGTACCAGCGGCTTCTCTCTTTTTCTCAGGCGGCTTCCGCGCGGATTCGATATTGCCGA  
CGGCCAAACCCAGCGTTTGGACTTCTCCATTCTACAGTCAATGGCGCAGCACTTAGCGCAAACAGCATGGCGTGGTGCAC  
CACGTCGCTTACCTGATACTCTGGCGACAATGACGCGCAGGCTTATAACAGTATTCAATACGACGCCGAAAATCGCTC  
TGGCATAACGTTGAAAACCGTCAACTGGAGCTCAGTTTTTCCATATGGAAATGGGATTCGCTCGCGCGTTCGTATGTT  
TTCTGTAGATCAGCAACACATCTGGCGCGTGAATTTCACTTTCCGCGGAGTTGTTCAAATACAACGATCGCGGTTGG  
ATACCAACCAATTTAGAAAGGCAAGCGATCTCGGTTTTCCGCGTGTTTAAAGCCCTTCCGCTGCTGTTAAAGCCGCT  
GATGTAGTATCATCTCGCGCGAGTTATTTCCGCGCGTGTGATGACACATAATACGGTTTGTGCGCCCGCGGCT  
GGCGATCGACACTTACACCGACAGCAAGAAAGAGTTCCCGACTTTACCGCTTCTGGTTTGTATACGGTAAAACAGGGG  
CAACCACCTTACCGTTTATGCGTTGCTGATAGCGCCAGCACTTACTGTTGCCATAAGTTCACTATTCATTTGAGAAA  
AATCAGGTGATTTGATGTTGGAATAACCTGATGCGCGCAAGACATTAACAGCTGGGCTTGCACCGATGACCAAG  
TATGTTACGCTGGGTACTAATGAACGTCGGATGTGCGACACCAATTCATCCGCAATTCATGACTCTGATCGTCTGTCCA  
TGTGGCGGGGCAACCGCGAGTGGATTTGCCGCTCGCTGAACAATCCGCAAAAATTCAGTTCATGCTTACACCGACAC  
AACCCGAAAAGGTTTGGTTTATTGCAACTGGATCGTGATTTCTCCCAATTCAGGACATTTATGGCTGGTATAACAAAGC  
CCCAAGTCTGTGGGTGGAACCGGTAACAAGTGGGGTAAGGGCACCATCGGCTGATGGAATCCCAACTACGGGGGAAA  
CGCTGGATAACATTTGTTTCTTGGCAGCCAGAAAAGCTGTAAAAGCGGGTATGAGTTGCAATTCAGTATCGTCTG  
TACTGGAGTGGCAACCGCTGTTCAATTTGCCATTTAGCCGCGCTTATGGCGACGCGTACCGGCTGGGCGGTTCCCGGA  
AGGTTGGGCACCGGTGAACACTATCCGAAAATGGGCGCGCAGCTTTTGCCTGCAATTTCTGTTGGTGGTGGTGAAG  
CTGCCGCGCAAAAGGCAATTTAGCCGGTATTACGCTTTCCAGTGGGGAAGCGAAGCAAAATCGAAATTTCTATATTGAA  
CCCATTGATGGTTATCGTATTAGTTTACTGGTATCCGACTTCGACTCCATGATCCGCTCGATATCGGGATGATCT  
CGCTTGTGACGGGCGACGCTATCAGTGAACATGGCTGTATCAGTATTTCCGCGCAGCGCGGATAAACGTCAGTATGTTG  
ATGACCGCTGATGAGTTAA

>Cluster\_11784

ATGTCGATATGCGTTTCCCTATCTTGGGACAGTATTTCCCGGCAATTTGGAAGCGGAATGTTATAGGAAGAATGAA  
AGCTTCGCTTACAAAACCTCTCCAGACCATACAAGTAAACGGGAGCAGGTTTTCAGGCAAAAACCGTCTGCTGCAGC  
AGCTTGTCAACATATAAGTCAAGCAAAAAGCACCCTACATTTCCGCTGCTAATGTTGGGATTTAGGTCACCAACCCAGCT  
ACAGATGAACAGTTTTTATCTGCTTTCGACAGAAAGCTTGCATTCGGTTTACGCAAAAATTTATCCAGATATGCAACGCT  
TTTACAGACATCGGAAGACGAGTTGTATGCTGACATCAGCAAGTACTTTGAGGCGTTAAAAGCGGAGATAAACGCTGCTC  
TGATGATCATGAGCGGTTTGTATAAACCGCTCGAAAATGGGTAATTTGACGAGGAAATTTATGGGACAGTTGCGGTGAACAT  
GCTCAATTTACCTAGTCTTTAGGTTGATAAACCGCCAGTCCGCGCAGACTTGGGAGTTAATCAGAAATCCGCAAGCGCAGAC  
CAGTGATTTTTGGAAATCTTCAACTCAGAACCCTCCACATCGAATGTTTTGATGACATGACCTCGATGAACGCTGCTT

GTAAGTTGCCAGGTATGAATTTTCGACCAGGGTGAATCTCTGAACTCTGGAATGAAAGCAATGGCTATCCGGTTTTACTA  
TTGGGGATACTTAATGTCTTTGACAATACATCCCTCCAGTGAACCGCTCAGTTCAAAAACTGCTGTGCGATGTGGCCATCCA  
GGCTTTAGCTGTTTTACGGGACCAGTTAGAATCATTATGGGTTGACTGCCCTGCTTCATCACAAGATCTTCCCTTCGGG  
TCATGGACGAAAAAGCTATTTTGGAGATCGGGGTCGCAAAAGCGCATCGATCGTTTATCGAAAAAGGTTTTGTTACT  
CAAGCTGGAAACAAAATACAGAGACCTTTGCTGGCTGACTACAGCTACCTGAAAGATCAGCCAAATGAAGGCAATGAT  
AATGCGCCTCTTTGGCACCCCTGATAACTATCTCTCTAACATGAAATCGGTATTTGAGCGGCAATGATCATATGCGAG  
GTATTGACCTGAGTTAAAACGTTATCTTGAGCGAGCCATTGGTGACCTACCCGATTAATCCGAGTGTCTTTATGACCAAC  
ATCCGAGGAAATCGTCGATCGTGTCTTTGAGCTTATCTGGGCTGCTGAGTTACCGGGCAGAAGCATCCCTTCTGACTGGTT  
AAATTAATGAGTCCAAATAATGAAAGCATCAATGGCCGTGACGTCGGGATTCCTCAGGGAGGAAACGAGTCTATTTGT  
TGAAATTAATGACAGGCACTGAAAACTGCTCACCTAGGGCGTTAAAAATAGCAAAACGACGTTTATCTGGTAAATTC  
ACGCAAAATTTTGGTGTATTTGGGCAACATCAGAAATGGCGCAATATTGACAAGGGGACTGCCATCCGATATTCCTGCT  
ATGCTGAGGTTGGCTGCCCTCAGTGACGAGAGACTACGCTAA

>Cluster\_9521

ATGGCAAAAATATCAGATTTGAATTTGTTATCAACACATGGCATCAGCCGCAATGTTAAACAAAAATGAAGCTTAA  
TACCTGGTGTGTGGGAATGAATGATTTTTGCTCGTAATGCCGAGGGGACAGGATAGCAGAAGGAATATTCCTCCTGGAG  
CATTTTTGGAGTTTTTGGCAAAAATATTTACCTGGGTTATGTGGATTTAGCAAAACGCTCCAACGAGCGGGTAGAAAT  
ATGATGGCTCATATGAGTCCCTCATCTTATATCAAAAATAATGATGGCAGTGAATAATGAATTTTGTATGAATAATCC  
TGAAGGTGAGCGTGGGATTCATCTAAGGTGATTAAGAAATTTCACTTTCTACTACCCTACTATGGGGACTCGTCAAG  
GACATACAGCCATATATTTCCACAATCTGATTTTTGAGTTTTCGTTATGAAGGTAAGTCTTTTGAAGAAAAGATGAT  
AGTTTACATCTGATTACTAACAGGTTCTGGCGTGTACCAACGGAAGTAAACAAGAATATGGCGCTTCATATTTAA  
TAATCATCAGTTGAACTGGAAGGACGCAATTTGATATAACGAGTTATTTAGAAAAGCCATTAGCCAGTACATGAAAA  
TAAAGAAAGAACATCTGCTATTAATGCCCTATGTATGTGATGACAGATTCCTACTACTAGGGCAAGGTGGTATACCT  
GAAGAAATAAATGATCTGAAAGCGTTACATGATACCAAGAAATGCTAGTGGTACAGAAGTAATGATGAAATTAATAACAT  
CAAAATTAACCTGCTAAATATTTCTTATTTAGTACCTTAGATGATGCAAAAAGTAAATCTGAAAAGGTCATCGATGATGT  
TGAAGACTTTTTTAAAAATGGCATAATTAATGATGTAAAAATCTGGAGTGGTGTTTTAAATCAAAGTATGCAATATTTCT  
GATGATACACAAAGATAAAGCATGCCCGCTCCGTGATCGATCATATTGATTTAACTGCGATCAGTCTAAAATAGCTGA  
GACATTTTTTTCAACCTCAATAAAGAACCCTATAAAAACAGCCCTGAGTTACAGGAATGATTTGGGAGAAGTTGGTTG  
TATATGTCAAATGATTTTTTAACTTAAGCAATAAGAAAATCAGCCTTAATACTAAGTTATTTGATGATGTTAAGTGTCTA  
TTTTAATGAAGTGCCTGTGACATTTTAGTAAATGATATTTTTTGAAGGATTTTTTCAAGAAGCAACCTGATTTTGGCAA  
GTGGTACTTCTATCAATTAATAAGAGTATGAGGGCGAACAGCTGATCTTAATGAGTTAGGATATGTTTATGGTAAATG  
AAGAAAAACAATGAAATTTGTAAAAAAATCTCCGGTTATGTCAATTAAGATTTTTGAAGAAAAGATGGGTAATGAATTA  
AAAATTAAGAAACAAGAAATGATGAAAATCCCTCCGGAATGGCAAAAATCAATATATATAAAATATATGAATATATGA

>Cluster\_26469

ATGGCTACATCAGTACAGACAGGTAAAGCTAAGCAGCTCACATTACTCGGATTTTTTGGCATAACGGCATCGATGGTAAT  
GGCTGTTTTATGAATACCTACCTTCGCAACATCGGGCTTTTCATTAGTCTTCTTCTGCTATTAGCGGGATTTTATGGT  
TTATTTCCCTGAGACTTTTGTCTCGGAAATGGCTACCTCGACGGCTGGGAAGAAGGTGGCGCTTTCCGCTGGTATCA  
AATACTCTGGGCGGAGATGGGGATTTGCAGCGATCTCATTTGGCTATCTGCAAAATCGCCATTTGGTTTTATCCGATGCT  
CATTTCTGCTGTTAGGGGACTCTCTACATCTGAAATGGCCAGCGCTGAATGAAGACCCCATTAACAAAACATTTGCG  
CACTCATCATCTTTGGGCGTGGCATTAAACGAGTTTGGTGGCACGAAATACACGGCGGAAATGCTAAAGTTGGCTTC  
TTCCCGGTTACCTGTTTACCTGCTATTTTATTTGATCGCATTTAGCGGCTATTTTATCTGCACTCCGGTGCCTGGCTAT  
CGAAATGGATGCGAAGACCTTCTTCCCTGACTTCTCTAAAGTGGGACCCCTGGTGTGATTTGTTGCTTTCATTTGAGTT  
ATATGGGCGTTGAAGCTTCCGCAACCCAGCTCAATGAAATGAGCAACCCCGGGCGGACTATCCACTGGCTATGTTACTG  
CTGATGGTGGCGGCAATCTGCTTAAAGCTGTTTGGCGGTTTGTCTATTGCGATGGTCAATCCGGGTAAGTAAATGAAAT  
CTCCGAGGGGTAATGCAAACTTTACCCTGCTGATGTGACATGTGGCACCGGAAATGAGTGGACGGTTCGCGTGTATCT  
CCGCACTGCTGTTGCTGGGTGTTCTGGCGGAAATCGCTTCCCTGGATTGTTGGTCTTCCGCGGGATGATGTACAGGG  
CAGAAAACCTGCTGCGAGCGGCATTCGCTAAAATGAACAAAATGGCGTACCCTGTAACGCTGGTCAATTCGCACTGGT  
GATTAATCTATCGCGTTGATCATCTTACCAATACCGGTGGCGGTAACAACATGTCCTTCTGATCGCATCGCATGGCTGA  
CGGTGGTGTATTTATCTGTGTGCTTATTTTATGCTGTTTATTTGGCTACATTTGTTGTTGGTCTTAAACATCTGACTTAAA  
CGCACATTTAATATCCCTGGTGGTAAAGGGGTGAAGCTGGTGGTCTATTGTCGGTCTGCTGACTTCAATTAATGGCGTT  
TATTTGTTCTTCTTCCGCGCGGATAACATCCAGGGTACTCTACCGATATGATGTTGAATTAATGCTGGTCTAGTTTCC  
TGGGTTACTTGGCCTGCCCTTTATTTCTATGCTGTTTATGCTGTTTATGCTGTTTAAAGCAAAAGCAATACCGGCTCCTGGAG  
CCAATCAACAGTCAAGACGCAAAAAGGTCACCTTCTTCTGCACCCGCTGCAGGTTACCACACTATATTGTGATGAA  
TGACAAGAAACACTAA

>Cluster\_38742

ATGACGATTTTTGATAAATATGAAGTGTGGTTTTGTAATTTGGCAGCCAGCATCTTTACGGCCCGGAGACTCTGCGCCAGGT  
GACGCAACATGCGGAACACGTTGTTAATGCACTGAATACAGAAGCGAAGTTGCCCTGCAAACTGGTGTGAAACCGCTGG  
GTACCACGCGGATGAAATCACCCTATTTGCGCGACGCGAATACGACGATCGTTGCGCTGGTCTGGTGGTGTGGCTG  
CACACTTCTCCCGGCCAAAATGTGATCAACGGCTGACATGCTCAACAAACCTGCTGCAATCCACCCAGTT  
CAACGCGCGCTGCGCTGGGACAGCATGACATGCTTTATGAACCTGAACCCAGACCCGCTGCGCGTTCGCGGTTTCG  
GCTTCATCGCGCGGATGCGTCAACAACATGCGCTGTTACCGGTCAGTGGCAGGATAAACAGCAGATGAGCGTATTT  
GGCTCCTGGATCGCTCAGGCGGTCTTAAACAGGATACCCGTCATCTGAAAGTCTGCCGTTTTGGCGATAACATGCGTGA  
AGTAGCGGTACCCGATGGCGATAAAGTTGCCGACAGATCAAAATTTGGTTTCTCCGTCATAACCTGGGCGTTGGCGATC  
TGGTGCAGGTGGTGAACCTCATAAGCGACGCGGATGTTAACCGCTGGTGCATGAGTACGAAAGCTGTACACCATGACA  
CCTGCCACAAAATCCACGGCGAAAACGACAGACGTTGTTGAAAGCGGCGCTATTGAGCTGGGATGAAGCTTTCTCT  
GGAACAAGGTGGCTTCCACGCTTCACTACTACCTTTGAAGATTTGCACGGCTGAAACAGCTTCCGGGTCTGGCGGTAC  
AGCGTCTGATGACGAGGCTACGGCTTTGCGGGCGAAGGCGACTGGAAAAATGCCGCTTCCGATCATGAAGGTG  
ATGTCAACCGGCTGCGAGGGCGCACCTCTTTATGGAGGACTACACTTACCCTTCGAAAAGGTAATGACCTGGTGTCT  
CGGCTCCATATGCTGGAAGTCTGTCGCTGATCGCGTAGAAGAGAAAACGATCCTCGACGTTCAACACCTCGGTATTT  
CGGTTAAAGCAGTCTGCCGCGCTGATCTTCAATACCAACCCGCGGACGATGTCGCGACGCTGATGATGATGATGATGAT  
GATCGTTACCGTCTGCTGGTTAACTGATCGACAGCTGAAAACACCGCACTCCCTGCCGAAACTGCCGTTGCGGTTACG  
GCTGTGAAAGCGCAACCGGATCTGCCAATGCTTCCGAAGCGTGGATCCTCGCTGGTGGCGGCACCATACCGTTTTCA  
GCCATGCGCTGAACCTCAACGATATGCGCCAGTTCCGCGAGATGCACGACATTTGAAATCACGGTGAATGATAACGACACC  
CGCTGCCAGGTTTTAAAGACGCGCTGCGCTGGAACGAAGTGTATTACGGGTTTCTGCTGCTAA

>Cluster\_23887

ATGAAGAGCTTGTCTCCGCTTAATACCGTTATTTGCTGCTTTTTTATCTTCTGCGCATGTTTTGCTGTGGAG  
TATCAGCCTGCACCTGGTTGAGCGCCTGATATGGCGGTGCTGTTATTTCCGTTTGGCTGCGGCTAGGGCTAATGCTGC  
AATGCCCGCGGATACCTGGCGGCTACTGGGTGCGGAGTGGCTGCTGATTTTACTGGCTAATGACGGCGGTGGTTTTA  
ACCCATTTCTCTTATTGATGATCGGTAGTTTACTGACGTTTATGCCCCGTTGGCGTGTATCTCGCGCTATCGCCATCAACG  
TGACTGGCGCACCTTGTCTTACAGGTTGCGGCTTAAACGGCGGCGGCTTGTGTCAGTCTTGCCTGGCTTTGGCACG

GCAAAGAGTCGTGGAATGCGCTGCTGCTGACTTTAACTGGCGGCTGACGCTGGCCCCATTTGCTGCTGTTCTGGCAC  
TATCTCGCCAATAACACCTGGCTGCCGCTCGGCCCCGCTACTGGTTTCTCAGCCAATCAACTGGCGCGGGCAGCATCTGCT  
CTGGTACTTGGCTGCTGTTTGTATCAGTCTCTGGCTCCAGTTGGGATTGCCAGACGAAGTGTCCGCTTTACGCCATTCT  
GTCGGCGCTGCCGATTAACGCGCTGGCTGGTACTATGGTTGGCAAGGAGCGCTGATGGCAGCTTGTGAACGCCATC  
GCGCTGATGGCGATCAACCTGGCGCATCATCCGGTGGATTATGGTCTCGCTGGTGGCAAAGTGTGACAGGGTT  
GTTACTGGGCGCAGGCATCCAGCGGTTGCGTGAACCTAACAGTCCGCTGCAAAAAGGAAGTGGCGCGCAATCAGCATCTGG  
CTGAACGTTTGTAGAACTGAAGAGAGCGTACGCCGCGACGTGGCGCGTGGAGTGCACGATGATATCGGCCAGACCATC  
ACTGCCATTCTGACTCAGGCGGGCATTTGCCAGCGACTGGCGGAGATAACGCCAGCGTGAAGCAGAGCGGGCAGCTCAT  
CGAACAACTATCCGCTGGGCGTTTACGATGCGGTGCGCGTTTGGTTAGGGCGGTTGCGTCCGCGCCAGCTGGATGATCTCA  
CCCTGGAGCAGGCCATCCGCTCACTGATGCGGGAAATGGAGTGGAAAGGGCGGGCATTGTGAGTCTCGAATGGCGA  
ATCGATGAATCAGCGTTAAGCGAAAACAGCGCTGACGCTGTTTCGCGTCTGCCAGGAAGGGTTGAACAACTTGTGAA  
ACATGCCGATGCCAGCGCGTACGCTGCAAGGCTGGCAGCAGGATGAACGGTTGATGCTGGTGGTGAAGACGATGGCA  
GCGGTTTCCGCGCGGTTCCGGGCAACAGGTTTGGCTCACCGGAATGCGGAGCGTAACCGCGCTGGGCGGCACA  
TTGACCATTCTCTGCTGCACGGCAGCGTGTGACGTTTCTACTCTAACGCTATGCTCAA

>Cluster\_54954

ATGCGCTCTGGAAGTCTTTTGTGAAGACCGACTCGGTCTGACCCGGAATTACTCGATCTACTCGTCTAAGAGCATTGA  
TTTACGCGTATTGAGATTGATCCCATTTGGCGCAATCTACCTCAATTTGCTGAACTGGAGTTTGGAGGTTTACGAGTCT  
TGATGGCCGAAATACGCCGTTTACGGGTTTACCGATGTGCGTACTGTCCCGTGGATGCCTTCCGAACGTGAGCATCTG  
GCGTTGAGCGGTTACTGGAGGCGTTGCCGTAACCTGTGCTCTCTGTCGATATGAAAAGCAAAGTGGATATGGCGAACC  
GGCAGCTGTGACTTTTGGCAAAAATGGATGCGCTGCGCAACCATACCGCGCAAAATGATTAACGGCTTTAAT  
TTTTACGTTGGCTGGAAGCGAACCGAAGATTGCGATAACGAGCATGTGCTTATTAATGGGCAGAAATTTCTGATGGAG  
ATTACGCTGTTTATCTTACAGATGAAAATGATCAACAGTCTTACCGGTGCGGTGGTGGTGTGCGATCAACGATTCCG  
TATGGCCGCCAGTTGCAAAAATGTCGCCGCCAGGACGCTGACGCTTTCAGTCAAATTTGTCGCGTACGCCGAAAATGA  
AGCATGTTGTCGAACAGCCGAGAACTGGCGATGCTGACGCTGATGACGCGCGTGTGATACGGGTGACACAGGTCACTAA  
GATCTCTTTGCCCTACGCTGCCATCAGGCAAGCCAGAGCGGGCAAACCTTACTGGCGTGAACGTGCGTCTATACC  
GGAAGATGCGGTGAGAGTGAACGTTTGGTCACTGCTCGGAAGGGAAGAAAGGATTTTGGAGCAGGCGAACGGTGGTT  
CGGTGCTGTTGGATGAAATAGGGGAAATGTCACACGGATGACGGGAAATTAAGTCCGTTTCTTAAATGATGGCACTTTC  
CGTGGGTTGCGCAAGCAGCCATGAGGTGATGTCGCTGATGTTGCGCTACGCAAGAAATCTGGTCACTGCGTGGT  
GCAAAAAGGCATGTTCCGTGAAGATCTCTATTAATGCTGACGCTGTTGACGCTCAATCTGCCCGCTACGTGACTGTC  
CGCAGGACATCATGCCGTTAAGTGAAGTGTGCTGCGCGCTTTCGCGACGAGCGGGTGCAGCGTCCGAACTGGCC  
GCTGACCTGAATACTGTACTTACGCGTTATGCGTGGCCGGAAATGTCGCGCAGTTAAAGAACGCTATCTATCGCGCAGT  
GACCAACTGGACGGTTATGAGCTGCGTCCACAGGATATTTGTTGCCGATTATGACCGCGCAACGGTAGCCGTGGGCG  
AAGATGCGATGGAAGGTTGCTGGACGAAATCACAGCGGTTTGAACGCTCGGTATTAACCCAGCTTTATCGCAATTA  
CCCAGCACGCGCAAAGTGGCAAAACGCTCGGCGTTTACATACCGCGATTGCCAATAAGTTGCGGGAATATGGTCTGAG  
TCAGAAGAAGAACGAGATTA

>Cluster\_10587

ATGACGGAACGGGAAGTGTCCATTATTCGTCGACTGGCGAAGAAATTCACCGGTGCTGGCGGATTTACAGCGCACATT  
TGAGGGGAAGATGGCCGCCAGGCACAAGCGTTTGAAGAGAACTGGCTTCCCTGTCGCGGATTATACAGAAGATGTCGA  
CGTGGATGAGTACATCCGGTTCTGACGGGATGGTGGATGACGCTGTGGGGACCATTCCGGTACCCTGATGATGCTGCT  
GATTATGATCCGGATGATGTCAGCAGGCGGTGAATGATGCGGTTGCGAATAATCCCGTACCGGCGGACGGCAAAAGTAT  
CACCCCGATGATGTCGCTCCGATGCTTGAAGCAGATGGTGAAGAGGCTGTAAGCCATATCCCTGCTCCGCTGACGGT  
GTGATTATGATCCGGAAGTACTGAAGCAGGCGGTGAATGATGCGGTTGCGAATAATCCCGTACCGGCGGACGGCAAAAGT  
ATCACCCCGATGATGTCGCTCCGATGCTTGAAGCAGATGGTGAAGAGGCTGTAAGCCATATCCCTGCTCCGCGTACGG  
TCGTGATTATGATCCGGAAGTACTGAAGCAGGCGGTGAATGATGCGGTTGCGAATAATCCCGTACCGGCGGACGGCAAAA  
GTATCACCCCGATGATGTCGCTCCGATGCTTGAAGCAGATGGTGAAGAGGCTGTAAGCCATATCCCTGCTCCGCGTAC  
GGTCTGATTATGATCCGGAAGTACTGAAGCAGGCGGTGAATGATGCGGTTGCGAATAATCCCGTACCGGCGGACGGCAA  
AAGTATCACCCCGATGATGTCGCTCCGATGCTTGAAGCAGATGGTGAAGAGGCTGTAAGCCATATCCCTGCTCCGCGT  
ACGGTCTGATTATGATCCGGAAGTACTGAAGCAGGCGGTGAATGATGCGGTTGCGAATAATCCCGTACCGGCGGACGGC  
AAAAGTATCACCCCGATGATGTCGCTCCGATGCTTGAAGCAGATGGTGAAGAGGCTGTAAGCCATATCCCTGCTCCGCG  
TGATGGTCTGATTACGATCCGGAAGTACTGAAGCAGGCGGTGTTGCGGCGGTGAATGCCCTTCCGGCTCCGCGAGCAC  
GGCTGATGCCACGGCCTGGAAGTGTCCCGCTATTGACGATCAAAAATCCCTTCCCGGGGACCGTATGCCACACAC  
CTGGGTGGACTCTGGCGGGCGTATGAAAAACGCACGGGATGCGGGGATGGGAATGCCGTTGACGGGTGGCGGATAT  
CGAGCTCAGCATGACGGATGAGCGGTTGTTCTCTGTGGTGTATCCGGCAGAGCAGTGGCCAGTGTACGGAAAAACATTTT  
CCCTGCCGTTGATGCTCTACCGCGGTGTTTCAGAGCCGGTGAACCTTACCACCCCGGCGATACGGTACGTTGGGGGGC  
TCCGTTGGCACTGCAACAGTATGACCGGTGATAAACCGGAGAAGTCAATTCATCAGGCTGGACCCTGGCTGCAAAAAC  
TGGACGGGATGACAGGAGCGGAAATGA

>Cluster\_62523

ATGAAAGATGAATATGTAATGGGTATCGATAATGGCGGACAGTCACTAAGCGGCTATCTACGATCGCAACGGCAGCGT  
GGTTTCTATCGCGTCAAAAATCCACCCGGATGCTGACACCCAGGAAATTCATACCGAACCGCATATTACCGAGCTGTGGG  
CGGTAAACATCGAGGTATCAAAAAGCGATGGAGCAATCAGGGATCGACGCCAGTCAAATCAAAGGAATCGCCGTCACC  
GGACATGGAACCGGTTTGTATCTGGTAGATGAAGTGGCAACCCGGTCCGCAACGGCATTTATCTCAACCGACAGTCCGGC  
AAAAGATACGTGGAAAAGTGGCAAACTCACCGAGTTTGTACCGGACATCCGCTAAAACCATGCACTCAACTGTTGG  
CCGGACAACCCATTGCTCTGCTGGCTGGCTGAAGATAACGAGCCGGAGGTGCTGCAGAAAGCACATACCATTTTTATG  
GTAAGAGCTGATCCGCTTCTACTTACCAGGAGGCTTATCTTGGCTTACGACATCTCCGGGACCAACCTGATTAA  
CGTACGTGACCGCAAGTATGACGATGAACCTAGGATGGTGGGGGCTTGTGACCTGCGCGGAAATGGCACCCTCA  
AGCTGTCCACGGACTGCTGCGGTCGGATTAACCGATGAAGTCCGCGTCCGCGTACAGCAGGCTTATGCGCAGGACCCCGCTCT  
GGCGGCTGTTGACATTTCCGCTCTGCTGCTGCTCCGGATTAACACTCTTGATAAGCTGGCTATCATCACCGGAAC  
CTGGAGCATCAATGAATATGTGACTGACCATCCGGTATCGACAAAGATCTGTTTATGACTTCGATTTACCCGATCGAGC  
GTAATGGCTGATAACAGAAGCTAGTCCGACGCTGCGCAGTAATCTTGAATGGTTTATCAATAATTTATGGAGAACGAC  
CGGAAAACCGCTGCTCAGGGATCTTCTGCTATGAGTGTGATAACTCGCTGGTCTTATCTACGACCGCAAGAAAG  
CCATCTGCTGTTCTTCCCTTTCGTTATTTGGCTCAACACCATTCCCGATGCTCAGCAGGCTTTATTTGGGGTGAACAGTT  
TCCATAAAAAGCGCATTTCCCTGCGCGGATTTACGAAGGTGTAGCGTTACGCTTACGATCTATCATCACCGAACGTTTACGG  
AACATCAATCCGGATTTGTGTCGACATCCGAATGCTGGGGAGTGACCACTCGCCGCTGCTGCTACAGGCTCTTGTG  
CGATATCTTCCAGTGCACGCTTGAAGATTGTTGATGTCAAAAGAACCGCACACTCGGTTACCGCAATGACAGCCGCTGCA  
TGATGGCTGGTTTGTGATGATGCTTTCGCGCGTCCAATGAAATGGTGCAGCTGCGCGAACCGTGACCGCAATCCGGC  
CATCAGCAAGTGTACCAGGACAAAATATCAGCTCTACAAAACCTGTTATCTGAAATGACGCTCCCATGGAAGACTGACG  
TAACATACATCAGCATTA

>Cluster\_43330

ATGCGTAAGATAACACCGCGGAGCCTGGCGCGCAAAATTCAGGACGGTGCAGTATTTGCTATTAGCGGTAACGGCGG

CGGCATGGTGAAGCGGACCATATTTCTGGCTGCTATTGAAGCGGTTTCTGCAAACCGGACACCCGGCGGATCTGCAT  
TAATCCACTCGCTGGGTATTGGCGATCGCGACTGCAAAGGCACTAACCGTTTTGCGCAGCAGAGATGCTCAAACGCATT  
ATTGCCGGGCACTTTACCTGGTCGCCAAAATGCAGGCGCTGGTAAAAATAACAGATGAAGCCTACTGCTTTCCTGG  
TGGCGTGATTACAGCGTTGCTACGGGAGATCGGTGCGGACGCTCCGGGGCTTTTTACCCACGTTGGGCTGGGATCGTTTGG  
TTGATCCACGCAACCGCGGTAAGTGAATGAATGAACTACCGACCTGACCATAGCGGTTAACATCGCCGCTGAGTGTCAA  
ACCAAACCTCGTTTATCGCCCTTTCAAAGTGGATTACGCGATTTTGGCTGGCATTATGCGCATCTCGAGGCAACGTCAG  
CCTTGAAGAAGAAGCGATTGATATGGATAGCTATTTCCATGGCGCTGGCAGCACACAACAGCGGCGGCAAAGTGTTCGTAC  
AGGTACGCGATGTGCTGGAAAGCTGGCGGATTGAACACCGCGGGTCAAATACCGGGCATTCTGGTTGATGGCATCGTT  
GAACACCGGCAACCGCAACCTATCTTGGCGGTTACGACTGACCTAGACCATAGCGGTTAACATCGCCGCTGAGTGTCAA  
CGACGCTATTGAACTGGTTAGTCATCCAGTACGCGGCTGATTGCCGTCGGGACGACGCGAACTGGTGGCTGGCGCTT  
CAACCAACTTTGGCTTTGGTATTCTTGGCGGTTATCCAGGCGTAGCGCTGCGCGAAGGCGTTCCTTATCAAAGTTTATGG  
CTGAGCGTCGAGCAAGGCGTGCATAACGGCATGATGCTGGATGATGCTCTGTTCCGGCTGCGCCGCAACCGCGGATGCCAT  
TATTTCCATCAGCTCAATTCGAATTTACAGTGGCGAGGATCGATATCACCTTCTCGCATGGAGAGATGGATC  
AGTACGGTAACTCAACGCTCCCATCTCAATGGCAATCTGATTGGCCCCGGCGGATTTCTCGAAATTGCGCAAAACGCC  
CGTAAAGTGGTGTCTGCGGCACGTTGCGAGCCAAAGGCGAGCAAGATCGATGTAAACGCGAGATGGCTTGCATATCGCCCA  
GTCAGGTCAAATCCCTAACTGGTTACCCAGGTGGAATAAACTACTTTTAGCGCCGCTACGCACAGCAAGGCGGTGAG  
AAGTCTGTATATACCGCAACGTCGCTTCCAGTTAACCGCAAGGCGGTTGAATTAATTGAGATCGCCCTGGCGGTA  
GAGATTGACCGGACATTTCTGCCGTATATGGCTTCCGTCGATATACAGGACCCACGCTGATGAAAGTAGCCTGTT  
TACGCCAATGGAGATGCATGA

>Cluster\_17742

ATGAGTTACTTTGGTCTCAACGCAGTTAACAGAAATCAGCAACTGGATGAAGCGGATCTAACCCAGCAGGGTTAATAC  
CGATGTCGGTTTCTTCGATAACTCAGGTAAGTGTCTGTTTCCGGCTTTACTCTGGACTGGTTGCCAAACAGACCAGC  
TTCTTTGGGCTGGAAATGGATAAGATCGTTTCCACCATCGCTAAGTTTGTAAACGAAACACTTCCATCAATGATACATCG  
GCTGAATACATCGGCGAACAGCGAAACCTGCGAGAGCAGGATTAAGCGCCTGACTCTGACGCCGCAACAGGAAAC  
TGCTGGTCAAGTACTGAATGGTCTGTTTCGATATGGCGGGCAGGCTGTGTTGGTACGCTGCTGGCGGTCACGCCGTTG  
GTGCTGCTGCCGCTCACTGCACTGCAAGGCTTCTCTGAGTTTGAAGAAATGACTGCTCAGGCGGTAGATTTCAGGACCGCT  
CAGGAAGCTGGTCTGGTGCAGGGTGTCACTGCTGGCGTGGTACATTTGATCCCTATGAGCCTCGGCTGCGCGCTGGTGG  
TGGCTGGCAGAAAGTGTGGCGCACAACCTGCGAGGACAGGTAAGGTAAGTGTGCGTAAATGTTGCGAGTCTGCTGTT  
GCGCTGCTCCAGATATCGCATACGACGCGGAACCTTGCCTTTGGGATGGCCAGCGTGGGCTGACTGCAAAAGACG  
CTGCGTGTGGTGGTATTAACGAAATGGCGGCTCAGTACGATGTTTGTGATCGCCAGTCTATCGCCATCGATGCGGTTCT  
TGGTGTGGCATTGGTGGTGTAGGTAGGTTCTGAACGCGCGGCTGAGAGCGCTGCAACTCCTGAATTTTCCCAGCGG  
AGTGGATGCAGCGCTGGCAGCAATCCCTCACATCACGCTGAGATCGATGTTGCTCCTGGTGTCCCGTTAATGTTCTG  
TCACGTGATGCGCATATACAGGCGCTACAGAAAGCAATGAACGATGTAAGCCAGGCTGTCAGTTGATGTGGCCAGCAT  
TGCCGAACAGCATCATTTAGCGATATTTCTGGGAGGAGAAACCTTATTTCTCAGGCCATAGATGAAACCTGTATCGCT  
CTGAAGAAGGAGCACTCAGATAGCTGTTGATACAGAGCGCTGGAACAGCAAGCGGCTCAGGCTTTAGAGCTTGAGCAG  
GTTAATCAGTTGCGAGATGATATCGCTGGCATCGAGAGATCCATTGAAACACTCAACAGGAAACGCTACAGGTTCTGAA  
CGAAACCTTACAGGCGGACGTTGAATATCACGTTACGTCAGCGGCTCAGGAAAGGCTGCGTGTATTTGACCAGC  
GTATCAATGACGAGTCCGTCAGACTACAGACGGCAAAGGATAAATCTGGCGGCAATGTTGAGGAGGGGTTAACTTTGAA  
GCGCGGCTGAATTAGCAGAGCGCCAGGCAAGGCAATTAACGCACAGGCAATGTCATTTAAACACGACAGAG  
AGTCCGGACTCCTGACGAGGCTGCACCTTTTGAACCTGGTGTGCTGATTGCGCATGACAGAGCAAGGCAACGCTGAAAC  
AGGCCGGAGATATGGATCTGCGTATCGCTGAAGACTCGGTTGTTGAGTCACTGACATGATGATCACCATTCTCGATGAT  
GACGGAAACCCACAGTCCGCGAGCGCTCGGAAAGTGTGGACGAAAGTGAACAGAGAGAATGAGCAGGCAAGTACAGGATTC  
CAGCTTTTGGACTGGCTGTAGCGTGTCTTGGAGAGATAA

>Cluster\_29259

GTGCAAACCTTTCAAGCCGATCTTGCCATTGTAGGCGCGGTTGGCGGGGATTACGTGCTGCAATTGCTGCCGCGCAGGC  
AAATCCAAATGCAAAAATCGCACTAATCTCAAAGTATACCCGATGCGTAGCCATACCCTGCTGCGAAGGGGGCTCCG  
CCGCTGTCGCGCAGGATGACAGCTTCAATATCACCTTTACGATACAGTAGCGGGTGGGGACTGGTTGTGTGAGCAG  
GATGTCGTGGATTATTTCTGTCACCACCTGCCAAACCGAAATGACCCAACCTGGAACCTGTGGGGTGCCCATGGAGCCGTCG  
CCCGGATGGTAGCGTCAACGTACGCTCGCTTCCGGCGGATGAAATCGAGCGTACTGGTTCCGCGCCGATAAGACCGGCT  
TCCATATGCTGCACAGCTGTTCCAGACCTCTCTGCAATTTCCGCGAGATCCAGCGTTTTGACGAAATTTCTGCTGGAT  
ATTTGTTGATGATGATGTTGTTGCGCGCTGGTAGCAATGAACATGATGGAAGGCAAGCTGGTGGCAGATCCGTTGATA  
CGCGGTCGTTATGGCTACCGCGGTTGCGGGTTCGCTTTATCGTTACAACCAACGGCGGATCGTTACCGGTGACGGTA  
TGGTATGGCGCTAAGCCACGGCGTTCGCTGCGTGACATGGAATTCGTTGATATCACCCAACCGGCTACCCGCTTCC  
GGTATCTGATGACCGAAGGCTGCCGCGGCAAGGTTGTTTCTGGTCAACAAAAATGGCTACCGTTATCTGCAAGATTA  
CGGCATGGCCCGGAAACCTCCGCTGGCGGCAAGGCAAAATATATGGAACCTGGGTCACCGGCAAGGTTCTCAGG  
CCTTCTGGCAGAAATGGCGTAAAGGCAACCACTCTCCAGCGCGTGGCGATGTGGTTTATCTCGACTGCGTACCTC  
GGCGAGAAAAATGCAATGAACGCTGCGGTTTCACTGCGAATGGCGAAAGCGTACGTTGGCGTCAATCCGTTAAAGA  
ACCGATTTCCGCTACGTCGACCGCACATACCATGCGGCTATCGAAACCGATCAGAACTGTGAAACCCGCATTAAG  
GCTGTTCCGCGTGGGTGAATGTTCTCTGTTGGTCTGCGAGGTCGCAACCGTCCGAGGCTCCAACTCCCTGGGAACTG  
GTGGTCTTCCGCTGCTGCGCGGTAAGCAAGCGACAGGCGTGCAGCAACTGCCGTAATGGCAACGAAAGCGCAATTGA  
AGCGCAGGCAAGTGGCGTTGAACAAAGCTCTGAAAGATCTGGTTAACAGGATGGCGGCAAACTGGGCTAAGATCCGCG  
ACGAAATGGCATGGCCATGGCAAGGCTGCGGATATCTACCGTACGCGGAACTGATGCAAGAAACCTACGACAGCTG  
GCAGAGCTGCAGGAACGCTTCAAGCGGTCGCGATCACCGACACTTCCAGCGTGTCAACACCGACCTGCTCTACCCAT  
TGAGCTGGGCCACGGTCTGAACGTTGCTGAATGTATGGCGACTCCGCAATGGCAGTAAAGAGTCCCGCGGCGCACC  
AGCGTCTGGACGAAGGTTGACCGGAGCGTGACGACGTAACCTTCTCAAACACACCTTCCGCTTCCGCGATGCTGATGGC  
ACGACTCGCTGGAGTACAGCGACGTAAGATTACTACCTGCCGCACTAAACGCTTTTACGGTGGCGAAGCGGATGC  
AGCCGATAAGGCGGAAGCAGCAATAAGAAGGAGAAGGCAATGGCTGA

>Cluster\_27875

ATGGAGCTTGGCACTACGCACTCAGTATTGATGCAAAATCAACCGCAATTCAGCGTTTTGCCAGAATGCTTGGCAGCGT  
TTTGCAGCTTGAAGTTGAGATCGTTGATGAAAACCTTGTGCTGCTGCGCGGAAACGGGCGGATGGGAAGCTTCTTGGCC  
GCCAGTTGAGCGGCAACTCACGCTGCTCCGCCAGCTCTGGAACGAAACCTGAAAAGTTGTGACACAGTCTCGCTTC  
GATCCCTTTGTTGAAGTTGCGATAGTAAAGAAAATGGCGGAAAAGCAATTTCTGGGTACGCTGCTATTTTACAGGA  
TCGTTGTGTTGGGATGATAAGTTGATTGCCGTTACCCACGAGCAACAAGAACAATACAGTGAATAATTTACCGCAATTTT  
CCGATACGTTCCGATATATCCACATTTTGGTTTCTAAACCTTCTGGAGGATCAGGACCAAGGATAAATACCATGATAA  
ATATTCGCGACCATGATCGATAAATGATCAGGGCTGTTAGTGGTTGATGCTGATAAATCGGTTTCACTTGTGTTAATCA  
GACAGTTTAAACACTCGGTTGTTGATAAAAATAATTTATGGAAAACCTGTTCTGTTTACAGCAATTAACATTTGAGA  
GTAATTTTAAACCTGCTATATGCAACATATTTGTTTCTGGATGATAAAAAGTGAATTAATCATTTGGTCAATGCAATAC  
ATCCAGGCGGCAACTATTTTAAATGGCGTTTACCAATCGCATACCAAGTTTCTGTTAGCAAAATGCACCTGATGAACC  
GCATATTGAACAATTTGGTTGGCAGTGGCGTGTATGCGGCAATTAACGACTCATTAGCCGATTTGACCCAGCCCAT

CCAGCGTTATGGTGGTTGGTGAAAGCGGCACGGGTAAGAAGTCGTGCCCGTGCAATCCATAAGTTGAGCGGAAGACGG  
AATAAACCCCTTTTATTGCTATCAACTGTGCCGCGATTCCGGAACAGCTTCTGGAGAGCGAACTGTTCCGGTTATGTTAAAGG  
CGCATTTACTGGCGCTTCTGCCAACGGTAAAACAGGGTTGATTACAGCGCGGAATACGGGCACGCTGTTTCTCGATGAAA  
TTGGTGATATGCCATTAATGTTGCAAGGCTAAATTTACTGCGCGCTATTGAGGCGCGTGAATTTCCGCGATTGGTGCCAGT  
AGCCCAATACAGGACAGCATCCGCATCATTTCTGCAACTAATCAGAATTTGGCCAGTTCATTGCCGAAGTAAATCCCG  
CGAAGATCTCTTCTACCGACTTAATGTTATCCCGATAACTCTTCCACCCTGCGTGAACGTCAGGAAGATATTGAATTAC  
TGGTGCATTACTTTTACATCTGCATACCGTCTGCTGGGATCGGTTTATCCTGGCATGCTCCTGATGCTGCGTGAATA  
TTGCGTAAGCATCGTTGGCCCGGAAACCTGCGCGAGTTAAGCAATTTGATGGAATATCTGGTTAACGTTGTTCTCCTCAGG  
TGAAGTTATCGACAGCAGCTATTTGCCGCAAACTCTGCTGAATTAATGGCACAACCGGAGCAAAGTGATGTAACAGGGTCA  
GTGAGGCGCACCTGTCTGATGATGCGGGCGGCACGGCGTGGAGGAGATGGAAGCAAAATGATCCGCGAGGCGCTT  
TCACGTCATAACGCAAGAGGAAGTTGCTGATGAACTGGGCATCGGCATTGCTACGCTCTATCGCAAGATTAAGAAATA  
TGAGTTGTTAAACACATAA

>Cluster\_54620

ATGAGCACTCAGTACGAAACTCAGGGATACACCATCAATAATGCCGGACGCCCTGGTGGTGCAGCCGATTACGGCGCAT  
CGAAGGCCACATCGCTCGCAAGTGAATATTAACGATCAGAATGTGATCACCATGCCGCTCTCCTGCGGCACCATGTTTC  
CGGGCTGGAGATCATCTCAAGGGCGCGACCCGCGGATCGGTGGGCGTTCGTTGAACTGATCTGCGGCGTCTGTACT  
GGCCTACACGCCCTGCTTCCGTTTACGGTTACGGATCGAAGATGCTATCGGTTATAAAGTGCCGGACAAACGCCAATATCCG  
CAACATTAATGCTGGCAACGCTCTGGTGCACGATCATCTGGTGCATTTCTATCAGCTTCCCGGATGGACTGGATCGATG  
TGTAGATCGCTGAAAGCCGACCCGCGGAAACCTCCGAACCTGGCGCAAAGTCTCTCCTCTTGGCCGAAATCATCCCT  
GGCTATTTCTCGAGTCAAAAACCGCTGAAAAAATTTGTTGAGGCGGGCAGTTGGGGATCTTCCGAATGGCTACTG  
GGGCACCCCGCAGTACAACCTGCCGCAAGCTAACCTGATGGGCTTTGCCACTATCTCGAAGCTCTCGATTTCCAGC  
GTAAATTTGCAAAATCCAGCGGCTTTTGGCGTAAAAACCCGCATCAAAATGGATGTCGGCGGGATGCCTTGGCC  
ATCAACATTTGACGAAAGCGCGCGGTCGGGGCAGTCAATATGGAACGCCCTGAACCTGGTGCAGTCAATTTACCCCGCAC  
GGCGGACTTTCATTAAACAGCTGATGATCCCGACGCTTAGCCATCGGTCAGTTCAACAAACCTGGAGGAAATCGGCA  
CTGGTCTTTCTGATAAATGCGTTCTCAGCTACGGCGCATTTCCGGATATTGCCAACGACTTTGGCGAGAAAAGTCTGCTG  
ATGCTGGCGCGCGGTTGATTAACGGCGACTTCAACAATGTGCTGCCAGTGGATTTGGTTGATCCGCAGCAGGTGCAGGA  
GTTTGTGACACCGCTGGTATCGATATCCCAACGATCAGGTCGGGCGTCACTCCGTTGATGGCATCACCCGCGCTGGT  
ACAACCCGCGGATTAACAGGCGACGATCCCAACCTTAGCCATCGGTCAGTTCACAAACCTGGAGGAAATCGGCA  
CCACGCTGGCGCGTAAACGCGATGGAAGTGGGGCGCTGGCGCGCAGTTAATCGTTATCACAAAGGCGATGCTGCGAC  
CGTTGAGTGGTTCGATCGATGATGTCGCGCTTGAACCTGCCGCTTTCCGGTATCCAGTCAACGTTAGCCCGCATTTTGT  
GCCGCGCGCAGGAGCGAGTGGGCCGAGTAAAGTTGAGTATTTCTTCGACAAGCTGATGACCAACCTGAAAAACGGC  
AATCTCGCCACTGTTTCCACGGAATAATGGAACTGCAACCTGGCCGACAGAGTGCCTGGTGTGGTTTACCGAAGC  
GCCGCGGGGGCTTAGGCCACTGGCCGCTTCCGATGGCAAGATTGATCTTACCAGTGGTGGTGGCGACCACT  
GGAACGCCAGCCGCGCATCCAAAGGCGAGATTGGCCTTATGAAGCGCGCTGATGAACCAAAAATGGCGATCCCC  
GAGCAACCGCTGGAGATCCTGCTACTCTGCACAGCTTTGACCCGTGCCTCGCTGTTCAACACAGTCTGGCGCAGCA  
CGGTAGCGAGCTGATCTCCGTCAGGTCGTTAA

>Cluster\_40774

GTGAGTGATCAGTTTGACGCAAAAGCGTTTTTAAAAACCGTAACCAGCCAGCCAGGCGTTTATCGCATGTACGATGCTGG  
TGGTACGGTTATCTATGTCGGCAAGCGAAAGACCTGAAAAACCGCTTCCAGCTATTTCCGTAGCAACCTCGTTCGC  
GCAAAACCGAAGCGCTGGTCCGCGAGATCCAGCAAAATGATGTAACGGTTACTCATAACAGAAACCGAAGCGCTGTACTG  
GAACACAATACATCAAACTTTATCAGCGCGCTTACAACGTTTGGCTACGCGATGATAAATCATATCCTTTTATCTTCT  
GAGTGGCGATACCCACCGCGTCTGGCGATGCATCGTGGAGCGAAGCATGCCAAAGGTGAATATTTCCGCGCGTTCCCGA  
ATGGCTATGCCGTACGTTGAACACTGGCGCTACTGCAAAAGATTTTCCATTCGCGAGTGGCAAAACAGTGTATTCGC  
AATCGCTCGCGTCCGTGCTGCAATATCAGATAGGGCGCTGCTGGGGCGTGGCTTGAAGGACTGGTGGTGAAGAAGA  
ATACGCTCAGCAGTGCAGTATGTCGCGCTGTTTGTGCTGGCAAAAGTATCAGGTGCTTACGCAACTCATTAGTCGTA  
TGGAACTGCCAGCAGATCTGGAGTTTGAAGAAGCGGCGGGATTCGCGACCAAAATCAGGCGGTGGCAGCTGTACC  
GAAAAACAGTTTGTTCATAATACCGCGACGACTTGGCTTATGGTGTGGCTTCGATGCGGGTATGGCTGTGCTCA  
CGTATTGTTTATCTGTCAGGGCAAAAGTGTCCGCGACCCGAGCTATTTCCGAAAGTGCCTGGCGGTACGGAACCTGAGCG  
AGGTGGTGGAAACCTTCCGTAGGTGAGTTCTATTTACAAGGCGAGCATGCGCACCTTACCAGGTTGAGATCCTGCTCGAT  
TTTAACTTAGCGATAAAACGCTGCTCGCGGATTTCCCTTTCAGAACTGGCGGACGCAAGATTAATGTTCAAAACCAAC  
CTGTGGCGATAGAGCGCGTTATCTGAAACTCGCGCGACCACTTACGCTTATGGTGTGGCTTCGATGCGGGTATGGCTGTGCTCA  
CTACCGTTACCAGCGGCTGACCGCGCTTGCAGCGTGTGAAATGGCGGAAGTGAAGCGGATGGAGTGTCTTGTGACATC  
AGCCATACCATGGGTGAACAAACCGTCCGCTTCCGTGTTGTTGATGCCAACGCGCCGCTGCGTGGCGAGTATCGGGC  
CTATAACATTACTGGCATCAGCCGGCGATGATACGCGCGGATGAATCAGGTGCTGCGTGGCGTTATGGTAAAGCTA  
TCGACACATGATAGATCCCGGATGTGATCCCTTATTTGCGCGGCAAGGCGACTTGGCGAGGCAAAAGTGTGCTGCG  
GAACTGGATGCTCATGGATAAAAATCATCCGCTGCTACTTGGTGTGGCAAAGGAGCAGATCGTAAGGCTGGGCTGGA  
AACGCTGTTCTTTGAGCCGGAAGGTGAGGGATTTAGTTTGGCGCGAGATTTCTCCGCGCTGATGTTATCCAGCATATTC  
CGATGAATCACAGCATACGCGATTGGCGGACCGTAAAAACGGCGAAGGTCAAAAATCCAGTTCCTCGGAAAC  
ATTTGAAGCGCTGGGCGCAAAACCTCGGCAAAATGTTGTTGAAATATATGGGCGGTTTGAAGGTTTACGTAACCGCAGCGT  
CGAGGAAATGCAAAAGTCCGGGATTTTCGCAAGGCTGGCAGAAAAGATCTTCTGGTGTGAAACATTGA

>Cluster\_50024

ATGACACCAAGTGAACCTTAGCGACTGCTTTGGGCGCAGGTTGACAGGGTGGCTCCGCACCTGTTGCCAAACGGCAAGAA  
AGAGGGGCATGAGTGGGTTGCCGGTAACGTCACCGGTGACAAGGGAACAGCCCTAAGGTCAACCTTAGCGGCAAGAAAA  
AATGGGCTGATTTTCGCTGAGGGAGACGGCGGTGACATGCTTGAATTTGGTGGATGGCATGCTGGAATTAACCTGCATTCAG  
GCTATGTCAGGAAGCGAAAGCCTTTCTCGGTATCAAGGATGACGATCACCATTTTCGATGCCAAACGTCAGAAAAATTTCTC  
CAGACTGATCGCAAGAAAAATCGCCGCTACGTTACCAAGAACGAAATCCATTTGATACCTGCAATCGCGTGGCATAAT  
CGCCAGAAATCGTAAAGCGCTACGAGGTTGTCAGCGCAAGGTGTGGAATGGAGAGCTGGAACGGATGCTCTGGTGATT  
CCGTACAACCGCGATGGTGGTGTGTCAGGTCAGCGAATCAGCACTGAGCGCCCGGACGGGAAAGTCAATATGGC  
AGAAGGTGATGCGAACCTTGTCTGTTCCGATGGCAGCTCTGGACGCTGGCGTGAGGGCGGTTGTACTTTGCCAAGCGG  
AAATTTGATGATGACCTATGCGCAATACGGCATTCGCGGTTTCTACGCTTATCGGCGGTAAGCAGTATCTGTTAACTCCACG  
CAGTGGATTGAGTTTGTGATACAACTCAGCAGGTTTGGAGAAATATTCATCTCGATGGACGTTGATGATGTTGGTCCG  
TGAAGCCGCAAGGAAATCGCAAGCGACTCGGTGAACATCGTTGCCGCTTGTACTCTGCCGTACAAGACATCAACG  
AATGCTGATGACCGGTTTACCAGGATGAAATCTGGCAGTACATCGGCACGGCATCTACTTCGATCCTGAAGAACCTC  
TACAGCGCCGAGAGTTTTTACCAGGACTATCAACGCTTTTCTACGCGAAGCAGCAGTATCTGTTTAACTCCACGTTGGGA  
ATCTCTGGCAGATAAATTCAGTTCCGTGAGGCGGATGACGCTGGTCAATGGTGTGACCGTACGGAAGAAACGGAGG  
TTGTCCGGCATATGGCACTTGAAGCAATCGCTCAGGTTGAGAGCTGCATCGCTCCTTGAAGTGAAGCGTGGTAT  
CTCCTTAAGCGCCTTACCCTCAGGCGAGTGTGCAAGATGCGCGAGTGGAAATGACCTGCAATTTAAATTTTAA  
TGACGAAAGACTTTGGGTTGTTGGTCTGACCGGAAACGGCGAAAGCCGACAGGCTGATCGAAATATTCGACTACGCTCGCC  
GCCGATACGGGATCCAGTTATTCATCATCGACAGCCTGATGAAATGGCGCATAGGTGACGATGACTATACGGGCGAGAA

GCATTGTTGACTCGATTTGTGACTTCAAAAACAAAACAACTCCCACGTCATTTCTGTTACTCACTCCAGAAAAGGAGA  
CAGCGAAGAAAACAACCCGGGAAAATGGACGTAAGAGCTCTGGAGCGATAACAGACCTGACAGACAACCTTTTCATCA  
TCTGGCGTAACAAGGCTCGCGAGAGAGCGTTACAAAGAGTTTACAGAGTGGTAAAAGATGTCAGAGAAGGACGAACAGCTA  
CTGGCGTCTCCTGCATCTGTTTTGATGCTTGAAAAACAACGTAACGGCGAAGGTTGGGAAGGTTGGTGTCCCGTTGTTCTCT  
TGACGAGCAATCGACACGTTCCGCACTTGAATCAGATCGCCATATAGCTACATCGCCAAATATGCCGAAATCGGAAT  
ATAACGAGGCGTGCGACAGGAAAACGTCACGGAGTATTA

>Cluster\_41180

ATGATTGTGCGCATACTGCTGCTGTTTATCGCTCTGTTTCACTTTGGTGGCAGGCGCAGGCTATCAAGGAAAGCTATGC  
CTTTGCGGTAAGGCGAACCCCGGTACGCAATTAATTTCAACCAATTTGATTATGTGAACCCCGCGCCAAAAGGTG  
GGCAAATAACGTTGTCTGCCCTCGGCACCTTCGATAATTTCAACCGCTATGCACTGCGCGCAATCCGGGCGCACGCACC  
GAGCAGCTGACGACACGCTATTTACGACTTCCGATGACGAACAGGCAGTTATACCCGCTGCTGCTGAAAGCGCACG  
CTATGCTGACGATTAATCTGCGGAGGAGTTCGCTATTAATCACGCGCCGTTTTCATGATGGTTCCGCCATACAGCCC  
GCGATGTAGAGTTACTTTTCAAAAATTTATGACCGAAGCGTCCGCAATTTTCGCTCTGGTCTACAAAAGGCACACCGT  
AAAGCCATTGGCCGTTAACCGTGGCATTGAGTTAGCTAAACCCGGCAAGAAGATAATGCTGAGTCTGTTTTCGCTGCC  
GGTATTTCCAGAAAAGTACTGAAAAGATCACAACTTACGACCCGCTCGCCACGCTCCGCTGCGCAGTGGTCCGTACC  
GCTTACGCTCTGAAAATGGGGCAAAAATTTGCTATTTCCCGCTGAAAAGATTACTGGGCAGCAAATTTACCGGTAAC  
CGTAGGCTGGAATTTCCAGAACCATTCGCTACGATTAATTTACCTCGATGATAATGTCGCTTTTGAAGCTTTAAAGCAGG  
TGCCTTTGATTTGCGTATGAAAACGACGCCAAAACCTGGCCACGCTATACCCGTA AAAATTTTCGATAAAAAATACA  
TCATCAAAAATGACCAAAAAGCAATCAGCCAGGATACCGCTGGCTGGCGTTAAATATCCAACGTCGGTATTCAGC  
GATCGCCGGTGGCGAAGCGATCCTCTCGCTTTGACTTTGAATGGATGAACAAGCGTTGTTTTCAATGCTGGAG  
TCCGACGAACAGTTATTTTCAGATAACCAATACCGCGGCGGCAAACTACCCCGACGCCGCGGAGCTGGTCTTGGCAC  
CAATGAAAAGATCTACCACAGAGTCTTACGCAAACTTACAGCGCCGCTATCCAAAGCGATGGCTACGATCGT  
GACAACTGTTAAAGCCGACAACTTCTCAACGAAGCAGGCTGGGTGCTGAAGGGTACAGCAACGCTTAATGCCAAAC  
AGGTCAGCCTGCGCTTTGAAATTTGCTTCCGCAAGCAGCAATAGTCAAGTGGTATGCGCTTCCGCTTCCGACACTGC  
AACGGCTGGGTATCAACATGGACATTCGCAAGTGGATAACTCTCAAATCACCAACCGCATGCGCAGTCCGACTATGAC  
ATGATGCCGCGCTATGGCGGGGATGCGTGGCCAGTTCCGATTTACAAATTTCTGGTCAATCGGAATATATCAATTC  
CACTTATAATGCCCGCGGTGCAAGCCCGGTTATCGACTCGCTGATCAACCAAAATTTATGCGCGCAGGAAAATAAG  
AAAAATTAAGCTGCGCTGGGACGAGCAGTGGTGGCTTAACTGCAATTAACAGTGAATTTATACATGCTGCCAATGTTGGG  
GAAGACGCTCTCGCTGGTGGGATAAATTTCCCAACCGCTGTACGCCCTGTTTACAGCCTGGGTATGATACCTGGTG  
GTATGACGTTAATAAGGACGAAAACCTGCGCTACGCCAGACAACAGGGAGTGTAG

>Cluster\_12040

ATGAGTACCACAACAGCTAAATTTAAAACCATTATCACGATACTGGTCCAAAAAATAGCTCAGGCAGCCGCGCCAGA  
TGGTAATCCTGTCCGCTGACTCACATGGCCGTGGCGACGGTGGCGGCAGTTGCCACACCAGACAGTAAGCAGACCC  
GTCTGGTGCATGAGGTGTGGCGACATACTGTTAATCGCGTCATCTGGACGCAACACATCAGAACCCGATTTATGCGGAG  
CTGGTATTTCTCCTGAAACGGGTGGATTTCTGGATCCGGGAAATTTGGTGTATTTGATGAGCAGGGCATTTAATCGCGGT  
GGCAACTACTGCCGAAAGTTACAACCAACCTTTGCGAGGGTCCGGACGCTGCACAAACATTTCCGACCACTTCAGCC  
TATCCAGCACTGCCACCGTGGCGTTACCGTGGATAACACCATGGTATGGCCACAGTGGATTACGTGAATGACAACCTG  
AAAGAATGAACAGTACGACGCTCACCCGAGCCTCGCTGACCGCAAAAAGGCTTTGTTCAACTCAGTAGCCCACTAA  
CAGCAGCTGTAAGCAGTGGCCGCAACCGGAAAGCGGTCAAGACAGCCTATGACCTTGCTAACCGGAAATATACCGCTC  
AGGATGCCACGACGACAAAAGGAATAGCCAGCTCAGTAGGCCACCAACAGCGATTCAGAAACGCTGGCGGCAACA  
CCAAAGCGGTAAAGGCAGCCTATGACCTTGTAAACGGGAAATATACCCGACAGGACGCCAGCAGGCAAGAAAGGAAT  
AGTCCAGCTCAGTAGCCTACTAACAGTGAATTTGAAACGCTTGGCCGACTCCGAAAGCGGTGAAAGCCGCTAATGACA  
ATGCCAAAGCGGCTGTCCTTGGACGTAAGGTTAATGGCAATCAGTACCAATGATGTCATGTTCAATGTTACCGAGGAT  
ATTTTTAACGACCAGAGTATTGAGATTGGTGCAAAATCAGAATCTGGATAAATACAAAACACCGGGGCTGTACCATCAGCC  
ATTTGAATGCCAATACAAGCGCAGCGCTGAAATACCCGGAGAATTTTGGGGTACTGCTGTTGTTAAAATGCCGGGA  
TAACACAGATTTACTATGTGATGACACATCCAGAAGCTATACCCGACGCTACTCAACGGGTGACTGGACACCATGG  
ACGCCACAAGATTTCTTCCGGTAGGTGGCGGATACCGTGGCTTCTGATTCAGTGCCTACAGGCTATACCGTTATGCA  
GGGCGAGCTTTTGATAAAAACAGTCTATCCCTGCTTGCAGTCTGTTATCCGCTGGTGTGATCCCTGATATGCGTGGCT  
GGACGATTAAGGGCAACCCGCCAGTGGTGGGCGCTATATCTCAGGAACAGGACGGCATTAATCACACTCCACAGT  
GCCAGCGCTCAGTACGGACTTGGGCAAAAACCATCATCATTTGACTACGGCACAAGACGCTCCAGTTCAATTTAA  
CCATGGCACAATAAACCAAGTACGCGCCGGGATCATTTACACAAATATTCCTGTTGGCAACACTGGCGCAGGTAATGGTG  
TTTTCGCTGGTTAATACTCAGGACTTGGCACTGAAAAACAAGTAACGACGGGGGCACTCTCACACAGTAAATATTGGC  
GCACACATCATACGGTAGGAATGGCGCACACACACTCCGTTGCGATAGGTTACACGGGCAATCCATCACCGTTAA  
CGCTACGGTAACCGAGAAAACCCGTA AAAACATCGCATTTAATAATTTGAGGCTTGCATGA

>Cluster\_30472

TTGACATTACGAAACTTGCATGGCGTGACCTGTTTCTGATACCGATAGCTATCAGGAAATATTTGCTCAGCCACATTT  
GATTGACGAAAACGATCCTTTATTCAGTGATACTCAACCCGACTGCAATTTGCGCTGGAGCAGTTGCTGCATACGCGAG  
CATCCTCTCTTTATGCTGGCGAAGCCCGGAAAGATCTGAGTATCTGAATCTTATTTGCTGATGCCGCGCTAGCCTA  
CAAAGCGATGCAAGCCAACTGGTGGCGGCTACATGAGGTTTCCGGCCACACCATCCGCTTACGTCACGCAAGTGC  
AGATGATAAATTTTGGACTTTAACGCAAGTTGTGCTGCGACTGGGTAGAAGCAGAGCAACTCTTGGCTGCTGCGCC  
AGTTAATGGCGACATTTACCCCTGACCCAGGCTGTTGCTGATCAGGCAAAATGGCGGTATTTCTCATCATCTCTTTGCGTACA  
CTGCTGGCGCAACCTTGTCTGGATGCGGCTGAAAAATATCGTTAACCGCGAGCGTTTGGCTGGGTTGATGATGA  
GTCGCGCCCTCTCCCGTCTCTGTGCTTTCGATGCCATTGAAGCTGAAAGTCAATTTGGTAGGCGAACCGCAATCATTGG  
CTGATTTCCAGGAGATGGAGCCAGAGCTTTTACAGCAGGCTATTTATAGCGAATTTGAAGATACTCTGAGATTTGCTGAT  
CGGGAGTCAAGGACGAGTGGTGTGCTGGGTGACATTTACCGCCAGACATAATCACTTACTTGCACCCGGGAGCGGATGC  
CTGGCCGGTGTCTTATCCGCAAGCAGCAGCTACACTGAGTGAACAAGAAACACTTCCGCTTAGCCCGCAGTGGATCCTCC  
GCCAGTGTCAAGAGTTCGCTCCTGTGATGGCGACACCTTCTCCGGCGAGCAGCTAAACTTAATGCTACAGCAGCGT  
GAATGGCGCAAGGTTTCTCTGCTGAACGCATGAGGATGAGATCCTTACAGGACAAATCCTGATTGAAACCGAAGGCGA  
ACGCATCGGCAAAATTAACGCCCTTTCCGCTCATTTGAATTTCCGGGTCATCCACGCGCTTTTGGCGAACCTTCTCGCATTA  
GCTCGCTTGCATACATTTGGCGATGGTGAATTTACCGACATCAACGCAAGCGAGGCTTGGCGGCAATATCCATCGGAAA  
GGGATGATGATCATGCAAGGCTTCTGATGTCGGAACCTACAGCTTACAGCAACAGATCCCTTCTCAGCATCGCTGACATTT  
TGAGCAGTCAATAGTGAAGTGGATGGCGATAGTGCCTCGATGGCTGAACTCTGCGCCCTGATAAGCGCCCTGCGCGATG  
TGCCGGTGAATCAGATCTGCTATCACAGGTTTACGTCGATCAGTTCCGGTCCGCGCCAGCCAGTCCGGTGGTTTAAATGAG  
AAAAATCGAAGGCTTTCTTTGCTATTTGCCAGCAACGCTGAGTTAACCGGAAAACAAGGTGTCATTTATCCCAAGTAACTG  
TCGCCATTTAAGTCTTACAGTGAACCTGGTGAAGCGGTAGAAGAAGCAAAATCACCATCTGGGCGTAGACGATGTGA  
CTGACGCACTGCGCTTATTTAATAATCTGGTGTGGGATGGCGAAGGCCAAACGACGCTGATGCAAAACCTCCAGGAACGCT  
ATCGCAACAGCATCGCAACAGGAAGGACGTCACCGTTTTCCATGGCCATTACGTTGGTGAACGTTTATTTCCGAACTG

A

>Cluster\_27270

ATGAGTGGTGA AAAAAGGCCGAAAGGCTGGCGGTTTTATGGCCTTGTGGTTTTGGGGCAATAGCGCTGCTATCCGCTGG  
CGTATGGGCATTACAATACTCTGGCAGTGGGCCAGAAAAACGTTGTGCCACTGGTGGTGCACAACAATCTGAAAAATCG  
ATCTCAATGAGCCGACCTCTTCTCGACAGCGACTCTCTGAGCCAGCTTCCCAAAGATCTCCTTACCATTCCGTTTCTC  
CAGCATGTTCTGAGCGAAGATTTCTGTTTTCTATATCAAGATCATGCCGATCGCTGGGCATTGAAGGAGCAGTATCGCCG  
CATFTGTTTTAAAGATGACGATCTCAGCTGAAAGATAAGCTTTTTCGTCACTCTTAGATCAGCCCGCGCAGCCGCTGAT  
GGCAGGATAAAACAAGGCCATCTTTCACATTACATGGTGTGATCCAGCGTAGTGGTTTTAAGCAAAGTGTGGAGCCATTG  
CTGTTTGGCGCCACCAGCGACAGCCAGTTAAGCAAGACGGAAATAGTAGCATCAAGATAAATAGTGAAGTATTTCCCTGT  
TTATCAGTTGGCTATAACCGCAATAACGCTCTGATGTTTGGGACTTATCAGGACAAAATATTTGGCGTTTTCCAGTTCCG  
ATATGCTGTTTTAAAGATGACCAACAGGATACCGAAGCCACGGCATCGCAAGTATTTGTTGAGTGGTAAAAACGCTGG  
GAAACCCGCTTTGGCCTGGAAAGCGCTACTGCCGAAAAACGCCAGTACGCCAGCGCATCGTAGTCAGCGCCAGGTTGCT  
GGGTTTTGGCTACCAGCGATTAATGCCTTCTTTTGGCTGGCGTACGCTTTCGAAATGGGTAAACGAGCGCTGGCACAGTTTTC  
TGGCGTTAAACGATGAATCCGCCAGCGTAGATGCCAGTTTCGATTTTACGCCGGTATGGAACAGTATGCCAGCGGAGCC  
AGCTTCTGTGTGGCGGTGCGTATTCACACGGTATTCGCAAGAGATGCTTTTCGCACATCAGCCAGGAAACGCAAGT  
GAATGGGGCGTTAGACGGTGGCGCCGGGTGTGCTGGTATGAAGACTCAAATTAACAACCCCGCTATTTGTTGGTCAAT  
TTGATGGCTCAGCCGAACAGGCACAACCTGCCTGGGAACTGTTTACGCAAAAATATTGGTGCACGAAAGCAAAGCGCCA  
GAAGGTGTTTTTCCGGTAAGCCAGACTCAGCAGGGCGAAGCGCAAATCGGGCTCGCGAAGTGAAGTCCCGGATACGGTCA  
GTATCCGAAAGCGCAGCGCGCAACCCGATCAATTAATGTGCGATTATTTTTTCCGCGTGTGCTGGCGGATGCAAAACA  
AAACGCTGCTTTTCTCCCTCGATGACACGCTGGTTAATAACGCCCTGCAAGCACTGAATAAAAACCCCGCCGGCAATGGTG  
GATGTAATACCCACTGATGGCATGTTCCGCTCTATATCAATCCACAAGGAATGGCGAAACTGCTGCGTAACGAAACGCT  
GACCAGTCTGCGAAGAACTCTCGAACCGTTTTTTATAACGCCGCAAACTTTATTAATGCCGAAGTGGACGCTTTAT  
CTCAACAACCCGCTTATGTCATGAAGCTGGCCAGATGGAACCCGCTGGCAGTGGCTACCCATAACCGTGGCAA  
CCGCTATGA

>Cluster\_2557

ATGAAAACGCTGCTGATTATTGACGCTAATCTCGGTACGACGCGCCTATATGGCGAAGACCCTGCTGGGCGGGCGGCG  
CGGAAAAGCAAACCTGGAATCATCGACAATCCGAACGACGAGAAATGGCGATTGTTCTCGGTGATTCCATCCCGAATG  
ACAGCGCGCTGAACGGTAAAAATGCTGGCTGGGTGATATTTCCGGGCGATTGCGCACCCCTGAGCTGTTCTCCTGAGTGA  
GCCAAAGGCCATGCGAAACCTTACACTGCGCCGGTCACTGCGACAGCACCAGGTTGGCGCCAGCGGTCCGAAACCGGTAGT  
TGGGTTGACTGCTTGGCCGACTGGCGTAGCACACACTTTATGCGCGCTGAAGCCATTGAAACCGAAGCGGAAAAACCGT  
GCTGGTGGGTGAAAGTTGAAACCCGTTGTTCTGTTGGCGCGGTAATGCAATCACTCCCGAGGAAGTAGCCGAGCGGAT  
CTGGTGAATGTTGGCGGCAGATATCGAAGTGGATCTGGCGAAATTTGCTGGTAAACCGATGATCGTACCTCTACCGGTCT  
GGCGCTGAAGAAAACCCGCGCAGGAACCTGGATAAAGCGGTTGCTGAAGCAACCGCGTATGAACCGCGGGCAAAGCTCAA  
CGCGACCTCTGAAGGTAAGAAAGAGAGTGCAGCGCATACCGTCACTTGTGCTGACGGCGCTCTTACATGCTGCGCGATG  
GTCGTTGCAGGTGGTCTGTGATCGCGCTTCTTTTGGTATCGAAGCGTTAAAGAGCCGGTACGTTGGCAGC  
GGCGCTGATGAGATTGGTGGTGGTTCAGCCTTTGCGCTGATGGTCCCGTACGGCAGGTTACATTTGCTTCTCCATTTG  
CCGATCGTCCGGTCTCACGCCGGTCTGATTTGGCGTATGCTGGCGGTCAGCACCAGGTTCTGGCTTCAATGGCGGTAT  
ATTTGGCGGCTTCTGGCTGGTTACATTTGCGAAGTAAATGACTGCAACTGCAACTGAAACTGCCACAGAGTATGGAGCTGAA  
ACCGATCTGATCATTTCCGCTAATTTCCAGTCTGGTGGTGGTCTGGCGATGATCTACCTGATCGGTAACCGGTTGCTG  
GCATTTCTGAAGGGTTGACTCCTGCTGCGAGCATTGGGACTGCGAATGCGGTTCTGCTGGGGCGGATCCTCGGTGGC  
ATGATGCTGACTGACATGGGCGGTCCGGTAAATAAAGCAGCGTACGCATTCGGTGTGGGTCTGCTGACTCAACACTA  
TGGCCGATGGCGCGAATTTATGGCGGAGGATGGTGCACCGCTGGCAATGGGCTGGCAACAATGGTGGCGCTCGCA  
AATTCGACAAGCGCAGCAGGAAGTGGCAAAGCGCTCTGGTACTGGGACTGTGCTTTATTTTCGGAAGGTGCAATTCGG  
TTTGTGCTCGTGAATCCGATGCGTGTGCTGCGGCTGATCTGGTGGGCGGCTGACTGGCGCAATCTCAATGGCGGAT  
TGGTGGAAACTGATGGCACCGCAGCGTGGTCTGTTGTTCTGCTGATCCCTGGCGCTATTACCGCGTATTTGGTACC  
TGTTAGCAATTTATGCGGCTACGCTGGTGGCGGTTTTGGCCTATGCCTTCTGAAACGCTCCGGAAGTGGACGAGTAGCG  
AAAGCCCGCTAA

>Cluster\_24491

ATGACTCATCTTCCCCACTGGTGGCAAAACGGCGTTATCTACCAGATTATCCAAAGAGTTTTTTCAGGACACCAGGGTAG  
CGGCACCGCGGATTTACGTGGCGTTATCCAACGCCCTGGACTATCTGCATAAACTGGGCGTTGATGCCATCTGGCTAACCC  
CCTTTTATGCTCTCCCAAGGTCGATAACGGTTACGACTAGCAAAATATACGCGGATGATCCCACTATGGCACGCTG  
GACGATTTTACGAACTGGTGACACAGGCAAAATCGCGTGGGATTCGATCATCTCGATATGGTGTAAACCATACCTC  
TACCAACATGCTGCTGTTTTGCGAGGGCGTGAACAAAGAAAGCCCTTACCGCAGTTTTATATCTGGCCGATGGCAGAAC  
CAGAAACGCCACCGAACAACCTGGCGTTCAAATTTGGCGGTAGTGGTGGCGTGGCATGGGAAAGCGAACAGTACTAT  
TTGCATCTCTTTGCACGAAACAGCGGATCTCAACTGGGAGAAATCAGCGGTACGCGCAGAGCTGAAAAAAGTCTGTGA  
GTTCTGGGCAATCGTGGGTCGACGGGTTGCGCCCTGGATGTTGTTGAATCTGATCTCCAAAACCCGCTTTCCCTGATG  
ACCTGATGGCGCAGCGGCTCGCTTCTACACCGCGGCCACGAGCACAGGATTTTTTGCACGAGATGAACCGCGATGTTG  
TTTACGCCACGGGTTAATGACCGTAGGTGAAATGCTCTCCACCAGCTTGGAGATTGGCAGGATACGCGGCTCTGAC  
AGGAGTGAATTTGCGATGACCTTTAATTTTCACTACCTGAAGGTCGATTTATCCCGGTTGGTAAAAATGGACGCTGGCTA  
AACCTGACTTTGGGTTTTGAAACATTTTCCGCCACTGGCAACAAGGAATGCACAACGTTGGCATGGAATGCTGTTGTT  
TGGTGAACACGATCAGCCGCGCATTTTCTCGCTTTGGTGTGATGAAGGTGAATACCGCGTGCCTGGCGCAAAAATGCT  
GGCGATGGTGTGATGCGATGCAAGGAAACCGCTATATCTACAGGGCGAAGAGATTGGCATGACCAACCCACATTTCA  
CGGCATTTACTGACTATCGCGACGTGGAGAGCTCAATATGTTTGGCGAGCTGCGCAACGATGGGCGTGGTGGCGACGAG  
TTATTTGGCAATCTCGCCAGTAAATCCCGTACAAACAGTGCACACCCATGCAATGGACCAACGGCGATAATGCGGGTT  
TACGGCTGGCGAACCGTGGATTGGCCTGGGCGATAACTATCAGGAAATCAACGTAGAAGCAGCGCTGGCCGATGAGTCT  
CGTGTTTTACACCTACCAAAAAGTTAATCGCACTGCGTAAGCAAGAAGCGCTCTGACATGGGCGGATTTACCAGGATCTG  
CTGCCAAACAGCCCTGATTTGTTGGTGTATCGCCGTGAGTGAAGGGGCAAACTTGTGTTGCTATGGCAACCTTAGCCG  
TGAGACCAACCCCTGGCAGCCAGGAAATGCGCGCAACTGGCAGCTTGTGATGATCAACTGCAAGAAAGCCCTACCCAC  
AACCTGTGCCATGACTTTACGGCTTTTGGAGCTGTCTGGTGGTTACAGAAGTAA

>Cluster\_22745

ATGTTGGCACAACCTGACCATCAGCAACTTTGCTATCGTTCTGAGCTTGAGATTGATTTTTCATAGCGGCATGACCGTAAT  
AATGGCGAGACCGCGCGGGTAAATCTATTGCAATAGATGCCCTCGGCTTTTGTCTCGGTGGTGCAGCTGAAGCCGACA  
TGGTGGCTACCGGCGCTGCTCGTGGCAGCTGTGCGCCGTTTTTCTCGAAAGATACGCCAGCGGCCCTGCGTTGGCTG  
GAAGAAAACAGCTTGAAGACGGCATGAATGTTGCTTTCGCTGCGTAATCAGCAGCGATGGTCTCCGTTGGTTTTCA  
CAACGCTCAGCTGTTCCCTGTGTCAAACTGCGCGAAGTGGGCTGAGTTGCTGATTCAGATCCATGGTCAAGCAGCTCAT  
AGTTACTACCAAAACAGCACCAAAAATTTCTGCTTGTGATGGCTATGCAATGAAACCTCTCAGTCCAGGAAATGACC  
GCAGTTATCATTTTGGGATCAAAAGTCCGCTGACCTCGCGCATCATCAACAGTTAAGTCAAGAGCGCGCCGCTCGTGC  
GGAGCTGCTGCAATACCAATTAAGAACTTAAAGCAATTTAATCCGACGCTGGAGAGTTTGAAGCAATTCGACGAAAGAT  
ACAAACGCTTGGCGAAGCGGTTCAATTTGACTGACCAACGAGAAATGCAATGGCATTTAATGGCTGACGCTGAGAGCGCA  
AACCTGCAAAAGTCAACTTTACACGGCTAAACAACCTGGTGGCGAATGATTTGGCATGGACAGCAAACTGTCCGGGCTACT  
TGATATGCTGGAAGAGGCTACCATCCAGATTGCTGAAGCCAGTGAAGTGGCCACTACTGCGATGCTGTTGATCTCG

ATCCCAACCGACTGTTTGAACACTGAAACAGCGCATCTCAAACAGATTTGCTGGCAGCTAAACATCACGTGAGCCCTGAG  
GCATTGCCACAGTATTACAGTGCCTACTGGAAGAAGCAGCAGCAACTGGACGATCAGGCCGACTCACAAAGAAACGCTCCG  
GCTGGCGGTAACGAAACATCATCAGCAGGCACTGGAAACGGCGCGCGCTTACACCAGCAACGCCAGCATTATGCAAATG  
AGTTGGCAGCTGATCACCGATAGTATGCATGCACTCTCTATGCCACATGGGCAGTTTACGATCGATGTTAAATTTGAC  
GAGCATCACTGGCGCTGACGGCGTGATCGTATTGATTTCCGGTAACCAACCCAGGTGAGCAGCAATGACGCTTAT  
TGCCAAAGTCGCATCCGGTGGTGGTGTGTCGGCATCGCATTTGCAATCCAGGTCATTACCGCGCGTAAAAAGGAAACCC  
CGGCACTGATTTTTGATGAAAGTGGATGTAGGGATTAGCGGCCAACAGCGGCAGTTGTCGGCAAACCTGCTACGTCACAT  
GGCAATCAACTCAGGTGATGTGTTACCCACCTGCCAACAGTCGCGGGATGTGGTCATCAACACTATTTTGTGACGAA  
AGAAACCGATGGTGGATGACAGAAACGATATGCAATCCCTGGATAAAAAAGCGCGGTTACAAGAGTTAGCGCGCCTGC  
TTGGTGGCAGTGAAGTACACGTAACACTGGCGAATGCGAAAGAACTGCTTGGCGGCTAA

>Cluster\_40069

TTGGATGCCACAACAATAATTAGCCTTTTCATCTTAGGATCCATCCTTGTACCAGCAGTATTTACTTAGTTACATTTTC  
TTCCCGTCTGGCATTTCCATTTCTGGTTATTTTTCTGGCGATCGGCATGCTGGCGGGGTTGATGGCGTCGGCGGTATCC  
CGTTTGATAAATTATCCCTTCGCCATACATGGTAAGTAACCTGGCGCTGGCGATTATTTGCTCGACGGCGGGATGCGCACT  
CAGGCCAGTTCCCTTCGTGTGGCGTTAGGACCGGCAGCTGTCGTCGGCAACGCTGGCGCTACTTATCACCTCTGGTTTAA  
CGGCATGATGGCGCGCTGGCTGTTAATCTTGATTTGATTTGAAGGATTATTAATCGCGCGCTATCGTCGGCTCCACCGATG  
CTCGAAGCGTCTTTTCTCTGCTGGGTGTAAGGGCTTAAACGAACGCTGTTGGCTCGACGCTGGAATTAATGAATCGGCAGT  
AATGATCCAATGGCGGCTTCTGACGATTACCTGATTCGATGATCCAGCAGCATGAAAGCAGTGTGAGTTGGATGTT  
CGTGGTCGATATTTGACGCAATTTGGCCTCGGGATTGCATCGGGCTTGGCGGTGGTATTTACTGCTGCAAAATGATTA  
ATCGCATCGCCCTGCCCGCGATTATATCCATTGCTGGCATTAGCGCGGATTTTTAATTTTGGCTTAAACCAACCGCG  
CTGGAAGGACGCGTATTTGCTGGCTGTTTTATCTGTGCGGTTTTCTGCTGGGTAATCGGCCGATTTCGCAACCGCTACGGCAT  
CCTGCAAAATTTGACGCGCTCGCTGGCTGGCGCAAAATCGCCATGTTCTGCTGGTGGGCTATTTGGTTAACCAAGCG  
ATCTGCTGCCATTTGCCATTTCCGGCGCTCATTTTGTCTGCATGGATGATTTTCTTCGCCCCTCTCTTTCCGGTATTTGCC  
GGATTGCTACCGCTTCGGTTCATCTGCGTGGCGGTGTTTATCAGTGGTAGGATTACGCGCGCGGTCCGAT  
TATTTCTGGCTGTGTTCCCGATGATGGCGGGCTGGAGAATGCGCGACTGTTCTTAAATGTGCGCTCTTTGTGGTCTGG  
TTTTCACTGCTATTTGACGGGAACATCACTCTCGTGGCGCGCAAAAAGCCAAAGTGGTTCGCGCAGTGGGACGTCGG  
GTGTCACGCGTGGCCTGGATATTCATCCGAAATCCGTGGGAGCAGTTGTTTATCAATTGAGTGGCGATAAATGGTG  
CGTGGCGCGGCATCGGTGATTTGCGATATGCCAAAAGCAGCGGATTTGCGGCACTGTTTCTGATAACCGATTGCTTC  
ATCCCAACCGCAGCACCCGACTGCGCGAAGCGGATGTGTTGTGTGTAATTGGTCGGGAACACGATCTCCGCGCGCTCGGT  
AACTGTTTACCCAGTCCGCGCGGTGCGCTGGATCAACGCTTCTTTGGTGACTTCATTTCTCGAAGCAGCGCAAAATA  
TGCTGATGTGGCGCTGATATGGTCTGGAAGACGGCGGAGAAATATCGCGATAAGCAGCAACGCTGGGTGAAATCGTCC  
AGCAGTTGTTAGGCGCAGCACCGTTGCTGCTGACCAAGTGAAGTTTCCCGGGATGATCTGGACGGTGGCCGAGAAAGAA  
GATAATGAAGTGTGAAGATTGGTGTTCGGGTAGCGGAGGAAGGCCAATCTAA

>Cluster\_60942

ATGGCTGGACGAATCCACGCGTATTCATTAATGATCTGCTGGCAGCAGCTGACATCGTTCGATCTGATCGATGCCCGTGT  
GAAGCTGAAAAAGCAGGGCAAGAATTTCCACGCGTGTGTTCCATTTCCACAACGAGAAAACCCCGTCTTCCACCGTTAACG  
GTGAGAAACAGTTTTACCCTGCTTTGGATGTGGCGCGCACGGCAACGCGATCGACTTCTGATGAACACGACAGCTC  
GAGTTTCGTCGAAACGGTTCGAAGAGCTGGCAGCAATGCAACAATTTGAAGTGCCATTTGAAAGCAGGCGCGCCGAGCCA  
GATCGAGCGCCATCAGAGCAAAACGCTTTATCAGTTGATGGACGGTCTGAATACGTTTTTACCAACAATCTTACAACAAC  
CTGTTGCCAGCTCTCGCGCCAGTATCTGGAAAAACCGGGATTAAAGCCACGAGTTATCGCTCGCTTTTGGGTTTTGTTTT  
GCGCCCCCGGCTGGGACAACGTTCTGAAGCGGTTTTGGCGCAATCCAGAAAATCGCCAGTCAATGATGATGGCGGGAT  
GTTGGTCACTAACGATCAGGGACGAGTTACGATCGTTTCCCGGAGCGGGTGTGTTCCCATTCGCGATAAACCGCGCTC  
GGGTGATTTGGTTTTGGCGGGCGCTGCTGGGCAACGATACCCCAAATACCTGAACTCGCCGGAACAGACGATTTTCCAT  
AAAGGCGCCAGCTTTACGGTCTTTATGAAGCGCAGCAGGATAACGCTGAACCAATCGTCTGCTGTGGTTCGAAAGGCTA  
TATGGACGTTGGTGGCGCTGGCGCAATACGGCATTAATACGCGTTGCGTCTGTTAGGTACGTCAACCCCGCCGATCACA  
TACAATGTTGTTCCGCGCGACCAACAATGTCATTTGCTGTTATGACGGCGACCGTGCAGGCCGCGATGCCGCTGGCGGA  
CGCTGGAAACCGGCGCTGCTTACATGACAGACGGCGCTGACGCTTATGTTTTTGGCTGATGGCGAAGCAGCTTCA  
CACGCTAGTACGAAAAGAAGGTAAGAAGCGTTTGAAGCGGGATGGAGCAGGCGATGCCACTCTCCGCAATTTCTGTTTA  
ACAGTCTGATGCCCAAGTTGATCTGATACCCCTGACGGCGCGCACGTTTGGTACGCTGGCACTACCATTGATATCG  
CAAGTGGCGGGCAAAACGCTGCGAATATATCTTCGTCAGGAATTAGGCAACAATTAGGCATACTGATGACAGCCAGCT  
TGAACGATTAATGAAAAGCGGCGAGAGCGGCTTTCTCGCCCTGTTCCGCGAGTAAAACGACGACGACCATGCGTATAC  
TTATAGGTTGCTGGTGCAAAATCCAGAATTAGCGAGCTTGGTCCCGCGCTTGAAGTCTGGATGAAAAAAGCTCCCT  
GGACTTGGCTTATTCAGAGAAGCTGTCACACTTGTCTCTCCAGCCAGGCTGACACCGGGCAACTTTTAGAGCACTA  
TCGTGGTACAAAATGCTGCCACCTTTGAAAAACTGTCGATGTGGGACGATAAGCAGATAAGAATATGCTGAGCAAAA  
CCTTCCAGCTCACTCAACCATATGTTTGGATTCGCTGTTGAACTGGCGCGCAGGAAGGTTAACTCGCTGAGCGCACG  
CATGGTTAAGCAACGAAGAAGCGCTGGAGCTCTGGACATTAACCCAGGAGCTGGCGAAAAAGTGA

>Cluster\_60537

ATGGCTTTTGTATCAGAAAGAGAAATTTGAAGAAAGATATTTAGCAAAAAATTTGACTTTACGATCTTGGCATTTTTCTA  
TATTTCTCTATTTTTTTCTTTCTTTGTTAGTGGCGTTCCTTTTCAATATTTTTACCCTGCTTCCACAAAAGGTAATTTGTT  
ATGAATGCTCAATGAACTTGTATTACATAAAACAAATTTTATTTTTCACGAAACCGCATGGTACCTCATATCTGCTGTT  
GCAGTATTTATGTCATCTGTTTTTATACAGCATAGAATTAAGCTTATTTAACATTTATAGCTATTACATGGATTGTACT  
AACAAATAACAGATGTGGCTTAATACACGCTTAGACAATATAGCCATGAATAATATTTTGGTAAATATACTATAAATC  
TTTTTGGGGCGATTTTATGTCATGTTTATGTTTATCAAAATCCCTCCTTTTCCACCTTAATAAGATAAAACATATT  
CCAATGATTTTATCGGCAATGATTCATTTAGTTTCCGCAATAAATAAGCCATACTCATAACCGCTGTATATATTTAT  
GTTTGGCCCGCAGGCGGTAGAGATTGAGATGGATATCTGAAGGTTCCAGACATCGCATATGTTAGGTGTAAGAATAATG  
AGGAATCATTTGGTTTTTAAATGATAAAAAACAGACACACCAACGATCTGATGTTAATCAAAAATGGTATTGATA  
TATAATGATACACAGGTTTAAAGTGGTGTGATTTTATATTTGCTCCGGTTGTTATGCCCTTCCAGATTTACTTCGCAA  
TGTACCGCTTGTGCTAAAAAATCTTTTCTGAATGTAAGAAAGCTAGAAATCACACAGAACTTCCAATGATGGGGTTCA  
TACAAGGTGAATCCGCTGATGTGATGCCAAAGCAGCATCCAGGTTAAGTTTGGAGCAAGCAGATGATAAATTTATGCCA  
GCCCAAGTGTACTGACTCTCAATAAAATTTAAATCAAAATGCAAAATGCAAAATGATGGTTGCTTTCCGATTTGATTTA  
AACACGAATGGTATTTTACATGATTTATACATACGATAAATAAATAAATGATAAAAAATAAATAAATGAAATCATGTTG  
CACCTCTATCTAGCTTGATAAAAAATAAGAAGTGAAGTGTGAATACAGCAATATCGGATTTAACAAATACGTATAAC  
ATTAATGCAAAATTTACTTAAACGGGTTTTTACTTGTCTTAAACCCAGATGATATTTAATTTACAACAATAGCCCTCCGCT  
ACTACTCAAGACTGATTTTTGCGTTCTATAAAAAACATACAGAAAGCTTGTATAAAAAATATGATGACATAAGCAATGGAA  
AATTTACTTCACTGAGAGCAACAGGTATCTCCAGTTTGTATCAACGGGAACATTTGCTGTTAAGGCCAGAAATCGGAG  
ATTTATTTTCTGAAAGGGAGTTTGTATGGACTAGTTAAATAAAGCAAAAAATCAAAAATATATGGCACAGCAGATCTTGT  
TTTTGTTGATAACAAAGATAAATGAACCTTCGTAAAAATACTTTATTTGCAATCAAGCTAGAAAATTTTTGTTCTTCTATTA  
TGGATATATTAAGATATATATTTGGTTTGGTCTGCTACCAATTTCTATAAAAAATCATTCATTTCTTACTTTAAGAATGAT  
GTGATGAAAATTTATTTCTGTAA



>Cluster\_53932

ATGACTGATGTGGAAATTAGATAGTAATTTCTTATCGAGGAACGAGCTGATTATATTGATGAGGATACGATAAAAAATAA  
TACTATCAGATCTGGAGAGTTTTTCGATATTTATACATAATGCTCTTATATCCCGAGGCATCAAACTTATAGTTGGTCCCTA  
GGGATCTGGTAAAAACACATTTGATGCGCTTATGCTTGGGTGAAATGTA AAAACGATGATAACGACCATTACCACCTGAT  
GTTTTCTTTAAGTAAATTTAAGTTAGAGCCGTTTTAAAAATAAACCAAAATGCAATTGATCTCTTTCATAACTGGGT  
ATTAGCAAAGATACACTCTCTGCTTATGAAATGCTTTCGATATTTGAAGATTCTGAATATCTTGATTGTCAACGATAC  
TCATAGCGGATAAAGAGTTCCCTAATTAATTTAATCGTAAGGCTTGAGCAGGGTCTTTCGCCATCATTAGAACAGAAAA  
ATTTGTTCAATTGATCAGTGTTCCTTCTGTCATATCCTCGTTGAGTTCACTATGTGATTGGCTTGAACGTA AAAAGATCAT  
TATTTTATTAGACGATGCAGCAATAAGCTTAACTCCTGAAATATCTTACGAGTTTTTTGATATGTACGTAGTCTAAAA  
CCTCAAAAATAGCTTTAAAGGCATCGGTTTATCCTGGAACAACCGAATATGGCCCAAGGTTTCATGTTGCTCATGATGCT  
GAAACAATTGATGCTTGGATTTCGCTACAGCACCTAATTAATCCTCAGTGATGGATGCTATAGCGCAGGCAAGGTTTCC  
TGGGTATGATGGCATTCCGGATGACTTGAAGAGTTATTTAAATTTCTCAGCATTGGTATTCACGTTCTTTTTTGATGA  
TGTTAAGAGATTATCAAAACAACTTAAGTACAGACAACCTCAGCAAAAATTTAATAAAAATAATTGAAAGGATGTTGAGCTT  
AGACTCAGCGAATACAGTTCACTAAAAGATAAGCTACCTCGATTGTTTACATTTGATTGTTTCAATTAGGTGAATCACTTTTATT  
AAAAGTAGTCAAACTTACTCAAGGAAAGTAACTCCCAATATAAAGAAAGGAAACAAAGTCAATAATCGGTATAGAGAAAAATG  
ATAATGTTTATTTTCTCGACTCACTAAGCTATTAATTTGAAACAGGGCTTTTTTATAAATCTTCCGTGATATTTCTCATGGT  
GATGGCCGCTACTTATGAAAGATATATACCTCATTTATGCTTTTTTATAAAGGAAAGAGTGTTTAACGAGGAAAGTAGAGG  
TTTTTCTCCTTCTCAGATTATTTCAAAAATACTAAGAAAGATGCTAAGCATCTGTGCAAGAAACATTTTCATCATTAT  
TCAATGCTGAGCAACTTGGGAGACTTAACTAATCTTACTCCATGCAATAACTGCAAGACTCCCGGATTTGACTGACAAT  
CAAAAATTTTGGCATTCTTGGGAATCAATGATTGATGAGTGGCTATAAATCAGTGCATGCTATTTCCACTGTCAAAA  
AGTACACATCTAACACTTGGCAAATGCAAAAATACTGGGCTGGA AAAAGTAAAAACTATAGGAGATGTTTCTCTT  
TACAAGACCTGGGAGTGAAGTAAAGAAAATTCACAGAATAGGACCCAAAATTTGCCAATAAAAATATGGACAAAAGTGTTA  
TTACATGTTGAAGAGTTTTTGTCTTAA

>Cluster\_29972

ATGGAAAATAAGAAACAAGCTAAAGCGTGGGCTAAGTACCCGACACATACGCTTTATGGCACTGGGTTCCAGCAATTGGCAC  
CGGGCTGTTTTACGGTTCGGCAGATGCCATCAAAATGGCCGGTCCAAGCGTGTGTTGGCCTATATTATCGGTTGGTATCG  
CGGCGTATATCATTATGCGTGGCTGGGGGAAATGTCGGTACATAACCCGGCAGCCAGCTCTTCTCGCGTTATGGCAG  
GAAAACCTCGGCCCGCTGGCAGGTTACATTAACCGGTGACCTACTGCTTTGAAATCCTTATTGTCGCCATCGCGGATGT  
GACCGCTTTTGGTATCTATATGGGTGCTGGTTCCCGACGGTGGCAGCTGGATTGGGTACTGAGTGTGGTGTGATCA  
TTTTGCGCGTAAACCTGATGAGCGTGAAGGTATTCGGTGGCTGGAGTTCTGGTTCTCGTCTTTAAAGTTCGCCACTATC  
ATCATCATGATTGTCGCCGTTTCGGCATCATCTGTTGGGATTTGGCAACGGCGGGCAACCGACCGGTATTCATAACCT  
GTGGAGCAACGGCGCTTCTTACGTAACGGCTGGCTTGGTATGGTGTGATGCTGTTGCAAAATGGTGTGTTGCTTACGGT  
GGATCGAAAATATCGGGATTACCGCGGTGAAGCGAAAGATCTGAGAAATCGATTCCGCGTGGCATTAACTCCGTGCCG  
ATGCGTATCTGGTGTCTTACGTCGGTACGCTGTTCTGATTTATGTTCTATCTACCCGTGGAATCAGGTTGGCACTGCCG  
TAGCCCGTTCGTTGCTGACGTTCCAGCATATGGGCATTACCTTTGCCCGCAGACTTCTTAACTTTGTTGTTGCTGACCGCT  
CGCTGTCGCAAAATAACAGTACGTTTGGTGTAGGCGTGGCTTGGTATGGTGTGATGCTGTTGCAAAATGGTGTGTTGCTTACGGT  
GGATCGAAAATATCGGGATTACCGCGGTGAAGCGAAAGATCTGAGAAATCGATTCCGCGTGGCATTAACTCCGTGCCG  
ATGCGTATCTGGTGTCTTACGTCGGTACGCTGTTCTGATTTATGTTCTATCTACCCGTGGAATCAGGTTGGCACTGCCG  
TAGCCCGTTCGTTGCTGACGTTCCAGCATATGGGCATTACCTTTGCCCGCAGACTTCTTAACTTTGTTGTTGCTGACCGCT  
CGCTGTCGCAAAATAACAGTACGTTTGGTGTAGGCGTGGCTTGGTATGGTGTGATGCTGTTGCAAAATGGTGTGTTGCTTACGGT  
ATTTTCAGCAAAACCTCGCGTGGGTTTCCGTTGGTGTGCTGGTGTGATGACTACCGCGTGTGTTGCGGTGTA  
TCTGAACATCATGATGCCGGAACGCTTCTTCCGTTGATGCTTCCGTTGGCAACCTTCCGACCGGTGTGGGTGTGATTA  
TGATCTGCTGTGCGAAATCGCCTTCCGTCGCGTTTGGCCGAGAAGAAGTTAAGCGCTGAAATTTAAGATGCCGGGT  
GGGTAGCAACGACCACTGGCGGTTGATTTTCTGCTTTTATTTAATTCGGGTTGATTGGTTATCACCTGTATACCGTAT  
CTCGTGTATGTTGGTTTTCCGCTGGATTGTTGTGCTGTTGATTGGCTGGATGTTAAGCGCCGCCAGATCGTCACTGG  
CTGAAAACCGATA

>Cluster\_38938

ATGGACATGATTAACATCGGCTACAGCGCGCTCAACCGCGCAGGTGGAGTGAACGTCACGGCGCAAAAACACCGCTAA  
CGCATGACCACGGGCTACACCGCTCAGGTGGCGGAGATCAGCACCATCGGTGCCAGCGCGGTTCCGCGAACAGCGCCG  
GTAACGGCGTGCAGGTGATAGCATTCCGCGCTCTCAACAGTATCAGGTGAATCAGGTGTGGTATGCCCGCAGCGAT  
TACGGCTATTACAGCACCCCAACAGGGTATCTCACAACACTGGAAGCGGTACTGAGCGACGATAACAGCAGCTGAGCGG  
CGGCTTCGATAACTTTTTCGCTGCCCTTAAAGCAAGCGACACCAGCCCGATGATCCGCCCTGCGCGAGCAGGTGATCA  
GCGAAGCCGGGCGCTGCTTGGCAGTACGACAACAGCTGGATTACATCGACTCGCAAAAGCAGGAAATCATCAGTCA  
CAGCAGGCGATGTTATCGCAAAATCAATACGCTGACCAGCGGCAATCGCCAGCTATAACAGCAAAATCGCTCAGGCGGA  
CAACGGCGATAACGCCCTCCGCGCTGTACGACGCGCCGATCAGATGTTGGAAGAACTGAGCGGAATGATGGACGTGACG  
TCAATGTTGACGACAGGGAACATAACGCTACCCCTGAAAACGGTTCAGCCGCTGGTGTGAGCGGGCAGCAAGCTCGACC  
ATCGCGCTGGAACCAACGCCGATGGTACAGCAAGTATGACGCTGACCTTCCGCGGAACCATCTCGACATGACCACCGA  
CACTGGCGGTTCTATTAGGCGACTGTTTATTATCAAAACGATGTGCTGACCGCTGACCGACCATCAACAGCATGG  
CGTCCAGTTTCGCGGATGCGGTTCAACAACAGCTGGCGCAGGGCTACGATCTCAACGGTAAACCCGGCAGCCACTGTTT  
ATTTATGACGCCAGCAATGCCGACGGCCACTGACCGTTAACCAGGATATCACGCGGATGAGCTGGCGTTTTCCAGTTC  
ACGGGATGAAAGCGGCAACAGCGCAACCTGACGGCGCTGATCAATATCTCCACCGAACCCTGGAAATAGCCAACTCG  
GCAGCTGACGCTAGGCGAGGCTGCTCAATCATCAGCAATATCGGCATTTACGTGACGAAAACAGCAGCGGAAGT  
GATGCCGCTCAATGCTTATTCGAAGCGAAAACAGCAGAGCAGCGTACGCGCGTACGATGGACGAAAGCGGCT  
GAACCTGATCACCTATCAACAAATTTATGAAGTAACTGAAAGTCAATTCGCGCGGGCCGAGATTTTCGATTGGTGTG  
TGGAAATGTGACGATA

>Cluster\_48848

ATGCGACTGAAACCGCTTTGCTGGCGTTTACGCTGGGCTGTATAGTGCAGGAACGGCACAGGCCGGGCTGCAGGATGA  
CATGAATTCGTTTTTCAACAATATGAGTTATGCGAGTAACTCCACCTCGCGGAAAGCCGTCGGCAGGACAGGCGCACGCT  
ATGTAACCGCGGTTCTGTTCTATGCCCGCACAGGAAACAAAATAATCCAGTGTATCCATCAGCCTGCCCTCCATCAAC  
GCCGATGTGGCGGATGATGCTATCTTGGATCTTCTTCTTATTAACTCCGACAGATTATGGCTTTGTGAAACA  
GACGATGGCAACCGCGCGGGTACTTTTTGACCTTGCAGTGGAAACTACCGTGGCTGAGCTGAAAGCGGCAAAAGACT  
TCTGACAGAGATGGCTGCTGACCTTAAACCGTTTCAATATGTCAGCTGCCAGCGGCAAAAGCGATGTTGACAGCGT  
CGCTCACTGTGGGGGAAAGTACGACGAAAGCTGCGAGTCTGTCGCGGTCAGAAATACGTTCTCGGACTGGGCTC  
ATCCCTCAGGTTTGCACATCCGCGGGAATACGAAAGCGCTCAGAAACAAGGCCACCGCGCAGAAAAGAACAGGTTCC  
TGAAGGATATTAACCTGATGTTGGATGCTCTCAGCAACAGTACGCTCAGCAGCAATGCAGAGCTGCGCAGTTTGCATG  
AGCATCAGCGGTTCCGTTGATTTTCCGCGATAACGGAGAATGCGTATCTGTCTTCACTGGCGTCAGACCGCAGTCTGCT  
GAGTGGATGATGAGTGGTGGCAGCGCAAAGTGTACGCTGTGATAACAGAAACAAGTGTCTGTCAACCTCCCTGAATA  
ACGTGACCATTTTCAGGCTCAAAAGTCTGTTGATCCGATGTTAGAGGACAGCTGACAAGCATAGAAAATAAAGCCATCACG  
GACACACCGTTGACGGATAAAGAGAAGCAGTTTCAACAGCACCTCCATCCCATCTGTCATGGATAGTGGACAGT  
ATCACTGACGCTCTCGAGTCTCTGTTTGGCCAGCTGACCGGATTTACATCGCGCTGACATTTTACCTGCAATCTGGAGG  
CCGTATGAAGTGGTTAATGGCTCAGCTGGCCAAAGACTATCCGGGTGCCAATGAAATGAATGAACTGAAAATGGCCCTG  
GCAGATGCACCGAGGCTCTCAACTCACTGCGAATGGAGTTTCAAGTAAAGAAAATGCGCTTATTTCCGACAAACAGCA  
AATCCGCTTATCCGCCAGCAGCTCTCTCAAAAGTACGCGATCGGCTGCTGGTTAATACCAGTTTACGAGAGTGAAT

AA

>Cluster\_38517

ATGCTTTCCACATCACAATTAATAATTTGTCAGGGACTGCCTGTTCATATATTACTGAAACACCTGCAAGCTTTAAAGTGA  
AATTTACGTCCTCCGGCAACTGGAAGATGCACGGGAAAGTGGTGTCTGCATATAAAAAATTTGTGACATGGAGTTCTTGCCTC  
ATTTACGGGAAGAATCACAGCGATAACAATAGAGAACGTGAATAAGCTGACCCGCTTACAGGGTACCAGGTCATATA  
AAAAGCCTGTCCGTTATTAATTTGTGAGAATCTGAAAGTCACTGAACTGCCGCCGACAGTAAGAGAGCTACATATTGAATT  
GAATAATTCGTCTTTTGTACATACTGTTCCAGAGGGCGTTGAGCATTTGAAACTTGGTCACTGTCAGGTTACGGGTGTGC  
CTGATAGTGTCCGGTCTCTTGTAGTTGACGGGTAGGGCTGCGGAGACGCTTACCAGGCTACCATCAGGGTTGTGTTCTCTG  
AGTATCCGGGATTAACCCGAGTATCAGGTCAGAATCGATAATTTTATATCCCTTCACTGCAGACGTTGTCTCTGAC  
GGGTTGCAGTAATATCGTGTGCGGAAAACTCCCAAAGGGATGGTGTGAGCAACCATTTATACAGAGCAGAAAACGA  
CATGGAACATCGTTGCTGAAGGATTTCCCGAAGAGATGGATCTTGATTACAGAAATGTACAGCTTCTCCAGATGTGATT  
AAGAAAAAATAATTTACTTTTACAGGCTATGCCATGGAGGGCGCTTACATTTTCTGCTAGGGGATATTGTGTATGGGCT  
TTCGGAACCCAGAGGAAAGTTGTTAATAACAATAAAACTGGTTAATGATTTTTCTAAAAAAGATATTTAATACAGAATA  
CGTTAACAAGTGTGTATGGGATTAATAATCTCTCGGAAATATAAGAAAGACGCTCTTATCAAGAGAGCATTAAGTGAG  
TCTGATAGAGGAATTAACTTAAGCAGTATTGGAAGAACCATAGTCAATATAAATGTCACTATGCCGATCTTTCTGTGTG  
TAATCGTGACAAGTTATGGGCAAAAACAGTAAGGCTGGCTGGAGTTTCAAGTTATTAGTAAGGAACAAAATGGTGCATT  
TTTTGTGCGGATTAACCCGAGTATCTAAAAAATATAGCCAAATAAGGGGATGCTTATGGGCAAGATTTACAGCAGT  
GAGTTGCGATGGAATTTATCGTAATCAGGATAATGAGCAGATAATGAAAAATATAAAGTTTATCTACGTGGGAAAGAAGT  
TCCGGCAGAGAAAATTTTAGGCATGCCAGAATGGAAGATTATCATCCGAAACGTTCTGGATTGATATCTGAATACTCTA  
AATAA

>Cluster\_27472

ATGAATCAACAGGATATTGAACAGGTGGTGAAGCGGTACTGCTGAAAATGCAAAGCAGTGACACGCCGCCGCCGCCGT  
TCATGAGATGGGCGTTTTTCGCGTCCCTGGATGACGCGGTTGCGCGCAGCCAAAGTCGCCAGCAAGGGTTAAAAAGCGTGG  
CAATGCGCCAGTTAGCCATTTGCTGCCATTCGTGAAGCAGCGGAAACACCGCCAGAGATTTAGCGGAACCTGCGCTCAGT  
GAAACCGGCATGGGGCGGTTGAAGATAAATTTGCCAAAAACGTCGCTCAGGCGCGGCGCACACCAGGCGTTGAGTGCCT  
CTCTCCGCAAGTGTGACTGCGGCAACGGCCTGACCTTAATGAAAACGCACCTGGGGCGTGGTGGCTTCGCTGACCG  
CTTCCACTAACCCGGCGGCAACCGTAATTAACAACGCCATCAGCCTGATTGCCGCGGGCAACAGCGTCATTTTTGCCCGC  
CATCCGCGCCGTAACCAAGTCTCCAGCGGGCATTACGCTCAACAGCGGATTGTTGCCGCGAGGCGGCAAAA  
CTTACTGGTTACCGTAGCAAAATCCGGATATCGAAACCGCGCAACGCTTGTCAAGTTTCCGGGTATCGGCCTGCTGGTGG  
TGACCGCGCGGCAAGCGGTAGTGAAGCGCGGCTAAACACACCAATAAACGTCGATGCGCGCAGGCGCTGGCAACCCG  
CCGGTAGTGGTGGATGAACCCGCGACCTCGCCCGTGTGCTCAGTCCATCGTCAAAGGCGCGTCTTTGATAAACAACAT  
CATTTGTGCGCCAGAAAAGGTACTGATTTTGTGATAGCGTAGCCGATGAACGATGCGCTCTGATGGAAGGCCAGCATG  
CGGTGAAACTGACCCGAGAGCAGGCGCAGCAACTGCAACCGGTGTGCTGAAAAATATCGACGAGCGCGGAAAGGCACC  
GTCAGCCGTGACTGGGTTGGTCCGATGCGCGCAAAATCGCGCGGCAATCGGCCCTTAAAGTTCCGGAACAAACCGGACT  
GCTGTTGTAGAAACCCGAGAACATCCGTTTGGCGTACCGAACTGATGATGCGCGTGTGCCCGTGTGCCCGTGTGCCGCTG  
CCAACTGCGCGGATGCCATTTGCGCTGGCGGTGAAACTGGAAGCGGTTGCCACCACCGCGGCAATGCAATGCCGCAAT  
ATCGAAAACATGAACAGATGGCGAACGCCATTGATACCAGCATTTTCGTTAAGAACGACCGTGTATTGCCGGGCTGGG  
GCTGGGCGGGGAAGGCTGGACCACCATGACCATCACCAGCCAAACCGTGAAGGGGTAACCAGCGCGCGGACGTTTGTCC  
GCTGCGTGTGATTTAGTGCATGCGTTTCGCATTTGTTAA

>Cluster\_22950

ATGACAGGGCGTTGCTTTTTCGCGTCTCAGGCGAGAAGCCGTTCTTATTACCGGACAATGAAGGGGTAAGATGAACAC  
TTCACCGGTGCGAATGGATGATTACCACCTAACCGTTTTTCACTGCGCATTTGCTGCGCTCACTTTCGCGCACACCTGA  
CCGACGGTTATGTTCTCGCGCTCATTTGGTTACGCCATTATCAGTTACGCCGCCATGCAACTGACCGCGGTTATGGCG  
GGAATGATCGGCGGCTCGGCGTTACTTGGTTTGTCTTGGCAGCCTGGTTTTGGGGTGGATCCTCCGACCATATCGGGCG  
GCAAAAAATCTTACCTTCACTTTATGCTGATACGCTCGCTTCGTTCTTGCATTTTTCGCCACCAGCCAGAGCATC  
TTATTTGGATTGCGCATTTTATCGGCATTTGGTCTGGGAGGCGATTACTCAGTCGGTCAACCTTGCTGGCTGAATTTTCC  
CCGCGCCGCTACGCGGTTATTTGCTGGCGCATTCAGTGTGGTGGTGGACCGTAGGCTATGTGCTGGCAAGTATTGCGG  
ACATCACTTTATTTCCGAAAGCCCGAGGCTGGCGTGGCTGCTGGCATCAGCGCGTTACCAGCCTTGCTGATTACGC  
TGTACGTTGGGGCAGCCGGAATCGCCAGCTGGCTACTGCGCCAGGGCGTTTTGCGAGAAGCTCACGCTATCGTTCAT  
CGCTATTTGGCCCGCATTTTACTGGCGATGAAGTGGCAACCGCGACCCATAAACACATCAAACCTTGTCTCTTCTC  
GCGTACTGGCGCGCACGCGTTAACAAGCCTTCTTGTGCTGCTCGTAATCCCATGGTTTGTGATTTTATACCTTGC  
TGCCGACCATCGCCAAACTATTGGTCTGGAAGATGCGCTGACTGCCAGCCTGATGCTTAATGCGTTGTTAATTTGGC  
GCGTTATTTAGGGTTAGTGTGACCCACTTGTTAGCGCATCGCAGATTTTACTGGGAAGTTTTTGTCTGCTGGCGGCAAC  
GCTGGTAGTATGGCTGTTTGCCTTCCGGCAGTTCATTAACGCTGCTGCTTTTTGTTCTCTTACGACCCACCATTTCCGG  
CAGTCAGTAATCTGGTGGGCAATTTGCTTCCGGAAAGTTTTCTACTGACATTCGCTCGTGGCGCTGGTTTTCCACC  
GCCATGAGTGGTTGGGCGGCGAGTAAGTACGGGCTGCTGCGTGGTGTGGCGAGTGGGAATGCAAGTACCTT  
ATTTGCTCTGGCGCAGTGTGTTGGTTGGTTTTGTGCTGACCTGGCTATGGGCACCAGAAACCAAAGCACTCCCGCTGG  
TGGCGCGGAAATGCAAGAGTGGCAATGAACATTTCTGTTAGCGTTTTAA

>Cluster\_39394

ATGCAAAATCGTCTGTGTCGATATTGGATCGACGTGGACAAAGCAGCCCTCTTCGCCCGGGAGGGGACGCGTTAACGTT  
GGTTAACACAGTACTGACCCCAACCACCACCATCATCTGGCGAAGGGGTTTTTCTCCAGCCTGAACCTGGTGTAAACG  
TAGATAATGCCCTCCCTGTTTAAACAACGGTGGGTTAGGATTAAGATATTCCTCCTTGCCAAAGGTGGGCTGGCGGTT  
GCCGCAATGGGGTTGGTGCCTTCTATCACCTGGAACCCGGAAGTAACCGCTCACTCTGCGGGGGTAAAAATTGCGCA  
ATATTAATCTTACAGCTGAACCGCCTGATATCCAGGCACTGGAAGAAACGACGCCGATATCTCTTGTTCACCGGCG  
GCACCGAGCGGGGAGAAAGCTACGGCCTGAATAACGCCCGTGTGCTGGCAGAATCAAACCTGACTGCGCATTAAT  
TATGCCGGAAACCGGATATTACAGGACGAGGTGACGAGATCCTAGGCATAAAGACCTGACCATCGTCGACAACCTTCT  
GCCCGATCTTGACCATCCGAACCTTTAGTGCACGCCAGGCTATCTGCGACATAATCCTTAAACGCATCGTTAAAGGGA  
AAGGGCTGGATGTCGTTGATAAAACAGGCGAAGAACCAATGCCGACACCGTGGACAGTCTTTGAACTGGTTAAGGCA  
ATCAGTAATGTCGATCACAGCTGGAAGAGTTTCACTGATCGACATGGTGGCGCAACCACCGATGTCATATTTCCGCTG  
TGCCAACACGCTCTCGCCGACACCGTTTTTACACGCGTACCGGAACCTTCTGGAACCGGACGTTGGAAGCGCATCTGG  
GAATGCGGCTCTCGGCAATGGTGGTGGTGAAGTGGCAAGAGTTAGTCAATGTGAATTTGCTCAGCAACCCGACAG  
CTGGACGCTTTTTATCATTAACCTCCGTCATCTAGTGCCTATCCGACTACTTACCAGGCAATGCAGAAGAAAAATTTT  
CGATAACCTCTGGCCGAGTGTGTGGGTTATGCCACCGAAAGCATGCGGGCACCAAAAAGAGGTTGCACTGCACTGCG  
TCGGCAATCTGATTTACAGATGGGAGTGCCTGACACCGTTCGTAAGCTGCTCGGATCCGCGGATGGCTCTCGGCT  
GCCAGTCACTGATATGATCACTGTTGAAATACCGGAGTTAAACGACGACGGTAACGCATTTCTTTACCGACCGA  
ATTTGAATATTACCGGATTTCCGGGGCTATTTACCACGCTGCGCAACGCTCGCCAGAGTTCATCCGCTGGCCCGCGCG  
GCACAGTATTCATGCTTAACCTATAA

>Cluster\_29155

ATGTCAACTCAGGTTATTACTTCTGAAAGTATTATTGCCAGTCCGCGGAAAGGCGATCCGCAACGCTGCTTGCAGGCT

CGAACGACTCCCTGTACCAGGCGTCTTTTAGCTATTCGTGTAGTGGTGGGTTTATCGACATTCCTTGTAGCTTACACCA  
TTATCGCGATAGCTTTTTCGCTACCGCACTCAGGAATGGGGATTAACACCAACCTTCACTCGGGCTGATCATTGCC  
GCAAGCTATGTTGGGCGCTCTGCGGCGCCTCTTTTTGGCTCTCTGGCAGAAAAATGGCCGCTATGGCGTGTGGC  
TATCACCATTGTGATGTTTCGTCGCGATGGATGCCGCTTGCCTGTTTGGCTGGAATGGAATGGTCGATTCGGTTATCCGTT  
TCCTGCAAGGATAGGAATTAACCTGAGCCGGTATTAACTCTGCGAGCTTATATCAATGAATTTATCGGAGCAAAAAAAGCT  
GGCCGCTTTTTTACTCTACGAGGTGATTTTTCCGATCGGTATGATGTTTGGCTTGTAGGCTATTTCTTGTTC  
GCTTACGGCTGGAAGTATGTTTTGATAGGCTTATCCCTTCGGCATTGACGGTTCGGTACGCTGGTAAATGCCTG  
AGTCTCCAGCTGGTTAACAGCGAAAGTGCCTATGTTAGGCTGAGAAAGTCTGTCGGCGTTGAGAAAGAAGCGCTG  
CAGCGAGGAATGGAAATTAACCTGAGCCGGTATTAACTCTGCGAGCTTGTGCAAAAAGAACCTGCAGGTGGCTAAAAAGACT  
ATTTTCCGGCATCTATAAATCACGCAGCTTTATGTTATGGGACTATGGCTGACCGTTTATACGGTGAACAATGGTATGA  
TCACCTGGTTCCCTACCATGTATAAAACGCTTTTTACTTACCCTGGAACAGTCTGGCTTATGGTGGATTAATCTCC  
TCCTGTGGAGTTTTTTCGCTCGGTAATTTGTGACTGCTTATCGATCGTATTGGAAGAAAAATGCTGGTATACCTGGCTTA  
TTTTACTGGCCATTTATCCGTTAGTGACTCTTTGTATTTTCGGAGCCAAATCTGCCATTGAAATCTTATTTTCGGTAGTA  
TGACGTATGCCATTCTCCAGACCATGCTTCTCTCTTTATCTCTACTCTGCAGAGCTATACCCACTCGCTGAGAGCG  
ATTTGGAACGGCATTTTCCAGTGCCTGGTTCGGGCTGGCTCTTCCGTTGGACCTTGTGGTGGGATTATGTTTCTGG  
TTTTGGGATCCGCTTTGTTTTATTGTGTTCCGAGTCACTCGGTTAATAGGCGCCTGGTTACCTATTTGTTCCGTATTG  
AAACGAAGGAAAAATCACTGGAAGAGCTTTCGCCGTAG

>Cluster\_63315

ATGAAAAAGACTATTTGAGAATTAGTAGTACTGTATTAGTGAGCTTATGTTTGGGCTGCTTGGTGGTGGTGAATAG  
TTGGTTTAAATCAGCCAGGCTTGAGGAAGTTGTTCCACGATCAACCTATCTGATGGTAATGATGCTTTATTTTATCG  
ATACTGTTGCATTTATTTTATGAGCTTGTATTTCATTTATGACCGTAGGCAATTTTCAAACGTATATACTTAGTTGGCT  
TTTCTGAGTGTGTTGATTTACTTTGTTAAAACGCTTATATCAATCAGCAAATATTGAGGGGCTTTGACAAGCAGTGT  
TGTCAAAAATGACATGCAATCTATTATTTGTTTCGTCAGATGAGTTTGTGCAATTAATATTTTCGGCATTGGTGAATA  
AAGTAGTGAAAAACACAAAACAGCGCAATTTATTTCCAAAAAATGACTTTGTGCATAAGTTGTTTTGTTTTGGG  
GGGCCGATAGTTGCTCACATACTTCTAGTCAATATGAGAGCTACAATTTACACATGCGGAGTTAACCAATGAAATGG  
TCAGGTGGTTTTGGAAGCCTCATATGTTACCATAATGATTTTCATGTGTGTTAACCTTGTCTTCGGTAACTATACTTTA  
ATGGTTTACGCTATGATATCTGGAATGGAGTGACGGTATGCTTTTTGTGCCGCTACTGTACAATATCTCTCTGTTATTT  
ATGATAGGTATAGCGTGTCCACTGTTGGTATATTAGTCGACTATGAAAGTGTAGTAAAGTAAAGTAAAGTAAAGTAAAGT  
TATGTGCCATATAATTCAGTGGCTACGAGTAACAAGAACATTCACATCGCGATCCCTAACCAATATAATTTAACAGAA  
ATTTATTTTAAATGAACGACAGTCAATCAGCATCAGCCAAAAAAGCGCTTATTGCGTCAATGATTATGGATATCGAC  
CACTTCAAAAAGTCAACGACACCTGGGGGCTCCGGTGGCGATCAGGTGATAAAAACAGTGGTGAATATCATTGGGAA  
AAGCATACGACCATGACTTTTAGCGCGCTCGCGCGCAAGAGTTTGGCGTCTTGTGACGGACATCGATACTGAAC  
GTGCGAAAGCTTTAGCGGAAAGGATTCGGGAAATGTTGAGCGTTTAACTGGCGATAATCCTGAATACGCTATACACAA  
AAAGTACGATTAGTATTGGCGCTGTTGTGACTCAGGAAATGCGTTAAACCCGAATGAGATCTATCGACTGGCTGATAA  
CGCACTTACGAGGCGAAAGAGACCGGGCTAATAAGTGGTTGTGAGGGATGTTGGAATTTTGTGAGTACCATAA

>Cluster\_53497

ATGCCATTAATCATTATTGGCGCAGGCGTCGCGCTGCTTCTTATCCTGATGATCGGCTTAAAGTTAACGGCTTTATTGC  
CCTCGTTCTGGTAGCTGCCGTCGTCGGATTTGCCGAAGGGATGGATGCACAGGCGCTCTGCCTCTATACAAAAATGGTA  
TCGGCAGCAGCTCGCGGGCTGGCAATGATCCGCTTTGGGCGCATGTTAGGCAAGCTGATTTCTGATACGGGCGCG  
GCACAACGATATCGCCACTACGCTGATTTGCTACTTTTGGTAAAAACGCGTGCATGGGCGCTAGTATACCGGCTGCTG  
TGTGGCCTCGCCATGTTTTTGAAGTGGGTTTTGTCCGCTGCTGCGCTTGGTATTTACCATCGTGGATCATCTGGAT  
TACCCCTGTTGATGTTGGCGTACCGATGGTAGCAGCGCTCTCTGTAACCCACTGTTTTCTGCCGCCACATCCAGGCGCT  
ACTGCCATCGCACTATCTTTGAGGCTAATCTCGCAACGCTACTATAATGGATTATCATTACCATTCCGACTTAAAGT  
TGTCGAGGACCGCTGTTTTCTAAACTGCTAATCCTGTTGAGAAAGCACCACCGGAAGGCTTATTTAATCCTCATCTGT  
TTAGCGAAGAGGATGCCCTCCTTCTGGAACAGTATTTTCGCTGCGGCTGATCCCGGTCATCCGATGCTATCGCCGCG  
GTTTTGTAATACGTTACCGAAAACTAACCCGTCGCGCTCTCTTTGAAATTTGTGCGTAACCTGCGCTTGGCTGTT  
TATTCGCTTGTATTGCGATTTTACACTTTTACACTTTGCGCGCAGCTAATGAGCACCATTCGAGCAAAATCGGATATCAT  
ATTCTATAGGCGCTATCGCGATGATTTGTTTTATATCCTGCGCGCGCGGCTTTAAGCAGGTATTAGTAGATAGCGGT  
GTCGGGCAATATAATTTACACTTAAATGACCGGAACTACGCTTTTCGCGTTATTGATGTCTGGACTGTGCGCGCTGTT  
GCTATCGCTCTGGGCTGCGCACCGCTCGCGGCAATACCACCGGGTGTGGTGTGGCGATTATCAACGTTACCATG  
CCGATCCGCTTTAATGGTACTGCGCAACTGGTTCGGGCAAGCTGATCGCGTCAACGTAACAGACCTTGGCTTGGCTA  
TTTTAAAGGATTTTTAATCTGACGGTTGGTGAACGTTGCGTACCTGGACGGTATGGAACCCCTATTTCTATTATGGG  
TTTGTGGCGTGTAGCCATTAACGCCGATTGCACTGA

>Cluster\_57101

ATGCAAGCAACAGCCACAACACTCGACCAGGCAAGAATACACGCGCATCAACTCGCGTAATAAAGTCTTTGTCGCCTC  
TCTCATTGGCACAGCCATTGAGTCTTTCGACTTTTACATTTACGCCACTGCGGCGGTTATTGTTTTCGCGATATCTTCT  
TCCCGCAGGGCGATCCTACGGCAGCAACGCTACAGTCTGCTCGCCACTTCGCCATCGCTTCGTCGCGCGCCCATTTGGC  
TCTGCCCTTTTGGTCATTTTGGCGATCGGTTGGGCGTAAAGCGACCTGGTGCCTCGTTGCTAACGATGGGATTTT  
CAGCTGGTGTATTGGTCTGCTGCGGGGCTATGCCAGATTTGGTATTTTTCGCCCCGCTGCTGCTGGCGCTGGCTCGATTG  
GTCAGGCTGCGGCTTAGGCGGTGAATGGGCGCGCGCGCTGCTGGCGACTGAAAACGCCCCACCGCGCAACGTTGCA  
CTGTATGGCTCCTTTCGCGAGCTGGGCGCACCGATTTGGCTTCTCTTTGCCAATGGCACTTTCTTGTCTTTCTTGGCT  
ACTGACCGACGAGCATTATGAGCTGGGCTGGCGTGTGCTGCTGCTTATCTTCTCGCGGTGCTGGTCAATACCGCTGCT  
ATGTTTCGCGTCTGCTGATGATGTCGCCGTGTTTGGAAAGTTCGCTAAAGCGAAAAACAGGTGAAGATCCCGCTGGGT  
ACGCTGCTGACCAACATGTTTCGCGTAAACGCTACTGGGTACGTTTCAATATGCTGGCAACCTATACGCTGTTTTACATCAT  
GACGGTCTACTCTATAGCTTTAGTACCGCCGCGCGGCTGGGCTTGGCTTGGCTGCGCGTAACGAAGTGTGTTGGATGT  
TGATGATGCGAGTATTGTTGTTTTGGCTGATGGTGCAGTCTGCTGGATTTACTGGCTGATGCTTTGGTTCGCGTAAAGC  
ATGGTAATCATCACACGCTGATCATCTGTTTCGCGCTGTTTCGCTTTAAACCCACTGCTCGGTTCTGGCAACCGGATTCT  
GGTTTTGCTTCTGCTGCTGGGTTAAGTCTGATGGTCTGACCTTTCGGGCAATGGGTGCGCTGTACCAGAGCTGT  
TTCCGACAGAAGTGCCTTACACCGGAGCATGTTCTCTTCAACAGTAGCGTCGATTTCTCGGGCTTCCGTTGCGCCATAT  
ATCGACGCTGTTGTCAGACTAACTACGGCTAGGTCGGGTTATATCTGGCGGATGGCTGGCTTGGCTTGAAGTAAAT  
CGCCCTGCTGCTGACCCATGAGACGCGACATCAGTCTGTTGTA

>Cluster\_42498

ATGAAACCGTTACGTTATACAGCTTACGACTGGCGCTCGGACTGGCTTTAATGGCAAAATGCGCAGGCGAGTGACGACCAT  
TCCGTTCTGGCATTTCTATGGAAGGGAACTGGGTAAAGAGGTGGATTCTTGGCCCAACGTTTTAAACGCCGAAAAACCGG  
ATTACAAAATTTGACCGACTATAAAGGCAACTACGAACGAAATTAAGCGCGGGGATGCGGCAATTTCTGACCGGCAAC  
GCTCCGGCTATTTTGCAGTTTATGAAATTTGGCACCGCAACATGATGGCTGGAAGCCATTAAACCGGTTGATGACGTT  
ATTTAAAGAGCGAGGATTTCAATTCGATGAGTCCGAGTTTGTGCGGAGGTTTCCGTTACTACTCCGACGAAAAAGCTG  
GGCACTTACTTTCCAGCGGTTCAACAGTTTCGACCCCCGTTCTCTATTACAACAAAGACGCTTCAAGAAAGCAGGATTA  
GACCCGGAACACCGCGGAAACCTGGCAGGATCTGGCGGACTATGCCGAAAATAAAGCTCCGGCATGAAGTGGG

CTACGCCAGCGGCTGGCAGGGCTGGATCCAACTGGAAAACCTTTAGCGCCTGGAACGGTCTGCCGTTTGGCAGCAAAAACA  
ACGGTTTTTACGGGCACAGACCGGCTGCTTGAAGTTCAACAGCCGGAGCAGGTGAAACACATCGCCATGCTCGAAGAGATG  
AACAGAAGGGCGATTTACGCTACGTCGGGCGTAAGGATGAATCCACCAGAAAGTCTATAACGGTGAATGCGCGATGAC  
ACCAGCCTTCCGGTTCTTTGCAACATTCGCGAGTACGCCAAATTTAACTATGGCGTAGGCATGATGCTTTACGACG  
CCGATGCGAAAGCCGCGCAAAACGCCATTAATCGCGGAGCAGCTATGGGTAATGCAGGGTAAAGATAAAAGAAC  
TACACCGGCGTGGCGAAGTTCCCTCGACTTCCCTCGCAAAACCAGAAAACGCTGCCGAGTGGCATCAGAAAACCGGTTATCT  
ACCAATCACCAAGCGGCGTATGACCTGACCCGTCGAGCAGGGCTTTTACGAGAAAACCCAGGAGCGGATATTGCCACGC  
GTCAGATGCTGAACAAGCCACCGTTGCCGTTACCAAAAGGTTTGGCTTGGGCAACATGCCGAGATCCCGGTGATTGTG  
GATGAAGAGCTGGAGAGCGTGTGACCGTAAAGAACACCACAGCAGCGCTGGATACTGCCGTTGACGCTGGGAACCA  
GTTACTGCCCGCTTTGAGAAAATCGACGAAGTCTTAA

>Cluster\_38943

ATGATTAACCCAAGAACCATTGCGCAAGAAATGCTTATGCGGATGTCGCCACCCCAAGCGGCAAAATTTGCAGGAGAAGCA  
GAGCGAGCTGGACGCTGAAAGCAGCGGCTGGACTCGCTCAGCTCGGCGTTAAGCGATTTCCAGAGCGCGGTTGACGCGC  
TGAACAGCGATACCAGCGGCCCGGTGACTTTTGGCCACCAGCAATAATGACTCGGCGACCGTTTCCGCTAACTCGCAG  
GCACAGGGCGGAAGCTACTCGTTTTCGTTGAGCAACTGGCGCAGGGGCGAGCAAAACCGTTCAGTATGGGCGACGACAC  
CTTTTCCGCCACCGGCACTTTTGAAGTACGATGGGCGACAGCACCATTGGATATTGATCTGTCCGGCGAGATCAGAAG  
GTGACGGCAGCGTTTATCGACCGCATGGAACGTGTAATGCGATTAACGACTCTGATGACAATCCGGCGCTGCGGC  
GCACTGGTAAAACCGACGGCACCACCAGATTATGCTCACCTCCGATAGCACCGGGGCGAGAGCGGTTTTCGCTGAG  
CGTAACGGGCGATGACGGCAGCAACGATAGCACCGCGCCGCTTGGCACGGATGTTTCCCTCCGCTCAGGACCGGATTA  
TTCACTCCGTCAGGCGCAGGGCTGAGATCACAACAGCAATAACATTTGCTGATGATCAGGCGCTCACCATG  
ACTTTTACGAAAGTACGCGATTCTGACAGCGATCTCACACCTTAAACATCAGCGAAGATTCCAGCGCCAGCGAGGAA  
AGTACAGACCTTTGTTGATGCTTATAACACCTTGATTGATACGGTTGATTCGTTGACCACCCAGGTGATGACAGTACCA  
GCGCCGGGTTATTTGCGGGTACGCGGACTCAGCTCAGTGGGAAACAGCTCGATGATATCGCCATGCCAGTACAAC  
GGGTTGCTGATTTGACTATGGCATACGCTTGTATTCACGGCCACTTACAGATTGACTCCGACCGATTACAGCA  
AATGGCGAAAATCTGACGGTCTGACTTCTATTTTGGTGGGACAAACGATGGTGGCACAGATGGACGACCTGATTA  
ACACCTACAGGACTCCAGCAACGGCATCATCACCTGCGCCAGCAGAACATTGACGATCAGATGAGCAAAAATTCAGGAC  
GAAGGCGATCAGCTTACTGATACCTATAACGCCAACTACGACCGTTATCTGGAGGAGTACACCAACACGCTGGTCCGAGGT  
GTACACCATGAAAGCCAGCATGGCGGCATTCGCGTAA

>Cluster\_31946

ATGAGCCAGAAAACCTGTTTACAAAGTCTGCTCTCGCAGTTCGAGTGGCAGCTTATCTCCACCAGGCTGGTCCGCGAG  
CTTTCAGTTAAACGAATTTTCTCTGCGCTGGGCCGGGCTTATTCAGGGGAAGGTGCAATGCGGATGATGCAGGTA  
ACGTTAGCCGTAACCCCGCATTGATTACCATGTTTACCGCCGACATTTTCTGCGGGTGCAGGTTTATATTGATCCGGAT  
GTAGATATTACGGACATTTCTGATTTAACCGGTCAGAGTGCAAAATGCTAAAAATATCGCACCGACAGCATGGGTACCTAA  
CCTGCACCTTGTGCGCTTATTAACGATCAGTTTGGTGGGAGCGTCAATAACTTCCAACTATGGCCGCGTACCGAAAT  
TTACCGACAACACTCGCTGGTATCTATGGCGGTAACCCGACTGCAAAACAACTCAACCTTAACTTACCGGGGCTTAT  
GCTTTAACCAATAGCTGGAGTTTGGTCTTGGTCTTGGTATTCGAGTTTATGCAAGGCAAAAATTTGAGCGTTACGCGGTT  
GCTGGGCCATTGTTGCTCAACAGTTGATTGCCAAGGGTGTACCCGCTTCATTAACCTAATGGTATTAATACTCCGACT  
CTCAAAATGCTCATCTGAAAGGTGACGAATGGGGCTTTGGCTGGAACCGGGTATTTCTTATGAACTGGATAAAGATAAC  
CGTTGGGGGTGACATCTGAGAACTTAAATCGACTTCGATGGGATTAACAAAGTCCATTAACCAAACTGAA  
CAATATTTGGGTAACATGGGCTTACCGTATGGCAGCATGGGGCAACCCAAATGGATCCTTAAACGCTGAACTGCCTG  
AGATGTGGGAGATTTCTGTTTATAACCGTGTGGCGCGAGTGGGCAATTCACATACAGATGGCTTATACCAGTTGGAGC  
CAGTTCAGGAATGAAAGCGAAAGCGGATAGTGGTCAAGCTGTTCTATAAAGATGAAAGATTCCGGGACCGGATTCG  
TATCGCGTTGGTCAACACTACTATTATGATAAAAACCTGGACCTCCGTTACCGGATTCGCTTATGACGACAGCCGGTT  
CGGCGATAAACGTTCTATTTCCATCTGACAGGATCGTTTGGTAAAGTCTGGGTTAACCTACGCATTTAATGAA  
GATGCATCCATTGACGTTGGCGCATCTTATATGATGATGGTCAGAAAGTGAATTCACCGAAGGTGAAGGAGCGGACGCTTA  
TTCCTTCGAGTCTGAAGGTAAAGCTGGCTGTTCCGGTACTAACCTTAACTACGCGTTCTGA

>Cluster\_36453

ATGATCTTCTGACTGGCCGTGGCGTCACTGGCGGCAAGTGCAGGGGAGAAACCATCGCCTTACGCTTAAATGACGAGCA  
ACTCAACTGGCGGAGCTTTGTGCTCGCGTCGATGAATTAGCCGCCGATTTGCGGTCAGGGGGTGGTTGAGGGCAGCG  
CCGTGATGTTCCGGGCGTGAATACCGCAACCGTGTCTGCGCTGGCTGGCGTTACTGCAATGCGGGGCGCGGGTGTG  
CCTGTAAACCTCAGCTGCGCAACCGTTGCTTGAAGAATTGCTGCCCAATCTGACGCTGCAATTTGCTGGTGGCGGA  
TGGGGAACACGCTTCCGGCATTAACGTCGCTGCACATTCAGCTGGTTGAAGGCGCACATGCCGCTACGTGGCAGCCGA  
CGGCTCTGTGCTCAATGACGTTGACCTCGGGTCTACCGGTTTCCGAAAGCCGCTGTCCATACTTATCAGGCCATCTT  
GCCAGTCGCAAGGTGATGATCGCTGATTCGTTTGGCGATCAGCATGATGGTGTCTCTTTACCCTGTTTACGTT  
CTCCGGTCCGGAATTTATGTTGGCGCTGGTATACGCTGCTGCGGATGACGGTACGTTGATAAACAGCCATGAA  
TGCTGGCAGGCTGTACTCAGCTTCACTGGTGCACAACAACCTGCGGCTTGTGTTAACCCTAGTTCCGTTTCCCTG  
AAAGCGGTTACTTGGCGGCGGGCTATCCCGTTCGAGTTGACGGAACAGGCGCGGAGCAGGGGATTCGTTGCTTTT  
CGGTTAGGTTGACGAGTTTGCCTCCAGGTTGTGTCGAAAGAAGCCGACCGCTGGCAGACGTTGTTCCCGCTGC  
CGGTCGGGAAGTGAATAATCGTTAATAATGAAGTGTGGCTGCGGGCTGCCAGTATGGCAGAAAGTTACTGGCTAACGGG  
CAACTGGTTTACGTTAATGACGAAGGCTGGTACGCTACGCGGATCGCGGTGAGATGCATAATGGCAAGCTGACCAT  
TGTCGGACGTTTAGACAATCTATCTTACGTTGGCGGAGAGGGTATTCAGCCGGAAGAAGTTCGAGCGGTAATGCTGCAC  
ATCCTGCGGTTTTGCAAGGTTTATCGTCCCGTTGCCGACAAGGAGTTTGGTATCGACCGGTTGGCGGTGATGGAGTAT  
GACCAGGAGCGTTGATCTTAGTGAATGGGTGAAAGATAAGCTGGCCGTTTTTCAACAACCGGTTGCGCTGGCTAACTCT  
GCCGCGGAGCTGAAAACCGCGGTTATTAATAATTCACGTCAGCGCTAAAAGAGTGGGTGCAACGTCAGCAATAA

>Cluster\_22517

ATGAGCCAGAAAACCTGTTTACAAAGTCTGCTCTCGCAGTTCGAGTGGCAGCTTATCTCCACCAGGCTGGTCCGCGAG  
CTTTCAGTTAAACGAATTTTCTCTGCGCTGGGCCGGGCTTATTCAGGGGAAGGTGCAATGCGGATGATGCAGGTA  
ACGTTAGCCGTAACCCCGCATTGATTACCATGTTTACCGCCGACATTTTCTGCGGGTGCAGGTTTATATTGATCCGGAT  
GTAATATCAGCGGAACGCTTCCGTCGTTGCTGAGCTGAAAGCCGATAAATCAGGCTACGGCATGGGTTCCGAACAT  
GCACCTTGTGACCGGATTAACGCAAAATTTGGTGGGCGCTTCTATTAACCTAACTATGGTCTGGCAACAGCTTTA  
ACGATACTTATGACAGGCGGTTCTGTGCGTGGTACAACCGACCTTGAACCATGAACCTGAACCTAAGCGGTGCGTATCGC  
TTAAATAATGATGAGGCTTTGGTCTTGGTTTCAACGCGTCTACGCTCGCGGAAAATTTGAACGTTTTCGACGGCATCT  
GGGCGAGCTGGTTGCGGTCAGATTAATGCAATCTCTGCTGGCAAACTCAGCAAGGGCAAGCATGGCAGCTACCGCA  
ACGGTATCGACAGTAAATACCAAAATCGCTCATCTGAACCGGTAACCAAGTGGGTTTTTGGCTGGAACCGGAACTCTGTAT  
GAACGATAAAAATAACCGCTATGACGCTACCGTCTGAAAGTGAATTTGACTTCAAAGGTAACCTACAGCAGCGA  
TCTTAATCGTGCATTTAATAACTACGGTTTGCATTTACCCTACCGGACAGGTTGGCGCAACGACGCTCAGTTATCTGACG  
TGAACCTGCATGAAATGCGGAAGTGTGGGTTAACAACCTGTTGCTCCGACGAGTGGGCAATTCATATAGCTGGCTTAC  
ACCAGCTGGAGTCAAGTCCAGCAGCTGAAAGCGACCTCAACGAGTGGCGACAGCTGTTCAGAAAATGAAGGCTTTAA  
AGATGCTTACCGCATCGGTTGGGTACCACTTATTACTACGATGATAACTGGACCTTCCGTACCGGATCGCTTTGATG

ACAGCCAGTTCGGGCACAGAATCGTTCATCTCCATTCCGGACCAGGACCGTTTCTGGCTGAGTGCAGGTACGACTTAC  
GCATTTAATAAAGATGCTTCAGTCGACGTTGGTGTTCCTTATATGACAGGTCAGAGCGTGAATAAATAACGAAGGCCATA  
TCAGTTCGAGTCTGAAGGTAAGCCTGGCTGTTCCGGTACTAACTTAACTACGCGTTCGA  
>Cluster\_22972  
ATGACGACACAATCCAGTCTGTATTACTGATATGAAAGTCATTCGGTTCGCGGACATGACAGCATGTTGCTTAATAT  
TGGTGGTGACATAAACGCATATTTACCCGCAATATTGTGGTACTCACCGATAATGCCGGGCATACCGGCATTGGTGAAG  
CGCCGGGGGAGAGGTGATTTATCAAACACTGGTCGAGGCTATTCGGATGGTGTGGGCCAGGAAGTTGCGCGCTGAAT  
AAAGTGGTTCAGCAGGTGCATAAAGGTAATCAGGCAGCCGATTTTGATACCTTCGGCAAAGGTGCCTGGACTTTGAATT  
GCCGCTTAATGCCGTGGCGGCTGGAAGCCGCTTTGGCTTTCAGCTGTTAGGTACAGCGCTGAATGTTCCGGTTCGGAAC  
TGTTAGGGCCAGGCAAGCAACGTGATGCTATTACCGTTCGCTGTTATCTGTTTTATATCGGTGATCGGACAAAACCGAT  
CTTCTTATCTGGAAAATACGCCGGCAACCATGAGTGTATCAGTTGCGGCATCAGAAAGCGATGAACAGCGAAGCCGT  
TGTGCGCTGCGCGAAGCCTCACAGGATCGCTATGGCTTTAAAGATTTCAAACTTAAGGGTGGCGTGTACCTGGCGAGC  
AAGAAATCGACACTGTTCTGTGCATTTGAAGAAACCTCCCTGATGCGCGGATTACCGTGTATCCCAATGGCTGGCTG  
CTTGATGAAGCCATTTCTCTGTGCAAGGGCTGAATGATGTTCTTACCTATGCGGAAGACCCGTGGCGCTGAGCAGGG  
TTTTCTCCGCTCGTGAAGTATGCGGAGTTTCGACGGGCGACCGGCTTCCCGTCGCGACCAACATGATCGCCACCACT  
GGCGCAAAATGGTCACTGCGGTGATGCTCAATGCGGTAGATATCCACTTGGCGATCCGCACTTCTGGACGCTTTCCGGT  
CGACTCCGCGTGGCGCAACTTTGCGAGCTGGGGCTGACCTGGGGCTGCCATTCAATAACCACTTGTGATATCTCTCT  
GGCGATGTTTACCATGTGGCGCGGGCACCCGGTAATCTACCGTATCGATACCACTGGATTTGGCAGGAGGGCG  
ATTTCTCGTCTGACAAAAATCCGCTGGAGATTAATAACGGAAAAATTCGCGTCTGATGCGCCCGGTCTGGCGTGGAA  
CTGGACTGGGAACAGTCAAAAAGGCACATGAGGCCATAAACGCTGCTGCGGTGGCGGTAAACGACGCGAGGCCGAT  
GCAGTACCTGATCCCGGCTGGACCTTTGACCCGTAACGCTCCCGTTTTTCGGCTCATGTA  
>Cluster\_36792  
ATGGCCAAAAATATGCGCGCTGGCACGCTCGGTGATAGCGGCACCTGGGCGCGTGGATAACATCTCGCGGTCACGCA  
CTGTATGACGCGGTTGCGTGGTATCAAGATGATGCGACTTATCGACAGCCGCGTAAAAAACCATCCCGCGCGTGC  
TCGGCGTGGTACGTAGTGACAACAGTGTACAGGTGATTATCGGCAATACCGTTTACAAAGCCTTTAGGAAGTTCGTCAGC  
CTGCTGCCGGGAGATATGACGCCGACAGCCGTTGGTAAACCCAAACTCACGCTACGCTCGCATTTGGTGGCGGATCCT  
CGATGCGTGTATCGGCACCATGTACCGCTGATCCCGCGGATTTATCGGCGGATCGATGGTCAAACCTGCTGGCAATGATCC  
TCGAGATGACGCGGCTGCTGACAAAAGGATCGCGGACCTTAAACCATTCGAATGTGATGGTGGCGGCTTTCTTCTCTC  
CTGCCGCTGATGGTTCGCGGCATCTGCCGCCATCAAATTTAAAACCAATATGTCGCTGGCGATTGCCATCGCGGGTGTGCT  
GGTACATCCGAGTTTATGAACTGATGCGGAAAGCGGCCAGGGTGAACATGTCGAATTTGCCCTGATTCGCGTCCACG  
CGGTGAAATACCTACACGGTATCCCGCGCTGGTGTGATGACCTGGTGCCTGCATATATCGAACGCTGGGTGGACAGC  
ATTAACCCGGCGGTGACAAAAAATCTCCCAAAACCAATGCTGATGTTGATGTTGATGCGCCACCGCTGGCAATCCGTGAT  
TGGCCGATTGGTATCTGGATCGGTAGCGCCATTTCCGGCGTGGTTTACACCATTATGTTATCTGGGCTGGCTTTCAG  
TCGCCATTTATGGCGCGCTGTGGCTCTGCTGTTAATGACCGGATGACCGCGCTTTTACGCCAACCATCATTCAGACC  
ATTTGCCGAAACCGGCAAGAAGGATGGTCAATCCGCTCAGAGATCGGCGCTAACCTGTGCTGGGCGGTTATCATCACTGGC  
AGTGGCGTGAAGAAACGAAAAACCCGAACTGCGTCAGAGCGCGCTGGCTGCGGCGGCTCAGCCATTTAGCGGGGATTT  
CCGAACCGCGGTTATATGGCGTGGCGATCCGCCGAAACGTCGCTTATCGCCAGTCTTATCAGCGGTTTTATTTGGCGC  
GCGGTTGGCGGTTATGGCGGGGCTTGGCAGCCACTCAATGGCAGCGCGGGGCTATTTACAGCGTGCAGTTCTTCGATCC  
GGCAATCCAATGAGCATGCTCTGGGTGTTCCGGCTCAGCGCTGCGCGTGGCGGTGGTGTGCTGTTTATCTCACACTGTTGC  
TCGGCTTTGAGGATATTTCTGTTGAGGAAGCGGCTGCCAGGCGCGAAAGTATCAGAGCGTACACACCGCCAGCTGCAAAA  
GAAGTAAGTCTTAATTGA  
>Cluster\_20321  
GTGTCGAACTGTCTCAATTATCTCCACAGCCGCTGTGGGATATTTTTGCCAAAACTGTTCTATCTCACCCGTCCTA  
TCATGAAGAGCAACTCGTGAATACATTGTTGGTTGGGCAAAAGAAAAGGTTTCCATGTCGAACCGGATCAGGTAGGTA  
ATATCCTGATTCGTAACCTGCTACCGCAGGATGGAATAATCGTAAACCGGCTGCTTTCAGGCCCACCTCGATATGGTGC  
CCGCAAAAAAATAACGACACCGTGCATGACTTACCAAAGATCTATCCAGCCTTATATTTGATGGCGAATGGGTTAAAGC  
ACCGGCCACACCGTGGTGGTGGGTAACCGCATTTGGTATGGCTTCTGCCTGCGGTTCTGGCTGACGAAAACCTGGTTC  
ACGGCCCGCTGGAAGTGTGCTGACCATGACCGAAGAAGCCGGTATGGACGGTGTCTTTGGCTTACAGAGCAACTGGTTG  
CAGGCTGATATCTGATTAACACCGACTCCGAAGAAGAAGGTGAAATCTACATGGGTTGTGCGGGAGGTATCGACTTCA  
CTCAACCTGCATTTAGATCGTGAAGCGGTTCCAGTGGTTTTGAAACCTTCAAGTTAACCTTAAAAGGTCTGAAAGCGG  
GTCACTGACCGCGGTGAAATCCACGTTGGCTAGGTAATGCCAACAAACCTGCTGGTGGCTTCCGCGGCTGACGAGAA  
GAACTGGACCTGCGTCTTATGATTTCAACGGCGCACACTGCGTAAACCCATCCCGCTGAAGCCTTTGGCACCATTGC  
TGTGCGAGTGTAAAGTGCAGCCCTGAAATCTCTGGTGGATACCTATCAGGAGATCCTGAAAAACGAACTGGCAGAAA  
AAGAGAAGACTTGGCATTGCTGCTGGACTCCGTAGCAGCAAGCTGATTAACGGCGACATCTCGCGATACCTTT  
ATTCGCTCTGAAACCAACCCCGAACCGTGTGATCCGCAACTCCGAGCTGGCAAAAAGCGTGGTTGAAACCTCTTGA  
CGTGGTGTGGTGAACATGACCGACAATAACGTAGAAATTCATGCGCTGATCCGTTCTCTGATCGACAGCGGTAAGACT  
ATGTTGGTGAAGTCTGGATTAACCTGGGTAACCTGGCAGGTGCAAAAACCGAAGCAAAAAGGCGCATATCTGGCTGGCAG  
CCGACGCTAATCTCCGTAATGCATCTGGTACGTGAAACTATCAGCGTCTGTTCAACAAAACCGCAACATCTCCAGT  
TATCCACCGCGGCTGAAATGTTGCTGTTCAAAAAACCGTATCCGAAATGGACATGGTGTCTATCGGGCCAACTCA  
CCGCTCCACACTTCCGGATGAGCAAGTTCATATCGAAAGCGTTGGCCATTACTGGACTGCTGACTGAACTGCTGAAA  
GAAATTCGGCGAAGTAA  
>Cluster\_39198  
ATGGTCAAGTAAAGCCATTTACAGCGCCGTTTTTCGCTGGCAACCCGCTGACCTTTTTTATCAGCCTCGCCACCATCGCGGC  
GTTTTTCGCTTTGCATGGATCATGATCCACTCGGTAAGAGTGCATTTTGGCCAGCAGGATATTAATGATTTAAAGGAGA  
TTAGCGCCACCCTTGAACGGGTACTTAACTACCTGACGAAACACAAGCCGACGCTTAAAGACGCTGGAAGATATCGTCA  
AGTGGTATTTCAATGCTGTTGATCTCCCTGGCAGATAGCCACGCTAAACCGGTGATCACTCCCGGTCGCGCGGATAT  
CCGCGAGTTTACGCGTACGCCATACCCGATAAAGACGCGCAGGGCGGCGAGGTGATCTCTTTCCGGCCCGACGATGA  
TGATGCCAGGGCAGCGTCAAGCGGATATGGAACACAGCAACTGCGCGGATGATTAACTTCCCGGTTGGCCCGCTGGTTGAC  
GGCAAAACCGATTTATACGCTCTACATCGCGCTTTTCGATCGATTTTCACTTCTTCAATCAATGATTTGATGAATAAAT  
TATGATGACCCGATCGGTAATCAGCATCTGATCTGTTTATCTGCTGTTGGCGGTACATAAAGGCTCAGCGCCATCC  
GCAGCGTACGCGTCAAATCCAGAAATACCTCGAAAGATCTCGAGCTTCCGCTTGACCCGACAGCCGTGCCATTGAG  
CTGGAACAGCTGGTACTGCTTCAACATATGATCGAGCGTATTGAGGATGCTTTTACCCGACAGTCCAATTTCTCAGC  
GGATATCGCCCAAGAAATTCGCACACTATTAATCTAATCTACGCAAAACGAAATCGCCCTCAGCCAGTCCGCGACCC  
AGAAGGAGCTGGAAGATGTTGCTTACTCTAATCTCGAAGAATGACGCGAATGGCGAAAATGGTCAAGCATATGCTGTTT  
CTCGCTCAGGCGGATAACAACAGCTAAATCCCGAAAAGAAAATGCTCAACCTGGCGGATGAAGTCCGCAAGTGTTCGA  
TTTTTTCCAGGCGTTAGCAGAAGATCGCGCGTGGAGCTGCGGTTTGGTGGCGACGAGTGTGAGGTTGGCGGATCCGCT  
TGATGCTGCTGGGCGTTAAAGCAATCTGTTTAAAGCTGCTTATACCGCAACCGGAGAGCAATTTGCTGCTGCGC  
TGCCAGACGGTGCATCACTGGTCAAGTTACCCTGCAAAAACCCGGTACGCCATTGCGCCCGAACACTTACCGCGATT  
GTTTGACCGTTTTCTACCGGTTGATCTTCCCGCCAGCGAAAAGCGAAGGTAGCGGCATTGGCTGGCGATAGTGAAT

CGATTGTTGTCGCGCATAAAGGCACAGTTGCGGTAACGTCAGATGTGCGGGGACAAGTTTGTATCATATTACCCGCT  
TAA

>Cluster\_59767

ATGTCCAGAAGGCTTCGCAGAACAAAAATCGTTACCACGTTAGGCCAGCAACAGATCGCGATAATAATCTTAAAAAAGT  
TATCGCGGGGCTGCAACGTTGACGTATGAACTTTTCACGGCTCGCTGAAGATCACAAAATGCGCGCGATAAAG  
TTCGTGAGATTGCGCAAACTGGGGCGTCATGTGGCTATTCTGGGTGACCTCCAGGGGCCAAAAATCCGTGTATCCACC  
TTTAAAGAAAGGCAAGTTTTCCTCAATATTTGGGATAAATTCCTGCTCAGCGCAACCTGGGTAAAGGTGAAGCGCACA  
AGAAAAAGTCCGTTATCGACTACAAGGCCTGCCTGCTGACGCTCGTGCCTGGTGCATCCTGCTGCTGGACGATGGTCCGG  
TCCAGTTAAAGTACTGGAAGTTTCAAGGCATGAAAGTGTTCACCGAAGTCAACCGTCCGTTGGTCCCTCTCCAAACAATAA  
GGTATCAACAACCTGGCGGGGTTTGTGCGCTGAAGCGCTGACCGAAAAAGCAAGCAGACATTAAGACTGCGGGCTT  
GATTTGGCGTAGATTACCTGGCTGTCTCCCTCCACGCTGTGGCGAAGATCTGAACTATGCCCGTCGCCGCGCAGGATG  
CAGGATGTGATGCGAAAAATGTTGCCAAGTTGAACGTGCGGAAGCCGTTTGCAGCCAGGATGCAATGGATGACATCATC  
CTCCGCTCTGACGTGGTAAGTTGTCACGTGGCAGCTTCGCTGTTGGAATTTGGCGAACCTGGTCCGCAATGCGA  
AGCGTTGATCCGTCGTGCGCGTCAGCTAAACCGAGCGGTAATCACGGCGACCCAGATGATGGAGTCAATGATTACTAACC  
CGATGCGCGACGCTGCAGAAATCATGGACGTAGCAAACGCCGTTCTGGATGGTACTGACGCTGTGATGCTGTCTGCAGAA  
ACTGCCGCTGGCGAGTATCCGTCAGAAACCGTTGCGAGCATGGCGCGCTTTGCTGGGTGCGAAAAAATCCCGAGCAT  
CAACGTTTCTAAACACCGCTGCGGACGTTTCAGTTTCGACAAATGTGGAAGAAGCTAATGGCATGTACAGCAATGTCAGCA  
ACCACCTGAAAGGCGTTACGGCGATCATCACCATGACCGAATCGGGTCTGACCGGCTGATGACCTCCCGTATCAGCTCT  
GGTCTGCCAATTTTCGCCATGTCTCGCCATGAACGTACGCTGAACTGACTGCTCTCTATCGTGGCGTTACGCGCGTGA  
CTTTGATAGCGCTAATGACGCGCTAGCAGCTGCCAGCGAAGCGTTAATCTGCTGCGCGATAAAGGTTACTTGAATGCTG  
GTGACCTGGTGTATGTCACCCAGGCGAGCTGATGAGTACCGTGGGTTCTAATAACACCGCTATTTTAAACGGTAGAG  
TAA

>Cluster\_15053

ATGGATATTTTTATTCAGGCACCTAACGTATATTAATTTGAATGCCATTCTGGCCATTATGCTGCTACGGCCTTTGGGTT  
ATTTGTGGGAGCCATTCCAGGATTGACCGCAACGATGGCGGTTGCGCTAATGGTACCTTTTACCTCTTTCTTGTATCCTA  
TTCCCGCTCTGGCATAAATGATTGCCGTTGGTGGCTATCCATTTATGCGGAGATATCCCGGCGCACTTTTGGCTATA  
CCAGGGACACCTGCTTCGGCGGCTTATGTTGCTGATTCAAATGAACTGGTAAAGCAAGGTAAGGTGAATCGCGTATTGGG  
ACTTGGGCTGGTGGTGGTTCGGTCAATGGTGGCGGTGATTGGATCACTTATTTGATGTTGGCTGGCCTGTACTGGCGAAAT  
TTGCCCTTAAATTTAGTCTTATGAATACACATGGCTTTCTCTTTTAGGCTTAACCTGCGCGACTCTGGTGTGGGGAAT  
CAACCACTGAAAGGCATGGTGCCTTATGTTGGGATTATACGCGCTGTATCGGTTATGATCAAATATCCGGGGTCC  
ACGTTTTACGTTTGGGCAATCAGCCTGTTACAAGGGTGAACTTTATCTCGATGATCGGCTGTCTGCAATATCCG  
GGCAATTAATATTCGTGACAAAAATAGCCAGGTAAGTGGTGTCTGTCACAAAACGCAACCGGGATTAATTTATCT  
AAGGAATGGGCGAGGTGATTTGGTACGAAAAATTAATCTTGGCCGAAGTAGTATTAATCGGTACGCTTATCGGAGCATT  
GCCCGGCGTGGAGCGGATATTGCTGCGTGGATAAGTTACGCCATTTCAAAAAAATCTCTCGCCAGCAGGAGTTATATG  
GGCATGGATCTGAGGAGCAATTTGATTCCTCGAGCAGTAACAACGCCAGTCTGGCGGGGAGTTGGATCCCTTTCATTA  
GTTTTCGGTTATTTCCGGGCGATTCTGCGCTGCAATTTACCTGCGCTGCTCTATATGAAGGATATGAATCCAGCCCGAC  
ATTATTTCTGTTCCAGGCAGATAAACTCTATGCCGATTTTATCTGTTTCTGATCGCCAAATATGCAATTAATCAGGTTAG  
CCACAATTCGGGTCAGTTTCATCAACCGCATCATCTGGATTGATAAAGCGGATTCTGTACCCGATTTATCTGATTTTCAGT  
ATTTGCTGGTGCATTTGCTATFCGATAAATCTCGGTCGCTCTGTCATGTTGGTCAATGGGGTTCTGGACTGCGGTT  
ACAACGTAAGGAATACCCGGTTTCGCCATTAATCTGGGGATGATTTCTGGGCAATGTTGAAAAAAATTAATTTATCTT  
CAATGATTAAGTCTAATGGTGAATGGCTGGCGTTGTTGAGCGCCGGTATCTATGGCACTGGCTGTCTGTTCTTTTTG  
GTTGTCGCGTTGCAAGGACGCAATATCTACCGTTCAATTTAGCCGTTAA

>Cluster\_23677

ATGCAAGGCACAAAAATTCGACTTTTAGCGGGCGGTTTGTGATGATGGCCACTGCTGGCTATGTGCAGGCAGATGCGCT  
CCAGCCTGATCCAGCATGGCAACAGGGGACGCTTTCCACCGGTTACAGTGGCAAGTGTGACACGCCCCAGCGTCCCA  
CGGATCGTGTGAAATTCGCCCTGCTGGTAAATACCGGTTTCGCTCGCGAAAAGTACACAACAGAGCGGTTACAGTACAGCC  
ATCCCTCGTATTGGCTAAACGCAAGCGGTGGCTTTGACGCGAGCGAGCGGCTTCATTTGTGGCAGCAGGGGATCGACCC  
TAAACGCCGATGCGCCCGGTAATGTCCTTATGACACCAGCTGTTAATCTGAGTTTGGCCAATAACCGTAAACGACT  
TGCTGAAAGAGGCGCTCTCTTATCTGGCAAAATGCCACTGGCAAACTGACTATCACGCCAGAAACCATCAACCATGCGTTC  
CAAAGTCAGGACATGGTGGCAACCTGGCCTGCCGATATAAAGAGGGCTGGTGGCGTTATCGTCTGAAAGGATCAACCTT  
GTTAGGTCACGATCCGTCAGCTCCGCTGAAACAACCGTTGAAAGCGGAAAAGATTAAGATTTCTATGAGAAATGGTACA  
CCCCGGATGCAATGACGCTGCTGGTGGTGGAAACGTTGATGCGCGCTCGGTCGTCGACCAAAATCAATAAAACGTTTGGC  
GAACGTAAGGCAACAGTGAACACCGGCTCCGGTGCACACGCTTTCTCCGCTGCGTGGCAAGCGGTTGAGTATTTATGAC  
CGACGCGGTGCGTCAGGACCGGCTATCTATCATGTGGGATACCGCTGGCAGCCGATTCGTAATCAGCCGACTGCTGC  
GCTACTGGCTGGCGGACCTGGCCGCTGAGGCACTGTTCTGGCATGTTGACGAAAGCGTTAAGCGCCAGTAAACGTAAGAG  
ATCGGCTTTGGATTTGACTGTCGTGCTGATCTGCGTGGCAGTGTGCCATCAACATCGAATCACCAACGACAAGCT  
GAACAGCAACCTTAACTGGTGGCGCTGAACCTGGCGAAGGTTTCGCGATAAAGGTTCTGCCGGAAGAAGGTTCAATGCGT  
TAGTGGCGCAAAAGAACTGGAGCTGCAGAACTGTTTTCGCCCTATGCGCGAGCTGATACCGATTTCTGATGGGCGAG  
CGGATCGCTTCGTTGCAAAATCAGGTCGTGATATCGCCCGGAGCAATATCAGAAACTGCGTCAAGGATTTCTTAAACAG  
CCTGACGCTGGAGATGTTAAATCAGGATCTGCGTCAGCAGTTGTCGAATGATATGGCGTTAATACTGCTGCGAGCGAAAG  
CGGAGCCGGAATTAACATGAAAGCGTTGACAGGCGGCTGGGATCAAAATCATGGCCCCATCGACTGCGGCTGCGCCACA  
TCTGTGCCACGGATGACGTACATCTGAAGTGACGGATATTCACCTGTACAGTAA

>Cluster\_41175

ATGAATACAAATCGCTCCGTTACGCTCCCGCATCATGTACACGCTCCACGATACGATGACAGCAGTTGCAATCACGTAT  
CGTTCAATTTTGGCTTTGGAGCCTTTACCGGCGACATCAGGCAATTAAGTACCGGATGCTGTAATGCCAGGGGCGGCG  
ACTGGGGGATCTGTGAAATCAGCTTGTTCAGCGCGATCAACTGATGAGCAACTCCGCGCACAGAACCATTTATATACC  
GTGCTGGAGAAAGGTGCGGACGGCAATCAGGCGATAATGTGCGTGGCGTTACAGAAATGCTGAAATGCAAACTGGATT  
CTTAGCGGCAATTTAGAAATTTTGCAGCCACAGGTGGCAATTTCTCCGACGATACCGAAAAAGGCTATTGTTA  
TTGACCCGGCCACCGGTGCACTGCACACAGCAATCCGCGTATTTACAGATCTACAAAACCTGAAGAACCCTACTCC  
CGCCAGGATTTCTGCTGGAAGACTGAAACGCCCGGTGAGCGCGCTTACACCGTTTACCGTCTCTCCGCGACA  
TATTTCCGACAATGGCATTGTTGTAAGAAACCGGCTGCGGAATGGCAGAAAAACGTTCCGCAACCTGCCGGAATC  
TAAAGAACACGCTAGTTTTCGGGAATATGGTGCACCGCATTTGTTCCGGCTGCAACAAACGAAATCACTGGCGGAAATA  
AGCCAGCATCTGGGGTGAATGATCCCTGCCGATTAGCTGCGAACCCTTTATCCAGTGGGTTGAAAGATAACTCTGCT  
CGCTGGGCGTCTCCCTGGGAAGTCCGAGGTGTACAAATGGTGAATGATGTCCTGCCATGGGAAGAGATGAAACTGCGGA  
TGCTTAATGGCAGCCACTTTTTCTGCTTATCTGGGTTACCTCTCAGGATTCGCCCATATCAGTGTGATGCAAGGAT  
CGCGCATTTTCGCCATGCCCGAGAACATTAATGCTGGATGAGCAAGCGCGGACTGCGGATTAAGATGCTGATTTAAC  
ACAATATGCGGATAAGTTAATGGACGTTTGTCTACCGCACTGAAACATAAGCAACTGGCAATCGCGATGATGGCA  
GCCAAAAATACCACAACGATGCTGGCAGGATTTGCGATACATCTGGGACGCGAAACGGACTGGTCTGCTGGCATTA  
GGCGTTGACGCTGGATGCGTTACGTCAGCGGCTTGTGATGCGGAAATGCCATTGATGTTGCGGATCCGCTTAGCGA

TAAAATTCGTGAAC TTGTTGCGGT CAGCAGCAGTGAACAACCGGTAACCGCCCTGCTTCCCTGCGTGAATTTTCGGTG  
ATGATCTGCCAGATAATCCGCATTTTGTGCAGGCCATCGAACAAAGCCTGGCAACAAATCGCACAAATTCGGCGCGCATCAG  
GCGCTATTAACACCCCTCAAATTTAA

>Cluster\_21967

ATGGCGGTAAACGAAACAGCCAGCCCTGTGACCTGGTCAATTTTCGGCGGAAAGGCGACCTTGGCGGTGTAATTTGCT  
GCCTTCCCTGTATCAACTGGAAAAGCCGGTCAAGTCAACCCGGACACACGGATTATCGCGGTAGGGCGTGTACTGGG  
ATAAAGCGCTTATACCAAAGTTGTCCGGAGGCGCTGCAAACTTTTCATGAAAGAAACCATTTGATGAAGGTTTATGGGAC  
ACCTGAGTGCACGCTCTGGATTTTGTAACTCTTGATGTCAATGACACTGCTGCATTACGCCGTCTCGGCGCGATGCTGGA  
TCAAAAATAATCGTATCACCATTAACACTTTGCCATGCCGCCAGCACATTTTGGCGCAATTTGCAAAGGGCTTGGGGAGG  
CAAACTGAATGCTAAACCCGACGCGTAGTCAATGGAGAAACCGCTGGGGACGCTGCTGGCGACCTCGCAGGAAATCAAC  
GATCAGGTTGGCGAATATCTCGAGGAGTCCAGGTTTACCGTATCGACCACTATCTTGGTAAAGAAACAGTGTGAACCT  
GTTGGCGCTGCGTTTGTCAACTCTCTGTTTGTGAACAACCTGGGACAAATCGCACCATTTGATCATGTTGAGATTACCGTG  
CAGAAGAAGTGGGATCGAAGGGCGCTGGGGCTATTTTATAAAGCGGTGAGATGCGGACATGATCCAGAACACCTG  
CTGCAAAATCTTTGCATGATTGCGATGTCTCCGCCCTGACCTGAGTGCAGACAGCATCCCGGATGAAAAGTGAAAGT  
ACTGAAGTCTCTGCGCCGATTTGACCGTCCAAAGTGCAGGAAAACCGTACCGGGCAATATACTGCGGGCTTCGCC  
AGGGCAAAAAGTCCGGGCTATCTGGAAGAAGGGCGGCAACAGAGCAGCAATACAGAAACCTTCTGGCGGATCCGC  
GTCCGATTTGATAACTGGCGCTGGGCTATTTGCACTTCCCTACCTGCGTACTGGTAAACGCTCTACCGACCAATTTCTGA  
AGTCTGGTCTATTTCAAAACACTGAACTGAACTCTGTTTAAAGAGTCTGGCAGGATCTGCCGAGAATAAACTGACTA  
TCCGCTCTGCAACCTGATGAAGGCGTGGATATCCAGGTACTGAAATAAGTTCTTGGCCTTGACCAAAACATAAAGTGC  
ATCACCAAGTCTGATCTGAGTATTCAGAAACCTTTAATCAAAACGCTGTCAGATGCTTATGACCTGCTGCTGCTGGA  
AACCATGGTGGTATTCAGGCAC TTTTGTACGCTGATGAAAGTGAAGGAAAGCTGGAATAAGGGTAGACTCCATTAATCTG  
AGGCGTGGGCGATGGACAATGATGCGCCGAAACCGTATCAGCCGGAACCTGGGGCCCGTTGCCCTGGTGGCGATGATT  
ACCCGTGACGGTCTTCCGAAATGAGTTTGAATG

>Cluster\_51150

ATGGTTGATTTAAATAAAATAAATATCAAATTTGGTACTAGTGGCTTACGCGGTCTATCATCTGACTTTTCTCCCGATGT  
TTGCCATATGTTTGTAACTTCTTTTATAAAAACATAAAGATAGATATAATTTTCAAATATTTGCTATTTGGGATTGACA  
ATAGACCTAGCAGTCCAGATATAGCCAGATACTGTATAAGTGTATATATTTCAAGGAATTGACGTCGATTATTTGGT  
GTACTTCCAACACTGCTCTTGGCTTATTTATAGTTTCCAAAATAAATACCATGTATAATGATTACAGGAGCCATATTTCC  
GTTTCGACAGAAATGGAATGAAGTTTATTTGCCGGATGGTGAATATCCAAGGGCGATGAGCAAGCAATAATTGATAATG  
TTAAACAAGCATGTTACTTTAAATATTTACTGACCTACCACATCCAAATGAATCTGCTATTTGACTTATATAAAACCT  
TATACATCAATTTTCCATCTGATTTACTAAGAGGTAAGAAATAGGAATCTATGAGCATTTAGTGTGGCGGTGATAT  
ATATAATAAATTAATTTCTGCATTAGGAGCAGAACTATTTCTTGGAAAGCGGATTTGCTTCTGTTGCCCATTTGATACTG  
AAGCAGTGTGTTAGAAGACCAGGTTAAAGCCAGATGTTGGGCGGTGAGTTTAAATTAGATGCTATTTTCTACGGAT  
GGTGTGAGATAGGCGCTGTTGCTGACAACATGGCAATGGATTAAAGGGGATGTTTATAGGCTTTTATGTTCTCT  
TGCTCTTGTGTTGATGCGATTTGATGCTTAAATTTGAAATCAATGATTGGTAAAGTGGGTACTCTGATTTTCACTAA  
CTAGAACCTAGAAATTTGGCTACCTTATGTACTGGATGGTATTAATAGATTAAAAAAAACAGGGAATATAGTCTGGATTT  
GAGGCTAATGGGGGTATATTTTATCATCGACAATATGTAAGAAATGGAAGGTTCTTGAACATTTAGCAACTCGTGATGC  
GCTGTTGGCTGCACTTGTGATTTATCATTAGCATATAAAAATATAGAAATAAATGAACCTTTAGTCACTTACCA  
AAATATATAACAGCAAGTACAGAAATACAGGACCTTTCCAATGAGTTTAAATACATGTTGACGTTAATAAATAAAGAA  
CCTAAAAATACCTTTGAAAGAAATAGGTTGTTGAAGGAAATATTTGATATAAATGCTGATGGTATACGTTGTTT  
TAATGATAATAAATATTTATCATATAGACCATCAGGCAACCGCCAGAGTTGAGATGCTATTTGAGTCAAGATGTTAA  
AGCATGCTGAGTCCGTTGTGCGAAGTTTAAATGATGCTAAATTTTATCAGGCATATCAATGAGCCTCTAA

>Cluster\_20443

GTGAAACAAAGCACTATTGCACTGGCCTTACCCTTACTGTTTACCCCGTGACAAAAGCCCGGACACCAGAAATGCC  
TGTTCGGAAAACCGGGCTGCTCAGGGCGATATTACTGCACCCGGTGGTGTCTGCCGCTTAAACGGGTGATCAGACCGCC  
CTCTGCGTGTATCTTACGATAAACCTGCAAAAATATTTTGTGATTTGGCGATGGGATGGGGGACTCGGAAAT  
ACTGCCGCACGCAATTTATGCCAAGGTGCGGGCGCTTTTAAAGGATTTGATGCTTACCCTTACCCTTACCCTTACCCT  
TCACTATGCGCTGAATAAAAAACCGGCAAAACCGGACTACGTCACCGACTCGGCTGCATCAGCAACCGCTGGTCAACAG  
GTGTCAAAACCTATAATGGCGCGTGGGCGTGCATATTACGAAAAGATCACCAACGATTTGGAATGGCAAAAGCC  
GCAGGCTGGCGACCGGTAACGTTTCTACCGCAGAGTTGCAGGATGCCACGCCGCTGCGTGGTGGCGCATGTGACCTC  
GCGCAAACTGCTACCGTCCGAGTGCAGACAGTGAATAATGCTCCGGTAAACGCTCTGGAAAAAGCGGAAAAGGATCGATTA  
CCGAACAGCTGCTTAAACCGCTGCGATGTTACGCTTGGCGGGTGAACAAACCTTTGCTGAAACGGCAACCGCGGT  
GAATGGCAGGAAAACCGTTCGCTGAACAGGACAGGCGCGTGGTATCAGTTGGTGGGATGACTGCTTCACTGAATTC  
GGTACGGAAGCGAATCAGCAAAAACCTTATTAGGACTGTTTGTGCTGACGGCAATAGCCAGTGGCTGGCAAGGACCGA  
AAGCAACGTAACCGTAAATATAGATAAGCCCGGACTACCTGTACGCTAATCCGCAACGTAATGACAGGTTGTTT  
CTGGCGCAGATGACCGACAAGCCATTGAATTTGTTGATGATAAATGAGAAAGGCTTTTCTGCAAGTTGAAGTTGCGTC  
AATCGATAAACAGGATCAGCAGCGAATCCTTGGGCAAAATGGCGAGCGGTCGATCTCGATGAAGCCGTACAACGGG  
CGTGGAAATTCGCTAAAAGGATGGTAAACAGCTTGGTCAATAGTACCGTGCATCAGCCATGCGCAGTATGAGTTGG  
CCGATACCAAGCTCCGGGCTCACCCAGGCGTAAAATACAAAGATGGCGAGTGGTGGTATGAGTTACGGGAACCTC  
CGAAGAGGATTCACAAGACATACCGGCAGTCAAGTTGCGTATTGGCGGTATGGCCCGCATGCCGCAATGTTGTTGGAC  
TGACCAGCAGACCGATCTTCTACACCATGAAAGCCGCCCTGGGGCTGAAATAA

>Cluster\_323

ATGAGTACTGAAATCAAACTCAGGTCGTGGTACTTGGGGCAGGCCCGCAGGTTACTCCGCTGCCTTCCGTTGCGCTGA  
TTTAGGCTCGGAAACCGTAACTGATGAAAGCTTACAACACCTTGGCGGTGTTTGCCTGAACGTCGGCTGTATCCCTTCTA  
AAGCACTGCTGCACGATAGCAAAAGTTATCGAAGAAGCCAAAGCGTGGCTGAACACGGTATCGTCTTCGGCGAACGAAA  
ACCGATATGCAAGAGTTCTGACTCGGAAAGAGAAAGTGAATCAATCAGCTGACCGGTGGTCTGGCTGGTATGGCGAAAGG  
CCGCAAGTCAAAGTGGTCAACGGTCTGGGTAATTTACCGGGGCTAACACCTGGAAGTTGAAGGTGAGAACGGCAAAA  
CCGTGATCAACTTCGACAATGCGATCATGTCAGCGGGTCTCGCCGATCCAACTGCCGTTTATTTCCGATGAAGATCCG  
CGTATCTGGGACTCCACTGACCGCTGGAATGAAAGAGTACAGAAAGTACAGAAAGTACAGCTGGTGAATGGTGGCGGTA  
TCTCGAAATGGGCAACCTGATACCGCGCTGGGTTACAGATTGACGTTGGTGAATGTTTCGACCGGTTATCCACGGCAG  
CTGACAAAGACATCTGTTAAAGTCTTACCAAGCGTATCAGCAAGAAATCAACCTGATGCTGGAACCAAGTTACCGCC  
GTTGAAGCAAAAGAGAGCGGATTTATGTGACGATGGAAGGCAAAAAGCACCCTGAAACCGCAGCGTTACGACGCCCT  
GCTGGTACGATTTGGTCTGTGCGAACGGTAAAACCTCGACGAGGCAAGCTGGCTGGAAGTGGACGACCGTGGTT  
TCATCCCGGTTGACAAACAGTCTGCTACCAACGTAACCGCATCTTTGCTATCGCGCATATCGTGGTACGCGGATGCTG  
GCACACAAAGGTTCTACGAAGGTCACGTTGCCGCTGAAGTTATCGCCGGTAAAGAACTACTTCGATCCGAAAGTTAT  
CCGCTCCTACGCTATACCGAACAGAAAGTTGATGGTGGTGGTGTGATGAGAAAGAAAGGCAAGGATGATGAGT  
ATGAAACCGGCTACTCCGCTGGGCTGCTTGGTCTGCTATCGCTTCCGACTGCGCAGACGGTATGACAAAGCTGATTT  
TTCGACAAAGAAATCTCACCGTGTGATCGGTGGTGGTATGTCGGTACCAACCGCGGAGCTGCTGGTGAATTCGGCT  
GGCAATCGAAATGGGTTGTGATGCTGAAGACATCGCACTGACCATCCACGCGACCCGACTCTGCACGAGTCTGTGGCC

TGGCGGCAGAAGTGTTCGAAGGTAGCATTACCGACCTGCCGAACCCGAAAGCGAAGAAGAAGTAA

>Cluster\_2322

ATGGCTTCATTTACATCTCTTGGCGTTGGTTCGAATCTGCCGCTGGATACATTGCTAAACAACCTGACCATCGCTGAAAA  
AAAAACGCTTAAACCCAAATFACCTAGCAACAGAGTGACAATACCCGACGCTCGACAGCCTATGGCACATTAAGAAAGTGCAT  
TAGAAAAAATTCAGACTGCAAAATCTGCGTTAAATAAAGCCGATCTGTTCAAAAGCACACCGTTACCGTAGCAATGAA  
GACCTTAAAGTTTCCACCAGGAGGAGGTCGCTCCCGGTATCTATACCATCAGCGTAACCCAACTGGCGCAGGCGCAATC  
TTTACGAACGTGATFCCCGGACAATCATTGCATCAACAAAAGATGCACCTGGGTGATGAGTCATCAGATACAGCACAATAA  
AAATTAACCAAGACGGTCGTAAGAGCCGCTGGAATCAAGCTCAATAAAGATCAGACGCTATTGGATGAGATCAGCAAA  
GCCATTAACCGATGCGGATAGTGGAAATTTCCGCTAGTATCGTTAAAGTCAAAAGATGGTAACATCAATTTGGTATTGACCCG  
CAGTGAAGGTCTGGCCAATAAATGACCATATCTGTTGAGGGTGACAGTAAATTAATGATCTGCTGGCTTATGACAGCA  
AGACCAACACCGGGAATAGAAAGAACTGGTTAACCGCGCAAAAAGCACAGCTAACCGTTAACGGTATCGATATTGAACGT  
TCAAGTAACAAAATFACCGATGCTCCTCAGGAGTGACTCTCGATTGACCAAAAAGTCACTGACGTCGGGTCACGGT  
GACAAAAAGCAACGATAAAGCAACCGAAGCAATTAAGCTGGTGGATTATATAAATFCCCTCATTGACACCTTTAAACA  
CCCTGACAAAATATAAAGAAGTAGACCCAGGTGCTGAAGCACAAGATAAAAATAATGGTGCACCTCTCGGAGACAGCGTT  
GTACGTACAAATFCAAGCGGCATCCGCGCACAATTTGCAACCGGTGCCAGCGACGGTGCCTTCAAAAACATTAACCGAGAT  
CGGATTAAGCAGGACCGCAGCGGTAAGCTGAAAATFAGTATGATAAATCAAAAAGTCTGAAATGAAAATACAG  
CATCCGTAGCTGAATTTGTTAGGCGAATGTTGAAAGCAAGTAAAGTAAACCAAAAATFCCACCGGAGTAAAGGTTAC  
CTTGCCGATGATGGCATTATTGATAGCGCACAGGACAGTATTAACGCCACACTGAAAAAACTGACCAACAGTATCTATC  
CGTCACTGCCAGCATGATGACACCGTGGCGGTTACACTGCACAGTTTACGCAATTAGATACCATGATGAGCAAACTGA  
ATAACACAGTACCTATCTCAGCAACAATTTACTGCAATGAGTAATTCCTGA

>Cluster\_55509

ATGGCTAGTATTTCAACGCTTGGGGTGGGTCGGGCTGGACTTAAGCAGCATCCTTGACAGTCTGGAGGCGGCAGAAAA  
ATCTACCCCTGACGCGGATATCAAAAACAGCAAGCTTCTTACACCGCGAAACTGAGCGCCTACGGGACGCTGAAAAGTGCAC  
TAGAGCTGTTTCCAGACAGCAACACAGCACTGAATAAAGCCGATTTATTTACCGCCACCTCAACCCACAGGATTCATCG  
GCTTTTACGCGCCACCACCAGGGCAGCGGATTTGCTGGGAAATACACCATTAGCGTTAGCCAACCTGGCGCAGGACAGAC  
GCTGACAAACAAAATAGTCAAAAAGACAGTAAAGCCGCTATGCCACAGCGATAGCGTACTGACCATFCAACAAGGGC  
CGGTAAGATCCGGTACGATTTGATATCAGCGCGGGTAACTCGTCACTTTCCGGCATTCGCGATGCCATTAACAACGCC  
AAAGCTGGTTCAGCGCCAGTATCATCAATGTTGGGAAACCGGCAATATCGTCTCCATCACCGCTAACGATACGGCGC  
CAATAACGCTATGAAACTTAGCGTCAGCGCGCACAGCGCCCTGGAAAGTTTTATGGGTACAACGGAACCGGGGTGATA  
GCAGCAATGGCATGATTGAAAGCGTACCGCGCAAAAACGCCAACTGACAGTCAATAACGTTGAGATTGAAAACAGCAGT  
AACACTATCAGCGACTCACTGGAAGATATCACCTCAACCTGAATGACGTACCACCGGTAATCAGACACTGACCATCAG  
TAAAGACACATCCAAAGCTGAAAATGCGGTTAAAGCTGGGTTGATGCCATAAACAATGACAGGATACATTCAGCAGCT  
TAACCAATAACACCGCTGTCGATGCCGGAGCTGAAAGTCAAGTCCAGTAAATGGCGCATTACCGGTGACTCCACACTG  
CGTACCATCCAGACTCAGCTTAAAACCTTGCTCGCCAATACTACAGCAGTTCAAACTATAAAAACGCTGGCACAGATTGG  
CATTACCAGCATGCCATCCGCAAGCTGGAATCGCGCACGCAAACTGCAACCGCGCTAAAAAATGATGCCGCTG  
GTATCGGTGAAATTTTTATAGGTGACGGCAAAAGTAAAGCTGGGTTAACCCAGGCAATTAGTAAACAACCTGACCTGGCT  
TCTTCCACCGGATAATCCAGCGCAAAAAGTGGCGTCAAGAAAACGCTGAAATAATTTGACCAGCAGTACAACGCAGC  
CAGTGAACGTATCGATACCTTAAAGACCGCTATAAAGCCAGTTACCCAATTAGATGTGTTAATGAACTCGCTGAACT  
CCACTAGTAGCTATCTGACACAGCAGTTGACACCTCAATAGCAACTCGAAATAA

>Cluster\_5903

ATGAATAAAGAAATCGTTATGGAAGCTAATCTGATATTAGCGATCCCATGTATTATTGGTTTTATGCCAGCTCCGGCAGG  
ATTAAGCGAACTGGCGTGGGTGCTTTTTGGTATTTACCTGGCGCCATTTGTTGGGCTGGTTATCAAGCCTTTCCCGGAC  
CTGTGCTACTGTTAATTGGCCTTGTCTCAATGGTGGTGGTGGTAACTTATCCGACGGTGGCTTTAAACCCACCGCC  
GTATTAAGCGGTTACTCTTACAGTACCACCTGGCTGGTGTCTCGCGTTTACCTTAAGCGCCGATTTGTGACCCACCGG  
TTTAGGTAACAGTATGCTATCTGCTGATTTGTTAAATFCGGTAAACACACGCTGGGTTGGGTTACGTTACGGTATTCC  
TCGATCTGGTACTGGCTCCGGCAACACCGTCTAACACCGCGCTGGGGCGGCATTTGTGTACCGATCATCAACAGCGTG  
GCGTGGCTTTGGGGTCCGAACCGGAAAAGTCCGCGTTCGGAACATTACTGATGATGTTCACTTTACATGGTTCAC  
CAAAAACACAGCTATATGTTCTTACCGAATGGCGGGGAACATTCTGGCGTGAAAATGATCAACGACATTTCTGCACC  
TGCAAAATAGCTGGGGTGGATGGCGCTGGCAGCGGATTTGCCGGGCATCATTATGCTGCTGGTCAACCCGCTGGTGAAT  
TACACCATGTATCCACCAGAAATTAAGAAGGTGGATAACAACACATCGTAAAGCGGGCCTTCCCGAATAGGACCGGAT  
GAAAATCCGCAAAAATGCTGCTCGGTCTTTGCTGGCGTGGCTGGGCTGGATTTCAGTAAAGTCTCTGGGGGTTG  
ATGAATCCACCGTGGCAATCGTTGTTATGGCAACCATGCTGCTGCTGGTATCGTTACCTGGGAAGACGTTGGTAAAAAT  
AAAGCGGCTGGAATACCTTAATCTGGTACGGCGGATTTATCGGCTTAAGCTCCTTATATCGAAAGTAAATTTCTTCCA  
ATGGTTAGCTGAAGTCTTTAAAAATAACCTGGCATTTGATGATGTCACGGTAACTGTTGCTTTCTGTTATTTTCTCA  
GCATTTACGTCGGTATTTCTTCCGTTCCGTTAGTGTGCTGATGTTACCGGATTTGCTATCGGATTTGCTATCGGCAAG  
GTCCTCCGGCAGCGTTAATGTTAACCGCGCTGGCACTGTTGTTCTCAACTCCTATGGCGGATGGTTACTCACTATGG  
CGGCGGGCAGGTCGGTTCATCTTTGGCGTGGGTTATAACGATATAAATCCTGGTGGTGGTGGTGGGCTGCGGCTGACGA  
TATTAACCTTCTGTGTCATATCACCTCGCGTGGTGGTGGAAATATGCTGATCGGCTGGAACATGCTGTAA

>Cluster\_21053

ATGTGCTTACTTGCACCAGAAAATCCTTATCCGATATATGCACCTACCACCGCTGGTGAGAAATGCAATAATTGAAACTCA  
AAAAAATACACAGGCACCTTTGGCTATGGTGGCAACATCCGCATTAACAGCGATCTCAATGCTGCTGAGAAATCAGATTG  
ACGTGTGCAGACCTGGAAATTTACATGGCCGTTAACTTACTCTGATTCTGGCTGATTCCGGTGAAGGAAAGGAAAGC  
ACCGTGGATAAAGTGTATGAAAGCATTTTATCTCAGGGATGAAGCCCTGGCGGATGAATACCGGAACTGGTTGAGAA  
TTACAGTACAGAAAAGGAAATATGGGAGCAAAAACAAAAGCGCTGGAATCAAAAATTTCAAAAAGAGATTCGTGCCGGTA  
AAGATTACAAGGCAACAGAAATCAGAGCTGAAACGCATCTGAATAAACCCTCTGTTCCCGCCGAGATACGTCGAAACAAT  
TTTAAATGACACAACGATAGAGGGAATGTTAAAATATTACTCCGATAGCAATCGCTCTTTGCTCTTTGATCAGTGAAGG  
GGGGGTAATTTTACAGCCGGCCATGAGTAAACTGGGAATTTAAACACTTTGTTGGGATGGAGGTTCTCTTTTTCATCG  
ACAGGAAATCATCTCCCGGAATTAATTTGAAGGAGCAAGACTGACGATATCGGTGATGATTCAGCCTGATGTTTACCAC  
AAAGGTTTTGTACGCGAAAAAAGAAATTTGTAACACGCTCAGGACATCATGCAAGGTTTTGATGTGCAACCAACATC  
AACCGAGGCAAGAAATAAACAACCGAGATAAATTAACACAGTATCAGGATTTGTTGAAAGAGGATCAATGAGC  
TTATTTGATGAAAGTCTGGCGATGAGTGGTGAACGAGCTTGCCTTCACTTTCTCTCAGGCTGCCAGAAATCTGGACGGAT  
TATTACAATGATGTGGAATCGAAGCAGGGGGATTTGGGCTTTAAAGACATTCGGGGAATATGCTGCTAAAAATGACAG  
GTATATGGCAAGACTGGCAGGACTTATTTACCATTCGAGCGGTGAAGAGGGGAGATTTCCCTTACACTGAGAAATGG  
CGAGAGAAATGACAAATATGTTACGTTAGTATGTTGCGGTTGCTTAATCCGTTAACTTTTGACAACTCTGCCTGACC  
GTACCTGTGCGACTCATTCAGAGGAGCTTGAACCTTTCAACTGGATAAAAAGCTATTGATTTGAGAAGGGGATCCTCTG  
TATGAAAAAATGACATTTTACAGCGTGGTCCGAACCTTTCCGGAAAAAGGATAAAAATCAACTGGTTACTGGATTTAC  
TGTATGAACAAAACAGAGTTGTACCGGTTATTGAGGGAAAAACGTTGTGTGTCGCACCTAACTTTGACCTCTGA

>Cluster\_23965

ATGAGCGATAAAAAGAGCGCAGTATGGCGGGTTTGGCGTGGATCGCGCGGATGGCCTTCTTATGACGGCAGCTTGTATGC



CACTATTCTGAATACCGCCTTACCGCAATCGCTCATAGCCTTAATCGTTCTCCTCTCGCGATGCAATCAGCCATCATCA  
GTTATACGCTGACGGTGGCGATGCTTATTCGGTAAGCGGATGGCTAGCCGATCGCTTCGGTACACGTCGCATTTTTACC  
CTTGCCGTGAGTCTGTTACGTTGGGTTCTCTGGCCTGCGCACTTCCAACCTCGCTACCACAGCTGGTGTCTCCGGGT  
TATTCAGGGGATAGCGGGCGCAATGATGATGCCGTGTTGCTCGGCTGGCCTTACGCGCCTTATCCTCGTAATGAACCTC  
TTCCGTGATTTGAATTTGTCGCCATACCGGCTGCTGGGGCCAAATTTAGGCCCGTCTTGGCGGCTGCTCGATCACC  
TGGCAACCTGGCACTGGATATTTTTAATCAATATCCCATAGGTATTGCGGGCCTTCTTTACCGCAACAAATATGCC  
CAATTCACCACCGCAGCAGCAGATTCGATACACTGGCTTTTGTGCTTTGGCCTCAGCCTGTTCCTCFAAGGG  
GAATAGAGCTATTCGGGGAAAAGATTGTCGCCAGCTGGATTGCCTTGACGGTAATGTACCAGCATCGGGTTACTGCTT  
CTCTATATTCCTCATGCGCGACGACGCCAAACCATTAAATTTCAATAGATTTATTTAAACCAGCCTTCTCGATCGG  
TATCGTAGGCAATATTGCAACCCGCTGTTGGGACCGGCTGTGTACCCTTCTTATGCCATTGATGTTACAGGTAGGATTTG  
GGTATCAGCGCTTTATTGCTGGCTGTATGATGGCACCGACAGCGTTAGGTTCCATATTTGCAAAATCGATGGTTACCCAA  
GTCCTACGCTCGTGGGCTATCGCCATACGTTAGTGGGATCAGGGTATTATAGGGCTAATGATCGCTCAGTTCTCTTT  
GCAATCACCAGCAATGCGGATATGGATGCTGATCTTGGCGTATTATATTAGGGATGGCTATGTCGACCAATTTACCG  
CGATGAATACCATCACACTTGGCGATCTGACCGATGACAACGCCAGCAGCGGTAACAGTGTTCGGCGTACGCAGCAA  
CTGTCTATCAGTTTAGGCGTTGCTGTAAGTGGCGCCGCTTCCGCGTTTACGAAGGGATGGAAGGCACACGACAGTCGA  
ACAGTTCACATACGTTTATACGATGGGCATTTACTGTTGCTTACGACAGCAATGTTTATGCTACTGAAAACAACCG  
ATGGTAATAATTTGATCAAAAGACAGCGTAAATCTAAGCCGAACCAGTTCATCAGAATCGGAGTAA

>Cluster\_11128

ATGGAAGAACTACTAATATAAATTAATGTTTGGGGGCTATCCGTTATTCAGCTCGCATCTCCAAATGAGGTTTTAA  
TTACCTTGCATCTACTTTAAATGATAATGGTTTATTAACCTGAAGTTGAGAAAATGATTCATTTTGAATTAATCTGAT  
AACATGGATATATACATCAAGTATCGAAGCGTAACAACCTTTATTCGTTAACGCTTAAAGGAAATGAACGACTAACTCCA  
TCGCTGAAAAGCTTCGTGATAAAATTAGACTATTTATGCTTGACAACGCACTCTGCTAGTAAATTAAGAGTGTGGC  
CTCAACTGATACAGAGAATATGGGCGGTGGTTCCGCGCTTTTACAGTTAAGGCACAATTCAAAAGAGGTTCCGCACCCAA  
GACAGGCTTGGGTAGGTTACGAGCAATTAATATTGGTTCGATGTCAGTAATGAGGCCAGCACACCACCCACAACG  
AAAAGCTCGCCACACCCTCTATTGGCCGATTAGGTTTTCTTTAAATTAATTAATTAATAAACTCGACGAAGTTTT  
TTTTAATAGTATGAGTAACTGCTATTGCTCTTGTATTGGCATATCTCCAGGGTTGATAACTGCAATGATAAAATCTC  
CCAAAGATACTATCGCACATTTAATTTACAAAAAAATCCGGTGGTTTTAGACCCATCCTTGGCTCCCGGAAATTCATT  
AAAACCTTACAGTATTGGTTAAAAGACTCTGTTTAAACCCTTTTAAATAACACTCTTCTGTTTATTCATCAAGAGTGG  
TGTAAGTATAAAAGATAATGCAATTAATCATGTAAGAAAAAGTTTGTGCAAAATATAGATATTTCCGATTACTTTGGT  
CGATTAATAAAAAGATGGTCAAGGATTTGTTTTATAAAAAATAACATACCGGAGCATGTATCAACACTATCTCTGGTATA  
GTTACATAAATGATGACTTCCACAAGGTGCACCTACAAGCCCTATAATATCAAATGCACTACTTTTCGAATTTGACGA  
AGAAATGAGTTTCCAAAGCTTAACTCTTTGATAGTATATATACTCTGTTACTCTGATGATATATCCATCAGTAGATAAAA  
AAGAAAACCTAGAGATACTTATAAGTATTGCTGAGGATAAATTAATTAATTAATTAATAAAGAAAAAAG  
CGAATATCTTCATATAATAGCCGTCAGGTTGCTACTGGGATTCCTGTTAATGAGCGGTAAGGCCAACTAGAATTCAG  
AAAGAAAATTCGCTCAGCATTGATCATGCTCTTAAAGAACAGGATAACAGTCAATTAACGATTAACAACTAAGAGGGT  
ATTTAAATTAATCTAAAATCTTTTTGAACCCTTATGGCTTCAATTTAATGAAAAAATATAAAGATATTCTAA

>Cluster\_40500

ATGAAAACCGTAACTGTAAGAACTCTCGTCAATGGTACGGGCGCACCTAAAATCATCGTCTCGCTGAGTGGCGAAAGATAT  
CGCCAGCTGAAATCCGAAGCTCTCGCCTATCGTGAAGCGGACTTTGATATTCGAAATGGCGGTGGACCATATGCGC  
ATCTCTCCAATGTGGAGTCTGTCTATAGCGCGCAGCAAAATTTCTCCGTGAAACCATGCCAGAAAACCGCTGCTGTTACC  
TTCCGAGTGCACAAAGAGGCGGAGCAGGCGATTTCACCGAGGCTTATATGACATCAATCGTGCAGCCATCGACAG  
CGGCTGGTTGATATGATCGATCTGGAGTTATTTACCGGCGATGATCAGGTTAAAGAAAACCGTCCGCTACGCCACCGCC  
ATGATGTGAAAGTTGTCAFTGTCACCAACATGCTTCCATAAAACGCCGGAATCCGAAGAAATCAATGCGCCTCGCGCAA  
ATGCACTCTTCGACGCCGATATTCCTAAGATTGCGCTGATGCGCAAGTACAGCGATGTGCTGACGTTGCTTGGCGC  
GACCTGGAGATGCAAGGACGATGCGGATCGTCCAATCATACGATGTCGATGGCAAAAACGCGCTAATTTCTCGTCT  
TGGCTGGTGAAGTATTGGGTCGGCGGCAACTTTGGTGGCGTAAAAAAGCCCTGCGCCAGGGCAATCTCGGTAAT  
GATTTGCGTACGGTATTAATTAATTTTACATCAGGCATAA

>Cluster\_36822

ATGCGCATATTGCTGAGTAAATGATGACGGGGTACATGCACCCGGTATACAAAACGCTGGCGAAAGCCTTCCGCTGAGTTTGC  
TGACGTTCAAGTGGTTCGCCCGCATGTAACCGCAGCGCGCTTCAAATTTCTTGACACTGGAATCTCCCTCGCCAGCT  
TTACCTTTGAAAATGGTGTATATTGCTGTCAAAATGGGAACCCGACCGATTGCGTCTATCTTGGCGTGAATGCTGTGATG  
CGTCCGCGCCCGACATTTGTTGTCTCGGAATTAACGCCGGCCGAATCTGGGGATGATGTTATTTATTCGGTACGGT  
AGCCGCGCGATGGAAGGCCGCTATTTAGGTTTTCCGGCGCTTCCGCTCTCGCTTACGGGCAATAACATACGACACTG  
CCGCGCGGTAACCTGTTCAATTTTGGCGCACGTTGTGTAAGAGCCGCTGCGCACCGGGCGTATTTTAAATTAACGTT  
CCGATTTAACCTTGGTCAAAATCAAAGTATTTCGCGTACGCGCTGCGGTACAGCATTCGCGGCAAGGAGTACCC  
GCAGCAAGATCCGCGCGCAATACGCTGTACTGGATTGGCCCGCGGGGTAATGTGATGCGGGTCCGGGGACCGATT  
TTGCTGCGGTAGATGAGGCTATGCTTCCATCAGCCGCTGCAATGTGGATTTAATGCGCATAGCGCGCAAGATGTGGTT  
TCAGACTGGTTAAACAGCGTGGGAGTTGGCACGAATGGTAA

>Cluster\_24137

ATGAAAAAGCGGGTCTTCTTTTTTTGGTGATGATAGTATTCGCGGTTGTGGTGCAGGATTTGGTTACTGGAATTAAC  
CGGTGAAGAGTCAGACCGTTACGTAAGATTGTTCTTGAGCAATGTTTGCACAACAGCAGGAAAACCAAACCCGTCGC  
CATGTGCGGAAGTCAAAACCAACGCCGGATACGTTGGTTTTAAAAGATCGTATGGCCACTGCAATATCTGTTGATGCCA  
ACGTACCGTATTAACGGTACTGAAAGCCATTTGTTGACCGATCCGTCACGCCAATTTTTTCTGGTTAGCTGGCAGGC  
GCTGATTTTATGAGCAAAAATACGGCAGCCTGTTCCGATCGCGCGGATCTCTGGCGATCAACTCCCGACCGGGC  
GTACGCAAAAACATTTTCAATTTTCTGATTTCTGATTTCTGATGTCGCGCAAACTGGATAACAATCTGGCGAAC  
ATCAGTAGCCGCTGGTTGCCACTGCCAGTGGTTGCGTGGGATGAGTACCTGGCGCTCGGTAACGGAAGGCAACT  
GGTACAACGCAGCCATTTATGATGCTGGCGGAAGAGTGCCTGAGGCGCGGGAACATATGGGAAGCTACGGGCTGGCGA  
TGGTACGGCAGATGATAACTCATTTGTATTGCTGGCGACACAACGAAATCTACTGACCTGAACCGTCTTACGCGGAG  
GAAATCAGGATCATCAGTGTGAGATTTTGGCTTAA

>Cluster\_37387

ATGAATAAGTTTGAAGATATTGCGGGCGTCTGTTTTGATCTTGTGATGTTGACGCTGGTGCAGAGTCTCTGGTCTGCTGC  
TGGCGTAGATATGGCGCTGATGCTGCTGGAGTTGCCCGTCGCAAGTGAAGAACCGGTTATTAACCTGGATTGGTAAACGGCG  
CAGATGTTCTGATGGAGCGCATTTGACCTGGGCGCTCAGGAACGTCGACTCAGCGTAAAACAATGGGTAAACCGCC  
GTTGATGACGACATTTCCGCGAGAAGAACAGTACGTAATTTGCGTAAACTGTTTCGATCGCTACTATGGCGAGGTTGCCGA  
AGAGGGGACGTTTTTGTTCGCCGAGTTGCCGATACGTTGGGCGGTTGCAAGGCTAAAGGCTGCGCTAGGCTTGGTCA  
CCAACAAACCGACCGCTTCTGTCGCGCCGCTGCTGAAGCCTTAGATAATGCAAACTTACGCGTGGTGAATTTGGTGGT  
GATGATGTGCAAAAACAAAACCGATCCGACCGCTGTACTTGGTGGCTGAGCGGATGGGAATGCCCACAAACAGAT  
GCTGTTTTGTCGGGACTCAGCAATGATATTACGGCGGCAAAAGCGGAGGTTGCCCATCAGTTGGCTTAACTACGGAT  
ATAACTACGGCGAGGCTATCGATCTCAGCCAGCCTGATGTAATTTATCAGTCTATAAATGACCTTCTGCCCGATTAGGG



ATGCCAGCACCGGACTGTACGATATAAACATCCGGTACCGGGGATACGAATGGAATGACGAATACGCCAGAAAAGGGAT  
AACAACTTCTCTAATAAGTGAATCATTCGCTATCGGTTACACGGTACGCGATGTCGCCAAAAGGCAGCTGGATCGACG  
AATCCACGGTACCGTACCGAAAGCGCCGCCGTTAACACCTGCCTCGGCGACCAAAGTGCAGGAGCCGACGCGCGC  
CAGGAAGATTACACCTTTTGAAGTTACCGCAACGCCGACGGCAGCGTGGGCACCAAAAACCTGTTGGGTATTACACACG  
CGTGCACATGCGCAGCGTGGAGACTACGTGGTTAAATTTACGAACGCGACTGCTGCCGAAATACCTGAGCATCG  
ACGGCGTGGTTCGACTTGAACCACCTCTACGGCTGTGGCGTAGCGATTAATGTACCGGCGCCGCTGGTGCATTTCCGACC  
ATCCATAAATTATCGCTGAACCCAACTTCGGTGGCGAAGTGTGGTGGTGGGATGAGTGCAGTGCAGCGACGCGT  
CTCCGGCTTACCACTAACCCCGCTGTCGGCTACGACTCTGACTGCTGGTGCCTGCGGCGAACGGTGTATGTTCTCCG  
AAGTCACTGAAGTACGCGACGCCATTCTGTTAACGCCACGCGCATCAATGAAGAAGTGGGCAGGCGTCTGCTCGAA  
GAGATGGCCTGA

>Cluster\_18914

ATGGGCGCCATTACCAGATATATGAGCAGGAAATGTTCTATAACTGGATAGGCGATGGTAAACGATGTGTAGCATTCCA  
CGAAGCGGGCCATGCAGTAGCCGATGGCTTATTCGCTTAGATATGACAGGTTATCGCCATTATGGATGAATCCGGCTACG  
TTGCTGGCGAACATGTACATGAAGCCAGTGTGGGCGTGTAAACACGGCATAATCCACAGCCACGATCTCAGGCGT  
TTGCGGGAGAGTAAATCTGGTGTAGTGGGACGATGGCAAAGTTATCCCTTTTATACGCTACTACGCGGAAGGTATAAA  
CGCGATGAACAAAGGCCCTTTTGTAGCCCTCGTGGACAGTAAGCGAAGCCATTTACGAAAATAACGAAATTTTCA  
ATATAAAGTATTACCTCCCTACCGCTATGACATGGCTAACGTAAGTAAATGACATGCTCGATTTAAATATGTCGCAAG  
CGAATTAACAGGAAGTAAATGCTTTCTAACTTGTGAAAAGACCAAATTCCTCATGACTCAATACTGGCCGGAAGTAGG  
AAAAATAGCGCATTTGCTTGGAGCGGATAACATTTGTTAATGGCCGCGATGTTAGCTCGCTAATCGGCCCAACGTCATTG  
ACCGGCAACGCCATTTTGGTATCTGACTTGAGCAGTACATTTGCTCATCTCCGCTACTCGTCCCTGCCATCGAATGAA  
TTAGCAACTTGA

>Cluster\_3457

ATGGATACCTTACTTTTTGCAAGCCTGATGGGGCTGTATTACTGGTTTGCCTGGTGGCTTACCTTCTCCG  
CATGCTGTTACAGCCAGTGGTGGCGGCTTTGTCCGCTGCTCGGCAATATGCTGCGCGATGATTATCGGG  
CGGGGATGCAAGTGGTCTATCTGGGTGTGACCTCAACGCCAGGCGGCAATGTGCCGTGAGCCGCGCTGGCGGCTGT  
ATCGCCATTCCTATCGCGCTTAAGGCCAATATGGACCCGAACCTGGCGATTGCACTGGCGATTCCATTGGCGTTATCGG  
CGTATTCCTCGACAGTTCGCTGCGCAGCTAAATGGCGCTGGGTGCATATGGCCGATAAACACGCGGAAACGGCCAAATA  
TGTCAAGCATTATGCGCTGCGCTTTCTCTACCCGCGCTGCTGGGCTGGTACTACGTTTCCAGTGTGTTCCGCGCC  
AACTACTTCGCGCAGAACGTAGTGGAAAGTTTCTCAAGCTGATGCGCAGTGGCTGACCCACTCGTTTGAATCATGGG  
CGGGATTCCTCCGCGCTGGGCTTCGCCATCACATTAATGGTGTATGGTAAAAAGAGCCTGCTGCCGTGGTTTATCGGG  
GATTTCTCGCGTGTGTACCTCAAGGTGGACATCATGGCGATGGCGATTTTCGGCACCTGCGTGGCTTCTGTATTA  
GGCTGGCGAAAATGAAGGAGCGGCATAA

>Cluster\_44142

ATGGATTATGTTTTCTCCGATGTTTTCTCTGTCAATCATTGATTTAATTATAAACAGGAGAGTTATCTCGTCAAAAA  
AAATTCATTGTTTTATTGTAAGCGACAAAATAGAAGGGAGTTACCAGTATGCCCTCTAAACTAAGAAATGTTGATATAG  
ATAAAGAAAACATGTTTTATCTTTTATCGACGTAAGTAAATGAGTGCCTGGCAAAATTTACTCTTGATAAAGAAATGGCTAT  
ATTGCTGAAGAGGAACCTCCATTATCGCTGTTTTTCTCTGTTTGAAGGGATTAATAAGCAGACTCACACTCCCTTTG  
GTTAAAAGAAAGACTATGATATCTTACTTGCCATGTTCAAAAAACGCGAAAGTGTAAATTTCTTTATACTAACAAATA  
TAAATACATTTACTGTAAAATTAAGTAAATCAAGTAAATTAATATTGAGCGGCAATGGCATTAAAGATATTGCGGAA  
TTGATTTTACGAGTGAAGGTTTTAATAAAAAAAGATTAAGGGATGAAGGAACGTCATTTACTGAAATATTGAGAGATAC  
TAGGATGAGGTATGCAAAAAACATCAACTTCAAACTCTATTTCTATCAATGTCGTAGCCGAAATGTGGCTATAACA  
GTACTTCAATTTTCAATATGTCATTTAAAGATTATTATGGTGTACGCCATCTCATTATTTTGAGAAAATAATCGCGCTC  
ACAGATGGAATAAACAAAACAAATGACTGA

>Cluster\_39372

ATGAAAAACCCGAACTGGAACAACCTGATTAACGAAAACTGAACAGCGCGGCGATTAGTGATTACGCGCCGAATGGTTT  
GCAGGTGGAAGGCAAGAGACAGTGCAAAAAATGTTACCGGTGTCAGTGCAGCCAGGCTTTGCTCGATGAGGCAGTGC  
GTTTGGGCGCGGATGCGGTCATTGTACATCATGCTACTTCTGAAAGGTGAATCTCCGGTCATTGCGGAAATGAAGCCT  
AACCGTTTTAAAACGTTGCTGGCGAATGATATCAACCTGTATGGTGGCATTTGCCGCTTGACGCACATCCTGAGCTGGG  
CAATAACGCACAGCTGGCGGCTTACTGGGGATCACGGTCATGGCGAAATGAGCCGTTGGTCCCGTGGGGGCAACTGA  
CCATGCTGTGCGGGGACTGAACTGGCCTCCTGGATTGAAGCGGCTGCGGACGTAAGCCGTTATGGTGTGGCGATACC  
GGGCTGAGGTGGTTTACGCGCTGCGCTGGTGCACGGGGCGGGCAAAGTTTTATCGATAGCCGCGGCTTTTGGCGT  
GGATGCTTTTATTACTGGCGAAGTTTCTGAACAGACCAATTCATTCAGCCCGGAGCAGGGATTGCATTTTATGCTGCGG  
GTCACCATGCCACTGAACCGGTTGATTCGCGCATGAGCGAGTGGTGAATGAAAAACCGATCTTGATGTGACCTTT  
ATTGATATTCCTAATCCTGCATAA

>Cluster\_13116

ATGAGCCAATATCTGATTTTTTCAGCTTCATGGGCGGATGGCGTCTGGGGGTGATGCTCCAGGTGAAGTTCGTCATAC  
CCATGAACCTTCTTCGCGCTCAGCATTTGCTGGGCTACTGGCTGCCGGGTAGGGATTGCGCGTGATGATACCGAACGCT  
TAAACGCGTTTTAATCGCCACTATTCACCTGGTGGTTTGCAGCCAGCGTAAACCGCTGGGACGCGGATATCACACGGTC  
CAGATGCCAAAAGAGGTGCGTAAAGCACGTTATTTTACGCGCTCGCAAGAGATTGAGCGACCTGAGCTTTTGGCGCGAT  
TATCTCCGGCGGACTACTACCGGATGCTGGTGGATGGTGGCGGTGGCAACAACAGCCGATGCGCCTTACAGCCTCG  
AACAGTTGCGAGGACGTTTACGCCATCCAGTTTTTCCGCTTTATCTGGGGGCAAAAAGTCATCCGCTGGCATTACCTCTT  
GCGCGTTACTGCTGCAAGGCAACGCGTGTGATGCTTATGTAATGCATACCAACAGTATCAGGATCATTTCCATAAAGT  
GAAAGTCTCACTCCGAAACTTCAGGATGAATGCTGGTGGAAAGGAAACACGACGGCTGGTCCGAGCAAAAATATTAC  
GCCGCGGGATGTTCTTTAAATCGTCAGCAGTGGCTGTTTGGGGAACGACCGTCAATCAGGGGCGGTGGCTCAGCAAG  
GAGGAACCATGTACTCTCAAGAATAA

>Cluster\_42784

ATGAAAAGAAAACCATTAATGTCATTTTTTCATTGCGATATTTATTTATGCTAACCATATTAATATTATTTCCATTTAATTG  
CACTTACAAAAATCACCTCAAGAACACTCACTTTCATTTATAAAAACAATTACCAAATACGGTGAACCTATCATCTCTTA  
CTTATAATAAAGAGAATGATTTCTGTATGCCACCCAGAATAGCCCTGCACAGTACTTAAAAAACCAAAAGTGGCGAC  
ATCATGGACAGAGCCCGCTGCTTTTATCTCTGATGCTGAAACAATTAAGAACATACAGGAAACATTTTGGTGCAGT  
AGACGAAAAGACTTCTGAACATTTCTTTTTTACAGTTACAAAAGATATGCATATCTCCTTTGAAATAAAAATTCAGTTAG  
AAAAATTCATAAAAAGAAATAGAGGGTTTGAAGGGCTGGCATGGAAGCAGATGATCGGATGCTGTTTGTGCGAAAAGAA  
AGACGCCAAAGTAAAATATTTATATCAACTTCTCCAGACTGCTGAGTGTAAAGCAAGCAACTATTTCCAGAGGCACT  
AAATGATATACGTTTAAACGATAATACCGGCTGGCTTTAATAATGAAAGTCTGATGATTTCTGTCGATGAAATCGCGTA  
AATTACTCAAGTTTAACTGACAGAGATGCTTTTCAATGAGATGCTTGACCTGACAAAAGGAAATCATTTCTGACAGT  
GATTTGCCCAACCTGAAGGAATGTAACCTGCTGATGAAAGCATTATGTTGCCAGTGAACCTGATATCTCGCGAA  
ATTTGTCCTAATAAGTAA

>Cluster\_18552

ATGAAACCTATGCTGTTTTTGGTAATCCGATAGCCACAGCAAAATCGCCATTCAATTCATCAGCAATTTGCTCAGCAACT

GAATATTGAACATCCCTATGGGCGCGTGTGGCACCCATCAATGATTTTCATCAACACACTGAACGCTTTCTTTAGTGCTG  
GTGGTAAAGGTGCCAATGTGACGGTACCTTTTAAAGAAGAGGCTTTTGGCAGAGCGGATGAGCTTACTGAACGGGCGAGCG  
TTGGCTGGTGTGTTAATACCCCAAGCGGTTAGAAGATGGACGCTGCTGGGTGACAATACCGATGGTGTAGGCTTGT  
AAGCGATCGGAACGCTGTCTTTTATCCGTCCTGGTTTACGTTATCTGCTCATCGGGCGCTGGTGGAGACTCTCGGGCG  
TACTACTGCCACTCTTTCCCTGGACTGTGCGGTGACAATCAATACGGACGGTATTCCGCGCGGAAAGAGTAA  
TTGTTGGCGCACACTGGCAGTATTCAGGCGTGGGTATGGACAACTGGAAGGTCATGAGTTTGTATCTATTATTAATGC  
AACATCCAGTGGCATCAGTGGTGTATTTCCGGCGATCCCGTCACTGCTCATTCATCCAGGCATTTATTGCTATGACATGT  
TCTATCAGAAAGGAAAACTCCTTTTCTGGCATGGTGTGAGCAGCGAGGCTCAAAGCGTAATGCTGATGGTTTAGGAATG  
CTGGTGGCACAGGCGGCTCATGCCTTCTTTGGCATGGCGTCTGCTGATGTAGAACCGGTCATCAAACATTGCA  
ACAGGAGTTGTCAGCGTGA

>Cluster\_23494

ATGAAATCACTGTTTAAAGTAAACGCTGCTGGCGACCACAATGGCCGTTGCCCTGCATGCACCAATCACTTTTGCTGCTGA  
AGCTGCAAAAACCTGCTACATCTGCTGACAGCAAAGCAGCGTTCAAAAATGACGATCAGAAATCAGCTTATGCACTGGGTG  
CTTCGCTGGGTGCTTACATGGAAAACCTCTTAAAGAACAAGAAAACTGGGCATCAAACGGATAAAGATCAGCTGATC  
GCTGGTGTTCAGGATGCAATTTGCTGATAAGAGCAAACCTTCCGACCAAGAGATCGAACAGACTCTGCAAGCATTCGAAGC  
TCGTTGTAAGTCTTCTGCTCAGGCGAAGATGAAAAAGACGCGGCTGATAACGAAGCAAAAAGTAAAGAGTACCAGGAGA  
AATTTGCCAAAAGAGAAAGTGTGAAAACCTTCTTCCACTGGTCTGGTTTATCAGGTAGTGAAGCCGGAAGGCGAAGCA  
CCGAAAGACAGCGATACTGTCGTCGTAACACAAAGGTACGCTGATCGACGGTAAAGAGTTCGACAACCTTTACACCCG  
TGGTGAACCGCTCTCTTTCCGCTGAGACGGTGTATCCCGGGTGGACAGAAGGCTGTAAGAACAATCAAGAAAGGCGGTA  
AGATCAAACCTGTTATTCACAGAACTGGCTTACGGCAAAGCGGGTGTCCGGGGATCCCACGAATTTACCTGGTG  
TTTGACGTAGAGCTGCTGATGTGAAACCAGCGCGAAGGCAGATGCAAAGCCGGAAGCTAATGCGAAAGCCGACGACT  
TGCTAAAAATAA

>Cluster\_13927

ATGCTCGAATTATCCATGACGTTACCGATTAAAGTGCAAAATGGTGGATTATTTATTTCCCGGGCTAGGGAGGCATCC  
TGCAAGGCGGCTGGAGTCATGGGAAATTTATCTTTGTCGAAAAAGGTCGATTAACGATTGAGGAAGAAGACGGATATTT  
TGGTGCATGCGGGAGAGAGTTTATCTGCTGGCCGAATCGACAACATGTTGGGGTGGAGGATTTTCCCGCCGATCTCAA  
TTTTACTGGCTGCATTTAGAGTTAAAGCGCGGATAGCGACCTCGCTGGCTTACTCATCTTAGCGTCCCGCAACAA  
GAAGTTGTCGATCCCGAGGCGCTGGTGGCCCTTTCGCCAGTCTTAAAGCGAACAGGAAAGCATCAACGCATCCGG  
CGCTGGAGTTTATGTCGCTGATTTTGCAGCAGCTACCCGTCGACGCGCTCTGATGAACAGGCCGATGGCGCAGGC  
ACCACCTTGCCTGGAAAGCGCAGAACTGATCCGCACGCAATATCATCGCCGCTTTCCACGCGCTTTTAGCCCGCA  
GCTGTACTGCAATGCCGATTATCTTGGGCGGCTTACCGCGGGTGTTCATCTGACGTTAACAGAAGCAATCCATCGCC  
AGCGAGTCCGCGAAGCCGAAAAGCTGTTAATTAGCGAAGCGGATCGCTCACTGAAGTGGCTGCGTTGTCGGGTTAAT  
GACGTTGGCTATTTCCGGCAGATTTTCCGCAAGCACACCGGTTAACGCCAGCAGCGTGAAGCGGCTTACAGCAGGA  
ACATATCAATTCGTAG

>Cluster\_27978

ATGTTCTGGCTGATGCTGTTATATTTCTGCAAAAAGTGGCGCATTCACTCTGGCGCTATTTCTCCTTTCTGCGGAATA  
TACGGCGGTTTCCCATCGGCGAATAAACCGCCCGTGCAGATGCAAAAACGTTTCGATAAAAAAGACGTGCAATTAATCA  
GCCAGCAAACTGGTTTGGCAAAATATCAGCCCGTCGCCACCGGTAACCACTGAACTGTGCCCTGGGCAAGAAC  
CGTCTTAATGTGGTGGCTGGCGGATCGCTTCTGGTGCAGACCCGCGGTTATTGAAGAAGGCGCAACAGCAGGT  
CTATTTGCAAGGTGAACGGCTTGGCTCTCACAACCGCAGTGTGATTGAGGAAATCAACCGGACCATGTGATGCTGCGCTATC  
AGGGGAAAATGGAACGCTGAGTCTGGCAGAGGAGGAACGCCCCCTGTGGCGGTGACAGCAAAAAGCCGCGCAGCGAC  
GAAGCAAAGCAAGCTGTTGCTGAACCTGTCGTCAGTGCGCCAGTGGAGATCCGGGCTGCCGTGCGTCAAGCACTGGCGAA  
AGATCCCGCAAAAATTTTAACTATATCCAGCTTACGCTGTGCGTAAGGAGGAATGTGCGTTATGCAAGTGAAGCGT  
GGGCGATCGTTCTGTTGATGCCAGCGGTTTACGGGAAGCGGATATCGCCATTGCGCTAAATCAGCAGGATTTCACT  
GATCCACGAGCAATGATTGCTCTGATGCGGCAGTTACCTTCAATGGATTCCATCAACTTACGTTTTTACGCAAGGTTG  
CGGCTACGACATTTCCATCGCACTGCGCTAA

>Cluster\_26649

ATGGATAATGCTGTTGATCGCCACGTTTTTTATATTTCTGATGGTACGGCAATAACTGCGGAGGTATTAGGACACGCAGT  
AATGTCACAAATTTCCCGTCACTATCAGCAGCATTACGCTGCGGTTTGTGCAAAAATGAGAGCCGTCACCGGCGAGTGAAGG  
ATCAGATTGACGCAATTTATCACCAGCAGGTGTGCGCCGCTGGTCTTCTACTCCATCGTGTGCGGAGATTCCGCGCT  
ATCATCTTCCAAAAGTGAAGGCTTTTGGCAGGATATCGTTCAGGCGCTGGTTGCCCGCTTACAACAAGAGATGAAACTGGA  
TCCAACCGCGATTGCTCATCGTACCATGGCTTAAACCTAATAATCTCAATAAATATGATGCGCGCATTTGCGGCGATTG  
ATTAACCCCTTGGCCACGATGACGGTATTTCTGTTGCGCAATCTGGACAGGCTCAGGTGATCCGCTCGGTGTTTCTCCG  
TGTGGTAAAACCCCAACAGTCTGTATCTGGCAATGCAATTTGGTATCCGCGCGGCAATTACCCCTTTATTTGCGGACGA  
TATGGATAATCTGTTGCTTACCCGCGCTCAAACCGCTTACGCAAAAATTTGTTCCGCTGACTATCGACCCGGAACGCT  
TGGCGGCGATTCCGCGAGGAACGTCGGGAGAACAGTCCGCTATGCTTCCGTCAGTGCAGGATGGAAGTCCGCGAAGTG  
GAAGCGTTGATACCGTAAAATCAGATCCCGTGGATTAACAGTACCAATTTATTCGGTAGAAGAGATTGCCACCAAGATCCT  
CGATATCATGGGCTTAGCCCGCAATGACTAG

>Cluster\_24797

ATGCGATTAGCTTCCCGTTTTGGTGGTATAATTCATCCGCGTGAACGCTCTTAAACGGATGATGAATTAATGCAGTT  
CGTGCCTTCGGTATTTTCCGGTGATAAATGAGTCCCGGAGTGAACGTTATACGTATATTTCAACAATCAATATCATCA  
ATAAGTTACGTGATGAAGGTTTCCAGCCATCTTTGCTGTGACAGTCCGGTTGCTGATTTGGGACGTCGCGAATACAGT  
AAACATATGTTACGTTCTCGCAGGGAAGGGCATATTAACGGACAGGAAGTTCCTGAAATATCTGCTTAATTCACATGA  
TGGTTTATCCAGTTATCAGATGATCCCGGAAATTTTCTGTTTTGCTGTCACAAATGGCCTGGTGTGCGGAAATAAATTTG  
CGGAAATCCGCTTCCACATAAAGGTGATATTTGCGGGCAGGTTATCGAGGAGCGTATGAAGTGTCCGGTGTCTTTGAT  
AAGTCACTGATAAATGAGGCGATGAAAGAAATTCATCTTAACAGTACGACGCAACATTTAATTTGGCAGCTGACT  
GATGGTCAAGTATGAAGTGAATAAAGCCAGTACACCTGAACAGATAATTTACTCCCGTCTCGGGAAGACAAC  
AGAACGATCTCTGGACAACCTGGCAGCGGTTCCAGGAGAAATGATAAAAAGGTTGATTATCGGGGCGAAGTGCCTCCGG  
AAAAATACCAGGACAAGGCCATTACAGGATTTGATGGTGATAAAGAATCAACAAGCGGTTATGGGTGATTGCCGAACA  
GTTCAGAAAAGTGGAAAGTCAATGA

>Cluster\_5345

ATGGATAAACCAAGGCGTACTGCGCCGTTTTCTCCCGCTTCTTTTACTTTCCGGCTTGTACCGTTGATGATCAGCCA  
GCCAGACCATCAGCCACAGCAGTAGATGCCGAGGCAAAAACATGGGCTGTCAAATCCAGCATCAAAGCTCTTTACCCG  
AACAAATCAAATAAAGAAATAAACCGCACCTGATCTCAAACCCCGCGATTTGCTGTTCTCCTCAAGCCCTTGGGGTAACTCA  
TTTTGAATCCGCTTCTCAGCATTCTCTGTGAGTACGTTGCAATCTTCTGGGTGATAAATACGTTGCAGAGCGAC  
AGGCGCTGGCGTCCAGTCTTTCCCTTAAAAAGCGATGAAGCATAGTGATAAGCTTTTCTGCTTACGAGTCCCGGATC  
TTACCCCGCAACAAGACAGATATCACCGGTTTGGCAATAAATAAAGATAGCGGTTATAACTATCGCGGATTTGCT  
GAATTTATTTCCCTTTATGGTGTACTGCCAGATGTGCTCACTGAATCCGTTCTCCGAGGATTTTCCGCAACAGTGCCTCAG  
CGGCTGGCGAAAGCGCAGTTAAGCAGTGTGGCGAAGGAGACAAAAGTCTGGTGTGTTGTTCCGAAATTTGTCACGGATG

CCTTTGCCAAAGCCGGGCATCCACTTACACTGGCGCAATCGGGCTGGATTAGCCCTGCCGATCTGATGCATATGCGTATT  
GGTGATGTCTCTGCGTTTTAAGCCAGAAACGCAGTTACAGTATGTTGGGCACCTGAAGCCTGGGATTTATATCAAGCCGG  
TCGCTTTGTTGGTTTGACCCGGTGA  
>Cluster\_5175  
ATGTCAGGCTCCGTTATACACAGCCAGTCTGCAGCCAGGTTACCGGCAGTGTATTCTGCCGGACAGTCTCCACAACCTCC  
TGTGTGTCATTGATATATCCGGCAGCTCTGGCACCTGCCAGATGTCGATGGTTCATGATGAACGCCGAAATATCTGCTGG  
CTCCGGAAAGTGAGTGCCTTCTCCATTACGTCGCCGATCTACGCCGCAAGATGCTGCTGGCCACACTGTGGAACACCGGT  
GCGCGCATTAATGAAGCACTGGCGCTGACGCGGGGAGATTTTTGCTCGCCCTCCGTATCCGTTTGTGCAGCTGGCCAC  
TCTGAAGCAGCGGACCGAAAAGCCGACAGGACGCGGAGGAAACGCTTCCCGGACAGCAGACTCACCGGCTGGTTCCGC  
TCTCCGACTCTGGTACGTCAGTCTGACGCTGCAGACGATGGTGGCAACACTGAAAATTCCTCTGGAACGGCGTAATAACGA  
ACAGGCAGGACAGAGAAAGCCGGATCTGGGAAGTGACGGACAGAACGGTCCAGGACCTGGATTGGGGAGGCGGTTGCCG  
TGCTGTACTGACGGTGTGACGTTCTCTGTCCCGGTCACGCCACATACGTTCCGCCATTCCTATGCGATGCACATGCTGT  
ATGCCGGTATACAGGCTGACGAGCTTGCAGAGCCTGATGGGCAATAAGTCCATCAGCTCAACGGAGGTCACACGAAGGTA  
TTTTGCGCTGGATGTGGCTGCACGGCACCGGGTGCAGTTTTTCGATGCTGAGTCCGATGCGGTCAACATGCTGAAAACAG  
ACAGCATAA  
>Cluster\_38909  
ATGCGCACAAAGCGAGCTTACGCAACTGATGGATCTGGCGCTGGGGCTGTGGTTTCCCTTCTGTCGCATATATGGCGTTTCT  
GCGCTATATGCCGGTGTGGATAACAGCGCCCTGACCGCGCGCTGCGGATTAATTTGTCGCTGGCGTGGCGATCATCA  
TCAGCCCGTTGATCCCCATCCATTCCCCACGACCTGCTTTCGCTCAATAGCCTGATCCTGACGGTAGAGCAAAATTTTA  
TGGGCATGTTATTCGGGCTGATGTTTTCAGTTTCTGTTTCTGGCGCTGCAACTGGCCGGGCAAATTCCTCTGTTCAAT  
GGGATGACCATGGCGGTGATGAACGACCAAGCAGCGCGCATCGACTACCGTGTGGCGGAGTTGATCAACGCTCTACG  
CGATCCTGCTATTTTTTGCATGGACGGGCATCTGCTGCTGTTAAGCGTGTGTACAAGAGCTTACCCTACTGGCCGAT  
GGCAACGGCTGCATCCGCAACCTGCGCACCATCGCCCTGGCCTTTAGCTGGGTACTGGCGTCCGCATCACTGTCTGGC  
GCTGCCGACCACTTTTATCATGCTGATTGTGCGAGGCTGTTTTGGCCTGCTCAACCGCATTCGCGCGGCAACTTTT  
TTTTGCTCGGCTTTCCCATCAACATGCTGGCAGGGCTGGTCTGCTTCCGACCCCTGCTCTACAACCTGCCGGATCACTAT  
CTGCATCTGGCGAATTTTGTGTTGACGCAACTGACGCGCTGAAAGGTCATATGCGCGATAG  
>Cluster\_42216  
ATGGGATCTGAAATCAGTAAAAAGATAACCCGCTCTGGGCTTTCGTTCTGTCCTACTGCTACAAGCAAGCTTTAACTACGA  
AAGGATGCAGGCGGGCGGTTTTTACCTGGCGATATGCGGATCCTGAAAAGATTTATAAGGACGACAAAACCGGGCTTAA  
GCGCGCGATGAAAGATAACCTCGAATTTATTAATACCACCTAATCTGGTCCGATTCCTGATGGGGTTATTAATTTTCG  
ATGGAAGAAAAAGGAGAAAAACCGCGACACCATTAAGGCGCTCAAAGTGGCGCTGTTTGGCCCAATCGCCGGATTGGCGA  
TGGCATTTCTGTTTACCTTGTGCAATTATGCGGAGGATTTGCTCATCGTTTGGCAGTCAGGGGAACTGTTGGGAC  
CGATTTTGTTTTTTCCGCTTTACCTGCTTATCTTTTTCTGCGCTGCGGTGGACCCACGTCGGTTATTCAGTCCGGCTG  
AAGCGCATCGATAAAGTGGGAGAGAACTCGCAGATGATGCTCCTTCCGCAACCATCCCGGGATCACGGTAATCGGGCG  
GCTGATCGCTTCGATGTGCATATTAACGTGGTGACATGTTTCCATCGACAGTACCACAGCGTCGCGCTGCAGCAGG  
ATTTCTTCGATAAAGCTTCCCGAACATTTACCAGATGGCCTACACCCGTTGATGATATTAATTCCTGCGGGTAAAAAA  
GCGCATCCGGTGTGTTAATCGGCGTACTTTTTGCTCTCTATGTTTGTTCGATTCGGCATTTTTGTAA  
>Cluster\_23537  
ATGGCATTTAAGAACTGGCAAAATGGTTTGCATTTACAACAGCAAGAAGCGGTAGCGGTGCTATCTGTCGGAGCGCAAA  
AGAAATGCTTATTGACCGCTGGTGGCGGTTGCCACTGGAGAACGACATTTATCAAAGATGGGCGGATGTTGATGTGCAGC  
GGCTGGCTAACACGTTGTTACCGTGGAGTCTGTAAGTGGCGCAGGCTCATCACATATGTTGGCGTTTCCCGCAGTCCG  
ACATTAACAGCGTCAATTTCCAGCCCGTCGATGTCCTCGGTGAGCGGGAGCAAAATGGCTGGCTGTCCGGACGATGCG  
CCGTGACCTGGATATGGATCCGGACTCCTGCGCTTGCATACAGCAGAACTCACTAGTCCCGCTATAACGTGACCTG  
CCGCGCAAAGCAAAGAGCTGGCAACGCTGCTTACTCTGGCAGAAAGGTTGCGTGTTCATGTTAGCGCGATCACTCCGGAT  
GCCAGTGCATTACAGCATTCCTGCTTTTTTACCTTCTCATCAGCAATGCTGCGCTGGCGTATAACGAAACAGTGGCT  
GTGGGCGACGCGCTATAGCTGGGGGCGCAAACTGGCGGTGGGGATGACTAGCGGAAAGGAGTGGCGGCGAGGTTATCTG  
TTGATCCGAAAGCGTCCGCTATGTGGCGAAGCGGATTTGACCCCTGGGAGGCGGTTTCTGTTCTGTCAGCCCGCTA  
CCGCCACCAGGTGGAGACTTTGCCATCGCGCTGGGGCTGGCGCTGGGAAGGTGTACTGA  
>Cluster\_48610  
ATGAAAGACGAAATTCAGAAATAGCCTGCGCATCATTTGATAAACTGGTTTAGAAATCAGCGAGAGCAATCGGCTAGA  
CATCATTAAGAAAGCCGTTCAATACGGCAATGGATCATAATCGCCACTCGTTTAGTCGAGATCCCGCTACCGGGCTACCTT  
ATCTGAAGTTAAGTTGCGCGTATGGGGCGAACCTGCACATGCACGACGTTCTGCATTAGTTGTTTTTGTACGCAAGAA  
AATTAACGAACTCAAAGTGCAGGTTGGGGCGTGGTTTGGATGGCAGAGTCACTATACAGATACCAATATCTGCTCCTCC  
AGGTGACGAAATATGAAGCCGTCATTCGAGAATCAATTCGAGCTATCGCGAGTTAGCTTTGCTGGAAGACAAAGCAAA  
ACTTTGAAGATTAATGCTGTCGTTAAAGCTGAACCAACATTTGCTCTGAAAGCCGATTTTCGTCACCCGCAACACTG  
TTGGAGTTTTGATTAATAAAGGGCTAATGATGCTGTAACCTAATCAGGGAGAGCAATATTCGACTCTTTGCGCAT  
GTGCAAAAGCCAGTTGGATCTTTGTCATATCATGTTGATGCGGGGAAGGCGTGTGATGGCGTAATGGCGAAATTTGCTG  
GAAAGATGGTCAAGTATGCTAACGAATTAACGATGATAGACAGGCGCAAAATCATAACGCAACCAATCATGTACAGAG  
CTTCTTCCCGCTATCGCTTAGAAAGCGATCAGCGCAACGCTGAAAGCGATTAACGCTCTTTACAGCGGAGTGCATGA  
>Cluster\_26335  
ATGCTCGCCGTTTACCTGTTTCCGCGCACTTCCGGTGGCCATCATCAAGAAGGTCTGGTTCATGACGTTAACTGCTTCATC  
TTCTTCCCGCGCTGTTACGAATTTCTCTGTGGTTGTTGCGCTTATTATCATAATCGTATGCGCGCTGGCCCTTTGTGCG  
ACAAGATCGACCCACGCGATGTCGCTGAAAGTGGCAAGAGATGTTTACGCTGTTTGGACCTCAATTTGTACGCGAA  
CTTCAACAGCGTGGTTTTGATATCTTCCGACCTGAAATTTACGATATTCACCAACTGCAGCGCACGCTGTCGCTGCG  
TGCAGTCTGACTTAGGCGTGGATGGTGAATGTTACGCGCTCCGGTGGGGCGCGTATGATGACCCGACGCGCTGAGGCAC  
TGGTGGCTTTGGCAAAGATGACCCGCTTTTGTGATGCTGACAGTATGACAGCATGGAAGCCAGCAGCTTCCGCGAT  
CTTGGCGTACACTGTCACCTGCAGATTAATGCAGAACGCTTGGCGGCACTGACGCAAAAAATGTTGGCTTGTGTTGGT  
GTGTTCTGCTCAGGAAGCTGCGCGCTTTAAACAGGATTTGGTTCAGGAGTTCAAACCTGTTTACGCCGGCATTGCTCCG  
AGGGAGTGAAGCTGGTGACAGCGCCGATTAATGACGCCAGAACAGGCGTGGCGGCTGGTGTGATTAATGGTGTAT  
GGTCCCGGTAACGCAATCGGTAGATCCAGCGCAACGCTGAAAGCGATTAACGCTCTTTACAGCGGAGTGCATGA  
>Cluster\_41862  
ATGAATCAAAATCGACCGTTTGTCTACCATCATGACGCGCTGCGGACCCGAAAACGGCTGCCCCGTTGGGATAAAGAGCA  
GACATTTGCCACCATGTCGCCCTTACACCTTGAAGAACTCAGAGGCTGCGACGCAATCGCCGTTGAAGATTTTGACG  
ATCTGCGCGGTAACCTGGCGGACCTGCTGTTCCAGGCTGTTTACGCACAAATGGGCTCAGGAAGAAAGGGCGCTTTGAC  
TTTTAATGATATTTGCGCTGCTATTAGCGATAAAATAGAGCGTCCGATCCGCAATGTTTTGCTGACAGTTTTGCGCAAAA  
TAGTAGTGAAGTGTGTCGCTTTGGGAGCAAAATCAAACCAAGAGCGCGCAGAAAGCGCAGCATTCCGGCTGGACG  
ATATCTCTCGTAGTGTACCGCTTAAATGGCTGCGCAAAAATCCGAAACGTTGCGCAACGTTGGTTCTGACTGGACG  
ACGCTTGGTCCGGTAGTCGATAAAGTCTACGAAGAGATCGACGAGGTGATGTACGAGGCGCGGAGGCTGTTGTCGACCA  
GGCTAACTGGAGGAGAAATGGGTGACCTGCTGTTTGCACGCTCAATCTGGCTCGTATTTAGGGACAAAAGCGGAAA

TCGCATTGCAAAAAGCGAACGAAAAATTCGAGCGTCGTTTTTCGCGAAGTGGAGCGTATTGTTGCCGCGGTGGACTGGAA  
ATGACAGGTGTTGACCTCGAAACAATGGAAGAAGTCTGGCAACAGGTAAACCGCAGGAAATGATCTCTAA  
>Cluster\_34043  
ATGCAGGAATACACGAATCATTCCGATACCACCTTTTGCACTCGCTAATATCTCCTTTCTGTTGCCGGGCGCACGCTTTT  
GCATCCCGTGTCTGTTAACCTTTCTCTGCCGGGAAAGTACCGGTCTGATTTGGTCAACAACGGTTCCTGTAATCCACTCTGC  
TCAAAATGCTTGGCCGTCATCAGCCGCCGTCGGAAGGGGAGATTTCTTCTGATGCCAACCGCTGGAAAGCTGGAGCAGC  
AAAGCGTTTGGCCGCAAAGTGGCTTATTTCGCCGAGCAGCTTCTCCTCCGCGAGAAGGGATGACCGTGCCTGGAACCTGGTGGC  
GATTGGTCTGTTACCCGTTGGCATGGCGCGCTGGGGCGCTTTGGGGCGGAGATCGCGAAAAAGTGGAGGAACTATCTCGC  
TGGTTGGCTTAAACCGCTGGCGCATCGGCTGGTTCGATAGTCTCTCTGGCGGCAACGTCAGCGGGCGTGGATCGCCATG  
CTGGTGGCGCAGGATAGCCGTTGCTGTGTTGCTCGACGAACCGACCTCGGGCTGGATATCGCCACCAGGTTGATGTGCT  
GTCGCTGGTGCACCGTTTAAATCAGGAGCGTGGCTGACGGTCTATTGCCGTGTTGCACGATATCAATATGGCGGCACGCT  
ACTGTGATTATCTGGTCCGCTCGCGGGCGGTGAAATGATTGCTCAGGGAACGCTGCGGAAATATGCGCGGGCGAAACC  
CTCGAAATGATTTATGGCATCCCGATGGTATTTTGGCCGATCCGCGGGTGTGTCACCTGTGAGTTTTGTTTTATTGA  
>Cluster\_66808  
ATGGAACACAGCCGAATTAAGAAGAGAAATGTCGCACTCATAGAAAAATGCGTATGAGCAGTATCGGTATTGAGAGT  
ATTCAGAAAGTTTGGCGGTAACCTTATAAGCTCCATACCTATACCAGTACAGGAGTCAATTCAGGATGCCATGTCGCGGA  
TCTCATTTGCGGGCGCTCAATTTTTCTTTTCTGCGCATGAGAAGTGAAGCGCAGAGAGGATATCTTGCATCGTGAACCTG  
GCGATTAAGTTTCCGCGTACCCGCGTTTGTATTGCGGATGATGATATGAAGCTCGGCTGATTGGTTCATTGTCGCC  
ATCACCGCTGGACCGTGTATTAAGTAAAGCGTCAACGCTGGAGATTTTTCATCAGGAACCTTTTGTGATTAATGAGT  
TACGTCAGGCGACCGGACTGAACAATCAGTGGTACATTAACCAAGCCGGAGCTAAGCCGACGAGAGAGAAATA  
TTGCGCTTTATGTCGCGTGGCTACTCAATGACACAAAATTCGCGAGCAGCTTAAACGCAATATCAAAACGATCCGTCACA  
TAAATTTAATGTGATGTCGAAACGCGGCTCAGTCTGATGACAGGTTGTTGGAGGCCGAGATATTCGTTATGATG  
GGCATTGGCAAGCAAGTATGTTGATCCCTATTAA  
>Cluster\_25055  
ATGTTAATTAACCCATATAGCTCATAAACATCTCAATCGTCCGATATACGAAAAAGCGGTGATGGTGGTCCCTAAAGC  
TCAGGCGAAGGCCAGCAGCAGGCAATGATTTGCAGCGCAGCAGTGAATACGGTGTGAATAATCTCAAGCCGATG  
CAGAAGTCGGATTGCGCTGCTTTACAACAACACAGGACTGATGACTTGAAGGGCAGAAATAAGCCGCAATGATTTT  
TTGGTTCTCGGTTTATATAAAACACAGGAGATCAGGCGCTTTATCAGAACCTTGTCTCAGCAGAAGCTACCGGGGGCT  
TGGCTCAACAGCTACCAGTAACAGTTACTTCCATTGCGCCCATGCTTTATAACAATGGCTTAGTGGGCAATGCAAA  
ATTTATGGAACCTGCTAAATGTCGGGATGAATGCGGATCAGGCGAGGCAACGCGAGGCAAAACTACGCCAATAATACC  
GGACAACCTTTCAGGGGCTTGGCGCTATTGTCGAGGTCAGGCGCAGCAGCCATCCAGTCTTTCGCGTGGTATTGGTGG  
GGCAGCATCAGGCGCTTTAGCGGGTGGCAACTTGGTTCCGTTTCCGTAATAGGAACCTGCGCGCGCTATTGGTG  
GTGGGCTTATTGGTCTTGTGGGGGCTTGGATTCTAA  
>Cluster\_50988  
GTGTCGCATCCAAATAATCAATGTTGGTCTTATCATGGTGGTCTGATGACTGGCGTACACCGTATCGTTTATTTTATA  
CCTGCATCTGTAGTTTAACTTTCAGTCTAGATGGTGTGCTGCAACTGAGTATGACGCATTTGTTGCCACGGTTCACCGATGATA  
TTCACAATCAATCATGGGTTGGTGAACGGTCTTCTGTTAACCCGCGTTTAGCATGGCTGAAAAGTTCCTCTTAAAGCC  
CCTGAAGCTGATGTTGTGTATGTTGTTCCGCTCAGTCAAAGACAACCTTACTGGCTTCGGTGTGATATACAAACCC  
CTTCTGTGATGATGATCGAACCTTACACCGAGCAGTCAAACTACTTCCACAGCAGGAAAGAGAGGTTGTAGTGGCT  
CACCGTTTCAAGTTGCGTTTGTGATATACAGGAACACACCCCGCAACCGAAAGTGAAGTTTACCAGACAATCTATTGT  
GGTACACAATGCTTTTACTTGGCGTGGTTAACAGGGTGGTTTACGTTGGAAGACCTCATATGACGATGACAGACGCT  
TGACAGGTTGATTTAAATGATGACCAAGGGCAACCCATCAAGAGCATCGCAGAATCGCTAAGAACTACTTAAGCACA  
CTTACAGGATTGTTCAAAGTTGGGCTGA  
>Cluster\_23609  
ATGATTCCGCTTTGAAATGTCAGCAAGGCTTATCTCGTGGGAGACAGGCGTGCAGGCGGTTACGTTCCATATGCAGCC  
GGGTGAGATGGCGTTTTCGACCGGTCATTCGGCGCAGGAAAGTACCTCCTGAAGCTGATCTGTGGGATTTGAGCGGC  
CCAGCCCGGAAAATCTGGTTTAGCGCCATGACATCAGCGTCTGAAAACCGTGAAGTTCCGTTTCTGCGCCGCAAG  
ATTGGCATGATTTTCCAGGATCACCATCTACTGATGGACCGTACTGCTATGATAACGTTGGCGATCCCGCTGATTATCGC  
CGTGGCCAGCGGTGATGACATTCGTCGCGGGTGTGCGCGCGCTGGATAAAGTCGGGCTCCTGGACAAGCGAAGAACT  
TCCCTATTGACCTTTCGGCGGTGAACAACAACGTTGGCATTGCCCGCGGTTGGTGAACAAGCCCGGTTACTGCTG  
GCGGCAACCGACTGTTAACCCTGGACGACGCGCTGTCGGAAGGCATTTTACGTTCTGTTGAAGAGTTTAAACCGGTTG  
GGTAAACGTTATTGATGGCAACGACGACATCAACCTGATTTGCGGACGTTCTATCGCATGCTCACCTGAGCGATGGT  
ACTTGCATGGAGCGTGGCCATGAATA  
>Cluster\_67038  
ATGGCTACTCCAGTGAAGAATAAATTTGTTGCGCGCCAGAATATATTATGAAGCACCAATACCAACCACGCACATACA  
ATATATCAATAAACCCGCATATAACCTTGTGATTTTATTAATGATAAATTTGGTATAATGACCGTTTATGTTTTTTTA  
TTCTGGTAAATGATAATTGCTGGTCTTTTTCGAGAAAATAAAGAAAATCACGCTGTGAGTGTATGACTATTTCTGGC  
TGCTTTTCAACGGAAAAGAGTACCATCTCCTTACTCTGTTGTTGGTCCGGATACGTTACCATTGTTACAGTTT  
TCAGCAGATCGGGGATATCATTCTGTCAGCATGGGCAACAGCTGGTCTGGATGCCGGGAATAAGCCGATTTGACGGGATTC  
TGGAGGATAATGTGACCTGGGCATTCATCTGCTGCTGGATGAAAAATCCGGCGAAATATTTTCCAGGAAGATCAAC  
CCGGAAGGCGGATATTTCTTTCGACAAAAGAACTTGGCGGCCCGGAAACACATCAGCGCCTGTGCTGCAGATTCAGTA  
TAAAAGCGGAAAAGATATTCAGTTTGTCTACTGGCTTAAATGAAAGAGCATTTGCACATGATGAACTGCGGCTATCGTCCG  
GAGGCATATTTTCCGGGGGAGGGATATACGTTGAATATGAATGGAGACTGA  
>Cluster\_55783  
ATGCGACTTGATAAATTTATCGCACAGCAACTCGGCGTTAGCCGTGCTATTGCCGGGCGTGAATCCGCGGCAATCGTGT  
CACCGTCGATGGCGAAATCGTCCGTAATGCAGCGTTCAAACTGCTTCCGAAACATGATGTCGCTTACGATGGCAACCCGC  
TGGCGCAGCAACACGGTCCAGTTACTTCAATGCTCAATAAGCTCAGGCTATGTTTGTCTCCAGGACGACCTGATCAC  
CCAACGGTCTCTATTTTCTGATGAACCGGTAGCGTGAAGATGATGCGGGCGGGCGGTTGGATATGATACCACCGG  
TCTGGTGTGATGACTGATGATGGTCACTGCTGCGCAGCAGTACTTCTCCGCGCCATCATTTGCGAGAAGACCTATCTGG  
TGACACTGGAATCACTGTAGCTGACGATACCGCAGGCAATTTGCTAAAGCGCTGACGCTGCATAACGAAAAGAACTC  
ACTAAGCTGCGGTGCTGGAAGTATTACCCCAACGAGGTTCTGCTGACCATCAGCGAAGGGCGTTATCATCAGGTGAA  
ACGATGTTCCGCCCGTGGGTAACCACGTTGGTGGAGTGCATGATGAACTGTTGGCGGATTTACGCTGGATGCTGATT  
TAGCCCCGGTGAATATCGTCCGTTAACTGAAGAAGAAATGCCAGCGTCTGCTAA  
>Cluster\_4478  
ATGAACTTGAAGAAGATTTTTTTTCACTGCTGCTACTGTTTTCAGTCTCTGCGCATTAACGGGATGTGACTACATGAA  
AGGCAAGCCGAAAGTAGTTTACTGAAACAACAAGAAACATAATAAATAAATTTGTGCTACTTGAATAACAACAGC  
AGCTAAAGAGTCAACTCGAAACTATTCAAACAACAAACTGGCATAATAAACAAGTACAAAGACTTTAACTACGTAAT  
AAATCCGTTAAAGACCAAAAACTATTTTATTTTACCAGGTTTAAACCAGCAAAAAGGATTTTATCTCCTGAACAA  
CGTTCCGTTGGCTTTAGCGGGTTCAGTGTATCCATTGACGCCACAGAGAATGTTAGTGTATTCATATCTCACTGGTCA

ACTTATTAAGTACACCTATCTCAACATTTGGTTTTAATGCGCATGGGGTGGTAAAAACCTGTCGATGCCAAAGAGTTT  
GCCGGTGGCAACATTACTTTTTCAACCATCAATGAAATCCACATTGAAATTTATACCAGGTCATGGCAAGACATTA  
TTTGACCTGAAGGGTGTATCGCCCAATAACCTGGGATATCTGAAGTTAGCCATCAACATGAAAAATATTCAGTTCGACA  
ATCTTCCCTCTGTGAAATCGGCAGAAAAAGCAAAAAATAA  
>Cluster\_2  
ATGTTCTTACCTAAGATAAACCTAAAGACCGGGGATCGAGGGTTATTTTTTTTACGCTGCCTGAATGGAAGCTCGCAA  
AGAAAAATCAGCCTAAAAAAGCATTTCCTGGTTAAACCTTACTATAAAAATATGACGCAAGGGTTTATTTTGGTTC  
CGATTTTAGGAGCTCCGATGATAGGACTACTTTTTGAGATTTTTCAAAACTGGGAGATAAAAGAACTGTTAACCGTAGGT  
TGGGCAGCTAAGTTAGGGGAGAAGCTTAAATGGGAGAGGTTTTCTCCAAAACAAGGCTATCTTTTGAAGGAACCTC  
AAGGCTTTACTGGGAAAAACGAAAAGTTTTTACCCAGAATTTGAATTTTTTACCAAGATTAAGAAAAATCTGTGCAAA  
TAGGATTAATGCCCTCATCTGGTCTATAATTTCTACAGACGCCCTTTTATTTTTGAAAAAATACACAATTTTTAAAC  
AAATGGGCAACTAAAGCTTATGCTTTAGACATGGAAACTTCTGCGGTGTTGCTTTAGGAAAAATTTTTAACGTTAAAC  
CCAGGCTACTTTTTGATTTACCGATGAAATTTGGTAGAACAGCTTTCAAAGACTGAAAACTTATTGAAACCAAGCAGAG  
AAAAATTTTAGAGTTAATACAAAGATTCTAAGCCATGAGGTCTAA  
>Cluster\_26356  
ATGGGTATTTTTCTCGCTTTGCCGACATCGTGAATGCCAACATCAACGCTCTGTTAGAGAAAGCGGAAGATCCACAGAA  
ACTGGTGCCTCTGATGATCCAGGAGATGGAAGATACATTTGGTTGAAGTACGTTTACTTTCGGCGCTGCGCTGGCAGAAA  
AGAAACAGCTGACTCGCCGATTTGAACAAGCGTCGGCTCGTGAACCTGGAATGGCAGGAAAAAGCGGAAGTGGCAGTCTG  
AAGAGAGAGAGGATCTGGCCGCTGCGGCTTAATTTGAAAACAGAACTGACCGATCTGATTTAAAGCCTGGAAACATGA  
AGTACGCTGGTGGACGATACGCTAGTGGTATGAAGAAAGAGATCGGCGAGCTGGAAAACAAATTGAGCGAAACAGCG  
CTCGCCAGCAGGCATTTGATGTTACGCCATCAGGCGGCAAACTCGTCGCGGATGTGCGTCAACTGGACAGTGGCAAA  
CTGGATGAAGCAATGGCTCGTTTCGAATCTTTCGAACGCCGATCTGACAGATGGAAGCGGAAGCAGAAAGCCACAGCTT  
CGGTAAACAAAAATCGCTGGACGATCAGTTTGCAGAACGAAAGCCGATGATGAATCAGCGACCAACTGGCACAATTA  
AAGCCAAAATGAAGCAAGACAATCAATAA  
>Cluster\_44648  
ATGAATACACAACCTGATGGGTGAGCGTATTCGCGCTCGCAGAAAAAGAACTTAAGATTAGGCAGGCTGCCTTGGCAAGAT  
GGTTGGCGTGTCTAATGTTGCTATTTCCCAATGGGAGCGTTCTGAAACTGAGCCCAATGGCGAAAACTTATGGCTTTAG  
CCAAGCTTTACAGTGCCTCCCTGATTAATTTGTTGAAAGGAGAAGATAGTCTTTCAAACATTTGCTATACAGCAGGCGAT  
GATCCAAGAGGTTGATCTCTAATTAAGTTGGGTAAGCGCAGGATGTTGGATGGAAGCTGTAGAGCCATATCATAAGCG  
TGCAATAGATAAATGGTACGATACAACCTAGATGTTTTCAGAAAGATTCGTTTTGGCTGGACGTAAGGGTGTATCGATGA  
CGGCTCCAGCCGGTCTTAGCATCCCGAAGGGATGATAATACTAGTTCGATCTGAAAGTAGAACCTCGTAATGGGAAGCTG  
TAGTGGCAAAAGCTCGAAGGAGAAAAACGAGGCAACTTTCAAGAAAGTTAGTTATTTGATGCTGGCAGAAGGTTTTCAAAAC  
ACTTAACCCACAATATCCGATGATTTAGATCAACGGAACTGCAAAATCATCGGTGTAGTTGTGATGCAAAAAATAGCAA  
ACCTTCCATAA  
>Cluster\_13391  
ATGCGAATTTTACTGATAGAAGATGACATGCTGATTTGGCGACGGCATCAAAACGGGCTTAGTAAAATGGGTTTTAGCGT  
CGACTGGTTTACACAAGGTCGTCAGGAAAAGAGGCGCTTTATAGCGCCCTTATGATCGGCTGATCCGATTTAACCT  
TACCAGGCATGGAATGGTCCGATATTTTCCGCAATGGCGAGAAAAAGGTCAGCGTGAGCCGGTACTGATCCTGACCCGG  
CGCATGCGCTGGAGGAACGCTGTAGAAGGGCTGCGTCTGGGAGCTGACGATTAATCTGTGTAACCTTTGCGTTGATAGA  
AGTCCGCGCCAGGCTGGAAGCTCTGATGCGCCGAAACCAACCGCCAGGCGCAGCAACGAGCTGCGCCACGGTAAACGTCATC  
TCGACCCCGCAACGATTCGCCAGCTGGCTGGCGAACCTTAAACATGAAACCAAAAGAAATTTGCCCTGCTGGAATTA  
CTGATGCGTAACGCTGGTTCGGTACTGCGCGCAAACTGATTTAAGAGAAACTGTATACCTGGGACGAAGAGGTCACCCAG  
TAATGCGTTGAAGTGCATGTGCATCATCTGCGACGCAAACTCGGTAGTGAATTTATTCGTACCGTGCATGGTATTGGCT  
ACACATTAGGTGAGAAATGA  
>Cluster\_7610  
ATGAGCGCTATAACCAAGATCGACTACTGCAATCAAGCAGTGGCGGAAACATACGGACCGGGTAGCAACGTTGTACT  
GCCAGCAGAAGAGCGGAAGAACCTGGCAGCAATTCGCTGGCCTCACTGGAACGCGAAACAGATTCGCCACGAGATGCCA  
AATGGTCTGACTCCACATTTGGCTGCGTTGGCCCATAGGTCGCTGAAACATCTCTCAAAGAGGCACTGGAAGCCGCA  
GCCGAACAGACGATCTTAGCGAGTGGGCTGATATGCAGTTCTGTTGGGATGCACAGCGCGTGCCTGGCATCAGCGA  
TGCTGAAATTAACGTTGCTATGGAAGATAAATGAAGATCAACATGGAGCGCCAGTGGCTGAGCCAAAAGATGGTGGAGC  
CTCGCTTGCACATTAAGAAGAACCGGCAACTCTCCGTTAACTCCTGATGGTTGGATAAGCTGTAGTGGCGAATGCCGGAT  
ACCAAAACAGCCGTTCTTGTGCCAGGAGTTTGACAGGAAAGGTGACTGGCGAATGAAATGGCGGACTTACATCCCGGG  
GCATCTGACGCTAATGATGGGTGGATAATTCCTGGTGGCTGCGGAAACCGTCAACATGGATGCCGCTACCGAGCCCT  
CCCTTTGA  
>Cluster\_35273  
ATGAGTAATCAGGAACCGGCTACTATCTGCTGATTTGACGATCACCCGATGCTGCGAACTGGCGTAAAACAGCTTATCAG  
TATGGCACCAGATATCACCGTGGTTGGCGAAGCAGTAATGGCGAACAGGGTATTTGAACTGGCGGAGTCTCTTGTATCCCG  
ATCTGATCCTGTTAGATCTCAATATGCCCGCATGAACGGTCTGGAACGCTGGATAAACTGCCGAAAAGTCCCTCTCA  
GGCGCATTTGGTATTACAGCTCTTAACCATGAAGAAGATGTTGGTCAACCGCACTGAAACCGCGCGGATGGCTATCT  
GTTAAAAGATATGGAACCGGAAGATCTGCTGAAAGCATTTGCATCAGGCAGCTGCTGGCGAAATGGTATTAAAGCAAGCAT  
TAACGCTGTTCTGGCCGCGAGCTTGGCGCTAACCTGACCTACTGAGCGCGATGTTAACCAGTTAACCCACGCGAG  
CGGATATTTCAAGCTAATGGCCAGGTTTCCGAAAGAGATGATTGCCCGCGCTGGATATCACCGAAAGCAGCAT  
AAAAGTGCAGCTCAAGCAGATGCTGAAGAAAAAGAGTCAAGTCTCGCGTGGAAAGCAGCGGTATGGGTGCATCAGGAGC  
GCATTTCTGA  
>Cluster\_5996  
ATGTTAAAAATGCTGCACCAATGAGTTTAGCTGAAATGATAATGATATTTTTCTTCAGCGTATCAATGCTTCTATTAC  
TCGCGTTAGGTTTGTCTCCAGTCTGATGAGAATTTCAAACAGTTTGTAAAGAAATGAGCTTGATTTCTGCTGTACAGGCAA  
TTGAGGAAAAATCAATAAATGAAATTTGATTTAACGAAAGATCAGCTTACTTTAATTTTACGCAAAATATAAAAAAT  
AAAGATATGGGAATTTGAAGCATAATCAACAGGATCATTGTGATATAACAATAAAGTTGAATGATTTTAC  
TTGGCATGGCGAGGCAAAAAACACACTGCTCATATGTTTATTTTAAAGGGTATGCACAACCTCACTGAGCGATATA  
GCACTGGTACTGTAGACAGTGAAGTGGTGGTTAATTTATATATACCGCTAATAAAAATGTAATGAAATGATGACTAAG  
TGGAAAGGCTCATTTAGATAAATCGGCTCAAGAATTTATGCTTGAAGTCTATCTCGATAACTCCTTGAAGGAAACCC  
ATTTGGTTTTTACAGTCAACATACTCACACTGTTAGTCAACTTAATTTAGAGTTATACACTACCTGTAACCTTTATC  
ATGAGCCTGTAGACTCAGAGCTTTGA  
>Cluster\_14105  
ATGTTCCAGATAGAAGCGGATTTTTTTCAGCTGCGACGGTACGCTGGTGCAGAGTGAAGTCAATTTGCTCCCGCATATGT  
AACGATGTTTCAGGAATTTGGTATTACGCTCGATCCTGAAGAGTATTCAAACGTTTCAAAGGTTGAAAACCTGTACGAAA  
TTATCGATATTTGTTCCCTTGAACATGGTGTACGTTAGCGAAAACAGAACTGAAACGTTTACCCTGCAGAAAGTCCGCT  
CGGCTGTTCCGATTCAGAACTGGAAGCCATCGAAGGGCTGGAGCGCTCCTGTCAGCGATCACTGCGCCAAATGTGTGGT

ATCTAACGGCCCAAATAACAAAATGCGCATTCTATGGGCAAGCTGAATATGTTGCACTACTTCCCGGATAAACTGTTCA  
GCGCTACGATATTCAGCGCTGGAAGCCAGACCCGCGGTTAATGTTCCATGCGCAAAAAGCGATGAATGTAATGTAGAA  
AATGCAATCTGGTTGATGACTCAGTTGCCGCTGCGCAATCTGGTATCGACGCAGGATGGAAGTGTCTACTTCTGCGC  
CGACCCGCAAAATAAGCCGATCGTTACCCGAAAGTACCACCTTTACCCATCTTTCCGAGTTACCGAACTGTGAAAG  
CGCGTGGTTGGGATATTACGGCATAG

>Cluster\_47158

ATGGAACTTTTGACCAATGCTGCAAGCCCTGTGGGCGCAGGATTTTAAACCTGGCCAATCCATCGATGATTGGCAT  
GTTGATTTTTGTCTTGTGTAATTTGTTCTTGAACCGGCTGCTTCCAGCGGCTTTTTACCGGCGCAGTTTTAC  
TGGTATTGGTCCGGCTGTTGATTGCGAAAAGCGCGATGGGTTACCCGCAAAACGATTTCTGCTGCTGACCGTTGCCGCCAGC  
CTCGGCTGCTGGGTCAGCTATATTACAGGGGCGATGGCTGGGCAATACCCGACCGTACAAAACGGCTATCTCATTTACC  
CGCGCATTATCATCAACGCGCACACCATCTTTTCATAAACACGGTTTATCGGCGCTGTTAATGGGTCGCTTTATGCGT  
TTGTCAGAACACTGCTGCCGACGATGCGCGGTTATCAGGGCTGAATAACCGCGCTTTCAGTTTTCAACTGGATGAGC  
GGCTCTGTGGGTATTGATCTTGCACACTCTGGGTTACATGCTCGGCAAAAACCGCGTATTTTAAAGTACAGGACCA  
GCTGATGTCATGCTGATGCTGCTCCCGTGGTGTCTGGTGTTTGGCTGGCAGGTTCTCTGGTGTGTTATGAAAA  
AGAAATATGGAATCGGGGGTAA

>Cluster\_60554

ATGACCATTACGCTCTGATGGCTATCGCTGGCTGAAGAACGATATTATTTCGCGGTAATTTTCAACCGGATGAAAAATT  
ACGAATGAGTTTGTGACATCGGCTTATGCACTTGGCGTTGGGCGGTTACGGGAAGCTCTTTCGCAACTGGTGGCGGAAC  
GGCTGGTACCGGTTGTAATCAAAAAGGTTATCGGTTGCCGCTTATGTCAGAGCAGGAGCTGCTCGATATTTTCGACGCC  
CGCGCAATATGGAAGCGATGTTAGTGAATGTTGCGGATGCGCGGTTGCGGATGAGTGGGAGGACGCTTCTCGCAAA  
AGCGCATCTGCTGAGTAAGCTTGGAGCCTGTGACGCGCAGGAGAAAATGCTTGGATGAGTGGGATCTGCTCATCAGCGCT  
TTCATACGGCAATTTGTTGGCGGCTGTGGTCTCACTATTTGCTGCAAAATGCGTGAACGTTGTTGATCTGGCGGCGCT  
TATCGATTTATCTGGCTGCGCGCAACGGTGTCTTTCGGTGGAAATGCTGGAGGATAAACACGATCAGCACCAGACCCCTGAC  
TGGCGGCTACTGGCGGAGATACCGCGCGCCAGTGAATGCGCCAGCATTACTGACGCCAATTTCCATTATCC  
AGCAGGCGATGGCTGGCAATTA

>Cluster\_29387

ATGAAAAAGGCTAAAATACTTTCTGGCGCATTATTACTGTGCTTTTCGTCACCCTGATTTCTCAGGCTGCGCACTGGA  
CGTACGTGGTGGATATCGTAGTGAAGCCACGCTATGAGACTCGACTCAAAGTCAGTGAGGGATGGCAAAAATGGATGGT  
GGGCAAGTATGGAAGTAATACCTGGAATACCATTCATGATAAATAAAGGAAAAATGCCGACCTCAATGATGTTCCAGGTG  
GAAGTAAATACCGGATTAACCTGATGATCAATGGACGGTGCGCCGGGAATGTTAACGCATTTTAGCAGCAACGGCAC  
ACGCTACGGACCTTACGTAACCTGTCTGGGACGCGCAAAAAGATCTTAATTTTGGCATTGCTATCGTTACGACTGGGA  
AAGCTTACCGCAACAAGACTTATCCGGTGATATGCTCTGCTGATAACGTTTCATCGTTGGGATGGATATGCTCACTACCAT  
ATTAATAGTGATTTACCTTCGCATGGCAACGACGCTATACAGCAACAGAACGATTTATCGCTATGCAAAACCATAGAA  
ATGGGCGACGGAATGCATTTGTTCTACAATACCATATGACGCCCGATATTACGCCATACATAGAATATGACTACCTTG  
ACCGTCAGGGTGTTTACAACGGCAGAGATAATTTATCGGAAAACAGTTATCGCATTTGGTGTGCTATTTAACTGTAG

>Cluster\_37228

ATGAACAATGTAATAATTACTGATGCGGAAAGTGCCCTTTTTTGGCATGTCAGCGCAAGCCGCTGATAGAGTATCAATTGA  
CCTTAAGGTGACTCTGGAAGCTGCAAGCTTGTACTCCAATACTAAGCAACCGCGGAGTTGTTAACTTCGGTAGTCAATTCAG  
TCAATAGACTTTCAACGCGACACTACACACAGATGGAACAGTAATAATAATGACTATAAATGCGAATCCGCTACC  
GGCATTTGGGATTACCGCTCGTGTATACAGCAATGGATAGTATGACCACCGGAAAAGATAGTGGGGTCCAGAGTGGTGTAAA  
ATATACCTTAAATGGCGGAGTTATATTTAGCCAGACACCGCGCTTATTCGGCTTAGGGAAAACAAAAGATAATAAAAAATA  
TCGGTAGTTATGCGGCTGTTAATTTGATAGCAACAACATTTAGTCCAGCAATGGTAGCCAGAGCTTAGCTGTATCAATAGCA  
GGTGCAGATGCGCGTCAATAACAGGGCAAAAAGAGCATGGCAACCGCTCACCGCTTATCCGCTTGCAGTCCGATCAAGACTA  
TTATTACACCTTTGTAAAACAGGTTGAAAACCCCAACTCTGTAAACGACGCCATTATACCGCTTCCAGGTGAGCGCAT  
CTATCGCGAATGATTTAGCGGTTTCAGAAAAATCGAACTTGTATGGGAAAGCTGTGATAGCGTAGTCTACTTTGTGA

>Cluster\_23059

ATGAAGAAAAGGTTTTATGTTATTACCTTGTGGCAGCGTTTTTTCAGGCTTTGTTTCAGGCTGATGACGCGGCAATTAACA  
AACGTTAGCCAAAATGGGCATCAAAAGCAGCGATATTCAGCCCGCGCCGTAGCTGGCATGAAGCAGTTCTGACTAACA  
GCGGTGTGTTGTACATACCCGATGATGTTAAACATATCATTCAGGGGCCAATGTATGACGTTAGTGGCAGCGCTCCCGT  
AATGTCACCAATAAGATGCTGTTAAAGCAGTTGAATGCGCTTGAATAAGAGATGATCGTTTATAAAGCGCCGAGGAAAA  
ACACGTCATCACCGTGTTTACTGATATTACCTGTGGTTACTGCGCACAAACTGCATGAGCAAAATGGCAGACTATAACGCC  
TGGGGATCACCGTGCCTTACTTGTCTTTCCCGCCAGGGCTGGACAGCGATGCAGAGAAAAGAAATGAAAGCTATCTGG  
TGTGCGAAAAGATAAAAACAAAGCCTTTGATGATGATGATGGCAGGTAAGAGCGTGCACACAGCCAGCTGCGACGTTGGATAT  
TGCCGACCATACGCCTTGGCGTCCAGCTTGGCGTTAGCGGTTACTCCGGCAGTTGTGCTGAGCAATGGCACACTTGTTC  
CAGGTTACCGACCCGAAAGACATGAAAGAATTCCTCGACGAACACCAAAAATGACCAGCGGTAATAA

>Cluster\_8207

GTGAAAAATGAAATTAACGGTGAATGGGCTGAAGATACAGGCACAGTACCAGAACAAGAGATTGAAAAATGTACATAAACCC  
GTTGCTGCAATGTTGGCGGCTTACAGACGGTAAATCCGCAAGCGGCTACGGTGGTTTTCTTTGCGCTCCCGCGGGGA  
CGGGTAAATCAACCTTAACACCTTCTGGGAATATCTCGGCAACAAGACCCGGAACCTGCCCGCTATTTCAGACGCTCCCG  
ATGGATGGTTTTACCAATTAACAATGCTGGCTGGATGCGCATCAATTCGCGCCCTTCAAAGGCGCACCAGAGACATTTGA  
CGTTGCGAAACTGACGGAATACTGCGCCAGGTCGTGGAAGGGGATTTGACTGTTGGCCGAGTACGATCGACAAAAGCATG  
ATCCTGTTGAAGATGCGTTGACGTTACCGCACCACTGCTCATCGTCGAAGGAACTGGTGTGTTACTGGATGATGAAAAG  
TGGCTGGAGTTGGCATCTTTCTGCGATTTTTCTATTTTTATTCATGCACCTGCTCAAAATCTGCGGGAGCGCTTGATTAG  
TCGTAAAATTTGCGGGAGGATTAACGCGGCAAGTAGCCGAAAGCATTTTATGCCCCACCGATGGCCCAATGTCGAGCGT  
TGCTGATGAATAGCCGCTCAGGCAATCTGATAGTAGAGATGACTGAAGAAGCCGGTATCACTTCAAAAGCTGA

>Cluster\_27123

ATGACCGAGTTACCAATCGACGAAAACACACCGGCTATTTTGTGCTGGAAGATGAACCGAAGCTGGGACAGTTGCTCAT  
TGATTTATCTGCGTCCCGGAGCTATGCGCGGACGCTTATCAGCCACGGCGATCAGGACTGCGGATGTTGCGCGACAC  
CACCGGATCTGATCTGTTAGATCTGATGCTCCCGGACCGATGGCTGACGCTGTGCGGGGAAATTCGCTGTTTTCT  
GACATTCGATCGTGTGACGCGCAAAAATCGAAGAGATCGACCGGCTGCGGGCTGGAGATTGGCGGATGACTA  
CATCTGCAAGCCGTACAGCCACGGGAAGTGGTAGCGGCTGTCAAACCATTTTGGCGGCTTGTAAACCGCAACGCGAAC  
TTCAGCAACAGGATGCGGAAAGCCGTTGATGATGACGAAGGTCGTTTTTCAGGCTTCTATGGCGCGGTAATAATGCTTGC  
CTGACGCTGCGGAAATTCGCTGTTGAAAACGCTCTCTCATGAACAGGAAAAGTGTCTCCCGGACGCAATGCTCAA  
TCATCTTTATGACGACTCCCGTAGTAACCTGACCGCACCATCGACAGCCACATTAAAAACCTGCGCTCGCAAGTGGAA  
CTCTGGACGAAGAGCAGTCTTTTATCCGCGCGCTACGGTGTGCTTATCGTGGGAAAGCCGACGCTTGGCGCATCGTT  
TAG

>Cluster\_26911

ATGACAGGATACGGATTTTTTTCAGCTGGCTTCGCACGATGCTGTTGCGTTTTTCAGAGGATGGAGCCGCAAGAGGTTCTA  
CCATGAAATAGAGCTTACGGCTCAGCAGCTGGAGTACGATTACTATTCGTTATGTTGCTCGCCACCCGGTACCATTACGC



GACCTAAAGTGGCTTCTACACCAATTACCTGAGTCGTTGGGTTAGTTATATCAGGCAAAAAATTTTCTCGCAATTGAT  
CCTGTGCTGAACCTGAAAACTTTAGTCAGGGCCATTTAATGTGGAATGATGACTTATTCAGCGAAGCACAGCCGTTATG  
GGAAGCTGCGCGCGCACATGGTTTACGCGCGGTGTCACCTCAGTATTTAATGCTGCCAAATCGGGCGCTGGGCTTTTTGT  
CCTTTTCCCGTTGAGCAGCGCGGAAATACCAATCTTTAGTGAAGTGAATGCAATGCAATGCAATGCAATGCAATGCAATGCAAT  
AGTCTGATGGCTCAATACGCTTAAATGCTTAAATGATGAAATAGTATGACGCGAGAGATGAATTTTCAGCAAGCGGAAAAAGAAAT  
TCTGAAATGGACGGCGGAAGGAAAGACATCAGCAGAGATAGCGATGATTTTGTCAATCTCTGAGAATACGGTCAATTTCC  
ATCAGAAAAACATGCAGAAAAAATCAATGCACCGAATAGACCCAGGTGGCTGTTACGCGCGCTACTGGCTTAATT  
TGA

>Cluster\_24911

ATGTCAGTTTTTTTTTCGAGTTTGTTTAGGGATTACAGTCTTCTTACTGCATTGCAAGTACAGGCTAGTGTGTTCTTGG  
TGGTACACGCATTATCTATCCTTCAAATCAAATGAAAGTTCAAATCACATGAAAAAATAAGATGCATATGCGCGTTATC  
TGGTGCAAAAGCTGGTAAAGTAAATATGATGGCTCTAAAGCCCCCTTTCCTCATTACGCCCTCAGTTTACAAAATGAAAGAA  
AACCGTCAAACATFACTCCATATFGTGTCTTACTGGTGATAAAGATAAACTTCCCTCAGGATAGAGAAAAGTTTATTTTGGC  
AAATGTAATACTGTTTCTGCTATGCCAGAAGAACTAAAAGATAAGAATATCTTGCAATTTGCAATGAAAGCAGACTTA  
AATATTTTGGCGACAGTTTCTTAGATAATAACGATGCTCTTACGGCGTGGAAAAACTTAAGTCCATAAAGAAGCA  
GAAAACTCATAGTAAAAATCCAACACCTTCTATATTTCAATTAATGATCTCACAGTATCTGAAAAAATAATTTGTTCC  
TGTCGATACATAAATCTGACCGAGTCACTAATTAATGATGTTGGTTGGGCTTTTCTGAACAGCGGTTTAGTCTTCCGTCG  
GAGCGGAAATGTTGTTGAGTGGTCTGTGATAACTGACTACGGTCAAGTTACAGGAAACGAAAAAAGTTTATAA

>Cluster\_66899

ATGAGCGCAGCTTACGGGCACTGATCCCCCTCAGCGCAGAGCAACAGGCCGCCATGCAGGCTGTGGCTGTCACCGAACA  
ACGTCGTCGTCAGGACGCACACTTTCAGCATGGCCTTATGCCAGCGCTTCTTTTCGTCGCTGAATGGCAGTGCAGCGGA  
TTTCGCTGACCGATCTCCGCTTTTTTGCCTGCGCTGACGAAGGAGGATTTTATGGCAACCGTCTCTGTGGCTGGCT  
GCCGTGGATAAACTGATTGAAAGTTTTGGTGAAGTCTGTGTTCTTCCCTGCCATCCGATGCGGGGCACTGCTCTGTTCC  
GTCCGTTCCCTTTTCGTGAAGGTGAGCGGCTGTCAGAAAACCGCTGACAGAGCAAAATACAGCCCGCAGCGGGAAC  
GTGAGGCAGAACGACGGGAACGGGAATACCAGACATGTTTGTCTAGGCGCAGATTGACCTTGGCTTTCATACTCCCGCC  
ACGGTCGGAAGCTGGTTGTCGCGTGGTCTGGTGTGTTGAGGAGCATGATCTGGAAACGATTTCTGGGGGTGGTGGCG  
CGCTTTCCATCACTGTCTATTTGACCGGTTTTTCTGGCAGGAGGAACCACTCTGGCGGCTGATTTTTGAAAGCGGTG  
AGGCGGTCGTGGTGCACCGGTACAGGTACGTGCACTTGGCAGTGGATGATCCGAAACAGCTGGAGAACGCAATATGA

>Cluster\_26975

ATGATTTTATCAATAAGCAAAGTAAAGATGAATGTTGAAAGATGAAACAACAGTATCTTCTTTGATACGTGTTCAAT  
ATTAGATATATTAATCTATCCATTTACATGGATTGTCAGACTCTTATGCAAAACATGCTTGAACCTATCAAAATTA  
ACGCTACGCTTGTGGTTAGTTTCCCTGCCAAAACGTTAACGAGGAGTGGATTGATAAATATGATGCTTCTTCCACT  
ATGGATAAAGAAATAAAAAACTAGATCGTAGTATAAGTTCGACAATTAACGTGACCAACTTAGTCTTAAATACAATTA  
TTCATGCCACCGAAATTTTCAGGCTCAATATATCTAGTAAAATAAAGTCCCTATCAGAACATTTCTAAAATCTTGTG  
AGTGTATTGAAAGCAATATGATCATACGCTGAAAGCAATGCAAGAGTTCGAAAACTGAAAGCAGCAAGGAAAGGA  
AACTTGAGCCAAAAGATTGTGAAATGTTGAAATGCTTTTGAATTTAGAAATCTGTCAAGAACTAAGGAAGCGGTTAATGA  
AAAAATAATATTCGTTACTGCAATAAAGAAGATTTGGCTCATACAATGCTCTAAAACCACTTGTATTTCAATTTG  
CATCTCATCAAGCATTAATCAATAGTGTAGAACATGTACTTGCAC TAGCGAAAAGACAGATAAAAAATA

>Cluster\_56178

ATGACCGAAAACGCTGTTCTCCAGTTACGCGCCGAGCGTATTGCGCGCGCAACACGCTCTTTTCTTGCCTGGGTAATCG  
CGTTCGTCGCTGCCAACGCTGCTCTTTTGCAGAGAAATATGTCCTGTTGCAAAATACCCAGCACAGCAAAAAGTC  
GCTTCTGTTTGTGATGTTGACACCGGCAATGAAGCCAGTAATACCGGGCGTCTCATTGCTGATATTTTGCCTGAT  
ACCGTTGCGTTTCAATGGTFCGCTACCGAACCTCAGCAGGATTTGCTGGAGTTGGTGCAAAACCGGACTATCAGCAAT  
GGTGGTCTTTCCGCTTTCGATGCTGATGAGCAACGGGAAGTGTCTTACACCACTTGCCTGTAAGCCACCGCTGTTTA  
TCATGCTCGATGGTACCTGGCCGGAAGCTCGCAAGATGTTTCCGTAAGTCCGCTATCTGGATAATCTTCCCGTCAATTC  
GTCGATCTTTCCGGCTTTCGCTATCGCTGCGTGAAGCCAGGCTGAAGGCCAATATGTAATGCTGCGGAGGTAGCCAT  
CGCATGTTAGATATGGCCGCGGATACCGGGCGGAGGTTAGGCGAGCATTTTACCCTGTTAAAACACGCTATC  
TGGCAGGAAAACGCAACATCTGGGTAGCATCACAGCAGAACAGTTAGAAAGCGTTTAA

>Cluster\_63841

GTGATTTTTCAAAGATTGCCCGCTTACTTAAATCCGAAATCAATGGCAATTCATGGCATGTTGGTGAATTTGTTGCCGTC  
AGAAGCGGAATCGCTGTTCTGTTATAATGTTTCCGCTAATACCTGCGTAAGGCATTATCCTTCTGGAAGGCGAAGGAA  
TTATTCACAGAAAGCATGGTTACAGAACATACATTCAAAAAAGAATTTTGTGTCACACATTGATCACATGAACAGTTTC  
AGTGAAATGCGCATAAAAGCGGCAAGAGGCGAGGAGTACAGATTATGAAATTTGAAAGTGCAGGATGCTTACCCACTAT  
TGCCACTGAGCTGAATTTAGTACTGCTGAGCAGGTTTATACATAAAGAGACTGCGATTCATTGAGGATAATGCAGCAC  
AATTAAGAAACGCTGGATGTCAGTAGCACGTTTCTGATTTAACCGTGTACATATGCAAAAATCCAAATTTTCATAT  
ATTGAGAATGAATGCGGGATCAAAATCATGTCACCTTTGAAACTTTCCTCCCTACTTTTCTTACCAGAAATGCGCAG  
TATTTTACGGATCAGCCACGGGATCCCATACTTAAAAATTCAGACCCAGGCTGTGGACAGTAACTCTATTCGCTGGATT  
ATTCGTTACTTTACAGCAATATTTTCGAGTTCAGGTAAGTACTTTTTCCCGCGATAA

>Cluster\_21716

GTGAGCGAAATTAAGACGTTATGTTTCAGGGGTTGTGAAAAACAACCTGCGCTGGTCCAGTTGCTCGGCCTTTGTCC  
GCTGTTGGCGGTACGCTCCACTGCCACTAACGCTCTGGGTTTAGGACTTGGGACTACGCTGGTACTGACGCTAACCAACC  
TGACCATTTTCGACGCTGCGTCACTGGACCCCGCGAGATCCGATTCCTATTTACGCTGATGATCATCGCTCGGTTGGT  
AGCGCTGTACAGATGCTGATCAACGCCCTACGCCCTTGGCTGTATCAATCATTAGGGATTTTTATCCGCTGATTTGTCAC  
TAACTGATTCGTTTGGGCGCGCTGAAGCCTTTCGCGCAAAAAGGTTCCGGCGCTTTCGCGACTGGACGGCTTTTCAA  
TTGGTATGGGCGCAACTGCGCCATGTTCTGTCGTTGCTTACTACGCGAAATTTATCGGCAATGGCAGCTGTTGTTGACGGT  
GCAGATGCGCTGTTAGTACTGGGCAAAAGTATTACGCGTGGAGATTTTCCACACCGACTCCCTTTCTGCTGGAT  
GCTGCCACCAGGTGCATTTATTGGCTGGGACTGATGCTGGCAGGAAAATACCTGATTGATGAAAAATGAAAAAGCGCC  
GTACTGAAGCAGCTGCCAACGTCATTGCCAAACGGTGAACAGAGAATGCTGTA

>Cluster\_49802

ATGAGTGTGGCATTAAATTCAGCCTTATTGGTGGTGCATATCTATAATCTCTATTGCTATATCTACCTATAATCAGAA  
TAGAATAAACAGCTCAATGAAACACTGGATGTAAGGAGAAAACATCAGTACTATATTGAACCGTTAATTCGCTCAGCTT  
CAGACTTACAAGCCGCTATTAACATATTAGAAATAGGGTTTATTGAAAGATTTTATCATAATGGGAGTAAGCGCCAA  
CAAGATTTATGTTTCAAAAAACGGTTTTTCTTTTCCAGTTCTTTGATGAGCAGAAAGCTGCCCGCATAGACATTC  
ATACCTTAGCTTAGAAAAAATAAAAAATGAGGGAGTTTATTAGATTACAGAACAATTAACCTCAATTAATCAAACAG  
ACGCTTTGGTCAATTTTATGTTTTTTCATAGGAGAGCAGAGACTATGCGGAAAAGATGTTGATATCAACAGATGCT  
GGATTTGATGCTAGGTTACGGCGGTTTCAAAAAGAAAATGCTTTTGTCAATGAAACCTTTTATGATTTTAAACAA  
TGAAGTATAAATATGCAAAAAAATACGAGCTTATAAAGAAGGCTAATCAGAATACAACATGCGTTAATTGATTTGA  
TTTTTTTTCTGATCCTAGCATGATTCGATTTGACGGTGAAGCATGAAAAATATAA

>Cluster\_38511

ATGAGTTTCTTACGACTTTCGGTCTTCGACCCGCGCAGCAGGGACTTTGTGCCTCGTACAGTGTCCCGTGGCGATATT  
TCTGACGACGGCTTTCTCTCCGTTCCGGTACCTGGTCCGTTTCGGTTCCTTTGTATATCTCATGACCGTGATGGCGCTGA  
CATGGGGCGGGTGGCGATCTATACGGGGAACTGACAGGGTTCGCCAATTGCTGATTCACGAATGATCGCTGTTTCA  
AACAGCAAATGCGTCAATTTGGCCAGAAATGAAACATCAGGAGAAAGCCCGGATGGTCTGGGAGGTGCTCATGATGATGA  
TGTATCCGCGCCAGCTACAGACATGGTGGCGTGGTATCTGACCTGCGTATCTGGTGTGAGTTTCCGGTATTTGCCCGGA  
CGTTTCTGATGACAGCCCTCATCGTGTCTGGTGGAGCCAGATACGGGGGTGAAGATCGTGAACAATTCAGGGAATGC  
CCGCGGAAAGTGTGGTCCGCTGGGTAGCAGGGGGCTGGCCTGTATGTATATGGTCACTGGCCTGGCGTGGGTGATATG  
CGACATTTCTGATGAACCGGCTTCGGGTGAAGTGTCTTCGTTGAGGCATTTCTGGCGAAAGTGAAGCGTATCGGCAACCG  
ATGACGATACGCTCTCTTCTGGTACGGATGCGGGCGCTGAACATGCTGACGCAGGGAGGGAGGAAAAATGA

>Cluster\_26242

ATGATCGAACTCGTGATTGTATCGCGTCTCCTTGAATAATCCGGATGCTGCCTTATGGCAGCATCAACAAGAGATGTTTGA  
GGCGATTGGCGGTCGAAAAATTCGCCAAAAGAGGATGCCATGCGCTGGGCATTTTCTGCGCGATTAAACGACGATGG  
ATCCGCTCGATGCCCAGGCGCAGTACAGCGAATGTTTCGACCGTGGCCGCGCCACGTCAGTGTGTATTTGAACATGTT  
CACGGTGAATCCCGTGACCGCGGCCAGGCGATGGTGGATCTGCTGGCGCAGTACGAGCAGCACGGCTTGCAGTTAAACAG  
CCGCGAATTCGCCGACCTATCTGCCGCTGTATCTGGAGTACTGGCGCAGCTGCCGCAAGCGAAGCCGTGGAGGGTTTGA  
AAGATATTGGCCGATTTGCGATTGCTGAGCGCGCTGTCGAACAGCGTGAAGCCGTTATGCCGTGCTGTTTGTATCTG  
CTGCTGAAACTAGTACATCCGCAATCGACAGCGAACAAGTGGCGGAAAAAATTCGGATGAAGCGCGCGCATACGCC  
GCAGGCGTGGATGCAGTCTGGGAAGAAGAGCAGGTTAAATTCCTTGTGTAAGAAAGGCTGGGTGATTACGAATCACTG  
CTCATCAGCGTCCGTTTGGCGGTGCCGTGCGCGCAATATCTGAATTCACCACCGGAGGACAGCACTAA

>Cluster\_48784

ATGAAGCCTTGGGTAAAAATTTCCCTCAAAGTTCGTAAGTGGACGCTTAAAAGAGCTTTTATGGACTGATGACAAGGT  
AGGAAAACCGTCACATAAGGTGCGAGCCTTAAAAGTGTATATAGCGCTGTCCATGAGAGCTGAAAGTAAAGAGGCTTTCT  
GTCATTACATAGATACCTACATAACATATTTTACAGCTCAGGCGACCTATGAGGAACTCTCGGAACTGACAGCCCTGAGC  
AGATCATCAATATCATCAGGCATTTGATATTTTAGAGAGACTTGGCTGTTATCAGTAGATAAAGTTAGGCGAAAAATAT  
CTACCATTCCCTGGGTTTGTATGGTTCGAAGGACTGGTGCAAAATGCCCTGTAGAGCGTTGTTATCTCGTGTGGCAAC  
GGATTGAAGCATTCCATAAACTTAAAGTTAAGAAGCAAGATTGAGCTTTATGCGCTAAAGATGTTTATCTACTTATGTGT  
GTTTCGAGACAATCAGTCTATTATACAAGCGCTTCAATTTGAAAGAATAAACTTGCAGACTTCTATTCAGAGCGGACAT  
ACCTAGGACGATGCTCAGCTGAGCGGGATAGGACTCAGCTTTAGTAGAGAAACGAAAGATGAGGTTTGGCGGCATGA  
AGAAAAACCTCCAAATTCCTACTTTGTACTGGTCTAATGACTTTTTTATAGGAAAGCGATAA

>Cluster\_36065

GTGAACACCGCAATTTTAAACGACAAGCATCCATGACCAGCGTTGAGATCGCAGAGCTGGTGGGTAGTCAAGCACTCAGA  
TGTAAACCTAGTATCGAACGCCCTGGTTGCTAAAAACATCATCCGAAACCGCAATGGCTGTTTCCGAGAAAAATCAATA  
ACTTAGGTTTAAAGTTCATATGAGCATTACCTGTTTGAAGGAGAACAAGGTAAGCGCGACAGCATATTGTCGTCGCA  
CAGCTCTGCCCTGAATTCAGTCTGCGCTGGTAGATCGCTGGCGTGAAGTGAAGAAACAGATCCGTAAGCCAAATGAGCGA  
AATTGAAGTGGTGTGCGATGGCTCTTGAAGCGTTCGTCAGCAGAAACGGATCACTCAGGTGGAAGAAAAAGTCAAGC  
ACGTTGCTGAACAGTACGAGCAATTTAAAAGGCGCAATTCGTTGAGGGCTATGCCGGATATGCCCAACTGAAAGCAAAA  
ACCGGTTTGTGATGATAAATGCCGCAATCTGGTGAAGCGCTATCAAAATCCACAGACACACATGAGTTCATGACGCC  
GGACGGATTGTTGTCAGCTGCGCAATTTGCTGTGGAACCGTTTATGGCTGCTTTTTATCGGGTTATGGAGGAAGCAG  
AACCGGAGGGACTCGCTGGTATCACCCGAAAAATGGGGTTATTTACAGTTATTGGTTGGCAGCGATGA

>Cluster\_12680

ATGACAAAGCCTTCTCATTTTAGAACCCCTCTTCGTTATCCGGAGGTAAGGCAAAATCTTGCCACATATTGAACAAAT  
ACTCCGCAACAATGATCTCATTGGTGGATGTTATGCTGAACCTTATGCAAGGTGGAGCCGGTGTAGCATTAGGTTTGTCTC  
TTAACGGTCTTGTGAAAAATATCTTCAATAAATGATATTGATCCCTGCGCTTATTTCTTTTGGTTGCGAGTGGTTAATCAT  
AACGATCTGTTATGTGAAATGATTGATGAAGTTCCTGTGACTATTGAAAAATGGCATACTCAAAAAGGAGATACTCTTAAA  
CAATGATAAATATAGTATGCTTGAAGTGCATTTACTTCTTTTAAATAGAACAACCGTTTCCAGGAATACTTAAAG  
CTGGCGTTTATGGAGGAAAGAAACAAAAGGACCATGGAAGTTAGATGCAAGATTCAACAAAAAAGAGTTAATTTAAAGG  
ATTGAACATAATTGGTGCATATAAGGAGAAAAATTTACGTATCGAATTTTGTATGCTGTAGATTTTCTGCTACACCAAAAAGC  
ATTGCTACCCAAAAATAGTCTAATAATCTTGTATCCACCTTATATGTTAAAGGAGCAGAGTTATATAGAAATTTTATA  
AACATGATGATCATGTAATAAATCGCTAATACACTACGGGAAATCAACACTTGGGTTGTGTCTTATGACAAATGTGCT  
GAAATAAAAAGCATATATCATGAATTCATATGACTGATTATACGCTTAAATATACTGCACAAGATAAGAAAAAAGGTTCT  
AGAAATTTATCATTTATAATCATGTTATAAAAAATCCCTGACATTTAA

>Cluster\_10745

ATGACGATGCCAAGCAATCAATGCCGTGGCGGATGACAGTTTCATCACATTACGCAAGAAACCGCGGATGTGTGGACGAT  
TTCCCTGATTTGCCACGATTAATACCTATACGCGCGGGCAATATGCACTGGTCAAGCTGCGAACTCAGCGGAAACG  
TGGCTGCTTACACATTTCTCCAGCCAGCGGTGAGTGAATATATCACCTGACCGTGGCGGGGATGATGACGCTGCTC  
GGCTCCAGTGGTGCAGCGCGATGTAACAGCGGTGATATCTCTGGCTTTCGGACGCGATGGGGAAATTTACCTGCGA  
CGATAAAGCAGAAGATAAATTCCTGTTGCTGGCGGCAGGCTGCGGCGTACGCGGATTTATGTCGATGCTGCTGCTGCTG  
CGAAGAACCGTCCAAGCGGATGTGCGGGTACTACACGCTGCGTACGCGCAGGATGTTATTTCCGCCATGAGTGG  
CGTAACATATCCGGTAAACCGTGGTGGCAGAAAAATAACGTTACCGAAGGCTTTATCGCTGGTCTCCTACTCGCAACTGCT  
GGCAGGTGATCTGACTTAGCTTACGTAACCGTATGACTGCGGCGCGGCTCCGTATATGGATTGGGTAGAGCAGGAAG  
TGAAGCGCTCGGCGTACGCGTTCCTTTAAAGAGAAATTTCTTACCCAGTAGCAGAAAGCGGCGACAGCGGCTGAAA  
TTCCAAAATGCAACCGGACGAGAAATTTACGCCCGGTTGGCACCACGCTACTGGAGCGGCTGAAAGCAATAACGTT  
TCCGGTTGCTGCTGCTGCGCTGCGGTTGTTGCGGCTGCTGTAAGACAAAAGTGGTTTCCGGTGAATATACGGTGAAGCA  
GTACAATGACGCTGACCGACGCCGAAATCGCTGAAGGTTACGTAAGGCTGCTCCTGCCATCCGAGGGGATTTGGTT  
CTCGCATAA

>Cluster\_22567

ATGAGTAAGATTTTTGAAGATAACTCGCTGACTATCGGTACACGCGCGTGGTTCCGCTGAATCGTATCGGTAACGGACG  
CATTCTGGCGAAGGTGGAATCTCGTAACCCAGCTTACGCGTTAAGTGGCGTATCGGTGCCAATGATTTGGGATGCCG  
AAAAGCGCGGCTGCTGAAACAGGCGTTGAATGGTTGAACCAACAGCGGTAATACCGGATTTGACTGGCCTATGCTC  
GCTGCCGCTCGCGGTTACAAACTCACCTGACTATGCCAGAAACCATGAGTATGAAACCGCGCAAGCTGAAAGCGTT  
AGGTGCAAACTGGTGTGACCGAAGGTGCTAAAGGATGAAAGGCGCAATCCAAAAGCAGAAGAAATTTGCTGCCAGCA  
ATCCAGAGAAATACCTGCTGCTGCAACAATTCAGCAATCCGGCAACCTGAAATTCAGGAAAAAACCACCGTCCGGAG  
ATCTGGGAAGATACCGGTCAGGTTGATGATTTATTTGCTGGCGTTGGGACTGGCGGTACGCTGACTGGCTCAGCCG  
CTACATTAAGGCAACCAAGGCAAGACTGATCTTATATCTGCTGCCGTTGAGCCAAACGACTCTCCAGTTATCCGACAG  
CGTGGCAGGTGAAGAGATTAACCTGGTCCGCAATAAAATTCAGGATTTGGCGTGGTTTATCCCGCTAACCTTGTAT  
CTCAAGCTGGTGCACAAAGTCAATGGCATCACCATGAAGAGCCATTTCTACCGCACGCTGCTGATGGAAGAAAGG  
CATTTCTGGTATCTCTTCTGGAGCAGCTGTTGCTGGCGGTTGAAACTACAAGAAGATGAAAGCTTTACCAATAAGA  
ATATTTGGTGTATCTGCGCTCATCGGGTGAAGGTTATTTAAGCACTGCATTTGTTGCGGATCTTTTACTGAGAAAGAA  
CTGCAACAGTAA

>Cluster\_17774

GTGAGCGAATTAGCAATTATCGAAATTCGCGCCGACATGGCGCAAGTATTTACGTAGAAAACGGTCTGGAAAAGTTCCT  
CGAACAGATCCGCGAAAGCGTTAAGGAAGTTCCTGACCTGAGTACTGCCAAAGGTCGTGCCCGCATTCATCTCTGGCAG  
CACAGGTTTCTCGCAGTAAAAACAGCAGTTGAAAAGCCTGGCCGCGATTACCTTCGTCACTCGAAAAGACCCGTCAAACCT  
GCTGAGGCTGAAGAGAAAATCGATTCGATTTGTATCAGCTGCGATGAGATGCGCGATGAAGTTCGCCCGCGCTAACCGAATGGGA  
AGCAGAACAAGAACGCATCAAGGCAGAAAGCCATGAACCGGATGCACGTGCAAGCGCTGGAGATGAACATTAAGTTCG  
ACCAGGAGCTGGCCGCAAGTTCGAAGCAGATCAGAAATGGCATTGCTGATGAATGACGCATTCGACCGCGAAGCGAAG  
CGGAAAGCAGAAGAAGCAGAACGCCAGCGCATTGCTCATGAAGAAGAGTTGAAGCGCCAGTCAGAAGAAAAGGCCAAGCG  
TGAAGCTGAAGAGAAAATCGAACCGGAACCGCTGAATCTGCACGTGCGGAGGCTGAATTAAGTTCAAGGCTGAGCAAG  
CAGAGCGTGACCGTATTGCCGCGAGCAAAAAGCTGAAGCAGAGAAGAAGGAAGCCGCTGATCGTGCCGAGCGCGAAAAG  
CAGGAAGCTATCGCAGCCGAACAACGCAAGCCGAAGCAAAAGATGCTGCTCGCTGGCTGAAGAGAAGCGAATCGCTGA  
TGAAGCTGCAGCGCGCCGCTGATGTAGAGCATCGTCGCGCTATTAATGCCTCTGCTGTTTACAGGCTCTGATCGAGCAGG  
GCATTCAGAAAGACTGGGCCAAAAGCCTGCGTAGTTCGCTATCGCTCGCGGGAAGTTCCGGCAACAACCATCAACTACTGA

>Cluster\_29451

ATGTTGGTATTCAATGATGACGGTTCAACAAACATCAAACACTACAGTGGCAGGAAAGCGACGGAACAATTAACAGCACAT  
TAGCCCGAACAGTTCACACCGGAGTGGGCAGTCTCTTTGGTGATAAAAAGGCTTTAACTACACACTGAACGGCGAAC  
AGTATTCAATTTGATTCACCAATCAGCCGAGTGTAGTCAACCAATATCGCATGGCAATACAGCGACCTTAATGTCGTT  
GCAGTGCATCAGCCTTACTGACCAGTGGTCTGCCGTAAGCGAAGTGGATATTGTTTGCACACTTCTCTGACAGAGTA  
TTACGACAGAAAATAACCAACCAATACGAAAAATTTGAGCGTAAGAAAGCAAACCTCCGAAAAAAAATTACATTAATG  
GCGGGGATACATTCACAAATAAAGATGTAAGTCAATGCTCATGCTGATTAACCGGAGTATGAAGTTTACAAGAATG  
GATGAGTTAGATTCTTTATTAATATAGATCTCGGGGGCACCACATTAGATATTCTCAGGTAATGGGAAAATTATCGGG  
GATCAGTAAATATACGGAGACTCATCTCTGGTGTCTCTGTTTACATCTGCAGTAAAGATGCCCTTCTCTTGGGA  
GAACAAAAGGAAGTAGCTATCTTCTGACGATATAATCAATGACAGAAAAGATAAATACTATCTGAAGCAACGAATTAAT  
GATGAGAACAATAATCAATAGTACCGAAGCAATGAATGACACTTCGTAACCTGAGCAACGCTGATTAAGTCAAGCT  
CAATGAATTTCTGGTTATACTCATGTTATGGTTATAGCGGTTGGCGCAGAATTAATATGCGATGCAGTAAAAAACACA  
CACAGATTCGTGATGACGTTTTTTCAAACCAATAACTCTCAATATGATTTAGTTAACGGTATGATCTCATAGGTAAT  
TAA

>Cluster\_22185

ATGTTTAAATAAAAAATATGTAGTGATAATTTGGGGTGGAGTATTATCATTACTATGTTCTTTACCTCTGTCTATTAGGG  
GGGTTTGGACGACTCGCTTGTATTTATTAACAGGCTATTTATATTTGGAATAATGGATTACTGGAGGGTTGAGTTCCTA  
TTTATCATCAAACCAATAAATTTGAAATTTGGTATGGGATTAATTTTTACTTGCAGGGGTTTTTGGGGGAGGGGCGGTTT  
GTATTTATCTTCTTAAATTTGTTTTGGTGAATTTCTCTGTTTTAATAATATCTTAAATAAATGATGAGTTAGAAT  
TAGCCGAGTTTGTATGTGTTACACTAATGCTAATGTCTTATATGTTTTTTCGAATAACATTTATGTGTGGCGCAGTA  
TTATCTGCTTATATTTCTCGTATTTGATGATCTATTCAAAAACAAAATAAAGAAAATATTTTTATTGGTCTCGGTTA  
TTGTTTCAATTAACCTTTATATTTGTTTCTTGTGATATATTTTTGCTGGATAAATAAATAGGTAATTTAAATTTAGCT  
AATTTATCTTATAAATTTACTCTTTTACTCTAATTTTATTTGATTTTATTTGATGAGTTATGCTTCTTATTTGTCGGGG  
GGGAGTTGTGGTATTTATGAGTCAAGATAATGAACTTTAAACGCTAATTTATAGCGGAACCTTCTTATTTTTATTA  
TTAATGATAAATTTAGAGAGTGAATGATGATGATGATGATGATGATGATGATGATGATGATGATGATGATGATGATGAT  
TTATGATGATAAATTTGCGAGCTTTCTCGCGGTTTTTGTTCGCCGCGCATATGGGTAAGTACTGCAATTTATTTGCTAATA  
TTAAGAAAAGATAGCTTTGGTGTCTTTGGGGATAACATTTATCGATAATACCGACCTTTAGATTGATTTTTAATTTATTA  
ATATTAGGCATCTTAA

>Cluster\_27318

ATGAGTTGGATATACCCGGAACGATGATGAGATCTGCTGACCGTCTTAAAGCGGTGGTATCTGCTGGTGGTGTGCAC  
CTGTGGGGCATTCATGAGCTTTGGCGAACGTCGCTGCTGGGTCTGTTCCAGAACCCTTACGGACCTAACCGTGTGGCT  
GGGTGGTTCGCTCCAGTTAGTTCGCGGACATGATCAAAATGTTCTTTAAAGAAGACTGGATCCCAAATTTCTCGGATCCG  
GTCATCTTTACCTGGCGCCGATGATCGCCTTTACCTCGTGTGCTGGCTTTTGGCATTGTGCCAGTCACTCCGGGTTG  
GGTGGTTGCCGACCTGAACATCGGGATTTGTTCTTCCGTGATGAGTGGCAGGCTCGCGGCTCAGCGGTTGCTGGCG  
GCTGGTCAAGTAACAACAATACTCGCTGCTGGGTGCGATGCGTGCTTCTGCGCAGACCCTGAGCTACGAAGTGTTCCTC  
GGGCTTCTTGTATGGGCGTGGTGGCGCAGGCCGTTTCAATCAACATGACCGACATCGTCAATAGCCAGCGCATGTGTG  
GAACGTCATCCCGCAATCTTTGGTTTTATACCTTTGCCATCGCGGCGTGGCGGTTGTACCGCTCACCCGTTTGACC  
AGCCGGAAGCCGACGAGGAATGGCGGATGGTTACCACATTGAATATTTCCGGCATGAAGTTCCGCTCTGTTCTTGGG  
GAGTACATCGGGATTGTGACCATCTCTGCACTGATGGTACGCTGTTCTTCCGTTGGCTGGCAAGGCCGTTGTTACCGCC  
GTTTATCTGGTTCGCGCTGAAAACCGCGTTCTTTATGATGATGTTTCAATTTGATTCGTGCGTCTTACCGCTCCGCGTT  
ATGACCAGGTAATGCTTTCGGCTGGAAAATCTGCCGCGCTGACGCTGATCAACTTCTGTTAACGGCGGCTGTCATT  
CTTGGCAGGCGCAATAA

>Cluster\_60175

ATGAAAAAATAATCTTTGCTTTTATTATATTATTTGTTGTTTTTACTCCCTATGATTAATTTTTTACCAACCCTGGGTCAA  
TGCATTACCGTCAAGCCCGACAGCAAGTCTGAGCAATAGAAAAACAGTTCGTTATCTTACACAACACTGGTGCATC  
CAGTAGTCCGACAATATGATAATCTGAATAGGTCGCGAGAATATAAAAAGAGGTTCTTTGTCAGTAGCGGTGCCAGA  
GTTACCTCGCAGGAGCTCCCATTTACGGGTGGCCCTACAAAAACATTGTTGCTGATTATGGTCTGCGATGGACCGCT  
GATTATTATTTGGTGGCATTATGACTCTGCCAGCAGTTATGAAAACGATCAATGACCTATACGCCGGGCGCGGATGATA  
ACGCCAGCGGTGGCGAAGTACTCGAAGTGGCAGTGGTTGTTTACATCAGCAAGTACCAGAAAACAGCGGCTGAGCTGGT  
GCCTATGCGTGGGAAGAACCGCCCTTCTTTCGTAGCGATGAAATGGGGAGCGGTTGCATGCAGCTTCCGCTTGGAGCTCC  
AGTGAATTAATGATAGCACTGGAGATGATGGCTATTACGACTCTGCGCTGGAAGCAGAAATACCCTTACCCGGCAA  
TGCTCTGGCTTTATCCCGATCGGGGAGACTTTATTGCCGTGGTGGCAGAATACAGGATATCAACGCCGTTCTGTCAGGTA  
AAAGCGGCATTTGTTGTCATCTCAGGATTTATCTGTTTATCTATGAAATACCCAGGTTTATTTCCCGTATTGATTTCTC  
TGACCACCTGAATATTGGCAACACGATATTCCCGCATAATGATTACTGACACCGCTTTTATCGTAATAAACAATACC  
ACTTGCAGGTTGATACCGCAGACAGATTGAATATCAGAAAATGGCTCAGGATGGATGGTGTATAACTTTGTTTATAC  
AACAGTAAATAA

>Cluster\_39980

ATGAACGTACTGCGATGATGGTTCAACAACAATCAAGTTGGCATGGAATGACAATGGGAAAATCTGTAAGTCTGTTGTC  
GCAAACTCATTTCTGTCATGGATGGAAGGTTGACGGGTTAGGGATTCGCCAGACATTTAACTATGAACGGAATGGTAAAA  
AATACAGTATGATGAAGTTAGCAACCAATCTATTTACGACTCATATTTGATATCAATATACGGATTTAACCTGTTA  
GCTGTGCATCAGCTTTTACTGAAATAGTGGATTAGTGCCCTGAGCTGATTCATTGACTGTGACTTTGGCTATCAGTGA  
CTACAGAAAGAGTGTCAAAAAAATGAACTCAACATTCAGCGTAAAATGAGAATTTAATGAGGCCGATTCGTTTAAATA  
AAGCGGATGTTTTTACCATTGAACACGTTGATGTTGATGCTGAAATGCGCAGCTGTTGCGAGCTGTGTTTTCTGCTGTTGAT  
AAAGTTGGTCAGTTTCGAAAATCGTGGTATGATTTGGCGGCATACGCTTGGTGTATGTTGTTGTTGTTGTTGTTGTTGTT  
TGACTCTGTAAGTGCATTCATGTAATTTCTGGCATTGGTGTGCTTTCAGTTACGAAAGCTGCATGAGTGCATTTGCCA  
TGGCATCCAGTATACAGTTTCTCTGTTGCGATGAAATGATTAACGCTGATGATGACCCGACTTTGTTGGCAGGTT

ATAAATGACGAAACAAAACTGATCTGGTCTTAATACCATTGAGGGGGCTATTGCCAGTCTGGGGGAGCAAGTAGTCAA  
TGAGCTCGGTGATTTTTCATCATGTGAATCGTGTATTGTTGTCGGTGGTGGGGCCCGTGTGATCTATGATTCCGATAAAAA  
CGGCATGGCACCATCTTTGGGCAAAAAGTAGTGATGATGGAGTCCGCACAGACAGCACTGGTTGAGCTATCGCGGCTTTC  
AAAGAGGAGTAA

>Cluster\_20349

ATGACTGTGGCACCAAAAGATCAAAGTTTGAAATCTGTAAGGGTGGGCTTTTACACAAGCTCTGAGAATATTCGCACTAG  
TAACAAGGGGTAAACCGCAGAGGGCTTTAAAAATCTCTATGATCGGTGTTCTAAAGACTTCAAGATGACCCACTATGCAG  
ACTTTGGTGAAGAGAACTTAAATTCATTTTCTAGACATCTCACCGAGGATGGCTCCTACTTCGGATTCTGTCTCGA  
AGAAGAAAAGCCGAACCTGGCATATATACAGATAAAGAGTGGGTGGAAGAGAAAAATCCCTCTAGCCGGGCAAGAG  
TCTTTTCAAGACGTACATACTTTATTTATATCTCAGACAGACATCTAGTATTGTCTTTAAATCATTTAGGTCCACGCC  
ATAGTGACTTAGCCTTCCCTTTCAACTCCAGTGATCGCGGAGTCCCTGTTTCTTTTGAAGCCATTGGAAAGAAAGAA  
AGCATCAAGAACACTCTCGAACTGGATCCAATCTAAGAAGCTGCGAGATTCTGTGGCCATCCAAGAACTTCAATGC  
CGCACAGTATCACTCGATGGAATGTTCCGCAATCAGTATTGAGATGATCAGAGGCACCAGTTCAGCCACCTGACTA  
TTTCGTTACGCGGACATTTCTCCATTAAGAAAGAAAGCAAGGGATGGCTTGGAGATGACGTTAAAAAAGCCTTAAGGAG  
ATGCTAGAAAAGTTCCTGGTGGTGGTGTGTTAACCTTTTGAAGAAAGCAAAATGTTGTTGCTCAGGGCGATAAAAAAGAA  
GAAAAGTCTGTAGACGAAGTTCACGGTAAAGAAAGTGGTCCATCCAAGCAGATGGGTATCCGACCAGTACTGACG  
TTAAAAATGCTATGCTACAAGCAAAGAAATGACAACCTTAGGTATCTAACCCAGTACTATTTGGTTAGTCAAACGTAA

>Cluster\_48592

GTGAATTAATCTCTTCGTAGATGGCAATAGCCTGGGTTATACCACCAACAATCTGACAAAATTGACAACCGCGAAATGGA  
AGTACAGGCTGCTTTCGGCTTTGTTAAGAACGTCCGCTTATAGCTCCATCCATGCCCGACTATGATTTCTTTGGG  
ATGGATTTAGTGACAAGCGTCCGACTTTTACCAGACTCAAAGCAAAATCGCAGCAGATCCTGATATGAAAAGATG  
AAGGAAGCTTTGCTATCCAGAAGCCATACATCTCAAATGATGACCAGCTTGGTATTAACCAATCATTTGCAAAAAGA  
TGCAGAAGCGGATGATCTGGCCGGGCTGCTGGTATCCGCATGGCACCAGCCACCGTGAACACATCTATCTGTTAA  
CAGGGCATCTCAACCGCAGTTCAGTTAGTTGCGCAAGCACTAAGCTGGTAAAGCTGCGTGAAGACGCGCAAAAACAAGCAG  
GTTAATTTTGGAGCAATTTGCGGAGCTGACAGGATTTGCGCACGCTCGCGCATTTTGGAAAGCAAAAAGCATTACAAGGCGA  
TAACCTCGGACAACATTAGCGGTGTTGGTGGCATTTGGTGTGCGGCTGCGAAAGAGCTGCTGCATGAATGGGGAAGTGTG  
CAACGATGGTACGCGGCATCAACGACGGCTCAATCGTGGTAAATAAGGGGCTCATAAGACCGCTTCAACAACTAGCG  
AAGAAATGCTTCAACGAGAAAACAGGCTGTGCAATGCTCAAGCTTCAAGAGAAACATCAGCTAATGAATGATTTGA  
GACGAAGTTTCCGCCTACCGAAATCGAAACAATCAAAGCAATCGTACGTTGAAAGCATTTCGAGCAACTGTGCTACGAGC  
TGAATTTCCGTTCCTTTCGAAAGCACTTGAAGTGTGTTCTTCCATTCGAAAGGATTTGCTAA

>Cluster\_54862

GTGGCTACGATTGCATTCCAGGGGAATCTGCGGGAATATGAGAAAGATAAAAAATAGGGCTGGCGCTGGGATCTGGCGC  
GGCGAGAGGTTGGTCGCATATTGGCGTTATTAATGCGCTAAAAAAAGTGGGATTTGAAATGATATCGTTGCAGGATGTT  
CAATTTGGTTCGCTGGTGGGCGCTGCCTATGCATCGCATGATTATCTGCGCTGGAAGATTGGGTGACCTCTTTCAGTTAT  
TGGGATGTTTTACGCTGATGGATCTCTCTGCGAGCGGGTGGTACTGCGCGGCGAGCGTGTCTTCAATCAATACCG  
CGAAATTAATGCGCGAAACAGAGATCGAAATTTGTTCCCTCGCTTTGCGGCTGTTGCCACCAATTTAAGTACGGGACG  
AATTAATGTTTACTGAAGGGCATCTCCATCTTGTATTTCGCGCATCATGCAGTATTCCAGGACTCATGGCACCCTGTTGCA  
CATAACGGCTACTGGCTGGTGGATGAGAGAGTCTTAACCAAAATCTCTATTTCCCTCACGCGTGCATTGGGGGCTGATAT  
TGTGATAGCGGTTGACTGCAGCAGCATGCTCATTTGATGCAACAAGATTGCTCTCCTTTAATGTCAGTGAAGAAAATA  
GCGAAGATGGTGAATTTCTGCGCGTGGCATGCGCGTCTGAAAGAAAGGTTAGGCAGCATAACGACACGCTCGGGCGGTGACA  
GCGCAACGGCAACAGAGATTATGACCATTCTATCCAGGTGCTGGAGAACCGCTTAAAGGAACCGCATGGCAGGTGA  
TCCGCCGATATTCTGATTCACCTGTTTGGCCGCAAAATATCTACGCTTGATTTCATTCGCGCGCACGCTGCCATTGGCG  
CCGACAGCTGGCAGTGGAAAGGAAAATGGACGAACCTTTGCGGTTGGTACGCACCAACATTTGA

>Cluster\_1369

ATGGATATCATCTTTTATCACCCAACGTTTCGATACCCAATGGTGGATTGAGGCACTGCGCAAAGCTATTCCTCAGGCAAG  
AGTCAGAGCATGGAAAAGCGGAGATAATGACTCTGTGATTTAGCTTTAGTCTGGCATCTCCTGTTGAAATGCTGGCAG  
GGCGCATCTTAAAGCGGTGTTTCGCACTCGGGCGGTGTTGATTTCTATTTTGGAGCAAGCTACAGGCACACCTGAAAATG  
CTGAACCTTCTGTTCCACTTTTTTCGCTGGAAGATACCGGTATGGGCGAGCAAAATGCAGGAATATGCTGTGATGAGGT  
GCTGCATTTGGTTTCGACCTTTTTCGATATTCGATCCAGCAAAATAGTTTCGATTGGCAACCGCTGCCTGAATATCATC  
GGGAAGATTTTACCATGGCATTTTGGGCGCAGGCGTACTGGGCGTAAAGTTGCTCAGAGCTGCAAACTGGCGCTTT  
CCGTGCGTTGCTGGATCGAACCCGTAATCTGTCGCTGCAAAAGCTTTGCGGACGGGAAGAACTGTCTGCATT  
TCTGAGCAATGTCGGGTATTGATTAATTTGTTACCGAATACCCCTGAAACCGTCCGGCATTTAATCAACAATTAATCTG  
AAAAATACCGGATGGCGGATCTCTCAACCTGGCGCGTGGTTCATGTTGTTGGAAGATGACCTGCTCGCGCGCTG  
GATAGCGGCAAGTTAAAGGCGCAATGTTGGATGTTTTAATCTGTAACCTTACCCTGAAAGTCCGCTCTGGCAACA  
TCCACCGTGGACGATAACACCATATGTCGCGGATTAACCCGTTCCGCTGAAAGCTGTGGAGTACATTTCTCGCACCATTTG  
CCCAGCTCGAAAAAGGGGAGAGGTTCTGCGGGCAAGTTCGACCGCGCACGCGCTACTAA

>Cluster\_40412

ATGAAGCTTAAAGAACCCCTCTGGCGTGGCATTGCTTTCTGTACGGCATTCTCCGTTAACGCAGCAACAGAACTGAC  
ACCGGAGCAAGCGGCGAGCGTTAAACCTTTTGAACGCTGAGTGGTTACCGGTCGTTTTAATGCTATTGGCGAAGCGGTGA  
AAGCGTTTCTCGTCCGCGAGATAAAGAAAGTGGCGCTCTTTTATGTTGTGCGACACTTCTGATTTTGGTAAACGCGGT  
AACTGGCGTGTGGTGCCTGACCTCTATAAAGCCGATGCTGAAAAAGCAGAAAGAAACAAGTAAATCGCGTAAATTAACGGTGT  
TGTGCAACTGCGGAAAGATCAGGCTGTTCTGATTTGAACCGTTTGCACAGGTACCCTCAGGGCTCTATCTGATGACG  
CAGAAGTCAATGATGCCATCACCAAGCGGCAAAAGCGAAAGGTGCTACTCTTTCTACATTGTTCTGTTCAATCGATGCC  
AACCGGGTGGTAACAGCGTATTACTGCATTTCTATAAAAAAGATGCTAAGAAACGATATCTGTCAGAGCCGAGTGT  
CATCCCGGCGAGATTCCGAAGCAGGACGTCAGCTCTGGCTGCGGCGGCGAAGCGGAAAGTGGATTTGAGATTTCCGCGGT  
TTGCGACTACCCGATCAACCAAGTTCGAAAGTCTGAAAGTCTGCTTCTTTGAAACCAGTTCATCAAAAGCGGGGCTTACCCGTC  
ACGCTCCCGGACGGCAATAAGTCAAGAACTGAACAAGCGACAGCAGCGATGATGGTCCGCTTCGACAGCATCAAAAT  
CTCTGGCAACTACGGCAACATGACCGAAGTCTCTATCAGGTTGCGAAACGTCGCGGAAAGAAAGGTGCTAAGTATTACC  
ACATCACCCGCGAGTGGCAGGACGTTGTAATAACCTGACCGTACGCGAGATCTGTATAAATAA

>Cluster\_17551

ATGATGACAGTCTCCCGGTGATGCATAATGCAGAATCTGTGCGTCTGCAACCGGTGACCGGATTTGCAGGCAATCCA  
GACCTGAAATATGTTCCGATCTTTCCGCCGTAAAAATGCGCGCTCAAGGACGTAAGCGTGCAGCTCTCGCGCTGCTGG  
CACAGGACACTGCTACCCTCTTCTGTTGATTTCTGCTGGCATTGAGCAAACTGCGCAGGAGTTCGGCTGGAAT  
AGTTTTTTTAAATCAATATTTTCTGAAGATGACGTTCCCGCGGCAAGCTGCTAGCCACCGTCCGGATGGCAT  
TATCTATACTACAATGGGGTGGCAGATATCACGCTGCTGAGTCTCTGATGGTGAATAATTTGATTTGGCGAACTGTG  
TGGCGGATGACCCAGCTTACCCAGTTATATCCCTGATTTACACTGCACAAATATGAATCAACACAGCAATTTGCTCGCG  
GCGGCTATCGCTAACCGTTATGCTTCTGGCTACCGGAAAGTGGCTGGCAACAGGATCTGTCGCGGAGGATTTGAGCA  
GGCTGGCGTGTGATCTGGACGAGATCTGGCTGAGGTGAAACAATTTCCATATGGCAACAGGTGATGATCACTACCCGATC  
TCGCAAGTTTACTCAATGCCACTTCAAATCGGGCAACAGATTTTGTGATTTCTGATATGTGGTACGATCGCGCAGCC

TTTGTGCTTATCAGGTTCTCTGGCGAAGGGGTACGTATCCCGCAGGATGTCGCCGTAATGGGCTTTGATAATCTGGT  
TGGCGTCGGGCATCTGTTTTTACCGCCGCTGACCACAATTACAGCTTCCACATGACATTTATCGGGCGGGAAGCTGCATTGC  
ATATATTTGAAGATCGTGAAGGGGAAGAGTGACGCGGATCCCTTGCCGCTGTGTATCCGTTTCCACCTGA  
>Cluster\_28264  
GTGACAATAACTAFTCGCCTATGGCGAATTGTGGCCGAGTTTTTGTGCCGCAACCACATCAAAAATTCCTCAGCC  
TGGGGAGTTTATCGGGCCATTTCCAGCGGTGCGCCAGCAATTTTTGTGCTCAGGTGCAAAACTGTCCCATCGGGCCA  
TCTTCTTTGGATGTTGTTGTAATGATGATTTTGCCGACTCATATAGAGCGTCTCCGTCATGAAGGTGTCATTACCGAT  
GGGATCCATGTTATGAACAATGCCGTCACAGGTACGGCGTTCGTGAGTTATCAAAAATCCCGCAGCGGGGATTTGCTCTT  
TAATATCCCTAACAGCGCTGCGGTTTTGTTTACTGCGGAGCATTGATAAAGGATCTGCTTAAACAGTGAACCATCTGC  
ATATTTGGGGCTCATCGTTGTTCTCATTTTCGCATGATCGATGTCATGCGTAAAGCAATAACGACGATCAAAATCGGCTGGC  
GGCACCGTTCTTTFCGATCCCAATATTCGCAAAAGAGATGCTGAGCATTCTGAAATGGCGCAGGCTCTCGATTATTTGAT  
TGAATATACGGATATTTTTATCCCGCAGGAAAGCGAATCCCTTTCTTCGCGGCTCACAAAAATCTGTGAGAGGAACAGA  
TTGTTAGCGATCTTCTCCAGCGGCGCTAAAACATGTGGCAGCATAAAAACGCGCCAGCGTGGGGCCAGCTATTACAAGCT  
AAAAACGGTACATTACAGCCCGGCGATGTTGCAGGTACGATATCGAAATATCGATCCAACGGGTGCAGGCGACTGCTT  
TGGCGCAACGTTTTATCCTCTTTTCTTATCCCGTTTCCCGGCACACAAGGCGCTGCAATATGCAAAATGCCAGCGCGCC  
TCGCGTAATGCGGCAAGTCCGATGGAAGGATATCCTCACTGGCAGACATTGAAGACTTTTTGCAGCAGCACTGA  
>Cluster\_34180  
ATGCACGCTTATCTTCACTGTCTTTCCACTCGCCGCTGGTGGGCTATGTCGACCCGGCACAGGCTGTGCTCGACGAGGT  
TAAATGGCGTGATCGCCAGCGCTCGGGCAGTATTACGGCGTTTCGAACCTGAACCTGGTCTGCTGTTTTGCCCCCGATCACT  
ACAACGATTTTTCTACGACGTGATGCCGCTTCTGTTAGCGTTGGCGCTACGGCGATCGGGCATTTTGGTAGCGCG  
CGGGGGAAATACCGGTGCGGACAGATCTGGCTGAAGCTCGCGCCACGCGGTAATGAAAAGCGGATTTTGGTAGCGCT  
GTCCTACAACATGACAGTGCATCATGGCTTCGCGCAGCGCTGGAGTTTTTGTGCGCGGCTGGATAAGGTGCCGCTGC  
TGCCAGTGTTTATTAACGGCGTCGCAACCGCGTTCGCGGGCTTTCAGCGTACCCGATGCTCGGTGAAGTGAATGGCCGT  
TTCGCGAGCTCAGTGAATAAGCGGTGCTGTTTTAGGCTCGCGGGGCTATCGCATAGCCGCGGTACCGGTTCCGCTGGC  
GAAGGCTGATGCCATATGCGTGACCGCTGCTCGGCAAGTGGCAAAACAGTTACCTGAAAACGAGCGGAGCTGCGCCAGC  
AGCGGGTGTACAGCGCCGCGAGAGTTTGTGGTGCATCAAAACAGCTACACCGCTTAACCTGCTGCGGATAACCGT  
TTTTATGCTCCTGCTTGCAGGGGGCTTTCAGGGGCTGGACGCGGTGAGTAAACGAGAGCTGTCGCGATGGCGGGCAA  
ATCAACGCACGATGAAAACCTGGGTTGCCGCTTTGCGCCCTTTGCGCCATTTCTGCTTTTGGCACTGGCGCAGCG  
AAGCCGTTATTACCGCCGATCCCGAGTGGATCGCCGATTCGGCTCCCTGAGCGCCACTACACAGAACTAA  
>Cluster\_42932  
ATGATCGAAGTAAAACCTGAAAACGCTACAAGCGTTGCGGAACTGCGGCTCACTCGCAGCCGCTGCGGGCAGCTGTGCA  
TCAAACGCAATCCGCCCTGTCTCACAGTTTAGCGATCTGGAACAACGCTTGCTTCCGCTATTTGTGCGTAAAAGCC  
AGCCGCTTCGCTTTACCCGAGGGAGAAATCCTGTTGCAACTGGCAATCAGGTGCTGCCGAAATTAGCCAGGCACTG  
CAAGCCTGCAATGAACCGCAGCAGACGCGCCTGCGCATTCGCAATAGAGTGCCATAGCTGATTTAGTGGCTGACGCCCC  
ATTAGAAAGTTCCATAAGAAGTGGCCGAGGTGGAGATGGATTTAAATCGGGCGTAACGTTTGTATCCCGCAGCTCGT  
TGCAACAGGCGAGCTGGATCTGGTATGACGCTCCGATTTCTGCGCCGATGGCTGCATTTATTCGCTGTTTCGAC  
TATGAAGTGGCTCTGGTGTAGCACCTGACCATCCACTGGCGGCAAAAACGCGTATTACACCGGAAGATCTCGCCAGCGA  
AACGCTGTTGATTTATCCGGTGCAGCTAGCCGACTGGATGCTTGGAGGCATTTTCTTCAGCCAGCAGCGCTAGCCCT  
CACTGAAAAGCTGCAATAACACCTTATTTGATTCAGATGTTGCGCACGGATGGTATTGCGCCACTACCGCATTTGG  
GTGGTGGAGAGTTTTTGAACGCCAGGGTCTGGTGGTCAACAAAACCTGGGCGAAGGCTTGTGGAGCCGATGTCAGCCG  
CGTGGCGATGGCGAGCAGCGTACGCGATTACAGAAGCGTTTTATCGTTTCAGCGCGCAATCAGCCCTCGGATCATCTGC  
CGTTTGTGAAGAGCGCGGAGCGACCCACTTACGATGCACCCACAGTGAGGCCAGGATCACCAGCGCCCTGTAA  
>Cluster\_2772  
ATGGGAAGAGATATAACGCTGTACCCTAAAAAGCAACTAGAAAACGAACTAAAAATACCTTAAAAATTTAGGTTTTAA  
AAGGTGTAACAATTTGTGGGAATGGCCCAAGGAACTGAAATTACTCTTGGTTTGTATGATACGGACTCAAAATCTACAG  
ATGGAGTTTCGGCTGATATATATCTGTTTCAAAATGACGAACTACACATATCTGGTAATAAATGGGCAATGATGTGCGT  
AATTTATATAGCGCTAGTTGGCATGATGTAATAATGCTTAATGATGTTCTAAAAGCGCACGGAGCTTTTTTGGTGGAAC  
ACTTATAGGTGATATAGGAAAAATAGGTACGCTCCTCTATGGAAGGATTTCTAGTAGTCCGATCAGTCTGGCATTTCTT  
CAATATTTAATCATGTCCATCATGAGATTTCCGCTGTTAAACATGCCCTTACCTGAACCTTCTATTAATAAATAAACCTACCG  
GAAGATGGCGGCTTATCCGAATACTTTGATTACATGCAATGATGGATCCAGTAGAGTTATATAAATGGATTTAGTACC  
TTTTCGGTTGCTATGTTTGAATATTTTTTCTCTAGAGCTTTTCAAATACTTATAAAGTACGATCTTTCGCAATAGCAA  
AAAGAACATCGTATAAGCAAAAAGTTGATTTTGTATTTCTGCTTGAGATAGAGAAAGGAAATATTTCAATAGAAAGTGT  
ATTCGAAGAAATACACTTTTCAAACCTTAACCCACCTAAATAAAGCATATAAAGAGTGGCTGGATATAGATGTGAGAGC  
GATTCCTTATAAGAAAAAAGAAATGGAAAAATCAGTTGATTTTCTTGAAATCGAATTTCTGAAATCATACAATATAGAC  
ATGGGATAGTTCATCTGAGTTGATTTGATAGGACTTAATCGGGATGGATGATATTTCAATATATAGATGCGATAGAAAA  
AGCATAATGAATTTATCCATTACATAGAAGGCAATAACAATTTAAATTAATGCGTATTAA  
>Cluster\_26265  
ATGGGAAGACGAAAGAAAAATCTGAACACGAAAAATTAACCTCAAAATGTATACCCAAATAAATATAGTTATGTATGGAA  
ACCAACATCCAGAGAATCTGTACACACTAACCGCATCAAGGATGGTTTTAGCTGCTTTATGAAAAAAGTATGAGAAAACTG  
TAAATAATCGGATCGTGCATGACATTCGGTCTGTTGGGAAAAATTCCTCGCCAGCGCTATTACAGTGACCTTAGT  
CCAAGAACACAAAAAGATTTATCTGCAACATCAAAAAAGTTGCTTGCCGTAATTCGGTAAGGTACCAGCGGATTCATATA  
ACCAGAACATCCGTCGATACATGGACAAAAGAGGGGACGAGTAAAACGCAAGCCAAACATGAAAAAAGCAGTATGT  
CCCGTGTTTACAGTTGGGGGATGAGCGAGGGTACGCTAAGGCTAACCCATGTGCAGGTGTAAGTAAATTAAGGCCAAA  
AACCGCAACGATATGTAACCGCAAAAGAAATACAGGCAGTATTAAGCGTTGCACCTCTCCTGTTTTATCGCAATGGA  
AATTCCTATCTGTGTGCGAGGAGGTTCCGATGTGTTATCGCTGAAATGGGAAACAGATGGAAACGACGGGATTTCA  
TCCAGCAAGGGAAAAACCGAAAAAAGCAAGATAAAGCATGGAGTCCAGGATTAACAGGCAGCATCGAAAAAGCAAAACAG  
TTACCAAAATCTGCCTATGTGATCAGCAATCAATACGGCAACCGATATATGTACAAGGCTTTAACGAAATGTGGGTAGA  
AGCAAGAAATCTGCTGGAATAATTTACGGTATTTAACCGACTTACCTTTCATGATCTGAAGGCGAAAGGAATTTACAG  
ACTATGAAGGAAGCAGCCGGGATAAGCAACTTTTCTCTGGTACAAAAACCGAAGGGCAAGTGCATATATGACAGGAAG  
GTTAAAGTTTACCAACACTTGATGTCTACCTGAAATAATTCGAATAATTTCAAGTAA  
>Cluster\_22086  
ATGAAAAAGAATCAATTTTTAAAAGAATCAGATGTTACGGCCGAGTCCGTTATCTTTATGAAGCGTCCGCGAGGTGTTAAA  
AGCACTGGGCATCAGCGCGGTGCATTTCTTTGGCTCAGCTCGCATGCGGATCTGCTTAGCTGGTTTAAAGGGAACG  
ATCGTCCACCCGCCCCCGGAAAAACCGCTGGAGTTACGAAGCCTGCGCCCTGGCAAAATAACCTGCCATGCCACGCCA  
GCAGATAAAGTTCCGGTTATAACAATTTCTATGAATTCGGGCTGGATAAAGCCGATCCCGCCCTAATGCTGGTAGCCT  
GAAAACCGATCCATGAGCACTGAAAAATAGCGCGAAGTAGGAAAAACCTTAACCTTCGATCAGATGATTTAACCCGCT  
GCTTCCCGCTGGAAGAGCGTATTTATCGTATGCGCTGCTGGAAGCATGGTGGATGGTGGTGGCTGGTGGTGGTGGTGG  
CTGCACAAATGTAGCGGTTGGCGAACCCACCGCAATGCGAAGTATGTCGCTTTCGAAAAAATTTATGACCCGGAACA  
GATGCCAGGCCAGCAGGACCGCTTTATCGCGCGGGCTGAAATATCTTATGTGGAAGGATTCGCTCAGCAAGCA

TGCATCCGCTCACACTGATGACCGTAGGTGTTTATGGCAAGCGTTACCGCCACAAAATGGCGCGCGGTGCGACTGATT  
GTGCCGTGAAAAATATGGCTTTAAAGGGATTAAATCGATCGTCAGTATTAAAGCTGACCCCGAGCGTCCGCCAACCCACCTG  
GAATCTGGCAGCGCTGACGAATACGGTTTTTACGCCAACGTTAATCCGCATGTTGATCACCCGCGCTGGTCACAGGCTA  
CCGAACGATTTATTTGGTTTACGGCGCATTTCTCGATGTTTACGGCCAGCCAACTACTGTTTAAATGGTTACGCCGACCAG  
GTGGCATCGTGTATCGTGGCCCTGGATTGCGGGAGAAATTTCTAA

>Cluster\_61236

ATGTTGGATATTGATAAAAAGCACCGTGGACTTTCTGGTACCAGAAAATATGGTTACAGGAAGTGAAAAAGTTCTCAGCCA  
TGACGTTCCCGTGGTGCACGCCATCGTGGAAAGAGATGGTGAAGCGCGACATTTGATCGTATTTATTTTCGTTGCCTGCGGAT  
CGCCACTCAACGGCGGCAAAACGGCGAAACATCTGGCGGATCGCTTTTCCGATCTTCAGGTCTACGCCATTTCCGGCTGG  
GAGTTCTGCGATAACACCCCGTATCGCCTCGACGATCGTTGCGCAGTAATTTGGCGTTTCTGACTACGGTAAAACCGAAGA  
GGTAATCAAAAGCGTGGAGCTGGGCCGGGCTGCGGCGCACTACTGCGGCGTTCACCAAACGCGCGGATAGCCCGATTA  
CCTCGGCGGCGGAATTTAGCATTGATTATCAGGCCGACTGATCTGGGAAATTCACCTGCTGCTGCTACAGCGTGGTG  
CTGGAGATGATCACCCCGCTCGCGCCGAACCGGAAATCGGCAAGATCAAAAACGATCTCAAGCAGTTGCCGAATGCGCT  
CGGTATCTGGTACGCACCTGGGAAGAAAAGGCCCGCAGTTGGTGAACCTGGCCAGCCAGTGGCCGATGATTTATACCG  
TTGCTGCGGGTCCGCTGCGTCCGCTGGGTTACAAAAGAGCATTTGTAACGCTGATGGAATTTACTGGACGCACGGCTCG  
GTGATTGAGAGCGAGAGTTCGCCATGGCCCGCTGGAGATTGTCGAACCGGCGTTCGTTCTGTTCTGCTCGGCCAA  
TGATGAAAGTCCGCCACACCGAACCGCCATTAACTTTGTAAACAGCGTACTGACAACTGATCGTACGTCATGATACG  
CCGAAATTTGCAAGGGCTGCACCCGTGGCTGGCACCGTTCCTGATGTTCTGTCGAATGGAGTGGCTCTGCTACTACCTG  
TCTATTTACAAAAGATCACAAACCGGATGAACCGCCTATTACGGTGGTCTGGTGGAAATATTA

>Cluster\_10996

ATGGTTTCCACACATCGGCTTCCCGACTGAAACGGTCAATTGTTTTATGCGCTTTTTCAGTCCGTTGCCATCTTTATTGA  
CCTGTTTATGCACCGTATGACAAGCCAATCTCGCTGAAGAGTGTGCGCTCTGGTCCGATTTCTGGGTTGTGGTTGCGA  
TGGCATTTGCCGGTTTCTCTATATCCACCACGGTGTGAGGTTGCCAGTCTGTTTGTTCACGGGTTATCGCTGGAGAAA  
GTGCTGTCCGGTACGATAACCTGTTTCTCATGATGGCAATCTTCTCTGGTTCCGCGTCCGATCGTTATCGCCACCGTGT  
TCTCTACTGGGGATCATTTGGTGCATCGTCTTTCAGGGCATCTTGTGCGCATCGGTACGAGCCTGCTGAGTCTGGGGC  
CGTACGTTGAAGTTGCTTTCGCTATTATCGTTGGCTGGACGGCGGTATGATGCTAAAAGCGGTGATGACGATGATGAA  
ATTTGAGGATTAACCCAGCATCTGGCTTACCGTATGGTTAAACGCTTCTTCCCTATCTGGCCGAAAGCTCAGAGGGCATGC  
CTTCTACTTAACCCAGTAAGGAGTGGATGCTGAACTGGCGAAACCAGAAAACAGCGATGTACCATTGGCCGTTGGTAAAA  
AAGCGGCGTGTATGCGACCCCGCTGTTCTGTGTGTGGCTGTGGTTGAACTCAGGACGTAATGTTCCGCTTTGACTCG  
GTACCGGCAATCATTTGCCCTCAGTCGTAACCGCTTATCGTCTATAGTCCCATGATGTTGCTATCCTGGGCTGCGTAC  
TCTGATTTTGTCTTGGAGCACTGAAACAGTACCTGGTTCATCTGGAGAAGGCCGTTATCGTGTGCTGTTCTTCTATCG  
CGGCAAACTCGGCTGAATGCGACCGATCACTCTGGCATCATGGTTACAGCATCGCGGCAACCAACCGCTGATGTT  
GTACTGGGTGACTGGCGTGGGCATTCGCAAGCGTATGTTCCGGGCAACCTGAACTGAGGAAAAGGGGAGTTA

>Cluster\_22919

ATGCAAGACATTAATAATATATACAATTTAGCCTCTTCTTTATATCTGGTAGTGTTTTTGCTCAAACGGAAATTTTCGAC  
TGCAAATTCGCTACAGTTAATGCAAGTTATGTTGAACCTTCAGCGGAAAAAATAATATCGCCAAGCGATAAACTCAATA  
ACCTTTTTGAAAGAAATATGCTCTCAGCCTTATATTTTACAAAAAATGGCGAGAGAATTTATTTATGTTCAACCGTATTTT  
TATTCACACTAGCTTTTATGTCAGAGACAAGGGGTTTTGCTGTTGATGCTCCGGAGGGTCCGCGTAAATATTTATTACA  
GGCAATTCGTGATGTGACTCCATTTACCCGTAACAGCGCTGGTTTTATTCTCATTACCATGTGGATCACATTTGGCGATAGTC  
CATTTTGGAACGATGAGGGGAAGAAAGAGCGGTAATCTGCGTATTTATGCCAGTAAAGCCACTGCTGAAAAATGCAA  
TTTTATGAACAGTCCGTTACCCGTCGCCACTCAGGTTTTAAGTAAAAAAGATGACCAGTTTAAATTTGAAAAGCAGACCAT  
TGAATTACACCGATTTGTTAAAGCAGGACATACCGACGACCAATTTCTGTATGTTGCTAAAACAGGAAAAAGTAGCTCACA  
GCCCGGATCTCTGAATCCTGACCAACTGCCGATGATGGGCTTCGCGTATCGGATACGTTGGTTTACCATGACAGTAAT  
TTGCGTCAAGTTGAAATGCTTACTGGAATAATTTTATTTGGCGGGCATGGTAAATTTGGTTTACACGATGATTTTAAAT  
TCAACGCCAGTTTCTTAATGATCTTCGGGATACGCAATTAAGTTCAGAAAAGAAAGTTTTGGTAAATTTATGAATA  
AAACGGCAAATAATATCATGCTGATTTTGGCGGAGCCGAAAGCAATTTAAGAAAAGTAACTGAAGTATTACGCTCCG  
AAATATGGCCATATGATGGCTACGACGCATCTATGCCGCTAATATCGAAATGGCAATAAGATTGGTCCGTTCTTATTA  
CTAA

>Cluster\_20633

GTGCTGAACGAAACTCCCGCACTGGCACCCGATGGTACGCGTACCAGCTGTTAACTTTGCGTAACAACGCAGGGATGGT  
AGTCACGCTGATGGACTGGGGTGCAGCTTTACTTTCCGCCGATTTCCGCTTTCCGATGGCAGCGTCCCGAGGGCGTGC  
TTGGCTGCGCCAGCCCGAATGCTATCAGGATCAGGCCCATTTCTGGGGCTCTATTTGGTCTGTTATGCCAACCGCATC  
GCCAATAGCCGTTATACCTTTGACGGTGAACCGTACCCTTTTACCAAGTACAGGCGTTAACAGCTGCACGGCGGCC  
GGAAGGTTTCGACAAACGTCGCTGGCAGATTGTGAACAGCAAGCATCGTCAGGTGCTGTTGCGCTGAGTTGAGATGATG  
GCGATCAGGGTTTCCCGGTAATCTCGGCGCAGCGGTGAATATCGTCTGACCAGCATAACCGTATCTCCATTACTTAT  
CGCGCCACAGTTGATAAACTTTGCCCGTGAATATGACTAATCAGCTTATTTCAATCTTGACGGCGAGCAGTCTGACGT  
GCCCAATCAATAGTTGCAGATTTGCGGGAAGAAATATCTGCGGTTGATGAAGCGGCATTTCCGCACGACGGCTGAAAT  
CTGTCCCGGAAACCTCTTTTGTATTTCCGCAACGCCAAAATCATCGCCAGTGAATTTCTTGGCGACGATCAGCGCAA  
GTGAAAGGTTACGATCAGCGTCTTGTGTTACAGCCAAAGCGATGGCAAGAAAGTGGCGGCGATGTTGTTGAGCAGA  
TGAAAAATTCAGCTGAAGGCTACACCACCGCTCCGGCTCTGCAATTTACTCCGGCAACTTCTCGGCGGCACACCGT  
CGCGGGAACCACTTACCGGACTGGCAAGGCTGGCTTGGAAAGCGAAATTTCTGCGGACGACGATCAGCGCAA  
GAATGGCCGCAACCGGACTGCTTCTGCGTCTGGCGAAGAGTATTCAGCCTGACAGAAATCAGTTTATTGCTCAGTA  
A

>Cluster\_11632

ATGGTTGATTTATATATTCGCTACACAGCTTGTGACAGTGGCTAATGCTGAAGATGTGCAAAAAATTAATGCGTTGTT  
TACCAGTTTGTGTTTTTACCTCGCTCGGTAATGTTTGAATCGAGAGACATTAATCTTGATACGATCGACGATCCAAATATCC  
CGATCGCGCGGTTTTGCTCTCCTATGGTGGGCGATAAAGTTTACGAGATGAGGGATACGAATCAAAAACAATTCGCCCT  
GGCTATATGAAACCGAAAAGCAGCATTGATCCTAAATAGTACTGCTGCGCCCTGCTGGTGTATCACCTGAGCAATACAA  
TGCTTTTTGGGCGCGTAATATTAAGATTAAACAGGCGATTGTAATCAGGCTAAAGCTATACGTCAGTATGAATGGC  
TTGCCGTTACGGCAATTAACAGGAAAAATATCATTGTGGCGATGGTATTGAACGTTATGAGCTGGACTGGAATATT  
AAACCACAAAATATCATCTACTCAGTCTGGCGGTGCTGAGTGGTCAAGGATAAAGGATCTTTTGACCCAAATGATGA  
TATTGAGAGCTACGCAGAAATTTAGTGGAGGATCACTAATATCATTATTTGCGGCAATGATGAAAAAATACCGCT  
CATTCAGAGCTGTAAAAGAGGCTCTGGATACCGCTCGAGGTTCTAATTCGAACTGAAAACGGCCCTTAAAGACCTTGGT  
GATTCGGTGAAGTTTAAAGGATATATGGCGATGTTGCGATTGTTTACAGCGGGCTTATACCGACGAGGACGGAAC  
TGAAAAATATTTCTTGTGATTTGATGTTGCTTGGCAATACGGCTTTCAGGGGATGTTGCTTATGGCGGATATTC  
AGGATCCGAGCTAATTCGGATGGGCTGACTAAAGCCGAACTTGCACCGAAAACATAATTTGTCCTGGTGGTGGCT  
ATTTGAATATGTGCAGACACATTCAGCACAGCAATACCGCCGATCAATCGTTTTGTTACCGTTCGCTATGGCTA  
A

>Cluster\_33735

ATGAAAACGTTAGTGAATTTATGTGCGAAAAGCAGCAGAGTTTTCTCATGTACCGGTGAGCTCACTGCTTTGCTGTG  
GGCAATAAACTGGGCGCAAGATTATCCATCGCGATATCAACAAAGCAGGACTGGTTGATATCCTGGGTGCCAGCGGTG  
CTGAGAACCTGCGAGGCGAGGTTTCAGCAGAAAACCTGCACCTGTTTCGCTAATGAGAAAACCTGAAAGCCGACTGAAAGCAGC  
GATATCGTTGCGAGGACCGGATGCGCTTGAAGAAGAAGATGAGATTTGCTGCTTTTGAAGGCTGTGAACACGCAAAATACGTTGT  
GCTGATGGACCCACTGGATGGCTCGTCCAAACATCGATGTTAACGTTCTGTGCGGTACCATTTTTCTCCATCTACCGCCGG  
TTACGGCTGTTGGCAGCGCGGTAACGGAAAGAAGATTTCCTCCAGCCTGGTAACAAACAGGTTGGCGCAGGTTACGTGGTA  
TACGGCTCCTCTACTATGCTGGTTTACACCACCGGATGCGGTTTACGCCTTTACTTATGATCCTTCGCTGGGTGTTTT  
CTGCTGTGCGAGGACCGGATGCGCTTCCGGAGAAAAGGCAAAACCTACTCCATCAACGAAAGGAAACATCAATTAAGTTTC  
CGAACGGGGTGAAGAAGTACATTAATTTCTGCCAGGAAGAATAAATCCACCAACCGCCGTTATACCTCACGTTATATC  
GGTTCACCTGGTCGCGGATTTCCACCGTAACCTGCTGAAAGGCGGTATTATCTCTACCAAGCACCAGCCAGCCACCGGA  
CGGTAAACTACGTTTACTGTATGAGTGCACCCGATGGCATTCCTGGCGGAACAAGCGGGCGGTAAAGCGAGCGATGGCA  
AAGAGCGTATTCTGGATATATCCCGAAACCTGACACAGCGCCGTTTCGTTCTTTGTGCGCAACGACCATATGGTTGAA  
GATGTCGAACGCTTTATCCGTGAGTTCCCGGACGCGTAA

>Cluster\_22724

ATGGCACAACGAGTACAGCTCACTGCAACGGTGTCCGAAAACCAACTCGGTCAACGCTTAGATCAGGCTTTGGCCGAAAT  
GTTCCCGGATTATTCACGTTTCGCGGATAAAAAGATGGATCCTCGACCAGCGTGTGCTGGTTAACCGCAAAAGTGTGATA  
AGCCAAAAGAAAAGTATTGGGTGGCAGCAGGTGGCCATCAACGCTGAGATTGAAGAAGAAGCGGTTTTGAACCGCAA  
AATATCCCGCTGGATATCGTCTAAGAAGATGAAGATATCATCGTCAATTAATAAACCGCCGACCTGGTGGTACATCCTGG  
CGGGGTAAACCGGATGGTACGGTACTGAATGCTTTCATTACTACTCCGCCATGTCGCGATGTACCGGTCGCGGCA  
TCGTCATCGTCTGGAATAAAGACACCACCGCCGATGTTGTTGGTGGCAAAAACCTTCCGGCTCAGACGCGTTTTAGTCGAA  
TCTTTGCAACGGCGTGAAATTAACGCTGAGTATGAAGCGGTGGCAATTTGGTCAATGACCGCTGGCGGTACAGTAGATGA  
ACCAATCAGCCGCCACCCGACCAACCTACTCATGCGGTTGCATCCGATGGGTAAACCGCGGTCACCTACATATCGCA  
TCATGGAAACACTTCGCTGTGACACCGCTGCGGTTGCGTTCGAAACTGGACGTACGCCACAGATCCGCTGCATATG  
GCCATATCACTCATCCGCTGGTGGCGATCCGGTTTTATGGTGGCGTCCGCTCCGCAAAAAGGTGCTTCGGAAGCGTT  
TATCTCCAGCTGCGTAAGTTTACCAGCCAGGCGCTTCATGCAACCATGCTGCGTCTTTATCACCCGATCTCCGGTATCG  
AAATGGAATGGCATGCGCCTATTCACAAGATATGGTGGAGCTGATTGAGGTGATGCGCGCGGATTTCCGAAGGCATAAG  
GATGAAGTGGACTGGTTATGA

>Cluster\_25529

ATGAAGCAACAGTTTATATCGCCAGCCCTGAGAGCCAGCAAATTCACGCTGTGAAACCTGAATCATGAAGCGCACTGAC  
GCTGACACAGGTTGTCGATGTGCCGGGGCAGGTGCAGCCGATGGTGGTCAGCCCGGACAAACGCTATCTATGTTGGTG  
TTCCGCCCTGAGTTTCGCGCTCTGCGGATATCGTATCGCCCCGAGCAGATGGCGCGCTGACCTTTGCTGCAGAGCTGCGCTG  
CCGGGGAGCCCGACGATATTTCCACCGATCACCTGGGGCAGTTTGTCTTTGTCGGTTCTTATAATGCGGGTAACGTGAG  
CGTAACCGCTCTGGAAGATGGCCGTCAGTGGGCGTCTGATGTTGGTGGAGGGCTGGACGCTTGCATTCGCCAATA  
TCTCACCGGACAACCGTACGTTGTTGGGTTCCGGCATTAAAGCAGGATCGCATTTGCCTGTTTACGGTCAGCGATGATGGT  
CATCTGGTAGCGCAGCCCTGCGGAAGTGACTACCGTTGAAGGGGCGCCCGCTCATATGGTATTCCAAACGA  
ACAATATGCGTATTGCGTCAATGAGTTAAACAGCTCAGTGGATGCTGGGAACGAAAGATCCGCACGGCAATATCGAAT  
GTGTCCAGACGCTGGATATGATGCGCGAAAACCTTCTCCGACACCCGTTGGGCGCTGATATTCATATCACCCTGGATGT  
CGTATTTATACCGCTGCGACCTACCGCAGTCTGATTACCGTTTTACGCTTTCGGAAGATGGCAGCGTGTGAGTAA  
AGAAGGTTTCAGCCCAACCGAAACCCAGCCGCGGCTTCAATGTTGATCACAGCGGCAAGTATCTGATTGCGCCGGGGC  
AAAAATCTCACCATCTCGGTATACGAAATTTGTTGGCAGCAGGGGCTACTGATGAAAAGGCCGCTATGCGGTTGGG  
CAGGGGCCAATGTGGTAGTGGTCAACGCGCACTAA

>Cluster\_53933

ATGGAACTAGAATCAAAAGAGGATTATGAAGAGACCCTCATCATAATGTGGCGTCTCAGTTGTCTACTGCAACCCATGA  
TAACTTAGATGGAAGAGAGTTTTTTGAACTATGTAGTAATCCAGCTCTAGTTTTTTTCGTTTGAGACACACAAAAAATTTA  
ATGAGTTACCTGTTGATAGCAAGGAATCCCGTTAGATCTTTTATAGCTAATACAAAGCACTTCACTTGTAAAGACTCT  
GGTATATTTCAACACATTAAGCCATCTGTTGTTATTAGGTTATGTTGCTGACGCCGAAAGTTATTGCGAGCTCTTAT  
CAGAAATCTAATTAATCATGATGAATATATACAGTCTATAGTTTCTGATAAGGCCGTTAGTTATGCGAGCGGCACAACACC  
ATAAAAAGGAGTTATTACAGAAGCTTTACTTGGAGACTTTTTCATTGGCAAGCCCTTATAATGTTTTTGAACATTAAG  
GACATTAATGGAATGAAAGGACAACGCAATCGAAATGATGAAATGCTCAAGCGAATTCATGAAAGTTTGGCAGTTAAG  
GCATTTGTTGTTTTCATCGATTTGGTAAAGTTGGGTTTCGAAAATGCAATCCGACTAGGATTGGCTGAACATATGAAGCACT  
TAGAAAACCGGATAATACCTAATATGATGATCAGGCAATCGCATTTATTGTTGAGAATTTTATTAGAATTTGAAAT  
AATACCGTTTTCAATTTTATAATTAATCCTACAGTTGAGAAACAAAATTAAGGAAAAGGAGGGGAAAGACTATATGATTC  
TGAATGGACATGGGTGTTTGA AAAAGATATAAGTCGATACGAAAAGTATTTTCAATATTTAGTGCAAAAACGATACCC  
TTCCCGGATATCATTAACAGGATTCATATCAACTTTTTTGTAAATGATATATAAGCCATAAACCCTTCTGCAAGAAAAAATAA  
AAAACGAAAGAAATTA

>Cluster\_57806

ATGGAACATGAACCTCATTATATCGGATTCGACACCGCTAAAGAGAACTGGATGTCGATGTTGCGTCTGATGGTGC  
TCATCGCACAAAAAATTCGCTAACACCCTAAAGGGCAGATGAGCTGGTGAGCTGGCTGAAAGGTCACAAGATTGACC  
ATGGCGATATCTGATCGAAGCGACCGGACCTATATGGAACCTGTCGCTGAGTGCCTTTACGATGCTGGCTACATAGTG  
TCAGTCAATTAATCCTGCGCTGGGTAAAGCTTTCGCTCAGAGTGAAGGACTGCGTAACAAGACTGATACCGTGGATGCGCG  
CATGCTGGCAGAGTTCTGTGTCAGAAGCGCCCTGACGCTGGGAAGCGCTACCCGCTTGAACGCGCTTGGCTGGCC  
TGGTAGTCCGCCACCAGGCGCTGACAGATATGCACACGAGGAACTGAATCGCACTGAAACGGCGCGGAAAGTCCAGAGA  
CCGAGCATGATGCTCACCTTCTGTGGCTTGAAGCAGAGCTGAAGCCTTGGAGAAGCAGATAAAAGACTGACAGACGA  
TGATCCGGATATGAAACCCGAGGAACTGCTGGAAGCACTCCGGGTATCGGAGAGAAAACATCTGCGGTTATTGCTGG  
CTTATATCCGGCTGGAAGGACCGCTTCCGCTATGCCAGCAGTTCCGCGCTTTTTCGCGGCTGACACCACCGCGCTATGAA  
TCAGGTAGCAGTGTGAGAGGGGCGAGCCGATGAGTAAGGCCGACATGTTGCTGCTTCCGAGGGCGTTGATATGCCCCG  
AATGGTAGCCACAGTAAGACTGAGTGGGGACGGCGTTCCGCGACCGTCTGGCGGCTAATGGCAAGAAAGGAAAGGTGA  
TTCTCGGCGGATGATGCGCAAGCTGGCACAGGTGGCGTATGGAGTGTGAAGTACGGCTGCGCTTCGATGCGTACCGG  
CATAATCCGGTAGCGCGTAA

>Cluster\_41152

ATGAATAAGAAGGTGTTAACCCCTGTCTGCTGTGATGGCCAGCATGTTATTCGGTGCAGCTGCACACGCTGTGATACTCG  
CATGGTGTAAACATCTATAAGTACGACGATAACTTTATGCTGTAGTGCAGGCTATTTGAGCAAGATGCGAAAGCCG  
CGCCAGATGTTACAGCTGATGAATGATTTCTCAGAATGACCACTGCAAGCAGAAACGATCAGATTCGACGCTATTGCTGGCG  
AAAGGGTGAAGGCACTGGCAATCAACCTAGTTGACCCGGCAGCTGCGGGTACGGTGAATGAGAAAGCGGTTGGGCAAAA  
CGTCCGGTGGTTTTCTTCAACAAAGAACCGTCTCGTAAGGCGCTGGAATGACTACGACAAAGCTACTACGTTGGCACTG  
ACTCCAAGAGTCCGGCAATTTACAGGCGATTTGATTGCTAAACACTGGGCGGCAATCAGGGTTGGGATCTGACACAAA  
GACGGTACAGATTCATTCGTACTGCTGAAAGGTGAGCCGGGCACTCCGGATGCAAGACAGTACCCTTACGTTGATTTAA  
AGAATTGAACGACAAAGGCAATTAACCTGAACAGTTACAGTTAGATACCGCTATGTTGGATACCGCTCAGCGCAAGATA

AGATGGACGCTGGCTGTCTGGCCGAACGCCAACAAAATCGAGGTGGTTATCGCCAACACGACGGATGGCAATGGGC  
GCGGTAGAAAGCACTGAAAGCACACAACAAAGTCCAGCATTCGCGTGGTTTGGCGTCGATGCGCTGCCAGAAGCGCTGGCGCT  
GGTGAATCCGGTGCCTGGCGGGCACCCTACTGAACGATGCTAACACCAGGCGAAAGCGACCTTTGATCTGGCGAAAA  
ACCTGGCCGATGGCAAAGTGGCGCTGATGGCACCACCTGGAATAACGAAACAAAGTGGTCCGCGTACCTTATGTTGGC  
GTAGATAAAGACAACCTGGCTGAATTCAGCAAGAAATAA  
>Cluster\_67024  
GTGATAAGAAAGACGCTGACAGCCGCTTTGATTGCGCTGGGGCTGTGCGCCGAAATGTGCTGGCAGAAGACAAGGATAA  
AATGTGTGACGGGAATTTTGTAAACCCGATCAGCGATATCTGCTGGGAGTGCATTTTTCCGATGAGCATCGGAGATGTTT  
CGGTCTTTGACGGTGTATGACCCGGATACCGGATAACCCGTCATGCCCTGCAGATTTGTCTCTGGTGGCCGATTTGGTTAC  
CGCATCGGCATGGCGATCGGGTACTGGGAGCCTTTTGGCTGACGGACGTGACCCGTTGCGCTACTGCATGGTTAATCT  
GGCGGTTTCAATATTCGGTTCGAAAAGTCCGGTGTGTAATGCAGGACAGGAAAGACAGACCTGTGGCAGGTGGTTTTT  
ATCATGTGCATGGTCAAAATACCCGCTGACATACTGGTGAATATCATTATGTCGATGCTGTCTGCAGCGTGGTGT  
CTGATATTTGGTATCTGTCTGAACTTGATCCGACCTGGATGATGATGCGCTGTCTGTAATTTCTTCCAGGAGCTGT  
GGTGGTGGCTAACCCGATTCACAGGGGGCCTGTGCCGAGATGCGATTAACCGGTGAAGGGGAAACCCATCAATGCGT  
TGTCTGGTGTGCCGTTTCTCACGGCAGTCTGTACCCGTTTACCGGTTTATTTCAGATGAATTCAGCCACAACAGTGC  
TCGGTGTCTTATCGGAGCGTATGGCCTCAAACTGCACCGTCAAGGGGATGATCCTGAACAGCATCGGTGAGGACCAGAA  
GGTCTCAAGAAATATTACTCGCCGATTTATGCCGAAAGACCGTTTTCGATATCAGATGGTGAACATGCGCCGATGACCA  
AAGCTGTACCCGTTCCGGGCAACCGTGTGCGCTGGGAGCCGGTTCATGCGTCCCAATACCAAAAAGAACTACGGC  
TACCTGATCTGGCGTAAACGTAACCTGCGTGTTTTTGTGA  
>Cluster\_2332  
ATGAGTAACTGACAGGCACCGATAAAAAGCGTCACTCTGCTGATGACCATTGGCGAAGACCGGGCGCAGAGGTGTTCAA  
GCACCTCTCCAGCGGAAAGTGCAAACCTGAGCGCTGCAATGGCGAACGTCACGCAGATCTCAACAAGCAGTAAACCG  
ATGTGCTGGCGGAGTTTGTAGCAAGAAGCTGAACAGTTTCCCGCCTGAAATATCAACGCCAACGATATCTGCGTTCCGTTA  
TTGGTCAAAGCTCTCGGGTGGGAAAGCTGCGCGCAGCTGGAGATATTTCGAAACTCGGCATACCCGACGGCGGTAT  
TGAAACGCTCAACTTTATGGAGCGCAGAGTGCAGCGGATCTGATTCGCGATGAGCATCCGCAAAATATCGCCACCATT  
TGGTGCATCTGAAGCGCGCCAGCCGCGGATATCTGGCGTTGTTTCGATGAACGCTCTGCGCCACGACGTGATGTTGCGT  
ATCGCCACCTTTGGCGCGGTGCAGCCAGCCGCGTGGCGGAACTGACCGAAAGTACTGAATGGCTTGTCTCGACGGTCA  
TCAAGCGCAGCAAAAATGGCGCGCTGGAACCGCAGCGCAAAATATCAACCTGATGAAAACTCAGCAGCAAGAAAGCGCG  
TTATTACCCGCTGCGCGAAATTCGACGGCGAGCTGGCGCAAAAATATCGACGAGATGTTCTGTTGAAAATCTGGTG  
GATGTCGACGATCCGAGCATTCAGCGTCTGTTGAGGAAAGTGGATTCCGAATCCTGTGATCAGCGTGAAGGGGCGCA  
GCAGCCACTGCGCGAGAAATTCCTGCGCAATATGTCGACGCGTCCCGCGGATATCTGCGCGACGATCTCGCAACCGTG  
GTCCGGTGGCTCTGTCGAGGTGGAACCAAGCAAGCGATCTGCTGATTGTGCGCCCGCTTGGCGAAACTGGCGAG  
ATGGTAATTTGGCAGCGCGGAGGATACCTATGCTGA  
>Cluster\_42635  
ATGAAAGTGACATTTGAGCAGTTAAAAGCAGCCTTAAATCGGGTCTTAAATTCACGCGCGGTTGACAACGAAACGGCTGA  
GCCTGTGTCAGAGATGTTTCGCCCCACCCAGCAATCCGCGGTTTATTTCACGCGGTTAATCGTTTCCCTCGTTTCATT  
AACAACTGAAAACCGCGATATCATTCTGATGCCAACCCAAACGTAATAACAGCCTCGCGCAATTGAACAGTGGGAC  
GCCAGCGCTTCGATCGGTAACTGACAGCGAAAAGATGATGGATCGCGCCATTGAACGCTGCCGATACCGGTATTGG  
TCTGGTGGCCTACGCTAATGCAACCTGATGCGCGCGCAGCTACGCTGGCAGCGCGGAAAAGGCTATATTG  
GCATTTGCTGACCAACTCCATCGCCGTAATGCGCGGTTGGGGCGCAAAAGAGTGTGCGATCGGCACCAACCCGCTGATC  
GTCGCCATTCCTTCCAGCGGATCACCATTGGTTCGATATGTCGATGTCGATGTTCTTACGGCATGTTAGAAGTTAATCG  
CCTGGCTGGTCTGAGTCCCGGTAGATGGTGGCTTTGATGATGAGGGCAATTTGACCAAGAACCTGGCGTTATTCGAGA  
AAAATCGCCGCAATTTTGGCGATGGCTACTGGAAGGTTTCGGGATGTCGATTTGTGCTGGATATGATCTGCTGATG  
TCTGACGGCGCATCGGTTGCGGAAGTCAACGAGGACAACAGCGCAATACCGCATTTTCAAAAATTTTATTGCCATTGA  
AGTGGATAAGCTTATCGAGGTTCCACCCGCGATGCCAAACTGCAACGATTAATGGATTACGTTACCAGTGCAGCGCTG  
CTGACGAAAACAGGCTATTCGTTTACCCGCGCACGAATTTACTACCTGCTGGCAGAAAACCGCGTAAACGGTATTACC  
GTTGATGACAGCGTGTGGGCAAAAATCCAGGCGTTATAA  
>Cluster\_11409  
ATGAATGGAGATTTGGTTGACAGCATAGTTGGTTTTGCTGAAGCCAGAAAGGAGTTTCATGCCAATTGTTACTGAATAC  
GCTCAAAATTAATACTGCCGGAGTTGTTAGTAACGCAGATAGCAGTAACAAAACAGTAAAGCTATAGCAAGAGAAATG  
CTCGCTTCTTGCAGGCTGAAAACGATTTGGTGAACGTTGTCAGCGCAAAACATCTGGTAATCAGTTTGGAGATCTGCGCA  
GAGTTTATAGAAAAACCTTTTTTAACTCAGCCACTTACGCCCTGGAATAAGGATGATACATCAGGTTTCTGGTAGAAA  
CAGATTAGAGATAGCTAAATATGAACAATATGCCCATCTTATAGCATTGGATAGTGTGCAAAAAGTAATCCTCAGCTAG  
CTGCTGCACTGGGAGTGAATATACGATTTACCAGATATTTGTTGAAAGAGAACCCTGAATGTGATCAAGTTATCAAC  
AGTCTGAAATTACTGGTGGATGATTTCTGTTACCCGATCTCAGCTCAGGAGTTCGAATGGTGGGAAACCAATATTACA  
CGCAAGTATTTCTGCAAAATGGACAATAAGAAGCGACCGGGCCAGAAATGCTCCTGTTCTGAGGCATTAATCTTATTCGCA  
ACCGTAAGGGAAATCTCCCTCATGTAATGGTTGTTACTGCTGAGCCTACTCCAAGTCTGCGCTCTATTTGCTTTGGT  
ACTGGTATATAGATTCGCTGATCATATTTGCGCTTTAATGAACTTATATCAGCAGTTGAAATATCGGGCTCAGCGATGC  
AGCTGACATGCTTTCCGTTGATGTTAATGGTAAAGATTAAGAGATATTTCTGATCTTCCCTTGGATCTGACGCTGTA  
>Cluster\_22628  
ATGTTACGGGAAGTATTGTCGCGATTGTTACTCCGATGGATGAAAAGGTAATGCTGTGCGGGCTAGCTTGAAAAA  
GATTGATTAATCATGTGCCAGCGGATCTCGCGATCGTTTCTGTTGGCACCCTGGCAGTCCGCTACCTTAAATCATG  
ACGAAATGCTGATGTTGGTATGATGACGCTGGAGCTGGCTGACGGGGCATTCCGGTGTATGCGGGACCGCGCTAAC  
GCTACTGCGGAAGCCATTAGCCTGACGCAGCGCTTCAATGACAGTGGTATCGTGGCTGCCTGACGGTAACCCCTACTA  
CAATCGTCCGTGCAAGAAGGTTTGTATCAGCATTTCAAAGCCATCGCTGAACATACTGACCTGCCGCAAAATCTGTATA  
ATGTCGGTCCCGTACTGCTGCGATCTGCTCCCGGAAACGTTGGGCGCTTGGCGAAAAGTAAAAAATATTATCGAAATC  
AAAGAGGCAACAGGGAACCTAACCGGTGTAACCAGATCAAAGAGCTGGTTTCAGATGATTTTGTCTGCTGAGCGCGGA  
TGATGCGAGCGCGCTGGACTTCAATGCAATAGGCGGTCATGGGTTTATTTCCGTTACGGCTAACGTCGAGCGGTGATA  
TGGCCAGATGTGCAAACTGGCAGCAGAAGGGCATTTTGGCAGGACCGGTTTAAATCAGCGTCTGATGCCATTACAC  
AACAAACTATTTGTCGAAACCAATCCAATCCCGTGAATGGGATGTAAGGAACTGGGTCTTGTGGCGACCGATACGCT  
GCGCTGCCAATGACACCAATCACCGACAGTGGTCTGAGACGGTTCAGAGCGCGCTTAAAGATGCGCGTTTGTCTGTA  
>Cluster\_65046  
ATGACCATCTATACCTTATCCCAGGGTTCGCTAAAGCTGGACGTTTCTGACCAGGGCGCGTAATCGAAGGCTTCTGGCG  
CGATACGACCGCGCTTTACGTCCTGGTAAAAAAGCGGTGTGGCAACCGATGCCCTCATGTTTTCCCGTGGTGCCATTTG  
CAAACCGGGTGGCGGCAATCGTTTTGCTGGCAGGGCGTGAGTATCAACTGCAACCGAATGTTGAGTGGGATGCGCAC  
TATCTACACGGCGATGGCTGGCTGGCGAGTGGCAATGTCTCGCACAGCGATGATAGTTTGTCTGCTGGTGTATGAACA  
TCGACGGTGTCTTACTACTATCGGGTAAAGTACGGCTTTTCAATTAACGGCGGATACGCTGACGGTACGCTCTGTGCA  
CCAATCAAGGGGACAGAGCCTGCCATTTGGTACCGGCTGGCATCTTATTTTCCGTTGTCGCGCAACCGGGATTCAG  
GCACAGGGGAGCGGTTACTGGCTGGAGCGGGAGCAGTGGCTGGCGGTTGATTTTGGCAGCAGTACCCGAGGAACTGGA



TTTTAACAGCCCGCCGTTGCCGCGCCAGTGGGTGAACAATGGTTTTGCGCGATGGAATGGTCAGGCCGCATCGAGC  
AGCCGAGAAAGGTTATGCCATCATCATGGAACGACGCCACCTGCACCGTGTATTTTTCATCTTTGTTTCCGACCCTGGC  
TTTGATAAAGGATATGCGTTTGAATTTCTTCTGTCTGGAACCGATGAGCCATGCGCCGGATGATCATCATCGCCCGAAGG  
GGTGATCTCATTCGCGTAGCACAGGGGAATCAACAACCTCAGAGATGTCGTTGCGGGTAGAGTGGCTGTA

>Cluster\_59177

ATGAGCGAAAAGCTACAGAAAAGTGTGGCGCGTCCGCGCCACGGTTCGCGCGTGAATCGAATCTATATTGAAAGCCGG  
TCGTTGTGAGTGTGATGGCAAAATGCTAAACTCGCGCATGCTGTTGAAGTTACCCCTGGATTGAAAAFCGGTATCGATG  
GTCACCTGATTTCCGTACGTGAGTCCCGTGAACAAATTTGTCGCGTTCGCGCTATTACAACCGGAAGGTGAGTGTGTG  
ACCCGTAACGATCCGGAAGGACGTCACACGGTGTGACCGTCTGCCAAAACCTGCGTGGCGCACGCTGGATTCGCGTGGG  
TCGCTTGGACGTTAATACCTGTGGTCTGCTGCTGTTACCACCGATGGTGAACGCGAAACCGTTAATGCACCCAGCC  
GTGAAGTTGAACGTGAATATGCCGTGCGTGTATTTGGTCAAGTTGACGACGCGAAACTGCGTGTATTGAGTCCGTGGCGTG  
CAGTTGGAAGATGGTCCCGCAGCTTTTAAAACCAATCAAGTTACAGCGCGCGGAAGGATCAACCAGTGGTACAACGTGAC  
TCTGACCGAAGGCGTAACCGTGAAGTTGCTGCTGTGGAAAGCGGTGGTGTGCAGGTGAGCCGCGTGGATTCGCGTCTC  
GTTACGGTGTATCCACTGCCAAAAGGCTGCCACGCGGTGGTGGACGGAGCTGGACCTCGCCAGACTAATATCTG  
CGGAACTGGTGGAGCTACCGCCAGAAACAGCTCTAAAGTCTGTGAGAAAAGACCGTCTGCGCATGAAGGCGAATCA  
GATTCGTCGTGCGGTGAACGTCACAGTCAAGTGGAGCGCGGTGCTGCTTCGCGCGACGTAATAAACGGTTAA

>Cluster\_13773

ATGTCATCATCCCGTCCGGTGTCCGCTCGCGTGGCTGCCTTATCTGCTGGTCCGCGCAGCTCATCATCACCGTTAT  
CTTTTTTATCTGGCTGCGGGCGAAGCGTGTGTGTAAGTCTGCTACAAAAGCGTGCATCCGTTTGGTTTCTCCAGCCAGTTTG  
TCGGCTGGATAACTTCCGTACGCTGTTCCATGACAGCTACTATCTCGACTCCTTCGAGCAGCAAAAATTCAGCAC  
TTTTGTCACCGTCCGCGTGTGCTGATCGCTGTTCTTTGCGCGCTGGTGGAGTACATCGTGGCGCGGACGCTTTCTA  
TCAAACCTAATGTTGCTGCTTACGCGTGGCTCCCGCGGTGCGCGCTATTTGTTGATCTTCTGTTTAAACCCGGT  
GCGGGTGTATCCCATTTTCTCGCGGAGTTCGGCTACGACTGGAACACGCGCAAAAACAGCGGTGAGCAATGTTTCTG  
GTGGTGTTCGCTCAGTATGGAAGCAAAATCAGCTACAACCTCCGTTCTTCTATGCGCGCTGCAATCCATTCGCTTC  
GTTGATCGAAGCCGACGATCGACGGTGCAGGCGGATTCGCGCTTCTTAAAGATTGCGCTGCGCTTATCGCCCGG  
TGAGTTTCTTCTGCTGTAGTGAACCTGGTGTATGCCTTCTTCGACACTTCCCGGTGATCGACGCCGCCAGCTCCGGC  
GGGCGGTTACAGCCACACGACGCTGATTTATAAGATCTACCGCAAGGTTTTACCGGACTGGATCTGGCTTCGCTGTC  
CGCACAGTCCGGTGGTGTGATGTTCCCTGTCATCGTGCAGCGTGGTGCAGTTCGCTATGTTGAAAAGCAAGGTGCGTT  
ACCAATGA

>Cluster\_39346

ATGCCGAAAACATTGAAGGTGATTAACCGCTATCGTCAACCCGTTTACCGCGACCGGCGAGTCTGAATATCCCGCGGT  
AAAAGTGCAGGTGAATCGTCAACCTGGAAGCGGTAACCGGATTTTTTGGCGCGCACCAACCGCGAATTTTTTGTGTTGA  
ATGAACAGGAGAAGCTCAGCGTTACGCAAACTGCGTGGATGAAGTGGTGGTGGTGGTGGTGGTGGTGGTGGTGGTGGT  
GAGATCTCTACGCGCGAAACGATTCGCTGCGGTGAGCAGATTGAAAACCTTGGCGTAGATGCCGTGTCGGTCAATGCCCC  
TTACTTCCGATCCGCTGAACAGGAAAGATTGATTGGCATTACAGCGCAATGCGGACGCACTGAGCATTCGATGTTTCT  
TCTATAACATCCCGGCCACCTGGCAATACGATCCAGCCAGAAACCGCGCTGCTTCCGCGTCCACCCCAATATCATT  
GGGATTAAGACAGCGCCGGAAGCGACGAAAGCCTGAAGGTTTTTCTCGATGCGGTGCGCGACATTGACGGCTTAAATGT  
GCTCAACGCGCCGGATTCGCTGATCCATAAAGGTTTTGTCGAGGGATGTTTCCGCTGATCTCTGGGCTCGCCAAACATG  
CGCGCGAGAAATCAATGCCATCTGGTCTCGCTTCCATCGCGGTGATATGAAAGGTTCTATGAAGCAGAGAGAGTGA  
ACGGGCTTCGCTACCGATTTTATAAAGTAGCATTTCTCCCGGCTGCGGTGAAAAAAGCGTTGAGCTTATGGGCGATGA  
TGTGGTGTATAGCGCTACGCGGTTAATTTACGCTGAACAGATCAGCGAGATCAACAATTTATTCGTCATTATAACA  
TTAATTA

>Cluster\_61734

ATGAATAAGTACACCATCAACGACATTACGCGCGCATCGGGCGGTTTTGCCATGCTGGCGGTGATCAGCGCGAAGCCAT  
GCGCATGATGTTTTGCCGCGGCTGGGGCACCCGCTCCGGTAGCCGATAGCGTTTTAACTGATTTCAAAGTTAACGCTGCAA  
AGGCCCTCTCGCTTATGCTCGCGGATTTCTGGTAGATCAACAATTTCTGCTACCGCCAGGTGGTGGTGGTGGTGGTGGT  
GCCAAAAGTTGCGCATGATTTGTCGCGCGATGAGTTTCAATTCCTGCGCAACGGTATTCCGCTGATAGCTGGTGGTATTGA  
CCGCAAAATCAATCCGCTACAGATCAAAACAGACGGTGGCAAAGCCTTAAAACGCTGGTGGTGGTGGTGGTGGTGGTGGT  
ATGCGCAGCAACGCTGATGATGTTGAAAGAGTCAACGAACTGTGCCACTCACACGGTCTGTTAAGCATCATTTGAGCCA  
GTCGTCGCGCCACCGGCTGTCGGGATAAATTCGATCGCGAACAAGCGATCATCGATGCCGCAAGAGCTGGGCGACAG  
TGGCGCTGACCTCTACAAAAGTTGAAATGCGCTTTATGCGCAAGGTCGCAACAGAGCTTCTCTGTGCTTCCACACGTC  
TGAATGACCATATCAATATGCCATGGGTGATCTCTCTCCGGTGTGCGACGAAAACGTTCCCGGCTGCGGTACGCGTG  
GCAATGACGGCGGCGCATCGGGATTCTTGGCAGGCGTGCAGTCTGGGCATCGGTGCTGGTTCACAGACAACGAGCT  
GATGCTGCGTGACGTTTGGCGACCGAAATTAACAACCTTGGCGATATCGTCGACGAAATGATGGCTAAACCGCGCTAA

>Cluster\_60751

ATGTTTGAATTTGCTTCTTACCATCGCGCAGCAACCTTGGCGATGCCATCAACCTGCTGGCTGACAACCCGAGGCCAA  
ACTGCTCGCGGTGGCACTGACGTACTGATTCAGCTCCACCATCAATGACCGTTATCGCCATATTGTTGATATTCATA  
ATCTGGCGGATGCGGGGAATTAAGTGGCGGAAGATGGTCTGCTACGTTATCGGCTGCAACGACATTTACCAGCTA  
ATAGAAGATCCTATAACTCAACGTCATCTCCCGCGTTATGTTGCTGCGGCCACGTTCCATTGCTGGACCGCAGATCCGTA  
CGTCGCTACCTACGGTGAATAATTTGCAACGGTGGCACCAGCGCAGATTTCTGCCACGCCAACGCTAATTTATGACCGGA  
AACTGGAGATCCACTCCCGCGCGGTGTTCTGTTTCCGCTCCGATTAATGGCTTTTACACCGGGCGGGCAAGTGTCTCTT  
GAGCATGACGAAATCCTCGTCCGCTTTTCAATTTCCGCCACAGCGGAAAGAACACGCGGGCAGCGCATTTTAAATATGC  
CATGCGGACGCAATGGATATTTCAACGATTGGCTGCGCGCACATTTGCCGACTGGATAACGGCAATTTACGCGAATTA  
GCTGGCATTTGGTGTGGCGCGCAACGCCGATTCGCTGCCAACATGCGCAACAGACTGCACAAAATGCGCCATTAAC  
CTGCAACCGTGGAAAGCTATCAGCGAATCTGCTGCAAGATGTCGCCCGCGTTCTTATGGCGGGCCAGTAAAGAGTT  
TCGCTGCATCTCATCCAGCAGTAGACCAAAAAGTGAATTAGCGAAGCGTTCGCGCGCGGGGGGAAAATTCGCAATGA

>Cluster\_16056

ATGTTTTTTTTTGGCAGCAAAAAGTCTTCTGGATGTTAGTAGTTTTGCAACAATATATCAACTGGACTTTCCTGTCAATGA  
CATCAGAAATATAGAAAGGCAATCAATCATATCACTCTGCTTTCAATGGAATATATATGCTTCTGCCAGATATATTG  
AATTTCAATGTGATAATAATCATGCTATAAATGATTAATTCAGGCTCTATAAATTTTATACTATTGATGGTATGGAATG  
GAATTTCCACAAAATAGATGAAATAATCATTTCTATCACTAACTAGATGATTTAAATTCGAAAACATCATCAAGGTAT  
TGGAGTGTAGACCCATCAATGATATTGAAAATAACAATCTATCTTTCTTTGGGAAATTTATTTAGTGAATTTGACTTTT  
ACAATTACAAGTTATTTCACTCAGAACACTTATATAATAAAGTAATATCCAGGTGCTCACTCTATATATCCACT  
AATAAAACATCATATATTTGGGGGAGAGAAAATTTGCTATTATTTATATCAATGGGATAAACAAGCCCACTTTTATTA  
TTTGAATAATGACAATAAAAATCCAGAACTATTAACCTGTCAGGATTTACAGACACATCAGAAGAGATTAGGTTTTACG  
CTAGTACAATAAAAAACAATGATATAAAGATAGTAGTTGCTTTATGGTTCCTGTAATGACATTAAGGCCGAAGTCC  
TCAATTTATCAGATTTAAGTGCCTCAGAAACGGTAATTTACTTAAATGAGAAATAATTTATTTGTTGAAAGAGGTTTT  
CGAACTATCTAAGAAAACAAATGGAGATACCTTAACTATAAATCTTTTGGCAATATGAGTAA

>Cluster\_19287

ATGTATCACGACGTAGCTATCTGCTCTCCCGCTGATCAACGGCCCGTGTCCCTGCGCCAGATTTACTTTGCCAGCAG  
CAACGGCCCGGTGCCGATCTTGCCTATCAGGTCGATTTTCCACGGCTGGAAATGTGCTGGAAGGTGAGTTTATTGATA  
CCGGCGCTGGAGCAGCGTTAGTTCCTCCGGGATGTGCTGTACTGCTCCCTGCTGGTGGCTGGAATTTTCCACAATGGCAAGCC  
CCCGCCACACCTTTAGCGTGTCTTTGGCAAACAGCAACTCGGCTTCAGCGTTGTGCAATGGGATGGCAAAATATCA  
AAATCTGGCGAAGCAACAGCTCGCCGACGCGCCGCGGCTTGGTTCCTTTCTGCTACAAACGCTCAATGAAATGCAAA  
TGCAGTTCGAGGAGCAGCAAAACGGCCAGACTTATCGTACCAGCCTGCTTAGCCACTGCGCGGATTTGCTCGGCGCCAA  
ATACAGACCGCTCACGACGCGAGGCTCTATTCGAAGCTATTCGTGATATATCGACGACAGCTATGCTCCGCACTTAC  
CCGCAATCTGTCGACAGGCGTCTATATTTCCGCAAAATACCTCTCGCACCTGTTTCAAAAAACGGGGCCATTGGTT  
TTAACGAATACCTGAATCACACGCGACTGGAGCAGCTAAGACATTATTTGAAAGGCTATGACCTGAAGGTAAAAGAGTG  
GCGCAGCCTGCGGCTTTGTCGACAGCAACTACTTCTGCGCTGTTTTCGTA AAAATACCGAACGCTCGCGTCCGAATA  
TCGTCGGCAGTACCACAGCCAACGACGAAAAACCGACTACTCCAGAATGA

>Cluster\_57496

ATGGTCGCTATTGCTGCCCGCTTCTTGACCTTTATCGGTGGTCTGTACTTATTACGCATCACAAGAAAGAGATC  
CGAGACGCTGCAAAGCCAGAAAGTGACCGAAACGGACTACCACAAAACAGAAAGACGCTGGCGCTACATTAAGAGC  
TGGAAAGTCGCCAGCGGGAGTGCCTGCGCCACAGAACTTCTGCGGTGGTGAAGTAAAAACGCGGAGCAACTGACA  
CCAGAACAACGCTAGCTTCTTGAACAAATGCAGGCTGATATGCGCCAGCAGCAACGCGAGTTGAAGTCCGTGGAA  
TGAACGACGCGCGGAACCGCTCAGCAAAAGCTACAGGCCAAACGCTCAGGCGCAGCAATTAGCGGAACGACCGCTGG  
CTCAGCAGTCCGCTACGACTGAACAAAGCTGGCAGCAGCAGCGCTACGTCGCAAGCCGACCGGTACAGGCGCAACCG  
CGCCAGTCTAAACCGGCTTCTTTCAGCAGCGCTACAGGATCTGCTGCAAACTCCTGCGCACAGCTGCGCAGTCCGAA  
GCCGACGCAAGCTGCGCGATGCTGCTGCGGCTGACGCGCAAACCGACGGCGGAGAAAAAGCAACCGCGCTGGGA  
TGGTCAGTGGCGTTCGTTTTCAGAGGCGCGAACAGGACGAGACGCTGCTGCTCAGCTGGCGTTTGAAGGCTTTGACTCG  
AAAATACCACCAACAATGGCTGGAATCTGTGGTCTATTTGGCCGGTGAAGGCAAGAGAACGACGACAGCACCCCTCAA  
TCGGTTGAAGATGGCGGTCATACAAACGCTTTCGGCTCGCCGCGGGGTTGA

>Cluster\_20222

ATGGCTGAAATACCGCATCCCTGGTAAAAGAGCTGCGTGAGCGTACTGGCGCAGGCATGATGGATTGCAAAAAAGCACT  
GACTGAAGCTAACGGCGACATCGAGCTGGCAATCGAAAACATGCGTAAGTCCGGTGTCTATTAAAGCAGCGAAAAAGCAG  
GCAACGTTGCTGTGACGGCGTGTATCAAAACAAAATCGACGGCAACTACGGCATCATTTGGAAGTTAACTGCCAGACT  
GACTTCGTTGCAAAAAGACGCTGGTTCCAGCGCTTCGACGACAAAGTTCTGACGCGAGCTGTTTGGCAAAAACACTGA  
CGTTGAAGTTCTGAAAGCACAGTTCGAAGAAGAAGCTGTTGCGCTGGTAGCAAAAATGGTGA AAAACATCAACATTCGCC  
GCGTTGCTGCGCTGGAAGCGCAGCTTCTGGGTTCTTATCAGCAGCGTGCAGCTATCGGTGTTCTGGTTGCTGCTAAAGGC  
GCTGACGAAGAGCTGGTTAAACACATCGCTATGACGCTGCTGCAAGCAAGCCAGAATTCATCAAAACGAGAAGACGATC  
CGCTGAAGTGGTAGAAAAAGAATACCAGTACAGCTGGATATCCGATCCGACTGCTGGTGAAGCCGAAAGAAATCCGAGAGA  
AAATGGTTGAAGGCCGATGAAGAAATCACCGGCGAAGTTTCTGACCGGTCAGCCGTTCTGTTATGGAACCAAGCAAA  
ACTGTTGGTCAGCTGCTGAAAGAGCATAACGCTGAAGTACTGGCTTCATCCGCTTCGAAAGTGGTGAAGGCATCGAGAA  
AGTTGAGACTGACTTTGACGAGAAAGTTGCTGCGATGTCCAAGCAGTCTAA

>Cluster\_20180

GTGTTAATATCGAAACCTGCGCTGCTGCGTACGAAATTCGCGCCCTGCGTATGGAAGGTAAAGCGGTGGCGCTGGT  
GCCACCATTGGGTAACCTGCACGACGGCCATATGAAGCTGGTTCGACGAAAGCCAAAGCCGCGCGATGTTGCTGCTGCTA  
GTATTTTCGTTTACCCAAATGCAGTTTGACCGCCGGAAGATCTGGCAGCTTATCCACGACCTTGCAAGAGGACTTCGGA  
AAGCTGAACAAACCTAAAGTGGATTTAGTTTTCGCGCTTCGTTAAAAGAGATCTACCGAACGGTACTGAAACCCACAC  
CTATGTTGATGTTCCCGGCTTTCACCATGCTGGAAGGTGCCAGCGTCCGGGACATTTTCGCGCGCTTTCGACTATG  
TCAGCAAGCTGTTCAACCTGGTCCAGCCAGATATCGCTGCTGCTCGGTGAAAAAGATTTTCAGCAACTGGCGCTGATCCGC  
AAAATGGTTGCTGATATGGGCTTCGATATGAGATTTGCGCGTACCAGTATGCTGCGTGGCAAGAGCAGGTTGCGGCTGAG  
TTCCCGTAACGGTTATCTGACGGCGGAACAACGCAAAATTCGCGCCGCTGTTACAAGGTTTTAAGTTTCGATTGCGGACA  
AATTCGAGGCTGGCGAACGGGATCTCGATGAAATATTGCTATTTGCGGGCAAGAACTGAATGAAAAAGGTTTCCGTTCC  
GATGATATTCAGATTCGTGATGCCGACACATTTGCTGGAAGTCTCTGAAAAACAGCAACCGCAGTGTATCTGGTAGCCGC  
CTGGCTTGGCGATGCTCGCTGATCGACAACAACTGGTTCGAACTGGCGTAA

>Cluster\_24057

ATGGTACAGGTTACGCTTTGCGCATCGTCTGGGATATCTTTTCCCGCAGAATGAAACGCAAGATTTACGCTGCGATAG  
CGCTTTTAAACATGCGGTAATCTGTATTCAGACGCGGGAACATTCATCACTCTGTTGTTGCGCAACGATCTGAAATC  
TCCCTGATGCTGCCAGAGTCTGGCTACCTGAATGTTGGGACTGGCGAAGAGAGATTGCCATTCCAGATCCCATCAGTTA  
ACCAAGGCTTACTGCGGACACCTCGATTTTGTGTTGGCGCTCGAAAACGCAACGCTCTGGCAGTCCGCAATTTGTTGGGAG  
AATGCTGACACTTTCAGGCAATCCCTTTGGTTTTCCAGCCTACCAACGATGGCATCGCAACGGCTTTTATTTTGTCTGG  
AACATAACGTTCAAAGCACATTCGACCTGCCGATAGTCTCACGCCAGGATAGCAGATTAGGAGCATTCAGATGCGC  
CTGGAACCGCCAGGTTGCCAACCTGATCGGCTTTGGTAAAGCTTAAACCGCCGATGGAGATGACTATTTTGGGCTATCT  
GGCAGCGCTCTGGTTATGGCAACTCCCTGCACCACTTGGCGATCATCAATACCGGTTGCAGCAGGCAATGATCAACATG  
CGCACAAACACCGGATATCAGTCTGATATATCTGGAGCGTGCCTTCAGGGACATTTTTCAGAACCGATTTGCCAGTTA  
CTGCAACAACCTGGTTGGGAGCGCATCGCAATGACAATCGCATCTGTGCAGAACAGTCAATGCAATTTGGCGCAACGTC  
AGGAGTAGATTTGCCAGGAATGCTGATGGCTTTTCGAACCTGAACACCATGAAATGA

>Cluster\_40702

ATGACTTCATCTCTGCCCTGTGGGCAACGCTTTTATTGTTACAGATGACCGAGCGCTGGCGCTTTCGACGCGCATTT  
TCGGCGGATAAGTCAATTTGATCTATCAACGAGCGGGATCGTTCTGCTGACCATAAACGCGACATGGTTTACAACCGAC  
TGGTTCGTCGTTTTCGCTGCGCTGGGACTGGCGGATTTCCGTCATTACCTGAACTTGTGGAATCTAATCAGCACAGCGGT  
GAGTGGCAGGCGTTTATCAATTCGCTGACACGAACTGACGCGATTTTTCGCTGAGGACACCATTTTCCCTCTGCTCGC  
GGATCACGCACGCTCGCGTTCTGGCGAGTATCGCGTATGGAGCGCGCGGCTTCAACCGGCGAAGAGCGCTACAGCATAG  
CGATGACGCTGGCTGATACATTTGGGACCGCGCCGCGCTGGAAGTGTTCGCGAGCGATATCGACACCGAAGTGTG  
GAAAAAGCCAGAAGCGGATTTATCGCCATGAAGAGTTGAAAAACCTGACCGCCGAGCAACTGCAACGGTATTTTCATGCG  
AGGACCGGACCGCATGAAGGGCTGGTACGCGTGCCTCAGGAGCTGGCGAACTATGTTGATTTTGCCTCGCTGAAATTTGC  
TGGCGAAACAGTACACCGTGCAGGGGCGTTTGGATGCGATCTTCTGCTGTAACGTCATGATCTACTTCGATCAAACTACC  
CAGCAGGATTTTGCAGCGCTTTGTTTTCGCTTAAACCGACGAGGATGCTGTTTTCGCGGCTACTTGAAAACTTTAG  
CCACCTTGGCGCGCTTTCAGCTGCGTGGTACAGCGGTATGCGCTAAGTAAGGATTA

>Cluster\_24432

ATGTTGTCCAAACAATCCCGCTTGGCATCTACGAAAAAGCACTCCCGCTGGGGAGTGTGGCTGGAACGACTGCAACT  
GGCAAAAACGTTAGGCTTCGATTTTGTGCGAGATGCTAGTAGATGAAACGAGCAGATCGCTTTTCGCGCTCGACTGGAGCC  
GCGAGCAGCTTGGCAGTGGTGAATGCGATTTGTTGAAACCGGCTGCGGTAACGCTCATGTCCTTTCTGCTCATCGT  
CGTTTCCCGCTGGGAAGCAAGATGACGCGGTGCGGGCCAGGGGCTGGAGATATGCGTAAAGCTATCCAGTTCCGCCA  
GGACGCTGGCATTCGCTGATCCAACCTGGCGGCTATGACGTTTACTATCAGGAAGCCAAACGAAACGCGCTGCTCGTT  
TTCGTTGACGGCTGAAAGAGAGCGTTGAGATGGCGAGCGCGCAGGTCACACTGGCGATGGAGATCATGGATTACCCA  
TTGATGAACTCCATCAGCAAGCGCTGGGCTACGCACACTATCTCAACATCCGTTGGTTCAGCTTACCCGGATATCGG

CAACCTGTCGGCGTGGGACAACGACGTGCAGATGGAGTTGACGGCTGGAATCGGGCACATCGTCGCGGTGCATGTGAAA  
ACACCAAACAGGCGTCTTCAAACAGTCCCGTTTGGCGAAGGCGTAGTGGATTTCGAACGTTGCTTCGAAACGCTCAA  
CAGAGTGGCTATTGCGGGCCGTACTGATGAGATGTGGAGCGAAACGGCGGAAGACCGGCGGAGAGTAGCGAAAGC  
GCGTATTGGGTGAAAGCGGCATGGCCAAAGCAGGCATGGTGGAGGCGGCATAA

>Cluster\_34389

ATGTCCGTAGAAAATATTGTCAACATTAACGAATCTAACCTGCAACAGGTTCTTGAACAGTGCATGACCACTCCGGTGC  
GTTCTATTTTTGGTCTGAACGTAGCCAGCACTGTTTGCAGTTAACCCCAATTCGGAAGCCCTCGCGGCGAGTACAACG  
GGCAATTTATTCTGGCGAAGCTGGACTGCGACGCGGAGCAGATGATTGCGCGCAGTTTGGTCTGCGTGCATTCGACC  
GTGTATCTGTTCCAGAACGGCAACCGGTAGATGGCTCCAGGGGCGCAACCGGAAGAGGCGATCCGCGCCCTGGGA  
TAAAGTGTGCGCGCGAAGAAGAGCTGAAAGCGCAGCAGGCGATGCAACTGATGCAGGAAAGCAATTACACCGATGCC  
TGCCATTGCTGAAAGACGCTGGCAGTTGTCGAATCAGAACGGGAGATCGGCCCTGCTGCTGGCAGAAACGCTGATTGCG  
CTGAACCGTTCTGAAGATGCGGAAGCGGTGCTGAAAACCATTCGTTGCGAGATCAGGACACCCGCTACCAGGGGCTGGT  
GGCCAAATCGAACTGCTGAAGCAGGCGCTGATACCGGAAATCAACAGTTGCAACAGCAGGTGGCGGGAATCCGA  
AAGATGCCGCACTGGCGACGCAACTGGCGCTGCAACTGCATCAGGTTGGGCGCAATGAAGAGGCGCTGGAGTTGCTGTT  
GGGCATCTGCGTAAAGATCTCACGCGCGCAGACGGTCAGACGCGTAAACGTTCCAGGAGATCCTCGCTGCGCTGGGTAC  
GGTGTATGCATGGCGTGAAGTATCGCCGCGAGCTGTATGCATTGTTGTATTGA

>Cluster\_35050

ATGACGAATCTACCAAGTCTCCACCGCACTGCTTCACTCCGCTTATTGGTTAACCTGGTTGGGTATTGGCGTACTTTG  
GTTAGTCTGCAATTGCGCTACCCGTTTACTACCGCTCGGTTGTGGATTAGGAAACTGGCGTTACGTTTTTGAAC  
GACGCGCAAAATTTGTCATCGCAACCTGGAATGTGCTTCCCGGAAATGAGCAAGAACGCGCTAAAATGGTGGTG  
AAGAATTTGAAATCCGTTGGCATGGCCCTGATGGAACCGGCATGGCGTGGTTCTGGCGGACCGCGAATCGCCGCTG  
GACGGAAGTATCGGCATGGAACACATTCGTGACGTGCAGGCGCAAAACGCGGCATCCTGTTAGTTGGCATCCATTTTC  
TGACACTGGAGCTGGGTGCGCGGCGAGTTTGGTATGCAGGAAACCGGTAATTGGCGTTTATCGCCGAAACGATAATCCACTG  
ATTGACTGGCTACAACCTGGGGCGTTTGGCGTCAAATAAATCGATGCTCGACCGCAAGATTAAAGAGTAA  
AGCCCTGAAAAAGGCGAAGTGGTCTGGTACGCACCGGATCATGATTACGGCCCGCGCTCAAGCGTTTTCTGCCGTTGT  
TTGCCGTTGAGCAGGCTGGGACACGACCGGAACTGGATGCTGGCACGGATGTCGCGCGCATGTCTGGTGCCTTCGTT  
CCACGCGTAAGCCAGATGGCAAAGGTTATCAATTGATTATGCTGCGCCAGAGTGTCTCCGCCACTGGATGATGCCGA  
AATACCGCGCGTGGATGAACAAGTGGTTCGAAAAATGCATCATGATGGCACAGAGCAGTATATGTGGTTACACCGTCT  
GCTTAAACACGCGCGGAAAGCGTTCTTCACGCTATTAA

>Cluster\_45508

GTGTCTAACACGTTATTAACGTTATGCGACGTCCATATCAATTTCCCGGCCGTAATAAAGTGGCTGGTAAAACCTACGGA  
ACATGTTCCATGCCATTAATGGTATTGATTACAGATCCGCCGTTGGTGAACCTTAGGGATCGTCGCGCAGTCAAGCTGCG  
GCAAAAGCACCCCTCGCACAGCTTTTAAATGGGTATGCTGCAACCGAGCCACGGGCAGTACATCCGTTACAGGATCACAACGC  
ATTTATGACAGATGTTGTTTTCAGGACCCGCTCTCTCGCTCAATCCGCGCTTACCGGTGTGGCGCATCATCAGAACCGCT  
CTGGATAGCTAAGCGTAGTAGTGAACAACAGCGGCGAGCGTTAGCAGAGGAGTTGGCTGTGCAGGTGGGTATCTCTCGCGG  
AGTATCTCGACCGCTGCCTCATGCGTTCTCCGCGCGGACGCGCAACGCATCGCCATTGCGCAGACTCTCTTCGCGAG  
CCTGACGTGATTGTGCTTGTATGAGCCAACCTCTGCACTGGATATCTCCGTCGAGGCGCAGATCCTCAATTTACTGGTAAC  
GCTACAGGTAAATCGCGGCTGACCTATGCTGATCTCACCAATGTCTCGGTGATTCTGTCATATGAGCGATCCGGGTAG  
CGGTGATGATTCTCGGGCAGATTGTAGAATGGGCGCAGCAGCAGGTTGTTGACGGCACCTGCACATCCATCACACCGGA  
TTATTGCTGATTTCCCTCCCGCATTTGATAAACCGCTGGAGGAAGAAATGGGCATTACGTAACAGGATCTGCGCGGAA  
CCGACGTTGCGCAAGGCTGTTTTTCTACGAAGCTTGCCTCTGGCAACCCAGGATGTGAAGTCCGGCAATCATTAA  
CAATAAGGAGGACGCGATGAGATCCGGTGTGGCGGCGCTGTAG

>Cluster\_64427

TTGATAACATCAACAGTTCAGAATCGATAGTGAACATATTGATATGAGTCTGCTGCGCGCCAGCATTGCTTAAAAC  
CCCGTTATTTTCAGATGTAAATCTAATCTACTGTCAGAGCTGCAGATATTATATCCCAATTTAACGCACTCCTGGAGT  
CAGACCCGGCAGTTAACTGCTGGAAATAGTTGCATACAGAGAAATCAATTATTACAGCTCGGGTAAATCAGGGGATGCTC  
GCTGATTTGCTCGCGTTTTCGAAAGGGACTGACCTCGACAGATGGCGCTAAATTTGACTGCGCTGTTGATAAC  
GCCAGCTAATCCCGACTCAGTCCCGGACTGAAGCGGTTTACAGAGTGACGACGAGTATCGTCATCGCATAACAATAT  
CATGGTACCGCGCTAATCTGCGCGCAGTACAACCGCTATAACTATTTTCGCGCTATCAGATGATCCCGATGTTCTGTCA  
CGCAGGCATACGGCCCGCTGTGACTCAGCCAGGTTACGTCGATATGTACGTTTGTCCCGGACAGGCGACGGTGTACC  
CCCGCAATCACTACTGAAATACAGTGAATGCGGCCCTGCTCCTGACGACACTCGCCACTAACCTGATTTCGTCAGCGGTA  
AACCTGCGTGAACCTGAATACCAGGTTGAGGCGGTTATCGTAGCGGGGCTCGGTCGCCAGCAGACGTTGTTGCTCAAC  
GGCGCGCAGAGGATTTAGCTATATACGTTGGCTACACAACATAAAATCGGGGCGACGGCAGCTCTGTCGGGAATTTACGA  
TGGATACACCGTACGCGCACTGAGCGTGTGATTCTGATATCGCCAACAGAGGACGTGATCGCTGGCGTGGACAGGCC  
CGCACTGCACAGAAATCAAACCTACGCTCAAAATGGGGTAG

>Cluster\_54959

ATGATGAATAATAAAGTCACTTCACTAACAGCAATAATCCAACCATCTCTTTGTCTGCAGTGCATTTTCCCTCCAAA  
ATTTGATGAAACCGCTCAGTATCAGGCAATGTGTTATCTCACCCAGTGGGGCGTTAAAGAACAACCGCCGGAACCT  
ATGCCAAAAAATCGCGGAAAGGGATTGTCATCTATTGCTTATGACGCATCTTATCAAGGTGAAAGTGGCGCGAGCGC  
CGTCAAGTTAGAAAACCCATACATTCGTACTGAAGACATCAGTCCGCTGATTGATTACCTGACAACGCTTTCTTATGTCGA  
CAATACCCGAATTTGGTGCATGGGAATTTGTGCGGTTGACAGGATATACAGCAATGCTGCAATTCAGGATCGCCGATCA  
AGGCATCGGTACCGTTAGTGGCTCAATATTGGTTCGATTTCCGTAATGGTTGGGAAACAATGTGAATCTATTGAT  
GCCCTGCCATACGTTGAAGCGGTTCAAACGCCAGAACCAGCGATATTAGCAGCGGAGAAATACGCCATTATGCCACTGGC  
ACCAATGAAGGAGTCCGATGCGCGAAGCAAGAACTGCGTCAAGGCTGGGAGTATTACCAACCCCTCGCGCGAGTATC  
CAACAGCACCGGGTTACGCTACTTTGCGCAGCCTTAAACAGATATTACCTATGATGCTTACCATATGGCGGAAGTGTAC  
CTGACTCAGCCGACGAGATTGTTGGCGGCGCAGCAGGAGGAGCAAAATGGATGAGTGACGACCTGTACAGCATC  
AAGCCAGGATAAACGCTATCACATTTGTTGAAGGCGCAACCATATGGATCTTTATGACGGCAAGCCTATGTGGCTGAAG  
CAATTTCACTATTAGCTCCGTTCTTTGAGGAACTCTGTAA

>Cluster\_436

ATGTCTTTACAGGAAGAGGAACCTGTTTCCAGTATGCGGGGAGCCTGAGCAGGCATCGTCGCTGCTTGATCAAATCAT  
GGCACAGACCCGTTATCAGCCGGTTCCGAAGGTTATGACGTTGCCCGCAGGTTGTGACAGCCTTTATTGCCAGCATCC  
TGCAATCCACTGCATCTGCGGAACCGGTTCAATAAATGCGCGTGGACAGCATGATTGCAGATATTGATGAACGCATCAGC  
CGCAGATGGATGTCATCATCTGCGCTGCTTTTCAAGAGTCAAGTCAAGTGCATGATGTCACCAAGCAGGAACCTTCTGGAAGACTTTGAGTTT  
TCCGCTGATTTTCCGTAATAAATCAAGGTCACGTTGCTTATGTCACCAAGCAGGAACCTTCTGGAAGACTTTGAGTTT  
CGCCAGAAATTTATCAGTCCGATTTTATAAGCAGTTTATTCGTCGGATTCGGACAGTTTGGTGGTGAACCATCGCT  
GCCGTGCTGGGCGTTATGATTTCAAAAATACCGCACTGCAATGAAACTGCTGCAATACGTCAGTGGCGTGGGCGCAAT  
GGCGCAGCAGCCTTCTCCGTTTCCCGGAGTTATGGGGCTGAACCTGTTGGACCGCAACTGTCGTAATATCAAAG  
ATCTTTATGCACTCTTTGAAAGTCCGGCTACACCAAAATGGCGCGCCTGCGTACTCGGAAGATTCCGCGTATTTAGGG  
CTTACTGCCCGGCTTCTGCTTCCGCGCCCTGGTACCAGCAGATAACCTGTTAAAAGCTTTAATATCAGGAGAT

GTGAGCCAGAACCCGAAAGATTATCTGTGGGGTAATACGGCCTGGATGCTGGCATGCAATATCGCAGACAGTTTTGCCAA  
ATACCGCTGGTGTCCAAACATTATCGGCCCGCAAAGCGCGCGCGGTGA

>Cluster\_42972

ATGGCTAACCTTTTGAATAAATTCATTATGACGAGAATACTCGTGCAGATAACCCCTTTTGTGAGTATCGTATTGACCAT  
TTTTGGTCACTATTTTTTGTTCGCTCCCGATCATCATTTGCCGGGATTGTAACATATTGCTACCTGTGCGAGTCAATTTGGC  
GAAAGGTTTTCCGCTTTTTTGTGATTTTATGATGATTTGCTGGTGTGAATGTCTGGCGGTATTACTGCATCTGAACCCATAC  
CTGCAATGGGAAGTTACGGGCTGGAAGGGTAAAGTAAGAAGAACTGGTATCTGCTTATTTGTAACCCAGCTAGTTGGGC  
AGATATTTGCTGACTGTGCGTGTGTTTTCGTAAGCACATTCGGATGAATAAATATTTCCCTCAAGCAGCAGCTGGCCTGGG  
TGCCTTTTTCTTGGCTGGCGTGTGGCGCTGGATGATGCCGTTTATGAAGCGTTATTCCCGCGCTTATTTATTACGTCA  
CCGGAGCGACGTGGTAAAGATGTGAAACCCTCGCGCTTCTTGTGAAAAGTTTTGCCTGCATCCACCACCATTGTCAA  
TTTTCGTTGAGGCTCCCGTTTACGCAAGAAAAACACCAGCAACCCACTCCACTTTTTCAAACTTGTGGCCACCAAAAG  
CGGCAGGCATTGGCATGGCGCTAAATGTACTGGGTAACAATTCGATAAACTGCTTAATGTTACGCTGTGTTATCCGGAC  
AATAACCGTCAGCGTCTTCGATATGTTAAGCGGTAACACTGACGCGGATTGTGCTACATGTGGATTTACAGATTACG  
CGATGAGTTACATGGCGACTACATCAATGACAAAAGCTTTAAGCGCCATTTTCAGCAATGGCTGAACTCACTGTGGCAGG  
AAAAAGACCGCTTCTGACGTCTGATGTCATCACAGCGGCAGGACAAGTAA

>Cluster\_28444

ATGCTGAGCAGTTTTTGTATTTTCTTGCAGCAGATGTTTAAACGGCTCACGCTGGGCAGTACCTACGCGCTGATAGCCAT  
CGGCTACACCATTGGTTTACGGCATTATCGGCATGATCAACTTCGCCACGGCGAGGTTTACATGATTGGCAGCTACGTCT  
CCTTTATGATCATCGCCGACTGATGATGCTGGCATTGATACCGCTGGCTGCTGGTGGCGGGGATTTCGTGGCGCA  
ATCGTCAATTGCCAGCGCTACGGTGGAGTATCGAACGGGTAGCCTATCGCCGTCGCAACTCTAAGCGCTGATTGC  
ACTCATCTCGGCAATCGTATGTCTATCTTCTGCAAACTACGTTAGCCTGACCGAAGGTTCCGCGCAGCTGGCGCTGC  
CCAGCCTGTTTAAACGGCTAGTGGTGTAGTGGGTCAATAGCAAACTTCTCTGCCCTATTACTACCATTGACGGCGTTATC  
TGGATTGTGCTTCTTCCGCTGCTGGCAGTACGATTTTCACTTCGCTATTTCCCGTATGGGGCGAGCTGCTGCTGCTGC  
CGCGGAAGATCTGAAAATGGCAGCCTGCTTGGCATCAACCCGAGCGGTTGATGCGTACCTTTTGTGATTGGCGCG  
CGATGGCGCAGTGGCGGCGTGTGCTCGGTGCTTACGGCGTAATTAACCCCTACATCGGCTTTTATGGCGGGATG  
AAAGCCTTTACCGCTGCGGTGCTCGGTGGGATTGGCAGCATTCGCGGGCGATGATTGGCGGGCTGATCCTGGGGATTGC  
GGAGGCGCTCTTCTGCTATCTGAGTACGGAATATAAAGATGTGGTCTCATTCGCCCTGCTGATCCTGGTGTGCTGG  
TGATGCCGACCGGTTATTCGGGGCGCCCGGAGGTAGAGAAAGTATGA

>Cluster\_60891

ATGAAAATAATACCTTCTGTTTTAGCAGCCCTGGCAAGTTTTACCGTACACGCACAGCCCCCTCACAGACCGTAGAACA  
AACAGTCCGGCATATTTATCAGAATAAATCAGATGCCACTGCCCTTATTTTGGTGAACCGGAGAGCGGGCGATAA  
CTTCTGCGGTATTCACACAGCGCTTACCTGAAACGCAATCTTACGCTGCCGGCAATATTGGCTGGTGGATTATGAT  
CCGGTTTTGTGATTGTGAGGATTTTGGCGATCTGGTGTAGAAAGCGTTGCGATAACCCAACTGACGCGGATCATGCCGA  
TGCCGTTGTCGCTTTCGTATCTTAAAGATGATAAAGAAAAGACCACCGCAGACTGAAAATGGTGGCGGAAAATGGTC  
GTTGGGTCAATGACGATAATGTGACGAACTCATGGCAGCCTTTACAAGCAGTTAATAGCGAGAATGAAAAACCGTGGCC  
GCTTTAGCTTCTGTTGCAAAAAGAACAGCGGAAAGCCTTTGTTGCCGAACCTTTTGAACATATTGCTGATATAGCTGGCC  
GTGGACGTGGGTGGTTCCGACTCTTACCGCCAGGCGGTTAATGCCTTCTATAAAACCACCTTCAAGACGGCCAAATATC  
CCGATGAAGATATGCAAAATAGAACGGCAATTTATTTACGACAAATCCGATCTGTTTTGGCGAAGAGTCCGCTATTTTACCC  
GTTGATGAAAATTCGAGTCTTGGAGAAAACCGCGATTCGCGCCGATTCATGTTGCTTTACGCTGACCAATGGCAACAA  
CGAAGAGCAAGAATCGTTTTCACAGCGCGCAAGGCAAGTGGGAAATCGCTGATTTTTATCCGCCGAACAGCGCGAGCC  
TACTTAAGCAGATTGAGGCAAAAACCTGCCGCCAGATTAAGCAATGA

>Cluster\_13114

GTGACGTTTTGTACCAGTACGCCGATCCCATTAAGATGCGACCACCATGATCTTCTCCAGTACGGTACAGTACGACGT  
ACTGGACGGCGCTTTCGTGCTGATCGACAAAACAGGGATCCGCACACATATTCGGGTGGGATCGGTCGCTGCATTATGC  
TCGAACCGGGAACGAGAGTTTCCACGCGCGGTCGATCTGGCCGCCAGGTTGGGAACACTGCTGGTCTGGGTGCGTGA  
CGGGCGTTCCGCTTTTACTCATCCGGACAACCCGGAGGGGCGGGCGAGATAAATTACTTACCAGGCAAGCCTTGTCTT  
AACGGAAGATCTTCCGTTGAAAGGTGGTGCACAAAATGATGAATACGTTTTCGTGAGCCACCAGCTGCTGCTTCAG  
TGGAGCAGTTACGTGGAATTGAGGGATCTCGCTTCCGACAGCTATGCAATTACTGGCGAAACAATATGGTGTGAAATGG  
AATGGTCCGCAAAATACGATCCTAAAGACTGGGAAAAGCGGATGTTGTGAAATCGCTGCATCAGTCTGCTACATCATGCT  
GTACGGTATATCTGAAGCGGAGTATTAGCCGCGGATATCGCCCGCTATTTGGGTTTATCCATAGTGGCAACCCGCTTT  
CATTTGTTTTATGACATAGCCGATATCATTAATTTGATTCGGTTGTCGCAAAAGCATTGAAAATAGCAGCGGCAACCC  
GCAGAACCTGATAAAGAAGTACGATTAGCCTGTGCGGATATTTTCCGTAGCACTAAGTTAACGGGCAAAATTAATACCGTT  
AATGAGGAAGTCTTCCGCGAGGTGAAATGAAACCGCCACAACCTGCCCGGATATGTTACCGCCAGCCATCCCCGAAC  
CTGAAACGTTGGCGGATAGCGGTCATCGAGGACCGGCTGA

>Cluster\_41436

GTGATGAAAACCCGACGCACACCAGGTTAAACAGTTTCTGCTCAACCTTACAGGATACGATTTGTGACGAGTTGAGCGCCGT  
CGATGGCGGAGAAATTTGTGCAAGATAGCTGGCAGCGCAAGCTGGCGGCGGGCGGTAGTCCGGTTTTGCGTAAATGGTG  
GTGTTTTGCAACAGCAGCGGCTCACTTTTACATGCTCACGGTGGAGGATGCTGCTTCCGCCACCCTCATCGTCCG  
GAACCTGGCGGGCGAGTTTCGAGCGGATGGCGGTTTCTAGTGTAGTGCATCCGCATAATCCGTATGTCCTCCACGCCA  
CGGAATGTGCGCTTTTTTATTGCGGAAAAGCGGGTGCAGAGCCGCTGCTGGTGGTTGGCGGGGCTTCGATTTAACCC  
CTTTCTATGGTTTTGAAGAAGACGCCATTCACTGGCACCCAGCCCGCTGACCTGTGCTGCCATTTGGCGAAGACGTT  
TATCCCGTTTACAAAAAATGGTGCAGCAATACCTTCACTCAAACATCGCAACGAAACAGCGGCAATGGCGGGCTGTT  
CTTTGATGATCTGAACACGCCAGATTTCCGACACTGTTTTGCTTTATGACAGCGGATAGGCAAGGCTACACCAGCCTT  
ATTTACCAATTTGAGAGCGACGAAAAGCGATGGCTACGGCGAGCGAGCGCAATTTTACGCTTACCGTCCGCGGCTGCT  
TATGTCGAGTTCAATCTGGTCTGGGATCGCGGCAGCTGTTTGGCCTGCAAACTGGCGGGCGCACCGAGTGCATCCTGAT  
GTCAATGCCGCCACTGGTACGCTGGGATGATGATTATCAGCAAAAGATGGCAGCCCGAAGCGGCTTTAAGTGAATTTA  
TTAAGGTCAGGATTTGGGTTTAG

>Cluster\_34780

GTGAAAATGGCAATTTGTCGGGATGGAACGCTCTATTTCTGTTAAGCGGCTGCGTGAAGCCGCTATACAGCGCGGTCA  
CCTGGTTGAAATTTCTGATCCGCTTCTTCTGCTACATGAACATAAATCTGCGCGCTTCTATTTCACTACAAAGCGCGCA  
AGTTACCCATTTTACGCGAGTATCCCGGATTTGGCACCAGCATTACCTTTTTATGGGACGGCGGCACTGCGCCAGTTC  
GAGATGCTGGGAGCTATCCGCTCAATGAGTCCGTCGCAATTCGCCGGCGGTGACAAAATTCGCTTCCATGCAACTGCT  
GGCGGCTCAGGGCATCGACCTGCTGTCAGGGCATTCGCGATTCGCCGATGATACCAGCGATTTAATCGACATGGTCTG  
TGGTGGCGGCTGTTGGTCAAGTTGTTGAAAGCAGCGAGGAAATGGCGCTGCTGCGCGGAGACCGCTCAGCGCGGCG  
GAAAGCGTATTGACGCTTTCGCGGCTGAAACCGCATATTTGGTGCAGGAATATAATCAAGAGGCGCAAGGGTGCGA  
TATCCGCTGCTGTTGTTGGCGATGAAGTGGTCTGCTGCGATTTGAAACGGCGGGCGAAAGAGGGCGATTTTCTGTTCAAAT  
TGCATCTGGCGGGCGCGCAAGCGTCCAGTATCACACACAGGAGCGTGAATTCGCGATAAAAAGCGCGCAACGATG  
CGCTGGACGTTGCTGGTGTGGATATTTGCTGCTAATCGCGGGCGGTTGGTGTGAGGAGTGAATGCTGCGCGGGGCT  
GAAAGGAATGAAAAAACCCAGGATTCGACATCGCGGTTAAATGATCCGCTGGATCGAACGCCAGCTACGACAGAAT

ATTGCCTGAAAACGGGTGGTTAG

>Cluster\_48645

ATGAAACTGTGGCAAATGCTTTTGGCCCGTCTGGTCTGATGGATGTTGCTGAAAGCGCATGAGCGTGGGGGCGTGGCGG  
TGTAGCTGTGATAATGAGCAGAGTACACAAGATCCTGACAAAGCAGGGTGAACAAAAAGAGCAGCCGAAGGGTATGAGC  
AATACGCTGGCAGTACTGAAAGAGTTACTGGCCGAATTCGCAAAACCAAGAAAGCTGGTGTGAACTGCTGAAAGAG  
AACATGAAGCGCAAAGAGAAAGAGCGCACATTTGGCCGATCAGCTTGTCTCAGTACGGTGAATCGACCCGGCGCTGCTCG  
CCAGCTTTTGAAGCTGAACAGGCGCAGAAAACGCACGCTGAGGCGGAGCAAGCTGAACGGAGCGTCTGGTGGAGT  
TCGATGCTGTTAAAAAACAGATGATCGAAGCACACCAGGCAGAGCTGGCACAGCGTGAAGACGTTATGCAGCACTGGAA  
AGTGAAAACGCATCACTGAAATCTCAATTAGTCGAGATGACCGTGGCCGCTTCCCTTCAGTAACCTCTCTTCCCTACGTGA  
CAAAGTTCGATGACTCCGGCAAAGGCCGCGTGTATCTACGGTCTCATTTTGAAGTGGGTGAAGACGGTAGCGTAGTGG  
GTTATGACAAACCGCAGGTCATAAAGAAGCAGCTGTTCTGGTTGACGGTGAAGGTAAGCCGTTGCCGTTTGAATCCGGC  
ATTGAACGCATTGTGCGGCGAGATCCGGAAGCTGACGCATTGATGCGTAGCGAAGCAAGCAGGGTGTAGGCTCACATTC  
CAAATCGACCTACACAATATCCCAACCGAAGAACAAAGTCGACTATGGATAAAGTTGGCCCTCCGGTCTGGGAAAAATTGGAC  
TTAAGTAA

>Cluster\_42188

ATGGCCAAAGAAAGGCGATTAAACGCTGGAAGCACTACGGGTTATGGATGCGATCGATCGCCGGGGCAGTTTGGCGGGC  
GGCGGATGAGCTGGGACGCGTGCCTTCCGCACTTAGCTACACCATGCAAAAACTGGAAGAAGAGCTGGATGTGGTGTCTGT  
TTGACCGCTCGGGCCATCGCACCAAAATTCACCAATGTCGGGAGGATGTTGCTGGAACGAGGGCGGCTTTTGTGGAAGCC  
GCAGATAAAGCTGACTACCGATGCGGAAGCCCTCGCGCGTGGTTGGGAAACGCATCTCACCATTTGTGACCGAGCGCTGT  
ACCGACACTGCTTTTTCCCGTTAATCGACAACTGGCGGCAAAAGCCAAATCCCAACTGGCAATCATACCGAAGTGC  
TGGCGGGGCGTGGGAACGCGTGGAGCAGGGGCGGGCGGATATCGTTATCGCGCGGATATGCATTTTTCGTTCTCGTGC  
GAGATCAACTCGCGCAAACCTCTATACCTTAATGAACGCTATGTTGCGCGCGGATCACCCGATTTCATCAGGAGCCGGA  
ACCGTTATCTGAAGTGAACGCGGTGAAAATATCGTGAATTTGCGGTGGCGGATACCGCTCGTGAGCGCCCGGTGTGACCG  
TACAGTTGCTGGCAAACAGCCGCGCTTAACGGTGGAGCAGATGAAGATAAAGCTCAGGCATTACTGGCGGGCTGGC  
GTGGCGAGCATGCCGATCCGATGGTCAAAAAGATATTGCGGAAGGGCGGTTGCGTGTGCTAGCCCGAATCGACCAG  
CGAGATCGATATTATATGGCCTGGCGTCTGACAGTATGGGGAGGCGAAATCCTGGTGTCTCGGGAAATTCACCAAC  
TTTTTAGCGGAAAAATA

>Cluster\_28717

ATGAAGCCATTGAGTTCACAATTGAATATGAAAATTAACGATTTTTATTTGCCGTTGTTGCCAGTTATCGGAACCGGTCG  
CCTCTATATACGTCGGAAGGTCATGCTTGCCTATGCATATTTTCGTGAGGTCAGCGGTATGTTATTCGTTTACGTTGA  
CATACTCGGGCTATGAGGGGCGTTCTGGATATCAGAAGAAGCTTCAATTCAGTGGTGCAAGAGTTATTTCCCGTATAGT  
GAAAGCCGCTGATACCGGAAGATATGATAAACTCATGATCTTATGGTAATGCAGACTGCCCTACCGGAAGGTGATGT  
GTCAGTTGATGATGTTCAATTTACGATGCTAAATAAAGATGTTTATCCGGTAATAGAAAAATAAATGGAGAAAAAGAC  
TTAATGTAATATACTCGAAACAAGGTTACAAAGTTTACAACATCTGATTAATGATAAATGGCAATTTGTTCCACATTTCT  
AATGCTCTTTTTTGTATGGCTATATCGTACCTGGGTGAGCTGATTTCCAGTTACAGAGTTGAGAGTTGGTGATAGTCT  
GAGACTCTATCTTTGATGATAGTCAAGAGAAAGGCTGGATTGTTATTAATAACCCCTTTGGCAACCGTAAAGCTGA  
GCGATAATAATTTATCTGTACGGATGTTCTGGCTGCAGATCCGTTATGTAATCAGCAGCGAGACTGTGATGAATCGC  
ATTTATTTGTTGATTTGGCACAGTGCATATTTGATATACATATGTTGCGTAAATGTCCAAAAGATGACATTTATCGATTAAC  
GGGATATCATCTTTTTGTTGGGTGCCAGTTAGTACGGAATAAATACTACAATCGCATACGGGAGTATTAATAAAATCAACG  
AAGATTTTTATTTTACTATTAGCTAGTATGTGATTA

>Cluster\_20183

GTGCGACGAAAAAACACTGGCATCCCGATGTGCTGAAAGAGATTTCGACGCCCTCAGGACAGAGCTGCCGAACCTCGGTAA  
AGAGCAGATTTTTTGTTCGCTGAAGCCCTGGTGCAGAACAGCGCTATCTGGCCTGTCCGAGTGTTCACCATCGGCAGAA  
TGATCGCTGCGGCATGATAAAATGCGGATGATACCTGTGCGTCTGGGATCGCGGGGAAGGCACTGCTGTGCAAAAAG  
CGGTCTGCCAAACCCCGCAGGCCAAAGCCTACCGCCGGTAAAGACAGGTGAGCTCATTTGGGATGGACGCCATTTGAGCT  
CAGAATGGGCGAACTGCGTCTGATGTCATCACATGATCGCAAGTGCAGCAATACGCGCTGGCGCTGGCTGTGCGCT  
CACTCAACAGTGATATCGTCAATCACTTCTCAGCCGCGCAGCCGCTGTTGTTCCCGGTGCGTATCAGCAGATAATCACA  
GATAACGGAAAAGAGTTCTGGGAACTTCGACAAAACGCTGCAGGAAGCCGCTATCAAAACCTCTGGACCTATCCCTA  
CACGCCAAAAATGAACGCTATCTGTGAACGTTTTAACCGGACGTTAAGAGAGCAGTTTTATTGAATTTAATGAGATTTTAC  
TCTTTGAAGATCTGGCGCTATTTAACGAGAAGCTGGCGGAATACTGGTGTGCTATAACAGCAAAAAGACCCCAAGGGC  
CTCCGACTAATGACGCCCGTGGAAATATATTTAAAAGAGAATAAAAAATGCAATATGTTGGTGGACCCATACAAGTGT  
CTCGCTTTGGCCTCGCCAGTTAAAATATTTGTTCTGTAGAATCGCAATATACATGCCTGATGGGTTGATATCAGTAAGTG  
TATCTGTTGACCAATGTTTGTATTTGTAACGTGTA

>Cluster\_54546

ATGCGGATGAATATGCTGACTTTGCCACTTTCTTTGCCGTTGGCCGTAATCAAAGCTTTCGTGCAGCGGGCGATGAGTT  
AGGCTTATCCTCGTCCGCCATTAGCCATAGTATTAACACTGGAACAACGCTTAAAATTCGCTTATTAATCGGACAA  
CCCGAAGCGTATCGTTAACGGAAGCGGGTTCTAATCTCTATGAACGATTGCGCCAGCTTTCGACGAAATTCAGATCATG  
TTAGATGAGATGAATGATTTTCGCTGACACCGACAGGAACGCTCAAAATCAATGCGCCCGGTTAGCTGACGATATAT  
TTAATGCTTTTACTGGTTGGTTTCACACGCTGAATATCTGATATTAAGTTCGAGCTCACAACGAGACTCTCTGTGCG  
ATATCGTCCAACAGGGCTTTGACGCTGGCGTTCGACTTGTGATCGTGCAGAAAAGATATGATCAGCGTGGCGATCGGC  
CCGCCAGTGAATTTATGTGATGACGCAACCGCAGAGTACTTTGCAAGATATGGCAAAACCCCGCATCTCATGATCTGCT  
TAATCATCAATGTGTTGTTTTTCGTTATCCAGCGGCAACCTTTCCTACTGGCAATTTGCAAGGAGCTGGAATTTGCTG  
TCGCGAGAAATATCATTTGATGATGTTGATGCTGAACTGGAGGCGGTTTTGATGGGTGCTGGTATCGGGTATCTGCTC  
TATGAACAGATCAAGGAGTACCTTGATACTGGTCTTTAGAATGTGACTGGAAGACTGGAGCACAGAGCGTCCAGGCTT  
CCAGATCTATTATCCAAACCGCCAGTATATGCTCGCGCTTGGCGCATTTCTCGATATGTAATAACGGGTCAGATCT  
GCCAGAGTCAGCGTACCAGCCACAATA

>Cluster\_55656

ATGAAATACTATATTGCCATCCCAACTTATAATGGTGGGGATTGTGGCGTACTACCGTGCATATATTAATAAAACAC  
GCCTGCAACACATTTGATAACAGTAACTGATTTGTTAGTAAAGATGATACCGCCACTGTAGCTTTAATAATGAGTTTTG  
ATGTGACATCTATTTGATAAAGCTCAGATTTAATCATGTTGTTGGAACCTCGTAACGAAGCAATTAATCAATATATGAGGATTAC  
GATGTAGTCAATTTCTCACACAAGATGCTATACCTGAACCGGATTTATGAAAGCATAAATACTGTTTTCAAGATGA  
AGAAATGTTATGTCCTATGGCAGGCGATTACCACATACTGATGCTAATCCATTTGGCACAACATGCCAGAGCATTTAAT  
ATCCAGATAAAGGGTATATTTGCTTAAAAGCAGCATACCTAAGTGGGGTTGAAAACGGCATTTATGTTCAATTTCTTTT  
TCAGCCTATAGATTTACTGTTATTTAAAAGAAATAGGTGGCTTTCCGTCGAACACAAATAATATGTTGAAGATATGTTTACAC  
GGCAAAGCAATATTTGGCAGGATACAAAGTAGCTTATGTGCCCGAAGCAAAGTACATATTCATAATTTACTCCAT  
CAGAAGAATTTAAACGCTATTTTACATAGGTTATTTCCATACCGATGAACCTTTGGATTAGGAATAGTTTGGAGGTGGC  
GGTGTGAGGGTAAAGCTTTTATTTTACAGGTTCAAATTTTTGCTAAAATAATTTACATCGGATACCCAGGCTCATT  
TTTTATATAATGTTATGAAATTTATAGGTTCAAAGCAGGTAAGTTATCAGTTCTTACCAAGTTTTTGTATTAATAAAT  
TCAGTATGCATAAGAGATTTCTGGGGACATTA

>Cluster\_25413  
ATGGCCGTCACCTAACAGGTCATCTGACCACCACCGTCGTTGCCGTTGACATCATCTCCAGCAGCACTTTGTCGGCTT  
TGACGGCAAGGTCGCGCGGCGGTAAGCCGTTCTCGGCGTCGCGGAAACCGATGCCAACGCAGAGGACGCCGTTGGCG  
TCAATGTGCTGGGGATTATGCTGTTGAAGCAGGCGCAGCAATGAAGCCGGTCTCCGTCAGTCCGATGCCGAAGGC  
TGCCCATTCGCAAAACCGGTAGCAACGCTGTCGCCGGAATCGCGCTGGATGCCGCAACGCAGCGGGAGATACCGTGCG  
CATCTGCCGCGGGCGTGA  
>Cluster\_6727  
ATGCCTTTATTATTAGGTATTCTGCACTATTGCGTTTTCTTATTGGGCTTGTTCCTTTATTTATTGGCTATGTGGCAAG  
CTTCTCGCAGCCTTGGGACTAAAACAGGATTGATAGCTGTAGCATTAGTTGCATTAATTACAACAACGTGCACTCTCT  
TAATGCAATATCTTGCTGAGGTTATGTACAATGGCCTTCTGCTGATTTTTTACATTTAATTGCATCTGTCTTACCAGAC  
CATTTTCAGGCCTGTGTTAATGTCAATTATGATTACTCGAATTAGCGTTTTTGTTCGATTTAAAACAAAATTCCTTGA  
TTATGCAAAACAGGTGATTTGA  
>Cluster\_38929  
ATGGGGATCAGTTTTTCAGCAGGCATTGGGAGTACATCCGAGGCAGTGAAGTTACGCTTTGAGAGGACCGAGCTACTGAC  
TGCGAATCTGGCGAACGTCGATACGCCAAATTTCAAGGTAAGATATGATTTTGCCAGGGAGATGCACGGCAAAATA  
ACGCGCGGTTGGATGTCCAGTACCGTGTGCCGATGCAGCCGTCGGAAGATGGCAACACCGTGGAACTGAACAGCGAACAG  
GCGCGTTTTTCACAAAATAGTATGGATTATCAAAGCAGTCTGACCTTTTGAATCTGCAAAATCAGCGGCATCAGAGAGGC  
CATTGAAGGAAATAA  
>Cluster\_4065  
ATGGGTTACAAAATGAATATTTTCATCTCTCCGTAAGCGTTTTATTTTTATGGGCGCTGTAGCGCTTTGTCTACTGGTGA  
CGCACAATCTGCGTGGCAGCCTAATGAAATCCGCTAAAGATATGACCTGCCAGGAATTTATGATCTGAAATCAAAAAGCAA  
TGACCCCGTTGCATGTTGGATGCTGCAATGAAGAAACAGTATAAAGGTTGGCGATACCGTTACTTTAAATGAACCGAT  
CTCACTCAAAATCTAAAGTGTGCAATCTGTAAGAAAACCCGAGAAAATTTGTATACCTTCAAAAATCAAGCATC  
TAATGACTTGCCGATTTAA  
>Cluster\_40245  
ATGAAGAAAAAATACGAACCTGGTTGTTAAAGGGATAAAATAATTACCCGAATAAGATTACTGTTACTGTGGCACTGGAAAT  
TGTTGGGTATCCGTCACCTGTTGTTGCCAGATGTGGCGATTAGTCTTGACCGTACTGAAGATGCCACGCTGGAGTTTACG  
AAGCTGAGGCGAAAAAGCAGGCGAAGCAGTTTTTCATGGATGTTGCTGCGCGGTTATGTAAGGGATGGTCCGTTGCCG  
GAAAAGCGCCCGTAATTTAGAGGCGCAGGATGTGTTGATAACCTACAGAGGAAAACACCGGGAATAATTACTGGTTC  
TCTGAAGACTCCACCGCTGGCCTGA  
>Cluster\_13642  
GTGGCCCGTATAGCAGGCATTAACATTCCTGATCATAAGCATGCCGTAATCGCATTAACCTTCGATTTATGGCGTCGGCAA  
GACCCGTTCTAAAGCCATCTGGCTGCAGCGGGTATCGCTGAAGATGTTAAGTACGTGAGCTGTCTGAAGGACAATCG  
ACACGCTGCGTGACGAAAGTTGCCAAATTTGTCGTTGAAGGTGATCTGCCCGTGAATCAGCATGAGCATCAAGCGCCTG  
ATGGATCTTGGTTGCTATCGCGTTTGCCTCATCTGCTGGTCTCCCGGTTCCGCGTACGCGTACCAAGCAACGCACG  
TACCCGTAAGGGTCCGCGCAACCGATCAAGAAATAA  
>Cluster\_41580  
ATGACAATGAACATTACCAGCAAAACAAATGGAAATTACTCCGGCCATCCGCAACATGTCGCAGACCGTCTCGCCAACT  
GGAAAAATGGCAAAACACATCTGATTAATCCACATATCTCTGTCCAAAGAGCCACAAGGGTTTGTGCTGACGCCACA  
TCAAATACACTAACCGCGTTCTGGTTGCCAGTGGTAAACATGAAGATATGTACACCGCAATTAACGAATGATCAACAAG  
CTGGAACGCGCAGTCAATAAACTGCAGCACAAAGCGAAGCACGTCGTGCCGCAACATCGGTGAAAGACGCCAACTTCGT  
CGAAGAAGTTGAAGAAGAGTAG  
>Cluster\_50409  
ATGACGACTTTTACCAGAGAGCAGTTAATAGCTCACGCAGAGGAGACTATTGAAGCACAGAGACTGTGCATACCGGGCAC  
AATCGACCATGACATCATCCGCATATTAAGATGGATATGCTGTTCTGGAAATCGCACTGGTATCGCTGGCAGCAGAGC  
CAGCCGGTAAATGTCATGAATACAAACAGTGGGATATCAGCGTCTGGTCGATGAGTTAACCATGCTGGTAAAGCAGTTA  
ACCTGGCAACTGAGGAAAGCGAAGCCAGACTGCAAAATACCGGATAAGCGCATGAGTTATCTGAGCGGAACGGACTGAT  
AAGCGTGGAGGATATTTTACGATGA  
>Cluster\_15795  
ATGAACAATATCCCCCTATACCACAGTTAGGAATTTATGCTCAAAAATCGATCCCACCTACGTACTGCTGTAACCGA  
TGTTGATATGTTGATGGTGAGGATGATCTCCGATGATGAATGTTTATTATTAGTCCACTGGATCGAGGGGAAAGATG  
AAAGTATATGACAGCAATGGGATTTGAGCTAGACCCAGTAGAGTGGCAGGCTTTCGTTGAATCTGAGCAATTAGTGT  
GAGCGTATCCGTACATGGATTCATCCCGAAAATTCAAACTGGCAAAAGATTCGGGATTTTCTCATGAAGACTAAACA  
GAATGATCATTCTGTA  
>Cluster\_33407  
GTGCCGATTTCTGAGGAAGTGGAGAAAAAGTTAAAGAGGAGGCCAGCGCCAAATTTATCAAAGTTGATATGAGAAAT  
TTGCGGGATTTTACGCAGAGTGAACCTGATATACCACCAATCAGGCAACCCACATCTGCGGCATACATTCGCAAGCC  
ATTTATGATGATGAATGGGGCAATATAATCGCATGCAACAGATCTGAGGACATCGGAGCATTCAGCAGACGATGGCCTAT  
GCGCACCTTGGCCTGACTATCTGCAAAATGCCCTCGCTGATGAAATCACTAAAAGCGGAGTGACGTTATAA  
>Cluster\_37106  
ATGCACCTGATAACTCAAAAAGCATTGAAAAGATGCTGCCGAAAAATACCCGCAACATAAAAACGGAGTTGGTGGCTCTGGG  
GAACACGATGCTAAGGGATATTTCAAAAACCTGAGTCAATTAAGAGCAGTATTTCCATCTCTGGATAACTTCAAAATATC  
TGGATAAGCATTATGTTTTCAATGTTGGGGCAATGAATACGTTGTTAGCAATGGTCTTTTTTGAATCGCAAAAAGTGC  
TACATACGTGAAGTTATGACGCATAAAGAATACGATTTCTTTACCGCTGTTTCATGCTACTAAGGGGAAAAAATGA  
>Cluster\_67133  
ATGACCGAAGAACTTAAAGGAACGGCTAGCGTTCTGCACTAAAACAAAACCTTATGAGGAATGGTTTCAAGCATTGAGT  
AGAAGTGCCTAACGGCTTGTGGCAATGCGATAAATACTGCTTTGCCAAGCAGGAATAACTTCAAAATGACGTTGCCG  
GATTCAGTAAGGTAAAGATAGCCCTGCGCACAGGAGAAGTTGATCTAGCCAAAACAGCGGAAGAGCGAACGCTGATGCG  
GCAGCTGTTTCAGCAAAATATTTGCGGGATTGAAAGCATCACAAAAGAGCAAGGATGAAATAAAGTGA  
>Cluster\_50030  
ATGACGGTAATCGTGTACGGAAATCAACATTTGCAGGAAATGCCAAAACCTCGCCGTCATGAGCGGCGCAGAAAGCTGGC  
TATCGAGCGTATTCATCTGCAACATCTGATTCGATCTTCCGACAGACAGTGGGAAGCTGTTTCAAGGAAGAACCGA  
GAAAGCGTTAAGTCTTTCTGAAAAGCAATATCACTCGGACATCATGATAAATCAAAATACAGATGCGAATGGCGGAAGC  
GTTTTGTTGCTGAAATGCACTGATGCTGTTACAGGTTCAATGAAATCAATTACCGCGAGATAG  
>Cluster\_66909  
GTGAGTATAGTGGGTAAGAAAGAAAGTGGAGTACGGCAAAAGACAGTTGTCAGGACACTCAGATTTCTCTCTGTTGA  
GGATGAACCATCAGGAAAAGAGTGAAGATTCGGACTTACTGTATCTGCTTACATCCGAAATGACGACTGAAATAAGC  
GAATTAACCTCCGTACAGATGATGCTTTCTGAAAGGATTAATGAGACTGGGAAGGATGCAGAAGCATCTGTTTGTTCAG  
GAAAAGAACCGGTTGACAGGAATACGCAGAAGTCTGTTGCCATAACCGAACTTACAATACATTGCGTAACAGTT

AATGGAAGGTGA  
>Cluster\_66908  
ATGGCTTCTAAAAATTTTACTCAGATGATGACATCCAGCTGGCAAAAGCTGCTTTATCGGAATTGCCAGATCTCACCGC  
TCAACGGAACAAATTCGCTGATTTCTTGTATGCCATTCGTGATGACATTTATGCTCGTGAAGGACAAAGGGTTATACAC  
TGGCAGATGTTTCGTAACGCTCAAAAATGACAGGATGAAGTAGGAGAGAAGGCACCTCGTGACATTTATCGGGGAGCA  
GAATCGAAAAAACATCCCGCCGTTCTTCTCTAAAACAGCACCTAAAAAGACAGATTTCAGGCAGGAAAGATGGCATCGA  
TATGAACAACAATTGA  
>Cluster\_23854  
ATGGCTAAGATTAACCTCAGATAAAAGAGGTGGATGGTAAACTCGATGACTGCGAGCAATCCATTAAAGAGTCGATTGC  
CTCTAAGCAGGCGTATTGTGCATCGCTGGTGAATTTGGATAAAGTGTCTGTATAAATATCAGATTAAAAACAATGCAT  
TTGATGAGCAAAAGCAGCGATTGTATGAGAAAAATCTTCACCTTCGAAGGAAAGCGTTCATGCTAGATTCACAAAA  
CGAACAAAAGAGAATCTGCAACATGTTAATAAATCAGTAGAAAAATATCTTTTGCCATAAAGGAACATTACTTTGACTA  
G  
>Cluster\_41644  
ATGACGACATTAACCTCAATGCCAGCAGCAGGTGCTGGATATGCTGATTCTTACCAGAAAAGACGTGGCTTCCCGCCAAC  
CAATCAGGAGGTGGCAACCATGCTGGGATACCGTTCAGTGAATGCAGCGGTGGAGCATCTTCGCGCACATGGAGAAAAAG  
GCGTCATCAGATAAAGCTGGCTGGCCCGGGGATAACGCTTCATACCGCGGTGAAGGACGACGACAGCAGCGAGCGGTC  
GGGATTATCCGCTACTGCTTGGCCGTGAGGAAAACGCAAGGCTGCGTCAACCCACTGGTTACATGAGAGAGCCTGAA  
AGCATGA  
>Cluster\_2421  
ATGATTGATGTCCTTAGGGCCGGAGAAAACGACAGCGCGTACCACACAGAAAAGATCGCAATTGTTTCAGCAGAGCTTTGA  
ACCGGGGATGACGGTCTCTCTCGTTGCCCGGCAACATGGTGTAGCAGCAGCCAGTTATTTCTCTGGCGTAAGCAATACC  
AGGAAGGAAGTCTTACCGCTGTCTGCCCGGGAGAACAGTGTTCCTGCTCTGAACCTGTTGGCCGCAATGAAGCAGATT  
AAAGAACCTCAGCGCCTGTCTGGCAAGAAAACGATGGAATAAAGTAACTCTCAAAGAAGCGGTTGAATATGGACGGGCAA  
AAAGTGGATAGCGCACGCGCCCTTATTGCCGGGGATGGGAGTAA  
>Cluster\_12422  
GTGGGCTGCCCGGTGCTGGTGTATGATCGCTTATCACCGAATGCCTGTTGGCTATGAAATTCAGGCTGCTGCATCAAT  
CGGTCTGCTGTTTCCATCATGTTATGGGTGGTTATCAACAAACACGTTGGTGGCGGGGATGATTTTACCCTAC  
GCCACGGCGTACTATCGGCAATCTGGTGCCAACGATCCATCTGTCCGGTCACTCGGTAACAGCGTTGAGTTGGGGCC  
AATGTCACCTGCTCGGCCGACGTGCTATTTGGCGATAACGTGACGATTGGCGCGGGGAGCGCTGTTGGTGGATAGCGTTCC  
GGACAATACGCTGGTCTGGGCGAGAAGGCACGGGTGAAGGTAATATA  
>Cluster\_48796  
GTGACTAATTTTAAATCAGACTTAAATCTAATAAGAAAAGAAATGGTATAATGCATTTTATTCAGGTAATACTGAAATGCT  
AGATTACTTGAAGCTGATGGTTTATTTCACAAATGGTCAAAAAGTATCTATAAAAAACATCAGTTACGAAAAGATTG  
ATATGCGTCCAGCGAGGATTTTACCGGGCATAGAAAAGATATGAATATGATGCTGTAATGCGTGAGTTTAAAGGAATTGCT  
TGTGTTTTACGGGAAAGCTGAAAATAAAGCAAAATGATGAAAATATTAATGGCATTTTATGAAAATTGGATAAAGGTTAA  
TGGTGGATGAAAATGCAGTTTATATCGTATGAAAAATCTAA  
>Cluster\_56430  
ATGATTGCCAACCTTACTCACAATAGGATATACTTTAAGCCACATCTTTCACCTATTCCATTGATTTCTGTAAG  
AGAACTAATGAGGTAGCCTTAGCCGTAAGGAAATATGCAAGGAAATCGGAAATACCAATATCACAGATAAAAAATTAG  
CACGAAAAATTTATGCTACCCATCGTCCGTACGATTATGTTAGCTTCGAAAATATAGATGAAATATTAGCTCTCTGCTG  
TGGCTTGAAGATGTGGAGAAATGCTGGACAACTGTTCCAGATGAACAGCTCTCTTCAGAAAGATAAATTCATTGAAGGTGA  
AGAAAAGAAATCGAGAATAAAGACGATAATTTAAAAAATTA  
>Cluster\_1048  
ATGGGAATTACGGGAGGGATGTTTGGCCGAATGGCGCTGATTTGCTCTGTAGTAATAGGGTTATCCCACCAGTCAGACA  
GTTATATTCATATATTTTCTGTGGTTTGGAGTATGCTTTTGTGTTAACTGATCCTTACCAGCAGTTTTCCTGTGGT  
TAGCGAGTATTTTGGACTGCTTTTATCTGGGGCATTACGGCTGCCTGTGAAGCAACAACACTGGAAGATTTGATCCGTT  
GCCGACACCTCTGAAATTTACAGTTCTCTTCGCTGTATCGTTCTGGGGCAATAACACTCTATTTTAGTATTTTAAAGCGT  
CCTCTTTAGAATTAAGTAAAGTTCTTGAATTTATTAATGGTTAGTGTGGTAG  
>Cluster\_52020  
ATGGCTATTTTAAAAATTAAGCGATGTTTTCCACATCGTAAAAGCATCACTGACGTAGTGAGCTATGCAACCGACCCTTA  
CGCGGCTGTAGAAAGCAAAAAATTTGCAGCACTTGACAAAGATGTAACGTGCGCGGACCTCATTGATTATCCGGCGCTA  
AATATGTTAGCGGCGCTGATGTTCTTGTGTTGTTGCTGACTTCGTAACCTGCTGATTCATAAAAAACAGTTAACGTGCTT  
CGTGCTAATGCCGACTCGTTTGCATCAAAGCTGATGCCCTGAATGCCAAGGCGCTGTAAGAAGCTGCTATTTGCAGC  
TCTCGCTGCTAAAAGCTTCCAGCTTGAAGGCTTCCACTCTGTTTTACATCTTAA  
>Cluster\_38643  
ATGAGTTTTACCTGCAGGCTATTACCGGATGACCCGGACATCCGTGCACTGGTGGCCGGATGAACGTTACGGATTTTCG  
TACATATGCGTCTGTGAGGGCATGGTTTCCCTGTTACGAAACTGCCGCTTATATGCTTTGCTGTCCGGTAAAA  
AGCGCGCTCTTTGAGCAGCGGCTGCGGAGGATGCGGAGTCCATGATGCCCGGTTGCTGTGGGGTGGTCCGTCGGG  
GCTTCTTTTAAACAGTGACCTTACGCTCTGTTTCCGGCTTACGCTGAAGGCCCTCATCTACTGGTATCACCGGTACTGTG  
TCGCTACTGCGTGCAGACTTACGAGCGCTGGTCCGCTTACTGAATCCGTA  
>Cluster\_60527  
TTGTTTGAATCACCGGAATTAACGCTCTCAGGGGCTCTAAAAGCTGCTGTTATGGCGACCGGCTTCGAGAACCCTTTGTC  
CTCAGTTAATGAAATGAGACGAAACTTTCTGCCTACTGGGTAGTGAGACCTGGTGAATCCTTTTGTGACTCTTGT  
GCGCTAACGGTCCAGAGTGAACCGCTTCTGTACGCTGGAAATGAAATATGGCCGGATCATGCTGGATACGGCCAAAAT  
ATTGATGACGAGGACGTTCCGACACATATCCTGAGCAAACTGACTTTTACTTTACGTAATCATCCTGAGTACCTAGAAGC  
CTCTGTTTTGCTCCCGATGATGACGCCAAGTCTGTCAATGGATTTTTGA  
>Cluster\_9744  
ATGGCTAGCGAAGCAGTACTGATGTGCAGGCATTTATCGGGGAGCTGGACGGCGGCTATTTGAAACAAAATCGGCGC  
TGTCTCAGTGAAGTCTGCTTCCGCTGTGATGAATACGAAAACAAAGGTAAGGCTCGCTCAACCTGGAATCGAACCAT  
TTGATGAGAACCGTGTGAAATCAAACACAACCTCTCATATGTTCCCGGACTAACCGGGGAAAATTTCCGAAGAGAC  
ACCACCGAACCGGATGATGTCATCGCGGTGGTCCGCTGACTATTTCTGCAGGAAGACCAGGGACAATTACTGACTCT  
TGCCGGTGAACCTGACGGAAAACCTCCGCGCAGCAGGTCATTA  
>Cluster\_29505  
TTGTTTACTTTGCTCACCGAGTTTTTTGTTGCTTTTTTTCATTGGACATTTAAGCGTTTTTTGCTTTTTCTTGGGAAAT  
GCTTCCATGGGTTTTCAGATAAATTCAGGTTAATTTCTTATGTGACTTTTTTCAGTGGGACTTTTTGTTACATTAAGGT  
CTTCCAATGAGGTTATGATTTGGTTTCCCTCTGGTGTGTAATGATATCTCAGGATAGGATTTAGCTATTGCTCT  
GATAACATCAGTCTGCTGTTAATATTGTTTTGCCACTGAGTTTCTGCTTATGTTTATCAGTACAAAAACAAAATAAT  
TAAAATGCTGTTTATGATCGGTTATTTTTAAGGGTAG

>Cluster\_50972  
ATGAACACTCATAATACTCAACCGCAAATAATGAACACTGACCCAAATCTGACGTTATGCGGACGCATGGCAAAACAAAC  
CGTTCGATTAATTTTCGGGCTATGGGAATACCGGAAACATTCGAAGTCACTGTCGGTGGCAACCTGACCGGACTCGATG  
TTATCAGTTTCGGCTATTGAAAGCCTGTACGAAACGCTGCCCTTATGAAGAAGTCCAGGATGAGCGCGATATCATCGCCACC  
ATTAATATCGCGCGGCTGAAATGCAAGGATGAAACTGTATCGGAGAGCTATGGCTTGCCGGAATGCTTATCTCAGCAGA  
AATATCAGTATTGAACCCGCTACAACATACGGCTCTGA  
>Cluster\_39647  
GTGACGACAAATGTAGAAATTTCTGTCCAACTAGCGATGAGGCAAGTTTCGAAAATGAAGCCAAACGTAAGGCAATTCGA  
GATTTTCAGAGCGCCCATCTGATTTGCTGTCGAAAAGAAGTTTTGCTCTTTACATCGGTAAAGACACCACGCGCGTGGCTG  
AAATGGCTAAAGCAGGAAAGCTGCCAGCCTTCTACATGACAGACCCATTAACAACAGAGGAAAGCTGAATTTATGGATT  
AATCGCCGTGAGTGGGACAGTACGCATCCCACTGGTTGATGAAGCTCCGACAGAATGGCATGACTGAAAAATCGCAT  
TAGTTACAGCAAAATCAAGACATGGCCGTGCGGCTTAA  
>Cluster\_22767  
ATGGCCCGTATCGGGGAAACCTGTTATTTCAAATTTGACGGTCAAGCTATCGCTGACCGGGCATTGAGGTGCCCAT  
GAACAGGACGGTCAATGATGACATCATCGCCCTGGACGGTTCAGTGGACCGCAAGGAACTCACCGTGGCCCTTATGTCA  
AAGGGACCTTCAAGGTGCCAAGAATTTCCGGTGAGCAAAATCACCTCGTCTGATGAGATGACCATCACTGCCGAGCTG  
GCGAACGGTCAAGTCTATGCTACTGCTGCTGCGTCCGCGCAAGCGCAACCATATGCGGAAGAAGGCACGGTTCGA  
TCTTGAGTTCACGGTGAAGAAGGGATTACCAGTAA  
>Cluster\_20515  
ATGAGCACACAATCCCATCTTTAAATCTGCACGCAACCGGCCCTGAAACGCGACGGCGAGTACGCTCTGTGGGCTGGA  
GGATATCAGCCAGGCGCTTACATCATTTCTGCGCACGCGCGGTTAGCGATCCCCATCGCCCTTTTTCGGTAGCGACC  
TGTGGCGCTATATCGACTGGCCTGCTGAACGGGCGATTCCCATGTGGTGGTGAAGTCCGGTGGAGGCTATCCGCCACTGG  
GAGCCGCGTGAATAATTTCTCAAAGTGGTCCGGAACCTGGACGGCAACATCTCACGCTGCGCATCCAGTGGCGCGCCG  
CGATGGCGTTATTAATGAACGGAGGTGGTATGGCGTTAG  
>Cluster\_43603  
ATGAGCGCTACAGGATCGCAACTGGCCATAACGCTGGGGTGAGCGTACATATCGTGGCGACTACCTGGTGGCGGG  
CTTGTTACGGCGGTTGGCTGCACCACGGGCGGCTACGGCGTGTTCGACGATGCGGCCCTTGAACGGCTGTGCTTCGTG  
GCGCGCCCTTCGAGGCGGTTATCGCCCTGGATGCCCTGGCGCGGTTGCGCGTGCCTCGACGCGAGCGGACGGCGCACA  
GCCGACGCGAGCTTGGCGTGCAGCCAGTTGGTTCGAGCGCGGCGCGCGGCTTGGCCATCTGGACGCGCAACTGGC  
CTCCATGCCAGCCAGCGGGCGCACGAGGAGGCAATTGCCGTGA  
>Cluster\_10964  
ATGGCTAATACGCACTGGTGTACCAGAATTTAAAGCAGCGGTTATTCATGAAAGGCTTATGTGCGGCATGGCG  
CTATGAAGCAGCCTTTCGTGAGGAGTGCATTTCTGGTTCGTGACGACTGATAATATCCCTTTTGGCTGGATGTTGACTCTG  
TTACTCGAGTATTACTCATTTGGTTCGGCAATGATGGTAATATTTGTTGAAATAATTAACAGTGAATTAAGCAGTTGTT  
GACAGAATTTGGTTCAGAATATCAGAATTTATCAGGACAGCAAAAAGATATGGGTTACGCCGAGTGTGATTACGATTTT  
AGTTGCTATCATTTATATGGGGAGTTTTTATTACTTTTCATAA  
>Cluster\_51537  
ATGCGTAATATCCGCAACCCGGCGAACGCTGGCAGCATGAGCGTGGCTGGACTGTCACGATTATCAGATTAAGTGAAGC  
CTCGCCCTCCGTTGGCGTGGTTAACCTGAATTCAGTGTGAAGTGCATTCGTCATGACAGCGACAATAAGCTTTCTT  
CCTGCCCTTCGGCATGGTTTTCGAGCAGCGTATACCGCCCTGTTTAAATGCCCCGCTTTTAAACCTTCGCTAGCTCCCGG  
GGGGTAGCGGCTCTGGCTGCGTGCATCCGTCGGTGGTATTTACCCGCTGGCGGAGCGCAGCATACGGCGTTC  
TGCTGAACCTGACGACATCACTATTCAAAGTTTCTCTGA  
>Cluster\_4553  
ATGAACAAGACTCAACTGATGTGTAATTGCAGAGAAAGCAGAACTGTCCAAAACCCAGGCTAAAGCTGCTCTGGAGTC  
CACCTCTGGCTGCAATTAATGAGTCTCTGAAAGAAGCGCATGCTGTACAACCTGGTTGGTTTCGGTACCTTCAAAGTGAACC  
ACCGCGCTGAGCGTACTGGCCGCAACCCGACAGCCGTAAGAAATCAAATTTGCCGAGCTAACGTACCGGCATTTGTT  
TCTGGCAAGGCACTGAAAAGCAGTAAAGTAA  
>Cluster\_16937  
ATGGCGGGTTATTTGTCCGGGTTATTTCCCGCTGTGAAAATCTCTCTAACTTAACGGTACGGCACCACTTCGGGGA  
TGAATGTTTCGCGCTGGTACTTTTGTGTTGCTACCTGGATGGCGGTTGTAAGATATTTGTTGATGCTTACAACACGG  
AACAGCAGTGTCTTTATTTATGAGCATCAACGGATCCGCCATGGCGGTTGTTTCCGATGAGGATTTTATAGATGTT  
TTCTGGCGACCTGCACAGGAGTACGGTGTATTTTAA  
>Cluster\_21296  
GTGCAGAGTTCTTTACCACCTGTCTAACACGGTTAAACAAGCGAATAAAGATATCGATGCCGCCAAATTTGAAATTAAC  
CACCGAAATAGCCCGCTCGGGGAGATAAAAACGAAACTGAAACAACAGATTTCTACGTTGATTTATGATGATTTAATGC  
TTTCTTTACTAAAAGAAGCGCCAAAAAATAATTAACACCTGTAATGAGTATCAGAAAAGACCGGTAAAGACACATC  
TTTGAGATACCTGAAGTCTGA  
>Cluster\_28732  
ATGGATACTGGATATTTTGTCAATTATGTGTGCAACGTTCTGGATAATATTTATCTCTCATTGCCATACAGTCATAGC  
GGCTCTGTATCGGTATTTATTTAGTCTGGTCCAGGCTATAACGCAGTTACAGGATCAAACATTGCCCTTTTTTGTCTAA  
AAATAATAGCAGTGTGTTGCTACGCTGCGCTGACTTATCACTGGATGGAAACAACAATCATCACTTCTCGTGCATAATA  
TTTGAAATGATTTCCGAAGGTGAACGGCTAA  
>Cluster\_44650  
ATGCAACTTACAAGTACTCGAAGAAAGCGAATGCAATCACAAGCAACATCCTGAATCGAATGCTGTACGTGGTTCAGCG  
AAAGGTTGCTGATGCATTTAGGATTAATGAATCGCAAAATTTCCGATGGAAGACAGCTTTATCCAAAGATGGCCATGC  
TTCTGGCTGTGCTGGAGTGGGTTGTTGAAGCAGGAAATAGCAAAGCTAGCAAAGAAAGTAGCCATGTTGCTGACAAAA  
GAAAAGCTCAAGACTGCTGCAACAGTTTTGAGGCTGA  
>Cluster\_3080  
ATGCGAGGAGCCGTACTCAGGACAGATAAAGGGATGTATCGTGCACCGGACAGGAAATTTTTCCAGGGCATGGGGATCA  
TGGTGACATTAACGCTCGGCTCACCGACTATCCATACGGTGTGTTTTCATAAATGCGGTTGGCATCTTCTCAAACAGGTAC  
GGAATATCTTTCTCCATACAGTAATCTGCGGCACTGCCGAAGTCCGGAATAAACAGTCCGGCTTCAATGTCAGGTCCGCC  
TGCACAGGAAACCCCGCATTACAACCGGGGGCTGA  
>Cluster\_10966  
ATGACTGAGCACTGGTGGGTCATGCAGATGATAATTTCCCTTTTCTGGGGAGCGACAGTATTTTTCATGCATGCCGT  
TCTTCAGTCATACGGGAGAGCATCTGTGATACAGTCCATACATTTGTTGCGGACGTCGCTCCGAGTCACTGACTGGTC  
TGCAAAACAGTTTATCTGTACAGGCGAGGCTTCTGTGTGATATCGTTTTTTCATATCGAGGGGGGGCTCCAGAGATGAAT  
GGAATAATAATTTCTGATGATAAATACCTTAG  
>Cluster\_21323  
ATGAAACGCAAAAACGCTTCGTTACTCGGTACAGTGTCTATGGGTTGGTCTGGTGGTAAATGGTGGTCCGGCTGGGGTA



TTCAATCCTCAACCAGTTACCACAGTTTAAATATGCCCCAGTATTTCCGACATGGTGTGCTAAGTATTTTCGTCGGTG  
CGATTCTCTGGCTGGCGGGTGCCTGTGTTGGCGGGCATGAACAGGTGTGCGACCGTTACTGGTGGGTTGCCACTATGAC  
AACGTTGCCCGGTAGCGATAATCGCCGTCATAGCTAA  
>Cluster\_48912  
ATGTCGCAGATCGAAAAATGCAGTAACTTCTCACCGAAAACGCATTACAGAAAAGGTAATCCGTTAACCGGAGCCGAGAA  
ACAACGTATATCTGTTTCCCGGAAAAAGGGACACATAAAGCGATTAATGTTTTTCATCCAGAGTGAACCAAAGATGATT  
TGACACAGCTTTGTAAAGATTCCGGCTTAACTCAAAAAGAAATGATAGAGCACGATGATTTGAAAAGAAAAGCTGCGATG  
GATGATGCCAATAGAAGTAA  
>Cluster\_37468  
ATGACCGATCTCTTTTCCAGCCCTGACCACACACTCGACGCACCTGGCCTGCGCTGCCCGGAACCCGTAATGATGGTGGC  
CAAACTGTGCGCAATATGCAGCCCGGCAACGTTGCTGATTATCGCCGACGATCCGGCCACTACCCGCGATATTCCTG  
GGTTTTGTACCTTTATGGAACACGAACCTGGTTGCGAAAGAGACGGATGGACTGCCTTATCGTTATTGATTTCGTAAGGC  
GGTTGA  
>Cluster\_61087  
ATGAACCTGTTCATGGCTCCAGATGACAAACATGATCTCATATCAGGGACTTGTTCGCACCTTCTTAGTACTTCCCC  
CAATAATTGGCTGGTGTATTATGCAAAATGGTCAAGAAGTGGTAATTGATAGCGGTAAGGCGTTAGCCACACTGACAA  
TGGCTCCAGCTTTTAAGGATGAAGGGGAACCTAACCGACATGACAGATATTACAGGCAATCTGACGGTCTGGTGGAGGCA  
AAATGA  
>Cluster\_62121  
ATGCTTTACTTTTCTGGCCTTGGGCTGTGGCTCAGCGACAGTCCCAATCTGTTCATCATTATGGTCAATGTCAGGGAGG  
CTACAGTGTGCCACTGATTATTACCGCCAGTGACATAACGCTCTCATCAGCCCGTCAGTAGAAAAATCAGTGCCCGTCAAT  
TCGCGAGTATTTTTCAGTGGATGACCGGTATTTGTACTGAAAAATATACCGCCATCAATCCGTCGACAGACGAAGATAAC  
TAA  
>Cluster\_64315  
ATGTTTCGCTTTGATTAATCAGGGACAACGTATACCGACAGTGGCGTTACCCGGTAAAAATTTATCGCTGCATAAATAA  
CACGTGTGTGTACAGAAGATGGATGGGCGAACACAGTCCGTAATAAATGAACTGTTTGAACGGCTCG  
ATCACAGAAATACCGACAAATCTGGCAGAAACAGAACGAACTCATCTGAAAAATACGGGTCATGAAAAGGAAA  
TAA  
>Cluster\_2297  
ATGTCACCGCTGAAATGCCGATCAGGAACCTGTTCTGATGTGGTTGCTTGCAGTGGTTATCAAACAAATCTGGA  
TGTTCGATGTAATCGCCCGCTTGAAGTTCGTGAAAAATGTCAGTCAAGTGAAGAAATATCGACTTACTAACCATC  
CCGCCCGCCAGACCCGGTCAACATGCGGGCAATCCAAAAAGCATCGCGCTTATTGAACTCAAGTTTACCCACAGGGT  
GAATCCCATTA  
>Cluster\_67070  
ATGAAGTGGCTGGTCAATCCGGCTGAAAGCCGTTACTGCTGCCGAAGTGGAGGCATTTTATCGTGGTGAAGAAATACC  
CCGTAAAAGCGCTGACTGCTGACTTTTGTGACCGCTGGCTGGATAACTGGCTGCAGATCTTCCGGTACTGCAGGAATTTA  
ATTTGCATGCGCATCTTTTTCTGGTACCCGAAACGAGCTTCGACTTTCTGGCTATACATCCCGCCGCTGTCTGAA  
GAATCGCTGGGGTAA  
>Cluster\_31348  
ATGGGCATTTCTGTATGATTAATTTTGGGCTTATTGCGGATTTCTGGCGAAGTGGATCATGCCAGGTAAAGATGGTGG  
TGGATTTTATGACTATCTGCTGGGATAGTCCGGTGGCTAGTCCGGGATGGATCAGCACGCTGTTTGGCTTTGGTA  
AAGTCGATGGCTTCAATTTTGGCAGCTTCTGGTGGCTTATTTGGCGGATTTGCTGCTGTTTATCTACAGAAAGATT  
AAAAGTTAA  
>Cluster\_17903  
ATGGTAACTATTCGTTTAGCACGTCACGGCGCTAAAAAGCGTCCGTTCTACCAGTTGTTGCTGCTGACAGCCGTAATGC  
ACGCAACGGTCCGTTTCATCGAGCGCGTTGGTTTCTTCAACCAATCGCTAGCGAAAAAGAAAGGCACTCGCCTGGATC  
TGGATCGCATCGCTCACTGGGTTGGCCAGGGCGCAACTATTTCTGATCGGTTGCTGCGCTGATCAAAAGAAATACAAA  
GCAGCTTAA  
>Cluster\_16616  
ATGGATGAGTTCCGAGGCGCAGAGATACGGGCCAGCAGATAACTATATTATTCAGGCAAAAATCACCTTCCGTGATGCGGG  
TATATTTTTTGGTAATGACGTAAGTGAATTTCTTACCGAGTTAATGAGACAAAATAGCACCTACAGCGAGATATTTAAAA  
CTAGGACAATGGGCCGCTTATTTTTGACCCCTCAAGGAGATGTTAGAGAGGAAGGCAACGATTAGAACAATAAGGCTA  
TGGGTGATAGCACAGCTGGGCCCGCAATGACATGTTTCGACAGAATCATGATGTTTTATGA  
>Cluster\_5140  
ATGTCGGGAAACGATTTAGAAAAATCCGTTTCCGAAAACTGTGACAGCAGAACCGCATTATCGGACTGCCGCTTGA  
TGAAGCCATCCCGCAGCTGTGTAGTGTGTGGGATTTTTCCGCAAGAAATATGTAATTTGGTCTGATATTGGCAGCAG  
TGGTCTGGCAGCTAATCCGGGCGCAAAACGCGGAAAGAGTTCCCGCTGGTTATATAACTGGTCTACTGGCATCTGCCT  
GTTGAATTTCCGGGTTGCTACCCGCTTATTTCCGACTCCAGTTACAGGAAATGGATAAAAA  
>Cluster\_24476  
ATGTCAACTACCGTAGCTATGAAAAATTCGCATCATGCGGAAGTCAAGAAATGCTTACACAAGAAAAATGGCAGAGATTAC  
TGGGCTTACTTCTGTGCATTAAGGCAATATGAGCAAGGACGAAATGAACCCAACTTGAAGTCAACAAAAAGCTTCTGA  
AAGCCCAATGTTCCGTAAGTACCAGCTGGTGTGTTGTTGATGAGTTGAACCCAAAGCCGGCAGGTTGTACCGGCT  
CTCGCACACATTTGGCAAGGCGAAGCGGAATCATCCGCTCCGGCAAGAAAACTGGTTAA  
>Cluster\_21995  
ATGAGAATGAAAGAAATATCACGGTGAAGAGATACAAAGATTACCTGTTAAAGCGTTACAGCATTTCTCGTGAAGGTTA  
CTTGTGAAAGATACTCACGGGGAAGTTTACCGGATTCGACCGAAGAAAGAGGAGGATTAATTTCTTTTACGATGGTG  
TGACAGATTTAAAGATTGACGCTTTGAAGTTTGCAGTACTATTTTCAATGATATCTGGGACTCAATCCACAGCTACGA  
TTAAAAGACGGTGAACCCGGTAACTGAGAGCCACCAATATTATCAAGGAAAGTGGCGGTA  
>Cluster\_49947  
ATGAGCAAAAGCGAAATATAGTGCACAGGCTGAAAAACTGAAAACTGGTGGATTCTGCCAGATTACAAAATCTTCTTCT  
TGCCGTAACAGCAACAGCCCATCTCAGCCAAATGAAGTGCAGAGGAAGTTTCAAGTCTCCGTTGGCTGCCAGGACGA  
AGGCTAAGAAATCTTAAGGCCATACCGCTGCTGATTTTGAAGTCAATGCGGAACTTAAAGCGACAGTAAAACATCTCTG  
GATTTTAGCTCATATATTATGAGGCTATAAGAGAGAAGCTTGAACGTGATGGTGAATAGGTCATAA  
>Cluster\_7939  
ATGAGAATATTCAATGTTTAAAGATAACTACTGAACATTTTCAAGCAGTATGCGATGGAACAAAAAAGCAGAACTGGC  
AGTAGATGACCGTAATTTCCGTTGTGGTATTACCTTTTATTGAATGAGTTTCTGTAATGAATGCACCTCAAAGTAGTGC  
TGGTCGAAATAACTATGTTTACCAGTAAGAGATTACCAATTTGGAACATAATGGGTAATTTCTTCAATCTCTCTC  
TTCCCTAATGAATACGCTATTGAAATTTCTGCAGCAAACTGAGGGAGCTATTATGTGCATCATACTGA  
>Cluster\_29462

ATGACTGACAAAGACCTCTACGGCGGTTTGTATCCGCCTGCACATCCTTCACCATGCAGCCGAGGAACCTGTCTTTGGGCT  
GGGGATCATCGAAGAGCTACGCCGACACGGCTACGAGATGAGCGCTGGCACCGTGTACCCGATGCTGCACGGCTGGAAA  
AAAAAGGCTATCTGACCTACGCCACGAAACGACCCGGGCGAGCTGACGGCGTGTATGACATCACTGAACAAGGCAGA  
ACTGCACCTTGCTGATGCGAAAACAAGGTCAGGAGCTGTTCGGAGAGTTGGTAGAAGGTGGTTGA  
>Cluster\_44764  
ATGGCAACAATGGACAGTAAATATATTCAGCACCTCAGGAAAAAGGTGCTGTGCTGCTCAGGCTGATAAGCAGAACATT  
AAAATATTTCCCTTTGGTCTTGTAAATAGTGCCGTTATATTATTTTATTTGACCTGACAGTTTTCGCTGAAATTA  
TTCATGAATGGAAGAAGGCAGATATATCAGAACAAGTGACACTTGTGATGATTAATCTGAAGGTGACATTTACATGTGTG  
TTTATGGCTGTTTTCTCAATTAATCTTTTTCTGATGATTCATGCCTGTAATAAGCAGAAAAGTGA  
>Cluster\_34227  
GTGATTAGCGCCGCTGAGAAGTTTGTGAGGATCAGAGAACTGTCATCCGCTCAACCCGATTGGGATAACCAAGTTCAT  
GACTTTGTGAGCAGGGACGCATACAGGAACCTGGATGCCGTCAGTAACGAAGAGCTTCCGCCATTGCCGAAAAGTCGA  
CACATGAAATCAAAACCTGGGTGCGCCGCTTTGCGCTATTTCTGCAATTTGGCAACTGGCGTAGCGAAGGGCGTTATTAC  
CGCCCAATCCCGAGTGGATTGCCGGATTGGCTCGTTAAGCGCCAGAACAGAGAAGTGA  
>Cluster\_46418  
ATGAAACTGGCAGTGTCTACGGACAAATGTTTTGTACCGTACGCCATCACGGACTGGCGCATGACAAATGCTGATGGT  
GAAATGATTGATCCACAAGGTAATCCTGACGGCAATGCGCCGTCGCCATCGACAATATTGGCGCGGGAACCGGGGAGT  
GGGTGTTACTGGTGAAGTGGCAGTTCGCCCGCCAGGCGCATAAAAGCGAAACGTCACCGGTCGATCTGTGCGTATTGGC  
ATTTGTCGATGAGGTGGTGTCTGGCGGTCAGGTAATTTTCCACAATAA  
>Cluster\_8572  
ATGCTGCACACATTACATCGCTCACCTGGCTGACGGATTGTTGCTGCGTCTGCTGCTCAGTGAAGGAGACGAACT  
GCTATTATTGCAAGATGGCGTAACTGCGCGAGTTGACGGTAACCGCTACCTTGAAGTCTGCGTAATGCCCCATTAAGG  
TCTATGCCCTGAACGAAGACCTTATGCGCCGCGTTGACTGGTCAAAATTTGCAACGACATCATTTCTCATGACTATACT  
GATTTGTCAGACTTACGGTTAAGCACCCAGCAGATGGCCTGGTGA  
>Cluster\_11455  
GTGAACGATAGCTACCGACAGTTTGAAGAACTGGTGGTCAAAGACAAAAGCCAGTTTACAGAAGCAGTGAATTAAGA  
GTTTGCCTGGGTGATATGGCAGGCATCACGAGCAGCTATTGAACTGGATATCGACTGGCCGAATCGAATGACGACCTTT  
GGAAAGATGGTGAAGAAGGTGCTTATGCCGATGGTATGAGGATGGCGTGACAAAACGGTAAATGTCAGTAATGAAAGCC  
ATCAGGGCCGAGGAATCAAAGAAAAGAAATTCGATTAA  
>Cluster\_45403  
ATGAGTAATGTTTACTGGCCGTTATACGAAGTTTTCTGTCGTTGGCAAACAGGGCTTATCACACCGCATGTTGGCAGTTT  
ACATGCTGCCGATGAGCGGATGGCACTGGAATAATGCGCCGTCGCTTACACCCGTCGTCAGCGAAGGATGTTCAATTTGGG  
TGGTGAAGCGAGTGAATGTTGCTCGCAACCGGAAGAACGCGGTGAATTTTTGATCCGGCTGAAAGCAAGGTCTAT  
CGCCATCCAACGTTTTACCCATCCCTGATGGCATTGACACATGTGA  
>Cluster\_5146  
ATGTTATGCGCGCAGCAGCATGGAAGGCCAGTTGATGAATTTGAGGCATAACAGACAAACAGCAATGCCGCAATGCC  
GCAATGCCGCAATGCCGCAATGCCGCGAGCGGAAACATAAAGGTCGAATATTGGTGAAGGAAGACTACATCGCATTCATGC  
CGAAACAAAATTTAAGAACGGCATGCAATAACCTTGCATTTGGCGATCGAATATTACAATGAAAACCATCCGCATAGTGGC  
TTTTGTTATCTCTCCGCGAGAATATCGACATCAGCGGGTAACTGTAACCTAA  
>Cluster\_12054  
ATGGCGCTTACAAAAGCTGAAATGTCAGAAATATCTGTTGATAAGCTTGGGCTTAGCAAGCGGGATGCCAAAGAACTGGT  
TGAAGTGTTTTTCGAAGAGATCCGTCGCGCTCTGGAACCGCGCAACAGGTGAAACTCTCTGGTTTTGGTAACTTCGATC  
TGGCTGATAAAGAACTCAACGCCCGGGACGTAACCGAAACCGGGCGAGGATATCCCATTACAGCAGCGGCGGTGGTGACC  
TTCAGACCCGGGCGAGAAGTTAAAAGCCGGGTCGAAAACGCTTCGCCAAAGCAGAGTAA  
>Cluster\_63821  
ATGCACGTCACACTGGTTGAAATTAACGTTTCATGAAGCAAGATTGACGAGTTTATCGAAGTTTTTCGCCAGAACCCCT  
GGGCTCTGTACAGGAAGAAGGCAATTTGCGCTTCGATGCTTACAGGACCAGAAAGTGAATTCGCGCTTTTATATCTACG  
AAGCCTATAAAGATGAAGACGAGTGGCATTCCATAAAACACGCCCCACTACAAAACCTGTGTCGCGAAACTGGAATCT  
TTAATGACCGGGCCGCTAAAAACGCTGTTCAATGGGTTGATGCCGCTGA  
>Cluster\_39323  
ATGAAAACCTCTCTTTTTCCCGCTTTATCCGGCTGGCTGGTGGCATCGGTGGTGTGTCGCGCTGATTGCGCTGATTTC  
CCCGCAGCAGCTTCCGGTCTGTTTACAAACTGAGCTGATCTCGCTGGCGGCGGTGCTGGGCTACTGGCTGGATCGCA  
GCCTGTTTCCCTATGCGCGGCCAAATTAATTTTCAGTCAGCGGAAAATGAACAACGCTCTTTGCGCGCCCATGCTGCGC  
CGTGGGTGATTGTCGCGGCGGTGTGTCGCGCTGGCGATGGGGCTGTAG  
>Cluster\_56907  
ATGAACAAAACATCAGGGATGACACTGCTTGAAGTCTTACTGGCGATGAGTATTTTACCAGCTGTTGCTCTGACTTTAAT  
GAGCAGTATGCAAGGGCAACGAAATGCCATCGAGCGAATGCGTAACGAGACGCTGGCATTTGTGGATAGCGGATAACACG  
TTCAGTCAACAAGATTCATTCGGCGAGGAAAACAGCTCCAGTTCGGCAAAGAGTTAATAAATGGCGAAGAGTGGAACTGG  
CGAGCGATATCCACTCAAGCAAAAGACGGCAGCTTCTGGAACGACCCATAACCGGTGACATTAACCGGCTCAGACAAC  
CTCGTTACGCGTTATCAAAAGCATGATAATAAATCCGGGCGAGCACAAGATGATTAA  
>Cluster\_41458  
ATGAAACGAATTGCGTTTTGTTGGGTACCGTCGGGCGAGGAAAACAACGTTATTTAATGCGTTGAGGGGAATTAACCCCT  
CGCAAGAAAAACACAGGCCGTTGAAATTTAATGATAATGGCGATATTGATACGCGGGTGAATAATTTAGCCATCCCGCT  
GGTATCACGCTTAAATACACGCTACAGGATGTTGACATGCTGATCTATGTCACCGCGCAATGACCCGAAAAGTCCGG  
TTGCCCTGCCGGGTTGCTGGATATTGGCGTCAGCAAAACGGCAAAATCGCCGTCATCAGTAAAACGGACATGCCAGATGCTGG  
CGTCGCGCAACCGGAAAATTTGCTTGGAGCGGGCTTCGAAAGAGCGGATTTTCGAGCTAAAACAGCCACGACCCGCAAA  
GCGTGCAGCAACTGGTGGATTATCTGGCATCTCTACCAAAACAGGAGGAAGCAGGTGAAAAAATCATCACAGCGAATGA  
>Cluster\_60472  
ATGATCAAAGAGTGGGCTACCGTCTCTCTGGCAAAACGGGCGAGGCGTGGTCAAGTTGATGTTAAAGCTTATGTCAG  
CAGTGGCGCTTACCGCGCGGTTGCGGTAGCCGCGTGTAAATAAACTTGGCCCGCAAAACACGATACCATTTGCTGATC  
CCTGTGATGAGCCGTTAGTGCAGGGGCAAAAAGTGGAAATGGGGATCGCCGAAAGCAGCTGCTTAGCTCCGCTTACTG  
GTTTATATGTCGCGCTGGTGGGATTAATCCCTTATCGCTTCGCTATTTTCACTACTCTTTGCTTCTGAGCTCGCAGCAT  
ATGTTGGTCGATCCTCGTGGTATTGGCGGGTTCCTGATGCGCGGCTACTCGCGTAAAGTTGCTGCCCGGCGAGAA  
GGCAACCGATCATCTTAAAGCGTGGCATTTGCCGCTGGCTTGTGCGGATTTGAAACATCTTCGGAAGACCGGAGCCGCA  
>Cluster\_18231  
ATGCAAGTAAATCGCATATCCGCTTCCCGGTCACAGACAGTGTATTACCTGTTTCTGTATCTCCCCAGCCGTTCCGGCA  
TGGCTCCGAAGCTGCTGCCAGCGGTAACCTTTTCTTTTACAGGAGCTTCTTTTCGCTGGTGCCTTAACACCGTAG  
GTGTCGCTGGCAGACTCCAGCACTGCTGTTTCGATAAGATCGACTGGCAGGGCGCTGTCGGGGCGTACATCAGGACAGA  
GTGAGCCAGCAGCCGTCGCTCTCGGGTTAGTGGTGGTATTTCCAGGTCATCAATGCCGTAAGTGTGACCGAAGTTAA

TGGTGGTGGTATCTTCCAGCGGAGGAGCAGCGGATGTGCCTCACATGCCCTTGCAGTGGCAGTAAATCCGGCTTCGGCA  
ATGGCTTACGGGGACACCACGGGTTACGTATCAGCGGTACGCACCTCAACCTGAGCAGTGAAGTGGGATGA  
>Cluster\_66964  
ATGAAAAAATTAATAAATTCGCATTAGTCATCGGTTTATTCGGAAACAGCGATAAATGCTAATGCTGCAACAAGCAATGT  
TACTGCAACTGCAACAGTAATGGTGACGCTACACTGAGTGCCACATATGTTGCCGGAGCACCCTGACTACAGATAACC  
TGAAATCGCAACAGATTGGTACTATTTCCGCTTACTGGTTATAACGGAACCTCTGCTGTAGCTGATCTGAATCTGAGCGAT  
ACTAAAGCATCTCAAGGTTTCTGGAGCTGAAAGATATCGCGGTAATGCTCTGTGGCGGAGGCTTTTATTAATGGAGG  
AGCCATTAACCTTAATGGTGCTTATGCAGCAGGAACCCAGCCACCGCAATCTTCCGGCAGGGACCCTAATATTTGATT  
TGAAAAACATGGGGTAGTCAGGCAGATATTCCTGAGCCGAATAACTGACAATGTGACAATCACGTTATCTAACCCAGTAA  
>Cluster\_14745  
ATGATGAAAACCTGTTAAACATCTTCTGTGCTGTGCCATTGCCGCCAGCGCATTAAATTTCCACCGGGGTGCATGCTGCGTC  
CTGGAAAGATGCGCTCTCCAGCGCCGCCAGCGAATTTGGCAACAAAACAGCAGCAGACACAGGAAGGCGGTTGGTGCCTCG  
CGTCATTAACCTAAGCTTGTCTAGCAGCGGAAACAGGCTTAAGCGCAGATAAATGAAACAATGCCGAGGCATCTGCAA  
TACTGCGCGAAGCAAAGCTGGCGTCCGTAACCGATGCCGAAAACATCAAGAACCAGGTGCTGGAAAAGCTGGGCCTGAA  
CAGTGAAGAGCAAAAAGAGACCAACATATCTGGACGCATTAGGGTTTGTGAAAACCAAGATGCTCAGCAACTCA  
ATCTGGATAACATCGGAACAACCTCCGCTGGCAGAAAAGGTGAAAACCAAGCCGCGATCTGGTGTAAAAACAGGGGCTG  
AACTTCATTTCCCTGA  
>Cluster\_16227  
ATGCCTCCATCATTACGAAAAGCCGTTGCTGCTGCTATTTGGTGGTGGGGCTGTGCCATAGCGTCTGTGCTCATCACTGG  
TCCGAGTGGTGACGATGGCCTGGAAGGTGTCAGTACATACCAATACGAAGATATCGTTGGCGTATGGACTGTATGCTCAG  
GACACACCGGAAAAGACATCATGCCCGTAAAACGCTATACCGAAGCAGAAATGCAAGCCCTCCGAAATAAAGACCTTGGC  
ACGGTCCGACAGCAATAAACCCGTACATCAACGTCGATATACCGAAAACACGCGCGGCTCTTTACTCGTTCGTTTAA  
CAACGTGGGCGCTGGCAATTTGAGAACATCGACGCTTCTTTCGCAAAAATAAACAGGGCGATATCAAAGCGCATGTGATC  
AGCTACGGCGCTGGACATACGCTGGCGGTAAGCAATGGAAGGGCTGATGACTCGCCGTGAGATTGAGCGTGAAGTCTGT  
TTGTGGGGCAACAATGA  
>Cluster\_41646  
ATGAGTCTTTTGAATGAAGTTCAGAAATACATTGAAGCCATCCGGGGTGTACTTCCGGAGACATTGCCGATGCTTTTTCG  
AGGTTACTCAGCGCAGCGCTTCTGCAGTCAGCAAGCAAGTTACGTCAGAGTGGTCTGTGGCTCACCGTTGTAAGGGG  
ATACACGCAGACATTTCCCGCGCTGACTGAGAGAGCGCAGGAGGGGAAACCGCAACCAGTTCGTGAAACCAGACCTGTG  
CGCAATTTCTATGTCGGCCTAACGACCCGCGGAGATTTTGTGCTGACCCGCGAGGCGGAAGAACTGGAGTCCAGGGG  
CTTATACCGTCTGTGCTGCAACGGTGTGGATGGCGGCATTCCTGAAAGCCACTCCAGCCAGAACGAAACAATTTTCTGG  
CGGCTCGTAGCAGTGTTCACGAAAAGCAGCAAGCGCGCTGTATCAGTGTGATGAGTGGTATCTGTGAGGAAATACGTCG  
GGGCTTAA  
>Cluster\_51451  
ATGGTCTGGATTGATTACGCCATAATCGCGGTGATGCTTTTTCTCTCTGGTTAGCCTGATCCGCGGCTTTGTTCTGTA  
AGCGTTATCGCTGGTACATGCGGTTGTGCTTTCTTTGTTGCCAGTCACTACTACACTTACCTGTGAGTCTGGTTACGG  
GCTTTGAAGACGAACTGGTTCGAAATGGGATTTGCCATCGCGGTACTGTTTATCGCTACCTGATCGTTGGTGTATCGTG  
AATCTCGTATAGCCAGTTGGTGGAGAAAACGGGGTGTGAGCAGCCGATCGGGTGTGGGGCTCTGTTTCCGTTGCGTT  
GCGCGGTGTGTTGATTTGTTGCTGCCATTTCTTTCTTCGACTCCTTTACCGGGGTGCGAAAAGCGAAGACTGGAGCA  
AATCACAGTGTATCCCGCATGCTTTTATCATCAGATGGTTTTTTGATTTATCTGCAAAGCTCGTCAAGTTTTCTTGCC  
AGAGCGTAA  
>Cluster\_66852  
ATGAAGCCTATGCAAGATGAGCGTGAAGATCAGGACGATCTGCAGCGTTACGAAAAGAAGGGGCGAGCCATAGGAGTAG  
GCGTCACAACACAAAAGTGGTGAATCTGTCCGGCGGAGTGATCAGGCAGTCAGCATGGCGTTTCGCGCGAAGCGGGCTG  
AGTTCGGGACTGTGCGTCCGAGTCCAGATGGCAGGGCTTTCGCGGATCGACGCCCTTTGGCGCAAAATGGCACAGCCAA  
TCCGTGCGGCGTGAAGGTATTTCCGCTCGGAGTGACACTATTCGACCTGACGCCAGCCAGCTTGATTTGCTGTTTCGACGA  
CGATGCGCGGCGCAACCGCAGGAAACGGGCATCAGCAGCGATCGACGGACTCATGCGCTCTCGGGGCGCACCCTCATCA  
GCCTGAGCGAACGGAAGCCACCGGCTGGCGGACATGTCCGGCGCAAGATTTCCCTATACCGGATACCGAGTTGA  
>Cluster\_35117  
ATGAGTCAGGACAGTAAAGTTTTCTTTCTGATATTTCTCGGATCGGCTCGGTACTGATCCTCATTTCTGTTGTTGCTTT  
TTATAACCAAGTTCACTATAGCAAAGACGCGATTCATACCGAAGCGCTATTGTTGATACCGTCTGGCACTCCAGTCAAT  
CTCATCGCACGGGTAAGATGGTTCGTGGTATCCCGTCTGCTTTTCGACCGACGCCAGATTACACGCTAATTTTCAAT  
TCGAGTATCGGCAGCGATTTTATGAAGACAGCGAAGGCGATAAAGTTAATGTTTATTATCTCCCGGCATCTGAAAA  
GGCTGAGATAAATAACCCGTGGGTTAATTTTTTAAATGGGGTTTATCGGCAATATGGGCGTTATTTTATCGCCGCTG  
GTTTTATTAATAAGTATGCCCTCTTAAAAAATCACGAGAAACGGAAGTCCCGCCATGA  
>Cluster\_7966  
ATGCTGGCATTAGGTATGTTGTTTTATGCGTCAGACGTTGCCCTATCAGAGTATGCAGCGCAGCGGATTATAGCTG  
GGCTCAAACTCCCGCATCGGAAACGCTGATGCTTTTTCAGTATCTCGTGAAGGAGAGGACAAAATCACCTGAGCGGTG  
ACCTGTATCTGAGCTGACCGCGGCAAGTTTTTCGATGCTGACGCTTTATGCGATGGCCGAGCAGGGACGAGCATGGCCG  
CTTATTTCTGGCTCGGGCTGGATTACGGGATGTTTATGTCAGCAATGTCTCGGAGACCGGCACGGTATTTTTTGGAGG  
CGGGTCCGCCAGAAAATCAGCTTACTCTGTCTACTGACCCGTGTCGATGAGTGGCTCACGGCGGCTATGGCGATATCG  
GAAAACAGGCGGAGATCTGGTCCGTAAGCGGGTATCTGCTGTCTAAGGTGGGGCTTAA  
>Cluster\_10995  
ATGAGCTTTTTCGACAAAGTAAAGGTGCCATTAACTCAGGCCGTGACGAACTGACCCGCCAGGTTGGCCGTTTCAAAAA  
CAAAAATTCATCGAGGACCCGTTGCTGTATGTGCCGATTTGCCGTATCGAGTGACGGCGTAAAGTTCGGAAGAAAAGC  
AGAAAATGATGGCTTTCTGCGCTCTTCAAGAGAGCTGAAGTCTTCGATACCAATGAGGTGATGAGTTCTTCAATAAA  
CTGGTTTCAAGCTTCGATTTGATGTTGAAATTTGGCAAGGGCGAAACCATGAAATACATCTGGCGCTGAAAGATCAGCC  
TGAGGCGGCTCAGCTGGCTTACGTTGGTATGCGGTTGCGAAAAGTGACGGTAACCTCGATCAGGACGAGAACTGG  
CCTCCCGGAGATCGCTATCGCGTTGGGCTTCGACCCGGCTGAATTTGGCCTCTGA  
>Cluster\_669  
ATGATGGAGTTAATGGTCTTACCCACATATTTTCTGGCTCAGTCTCGCGGTTTGTGCTGGCAGCCGAGATGCTGGG  
CGGAAATGGTTATTTGTTGTTGGAGCGGCTGGCAGCGGTGATTACCGGCTGGTGGTCTGGCTGGTGGCCTGGGTTGGG  
AGTGGCAAGGGTAAATGTTGCCATCTTACGCTGCTCGCCGCTGGCTGTGGTGGAAATGGTTGTCGCGCGGGTGGC  
GAACAAAAGCACAGCGATAGTCAATTTAAACAGCAGCGGCGAGCAGTGAATGGCCGACGTTTTGTGCTGGAATCTCCGCT  
GGTCAACGGGCGCGTCAATGCGCGTCCGTTGACAGTTTATGGCTGTGACGCCAGCGAGGATCTCGGTGACGTTACG  
ATGTTGAAGTCAATTCGATAGAAGGGATAACCCATCATATCCGAGCCGCTCGCTTAA  
>Cluster\_19779  
ATGGTGAATACCTCAAGGAGAATCTTCTGCTCCGGTACCACAGGTTCCAGAGCTTCACTCATGTCAATCAACAACCTGGA  
GCAATGGATAGCCGATGTGGCTGACAAAACGGGAGCTTCCGAGTTCAAAGAAACCGCGAACAGCGCTTCGCGCTGGAGC

AGGAACATCTGCAGCCGTTACCGGATACCGACTTCGATACCAGTTACTTCGACATCCGCCATATGTCCTGGGACAGCTAT  
ATCGAGGTTGGCGGTAATCGTTACAGCGTTCGGAAGCCGTGTGGTTCAGCCGGTATCGATACGAATATCGTGGATGA  
CGAGTTGCGGATCTACAGTAATGAGAACTGGTGGCTCACATCGCTCTGTTCCGGCATGCTCGGCTGGCAGACAGTGC  
TGGAGCATCACGCCCGCTTGGCAGCAGGTGAGTTCAGGTGGAACATCGACCCTGATGTGCCATGA  
>Cluster\_28658  
ATGGACATAACAAAAATCCTGAATACGAATCGCGTTATTTAGATATGCAAGCAACGAATAAAGCGGAGGCGATTGAAGA  
ATTAACATACTTCTCAAAAAGATGGTGGGATCGATTGTCGGGAAACCTTTATTAAGATGTCTGGCAGCGCAAGCGG  
AAGGCTCGACTGGTTTGAATAATCATATGGCATCCCGCATGGTAAATCTTCTGGGTAATTAATACCTACGCTGGCAATT  
GGCCGTACCCCGCAGGATATCCCTGGGAAACGCTGGATGGCAGTAGCGTGGCTGTATTTATTTGGCGGTACGCTCT  
TGAAGATCAAAAATACCACCATACTCGTTTACTTTCCAGGTCGCGGGCGCGTGGCGGATGATGACATCATAGAACAAAT  
TGTAGTTGAGACGAGTCCGCAAAAATCATTTGATCTCTTTAGTTCAGTATGCACAATCCGATGCTGTCTAA  
>Cluster\_47188  
ATGGATTTTCCACAAAAGGTTAATGGTTGGGCGTATATGCTCATCCCTGTTTTTCAGGAAACCTACGACGCTTTAGTTGC  
CGAAGTCGAGACATTAAGGGAAAAGATCCTGAAAATATCAGAGAAAAGCCGCCACAAAATTTAGGCGGTAGTCCATA  
AAGTGATTGAGGACATATCACGGTCAATCCATCATCACCGGCATTCCGTCATGGCAAGTCGTAGGCTCTGGGAAAAAT  
AAAGACTGGTACGGGTAATAATTTGGTGTGCTGTTATCGTCTCTTCTTTCGTTATAGTGAAGAAAGAAAGTATCAT  
TCTGGGATCGGATGAAACACTCTGCGCACCTACGGTAAAAAAGAGATGCCATATCCGATTCAGCAAAAATGT  
TAAAAAGAGGACATCTCTTCCGACTGGGAAAGCCTCACCAAGAGACAGAAGAAAACCATTTGA  
>Cluster\_26290  
ATGAACCGTGTCTGTGCGTGGTTATCATTTGCTCTGCTGGTGGCTGTGGTGGCTTAGTCTGGGGCTGAATCATTTACCG  
TGATCACGCCATCATCTACAAAAGAGCAGCGCATAAAAAGCCAGTGGAGCTGGCGAACCGCAACATTTACTGATA  
TGCAGATACGCCAGCGTGTGCTGCTGCACTTGTGTCAGATACTCGAGGAAATAGCCGATGCGAGAGCTGAAAATGAA  
ACTCTGCGTGTGATGTTTGGCGTGGTGTGTAAGCGCCTGGGATCAACGCCACCTGCTCCGGTACCGTGGTGAAGCCAC  
CGGCACCTCCGGTGGATTAATGCAACCGCCCGGACCTGGCAGACACCGTGAACGGGATTAATTTTCCCTCAGAGAAC  
GGCTGATGGCAATGCAGAAGCAACTGGAAGGAGCACAGGAATATATCCGTACCCAGTGTATACCGTGA  
>Cluster\_32781  
ATGGCGAAAATCAGCACTGTTTATGTTGCTGCTAATAATGAGTCTGCCAAAAGTGGCGGGCTGAATGGTTATTCGATCCGG  
GAAACACGGTCCGTTTCTGGATGCTCAGAGTATCCGGCGTGTGACTACGTCCGCTCTGAAATCTTTCAGCGGATGGAC  
ATATTGTCAAAGTCTGGAGGGCAGGTTTGCCTGCACTGTGGCGCAAACTGGTATTACGCCAGGGACGCTTTGGTATG  
TTTATTGGTTGCACTAACCTACCCGAAATGCGAACAATACGAACTTATCGATAAAACCGGACGAAACAGCAATTCATGCCC  
CCAATGCCGGACGAGCCTCTGGTCCAGCGCGCTCCCGTTATGGCAAAACGTTTCACTCCTGTGATCGCTACCCGGAGT  
GTCAATTTGCCATTAACCTCAAAACCCATAGCTGGAGAAATGCCCTGAGTGTCTATATCCGCTACCTATCGAAAAGAAAAC  
CGCAGGGTGTAAAACACTTTTGTGCCAGTAAACAATGTGAAAGCCGGTTTCGGCGGAAATA  
>Cluster\_17744  
ATGTGCAGCCCGCTATCGCTCTCGCTGGCGCCAGTGTGCTATTAAGTGGCGTTTTCAGCATAACAACAGTACCAGCAAGG  
TAAGTATTCGCTCTGCTAGCCGAGCAAAATGCAGAAGTGGCCACGGCACAGGATTCATCAACCGTGGTAATG  
CTCAGGCTGATGAGGTTCTGCTGCTGTAACCGCCAGGCTGCTGGCACCCAGGCGCAACCATGGGCGCAACTGGCGCAGAT  
CTTTCCACTGGTGGAGCGCTTGAATATCTTTGGCGATACAGCTAGTTTGGCGCGCTTGTATGCGCTGACTACGGTTAATAA  
CGCTCAGCGTGAAGCATATGGCTTTTCAAGTTCAGGCTGAAACTACAAAGCTCAGGCTCAGCAGCAAGCAGGAGGGA  
ATATGGGCGCATTTTACCACACTGCTGACTGCTCCACTTACGGCATAACGGCGCTTACCAGATGGGCGCGGAACGTTGGTCA  
CCATTCATCAAAAGCAAAGCGGCACCGATCAGCGCTGCCATCGGCACACCAACCGGTCGATAA  
>Cluster\_43571  
ATGCCCGCGCACCTTCTCGAATCATTTGTTTATATTCATGATGACTTATCTAGGCAACCTGGAGTTGAGTCCGTTGGCTAG  
GGAATTTGAAACATATAAATCCTATGCGTTTCAGATAGCGACAGATAGTGAATGTGATGTTTTCGAACTTCTTCTTACAT  
TGGATGAAGAAGATCAAAAAGGCATTTCCGTCACCGACCCGCTTTTGGTTCGAGATCGTCTTTTCTATGGCCAAAGGATA  
AGGCGAGCAAAAGATCCTGCTTTTACGTTTCACTTGCATACCAAGAAACTATTAATCTTGGTATGCTTTTGATAAAGC  
AGATGTTTTTTGTTAGTTCAGTGGGATTTGTAAAGTGCAGCTGATTTGGTCTATGTCATATTTGAAAACAGAAATGATGATT  
ACCACTTTTTTGTTGTTAGAGATCGTGGCTCCAGGGCTCATGACCTTTTATCAAAACAGAAGGTAATAATTCAGAGTGGAGA  
CATAAAAC TAGAAATTTCCGCTATAGCAGCCAGAAATCTTCTCGAGAAGTTGA  
>Cluster\_3314  
ATGTTTCTTATTCGTTTTTAAACGTCGCGCTGCTCTGTATGGCGATGCTGACGGTTGTTCTGAGCGGCTGCGGGCTGAT  
TCAGAAAGTGGTGGATGAATCGAAAAGCGTGGCCTCAGCCGTTTTTCTACAAGCAAACTCAAAATCTGCATCTCGATTTCT  
TCTCCGAAAGTGCCTGAATACGGATGCGGAAGATACGCGCTTTTCCAGATGGCGCATGCTTGGCAACTGAAAACCCCG  
GAAGATTTTGACAAGGCGGATTAAGCACCTGTTTATGCAGGAAGAGAAGACGCTGGGAGAAGGACGCTACTGGCAAAAAC  
CACCGTCTGGGTAATAACCGGAAGGCACCGCATCCCTGAAATGTGCGCTGGATAAAGAGACGCAAGTTTGTCCGCTAATTTG  
GGCAGTTTTATCACCTGATGAAAAAGCGACAGCTGGCGTCTGGTGTATCAAAAGGACGAACTGGAGCCGACAGCCG  
CGCTCGATTGAACGTGATGAGAAGCGACCTGCGACTGCTGCCCTCAAGGATAAATAA  
>Cluster\_12417  
ATGCAGGACTTAAGCGGATTTAAAGTGCCTGGAGGTTTTTCGCGCGGTTGGTGCATTAAGTGCATTTAGTTGGGCGGT  
GCAAGCAACATTAATTCGCTGGTACCGCAGGTGATGATCGCTGGCGTGGCTTTTATACGAATGTTTGGTGCAAAAA  
TAGGAAAAACGTTAGTCAATTCGGCTTCAATAAAAATCACTTACCCGTGGAAATTAACCTGGGAGATATGCTGGGTG  
GGTACGACGCGGTTTTATATACGTTAGTGTGATTTACGATGGCGCCATGGCGTTATTTTCGAAAAAAGTTATTTATG  
CACCGGGAGTCAATGATTTAGCCAGTCAACATTTTGTATTTAACGCCACCGGATTTGTTGGTGGCGCTAAATGCTGGTTGG  
CGACAGATGCTTTTGTGCGCCTGGCGTGGTGTGATGGCACCGTGGTGGAGCACGAAGCAGGCTATTTAAATCG  
CTGCCAGCAATGTTGTTTGTGGGAAATCCCGCAGTGTACGCGCGCAACCGCTCGAGAAAGTTACTCCCTGA  
>Cluster\_1681  
ATGAGAGACGCGAATTTAGAGCGATGCTTCAGGCATCGAGACAACGTAACAGATACAACCTCTACAGCTACACAGACAC  
CCCCACCAGCTACGAATTTACCAGCTCACCAAAAAGAACGCAAGGATGACGAAGTAAATTCGGGCAATTTACACCGA  
GGAACCGTTACATGCCAACACGCAAAAACAACAAGAACAGCATCAGGAATATCTGGCTAGCTTTGACAGCTACGCGCAA  
CTACCGAGCAAGCTTTGATGATATTTTATGATTTTTCGAGATTTGCAAGCGGAGGTCACCAGAAATACACCAAGGTTTTTTA  
TTTTACTGCGAAGTCTTGTGAAATTAACCTAGCCACCGTGACAAATCATCTTACGCGTCAAGCAACAGACTTAGCCATG  
AATTTACCAAGCGATAAATATGCGCTTTGCTTGTGTAATGTGCGCAAGTAAATGGTGTGTTGAGCATCATATTGCC  
GCTGGAAATTTGAGACAATGAAAAACGAGCAACAGATTTTCGAGTTTACCCGATTTTAGTTACAGAGGAATTTTAA  
>Cluster\_36069  
ATGAAGACACTAAAAGCAACTCCAGAAACAACATTTTATCAACTGCGGCTGTGTTACGCTTGAAGGCTTAGAAGTTGA  
TTCTTTGCAATTAATAATGCAAAATTTGCTAAGTGTGTACGCACATTTCTCTGGATTGTGCTCCTCAAGGAAAC  
TGGCATTTGAGGTAATGGAATTTTATCCATGAATATGCCCTATCTCGGGCTTCTCTGCACACAAAAACAATCCCTCCCT  
AAAAGCTGGCTGGTTAACCTTGCACCCAACGCGAAGCCTGCGGCTTAAACAACCGCGAAGCTCGCCAGGCTGCTGATCT  
CGATGAAGAAATCATCATTCAGTGGGAGAGCGGAGATGAAACCAACCATCAGTATGCTTATCCACTGGCAATATTC

TTGGCTGCGATCCGATGTGGCTGTTAACTGGCGAGGTTACTCCTCCGGAGCAACCAAAAAGTGAGGAGCAGCAACACCAT  
GACGCATCTCAACAGTTTGGCCCTTATCTCGGAAGCTTCTCGGAAGAACAATACCAATGGTGA  
>Cluster\_20028  
ATGGCTAATATTTGGATACATTAGGGTATCGACTGTGCAACAAAACACAGACCGTCAATTAGCTGGAGTAACTCTTGATAA  
AGTCTTTGAAGATAAAGCGTCAGGCAAGAACACFCAGCGCCACAGTTTGAGGCAATGATGAACATATGTGCGGGAGGGTG  
ACGTGTTACACGTCATAGTATTGATCGCCTTTGTCGTAATACAGCCGACCTTCTGGCAACGGTTGAGCAATTAACAGAG  
CGCGGGCTGTCTGTGCATTTCCATAAAGAGACTTTAAGACAGGGAAGAACTTCCCGCAGGGAAATATGATGCTCACAGT  
GCTTGCAGCAGTGGCACAATGGAGCGTGAAATGATGCTTGGCGGCAACGTTGAGGGGATCGCCGAGCTAAGGCCGCTG  
GGCGTATAGCAAAAACGTTGTAATGGAAAAGCAATGATCGAGCAGGAAATGCTGCCGCTCTCGGAATGGTGGATCAATT  
CGGAGCGTAGCAAAAAGTTTCAAGTGTACAGTACAGACGGTGCACAGTATTAAGAAAAGAGCAGGAAGCGTAA  
>Cluster\_57710  
ATGCGCCTGCTCCTCTCGTTGCCGAGCGACAGCTGCATTTCTGGTCTGTTGCCGTCAGTTCTCTTACGCCGCCGCGTGG  
CGTAACAGTAGTGAATAAATTCGACGCCAAACGTTATCTCGGTACCTGGTATGAGATTGCCCGTTTTGATCACCGTTTTG  
AACGTGGACTGGA AAAAGTCACCGCAACATACAGCCTGCGTGTACGCGGCGCTGAATGTCAATTAATAAAGGCTATAAC  
CCTGACAGAGGAATGTGGCAGCAGAGTGAGGGGAAAGCGTACTTTACC GGCGCACCAACTCGCGCTGCCTGAAAAGTGT  
ATCTTTGGTCTTTCTATGGCGGTTATAACGTTATTGCATCGATCGGGAATACCGCATGCGCTGGTTTGGCGCCCGG  
ACCGGACTTACTGTGTAATCTTCCGCGCACGCCAACCTTTCTGACGAAAGTGAACAGGAGATGCTGCGAGTCCGCGACC  
CGGGAAGGGTTTGTATGTCAGTAAGTTTATTTGGGTACAGCAGCCCGTAGTTAG  
>Cluster\_27033  
ATGAATACCGATGCAATTGAGTGTGTCAGGGACGTTTGAACCGCATGAACAGTTTACAGGATGCAGCTCCTGTTTT  
TGCGGTCCCAGCGCTCAATACAGAGCGCCAAAGTGACGGATTACCCTGGCAATAAACAATCCCGAATGGGTTAAAA  
CAGCAACCAATAAAAACGCTCGACGATTTCACTCTGGAAAATGTGCTCAGCGATAACGTCACCGCCAGGATATGCGCAT  
ACCCCTGAAAACATTTGCGTATTACAGCGCGGATTTGCCAGAGATGCTGGTCTGATCGCCTGGCGATGAATTTTGAACGCGC  
CGCTGAGCTTACCTCAGTACCGGATGATCGCATCTCGAATCTACAATGCGTTACGCCCTTATCGTTTCGACTAAGCAAG  
AACTTATTGCCATTGCTGACGATCTGAACGGCGTTATCAGGCCAAAATTTGTGCTGCATTTGTCCGTGAAGTCCGGA  
CTTTATGTGCGAGCGCAAAAACGAAAGGCGACGATTA  
>Cluster\_47422  
ATGGCAGAGAAAACGCAATATCTTTCTGGTTGGGCTATGGGTGCGGAAAAGCACTATTTGGGCGCCAGTTAGCTCAACA  
ACTCAATATGGAATTTTACGATTCGATCAAGAGATTGAGAAAACGACCGGAGCTGATGTGGGCTGGGTTTTCGATTTAG  
AAGCGAAGAAGGCTTCCGCGATCGCGAAGAAAAGGTCATCAATGAGTTGACCGAGAAAACAGGATTTTGTGCTGGCTACT  
GGCGGGGCTCTGTGAAATCCCGTGAACGCGTAACCGTCTTTCCGCTCGTGGCGTTGTCGTTTATCTTGAACGACCAT  
CGAAAAGCAACTTGCACGACGACGCGTATAAAAACGCCCGTTGCTGCACGTTGAAAACACCGCCGCTGAAGTTCTGG  
AAGCGTTGGCCAATGAACGCAATCCGCTGTATGAAGAGATTGCCGACGTGACCATTCGTAAGTATGATCAAGCGCTAAA  
GTGTTGCAAAACGATTTTACATGCTGGAAGCAACTAA  
>Cluster\_49740  
ATGGACAGCGAGGAGCCTCCGAACGTTCCGGTTCGCTCGGGTGTATCGACGAGGTTGTGCGGCTGATGCACGACGC  
TGCGGCGTGGATGTCCGCCAAGGGAACGCCCGCTGGGACGTCGCGCGGATCGACCGGACATTCGCGGAGACCTTCGTC  
TGAGATCCGAGCTCCTAGTCGCGAGTTGACGAGCAGCGCATCTGTCGCGTGTGACCTTTGTCGCGCGAGGATCCGAGGTT  
TGGCCGACGCGCTCAAGGGGAGGCGCATATCTGCACAAGCTGCGGTTGCGGACGACACATGCGGGCCGCGGTTGTCAG  
CTCCGCGTGTGATGAGGCTTGGCCCATCCCGCGCAAGCAGGCGTGCAGGCTGCGGCTGCGGCTGCGGCTGCCACCCGAA  
TGCGTGGCTTATACAAGCGGCTCGGATTCACCCAGCTGCACACTTTCAATCCCGGCTGGGATCCAACCTTCATCGAGAA  
CGCTAGAACTCGAAATCTAA  
>Cluster\_29130  
ATGAAAAGACCACAACGCAAGGATTTAGCGCAGGCTGAAAAAATCTGCGCACAGCGTAATGTGCGCCTGACCCCA  
GCGCTCGAAGTGTGCGCCTGATGAGTCTGCAGGATGCGCTATCAGCGCTTATGATCTGCTTGATTGCTGCGCGAAG  
CTGAACCGCAAGCCAAGCCGCAACGGTTTATCGCGCGTGGAGTTCTGCTTGAACAAGGTTTTGTGCATAAGGTGGAA  
TCCACCAACAGTTTATGTCCTGTGCATCTGTTTCGATCAGCCACCCATACTTACGCCATGTTTTATTTGGATCGCTGCGG  
CGCGGTGAAAAGAAGATGTGCTGAAGGCGTGAAGACATCATGCATACGCTGGCGGCAAAAATGGGTTTTGCCCTGCGGC  
ATAATGTTATTGAAGCACATGGATTATGTTTACGATGTGTAGAAGTAGAAGCGTGTGCTCATCCCGAACAGTGCCATCAT  
GACCACTTATTCAGGTTGAAAAGAAACCTCGCTAA  
>Cluster\_29329  
ATGAGCTTACTCAACGTCCTCGCGGTAAGATCTGCCGAAGACATCTACGTTGTTATTGAGATCCCGGCTAACGCAGA  
TCCGATCAATAACGAAATCGACAAGAGAGCGCGCACGTTTCGTTGACCGCTTCATGTCACCGCATGTTCTATCCGT  
GAACTACGGTTACATCAACCACCCCTGTCTTGGACGGTGACCCGGTTGACGACTGGTCCCGACTCCGTACCCGCTG  
CAGCCGGGTTCTGTGATGTCCTGCTGCTGCTGCTGCTGCTGCTGCTGCTGCTGCTGCTGCTGCTGCTGCTGCTGCTGCT  
TGCTGTTCCGCACAGCAAGCTGAGCAAGAATACGATCACATTAAGACGTTAACGATCTGCCAGAGTTGCTGAAAGCGC  
AAATCGCTCACTTCTTCGAGCACATAAAGACCTCGAAAAGGCAAGTGGGTGAAAGTTGAAGGCTGGGAAAACGCAAGAA  
GCCGCTAAAGCTGAAATCGTTCCTCTCGAGCGCGCAAGAATAAATA  
>Cluster\_35611  
ATGGAACCTCAAAACATTACGCGTTACTACCCTGAAGACATGCCTTATGGTGACGGCATTGATATTTCCGTAGTGAAGA  
CGGGCAGGATTTTTATGAATCACTGGATAAATTCACGAAGAAATACAAGCTGTGCACGCATCTGAAACCGCGGTTATTT  
ATTCGCTGGCGGAAGATGATCCCGTCTTATCCCGTTGGTTTTACCATGTTGGAAGTGGATGAATACCGGATGGCTTT  
TGTATAGAGGCGCGTGGTATTATAAAGACGGTGAAGTACTACCGGCTCCTGTTGACTACAGGACAGCGAGAGTCCGGA  
GCGTGCACGCTTACTGCGATGCGGAAACGGGAAATATCCGATAAGAAGACGGATTTACTTTTGGAAATCATCGGTGATG  
AAGAAAAGAAAAGCTGACAGTCTGGCGCATTTACGCGAAATCGTGCAGGCGATGGATTTACGACCATCACTGATAAAA  
ACCTCATATAACGCCATTGAATGCCCCGCTCTCCGGAAGCCTCTTCTGA  
>Cluster\_48788  
ATGTTTACAGACTTTTATTCTCGCCATAATCAAACTTTTTTTCTGATAAGCTGGTTCCTACTCTGTACTCCAGCTTC  
TTCGGACCTGTTTTACAGACACCTAAAGCTACATCGTCAACGTTATATTTGATAGTTTGACGGTTAATGCTGGTAATG  
GTGTTTTCTTCTTCAATGATGATGATGATGATGATGATGATGATGATGATGATGATGATGATGATGATGATGATGATGATG  
TTTTGATGCGGACCTAAATTTTTTGCCTGTTGGTTCGCTTTGAGTCTTCTCCGTTCCGACTACCCCTCCGACTGCCTA  
TGATGTTTTATCCTTTGGATGGTCCGATGATGGTGGTTATATACCGTCAAGGACTGTGTGACTATTGACGCTCTCCCC  
GTACGCGGGCAATAATGTTTATGTTGTTTCAATGTTTGGTCTAACTTTACCCTACTAAATGCCCGGATTTGGTTTTCG  
CTGAATCAGGTTTTAAAGAGATTAATTTCTCCAGCCACTTAAGTGA  
>Cluster\_62300  
ATGATTTTATAATTTATCGCATCCGATCCGATCCGATCCGATCCGATCCGATCCGATCCGATCCGATCCGATCCGATCCG  
GAAAGCGTCAAAATTCGCTCTCTTCACTCACTATCTGACTCAATATCGATATTTGCCCGGAGCAGGAGCGCTGT  
CTCGCGCGATCTGATCGTCTGGCAGCACCCGATGACGTTGACGATTTCCACCGCTCCTCAAACTTTGGATCGATAAA  
GTTTTCTCGCACGGCTGGGCTTACGGTACGGCGCACGGCGTGCATGGCAACATTTGCTGTGGGCGTGACGACCGG

CGCGGGGAAAGCCATTTTGAATTTGGTGCATCCGGCTTTGATGTGCTGTCGACGCCGTACAGGCGACGGCAATCT  
ACTCGGGGTGAAGTGGCTGCCACCGTTTGGCATGCACTGCACCTTTATTTGTGACGACGAAACCCTCGAAGGGCAGGCG  
CGTCACTATAAGCAACGCTGCTGGAATGGCAGGAGGCCATCATGGATAG  
>Cluster\_16206  
ATGAACGAGAAAACCTTAGTCAACGAATTAGAGAAAAGCGCAAACAGGTTGGTTAAGTCAAACGATTTAAGCAAAGC  
TGCTGGCGTATCTGGCTCATCAATTTCACTATGGGAAAAGCGACATACAGCCCGCGGGGAAAATTTGCATCGCCTGG  
CTGAGGTATTGCAATGTTCCACCACTTGGATACGTTTGGTGACGAGGATAAAACACCAGATCCACCAGTTGCACTCAAC  
AGCGCCTTAGACTTATCGGAAGATGAGTTGGAGATGTTGCGATTTGATCGCGCACTTCCAAAAACAGAGCAGCAAGCACA  
AATCAGCGAACTCCGTGCCCGCTGAGAAATTTAATCGCCTATTCACCGAGCTACTAGAAGCTCGCAAACGTAACAAAC  
ATCAATAA  
>Cluster\_62594  
ATGACCATAAAAAGAAAATTTCTCACAAAATATCCCCATGCTTCTTTTGTACTTTTGGCGATTACAGCAGGTTGGCCGA  
TCACCTCGCAACGTTGATGCGACTGGTGTAAAACAGCTTCCGTGGTTTCGCTGGCGGGATGATTGAAAGACAAACGCAT  
TTCCGATGATTTGGTGAGTATAAGATTGTAGAAAATAGCCGTGGTGAGCCTGTATGTGTTATCAGAGTGATTGGCCTGCAT  
TTACTGCGCTTTTCTGATGTCACCGTGGAGCTTCCCGTAAGGAAAGGTGAAGGTGACCTCAGTCTTGAATATTGGCGTAA  
TGAACACCGTCTGTTTTTCCAGGCGAAGGAAGCTATTCACGAAAATGGACGTTATATTTGAAGAATATGCCCTTATTG  
ACGTTGTGTAG  
>Cluster\_28468  
ATGCAACGAGTACCATCACGCTTGATGACGATTTACTGGAGACGCTGGACAGCCTGAGCCAGCGTCGTGGTTATAACAA  
CCGTTCCGAGGCGATCCGCGATATCTGCGTAGCGCTCTGGCGCAGGAAGCCACTCAACAACCGGCACACAAGTTTCCG  
CGGTGCTGTGCTATGTTGATGAACACGAAAACCGCACTTAGCCAGCCGATTTGCTCCACCCAGCATCATCACCCAGAT  
CTCTCGGTTGCTACTCTGCATGTGCACATTAATCACGACGACTGCTGGAATCGCCGTGTTGAAAGGTGACATGGGCGA  
CGTGACGATTTTCCCGATGACGTCATCCTCCAGCGCGCGTGGCGCACGGGCATTTGCAGTGCTGCCGAAGGAAGATT  
GA  
>Cluster\_40727  
ATGAAAAATGATATTTGGTTCAGCGGTTGCGTGAGGAAAGGAAAGATTGGGACTTAGTCAAGTTGCCATGAGCGACATTGG  
TGGAGTCAAAAAGCTAACTCAGCTTAGATATGAGAAAAGGAGATAGCTTTCCTGATGCTGCGTATTTGGCAGCGCTGTCTC  
TFTTTGGCCTTGTGTTTCCAGTATGTTTGGGAATTCACCTGAACTTATAACGATGATGAGCAGGAGTTGATT  
ACTCGCTTTCGAGCAGCTTCCGTTAGATGTGAAAACCGCGTATTGGGGCTTTAAAAGGTGCGATCAGTGAAGGAAAC  
TCAGCCATCAGGACGTGAGTTAAATATTTCTGGTGGTAATAACCGTATCGCTGCTGCTGACTATAACGAACTAAGGGTA  
GGTGA  
>Cluster\_60345  
ATGGAAGGCGAAGTATAGAAAACAATGGGTTAGACATTTATGACACCAGCGAAAACCCGAAAAGCGCGGTCCGCCAGC  
TAAATATAATGAAAAAATAGCAACGCAAAATCGTCTATTTGGTAAGCGAAGGTTATAGTTTCCGCAAGATCAGCATGATGC  
CAGGGATCCGAGCCACCGTCAGATGATGCGCTGGCACTGGAGCATAATGGACTTCAGGGAAGGGATAGCCTGGATGTCG  
TGGCTATGGTGGCTGAACTGAGCTGGCCAGCTGCCCTGAGATAAATCGACGAGTTGATATAAACGACAGGATGGGCGCAA  
GCAGTTGCCGAAAGCAGAAGCAAAGGCAAAGGCACTACTGGCAGCAGCAAGCTGAATAGTTTGAACATTACCATTTG  
GAGATGACAAACAATGA  
>Cluster\_26069  
ATGACGCGTCTTGCAGAGATCCTCGACCAGATGTCGCTGTGCTTAACGATCTCAAAAAGGTAATGGATCAAGAGCAGCA  
ACATCTCTCTATGGGGCAGATCAACGGCAGCCAGTTGCAATGGATTACAGAACAAAAAGCTCTCTGCTGGCGACGCTGG  
ATTACCTCGAACAGTTACCGAGGAAAGAACCAATTCACGAAATAGCGTTGATATTAGTCAACGCTGGCAGGAAATTA  
GTGAAAACGACGCAACTACGCAAAATGAATCAACATAACCGCTGGTTACTGGAAGGACAGATTGAGCCGCAATCAACAGC  
GCTGGAAATGTTGAAACCGCATCAGGAACCGACGCTATATGGAGCGAACGGTTCAGACCTCAACACCCATCGCGGAGTA  
AAATGATTTTCGATCTGA  
>Cluster\_24784  
ATGCATGAGCTGGAAAGTCTGCTGAGTGCCTGAAAATGGAGCATCTGAGTTATCACGTTGAAAAGCCTGCTGGAACAGGC  
AGCTAAAAAAGAGCTGAAGTACCAGGCTCTGTGCATAGCGCAACAGCAGGAATGGAACGACAGGCATCAGCGCGGTATGG  
AGTCTGGCTGGAGCGCTCAGCTACAACAACGAGTTATGCCCGGTGTGATCCTGGATGAAATAGGCATCTGCCGATG  
AACAGAGAGGAAGCAGCCTGTTCTTCCGGCTACTGAACCGCTCGATATGAAAAGCGAGCATCATACTGACGTCAAACAA  
AGGTTTCGACAGCTGGGGAGAAATGTTCCGAGATCACGTTGCTGGCAACAGCGATCCTGGACTGGCTGCTACACTACATCA  
CTCAACCACGCTGA  
>Cluster\_16611  
ATGAGCGAAGCACTTAAAATTTGAACAACATCCGTACTCTTCTGTCGCGAGGCAAGAGAATGTACACTTGAACGCTGGA  
AGAAATGCTGGAAAAATAGAAAGTTGTTGTTAAACGAACTCGCGAAGAAGAAAGCAGCGCTGCTGAAAGTTGAAGAGC  
GCACCTGTAACGTCAGCAATATCGGAAATGCTGATCGCTGACGGTATTTGACCCGAACGACTGCTGAATAGCCTTGGCT  
GCCGTTAAATCTGGCACCAGGCTAAACGCTGCTCAGCGTCCCGGCAAAATATAGCTACGTTGACGAAAACCGCGAAACTAA  
AACCTGACTGGCCAGGCGCTACTCCAGCTGTAATCAAAAAGCAATGGATGAGCAAGGTAATCCCTCGACGATTTCC  
TGATCAAGCAATAA  
>Cluster\_9800  
ATGCTGAAGTTTATGCTCGATACCAACATCTGCATTTTCCAGATAAAGAACAAACCCGCGAGCGTCAGGGAGCGTTTTAA  
CCTGAACCAGGGGAGAAATGTATCAGTTTCGGTACCCGTAGTGAGCTGATATATGGTGCAGAAAAAGCCAGATGCCCTG  
AACGTAATCTCGCTGTGATCGAGGGATTTGTTTCCCGCATGATGTTCTGGATTACGACGCTGCCGACGCCACACACAGC  
GGCAGATAAGAGCAGAACTTGGCCGTCAGGAGCGCCCTGTCGGGCCATTTGATCAAAATGATCGAGGTCATGCCCGCAG  
TCGGGGACTGATTTGTTGACTAATAACACCCGGGAATTTGAACGTTGGACGGTCTGAGAATTGAAGACTGGAGCTGA  
>Cluster\_67033  
ATGAGAGCCATGAGTGA AAAAAGAAAGGATATGCAGATCCGGATATTCACGAAAAGCTATGTATCGTGTGATAATATG  
TGGAGCCTGTTTCTGATCGCTGGCTGATAAGTACTGGTTATGGCAGGGAATGTTTCCGCGCAATATATGGGAGCATA  
CCGGCGATACAGGATCGCTGGCATGGCTACTGACCCTGTTATTTATCGGGGAATATGCAACACTGAAACCTCGCATCAAT  
CTGGTATGACTACCTTATCCCTGGACTTCTATGCATGCACTTGGTTGCGGCTGCTATTTGTGACAGGTTGTCGGGACGTTACT  
GGATATTACGATGAAGGATTTGTCGTATCTTCAGAAAATGGAGGCAAAACAGCACGTCAGCCGGTAA  
>Cluster\_35763  
ATGACGGAAGATTTATTTGGTGATTTGACAGGATGACACCATCTGGCACATCTTGACAATCCCGCAGAGGATACGTCACG  
CTTTCCCGCACTGCTGGCGGAGCTGAACGATTTACTGCGCGGGGAATTTGCCCGCTGGGTGTTGATCCTGCCCATTCAC  
TGGAGATTGTTGTGGCTATCTGTAAGCATCTGGGCGCGGTCAGGCTACATTTCCACGCGGTCAGGTTCTGGACTCGCTG  
ATTCGGGATTTGGCTATCTGGAATGATTTTAAACGGTCGCAACGTCAGCGAACTGACCAACCCGTTATGGTGTCACTTTCAA  
TACGGTTTACAAGGCCATTCGCCGATGCGACGGCTGAAATACCGCAGTACCAGCCCTCACTTCTGTAA  
>Cluster\_41363  
ATGACACTCTTACACGCTCTCAGTTCGCGCGAATATACCGATATCTACTAAGTGCAGGAGGCTTACCCAAAAGA

GTTTGACGACATATTAAGGAAAGCCGGAATACAGAACCTAGTCGCGTTTAAACGCTGTTACGCAACGATGGGGAAATTC  
CTGTTGAGCAGTTTAAAACAGAGCGTATCACGTCACAGAACGCAATTTAGAAGCATAACCACAGCGATAAAGACGAAACA  
TTGAAGATCTGGAGGACGACGCCAGATATGTAAGACATTGCGTAAGGTAACATAACGTTGCTGTTGCGTGGGCT  
GGTGGGTAAGTGCCCTGAAGACCGCTTAGAACGTTTTACAAGGGTATGAAACCAAATACCTGTGA  
>Cluster\_53711  
ATGAAAAAGCTGCAAAATTCGGGTAGGTATTTTCGCAACGAGAACAATGAAATCTTTATAACGCGTCGCGCAGCAGATGC  
GCACATGGCGAAATAAAGTGGAGTTTCCGGCGGTAATAATGAAATGGGCGAAACGCCGGAACAGGCGGTGGTGGCTGAAC  
TTCAGGAAGAAGTCGGGATTACCCACACAATTTTTCGCTATTTGAAAAACTGGAATAATGAAATCCCGGACAGGCATATA  
ACTCTGTGGTTCTGGCTGGTCAAAGCTGGGAAGGGGAGCCGTTGGGTAAGAAGGGCAACCCGGTGAAGTGTGCGCT  
AGTCGGTCTTAATGCCGATGATTTTCCGCCAGCAATGAACCGGTAATGCGAAGCTTAAAGCTGTGTAG  
>Cluster\_67011  
ATGCCGAGACAAAACGTTTATATGAAACAAAAACACTTGATGGTATTGCTCAACTTGTGATGAAAGACTGGCTGAAGG  
AGCCACTCCGGCTGATGTTAATATGTCAAGTGTCTGTTCCGAATGCTGGAGACAGGATGCGCGTTGTACAGCAATTA  
AAAAGCGTGAACAGGAAGAGGAAAAAATGGCGGGTAACTGATGAGGAATGTTTTCGTAAGCGACTTCTGGAAGATGT  
ATGAAGAGTCGCCCTTACCACTCAGGCTATTTCTTAATGTTATGTTGATTTAACAGAAATAAAGTCGGATTCGCGCTATA  
CTATCATGAGATGATTTCCGAAGTTAAGAAGGAAATAAGGGAGTCGTTGACAGGAGTTTTTCCGAAAAAGAAATGA  
>Cluster\_19845  
GTGGCGTTTATCTGCGAGCTTGATGAGCAATGGAGCTACGTTGGCAGTAAAGCCCGGCAACACTGGATCTGGTACGCGTA  
CAACACAAAACAGGCGGTGATGCGCTACACTTTTGGTCCCGAACCGATCAACCGTCCGGGAGCTACTGGCACTGC  
TTACACCTTCAACATCGGCATGCTGACCAGCGATGACTGGGGCAGCTATGGCCGGGAGGTGCCGAAGAATAAGCATCTG  
ACCGCAAAATATTCACCAATGCAATGAGCGTAATAAATCTGACGCTACGCACCCGCAATTAAGCGGTTGGTCTGTA  
AATCTGCTTCTCAGCTCAGTTGAGATCCAGAAAAGTATCGGAGCGTTTATCGAAAAACACATGTTCTACTAA  
>Cluster\_32737  
ATGGCTGAAAATCAATACACGACTGGTCCCGCAAAGTTCGCGAGCTCGCGTTTTCATCAAACCGGCAACGGTAA  
AATCGTAATCAACCAACGTTCTCTGGAACAGTACTTCCGGTCTGAAACTGCTCGCATGGTAGTTCTGCTAGCCGCTGGAAC  
TGGTCGACATGGTTGAGAACTGACCTGTACATCACCCTTAAAGGTGGTGGTATCTCTGGTCAAGGCTGGTGCATCCGT  
CACGGTATCACCCGCGCTCTGATGGAATACGACGAGTCCCTGCGTCTGAACTGCGTAAAGCTGGCTTCGTTACTCGTGA  
CGCTCGTCAAGTTGAACGTAAGAAGTCCGGTCTGCGTAAGCAGCTCGTCTCCGAGTCTCACAACGTTAA  
>Cluster\_5376  
ATGAACGTTTAAAGACACGTTAATGCGATTAACATGGGAGTGTGCATTCTAATTTGGGTTATTGGATGTGCAATGCTAA  
AGTTCTTAAACGATGTATATTACCCGCTCCTGATGGTGGCGTAGAAAAACTATCAAACCCAACCTTACATGGAGTAATTA  
AAAAAGTTGATTTGAACCAAAATGAAGCGAAATTAATAAATAAAGAGGGGGGCGAGTGAATTTATTTTAAATGAGGAA  
ACATTGTATTTTACTGTTTTTGGTGGGGATTTTATTTATGATGATTTAAAAAAGTAAAAAATACGGAAGCATGGGTATG  
GTATAAAAATTCGATAGTAAAAATAAATATGTCGAGTTGAACCTTCTCAAATCTACGAATTCATCAATGA  
>Cluster\_18191  
ATGCGGCTTATTGATTATTTTCCAGAATATCAATCTCAGTTATACATTCACAAAAGACTGGCAGGAAGCTATCAATTT  
CTCGATGGCATCACTGTTAGCAAAAACATATACAGCGAGAATTACATTCAGGCTATTTAAAGATTCACCATCAGCAATG  
GTCCTTATATATATCTCGCTCCAGGCGTGGCAATGCTCATGCGCAGCCGAAATGTTGGGGCGCTTAAACCGGGATGCT  
TTGACGTTACTTAAACAAGGCGTTTATTTTCCGGGAAATGACGAACCGATTAATTAATCTCATCTGGGCTTCTGCTGCGGA  
TGCCAATTCGCACATTTGGCGCTATTCAGGCGTTAAGTGAATTAATCTGTCGGAAGAAGAAATACTCGAACCACTTAAACCG  
CATCATCAGAAAAACAATTAGTGGACATTTACGCGCGGATAA  
>Cluster\_38899  
ATGTTTAAAGCAATAACGACAGTCGCGCTCTGGTTCATCGCCACCAGTGAATGGCGCAGGATGATTTAACCATTAGCAG  
TCTTGCAAAGGGGCAAAACCAAAAGCGCGTTTAAATCAGATGGTGAAGGGCATAAGCTGCCGCTGGGTGATGAAAG  
GCGGTACTTATACCTCCCGCACAACCGTACATTTGGGAGATGAGACGATCAGGTGATGAGCGGTGCAAAACCGCATGAC  
TGTGGCTCGCAACGATCCTGCTGTGATGTTGTCGAGAAATCTAATCAGATGACGGGGCTGTTCTCGACCATGATGAGAA  
AACGTCGCAAGAGAAACTCACCTGGTTGAATGTGAACGATGCGCTTTCTATTGATGGTAAAACGGTGCCTGTTCCGACGCT  
TGACCGGCGAGCTTGAAACCATCCGGATGGCTTAAATTTAAATAA  
>Cluster\_49714  
ATGAAAAAACTAACCTTTGAAATTCGATCTCCAGCACATCAGCAAAACGCTATTCACGAGTACAGCAAAATCCTTCCAGA  
CCCAACCAAACCAATCGTAGTAACCAATTGAGGAACGCAACCGCAGCTTAGACCAAAACAGGAAGCTATGGGCTGCTTAG  
GTGACGCTCTCTCGTCAAGTTGAATGGCATGGTCTGCTGGTGGATGCAAGAAAGCTGGAAGTGTGTGTTTACCGCAGCATTA  
AAGCAGCAGGATGTTGTTCCAACTTCCGGGAAATGGCTTTGTTGTAATAGGCCAGCAACAGCAGGATGCGTGTAAAG  
CGAATTTGCGGAGCTATTAGAGCTTATACAGGCATTCGGTACAGACGCTGGCGTTAAGTGGTCAAGCAAGCGGACTGG  
CTCTCGAATGGAAGCGGATGGGGAGATCGGGCTGCATGA  
>Cluster\_58287  
TTGTTGAGGATTCAGGGGGCCAGTCTAGTAATATGCGTTTTATTCGTTCTGGCACAATAATCAGCAATGGCGTAAAAAT  
TGGTTTTGCCACCAGATTAATAATGCGGTTATTGAAGCGGAAGCAACGATTTGGTCCGCAATGTTTTATGGCAGCTCGG  
TAGTTGCAAAACAGGCAATTTTAGCGCACAAAGTACGTACAGTAATCATCGTCTGGATGAACAGCCGCTGTCTGTTTCA  
ACTCCAGAGGAAATATCGCTACCGGATGCGATAAATAGGTTGTTATATCGGGCAGCGTTACGCGCTTGGCGTACAAGT  
TATTATTTTCCGCTGGGCGAATTTTCCCGAACACGCAACTTGGCCCGCGGTGATTGTAGAAGCTAATTTACCTACCG  
GAACTTATTCACCTCCGACAAGAACTTATCCGTACAGGAGATTA  
>Cluster\_26008  
ATGGACGAAAAACAGTTACAGGCTCTTGTAAACGAACGTGTCAAAAACCTCAAACCCCTGAAGACCTCAGTCAGTTTGA  
TCGGCTGCTGAAAAAGCTCAGCGTTGAAGCGCTCTCAATGCTGAGATGACACACCATCTTGGGTATGAGAAAAATCAGT  
CCAGACTAGGAGCTTAAACCCCTAACGGTTATCCACAAGACCGTTATCACAGGCGCAGGCTCACTGCGTACGCTACT  
CCGCGGATCGTGACGGTACCTTCAACCAACTGGTAAAGAAAAATCAGCCCGTATTACCGGGATGGGTAACAGAT  
CCTCTCGTGTATGCCAAAGGGATGGCCACCGTGAGATAGCTGCTGCGTTCAAAGAAGCTGTATGACGAGATGTTTAC  
CGGCACTGATATCAAAGTTACCGATGCCGTGATGGAGCAGGTTGTAGAATGA  
>Cluster\_23882  
ATGATCTGGATAATGCTCGCCACGCTGGCGGTAGTGTGTTGGTGGTTTTCCGGTGTGACATCCGGGGCCAGAAAAGC  
GATTCGCCGCTCTAGCGATCGGCTGAACATCGATGTCGTTACCGTGGAGTCTGATGGTTCGATCAATGGGAAAGTCAGCGC  
GTGACGAATTTTACGTTATTTGATCAGCCCGGATGAGTGCACCTGCAAAACGCCGCGCAGGTTGCTCATCTGGCAA  
ATTGTCATTGTCGATGGTAGCGAACCACTGCTGCAATGCGGATTTTACAAAAAGCCGCTTGGCCGCGGAT  
TACCGATGCTCAGGTCAGGCTGGCGTGGGTTTTCTGCGGAAACCGAACCTGAAATGCAGGATATCAATGCTTTTCA  
TGGCTATAACGCTTCTTTCAGCTGCGAGGGCGTTCACTGGCTGCATTA  
>Cluster\_39758  
ATGGCCAACTAAAAATTAACCTCAATCCTGGTGGTTTGTACCGGCAACATTTGCCGTTCCGCCATGGCGAGCGCTTGGT  
GCGTAAACGCTCTGCCAGGCGTAAAGTCAAATCGGCAGGTTTTCATGGTCTGGTAAAGCACCTGCAGATGCAACAGCGG

CAGATGTTGCCGCTAATCATGGCGTATCTCTTGAAGGACATGCCGGACGTAAGCTTACTGCTGAGATGGCACGAAATTAC  
GATCTGATTTCTGGCAATGGAGTCGGAACATATTCTCAGGTTACGGCAATCGCTCCCGAGGTCGCGGGGAAGACAATGCT  
GTTTGGGCAATGGCTGGAAACAGAAAGAGATCCCGGATCCCTATCGTAAAAGTCAGGACGCATTTGAGCATGCTACGGTA  
TGTTGGAGCGCCAGTCAGGAATGGGCGAAGCGCTCAGCCGGTAA  
>Cluster\_27765  
ATGAGTAATAATAAAAAATATGGCTCCAGAATACTTGATATGGGTGTTCTGCTGGAAATGAAAGCGCTTGTGAATGCAAA  
TGGTGGTGTGTCACGGTGCATTATGGAGTGTGCGCAACTTGCCAGTGAGGTCCTCATTCGCAACAATTAAGTGGATAAGT  
TGTCATGTATTGACGACTGGCTGTGCGGGTTTTCTCAATAATGTATCACCGTTTTGATAAAGAACAGATTACAGTGGCGG  
GAGGATGTGGACAGGAATATCCAGAGAAAAGGTTTATATTTTCAGTCCCGATAATGTCTCCGTCCATAAATAATGATAT  
TAAAGACTCTGCCAATAACACATCAGGAATAACCGTGTGCGTTACAGCCAGTAAAATATGCGCAGGTCAGAAAGAGTTTG  
ATGCTTTTTTAAAACCTGGCAGAAAAACTGAGAGAAAACCTACGGGTAATTA  
>Cluster\_28838  
ATGCCGTGGCAACCATTAAAGCGATGCACTGAGCCGGGCTGTAATAAGCGCGTGAAGTCCGGCAAGTGAAGAGCACAG  
ACGGGCTGTATGGCGTGCAGAGGATGCCAGACGGGGACACCGCCGCGCGGGTATCCCGACAGTGGGACAAATACC  
GCGCCCTGTACTGAGCAAAAACCGTTATGCGTGCCTGTCTGGCTAAGGGGATTTATACGCCAGCTCTTGTGGTGGAT  
CACATCATCCCCATCAATGGCGGCGGTGATGTTCTTCTGGCCTGAGTGGAAACCACAGGCAATTGTGCCAGACGTGCCA  
CAACCGTAAGACGCACGGGAAGATCAGCCACGAAAGCAACCGTAAGCGGGCATGTATCGCGAGCAGGAAGAACGGG  
CAGCACACCGTAACGACTGGATGTATGGCGATGATGACTGA  
>Cluster\_1308  
ATGTACTGTACTGTTAAAGAGATCATCCGCGATGTACTGGATACAGACGTGCCGGACAGTGAATGCGTTTTTGGCGTGGT  
GCTGACCCCTGGTGTATGTCGCTACATAGCCAGGACTGGAGTCTGACAGACGATGAGCTGGAACCCGTCATGCAGCGGC  
TGGACGATGCTTTTGTATATGGCGCATGTGACAGAGTTGTTTCCGATATGTCAATGAACTGATGGAGAAAAGCGCGTA  
AACCCTTTGTAACAGTCCCTGCGGTGCTGCTGAAAAAGTGAATGGTGTATGGCTGGTAGTGAATTTATCGCCTCCATGC  
TGTCGGGAGCGAGAACGGGGCGACGGTACGCATTTGTCAGGAAGAACGTGAGATTATGCGGGTGTGCGTCAGGGC  
TGGACGGGAGAACGGGTA  
>Cluster\_50008  
ATGGCGACTGAGAAAAAGAAAGGTGGTCGCCCCCTGATTATATGCCGGAGGTTGGTAATGACATTTGCGCATTTGCTTTC  
CTCCGGTGGAGTCTGCCGAAAGTTTGGCAACGCCAGGAATGCCGAGCAAAAACATCAGTTTTTCGCTGGCTGGCTGAAC  
ATCAGGAGTTTCGTGACAGTACGCGAAGGCAACAGAGACTCGGGCCGACTCTATTTTGAAGAGATATTCGAAATGCT  
GACGACGTAATCCCTGATGCCGTGAGGTGGCAAGGCAGACTTCGCGTTGATACCCGCAATGGGCGCTGGCCAGAAT  
GAATCCCCGTAAGTATGGCGACAAGGTAACACGAGCTTGTCCGTAAGGACGGCGGCGCAATTCAGATTGAAACATCAC  
CGATGAGCACTCTATTCGAAAAATGA  
>Cluster\_46995  
TTGACTAGCATTTCTTAAAAAGAAATTTGATAGAGCCGTGTTTCTTTTTCAGCCGTCAGATGATGGCCGAGGAGAAGA  
AAGTTTTAATGATATTTTAAATCGCATAAAAAAAGAACACCTGACATTCGTTTCATACGAATGGCTTCTTTATGGAAC  
GATTTTCTACGCTTTCGGACAGAGCGTACTTTTGAACAAGGAGAGCGTTCATTTAGTATATTTTGGGAAAGTTA  
CGCGGAATTTGTTTAAACAATAAAATGTAGTAATGGAACATTTATCTGTCTATTACACGAACCCCAATAACAAAATCA  
TATTTTTTTATACATAAAAAAGAAATTTATTTGTGATAAGTTAAAAAGAAATCTTTCTGATGAACCTATTGAATTTCTCAA  
TTGAATATGAAAAATTA  
>Cluster\_3132  
ATGAAACCTATTCAAAGTTTTTGAATAATTTAGTTCAGACCACTTTTTTTTATTTTTTTCGGACTCTCACTTTGTGA  
ATTTTTTCAGAAACAATCTGTTCTGATGAATCCATCAGCAGATAACATCGCGAAATTAATTCGACGATGATATAGTTG  
TTTTTTTTTACTGGGATTTGAATGGCTAATCTCAAGTTCAAGTGAACCTTGAACCTCATGATCAAGGCGATATGGGA  
CCAACAATTGGAACGGCTACTTTAGCTGTATACCTAGTTTATGCTTTTCACTTTCTCAGTGAATAATCCTGAAGCATTA  
TTTAAAGTTATTAACCTCTGCTTTATATACAGCACAACTCTATTATTATCTCATAGAAATGCATGAAGCTTAGAA  
GACTTAAACAAAAATA  
>Cluster\_10061  
GTGTTGCAAGGCTGAGCTGAGTTTTGCCCTGAAACTGGCGCGTGAGATGGGGGACCCGACTGGCGTGCATGCTTGGCGG  
GATGTCATCCACGGAGTATGCCGACTGGCACCCTTTTACAGTACCCATATTTTCATGATGTTCTGCTGGATATGCACT  
TTTTCCGGGCTGACGTACACCGTGTCTGAGCTGTTTTTTCAGCGATCCGGATATGCATCCGCTGGATTTCAGTCTGCTGAAC  
CGGCGCGAGGCTGACGAAGAGCCGTAAGATGATGTGCTGATCAGAAAGCGGCAGGGCTTGGCGGAGGTTGCGCTTTGG  
CCCGGACGGGAATGAAGTTATCCCGCTTCCCGGATGTGGCGGACATGACGGAGGATGACGTAATGCTGATGACAGTAT  
CAGAAGGGATCGCAGGAGGAGTCCGGTATGGCTGA  
>Cluster\_57772  
ATGGCTAAGCACAGTTGGTTATTAATCGCCGATTACCTCTCTCCATTTACCTTCTGGGGCGCAGATTTTTATTACCG  
CCAGCAGGAGAAAGGCACGGTTTATGTTGCCGAACAGAAAGGAGAAAAGGATGAGATCCTCTCCGAACGCGGGCGTTA  
ATTTTTCCCGCTCTGGCGTATTGCCAATTTAGCCAATAACCAAGAAACCCGCTTACTGTCCGATTTTAAATCCCGATAAG  
TTCGATTGCGATGATCGGAATAATGCCCAGCATACTGGCTCCCGATGGACGCTCTGTCTTTGGTCTGGCAAGCTCT  
GAAAAATCCCGCGTGAACCTAATGTCGATGCCCGCAGTTTTTCAGGCATTCGGTGTCTTTCGCTGCCGATAAACCGCAGC  
TCTATTTTGCAGGTCAGGTTACCGATGATAGATGA  
>Cluster\_35322  
ATGAAAAAGAGTATATACAGCATTATCACGCAATAGAGCAGGATTTAATGATCCTGTTTCGAGTGTGTGCTGTA  
TCTTTTTCTTTTTCTGGTTAGTAAAGATGCTAAAAATATCAATCACTTTACATACAAAACCTTATCAATGGTTTAACT  
ATCTAACTGATACGAAAGATGACTATATCCTGCTAATAAAGCAACTGATATTTATCTAGCTATAAAGCACATCTATTG  
GATATGCATTTTCAATACATTGATAATTTAACGGAAAGAACCAATACCAGTTGAAGATGATCTTATTTCTATGCTTTAGA  
CACAGGAAGTTTTTACCATCCAGAAACTGGCAATTTGGTTGATAATTTTAGCCAGTATCTTTATCCATACTTTACTCCTT  
CGAGTCTTTTGGAGAGTCTGCATGAGTGA  
>Cluster\_176  
ATGGGTATAGATCCGTTTAACTTTGACAGCCTTTACTGGGAGTTCTTGTCTCAAAGATTGACTAAAAGACTCTGCAAAGA  
ATGCAAGGAACCTTATACCCCTTCAAGAAGAGATAGAACGTTTAAAAGAGAAATACGGATTTTCATCTACTAAACCTC  
TGACCGATGAAATGATTGAAAAAGCTACTTTTTTTCAGGCTGTAGGGTGTCTCAGTGAACATACAGGTTTTTAAAGGT  
AGGATGGCTATACATGAACCTTCTTATTCTGATGAAGAAATAAGAGAAATACATTTATAAAAAACAAACCTGCTAACAGAT  
TAGAACTTAGCTATCACTAAAGATTTACGACCTTAAACAAGACGGTATTTTAAAAGTTTTTAAAGCGGAACTACCT  
TAAAACAAGTGTCTGTTAACCCTAAGTAA  
>Cluster\_25109  
ATGACAGACTTTTACACAGCAGGGAAAGGACAAAATCAATCCGGTGGTGTTTTACACTTCCGCCGACTGATTTTGT  
GTTTTCCCTGCAACACTCTGTTTCCGACTTCTCGGCTTCTCGGCGGCTGGATTGGCCGACGCTGGACTGGGTTTCTAAAACCT  
TCGGTTGGTACTATCTGCTGGCGCAACGCTCTATATTGTCTTTGTGGTCTGTATCGCTTGTTCGCGTTTTGGTTCCGGT  
AAGCTCGGGCAGAACAAATCAAACCGAATTCAGTCTGCTGAGTTGGCGGCGATGCTGTTTTGCTGCCGGGATCGGTAT



CGACCTGATGTTCTTCTCCGTAGCCGAACCGGTAACGCAGTATATGCAGCCGCCGGAAGGCGGGACAGACGATTGAGG  
CCGCGCGTCAGGCGATGGTCTGGACGCTGTTTCTACTACGGCTTAAACCGGCTGGTCGATGATGCGCTGATGGGCATGGCG  
CTCGGATACTTTAGCTATCGTTATAATTTGCCGCTACATATCCGCTCGGCGCTGTACCCGATCTTCGGTAAACGGATTAA  
CGGGCCGATAGGTCAGTCACTAGTGGATATTGCTGCGGTGATCGGCACCATCTTCGGTATTGCCACTACGCTCGGATTCGGTG  
TGGTGCAGCTTAACTAGGCTTGGCTTGGAGCTACTGTTGATATCCCGATTTCGATGGCGGCGAAAGCGGCACCTAGCCTG  
TCGGTGATCATCGCCACTATCTCGGTGACATCCGGTGTGATAAGGGCATTTCGGTGTATCGGAACCAACGTTGCGCT  
GGCGCTGGGATGATCTGTTGCTGTTTATGGCGACACCTCGGTTCTGCTTAATGCACCTGGTGCATGAACTGGGG  
ACTATGTGAATCGTTTATGGGCATGACGCTCAACAGTTTTGCCTTCGACCGTCCGGTGGAGTGGATGAATAACTGGACG  
CTCTTCTTTCGGGATGGTGGGTCATGGTCCGCTTGTGCGGCTTGTTCCTGGCGGCTATCTCGCGTGGCGCTACCAT  
TCGCCAGTTCGTGCTGGGCACGTTGATTATCCGTTTACCTTCACGCTGTTATGGCTCTCGGTATTCGGCAATAGCGCGC  
TGTATGAAATCATCCACGGCGCGCGCATTTGCCGAGGAAGCGATGGTCCATCCGGAGCGCGCTTTCACAGCTGCTG  
CGCGAGTATCCCGGCTTTACCTTTAGCGCTCCGTCGCCACCATTTACTGGCTGCTGTTTATGTGACCTCGCGGACTC  
CGGTGCTTGGGCTGGGAAATTTACCTTCGCAGCTTAAAGATATCAACAGCGACGCACCCCGCTGGCTGGCTCTTCT  
GGTGGTGGCGATTGGCTGCTGACGCTAGGCATGCTGATGACCAACGGGATATCCGCGCTGCAAAACACCACGGTGATT  
ATGGGCTGCCGTTACGCTTTGTGATCTTCTCGTGTGGCGGGTGTATAAATCTCTGAAGGTAGAAGATTACCGCGC  
TGAAGGTGCCAACCGGATACCGCACCGCAGCCGCTGGGGCTTACGATCGCTGAGCTGGAAAAACGTTCTTCGCGCC  
TGATGAAATTAACCGGCGCGCTTACCTAAACAGATGATGGAGACGGTCTGTTATCCGGCAATGGAAGAAGTGGCGAG  
GAACTGCGGTTGCGCGCGCGCTACGTGGAGCTAAAAACCTGCCGCGGAAGAGGGACAAAGTGGGGCATCTGGATT  
GTTGGTGCATATGGCGAAGAGCAGAATTTGTCTATCAGATTGGCCGAGCAATATTCGGTCCCGGCTTTTACTTACC  
GCGCAGTAGCGGAACTCGACTACTACCGCTGGAAACCTTCTGTTAGAAGGCAGCCAGGGCAACGACCTGATGGAC  
TACAGCAAGAGCAGGTGATCACCAGATTTCTCGACAGTACGAGCGGCACCTTAACTTTATCCATCTCCATCTGTAAGC  
GCCGGCCATAGCTGATGTTCCCGGACGCGTGA

>Cluster\_17625

ATGTTTTATTACAGCAATGAGCTGGCGGCTTCTCGGTTTGCCTGTTACAGTTCAGGGGTTGCGCTGGACGCTCAATCG  
GATCACAGAGACGCCACCCAGAATGGAAGCGCAAGCGGAAGGCACAAAGCATTTCGAGTATCACATCGACTGCTGCCCG  
CTGAAGCGCAGAAAGTTTACGTAAGCGCTGACTCATCAGGTCCTGGAAGATGCACAACCTGCCCGCGTAGTTGAGCAG  
AAAGCAGTTAAAAACGTCGCGTTTCGCGATGAACTGGAGGTGATGGTCAAATGCCCGGAGCTGGCATTACGCGAAGTCCA  
GTCACTGACCCAGCAGCAAAAGGCCATCGCTGATGCGCGGATATGCTGGCTACTGAAAGTGCATAAGCTGCGCGAGTATG  
CCGGAATGACCAGGAAGGCCGCTTAAAGCACATCGTTGATGGTGTGCGCATGGGGCGTTTACCTGACCGCATATCGAA  
GCAGCGAATACTGCAAAATGCACGTCAGGGAAGCGAACCGGTGTCAGCACCGGCGAGCTGGATAGCTGCTACTCCAGCTG  
GGTGTGAGCGCGGCTGATGCCAATCAGTTACTGGGCTTACTGGCTCCCGCTCATATAAGGGAAACCGTGGGAGCAGG  
TCTGGTGGTTGAGCGATTCTTTATGTTTATCCGCTCATGGAAGCGCCGACTGTTGAATATGCGTATCGTGAATTTTCA  
GCCTGGTGGCATGAAAAACCGCAATGATGCGGGAATGCTGGCGGCACTGCCCTCAGTTCACGCAGTAAGACGGGTGTT  
AAGCAGCTCCCGGCTGATGTTAAAGAGCGTTTCCGCTCCACCGGTTACGCTGGCGTTCGCTCAATCCCTTTGTGCGCG  
CGGACTGGACATCATTACCGGTTAATGCGGTATGGTTCGGGATGGTCTACTGTATGAAAATGACCGCGTTTAAACCCCTG  
ACCGCAATATTTTCCGGCAGAAAGTGCAGCTGGTTGTTGAGTGGGGCAACGCTTTGTTGTTGGGCTGGTCTGCTCCCT  
GTCGGAGAACGTTGATAGCCGTTGCTGATGCGTTACGTTACGGCATGGCGCAGCACGGGATACCGCTGATTTATTTACTCCG  
ATAACGGGGCGGTTGAAAAAACCGGTTGATGCGGATATTTACCGGGATTCTGCCCGGCTGGGTTGGAACATCAC  
ACGGGGATAACAGTACCCCGAGGGCGCGGGTGTATGAACTGAACTGAAACGCGCAAAAGGAATACCAAGAGCTGGCTCTGAG  
TTTTCCAGACGCTATGCGCAAGGGATGACAGCAAGGAAACCGTAAATGATGCAGCAACCGGATTTGCAAGTCAAGCATTAAAG  
CCACCCACAAGGGAAGAACTGACAAAACGGCAGGTTAAGGCAGGGATGAAATCCACCTTTGAGCAACTGCTGGCA  
GCCATAGAGCTGGAGGTCAGACGCTATAACAACCGCCACACAGCAGCTACCCCGCAAGAGGATGGCGAATATTAAG  
CCCGGACCGTATCGCCGAAACGATAAAAGAGCAGAAATGTTGAAATGATTTCTGTCGCCGGAAGAACTGAAA  
TGTTACAGCCGGAAGTGCAGCGCAAAACATTTCCGGGGAAATTCAGTTATTTCAACAATATTTTACTCATATGATCTG  
GCCGACAGCAGCGGAATGAAGTCAAGGTCAGTTACGATATTTATGATGCAAAACAGCGTCATTGTCCGGCGGGCTGATGG  
CTCTTATATCTGCGATGCCATCTGGAACGGTAAACAGGTTGATGCCTTCGCTAAACAGTATTCGAACAAAACTGGAGA  
AAGCGCTCAGGGCGCATTTGCACGGGCTACCGAGAAATCGAAGAGGCTAAACCGCAGCTTACCCCGCTATTACCGCAG  
AAGCTGACTTTAATCTGGGATATGGACTGGAGCGCCGGAGAAAAGGAAAAGAACTTTATTTATTCGCATCTGA  
ACCGGAGCGCAATTTAAAGAAAAACGGCACAAACCAACCTTAA

>Cluster\_31998

ATGGAATCAATCGAACAACACTGATAGAACTGCGAACGACGCTTCGCCATCATGAATATCTTTATCATGTGATGGATGC  
GCCGGAATTTCCGACGCTGAATACGACAGGCTGATGCGCGAAGTTCGCGGAGCTGGAAACCAACATCCAGAATGATTA  
CGCTGATTCGCCATCCCAACGTTAGGTGCAGCGCGCTGGCGGCTTTCAGCCAGATCCGCCATGAAGTCCCAATGCTG  
TCGCTGGATAACGTTTGTGATGAAGAAAGCTTTCTGCTTCAACAACAGTGTGCAGGACCGTCTGAAAAGCAACGAGAA  
AGTCACTGGTGTGTTGAGCTGAAGCTGGATGGTTCGCTGCTGATGATAAATGGCGTTTATGTCAGTGGCG  
CGACTCGTGGCGATGGCACACCAGGGGAAGATATCAGCTTAATGTGCTACTATTCGCGCATTCGCTGAAGCTACAC  
GGTGAATATCCCGCGCGCTTGGAAAGTGCCTGGTGAAGTGTTCATGCGCAGCGGGGTTGAAAAGATTAACGAAGA  
TGCCGACGACCGGGCGGAAAGTGTTCGCTAACCCAGTAACTGCGGACGCTGGTTCACTGCTGAGTTCGCTGAGTTCGCGGTA  
TTACAGCGAAGCGACCGCTCACTTTCTGCTACGGCGTGGTGTTCGGAAGCGGTTGAATTCGCGGATACCCATTTG  
GGAGCTTAATGCAATTTAAAGCGTGGGATTAACCTGTCAGTATCGGGTAACTTTGTGAATCGCGGGAAGAGTGT  
GGGCTTACCACAAAGTGAAGAAAGACCGTCCGACGCTGGGCTTGTATTCGACGGCGTGGTGAATTAAGGTTCAACTCAC  
TGGCAGCAGCAGGACGCTGGCTTTGTCGCGCGTCCCGCGCTGGCGGTAAGCTTTAAATTCGCGCGCAGGAACAG  
ATGACCTTTGTCGCTGACGCTGAGTTTACGTTGGGCTACTGGCGGATTAACGCTGTTGCGCGTCTGGAACCTGTCCA  
TGTGCTGGCGTGTGGTGAAGTACCTACACTCATAATGCTGACGAAATCGAACGCTTGGTTTACGATTTGGCGATA  
AAGTGGTTATTCGCGCGCTGGCGACGTTGATCCCGAGGTTAAGTTCGCTGCTTTCGAAACGCGGGAAGATAACCGT  
GAGTTGTATTTCCGACGCAATTTCCGTTATGTTGCTGCTGAGCTGAGCGTGTGGAAGGTGAAGCGGTTGACGCTGAC  
CGGTGGCTGATTTGGGTTGCGCAGCGTAAAGAGTCTCTGAAACACTTTGTTTCCCGCGTGGATGGATGTTGACGGAA  
TGGCGCAGAAAATCATCGATCAACTGGTGAAAAAGAAATATGTCACACTCCGCGGATCTGTCAAACTCACCGCAGCG  
AACTGACCGGACTGGAGCTATGGGCGGAAATCGGCACAAAACGTTTAAACGCGTGGAAAAAGCGAAAGAAACAC  
CTTGGCCGCTTCTCTATGCACTTGGCATCCGTAAGTTCGCGGAGGCTACCGCAGCAGGCTGTCGGGCAATTTCCGCA  
CGCTGGAAGCGTGAAGCCGCTGATTAAGAGCTGCAAAAAGTGCCTGATGTTGGAATGTCGTTGCCCTCCACGTT  
CACAACTTCTTTCGCAAGAAAGCAACCGCAATGTCATCAGCGAGCTGTTGGCGGAAGGTGTTCACTGACCTGAGCCGAT  
CGTTATCAATGCGGAAGAGATTGACAGTCCGTTGCTGGTAAAAACCGTGGTGTACGGGCGCTTACGGGCGACTTAAGCCAGATGTCG  
GTGATGACGCTAAAGCTGACTGGTCAACTGGGCGGAAAGTTCGCGGCGAGCTGTCGAAGAAAACCGGATCTGGTGATA  
GCGGGTGAAGCTGCAGGATCTAAACTGGCGAAGGCGCAGGAACGGGCATTGAAGTCACTGACGAAACGGAATGCTGCG  
TTTGTGGTGTAGCTGA

>Cluster\_44640

ATGTTACGTAATGGAATAAATACTCTGATGCTGGTGGTGAATATAATGCTCACCGGCTGCATTAGCCAGTCAAGAAC  
ATCATTTATACCGCCACAGGATCGGCAATCTTTACTCGCGGAGCAACCGTGGCGCATATGGTTTTGTGAGCATTTCAT

GGCATAACGTTGAAGACGAAGTCCGACCAGCGTTTTATGTGTCAGTGCAGGACATCAGCACTGCGTGAACAATTTGCCTGG  
CTGCGCGAGAACGGTTATCAACCGGTGAGTATTGCTCAAAATTCGTGAAGCACATCGAGGAGGAAAACCGCTACCGGAAAA  
AGCTGTAGTGTGACTTTTGTATGACGGCTACCAGAGTTTTTATACCCGCGTCTTCCCAATCTTCAGGCTTCCAGTGGC  
CTGCTGTATGGGCCCCGTCGGCAGTTGGTTCGATACCGCAGCGGATAAAACAAGTAAATTTGGCGATGAGTTGGTTCGAT  
CGAACAATTTTGGCCATGCAACAGTGCAGAAAGTTCGCGCTTCCCGGCTCGTTGAGCTCGCTTCCGCGGTTAATACCGCA  
TTCTCAGTACGGTATTACAGGCTAATGCCACCGGAGCTTATTGCTGTATATGTAAATCGTGCATATTTTACTGACCAGC  
CACGGTATGAAACCGCAGGAGAAATCCGGGAAAGAATTGCTCTGGATGCTGTAAATGACGGAATACCTGCGTACAAAG  
GTTGAGGTAATCCACACGTTTTTGTGGCTTATGGCGAAGCGAATGGCATAGCGATAGAGGAATTAAGAAACTCGG  
TTATGACATGTTCTTACCCTTGAATCAGGTTTTGGCAATGCGTTCGCAATTGATTCACCCGCTCAGGTGTAACACATCTAATCGCG  
ATAATCCCTCATTAAGAGTTTTGCCAGCAAAATATTACCGTACAGGAAAAATCACCACAACGGATAATGCATATCGAT  
CTTGATTACGTTTTATGACGAAACCTCCAGCAATGGATCGCAATATTGATGTCTAATTCAGCGGGTGAAGATATGCA  
AATATCAACCGTGTATTGTCAGGCATTTGCTGATCCCGATGGTGTGATGGCTGGTCAAAGAGGTCTGGTTTCCAAATCGTT  
TGCTACCAATGAAAGCAGATATTTTAGTTCGGTTGCTTGGCAATTACGTACCCGCTCAGGTGTAACACATCTAATCGCGTGG  
ATGCCGGTATTAAGTCGGATTTAGATCCACATTAACGCGAGTAAATACTTACCAACAGGGGAGAAAAAGCACAAAT  
TCATCCTGAAACAATATCACCCTCTCTCTCTTTCGATGACAGAGTCCAGAGCACAAAGTTGGCATGTTATATGAAGATCTTG  
CCGGACATGCTGCTTTGATGGCATATTGTTCCAGATGATGCTTTGCTTTCAGATTAAGAAGATGCCAGTGCACCGGCT  
ATCACGGCTTATCAGCAACGAGGCTTTAGCGGGAGTCTGAGCGAAATTCGACAAAAACCGGAGCAATTAACACATCTAATCGCG  
CCGCTTTAAAGTCGTGCGTTAACTGACTTACCTTTAGAACTTAGTGCAGCGTAAAGCCATTCGCGGTCCACATATTA  
AACTGACAGCAATATTTTGCACCTCCGGTAAACAACTGAAAGTGAAGCCGTTGTCACAGAAATATGCTGATTTTC  
CTAAAAGTATGACTGGACCGCTATTATGGCTATGCCCTATCTGGAAGGTGTCGAGAAAAATCGGCTGACCAATGGTT  
AATACAAATGACCAATCAAAATTAAGAACTCCCTCAGGTAAAGACAAATCTATTTTGAATTAACAGGCACAAACTGGC  
AGAAAAATGGTCAGCATCAGGCTATTTCTTCGCAACAACCTGCTCACTGGATGAGCCTATTACACTGAATGGAGTGAAA  
AATATGTTTATATCCGCAAAATTTCTGCAATAACCAACCTGAAATAGACCTTATTCTGCTCTGAGTTTTCAACAGCCTG  
GTATCCGAAAAATGATTA

>Cluster\_30750

ATGAGCACAAAATTCAGAACCGTTATCACCCTGCGGTCAGCAAACTGGCAGCGGCAACCGCACCGGGAGGGCGGAA  
GGTCAACATTTACCAGATGGCGGTCGGGGATGGCGGTGTAATTTGCTGTCCCGGATGCCGGACAGACCGGGCTTATCC  
ACGAAGTCTGGCGACATGGCTGAACAAATCAGCCAGGACAAACGAAACAGTAAATTAATTAATTCGACAGCTGGTTAT  
CCGCCGAGGTTGGCGGTTTCTGGATGCGTGGCTTGGCTGTACGATGATGCGGGAACGTTAATGCTGTGGCGAACAT  
GGCCGAAAGTTAATAGCCAGCTCTTGCAGAGGCTCAGGGCTTCGACAGCTGCGGTATGGTTCATCATGCTCAGCAGTG  
TGACCTCAGTGGCGGTGACCATTTGACCCACAACCGGTGATGGCGAGCAGGATTACGTTGATGACAAAATGACAGAACAT  
GAACAGTCCAGACGTACCCCGGACGCTTCCGTCGACCCGAAAGGTTTTACTCAGTTAAGCAGTGAACCAACCAACGCGCTC  
TGAAACACTGGCTGCAACCGGAAAGCGGTAAGGCGCGTATGACCTTGCTAACGGGAAATATACTGCGCAGGATGCCA  
CCACAGCGGAAAGGCTTGTCCAACTCAGTAGTCCACCAACAGCAGCTGTAACCGCTCGCCGCAACACCAAAAGCG  
GTAAGGCGCGTATGACCTTGTAAACCGGAAATACACTGACAGGACGCCACCACAGCGGAAAGGCTTGTTCAGCT  
CAGTAGCGCCACAGCAGGATTCTGAAACGCTGGCGCAACGCAAGGCGGTAAGGTTGCGTATGACCTTGTCAACG  
GAAATACACTGCACAGGACGCCACCACAGCGAGAAAAGGCTTGTCCAGCTCAGTAGCGCCACCAACAGTGTATCTGAA  
ACGCTTGGCGCAACCGGAAAGGCGGTAAGGTCGCGTATGACCTTGCTAACGGGAAATACACTGCACAGGATGCCACCA  
AGCGCGAAAAGGCTTGTTCAGCTCAGTAGCGCACCAACAGTATCTGAAACACTGGCCGCAACCAAAAGCGGTGA  
AGTCTGCTATGACAAATGCTGAAAACGCTTTCAGAAAGATCAGAACGCTGCGGATATTCCTGATAAAAGATTTCTCTG  
CGCAATATTTGGAGCAACAAATTCACCAACATGCTTTTGTAGTGGTGTACAGGATGGTTTACGGCTGGCAACTGTAACCA  
TATCCACAGGCTGCTCCGTTTACATAAGCCTGATTTGGTGGTCCCGGATATAATGTTAACTCCCTATGACAGGCTGGTA  
GCTTGAACCTTGTCTTCTGCGGAAATGAAATCAAAAGGTTTACTGCTGCGTTATGGCGACGGACATCGGTTGGA  
TTTACTAATTTTGCATGGGTGAATACATCCGGTATACCTATGATGTTTATGTTGAAATAGGTAATTACGCCACAGGTGT  
TAATATTCAGTGGGATTAACAGTAACGCCAGCGTAACGATTATACATACCAACTTATACAGCGAATAAACCAACAG  
GCCTGACAGATGGAACGTATATGTAATTTACAGTTCGTACATTAACCGACTGCTGCTGATGTTGGGCGCTTATCATA  
TCTGGTGGTCAATTTGAATGGTGCCTGCGGTATAGGAACATCAGTGTCTTGGCGGTAATTCGATTTGTTGGTGATAA  
TGACACGGGCTTTAAACAAAATGGTGTGATGTTAATCTGGATGTTTATGCTAATAGCGTCCATGTTATGCGCTTTGTCTCCG  
GAAGCGTTCAAAGTAATAAACATAAATATACGGGGCGTGTAACTCCCTCGGATTACGGTAACCTTTGATTCGCGCTAT  
GTGAGAGATGTCAGACTTGGCACAGCTTGTTCAGACCATGCAGAAAGGGGTGATGATGAGAAAGCAGGGCAGCTAAT  
TACCGGGCTTGGTATTGTCGGTGAAGTCGATGGTATGACCCGAGTATTACAGCAATAACAAAATACATCAATGGCA  
CATGGTATAACGTCGACAGGTGTA

>Cluster\_64790

ATGACCGGAAACGCTTAAAGCGTCACTATTATTGACCTTAATGGCAATCTTTCCCGGCTTCCGCCAGTATTCGAA  
CCAGATAAACGCCCTGTCCCGTAGTGGGCAAGTTCCCTGCGTCCCTGCGTATGGAAGTGGTGCAGGCTGCTGGTGCCA  
TTGACAGAAATGGGTTCCCTCTCAACCCGTACATTCGAAATGCTGTCAGCCGGGCGCTGGGTGTTGCCGGGTGGGTTAC  
ACCGCAATAAACTGTTTTATCAGCGCAGCAGCTCAACGTGAGCAGCAGATTTATCGCAATGAACTCGCTGATCAGCGGCA  
TAAGCCAGAGCGCAGCAATGATGGCTTGGCGAAGCAGAACGCAAGGATACCACGTTGGGGCTGGCGCGCTTCTGG  
ATGAAATTCGCTCGTCAAAGGCTTTGGCATGACGGATGAAACAGACGAAAGCAGTTTATCACCATGTTGACGAGTACGGG  
GCATTTACAGGTTGGGATTTATCTGCTGCGCAGGGGCTCGCTGCAACTGAAACAGATGTTCCGCCGCGCAGCAATCAC  
AGCGGCAGATGCCAACCTGCTGACCGGCTACGGTATCAACGTTTACCAGACACTGGCTGATGCGCTGGGTAAGACGTTA  
AGGAAATCCGAAAGCAAGGGGAAAAAGCAAACTGGGGCTGAAAGTGAAGTGCATTCCTGATGGTATTACGGGCGCTGACAACA  
TCAAAAGGCGCACAGGCCGAGCATGAACTCGTGGTCAAGGATGACGGCACAGATGGAGGCTAACTGGAACGAGTTTGC  
CGTCAAGGTTGATGAAACAGCGCCCTTTTGAAGAAATCAAGAATGAGATGCGCCGGGTGCTTAACTGGCACGATGCGGCG  
ATAAATCCGGGGAGCTTGATAAACCGGCTGATGAAATTTGGTCAGAAATTCCTGACCACATTCAGAACCTGAAAGCTGCG  
GCACAGGATTTATGGCTTGGCTGAAACCGGCTAAAGATGCGCTGGCATGGGTTGACAGAAATATTGTCAGCTGAAAGAA  
ACTGGCTGCTGTTCTGGTGTCTGCTGCGCTTGGCAATAAAGCACTGAGGGCGGGCTGGGCCGTTGGCAAGCCATCATGGC  
AGGTTGCCAGTATCCGTTCAAAACCGGCGCTGATGTTGGCGCTGGATGCGAAAACGCAAACTGGGCGAGCAGGCATT  
CCGGCACCGGATGCGCTACCTGCTACAGAACTACTGCGGGAACGACAGTTTACGCGCTTTTGTGACTAATGGCCCAA  
CGGTTCCGTTGGATGAGCGGATTTTCCGATACGGAGTAAACACCGGACAGTATGCCCCGCGCAGGCTTATGCTGT  
CCGGGCCACAACCGCTGGCACTTCCGGCCCCACGCACTGTTCCCGATTAACAGCACGAAACCACTGGCATTACCTGCA  
CCGCTCCGGTATGGCATTTGCCATCTCCGGTGGCTGGGGGCCACAGCGCACGATCGTTACCTTTGCCCGGCAAACT  
CGGCTGTTGAGCAGGCTTGCAGGCACTGCTCCGGCAACTGGTTACGGGAAACAATCGGAAAGCTGGCTGAAAGCGGCT  
GTACCTTTGGAGGTTGTTTTCCGTTATCGGAAACAACTCGCAGACAGTGCATGGGTTGTGACGTTGGGAGGGGCG  
GGGCGCTGGGCTGGATGGGAAAGGCGGGTCTGCACTGTCAGTCTTGGCGGCTCGGTTGATGGGGCGCTCCAGCT  
TGCTCCCGTTCTGATGGATGAACAGGCATCAACTCATGAGAAAGCCGGAGCAATTTGGCAGCACTGCGCGCCCTGGCTCG  
CGGTTCCGTTGGCAGCTTGGCGGACCTTGGCGACGTTGCGGTTGCCAGCTGGCAGTGTGCGGGGCAATATCTG  
GGCGGTTTTGTGACTGACCTGATATCAGAAATGGACGGCCCCGAAAGGAAACCGAGGAGCAAAAGTGAATGCGGAAGC  
ATCGTGGCGCTGAGCTTGGCGAAGGATACGCTGACCACTTCCCGCTCACCGAGGATGGTATGGGGCTGAAATTTT

ACGGGGCGATAACTACATTACAGGCTGGTAA

>Cluster\_42407

ATGTGGCGAGACTGATTTATCACCCGATATCAACTATGCACCTTCGACAACGCTGGTGCTATGTTTGGCCGTGGCCGT  
TGGTTAATGCTTTGGCGAATTACGATTCGGCCTGCTCTTCTCCCTCGTTCCCTGCTGTTGCAATATTGGCGGCCTTGATA  
CGCCTCAAAACGTTTTTTCAAACGCTTAATCAATGGTGGTCCGCTGTTTGGCCACCTGTAGCTTGCTGACACAGGTGCTA  
CTGGCAAAAAGATGTTCCCTGCCCTTTTTGCTGACCGGATTAACGCTGGTACTTGGCGTCACTGCTGAGCTGGGGCCATT  
GCACGCAAAATTGCTTCCCGCATCGCTGCTGCGCCGCAATTTTACCCTCAGTCTGGCGGGATAACATGCCGGTCTGGGAAC  
CGTTGCTCATCTATGCGCTGGGCACTTTTGGTACGGATTGTTAACTGGTTTTGGTTCTGGATCTGGCGCGAACAACCCG  
CTACCGGACTCCTAAGTCTGCTGTACCTGCGCTGACTGCTGGCTGATGACATTCCTTACCATCGCCTGCCAACCGCTTTACGA  
CGACCCTGAAAAAGCGCTGCCCGCTGCTGGTGGCCAGCAAAAAGCGGTCGATTTAATTACCCAGTGTATCAGCAAA  
TGCATATGCTTTCCCGCGCAAAATAATACCGATTACAAGCGGATGCTGCGTATTTTCCAGGAGCGCTGGATTTGCAGGAA  
CATATTTCCGCTCAGTTTGCATCAGCCGGAAGAGGTGCAAAAAGCTGGTGCAGCGTAGCCATGCCGAAGAAGTTATCCGCTG  
GAATGCGCAAAACCGCTGCTGCTGCGCTGCGCTGCGCTGCTGGCTGATGACATTCCTTACCATCGCCTGCCAACCGCTTTACGA  
TGGAAAAGCAAAATGGCGCACTGCAAAAATCGCCCGCAACACCCGGATAATCCGGTGGGCAATTCGCTACTGGCAT  
TTCAGCCGATCGCTGCTGCTGCGCACCCAAAACCGCTCTATGCCCGTGACTTACGGCCGATAAACAGCGGCGAAT  
GCCATTACTTCCGGCGTGAAGAATTATCTGTCACTAAAGTCTCCAGCGCTACGCAATGCCGGACGACTCAGTGTGATGT  
TAAGCGTTGCCACCGCTGATGGGCAACCCGCTGCATTCGCGAAGTCTGCTACTGGATCCTGATGACAGTATTGCCGTCAGC  
CAAAATGGCTATGGCGCAACCCGCTGAGGATTGTAATCGCTCCGTTGGGAACCGTGGTCCGGTTAATCATTCAGCGCT  
GACGCTACTTTAAAATTCGGAAGGTTACACCTGACTTGATGCTGATTACACCCCTCGCCAGCTACCTGATATTCC  
GCAAAAATACGGCTGGCGCAGTGGTTTTACTATTACCGCAGTATACCTGCAACTGTTGTGGTGAACGGTGGAG  
CAGTACATCTTCCGCTTATCGATACCATTTATGGTTGTTTTAATTGCTTTTCCGCGTACTGTGCTGCTGGCCGGA  
GTGGCAGAGCGGTTATTTGGTAAAGACGCCATGACGCTTTAGAAGCTATCAGGACCGGATTCGCTTGATTCTGAGCG  
AGGACCCGCAACCTACGCCACTGGCCTGGCAGCGAATGGCGGTAATCAGGCGCATAACACTCTGTATAACTCATTTGAAT  
CAGCGGATCGAGGAACCGGCTTAAACAGCCATTATCTGGCAGATATGAAACTGTGGTTAACGCACAGCCAGTTATTGT  
TGAGCATATTAATGCCATGACCAGCTGGCGGGGAACACCCGGCATTGCCACCGGAAGTGGCACAAGAGTATTTACAGT  
CTTGTGAAATCGCCATTCAGCGTTGTGACGAGCGACTGGAGTATGACGAACCGGGTAGTTCTGGCGATGCCAATATCATG  
GATGCGCCGGAGATGACGCGCAGGAAGCGCGCAGGTACGCTGGAGCAGCATTTACAACGGGTTATTTGGTCTATCTGAA  
CACCATGCACACCATTTCTGTCGATGGCATGGCGGCAGCCAGCATCACGGGATTTGGCTGAGTCGCAAGTTGGCGGATT  
CGAAGGCGTAA

>Cluster\_20958

ATGAAGAAGAACTTTATCTTTTAAAGTGCCTGGCCATTGCCGCTCCAGTGCCTGTCATGCTGAAGTATTAACCTACCC  
GGATCCGCTGGGGTTCGTGCCAATCAGACTTTGGCGGCACAGGATGTTGCAGATGCCAATGCCGCGCATCGCACCGGAAG  
GTGAATTCAGCGTCAACTACCGGATAACGATCAATACCGTTTTACTCCACGTCCTGGCGCTGTTCCCATGGCTGGAA  
GGCACCATTCGTTATACGGATGTGCGCACACGCAAAATATAGCCAGTGGGAAGATTTACGCGGCGATCAGTCATACAAAGA  
CAAACTTTTCGATTTTAAACTTCGCTGTTGGGAAGAAGTTACTTGTACCAGTGGCGTTGGTAAACGTTGATATTG  
CTGTCACGGCTCTGTTTTGACGGTGAATATTTTGGTGGCCAGCAAGCAAGCGGGCCATTGATTTCACCCCTCGGGATGGCA  
TGGGGCTACCGGTAATGCGGGCAATATTAACCAACCCGTTTTGGCGGTTGAGCGATAAAATATGTCATCGTGCAGGTC  
TCACGATGCGGGCATATCAGCTTTAGCGATATCTTTCTGGCCGGCTTCCATCTTTGGCGGATTGAGTATCAAACCC  
CGTGGAAATCCCTGCGTTCGAACTCGAATACGACGCAACAATACAGAATGATTTGCTGGCAACTGCTCAGGCA  
AGCCATTTCAACGCTGGTGCAGTTTATCGCGTGGCAGCTGGGCGAGACCTCAACCTCAGTTATGAACGGGTAACCGTT  
GATGTTGGTTTACTTTACGGACCAATTTCAACGATCTGCGCCCTGCGCTGCGGATACGCCAAAACCGGCATATCAAC  
CTGCGCTGAATCTGAAGGATTGCAAGTACACCGGTAGCAACAACCACTTACCGCCCTGAAGTATAACCGGGCTTTGAG  
CGCCGAGAAATTCAGTTCGCGGATAAGACGCTGTATATGCTGGTGGCAATAACAATAACCTGACTCTGTTGAAGCGGT  
CGATCGTGCAACCGGATTTGTTGAATAAACCTGCCGCAAGCGTTGAGAAGATTAGCGTGACGCAAAAAGCGCGAGCATA  
TGGCGATGTTGACTACCGAAACCGACGTAGCCAGCCTGCGCAACAGCTGGCCGGTACAGCGCTGGTAAATCAGAGCAA  
CTGCAACAACAACGTTGGAAGCAGAAGATCTTTCTGCCTTTGGTGGGGCTACCGTATTCGTTGAAGTACGCTTTAGCTA  
CTCTTTCAACCCAACACTTTACAGTCTGCGTGGCGGCGGAAAGATTTCTATACTGTTCCAGCTGGGGCTGATGTTCCAGG  
CCCGCTACTGGTTTACCAGCACCTGCTGCTTGTGAGCGGATTTTACCACATATTTACAATAACTACGACAAGTTTAAAG  
TCTTCACTATTACCAGCGGACTTACCCTCCCGCGCTGCGCACGATATCCGTGACTACGTTTCGCAATGACGCTTTATCT  
CAACAACCTGCAGCGCACTATTTTGGCAGTTAGGCAATGGTTTCTATGGCCAGGTGATGGCGGTTATCTGGAACCGA  
TGTACCGGGTGTGCTTCCGAGCTGCTTTATCCCGCTGATGTCAGCTGGCGCTGGGTTGGACGTTAACTACGTG  
AAGCAACGTGACTGGGACAACATGATGCGCTTACCAGTATTTCCACACCCACAGGTTTCTGTCAGCGCTTACTGGAACCC  
GCCGACGCTCAACGGCGTACTGATGAAACTCAGCGTTGGGCAATATCTGGCAAAAGATAAAGGCGCAACGATCGACGTCG  
CAAACGCTTTGACAGCGCGCTGGCGGTAGGGGTATGGCGGCAATCAGTAACTATCTAAAGATGACTACGGCGAAGGC  
GGCTTTAGTAAAGGTTTTTATATCTCGTTCGTTGCTGACTGATGACCATTTGGACCTAACCGCAACCGCGGTGTTTC  
GTGGACACCATTTGACGCGTGTGTTGACAAATGCTGTCACGCAAAATACCAGCTCTATCCAATGACGGCAGAGCGAGAAG  
TACCGGTTGGACAATAA

>Cluster\_22431

ATGAAAACCGTCTGTTTTTGCCTACCACGATATGGGATGCCTCGGTATTGAAGCCTGCTGCTGCCGGTTACGAAATTAG  
CGCATTTTTACCATATGATAACCCGGTGA AAAAGCCTTTTATGGTTCCGTTGCCGACTGGCAGCGGAAAGAGGCA  
TTCCAGTTTATGCGCCGGATAACGTTAATCATCCGCTGTTGGGTGGAACGCAATTGCCCAACTATCACCAGAGGTGATTTTC  
TCTTTTATATCGCCATCTTATTTGCGATGAGATTTTGCAGCTGCTCCGAGAGGTGCAATTAATCTGCATGGTTCGCT  
GTTACCAAAATATCGTGGTGCAGCGCGCTGAACTGGGTGCTGGTGAACGGTGAACGGAAACTGGCGTTACATTGCACC  
GAATGGTGAACGTTGCCGATGCCGGGCGATTGTTGGCACAACCTGCGCTTGCCTATGCGCCAGACGATATCGCCATTAGC  
CTGCATCATAAATTTGGCATGCCGCGCGCCAGTACTGGAACAGACATTAACCGCAATTAACACGGTAATATTTCTGGA  
AATCGCCAGCGCGGAAACGGAAGCCACCTGTTTTGGTCCGAGAACGCGGATGACAGTTTCTCGAATGGCATAAAGCCG  
CATCCGACTGCACAACATGGTGCCTGCGCTGGCGATCCGTTGGCGGGTGCCCTCAGCTATGTTGGTAATCAGAAATTT  
ACCGTCTGGTCTGACGCGTGCATTTCTCATGCGCCGCGAGCACAAACGGGGAGCGTATTTCTGTTGCCACCTGCTGAT  
TGCTGTGGCGATGGCGCGTGGAAATCGTCACTGGACAGGCGGGCAGCGCAATTAATGACAGGCTCGCAATTAGCGC  
AGACCTGGCGTGGTGCAGAGTTACGCTTGAATAGCCAGCCCTGCTGTCGCCGCGAGCCGCTACCGGTAAGCTACTC  
CTCGGGTGAATGGCTTTATTTGGCAACCATCTGACAGAACCCTGCTGCGCGAAGATCATTTATGAAGTTTACGGTCTGGA  
TATTTGGCAGCGATGCGATAAGCCGTTTTATGAATCATCCGCAATTTTCACTTTGTCGAAGGCGATATCAGTATTTCAATCCG  
AATGGATTGATATCAGTCAAAAATGTTGATGCTGCTTTCCTTTGGTGGCGATAGCCACGGCATTGAATAATACCCG  
AACCCGCTGGCGGATTTTGAACCTGATTTTCAAGAGAACTTCCGCAATTTATCCGCTACTGCTGTAAGTACCGTAAGC  
CATCTTCCCGTGCATTCAGAAGTTTATGGGATGTTAGCGATAAATACTTCGATGAGGATCATTTCTAATTTAATCGTCC  
GCCGGTGAATAAACACCGCTGGATTTATTCGGTGTCTAAACAATTAATGATCGGGTATCTGGGCCATGGCGAAAA  
GAAGTTTACAGTTTACCCTCTTCCGCGCTTTAAGTGTAGGAGGTTACCTGATGGGCGCAGCAGTGGATAACCTTAAATGACGCGAATTTG  
CAGCTCCCGCTTATTACGCAACTCATTTCTCAATCTGGTAGAAGGTTACCCGATTAAGCTGATGATGGCGGAAAAA  
AACGCTGCTTTACTGATATTCGGGATGTTATCGAGCGTTATACCGCATTTATGAAAATGGCGGAAATCGCTGCGATGGC

GAAATATCAACATTTGGCAATCTTGAGAACGAAGCGAGCATTGAAGAACTGGGTGAGATGCTGCTGGCGAGCTTCGAAAA  
ACATCCGCTGCGCCATTACTTCCACCGTTTGGCGGCTTTTCGTGTTGTGCGAAAGTAGCAGCTACTATGCGAAAGGATATC  
AGGACGTAGAGCATCGTAAACCGAGCATCCGCAATGCCCGCCGCTGCCGAGCTGGGAACCGAAAATTGATATGCAGGAA  
ACCATCGACGAAACGCTGGATTTCTTCCGCGCACCGTTGATCTTACGGATAAACCATCATGA

>Cluster\_28588

ATGATTATTGCGACTGCCGGACACGTTGACCACGGCAAAAACCTTGTGTCAGGCGATTACGGGCGTAAATGCCGACCG  
TCTGCCGGAAGAAAAAAGCGCGCATGACCATCGATCTCGGCTATGCCTACTGGCCGAGCCGGATGGTTCGCGTGCCTG  
GTTTTATCGACGTACCCGGTTCATGAAAAGTTTCTTCCAAACATGCTGGCGGGCGTGGTGGTATCGATCACGGCTGTTG  
GTGGTGGCGTGGATGACGGTGTGATGGCACAGACCCGTGAGCATCTGGCGATTTTGCAGCTGACCCGGTAAACCGATGCT  
GACAGTGGCGCTGACCAAAGCCGATCGCGTGGACGAAGCGGTGTGATGAGGCTGAACGCCAGGTAAAGGAGGTGCTGC  
GGGAATACGGTTTTGCTGAGGCAAACTGTTTATCACCAGCAGCAACCGAAGGTCGGGGAATTGATGCCCTGCCGAGCAT  
CTGCTTCACTGTTACCAAGCTGAACAGCCAGCCAAACATAGTTTCCGCTCGCGATCGACCCGCAATTTACCGTAAAAGG  
TGCCGGGCTGGTCTCACCGTACCGGCTTAAGCGGGGAAAGTAAAGTAGGCGATTCACTCTGGCTGACTGGTGAATA  
AACCGATGCGCGTGGTGCCTGCATGCGCAAAATCAGCAACAGAACTGCCATGCCGGGAGCGTATCGCGCTTAAAC  
ATCGCGGGTATGCGGAAAAGAGCAGATTAACCGTGGCGACTGGCTGCTTGGCGATGTCGCGCGGAGCCGTTACACAG  
GGTATCGCTGAGCTTCAACCCATACACCGTGAACCGTGGCAGCCGCTGCATATTTACCAGCCGCGCAGCCAGCTTAA  
CGGACGCTGTTCCCTACTGGAAGATAACCTTGGCAGCTGGTGTTCGACACGCGCGTGTGGCGGATAACCGATCCG  
TTAGTGTGCGGATATCTCGGCCGCAACACGCTGGCGGGGCGGTGTGGTATGCTTAAACCGCGCGTCCGCGTAA  
GCGTAAGCCGGAATATCTGCAATGGCTGGCGTCTTTGACGGGCGCAGAGCGATGCCGATGCGTTATCTGTTTCACTG  
AACGCGCGCGGTTAACCTTGCAGATTTGCGCTGGCGCGCAGCTCAACGGCGAAGGATGCCGGAATGCTGCAACAG  
CCTGGCTATATTACGGCTGGTTACAGCTTGTGTAATGCGCAGTTGCGCCCGCTGGCAGCGGAAAATTTCTCGACAT  
AGCGACTTATCATGAGCAACATCGCGATGAACCTGGTCTTGGCGCGCAACGCTGCGACGTATGGCTTGCCAATGGAAG  
ATGAAGCGTGGTACTGTTGCTGATTGAAAAGTAGCGGAAAGCGGCGACATCTCAGTCATCACGGCTGGCTGCATCTG  
CCGATCACAAGCGGGCTTACGCAAGAGCAGGACGATCTGGCAAAAAGCAGAGCCGCTGTTGGTGGACGACCGTGG  
GTGGTGGCTGATCTGGCAAAAAGAGACGGAAACCGACGAGCAATGCGCTGACTTACGCCAGGCGCGCAGCAGG  
GGATAATTACCGGATCGTTAAAGATCGTTATTACCGTAACGATCGGATGTGCGAATTTGCCAATATGATCCGCGATCT  
GATCAGGAATGTGGTTCAACCTGCGCGCGGATTTCCGCGATCGCTTAGGCGTAGGCCGCAAGCTGGCAATTCAGATTCT  
GGAATATTTGACCGCATTTGGCTTTACGCGCGCTGCGTGAATGATCATTTATGCGCGACGCATTATTTCCGAAAA  
AATAA

>Cluster\_7764

ATGGCCTTATTACAAATTAGTGAACCTGGTTTGGTGTGCTGGCCGCATCAGCGTCTGCTGGCGGCGGTTATTGACCTGGG  
CACAAACCACTCGTGGTGGCGACAGTGCAGCGGTCAGGCCAAACGTTAGCCGATCATGAAGGCCCTCACCTGCTGC  
CATCTGTTGTTCACTATCAACAGCAAGGGCATTGGTGGGTTATGACGCGCTACTAATGCAGCGCTCGATACCGCAAC  
ACAATTAGTCTGTTAAACGCTTATGAGGACGCTCGCTGGCTGATATCCAGCAACGCTATCCGATCTGCCTTATCAATT  
CCAGGCCAGCAAAAACCGCTGCCGATGATTGAAACGGCGGGGGCTGCTGAACCCGGTGGCGGTTTCTGGCGACATCC  
TCAAAGCACTGGCGGCGGGCAACTGAAGCCCTGGCAGCGAGCTGGATGGTGTAGTTATCACCGCTTCCGGCGTACTTT  
GACGATGCCAGCGTCAAGGACCAAAGACGCGGCGCTTGGCGGCTTACAGTCTGCGCTTACTTAAACGAACCGAC  
CGCTGGCGCTATCGCTACGGGCTGGATTCCGGTCAAGGAGCGTGTATCGCGTATTGACCTCGGTGGCGGGAGCTTTG  
ATATTTCCATCTGCGCTTAAAGTGCAGCGGCTGTTGAAAGTGTGCTGGCAACCGGGTGTATCCGCGCTCGGCGGATGAT  
TTCCAGCATCTGCTGGCGGATTAACATTCGCGAGAGCGGGCATTTCTGATCGTAGCGATAACCGCTTACGCTGAACT  
GCTGGATGCCGCCATTGACGCAAAATCGCGCTGAGCGATGCGGACTCCGTGACCGTTAACGTTGCGGGCTGGCAGGGG  
AAATCAGCCGTGAACAATCAATGAACCTGATCGCGCACTGGTAAAACGAACCTTACTGGCTTGTGCTGCGCGCTGAAA  
GACCGGGTGTAGAAAGCTGATGAAGTGTGGAAGTGGTGGTGGCGGTTTACTCGCGTGGCGGCTGAAAGCGGTAACG  
GGTAGGCGAATTTTTCGGTGCCTCACCGCTGACTTCCATCGACCCGATAAAGTGTGCTGATTTGGCGCGGATTCAGG  
CGGATATTTGTTGGGTAACAAGCCAGACAGCAAAATGCTGTTGCTTGTATGATGCCACTGTGCTGGCGCTCGAAACG  
ATGGGCGGCTGGTGGAGAAAGTATCCCGTAAATACCACTATTCGGTGGCGCGGCTCAGGATTTACCACCTTTAA  
AGATGGCTCAGACCGCGATGCTATCCATGTAATGCAGGCTGAGCGCGAACTGGTGCAGGACTGCGCTCAGCTGCGGTT  
TTGCGCTGCGTGGTATTTCCGGCGTACCAGGCTGGCGGTGCGCATATTCGCGTACGTTCCAGGTCGATGCCGACGGCTT  
TTGAGCGTACCGCGATGGAGAAATCCACCGCGTGGAGCGCTATTCAGGTCAAACCGTCTTACCGTCTGACCGATAG  
CGAAATCGCTTCGATGATCAAGACTCAATGAGCTATGCCGAGCAGGACGTAAGGCGCAATGCTGGCAGAACAAAAAG  
TAGAAGCGCGCGTGTGCTGGAAGTCTGCACGCGCGCTGGCTGCTGATGCCGCGCTGTTAAGCGCGCAGAACCTCAG  
GTCATTGACGATGCTGCCGCTCACCTGAGTGAAGTGGCGCAGGCGATGATGTTGACGCCATCGAACAGCGATTAAAA  
CGTAGACAACAACCCAGGATTTCCGCCCTCGCGCATGGACCAGTCCGTTCTGCTGCGCTGAAAGCCATTTCCGTTG  
ACGAGGTTTAA

>Cluster\_5998

ATGAACACCACATGACACCCGAGATCTCGATCCCGTGGCAGGCCATGCTGCTGACTTTACGGGATACCGGCTAGC  
CCGATTTGCTGAAATGCTGGCGGAGAAAGTTGCAACCGTTCACAGCTGGAAAAACCGCACAAGTGGGGTGCATATGGGC  
CGTGGATCAGATCGAGTCAACACCGCGCAGCTACTGCGAGCTCATATGAGGAGCACAAGAAGGGAAGAAATTTT  
AAAGAGATTGACCTGCTGGCGCGCAGTCCGAAACCGCCAGCGCGGATCGGCAAGTTTAAACAATGGCGCAACGAAAGCCGA  
CTTAAACCTAACGCTGCGCAACCGCAACAAGGCGCGCGCTCAGCCGGAAGAAGTGTTCACCGATGAGCAGATTG  
AGAAGCTGGAAGAAATTTCCATTTCTCCATGTTCAACTACAGCACCCTGGTGGGAAGCCGAAAAACCAACCGCATC  
CGCAACCTGCTGAAGTCAAGCAGATCGCGCGGACCTTTTACTTTGCGCGTGAAGCCCTGATTGACGCTCTGCTTACCG  
ACGTAACCAAAATTTCTTTCCGCCAGCAAGGCACAGGCCACGCTTTTAAAGCAGTACATCATGACTTCTGCTAAAGAG  
TGGAGGTGGAGCTGAAAGGCGATCCGATGGTGTCTTCAACGGGGCCAGCTTTACTTCTCGCACCAATGCCCGCAGC  
GCCAGAGTTATCACGGCAACCTGTATCTGGATGAATATTTCTGGATACCGAAATTCAGGAGCTGCGCAAATGGCTT  
CGGTATGGCTATTTACAAAAAATGGCGACAGACTATTTTCCACCGCATCCAGCCTGACACACAGTGTCTTAACTTCT  
GGTCCGGTGGCTGTTCAACCGTGGCGCAACAAGCCGATAAGGTGGACATCGACTGTCCACAGCAATCTGGCCCC  
GGCTGCTGTGCGCAGACGGACAATACCGCAGATAGTCAACGTTGAAGATGCGGTGCGCGGCGGCTGTAACCTGTTCCGA  
CCTTGACCACTGCGCATGGAATACAGCCCGGACGAATACAGAACCTGCTGATGTTGAGTTCTGTTGACGATCTCGCG  
CCGTTCCCGCTCAGCAACTGACGCGTGCATGTTGGAGCAGTTGGGAAGTCTGGACCACTTTCACTGACCTGGCCG  
CGCCGTTTGGCTGGCGCAAGTATGATCGGTTATGACCCCGCAAAAGGTACTCAGAACGGCAGTGCAGGATGCGT  
GGTGGTGGCAGCCAGCGTACCGGGCGTAAATTTCCGATTTCTGAGCGTCAACGTTGGCGCGGGATGGACTTCCGCG  
CTCAGGCTGACGCCATCAAAAACTGACCGAACAGTACACGCTGACTTATATCGGATTCGACTCAACCGCGCTTGGTCA  
GGGTTTACGGAACGTTGAAAGCATTTCTTTCTGCGCTGGGAGTTTGTCTACAACCCCAACGTTAAAAACCGCTTGGT  
GCTCAAGGCTACGACATTTACGACCCCGCTGAGGTTTGGAGTTCGACCGGGCACACCGACATTCGCGAATCATTTATGG  
CAATCCGTCGCGTACCACCGCCAGCGGCAACCGCCGACTTGAAGCCAGCGCAGGAAAGCCAGCCAGCCGAT  
CTGGCTGGGCAACGATGCAGCAGTGTAAACGAACCGCTGCAGGGCAATCCGCAATGCCAGCAATTTGTTGAGAT  
TTTTTGA

>Cluster\_40838

ATGAATGCTGCCCTGACTGAACGACTGGTTTATGTGCCCCGCGGGCAGCTGACGCGGGCATGGTAAACCGGTTGCAAT  
ATACGACGCTGCCTGTGCTGAACTTGGCATGTCCCGCGCCACTCTGCTGCGCAGGCTGAAGGAGATCTCTGTGACTGATA  
AACGAAAAAACGCGCCGATGCCGGGCGCAGCGCCCTGACCCGCGACGAGCCGCGCTGATATCTGCCACACTGCGTGAG  
GCCACCGCAAGAACCGTAAAGCGTCTCTATTCCATCGCAGATGCAGTGGAAACCCCTGCGGGCTAACGGCTTTATCACCCG  
AGGCAGAACAGATGAAACACACAGTGGATTTTTCCCGTGTCTGAAGATGCCATCAGCCGCTGCTGCGTAAAGCGGC  
TGACCCCGGAAACAATGGATGCCCTGCACCACATACCAGAGTGGCCAGTCTGCATCCCAATCATGTCTGGCAGATTGAC  
GCCTCACTCTGCACGCTTTACTACTTGAGCAATGGACATAAAGGGCTGCAGGTGATGGACAGCGCGAAGTTCTACAAGAA  
CAAGCCCGCTAACCTTGCCTGATCGCCAGTACCGCGTGTGGAGTTACGAGATTACCGACCATGCCAGCGGCTGGATTT  
ACGTTGAGTATGTGACGGGCGCGGAATCAGGTGAGAACCTGTGTCTGTTGCTTATCAACGCCATGCAGGAGCGTGGCGGC  
GCAGAGTGTGCACGGCTGCCGAAAACTCTATCTCGACCCCGGCTGGCAAAACCCGCGGGTATGACGAAAAACAT  
GTGCCGCTCACTGGGCATCGACCTGATAGCGCACAAAGCCGATAACGCCCGCGCCACCGGACAGGTGGAAAAGCGCGT  
ACATTTATCGAACGCAAGCTGGAGCCGGTCTGAAGTTCGGCCGGTTCACAGTCTGGAAGAACCAACGCGCTGGCCGCG  
AAATGTCGACCGCTTTTAAACGCCACGGTGTTCACAGCCGCCACGGTAAAACCCGACCGGATATCTGGCTGAAGATTAC  
TGCTGAGCAGCTGAAAAAAGCGCTTCCGTTGAGGTATGTCGTGAAGTGGCTGTGGCGGACCAGAATCCGCAAAGTCA  
CGCCAAAACCTTCGTGTCTCGTTCGCGGGCACTGAATTTGACGTATCAACGGTACCGGGCGTACGGTTGGTAAAAAATCT  
ATGATTACCCGTAAACCAAGCGCAGGATGTGGCAGGTGTTGACCGGTGAGGACGGCCACGAGACGTTCTTCCCT  
GTCGAAAAGAGTCAAGAAAGCAAGCTTTGGCTTTGCTGAAGGCGCGCGGTATTGGCGAAAAGTTACAAGAGCCGCGC  
AAACCCCGCACAGATGGCGGCAAAAGAAACCGAAGCGTGGTTACCGGTACAGACAACCGCCGAGATGCAGCCGCGCA  
CGCAAGGCGAAGGCGCTGCCGTTTCGCGGGCGGCTTGACCCGATAAAACATATCGACGACACCACACTTCGGGCTATAT  
GCCGAAGCGTGGTACGGCTGACGTACGCGGGCGGCACCTGAACAACGTCATGACTCATGTGGAGGCGCGGAAAG  
CCCTGCGGATAAGTTACGCGCCGACGGCTTACTGGACCGCGGAACATTACCGCCAGTTAACGGCACAGTACCGCGGAC  
GGCTACCGGAAGCCGACTGGATGAAGTATGGCCACGCTGACCACCCGCGCCGACGAGTGTATCAGCATTTGTTAA  
CGGCAACTGA

>Cluster\_23500

ATGATTGTTTTTCTCGTTACAAATTCGTCGCGGGCTGCGGCTCTGCTGGATAATGCCACCGCCACCATCAACCTGG  
GCAGAAAGTCGGCTTGGTGGGTAATAACGGCTGTGGTAAATCTACCCTGCTGGCATTGCTGAAAAATGAAATCAGCGCCG  
ACGGCGGACGCTACACCTTTCGCGGAAGCTGGCAACTGGCGTGGGTGAATCAGGAAACACCGCGGTTACCGTAAAGCGCG  
CTGGAATATGTCATTTGACGGGACCGCTGAATATCGTCAACTGGAAAGCGCAGCTACACGACGCCAACGACCTAACGCGG  
GCACGCCATTGCGACCATTCATGGCAAGCTGGATGCTATTGACGCATGGAGTATTGCTCCCGTGCCGCGCAGCTGCTGC  
ACGGCCTCGGTTTTAGCAATGAAACAACCTGGAGCGCCGCTAAGTGAATTTCTCCGGTGGCTGGCGTATGCGTCTAACCTT  
GCCAGGCGCTGATTTGCGGTTACAGACTTGCTGCTGCTCGACGAACCGACTAACCCACTCGATCTCGATGCGCTTATCTG  
TGGGAAAAATGGCTGAAGAGCTATCAGGGCACCGCTGATCCTGATCTCTCACGATCGCGATTCTCTCGATCCGATCGT  
ATAAAATTTATTCATATCGAACAACAAGCATGTTGAGTACACCGGCAACTACAGTTCGTTTGAAGTACAGCGCGCCACC  
CGTCTGGCGCAGCAACAAGCGATGATGAAAGCCAGCAGGAACCGCTGGCGCATTTGCAAAAGTATATCGACCGTTTCCG  
TGCCAAAGCCACCAAGCGAAGCAGGCCCAGAGCCGATCAAGATGCTCGAGCGTATGGAGCTGATTTGCCCGCGCAGC  
TTGACAAAACCGTTTTCTGTTTTAGCTTCCGAGCGCCGGAAGCTTCCCTAATCCGTTATTTAAAGATGGAAGAAAGTACGCGCA  
GGCTATGGTGATCGCATTATCTCGACTCGATTAACCTGAATCTGGTCCCGGCTCGCGCATTTGGTCTGTTAGCCGCAA  
CGCGCGGGTAAATCGACATTAATCAAACCTGTTAGCCGCGCAACTTGGCCAGTACAGCGGTGAAATTTGGTCTGGCGAAAG  
GGATCAAGCTCGGCTACTTCGCCAGCATCAACTGGAATACCTGCGCGCCGACGAATCGCTATTCACATCTGGCCAGCT  
TTAGCGCCCGCAGGATGGAAACAAAACTGCGTACTACCTCGCGGCTTTGGTTTCCAGGGCGATAAAGTAAACCGAAGA  
AACGGCGCGTTTTTCGGTGGGAAAAAGCCCGCTGGTGTGGCATTAAATGCTGCGAGCGTCCGAATCTGCTGCTGC  
TCGACGAAACCGCAACCACTTACCTCGACATGCGTTCAGGCACTCACTGAAGCATTAATCGAGTTCAAGAGCGCGCTG  
GTTGTCGCTCGACGACCGTCAATTTGCTGCTGCTTCCACACTGACGATCTCTACCTGGTTCACGATCTTAAAGTAAAGC  
GTTTCGACGGCGATCTGGAAGATTATCAACAGTGGTTGAGCGACGTACAAAAGCAGGAAAAACGACCGACGAAGCGCCAA  
AAGAGAACCGCAACAGCGCCAGGCACGTAAAGATCAGAACGCTCGGGAAAGCGGAGCTGCGTGCAGCAACCCAGCCACTG  
CGTAAAGAGATTGCCCGTTCGAAAAAGAGATGGAGAAGTGAACGCGCAACTGGCGCAGGCGGAAGGAAACCTGGCGCA  
CAGCGCAACTGTACGATCAAAAGCCGTAAGCGGAGTTGACCCGCTGCTGCAACAGCAAGCCAGCGCAAAATCCGCGCTGG  
AAGAGTGCAGAAATGGCATGGCTGGAAGCCAGGAGCAGCTTGGACAGATGCTGCTGAAAGGCCAAAGCAACTGA

>Cluster\_2137

ATGCGGTTGTTTTATTTGCCGAAAAACCGGATCTGGCGCGGCCATTGCTGATGCTCTGCCCAAACCGCACCGTAAAGGCGA  
TGGCTTTATCGAGTGCCTTAATGGTCAAGTGGTACCTGGTGTATCGGTCACCTGCTTGGAGCAGGCGCAGCCAGACGCT  
ACGACAGCCGCTATGCGCGCTGGAATCTTGGGATTTGCCGATTTGCCGAAAAGTGGCAATACAGCCCGGACCTCC  
GTGACCAAAACCTTAACGCTCATCAAACGCTTCTGATGAAGCCAGCGAAATCGTTCACGCCGGGACCCGGATCGTGA  
AGGGCAATTTGCTGGTGGATGAAGTGTGACTATCTGCAACTGGCACCAGGAAAAGCGCAGGTTGCAAGTGTGCTGTA  
TAAACGACTGAAACCGAGCGGTTGAGCGGGCGATGACCGCTTCTTCGTTCCAACAGTGAAGTTTGTGCCATTGTGCGTT  
TCTGCGCTGGCGGAGCGCTGCGGACTGGCTGTACGGCATCAATATGACCCGTGCGTATACCATTTCTCGGTGCAATGC  
CGTTATCAGGGCTACTTTTCGTTGGGACGCGTGCAGACCCGCTGCTCGGGCTGGTGGTGGCGCGCATGAAGAGATTG  
AAAACCTCGTGGCGAAAGACTTCTTTGAAGTCAAAGCGCATATCGTGACACTGCCGATGAGCGGTTTACCGCTATCTGG  
CAACCGAGCGAAGCGTGTGAACCGTACCAGGATGAAGAAGGGCGCTTGTACATCGTCCACTGGCGGACGATGTTAA  
CCGATTAGTGGTCAACCGCTATTTGTCACCAGTATAACGATAAACGGGAATCAGAAATCCCGCGCGCTGCGGTTTTCCG  
TTTTCGCGTTGACAGATTGAAGCGGCAAAACCGCTTTGGTCTGAGCGCGCAGAACGCTTGATATCTGCCAGAAGCTGTAC  
GAAACACACAAGTTAATCACTTATCCGCTTCCGATTTGCTGCTATTGCGCAGAAGAACATTTTCCGCGACGCCACCGGT  
GATGAATGCCATCAGCGTTCATGCACCAGATCTGTTGCCGACGCGAGTGGTAGATCCAGATATACGCAACCGCTGTTGGG  
ATGACAAAAGGTCGATGCGCACCGCATCATTTCCGACCGCAAGGAGTCTGCGATCAACCTGACGGAGAAGCAAGCG  
AAGTCTATAACCTGATTTGCCGTCAGTATCTGATGCGAGTCTGCCCGGATGCGAGTGTCCGCAAGTGTGTTATCGAAT  
GGACATTTGCCAAAAGGCAAAATTTGTCGCTAAAGCGGTTTTCTTCTGCTGAAGCAGGTTGGCGCGGCTGTTAGCGCAAG  
AGCGCGATGAAGAAAACGACGGCAGCCATTGCTGTTGGTGGCGAAAGCGGATGAGTTGCTGTGTGAAAAAGGTGAAGTG  
GTAGAGCGCAAAACCGCGCGCCGCTATTTTACCAGTGAACAACCTGCTTTCGGCGATGACCGGGATGCGCGCTTTTGT  
GCAGGATAAAGATCTGAAAAAGATCTTCTGTCGACCGGATGCTTGGGACAGAAGCAACCGGTGCGGGATTTATGAACT  
GTTGTTCAAGCGGTTTTCTTCCACAAAAAGGGCGCTATATCCACTCCACCGCGGAAAAGCGTTATTCCATTCG  
CTGCCAGAAATGGCTACGCGACCGGACATGACCGCGCACTGGGAATCGGTGCTGACGCAAAATCAGCGAAAAGCAGTGTG  
CTATCAGGACTTTATGACCGCGCTGGTGGGACGCTATATCAGCTTATGATCAAGCCAAACGTACCGCGGTGCGGCAGT  
TTCGCGCATTTGTTGCTCCGGCAGTGGTGGCAGTGTGATAAAGAAAGGCTGCACCGCGTAAACGATAGTGCAGAAAAA  
AGTCCCGCAGCAGATGAAGCCGGAAGCGGCGATAGCTAA

>Cluster\_42841

ATGACGGAGTTAGCCAGAACAATAGTCGACGAGTTCGGGGCGCAGATAACATTTGTGAGTCTGATGCAATTTGTGCAACCGG  
ATTAAGTTTTAAGTTAAAGGATGAAAGCAAGCGCAAGCTGAGGTACTGAAAAAGACCCCGGTTATTAATGTTGGTGG  
AAAGCGTGGCCAGTTTCAAGTTTGTATAGGTAACCATGTGGCCGATGCTTCCGCGGTTAACAGCGTGGCAGGCTT  
GGGAAAAAGCGCAACAGGCACCGGAAAATGATGATAAAGGTAATCTGTTAAACCGCTTGTGTTATGTTATTTCAAGTAT

TTTTACGCCCTCTGATCGGTTTATGGCGGCAACCGGGATCCTGAAAGGTATGTTGGCTCTGGCACTACTTTTTCAGTGGACGACCGAACAAGTGGTACTTATTTAAATTTTATTTAGCCGCGATGATGCCTTGTTTTGGTCTTCCCGATAAATCCTGGGC TACACCGCAGGGAACGCTTCAGCGGCAATCCATTTACGCGCATGGTATGGCGGAGCGTTAGTGCATCCATTAATTTCT GACTGCTTCAGGAAACCGGCAAAAAGTGGATGCCTGGCCCTGGATTTCTGGGTATTTCCGGTACATTTGTTGAATTTACT CACTACGACCAATGATCCCATTTTTCCTGCTGGTTGFCAGCATTTGGAACGCGACTTAATGCATGCTTCTCTGCGG GCAATCAAAAATTTCTTACACCCCTTGCATGTCTGATGGTCAACGCCCATCACATTTCTGCTGGTGGGGCCGCTATC AACCTGGATAAGTGAACCTGATGCTGCCGTTATCTCTGGCTTATCAGCGGTTCTTGCATTTGCAGGCGCGGTAATGG GCGGCTTCTGGCAAACTTTGTGATGTTCCGCTGCAATGGGGTTGATACCTTAAATATCAATAACTTACCCGTGCTG GCTTACGACCAATGATCCCGCTGTTAAATGCCCGCCATTTATGGCGCAAGTCCGGGGCGGCTGCGGCTTCTCTGCGG ACGCGATGCGCAGAAAAAGTGGTAGCGGGATCGGCGGCTTGACAGGTTGTTTGGTATCACCGAACCGGATATATG GCGTCAACCTGCCGCGTAAGTACCCCTTCTGTTATCGCCTGCATAAGTGGGGCATTTGGGGGCCACCATCATTGGCTACGG CAAACGAAAGTTTACTCCTTTGGTTTGGCAGGTATTTTACCTTCATGCAAAACATCCCGTCAACGGGGATGATTTTCA CCGTATGGGCGAGCTTATTTGGCGGTGTCATTGCCATCGTTCGTCATTTGTGCGTACGGTATGTTTCAATTTCAACCG CTAAGAGTCACTGACGCGAAGTTGCCAGCAAGAGAAAAACACCAGAGGTTATTACCTGAGCAGGCGGTTATCTGTTCA CCGATGACGGGAGAGATTGTGCCCTCATTCACGCTCGCTGATACCAGCTTTGCCAGCGGCTGTTGGGTAAAGGTATTGC CATTTGCCCTCTGTTGGTGAAGTGCCTTCTCCGGTGGCGGTCGAATTTGCTTCTGTTTCCGACATTTACATGCCATCG GCATTGAGTCAGATGCGCTGGAGTCTGATTCATGCTCGTATCGACACCGTAAACTGGACGGCAAAATTTTCC GCTCACGTCACCTGGGTGACAAGTCAATACAGGCGATCGGCTGATTTCTTTTGTATATCCCTGCTATTCGCGAGGCCG GATTTGATCTGACGACCGCGTATTAATCAGTAATAGCGATGATTTTACGGACGTTATACCCACCGCACGGCGCAGATAA ACGCTGGTGGAGCGCTGTTATCCATCATTCGCTAA

>Cluster\_53926

ATGACTGACACCAATTACCTGATCTCTATGCGGCTTACACCTTTTTCGGCGCCAGGACATTTAAATCAGTGGCGAACGG GAAAATCTATATCGGAAACCTGACACTGACCCGGTAAATCTCTGCTAACCAAAATTCGGGTATATGCGGTTAATGAGAAATG GATCCGAGTTCCAGGTTTCTCAGCCAATCATCATTAACTGGAGGCTTCCCTGTTTATAACGGGCGAGTATGAAGTTT CATAACCAACAGAACTTACGATGGCGGTGATGATGCATATGGGCGCAGCAGTTTACTGGATTAATGTTGCAAAATAT GGACCCAAACTCTGCGTATCTGGAAGCGGTTAATGATGTTTCTTGAATGCTGGGCTCAAGCGATGGCGCAAACTGATAG GTGGAATGAGCTTCTTACAGCGGAAATGTACTCTCATCTTGTGAAGGGATGGACTGGAGGAAAGCAATTCAGCTGCT ATAGCCAAAGTCCAGGTTTACCGGAACTATTTAGCCGGAAGCGGCCCAACCAATATTCTCATTGGAGGTAAATTTCTCT CAATCCTAATTTCAACTTTGATACCTGGTGGGTTGCTGCGGTCGAGGTGCGCTGTGTATGCGTAGTGGTGAACACTGA TGGGCGGCGGAGCAATCAGCCTTGTGATGGCAATTTTACTGGCTCAGCCAGCGGCAATCATTACAAACTGGGAAGGCCG CCGGATAACTGCAAGATTACGGGATCAGCCTTAAACCGCAGCCGTGGCACCGCTGCCGGAACGGGGATTAACCTGCATTA TATCTTGGACTCGGATAATGTCACTATTGATAACGTTAAGCGGATAGATAGCACTTCTGGAGGATTTATTTACGCGG CTAACAATACGGTTTATGGCTGTTCTAACTCAAGAATTTAAGACTGCTACGTTCAACAGTTGAATATATGGCATTCAG TGTGAACGCCCAACGGGATGACCATTAACGGGATGTCGCTAGCCTCCGCGGTGATAATGGCATTGATATCTTTGGTAA CGTAACGACGAATCTGGACAGGAGTTGCGGAGGATGTTGTTGTTAGTAATAACACTATCCGTGATGTAAGCGTAGGAG TGTTCATCGAATCATGCGGAAACGTTGCCAATATCTTCCGTCGCTTATTTAGGATTTAGTAACCTGCTGGTCTTTTAA CCGGATAAATACAGCTGCGTATAATGTTCTGTAATGGATGCACGATAACAGGGCGGATATTACCTCCAGCCAGGGCAT CCGCTGGAAGAATCCAGTTGGTTTACACTCGCTTATAACAACACACTAAAAACTGTATTGACTCCTTTGTGACAACTG GAGGATGATTTACGTTGATATTTGGGTTGAATAACCATGAAAGCATTTGGCAGTGTTTTCTTTACGTTCCCAAAAATCT AACGGATGTTCTATACAAGAATGGTTACAGAGTCTACAACGGAGTTCCAGACAGATGCCATACCGTACCAACAGCACCC TCGTGGTTGGCCATCCGCAAAACACTAGGTAATCTGCTGTTTCAATCCAGCGCCGTACATGATGATTTCCGCTACGA CTGGGGAAGATAACCTCATTCGGGCTACAGGCAATTTGCCATTTCAACAGTGGCTGGGGCCCTGCTTACTCGCTATACAAT ACGATTTGTTTCTGGGAAACAGTAAATAGCCATGGGAGCTCGTACTGTCTGCGGTAAGTAACTATGCTAAATAAGCTT TATTTATTTAGTTTATAGCGTACATCATCCTATGCTGTAGTAAGGAAATGGGATGATCCAGTACAGGACTATATGCGG GAGACTACACATCTTATTTAAATAGCGCATACGATATTCATCTTACAGACTGCTTGGGAAACTATGA

>Cluster\_67125

ATGAAAAATTAATCCACATTTAAATTTGCATAATTTATCTGTTGCAATTTATCGCATGCTGCTCTCAGCAGCATATGCTGA GGACTATTTTGCACCGGATCTGCTCAGTCTGGGAAACAGGGATATGTCAGTACAGACCTCAGTGTCTTTTCTGAGCAGG GGTATTTCTGCGCCCGGCTATATATTTGTCGATATATATGTTAATGGAAACTATCTTAAACTGACAGCATCCGTTTGTAG CATGATAAAAACAACACGCTGAAACCTCTGTTCTCATTAAATGACCTGAATGAGATTGGCGTGAACCTGCATTTCCGTTAA AGGTACAGAGCACTTACCAGCATGACAGTAAAGTATTTGATAACCTGCTGTTAATACCGTTTTCATCTTTTGTGATA ACAGTAAACAAGACTGAACATCAATGTTGCTCAGGTGCACATGCAGAAGGAAACGGATAATCGCCTGGCCGTAATTC TGGGACAGGGCATTCGCGCTCTTTTGTGAATTACAGCTATTAGGCAAGTACAGGGGCAATAAAAACAA ATCGTCCACCACATCTGACTTTCGAGTCTGAATGCGGGTGAACCTTGGGGCATGGCGACTCCGACGAATATGAAT GGACAGTCCAGGCTTTGAGTCTGAACGATGATGATACTTTTGGAGCGCTTATCGTAAGCAAAAGTCAACAGAGCAAG TGGATACCGGTGACACATACCTGCAGCGTGTGTTTCACTTTCGAGCAGCAACTGACCATCGGTGATATCGTACAAC CAGTATTACTGAGCAGTTAATGACGGTTTTCAGTTCGCGGGTGTGAGCCTTTCTTCCAGTGAATGATTTCCGGCGG CACTGCGGGGATTTGCGCTGTTATTTACGGGATGCGAGCAAAATGCGAGGTTATCGTACCCAGAAATGGTTACTCC ATTTATCAGAGCCACTTGCACCGGGCCATTCGGATGATGACCTGCCCCGCGCAGTTCCGGCAGGGGATATTTATGT TTCAGTAAAGAAAGTGACGGAACCGTTTATGTTTCCGGCAGGCATATTCACGCTGCGGAAATGCAGCGTACGGGAG ATTTTAAATTTGAATATTTCTGCTGGGCGTTACAAAACAGAGCGGATATTCACATATGAGAACACTCCGTTGTTTCTAAC ACCCTATTTCTGTACGGGTTGCCCTCAACAGTACGCGCATGGGGAATCTCCTTATTTCCGGGATTTACAGCTGTAAG TCTGGGGCGGCATTTTTCATTAGGCATGCTGGGACGTTTCAACTTCAGTACCTCATCAGTACTGAAAGCAGGGATA ATGACAAATTTGCGGGGATATCCGTTAACGCAAGATACAGCAAAAGTCTGACGGAACCGGGACACTGTTCCAGCTGGCG TCATATCGCTATTTCAACGCGGACTTCAGGAGCTTTTCTGAGGCCAACGTTGAGGAGTACAGAGGCTCATCTATATCAA TTACATGCTTTTCCAGTCCGAGGAAAGATACGTTGCTGTTAATAATAAACAGAGTATTACATCAGGCTGTCGCTCGGTG TGTACAGGACGAGGATAATTACGGGACCGGATTCACAACAGCCTGTCAGCAGGCTGAAACGAACTTCCGGCAG ACAAGCTGCTCCCTTAAATTAACAATATGACAGGTTGAGAGGAAATGGCTCATGGCCTGAAAACAGGGAATATCCCTGAG TGTTCAGTGCCTTCACTGCGTTCATGCTTCCGGCAGCATGAGCTCTGCGAATTTTAACTATCGTACGGCCATAATA ACCAGGGACGTAACAATAATGTTGAGCTGAACCGCAGCGCACTTGGAGAAAATCGTTTGTCTGGAAATATGTTGAA AACGAGTAACTCCAGCCGAAATATCAGCGGATGAGAATTTTCTGCGGGCTGCTTATGACAGTCACTACGCCAG ACTTTTACGGGGGTACGGCAGAACCAGTCAAGTAATCTTACAACTATGGTGCAGCGGCTCCTTGCCTGCTCATCCGG CCGGCGTAATCGTCTCCGGCAGAAATTTGGTAATGCTGCGGCACTGGTTCATGTCCTGATGTTCCGGGTGCCCCGGTA ATGAAATGGCGCTGATCTCATACTGATAATAAAGGATTTGCACTGGTCCCATATGTAGCAATCTATGAAAATAAACAAT CACTATTGACCCGGTTTCTTATCCGATGGAATGAAATGTCAGAGACAGTAAGCAACGATCCGACCAAAAGCGCCA TTGTTTCTGTTGAAATATAAGGTTCACTCAGGTCAGCAGGCTTTGATAAATCTTACACAGCAGGAAACCTGTTCCACTA GGAGCTTTTGTGACGATTTGGTACCAGGTTCTTATTTGGGACATTCGGCCAAAGTATATGATCCGGGATACAGAAAG TGGCCGTTTAAAGTAAATGGGTTGATAAAGAAAGCTATGTTGCAAAATATAAGCTGAATGCAAAATCTCCGGCCATTC GATATCTGACGAAAATGGCGTCCATTAACAGGAAATTAATGTGGTCTTTAA

>Cluster\_27687

ATGAGCAAGAGCACCGCTGAGATCCGTCAGGCGTTTCTCGACTTTTTCCATAGTAAGGGACATCAGGTAGTTGCCAGCAG  
CTCCCTGGTACCCATAACGACCAACTTGTGTTTACCAACGCCGGATGAACCAGTTC AAGGATGTGTTCCCTTGGGC  
TCGACAAGCGTAATATTCCCAGCTACCACTTCCCAACCGTGTGTGCGTGCAGGTTAAACACAACGACCTGGAAAC  
GTCCGTTACACCGCGCTACCATACCTTCTTCGAAATCTCGGGAAGTCCGGAAGAACAGCGGACCGCTACATTGAACTCGGAACA  
CATTCAGTTTGCATGCGGAATCTGACCAAGCAAAATGGTTTCCCTGCCGAAAGAGCGTCTGTGGTTACCGTCTATG  
AAAGGCGACGAAAGCCTACGAAATCTGGGAAAAGAAAGTAGGGATCCCGCGCAACGATATTATTCGCATCGCGGATAAC  
AAAGGTGCCCATACGCATCTGACAACTTCTGGCAGATGGGTGACACTGGTCCGTGCGGCCGTGCACCGAAATCTTCTA  
CGATCACGGCGACCAATTTGGGGTGGCCCTCCGGAAAGTCCGGAAGAACAGCGGACCGCTACATTGAACTCGGAACA  
TCGCTTTCATGCAGTTCAACCGCCAGGCGGATGGCACGATGGAACCGTGCAGAACCGCTGTAGATACCGGTATGGGT  
CTGGAGCGTATTGCTGCGGTGCTGCAACACGTTAACTTAACATGACATCGACTGTTCGCGACGTTGATCCAGGCGGT  
AGCGAAAGTCACTGGCGGACCGGATCTGAGCAATAAATCGTGCAGCAATCGCTGACCAATTCGTTCTGTGCGTTCC  
TGATCCGCGTGGCATAATGCCGTCCTCAATGAAAACCGTGGTTATGTACTGCGTGTATCATTCGTCGCGCAGTGCCTCAC  
GGTAATATGCTCGGCGGAAAGAAACCTTCTTCTACAACTGGTTGGTCCGCTGATCGACGTTATGGGCTCTGCAGGTGA  
AGACTGAAACCGCGACGCGGCGAGGTTGAGCAGGTGCTGAAAGACTGAAAGAGAGCAGTTTGCCTGACTCTGAGCGCG  
GTCGCGCTGTCTGAGTGAAGAGCTGGCAAACTTCTGGTGTACGCTGGATGGTGAACCTGTTCCGCTGTACGAC  
ACCTACCGCTTCCCGGTTCACTGACGCGTGTGTTGTCGTTGAGCAACATCAAAGTTGACGAAGCTGGTTTGAACCG  
AGCAATGGAAGAGCAGCGTGTGCTGCGCGGAAAGCCAGCGGCTTGGTGCAGATTACAACGCAATGATCCGTGTGACA  
GCGCATCTGAATTTAAAGGCTATGACCACTTGGAACTGAAAGTAAAGTAAAGTAAAGTAAAGTAAAGTAAAGTAAAGT  
GATGCCATCAATGAGCGCAGAACTGTTGCTGTGCTGATCAACCGCAATTCATGCGGAAATCCGCGGTCAGGTTGG  
TGATAAAGCGCAACTGAAAGCGCTAACTTCTCTCCGCGGTGGAAGATACGCAAGAAATACGCGCAGGCGATTGGTCACA  
TCGGTAAACTTGTGCGGGTCTCTGAAAGTGGGCGACGCTGTGCAGGCTGATGTTGATGAGGCTCGTGCAGCCCGTATT  
CGTCTGAATCACTCCGCAACGCACTGATGACGCTGCGCTGCGCCAGGTTCTGGGTAATCATGATTCGCAAGAAAGTTT  
ACTGTTAAAGCACAAGGCTGCTGCGCTTCGACTTCTCACACAAGGATGAAACGAAAGAGATTCGTGCGGCTGAAAG  
ACCTGGTGAACGCACAGATTGCGCGTAACTTGCAGATGAAACCAACATCATGGATCTCGAAGCGGCGAAAGCGAAAGGT  
GCGTATGCGCTGTTTGGCGAGAAGTATGATGAGCGGCTACGCGTGTGAGCATGGGTGATTTCCACCGAGTTGTGTGG  
CGGTACTCAGCCAGCCGCACTGGTGTATTTGGTCTGTTCCGATCATCTCTGAATCGGGTACTGCTGCTGGCCTTCGTC  
GTATCGAAGCGGTAACCGGAGAAGGCGCTATCGCCACCGTTACATGACAGCAGTGTGCTTAAGCGAAGTCTGCGCATCTG  
CTGAAAGCGGATAGCAATAATCTGGCTGATAAAGTGGCTTCTGACTGGAACGTAACGCGTCACTGGAAGAGGTTACA  
ACAGCTTAAAGAAACAAGCTGCGCGCACAGGAGAGCGCAATCTTCCAGTAAAGCAATGATGTTAATGTTTAAAGCTGT  
TGGTTAGCGAGCTTAGCGGTGTTGAGCCGAAATGTTGCGTACCATGGTTGACGATTTAAAAAATCAGCTGGGGTTCGACA  
ATATACGCTGCGCAACGCTAGCGGAGGTAAGGTTTCTCTGATGACGCGGCTATCTAAGGACCTCACAGATCCGTGTGAA  
AGCAGGGAACTGATTTGGTATGGTTGCTCAGCAGGTGGGCGCAAGGGTGGTGGACGCTCTGACATGGCGCAAGCCGGTG  
GTACGGATGCTGCGGCCCTTACCTCAGCGCTTAGCCAGTGTGAAAGGCTGGGTCAGCGCAAAATGCAATAA

>Cluster\_42479

ATGAATGCTCCGTTTACATATTCATCGCCACGCTTAGCGTAGAAGCTCTTAAGCACTCTATCGTTACAAGCTGATGTT  
TACGATTGGAAGGATCCGGTCTGTCGCCAATAAATGAAATGAGTGAACGCAACGTTATTTGCTGTGCGGATCGTCTCG  
TGGAGCGCTGGTTACGTTCAAAACCGTGCAGTTGTGCGAAGAACTCGTCAGTCTTACTACCTGTCGATGGAGTTTGT  
ATTGGCGTACGCTCTCCAACGCCATGTTGTCGCTAGGAAATTTACGAAGATGTACAGGGCGCATGGAAGCAATGGGAT  
AAATCTCGAAGAGCTGATTTGATGAAGAAATGACCCGGCCCTCGGTAACGCTGCGCTGGGCGCTTGGCGCTTGGTTCC  
TCGATTTCTGCGGACGTTAGGGTTCGCGGGGCGGGTTACGGCATCCGCTATGACTACGGTATGTTTCAAGCAAAACATC  
GTTAAACGGTAGCCAGAAAGAGTCCGCTGACTACTGGCTGGAATACGGTAAACCCGTTGGGAAATCAAACGCCACAACCGCG  
CTATAAAGTCCGTTTGGCGGTGCGATTACAGCAGGAAGTAAAAAACCGCTGGATTGAAACCGAAGAGATCTTGGGAG  
TAGCTTACGATCAGATAATCCAGGTTACGACACTGACGCGACCAACCGCTGCGTTTTGTGGAGTGCCCAAGCCAGTAGC  
GAAATTAACCTCGGTAATTTCAACCGAGGCGACTACTTCCGCGGAGTGAAGATAAAAACCACTCCGAGAACGATCTCG  
CGTACTGTATCCGGATGACTCCACTACTCCGGACGTGAGCTGCGACTGCGTCAAGAAATCTTCTGGTTTCTCAGCA  
TTCCAGGACATTTTAAAGCCCAATTCAGTTGCATAAAAACCTACGATAACCTGGCGGATAAAAATGCGATTCACCAAC  
GATACCCATCCGGTGTGTCGATTTCTGAGATGATGCGTCTGCTGATCGATGAGCACCATTTAGCTGGGACGACGCGTT  
CGAAGTGTGTTGTCAGGTTCTTCTCTACCAACCAACGCTAATGAGCGAGGCGCTGGAACCTGGCCAGTCCGATATGC  
TGGGTAATAATCTGCCGCGTCACTGCAGATCACTTTGAAATCAACGACTATTTCTGAAACCTTGCAGGAACAGTAT  
CCGAACGATACCGATCTGCTGGGACGGGCGTGCATCATTTGATGAAATCCAACGGTGTGCTGCTGTGCGTATGCGTGGC  
GGTTGTGGTGAGCCAAAGTTAACGGTGTATCGGAGCTGCACCTAACCTGATGGTGAATCGCTATTTGCTGACTTTG  
CGAAAATCTTCCGGGTCGTTTCAACCAAGTCAACCAAGGTTGACGCGCGCTGCTGGCTGGCGGTAGCGAACCATCG  
CTTTACGCGCTGTTGGACGAACACTGGGCGCACTGGCGCACCGGCTAGCCTGCTTAATGATCTGCAACAACACTG  
TGATTTCCCAATGTTTAACTACCGGTTGATCAGCGGAGTCAAGCGGAGTGGAGAACAATAAAGCGTCTGGCGGAGTATCGCCAGC  
AGCTGAATGTGGTGAATCCGAAAGCGCTGTTGATGTGCAAAATCAAACGATTTCAAGAAATCAAACGTCATTTGATG  
AATGTGTTGCACGTGATCAACCGCTATAACCGCATCAAGGCGGACCGAGATGCGAAAGTGGGTACCGCGGTGAATATTTT  
TGGCGGTAAGCGGCTTCGGCTATTACATGGCGAAGCAGATTTATCTATTGATCAATGACGTAGCAGAAAGTATGATCAACA  
ACGATCCGAGATTGGCGCAAGCTGAAAAGTCTGTTTCATCCGAACCTACAGTGTAGCTGGCGCAGTTGATCATTTCCG  
CGGCGGATCTATCTGAACAGATTTGCTGCGGGGACGGAGGCTCCGGCACAGTAACATGAAGTTGCGCTTAAACCG  
CGCGCTGACTATCGGTACGCTGGACGGTGCAGATGTCGAGATGCTGGATCATGCGGTGCTGACAATAATCTTTATCTTTG  
GTAACACAGCGGAAGAGTGAAGAACTGCGTCTGCTGCAACACCGGTAACAAACCGGTAACACTACGAGAAAGATGAGGAGCTG  
CATCAGGTGCTGACGCAAACTCGGCGAGGTTGATTTAGTCCGGAAGATCCGGGTCGCTATCGCGATCTGGTTGATTCGCT  
GATCAACTTCGGCGATCACTACCAGGTTACTGGCGGATTTATCGAGCTATGTCGATTTGAGGATAAAGTTCGACGAACTCT  
ACGAGCGTCAGGAAGAGTGGACCGCAAAAGCGATGCTGAACATTTGCCAATATGGGCTACTTCTCTTCTGACCGTACGATC  
AAAGAGTACGCCGATCATATCTGTCATATTTGATCCGGTGTGATTTGTA

>Cluster\_36738

ATGGCAAAACGGGACAGCGGAAGATTCATTATTAATGGGGGTTACAGGTAGTTAATGAGGGCGGCTGGCTGAAAACCT  
GGTGTCTAATGACGGGCGCACACTCGATGTGCGGGAGAAAGCGAGCGCAACCGGGATACAGCAGAGTAGCCAGGGCGCTT  
TGTTGCAACACAGCGGCGACGCGGACAGGAACAGCGCGGATGGCTGCGCTCAGCATCAGAGAGGTCGCGCGG  
AACAAATATCTGCTGGCAAAATGGCGGCTGTTAACCGTGGAGTCAACACCTTCTGACAAAACACAGGTCAATATGGG  
CGGACGGGAGATCGTCAAAAACAAAGCCACTGCGACAGGACAGCGCTCACCGCGGTTGAACAAATTTGCGAGGGTGTGG  
CGAATGAGACAACAATTAACGACGGCGGAATACAAACAGTATTCAGCTAACGGAGAGGCAATAAAAACAAGATCAATGAA  
GGCGGTACCGCTGACAGTCAACGATAAATGGCAAAAGCGACAGATACTGCTCAGAACAGCGGTCGCCCTCCAGACAGGAC  
GGCTAACGGTATTGAAATCAGCGTACTCACAGTACGGTACTTTTCCATTTCCGGCAATTTAGCGCAATATGTTGCT  
TGGAAAATGGCGGTAATTTATTTGATTTAGCAGGTACCGAAGCTGCGACTCCACGGTTGGCAAGGGTGGGGCAATGCAA  
AACCTGGGTCAGGATCCCGCCACAAGGTTAATCTGCGGGGCAATATACCTTGGGCGGTCAAAAGATGAGTTTCAGGC  
TCTGGCCCGGCGAGAAGATCTCCAGGTCGCTGGCGGATACGGCAATCTGCTACGAGGTCAGCTGGCGGATGATCGGTC  
GTGGCGGACAGGAAGCTGTGCTTAAATGACGCGACGGGATAATGTTACGCCAGTTAACTCGAAGGGCGGTCGGATT

ACCGATAGCGCGACATTGACTCTGGGAAATGGCGTCGATACCACGCTTGCCGACCTGACGGCTGCCAGCCGGGGCAGTGT  
CTGGCTTAACAGCAATAAATTCCTGTGCAGGTACCAGCAACTGCGAATATAGAGTAAACAGTTTGTACTCAACAGCGGTG  
ATGTTTATTTGTGACACAAACAGCAGCGCCTGCCACAATAACGGTATCTACAATACGCTGACACCAATGAACTTTCC  
GGTAGCGGTAATTTCTACTGCAATACCAACGTTGCAGGCTCCGGGGGCGATCAACTGGTCTGCAACAACAGCCACTGG  
TAAATTTAAATCTTTGTTFCAGGATACCGCGTCAGCCACAGTCTGACGACGCGATGACGCTGGTAAACAGGAGGGGAG  
GGGATGCTTCGTTTACGCTGGGCAATACCGCGGTTTCGTTGATCTTGGGACCTATGAGTATGTCCTGAAAAGTGACGGC  
AACAGCAACTGGAACCTGACCAATGATGTCAAACCCCAACCCGGACCCATCCCAAATCAAAGCCAGACCCAAAACCCGA  
TCCAAAGCCAGACCCAAATCCAAAACAGACCCCTACTCCGATCCAACGCCGACCCGTTCCGGGAAACCGCATTACCG  
CTTCTACGGCAGCGTACTCAATATGCGACCAACATTACCGTTGGTATTTGATGCTGAGCTAAACAGTATTCCGCGAGCGG  
TTGAACATAATGAAAGCGAGTCCACACAACAATAATGTCTGGGGGGCGACGTATAACACCCGTAATAATGTCACCACCGA  
TGCGGGTGCAGGGTTTGGAGCAGCGCTGACCGGAATGACAGTGGGGATCGACAGCCGTAATGATATTCCTGAAGGAATTA  
CCAGCTTAGGGCCTTTTATGGGCTATTCCTCATTCACATATCGGTTTGGATCGCGGAGGACATGGCAGTGTGGGCACTTAT  
TCTCTGGGCGCTTATGCCAGTTGGGAACATGAAAGTGGTTCTATCTGACGGTGTCTGTAAGCTGAACTTTAAAAG  
TAACGTAGCAGGTAATGAGCAGCGGTGGAGCCGCAATGGCAGTTACCACAGCAACGGGCTGGGCGGTACATTGAAA  
CCGGGATGCGATTACCGATGGTAACTGGAACCTGACGCGGTATGCATCGTTAACGGGTTCCACCGCTGATAACCCGAA  
TATCATTTATCAATGGCATGAAATCGAAATCAGTTCGATACCCGCGATATATCGTGAACCTGGGCGCAACGCTGAGTTA  
CAACATCGCTCTGGGGAACCGTATGGAAGTTGAGCCGTGCTGTAAGCGCGCTGTGCGCAAAAGAAATTTGCTGATACCC  
GGGTGAAAGTGAATAGTGACGGTAAATTTCTGCAATATTTGTCGGGCGAGCGTGAATATACCAGGCAAGTATTAAGCC  
TCATTCAGCAGTACGTTAAGCGGGCATCTTGGGGTGGGGTATAGCCATAGTGCCGGTGTGAAATCCCGTGGAACCGGGT  
AGCTGGTGTGAACGTGCTTCTGA

>Cluster\_10237

GTGGCACTGACCGGCAATAACTATGCATTCAGCGGATATATTGATGTCGCTTCTGGTGTGTCGCGGTTATTTCTGAAGA  
CAAGAACATCGGCGTGCAGGACCTGGATGTTGATGGCAAACTGCAAAATCAATGCCAATAAAGATTGGGTATTTGATAACG  
ATCTTCAAGGTAGGTTTGTGAAATAAACATGGGGAATACGCAATTCCTTCGATGAGTTTGGTATTTGATACACGACTGG  
TTCAGGGGTTCACTGGCGTTCCAGAACACGACATTTAACTGGAAAAGAAATGCTGAGTTTCTGCAGAGAGCGGGATCAC  
TGCGGGTCAAGGAAAGCCAGGTAACAGTGGGTAAGGGCGCTCACATTCAGCACTTTGGGATTCTCCGCGGAAACCGTTG  
ATTTTGGTGCCCTGACAGCAGGTGCACAGATGACAGAAGGGACGGTCAACGTTAGTAAAACGCTGGATTTGCGCGGCGAG  
GTGTGATTCAGGTTTCTGACAGTGCAGTGTGTCGCTCAGTATCTCGTATGATGACTGCTGCTGATGACTGCTGCTGATGAA  
CGATGATGGTAACAGCGCCATTAAGCTGGTGTGATGCGCAAGGTGCGGAAGTTCTGGGCGATGCGGGCAATCTGCAATTGC  
AGGATAAAAATGGCAAAATCTCTCCAGCAGCGCCAAAGCTGATATTCAGCAGAAATGGCAAAAAGCGCCGTCGGCACT  
TACGACTATCGTCTGACGAGTGGGGTAAACAATGACGGTCTGTATATCGGTTACGGCTGACCCAGCTTGATTTACACGC  
TACCGACAGCGGATCTCTGGTGTGAGCTCTAACCGGTAAGCGGAGAAATGCGCGGATCTCAGCGCAAGAAATTTACGGGCGCAGC  
GTGGTACCTGGCATTACGACGCGAGAAGGGTACAGCCGATCTGCTTTCTAACAAAGACAACGACTATACCGGTGTTACC  
GATCTGCGCAGTGGGACGCTTTTGTGTAATAACGATAACGTTGTTGGGTAATACCCATGAACTGCGTCTGGCGGAGAGAC  
TGAATGATATGAAATGTCACAGCCAGACCGTGGGCGCTCAATGGCAGCGCCGATTCAGTCTGAGCTTAAATGGCG  
CGACTGTACCGTTTACCAACCGGGGCACTTCAACCGGTTCTGTTAACGGGAGCGGAGAGCTGAAATATTACGGGCGCAGC  
CTGGACATCGCGGGGATAACAGCAACCTGACGGGAAATGTAACATTGCTAAATTCGGCTAATGTCCTGGTAAGTCATGC  
GCAGGATTTGGGTAGCGCAACGTTGAGAACCAACGTTACCTGGCGTTGAAATAATAGCGCTGAAAAAAGAGCGGCTGGCT  
CTGTGAATTACACCTGGGCGGCAATCTGACCAACACGCTACGCTGATGACTGGAATGTCAGGACAGCAAGCTGGCAAT  
GTGTTAGTGGTGAAGGGGAACTACCAAGTAAATAACCGTCAACTAGTAATGAAATACCGTACTGAAATGGCGATGACTCAGT  
AACCGATAAATGGTGTGTCGAGGGGATAGTAGCGGACGACTGCCGTTACGGTGAATAACGCTGGCGGTACAGGTGCGGA  
AAACCCCTTAAACGGTATCGAACTTATCCATGTAGACGGTAAAGCTGAGGGCGAAATTTGTTACAGGCTGGTCTGATCTGGC  
GGGGGCTAGACTACACTCTCGCGGTTGGACAAGGGGCAAAATAGTGGTAACTGGTATCTGACAGCGGAGTATCTCC  
TGAAGTGCAGCCGAGCCAGACCGATGCCAAATCCGGAGCCAAACCCGAATCCAGAGCCGAACCCCTAACCCGACACCTA  
CGCGGGTCCGGATCTGAATGTGGATAATGACCTGCGACCGGAGGCGGTTAGCTACATGCGAACCTTGCAGCAGCGAAT  
ACAATGTTACCACCGCTGTCATGAGCGTCTGGGTAATACGTAATACCGACATGGTGACGGGTGAGCAGAAAACAAC  
CACTATGTTGGATGCGCCATGAAAGTGGTCAATAAATAAATGGCTGATGGCAGCGGCAAGCTGAAACCCAAAGCAATCGCT  
ATGTTCTGCAACTGGGAGCGATGTCGCGCAGTGGAGCCAAAACGGCAGCGACAGCTGGCATGTTGGGGTTCATGGCGGGA  
TATGGCAACAGCGACAGCAAAACATTTCTCGCGAACCGGTTATCGTCAAAAAGCGAGTGTGAACGGATATAGCACCGG  
CCTCTATGCCACCTGGTATGCCGATGACGAGTCCGCTAATGGCGGTAATCTCGACAGTTGGGCGCAGTACAGCTGGTTG  
ATAACACAGTGAAGGGGATGACTTACAAAGTGAATCCTATAAATGAAAGGATTTACCGCTTACCGTAAAGGTAAC  
AAACACAATAATGCTGAATTTAATGGCAGCCAGGGAACCGGTAATGAAATGGTATGTTTACGCCGAAGCACAGGTTACCTG  
GATGGGATCAAAGCCGATAAGCACCGGAAAGCAACGGAAACCTCGTTTATAGCAACCGGTGATGGCAATGTTCAAACCC  
GACTTGGCGTAAAAACCTGGTGAAGAGCCACCAATAAATGGATGACGGTAAATCCCGCGAGTTCCAGCCGTTTGTAGAA  
GTGAACCTGCTGCAATAACAGTAAGGATTTACGACCCAGTATGGATGGCGTGTCCGCTACTCAGGATGGAGCCGGAATAT  
TGCTGAGATAAAAACCGGGTGGAGGACAGCTAAATGCCAACCTGAAATGCTGGGGGAAATGTTGGGCGTTCAGGTTGCCG  
ATAGGGGATATAATGACACCTCTGCAATGGTTGGCATTAAAGTGGCAATTTCTGA

>Cluster\_29359

ATGGAAAAGACATATAACCACAAGATACGAACAGCCGCTTTACGAGCACTGGGAAAAGCAGGGCTACTTTAAGCCTAA  
TGGCGATGAAAGCCAGGAAAGTTTCTGCATCATGATCCGCGCGGAAAGCTACCGGCAAGTTTGCATATGGGTACGCT  
TCCAGCAAACCATCATGGATACCATGATCCGCTATCAGCGCATGCAGGGCAAAAACACCTGTGGCAGGTGCTGACTGAC  
CACCGGGGATGCTACCCAGATGGTCTGTGAGCGCAAGATGCGCGAGAAGAAGGTAAAAACCCGTCACGACTACGGCCG  
CGAAGCTTTCATCGACAAAATCTGGGAATGAAAGCGGAATCCGGCGGCAACATTACCCGTCAGATGCGCCGTTCTCGGCA  
ACTCCGTCGACTGGGAGCGTGAACGTTTCACTGAGGAGGCTGTCCAATGCGGTGAAAGAAAGTTTTCGTTCTGCTG  
TATAAAGAAGACCTGATTTACCGTGGCAACCGCTGGTAAACTGGGACCCGAAACTGCGCACCCGCTATCTCCGACCTGGA  
AGTGAAAAACCCGAAATGAAAGGTTGATGTTGGCACATCTCCGCTATCCGCTGGCTGACGGCGGCAAAAACCCGACCGGTA  
AAGATTATCTGGTGGTTGCGACTACCCGTCGGGAAACCTGCTGGGCGATGACTGGCGTGGCGTTAACCCGGAAGATCCG  
CGTTATAAAGATCTGATTGGCAATATGTCATTCTGCCGCTGGTAAACCGTCTGATTCAGGATCGTTGGCGACGAACCCG  
CGCATGGAAAAGGCAACCGGCTGCGTGAAGATCACCCAGCGCACACTTTAACGACTATGAAGTCCGTTAAACGTCACG  
CCCTCCGATGATCAACATCTTACCTTTCAGCGGATATCCGTTGAAAGCGCCAGGTTGTCGATAACCAAGGTAACGAA  
TCTGACGTTTATTCAGCGAAATCCCGGACAGTTCAGAAACTGGAGCGTTTGTGCTGACAGTAAAGCAGTCTGTTGCTG  
GGTTGACGCGCTCGGCTGCTGGAAGAAATTAACCCGACGACCTGACGTTCTTATGGCGACCGTGGTGGCGTGGTTA  
TCGAACCGATGCTGACCGACAGTGGTACGTCGCTGCCGATGTAAGTGGCGAAACCGGCAAGTTGAAGCGGTGAGAAATGGC  
GACATTCAGTCTGATCCGAAAGCAGTACGAAAACATGTAATTTCTTCTGGATGCGCGATATTCAGGACTGGTGTATCTCTG  
TCAGTATGGTGGGGTACCCTATCCCGCATGGTATGACGAAGCGGTAATGTTTATGTTGGCCGAAACGAAGACGAAG  
TGCGTAAAGAAAATAACCTCGTGTGATGTTGGCTGCTGCTGAGGATGAAAGCTTCTCGACACCTGGTTCTCTCCGG  
CTGTGGACTTCTCCAGCTCGGCTGGCGGAAACACCGACGACTGCGCAGTTCCACCAACAGCGGTGATGTTATC  
CGGCTTCAGCATCATTTCTTCTGGATTGCCCGCATGATCATGATGACCATGCATTCATCAAAGATGAAAATGGCAAC  
CGCAGGTGCGGTTCCACACCGGTTACATGACCGGCTGATTCTGATGACGAAGCCAGAAGATGTCAAATCCAAGGT



AACGTGATTGACCCACTGGATATGGTTGACGGTATTTCCGTGCCGGAACCTGCTGGAAAAACGTACCGGCAATATGATGCA  
GCCGAGCTGGCGGACAAAATCCGTAAGCGCACCGAGAAGCAGTTCCGAAACGGCATTGAGCCGCACGGTACTGACGCC  
TGCGTTCCACCTGGCGGCGCTGGCTTCTACTGGTCTGACATCAACTGGGATATGAAGCGTCTGGAAGGTTACCGTAAC  
TTCTGTAACAAGCTGTGGAAACGCCAGCCGCTTTTGTGCTGATGAATACGGAAAGGTCAGGATTGCGGCTTTAAACGGCGGTGA  
AATGACGCTGCTGGCTGGCGGATCGCTGGATTCTGGCAGATTCAACGACCATCAAAAGCGTACCGCGAACCGGTGGTGA  
GCTTCCGCTTCGATATCGCCGACGGCATTCTGTATGAGTTACCTGGAACAGTTCTGGGACTGGTATCTGGAGCTGACC  
AAGCCGGTAAATGAACGGTGGAAACAGAAGCCGAACTGCGCGGTACTGCGCATACGCTGGTGACTGTTCTGGAAGGCTGTGT  
GCGCTCGCGCATCCGATCATCCGTTCCATCCCGAAACCATCTGGCAGCGAGTGAAGTACTTTGCGGTATCACTGCCG  
ATACCATCATGCTGACCGGCTTCCCGCAGTACGATGCGGTCTCAGGTTGATGAAGCCGCACTGGCCGACACCGGATGGCTG  
AAACAGGCGATCGTTGCTGTACGTAACATCCGTGCAGAAATGAACATCGCACCAGGTAACCGCTGGAGCTGTGCTGCG  
TGGTTGCAGCGCGGATGCAAGACGTCGCGTAAATGAAAACCGCGGCTTCTGCAACCGTGGCGGCTGGAAGCATCA  
CCGTGCTGCTGCTGATGATAAAGGTCGCTTTCCGTTACAAAGATCGTCGACGGCGCAGAATGCTGATCCCGATGGCA  
GGCTCATCAACAAAGGATGAGCTGGCACGCTGCGGAAAGGATAGCGAAGATCGAAGGCAATCAGCCGATTTGCTG  
GAACAAGCTGGCGAACGAAGGCTTTGTCGCCCCGCGCACCGGAAGCGGTATCGCGAAAGAGCGTGAGAAGCTGGAAGGCT  
ATGCAAGCGAAAGCGAAGCTGATTGAACAGCAGGCTGTTATCGCCGCGCTGTAA

>Cluster\_21949

ATGAGTCAGGAAACGCCGCTTCGACGACTGAAGCGCAGATTAATAAATAAACCGCGTATCTCACCTTTCTGGCTGCTGCC  
GTTTATCGCGCTAATGATTGCTGGTTGGCTGATTGGGACAGTTATCAGGACCGGGCAATACGTACCATCGACTTTA  
TGTCGGCGGATGGTATTGTTCCAGGCGGTACGCTGTTTCTGTTATCAGGCGGTTGAAAGTTGGAACAGTGCAGGATATCAGC  
CTCAGCGACGATCTTCGTAAGATTGAAGTCAAGTCAAGTCAAGTCCGATATGAAAGATGCGCTGCGGAAGAGACACA  
GTTTCTGGTTGGTGAAGCAGGCTCGTTGGCAGGTTGCTCCGGGCTGGACGCGCTCTCGGTTGTTATATCGGA  
TGATGCCGGTAAAGGTAAGAGCAGGATCACTTTGTGCGACTCGACACCAACCGAAATATCGGCTGGACAATGGCGAT  
CTGATGATCCACCTGCAAGCCCCGATCTCGGTTCACTGAGCAGTGGTTTCACTGGTCTATTTCCGCAAGATCCCGGTTGG  
TAAAGTCTACGACTGATCAATCCAAACAGCAAGCGGTGGTATTGATGCTGATGATGCTGATGAGCGGCTTTTACCGTAA  
TGTTGAAAAAAGGTAGCCGTTTCTGGAACGTTTCCGGCGTTGATGCCAACGTCAGTATCAGTGGCGGAAGGTGAAACTG  
GAAAGTCTGGCGCACTGGTTAACGGTGGCATTGCTTTCGATTCACTGAAAGAGTCAAGAACTGCCGAAGCGGAAGATAC  
CTTTGGTCTGATGAAGACTGGCCATAGCCAACGTGGCGTAATAATAAACTGGAAGTCCAGGCGGTGCCGGATTAA  
CCGCCACTCGACGCTTAATGATCAGGGGCTGGAAGTCCGACAGCTGACTAACTGGATTAAATCTGGTGGTAA  
GTCAGTGGGAAATGACCGTTGATCCCAGCGTCTGACCTGCTTCTGTAATAACCCGATCGAATTACGTAATCCGAA  
ATTTATCCCTTAGCGATGCTAATCTCAGTGCCTGCTGACCGGCAAAACCTTCGAACTGGTCCCGCGGATGGCGAGCCAC  
GTAAGAGTTTGTGTTGTCGAGGCGAAAAAGCCCTGCTGCAAGAGCGGATGTTTCTGACACTGACCTGACAGCACA  
GAAAGTTAGCGTATTGATGCTGGTGCAGCGCTCATTTCTCACGCGCTGCAGGTAGGCCAGGTTATCGATCGTAACCTAC  
CAGCAAAGGCGTCACTTTACCGTCGCCATCGAGCCTCAGCATCGGAACGTTGTAAGGCGATAGCAAAATTTGTCGTC  
ACAGCCGCTCGACGTGAAGGTAGGCTGGATGGCGTTGAGTTTCTCGGTGCCAGCGCTCAGAAATGGATCAATGGCGGA  
ATACGTTTCTGCCGGCGGATAAAGGCGAGATGAAAGCCAGCTATCACTGTATGCCAATCTGGAAGGCGCTGGGAA  
CAGCTTAGCGTATTACCCACCAACCGTGAAGTTGAGTTGAGTGCAGAGACGCTGCCTGATGTGACGGCAGGATAGT  
TGTACCGTAAATTTGAAGTTGGTGAAGTTATTACTGTGCTCCACGAGCTAACCGTTTGATATCGATCTGCATATTAAG  
CCGGAGTATCGCAACCTTCTGACAGCAACAGCGTGTCTGGGCAAGGTTGGGCAAAAGTTGAGTGAATGGTAGTGT  
TCTGACTGTACAGGATCCCGCTCTCCAGAGCATTAAGGGGCTATTAGCTTCGATAACCTCAGCGTGGCAGCCCA  
GTCAGCGTAAAGGCGACAAGCGTATTCTGTATGCTTCCGAAACAGCGGCTGCGGTTGGCGGCAAAATACGCTTCC  
GCTTTCGATGCGGAAACTGGCGGTGGGATGCCAATTCGCTATCTCGGTATTGATATCGGGCAAAATCCAGAGCTGGA  
TCTGATTACCGCAGCAATGAAGTACAGGCAAAAGGCGGTGCTCTATCCGGAATATGTCAGACCTTTGCTCCGGTGGTA  
CGCGCTTCTCAGTGGTCAACCGCAAAATTCGGCAGCTGGCTGAGCATCTTGATACATCTCCAGCGCTGATATCAAC  
GTCGAACAGGCGGGCAATCTCGCCGCGACTTTGAATTACAGAGCCACCACTACTGATTCGCGTTACCTGGATGG  
CTTAAGCATATTGTTGAAGCGCGGAAGCGGTTCTGTTAGGTATCGGTACACCTGTGCTGTTCCGTTGCTGGAAGTAG  
GTACGGTTACCGGAATGACGCTGGGACATTTGTCAGATCGCGTGTGATGATTGCGATGCGCATCAGTAAACGCTATCAACAC  
CTGGTGGTAAACAATCCGTTCTTCTGGTTGGCATCGGTTACAGTCTGACTTTGGTCTGACGGCGGCTAGTGA  
CGGCACCTTTAACAGTTTATCCGTTGGCGGATCGCTTCCGCAAGCTCCGGTACGCCACTGGCACCGAAAGCCAGG  
AAGCAAGCACTTCTGTCAGGAAAGTGAACCGAAAGAGTGGCGTGAATGGGAACTGCGCTTCCCAATAA

>Cluster\_32957

ATGACGCATCTGGAACTGGTTCCCGTCCCGCTGTCGCGCAACTGGCGGGCGTGGCCAGCATATGGAAGAAACCGTTGC  
GCTGAACAATATCACACTCGATATTCGGCCCGTTGATGCTGGCGGCTGATTGGACCGGATGGTGTGCGTAAATCGAGCT  
TGTTGTCGTTGATTTCGGTGCCTCGCTCATGAGCAGGCGCGGCTGATGGTGTGGCGGCGATATGCGCGACCCAAAG  
CATCGCGCGCATGCTCCCGCGCATCGCTGGATGCGCGAGGGCTGGGCAAAATCTTACCACTCTGTCGGTGTGTA  
TGAAAACGTCGATTTTTCGCGCGCTGTTCCGTCACGCAAAAGCGGAGCGGGAAGTGCGAATTAATGAGCTGCTGACCA  
GCACCGGATAGCACCGTTTTCGCGATCGTCCGGCAGGAAACTCTCCGGCGGATGAAGCAAAACTTGGGCTGTGCTGT  
GCGTTAATCCAGCAGCCGGAATTTGATTTCTTGTGATGAGCCAACAACGGGGTTGACCCGCTCTCTCGCGCCAGTTCTG  
GGATTTGATCGACAGTATTCGCGACGGCAGAGCAATGAGCGTGTGTTGCCACCTATATGGAAGAGCGGAAAC  
GCTTCGACTGGCTGGTAGCGATGAATGCCGAGAAAGTGTGCCAACCGGTAGCCGCAAGAGTTGCGGCAAGCAACGCAA  
AGCGCCAGCTGGAAGAAGCATTATAAATCTGTTACCGCAAGCACAAAGCGAGCGCATCAGCGGTAGTGATCCACC  
GTATCAACCTGAAAACGCAAGATTGCCATCGAAGCGCGGATCTGACCATGCGTTTTGGTTCCTCGTTGCCGTTGATC  
ACGTCAATTTCCGATTTCCAGCGGGGAGATTTTGGTTTCTTGGTTGCAACGCGTGTGGTAAATCCACCATGAAA  
ATGCTTACCGGATGCTGCCCGCAGCGAAGGTGAGGCGTGGCTGTTCCGGCAACCGGTTGATCCAAAAGATATCGATAC  
TCGCGCTGGGTTGGCTATATGTCGAGCGGTTTTCGCTCTATAACGAGCTCACCGTGGCGCAAAACCTGGAGTTACATG  
CCCCTTTGTTTACATCCCGGAAGCGGAAATCCCGCGGAGTGGTGAATGAGCGAGCGTTTAAAGCTCAACGACGTT  
AAGATGTTCTGCGCGAGTCAATACCGCTCGGCATTCCGCGCTTTCGCTGCGGCTTTCGCTGGCGTGGCGGTGATTCATC  
GATATTAATCCTCGATGAGCCAACCTTCTGGCGTGCATCCGGTGGCGAGGATATGTTCTGGCAGTTAATGGTGCATCTT  
CGCGCCAGGCAAAAGTGAACATTTCATCTCACCCACTTTATGAACGAGCGGAACGGTGCATCGCATCTCACTAATG  
CACGCGGAAAAGTGTCTCGCAGCGGTACACCGCAGGAATGGTTGAGAAACGCGGAGCCGAGCTGGAAGAGGCAT  
TATCGCTTATTTGCAAGGAGCGGAGGCGAGCAAGCGAAAGCGGCGCTGTGGTACATGACACCCACCGCGC  
CGCGTACGGGATTTAGCTGCGACGCTGTTTGTAGCTACAGCGCTCGGAAAGCACTGGAAGTGCAGCGCGGATCCGGTACGT  
TCGACGCTGGCGTGTGGAACGGTGTCTGATGCTGATAATGGGTTACGGCATCAGTATGATGTTGGAATCTGCG  
CTTTGGGTTGCTGATCGCGACAGACGCTCAGTAGCCAGCGTGGACGCTCAATCTCTCCGTTCCGTTTACTTTATCG  
AACAGCGCGCTCACCGATTATGACGAGCTTGTGCTGGTTCGCTGGCGGATATCAGGTTGGCAATGAGATCCCT  
CCTAATTTCCGGCGGATATCGCGCGTGTACGCCGTTGGAACCGGTTCTGGATCGACGGTGCAGTCCGAGCCGCG  
CGAAACGGTAAAGGCTACGTGACAGGCTACCGCAGAGCTGGTACAGGATGTTGGCGAGCCGACAGTCCACCCGCA  
GCCAAGCGGCTGATGAATATTGAGACCGCTATCGCTATAACCCGGAGTAAAAGCTGCGCGGATTTCTCCGGG  
GTGATCCCGCTTCTGCTGATGATACCCGTTAATGCTAAGCGCTTACGCTGGTGGCGGAAAAAGAGCTAGGGTGCAT  
TATCAACCTTACGTGACCCCAACCCGTTAGCGAATTTTGGTTGGCAACAGCTGCCATACATCGCGCTGGGATGC

TGAACTTTTCTGCTCTGCGCCCTGTCCGATTTTGTATTTGGCGTACCGCATAAAGGCAGTTTCTGACTCTCACTCTG  
GCGCGCTGCTGTATATCATCATCGCCACCGGAATGGGCTGCTGATCTCCACCTTTATGAAAAGCCAGATTGCGCCAT  
TTTCGGTACGGCAATATACAGTTGATCCCGGCGACACAGTTTCCGGGATGATCGATCCGGTAGCTTCGCTGGAAGGTC  
CAGGACGTTGGATCGGCGAGGTTTACCCGACCAGTCAATTTCTGACTATCGCCCGCGGAACGTTCTCGAAAGCCTGGAT  
CTGACTGATTTGTGGCAACTTTTTATCCCGTTGCTGATAGCCATACCGCTGGTATGAGCCTAAGCATCTGCTGTGAA  
AAAAACAGGAGGGATGA

>Cluster\_40691

ATGACATTAACAAGACGTTGAATTTATTAACATAGCGGTATTGCGGCAGGGACGCTGGTGGTACATCGGCTGCACCCTG  
ACCCGCATGGGCAGAAAGGAAGGTGGCAAAATCCTCACCAGCGGCGGTTGGGAGCGATGAACGTAGAAAGTGAAGGACG  
GCAAAATGTTTCTTCGACAGGCGCGCTGGCGAAAACCATACCGAACCTCTTACAGTCTACGGCGGCGGATCAGGTACAC  
ACCACGGCGCTATTCAGCATCCGATGGTGAGAAAAGCTATCTCGATAATCCACTGCAACCGCGGAAAGGTCGTGGCGA  
AGATACCTATGCTACAGGCTGGGAACAAGCATTAACATGATTCATGAGCAACAGATCGTATTCGTAAGCACTAACG  
GACCATCGGCCATTTTGGCGGATCTTACGGCTGGCGATCTTCTGGCGTGTGATGATAAAGCGCAAAACCTTACTGCAACCT  
TATATGAACCTGGCGGGCGGTTATTCGGGCGATAGCGGCGATTATTCAACCGGGGCGAGCAGGTGATCATGCCGATGT  
GGTCGGTTCTGTAGAGGTGATGAAACAGCAGACCTCTGGCGCTGATCTGGAAAACAGCCAGGTTGGTGGTGTGGG  
GGATGAACCCGCTGAACACGCTCAAAATTCCTGGAGCAGTACCGATGAGCAAGGGCTGGAATACTTCCATCAGCTGAAA  
AAATCTGGCAAAACAGTGAATGGCATTTGATCTCTGCTCCGAAAACCATGAAATCTTTGGCGATAATGCCACCTGGAT  
CGCACCAATATGGGACCCGACGTGGCACTGATGTTAGGGATTGCGCATACCTGATGACACAAGGCAAAACAGATAAAG  
TGTTCCTTGAATAACACTACCGGGTATCCGCAGTTTGAAGAGTATCTGACAGGTAAGAGCGATAATACGCCGAAAGAC  
GCGCGCTGGCGGCGGAAATTAACGCGTACCGAAGCGAGATGTCAACTTGCAGAACTGACAGAACTGACGCTGCGGCA  
AATGCTGATGGCAGGCTGGGAAATTCAGCGCCAGCAATATGGTGAACAGAAACACTGGATGCTGGTGCAGCTGCGCGCA  
TGTTAGGGCAGATTGGTACACCGGCGGCGGTTGGTTTCTTATCATTACCCAACGGTGGCAACCCGACGCGGTGTT  
GGCGCGTCTACAGAAATGCTGCGCGGATTGCCGACAGGCGGAGGCGGCTGATGATGGCGGAATACGGCGAT  
TCCGTTGGCCGATCTCGATGCGCTGGAAAATCTGGCGGCAAAATATCAGCATAACGGTAAAGCAAAACGATCCGA  
ATATCAAAATGATCTGGTGGCGGGTGGTGGTAACTTTACCCATCACCAGGATACTAATCGTCTGATTAAGCATGGCAG  
AAACCGGAGATGATCGTCTGTTCTGAATGCTACTGGACCGCAGCAGCCAAACCGCAGATATCGTATTACCGATCACCAC  
ATCGTTTGGAGCGCAATGACCTGACGATGACCGGTGATTACAGCAACCAGCATAATTGTGCCGATGAAGCAGGCTGTGCTG  
CGCAATTTGAAGCGCGCAACGATTTTGGCTGTTGCTGATCTTGTGTAATTAACCTGGCGGAAAGAGATCTAT  
ACCGAAGGTAAGATGAAATGGCGTGGCTGAAATTTTTCTATGATGCGGCTCAGAAAGGTGCCGTCGCAACCGGTCAG  
TATGCCGATGTTTAAATGCCTTCTGGCAGCAAAATAAATGATCGAAATGCGCCGACGAGAGAAGCAACAGTACATTC  
GTTATGGTGAATTTCCGCGCGGATCCGGTGAATAATGCGCTGGGTACGCCAAGCGGCAAAATGAGATTTACTCCAGAACG  
CTGGAAAATTTGGCTATAAGGATTCGCCGCGCACACCCTGGCTTGGCTTGCAGCTGATGATGGAAGGTTACCGCGACGA  
GAAGCAGTTGCAGCTTCTGACCGCACATCCGGCACACCGTTTACACAGTACGCTTAACATGCGGAACGCGTAAAAAT  
ATGCGGTTGCCGATCGTGAACCGATCACTATTCACACCGAAGATGCTGCTCGCTTGGTATTGCGAATGGCGATCTAGTG  
CGTGTGGAACAACCGGTTGTCAGATTTCTGACAGGCGGCTGGTACTGACGGGATCAAAAAGGCGTGGTATGCGTGCA  
TGAAGGATTCAGGCAGATCTGGAAAATGGCTTGTGTA AAAACCGCAGTGCGAACCTGTTAACCGCGGATATCCCGAGCT  
CTCAGCTGGCAAAATGCATGTGCCGTAACCTCTGCGCTGGTGTATATCGAAAATAACGGGTAACGCACCGAAGTTAACG  
GCATTTGATCAGCCAGCTTTACGGCATAA

>Cluster\_24046

ATGACAAATCTTAATACACCCTCGGTTTCCCTCGCGTGGCCGCGTTCGCGAGCTGAAAAAAGCGCAAGAGAGTTATTG  
GGCGGGAACTCCACGCGTGAAGAACTGCTGGCGGTAGGGCGTGAATGGCGTCTCGTCACTGGGATCAACAAAAGCAAG  
CGGGTATCGACCTGCTGCCGGTGGCGGATTTTGGCTGGTACGATCATGTACTGACCACAGCTGCTGCTGGTAAACGTT  
CCGGCGCTGACCAAGAAAGATGGTTCCGTTAGATATCGACACCCTGTTCCGTTATTGGTCTGGAGCGTGCAGCAGTGG  
CGAACCTGCGCGGCGAGCGGAAATGACCAATGGTTTAAACCAACTATCACTACATGGTCCGCGAGTTCTGTTAAAGGCC  
AACAGTTCAAACCTGACCTGGACGAGCTGCTGGAGGAAGTGGACGAGGCGCTGGCGCTGGGCCACAAGGTGAAACCTGTG  
CTGCTGGGGCGGTTACCTACCTGTTGGTGGTAAAGTGAAGGTGAACAGTTTATGATCGCTGAGCCTGCTGAACGACAT  
TCTGCGGTTTATCAGCAAGTGCCTGGCAGAACTGGCAAAACCGGCATCGAGTGGGTACAGATTGATGAACCCGCGCTG  
TTCTGGAACCTGCCGAGGCGTGGCTGGATGCGTACAAACCCGCTTACGATGCTCTGCAGGGCAGGTGAAACTGCTGCTG  
ACTACCTATTTGAAAGGCTAACGCCAAACCTCGACACGATTAATGCGCTGCCGTTTACAGGCTGCTGATGTCGATCTCGT  
ACATGGTAAAGATGACGTTGCTGAACGCAAGCGCTGCTTCTGACTGGCTGCTGCTGCGGGTCTTATCAATGGTCT  
GTAACGCTGGCGCGCGATCTTACCAGAAATATGCGCAAAATTAAGGACATTGTCCGCAAAACCGGATTTGTGGGTTGGCA  
TCTTCTGCTCGTTGCTGCACAGCCCATCGACTTGAGCGTGGAAACCGCTTGTATGCAGAAAGTGAAGGCTGGTTTGC  
CTTCCGCTGCAAAAATGTCATGAACTGGCATTGCTGCGGATGCGTTGAACAGTGGTATACGGCAGCTCTGGCAGAGT  
GGAGCGCTCCGATTCAGGCGGCTGCTACTTACTCTGTTACTATTAATCCGGCAGTAGAAAAGCGTCTGGCGGCGATCAC  
GCTCAGGACAGTACCGCTGCAATGTCTATGAAAGTGGTGGTGAAGCCAGCGTGGCGGCTTTTAACTGAGGCTGGCC  
GACCACACGATTGGTTCTTCCGCAAAACCGGAGATTCGTACCCTGCGCTGGATTTCAAAGGGTAATCTCGACG  
CCAATAACTACCGCAGGCGATTGCGGAACATAAAGCAGGCAATGTTGAGCAGGAACGTTTGGGACTGGATGTGCTG  
GTACATGGCGAGGCGGTAATGACATGGTGAATACTTTGGCGAGCATCTGGATGGCTTTGCTTTACGCAAAACGG  
TTGGGTACAGAGCTACGGTTCCCGCTGCGTGAAGCCACCGATTGTTATTTGGTACGTTAGCCCGGCGACCGATACCG  
TGGAGTGGGCAAAATATGCGCAATCCCTGACTGATAAACCGGTGAAAGGGATGTTGACCGGCCGGTACTATCTCTGCTG  
TGGTCTTCCGCGTGAAGATGTCAGCCGTGAAACCATCGCAAAACAAATGCGCTGGCGCTGCGTATGAAGTCCGCGA  
CCTGGAAGCCGCTGGAATTTGGCATCTTCAAGATTGACGAACCGGCATTTGCGCAAGGTTTACCCTGCTGCGACGACT  
GGGATGCTATCTCCAGTGGGGCTGGAGGCTTTCCGTTATCAACCGCGCGTGGCGAAAGATGACACAAAAATCCACT  
CACATGTTTACTGCGAGTTCAACGACATCATGGATTGCGGCGTGGACGCGAGCTCATCACATCGAAACCTC  
CGTTCCGACATGGAGTTGCTGGAGTCTTTGAAGAGTTTGAATTAATAAATGAAATCGGCTCGGCTCATGACATTC  
ACTCGCAAACTACCGGCTGGAATGGATTGAAGCTTGTCTGAAGAAAGCGCAAAACGCAATTCGCGCATGAGCGCTG  
TGGTCAACCCGACTGTGGCTGAAAACCGCGGCTGGCCAGAAACCGCGCGGCTGGCGAAATGGTGCAGGCGGCG  
GCAGAATTTGCGTGGGGTAA

>Cluster\_53961

ATGAAAAACAGTAAGGCATTTTACCAGCGCATTAGCGACAGCTATTGTTATGGCTCTTCTGCACCAGCATTCGCTGC  
TGATAACCGGTTACACTACACCGGTTACTGGATAAAGATAAGACAACCTGATCAAGATGTTGTTATTAGCAATA  
CAGCAGACCAACAGATTACAGCGGTAACAAATTAATGCGGCAGATAAAGATCTTAAATGTTACTTTTGGCGCTATGATATT  
ACTGCTGAACTCAACGGCAGACAAAAATTCCTTGAAGGTGTAAGTTAGCGGTGACAAAAATGTTGTGATTAATGCTAC  
AGGCTCCACCATACAGCTCAAGGTGAAGGCACCTATGTTCCGGACTGCAATGGTCAATTTCTTCACTGGCGGATTTGTTG  
TTAATGGCGGTAATTTCTGTGCAAAAAATGAAAAAGTAGTGCACAGGAATATCTCTGGAAGGGCCACGGGAATAAT  
GTAACGCTAAATGGTACAACCAATAAATGCTCAAGGTAATAAGAGTTCCAGCAACCGGCTACGGCAATTTTGTCTCAAAA  
GGGTAGCGTAAATGGTTTAAAGGTGATGCAACCGCAACATACCTTGGTGGCTCAAAATTAATTAATGGCCGGA  
TTGAAACAATAGTTATTGCAAGGAGAAATACGGGAACCTACAGTCAATCTGAATATTAAGGATGGCTCAGTAAATGGG  
GCGGCTAATAAATAACAACAAATTTATGTTCTGCTTCCGCACAGGAGCAGGTTGAGCAACGCAAAATTTAAATTTATC

TGTCGCCGATTAACCATCTACTCTGATATCCATGCCCTTTCTGCAAGCGAGAATTCAGCCGGTACCACAACAAATGTAA  
ACATGAACCTTGCCCGCTTACTGCGGAAGGTAATGCTTATACCTTCAATAGCGGCGATAAAGCGGGTAGTAATCTGGAT  
ATAAATCTTTCCGATAGCTCAGTCTGGAAGGCAAAGTTTCAGGGGCAGGAGATGCCAGTGTATCTCTGCAAAACGGGTC  
TGTCTGGAATGTTACGGGATCTCAACTGTTGATGCTCTGGCAGTAAAAGACAGTACGGTTAATATCACGAAGGCTACAG  
TCAATACTGGCAGCTTGGTTCTCAGAACGGCACTCTGATTTGATGGCTCTTCTGAAAACACTCTCGGATATCAGCGGA  
AAAGCGAGCGGTGACTTGGCTGTTTACAGTGGGGTTCATTGGATCTTATCAATGAACAAACGGCATTATTTTACCCG  
CAAAGACAGCACTTAAAAGCCACAGGCAACACGGAAGTGGTCTGTATCAATATGACCTGACACAGGAGCTGATGGTA  
ACTTTTATTTCTGTAATAAACACGCATAAAGCATCCAACGCCAGCTCCCTGATTTCAGGCAATGGCAGCAGCTCCGGCTAAC  
GTTGCTAACTCTGACGCTGACACGCTCTCAGCCCGTCAGGATGCTGTCCGCTCTGAGCGAAAATGACAAGGGCGCGTATG  
GATTCAGTACTTTGGCGGTAAACAGAAACATACCACCGCGGAAATGCATCCTATGACCTGGATGTAACGGTGTAAATGC  
TGGTGGTGTATACCCGCTTCATGACTGAAGATGTTAGCTGGCTGGCAGGTGTAGCGATGTCTTCTGCGAAAGGTGACATG  
ACCACCATGCAGAGCAAAGGCGACACTGAAGTTACAGCTTCCACGCTTACCTGAGCCGCCAGTATAACAACCGGTATCTT  
CATGTACTGCTGCACAGTTTGGTCTACTACAGCAACACGGCAGATGTTGCGCTGATGAATGGTGGCGTACCATCAAAG  
CTGACTTTAACCAATGGTTTCCGTTGCGATGGTTAAAGGGGTTACACATGGAAAGACGGTAATGGCTGTTTATTCAG  
CCATATGCCAAACTGTCTGCGCTGACGCTGGAAGGTGTGGATTATCAGCTCAACGGCGTGGACGTTTCTGACAGCTA  
TAATCTGTGTGGTGGGCGGTACGCGCGTGGGTTATGACTTCCGCTGTGGGCACTCGACCGTTAAACCTTATCTGA  
ATCTGCGCAGCTGAACGAAATCTCTGATGGCAACAAAGTCCGCTGGGTGATGAGTCTGTCAATGCCAGCGCTGATG  
GCAGCATTCGCGTGGTGCAGGTGTACAGGCTGATATCACCAAAACATGGGAGCATATGCAAGCCTTGACTACACCAA  
AGGTGACGACATTGAGAACCCTGACAGGTTGATTTGGTATCAATGTGACCTGGTAA

>Cluster\_55658

ATGTCACCAGTTTATAATAAAACAAGCATCTCAGGAATCTGATGAAATCGATTTTGGTCCGTTAATCGGTGAATGATTGA  
TCATCGCAAATGATAAATACAGTAACCTTCTATTTACCGTTATTGCATTGGTTTATTCATTTTTTCAACACCAGTGT  
ATCAGGCGGATGCGTTGATTCAAGTGGAGCAAAAACAAGTAAAGCATTTTAAACAATCTTAGCCAAATATCTCCGGAT  
AGTCAGCCGCAACTCTGACCTGAAATAGCATTTATTAACATCTAGGATGATTTTGGGAAAACGGTAGATAGTCTTAACAT  
ACAGGCAGTTATTAAGCAAGATTACTTCCCTGTTTTTGGTAGGGGTTGGCTAGGTTGCTAGGGGACAAAACAGGCAATT  
TAATGTCGGGCGGTATATATAACAGGTAGCCATGATGAAATCCGAAAATTTAAATAACAATAATGATAAGAAATAGC  
TATACGGTAGAATATAATGATGAAAAGTTCAATGCTAGCATTTGAAAAGTTAGTAAATAAAAATGATGTCACAATTAATA  
TGATAAAAATAGACCTGACCGAGTACTAGCTTATATACTTCTGAATTTGGATGCAATAAGCTTACAGAGA  
AGAAATTAATAATTTAGAAAAGGCAAGGATACGGGTATTTAAACTTGACTCTTACAGGAGAAAATCCAAAACAAAT  
AAAGAAATCATTAATAGTATTAGTGAGAATTACCTTGCACAAAATATCACAAGCAAGCAGCGCAAGATGCAAGAGTTT  
AGCATTCTGAATGAGCAATTACCAATTTGTAAGTGTATTTAGATAACGCTGAAAGCAAACTTAATCAGTATCGGAGGC  
AGAAATGATTCGGTTGATTTATCCTTAGAAGCCAAATCTGTACTTGACCAAAATAGTAAATGTAGACAACCAATTAATCAA  
CTGACTTTTAGAGAGTACAGAAATATCACAACCTTATACCAAAGAACATCTTACTTATAAGGCTTACTTGAAAAAGAAA  
AACCTTACAGATGAAAAGTTAAAGCTTATAAAAAAGTGTACAGCATGCCGGCAACACAGCAGGAAATATTACGCTCAA  
ATCGTGATGTCAAACTGGGCGTGTCTTCTCATGATGTACTTAAACAGGCAACAAGAATGAAATATGCAAGAAATCAAGT  
GCAATAGGTAAGTTAGATTTATCCTTAGAAGCCAAATCTGTACTTGACCAAAATAGTAAATGTAGACAACCAATTAATCAA  
AGTTGGTTTTGTTCTTGGCTTACTGATATCAATTTGGTGTGTCTTATTACGTGATTTTTTGGCAAGAGGAATAGAAACCC  
CTGAGCAACTCGAAGATTTGGGTATAAATGTTTTATGCAAGCATTCCTATTTCTGAGTTACTTACCAGAAAGCTACTAAA  
TTAGAGGGTTTGAAGAGAAAGAAACAATCAGAGCCTCAAACCTTCTTGGCATGAAAATCCTGCTGATTTGCAATGGA  
AGCGATTAGAGGATACGCAACAAGCCTGCACTTTGCAATGATGGAGGCTAGAAAACAATTTTTAATGATATCAGGATGCAA  
GCCCTAATGCAGGTAAGACTTTTGTAAAGTTCAAACCTTATCAGCAGTAAAGCACAACATGGAATACTGTTCTATATATT  
GATACAGATATGAGGAAAGGATATGCACATAAGCTTTTGGATTAGATAACAATAACGGCCTTTCTGAAAATATTGTCAGG  
GAAAGTTGAAGTATCCCAAGCAGTGAAAAAGTACATAGCCTGGTTTCGATTTTCTGTTTCTGTCGAGGTTCCACCTA  
ACCCGGCCGAATTTACTTATGACACAGACGTTTTTGGAGAACTTTTAGCATGGGCAGAAAAAAAATATGATATTGTGATCTT  
GATACTCCACCTATTTTGGCTGTCACTGATCCGCAATTTATTGGGCATTTATGCAGGGACAACCTTGTCTGTCGCAAGGTT  
TGAAAAAACACAGCCAAAGAAATTTGAAATTAGTGCAAAACGTTTTGAAAATAGTGGTGAATAGTAAAGGTTGCATCT  
TAAACGGCGTGGTGAAGAAAGCTAGTAGTTATTTATGGTTATGGCTATAATAATTTATGGTTACTCATATAATGACAAGGAT  
AAGCACTAA

>Cluster\_24074

ATGCTTTTACAAGGCGACACCCCTGTACCTTGACTGGCTGGAAGATGGCATTGCCGAACGGTATTTGATGCCCCAGGTTT  
AGTTAATAAACTCGACACTGCGACCGCTGCCAGCCTCGCGGAGGCCATCGGCGTGCTGGAACAGCAATCAGATCTAAAAG  
GACTGCTGCTACGTTTCAACAAAGCAGCCTTTATCGTCCGTTGATATCACCGAATTTTTGTCCCTGTTCTCGTTCCCT  
GAAGAACAGTTAAGTCACTGGCTGCACCTTTGCCAATAGCGTGTAAATCGCCTGGAAGATCTGCCGGTCCCGACCATTC  
TGCCGTCACCGGCTATGCGCTGGGCGGTGGCTGCGAATCGGTGCTGGCAGCGATTTATCGTCTGGCGACGCGGGATCTGC  
GCATCGGTTGCGGAAACTTAACTGGGATCATGCGGGCTTTGGCGGTTCTGTACGTTATGCGCATGCGGCGCTGCGGCGT  
GACAGTGCCTGGAATCATTTGCCGCGGTAAGATGTGCGGCGGATCAGGCGCTGAAAATCGGCTCTGGTGGATGGCGT  
AGTCAAAGCAGAAAACTGGTTGAAGGGGCGATGGCGATTTTACGCCAGGCCATTAACGGCGACCTCGACTGGAAGCAA  
AACGTCAGCCGAAGTGGAAACCGTAAAACCTGAGCAAGATGAAAGCCACCATTGAGCTTACCATTGCTAAAGGATGGTCT  
GCGCAAAACGGCGGGGAAACATTTCCGGCCCCATCACCGCAGTAAAAACCATGAAAGCTGCGGCCGTTTTTGGTCTGTA  
AGAAGCCTTAAACCTGGAACAAAAGTTTGTCCCGCTGGCGCATACCAACGAAGCCGCGCAGTGGTGGCATTTTTCC  
TTAACGATCAATATGTAAGAAAGTAAAGCGAAGAACTACCAAAAGATGTTGAAACCCGAAACAGGCGCTGTGCTGGG  
GCAGGCATTTAGGGCGGGCGCATCGCCTACAGTCTGCGTGAAAGGCCGTTGCGGTTGTCATGAAAGATATCAACGACA  
GTCGTTAACCTCGGATGACCGAAGCCGCAAACTGCTGAACAGCAGCTTGGAGCGGGCAAGATCGATGGTCTGAAAC  
TGGCTGGCGTGTCTCCACAATTCACCCAACGCTGACATGCGGGTTTGGACCGCTGGATGTTGTGGTGAAGCGGTT  
GTTGAAAACCCGAAAGTGA AAAAGCGGTGCTGGCAGAAAACGAAACAAAAGTACGCCGGATACCGTCTGGCGTCTAA  
CACTTCAACCATTTCTATCAGCGAACTGGCCAAACGCGCTGGAGCGTCCGAAAACCTTCTGCGGGATGCACTTTTAAAC  
CGGTCCACCGAATGCCGTTAGTAGAAATTTATCGCGGCGAGAAAAGCTCCGACGAAACCATCGCGAAAGTCTGCGCTGG  
GCGAGCAAAATGGCAAAACGCCGATTTGGGTTAACGACTGCCCGGCTTCTTCTGCAACCGTACTGTTCCCTATTT  
CGCCGGTTTCAAGCAGTTGCTGCGCGAGCGGCGGATTTCCGCAAGATCGACAAAGTATGAAAAACAGTTTGGCTGGC  
CGATGGGTCGGCATATCTGCTGGATGTTGGGCAATTCAGCAGCCGCAATCACCGCGCATCACCGCCAGGCTGTCATGGCAGCAGCTT  
CCGACGGGATGCAAGAAATTTACGCGATGCCATCGACGCGCTGTTTAAAGCAACCGCTTTGGTCAAGAAACGGCCT  
CGGTTTTGCGGTTATAAAGAAAGACAGCAAGGTAAGCGAAGAAAGAAAGACGCCGCTGTTGACGACCTGCTGGCAG  
AAGTGAGCCAGCCGAAGCGGATTTACGCAAGAAAGATTTACGCCGATGATGATCCGATGGTCAACGAAGTGGT  
CGCTGTCTGGAAGAGGGCATTTACGCACTCCGCAAGAGCGGATATGGCGCTGGTCTACGGCCTGGCTTCCCTCCAT  
CCAGGGCGGCGTTCCGCTGGCTGGACACCTCGGTAGCGCAAAATACCTCGATATGGCGCAGCAATATCAGCACCTCG  
GCCCGCTGTATGAAGTACCGGAAGGTTCTGCGTAATAAAGCACGCTACATAACGAACCGTACTATCCCCCGTTGAGCCAGC  
CGTCCGGTTGGCGCAGCTGAAAACGGCTTAA

>Cluster\_61084

ATGTTAAAAAAACGTTACTGGCTACACCATTGGTTTTGCTTTTCTCCCCAGCCAATGCAGATGGTATAGAGATTGC

CGCTGTTGATTTTGTATCGGGAAACATTAATAACTACTAGGTGTAGATCCTAATATATCGCATTATTTTTCCCGTTACGCC  
GTTTTTTGCCAGGTGAATATTTACTGATAGTATCAGTAATGGCGAAAAAAGGCAACATTGCTACGGCCTTTGATGAA  
AATGGCGACATTTGCTTTGATCAGGCATTTCTGCAACAAGCCGGTTTAAAAATTCCTTCTGAAGAAAAAATGGCTGTTA  
CGACTATATATTTGCTTACCCGGTACCAACATCACACCATTAACCAACAGGAGCGTTAGATATTTACGTTTACACC  
AGGCATCAATTTCCATCCGACCGGATTTCCACAAACGCAACTGGTGGAAACAGCTGCCGTGCTAAACACTCTCTGATG  
AGCAGCCGTCAGAAATTTCTAATGGGAGTTCCGACTATCCCAGGCTGCACCTGAAGCGGGATTAATATTAATGACTG  
GATGTTACCGAGCATCAGTTCTTACCAAAACAAATGGCACATTCAGTAACAGAACCTGCTAACCTACCTCAACGTA  
CCTTTACAGATCTTAAAAACTCATGCGAGCAGGTGAAGTTAACTCAATAATAGCGTGTGGAAGGAGCCAGTATTTAC  
GGTATCGAAATCGCACCGGACAACGCATTTGCAAAACAGCGGCAGTGGTGTGCAAGTTACTGGTATAGCCAAACCTCA  
GGCTCGTGTGAGATTTGCTCAACAAGGAGTTTTAATTCATTCCATTCTGGTTCCTGCGGGCGCATTCACTATCCCTGATG  
TACCTGTTTCGCAATGGTAATAGTGTATCTTAATGTCACCGTGTGCGAAACAGACGGTAGTTTCGCAACATATATGTTCC  
TCCACCTGTTTAAATCAGCATGTAGAAAGCTTCCAGGGTTATCGCTTCGCGATAGGGCGGGTAGACGATGACTATGACGA  
ATCACCTTGGGTAATAGTGCATCGAGCGGATGGAATCTGCACAGCTGGAGTGAATGAACGGCGCGTATATCTGACGAG  
AAAATATCAGCGCGCATCAATCCGGTCGAGTCTGGTTCCCTGCCGATTTAACAGTGAAGCAGCCAAATTAGTACATCG  
CAGGATACGAAAGACTCACTGCAAGGACAGAAATATCGTCTTACGCGCAACTACAATCTCCCATTTTCACTTGGGCTAAC  
AACAGCTCACTGATCTGATCGCCATTTACGCGAATGTCTGAAGCGATTGATGATGATTAACCGATCCGACTAAAA  
GCATTTATCGCTTGGTTTTAACTTAACTTAACTCCATTCTGGTGGTTTTCAACATCAGTGGCTATAAAAACATATAGTTAC  
GACGGTGACAATGACTCAAGCAACCTTAATATTAATGGAACAAAGCGTTCAAACACGCCACGGTTTCCGTCACCTGGCA  
GCATCAACTTAGTCTTACAGAAAATAATGAAGCAGATGGTGTATCTGTTCTACGTCACATCAGTATTCCATTTGGCAGAT  
CAAAACCCGCACTGATCTGATCGCCATTTACGCGAATGTCTGAAGCGATTGATGATGATTAACCGATCCGACTAAAA  
GAGATGTCCTACTATGTGAATGCTGAACGAGATCACGACGAACTGAAACGAGCTGAAACGAGCTGAAACGCGAGTATCAGTTCCAATCT  
CCATTACACCAAGTCAAGCTTTCGCGCAGGAGCAAGCGCAGTGTATAGCCGTAATTACACGGTACGATGTCAGGTGGTA  
TTGCGGTACATGATCAGGGAGTGACCTTTTACCGTGGACTATCAATGACACTTTTCGCGCATCGCAAAAATGGATAACAAT  
ATTTGAGGTGCTCAGAATAACATCAACCGCAGCCAGTATGAGCAGATTTTCGGGTAATGCCGTCAATCCATCAATCCA  
GCCGTGGCGAACATCAGGAGTTGAGATCGATACCGCCAGCTTGGCAAAAAATGTCGATATCGGTAACGGCACAAAAATGA  
TCAAAACAAGCCGTTGGTGCAGTAGGAAAGTCCGATTCAGTGCAGTAAACAACCGCGTGCATTACTCAATATCACACTT  
TCCGACGGCAAAAACTGCCAGAGCGTTGCGATTGAAGATAGTGAAGGCAACTATCTGACAACATCAGTGGATGACGG  
GTTGATTTCCCTCAATAAACATCAACCGCAGCATGGTGTAGATATAAAAGATGAGCAGCAATCATGCCGTATTACCTTA  
CATTTCCAGAAGATGCACCAAAAGATGTGTTCTATGAGACAGCAACAGGAGAGTGCCAATGA

>cluster\_39164

ATGATTGCACGTTGGTTCGCGCGAATGGCGCTCGCCGTCGCTATTAATTTGCTGGCTGGCGTTAAGCTGGCGGTGGC  
CTGCGTGTGGCGCTGGCAATATCAGCGATCGCATGGAGAAAGGTTTTAAGCCAGCAAGCCGTGAGTTATGGCGGGCG  
ATAGGGCGTTGCGCAGTTTCGCGCAAGTGCAGCAAGCGTGGCTGGAGGAAAGCGCAAAAGCGCGCCTGAAAGTGGCAAG  
CAGCTGACTTTCCGCCACCATGACCTTTGCGAGGCGACACACCGCAGCTGGCGAAGCTCAAAAGCGGTGGATGATATCACC  
GATGATGGCGATCTGCAAACTAATCCCCTGGCCTGAAACCCAGCCGCGGCGAGCGTATTGCTGGCCCCAGCCTGATGG  
CACTGCTTAACTGAAACCGGGCGATACCATTGACCTGGGGCATGCCCACCTTGGCGGATGCGCACTTGGCGGATTTGGCGGAAAGT  
CCGGATTCGGTTTTAATCCTTTCCAGATAGCCCCACGCTGATGATGAATCTGGCGGATGTTGATAAAAACGGAGCCGT  
GCAGCCGGGGGATCGGGTCACTGGCGCTATAAATTCGCGCGCAGCGAGAACCAGCTCGACGGCTATGAGAAATGGTTCT  
TACCNCAGTTAAACCTGAACAACGCTGGTACGGTCTGGAACAAGGAGCGCGCTGGGGGATCGATAGAACGTTCTG  
CAACAGTTCTGCTGTTTTTCGGCGCTTCTGACCTTGTCTGCGGGTGGCGCGGTTGCGGTGGCGATGAATCATTAATG  
TCCGAGTCCGTACGACTTGGTGGCGATCTCAAGACGCTGGGGCAGGGCGAGCGCAACTGCGTAAGTTAATCGTCGGT  
AGTGGTTGATGGTGGCGCTTTCAGCCGTTACCGGTTGGGCGGATAGCCCTGTTGTTTCGAAAACGTTGATGGTGTCTG  
CTCAAGCCGTTCTGCTGCTGACTACCGCAGCCAGCTCTGCGCGTGGCTGTGGCGCTCGCACCATGAGCTGGCTTAT  
TTGCTGCTGGTGGGGTACGACCGTACCGACTGTTACTGGCCACGACGCTTTACCGGATTTACGTAATGATGTTGTTAG  
CGAAGCTTGGCGCTGAAAGTTTTATCTGCCGATGTGCACCGTGGTGGTGTGTACTGCTCGCCGACTGATGGCGCGC  
AGTATGCTGCTGGGCGGTGCTGGCGGGCGGGTCTGCTGGCATGCTGTGGCGGCTGCTGGGCTGGATGCTGTCTGAA  
TGTAATTCGCGCATGACGCTGAAATCGTACCTCTGCGCGTGGCGGTTAGCCGCTGTTAGCCGCTGTTAGCCGCTGTTAGCCT  
TAAGCCAGCTTTTCGGCATTTTCGCTCTCCTTTATGCTGCTGGCAGTGTGCTGGTGTGCGTGGCGATCTGCTCGACCGT  
TGGCAACAACAACCTGCCCGCAGAAAGCCGAACTACTTTTTAATCAACATCGCTACGGAACAGGTTACGCCGCTGAAAGC  
GTTTCTCGCGAACATCAGATAGTCCCGAATCGTTTTATCCGGTGGTGGCGCGGGTTGACGGCGATTAACGACAAGC  
CGACAGAAGGCAATGGAGATGAGGCGCTCAACCGCAGCTGAACTCACTCGGCAAAAATACCGCGCCTGATCATAACCCG  
ATCGTCCCGGTAACCTGGCCGCAAAAGCCGATGAAGTGTGATGGAAGAGGGCTGGCGAAACGCTTAAACGTTGCCCT  
CGCGGATACCGTGACTTTTATGGCGATACCCAGGAGTTCGCGCTAAAGTGACCAGCCTGCGCAAAAGTGGACTGGGAAA  
GCTGCGGCTAATTTCTATTTTATTTCCGGAAAGGGCATTAGACGGGCAACCGCAGAGCTGGCTTACCAGTTCCTCCG  
TGGGAAATGGCAACCGCATTTGACGCACTCAACCGCAGTTCCCGACCTTAGCCCTGTTAGACCTTACCGCGCATTTT  
AAAACAGGTGGTCAAGTGTGAGCAGGTAAGTGGCGCTGGAAGTGTGTTGGTGTGTTGCTACCGCTGCGGCATGT  
TGCTGTTGCTGGCGAGGTGACAGTGGGAATGCTCAGCGTATCAGGAGCTGGTGGTGTGGCGCACACTGGTGGGGG  
AAAAACTGCTGCGCACGACATTTGTTGTGAGTTCGCGATGCTGGGTTGTAATCGGCTGTTGGCGCAATGGTGTG  
GAAACGGCAGTGGCGTACTGCAATCGAAAGTGTGTTGATTTCCCGTGGGAGCAGACTGGCGATTTGTTGATTTCTG  
CGTGACGGGTGCGCTACTGCTGCTGCTTTGCGGGCGTGGCTGGGTGCGGACTGCTTAAGGTAAGGGCTGTTTCCAG  
CAGTTTGGCGGGTGA

>cluster\_25844

GTGGCGCAGGCGAGTTTTATCTTAAACCCGACACTGGCGGGACACCCCGCAAGGACCGAAGTTTCTTCTGGCTGGCAAC  
GGACAACGGCGCTTGCAGGTTACGCTTTCGCGCGCAAGAGTCCGTGGCATTATTTCCCGCCGATCATGTTCCCGCGCT  
AGCATATTTTGCAGGTTGAACAAGGCTTTCCGCTGACGCGCTGGCGTTAAAAGATTTTACCAGCCAGCGGCTGATGGC  
CTTTACTGTGCGGCCCATCGCCAGTTGATGAAATACGAAAAGCCGCTGCGTGAAGGTGGCGTTACCGTCTACGAGCCGA  
TGTGCGCCCGCCAGAACGCTATCTGATGGAGCGGTTTATCACCCTGCGCAGTGTGGGTCGAGGGTGAATGCGCAACGGCG  
CTATCGTTAATGCCGCTCGAAACCGCATCCCGACTATCGTCCGCCGCTCAAGTGGGTTTCTATTTGATATGAAACCC  
CGCCACGGTGAAGTACTGCTGATCGCCGCTGGAAGTTCGCGGCGAGCTATCGTTTATAATGCTGGGGCCAGAGATGGCGA  
CGCTCCGCGCTGATTTTGAACCTGGAATCACTGCGCACCCCGCTGCTACTGGAAAAACCTAACCGCTGGTTTGGCA  
CTCATGATCTGATGATCATCGTTGGAACGTTGGTGCAGTTTGCATCTGCGAATGCTGCAAAAACATGCCGAGCGTTAC  
CGTATTTCCGCTGCGCTTGGGCGTGATAACAGCGAGCTGGAGTGGCGGAGCAGCGCTTAAAACCGCGCTTTTTTTTC  
TCAGGCAAAAGGCGAGTATTAATCGACGGTATCGAGCGCTGAAATCCCGCTTCTGGAATTTCTTTTCTTCTGCTGG  
AAACCGTCCGCTCAGGAGTTATTAGCGAAGGAAAATCTATCGATAAACCCGTGGGATCGAATGGAGAAATGACCCGCT  
TTCGCGAAGATAAGCTTGGCTGGCAACTTATAACCTGAAAGATTGCGAGCTGGTGAAGCAGATCTTCCACAAAACCTGA  
AATCATGCGTTTTTGTCTGAAACGGCGAGCGTGAACGGCTTCCCGTATGATGACAGCGCGTTCCGTTGGCGAGCTTTG  
GTCATCTTATTTCCCGGTATGATCGCGCTGGTATATCTGCGCTAATCTGCGCAAGTGCAGCGCAGCGCAGCGCT  
GGCGGCTACGTGATGATTTGCGACCTGGGCTTTATGATTTGGTGTGCTGGACTACAAAAGCTGTACCCGTCGAT  
CATCCGACCTTTCTGATTTGATCCGCTGGGCTGGTGGAGGCATGGCGAGCTGATCCAGAGCACAGTACCGAAGGTT

TTCTCGATGCTGGTTCACGGGAGAACATTGCTGCGGAGATTGTGACTAACATCTGGCACGGGCGGATGAAGCC  
AAACGTCAGGGTAATAAGCCGCTTTCGCGAGGCGTGAAAGATCAATATGAATGCCTTTTATGGCGTGCTTGGCACCCACCCG  
CTGCCGCTTCTTCGATCCGCGCTAGCGTCGTCGATCACTATGCGTGGTCATCAGATCATGCGGCAAAACAAAGCGTTGA  
TTGAAGCGCAGGGCTACGACGTGATCTACGGCGATACGACTCAACGTTTGTCTGGTTGAAAGGCGCACATTCGGAAGAA  
GAAGCGCGCAAAATTTGGTCTGCTGCATGGTGCAGCACGTTAACCGCTGGTGGGAGAAAATGCTGCAAAAACAAAGCGTAAAC  
CAGCGCACTGGAAGTGGAGTATGAAACCCATTTCTGCCGTTTTCTGATGCCAACCATTCGCGGAGCCGATACCGGCGAGTA  
AAAAGCGTTATGCGGGCTGATTAGGAGGGCGACAAGCAGCGGATGGTATTTAAAGGCTGGAACCGTGGCGACCGAT  
TGGACGCCGCTGGCCAGCAGTTTACGAGGAGCTTACCTGCGCATCTCCGCAACGAGCCATATCAGGAATACGTTGCG  
CGAAACCATCGACAGCTGATGGCGGGCAACTGGACCGCAGCTGAGCTTTACCGTAAACCGCTTCGCGCTCCGCTGAGCG  
AATATCAGCGTAATGTTCCGCCCTCATGTACGCGCGCTCGCTTGGCGATGAAGAAAACATAAGCGCGGTGCGCCCTTG  
CAATATCAGAACCAGCGCACCATTAAGTACGATGAGCACCAACGCGCCGAGCGCTGGACTACCAACGTTACCACCT  
GGATTACGAACACTATCTGACCCGCCAGCTACAACCCGTGGCGGAGGGAATACCCCTTTTATGAGGATAATTTGCTA  
CACTTATGACCCGGCAACTGGGCTATTTTGA

>Cluster\_50096

ATGAAAACGCTGAAAACGTTGACCCCTGCACAAACAATCTGCCACCACGTTGAACTGCTGGTCTGATGGCCAGCATATCCT  
GTCCCTGTACGCTGGAAGAAATCTGTTCCGCGTGTGTTAAAACGCAAGGCGAGCTGGCGCTAGATCGCACCTGGGA  
GCATTGCTCCGGCGCAGGATGTGCCATGGGAAGGCGCAGCGCGAAGATCTCAGCGGCTTTAGCCTGCCCGCTGAGCA  
TTGATCCAGCAGCAGCACCCGTTGTTATCGCCACCGAGTCACTGCGTGAACCGTTACCAGCCGCTGTGGCTGGAGTG  
GCATATCGTAACAGCAAGGCGAATGGCTGCCGTTGGTGAATGACCGCCGACCGAGCGCTTACTGCTGAATGCCACG  
CGATGGCTGGCACACTATCAGAGCCGTCGTAAGATGAACGCTTTTATGGCTCGGAGATAAGCCGGCGACCTGCA  
CGCAACGTTAAACGTTACGAGATGCGTAACCTCGACGCGATGGGTACAAACGCGTTAGTACTGACCCGCTGTACAAACA  
CATTCATTCACCATCACCCGCGCGATGACATTAGCTTCGGCTGTTTTATGACAACCTCAGCAGCTGCTGGCTGGATC  
TGGCAACGAGATCGACAATACACACCGCTATCGCCGCTGGCAGGCGGAAGCGGGTGATACTGACTACTAGATGTTT  
ACCGCGGAACGCTGTTGATATACCAAGCCTTCGTAACGCTGACCGCGCAAAACCTGTTCCGAGCCATGGAGCTT  
GGGCTACAGCGGTTCAACTATGCACTACCCGATGCGCGGACGCACAAAATCAGTTGATGAACTTTATCCGCTATGTG  
AAGAAATGCGATTCCTCGGATTCGTTCCAGCTCTCTCCGGTTATACCTCAATTAACGGCAAGCGCTATGTGTTCAAC  
TGGAAATACGAAAGTGGCGCAGCCGAAAGTGTGAGCCAGGCAATTTCAAAATGCTGGTTGGCACTGGCCGCAATAT  
CAAGCCGTGCTGTTGCGAGGATCCACGCTATAACGCTTGGCAGAAAGAGGACTGTTCACTCGGTGATTCGAAACAG  
ATGAACGAGAAGCTTCAGCTTCGGGATGACGAAGGTTCTAACCTCGACTTTACTAACTCCGAGACCATCCAGTGGTGG  
CAGGAAGCGTGACACACAGCTTCTGGAGATCGGTATCGACTCCACCTGGAACGACAACAACGAATTCGAAGTATGGGA  
CGGTGAAGCAGCTGTACGGCTTGGTTCAGACGATCGCGATCAAAACATAATTCGCGCGGTGATGCCACTGCTGATGATC  
GAGCCTCGATGGAAGCCAGCAACGTTTTCGCTCCGGAACGCTCCGCTACTTGTATCTCCGCTCCGGCTCCGCGGAAATG  
CAGCGCTATGTGCAGACCTGGAGCGCGATAACCGCACTAGCTGGGACACTCTGCGCTACAACACCCGATGGGTCTGGG  
GATGAGCCTCTCCGGCTGATATAACCTCGGTGACGACGTCGGCGGTTTTCTCCGCTGATAAGCCGGACCCGGAACCTG  
TGGATGTTATCCGGCGCTACTCCGCGATCCGCTATTTAGTGGTTCGCTATTCGCGCTGCTGCGCTACTTTTATACCT  
GATGTGGCAGGCATACCGCGATGATGAACCAATGCTGCGTCCGACTTTCTTGACCACGAGCAGCAGCTTCAGACTTTTG  
AAGAGTGTGATGACTTCTGCTTGGTTCGCGATATTTGGTGGCAGCGTCGTAGAGCAAGGCGAGCGCGCAGCCGCTGTA  
TGGCTCCGAGATAACGAAACTGGTGGTACGATTTCTACAACGCGAATGGTTCACTGGCGGTGATGATCACCTCGA  
CGCACCGCTGGAGAAACTGCCGCTGATGGTGGTGGTGGTGGTGGTGGTGGTGGTGGTGGTGGTGGTGGTGGTGGTGGT  
CAGAACAGACGATACCCGGAACGAAACTGTTCCCGCTGAAAGGTTGGGGACAACGTCGCGCTGCTGTTTGAAGAC  
GATGGCGAAAGCTGGGGCTACCAAACTGGTAATGCGCTTTGGGTGGAATGGGAAATGGTTGCGATGGGGCGACCATCAA  
CCTGAAAGTCAACCGCGCGGGGATATCGACCTGCATGGAGTGCATGAAAGTGTCAATACCAGTGGAGAAAACGCA  
CGTCTGCTGCTCAATGGTGTGAAAGGAGTGAATGGATGCGTTAA

>Cluster\_20533

ATGCCACGCGGAATCTACGTTACCCCCACCGAGTTTGTCTCATTCAGCGAGCCGACCAAAAGCCTGTCAGAGCAAAATCGC  
TGTCCGCTCGCGCTCGATTTGATTTTTACGGGCTGGAAATGTACTGCCCAACCTGACCCCATTTCTCAAGGCGCAGGGGC  
GCGATATCAAAATCTACCCGGAACGCGCAGCGATCCCTTAGTCCGCGGTTGATCCGCGGACGTAAGCGCGGCTGAAA  
GCGCTGGAGCAGCGTGTGCAACGCGGCAACGCCAGGCGCGGGTGTTCGCTTGTGCGTGTATCTGTTCCGCGATTTAGA  
TATCGCCCGCATCACCGGTGAAATGACCGACGCTGTGCTCTACGGCTATCAGCCGTTGAACTGATGTGGGCGGCTGGCG  
GCAAAATCATGGGCAAGTACCGATGTGGTGGTAAAGCCCGGAGTGGTTCCAGTTGATGATGGAAAACCCCTCGCTTT  
CGCGCCGTAATGCCGACTAGAGGGGAGTTGACGCCACCGTATAAAATCTGCTGCGCGCTCAGGATGCGACCTACGA  
TAAACCGTATGGTTTCCCGGATCTGTGATGTGCTTCTGGCCGCTGACCTTCAAGAAAGCGGATGAAAGTTTGGGTG  
CTGGATTCGCTGGGAGATGATTGAGGATCGGTGGCGGCTATCCCGGATGACTCTTCCGTTGATATCAAAAGGCGCC  
AGGTAAGCGGATTCAGCGATATTTACAGAACCTGATCACAATGTCGCGCAGTGAATTTCCATTGCTTGTGGGGC  
AGAATCAGACCACTGAAGCCAGCGCAACAAAGCTTCGCGCAGGCGGGCTGGAAGTACCGGATGATATCCGTGACGCT  
GTGTTCCGATATGTTGGGACGAGAAACCGTTGATGAGGTGAGCGCGGACCGACGAGGATTTATCGAGGCAAGTGTGA  
AATTCACCCCGCAGTACTGGAAGCGGAGTATCAATACAGGATGGCGATATCGACGAAACCCGCGACCTGCGCCAGTG  
GCATTTGGCGGAGGCGGTGACAGCGGATGTGCCGCGCAGGAGCTGCTTACACGGCGCTGGATGAACTGATGACAGCGG  
TAAGCTGGACGATACGCTGACGCGGCTGCTGCTCCCTTGTGCGGGTACAAAAGGCGCTGACACGAGCGGCTGCTGA  
TGGCGAACTGGCGGAACTGATCCCCAGATGAACACCGACGACCTGACAGAACCGCTGGCGGCTGCTGTTTGTGGCG  
AATATCTGGGGCGGCTCCATGAGCGTACGAGCAGTGA

>Cluster\_42913

ATGCACTATCGCAATGTGGTTTGTATGCTCTGTTCTGTTTATGCTGCTGATGGGATGTGCGGCTTTCCGCGCC  
GGAACATAATATTTACCAGAAACAGGAAAAGGCGTGGTGTACTGCGCCCTTATAAAGAAAACAAATCTTCTCTACCTG  
ACGTGAATTACAAGAGTTTGCCTGTTTACCTAATTTATTAATAGACCCGACAACACAAGATGAATGGGATAAAGTACCT  
CCTCTGACTGATCTGACAACCGACTACCTCTATGAAGGCGCACAGGCTGGTATCCTCATTACTCTGGCATAGCAGTGG  
TCCGCTATATCTCTTACGCGGGTGAAGTTGTGCAAAAACCCGACGACAACCTCCGCTCGATGAGCTGCTTCAAGGAT  
GGGTGATTTTGGCGGGATAAACACAGTCTCTATTTTGAAGGACCGCGCACCGATGACAATGGCGGAGAAAATAGTCTA  
GATATCAAAACGCTGCATCAGGTGAAATTCCTTCCCTCGGAAACCTGACTTTTGGGGCTGATATTTACGTGACGCTAA  
TTTTCTATATGTCGATGGACATCGCTCGTACCCCGAGAGTTTCCGTGCTGAGCAGAGTTCCTGGTGGAGCAGAAGTCTGGGATCAGCGAG  
GAAAGTTTTCTACCGCTTAACTCCCTGTGTTGCTATGCCATTTTGGCCCTGGGATACCTGGCTCGTACACGAGCAAAA  
ATCCTGATCAACGGCGAACAGCTTGTGCGGACCCGACACCTTTTCCGCTGCTGCGCTGGATGCCCGGCTCACCTTGAC  
CTGGCGTGAATAAACGGGCTACAGCTAAAGTCTTCGACAAGGAAAATCTGGCGTGGGATGAGGATTTAAACAAAGCACT  
GTCGGAATTTTCTCTCGCTGGAAAAGAAAGTGTTCGGCGCTGAGGGCTGACTGTAACAGGAAAGAAATTAACGGGACTC  
GATCCGGAACAGTTTACCCCATCAGTGTGCTGTCGACAGTATCAGGACTCGCTTTATACCATCATCGAAACAGAGTCT  
TGGTACCGCAAGCTGGAGATCGTGAACCTGATGATCCCAATCTTATATCAACAAACGTTTTCAACGCGGGAAACGCGC

ACGGCTATTTACTTACGCGTGCCGAAGGGTGGCCATACCATTCCGGTTTACACGTGTTTGAATCTGACGGACCGTGATC  
TTACTGGATAACCCTCTCCGGATGAACCGGAAGCCATCTTAATGACCATCCCTTTTTCGCGAGATGGTATGCCCGGA  
TAACCGCTACGTTTACAGCTTTGATGGCGCGCAGCTCTGGCGATACCGCACTGCGGATCCGAAACAAGTTCGCTTAATCT  
GGAAGGAACAACATTCGGGATATGGCTACGGGGTAAATTCAAAAACGGGATATCTGGACGGAAAAATACCGATGACGGC  
GAATTTATTCCTGCCCGCGCAATGAGGGCAGAAAAATGA

>Cluster\_25873

ATGAATACACAACAATTGGCAAACTGCGTTCATCGTGCCCGAAATGCGTCGCGTTCGGCACATACATTTTGTGCGGCAT  
CGGTGGTGGCGGTATGGGCGGTATGGCGAAGTTCGGCCAATGAAGGTTATCAGATCAGTGGTTCGGATTTAGCGCCAA  
ATCCGGTACGCGAGCTTAATGAATCTGGGAGCGACGATTTAATTC AACCATCGCCCGGAAAACTAGCTGATGCCAGC  
GTGGTCTGTTTCCAGCGCGATTTCTGCCGATAACCCGGAAATGTTGCAGCTCATGAAGCGCGTATTCGGTGATCCG  
TCGTGCCGAAATGCTGGCTGAGTTAATGCGTTCGTGATGCGCATCGCCATTCGCCGAAACGCAGCGCAAAACGACAACCA  
CTCGCATGGTTCAGCACTACGCGAGAAGCGGGACTCGACCAACCTTCGTTAACGGTGGGCTGGTAAAGCGGGCGGGC  
GTTCAATGGCGGTTTGGGGCATGGTCGGTACCTAATTGGCGAAGCAGATGAGAGTGTATGATCGTTCCTGCAACCC  
GATGGTGGCGATTTGACCAATAATCGAAGCCGACCACATGGATACCTACCAGGGCGACTTTGAGAATTTAAAACAGACCT  
TTAATAATTTCTGCACAACCTGCGGTTTACGGTCTGTCGGTGTATGTGTTGATGATCCGGTGTATCCGCGAATTTATTA  
CCGCGTGGGGACCTCAGACCCAGACTTACGGCTTCAGCGAAGATGCCGACGTGCGTGTAGAAGATTATCAGCAGATTTGG  
CCCGAGGGCAGCTTACCTGCTGCGCCTGGACAAAGAGCCGATGGCGCGTCAACCCTGAATGCCCGAGCGCCATACAGC  
CGCTGAACCGCGCAGCTGCGGTTGCGGTTGCTACGGAAGAGGGAATTGACGACGAGGCTATTTTGGCTGCGCTGGAAGC  
TTCCAGGGGACGGGGCGCGTTTCGATTTCCCTCGGTGAATTCGCCCTAGAGCCAGTGAATGAAAAAGCGGTACGGCAAT  
GCTGGTGTAGTACGACGCGCCACCCGACGGAAGTGGACGCCACTATTAAGCGGGCGCGCAGGCTGGCCGGATAAAA  
ACCTGGTAAATGCTTTTACGCCGACCGTTTACCCTGACGCGCAGCTGTATGATGATTTCCGCAATGCTGTGCTGACGAG  
GTTGATATCTGTTGATGCTGGAAGTGTATCCGGCTGGTGAAGCGCAATTCGGGAGCGGACAGCCGTTGCTGTGTGCG  
CACAAATTCGTGGACGTGGGAAAAATTGATCCCATTTCTGGTGGCGGACCCGGCGCAGGTAGCCGAGATGCTGGCACCGGTAT  
TAACCGGTAACGACCTGATTTCTGTTACGGGGCTGTGTAATATCGAAAAATTTGCTGCTCTTTAGCTGAAATCAAACTG  
AAGCCGAAACTCCGGAGGAAGAACAACATGACTGA

>Cluster\_24055

ATGGGCGACGCGCGTGGCGAGACTCAGTTGACAGAAAAAGGGCTAAACCGCATGAACACCTTATTTAATCAGCCTTTGAA  
GGTTGTGAACGCGGGACTACACAGTTTTTCTGACAATAATCAACATGCCGGGGGAAGCAATTCACATCAACATGGCAGC  
CACCAGCACAAAGCGATATTGACGCTGGATTGGATCTGGCATCGTGTGCTACGTCATCCCTGGTAGAAAAATGCCAACCAA  
ATCGCCATGACACGTTATCTCGAAGCACAAACCGTGTGGTGGATGTCATGCTCGCTAAAGAGCCATTCAGCAATGGC  
TGAACAAAAACGATTTTGCACCTGCGCCCGCGATTGCTGGGAAGAGATGTGTGGTCCGGTAAAAGGGGCGATTTATG  
GTGCCATGCTGTAGCAAGGTTGGGCCACCAGCCAGCAAGACGCTGAAAAACCAATAAACCGCAGCGCAATTCAGCCTGGC  
CCTGTGTCATTTATCAGCGGTTGGCCCAATGGCAGGCATCATCAGCCCGTCGATGCCGTTATGGGTGGTAGAAAACAA  
AACCACGGCCACCGTACTTTTAGCAATTTCAATGAAGTCTGGGTAAGGTTCTCCGTTTGGCGCAATAACGATGAAG  
TTCTCAATCTGCGCTGGATGCGCGATGAACGACGCGGCAATGAAAGCAGCAATCGCACAAACGCGGAGCTGGAA  
CTCAAGCCATTAATGGCGCAGGCGCTGCATATGGGGATGAAGTTCATAAACCGCAATGCTGCCCTACCGGTTGCTGAT  
TAAGCGCTGCTCCCGCATTTGCTGGCTGCTCTTCCACAGGAACATATCCAGCGCTCGTGGCATTATCACCAGGTA  
ACGATCACTTCTTCTCAATCTGTGCGATGGCGCGCTGTAAGCAATGATGGATGCCCGCGCAATGTACCGTTCAAGTTCA  
ATGGTTACGGTGTATGGCGGTAACGGGGTGAATTTGGTATTTCCGGTTCGCGTACTGGCGATCGTGGTTCAGCCTCC  
TGCCAACTCGGTTGAAGGTTCTGTTTCCCGGATTTGGCGTTGACGACGCTGTGCTGACCTGGGTGATAGCGCAATTA  
CTGAAACCGCAGGTTGGGTGGCTTCGCGATGGCGTCTGCGGCGATCGTCAAAATTTGTGGGAGGCACCCCTGCCGAT  
GCCACCAATAACAGCCGTCGGATGCAAGCAATCACCCTCGGCGGTAACCCCGCATTTACACTTCCAGCCCTCAATTTTGC  
CCCCACCGCAGGAGGATTTGATGCGCGTAAAGTACCGATCGCGCATTTTACCGGTCATCAATACGGCTACGCCACA  
AACAGCGGGGGTGGGCAAAATTTGGTGGCGGATACCCACTGCGCCGATGGCTGTTTTGTGCGCGCTGTACGTGACCTG  
GCGGAGATCGTCAAAGGAGAACCATCATGGTTAA

>Cluster\_6742

ATGCAAAACGAGTGTATACCCGCGCTTACCCTACTTTGCGCCCGCTCGGTTTATAAACAGTATTCAGGGGTCAATGTCTT  
GAAAGGCATCGATTTTACGTTGTCATCAGGGGAGGTTCCACGCCCTGCTCGGCGCAATGGTGGCGGTAATTCGACGTTAA  
TGAAGATTTATGCCGGTATTACCCTGCTGATAGCGGTACGCTGGAGATTGAGGGCAACAACCTACGTCAGATTAACGCCA  
GTTTCATGCTCATCAGCTGGGTATTTATCTCGTTCCCAAGAACCGTGTCTTTCCCAAGCCTGTCGATAAAAAGAAAAAT  
CCTGTTTGGGCTGGCAAAAAACAGCTCTCCATGACAGAAATGAAGAACTTGCCTGGCGCGCTGGCTGCCAGTTTGATC  
TGCAATGCTTGGCAGGATCGCTGGATGTCGCGGATCGCCAAATGGTGGAAATCCTCCGCGGCTGATGCGCGACTCGCGG  
ATTTCTGATCCTCGATGAACCTACCGCTCGCTTACCCTGCGGAAACCGCAACGCTTGTGTTAGTTCGCTTCAAGAGCTGCT  
TGCTACTGGCTGGGTATTTGTTTATCTCGCATAAGCTGCGGAAATTCGCCAGATTTGCCGATCGAATTAGCGTGATG  
CGACGGAAACCTACGCTTAAAGCGCAAAACAGCAACTGCTTACCGACGACATTTATTCAGGCAATCAGCCGCGGTA  
CGGAAAAATCGCTCTCTGCGAGCAAAATTTAGGCTGGAGTTACCTGGTAAACCGCCACAACATGCGCGCGGAACGCC  
GGTCTGACACTGAAAAATCTGACCGGGCAAGGTTTACGGAATGTCAGCTGACGCTCAATGCCGAGAAATTTGGGCG  
TGGTGGGCTGGTGGGGCGGACGACAGAACGCGGAGACGCTCTATGCTGCGTACTTTGCGTGGCGGACGAT  
ATGCTGAATGGTAAAGAGATCAATAAATTTATCCACTGGAGAAGCTTTACTGCGCGGCTGTTTATCTGCCGGAAGATCG  
CCAGTCATCCGACTGAAATCTCGATGCTTCGCTGGCCTGGAACGCTGCGCCCTTACTCATAACCTTCGTGGATTTCTGGG  
CGAAAAACCGGAAAGATAATGCCACCCTGGAACGTTATCGTGGGCGCTGAATATTAATTCACCAACCGGAAACAGCT  
GCACGGACATTTACCGGTGGCAACCAGCAAAAAATCCTATGGCAAAATGCCCTGGAAGCTTCGCCGCAAGTATTGATTT  
CGATGAGCCGACGCGCGGCTGGATGCTCGGCCGCTAATGATATCTACCAGCTGTTGCGCAGCATCGCCGCAAAAAATG  
TGGCTGTGCTGCTTATCTCCTCCGACTGGAAGAGATCGAACTGATGGCAGATCGTGTGATGATGATGATGATGATGATGAT  
ATTACCCTCTGCACTGACCGAGCGGATATTAATGTGAGACTATTTATGCGCGTGGCTTCGGCGATAGTCAGCGTCA  
GGAGCGTCAATGCTGA

>Cluster\_22526

ATGGCAATCACTAAATCAACTCCGACCATTAACCGTGGGACGTTATGGTGGCTCACTATTGCATTGTCATTAGCGAC  
GTTTATGCAAAATGTTGGATTTCACTAATTTCTAACGTCGCAATACCGACAATATCTGGCTTCTGGGAGCATCAACAGACG  
AAGCCACCTGGGTTATCACCTCGTTTGGCGTAGCAAAATGCCATTCGCGATCCCTGTTACCGCGAGCTGGCACAAGAATA  
GGCGAATTAAGGTTATTTTTACTTTACGTAACCTTTTTTTCGCTGCTTCAATTAATGTGATGTTATCGACCAATCTAGA  
TGTGCTGATATTTTTTAGAGTCTGTTACGGGTTAATGGCGGGGCGTTAATTCACCTGTCACAGAGTTTATTTAAGGA  
ATTAATCCACCAGAAAAAGAACATTTGCTCTGGCATTATGGTCAATGACCGTGATTTATCGCTCCGATATGTTGGGCCGATA  
TTGGGCGGCTATATTTGGGATAACTTTAGCTGGGTTGGATATTTTTAATCAATGTCCTTATGGGATTTGGGATTTGATG  
ATTAATGCTTAACTTACTTAAAGGAAGAGAACTGAGACTTCACCGGTCAAAATGAATCTACCAGGACTGACCTGTTAG  
TGCTCGGTTGTTGGCTTGCATAATGCTTTGATAAAGGGCGCGATCGGATGGGTTCAACTCGAGTACAATAAATA  
CTAACAGTATGATCAGTTATTTCTGATCTTTAGTCAATTTGGGAGTCGACCTCAGAGAATCCGATTTCTTACCTCAG  
TTTTGTTAAGTCCGTAATTTACCATTGGTATTTGTGATGATACATGCGCGTATTTATTTTACTCTGGAGCGATGTTCT  
TTATGCCGAGTTACTCCAGAAACGATGGGGTATAATGCGATATGGCGGACTTGCCTATGCGCCCATCGGATCATG

CCGCTATTAATATCACCTTTTGTATAGGACGTTATGGCAACAAAATAGATATGCGGTTGTTGGTGACATTTAGTTTTTGGAT  
GTATGCGGTTTGTACTTACTGGCCTTCTGTGACATTTATGCCAACGATTGATTTTACAGGCATCATTTTGCCACAGTTTTT  
TTCAGGGATTCGCGCTTGCCGTGTTCTTTTACCCTTAACAACGATTTTCGTTTTCAGGCTTGCAGATAATAAATTGCC  
AATGCCCTCGAGTATAGTAATTTTTTTCGCACCTTGTACAGGATCAGTTGGTACGCTCGTTGACAAATGACACTGTGGGAGC  
CCGGCAATCGTTACACCATAGTCAAGTTGACAGCAACCATCGATCAATTAACCCTGTTAATTCATCGTCAAAAATTA  
TGGATAAATACTATGGTTTCGCTTTCAGGAGTTCATAATGAAATAAATAAGAAATACTAGCAGTCACTTCTATTTCT  
GCAAATGAGATTTCCGTAATGGCGCTATGCTTTTATCTTACTTACGGTTTTGGTTTTGGTTTTGGAAACCGCGTTTAC  
AGCGAAAGCGCTTGGGTGA

>Cluster\_25824

ATGAAGAATGAAAAGAGAAAACGGGAATAGAACCAGGTTTTCTTTCCGCCGTAATAATCGTGGCATACTTTGTTG  
GCTTACAGTCAGAGATCTGGATGCAGCGAATGTGCTTATTAATGCTGTATTACGTACGTCACCAATGTATGGGGATGGG  
CATTTGAATGGTATATGGTAGTGATGCTTTTCGGTTGGTTCGGCTGGTGTGGCCGATGCCAAAAAGCGTTTTAGGT  
AACCAACCACTGAAATTTAGTACCGCCAGTTGGATCTTTATGATGTTTCGCTGTGACGTCGTCTGCTGCTGACGTTCTG  
GGGATCGATTGAGATCTACTACTACATCACCACCGCCGTTTGGCTTAGAACCGAACCGACAGGGGCGAAAGAGTTGG  
GGCTGGCTTACAGCTTGTTCACCGGGACCTCGCGTGGGGCACTTATAGCTTCCTTTCTGTGCGCTTCGCTTACTTTC  
TCTTGTGTCGGCAAAATGGAAGTATCCGCCAGCTCCACCTGGTGGCGCTGGTAGGTGAAAAACCGCAAAGGGTT  
GTTCCGGCACTATCGTCAACAATCTATCTCGTCCAGGATCTTTCGCGATGGGTACCACTGGGCTTGGCCATGCCACCGCC  
TGGTGACCGAGTGTATGCAATGGTGTGTTGGCATTCGGCATACCTGCAACTGGACGCTATCATCATTTACCTGCTGGATT  
ATCCTCAACGCCATTTGGCTCGCTTGGGCTCGCAAAAAGGGGTACGATCGCCAGTGACGCTGCTAGTTACCTGAGCTT  
CCTGATCGTGGTGGTGTTCATCGTCAAGTGGCCAGCTTATCATGAATGAATCACTACTTACCGATTCGTTGGGATGTTGC  
TGATGATCTGCGCGCATGTTGTTCTATACCGATCCCATCGCTAAAGCGGCTTCCCGCAGGGCTGGACCGTGTCTAC  
TGGGATGGTGGGTGATTTACGCTATCCAGATGAGTATCTTCCGCGCCGCTTCCCGTGGTGTGCTGCTGCAACT  
GTGCTTCCGCATGTTGCTGGGGTGACAGCGCTAACCTGGATCTGTGGACTGTTACTCGGTAGTAACACTCTGCTGTTGA  
TAGATAAAAAACATCAACATCCAAATCTGATCGAACAGTACGGTGTGGCGCGCCATCATCGAAACCTGGCGCCTG  
CTGCCACTCAGCACCGCCACCATGTGGGCTTCTTCATCCTCTGCTTTTATGCCACCGTTACGCTGGTAAACGCTGCTC  
TTATACCTTGGCGATGTCCACTTCCCGGAAAGTGGGTGACGGCGAAGAACCCGCTGTGGTGGCATTGGTTGGTCAAG  
TTCTGGTGGCATTATCGGCATTGTTCTGTGCGCTCGGGCGCTGAAACCGATTCAAACCGCCATTATCGCCGGAGGA  
TGCCCGCTGTTCGTCACATCATGGTGACGCTCTCCTTTATTAAGACGCGAAACAGAACATGGAAGATTA

>Cluster\_40930

ATGATTAGTGAATCACACAATAAGGCACTAAATTAACAAAGAAATAAGTGCTAATGATATTAATATTTATGATAT  
GGATTCTTTACTTTACTTATTTGGTATAAATGGTTCAGGGAAGACAAAATCCTTATGTAGCATAATTAACATTTCTTTTC  
CTAAAAATAACATGCAATTAACAGGCGATTGTACAATATAAACCTTAGCGGTAAGAAGATAGATCATCTGAAATTAGA  
AATGGGGAGTTATATATTTACCCCATTACCATTTAGACCAAAGTTGAATATAGAGATAGTAGGTTTATTAACGCATC  
TCCAAGCTGAAATGGAATAACTGTATTTGACCTTATCGAATACAAGGATTAATACTGACTTTGATATTTATCCAA  
AAGTTGTTGCCATGAAGATGACAACATTAAGAAAGTTGCAAGATAAATTAATATCGCTTTAAATAAAGATCTT  
AATCAGAACAGCATACTACTGAATCACGGCTCCTTTGATATTTTGTGATTCAGTGCAAAATGATGATGATATAA  
TGACGATTCAGACACTATAAATAATAGTACCAATAAAAATTTCAAGCAGAAATGATTTCTATATGACAGCGTTGCTCCG  
CGCATCTGATTTGATGAAATACTTTCATCGCGAGGTGAAGAAAACCTCTTTTCCATATTTAGCATAATAGATTTGGCAAGT  
ACAAAACAGACTTCAAGTATAACGTAGTAAATCCATTTAACAACCACTTAAATTTAACAATCCGTTCAAATAGAAA  
ACTCAGAGAGACTAAATTAATTTAGAAAGTGAAGGCAAAAATAGATAGTTTACTTAAATATAAATAATGAGTAAAAA  
ACCATGAAATCATAAAGGATTCAAGACTAATGAATCAACTTTAAGGTTAGAAATTCGAAATAGACCCTTACGAAAGACA  
AGTTAATTAACAAGATAACTTTGAATGATATTTTAAATAATGATTTTTCTGATATGAGTTCGGGCAATTTGCTATTTCT  
AGCTCAAATTTGGCGCATCTCTGACTCTATTACTAAACTGATCAGATAGAGGTATCAGATCAATACTACTATAATAGATG  
AAGGGAGCGCTTTTTTACATATCGATTGGCAAAGGAAATATTTCTAAATTTAAATAAATGCAGGCTCATTTAAACA  
TCTCTGGGATAGATAAATTTACAACCTTATCTAGCCTCGACTCTCCATTGTTAGCCAGACGTTCCCAAAGACTTTTAT  
AATAGACTACCAATGAAAATGCTACGTTAAGTGGTTTTGCACTCCTCCTTTATATTTACTAAATGAATCTTTGGAA  
CTAAAACCATTTGGGAAATTTGCAACAAAATAAAATGAAACCATCATCGACAAAATACCTAATAAGAAATGATGATAA  
GATTATTACCTTATAAATAATATAGACAACCTCTAATAAAAAGGCAAAATCGAACGTTAATTTATGACAGCATAAGGATG  
A

>Cluster\_2753

ATGGCACGAAACAAACAGCCCTGCGGCGAAGTGCAGCGCCACAGCTGATGGTATGAGAATTTATGCCCGGCTAGG  
GATGCAGACACCTAACAGCACTCAGCATCCACCTACCAGGCTAATTTACCAGTCTGAACCGCATGCTGGTGAATGGT  
CCTATCGTTCACTCTGGATCATCGCGGAAGCAGTCGATGCTATCCCGGATGATATGACCCGAAAGGCATTCGATCAGC  
TCGGAATTTGATGCAAAGATCGTGGCATTCGAATCAACAATGGATGAGTTGCAAATTCGGGATCGGCTGAAATGCAGT  
GCTGAAATGGTGGCGCTTACGCGCGCCGCTGCTTATCATCATGATTTGAGGGGCGAGCACCATAAGCACCCTGCGAC  
CCGAACCATCGGTAAGGGCAAGTTAAGGGGATTTCTCCGCTCGACCCTGGATGATCGACCGGTACTGACCCGCCG  
ATTAAGATATGGGGCCGACCTGGGTAACCTGAGTTTTACGATGTGGTGACACAGCAACGGGAATTCCTGCTGGCG  
CATTCATCAAGTGCCTGATTTCGCTTTGATGGGCTCACGCTGCCATTTGACAGAGAAGATGACCGAGAACGAAATGGGAA  
TGTCGTTGTTAGAGCGTATCTGGGATCGTCTTACCAGCTTCGACAGCGCTACTGTGCGCGCGGCTGGTCTACAAAG  
GCGCATCTGCGCACCTACAGCTGGGAAAGCTACGCGAGCTTATCGCACTTGGTGGTCTGCGTATGAAGCCTTGTGAA  
GAATATCGACCTGATTGACAGTTCCAGAGCAATGAAGGTATGACACTCATGGACTCGCGGTAAGTTTGAACGCATC  
AGTACAGCTTCAAGTGGTCTGGATGATCCTTTTCGAGTGTGCAAGACAGATAGTGGCGCTGTTGGTATCCCATGGTG  
CGGTTGTTCCGACAGTCCCAGAAAGGATTTCTACCAGGATGCAGACCTTGCCAACTATTACGACCGGGTAAGCTCGTT  
ACAGGAGAGGGCTTTACGCTTTCCGGTGCGCGGATATCGGATCATGCATGCTGCGAGCTTGGCAAGCCGCTGCCGG  
ACGATTTACAGTTTAGGTTTAAACCGCTTGGCAAAATGCTGATGTCGATCGCTAACCGTGGCGTTAAAACACTAAAC  
GCAATCAGTACGGCGTGGGTGATGGTCTGATGACACTGAAAGCGCTATGACGATTTGCGCGAAATTTCTGACCTAAC  
CGGCATCGGGGCTATCCATTACGACGAGGACATCGAGAATGCCGAAGTGAAGCGCGCCCGGATCGGGCAATCTGATG  
ACGAACCGCAGGAACCGTCAAGCGGAAATCCGCTATCGAACACCGCTACGCAGGATAGCGGGCGGTGCGAGACATCCT  
AAATGGTCTGCTACGATGGTCAATGA

>Cluster\_23024

ATGGTTACTATCAATACGGAATCTGCTTTAAGCCACGCTCTCTCGGGATACCGGGCTATGAATATGTTGTTTCCGT  
AGCTGCTGCGGTCCGAGGATTTGTTATTTGGTCTTGATATCGGGCTAATCGCCGAGCTTGCCGTTTACCATCCGATCACT  
TTGTTGTTGACAGCCGTTTGCAGAAATGGTGGTCAAGTCAAGTATGCTCGGCGGGCAATGGTGGCTGTTTAAATGGT  
TGGCTGCTGCTCCCGCTGGGGCGTAATAACAGCCTGATGGCGGGGCTTCCCTGTTGTTGCTCGGTGATAGGGTCCC  
TTTTGCGACAGCGTATAGATGTTAATCGCCGCTCGAGTGGTGTGCGCATTTGCTGTGCGGATCGGCTTTACACCGCTC  
CTCTGTATCTTTGAAATGGCAAGTAAAAACGTTCCGGTGAAGATGATCAGTATGTACAGTTGATGGTCAACCTGCGC  
ATCGTGGCGGTTTTTATCCGATACAGGCTTCAAGTATAGCGGTAACGCGGCAATGTGGGGTTCTTGTCTTACC  
AGCAGTCTGCTGATTTATCTGGTGGTCTTCTGCCAAATAGCCCGCTGGCTGGCGGAAAAGGGCGCTCATATTGAGG  
CGGAAGAAGTGGTGGTATGCTGCGCGATACGTCGAAAAAGCGGAGGAAGAACTCAACGAAATTCGTGAAGCCTGAAG

TTAAACAGGGCGGTTGGCATTGTTTAAAGATCAACCGTAACGTCGCTGCTGTGTTTCTCGGTATGTTGTTGACGGC  
GATGCAGCAGTTTTACCGGTATGAACATCATCATGACTACGCGCCACGTATCTTCAAAATGGCGGGCTTTACGCCACAG  
AACACAGATGATTGGGACTCTGGTCTGGGGCTGACCTTTATGTTCCGCCACCTTCATGCGGTCTTTACGGTAGATAAA  
GCAGGGCGTAAACCGGCTCTGAAAATTTGGTTTACGCGTATGCGGTTAGGCATCTGGTGTGGGTTACTGCCTGATGCA  
GTTTGGATAACGGTACCGCTTCAGTGGCTTGCTGGCTGCTGTTGGCATGACGATGATGTTGATTGGCCGATATGCGA  
TGAGCGCCGCGCCAGTGGTGTGGATCTTGTGCTCTGAAAATTCAGCCGCTGAAAATGCGCGGATTTTGGCATCACCTGCTCA  
ACGACGACAACTGGGTGTCGAATATGATTATCGCGCGACCTTCCTGACACTGCTTGATAGCATTGGCGCTGCGGGTAC  
GTTCTGGCTCTACACTGCGCTGAACATTTGGTGTGGGCATCACTTTTTGGTCACTTCCGGAAACAAAAATGTCACGC  
TGGAAACATATCGAGCGAACTGATGGCAGGCGAAAAGTTGAGAAATATCGGCGTCTGA

>Cluster\_22077

ATGCAGGAAAATATATCAGTAACCGATTATACAGCACCGGGAATGCCGCACAGGCAATGCTGGAGAACTGCTGCAAAAT  
TTATGATGTTAAAACCGCTGGTGGCGCAGCTTAATGGTGTGGGTGAGAAATCACTGGAGCGCGCAATTTTAAAACGTCGCGC  
TGGCGAATGACTCGGCATGGCACCGTTTTAAGTGAGAAAGATTTCGCCATCTGCAAAACGTTGTTACCCAAACCCAGCGAA  
CATCATCCGCATTATGCGTTTTGCTTTATCGATCTATTTGCCGGAATTTGGCGCATCCGTCGCGGTTTTGAATCGATTGG  
TGGACAGTGGCTGTTTACAGCGAATGGAACAAACATCGCGTACGCATTTATAAAGCCAACCATTTATGCGACCCGGCGCA  
CGCATCATTTTAAAGAATATCCGCGACATCACTCCAGTCAAGAAAGCGTGAGTATGAGGCGCGCGGGAACAT  
ATTCGTCAACACATTTCTGAAACAGCATGTTTTACTGGCCGTTTTCCCTGTGACGCCATTTTCGCTGGCTGGCGTATCGAA  
AAAGAACTCGCTCGGGCGGCGCACGGTTTTGCCTGCGATACCCAGGGCACGCTGTTCTTTGATGTGGTGGCATTATCG  
ACGCGCGTCTCGGGCGATGTTTTGTGCTCGAAAACGCTCAAAAACCTGAAAAGTACGATAAGGGAAAAACGTTCCGCAATC  
ATCATCGACAGCTGGACGAATGGGCTATGACGTTGCGCAGCAGAAAGATAACGGGCGGACGATCCGAAAATCATCGA  
CGGTAACATTTCTGCGCAGCACCGTGAACGATCGTGTGCTGGTGGGTTTTCTGTCGCGATCTGAATCTGAAAAGCGATT  
TTACTCTGCGTGATATCAGCGAATGTTTTCCCTGCACAGCGAGTGACGCTGGCGCAGCTGCTGGACCCGATGGTTGAGGCA  
AAATATATCTGACGCGCGTGTGTGGAAGTACCTCTATCGTTATGCGAAAAACATCAGGCACGCGGTAACGGCTTCCG  
TTATGGAATGGTTTTATCCGAACAATCGCAAGCGTACGCGTACGCTGTCTGCTGTTATTAACAAGATGCGCGGAAA  
TTTTAATCGATCGCGTTGGGATATGGCCACGGGTGAGAAAGACTTTGACGATCCGCTGAATCAGCAACATCGTCCACGT  
CGGTTAACGCTCGTGAATGTGCGCGCTTAATGGGTTTTGAAGCGCGGGAGAAAGCGAAATCCCGATTCCGGTTTCGGA  
CACTCAGGCTATCGCCAGTTCCGGTAACTCGGTGATCGTACCGGCTTTTGCAGCGGTGGCAAACTGCTTGAGCCAAAA  
TCAACAGGCGGTTGGCTGCGTACGCAAGAGGCACAACATGGCCGACGTTTACGATAA

>Cluster\_28028

ATGTCAGTCAAGTCCGCTCAGTTCAATTCAGGCATCGGGGATTGCACTTTGTGACAGGCGCTGTTCCCTGAAGGCCAGCGC  
AGCCGGGCAACAGCAACCGCTACCCGTTCCGCCGCTGCTTGAATCTCGCCGTTGGGCAACCGCTGTTTATGACTGTACAAC  
GTGCGCACTGGTCAATTTACGCGAGGACACCGCATCGGTTTGGGGAATCAATGGTTCGTTACCTGGGGCCGACTATCCCG  
GTCGGAAGGGGACGATGTTAAGCTTATTTACAGCAATCGCCTGACAGAAAATGCTCAATGACGGTGGCCGGGCTACA  
GGTACCTGGTCCGCTGATGGCGGCTCGGCACGGATGATGTCGCCAAACGCTGACTGGCACCCGCTACGCCCATTCCGCC  
AGAACGCGACTCTGTGGTATCAGCCAATACTCCCAACCCGCGCTCAGCAGGCTATAACGGCTTGGCGGAATG  
TTCGCTGGTGAAGATGTAAGTCAAGTCAAGTCAAGTCAAGTCAAGTCAAGTCAAGTCAAGTCAAGTCAAGTCAAGTCAAGTCA  
GGATAAACGGCTGGATAACTTTGGTACGCCAGAATAAACAACCGGGAAGCGCGGCTTTGTTGGTGATACGCTGCTGG  
TTAACGGTGTACAAGCCCGTACGTTGAAGTCTCGCCGCTGGTGGTGGCTTGGCTGCTGTTGAACGCGCTGCAACTCTGCT  
GGTGAAGCAACTTTTCGCTGGCACCGGGCAGCGCTCGTAGATTCTGGTGGATAAGAGCAACGGTGTATGAAGTGTGCAATTA  
CCTGTGGCAAGCGGCGAGCATTGTTGATCGTATTCGTGGCTTCTTTGAGCAATCCAGCATTCGTTTCTACGCTGGTGT  
CTAACGCTGCGCCCAACCGGCTTCTGCGCTGGTACAGACAGTCTTCCGATGCGTTTGGCTGCAACTGAAATCATGCG  
CGGTTCCCGGATTCGCGATATTAGTCTGGGTGATGACCCGGGATTAATGGACAACATGTGGGCTCAACCGTAA  
TTGATGTCACCGCGCAGCAAGGAACGTTGGAACGCTGGACGCTACGCGGGACGAGCCGCAAGCGTTCATATGAAGGC  
GTGATGTTCCAGATCCGTAACGTTGAATGGCGCATGCCGTTCCCGGAAGCAGAGGCTGGAAAGATACCGTTTGGGTTGA  
CGGACAAGTGGAGCTGCTGTTTATTTCCGTTACGCTTCTTGGGCGCACTTCCCGTTCTACTTCAACAGTCAAGCGCTGG  
AAATGGCGGACCGTGGCTCGATTGGGCAACTGTTGGTCAATCCGGTACCGTAA

>Cluster\_50007

ATGACCTCGATTAACTCTATCTTTGAACCGTTCATTGAGGCGCATCGCTACAAAGTCCGCAAGGCGGTCGAGGTAGCGG  
TAAGTCATGGGCAATGCGAGGCTGCTTGTGAAGCGGCGGCTCGTACGCTGTCGCTATCTCTGCGCTCGTGAACCTGC  
AAAACAGTATCAGCGATTCCGTAATCCGTTGCTTGAAGATACCATCGAGCGTGAAGGTTATTCCGCTGAGTTTGAATTA  
CAGCGTTCAATGATTCGTCATCTCGGAACGAATGCTGAGTTCAATGTTTACGGCATCAAAAACAACCCGACGAAGATTAA  
ATCGCTCGAAGGCAATGATATATGCTGGGTGGAAGAAGCGGAAGCGGTAACGAAGGAATCATGGGATATCCTGATCCAA  
CCATCCGTAAGCCGTTCTCTGAAATATGGGTGAGCTTTAACCCGAAGAATCTCTCGACGATACCTATCAGCGATCTGCT  
GTAATCCCTCCGATATTTGCTGCTGACGGTGAACCTACCCGACAAACCGCACTTTCTGAAAGTCTCCGCTGGA  
GATGGAAGAGTGAACCGAGAAATCCGACACTGTATCGTCAATCTGGCTTGGTGGAGCGGTAAGCGCAAGTATATGG  
CAATCATCAACGAGAAATGGCTTGAAGCTGCAACCGATCGCACAAGAAACTCGGATGAAAAGCGAAAGGCGCTGTTGTC  
TCTGCGCATGACATCAGATACAGGGCCAGATGCTAAAGTTATGCAATCGGCTATGTTTCGGTAGTTAAGCGCATTCG  
CGAAGGCTGCTGATGGACATCAACGAGGCTGCTGACTGGGTTACTTCTGCTGGCGATTGAAAGCGCGCTGACCATTACC  
TGTGGGATGGTATGGTGTGGTGCAGGTTACGACAGACAGCAACGGAAGCGTTCTCCGGTAAGAAAATCACCGCCAGC  
ATGTTCAAGGGCAGCGAATCGCCATTGATGAAGATGCACCATATCAGGCCGAGCATGGGCTGATGAAGTCTGTCAGGG  
CGACAACGTTCCGCACTATTGGCGATGTTTCCGCAATAAGCGAGCACAATCTATTACGCGCTGGCTGACAGGCTGATC  
TGACATATCGGGCGGTTGTTACCGGTGAGTATGACAGCCAGACGACATGCTGAGTTTCGACAAAAGAGCGATAGGCGAG  
AAGATGCTGGAGAAGCTGTTGCAAGACTGACGCGAGTTACGCGCAAAATCAATAACAACGGGAAGCTGGAGCTTATGAC  
TAAGGTCGAAATGAAGCAGAAGCTCGGTATCCATCTCCTAACCTGGCTGATGCGTTGATGATGTTGATGATGATGATGATG  
AGTCCGCTGCGCAACCCGACTATTCAGTTACTCAATTCCTTGGTGTAGGTTGA

>Cluster\_58298

ATGCACTCTGAAAAAGAACTTGTAGTATCACAATAGCATGGCTTGCACCTCTGGCTATCACCTTCAGGCTAATGC  
AGCAAACTATGATACCTGGACTTATATCGATAATCCCGTTACAGCACTTGATGGGATCATATGGATAAGGCAAGGCATG  
TAGATGGCAACTATGTAACATATAGTGGTTTTGTTGCTATTAACAACAACCAATGGTGAATTTGATCAGTCTTAAACCGC  
GATACCGTTAACGGCAGCATCTCAACCTATTTTGAACCATGATATGACAGACAGTACTGCTAATCAGCTTGATATCAG  
TAATTCAGTGATTCACGGTTCGATTACTTCTATGCTGCTGGCGTTATATGATCGTTTGTATGATGATGATGATGATGATG  
TGGGTGGATATGATTTTTACTGATGCGGTTGTTGATACACTGCGGCTGATGGTGTGATGTTTCACTTTGAACATTTGCT  
AACACTACTATTGATGATGATTAAGACTTTTTACTTCACTGATTTCTATAAAGATGGTGTGATGATAACCAAGCACAAA  
TGAGACATTTGATAAAGTGAAGGCGTTGCTGTTAATCTTGTATGATAAAGTAAACATCAATATTTCCAATAACTCCCGG  
TTGAGGATTTGATATCTCAAGGTAATACTTACAACGAAACCTACACTACCGAATCTCATACTTGGGATAACAATATC  
TCTGTAAGAGATTCACAGTGCATTCGGGTTCAAATTAATCTTGAATAGCAATACTTATGGCAAACTGGTCACTTTGG  
CAATTTGATGAAACCGAGTATGTTGCTGGCCGGGTGATGTTGCAATGCTTTACTGCTTCCAGTTCCGACTATGCGA  
TGAAGACAAATGATTTCTCAGCAATTCACGCTGATGGTGTGATGTTGCTTTACAGCACCTGGAATAGTAATTTGAT



CCGAATGGTCATGATTCACACGGGTGACGGGGTGAAGATAACACGGGGTGGACTGATGATAGCCTCAACGTTGATGA  
ACTAAATCTCACTCTCGATAACGGGAAGCAGTGGGTTGGTCAGGCAATTTATAACGTTGCTGAAACGTCAGCAATGTATG  
ATGTTGCTACAAACAGCCTTACTCCTGATGCAACATATGAAAACAATGACTGGAAACGTTGTTGATGACAAGGCTTTC  
CAGAGCGGTGATTTAACGTAGCGTTGAATAACCGTTCTGAAATGGGATACTACAGGTCGTTCCATCGTTGATACCTTGC  
AGTTAATAATGGTCTCAGGTTAATGTTTCGGAATCTAAATTAACCTCAGATACTATCGATTTAATAACGGTCTTCGCG  
TGAACATTTGGTGAAGATGGCTACGTTGATACCGATCATCTGACTATTAACCTCCTACAGTACTGTTGCGTTGACCGAATCT  
ACTGGGTGGGGGCTGATTGA

>Cluster\_27518

ATGCTACGTATCGTAAAGAAGCTCTGACGTTTACGACGTTCTCCTCGTTCCGCTATTCTACCGTTCTGCGGAATAC  
TGCTGACCTCAGCACTCAGCTGACGAAAATATTCGCTGTAATATCCCTATGCTTCCGCGAGCAATGGATACCGTAACGG  
AAGCGCGCTGGCTATTGCTCTGGCTCAGGAAGCGGTATCGGCTTTATCCACAAAAACATGTCCATTGAACGCCAGGCA  
GAAGAAGTTCCGCGTGTGAAAAACACGAATCTGGCGTGGTACTGATCCACAGACCGTACTGCCAACCCAGCAGCGTGGC  
TGAAGTGAAGAATCTGACGAGCCTAACGGCTTTGCTGGCTACCCTGTTGTTACCAGAAAAACGAACCTGGTCCGCTATA  
TCACCGGTCGTGACGTGCGTTTTTGTGACCGACTTGAGCCAGCCGTTAGCGTTTACATGACGCCGAAAGAGCGTCTGGTA  
ACCGTGGCTGAAGGCCAAGCCCGTGAAGTGGTGTGGCAAAAAATGCACGAAAAACCGCTTGAAGAACGCTGGTGGTTGA  
TGATGAATCCACCTGATCGGCATGATCAGTGTGAAGGACTCCAGAAAGCGGAACGTAACCGAACCGGTGTAAGAGC  
AACAAAGCCGCTCTGCGTGTAGGTGACGCGTTGGCGCGGGCTGGTAACGAAGAGCGTGTGATGCGCTGGTGGCCGCA  
GGCGTTGACGTTCTGCTGATCGACTCCTCTCACGGTCACTCTGAAGGTGTTCTGCAGCGTATCCGTGAAACTCGCGCTAA  
ATATCCTGACCTGCAAAATCATCGCGCGCAACGTTGGCACTGCTGCAGGTGCCCGCGCGCTGGCAGAAGCCGGTTGCAGTG  
CCGTTAAAGTGGGTATCGGCCCTGGTTCATCTGTACGACGCGTATCGTGTGCTGGTGTCCGCTGTTCCGAGATCACCGCC  
GTTGCTGATGCGTAGAAGCCCTGGAAGCTACCGCATTCGCGTTATCGCTGACGCGGTATCCGTTTCTCAGCGATAT  
CGCTAAAGCTATCGCCGCTGGCGCAAGCGCGGTGATGGTAGGTTCCATGCTGGCAGGTACTGAAGAATCTCCGGGTGAAA  
TCGAACTCTACAGGGCCGTTCTTACAAATCTTACCCTGGTATGGGTTCCCTGGGCGCGATGTCCAAAGGTTCTTCTGAC  
CGTTACTTCCAGAGCGCACACGCTGCCGCAAACTGGTCCGGAAGGTATCGAAGGCCGCTAGCCTATAAAGGCTCCGCT  
GAAAGAGATCATTACCAGCAGATGGGCGGCTGCGCTCCTGTATGGGCTGACCGGCTGTGGTACTATCGACGAACTGC  
GTACTAAAGCGGAGTTTGTACGTATCAGCGGTGCGGGCATTACAGAAAGCCACGTTACGACGCTGACCATTACTAAGAG  
TCCCCGAACCTACCGCTGGGCTCCTGA

>Cluster\_41141

ATGAATCGTGATTCCTTTTATCCCGCCATCGCCTGTTTTTCGCTGTTACTGATGCTGACCGGGTGTGCGCCTATGATGA  
AACC CGCAGGCGTTAAGCCAGCACACGCGCTGTGCAAGTTGACACCGCATTACCCACGGCGCTGAAAAATGGTTGGC  
CAGACAGCAATGGTGGCTGGAGTATCAGGATAATCAACTCACCTCATTAATTAATAACGCACACAGAACGCACCGGAT  
ATGCAGGTGGCTGAACAGCGCATTCAGCTGGCTGAAACCCAGCGGAAGCAATGCTACTCAGGATGGTCCGCGAGCTCGA  
CTTTTCTGCGGATATGGAGCGGCAAAAAATGTCGCGCAGAAGGGTAAATGGGGCGTTTGTCTTGAACGATCCGACCGCAG  
GTACGACCGGTCCTGGTACACCAACGGCACTTGTGGCTTAAACGGCGGCTGGCATCTCGATATCTGGGGAAAGAATCCG  
CGGAGGTTACTGCTCGCTGGGTACGGTTAAAGCACGAGCGGCGGAACCGGCAACCCGCAATTTGCTGGCTGGCAG  
CGTAGGCTCCCTGTACTGGGAGTGGCAAAACCCAGCGCGGTTAAACACTGTCTTACAGCAAAATCGAAAAAGCAGCAACA  
CCATTATCGCCACCAGTACCGCAGCTATATCAGAAAGGATTAATCTTCAAGTTGAAGGTGTGGAACCGATATTAATGCC  
AGCAAAACCCGCGCAGCTCAACGATGTCGCGGGGAAAAATGAAATTTATTGAGCAGCGTTAAGTGCATTTACAAATCA  
CCAGCAAAAGCCATTAAGCTTAAATCCGCTGCGTTGCCGAAAGTGGCAAGCCAGCTCCTGATGAACCTGGGGTACTCCT  
TACTGGCCCGCGGGCAGATTTGACGGCGCGCAGCTGGTACGTTGAGTTCATCGTTAAGCACTATTGATGCGGGAAAAAGCG  
GCATTTTATCCTGACATCAACCTGATGGCTTCTGCAACAGGATGCGTTGCACTTAAGCGATCTGTTCCGCTATCCCGC  
GCAGCAAAATGGGCGTTACCGCAGGCTGACCTACCCATTTTCGATAGTGGTCTCTTAAACGCCAACCTCGATATCGCAA  
AAGCCGAAAGCAACTTGTCTATCGCAGCTACAACAAAGCGGTGGTTGAAGCGGTGAATGACGTGGAGCGGACGACGAGT  
CAGGTTACAGACTGCGCGGAGAAAAACAGCATCAGGCGCAAAATGAGCGCGATGCTTGGCTGTAGTAGGCTTTCGCGCA  
GGCGCGCTTAAACCGGGCATCATTCGCGGTTCCCGCTCAGCGAAGCCAGAAATCCCGCGCTGCGTGTAGCGGGCCAATG  
GCCTGTTATTTGCAAGGGCAGTGGCTGGATGCCCTCCATTCAACTCACTGGTGGCTTGGGCGGGGTTACAAACGCTGA

>Cluster\_24396

ATGATCTTTACTTCCGATTTTGGATTTGGCAATAGCCCATCGGCTTATTACTTAAATGGGTTATAGTGCAGTTCCTTTTTA  
TATATTTTCTGCATTTGTTATTCTTATTCCATTGCGCTTAATGATGGCTGAAATGGGAGCTGCTTATCCGAAAGAAAG  
CGGATATCTATCCTGGATGAATAATAGTGTGCGGACCAGTTTTGCCTTCAATTTGGTACATTTATGTTGGTTTTCTCTTAT  
ATCATCTGGATGGTGAAGCACTCCCGGAAAGTTGGGTACCGTTCTCAACATTTCTCTATGGTAGCGGATGCGCAGCA  
CTGGCGTATTTGCCGACTGGAGCCTACGAGGTGGTGGTCTGCTGGCAGTGGCATGGATGATCTGGTACCGTCTGTTG  
CTTCTAAGGGGATTAATAAAATGCTCGCATTACTGCGGTGGGCGGATTTGCAAGTATGTTGAAATTTAGTATGCTG  
TTAGTAGCATTACTATTTTGTATTAATGGTGGGCAATTTCCGCGCAGGATATTAATTTCTTGCATCCAGCAACCCAGG  
TTATCAGTCCGCTGCGGATGCTATCGTTTGTGATTTGCTTATTTTGCCTATGGCGGAAATGAAAGCGGTGGTGGT  
TGGTGCATAAAACGGAAAAATCCAGAAAAGAACTTGGCAAAGGATTTGTTTGGCGCTATTGTTATTTCAATCGGTTAT  
TCGCTGGCAATAATTTTTTGGGGCGTACGACAAAACCTGGCAGCAGGATTAAGTAATGGTTCGTTAACCTCGGCAATAT  
TACCTATGTGCTGATGAAGAGCCTCGGGTGGCTGACGCTGGTACGCACTGCATTTGTCACCAGAAAGCGTATTGTCGCTGG  
GCGTATGGTTTGGCGGATTTACCGGACTTTGATGTTCTCCTGCTTATACCGGCTGCTTTTACGCTTTGCTATTACCG  
CTGAAAGCCATCATCCAGGGAACGCCGAAAGCATTTGTTGGCGGAAACCGATGACGCGCTGAATACGATGGGTATGCCCTC  
TATCGCCATGTGGATGACGTGTGGGCTGGTACTGTCTTATCTGCTGGTTTCGTTTGGCGGTGGCACCGCATCGGCGT  
TCTTTAAACAAGCTGACGTTGATGGCGAAGTGTATGACACTTCCCTTACCTGTTCCCTCGCGTGGCTTTCCGCTCTTT  
AAAGCACGTCAGGATCTCGACAGACATTTGTGATTTTCAAACGCAATTTGTCGGCAATGATTGCGACGGTGGTGTGCTG  
ACTGGTGGTACATTTGGCAAGCTTTCACCATCATTAACCTGTGGTGAAGCTGGAGACTGGGACAGCACATTTGTGGA  
TGATTTGGCGGCTGTCTTCTCCTGCTGTTAGCGATGGCGATTTACCAGAACTATTGACGTCGATGGCGAACAACCT  
GAGTTAGCTCTCGACTGA

>Cluster\_23973

TTGACCGCTGGCATGAGTACGCAAGGCGTAAAAACGGCAAAATACGGCCTGTAACGACTGAAACAGGCGGTTAA  
ACGGTATTTTTCTGACCTGAAACCCCTTTACACGTTTCGATCCGAGGTCGTTGGAGCGGTTTATGCTTTTTCCAGGG  
TGTCTCGCAGCTAAAAGCGCAATGCGCGGTAGCCCATTTAGCTGGAGCGCTGGCAGCAGTTGCGCTTTGCTGCACTC  
CTGGGCTTTAAGGTTAAGGCCACCGGACGGCGCAAAATACACCAGCGCATTCATTGAAGTCCGCGAAAAAATGCCAAATC  
CAGGTCGCGCTATCTCGGTAAGTGGTTCTGGTTATGGAACCGGCGAGCAGGATATTTACACCGCGCGCTGAGTC  
GTGATCAGGCGCGGATCGTGTGATGATGCGCGTCAAGTGTGCTTTTATCCCGACCGTTACGAAAGCGGTTAAATAT  
CAGGCACACAAGGTTGATACACCCGAAAAACCAAGCCTGTTAAAGCCACTGGCAGCAAAAGCGGCAACCATTTGAAGTAC  
AAACCGAGTCTTGCATTTGTTGATGAATATCACTGCAACCTGACAACGGGTTTATCCGCGCTTGAACCTGGGAATGG  
GGGCGCTCCGAGGGGCTGTTATTTGCCATCACCACTCGGGAGCAACGTTGTTTACGCTGTAACCAACACTATGAC  
TATTTGTCAGATATGATGGTGAAGGTTGAAGGTTGAACGATGTTTCCGCTGATTTACGAGCTGGATGAAAGCGA  
GGTTGACGATCCGCGATGTTGATAAAGGCAATCCCAATATCGATGTTTCCGCTGATCGTGAACAACTGGCTCAACCA  
TCCAGAAAGCGGGGATTTCCGCTGCGAGTGGGTGAAATGCTCACCAAGCGATTCATATCTGGTGTGAGGGGCTACA

CCGTGGATGGGTAGCGGTGCATGGCGGAGTGCGCCGGAACGTTCCGGAGGCGGATTTATACGGTCAGGAGTGCACGC  
GGGCTGGACTTATCATCAACCAGCGATATTTCCAGCGTGTGCATGCCTTTCCGGTCGGTAAAAAGATTATGCTGGTTT  
CCCCTACTATCTGCCGGAATTTACGCTACAGAACCCGCCAATAAAAAACCGCCCATCTATCCGCGAGTGGGTAAGGGC  
GGCTGGATACGCAACACCCGGGTGACATTCATTTGACCTATCCGTGATGACATCATGGCGGATGCGAGAAATTT  
CAATATCAGGCTGTGGGTTTCGATACATGGAAACGCGCAGCCTGAGGACGCAGCTACAGGGGCGAGATTTGAGGTTG  
AGCGGTTCCCGCAAACATACCTTCGTTTTAGTCCGGCGCGAAATCGTTCGAAGTTTTTTGTTAACCGGAAGGTGATTGTG  
CATCGTGGCGATCCGGTGTGGCTGGTCAATGAGTAAFTGTTGATGACAGTGCACGAAACGCCAATATCAAGCCGAA  
CAAGAAAAATCATCAACAAGTAGACCCGAGCGTTGCGGCTCTGATGGCGTTTGGCACATTCAGGCGAACAATGAGG  
AATTTGCATTTGATATAAGCGACAGCCAAAGAGCGGCTTGGCGGCTTGGATGGGGTATGA

>Cluster\_43953

ATGGCAATACAACACCCTGACATCCAGCCTGCTGTTAACCATAGCGTTTCAAGTGGCGATCGCTGGTCCGGTCCGGTCCG  
GCTGATGATGGGAACTATCTCGGCCAGATGGGCATTTGACGTGCTGGTGGTGGAAAACTCGATAAGTTGATGCTGACTACC  
CGCGTGCATTTGGTATTGATGACGAGGCGCTGCCACCATGACAGTCCGTCGGCCTGGTCGATGATGTTCTGCCACACT  
ACGCCGTGGCACGCGATGCGTTTTCTCACCCGAAAGGCGCTGTTTTGCTGATATTCAGCCAATGACCGATGAATTTGG  
CTGGCCGCGCCGTAAACGCTTTATTCAGCCTCAGGTGATGCGGTGATGCTGGAAGGTTGTCCGCTTTCCGAAATGTGC  
GCTGCTGTTTTCCCGGAGCTGGAGGCTTCAGCCAGCAAAATGACGAAGTGCCTTGCACCTGAAAACGGCAGAAGGG  
CAGCGGAAACGTTCAAAGCCAGTGGCTGGTAGCCTGTGACGGTGGAGCAAGTTTTGTCCTCGCACCTGCAATGTGCC  
GTTTTGAGGTAATACTGCCCAAATCAGTGGATTGTGGTAGATATCGCCAACGATCCGTTAAGTACGCGCATATCTATT  
TGTGTTGGCATCCGGTGCCTGATGTTTCTGCCGCGTGCCTCATGCGGTACGTGCTTTGAAATTTATGGTATGCGC  
GGAAAACCGAAGACGCTGCGTGAGCCGCAAAATATGCGCAAGCTGTTAAGCAAAGTGCCTTAATCCGGACAATGT  
TGAATTTGATTCGCGCAGCGTGTCTACACCATAACGCGCAGTGGCGCAACGTTTCCGTTATGATCGGTTACTGCTGGCGG  
GCGATGCCGCGCACATCATGCCGTTGTGGCAGGGGCGAGGCTATAACAGTGGTATGCCGCGACGCTTTAACCTCGCCTGG  
AACTGGCGTTGGTTATCCAGGGGAAAGCCCGCATGCGCTGCTCGATACCTAACAACAAAGAGCTCGCGATCAGCCAA  
AGCGATGATTGACCTATGCTGACGCGGGCAACGTGCTGGCTCCGCGAAACGCTGGCAGGGTACGTTACGTGATCGGG  
TTTTCTGGCTGTTGAATTTATCTGCCCGCAGTAAACGCTATTTCTCGAAATGCGCTTCAAGCCGATGCCGCAATTTAC  
GGCGGTGCGCTGGTGCCTGAGGGCGAAGCGAAGCACTTCCGGTCCGCAAGATGTTTATTCAGCCGAAAGTACGCTGGA  
AAACGGTGCAGTGCCTGCTCGATAACGCGATTGGCGCGAATTCGCGGTAATTTGGTGGGGATGCAATCCACTGTGGG  
GGATGACCGACGACCAAAATCCAGCAGTGGCGCGCTGGGCGACAGCTTCCATTAGTGGTGGCGAAGTGCAGAAATTCAT  
ACCGCACAGGATAACCACGACGCGTGTACGCGTGGCGGATACGCAAGTGCCTGCGTAGCTGGTTCCGCGCAACACAA  
TGCTTCGCTGGTGTGATGCGCCCGGATCGCTTGTGTCGCCACCGCATTCGCAAAACCTGGGCAAGACCTGAATA  
AACTGGCGTGGTATGACGCTGACCCGCCCTGATGCCGACGTTTCTGTGAAAAGGTAGCCTGA

>Cluster\_38980

ATGAGAGTTAACCTACTGATAGCGATGATAATCTTTGGCGTAATCTGGCCTGCAACCGCGCTCAGAGCGGCTGTGAGCAA  
AACAACTGGGCGGATGCACCGGCACGCGAGTTTGTGTTTGTGCAAAAACAACCTCAGACGACAACCTTTTTCGCTACTCCTG  
CGGGGGCGTGGATCCGGCCTGACCGGTGCCAACCGCTGGACCGGTTAAAAATCAATGGTTTCAAGAACCTATATCAG  
CAAAGCCTCGGCTTATGATAACCGGTTTAAACACCGGCTTTTATACCAGTGGAAAGTTTATGATGTGGCTGGAAATTC  
ACCAGTTTACTCTCTTTAACTGGCTTGGCTGCATCAACTGGTACGCTGGGTGTAATATGACCACAGTCTTATCTCTGC  
CGCAAAACCGCAGCCTGATGTTTATGGCGCGAGCGTACCAGCGCGCGCGCAAGTGGATGCACGGCATGTTGTCA  
GACGCGTTTTTACCAGTCTGCAACAAATGCCCTGCGCAGCAGCTTTACAATGACCATCAATGCTCCGACCTCTCTGT  
GAATATGATGCCAGTACGCGGGCACGCTGTAAGGATACAGGCTCCCGCAACTGGTATGTTGCAACGTCACCCATACGA  
AAGCAGCAATCTCGGTTGATAAATACCCACTCGCTGGCGGAAGTATTTATCAACAGCGACGAGTACCGACTCTGGGC  
GAAGGAAATGCCGATGCCGGACGCAAAACCATCGCAGCGCTTACAGTAAAGTTGTAAGATGGTTAACTATACCTGCA  
AACAAACCGCATAGCAACACTCAATCATATATTTCCGGCGATCGCAACTCGCTGAGCTTACGCTCGGGCGGGCGCT  
ACGATATGCAGTTTACGCTGAATGGCAGTTCATGGAAACCGGTGAGCAATACTGCCTATTACTACACCTTCAACGAGATG  
AAGAGCGCAGACTCGATCTATGTTTCTTCTCGAGCACTTCTTAAACAGATGGTGAACCTCGGGATCAGCGATATCAA  
CACCAGATCTATTTCACTTTTCGCTTTTCAAGAACACCACATCACCGGAGTCTGGCTGGTATGAATTTTCTACCTCAA  
CGCTGATTTATCAAACCCGCTGATTTTACGATCAGTATTATCTCCGATGAATATACTCAGACACCGTCCGGCGGGGAT  
GTCGGCAGCGGAGTCCGCACTCGATTTCCGGCTATATCGTAACCACAGCGGTAACACAGTGCAGCAAGTGTGCTGAT  
CAAGGTGACCGGACCCGCGCAGTGTGATTGGCGGCGCTCCTATGTTGCTTACGCTCCGATGACGGTAAGCGCAAGTAC  
CGTTCCCGGCGAGCTTTCTTTTATACCCGCAACGGAGTACAAAACCTACGATGCCGGGTGCGATGATAGCTGGCGG  
GATATGACCGATGCGCTGTGGTTGATCACACCGTGGACTGATATCTCTGGCAAGTGGGGCAGATGGATAAAGCACACAGT  
CAAATTTTCGATTTCAATGGATAACGCCATTTCTTCTGCGTACGGTAGATGATAACGGCTGGTTTGGCGAAGTACGCGCT  
CAGGAGAGATTATGTTTACGGCGAGTGGCGTAACATTAACATA

>Cluster\_21176

ATGTCCAGCTTGATCAATAACGCCATGAGCGGACTGAACGCGGCCAGGCGGCTTAAATACGGCAAGTAATAATATCTC  
CAGCTATAACGTTGCCGGATATACCCGCCAAACACTATTTATGGCGCAGGCCAATAGCAGCTGGGCGTGGCGGCTGGG  
TTGGCAATGGCGTCTACGTTTCTGGTGTGACGCGTGAATGATGCAATTTATTTACCAACAGTTACGTCGGCGCAGACG  
CAAAGTAGCGGCTGACTGCCCGTATGAGCAGATGTCGAAATCGACAATATGCTCTCCACCAGTACTCTTCCGCTGGC  
AACACAGATGCGAGTATTTCTTACCAGCTGCAAAACGCTGGTAAGTAAACCGGAAAGACCCGGCAGCGCCAGCGCTGA  
TTGGGAAATCAGAAAGGTTGGTGAATCAGTTTAAACACCGATCAATATCTGCGCGACCGAGCAAAACAGGTCATATC  
CGGATAGGTGCCAGTGTGATCAGATCAACAATACGCTAAACAAATCGCCAGCTGAAACGATCAAAATCTCGCGTCTGAC  
AGGCTGGGGGCGAGGCGGCTCACCTAACAAATCTGCTGGATCAACGCGATCAACTGGTGAATTAACACAGATTTGTTG  
CGGTAGAAGTTAGCGTTACGATGGTGGCACTTATAACATCACGATGGCCAATGGCTACTCACTGGTTACGGGAAGTACG  
GCGCGCAGCTGGCGGCGAGTTCTTCCAGCGCCGACCTTCCGCTACGACTGTGCTTATATTGATGGGACGCGTGGCAA  
TATTGAGATCCCGGAAATTAATGAAATACCGGCTGCTGGCGGCGATTTGACATTCGCTTCCAGGATCTGGACACAGA  
CGGTAATAACGCTCGGACAACTGGCGCTGGCATTTGCCGAGGCTTTCAACACCCAAACAAAGCCGGATTTGATGCCAAC  
GGCGATGCCGGTAAAGATTTCTTTGCTATCGGTAAGCCCGGCTTCTGCAAAACAGAAAACAAACGGTGCAGTTGCGAT  
CGGTGCCACGGTAACTGATGCTTCCGCGTACTGGCGACAGATACAAAATCTCGTTCCGATAAATAACAGTGGCAGGTC  
CCCGCTTGGCAGCAATACCCTTTACGGTGCAGCGGATGCCAACGGTAAAGTGGCATTTGATGGTCTGGAGTTGACG  
TTTTACAGGAACGCTGCGCTTAAACGACGCTTACGCTGAAACCGGTAAGTGCAGCCATCGCTAACACTGATTTAAT  
CACTGACGAAGCGAAAATCGCCTAGCGGTGCGAAGAAGATGCGGGTGAAGCGACACCGCAACGGTCAAGGCTGCTGG  
ATCTGCAAAAGCAACAGTAAACCGTGGCGGTCGAAAATCTTTAAACGCGCTTATGCTCATTAGTGAATGATATCGGG  
AATAAAACCGCGAGCTTGAACACAGTAGCGCCACGCAAGGTAATGTGGTGCAGCAGCTTTCCAATCAGCAGCAGTCTGAT  
TTCCGGTGAATCTCGATGAGGAGTACGGAAATCTGCAACGCTTTTACGAGTATTACCTGGCAATGCGCAGGTTCTGC  
AGACGGCAACCGGATTTTTGATGCGCTGATTAACATTCGCTAA

>Cluster\_20550

ATGAGCGCGTCAFGACCGAACGCTTAGTGTGCTGCTCAGGCTGCACGGCAGGCGGGCATGGCGCACGCGGCGCAAT  
CTACTACTGCCCTGCGCGGAACCTGGCCTGTCCCGCGCCAGCTGTTACGCGAATAAAGGAGGTTGCGGTGACCGATA  
AACGCAAGCGCGCACCGACCGCGGAAACCGCGCTGACCCGCGATGAGCGGTTGATGATTTCCGCTACGCTGACGGAA

GCCACCCGTAAGAACGGCAAGCGCTGTATCCCGTCATTTGATGCCGTGGAGATGTTACCGCCCAACGGCGAGATTGACGC  
CGGGCGGCTGGATGAGGAAAGCGCGAGTGGGTGCCATTTGTACAGAAAGACCATCATCCGGGGCTGCGTGGCTACGGCC  
TGCACCCGGATCAACTCAGCCAGCCCGGCCAGTGACGGAGCTTGCCAGTCTGCACCCCAATCAGCTCGGGAATCGAC  
GCCTCGCTCTGCACGCTGTACTACTCAGCAACGGCCAGCGCGGGTTACAGGTGATGGACAGCGCGACGTTCTACAAAAA  
CAAGCGGAAGACGCTCAACAGTATCGCCAGTACGGGATGAGGATATGAACTGACCCGACCATACCCAGCGGCTGGATCT  
ACGTTGAATACGTGATGGGGGCGGAGTCTGGCGAAAATCTCTGTTCCGTTCTCATCAATGCCATGCAGGAGCGCGGGC  
GCGGATGTGCTCCAGGGCTGCCGATATGTTGATCTCGACCCGGCTCGGGCAACACCGCCGCTATGACGAAGAACCT  
CTGTGCTTCCGCTGGGCATTGACGTGGTGGCGCATAAAGCCCAACGCCCGCGCCACCGGGCAGGTGGAAAAGGGCGGGC  
ACATTTATCGAACCGCGCTTTGAACCGGGCTGAAGTTCCAGCCGGTTCACAGCCTGGAGGAACGTAACCGCAAGCGCCG  
CTGTGGCGGAGCACTTCAACGCCACCGCGATTACACCCGCCACGGCAAGTCGCGTAGTAACGTTGGATGACCATCAC  
CGCGCAGCAGCTTATCAAAGCGCATCGGTGGAGGTCTGCCGGAACCTGGCTGTTGCCGCGCGGAAAGCCGCAAGATA  
CGCCGAAGCTGCGCGTGTCTTTAGGGTACGGAAATACGACGCTTCCACCGTCCAGATGTGATGGTGGTGGAAAACTG  
ATGATCACCCGCAATCCGTTGGCGCAGCATGCCGCGAGGTAGTGTCTCATCGGTGACGATGGCCACGATATTTTACCT  
GGTGGAGGAAGTCCGAAGGACGAATACGGCTTTGCCGAAGGGCGGGCGGTGCTGGGCCAGAATCACAAGCGCCACGGC  
ATACACCCCGCAGACTGCGGCTAAACAGATTGAGCAGATTGTTACCGGAACAGATAACGAGACGGACCGGGCTGCGGGC  
CGTAAAGCGAAGGCGCTGCCGTTCCGGCGCAGGCTTGACCCGTTATAAACCATCACCAGCAGGAACTGCCCGCTTCC  
GCCGCGTGGTCAAGATTCCCGGTACGCGCTTACCGCTTGAAGCCGTTGAAGCCCGGGCTGTACTCAGCTCAGGCGGAAAG  
CGTGAAGCAGCGTTGCCGAATGGAACGTCGCACTGTATCAGGAACGGTGAAGCCTGGCCAGAAGGGTGGCGGAA  
GAAGAACTGGACGCGCCGCGCAGCAGCTTACCGCCGAGTGAACCTGAACGTTAGTTCGGCGGTTAA

>Cluster\_46484

ATGCAACTGTTGGCAGTCTGCATCCCAACTTTTCGTAATCTACGTGGTCTCGATATTGCCCTTCGCGACGCAATTTGTCAGC  
CGCTTTAGGCGCGCCAGCTGATGCTCAACCAAAGCCGATCCGCGAGCCACGCCCTGATTGGCCAGAACGGGACCGGCAAGT  
CCAACCTTGATCGAAGCGCTGATCACCATCTTCCGTGATGTCGACCTGGATCGTGAAGCTGCGTTTCGATTACACACTGGAA  
TACAGCAATTCGTAATGTTGTACGCATGGAAGCGGATACGGTCAACAAAAAGCGCCCTACGTTGGGTGCGGCA  
AGCTGAAACGCGAGGCTATTTGCTGAAAAATCGCGAGCTGCTACCCACACATACTTTGCTTATTACTCGGGCCGCAACG  
AGCGCATTGAGGCTTGTTCAGAGCATCAACGCCGCTTCAACCTACGACAGGAAATCACCACCGAGGAGGTGCTTTCA  
GAGCAGCTGTTGGAAAATTTACCGGATCTGAGGCGGATATCCGCGCGGTGGAGGAAGCCAAACGCGCGGAGAACTCAG  
ACTGAAACAGCGAGCGCAGCCGCTGCGCGTCTGTCTACTGCGCGTGGTGGCCATAGCCAGTTGGTGGTGGCTGCT  
GCTTGCTCTCCGATGACCAGGTGTTTCAAGAGTACTGAAAACTGCACATTGAATCACTGGAATCGGCTTTATTTGTA  
CTGAAAGACCCATCTGCTGCGCGAAAAACGCGCAGCGGCAAGTTCGACGAGCAGGAACTGATCGAGGGCGATCCAGC  
CTTCTGGTATTTCCGTTGGCAATGTGGTAAAGCAGTTCCTCGACAAGCTTGGCAAGTATCTTGGGCTCCGATTGAACAGG  
AGGCAACTAAGCAAAATGAACTTCCGTGGCCGTAGCGAAAAACAAAAAGCAGCTGATCTGTTCTGTCGCGCAATCAGGCAAG  
CTCAAACAGTTGGCGAGCTTGTCCGCGCAGCTGATAGTTTCTCCGCTATGCCGAGGGCGCTTACATCGGTGACTTGAT  
CGACGAGGTGCGCATTACGCTCAAGAAGCGCGATGAATATGGCGGAAAGGTGAGTTTCCACCCAGCTCTCTGAAGCGCAGC  
TACAGATGCTCACCTGCTGGGCTGATGCGCATAACCCGAGAGGACCTGCTTTCTTCTGCTCGATGAGCCGGATACC  
CACTTGAACCCCTATCTGGAAAGCTGCGCTACTTCCAGCATATCGAAGGTGTTTGGCCCTGATGAAGGTTGCGGTACA  
GGGCGAGTCGAAATCTCATCACCCTCACGACCCGATGATGATTGGCAGCTCAAGCGGAGCAGGTGCATATTTCTGC  
GAGCGCAGAGGGACGCTTATCTGTTGATACGCTGATGAACATCCGCAAGGATGGGAGTAAACCGGGCTGCTCAAGAGC  
GAGTTGTTGGCTGCTGCTCCGCTGAGATTTGAACTGAGCAGCAGCTTTTCCGCGCAATGAGCTGTTCTGTAATAATC  
ACCAGCTCCCCAGGAAAGATAACAGACTATCAGCACTTTTCCACTGAATTTGGCGATTGGGTTTCTTACTGCGGAT  
TTCCGCGATCCGACTACGCGCTATCTGTCGGCAAAATGGCACAGCATCTGCTTCCGCAAGCTACGCTCACGCCCGAG  
GAGCAAGCCGAGCAGGACCCATTTCCGATTCGATTATGATGAAATTTTGGCTGAGGAAAGAGGACCAATGA

>Cluster\_27304

ATGTCAGTAAGCGCATTTAACCGACGCTGGGCGGGCTCATTTCTGGAAGCATTAAACGCGTCACGGCGTAAGACACATCTG  
TATCGCCCTGGCTCGCGTTCTACACCGTTAACGTTAGCGCGCGGAGAATTCGCAATTCATTCACCACACCATTTCG  
ATGAGCGTGGACTGGGACCTGGCGCTGGGGCTGGCGAAAAGTCAAGTAAAGCAGCCGGTGGCGGTGATTGTGACCTCCGGC  
ACGGCGGTAGCAAAATCTTACCCGCGACTGATTGAAGCTGGGTTAACCGGAGAAAAACTGATCCTGTTAACCCGCTGCG  
CCCCCGGAGCTAATTGACTGCGGCGGCAATCAGGCGATTCTGACCCGGAAATGTTCCGCTCACCACCGCACAGTA  
TTTCACTGCGCGCCGACCCAGGATATCCCGCACGTTGGCTGGTTTCTACCATCGACCAGCTCTCGGTACGCTTCA  
GCTGGTGGAGTCCATCAACTGCCGTTTGTGAACCGCTGATGGCGAAATGGACGACACCCGGATTAGCTGGCAACA  
CGCGCTGGCGCACTGATGGCGAGGACGACAAAAACCGTGGCTGCTGTAAGCGCCCTCGTGGGAAAGTGAAAAAACGCGCACT  
GGTTCTTCTGGCGACAAAAGCGCGGCTGGTGGTTGCCGGCGCATGAGTGGGAAAGAGGGCAAAAAAGTTGCATGTGG  
GCGCAAACTCTTGGCTGGCGCTGATTGGCGACGCTGCTGTCGCAAAACCGGTGACCCGCTGCGGCTGTCGCGATCTG  
AGGCAATGCCAAAGCGACCGCAACTGCAACAGGCACAAATAGTGGTGAACGTTGGAAAGCAGCTGACGGGGAAACGAC  
TCTCCAAATGGCAGGCAAGCTGTGAACAGAGACTGGATTGTTGATGACATTGAAGGGGCACTTGCAGCCGACAC  
CATCGGGAGCTGCTTAATTGCCAATATTTGCCACTGGCTGGAGCTGATCCGGCAGAAAAACGCCAGCCCTGGTGGCT  
TGAATCCCGCGCTGGCGGAACAGGCAATGCAGCGGTTATTGCCGCTGCGGATGCGTTGGCGAAGCGCAACTGGCC  
ATCGCATCAGCACTATTTGCCGTAACAGGGCAATTTGTTGTCGGTAAACGCTGTTGGTACGTTTGTATGATGATGCGCT  
TCCCAACTTCCCGCTGGTTACCCGCTGACAGCAACCGTGGGGCAGCGGATCGACGGACTGCTTTCCAGCCCGCAGG  
CGTACAGCGGGCAAGCGGCAACCGACGCTGGCGATAGTGGGCGATCTCTCAGCTTTTACGATCTCAACCGGATGGCGT  
TATTACGTCAGGTTTCCGCGCGCTGGTATTAATTGTGGTGAACAACAACGGCGGGCAAAATTTTTCGCTGTTGCCAACG  
CCGAAAAGCGAGCGCGAGCGTTTCTATTGATGCGCAAAATGTTCCATTTTGAAGCAGCCCGCGGATGTTGCGGTA  
ATATCATGCTCCGCAAACTGGCAGAACTGAAACGACACTAGTCTGATGCTGGCGCAGCCGACCCACCGGTGATTG  
AAATGGTGGTTAACGACACCGATGGTGGCAAAACGCTCAGCAACTTTCGGCGAGGTAAAGCCATTTATGA

>Cluster\_22779

ATGAGCCGAAATCTTACCCCAACGTAATGCTGCCAATCAGTATGCCCGTATGTCGTCGCGGAAAGATTGTCGCTG  
CCAGTTTGTGATTCAGGCTGCCAGCGCATCTTTGATGACCTGATGGAGGAAAAAGTAAAGTCTTTCGTTACCGCTTCG  
ACAAGGACCTGGCTGAACGGGCGCGAAATTTATTCAGCTGTTGCCGACACCAAGGGTGAAGTGGGCAATTAAGAGGATG  
CCCATCAGCTGGAGCGTGGCAGCTCTTTGTGATCTGCTGCGCGCTTTGGTGGTCAATAAAGGCTCCCGCTGGCGC  
CTTCCGTGAGGTGATACCGAAATCCCCGTAAGCAAGCGCAAACTCGGCAATCTCGCGGCTGTCGCTGTTGTTG  
CCTGTGATAACGAGTTCCGCGCGGAAGTGTATTTCCGTTGCCACGAGGAGAAACAGGCATGGGAAGTCTTTCGCTCGGCA  
AGACTGATGTGTAACGACACCCATGCTGACGGAAGCGTTCGGGATTGAGGTTAACCGCTCAAACATGAACCGTCCGGA  
GGATGGTGGCGGTTTGAACCGCTGATCGGTAACCCGGTATGGTTCATCACCCACTGTGCGGTGGTGGATGAATATC  
ACGAGCAGCCACAGATTCGCTTACACACAGTGTACCGGATGGGGGCGGACGCTCAGCCATGATGTTGGCTATC  
ACTACCGCGGGTACAACATTGAGGGCGGCTGCTACGACAACGGCGGAAAGTCAACGATGCTCAACGGCTCGGTGCC  
TAACGATGAATGTTCCGGATCACTATACCGTTGATGAGGTGACACTGGACCCGACCCGAGGTTGGAAAAAGGCA  
ATCCAAATATTGGGTGCTGGTTATCGCGAATTTTGTGTTAAGTACAGCAGCGTGGCAAAAAATAACGCCGCTGGCA  
AACGCTTTTAAAAACAAACACTCAATATCTGGGTGTCGGCGGCTTCCGCGTATTTCAACCTGGTGGTGGCAGAGCTG  
CGAGGATAAATCACTGACCCCTGAGCAGTTCGAGGGGCGCGGTCATTTGCGCTTTGACCTGGCGGTAAGCTGGATA

TGAACAGCATGGCGCGACTTTATACCCGCGAGATTGATGGTAAAACGCATTACTACAGTGTGGCCCCGCTTTCTGGGTA  
CCGTATGACACGGTGTACAGCGTCGAGAAAAATGAAGATCGCCGACAGCCGAACGCTTTCAGAAATGGGTGGAAATGGG  
CGTTCTGACCGTTACCGATGGTGGGAGGTGGATTATCGCTACATCTCGAGGAGGCCAAAGCGGCGAACAAAATCAGCC  
CGGTCAGTGAAGTACCCATCGACCCCTTCGGGGCGACCGGGTTGTACATGACCTTGCATGATGAAGACCTGAACCCCATC  
ACTATCATTCAGAACTACCAACATGTCCGACCGATGAAAGAGCTGGAAGCGGCAATGAAATCGGGGCTTTCATCA  
TGATGGCAATCCCATCATGACCTGGTGTATCGGCAACGTGGTTCGGCAAAACCATTCGGGGTAACGATGATGTGGTGAAGC  
CCGTCAAAGAGCAGGCGGAAAACAAAATCGATGTTGCTGCTGCTGATTTATGGCGGTTGGCAGACCATGCTGTACGAG  
AAAGAAGACAGTGTCTGACCACATGAGTCCATGGGATCCGCTCGCTTAA

>Cluster\_34826

GTGAACCTACTGTTTACACTCTGCTTTTTTGTCTTCTATCTGACTTGCTTTATTCCAAATTTTATTCGTTTAAAAAT  
AAAATGTGACAGCAGGTTATAATTTTGCATTTCCGCTATTTCGCGACTTCTTATTTCGCCGCGCATATCCCTCGTTTTACAG  
ATGCCCTTTAATTTTGGCGAAGGATTTGTCTATGGCTGGGAATGTTTCAGGAAAAACAGTTGCGATGGTACAACATTTGCG  
CTGATGCTCTTTTACACTCTGCTGGGTTTGGCAACGTGTGTAATAACATATGCCAACAGGGGCTGGTGGTGTCTTTCT  
ATGGGTGTTTATCTTTGCACTCTATTTACACCTTATGCGCTAATTTGTTGGTCAAGTTAGGCTCGACCTCAAAGATGGGA  
AGGGCGGGTTCAGTACCTGGATTAAACACACGATGGGACCCGGACTGGCTTATCTCGCCGCGTGGACCTACTGGGTGGTG  
CATATTCCTATCTGCGCAAAAACCCAGGCAATTTGATTTGCGCTCGGTTGGGCGATGAAAGGCGACGGTTTCGCTAAT  
CAAAGAATATTCAGCTGATCGTTACAGGGGTTAACGCTGGTGTCTTATCTTTTATGTGGGTTGCTTACAGCGGTA  
TGAATCGCTGAAAATCGTGGTCTGTGGCAGGGATTGCTATGTTGTTATGTCGCTCCTGTATGTGGCGATGGCGGTA  
ACCGCGCTGCAATTAAGTGCATATTCGACCAACAAATACCTGGGAAACGTTCAATTCCTCATATCGACTTTAC  
CTACATTAACCATTTTCAATGCTGGTTTTCGCGGTTGGCGGAGCAGAGAAGATTTCTCCTTACGTTAATCAAACGCGCA  
ACCCAGGAAAAGAAATTTCAAAGGGATTTATGCTGCGGTTGCGGATGGTGGGTTGCGGTTTGGCCATTTCTGGGCTCGCTGGCG  
ATGGGATGATGTTGATTCGCGTAATATCCCGATGACTTAATGACCACGGTCAGTATTACGCTTTCAGAAGCTGGG  
CGATATTACAACATGGGTAATCTTTAATGGTGTATTTACGCCATTGCGAATACCCCTGGGACAAGTAGCGGCGCTGGTAT  
TCTCGATTGATGGCCCGCTTAAAGTGTCTATTAGGTGATGCTGACAGCAAAATATATCCAGCCAGTTTATGTTACCAAC  
GCTTCTGGTACGCCGTTAATGGCTATTTCTGACCTGGTACTGGTGGCGATTCTGATTTATGCTGCCGACTCTCGGCAT  
TGGTGATATGAACAATCTCTATAAATGGCTGTTGAACCTTAATTCGGTATGATGCGCGTTCGCTTATTATGGGTATTTG  
TTGCATTTATGTCAGTCTGCTGGCGCAGAAAATAAAACAGAAATATGCTTTATTCGTAATAAGCCTCTGGCAATG  
ACCGTCGGGATTTGGTGTCTTTACGCCCTTTCGCTTTGACGGGGATCTCCGAAAATGGAAGCCTTCACTGCG  
AGAGTGGACCTTCCAGTTGGCGCTGAATGTTGCAACGCCGTTTGTGCTGGTAGGATTAGGACTGATATCCCGCTGCTGG  
CGGTAAGCGAATAGTAAATAA

>Cluster\_50547

ATGCTAAAACAAAACAGAAAAAATTCAGATCTGATGTTTGAACGATTTAAGCGCAATGTATCTGAAATCGTCACGGGAGA  
TGGGGGAGAGCTTGAGCTTACTGTTGAACAGAGAAAATACTTTCTGATATTCAAAATGGTATTTTCTTGTCTTTCAT  
GTCACATGAAGCATCATCTGGTACAGATGTTACGTAATCGCAACAAGAAAAGGGTATCCAAACCTCACTATTTATGAG  
GTGAACCTAAAAGATATCAGGTTATTTGATGAAGCATCTCAAAACCGTACAGAATAATGGACAGGATCTATTACCAGT  
CGAAAAGAGCTTCAATGCTACTTTTCAATGCGCGGATGAGATGAAGTATTTACACATCAAAGTCAATGAGTGTG  
AGGCTGATATTTATATACGTAAGATGGGGATATGGAACCTTTGCGCTCAGATTGAGTCTAATACGGCGCATTCATTTCTT  
GCACTATTATATAAATGACAGATGATTTCTGATGCAACCTATAAAAATTAATGCTTATCAGGCTGCTCGCATAGGTTGCTTC  
AAAATCGAGGCTGGCTTACCTCCGTAATTCAGGCGGTGCGCTTCAAGTTTAAACCTTGGTCAAGGTGGGCGCATAT  
TAATCGCACGATTTCTGTATACAGCAAAAAGTGAAAAACAAAAGAAATGGATCCAACAGATTCGGATTTCCATCATTTCA  
CATGCTGAATCATTTTCAAGAATGGGAATCTCCCAATTTGGTATAAATATTTATCTCCGACCGACGGGTTCCGGTAAATC  
AACAAACCTGAAAATTTACTTGGATTTATGATATCGAGAAAAGAAAAGTTAATATTTATCAGCATTTGAAGATCCAC  
CTGATATGAAATTTGACGGCACGGCTCAGTTACTATAACGACGTTGAAACAGAGGCACAAAAGGGTGAAGAATATCTG  
AAAGCCATTACAGCCGCTTTCGCTTCTGATCCGGATATAAATAATGCCAGGGGAAGCCAGGGATGCTGAAGTGAATAACCT  
TCTTTTCACTGCAGCAATGACAGGACATCAGGTATGGACATCATACATGCAAAATAATGCACTGGCTATATTCGATCGAT  
TGAAGATCAGGGCGTGGATGAATTTAACTTACAGATCCGGAATGATCACTGGATTGGTGGCCAGCGATTAGTCAGA  
AGATTTGTGCGAATCAATGTAGCATAAACATTAACAGAATAATAGCAAGTGGCGGGGAGATATCTGACACGGACAGAAAAT  
AATCTCAGGTCATGAAACATCTGTACGATTTCCAATCTCTGCTAAAAAATGTTGTGCGGATGGGTATAATGGAAGGA  
CAATCTCCGCGGAGGTTATTGAACCGGACTCAAATTAATTAAGGTTGGTGTGCTGAAGTGAAGCAGAGGATGCTCTGCAT  
TACTGGTTAACATCTTCTCATGGTATGGCTTAAAAGAGCATGATGTTAAAAATAATTTCTGGTGAATATGCGTTAT  
GGATGACAGTAAATAAAATTTTCAAGCATCGATAATATTACAGAAGAAAGGAAAAAATATCTTTTTCAGCAGAGATAACAGGA  
TATAG

>Cluster\_64189

ATGATGAGCAATGTAAAGAAAAAGATGTGCCGCTGATAAGCATCAGCCTGGTGGCCATTCCTTTTTCATCGCAGCTGCATT  
AAGCCTTTTCCCAACAATCGGCCGACCGGCAACGCAATATACACTTTTGTACGCGTACGTTAGGTTCCGCCGTAC  
AGGTATTGGTTTTGCTGGCAATGGGACTGGTATTTATTTAGCCACCAGTAAATACGGCAATATTCGCTTTGGCGAAGGA  
AAACCGGAATACAGCAGCTCTCTTGGCTGTTTTATGTTTATTTTGTGCCGTTTTAGGTTCTTCTACGCTTTATTTGGGGGT  
TGCTAATGGGCTATTATATCAAAACCGCTGGATTAATATCGCACCGCTTACACAGGCACCTGCAATTTAGCCTCC  
CTTACTCTTCTTCCACTGGGGCATCAGCGCTGGGCAACTTATACGCTGGCCCTCATTAATCATGGCTTATCACTTTTCAT  
GTGCGTAAAACAAAGGTCGAGTCTTTCCGGCATTATTCGCGGATTTACCGGCTTCCCGCAAGGCCATGGGAAA  
ACTGGTTGATTTGATGTTCTGATCGCCACTGTGCGGCACTGACTATTTCCCTGTTGTACCCGACGCAACCTTTACTC  
GTGGACTTTCCGCGCTGACCGGTTTACCAGATAACTTCCGTCAGGCAATTTGTGATCCTGCTTTCCGGCGGCAATTTT  
TGCCTAAGCTCGTGGATTGGTATCAACAACGGTTTGAACGCTGAGCAAAAATGGTGGTGGGGCGGCTTCTGCTGCC  
ATTACTGGTGTGATTTGTCGGCCCAACGAATTTATTACCAACAGCATCATCAATGCCATCGGCTGACACGCAAAACT  
TCTGCAAAATGAGCTTATTCACCGATCCGCTGGGATGGTTCATTTACCGCAACTGGACCGTTTTCTACTGGCTGTGG  
TGGATCTCATACACCCCTGGCGTAGCAATGTTTGTACCCGCTTCCCGCGGTCGTAAGATTAAAGAAAGTTATCTGGGG  
ACTGATCCTCGGCAGCACCGTGGTGTGCTGTTCTTCTCGCGTAATGGAAGCTATGCCATTCATCAGTTTATCAATG  
GCGTAATCAACGTCACACAGGTCGTGGAACACATGGGCGGCAACAGCTGTACAGCAAGTTCGATGTCGTTGCCAGCC  
GGTAAATTTGTTCTCGCCGATACCTGGGCGTGTGATTTTCTTCTGCTCGCATATGGATGCGGTGGCTTACACCAT  
GGCTGCGACGATGACCGGTAATCTCCAGGAAGGTGACGATCTGACCGTGGGCTGCGTCTTTTCTGGTGGTGGTATCA  
CTCTGATCCCGCTTTCCATCTTGTTTACCGGTCCTGCTGGAACAGTGAAAACACCGTCTGCTCACAGCCCTTCCC  
TTCTCTGATTTTACTGGTGAAGTTCGGCGGATTTATTCGCTGGCTGAAAACAGGATTACGCCGATTTCCGGCTCATCA  
AGTTGAACATTTCTCCCGCAGACCCGTTGAAGCCTTGAAAAACGCCAGTGTCTCTTCCGGGAACCGTATTCAAAG  
CGCAACTGA

>Cluster\_47895

ATGCAACTGAATTCACCGAAATCAGCGAATGATCAAGCAGCGCATTGCTCAGTTCAATGTTGTGAGTGAAGCTCACAA  
CGAAGGTACTATTGTTCTTGTAAAGTACGCTGTTATCCGATTCACCGCTGGCGATTTGATGAGGTTGAAATGATCT  
CCCTGCCGGGTAACCGTTACGCTATCGCACTGAACCTCAGCGCGACTCTGTAGGTGGGTTGTTATGGGTCGGTACGCT  
GACCTTGGCGAAGGCATGAAGTTAAGTGTACTGGCGTATCTTGAAGTTCCGGTTGGCGTGGCTGCTGGGCGGTTG

GGTTAACTCTGGGTGACCAATCGACGGTAAAGGTCGCTGGATCAGACGGCTTCTGCTGTAGAAGCAATCGCT  
CGGGCGTTATCGAACGTCAGTCCGTAGATCAGCCGGTACAGACGGTTATAAAGCCGTTGACTCCATGATCCCATCGGT  
CGTGGTCAGCGTGAATTGATCATCGGTGACCGTACAGACGGTAAACCCGACTGGCTATCGATGCCATCATCAACCAGCG  
CGATTCCGGTATCAAAATGATCTATGTCGCTATCGGCCAGAAAGCGTCCACCATTCTAACGTTGGTACGTAACCTGGAAG  
AGCAGCGCCGACTGGGTAACACCATCGTTGTGGTAGCAACCCGCTGTAATCCGCTGCCTGCAATACCGTCCGACTGAT  
GCCGGTTGCGCAATGGGCGAATACTTCCGTGACCGCGGTGAAGATGCGCTGATCATTTACGATGACCTGTCTAAACAGGC  
TGTGTGTTACCGTACGATCTCCGTGCTCGCTCGCCAGGACGTAAGCATCCCGGGGCGACGTTTCTACCTCC  
ACTCTGCTGCTGGAGCGTGTGCACGTGTTAACGCCGAATACGTTGAAGCCTTACCAGGTTGAAGTGAAGGGAAA  
ACCGGTTCTGTCAGCCGACTGCCGATTATCGAAACTCAGCGGGTACGTTTCTGCGTTCGTTCCGACCAACGTAATCTC  
CATTACCGATGGTCAGATCTTCCGAAACCACTGTTCAACGCCGGTATTCGTCCTGCGGTTAACCCGGGTATTTCCG  
TATCCCGTGTGGTGGTGCAGCAGACCAAGATCATGAAAAACTGTCCGGTGGTATCCGTACCGCTGTGGCAGAT  
CGTGAACCTGGCAGCGTCTCTCAGTTTGCATCCGACCTTGACGATGCAACACGTAAGCAGCTTACCAGCGTGAAGT  
GACCGAAGCTGCTGAAACGAAACAGATATGCGCCGATGTCCTGTTGCGCAGCAGTCTCTGTTCTGTTCGCGACGTAAGT  
GTTACCTGGCGGATGTTGAAGTGTGAAAAATTGGCAGCTTCAAGCCGCTCTGCTGGCTTACGTCGACCGTATCAGCT  
CCGTTGATGCAAGAGATCAACAGACCGGTGGCTACAACGACGAAATCGAAGGCAAGTGAAGGCATCCTCGATTCCCT  
CAAAGCAACCAATCCTGGTAA

>Cluster\_26753

ATGCAAAAAGCACAACGGATCATTAACCTATCGCCGTAATCGAATGATGTTTGTACGATTTGCGCCCTCGTTACGCT  
CGCTTCGACCCGTAGCGTGCATTTATTTACAGCGTAAGTAAATCAACAACGGGTAGTACAATTCGCCAATCACGCTG  
TAGAGGAATTAGATAAAGTACTGCTTCCCTACAGCGAGTACGGAAGTCTTGTCTCCGCTGATGTTGCTGCCCTGCTCT  
GTCGCCCAATTTGCCAATACGTAACAGGCGGCAAACTCCAACTGTGCGATCCATTGGCCTGGTGAAGACGCGCACACT  
TTATGTCTCCAGCATTTTGGTTATCGCAATGTGCCGTCGTGGACATTTCTGGTGAACCTTCCGACCGCAACCACTTT  
TACGCTGACGATCGACCGTGCCTGATTAAGGACGTCGCTTGTGATTCAGTGGACGCCAGCAGCGGGCAGTAGCAAA  
GCTGGGGTTCCTGGTGAATCAATCAATCGGCTGCGCAGCAGTTCGATTCGAATGTTCTGCCAGCCTTTGCTTACGCGCA  
GCCAGCAATGATTTGGTGTAGAGATTTTGTGCGCTGGAACAATCCACGTCAGGGCTGGATTTACCAGGATGTGTTTATT  
CCTATCGCGGAAGAACATCATTTAATGTCGCACTGACCCGCTATGTGATGGCAGAAACCATCCGTCAGCGGCATGTTT  
CCCAATGAGTAGTCAGTTTTCATGTTGGCATTAACTGCGCACCCAGCATTTCGCGGTGGTGTCTGATAAAGATCTCA  
ATCAGTACTGGTTTAGCGCTCACCCGATTCAGCAACTGATCTCGAAATCACCGAACGCGATGCCTTACTGGATGTTGAT  
TATCGGATGCCCCGAGCTACATCGTAAAAACGTCAACTGGCGATTGATGACTTCGGCACCGGCAACAGTTTCAATTTT  
CTGGCTTGAACATTACGTCCTGACGTCGTGAAAAATTGATAAGTCAATTTACCAGCTATAGGTTCTGACCGCGTTAACT  
CGACGGTGACCGATATCATCATCGCACTGGCGCAAGACTGAATATTGAATGGTAGCGGAGGGTGTGGAACGCAAGAA  
CAGCGAAATATTTAGCGCTCATGGCGTCAATTTTGAAGGATTTGTACGACACAGCCGATGCCCTACCGTACTGATTT  
TCCCAATGGCTGGCGGGCAGCCAACCGCCGCCCGCCGCATAATGGACATATCACGCCGTTATGCGGTTACGTTAA

>Cluster\_37483

ATGAAAATTGGAACGTGTGGCAGGCACTAACGACAGTACAACGACAATCGCAACAATGATATGGTGAAGAGCATGTTAC  
CAACTTCAATAAAGAACTGTTTGGGTATATTGCAAAATGATAGGTGATGATAATCAAGTATTGCCAGGACAATGCTCG  
GTGAGGTTGTGGAAAAAATAGATGATTGGCAATAGAACGGTCCAAACATCTATTCAAGATGACAAAAATTTCAATTTACC  
ATACAAACGGATCATTCAGAAAAATATAGTATGATATCGGCGATGCGTCTCATATTTACGTAAGAAATAAATATATCA  
GTTTATTGGTGAACAATAATAGCAAAAAATTACGGTTGCTCTTGTATAAATACCGATGTTAATGGTGGTCAATGTTTATT  
TACTTAATAATATGACAGTAAATGATAATGCTAATGATGTTGACGTTACTGAGTCGTACAAAACCCATCTGGAACGGAAA  
ATATCGCAATATAATGATCTGATATTAATTCGAAACAAATGATAAAACCCAGTTCGCTGACAGAATCTATTTCTCCAA  
TTGTTTACCCTGATCCCAAGTACCAGACCAACCTATTTTGGTGTACCGATGGCTCAGTCGGTGCAGTTTTGTTCTG  
CGCTTTTCCGCAACGGGACATTTGGGAATCATGGCTGAAGGAGAAAAATTTCTTAGCCAGTTGCTTAATATAGAAGATGAA  
GTTCTCAACGATTTGCTAAGGGAGAATTTAATGAGCAACTTAACACTAATGTTAATAACAATAATCAGTATCTGAAACAG  
AAGAGACATATTTTAGAAAGTCTTACGCTTATTTAGTTAATTAAGAGACGCTGTGACGCCATGTACGTTTTCTGGGG  
ACCAACCCGGCGATCGATTTAGCAATATCTGTGGTGTCAATTTATCACTGATTTGTTAAAACGCATAATGAGTATCAAT  
GAAAATGTTTCATGTTATTAGCTGGAAATCATGAAACGAAATGCAATGGTAACTATATGCAAGAACTTCCAGCGTATGAAACC  
ACTCGATGAGGATACCTACTCTGGGATAAAAAGATTATCTGTATGTTTTCTATGACCCCAATACAAAATAATGGCAAATC  
ATCATGGGATAACTTTTGTATGATCAGCGAAAACGTTACATATAGGACCGATAACAGTCTCTATTGATGAAATGACCAAT  
GCTCTCGATCCGGTCAATTAGCGGCAATTAATCAATAAAAACGATCATGCTATAATTAATGGCAAAAAGTTAAAACATG  
CCGGGCTATCTTGTGTCGATCTTAACTCGTTTATTTCTGTTTTCGACAGATTACAGACCTAAACTTACCGCTATTAG  
CATGTTCAACAATGTTAGGTATAAATCAAGTTGTTGCACATAACGAAATGGTGAAGAGAACGCATAGCGGAAACGGGG  
ACAGTTTTAGGCTTAAACCCCGTACAGTAAACATGCTGGAAGAATGTTTACGATGCATAATGCAAAATTAACCTTGG  
TGCAGGCTGAGATAACCACTCCTGGAAGTCTTACCAGCATGAAAAAACGAAATGGACTTATGCTTTGATTAGAA  
GGCGACAATGTTACAGCTCTGA

>Cluster\_56980

ATGCGCGTTAAACATGGTTGACCCGCAAGAACTCGAGGCTTATGGTATCAGTGACGTACATGATATCGTTTACAACCC  
AAGCTACGACCTGCTGATCAGGAAGAGCTCGATCCGAGCCTGACAGGTTATGAGCGCGGGGTGTTAACTAATCTGGGTG  
CCGTTGCCGTCGATACCGGGATCTTACCGGTCGTTACCAAAAAGATAAGTATATCGTCCGTGACGATACCACTCGCGAT  
ACTTTCTGGTGGGAGACAAAGGCAAAGGTAAGAACGCAACAACCTCTCTCCGGAACCTGGCAGCATCTGAAAGG  
CCTGGTGACAGGACGCTTCCGGCAACGCTGTTGCTGTTGTCGACGCTTCTGTGGTGCAGAACCCGGATACGCTCTTT  
CGTCCGTTTTCATACCGAAGTGGCCTGGCAGGCGCATTTTGTCAAAAACATGTTTATTCGCCCGAGGATGAAAGACTG  
GCAGGTTTCAAACAGACTTTATCGTTATGAAACGGCGGAAAGTGCATAACCCGAGTGGAAAGAACAGGGTCTCAACTC  
CGAAAACCTCGTGGCGTTTAACTGACCGAGCGCATGCAAGTGTATGGCGGCACCTGGTACGGCGGCAAAATGAAGAAAG  
GGATGTTCTCGATGATGAACCTGCTGCCGCTGAAAGGATACGTTCTATGCACTGCTCCGCCAACGTTGGTGAAGAA  
GGCGATGTTGCCGTTTCTTCCGGCTTTCGGCTTAAACCCACCTTTCCACCGACCCGAAACGTCGCTGATTTGG  
CGATGACGAACACGGCTGGGACGATGACGGGCTGTTAACTTCAAGGCGGCTGCTACGCAAAAACATCAAGCTGTGCA  
AAGAAAGCGGAACCTGAAATCTACACGCTATCCGTCGTGATGCGTTGCTGGAACAGCTCACCGTCCGTAAGATGGCACT  
ATCGACTTTGATGATGTTCAAAAACCGAGAACCACCCGCTTCTTATCCGATCTATCATATGATAAATGTTTAAAGC  
GTTTTCAAAAGCGGCGCAGCTAAGGTTATCTTCCGACTGCTGATGCTTTTCCGGCGTGTTCGGCGGTTTCCGCTG  
TGACTGCCGATCAAAACCACTACTTCTCTGCTTCCGCTTACCGCAAACTGGCCGGTACTGAGCGTGGCATCACCGAA  
CCGACGCCAACCTTCTCCGCTTGTCTGGCGCGGCACTTCTGCTGCAACCGACTCAGTACGCAAGAGTGGTGGTGA  
ACGTTATGCAAGCGCGGCGCGCAGGCTTATCTGGTTAACTGCTGGTGAACCGGCACTGGCAACGATCTCGATTAAG  
ATACCCGCGCATATTCGACGCCATCTCAACGGTTCCGCTGATAATGCAAGAACTTCACTCTGCCGATGTTTAAACCTG  
CGATCCCAACGAACTGCGGGGCTAGACAGAAATCTCGATCCGCTAACCACTACGCTTCTCCGGACAGTGGCA

GGAAAAAGCCGAAACCCCTGGCGAAACTGTTTATCGACAACCTTCGATAAATACACCGACACCCCTGCGGGTGCCGGCTGG  
TAGCGGCTGGTCCGAAACTGTAA  
>Cluster\_24161  
ATGAAAACAGCGGACTACTTTTATTTGCGCAACATTGCTGACTATTTTTCGACCTCAGTTATGGCGCAGGATGTCAC  
GATTATTTTATACCAATGATCTTCACGCCATGTGGATTCTTATAAAGTACCATATGTCGAGACGGAAAAACGACATFG  
GTGGCTTTGCCAATATATCTACGTTAGTAAAACAGAGAAAGCCAAAAATAAAGCCACCTTTTATTTTATGCTGGAGAC  
TATTTACCGGGCATAATATCAGTAGCCTGACAAGGGCGAAGCAATAATTGATATTAAGAATACCATGCCTTTTACGCG  
AGTATCAATCGGTAATCATGAGTTTACCATGGCTGGGATAATGCCCTCCGACAATTAAGCAAAGCGAAATTCCTGTGTT  
TATTAGGCAATGTTTATCATAAAGAGAGTGAAGAACCCCTTCTGGAAACAAGCCCTACACCATCCGAAAAAGATGGCATC  
AAGATTGGTATTGTTGGGCTACACGGCTATTTGCATTTAATGACACGGTCTCGGAGCTCTCTCCAGGGACTCGATAA  
TGACAATAAACCAGATTGATAAATCTTCCGCGACCCCAAGAAATCAGGGGATGAAGCACGCTGAGGAAAGTGAAGTATT  
TGCAGCATATATCGACAGATTACGTGATAAGTTGACCTCACCGTGGCGTGGTTCATGAAGCGTACCGGCGGCTCAG  
TCCAGCATGGCAATGACAGATGTAGACGTGGCTGGATAAAGATATTCAAACCGCAAGCAAGGTGAAAGGATGGATATT  
TCTGATTACCGGGCATGCCACGCTCGGAACGCCAGAACCAATCAAAGTCGGCAACACCTTAATCTTTGACTGACAGTG  
GCGTATCGATATTTGGTAAATTAATCTTGTATGTAACCTACAGCTCGTACTATAAAGTGAAGAGCTTTGAGCTGAAA  
ACGGTTTATGCGGATGAAATGGATACCCGATCAACCACAAAAAGTTTATCAATGGCTGGAATAAAAAATGCGGATCT  
TCTAGCCCAACCGATCGGTGAATCATCGATTAACTTAACTCGTCTAGCTGAGTCACTCGCAACTTGCAACTGTTTAT  
CCGATGCAATGCTTGTGCTGCACCGACTGCACAAATTCGGTTGATAAATCCGGCAGTTTACGTGCTGATATAAATGCA  
GGCAGATTACCTTTGGTACATTAACAGTACATTTCCCTTCAAGAATGAACCTACTGAAATGGATCTCAGCGTAAAGGA  
TCTCGTAACTTACGAAACACGGGCAATCGCTTACCAATGGCATCTGCAAAATGTCAAAAGGCGCAGAAATGCGCTATA  
CCCTGCAGAAACAGTAGTTCAGCGCATTTGTATCTTTTAAAAATTAATGGTGAAGAGATCGTTGATACGAAATTTACCAT  
GTTGCGACTACGACTTCTTGCCTTGGGGCGATGGTTTCTGGCATTCAAAGAGGGAAAAATGTCCAGGTCGCGC  
CGGAAATAACATGTCCAATGTCTAATCGATTATTTAAGAAAGGCCACAAGATTACTCTGCACAGGTAAATGAAATGC  
GGTAGAAGTAAGCAAATAA  
>Cluster\_10965  
ATGATTAATAAAATCAGTATTAATTTCTTTCTTGTATGTTAATGATAGATGTTGTTTTGCCACATTGTTCAATATCCC  
TGTCTGGATGCATCTGTTAATATTTAATAAACCCTTGATGGTGTGAAACTTGGATTTATATATCTCTTCCAGTCTTTC  
TGATATCTGCATTAAATTTGTTTTTACCCGTTCTCATCTCAGGTATATATTTAAACCTTTTTTTTGTATCTGTTTAC  
TGATGTTCCATTGTTACATATGCCACCATGAAATATGGTGTGCAGTTTGAATAAAACAATGATGCAGAAATTTTTGAAAC  
AAATGCAGGTGAAATGACATCATATTTCAATATGTCTGTGTACTGTGGTTTTTATTTACGGGTATACCTCCATGTGGAC  
TATTTGTTAGTAAATACCCGTTATCCGAGACATGGATAAAGGGTATTATATATCGTTAATATCAATGTTTGCATCT  
CTCTGATATATTTGCGATTGCTTTTTCTTTTATAAGGATTATGCATCAGTTGGCAGAAACAACCTCTCATTAATAA  
AGAAATAACCTACTAATTTATCTACAGTGGGTTTAAATATGTAAGGGATTTTTTTGTTTCTCTCGGCGAGTTTCGTC  
AGACTGGAACGGATGCATCCCGACAATAAATGAAAAACAAGCCGGTAATTTAGTTTGTCTCGGGGAGACAGCA  
AGAAGTCAAAACTATGCTCTGAATGGATATCTCGTGGTACCAATGATTTTACAAGAAATATAATGAACATATATCTCT  
TCATAATGTGCGACTGTTGGCAGATCCACAGCCATCTGTTTCCATGATGTTTTCAGATATGAAGCAAAAGGAAAGTTCA  
ATTTCCGCAAGCCGTAATTTCCGAAAAATGTACTGGATATCTGTACAGAACGGGGTAAATTTACTCTGGATTGAAAAAT  
GACGGGGATGTAAGGTGTATGTAAGCGAATCCCTACAAATTAATATTTAGCCATCAAAATTCAGATAATACATTTATGCAA  
GAAAAACTCATGTTGATGAGGTTATGCTAAAAAATATGATGAGTATATAAATAAATAACTCAGAGGATAAATCTATCG  
TATTTTCAATTTGATGGGTAGTCTAGTCTTACCTACTATCTCCGTTATCTCTGAGCCACATAAATAATTTTAAACCAACTGT  
GATCGTAGTGATATCGAAAAATTGTACGATGAGCAATGATTAATACCTATGATAATACAATTCGCTATACTGATATAT  
AATATCAAAATTAATGCAAGCTTATCGAATAAAGATGAGTATGACTGTTTTATATATGCTCTGACCATGGAG  
AATCTCTGGGAGAAATGGATTTATACCTTACATGGAAACCATATAATGTTGCTCCAGCTGAGCAACCGATGCGCTCTT  
ATTACCTGGATGCTCTCGGGGTTCTGTTTCTTAAAAAATGATTTGAAATGTTTGTGAGAACATGCTCTAAACAGAAC  
AGTAAGTCATGATAATATATTTTCTATCGTTACTGGGGTTATGGAAATGTAATACTTCAGTTTATAATAAAGAAAGATGATA  
TTATATCTCTCGAGATAG  
>Cluster\_38548  
TTGGGCGGTAATGGCGTAAACGGTGGTATTAATGGTAGTAATCTTTTCACTACTAACGACAACATGATACTGG  
AGGATATGGAATAAAACAAGGGGAGATGCTATTTCTGGAATCAAATCACTTGAATAATAACGGTATTTGTTAGGGGG  
GATATGGCCCCGACGGTGGTGTCTGTTTATGGAGAAGATATCCATTAATAATCAATGGTAACTTTTACAGGATATAT  
AATAGCCAAAAAGATGCTTATAATACATCAATAATTTTTTCTGGCGGGTATAAATTCATTAGATATTTTATCAGATTCTGT  
GATTAATGGTATATTAACCTAGCTAGTATACCTGTTAATGGTACAAATGAATTAATTTAAAAACATCAATAACGCCAA  
CAGCAATTAATGGTGGGCTAATGATGGGAATGGCTCATCTGTTATCTGTGAGGCAAGAACTCCATTTTAAACGGAAT  
ATAAGTATGATGAGACGCATCTATGAACCTGTCTGTGAAGAAATGCTAATGTTTACGCAAACTACTATTAATTAATAA  
TGATTCATGGCTTAAATATGACACATCAATTAAGAACCTGAGCTCAGGACTAATTAACACATATTTGTCGACACAGGTA  
TCTCGATCGCTGATAATAGTACATTTGTACAATAAATGATTTACTGACAGAAGGTGCTGAAAGTTATGTTTATACGTC  
TTAAATGACGACGATAACAACTGATATCCATGCTGAGATGGAATAATACAAAAGGGATGGGATATGGAACCTTTAATAT  
AGAAAAAGTACCCACTGAAACATAGGCTTTCTTCTTTCCGATAATCTTTCACCTTTATATATGATGGCTGGGACGGCA  
AAAGTCTGACAAAAATCAGGTAATGGTACTCTTACTTTCTGCAACAAACAATAATACAGGAAATACAGAGGTTAAATCT  
GGCGTATTAATTTCTGTCACCTGATGCTCTTGGTGGGACTGAGTATTTATATTTATCCCGTGGCGAGAACCTGGATAT  
GAATGGGTATCTCAGACAATAAGCAAACCTACTGACGGCTGCAGGCTCTGTGCTGAACATTCATGGCGGAAGTCTGATAC  
TGAATAATGGAGGAAATCTGCAGGTAATTTGAGGGGATGGTCTCTGAAACATAAATGGGGGAATGTTGATATAAGC  
GGTAATAATCGTAATTTTTCCGGTGTTTTTACCCTGAATAAGGGGGCTCATTTGGCTGTATCCACGGCTGATAATCTGGG  
GACAGCTTTGTTGATAACTATGGCACATTAACCTGAAACAGTACATCAGCATGGCAGCTTACCAACAATATCAGTGGTT  
ATGGTAATGTTTCGCAAGACGGGAGCAGGTGCACCTGAACTATAGCGATAACGAAAAATGGACGGGATGACAGATATTT  
CAGGGACAGTGATGACTGGGGAACCGAGATTACCGGCTGATGCTCGGCAAGTAAACAGGTCATTTGTTGAAGACGGGCA  
ACTCTCCGGGTTTGGGGCGTTGCAGGAAATCTGAGCAATAGTGGTATAGTCTGATCTCCTACATATATGCGGGTAATA  
TACTGACTGTCCGAGGGAATTAACCTGGCAGAAATGACTTATCTCTCCAGACAGAAACAGGTGGTGAATTCGAAA  
ACAGATCGTCTGGTGAATTAAGGTAATGCCAGTGGCGTACCCGTGTCGCTGTTACTCAGGCCGTTGGTACTGGTGCAGA  
GACACTTAATGGGATTAAGTGAATTTACCTCAGTGGCAATGCTGATAAATGCTGAATTCATTCAGGCAACGTAATCACG  
CCGGAGCTTATGATTACATACTGAAACCTGGTCCAGGGGATTAACAGCACTAACGGTATCTGATTAGCAGAAAAGCATT  
CTGTACCACAACCTGAAGCTGTACCGGAAAGCCATGATAAATAATTTGCGTCTGAGGCGAGGTAGTATGTTGCCAGTAT  
TGCTGCTGCAAAATCTGTTTGAACGAATCTGTATGAACGACAGGGACAGGAGTTGATATCAGCCATGACAGGAG  
AGAAAAATGAAGCAGGATCTGGATGATAAATAAAGGAAAAACAATACTGCTGGCGTACCAACAGTATGCTGACGACACC  
CGGGGAATAGCTACGTTGTTTAAATAGGGGAGATATAGCTCAGTGGAGCTGAATGGTACCATCGCTGGCATAACAGG  
TATGATGGCTGGCTATGGTCATAATAAATACAGTACGAATGCCCTGAGCACGGGATACCAATCGGAAGGAAGAAATGAA  
GATACACGGGGGCTTTATGCAACATGGTATGCAATGATGAACACACAATGGTCTTATCTTGTATGATGCTGGTGC  
TACAGCTGGTTGATATCATATAAATGGGAAACGGCTGCCTGCTGAGTCAATGAAAGTCAAAGGGTTTACCGTATCTCT  
GGAAGCAGGATATTCATGGAAGGCTGGAGGTTTACCAGCAATTAACAAGGAAAGTCAATGATGTTGTTGAGCCGACG

TTCAGGTTGTCCGGATGAATGTAAAATCAGACAAATATCATGAAAGTAAACGGAAACAGTATTGAAAATACCGGTAACGGA  
AATATTTCTACCCGCTGGGAGCAAGAACATGGCTTACCAGCAAAAACGGTAAAATACGCGGTATGCGGTTCCGTTCCAG  
ACCATTTGTGGAGGCACACTGGTTGCACAATAGTCGTGTTTTCCGGCACCAGTATGAATGGTGTAGTATATACCAGGATG  
GTGCGCGTGATATCGGAGAAATAAATGGTGGTGTGTGGGAATGATAACACCAGAAAGTAGCATTCGCGGTGATGCAGGC  
ATTCAACTTGGAGAACATGGATAACCATAATACATCTGCCATGTTGAGTGTGGAATATCGTTTCTGA  
>Cluster\_17770  
ATGGAGATTATTACTCGTATTGACGCTGCAAAGGCAGGTCTTAAGCGTTATTACACCGGCAAGCAGTGAAGCATGGTCA  
TGACAGTGAACGTTATGTTTATAACGGGCACTGCGTTACGTGCGCCATCAACACAAGCCTGCGCCGACAGGAGAAATAA  
AGCAGCTCATGGCCGAAGCCAGCCTGCAACATTCAAGCTGA  
>Cluster\_46626  
ATGGCTGTATCCAGTGGATTATCTGAACACAGCAGTATTTATCGCTATCAGCGCGAGGGGCGTCATGCGGTCCGTCAGGA  
GATTCGTGGCTTTTTCCAGGGAAGCGGCAGAGGTCTGGCAGAATGCGGCCCGGCTGGCACCCCTGTGAAGCATGGCGGGATT  
TTGCTCTGAAGAGGGCATCTGCATGTGCGGTGTAAGTGCCGATAA  
>Cluster\_15641  
ATGGATAAAAACACCCTGCTTACTGGAATCTGTCACTTGATACCGAATGCCAAAATGCGGTACAATTTCCGATCTGCT  
TTGTGACGCTGATTTCTGGGAGTTTTCTGGAGCTAAACAGGCATGTGAAGAAAATAAAGGTTACGAAACATGCTGTCCAG  
AATGTAACCATGAATTTAAACAGATTTTCGTGTATTGA  
>Cluster\_53204  
ATGCAGATCCTGTTTAAACGATCAACCGATGCAGTGTGTGCGCGGACTAAGTGTTCACGAACTGCTGGAGCAACTCGATCA  
ACAACAAGCAGGTGCGGCCTAGCGATTAATCAGCAAACTGCTCCCGGGGAACAATGGCGCAACATATCGTGCAGGATG  
GCGACCAGATCCTGCTTTTTCAAGTTATTGCAAGGGGGTTGA  
>Cluster\_66918  
ATGGCAAAAACAAAACAGGAATGGTTATATCAGTTACGTGCGTGTCCAGCTTAAAGACACTTGAGAAAATTATGCTAA  
AAACCAGGGCAGCTTTAGCCTCGGATAAAAATAGAAGCATCAACTCTGCAGTTGATCATGCGCTTGGCGAACTGACAATGA  
ACAAATTTGACGACAAAAGTACCGGCTTCTGTCTGGAAGCATGTAAAATAA  
>Cluster\_46615  
ATGCCAAGAAAACGCTAGAAAATTTGGTAAATGTTGCACGTGACTCAGGAAATAGCGGATAAGAGAAAGCCGTTTTTT  
CGGGTATCTTGAACAGCATGGCTTGAAGAGGAATGAGGATAGTGTCACTTTTTGCTATGCATTTACGGTTGCAACACA  
ATGAAAGAGATAATCTTGTCCATGAACGTGATGTCGGATTACATCATAAATAG  
>Cluster\_17764  
ATGAAAACACAAATTCAGAAAGCAAAGATTCTTGATAAACACGGCACCCTACTTTATCAATGGTTCATCTTCCGTGTTA  
TCTCAATGAAGATGGCGACACGTACCTGGTTGAAGAGTACGAAACAGGCGAGCGGTGTGAGCACATTTATAAAGACCTGT  
TCGCAGACGGCGTCTGGTTGCAGTTAATCCGATTGGTTACAACCTGA  
>Cluster\_51314  
GTGGAAGCAATCAGAAAATACTTACCCTCAGGAAGTAAAAATATTTCTGCGCATCAAGGCAGACAGTTGCTACAGGA  
CATGATCAACGCCCGGAAAATTCGAAAGGCTTCAAAATCGGCTGCGTGTGTTGGTGGTATGAAGATGAAGTGTCTGG  
CCTGGCTGAAAGAGCGGAGGAAGAAGCGCGGAAACGGCTGCGTAA  
>Cluster\_20764  
ATGGAACATATCGCATTGCAGCGGATTGCGTTGTTTACCAGTTGATCGCCAAAAGTAATGCACTGGCTGTGAAAAGGA  
CATTGCACTTGCCTGGCTAAGCGAGCTGACTTACAGATCTGGAAGTAACTTGTATGAATATGAAAGTAAAACCCCGGG  
AAGGGGCTTATCAGGCGGGGAGTCGCTTTCAGTAG  
>Cluster\_50970  
ATGAATATTTATTTTCAGAAATAGTCATATCACTGGCAATATCTCATGCATTTACGGATTACTCGTCCCGTTTCTGATATC  
AATGAAGGATACGGTAGCGGTAATTTCTGGCTTTCGACTGGCGTTTCTGACCCCGCATGCATTTATGCCATTTATAAGG  
GGCTTCTTTCATTAAGGATAAAAAGATGA  
>Cluster\_34171  
ATGGCGGGCGAGGCTGCCGTGTCGACCCCAAGGGCTGGCATGGGCAGCCTCCCTGGCTCGATCGCGGTGGCGTTCGT  
GGCCGCGGGTACCGGGTCTGCTACAAGCGTATCCGCGGTCGACCACGCCGTGGGGGCTGCTCATCAGCGCGGCACCTG  
CCCTCCCGCTCGCTGGCCATCCGTTTGCCTGA  
>Cluster\_38602  
ATGAAAAACAGAAAAACCAATGTGATGGTTCGTTGGGAAAAACCGGTAGCGGTAAGACAGTCATCAGCGTTGATGTTATGCG  
GACCTTTTTATCAGAACAACAACCTCCGTGACTGGCGTGAATTCGCAAAAACATTCAGAAAGACGGCAAAAGCGCAGGAG  
ATAAAGATCATGACAACCAACAGTAA  
>Cluster\_59147  
ATGCCACTTCTCAATGATCTGCTCGATTTCAGTGACCATCCGCTTATGCTCCGCCCTTGCACAACATTTGCAGAACA  
CCTTCCACCGAGTGGATAACAACACTGCTGACGCTTTCTGCTCATGCGACCGTTCGCGCCGCTGTTTACGGGGGACA  
TGTTTATCTGGATGGTGGTGAATGA  
>Cluster\_29366  
GTGCGTAAATTCCTTTACCTCTTATCCTCAAGACCATCAACACATTTTTTAAACATCAACCTACTCAAAATCATCTTCTGGAG  
CTTATCAGCTTGGTATGCCAACCCTCTTCAAGAAATTCATGCAATTTTAGAAGTATTGCTATCGTGACCAGTATGA  
TAAATCAGTCACTCAATAAAGGTATGCTGAAATAA  
>Cluster\_205  
ATGCCCTTAGATGTTTTTAGGACAGTACGAAAAAGAGCTGTATGAGTTTTATTGAAAGTAAATACCAGAAATTTATAAAGA  
AATAAGAGAGAAAAAGAGATCTCTCCAGAGTTAGAACAAGATGATGCAAGTTTTTAAAGATTTAATGAATGTTTTA  
AGAAAAACAACAACATCGAGCCTGTTCCTATTCATAA  
>Cluster\_29485  
GTGACTAAACAGGAAAAACAGCCCTTAACATGGCGCGCTTTATCAGAAGCCAGACATTAACGCTGCTGGAAAAGCTCAA  
CGAACTGGACGCGGATGAACAGGCAGACATCTGTAATCGCTTACAGACCAGCCGATGAGCTTACCAGCAGTGCCTCG  
CAGCTTCGGGGATGACGGTGAACACCTCTGA  
>Cluster\_11627  
ATGCGTGAATTTTACCTCGAAACAATAGACCGCATTTCTTGCCTTTCTCACAGTGAAGCATGATGGAAATATTACG  
CATATGGCTTGAACACTTGGCGACAATGAACGCGACAACAAAATCAGAAATGCCACGGCATTAATAACGCTTCTTG  
AGCCTGTAATAATGAACTGCAAGAAATAGATCTATTGACAGCAGATATAAAGAACAGCACACCGGAGAAATAA  
>Cluster\_5170  
ATGCTGGCTGATTTTCGACCATCGGGTATAGCGCAGCCGGATTTATTTGATGAAATCCAGCCCGTAAAACAGTAAAA  
GTTAATGAAAACACTCGATGAACGAAACAGTCCGGGAAAAGGGAAAAGTGTGGTTTGGCGGGCAGGAAACCGCCCTGAAT  
GGCAATGAAACGGGAAATGCTATCGCTTTCGTATACAACAATGACTGAGATCCCATTTGCTTCAATCTGA  
>Cluster\_39626  
ATGAAAAGGGTACTGTTAAGTGGTTCAACAATGCCAAAGGGTTGGTTTTCATCTGCCCTGAAGCGCGCGCAAGATAT

TTTCGCTCATATTCCACCATTCCAGATGGATGGTTACAGAACGCTAAAAGCTGGACAATCCGTTTTCAGTTTGTATGTCCACC  
AGGGGCCAAAAGGCAATCACGCCAGTGTATTGTGCCCGTCAAGTAGAAGCGCAGTGCATAG  
>Cluster\_11624  
ATGTGCAATAAAACACACCCGGACGCAGCAGCCGCCGCTCACTACGCTGATGCACGCGCTTATTGATATTTCTGTTAT  
TGCTGCAGGGCGATAAACACGCAGCCAGAGAAATCAGATGCATCTCCATTATTAGCATTGTGCAGCTAAAAGCCG  
ATCAGGCACTGGATAAGGCCGAAAAATATCATGGCTGATGTGCAGGAGGTGCACCATGCATAA  
>Cluster\_39328  
ATGAACAACTAATGAACAACACCAAAATCCACGCGCGACTGATTGAGCAGGGCAGCAACTTTCCGCCAGTTCGCCATCAG  
TACCGGCTACGAAACCCCGGACGGTTACGCAAGCTGTTGATCGCTGGGCGGGTAAACAGGATTTGCCCGTGGACGGCTGA  
CGTTTCGCATTCTGAAAGAGCTGTCCCGCACCATCGGCAAAAGAGATCGTGCCGGGCATCTGCACGAACCTAACTAA  
>Cluster\_998  
ATGATGTCTATAAATGAAGTTGTTAAACAGGACTGGCACCCTCGCGCATGTTGTGCGGGCGGTGCATGTAAAAGGTTTTAC  
TTTACGCTCTCTGTCCATTTGAAGCCGGTTAAACCAGGATCTTTAAAGAATGCCCTGTACCGCAAATGCCCAAATATG  
AGCGCATTATTGCTGATGCTATTGGTGTGGCCGGAGGAGATCTGGCCAGCCGTTACGCTCGTAAGGTGGCATAA  
>Cluster\_22305  
GTGGTTGGCTGGAATATTCAGGATACCCTCGTCTGTGGCTGGAGGGCTGGATTGCCAGTCAACAAGGATGGCGCATTTGA  
TGTCTCGCCACTCGCTCAATCAACTACGCCCTGAACGTTTCAAGGCGGTACATTGCTGGTGTGGTGGCGGATAATC  
GAACCTCCGCCAACACAGCAACTCACCCGTTGGCAGGAACAAGGCCATGATATTTCCACTCGGCATTTAA  
>Cluster\_40452  
GTGAAGTTTATGCTCAATGCAACAGGATTGCCCTTACAAGATCTGGTGTTCGGTGCCTCCGCTACTTTCTCCGTTTTT  
CAAAGCCTTCGCGTTTGGATTTCGTCATCTGGCTTGTCAACACCGCTTCTCGTGGCTGGATCTACGCTGGTGCATCT  
GGCATCCCTGTTAATGATTTATCGCTGTTTGGCATTGGCTTGGCTTGGCTTGGCAATACGATTGGCTGGTAA  
>Cluster\_15655  
ATGAATCAGACATACATTCCATCATGCTTGAGAAATCTGCCAAAGCAGAAAGCAAAGCCCGCAAGCCATAAAGGA  
CGCTAAGGCAGAGGTTATTGATCAAGCAATACAATTGCTCAGGAGGAGTTAAGAAGTGGCAAGCTCGAAGGAATGATGA  
TGCCCTATCAGCGGGATATCTATCGGGATTAGTAAGTTGGAAGTATGAAGAGTGAATTATGA  
>Cluster\_40845  
ATGGCTGACATACCTCAGTGAAATCACCGCATGGATACTGATTCCTACTGGCTGGCGACATGCCTCAGTGCAGGGGGCTGC  
CCTGGCTGCCCTGCTGATGCACATAACAACACAGTGGTTATGGGAAAAGCTTAAAGCAGCATAACGCCGTAAGAGCTGT  
CCGACGCTGTCCGGCATGGAAACGGCAGAAAAATACCGGAGATACAGAACAATGA  
>Cluster\_53648  
ATGACTCGTTTTGAAAGCAATTAACAAGCCATATTAATAATTTGGATATATCGATAGTATGCAACTTCCCGTCGATAA  
GTGTGAGCTAAATCTGCTTATGTCATCAAAAATATCGATTCCCAAAGATTACTTAAATGGCAAAAAAACGGTCTCT  
CATCAGAGAACCGTATTACTTATTCGATCAAAATAGCGGATGAAAAATATCCGCCATGA  
>Cluster\_44122  
ATGGCGACATTTTTCTTTAGGTAAACATCCGCACGTTGAGCTGTGCGACTTGTGAAACTGGAAGGCTGGAGCGAAAGCGG  
CGCGCAGGCGAAAATCGCGATTGCCGAAGGCCAGGTGAAAGTCGACGGTGGGTTGAAACGCGCAAACGCTGCAAAATCG  
TCGCCGGTCAGACAGTGAGTTTTTCAGGTCACAGCGTACAGGTTGTTGCTCGTA  
>Cluster\_6917  
ATGGCGGAAAATCGTGTGTAGGCGCAACGCCATAATGCGGGCGGTTGCCGGCATCCAACGCCATTCATGGCCATATCAA  
TGATTTTCTGGTGCCTACCGGTTGAGAAAGCGGTGAAGTGAAGTGCAGTTGCATGTTTTACGGCAGTGAGAGCAGAGA  
TAGCGCTGATGTCCGGCGGTGCTTTTGGCGTTACGCACACCCCGTCAGTAGCTGA  
>Cluster\_18924  
ATGCCACGCAACATCGCTCATCAAGCAACCTGATCAAATTAATGGAACGCCAGAAAGGTATAGGGCGCGACGATATCCA  
GATCGCAGATAATCGCCCTACATTCATCGCTACGAGCCGAACGGAACCTACGCTACAACCCGCATACCCCGCTATGC  
TACGCAAGCTCCACGGCATCCAGGCAAAAAGAAATGTGTGATCTGAAAGGAGGTGAGAAATGA  
>Cluster\_15785  
ATGAAACCTAACATTTCAATCACCTTACCACGCCCTCATGTGACTATTGAACGTTATAGCGAGCTGACAGGGCTATCCAT  
CGATACTATCAATGACATGTTGGCTGATGGACGCTTATCCCGTCCCGTCTGCGGAAAGATAAAAAACGCGAAAAAGTGA  
TGATCAACATAGCAGCCATGACCGTTGATGCGCTTTCAGAATGCAATCTAAACCTTAATTAG  
>Cluster\_63835  
ATGAAACCTTTTCATCCGCAATAGCAGCTGCGCTTATTTCTTTTTCCGCGCAGGGCGTTGCGGAAACAAACCACGCAGCC  
AGTTGTTACTTCTTGTGCCAATGTCGTGGTTGTTCGCCCATCGCAGGAACAACCCGTTTGAATTTAAATCACATGGGTA  
CTGGCAGTGATAAGTCGGATGCGCTCGGCTGCCCTATTTATAATCAACACGCTATGTAG  
>Cluster\_59984  
ATGTTTCATGTCTTTTATGCCAGCATGCCGCACATGCCGCTACAAGCCGCTATATCACTGACACGACAAAAGAGCGTTA  
TCACCAGTGTGCAACGTTGAATTCAGCGCCACGTTTACATCACTTATGAGTCCGTTACAGCGATACATTGTGAAGCCGGGAG  
AAGTCCACGTCGTAAGGCCGACCCGTTGCCGTAGGGCAGCAAAATATGTGGATGTAA  
>Cluster\_16411  
ATGCCATTAACCTCAGATATTAATTCATCTTCCGTTCCATCTTGAATGGAATTTGTAAAAAACGCCACAGGCATCAGGA  
ATATAAGAAGGTGCTGTGGTTGACAGGTTTCAGATGACTTGA  
>Cluster\_9689  
ATGGGGGCGAACTCGTAAAATGGGTTAAATCGCATAAGATAGATGCTGGTAGTGACTCCAACCTACTGATAGTGTTTTA  
TGTTTCAGATAATGCCGATGACCTTGTCTATGCAGCTCCACCGATTTTGA  
>Cluster\_20378  
ATGAAAGAGAATAAAGTACAGCAAAATCAGTCATAAACTGATTAATATCGTTGTTTTTGTGCAATTTGTAATACGCCCTA  
TTTATTTCTCCATTTCTATTTAA  
>Cluster\_59329  
ATGAGTAAAGTTGGTATTAACGGTTTTGGTTCGATCGGTCGACTGGTGTGGGTCGATTACTTGAAGTCAAAGCAACAT  
AGACGTTGTCGCTATTAATGATCTCACTTCCCCATAA  
>Cluster\_13681  
ATCGGATTGCTGTAGTCAATGAGTGGCTTCAAAAATAAAATGGCATAGCGGGATATGCCCGGAGCGGGCGATTTT  
AGGTGATTTTGTGATCTGTTAAATGTTTTATTGCAATCGGTTGCTAAATGCAATTTTAAGAGGTGA  
>Cluster\_30598  
ATGCCAGGAGTACCGGAAGTCAAATTCATGGGGATATTGACTGTTTATGACTGGGGGGACGGAATATATAAAAAAAA  
AAGAAAAAAGATTTATTTTCTTGGTGCTTGGCTGCTTTTTTGTAGTTTAAAGATTATTCGCTGA  
>Cluster\_6568  
ATGGATTTTATGCTGACGGTTTTCTGGTGTGGTTATCTGTCCATGCTTATATACTGCAGATAAAATAGGCTGCCATTTGTT  
ATCAGTATTTGGCGTTATGTTGCTGATGCTGATTTTCTCGTGCCTTTTTTTTGTAGTAA



>Cluster\_48663

ATGCTGGTGGCCTTAAATGACCATCCTGCTCCCTCAGGCTAAAAACCAACCTCTTACCTCCAGGCAACCGACAAACC  
CACCTGTTCCCGTCCGGTACCCTAACCTTTCCACTTTGACGCTTATTCTGACACGATAA

>Cluster\_9687

ATGGGCGGAGTACGAACTGACCAATCTCGAGTTGTTACATCCGAACCTGCCACCGACAGTTACACAGCAGGGAAGCCGG  
TGCTCACCAGAAAGCACTTATAA

>Cluster\_23260

ATGAATCGCTGGGAAAACATTCAGCTCACCCAGAAAACCGACTTGCGCCGGTGGCTACTTTTTTTCATATGATTTCTGT  
TGCGCAGGCGGTACTTTGCCCCGAAAACAGCAGCCTGTTTTCTGCCCTTAAGCGGTTCAGTGAATTTCCACTTTTTTGG  
ACCACCCGCTGCAAGTGCCAGAAGCCTTACCCTCTGAGTTAATGGCTGACTGGGGGCATATTACCCTCCCGCCATGTGG  
CAAATGGAAGGTACGCGAACTGCAATATACCAGCAAGGTTTTCCATTCCCCATCGATGTGCCGTTTTGTTCCCGAGCGA  
TAACCCAAACCGGTGCCTATCAACGTATTTTACCCTCAGCAACGGCTGGCAGGGTAAACAGACGCTGATCAAATTTGACG  
GTGTGAAAACCTATTTTGAAGTCTACGTTAACCGTTCAGTGTGGGGTTCAGCAAGGGCAGTCCGCTGACCCGAGAGTTT  
GACATCAGCGCATGTTTAAAACCGCGACAACCTGTTGTGTGTGCGGTGATGCAGTGGGCGGACTCTACCTACGTGGA  
AGACAGGATATGTGGTGTGCGGCGGGATTTTCCGCGATGTTTATCTGGTCCGTAACAACCTCACGCATATTAAACGATT  
TCACCGTGTACCGACTTTGACGAAGCCTATTGGCATGCCACTTTCTGCGAAGTGGTGCAGAAAATCTCCGCGCC  
TCCCTGTGCTCAGCAGCTGGAATATACCCTGTTGATGGGGAACGCCTGGTGCACACGAGCCCATTTGATCATTTGGC  
AATTGAAAACCTGACCAGCGCCAGCTTTGCTTTTACTGTGCAACAGCCCCAGCAATGGTGCAGCAGATCCCCTTATCTTT  
ACCATCTGGTTCATGACGCTGAAAAGACGCGAGCGCAACGTTCTGGAAGTGGTACCACACAGCGTTGGCTTCCGTGATATC  
AAAGTGGCGGAGCTGTGTTGATCAATAACCGTTATGTGATGCTGCACGGGCTCAACCGTACGACCAACAGCATTCG  
CAAAGCCCGCGCTTGGGATGGATCGCTCGAGAAAGATCTCCAGTTGATGAAGCAGCACAACATCAATTTCCGTGCGTA  
CCGCTACTACCGAAGCATCTCGTTTTTACGAACCTGTGTGATATCTACGGCTGTTTGTGATGGCGGAAACCGACGTC  
GAATCGCACGGCTTTGCTAACGTCGCGCATATCAGCCGATTACCAGCATCCGAGTGGGAAAAGTCTACGTCGAGCG  
CATTTGTTCCGCATATTACCGCGCAGAAAACCTCCGTCGATCATCATCTGGTCCGTCAGGCAATGAATCCGGCTATGGT  
GTAACATCCGCGGATGTACCATCGCGGAAAGCGCTGGATGACACGCGACTGGTGCATTACGAAGAAGATCGCGATGCT  
GAAGTGGTGCATATTATTTCCACCATGTACACCGCGTCCGCTGATGAATGAGTTGGTGAATACCCGCATCCGAGCC  
CGCATCATCTGTGAATATGCTCATGCGATGGGGAACGGCGGGCGGCTGACGGAGTACCAGAACGCTTCTATAAGC  
ATGATTTGCATTACGGGACATTATGTCTGGGAATGGTGCACACCGGATCCAGGCGCAGGATGACAAACGGCAACGCTGG  
TACAAATTCGCGCGGACTACGGCGACTATCCCAACAATAACTTCTGTCTTGTGATGGTTTGTATCTATTCCGATCAGAC  
GCCGGGACAGGCTGAAAAGAGTACAAAAGGTTATTGCGCGGTAAAAATCCACGCGTGGATCTGACTCGCGGCGAAC  
TGAAAGTCGAAAATAAATATGTTTACCACGCTTGTGACTACACCTGCACGCAGAGGTGCGCGCGAAGGTGAAACG  
CTCCGCGCAACAGAGTAAACTGCGCGACTTTCGCCGAAACAGCAAGCCCTTACAGATACAGCTCCGCGAGCTGGA  
CGCCCGGAAGCGTTCTCAACATTTACGGTGACCAAAGATTCCCGCACCCGCTACAGCGAAGCCGGGCATTCTATCGCA  
CTTATCAGTTCCGCTGAAAGAAAACACCGCGCAGCAGTGCCTTTCCGACCAATAATGCGCGTCCGCTGACCTGGAA  
GACGATCGTTTGTAGCTGCACCGTTCCGCGCTACAACCTTCGGATCACCCTTCTCAAAAATGAGTGGCAAACCGACATCTG  
CGAGTAAATGGCGGCTCCCTGCTGACCCGCGAGCAAAAATCAACTTCTTCAAGCAATGATGACCAACACAGAGG  
AGTACGAAGGCTGTGGCAGCCGAATCATTTGCAGATCATGCAGGAACATCTGCGCGACTTTGCCGTAGAACAGAGCGAT  
GGTGAAGTGTGATCATCAGCCGACCGTTATTGCCCCACCGGTGTTTTGACTTCGGGATGCGCTGCACCTCATCTGGCG  
CATCGCTCCGATGGCCAGGTTAACGTGGCGCTTTCCGGCGAGCTTACGGCGACTATCCGCACATCATCTCCGTACCTG  
GTTTTACCATGGGGATTAACGGGCAATACGACACAGGTGGCGTATTACGGTCTGGACCGGGGCAAAAATACGCGCAGC  
CAGCAGGCTAACATCATCGATATCTGGCGCAGCACCCTGATGCCATGTTTCGAGAATATCCCTTCCACAGAACACCG  
CAACCGTCAGCATGTCCGCTGGACGGCACTGACTAACCCGCAAGCAATGGTCTGCTGGTGTTCGCGAGCGCCCAATTA  
ACTTCAGCGCTGGCGCTATACCAGGAAAACATCCGCTGCCAGCTGACCGACTGTAACGAGTTGCAGCGATGATGACATC  
ACCTGAAATCTCGACCACAGCTGCTTGGCCTCGGCTCCAACCTCTGGGGCAGCGAGGTGCTGGACTCTGGCGGCTG  
GTTCCGTCAGTTACGCTACGGCTTTACGTTGCTGCCGTTTTCTGGCGGAGAAGCTACCAGCGAAAGCTGGCGTCTGATG  
AGTTCCGGCGAGGGCTTTTCCACGAATTTGCACAGCGAGAATAAGCAATGA

>Cluster\_39971

ATGAGAAGATCATCCGAACTGAAGCACTGATGCCAGTACTGAGTGTAAACAAAGCTCAGGAAGAACAGATTAAACACCTC  
CTATGAACCAGTACTCCCTCAGTCAATTACAGATGAAAAGCACAAGCTATATCGAAGCTTTGAATTTGCTGTTCTC  
GCCCGGATATCAGAAAATTTGAGTAACAGGGCCGTACGGGGCCGTAAGTTTCGGTATTACTGACATGGGAAAGGGCG  
GAGGATAATGACTTTCCGGTGTGATGACCGTATCACTGGCTGACTTTGAAATGCAGCGGGCATAACCCCGAGATTCGCTGTC  
AGTTGAGGGTAAGCCGACTATGATGATAACGAAAAAAAGCGGAAAAGCCGAAAGAGAAAACAATCGAGTACAGCATCC  
TGCAACAACCTGCTCTATAAAGAGAAAAAAGTGTGTTACCCTATTTCCGCTGGAGCGCATTTCTGACGTAAGTGCCTGT  
CAGATAGCCATGATGACGGCCAGTCTGTTATTCATACTGGCTTCGACGGCAACTGGTCTGCTTTTTCTTTCCCGGATTA  
CATCCGGGAAAAGCTTCCCTGTGCGCAGAACTGACTGACTTTTTTGTGAGAGTTCCTGTACTCGTACTGTTGGTAGCG  
CCGGGATATTTCTTTTACTGCTTATTTCTTGGACTGAAGAAATGCACCGTACAGGGGTATTGATCGGCGTGAATAA  
ATTTGATAAAGTTGACATACTGAAAGGTGCCATTAACAACCGCCCTGCGGCCCTTCTCTTCTCAATGTGTACATTGATGA  
AATCGTCTACTTTTTGAAACAGACACAATAAATGTAGTGCATATTTGAGGATCTGACCGTCAATAATGACGGAGCCATTT  
TTATCAAACCTCCGGGAAAATAAATCAGCTTATCAATAAATGCCTCCCAACAGACAATCTGTCGGATTTATCTACGCTGTC  
AGGATAAACCCTTTTCATAACACCAGAATCACGGACAAAATTTTTCGATTTCTGATACAGTAATCCAGTAATCCAGTAATG  
TGAGAATGCTTCTGAGCATTTTCTAAGTAAATTTACACTTGTGAACTCAGGCAGGAAGGATTCAAAGACTGCCTTGCCA  
GACTGGCTTTTTTATTCCTGATATGCGGGTTATGCATAAACATTCGGAATGAATTTCTGCTTTTACCAGGAAATTTGTAAT  
AATGGAGGAGATTTAAAGCGTCTTATTTCACTGATCACCTATAAAAACCTTTATGCTGAAGACTATCACAGGATAGATCA  
GAAAAAAGGAATGCTTTATAGCATGTGATCTGAATATGCATCAGGTAATTAAGAGAGGATTTTTCGAATAATCTAAAAA  
ACAAAATGAAACGTTGCTAACTGAACATATAACTACAGAATGAAGAAGTGGTCACTGAACATGAGTTAAGAAGTGAA  
ATTTTGGCGCATATATCAGTGAAAAACAGCACCCCGATATACATATTTATGACAAAGTACAGGGGGCAATGATTTTGA  
TGATGTAATCCAAAATGAAAATTCATTTCTTCTTGTGAGCAACAAAATAACAGCATTAAACCTAGTGGATAAACA  
TTACTATAACAACATCGATAAAAAAACAGCTCAGGTTATGAAGGAGGAATATCAGGAAAAGATAGCGATTTATCAAAG  
AACTAAATAATGATGTTTCTCGATTGGAGGAAAATTTAAAAAAAACAGGTGCGGAGATTCAGAATGCATCCCTGATGA  
TCTTGTTTTTTCAATCAATAAAAATGGGGAGATCAGTTTTCGAAAGATATTTGATGATTTGTTTCAACGCCTGTAAG  
ACGGAGAATCCATTAAGTAAATGCCGCAATAATGATTTTATTTATTTCTTCTATCTCATGTTTATCTTTCCACTGAT  
TATATGGCTTACCCTCAGTCTTTATGCGAGGTAGTCTGAGCAGCGAAGACAATAACTTTATCAGGGCTGTGACGTCAGG  
AAGATTACTGTGAACCGGCAAAAATGCCCTCAGCAATATTGCTAACACAGTAGCAAAAATTCATGGACTGGGCGATAC  
TGATTCATGACAATGATGATGATGATGATGATGATGATGATGATGATGATGATGATGATGATGATGATGATGATGATGATG  
AGGATGACAGGAGGTCGGAGCCGACGGCGGATGGTAAAGACTGGCCATGAGATCTTCCCTTATGGGAACCTGCTGC  
GCAGCGGAAATATACAGATTAATGGTCGACGGGATGGTCACTTTATCCACTATGATCCACAGATGGGAGCCGTAAT  
ATCCGTAGACTGAACAAAATCTTCCCGTATTTACTGTCCTTACCAGTACTTTCTGGGAAGCGCTCTCAGATAACT  
CGGGAAGAAGTGCAGAGACTCATCGATTTGCAATTTAATCTCGTAACGTCCTTACCAGGAAATGTGGCAGATTTTCTG  
TGAAAACCTGCGGAAATCAGGTTGTCGCTGACTAACATCTCTTGGCCGGAGTACTCTGGCAGGAAATATGCAAT

TGGTGGTACAGAAAAAATTTGGACCTATTCACGTTAAACCTGCAAAACATTTGTTTCTCATTCTCATGAGTCAGAG  
AATAACAGTGATACCTTCGTAAGAAGCCTGTTGCTCTAATAAAATCGTTCGTATTCCGAACCTTGAAAAATATGTTTA  
TGAAACATATCATCATTCATTCGTGATGTTTTATACACTCTGAAGAAAATGATCTCATTCCTGATTTTCTTAATTCGA  
CATTCGTTGACTGGGATGATGCAAAAGTACATGACAGAAAGTATGAGCTTCGTACTGGAAGACGTATCAGTTATCCTGAA  
AAGAGAATACCGAAACAAGCAAAATTTCTTATGATCAAACCTGTATTCACTTCTGGCTCATCAATACATTAACCC  
TTGCTGGAATAATGTTATTTCTCTACTGAGTGAAGATCGCTCACTTGTGTTGATACCTTTTGTGAGTGGCTTAATATTA  
ATTATCTTTTATTGCAAAATAACFCGTTGCCTTTGACTGATGTTTCAGTTCTCGCAATTACTTATTAAGGCTGTACATCA  
CCTCATATCAGTAAAGAAGCGTTAATAGCGATAACCATGGCATTAGGATAACTCTTATTAATGTACCAGAAAACCTTACC  
ACTGAATAATGCTCGGTTACTAATAACAAGCAAAATGGCTGGCACCACAGTACTGTGTTGAACAACCTTATCAGGCAC  
TGTACGAAGAAGGTGACAACTGACATCACTACTTTATGCACTTATTTGTGCCGCTCCTGTATATTAGTGTGATAATTAC  
GAGCTGTTTTATTGCTGATGACCAGTTGACCTAGGGATTACTCGTTTAAATCTGAAATGGCGATAAGATTGAGATGGA  
AGTCTGTATCAGTATCTGAACTGGCTCGGGAAAAGATGAAGCCCTGCTCTCTGAGGCACCACTTCTCAGCCAGCAAG  
CCCTGATAAAGTTCTCCACCAAAATAACCGATGACCCGGCAGAACAGCAAGGCACTGCTGATGCAATGTCTTAAAAATGACGCT  
GGGTACACAAGTTTATAAGACAGGTGCTCATGACGTTCCGGCATCAGGATTAAGCCGTTTCTCACAGAGAGGAATTA  
TCGTAGCATTCGCCGTAGTGATGCCATGTGGCAACTGGCTGTCCAGCTGGGAAATAGTGGATTATCAGGCCGCCGAAAC  
TTACTCACGCTGATACAGTATTCGTATAGAGCCCTTTTTAACGCTGAAAATGAATACGACTGA

>Cluster\_42732

ATGCCACGTCGTTCCATCTGTCCGCCGCCGAGCGGAAAGCCTGCTGGCGTTGCCGGACTCCAAGGACGACCTGATCCG  
ACATTACACATTCACGATACCGACCTCCTCGATCATCCGACAGCGGCGCGGGCCAGCCAAATCGGCTGGGCTTCCCGGTC  
AGCTCTGTACTCGCTTTCGCGCTCATCTGGCGCTGATGAATACCGTTCGCGCCCTTGTTGAAGCTGGTCCGCC  
GACCAGCTCAAGGTCGCGCTCGAAAAGCTGGAACGAGTACGCCAGCGGAGCAGACCCGGCGGAGCACTGAGCGAGCT  
GCAAACCGTGTTCGGTTTCCGGCCCTTACCATGAGCCATTACCGGCAGGCGCTCCAGATGCTGACCGAGCTGGCGATG  
AAACCGACAAAGGATCTGTGCTGCCCAGCGCTTGTATCGGGCACTGCGGCGGAGTCCGCTCATTTCTGCCGCCCTCAAC  
CGGCTGAGCGGCGGAGTCCGAGGCGATCACCGTGCCTAACCGCGCATCTACGACGCTTGGCCGAACCTGCGCGGA  
CGCGCATCGCGCGCCTCGACGATCTGCTCAAGCGCCGGGACACCGCAAGACGACCTGGTTGGCTTGGTTGCGCCAGT  
CTCCGGCCAAAGCCAAATTCGCGGATATGCTGGAACACATCGAACCCCAAGGCATGCGAGGCACTGATCTGCCTACC  
GGCATCGAGCGGCTGGTTCAACGAGAACCCTGCTCAAGATTGCCCGGAGGGCGGCGAGATGACACCCGCGACCTGGC  
CAAATTCGAGCCGCGCAACCGGCTACGCCACTCTCGTGGCGCTGCCCAGGCGCATGCCCACCGCTACCCGAGAAATCA  
TCGACCTGCACGACCGCATCTCGGGTAAGCTGTTAACGCTGCCAAGAATAAGCATCAGCAGCAGTTCAGGCGCTCAGGC  
AAGGCCATCAACGCCAAGGTACGCTGTACGGGCGCATCGGTCAGGCGCTGATCGACGCCAAGCAATCAGGCCGCGATGC  
GTTTGGCCCATCGAGGCGTCAATGCTGCGGATTCTTTGCCGAGAGCGTACCGAGGCGCAGAAGCTCGCGCAACCCG  
ATGATTCGATTTCTCGCATCGCATCGCGGAGACTACCGCGAGAGCTACCGCACCTCGCCGCTATGCAACCGGAATTCCTT  
AAGCTGCGGGCCGCGCCCGCCGCAAAAACGTCCTGATGCCATTGAGGTGCTGCGCGCATGAACACCGACAACGCCG  
CAAGCTGCCAGCGGATGACCCGACCGGCTTCAAGCCGCGCTGGCAGAAACTGGTGTGATGACCGACCGCGCATCGACC  
GGCGCTACTACGAATGTGCGCGCTGTCCGAGTTGAAGAACTCCCTGCGCTCGGGCGACATCTGGTGCAGGTTTACGC  
CAGTTCAAGGACTTCGAGACTACCTGGTACCGCGAGAAAGTTACACAGCTCAAGCAGTCCAGCGAATTCCTTGGCGTGC  
CGTGGCCACCGACTGCGAAACAATATCTGCATGAGCGGCTGACGCTGCTGGAAGCAACTTGCACCGTCAACCGCATGG  
CGGCAGCCAACGACTGACCGGATGCCATCATACCGAGTCCGGCTTGAAGATCAGCCGCTGGATGCGCGGTTGCCGAC  
ACCGCGCAGGCGCTGATGACACGACAGCATGCTCTGCCGACGCTCAAGATCACCAGACTGCTGCTCGAATGCTGATGA  
GTGGACGGCTTCAACCGGCACTTCAACGACTTGAATCGGGCGATCTGGCCAAAGGACAGAACCTGTTGTTGACACGA  
TCCTGGCCGACGGATCAACCTGGGCTGACCAAGATGGCCGAGTCTGCCCGGCGACGACTACGCGAAGCTCGCTTGG  
CTGCAAGCTTGGCATAACCCGCGACGAAACGTAATCGACAGCGTTGGCTGAACTGGTCAACGCTCAGTTTCCGGCATCCCT  
TGCCGGGCTGGGGGATGGGACACACATCATCGGACGAGCAAGAAATTCGAAACCGTAGCAAGGCAAAAGACACGG  
GGCACATCAACCCAAAATATGGCAGCAGCCAGGACGGACTTTCTACACCCACATCTCCGACCAATACGCGCCATTCAC  
ACCAAGGTGGTCAATGTCCGCTGCGCGACTCAACCTACGTGCTGACGCGGCTGCTGTACCACGAATCCGACCTGCGGAT  
CGAGGAGCATACACCGACCGGCGGCTTACCGATCAGCTTTCGCGCTGATGACCTTTCGGCTTCCGCTTCCGCTTCGCG  
CGCGCATCCGCGACTGGGCGACACCAAGCTCTACATCCGCAAGGCGGATGCGGCTATGACGCGCTCAAGCGATGAT  
GGCGGACGCTCAACATCAAGCAGTCCGCGCCATTTGGGACGAAATCTGCGGCTGGCCACCTCGATCAAGCAGGGCAC  
GGTACGCGCTCGCTGATGCTCAGGAACTCGGCGACTACCGCGCCAGAACGCTTGGCCGCTCGCGCTGCGCGAGTTGG  
GCCGATCGAGCGCAGCTGTTTCACTCTCGACTGGTGCAAAGCGTTCGAGCTACGCGCGCGGCTGATGCGCGGCTGAA  
AAGGGCGAGGCGCGCAATGCGCTGGCGTGGCTTCTTCAACCGCTTGGTGAATTCCTGACCGAGTTTCGAGCA  
GCAGCGCTACCGGCGCAGCGCTCAACCTGGTACGCGGCGCATCTGCTGTGGAACCGGCTTACCCTGGAGCGTCCGG  
CGCATGCGTTGCGCGCAATGGTCAATGCGCTGATGCTGCTATTGCAAGTACCTGTCCGCACTCGGCTGGGAGCACATC  
AACCTGACCGGTGATTACCTATGGCGCAGCAGCCAAAGATCGGCGGGGAAAGTTACAGGCGCTACGGCTCTGCAACC  
GGCTTAG

>Cluster\_11495

ATGCCAACAAACCCTGCACAAATTAAGACACACTGCAGTCTGCAAAAGCAATCCGCTGAAAAATAATGCACTCAGC  
AGGACAAAGCACGAAAGATGCAATTAAGAAAGCAGCAGAGAAACCCGCAATGCGGAAACAGACTCATTTTACTTATCC  
CTAAAGATTATAAAGACAGGGTTCAAGCCTTAATGACCTTGTGAGGACGCGAGATGAACTAGGAATGAAAGTCCAGTAT  
GATGAAAAGAAATGGCAGCGGATTAATAACAGGTGTTCCGACAGCAGAGAAACTCATTTGGCTCACCGAACGGGAGT  
GACTATCTTTGCACAAAATTAGACAAATTAAGTCAAAAAGTATCAAAAAGCAGGTAATAAATAGGTGGCAGTCTGAAA  
ATATCGTGTAACTTAGGAAAGGCGGATATTTATCAACGTTTCAAAATTTCCCTGGGTAAGTCACTTCTCAATG  
AAAATAGACGAACTGATAAAAAACAAAATCTGGTGGCAATGTCAGTTCTTCTGAGATGGCAGAAAGGAGTATTGAGCT  
AATCAATCAACTTGTGGATACAGCTGCCAGCTTAATAATAATGTTAACTCATTTTCTCAACAACCTCAACTCTGGGAA  
GTGATTTATCAATAACAAGCAGCTGAACGGTGTGGTAAATAGTTACAGAATTTACCTAATCTTGATAATATCGGTGCA  
GGTTAGTACTGTATCGGGTATTTATCTACGATTTCAAGCAAGCTTCACTTCTGAGCAATGAGATGCAAGTACAGAA  
TAAAGCTGCAGCAGGTGTTGAATTAACAACGAAAGTACGGGTAATGTTGAAAAGGATTTCTCAATATATTATCGCAC  
AGCGCGCTGCACAGGGTTATCTACATCTGCTGCTGCTCGGCTTAAATGCTTCTGCTGTGATACTAGCAATTAGTCCC  
CTCTCATCTCTGCTTTCGCGATAAGTTTAAACGTTGCAATAAAAATAGAGGAGTATTCACAACGATTCAAAAACTTGG  
ATACGATGGTACAGTTTACTTGTCTTTCACAAAGCAACAGGGGCTATTGATGCACTAATAACAACGATAACACTG  
TACTGGCTTCACTATCTTACGATATTAGTGTGCTGCAACGACATCTCTGGTTGGTGCACCGGTAAGCGCGCTGGTAGGC  
GCTGTTACGGGGATAATTTCAAGTATCTTGGGCTTCAAGCAGGCAATGTTTGAACATGTTGCCAGTAAAAATGGCTGA  
TGTATTGCTGAAATGGGAGAAAAACACGGCAAAAATTAATTTGAAAATGGATAATGATGCCCGCATGCTGCATTTTTAG  
AAGATAACTTTAAAAATTTATCTCAGTATAATAAAAAGTATTTCTGTTGAAAAGTACAGTCCCTCATTACCAGCAACTGG  
GATAAGCTGATAGGTGAGTTAGCTGGTGTCAACAGAAATGGAGACAAAACACTCAGTGGTAAAAGTTATATTGATTATTA  
TGAAGAAGGAAAACGCTGGAGAAAAACCGGATGAAATTCGAGAAAGCAAGCTTTGACCCATTGAAAGGAAACATGACC  
TTTTCTGACAGCAAACTCTTACGTTATTGAAATTTGTTACGCCATTATTAACCTCCGGTGGAGAAATTCGTAAGAGGAG  
CAGTCCGAAAAATATGAATATATTACCGAGTTATTAGTCAAGGTTGTTGATAAATGGACGGTGAAGGGGTTCCAGGACAA  
GGGGCTGTATATGATTACTTAACCTGATTCAGCATGCATCAGTCCGTAATAACAGTATCGGGAAATTCGTATTGAGT

CACACCTGGGAGACGGGGATGATAAGGTTTTTTTATCTGCTGGCTCAGCCAATATCTACGCAGGTAAGGACATGATGTT  
GTTTTATTTATGATAAAACAGACACCGGTTATCTGACCATTTGATGGCACAAAAGCAACCGAAGCGGGTAAATTACACGGTAAC  
ACGTGTACTTGGTGGCGATGTTAAGGTTTTACAGGAAGTTGCGAAGGAGCAGGAGGTTTCAGTCGGAAAAAGAACTGAAA  
AAACCGCAATATCGGAGTTATGAATTCACATCAATGGTAAAAAATTTAACAGAGACTGATAACTTATATTCGTTGGAA  
GAACCTATTTGGGACACCGGTCGCGAAGTTTTTTGGCGAGTAAATTTACTGATATCTCCATGGCGGGATGATGA  
CCTTATAGAAGGAAATGATGGGAATGACCGCTTATATGGTGATAAAGGTAATGACACACTGAGTGGTGGAAACGGAGATG  
ACAGCTCTATGGCGGTGATGGCAACGATAAGTTAATGGGGAGCAGGTAATAATTACTGAAACGGCGGAGATGGAGAT  
GATGAGCTTCAGGTTTCAGGAAATTTCTTTCGAAAAATGATTTATCCGGTGGAAAAGGTAATGACAAGCTGTACGGCAG  
TGAGGGGGCAGATCTGCTTGGTGGTGGAGGGGAATGATCTCCTGAAAAGCGGATATGGTAAAGATATTTATCGTTATC  
TGTCAGGATATGGTCATCATATTTATGATGATGATGGGGGAAAGAGGATAAACTCAGTTGGCTGATATGATTTCCGG  
GATGTGGCCTTCAAGCGAGAAGGTAATGACCTCATCATGATAAAGCTGAAGGTAATGTTCTTCCATTTGGTCAATGAAA  
TGGTATTACATTCAGGAAGCTGGTTGAAAAAGAGTCAGGTGATATCTTAATCACCAGATAGAGCAGATTTTTGATAAAG  
GTGGCCGATAATCACACCTGATTTCCCTTAAAAAGGCATTTGAGTATCAACAGCGTAATAATAAGGCAAGTTATGTTAT  
GGGAATGATGCATTAGCCTATGGAAGTCAGGATAATCTTAATCTATTAATTAATGAAATCAGCAAAATCATTTACAGTGC  
AGGTAACCTCGATGTTAAAGAGGAAAGAACTGCAGCTTTTATTTGTCAGTTGTCGGTAAATGCCAGTGATTTTTTCATATG  
GACGGAACCTCAATAACCCTGACCACATCAGCATAA

>Cluster\_24350

ATGAAAAACCGTGTTTATGAAAGTTAACTACCGTGTTCAGCGTCTGGTGGTACGACGCTTTCTTTATATCTGGTTTC  
CACGTACTGA

>Cluster\_25593

ATGGTGGTAAACAAGTGTATGTTCTACAAAAGTCTATTGATCTTTTAGAAGGTAACGAAAGTGCAGCATTAAACTGGTGTAA  
AGAGCCAAATCGCCATTAG

>Cluster\_38366

ATGCAATTCAATTACCAACGGCCCTGATATTCCTGATGAGCTTTTTCAGGGCAGCAGGAAAGGGCGCTTGTGTTCTTCTG  
TGGAGCAGGCATTTCCCTACCTGCTGGTTTACCTGGTTTCAAAGGTTGGTAGAACTAATTTACCAGAGGAACGGAACAA  
CACTTTCAGAAATTTGAGCGTGAGGTTTTTCGAGCGTGGGCAATTTGACGGCACATTAGATTTGCTGGAACGGCGCTTACCA  
GGGCGAGCTATAGCCGTCGACGCGCGCTTGGAAAAAGCCCTTAAGCCAAAGGCTCCGTCGTAGGGGGCGCTATTGATCTCA  
GGCGCGCTGTAGTTACGTTTACGCTTAGCCGCTAGCCGAGGGTGCCTTCGATTTGGTCACTACC AACTTTGACCGCTCTTTCA  
TGGCAGCTAAACGTACAGGCCAGGCTTTTCAGGCCTATGTAGCGCCGATGCTGCCAATTCAAAAACAGCCGCTGGGAT  
GGACTTGTATACCTGCATGGGCTGTTACCGGAAAGGCGGATGATCTGCCCTGAATCGTCTGGTTGTACCAGCGGTGA  
CTTTGGCTTGGCTTATCTCACTGAGCGTTGGGCGAGCTCGCTTTGTGAGTGAGTTATTTGTAACATATGTTGGTCTGCTTCG  
TTGGCTACAGCATCAACGACCCGCTACTGCGCTACATGATGGATGCGCTGTCAGCAGATCGGAGGCTCGGTGAAGTCACA  
CCACAAGTATGGGCACTGGGGAGTGTGAGCCGGGCGAGGACCCGAAAGCCATCGAGTGGGAGGCCAAAGGGGTCAC  
TCCTATCCCTTACACCGTACCGCGGGCTCCACTGATCATTCAGTGTGCATCAACGTTGTCAGCCTTGGGCAGATACCT  
ATCGAGATGGTATACAGGGCAAAGAGGCTATAGTCGTCAAACATGCTCTGGCCCGCCGAGGACAGCACTCGTCAGGAC  
GATTTCTGTTGGTCCGATGTTTGGGCTTTCGAGTAAATCAGGTTTTACCAGCAAAACGCTTTTGGGAACCTCAATCCG  
ACCGCCGCTGGATTGGTTATGAAAGCTTTCTCGGACGAAAGATTTAAATACAGCGATCTGCCAGCTTTTGTGTATCTC  
CGCATGTCGAAATTTGACCCGAAACTCCGATTCAGTCTGGTTTACGCTCTCGCTCCTATGAGCTGGCCCGCAGATGTCG  
CTGGTTTCCGATGTGTCAGTGTAGCAATGGGATGACGTAATGTCATATAGCCCTTGGCTAGTTCTGTTATCTGGG  
CGACCTTAGTTGATCATATGGAATTTGCTGAACGCGGCGGCAAAATACACGACCTTGGATGTTTCTGATTTGAGAGCGAAC  
TAGATCGCTTAGCAGCAGCTGATGCGGGAGCGTAAGACTTCTGAGTTAGATGAAATTTCTTGCATTTCCCTTGGCTATT  
CCTGGTCCACCTATTTCTACTTTTATGGCGGCTTCTGCTTAGTGGTCTGTGAAATCGCCATTGCGAAGCTGGATTTGTA  
TCGTTTGGCAAAACCGCTTAAAGAATGAAGGCTTACAGCATACATTTGCGCTTGGAGTTACGCGAGTTGCTTTCTCCAAAG  
TTATGTTGAGGCGGCGCTTTCGCTATAGTGAAGCAGATTGCGAGCAGCACTGATGAACCTTGCGAATCAAGCAATGGTG  
GATTTGGGAGCTGGTGTGCTGACTGCTGATTACGTACGTTCAACCTGTTTCAGCTTGTGCTGACGAGTCATGAAATCGTCT  
GCCATACCTGTTGGAAGATTTTCAGCAGTTGTTGCGTGATGCACTGGACTTGTGCGGGAGTTGGGAGAGTCCGACGATC  
GTCACGACGCTCGCATTTGGGATTTGGCTCCATCACTCCGCTGCGACTGGCAGAACCAGGGGTTCCGCGATTTGGGTTGAGC  
ATTGAATTTACTTCGGGATTCATGGTTAGCCGTTTCGAGCCAAAGACAGCGATCAGGCTTCGCGCATGCTCAGAATGGTT  
TGAGTTGGCATATCCACCTTCAAACGCTGTCGACTGTTTGGCCGAAAGCAAGCAACGTCATACCACCTGAGCGGTGGG  
TTAATTTGGTTGTTAGAGGACGGTTTCATGGTGGTTGTTGGGCCACGGATACTCGGCGAGAGGATTCAGACTGTTTGTGTTT  
CAGGACGACATCTGCAGGAAATGTCACAAAGAGCGTCTGGAAACTGCTATCTTGGCAGGGCCTCCGCGCAGATGTACGA  
GGATAATTTGGAAGCAGACAGGTGGCATTTATTTGGTGGCTCATTCGCTGTTGTTGTTAGCGAAGCTCAGGGGAGCGG  
GCCTGTTTTTGGGAGAGTCTGCGCTACACGTTTTCAGCGAAATATCCACAGCATACCCAAAATGGCAACTGGCAACCAAC  
GAGCGTGAATGAAATTTCTCACTGGATGAGCGGAAACCGGTGATCCAGGCTTCGAGGAGAGTATAGATGTCGACATTTGCGC  
CCGTAAGTGGCAGGAATTTAGTGCATTTGGCTCGCAAGGCTATGCGCAAGAAAGACTGCTTTCTATGAGGACATTTGAGTG  
ATGTTTGGCGTACGCGCTTTTTTTCAGCTCTGTATGCGTTACGTAACATCACAAAGATGATGTTGGCTGTTGGTCCG  
TGGCGTGAAGCTCTGCAGACTTGGGCTGAACACAGGATGATTTTGGCTTGGTGGCGGTACGCCACCTGTTGGTCTTGA  
CATGCTGACGCACTTTCAGGAGATTTCCACGCTGTCATCTGGTGGATGGAGGCTTCCGAAGCCATCTCTGCC  
ACGAGGAGATTTCTACTGGCCCTTTGTGCTGGGTTCTGATGATAGAAACAAGCCAGAGTCTAGCACCATTCCGAAACGGA  
ATTGAGACCTATGATCTGTTTCTACGGCGATCAATCACTCCATTTGGGATGTCACGCAATCACTGATCACCTATGGTT  
CAAACAGAACCAGGAAATGACAATGATTTGCTTCTGTTGAAATGAAAACACTTTTACCAAAATTTGTTAATGTACAGATAG  
AGCTATTTCCGCAATGGTTCGGGTTGCTGCGGTCGCGGCTGATCGCATTTTTTTCGCGTAGATGACCTTGGACCGAACAG  
TATCTATTTGCCCTTGTGTTGCTTGGAGTAATCCCGTCAAGCAAAAGCTGTTGTTGGGAAGGCTTCCCTGTTGCTCGCCACGCT  
GTATGAACCGTTGCTGATAGCTTTCAAGTCAGATTTTTTGGAGAGCGCAATCACTATTTCTGATCTTGGCGAGCACCGCG  
AGCAATTCGCTATTTTCTGACTTATGACAGCTTGGGCCCTACCGAGGATATACCGTGGAGGAGTTCCGAACGGCAAT  
AGTCTCTTCCACAAGAGGCTTGGAGGTAGCCGCGAGGCTTATACAGGCACTTGAAGGTCGGGCGCATCAGCGGCA  
GGAGTATTTGAAAAATCGTGTCCAGCCATTTTGGCAACAGGTTTGGCCAAAGTCCCGCAACTTGGCCACCCACGATAT  
CCGAATCGTTGACTCGATGTTGATGCTGCCCCGAGGTAATTTCCGGCGGCTTTGGCAGTGGTGCAGGACTGGCTGCAA  
CCGCTCGAACACCTTAGCTACGAGCTTCGCTTTTGTGATAAGATCAGATATTTGAGCCGATATCTTCCGAGCGCTCTATC  
CTGCTGAAATCCGCTGATTTGCCGAAACAACCTGGAGGCTCAGAGTTGGGGCAATGCTTGGCTTCAAAATTTGTTCAAGCTG  
CTCCACAACCTGGAGCAAGATGTTCTGTTATCAGCGATTAATGAATATTTCTCAAGGGCAGCGGTGTA

>Cluster\_51668

ATGTCCTGACCCTGAATAAAATCCTTGTGTTATGCGCATTTGCTGATAAGCGCAATGCTGCCCTGGGTGGTTCATGGGCAGA  
ATCTGCATGGCAAGACTCTTTCAGATACGGTTCGGCGAATTTAAACGGTACCGTGCCTACTGCCGACAGCGCCAGCATACCCG  
TCTACCAGGGCAGTGTCTTTCTCGATCTGCAAAAGACGATGATGATAGCGTTTACCGTAAACCGAGTGAATTCAGCGG  
GATGTTAGCGTCTCAAATTTGCTCGTCAACATCCGCAAGCAGAGAAGGCGATATCACTTGGCCACCCACGTTGGGAAAA  
CAAACCGCCACCGCAATATCTTTAGTTTGGGCGGATGCGCGCACTTACTGGCCCCACAGCTTGGTCTGCGAG  
ATCGCTCGTTTTGTGCACAGGACTTGGCCGGGCTTGGCTGGTGGCTTGGGCGAGCTGATCCCCAGCAGACCATGCGG  
CTGTTATATTTACTCACCTGACGGGCTATCCCTATGAAAGTGTCTGACGCTCGCCGATCAGAAAGTACGCTGAGAT

TGCGCCCGCGAGGGTGACCTTATTTCCGTCAGCGCTGCGGGCTATGACGAATCCTCAGGTGCGGGGAAAATGACGGTTG  
GGGCGAGTATCACGTTAACGGTCCACCACAAAGATTGCGTCGGTAATGTTGTGGGAAATATTCCTTTTTGTATCAAACGC  
AAAGATGCTGAAAACCGCCAGGGTGTGGTGAACAATACGCGCTGTAAAACCTGGGCAGGACCAATTAACCACCACCGC  
GACGGAATATCGTGGTACTACCGATGCGAATGGTGTGGCAGCGTTACGGTCAACCAGGCCAACGGCCCTGGTGTAAAA  
CGCCGTTGGCTGCGAGGCTTCGCGGGTATGCTCAGGCCAGTAAACGGCAGTGATCTTTACCGTCTCCACGCGGGAT  
GTTCCGCGAGGCTACAATGTGGGGTCATATGCCGATACGCTGAAGGCCGTGATTACACTTTTTAGTTCGACAAAACTGGC  
GGCGGAAGTCGATAATGAAGGGCGTACGGTAAACGATCAACAATGAAACCTGGTCCACCCTTACCTGGAGCGGCGGGATA  
AACATTGGCAGATTTTGGCCGGAATCGCTCAGTTCGGTTCGGTGGCGACGGTGGTCCAACGTCAGTGCAGGATGTGGCT  
GGTTGGCCGATGCAAGGTAATTTCTACTGGTCACTGCTGGCGGGGATGAGCGGCCAGCACCATGCGCGGGATGTTTCGAA  
CCGCGAGCGAAGCGCAAAAACCGGACGATACGACGTTTATGTTGAGCTGTGTGATAAAGAAGCGCCCGATGTTGAACCGA  
AGCTGGTACTGACCCGGCAGCTATGATTCGACGATAAAAGCGATGAAAGTAAAGGTGGGGGAAAGAGCTTCTTTACGT  
CTGACGATTACCGATAGCAAGAACAACGATCAGCCGCTGGCTTACTACTACTTTTCGCTGCATCTGGATGACGGCATTA  
CCGTAAGAATCAAACCTGACCGCGCTGGGAGAGCATCCGGTACAAAATGATGGCGGCAGTAACGTTCCGCAAAAGTTCGAG  
CCCATACCTATGAAGGAATCACTGATGCTAACGGAGAGGCCACTCTGACGCTGACCCAGCCAGCGCGGTGGGGGTGAAA  
ACTCACATCACCGGAGAAATGCGCAGTGATTTTTACTGCCTCGGATGAGAAAGAGCTTATTTTTACGGTGTATCACGAGCC  
CGATACCGACAAGCGCGGATGTGGGCCATATGTTGGGCATTTGAAAGCGAACAATATCTTTAAACGCCACCGGCTGG  
CGGTAAGAACTGACCAACGAACTGGGATCGGTGCGGAAAATAACGAAGACTGGCGCTGTTTGATCAGATAGCATGATG  
CAGGCTGAGTGTGGTTTAGGTCAATTTCCGAGCCAAAGTTCATTGCACAGTTTGTTCGCGCTCATCCAGCCAATGCCAT  
CGGCACCGAATATGGCTGGCCAACTGTCAAAAGCGTATCTTACTGCGGTGGAAGAGAGCTGCGACCGGTGCGTAAACC  
TGGCCACGGGCAACATGACACCTATTCCGGCTTTAAGCAAACTACTCTCTCTGTTCCGGCAATGAGATGGTCGCCAAG  
ATTCGCGGACCCAGCTGCTGATGTTTTCCGCGAGCAGAGCGAGGCCAAAGTGGGTGACACGATCACCATGACGGT  
ACGCACCTTAAATGCTTGAATAATGCACCCGTGCGGTATACCGGTTACCATCACTAAAGATATGGGAAAAATCGTC  
AGGGCGAGACTACAGTTTGTGATGATCAACCCGCGGCCAATCGAGATGAATGGCACACTCTACGGAACATCGCAACCG  
TCTTTAGTCTATGCGGTACTACGGTGTGCGAGGTTTGTGCTCCAGCTGTGAAATTAAGCAATCGCAAGGTGTGGGCTTATC  
GACGCGCTAAATATGTCCTGTAACCTTATATCCCAACTACTGTTAATTACAATGTGATTTTACTACGCTCACCA  
GTCCGGATGCGGTTGGCGCGCAGATGTGGGGCATATGGATGAGACGATTACCGTGCATGCTTTAACCTTTGCCGACCC  
CGACTGGCTGCGGAAGTGTTCAGTCCGGACGGCACATTAACGGAAAAAACAAGTCTGGTCCGAGTCAAGCCAGGCCAA  
CGCTCCAGCACCAAGTAAAGTGGTGTGGCGCCAAATGCTCCACCGCTTCTCAGCTTAGCGCGCTATGATGCGCA  
ATAACGGTGACGGTGTACAGACAGTACACGGCTGGCCAACGACGCTGAGCCCTACTGGAGCAGTTCGCCCCGAGATCAG  
GTACCGCATATTTACACCATAGCCCTCAACGATGGGGCGCGACCGTTGGCGGTAGCAGCGCGGTTTATGTCAGTTCGCT  
GACGACGGTAACAATCCTGCCAGTAGCATTACGCTGGAAGTGGTGGATCCGGCGCAGTGAACGCGGCTGCAAAATGCGG  
CGAAGCTGAAAAAAGCGCAACCGTACAGGTAAAGGTGACGGTAAAGATGCGCAGGGCAATCCATTTGGGTGATATACCC  
TTTTACCTGAAACGTGGCGATGGTTATACCCGCTCAGAGGAAAAACAGTTCGTTGGTAGCGGTGATGCGCTGGTTGTGGT  
CAATGGTGGCCTGCGCGACGAAACTTCCGCTTAATAATACCGCTGCAGCATAACCGGCCAGCGACGGAACTA  
AAATTTCACTATTACCCCGCCGATACCCATGGCACGAAACGTCGCTGACCGCTACGCTCTATTCAGATACAACGAAA  
AAAGCTCACCTAGATACCTATTTTACCCTGTTAACCAGTCCGGACAGCGATAAGGCCAAAAATGTTGGGCGATATGCC  
AACAGTGACGGCTGCAGATGGAGCGGCTTTAAACGCCCATTTATGTTGAAAGAGTTATCCAGTACGTCGGGGCGAACAG  
CGATTGCGAGAAGAATAAGAGCTGGGGCGCAATTTACCCAAACCCAGGCTATAAGCACATCTCTAATGGTTGCGGTAGT  
GAATATGTTCCCTCCAGGCGGGCTGGAGTCATGTTGTAAGCCAACCGCGCAATCGCATGAAAACGGTTGAGGCTG  
GCCCTGCGCTCAAGTTTACCTTTCCAGCACGACAGGTTAGTAGTACCTGGAACAGCGTACTTCAAGGCCGCTCAATCTCA  
GTTTACAGCACAGTTCGATAATTCATCTGCCACAAAAGAACTGCTTACTGCGAGACGACCGGATCGTTAAGGCAAGC  
CAAATCGTTCCTTAGGCTGCGGACCCCGGCAAAATTTGACAGTACGAATAATGTTGTCAAAGCGAAAAAGGAAAGAAAT  
CGTGGTTCCGGTGCACCTAAAGATTCGACGGGTAACCCGGTGGGAAATACCGCATTTACCTCAACGAAAACAGGCG  
TGAACAGGGCCAATGTGTCAACTACGACGTCGATTGCTTCGCTGGCGGTAACGGATGCTGGGAAATACTCAAAATGAT  
TTTTCTTCAACGACCTGTTATTTATGGCGTACGCGGGGCTGATGGCACCCACTTTCACATTTGAAGCAAGACCAGAC  
TACCGGGCTAAAAACGAGAACTCAGCGCAGCGTTGGATTCTCCAGCAGCACTAAATCGACGCTTCCCGTTGCTTTACGG  
TGCTTACCGACCCGGATTCCGCAAAAGCAAAATTTGCGGGCATAATGGCTGAAACGGCGACAGGCGATGACGCTTAT  
TATCGAAGGCTTTGTTGAGGGACGAGAATAGTGTACCACCAGTATCCGTTACCTGGTGAAGAGGGGGAGGCTGGTC  
TACGTTCCCGTGGCGCAGGCTAACGATACCTCGATAAATGGTGTGGCGCGGAGTATGTTCCAACTGACAATGAACCTA  
GGGCCATTTATGCGCACCCAGGGGAGTAGCGCATTACATGATGCTATTGGCTGGCCAGTTCGAGGTTCTATATCTCGAAT  
ACCGTTGCGAGATACGTTCACTCAACCTTTACGTTATGATGCTGTTTCGCTGAAACAGGAGATGAAACCGCATGCGCTC  
ATCTGGTGGTGCATTTACTGAGCTGCCGGACACGCTGTCGCGGTTGCCAGTCAGATCATGTTGAGGCGAATGATACGG  
CGCAATTTGTCAAAGTTGACGACACCTTGTAGTGCCTGAAAGTAAAAAAGCGGAAGACGCGGTTGATTGCGCTGGTACT  
AAAAATGCGCAGGAAATAGCGTGCCTAAATGTCCTTTTACTCAGACGTAAGGCTCGAAGAACCCTCAATATGCGCA  
GATGATAAATAAGTCGATTAACGTTAATTAACCGCGGATGCTTCCGAGGATGAAATAGTTCTTCAAGCTGCTTTATG  
GGTACTGGCGCGGACGGGACTACCTCTTTACGGTAAACAAGATGATTTCTATGGGCTGGTAACCAATATGTACGCC  
CAGTTGATACAGCCGACGATAGAATCAACAAATTTACCGGTCATGTTTACCGTATAACAGCCCGGATACGCCACTGGC  
AAGTTACTGGGGCATATCCCTGAAACGTTTACTACCCGGTCGGAAATGCTTTAAGCGGCCATTGCTTACTGCGCAGC  
ATCCAGCGGGCATCAACCCCTGGCTAAATGAATCATGGCTTTCTTTGAATACGGCAGCAAAAAATGATGTCAGCAAAA  
TCAGACTGGCGCAACCTTATCAACCGTTATTAAGCGAATTTCAAGAGTTATACAGTGAACATCCTAATGGTGGGATAG  
GACCGATTTAGGCTTCCGCTGACTAACCTGGTGGGCTTACGATAAAAATGGCTACGCGAACGCTCTGGTACGATCAGT  
CTATTAATTTATCGAATGGATCAAGCTCCAGGCAATTAACAACACCGTGGCATTTGTGTCCTGTCTGGTAAACCCCTCAT  
GCAGTGGCAGATTTATAGAGATGACCTCCACGGCAGTGGATGCGGAGAAAAACGGCCAGCAACGATGGTGCCTAGTGC  
AACGGCGCGAAAGGTACGGCGATCCGGATGACGGTGTGTCGGGATAGCGCAGGAAATCTGTTGCCAGGTGCAAACT  
TTAATCTCATACGCGGACTGCGTTGGATCGTGCAAAAAACAGGCTAGACTCTACGATGATGATCTTACTATCGTGGCG  
GTCACCCCTGCCGGAGTAAACATGTCACCTATATAAATGGGGCACAGGCATTTCTGACGACAGGAAGTGAATGTTAAAGC  
GACTTTTGTGATGACGCAAAACGAGACTTATGGGCTGGCAACTCCGCTCACTGCAACATTTGATGCGCGACACCACAAAA  
GTGCCAGGATGGATGTTATTTTCACTGTGATAACAGTCCGAACCTCACGAAAGCAAAATACTGGGGTCAATGCCCCGAC  
ACGTTTACCAGTAGGGCGGGGTGACCTTTAAACGACCCGCTACTGGCAGCAGAAGCGACCTTGGGGTCTCGGTAAGTAA  
TAATAATGATCGTGGTCAATACCTTTTTTATACGATAAAGTAAAGTTACGCCGATTTGCCCGGTTGAGATACAGCGCTCA  
ATGAGTTACAGGGCTATATAATGATCATCCAGGCGGACAATACTGACAGATTTGGGTTGCTTAACTGCGGGAAGT  
GGAAATGGTGGACTTATGAAATGAGCACCCTGACGCGTTGACGTTGATTACGGCGTCATTAATTTGAAAAACGGGACA  
ATCCAGCAGCATATAAATGGATAACGCTTAAATGCTCTGTCTGACGACCCACATTCGGCACCAAGCCCTTACGCTGT  
CTGACTGCTTATGATGAGGGCGAACCTGCCAGCAATGGTGGTACCCCAACGTCATGTTGAAAAAAGGTGAGATGCTT  
CCCATCGTGGTACGATCAAAGATGCCAATGGTAACTCTGTTGGCGCGAAGGTGTTACGCTCAAGCGGTGACGGCGAA  
AAGCGGTTACAGGATCTCTGTATCTCCAAATACCGTAGATGATCTCATTTTAGATGAAGTACCCCAACATCGCGCGGTA  
TCTCCTTCAACGAATACTGCTCGCATGGCAGGCTTCCAGCGAGTGTAGGCAGATAACGTTACGTTACCCAAAT  
AACACCGTGGTCTGGTAACCGGTTTACAGCTTCAATTTGGCGGAAATCCGCGAGTTACGGCTAATCAGGACCTGATAT  
CACGGTAGTGACCGCCGATTTCTGCGAAGGCTAACTACTGGGGCATATGCCAGCAACCTTACGCGAGTGAATGGT

CGGTATTTGAACGCCGAAATTTGTGGAGTGAACAGTACATCGACTTCTGGCGTCGGCAAGATCAATAACAATAATGAAGAC  
TGGCCGTACTTTTACCCCAACACAGAAATCAGATGCAAGTGTGAGCCCTTGTGAAGTAGCAAGGCAGCCACTATTCAATGA  
TTTAAGTTCGTTGCTGCGCGTTATCCGAATAACACGTTTGTACTGAACTGGCTGGCTGCGTATTACACCTGGTGGG  
CAGAGGATAAAATCCGCGGATGGTAAAGACCAGTTCGGTTGATTTGAGAAATGGCACGCTGATATACGGGTTCAACAAAATCA  
TTTACGCCCTTGCCTGGCTAACCGGTTCAACCGTTTCCAGCGTCACTGACCTCAACAGCGTTTGTAGCTGACAGCCA  
GGCGGCGAAAGTGAAGAAAGCGGAGCCATGTCCGTTACCGTGCAGGTTGAAAGACAGCGCCGGGAATACGGTGGCGAATG  
TTGAATTTACTTTGAAACGTGGTGAAGCATCGCCGCTAACGCTGGGGCAACGTTGTATGGCAATGTAGTGGCGATGGAC  
GATCTCATCGTTACCGGTTATCTGGTTCCGGCTATTACGCTGAGTGAAGCGGTAATACCATTAGTGGCATGACAGGCGC  
GGATGGGACGGCAAGTTTACGCTCCGCCAGGATAAATACCCCTGGTTATAAAACGCCACTGACGGTTACTCTGGCTAAT  
ACGCTTCCGCGACAGACAGCTGGAGCTATTTTTACGGTACCAACCAGCCAAATGTTTCTCGGCGCACTTTTGGGGA  
CATATGGCAGACAGGTTAGTGGTGAATGGTAAATCGCTACATCGACCGTTGTTAACGACAGAATGGCCGTCGGGGCTAA  
TCCCGTATCTCACCGATTATTAACACGAAACTGGGCTTCTGCACATATCATTGATGCCAGTAAATGGGATATCGCAA  
GGCAGTGTGGCAGCATAGAAAATGCACCCGACATACAATGAATTAGAGTTGTTGCATACGTTTTTAATTCACCTGGGATG  
CCGTCTTACCCAGTTTTCTTATTTGCTCTCAACAGTGTGGGATGGACGAAGGACTGGAGCACAGGATTGTAGTAT  
CACGCTAATAAATAAACCGGGTCTGGTGACCTGCTCCAGTAA

>Cluster\_9739

ATGGAAGATCAAAAAGCAACCAAGCCACAGCTTAAAGTTCGACACAATGAAAGCATTTCGAGGTATGGGGCTGCTGTTGA  
AGTTCTGATGAAGGCTGCTCCTAATGCGTTCACCTACGCTACTGCTCTCGGTAAGAGCAGCAGGGTAAGCTTCGTCGTC  
GCAAAGCAGCATGA

>Cluster\_35177

ATGAGCTGCCACTCAAAAAACACAGCGGTTGAGTATCCGCTCGCGATAAAAAGCGTTGTGGCAGTCCCTCGCCAGT  
GATTGATGAAAATGCGCACATCGTGAACAAGTAAAAATGCTTTTGTATTCGGTTTTTCTCGTTATGAGAAAGCCATGG  
AAGAACTTTCAAAAGTGTA

>Cluster\_41621

ATGTTTGTGAAACCTGTTAAAGGGCGGTGAGTGCCTGACCCTGCCCGGGCGACCTTTTGGCCGCGAAGGGCGAAATGT  
TGACGAGAACACTACTGCTGCGCGTGAAGCGCGGTTGATATCCGCGCGTGAATAAAAAGGTGAACACCGATGACG  
ATAAGCTTTAA

>Cluster\_63858

ATGGATATAACACTTTTCTTTCATGTGCTTTGTGATGTGGCTGCGCAGATACTGGTTGGTCTTTTACCGGAAGCTGGGT  
TTACGGTGCAGATAGTTCGGTTGTACGTTCTTCGTTGTGAGTGCCCTGCGAGAAGAACCTGGCTTGAACAGTTCGGGCA  
TGGCAAGCGTATGA

>Cluster\_31799

ATGACAGAAGCCGAAATACTGGGATTAATCCGCGTGTGATATCCAGCTTAATGGCGTGGATATGCGCAACATACGAAC  
CAGAGTTCCTGAGTTGCTGGCCTACCGTGCAGCGGTTGAGATGTATCGGGAGAAGGAAAAATACCTACCCTGGAAGA  
AGCCGGAGCGGTTGCGGCGGTA

>Cluster\_6823

GTGCTTAAAACCTTCCGTGATTTTCCAGCGCTGTTAACCCACTAGGCCACACAATTGGTATCGCTCAGAATGTGAAGGC  
TGTTAATGTTTACAGCGGCTATTGCTGCGGTGAGAAGCGAATCATCAGAATATGGCTTATCACAAGTCAATATTTACAGCAG  
TGTATGAATAAAAGAGGTGCATTA

>Cluster\_45045

ATGGTGGTGGGGGAAGGATTACTCAGCGCTGCGCGCTTCGCCCTTCGGGTGCTTGCCTGCGGCAACGCTCTCTCGCTGGC  
GCTCAAGTCAACCTTGGTCAAGCTTCTCATCCTTCCCGCTTGGGCGAATATTTAATGCGGATTCGTTTGGAGGTT  
TACGGACTTTTGAAGTGA

>Cluster\_48709

ATGAAACGACATCTGAACACCAGCTACAGGCTGGTATGGAATCACATTACGGGCAACCTGGTGGTGGCTTCCGAACTGGC  
CGGCTCACGGGAAAACGACCGGTTGGGATGCGGCTGCTCTTGTGCGGCACTGTTGCAAAATAGTCGGTGGTGATA  
AACTTATCATCCCTTTTGTGTA

>Cluster\_9959

ATGTCACTGGAAATGCCCTGACGATGTCAACTGGCTGTGATTTGATTTGCTGCTGGAAGAAAATCAGATCCCAGC  
CCGACCGTGTGCGCGCTGGATATTGTAACCGGATTAATGAAAAGAAATTAACGCGCATGATGAGGCGGAAAAGT  
GA

>Cluster\_36287

ATGAATAACAATCTCGCATTGGCGGGGATTTCTTTTATCTGAAAAGGACAGAATACATGATTAAACAATATTGCAAAATCA  
GCTTCGTTTCCGGCTGCAACAATGACAGCCAGATGCTGTTGAAAATGGTTAATGAGGCGCGGAGACTGTGA

>Cluster\_45281

ATGCTCCGTTTACTTCGTCATTTATTTTACTTTGTTCCCGCGCAGTTATCAAAAAGCAAAGGAATAGGTAAAAATATTCT  
TCTCAAAATACAGTTAGTTATAAGGATTTCTTAACTGCTTCTCCTCACCATCATGTTATTTTCCGCACATCATA

>Cluster\_66125

ATGGACGATGAGCGACTGAAGAATCCGCTGTGCGTTCTTCTGTCTCGAACGCATCCGCGATATTGCGCCAGCATGCG  
CCGTGTTTATTGCAAGTGAATTTGCCCCCTGCTGACTCTCAGCAACTGTATGCCATTAAAGGTGA

>Cluster\_11215

ATGGGGTGGCTAATGATATCAGATAAACTCATAACGCTGGTGAAGAGCCTCTGTGTACTTGTGCGCATTTCAATTTTAGT  
CATGCTGGTTGCCATTTTCTTTTCCACCCTGCGGAGTCTGACGTTATCGGACTGGTGGGGTGA

>Cluster\_55561

ATGCCGCGAAACTCAGATATCGAAATAGCCTGGCGTCAGGCAATTGTCATTGAGCCTAATGGCCGTCGCACCGTGACAAC  
GTCGCGTTTATCCGGAACTCGAAAAGTTAACTGGATATGGTACCAGCGCCAGGCTAACCAAGTGGATAGAGCACTGA

>Cluster\_48685

ATGCTTGAAGATTTCCGGTGTGATCGTCAATGCTCTTCTGGTATGGCGGTGTTGGTGGATTTTACGGGAAAGATGAT  
GCTGTCAATTTCTGATGGCGTCCATTTGGTTTGGCGATCTACTTCGCTTATCCGTTAGTTCGTAAGCAAAGTGTAA

>Cluster\_3098

ATGCGGCGACTGATACCCCTCAGCACAGAGCAACAGGCCGATGGCGAGCGGTGGCGGAGACGGAAAAACGCCGCATCA  
GGAAACACGCTGGCGGAATATCCGTATCGGGGGCGTTTTTCCGCTGCTGACCTGTGATTTTTCATGCCGTCCTGTA

>Cluster\_53247

ATGGGTGATTTTTTTGGGCTGTGTGTTTTGCCAGATGCGACGTTGATGGGAGATGCCCACTTAATGAGCTGAACAAAAC  
ATACAAAAAATATAGATCTCCGTCACATTTTTCGTTATACAGGAAGCTCGCCACTGTGAAGGAGTACTGCTATGA

>Cluster\_39183

ATGAAACAGGTTTGGCTCTCGGTAACGGGCGTTAGGCCGTATGCTGCGTACGGCAGGCAACCGTTAGGCATTGCTGT  
CTGGCCGGTGGGTTGGACGCTGAACCGCGCGGCTGCTTTTCAACAAAGCGTGATTACCGCTGAGATCGAACGCTGCG  
CGAAACTGCATTAACCCGCGAGTGGCGGCCATCCGCTTTTGTGAACCGCATGTGTTCCGATTATTGCCGACCGT

CTGACTCAGAAGCAGCTTTTCGATAAGCTCCACCTGCCGACCGCACCGTGGCAGTTACTTTCCGAACGCAGCGAGTGGCC  
TGCGGTGTTTTGATCGTTTTAGGTGAGCTGGCGATTTGTTAAGCGCCGACCTGGTGGCTATGACGGACCGGTCAAATGGCGTT  
TACGCGCCGATGAAACCGAACAGTTACCTGCTGAATGCTACGGCGAATGTATTGTCGAGCAGGGCATAAACCCTCTCTGGT  
GAAGTGTCCGCTGGTTGGCCGCGCGGTTTTGATGGCAGCACCGTGTGTTTTATCCGCTGACGCATAAACCCTGCATCAGGACCG  
CATTTTTCCGACCCAGCGTGGTCTGCTTTCCCGCAGGCCAACGCACAGCTGTCAGGGCGCAAGCTGAAGAGATGTTGTCGGCGATTA  
TGCAGGAGCTGAGCTATGTAGGCGTGATGGCAATGGAGTGTGTTTTGTCACCCCGCAAGGCTGCTGATCAACGAACCTGGCT  
CCGCGTGTGCATAACAGCGGTCACTGGACACAAAACGGTGGCCAGCATCAGCCAGTTTGGAGCTGCATCTGCGGGCGATTAC  
CGATCTGCCGTTACCGCAACCGGTAGTGAATAGTCCGTCGGTGTGATGATCAACCTGATTGGTAGCGATGTAATATGACT  
GGCTGAAACCTGCCGCTGGTGCATCTGCACCTGGTACGACAAAAGAGTCCGTCGCGGGCGTAAAGTGGGACATCTGAATTTG  
ACCGACAGCGACACATCGCGTCTGACCGCGACGCTGGAAGCCTTAATCCCGCTGCTGCCGCCAGAGTATGCCAGCGCGT  
GATGTGGCGCAGAGTAAGTTCAGTTAA

>Cluster\_58019

ATGTTAGTTTGGCTGGCCGAACATTTGGTCAAATATTATTCGGCTTTAACGTTCTTTCTATCTGACGTTTCCGCCCAT  
CGTCAGCCTGCTGACCCGCTGTTTATCTCATTTGTGGATGGGCCCGGTATGATTGCTCATTTGCAAAAACCTTCTCTTTG  
GTCAGGTGGTGGCTAACGACGGTCTGAATCACACTTCAGCAAGCGCGTACGCCGACCATGGCGGGGATATGATCCTG  
ACGGCGATTTGATCTCCGACTGCTGTTGGCTTACCCGTCCAATCCGTACGCTGCTGGTGGTGGTGGTGGTGGTGGTGGT  
TTACGGTGTATTGGCTTTGTTGATGATATCGCAAAGTGGTGGCTGCGTAAAGACACAAAAGGGTTGATCGCTCGTTGAAGT  
ATTTCTGGATGTCGGTCAATGCGCTGGGTGTCGCCCTTCCGCTGTACCTGGCCGCAAGACACGCCCGCAACGCAGCTG  
GTGGTCCCATTCTTAAAGATGTGATGCCGAGCTGGGCTGTTCTACATTTCTGCTGGCTTACTTCGTATTGTTGGGTAC  
TGGCAACCGGTAACCTGACCGATGGTCTGACGGCTGGCAATTTATGCCGACCGTATTGTCGCGGTGGTTTTGGCG  
TGGTGGCGTGGCGCACCGCAATATGAACCTTTGCCAGTACTTGCATATACCGTATCTGCGACACGCCGGGAACCTGGTT  
ATTTGCTGTACCGGATAGTCCGGGCGAGACTGGGCTTCTGTGGTTTAAACCTATCCGGCGCAGGTCTTATGGGCGA  
TGTAGGTTTCGCTGGCGTTAGGTGGTGGCTTAGGCATTTACGGCTACTGCTACGTCAGGAATTCCTGCTGGTGAATATGG  
GGGCGGTGTTGCTGGTAGAAACCGTCTTCTGTCACTGCGCTGGCTCCTTTAAACTGCGCGGACAAAGTATTTCCCG  
ATGGCACCGATTATCACCACATGAACGAAAGGCTGGCCGAAACCGCGCTCATTTGCGTCTTCTGGATTATTTCCGCT  
GATGCTGGTCTGATTGGTCTGGCAACGCTGAAGTACGTTAA

>Cluster\_40194

ATGACCGAACCGTTAAAACACGTTATTGATTTTCGACGGTCCACTGGAGTTCGATCAGAATCCAAAATTCAGGGCGCAGCA  
GACCTTTGACGAAAATCAGGCGCAAAATTTGCCCCAGCCAGCTCGATGAAGCGCAGGAAGAAGAGGGGCAAGTGAAG  
CGTGTATGGACGCAGCGTTACGTCGAAACGCAGCCTGTCGGCGCAAAATGGTGTATGGCGGGCTGGCTCTGTTTGGCGCA  
AGCGTTGTCGGGACGGGCTGCACTGGACAATGAACGCTGGCAAAACCGAGACTGGGTGGCGCTGGGTGGATGTGCCGC  
TGGGCATTTGATTTACGGGCTGGCGTAGGTTCTGTGTAACAGAGTGGCGGCTTATGGCGCTTGGCACAGCGCGCC  
ATGAACCGCAGCAAGCGGCTGATTTATGACAGCCATGGCACCGCAAAAGCGCGCATTTTGCAAAACCTGGCGCAG  
CAGCGGGGATCGATCAGTCACATCCGGCTCTGCAACGCTGGTATGCCCAATCCATGAACGCAAAACGACCGTGAAGT  
GGTCAGTTTGTATGCGCAATTTGGTCCAGCCAGTTTAGATGCCAGGCGCGCGCAAAATCAGCCGCTCAGCGCGGAAT  
CAACCTTAATGATTTACGGCTTAGCCACTGGCGTGGTGGATATGGCGTTTATCGCTGGCGCAATCTGCGTTGATTAAT  
CGCATCGCCACGCTGTATGGCATGAACGGGATATTACAGCCGTTTGGCGCTTAAAGCTGGTATTGCTGAATATTGC  
TTTTGCCGGAGCCAGCGAATGGTGGCGAAGTGGGATGGACTGGATGTCGCAAGATCTCGTGGCGCTTTGCTACCC  
GGCAGCTCAGGGATTTGGTCTGGACTTCTGACGGCACGACTGGGATTAAGCTATGGAGCTTTGCCCGCCGCTGCCG  
TGGATTGACGATGCAAAACCTCGCCTCGGGGATTTCCGTCGCTCAGCTTATCGGTCAGGTGAAAGAGACCTGCAAAAAGG  
CAAAACGCCAGCGAAAAATAA

>Cluster\_41483

ATGCTCGAAATGTTGATGCAATGGTATCGCCGCGTTTTAGCGACCCGGAAGCGATTGCTTGTGGTATTTTGGTTGC  
TGGTTTTGGCATTATCTTTTTCTTTAGCGGCTACTCGCGCGTGTGCTGGTGGCTATTGCTGGCTATTTGCTGGAAT  
GGCGGACTGTCCGCTGCAGTCTATTGGCTGTTCCCGCCTTGGCGGACATCTATCGTGTGATCCTGTTTGTGGGCATC  
CTGCTACTGATGGCGTTCGTGGTACTGCTATCGCTGGCAGCAGGGCATCTACTTAATCCGGATATGCCGGGATGCT  
TAATAAACCTTTCTGACTTTGGCGCCACGTTGGCGCGCTATCCGGCTTAATGGATGCGGGCATTTATGATGCAATGG  
CCGAAAATATGCGCAGTCGGATGCTGACCATGGGCGATTGGTGGTGAATAATTTCCCTCGCTCGTTGGTGGTGGTGGT  
ACCATTTGCCGCTATCTGGTGTGTTACCATTTGATGGTCTTCTCCTGCTGAAAGACAAAGAGCAGATGCTGAACGCCGT  
TCGCCGGGTGCTGCCGCGCAACCGTGGACTGGCAGGACAGGTGGGAAGGAGATGAATCAACAAATCACCAACTATATCC  
CGGCAAAAGTGTCTGGAGATGATCTGGTGGGATCGCCACCTGGCTGGGTTCTACTCTTCCGGCTGCAACTATTCGCTG  
CTGCTGGCGGTGCTGGTGGCTTCTCGGTACTTATCCATACATTTGGCGCATTTGTTGGTGACCATTCCGGTGGTTGGCGT  
GGCGCTATTCAGTTTGGTGCAGGCACGGAATTTGGAGCTGCTTCCGGTGTATCTGATTATTCAGGCGCTGGACGGCA  
ACCTGTTAGTACCGGTGTTGTTCTCCGAAGCGGTTAACCTGCATCCGCTGGTGGTATTTTATCGGTTGGTGTCTCGGT  
GTTTGTGGGATTTCCGGGCGTATTTCTCGCCATTTCCATTGGCGACGCTGATCAAAAGCGGTGATTACCGCTGGCCGA  
TGGCAAAATCGCGCAAGACTGA

>Cluster\_22268

ATGTCACCGCAGAAATATCATCTGCAGCTCCGCTGCCGCTGTGTTATACGCCGATGAACCTGGCAAAATTAIAAAAAA  
TGATCACGCACCTTGGCCGCGGTTGGCAGTTAAGTTTGGCTGCGGCCCGTGTCTTTATCCTTGGCGATAGCGCGCAAA  
ATATAGCCGTAAGTGGTGTAGTCCCTCCGCTGTGCAACGATGTTAGTCACTCTTGGCACCGGGCGCGGTTGATG  
TTGGTGGGGAACTGGCACCGCAAAATCTCTCCTGTGATTAAGTGGCAACCGCTATAGCGGGGATGCGGGGTTAAC  
CATCCAGGGCGGCGCATCTACTGAAAGATCAAAATCAAGTACGGCTGGAACCTACGCCCTGTTATCAACCATGGTCCGT  
CAACGGAAGCAGTGGTCCCTGCCCGCTTTACCAGGGAATGCGCGACGGCAAAATCGTCCGTTTTGAAGAGATAACCGGT  
ACACCGCTGGAAGTACAAGACTGCTGTAGGTATGCTTTCTGACAGGGTGTGACGGTGGCGGAACTCACCGGTGAAGC  
CAGTCACTATGCGCGGGAAGGCTTTAATATTTAGCCACTGCCAATACCCGCGATCGCGGCTCAATGAATGAGTG  
CCGCGCTAAAGCGTCGCTTCGATTTGAACTGTCTTTCCGATATGGATTTCGCCAGGAGCTGGAGCTTGTCCGAGT  
GCTTCCGGCGGTTTTGCTGGCCATAGCGGCATTCGCAATAAGTGGCTGACGCGGTACTGGAGTACTGGTCCGCACCTT  
TCGCGATCTGCGTGCACCGCGCAAAAGAAAACGCTCAATGGATACACTGACAGCGATTATGTCACCGCTGAAGCCGTA  
ACGTGGCCACCGGTTGGCGCTCCGCGCTGGTTTTAGCGAATCGCGCAGGGGAACCTGCCGACCTGGTAGACTGTATT  
CCGCAACTATCGTCAAAGATAACGAAGAACTGCTGCTGCTGCTTACTTCCGAACACGCTGTTGTACACATAA  
AGAAGCTCACTGGCAGGCTTATTATCAAGCTCGCCACCGCTGCCGTA

>Cluster\_54223

ATGCTCACAACTATCCGCGTGGTCTGCGCCCGGCTAACTACTTTTACATCCAGGAAGTTTCAATCACCTGCACGA  
TTTTTTTCACTGATGAACAACTTTCTCGCGCGTGGATCTACGGCAACCGCCATTGCTGCGGGCGCAAAACAACTTC  
CGCCAGCTTTGGACTGCCAGGGCAAGCATAATTTGTTTCCGGCTATGTCAGCGAAAGCGATGTACAACAACTGGCG  
GCTGAGTCCGGTACCGCAGCGTGGTGTATGGCTGCTGGTGGCGTGCATGCTGACACCGCGAAAGCCCTCGCCCG  
CCGCTCGGCTGCGCTTTGTTGGCTTCCGACGATCGCGCCACCTGCGCGCGCTGGACACCGCTCTCCGCTGGTATA  
ATGATGCCGGACAGGCGTGCATTTATGAGATTTTCGACGACCGCAATTTATGGTGTGGTGGAAACCGGAGATTATCTC  
AATGCACCGCAACATATCTGCTGGCGGGATCGGTGACAGCTGGCGAAATGGTATGAAGCGGTGGTGTGGCTCCGCA

ACCAGAAACGTTGCCGTACCGTGCAGCTGGGATCAATAATGCCAAGCCATTCCGCAGCTCTGTAAACAGTAGCC  
AACAGGCGTGAGCGATCAGCAAATCAACAGTTAACGCAATCATTTCGCGATGGTGGATGCTATTATTGGTGGT  
GGGATGGTGGTGGTCTGGGCGATCGTTTACGCGTGTGGCGCAGCTCATGCCGTGCATAACGGTCTGACCGTGGTGGC  
GCAAACGGAGAAGTTTCCTCCAGCCGACCAAGTCCGCTACGGAATTCCTGGTGCAGGCGCTTCTGCTGGGTGAGGATGATG  
TGCTGGCGCAATTAACCTGGAGCGTATCAGCGTTTCATCTGCCACTACACTGGCGGAGCTGGAAGTGGATATCAATAAT  
CAGGCGGAGATCGACAAAGTGATGCCCCACCCCTCGCTCCGGTGGAGTCCATTCATTACCTGCCAGTACCGTGACACC  
AGATACGTTGCGTGCAGCGTTCAAAAAGTGGAATCGTTTAAAGCCTGA

>Cluster\_48581

ATGACTTTGCCATACGGCGTCATTTCTGACTGCCACTACCACAATGGGATGCGTTCCTCCAGCACGAACGCTGAGGGGT  
TAACTCCAGACTTGAATACAGTTGGAAGCAACGAAAGAACGAGCCATCGCCATGAGAAGGCGCGTGTGAAGTACATGT  
TGTTTGGCGGTGATACATTTACGTCGAGGACTGTGTCCCTTCTGTTTTGCATTACGTAACGTAAACGTAACAGTGG  
ATTATCAACGAGCTTGCATGACAGTAGTAATGCTGGCCGGTAACTCAGGATCTTGAACCAACGATTCAGTATATAGCCG  
CAACGCGAGCATCGCTGAGTTCTATCGGCGTGGTAACTGTAATGTGGCAAGCACCACATTCATAAAAATTTGGTGTAGT  
TACTGTCCACCTGATTAGCTGGCGTAAACATCATGCAGAGCTTATCAGCGATCTGAAAGCATTACGTAAGATCGTAGAA  
GGTGATAATCATGACGTTGTATCCATACATCCATTAAACAAAGCCATTCAACCAATGCCTGACGTCGGTATCGATGCGCA  
GGAGTTAAAGGATATCGGCTTTCGTCTCGTGTAGTGGGATTACCAACCAACCAAGAGGTCATTCCCTGGAGTTATCA  
GTGTGCGGTGCGCATCCATCAAAAATTTGGGAGATGTTGGATCTCTGGCTGGTTACATGATGATCGTAAACCCGGGCGACT  
TTCAGTCACTACGAAACGAGTGCCTAAATTCATTAACTGGAAGATATGTGCGGATGACCAATTCGGCGCAACTA  
CGTGCGTTTCGGCGCCGTAATGAGAACGATGAAGAAGCATTAAAGTACCAGAACATCCTCAAAAACATGGGTGCAAAAG  
GTGTCGTGTCGAACCTTCATCCGTAAGTCATCAATGATGGAAGGACGCAAGCACAACGGAACACGCAAAATCGATAGC  
TTGGGAGAGTCGGTATCCGCTTATGCAAGATTGTCAGATACTGACGGCGGATTTGATCTGAGCAAGTTGGATATTTT  
GTGTCAGGAAATCCTCACCGAAGCGGAGAGTTCGGAGGCTGTGTGA

>Cluster\_56679

ATGAGAAATCGATTGATTGGCGGATATTGGGCTGTGTGGTGGCGTTACTGGCGTTCAGGCAGCTCCTAACGTCAGCAG  
TGAAATTACGTACGATTTGGCATCTGGCAGAGCGGATTATTACTTCTGGAATGAGGAGCCCCACCGGAGGTGAGTTACA  
GTACAACATTTTCAATTTTCAATGTAGTACCTGATTCACAGCAGACTTGTACATCAGCAGGTAATACTTCTGTGCGTG  
CAAATTTTCTAACTGAAAAACGAGCGGTATGCGCTGGCCGGTAAACTGAAAGGGTATATGACAGTTCAGGTGGTGGGA  
GGACGGACCGGTGAAGGGTGGTACGATAGAAAAGGCTGGATGATGGGACGGGTATCAATGTAAAGATACGATTAATA  
ACGTTGGTTATCTGGCTAAAACAAAAGTTTAACTCTGTATATGAGCAAGAAGAAATGAAGAAAACGCGGATGGCGGT  
TTATGGGAAAGGAAAAGTTAACTCCATTTACCTACCCGGCAACAGATATCAGGCTGATATTAAAGCTTAATGTTCTCGA  
CCCCAACCATATCGAGCTGTCTTCCCGGAGTTCGCCACGCCACGCGGTCAGTTAGACTTGCATCCAACAGGGA  
GCCATTAATGGCAGCAACTACGCGCAAGATCTGACCATGTGGCATGTCTGTACGATGGTTTAAACGGTAATGCCATC  
AGTTATGAAATCATGCTCAAAGATGAAGGGCAGCCGCGCAGGGCGCAGAGACGGTACTTCTCTATCTATCTGTGAGG  
AGGAACACCACCACGAGGAGAACGCATTGATTAACCGGTCAAAAATGTACAACCCGGAACCGGTGGGCAAAATGATG  
TGCGCAATAATGAAAATATGGTCTGGAACAGCATTAACCTGAACCGTGTGCGTCCGGTCTGATTTGCCAGGGATCCGCTAT  
GCCGTAATGTGTGTCACCGCAAGATTAACGCTGGCAGTAGAAAATTTAGCGTATGGCAAAACAGGCTGGATATTACAT  
GGGAAATTTGCGGTAATCTTTACGCTTCTTGGCAACCATCAATTA

>Cluster\_26954

ATGAAAAGAAAAGTCTGGCAATGCTGGTCCCGCGTTATTTAGTTGCTGGCGCAGCAAATGCGGCTGAAATTTATAATAA  
AAATGGCAATAAAGTTGAGCTATACGGCAAGATGGTTGGTGAGCGCATTTCTGACCGACCGTGAAGTGGTGAAGAAAGGG  
ATAATTCTCAAGTACCTTATGCCCCTGTTAGGGGTGAAAGGTGAAACTCAGATCAACCTGAACTGACTGGTTACGGT  
CAGTTTGAAGCTAGACCTGGAAGCATCAACAGACACAACCCCTGACCAAACTCGTTGGCATATGCTGGTGGAGTTACAA  
AGACTTTGGTTCATTTGACTACCGTCTAATGTGCGTGTGCGGTATGATGCAAGAAGCATTTACTGATATGTGTTGAGT  
GGGGCGGTGACTCATGGGCTGGTACTGACCTGTTCATGACCAACCGTACCAACGGTGGTGAACCTATCGTAACACAGAT  
TTCCTTTGGCATGGTTGAAGGTCTAAATTTGCTCTGCAATATCAGGGTAAAAATGAAGGTACAGGCAACTACAAGCAAA  
TGGCGATGGCCATGGTTTATCTGCAACTTACACTATTGACGGTTTCTCATTGCTGGTGGTATGCAAACTCTGACCGT  
CTAATTTACAGTCTGGTGTAGTGGTAAAGGTGAAAGAGCGCAAGTTTGGCGGTGGTCAACAAAATATGACGCTAAACAATGTC  
TATGCTGCTGTAATGTACGGTGAATCTCACAACATGAATTCGACGACGGTGTGTTGTAACAAAACACAAAACGTCGA  
AGCTGTCTGCAATATCAGTTGACTTTGGTCTGCGTCCATCCATCGTTACTCCTATCTAAAGCGCTGGACGTAGCAG  
GTTACAAGATTTCTGATCGTCTGAACTATATTGAAATCGGTAACCTGGTATTTACTTCAATAAGAATATGAACGTATATACC  
GCTTATCAGATCAACCTGCTTGATAAAGAGTGAATGTTCTGCTCATGGACTGAACACCGGACCACTGGGAGGCTGGT  
TATCGTCTACCAGTTCTAA

>Cluster\_46613

ATGGAAGCTACTGTGATTCGATTGATTTTCTGATCCGTAGTGAAGATGATTTTCTAACTTTCTGGAAGAAATGAAAGC  
CCGAGAGGGGCTGATTTCAAGAGTTTATTTTCCCTAACGTAAGTTTGCAGGCTGGCCATCCTTAGACATAAATGTA  
AAGGAGAGCGGTATCATTCATCAATTACATCAGCAATGTGTTTGGTATGTCAATGCTCAACGAGGAGATACAGCGGGCG  
TTTCAACCATACGATACGGATCGCAGAACTTTCAACGCTTGAATTAAGAAAGCAAGCAACGACTTGAATAAATTTTAA  
AATTAGCGAAGTCTTAGTATGCGGAAGGCACACTGACAAGATCATCAACGAGTAAGTATTTTGGCGAGATCACTA  
TGCTGGACTGAACCGCTGGCAGAAAATGCTTGTATAATCAAAATGTTGGCGCGGCCAGCACATGGTGTAACTACATC  
ATTTCAAGAAATGCGGTAACAGAAAGACATGCAACTGATCGGCAGGTTGAAATGCAAAAACACATCCGATGCAATAA  
CAAAGCCATAGAAGCAACATTAGATTTAAAAATCTATGGGAAATCAGCGATTAGCGATAAAGTTACTAGTACGGGACAG  
CAGGTAAAAGTGGTTTGTAGTGAAGCAATTAGCTGCTGATCCTACTGTCGAAACCGTACTTTAGGAAATGAGAACA  
CGACAAGACCTAAATACCTACAACAGCCGACAATCTGTAGATAGAGAACGTAAGAACGAACGATATATTTTCCATCAA  
AGGTGTAACCGAAGCAGGGCCAAACAAATCAGGATATTAATATTAACGTTGTTAGGGTCTCTAATGACGAAATGCTTCA  
TCAAAGCTTACGCTGATGTTATCACCAAGATGAGTTGACAGCTATTGTTGACGCTTTGTCAAACAACCTCATATTA  
ATCAGTTACTTAGAGGTAATGAAAAGGTTGCTGTTTCTATAGGTCAGTTCAACACTATGTTTTCAGAATAA

>Cluster\_45457

ATGGGGCAACAAAAGCAGCGTAATCGACGTTGGGTTCTGGCCTCGCGTCCACATGGCGCACCGGTTCCGGGAGAATTTCCG  
TCTTGAAGAAGATGATGTCGCCACACCGGGTGAAGGACAGGTTACTGCGCACAGTTTATTTGTCCCTGGACCCGTATA  
TGCGTGACGATGATGAGCCATCTTATTACCGCTGTTGATATGGCGCGCTGATGGTGGCGGCGGCGGACTGAGC  
CGTGTGTGGAGTCAATCATCCGATTTATCAGCTGGCGACTGGGTGCTGGGCTACAGTGGATGGCAGGACTATGACAT  
ATCCAGTGGTGTGATCTGGTGAACCTTGGCGATCATCCGCAAAATCCATCGTGGTGGTGGGTTGCTGGGGATGCCAG  
GCTTTACCGCTTATATGGGGCTGCTGGATATCGGTCAGCTTAAAGAGGCGGAAACGTTGGTGGTGGTGGTGGTGGTGGT  
CCTGTGGGAGTAAACCGTGGGCAAACTCGCAAACTTAAAGTTTGCAGGGTGGTGGGGTGGTGGGGTGGTGGGGTGGG  
CCGCCATGCTATCGAGGTCGTTGGCTTCGATGTTGTCTTGATCACCACGCGGATGATTTGCGCAACACTGGTGAAG  
CCTGCCAAAAGGTTATGATATCTATTTGAAAACGTTGGCGGTAAGGTTATTTGATGACGATGCTACCAATTCTTAATACA  
TCTGGCGCATTTCCGTTTGGCTTGTGAGCAGCTATAACGCTACAGAGCTACCACCGGTCCGGTCCGTTACCTTTACCCT  
GTTGATGGCAACGGTGTGAAAAACGTTATCGCTGCAAGGGTTATATCGCTCAGGATATGTTGTCACCGCATCCATG  
AGTTTCAGAAGGAGATGGGGCAATGGGTGAAAGAGGATAAAATCCACTACCACGAAGATTTACTGATGGTTAGAGAAT

GCGCCACAGACGTTTATCGGCCCTGCTGAAGGGTAAAACTTCGGCAAAGTGGTGATCCCGCTCGGGGTGATGATTAA

>Cluster\_43388

ATGTCGATGATAAAAAGCTATGCCGCAAAGAAGCGGGTGGCGAACTGGAAGTTTATGAGTACGATCCCGGTGAACTGAA  
GCCACAAGATGTTGAAAGTCAGGTGGATTTACTGCGGGATCTGTTCATTCCGATCTGTCAATGATCGATAACCAATGGGGAT  
TTTCCACAATATCCATGTTGCGGGCATGAGGTGATTGTCGCGTAGTGGCGCTCGGGAGTGGCGGATATAGCTATAAAACT  
TTGCAGGTCGGTACGCGTGTGCGGATTGGCTGGACGGCACGACGCTGCGGGCATTGCGATGCCGTATAGCGGTAATCA  
GATCAACTGCGAGCAAGGTGCGGTGCGGACGATATGAATCGCGGTGGCTTTGCCGAGAAGTTGCGTGGGACTGGCAAT  
GGGTGATTTCCATGCCAGAAAATATCGACATTTGAATCTGCCGGACCGCTGTTGTGCGGCGGTATCACGGTCTTTAAACCC  
CTGTGTGATGCACCATTTACTGCTGCCACCAGCCGCTGGGGTAATGGTATTGGCGGGCTGGGGCATATAGCTATAAAACT  
TCTGCACGCAATGGGATGCGAGGTGACAGCCTTTAGTTCTAATCCGGCAAAGAGCAGGAAGTGTGGCGATGGGTGCCG  
ATAAAGTGGTGAATAGCCGCGATCCACAGGCATGAAAGCACTGGCGGGCAGTTTGATCTCATTAACACCGTCAAC  
GTCAGCCTCGACTGGCAGCCTTATTTGAGGCGCTGACGTATGGCGGTAATTTCCACACCGTCCGGTGCCTTCTACGCG  
GTTGCCGGTTCGCGCTTTACGCTGATTGCGGGCGATCGCAGTGTCTCTGGCTCTGCTACCGGTACACCTTATGATTTGC  
GTAAGCTGATGCGCTTTGCCGCCCGCAGCAAGGTGCGCCGACTACCGAACTGTTCCCGATGTCGAAAATTAACGACGCC  
ATCCAGCATGTGCGGGATGGTAAGCGCGTTATCGCGTGGTGTGAAAGCCGATTTCTGA

>Cluster\_26567

ATGGCTACCGCCAAAAATAACCATTCATGATGTTGCGCTGGCTGCGGGCTGTCGGTAAGCACCGTTTCGCTGGTGT  
AAGTGGCAAAGGGCGAATCTCTACCGCCACAGGAGAACCGTTAACCGCCCATTTGAAGAGCTGGGATTTGTGCGCAATC  
GGCAGGCGTCGGCCCTGCGCGGGCGGCAAGTGGCGTCTATGGTTTGAATCGTCCGTGATTTATCTGCGCGTTTACGCC  
GAATGACGGCCGGATTGACGGAAGCTCTGGAAGCGCAGGACGGATGGTTTTTTTTGCTTCACGGCGTAAAGACGGCGA  
GCAACTGGCACAGCGTTTTTACTATTACTGAACTCAGGTGTGCGATGGTGTGGTCAATTGCCGGGCTGAGGAAGCAGCG  
ATGACCTGCGACGGATAGCAGAAGAAAAGCTATCCAGTGATTTTCGCTTCCCGTGCAGTTATCTTGTATGACGTTGAT  
ACGGTTCCGCCGGAACAATGACAGGCTGCACAGTTGTTGACGGAGCATCTCATTCGCAATGGGCATCAGCGTATCGCCTG  
GCTGGGAGGCAAAAGTTCCTCATTAACCCGGCAGACAGCGTGGGGGCTAATTTGCGACTCTACTAAAATTTGCGCTGC  
CGTTTACAGCGATTGGGTGCTGGAGTGCACTTCCAGCCAGAAGCAGCCGCGAAGCTATCACGGCGCTTTTACGTCAT  
AACCCGACCATCAGCGCGTGGTTTGTCTATAACGAACTTATTGCGATGGGGCATGGTTTGGTTTGTGAAAGCAGGAAG  
GCAAAGCGGGGAAAGCGGAGTCGATCGTTACTTTGAGCAACAGGTTTCCGCTGGCGGCATTTACCGATGCAACGCCAACCA  
CACTTGATGATATACCCGTTTACCTGGCCAGCAGCGCGGGAACTTTGGTACCACACTTGGCATGATGCAA  
AAAATCACCCATGAAGAGACGCATTTACGCAATCTTATATTCCCGCCCGGCTCATTTGCGGAGAAATAA

>Cluster\_55508

ATGGCACAAAGTCAATTAACCAACAGCCTCTCGTGATCACTCAGAACAACATCAACAAAACCAGTCTGCGCTGTGCGAC  
TTCTATCGAGCCCTCTCTTCTGCTGCTGATTAACAGCGCTAAAGATGACGCCGCGGGCCAGGCGATTGCTAACCCGCT  
TTACTTCTAACATCAAAGTCTGACTCAGGCCGACGTAACGCCAACGCGTATTTCTTGGCGCAGACGGCTGAAGGC  
GCGCTGTACAGAGATTAACAACAACCTTGCAGCGTATTCGTGAACGACCGTTACAGCCCTACCGGCACGAACTCTGATTC  
CGACCTGTCTTCTATTACAGGACGAAATCAAATCCCGTCTTGATGAAATGACCGTGTATCTGGTCAGACCCAGTTCAACG  
TTGTGACCGTGTCTCGAAAAACGATTCGATGAAGATTTCAGTTGGTGCCAAATGATAAACACAGCAGTACGATTTGGCTTG  
CAACAATCGACAGTACCCTTTGAATCTGAAAGGATTTACCGTGTCCGGCATGGCGGATTTACAGCGCGGCAAACTGAC  
GGCTGTGATGGTACAGCAATTTGCTGCTGCGGATGTCAAGGATGCTGGGGTAAACAAGTCAATTTACTGTCTTACACTG  
ACACCGCTCTAACAGTACTAAATATCGCGTCTGATTTCTGCAACCGGTAATATACATGGAAGCCACTGATGACCTTACC  
GGTACGGCGCGCGGTAATCTGTTGGTGCAGCGGAAAGTTCGGCGGAGCCGCTACAGCCGATCCGTTAAAAGCACTGGATTC  
CGCAATCGTAAAGTCGACAAATTCGCTCCTCCTCGGTGCGGTTCAAACCGCTCTGGATTTGCGGTCACCAACCTGA  
ACAACACCACCACCACTGTCTGAAGCGCAGTCCCGTATTCAGGACGCCGACTATGCGACCGAAGTGTCCAACATGTGCG  
AAAGCGCAGATTATCCAGCAGCGGGCAACTCCGTGCTGTCTAAAGCAACACAGGTACCGCAGCAAGTCTGTCTCTGTT  
ACAAGGCTAA

>Cluster\_22591

ATGAAAAAGACCCGTACAGCCAAATTTGCACCATCTTTATCATGAACCTTACCCGAAAACCTGAAAGTTCACGCCGAGGT  
CGAAGTGGATAAATGTTCAACACGACAGACAACGGACGCTATGAACATGCTTTGACAATACCCGCTGGCAGCAGATTT  
ACGATCAGCTGCATCCGGGCAAGTTTCAATGGTGAATTTACGGAAATTTACTCGATGATATTCAGGTTTTTTCGTAATAC  
ACTGGTCTGGCGTGCCTGAGTCTGCTGCTGCTGCGGAACTCGTTCTGGTTTGGCATTCGCGCGACCGCGGTGAGCA  
GGGATTTATCGGTTGCAATGCTGGAAGCGCAGAAATTTGCGACGCGCCCTGGTGGAAACCGAGTTTGAATTAAGTACGC  
CGAGCATTTACACGATCCTTGGCGTAGTCTTTCTGAAGATGTCATCACTCGTCAGGCTAACTTTTTGCAATAATCCGGAT  
CGGGTATTACATATGCTGCTGAGCCAGTCCGGCTGGAAGTGAAGAGCAGCATAAAGCCGCTCTGTGGGGCTTTGTCCA  
ACAGGCGTGGCGACGTTTTTTCGAGAACCAGGAAAATCTCCATCAGCTGCAGTGCAGAAAAGTGTGGGGGATAATTTGC  
TAATGGCGATGGGGGCGATGCTGGAAGAAGCGCAGCCGATGATGACGGCGGAAAGCATCAGTCAATCAGAGTTACCGTCA  
TTGCTTTTCCCGCCCGTGAATATGCTGCGGAAAACATGCTCGAACCAGGTCAGGCTGTTGGATTTGTGCAATCACTGCA  
TGTCAGCCGCGCAGCTACAAAACGCGTTTACGCAATTTTGGGATTTGGTCCGAACCGGTGGCTGAAACGATTTCCGCC  
TGAACCGCTGCGCGCGAACTCATAAGTCCGTTGGTCAAAAGCACAACGGTAAAAGACGCGCCATGCAAGTGGGATTC  
TGGCATCTTGGCAATTTGCCACGGATTATCAGCAACTGTTTGGCGAGAAGCCGTCATGACGCTGCATCAGCGGATGAG  
AGAGTGGGGTGA

>Cluster\_30672

ATGGGAGGGGATTTTGGCCCTTCCGTGACAGTGCCTGCAGCATTTGCAGGCACTGAATTTCAATTCGCAACTCACTCTTCT  
TTTAGTCGGCAATCCCGACGCCATCAGCCATTACTTGTAAAGTACTTTGAAACAAGTTCGCGTCTGCAGATTAATTC  
CTGCGCAGTCACTATCGCCAGTATGCCCCGCTTCGCAAGCTATCCCGCCAGTCTGGGAGTTCAATGCGCGTGGCC  
CTGGAGCTGGTGAAGAAGGTGAGCGCAAGCCTGTGTGAGTCCGGTAAATACCGGGCGCTGATGGGCTGGCAAAAT  
ATTACTCAAGCCCTGGAGGGGATTGAGCGTCCGGCGCTGGTGCAGGTTATACCGCATCAGCAAAAGGGCAAAACCGTGG  
TCCTCGATTTAGGGCCCAACGTCGATTTGACAGTACAATGTTGGTGCATTTGCCATTTATGGGCTCAGTTCTGGCTGAA  
GAGGTGGTGGAAATTCCTAATCCCGCGTGGCGTTGCTCAATATTTGGTGAAGAAGTAAAGGGTCTCGACAGTATTCG  
GGATGCCCTCAGCGGTGCTTAAAACAATCCCTTCTATCAATATATCGGCTATCTTGAAGCCAATGAGTGTGTTAATCGGCA  
AGCAGATGTTGGTGGTGTGACGGCTTTACAGGAAATGTCACATTAAGACGATGGAAGGTGTTGTGAGGATGTTCCCTT  
TCTCTGCTGAAATCTCAGGCTGAAGGAAAAACGGTCTGCTGGTACTGTTATTAAGCCGCTGCGTCAAAAAGAGCCCT  
GACGAGGCGATTGATCAGTCAACCCGACAGTATAACGGCGCTGCTGTGTTAGGATTTGCGCGCACGGTGATAAAAA  
GTCATGGTGCAGCAATCAGCGAGCTTTTGGCGTCCGATTTGAACAGGAGTGCAGGCGGTGCAGCGCAAGTTCCTCAG  
CGAATGGCCGCTCGCTGGAATCTGTATACCAGCTGGTTTTGAGTGTGACGGTGGCAAAAGCGGAACTCTGCGGTA  
G

>Cluster\_11018

ATGCTGCTTTATATCGCCTTTATCTCTTACAGCAGCGGATGTCGGCGTAGCGGAGATGAAGCATTATCATTTACGCA  
GCAGGCTCAGGAAGCCCTTGAGCAACAACGACGCTTACGCCCTGATGTTGCGCTTTCTGCACCTGGCTCTTTTGGCC  
ATAAGATTAATTTTCTGTTGAAACCGCTGTTTTTTCAGATTAACAGACGGAACTGAAGGGGGCTGATGCGTTTACACAC  
TGGTGCCTTTACAAAAATCGCAACGGGGCGTGGGCATTGCTGGGGCGAAAGGAATTAATCTGCTGATGAGTAC



ATTGCAGAACCGTCTGGTCGATCATGGTTATGTACCACCCGTTCTGGCACCTTCGACAGGATTTAAAAAGCGGTATCC  
TCCGGCTGGTTATATTCCCGGTGTTGTGCGACATGTGCGTCTGACACCGGACAGTGACTATATTAGTTTATTTCC  
TCATTCCCGGCACACGAAGTTCCTGCTGGATTTACGGGACATGAGCAGGGCTGGATTTAGGTAAACGCCGATACA  
GGGACAACATACTGAGCTGAATGCAACCAGTGGAAATCTGTCTACACAGAATGCGCAACTGAGTGGCGATACGCTTTCCG  
CCCGGACTGCCGGCAGTTCAGCAGTAATGGCGGTACGATAAATGCCGACACACTGCAGATATCGGCACAAAGCTGTCA  
AATCGTAAAGGCAGTCTGATTCAGACGGGAACAGGGGATTTTTGCTGAGTCTGCCGGGAAGCGTGGATAACCGGGAAG  
GCTGCTTGGCGCAATGGCGCGGTGCGTCTGGATGCACGAGCCTTGATAATCGCAAGGGGAAAGTGCAGGCGGAGCAGT  
CACCTCCCTTCAGAAATCCCGCCACGTTTCTGAAACCGTTTGTGGCTGGTGTCTGTGCGGATTCGTTGGCGGTACG  
GTGGCTATTCCGGGATGGCAGTTTCTGACACAGCCATCACCGGAGGAGCAGCATTTTACTGGGGAAATGGTTGTA  
GCAGTGA

>Cluster\_64788

ATGAGTAAATACCGTACACTGCGAGCGGATGGCAGGCTGTTTACCGGCTGGACGTCAGTCTCTGTACCCCGCTCCATTGA  
ATCCGTAGCCGGATATTTGAGCTGGGGGTGAATGTGCCACCGGTACAGATTATCCGGCTGGCACCGGGAAAGCGT  
TCACGCTGGAATCGACGGGAGATTGTCTGCACCGGTTACATCGATTGCGGGCAGCCAGATGGCCGCTGACAGCATG  
AAAATCATATTGCGCGGCGGACAAAACCGGCTGACCTGATTGACTGTGCAGCCGTTTACAGTGGCGGACAGTGGAAAA  
CCGACACTGGAACAGATTGCGCGTGACCTGTGCGCTCCTTATGGCGTTACCGTTCGCTGGGAGCTTTCCGATAAGGAAA  
GTTCCGACGCTTTTCCCGGCTTACGCTGGACATTCAAAAACCGTTTATGAGGCGCTGGTGCCTGCCCTCCCGCGCACCG  
GGTGTACTGATGACCAGCAATGCCGAGGAGCTGGTATTACGCGGGCTGCCAGCACAGCCACTGATGAGCTGGTTCT  
CGGAGAAAATCTGCTGACACTGGATTTTGGGAAAGACTTCCCGGACCGGTTACAGCAATACACCGTCAAGGGGTATGCCC  
GCGCAACCGTGGTGGTGTGATGATTTGATGCGAAAGTATCGTCTCCCGAAAGGGACCGCCACTGACAGTGTG  
ACCCGTTACAGACCGATGATCATATTGCGGACAGAAAATACCGCGAAGGATGACAGCCCGCGCTGCGTGGGAGCA  
ACGCCGAGACTGGCAAAATCCATCACCCTTGGAGCAGAAATGACGGATGGACAGCAAGGACGGGCAACTTGGATGC  
CGAACCTGCTGGTCACTATGATGCTCGAAATATGCCATCAAAACACAGAAATTAAGTGGTACAGCAAAAGTCAACCTGATA  
CTGAATGACCAAGGACGGGCTGAAAACCCGCTCAGCCTTGCACACGCGAAGGCTTCTGGTGGCGGTTGAAAGCGACCG  
TAAAAACAGGAAAGGCGGACAGTAACGGCGGTATTGATGCGCTGGTGAAGATTATATCGCAGACACCCGGAGAAAA  
CGCCGCGTGGAAAGAGTAA

>Cluster\_60994

ATGAAAATCGTAAATCGCCCCAGACTCTTATAAAGAAAGTTTATCTGCCAGCGAGGTTGCGCAGCGCATAGAAAAGGATT  
TCGGGAAATTTTTCTGATGCACAGTACGTTTCTGTCCGGTTGCCAGCGGTGGCGAAGGACGGTGGAAAGCGATGATTG  
CAGCCACCAGGGGGCTGAACGTCACGCTGGGTTACAGGGCCGCTGGCGGAGAAAGTGAATGCCAGTGGGGGATCTCC  
GGCGATGGCAAAACCGCGTTTATGAAATGGCGGCGGCGAGTGGGCTGGAGCTGGTACCTGCGGAAAAACCGCATCCACT  
CGTGACCATTTCAGCGGACAGCGGAGTTAATCTGCGAGCGCTGGAGAGCGGTGCCACAAAACATTATATCGGCATTG  
GCGGACGCGTACAAATGATGGCGGCGCAGGCATGGTACAGGCGTGGGGGCAAAATTAAGCAGCCAAACGGCAATGAA  
ATTGGTTTTGGCGCGGTAGTCTTAATACTCTGAATGATATTGATATTTCGGGCTCGATCCGCGCTTAAAAGATTGCGT  
CATTCGCGTCTGTGATGTCACCAATCCGCTGGTGGGCGATAACGGCGCATCGGCATCTTTGGCCCAAAAAGGGAG  
CCAGTGAAGCGATGATTGTTGAGCTGGACAATAACCTCTCTACTATGCGGAGGTCATTAATAAAGCGCTTGTGAT  
GTAAAGATGTCCCGGTGCAGGAGCTGCGGGTGGTATGGCGCGGCGCTAATGGCGTTTCTTGGTGCAGAACGAAAAG  
TGGTATTGAAATCGTCACTACGGCGCTGAATCTGGAGGAACATATTACAGATTGTACGCTGGTGTATCAGCGGTGAGGGC  
GTATTGACAGCCAGATATTCACGGGAAGGTACCGATTGGTGTGCGAAACGTCGCGAAGAAAGTACCATAAACCGGTGATT  
GGCATTTGGGGTACCGCTGACCGATGATGTTGGCGTGTGATGATGATGATGATGATGATGATGATGATGATGATGATGAT  
CATAGGTACGTTGGACGAAGCATTCGCGGGGCTTATGACAATATCTGCGGTGCTTACGTAATATCGCCGCGACACTGG  
CGATTGGAATGCGCAACCGGGGTGA

>Cluster\_29255

ATGTTCAAAACGACGCTCTGCACCTTATTAATTACCGCTCTTGTCCACATTTGCCGACCTCAACAAATCAACGATAT  
TGTGCATCGCACAATTACCCCGCTTATAGAGCAACAAAAGATCCCGGTATGGCGGTGGCGGTAAATTTATCAGGGTAAAC  
CTTATTACTTTACCTGGGGCTATGCGGACATCGCCAAAAGCAGCCGTCACACAGCAAAACGTTGTTTGGTTAGGTTTCG  
GTCAGCAAAACATTTACGGGCGTCTTGGTGGCGAGCCTATTGCTCGAGGGGAAATCAAGTTAAGCGATCCCAACAAAA  
ATACTGGCTGAACCTACCGCTAAACAGTGAATGGGATCACACTATTACATCTCGCAACCTACACCGCTGGCGGCTGC  
CATGTCAGGTGCCGATGAGGTGAAATCTCAAGCGACTTGTCTGCGTCTTATCAAACTGGCAGCCTGTATGGGCTCCA  
GGAACACAGCGCTGTATGCCAATCCAGTATCGGTTTTTTCGGCGCACTGGCTGTGAAGCCGCTGTTGAGTTTTGA  
GCAGCGGATGAAAACCTGCTGTCTTCCAGCCACTCAAACTCAATCATACGTTGATTAATGTACCGTCCGCAAGAAAAGA  
ACTACGCTGGGGATATCGCGAAGGTAAGGCAGTACATGTTTCCGCGAGGGGCTTAGATGCTGAAGCTTATGGTGAAG  
TCGACCATGGAAGATATGGCCCGTGGTGCAGCAATTTAAAACCCCTTGAATCAATGAGAAAATACTTCAACAAGG  
GATACAACTGGCAATCTCGCTACTGGCAACCGCGATATGATCAGGGTCTGGGCTGGGAAATGCTGGACTGGCCGG  
TAAATCTGACATCATCTAATACCGGAGTGCATAAAAATGGCTACTGGCAGCAGCCCGTAAAACCGATTACGCCCCCA  
ACTCTGCAGTACGCGCATCATGGGTACATAAAAACGGGGCGACCGCGGATTTGGTAGCTATGTCGCTTTATTTCCAGA  
AAAAGAGCTGGGTATCGTGTATGCTGGTAAACAAAACATATCCCAATCCAGCGAGGTTACCGCGCTGGCAGATTCTCA  
ACACTCTACAGTAA

>Cluster\_57722

ATGTCAGAGCCCCGATCTCAATCAGTTAGCGCAAAAAATTAACAGTGGGGCTGGAACCTGGGCTTTCAGCAGGTAGG  
TATTACCGATACCGATCTCAGCGAGTCCGAGCCAAACTGCAAGCATGGCTGGACAAACAATACCACGGCGAAATGGACT  
GGATGGCAGTACCGTATGCTGCGCGCTCCGCCCATGAGTTATTGCCCGGTACGCTGCGCGTATCAGCTGCGGATG  
AATTACCTTCTGCTAACCGCGATTGTCAGCAGCCTGAAAAACCCAAACTCGGCTATGTTAGCCGTTATGCGCTGGG  
CCGTGACTATCAAACTTCTGCGCAACCGACTCAAAAAGCTGGGCGAGATGATTCAGCAACATTTGTTTCCGTTGAAT  
TTAGACCGTTTGTGATCTGCGCTATTTCTGAGCGCCGTTAGCTGAAAAGCTGGGCTCGGCTGGCAGGTAAGCAC  
TCACTTATCTCAATCGCAGGCGGCTTCTTCTTTTCTTTTATGCGCAATTTGCTGGTTCGATATTCCGCTGCCCTGAT  
ACCAGTCGAGGAAGGATGCGGTAATGCGTGGCTGTATGACGATTGCGCCGACCGGTCGCTGCGAGCCATAACCG  
TCGATGCTCGCGCTGTATCTTATCTCACATCGAACTTGAAGGGCGATCCCGGAAGAGTTCGCGACCGTTAATGGGA  
AACCGTATTTACGGTTCGATGACTGCCAGCTTATCTGCCCGTGAATCGTATTCACAACTCACACAGAAGAGGATTT  
CAGCCCGCTAAGCCGCTACACGCAACCGAACTTATGAGTTATTCGCTGGAGCGAAGAGGTTTTTAAAGTCAACGG  
AAGGATCGGCGATTCTGCTGATTGGTCACTGCGTTGGCTGCGTAATAATCGCCGTAGCATTAGGCAATGCCCCTTGGGAT  
GAAACGATTTTACAGCGCTGGAAGTCTGAAAGGTGAGCACCCTTCTCGATGAGCACATAGCGTGGGCGATTGCGCA  
GCAATAGAGAGACGAAATGCGTGCATAGTCAAGTGAATGCGCAAAAACAGCGCTTGGTTCGGGTGATTGAAAAAG  
GGTTACCGCTGACCGCTGA

>Cluster\_64407

ATGAAAAGAAAAGTTCTGGCAATGCTGGTCCCGGCTTATTAGTTGCTGGCGCAGCAAAATGCGGCTGAAATTTATAATA  
AAATGGCAATAAATGATCTGTACGGAAGTTGATGCTGCTCATACTTTTTCCGATAACCTGGCGATGACGGCGATG  
AAACTATCATCGAGTTAGGCTTCAAGGTGAGACCCAAATACAGATCAGTTAACTGGTTATGGTCAAGCACTGACCAAA  
ACAAAGGTAGCGACACTGAAGTTCTGATAATACTTATGTCAAACTTGTCTTTGCGAGTCTGAAGTTGCGCGAGATGGG

CTCCTTTGACTATGGTCTGAACATATGGTGTGATTTACGACGTTGAAGCCTGGACAGATATGCTTCTGTATTCCGGCGGC  
ACTCCTATACCTGGACTGATAAATTCATGGCAGGCCGTGCAAAATGGGGTAGCTACTTACC GCAATAGTGATTTCTTCGGT  
CTGGTGGAAAGGCTGAACCTTTCGATTGCAAGTATCAAGGTAACAACGAAGGCAGCAATGCAGGAGAAGATCAAGAGGTAC  
TAAAAATGGTTCACGAAGACGTTTCGCTTCCAGAACGGTGTATGGTTCCTTCCACTTCATATGACTTTGACTTCGGT  
TGAGTCTAGGTGCCGCTTACTCAAATCTGACCGTACC AATCTCAAGTAGCTCTTGGCGGGTATCACATTAAGAATAC  
AGCAAATTTGCTGGTGGTGATACAGCTGAAGCATGGACATTTGGTGCAAAATACGACGCCAACAAATGTTTATCTTGAAT  
GATGTATGCTGAAACCCGCAATATGACACCATATGGTAATGTGGGTATCGCAAATAAAACCCAGAACCTTGAAGCTGTAG  
CACAGTATCAGTTTCGATTTTGGTCTGCGCCCATCTCTTGCATATGTTTATCAAAGGCAAAGACCTCGGGCGTAAACGAC  
TATAACAACAATGGTTCATCAAGAGTATGTGTGATCAGGATCTGGTCAACATATGTTGAAATGGAGCGACCTACTATTTCAA  
TAAGAATCTTCAACATATGTTGACTATAAAATAAACTTGTGGATAAAGATGACGATTTCTATGACAACAATGGCATCG  
CAACAGATGACGTTGTTGGTGTGGGCTTAGTCTACCAGTCTAA

>Cluster\_25126

ATGAGCGACACAACGATCTGCAAAACTGTACCCATGTCAATTAACCGAAAAATCGGTGGCACTTTCCGGCGTTCGGCG  
GGCAATACGGCGCTCTGCACCGTGGGTAAGCGGCAACGACCTGCATTACCCTGGCTACGATATTTCTGATCTGGCGG  
AACATTGTGAATTTGAAGAGTGGCGCACTGCTGATCCACGGCAAACGCAACCCGTGACGAACTCGCCGCTACAAA  
ACGAAACTGAAAGCCCTCGCTGGTTCACCGCTAACGTGCGTACCCTGGTGGAGCCTTACC GGCGGCGTACACCCGAT  
GGATGTTATGCGCACCCGGCTTTCCGCGCTCGGCTGCACGCTGCCAGAAAAAGAGGGGCACACCGTTTCTGTCGCGGG  
ATATTGCCGACAACCTGCTGGGCTCACTTAGTTCGATTTCTCTACTGGTATCACTACAGCCACAACGGCGAACGCATC  
CAGCCGAAACTGATGACGACTCTATCGGCGGTCACTTCTGCTGCTGCTGCACGGCGAAAAGCCGTGCAAAAGCTGGGA  
AAAGGCGATGCATATCTGCTGGTGTGTACGCCGAACAGGATTTAACGCTTCCACTTTACAGCTGGGATTTGGCGG  
GCATGGCTCTGATATGATTTCCGCCATTTATTGGCGGATTTGGCGCACTGCGCGGGCCGAAAACACGGCGGGGCAATGAA  
GTGTCGCTGGAGATCCAGCAACGCTACGAAACCGCGGACGAAGCCGAAGCTGATATCCGTAAGCGGTGGAAAACAAAGA  
AGTGGTCAATTTGGTTTGGGCATCCGGTTTATACCATCGCCGACCCGCGCCACCAGGTGATCAAACCGCTGGCAAAGCAGC  
TCTCGCAGGAAGGGCGCTCGCTGAAGATGTACAACATCCGCCATCGCCGTAAGAACAGTATGTGGGAGAGCAAAGATG  
TTCCCAATCTCGACTGGTTCTCCGCTGTTTCTACAACATGATGGGTGTTCCACCAGAGATGTTACACCACTGTTTGT  
TATCGCCCGCTCACTGGCTGGCGGGCGCACATATCGAACAACGTCAGGACAACAAAATTTATCCGCTCTCCGCCAAT  
ACGTTGGACCGGAAGACCGCCAGTTTGTGCGCTGGATAAGCGCCAGTAA

>Cluster\_62642

TTGAAACGTAGTCTGCTTTTTCTGCGGTGCTGTGTGCGGCTCATTGACCTCCGTCCATGCGGGCGAGCCGATCACTGA  
ACCGGAGTTTGCCTCTGATATTTGTCGATCGTTATGCGCATCATATTTTACGGCAGCGGTGCACGGGGATGGCGCTGG  
TTGTTATCGACGGTAACCGCGCTTTTCGCAAGTATGGCGAAACGCGACCTGGTAATAACGTTCCGCCGAGCTGGAT  
TCGGTCGTGCGTATGCTTCCCTCACCAAGCTAATGACCAAGTAAATGCTGGTAAATGCTGAAATGCTCGACCGGGACCGTGA  
GTTAAACGATCCGCTAAGTAAATATGCTCCGCCAGGCGCACGCTGCCAACCTACAATGGGACGCCCATTTACCTAGTGA  
ATCTGGCAACCCATACAGCGCCCTGCCCGGTGAACAGCCCGTGGCGCGGCACATCGTCCGCTGTTTGTCTGGCAACG  
CGCGAGCAACGCTGGAATACCTTTCTACGGCGAAGCTGAAAGCCGCGCCAGGTCAGGCGGCTACTCTAACCTTGC  
GTTCCGACCTGCTGCGCATGTCACCTGGCGAATGCTGCCGCAAGCTTATACCGAGTTTGAAGAGGAAACCCGCT  
CATTTGGGGATGAAAGACACCACCTACACCCCTCACCGGATCAGTGCCTGCTTAAATGGTTGCTGAGCGCGGTGCCAGT  
CCGTGCAATAACCGCTGGCGGCAATTTGGCAGCGCGGCGCTATTCCACGCTGGCGATATGATGCGCTGGATGCGAGCA  
GTATTTGCTCATCTGATTTTATCAGCGCAGTAACCAAGCAGATCGCATGCAGAGCTTGATTTATCAGCGCGCGCATTTA  
CGAAAGTGAATTTGGCATGGATGTCCTCCGGCAAAGCGGATCGCTTGGTTTAGGCTGGGTATATATGAAAGAGGGGT  
CGTCCGGGATTTATTCAGAAAGACAGGCGGTGGTGGCGGTTTCAATACCTATATGGCGATGATCCCGCAGAAGATATTGG  
CGCGTTTGTGGTGGTCACTCGTTTCGCGCTTGAACGCTTAAAAATATGAGCGATGGCATCAATGATCTGGTGAACCGAGC  
TAAGCGGGAATAAACCGTTGGTTATCCCGCATCTGA

>Cluster\_61379

ATGAACAGAAAGAAAGCTGTTAATACCGTTGTTATTCTGCGCGCGATGCTCACCGCTGCGATGACAAAATCGGCGGA  
AAACCGCGCCCATGACGCTGAGGTCCGGTGTGCTCACACTCTCCCGGTTCCGGTCAATGTGTTGAGCGAATTTGCCCG  
GTAGAACCCTTCCCTATGAAAGTTGCGGATACGTCCTCCAGTGGCGGTATTATCATTAACGCAACTTTATCGAAGGC  
GATAAAGTGAACAGGGCGATTCGCTGTATCAGATTGATCCTGCACCTTTACAGGCGGAGCTAAAATCCGCCAAAGGCTC  
GCTGGCGAAAGCGCTCTCTACCGCCAGCAATGCCCGCATCACCTTTAACCGCCAGGCATCGTTGCTGAAGACCAACTAGC  
TTAGCCGTCAGGATACGACACCCGCGCACCCAGTTGAATGAAGCAGAAGCCAATGTACCCGTCGCCAAAGCGGCTGTT  
GAACAGCGCAGCATCAATCTGCAATACGCGAATGTCACTCAGCGGATTTACGGCGGTACGCGGCGTCAAGGCAATCGCT  
CGGCGCACTCGTTACCGCTAATCAGGCAGATTCGCTGGTTACCGTACAACGCTGAGCCCGATTTATGTCGATCTCACGC  
AGTCGGTGAAGATTTCTTACGCATGAAAGAAGAGGTCCCGAGTGGGCAAAATCAAACAGGTTACAGGCGAGTACGCCAGTA  
CAGCTCAATCTGGAATAAGGTAACGCTACAGCCAGACCGCCAGCTGAAATCTCCGACCCGACAGTGGATGAAACGAC  
GGCTCCGTCAGCTTACGGCGGATTTTCCCAACCAAAATGGTGAATTTGCTGCTGCGCTGGCATGTAGCTACGCGCATTTGGT  
ATGAAGTACCGCCAGAATGTATTAAGTGGTGCAGGAAGGCTCACCCACAACGCCAGGTAAGCAACGGCGCTC  
ATTTCTGATAAAGACGATGTCGTGACGCTACGCGAAATGGAAGCCAGCAAGCCATCGGCGACAGTGGGTGCTACCTC  
TGGCTTGCAGGCTGGCGATCGGGTGCATTTCCGTTTGAACGCAATCGCTCCGGGTATCAAAGCACGAGCAATTTCT  
CCAGCCAGGAAAACGCCAGCAATGCAAAATAA

>Cluster\_20672

ATGAAACGCGCATATAAATACCGGTTTTACCCGACAACGAGCAGGCTGAGCTTTTAGCTCAGACGTTTGGCTGTGTGCG  
CTTCGCTACAAATCCATCTCTGTTGGCTACCGATGCGTACTACGAGCGAAAAGAAAAGATCGGTTATCTACAGGCCA  
ACGCTCGCCTTACGGCGCTCAAAAAGAGCCTGAATACATATGGTGAATGATGTTTCTGCGTTCCCTCCAGCAGTCCG  
TTGCGCCACAACAGCCGCTTTGCTAACTTCTTGGCGGACGAGTTGCATATCCGGCTTTCAAAAGCAAACGGCACAA  
ACAGGTGGCTGAGTTCACTGCCAGCGGCTTTAAACACCGTGCAGCGGAGTTGTATATAGCAAAGAGCAAGTCCGCGCTG  
ATGTTCCGCTGGAGTTCAGAAATACCATCTGCGCGTCAACCTTACCATTTCAGAGATAGCGCTGGCAGGCTTTGTT  
TCTGCTGTGTGAGTTTGAACCTGTATCAATGCCTGTTACCGCTAAAACGGTCCGCAATGATGTTGGGCTTAAAAGATTT  
ATTCGTACCCGATACCGGATTTAAAACCGACAATCCCGCCACACCGCTAAATATGCGAAGCGATTAACGCTGCTACAGC  
GACGTTTAAAGCAGGAACAAAAGGCTCAAGAAACCGTATAAAGCCGCTTAAAGGTCGCGGACTCCACGCGGAAAATC  
CCGGAATGGCCGATGGACAATCTGCACAAGTTGTCGCAACCTGATTAACGAAAACCAAGTTGTTTGGCTCGAATCCCT  
CAAGGTGAAAACATGATCCGAACCCGAAGCTGTCTAAAGCAATAGCTGACGCGAGCTGGAGCGAATGTTTCCGCGAGC  
TCCAGTACAAGGCAAAATGGGCGGGCGGTGAGTGGTCCGCAATGACAGTATTTACCGTCTCAAATGCTGTGATTTCC  
TGGGTTTCACTGCAAAAATGCCTTAAATGTTTCGTAATGGCACTGCCCTGAATCGGCGCAGACCATGATCGCGA  
CATTAACGCGCACGTAATATTAAGGCTCCGGGCTGCAAGGTTAGCCACCGAGAGCTTGAACACCTGAACTGAACTGCAGC  
ACGGGCTTAG

>Cluster\_22991

ATGAATAAGGTTGATTTGCTGTGCGCTCCGGGCTTTGAAAAGAGTGCGCCGAGAAATACCAGTAAAGCGGCGAGCG  
GAAAATTTTCGGTTTTCGCCGCTGAAAGAGAATGCGGGTTATGTCATTTATGAGTGTATCAACCTGATGATGGCGATA  
AGTTAATCCGTGAGCTGCCGTTCAAGTTCATTAATTTTTGCCCGCCAGTGGTTTGTAGTGGGGAGCTTTTGCAGCATTTG

CCGCCAGAAGATCGTATTACCCCCATTGTTGGCATGTTACAGGGCGTAGTAGAGAAGGGCGGTGAACGCGTGTGAAGT  
TGCCGATACCAACGAAAGCAAAGAGTTGCTGAAATTCGCCGTAATTCACCGTGCCGCTACGCGCTGCCCTTGCCTGATG  
CGGGGGTGTGGCGAATATGAAACGCCGAAGCGTCCGGTTGTGCATGTATTCCTTTATGACACAGCGTGTGTCTATACT  
GGTTACTCATACAGCAATAATTCGCGCTTCTATATGGGCATTCGCGCCTGAAATTCGCGCAGATGCGCGAGTGC  
TTCCAGCTCAACCTGGAAGAGGCATTTCTGTGTTTATTCCTGCGGATGAGTGGGATGAACGCGCTGACAGATGT  
GGGCGGTGGATTTAGGCGCTTGCCAGGCGGTGGACCTACCAACTGGTGAAGCGCAACATGTGGGTTTATTCGCTCGAC  
AACGGCCGATGGCGCAAAGTCTGATGGATACGGACAGGTGAGTGGCTGCGGGAAGACGGTTTCAAATTCGCTCCGAC  
ACGCAGCAATATCTCCTGGATGGTATGCATATGGTTGAAAAACCGGCGAAAGTTGCGGCATTGATGGCGCAGTGGCTGG  
TTAATGGCTGGTGCCTGAAACCATTTTCAACCTCAAACCTGCGGATGAAAAACCGCTATGAAGAAGTGTACACAATCTG  
CGGTATATTCAGGCACAGCTTGATGAACATGGCATAAATGCTCAGATTACGGCGGGCAGTTGTATCACGATCGCGAAGA  
AGTGACGGTGCACCTCCGCCGTATCTGGCTGCGGTGGTGGTCTGCGGACGAGCGATAA

>Cluster\_43410

ATGAATAAAAACAATAACAGCGCTTGCTATCCTAATGGCTTCATTTGCCGCAAACGCGTCTGTATTACGGAACTCCTGT  
GCCATTTAAAAGTGGTACCGGAGTAATTGATAACGACTGTCTACATTGGTTTAGGTAGCGCAGGTACGGCATGGTACA  
AGCTGGATACACAGGCCAAAAGATAAAAGATGGACAGCGTTAGCTGCATTCCTTGGCGGACCGAGAGATCAAGCAACCTCT  
GCATTTATGATGGCAATCTGTATGTGTTTGGCGGCATGGCAAAAACAGCGAGGGCTTGACTCAGGTATTTAATGACGT  
ACACAATAACAACAAAACAATAGCTGGGTTAAATTTAGTGTGCGCACGCGCCGATGGCATGGCAGCCATGTGACTT  
TTGTACACAACGGCAAGGCTTATGTACTGGCGGTGTTAACAGAATACTTCAATGGCTATTTTGAAGATCTCAACGAA  
GCTGGAAAAGATTCACCCGCTATAGATAAAATCAACGCTACTATTTTGACAAAAAGCAGAAGATTTTCTTCAATAA  
GTTTCTGTGCTTTTGTATCCCTACACAGCAATGGAGTTACGCTGGCGAATCTCCTGGTACGGAACGGCTGGTGGCG  
CGGTTGTGAATAAAGGTGATAAAAACCTGGCTTAATAATGGCGAAGCAAACAGGATTGCGAACGGATCCCGTATTTGAA  
CTTGATTTACCAGGTAATAATTTAAAATGGAATAAGCTTGCTCCCGTGCATCACAGATGGCTCGCTGGCGGTTTTGC  
AGGATGAGCAATGACTCACTTATTTTCCGGAGGGGGCGGATTCAAAGGTTACAGAAAAATACCAGAACGGTAAGA  
ACTATGCGCATGAAGCCCTGAAAAAATCATATAGCGCTGATTTATTCATTTGCGATAACGGGAAATGGGATAAATCGGG  
GAATATCGCAAGGCCGGCCTACGGAGTATCATTTGCCCTGGAATAATAGTTTTATTAATTTTGGCGGTGAAACTGCAGG  
CGGCAAGCAGTGACTGATTGATTTTGTATTTCTGTGAAGATAATAAAGTCACAGTACAAAACTAA

>Cluster\_67112

ATGCTAAGAAAGTCTGTCTGTTTTTTTTAACAGCGATGATTGTTGCTTCTGTTTCCGTCGGAATGCCGTGTACAGG  
CATTTCCCTGACCTCCCGTATTACATTACATACAGGCCAGAATATGGAATGGGGAGGCGAAAAATCTTCGACGAAAC  
TGATTTGTTTCGCCACAGGGATACCGATATTCCTCAGTTCTGTCTGGCGGGGAAAAAGGATTTATCCTGGCAGGCAGATA  
GGCTTTGTGGGATCTCCGTCTTTGATGACCGGTATATGCGGAAGGTATTAATCAGGAAGGTTTATCAGCTGGGTTAT  
TTATTTCAAAAACCTACGGTTTATGTGCGAAATAAATCCCTCAGACTCCGACAAAAATCTGGCAGATATGGATCTGCTC  
GCTGGATCTGACTCATTTTAAAACAGTCAGGGAAGTTCGTGAGCATAATCAACAACCTGAACATTTGTTCAACTGTTATT  
GACAGGAATCAAAAAAATACCGATACCGTTCACGCGCGGTGGCTGACAGACTGGGGGAAACATTTATATAGAAATAAA  
AAATCAGGGGAGTATTTCCATTCATGAAATCTGGCCGAGTGCATCAAAATCTCCGATTAAGTGGCATTTAACGA  
ATCTTAATAAATACATTAACCTTCCGCGAGGAAGTTCCTTCCGGACAGATCAATGGGGTGAACACGTTTTCCTGG  
GCAGGCTCCCGTCTCTGGGACTGCTGGCGATATCACGCCCCCTTCCCGTTTATCCGGGGCGCATTTTATGTCAATAC  
CACCCCGAATGAAAAACGGAGATGAAGCTGTTTCTCAGGCTTTTCAATTTGAAATAATTTGATATCCCTGTTGGCG  
TTGAATATACATATAAGCATGAAGTGCCTGAACCTCCGCAACCAATGGACAACAGTGTGATCAGATTCGCTGCT  
CTTCTTTCTATAAAAACCATGAACGACATACGGTTAAATTTGATTTGATCTGGGCAACATCCGTTTACACAGGAAAAAGA  
GAACCATTATCCACTGGATAACGGGGTGTTTTTCATTTACGCGAACAGTATTGATTAA

>Cluster\_16613

ATGATTCCTGAAATGAACTTAGAGATATTCAGCCAAAGGGAAGCAGTGTCCCGTCTTCGCACATTCAGACTGG  
ATTACCGATTCCAAAAACAGTGCGGGTTTCACTTTTAGCCCTGACGAATGGGAGTCTGTTTACAGAGGAATGGGCAAGTT  
ATCTCAAAAATGAATATGTTGCACGACAGCGCTTTGGGGGTTCTGGTGTATCTGGGATAGATATGCTGGTTTCTGTTCT  
GACAAGGGATTCGAGGCGGTATGGGATAATATCAATGCAAGCGCTATGGACATCCTCTTCGGCTGGTGATATCTGGGT  
TGAAATGGCAAGATTAATTTACTCATATCTTGGCAAATATACCCCTCCACGAAAGCATTTTGTGTTGCTCTCAGG  
GAATAGGAACAGTCTTGAACAGTTGTTGAACAAGCCTACTGAGTTGAAAGAAAAATCGATTGAAAACGGGATAATTAC  
TGCTCAAGGGTATCACTTCTACTGCTGAAATTCGGTTGACTGTGCTAATAGAGCTTACCTGACGCAATTTGATTTTCA  
TATTTTCTCATAAAAATCGATAGTTGAGCTTATCGAAATTCATGCCAGAACGGGTTTCACTCGGTTCCGTTTGGCGGCG  
GGCTCCCGTATCGGCTTAATCTCATCTTCCACCAACCATACCGACGGAATAATGAAAGCCGATACATTCGCTTCCGCTT  
GATGCTATGGAGACATTTAGGCACAAATTTACCAGACGCTGCTTCTGTTGGCGTACACAATCAATTTCTGATGACTA  
TCTTCGCCAGCGCAACGTTTTTATCACGAGAATCGCTAAAGAAATTTGCGCGAGATACTGTCTCCTGCGGGGACATTTG  
ATGCTTACAGGATGAAATCTACCATGGCGTAAATGATGCTGCGAAGATTTACTTCTGAGTGGATTTGCGGAGATGAAA  
GAAACCTGAAGCAGCTACCACATCGCTGTACATCAATCCGTTGGTCAATTTAAACACAAGATCCCAAAGG  
TATATGCCATCAGTTGGCTAATGACGATCGCTGATTTGGGTGCCAGATAATGAATCATAA

>Cluster\_40604

ATGATTACACGGAGCATGCGCTGGCTTTTGTGTGAAGCGTCCGTCCTTTCCGGCGATAGCCCTGGATACTGAATT  
TGTTCTGACGCGACTTATACCCGACGCTGGGTTTAAATTCAACTTTTGTGATGGTGAAGCATCTGGCGCTAATTGATCCTC  
TCGGGATCACCGACTGGTACCCTGAAAGCGATCCTGCGCGATCCGTCATCACAAAATTTCTTCTCATGAGGAGTGA  
GATCTGGAAGTGTCTCAATGTCTTTGGCGAATACCACAACCTTGTATGACACGCAAAATCCTTGTGCTTCTGGCG  
ACGCCGATGTGATGGGTTTTCGCTTCCATGTTGGAAAGATATTCGGCGTTACGCTGGACAAGAGTGAATCGGCGACCG  
ACTGGCTGGCCAGACCGCTGACCGAACCTCAGTGTGAATACGACGCGCGGATGTCTGGTATCTGTTACCGATCACCGCA  
AAGCTTATGGTAGAAACGGAGGCTCCTGGCTGGCTACCCTGCGCGCTGGATGAATGCCGCTGATGCAAAATGCGTCTGTC  
GAAAGTCTGTTGCGCGGAAAGACGCGTGGCGTGATACCAATGCCTGGCAGTTACGCACACGCCAATGGCCTGTCTGC  
AATGTTAGCCGACTGGGATTCGCGAAGGCGGAGAGCGCATCTGGCGGTGAACTTTGTCTGTCGCTGAAAGACACTTG  
TGGTGGTAGCGGTTATATGCGGGAAAGTCTGGGCGAATGGACAGCTGGGCTTATCTGGTAGCGAAATCCGCTTCCA  
CGGTAAAACGTTGCTGGCGCTGGTGGAAAAAGCGCAGGATGCGGGAAGAGGCTTACCAGCAGCCGATGCTTAACTGA  
TGGACATGCCGGTTATCGTAAAGCGTTTAAAGCGATTAAAGTCTGATTAAGTCTGATTAAGTCTGACGCTCAGCGAAACGCA  
AGATTCAGCGGCTGGCATCCGCTCGGCAAAATCAACCTGAACTGGCAACTGGCAACTGAAACCTGAAACCGCAAAATTTGCC  
GGAGCTGATTTCCGCTGGCGTGGTGGTGTGATGGCGGAAGCATTACACAATTTATGCGAGGAATATCCACAGTAA

>Cluster\_47943

ATGATTCATTTAACGCACCGCCGGTGGTGGAAACCGAATCGACTATATGACGCTCGGCAATGGGTAGCGGCAAACTGTG  
TGCGGATGGCGGTTTTACCCTGCTGCGCAGCAGTGGCTGGAGCAACGTTTTGGCAGCGCCAAAGTGTACTGACGCCGT  
CCTGCACCGCTTCTGCTGGAGATGGCGGCGCTGCTGCTCGATATCCAGCTGGCGATGAAGTATCATGCCGAGCTACACC  
TTTGTCTCCACCGCAATGCTTTTGTGCTGCGTGGCGCAAAATCGTTTTTGTGGATGTTTCGCGCGGACACCATGAACAT  
CGACGAACCGCTGATTGAAGCGGCGATCCCGCAAAACCGCGCTTATCGTGGCTCATTAACGCGGTTGTGGCTGG  
AAATGGACACCATTTATGGCGTTGGCGAAAAAGCATAATCTGTTTGTGGTAGAAGATGCGGCTCAGGGCGTGTGCTCACT  
TACAAAGGGCGTCACTGGGAACCATTTGCTCATATTTGGCTGCTTTAGCTTCCATGAAACCAAAACTATACGGCGGGTGG

TGAAGCGCGCGCAGCGTGATTAACGATAAAGCGTTAATCGAACGAGCCGAGATCATCCGTGAAAAGGGCACTAACCGCA  
GCCAGTTCTCCGTTGGTCAAGTTCGATAAATACTGGCGCGATATTGGCTCCAGCTATTTGATGTCCGATCTGCAAGCT  
GCGTACCTGTGGGCGCAACTGGAAGCAGCGGATCGTATCAACCAGCAACGCTCTGGCGCTGTGGCAAACTACTACGATGC  
GTTAGCGCTCTGGCGAAAGCGGGCGTATCGAGCTGCCGTGATTTCCCGATGGCTGCGTGCAGAACCGCGCATATTTCTT  
ACATTAACCTGCGGATATTGATGACCGGAGCGGTTGATTAACCTTTCTGAAAAGAGCGGAAATCATGGCGGTTGCTT  
TACATTTCCGCTGCACGGTTGCCCTGCCGGGGAACGCTTTTGGTAGTTCACCGTGAAGATCGTACACCACCAAGAGAG  
CGAGCGCTGCTGCCCTGCCGTGTTTACAACCTGTGCCCGTCAATCAGCGTACGGTAATTGCGACTTTGTGAACT  
ACTTCTCCTGA

>Cluster\_58766

ATGACCGCTTAAATAAAAAATGGCTATCGGGTCTGGTTCGGGGTCTGATGGCCGCTCTGTGCGCACGCTCGCGGC  
TGAACAAAAACACTCCACATTTATAACTGGTCTGATTATATGCCCGGACACGGTGGCCAAATTTGAAAAAGAAACCG  
GTATTAAGTCTGCTACGATGTTTTGACTCTAACGAAGTACTGGAAGCAAATTAATGGCCGGGAGTACCGGCTTTGAT  
CTGGTGGTTCATCTGCCAGCTTTCTGGAGCGCAGTTGACTGCGGGAGTTTTCCAGCCGCTGGACAAAAAGCAAAATGGC  
GGAGTGAAGAATCTCGACCCGGAAGTCTGAAGTGGTGCACAAACACGATCCCGACAATAAATTTGCTATGCCCTATA  
TGTGGGCGACGACCGGGATTGGCTATAACGTTGATAAAGCTTAAAGCGGTGCTGGCGAAAACGCGCCGCTCGATAGCTGG  
GACTTGATCTCAAACCTGAAAATCTGAAAAACTGAAAAGCTGCGGTGTCTCTTTCCGATGCGCGAGAAGAAGTTTT  
TGCTACCGTGTGTAATTAATCTCGCAAAAGATCCCAACGACATAAAGCGGATGATTACACCGGACCGCAACAGATCTGC  
TGTTAAAGCTGCGCCGAACATTCGTTATTTCCATTCACTCAATACATTAACGACCTGGCAAACGGCGATATTTGCGTC  
GCTATCGGCTGGGAGGTGATGCTGGCAGGCGTCAAACCGCGGAAGGAAGCAAGAATGGCGTGAATGCTCTGTTCTC  
GATTCAAAAGAAAGGGCGATGGCGTTCCTTGTGATGATTCGCCATGCTGCGGATGCCAAAAACAAGACCAAGCCTATC  
AGTTCTGAAATTAAGTCTGCTGCCCGGATGTAGTAGCGCATATTTCCGACCATGTTTCTATGCCAACGCCAAATAAAGCA  
GCCAGCGCTGGTGGTGGAGTCCGTTGAGAACCCAGGTAATTTATCCGCTGCGGATGTTGTCGGAAGCTGTTTAC  
TCTGAAAAGTGCAGGATCCGAAAATCGACCGTGTGCGCACCCGCGCTGGACCAAAGTGAAGAGCGGAAAAATAA

>Cluster\_40820

ATGTCAGCCATTACATTTTTTAAAGCGGCTACTCATAACCGATATGCACGGCAAAAACTGCCGTTACGCCAGACGATCT  
TGCCGCTCGGTGAAAGCCTATGACCCGTCCTGATGAGCACCACCTCGTATGGTTCATCCAGAACGGAAGACCCGG  
CGTGGGGTGGGTGAAAGCCCTGTCGCTCAGCGCGCTCGATGATGGCAGAGCCTGCCAGCTGGACCCCGAGTTTGTCT  
GAGATGGTCAACCGGACGAGTCAAAAAAGTGTCCGCTCTTTCTACCTCCCGGATTACCGTCCAATCCGAAAGCCGG  
CGTGCTCTACCTTCGCCATGTGGGCTTTCTCGGGGACAGCCACTTCCGTCAGGGGCTGAAACAGGTGTCCTTCAGTG  
AGCAGGAAGAAGTGTGGTGGAGTTCGCGACTGGCAGCCATCACGAATGCCCTCCCTGTGGGAAAGCTGCGCGATTTT  
CTGATCGCCCGCTCAGTCTGGACGAGGCGAAAAAGTCTGCCGGAATGGCAGCTCAACAGTCTGCGCGAAGAGGCGTA  
CCGCGACACACTGTCGACGAGATGCAGCAGGTGCACAATTCAGTGGAGACAGGCGCGGCGCTCTCCGCAAGTAAACGAG  
AATCATCGATGACAAAAGAAGAGATTGAAGCCCTCAGGAGGAGAACCAGCCGCTGAAGCAGCAGGCTGCTGATCGCGAT  
GCGCGTGTGACAGGTCAGACAGGAGCAACTGCATAAGGACAATGTGGCCTTTGCAGAAAACTGGTGCAGAGGGCGC  
TCTGGTCCCCCGCTCCTCCGTTGGTGGTGGCCCTGCTGGATGCCCTGCGGGTGGCGACAAGCCGGTGGAGTTTGGCTG  
AGGGGAAAGCCGACACCGCTGGCCACCGCTTTCTGTTCTGCTTCCGACGCGGAGCCGCTGATGAAATTCGCGGAA  
CAGGCCACAAAAGAGCGTGTGCGGACACGGTGAAGGTGGATGTGGCAGATTTGCGGAAGCCGATCCGAGCGTCTGGC  
CCTGCATCAGAAAGCAGTGGCCCTGTCCAAAAAGAAGGCATCAGCTATGAGGCTGCTGTGCGACGCTGCCTGTAA

>Cluster\_59204

ATGATTATCTTACCTTACCGCGCATTTTTGTTATTGATGTGTCACCTTGTTCCTGCTGACCTTCGTTGGCTTACGCTT  
CTATTTACCCCTCATGCGCCGTTACAAGGCGGTCACGTTGGAATGCCTGGGTGTTCTGGTTTAAACGGCCTGATCCACT  
GGGATTTTGGTGTTCGAGCATTAACGGTCAACCGATTGCCGAACAGTTAAAAGAGGCTCTCCCGGCGACGATGGAAC  
TGCACTCTCAGCTTCGCTTTGCGTGTGTTGGCATCCCGCTGGGGATGATTGCGGGGATTACGCGCCATAAGTGGA  
GGATAACTTGATCAACGCCATCGCCTTACTGGGCTTTTCAATCCCGGTGTTCTGGCTGGCGCTTCTGTTGACGCTGTTTT  
GTTCACTCAGCTAGGTTGGTTGCCCTTTCAGGGCTTTCGATCTGCTTACGAAGTGAACCGATTACCGGTTTTGCG  
TTGATTGATGCTGGCTTTCGGACTCACCATGGCGGATGAAATGATCATGAGCGCAATCCGCGATATGATATTGCCCGT  
GATCACCCCTGTGCTGGTTGCGCAACAACCTGAAGTGTGATCCGCTGATGCGTATCAGCACTATCGAAGTGTATGACCA  
ATGTTAAAAGCGCGGCGACCCGCGGTTTGTGCGCTTTACTATTTTGGCTGCGCACGTTCTGCATAACCGGTTACCGCG  
GTTATTTCTCGCTGGGCTTACAGTTTTCCACCATGCTGACGCTGGCGATGATCACGAAATGGTTTTTAGCTGGCCGG  
TTTTAGGGCGCTGGTTAATTAACGCCATCCGCCAGCAGGATTACGACGCAATTTCCGCGGAGTGTGGTGTGTTGGCTC  
TGGTCAATATTGTTAACGTTATTTCTGATATTTGGGTTGCCATGGCTAACCCCTTGAACATAAGGAATGGTATGCCCTT  
CGATAG

>Cluster\_39075

GTGGCACAGGAATATACTGTTGAACAACATAACCACCGGCTAAAGTCTATGACTTTATGCGCTGGGACTACTGGGCTTT  
TGGCATCTCTGGTCTGCTGTTAAATCGCCGCTATCGTTATTTATGGCGTGCAGCGCTTTAACTGGGGGCTGGATTTTACC  
GTGGTACGGTTATTGAAATACGCTCGAAAACCGGCTGAAATGACGTAATGCGTGTGATGCAAAAAGCCGGTTTT  
GAAGAGCCGATGCTGCAAAACTTTGGTAGCAGCCACGACATCAAGGTCGCTATGCCGCTGCTGAAGGCGAAACCGGGC  
TCAGGTGTTGGGACGAGTCTTGAAGTGTATTACGAATCCACCAATCAGAAATGCGGAGTGAAGCTATTGATGTTG  
TCGGTCCGAGCGTGGGGGACAGCCTTGCACAAACCGGTCGATGGCGTTGATGGCGGCGCTGCTGCTATCTCGTGTAC  
GTAGGTTTTCCGCTTTGAGTGGGACTGGCGGACGGGTTGTTATGCGCTGGCGCACGAGTTATCATACGCTGGGAT  
TTTTGCTGTTATTTCCATATCGAGATTGACCTGACCATTTGGGATCGTTGATGTCGGTTATCGGTTACTCGTTAACGACA  
GTATCGTGTATCGGACCGTATTCTGTAACACTTCCGCAAGATCCGTCGCGGTACGCCTTACGAAATCTTTAAGCTGTCC  
TTGACCCAGACGCTGCACCGTACCTGATCACATCCGGTACTACCTTGTGTTTATCTGATGCTGTACTCTTCCGTTGG  
TCCGGTACTGGAAGGCTTCTGCTGACCATGCTTATCGGTTTCCATCGGTTACTGCACTTCCATCTATGTGGCATCTG  
CACTGGCTCTGAAACTGGGTATGAAGCGGCAACATGTTGACGAGAAAGTGGAAAAAGAGGGGCGGATCAGCCGTTCA  
ATTCTGCCCTAA

>Cluster\_22202

ATGAGTAAACAACGAGTTTTTATGCTGGTCTATCGCGGATGGTTCGGTCCGCGCATCAGGCGGAGCTCGAACAGCGCG  
TGATGTGGAACGGTATTACGACCCCGACGAGCTGAACCTGCTGGACAGCCGCGCTGCATGATTTCTTTGCCAGCG  
AACGATTTGACCGCTATCTGGCGCGGCAAAAGTGGCGGATTTGTTGCCAACAACACCTATCCGCTGGATTTTAC  
TACCAGAACATGATGATTGAGAGCAACATCATTCACGCGCGCATCAGAACGACGTAACAACTGCTGTTTCTCGGATC  
GTCTGCTATCTACCCGAAACTGGCAAAACAGCCGATGGCAGAAAGCGAGTTGTTGACGGGACGCTGGAGCCGACTAAC  
AGCCTTATGCTATTGCCAAAATCGCCGGATCAAACCTGTGCAATCATAACAACCGCAGTACGGACCGGATTAACCGCTCA  
GTCTGCCGACCAACTGTACGGGCCACGACAACTTCCACCCGAGTAATTTCGATGTTGATCCCTGCTGCTGCTGCTG  
CTTCCACGAGGCGACGGCACAGAATGCGCCGAGCTGGTGGTATGGGGACGCGGTACACCGATGCGCGAATTTCTGCACG  
TCGATGATATGGCGGCGGCGAGCATTCATGTCATGGAGCTGGCGATGAAAGTCTGGCTGGAGAACACCCAGCCGATTTG  
TCGCACATTAACGTCGGCACGGGCTTACTGCACTATCCGCGAGCTGGCGCAAAACCTGCGCAAGTGGTGGTTACAA  
AGGTCGGTGGTTTTTGTATGCCAGCAAAACCGGATGGTACGCGCGCAAACTGCTTGTGATGTCGCGCTGCATCAGCTTG  
GCTGGTATCAGAAATCTCACTGGAAGCGGGCTTGCACGACTTACCAGTGGTTCCTTGAGAATCAAGACCGCTTTCCG

GGGTAA

>Cluster\_34756

ATGGGCAAAGCAGTCATTGCAATTCATGGTGGCGCAGGTGCAATTAGCCGCGCGCAGATGAGTCTGCAACAGGAATTACG  
CTACATTTAGGCGTGTCTGCCATTGTTGAAACCGGGCAGAAAATGCTGGAAGCGGGCGAAAAGTGGCGTGGATGTGGTGA  
CGAAACCGTCTCGACCATAGCGGTGCGCCACTGGATGAAAAACAGAAAATGGGCACCGTGGGGCCGTGGCGTTGGATT  
GAACTGGACGCGCTGTGTGATGGATGGTAACACCCTGAAAGCCGGTGGCGTGGCGGGCGTTAGTTCATCTGCGTAATCCGGT  
TCTTGGCCGCCCGGTGGTGGATGGAGCAAAGCCGCATGTGATGATGATGGCGAAGGGCAGAAAATTTTGGCGTTGCTC  
GTGGCATGGAGCGCTCTCGCCGAGATTTTCTCCACGCCCTTTGCGTTATGAACAACACTACTGGCAGCGCGCAAGGAAGGG  
GCAACCGTCTCGACCATAGCGGTGCGCCACTGGATGAAAAACAGAAAATGGGCACCGTGGGGCCGTGGCGTTGGATT  
AGACGGCAATTTGGCGGCAGCCACTCCACAGGCGGAATGACCAATAAATACCCGGACGAGTTGGCGATAGTCCCTTAG  
TGGGTGCCGGATGCTACGCCAATAACGCCAGTGTGGCGTTTCTTGTACCGGCACGGCGAAGTCTTCATCCGCGCGCTG  
CGCGCATATGACATCGCCGCGTTAATGGATTACGGCGGATTAAGTCTCGCGGAAGCCTGCGAGCGGGTAGTAATGGAAAA  
ACTCCCTGCGCTTGGCGGTAGCGGTGGCTTAATCGCTATCGACCATGAAGGGAATGTCGCGCTACCGTTAACACCGAAG  
GAATGTATCGCGCTGGGGCTACGCGAGCGATACGCCAACCCGGTATCTACCGTGA AAAAGGGGACACCGTTGCCACA  
CAGTGA

>Cluster\_23696

ATGGCGTTATTAATGTAGATAAATATCGGTGCATTTTCGGCGACGAAAGCGCACCGTTCGCGCCGTAGACCGCATCAG  
CTACAGCGTAAAACAGGGTGAAGTGGTCCGGATTGTGGGTGAGTCCGGCTCTGGTAAATCGGTGAGTTCGCTGGCAATTA  
TGGGGCTGATTGATATCCGGGCCGCGTAAATGGCGGAAAAGCTGGAGTTAATGGTCAGGATTTGCAGCGTATCTCAGAA  
AAGAGACGTGCAACCTGGTGGTGGCGAAGTGGCAATGATCTTCCAGACCCGATGACCAGCTTAACCCGTGCTACAC  
CGTGGGTTTCCAGATTATGGAAGCGATTAAAGTGCATGAGGGCGCAACAAAAGTACCCGCGTACGCGAGCGATTGACC  
TGCTGAATCTGGTGGTATTCGCCATCCGGCATCGCTGTTGATGTTTACCCGCATCAGCTTTCCGGCGGCATGAGCCAG  
CGCGTGTGATCGCCATGGCGATTGCCCTGTCCGGCAAAACTGTGATTGCCGATGAACCGACCACCGCTGGACGTGAC  
CATCCAGGGCGCAAACTCATGCAACTGCTGCTGGAGTTGAGCAGAAAAGAAACATGGCGTGGTGTGATCATGACCG  
TGGCGCTGGTGGCGGAAGCGGCACATAAAAATCATCGTGTGATGATGACAGCCAGGTAGTAGAAAACGGCGATGCCACGCT  
ATCTTCCATGCGCGCGCTCACCGTATACTCAGGCATTGCTGCGTGGCTGCCGGAATTTGCTCAGGCAAAAAGACGTCT  
GGCGTGGTGGCAGGTGCTGTTCCGGCAAGTACGACCCGCGCAACGGCTGCCTGCTTAAACCCGCGTGGCCCTACGCCA  
CTGACAAAATGCGCGTGGTGAAGAACCGGCGCTGAATATGCTCGTGCAGGGCGTGCAGTCAAATGCCATFACCCACTTGAT  
GATGCCGGGAGGCCGACACTATGA

>Cluster\_18311

ATGAAAGCACTCTGCTCCTGACGGCATCGCTTATGCTGTTAACAGTTGTTTATTAATATCTAATACCACACTGGCAAA  
AACAACTTAAAACCTGAGTCATAATCAGGATAAAAAGCCATGCTGTCCATAAAGCATTAAGCTATTTAGCGGATAAAAACA  
AAGAGTATCTAATAGTGAATTAGTTATTCGCATTTACCCAAATGCGACATTAGGTAATGAGCGTGAATCACTGGAATTA  
ATGAACTCCGGTGCATTACAGATGGTTAAGGTTAATGCCGCATCACTAGAATCATTTGCTCCGGATTACAGCCTTTTCAG  
TCTGCCGTTCTTATTCGCGACCGTGTACTATTATCGTGTCTGCAAAGTGAATTTAGGTAAAAAAATACTTAATTCAT  
CAGAAAAGCAAAGGTTTGGTGGTATTACGTACTATGACGGCGGTGCGAGAAGTTTATTTCAATAAAGCCGATTACAAAA  
CCTGAAGATTTAGCGGGAATGAAAATCAGGGTTCAACAAGCCCGACGCCATTGCAATGATGAAAGCACTCGGTGGTGT  
TCTTACCCCGATGGCGCAAGCGCAACTCTACACCGCATTCAGCAAGGAGTGGTTGATGGCGGAGAGAACAATACCGTTG  
TCTATGCCGATATGCGTACGCGGAAGTCCGAAAAGTCTATTACGTTGATGAACACACCATGGTGCCTGATGTGTTAAT  
ATCAGCACCGACGTTTGAATAAACTTGGTGTATAAAGAGCGCACCGCATTTATTAAGAGCAGCCGATGATCAATGGA  
GATGAAGGACGCTATTGGCCTGCGGCTGAAAAAGAAGCCTACGACAAAATGAAAGGGATGAAACGCAACAGTTGTGATG  
TTGATAAATCCGCTTTCAAAGAACCAGCGTCAAACCGTTATACGATGAATCAAGCGGAAAGATGCAACAACAGCAAAAAAC  
CTGAGCTAGTAGAAGTATGTAA

>Cluster\_13308

ATGAATATGGAAGAAATTTGGCCCTTAGTGTAAGCATAACGCTCTCGGATCTACACCTGTGCAGCGCTGGCCCGCAGC  
ATGGCGCATTCGCGGGCTAATGGAAGCTGCGCCGTTTGGTGGCGCGGACGTCGAAGAGCTACTGCGGGAGTGGCTGGATG  
ACGATCAGCGGGCAATAATTTGCTGGAATAAAGGCGCAGCTGGATTTTGGCGTGTGCTGGCGGAAAACAGCGGTTGCTGGC  
AGTGGCTTCCGCGCAACGGCAAGGTATTTCTTGGCATTACGGTTGTTACCTTCGCACTGTCCACAGCTCGAACAGCTTGG  
CGCACCAACGGTATTGCCGGAATTACTCAAGAGCGAGAATGGCCTGATCTGGTGCAGGGGGCGACGGGGAGCGGCAAA  
CTACCACGCTGGCGGCGATGGTTGGCTATCTCAATCAACATGCCGATGCCGATATCTGACGCTGGAAGATCTGTTGAA  
TATATCTATGCTCAGCCAGCGATGTTTGTATCCAGCAGCGGAAATGGTTTGCACCTGTATGACGTTTCCGATCCGGATTGCG  
GGCCGATTGGCGGAAGATCCTGATGTGATTTTGTCTGGAGAGCTGCGTGACAGCGAGACAATCCGCTGGCACTGACCG  
CGGCAGAAAACCGGCATTTGGTGTGCGCAACATTACATACCGCTGGTGGCGCGCAGGCAGTTGAGCGACTGGTGGATTCA  
TTTCCGGCGCAGGAAAAGATCCCGTACGTAATCAACTGGCAGGTAGTTTACGGGCGGTGTTGTCACAAAAGCTGGAAGT  
GGATAAACAGGAAAGGACCGCGTGGCGCTGTTGAATATTGATTAACACTCCCGCGTGGGGAATTTGATTCGGAAGGGA  
AAACCCACAGTTACCGCATGTTATTAACACCGGGCAGCAGGTGGGATGTTAACGTTTACGACAGGTTATCAGCAGCGG  
GTGGGGAAAGGGCGTTTGTGA

>Cluster\_57202

ATGAGCAATGATTACCCCTTAGTATCCATAATAATACCAGCTATAATTCATCTGATTACATTACTGAAAACCTAAACGAA  
ATTAGAAAACAACTTACCCAAATTTTGAATTTGTTATGTTAATGATGGTTCTAAAGACAACATCAAACGTTTTTGA  
GAGAGTATGGGTTAACCCACTCTCGATTAAATATATCAATAAAGAAAATGGCGGTGTTTCTGCTGCCAGGAATACAGGT  
ATCCGCAAGGCGCAAGGACAGTTTATATGTTTTATGGATGATGATGAGATAGATCCTAACATATCTGCTGAAGATGTA  
TTCCAGACAACATGAGACGGGAGGAGATGCCATTTATTTGGGCTTTATGGCCATCATATAAAAAATGGTGTACTTACT  
CACCTATAAATACAGAGTTTAAATGAAGGATCTTTACTTTTCGACTTTTTTTATAAAAAGGTTAGATTCCATATAGGGTGC  
TTGTTTATAAGAAAACAACTTCTGGAAGAGAATAATCTTTTTTTGATGAAGATTTACGACTAGGAGAAGATCTGGATTT  
TATCTATCCAGCTGCTAAATFACATCGCATATGATGCGGTTTCCATATTAATGATAAAGCATAAATATAGGAAAATTTCT  
TAATGAACCTATGTAGAACCATCACTCATTTATCGACATGAGTCAATTTGCGCACGAAAAAATCTACTCTTCTGTGATGCAG  
TTATACAAAAGGTAACCCGGAAGAAGAAATTCATACATTATTGAGTCAAATAAGAGCTTATCATAAAACCTGTTATTTGG  
GAATGTTCTACTTAATGGTGAATTTAAACAATTAATCAATAGTTGAAAGCAATGAAAAAGAATTAAGATTTGTAATC  
TTCTGGCAAGAGAGATAAGAGACGAGCAAAAAATATTAGCATCAAAAAATATATTTATCTGGAGGATGGTAAGACTGGTA  
AATAGAAAAAAGAATAAACGTTAG

>Cluster\_26821

ATGAAAAAAGAACTAATGCTTTTATTATGCTAGATAAACAGATTGCACAATTCCTTAAACATTAAGCCAATGACCG  
CCTGGTATATTTCTACTATGCTGGATGGTCTGATTATTACGAATCTAAGTTCGGGAGATATGCACCAAGTATTGACTATT  
TGATGGTTATGCTGGTGTACACGTAATACAGTTATTGATTCACTTAAGAGACTTGAGTACACCGGACTTATCGAAAAG  
ACCAATGTAAGGGTCAGCAAAGTATTTTAAAGTATTACGTTGGATGAGCGTCCGAAAGTCTTATCAGAACCTACCTT  
TGATGAGCGCTGTAGAGCAAATTAATCAGGTCAACAGAAATGACACTTAACCCAAACAAAATGGTTTACTACCCAAAC  
CAGAAATTTGGTTACTTACCAACAGAAATTTGGTTACATGTAATACTGAATATAAAGCAAAAAATATAAATACTGAAGAA  
GAAAGACTAAAAGGGAACTTTGAAGAAGATCTCTTAAAGAAGGAGCTTCGCTCTGTGATTACATGAATGTGATTCTCT

TGGTATTGAAGAGGCTATTAAGAGGCTGTTAAAACATCTGACTTAGATGACCTTGATAGTGAAGCTACTAAAGAGGCTA  
TTAAAAAGGAAGATAAAATCTCTGATGTGATTGCTAGTAGTGACCATAAAAAACACACAGTGCCCGCCACTGATGATGAA  
TTACCGGATGTTGACCTTGATGATGAAGAAGACCTGAAGAGGAATTGAAACGTGAACAGCGTAAGGCAGAAATTAAGA  
AAGATTTCAGAAAGGCGAAGCTAAAGAACAGGATTGATGAACTTGTATGACTTTGATGATAGTGACGATGATTTTACTTACA  
GACCCAAAAAGAAACTCACACTGATTCAAAGAAAGAGAGGATTAACCGAAGATGTATTTGCTGGTGGAGGATTAAG  
TGA

>Cluster\_39312

ATGCCAAATCATTACAGGGTAAACCGCTGCTTAAACCGATCCTGACCACCGTCGCGCGCGTTATAAAAAACGCGCGCTT  
TATCGGGGAGAAGATTTTCCCGGTGGTGGAGATGGATAAAGAAGGCGCAACGGTGCCGACGTTCCGGCAACGGCGTGTG  
CCGTCTATGAGACGAAACCGCCGTTGGGTGCTGACAGTAACTCATGATCCGTGAGAAAAACCGGTTCCGGTAGATATCGTG  
CTGGATGAGCAGCACCTTTCGCGCCGGTGGATTACCGCGAAAGCGCCGAGAGCATCTTCGACGAGGAAGCAAAGGCCAC  
CCGTCGCGCCACCAATGGCATCCTGTTGCGCGTGAAGTCTACGCGCGCGCTAGCGCAGGATGCGAAAAATCTATAAGC  
CCAATGCGAAGAAAGTCTTCACTGCGCGGATTTCTGGCCAAACGGTCAAGGTCAGGCGACCCGCTGCGCGCATGAAACCTAT  
ATGGATGCGGTACGCAATAACGTCGGTCTGCGCCGAACATTATCACGATGGGCGCATCGGTGATGACGCTGCTGAAAT  
CCACCCGGTATCCAGGCGGCAATCGCGCGCAACGAACGAAGATTATTACTACCGGATTTCTCAAAGAACTGTTCCGGC  
TGGATGAGTGGTGGTCCGCTAGCCCGGATCGCTGCGGCAAGGATGGTAAAGCTGCCGATCTCTGGAAGACAATCTGATG  
GGCCACTACGTCAACCGCCCAAGGTGCGCGCGCTCTCCGATGAGAAATGACCCATCGTTCCGCTATACCTCCGCGC  
CAAGGGATGCTGTTATTGACCAATACGACACGGCAGGCGCAAAGTGGCAATTTGCTGCTACACCGATATCTATAAG  
TCGTTGTTGCTCGTCTGACGCGCGGTTCTGCTCTCTGGTCTGAAAGGAGGTGCATGA

>Cluster\_62598

ATGAAAAATTCGTGGCGTAATAACGTTGAGTTTTACTTGTATCGGCTGCTGGTCTAACTGTTGCCGCTTCCAGCATTAC  
TATGCCGGAGATTTCTGGTGCATAAGTAATTTCCAGTCCGTCGCTTCGCAATGCCCCGCTGCTGGGCATCTGGCGTTGG  
CTATGGCGGTGACCATGCTTTCGCGTGGCATTAACTTGTCAATATAGCCACTGCTAACGCCCTGTTCACTGGTATGGCG  
TGGTGAAGCCACTTACCTGATCCACCGGATTTGCTACGGTGTGCTACGTTACTGGCGGGCGCTGGCGCGGCTGATAAT  
CGGTTTATGTAACGGCGTATTGATTGCTGGTATTCGAGTGTGCGCAATTTCTGCAACGCTTGGGATGATGACGTTGCTCA  
AAGGGATAAATATCTGGTGACAGGTGGTAGCGCATTGCCAATATCCCTCATGGGTGCTGTGGTTGATCATGCGCAA  
TGGTTCGGTATTCGCTACCGATGTTGGTGTGTTGCCGAGTGGCACTGGGGCTATGGATATTGCTGGAGAAAAACGCGCT  
CGTTAAAGCCACTTACCTGATTTGGTGTAAACGAACGACCACTTTACTCCGCATTAAACACTTCGCGGTTGATTT  
GGGTTTATGTCATTTCCGCTTGGTGTGCTGGTGGTAGCGGCATTTTGTATGATGCGAACTCAACTCGGCTAAGGCCCTCT  
TATGGCGAATCGTACTTGTGTTGCTCAATCCTCGCGCAGTACGCGTGGGTTAATCCGACGGCGGAGCGGGCGGAT  
AATTGGTATGGTGTGCGCTGTTCTTCTGCAAAATATTGAAAGCGGCTCAATATTTCTCGGTATAAGCCCCCTACCTGA  
CGATGGCCTTATGGGGAACGTTGCTGCTCTGTTTCACTCAGGTCGCGCGCATGTTGGGCTGGATCGGCTGGTTAA

>Cluster\_59802

ATGAAGAATCAAGCGCATCCGATATTGCTGCTCAAACGACGCAAGCCAAAAGCCACGGGGCAGCACATGGATCGTGGAA  
GATTGCTTATGCCGACTTATGACTGCGATGATGGCCTTTTCTGGTGTGTTGGTGGTATCTCCATCTCCAGCCAAAAG  
AGCTTGATCAGATTGCGGGAGTACTTCCGACTTCCAGTCCGCGTACGCGTTACGGGCGGCGATCGCATTTCTAAGTAGAA  
AGCCCAATTCGCGCGGTGGTGTATGATTACCCCAAAGCCAGGGGAAGTGAATAAGCAGCCGAACATCGAAGAGCTGAA  
AAAACGCTGAGGAGCAAAAGTCGATGCGGAAATTCGCGGGTGTATCTGACCACTGATAGAGTCCGATCGAAACTCGCGG  
GCTTACGTCCTTCAAAATCGATCTGGTCCAGGAAGTCTACGATATTCAGATCATCGATAGCCAGATCGCCGATG  
TTTTAGAACCCGCTGCGGATGTCGAACCTATATGCGCGACATTTCTGCGCGCATTTGCGCTGACTGAACGCTATTCC  
CAACCGTATTAGCCTTTCAGGTCATACCGATGATTTCCCTACGCCAGCGGTGAGAAAGGATATAGCAACTGGGAGCTTT  
CTGCGGATCGGGCAATGCATCCCGCGCAACTGATGTTGGAGGGTGGATAGCGGCAAAAGTGTACGTTGCTGCTGCGC  
ATGGCGCAACGATGCGCTTAAGCGATCGCGGACTGATGATGCGCTCAACCGTCCGATCAGCCTGGTCACTGAAACA  
ACAAGCCGAACAGGCCATTTGTCATGAAAACGCGAAAGCCAGAAATGAGCCAGTAAGCGCCTGGAAAAACCTGAGGTTG  
CACCACAGGTCAGTGTCCCAATGCCATCAGCCGAACCGAGGTGA

>Cluster\_43214

ATGAATAAATATCTGAAATATTTAGCGGCACACTCGTGGCTTAATGTTGTCAACCAGCGCTTTTGTGCGCGCAATA  
TGCTGTGCTATTGAAAACACTCTCCAACCCATTTTGGGTAGATATGAAAAAGGCATTGAAGATGAAGCAAAAACGCTGG  
GCTCAGCGTTGATATTTTGGCTCTCCCTCAGAAAGCGGATTTCAATCTCAATTGACGATTTATTGAAGATCTCAGTAAT  
AAAAATTACAAGGTATCGCCTTCGCGCATTAACCTCAGTAAATCTGGTTCATGCTGCTGCGCCGCGCATGAAAAAAGG  
CATTTATCTGGTCAATCTCGATGAAAAAATCGACATGGATAATCTGAAAAAAGCAGGCGGTAATGTGGAAAGGTTTGTCA  
CCACCGATAATGTTGCGCTGGGGCGAAAGGCGCTCATTCATTTATGACAAGCTGGGTGCGGAAGGGGTGAAGTCGCA  
ATCATCGAGGGTAAAGCCGGTAAACGCTCCGGTGAAGCGCTGTAATGGTGCACCGAAGCCTTCAAAAAGCAAGCCA  
ATCAAGCTTGTGCGCAGCCAGCCTGCCGACTGGGACCGTAAAGCACTTAAAGCACTGCGATGTCGCCACTAACGTTGCAACGTA  
ATCCGAATATAAGCGATCTATTTGCGGAATGACACGATGGCAATGGGTGTTGCTCAGGCAAGTCCGAAACCGGAAAA  
ACGGGCAAAAGTGTGGTCTGCTGATGGAATTCGGAAGCCCGCAAAATGGTGGAGCCGGAATAATGACCCGCGAC  
GGTTGCCAGAACCCGGCGGATATCGGTGCAACGGGTCGAAAGCTGATGGTTGACGCTGAGAAATCCGGCAAGGTTATCC  
CGCTGGATAAAGCAGCGAATTTAAACTGGTTCGATTCAATCCTGGTCACTCAATAA

>Cluster\_38868

ATGAGTCTGAATTTCTTGTATTTGAACAGCCGATGACAGAGCTGGAAGCGAAAAATCGATTCTCTGACTGCGGTTAGCCG  
TCAGGATGAGAACTGGATATTAACATCGATGAAGAAGTGCATCGTCTGCGTGA AAAAAGCGTGAAGTACGCGTAAAA  
TCTTCGCGGATCTCGGTGCATGGCAGATTGCGCAACTGGCACGCCATCCACAGCGTCTTATACCCTGGATTACGTTCCG  
CTGGCATTGATGAATTTGACGAACTGGCTGGCGACCGCGCTATGCAGACGATAAAGCTATCGTGGTGGTATCGCCCG  
TCTCGATGGTCTGCGGTGATGATCATTGGTCACTAAAAGGTCGTGAAACCAAGAAAAATTCGCGGTAACCTTTGGTA  
TGGCAGCGCCAGAAGGTTACCGCAAAGCACTGCGTCTGATGCAAAATGGCTGAACGTTTAAAAATGCTATCATCACCTTT  
ATCGACACCCCGGGGCTTATCCGGCGTGGGCGCAGAAAGCGGTCAGTCTGAAGCCATTGCACGCAACCTGCGGTGA  
AATGCTCTGCGCTTAGCGTACCGACTATTTGTACCGTTATCGGTGAAGGTGGTTCGGTGGTGGCTGGCGATTGGCGTGG  
GCGATAAAGTGAATATGCTGCAATACAGCACCTATTCCGTTATCTCGCGGAAGGTTGTCGCTCCATTCTGTGGAAGAC  
GCTGACAAAGCGCGCTGGCGGCTGAAGCGATGGGTATCATCGCTCCGCGCTGAAAGAGCTGAAACTGATCGACTCCAT  
CATCCCGGAACCGCTGGCGGTTGCTCACCGTAACCGGAAGCGATGGCGCGCTCTGAAAGCGCAGCTGCTGGCGGATC  
TGGCCGATCTCGACGTTAAGCACTGAAGATTTAAAAAATCGTCTGTTATCAGCGCTGATGAGCTACGGCTACCGGTAA  
>Cluster\_43022

>Cluster\_43022

ATGATTAAGAAAAATCGGTGTTGACAAGCGCGGTGATGCGCCAGGCATGAACGCCCAATTCGCGGGTGTGTTGTTCT  
TGCGCTGACAGAAGGCTCTGGAAGTAATGGGCATTTATGACGGCTATCTGGGCTGTTATGAAAGCCGATGGTACAGCTAG  
ACCGTTACAGGCTTCTGACATGATCAACCGTGGTGGTACGTTCTCCGCTTCTGCGGCTTCCCGGAAATCCGCGACGAG  
AACATCCGCGCGTGGCTATCGAAAACCTGAAAAAACGTTGGATCGACGCGCTGGTGGTTATCGCGGTTGACGCGCTCCTA  
CATGGGGCAATGCGCTGACCGAAATGGGCTTCCGTCGATCGCCTGCGCGGACCTATTGACAACGACATCAAGGCA  
CTGACTACAGATCGGTTTCTTCACTGCGCTGAGCACCTGTTGTAAGCGATCGACCGCTGCGGTGACACCTCTTCTTCT  
CACCAGCTATTTCCGTTGGTGAAGTATGGGCGTTATGTTGGCGATCTGACGTTGGTGGCGCATTCGCGGTGGCTG

TGAATTCGTGTGGTTCGGAAGTTGAATTCAGCCGTGAAGACCTGGTAAACGAAATCAAAGCGGGTATCGCGAAAGGTA  
AAAAACACCGCATCGTGGCGATTACCGAACATATGTGTGATGTTGACGAACTGGCGCATTTTCATCGAGAAAGAAACCGGC  
CGTGAACCCCGCAACTGTGCTGGGCCACATCCAGCGGGTGGTTCCTCCGGTGCCTTACGACCGTATTCGGCTCCCG  
TATGGGCGCTTACGCTATCGAGCTGCTGCTGGCAGGTTACGGTGGTCTGCTGCTAGGTATCCAGAACGAAACAGCTGGTTC  
ACCAGCATCATCGACGCTATCGAAAAATGAAGCGTCCGTTCAAAGCGGACTGGCTGGACTGCGCGAAAAAAGCTGTAT  
TAA

>Cluster\_30606

ATGAATATTTAATGAGCTCAACTTTCAGATTTACTGATCTCAAAGGATTCATATAATTTCCGTTTTCTAGAAGGGCA  
ACCATATCCAATATGTAATGTGCCGGATAATTATAATGCAGAAGTGCAGGAGATGGTGCAGAAGCTTGAGTGTATCCGGG  
AAGCAAAGGGAAATGAATTTTTTTATCTTCATCTTGGGGTACCTTATCGAGTTGCGGTTGTGCAACAATCAGTGGTTCA  
GGTTTTTTTCTTACGTAACCTGAAACTGCCGGTACCATCACTCGATAGCCTCGGATTTTCCGAACCATTCTGAATACATT  
AAAATGATGGGGAAGAAAGAGGTTGCTTTTAGTTAGTGGAGCTACAGGCTCTGGCAAGTCCACAACAATCTATGCTT  
TGCTGACATATTTAGTTCAGAAAATACGGTGATATGCTATTTCAATTGAAGATCCACCGGAAGTTCCCTGTTACGGGAAAT  
TATGGTGATAATCAGGAAGGCGTCTGGTTTTCAGATGGATGCACGTGAGCTTGGGGATATGAAAATGCAATGATTTACAGC  
GATGCGTTATAATCAAGATATATTTTCTCGGGTGAGATTCTGAGCGCTAAAACAGCGAAAGAGGCCATTCCGGCTGCGAG  
TCAATGGGCATCTGTGATTTCAACAATACACGGAAGCTCTGTTTACGGGGGCTATTTATGCTTACAGCAGATAGCTTTCT  
GCTGAGGGAGAAGCAGATCTTGTTCGACGATCATTTGCTGACGGCTGTTAGGTATAGTTTATCAGGAGTACTGTTTTAC  
AGAAAACGGACAGCGGCTCACTCAGTGCAAAATTTTATGCAACGATGGCTCTGCATCTATTTCTTCAAAAATAAGAAGCG  
GTAAACTGGAGCTTTTGGAGTAGTGAAATGAGCAACAAGTATGTTGAGCCATGGGAAAAACCTGATTAGCTAA

>Cluster\_39535

ATGAGTAAATCACACCCACGCTGGCGCTTAGCAAAAGAAGATCCTCACCTGGCTGTTTTTATCGCGGTGATTGTTGGT  
GGTGGTCTACGCCAAAAAGTGGACTGGGAAGAGGCTGGAAGGTCATCCGCGACTACAATCGCGTTGCGCTGCTTAGTG  
CGGTGGGGTGGTGGTCTGAGTTATCTGATTTACGGTTGCTACGACCTGCTCGCCGTTTCTACTGCGGTCAAAAACCTG  
CGAAGCGCCAGGTGATGATGGTGCAGAAAACCTGGTCTGCTGCTCATGGAATTCGCCCTCGCCAAATGCTGATTTCCAGCG  
TATGCGCTATCGTTTGTACTCCCGGCTAGGGTTACCGGCGAGCACTATTACCGGGATTTTCTCGCTCAGTATTACCACCA  
ACTGGCTGGGCTATATTTTGTGCTGGGATTATCTTTACCGCAGGCGTGGTGGAGCTGCCGGACCCTGGTATGTCGAT  
CAAACACCGCTGGCATTCTCGGCATTGGCTTACTGATGATTTACGCGGTTTATTTGTGGTTTTGCGCTTTCGCGAAGCA  
CCGCCATATGACCATCAAAGGACAAAACTGGTCTGCTGCTCATGGAATTCGCCCTCGCCAAATGCTGATTTCCAGCG  
TTAACTGGATGGTAAATGGGGCGATTATCTGGCTGTTACTTGGTCAAAGCGTGAACATTTCTTTGTACTGGGCGTGTTA  
CTGGTTAGTAGTATGCTGGCGTCACTGTCATATTCCAGCGGAAATGGTGTGCTGGAAGCGGTGTTTATCGCGCTACT  
GGCTGGGGAGCATACTCCAAGGCACAATATCGCCGCTGCTGCTTACCCTGCTGCTGATTTACTTTATCCCACCTGC  
TGTGGCGCTGATCTGTTACTGTTGCTGGAAAGCCAGCGGAAGAAGTACGGCGAAAAATGAAGCGCGGATGTGA

>Cluster\_22680

ATGCTCTGCTTCGTCATTACCATTGCCCGAGGGCAAGAGCGTCTCGCTCAAACAATTTGTCAGTCGCCATATTAATGAGAT  
CGGTTTGTGGTGGTGGTATGCCATTTTATCTGCTTCTCCCTGAAATGCGCCTGGCTTTATCTCATTAATAACCAA  
TGAACCTGGTGGCGCTGCCGCCACCATCGGGATCGCGCTGGGCGATGACGCTGATTTATTAATCTCCGGTAAATTTGAT  
GTCAGCGTTGGGCCGATGGTGGCTTTTGTTCAGTGTGCTGGCGTTTTTGTGCAATTTGACGTTCCGCTGGCGATTGC  
TTGCTGCTGGTGTGCTGTTAGGTGCGCTGATGGGAACGCTGCCGGGGTGTGCGCGGCGTGTTCACGTTGCCAAGTT  
TTGTTGCCACGCTGGGTTTATGGAGCGCCTGCCGGAATGGGGCTGTTTATGACGAACGCTTGGCATTGCCAATTAAC  
GAAAACGAAAGTGTGACTTGGCTGGGCGGACAATTTCTCGGGTGGCGGTATCCGCGCTGATCATGATGGTGTATTTTC  
GCTGTTTGTGTTTATAGCCGAAAACCTGCTTCCGGGCTCGGTTTTTGTGCTGTTGGCGGTAATGCCACTGCAGCGCAGT  
TGTGCGGTATTAACGTTTCGCTGGGTACGCATTTCTATTTTACCCCTTTCCGGGATTTATAGCGCGGTTGACCGGATTTG  
TTGGCGCCCGCTTCGGTTTCGGTAAACGAGGTTGCCGAAACGCTGGAAGTTGAGGTTACGCGGCTGCTGCGGCTGCG  
CGGTACGGCGCTTTCCGGCGGCTCGCGGCTGTTGTTGCGGTACGCTGCTTGGCGTACTGGTGTATACGTAATCGGTAACG  
GTCCTGGTGTGCTCGGTTAATACCTTTTCCAGCAGGTGGTACGCGCGCTCATCATGTTGGTGGCGGCTGCTGGCGAAT  
ATCTTGTGACCCAGCGAAGCAGTAAAGCGAAACGCTAA

>Cluster\_59231

ATGTCCTTACTATTTATGATATTGCCAGGGTTGCAGGCGTATCAAAATCCACCGTATCACGCGTGTGAATAAGCAAAC  
TAATATCTCCCGGAAGCGCGCAAAAAGTGTACGGGCCATTGAAGAATTACAGTATCAGCCAAACAAGCTGGCCCGCG  
CGCTGACCTCTTCGGGTTTTGATGCCATTTATGGTGAATTTTACCCGTTCCGACAAAACACGCGGGTAAATCCGTTTTTC  
TCTGAAGTTTTGATGCCATCACCGCAAAGCTGAAGAAGGTTTCGACGTGATATTAACAACGTCGCACAAATCCGCG  
AGAAGATCTGCAAAAATGCGAAAGCAAATTAAGCAGAAAATGATTAAGGCATTTATGCTCAGTTCCGACGCGGATG  
AGTCATTTTTTGGCCAACTCGATAAATATGATATTCGGTGGTGGTGAATGGCAAGTTGAAGGTCATATGCCCATGTT  
TATCTGTCGATACCCGATAATTTTGGCGACAGCATTTGCTTACCAGTGCATTAATGAAAGTGGGCATCAAAATATTC  
TTCCTGCTGATGCTCGATGTTGATGCTTATGTTTTCGGTTGCTGCTGCTTAAATGTTATAAGCAGAGCTTGGCTCGC  
TTGCAAGTGTGATGAATGGATTGTTGATGGCGGTTATACCATGAAACTGCATTAAGCAGCAGCGCAATTTAATGAGC  
CAGTACCGTTGCTGAGCGGTTGTTGCCACTGACAGCTGAAATTAATGAGCATTTATCTGCGGACGAGAGAAAAA  
TATTTGCTATTCGCGCAGTTAGCGGTGGTGTATAGCAATGAAACGCTGTCATTTATTTAACGCTGACCGGGCG  
GCATCGATGTTCCGACGCAAGGTTAGGTCAACAAGCTGCGAGTTATTTCCGCTTAAATTTCTGGAACCCGTCACCA  
CAGAAATATTACCGTTGCCACGATATGACGCTGAAATAA

>Cluster\_28169

ATGGAGCTGCTCTGCCCTGCCGAAATCTCCGCGCTTAAAGCGGCCATCGAAAACGGCGCAGATGCTGTTTATATCGG  
GCTAAAAGATGATACTAATGCCGCTCACTTCGCGCGCTTAACTTTACCGAGAAAAAATGCAAGGAGCGGTGAGTTTTG  
TCCATCAACATCGCGCAAACTTCAATCGCGATTAACACTTTTGGCGATCCGACGCTTACGCCGTTGGCAGCGCGCC  
GTGGATATGGCGCGCAGCTGGGTGGCGACGCGTGTATCTCGCGACCTCGCCATGCTGGAGTACGCCCGCGAGCGTTA  
CCCGCATATGAAACGCTCAGTATCGGTGCGGCTTCCGCGACCAATGAAGAGCGGATTAACCTTTATCATCTCCGCTTTG  
ACGTTGCACGCGTGGTGTGCGCGCGTGTGTCGATTATCAGGTGAAACAACCTGGCGGGTACGCGCTGTACCCTG  
GAAGTCTTTGCTTTCGGCAGCCTGTGCATATGTCGGAAGGCGTGTGCTATCTGCTGCTGATCTGACAGGTGAGTCCGC  
CAACACCGTGGTGCATGTTCTCCGGCCGTTTTCTGCGCTGGCAGCAAACTCCGAGGGGCTGGAATCTCGCTGTAAC  
AAGTGTGATCGACCTGATCAGGACGGCAAAACGCGGTTATCCGACGCTGTGTAAGGGCGTATCTGCTGCGGACGCG  
GAGCGCTATCACGCGTGGAAAGAACCAACAGTCTCAATACCTGGAACCTGCTGCGGAGTTAATGGCGGCAATATCGC  
TTCCGTTGAAAATGAAAGCGCCAGCGTAGCCCGGCTATGTCAGCCAGGTGGCAAAAGTCTGGCGTCAAGGCTATCGACC  
GTTGTAAGCCGATCCGCAAACTTCGTACCGCAAAGCGGTTGATGGAGACGCTCGGTCGATGTCGAAGGACGCGAG  
ACCACCTTGGCGGATATCACCGTAAATGGCAGTGA

>Cluster\_27357

ATGATACAACCTATTTCCGGCCCTCTCTGGGCAACCACAGGTCAGGGAGATAACCTGCCGCTTGGCGCGGGCAATCA  
GCCTTTATCCAGTCAACAGTACTTCTGTTGAAAGCTTAAATGACGAAAGTGAACCTACTGACGCAACAACAAGAGCAG  
AACTGTGGCGGGTATCAGGCACGATATGGTCTGTCGGGAGATTACCGCTGCTTTCGCGTCACTTCCCTGCCGCTGAG  
CATAATCTGGCGCAAGTCTGCTGGCGCGCAAAAAGCCATTTCGCCCGCAGCTTTTACGCAATTAGGGGAGTATTT

ACGCTCGGGGAATAATCGTCAGGCGGTACGGATTATATCCGTCATAACTTTGGTCAGACGCCGCTGAATCAGCTCTCAC  
CGGAGCAATTAAAAACCATTTCTAACCCCTGTTGCAGGAAGGGAAGATGGTTATTTCCGCAACCGCAGCAGCGGAGGCCAGC  
GACCGTCCGTTATTTACCGCGGAGCACAATGCGCTCAAAACAGCTGGTGACAAACTTGGCGGGCAACGGGAGAACCCAG  
CAAACAGATCTGGCAATCGATGCTGGAACCTTTCCGGGGTGAAGAGTGGCGAGTTAATTTCCAGCGAAACTGTTTTAACCTATC  
TGGTGACCTGGCTGACCGCGCTCAGACGCTAAGCCAGCAAATAACCGCAGCGCTGAATCACATACAGATGACAGTGAAGAA  
CAACCTTTAGATGCCAGTGAACCTGGCGGCTTATCCGCATATATCCAGCAAAAATATGGCCTTTCTGCGCAATCATCGCT  
TTCTTCTGCCAGGCCGAGGATATCTTAAATCAGCTTTATCAACGGCGGGTTAAAGGGATTGATCCCGCTGATATGCAAC  
CGCTGCTTAACTCTTTCCACCGATGATGGACAGCTTGCAAAAATATGGCAACCGCTCCCGCGCTGTTGGATACTGTTAGTC  
CGGATTATCTGATGCTGGTCTGGCTGGTTCGTTAA

>Cluster\_66095

ATGTCCTCAACTCAATGATAGTGACATCATCTTTTGGAGTATAATTTTTCATTATCAAAATATAAGATCTAAAAATACCTCT  
TGATATAGCAATTTGGTATGACAGAAATTTTCTTTTGGATGTGGTGTAGCCATCGCATCTATTTCTATTAACAATAGAG  
AAATCTCTGTGAATTTTCATGTTTTCACAGATTATATCAGTGAATAAGACAAATATATATTTTCTGATTTAGCAAAAACA  
TATAATTCAGAATTAATATTTATGTTATCAATTTGTGATAAGCTGAAGTCAATTAACAAGCAGAAAAACTGGACTTACGC  
AACATATTTTCGATTTATATATGCGAGATTTATTTCTATCAATAACATGAAAAAATACTATATCTTGATGCGAGATATGCTT  
GCAAGGGTAGTATTAAGAATCTTAGATTATCAATTTTCTACTAATGAAATGCGCAGTTGTAGCTGAAAGAGATGTT  
GAATGGTGCAAAAATCGAGCCCTCGGTATTAACCTACACCAAGTGTAGCTTCTGGATATTTCAATGCTGGTTTTTTTACTGAT  
AAATATTGATGAGTGAATCTAAATAACATTTCTGCAAAAGCTATTGAAATGTTGCGTACCCAGATTGGGTAAGTAAAA  
TCACCCACCTTGATCAAGATGTACTGAAATGATTTATGAAATGGTAAAGTGAAGTTTATTTCCGGAGAAATATAATACCCGA  
TATAGTATTAATGAAATTAAGAACAAGTTGATAATCAAGTCAATGATGACACCGTGTATACACTATGTTGGGACC  
TACAAAACCTGGCATGAGTGGGCTGACTATCCGGTGTACAGTATGTTTTTTGATCGCCAAAGCAGCTTCTCCGTTGGGATA  
AAGAAGATTTACTTAAACCTGTAATAGCAATCAGTATCGGTATGTTGCAAAAATAAAATTAACAAAAGCATTATATG  
GCAGGCATTTTAAATTAATTAAGTATTTAAAGAAAATGCTTCTAA

>Cluster\_48837

ATGAGCTGGTTTAGCGATATATATGTTTGGAGGAATCAACTACGCCAGAATCAGGCTAAATTTCTGCATTGATGGTCC  
CCTGCTTCATACAGGGGGCAGTATCCCGTACCTTTCATGCGGGGATACTGACTATGCGGAGTCTGGCTGAATTTACGGA  
AGGCGGTTTGTAGTCTGGAGGTAAGTGGAGGTGAAAGGATAAAGTTAAGTAGTTTGGTGGCGGACGCTTATGAACTTCAT  
CGGTGGCCGGAGGCGAATCGCGCAATAAATCCAGGTTGCCAGTCACTTTAACCTCTGGAAATGCGAACGAGCAGCAGC  
ACCGGAGAAGGGGATCACCACATATCAGTACGATTATACGAGGGTCCCTCATGTGCAATGGCCTGTGCCCGCGCTACGG  
TGTTCGTAACATCTGGTCCCGGTTGGATCGCAGAGGGGGCAGACTCAAACTGTCAACTCAACGCTCTGGCGGACATG  
GACAGAGCCATTTGGCATTGGGGGATCCGGATGCAAAAATGGCTACGCTTCTTCAACCGGATACGGTACTCGCCATCAG  
CAACATATTTGAGCGGATGGATGAGCTTTTCGCGTGTATGGGTGAGGCGAGAATCTCCCGTAGGGGTTTCAATTTGACACGG  
AAGTGACAATTTCCGGGGTATCGAAGGACCAGCGGTTACCCAGGTGCTTTGCTCTGCTTTACCTGTTGCTTATCACTAC  
TCCCCACGAAAGGACTGGGCTCCCTTTGCGACTTTGGTCTCGAGGCTGCTACGAAAGCAGCCCTGCTGGCTGGGTTGCT  
AAATATCAGCACAGGTAACCCAGAGTCTATCTGACTTGGTGGTGGAGGAGCTTTCCGGTAATGATCTCAGCTGGA  
TCGTCCTGCTCTTAGACCGCTCTTAAGCTGGTCACTCATCACTGCTTGGTGGTGGTGAATAATCGTAATGTT  
CCTATAGAGATAGAGTCTGATCCGGAAATTTGGAGTGGTGCAGTGGCTGA

>Cluster\_66873

ATGGCCGATTCAGTCAATCTGCAGACCGATGTGGTCTCAGACAGCATACGGTTCCCGTTTTTTTACTGAAGCATTTCAGTAC  
GCCGGAAAGGTAAGCGTCAAGCTTTTACGCTTTGACAAGGCTGCAGGGCGCCCTATGCCACCAGCCGGATGATG  
CAACCGTCCGCAACAGCTTCTACAACTCGAAAATCACCAGGACGCTGAGTCTTGAACACTGCTGGGATTTACGAG  
CACCACGCGGACCGGTAATTCAGCCCTGCTGGCGCAGGGATATTCGAGGCTGACAGATGACGAACGCTACAGGCT  
GGCCGCTGTTTGGTGGTGCAGCGGCACGAACCTTCGGGCACTGGAGCGTATCTCAGGCATGATTTCCGTTGCTCAGC  
ATAAGATGGAGGCAATCGGCTCGACTAAAGAGCAGGCCCTGGAACCCCTGGGCTGTGCTCGGGGGGATACCAAGGAT  
ATTTTCTCGCGAGCTCGTCCAGCAGATGTCACATATGATCACCCTGTAAGAAAGGACTGGTACCTTCTGGAACCCAG  
GCCAGAAAGTCCGTTTTACGTATCAGACAATCCCGTCTGCTTAAAGAACGCAATGACTTCGGTCCGTACGGTAACTTTG  
GTCTGGCCGTTTCGGGGATACAGATTTTACTCCCTGTCATCGGCTGATGCTGGCCATGATTTGCCCTTCCCTTCCCT  
GAACAGATGATTCGTCAAAAGCAGCATCTTCAAACTGCTTGGCAGAGCGCCGATCTTATCCCCGTCACATTCGGCC  
TTTTGAAAGACTGGAACATATCCGGAGGTATACGACTATCTTTTTCATGCCGTTACCCCGGATCATGTCACGATTA  
ACGCCCTGAGGTTGGAGTTCGGGAGCAGTACGTTCTGCGGTGAAAGGATTTCTCTGTTGAGAGATGCTGGCC  
GATAGTGAACGCTACCCGACGGCCGCTTACGTTTTAG

>Cluster\_64523

ATGTATAATATGAATATAAAAAATAGTGAGATAGATATCGTTGTTTTATGGGTGGACAGTAAAGATGCGAAGTGGAGAAC  
TGAGTTGAACTTTATTCATCGAAATTAATGATGGTGAATAAGGATAAATATTAGATTACAGACTATAACTTGATAAAA  
ATTTGGTTTGGGGATCGAGAAAATTTTGGTGGGCTAGAAAAGTTTCAATTTTGTAAATGACCGGTATATCCCTAATTTG  
TTGAATTTAATAATAAAAGACTTAACTTTGTAAGCATCTGATTTATATACCTTCAGAGTTTTTACCACGTTCAACTC  
GCATGTTATCGAGTTAAATTTACATAGAATAAAAGAAATATCCGAAAATTTTGTATATTTCAACGATGATTTTTTTGTTA  
TAGATCATATATCAGATGAACATTTTTTTCAGTGATATCCCAATGATTGTGCTATTTTTAGTCCAATAGTACAGGT  
GGATATACATATTTCTAATAAAACAATGTTGAGATAATAAACAAGTATATCAATAAATCTAATGTAATCAAAAAAGATTT  
TTGAAAATGGTATTTCCAAAATATGGACTTAAATTTGCTCCGTAATATATGCTCACTCCATGGCCACATTTTGTGGAT  
TTAAAGATACACATTTACAGTTAGTTTTAAAAAAGCACATTTGTTGAATTAAGGAGAAAGAGCCTGAGATAATGGAA  
AAAAACATGTTTTCAAAATTTAGGAGCAATCAAGATGTTAGTCAATATTTAGTCAAGATTTGGCAATTTAGTCAAAAGGT  
TTTTAATCCTAAAAATACATGAAATATGCATCTTATAATGTACTTTCAAACCTAGATTTGATGAAATAAAACAGGTAA  
TTGAGAAAACAAAAAACAAATTTATCATTTAATGATGGCGATGATATGATTTTAAACCATGCAAAAATAGAACTGGAG  
AAATCGTTTGAATTAATTTCTCTGAAAATCATCATTTGAGAATAA

>Cluster\_27672

ATGCGACATAGCGTACTTTTTGCGACAGCGTTTTGCCACGCTTATCTCTACACAACTTTTGGTGGCAGCTGCCGGGCAA  
AGGCATTACTGTTAATCCGGTTCAGAGCACCATCACCGAAGAACTTTCCAGACACTGCTGGTCCAGCCGCGCGCTGGAGA  
AATTAGGTTATACCGTCAATAAACCCAGCGAAGTGGATTACAACGTTGGCTACACCTCACTTGGCTCCGGCGATGCAACC  
TTCCACCGAGTGAACCTGGACCGCCATGACAACTGACAAAGTACGAAAGCTGCCGATGAGGATAAGAAAATTTTATCTGAA  
AGTATTTGTTAACGGCGCGCACAGGTTACTGATCGATAAGAAAATGCGGACAGTATAAAAATTAACAACATCGCGC  
AACTTAAAGATCCGAAGATCGCCAACTGTTGATACCAACGGCGACGGTAAAGCGGATTTAACCGGCTGTAACCCAGGC  
TGGGGCTGCAAGGTGCGATCAACCACGCTTGGCCGATGAGACTGACCAATACCTGACGCATAATCAGGGGAACATA  
CGCAGCGATGTTTTCAAAATTTAGGAGCAATCAAGATGTTAGTCAATATTTAGTCAAGATTTGGCAATTTAGTCAAAAGGT  
TGAGTAACGAACTGAAACCGGGAAAGATGTTGTTGCTGGTTCAGGTTGCGGCTTCCGCACTGCCGGCGATAAAAATGCC  
GATACAACTGCCGAATGGCGCAATACGGCTTCCGGTCACTGACATGATCGTTGCCAAAGCCCTGGGCGCA  
GAAAACCCGCGCAGCGCAAACTGTTTGGCAGTTATGCAAGTACCAGTGGCTGATATTAACCGCCAGAACCCATCATGC  
ATGACGGCAAGCCCTCAGAAAGCATATTCAGGGCCAGTTGATGTTGGATCAAAAGCCACCAGCAGGTTGATGCTG  
TGGTGAATGAGCGCTGGCAGCGCAGAAGTAA



>Cluster\_25452

GTGAATAATATATTGCGGTAACGATGGGTGACCCGGCGGATATTGGCCCGAGATCATTATTAATCCCTGAGCGAAGC  
CGGGCTTGTGTTGCCCGGTTGGTGGTGGGCTGTGTGCGCAGCTGCGACGATATTATGGCGATGAATATCACGCCGC  
AGGCAGAGTTACGGCTCATTCAAAGGTTGCGACGCCCATTTTGGCTCCCGGCGTGAATACCGTATGATGAGCGCCGTCG  
GCTAACCCGAGCCGTCACACCCGGATGGTACAGGCTGCGGAGCGGATTTAGCGTATCGCTGTATAACACATGCAC  
GGCTCTGGCCTTATCAGGCGAGGTGAAAGCCATAGCCACTGCGCCGCTGAATAAAGAAGCGTGCATCTTGGCGGGCATA  
ACTATCCGGGCATACGGAATTGCTGGCCCATCTTACCGGCAGCAAAGAGTACGCGATGGTGCCTTATACCGATAAGCTC  
AAGGTTATCCATATTTCCGACTCAGCTCCTGATACCTTCCGATACCTTGAATGGTGAAGGGTCAAACCGGTTAT  
TCGTGTTGGCAACCTTCCGAAACGTTGGTATTGAGCTCCGCGTATTGCGGTGGCGGGTGAATCCACATGCAC  
GGGAACATGGTTTATTCGGCACTGAGGAAATCGAGATTATCGCGCTGCGATTGAAGCAATGCAGGCTGAAGATATTGAT  
GTTACTGGCCCGTCCCGCCAGATACCGTGTATTGCAATGCCATGAAGGGCTATTCGATATGTTAGTGGCTATGTACCA  
CGATCAGGGGCATATCCCTTTAAACTGCTTGGATTATGATGGGGTGAATATCACCGCCGGGTTGCCATTTATTCGCA  
CTTCTGCCGACCACGGCACCGCTTTGATATTGCTGGACAGGAAAAGCAAGTCTGAGAGCATGGCAGTTTCCATCCAG  
TTAGCAATGCAGATTTCCGCGAGAATAA

>Cluster\_20896

ATGATCGAAAAATCTGGTCTGGTGAATCCCCTTTATGGCGGCTATTGCTGCCACTCTCTGGTTGTATGGCCTGGTGAG  
TGGCGCGATCCGCTTTTGTATATAAACTAAAACCTGAAGCGCCCTGGCGTGCCTCCCGTACCCTGTTGTCGTTGGTAATC  
TCACCGCAGGCGGCAACGGAAAAACCCCGGTCGTTGCTGGCTGGTGGAAACAGCTGCAACAGCGCGGTATTCCGCTGGGG  
GTCGATATCCCGGGATATGGTGGTAAGGCTGAATCTTATCCGCTGTTATTTGTCGGCAGATACCACACAGCACAGGCGGG  
TGATGAACCTGTGTTGATTATCAACAGCCTGGCGCCCTGTTGGCGTTCTCCCGTGGCTTCGACCGGTAAGAACCA  
TTCTGGCGCAACACCTTGTATGTGCAGATCATCGTAACCGACGATGGTTTACAGCATTATCGTCTGGCGCGTGTGGAA  
ATTGTCGTTATTGATGGTGTGCGTGCCTTTGGCAATGGTGGTGGTGGCGGGGGCAATCGGTGAGCGAGCGGGGGC  
CTTAAAGTCGGTTGATGCGGTAATCGTCAACGGCGGTTGCCCGCAGCGGTGAAATCCCATGCATCTGCTGCCGGGTC  
AGCGGGTGAATTTACCGGTACCGGTACCGTGTGACGTTGCTGACGTTGAAACATGTGGTGGCGATGGCAGGGAT  
CCGCGCGCTTTTTTGGCACGCTGAAGATGTGGCGGTACAACCGAAAAATGTGTACCGCTGGCCGATCATCAGTCTTT  
GAATCATGCGGATGTCAGCGCTGGTAAGCGCGGACAAACGCTGGTAAATGACTGAAAAAGATGCGGTGAAATGTGGG  
CCTTTCGAGAAGAAATTTGGTGGTATTTGCTGTAGACGCACAGCTTTTCAAGTGTGAACAGCGAAACTGCTTGGCGAA  
CTAACCTCGCTGGCTTCTGGCCACTAG

>Cluster\_17751

ATGGCTGTAAAGGCTTAACTGCCTGACGCTGGCAGACTGGGGCAAGCGCATCGACCCGAACGGGAAAGTCGATAAGAT  
TATCGAGCTGCTTCCAGACCAACCAATTCTTCTGGACATGATGATCATGGAGAGTAACTCCTCAACAGGTCATAAAA  
CCACTGTACGCACCGGGCTTCCAGATGGCAGCTGGCGCTTCTGAACTATGGCGTACCACAGCAAAAGTACCCTGCT  
CAGGTGACTGATACCATGGGTATGCTGGAAACCTATGCCGAAATCGATAAGTCTCTGGCCGACCTGAACGGTAACCCGC  
TGAATTCGCGCTGCTGAAGACCGGGCATCTCTGAGGGGATGAACAGAAAGATGGCTCAGACCTGTTCTATGGTGATA  
CCAGCGTTAACCCACAGCAGTTTATGGGGCTGGCGTCTCGTTATTTCCAGCAAAATCAGCAGGTAACGGTCAGAACATTA  
GCGCTGGCGGCACTGGCACCGGATAAACCTTCTATCTGCGCTGGTGTGGTGGGGTGAAAAACACCTTCCAGGGCATTTCC  
TAAAGGACAGAAAGCTGGTCTGCAATGCAAGATCTCGGTGAGCAGACTCTGCGTGTATGCTGCTGGTGGTCAATATCAGG  
GCTATCGCACTATTATAAATGGGATAACCGGCTGACTCTTCTGACTGGCGCTATGTAGTACGATATCCGCAACATCGAT  
GTAAGCGATCTGCTGTCTTCCCTGCTGCTGCAAAACATCGTCAACGAGATGGTAAAGCGCTGCACCGGTTCTTCACT  
GAAGATGGGCGCTGGCGCTTTTACATGAACCGTACCGTTTGGCCAGGCTCTCGACCTGCAATCTCTGGATAAAGCTTCTC  
TGGCTCTGTCGCTCAAAGAGACAGAAAGCGAATGGTGGACCATTCTCGTGGCATTCTATCCGTGAAACCGATGCGATT  
CTGGAACAGAAAGCGCGGATTTGTTAA

>Cluster\_42640

ATGAAATACGTTCTGTAACTACGCTTTATTAATTTGCGGAGTGGCGACGTTTCAGCACATCTTCTCTGGCGGCACAATC  
ATTACGTTTCCGGTATGAAACCTCACAAACCGATTACAAACATATTGCGGGCAAAAAATTTAAATGAATTAAGTCAAGAAA  
AAACCAAAGGCGAACTGAAATTAACCTGTTCCCGGATAGCACCTTGGTAATGCGCAGGCGATGATCAGCGCGGTGCGT  
GGCGGCACTATTGATATGGAGATGTGAGCTCTAACAACTTACCGGACTCTGCGCCGTCATCAACCTGCTCGATGCTCC  
GTTCTGTTCCGCGATACCGCTCAGCGCATAAAACGCTCGACGGCAAAAGTGGTGTGACCTGAAAGTCTCCCTGAAAG  
GTAAGGGGCTGAAAGTACTGGCTACTGGGAAAACGGCTGGCGCGATGTCACCAACTCAGCGTGCACCGGTCAAACCGCT  
GCCGACCTGAAAGGGTTGAAATCCGCAACCAACAGCCCGATGAATATCGCTGCATTTAAAGTTTTTGGCGCTAACCC  
GATCCCGATGCGCTTTTCCGGAAGTCTATACCGGGCTGGAAACCCGCACTATCGACGCTCAGGAACACCCGATCAACGTCG  
TCTGGTCAGCAAAATTTTATGAAGTGCAGAAGTACCTTTCCCTGACCCATCACGCCTATTTCCCGCTTCTGGTGGTGATC  
AACAAAGCGAAGTTTGTATGGCTTAAACGCTGAGTTCACGACGCACTGATCTCATCTGCGCAGGAAGCGGGTACGATCA  
CGCAAACTGGTCCGCAAGATCAGCAAAAATCATCGACGCTATGAAAGAAGCGGGCTGGAAGTCAACCCGATCTCG  
ACCGCAAAGCCTTTAGCGATGCGCTGGTACCAGGCTGACATGTTTGTAAAGATGTTCCCGAGGGTGGTGTATGCTG  
CTGAAAGCGGTGATGAGGTGCAATAA

>Cluster\_40182

ATGCCATTACTCGATATTCTGTAACCTGACCATTGAATTTAAACCGGATGATGAGTGGGTTAAAGCGCTCGACCGGTAAG  
TATGACCTTAACCGAAGGTGAAATCCCGGCTTGTGGCGAAATCCGGTTCGCGCAAAAGTTTATTGATGCTAAAGCGATTT  
GTGGGGTGAATAAAGATAACTGGCGTGTACTGCTGACGATGCGTTTGTATGATATCGATTGCTGCGTCTCTCCGCA  
CGCGAACGGCGCAAGCTGGTGGTGCACAACGTTGCTGATTTTTCCAGGAACCGCAGTCTGTCTTGACCTTTCAGAAGC  
TGTGGGTCGCGAGTTGATGCAAAACATCCCTGCTGGACCTATAAAGGCGGTTGGTGGCAGCGTTTGGCTGGCGCAAC  
GCCGTGCCATTGAACTGCTGCACCGGCTGGGGATTAAGATCACAAGATGCGATGCGCAGTTTTCCTATGAGTTGACC  
GAAGGTGAATGTCAGAAAGTGTATGATAGCCATTGCACTGGCGAATCAACCGCTGCTGTAATGCTGACGAACCGACCAA  
CTCAATGGGAGCAACAACCCAGGCGCAATCTTTCCGCTGCTGACGCGTCTCAACCAAAAACAGCAATACCACATTTTGT  
TTATCAGCCATGACTTACAATGCTTAGCAATGGGCGGATAAAAATTAACGTGCTTTACTGCGGTCAAACCGTGGAAACC  
CGCGGAGTAAGGAGTTGGTGCAGATGCCACACCATCTTATACCCAGGCGTGTATCCGCGGATACCAGACTTGGCGAG  
CGCGATGCCGCATAAAGTCCGCTCAATACGCTGCCCGCGCTATCCGCTGCTGGAACAGTTACCAGATTGGTGTGCTG  
TGGGGCACGTTGCCGATGCAACAACGAGAATGCATTTGACGCCACGTTTACGGGGGGCAAAAATCATCTCTATGCC  
TGTCAATTTCCCACTGAACATGGAGAAAGATGA

>Cluster\_40262

ATGCAGAGCGATAAAGTGTCAATTTGCCGGCAGGCTACTTTGGTATTGTTGGGGACGATAGGGATGGGATTTGCCCTG  
CGCTATGCCAGCAGGTTTGGCAGGTCAGCACTGGTGGTGGTGGTGGTGGTGGTGGTGGTGGTGGTGGTGGTGGTGGT  
TATTGACTGGCGCATTTTATTTACCGACTCAGACTGCTTTCCGCTAGCGTGTGGCAGAAAGTGGCCATCCAGTCTGAGC  
AGTTTTGTGAGTTTGTTCGGCAACGACGATGCTGGTGGCGATGGTGGTGGTGGTGGTGGTGGTGGTGGTGGTGGTGGT  
CCTGTTCACTTTGGTGTCTGGTTCAGTTGGCTTATGCCCGCTGGCAAACTGCGGGATTTATGGCGCGGATCTCACCTC  
AAGAACTTACCAGCTGACTGTATCTGCCGACAGTTGCCCAACACTTTATCAGCGCAATGGCGTGGTGGTGGTGGTGGT  
TACACCGACGCGGCTGCTGGTGGTGGTGGTGGTGGTGGTGGTGGTGGTGGTGGTGGTGGTGGTGGTGGTGGTGGTGGT  
GCGCAGTTCCGGGAGAAATACCACGGCACTGCGGACATCACTGGCATTCAGTCTGCTCTGCGCTGGTGGCTGTAGTG

CCTGGCTGAGCGTCAACGGCGGGGAGGGTGACACGCTGGCGAAAATGCTTTTCGGTTATGGACTGCTGCAACTGCTGTTT  
ATGCTACGCTGATGCCATGGTATCTCTCCAGCCATTAAATGCTTCATTCTGGAGTTTCTCGTTCCGGTGTATCTGCACT  
GGCAACCACCGGTTTGCATCTGGGGAGTGGCAGCGATAATGGATTTTTCCATACGCTGGCGGTGCCGTGTTTATCTTTA  
CCAATTTTTATTATGCAATACTGCTCATCCGTACTTTTTCGGCTTCTGATGCAGGGAAAATGTTAGTCAAGACCGAGCGC  
GCCGTTTTAATGAAAGCAGAGGACAAAGAAATGA

>Cluster\_55489

ATGCACAAATTTACTAAAGCCCTGGCAGCCATTGGTCTGGCAGCGTTATGTCACAATCCGCTATGGCGGAGAACCTGAA  
GCTCGGTTTTCTGGTGAAGCAACCGGAAGAGCCGTTGGTCCAGACCGAATGGAAGTTTCCCGATAAAGCCGGGAAGGATT  
TAGGTTTTGAGGTTATTAAGATTGCCGTGCCGGATGGCGAAAACATFGAACCGGATCGACAGCCTGGCTGCCAGTGGC  
GCAAAAGGTTTCGTTATTTGTACTCCGGACCCAAACTCGGCTCTGCCATCGTCGCGAAAAGCGGTGGCTACGATATGAA  
AGTCAATTGCCGTGGATGACCAGTTTGTAAACGCCAAAGGTAAGCAATGGATACCGTTCCGCTGGTGTATGGCGGCGA  
CTAAAATTTGGCGAACGTCAGGGCCAGGAACGTATAAAGAGATGCAGAAAACGTTGGTGGGATGCAAGAAAGCGCGGTTG  
ATGGCGATTACCGCAACGAACCTGGATACCGCCCGCGCTACTACGGGATCTATGGATGCGCTGAAAGCGCGGATTT  
CCCGGAAAAACAAATTTATCAGGTACCTACCAATCTAACGACATCCCGGGGCAATTTGACGCTGCCAATCAATGCTGG  
TTCAACATCCGGAAGTTAAACATTTGGCTGATCGTCGGTATGAACGACAGCACCCTGCTGGCGCGCTACGCGCGACGGAA  
GGTCAGGGCTTTAAAGCGGCCGATATCATCGGCATTTGGCATTAACGGTGTGGATGCGGTGAGCGAACTGTCTAAAGCACA  
GGCAACCGGCTTCTACGTTCCCTGCTGCCAACCCGCGACTACATGGCTATAAATCCAGCAAAATGCTTTGCCAGTGGG  
TAGCAAAAGACGTTGAACCGCAAAATTTACCGAAGTTACCGACTGGTACTGATCACGCGTGACAACTTAAAGAGAA  
CTGGAGAAAAAAGTTTTAGGCGGTAAGTAA

>Cluster\_65764

ATGCAGGGTTCTGTGACAGAGTTTCTAAAACCGCGCTGGTTGATATCAGCAAGTGAGTTCGACGCACGCCAAGGTGAC  
CCTTGAGCCTTTAGAGCTGGCTTTGGCCATACCTGGGTAACGCACTGCGCCGATTTCTGCTCTCATCGATGCCGGGTT  
GCGCGGTGACCCGAGTTGAGATTGATGGTGTACTACATGAGTACAGCACCAGAAAGGCGTTCCAGGAAGATATCTGGAA  
ATCTGCTCAACCTGAAAGGGCTGGCGGTGAGAGTTTCCAGGCAAGATGAAGTTATTTCTACCTGAAATAATCTGCCAT  
TGGCCCTGTGACTGCAGCCGATATCACCCACGACGGTGTGTCGAAATCGTCAAGCCGACGACGTTGATCTGCCACCTGA  
CCGATGAGAACCGCTTATTAGCATGCGTATCAAAGTTTCCAGCGGGTCTGGTTATGTGCCGGCTTCTACCCGAAATTCAT  
TCGGAAGAAGATGAGCGCCCAATCGGCCGCTGCTGGTTCGACGCGATGCTACAGCCCTGTTGGAGCGTATGCTTACAATGT  
TGAACGCGCGCTGTAGAACAGCGCTAACGACCTGGACAAGTGGTTCATCGAAATGGAACCAACCGCCACAATCGATCCTG  
AAGAGGCGATTCTGCTGCGGCAACCATTTCTGGCTGAACAACCTGGAAGCTTTCTGTTGACTTACGTGATGTACGTCAGCCT  
GAAGTGAAGAAGAGAAACAGAGTTTCGATCCGATCCTGCTGCCCTGTTGACGATCTGGAATTGACTGTCCGCTCTGC  
TAACTGCCTTAAAGCAGAAGCTATCCATATATCGGTGATCTGGTACAGCGTACCGAGGTTGAGCTCCTTAAACCGCCTA  
ACCTGGTAAAAAATCTCTTACTGAGATTAAAGACGCTGCTGGCTTCCCGTGGACTGCTCTGGGCATGCGCCTGGAAAAAC  
TGGCCACCGCAAGCATCGCTGACGAGTAA

>Cluster\_21740

ATGAAAATTAACATCCGTTGCTGGCGTGGCGATTGGCGGTTTTGGTATCGGGACAACGGAGTTCTCGCAATGGGCTT  
GTTGCCCGTCAATTCCGCGCGGTGTTGGATGCTCGATTCCCGCTGCCGGAATGTTAATCAGTGTATGCAAGTTGGCGTAA  
TGGTTGGCGCGCCGCTGATGACGCTTCTACTTTCTCATCGTCCCGCCGAGTGGCTGATTTTTCTGATGGCGATTTTTC  
ACGCTTGGCAACGTTACTTTCCGCGCATCGCGCGGATTTATGACCCTGATGCTTTTACGCATTTTTCAGCAGCTGAATCA  
CGGGGCAATTTTTGGTTTGGGTTTCACTGCTGGCGCAAGCGTGTGCCAAAACATAAACAGGCTAGCGAGTTGCCACTA  
TGTTTATGGGTTAAACCTGGCAAAATATCGGTGGCGTGGCGGCGGCACTGGTTGGGCGAAACCATCGGCTGGCGGATG  
TCATTTCTGGCAACAGCGGGGCTGGCGGTGATTTCATGGTAAAGTCTGTTCTTCTCATACCTAAAGGTGGCGAGGGGC  
GCGACCTGAAGTGAAGAAAGAGCTGGCGGTTTAAATGCGTCCGCAAGTGTCTGCTGCAATGCTGACGCGGTTACTGGGCG  
CTGGTGCATGCTTACCCCTTACACCTATATCTCTCGGTAACGACTGCAAAAGCATTACCCAGTAAACGCGGTTCTGCTCAG  
GCAATGCTGGTGTGATTGGTGTGCGATTTTCTATCGGTAACCTATCTCGCGGCAAACTGGCAGATCGTTTCACTAACCG  
CACGTTGAAAGGCTTTTTGTTGTTGCTGATGGTGTATGCTGGAATCCCGTTCCGTCGCGCAATGAGTTCCGCGCAG  
CTATTAGCATGGTAGTGTGGGAGCTGCAACCTTTGCGGCTGTTACCGCGTTACAGATGCGCGTGTGCGTGTGCGCAGT  
GAAGCCCGAGGCTGCTTCTCATAGTCAATATTTGGTGCCTTTAATCTTGGAAATGCGCTGGGAGCAGCTGCTGGTGGTGC  
GGTAAATTTCCGCTGGGCTGGGATACAGTTTGTGCGGTTGATGGGGCGATTGTCGCGGGACTGGCATATTGCTGGTGT  
TTATGTCAGTCAGAAAACAACTGAAACAGTTTTCGCTTCCCAACAGCTAA

>Cluster\_2079

ATGAGCACACATGAAATAGCTAGCACACAAGCACAAGGCAACTCGTATCAACAGATTTCATCGATTGAGCAATTTTT  
GGAGTCGCTTGGATTACCAAAAGAAAATGTTCTTGTCTCAACGATGGAGCGTCAAGTTGTTCCAAAACAACTTTCTCAGT  
TTGTGATGGCGTTACCAGAAAGACGTTAAGCGTGAATCTAGATATTTGTTCCAAATTTGCAAGCAGCAAGTCTATTGGTTG  
TTTGTGATGCTTGAATTAATGCTGGAACGAAGTTGTACTTAACTTACGAAGAAAGCAGTTATTTATGGTTTGGAACT  
TTTTTTTTGATGCTTACCCCTTACACCTATATCTCTCGGTAACATAGAGATCTTATTTAGTACTGAAAGTGAATTAAGT  
TTCTTCTTGATAATGCGCTAAATAGAAATGATCTCCGACTCAATTTATAAAAAACTCACCAATATTTAATATGCGC  
AATGATCTTGGTGCCAGTCACTTAATGATGCGAAAATCAATGCTTATGAACCTGATGGGTTGGTGAACAATGTTTCA  
AGAAGTTATCAATGACACCTTACAGAGCTGCACTGCAAGTTAAGGCTTTTGTGAGAACTGCGAAATCAACTGAAAG  
TCATCAGTAGCTGATTTTTCAGCATATGAAAAATGGGCTCAACAGCTACACACAAGAAATTTGATAAATGCTTCTCAG  
ACAATCTCGGATATGATATTGGTGTGCTGGTGAATAAATCACTTAAAGAAAATATATCTGAAATGCTCCAAAGTTTGG  
GGAATGTCAGATAATAATATAAATAAATAAAGTTGTTGCGCTGATGGTTATCGAACCAACTGCACAATGATAAAT  
TTTTAGCAGGTAACGAGTTTTTCGAATTTGCTGCTGGTAAATAAATTTAAACCCCTTGGGCTAGGTTTATCTGCTTGT  
GAATATCTGGATGATTTAAGTTCTGCTCACAGCGGTTGGGATAATTTCTATAATGAAGTTCTCATGCTAGGAAAATATT  
AAGTTACATTTCCAAATGAATCGGATATTCTTAATGAACGTAAGAAAATTAATTCGATAAATCTATCGTGTGCTGATG  
GTAATGGTGTTTCTTATAACACTGGTGTCTCTCTTTAGGCAAAACCATATACGATTCATATTAATGAAATGCTGGGCGAT  
GATAAATCGTTCAAGTTTATCATGCACTCATATAATCAAGAGATTACCACTTATATCTAACAAAACTGTAGGAAAGCA  
TGCTGTGCAAAATCTAACGGATAAAGAATAATGTTGTTAGTATAAGCTCAAGCAAACTTATAGATTATCTGATGTTAA  
ATGGTGATACTTTGGAAAAAATATGAAAAACACTGAAATTTAAAGCTCTAGCATCAAGTCATATAAATTTAGTTAA

>Cluster\_21830

ATGACCCGTCTTTTATTACCCGCTGGCGGATGAATGCCAGAAACCTATACAGCACTTTCCCTACGCCTTTAAATAA  
TGCCCGGCTGATTTGGCATAATACCGAATGGCTAACAGCTGAGTATCCATCGTCTGTTTAAAAATGGCGCAGGTG  
TCTGGGGCGCGAAAACCTACTGCTGGTATGTCACCCTTGGCAGGTTTACAGTGGTCAATGTTTGGCGTCTGGGCG  
GGCCAACTGGGTGATGGCGCGGCAATTTACTCGGCGAACACTGCTTGTGATGGCACTACAATGGATGGCATCTGAA  
AGGTGCTGCGCTGACGCTTATTTCCGCAATGGGGATGACAGCGGTTTTTACGTTCCAGCATACGAGAAAGTCTGCCA  
GTGAGGCGATGCATATCTGGGCATTTCCGACACCCGCGCTTTAAGTATCGTACCAGCGATTCCGCACTGTATCGGGAA  
ACGCTGGAGTCAAGCGCGATGCTGATGCTGTGGCACCAGTCACTGCGCTTTGGTCAATTTCTGAACATTTTTACTATCG  
CCGCGACCGGAAAAGTTTCGTCAGTTAGCTGACTTTGGCATTCTGCTTACTGCTGCTGCTGCTGCTGCTGCTGCTGCT  
AATACCGTCTCTGGTTTACCGATGTTGTCGCACTTACCCTCGTTAATTTGCCAATGGCAGACGGTCCGCTTTGCTCAT  
GGAGTGTGAAATACCGACAACATGTCGCTGCTGGGCTGACGCTTGATTACGGCCGTTTGGTTTTCTTGTGATGATTACGA

ACCCGGTTTTATTTGTAATCACTCGGATCACCAAGGGCGTTACAGCTTTGATAATCAACCTGCCGTCCGGTTGTGGAATT  
TACAGCGTCTGGCCAGACATTTGTCGCCATTTGTCGCCGTTGATGCCCTGAATGAGGCCCTGGACAGCTATCAGCAGGTT  
TTGTTGACGCATTTATGGACAACGGATGCGGCAGAACTGGGCTTCATGACGGAGCAAAAAGAGGATAACGCGCTACTGAA  
TGAATTTATCAGTCTGATGGCGCAGAGCGCAGGATTAACCCGCACATTCGCCATGCTGAGTCTGACCGGAGCAGTACA  
GCGCGCGTACCCTGATGAGTTTATCGATCGTGGCGCATTTGATGACTGGTTTGCCTTTATCCGGTACGTTTGG  
CAACAAGACGAGGTTACCGATAGTGAGCGTACGAGCTGATGCAAGCGTTAACCCAGCTCTGGTGTTCGCAACTGGTT  
GGCGCAACGGCGATTGAAGCGGCAGAAAAGGGTGATATGACGGAATTCACCCTGATGAGGCGTTGCGAAATCCTT  
TCAGCGACAGAGATGATGACTACGTCAGTCCACTGACTGGGTAACCGGCTGGAAGTACAGTGCAGTAA

>Cluster\_41697

ATGGCCAGTATCAACACCATTGTGAAACGCAAGCAGTACCTGTGGCTGGGGATTGTGGTTGTCCGTACAGCTCCGGCAT  
TGGTGGGGCACTGTATCTGTCTGATGTGGACATGTCGGTAACGGTGAACCGTGGCTGAACAGGAGCCTGTGCCGGATA  
TGACCGGTGTGGTGGATACGACCTTTGATGACAAGGTGCGTCAGCATGCCACCACCGAGATGCAGGTGACGGCAGCGCAG  
ATGCAAGACGAGTATGAGGAAATCCGTCTGAGCTGGATGTTCTGAACAAACAGCGCGGTGATGACCAGCTGCTATTGA  
AAAACCTGGGACAGGACAATGCCGCCCTGGCAGAGCAGGTAAGCCCTGGGTGCTAATCTGTACCAGCGACCGGTGAGC  
CAGTACCGCAGACGCCAGCCTCACCGCCCGCCGGAAGGCGAACACAGCCAGGAAACACACCGGTATCTTTCCCGCCG  
CAGGGCAGCGTCTGCTTCCACCGCCGACCGCGTTTTATCCCGGAATGGTGTACGCCACCACCGAGTACGCTACCA  
GTCGTGACCGGTGCCATAACCGGATACAGCGTAAAGGTGTTCAACCGTAATGAGGGAAACAGGGACCATCACTGCCGTACA  
TTCCGTACAGGAGTTTTCGAAAGCCATGCTGATGAAGGAGCGGATGCCAATGCCTCAGTACCAGGTAATGAATCCAG  
GTGCCGATGACAGTCCGATACACCGTCTGGTGGAAATGCCGAACAGCAAAACGATGACGCAACGGGATGTTTTGTGG  
TCTGGAAGCCTGGGGGATGTGTCCAGTGAACGTGCCATGTACGCCACCGCAATATCAGTGCCTGAAGGACGGCAAAA  
CTATTGATATGCCGATTAAGGGGATGTCAGCTTCCGGGGTAAACCGTATCAAGGGCGAAGTGGTGTGCGTAACGGC  
AAAATCCTCGGCTGGCATGGGGCGCGGATTTGTTGACGGTATCGGTACGGGATGGAGCGTCTCCAGCGCGCTGT  
CGGGCTGGGTGCCACTGTGCTTACGGGGCCGGCGATGTCCTGAAATGGGTAACGGTGGCGGCGCATCGAAAGCCGCAC  
AGACGCTCAGTGACTACTACATCAACCGTGCAGACGATACCCCGGTGATACCGGATGGTGGCGGCAACGAGTACG  
GTGGTGTTCAGGACGGCTTCCAGCTGAAAACCGTGAAGAGATGGCGCTGGAGCGCACGAGAACAGAGCGGAAGA  
TAATCCGGAAAGTCCGGTTCCTGTTCCGCCATCAGCTGAAAGTCACTTAACGGCTTTAATACGACCAGCTGCTGAAG  
AGCTGGGCAACCTGAATCCGAGCAGTTTATGTCCGGCAGCCAGGGAGGGGGCAACGATGGCAATAA

>Cluster\_24302

ATGACAAGGATAAAAAATAAACGCACGCCGATCTTACGCTTATTGATTCCTTTTTTCTTTTTCTACTTCTGTTACGCTGA  
ACAAACGGCTGCTCCCGCAACACCTGTAACGTGGAAGCGAAGAAATGAAACCTTTGCCCGCAGCATCCCGATCAATATC  
TCTCTGGAAAGTCACTCGGAACAGTACAGCGGTGTGACGCCCTGGCGGAAGATCCACGGCTGGTGTATCTGTGGGCA  
GGTATCCCTTCTCGCGGATTAACAACAAGCCGGTGGACATGCCCTTCTGCTGTACCGATGTGCGTGAACCCATGCTGAC  
CGGTGGCGGAAAAACGCTGAAGATGGTCCGCTACCGATGGCGTGTGGAGTTGTAAGCCCGGATGTGGCTCGTCTGA  
TCCAGAAAGACGGCGAAGATGGCTACTTCCACGGAAAAATGGGCGCGCGCGCCGGAAATCGTCAACAACTTAGGTTGT  
GCCGATGGCATAAACCGCTCACAGAGTTCGCAAAAGGCAAAACCGGATTAACCTTTCCCGTCCGATACCGGCTCG  
CGGATGGAAAGCATTGGTAAACCTTTTCGAGAAAGCCGACGTTTCGACCAGCAATCGATGGTTTGGCGTCACTGTT  
TGGAGTATTACTTTCGACGGCAAAAAACAAGCGGTTAAATTCCTGGGATGACGGCATGAAAGTCGAAAAATATGGAGCAG  
TATTACGACAAAAATTGCTTCTCTGACTGGACTAATCCTCTGCGAAAACGCCAATGCTGAAAGCGCAGCACCAGGAA  
TGAACCTGGACAGCGGGCATTCACGGCAAAAAACAGCTGACCTGTATCGATGTCATATGCCAAAAGTGCAGACGCGC  
AAGGCAAACTCTACACCGACCAATAAAATGGTAACTCGTTTGAATAACTTCCGCCAGACTTGTGCGCAACTGCCATACCCAG  
GACAAAGCTGCCCTGCAAAAAGTGGTCCGGAAAGTAAAGCAGTGCATTAACGACTGAAATTAAGGTTGAAGATCAACT  
GGTTCAGCTCACTTGAAGCGAAAGCGGCGTGGATGACAGCGCAACGGAAAGCCGAAATGAAGCCGATTCAGGACGATA  
TCCGTCACTGCCAGTGGCGTTGGATTTGGCGATCGCTTCCACGGCATTCATATGCACGACCGGAAAGAGGTTGAGG  
ATGCTCGGTACGGCGATGGATAAAGCGGCGATGCACGACCAAACTGGCGCGCTGCTGGCGACAAAGGCATAACCCA  
TGAAATCCAGATCCCGGATATCTCGACCAAGAGAAAGCCAGCAGGCATTGGCCTGAACATGGAGCAAAATCAAGGCCG  
AGAAGCAGGACTTCATCAAAACGGTATCCCGCAGTGGGAAGAGCAGGCACGTAACAAACGGTCTGTTAAGCCAATAA

>Cluster\_7833

ATGTGCAATGCTAATATCGCACCAAAAGTAAGAAAATGACAGTGGGGACACTCGCTATCATGAATATAACTGCTGTAGT  
AAGTCTACGATTTTATACCTTCTGAGCAGAATACGGCTTAGGTGCCATTTTTTACTATACCTTTGCTGCAATTTATGTTTT  
TAGTACCTGTGCTTTGTTGCGGCTGAGCTAGCTACAACATACCACAAAAAGGGGGGGCATTTGATGGATAGGAGAA  
GCATTTGGGGCTCCCTGGGGTTTTGTAGGAATGCTTATGACCTGGCTACAAGTCAATCCCTACTTTCCACAGTATGAC  
ATTTGGTGCAGTCTCGGTTGCATTTATTTGATGTTGATAAGGGGTTGGCAGAAATCAATGCCAGTAATAAATGGTATATTT  
TATTTTTCTACTATTTGTTTACGAGGAGCTATTTGTGTTGCTTACGTTGCGGTTGGTATTTTCTCGAGGATCTAAG  
TGGTGGGTTATTAAGGACAATTAATCCAGCTATTAATCTTGTATTTCTTGGTTCTCTATCTGTGGTTCCAGCGGTA  
ACCAGCGGTGATCCATAGGTTGGGTTGGGTTGGGTTGGGTTGGGTTGGGTTGGGTTGGGTTGGGTTGGGTTGGGTTGGG  
TATTTCTTGCTTATGACGGGATGAAATGAATGCGGTCATGTTAACGATTTAGATAAATCAACTAAAAAATACCAAT  
GCAATTAACCATCGCTTCTATAGGTAATTTGCAATATTTCTGCTCAGTACTTTAGGGGTCGCCTTTATTTATCTTACAGA  
TAAAATAGTCTAACTCAAAGTTTGTGGTTGCTACGATATGCTGTTGCAATGGCTGGAGTGCATGGCTGGCTGGCTG  
TGATGGCATTTATGCTAGCAATTTGGCGTACTGGGTGGGTTGTTACTTGGATTGCAAGGCTAATACAGGTTGATAGCG  
ATCGGAAAGCTGGTTATTTACCTAAGTTTTCAAAAACCAATCGTATGGAATGGGGCACCATCTGATGTTTGTACA  
AGGTATAATGCTCAGTCTTTCTGTTACTTTTGTGATAATGCCCTCAGTTCAGCAGCTTTTCAGATTTTATCACAGT  
TAACAGTTATGCTCTATTTAGTTATGATATGCTCATGTTGCTGGTGTATCTATCTACGACATTTCAACCTGATAAA  
AAACGCCCATATCGAGCCCTGCTTTATCTTCTGGGCAACACTGGATTCTTAGGGTCTTTTCTGGCTTTTGTATTAAG  
TTTTATTCGCGCCGAGCAATCCCAACTGGTAGTCCAACAGCTATGTTCTTTATTTGTTAGTATAGTTGCCCTATTTT  
TATTAATTCGAATATTAATTTACGCTTCCGAAAACTGACTGGAAAGATCAAACTCTGATTTGCAACCATTTTCTTGG  
GAAAAAGAACTAGTAATTA

>Cluster\_25957

ATGAAAAAATTACGTCATTTTTTTCCCGCTCCTGCTGCGGGTACGTTTTCTGTTAGCAACGGCAGCAGTAGTATTGGT  
GCTTTCGCTTGCTACGGAATGGTTGCGCTGATCGGTTATAGCGTCAGTTTCGATAAAACCAGTTTCCGGCTGTATACGTC  
CGGAGCAATCTGTTCTATACCTTCCGAAAGTGGAAAAAATAAGTTGTCATGTCGAGTTACCCGAAAAATCGACAAG  
CAAAGCCCAAGTACACTAATTTATGATGAGAACGGGACGTTTTATGGGCGCACGTCAGCTGCCCTGGCTGATGAA  
GATGATCCAGCTGACTGGCTGAAATCGAATGGTTTTCTATGAAATGAAGCGGATGTTAACGATACACGCTCTTGTCTGA  
GTGGAGATCATTCGATACAGCAACAGTTGCAAGAGTGGCGGAAAGATGATGACGACCGGAGATGACCCACTCCGGTGGCG  
GTAACAGCTTACCCGGCAACATCGCGGATGCGAAAGTTAACCATTTGTGGTGGTGGATACCATTTCCGGTGGAGTAAAAAG  
TTCTATATGGTCTGGAGCTGGTTTATCTATGTGCTCTCAGCCAACTGCTGTTAGTGTATCCGCTGCTGTGGGTCGCCG  
CTTGGTGGAGTTTACGCCCATGCAAGCCCTGGCAAAAGAACTCCGCAACTGGAAGAACATAACCGTGAATGCTCAAT  
CCAGCTAACCGGAGAACTGACAGCTGTTGTTACGAACTGAAACGACTGTTAAAAAGTGAACGCGAACGTTACGACAA  
ATATCGTACGACGCTACCGACCTGACCCATAGTCTGAAAACACCACTGGCGGTGCTGCAAGTACGCTGCGTTCTCTGC  
GTAGTGAAGATGAGCGTCACTGATGCTGAGCGGTAATGCTGGAGCAATCAGCCGATTTACAGCAATTTGGCTAC

TACCTGCATCGTGCCAGTATGCGCGGGGGACATTTGCTTAGCCGCGAGCTGCATCCGGTCGCCCCACTGTTGGACAATCT  
CACCTCGGCGCTGAACAAAGTGTATCAACGCAAAAGGGTCAATATCTCTCTCGATATCTCGCCAGAAATCAGCTTTGTTG  
GTGAGCAGAAATGATTTTGTGCAAGTGTATGGGCAACGTGCTGGATAACGCTGTAAATATGCTCGAGTTTGTGCAAAAT  
TCTGCAAGGCAAAACCGACGAGCATCTCTATATTTGTTGGTGGAGGATGATGGCCCCGGTATTCATTAAGCAAGGAGAGGT  
CATTTTGTGACCGTGGTCAACGGGTTGATACTTTACGCCCTGGGCAAGGTGTGGGGCTGGCCGTGACCCAGGATTCAAAA  
AGCAATATGAGGGTAAAAATCGTCGCGGGAGAGAGCATGCTGGGCGGTGCGCGGATGGAGGTGATTTTTTGGTCCGAGCAT  
TCTGCGCCGAAAGATGAATAA

>Cluster\_40634

ATGCTCGTGGCCCAACACACCGTTTATTTCGCGAGCCTTTCTGACACAAATGCGCGAAGCGATGCCTTCGACGCTCTC  
TTTTGATGATTTTTCTTGGCCCTGTGACGCGCCGTTGCGCCGAGCATTCGCGTTAATACGCTGAAAACCTCCGTTGCTG  
ATTTCCCTGCAATTAAGTGTCTTATGGCTGGACGCTTACGCCAATTCGCTGGTGTGAAGAAGTTTCGATTGAACGC  
GACAGTGAAGATGCATTCGCGTTGGGTAGTACCGCCGAGCATTTAAGCGGCTGTTTTATATTCAGGAAGCCAGTTCAAT  
GTTGCTGTTGCGCCCTTGTGCTGACGGTAATGCACCACAGCGGGTGTGGATGTCGCTGCTGCACCCAGGATTCAAAA  
CGACGCAAAATGCTGCGCGGATGAATAACGAAGGGCAATCCTTGCCAATGAGTTTTCCGCCAGTCGGGTAAGGTGTTA  
CATGCCAATATCAGCCGCTGTGGCATCAGTAATGTTGCGCTCACGCATTTTGTGAGCCGCTGTTTGGTGGCGAGTGGC  
AGAAATGTTTCGATGCCATTTGCTGGACGCTCCCTGCTCCGGCGAAGCGTGGTGCCTAAAGATCCCGATCGCCTAAAA  
ACTGGTCACCAGAAAGCAATCAGGAAATCGCAGCGACCAACCGGGAGCTGATCGACAGCGCCTTTTCATGCATTCGCTC  
GGCGGTACGCTGGTTTACTCGACCTGTACCTTAAACCGGGAAGAAAACGAAGCCGTTTGCCTGTGGCTGAAAGAGACTTA  
TCCCGACGAGTAGAGTTTTTACCGCTTGGCGATCTCTTCCCTGGTGCACAAAGCGCTGACCGAGGAAAGGCTTTTTTC  
ATGTTTTCCACAAATTTACGACTGCGAAGGCTTCTTCGTTGCTCGTCTGCTGCTGCTGCTGCTGCTGCTGCTGCTGCTG  
GCCCAAAATCAAAAGTGGGCAATTTCCGTTACGCCGTTGAAAAGATCGCGAAGCCGCAAAATTCGTCAGGCGCTGTC  
AAGTGTGGCTTAAACTGGGATGAAAACCTGCGACTCTGGCAGCGTGACAAGAACTGTGGTTTTCGCGGTAGGCATTTG  
AAGCCCTGATCGGTAAAGTCCGATTTTTCTGCGCTGGGGATTAAGCTTGGCGAAACGCACAACAAAGGTTATCGCTGGCAG  
CATGAAGCCGTTATTTGCCCTTGCCTCCCGGCAATTCGACCGCTTTTGAACCTGACACCGCAGGAAGCGGAGAGTGGTA  
TCGCGGGCGGATGTTTACCGCAAGCCGCGCCAGTGGCGGATGATGTTTGGTTACTTTCCAGCATCAGCCGATGGTT  
TAGCAAAACGATTTGGTTACGACTGAAAAACAGCTACCCGCTGAACTGGTGGCGACGGGAAACTTTTTACCGGTAAC  
GCCTGA

>Cluster\_28564

ATGTATATCGGGATAGATCTTGGCACCTCGGGCGTAAAGTTATTTTGTCAATGAGCAGGGTGAAGTGGTTGCTGCGCA  
AACGGAAAAGCTGACCGTTTCGCGCCCGCATCCACTCTGGTCGGAACAAGACCAGGAAAGTGGTGGCAGGCAACTGATC  
GCGCAATGAAAGCTCTGGGCGTTTACGATTTCTGCAAGACGTTAAAGCATTAGGTATGCGCGACAGATGCACGGTGC  
ACCTTACTGGATGCTCAGCAACCGGTTTACGCCCTGCCATTTTGTGGAAACGACGGGCGCTGTGCGCAAGAGTGCATTC  
GCTGGAAGCGGAGTTCCGCAATCGCGGTGATTACCGGCAACCTGATGATGCCCGGATTTACTGCGCTAAATTTGCTAT  
GGTTTACGCGCATGAGCCGAGATATTCGCTCAAAATCGATAAAGTATATTACCAGAAAGATTACTTGGCTCTGCGTATG  
ACGGGGGAGTTTCCACGATATGCTGACGAGCTGGCATACTGTTGGTGGATGTCGCAAGCGTACTGGAGTGCCT  
CATGCTGCAGGCTTGGCACTTATCTGTCGACCATCCCGCATTTATACGAAGGCAAGGAAATTAAGTGGTGTGCTTGTAC  
CTGAAGTTGCGAAAGCGTGGGGTATGGCGACGGTGCAGTTGTCGCGAGCGGTGGCGATAATGCAGCTGGTGGGTTGGT  
GTGGGAATGGTTGATGCTAATCAGGCAATGTTATCGCTGGGGAGCTCGGGGCTATTTTTGCTGTGCTGCGAAGGGTTCTT  
AAGCAAGCAGAAAGCCGCTACATAGCTTTTGGCATGCGTACCAGCTGCGCAACGTTGGCATTAAATGCTGTAATGCTGAGTG  
CGGCTCGTGTCTGATTGGGCGCGAAATTAACCGGCTGAGCAATGTCAGCTTTAATCGCTGACGCTCAACAGGCT  
GATGAAAGTGGCGAGCCAGTTTGGTTTCTGCTTATCTTTCCGCGAGCGTACGCCACACAATATCCCGAGGCGAAGGG  
GGTTTTCTTTGGTTTACTCATCAACATGGCCCAATGAACCTGGCGGAGCAGTGTGGAAGGCGTGGGTTACGCATGG  
CAGATGGCATGGAATGCTGATGCTGCTGCGCATTAACCGCAAGGTTACGCTGATTTGGTGGCGGGCTCTGATGAGT  
TACTGGGCTCAGATGCTGGCGGATATCAGCGGTGACGAGCTGATTTACCGCACAGGGGAGATGTTGGGCGGAGCTGGG  
TGCAGCAAGGCTGGCGCAGATTCGACGCAATCCAGAGAAATCGCTCATGAAATGTTGCGCACAACTACCGTTAGAACAGT  
CGCATCTACCAGATGGCGAGCGTTATGCGGCTTATCAGCCACGACGAGAAACGTTCCGTCGCTCTATCAGCAACTTCTG  
CCATTAATGGCGTAA

>Cluster\_22931

ATGAACACCGCACCTTGCACAACAAATCGCCAATGAAGCGGCGTCAAGCCTGGATGATTGCGCAACAACATAAAAGCCT  
GCTGCGTTTTCTGACCTGTGGTAGCGTCGATGACGGCAAAAGTACCCTGATTGGTGGCTGCTACACGATACCCGCCAAA  
TCTACGAAGATCAGCTCTCATCGCTGATAACGACAGTAAAGCGTACCGCACAGGCGGCAAGGCTGATCTGGCAGCTG  
CTGGTGGACGGCTGCAAGCTGAGCGCAACAGGGCATCACTATTGATGTGGCTACCCTATTTCTACCGAGAAGCG  
TAAATTTATATCCCGACACCCAGGGCAGGACGATACACCCGCAATATGGCGACTGGCGCATCGACATGCGAACTGG  
CGATCTTACTGATCGACGCCCGTAAAGGCGTGCATCAAAACCGTCTCACAGTTTATCTCCACGCTGCTGGGGATC  
AAACATCTGATGCTGGCGGATCAACAAATGGATCTGGTGGATTACAGTGAAGAGACGTTACCGCTATTCGTGAAGATTA  
TCTGACCTTTGCGGGCAGCTGCGGGTAACTGGATATCCGCTTTGTGCGCTCTCCGCACTGGAAGGTGACACGTTGG  
CTTCGCAAAAGTAAAGTATGCGGTGGTACAGCGGTCCGACACTGCTCGAAGTGTGGAACCGTGGAGATCCAGCGAGTG  
GTGGATGCAAGCTATGCGCTTCCGGTGCAGTACGTTAACCCCGCAATCTCGATTTCTGCTGGCTACGCGGCAAGCT  
GGCATCCGCTGCGGTGGAAGTCCGGCAACGTTGCAAAAGTGTGCTGCGCTTGGTGTGGAGTCAAAAGTCCGCGCAATCGTGA  
CTTTTGTGATGGCGATGCGCAAGAAGCCTTTGCGGAGAAGCGATCACCTGGTGTACGGATGAGATCGACATTAGCCGT  
GGCGATCTGCTGCTGGCGGAGAGCGTTACCGGCTGTGCGAGGCGGCTCGGTGGATGTTGGATGGATGGCGGAACA  
GCCGTTTTCCCGGGCAGAGTTATGACATCAAAATGGCGTTAAGAAGACGCGTCTGCTGTTGATGCGCTGATCTGTTATC  
AGGTTGATATTAATAACCTTACCACAGCGAAGTTGAAAACCTGCGCTGAACGGCATCGGCTGGTAGATCTCACCTTT  
GACGAGCCACTGGTGTAGATCGTTATCAGCAAAACCGGTTACCGGTTGGGCTGATTTTTATCGATCGCTGAGTAAATG  
GACCGTAGGTGGCGGATGGTGCACGAACAGTTAGCCAGGCAACTGCTGCGCATCTGAATTCAGTGCATTCGAACCTGG  
AATGAAATGCCCTGGTTCCGCCCATTTCCGCATTGGGGTGCAGCGGATTTACTGGGAGATAAATAA

>Cluster\_8291

ATGAAATTTACCAACGCTTTAGTCTGCGGCTCAGGCTGACGCTAATCTTTTTAATTCGCGCTCGGTGACCTGGCTGCT  
TTCAGCTTTGTCGCTGGAACAAACCAACGATAACGTCGATGAATTTGTCGACACCAACTGATGCTGTTTGGCAAGC  
GGTTAAGTACGCTGATCTCAACGAAATCAACCGCGGCGGATGCGATGGCACAGACGCCAAATAGATTAACCAACGCTCAT  
GTTGATGACGATGCGCTGACCTTTGCCATCTTTACCACGACGGCAGAAATGGTCTTAAATGATGGCGATAACGGAGAAGA  
TATTTCCCTATAGCTATCAACGGGAAGGTTTGTGACGGGCAACTGGTGGTGAAGACGATCCTTGGCCTTTTGTCTGGA  
TGACCTCACCTGATGGCAAAATATCGCATCTGTTGGCCAGGAATGGGAATACCGTGAAGACATGGCGCTGGCGATTGTT  
GCCGGCAATTTGATCCCGTGGCTGGTGGCTGCGCATCCGATTTATGTTAATCATCATGATGGTACTACTGGGCTGTAACCTCC  
GCCGCTGAACAACTGGCGCTGGCACTACGATGCGGTGACCTGACTCGGAAAACCACTAAACGCGACTGGCGTACCCA  
CGGAAGTCCGGCCACTGGTTGAGTTCGCTAAATCAACTGTTTCGCGCCGACACATGCGATGATGGTTTCGTAACGACGCTTT  
ACCTCCGACGAGCTACGAACCTTCGTAGCCGTTAACGGCGTGAAGAGTGAACCGAAGTTGGCGAGCTCTGACGA  
TGATCCGACGCGCGGAAAAAGCACTGCTCAATTACATTCGGGATCGATCGCGTACTCGTCTGGTTGATCAACTGC  
TCAGCTATCGCGCTGGACTCACTGGATAACCTTACGACGCTCGCGGAGATCCGCTGAGATCTCTGCAATCGTGC

GTGATGGATATTTACCACACGGCGCAGCAGGGCAAATTTGACGTGCGACTGACACTCAATGCCACAGCATCAAACGCAC  
CGGCCAACCGCTATTGCTAAGTTTGTGGTGCAGAAATTTGCTGGATAACGCCGTGCGCTACAGTCCACAGGGCAGCGTGG  
TAGACGTACCGCTGAATGCTGATAATTTTCATCGTGAGGGATAACGGCCCCGGTGTGACACCAGAGGCACTGGCGCGAATT  
GGCGAACGCTTCTATCGCCACCCGGACAAACCCTACCGGCAGCGGGCTTGGCTATCGATTGTCCAGCGAATCGCCAA  
ATTGCATGGCATGAATTTGAAATTTGGGAATGCGGAACAAGGTGGATTTGAGGCGAAGGTAAGCTGGTAA

>Cluster\_2458

ATGTTTAAACCGGAACCTCTTTCCCGGGCGGGAACCGCTGAAAAATATGCGTTACGCTTTTCGCTTATGGCGCAGATGCTGT  
TTATGCGGGCCAGCCGCTTATTCCTCGCTGTGCGCAACAACGAATTCACCCACGAAAAATCTTCAGCTCGGCATCAATG  
AAGCCACCGCGCTGGGGAAGTTTATGTCGTGGTCAACATTCACCGCACAAACGCCAAGCTGAAAACTTTATCCCT  
GACCTGAAACCGGTGGTGGAAATGGGGCCGGATGCGCTGATATGTCGATCCAGGGCTGATTATGCTGGTGCCTGAGCA  
CTTCCCTGAAATGCCGATCCACCTTTCCGCTGACGGCTAACGCCGTGAACTGGGCGACGGTGAATTTCTGGCAGCAATGG  
GCCTGACCCCGCTGATCTCTCTCGGAGCTGTGCTGGAAGAGATTGAAGAGATCCGCAATCAGGTGCCGATATGGAG  
ATCGAGATCTTCGTTACCGCGCGCTGTGCATGGCCTACTCCGCTGCTGCGCTGCTCTCTGGCTATATCAACAACCGCGA  
CCCCAACCGGGCACCTGCACCAACGCCCTGCCGCTGGGAGTACAACGTCAGGAAGGGAAAGAAGATGATGTTGGCAACA  
TCGTACACAAGTACGAGCCGATTCCGGTGCAAAATGTTGAGCCGACGCTGGGTATCGGCGCACCAACCACAAAGTGT  
ATGATCGAAGTCCCGCCGCTCGGGCGAGTATGACCCGCTTTGAAGATGAGCAGCGCACTTACATCATGAACTCGAA  
AGATCTGCGCGCCATCGCCATGTAGAACCCTGACCAAAATGGCGCTGCATTCGCTGAAAAATCGAAGCTGTAACAAAT  
CTTTCTACTATTGTGACCGCACCGCACAGGTTTACCAGCAAGCTATCGATGACGCCGCTGCGGAAAAACCGTTTCGATACC  
AGCTGCTGGAACCTCTGGAAGGTCTGGCGCATCGTGGCTATACCGAAGGTTTCTGCGCTGCTATACACGACGATTA  
TCGAGACTACGAATACGGTTATTCAGTTTCTGACCCGACGAGTTTGGTGGTGGTACCGGTGAGCGCAAGGGGGACC  
TCGCGCGGTAGCGGTGAAAAATAAATTTCTCGTTGGCGACAGCCTTGGAGCTGATGACCCGCAAGGCAACATTAATTTT  
ACCCTTGAGCACATGGAAAACGCCAAAGGCGAAGCTATGCCGATAGCACCAGGCGATGTTTACTGTGTGGCTCCCGGT  
CCCGCAGGATCTTGAGCTCAATTCAGCGCTGCTGATGCTAATTTCTCCGGGAAACCAGCGTAATCCCCACGGTAAGT  
GA

>Cluster\_62236

ATGAGCGAGCTGACTGATCTTTTACTGCAAGGGCCGCTTCTGCCCGGAATTCGCCACGCGTCTGGCAATCAGTCAGGC  
GACGTTCTCACGCTTGTGGCAGAGAAGATCGGGTGAATTCGCTTGGTAAAGCACGGGCAACCGCATATGCACTGCTGC  
GTCTTATCGCGGAATTTGAGCGTATTCCTGCTGCGGGGTGGAGGATACCGGAAAGGCGCATAAATTCGCCGACATCCGG  
TTGTGCTGGCCGAGGGAAGTTGCTGTAACAGGCGCAGATGGCGACGAACAGTGGTTGATGGTTTGCCTGGTATTT  
GACCGATCTCCGACCGCAGGGCTTTTATAGGCGCGCGTGGGGCAGGAAGTTAGCCGCGCAACTGAATCTGACTGATGATA  
TACGTCTCTGGCAGGAAGAAGATGTGCTTACGCCCTGACCTATTAAACGGTGAATATACTGGCGGTTGGTTGGTCCGG  
GAGGGAAATATACGCGATGGATTAAGTGCACAAACCCCTGCGGAAATTTCTCTGGATCAAAAACCTCACCCATTACGAACA  
GCTGGCAAGTGAATGCACTGGCAGGAGAAATTTGGGTTCTTCTCGGGCGCGGAGCAGCAAAATTTACCTACTATGCAC  
AAACGCCCTCAGGCAATAAATCATGTTGGTGAATTCACCGTACCACAGCAAAACCGCGTACGCAACGTTGGGGTGC  
CTGCTAATGCTGAATCTATTGCCGCGCAAACTCTGCTGACGGTGGGATCCACGCCATCGAGTCAACGGTGTGTTGTAAC  
AAGTAAACAGCGCAGTATTTCTCGAAGCGGAACGCTTTGACTGCAAAAGGTAACGATGGTGGCTTGCCTATTGCTGCTG  
AGGCGGTGCAGAGTGAATTTATCTTCTCCGGATCGTGGCCGAGGCAATGCGCCGTTTGTGTGAGCAACAACCTGTC  
ACTCACGAGCGTGGCGCAAAACAGAAGTGAATTCGGGCAATTTGGCGACTTATCGCAACAGCGATATGCACAGGTA  
TTTATCTGTTTATTTATGTAACCGCCATTTGCGCTGACGCCCTTACGACATGCTGCCGATGGTCTATGCACCAACA  
CGCTGGAATGCTCGCTGCTGCTGCTGCTGCTGCTGCTGCTGCTGCTGCTGCTGCTGCTGCTGCTGCTGCTGCTGCTGCT  
CCGCTGGCGCAGCAGTTCTGGCAACCGTCCAGAGATCCGCTATCAGCGAGGCGTTTCGCCACATTCGCGCAAGAAAT  
GCCGAAAAAATCCGGCAATCGAAGAGAAAGTTGCCCGCATGGGCGGGTAA

>Cluster\_26705

ATGGATCAGACATATTTCTGAGTCAATTCCTCAACCATGTCCAAAAGCGCGACCCGAATCAAACCGAGTTCGCGCAAGC  
CGTTCGTAAGTAATGACACACTCTGGCTTTTCTTGAACAAAATCCAAAATATCGCCAGATGTCATTAAGTGGAGCGTC  
TGGTTGAACCGGAGCGCTGATCCAGTTTCGCGTGGTATGGGTTGATGATCGCAACAGGTGCAGGTCAACCGTGCATGG  
CGTGTGCACTTCCGCTCTGCCATCGGCCGTACAAAGCGGTATGCGCTTCCATCCGTCAGTTAACCTTCCATTCTCAA  
ATTCCTCGGCTTCGAACAAACCTTCAAAAATGCCCTGACTACTTACCAGTGGGCGGTGGTAAAGGGCGCAGCGATTTCC  
ACCCGAAAGGAAAAAGCGAAGGCGAAGTTATGCGTTTCTGCGCAGCGCTGATGACTGAACTGTATCGCCACCTGGGCGCG  
GATACTGACGTTCCCGCAGGTGATATCGGCGTTGGTGGTCTGTAAGTCCGCTTTATGGCGGGGATGATAAAAAGCTCTC  
CAACAATACCGCTGCGCTCTTACCCTTAAAGGCTTTTCAATTTGGCGGCAAGCTTATTTCGCGGAAGCTCACCGCTACG  
GTCGTTTATTTTACAGAAAGCAATGCTAAAACGCCACGGTATGGGTTTGAAGGAATGCGCGTTTCCGTTTCTGGCTCC  
GGCAACGTCGCCAGTACCTATCGAAAAGCGATGGAATTTGGTGTGCGAGTACTGCTGCGTACAGCTCCAGCGGCAC  
TGTAGTTGATGAAAGCGGATTCAGAAAAGAGAACTGGCGCGCTTATCGAAATCAAAGCCAGCCGATGGTTCGAGTGG  
CAGATTACGCCAAAGAAATTTGGTCTGCTATCTCGAAGGCGCAACAACCGTGGTCTGTAACCGGTTGATATCGCCCTGCT  
TGCGCCACCCAGAAAGCAACTGGATGTTGACGCCGCGCATCAGCTTATCGCCAAATGGCGTTAAAGCCGTCGCCGAGGGGC  
AAATATGCCGACCACATCGAAGCGACTGAACTGTTCCAGCAGCAGGCGTACTGTTTGCACCGGGTAAAGCGGCTAATG  
CTGGCGGTGACAACTCGGCTGGAATGGCGCAAAACGCTGCGCGCTGGGCTGGAAGCCGAGAAAGTTGACGCA  
CGTTTGCATCACATGCTGGATATCCACCATGCTGTGTTGAGCATGGTGGTGAAGGTGAGCAAAACCAACTACGCTGCA  
GGCGCGAACATTCGGGTTTGTGAAGTTGCGGATGCGATGTTAAGCCAGGCGGTGATTTAA

>Cluster\_20154

ATGAATATTCACAGCTCACCGCCTGTGTCTGCGTTATCAGGGAGTCTTGTGGATGCCAGCGAAGAGGTGGTTTCATGT  
TGCGGTGGTGCATGCCCTTCGCATGAGCTACTGGACGATTCGATTTTCGCTACCACCAACGTTATTGAGATCACCTGCT  
GGACGCGCAACAATGGAAGGTACGCGCAGTGCACCCCAACAGACATTCGCCGTAGCTATTCATGAGAAAGCATCAGGCC  
AAAGCAGAGTTGCTGACTCGAACGTTACAATCTGCGCTGGAACAACCGCGCTGATATTCATATCGAACAGCGGACAA  
TGCTTACCCGCTCGCTTCCGATGACAGGCTGATTTGCATCTTACCAGGATGTTTACCAGGATGCGCGGAGCTGATTA  
CCGCCAGATTAAGTGTGGAACCTGGATATTTGCGGAACATCGCCTGCCGACGAGCGGCAATTCAGTGTGCACTG  
GCAGGAAACCGCTCTCATTTCTGATTTGCGACCTTAGCATGTCGGGGTGGTGAAGGTTGGTATTAAGGTTGTACAGCA  
GGTGAACAGGCACTGGATGTTAACCGCTTGAATGACGCGCTCACAACCTGGTGGACTTGTCTATGCTTGAACAAC  
CACAGGACTGGTCTGTTAAGTGGCTTACAGCAGCGGCAAAACCGTACGCTTATAGTGCCTGCAAAACCGTGAAT  
ACCGCTGACATTAATATTTGTAGCTCGAAGATCCGGTTGAGATCCCCATAGCCGATTAACAGACGCAATCCATTC  
GCTGCGGACTCACTTTAGGGCTTTTGGTGGCTTATTGCGCCAGGATCTGACGTCATCATGATCGGAGATCC  
CGATGGCGAAACCGGAGAAATGCCATAAAAGCCGCAACCGCTCACCTGGTGTGTTGCTACCTTACACACTAATTC  
ACCTGCGAAACGCTGGTACGTTTACAGCAAAATGGGAGTCCCGCTGGATGCTATCATCGGCGCTTACGCTGGTAAATAGC  
CCAGGCTTGGTACGCAAACTTTGCCCGATTTGCGCCGACGCAAGGGGAGCCATCCATATTCAGACAATGATGGC  
GCTCGCGCTGCCCACTGGCAGGCAACCGGTTGTGATGCTACCGGTTTATGTTGCTGCACGGCTTATTTGAA  
TTTCTGCCATAAACCGGTACATGCTAGCTTATTTCCGCTAATACCGACGTTGAATCGCTGGAACCGCAGCCGCA  
GGCGGATGCGAACGCTTTTGAAGGCTGCTGGCGGTGGAGCAAGGCTTAACCACTTTGAAGGTTAATCCCGG  
TATTGGGATGCCGATGCGGATTA

>Cluster\_40295

ATGGCACTGCAAAAATGAGAAAAATAGTCGTTATCTTTTACGCGACTGGAAACCAGAAAATCCGGCCTTCTGGGAAAAATAA  
AGGAAAGCATATTTGCACGAGAAACCTATGGATATCAGTCAGTTGCCACTTCTGCTTCTGCTGCTGGATGCTATTTA  
CGCGAGTTACTGTTAATCTCAATAAAAATCGGTTTTAATTTTACACACCGATCAACTCTTTTATTAACCCGATTAACCCCTC  
GTTTTCTCCCGCTATTTCGCTGTCCCTACTCCTTTATCGTGTATATTCGGTGGACGCCGATGGACGGTTTTAGTAC  
TGCAATCCTGATTTATTCCTTGCCTGCTGGCTCGGAATTGCGGTGCAGAAATCCGAATACTCCTTTTGGGATATTTATCGTTA  
TCGCTTTGCTATGCGGTTTTGCAAGTGCAGACTTTGCTTCGAGCATGGCAATATCAGTTTCTTCTTTCCAAAAGCCAAA  
CAAGGGAGCGCTCTGGGATTAATGGCGGATTAGGAACTTAGGTGTAAGTGTGATGCAGCTGGTGCACCGCTGGTCA  
TTTTGTTCCCGTATTTCGCTTTCTCGCCGTCAAATGGCGTACCGCAGGCCGACGGTTCGGTGATGTCGCTGGCGAATGCCG  
CATGGATTTGGGTGCCATTACTGGCGATTGCCACGATCGCCGCTGGTCAGGGATGAATGATATCGCCAGTTCACGCGCC  
TCAATTGCCGACAGCTCCTGTCTTACACGCCTGCATCTCTGGCTGCTGAGCTGCTTTATCTTGCACCTTCGGTTTC  
GTTTATCGGTTTTCTGCGGGTTTTGCCATGCTGGCAAAAACCGATTCCCGGATGTGAATATCTGCGCCTGGCGTTCT  
TTGGCCCATTTATCGGTGCCATCGCGCATCGGTTGGTGGTGCATTTTCCGATAAAATTCGGCGCGCTGCGGGTACGTTG  
ATCAACTTCAATTTTTATGGCGATTTTACGCGCCTGCTGTTCTTACCTTACCGGGCACAGGCTCCGGTAATTTATCGC  
ATTTTACGCGCATTTTATGGGGCTGTTTTCTGACCGCGGCTCTGGGAAGTGGTTTACTTTCCAGATGATCGCCGTCATCT  
TTCGCCAGATAACAATTTATCGGGTGAAGATGAAAGCGGCTAGTGTAGCAAGCTCAAAGAGAAGCCGTCACCGAAACG  
GCACCGCTCTGGGCTTTATCTACCCATTTGCCGACAGTGGCGGCTTTTTTATTCGCGAGCGTTTGGCATGTTCCGTA  
TATGACCGGCTCTCCGTTGGCGCGATGAAAGTGTTTTTAATCTTCTACATCGTTTGTGTCTACTGACCTGGCTGGTTT  
ATGGTCCGGCGAAGTTACGCCAAAAATAA

>Cluster\_41877

TTGATTACACATAATTAGCCCGCTTGGCTCCATGGATATGTTGTCGACAGCTGGAAGTGGATATGCTTAAACGCACCGCCAG  
CAGCGACCTTATCAACTGTTTCGCAACTGTTCACTTGGCGTACTGAACTCCGGTAGTTTACCGATAACAGCAAAGAAAT  
TGCTGTCTCGTTTTGAAAATTTTCGATATTAACGTCCTGCGCGGTGAACCGCGGCTAAAGCTGGAACTGATAAATCCCCCG  
GAAGAGGCTTTTGGTGGCGGAAATTTTCGCTTTCGCGCTTCGACAGCCAACTTGTTCGCGGTTCTGCGTGACATTTTTCGTT  
TTATGGGCAAAATTCATAACACCGTTTCGTTTTCCCAACCTGAATCTCGACAACCTCCGTCACATCACTAACCTGGTCTTTT  
CCATCTTGGTAAACGCTCGCGCGTGCATGTCGGTGAAGCGCCAAATATGGTGGTCTGCTGGGCGGTCACCTCAATTAAC  
GAAAACGAGTATTTGATGCCCCTGCGCTCGGGAATCAGCTGGGCGCTGCGTGAGCTGAATATCTGCACCGGCTGTGGTCC  
GGGAGGATGGAAGCGCCGATGAAAGGTGCTGCGGTCCGACAGCCGACGCGCAGCGGTTACAAAGACAGTCTGCTTTATGGTA  
TGACAGAGCCGTCGATTTACGCCGCTGAACCGCTAACCCGCTGGTCAACGAATTGATCATCATGCCAGATATCGAAAAA  
CGTCTGGAAGCGTTTGTCCGATCGCTCACGGTATCATTTATCTTCCCTGGCGGTGGGTACAGCAGAAGAGTTGCTGTA  
TTTTGCTGGGAATTTAATGAACCCGCAACAAGATCAGGTTTTACCATTGATCCTCACCGGCCGAAAGAGAGCGCCG  
ACTACTTCCCGTACTGGACGAGTTTGTCTGTCATACGCTGGTGGTGAACGCGCGCCGATTAACCGCATCATCATTTGAT  
GACCGCGTGAAGTGCCTGTCAGATGAAAAATCGATGCCGCTGGTGAAGAAAAATCGCCGCGACACTGGTGACGCTTA  
CAGCTTTAACTGGTCAATGCGCATTTGCCGAGATTTGCAAAATGCGGTTTGGAGCGTCTCACGAGAATATGGCTAATCTGA  
AGCTTTACCCGGATCAACCCGTTGAAGTGTGGCTGCCGACCTGCCCGTGGCTTCTCCGGTATTGTGGCGGGTAATGTA  
AAAGAGTCCGTTATTCGCGCAATGGAAGAGTTTGGTCTTACAAAAATCAACGGCGACAAAGAGATTTATCGCTATGGA  
CGACCTGTACAGGGTTTTGTTGCCAGCATCGTATGAAGTTGCCAGGCTCAGCTTACATCCCTGCTACGAAATCTGCA  
CGTAA

>Cluster\_22918

ATGTCCACAATTACATTTGTTATGCATTGCGTTAGCTGGCGTAATCATGCTGTTGCTACTGGTCAATCAAGGCAAAGGTACA  
ACCATTGCTGCTGCTCCTCGTCAGCCTGTTAGTCGCACTTGGCGGGGTATACCGCGGGCGAAGTGGGTAAAGTGA  
TGATCGCCGGGATGGCGGTTACTTGGTTCCGTCATTTATTTATTTGGTCTGGGCGCTATGCTGGGCGGTATGATCGAA  
CACTCTGGTGGTGCAGAGTCACTGGCTAATTTATTTAGTCGCAAGTTAGGTGACAAACGAACATATCGCTGGCGTACTGGA  
GGCAGCGTTCTTCTCGGTATTTCCGCTTCTTTGATGTCGGCTTTATTTATTTCTTGGCCAAATCATTTACGGTTTTGCGCA  
AGGTTGCCAAAATATCACCACTCAAAATTTGGCCTGCTGCTGGGATCATGCTCACGTTTACGTTGCGCGGTACCGCCG  
CATCCAGGCCCTGTCGCCGAGCGGGGTTACTCCAGCAGACATCGGCTGGTAAACATCATCGGTATTGCGATTTCTAT  
TTCCGTTAGGGATTGTTGGCTACTTTGACGCGAAAAATAATCAATAAGCGCAATATGCGATGTCGGTTCGAGTACTGGA  
AGATGCAACTGGCTCCGGCCAGTGAAGGAGCGGACAAAAATTAAGCGATAAAAATAAATCCACCGGGCTGCGCTGGT  
ACCTCGCTAATTTGTTATTTCTATCGCGATTATCATGCGGGTACGGTTTCTGCAACATGATGCGCCCTTCGATCCCT  
GCTTGGTACGCTACAGTTGATCGGCTCACCAATGGTAGCTTAATGATTGGCTGGTGTGCTGGCATTCTGGTTATTGGCT  
TACGTCGCGGCTGGAGCTTACAACACACCGACGACATTTGCGGCTTGCCTTCCACATGCGCGGTAGTGTATTGGTT  
ACTGGTGTGGAGGGTATTTTGGCAAAGTGTGGTGAATCGGGAGTCCGTAAGCCCTTGGCAACATGTTACAAATGAT  
TGACCTGCTCTGTTTACAGCGGATTTATTTTACCTGGCGCTGCGTGCATCGCAGGGGTCAGCAACCGTACGAATCC  
TGACAACCGCGGGTTACTCTCAGAAGCGGTGATGGGATTAATCCGATTCAGTGCCTATTGGTGACGCTGGCAGCCTGC  
TTTTGGTGGCTTGGCGCTTACATATTAATGACTCAGGTTCTGGATTTGACCAATATCTGGGTTGCTCGGATGACG  
CGTCTGAAAACCTGGACAGTGTAAACGACATTTCTCGTTTTTACCGGATTTAATTTACCTGGTGGCTATGGCTCGTCA  
TCTAA

>Cluster\_25347

ATGACGCAGAAAAATTGAACAATCTCAACGACAAGAACGGGTAGCGGCTGGAATCGTCCGCTGAATGCGATCTTGCCGC  
TTTTCCAGAACTCGCCAAAGCAAACTACAGGCTGAAAAGCGCGCATCGCAAACTGTGCGCAACCTGGAAGAAGCGA  
TTCGTCGCTCTGGTTTACAGGACGGCATGACGGTTTTCTTCCATCACGCTTTCCGTTGGCGGTGACCTGACCGTCAATATG  
GTGATGGACGTCATCGCGAAGATGGGCTTTAAAAACCTGACTCTGGCCCTCAGCTCCGTTAGTGTGATGCGCATGCGCCGCT  
GGTAGAACACATTCGCCAGGGCGTGGTTACCCGCTTTTATACCTTGGCTGCGCGGTCCACTGGCGGAAGAAATCTCCC  
GTGGTCTGCTGGCGGAACCGGTGCAAAATCCACTCTCACGGCGGACGTGTCATCTGGTACAGAGCGGCAACTGAATATC  
GATGTGGCTTTCTCGCGTCCGCTCTGTGATGAATTCGGTAATGCCAACGGCTACTCCGGTAAAGCCTGCTGCGGCTC  
CCTCGGCTATGCAATGGTTGATGCGCACACGCAAAAACAGGTCGATGCTTACCAGAAACTGCTGCTTCCGATATA  
ATCCGGCAAGCATTTAGCAAGATCAGGTTGATCTGATCGTCAAAGTTGATCGGTTGGCGATGCTGCAAAAATCGCGCT  
GGTGTACCCGATGACCACTAACCCGCGCAACTGCTTATGCCCCGAGCGTGCAGGATGTTGTTAATCTGGCTA  
CTTCAAAGAAGTTTCTCCATGCAGACCGGACCGCGGCTTCCGTTGGCGGTAACCCGTTTCTGGAAGACAAAATGC  
GTAGCCGATATTCGCGCCGACTTGCCTCGCGGATATTACCGCAACGATGGTTGATCTGCAACGAAAAAGGTTTATC  
CGCAACTGCTGGATGTGCAGAGCTTTGACAGCATGCTGCGCAATCGCTGGCCGTAACCCCAATCACATCGAAATCAG  
CGCAACCAAGTACGCTAATCGGGGTCGAAAGCGCAGCGGTTGATCGTCTCGACGTTGGTACTGAGCGCGCTGGAAA  
TTGACACCCAGTTCAACTGTTACGCTGACCGCTCTGACGCGTACTGCGTGGTGTCTCCGGTGGTCACTGCGATACC  
GCGATTGCTTCTGCGTTTTCCATCATCGTCCGCGCTGATTCAGCGGTCGATTTCCGACGCTGGTGGATAACGTTGAC  
CTGATCACCCCGGCTCCAGTGTGATATTTCTGGTACAGACCAGGCTACGCTGTTAACCCGGCACGTCCGGAGCTGG  
CAGAAGCTTGCAGGAAGCGGGATCAAAGTGGTTTCTATTGAGTGGCTGCGTGAACGTCGCGCTGCTGACCGGTTGA  
CCACAGCCGATGAAATTCACCGACCGGCTGTTGCCGTTGTGCTTACCGCATGGCTCGGTGATCGATGTTGTGCATCA  
GGTGAAGGAATAA

>Cluster\_33767

ATGACCAGTCTTCAGCAGCGCGGAGCTTCATCGCCAGATCTGGCAAATGCTAACGATGTCAGGGGTTCCGGTCGATGG  
ATGGGATTTTAAAGCAATACGTTCTGGGCGCACATTTTCTACCGTTTATCAGCGAAAATTTTCCAGCTATATTGAAGCCG  
GTGATGACAGTATCTGTTATGCGAAACTGGATGACAGCGTAATTAAGACGATGCCATCAAACCCAAA  
GGTTACTTTCATCTACCCAGTACGCTTTTCTGCAACGTAGCTGCGAAAGCAAAATACCAATGACAGACTGAATCGCGAATTT  
AAACAGCATCTTCGTTATCGAAAGTTCTGCTTACGGTACCCTTCCAGAAAGCAGACATCAAAGGTTGTTGTTGTTGAT  
TCGATACCACCAGTAACCGCCTGGGTAACACCGTTAAAGATAAAAAATGCCCGCTGGCTGCGGTTCTGAAAGGGGTTGAG  
GGGTTAAAACCTGGTGACATCAACGACATCAGATTGACTGTTGCGGTGATGCCTATGAGTTCCTGATCTCTAACTATGC  
GGCAAATGCCGGTAAAGTACGGCGCGAGTTCTTACACCGCAGCAGCTCTTAAGCTGATGCACAACCTGGCTATGCACG  
GGCAGACCACGTTAACAAAATCTACGACCCGGCAGCGGCTCCGGTTGCTGTTGTTGTCAGGCTAAAAACAGCTTGTGAT  
GACCATATCATCGAAGAAGGTTTTTTTTGGTTCAGGAGATCAACCATACGACCTATAACCTGGCGCGTATGAACATGTTTTT  
GCACAACATCAACTACGACAAGTTTGATATCAAGCTGGGCAATACGCTGACTGAGCCGCACTTCAGAGATGAAAAACCGT  
TTGATGCCATCGTTTCAACCCGCCATATTCGGTGAATGGATTGGCAGCGATGACCCGACGCTGATTAACGATGAACGTT  
TTTTGCCCGGCTGGCGTTCTGGCCCCAAATCCAAAGCTGACTTTGGCTTTGTTATTACATGCGCTGAACATCTTTCTGC  
CAAAGGTCGTGCTGCGATTGCTGCTCCCGGGCATTTTTTACCGTGGCGCGCGGAGCAGAAAAATCCGTCAGTATCTGG  
TTGACAATAACTATGTCGAAACCGTGTATTCACGCGCAGCAACTGTTCTTTGGCACCACCATTTGCCGTCAATATCTG  
GTGCTGTCTAAACATAAAACCGATACCAACGTTTCAAGTTTATTGACGCCAGCGAAGTGTCAAAAAAGAGACTAACACAA  
TATCCTGACCCGATGCCATCAACGATTAACAGGTTATGCAAGTATTGTCAGCAAGGAAGATGTTGCTCATCTGGCAAAATG  
TCGCGTTTGAACCAATTGTAGCGAATGACTATAACCTGTCAGTGCAGCAGCTATGTTGAAGCGAAAGATAACCGCGAAATA  
ATCAATATGCTGAGCTGAATGCAGAACTGAAAACCTACGGTACGCAAAATCGACCAGTTCGCTAAAGATATCGACTCAAT  
TGTGGCAGAGATTGAAGTGCAGAGGTGCAGGGATGA

>Cluster\_24349

ATGCTGAAAAGGAAAAAAGTAAAACCGATTACCCCTCGTGATGTCACATATTATTGATGACGGTAAACTGCGTAAAGCCAT  
TACCAGCAGCATCACTGGGTAATGCAATGGAATGGTTTCGATTTTTGGTGTATTATGGTTTTGTGCTTACGCATTAGGTAAG  
TTTTTTTTCCCGGGGCTGACCCAGCTGCAGATGGTTGCTGCCTCGCACTCGCCACTTCTCCGTTCCGTTAGTGTGATTGACCG  
CTTGGCGGGCTCTTCTTTGGTATGTTGGCGATAAATAATGGTCCGAGAAATCCTCGCTATCACTATTGTGATTTATGTC  
GATCAGTACGTTCTGTTATGGCTTAATACCGTCTACGACACGATTGGTATTTGGGCACCGATTCTGCTGTTGATCTGTA  
AGATGGCACAAGGTTTCTCGGTCGGCGGTGAATATACCGGGGCGTCAATATTTGTTGCGGAATACTCCCTGACCGTAAA  
CGTGGCTTTATGGGCGAGCTGGCTGGACTTTGGTTCTATTTGGTGGTGGTGGGAGCTGGCGTAGTGGTGAATTTGTC  
GACCATTGTCGGCGAAGAGAACTTCCCTCGATTGGGGCTGGCGTATTCCGTTCTTTATCGCTCTGCCGTTAGGGATTATCG  
GGCTTTACCTGCGCCATGCGCTGGAAGAGACTCCGCGCTTCAGCAGCATGTCGATAAACTGGAACAGGGCGACCGCGAA  
GGTTTGCAGGATGGCCCGAAAGTCTCGTTTAAAGAGATTGCCACCAAACTGGCGCAGCCTGTTGACATGATTTGGTCT  
GGTAATTGCTACCAACGACTTACTACATGTTGCTGACTATGCGGATATGCGGAGTTATTTGTCGCATAACCTGCATTACTCCG  
AAGACCACGGGTGCTGATTATATCGCCATTAATGATCGGTATGCTGTTGTTCAACCGGTGATGGGCTGCTGAGTGAC  
CGTTTTGGCGCTGCTCGCTTTGCTCTCTGGTGTGTTGCACTGTTTTGTTGGCGATCCCGCGCTTTATTTGATTAA  
CAGTAACGTCATCGGCCTGATTTTTGCGGGCTTATTGATGCTGGCGGTGATCCTTAACGCTTTACGGGCGTTATGGCTT  
CTACCTTCCCTGCGATGTTCCCGACGATATCCGCTTACAGCGCTGGCGCGGCATTTAATAATTTCCGTTGCTGGC  
GGTCTGACGCCAACGCTGGCGGCTGGCTGGTCAAAGCTCGCAGAATCTGATGATGCTGCTGCTTATTACCTGATGGTAGT  
GGCGGTGGTTGGTTTAACTACCGCGTAACCATGAAAGAGACGGCGAATCGACCGTTGAAAGGTGCGACACCAGCGGCT  
CAGATATACAGGAAGCGAAAGAAATCTCGTCGAGCAATACGATAATATCGAGCAGAAAATCGATGATATTGACCACGAG  
ATTCCGATTTGCGAGCGAAACGTACCCGCTGCTGACGCAACATCCGCGAATTTGATGAATAA

>Cluster\_16049

ATGATGACGACAAAATATCACTCCCTGAACTTGACATAAACTAACTGCCTGACAGGACCCAGGCATTACTTAATGAAAT  
GCATGAAGGAACGGGAATAAGCCGTGAAATACTGCTGTGTTATGCTGACGGTCAAGGCTGCCTCAGTCCAGGATACGC  
ATGAAGTTGAACTTTCCGGAGGACAGCGTACCAGCCTTCAGATATTTATGTTGCTTTCATCAGCATCAGGCAGTGGAAAA  
ACCTCTGCCTGTGCAAAAATAATCGCTCCTGTTTATGAAACAGAAAGAACTACATCAGGCATATATCGACGATAAGAA  
AAACTATGACCGAATGATGGAGATGTGGACAACAGATAAAAAAATACTGGAGCGGAGATATAAAAAAGGAAATGGAAGAT  
CCCCGAAAATGCTGCTGCTGACAGAGCAGCATTTGAAAAGTGTATAGCAAAATAAACCCGTACCTCCCACACAGCGTT  
CTCATCGTTAATGACGCGACACCAGAAGGGATAGCTTTGAAACTCAGCCAGTCCCCCTCTCTTCTGTTGCTGCTGACGA  
AGGAGGTACTATTCTGGATAAGCGTTTTCGAAACGCAAACTCGGCACTGTACAACACATTAATGGAGTGGGCACCCGCTCAACG  
TTGAACGGGCATCCAGACCCGGGTTCCGGCTGAATGATGCTCCTACTATACTTATACTGACTCAACCCGTAATATTT  
GATAAGTTTTTTTACTCTCACTGCGGATCAGATCCGGGGCAATGGCTTTCTGGCCGGCTGCTATTTTGGCAACCCGAGC  
AATTAATAAATGACGACAGAACCGCATACTGCCACTCCAGTTGTGACGCGCAATGTGCAAGCTGTTTTCGTAAGAAAA  
GTTTTGGCAGTGCATCAGACACTCTCTGAAAGCATCCAGAGAAAGACGTCGAAAAAGTGAAGAGCGCATCTGCATGACA  
TTATCAAATGCGACATCCCGCGCATGGAGATCTTCAAAAAGAAAATATGGATACTGTCAGACAGAAATCTCTCATATGGG  
TACTTTTTGAAGACATTAATTTGTCAGAAAAGAGAGCAGGTTGTCAGGATAGCCGCAATTTCTGGAACGGAGAAAGATCCAG  
AATCGACAGTAATAACGCTGGAAGTACTAATAGCGCCATTTATCTCATGAAATTTTATTTCAAGCATCTTATATATAAA  
CTTGAATCCCTTCCGGAAATATCCCGGCTGAGAAACTTGATAAATGGCTTCAGAAAAGAAATATCACAAACAGCAGGTTA  
CATATTCAGAAAAGTTATATTTTACAAATAGCCCCATATGCTCTCAGAAAAGAAATGTTCTGGATGAAGCATCTGACA  
TACTGGCAGAACAAAGGAAAATAAGGATTTGATGATAAAGCTGTTGTTTTATATAGGAAACACGATTAACACCATCCGAACTG  
GCAAAAAAATAAATATCTCTGCATTCGATGCGGAGTTTTTCATTTGTTGATCATCAAAACATACTGAAGTATCACCGAAA  
CAGACTATAG

>Cluster\_7723

ATGAGTTATTCTGTGATGTTTCGCTTTACTCCTGCTCACGCCGCTGCTTTTTTTCGCTGCTCTGTTTTGCTGCCGGAACG  
GAGACTTTCTGCGACTCGCACGGTGACCGTATTACATAGCTTAGGGATCACACTGCTGCTGATTTCTGGCACTCTGGGTGG  
TCCAAACTGCGCGTGTATGCGAGGAGAAATATTCGCTGCGGGACTGTGGCTTCATATGATGGTCTGGGCGGTTGTTCTCTC  
GCCATTTTGGTGTGATTGGCTTTCTCACCCTTATTACTCAGTTGCTCAGTTGGCTTACATGCGTCAATGAAGTGGCAGCAGCGAGCT  
TTCACCCGTTACGCTGTGCGATTACTACGGTTTCTCCATCTGTTTTTGTTCACCATGCTGCTGGTTGTACCAGCAATA  
ACCTGATTTGATGTTGGCGCGCATCGAAGCCACCCTTAAGCTCGGCGTTTCTGGTAGGCATTTACGGTCAGCGTTCA  
TCGCTGGAAGCTGCATGGAAGTACATATTATTTGACTGTTGGTGTGCTGCTTTTTGGTCTGTTCCGGTACCGTGTGTTATA  
CGCCAACCGCCGAGCTTATGCGCGCAGAAATGGCGATATTTCTGGAGCGAGGTTCTTAAGCAATCGTCTTCTGTTG  
ACCAACATTAATGCTGTTGGCTTTGTGTTTTGCTAATTTGGCTTTGGTACCAAAACCGGGCTATTTCCCATGCACGCC  
TGGCTGCCGGATGCTCACAGTGAAGCGCGAGTCCGGTCAGCGCCCTGCTCTCCGCGTATTGCTGAACCTGCGCGCTGTT  
GGTGTGATTCGATTAACATCATTAATTTGCCAAGCATCGGCAGCGAATTTCCCAACCGGTTGTGCTCATCTTCGCA  
TGTGTCGCTGGCTGGCGGCAATTTTTCAATCTGGTACAGCGGGACATTAAGCGCTGCTGCGGCTACTGCGGCTGAGG  
AACATGGGCTGTTGCGGTTGGAGCTAGGCATTTGGCGGGCCGCTGGGAATTTTTGCGCGCTGCTGCACATCTTAAACCA  
CAGTCTGGCAAAAACGCTGCTGTTCTGCGGTTCCGGCAATTTGACTGCTCAAGTACGGCAGCGGATCTCAACCTGCTCT  
GTGGATGCTCAAAATCATGCCATTTACCGCTGCTGTTTTGCGGCGGCTGCGCTGGCAGGATGCGGCTGAGGCTGCTC  
AACATTTTTCTTAGCAATTTATGACCATTAACCGCGGACTGGCAGCTAATCACTGCTGATTTATGCTCTGCTGTTATT  
GCTGTTAACGCTGTTGCTGGCGGCTGTTACGGATGGCTGCGCGGTTTAAATGGCGAAACCGCGCAGGCGTTAAC

GGGGTGATCTCGGCTGGTTGACCACCTCGCCAATGGTGATTTCTGCTGGTCATGATGCTGGCGATGGGAACGCATATTTCCA  
CAACCTGTATCAGGATCTGGCGGGCGCTTCCACTATAGTCTCTCAGGGACGCACGATCTGCCTGCACAACGTAGCAC  
CTGGCATGATTTTTTGCCTTCAGGCACCGCATCTGTTTCGGAGAAACACAGTGAAACGTAA

>Cluster\_39794

ATGAAAACGCCACCATTCCACCCCTTCGCGGGCCGACGGCATGACATCGCTGCGCGAATATGCCGGTTATCACGGCGG  
TGGCAGCGGATTTGGTGGGCAGTTGCGGGCGTGGAAACCACCGGGTAAAAGTGTGGATGCAGCCCTGCTGCCAACTTTA  
CCCCTGGCAATGCCCGCGAGACGATCTGGTACGCAATACCGGTATGCGGCCAACGCATCCAGCTGCATCAGGATCAT  
ATCGTGGGCTTTTTTCCGGCTCAGTCATCGCCCAAGCTGGCGCTATCTGGGCATCGGGGAGGAAGAAGCCCGTGCCTT  
TTCCCGCAGGTTGAAGCGGCATGGAAAGAGTTTGGCCGAGGATGACTGCTGCTGCATTTGAGCTTGAGCGAAAACGCACGT  
TTACCATGATGATTCGGGAAGGTGTGGCCATGCACGCCTTAACGGTGAACGTGTTCTGTTTCAGGCCACCTGGGATACCAGT  
TCGTCGCGGCTTTTCCGGACACAGTTCCGGATGGTCAGCCCGAAGCGCATCAGCAATCCGAACAAATACCGCGCACAGCCG  
GAATGCGCGTGGCGGTGCAGATTAATGACAGCGGTGCGGGCTGGGATATTACGTCAGCGAGGACGGCTATCTGGCT  
GGATGGCAGAAAATGGACATGGATACCCCGTGAATACCCCGCGGGCCGCTTCGTTTATTACGTTTGTGAACCCGCTG  
GAGGACGGGCAGACCCCGGTGCAAAATGTGTTTTACAGCGTGTAGGAGCAGATGAAGATGCTCGACACGCTGCAGAACAC  
GCAGCTGCAGAGGCCATTTGTGAAGCGATGTATGCGGCCACCATCGAGAGTGAGCTGGATACGCAGTCAAGCGATGGATT  
TTATTTCCGGCGTAAACAGTCAGGAGCAGCGGACAGGCTGACCGGCTGGATTGGTGAATTTGCCGCTATTACGCCGCA  
GCACCGCGGCTGGGAGCGCAAAAAGTGGCGCACCTGATGCTCGCGGGGACTACTGAACCTGCAGACCGGCAACAC  
GGATAACGGCTACTCCGTGTTTGTAGCAGTCACTGTTGCGGTATATCGCTGCGGGGCTGGGTGCTCTGATGAGCAGCTTT  
CCCGGAATTTACGCCCAGATGAGCTACTCCACGGCACGGGCCAGTGCAGAACGAGTCTGGGCGTACTTTTATGGGGCGGCA  
AAATTCGTCGCATCCCGTCAGGAGCAGCGGACAGGCTGACCGGCTGGATTGGTGAATTTGCCGCTATTACGCCGCA  
ACCTTCAAAGCGGCTTTTTCAGCTTTTTCAGGAAGCCGCGCACCTGCGGGGAACTGTGACTGGATAGGCTCCGGTCTGATGG  
CCATCGATGGTCTGAAAGAAGTACAGGAAGCGGTGATGCTGATAGAAGCCGACTGAGCACCTACGAGAAAGAGTGGCGG  
AAACCGGTTGACGACTATCAGGAAATTTTTTGCACAGCAGGTTCTGTAACGATGGAGCGCCGCGCGGCTGGTCTTAAACC  
GCCGCTGGGCGGCTGCGGCATTTGAATCCGGGCTGCGACAATCAACAGAGGAGGAGAAGAGTGACAGCAGAGCTGCGT  
AA

>Cluster\_21385

ATGCAAAACAAAAACCCGACTCTCGAAGTCTAACCTGCAAGGCGCTTATCGCGACAACCCGACTGCGCTTTTTTACCA  
GTTGTGTGGGATCGCCCGGCAACGCTGCTGCTGGAATCCGAGATATCGACAGCAAAAGATGATTTAAAAGCCTGCTGC  
TGGTAGATAGTGCCTGCGCATTAAGTACAGCTGTCACAATCCAGGCGCTTTCCGGCAATGGAGAAGCCCTG  
TTGACACTACTGGATAACGCCCTTGCCTGCGGGTGTGGAATATGAACAATCACCAAACTGCCGCTACTGCGCTTCCCGC  
TGTCAGTCCACTGCTGGATGAAGACGCCGCTTATGCTCCCTTTCCGTTTGTGACGCTTTCCGCTTATTACAGAATCTGT  
TGAATGTACCGAAGGAAGAACGAGAAGCAATGTTCTTCGGCGGCTGTTCTCTTATGACCTTGTCGGCGGATTTGAAAAT  
TTACCGLAAGTGTACGGGAAAATAGCTGCCCTGATTTCTGTTTTATCTCGCTGAAAACGCTGATGGTATTGACCATCA  
GAAAAAAGCACCCGATTTACAGGCCAGCCTGTTTGTCTCGAATGAAGAAGAAAAACAAGTCTCACTGCTGCGCTGAACG  
AATACGTCAGCAACTGACCGAAGCGCGCCGCTGCGGGTGGTTCCGTCGCCGATATGCGTGTGTAATGTAACCA  
AGTGAAGAGGATTCGGTGGCTAGTGCCTTCCGTCGAAAAGAGGATTCGCGCGGAGAAAATTTTCCAGTGGTGCATC  
TCGCGGTTTTCTCTGCGCTGCCGCTCACCGCTGGCGGCTTATACGTCGTAAGAAAGAGTAATCCCAGCCGCTACATGT  
TTTTTATGACAGGATAATGATTTTACCCTGTTTGGCGGCTGCGCCGAAAGTTCCGCTCAAGTACGACGCCACCGCCGCA  
ATTGAGATTTACCCGATTTCCGGAAACAGTTCACGCGCTGCTGCTGCGGATGGTTCACGTTGATAGAGCCTCGACGCC  
CATCGAACTGGAATGCGTACCGATCATAAAGAGCTTTTGAACATCTGATGCTGGTGGATCTCGCCCTAATGACCTGG  
CACGATTTGCACACCCGGCAGCGCTACGTCGCGGATCTCACAAAGTTGACGCTTACTCTTACGTCATGACCTGGTCT  
TCCCGGCTGTGGTGGTGGTGGTGGTGGTGGTGGTGGTGGTGGTGGTGGTGGTGGTGGTGGTGGTGGTGGTGGTGGTGGT  
CGGTGCGCCGAAAGTACCGGCTATGCGAGTTAATGCGGAAGAGGTCGTCGACGCGGAGCTACCGCGCGCGGCTGAG  
GTTATTTTACCGGCTATGGGATCTCGACACCTGCATTGTGATCCGCTCGCGGCTGGTGGAAAACGGTATCGCCACCGT  
CAAGCCGGTGTGGCGTAGTCTTGTGATTCTGTTCCGAGTCTGGAGCAGACGAAACCCGTAATAAAGCCGCGCTGTACT  
CGCGCTATTTGCCACCGCATCATGCACAGGAGAGCTTCTAA

>Cluster\_64437

ATGACTGCTCAGCAGTTGCTCGGGCTGACGGTAAAACGCCACTACGCGGTTACGCGGGGTATAACGGCGGGGTTCCCG  
CTTCGGTGGCCAGCTGATTTGACTGGAATGCACCACAGCAAGCGCCGATGCGGCACTGCTGCCAATTTTTATCGCGGTA  
ACGCGGAGCAGCAGATCTGTTTCGTAATAACGGCGTCCGCTGCAACCGCGTCCAGCTGCATCAGGATCATATCTGTCGGC  
AATCTGTTTAAAGTTGAGTTTATCGCCCTAAGTGGCTTACATCGGGATATCTCGCGAGGACGCCAGGTCGCTGGCGGTA  
CGTTGAGGTCGCGTGGACTGAATACGCCGAGGACCCCTCACTGCAGGATGATATCGAGCGGAAACGGACGTTTCAATGA  
TGATTCGCGAAGGCGTGGCCACTCACGCGTTCAACGGTGAACCTGCGTACAACCGGTTGGGAGAGCTGCGCGGCGCAGC  
GTTTTTCCGACCGGATTTCAAATGGTCTCACGAAACGAAATTCGAAATCTGGCTACGACGCTGACACTCAATTTCCGCG  
CGCCGCTGTTGATTCGATATAAAGCGGGCGCGGCTGGTGGTGGTGGTGGTGGTGGTGGTGGTGGTGGTGGTGGTGGTGGT  
GTAATGCGCGGCAATACAGCAAACTCAGCAGCGGACAGCAGCATTCATTACATATTCGAGCCGCTCGAGGACGGA  
CAAACCCGCGGAGATAACATTTTTTACAGCGTAATGAGCGGCTGAAAATGCTCGATACGCTGACGAAAACAGCTGCA  
GAGCGCATCTGTAAGGCGATGTACGCCGCCAATCGAATCAGACTCGACGCCAGCAGGCTTTGAAATATATCGCGG  
CGCGGGTACTGATATCGACTCGAACCCTGAGTTGTTTATTTCAGAGTTACGTCAGCTACTACAACCGCGCAAAATATC  
AAGTCTGGTGGTGTGAAAGTTCCCCACCTGCATCCCGGCGCAAACTCAGTTTACAGACCGCTCAGAAATGCTGATGCTGG  
TTTCAGTTTCGCTGAAAAATCACTCCTGCGTTACGTTGCGGCTGGGCTGGGCGGCTCATATGAGGAAGTGAAGTGGGACT  
ACAGCCAGGTCAGTTACTCCAGCGCGGGCCAGCGCAAACTGAGCTGGCGTTTTTTTTCATGGCCGTCGACGTTTTTATC  
GCCGACGACAGGCGTCACTGATGTTCTGCTGCTGTTTGGAGGAGCTTGGCGCGGAGTTATCACCTGCCACGCTC  
AGCGGTCGGTCTGTTTTATGAAGCGCGAACTCCTGGACGACGCGCTGATGATGCGGCTGGTGCATGGCGATGATG  
GGTGAAGAGGTTTACGAGAGCGCCATGCGCATCAGACTGGCCTCAGCAGTATCAGAACGAACTCGCGCTGCAGGGG  
CAGGACTACGAGGAGGTCATGGAACAACAGGAATACGAAATTCAGCCTCGCGCGGCAAAATGGGGCTGAGCGAACCATCTG  
GTCAGTATCTCACCCCTCAAATACCAACGATAACGGCTGGGAGGTAACGTA

>Cluster\_29514

ATGATCGTTAAGTTTACCCTCGAGGGCGGGCGGTTGGCGCGGTTCCGTTGGATTATCTGCTGGGAAAGACCGACAGCG  
CGACGGCGCCACCGTTCTGCAGGGGAAGCCGGAAGAAGTACAGGAGCTTATCGACGCCTCGCCCTACGCAAAAAGTACA  
CATCCGGCTCTGTTCTTTGCCAAAAGGATTTACCGCCCGGCGAGCGGAAAAGCTGATGGCGAGCTTTGAACGGGTT  
CTGATGCCCGACTCGATAAAGACAGTACAGCGTGTATGGGTTGAGACCAGGATAAGGGGCGGCTGGAGCTGAACCT  
CCTGATCCCAACATGGAGCTGCTGACAGGACGGGCTCCAGCCGTTATACGACCGCGCCAGCCCTCCGCGCTGATGATG  
CCTGGCAGACACTCGTGAACCGGACGCTGGGGCTGCATGACCCGAAACGCGCTGAAAACCGGGCGGCGCTGGTCAAGCGG  
TCCGCGCTGCCAAAACGAAGCAGGAAGCGCTCAGGCAATTACAGGGGTTTACTGGCTTAGCCTCTCGGGGAGCT  
GAAAACCCGCCAGGAGCTCACTGAGGCGCTAGAAAAGCGAGGTTTGGAGTGGTGGCACCACAAAAGCAGCATCAGCA  
TTGCCACCCGAGCGGGGCGAAAACATCCGACTGAAGGGAGCATCTATGAACAGTCTTTTAAAGCTGAGGAGGAGCTT  
AGAGCAGAAATCGAAAGCGCAGCAGCAGAGTACCGCGAGATGCTGAAAGTCCGATTCAGCGAGCAGGAAAGTTGTCA  
GAGCGAACTGAGCGAAAGCGAGAAGAGATCAGCGCCGCTCCTCGACCACGACCGGAAGTGTCTCAGCCATGAGC



CAGCGCACGAAAGGCATGGTGGCGTATGGTACGCCAGACGCTGGCTGACCATCGTCTGGTGTCTACTGCTGACAGCAT  
GGGCGCAAGCATTCTATGGTGGCAGGGGAGCAGATACTCGACAAATTACACGATCATCCGGGAGCAGAAGAGCACGAGG  
CCATGCTGTCCGAGAGAAACAGCGGGCTGCAGCTCTCGACCTGCGGAGAGCAGAGACGGCGCTGCGTGAGGGTGAACCCG  
GAAGCGGGACGGTTCCGAGAGGATTCGAGCTGGATGATACTGGCGGGGAAATAGCACATGACGGAGCTGGAAAAACAGTT  
GCTGAGCGCATTAGACAGCTACAGCAGACTACTCGAAAAGGCTGGACGAGTGGGAGAACGCCTTCGGCGAAATGGCGGA  
CGATGTTTTGGTCTTATGCAACGGGAGAAACGCGGCGCTGAGCGAGCGGCTCACGGGCTTGGAGCAGCGAGGTGCAGAGTTTG  
AGCGAGCAGCTGCCCGGTTGTACAAGCTGAACGTGATAGAGGCACATCGTGGAGCAGGACGGGCGGCGCAGCATCAG  
AAAGCGCTGGAGCTGGAACGATCTCAGCGACAGCGAACGTACAACGGTCCGTCACCTTTGA

>Cluster\_60058

ATGGTTTTCCGAAACTAAAACCACAGAAGCGCGGGCTTACGCCGTGAATTAAGGCGCGTACCTGACGATGATTGCCAT  
TGGCGGTTCCATCGGTACAGGTCCTTTTTGTGCTCTGGCGCAACGATTTCTCAGGCAGGTCCGGGCGGGGCATTTGCTCT  
CGTATATGCTGTTAGGCTGATGGTTTACTTCTGATGACCAGTCTCGGTGAACGGCTGCATATATGCGCGTTTCCGGT  
TCCGTTTACCCTTACCGTCAAGACTATGTTGAAGAAGGCTTGGCTTCGCGCTGGGCTGGAACACTGACTGCAACTGGG  
GGTACTATCGCCGTTGACCTGGTTGCAGCTCAGCTGGTATGAGCTGGTGGTTCCCGGATACACCGGGCTGGATCTGGA  
GTGCGTTGTTCTCGCGCTTATCTTCTGCTGAACTACATCTCAGTTCGTGGCTTTGGTGAAGCGGAATACTGGTTCTCA  
CTGATCAAAGTCAAGCAGTATTTGCTTTATCATCTGGCGTGTGATGATTATCGGTATCTTCAAAGGCGCGCAGCC  
TGGCGGCTGGAGCAACTGGACAATCGGCGAAGCGCCGTTTGTCTGGTGGTTTTGCGCGGATGATCGCGCTAGCTATGATTG  
TCGGCTTCTTTTTCCAGGAAACCGAGCTGATCGGTATTGCTGCAGGCGAGTCCGAAGATCCGGCGAAAAACATTCACGC  
GCGTACGCTCAGGTGTTCTGGCGAATCCTGTTGTTCTATGTTGTCGCGATCCTGATTAACAGCCTGATTAATCCGTACAC  
CGATCCGAGCTGCTGCCGTAACGATGTTAAAGCATCAGCGCTAGTCTAGCTTACCCCTGGTGTCCAGCAGCGGGTCTGC  
TCTGCGCGCGGCTGATGAACGAGTATTCTGACGCGGCTGCTGTGACGCGGTAACCTCGGTATGATGCTACTACT  
CGTATGCTGACACCTGGCGTGTGACGTTAAAGCGCGCGCATTTTCGCTAAACTGTGCGTGGTGGCTGCGCGTAA  
TGGCTGTATGCGACGACGGTGAATGCGCGTCTGTGCTTCTGACCTCCATGTTTGGCAACGAGCGGTATACCTGTGGC  
TGCTGAACACCTCGGGGATGACGGGTTTTATCGCTGGCTGGGATGGCATTAGCAGCTATGCTTCCGCTCGGCTTAC  
GTATTGACAGGACACGACATTAACGATCTGCCGTACCGTTCAGGTTTCTTCCACTGGGGCGGATCTTCGATTCATTCT  
GTGCTGATTATCACTTTGGGCCAGAATACGAAGCTTCTGAAAGATACTATTGACTGGGGCGGCTGAGCGCAACGT  
ATATTGGTATCCGCTGTTCTGATTATTGGTTCCGGTACAAGCTGATTAAGGAACACTCTCGTACGCTACAGCGAA  
ATGAAGTTCCCGCAGAACGATAAGAAATAA

>Cluster\_40284

ATGAGTTTTGCAGCTACTGATTATCCATCCGGCGCAGTGGTGGTACACATAATGTGACTTTGAGCGGCAGCGC  
AGTTCTGATGGAATGTTACTGTTTGAAGCTTAGGGGGGACAGAAACAGTAGGGGAACATTTACTTATTCTATTAAT  
TAAAACCTCTGACATCTGAACCTGGACTATGTTTCCCGCAGCCAACTCGAGCTCAAACCGATGGTGGCAAGAT  
CTGTGCGTCAATATCGAAGTGGATGGCGCGGAAACGGTATATCAGCGGGCTGGTGCAGCGGCGCAGCGTGGCCGCTCA  
TCAAGGACGCTCGGTGGTGTATGAACCTGCGACTCGAACCGTGGTAAACACATGACCCACACTAGTACTACAAGCGT  
TTCAGAATAAAAACGCTGGTGGACATCTGGATGAGGTACTGATGAGTACCCCTGGCCAGTGGAAAAACGATTTGGTAGAA  
AACTATCCGACTCGGCTGGCAGGTGCAGTACGGTGAACAGATTTCGATTTTATTCAGCGCCTGATCGAGGATGGGG  
TATCTACTGGTGGTTTGGACACAGCGAGAACAGTACACGTTAGTGTGGCTGATGCCATTAATGTCCACAAGGCATGCG  
CAGATTCGCGCTGGTGTGTTATACCAGAAAGGGCTGAACTGGCAAGGATTTATCCATACCATCACAGAAATGAA  
AGTCTGCGCAGCGGACAGTGGTGTGATTTGCTGAAATGAGCACTACGAAATGGCCGGGAGATTACTTCAAAAGAGTGAAGGTGAAATCG  
TGCACGCTATCCGATGGAAGAACAGCGTAGCCCGGTAGTCCGGTACAGGGCAGCGGCGAGGAGCTTACGACCCCGG  
CGGGCGACTGAAGCGCAGGGGAGACATACAGCGGGATGCGCGGGTGGTTCCGGACACGTTACGCGACCGGAGTACAGCT  
ACAGCGCGGAGGGGAAACGGACTACTTCTATGACACACCGGGCGCATCACGGCTGTGCTCGGAGGATGAGGGGTATC  
TGGCGAGCTGGGAGTACGACGCGCGGGCAACCTGCTGGACAGGCGCGGGGGGAGGGCCACGGTAGAAAAACAGCGTG  
GTGCTGTTCAACCGGCTGATGCTTACCCTGGTGTGCACTACCCTTATGACGAATTTGGCCGTGCGGTGGAAAAGGAGGG  
CGGGAGCGGAACACAGAGTTACCCTTATGATGCGGAACACCGGATGGTGGAGGTGACGACAGCGCGGGAGACATACCGGT  
ATGTTGACGATGCGCTGGGGAGGCGGACGGAACAGCACATCAGCCCTGACGGTAAACCGTACAACCGGACAAAATTTT  
TATGGGACGGAATGCGGCTGGCGCAGGAGAACAGGCGGAGGGAAATAA

>Cluster\_40934

ATGATAAAGAATAAAGGATTTACCTTACTGGAAGTCAAGTATTGTTTTAGGTATTGGAACGCTTATCGCTTTTATGAAAT  
TCAGGATATGAGAAACAATCAGGAAGCGTATTGGCTGATAATGTCGGAACACAGATTAAACAGCTTGGAGAAGCGGTTA  
ACCGCTATATCAGTATTCGCTATGACAAGATATCCACTGTCAATCAATCAAAAGCAGCGATCCGGGGCCAAGA  
ACCTGTACGCTAATGGCTGTGAAATCACTTACAGACGTTAATTAATGAAGGTTTGTGCTGTAGGCTATACAGGAAC  
TAACCGCGAAAAGCATCTTACAAAATTTGTTAAAGCGTTCAGGAACCGCGCTAATTAACGTGATTAATGGCCTTATAA  
CAACCCGACCCGTTGGGAAGAAGGTGGTCTGATTTGTTATGACCTGTTAGGTAAGCGGTTTACGCGCGAGGTTGAT  
GGTGGTATGAGCAGAAGCACAAGATCGCTTCTGGTTATGGTGGTCAAGTGGAGTGAAGTCTAACAGCTACAATAACAT  
CACGGGTGGTGGATTGCTGGCTTACCCTGGGTTAATCTTCAATGATTTCTGTTTACCTGCGCGTGTGGGACGCT  
TGCCGATGACGGGTGATCTGAATTTGGTGGTAAAGCATCAAAAACATCAAAGATATGACGGCATCAGGAACAACAACA  
ACGGGAGCACTTAAAGACAACCGGTAATGCTGTTGTCATGATCTGAGTGTGGGTGGAACCTCGACCCCTAATGGTCC  
TGTAATAATCAACAACAATCTGAGGGTAAATCCGATACCTATCTGAACACGCTTCAACAACAGGCTTGGCGAAGTTTG  
GTAGTCTGATCGGACGAATGGACTTAAATCAAAACGATCTGCTGCTGGCTGGGCTGGCGGTTTTCGACCTATGATTTA  
TATGCTCAGGGACTTTGGTGTAGGAACCGGAAACAGTTAAAGCTTACATGAATAATGCGGGTAAATTTTATGCTTC  
AGGTAATCTTACTGCGGAAACGATAAAAATCAACGGAACAATGAATCAACAGGCAGAAATCAAAGCAGGTGAATATCTTC  
ATTTGAATGGTCAGGCAACGTTAAATGCGAAATATACGCTAATGGTCTGGTGGGGCAGACAGTGGCGGTAGGATGTTA  
TCGTGTGTCAGTGGTAAATGGCAGACAGTCAAGTGGTGTGAAAGGATTTTATCACAAATAACAGATCAAAATCTC  
TGGTTATAAATCCGCTTATACCAATAGTACACCTGGGACATGCTGCTTCCCGGATCAACCTCAGTTTGGTT  
ATATATCTGGAATTTAATCGCTGAATACGATGAACGAGCTTGTAGTGGTAGTAAAGACGAGCAGTGTATAGTAATATA  
AGAAGGTTATATCGGTGTAGATAA

>Cluster\_57886

ATGAAAAAAGTAAATCATTGGATCAACGGTAAAAATGTTGACGTTAACGACTACTTCCAGACTACCAATCCGGCAACGGG  
TGAAGTGTGGCGGATGTGGCTCCGGCGGTGAAGCGGAGATCAATCAGGCGGTAGCGGCAGCGAAAGAGGCGTTCCCGA  
AATGGGCCAATCTGCCGATGAAAGAGCGCGCGCTGATGCGCGCTGCGGCGATCTGATCGACAGAACGTCGCGGAG  
ATCGCCGCGATGGAACCGCGGACACGGGCTGCCGCTCAGACCAAAAATGTGTTGATCCCACGCGCTTCTCACAA  
CTTTTGAATTTTTCCGGGAAGTCTGCCAGCAGATGAACGCGCAAGACTTATCCGGTGCAGCACAAGATGCTCAACTACCCG  
TGGTGCAGCCGTTAGCGTTTGTGCACTGGTGTACCGTGAACGCTGCGGTTTATGACCGCCACTGGAAGGTGCGCGCG  
TGTCTGGCGCTGGGCAATACCGCGGTAAGAAATGTCGGAATCTCCCGCTGACCGCTGACCGCTGGGTGAGTGTGC  
GCTGGAAGCGGTTATCCGGCAGCGGTGCTGAACTGGTACAGGGCTACGCGCAACCCGAGGGGATGCGCTGCTGCT  
ATCATGACGTACGTGCGGTTTACCGCGGTTACGGCCACCGGGCGCAACATCATGAAAAACCGCGGCTGAAAAAA  
TACTCCATGGAATGGGCGTAAATCGCGGTTGATTTTTGAAGATGCCGATATTGACGCGCGCTGGACGCGCCCT

GTTACCATCTTCTCGATCAACGGCGAACGCTGCACCGCCGGTTCGCGCATCTTTATTACGAAAGCATCTACCCGGAAT  
TCGTTAAACGCTTTGCGGACCGCCAAACCGTCTGCGCGTGGGCGATCCGAACGATCCGAATACCCAGGTTGGCGCGCTT  
ATTAGCCAGCAGCACTGGGAAAAAGTCTCCGGCTATATCCGCTCGGCATTGAAGAAGCGCAACCCCTGCTGGCGGGCGG  
CCCGGATAAACCGTCCGCACTGCTGCGCACCTGAAAGCGCGCAACTTCTGCGCCCAACCGTCTGGCAGACGTTGATA  
ACCGTATGCGAGTCCGACAGGAGATTTTCGGGCGGCTGCTGCGGTTTAAAGACGAAGCGAAAGCTTA  
CGTCTGGCAAACGACGTGGAGTACGGCCTCGCGTGTACATCTGGACACAGGATGTACGAAAGTGTTCAGCCTGGCGCG  
TGGATTGAAGCTGGCATGGTGTGCTAACACCCAGAAGCTGCGTGACTGCGCCAGCCATTGGCGCGGTAAGGCT  
CCGGCACCGGGCGTGAAGCGGTGAGTACAGCTTCAAGTGTTCGCGGAAATGAAGAAGCTCTGCATTTCCATGGCGGAC  
CATCAAATCCGAAATGGGAGTCTGA

>Cluster\_35623

ATGACAATAAGTTTTAGTGTCTTCCGTGCAATACGCTGGTGCCTGTTGTTCTACGCCGAGATGGACAATCTGCGGCAAA  
TACAGCGGTGACAGCGCCCTGCATTACTGATGGGCAACGAGGCAACGATGCTGCCATTGAGGTTAACAGCCTGGTGC  
TGATGCCGTGCGGAGATTATGCCGTGATTTGAGAGCGGGAGCCAGCTGCGCGTATGGTFCGAAATACCTCCAG  
ACAGATCCTTTCCGTGAAGTGTATGTTATTCGGTACCGGAAGCCAAAGGGCGGGCAACGGTCAGGGTGACGGTTAC  
CGGAGAAGCAGAGAAAGCGGCACCCCTGAGTCTGTATGTCGGGCGCTCCCGTGTACAGGTGCCGTGGTGAATGGCGATA  
ATGCCACTGCGGTTGCCACCGCGATTAAGGAAGCGGTAATGTTGTTATCACCTGCGGTTTACGGCGTCACTGTAGTCA  
GGTGTGGTACACTGACTGCCCGTCATAAAGGGGCTGTATGGTAACGAGTCACTGTCTGCTGAATTTATTTCTCG  
TGGTGGTGAATTTCTGCCGCGGACTTACAGTCTGACGGAAGCCGGAAGTGCAGGTAGTGGAGCGCTGATCTTACCG  
CCGCTGTTGCCGCTATGGCGGATGAGGTATTGATTTTTATCGGCTGCGGTTCAACGATGCCGCTCCATCAATATGATG  
ATGACCGAAATGAATGACAGCAGCGGCTGAGTATGTCGCGCCAGTTATACGGGCAATGTCATACCGCAAAACTGGG  
AACGCTGTGAGAGTGGTGGTGGCGGAGATATGCATAATCAGCAACATATCACGCTTCCCGGTTACGAAAAAGAAACC  
AGTGCCTGTGATGAAGTGGTGGCAGTGCCTTGGCCGTGAAGCGGATTTTATCCGGAATGATCTGCCCGTCCGACA  
CAGACGGGGGAGCTGGTGGGGATGCTTCCGGCACCGAAAGTTAAGCGATTCATCATGACAGAGCAGCAGACCTTTTATC  
TCACGGCGTGGCGAGCTTATGTTGGAAGCGGACGTTGCGGATCCAGCGTCTGTAAACCATCAAAAAGAAATGCGT  
ATGGCGTGGCAGACAACAGCTATCTGGACAGTGAACCTCTGCATACCAGTGCATATGTTCTTCGCAAACTGAAATCGGTC  
ATCACAAGCAAGTACGGAGCTCACAAGCTGGCAATGATGGTACCCGTTTGGTCCGGGGCAGCGGATGTCACTCCTGC  
CGTTATCAAAAGGGAACTTCTGGCGACATATCGTCAGATGGAGCGTGCCTGATTTGGGAAAAATTACGATCTGTTAAAC  
AGTATCTGATGTTGAGCGTGTATGCGGATAACCGAACCAGCTGAATACGCTGTTCGCCCGGATTATGTTAATCAGTTA  
CGTGTCTTTGGCGTGGTTAACAGTTCCTGCTTTCAGTATTCAGAGGAGTACGACATA

>Cluster\_23420

ATGACGGATGTTATTTCTTATGTTTCGCATATTGCGAAGACATTTGGTCAATGTTACGGCATTAAAAGATATTACACTCTC  
TTTACGTAAGGGCGGGTGCATACTTTATAGGCGAGAATGGTGCCGTAATCGACATAATGAAAAACTGCGCGGTG  
TTTATCCGCCAACCCAGGAAACGATAACACTACGTGGTGAACCATCACAAATTAATAATCCGCAGCATCTCGCCAGTTA  
GGGATTGCCGATTTTTCAGGAACTGAGCCTGAGTAATAATGACCGTGGCGGAAAAATATTTATGCCAATAATGAACC  
GGCAGCTTTTGGCATATTAACGATAAAAAATGCTCGCAGATTGCCAGAAATCTCCTCGCGGACCTGGGCATACCCTAG  
ACCCATGAAAATGGTCGGCAATATGTCGATGGCATAAGGCAACTGGTAGAAATGCTAAAGCCTTAAGCTTACGCGG  
GATGTCGTGATTATGGATGAACCGACATCTTCGCTAAGTATAATGAAGCGGAGATCCGTTTAAATATTGAAAAAT  
AAAGCAGCGAGGCTGTGCGGTTATTTATATCTCATCCGATGGATGAAATTAAGCGGATTTAGATGATATTTCCGGTGA  
TCCCGACCGGTGAGTATACTGCTACGCATGAAAAGAAAACAGTGAATCCAGCACTGATTTGCCCAAATGGTGGTGG  
GAAATGAAAAATATTGGCCAGCAGCTCTTGGGAAAAACCGGATGAAATGTTACTGCAAAACTGGAAGTAAAAAATCT  
TTCCCATCCTTCGCTTTTAAAGAGGTCAGTTTCGCTGTCGCTCGGGGGAAGTCCCTCGGATTTTGGCCTGGTGGGG  
CCGGCGTTCGATGTGATGAAGCGCTATTTGGCCTCGTTTCGATACCGGGACTGTGTGATTTGATGGTAAGGAAGTC  
AGGATCGCTAATCCCAACAGGCTATTGATCATGGCATTGCTTTTGTGACCGAAAACCGAAGGAAGGGTTAGTGT  
GATGCACGAGCTCAATATGAACAGCACCATGTGGCCTTCAATATAACGCTTCGCGGATGGGACTCATCAATCACCGAC  
AAGAAAGAGCGAAGCAGCTGCAATCAATGCGCAGAATGAACATAAAGTGAAGTCTGTGCATCAGGCAGTGGGAGCAGT  
AGCGGGGTAATCAACAGAAAATCGTGTATCGAAGTGGTGGAGAAAACCTCCGCGTATTTTATGTCGATGAGCCAA  
CGCGGAGTGGATGTCGGCGCAAAATTTGAAATCTATAACGTGATACGTTCAACTGGCTGCGGCAAGGCAAGCAATATT  
TGGTGTCTCTGAACTGCCAGAAGTCAATGGCACTTAGCGATCGTCTGGTGGTAAATGCGTAATAAAAACGATTGCCGATAT  
TATTCATGTGAAAATTTAACCGCAGACACAGGTAATGACCGCTGCAACAGGAGTACGTTAA

>Cluster\_28935

ATGGACGCCATGAAATATAACGATTTACCGGACTTCTTACGCTGCTTGAACAGCAGGGTGAGCTAAAACGATACAGCT  
CCCGGTGGATCCGCACCTGGAATCACTGAAATGCTGACCGCACTTTGCGTGCCTGGTGGCCCGCGCTGTTGTTGAA  
ACCTAAAGGCTACTCAATGCCGCTGCTGTGCAACCTGTTCCGTACGCCAAAGCGCGTGGCGATGGGCATGGGCGAGGAA  
GATGTTTCCGGCGTGGTGAAGTTGGTAAATTTATGGCCTTCTGAAAGAGCCGGAGCCGCAAAAAGGTTTCCCGGACCT  
GTTTGTAAACTGCCGCACTTTAAGCAAGTATTGAACATGTCGCGAACAAGCGACTGCGTGGTGCACCTGCAAAAAA  
TCGCTCTGCGGATGACGTCGATCTCAATCGTATTCCTATGACCTGCTGGCCGGAAGATGCCGCGCGCTGGTTACC  
TGGGGGCTGACAGTGACGCGCGGCCGCAATAAGAGCGGCAGAACTTGGGCATTTATCGCCAGCAGTAAATGGTAAAAA  
CAAATGATATGCGCTGGTGTGTCGATCGCGCGGCGGCTGGATTAATCAGGAGTGGTGTGCGGCGCATCCGGCGAAT  
GTTTCCCGGTTTCTGTCGCGTGGTGGTGGCAGTCCCGCCAGTATTCGCTGCGAGTACCCCGGATACCGGATACCTTCA  
GAGTATGCGTTTCCGGGATGCTGCGCGGCACCAAGACCGAAGTGGTGAAGTGTATCTCCAATGACCTTGAAGTGCCTGC  
CAGTGGGAGATTGCTGGAAGGGTATATCGAACAAGCGAAACTGCGCCGGAAGGGCCGATGGCGACACACCGGTT  
ACTATAACGAAGTCGATAGTTTCCGGTATTTACCGTACGCATATTACCAGCGTGAAGATGCGATTTATCATTTCCACC  
TATACCGGGCGTCCGCCAGATGAACCTGCGGTAAGTGGTGTAGCACTGAACGAAGTGTTCGTCGCGATTTGCAAAAA  
GTTCCCGGAAATTTGTCGATTTTTATCTGCGCGGGAAGGCTGTTCTTATCGCTGCGCGTGTGACGATCAAAAAACAGT  
ACGCGGACACCGGAAGCGGCTCATGATGGGCGTCTGGTCTTACGCCAGTTTATGTACACTAAATTTGTGATGCTT  
TGGATGATGACGTTCAACCGCACGCGACTGGAACGATGTGATTTGGGCGATTACCAACCGTATGACCCCGGGGATAC  
CGTTCTGGTAGAAAAACGCTATTTGATATCTGGATTTTGCCTCGCTGCTCCGGGCTGGGTTCAAAAATGGGGCTGG  
ATGCCACGAATAAATGGCCGGGGGAAACCAGCGTGAATGGGGAGCTCCCATCAAAAAGATCCAGATGTTGTGCGCAT  
ATGACGCCATTTGGGATGAAGTGGCTATTTTTAACACGGTAAAAGCGCTGA

>Cluster\_38700

ATGCAGAAAACATTAATGGCCAGTTTATGTCGGCTTGCAGTTTGCACAGGGAATGCTTTTAAATCCAGTCTAGCTGCCGA  
GACTAAACAAACCAATTTAGTCAATTTATGGCGGATGATTTAGGTTATGGCGATTTAGCAACATATGTTATCAGATCG  
TTAAAACACTAATATCGACAGGCTTGCAGGAGGGGTCAAAATTTACTGACTACTATGCCCCGCTCCTTTAAGTTCA  
CCTTCACGCGAGGGCTATTAACCGCGGATGCCATTTCTGACTGGAATTCGCTCATGGATTCTTACGCAAAAGATGT  
TGCTTAGGGCGTACGAACTCAGGATTTGCTAATCTACTCAAAGCGCAAGGGTACGACACGGCAATGATGGGTAGCTGC  
ATCTGAATCGAGCGCGGATCGCACCGTACAGCCACAAGCATAAGGCTTTGATTTACTCACTGTTAATACCGGCG  
GGCTTTGTTACCGAGCCAGCTGGATAACGCTAAAGAAGCGCCGCTTATGGCATGGTTTACCCGACAGCTGGCTAGC  
TAACGGGCAACCCACTCCAGAGCCGATAAAAATGAGCGGTGAGTATGTCAGTTCCGGAAGTCTCAACTGGCTGGATAACA  
AAAAGGACAGCAAGCCTTTCTTCTCTATGTTGTTTTACCGAAGTGCATAGCCCTGGCTTCGCCAAAAAATACCTC

GACATGTACTCACAATATATAGCGACTATCAGAAGCAGCATCCTGATTTATTTTATGGCGACTGGGCGGATAAACCCCTG  
GCGTGGTACAGGAGAATATATGCCAACATCAGTTATCTGGATGCTCAGGTTGGAAAAGTACTGGATAAAATCAAAGCCA  
TGGGTGAAGAAGATAACACCATCGTTATTTTACCAGTGATAACGGCCAGTAACCCGGAAGCACGTAAGTTTATGAA  
CTGAATTTGGCAGGGGAAACTGATGGATTACGTGGTCGCAAGGATAATCTCTGGGAAGCGGGCATCCGTTCCGGCAAT  
TATTAATAACCGTAAACATCTTCCAAAGGGAATGGTTCCAGATACGCCAGTTTATGGGCTGGACTGGATGCTTACGCTGG  
CGAAAATGATGAACCTCAAATTACCGACAGACCCACTTTTGGATGGCGAATCGTTGGTTCTCTGTCCTTGAACAACAGCG  
CTAAAACGTGAAAAGCCATTAATATTCGGAAATGACATGCCATTCAGGATGATCCAACCGACGAATGGGCGATACGTGA  
TGGTGACTGGAAAATGATCATCGATCGTAACAATAAGCCAAAGTACCTATACAACCTCAAACCGATCGTTTTGAGACCA  
TTAATCAGATAGGTAAAAATCCAGACATGAAAAACAAATGTATGGTAAGTTCTTAAAGTATAAAGCCGATATTTGATAAT  
GATTCATTAATGAAAAGCCAGAGGTGATAAACCGGAAGCGGTAACCTGGGGCTAA

>Cluster\_12490

ATGTTTGCAGCAAGCCGAATTAAGTCAAAGATGTATTTCTGGACTCCTCACAACCTGGGCCAAATGATGAAAACGTAAA  
TAATAAACCGTCAAGTGAATGCGCAACAGAATCAAACAGTTTGAAGCGATTACAAAATCGGTATATATACAACCTGACA  
GTAATACTCTGAAGGATGGATTGTGTAGCCAAGCCACATAGGAACTCAACCTTATCGGCCAGGTGCTGACTCGCCGATA  
ACTGTGAGATCATTCCTACAATCACACTTTCCAAACAATAATTACAAAATCATTAGAGCATCTGCAAACACGAGCAGAGAA  
TTATCTGAGGTATCGCAAGCAGAAGATAATTTCTGCTTCGACCGTTGAGGGGTACCAAATCCAGAATCTCTCTGTAT  
TCAAACAACACAGCATGGATGGGGCATCTGGAGCTGGCCCTTTGGAAAACCGGAAACAGCTGGGATGGAACACCGCCGAG  
CAGCTAGGCAAGAGGCTCTTGGCTCAGAGGAGCCAAAACCTGGTTCACCATTTTACGGTAGTCTGGACTAAAATTATC  
CGACAGTGGCATCTTGCCTTCTCAATGATGCTGTGCGGTTCTGAAGGTCCATTACAAAAGAAACAAGCACTCTCTGGTT  
TCGAGCTTGTCTCAAACCTGGCCAAAGTGTCTGGCTGGAAGCTAAAGATTCCAGGACGAGTTAAATCCCGCGACACCCG  
ATTTGATGCTCAGCTAACGGTACACACTCAACCCGACACCAACAGGCATGGATCTTTTCTCAAGATATCGGCACAATTA  
GCGTGATAAAGCTGGGCTACCGTTCATGAGCGGAACATCCGGTTCCTCTCTGATGCCACTCTTGCAACAGTTACGCTG  
CCGAGCATTTTGGTAAGACATGGGCCGCTCCAGGCTTAAGCCAAAGCAGAAGGATGCAAAGCTATCTCGGATCTGTACAT  
CACTATTTTTCGTGCAGAAGGCTCCAGTCCACCACAATCAATGGCAACGGGAATAAATAAGGTTCTGTATGATCGAGGAAT  
GGAAGAGAAATATGTAATAACACTGGATATATTTACACATAGCTACCCAGAAATTTATGCTGGGGTTGCATTGACGATTG  
CTGGGCTGGCGTAATGATGAGCAGGCAATGTATAATGTTACGCAAGAGCCGCTCGTATTTGACGCAAGCTGAAACT  
AAAGATTGA

>Cluster\_39261

ATGAATACATTTTTTCCGCTCGTATCATGAAGCGCTGGCGCTACCACGGCTCTTTGCACAGCCTTTATCTCTGCTGC  
ACATGCCGATGACCTGAATATCAAACCATGATCCCGGTGTACCGCAGATCGACGCGGAGTCTACATCCTGATTGACT  
ATAACTCCGGCAAAGTACTCGCCGAACGAAAGCGTGTATGTCGCGCGGATCTGCCAGCTGACCAAAATGATGACCAGT  
TACGTTATCGGCCAGGCAATGAAAAGCCGTAATAATTTAAAGAACTGATTTAGTCACTATCGGCAACGACGCATGGGCCAC  
CGGTAACCCGGTGTTTAAAGGTTCTTCGCTGATGTTCCCAAACCGGGCATGCAGGTTCCGGTTTCTCAGCTGATCCGG  
GTATTAACCTGCAATCGGTAACGATGCTGTGTGCGCATGGCCGATTTTGGCCGTTGGTAGCCAGGACGCTTTTGTGGC  
TTGATGAACAGCTACGTTAACGCCCTGGGCCGAAAAATCCCACTTCCAGACGGTACACGGTCTGGATCGTGTATGGTCA  
GTACAGCTCCGCGCGGATATGGGCTGATCGGCCAGGCGTTGATCCGTCAGCTACCGAATGAATACTCGATCTATAAAG  
AAAAAGAATTTACGTTTAAAGGTTATTCGCCAGCTGAACCGTAAACGGCTGTTATGGGATAACAGCCTGAATGTCGACGGC  
ATCAAAAACCGGACACACTGACAAAGCAGGTTACAACTTGTGTTCTTCCGACTGAAGCCAGATGCGCTTGATCTCTGCG  
GGTATGGCGGACGACTTTTTAAAGGCGTGAAGCCGAAAGTAAAAAATGCTAACCTGGGGCTCCGTTTCTTCGAAA  
CCGTTAACCCATGAAAAGTAGGTAAGAGTTTCGCTCTGAACCGGTTTGGTTTGGTGTATTTGATCTCGCCTGAGG  
GTTGATAAAGACGTTGACTCTGACCATTCGCGTGGTCGATGAAAGATCTGAAAGCCAGCTATGCTGAACAGCAGTGA  
ATTCATGCGCGCTGCAAAAAGAAATCAGGTCGTGCGAACTATCAACTTCCAGCTTGTATGGCAAAACGATCGAAACAGCC  
CGCTGGTTGTGCTGCAAGAAATCCCGGAAGGTAACCTTTCGCGAAAATCATTGATTACATTAATAATGTTCCATCAC  
TGGTTTGGTTAA

>Cluster\_56134

ATGAAAGAAAAACGATCATTTATGTCGGTGGCGGGCAAGCGGCGCAATGGCTGCGGCTCGCTACGCCAGCAAGGGTT  
ACCAGGTGAGCTGCATCTGTTTTCCGATGAGCGACATCTTCCCTTATGAACGACCTCCACTCTCGAAAATCCATGTTGCTGG  
AAGATTCCCGCAGTTACAGCAGGTGTTACCCGCTAACGGTGGCAGGAAAACAATGTTTCATCTGCATTCGGGTGTAACC  
ATCAAAAACGCTGGGTGCGGACACACGAGAGTTAGTGTTAACCAACGGCGAAAGCTGGCAGTGGGATCAGCTTTTTATAGC  
AACCGGCGCGGACGCTCGACCGCTGCGGTTGCTGTATGACTGGGAGAACGCTGCTTTACCCTACGCCATGCGCGGTGATG  
CCGCCAGACTGCGGAGAAGTTCTGCGAGCCGAACGGTCACTGATTTATCGGTCGCGGAACTATTTGGTCTGGAACGGCT  
GCCAGCGCCACGCGCAGATGTAAGGTGACAGTGTGAACGGCGCAACCGTCAATGGGCGTAATGCACCACCGCC  
CGTGCAACGCTATCTTTTACAGCGCCACCAGCAGGCTGGTGTGCGCATTTCTGCTCAATTAATGCCATTGAACATGTTGGTGC  
ATGGTGA AAAAGTAGAAGCTGACGCTGCAAAGTGGGAAACGCTTACAGCTGATGTTGGTATTTACGGTATTTGATATCAGC  
GCCAACGACCAACTGGCTCGCGAGGCCAACCTTGACTGTCGCAATGGCATTTGTCATTGATGAGGCTTCCGCGCA  
TCCCGCATCTTTGCGGTTGGCGATGTGGCAATCACTGCTTTGATAATGGTGCATACACCGCTGCGAAAGCTGGGAAA  
ACGCCAATAACAGCGCGCAAAATGCGGCTGCGCGCAATGTTAGGGCTACCGCTACCGCTACTGCGCGCGCGTGGTTCTG  
AGCGATCAGTACAGTGAATAACTTACAGTTTATGGCGATATGCGTGGCGATGACTGGCTTTGTGCTGGCAACCCGAAAC  
TCGAAGGCGATTTGGTTAATCTGCAAAAACGGCTGCTTATCGGTCGCGTACAGCTGAATCAGGGGCTGAGATTGCGC  
CAATTCGCAATGGATCCAGAGCGGCAAAACGTTTGTATGCGAAACTGCTGATAGATGAGAACATCGCGCTTAAATCACTG  
TAA

>Cluster\_48986

GTGCTGCTTGATGCTCTGTTTCCAGAGTAAATCACTGGAGAATCCTTCCACCCGATAACCGGGGATGCGGTTGATACTGA  
TGGGCTGTTCGGGCGAGCAGTTTATGTCAGTCCGAAACTGCGATGAAACTGGCTGCGGTGATTTCTGTATCTATGTCC  
TGCTTCCAGCCTTGCCAGATGCGGTTGCATGTTATGCGCAGGCACAATGGGAAGGTTGAGCCCGCAGCGATCATCCG  
CGGTTTATCTGGTTTCAATGATGAGCCCAATACCTGGCAACAGTACAAATGGCGCAACTGAAGCAACGCTCACACTCT  
TGGCTGGGGGAATGGGTATACCTGGGTGAAACGTAATCGTCCGCTGAAAGTCAATACCTGGATTGCTGTATGCGGTTGG  
AAACGACGCTGATGAATCTGGTGGCCGATACACCTACGGTTTGTACAACGAATATGGAGCGTTTGGCATCAGCCCGAC  
GATATGATCCACATCCGAGCGCTGGGTAATAATCAGAAGATGGGGCTGAGTCCGATTTGCAACATGCGGAAACAATAGG  
CATGGGATGAGCGGTCAGAAGTACACGAAAGCTTCTTACGGGTAATGCCCCGTCGCGGGGATAGTATGATAA  
GCGGACTCAATAAGGAAAGCTGGGGCTGGCTTAAAGAACAGTGGCAGAAGGCATCGCAGGCGTTACGCCCGCAGGAAAC  
AAAACCATGCTGCTGCCAGCGATCTGGATTACAGGCACTGACTGTGTCGCCAGTTGACGCTCAGATCATTTGACATGAT  
GAAGCTGAAACGTTCAATGATCGCCGTTATTTCAATATCTCGGCACATGATTAATGACCTCGAAAAGCCACCTTCT  
CCAATATTTCTGCGCAGGCGATTGAGTTTGTCCGCTACACGATGATGCCGTTGGGTGACGAACCTGGGAGCAGGAGCTTAA  
CGTCCGTTGTTTACCCGCTGAGTTAGCCGCGGATATACGTCAGGTTCAATCTGACGGGCTTTTACCGGAACTCC  
GCAGGAGCCGCGCAATTTATCACTTCCGATTTACCGATGGATGGATGAGCCGTAATGAGGCCCGCGATTTGAGGATA  
TGAATCCGGTTGAAAGGCTGGACGAGATGCTGGTAAGCGTGAATGCTGCTAACCCGGCAGGAGATTTTAAAGCCCCAAAA  
AACGATGAGGAAAAACCAATGAATGA

>Cluster\_67124

ATGTCAAATAATAAATTATCCAATTACTGTTAATATTCATCTTTCTGTTTCCGCTCGGAGTGTGGGCCGGGCAATTCAC  
CAAGAACATAACCATCCGGCCTGGAGCACAGACAGTGTTTACGGGGAATAATACCGTTTATGAAATGGCTCTAACATCAC  
AAACGTTTAAATTATAGCGAGTATGGGATGGGTTCTAATAGAGGAGGTGTATATCTGGAGCCATTTACATCAATTCCTTCG  
CCAGGTGATAAGCCTGTCTTGATGACAATTGTAACACTACTATTTGATATTTACAGGGAATTAGGTTATCAGTCCAAACATA  
CAACCGTGTAGTACTACTATAAGGCTCATGGGGTAATGGTGGGTATAAGGGAATCAGAGTGGGCCCGCTCGGTTCA  
AATCTACCTACAGGCATTTGTATGTTCTAAACGACAGTAAAATAAAAAAATAAAAAACGAAATAAAGGGGGAGTGCCGGTG  
TCCATTCTTCTGAAGGAAAGACCGTCACTATTACATTGAAGCAATGCATAGTGTGATAACTTTTACATGTCCAC  
TTGTAATAGCCTTAAACCGGTTACGTCGGTATTAACCTGACTTTGAACATAACTGTACCACCACCACTTACCCAAAG  
TACAGTGTACTACTGTCCTTGGTCTAACAGCATTAATTTTCAGCCCGTTACTGTTCCGGTTGAAAACCTCAAAATCAGGT  
CAGGCAACCTGGCCTCTGAGTGGTAGTAACCTTTGTCGGTGTGAGAAGCAGAGTGCAAGTCTGAATGTAACTGTAAATCA  
CATTGACACGGGACTCTCCAGTTTTCCTTTGAGTGTGAGATTAACGGGGCGAACTGGACATACGGACAAAATGGTGAAC  
TTTACTTCGATACGTAGCGCAGTATCGCTGTAGCTGCGAATTTGAGAAATGGAAGCCACAGGTAACGGTACCTTAAATCTT  
GATACTTCCAGAACTACTGTATGCCAATTAACCTGCTGATTCAGTCCCATCCGAAAGTTGGATTTGAAATGGGGCCGGTCAAAAT  
AAGTGAGTACTTAAGTGCAAAACGAATCTGCCTGTCACTTATTCACACTCTGCCAACAGCGAGTAATGTTGTCGAGGGTT  
TTAGATTTACACTGAATGCCATTCTAGGGGTGTCAAAACAGAAGCTAACTTACTCTCCAACTTATGGTGTGCACAAAGGT  
GCATTAATGCTGGAAGTAACTCATTATAA

>Cluster\_26607

ATGCAACCTGGGAAAAGATTTTTAGTCTGGCTGGCGGGTTGAGCGTACTCGGTTTCTGGCAACCGATATGTATCTGCC  
TGCTTTCCGGCCATACAGGCGGACCTGCAAAACGCTGCGTCTGCTGTGAGTCCAGCCTTAGTCTGTCTTCCGGGTT  
TTGCCGACGCGCAGCTTCTGTGGGGCCACTCTCCGACCGTTACGGTCTGTAACCGGTTTATTCATCGGCCTGACAAAT  
TTTTGCGTTAGGTAGTCTGGGGATGCTGTGGGTAGAAAACCGCCAGCTGCTGATATTGCGTTTGTACAGGCTGTGGG  
TGCTGCGCCGGCGGTTATCTGGCAAGCATTAGTGACAGATATTAATCCTTACAGAAAGTTAACCGTATTTTTGCGA  
CCATCATGCGCCTGGTGGGTCTGTCTCCGGCACTGGCTCCTCTGTTAGGAAGCTGGTCTGTGGTCCATTTTTCTTGGCAG  
GCGATTTTCCGACCGTGTGGTTCATTACCGTGGTGTGCTTACCTATTTTCTGGTCAAAACCCAGCAGGCGCCG  
TAACAATAGTCAGGATGGTCTGACCTTTACCGACTGCTACGTTCTAAAACCTATCGCGGCAACGTCGATATACGCAG  
CCTGTTACGCGAGTTTTTTTGCATGGCTGACCGGTTACCGGTTTATCTAGTAAATGGGTTACAGCCCGCAGTTAT  
GGTTTAAAGTTATGTCGCGCAAACTATCGCGTTTTCTGATTGGTGGTATGGCTGTGCGCGCGGCTGCAGAAATGGCAAGG  
CAAGCAGTTATTACCGTGGTGTGCTGCTGTTGCTGTCAGCGCTCATTTGTGACCTGGGCTGCGGGCTTCATTAGCCATG  
TGTCGTTGGTCAAACTCTGATCCCATTTCTGTGTGATGGCGATTGCCAACGGCGGATCTACCCGATTGTTGTTGCCAG  
GCGCTGCGTCCCCTCCACATGCAACCGGTCGCGCCGCAAGCTGTCAGAACACTCTGCAACTGGGTCGTGCTTCCCTCC  
AAGTCTGGTAGTTTTCTGGCTTATCAGTATCAGTACGCCATTGCTCACCACCAGCGGTGATGTTATCAACAGTAGTGC  
TGGTCGCTCTGGGTTACATGATGCAACGTTGTGAAGAAGTTGGCTGCCGAATCATGGCAATGCCGAAGTCCGCTCACAG  
GAATCACACTGA

>Cluster\_20087

ATGGATCATCTACCCATGCCGAAATTCGGGCGGTTGGCCGGATTGCGCGTTGTCTTCTCCGGTATCGAAATCGCCGGACC  
GTTTGGCCGGCAAAATGTTTCGAGAAATGGGGTGGCGAAGTTATCTGGATCGAGAAGCTGCGCTGGGCGGACACCATTCGGC  
TTCAACCGAACTACCCGCAACTCTCCGCGCAATTTGCACGCGCTGTGCTTAAATATTTCAAAGATGAAGGCCGCGAA  
GCGTTTCTGAAATTAATGGAACACCCGATATCTTTCATCGAAGCAGTAAAGGTCGGGCTTTTCCCGCTGCTGGCATTAC  
CGATAAGTCTTGTGCGCAGCACAAACAAAACCTGGTTATCGCTCACCTGTCCGGTTTTGGTCAAGTACCGCAGCAGGAGT  
ACACCAATCTCCGGCTTAAACACTATCGCCAGGCTTTCAGTGGTTACCTGATTCAGAACGCTGATGTTGACAGCCA  
ATGCTGCGCTTCCGATATACCGCGATTACTTTTCTGGCTGACTGCCACCACGGCGGCTGGCAGCAGTGCATAAAGT  
CGGTGAAACCGGCAAGGCGAAAGCATGACATCGCCATGTAATGAAATGATGTTGCGCATGGGCCAGTACTTTCATGATGG  
ATTACTTCAACGGCGCGAAATGTGCCCGCATGACCAAAAGTAAAGATCCCTACTACGCGGTTGCGGCTGTGATAAA  
TGCGCGCAGCGCTACATCGTATGGAACGTTGGGTTACTCAAATTCAGAGTGTCTTAAAGATATTGGCTCAGCGCA  
TCTGCTCGCAGCGCAGAAATTCGGAAGGCATCAACTTATACACCGTATCGAATGCCCTTACGGCCACTGTTAGAAAG  
AGAAACTCGATGCTGGCTGGCGGCACATACATCGCAGAAGTTAAAGAACGCTTTGGCCGAACTGAATATCAACTGTGTC  
AAAGTACTGACCGTACCGGAACTGGAAAGCAATCCACAGTATGTTGGCTCGCGAATCAATCACTACGTTGGCAAGCAGTGA  
TGGTGCACCTGCAAAAGGCGCAACATCATGCCGAAATTCAAAATAACCCCGGCAAAATCTGGCGGGAATGCCCTCAC  
ATGGCATGGACACGGCTGCCATTTTGAATAATACGGCTACAGCGAAAACGACATTACAGGAGTGGTACGAAAGGCTG  
GCCAAAGTTGAGGACTAA

>Cluster\_43994

ATGCGCATCTTACACCTCAGACTGGCATCTCGGCCAGAACTTCTACAGTAAAAGCCGGAAGCTGAACATCAGGCTTT  
TCTTGACTGGCTGCTGGAACAGCACAAACCATCAGGTGGATGCGATTATTGTTGCTGGTGTGTTTTGATACCGGCT  
CGCCGCCCAGTTACGCCGACGTTATACAACCGTTTTGTTGTCATTTACAGCAAATGGCTGTCTGTTGGTGGTACTG  
GCAGGAAACCATGACTCGGTCGCCACGCTGAATGAATGACCGCGATATCTGCGGTTCCCAATACGACCGTGGTCCG  
CGCCGACATGCGCCGAAATCTTGCCTCGTCCGACGGGACGCCAGGCGAGTGTGTCGCCATTCGCTTTTACGTC  
CGGCTGACATTTATACAGCCAGGCGGGCTTAAACGGTATGAAAAACAGCAGATTTACTGGCAGCGATTACCGATTAT  
TACCAACAACACTATGCCGATGCTGCAACTCGCGGGGATAGCCTCTGCCATCATGCCACGGGACACTTAAACGAC  
CGTGGGTTGCCAGTAAAGTACGCGCTGACGCTGACATTTATATTGGCAGCTGGACGCGTTTCCAGCACAAAACCTTCCAC  
CAGCGACTACATCGGCTCGGGCATATTCACCGGCACAGATTTATTGGCGCATGGAACATGTTCTGCTATTGGCGCTCT  
CCCATTCCACTGAGTTTTGATGAATGCGGAAAGAGTAAATATGTCATCTGGTGTGATTTTCAAACGGCAAAATAGAGAG  
CGTGGAAACCTGAACGTTACCGGTAACGCAACCATGGCGGTCGTAAGGCGCATCTGGCGTGTGATACCGCAGCTGG  
AACAGTGGCGCATGATCACAGGAGCCGCTGTCTGGCTGGATATCGAAATCACTACTGATGAGTATCTGCATGATATT  
CAGCGCAAAATCCAGGCAATTAACCGAATCATTTGCTGTTGAAGTATTGCTGGTACGCCGGAGTGTGAAACAGCGGAGCG  
TGTGTTAGCCAGCAACAGCGTGAACCCCTCAGCGAATCAGCGTCAAGAGGTTCAATCGCGCTGCGACTGGAAG  
AATGGATGAATCGCAGCAGCAACGCTCTGCAGCATCTTTTACACACGAGCTTGATACCTCGCCGGAGAACGAAAGCA  
TGA

>Cluster\_61304

ATGAGTAATATTGTTTACCTGACAGTAACGGGAGAACAAACAGGAAGCATCTCCGAGGTTGTGGACTTCTGAGTCTAC  
AGGTAATCGTTGGCAGAGCGGGCATGAGGATGAAATATTTACATTTCTACTCTTAAATAATATTAATAATACGGGCTTG  
GTTACAGTTCATGGTATAAATTTTGTAAATTAATTGATAAAGCACTCCATTTATTAATCCATTAACAATAAT  
GAACAATTTATTTAGGATTTGACTTCTATCGAATAAATAGATTTGGTAGATTGGAAGATATTTATATATACAACTAAG  
AGGCGCTTTTTTATCGGCTATTTCATCACCAGATCATTTGAAAACCAACTGGATACAGAAACAATAACTATTAGTTATGAAT  
TTATCTCTGTCAACACTTATCGCAAAATCCGAGTTTACGCTATTTGGCACTCCCTGAAAATTTATAACCGTTTGTTTTA  
CCAAATTCAAAAACCAAAACAAATAATCGTTTCAAACGTTAAACAGCAAAGCTATTGGCAGGCTACTTGTGCTGGTGG  
CGTATACAAATGGGAACATGGAAGGATTCAGAGATACTGCGGAAAAAATCGGGTGGAGATGCAATAAAGGCTATGATCAAA  
TACTAAATGAAAAACAGCGGGCATAGCGATAGCAACAGCATTTATCTTTTAAACAAAGCGTTTCAATGTTGATACATAT  
ACAGAAATAAATAGTTACTTAGGCAAACTTAGAGGTCAACAAAAAATCTTGTATGGTATAGACATAATAGAAATAATATA  
CATTAAGAGACCTTCAAAGACTTAGCTAATTTACGAAAGGAGTTTAAATAAACTGTAAGAAAAAATTTCTTATCAAC

TTGCAAAAACCTCCGAAGCATCTGGAAGATTCACGCCGAAGACCTTTTAAGAATGAGAAAGGGCAATGTTCCTCTAAAT  
TATAATGTTACCCATAAACTATCTCTAGATGATGGTGGTACTAATGATTCGAAAATTTAGTATTAATCGAAAACGAACC  
ATATCATAAAGTTTTTACTAACATGCAATCAGCAATAGCTAAGGGAATATTAGTAGGTGAAAGCAAAATCACTCCCTGGG  
CATTTCATCTGGCTCAATTTATCTCCCATGAAAAATATTATGGACCACAAAAATGA

>Cluster\_42413

ATGACTAACAGCAATCGCATCAAGCTCACATGGATTAGCTTTCTCTCCACGCACTGACCGGTGCGTTGGTTATTGTCCAC  
CGGGATGGTGGTGGGAAATATCGCGGATATTTCAATCTGCGCTTTCCAGTATGAGTAAATACCTCACCTTCTCAACG  
CCGGCATTTTAATCTCTATCTTCCCTCAACGCCTGGCTGATGGAATCGTCCCGTTGAAAACGCAGTTACGTTTTGGCTTT  
CTCTGATGGTGGTGGCGGTTGCGGTTTGATGTTAGCTCAGCCACAGCCCTGGCGCTGTCTCGGCGCGATGTTCAATCTCGG  
GGTGGTACAGCGCATCACCATGTCGATTGGTACATTTCTGGTAACACAAAATGTATGAAGGACGTCAGCGCGGTTACAGCC  
TGTATTTTACCGACTCCTTCTCAGTATGGCCGGGATGATTTTCCCAATGATCGCCGCTTTCTGCTGGCAGCTAGCATT  
GAGTGGTACTGGGTTTATGCCTGCATCGGGCTGGTGTATGTTGCTATTTTTATTTCTGACCTTCGGCTGTAATTTCCGGC  
ACTGGGCAAAACATGCGCCAAAAACAGATGCTCCGGTAGAGAAAAGAAAAGTGGGGGATCGGCGTACTGTTTCTCTGTG  
CGGCGCTGTGCTACATCTCGGTCAGTTAGGTTTTATCTCTGGGTGCCAGAATATGCCAAAGGCTGGGTATGAGCCTG  
AATGACGCTGGCAGCTGGTAAGTAACCTCTGGATGTCGTACATGGTCCGGCATGTGGCGTTACAGCTTATTTCTCGCT  
CTTTGATTTGCAACGTATCTGACCGTACTGGCTGGTCTGGCTGCGATTTCTGATGTACGTTTAAACCCGGAACACCCG  
CATATATGGCGTGGTCAATTTCTCGCCCTGGCTTCTTCTCCAGCGCGATCTATACCACCATCATCACCTGGGTTACAG  
CAGACAAAGTACCGTCGCCAAAACCTGGTAACTTTGTCTGACCTGCGGGACTATCGGTACTATGTTGACCTTTGTGGT  
TACCGGCCGATTGTTGAACATAGTGGTCCGACGGCGGCTGTGACGGCAACGGTCTGTACGCTGTGCTCTTTGTGA  
TGTGCTTCTGTTAGGTTTCTGTCAGCGTCACCGTCAGCATAACACCTGACCTCTCATTA

>Cluster\_27677

ATGAGCGCAATGCGGAGACTCAAACCCCGCAGCAACCGGTAAAGAAGAGCGGCAACGTAAGCGTCTGCTCCTCTCT  
CACCTTGCTCTTTTATAATTTATTGCGGTAGCGATAGGGAATTTATTGGTTTTTTAGTACTGCGTCAATTTGAAAGAAACCGATG  
ACGCATACCGCGCAGGGAATCAGATTCAAATTAATGTTCACTGGTGTGCGCAGCGTACGAAAGTCTGGGCTGTAACACC  
GATTTTGTAAAAGAAGGCGACGTTGCTGGTCACTCTCGACCCGACAGATGCTCGCCAGGCGTTTAAAAAGCCAAAACCTGC  
ACTGGCTTCCAGCGTTCGCCAAAACCCACAGCTGATGATTAACAGCAACAGTTGCGAGCGAATATTGAGGTGCAAAAA  
TCGCCCTCGCAAGACAAAAGCGACTACAACCCCGTGTGCCGCTGGGCAATGCCAACCTGATTGGTCCGGAAGAGCTG  
CAACACCGCCGCGACGGGATCAGAGTGCACAGTGCACAGCGCACTGGACGTCGCTATTTCAACATAACAAATGCCAAAT  
GATTTCTGGGGACGAACTGGAAGATCAGCCTGCCGTGCAACAGGCTGCCACCGAAGTACGTAACGCCCTGGCTGGCGCTGG  
AGCCTACCGTATTTGTCAGTCCGATGACCGGTTATGTCCTCCCGCCGCGGTCAGCCCTGGGGCGCAAAATAGCCCAACG  
ACGCGCTGATGGCGGTCGTTCCAGCCACCAATATGTTGGTGGATGCCAACTTTAAAGAGACGAGATTGCCAATATGGC  
TATCGGTCAGCCGTCACCATCACACCGGATATTACGGCGATGATGTGAAATACACCGGTAAGTGGTGGTCTGGATA  
TGGGCACAGGTAGCGGTTCTCACTGCTTCCGGCGCAAAACGCCACCGGTAACGGATCAAAGTCGTTACGCTGCTGCC  
GTGCGTATTTGAACTGGACAGAAACAGCTGGAGCAATACCCGCTGCGTATCGGTTTATCCACGCTGGTGGTGAATAC  
CACTAACCGTGACCGTACAGGTACGGCAATAAAGTACGTTCCACACCGGTCGCGGTAAGCACCGCGCTGAAATCAGCC  
TGGCACCTGTCAATAAACGATCGATCGATATCGTAAAAGCTAACCTGGCTGCTAA

>Cluster\_55925

ATGACTGCTGTAAGCCAAACCGAAAACAGATCTTCTGCCAATTTTTCGCTCTTCCGCATCGCTTTTGGCGTTTTTCTCAC  
CTACATGACCGTAGGGTTGCCGTTGCGGTTATCCCGCTGTTTTGTTTCAATCATGAACTGGGCTATGGCAATACCATGGTCCG  
GCATTTGCCCTCGGATTCAGTTTTCTGGCTACGGTGCAGCGGTTGTTACGCCGGCGACTGGCCGATCAATAATGGTGA  
AAACGTTCCGGCGCTTCCAGGGAATTTAGCTTGTGGTCTGGCTGGCGGCGGTTGCTGCTGGCGCGGATTTGCTGTCTC  
CGCACCTTCAAATTTGCTCTGTTGGTCTGCGGCGTTTGATTTCTGGCTTTGGTGAAGCCAGTTACTGACAGGCGCTG  
TGACCTGGGGACTAGGCATCGTAGGGCCAAAACACTCTGGCAAAAGTATGTCATGGAACGGAATGGCCGTTACCGTGCC  
CTCGCTGTTGGTGTCTCGGCTTGGCTGTTGATTATAGCCATTACGGTTTTGCGCGACTGGCGATCACCAATGGTATT  
ACCCGATCTGGCGTGGGCTGTAAACGGCACAGTGCAGCAAGTACCGGCCCTGGCGGGAGAACGTCATCGCTGTTGGAGCG  
TTGTCCGGCTTATCTGAAAACAGGGTTAGGCTGGCACTACAAGCGGTTGGTTTTGCTGTTATCGGGACTTTCTGTTTCC  
CTCACTTTTGGCCAGCAAGGATGGGCGATGGCGGGCTTTACTCTTACCGGTTTGGCGGCGCATTTGTCGTGATGCGCGT  
CATGTTTTGGCTGGATGCCGACCGTTTTTGGCGGCGTAAAGTGGCGATTGTCCTCTGCTGTAGAAACGGTGGGCTTGT  
TGTGCTCTGGCAAGCCCGAGTGCATGGTCCGATTTAGCGGGCGCGGTTAACCGGAGCCGGATGTTGCTTATCTTT  
CCTGCGCTGGGCGTGGAGTGGTTAAACGCGTCCCTCACAAGTTCCGGGCACCGCACTGGGCGGTTACGCGCGTTTTCA  
GGATATCGCCCTCGGCGCTCCTCGGCGGCTGGCGGGAATGCTGGCGACACGTTGGTACTCTTCCGTTATTTCTTGGCCG  
GGCGATCTTGGCGTCTGGGTTATTTGTCACGATACTGTCAATTTCTGTCGGGTTAA

>Cluster\_27244

GTGACCACCCGACAGCATTGCTGTTTGTATTTTATCTTGGCTGCTGGCCATGTTGATGCCGCTGTCGATTGA  
TATGATCTGCCCTGCCCTACCGGTAATTTACGCGCAGTTTGGTGTACCGCGGCGCAGTACGCAGATGACCCTGAGTACTT  
ATATCTGGGCTTTGCGTTGGGGCAGTTAATCTACGGGCGGATGGCAGACAGCTTCGGGCGTAAGCCGGTGGTCTTGGC  
GGTACGCTGGTGTGTTGCCCGCCGCGGTTGGCGTGTGCTTGGCACAACCATCGATCAGCTGATTTGATGCGTTTTCTC  
CCAGCGGCTGGCTGCGGCTGCGGCGAGCTGGTTATCAACGCTTTGATGCGTGATATACCCGAAAGAGAGTCTCAC  
GGATGATGTCGTTTTGTATGCTGGTACGACCAATTTGACCGCTGATGGCAGCGATAGTTGGCGGCTGGGTTGGTGG  
CTGAGCTGGCATTACATCTTCTGGATCCTCGCGGTTGGCGGATCTGGCTTCGGCAATGATCTTCTTCTGATCAAAGA  
AACCTTACCGCGGAGCGTCCGACGCTTTTACATTCGTAACCACTATTGGTAACTTTGCGGCGCTGTTCCGTCATAAGC  
GTGCTTGTGATTTATATGCTGGCCAGCGGTTTACGCTTTGCCGGATGTTCTCATTTCTTAAAGCGCGGACCGTTTTGCTAC  
ATTTGAAATCAACCAGCTCGCGCCGAAAACCTTTGGTTATTTACTTTGCGCTAAACATTTCTTTTCTGTTGCTGATGACCAT  
CTTTAACAGCCGCTTCTGTCGCGGATTTGGCGCGTAAATATGTTCTCGCTCGGGTTGGTATACAGTTTATTATGGCAG  
CGTGGATGGTATCAGTGCACGCTGCTGGGCTGGGATTTCTGGTCTGGTGGTGGGCTGGCGGTTTGGGCTGGGCTGGG  
TCGATGGTGTCAATCGAATCGGATGGCGGTCATTTCTGATGAGTTTCCCATATGGCGGGAACGCGATCTTCGCTGGCAGG  
AACCTTCCGTTTCCGATAGGGCAATTTGTTGGCGATTACTTTCTCTTGGCACCTTTAACTGTCATGGCCGATGATTT  
GGTCAATTCATTTCTGCGCAACAGCTCCATTTCTTCTGTCTGTACGCCAGTCCGGCGAAAAACCGTGA

>Cluster\_41932

ATGTCCGTTTTCTCATTTGAAGATGATATCGCCGATAACAAATTTTTCAACGGCGAAACATCACCGCTTTTTTCGCAAAG  
CCAGACAAACTGGCGCGCCAGTTCCACCAGAAAATTTGCTGGTTATCGCCCAACACCGCTTTGTGCGCTGGACGATCTCG  
CAAACCTTTTTTGGTGTGAAGAAAATTTCTGTCAAAAGCAATCAAAACGATTCGGTCTGAACGCTTCAAAAATGCTCGCG  
GGTGCATACGCCATCGCTCAATTTATGTCGCAAAAATATCATCTTGATATGCAACCGTGTCAATTTGAGCACCTGAAAA  
TGGCATCGCGCAAAAAATCACTTTGCGGCAACACCGACCGCAACACCGGCGCGGTTGGCGTGGGCGAGCAGCAAC  
TCGGACAGAAATGCGGTGATTTACATGCCGAAAGTTCTGCTCAGGAACCGGTTGACGCCATTTCAACCTCGGTGCCGAG  
TGCATCTGTCAGGATATGAACTATGACGATAACCTTCCGCTGACCATGCAACCGCGCAGCAGCAGCGCTGGGAAAGTGGT  
ACAGCACCGCATGGGAAAGTTACACCAAAATCCCAACCTGGATCATGCAAGGCTACGCAACACTGGCGGATGAAGCGG  
TCGAGCAAAATGCGTGAATGGGCGTAACCCGACACACCTTCTGCTACAGCCGGTGTGGTGAATGGCCGGTGGTGTG  
CTGGTTATCTGGTGCAGCTCTATAGCCCGAAAATCTGCACAGCATTATTGTTGACCTGACAAAGCTGACTGATTTTA

TCGCTCCGGCGTCAAAGGCGACATCGTCAACGTTGGCGGTGATATGGCCACCATCATGGCGGGCTGGCTCGGGCGAAC  
CTAACCCGCTGGGCTGGGAAATCCTACGTAACCTGCGCCACCAATTCATCTCCGCGCAGGACAGCGTTGCCGCATTAGGT  
ATGGCGTGTGGTAAATCCGTAATGGCAACGACCCGCGCATCATCTCCGGTGAATCCGGCGCTGTCGGTTGGCGTTCT  
CGCAGCGTTTCAATATACCCCGAACGTCAAAGCCTGATGGAAAACTGGCGCTGAACAAAGATGCCGTGGTGTGGTTA  
TCAGCACTGAAGGCGACACCGACGTGAAGCACTACCGCAAGTTGTCTGGGAAGGCAACACGCTGTAGCACCTTAA

>Cluster\_23438

ATGTCTCATCGCCGCTCAACCGTTAAAGGCTCACTCTCTTTTGCCAACCTACGGTTCGCGCTGGTTATTCAGATCCT  
TGCCGTTGTGCTGTTGTCGGCATTATTGGTTGGTTATTTACAACTGTAACGAATCTCAGTAATCGTGGCATAACAT  
CAGGATTTACTTTTCTTGACCAATCGTGGGCTTTGGCATCGTTCAGCATTTGATTGATTATCAGCAAGGCGACACTTAC  
GGACGCGTTTTTATGTGCGGCTACTCAATACGCTACTGGTTTCTGCATTGTGATTGATTATTCGCTTCTGTTCTGGGCTT  
CTTTATCGGTCTGGCGGACTTTTCGGATAACTGGCTGCTACGAAAGCTTTCCACAATTTATATGAGATCTTCCGTAATA  
TTCCGCAATGTGTCGAAATCTTCTTCTGGTACTTTGCCGTAATTTGGCAATTTGCCCGGACCACGACAGGACGTGAGCGG  
TTTTGATCTCGCTTTTGTAGCAATCGTGGGCTTTATATTCCTGCGCGAGCTGGGAGACGGATTTATTTGCTTATCTC  
CGCTGTTGTTATGGCTATAGTCTTTTCACTTGGGCTATTCGCTTTAATAAAACATACCAGATAAAGACCCGACAACCTGC  
GCCGACCTGGCCATTGCGCGCTGTGTTGATCATTTGGTTTGGCTTTACTGGCGCAATGGCTTTTGGCGCAGCACTACTC  
TGGGATGTCCAGCCCTTCGAGGCTTAAATTTCCGCGGCGGATGGTTTAAATTCCTGAATGGCAGCTTAAACGCTGGC  
ACTTTCCGGTTTATACCTCTGCATTTATCCCGGAGATTATCCGCGGGGATCCAGGACGTGCCATTATGTTCAACATGAAG  
CTGCTCGGTCACTGGGATTACCAACCCGGTTACGCTACGCCAGGTCAATTTCCCGAGGACCTGCGGGTGTATTTCCA  
CCGTTAACAGCCAGTATCTCAACATCGTCAAAAACCTCTCTCTTGGCGCGGATGGCTATCCGATATGGTTTCGCT  
GTTTGGTGGCACCCTGCTGAACAGAGCGGGCAAGCCTAGCAGATAGCCATGACCATGCTCGGCTATCTGATTATCA  
GCCTGACTATCTCGCTGCTGATGAATATCTATAACCCGCGCATCGCATCGTTGAACGCTAA

>Cluster\_26516

ATGAACCTTATCTTACGACGCTCTACCAGCGCCCTTCTTGCCCTCGTCTGTTTATTAACCATCGGACGCGGCGCTACGCT  
GCCGTTTATGACCATTTACTTGAGTTCGCGAGTACGCCGTGAGTGTGATCTAACTCGGTTATGCGATGACAATTCGGCTCA  
CTATTGGCGTCTGTTTTAGCCTCGGTTTTGGTATCCTGGCGGATAAGTTCGACAAGAAACGCTATATGTTACTGGCAATT  
ACCGCTTCGCTAGCGGTTTTATGCGCATCTCTTAGTGAATAACGTGACGCTGGTGGTGTCTTTTTTGGCCCTTATTTAA  
CTGCGCCTACTCCGTTTTTGGCTACCGTGTGAAAGCCTGGTTTTGCCGACAATCTTTCGTCACCAGCAAAAACGAAGATTT  
TCTCAATCAACTACCACTGCTCAACATTTGGCTGGACCTCGGTCCGCACTCGGCACGCTGTGGTGTGATCGCAGCATC  
AATCTGCCCTTCTGGCTGGCAGCTATCTGTTCCGCGTTCCCAATGCTTTTCAATCAAATTTGGGTAAGCGCAGCGAGAA  
AATCATCGCCACGAAACAGGACGTGCTGTTGCCGAAAGTTTATTTACAAGATAAAGCACTGTTGTGGTTTTACTGCT  
CTGGCTTCTGGCTTCTTTGTTAGCGGCGCATTTGCTTCATGCATTTCAAAATATGTGATGGTGTGATTGCTGATGGTGTGAT  
TTTTCCGAAAGGTGGTCCGCGTTGTTCTTCCGTTGAATGCTGCCATGGTGTACGTTGCAATATTCGCTGGCCGCGCGC  
CCTTAACCCGGCTAACATCCGCGCGCTGATGACAGCAGGACCCCTCTGTTTCGTCATCGGGCTGGTGGTTTTATTTTTT  
CCGGCAACAGCCTGCTATTTGGGGTATGTCAGCTGCGGTATTTACTGTCGGTGAATCATTTATGCGCGGGCGAGTAT  
ATGTTGATGACCATATTTGGCGCGCAAGGAATGAAAGCAGCTATTTTCCGCCAGCTTTTAGGCTGGCTGGTGTCTGC  
GATTAACCCATTAGTGAAGTGGCATAGTGTCTTACAGCTCTGCCGCTTTCTCGTGTTTATCATCTTAGCGTTAGTGTATCG  
TTGTTGCGTGGTGTGATGTTAAAGGAATTCGTGCAAGACCTGGGGCGAGCCCGCTTTTGTGA

>Cluster\_60666

ATGTCCAAAATCGTAAAAATCATCGGTCGTGAAATCATCGACTCCCGTGGTAAACCCGACTGTTGAAGCGAAGTACATCT  
GGAGGGTGGTTTTCTGCGGTATGGCAGCTGCTCCGTCAGTGTCTTACTGTTTCCCGTGAAGCTCTGGAACCTGCGCGATG  
GCGACAAATCCCGTTTTCTGGGTAAGGCGTAAACAAAGCTGTGCTGCGGTAACCGCCGATGCTCAGGCGCTGATT  
GGCAAAGATGCTAAAGATCAGGCTGGCATTTGACAAGATCATGATCGACCTGGACGGCACCGAAACAAATCCAAATTCGG  
CGCAACGCAATCCCTGGCTGATCTCTGGCTAACGCAAGCTGCTGCAGCTGCTAAAGGTATGCGCGTCAACGACACA  
TCGCTGAACCTGAACGGTACTCCGGGCAAACTCTATGCGGTTCCGATGATGAACATCATCAACGGTGGTGAACAGCT  
GACAAACAGTGTATATCCAGGAATTCATGATTGAGCCGGTGGCGCGAAAACGTGAAAGAAAGCCATCCGCATGGGTTCT  
TGAAGTTTTCCATCACCTGGCAAAAGTTCTGAAAGCGAAAGGCATGAACACTGCTGTTGGTGAAGGTTGGCTATGGCG  
CGAACCTGGGTTCCCAAGCTGAAAGCTCTGGCTGTTATCCGCTGAAAGCTGTTAAAGCTGCTGGTTATGAACCTGCAAGAC  
ATCACTTTGGCGATGGACTGCGCAGCTTCTGAAATTTACAAAGATGGTAAATACGTTCTGGCTGGCGAAGGCAACAAAGC  
GTTACCTCTGAAGAATTCATCACTTCTGGAAGAACGACCAACAGTACCCGATCGTTTCTATCGAAGACCGTCTGG  
ACGAATCTGACTGGGACGGTTTCGCATACCAGACCAAGTTCTGGCGCAAAAATCCAGCTGGTGGTGAACAGCTGTTCT  
GTAACCAACCAAGATCTGAAAGAAAGTATCGAAAAGGTAATCGCTAACTCACTCCATGATCAAAATCAACCGACCG  
TTCTCTGACCGAAACTCTGGCTGCAATCAAGATGGCGAAAGATGCTGGCTACTGCAAGTTATCTCTCACCGTTCTGGCG  
AAACTGAAGACGCTACCATCGCTGACCTGGCTGTTGGTACTGCTGACGCCAGATCAAACTGGTTCTATGAGCGTTCT  
GACCGTGTGCTAAATACAACAGCTGATTCGTATCGAAGAAGCTCTGGCGAAAAAGCACCGTACAACGGTCTGTAAGA  
GATCAAAAGGCCAGGCATAA

>Cluster\_10

TTGGAAATAGCTTATCTTAGCCTTTCTACTCTCTGTGTTTAAAGCTTTCTGTAGGGGAGAAGAAGCTGATAGAGGTTTTGCA  
GGTTTTAACCGCAGATCTCACTCACTGTCTTTTATCTTTGATGAACTACGTTAGGGCTTGAAGTAGAACCGGGTTA  
AAGTGTTAGAATTTTTGAAAAATCTGTTAAAAAAGGAAATTCATTTAGTCTGATAGAACATGATCCTTTTTTTATCTAT  
GAAGCTGATTTTATCATCGAGTTAGGTTTTGAGGGAGGAGAGAAGGGGGATACCTTAGTAAAAGCAGATTTTAACTCCTTT  
GTATTTTGAAAAAAATGACCTTAAACGTCAGCTTATTTTTTTCAGGAGAAAAAGGATTTGTCAAGAAAGAAAAGACAAAG  
AACTGAGATACTTGGTCTCCTTACCCTTTGGTTCGGTTAAGATTTCTTCTAACCGGATAAATCTCATTTACGGAAGG  
CCTGGGAGTGGTAAAACCAAGTGTTCACCAACTTTTTCGAGTTTTTAGTCAATCAGGATAAACAGGTTGGTTTTTCACTGA  
TCTCTCAGTTTTTGAAGAAAAGAGGATTTGGGTTATCCAGTATCTAAACCTTTGGGACTGTTTAAAGAGAGTTTTGTCTC  
AATCTCTTCGGCAAGGGTAAAAGGCTTTACAAAACAAATTTAGTTTTCACTTCCAAAGAAGGAGTTTTGTGTAGGTTGT  
AAGGGTAAAAGGAAAAAATTTTCAAAAGAAAGAAAGAACTGTGATAGAAGTTTTGTGTGAAGAAATTTTTGGTAAAAGATT  
AAGTTTTAGAGGATTTAACTTAGAATACAAGGTTTTTAAATTTTTGAAGTTTTAGATTTTACTATAGAAGAGGCTTTT  
AGGTTTTTTCAAACTTACCTAAGGTAAGAAAGAAAGTTGATGATCAATAGACATCGGACTAGGGTATCTAAAACCTTTCT  
CAAGAAGTTTCAAGCCTTTCTGGAGGAGAAAAAGTAGGCTTTCTTAAATAAAAAATTTAACTGAAAAAAACAGGTTGGA  
ATATGTTTTTTTTAGAGTTTTCCCTTCGAAAGGTTTACATTTAGAAGATATAAACAGACTTCACTCAGTGGATGAAAGAAATGG  
TTGCAAAACCTATGACTTTTATATCTTAGAGACAACCCCTTTAGCTTTATTTTTGGCTGATTTTTTAAACAGAGGTTAA  
CACCAGAAGATAAATTTTCAAGGTTTTTTTTGAGGACTGCTAAAGGCTCAACCTGAAACACTTAAAGAAAAATTTGCGTT  
TTATCAACGGTTTTGTGGCTAAATTTTAG

>Cluster\_53509

ATGGACAGCAGTACAACAGGCAACATAACGACCCCGTAAATAGCGAAGCGGCACTTAACTCTGCCTGCAGCTTTGGCA  
ACAAGGTGGTTTTGAACGCCAAACAAAGCAGCGTTGTTACTGGCGGCTGTGCCTGCCCTTAGGTCAGTGTACAACCAATA  
CTGTCGCGCAAAAACAGCAGCTGAAACGGATATCGTTAGCCCTTAGCCCTACTGCACCATGCTATGCTTAACTTAA  
GATTTAAGCCAGTCAAGTGAATGGCAATTAGCGTTGTTGGGCTTAAACCCAGCAGCTTCGCCAACATTTGATAAATTTAGC  
CGCGCTCGCTGCCAGGAAGCAGGCGCATGAATGACATAATGTTATTTGGTTAACTCATTCAGCACTGGGTAATGCCA

GTGAATGGGTCTTAGCCAACTGAAAAGCAGGCCACCACGCCGCAAATCATTGCCGGCCCTCTGGCAAAAACCGAACGC  
GATTTGCTCGGTCTAGCCTAAACGACAATGCAGCCATTCGCCGCTCTATGCCGATTTTGCACACCAGCCATACCTTGGT  
TACTGTAAGTGAACAAAATGAACCACCAGCACCATACAGCGGTGGATGTCACCGCAAAACAACTGACAATAACTGGT  
GTAGTGGGCGGTTGTAGCACTCCCTAAATACCTTGGCTTATGACATGACCTTAAACCCAATGCCGATTTGGTTATGGTG  
TCCGCTACGGTGCAGCAACAGTGCCTTACCAGCTATTCCGCCAACAGCCCTGGTATTTTTCAGTCTCAGTCTCATTAT  
CTTTGTGCAAGATGCCTGGGCTGCCGAGCAACGTGGCGGTTTGTGCTCACCTTACCTGCCGGGCAAAATGCCTTTGCC  
CCGGTCAAAATAAATGTGGCGGTACAGGGCATGTAAGGTGATGAGGTGAGTCTGGGTAGTTTGGCCGAGTTCTTGTGCTT  
CTGCTCGGTGAGTCAATATCCCTCTATCCGGCCTCGATGCGAACACGGAAAGCATCAACCGCTTAAACCGGCTCT  
GAGCTCATTCATTGCCGAATTTGGCAAAAAAATCTGGCAATTTACCAGGCGGGTCTGGTGGTGGTCCGGCAATATC  
GAATTCATACAAGCTTACGCGATGCCTGTTATAGCCTGCCGTTAGCACCACTATTTGGCTACAAAAGCCAAACGTTACAA  
CGGGCCATTAAGCAACTGGCGCAAAACTGCTATGCCAATAAAAAACGCCGCCCAATAGAATAAACCTTCAAGGATCGTC  
GTTATGA

>Cluster\_25698

ATGCTCGATCCCAATCTGCTGCGTAATGAGCCAGACGCAGTCCGTGAAAAACTGGCACGCCGGGGCTTTAAGCTGGATGT  
AGATAAGCTGGGCGCTCTGAGGAGCGTCTGTAAGTATGTCAGGTCAAAACCGGAAAACCTGCAAGCGGAGCGTAACTCCC  
GATCGAAATCCATTGGCCAGGCGAAAGCGCGGGGAAGATATCGAGCCTTACGCTCTGGAAGTGAACAAACTGGGCGAA  
GAGCTGGATGCAGCAAAAGCCGAGCTGGATGCTTACGAGTGAATTCGCGATATCGCGCTAACCTAACCTGACC  
TGCAGATGAAGTCCCGTAGGTAAGACGAAAAATGACAACGTTGAAGTCAAGTCTGGGCGACCCCGCTGAGTTGACT  
TTGAAGTTCGTGACCATGTGACGCTGGGTGAAATGCACCTGCGCTCGACTTTCAGCGCAGTAAAGTTGACTGGTTCC  
GCCTTTGTGGTAAATGAAAGGCGAGATTGCTCGCATGCACCGCGCACTGTCGAGTTTATGCTGGATCTGCATACCGAACA  
GCATGGCTACAGTGAGAATGATGTTCCGTACCTGGTTAACAGGACACGCTGTACGGTACGGGTCAGGTCGCGAAATTTG  
CTGGCGATCTGTTCCATACTCGTCCGCTGGAAGAAGAAGCAGACACCAGTAACTATGCGCTGATCCCAACGGCAGAAGTT  
CCGCTGACCAACCTGGTACGCGGTGAAATCATCGATGAAGATGATCTGCCAATTAAGATGACCCACACCCCATGTTT  
CGGTTCTGAAGCTGGTTCATATGCTGCTGACACTCGTGGTCTGATCCGATGACACCAGTTCGACAAAGTTGAATGGTGC  
AGATCGTGCGCCCGAAGACTCAATGGCGGCGTGAAGAGATGACCGGTCATGCGGAAAAAGTCTGACGCTGCTGGGC  
CTGCCGTACCGTAAAATCATCTTTGTACCGGCGACATGGGCTTTGGCGCTTGCAAAACTTACGACCTGGAAGTATGGAT  
CCCGGCACAGAACACCTACCGGAGATCTTCTGCTCCAACGTTTGGGATTTCCAGGCACGTCGATGACGGCAGGTT  
GCCGTAGCAAGTCCGCAAGAAAACCCGCTGGTTTCACTACCTGAAACGTTCTGGTCTGCTGTTGGTGGTGGGTT  
GCAGTAATGGAACATATCAGCAGGCTGATGGTCTGATTAAGTACCAGAAGTCTGCGTCCGTAATGAACGGACTGGA  
ATATATTGGCTAA

>Cluster\_26794

GTGCAACAGATAGCCCGCTCTGTCGCCCTGGCGTTAATAAATTACCGCGACCACACCAGCTTATGTTGGGGTGCCTCAC  
CGTCTTACTCTGGCCGTCGCTGCTGGCGGCCCTATGTTTATCACCGCGATGCCACGCCAATGTCAAACCATGAGC  
TGGAAACAGAACGAAATTCCTTCCGCTTACCTGAAGCCAGTGAAGCCGATGATCAAGCTGCACAGAAGATGAAGCCATT  
CCCAGGACGAATGGATGACAAAATCCCGGTTGAAGCGGGCTGCATGAATAATGTTGTTCCACTGGCGATACGCTAAG  
CAGCATTTCTCAATCAGTATGGTATGATATGGGTGATATACCCCACTGGCTGCTGCCGACAAAAGAAATTCGCTCA  
AAATCGGTCAACAACCTCTCTGGACATTAACCGCGGACGGCGAACTGCAGCGCTCACCTGGGAAGTGTCTCGTCTGAA  
ACCCGAACCTATGACCGTATGCCGCTAACCGTTTAAATAAGCAGCGAAATGCAGCAAGGAGATGGGTCAACAATCT  
GCTGAAAGGTACCGTGGGGGAAGCTTTGTTGCCAGCGCAGAAACGCCGCTTAAACAGCGCCGAAGTGCAGCGAGTGA  
TTAAAGCCATGCACTGGCAAAATGGATTTCCGCAAACTGAAAAAGGCGATGAAATTTGGGTTGTTAATGTCACAGAAATG  
CTTGATGGTAAACGTTGAGCAAAGCCAGCTGCTGGCGTACGTTTGGCTTCGGAAGGTAAGATATTACGCAATCCGCGC  
TGAAGATGGCAAAATCTACAGATCGTAACGGTACTGGTCTGGCGAAAGGATTTGCGATTTCCGACGGCGAAACAGTTCC  
GTATCTCATCTAACTTAAACCGCGCTGACTAATCCGCTGACCGTACCGGTCAGCGGTTGCCGTTGCCGACAGAGTGTGTTTGGC  
ATGCCACAAGGTACGCCAGTGTCTTCACTGGGTGACGGTGAAGTGGTGGTGGCAAAACGTAAGTGGCGCAGCAGGTTATTA  
TGTGGCTATTCGTATGGTTCGACGCTACACCACGCTTATATGCACTTGCAGCAAGATCTGGTGAACCGGGACAGAAGG  
TGAACGTTGGCGACCGTATCGCGCTTCCGGTAATACCGGACGTTCAACCGGGCCGATCTGCACTATGAAGTATGGATA  
AACCGAGGCGCTTAAACCCGCTGACGGCAAAACTTCCGCGTACCGGAAGGCTGACCGGCTCCGATCGTCGCGAATTCCT  
GGCACAGGCCAAAGAGATTTGCGCGCAGCTACGGTTTGATTA

>Cluster\_62124

ATGCACATTTGGACAGGCTTTGATCTGGTATCCCGTTACGATTTCTGCGTAACCCACTGACTTCTCTGGGGGTTACCT  
CGACCCCGAATCATCTCTCGTTGCCTTCCGCAATCAGTACTGTAACGCTACGCAAGCGCGCTTCCCTCGAAATGA  
TGGTCTGGTGTATTTGGCATGGCGCTTGAGCGTAAAGAACCCTTACCAGATTTGTAATCGCCTGGACATCATGCTG  
CCGGGCAATCGCCCTTCCGTTGCCCCAGTGCCTTATTCAGGCCCGCAGCGCTGGGAAGTGAAGCTGTCCGCCGCT  
GTTACGAAAACAGCGCAGCTCTGGCATAACGCCACGCCGCTCCGCACTGGTGGCGGCTGACCTGCTGGCCATCGATG  
GTGTTTCTGGCGCACCCGATACACAGAGAACGATCGAGCTTCCCGCCAGACACATGCGGGGAAACCCGGCGCTC  
TACCCGCGAGTCAAAATGGTCTGCCAGATGGAACGACAGCCATCTGCTGACGGCTGCAGCTTCCGGCAGATGAAGAA  
CAGCGAAAATGAGCTTGTGAGCACTTATAGAACAACCGGGCATAACACTGACGTTAATGGATAAAGGTTATTACT  
CACTGGGACTGTTAAATGCTGGAGCTGGCGGGAGAACACCGCCACTGGATGATACCTCTCAGAAAGGGAGGCAATAT  
GAAGAGATCAGAAAATGGGTAAGGCGATCATCTGGTGAAGCTGAAAACCGCCAGCGCAAGAAAAGTGGCCGG  
ACTGGGAAATGAAGTGAAGTGCCTGCTGACCGTGAAGCGCAAGGAAAAGTCTGCGATCTGCTGAGCTGATGACGG  
ACGCCATGCGCTTCCCGGAGGAGAAATGGGGATCTGTACAGTCACTGCTGGGAAATCGAACTGGGATACAGGGAGATA  
AAACAGAGATGCAACGGAGCAGGCTGACGCTGAGAAGTAAAAAGCCGAGCTTGTGGAGCAAGAGCTGTGGGTTGCTT  
ACTGGCTTATAATCTGGTGAATATCAGATGATTAATAAGCGGAACTCTGAAAGGTTACTGGCCGAATCAACTGAGTT  
TCTCAGAAATCATGCGAAATGGTGAATGATGATGATGATGACATTGACGGCGCTTACCAGGAGCTATACCGGAGCTGATG  
CGCGATCTTGAAGTATGGGCAACTTGTGAAATTAACGACAAGAAGGAAAAGGGCTTCCCGAGAGTGGTAAAGGAGAG  
GCCCTGGAATAACCCACAGCCCGAAAAAGAGCCAGTTCAGTTGCTTAA

>Cluster\_21497

ATGGAGTCTTTGAATCAATTTATTAATTCGCTTCCCCAAAATATCGCACTGGCGACGCTGATTTTACCACCTATGCAGA  
GTCTGGCTGGGTGGAATTCGCACCTGCCACCGTTGTTGGGGAAGAAATGCAGCAGCTCGGTTATTCACCTGGCGCTGGCC  
GCGAAGTAGTTAATGAAAGTAGCCGATGGGATTAACCTGATAATTCACCTACTCAACAGCGAAATTCGAGCGCGCTGCA  
CAGGGGCGCTAGAACAATGGATTTGGGCTTTTGAAGCGGTTTCACTGGTATCGTCCGACCCCTGGATACCGGTCGCCC  
CGTCCGGTGAATGCTTCCGTTGCTGATGAGCAGCGCTGGATCTCAGTGAAGAGCAGGATGTGAGCCATCGCCCTACC  
GCGACGTTTGGCTCATGTAACGCCGGAATGATGATGCTGTTGGTCAATGCGGCAATACCGCCATTTGGGCTTGGGCTG  
GCGCATACCTTAAACAGTTTCAGTCCGACTACATGGCGTCACTAAACTGATTTTTCAGCTGACAGGAAAGGTAACGG  
TGGCGCGCGGGCGATGGTAGATGACAGTGTCTGATGATGTTGATTAATTTACTGCGCTGCACATTTGGCACTGGCGTAC  
CTGCGGGCACCGTGGTGGCGGAGTGAATTTTATGCAACACCAAAATTTGACGCGCACTTACCAGGACCGCCGCT  
CACGACAGCGCAAAACAGAAAGCGGTCACAAATGCTTGTGGCGGACGCAAGCAACTTTCAGCTGACAGGATGCAATCGC  
CCCGCAGCGCAAGGAGCTTCCAGAGTAAACGTTGGGCTTATGACAGCGAAGGAGCGTCTGTAATGTTGTTCTGCTCCG  
CGTTGCTGAAAGTGGAAACAGCGGGGCGACGACGCTAATTAATCAATATGTTTGAACGCTGCACAACAGCGATTACG

GGCGCAGCAACCATGTATGGTGTGGCGTTGAAACTCGTCTGATGGGTGCAGCTACCGCCAGTTCCTCCTCGCCGAATG  
GGTCGCATGGTTGCAAAAGTCAGGCGGCTCAGGTCGCGGGGTC AATCAGGCCATTGAACGTGTTGAAGCGCCTCGGGGTT  
CCGAAGATGCCACATTAATGATGGCCCGGTGCAGCAACAACAGGGCAAGCCCTCTATATGGTGTGGCAGCAGCTG  
GCGCAGGTTCATCAACGAAAAATTCGATTTTACGAGCAGGTTCTCGCTATTCGCCGCGAAACGCTGGCGGCACCCG  
GCTCAATTTTCCCTGGACGCGAGGTATCTGA

>Cluster\_3664

ATGGCCGTCAATCTTACTGAAACAGCCATCCGAGCATTGAAAGCAAAAAGACATCGTCTATGTCTGGAGCAACAGCTC  
TCAACGTGGCACTGGACGACTTGGTGTCAAAGTTCAGTCTTCTGGCAGCAAGATTTTCTATTTCCGCTATTACGTGGAAA  
AAGGAAAAAAGAAAGATTCATTCAATTTGGGTATATGGCTGAGATGAAACTGGCCACAGCAATGAACCTGGCAAAAAAG  
TATGGTGCCTGGCTCATTGAAGGAAAGGATCCCCAGGCAGAACTGGAACGACAACAGTTCGAGAACAGCAGCGGATAACA  
ACTCCATCAATCAGAGGGCTCATTTGAAGCATTGATTCATGGTTATGTTAACAAAATGAAAATGATAATAAGAGGACAT  
GGCAGGATGTTCTGAAACCCCTTGAATAAGTATACAGTATACAGTATCCCCGTTGAAACTAAAGCTAAAGATGTTGACTTCC  
GGACAGATTAACCATATCTGGCCGGGATCATTAGCAGTGTGCTGGTTCACCTTAACCGGATCCGTTCTTACTGAT  
GGCTGCATTTAATATGGACTGAAAGCAGATAACGATCCGATGAACACAAGTGCAGGGATTACTTTTGGGCTGGAGGCAA  
ATCCGGTGTGAGTATACCGAAACAGTCACTGCTGAAAAGTCCGGTGTATACCTGGCTGACACTTGAAGAGTTGCGTTTT  
CTAATGGAACATTTGCTGAAGCAACCAACGTTGGATTATGATGCAACATTTGATCCGATTCGTATCTATACCGGAGG  
GCAACGTCCTTCCAAATGATCGCCAGTCACTGATGTTGATTTTCAACAAAAAACGCTGCTGGTGTGATG  
TCTCTAAAAATAAACGAGAGCATTGATACCGTTGACTGAATCAGCATTACAGGAATATCCTGTGTGCAGGAGTTAACA  
AAAGAAAAATCCAGCCCTTACATTTTCCACTTTGACTTAATGTAAGCGTCCGGTTCGTACGGACAGTCTGGCTCGCC  
TATCATGATTTCCGGGCTTTAATCCTGACTTTAAAATTTTACAGCAGTGTACTGCGGACCTGTAACAAAGCTTAA  
TGGGAAAGCTGGGATCAGTAAGGAAATCCGCGATCGTATTCAAAATCATGCGTTGAACGATGTCAGTTCAAAACATTA  
GATCGATACGATTAATTTGCCAGAAAACGAGAGCACTTGAGATCTGGGAGGACCGGGTAAATAACTATCAACAGCAAA  
AGCAATAATGTTGCTCAATCTGTTTGGCAGAAGGTGA

>Cluster\_7153

ATGGCACAAGTCATTAATACCAACAGCCCTCTCGCTGATCACTCAGAACAACATCAACAAAAACAGCTGCGCTGTCGCAC  
TTCATCGAGCGCCTCTCTTCTGGTCTGGCCATTAACAGCGCTAAAGATGACGCTGCGGGCCAGGCGATTGCTAACCGCT  
TCACTTCTAACATCAAAGGCTGACTCAGGCGGCACGTAACGCCAACGACGGTATCTCTTGGCGCAGACCACTGAAGGC  
GCACGTCTGAAATCAACAACTTGCAGCGTGTGCGTGAGTTGACTGTTTCAAGCGCAGCAGCCGGACTTCTGATTC  
TGACCTGTCTTCTATTACAGGACGAAATCAAATCCGCTGAGTAAATGACCGTGTTCGGTCCAGACCCAGTTCAACG  
GCGTGAACGTGCTGGCTAAAACGGTTCATGGCGATTGAGTTGGCGCGAATGATGGCAGACCATCAACATCGACCTG  
CAGAAAATCGACTTCTTACTCTGGGCCGCGGCTTCTCCGATCTAACAAATGCACGAACTGAGCGATTCTATCAC  
TCAGGTTGGTCCGAGTGGTTCACCTGGCAGATGTGAAACTGAGCTCTGTGCTCGCTGGTGTAGACGCAAGCACTC  
TGACTCTGCACAACGTACAGACCCAGCTGGCGCAGCAACAGCTAACTATGTTGTCTCTTCTGGTCTGACAACACTCA  
GTATCTGTGAAAGATAGCTCCGGTACAGTTACGCTGAACACCACTGATATAGGTTATACCGGATACCGCTAATGGCGTTAC  
TACCGGTTCCATGACTGGTAAGTACGTTAAAGTTGGAGCTGATGCAATTTGGTGTGCTGTAGGTTATGTCACCGTACAGG  
GACAAAACCTTCAAAGTGTGCTGGCGCGTAACTTAACTCCAAGAATGCTGCTGGTGTAGTCAAGATGTTACTTCTGCAATT  
GGCGATATTGCTAAATAAGCGAATGCTAACATTTACACTGGAACCTCTTCTGCAGATCCACTGGCTCTGCTGGACAAAGC  
TATCGCATCTGTTGATAAATCCGTTCTTCTTAGGGGCGGTGCAGAACCGTCTGAGCTCTGCTGTAACCAACCTGAACA  
ACACCATAACCAACCTGCTCGAAGCGCAGTCCGTTATTAGGACGCGACTATGCGACCGAAGTGTCCAACATGTCGAAA  
GCGCAGATCATCCAGCAGCGGTAACCTCCGTGCTGTCTTAAAGTAAACAGGATGCGCGCAGGTTCTCTCTGCTGCA  
GGGTTAA

>Cluster\_37867

ATGTGCTTGGCAAAAAGCGTCTTGTGGACGGCGCCAGTACACTGGTCAAGATTGGTGGCGGGTACTGGTGGTAAAGTT  
GCTGGCGGTGTCATTTGGTCCGGCGGGGCTGGGCTGGCGGCAAAATTTCCGCCAGTTGATTACCGTGTGCGCGTGTG  
CCGGGGCTGGCATCTTAAACGGTGAACCAAATACGTTGCCAGTACCATGATAATCCGCAACAGCTGCGCCCGTGGT  
GGCACTTCATCAGCGATGGTACTTGGTTCTCTACGCTGATGGCGTGGTTTTTGTGCTGGCAGCTGGCCAACTCAGCCA  
GGGATTTGTTGGTAATAACGACTATCAGGGCTGGTGGCTTTAGTGGCGCTGGTGCAAATGGGGATCCGCTGGGCAACC  
TGTTACTGGCGCTGATGAAAGGCTTTCGCGATGCCGAGGTAATGCGTTATCGCTGATGTCGGCAGCTTGGTGGCGTT  
CTCGCGTACTACGTCAGTTACCGTTTGGCGGTTATGAAGGGCGTGTGCTGGTCTGGCGCTGATCCCGCGCTGGTGT  
AATCTCGCCCATCATGTTGATCAACAGTGGTGTCACTCCGTTAAGCTATCTGAAACCCAGCTGGGATAACCGTCTGG  
CAGGCACTTGGCAAAATTTACGCTCATGGCGTGGTGGCTTACGTTGCTGGCTGGTGGCTGGTGGCTGGTGGCTGGT  
CTGCTGGCGGCGCAGTATAGCTGGGATGAGGTGGGATCTGGCAAGGGGTGAGCAGTATTTCCGATGCTTACCCTGCAATT  
TATACCGCATCGTTACGCTATATTTGCTGCCACGTTGTCGGGCTAACGGAAGCGCGATATCACCCGGGAAGTGG  
TTAAATCGCTGAAATTCGTTTACCAGGCTGGCGGCGGAGTTTACCCTGCTGGCTGCTGCTGATTTGCTATCTGG  
CTGCTGTTGCTGAAATAAATTTACGCTATGCGGCTTCTGGCTGGCAGTTAGTGGGTGATGTTTAAAGTGGGCG  
TTATGCTTTGGTTATCTGGTATCGCCAAAGCTCACGCGGTTTTATATTCGGCGGAAGTACGCCAGTTCACTTTAT  
TGATGGTATTTGCCCACTGGCTAATCCCTGCGCATGGTGCACCTGGCGCGGCGCAGGCATATAAGCAACTTATATCGTC  
TATTTTCTCTTTGTTGGCGTGTTTTACTCTGGCGTAGCGGGCATGA

>Cluster\_17784

GTGCTTACTGATACCAAACTGAAAACTCAAGCCGAGGCAAACTGTATAAGTTTCGGATCGTGACGGGCTGTATGT  
TGCGGTGCTTACTTCCGGTTCTGTCTCTTCCGGTACGACTACCGCATTAACGGGCGCGGAAACCGTGGTCACTCGGTC  
AGTACGGTCTGACGGTATCAGCCTGGCGGAAGCAGAGAAGACTCATGTGCGCAAAAAACGTTAAAGCCAGGCCAG  
TCGCCAGCTGGCGGAAACGTGACGGTATCAAAAAGATCCGTTGGTGTGAAACCTTCCGGTACATACCGACAGCTATAT  
GAAGCAGCTCATTCTGGCTGACAGTACCGGGCGATGAAACAGGCCGTTATCGATCGCGACATCATGCCGTTGCTGGGTA  
ACAAAATGATGGCTGAGATAAACACCGGATGGTGGCTGACCTGTGCGATCGCATGTTGAACTGGAGGCGGGGCTACG  
CAGTGCAGGCCAGAGAGATAATCAGCAGTGTATACCGCTACGCTAATGATCGCGGGCATGGCTGTTTAACTCTGCTG  
TGATATCAAGCCTTCAATAGCCATGTTCAAGCCGCGGACCGCACGCTGCAACCTGAAGAGATAGGCGTATTTCTCC  
GGCGCTGGATAATGTCGGGGCTATGGCCACAATGAACTGGCATTAAAACTGGTGTCTCACCCTGGTTCGCAAAAGC  
GAGTTCACCAACGCCACATGGTCAGAAATCGATTTCAAAAAATGGACATGGACGATACCGGGGAACGAATGAAGGGAAG  
CCGGTACACAGTTATCTATCTGCAAAAGCAGGCGCAGGATCTCATTTGCTGGCTGACGATGTCGCTGGTGGTGGT  
ACCTTTTGGCCGGGCGCTATTCGGTTAGCAAGCCGTTATCCAATGGCGCACTGAAACAGGCTGATCAATACCACCGTCGAA  
GCGGTGAGCGAGGCTGGTGGGCTCTTGTGATGAATCTCTGTGACGACCTGCGCCGACAGCCAGTACGCTGTTGCAATGA  
GGCTGGTTATCCATCAGACTGGATTGAAAAGGCGCTGGCGCATGAGCAAAAAGGAGTGCCTGCGGTATAACAACAAGCGG  
AGTACGCCAGGCGCGCTACATGTTTGCAGCAGTGGCAGATATGGTTGATGGCTGATTACGGGGAGCACACCCGAT  
CTGGTGCCATTTCCCGCTCGAAGTTTGGAGCATGGATGAGTGAAGGTGATTA

>Cluster\_28880

ATGCAGCAACAGGTTCCAACGGTCTTTTTCATGTGATGGCGAAACCGAGCGGTTCTGATTTGTAATCTGAACTGTGACTA  
CTGTTTTTATCTGAAAAACAATCCCTTTACCACGAAAAGCCAGTACGCATATGGACGATGACACGCTGGAAGCGTATG  
TCCGTCATATATCGCTGCCAGCGAAACCCAAAACGAAGTGGCTTTTACCTGGCAGGGCGGCAACCAAGCTTACTCGGG



CTGGATTTTTACCGCGTGGCGCTACAGCGAAATATGGTGTGGCAGGAAGATAAGTAACAGCTTCCAGACTAA  
CGGCGTGTGCTCGATGATGAATGGTGTGCATTTCTGGCAGAAAATCATTTTTCTGTTGGGTTATCGTGATGGTCCGG  
CTGAGATCCACAATCAATATCGCGTGACCAAAGGTGGCAGACCACGCATAAGCTGGTATGCGTGCCCTGACGCTCCTG  
CAAAAACATCATGTGCGACTATAACGTGCTGGTCTGGCTCAATCGCACCCAGTGCCTTACAACTTTGCAAGTCTATGATTT  
TCTGTGTGATGCGAGGTTGAGTTCATCCAGTTTATTCGGTGGTGCAGCGCCGGCTGATGAAACGGTGTCTATGCTG  
GACTTAAGCTACATGCTCCCGGCGATATTCAGGGCGAACTGACGGAATGGTGGTACACCCCGAGGAGTTCCGGTGGT  
CTGGTGGCGATTTTCGACCACTGGATTAAGCGCGACGTCGGTAAGATTTCGTAATGAATATCGAATGGGCGTTCGCCAA  
TTTTGTGGCGCACCGGGCGCGGTTTGCATCATCAGCCAACTGTGGGCGCTCGGTGATGTTGAGCACAACGGTGGC  
TTTTATGCGTGCAGTCACTATGTTTATCCCGAGTATCGACTAGGGAATATGCTTACGACAGACGATGCGAATAATGATGAT  
TCCCCGCAACAGCAGGCATTTGGTGAAGATAAATCAAGCAGTTACCGGCACAGTGTGCGAGTTGCAACGTGTTAAAAGC  
GTGCTGGGAGGCTGCCGAAACACCGCTTATGCTCGATGCCAGCGCAAACCCGGGCTGAATATTTGTGTGCCGGT  
ATCAGCGTATTTCCGCCATCTACCGCCATATCTAAAGCAATGGTTGATTTGCTGGCGCACGGTGTCCGGCCAGCGAC  
ATTATGCAAGCGCATTTGCTGGTGGTGAATAAGTAA

>Cluster\_25034

ATGACACAGGCAAACTGAGCGAAACCCGTTCACAAACCCGCTTAAACATCCGAAACCTCGACGCTAGTCCGCCGCTT  
TAGTCAGGGCGCAACACCGCTGTGCAGTCGGCCCTTGATGGTAAAACCATCCCTCACGTTATCGCATGATTAACCGCT  
TGATGGGATCTGGCGCGCATTGACCCCGTGAATCCCTCGATGTCCAGGCGCGTATGTTGATGAGCCATGCCGAACCT  
ACCGACGATGATTTATACGATACGGTATTTGGCTACCGCGCGGCAACTGGATTTATGAGTGGGTACCCAGGCGATGGT  
GTGGCAACAAAAGCCTGTGGGGAAGAAGATCCGCAACTCAGCGGTGCACACTGGCTGCATGGGCTACGTTGTACAACA  
TTGCTGCCATCCTCATGAAAGGAGATGACCTGGCCGAGCAAGCGCAGGCTTTGTCAAACCGCGCTATGAAGAGGGC  
GCTCAGCGTCTGGCGGCGCATGCGCGAGATGGAGTTTACCGTACCGCGCGTGGCGCCATCACCGGCTTTTTGCATAT  
GCCGAAAGGCGATGGCCGTTCCCGACAGTATTAATGTGTGGTGGTCTGGATGCGATGCAGACGGACTATTACAGCCTGT  
ATGAACGTTATTTTGGCGCGCGCGCATTTGCTATGCTGACTATTTGATATGCCGTCGGTGGGCTTTTCTCAAATGGAAG  
CTCACCCAGGACTCGCCTGTTGTCATCAGCACCTTTTAAAGGCGTGCCTAACGTAACGTTGGGTGATGATGACGCT  
CGCGGCTTTGGTTCGGTTCGGCGTAACTGGCGTGGCTGGCATAACCTGAATCGCGCGCTGAAAGTGGTTG  
CCTGTCTTGGTCCGGTAGTTCATACCTGTTGAGTGATTTAAGTGCCAGCAACAGGTGCCGGAATGATCTTGACGTT  
CTGGCCAGTCTGTTAGGAATGCATGATGCTCCGATGAAGCGTTGGCGTGGAGCTGAATCGCTATTCATAAAAGTGA  
AGGATTTGCTGGGACGCTGCTGCCAAACCGCAATGTTATCAGGCTACTGGAAGAACGATCCGTTAGCCCGGAGGACT  
CACGCTTAATCACCTCATCATCTGCTGACGGTAAATTTGTTAGAGATCCCATTTAAACCCGGTGTATCGGAATTTTGACAAA  
GGTCTTCAGGAAATCACCGACTGGATCGAAAAACGATTGTGTTAA

>Cluster\_21905

ATGACCTGGTTTATGACCGCGCTCTGAACGGCAAAAATAAAGCATGGTGAATCGCCAGCGTTTCTTACGCCGTTATAA  
AGCGCAAATTAACAATCGATCTCCGAGGCCATAAATAAGCGTTCGGTACTGACGTCGACAGCGGCGAGTCCGTATCCA  
TTCCACGGGAAGATATTAGCGAACCGATGTTCCATCAGGGCGTGGAGGCTGCGCCACCGGTGTCATCCGGGCAATGAC  
CATTTCTCCAGAACCGCAATGAACGTCGCCAGGGTGGTGGCGGAGGTTCCCGGAGTGGTCAGGAGGCCAGCCAGCCA  
GGATGGTGAAGTCCAGGATGAATTTGCTTCTTCCAGATTTGAAAGATGAGTATCTTGTATCTGCTTTTGAAGATTTGGCCT  
TACCGAATCTGAAACAAAACCAACACGCCAGCTGACCGAATAAATAACGCATCGGGCGGTTATACCGCTAACGGCGTT  
CCGGCAAATATCAGCGTTGTACGTTTATGTCAGAACTACTGGCGCGGCGCACAGCCATGACGGCGGGGCAAGCGCGGGA  
ACTTCATCGCTGGAAGGCAATTTGGCCATCATCAGCAACAGTGAACCTGCGCAACTGCTGGAAGGAAAGCTGCGCA  
AAGAAATTCAGAAATTAAGTCCAAAATGAACCGCTCCCTTTTACGACCTTCGATTTACGTTATAAGAATACGAA  
AAACGGCCGATCCCTCCAGCCAGCGAGTGTGTTTGGCTGATGGACGTTTCCGGTTCAATGGATCAGTCCACTAAAGA  
TATGGCTAAACGTTTTTATATCTGCTGTATCTGTTCTTAGCAGAACGTTATAAGAAGCTGGAAGTCTGTTTACATCCGCC  
ACCATACTCAGGCAAGAAAGTGCATGAACATGAGTTTTTCTACTCGCAGGAACTGGCGGCACCATTGTTTCCAGCGCC  
CTGAAACTGATGGATGAGGTAGTGAAGAGCGTTATAAACCAGCAGTGAATATTTACGCGGCACAAGCATCGGACGG  
CGATAACTGGGCGGATGACTCTCCGCTTTGCCATGAAATTTCTGGCGAAAAAATATTACCCGTTGTTGCTTATTACAGCT  
ATATCGAAATTAACGCTCGCGCGCATCAGACACTGTGGCGAGAATATGAGCATCTGCAATCTACTTTCGACAACCTTTCG  
ATGACGATATCCCGACAGGATGATATTTATCCGGTGTCCGTGAACGTTTTCATAAACAATAAGCAACAGCTAAAGA  
CTAA

>Cluster\_25130

GTGTGCAATAATGCTTTACAAACAATATTAAACGCCGCTTACCCGGCAAGAGGGGCTGTGGCAGATTCATCTTCCAGCA  
CGGAAAAATCAGCGCCATTTGATACGCAATCTGGTGTGATGCCCGTAACGAAAACAGCCCTGGATGCCGAAACAGGTTTAG  
TTTTACCGCGGTTTGTGGAGCCGATATTCACCTGGACACCACGCAACCCCGGACAACAGAACTGGAATCAGTCCGGC  
ACCGTGTTTGAAGGCATTTGAACGCTGGGCGGAGCGCAAGCGTTATTAACCCATGACGATGTGAAACAACCGCGCTGGCA  
AACGCTGAAATGGCAGATTTGCCAACGGCATTACGATGTGCGTACCATGTCGATGCTCCGACGCAACGCTGACTGCGT  
TGAAGCGATCTGGAAGTGAACAGGAAAGTTCGCGCGTGGATTGATCTGCAAACTGCTGCCCTTCCCGCAGGAAGGAT  
ATGTCGTATCCCAACGGTGAAGCGTTGCTGGAAGAGCGTTACGCTTAGGGGACAGCGTTGTTGGGGCATTCGGCATTT  
TGAATTTACCCGTTGAATATGGCGTGGAGTGCCTGCATAAAACCTTCGCCCTGGCGCAAAAATACGACCGTCTCATCGATG  
TTCAGTGTGACGAGATGATGATGAGCAATACGCTTTTGTCAAACCGTTGCTGCCCTGGCGCACCGTGAAGGATGGGC  
GCGGAGTCACCGCAGCCATACTACGGCAATGCATCCCTATAACGGGGCGTACTTTCGCGCTGTTTTCGTTTTCGTTGAA  
AATGTCGGTATTAACCTTTGTCGCAACCGTTGGTCAATATTCATCTGCAAGGACGTTTCGATACGATCCAAAACGTC  
CGGCGATCAGCGCGTAAAGAGATGCTGGAGTCCGGCATTAACGCTGCTTTGGTACAGATGATGCTTTCGATCCGTTGG  
TATCCGCTGGGAACGGCGAATATGCTGCAAGTGTGCATATGGGGCTGCATGTTTGGCCAGCTGATGGGTGAGGCGAGT  
TAACGACGGCCTGAATTTAATCACCCACCATAGCGCCAGGACGTTGAATTTGCAGGATTACGGCATTCGCGCGGAAACA  
GCGCAACCTGATTTATCTGCTGCAGAAAATGGGTTTGTATGCGCTGCGCCGTGAGTTCCGGTACGTTATTCGGTACG  
GGCGCAAGGTGATTGCCAGCACACAACCGGCACAACCCGCTATATCTGGAGCAGCCAGAAGCCATCGATTACAAACG  
GTAA

>Cluster\_34020

ATGGGCGTCTGAATACTCCACATTTGCACGGCGCTGATATAGTGAGCCGACTCAGGGATTAATGTCCCGGAATCGCCT  
GAAAGCAACACAGCAAGCATAAGCAGTACGAGCGCTCGCGGCTGGACAATGAATATCAAAAACCTGGAGCGTGGCTG  
AGCTTACACCCCTGCATATGCAAGCGTGGGGGTAATAACAGCGGCATTGAGCGTTATAAATGCATCTGATTTCTGTT  
GTATCACAACGAAATCAACAGTCTCAGATGGTTTTCAATTCGCTATCGAGTCGATAACCGGAAAGCATCCGAAGGATTT  
GCATTTTTCCGGTACACTGCGCGCTATTCATCAGAAGTTGAGCCATTTCTCGCCAGAGCGCAACGCTTGCAGTGGAT  
GGCAGGCAAAATTCCTGCTGAAATAACTCCCGTACCTGTTACGGACATATCAGGTCAGGTTGCTGTTGAGCAGCTTCG  
GGCCGTTGGCAATCTGCCACCTCAGAGCGCGTTCGCCACTACAGGCGCATTCAGTGGTTTCAAGGGCTACCG  
CTGGAGCAGGTTAATTTGATTTTGGCTGAACTACGACAATTTGATGCTCAGCATCCGCAACCGCTTGAAGGAA  
GCGCAGGCGTCTTTTGAACCGCGAAATGGCTGGATTTGATTCAGATTTGGTTTAAACGGTACGCACTATGCGGATACA  
TCAGATCCCGGAAACATCCGGGCGTGTGATGTTGGGCTGGGTTGCGAAGTTTCAAATGAAAGCGGGAAG  
GGTTATCAGCGGCTTTCTGTTTTCATCACCAGAAAGTAATACAGCGGTACACACCATAAGATGCGCTCGTCTTGG  
ATGCTGGCAATCCATGATGATGAACAGTGGCAGGAAGCATTTGGCGGATGTCAGTCAATAACGCTGGTCCGTAAG

CAATGGCCTTTGATAAACCGTCTTGATCCATCGCAGATGAATCAGGAAATTTTGTAAACGAGGAAATCATTAATAAATCC  
TGTTCGTTGGGGAATCTCCCGGCTGTGACCGTTCCATTTTTCCCGGACAAATGCTGTATTGATCACACCTCTTGCCAACTCTGT  
GTCGTACTGGCAGCGTGGTTCCGTTCCGTGGCTGGTAAAAACGAGCCTCAGTATAAATCGCCTCGCGTCTATGAGTCC  
TGTAACTTTGACTGGGTGGTGGGCAATATGAAGCAGGGTGTACTGGATGGGATTGACTGGAAGAATAAG

>Cluster\_45117

ATGACCGAACATACCAGCAGTTACTACGCCCGCAGTGCGAATAAATATGCGCCTTTTCGACACGCTGAATGAGTGCATTTC  
CTGCGACGTTTGGCTGGTCGGCGCGGCTATACCGGGCTTCCFCCGCGTTCATCTGGCGGAAGCGGGCTTTGACGTAG  
TGGTTCTCGAAGCCTCACGCATCGGCTTTGGTGGCAGCGGGCGCAACGGCGGGCAGCTTGTGAACCTCTACAGCCGCGAC  
ATCGACGTTATCGAAAAAGCTACGGCATCCGCTCAACGGCGGGCGGTGTATGAACTTTCTGCCGTGACGCAGATCCAGCATCAT  
CCGCGAACGTATCAAACGTTATCAGATTGACTGCGACTACCGCCCGGGCGGCTGTTTGTGGCGATGAATGATAAAACAC  
TCGCCACACTTGAAGAGCAGAAAGAACTGGGAACGCTACGGCAATAAACAGCTGGAACCTGCTGGACGCCAACGCCAT  
CGCCGCGAGGTCGCCAGCGATCGCTATACCGCGCGCTGCTTGTATCACAGCGGGCGGCATATTCACCCGTTGAACCTCGC  
CATTTGGTGAAGCCGACCCATCCGCTCAACGGCGGGCGGTGTATGAACTTTCTGCCGTGACGCAGATCCAGCATCCAGCA  
CGCCAGCCGTTGTGCGAACTGCCAAAGTCAAGTGACGGCGAAGTATGTGATTGTGCGCGGAATGCGTATCTGGCGAT  
AAAGTAGACCCGAACTGGCGAAACGACGATCGCGTGGCGGCGCAGCTGATCACCAGCAACGGCTGTCCGGAAGATT  
AGCCCGTCTGCTGATCCGAAAACTACTGTGTGGAAGACTGTAATCTGCTTGTACTACCGCTTACCAGCCGACA  
ACCGCTGCTGACTCGCGCGGCTGCTACCGCGCGCGCACCCGATGACGTTGAGCGCCTTGTGTGCGAAACTG  
CTGAAACCTTCCCGCAGCTGAAGGGCTGAAATTTGATTACCCTGGACGGGCAACTTCTGCTGACCTTGTGCGGCAT  
GCCGAGTTCCGGTCCCTTGTATCAACATCTATACATGACAGGGCTACAGCGGCCACGGCGTCACTGTACCCATCTTG  
CCGGCGCTGATGTCGAACTGCTGCGGGCGACGCCGAACTTTCGATGCCCTTCGCAATCTGCCGATTTACCCTTTC  
CCGCGGGCGCACGCTGCGCGTCCATTTACCAGCATGCGCGCGGCTTATTACAGCCTGCGCGATCGCTGGCGGCTTTA  
A

>Cluster\_24815

ATGTCCCGTTTGTTCCTCGGTAACCTGCATCGATGTTATGGCCGATCCCTGATAACGCCATTGATTTTCATCCTCACCGA  
CCCAGCTACCTCGTCCGTTTCCGTTGACCGTTCGCGGCGCACCATCGCTGGCGATAAAACCGATGAATGGCTGCAACCGG  
CCTGTAATGAAATGTACCGCTACTCAAAAAGATGCGCTGATGGTCAGCTTCTATGGCTGGAACCGCTCGATCGCTTT  
GTGGCCGCTGGAATAATGCGGGATTACGCGTGGTCCGACACCTGGTGTTTACCAAAAACACATCGAAGGCCGCGATA  
TGTGGCTATCGCCACGAAATGCGCTACATCCTGGCAAAAGCCGTCACGCTGCCCAAAAACCCGTCGCGGACGTGC  
TGGGCTGGAATAATTCGGGCAACCGTCAACCCGACGGAAGCCGTTACCAGCTGCAACCGCTGATTGAGAGCTTC  
ACACACCCGAAACGATTTGTGCTGGACCGTTCAGGCGAGCGCTCAACCTGCGTCCGCGCCCTCCAGTCCGCGACCGC  
GTATATCGGTATCGAGCTGCTTGGAGCAGTATCACCGTCCGCGACGCAACGCTGCGTCCGCTACAGCGGGCCATGCAGC  
AGGGGCGCGCAATGATGACTGGTTTATCCCGAGGCTCGCTAA

>Cluster\_43430

ATGACACAACAAGGGGATGCTGTAGCTGGGGAGCTGGCGACAGAAAAAGTGGGTGTTAAAGGGTATCTGGCCTTTTTTCT  
CAGGATATCTTTTTTCCGGTGTTTTTTCCGGGACAGACAGTTGGTGGCGGCTTTTTGACTTTTTCCGTTCTGAACGGAT  
CGTTTGGGCAACTCGCTGGCAATGGCGCTACCACCTCGTTTCCGCGCGCAGGTGGCACTGGAGTAAAGATGGCTTT  
CTCTTCGCGCTGGAACCTGGCTCCGTCAGTGATTCTCTCTCTGGGAATTATCTCGATTACCAGTGGTCTTGGCGGATTGCG  
CGCCGCGCAGCAGTTAATGACGCCCGTGTAAAACCGTGTGGGCAATTCAGGCATCTGTTACTAGCGCTGATTGCTA  
ACCTGCAAAAACCGATGCCCGCGAGGTATGACCAAAAGAACTGGCGCAGGAAGGGGAAATACCGAAGCTGATAAAGT  
ATATTGCGCCCTATCAAAACAGCGGTAGCGCCATCATCAACCAACTACTTCTCTTCCGCGCTCGCGGTTTGGCTTTCT  
GGGACGTCGGTAATCGTACCTTTAGCGTTCATCTGGTGTTTAAATTTGTCGGAGCCAAATTTTGGCGCTCTGGCTTA  
ACTTCGAAGAACGTCGCAACCCAACGCAAGGAGCGCAAGCATGA

>Cluster\_42897

GTGCCCGTCCGCGCCAGTATTGAGCCACTAACCTGGGAAAACGCCCTTCTTGGTGTAAACAGCGCCATCGTGGCGATTAC  
GTCGAAAGCACCCTCTGACGCGCAGACGCGTTAGCGTGGTGCACGGGTGCAGGCCAAAATGCGGATCAAAATACGG  
GTGAACTGGATGCCCTGCAACAGCTGGGATTCTCCCTGGTAGAAGGTGAAGTTGATTTGGCGCTACCCGTGAACAATGTC  
AGTGAAGTGGTGCAGTAGTGGCACAAGAGACCGATATTCGCCGATTACGTCAGTTAGCCAGCCGCGATTTGGCAAAAG  
CCGTTTTCTGTCGCGCGTGGTATGCGCCTGACGCCAGCGGTGCGTTTTATGACAGTGGATTGAAAATGCCGTGCGCGGCA  
CCTTTGATCATCAATGCTGATTTCAGTGCAGCGTCCGGCGATATTCGCGGTATGTCTCTTACGGGAACTCAATGCG  
ACAGAGGCGGAAATTTGGCTGCTGGCTGGACCGGCTGACGGTGTGAGCTAATGCAACCGCGCTAAACTGGGCGTATGC  
TCGCGGTAAAAACAACTTTCCGCGGTGGCGACCCAGATGGGCAACACCCGCGCTTAAACGATACATACAAAGTGGTGGCA  
ATGTAGAAAGCACCCTGCTGTTATACAGGTGA

>Cluster\_40557

ATGTTGCAACATTTATCAGTGTCAATGAAAAAAGGACTGGCTGCACTCTGCTTACTGGCTGTTGCTGGGCTTAGCGGCTG  
CGATCAAAAAGAGAAATGCGCGCGCAAAAGTGGAAATACAACGGACTTTTCGAACAGCCAACCGCTGCGTGTGATGCCAATA  
ACCATACGGTAACCATGCTGGTCAAAATTAATGGTCTTCTCACCGACGACACTCGTACGGTATTGTTGTTAAAGAT  
GGCTCCAACGGACATAAATCGCTGTTTATGGGTTATGCGACCCGAAAGCATTATGTAAGCCCTGAAAGAGGCGAGGTGG  
TACGCCGGGCGAAAACATGACGATGGATAATAAAGAAACGACTCATGTACAGGCAGCAACTGGATTTTCGTTCACT  
GGCAAGGGGCGGCAAAAGCGTATTCCTTCGATGAAAGTGTATTGTTGACAGTAATGGCAAGAAACTGGACATGCGCTTTGGC  
GGTAATTTAACGGCAGCAGAAGATAAGAAAACGGGTGGCTGGTGTGCTGGATAGCTGCCCGGTGCGCATCGTCAGCAA  
TGCAACATACACTTATGGTGGGTTGAAAAACGCGGCAAGTGAATTCAAAGGCAATGCCTCAGTTCTCCCTGCGGATA  
ACACGCTGGCAACGGTTACCTTTAAATCACCGAATAA

>Cluster\_62554

ATGAGCAACCAAGGCGAATACCCCGAAGATAATCGGGTGGGAAGCACGAGCCGACGATTTAAGTTTACCCGTCGCGA  
TCTGATTAAGTGGAGCCGCAACAGCGGCGACCGCGTGGTTATCTCATTTACGCTGGCGGCAAGCGTTCGCGCAG  
CTACACCCGCGCCAGAGATAATGCCCTTACACTGAAAGTGAAGCTGAAAGCGCAAAACGAGCAGCTTGAAGTGGATCCCGCA  
ACGCTACTGGACGCTTTGCGTGAATACTGCATTTGATCGGTACCAAGAAAGTTGCGATCACGGACAGTGGGAGCCCTG  
TACCGTGTGGTCAATGGTGCAGGCTTAAATGCCTGCCGACGCTTGCAGTCAATGATCAGGGGGCGAGATCACCCCA  
TTGAAGGCTGGGTTCCGAGATAATCTTACCCCATGACGGCGGCTTTATCAAGCATGATGGCTTCCAGTGGCGCTAC  
TGACCTCCGCGCAAAATTTGCTCATCAGTAGCGGCGCTAAAAGAGATTCAGGACGCGCATTCAGTACGCTACGCTCGA  
TTTTGGTTCCGCTCCAGAAAACACTGCCGATGAGATCCGTGACGCTATGAGCGGCAACATCTGCTGCTGTTGGTGCATACG  
CTAACATCTTGGCGCATTTGAAGATGCTGCGGGGAGATAAAATCATGA

>Cluster\_49780

ATGAACTTTGAAATTTGTAAGAAGAACTGGCTGATAATAGGCATGCTATTTCATAGCATGTCTATTATTAATTTAAAAAT  
CAAAGATAATTTACAGAACACACGATCAGTTTAAATACGTCGTGATGTCATTGTGCGCTGTTTTGACACTTGTGTGGGAG  
GATATACCTTTGATGTTTTGCACAAAGGATAAGCGCAAGGATGATCTTATAGAGTTAAGAAATAGAATTAGAAATACA  
GAATFCGACATTTTTTAAATGTTGACGTTAATGTTTAAATCGATGATGTGTTTTATATAAAGCTAATGTGACTATTAG  
GAATAACAGTAATGAGCGAATTTATGTGAAGCTTAAATAACAAGTCCCTTGGCTGTTAGTGTGTTTTATCGCGGCTGCAA  
AGCAAGTCGCTACGGAAGTTTTTTATCCAAATTTATGAGGAGTTGGCTGTTCTTAAATGAGAAAGTAGCTCGCAAGGA

AAAGCTAAAAATATACCTTTATATGACATATCCGTTCCATCTCTGCTGAAAGACGCTTGAACATCTTGTTCGACAAA  
AGAAAAAGGAATGATTATGTAACATTTAGTGCAGGCAATGAACGAAGATGGCTCGCTGTTCTAAATACATAAATG  
GGAAAAATCTATATGGTTTTCTTCTTCATATATGAAAGTTAAAGATTGA  
>Cluster\_41691  
ATGATCCGATGGATCGTATTCAACAAAAACATGCTCGTCAAATAGATCTGCTGGAAAATCTGACGGCAGTTATTCAGGA  
TTATCCAAATCCAGCTTGTATCAGGGACGAAATCGAAAATTTATTTTTGCAATACGCTGTTTTATGAGTCATTTCTTA  
CACAGATCAAAGTGTGTAAGAAATGGCTTCTGTGCGAGAGATTTTTGTGAATGATCTCTGTCACAGAGATGGAAGCA  
TACAGGAATGAGCATACGCATCTTAATCTTGTAGAGGATGTTTTATTTCAGAACAGATCTGGACAATATCTATTCAGTC  
ATTTCTTAATGGACAGAAATATCATTCTGTGGCAATTTATGATGCTGCTCATGTTCTGTCATAAAGACAGTTATAATC  
AAAAACGATTTGTCAGTGATGATATCAGAAATATAATCAGAAGATGAGTGATGATTTCTCTGTATCATCATATGTAAT  
GATGCTTTTACTTATATAGCACCGAAATCAGTCATAATGCTATAGCAAGAATATAAACATATCCATCTCCACATCAA  
GAAACACGGCTCTGATATGCGACTACTTCTCTGTTTTCTAATAAAGATGAGTTAATCATCTTACTCTACAATAAAAAGT  
TTATTCATATTTTGTACGAGAAGCAATGTGTATCATAAATATGCGTTAA  
>Cluster\_54053  
ATGGCGAGACGATTTCTGGTCTGTAAGATGAAGCTCCAATTCGCGAAATGGTCTGCTCGTCTGCAACAAAATGGCTT  
TCAGCCGGTCAAGCGGAAGATTATGACAGTGTGTAATCAACTGAATGAACCTGGCCGGATTTAATTCCTCTGACT  
GGATGTTACTGGCGGCTCCGGTATCAGTTCAACACACCTCAAGCCGAGTTCGATGACCCGGGATTTCCAGTGGTG  
ATGTTGACCGCCAGAGGGGAAGAAGATCGCGTGGCGGCCTTGAAACCGGCGGGATGACTATATCACAAGCCGTT  
TTCCGCGAAGGAGCTGGTGGCGCAATCAAGCGGTAATGCGCGTATTTTCGCAATGGCGGTGAAGAGGTGATGAGA  
TGCAGGATTAAGTCTCGACCCGACATCTCACGAGTGTGCGGGGCAAGAGCCGCTGGAGATGGGGCCGACAGAATTT  
AACTGCTGCACTTTTTTATGACGCATCTGAGCGCTGTACAGCCGCGAGCAGCTGTTAAACCAGCTGGGGAACATA  
CGTGTATGTGAAGATCGTACGGTCTGATGTCACATTCGTCGCTACGTAAGACTGGAGCCAGGGGCGATGACCGCA  
TGGTGCAGACCGTGGCGGTACAGGATATCGTTTTTCAACCCGCTTTTTAA  
>Cluster\_35573  
ATGAATAGAATCTATCGCGTATATGGAATGCACTCTACAGGATTTTCAGGCCCTGCTCGGAATTAACTCGACGGGCAGG  
TAAAAACATCGACGGTAAATTTGCGTAAATCCTCTGGACTGACAACGAAATTCAGTAGATTGACGCTGGGTGTTTTGCTGG  
CACTAAGCGGTTACGCGTCTGGTCAAGTCTGGAAGTTGATAATGATCAGATTACCAATATTGATACTGATGTTGCTTAT  
GATGCTTACTGTTGGCTGGTATGGCACTGGAGTGTCTAATAATTTTGGCTGGCGGTAATGCCCTCAACCCACTATTAC  
TACCAGCGTCAATGGCGCTAATGAGGACTCAGAGGGCACCGTTAATGTTTTGGGTGGCACCTGGCGATTGATGATAGCG  
GAAATAATCAAGGCTTTAAATGTGGTCAATCCGGAACGGGACGCTGAATATAAACAGAAAGGTCACGTCGATGGA  
GGCTATTTAAGATTAGTTCTTCGACAGGAGCGTGGGACGGTCAATGTTGAGGGAGAGGACTCTGTTCTGACGACCGA  
ATTTATCGAAATAGGTAGCTATGGCACAGGTTTCAATAAATATTACGGATAAGGTTTACCTCACGAGTTCAATCGTCGCCA  
TTTTAGGCTATCAGGCGGCAGTAATGGCTAG  
>Cluster\_27253  
ATGTTGGATCTGTTTGGCGATGCTGAACCGTGGCAAGAACCCTGGCGGTGGAGCGGTGATTTTGCACCGTTTTGCTTT  
TAACGCTGCGGAGCAACTGATCCCGATATAATGACGTTGCCAGCCAGTCCGCGTTTTGCGCAGATGGTCACTCCAGGGC  
GATATACCATGTCGGTGGCGATGACCAACTGTGGGCTTTGGGCTGGACGCCATCGGCAAGGTTATCTCTATTCGCCC  
ATGATCCGCAAAACAAATAAACCGTGGCCCGCATGCCGACAGATTTTTCATCATTTATGTCAACGTCGGGCTACGGCGCC  
GGCTATCCAGATTTCCAGCAGATGCTGTTTGTATCAACCGCTACGTTCTTGGCGGAAACTGTCGCTCATCAGGATA  
AAGACGAACCGGATTCGCGCGCCAAATTTGTTTTCTCTGGGCTTACCCGCGATTTTCAATTTGGCGGCTGAAA  
CGAAATGATCCGCTCAACGTTTTGTTGTTGGAACATGGCGATGTTGGTGTATGGGGTGGTGGTGGCGGCTGTTTTATCA  
TGGCATTCAACCGTTGAAAGTGGGGTTTCACTCCACTCACACCAGCTGCGCTACAACCTGACATTCGCTCAGGCAGGTA  
AAAAAGAATAA  
>Cluster\_49994  
ATGAATTTGACGATCAATTCATCAAGAGTATCTCTGGCAAGACAGTCCAGGGGTATGACGCGAGGCGAGTTGTCAA  
ATTAGCTGGTGTGTTCAACGTCAAATAGCTGCATACGAGGGTGGTGAAGGCTAAACCAGGGTTCGCTGATTTGCAGGCAT  
TAGCCAACGCATTAGCCACTACGCTGAGTGGTTAGCTTGGGTGAAGGTGAGGGCCCTGGAACAAAAACAGTATGCCT  
GACGTTCTGGTAAAGCAATACCAATCCCAAACCTAGATGAAGTTATGCATTACCTAAACACAGGTGAACATTCATCGTC  
TAGATTTCACTCCGCAATATACAATGTTGGTACTCTGCATTTGCATTGACTATTGAAGGTGAAGCTATGACTACAAGTT  
CAGGTATTAGCTTTCCAGAGGATCAGTTGTCAGCTTCAGCCCTCTAGTAAAAGCTAAAAGCAAGATTATGTAATAGCA  
TCATTGGATAAAGAGCAAAATATTGAGCTTCAAGCAGGTTACATTTGGTGAATAGAGACAAACTTAGTATCCCTAAACCC  
AATGTATCCTAATATCTTGTAGAAATGAAGATGTTAGTATTTTGGCAACCGCAGTTTACCTTGAATCCCGTTGCTTT  
GA  
>Cluster\_41557  
ATGCAGAAAGAACAACCTTCCGCTTAAATGGATGGCGAAACGCTGAATAGTGAAGTGTGTTAACGAACCTGGCTCATAACCC  
AGAAATGCAGAAAACCTGGGAAAGCTATCACTTGTATCCGTTGACTCAATGCGGGGTGATACTCCGAGGTGCTCCATTTTCG  
ATATCTCTTACAGTGTGATGGCCGCCATGGAAGAGAGCCAGTACGCTAACCGGCGACATGATCCCGGAAGCCAGCT  
TCCCGCATCAATGGCAGAAAATGCCATTTGCGCAGAAAGTACGCTGCGGGGCGACAGCTTACCCAAATGGCCGATGAG  
AGCATGCTATCGCTTGCAGTTATCCTGTTGGCGTCCAGCATAATGGGCAATCTGAAACGCTCCAGCAGCCGAAACCGC  
CAGTATTTAATACACTGCGGATGATGGGTAAAGCCAGCCGGTTAGTCTGGGAGTACCTTCTGAAAGCGACCGCAATAAT  
GGTCAACAGCAGCAGGTACAGGAGCAGCGTCTGCGATTAATGCAATGTTGCAAGGATTACGAACCTGCAACGCCGACTCCA  
CTCTGAACAGCTTCAATTTGAGCAGGCACAACTCAGCAAGCCGCTGTACAGGTGCCAGGAATTCAACTTTAGGACGC  
AATCGCAGTAA  
>Cluster\_20938  
ATGAAAACCGGCTGACCCCTTGAATGCAATGTTTGGCGGTATCCGTTTTTGGCACCACGCTGCGGCTTTCTTAC  
TGATGTCGATCTTCTGGTACTCGACGGTAAAGAGGTTTTCCAGCTCTCTGCTGCGCGGTGCGGACAGCATTGAACTGGACA  
ATGGACCGCATCAGTTAGTGTTCGCGTTGAGAAGACGATTATCTTTTCAATAGTGAAGAACGGCTCTATATCTCCCT  
CCACTGGTGGTGTGTTTTAATACCAGCTCATCAACAGGTCATTTTTGCGCTGCCTGCGCTGGAGAAATGAGCGGGAAGC  
TAACATTTGATGCGCGCCGCGCTTGAATTTGTTGGATGGCAGTGCAGCCGATTAACCAATTCGCGTAAAGCTGGATTTCTCG  
CCATTACCTCAACTGCAAAAACGATGATTGATGAGTTCAGGTTGAACGCTATAAACAATCCGCGAAACCGCTTCACTA  
CCGCAATTTGCCAGATGATGGCAGATGACAGTACGCTGCTTTCCGGTGTTCGAGCTGGATGCTATTCGCGCCGAGTC  
TCAGGTGCTCACAGAAACCGGCTGAAGTATTGGTTTTAACTGCTGACCCACAACCGGAAATCTTCTGCAATGGG  
CGGAAAAACAACCTCTCTCTGA  
>Cluster\_28922  
ATGACGCAATCCATTTTTAGGCTCAACCTTTGAATTACCTTTTGTATCCGCACAACTGCCCTGGTCAATGATCGCAT  
GCAGCGTGAATTTGTCGAAGCAGGGGCTTCGGTGAAGGCACTGGGCAATGATGTTTCACTGGTACGCACGCTATCGCAT  
CATGTACAGAGTGTGCTGGACCGCAGCTCAAAAAGGAATATGTTATTCATACCTCGTGAAGGCCATCGTGCAGCTTA  
AGCGACTGCCCGCAGCCAACTGACGCGCGGCGAAAAACCTTTATTTGGTGAACAGGACCGATGGGACGATTTCTGGT  
CAGAGGTGAAGCGGGTCAATGACATCTTCTGAACTGTACCCGTTAGTGGTGAACCGGTGATGATAAGCCCGTAAAG

GCGCTTTTTATCAAACCGACTTACATCTGATTTTGCAAAACACGGTATCAAGACGCTGATAGTTTGTGGTGTAAACAAC  
GAAGTTTTCGCTAACCAACCGTTCGCGAAGCAAAATGATCGTGGCTATGAATGCATTAATCCCGAAGATTGTGTCGGCTC  
CTATTTCCCGAATTCAGAAATACGCCCTCGAGATGATCAAAGCACAAGGTGCCATTTTCGGTGGTACTGATTTCCA  
AAGCATTATTCAGGCTGGAAGGCTAA  
>Cluster\_48674  
ATGACCACCGTTAAACAATAAGAAATGCTACCCAAGCGAGAAATATCTTAATGAGCTGATCACCAACATTGAGTTTGTCTGC  
AAGGGACAGTTGAAGTCGTGAGAGCGATTGACAGCAGAGCTACAGAAGCACCCTAAGCCTATGCCAATACAGCCGCAT  
CTAAGGATGGTTGGATAAGCTGTAGTGAGCGAATGCCTGTAATGGCGAGCTAAATGGAGAAGTACTGTTTCTTTACTG  
GTTACGTGTGAGATCGCCGTTATACCTGTATTACGGCTTTGTGAGCGTTAATGGTAATAGGCATTATGGCTTTATGGA  
GAGTCTTAAATACGGAGACGATAACGGCAACCATCTCAAACCTAATGAATATGGTCTGATAGCAATGTCACACACTGGA  
TGCCACTACAGAACCGCCGAGGAGTCGAACAGTGAATATGCAGAGTATTTTCAGAAAATATCGGCTCTCGGACTGAA  
TGCCACGCTATAGCATCTGAGCTTGATGTTGGCGATGAACGAACCGAGATGTTTCGAAAATATACAGTGTCTGCGCAATCT  
CTGTCGGCGTGGCTACGCCACTCAAGTAGGGCGAATGACTAACCCACTACTCTCATCTGTGATGAGGATGACTCGGATG  
AGGATGACGAATGA  
>Cluster\_61567  
ATGAAGTTGAATTTTAAAGGATTTTTTAAAGGCTGCGGTTTATTTCCACTGCGCTGATGCTTTTCAAGTGTATCTCGTA  
TGCTCTGGTTTCCCATACCGCAAAGGGTAGTTTCAAGAAAGTATCAATCGCAGTCAGACACCATCACTGGGCTATCGCAGG  
CAAAAGATAGTAATGGAACAAAAGGCTATGTTTTTGTAGGGGAATCGCTGGATTACCTTATCACTGATGGTGGCGATGAC  
ATCCTTAAGATGCTCAATGATCCAGCATTAAACCGGCACAATATTCAGGTTGGCGATGACGCAAGATTGTTTTAAATGC  
GGGAAAAGAAATTTACCGGCACAATATCGCTTACTACTGGAATAACGAAGAAGAAAAGGCACCTGGCAACGCTAT  
ATGGTTTTGCCTGTGGTGTCAACACTGTACCAGTCACTGGAATAACCTAAAGGCACAAATCCATGAGAAAAATAAAAA  
ATGGATTACTCAAAGGTGATGGCTTCTACCATCCATTTAAAGTGCATTTTATGAATACTATTCACCAGAGGCATTCC  
GGATGGTGTTCGCGAGCATTACTGCCAGTGTACTGCGCTGGACATCATTACTGCACCGCTGCAATTTCTGGTGTGAT  
ATGCAGTAAACCAATA  
>Cluster\_33637  
ATGATCAATGTATTAATTCATCGATGACGACGCAATGGTCGCGGAGCTGAATCGCGATACGTTGGCACAATCCCGGGCTT  
TCAATGCTGTGGAACGGCTTCGACGCTGGGAAAAGCAAGAGATTATCTTCAATAGCGATACGCCTATCGCAAGCTGATAT  
TGCTAGATATCTATGCAAAAAGAAACGGCTCGAATTTACTGCTGCTGCTGCAATAACCGCGCTTGCAAAAGTGTGG  
ATTGTCATCTCCTCCGCTGCGGATGACGCAACCATCAAAGATTGCTGCAATTACGGTGTGTGGATTACCTGATCAAACC  
CTTCCAGGCTTCCCGCTTGAAGAGGCGCTCACCGCTGGCGGCAAAAGAAAATGGCGCTGGAAAAACATCAGTATTTATG  
ACCAGGCCGAGCTGATCAGTAATCCACGGCAGCAGCTCCAACGAGCAGGATCCTCGTCGCTTGCCAAAAGGCTTAACG  
CCGACAGCTTACGCACGCTGTGCCAGTGGATTGACGGCATCAGGACTATGAGTTTTCAACCGACGAGCTGGCTAACGA  
GGTAAACATCTCGCGTGTTCCTGCCGTAATACCTTATCTGGCTAGTCAACTGCCACATCTTGTTCACCAGTATCCATT  
ATGGCGTACGCGGCGCTCCGGTTACCGTTACCSTATTAGGCAGAACACTACTCACTACTGAAAACAATATTGCCAATA  
>Cluster\_46461  
ATGAGAAACAAACTCTCTTTCGACTTGCAGTTGAGCGCAGAAAAGCGGCAATCGCTGAACGGATTGCTCCCATAAAAT  
TGCCCGCAGTAAAGTGTCCGCTTTTTTAAATGGCGATGTCGCTGGCGTGTATGCGGATCGGATTTACTTTTTACCTTT  
CCGTTATCCCGGATCCCCGCTTTCACAGGCATTAACCCATCTGGTGGCGGCTTTGCTTTTACACTCCGGCTTTATTTT  
CTGGCGGTTTGTGGCACCCTGTTCACTCGTCGTTAATGACGGTATGCGCAAAAAGTTCGGGCGTTATTAGTTGGCG  
AACTTGGCTGATTAACGCACCTTCTGGTGGCTGCGGTAATCTGGCAGGATTGCTGTTTTCAGTTTGTTAATCTGGTTTT  
CCGGGCTGTGATGAGTGAACGCGATGTGGGAGTCCGGTTTTACTGCGCCGAGGGCAAAATGATCATACATTT  
ACTGAATCTGTACGCTCCGGCATTATGTCAATCTGATGGTTTTGCCTGGCGCTGTGGATGAGTTATTGGCGGCTTCATT  
ATGGCAGAAAATCCGCTATGATTTTGCCATCACCCTTTGCTGCGCAGTGGCTTTGAGCACTGATTCGCCAATTTGT  
TTGTGATTTCCGTTCCGCAATTGCCATTGCCAATTTTGCCCAACGCCCCCTGGCAACTGGCGCACAGTAGCGCAGACAAT  
TTCCGGCACTGA  
>Cluster\_8954  
ATGATCTAATAAAGCATTGCGGAGCGGTTAAGAATTCGACTTAACTCCGAGATTTACGCTAAACAGCCTTCTTCCCGG  
TGAAAAAAGCTGGCGGAAGAGTTTGGCGTATCGCGGATGACCATCCGTAAGCCATTGACCTGCTGGTAGCGTGGGGGC  
TGTGTTCCCGCCGACGGTAGTGGCATTACCTGGTGCAGAAAGATGACTGCATCAAACCGCCAGTCTGACCGGGCTG  
GTGGAGGTGTTAAACCGGAGGAAAAACGGTCACCAGCCAGGTGCTGATTTTTGAAATCATGCTGCGCTCCGGCCAT  
TGCCAGCCAGTTACGGATTCAAATCAACGAGCAGATCTACTTCCCGTCCGCTTCTGTTGGAAGGGAAACCGCTGA  
TGCTGGAAGACAGCTATATGCCGTAATACTGTTCCGTAATCTTTCGCTGCAACATCTGGAAGGGTCGAAGTTTGAATAT  
ATGAAACAAGAGTCCGGGATTTTGTATGGCGGTAATATGAAAGCCTGACGCCAGTGCCTGCCGATAGACTGCTGGCGCG  
GCAATGAAGGTAGCGGAACACAGCCACTGCTGCCGATCACCCTGTTGTCATATAGCAGAGCGGGGAGTTTTTGAAT  
ATTCAGTGTGTTTCAAGAAATGCCAGCAATACCAGGTGGAGTACCATTACGGCGACTCCACCGGAAAAGAGTTAA  
>Cluster\_40002  
ATGAGCGCACGTTTACAGGCACTGGTTCCTCTCAGCACAGAGCAACAGGCCGATGGCGGGCGGTGGCGGAGACCGAAAA  
ACGCCCATCAGGTTAACAGCTGGCTGAATATCCGATGACCGGTTGCTTTTTCCGCTGCTGACCGGAAGCCGAGGA  
TATCGCTGTCTGACTGCGGATTTTTCATGCCGTCCTGACCGCAGAAAGACTGACCGCAACCGCTTCTCAGTGGCTGTAT  
GCCATCGATGTGCTGATTGAAACACAGGGGAGGCTGCTCCTTCCCTTCCCGGTGATGCAGCAGAGCGCTTGTTCCT  
GTCGGTGGCGTTTCTGTCAGGGAAACGAGTCCGCATAAATCCGCGCTGGTCAATGCAGAAATACAGCCGCCAGCGGA  
GGGAGCCAGAGCAGAAAGCCGTCGCTACCAGGCTGCTGCTCAGGCTGAAATCGAACTGGCAATTCATTCCCGGAA  
ACAGTCCGGAAGCTGGCATGCACGCTGGAGTGACCGGTTGGCAGAGCATAAACCCTGGAACCCCTGTTCTGGCAGTGGGGGA  
GCTTTTTCCGCTACTGGCCGAAATGGAACGCTGGCAGTGGCAGGATATGCCGTTCTGGCAGGTTATTGGGAAAGCCAGTCT  
TTGAGCAAGAGAGCGCGGTACGCTGTCCGTCAGATGGAGCGGTGGATGGTGCAGCAAAACCTCCGGGAGGCAGCGTGA  
>Cluster\_30597  
ATGAACAATGTCAATTCCTTGCAGAAATCACCAGAACGCGTCTCCCTGTTACCATTGCGCGGGGGGGGATTTTGAAC  
AGCGCTCTCCCTGAGAAGATGGCCACCCTCACGGGGGCCACCGGCCATACCTGCTGGCCCCGGAAGTGAAGTCCCTTC  
TCTTCTATATGCCGATCAGCGTCAACATATGCTGTTGCCACCCCTCTGGAATACCGGAATGCGTATTGGCGAAGCCCGG  
ATGCTGACCCCGGAATCATTTGATCTGGATGCTAAGACCTTTGTGCGGATCCTTCCGAAAAGAGTCCGCGCAGC  
CGGACCCCGCAAAAAGATGAAGTCCGCTGGTTCGCTGACAGATATAAGCTATGTCAGGCAGATGGAAGCTGGATGA  
TCACCACCCGCCCCGCTGCTGTAACATTTATGGGCTGACCGAGCAAAACCTGCGCAACTGGCTGAAGCAGGCTGTC  
AGACGGCCGAAGCTGACGGGGTACACTTTTCGATTCGGTACACCACACAGCTTCCGGCACAGCTATATCATGACAT  
GCTTATCACCCGCGAAAGCTCATCCAGGCATGGCTGGTTCACAGGATCCACGTTTCGATGGAGGTTTATACCA  
GAGTGTTCGACTGGATATGGCTGCCACGCTGGCAGTGCCTTTACAGGTTGACGGTGGGATGCTGCGGAGATCTGCGT  
ACACTGCTCCCTGAAGTAA  
>Cluster\_17653  
ATGCAAAAACAGATTTATGGTAACGCAACGTTGATTGCGGTGATGTTCTTGTGATGCTGCGGGCTTATCCGAACGTTT  
TGATGCCGTCATTACCGACCCGCTTACAGCAGTGGTGGCACACATAAATCAGACCGCAGCATGGCCCCCTCGGACAAGT

ATGTCGGTACACCCAGTATGCCGAGTTCAGCGGGATAACCGGACCAGCGCAGCTGGGCATACTGGAGCACCCCTGTGG  
ATGTCGGGGCTGCCCGCTTGTGCGCCCCGGTGTATGTCAATGGTGTTCAGTACTGGCGACAGCTTCCCACCATGAC  
CGAGCTTTTTCAGGCCGGTGGTGTGCTGTGGCTGTGCTTGTGTCTGGGATAAAACGAGGCTTCCCGTGGCCACACA  
CCGGCTATTTCCGGCATCAGGCCGAGTATGTGGTCTGGGGCAGCAACGGAAAACTCGACAAAATGCCCGCAGGTTGGCCCG  
TTCCCGGGTGTGATTACGACGCGGTGTGCCGTCGCAAAAACATGATATGACGGCAAAGCAGTTTCAAGTGTGGCCGA  
GCTGGTTAAACCGCTGGCACCGGATGCGCACGTTCTCGATCCGTTTATGGGAAGCGGCACCACCGCCATCCCTGTACTGG  
CCCGTGGCGGACGTTTACCGGCATTGAAATGACTAACAGTATTTTGTATATCGCTGCGCACGCTCTGAAAAAGCGCAG  
GCAGAAGCAGCGCAGGTGTGA

>Cluster\_39375

ATGAAAATGACCTGAACGCCGATCTGGGGCAAGGCTGCGCCAGCGACGAGCTATTAACGCTGGTTTCTCTGCCAA  
TATGCGCTGTGGATTTTATGACGCGATGCGCAAAACATGACGCTTGGTGTGCTGAAGCAATAAAAAATGGTGTGCGGA  
TTGGCGCTCACCCGAGTTTCCCGACAGGGAAAAATTTGGTTCGACGCGCCATGACGCTGCCCGCAGAAACCGTTTTCGCC  
CAGACGCTGATCAAATTTGGCGCTGGCAGCAGATTACCCGTGCGCAAGGCGCGTAATGTGTATGTCAAACCCGACCG  
CATGTTATAACAACAGCGCGGCAAAAGAGGCACAACCTGGCAGACGCCATCGCCAGAGCGGTATACGCTTGGCATCCGGCAT  
TGATTTCTCGTCCGGCTGGCAGGAAGCGAGCTGATTCGTGACGGCGAACGATATGGCCTGGTAACGCGGGAGGAAGTGT  
GCCGATCGCGGTTATCAGGCAGACGGTTCGTGGTGGCCGCAAGCCAGCCAGCGCGGTTGATTGAAAACGAGAACAGGC  
GCTGGCGCAAAACGTTGGAGATGGTCAACACGGCAGAGTCAAAAAGTATCACCGCGAATGGGCACCGTCAAGCGCAAA  
CGGTCTGCCTGCATGGCGATGGCAGCACGACCTGGCGTTCGCCCGCGATTACGAGCTACATTTGCTGAAAAGGGGATT  
GTTGTCGCAGCATAA

>Cluster\_11131

ATGCTGACACACTATCCCTGAATATCTGCAACCCGACTGGCACAACCTGAAAAAGGCCAGAGCCGCCATCTTGAGAA  
CGCCCGCTGATGGATGAGACCGTCACGGCCATTGAACGGGACAGCAGGAAAAAATGCGCTGGCGCAGGCCAGCGGAA  
ACGACGCTGACGACTGGCCACGGCCTTTTCGTGACGCCGGTGGTGTCTGAGCGACGAGCTGAAAACAGCGCCACATGAG  
CGGTGGCAACCCGCGGAGCTGGTACAGGAATATGACAACTGGCCGCTGGTGTGTAATTTGAAACGCGAACCGCATGAAAG  
GGCGTGTGACAGCACGGCCACCGCTACCGGAAGGCACATCATCACCTGCTGAGTCTGTATGCAGAGCATGAGCTGGAAC  
ACGCCCTGAATGAAACCTGTGAGCGCTTGTCCGGCAATGCATCTGAGCATCTGGTACAGGAAAAATCCGCTCGCCAAC  
ACCACCGGCCATCAGGGCTACGTGCGACCGGAAAAAGGCTGTATGACGAGGTAATCATCGCTGGAACAGAAAAATAAA  
ACAGATGCCAAATCAGCTCACCGCGACCGGTTCTCCGGCTGACCGGACTGTGAGCGCAACACTCCCGCACATGGATT  
ATGAGGTGGCAGGCACACCGGCACAGCGCAAGGTGTGGCAGGACAAAAAGACCAGCAGGGAGCAGAGCTTAAGGCCAGA  
GGACTGCTGTCATGA

>Cluster\_48632

ATGGGAATTAAGCTGATATTCAGAGCTTATCTCCCTGACATCATTGAGTTGTTCTACTGGATATGTCGAACACAAC  
TTCAGGGGGGAGCTATTTCTCCACGCCGGAACAAACGAACTGATGCAACCGGTCGCTGGCAAGGGGTGACATACGAGC  
CGTGGCCAATCAAAGCATCAGGCTTTGACAAAACGGGGCAGGGAACGTTGCCACGTCCTAAAAATTCAGGTATCGAATTT  
GCCGGAACCGTCTCTGCGGAAGTTCAGGCGAACGACGATCTTGTGGCTGCCGATTAATTCGCAAGATGACGCTGGCTCG  
CTTCCCTCGATGCCGTTAATTTTAAAGACGGCAACCCCAACGACGATCCAAAACAACTTTCCCTGATGAAATGTGGTTA  
TCGAACAGAAAACCTCTCGAACTCATCAGGTTGTGAGTTGAAATGTCCAGTGTGTTGATTTGATGGGGGTGCAACTG  
CCGTATCGTCAGATCATTAACAAACCTGCCCGTGGAAATACCGAGGGCCAGAATGCGGATATACCGGTCATATTTGCA  
CAAAAATAACAGCAGAGCTTATGTCTGGTGGGATTACTGCACAAAACGTTATGACGCTGTAATGCGCGTCGGAATT  
ATTTTGGCAGCGGTGTGATCCATTTTGGCGGATTTATTGGAGCTACGCGGTATGGGTA

>Cluster\_25946

ATGCAGGATATCCGGCAGGAAACACTGAATGAATGCACCCGTCGGGAGCAGTCGGCCAGCGTGGTGTCTGGGAAATCGA  
TCTGACAGAGGTCGGTGGGAGAAGCTTATTTTCTGTAATGAGCAGAAACGAAAAAGGTGAGCCGGTCACTGGCAGGGGC  
GACAGTATCAGCCGATCCCATTCAGGGGAGTGGTTTTGAACTGAATGGCAAAGGCACAGTACGCGCCCCACGCTGACG  
GTTTCTAACCTGTACGGTATGGTCAACGGGATGGCGGAAGATCTGCAGAGTCTGGTCCGCGGAACGGTGGTCCGGCGTAA  
GGTTTACGCCCGTTTTCTGGATGCGGTGAACTTCGTCAACGGAAACAGTGACGCGGATCCGGAGCAGGAGGTGATCAGCC  
CTGGCGCATTTGACGAGTGCAGCGAACTGAGCGCGGTGAGTCCCTTTGTAAGTGTCCACGCGACGGAACGGCAGCGC  
GCTGTTTTTCCGGGACGATCATGCTGGCCAACACCTGCACCTGGACCTATCGCGCGGTGAGTGGGTTATCAGCGTCC  
GGCGGTCCGGGATGAATATGACAGCACAACGTCGATATCACGAAGGATAAATGCAGCAAAATGCTGAGCGGTGTAAGT  
TTCGCAATAACGTCGGCAACTTTGGCGGCTTCCCTTCCATTAACAAACTTTCCGAGTAA

>Cluster\_57575

ATGGAAGTGTCTTTTATTGAGTAACTCGACGCTGCCGGTAAAGCCTGGCTGGAACATGCACTGCCGCTAATTGCTGAACA  
GTTGACAGGTCGCGCTCAGCGGTGTTTTATCCCTTTCGCTGGCGTAACGACAGACTGGGATGATTACACAGCGAAAACCG  
CTGCGGTTCTCGCTCCGCTGGTGTGTTCTGTCAACCGTATCTATAGCGTTGTCGATCCCGTTGCCGATGAAAATGCT  
GAGATCGTATTTGTCGGCGCGGGAATACTTTCCAGTTCTGAAACAGTGCAGCGAGCGGGGCTGCTGGCACCAATTA  
TGACGTGGTTAAACGTGGCGCTCTGTATATTGGCTGGAGCGCAGCGCTAACCTGCTTGGCCAACTTCGTACCACCA  
ACGATATGCGGATTTGTCGATCCGCAAGGTTTCGATGCGCTAAATCTGTTCCTGTTGCAAAATCAACCCGCACTTACCAAC  
GCGCTCCGGAAGGCCATAAAGGTGAAACCCGTGAGCAGGCTATTCGGAACAGTGGTGTGCTGCGCGCAGCACTGACGAT  
TATTGGTCTACCGGAAGGTAACCTGATACAGTGAAGTAAAGGTACAGCTACGCTGAGTGGTGGCCGAAACCCACTTATGT  
TTAAGGCTGGTGAAGAAGCGGTGCCGCTAGAAGCTGGTACCCTTTTTAA

>Cluster\_8140

ATGAAAACAATTGGTTTGTGGGAGGAATGAGCTGGGAATCCACCATTCTTACTATCGTTTGATAAATGAAGGCATTAA  
ACAGCGGCTTGGTGGGCTTCACTCTGCGCAAGTGTGCTACATAGCGTCGATTTTTCATGAAATAGAAGAGTGGCAGCGTC  
GCGGGAAATGGGATAAAAACCGGGGACATTTCTGGCTGAGCGCGGCTTGGCTTACAGCGGGCGGGCGCAGAAGGTATTGTG  
TTATGTACCAATACGATGCATAAAGTGGCGGATGCCATTGAGTCACGTTGCACCTGCTGCTTTCATACATATGCGGATGC  
CACCGGACGTCGAAATACCGGGGCGGGAATGACCTGTTGGGCTGCTGGTACGCGTTACACATGGAAACAGGATTTTT  
ATCGCGGGCGGCTGACGGAAACAATTTCCATCAATTTGCTTATTTCTGAAAGCGGATGAACGGGCGAAAATTAATCAGATT  
ATTTTTGAAGAACGTGTCTGGGCAATTTACCAGAGGCTCACCGCTTATTTGCGCAAGTGTGCTGCGCTTGCAG  
ACAGGGCGCACAGGGCGTATTTTGGCTGCACAGAAATGGTTTACTGGTGCAGAAAGAGCGCAGTGTTTGCTGTGT  
TTGATACCGCGGATCCATGCGGAGGATGCTGTCTTATGCTGCTAG

>Cluster\_17535

ATGGATTTGAACAAATTCGATGAGCCATTCAGCCCTGAAGATAAGAATGGAGAATACAGCAAAGCGGTAAAACACCGCGA  
TGGCAAGGTGTGGCTATGGTGTGCTTATGTCACGAACGAGGCAATCATGAAACGCTTGCAGATGTTTGGCGGCAAG  
CAGGATGGCGCAATGAATACCGAGATAATCCCAACAACGAGGCGGTTGAATGCGGCATATCAATCAGGATTTGATCCGAA  
TGGGTAACCAAAATGGGATGCTGCTGAAAACACGAGGTAGAAGCGTAAAGGTGGTCTTCCGGTGCATGAAGCGCGC  
TGCCGTTTCAAGTGGGAAATCGGTCGTTATCTGTAACCTTGAAGGAGGTTTCGCACAAAACATCTCTCGATAAAAAGCAGG  
GATGGCACAGGGCAAAAACCTCAAGGATGGAAACAGGATTTTACTGGCTCCCTCCATCGCTGCGGGGATGGGCAATCCGAGCA  
TCAGATAACAACCATCACAGAAAATCAACACAGACATCTCCATCGGTTGACTGCGAACAATCTTGAAGACTTTCAG  
CGATTATGCATCAACAGAAACTGACAAGAAAAACTCATCGAGGCTTATCAGCGTGTGCAATTAATGGCTGGCAACG

AGGAGGCACAGGCTAAATGCGTTCAGGTAATGAACATCAGAGTTAACGAACTAAAACAGGCGGCATAA

>Cluster\_25008

ATGAATACCTGGCGCTGAATGCGCAATCACCGCAGCCGACCCGCGGAAAGCAACAACGTGGCGGCCAGCGCAC  
GACAAGCAGCAGCGATAGCTCGCCGTTGATACCTTCCGACGCTGTTTGTGCTGAGATCCTAAAACAGGACCCGACCG  
ACCCAGCCAGCAGCCGAATATATCGACCAGCTTTCGTCFAATGGCGCAGGTGGCGATGATGGAAGAGATGAGCGTGCAG  
GCGAATACCAACGCGGTGCTGATGAGCAACATTGAGGTGATGGCGCTCGGCAACCTGGTGGGCGACGACATTAAGTGC  
GACCACCGCTTGGAGGTGAGTGACCAGACCATTAACGGTGCGCCACGCTTGACGACGCTGTACCACCGCCGATCTCC  
ACTTTACCGATGCCGAGCGATGACTATACGGTGTGCTGATCCCGGAAGGCAGTTCGTCGCTGGACCAGGCGAGGTC  
GATTTCTCGATTAATCCGCGGATACCGCATCCCGCGGGCGATTACGACGCTCGGTGGTGGACCAATACCGGAGAAGA  
AGAGGTGCCGATTGAAGTTCCGGTGAAGTGAAGATGTACGCATCCCGCTCGATGGCAGCTCCCGGTGCTTAACGTTG  
CCGGTGTAGCGAAGTGCCTTACCATGATTAGCCAGTTTGGCGTACCCGATGCCGACAGTGTGTGGCGTGA

>Cluster\_66929

ATGAAACCTGAAACAGAAATAGATGAAACCGGCAGCTTCCGGTGAATCCGAAAGAAACCCGCCCTTCTGAAACGTT  
CGTCTGGGGGATATCTGTAGCAACATGGGGCTATGTGCAGTGTGTTGCTCGCAGCCATATGGTATCTGTTCTGAGAG  
CGCCATCGGAAACAGGCATGCTTTCGTTAATGATGCGGATGCTGGCGTACAGACCTGGCAAACACCCCAAGAATCATCA  
CCTTCCGTTACGTCAGTATGACTGTCCGGACAGGAGAAGATATGAGCCAGCTTGCCCGGGATGTAAAACAGAGA  
CTGGATAACCCGATGAAATACTGAGCAACCTGAATATGCTTACGACAGCATTAACAAGCTGGGCGGATGATATA  
AAAAGGATGAAGAATACGCACAGGAAACCGCCGTCAGTGGATGATATCCGGAGCCGCTGAACGGAATAATGACACAG  
AAAAGCGTCACTGAATCCCTTCCACACCGCATCCAGCAAGAAAAAACGTCGCTGTACTTAAACGAAATGAAATCAT  
GTCGATGGAACCTGGCATGGCTGGATTCCGTTGGCAGGTAGTACTGGGCTGTGAGGAAGTCAAGACTCTGGGCAATG  
TGGTATCCAGCGGATGATCCGACGACCCGACCATCATACCAGTGGCGGACGTTACGCTGA

>Cluster\_1154

ATGCGCCTGGTTCAGCTTCTCGCCATTCAATAGCCTTCCCTTCCCGGAAGGCGCATACGTTAGCCTAACGGCCTGCT  
GGCACTTGGGGGCGATCTTAGCCTGCGCGCTTAAATGGCTTACCAGCGTGGTATTTTCCGTTTCTCCAGGCG  
ACCCATCCTCTGGTGGTGCAGGATCCCGCGCGGTGCTATGGCCAGAATCACTGCATATCAGCCGTAGTATGAAGCGA  
TTTCATAAACGCTCGCCCTATCGTGTACGATGAATTAGCCTTTTGGTTCAGGTCAATGAGGCCTGTGCAGCGATCGCGA  
AGAAGAACTGGATCACGCGTGGCGTGGTGAAGCCTACCATCGCCTTACGAACTCGGCCATGCCACTCCATTGAAG  
TCTGGCGTGAAGATGAGCTTGTGCGCGGTATGTACGGCGTGGCCAGGGAACGCTATTTTGTGGCGAGTCCATGTTGAG  
CGGATGGAATAACGCTTAAACCGCGCTTCTGGTATTTCTGTGAGGAATTTATCGGTCATGGCGGTAAGCTTATCGACTG  
CCAGGTCCCTAACGATCACACAGCATCGCTTGGTGCCTGCGAAATCCCGCGGGATTAACCTAATATCTCAATCAAA  
TGCGCCTCGGACGATGGCCGAATAATTTCTGGGTACCAGATGCTTGTTTTACCACAAGAATGA

>Cluster\_2562

ATGCCAAGAGCGAACGAAATTAATAAAGGTATGGTACTGAATTACAACGGCAACTGCTGCTGGTTAAGGATATTGATAT  
TCAGTCGCCCACTGCCCGCGGTGCCGCTACGCTGTACAAAATGCGTTTTTCTGATGTCGCTACCGGGTGAAAGTAGAAG  
AGCGTTTCAAAGGTGATGATATCGTTGACACCGTACGCTGACCCCGCTTACGTTGACTTCTCCTATGTGATGGCAAC  
GAATATGCTTTTATGGATAAAGAAGACTATACCCGTAACCTTACCACCAAGATCAGATGGAAGAAGATGCTGCTTAT  
GCCAGAGGGCGGCATGCCGGACATGCAGGTGCTGACCTGGGACGGTCAACTGCTGGCGCTGAGCTGCCGAGACCGTTG  
ATCTGGAATCGTTGAAACCGCACAGGATCAAAAGGGCATCTGCCAGCGCCGTAACAAACCGGCGACATTGAGCACT  
GGTCTGGTGAATCAGGTACCAGAATACTTAAGCCCGGGCAAAAAATTCGTATCCATATCGAAGAACCGCCTTATATGGG  
CGCTGCTGACTAA

>Cluster\_27484

ATGACGCAAAATCACCCCTCGTTAAAGACAAAATTTCTCTCGATAACTATTTACCCCTGCACAACATTACTTACGATCT  
CACGCGCAAAGATGGCGAAGTTATCCGCATAAACGTTAAGTTTACGATCGCGGTAATGGTGCAGCATCCTCCTGTACA  
ACGCGAAGAAAAAGACCGTGGTTCTGATTCGCCAGTTCGCCGTCGCTACCTGGGTTAATGGCAATGAAAGCGGCAACTG  
ATTGAAACCTGCGCGGGCTGCTGGATAACGACGAACCGAAGTGTGCATTGCGAAAGAGCGATTGAAGAGACGGGCTA  
TGAAGTTGGCGAAGTCCGCAAAATTAATTTGAACGTGATATGTCGCCAGGCGGTGACTGAGCTAATCCATTTTTTATCG  
CCGAATACAGTGCAGCCAGCGCTAACGCGGTGGTGTGTCGAAGATGAAGATATGAAAGTACTTGGCTGAGCTGCCGTT  
AGCCAGGCGCTGGAGATGATTAACCGCGGAGATACGTGACGGTAAGACGGTGTATGCTTAACTATTTGCAAAATGTC  
ACATTTAATGGACTGA

>Cluster\_4608

ATGATCACTATTACCAAAGGGCGACTGCTGACAATCCAGCAGTGGCGGAAACATACGGACCTGGCAGCAACGTTGTACT  
GCCAGCAGAAGAAGCGGAAGAACGGCAGCAATGACATGGTATCGCTGGAAGCAGAGCCTGTAAGCCAACTTACAAC  
TGCCAGAATTAATCGAAGGCATGGAAGTTTCCATTGATGTAAGCACTTGTGATGTTGATTTAGGTAATCGCTATTTCCGT  
ACCGTACCAGGCGCTTGAACCTGATACAGCCAAAATGGTTACATCCTCCTAGTTACAGGACGACAGCCAACTTCGA  
TGTAAATGGCAACTCTCCGGAACTCCGGATAGTTGGATAAGCTGTAGTGAATGCTGAAAGGGCGAGAACGCTGCT  
TTATTTCCGTTGAATTTGATAGCTCTCAGGTTGAACCGCTAATATGCTCCGACGCTATACCGAAGCACCTTTCCGGCG  
GGAGATGCAACGATTAAGCCGGTAAATGATTTGAGCAAGCAACTTACATGGATGCCGTACCGGAACCGCCTGGAGGT  
GAAGTGA

>Cluster\_345

ATGATAAAAAACGCCACATAAAAAAGCGATACTGATGGGAATATTATTATCACCATCAGTATTTGCAACGGATATTAA  
TGTAGAGTTTACAGCCACTGTCAAAGCGACAACCTGTAACATCACACTTACTGGTAATAACGTCACGAATGATGGCAATA  
ATAACTACACTTGAAGTCCCTAAGATGGGTCTGGATAAGATCGCGAATAAAACGACAGAATCTCAGGCTGATTTTAAA  
CTGGTTGCTAGTGGGTGCAGCAGTGGCATCAGTTGGATTGATACCACTCTGACCGGAAATGCATCATCAAGCTCACCTAA  
GCTTATTATACCGCAGTCTGGTGTATCATCTTCCGACGACAAGTAAATATCGGTAATGGGTTTCAAAAACGGACTACTGATG  
ATGCCACTTCTTAAACCTAACAGTGCAGGAAAGATACGCTGGAGCACAGACGAGATGCAGCCGATAAGGGTCTTGAA  
ATGACCGTTCGCGCTACGTGAAACAGATGACGGCAAGGCGTACCGGGAAATTTCTGTGACTGGCAACGTTTAAATTTCA  
CTATCAATAA

>Cluster\_5746

GTGCGATACTGGCAACATTTGTTGTTATCTTGGCGGTGTTAATCACCGCGGGTGTGGCTGGCATCTGCGGTATACCAC  
GCAGGTTCCCTTCCACTATGAAGGTCATGATCCTGGACTCAGGCGATCCGAACGGGCCATTAAGCCGTGCGGTGCGTAACC  
AGTTACGCTGTAATGGTGTGCGATTGCTTGTATAAAGAAACACCGGTAAGGACGTTCCATCCTTGGCTTTGGGTAAGTG  
AGCATCGGAAAGATACCGCATCGGATTTCCGTAACGGTCAAACAGCAGAGTATCAGATGATCATGACGGTTAATGCGAC  
CGTGTGATCCCGCGCGTATATCTACCCGATTAGCGCAAAAGTCTTCCGTTCCGTTTCGATAACCCGCAAAATGGCGT  
TATGCGAAGATAACCGCAACAGACATGATCGTAAAGAGATGTACGACCTGCTGCCGAACAGCTGATTCGTAAGCTGCCA  
AGCATCCGTTGCTGCGGATATTCGTTCCGACGAAGAACAGACGCTGACCAACAGGATACTCCGGCACGCTGCACGCGT  
CTCCACCAGCTGGGTAACCTGA

>Cluster\_9759

ATGCATTAATGGCAAAGTTAAAAATGTGCGATATAAGCGAATCCGTCGTAAGTCAATATCTGAAAGTCAAGCTGAC  
GAGGACTCGTCTGACTGACATTCGCTTACCTGTTGCTGGAACCAACATCCTGCGTTGGTGGCGTTTAAATACCA

GCCAGGGATTTCCGGAGAGGCCACGGATATGTTTCTTATGATGGCCTGCCTGTCTCTGTTTGAACAGATGAACGGATG  
TCATTGTTTTTAAGTGGATGTTTTATCCAGCATAAGTGCCAAAGTCAGGGCGATAATTCAGACAGATATATCAGCAAGCTG  
GACGCTTGGTGCATGTCTACAGTTGCATATGAGTGAGAGTTGTTAAAGCAAAAAGTGAAGGGGGCATGT  
TCAGTCGCTTGTGCTGGAGAGCGGATGCGTGTGCTGTAATAATGTTATGTTCCCGCATGGATATGGACAGGCTATA  
GCAGAAAAATGCGGTTATTCAGCAGTCTACTTTATTTCTGTATTTACCGCTATTATGGCTTCCCGCCAGACAGATA  
TGATCCAGGCAAGGGCTTGATTATTGA

>Cluster\_17267

ATGGATCTCAATACACTCATCTACAATATGGTTATGCCCGCTGGTGATCGGTAGCCTGGCGGAAGGTGAAACCGTGAC  
TTTTGCTGGGAGGCTTGGCGCACATCAGGGGCTATTAAGTTCCCGCTGGTGGTACTTTCTGTGGCGCTTGGCGGCATGA  
TTGGCGACCAGGTGCTTTATCTGTGCGGGCGGCGTTTGGCGGCAAGCTGTTACGCGCTTTCTCGAAACATCAGGATAAA  
ATTGAGCGGGCGCAGAACTTATCCAACGCCATCCGTATCTGTTGTCATTGTTACGCGTTTTTATGATGGCTTTCGGGT  
CATTTGGCCGACGCTGATTTGGTGGCCAGCAGCTGCCCGGAAATCTTTCTGCGCTGAATATCTCGGCGCATTTGCGCT  
GGTCTGATTTTTTACCATATCCGTTACGCTGGTGGCAGGTGATTTGCGCGTGGTTGCACAATCTCCAGCCAGTATTG  
AAGCACTGGGTCTGGTTGATTTCTGGTCTGGTTCTGGTGGTAGGCGTGCCTGGTGGCTGAAACGGCGCGGGAAGAAAA  
GCCGGATCATCAGGCGTAA

>Cluster\_6514

ATGAGCAACATCCTGATTATCAACGGCGGAAAAAATTCGCCACTCCAATGGTCAACTGAACGACACCTGACCGAAGT  
CGCGGATGGCACACTGCGCGACCTCGGGCATGATGTCGCGATCGTTGCGCGGACAGCGACTACGATGTCAAAGCGGAAG  
TACAAAATTTCTCTGGGCTGATGTTGATCTGGCAGATGCCAGGCTGGTGGATGGGCGCGCGTGGACAGTGAAAAA  
TATATTGATGATGATTTACCCGAAGGTCATGGAACGCTGATGCCAGCATGGCCGTACCCGCAAGATCCGCTCAAAAA  
ATACGGTTCCGGCGGCTGGTACAGGGCAAAAAATATATGCTTTCTCTGACCTGGAACGACCAATGGAAAGCTTACCG  
AAAAAGATCAATTTCCAGCGGCTTGGCGTCGACGGTGTGATCTGCGCTTCCATAAAGCAAACCAATCTTTGGCATG  
GAACCGCTGCCGACATTTATCGCTAATGACGTGATAAAAAATGCTGATGTTCCCGCTATACTGAAGAATATCGCAAGCA  
TCTTGTGGAAATTTTGGTTAA

>Cluster\_64440

ATGGCAAGTCAGGCTGAGGTCGACGACATTTACTGCTATCAGATCGTCTGCGGATCTCGCAAACTTCCGGGAGC  
ACCAGTCCCAAGGACCTGGTGGTGGGAGCTAGACGCTGGCGCAATTTCTATATTATTATCTCCGGAGTAAATAGAC  
GCGACACAGTTGGTACTGACGAACCGGAAGTGGGGACAAATTTCCCGAAAAAATCGCGAGCAGTGGCTGAAAAATGAG  
GAACGACAGGAGCGAATCCTGATGGCTCGCGTGAACCGCGCATTTCTTGTAAACGCTACGCGCAATGAATTAATCAG  
CGTCGCTGATCTCGCGTCGAGTTGAATTACGTACCCGTGTCGAATCGTGGCCACCAGGTTGAAAAAGGTGTGGCCTG  
AAATGCCGAGGAGGCGAGCAGTGTTCACGAGAGGAGCTGGCGATAGCCCTGAATGAACTGGCAGACATACGAGTCGAC  
TTCAGCGATTACGATGTCAGCGATATCGAACGCGATCTCGACAGGGTTGAATCCCTTGGCGGTGACGATACCGATGACGG  
GGTTGA

>Cluster\_66945

ATGTCAGGGGGTACAGTACCCCTCAGACTTATTTCTAATTAATCTGCTTTTTTCTCTTATTCCACCCGCGGAGCTTCATA  
CGTAGCCCCCAAACAGATCTGGACCAACAGTGGGACAATTTGCTTTGCGCTGCGGGCGCGCTATCAAATGAACCAT  
TATATTGAAGGCTATTTCTGCCGGGAATCTTCGTTGAGGCGGGCGCAATTAATATAAATAAGGACAAAAAACAGGT  
AAAGCCAGTAGCAGGATTAATGGGTTGATGCAATAAACTCAACCCATATTCCAAAGCTGATAAATATGGGCTAATAAA  
AAAGTCTGAGATTTAATTAACCAACCATGCTTAATATCAATAGGAAGCTGGATACTGCAAGACATTTTCAGATAT  
GTGGCGTCAAGTGAATTTGCTTTGGGTCATACAATGCCGATTTCCGTAAGGACAGACATGAACCAAGAGCAATATGCC  
AATAAAATATGGAGAATTTATCGTGACATGAAAGGATATGCTTCCCGGACAGGAGGCGAGCAATGCAGACATCGTA  
G

>Cluster\_63855

ATGGAAAATAAAAAAATAGGAAATGCCCGCTATCTTGAAGTGGCGCAATGACTGTGAGGTTTTATTGGAAGGGATGGA  
GGCCCCATTTCCCTATACAGCCACACAAGAGACACTGAAACGACAGGCCAGCAATCTGGGAGGAACATGACAGTGGCA  
AATGGGGTGAATCGCCCGTTCACCATAACACCTGAACTTATCACCGTAGCGAAAGATGCCAAAAAGCGGAAATCGAA  
GCGTGGCGTACAGAGCAGGAGGCGAAGCCGTTACGTTGCAATGGAAGACACACCTGGAATGCTGGCCGCTGATCGCT  
GGCCCGCTTTATCCGGTGGTAATGGCTGCGAAATTCGATACAGCAGCAACCGCTCTGACGTGGGGTACGCCGATAATC  
AACAGGTGAAACTGTCGATGCCGGAACGGAAGAACTGCTGACAGCAATGGCGCAGGCCAGGTCGATCGCAACGACGAA  
ATTTATCGTCGCCAGCGGAGATGAAAGAGAGGTTGAGCGGCTGGATGATTTGGTTTCAATTCGAGCGCTTACGCTTGA  
GTAA

>Cluster\_63899

GTGAGCGAAATTAACCTTTAGGCGCTGCGTGAAGAGCAGAGAAAGCAACTAAAGGAACTACATCGTAGGGCATAACATC  
TGTTAACACGACAGCGCAATTTAACAGGGGTTTTGTTTTGTCAAAAATGGAAGGAGAACCCGGTGGCGTATTGCAAGAT  
GTCACGTTAATCCTGGTGGTTGAAACAGATGCTCAGGCTTATGCAACCGCAGAAATTCATAGCAGAGGCTAGCCCGCTACC  
GTGCTGGCATTACTGGATGAACTGGAGGACGAAAAAGCGCATGTCAGAACTGGAAGCACGGGAAATAAAACAGCCAA  
AGGCGAAGTTCTTGTCTGTTGATCTGGTTTACTGTTTCCGAAAAAGCGCAATGCGGGGAAATAGAAATCGCGATGA  
AGGCTATTGGTGTACCGGTTAAGTGGACTAATGGCGATGCAAGAAAGCGCATGACCGGCGTACTGGCTGACAGCAAT  
GAGATGTACAAACCAACTGTGCGCATTTGGAAGTTAATGTGCCACGCTGCTGCGGCTTCGCATCAAAGGAGAGTGA

>Cluster\_61335

ATGCGCAATCTGGTTAAATATGTCGGAATTTGGCTGCTGGTTATGGGGCTTGGCGCTGTGATGATAAAGACACTAACGC  
TACGGCGCAGGGTTCCGTCGCGGAAAGTAAACGCTACCGGAAATCCCGTCAACCTGATGGCAAGTTAAGTTTCTCGC  
TGCCAGCGGATATGACCGACAGAGCGGTAAGCTGGGAACGACGGCAATAACATGCATGCTGTTCCGACGCCACCGGG  
CAGAAAGCAGTCACTGTCATCATGGCGATGATCCGAAAGAGATCTGGCGGTGCTGGCGAAGCGTCTGGAAGATCAGCA  
ACGTAGCCGCGATCCGAGCTGCAAGTGGTAACCAATAAGCCATTGAGCTGAAAGGTCACAAAATGCAGCAGTTAGACA  
GTATTATCTCCGCGAAAGCCAGACGCGTACTCTCCGTTATCTGGGTAACCTGGGTAATCACTGCTGACCATGCA  
ATTACGCTGCCGCTGACGATCAGCAAAAAGCGCAGACCACCGCAGAAAAATCATTAATACGCTGGTTATTACAGTAA  
GTAA

>Cluster\_16969

ATGCTTGAACCTAATGCTAAACACCGCGCTGGTGGTATTGATTTACAAGAAGGCATCTTGCTTTTTGCGGAGGTTCC  
ACATACTGCCGATGAGGTGGTTAATCGCCCGGAAAGCTGGCGCGAAATTTCCGCCAGCGGTCAGCCCGTGTCTCGG  
TGCGGCTTGGCTGGTCTGCCGATACGCCGAAGCATTAACACAGCCGGTTGATGCCCCCTCCCCCGAAAAGTGTGCC  
GAAAACCTGGTGGCAACATCTGCTGCAATAGGTGCAACCGACAGCGATATCGAAATCATCAAACGTCATGGGGTGGCTT  
TTACGCTACGATCTGGATTGCAATACGCCCGCGGGTATCGATAACAATAGTGTATGTTGGATCTCGACCAATATCG  
GTGTTGAACTACCGCGCGCAATGCTGGGAACCTCGGTTTAACTGTTGATTTGCCGAAGATGCTGTAGCCCGCCAGC  
GCCGAGCAGCAATAACAGCATTAATCATATCTACCCGCGCATGCGCGTGTGCGTAGCGTTGAAGAGATCTCAACGC  
GTTATGA

>Cluster\_17958

ATGTACGAGCGTTATGACAGGTTTAAATTTTGTATGATGGATGGCACCATCTGGATACCGAGCCTACGCACCGTAAAGCGTG  
GCGCGAAGTATTAGGGCACTACGGTCTTACGATACGATGTTACGCGATGATTGCGCTTAAATGGCTCGCCACCTGGCGTA

TTGCTCAGGCGATTATTGAGCTGAATCAGGCCGATCTCGACCCGCATGCGTTAGCGCGTGAAAAACAGAAGCAGTAAGA  
AGTATGCTGCTGGATAGTGTGAGCCGCTTCCCTTTGTAAGTGGTGAAGAGCTGGCATGGTCGTCGCCAAATGGCTGT  
AGGAACGGGGAGTGAAGCGCCATCGCTGAGGCATTGCTGGCACACCTGGGATTACGCCGTTATTTGACGCCGTCGTG  
CTGCCGATCACGTCAAACACCATAAACCCGCGCCAGACACATTTTGTGTGCGCGCAGCGTATGGGCGTGCAACCGACG  
CAGTGTGTGGTCTTTGAAGATGCCGATTTCCGGTATTAGGCGGCCCGTGCAGCAGGCATGGACGCCGTGGATGTTCCGTT  
GCTGTGA

>Cluster\_39727

ATGAAAAAGTGGCTAGTGACGATTGCGGCCTGTGGCTGGCCGGATGCAGCTCCGGCGAAATTAATAAAAACTATTACCA  
GTTACCTGTGGTGCAGAGCGGTACACAAAGCACCGCCAGCCAGGGTAAATCGCCGTGTTATGGGTTGAGCAGGTCGCTGTT  
CTGACTATCTGGCGGGGAATGGTGTGGTTTATCAAACAGTGTGTAAGTATGTGATTGCCAACACAACTGTGGGCC  
AGCCCGTTGGATCAACAGTTGCGCAACACCCCTGGTTGCCAACCTGAGTACGCAACTGCCCGGCTGGGTGGTTGCCCTCCA  
GCCTCTGGGAAGCGCCAGGACACGCTCAATGTTACCGTACCGGAGTTAACGGTCCGATGATGGCAAGGTCAATGTCA  
GTGGTGAAGTGGCTGTTGAACACACAGGGACAACCTGATCAAACGTTCCGTCCGTCTGGAAGGAGTGCAAACTCAGGATGT  
TACGATGAGATGGTTAAAGTGTGCGCAGTGTCTGGAGTCAAGAGCCGCTTCTATTGCGCAAGAGATAAAGCGTCTACC  
TTAA

>Cluster\_67128

ATGCCTGTTTTAACTGACTACTCTGCATCTCTGCTGCTTTCTTTATTTGTTTCGACAGCAGAAGGTGCTGCGAAACT  
CAATTTTTCCGTGACCATCGAAAGGCCAACCTGTGATCTCAATGTTGTCGGTGAAGTGGTGGCACTATCGATCTGGGAG  
AGATTGATATCACAAGTTTGAAGAGGACAGACGCGGATTCAGCGGGGCAAGGGTTTGGCTGCGAGTTAAGCAATTCG  
AAAGCGCGGGGTGGTGACTAAACCATCTAGCAGTATGCGGCGCTCAGGAAGACGTTACCGAAATGGCGTTTTCAG  
GCAGTCGGCAAAAAGCACTTCGACAGAACCTCGGCATACCTCTGAAATAAGGAGCGACAGATTTCTCGAGGCTCAGGAGC  
TCACTGGCAGCCATTTACCTGGTCTCTGCCAGGATATGTCAGTGTGCTGCTGATGCGCAGTATAATTTCTGGGT  
GGACCTACAAGAGTGTCTGATTATGCTCAGACGCGTGCAGGAAACGGTCAAGTGTGATAATTCGCTTTTCATTTGAGTGGG  
TTAA

>Cluster\_17733

ATGGACATTAACAGTTCGCGCGTGCAGCCGGTATCACTGAGCAACTGGCCGACGCTGGTACCAACATATCACTGCTGC  
TATGAATGAGTTTGGCATTACCAAGCCAGATGACCAGGCGATGTTATCGCGCAGGTCGGGCATGAGTCCGGAGGATTTA  
CCAGGTTACAGGAAAACCTCAACTACAGCGTTAACGGCTGCTGCGGTTTATCCGTGCCGGGCGCATCACTCCAGACCAG  
GCCAACGCACTCGGCAGGAAAACATATGAGAAGTCTCTTCCCTGAGAGCGCCAGCGCGGATCGCCAACTGTTGTACAG  
CAAGCGCATGGGTAAACAAGCGCCGGGTGATGGATGGAATATCGCGGTCGTTGACTTATCCAGATCACTGGTCTGAACA  
ACTACCGGGATTCGGGTAATGGTCTGAAGTGTGATCTGGTGCCTCAGCCTGAACTGCTGTCGAGGATGAATACGCGGCC  
CGCAGCGCGCGCTGGTTTTTCGCCAGTAAAGGCTGCATGAAGTACACGGGAGACCTGGTGCCTCACGCAGATTATCAA  
CGGTGGCCAGAACGGTATCGACGACCGGCGAGCAGTTACGCCGCTGCCCGTAAGGCACTGTTATGA

>Cluster\_64426

ATGACAAGTCAAAGCGTATTACCTCCGAACCGAATAACCCCCGAGAGAGCGCTGGAATCTGTTTTATCTACGTTGGCGA  
TCTGCCTGGCGATATTGAAATTAACAAAACCCAGACACATGTCGCCGCGATTATTACCTGGCTGGCATGGGAATATG  
CTGTTACGTAAGTGAACCCCGACTGGAGTGAGCAGCAAAAACGCGAAATATTAAAGCAGCTGCGTGGCAGAACAAGCAC  
CGCGGAACCGCTGGAGCTGTTGAACGAGCGTTAATAACAGTTGGATTTGAGAGCAAAAAGAGAGAGTGGTTTTGAGCCCG  
GCCAGGGACGACCCGTTATACATTCGCAATTAATAATATCTGCTGTAAAAAGTATGGGCTTAGATTTAGAGCTATTGAATA  
CATTTATTTATGCAAAAATTTGATGCAAAAATTTGCTGTTCAATTAAGGAAATAAATTCGAAACGGGTGTCGATGGT  
GAGTTTTTATAGCTGTACATCTTACGCGAAAATAGGCGTAAATATACCGGCAGATGGTGTGATGGTGGCGTGAATTTAA  
TGGCGGATATATATATACAGGCTCGCAATTTGTTAGTTTAAACGTTGAGATAGACCCAATGGCTGA

>Cluster\_35258

ATGCCCTGCCGATTTTCGCTTATCCGCTGCTACCCTGGCTGCTTGTGCTCACTGCCTGTTCCGTTACCACGCC  
CAAAGGTCCTGGCAAAAGCCGGATTCGCCACAATGGCGTCAGCATCAGCAAGACGTCGCGCAATCTTAATCAGTATCAGA  
CTCAGCGCGCGTTCGCTTATTTCTGACCAACAAAAGTGTACGCGCCGCTTTTCTGGCAGCAAAACGGCCAGGATCGC  
TACCGTCTGCTGCTCACTAACCCATTGGGCAGCAGGAACTGGAGCTGAATGCTCAACCGGTAACGTCGAGTTAGTCCGA  
CAATAAAGGTGAGCGTTATACCGCGATGACGCGAAGAGATGATTGGCAAATGACCGGAATGCCAATTCGCTCAACA  
GCTTGCAGCAGTGGATTTTAGGTTTACCGGGTGTGCAACCGACTACAACCTGGACGACAGTACCGCTGAGCGAAAT  
ACCTACAGCCAGAAATGGCAAAAACCTGGAAGGTTGTTATGGTGGTTATGACACCAAAACGCAACTGCGATGCCAGCCAA  
TATGGAACCTCACCGCGTGGTCAACGCATCAAGTTAAAAATGGATAACTGGATAGTGAATAA

>Cluster\_5561

ATGTCATACAGCGCGCAACGAGATAACTTTGCACCCCATATGGCGCTGGTGCAGATGGTCAATGAACAGACCTCACGCGG  
TGAGCGCTCTTTGATATCTATTCTGCTACTTAAGGAACCGCTCATTTTCTGACTGGCCAGGTTGAAGACCACATGG  
CTAACCTGATTTGGCGCAGATGCTGTTCTGGAAAGCGGAAAACCCAGAAAAAGATATCTATCTAGTACATTAACCTCCA  
GGCGGGTGTACTGCGCGGATGCTATCTATGACACCATGCAGTTTATCAAGCCTGATGTCAGCACCATCTGTATGGG  
CCAGGCGGCTCGATGGGCGCTTTCTTGTGACCGCAGGGGCAAAAGTAAACGTTTTTGCCTGCCGAATTCGCGCGTGA  
TGATTCACCAACGTTGGGCGGCTACCGGGCAGGCGACGATATCGAAATCATGCCCGTAAATTTGAAAGTTAAA  
GGCGCATGAATGAACCTTATGGCGCTTACACGGGTCATACGGGTCATAGAAACAGATTGAACGTTGAACTGATACCGGCGGATCGCT  
CCTTCCGCGCTGAAGCGGTGGAATACGGTCTGGTGCATTGATTCTGACCCATCGTAATTGA

>Cluster\_29285

ATGGCCAGAAAACGCAAAATCCAGAAATAACAAAATATCGGACATGGGCAATCAGTGCATTTGGTAGACCGCATAATCC  
TTTTGAGCCGCGCGCAATCGCTACGCACAAAAATACTTAACGTTGGCCTAATGGGCGGTGCGCTTTTTTCGTATTGA  
AAGGTTGTGGCGATAGTGGCGATGTCGATAACGACGCGGACGGAACGTTTTACGCGACTGTGCAGGATGTTGATGATG  
GGTAATAATTCAGATATCTGTGCTCATGGCTGGAACAACGCAAAAGCGGATTTTATGCCGATGTTCCGAAGAAATGAC  
TCAGCAGAAATGTCAGTCTAAGTACGAAAATGCTACTACGACAAATGTTGAACAGAGTGGATCCCGTCTGGTGGAT  
TTTTGTTAAGCCGGTTATTCGTAAGATCGCGATGAGCCGTTCTGCTATAACAGCGGCGGATCCTCATTTGCTTCCCGC  
CCGCTGTCGCGCAACACTTCCGGTGAATTAACCTGCGCGCTCCGGTTCTGGCAAAAAGAGTCTACTCTTCCGGCGGCT  
TACCACAAAAGCGTCAACCGTTTCTCGGGCGGCTATGGTCTTCTTCCAGCGCCGTTGGCATTGGGGAGGCTAA

>Cluster\_34672

ATGGCAGCGACGCACACTCCCTTGGCGTACCAGGCGATGGCAGCATCTGCCTTTACGGGATTTACACGATTTGG  
TCGCCGATCGACCTTCGTGTAACAAAGCGGGGCGAAGCTATCCGTGCGCTGGCCACACAGATCCCGCGTTTTCTGTCAGA  
AATGATGAGGGTGGTATCAGGTGCGCATGTCGGGGCGTGAATGCGGCAAAACCGAATTTCTGCCCCTTTAATGAG  
CCGCTGGCAAAATGGTGGCGTACACATTTGTCGGCGTTCGGCGGTTGCCAAAAGTGGCGGTTTTTTCAGGCAAGTGT  
GGTGGCGGCTGATTGCTACGGCAATCTGGATGCCGGAAATCAGTATCGCTTTCAGTACATCTCTTTCTATGGGG  
CAGCGATGACGCTTGGTGGTGTTCACAGATGCTGGCTCCTAAACCCCAACCCCGAACGACAGCAACGGATAACGGC  
AAACAGAACACTTATTTCTCCTCACTGGATAACATGGTGGCCAGGCAATGTTCTGCTGCTGTTCTGTACGGTGAATGGC  
CGTGGGTCACCGTGGTTTCTCAGGAGATCAGCACGGCAGACGAAGGGATGGTGGTCAAGTGTGGTATTGGTGGT



>Cluster\_5458

ATGGATCCCTTTGGCATGCCGTTTACCTGACCGTAGGACTGTTTCGTGATTACTTTTTTTAATCCGGGAGCCAATCTCTTTTGT  
GGTAGTACAAACCAGCCTGGCTTCCGGTCGACGCGCAGGGGTGCTGACCGGGCTGGGCGTGGGCGATGCATTTT  
ATTCGGGGTTGGGTTTGGTTTGGTCTTGCACCGCTAATTAACCGCAGTGTGAGGAGATTTTTTCGCTTATCAGAATCGTCGGC  
GGCGCTTAFCTCTTATGGTTTGGTGGTGCAGCATGCGCCAGTCAACACCAGCAATGAGCACACATCAACACCCGAT  
TAGCGCCCCCTGGTATGTCTTTTTTCGCGCGGATTAATTACCGATCTCTCTAACCCGCAACCGTTTTATTTTTTATCA  
GTATTTTCTCAGTAAATTAATGCCGAAACACCAACATGGGCAGTTAATGGCCTGGGCGGGGATTGTGCTCGCATCA  
ATTATCTGGCGAGTTTTCTTAGTCAGGCGTTTTCTTTGCCCGCTGTGCGTGTGCTTATGGGCGTATGCAACGCGTTGC  
CAGTCGGGTATTGGTGAATTAATGGTGTATTTCGCGCTACGCTGATTTACGAAGGGGTGACGACGCGGTGA

>Cluster\_44898

ATGCCAAAAATTAATAATCCAATTAGATTCAGCGCAGAGTCATTAGATATTTAGAGAAAAATTTGCTTCTCCAGATTT  
TAAGCATACCAACTGGGGAGATGATGATTTGCAAGTTCCTCGTGCAGAAAATAGAAATCATTACAGAGAAGAACAAAAGC  
TAGAATGTGTATATTTGTCATGAGCCTATTGGGGTAAGAGCTGCACAAGCTGCTCCTATAGAGCATATTTGTGCCAAAATCT  
CAATATCTATGTTTTATTTTTGAACCTAAGAATCTATGTGTAGTATGCTCTGACTGCAATGAATTCAAAGGTAATAATGA  
AGTGTATTTTGAACCCGTAATAAATGGGGGGCGCGCAAAAACATCCAACTGCATCTGCATCATTTCGCATCGTTTCATC  
CACATATAGATGATGATGAGATGCATATTTATAAAGCAAACTGTGTTTATGTGGACAAAACCTAAAGGGCACTATACC  
ATTTGAAATATGTAACATAAATAGATTTTTCTTATTTTGGGATGTGTGATGAATTTGTTAATGATGCAAAAATTTGCTGA  
GGCAATGAAAATTTTTTCAAAAAGGTAGTATTACTACTAATGAATTTATGGATGATGACATTCATTTGATTTAA

>Cluster\_43569

ATGATAAATGATTCAAAAAAGTAACCGCTATGAGTACAATAAGAGAAAAGAAAGACTGATTTCCCTGAAGCCTTACT  
ATCCATATGGGGGAGACAAATCCTTGGTTTCAGGATGGACAACAGTCCCAACGAAGTCTAAAAAATCAATCTCACTTGG  
GTATCAGTAACTCAGAGTGTAGTTCTCTTATCCATTTGATATCATTTATGCATAGTGCCTCTGCAAAAATATTTCCATCA  
ATAGATTTCTTAGCAGAAAAGAAATGAACCAAGACCGCGTACCATTTCAGAGAACCATACAAAGGCTCGAAGATAAGGAGCT  
GATAAGAAAAGAGATACGTTCAACTGGGAAAACCGATGTAGGGATGAGTAATGTGTATGATATTTCTCCATTAATGTCTCA  
AGCTTATCAACATACAGTACCAACAATGAGCCCTCTCCAAACACACATACATGTCCAAAATGTAAAAAATTTGCAAAA  
TCCGAATCTGACATCGAACGATTTATTTGTTTACCGAAGGATTTCCGGCAGAAAAGATGGTCATACAAAGCTGGTGTAAAGA  
ATGCAGAGGTGCTCAAAAAAACCGCAAAGTCCCAAAGAGGCTCGCCTGATTTACCATAA

>Cluster\_76

GTGGAAAGAGTAAATGATTCGCCATGAACCGCTGCTGATGCCGCTGATGCGTGTGCGCCTGATGCTTGGCGGTGC  
CGTTGTTAACGTGATTAACGACGCGACGAAAGGTTTCAGAACCTGCAAGTTCAGGTTGGTCTGCTGATGATGAGGAAATCTGATGAAG  
TGGAGCGCTGCAAAAATACGGGCAATTTACGCGTTCTCTGCGGGGCGCAGAGGCGCTGATTTGCTGTGTGGGTGCACAA  
CGTGATCAGGGGATTTGCCGTTTGGTGGAGAACCGCCGCTACCCCGCACAAAATCTTGAACCGGGTGTGCTGGCATTTA  
CCACCACGAGGGGATCGTATCAGGCTGACAAAGGACGGACGCTGCATCATTACCTGTAAAACGGTTGAGGTTTACGCTG  
ATGAAAGTATGACCGTTGACACACCCAGAACCGTTTACCAGGCGAGCTTGGATCCAGAAAAGGCTGGGCGTTAAAGGT  
AAAAGCCAGTTCGACAGCAATATTACTGCCCGGATGCCATCATCAATGGCAAATCGACGGATAAGCATATCCACCCTGG  
CGATAGCGGGGAAACCGGGGCAATGAATGA

>Cluster\_46727

ATGAAACTGATCGTGGGATGACAGGGGCTACCGGTGCGCCTCTTGGTGTGGCATTACTGCAAGCGCTGCGGGAGATGCC  
GAATGTCGAGACTCATCTGGTGTGATGTCGAAGTGGGCGAAAACCACTTGAACGAAACGCCCTACAGCGCTCGCGATG  
TTGCTGCCCTCGCAGACTTCAGCCATAAACCAGGCGGATCAGGCGCGATCATCTCATCCGGTTCTTTTCGTACCGACGCG  
ATGATCGTTATTCGTCAGTATGAAAACGCTCGCGGTATCCGGCTGGTTACGCCGATGGCCTGGTAGGGCGCGCGGC  
GGAGCTCGTCTCAAAGAAGGCCGCAAACTGGTGTGTTGCGCGGAGAAAATGCCGCTTAGCACCATCCATCTGCAAAAATA  
TGCTGCACTTTCACGATGGGCGTGGCGATGGTGGCGCCATGCTGCTTTTTATAACCATCCGGAACCGTGAATGATGAC  
ATTTGTCACCATGTGGTAGCCCGCTGCTGGATCAATTTGGCTCGAACATCCCCACGCCAGGCGCTGGCAAGGATTGCC  
GCAGGCCCGGAATTTTTCTCAGGAGAATGAATAA

>Cluster\_23496

ATGAAAGTAGCAAAAAGACCTGGTGGTACGCTGGCCTATCAGGTACGTACAGAAGACGGTGTGTTGGTTGATGAGTCTCC  
GGTGAAGTGCAGCGCTGGACTACCTGCATGGTACGCGTTCCCTGATCTCTGGCCGAAACAGCGCTGGAAGGTCATGAAG  
TTGGCGACAAAATTTGATGTCGCTGTTGGCGCGAACGACGCTTACGGTCAAGTACGACGAAAACCTGGTGCAGCGCGTTCTCT  
AAAGACGTTATTTAGGGCGTTGATGAACGACGAGTGGTATGCGTTTCCCTGGCTGAAACCGACAGGGTCCGGTACCGGT  
TGAATCAGTCCGCTTGAAGACGATCAGTGTGGTGGTGGTAAACCATGCTGGCTGGTGCAGAACCTGAAAATTTCAACG  
TTGAAGTTGTGGCGATTCGCGAAGCGACCGAAGAAGAACTGGCTCATGGTACGTTTACGGCGCGCACGATCACCACCAC  
GATCAGCACGACGCGTTGCTGCGGTGGTTCATGGCCAGATCAGGTCATGAACACGGTGGCGAAGGCTGCTGTGGCGG  
TAAAGGCAACGGCGTTGCGGTTGCCACTAA

>Cluster\_48630

GTGCTGAGTTAGTTCATGTCAGCTTGGCGGCCCTATGGCCAACATTTTGGCCGCACTGGCATTAAAGGTGCGCAA  
TACAAAACAGGCTCTGGATTTAATTTGAGGCCAACAAAGCTGGGTTTAAAGCATGGATGAAGCGCAACATCAAAACCTATG  
ACAGATACCACATCCAGATCACCATAAACAGGGCCACAAGTGGTCTGTGGACGAGAGTGAATATCAGATGATGGGCGAG  
TCTGACAACATTTGCCAAAATCCGCATTTACCCCTGTTCCGCGAGGAAAGTGGTGGATCTGCTTTTTGGTGGTTTTCAGACCGT  
TGTGGAGCAGTATTAATGGTTGCTCGATATGGGTGCCGCTCTTGCCTCTCGGTTTGTACTGATGATGGGTGGTGA  
TAGCGCAATCATATCTCCGAAGCCACTAACGAAAAGTGTGAGGACAGGCGGATAAAGTCAAGTCTTATTAATCTCGATGGA  
CCTCAAAAACAACAACAGGGGAAACCTGTACAGCTTATCTATGGTGAAGAAATTTAGTTGGCTCACAGGTCGTGAG  
TTCTTCTATCACCATCGACCAGCTTATGTA

>Cluster\_67129

ATGATAATGGTGGTGTGAGAACTACAGGTTTTTAAATCAGGATGAAAAAGTTAAGTGTCTTTGACGGCGCTCTCTTTTT  
AGGTTGCAGCACCTGGTCTTTTGTGCTGCTGATGTACGCTTACTGTAAAGCGGGGAAATAAATGAAGGTTCTCTGTACCG  
TGAACCTGACTAACGGCAACGTTAATTTAGGGGACATCGAGCTCAAAAATACCAGTTTAGGTTCTGATACTGCAACGAAG  
CCTCAGGAAATAACCTTAAATATTAAGTACTGCTGTTACAGGAAATGGCAACTCAAGCGACATTAATAATTTGATGGCAA  
TGTGGTGGTAGTGCATTTGTCGCTGACACAAAATCATCTGACGGCAATAATGCTGGTGAAGCGTACGGCGTTCTCA  
TTAATGAGAAAACCTAATCTGTTGACAAATGACGATAACAAAAGGCAATTTTAAATGGCTATTTGTAAGTGGG  
ACGCAAGGTGAATTAATAGGAGACAAAAGAAATTAAGTACTGAGCGTGGTTTGGCAATCAGGGTCTGCTGACATAAATAC  
CGTGGTATTAATCCAGTATAAAGATTTCAATTTGTATATCAGTAA

>Cluster\_43893

ATGAATATATTTTGAACAACTCCACCGAACCGCAGACGTTATGGTCTTGTGCTGATTCATTTGGGCTGATTTGCTGGCGTTGT  
TTCCGCATTCGTGAAGTGGGGGCTGAAGTTCCATTGCCGCCAGTACCCCGTGGATATGTTTAAATGCAGCGTGTGGCC  
CGGAATCATTAATCAGGGCTGCAGGCCAAATGATGCTCGCGTAATTTTCTCAATCCACCGTATATTTTCTTCGAGAG  
TGGTTGGGCTGACAGATCCCAATGCGGCTGTTTATACCTTTTCCGGGATGCTTTAACTGGGTTGGTGTACGACAT  
TATCTTTTCGATAGTGTGCTGTCGGTTATTGTGTGGTGCCTGAAGTATTTCCAAAAATTAAGTCTGGCAGGGCTTAC  
TGGCAGGTGCTTTAGCCCACTTTTGTTCATATGATTTTCATTTCCCTCTCATGGGACTGACGCCACCTCTGTTTGTATCTC

CCGTGGTATGAGAAATGTTTTCTGAAATTTTTGGACATTTAGTCTGGTCTATTGAAATTTATTCGCAGAGATTTACG  
AAACAGAATTACTCATGAGCCAGACCCCTGAGATCCCTTAGGCTCAAACAGATAA  
>Cluster\_53746  
ATGCATCCCACTAACGTAAGCTGATGAAGAGAATAAATTCGTCTGTCACTACAGTTTCCCATACCTATCCAGCCAT  
CGCTGGCCAGGATATGACCTTGTGCAATGTAAAAACAGCACTTGCAAAGCGGAATCAGTAACAGGGTAAATATG  
ATCTTGGCGTCTGTTGGGGTGGGATATTTTTTCAGATAATGTACTCCTGAAAGCTATCAACCAGGTGAAAAGAGTTCACT  
GTCACAGTATCAGACTGTGCATTACAGGGAACCTGGCGATGTGCTTAATCAGTTACATATTTGATTTTAGAGCCCTTAGCGG  
TGTCTATGGCTGCAGGTTCAAGGCAATAATTTGCCAATGAAGTCGCAACCGGGGCTAAAAATGTCGGTGTCTCTTTTT  
CCATTCAGGACCCGACCAATATATTCAAATGTTATTTAGTTCAGCAGGAAATCTCGTTCCTGATCCAGTAATGACTCT  
GCCCTGCATAATTTCTCATGAAATTTTTATGCCAGAATGCAAAAAATCGATCCCGCGCTGGATGTCATATCTGGCCAGGT  
AATGAGTCAATATATAGTTGATGTGTACTACGAATAA  
>Cluster\_51981  
ATGAATAACACGGATCTTATCCATCTCATTAACATTTTTATGCGTAACGAACATAAAGCAGTTGAAGAAGTTATGATTC  
CCCTCTTTTCGGAGGTGCGAAATTTAATTAAGTATTACAATCTGTGTCAGGGGAAAGTTGTTTTTATTGGTGTGGTAAGT  
CTGGTATTTATGCCAGGAAACTCGCCGCAACATTTGCCAGCACCGGAACTCCCTCGTTTTTTGTTTACGGTACGGAAGCG  
GTACACGGCGACCTTGAATGTGGCGGAAAGACGATGTTGTTATTTTCAAAACAGTGGTGAGACGGCGGAAACCT  
GGCGACCTGCTAGTCTGAAAAAATGGGTAATTTTGGGATCTTTTTTACCCGAGTCACTACTCATCGTAACTGATGATA  
GTTGTGATTTATCTGTTGAAATCCCGCTCAAAGTGGAGCGGATAATTTAGGTTTAGCACCGTATGCTCGTCTGACTGTT  
GTTCTGGTGTGGTGTGATCGGTTGGCGCTTGCCTCTGAAATGAAAAAATTTACTCGTCTGATTTTCGGCTTATATCA  
TCCAGGAGGTGCACTCGGATTAAGCAAAATTCATAA  
>Cluster\_48614  
ATGAGCCAAATCTTTTTTCGACACCATCGACAACGACCAGTACGACTTCATGACAGAGTGAATACCGCTGTTATGGATAA  
GTGGGTTGCTGAAAAATTTGGTTTTGTCGCGCTGCAAAGACGAGGCTGAACTCTTCGATACGAAGTGGTTTTGATTACCGCG  
ACATGCATCCCTTTATGCGCACCTGTCTGTTTACGGAGCATACAACCTCAGTACTCAATATCATGCTGACGCACGGT  
CGCGAACACTTTGAAACAGCTCCGTTACCACCGGGTTAAAACGCTGCTTATCAGGAGTTGTCGACTGCCAATAAAAC  
GTCGCTATGGAAAGCAGCCAGTTGCTGACCGTATTTGTTGCTCATACGACTACTTTATCTCCACCGTGTCTTCGCGAG  
CTGCACGACGTTTGTGGGACAAGCTGCCTCGCCACAGCAATTTGTGGCAGCCAGAATGATTGAGATATTTGAAGAGAAA  
TTAGCCAGCTCTTATGCGCAACACCCGCTGTGGATGACTCTCTGTTAGCTTTAAGCATATGGGAGACATCGACTCAACGGT  
TCAGGAAAGCTATTTGAGTGGATTCTGGAGCGTTTACGCGCCATCCCCGCGCAGCAGCGCATACGCGCAATTTCTCCG  
CTATCTGGCTAATGGAAATCGTTCCAGAGCGCTTATTTCCGCGCCACTTTCAGAAAGAACTGGAAGAAGCAGCGCGTTT  
ATTGATCCCTATCTAATTA  
>Cluster\_66907  
ATGAATCAGACTTTACCCTGCTGACCTGAATACTGCCGGCAGCAGACGTTATTCCTGCTGTGGCTATCGACCGCAT  
CATCGCGCAGCGTAACGAAGGATTTGCACTGTTTATGCAAGCGATGGAATGCCGCGCAGCGCGCAGGATTTGCTCG  
ATCGCTCAGGTGATTTTTTTTACGGGTTTGAAGACTGCGTACTGACTGCTCGTTCGTCGCATGGATAAACCCGGAAGA  
GCGAAAAGGAAATATCACCGTCTTCCGACCGGAAATCTGGGATCGCTGATGACAGATACGGGATGACACTTACCTCAT  
GAGTTCATGCCAGCTGATGAGTGAACAACAGCTGATGAGCGACCTGTCTGAAATCACCTGGACAATGTACTGG  
CAACTTTTTCGCCTCTGAAATGCCAGTAAGATGCAGACATTTGAACAGGGACTGATGATGCTTACCGGAAATTTCTATG  
GATTCAGAACAAATAATCCCTGCCCTGCGCTGCGCAAGAGAATCATATTTGAAACATGCTGTACCGGAGTGAACGGGG  
TGTGACGCTGGAATCTGAGCGGACGGAGGACCTGATGACCTGTTGACGCTCTTTTTTATCTGCTGGACGGCGCAACGTT  
CTGACTTACAGAACAGCATCGGGGCGCAGTATGTTGAAATTTCTCGGAAACGGCGACAATGTCGGTAAAGTTGTTAGAAGG  
GAATATTTTACGGTGGCTGCTTACCAGAAAGGGACCTACACATTTGCTTTAAGCGTTCTGACTTGTGAAAAACTGAA  
TGATATTATGACGGCATATCTGTTGATTTGCGCCACGAGTCTGA  
>Cluster\_55652  
GTGAATAATATTATGCAAGTGTGTTTTATATAACAAGAATTTCTCTCATCTTTAACTTTAAATAATTTATTACATATTAC  
TCTAACTGATACCCATCTAGTCAATATCAATAATGGGCCTAATGAAATTAATTTGATTTCTTTATATTGAAATGAAAA  
GTAAATTTACAAGTGTGTTACGATATCTGAAATATCTGAAATATGATCCTTGGCTGTGATTTATAACAATAATATAAT  
TACAATGAGTACGATCGCTTTATATTATTTGATGATGATACAATAATATCTGATCTTTTTTTTTCAAGATATGCAAAATTA  
CTATAATCGCGATGATGTTACAAATCCCTCGAATTTATGATTCGGAACGAAATTAATACATTTATCCATTTATGTAATG  
ATAGAGTGTATAATGCAGACATTCATATACTTTAATGTCAATGATAAAATTTTCAATTTGGGCTGGGTTAGTTATT  
TATAAAAGTCTTGTGTTGAAATGTTTTCAGGAAGGCTAATCTAAAACTTTTTATGAGCGTTATGCTCTCTACGGAGTCAAT  
CAGTTTTTTTTCTGATGATTTCAAAGGATAAAAAACAGTATGATATTCGGGTTCAAATTTTTTAGCACGTTGGAACACTCT  
TTTTCAAAAACAAATACATCTTCCGAAATGGCGGCATCGTGAACATTTATATGATTTAGCAATTTCTGTCGCTTTTTAT  
TCTAAATCTGGCATTCATATGTTTGGGAATGACAAGATGTTTCTTAGAGAGATAATCAGCTGTAGGTTTAAACAATTT  
GAAGTTACTTACTTTAACTTTTCAATAAAGGCGATCCCGATGCCATTA  
>Cluster\_29  
TTGGTTGACCTTCACACCATTTCTACCGCTCTGACGGAACCTTTTCCCTAAGGAGTTGGTAATTTTAGCCAAGAAAGA  
GGGATTACAAGCTTACCCCTTACAGCATTGACACACCCAGGACTTAAAGAGGCTTATCTACTGTAAAGAGGTAG  
ACCTTCCCTTTCTTGGCGGGTTCGAGATAAGCATTAAGTTTGAAGGACCCAGGGCATTTTCATCTGTTAGGTTATTTTTTA  
CAACCTGAAATCCCTGAAATACAATCTACCTTAGAGATTTTACAAAAGCTTAGAGACACCCGTAAACAAAATAATGATAGA  
AAAACCTTCAACAAGCAGGAATAGATATTACCTTGAAGAGTTAGAAGAAATCGCCAAAGGGGAGATAGGAAGACCTCATA  
TTGCCACCTTCTGGTTAAAAAAGGTGTGTTAAAACCTTTGAAGAGGCTTTCAGAAATATTTAAAAAAGGGGCTTGA  
GCTTACGTACCTAAGGCCCTCTTTCTCTGAAGAGGCGATTAACCAATTAGACAGGCTAAAGGTATACCTGTTTTAGC  
CCACCTTTTACCTTAAACTCTCTTATGCCGACTTTATAAATACTTATCTGGCTGAAAGATATAGGTTTGTATGGGG  
TTGAAGCTACTATACCGAACATAACCAGGATTTTACCGATTTTGTGTTGAAACAGCCAAAAACTTGACCTTATCGTT  
ACCGGAGGAGTGAATTTTACGGCGCTAACAACTGACATAAAAACCTCGGTAAGGGCTTAAACACCTTTCTGTCTCTTT  
TTCTGTCTACAAAACCTTAAAAACTGCTTGAAAAAATAATTA  
>Cluster\_22979  
ATGCTCTTATGCAAAACCATCAGGCATTTGCGGGCTGACACTTGGAAATCAACCGATTACCGGGATACCTATGACGC  
CAGCCTACTGCAAGCGTTCACAGCAGCTGAATCGCGACCGCTGGGCTGAAAGCGGATAACCTGCTTTTTCACGGTA  
CGGATATCTGGACGCTGATGAACCTTCTTGGCTGAATCGGAAAGGTTTGGCGCAGGTCGCTGCGTCAATGTTGACTT  
GATTACACAGCGTAAATCTGATGAGTGAAGAGTTTTAAGCTCTATCTCAACAGTTTTAACCAGACCGCTTTAATAA  
CTGGATGAGTGGCGCAGCAGCTGGAGCGGACTTAAGCACTTGGCCCGGTAAGGTTAGCGTGGCGTTATATCGTCT  
TTGATGAACCTGGAAGGCCAGCCGATAGGTCATTTCAATGGCACCTGATTTGATGACAGGATAATCAGTAACTAT  
GAATTCATCTACTGACTATCTGGAGAATGCCACAGCGGTGAAAAAGTAGTGAAGAGACGCTTGTGAGCCACTGCTGAA  
ATCAAATTTGCTGATCACCATCAACAGATTTGGGTTCCATCAAATTCAGTATCTGGAGCGCAAAATTTGACAGAGAAA  
AAGTGTGGTCTACCTGCTCTTTCCGTCATCAACAGTTCACCAACAGTGCCTGGAACGCATCTTTAATGACCTG  
TTACGCTTCTGCCAGCCAGAAAAATGAGCGTTTACGCACTTATACCGCTGCTGGCGGCTGGACATTAACCCCTGGCG  
CAGTAATAACGATTTTGTCCATCGACCACAAGACTGGTTCGGCAATAA

>Cluster\_27743

GTGACTGATCTTCCACCAACGTATTACCGCCAGGTAAGAAACCCGAATCCGGTGTTTACACCCCGTGAAGGTGCAGGAAC  
GCTGAAGTTCTGCGAAAACTGATGGAAAAGCGGTGGGCTTCACTTCCCGTTTGTATTCGCCATTCATGTGGCGCATG  
CCCCTTCGCGTGGTTCGCGTCGACGCATGCCACCGGTGCTGCGTCGACGGGCTATTGATGCGCTCCTGACGGGGCTGTGT  
TTCCACTATGACCCCGTGGCAACCGCGTCCAGTGCCTCACACCAGCTGGCCATTGAGTGGGACTGGCGACGGGAGTC  
TGCTGCCGGAAAACTCTCCATCACCCGTGCCACCCGTGCCCTGACGTTCTGTGAGAGCTGGGACTGATTACCTACCAGA  
CGGAATATGACCCGCTTATFCGGGTGCTACATTCGACCCGACATCACGTTACACCCGGCTCTGTTCGCTGCCCTTGATGTG  
TCTGAGGATGACGTGGCAGCTGCCGCGCCGAGTGTGTAATGGGAAAAACAACAGCGCAAAAAAGCAGGGGGCTGGATAC  
CCCGGGTATGGATGAACGTATAGCGAAAGCCTTGGCGTTTGTGCGTGAAGCTTCCCGAGTTACCAGACAGAGCTAAAGT  
CCCCTGGAATAAAGCGTGGCCGTGCGCGTGTGATGCGAACAGGGAACGTGAGGATATCGTCACCCTGGTGAACGGCAG  
CTGACCGGTGAAATCTCGGAAGGGCGCTTCACTGCCAATCGTGAAGCGGTAAAACGCGAAGTGGAGCGTGTGTGAAAGA  
GCGCATGATTTCTGACGTAACCGCAATTACAGCCGGCTGGCCACAGCTTCCCCCTGA

>Cluster\_28583

GTGCGTAATCATCCGTTAGGCATTTATGAAAAAGCGCTGGCGAAAGATCTCTCCTGGCCGGAGCGGCTGGTGTGGCAAA  
AAGCTGTGGTTTTGATTTGTGCGAAATGTCGGTGGATGAAACCCGACGAACGGTGTGTCAGCTCTGACTGGAGCGCCGCAC  
AACGTGCTTCGCTGGTCACTGCGATGATCGAAACGGGTGTGCTATTCCGTCATGTGCCCTGTCCGACATCGCTCGTTTT  
CCTTTTGGTATGCCGGGACCGCGTGCACCGCGGGGAGATTTAGTAAAGCGATTCCGCTGACCGCGCATCT  
CGGCATTCGTACTATTCAACTGGCAGGTTACGACGCTTATTACGAGGATCATGACGAAGCCACCCAGCAACGGTTTGCTG  
AAGGGCTTCCGTGGCGGTTGAACAGGCAGCGGCATCACAAAGTATGCTGGCGGTGGAGATTAAGGACCCGCGTTTTATG  
AATCTATCAGCAAATGGAAGTGGGACGAAATGCTGCGTCCCGTACCCTGTTTACCAGACGTAGGCAACCT  
CAGCGCCTGGGGCAATGATGTTCCCGCGAAGTAAACTGGGTTATCGACCGTATCGCCGCCATCCATCTGAAAGCACTC  
AACCCGTTACCGAACAATAGCCCGGACAGTTCCCGGATGTGCCGTTTGGCGAAGGCTGTGTCGATTTTGTGGCATCTTC  
AAAACGCTGCATGAGCTGAACTATCGCGGATCATTTCTGATTGAAATGTGGACCGAAAAAGCCAAAGACCGGTGCTGGA  
GATTATTCAGCGCGCGCTGGATTGAAGCGGCTATGCAGGAGCCGGATTTATATGTTAG

>Cluster\_38913

ATGCTGAAGTACAGTAAACGCCAGGCATCTTTAAATTAGAAGGTAATCGGCTTGGACGCCCTACCATCGCCTGCCGAC  
CCTGTTTACGGGGAAATTTGACGTGATTGATTCGCATCTTGGCAGTACTTTCTCAAAAAGCATCGCAGCAATACACCT  
TAAAAAAGATTGGCTGCGAAATGATATTTAATAAAAAATGCCGAGCTGATGTTTCCAGGTCCGGCATCTGGCGTTT  
GATATTGATCGCTCCTTATTGTTAATGCTGCTGGGCAATTTTTATGGTCTGGAATCGTCTCTTGAAGAAGCGAAATCACA  
CAATGGATTACCGACAAAACGGAAACAGTTTAAAAAACCGCTCGCGCTGGATATCTGCACGCTGATTTTTAATCTGC  
AAACCTCCGGTATGCGCTGAAATTAAACTGGACAGCAGCAGGTAATTACCACCTGGGCGTATCAATTAACCTTTACC  
CTTGGCGGCGATGAAGAGAGCAGTTTTCGTATTTGCTCGACGACGCCACACCGATTATTATTTAAATCTGATTCGCCA  
CAGCGAGCACAGTAAACCGCAGCAGGTGGCGAAATCCGTTAATAAACCGGCCCTGATTAAAGAAATCATCCGCTCTATGC  
CGCTGACCTGAACGTCAAAATCGCCGAGTTGCTGCTGAATGTGCGGATCTGGCGCAGATAAAAAGCGGGGGATTTTTA  
CCCATCTCGCTGGGAGAAACGTTCCCGTGGCGATTGGGCAATCTGAATTTTATAGCGCCCTGATTGTGGAAGACAAAGA  
CAAACGTTTTTTGTCGGAGCTGGCGGAAAAAATGGAACAACCATGAGTAA

>Cluster\_55366

ATGCAACAAAAATGATTCATTAATAGTGGCAGTGTCTCACTGCCAGCCGTTAGGCGAGGAAACATGGTATATGGGCGAAGA  
TGCCAGTCAAGCAGCAAGAGTGTGCTGCATCGCGCGGGCATTGAACTCGGTTTAAACCTCATTGATACCCCGGAA  
TGATGCGCATGGCGGTGCCGAAAAGGTTGGTGGGAAAGCATTAACCGTCTGCGAGAGAAAGGCTTTTCTCGTCTTAA  
GTCTATCCGTGGAATGCTGGCGGCAAAAAGCGATAAATGTCATGCGAAGCCAGTTTACGCCGTCTCAATACTGATATCT  
CGATCTTTACTTATTACTGCTGCTGGCAGTTTTCGCTTTTGAAGAGACTGTGCGCAGCGATGGAATAATGATGCCCCAG  
GAAAAATCCCGCTGGGCGTTTCAACCTGATTAATGATGATGCAAGAACTGCGCAGCTGCGCGGGGGAAATCAG  
TGTGCCACTAATCAGGTGCTTTACCATCTCGGTTACGAGGAAATTGAGTACGATCTACTCCCTGGTGGCAGCAACAGCA  
GATGCCGGTGTGCTTACAGTCCGTTAGCCCGAGGCGGGCGGTTGCGCAATGACTGTTAAAAAACCGGTTAGTCAACG  
AAATGTCACATGCTCACAATATCAGCGCGGCACAAGTATGTTGGCGTGGGTGATCAGTCAATCAGGGTGTGATGGCGATT  
CCAAAAGCGGCCACGATTTGCCATGTTCCAAACAAAATGCGGCTGCTGCTGAGGTGCAACTTCTTCAGCGGAATTAGCTAT  
GCTGGATAAGGCATATCCCGCACAAAAGGAAAAACTGCGCTGGATATGGTGTGA

>Cluster\_39456

ATGACGCTGGATGAAAAGATCTTCCAACGGGAAAAAATGCGAATGAGTTCTCCGCCAATGCTATCGAGCATA  
AGCTGTAGAAAATTGGCACTGGCACTGTGTAATAACATGGTGTGATTTGAGCAGCGTAACCGTTACTCGACTGGGCAATTA  
AGTTTGCCTCAAGACCTAGCGAATGCCCGAATGCATGAGAGATGAGCTTATTCCGGCTACAGGCAGAGAAGATAAAATC  
GACGAGGAATCACGTAAGCGCAATGTGCGAGTTTCTGTTGAATAATCTTGTATATTCCTGAACGATTCAGGGGTTGCACACT  
ACAGAATACGAGCCAGTCAACGACGATGCAAGAGAGTGTCTCAGGTTGTGTCAGGCATACGCCAGCAATGGCCTGAGA  
GGTTACAGAAAGCGCTGGGCTGTTTATGTTGGAAAGCCTGGTACTGGAAAGAAATCACTTTGCACTGCTATCGCCTGG  
CACGCAATACCGAACAATCAAGCTCAGTATTTTACAAACCGGCTGAAAATGCGCAGAGAAATAAATCAACATGGTTC  
GAAAAACTCCACCCGCACTGAGGATGAAAGTATCCGACAGTTTCACTAAACCTGACCTGCTAATATCGATGAGGTGGTG  
TGCAGTTTGGAAAGCGAGGCGGAAAAGATGATCATGTTCCAAATCATCAACCCCGTACGAGCGTATGAGCCAAACAATC  
CTGATTAGCAACCCAGAGCAAAAGATGAACCTGTCTGCATTTGCTGAGGTGAGCGTGTATTGACAGGATGAATGATGGCGCGG  
ATGACCCCTGCGTTTACATGGGATAGTTACAGGAGCAGATCGTGA

>Cluster\_39922

GTGCCGTTTCGCGAGCAATAATCTCCTCACGCGGACGAAATGCTGTGCGGCTTTTCCCGCAATTCATCCCGTCACGAC  
GTTAATAGTGGGCTTAGTGGCGGGAGTTTCTCATTTGAACATCAGGGCCAGCGTTTTGTGTGCGCTAGCCGACGATC  
CTGATGCGCGCGGTTCCGCTTCTGCGCCAGTATCGGGCTTTATCACAACTACCCGATGCATTCACCGAAGCCGAT  
TTATATCTCCGTGATGGATGGTGGTGCATCTGCCCCGGCAGGTAACAACTGATTTGCGGATACCAACGAACTGGC  
AGGCTTGCCTGATATATCTACATCAACAACCGGTTTGGCTGGCGAATAACCGCTGTGCGCTTACTGGAACTGACTGGC  
AGCAAAGCGATCCGGCGCGGACAGTGGGTTGGCTGCGAAGGTTAAAACGCTGCGCAAGCGCGGGAACCGGCT  
TTACGCTTAAAGTCCATTGCATATGGATGTCACGCCGGAATTTAGTGCATAGCGCTCAGGGTAAAACCTATCGACTG  
GGAGTATGCCGAGATGGTGTATCGCGCTGAACTGGCGGCGGTTGGGTTGGAAAATACTGACCAGCACCGGCAATTTG  
TCAATGACTATGCCACTCGCGCGAAGATTTATCCGCGCAATTTAGCGCTCAGGTCAGGCGATGGTTTTCCCTGGCTGCTG  
ATGCTCAAAGCAGGTTGTTGAGTACCCTGGCGCAAAACCGCGATCAACAATTTATCAGGCTGGCCGATGACACCTG  
GCGGAGCTATTAATAAAAACAATAA

>Cluster\_18420

ATGAGTAATACCGACGCTTACAGCGAGAAGCGAGTGACAGGCACCAGTGAAGCAGGAGAGCAGATCATCAACGCTGCG  
CCAGCAAGGAAGTGTGCAAGTTAATGATCTATCGCGTTGTATGGTGTATCTACTGTGACGATCCGCAACGATCTGGCGT  
TTCTGGA AAAAGCAGGGGATCGCTGTGCGTGCCTATGGTGGCGCTTGTATGCGATAGCACAACCGCGTCACTGAGCC  
TCAGTGGAAAGATAAAAAGCGCTGAACACCGGATGAAACCGCAGGCTTGGCAAAAGCTGCGGTTGAGTTGATTCAGCTGG  
TCATCGGGTATCTCGACTCCGGGACCCACTTTTGTAGATTGCTTGTCTGATGCGCAAGCACACTGACGTAATGCGGA  
TGACCACGGTATGAACGTGGCTAATGCGTTGCTGGAAGCGGAAGCGTTGAGCTGCTGATGACCGGGGGCATTTGCGC

CGTCAGTCGCAATCTTTTTACGGTGATCAGGCTGAGCAATCGTGCAAAAATTACCACTTCGATATGCTGTTTTCTTGGTGT  
AGATGCGATCGATCTGGAGCGCGCGCTAGCACGATAATGAAGATGAAGCCCGTTTAAACCGTCGGATGTGCGAAGTTG  
CGGAACGGATCATCGTGGTCACCGATTCAGTAAGTTCAATCGTTCAGTTTACATAAGATCATGTGATACTCAACGTATC  
GACATGATCATTTGTATGAAGGCATTCCTGCGGATAGTCTGGAAGGACTGCGAAAGGCTGGAGTTGAAGTGATCTGGT  
CGGGATCAGCGCTTCGCTGTGA

>Cluster\_40406

ATGCGTACAACCATGTGCTGAGTGTGGGTGCAATTAGTTGACGTCTGCTTTTGTGTTGTCAGATAAACAGACGTTGC  
CAATCCGGCAAACGATGAGGTCAGCACCCCTGTTTTTGGTTCATGATGATCGTGTGCCAGTGAATGCACGACCCCAATCAC  
CGTGGGATGCGGTTGGCCAACTGGAAACGGCCAGCGCAATTTATGTACGGCGACGCTGATGCAACCCCAATCCGCAATTA  
ACGGCAGGACACTGTTTTATGACGCCGCAAGGGTAAAGCCGATAAAGCGGTAGCGCTGCGTTTCGTGTCAAATAAAGG  
TCTTTGGCGCTATGAGATCCACGACATAGAAGCCGCGTTGATCCGACACTGGGAAAGCGGTTAAAGCAGATGGGGATG  
CTGGATTGTACCTCCCGCAGCTGCGCCCTGGGACTTCGGTTTGTATTGTGCTACGTAATCCCCCTTCTGGCATTACACCG  
TTGCGGTTATTTGAGGGAGATAAAGCCGCGCTTACCOCGCAATTAAGCGGCTGGTCTGTAAGTGACTACGGCGGGCTA  
CCCTGAAGATCATCTCGATACGTTGTACAGTCACTAAACTGTGAAGTACTGGCTGGGCGCAAACGTCGGTGTATGTCGC  
ATCAGTGCATACCTTGGCGGGTACAGCGGTTGCGCTCTGATGTTGCATACCGATGACGGCTGGCAATTAATTTGGGGTG  
CAAAGCTCGGCTCCTGCCGCAAGATCGCTGGCGCGCGATAACCGGGCCATTTCTGTTACCGGCTTTCGCGACAAGCT  
GGATCAACTGTGCGAAAAATAA

>Cluster\_21085

TTGTTTAAAGCAATCATGTTCCGGTATTAATGTATCATCATGTCAGCCATTGCCAGGACTGGTTACACTTTTTCTCCCGA  
GACATTCGGAAACAAATGAAATGGTTGGCTGAAAACAACTGGAAACACTGTATCAGATGAAGTGGATTTTTTTATC  
GGGCGGAAACCTTCCCGTAAAGCGTTATGTTGACATTTGATGATGATACCTTGACAACCTGGTTTCAGGTATATCTC  
TTATTAACAGAGTTAATCTCAAGGCACATATTTTTTTAATTACCAGTTTATTTGAAATGGTCCGGTTCGCTACTCTCC  
TGGAAAGGAATATCTCATCGCGATTGGCAACATAAATAGCAACCGGGAATGCTGATAATGTTATGCTTCGCTGGTCTG  
AAGTGAACGAAATGTTGCAATCTGCTGCTGGAATTTTATGATGATGATACATACTACACATACACTACAGTTGGGATAA  
ACTTCACGAGAAGAACAGTGTAAACATCTTCGGCAGGACTTATTGAGCGGGAGAGAATATTTAAAAAATGACAGGAAA  
ATGCAAGTAAACATTTGTGTTGGCGGGAAGGTTATATAACAAGGATTATATTCAGATCGCTGAAGAACCTGGATTCCATT  
ATTTATATACAACAGAAAGAAATGAATGCTCCTGCTAAAGGAACTACACGGATAGGAAGAAATAAGCACCAAGGAACGG  
GAAAATGCGTATGGCTGAAAAGACGACTTTTTTATTAACAACCGCTTTTTTTCATCGTTGCTGGCCCTTCATAAGGG  
GCCAAGATTACCGGATGACTAA

>Cluster\_32864

ATGAAGAAAATTCGCGCTTTTTTGAAGTGGGCGGGGCAAGTATCCCTGCTTGATGATATTAACGGCATTGGCCAA  
GGCGAATGTCTGTTGAGCCTTTGTAGGTGCGGGTGGTGTCTTCTCAACACCGACTTTTCTCGTTATATCCTTGCCG  
ATATCAATAGCGACCTGATCAGTCTCTATAACATTTGTGAAGATGCGTACTGATGAGTACGTACAGGCCGACGCGAGCTG  
TTTTTCCCGAAACAAATTCGCGCGAGGTTTACTATCAGTTCCCGGAAGAGTTCAACAAAAGCCAGGATCCGTTCCGTCG  
TGGCGTACTGTTTTATAATTTGAACCGCTACGGTTACAACGGCTGTGTCGTTACAATCTGCGCGGTGAGTTTAAACGTC  
CGTTTGGCGCTACAAAACCCATTTTCCCGAAGCAGAGTTGTATATCCTTCTCGTAAAAAAGCGCAGATACTTTTTTC  
TATTGTGAGTCTTACGCCGATAGCATGGCGCGCAGATGATGCATCTGTCGTTTATTGCGATCCGCCTTATGCGCCGCT  
GTCGCGACTGCCAATTTACGGCTTATCACACAAACAGTTTTACGCTTGAACAACAAGCGCATCTGGCGGAGATCGCTG  
AAGGTCGGTTGATCGCCATATTCAGTGTGATCTCCAATCAGGATACGATGTTAACGCGTGGTGGTATCAGCGCGCA  
AAATGTCATGTCGTAAGTTTCGACGAGTATAAGCAACCGCGGCACAGTAAAAAGGTGGACGAACTGCTGGCTTT  
GTACAACCAGGAGTCTGTTTACCCGCGAAAAATAA

>Cluster\_27368

ATGAAAATATTCGTTTGATAACCTGTTTTATTAATGCTGATATTTGCGGGAGTGGGCGCAGCGCGCAAGAAGATTGC  
CACGTTGTATACGTTTCGGGGTTTTTCCACCTACTGGACGCGAACTGTGTACCACCTTGAATTTCTTACCCCCGAAGCG  
TTAACCATGGCGTGTACAAGGAGCCGGCAGTGGCATGGGTAGTGTAGGTTATCTGGAACCTGGTTCCGACAGGGAGT  
GGTACCCACCCAGTTTATATTTGGGTTATTTAATTCGGTACCGAAGTCAACCTGCACAGGGCTTGACGCCCTATGATGC  
CCGCTTAAAACCTCAGTGGGAGTGTATGAGATGCCATAFCGATGCTTATATGATGGCGATCTGCATGGCTGCCATGGT  
TAATCACAACGATGATGAGAGTATGTTGGAGACGGAGATTTGGCCCTATATTTGGCCGCGAGCGCGTAACCTCGACC  
TGCCCGGTATCAGTGGCCACCTATGATATTTGTTGGAGTGAAGACTACATCTCGTATACGAAGTACTGTCTGTTACAGTC  
GACGGGCGCATGATTGAGAAAACGCTCCCGACTTCTGATGAAAACGGCAAGCTTTGCGACGGCAGCCAGTTGGGATG  
AACCGGTCGCTACTCGCCGTTTTGTCGACAGATGATCACGTTCTTCTACTCCGTTGGCAGCAGATTCAAGCGTTCGAT  
ACGCCAACCGGCACCCCATACGGACAACAGCTACACGACATGGTAGTGATGTTGATACCAGCAGCAGACGGCCGAT  
CAATTCACCTGCCGCTTCCAGTACAGTTGAACGAACTGTAG

>Cluster\_67122

ATGCACAATCGCCACACCATAGACAGACTTATCGTTACGACATATTTTTATGGATAGAGGATAAATTTGAGTCAACGAT  
AAAGATCGAGGATGTTGCGACTATACAGGTTATGTTAGGCGCAATGTCCAATGATATCAAGCGTTATGTCCATATAT  
CTCTGGGGGAATACATACCGAGAAGAAAATAGCTCGAGCAGCGGCATGTTAAAAACATCGACATTAATAATTTGATAGAT  
ATATCTATTAGATTGATTTTGAATTCACAGCAATCTTTTACAAGAGAAATTTAAAAAATACTGGAGTTCGCGCACAGAA  
ATACAGAAAACAGAAATTTTGAATCTGCCTTACTTATGCCCCCATACATCTGGGGGAAAGCAATATCATTTTACATTTT  
TCGAATTTCTGAGATGGTGTAAAGCAGTGTATTAATCCTGGCAACTATTCATGCTTTTACGCAAGAAACCAATAATG  
AGTTATATTGATAAATAAAGCTGATGTATATTGCATATCAGGTTATGGATTGCAACAGAAAATAGGTGATTTAGATTA  
TAGAGATAACTATATAGCAACAACAAAATGATAAGGCGACTGCAAAAAATGACAATCCCTTCCGGGTTGTATGCAA  
AGTTTCTGTATAAAGGAACGTTGGAGGATTTTTTACGATTGCCTAAGTATCTGTATTTAACATTTGTTACCTGCTCATGGT  
CTTGACACATGGATGCTTTGTGATATTAATCCATATACCATATCTGATGCAGGATTTGGTGAATAAATGAAATAGAGTG  
CACATACTACATCCCGTTACATGGATGTAG

>Cluster\_21330

ATGGAATATCAACACTGGTTACGTGAAGCAATAAGCCAACTTCAGGCGAGCGAAAGCCGCGGCTGATGCTGAAATCCT  
GCTGGAGCATGTTACCGGCAAAGGGCGTACTTTTATTCGCGCTTTGGTGAACGCGAGCTGACTGACGAAACAATGTCAGC  
AATTTGATGCGCTACTGACGCGCTGTCGCGATGGTGAACCCATGCTCATTAAACGGGGTGCAGAAATTCGGTCTGTTG  
CCGTTATTTGCTCTCGCCAGCGACCTTAATTTCCGCGCCGATACGGAAGTGTCTGGTGGAGAGCAGCACTGCGGTTACC  
TGAACAACCTTGGCGTATTTCTGATCTCGGGACGGGTACCGGGCGATTGCGCTTGGCTTGGCAGCGAGCGTCCGGACT  
GCGAAATTTACCGCTGTAGATCGTATGCCGATGCTGTGCCCTGGCACACGTAATGCCAGCATCTGACTATCAAAAAT  
ATCCACATTTGCAAAAGCAGTGGTTTACGCGCTAGCCGGCAGCAGTTTGGCATGATTTGTCAGCAATCCGCGGTATAT  
TAGAGAGCAGGACCCACATCTTCAACAAGCGATGTCGCGCTTTCAGCGCTCACTGCGCTGGTTGGCGGACAGCAGTGGAA  
TGGCAGACATCTGCATATCATCGAACAGTGCAGTAAACGCGTGGTATCCGGCGGCTTCTGCTTCTGGAGCATGGCTGG  
CAGCAGGTTGAAGCGGTGCGACAGGCAATTTATCTCGCGGGTATCATGACGTCGAAACCTGCCGTGACTATGGGGATAA  
CGAGCGGTAACGCTCGCGGCTATTATCAATGA

>Cluster\_6285

GTGACTTACCATTATTTCAACAAATGCTGATAACCGGGTATGTCAGGTAACCTGCTTCTTCTGAAAAATTTGTGGT

TGATTTCCGCAACCGAATCGATGTTGCACAGGAGCATATCCGCACGGCCGGAGAGCGCACGTTCTCCGGCGTTTAAAG  
AGGGGCTGACCGGCGAAGCGCTGCACGGCAGAATGCCATCAATGCGTCGCTTGCACAGGGCGTTGAGCGCTCCCTGCC  
TGGTGCACGGAGATGACAACGCTACTTCCACCACAACTACCGGATACCCGGGTAAACGACAGGGTCACTTACTGGT  
CAGTGATACACCGAGGCTGGCGCATTTCCGCAGATACCGGGAGCAGTTACTACCCCTGGCCGATAGGTTTACCATA  
AACCTGAATCATCTTGAAGAAAACTCCACCGTGTGACAGGTTACGCGGGCGAGTTACATCTTGAGCAGATATCTCA  
TGGTGGAGCGCGGGCGATATGCGTCAATTTCCCTGCCGACGTTGTTATGTGGCATTGAAGAGCTTCGCTGGGGCC  
GTTTGGTGTATGTATACGTCAGGGCGAAACAGGCCAGGTTAACAGCTACTGGATATTCTCAGACATAAAGCATTAAACG  
AGATGGCACAGGAGAGTGGCGGTAGTGCACCCGTCGCTGAACTCTGGACTGGCTTGGTGGTTCAGGGCCGGAGCAG  
GCAGATAACGAGTGGCATGACGCGATTAACCTGGCTGGGAGACTGGTGCAGTGAAGAGCAGCATCCGGTGATCTGGTCAAC  
CACGAGGCTGCAGAACCTTACCGGTTGCGATGCCTCGCTCTGCTGTCAGAACGCTCTCTGAAAGTATGGTCGATG  
AAATATTTTCAAGGGGGGCTGCATGA

>Cluster\_23095

GTGAAAGCACCTGTTTCAATAAATTCATTCGCCCCACAAAATCTCTTCTGATCGCCATTGGCGTGTTCGCCGTGATTGT  
GCTGCCATTTCTCTCGTATTACACCGTTAATGAAGGTGAACGCGGCTTTTGTGCGCTACGGAAAAATCGTAAAAGTTG  
CCGAGCCGGGGCTGGGTTTAAAGATCCCTTTTATGGAAGCGTGGAGAAAAATTCACCGGTAATCAGGCTGTGGTCTAC  
CAGGGATTACAGGCTTACAGCCGACAGCAACCGGCACAAATGACAGTATCAGTCAGCTTCCACATTAACCTTCAGA  
AGCAGGCGCGGTTTATACACCTTACAACACCTTGAAGCATTAAAAGATCGTCTGATTGTCCGTCAGTTGCCAATCAAC  
TGGAGAACGTTTTTCGCCAATATACCGCATCAGCGCCGTACAGGATCGTACAAAATGTTTCAGGATCTGAAAATGCC  
ATGCGCAAAGCCGTTGTTGGGCCAGTGGTAATTGACGGGGTCCAGATTGAAAACATCGATTTTCTGACGCTTATGAAA  
GTCGATTGAAGACCGAATGAAAGCAGAAGTCGCATTGCCACCGTAAAGCAAAATCTGGAACGGAGAAAATCCAGGCCG  
AAATAGCGGTAACCTCAGGCCAGCGGAAGCAGACAGTAAACTGGCGGCAGCCAAAGCAGAAGCGGAAACTATTGCGGTA  
AGAGGCGCGCAGAGGCTGAAACTATTCTGTTTAAAAGTGGCGTGAAGCAGAAGCTATCCGCTGCGCGGTGAAGCTCT  
GCGGGAGAAATCCCGACTTGTTCGCTCACCACGCTGAGCGTTGGGACGGTAAACTGCCGATACCATGATCCCGGCA  
GCACAGTTCCGTTTATCTCTACTAAGTAA

>Cluster\_28961

ATGACCAGAAATTCATGCGTGGGTATCAGATTTCAGGACAGGATTTATCTTTGCCACTCTGCGGAGGGCAGCGGGAA  
ATATCAGGCAAAATCATTATCTTGAGATTGGTGGCGGCCCGCAGCAACAGCCGCTGTTGCAATCGCAAAGCTTGGCGTGG  
AGGTTGATTTTCATCGGTCGCGTCCGCGATGACAGTGTGGAAATACCTTACTTGCAGAACTTGGGTTGGGGCGTCAAT  
ACCGCATTTTGGCCCGATATCCTAACGCCGTTCTGTCGCAATCAGCGATCCTCGTTGATCAGCATGGCGAACGGATTAT  
CGTTAATTTATCAAGTCCGATCTCGGTAAGTGCAGGATGGTTAGAAAGCGATCGATTTCTCTCGTTATGATCTGATTC  
TGGCCGATGTTGCGTGGCATAGCGGTACTGAAAAGCATTTCTCGTAGCGGCTTTCGCGGTTGACAACTTTTAGAC  
GCCGATATGACACCGCAGGATATTTCTCACTTGTCCGCTTGGCGATGACCGGCTGTTCTCAACACCGGGCTGAAACG  
CATGACTGGCCTGCAGTCACCTGAAGAAGTGTGTTCCAGGCAACGACACAAACAGCAGGTAAGTGTATGTTACGCTGG  
GTTCTGAAGGATCTGTTGGATTGAAGATGGTCAATTTGTGTCACAGGAGGCAATTTCTGTCAATGTGGTTGATACCCT  
GGAGCAGGCGATGTTTTTACGGCGCACTCGCGGTAGCGTTGGCAGAAAAATGCCAACAAAAAGGCTATTCTGTTTTGC  
CAGTGGCGTTTGGCCGATGAAATGTACCAGCCTGGCGGTGGCCGCGGCACTTCTAATCGTGAGCAAAACGAAATCATT  
TGCTACTTTATGCGTAA

>Cluster\_28978

ATGGCTTATCAATCGCAAGATATCATTGCTGTTCCGCGACTAACGGTCTGACCCCGCGCCTCAGGCGCGGACTTCCA  
GGAAGAAGTGGCGAAACTCATCGACGTACCACCTGTAATCGGCTGTAAGCCTGTGAGGTGGCGTGTTCAGAAATGGAACG  
ACATCCCGGATACCGTCCGCAATAACGTTGGGGTGTACGACAACCCCAATGATTTAAGTGCCAAATCGTGGACGGTGATG  
CGATTTCTCGGAAGTGGAGCAGAACGACAACTGGAATGCGTATCCGCAAGACGGCTGTATGCATGTTCCGATCCAGG  
CTGCTGAAACCGTGGCCGGGAAGGGCAATATTCAGTATGCAACCGGTATCGTGCAGTTCCAGTCCGAGCATGCA  
TTGGCTGCGGTTATGCAATGCGGGCTGTCGTTGACATTCGCGCCTCAACCCGGAAGACAACCGGCTTACAAAATGT  
ACGTTGTGCGTGGACCGGTTGGTGGTGGGCAAGAACCGGCTGCGTGAAGACCTGCCCAACGGCGCGATTCCTCGG  
TACGAAAGAGTTCGATGAAAACGCTGGCGAGCGAGCGGTTGGCGGAGCTGAAAACCCGCGGTTACGACAATGCGGGT  
ACGACCCGCGCAGGCTCGGTGGTACACAGTATGTCAGCTGCACCATGCTGACAAGCAAAATCTGTATCATCATGCTG  
CCGGAGAACCCGAAATCAGCGAAACCGTAAAATTTGGAAGGCAATCGGAAACCGCTCGCAGCTGTTGGCTTTGCGGC  
TACCTTCGAGCCAGTATCTTCCACTACGTTGGTGTGCGTCCGAAACCGTGGCGATGAGGAAGGAATAATCTGCACGAAG  
AGAAAGACGAGGAGCGCAATGA

>Cluster\_20519

ATGTTTGGCCTACTGGGTGATATTGAGTTTGGGTGGTACCTACTGGGACGGCTTTGATGCGTCTGTTGGTATGGATTA  
TGCCGAACATGCCCGCATGGAAGCAAAACCGGGGTTGCAAGTTTATCGGCGAAAAGCTGGATGAAGTGAATATAGCCTAG  
TGTTCCACGATCACTATTGCCAGCCGATGTTGAACCTGGCGGACTGCGTACGCAATGGTGGCGCATCAGGCGCTGGCG  
CTGGTATTTGGCAACCGGCACTATCGCGGCTGGTTTGGTGAACCGATATTCGGGCAACCGAGCAGACCGATGGCCT  
CGGTAATGTGCAGGCGTTAAGTGCAGAGCTGTCGCTGAAGGATACATCGGCGATCCGAAAAATCCCTGACGCCACCGG  
CTGTGTCGGGGACGATCCGAATATCGATTCGTTGCTGACGATGCGGACGACAGTTTTTCCGGCAGCGATATGTTGAC  
GGCCTAAGCGATATACGACGGGCTGGATGCGGCATCGGACCGCTGGATGCCGAGAGCAGGCGTTTCGATGAGGAGT  
GTCGTGGCGGAAGATGTTGGTGGAGCAAGTTGAAGATGCGATTGATGACGTACTTTTCCCGCTGGAGGACGTTCTCAATG  
AGTGTATACCACTCGATGAGGTGATGACGGCGCTGGAGGGTATCATGGGCGCGGCTACTGACCGATGCTCTCGGC  
GAGGTCCGGCAAGTCCCTCGCAGATTTACGATGAAATCAGCAGTACGTTGACCGGGCTGACGGTATCACCCCGACAA  
CTTTGCGGATCTGTTCTCGCAGGCACTGGACGTTGGTGCACACGGTCAGTCATTGATGGAAGCGTGTCTCCCGCGTTA  
GCAGGCTGGCGGGCAATCATTACCAGGAGCGTGTGA

>Cluster\_26414

ATGGAAAAAATAGTCTGTTTGTAGTCAGCGCATCCGTTTGGCCACCTTCATACATTCGTAGCTGTGCGCACAAAGAAC  
TTTGGGGCGCGGCTGAAACCCCTAATTTGAGTCAACCTGCGCTCTCTAAGACATGAAATGAACTGGAGCAGCTGACGG  
GCGCTCGCTGTTTGGAGCGTGGTCTCAGGGGGCGCAACTTACCTTACCCGGCAACAAATTTTAAACGATGACGTCAGA  
GTTCTTACGCGCATCAACACTGCCGACAGTCTGCTTACGTAAGAAGGCTCTAATAATGATGTCGTGAGGTTGGTCC  
GCTACCTACTGCGGCATAGGATATTACCTTCGGTTATAGGTCAGTTTTCATCAGCAAAAAAGAGACGACCTTGAAG  
TTGCGCAATGATGTAACCTATGATTCTGCGGGTTTAAAACCGGGAAATCGATATCGGCAATGTCGATGTCAGT  
CCTGAACTGATGAACGGGCTTAAATACGAACGCTGTTTCTTGAATCGCTGAAGCTGGTTGTCGCCCCCAATCACCCGCT  
ACTTCAGGAGAACGTAACGCTAAGCCGGGTGCTGGAATGGCCGCTGTTGATCACCAGAAGGCACTGCGCCACGCCAGC  
ATTCAGATGCATTAGTGCAGAGCCAGGATGTAATAATCTTCGGTTGATCGAAACGCTGTCTGCTTCGCTATCTCGT  
CAACTTACGGTTGAATACGATTACGTTGTTGTTCTTCTGCGCTGTAAGAAGACGACCTGCGTCAATGTCAGCTGGT  
AGCCCTGCTGTTCCGGGACATGGTGCAGGCGAACCGATGGAATACTGACCCGCTGATGCGACGTTCTCTCTGTT  
GCCAGTTGATGATTAACGCTATTGAAAATCAATGCCGTTCTGA

>Cluster\_67074

ATGAATCAGAAGTGAAGACGTTAATTAATTTTCAATTAATAACCATCAAGTATATATCAGGGATTGCGTTGATAGTTCT  
CTGGGATATTTAGTCCGCTGGCCGACTAGATATTTCTTTGATGTAATGAATATTAAGCATCTTGGTGTGGTTT

GTTGTGCAACTATACTATCATTTGGCTATGATAGTATTTATCTTTTTTACAACCTTTTTTTTATACCCGTAGTTATTCCT  
CAGGATATAAATAATCTTCTCGCTTACAATAAGATTCCAGGGTATTTTTTATCTGTGATGATGTTATCTGGCATGTTCC  
CATGGCTTTATATATGTGTATACTGTGCATTTGATTTTGTATCAGAAATGTTAAAGATAACTCTGGCTGGTTATCTATTG  
CAAGTATGGGTACTGTAGTCTGTTATTTTAGCCATAGTAAATAAGAGGTATCTTGAATATGACTTATCGTTTAAACAA  
AATAGAATGAAACFTGTAGAGCGTGTTCAGATCTATCTGTCTATCTCGTTGCTATTGGCTTTACTGGTGCATCAGTT  
AATTCCTCTGGAGATGGTTTTTAGGAATATTGCAACTTTCAGATAAGAGTGTAAATTTCAAAGTATAGCTGAACTGGCTT  
TCATGTCAATATTTATCTTTCTTCTGACAAATGCTTCTCGGAGTCAATTTATCTGAAAATGAATCCACAGATAAAATTTCA  
AAAAGAATTAGCCATTCATTTATCTCATCTTGTATGTTATTAATAATATCGACTCAAATAACCGTGTACCAGTGTAT  
TTTTACCCATTCGGTTATTAAGCTATCAGGTATAAGTGACTTCAAATACATAGCTACATTATTAACAAGTGAATATC  
CTGAAGAGTTTTTTTTTCCAATGCAGCATGGGATAA

>Cluster\_27021

ATGAACCTTCAGACGCCTGAAATACTTCGTAATAAATTTAGATATTGGTAGCCTGACCCAGGCTGCTGAAGTATTGCATAT  
CGCACAAACAGCGCTCAGCCAGCAGGTTGCCACACTGGAAGGTGAGTTAAATCAACAGCTTTTATTGTCACAAAAACGGG  
GCGTTACGCCAACAGACGCCGAAAAATTTCTCTATACCCATGCACGGGCCATTTTACGTCAGTGTGAGCAGGCCAACCTG  
GCGGTGCATAACGTTGGTTCAGTCAATATCGGGGCAAGTCTCGATTGGCTTTGCGCCAGGAACCGCTGCGTCATCCATCAC  
CATGCCCCTTATTACAGCGGTTCCGCGTGAATTTCCGGAGGTCGTTATCTATCTTTCATGAAAAATAGTGGTGCAGTCTTA  
ACGAAAAACTGATAAATACCAACTCGATATGGCGGTTATTTATGAGCATTTCCCTGTGGCTGGGGTATCCAGTACGGCT  
TTGCTGAAAGAAGATCTTTTCTGGTAGGAACCAAGATTGCCGGGGCAAAGCGTTGATGTTAATGCTATTGCGCAAAAT  
GAACCTCTTTCTCCAGTGAATACAGCGCTGTAGACTTCTGTTGATGAGGCTTTTTCCCTACGGCGGCTCACGGCAA  
AAGTCTATTGGTGAATTTGAGTCTATTGTCACGCTTACCGCAGGATTTGCCAGCGCATGGGCGTTCAGTATTACCTGAA  
TCGGCTGCGCGCTTCTGTTATGTTGGCGCAGTAAATGGGTGATGTACGCATTAACACTCTTCAATGAGTCTCTCTTTGTC  
CTTAATTTACCGCCAGAGCAAATTTGTCACACAGGCACAGGCAGTGAAGAGTTGTTAATGTCAGTATGAGTTCCTC  
CAGTATGAAAAAAGGCAGTGGCAATTTGGTAGCTAA

>Cluster\_17626

ATGAGTTTAAATTACGCAATTAATGACGTAATGGCCCGTCGCGGTATACGCAGACCCACGTCGCCCCGTGCTATTGGTGC  
TAGCAGCGCGTTTATCAACCAGTATTTACAGGGTAAATATCAGGGCGATATGGCTGATATTGAAGAAGCATTTCCTGCT  
TTGTGACCCGTGAGCGGGAAAAGGAAAACAGCCGCGTATTAAGCGAAATTTGTTGCCACCGGTATGGCTGCCAAAGGA  
CTGGAAGTCTGGCCATATGCTCACTGGAAATGTGAAATCTGCTACTGTATGGCGCGGAGGCTTTGGCAAACATGAT  
TCTGCGTGAATACGCCGCCAGAAACCGGATGCGGTCCTGATTGAAGCTGACCCGGGCTATACAGCCAGAACTGCTTG  
AGGAGCTGTGCGCCAGCTGGGGTAAAGTTCGCGCAATATCCACGAACTGATTGATGCATGTGTGCGAGAAGTGCCT  
GATTCGGTTCGCTGCTGATGGTGGACGAGGCTGAACCTGCTCCCTATCGCGCACTGGAGGTTCTGCGCGCTCTGCATGA  
CAAAGCGGTATCGGGATTTGCTTGGCGGTATGCCACGCTTCTGATTAACCTCAAGGGACGTCGCGGTGAGTTCGCC  
AGTTATACAGCCGTGTTGGCGTGGCGCTTAACCTGGGCGATACGCTGTGCGAGGAAGATTTAACCAGATAGCCACGGG  
CTGATGCCGAAGCAGTAGAACCGGAAATCAGCGAGGCGCTTTACGAACGCTCGCTGGTAAATGCCCGCGCTCTTCAA  
ACTGGCGCGGTTGTACCGGATTTGTGATATCAGCGATGCACCGGTCAGTGTGACGGCCATTGATAAATTCGCAGAAA  
TGTTAATTCAGTGA

>Cluster\_53100

ATGCTAAAAACCATTCAGGACAAAAGCAGGCATCTGACCCGCTCCACTATGGGCTGGCTAAAACTACTCTGGCAACGCAT  
TGATGAGGACAACATGACAACCTGGCAGGTAACCTTGCTATGTGCTGCTCATATAGTCCGCTGGTTGCGGTTG  
TTTTTGGCGTTTTTCGCGTTTTCCCATTTTTCCGACCTCAGCATTCAAGTTGCGTCACTTTATTTTTGCAACTTTCTG  
CCTGCTACTGGCGATGTTATCCAGCGATATATCGAACAGTTTGTGCGCAATTCACAACAAATGACCGCGTCCGGGCGTG  
CGGGCTGATCGTCAAGCGGTTATTTGTTGATGTACTCCATCGATAGCGGTTGAATACCATCTGGCGCAGTAAACGAGCGC  
GACCCAAAATTTACTCTGTTTGGCGGTACTGATGATTTTAACGCTGGGGCGCTGTTGGCAGGGGCGAGTCTGGCGAT  
AGCTCCTATCTGCTCTCTGCGCTGGGCGAGCGATCTCAATACTGTCTCATGATAATGTTGTCGATTTTTCCGCTGCT  
GTTGTGCTGGATCTCTTCTGGCTGCTGTACAGCATCGTTCCTACCATCCGTGTAACCTAACCGCGACGCGATTGTGCGG  
CGTTTGTGCGCGGCTCTGTTTCAAGCAGGAAAGAAAGTTTTCGCGCTTTATATCACCATGTTCCCATCATATCAGCTC  
ATTTACGGTGTGCTGGCGGTGATCCCATCTCTCTTTGGTCTACTGGACATGTTGATGATGATGATGATGATGATGATGAT  
AATTACTGTCACTCTCGGGGAATACCGCAAATTAACAAGCTGCTGAACAAGAAGAAGACGACGACCATGTA

>Cluster\_22903

ATGTGTACAACATTCGGGTTGCGGTGAAGCAACCTCTATATTGAGGGTGAACATAACCCCTCATTCGCGGTTTCGTAG  
CGCGCATTTGCCCGCGGCGCACGCCGAAAGATGAAAAACACCGGCATTAAGCGCCTGAATTTACCCCGAGCCAGACTG  
AAGAAGGCGACCTGCATTTACGGTATGCGGAAGCGGCGACTCACGCGCGGGCATGAGCCAGCGTCCGATGCTGGAAGTC  
GAAATGACGTGCTGGACAAAAATAACCGTCTGGCTGAACGCAACCGCGCGGCTTTGCTGCCCGCAAGCAACTGTTGCT  
CAACCTGGTTTCCAGCCCTGGTTCCGGTAAAACACCTGCTGACGGAAACCTTAATGCGCTGAAAGACAGCGTTCCGT  
CGCGGTTATTGAAGCGGATCAGCAAAACCGTGAACGATGCCGCGCATTTCTGCTACCGGCACACGAGCTTACGGTG  
AATACCGTAAAGGCTGCCATCTCGACGCTCAGATGATTGCCGACGCGCACCGCGCTGCCACTGGACGATAACGGTAT  
TCTGTTTTATCGAAAACGTCGGCAACCTCGTGTGCCCGGCGAGCTTCGATCTCGGTGAAAAACAAAAAGTGGCGGTGCTTT  
CCGTTACCGAAGTGAAGCAAAACCGCTGAAATATCCGCACATGTTTCCCGCGCTCGCTGATGCTCAACAAAGTT  
GACTTGTGCGGATCTCAACTTTGACGTTGAGAGTGCATCGCTGCGCCGGAAGTCAATCCAGAAATGAAATCAT  
CCTATTTCCGCCACCAGCGCGAAGGGATGGACAGTGGCTGAACTGGCTGGAGACACAGCGATGTGCATAG

>Cluster\_29318

ATGATCGCTATTACTGGTCCACTGGCCAACTTGGTCACTATGTTATTGAATCCTTGTATGAAAACGGTTCCCTGCCAGCCA  
AATAGTGGCTATCGTTCCGTAATCCGGCAAAAGCACAGGCACTGACAGCACAAAGGCATTACCGTGCCTCAGGCTGATTACG  
GCGATGAAGCCGACTGACATCTGCGCTTCAGGGAGTGGAAAACTACTGCTGATCTCTCCAGCGAAGTGGGTCAACCT  
GCCCGCGACATCGTAATGTTATTAATGCCGAAAAGCGGCGGACGTAATTTATCGCTTATACAGCCTGCTACATGC  
CGATTTCTCCCGCTCGCCCTCGCCGATGAGCAGATCGAGCAGGAGAAAATGCTGGCTGATTCTGGCATTTACACCC  
TGCTGCGCAACGGCTGGTACACCGAAACTACCTCGCCAGCGCCCGGCGAGCACTGGAACACGGCGTATTTATCGGTGCC  
GCGGGCGATGGCAAAATTCCTCAGCAACCGCGGCTGATTATGCGGTAGCTGCGGCACGCGTAATTAGCGAAGCGGTC  
CGAAGGCAAGGTTTACGAACTGGCGGGGATAGTGCCTGGACGCTGACACAGTTAGCGGCAGAACTTACCAACAGAGCG  
GCAAAACGATTTACTTCAAACTGAGCGAAGCTGATTTCCCGCGGCTGAAAAGCGTCCGCTGCTGCTGCTGCTGCTGCTG  
GCGGATATGCTGGCGGATTTGACGTTGGCGCATCGAAAGCGGCTGCTGTTGATGACAGCAAAACGCTTAGCAAAATGAT  
TGGCCGCCAACGCAACGTTAGCCGAAAGCGTAAATCTTTTTTAAATGTTAATAACTAG

>Cluster\_58277

ATGAGTTTACAGCCAAAAACCGAAGCGCCACCAGCGTTTTCTGAAATGATAAGAAGCGGGTAAAACGCTGCGCATCCA  
TTTTAATGACTGCGGACAAGGCGACGAAACCGTTGCTCTGCTGATGTTCCGGCCCGGGTCTACTGGCTGGGCGAACT  
TCAGCCGCAATATCGATCCGCTGGTAGAGGCGGGCTATCGGTTGATCTGCTGGATTGTCGGGTTGGGGCAAGAGCGAT  
TCGGTCTTAATAGTGGTTTCGCGATCGGATCTTAATGCAACAACTTGAAGAGCGTGGTGGATCAACTGGATATCGCCAA  
AATCCACCTGCTGGGCAACTCGATGGGGGGCATAAGTTCTGTGGCTTACCCCTTAAATGGCCGAGCGGCTCGGCAAC  
TGGTGTGATGGGCGCGGTACGGGCGGATGAGTTTGTTTACCGCGATGCCAACCGAAGGATTAATAGCGACTGAATCAG

C T T T A T C G T C A G C C G A C T A T C G A A A A C C T G A A G C T G A T G A T G G A T A T C T T C G T T T T G A T A C C A G C G A T T T G A C C G A C G C  
C C T G T T T G A A G C G C G C C T G A A T A T A T G C T G T C G C C C C G A T C A C C T G G A A A C T T C G T T A A G A G C C T G G A A G C T A A T C  
C G A A A C A G T T C C C G G A T T T T G G C C C A C G T C T G G C G G A A A T C A A A G C G C A A C C C T G A T T G T C T G G G G G C G C A A C G A C C G C  
T T T T G T G C C G A T G G A T G C G G G T C T G C G T C T G C T G T C C G G A T T G C C G G T T C T G A A C T G C A T A T C T T C C G C G A C T G T G G T C A  
C T G G G C G A G T G G A A C A T G C C G A C G C T T C A A T C A A C T G G T G C T G A A T T C C T C G C A C G C C C T T A A

>Cluster\_21863

G T G T A C G G C G T T T A A C T T C C C G G G C T C G A A T T T G A A G C T G C G G C A A T T T A T G A A T A T C C C G A A C A T T T A C G T T C A T T  
C C T T A A T G A C T T A C C C A C C G A C C A G G G G T G T A T C T G T T C A T T G G C G A A A G T G A C A C C A T G C C G C T C T A T A T C C G G A A A A  
G C A T T A A C A T C C G A G C C G C T C T T T C T A T T A C G T A C C C G G A T G A A G C C C A T G C T G C G A C A A T C C C G A C G C A T C  
A G C T G G A T A T G T A C T G C C G G T G A A A T C G G C G C T C T G C T C C T T G A A G C G C G A T T A A T C A A A G A C A A C A G C C G C T G T T T A A  
T A A A C G G T T G C G C C G C A A T C G C C A G C T C T G T G C C T G C A A T T A A A T G A A A G C G C G T C G A T G T G G T G T A T G C C A A G A G G  
T G G A T T T T C A C G A G C C C C A A C C T G T T T G G C C T G T T T G C C A A T A G G C G C G A G C T T T G C A A G C A T T G C A G A C C A T C G C T  
G A T G A A C A A A A A C T T T G C T A T G G C C T G T G G A C T G G A A C C G T T A A G C C G C G G C G T G C T G T T T C G T T C G A T T A A A  
A C G T T G C G C T G G G G C G T G T T G C G T A A A G A G A G C C A T G A G G A A C A T G C G C G A C G C T T A C G C C A G G C T C T G G A G C G T T T G C  
G G G T G G T G T T G C C C T T G G C A A G G T G C G G T G G C A C T T A A A G A A C A G C A C C C G A A A T G A C T C A A T A T C A T A T T A T T C A A  
A A C T G G C T G T G G C T G G G G C G G T T A A T T C G T G G A A G A A G C G A C A A C G T T A A T T C G G A C A C C T G C C G G T T T G A T C A C G A  
C G G T T A T A A A A T T C T T T G T A A G C C G C T G C T T T C C G G T A A C T A T G A A A T T A C T G A A C T T G A T C C G G T G A A T A A C C A G C A A G  
C C A G T T G A

>Cluster\_17520

A T G G A A C C A G A A A A C T G G T T A C A T T C C G T T G T A C C G G A G C A T T C T G A A A C A G T C A T G G G C G A A A G A T G T T T A T C T T C G  
C A C C T G T G G G A A A A C C T T C T C C T G A A T G C C G C C A G A A A G C C A T A C A A A G C G A A T T T C A A A G G T C A T G A A T G G C A T C T C G  
A A C C C G G T C A A C T G G T T G T G A C A G C A G C T G A T T T A G G T C T T C A G T T A T G C G A C A G A C A T G G C A A G C C A G C A A G C C G T G A T  
C A G G T T G A G C G G A T G C T T C A G G T T T T T G T G A A A G A G G G G A T G A T C C A T T G A T G G A G A G A A G C A A A A A G G T C G T G T G A T  
C A C C A T C A C A A A T T A C C A T G A A T A T G C T C A A A A A T G G A C A A T T T A C C C G C A C A T G A A G C C G C A C A A A C A A C C A A C C A C A T G  
A T G C C G C A C A T G A C G A A G C C A G T A A T G G C G C G G C T T T C A G C G C A C A T G C C G C A C A T G A A A G C G C A C A T G A A G C C G C A C A A  
A C A A C C G C A C A T G A T G A A C A A G A A G G T A T T A A C A A G A A T A T A A A T A A T A C C C C C T A C C C C C A A T G G G G A G G C G A T G G  
G C A G G T T A A A C C T G A A C G T C G C A A G G C A G A A C G A A T C G A C T A C G A A T C C T T C C T G A A C G C C T A C A A C C C G A A G T C G G T G  
A C G A C T G C C A A C C G C T G T T G C G T C A A C G A G A A A C G C A A A C C G C C T G A A G A A A A T C A T C C C G C A A C C A A C C A A C C G C A  
A A C G T G G A C G G T T T C A G A G C G T A T G T C A G G C G C T T T G T G C A T C A G G C C A A G C C G T T T T A C T T C G G A G A C A A C G A C A C T G G  
C T G A C G G C A G A T T T T G A T T A C C T G C T G A G G A A G A T T C G T T A A C G G G A G T A C G G G A A G G G A A G T T T G C A G A C A G G G G A  
T T G C A T G A

>Cluster\_23010

A T G A C C A G T A G C T A T C T G C A T T T T C C G G A G T T T G A T C C G G T C A T T T T C T C A A T A G G A C C C G T G G C G C T T C A C T G G T A C G G  
C C T G A T G T A T C T G G T G G G T T T C A T T T T T G C A A T G T G G C T G G C A A C A C G A C G G G C G A A T C G T C C G G G C A G T G G C T G G A C C A  
A A A T G A A G T T G A A A A C T T A C T C T A T G C G G G C T T C C T C G G C T C T C C T C G G T G G A C G T A T T G G T T A T G T T C T G T T C T A C  
A A T T T C C C G A G T T A T G C C C G A T C C C G T G T A T C C T T T T C C G T G T C T G G A C G G C G C A T G T C C T T C C A G C C C G C C T G A T  
T G G C G T T A T C G T G G T G A T G A T T A T C T T C G C T C G C C G T A C T A A A C G T T C C T T C T T C C A G G T C T C T G A T T T T A T T G C C C C A C  
T C A T T C C G T T T G G T C T T G G T G C C G G G C T C T G G G C A A C T T T A T T A A C G G T G A A T T G T G G G C C G C G T T G A C C C G A A C T T C  
C C G T T T G C C A T G T T C C C T G G C T C C C G T A C A G A A G A T A T T T T G T G C T G C A A A C C A A C C C G A G T G G C A A C C A T T C A T T T  
C G A C A C T T A C G G T G T G T C C C G C C C A C C C A T C A G C T T T A C G A G C T G C T G C T G G A A G G T G T G G T G C T G T T T A T T A T C C  
T C A A C C T G T A T A T T C G T A A A C C G C C C A A T G G G A G C T G T C A G G C T T G T C C T G A T T G G T T A C G G C G G T T T C G C A T C  
A T T G T T G A G T T T T C C G C C A G C C C G A C G C A G T T T A C T G G T G C C T G G G T G C A G T A C A T C A G C A T G G G C A A A T T C T T T C  
C A T C C C G A T G A T T G T C G C G G T G T A T C A T G A T G G T C T G G C A T A T C G T C G C A G C C C A C A G C A A C A C G T T T C C T G A

>Cluster\_28771

A T G A C A G C T C G C T A C A T C G C A A T T G A C T G G G G A T C G A C C A A T C T G C G C C C T G G C T T T A T C A G G G C G A C C A C T G C C T G G A  
C A G C A G C A A T C A G A A G C A G G C G T C A C G C G C T G A A C G G A A A A T C T C C G G C T G C G G T G T T A G C A G A G T G A C G A C C G A C T  
G G C G T G A A G A G A A T A C G C A G T G T A A T G G C A G A A T G T C G G C A G A A T G T C G G T G A A A G T T G C G C G T A T T A T C C  
G T T C C A G C C C G T T T T T C G T C A T T G G C G A A C A A T T A A C G T C T G T T G G C G A C A A T A T C T G G A T T A T T C C C G G A T T A T G C G T  
C T C T A T G A C G A T A A C C A A A T G T A T G C G C G G C G A A G A A C A C A A T T G A T C G G C G C G C A C T C T G G C T C C T T C C T C T C  
T T T A T G T C A T G C C C G T A C G C A T T G C A A T G G G T G C A G G C C A T A G C C A G A A A T T A A C G A T T T T C G C A C C G T G A T G A C C  
G G T G A A T T A A A C A T C A T T G T T A A A T C A C T C A T T G A T T G G C G C A G G T T T G C C C C G C A G G A A A A C T C T G C C G A T G C T T T  
C G C G G C T G G C C T T G A G C T G G C C T T A A T G C G C C G C C A T A T T G C C G A G C T T T T T G A A G T T C G C G C C T C G C A T G T G C T G G  
G A A C A C T T C C C C G T G A A C A G G T C A G C G A A T T T C T C T G G A T T G T G A T T G G C C A G A G G T T G C C A G T A T G C G C G A C T A T  
G T G A C C A T C A A C A C G C C A T C A C C T T G T C G C C G G A A C A T C G T G A C C G C G C T A C C A G C A A G C C T T T C A G G C G A T G G G  
T T G C G A C G T G G C G C G T A G C G G C A C A G G C A T T T C A G G C T G G T A T A A G A G A C A T C G T C A T G C A T G G C G A A A C T T A A

>Cluster\_28142

A T G A A T A A C G A T G T T T T C C C G A A T A A A T T C A A A G C C G C A C T G G C T G C G A A A C A G G T A C A A A T T G G T T G C T G G T G C A G C T C T  
C T A C A C C G A T T A G C A C T G A A G T T C T T G G T T T G G C T G G T T T A C T G G T T G T G C T G G A T G G T G A A C A T G C G C C A A A C G  
A T A T C T C C A C G T T T A T T C C G C A G T T A A T G G C C C T G A A A G G C A G C G C C A G C G C C A G T A G T G C G A G T G C G C A A C A C G A G  
C C G T A A T T A T T A A G C G T T C T G G A T A T C G G T T T C T A T A A C T T C C T G A T T C C T T T T G T A G A A C A A A A G A G G A A G C A G A  
G C A G G C G G T G G C A T C A A C T C G T T A C C C A C C G G A A G G C A T T C G C G G C G T C C G T T T C T C A C C G C G C C A A T A T G T T G G C A  
C C G T G G C G G A T T A T T C G C T C A G T C G A A C A A G A A C A C T A C T A T T C T G G T C C A G A T A G A A A G T C A G A G G C G T A G A T A A C  
G T C G A T G C C A T T G C C G T A C T G A A G G T G T A G A C G G C A T C T C G T C G G C C C A G C G A T C G G C T G C G G C A T T A G G C C A T C T  
C G G C A A T G C C T C G C A C C C G G A T G T A C A A A A G C A A T T C A G C A C A T T T T A A C C G T G C C A G C G C A C G C A A A C C C A G G C  
G C A T C C T C G C A C C A G T C G A G G C T G A T G C G C G T G T A T C T G G A A T G G G C G C G A C G T T T G T G G C C G T C G G C A G C G A T C T C  
G G C T C T T C C G C T T C G C C A C T C A G A A A C T G G C T G A T A C C T T T A A A A A A T A A

>Cluster\_3180

A T G A A A C C T C G T C A G C G T C A G G C C G C A T T C T G G A G T A T C T G C A A A G C A G G G T A A A T G C T C G G T T G A A G A A T T G G C G C A  
A T A C T T T G A C A C C A C A G G C A C A C C A T T C G A A A G A T C T G G T C A T T C T G G A A C A T G C C G G A A C C G T C A T T C G T A C T A T G  
G C G G A T G G T G T T G A A A A G A G A A T C C G A T C C G C C T A C T C A T C A T A A A A C C G C T C A T C A A C A C C C A C A A G A A A G A A C T G  
A T T G C A G A A G C T G C C G T T A G T T T A T T C A T G A T G G C A C T C A A T A A T T C T T G A T G C T G G C A G T A C C G T T T G C A G A T G G T  
C C C C T G C T C G C G C T T T A A T A A C A T C A C G G T G A T G A C C A A C A G T C T G C A T A T C G T C A A T G C G C T A T C T G A A C T G G A T A  
A C G A A C A A A C C C T G A T G C C A G G C G G A A C A T T T C G C A A A A A T C G G C C T C A T T T C A C G G C A A C T G G C A G A G A T G C C  
T T C G A C A T T T C A C C T T C G A C A A A T T A T C A T G G G T A C T G A C G C C A T C A T C A A T G C G G G C T A A C C A C C T T C A A C G A  
G G T C T A T A C C G T C A G T A A G G C A A T G T G C A A T G C C G C G C G A A G T G A T T T A A T G G C G G A C T A C A A A G T T T G G C C G T A  
A A A G C C C A A C G T A G T T T G C A G T C T G A A A G C G T C G A T A A G C T G A T T A C C G A C G A G G T A T C G A T C C G G C G T T T C G T C A G  
G C G T G G A A G A G A A G G A T C G A T G A T A T A A C C G G A G A G A C A A T G A T G A

>Cluster\_62576

A T G C G T T T C G T T C T T T C T G T C C C T C A G G A A T T G T A C C T G C A C A G T T T G A A G C T C A T C A A C C G G T T C T G T C G A A T A T

TACCTGCATCAGAACAGAAGAAGAGTTACGCAATAAAATTGCGGCACAGGCCGAGAGTGTCTGATATCGGCAGGGCGAC  
CTGCCAATGCGCTGAAATGTGGTTCCGATTTTATCGGGATCACTCATTCGTGGTGGTGTGTGCGCTCCGCCCTTTTTT  
CTGCCACCGGATGTGAGTATTTCTGGCGTTCTCAAAAACCTGAGGTTACTGAAAACAGGAATGTCAGTAGAGCGTGTCTAT  
CAGTGTGTCAAATGCCTCTGGTGGGTTTTTCAGGACTGAAACATGCAGAAAATTTGCCAGTTATGGACAGTTACTCTGTCT  
TTATGAATCAGGTGAATAACCGCACAAAGACAATCGTCAATGTCAGAACGCTTCCGGAAAAGCAAAAAGAGGTGTGTGCG  
TTGCTTCTGCTGGACACAGCTGGGAATACAGTGCAGTTTCTCAAAACGGGGATAAGACAGATATGGCTTGTGTGAGCA  
GTCGCTAAAAAGCGTTGGGAATACCGGACAGCATGTATTGCGGGAAGCCCTGCTGCTGAGCAGCAATAAAATTCAGC  
GTGATGGAATGCATTGGAAAAACGAATGCCATGACATTGCGTGAAAACGGAATACCAACAGGTATTCCTGGTGGTA  
AATGCAGGGACGACGGCTTATCTCTGCATAAAATAAATAA  
>Cluster\_40329

ATGGGTAAACAAAACGATGTGATGGATGCACAGGCTATCTGGATGGCGATTACGCAACCCGGTAAAGAAAAGTGTGGTTAA  
AACGGAAGAGCAGCAATCGGTACTGGTTCTGCACCGGACCCGAGGCAACTGGTGAAGTTCGGCTCCATGCAGATCAACT  
CACTGCATGGCAGCTTCTTGAATTTGGTGAAACCCCTTCAAAAAGGTCGGGACGCGATGGATCGGGAGTTCCCTGAGGAT  
CTGGAACGACTGAAAGAGAGATTACCCCGTATGTCATTAGTGTCTGGAGAATCAGTTCAACAGGCTGAATGAACTGGA  
TTTACAGATAGATGATATGAAAAACAGCTTACAGCGTGGCGAAAACAGAATGAAACCTGTAAGCGGTTGCTGGATATTC  
CCGGCTTGGGCCACTTATGCAACGGCAGCGGTGGCCACTGGGGAAAACATCAGCGTTTAAATCAGGGCGAGAGTTTC  
AGCGCTTATGTTGGTCTGTGTGCTCCAAACAGACTGGCTCAGGAGGAAAATCCGCTTCTGGGGATAAGCAACAGGTTGA  
TACATATCTGCAACCCCTGTTTATTCATGGCGCAAGGGCAGCAGCATTTACTGACCAAGAACCCTGGTCCGTGGATAACCG  
AATGAAAAACGTCGTCCAGCCAGCGTGGCGATCGTTGCCATGGCAACAAGCTGGCGCAACGGTGTGGGCAATAGCC  
GCTCATGGACGTAATATGACAAGAACCAGTTAGTATCAGACCATATTA  
>Cluster\_10967

ATGCTGGATCTCCGTTTTACGCGTCTGCACGGGAAAACACGCTCACCACCCGTCATCATGTCCGGTCCGCTCACTGTTCA  
CGCTCCTTTTTATCCGAAAGAAGAAACCTGCCACCTCTGTCTGTCTTCAACCCCGGTTGATCGTCCGGCGGTGACGAA  
TCATCATCAACGCAATAATGACTCTGATTGCCATACGCTGATCACCATGCTGGTCCAGTAAATTTTACCGCAGCAGC  
GGCGCGCAGGGCACCTTACGAAAAACCTGACGCTGTGCAATAACGCAACGCTGGAGTGGTTGCCACAGGATTCGATTTT  
TTTTCCCGCGCTCACGCCAGTTCGATACCGTGTTCATCTGTCTGCTCCAGTACACTGCTGGCCTGGGATCTTCTGT  
GCCTTGGAGCTCCGGTCACTGGAGAAACCTTACGCCACGGAACACTCGCTAACCGTCTGGAGATATGGGTGACGGTTCT  
CCGCTGTTGATGATGCTGACGCTGGCGCAATGGAGAACTACTTCCGTTGACCGGAAAACCTGGGTGACGAGTGT  
GTTCTACCTGGGAAATGAAACGCAACTGGAAGACATACGCGAAAACCTCACACCCTGGAAAACCTACGCCGAGCCACGC  
TCACCGATGGTCTACTGACAGTTCTGCTTTTAAAGTGATGATAAATCTGCGTTGCCAGCAGGTAATGCGTATATCTGGCAA  
TTTTATGGCGCCGCAACTGACTGACAATACCCGGTACTTCCCGGATCTGGCTGACTTAA  
>Cluster\_48475

TTGATTTGCCGTTTTATCGATACCCACTGCCATTTTGATTTCCCGCGCTTTAGTGGCGATGAAGAGGCCAGCCTGCAACG  
CGCGCACAAAGCGGGCGTAGGCAAGATCATTGTTCCGGCGACAGAGCGGAAAATTTTCCCGCGTGCAGGCGTTAGCCG  
AAAAATATCAACCGCTGTATGCCCATTTGGGTTGCATCCGGGATGTTGGAAAAACATAGCGATGTGTCTCTGTATCAG  
CTACAGCAGCGCTTGGAAAGCGTTCGGCGAAGTGGTGGCGTGGGGGAGATCGGTCTGGAATCTCTTCCGCGCATCC  
GCAATTTGAGAGGACAGTGGTTACTCGACGAACAGCTGAAACTGGCGAAACGCTACGATCTGCCGGTATCCTTCATT  
CCCGCGTACACGCAAACTGGCGATGCATCTTAAACGTCACGATTTACCGTGCACGCGGTTTACCGTTTTTCC  
GGCAGCTGCAACAGCCGAGCGGTTTGTACAGCTGGGCTACAAAATCGGCGTAGGCGGTAATATCCATATCCAGCGC  
CAGTAAAACCCCGGATGTCATCGCAAAATTACCCTGGCATCGTTGTTGCTGGAAACCGACGCCGATATGCCGCTCA  
ACGGCTTTAGGGGCGAGCCTAACCGACCGAAGCAGGCTGTGCGGTTGTTGACGTGCTTTCGAGTTGCGCCCGAACCA  
GAAGATGAGATTGCCAAGTGTGCTTAATAATACGATGCGTGTGTTAGCGTTAGTGGGTAG  
>Cluster\_24548

ATGAAATCTGCCACCTCTGCGCAAAAGACCTTACCAGGAAGTCGGGGCGATGATCCGCGATCTGATCATAAAGACGCCGTA  
CAATCCTGGCGAAGCGCTGCCACCGGAGCGTGAATTTGAGAAATGCTTGGATGTCACGCGGACGGTGGTACGTGAAGCCG  
TGATCATGCTGGAGATCAAAGGGTGGTGAAGTGCCTGGGGTGCAGGTATCTATGTTCTTGATAGCTCAGGCGCCAC  
AACGCAGACAGTCCGGATGCCAACGCTCTGCAACGATGCCGCTCCTTTTGGAGCTGTACAGGCGCGGCTACTTGAAG  
TAACATCGCCGAGTTTGGCCGCCGTCAGGCTACCCGGAAGATATCTGCAAAATGCGCCAGGCATGCAACTGGAAGAGC  
GTGAATGCTTCCAGCGCGCGGCGAGCAGCGAAGCGGTGACATGCAAGTCCATCTCGCTATTTGCCGAAGCAACGCA  
AACAGCATGCTGGTGGAGTTATTCGCTCAGTCTGGCAGTGGCGGGAAAACAAATCCAAATGTTGGATCCAGTTGCACAGCCA  
CCTGGATGACAGCTGATTCGCAAAAGAGTGGTTGGGCGATCACAAACAGATCCTCGCCGCTTAAATCAAAAAGATGCC  
GAGCGCGAAGCTGGCAATGTGGCAGCATCTGGAGAATGTGAAGCAGCGCTTGTGGAGTTCTTAATGTTGATGACATC  
TATTTGATGGCTATCTGTTGATTCATGGCCGCTGGATAAAGTCGACGCTGA  
>Cluster\_60764

ATGATTGAACAAATTTTTCAGGCCGACTCTGTGCAACAGGCGCTGGAATGAAGCGCCGTACCAGGATGAAGCCGCTCTG  
GTTCCGCCGGGGCAGCAAACTCAATGCTACACCAACCCGTACCATAAAAAGATGCCATTTCTTACAGGATCTGGAAC  
TGGACTGGGTTGATGGGATAACCGTGCCTGCGGATTTGGCGAATGTCTCGCTTGCAGCCACTGCGTATGCGCGATTT  
ATTCCTGACGCTGCTGTAAGCCCTCGGTTTTGTTTACTACGCCATGTTCTGTAATCAGTCGACCATGTTGTTGTAAT  
CGCCGCCGCCAGGAAGAGTCTGGTCTGCTTCCGCTCCTGTTGGCACTGGATGCTGAACCTGGTTTTTGGCAACGGCGAAA  
CGCTGTCAATCAGGACTACCTGGCCTGCCATGCGATCGCTGCTAACCGAAATATCATTAAGATCCGTATCGCACC  
TGTGCGACCCGAAAATTAGCCGTTCTCAGGACGGTTTAAACCGTCTGACGGCAGCCGTTGCAATGACAGACCAGCAGCG  
TATGCAAAATGCGCTGGATGGCGTCCAGTAAAGCAGTGCCTGCTGATGATGTCGAAAACAAAATGGAAGGCAATG  
CACTTGAACAGGCTGTGCGCAACGCCATTTTCCCGCAGGAAGATTTGGGGGAGCGTGGCTATAAACGCTATATCAGC  
GGAGTTCTGGTAGCCGACTGTATGCGGACTGCCAACAGGCTGGGGAGGAAGCGTATGA  
>Cluster\_24355

ATGAGGATTTGCAGCGACCAACCTTGATATTGTTTATTGACTGAAAAAGATGTCTGGATAAGGTTGAATGGGAAAAGAAC  
TATTAGCCTTAAAGCTAACACATGGCGTTATTAATTTGAAAAATAATATTCGACGCTCTCTCTTAATAACACTT  
TGGTGTCTATATAGTACGACATCATCAAAGATTACCTCCGTTTCTGAATAAAGATCTCTCGCAATACAGTATGG  
CAACGTAGCGCTACGCCATCCTCACCTGCCATGCTGACGCGCAGCGTCTTTCGCGTTGCCGCGCAACATAGCATGAT  
GCCCGTGAACCTGAGTCAGAAAAGGAACGCAACCTGCTATTATTACTGTGCTATCCCGTTTTTCTCGACGATAAAA  
AATTCCTTCTACTAATGATGATATGTTACGTAATTTGTTAAGTGACAGCGTTTTATCAAAATTAATGAAAGCGATATCCAC  
AAAGACTGGAATCTTAGTATGGTAGCCAGTTGTTATGTCCTTAGCCCAAGTCTGTTAAAGAAAAGCTGAAAAGCGAAAA  
CACCAGTTATAGCAAATAATCACACCCTGCCATGCTTATGCCGTAATGAAATTAATGATGGACGGTAAAAATATCT  
CTCAGGTATCACAGTCTCCGCGCTACAACAGTACGCTGACTTTATTTCTGCTTTAAAGACTTCTACGGTATGACGCGC  
CTGATTAATGTTAGTCTAGCACAGAGAACGCACTGTCCGCTGA  
>Cluster\_26139

ATGAAAAACATTTGGCGAGTGGGGTCTTGAACGATTTGCGAGACTGCACCACAGGGTTCGGTTCACCGTACCGGAC  
GGTGGAGGAGTGGCGGAAATGGCAACTTGTGTAAGGACGAAAACGAGCGAGGAGATTAACCGCCAGAATCGCCAGTTGC  
GGTGGAAAAAATCCTGAATCGTTCCGGCATCCAGCCTCTGCACAGCAATGCTCGTTTGCAAATTTACAGGTGACAGAAC



GACGGGCAAAAATACGGCTGAGCCAGGCCAAAATCCATAGCTGACGAACTGATGACCGGGTGCACGAATTTTGTGTTTCAG  
CGGTAAAAACCGGCACCGGAAAAATCACCTTGCAGCGGCGATGGGCAACCGGCTGATGGTGAAGGGGCGCAGCGTGATTA  
TCGTACCCTGTCTGACGTCATGAGCGTGTGCATGACAGCTACGACAACGGCAAATCCGGGGAAAAATTTTACAGGAG  
CTTTGGGGGGTTGATTTGCTGGTCTGGATGAAATAGGCGTTACGCGGGAGACGAAAAACGAGCAGGTGGTATTCGACCA  
GATAATTTGATCGCCGACAGCATCTAGTGCAGTGTCCGGATGTTAACAAACCTGAATCATGCCCAATGGTACGCTTC  
TTGGTGAGAGGATATGGACCGCATGACCATGAACGGTGGTGCATGGGTGACGTTTAACTGGGATAGCTGGCGTCCAAAT  
GTCAGCAATATGAGGGTTGTGAAGTAA

>Cluster\_40539

ATGGAACGCTTATGATTGTTAATGCCGATGATTTTGGCTTAAGCAAAGGTCAGAACTACGGCATTATCGAGGCTGTGCG  
CAATGGGATTGTACATCGACGACGGCGCTGGTGAATGGGCGAGCTATTGACCATGCGGTGCAGTTGAGTCTGTGATGAAC  
CGAGTCTGGCCATAGGGATGCATTTTGTCTTACTATGGGCAAGCCATGACAGCTATGCCGGGGTTAACCCGGATGGT  
GTGCTGGGAAAATGGATCTGGCAGTTGGCAGAGGAAGATGCTTTACCCTGGAAGAAATTACTCAGGAGCTTGGCAGTCA  
GTATTTGCCGTTTCAATGAGCTATTTGGACGCAAACTACGCATCTTGATAGCCATCATCATGTGCATATGTTCCCGCAGA  
TTTTCCCGATTGTTGCCAGGTTTGGCCAGAAGAGGGCATTGCGTTGCGGGCGGATCGTCAGATGGTGTGTTGATTGCCG  
GTCACCTGCGCACTACCCAGGGATTACGAGTGCATTCTACGCTGAAGAGATCAGTGAAGTCTGTTCTGCAAGTGTG  
TGATGATTCAGCCATCGTGGGGAACGCTCGTTGGAAGTTATGTGCCATCCGGCGTTTGTGTAATAACGATTGCCAGA  
GTGCTTATGCTTCCCTCGGTTAACGAACTGCATGTGCTGACTTCAGCGTCTGTAATATGCGATTGCTGAGCGTGGT  
TATCGGTTGGGTAGTTATCATGATGTGTA

>Cluster\_39761

ATGAATAAATACAGTCGTATTTTCACTGACGCTCTTTTACGTAATGACACCCCATGCCTTTGCGCAAGGAATGGTGC  
TATTTATCTGCCGCAACAACAGACACTTTCCGTTGGCCCGTAGAGAATGTTGCCAGTTGGTGACACAACCGCAAC  
TGCGGATCGCCTTGGTGGCTGGTGCCTTGTGACGACTCCGCGAGGAAAGCTAAAGCGCTTAAAGACTACCAACAT  
GTCAATGGCACAGCTTGTCTTCTGGGAAGCAGAAGCTGACGACGATGTGGCGGCAACGATTAATCCGTCGCGCAGCAGTT  
ACTCAATCTCAATATCACTGGTCTTACCCTGCAACCTGACCCCTGATTTTGTGCGAGTGGATGAGAACAGCAATCCCG  
CGTGGTCCGGGACTATACGCTCTATACCGTACAGCGTCCGGTACTATTACTCTGCTGGGTGCGGTTTCTGGGGCTGGG  
CAATTGCCCTGGCTGGCAGGCGTAGCGTTACCATTACTGCAAGATCACCCCGCTCGCAGGCGCGGACAAGAATAA  
CGTTATGGTGATTACGCTGAGGGTGGAGTGTGCTGCGCCCTGTTGCCCTGTGGAATAAAGACATGTGGAACCCCGC  
CGGCGAGCAGCTTTGGTTGGGCTTTTCTGCGCATGACTGCCCCGAAAAATATGCTGATTTAAATGACCAGATTGTGTCT  
GTTTTAACGCAACGTGTTCTGACTGA

>Cluster\_45582

ATGATTGAGAATCATCTACTCTCTGGTACTGTTGTGAAATACAAATTAATACCATGCTTACTCGCGATATTCCTCAC  
AGGATGTGACCCGACAGAGGTAACACTTTCATTACCCCTGAGATGGCCAGTTTCTCTAATGAATTCGATTTTGGATCCCG  
TGCGTGGTCCGTTAAAGATTTCACTCAGACATTAATGGATGAGCAAGTGAAGTGAAGTGAAGTGAAGTGAAGTGAAGTGAAG  
TCGGAAGAAGGCTGTTTTGATTCCTCGAATTAATGATGCTGGAATAAATACCGTGGTGGTCTGTTACTGGACGCCAA  
TTATTCAGCTGATGCCGAGCAGCTGGGAAGAGAGTACGTTTACAGGAAAATGCCAGCTAGCAGAAATACCTCTGCGG  
GGGTGAGTTGGGAAACCGATGATAATGGCTTCCGTGATTAAGCCAGCAGCAAAACAAATGCAGATGGAATATCGCTATGAT  
GATCAGGTTATCCGCTGGGTAACACGAAAAGTAAACGAAAACATTTATCTGTCAGCGCCACGCCATCAACGGATCC  
GATCAAAAATAGATTACACAGCGGTTACTTTACTGAATAATCAACGGGTTGGTAAATGTAACAGAGCTGTGAATATG  
ACAGTACGCTAATCCGGTGGACTGTGACTAATCATTTGATGTAAGGAGTAAACCCCGCTCGAACGGGTTTACACC  
ATCAAAAATACGATCGATTATTTAA

>Cluster\_24842

ATGAAAAGAAAAAATAGAAAGTCCCGGGTGTGAATCATATGAAGGTTAGATGTTGAATATATATTTGATTCCGAAAC  
GGGGAAATTTAAAGCGGTTTATACATTTCAATAATGAAATGTTAGATCGCATAAAAATGAGTGGGCGTATTGCCGATAGAG  
CATCTTCACTGTCCCTAATTCATAGGGACTTAAAAAGTGTAAAGAGTGGTACCAATAGCTAATGAACTGGCAGGGAGA  
AACGAATTAAGGACAGATGGCAAGTTATACGGGAATATACTTGATCTAGATTTATCAAGTGAATTAGAGCGTTATTTGT  
GGCAAGCCTAACGTTTTATGGTAAAGCTTTCTCTGAAGCTAAAGGGAGAAAATGAAAGATGGAGCGTGTGGCTTGATT  
CTGAATATTTGGGTTGCATGACTGATGATTTATTAACACTACAGGCATAATTTTGCAGCACATAGCGGCAACCAAGACTATGAG  
TCAGCAGAACTTCACTGTTACTAATAAGGAAAATGGGAAAACATTTTATCAAGCAGTGAAGATAGAAAACAACTGAG  
CATGATTGGTGTGCGAGGACGAGCATGTTGATATGATTAATTTATTTGAACATGCGATACAGGTTGTTGAGAAAAAATA  
ATGAAACATTAGAGAAATAGAACCTATGCTATGCAAAAGAGTTATTTCTTTTGGGTTTAGCTGCCACAGGGAAAGAT  
CCGTCATTTAGATAAGTTAAATAAGAAAGAAAAATAA

>Cluster\_42341

ATGAGCCAAATTTACTGCAACCTGCTAACCGGATGATTACGCTGGAACCGTCAATAAATGGTATGGCAATTCATGT  
TTTTGAAAATATAAATTAACCGTACAACCGGAGAACCGATCTGTTGTTGGCCCTTCTGGTCCGGTAAATCGACAA  
CAATTCGTTGATTAATCACTTGGGAAGAATCAACAGGACCGATCGTAGTAGATGGCATCGAATTAATGAAAGATATC  
CGCAATATTGAGCGGCTCAGGCAGGAAGTGGGAATGGTCTTTCAGCATTTCAATCTCTTCCCTCATCTGACCGTCTTACA  
GAATGTTACCTGGCACCATTGGGTACGCAAGATGCTAAGAAAAGAGGCTGAAGCTCTGGCGATGCATTAACCTGAGC  
GGTGGAAATGGCGAACATGCCAGAGTTTCCCGGACAGATTTCAAGTGGTGCAGCAGCAACCGGTTGCCATAGCAGCT  
TCACTTTGTATGAAACCAAGATCATGCTATTTTGTGAACTACGTCGGCGCTCGATCCGGAGATGGTGAAGAAAGTGTG  
GGATACGATGATTGGGCTGGCGAGTCCGGTATGACAAATGTTGTTGTTAAACATGAGATGGGTTTGCAGAACCGTGC  
CTGACCGGGTGTATTTTATGGATCGTGGGAAATAGTGGAGCAAGCTGCACCTAATGAATTTTTTGGCGATCTAAATCA  
GAGCGTACGAGGGCATTTTATCGCAGGTAATCCATTA

>Cluster\_23097

ATGAAAATTCGCGCTTATTTGGTAGCAATGAGCGTGGCAACGGTACTGACCGGTTGCCAGAATATGGACTCCAACGGACT  
GCTCTCATCAGGAGCGGAAGCTTTTACGGCTTACAGTTTGAAGTATGCGCAGGTGAAAACCTGAGCGATCAGGCATGTC  
AGGAGATGGACAGCAAGGCGACGATTGCGCCAACCAATAGCGAATACCGCTAAACCGTCTGACAACTAATGCGCAATG  
GGCAACAATATCAACGGTCAGCCGGTGAATACAAAGTGTATATGGCGAAGGATGTAACGCCCTTTGCAATGGCTAACGG  
CTGTATCCGCGCTATAGCGGGCTGATGGATATGATGACGGATAACGAAGTCAAGCGGTTGATCGGTCACGAGATGGGCG  
ACGTAGCGTTGGGCAATGAAAAAAGGATGCAGGTTGGCACTTGGTCAAAATGCCGTACGAGTAGCTGCGGCTCTGCG  
GGCGGATTTGTCGCGAGTTTATCGCAATCACAACTCGGTGATCTGGGCGAGAAATAGTCAATTCGCAATTCACCCAGCG  
CCAGGAAGCAGAAGCGATGATTTACTTACGATCTTCTGCGCAACACGGCATCAGCCCGGCGAGGCTTGGCCACGAGCT  
TTGAAAACCTGGCGAAGCTGGAAGAAGGCGTCAAAAGTCAATGTTTGGACGACCATCCAGCATCCGCCGAAACGGCCAG  
CATATTCGCGATCTATGAGCGCGGATGGAGTTAAGTAA

>Cluster\_42471

ATGAAACAACACACAGCTCAACGGTATTTATCGAACTGGTTAAACAGCAGGTTATGTGACTACGAGGAGCTGGTGG  
GCCTTCTCCGTCAGCCCGCAGACTATTTCCGCGGACCTCAACGAACCTGGCAGAGCAAAACCTGATCTGCGCCATCATG  
CGGTTGCGGCGCTCCCTTCCGTTTAAACAGCGCTGGCAGCATGCAAGGCCACCCAGCCGAAAGAAAGAGCGC  
ATCGCCCGCAAAGTGGCGGAGCAAAATCCCAATGGCTCAGCGTGTTTATCGATATCGGCACCCAGCCGAAAGCGGTTGC  
GCACGCGTCTTAAATCACAGCAATTTACGATTTGTGACCAACATCTCAACGCTGCTAACACGCTGATGGTAAAGAGG

ATTTCCGTATCATTTCTTCCCGGTGGTGAATTCGCTAGCCGTGATGGCGGGATCATTTGGCGAAGCAACGCTCGATTTTATC  
TCCAGTTCGCCCTCGAATTTCCGGCATTCGCGGATAAGCGGCATCGATAGCGACGGCTCGTTGCTGGAGTTCCGATTACCA  
CGAAGTTCGCACCAACCGGCCATCATTTGAGAAGCTCGCCACGTTATGCTGGTTGTCGACCCTCAAATTTGGCCGTA  
ACGCAATGGTCAATATGGGTAGCATCAGCATGGTGCATGCTGTCTACACCGACACGATGCCGCCCTGCGAGCGTGATGCAG  
GTGCTGAAGGACCATCATATTTCAACTGGAGCTGTGCTGA

>Cluster\_31635

ATGTCCGTGTACTATAAAGAAGATCCTGTTTTTTTTTATGATGCTGTTAATAGTGTGTTGAGAATACGATCCCTCCAGA  
TGATGTGGTCAATTTGCTGTTGATGGACCTATCCCGAAGGTATTACGGATGTAATATTGGCGCTAAGAGAAAAATGAAC  
TTAACATTTGTTAATTAAGTAAAACGTTGGTTTAGGGAGAGCTCTAAATATAGGTATTAATTTATGCAAAATATAATATT  
ATAATGAGAATGGATACTGATGATTATTGTATTAATACAAGGTTTCAGGAACAATTAGATTTTTTTTCCACTCATCTCGA  
TGTGGTCCCTTCTTGGTGGGGATATGCGAATTCGATACTGAACTGCTAATTTTATTGGTGTAGACACGTGGCGTATA  
CTTGTCAAAGTATAAGGGATATGGCAAAAAAGAGAAATCCATTTAATCATATGACAGTAGCCTTCAAAAAAGATAATA  
TTATCAGTTGGTGGATATAAGCATCATCCATTTATGGAGATTACAATCTTTGGTTAAGAGTTATTGCTAAGGGACATAA  
AGTAGCTAATCTTCTAAAGTTATGGTTAATGTGAGAGCTGGTAAAGTATGCTTTCTCGACGAAAAGGAATTCGCTATA  
TATATAGTGAATGATATATATAAACTCAAGTTGAGCTTGGGTATTGATAGTTAGTTCATGTTTTTTTATATTTTTG  
ATGCGTGCATTTATTCGTGTTATTTCCAAATGGTATGATAAGTATCTTATTTCAAGTATAAGAAAAACATGAATACATA  
A

>Cluster\_24966

ATGGCTATCCCTGCATTTGGTTTTAGGTACTTTCCGCTCTGAAAGACGACGTTGTTATTTTTCATCTGTGAAAACGGCGCTTGA  
ACTTGATTAATCGCGCAATTTGATACCGCAAAATCTATGATAACGAAGCCGAGTAGGTACGGCATTGCGAGAAATGGCG  
TGCCGCGTCATGAATCTACATCCACATAAAATCTGGATTGAAAATCTCAACAAAGCTAAAATTGATCCCGAGTCTGAAA  
GAGAGCCTGCAAAAATTGCGTACCGATTATGTTGATCTGACGCTAATCCACTGGCCGTACCAAAACGATGAAGTCTCTGT  
TGAAGAGTTTATGACGGCGCTGCTGGAAGCCAAAAAGAGGTTGACGCGTGAGATCGGATTTTCCAACTTCCAGATCC  
CATTGATGGA AAAAGCGATTGCTGCTGTTGGCGCTGAAAACATCGTACTAACCAGATTGAACCTCTCTCTTATCTGCAA  
AACCGTAAAGTGGTGCCTTGGGCTAAACAGCACGGTATCCATATTACTTCCCTATATGACTCTGGCGTATGGCAATGCACT  
GAAAGATAAGGTTATTGCTCGTATGCGACTAAACACAATGCGACTCCGGCTCAAGTGATTTCTGGCGTGGGCTATGGGG  
AAGGTTACTCAGTAAATTCCTTCTTACTAAACGTGAAAACCTGGAGAGTAATCTTAAGGCACAAAATTTACAGCTTGAT  
GCCAAGATAAAAAGCGATCGCCGACCTGGATTGCAACGACCCGCTGGTTAGCCCGAAGGCTGGCTCCTGAATGGGA  
TTAA

>Cluster\_62525

ATGTCTAAAAGAACCCGCTCTCTCAAAGATTTTTGCAAAAGATGGTAAATCAGTGACATTAGCGCTGGATGGTTACTATTT  
TCCACGAAAACAATGGTATTGATAATACGATTAACCAACTGCCTGCATTGGTGGAAACAAGGCTGGATTGTGCGTTGG  
TCACGTACGGTATGCTGAAAATTTTCGTGAGCCATTAATATCTGTCCTGTTGTATTACGCGTCGATAGTACAGTCAGT  
ATTTTTGATAATACCGTTCCCGATACTACCCCGATGTTTACCGTTGAAGATGCGTTGAAAATCGGTGCAAGGTGTCCT  
CTGCATGACCTTCCCGGTGCTTTCAACGAAGAAAAACGCACATCATGGCAATGCAACTGGCACAGGCTGCAGACCCGCT  
GGAAGTGGCCGCTAATTCGAATCACCTTCCCTATGGCTTACCCCGTACTAGCCGACGACTCGAACAACCCGGAATTTATC  
GCCGCTCGGCTCGCCGCGAGTGAAC TGGGGCCGATGTCA TCAAAAACAGCTTTTACAGGTACAGCGGAAGACCGCTT  
GATCGTCAAGCGCAGGCGTTCCCGTCTTGCCTTGGTGGCCAAAAACCGGCATTGATGGTTACTTTCAGGTTTGGTTC  
AGCACTGTATGCAAGTTGGGCTAAAGGGTGGCAGTGGTTCGAAATATCACTCAGGACCCGCGACGACAGAGTGGTTC  
GCAGGCCGTAATGCTATCGTCCACGAAAATGCTCTGCGGAAAGACATACAGCCTCTATATGGCTAAATAA

>Cluster\_39376

ATGCCTGAAAGCCCGGAGATCCGCGTGACGGGATAACCTGGAGGCGGCGATCAAAGGCAAAACCACTAACTGATGTCTG  
GTTTGCCTTCCCGAGTTAAAATCTTATCAATACGACTTATCGGTCAACAGCTTACCATGTGGAAACCGCTGGTAAGG  
CGTTGTTAACTCATTTTTTCCAACGACTTAAACGCTCTACAGCCATAATCAGCTTTACGGCGCTTGGCGCGTGGTTGATAGC  
GGCGAAGACCGCAGACCACGCGAGTACTGCGGGTAAAACGCAACCGCTGCAAAAACCACTTCTGCTTTATAGCGCCTC  
GGATATTGAGATGTTGACCCCGGAACAATTGACCACGCATCCGTTTTTACAACCGCTTGGTCCCGATGTGCTGGATCCGA  
ATCTGACGCGCGGAGGTGGTAAAGAACGATTAATGTCGCGCGCTTTCGTAACCGTCAGTTTGGTGGATTACTGCTGAT  
CAGGCGTTTCTGCGCAGGACTTGGCAATTAATTTGCGGGTGGAGATCCTCTGGCAGGTTGGGTTGACCGGAAATCATAAAGC  
GAAAGATCTCAATCGCGGCAAC TGGATGCACTCGCACAGCGTTACTGGATATTCGCGACTTCTTACGCTACGCGGG  
GGCAGGTGGATGAAAACAATATCATGGGGCGATGTTTCGCTTAAAGTTTTTTCACTGATGGCGAACCTTGGCAACGC  
TGTGGCGGCATCATTTGAGAAAACACGCTGTCTATCGCGCCGCTTTTACTGGTGGCCAGGCTGCCAGCACTAG

>Cluster\_27028

ATGAATGATTCAC TCAAGGCGCAATGCGTTGCCGAGTTTTTGGGCACCGGACTGTTCCCTTTTTTGGTATTGGTTGTTT  
GTGCGCCTGAAAGTGTCCCGGGCAAGCTGGGACTGTGGGAAATTTGATATTCATTTGGGGTTAGGATTTCCGCTTGCTG  
TTTACCTTACGGCAGGTATTTCCGGCGCTCATCTCAATCCGCGAGTTACCATTGCTCTGTGGCTGTTTTGCTCTTTCCCA  
GCCCGTAAAGTGTGCCATTTTGTGTGGCGCAATTAGCGGGTGCCTTTGGTGGTGGGTTCTGGCATAATCTCTCTACAG  
CAGTTTGTATTACGATTTTGAATCTGCTCAAAATATAGTGCCTGGTAGCGCAGAAAGTTTACAACCTCGTATGATCTTCA  
GTACTTATCCAGCAGCGGATTAATGATGGAAGCAGCTTGGTTCGAAAGTGGTTCATACGTCATGTTAATGGGTTG  
ATTTATGGCGTTGACCGGATGACGGTAATGCGGTAACCCAAAGGACCGCTTGGCGCTTACTCATTGGTATTTCTGGTTGCTGT  
TATTGGTGTCTTACCGGACATTAACCGGTTTTGCGATGAATCCAGCGGCTGATTTTGGACCTAAAATTTTACCTGGT  
TTGCGGGTTGGGGGAAATTTGCGATGACTGGTGGACGCAATATTCCTTATTTCAATGTTACCAATATTGACCCGATCAT  
GGGCGATGTTGGTGGCGGATTTATCGCTATCTCATTTGCAAGAATTTACCCTGTCATAGTGTACGCCTAAAGAAAT  
CAGCGAATAA

>Cluster\_44781

ATGCGACTAGCCAGTCTGTTTTGGTTATACGAACCAGATACCGCGTGACCGTCCGCTGACACACGAAGAAGCTGATGCACTA  
TGTPTCCCGTATTTTCCGTTGAAGACCGGCATATCTCCGCGAGTAAACGATATGCGTACATTTCCACCATCACCCTACTGG  
AAAGCCTGCAGCGGGAAGGCTTTACGCCATTTCTCGCTGCCAGACCCGTGTGCGCGACCCGGGCGCGGGGATACACA  
AAACATATGCTGCGTCTGCGCGGGCGGAGAGATAAACCGGAGAACATGTCCTGAAATCATTCTGCTCAACTCCCATGA  
CGGTACCTCCAGCTACCAGATGCTGCCGGTTACTTCAAGTTCGTTCTGTCAGAACGATGCGTCTGTGGTCACTCTCTGG  
GGAAAGTGGCTGTTTCCGATCGGGGAAATGTTGGTGGACAGAGTATTGAAGGGGCTTACGAGGTTGGTGGGCTTTTTCAG  
CGGATTGAGGAAAAGCGTATGCCATGCGAGTGGTCTGCTGTCAGAACGATGCGTCTGTGGTCACTCTCTGGTCACTCTGG  
GACTTACCGTTATGGTGAAGCAATCAGCCCGTACCACCGCCGACATTTCTGACGCCACGACCGGGGAGGATTCAGGTA  
AGGACCTGTGGAGCGCATATCAGACCATCCAGGAGAATATGCTGAAAGCGGGATTTCCGGTCCGAGTCCAGAGGAAAA  
CGTATCCATACCCGGGCAATTCACAGCATTTGATACCCGACATTAAGCTCAATCGCGCATTTGTTGGTGTGGCAGAAACGAT  
GCTGGAGAGCCTGCGCTGA

>Cluster\_64455

ATGGATATTAATGAATTTCCACCGGAGTAATCAACACTCTTGGCTGGTATGCTACCGCTGATTGACCGGAGAGATGG  
CAGTACGTTTACTAGTAAAGGAAAGGTAATCGTGTCTTTGCCCATATGCGTGGTGGAGTTGCTGCAAGTGGATGATG  
ATGATGAGTTACTGAGTAACAACCTCAACAACCTCGGGAGATCAGATTAGCTGGTCTTGGGTTATCCATGTTATACAT

CGGCACGGTATGGCTGAAGAAAAACGGCTTACGAAGTTGAAGCAGCTCTCATAGACGCTATCCCGGCTTGACTAACAT  
CATGAACGGTGCCTGGCAGTAACGAGTTCGGTGCACACATCAAGAATAAATCGCTACGTACCAACCTGAAACAATTA  
CGTTCCAACATAAGACCTAATGATATCGGTTAACAGAAGCTCAAAGGATATTGACCTTATGATGCTGTACGTTTACG  
TGCGGTGTGAGCCTGGAACGGCTCGTAAGGCTGAGGTACATCGGCGCAGTAAGAGGAATTTGAGGGGGTGTATATAT  
CGCAGATGAGTGGCTCAAGTCTACCCGTGAGAATTTCCAGAGATACCTCATGGGATGCGGATGATGAATTTGAAGCTA  
CGCAAAGTTCCCGCTTTGGGTTCCGGGGTAGGGCTGCACCTCTGAGATTACACAGCTTTATTTAGGTAAAGAAGATCCCT  
GATGATCTCAGAAAAAAGGTGCTATGTCTCCTGTGAGATATTCTCCGGATTGATTTCGGAATGGAACGGGATTTTAG  
ATCGTAG

>Cluster\_45452

ATGAAAGTTCAATTGTACAAATTCACGGGAAGATAAAAAATAAACCTTACCTTCAGATGGACGAAAAACACTTTGAGTT  
TTGTATGGATAATAAAATCTTTTAAATCATAAGGGGAAGAAGTCGTATAAAGAAAGGAATTTATTTCTTTTCAAAAAG  
GTGACAAGATAACAATTGAAGATAATGTTATTGCTGAAGAATATTCAACAATGCCTGTGAAAAATTTCCAGTGTCCGGC  
GCTTTTTCATTTCCGACCTGCCATTTTTCAGGGAATATACGTATAGGTCGATTTTGTAGTATTTGCATCAAAATGTA  
AATGGGTGGAATCATCTTTGAATCGTTTACTACTCACATGATGACTTATAACGGTGAATTTGATAAGTTTGTATGA  
GTGAATTTGAACGTAGCTGGACATTGAAACCATTCATTACCAACCTGAAAAATCCGATATAGGAAATGATGTCTGGATA  
GGAATGATGTTGATTGAAAGGTGGCATCGCAATAGGTGATGGTGTGTTATTGTGCTCAATTCCTGTTTACCAAGA  
TGTGCCCCATATGCTAGTTGCGAGGTTCCCTGCAAAAATAATCAGATTTAGGTTTATTCAAAATGTTATTGTAAGC  
TGTGAGAATAAAATGGTGAATATAACTACTCAGATCTCCGGATAATAACAAGTGTGATGATAAAATTTATTTGTT  
GAAGAGATGAATCGATTGATATCAGATGGAATATTCAAGAGAGGGACTATAAAAAATCAATCTTTCTGAGGTATTTCAG  
AGGCTATAA

>Cluster\_10135

GTGATTGATAAATCCGCCTTTGTGCATCCAACCGCATTGTGGAAGAGGGCGCTCAATTGGCGGAAACGCACACATTGG  
TCCTTTTTGTATCGTTGGACCCATGTCGAAATTTGGTGAAGGTACCGTACTGAAATCTCACGTTGTGCTGAAATGGTTCATA  
CTAAAATTTGGCCCGGATAATGAGATTTATCAGTTCCGCTTCATCGGCGAAGTTAACAGGATCAAGAAATGCTGGCGAA  
CCGACCCGTGTGGAATCCGCGATCGTAACCGCATTCCGCGAAAGCGTACCATTATCATCGTGGCACAGTCCAGGGCGGTGG  
ATTGACGAAGGTGGCGAGCACAACCTTACTGATGATCAACCGGCACATTCGCGCACGATTTGTACGGTAGGTAACCGCTGTA  
TTCTCGCAACAACGCAACGCTGGCGGGTACGTTATCGGTTGACGACTTCGCGATCATCGGCGCATGACCGCAGTCCAT  
CAGTTCTGGCATCATTTGGTGGCAGCTGATGGTTGGCGGCTGCTCCGGTGTGGCGCAGGACGCTCCCTCTTATGCTTACG  
GCAGGGTAACACGCAACCGCTTCGGTGTCAATATCGAAGGGCTGAAGCGCCGGGATTGAGCCGTGAGGCGATTACCG  
CTATCCGCAATGCGTATAAGCTGATTTATCGTAGCGGTAAAACGCTCGATGAAGTGAACCGGAAATGCTGAACTGGCG  
GAAACATATCCGGAAGTGAAGCCTTTACCGATTCTTTGACGCTCAACCGCGGCTGATTCTGTTAA

>Cluster\_6898

ATGAACCCGTCGCAACATGCTGAACAGTTTCAGAGCCAGTTAGCGAATATGTGCCACAGTTCCTCCGAATTTTGGCC  
GGTGTGGTGTGATCATTTGCCGAGTATTGCTGGTGGGATGTGGTGGTGTGCTGGGGCTGCATGCCTTGCCTCGTCTCGTG  
CGTGAAGAAATCAGCCACCGATCATGGTGAGAAGATTTATCTTTACAGCAAAGCGGTGAGATTATGGCAGTGGTTCGAAT  
CCGTTACTCTTTGTTATTGTTGCTGGCAGTGGGCTGATAAATCACTTTGCGATGGTGGCGCAACTGCGGTTAAAAGTCT  
GGTTGCGGTGCATGAAGTTTGGGATTTTGTACTGGCATGCTGGCTCGGCTTTGTGCTGATCAATGCCGTTGGGGATA  
ATGGTACCACATATCGCATTTGCTGTCAGGGGTGGTGAACGAGCGGCAAAACCAACCGGATTTTATTTGTTTGGCAT  
ATGACGGGGGAAGAACATCTTTCCCGCAACAACCCAGTCAAAATTTAATCCCTTACAGCAGGTCGCTATGTTGGTGT  
CATGATGGATTGCTGCGCTTGTACTATTGACGGGGCTGCTGTGCTCTATCCGCAAGCCGTGGGAGATGTTTTCCTG  
GCGTAAGATACTGTTTATGTCAGACACATTTGCTCTGGCATTATAAGCCTCTTTTTTATCTTCGGTCACTTTATCTT  
TGCACCACGGGGCTACGCCACACGAAACCTTTAAAAGCATGGTGCATGGCTATCACCGGCACATAA

>Cluster\_37376

ATGAAAACCTGGCGACAATCGGCGATAACTGCGTCGATATCTACCCGCAACTGAATAAAGCGTTTCTGCGGGTAAATGC  
GGTCAATGTGGCGGTGTACTGCACCTCGCTACGGCATAACAGCCGGATGCATTACTGGGTGGGTGACGATGACTACGGCA  
CAAAGCTGAAGCAGGATCTCGCCCGATGGCGTCGATATCAGCCATGTCATACGAAACACGGCGTTACCGCACAAACT  
CAGGTGGAACCTGCACGACAAATGATCGCGTTTTGGCGACTACACCAGGCGTATGGCCGACTTTGCCCTGAGTGAAGA  
GGATTACGCCCTGGCTGGCGCAGTATGACATTTGTCACGCGGCAATCTGGGGACATGCGGAAGACGATTTCCACAGCTGC  
ACGCTGCGGGCAAACTTACCGCTTTCGACTTCTCCGACAAAGTGGGACACCCCGCTCTGGCAGACACTGGTGCCGATCTC  
GATTTGCTTTGCTCCGCAACGCAAGAAGACGAAACGCTGCGTCTGAAGATGAAAGCGATTGTTGCCCCGTGGCGCAGG  
AACGATGATTGTCAGCTGGGTGAAAACCGCAGCATTTGCTGGATGGCGCGCAGTTCTGGCGTCAAGGCTCTGAGGAT  
TGACGGTTATCGACACCATGGGTGCCGAGATTCTGTTCAATGGCCGATTCTTTGCGGCTGGTCTGGGGGATGACATTA  
CCGACGGCGATAGCGCAGGGAACGGCTGCGCGCGAAAACCATTCAGTACCAGGCTGCTGGTAG

>Cluster\_60678

ATGCTGGAATACTCTATCAGGATGAATGGCTGGTGGGTAATAAACCTCCGGCTGGCTGGTTACCCGACGCTGGCT  
GGATCGCGACGAGAAAGTAGTGGTATGCAAAACCGTGCCTGACAGATAGGCCAGCATTTTTACTGCTCATGCTCTGG  
ACCGACCCACTTCTGGTGTGTTGTTGATGGGATTTATCCAGCGAGGCGGACGGCTGCTGGCACAAAGTTTGAACAGCAC  
CAAACTCAGAAACGTTACCATGCGATTGTCGCGGCTGGTTGATGGAAGAAGCGGTGCTGGATTATCCACTGGTGAAGA  
ACTGGACAAAATCGCTGATAAAATTTGCCCGCAAGATAAAGGCCCGCAGCCAGCAGTACGCAATTTATCGCGGTCTGGCA  
CCGTAGAAAATGCGGTTAGCGACCGGACGTTACCGACACGCGCTACGGCCTGGTGAAGTGGAGCCGAAAACCGGACGC  
AAACATCAGCTTCCGCGACATCTTGCCATTTGCGTCACTCCGATTTATTTGGCGATAGCAAAACATGGCGATTTACGCCAGAA  
TCCGACGGTGTGTCAGCATTTTGGCCTCCAGCGGTTAATGCTACATGCTCAGTCAAGTTGCTATTGACGCATCTTTTACTG  
GCGAGCCGCTGACTATTACGCGGGCTGGACGACACCTGGATGACAGGCTTATCACAATTTGGCTGGCGGGTCTGCTT  
CCTGAAAATGAAAGGGTTGAGTTTCAAGTGCCTATCGGGTCAAGGATGGAGAGATAAGTTCTTAA

>Cluster\_36499

ATGAAGAAGTCTGATTTCTCGCTCTGTCTTTGTTAGTTCGGTCTCTCCACAGCGGCTTCCAGCTATGCGGCGCTACCGGAGAC  
GGTACGATCGGAACCGATACCACCTACGCACCGTTCATCGAAAGATGCTAAAGGTGATTTTGTGGCTTTGATATCG  
ATCTCGGTAAACGAGATGTCAAACCGATGCAGGTGAAATGTACTCTGGTGGCAGTACTTTGACGCGCTGATCCCTCA  
CTGAAAGCGAAAAAATCGACGCTATTTATTTGCTGCTTTCCATTACCGATAAACCTCAGCAGGAGATTGCTTCTCCGA  
CAAGCTGTACGCCCGCAGATTCTCGTTGATTGCGCCCAAAGGTTACCCGATTCAGCCAAACGCTGACTGAAAGGTA  
AACATGTTGGTGTGCTGCAGGATCAACCCAGGAAGCTTACGCTAACGAGACCTGGCGTAGTAAAGCGGTGGATGTTGGT  
GCCTATGCCAACCCAGGATTTGGTCTATTCCGATCTGGCTGCAGGACGCTGGATGCTGCTTACAAGTGAAGTTGCTGC  
CAGCAAGGATTTCTTAAGCAACCTGCTGGTAAAGATTTGCTGCTTGTGCTCATCAGTAAAGCAAAAAATACTTCCG  
GTGATGGCACCGGTTGAGGGCTACGTAAGATGATGCTGAACTGACGGCTGCTTCAATAAGGGCTTTGGCGAGCTGCTGC  
CAGGACGGCACCTACGACAAGATGGCGAAAAGTATTTGACTTTAATGCTACGGTACTGTA

>Cluster\_4792

ATGGCGGAGGAAAGCTGCTATTACCTTCTTCAGAGAGCCCGCAGTACTTCTGTGACTCTCGATGACGCTGCCGAAC  
AGCCAGAATCGTCTCGCAGAGGACCCGAAACCTCAGTATCAGCTGTTGTCAACGACGGATGACTATTGCACCGTTCGTG  
ACAGTGTGCTGCAAGCGGATGCTACGCGGGTTCAACGAGCTGATTCGAATGGTGGATAACGGAAGCTGCCGTGCTGG

GCTCATGCCCGCGAAAGATCCACGATGTGCACGTCCGCATCCCGTCAGCACTGACGGAAGAAGCCCTGGAGCAGATCGG  
TCAGTTGTACGCCATAGAGGCGTATATAAGGGGAATGCCGGCAGAGCAGCGGCTTGTGAACGTCAGCGAAAAACGAAAC  
CGCTGTTGAAATCCCTGGAAAGCTGGTTGCGGTGAAAGATGAAGACCCGTGCGGATACTCAGAGTTGGCGAAGGCGTTC  
GCGTACGCACTTAAACAGTGGCCGGCACTGACGCTACTATGCGAAGCATGGCTGGGTGGAAATCGACAACAACATCGCTGA  
AAATGCGCTTGGGCGGTGAGTCTGGGCGTAAACCTTCTGCGGTAACCTGTTTTCGGCTGACCATGGTGGAGCGGGGCGC  
TACTGTACAGCCTGATCGGGATGTGCAAACTGAATGACGTGGATCCAGAAAGCTACCTTCGCCATGTGCTTGGCGTCATA  
GCAGACTGGCCGGTCAACCGGGTACGCAACTGCTTCCGTGGCGCATAGCACTGCCAGCTGAATAA

>Cluster\_19459

ATGCAAACGATTAFCCTGTGAGAAAGCTGCCAAAACCTTCAATCAGCATCAGGCGTGCACGCGTGTATCTGAACAT  
TCATCATGGTGAATGGTGGCTCTGCTTGGCCGTCGGGTTCCGGAAAATCCACCCTTTTACGTCACTTAAAGCGGTTTGA  
TTACCGGGCATAAATCTGTGCGGTAGCCATATCGAGCTGCTGGGCGCACTGTCCAGCGCGAAGCCGCTGGCCCGCAT  
ATCCGCAAAGCGCGCCATACCGGCTACATCTTTCAACAATCAACCTGGTGAATCGCCTGAGCGTACTGGAGAACGT  
GCTGATTTGGCGCGTCCGGCAGCAGCCATCTTGGCGAACCTGTTTAGTACTTTCACCCGCGAGCAGAAACAGCGCGCCT  
TACAGGCGTGCACCGGCTTGGCATGGTGCACCTTGGCCATCAACGCGTTTCCACACTCTCCGGCGGCCAGCAACAGCGT  
GTGGCGATGCCCCGCGCTGATGCAGCAGGCGAAGGTCAATTCGCTGACGAACCCATCGCCTCGCTGGACCCGGAATC  
GGCAGCATCGTATGACACCCCTGGCGACATCAACGAGAACGAGCGCATACCCTGGTCTGTCACGCTGCATCAGGTGG  
ATTACCCCTGCGCTACTGCAACCGCATCGTCCGCTGGCCAGGGGCACTGCTTCTACGACGCGTGCAGCCAACAGTGT  
GATAACGAACGTTTTGACCATCTTACCAGCAGCATTAACCGCTCGAAGAGAACGCGAAAGCTGCCTGA

>Cluster\_17768

GTGAATAACGATTTTACCAGCATCCAGAACCAGAGCCTGAGGCTATGGCCAAATTAACCGGATCAGACCGTCACTATGC  
AGGTAGCGCAACCTTGTGAACATTAACGCGAGAGCAGCTTGTGGATGCCTGTTTAAACAGCTTAAAGCAGCTATTC  
CAGCAGAACAGCAACCTGAAGACTCCGGCACAGGAGACAGCGGCAAACAGCAGTGGATCGCTGCATTCGCTGAAGGT  
GGTGTTCGTACCCGTTGAGCAGGTATCGGCAGGAAATCGCCATGCCCGGCCAGTGAATCACCGTTCTGGCCTTCGCCTGG  
GCAATTCATCAAGTGGTGAAGACAGCAAGATGGTGGTGGAAATCGCATCGAAGACGCTGATGGGTGAGTTTCCAGGTT  
ACGCCAAAGAGAAAAGCCTCCAGCCTGGTGGACCCGAGAGATTCCCGTGGCGCCACCCGGTCACTGATGATGATGATG  
GATACCCGAGGGCGATGATCAGCGACAACCTGAGTGGGCTGAAGTGCAGAAAGCATGCGCGAAAGCTGCTGGATGAATG  
GTCGGCAAAGTGGCATCCGGTACCAGATTCCAGATCCAACTACTCAGCATACAGGCCAAGCCAGAACAATGAGCACAC  
CACCAACAGGCTCAGGTACCGCTATCATCCACAGGCGAAGTTCGATGCATGCCAAGCAGCCACCCCTGGGAGGG  
ATAACACCGGCACAGTGGCTTATGGAGGAATACAGACGAGGGAAGGCAGCGGGACTCATCAAGTAA

>Cluster\_29874

ATGAATATAAAAACATATAGACAAATTCATGGTGGTATGAGGTCGTTTGTACCACAAGTTTATTCCTGTTGGGGCGAA  
TAAATTTGCAAAATCCGATGCAAGGAAGTCTGTCTCAGTAAGACATCATCAGATAGTCCGCGCTGGAAGTGTGATG  
TAGGATGGCTGGCTGCTGGTACATGTATTTTTCATTTGCTGTGATATAAAAATAAATACATAAATGTCTGGTGCACCGTCA  
ATAAGCATCGAGTCGCTAATGGCGCAAGGCTAAGTGGTGAAGGAAAATAGTAAACATAGGCACGACTAAGCTTAAAGA  
ATGGGAGACAGTGGCTGTGATGGATGTTGCTGAGTTGATAAATCACTGATGATGATGATGATGATGATGATGATGATG  
TATTTGGGACAGTTTGGTTCAGAAATCCAGAATTTCTATCAGAAATGATCAGGCTAGATTGCTTAAATAATTTCTCTCTA  
CTCAGATCAGGTAATGTTTGGCGTGTGATACTGGCACATTTATTTACAATGGAGCTGTATTAGTATCAGCAAACGGTGA  
CTCAATAGAGGTTAGTTGGCCATATGTGAACAATATTAGATCACCATAGTTTACACAACATATAGATACTGGTTTATGTC  
TGTATCTGCTGGATGATATCATGCGGTCACATTCAGTAAGTAATTCAGATGCAAAATTCGATTAATTAACCTGAT  
GGCTCATTTGTAAACAGATGTTACAAATGGAACGACACTGAGAATTCATGTAAGCGTTAATATATTA

>Cluster\_48587

ATGACAGCTATTAAGAACTCTACGATGCCGCAAACCGCGCTCTGGATGTTATGATGATGAAGTATCAAAGGCTTTCC  
TGAACCTGATTTGGCGCATFCAGCTACGAAACGCTATCGCGGAAATGAATCCACAGATCCGACCACCGACAGACAGACT  
GGCAGCGATTTATCCGATGTACGCTCAGGAAATAGGTTCCAAACGCCAACGGCAGAGCAAGCAATGCTGCTGAAATACCTC  
AAAGAGGGGGAGAGGATTTACCATTTGATGACTCAGCATATTTGGTTCACACTGCGCATGGCGTAAAGTATGACGTGATAT  
CACACAAGGCATGGGGAGCAAAGATATGGTGTGTGGCATCTACTCCATATAGACACAGCCGTTGACAGAGTTATGAAAC  
AGTTTTTCCCTAAACAAGATGATTGA

>Cluster\_110

ATGAATACGCGACGGTAAATGACCTGTGCGCCGCTATACACGTACGCGGCTGGATATTTCTACCCCGCCTAAAACAGC  
GGACGGGACGCGGATGATGCGGTGGCAGAACAGGCACTGGCAGATGCTTCGGCCTTTTATGATGGCTATCTCGCCCGCG  
GCTTTTCTGCGCTTACCGCTCCCTCACCTGCTGAGTAAACGGCAGTGTTCGCTGGTGGCTGGCTGGCTGGCTGGCTGG  
TCACAACCACCGAGCAGCTCATCGCACTTACAGGGACAGGTCGCTGGTGGAACAGGTGCGGATGGCAAACAGAG  
TCCCGCGTGGAAAGCAGGACGGCAGCCTCGCCGGATGGTGAACCTTGTGCAGGTGCAGTCTGACGCGCCGCTTCTCT  
CACGAAAACAGAGGGGTTATCTGA

>Cluster\_16210

ATGGACCGTGCAGGGCGGTGAACATGGCCTCCGACCTGGCTGAGTTTGTGGCGTGAATTTCTGAAAGCGGAGCCAA  
TCCATTCGCTGTGACGGTGGATGCGGTGATGGAGGAGTACCGTCTGCGCGCAACGAGTCCCTGGCGATACGACGGGAGCG  
ATAAATACCGTGGTCTGACCTGTGCTGATACATTTGCTCGAGATGCGTTCAAAGGGGATGAGCGGAGATGACG  
GAAGGGGAGTTAAACCGCTTGCAGAACGGCAGTGCAGAAATGGGCAAAGCATGTTAGTAAACGGCTGAGTGTTCGGCC  
AGTCCGGGACAACTGGCGGCACCAACGCCCCGCGGGCCAAACGCAATGAGTTGCTGAAACAGGAATATGAACGCC  
GAAAGCGGCTGGGCTTGTCTGA

>Cluster\_60178

ATGACACCTTAGAACGCATTACCCAACCTGTTAATATCAATGGTGTGTTAATAATCCTGATACTCCTCGTCCATTGTT  
ATCTCTTGAGGATTTTTTATTGACAATAATATCCATGGTTCATATGTTGCAATGTGATCCAGAACAATCTCCGCAAG  
CTATCTATCACCATTTCTGAAAATACGTGAGCGTAACAATGTTAGTGTGTTTGGTAGAAATACGATGTTGTCGATGAC  
CCAGACTGCCCTTTAGTGAAGTATTTTATGTTATCAGCACTGCTTACCAGAAAGATTCAGAGCTGTTGTTAGAAAG  
AATTGCCCTGATGAGTGTGGGAAGGATGGTCAAGATACGGAGCATGGATGGGTTGAAGTCCCTGTTGGTATGCATC  
CGTTACTTGTGGTGGGATTA

>Cluster\_20290

GTGAGTATCCGGTTACAACAGGTGAAGGCGTTGTTGCAGGAAATTCGTGACGACGACGCACTGTACGATTTCCCTGCGTGA  
ACTTCTCCAGGCTCAGCGGATCTGCATGATTCGCCCGCCAGCGAGGATCTGCTGGCGGTAACGACGAGATAACGCAGC  
ACTATGAGCAGTTGCATGGGCATAGCTATCAGCGGCATAGCCTGCTGAAAATGCTCGGTGTTAGCGTAAATCGTGACGGT  
CTGGCGCAGGTGTTTGCCTGGCTTCCGGCGGTACAAAAAGCGGCAGCACAACTGTTGGCAACGCTTTGAGCAAAAAGC  
AGAACGCTGCAAAAGCCTATAACGATAAAAACGGCGAGCTGTTAATTCGCGCAGTATGAATTTATTCAGGCTTTTTTAGGCA  
GCGAAGCGGATTTTCTCTATCAGGGATAA

>Cluster\_66895

ATGAACCGGCTAAAATTTTGGCTCGCCCGCCGACAGCTGTCCCGTGGGCGGTAAACGGGCCCCATCGGAAAGGTC  
CACTGCGGGGAGAAACCCCTGTGAAGTGGACGGCAGGAGGAGCTTTCGCTCCTGTAAGGGGCACATGAACGTCCTCGT  
CCGGTAGCTGGGAAGATAACGGTATCACCGGTTACGCTACTGAAATTTGTTAAGACCACGGGCACCGTGCAGATGCTG

GGACGTGCACCACAGCAGAACGCTCAGGCGCAACCGAAGCCTCAGCAGAATGGGCAGCCACAGAGTGTGACGCGACGAA  
AAAAGGTGGCGCGAAAACGAAAGCCGTGGACGTAAGGCCGCGCAGCCAGAGCCTCAGCCTCAACAACAGCCAGAACCTC  
CTTATGACTTCGACGATGATGCGCCATTCTGA  
>Cluster\_24219  
ATGAAACCGAACACGAAAATTCGCCCTGGTAATGATGGCGCTTTCAGCAATGGCGATGGGATCGACATCGGCATTTGCTCA  
CGGCGGACACGGTATGTGGCAGCAAAAATGCCGCGCCTTTGACCAGCGAACAACAGACAGCGTGGCAGAAAATCCATAATG  
ACTTTTACGCTCAAAGCAGCGCACTGCAACAGCAACTGGTGACAAAGCGTTATGAATACAATGCCCTGTTAGCCGCGAAC  
CCACCGGATAGCAACAAAATTAACGCGGTCGCCAAAGAGATGGAGAATTTGCGTCAGTCGTTAGATGAGTTACGGGTGAA  
ACGAGATATTGGCATGGCTGAAGCGGTTATCCGCGCGGTACCGGAATGGGCATGGGTTACGGCGGCTGCGGTGGTGGC  
GTCATATGGGTATGGCCACTGGTAA  
>Cluster\_41811  
ATGGCAGTTTCAGCAAGAAATCAATTAACCGGAACAGTTAGCGCAGTAGCAATGGGCGCGGTGAATGACGAAGTAGAACT  
GACGCTGGCAGGTGGTGCAAAAGCTGGTGGCAATGTGACTCACAGCAGCCAGCAAGCGCTGGGTCTGGCAAAAAGGAAAG  
AAGCGATTGCCCTGATTAAGGCCCGTGGGTAACACTGGCAACGGAAGACTGTGGACTGAAATCTCTGCTCGCAACCAG  
TTTGCTGGCAGCGTGTGCACAATCACCGAAGGCCAGTGAACGCCACTGTCCATATCAAAACGGATGCGGGTTTTGAAAT  
TGTGGCAGTGGTAACAAATGAAAGTCAGGATGAAATGAAACTACCACCTGGCTCGCGCTTATGTCATTGATCAAAGCAT  
CAGCCATCCTGATTGCCACCAAAGCGTAA  
>Cluster\_42771  
ATGGAATCTAAAAATAAAAATGGCGACTATGTAATTCCTGACTCAGTAAAGAATTACGATGGTGAACCTCTGTATATCTT  
GGTTCTCTTTGGTGTAAATTCAGGAGAAATGGATTTCTCGCAATGATATTGCCGAAGCATTCCGGTATAAACCTGAGGA  
GAGCATCATTTATATAACTTATATATCGAGAAGAAAAGAAAATTTTATTTCGTGTGATATGTTAGTTATGGTAAAT  
TTGCATTATAAGCGCCTTGAGATTTTCATTTATGATGTTAACCTGAGGCGGTTCCGATAGAAAAGTCCGATCAACCGG  
ACCAAAAAGAAAACCTACCGAGTTGGTAAATGGTATTGTGGGACAGTCAATACTGGAACGAAATGATCTTGAGGCGGA  
AAAAGGAGAGTTAG  
>Cluster\_4788  
ATGAAACACACATCCCCGACGACATCGAGCAACTGAAGGCCCTGCTGATCGCACAGCAGGCTGTTATCGTCCGCTCTGTC  
TGGTGAATAAACCGGCTATGCCCGCAGATCAGCTCACTCAGAGCGCTGGTCCGTAACCTGCAGAGAAATGTTGTTCCGGT  
GCAGCAGCCGAGAAAAGCCGCGAGAAATAGAAAAGAAAGATCGCACGGGAGAAAACCGGTATAACCGAGTCCAGAACAGG  
CTTGGTGAGGCGCAGTTGCAACTCACCTCAATGGCCGGGAGACAGCGCGAAAACATCAGACTCTCCCGTCCGCAAGCA  
CTTCCGGCAACACTTCCCGTGCAGGCAAGTTATCTCCCGGAGAAAACCGAATGCCCGCTGACGCGGCAAACTGA  
>Cluster\_42727  
ATGGCAGGTAACAAGTGGCAGATCAGCGATGAACTCTGGGAAAAAATGGCTCCGTTGCTCCCGAACAACAAAACCTACCA  
TCCGCTGGGTACGCATCGCAGGCGGGTTAATAATCGTGCCGAATGAACGCCATTCTCTTTGTGCTCAGAACGGGTTGCC  
AGTGGAAATGCCCTGAATGCCACCGGGATATGCTCGTCAAGCTCTGCTCACCGCGCTTCCAGGAGTGGCGGGATGCAGGA  
GTTTTTGAACGGTTCTGGCAAAACGGGTTGCTGGCCTGTGAGCAGTTGGATGCCATCGACTGGTCATGGCTGTGATGGA  
TGGCTGTATGACGAAGTCCACCGCTGGCTGGCTCAAAAACAGGACGGAACCCACAGAACGAGGAAACAGGGCGTAAAA  
CGTAG  
>Cluster\_23192  
ATGAAAAAATTCGCAGCAGTAATCGCAGTAATGGCCCTGTGAGTGCACCGGTTATGGCAGCAGAGCAGGAGGTTTTTC  
TGGCCATCGGCAACGAAAAGTCAAGCCGAGGATTCCAGGGCCGAACGGCAGCGTAAACGACCGTAGAAAGCCGCAAAAT  
CCCTGCGTGACGACACCTGGGTAAACCTCGCGGCAATATCGTTGAACGCATCTCTGACGATCTCTACGTGTTCAAAGAT  
GCCAGCGTACTATCAATGTTGATATCGACCACAAACGCTGGAACGGCGTGACGGTGACGCGGAAAGATACGGTTGAGAT  
TCAGGGTGAAGTGCATAAAGACTGGAACCTGTTGAAATGACGTCAAACAGATCCGCAAGTAAATCCGTAA  
>Cluster\_25058  
ATGATTGCCATTTCAAACAAAGCTAAAGGGAGGTTGGTGTGAGGGGGCAGGCAGTTATAATTTTGTGGGTTAAT  
TGTGCAAAAGTTATACCCGACTTTATCGATGGTGTGTTTTGCCATTATTTGGCGCAGCCATCTTTACTTATATCATTAAC  
ATACCGCCTTGTGGTTCATAAAAATTTGATATAGTTTCAGAAAGTTTGTACGTCCTGTGTCGATGTTATTACTAGCATTAATA  
CCAATTTGGTGTGCTTATGTAATGATGTTTTTTTACCCTTCGGACACTGAAAGGTGGTTGATAGTTTTGTATTGTTATAT  
TGGTGTAGCTCTCTTTTGTGGATTTTCATTTGGTGTTCGAAAAGATCAATGACTCTATTCAAAGAATAAAGATTGA  
>Cluster\_60780  
GTGGTCTGTGGCAATCTGATTTGCGGCTCTCCGCGCGCACAGTGGCTTTCCTTGTGATTGATGAGGCTGGTTGCCG  
TGTTATTTTACTCATGCCCTGGCCACTCAGTTACACCCGTTATGGATGGTGTACTTTGCTGGTGGTGTGTTGATTGCG  
TTCGACGACGCGCGTATTAATGCTCGCCAGGGGAAATTCGCTTGTGATGGACGGCGTTCGCTGGCAAGGGCAG  
GAGTGGAGCATCGTCAAAGCACCCTGGATGATTAAGAGCGGCATGATGCTGCGTTTACGTTCTGATGGCGGTAACCGCA  
ACATTTATGGCTGCGAGCCGACAGCATGGACGAAGCTGAATGGCGGATTTACGGCGGATTTTGTGCAACAAGAGACGC  
AAAGATAA  
>Cluster\_26920  
ATGTACGCGCAAAAGGCCACCGCCTATGCACAATTTGGCTGCGAAAGCGCGTAAATGAGCGCCAGCAACAGCAGCT  
GGTCACCATGCTATTTGATGGAGTGTGAGCGCACTGGTTAGAGCGCGCTGTTTATGCAGGACAACAATCAGCAAGGCA  
AAGCGCTCTTTTATCAAAGCGATCAACATCATTTGAGAACGGGCTGCGGGTGAAGTCTTTGATGAAAGAGCAAAAGACGAA  
TTAACCAAAAACCTGATTGCTCTTTATAGCTATATGGTCAGGCGTTGCTGCAAGCCAATTTACGCAACGATGCTCCTCCG  
AGTCGAAGAAGTGAAGCATTAAATGCGCAATATGCGGATGCTGGAAGAGTCTTTACTCTCCCTTCTTTGATTACAG  
ACCCAGTCTGA  
>Cluster\_45243  
GTGGTTAAAATTTAGAATACATGAAGGGGATGCTTTGAGGTATTTTTGAAAGCGAAAACCTCCCTTTATATCTACAAAAGA  
CTTAGCTAATGCGGGTACGATATCTGCTCGAATGAAGGGATGTTTCAATATCTACTTCTTATGAGCAAGGTATATCA  
GTAATAAAGATCTAATAACGGATGACATAACTAACTGGGCTACATGCGCCATTGTGGCCATATGCTAGATATGGGTACC  
GACGTGCGACTATCTGCGCAGGGACAAGAAATTCGCCAGGCATTAATGAACCTACCGTTTTTGAAGAAATTAAGTCAAT  
GAGCATGCCCCCTTTGAGTACAATCAAAGATGTTGGGCTGGAGTTAACGAAGGCTATTTAAAGAAGAAATTTGGCCTCG  
AGTAA  
>Cluster\_24240  
ATGGTCAACGCCATTTTTTGTGCGCATGGCAAAATTAGCTTGGCCATGCTGGAATCGGTTGATGGTACGGCGATG  
CAGGGTCGAGGCGGTTGAAATTTGTGCCCGGCGAGAACCGCGGAGACATTTGGCAAAGCTGGAGAAGTTAGTGAGCATTC  
ACAAATCATGACGAGTGGCTAATCGCCGTGGATTTACAGTGGCGGACCGGTTGGAATGCGGACGCGATGCTTGGCATGCGC  
AATCCTCGTCTGCGGGTAAATCAGCGGCTTTCTCTGCGGCTGGCGCTCGAACTGGTTGATAACAGGACAGCATGAATGT  
TGATGAACTGTGTGAACACTGACGCAAAATCGCAAGCAAACTGCGTCTGTTGGAGCAGGTTGGCAACAGCAGAGGAGG  
ATTTCTGA  
>Cluster\_20987  
ATGAGCAGGGTAACCGGATTTATCTCCGCTCTGGTTATTTGCATCATCTCTGCTGTGATGGGCTGTTAATCATTACCG

TGATAACGCCATCGCCTACAAGAGCAGCGTGATAAAAAAGTCAGTGAGCTGAAGCAGCGACCGCCACCATTACTGACA  
TGCAGCAACGCCAGCGTGTCTGATGTACTCGATGCTAAATACACGAAAGAGTTGGCTGATGCGAAAGCTGAAAATGAT  
GCTCTTCGGCGCAAGCTTGATAATGGTGGTCTGGGTGCTCGTCAAAGGAAAATGCTCTGTGCCATCCTCAGCCGAAACCTC  
CAGCGCCTCCGGCATGGGAATGATGCCACCGTCAACCTCTCCAGTTGCTGGACGAAACGTTCTCGGTATCCGGGACG  
GAATTATCCGTGACCAACAGCACTGAGAACGCTTCAGGAGTACATCAGGACGCAATGCCTGAAATAA

>Cluster\_48834

ATGAGTTCCGGTTGTATCAAGTGGTGAGACTGGCCAGTCTCAAGAGAGCAAAGACAATTTTAACTTCGTGCAACTCTCTAG  
GAGTTACTTAAAACAACTAAGAACTTAGCGAGGAAAAGCCCTATTGCGCATGAAATTTCTACTACTTAGTGGAGCACA  
TGGGCAAAAACAACAAACGAGTGTATGTTTATGCAACTCTGTGAAATTTACAGGTGTTAGTCGCCCAACTGTAGGG  
AGGGCTATAAAATTAATAAGATGACAATTTGGATAGATACAGTCAAAGTCCGGTAACGCGAACGCATATTTGCGTGAATGA  
AAAAGTTTCTGGCAAGCGGGAAGGAATCAAAGGAAATATGCAATATTTTTCAGCAACTGTATAGCATCGGAATCAGAAC  
AAGACGAAGGCTTCCAAGAGAAGGCGAAACAAAAGTTAAATTACATACCTATAGTAGAATCAAACATTGA

>Cluster\_33699

ATGAAATTTACGTGATTCGCTGGCTGAAAATAAATCTATCCGCTGCAAGCGGAAGCAGAGACATGGCAGGACGCAGTGAA  
AATCGGCGTTGATCTGCTGGTAGCGGCAGATGTGGTAGAGCGGTTACTACAGGCGATTCTGGATCGGGTTGAACAGC  
ACGGCCCTACTTTGTGCTCGCACCCGGCTGGCAATGCCACGCGGACGCGCGGAAGAGGGGGTTAAGAAAATGGTTTT  
CGCTGGTGACCGTGA AAAAGCCGCTGGAGTTC AAC CAGGATAACGATCCGGTGGATATCCTCATCACCATGGCGC  
GGTTGATGCCAACACTCACAGGAAGTGGGCATCATGCAGATCGTCAACCTGTTTGAAGATGAAGAGAATTTGACCGCT  
TACGTGCCGCTACCGAGCAGGAAGTACTGGATCTCATTGACCGCACCACGCGGAGCTTAA

>Cluster\_139

ATGCTATAGAAAATCCCTCCCTTAGAGACAGAAAAGAAGATATACCGATCTTGATTAATCATATTTTGAATAATTTTTTC  
TGAAGAGTTCCAAAAGGCTTTACCTCAGATAACAGAAGAGCTTTCCAAAGCTTTGATAAGATATGATTATCTCGGTAACG  
TAAGAGAACTAAAACATGCCATAGAAAAGGGCAGTTTTTATAGCCGTAGACGGCAATATAACTCTAGCCCATCTACCTGAA  
GAAATAAGCCAGAGTTTTTAAATCAGAAAAAAAAGATGTTTTAGATTATAAATCGCTAAAGAACTATAGAAAAAGAAAT  
TATACTTAAAATTTAATAGAAAACCACTGGAACAAAACCGAAGCAGCCAAAAAATTAGGTATCAGTAGAAAAACCTAT  
GGCAAAAACCTCAAAAATTTAACCTTCTTTACCATCACTCAGAGGATGCAATCCAATCAGAAGAGTAG

>Cluster\_6424

ATGCTTAGTGGTAAAGACTTAGGCGGAGCGATAGAGCAGGCCATTAACAAAAAATGTCATCAGGAGCGCTCAATCAAA  
GGCGGAAATCGCAGCTCATTTCAAAGTCCAACCACCATCAATCCATGACTGGATTAAGAAAGGTTGATAAGTAAAGACA  
AATCTCCAGAACTATGGCGTTCTTTCTGATGTGGTGGTCCAGAGCATTGGGGCTTAACGAAATACCCCATACCAACC  
CCATCCACTTCAGATACAAAAGTGAACTTTAGACATAAACAGCCTTTATCAAGCCGCTCTGATGAAAAAAGAGCAAT  
TGTGGCTTTCATCTTATCTGGAAGTCTACGGAGCCTAGTTGGTTGATCATGACGTTTCGCGCCTACATTTGCCCAATGG  
AAATGAAGGTAGCTAACTATCTGAAAAATCAAGAAATCAAACGGAAGGACGAGCAATCACCAGACAGGAACTTAA

>Cluster\_38051

ATGCTTAACAGCTCGATAACCTGACGGAGCGCGTCAGAGGAAGTAAACAACTGGTTGATCGCTGGCTACATGTACGTAA  
GCATCTGCTCGTGGCTTACTACAATCTGGTTGGCATTAAAGCCTGGCAAAGAAATCGTACATGAGGCTAAACGAAAAAGGCC  
TTGATGATTTTTGTGTCAGAGCCTGGTTCGATTAATCTGCTGCGGACATTTTCAGTATTTATGAGCGCATTTCTCATAAGCTG  
GAAGGCAACGGGCAACTCGCGCGCGCGAAGATTTGGCCGCAACTCGAAGCAATACTCAACAGATTTATGGATTACTA  
CGATTCAGTCTGGAACCGCCATCGATCATGATAATTAACCTTAGTTTCAACAGGTTTTATCTGCATCGCGGAGGCGC  
TGGAAAGCGCGCTTTGTGCTGGAAGATAATCTGCTGGTGTGACGCGCGCGCTCAAAATCTGCTTGA

>Cluster\_4031

ATGCAAGGCATACATTTTCAGGAAAATTTATTTCAACGACTTCCGGCAGGGTTAAGCGTTGAACAGATCATCCGTCAGTT  
AGCGCAACCGTTGGTTGGCGCGAGCTGGTCTGCTCCCTGATTTTTGCCGATCAGCTACTGAAACGTTGAGCGGACGTTACCCAA  
CGGGGCTGCCACCGAACCCGTCGCTCGCTATTTCCGACACGGACCATAAACATGTGAGGCACAATGCAATTTGCCGTC  
GGCATCTGCCGGAACCGGTAGAGTTTGGCGATATGGGCGCGCATCTGACCCCGTACCTGTCAGGGTGATTTTTTTGCT  
CGCCTTAAGCGAAAGTAATAAACAATTAATGACCTGGGCTGGATTATGGAATGATTGAGGATACGCCCTTTATGCAAG  
CCCTGCTTGCATGGAACAACGAAATACACACAGTAATCTTAAACAAAATGAAAGAACGAGGTGAAATATGA

>Cluster\_42386

ATGAAAGGTGATGTTAAGATCATAAATTTCTCAATAAACTATTTGGGAAATGAGCTTGTGCGCAATAAATCAGTATTTTCT  
CCATGCCCGGATGTTAAAAACTGGGCGCTGATGCGTCTCAATGACGTCGAATACCATGAATCCATCGATGAGATGAAAC  
ACGCTGATAAATATATCGAGCGTATTTTTTTTTAGAAAGGAAATCCCAAATTTACAGGATTTAGGCAAACTGGGATTTGGT  
GAAGATGTCGAGGAGATGCTGCAATCCGACCTGCGATTAGAGCTGGAAGGCGGAAAGGATCTACGTGAGGCTATCGCGTA  
TGCCGACAGCGTTTATGACTATGTTAGCCGTCATGATGATGATCGAGATCCTTGGCGATGAAGAAGGTCATATCGACTGCC  
TCGAAACTGAGCTGGATCTATCGGTAAAATCGGTCTACAAAATTAACCTGCAATCACAATAAAGTTAAAGATTA

>Cluster\_53911

ATGGCGAAAACGAAGGGTATCTCGTTCTAAAGGCTTTACGAAAAGCCGGGCTGTATTTCCAATGCCACGTTGACAGATGC  
TGACCTCAGGCAATTTGAAGATGCCATTAATGACCTCGAAGACATGATGGCAGATGGCAGGCAAGGATTCAGACTG  
GGTATCAGTTTGTGATACAGAAAACGGCATCATGCGTTACCTGACGATGATTCAGGTATCCCTGCAATGGGCAAAATGAT  
GGGTCGCTTTGAAAACCTCGCTGTGCAAGTGTGCATGGAATAACGTCATTCAGCCGTCAGACGCTCTCTTACCGCTGCTGA  
CAGTGCATATCAACAATCTGTATCGCTTTAACAAAATACCACCCTTGAGCGGCGAAATGATATGCCTCGCGGTAGTG  
GTAACAAAAGCGGCTTTACGTGGAATCGGTTTTACATCGAGAAAGATGATCCGAGTACGTGA

>Cluster\_53905

ATGGCGCGCCAACAAGATCAAGAGGCGTATGCCGAACAGGACGCAAACTGTGCTTGTGGCTACACCGATGCAGA  
GCTTGCTGATTTCTTCAAGTCACTGAGTCAACTATTAACAAGTGAAGCTTGATATCTTGAGTTTTCGGAGTCCATAA  
AAAAGGGTAAGGCGCTCGCTGATGCAGAAGTTAGTGACCGCTTTATCAACGCGCTATGGGCTTCGTGGCTCCAGACATC  
GATATTCGTGTTTATGAAAACGAAATTTGCGAAAACCTCCGCTTGAGAAATTTACCCGCTGATACAACCGCCGACCTTT  
CTGGCTTAAGAACCGACAGAAGGATAAATGGCGCGACAAGGTTGATCAGGAGTAAACAGGCAAGACGGCGGCGCAATCC  
AGATTGAAACATCACCGATGAGCACTCTATTCCGAAAATGA

>Cluster\_10456

ATGACTGATAACAATACCGCCCTAAAGAAAGCTGGCCTGAAAGTAAACGCTTCCGTTTAAAAATCCTGGAAGTTCTTCA  
GGAGCCGGACAACCATCACGTCAGTGGGAAGATTTATACAACGCTCTGATCGATATGGGTGAAGAAATGGTCTGGCTA  
CGGTATATCGCGTACTGAACAGTTTACGACGCGTGGTATCGTCAACCCGCCACAAATTTGAAGGCGGTAATCCGTATTT  
GAAGTACACAGCAATCACACGATCACCTGATCTGCCCTGACTGCGGCAAGGTTATCGAATTTAGTGTGATTCAT  
CGAAGCGCTCAGCGTGAATTTGCCGAAAACATGGCATTTGCGCTGACTAACCCACAGTCTCTATCTTTACGGTCACTG  
CCGAAGGCGATTGCCGGAAGATGAACATGCGCACGAAGGCAATAA

>Cluster\_11870

ATGGCTCAGGCTGCCATTTTTTAAAGAAATATTCGATCAAGTGGTAAAGATTTAACTGTGAATTTTTTATTTCTGAGCT  
AAAACGTCACAATGTCTCACTTTTATATTTACTATTTAGCCACAGATAAATTTACATTTGTTTGA AAAACGACAAATAG  
TGTTAGTAAAGGACTCAAAAAGGTTGTAATGTTAAATTTCTCCAGAAAACAAATCTTATAGAGACCTCTATAATAAG

TTGAAATCAAAGAAATCACATTTCAACAATACAGGGAAAATCTTGCTAAAGCAGGAGTTTCCGATGGGTTACAAATAT  
CCAGGAACACCAAAGATATTACTATGCCTTTGATAACTATTACTATTACTGAAAGCATCCAGAAAAATTACTGAAAGCA  
TCCAGAAAATACACAGATCTTACCACGCTAA  
>Cluster\_66952  
ATGGGATGGCTGGTCATGGCCGTGCGCCTGACCATTCTGATTATCACTGGTAGCTACCAGAATCAGCAGATGTCTGAAAC  
CACAAACGCCCAACAATATGCAGGTGCGTCTGTATGGGCAAGTCAGATACTGATGATTGCTAACAGAAATCAATGATATCA  
GATACGTATCAGGCCAGCAGGACGGAGTAATTTCTCAGATATACTGGCTCTCCCTGTCACTCCGGACFCCCGAATTA  
CATCAGTTACAACAGGGGCGTCTGTGGGTATGGATGCCGGAACAACAGGACTTGTGAAACTTTGCGTTCAAAAAGTCG  
TGGTTCTGCACATAATAGGGATCTTCCAAAACGGGCAACTCACCTGGCTATCAGGAACGCAACCGGCTGCACACCCCGG  
CAGGTATTACTGCTGGTCTGTCTGCTACGTTAACTAA  
>Cluster\_7532  
ATGTCAACGCGGATAATCGTTCTGTTAATTTTTTTAGCTTGTTCGCGGGGACAGCATTACTCAAAGACGTGGCCGCT  
GGAAAACGCCCTTGCCTCCGCTTTGTGCGAAAATCGCGTTATCAAGATGACGCTTATGCGATCCGTTTTATGCGCCGA  
TCGCCGTATTACTCTCTGCTGGCAGATTGCCCTGGGCGGTACAGCTGGGCGGCAGTTGCCACTGCCCTGTTCGCTTA  
AGTTTACCATGCAGGGATTGTGGTGGCTGGGCAAGCGTTCTGTACAGCCATTACCCCTGCAATCCTTAACCTGGTTTA  
TGAAGTTCGCGGTAATTCAGGAGTCTGGACAGGTGTGGCACCCGTTGAAGGCAAGCCTGATTACCAGGCATTAGCTG  
ACACGCTTAAGCGCGCTTCAAACAACCTGGATAAAAATTTCTTGTATGATTTGTAA  
>Cluster\_23133  
ATGAATTCGTTATCCCGCACAAAAACACGGGCAAGTTTTACCCTGCTGGAAGTGTGGTGGTGTATGTTATTTCTTGG  
CGTCTGGCAAGCTGGTGGTGCCTAACCTGCTGGGCAACAAGAGAAAAGCCGATCGGCAAAAAGCCATCAGCGATATCG  
TGGCGCTGGAAAACCGCGTGGATATGTACCGACTGGATAACCGGCGTTATCCGACTACCGAACAGGGGCTTGAGGCGCTG  
ATCCAGCAACCGGCAATATGGCGGACGCCGCAACTACCGTACCGGTGGATACATTAACGACTGCCAAAAGATCCGTG  
GGCAATGATTATCAGTATCTCAGCCCGGGTAAAAAGGACTGTTTGTATGTTTACACCCTGGGGCGGATGGTCAGGAAA  
ATGGGGAAGGCGCTGCGCAGATATCGGTAACCTGGAATTTGCAGGAGTTTCACTAA  
>Cluster\_57888  
ATGCACGACTCTCTAACCATTTGCGTTGCCAGGCGGAGAAGCGGCGATGAGTTATTTTCGCCCAATCGTTAAACGGCA  
TAATTTGACTGAGCAACAGTGGCGCATCGTGCCTATTTGCGGAAAAGCCCATCAATGGATTTTACAGATCTGGCGTATC  
GCGCTGCATTTTGGCCCAAGCCTGACCGGATCCTCAGCGGATGGAACGCGACGGTTAGTGTGGGATTAAGCCG  
ATCAATGATCAGCGGAAGCTCTATATCTCGTAACCAAGAGGGGCGAGCGCTGTATAACCGCCTCAGACACAGATTGA  
AGAAGCCTATCGGAGATGGAAGCTCAGTTTACGCGAGAAAATGCAACAGTTAACCATCTGTTAGAGGAATTTATTTG  
CTCTGGGCAATTTCCGACAAGAAGCCATCCCGGGGATAATGAATA  
>Cluster\_55568  
ATGAGTGATATTTCTCATTCTGGGATGTGGATGCCATTATGCTGACTGGCAAACCGGTAACGGCGTACTGACATCTGA  
GAATGATATGCACACGGCCATAATTATCAGTTTGTACTGACGGACTGGCGCGCTGATGATGATTATGAAGGAACCTG  
ACCGCGCGGCTGGTGGGGGATCTGGACAACGACCGGAATATGGCTCAAGGCTGTGGCTACTGCGGCGTAAAAAATC  
ACGCGCAAGTGGCGATGAGAGCTGAAGATTATGCGGAAGGCTCTGGCTGATGAAAGTCGGATGGTATGATGAGCAGC  
GATAGAGGCTCAGTCAGAGATTGTTTCCGAAATAGGCTGAACCTCATCATCCGGTATTTGCCCGCGGGGACTGGC  
AGGAGTTCAAATTTCTTGGCTATGGGAGCAACTGAATAATGCCATTTAA  
>Cluster\_29586  
ATGAGTGAAGATTTTGAAGATTTTACAGGTGTGTCTGTAAATATTTGTCAATTATGCGGTTATTTCTTTCTTGA  
GCGTAATGACAGGAAAATGTTCTCCTGAGTTCCTGTTTCTTGTATTAAATATCGCGTGTATATGTTGCTTACC  
CCAGTCTCTGTTTCTGTGTGGTCAATATGAAATCAGGGCGCAGCAATGGTTGTCCAAATGGTTATTTGGCTCATACC  
AACGTTACGAGCTTCGACAGGTTTCAAGAAATATTTATCTGTATTATGTTGTCATCGGATGGTCCGGAGTGTGTTG  
TTTTATAAGGGGCTTATGA  
>Cluster\_24717  
ATGCATACAGGGGATTTGTGTTTTTTTACAGGTGCCAGCTGTTTATCTGTTGGGTTGTGGTTATTTCTTTACAGGACC  
AAATAAATAAGGATTTTATCTGCTGAGCTCGTTTGTCTTCTTTGTAGTAAATGTCATAAGTGTATGTATGCTGCCAGATA  
ATTTCTTGTTTCTTTGTGGTGGGTTATGAATCAGTGTGCCGTACCGGTTGTTTCAATGGCAGTCACTACCATACCGGTT  
ATCAGGAAGTTTGACAGTTTCAAGAGATGTTTGTGTTGTTATGTTGTCAGCCATATGGTCTGGAGTGTGTTGTTT  
TATTATTTCAATTAGTGAATGA  
>Cluster\_63875  
ATGATGAAAACCGTTACTGAACAGCGCACAGGTGCGCGCATTTTCTGCTGGCAATGACCCGGTGCATACAGCTGTGGGTAA  
AAGTGGTATCACGCTCTGCCACACCTGCACTGACGCCGCTGATGCTGGATGACGCCACCGGAAAATGGTGGTCTGGGATG  
GTCAGAAAGCCGGAACGGCTGTGGGTGTGCTGGCACTGGCGCTTGCAGGACCGAGCTGTGCTGACTTACTACAAAAGC  
GGTACGTTTGGCCACCGAATCGCTCTGCGCTGATTCCGTTGGATGCGGTGAAACAAGCAACGCATTTGTGGGCAAGTC  
GATCAGCCAGCCTGA  
>Cluster\_48633  
ATGGAAGACAAACGTTTAAATTGTTATCCAGATTACGAATCTGAAAAAAGCGTAAAACCGAATGTACGGTACTTAATTT  
TGGTGAATGACTACGAGCAGCAGCAGGCTCAAGGCTTAAATCGTATTAAGAAGAAATGGTGGTAACTTTACCAGATCAT  
ACAACGAAATTAATGCAATCGATGACTTCTGACTGAGCGATCAGCGTTGAATCGTTCTATTGGGTTAATCCAAGAGGC  
AAGCAGATTGTAGTTGTATGTGACAGTCATACGGTCAAGCGATATCAGGGGCACTGTGTCTTAACTGCTACATTCAGACA  
AGTATTTGAGGCTTAA  
>Cluster\_55571  
ATGACGGATGCTGCTGCAGATTACAACCAACAGTCTGTAATGAGGCCAAGAAATCACTCAACCGGTGGCCGGGCAACT  
GGATACCGGCTTACTACTGGCGGGGCGACCGTGGCGATGATGATCTTTATACGGCATTTGATGGACGTGAGAACCCTTTTC  
TGAATACCATGGCTCAGACTTCACTCCGACTGAGTGGATGATGCAAAATCAATACTGCGGTGCGGTTCTGCCCTGGTA  
CTGGCCAACCGCTGTATCAGGATGCCCTCGGGGCAAAATGAACGATACAGGAGGCCAGCGTACCGCATCCGGCATTTAT  
GCCGACGACGATGAAGGTGTTGAGACAATGA  
>Cluster\_29452  
ATGATGGACAAGCCAGAACCATTGCCTTCAAACATAAATCCAGATGTAATCAAACAGATAAAAATGTTTGTGATACACT  
GGACAGTATCCCGCAAGGGGAACGAAGCCGCTTAAACGGGCGCACTGACGGCAGGTCTGGCTTATACAGACAAGATC  
CCCGGACCCCTTTCTTTTATGTGAGCTGCTGACGAAAGAAACCAATTTTCCAGATATCGTGAATATATTTGAGATCGCTA  
TTTTCAAAAAGAGATGGCCGATTTTAAATCTTCAATAGTCACTCAATCTTCCACAACAAGAGCAAAAAGTGAAGA  
GACCAAAAAAATGCGATGAAGCTAATAAATTA  
>Cluster\_43468  
ATGCGCATGAATGTTTTGCAAAATGGAAGGTTTTCTTCCGGGAAATGTGTACCGCGAGATCTGAAAAGTGAATGAAACAAA  
TGCTGAGTATCTGGTGGCTGAAATTCGATGAAGTACGTGCTGAGGCTCGCAACGAGGATTAACCTATACCGCAAGCCGCG  
TTGCTGCTGCGTTCAATCAGCGATTTATCAATAAGTCTTTACGTGAAGTTTTCTGACGTTACACGCATGATCTGTCTAGCG  
AAAGATGAGTTGGCTAATGAACCGCACCGGATTTGATGGTCTGTCCGGTGAATATGCGGAGAAATCCCTTGAAGATGGGC





ATGGCGAAAGTGCAGGCTTATGTCAGTGACGAAATGTCTATAAAAATAAAATAAAATGTTGGAAAGAAGACGTGCAGAAGG  
AGCTAAAAGTACAGATGTAAGTTCTCAAGCATATCCACTATGCTTCTCGAATAGGGCTTCGTGTATATGAGGCTCAGA  
TGGAGCGTAAAGAGTACAGCTTCAATCAGGCTGAGTTAATAAGGTACTTCTTGAATGTGCGGTAAAAACACAGTCAACA  
GTTTCTAAGATTTTAGGTATTGAGTCACTAAGCCCTCATGTTTTCCGGGAATCCAAAGTTTGAATATGCGAATATGGTCTGA  
AGATATCAGGATAAGGTGTCTATCTGAGATGGAGAGTTCTTTCCAGAAAATGATGAGGAATAA  
>Cluster\_48672  
ATGGGCTTCCCTTCTCCTGCGGGCGGATTATGCTGAGAGCGTATTTCTCTTGATCAGCAGATAATTAGACATCCTTCAGC  
GACCTACTTCATGAGGGCGGCTGATAGTCACTCATCGTGAAGGAATATTGCAGGGTGCATTGCTGGTGGTGCATTCTCCTCAC  
TGACTCCTGTTGATGGATCTCTTCTGATGTGCTCTGGATGGGGAATATCCGCTAAAAAGATACCGGAAGTATCCACGT  
CAGCATCTGGAGGATTTAAGAACTGGTAAGAAGGAAGCATTGCCAAAGGATGATGATGGATGCACGGGCGCAATGCCGT  
GTTTGGTGTGATCACTCACATTATCAACGACGCAAGAAGTGGCGAGTTTGTGATGATGCTCTGTGATGTAG  
>Cluster\_21331  
ATGACAAGTTTTTCTACGTTGCTTAGCGTTCATCTCATAGTATCGCGCTTCTGTTGGGCTATTGACCTTACGTTTCTG  
GCTACGTTATCAGAAGCATCCACAGGCATTTGCTCGCTGGACGTGCATCGTCCGCGCGGTTGTCGATACGCTGTTATTGT  
TAAGCGGCATTGCGTTGATGGCTAAAGCGCACATCCTGCCATTTCGCGGCAGGCACAGTGGCTGACTGCAAAGCTGTTT  
GGAGTTATCATTATATCGTTTTGGGTTTTATTGCACTCGATTATCGTGTATGCACAGTCAAGCGGCGCATTTATTGC  
CTTCCCGCTGGCGTTGGTGTCTGTACATCATATAAACTCCGCCACCACAAAAGTACCGTTACTGGGGTAA  
>Cluster\_43360  
ATGCGTAAAAGCCTGTTAGTATTTCTTGCAGTCTCCTCGTTGGTATTAGTTCGGCGTCTGTTGCCGCTGATCTTGAAGA  
CAATATGGAACCCCTCAACGACAATTTAAAAGTGGTTGAAAAGCCGATAACCGCGCGCAAGTCAAAGACCGGTTAACGA  
AGATGCGCGCTGCGCGCTGGATGCGCAAAAAGCGACGCGCCGGAAGCTTGAAGGCAAATCACCGGACAGCCCGAAATG  
AAGACTTCCGCCAGGTTTCGACATTCGCGCGGTGAGATTGACGACGCGTGAAGTGGCAAATGAAGGTAAGTAA  
AGAAGCGCAGGCTGCCGAGAGCAACTGAAAACGACCCGCAACGCTTATCACAGAAATATCGTTAA  
>Cluster\_13641  
ATGGCAAAGGCACCAATTCGTGCACGTAACAGTGTAAAGAAAACAAGTCTCTGACGGCGTGGCTCATATCCATGCTCTTT  
CAACAACACCATCGTACTATCACTGATCGTCAAGGTAACCGGTTGGGTTGGGCAACAGCCGTTGGTTCGGTTTCCGCTG  
GTTCTCGCAAATCCACTCCGTTTGCAGCTCAGGTTGACGACGAGCGTTGCGCTGACGCGTGAAGAAATACGGCATCAAG  
AATCTGGAAGTTATGGTTAAAGGTTCCGGTCCAGGCGCGAATCTACTATTCTGCTGTAACCGCCGAGGTTCCGCAT  
CACTAACATTACTGATGTGACTCCGATCCCTCATAACGGTTGTCGTCCGCCGAAAACGTCGCGTATAA  
>Cluster\_59752  
ATGGCTTCAACTGCACGCTCCCTTCGCTACGCGTGGCAATCCTGACCATTCTGTTGGTGCACCTTCCGCTGGGCACA  
TGCCGATTTAACGCATCAGTATCCTGCGCAAAACGCGCAAGTGCAGCTGCACCGCAGGCAATCACTTAAACTTCTCGG  
AAGGTGTTGAAACAGGATTCAGTGGTGCAAAAATCACGGGGCCAAAAACGAAAATATTAACATTACCGCGGAAGCGA  
AATGAGCAGGACAAAAGCAACTGATGTTTCCACTGGCCGATTGCTGAAACCCGGAACCTACACCGTTGACTGGCATGT  
TGTTTCGGTGGACGGCATAAAAAGAAAGGACACTACACCTTTAGCGTGAATAA  
>Cluster\_49704  
ATGTCAAACATCAAAAAATACATCATTGATTACGACTGGAAGCATCAATAGAAATTGAAATCGACCATGACGTAATGAC  
AGAGAAAAAATTCACCAGATTAATAATTTCTGCTCAGACTCTGAATACCGACTCAATAAACAGGCTCTGTATTAATG  
CTGTATTAATCATGCTGGCGCAACATGCTCTGCTTATAGCAATTTCAAGCGACTTAAATGCATATGGTGTGTGTGAG  
TTCGACTGGAATGATGGAATGGTCAGGAAGGATGGCCCTCAATGGATGGTAGTGAAGGAATAAGAAATACCGATATCGA  
TACATCAGGAATATTTGATTTCAGATGATATGACTATCAAGCCGCTGA  
>Cluster\_32476  
ATGAAGCGCGGATTTACCTTGCTGGAAGTATGCTCGCGCTGGCGATTTTTGCGCTGGTGCACGGCGGTGTTACAGAT  
TGCCAGCGGTGCGCTGAGTAATCAGCAAATCCTTGAGGAGAAAACGGTAGCGGGTGGGTAGCTGAAAACAGACTGCGC  
TGCTTTACCTGATGACCCGTGAACAACGAGCGGTGAGGACAGGCGGAGAGTATGTCAGGAAAGCGCTGTTACTGG  
CGGACCACACCGCTGAATACCGGTAACGTGCTGCTCAGGCGGTGGATATTGAAGTCACTTTCATGACGACTTTTCGCC  
AGTGAATTCAGTACGACGCGCTGGTTTTAGCGCGTGGGAGGCCAACAGTGA  
>Cluster\_6435  
ATGGCACTCACTGAATTCGGTAAGGCCGTTAGAAAAGCAGGATCGATACTGACAGTACTCTTCTGACTATGTCTCAAGA  
ACTGGCACTACGCCAGCGTTTCTTAGCGGTTTGAAGTGGTAGCAAAAAATACCTCTGAAGTGGGTTAAGAAGATTG  
ATTCCTACTTCAAGGCCCAAAGGTGTAAGAAATGAAGGGTTACAGGAGCTAGCGGAGTTGCGAATGACTCAGTTCAGTA  
AACGGTTTGTCTCAGCAACAGAAAATGCTTGTAGCGGGATTGCTAAGTCGAGTTTACGCCGGAACAGCTAAAGAGTTT  
TGCAGATTTATTGCAAAAAGATTAATAACATGAGGGGTAA  
>Cluster\_48957  
ATGAAGTTCGATATATTTAAAATCTGTTCTGGCTTTTATATTTGTTGGTGTATGGCTATGTTGATATGTTGCTTTTTCTA  
CAATGATTACCTTGAGCAACAACCTGCAACACCAGAACAACCTGACAGAGATTACACAGGATACCCCTGTGCAGCAGAAA  
CATTTAAGGAAGCCATTAAGTCTGACACTTCTGATTATCAGCCTGAACCTTTAAGCCTTGGTAAGGCAAAAAAGCTTGA  
TCAGCGTGTAGAGAAAAGAAACGAAATGGCAGAGGTGAAACGGTAAAGAAAAATGAGCGAAATAGATACGTGAAAAACA  
ACTTCAGGCATTAATGATGCTCATTCAGCAAAAGAACATTA  
>Cluster\_33161  
ATGATTATGAAGGATGGCATCTATAGCATTATATTTATAGCAATGAAGACTCCTGTGGGGAAGGTATACTGATTAAAAA  
TGGAAATATGATCACTGGCGGCGATATTGCTTCTGTGTATCAGGGGTTCTCTCTGAAGATGAGGACATCATACTTTCATG  
TCCATCGATATAATACGAAATTCCTCGGTGCTAAACATTGAACAAGATTATCAATAGTTATCCCTAAAAAAGTACTG  
AGTAATGATAATAATCTCACATTACATTGCCATGTAAGAGGAAATGAAAAATGTTTTGTGATGTTTATGCCAAATTTAT  
AGAACCATTAATTAATAAAAACACAGGAATGCCACAAGTTTATTTAAAATAA  
>Cluster\_11190  
ATGAAAAACAGTGTCCAGTTTATTACTGATAATGCCGGTGTAGAACCGGGTCAATTATGTCAGTTGCTGAATATGAACG  
GCTGTTAAGTCTGGCAGATCCTGATGATGATTTTGAAGCATCCAGTATGAAGCCGGAGAGAATGACAATGAAACAATAC  
CTCATGAAGTAGTATCCATCATGATGATGATGATGTCATTGTTGGCAGCATGGCGGATTTACAGCGAATGACTCAA  
CAGGAAGTGGCGGAGCCCTGGGGTTAAACAGTCAAGGCTTAAACAGTATCTCAGTTTGAAGAGCAGGAGCTCCCGGAAAATCAAC  
ACTGAAAAACTGGCTGAGATTTACAACGCGGACCAATCAGTTGGCTGATTAA  
>Cluster\_14904  
ATGGCTGGGTTTTTGGGGCTTTATGTTCTTATAGCTAAAGTTTTGCTGTCCAGTTAGCAGGTGCAGGTGTTGAAGG  
TGCTGTTTCAAGGGCAGCCATGATGGGGTGGGTGCTGCTGTTATGGCTACTGGTAAGTCTCTGATGCTTGGCGGTGCTG  
CTGGTTTAGGTTTTGGCTTAGGGATGGCCGGAAGAACGGGCATGAATTTTATCTGGGAAAGCAGGGAACTGATGGGG  
CGTGGTGCAGCAACAGCCCTGAATGGCGGGTGAAGAGGGATATCAGCGCTGGCTCCGACAGGTGCTTTGGGGATGAA  
GGCAGAAAGACTTGCATCCCTGGAAAAGCAGCAGCGAGGAATGCCCATGA  
>Cluster\_50435  
ATGCGTGATATTCAAATGTTCTTGAACGTTGGGGGCGATGGGTGCAAAATAATCACGAGGATGTGGAATGGTCACTGT

TGCTGCAGGTTTTAAGGGATTAATTCCTTCGAAAGTAAATCCCGCCCGCAATGTAGCGATGACGATGGCCTGATCATTA  
GCTCTGCGATGACAGTTCTTAAGAAAAAGGAACCGTATCAATACGAACTACTGGAAATGATTTATGTGTATGGGGTTACA  
TTACGGCGCTTGGGGTAAACTGGGGATATCACTTAATCAGGTTGTTATCAGACTGCAGAAAGCTGAAGGGTTATTGA  
CGGTTGCTGGCAATGTTGGGGTATCTTTAGAAATGATTTGTACATATAG  
>Cluster\_34149  
ATGAAACAGCTTTCTTTTTACCCGGCGAGATGACGCCACAGGACCGCGTCTCATTACGCGGGCGCTCAGGGCTCTGGA  
CCGCCACCTGCATGAGCCGGCGTAGCCTTACCTCTACCCACGCCGTACGTGAATGGCTGCGACTGCATATGGCCGGCG  
TTGAGCGGGAAGAGTTCCGGGTGTTGTATCTGGACAACAGAATCAGTTGATTTGCCATGAAACGCTCTTACCCGGCAG  
ATTAACCGCACCGAGGTGCATCCCGGGAGGTGCTCAAACGCTGCTCTGCACTTCAACGCGGGCGGTGATACCTCGCGCA  
TAACCATCTTCCGGCGAGACGACACCTAGCCAGGCGGACAAAACCTCACGCAGCGACTGGTTACAGGTGCTTACAGTGG  
TGGATATCCGTGTCCCTGACCATCTGATTTGTCGGTGGCAGGCAATCTATTCTGCTCGCAGAACACGGTCTGCTTTGA  
>Cluster\_58361  
ATGTTCAAAAAAATCCTCTTCCCGTTAGTTGCTCTGTTTATGCTTGCAGGATGCGCAAAACCGCAACAACTATTGAAGT  
TTCCCGACGATTACTGCCACAGCAGGATCCAAGCCTGATGGGCGTACCCTAAGCATTAAATGGTGGCGATCAGCGTA  
CCGATCAGGCGCTGGCAAAAGTCAACCGGATAATCAAATCGTTACCCGACCGCTCCCGCGATCTGCGTTTTCTGCTG  
CAAGAAGTGTGAAACACAGATGACCGCGCTGGTTACATGGTTGGTCCGAAATGGCCCGTTAATCTGCAAAATCATCGT  
TAGCCAACTGCATGCTGCTCCAGGGCAACGTGCGCTACAACATCGCGACCAAAAGCGGATATCGCCATCATCGCTA  
CCGCGCAGAATGGCAACAAAATGACCAAAAATATCTGTCAGCTACAACGTTGAAGGTGCGTTCCAGGCCTCAACAAA  
AATATCGCCGATGCGGTTAACAGTGTGCTGACCGATACCATCGCTGATATGCTCAGGACACCAGCATCCACGAATTCAT  
CAAGCAGAACCGCGTTAA  
>Cluster\_37683  
ATGCCAGCAATATATCAGGAACACCTTCAACTCATTGGGTATAAGCTTTATCCAGAAACAGTCTGCTGGAGGAAATC  
TGATGATATCCTGCGATGTTCAATGGGTGAGGACTCAAGTTATCCACTAATACGCTGAACAACCGAAATTTGACCT  
CCGTCGCCGCAAAAGCACCAAGATATTAATGCTGGAAAGAGATGAACAGACAGTTTACCATCTCGCTGATCAAC  
CAGGGAATTGATAAATATTGTGCTGAAAATAGCAGAAACATTTCCAGTGAAGTACGGCAAGAGTTTTTAAATTCATTGA  
AAAGGATTACAGTCTCAAGTTGAATATCATAGCAGCGCAAGCTCTATCAACCATCTCATAATAGGAAATGGCCGTTTTCG  
GTGATAAAAATAAATATGCTTTGCAAGGGAGTGAAGTAGAGAAGTAAAGAACCAGACAATGGATGTAATAGCCAATCAACTC  
GCAGACCAATTTTCCAAAAGCATATAGTCCAGATGTTGACATCAAAACAGCTACGAGATGACATCCCGATATATTTAT  
GGCTGCCAGCGTCATATCGGCATAA  
>Cluster\_25562  
ATGCCATCATTAGTTTACAGGTATTCAATCATCTCATTTTCCACCGGAATGCAGGTTCTTCTGCTCAAATGGCCGCCAG  
TGGTGGTGGAGAAATTACAGTAGCGGACAGACCGTTAGTATCACATATAGTGAACCGATGGTTCGCTTTCTGGCGAGTG  
GGGCAATAACAGTTTGTCTTCTGGATTATTACTTACAGGGCTTAATGGTGGTCTGAAGCGCTCAGGATATAATGTTA  
AGAATGGTTTACAGTTACAGTAAACACACATCATGTTGATATTGAGGGGAAAATATCACAATAAAGTTTTCTGCTTAA  
TACGCAGACCTTACAGTCCCATCCGAGGCGGTTGATGCCCAATTTACTGGATAAGCCAGAAGAGGTGTGTTGTTA  
AAAATTCAGAAGATTCTTTGGTTTGTGATTTGATTTGATTTGATTTGATTTGATTTGATTTGATTTGATTTGATTTGATTTG  
CCGCTAACACGAGAACCAATAACGTCATCAATGATTGTAAGTCCAGAACAATGATTTTATGACCAAGCCAAAGGAACTT  
TGTATAAAGGATAAGTGA  
>Cluster\_3441  
ATGGCGCTAGCCACTTTTCCAGTACAGGACTGGTGTGATCGTTATATCTATCGCCATCAATATGATCGCGGGCAACT  
GGCCAGCATGGTCAAATTAACCTATATTTCTCGACTCCATCGGCACACTTATTAGCGCGTACTGCTTGGTCCGGTGATCG  
GAATGCTGACCGGCTTACTGACCAATTTACTCTGGGGATTTGCTGACCGACCGGATCGCCGCGGATTTGCACCCGTCGG  
ATGGTCACTGGCCCTGGTCCCGGTTGGCTGGCGGAGCGGTTGGTTTTCGCAACCTGCAAAAGTCTGTGTCAGCGCGCT  
GATTATTACGCTTGGGTAACGGTCTGCTGCTGTACCGTGCCTACTGCGCTGTTCCGGGTTGTCACCGGTAGCGGAGCCG  
ATTTGTTCTGCTTGGCTGATGACCTCGATGGGGCAAAACCTGGTGGAGTGGGTCGATACCGTGGATAGCGCGCAACCTG  
GTCGATAAAAATCTTACAGCGGTGATTGCTGGCTTTTACTGCGCCAGCTGCCGATTCGCACCACGCGCCATTTTCCGGC  
AATGGCTGCCGTGCGCTAA  
>Cluster\_48567  
ATGATTGCAGCCGAAAAAATCAACAGCGAAAGCGGACAACTCTCTTCTGACCTCTGGAGAACACCTGATTGGCTGTT  
TTCTGCCATTCACGTTATCTTGGAGTGACATTTGATGTTGACGTTGCTTGCATCAACAGGACAAATGCAAGCTGCCATTT  
TCATAGGCGTTGAGCGCGATGCTTTGAAATCTGAATGGGGGACGCCAGGTACAATTCCTTCCATCCACCTACTCC  
AAAATCTCCCCCTGGATTGATGCGGCTATACGTGAGCAGGCTCGCGGAGTTACAACAGTATGCTAATCTCTCAATCCCT  
CGATACAAAGTGGTATGAGCGTGAACAGAGTATGCGAATGAGACGATTTATCTGTCTGGTGGCCGCTTGCCTTTGTCG  
AGCCTGACGTCATTTGGGTGAGTGAAGTAAACATCAACCCCGTGGCAGTATGCTCGTTGTTTTCGAGGGTTTTGT  
CAGGACGCTGGGCACTCTATAAGCAAGAATCCCTTTGGAGCTCATGAAAAGTCTGGGAGGATGATCCTCGCAATGTGAT  
CAGGAAAAAAGACCATCAAGAAGGCTGCTTAG  
>Cluster\_53635  
GTGGCCGCTGGCGTTATGCTTTCGAGGATTACAGGACATTCAGCGACCATCTTTACGAAAATGATAAACACTATATCA  
GAGTGATTATGATGATTTTATGATATTGGCAGAAAAATAGCCTTTCTGCTAATATTATGCAACCTTTATCCAAATAATC  
TGGGAAATGATCATTAAGTGCCTTTGGCGGAATTACGCGGGGCAAGTGAAGATGCTAAAGATTACCAATTACAGTTAC  
TCCAATAACTGGCAACACATTAAGTTATACTTTCTCTGCGAGCAATCTTATGATGAAAATAATAAAGAAGAGGAGCGTTT  
TAATCTGTTTATCTCCATTTCTACTGGGGGATGATATTGCCAAAACAGCTCACCAAAATTAACCTTATCGAATTCGA  
CCTCATTTTCCAAAGATGGCTATTCTTCCAAACAATACTGGAATTAAGTGGCATAGCCGGTGAACATGATCAGTTAAATTA  
GGTATATATGTTAATCAGCAACAACAAAATAATGATACCTCGTTGGTACGAATTTAAGCTGGAGAACCTCCATCGCCAT  
AATAGATGGCAGCTATAGTCATTTCAAAAACGCTAG  
>Cluster\_25108  
ATGCCAAATTTGGGAATGCAGTCGATCCGGCGCAGACAACCTGATCGACGCCACGCTGGAAGCAATAAATGAAGTGGGCAT  
GCACGATGCAACGATCGCCGAGATCGCCCGCGTGCAGCGGTTTCTACGGGATCATCAGCCACTATTTCAGGACAAAA  
ATGGTCTGCTGGAAGCAACCATGCGGATATCACCAGTCAGTGCCTGACCGGTTTTGAATCGATTACATGCACCTCCG  
CAGGCAAGTGCAGAGCGGCGATTACAGGCGATTTGTCGGGAAACTTCGATGAAAACCGAGTGCAGTGCAGCGGATGAA  
AGCCTGGCTGGCTTCTGGGCCAGCAGTATGCATCAGCCGATGCTCTATCGCTTGCAGCAGGTGAGCAGCGCTGCTTGC  
TGTGAACTGGTGGCAGGTTTTGCGCGCAATTTGCGCGCCACCAGGACAGGAAGCGGGCTACGGCTTGGCGCGCTG  
ATTGACGATTTATGGTGCAGCGGCACTGAGCGGCAACCGCTGGATAAACCTCTCGCACACTCGCTGACCCGTCACCT  
TATTACTCAGCATTTACCACCGATTAA  
>Cluster\_54867  
ATGGCTCTTCCGCGACCGCACAGACAGGGGCGGGAACCTTACCTGAAGGATGACTGGCACGGCTGCAACTTTTTTC  
CATGATGGGCGCAGCTTACGACACTGATAAACCCGAGTGCCTGAAATATTATGGGTTGCAACACATCCACTAAGC  
GGCAGAACGCTACCCGTTATGCTGCTGTTGGCTTAAATGAACCTGGGAAGTACATTTCTGCTGAATGCCGTGACCGCA  
CCTTACCAGCAGGCAAACTGTGCTGGCCACTCCATGCTCGCCACCATCCGGATAACTCTATTACGTTGTTGATAA

ACTTTTTTACAGCGAAGACCTGCTGCTGACGCTGAACCAGAAGGGTTGTAACCGCCACTGGCTACTGCTGCGTGAAGA  
ATATCGCATCAGAAATGATAGAGCTGGGAAAACCGCGCTCACAGGGACCATCCCAGAACGACTGGAGCATCTTCGGGT  
GCTCTGGAAGTGGTGTTCATAACAAAACGCCCCGACCATCAAGGCCGAGGTCGGTTAAGATATCAAAAACCCGTTATCC  
TGTGAAACATAGTGCCGCTCCTCTTAAGTGA

>Cluster\_7932

TTGATACTTGATACTCAGGTGAATAACGACGAGTTACTGGATAGAATCTGTCAAGTATATGGTTTTACTCAAAAAATCCA  
GCTAGCCCGGCATTTCAATATTGCGGCCAGTTCCTACAAAACGCTACACGCGAGGCACTGTTCTTATGATTTGCGCG  
TACAGTGGCATTAGAAAACCGGGCAAGCCTACTATGGCTTCTTACGGGGCAAGGCTCTCAATATGACGGCAACAGTCT  
CCAACGGATCCGAAAACGATAGACGCCCTTCACTCTTAGTGTGAAAGCTCGAAGAAAATCACCATTGAGTATTGATGC  
TGGTTTTCTTAGTAAAGCAAAATGTCAAAGGTATTGCTGTTGCGCCGATGAAAGCTGCACCTTATAGAAACAAGATGCCT  
CACTTTCTGATGGCTTTGGTTGGTTGATATTGAGGGGCTACAGCATCAGAGAATTGACGCTCCTACCCGGTAAAAAG  
TTACACGTTGCTGGCGCAAAGTACCCTTTGAGTGGGGATAGATGAGATAAAAAAGATTGGCCGTGTAGTGGGTGTATA  
CAGCGAGGTTAATTGA

>Cluster\_28093

ATGCAGCAAGGATACTACTCTCTCCCGCCCTTATTTCCGCTCTCGATGCCGGGAAAAAGGTGAAATACCTGTGGTTCTG  
GGCCATCAACCTGCGCGAATCAGAAATTACCGCCTTGTCTTTAGCCAGTGGTGGCAGGGTTGCGCTTTTACCTATG  
ATGGTATAAACCCTATGTCACCGCAGAACCTGGATGATGGCGGAAAAGCGCGGCTGTTTAATGACAGTAAAAACCTTGGC  
AGAATTCTGGCGGCGGACTCCGGCAGAAGCCAAAAGCTGGGGCGACAGGTGACAACTTTGACGAGCAATGCTGGCA  
AGCTTGTCTGCTTTGATCTGGTCTGCGAAGGGAACCTACATAAATTTAGCCAACATTCGGCATTAAAAACATTCCTGCTGA  
ATACGCGCCTCGCATTTCTGGTTGAAGCCAGCCGGTGGATAAAAATCTGGGGGATTGGCTTGCAAAGATCACTCCCAT  
GCCGGTGTCCATCTCACTGGAAGGGGAAAAATCTGCTGGGATTTGCGCTTATGGTAGTCAGAGACCCTTTGCGGGAAGA  
ATAA

>Cluster\_17491

ATGGGGAACTCCGATTGAGCAATAACACCAGTACAGAGCGGATGGTTAATACCAACCAGTGGCGATCCGGATTATGA  
CGAAGCGCTCGACAGGCTGTTAAGCCAGTGGATGCGTAACGTTTCCGGCTGTCTGCCGGGATGGTTCGCCCCGCTGGC  
AGAAAGAGCAGCCGCCACTGCTACCGGTTGAAACGAACCTGGTGTGCGTTTGGGGTTATCGGATGGTCAAGTATGACAGT  
CCGGCATTACCAGACAGACCGATAATGGCTCTCAGCTCTGGCGCATGAAACGATTGAGTGTATGGCTTCGTTTTATGG  
ACCGCGGGGATGGTGTATGCGTCCCGTTCTGTGACGGTATACTGTGCCGAGAACAATGCAGCACTGAATGCGCTGG  
GGCTGTCTCTTGGCGATTACACAGGCTGACTCCCTCCCTGAACTTATTAATCAGCAATGGGTCCGCGCTACGATATG  
ACGGTGCCTGCGCCGGAAGGTTGTGCGCGAGTACGGTATTAATTCGCTGGTGAAGCACCAGTCACTTTTTTCGGAGA  
TTAA

>Cluster\_3658

ATGGCGAGTTTTGCATACATAGACTCTGAAAAATGGTCAAACCTAATCGCTTAAAATCCATGATTCAGAGATATTTTAA  
AGAACCCTATTGCAAGTTAACAGCGAATTGGGTCGCCGGATATATCTGCGCAGACAGAAAACGGTTAGTTCGACTCC  
TGACGAGGATATGCAAAAGGGGTGATATCTGATTACTAACTGTTAACTTGTTTGGTAATACGCCGAAAAAATACAG  
GAGTTTTTATCTTTAAGTATCAGACAAGGTTAATAATTTGCTTTTTTATGTCATCAGAGTTGCCGGATGGTATGAT  
TCCTGTGGTACTCACCGGATGATTTTACCTACAGATATTAGAGGAAAAATCCCGACATCAGTATCCGAAAAATAAAA  
GAAAACCGAAGGAAAGAGGGAGTATTCATAGTAAAAATATCAGACAGTTGAAATTCAGGGGTTAGTCACTACAA  
ACAGCCAGAAAATTAAGCATCAGTTTATCCACTGTA AAAAGACTGGGATAAAGGATTTGTTGATCTA ACTGCAGAGTA  
A

>Cluster\_11181

ATGACTGAAATTAACAAAGAATGGCTACAGTACAGATTACCGGAATTGAGTCATCACGGGATGAAATACCGTTCCGACT  
CGATGAAGATCAAAAACAACATGCTTACCGCATTAAAAATGCACTGGCATCACGTCAGTATCGGATGAACGGGCGAG  
CCTATGAATTTATTTATGGAGAAGCGTTTCGGGGAATCTGTAGATCGCCGACAGCAAAAAATGGCGATAGAGAATACATG  
GCATGGGATATGGCGCTTGGCTGGATTACTGGTGTACCCGCGCCGATGCTTCAGGCTGGAACCTTTCGGGAAAAATA  
GGGTTCTCAACCAATAATTTTCGGATAATCTCGGAAACGTCACCAACTCTCCGGCAATCCCTGATGAGGTGTTGCTCCG  
CAATCTGAAGTGCAGGCTTCCGAGGCTTCTGTCAGATTTCGATGCTTCTGAAGTGGACAGGCGAGGATATCGGTAGTGTG  
GAGCCGAGCAAGAACTTATCGTTACCAATTAACGAATACGCCAGTACAGATCGCAGTAGAAGCGACACAGGGGGAGACCA  
ATGA

>Cluster\_40799

ATGCTGATTGGCTACATACGTGTGTCAACAAATGACCAAAAACAGATTGCAACGCAATGCATTAATGTGCGCAGGATG  
TGAACAGATTTTTGAGGACAAAATGAGCGGAACCAAGTCGGAACGACCAGGCCGAAACGCGCTTAAAGTGCCTAAAA  
GAGGGGATACATTTGGTGTCTGGAAGCTGGATCCGTTGGGTAGAAGAATGAAACACCTCATGCTCTCACAGAAGAGCTA  
CGCGCAAAAGGTGCAATTTTCGAGTCTGACGGATTCAATCGATACCAGCACCTCCGATGGGAAGGTTCTTTTTTCATAT  
GATGGGTGCATGCTGCGAAGAAATGGAGCGTGAATGATAGTTGAGCGCACGCTGGCTGGACTGGCTGCTGCGCGAGCACAAG  
GAAGAGTTGGAGGACGTCGCCCCGAACTGACGAAGGAGCAGCATGAGCAGATCGCAAGATTGCTCCAGAAAGGATGATGAC  
AGAAAGCGCTGGCAATTTATCTATGATATTGGACTGTCAACGATCTACCGCTATCACCTGTTGGGACTGTCTATAACGCA  
ACCTGAAATGTAA

>Cluster\_32982

ATGCGCGGCAAAGGAGCAGGGTTACGTACACATGTATTAATTGGCATGGGAAGCGCCCTGTTTATGATGTTTCGAAATA  
TGGTTTTGCTGACGTGCTGTCTTTAGGTCACGTCGGACTGGATCCCAGCCGATTTGCTGCTCAGGTTGTGACGGGCGTCCG  
GGTTTATCGGTGACGTAACATTTCTGTTGTAACAAAAATTTGAGGTCTGACGACGCGAGCGGATATCTGGGTGACC  
GCAGCCATTGGTATGTTTATGGCAGCGGATGTACGAACTGGGTATTTATGGTTTCAAGTATGACCTTGTGCTGCTGGA  
AGTCTTCCATCAATTAACCTTCCGCTGATGAACAAAAATACCATTTACAGCTGACATTAGTGAACGGTAAATACGGTAT  
CAATGCTCGACTGGTTAAGCAGCAAAAAATAAAAACGGATTTAGTTTCTGTTGAGGAAAAATGAAGATCATGAAGTGGTC  
GCCATTGATATCCAGCTTATGCCACAACGTCGATAGAAGATCTGTTGCGATTATTTAAAGGATGAGCAGGGGTGAAAGG  
CGTTTCAATTAGCTAA

>Cluster\_7576

ATGAGTAAGTTTGTAAAAACAGCTATTGCTGCGGCAATGGTGTGAGGGCGGTTACCTCTACGGCAACAATCGCTGCGGG  
TAACAACGGTACTGCACGTTTTTACGGCACCATGAAAGCTCAGTGTGTTCTATCGTTCCGGACGATCAAAAACCTGGAAG  
TTGATATGGGTGATATCGGTGCCGAAAAACTGAAAAATAACGGCACACCACGCGGAAAAATTTCCAGATTCCGCTGCAA  
GATTCGCTATTTGATACCTCAGGAAACAATGACCACTACCTTTACTGGTACCGTTTCTTCTGCAAAATAGCGGCAATTTATTA  
CACCATTTCAATACCGATACCGGTGCGGCAATTAACAATGTTAGCTGGCGATCGGTGACTCTCTGGGTACCTCTTACA  
AAGCGGCTATGGTATTGACCGAAGAAATCGTGAAGATATCTCCACTAATAAAGGCAAAAGCAGAGACTTGAACCTTT  
AAGCCTGGCTGGTGGCGCAGTGTGCGCCAGATCTGGGTAATTTCAAGCAAAATACCACCTTCAGATTACTTACCT  
GTAA

>Cluster\_32580

ATGTTAAAAAAAACATTTGTTATCTATGTTGCAACCGCATTTGTTATCTGGCGTTGCTTTTAAACGCGCTTGTGATGACCC  
AAATCAGGGTTCTGGTAAAAATAACATTTAAAGGTGAAGTTATCGATGCGCCTTGTCTATTGCTCCTGGTGTGATGAAGATC

AGACAATAAACCTCGGTGAAGTGTGCTGATACCGTATTAATAAAGCGGTGAGAAATCTCTGCCTGTAGATGTACCATTAC  
TTGACAGGATTTGATTTTTTCTGACGGCCTAACACTGTTGATAAAGTCAAAATCACCTTTAGTTCTGCCAGTGTGACCC  
TACCGACTCCAACCTGCTTAAAAACACTCTGGAAGGTAACATCGGCGGTGCAACTGATGTAGGCGTACGTCTGGTGAAT  
CAGACAACACCAAGTACTCTTTGGCACTCCAATCACTATCAACTTCCCGACGACTAACTCTACCAGGAGTTGAACCTT  
AAAGCCCGTATGGAATCTCTGGGACGACCCGACCCCGGGTAACTGTGACGGCACAGGCTAATTACGTACTCGACTACAA  
GTAA

>Cluster\_12102

GTGCTAGACCGCCATCTTCATCCCGGATTAACCCGTTGTGTCATCAGTGCCTGCGGGTTCTTGATAAACCGGGCATTAC  
GCCAGATGGTTAACATTAGTGGGATTTGCCATCGGCGTGTGCTCTGCCGTTTCTGGCGCTGGGCTGGTATCTGGCGG  
CGCTAGTCGTCATTTTGTGAACAGGCTGCTTGATGGTCTGGACGGTGCCTGGCGGGCGCAGAGAGCTTACCGACGCG  
GGCGGCTTTCTTGATATTTCTCTCGATTTCTCTTTTACGCGCTGGTGCCTTTGGCTTTATTCTGCTGCACCGGAGCA  
AAATGCGCTGGCAGGCGGCTGGTTGTTGTTGCGTTTATCGGCACGGGCGAGCTTTTCTCGCTTTGCTGCACCTGGCAG  
CAAAAATCAGATFGATAAACCCCGTTATGCACATAAAGCTTTACTATCTGGGGGATTAACCGAAGGCACAGAAACG  
ATCTTACTGTTTGTGCTGGGATGTTTATCCCTGCATGGTTTGCCTGGTTTGCCTGGATCTTCGCTGCCTTGTGCTGGAT  
GACGACCTTACGCGGGTGTGGAGTGGGATCTGACGCTGAAGTCGCTCCAGCGTCAGTAA

>Cluster\_23838

ATGCTTAATGGAATTAGTAACGCTGCTTCTACACTAGGGCGGACGCTTGTAGGTATCGCAAGTCGAGTGAAGTCTGCGGG  
GGGAACTGGATTTTCTGTAGCCCTCAGGCCGTGCGCTTACTCCGGTGAAGTTCATCCCCCTTTTCTCCAGGTTCCGT  
CGAATGTTAATGCGAGAAGCATTTTAATGTGAGCAGCCAGGTGACTTCAATTTATCCCTCTCGTCCGGCACCAGCCGCCA  
CCAAAGTGGACAGGCATCCGGGGCATTCCGATCTTTTACCGCCATTGCACAGGCATTAAGAATCACTTGAATGCTGCA  
TGAAAAATCGAAAGGCTCTGAGGTTTATAGTTTAAAGTCCCGCCCGCCGGCACCAGGCAAGTGGACTGGCAT  
CTGGTACATCCGATCTTTACCGCCATTGCACAGGCATTAAGAATCACTTGGCTGCCTATGAAAAATCGAAAGGTCCT  
GAGGCTTTAGGTTTAAAGCCCGCCGTCAGGCACCACCACCAGCAAGTGGACAGGCATCCGGGCCGTTGGTGGACTACC  
GCCCTTGGCGAGGCATTAAGAATCACTTACTGCTTATGAGCAATCGAAGAAGGGTAA

>Cluster\_17499

ATGGATGCGCTGGAGCGCTACAGCGAAATCATCCCCCTGGGCGACGAAGTTGCTGAGAATTTACCGCCGACATTGC  
CGCCAGAAATGAAAAGCAGTGGCGTACGACAGCCGGAACATCAGTGCAGAGCTGCGCAACATGGTTGACCGCCGCCCCG  
TAGGCCAGGTGATGAAAATCCATCGTTGCCGAGCAGATTAAGTACATCAAAATCGCTACCCTTTGAGGCCCGGATCGGGTG  
TATGACATTCAGAACAAAGCCATCGAGGCCGTTGTGACTGGTGGCCGCGCTGAGCCATTCGCGAAAGAGATAGCTGCGTC  
CGTGCAGCTGTCACGCTCACGAGCGAACCTTATCGCCGTACCAGCTTGGACGCGCAACCGCGCGCTCGATCAGGCGC  
GTGCGCTGTCATCGGCTCGAATGGTTATATCTGGCGTACAGCCGAAGATGGCGACGTCGCGCATTTCTCATCGGGAGATG  
GAAGGTAAGTTTGTGCAATGGGGCCGACCTCAACGCTTACGCGTATGACCGGTCACGCTGGTGAAGTCCCAAGCTGCC  
CTGTTACAAAGAAATCGCTTCCCCAACCTCATTTCTTATCTGCGCTGA

>Cluster\_62537

ATGGCAGCCACTTCTGATTCGTTGAAAAATATCATACCATTGATTACATTTGCGTTAGGTATTTTTGCTGTGCCTTTAGT  
AGAGTATCTTAAAGCAAAAAGGAAAGCGAAAAGGGTAAAGAATAAATTCAGTTTGAAGATGAAAATAAAAACAT  
TGAAAAAAACCTAAAAAAATGGGTAAGGCATTGAAAGATGCAAAAAAATGAAAATCGGCAACCCAGAGCAAGGTGAT  
ATACGTAGATACGCTCCGAGGTGCACACAGATCTACTTCAATTTGGTCAAGCTATGGAGTTTTCATTTGGAGAGTTTAAATGA  
AAAAAAGAAATCAATTAATCTTTCTTTGTCAAAATGAAAGCAATCAATGATTACATCAAGAGCAATTAAGTAATTA  
ATATTGAAAACACTGCGATTGATGAAATGATGATGATGACTACAAAACGTTACTTACACACTGGTTCTTGCATGCTTAAACACA  
ATGCGAAATATTAATAATGATGTAATTAACACCAGTGAAGAACGACAAATGATATTAATAATGGTGTTTCAAGAAAT  
GGGAATCGAATTTCTTATGAAGATATTAATAAAGAAAACAACAAACATTGCATAA

>Cluster\_8225

GTGACAGCGCCCTTCTTTCCACGCATACCTGGGCGCTGTGCTTTTTTGAACCAGGAAACAGAACCTCTGACAAATGAATTT  
ACAGCATCACTTTCTTATFGCCATGCTGCTCTCCAGGATCCGATTTTCCGTCGTTCCGTTGGTCTACATTTGCGAACATA  
ATACCAATGGTGCATGGGGATCATCGTCAACAAGCCGCTGAAAAATCTAAAATGAAAGGATTTCTGAAAAGCTGGAAG  
ATCACCGGAGCCGCTGATGAAATCAATCCGCTGGAATAAACCGGTTATGCTCGGCGGCTCCGCTGGCTGGCTGAAAGTACGCGG  
GTTTATTTTGCATACTCCGCCCTCCAATTTGCTTCCAGCATTCGCATTTAGACAACACGGTAAATGACCCTTCCCGCG  
ATGTGCTGAAAACGCTCGGCACCATAAACAACCGTCTGACGATTTGGTGGCTCTGGGTTATGCTCCGGAAGAGT  
CAACTGGAACAAGAAATCTCGATAACCGCTGGCTAACGGCCCGGCAGATCTGAATATTTCTGTTCAAAACGCGGATTCG  
CGACCGCTGGCGCGGAGGCGCAAAACTGATTGGTGTGGATATTCTACCATGCTGGTGTGGCAGGACACGCTGA

>Cluster\_12194

ATGAAAACTGAAAAACAAGTGCAGAAATCAATCCTGACCACCGCCCGGTTGTACCGGTTATCGTGGTAAAAAACTGGA  
ACACGCGGTGCGGATGGCAAAAGCCTGGTTGCTGGTGGGCTGCGCTTCTGGAAGTGAAGTCTGCGTACCAGTGTGACG  
TTGACGCTATCCGTTGCTATCGCCAAAGAAAGTGCCTGAACGATTTGGGTTCCGCTGCTGATGAAATCCACAGCAGCTG  
GCAGAAGTCACTGAAGCGGCTGCACAGTTGCAATTAGCCGGGCTGACCGAGCCGCTGCTGAAAGTGTACCGAAGG  
GACTATTCTCTGATTTCCGGGATCAGCACTGTTTCCGAACTGATGCTGGGTTAGGACTACGGTTTGAAGAGTTCAAAAT  
TCTTCCCGGTGAAGCTAACGGCGGCTGAAAGCCCTGAGCGATCGCGGCTCCGTTCTCCAGGTCGTTTCTGCGCCG  
ACGGGTGGTATTTCTCCGGCTAATACCCTGACTACCTGGCGCTGAAAAGCGTGTGCTGCATCCGTTGCTTCTGCGCTGGT  
TCCGGCAGATGCGCTGGAAGCGGGGATACGACCCGATTAAGTGGCGCTGAAGCTGTAGAAGGCGCTAAGCTGT  
AA

>Cluster\_14980

ATGGCGTCTTATTTCCAGCATTTGTGCTGTGTGCGGCGTCACTTCCGGATACGATAAATGATATTCACGGGTCGA  
GAGTGGCTTCAATCCTTATGCTGTGGCTGAAATTTATCCTGAAAAGGGAACGCGGTAGCTATGGCAAAAGTGTATCAGTC  
ATATGCCCAAAAGTAAGGAGGAAGCTTTACAGTTATCAGAGAAATGAAAACAGAAAAGACGTTATTTCTGTCGGATTTG  
ATGCAGATTACCAACAGTAATTTTCTTTTATTTACCTCGCAGAAAACCTTCTGATCCGTTGTAAGTGTGCTGCTG  
TTTCGAAAAGATTAATCGTGGATTGTTATAAACGAGGGAGGAGCCTGGAGAATGCGCTTAGTTGTTACTATACAGGAAAT  
TTAGTAAACGGTAAGCGAAAAGAAAAGAAATTAATAATACAAGTTATGTTGAGCGAATGGTTATACAGGGAACGAAAA  
AAATATGTTGTACCAGGTACAAGAAGCAACGGGGGAGAACAGCGAAAATTCGTTACACAATGCGTCAGTTATCTGGCC  
CGAAACCAATCTGAAATCTGCTTTTGTGATAAATCACTTCAACAAAAGTTATAATTA

>Cluster\_29083

ATGCTGGCAGGCGCTCTGTTTCTCACTGCCTGTAGTCAACAATCTTCACTTCCCTTTACCAGGCTGGATTTGCTGA  
AGACCAGGCGCGGATCGCATCTGGCGAAAAGACAGCGGCGATAATGTGCATCTGCTTCCGCTGTTAGCCCGTGGCGCA  
GTGGCGATAACCAACGCGAGAGTATCGCTGGCAGGCGATAACCTCACGCTCATCAATATCAATGTTTACAGCAAAACCC  
CCGGTGAATATTCGCGCGGCTTTTACGATCGAGGCGATCTGAGCTTTATGCAACGCGAATCCGATGGGGAAAAGCAGCA  
GCTTTCTAACGACCAAAATCGATTATACCGTTATCGTGTGATCAGATCCGCCAGATTAGCGATGCTTACGTCAGGGA  
GAGTCGTTGCTGCGCGAGGCGCTGGCATGCGATGCGAGCAGACTGTGACCACCTGCGAAGGGCAACCAATTAACCTGAT  
TTAGATTGCGAGGCGATAGCGCATATCGAGCGCCGACAGGCGCTTCTGTTGATGTCAGCGTGGCATGGCTGGAAGC  
GCCGAGGCTCGCAATTAAGTGGTGGCAAACTCTGATTTCTGCTGCTGGCAACCCACGAGAAAACGTTCTGA

>Cluster\_653

ATGCAAAACAGCCCGCTGTAAACACAGCTTATGGAAGCACTGCGCTGTCTGCCGGCGGTGGCCCGAAGTCGGCGCAGCG  
TATGGCGTTCACGCTGCTTCAGCGCGATCGTAGCGGGGGATGCGTCTGGCGCAGGCGCTACCCGGCGGATGTCGGAAA  
TCGGCAACTGCGCGGATTCGGCCACTTTTACCGAACAGGAAGTCTGTAACATCTGTTTCAATCCGCGTTCGTCAGGAAAA  
GGTCAAATCTGTGTGGTGGAGAGTCTGCGGGACATCTACGCCATGAGCAGACGGGGCAGTTTTCAGGCCGTTATTTGT  
GTTGATGGGGCACCTGTACCGCTGGACGGCATCGGTCCGGATGATATCGGCCGTTGATCGTCTGGAACAGCGTTCGGCAG  
AGGAAAAAATCACGAAAGTATCTCGCCACCAATCCACGGTGAAGGTGAAGCTACCGCTAACCTACATTGCCGAGCTT  
TGGCGCAATATGACGTGGAAGCCAGCCGAATCGCTCATGCGGTACCGGTTGGCGGGCAACTGAAAAATGGTCGATGGCAC  
CAGCTGTACACTCCCTTGGCCGGCGTCATAAGATTCTGTTTTTAA

>Cluster\_39294

ATGAAATATGCGTATTTTGAACCCTCATCAATGAAGGTTTTAGACTGGCTGGATACCGAACAAATATCCTTTGTTTTGCC  
TGACAGTGTGTTTCGGTAACTGATGAGCAATGGTGTATCGTGATCGTGAATGCTGGGTCAATATTTCAACCACAGAAA  
TCATCACAAACCTCCACCCGGTATTTTATCGGCTTATGGTGATAAGTGGGTGATGACGCAACCAGCTATACTGCT  
GCGCTAGACGGTCTAAGTCACTAGTTGTTAAGGCAATCAAGGCGCTACGCGATGAAGTCACTGCCGATTATATCATTAT  
CGGCGACTATACCTTTACAGCGATGCCAGCAGTCTGATCCAGCAAATGTCACCTACCCAGGATGGGGCAACGAAAGCAA  
TCCCCAAAGGCTTAATGTGGCAGACCAAAAACCTCGGACTTCTCGAGCTAACCAATGAAATCGCGGGCAGTTTGAGTCC  
ATTACAATGGATCAGGATATCGGCTCTTTGCCAATGCCACCGACATATTGCCCGCGTGTAGGCGCTGGAAGATATCCT  
GGCAGTTCAGGATGATGACTACTCTACGGGGTGGCAACCATGA

>Cluster\_21114

ATGAAACAACAGTATCAGACCCGCTACGAATGGCTCCAGAAAGTACCAGAAATGGCTGACCGGCTTACCCGGCAGCG  
CGTATCCTGGGGCTGTGTTCATCCGAATATCTACTACTTCCATAATCTGACGCCCGGTTGGGTGTCAATCAATGGTGA  
AACCGGAGATTGCCATCGTACCCAGAGCTGCACCGGCTGATTTATGGCCCTGACAAAACGGGCCACGCCGCCCTGGAT  
GATGATCTGATAGTGAATTTATGACCAGTGAACATCTGCTGGTTCATCATCCGATGCTGGAAGGCATTTCTCCTGTCTGA  
ATGTGAACCTGTGAGCGAGGCTTCTTGGCAATAAAGTATGATCAGCCTCTTCCGTCAGTTGGTGGCAGGAGTTGGCC  
TCAAACCTGGTCTGGCTTTGCTGGCTTGAATTAATGACCGGAAACAGCCTTGAAGACTGAAAGAGAACCTGAAACGGAAA  
TCAGAAAAAGAGCTGGAGGAATGATCATCAACCGTACAGAGCAGAGCGCAGCAGTACGCGATCTGATGGATCAGTACGT  
GCTCCTGGCATACCCGCAACCGTTGACGATAGCCGCAACTGA

>Cluster\_39772

ATGACCACGCTGACAGCACAAACAGATTGCCGTGTGTTTACGCCCTGGCTGGCGCAGTTGTTCTCCCGTGAAGTGGACGATGA  
ACAACCTGACGCAAACTCGCCAGTGCAGATGGCTGAATGGTTTTCGGTTGCTGAAAAGCGAACCTCCCGTCACTGCGGCGG  
TGAATGGGCTGGAAAACAGTATTGCCACTCTGACAGTACGTGACGATGCCCGTCTGGAAGTGGCCGCTGACTTTGGCGGC  
CTGTTTCTGATGACCCGACAAACAAGCGGCTGCCGATGATGATCGGCTTACAAACAGGACGAGCAAGAGATTAACCGCTT  
GTTAGTTGAGGCAGGGATGGAGACCAGCGGCAATTTCAACGAACCGGCAGATCATCTGGCGATCTATCTCGAGTTGTTGA  
GTCATCTGCATTTTTCGCTGGGAGAGGGACCGTTCCTCGCGAAGAATCGACAGTTTTCGGGCAAAAACACTGACGGCG  
CTGTGGCAATGGTTACCGGAATTTGTTGCGGCTGCCATCAGTATGACCGCTTTGGTTTTTACGACGCACTAAGCCAGTT  
GTTGCAGGTGTTGGTGGAGTGGCAACCAAAAAGGATAA

>Cluster\_29003

ATGAAGCTAGGGTGTACGCTGTTTTTTCTCTTATGTTCTGCATTAACCGTTACAAACAGCGCGCATGCACAAACACCAGA  
TACGGCAACGACCGCGCTTATCTGCTGGCTGGAGCCCTACTTTCGATCTCTCCCTCAGCCAGTTTCGAGAAAGACTTTA  
ACAGCCAGAAATCCAGCCTGCCACTGAACGAAATTCGTTGCCATCGACAGCAGTCCCGACAAAGCCAATCTCACTCGTGA  
GCAAGTAAATTAACGAGAACTTGTATGTTCTACTGCACTGGAGCGGTTACCTTAAAATCAAAGCATTAATAAAC  
CTGGTACCCTACCGAGGGCCAGAGCAAAAAGCCGCAAAAGCTCAGGATACATGAGCAGCGGTGATCCGCAAC  
TCACCCCATTAATGACCAAACTCAAAGCCAGAAAAAATCGCAGTGCCTACTAACGGCGGGGAAAAACAAACGTTATTAC  
ACCAGACAGAAGGTGCACTGCGTTATGTTGTCGCGGCAACCGGCAAAAAGGGCTGACCTTCCGCTGTTGACCGATTAA  
GCTGGCGCTATCTGAATCGCTTGAAGGTTTGAATAAATGA

>Cluster\_50036

ATGAGCAAAGAAATTTACGCAAGACTGGCAGCTATTACAGGAGAATCTGAATGCGCCAAAGAATCAGTACAACCTCATTCGG  
TAAATATAAATACAGAAGCTGCGAAGACATTTTGAAGCGTTAAGCCGTTACTGAATGGCTGTTTTTATCAATCAGCG  
ATGAAGTTGTGTTGATGGTGATCGGTATATGTGAAAGCCACGGCAACTATTACCGATGGCGAAAACAGTCATACGGCA  
ACCGCTCTTGCCAGAGGAAAGAAAGAAAGAAAGGAAATGGATTCTGCACAAGTTACGGGAGCTACAAGCTCTTATGCACG  
CAAGTATTGCCTCAATGGTTTTGTCGGCAATTGATGATGCGAAGATGAGATACCGACGAGCATAAAACATCAGCAGAACC  
CAGCAGAAAGCAATCAAAACATCACCTACACCTGAACAGGTTCTAAAAGCAATTCACCTGACGACGAAATGCAGAAAAAC  
ACCGTAGAAGAGCTTAAACAGCGGCTTCGCCAAAGCGTGGAAAGTGTCTCGAAGGCACACCGGAGCAGCATAAAGCGCAGGA  
CGTTTACAACATCAGACGAGCAATTAAGAAGGAGCGGCTGCTTAA

>Cluster\_20121

ATGGCAGAGAAATTTATCAAAACACAGGCTGGTGGTTCGCTGGATGCCGCAATGTCGATACCGATGCAATCATCCC  
GAAACAGTTTTTTCAGAAAGTGACCCGTCAGGGTTTTGGCGCGCATCTGTTTAAACGACTGGCGTTTTCTGGATGAAAAAG  
GCCAACAGCAAAACCCGGACTTCGTTGCTGAATTCGCGCATACAGGCGCTTCCATTTGCTGGCAGGAAAAACTTC  
GGCTGCGGTTCTCGCGGTGAGCAGCGCGGTCAGGATTCAGCGATTACGTTTTTAAAGTGGTGTGATGACCGAGTTTTGTC  
TGACATCTTCTACGGCAACAGCTTAAACAACAGCTGCTGCGGTTGAAATTAAGCGACGAGAAAGTGGACGAACTGTTTTG  
CGTGGTGCAGGCAATCCGGGATTCATTTGATGATAGACTGGAAGCGCAAGAGGTGAAAGCGGGAGAGAAAACTTAT  
CGCTTACCATCGATGCTTCCCGCCACTGCATGATGAACCGTCTGGACAGCATCGGCTGACTCTGCAGCAGCAGCA  
CGCAATTGCGTCTTATGAAGAGAAGCAACCGCGTTTTATGCGTTAG

>Cluster\_42

ATGTTTAAAGCAATTTTTGATGCTTCTGTCTATATGGGGTTTTTACCTTTTTTGTGCTGGCAGACGGGCTTTGCTCCT  
GGTGTGGGGAGAAAGGGTATCTGCTCTTACTTATGTTTCAATGCTTGCTTTGTTCCAGAGGGATATAAAGTTTGG  
AGCATATAGCTATAAATCACTTTTCAAGAGTAGGAGGTGCATGGGAAAAATTAATGTTTTTACAGGAAAAAGCTTATTTTA  
CTTGGAGTGCTTTTGTCTTTTTTTCTTATTTTTTTCAGACATGCTTGAATCCTTTTTTTTCAGACATGGAGCTTTCAC  
TCAAACAGACGCAAGCTTACAGCCATGGCTACAAGGTTTTATGCTCTTCTACCTTTTTGTTATTTCTTGGCCAGTTTT  
TCTTTAGAACCTTTTCAGATAAAAAACGAATCTCTCAGTTTTTCTTTGTTAGCACTTGCAGGATTTTTTATGAATATGTT  
TTAAAGTATATTTTTGTTATGTTTAAAGCTTGGTATTTATGGTATCTGCTTGGGACCTTTTTTGTCTACATAGTACT  
TTGCGGACTATCTTTTTGTTTTTAAAGAAACTTGCTAACTAA

>Cluster\_61183

ATGGAATTAGTATTGAAAGACGCGCAGAGCGCGTACTGTTTTCCGAACTACCTTCGGTCTGATTTCAACGAAAGCGCT  
GGTTCACCAGGTTGTTGTTGCTTATGCAGCTGGTGTCTGCTCAGGGTACTCGTGTCTCAGAGACTCGTGTGAAGTAACTG  
GTTCCGGTAAAAAACCTGGCGCCAGAAAGCACCAGCGGCTGCGGCTTCTGTTCTATCAAGAGCCCGATCTGGCTTCT  
GGTGGCTGACCTTTGCTCGTCCGAGGACACAGTCAAAAAGTTAACAAGAAGATGTACCGGGCGCGGTAAGAAAG  
CATCTGTCCGAATGGTACGTCAGGATCGTCTGATCGTTGTCGAGAAGTTCCTGTGTAAGGCGCCGAAAACTAAGCTGC  
TGGCAGAAACTGAAAGACATGGCTCTGGAAGATGTGCTGATCATCACCAGTGGAGCTGGACGAAACCTGTTCTGGCT

GCGCGCAACCTGCACAAGGTTGACGTACGCGATGCAACTGGTATCGACCCGGTTAGCCTGATCGCCTTCGACAAAGTCGT  
AATGACTGCTGATGCTGTAAAGCAAGTTGAGGAGATGCTGGCATGA  
>Cluster\_37338  
GTGCCCTGATACTTTGTGTGCTGCTGCTATCGCCTGCGCCCTGGCACCTTTACGCCCCATCGTACTGGCGCACTCTT  
TCTCTATTTCTGTTCTGCTACTCAGCTCAGTGTATTGATTTTCGCACFCAGTCTGCCGACAAACTCACCTTACCGC  
TGCTCTGGCTTGGCTTGGTATTTAATGCGCAGTATGGAATTAATGATTACATGATGCGGTTTACGGCGCGGTAGCGGC  
TATGGGGTCTGTGGTGTGTTTACTGGGGGCTGTTGTTAGTTTGTACAAAAGAGGGATTGGGCTACGGTATTCAAGCT  
ACTGGCCGCTGCAGGCGCATGGTGTGGTGGCAAACTGGCCAATGATACTGCTGATTGCCTCGCTGGGTGGCATGGTT  
ACGCCATCGTTTCACAACTTCTGCAACGCCGACTATAACCACATATCGATTCCGGCCCGTGGCTTGGCTCGGCAGCATG  
ATAAACCTGGGGTATCTGGCCTGGATCTTTATTA  
>Cluster\_40208  
ATGCTGAGATTACTTGAAGAAAAAATTGCCACGCCACTGGGCCACTGTGGGTGATTTGCGATGAGCAATTTGCGCTGCG  
GGCGTTGAATGGGAAGTACAGCGAACGCATGGTGCAGCTGCTGGATATCCATTATCGCAAAGAAGGCTATGAGCGCA  
TTTCTGCCACCAACCAGGTGGTTAAGCGACAAGCTTCGTGAATATTTGCGGTAATCTTAGCATTATTGATACGCTT  
CCCCTGCCACGGGGGGAGCCATTTCAGCGCGAAGTCTGGAACAACTGCGCACTATCCCCGCGGCGAGTAAATGCA  
TTATGGCCAACCTGGTGAACAATTAGCCGCCCCGGCGCGCGTGGCTGGTGGCAAAACGGATCGAATCCCATCA  
GCATCGCTCCTACCTTGCATCGGTTATTGGCGAAACCGCACCATGACCGGATATGACGGCGGAGTTACGCGAAAAAG  
TGGTTATTGGCCACGAAGTTATCTTTTGTGTAA  
>Cluster\_64423  
ATGTCAGACAGCAACGCTTACCGCGCTTTCGCTATTCGTGCAGGGCAACGGGTTTAAATGTACTGAATATACTCC  
TGTGATATGAAAAAATCGAGGACGAGTTTAAACAGCGCGATGGATACAGCCATCACATTAGATGGCGGTATGGAGA  
AAATGTCAGCCAGTTTAAAGTTTCGGGTTCTGATTCTGGTGTATGAGCTATTCGGGTTAATACGGGAGTCAAGACG  
CGGTTTGAATTCGTAGTGCCTACAGACTCCATGGAATAAATTTTGGCGTATTGATACCTACGAGGGACTTATTAC  
GGCAATCACTGATGACGCTCAGGGGACTATTCAAAATCGTCAAGTGGGCAATCAGTAACGATTGCGCCGAGCTATTATA  
AACGAGTTCAAAATGACGAATTTTACGAAATTCATCTGCAAAAATGAAACCGGTTATCAACGGTGTGATGTTCTT  
GCGGGCTCGCTCGAATCTTCATGTATATTA  
>Cluster\_47581  
ATGAGGATGAGAACTCCCGGGGAGGGAGGTTGACTCGAGCGAAGCGAGAGAACGTTGCGCCAGCAACGGCCCGCAGG  
GCGAGCCACGAAGTGGCGAGTAATCCTCTATCACCGACCAAATCGAAAAGCTGCTCAGCGAGCAGGCTTTTTTGCATT  
TGAAGCCATGAGGATGAGAACCTCCGGGGGCTGGGAGGTTGACTCGACGTAGGCTTATAAGACGCCAGCGTTCGCA  
TCAGGCAACCGCACCGCACTTATGTGGATGCGGGCGGACCGCTTATTCGACCTACACACCACACATTTCCCTGCCAA  
ATTTGCGCCCATATCTCCTACTATCCATTACGGATTGTTGACAGAAACCATGCTTTTTTTTATATTTTGCCTTAAATCTTT  
TTTTGCGTTACTTATGGCTGACCTGGCATTTCGCTGTGCGTTTTAGCGTTTATGTTATTAATCGCTCAGATATCCAC  
CTTTTCTCAGATTTTTTTCATTAATGCATA  
>Cluster\_39466  
ATGAGCATAAAGAGAACTAAATCTCACAAAGAGCAGCAGAGTGGCTGAATGGCTGGCTGAACTGTGGGGCGCATGGGT  
TTATTCAGGTCGCTCGAAAAGCGCATGAGCAGCGTAATAGCGAAGTTTATGGAGAGCGTAGAGCCGGGAAGAGTTATGA  
CAAGGCCAATGTGCAATGATGATGATGGAATGTTGATTTCCTCAGGTCGTCGATTCCGTCATGTACATGACAAAAAGCC  
TTTTGGGACTCTCTCAGTACTACGCTCATGTTTCATCTAAGCGAGCAATGCACTCTACTATCACCGGACTGCAAGCC  
ACGGAAGATGTTGCGAGTGGTGGCGAGGGATGGAGAAAACCTTCACTGGCAACCTGTAGAAAACGAAATGACGACATCC  
TGAAGCGTCGTTATTTGTTTTGTACCAACCAATGCAAAATGCTTTCAAAATGCGTAAACGTTGAGAAAGTTAAGCAT  
GTTGCTGTAAAAGCCTTGACATGCAATTAGCCATTTAG  
>Cluster\_48510  
ATGATATTACAATCTAAAACAGTAAAACCTCGTTTGTAAATGAGAGTATGATCCTTTTCATATTTACTTAGATTA  
TGAAAACATAAATAAATCTTATCTTCTGTGAATAACGATATTGAAAAACAAAAGTTTGGATCAGAAATATAAACAGA  
AAGAAAATAAATAAAGAAATCTACTTTCATCAGAACTCTAGATGGCATTCTTGTGAACTGTGAGAAATTTACGAC  
ATTCACAATAAATCAATTTTCTTGGGGAGCTGGTACTGAAATGAAATCAAAAACAAAGAACTGCCGCTATAGAAAGTGCATT  
ATTAGTATATATTTTGGCTTTGATATTAAGGTTATTCACGTTGTCACTTTGAAAGTTATGAAAGGAAATGAAAAGGTA  
TTTTATTTTATGAAAAATCAATGCCAAAAGGACTCATGAAGCAGACATTCATATTTTTATGAAAGTATTTCCTAGTGAT  
ATTTTAGATATTAATAAATAAATTTCAAAATTTTATCAAGTAG  
>Cluster\_56740  
ATGAGTAAGAAAATTGCCGTTTTAATCACTGATGAATTTGAGGATTCAGAAATTTACTTACCCCGCAGACGAGTTCGGTAA  
AGCCGGACACGAAGTATACCATTTGAAAAACAAGCGGTAACCGGTAAGGCAAAAAGGAGAAGCCAGCGTACCA  
TCGATAAATCCATCGATGAAGTGACGCTGCGGAGTTTGTATGCCCTGCTGCTACCGGGCGGCCATTACCCGATATCTG  
CGTGGGACAAACCTTTTCTACCTTTTACCGGTTGTTGTAATGAGTGGCAAAACCGGTTTGGCTATGACGAGCC  
GCAGTTGCTGATCAGCGCGATGTGATTGGGGGCGCAAACTGACCGCAGTTAAACCGATCATATTGATGTTAAAAATG  
CGGGCGGGAATTTTACGATCAGAAAGTGTGGTTGATAAAGATCAGCTGGTTACCAGCCGGACACCGGACGATCTGCCA  
CGTTTTAACCGCGAGCGGTTACGCTGCTCGGTGCCGA  
>Cluster\_66978  
ATGAATGCGAATGATGTTAAACAAACGGAATAAAGAATGGATGATTGTAATCATTATTAATCTATCTTTTTATTTTGTATG  
TATAGCAACATACGCTATTGGGGCTATGCTCTAGGTTGGTTACCAACACCTTACGCACCATTAAAGGTTGCCACTGATGT  
GCGGAGCAATTGCCATATATAGGTGGTGTATATTTGTTTTCGTCGAAATTTACCTCAATAAATGTATTAGAAAACAATGG  
GATCCAGATTGGCATGTATGGTATTTTCACTTCCGCCACTGACCAGTACAATCGCAGGTGCTATCAGTTATTTATCTTAA  
GGCGGGTTGTAGTTTTGGAGTCTAGTTCCAAATGTAGGAGCTAGTGAATGGGTTTCTTTGCGCTGGCATTATGCTG  
GTTTTAACGTCGATAAATTTGTCGCAAAAATCGAGGAAGTTGCAAAAGGCTGCTGCGGTTATTGAAAAAATCGAAGCTCG  
ACTAATAATGATGCGAAAAATTCGAAAAAAAAGAATG  
>Cluster\_55454  
ATGAGCATAGATAACTATGTAATGGGATGAGCGAAGGAGTCAACGAAGAGGCGGTAAGGATAAAGTGTATAAGCG  
TCCCGTTTCGATCTTAGTGGTCACTACGCACAAGATACGAACCGGTTGCTGATGTTGACGCGGCGTACGATCCCGATT  
TCTGGCAGTCGGTAAACCGCGAGCGTGAACCCGCGCAAGCTGCCATGCGCGAAGTAAAGGAAGGAGTCA  
ACCATTGATGTTGCTGCTGAACAACTGACCTTAATTGACTGTCAGCGCACGGTAGAGTTTGAATTTTTTTCACATTTACG  
TCATCGCTATGCGCGGGCGTACGCGTAAATACGGAATCATGGTTCTGCTTTCGCTTCCGACGAGCGGAGATCGTTT  
TCACTGAACATCTGGCTTACAAGTGGCTTGTATGCGCTGCTGCGGCGGCTCACTAAGTCTTGGAGCAACCGGACGGC  
ATTTGAACAGTTTTGTAATTAACGCTGCCGA  
>Cluster\_22816  
GTGTGGTGAACCTCTGTGTGACAACGTAAGTCCGGAAAAAACCATGCCGTTTGGCTGCTGACGGTTCTGCCACCCG  
CCTGGATGTTGAAGTGAATGGCTTAAACGGTGGTGTTCGTAACGGTGTTCCTTCTGATATCACTGGTATACGGAACAGT  
ATGGCGTGAAGTGGCCTGTGGGGTATGAGGTGAATATCAGTAGTACAGGAGACAACTTCACTCAGGTTGATTTGACACG  
CCGTGGTGTGACCGGAAAGCGAGCTTATGCAAGATTAAGCCGCGTTTCAGCTGCACGCTGGAGCACTGGTATGCCGA

ACAGGGCTGTGATTTCTGTGGCTGGCAGTTGTATGAGCGCGGAGAGCTCGTTGATGTGCTGTGGGGGAACTGGAATGGT  
CTTCCCGACAGATGACGATGAGCTGCCGGAAGTACCAGGACCTGCGTGGATAGTCGACAATGTGGCGCATTATGGCGGA  
TGA  
>Cluster\_18682  
GTGTGTGACATTTTATAGTGGCGAAATTACCAACTGGCGCAGGTTGGCGGTAAGGATCAGGAGATCCAGACCTGGCAACG  
CCCCGAAGACTCTGGCAGCCAGACAGTGTGCAATCACAGGTCATGAAAAATGTCCGCATGATCTCGCCGAGGAAACCG  
AAGTGGCAAGCATGATGGAGGGAATGATTAAGTCTGTTGCCGAATACCCTAATACAAACAACGCAATAGGCTACACCTTC  
CGTATTACGCAACACAAATGAATGCCGATAAAAAATATAAACTGCTAGCGATTAACGGTATTGCACCGACTGTGAAAA  
TATTCGCAACGACAAATATCCCTATATAGTCGATGCCCTTAATGTTAACCGGAAAAATACGACGTCAGAGACACAAAAAT  
TGGTGGAGTGGTTTTAACACCGCAGGGCAGAGTTTGGTGGAAAGATGTGGGCTATGTCCGATGGATAAAACGTTGCAT  
TAA  
>Cluster\_39599  
ATGACATCGCTGGTGGTCTCTGGTCTGGATACGTTGCGTCAATGGCTCGATGACCTGGGGATGAGTTTTTTTTGAATGTGA  
TAACTGTCAAGCTCTGCATCTGCCCATATGCAGAAATTCGACGGTGTCTTTGATGCTAAAATCGATCTGATCGATAACA  
CGATCCTGTTTTCTGCGCATGGCGGAAGTCCGACCTTACGCGTATTGCCGCTGGCGGGGATTATCAGCCATCAATGCC  
AGTTCGCTGACCGTGAAGCAATTTCTTGATATGCAGGATGATAAATCTGCCAAAGCTGGTGGTTTTGCCAGTCTTTATCCGT  
TATGCAGGCGTAAAGCTGATGAGCAGTTTGCATGCTGCGTTCAGAGCGAAGAGCAGATTTCGATGGCTACTTTTGAAG  
CTAATGCCATCAACTGCTGTTACCGACTGACGATGAAGGGCAAATAACGTTACCGAAAATTTATTCCTCCACTGA  
>Cluster\_442  
ATGCTTCAAATTTATAGAGGCAAACTTGTCAATTTTTTTAATTACCTTTGTTTTATTTGTTGTTTACCTGGGTTTGATAA  
CAATTCAAATTTCTGACATCGTATTTTATGGACATAAAACACCAAAGAGCGTTGAGATAATCTTTCTGAAAAAATAATTA  
TTTTAAAAATAATTAATGACAAAAAATAGTAGAGGGAAATGGTCAATTTATAAGTATAATGGTAAATAATTACAGGACG  
CACTGTGGAGTGGTTGATATAAACTTTAATTTTTTCAATGATATCTTTTATAGCGTGCATTAATAAACATTAGTAAACT  
GGAGAATATGGGTTCTGCGCTAAAAACAACGGGTGATTTTTAGTGATAAAAAACAAGAGGCTAGTTATAAAAAATAATTA  
ATTATGGAGACTATTACGATGTTGATTATATGATAACAATTTGAAAAATGAAGTTTTTACTGGATTGGTAAATGGTCA  
TAA  
>Cluster\_47155  
ATGAAAAAGGTATTTGCAAAATCTCTTCTGGTTCGAGCGATGTTTTCTGTTGCAGGCTCCGCATTGGCAGTACAAAAGGA  
TATTACTGTAACGGCCAACGTTGATGCCGCTCTGGATATGACACAGACCGATAACACCGCGTTGCCGAAAGCAGTAGAAA  
TGCAATATCTGCCGGGCAAGGCTGCAATCTTACCAGTTGATGACCAAAATCTGGTCTAACGACGTTACCAAGATGTA  
AAAATGCAGTTAGTTTTCCCGGCGCAACTGGTTCAAAGCCTGGATGCTAGCAAGATTGTTCCGCTGACAGTAACTGGGG  
CGGTGAAGAAATTAAGCTGATGCGGCAACCACCTTTTACCGCAACCAAAATCTTGGCTTCCGATGCGTTAACTAACGGTT  
CTCTGGCTAAAAACCTGATGTTTGTCAAAACCACCAAAGGTGTTCTGGAGACAGGCATCTACCGTGGTGTAGTAAGCATT  
TATCTGTCTCAGGATATCTAA  
>Cluster\_39480  
ATGAACCTGACAACGAAGGGTGAATTTAGTCTTTCGGGCATTACGTAAACTCGGTGTGGCATCAAATGCCACGTTAACCGA  
TGTCGAACCGCAGTCTATGGAAGACGGCCTCAACGACCTTGAATGATGATGGCTGAATGGCTTGGCGGTGATGTGCAC  
CTGGTATCAACGTTGGCTACATTTTTCTGCTGATGAGATGCTCTCCAGATCCGGGCGATGAGCAGGTTTATCAATAAC  
GCTATCAATGCTGTCTGATTTCAACCTTGCCTGCCGATTCGACCGGATATGCGCTGGAAGCGCTGCAAACTTATAAC  
CACTGCCAGATACGGAAAGAGCGACTCTCAAACCTGCTGCAATGGAACAGAGCAAAAGCCGCTAAATGTAAGTCCGGTT  
ATCCAAACCGTATGCTGTTGGTAGCGGTAATCAGTTGGCGAAGTGAACGGTTGGAATTACTCCACCGAAAGGACCT  
TGCATAACGGGACGGAATAA  
>Cluster\_29468  
ATGAACTCGGAATCAGTACGCATTTATCTCGTTGCTGCGATGGGAGCCAAATCGGGTTATTGGCAATGGTCTTAATATCCC  
CTGAAAAATTCGGGTGAGCAGAAAGATTTTTCCGAGACTCACTGAGGGAAAAGTCTGTTGTCATGGGGGAAAGACCTTTG  
AGTCTATCGGCAAGCCTCTACCGAACCGTCAACATTTGGTAATCTCACGCCAAGCTAACTACCGGCCACTGGCTGCGTA  
GTTGTTTCAACGCTGTGCGCAGCTATCGCTTTGGCATCCGAACCTCGGCAATGAACCTCTACGTCGCGGGCGGAGCTGAGAT  
ATACACTCTGGCACTACCTCACGCCACGGCGTGTTCCTATCTGAGGTACATCAAACCTTCGAGGGTACGCTTCTTCC  
CAATGCTCAACGAAACAGAAATTCGAGCTTGTCTCAACCGAAACCATTCAGCTGTAATTCCTACACCACTCCGTTTTAT  
CGCGTCGAAACGGCTAA  
>Cluster\_14975  
ATGATAGCGTTACAGACTTAGTATGATGAGTAAAACCTGCAGAGCATAACGCTATATCAAGTGGGTTTACCAGCATCAA  
TACATTTGCCAGGCATAATGTACTTAATGTTGATGTTCAACCATCAAATATACCCGTCAGCAATGAATCATCAAAGGCTG  
TAAAAACCTGTTTTATACCTCATGAAATAGAATGTTTAAACGTAATGCAGCCCTTCACGGCATGAGCATGAGCAGAGAA  
ATTGCTATTTCGTTGCGTCACTTTTGTAAAGAAATGAAGTCTGCTTTTACCCTGATGAAGTTAAGGAACTTAAAAAAT  
ATCAACTGCTGTAGATCGTGTGGTTCGCAACATTCATTTTATCATAAAAGGTGAAAGATTTTGCACGGTTAACGATCCTG  
ATTTTCAGAAAAGACGTTGTTGAAGTGTGAACTATGTAAGCAAATGATTTCAAACCTTGAAACGTTAACCAAGAGTGT  
GTTAACAGATTTGGGTGA  
>Cluster\_35931  
ATGGGTTTACCGCGCTTAGCAAAATTCCTTTAATTTTACGTCACAGCGGTGGCTGCATCGTCGCCATTACGGCGAGGT  
GCTAAGCCCCATTCGCTGGTGGGGGGGATCCCGTTTTATCTTTTATCTGGTGTGATGTTTGTGGCTGGCTGGAGCGCA  
AACGCTCACCGCTCGATCCGGTAGTACGATCGCTTGTGTCAGCGCGCATTCGCAAAATGTGCCGTGTGAGTTTTGTGTG  
GATATCACAGTATGAAAGTTCGCGAGCGCACCAGCAGCGATAAACTGCTGGCAGTGGCTGACTGGCGGCAAGGCC  
GCTCTTTAGCGATGAAGAACGGCTGGCGCTGGAGTACGCCGAAGCCGCAAGCGTAAACCGCCAACGGTTCGATGATGCC  
TGGCTACCGACTGGCTGCGCATTTGACGCTCAGGCGCTCACCGAATGACGGCATGATCGGCCTGCAAAAATCTGTCA  
GCCGTTTTAATTTCTGCCATGGACATTCGGCTCAGGGGCTGTGCCGATTTCTGAAAAACGTTCTTTAA  
>Cluster\_58467  
ATGAAAAACTTATCGTTTCAACTGTATGGCATTCAATAACATTTTCTGCGCAGGCTGACGATTTTACGGTCACTAGTAA  
TGAATAAAAAACAGGAGAGCAACTTACAACGCTCATGCTTTTTCTGGATTGGGTGTGAAGTGGTAATACATCGCCCT  
CATTAACCTGGTCTGGTGTCTCGAAGTACAAAAAGCTTTTGGCGTAACCTGATATGATCCAGATGCACCTACAGCAGT  
GGTTGGTGGCATTGGACTGTTGTTAATAATTCAGCAACAGTAACATATTTGCCGTTGATGCAGGGAGACGTTGGAAC  
AAAACCTGCCGACTGGTGTGTTCAAGGCGAAATGATTTTGGCTATGCTGGGTTTGGTGGCGCATGCTCTCTTAAAGGAG  
ATAAACCATCATTACCAGTTTAAAGTATGGGCTCAAAAACCTGAAAAGATTTCTGTAGATTTAACTCCAGCGGAGCG  
TTAGTTGGTTATATGCTAATAAAAATCACAACCAACCCAGTTTATGAGATAAAGTAG  
>Cluster\_33338  
GTGAAAACATTAATTTCTTCTCAACAAGGGACGGACAACCGCGAGATTGCCCTCTACCTGGCTTCGGAACCTGAAAGA  
ACTGGGGATCCAGGGGATGTGCGCAATGTGACCGCATTTGAAGAACCACAGTGGGAAAACATACGACCGTGTGTGCTATG  
GTGCTTCTATTCGCTATGGTCACTACCACTCTGCGTTCAGGAATTTGTCAAAAAGCATGCGACGCGGCTGAATTCGATG  
CCGAGCGCTTTTACTCCGTAAACCTGGTGGCGGTAACCGGAGAGCGTACTCCACAGACCACAGCTACGCGCGGAA

GTTTCTGATGAGTTCACAAATGGCGTCCCGATCGCTGCGGGTCAATGCCGGGGCGCTGCGTTACCCACGTTATCGCTGGT  
ACGACCGCTTTATGATCAAACACTGATTATGAAGATGTCAGGCGGTGAAACGGATACGCGCAAAGAGTTGCTATACCGAT  
TGGGAGCAGGTGGCGAATTTCCGCCGAGAAATCGCCATTTAACCGACAAACCGACGCTGAAATAA  
>Cluster\_17503  
ATGAAGTTAGAAGATTTTCGACGCTTATAACCGCCTCAATCGAAGGTGTCGATGAGAGGAAATTTCTTGATTACATTCA  
CAGTCGGAACAGATGGGTGAGTTTATCAAAGCATCGATAACGAAAGCCAGTATCAATGGCCATGAAAAATTCATTCC  
ATAGTCAATGGGTGAGTCTGGGGCCTTTATACGTGAAAAGATCAACGACGACTCAATTTCTCCCAAACATTAACGCTC  
TTATTGCCAACATATGATGGTGACAGCCTTGACTTTATCGGGGGGAAAAATAAGACAGGTTCGATAAAGGGCTCATTGG  
ATTTTGGCTGGACAACGGACATTTTCAGTCGCCGAGAAATTTGGTCTGGATTGAATGCATACAAATCACCAAGTTTGGCTG  
TAAGAGCTGAAGCTCCAGCCTGTCTATATTAGCTGGCCCAATGCCACAGTCGTTATCTTGGTGAAGATGAGTTCAG  
GTTAACCCCTCGCTCTTCAAACATAACCGTTATTGAAACCTATCCGGACAACCTCTTTTTCAAATGA  
>Cluster\_55646  
ATGAACATATATAAACAGATATTCCTGAGGTGCTGATTTTGAACCGCGCTGTTGGTGTGCGCGGGCTTCTTCTT  
CGAGAGCTTCAGCAGCAAGGTGTTAATGAAGCGGTGGGCCGCCAGGTGGATTTTGTTCAGGACAACCACTCCCAGTCCC  
AGAAGGGCTACTGCGCGGGCTGCACTATCAGCTGGCTCCGCACGCCAGGGCAAACCTGGTCCGCTGTGTGGAAGGTGAG  
GTGTTGATGTGGCGGTGGATCCGTCGTTCACTGCCCACTTTGGCAAATGGTGGCGCGGTACTCAGCGCAGAGAA  
TAAACCTCAGCTGTTGATCCCGGAAGGTTTCGCCACCGGTTTATGGCGCTGAGCGACACGGTGCAGTTTGTCTACAAG  
CGACGAACACTACGCGCCGAGTCAGAACGGAGCATCATCTGGAACGATCCGGAGATCGGATGACGTTGGCCGGCGCTG  
AGCGATTGCGCGCTCTCGCTGTGCGGAGAAAGATCTGCAGGCACATACTCTGCCACTGCAGAAGTATAAATAA  
>Cluster\_2424  
ATGTCAAAGTCCGCTCTCATTACTGCGGTAACCGGCAGGATGGTCTTACCTGGCAGAACTCTGCTGGAAGAAAGGATA  
CGAAGTACACGGTATTAAGCGTCCGCTTCATCATTCAACACCGAACGCTGTGGACCACATCTACCAGGATCCGCATTCAG  
GCAATCCAAATTTTCATCTGCACATATGGTGATTTGACGGATTCATCAATCTGACCCGATTTTAAAAGAGGTTCCAAACCG  
GATGAGGTCTATAACCTGGGCGCATGAGTCACGTCGCGGTGCTGTTGACTACCGGAATACACCGCGGACGTCGATGC  
AATTGGTACGTTGCGTTTGTGGAGGCTATCCGCTTCCGCTGCTGGAAGAAAGACCCGTTTCTATCAGGCTCCACCT  
CAGAACTGTACGGCTGGTACAGAAATCCCGCAGAAAGACACGCGTTCACCCGCGCTCGCCCTATGGGGTAGCT  
AAGCTGTACGCCCTACTGGATCACCGTCAACTACCGGAGTCTTACGGGATGTATGCCTGTACGGCATCTGTTCACCTG  
A  
>Cluster\_58385  
ATGAGCACAGAAAAGAAAAGATGATTGCTGGTGAATGATCGCTCGCAGATGAGACGTTATCTCGGATCGCCTGCG  
CGCTCGTCACTTATTCACCGATACAATCATCCCTGGCGGAAGAGCACACATTACGCCAGCAAAATTCGCTGATCTAT  
TCCGTCAGGTGACAGAGGCTTATATTGAGCCAACGTTTCGCTGTGACTATGGCTATAACATTTTCTCGGTAATAATTT  
TTCCGCAACTTCGATTGCGTGATGCTTGATGCTGCCCCATTCGCATCGGTGATAACTGTATGTTGGCACCAGGCGTTCA  
TATCTACAGCGCAACACATCCCATCGACCTGTAGCACGTAATAGCGGTGCTGAACTGGGAAACCCGTCACCATCGGTA  
ATAACGCTGGATTGGCGGACCGCGGCTATTAACCTGGTGTGACCAATGGTGATAACGTCGTTGAGCTCAGGTGCA  
GTTGTACAAAAGATGTCGCCGACAACGTTGCTGCGGGGTAATCCAGCCAGAATAATTAATAAATTTGTA  
>Cluster\_2139  
ATGGATGCACTGCAACTATTGATCAATCGCCGTAGCGCTCCCGCTGGCTGAACCCGCGCAACGGGTGAACAACCTGCA  
AAACATCTCGTCCGCGGATGCTGCGCGGACCATAAAGCTCATGCAACCGTGGCATTTTTTGTGATGAAGGGGAAG  
GGCCGAGGCTTTTCAGCGCGTACTGGAACAGGGGGGCGATTGCTGCGGTAAGTATGACAAAGCTATGACAAAGCCCGT  
AATGGCGCTTCCGCGCAGCGCTCATCATCAGGTGGTGGGCAATGCGAAGAAATCATAAAGTCCCGGATGGGAACA  
GAAATGTCTGCCGATGCGCGGTCATGCGCATGCAAAATGGCAGCCGTTGCCAAAGGATTTGGCGGCATCTGCGCGCAGT  
GCGCATTAACGTAAGAGTCCGCTAGTGGTGAAGCATTCGCTGCGGTGAGCAGGATAAAAATTTGCGGTTTCTCTACCTC  
GGCAGCCGAGTTGAAAGCATCTACGTCGATTAACTCCCGACCCGACCGCTTTGTAACCTATTTCTGA  
>Cluster\_999  
ATGGATAAGCTGAAAGGAAAGTCACTTTCTTTGCGGAAAGTGACAAAAGAAAGTATCCCGGAGCGTTTGGAGAAATTAAT  
TGGAAAAGAAAGTGAAGGGCTGCTGCGAAAGATTGGGGGTTGTTTTCTACTTTAAACAATTACCTGACGCGAGGTA  
CTGAACCTTCACTCAGTGTGGCTCGGCAGATAGCTGCAATGAAAGGGTTACTATCGAATGGATATGTGGATCACATGAT  
GATTCATATGAGAATCACCAATTTCAACTAACCGCATAATGAGAATACAAAACCTCATTATGAACATCATTAACGCCTT  
GGATGCAAGGATATGAGCGACTATCTAAGACTCTTGGCCCTCAATGGTGCTAAGTATCTGACTCAAATGTTGGAACCCG  
AAAATCAAGGCTTACTCGCTTTGAAGGACGAAACGTTGCTGCGCGCTGCTATTAGATGATTACCTGATGAGCGTATC  
AGAGAGATTTGGAAGAAATGAGAGCAGCAAACTCTCAAGTAGTGTAAAATCGAGAGCGGGCTAG  
>Cluster\_39675  
ATGAGTGATTCGCGACTGCTGCCGACCGCTCATCACCGCTTGGGTGCGCGCGCAAAAGCTGTGCGGAAATGAAAA  
AACACCGGTCAGTATTCGTGAGCTGTGGAACCCGGACACTGTCGGGCAAAATGCTGCGCTGGCTGGCGTGGCGTTTT  
CGGTGCACAGGTGGGATGAAAGTGGCCGGAAGCGACAAAACCGCGCTTATCCGCGATGCTTATTTCACTCCACTGTCA  
AAGGGCACTATAGGTGCAATCCGCGCTGTTGGTGGAGCCGCTCGGCTATCTCATCAACGTGACGGAGTGGTGGGAAACAG  
TGACCCGCGGACCTCCGCTGATATGGTGTACTGGAAGCGGCATCAGAGGCAATGTATCAGGAAATGAAAC  
GGCTGATTGCTGATGCCAAACCTGCAAGCCGCTACCTTATTGGCTGAAACATTACCCGGGACATTTCCCGGCTACCTGTT  
GCCGTTGGTGGCTTACGACGGGATGTAATTACGGTTTACCCGGATAA  
>Cluster\_42368  
ATGTCCTGTTGCTTAAAGCACCCTGCTGTTCTTCCGCGGCTGACGTAATAAATCAACGGTCAAGTTATTACGATCAA  
AGGTAACAAACGGGAGCTGACTCGTACTCTCAACGATGCTGTTGAAGTTAAACATGCAGATAATACCTGACCTTCGGTC  
CGCGTATGGTTACGACAGCGTTGGGCACAGGCTGGTACCAGCGCTGCCCTGCTGAACTCAATGGTTATCGGTGTTACC  
GAAGGCTTCACTAAGAAGTGCAGCTGGTTGGTGTAGGTTACCGTGCAGCGGTTAAAGGCAATGTGATTAACCTGTCTCT  
GGGTTTCTCTCATCCTGTTGACCATCAGCTGCCGCGGATCACTGCTGAATGTCCGACTCAGACTGAAATCGGTGTA  
AAGGCGCTGATAAGCAGGTGATCGGCCAGGTTGCAGCGGATCTGCGCGCTACCGTCTGAGCTTACAAAGGCAAG  
GGTGTTCGTTACGCGCAGGAAGTCTGCTACCAAGAGGCTAAGAAGAAGTAA  
>Cluster\_50446  
ATGCAACATCTGAAAAATATTACCGCGGAAACCCCAAAACCTTGAAGCAGTATCAGCTTACGAAAAAGCTGGCGTTAT  
CTGGCTATATACAGAAGACGGTAAAACCTGGTATGACGAATTAATAAATTTTCAGGATGATATTTAAAAATAGCTTATG  
ACAGAAGGGGATTTATTCGTTGTTATTGAGAAAGACGTAACAACCTTAAACCTGACGGGTTAAGTGTGTTGAGTTACCG  
AATAAAGCAGCAACCTGCGCCGATATCTCGGAAACTGGAAGTTTCTGATGGTAAAGTAGTAAAGCGGAAATATA  
AAAACAGGAACTGCAACAGCAGGAGGTTTACAAAAGCCGCTTTGCTTTCCGAAAGCGGAGTCTGTGATTTCAACCGCTGG  
AACGTTGCTGACTGAAATATGGCAACTGATGAGGAACGACACGACTGGAATCATGGGACGCTACAGCGTTATGGTC  
AGCGTGTGGATACTGCAAGCCGTAATGGCCACAGAAACCAATAA  
>Cluster\_48676  
ATGAAATATCAAATTTTCTGAGTTGGTGAATCGTATTTGTCCAACAACCCAGCCATCGTCCGATATGGATGTAAC  
GATCGTTGTTCAATCGCTGGTGCATCGGTTCAACACCATCAGTTGAGGTTCACTCAATTAAGCGGGTTTTGATTGGG



ATGCCGGCAAGTGATGATTTTTCCATCACAGCCACTGACCACGCTAACACCAGAGCAGGTTGCTGATATCACTGATAGT  
GTGCGCAAAGGTCAGTCTTGGCACGCGTATCAGGAATACAAGAAGCATAAAGAGCAGTTGGAAAAATTTGCGATGGAGTT  
GGAAGCCGCTAAACAGCGGAAAAAGATCTGTTTTATGGAAAATGTTGACTTAAGTCAGGTATAGCCGGTCTGATACACC  
TCGGTATTCGATATGCGGATGTTGAGGTTCATGAAAATTTCTGGAGATGCCAGCTTTCTACTCCATGCCTGACAGCATC  
ATAAACAGCATTCAGCAGGTATTTTACCAAAGAGGGGGCAGCACGATGA  
>Cluster\_34627  
GTGGCTAAAAAAGGGCAGCTTAAAGCCTACCCAGAAAAGGTTGACCAAGCTATTAAGCTGCTTGAAGAAAGTAACTTTTAG  
CGGAGTTTCGTGGACCGGAAGTGAAGGACGAACCCCAATCTGGTTAAATGGATCTCAAAGCTTTTGTGAAATTTGGCA  
ACCCAATCACAGGCATAAAGATTTATGCTTCACTGGCGTTCTCCATCGTTGAAGGGGTGGATATAGTGAAAGCTTTCATTT  
GTGATGTTTCTTCATGACAGGCGCATTTACGCGCTTGACCCGTACCCTGCGCATAACAAGTCACACCGTAATAAATCTAT  
AGTGCACCATCCAGATTTTGTGAGGTGGCTCGAGGTCCTCACATATCATGTACTTCAATCAGCTGGGGAAGAAATG  
CACTCAAGCTTGAACGAACATCAAGCCAGATGATTTTTTTGGCTACTGGAATATTTTTTGGCAGGCGCTTAATATCATA  
TATGAAGGCAGCCACTTTACCAATCAAGATAAATCAGGTACAGTATCATGGAAGAAATGTA  
>Cluster\_41312  
ATGGAACAGCGCTGCTTTGGCAAGTACTGAATGGGTGGATATTTGCAATGAAGAGAACGAAGTCATTGCACAAGCCAGCCG  
GGAACAAATGCGGGCACAGTGTCTGCGTATCGTGCACTTACATCGTGTGATGATGGCATGGGCAAAATTTCTGGTCC  
AGCCTCGTACCGAGACAAAAGACTTTTTTACCAGGCATGTTAGATGCGACCGCGGCTGTGGTCCAGCCGATGAGCAA  
CTGCTGGAATCCGCGCTGCGAAGCGGAAGAAGAGTTGGGCAATGCGCGTGTCCCTTTGCCGAGCACGGGCGTCTTA  
TTTTGAAAGATAAAAATTTGCGTGTCTGGGGCGGTTGTTTCAAGTTGCGTCTCTCACGGTCCCTTCCGCTTACAGGAAGATG  
AAGTCAGTGAAGTTTGGCTGACGCGGAAGAAATCAGCCAGCTGCGATGAGTTCACCTCAGACTCGCTGAAAGCG  
CTGGCGTTTGTGGATGAAGCGCAATGCCAAAAATGAAGCTAGAAAAGTGAAGCGCAGAAATGTA  
>Cluster\_20351  
ATGTACCAGCTAAAGATAACCATCCGAGACAGCAAAACCCTATATGGCGGCTGTGCTGGTTCCAGAGCAAATCCCCTT  
TAGTAAACTTCATGCCGTGATCCAGTTAGCTTTTGGCTGGAATGACGAACACCTGTATATGTTGAGAAAGGGGTAAAG  
GTGATCCAGGTAGCGAGTATCGCGTATGGGGTGAAGATGAAAGCATGGGTAACCGGCAATCACGCCACTATGGGCGGCG  
CTCCAGAAATGAGGTTGACAAAGCTGGTTTACACGTATGACTTTGGCGACTGGTGGGATTGCGTCAATTTGCTGGAGAAGCA  
AACACACGATACGAGTAATCAGCCCATTTAGCTGCTGCGTGGGAAAGGCACCACCCGCGGAAAAACTCAGGCGGCTTGC  
ATGGTTACAATGAATTTGCTATTACAGCCAGAGAGTCTGATAAATCTGAGCAGGCGGAGATCCCAATTTCTGATGCTG  
GATATTGAACCGGGTTTACGACCTGAGCCGCATCAACGACAGATTGACGGCTATTAAGTGA  
>Cluster\_53504  
ATGCCTGAAGTTGCTGGGTAATGAGACATTTCCACTTTTAGCAAGCGGTAAGCTATTGGACCAGGATGATTGGTCCA  
CAGCCTGGGCTGTAGCGTTTGAATACATTCGGGCATGAACAGTCAATTTATGGCGGTAGTGAATGCCCGGCTCCAAGGA  
CATTTGGTGTGATATTCGCTCTGACTCGGGCTGGTTTCAATAATCTTCTGCATCGCCGTGTGTGTTAATCGAATTTGAA  
CGCTTTGATGGTTTCAAGGAGGGGCGAGCAAAAGCTGGAAGAAAAATTAATAAACTTACTGGAAGCAGCACAGGCTGGAA  
TCATTTGCCCAAAACCTGGTCCCTCAGTGCCTGAGGCAAGGCTTAGTAGGTGTACTGATATCAAAAAGTGAAGACA  
TATGCCGTATGGGTTTACTTTCGTTCCAGGGTACCAAGTAAATCGCCGCTCTGATGTTGAGGTTGGTATTTAGTCCGCTTT  
TTATTTATCAAAAACCTGAACATGATTGTTTGGACAGAAATTCATATGAGGTGTGATGTA  
>Cluster\_22032  
ATGTCGCAAAAATCGCTTACGGCCATCAGCTTCTGCGTACGGTAATCCTCATCATCTGGATGCTGCAGGTTGCTGTG  
TGAATAACGATGAGCTTCTGGGAGCGGAGTTTGGCGGTTCTTACAGTGAAGCAGTAA  
>Cluster\_36907  
ATGTTATCCACAGAAAGCTGGGATAACTGTGAAAAACCTCCACTACTGTTTCCATTTACAGCCTTGACGTGCGACGAAAC  
TCCAGTTTTTAGTGGTTCACTGCTTAACCTAGTGGCACATTTCTGTGGATAAATACGGCATTGGTTGA  
>Cluster\_56876  
ATGAAAGTTGCTGCTCCGTCAGAAATATGCGGTAACGCAAAATCGTTAAGCGTGATGGTGTGATCCGCTGATTTG  
CAGTGCAGGAGCCGAAGCATAAACAGCGCAAGGCTGA  
>Cluster\_16612  
ATGAAAGCACTACTAATTAATGCTATTTATCATGGGATTCATTTCCGTAATAATGCAATCTGCTGCTGAGGAGATTCA  
TGCAGATGCAAAAGTCAGCATCAGGTCCTCATAGCTGAGTAA  
>Cluster\_63886  
GTGAAAAGTGCAGCGCTTGTGCTGGCTGCCATCTGCTGTTTCTGGTAGTGGTGGTGGATTTACCCGGACGGCTGATGTC  
GGTGTGCGAGATGGTGTGCTGGTGGCGATGGCGCTGGTGTGCTCGGCTTTACTGCGTAAATCTGAATAA  
>Cluster\_66914  
ATGATGCCACAGCAAGCTTTTTAATAATGTTAATCGTCTGCTGTGAGCATTTCTGTGTTTTGCTGGATGGTGGGGA  
TTGCTTTTCCGGACTCCGCTCCAGCGGAAACAGTGTCTTGTGGCAACGTTAGCTTACGAAGTTAAACGTTAA  
>Cluster\_49694  
GTGGATGACCCCGATCTACATGAGAATAATTCGCATTTGCTATCCGATGGCAATATGAGTACGATAAATATTATCTATGT  
TGAAGAAGAAATTAATACATTAGGTGCGGTAGTAACATATGCACAGACCGCGCTGATGATACGATGAATGA  
>Cluster\_9290  
ATGGATATTTCTTAGTGAAGAAGAAGTGAAGTTACTATAAAAAATCGCTCATATCCAGGAAGGAAGCATAAAAAAGGTGC  
GCCAGGAGACGCCAGCTGTTGGAAAAATCAGCACTGTGGGGCGTAATTACCCTTGCCTTTTACACTGCTGA  
>Cluster\_64461  
ATGAGTGAATGAAAATACGTCGCAAGGCAATAGCACGCTTAAAAATCCATTACCAGTGCCTCCGCAATGCCATTTTTG  
TGGTGGGAATGATCAGGATTTGGTACGTATGATGTTGA  
>Cluster\_30616  
ATGATTCATCCAGTCTCTTTTTAGATAAAGCAATTAACAATACAAGAGGTAATAATGCTAATATTAACATAG  
TCAAATCAAGAGATAAAAAGGAATTTTACCTATAAAAAAATGATGACATATCATCCAGATTTAAATTTTACAGTTCGC  
TAGTAAAGCAGAAAAACTCAACGAGAAGATGTTGTTTTGATAGGAAAAATGATTTCAAGTGAAGTTAGAAATTTACAGCTCC  
ATACATAATGATAGAAATATCGTAATTAACCTGGAATTTGAAAAACATCTTTTTTATGTAATCTGCCAGACTGCTATA  
TAGCATGTTTAAACGGTAGTGTCTATTTTTCTCCCGTGTATGATAAATAGTTTCAATCCCGCAGTCAACTCTACCTACTA  
TACATCAGTCTGAAAGGAAGGAGTTATTAACAACAAAAAGCATCAATCATTTAAAAAGAGTATACCATCGATGAATAC  
ATTAATAAAGAAAAAAGAGGCAATGAAAGTCAAAATAAGTGAAGTCAATGACATCATAATCAATGAAAATATGCAAA  
CTAAAAATAGCCGAAAAAGGTATAGAAATATAGTTAAGCAGGAGAAATGTTTATCATCATTAATAAATGATGACAAAGAA  
AACAGACAATATCAGACAATATATCTAAAATAATAAATTTATAGGGATAGAGTATCAGTCAATAAAGTAGACATAGA  
GCCATTTATACATGAGTATGGGTTGACAGTGCCTCCCTGAAAAATACATCGTATATATAACAGCTTTTTTAAATACAT  
ATAAAAATTAATCTACTTTGCTCTGGATGATCCCAATGCTTTTTGGTGCAGCCAAAGTTAGTGAATTTAAAAAATATA  
GCCATGAATATGCAATTTATGCGTTTGAAGAAGAACCACTCTCATTTAGCGGAAGAAATGAATGATGATATTAATAAAT  
ACAAAACATCAAAAATAAACAGTAGATTTTAAATGAACAAGAGAGGGTGAAGGAATTTGAAAATAAATACAAATCAT

TAACGAGAGAACTAAAGAAAAATCAATGTTTTTTTTCTTGAATCAATGATAGGTATGCAAGACAACATTTTCACATAT  
TGTATATCAAACGGAATATCAAATACTGATGATGCATCTAGACTTAACTTTTTAACTACTGTTTTAAACTTTTCACCAGA  
CATTCAAAATGACTTTAAATCTACAGTAGAGAAAAACAAAAGGATATCGATTTATTAAGACATTAATCTCAAAAAAT  
TCGGAGATAGATTTCAACTGAGAGATATTAACACATTTGAATCATTTAAAAAACCCACAAGATTTATTTTTTTTCAACAA  
GAGATGCTATAAGACTGGAACACGCTGACGCGCTGATCAGATCAGGTAAGAAATGAATATATTTGAAAGAGTATGGAGGGATTTA  
TACCAGACTGATATTTCTCCTGCATATTCAGATGAAGTGTACAGATAATAAATAAAAAAGTATGGAGATATGTTTT  
TTGAAGATTTAAACTAAGAAGGATATATCAGAGCTATTTCTGTCCATAATCAAGGGGAAAAGTACFAATTAAGCAT  
GATAGTTTATGATGAAAAACACGTAATCAGTTAAATACCATATGAGTGAATAGAAAAGCTGACGATAGATAATATTTT  
TAAACCTGTTGAGACAACAGTTGTCAGAGATACTTTTAAATTTTTAAAGATATCAAAAATGGACAGAAAACAGCTGGA  
ATATTTAGAGGGAATAAATAATTTTCATGCTAACTCACAAGGGAAGTAAGTGTATTGATTTTATTTCAATCAGGACAGAAAAA  
CAATATTTAGAATTCAGCGTATCAGAGATAATAAGTTATAAATAATTTCTTTTATACCACAATGATCTAAAATCTTT  
AGATAATGTGGAATAGGAGGAATACCTGCAAAAAATTTAGAACACGGATGTTTTCTGAAATATCGACAGGACGGTA  
CAATTTCTTATGATGACTACTCTAAATATATCTGGCCAGACATGATATGCGCACAATGAAAAATACTATAAATCT  
CTAGGACGCATAGGTGAAGTACACATTAAGACAAATAAATTAAGTATATGAATTTTGTGGGTGTATATGCAAGTTCAGA  
TAAAGAAAAATAAAGTTTTAACTGGCTGAATCCAGTGAAGTGGTGTAAATGATATTTACACCGGATGATGAAAGCTCAT  
GGGCTGTAAGAAATAATGATATTAATAAATTTTTATTCGAGAAAAATAAATGTGATGTTACCCGAAAAATACCTACCTCC  
CTATCTATGATGACTCGACTCGCGAGTTTTTTTTCTGGATGGGATAATAAAGCATAACAATATGTTACTGAGACTATAATA  
AACTTTATTAAGATATAAATTTATTGTTAACATCGTCTAATGTTGATGTTAACTTTTAAATAGCTAGATCGTGAAT  
TATATGCAATAAGCAGCAAAATAGAGAAATCCGTTAGCCTTGGCGCTATAAGGACTTTACAGCTACAATAAATCAATTA  
GTAACCTCAACACATTTGAACCTGAAAAATCAATTAATTTTTATGATTTTATAGTAAAAACAAAATGATTTACT  
TAGCGCAATGAAGTTATTTTTCGCGTAATGATGTCGAGACAATAAATCATGTTTTGGTACAAATCAACAATGAAAAAATG  
TATTCCTCCGAGAGGTTATATCATGTGTTTTATGGACTAAAAAGTAGACTCTTATATAAAGAAAACAAAAACACTTA  
TCTACGGAAGATGCAAACTTTAAGAGATTTGCAAAAATAAAAATAAAGAACTATTTTCGATGTTGGATGATGATG  
TTATAAAGAAATCAATACTACAAATGCAATATTAAGAGAGAAATAAATATCAGGCATTAACAACAACTGAAAT  
CTATATATCAGGTCATGAATCATTTGATATAATACGAAGCCATCAACATGAGTGGGAGATTTATCAACGGTAGAGCAA  
TTTTAAAAATTTGAATTTTATGTTAAAGTGAAGTTATCATTTTTCCAAGTCAATTTTTGATGATATAAAAAACAAATATAT  
CACAGATCCCGAAACAAAACGAAACGCACTTTACCATCAATAGATAGTGATATCAAGAGCGAATAGCCTTTCTCGACA  
TTATCCACTACGCATATACAGGATGTTTTATGAAAAATTTACAGTTAAGTGGCTACGTTTTTTCTGACATCAACAAAT  
ACAGAATACTTATGCTAGTTACGGAATTTCTGGCATTATTTCTACGGCGTGGTATACCCAGCTCCATCTGATAAAT  
ATTTGAGCTATTAAGAAGACATACAAATTTCCAATTTCTGATGGATAGAAAAATAATCCCATATGTTTATGATATCTTAT  
CAGGTAATGTGTCAGCTTTCTGCACTCTTCTTATCAGAAGAACAAAAAATATTTGAGTATATAAATAGAAAT  
AGTGAATCAGATCAGAACAGTATTTTCAAGTGTGACAGAACAATAAATCATCAGTTATGGCATTAAATACTCTGTTGA  
TTTTGATAGATACAATGAGAATTTATTTTTGCTTTACCTATAAATCAAAATTTAACCTACCTTTTCAATGATCGCTACT  
TCGAGATGTTATATGACATTCACATTTGGAATCTTAGAAAAACAGGGCAATAGAGATTTTATATATAGGAAGTTTTTCTAT  
TTAAATTTGGATTTTCTAATTAATGACGAGAGGTTCTTAATCTTGAAGGCTTAATAAAAAATAAATATTTATCAT  
TAGTGAAATACATAAATTTAAACAAATAACAATTTCTTTGAGGATTTTCCATACCATTAATTTACAGACTATATGTTCCCA  
GTATAACAACAATAAATAAAAAACAGAAATCATGGACATCAGTTAACCAATGCTATGACAGTTGCTTCACTGGTTAAG  
CCATATGACTTTAGTAATCTTGGTGCCTAATAAGTATAGATAAGTCCGTTTTCTGATATACCTGCATTGCATACAATTTG  
TGAACAAGCGAAGTATAAATTTACTTTTCAATGGAATGATTTTTATAAATCTCATGCGTCAATATGGGATACAATGCAAGG  
AGCATAAAGATGCAAAATCTGAAATTTTACCCACAAAGTCTTCTTTTTGATAGAGATTCGAAAGGAAAGTGCCTTTGGTTT  
TCTCTCCTGTATCTTGATACAGGAGGTTATGGAAGCAGATATCAAAAACTAAGACACAATATTGAAACGTCAGGCAAT  
GTATCAACAAAATATAATGACAATATAAATTTATCTAATAGCGATGATTTCTTTTTAAGAAAAACACACGATCATTA  
CAATGTTCAATGATGATAGCAATATAGATTAAAAACCTCACAGTTAGAAATCTAGAATGAAAGACCTGACTACT  
GAAGGCATATTAACCAGCGTCGAATATCATCTTTTTAATAACAACAGAAATACACTCACTCGGTTACAACAAGTATC  
TTCTTTTTGGAGGTAACCGATCCTAATTTTGGCATTGTGACTTCCATTCCTTAGCAGAGGCTTTAAGCTTTATAAAAA  
ATATAACGAGCAATGTAACCTTTTCTATCTTTATGGAAGTGGTATTTGTTAAATTTCACTTTAGTGAGTCTCCTAAACA  
TTGGAAGTATTAACCTCCTCTTTATTTCAAAATGAATCTTTGTCAGGGATATATATTTGCAACTCCAGCAAAATTAAT  
CGCAACTGGAGATTCATTAATAATTTAGGGACATTTAGTGCTGTCAGTTTTATTTATGACATTTGAGGAGTCTCTAATG  
GCAACAGAAATAAGTGAAGCAGACATATAAATAAATAAATCAAGACTCTGAAAAATAAATGGTATATTTTACAACATTA  
ATAAATACGCATTTATTTGTCAGAGTCGCAAACTCAGAAGATAAAGATATTTGTTGATTTTTTAGGCATTCAGGACAAA  
AAAAAGTATAAGCTTGAAGTGAATTTAGACATATAAGTGAAGTTCAACAACCCCTTCAATCTATTTATTTACGGCAGA  
AAGAACATGTAAAAACTTACTATCTGGATTACTTAATGAGTTTTCAAAATAGTTAAGACAGCAAGGCTTTCACTTAAA  
ACAAATGTTCTTTTCAATTAACCTTCAAAGAATCAAAGATAAATAGTATGATGTTGAGGATTTACAGTAACTGATCTGCA  
AGGAAGACTTTATAGTGTGATATAGATAACAAGGTTATTTGCTGACTTTTAAAGAGGGGATAAATAGTTTATCTGAAG  
CACTCGAACAACATATAGATGCAATTTATGCTGTTATTTGGCTGGTTCAATATACAGAAATGATAAACAACAAATGAC  
AATATTTAGCGCAATAGATCATGACAGGAGCAGTATCAGATATTAATAAATATTTGATAGACAATTTTTAGGCGGAATTTAAC  
TTTTACTAATAATCGCGTATATAACCCAGGTTGATATCTAGTGCCTCGCTTGAAGGATTTATATCTTCTGTTTGAAG  
TGTGCGCGTCAAGAAATAGGTGGCACCGCTGGCGTTATCTTAGCAATGCGCAAAAGTAAATAAATTTACCTTTGCTAGAT  
ATAGGCATAAATAATTTGGTCATTTATGACTCTTCAATTAATCAATGCCAGAGCCACACAAAATGAAATATGATCAAC  
AGGATAGATGATCTTTTCTATATAAATCTGCTTTATCAATAGGCGCAATCGCATATCCCTTTGGCAATAGCTA  
TAGTTCCGATAACTATTTTTTCTCATGAAGTAAAAAATATGCTGTTTATGTTGAATCAAAATTAATGAGCGACATAAGTTA  
TGGCTTGAAGCTGAAAAATATCTGGCAATGGAAGCGCAAGGTTCTAAGCATTAACAAGATACAGGCAATAAATGATTT  
ATCAAAATAATCAGGTGTTAGGTAATATTTATTTAGATATGAGAGAAAACCTCCGATATTTACATGGTAAAAATCATATA  
ATAGCGGGAAGAATATTGGAAGTCAATCCAGATATGAATGACAGAGAAATTTAGGAGTCTAGAGCATACAAATTTGCTGAT  
ACAAAACCTCAGATGACAGGTAACCCGATTTTTGCTGGGAGATAAGGATGATGTAATCAATGGAATGCTGCTGA  
ATCTCAATFAGCTAATGGGTATTTCAACCGCAATGGCTCTCAAAAAGTCCAGTTATTTCCAGAAGGGATTTATAAATAC  
TATATCTTGGGTATGGAGAAACATTTAGAGCTAATACTGAAGTTACATTTGAGTACGCTGTTACTTTTTACGAGATTGCA  
AGGCATATACTGATGATGAATCTGAGCATTATTAACAGTATGTAACCAACGTAGTATGTAATTTGGTGGAAAAAGA  
ACCATTAACAATAATCTCTGCTAATTTGAACATGGTATGCTTTGGCTCAATCTACATATGATGAACGTTTTAAAAACT  
ACAAATTTTCAATATCAGAGGGGAAGGCGGGATAAATAAATTAATGGTGGTATTTGGTATTACAACATAGAATGATACC  
CCCGGTTGTAAGAAATTTATTTCTTTTGAACAATTTACCGTGACTTCAATCTGGATTTGGATTTATCAGATGAGAGGAA  
ACAAAATTTTAACTTTTCTATCTCCTCTGGTTTTTATTTAGGAAAAAGTCAATGACATAACGCAAAAGGCGATAAATTCGA  
TTGTTGGTACTAACTGGGATATGATAAGATTTCTGGTAAATTTAGATAAATACCTTTTCCCTCGGAAATGGGGGGGG  
GTTATATATTTGAGGAGGAAGCAATACATATTTTGTCTGCTACACTACAGGATAATTTGCTATATATATACAGAA  
AAAATCAAAATGGTAAACATATTTATTTAGGTGAGACACACTCGCTTATCTATGAAATGCCACTTTAGTGATGATAAAA  
GAGAGTTTATAAAGATGGACTTTATAATGGAGGTGATGTAATTTTAGAAAGTGAACCTTTACAAAAATAAATACATTT  
TCAAAAATAAACAATACAGACAGCGGATGGAGTTATGGCAAACTGGGATGATGAATCAAGTACTCTGTGTTTATCT  
AATAGATATGATTTACCTGGAGGGATAAATAAATAAATAAAGGCTTTACCACTTGTATGATTTAGTTAACTAACT  
GGAGGATACATAACTCATGCTCTTATTTTTATGATAAATCAAGTTGACATTTGAAGCAATAAATAAAGTATACAAT

TTATTTCTGATACGGAGTTACCTGTTCAACTTAATTAAGCTAGTGTATTTATGGTAATCATGGGGCAAATAATACATT  
CCTCGACTCAGGAAGTAAAGCTATAACCTTACATTAAGTATGATGAAAGTGGCGATTATGATACTTTTGACTTCCGCAATA  
TTGTTTTTGAACATCACACCAATGACATGTTTATAAGCTTTGATAATCAAGGAGGATTTGTTATATCAATATCAATAAT  
GCCACAAATGAACTGGCAGATATAATGATTTCCGAAAAAATGACTTCTTTTGGATGGCTGTCTTCAATGATATAATTT  
GCCTGGCGGTGATTTTTTATATTTTATATTTTATATTTTATATTTTATATTTTATATTTTATATTTTATATTTTATATTTT  
AGAAACCCGGACATTAACGACATCATCAATGTAGCTATTTTAGAAACTTCTTATCTGCAATAAAAAAATCCAAATAAT  
GATGATAGCAGTTATGTTTTATGTTCTAGACAACCTAACCTCTCATCTTATACATTACACTTTAATGACTTATCTGGATA  
TATATCAAGTATATGGGATAATATAGAGGAGGCTTCACTCTTTTCAATAATAATAGTGTAAACATCGCCCTAATGAAA  
AAAAATTTATTTCCCTAACAGAGCCAGATAAAGTTGTCTATTAATAAATGTCACCAATTTGATGTTTTTATAGAGAAGCATTAGAGGTAATAAAT  
AGTTATAAGTTAAGTAAATTTACATGGGAAACGTATGGTGATATCGTGGTATCACCTGAAGATAGGATTTCTCATCTGGA  
ATTAGATGGATTTAATTTATTTTCAACCCGAGTTAGATGCTCCAATATCAGACTCCTTTTCATATCTATATGATAATTT  
TTCAGATTTGCTGATGGTGATGTTTATTAAGCTTCTTATCTCAATAGAGAAACAAAGCAAAACGACCAATCGTATTT  
ATCCTTCAAAAATCTTTTATAGACTCATTTGCTAAAACAGTATCTCTGACAGAGAAAACAATATATATCTCTGTTATTTG  
TGATTTCTCTGATCACTTCCACAAGTATATATAGGCATCCATTTAGGATAGTTCTCGGGAATAAATAATTTGATATCCAT  
CAGAAGAATTTGTAAGTTTATAAGAACCTCAAAGGAATATTTAAGCAATATGATGTAATTAATAATGTTATTTGTTCCA  
CAAAAAACAATAAGAAAAAATAATCTGCTGTTAGTTAATAAGCAACATCAAAAATGATGTTGTTATTTGCTGGAGT  
AATGACAGAAACATCAAGGTTTTTATCTAAAATAAATCAAGCGACTTATTGTTAACCACTTCAAAAACATCTGGGGGCG  
GGATTATAGTTATTTTAAAGATTTTATAAATAACTGGTGAAATAAACCTTACATTTGATAACAGTTCTTATTTGATGAC  
AAATTTGCTAGATAATAGATAATTAATAACCAATGGGTATAACGATACATGAAATAGTCAATGGGGATGATAAGTTGTT  
TTTTTATCTCAACCAATAAAAAATGATGTTTTATCTTACATAATCCACTTTACTCTAATTCATTTCTCTTATCATAT  
CACATGAATTTATTTGGTTTGGTTGAGGCATATAGAAATCAACATGATTTGTTTACAGAAATAGTATTTATCAATGATAT  
ATACATATGTTTCTGAGCATAATGGAAAAGACGGTGTAGCTCAGATGTCATTACCTATATATGCATACTCAACATGTCG  
TTTTTGGCCAAAAGAAAGTGTAGCTGTTGGAGATCAATAAATTTATCTAATTTAAGCAATATGAAATTTAGCTTTAATTT  
CTTTTAGTAAAGATGTCGTCTGTGAACAAAATGTTGATATATAAATAATTTTTTGAATTTGGCTTTTGAATTTGATG  
ATTTGTTGAGCGAAAATATGCTCACTCAAAAAAATCTCTGGAACACAATACATTTTTTCAAGTGTACCGGCATAGATGA  
GTCCTCTATGAAAAGTATATAATCTTTTATCCTTAAAGCAATCCCTCCCTGAAGTAG

>Cluster\_24490

ATGACGGGCGCTACAGCATATGTAATTTTTTAAATTTTTTATGAAATTTTTTGGATTATAAAAATCAACAAAAACAACATGCTGACAGG  
CAAAACCCCGGAATGA

>Cluster\_20905

ATGATTGAACGGGTAAATTTGCTGCTACTGACGCTGATTAACCTGGAACGGCTTTTTTGGCCGAACTTTTGACCTTGACGA  
GCTGGTCAAGCAGCTTTCTGGCGTAACGGGGCGGTAATCCACCACATGGCGCGTTCGTTACGGCGCTTATCCCG  
ACCTGACCTGCTGCATTTCCGTAACACTACGGAAGCCGGGCCACCAGCGGTTCCGCGGATAAAGGCTGACGCGTAAG  
CTGAAAGCGGGTGTCTGTTATTCGATGCTCGACACCATTAACCTCGCGCCACCAGCGTGTAGTGGTCCGTTGCGTCTGCA  
ACAGGTTGCCGACCGCATCGTAAAGTGGATATCAACCATTTGCCATTCAGGCTCGCCGATGTCGGTGCAGCCGACAC  
AAGTGGTGAACGAACTCTGAACGAACGCCAGGCGCGCTGCTGCCGTTAAGTGAAGTGAAGTGAAGTGAAGTGAAGTGAAGT  
GAAGGCGTGCAGTTAAGCAGTTCACTCCATTACCGATTACCACTCGCTGATGTTGATCTGGGCATCATCGCGCTGCG  
CCTCGCTTCAAGCTGCTGATGCTAGTAAATTTCTATGCTGATCGAAGCCTCGCTGTATGGCGGGATCTCCAGCCGCAATTA  
CTCGTTCTCTGCGGACTTACTGTTGCGGAAAACAGCGGGTGGCGAAAAGCGTTCAGGACATGGAAGCGCGCTGCGT  
GAAAACCCGATGACGCTGGAAGCGATTCTGCTCAACCGCTCGGACCGTGCCTGTTAAGCATCTGATTAGCGAAGCCAC  
CAACTACGTTGGCGGAGATACATGCGTCAACGCAACGAGCGCTGTCATCTCGACAAAGCGTGGAGTTTCTGCGG  
AGCTACATACTTCCGCTGACCAACTGGCGGCTGAGCAGTACAACACCTCGATATGGCGGAGAGCTGGTGCAGCACAAC  
GTTGCCGAAAGCGATCTGGAAGCGGATTATCAGGCGGCGAGCATCACTGAACTGGTGAACCGTCCGATGAGCA  
GGAGAAGATCGAAGCTTACGAAGCGGATCTCGATGAGCTGCAGATCCGCTGGAAGAGCAAAACGAAGTGGTGGCAGAAG  
CCATCGAAGCGCCAGGAAGAGAACGAGGCTCGTGGGAAGCTGCCGAACGGAAGTGGACGAGCTGAAAAGCCAGCTTGT  
GACTACGACGAGCGCTGGAGCTCCAGCAACCGCGCGGATCCAGTATAACCAGGCGATTGCTGCGCTTAATCGTGCCAA  
AGAAGTGTGCCATCTGCGGAGCTTAAACCGCCGACAGCGCTGCCGAATGGCTGGAAACCTTCCAGGCGAAGGCTGGAAG  
CGACCGAAAAAATGCTCTCTTTGAGCAGAAAAATGAGCATGGCGCAAAACCGCGCAGCCAGTTTGGAGAGGCTTATCAG  
CTGGTGGTGGCAATCAACGGCCGCTGGCGGTAACGAGGCGTGGGATGTCGCTCGCGAATATTTGCGGAAAGGGTCCGA  
TCAGCGTCACTGGCAGAGCAGGTTACGCGTTGCGGATGCGCTTAAAGCAACGGAACAGCTGCGTGCAGCAAG  
AAGCTGAGCGTCTGCTGGCAGATTTCTGCAACCTGAGGCAAGAAATTTGATATTGATGAACGGAAGCTTGCATCAG  
GAGCTGGAAGCACGATTTGCCCTCTTTCCGATAGCGTCTTAAACCGCGAGAAGAGCGGATGGCACTGCGCCAGGAGCA  
GGAACAGCTGCAGTCTCGCATTCAGAGTTTGTATGACGCGTGGCGGGTTTGGCTGGCAGCGCAAAACAGTCTCAACAGT  
TGAGCGAACAGTGGCGGAAAGAGTTCACTCCAGCCAGGATGTCACCGAATTTCTGCAACAGTTGCTGGAGCTGAGCCG  
GAGGCAATTTGTTGAACCGGATGAAGTAGGCGCGCAAAAACCGCTCGATGAAGAGATCGAAGCTTTAAGCCAGCCAGG  
TGGTCTGAAGATCAGCGTCTGAACCGCTGGCGGAGCGTTTTGGTGGTGTGCTGCTGAGAAATTTATGACGAGCTTA  
GCCTGGAAGATGCGCCGTTCTTCTCAGCACTGTATGGCCGCTACGCCAGCCATCTGTTGTCAGATCTGTCAGAGTTA  
ACCGAACACCTGGAAGCTTGACGATTTGCCGGAAGATCTTATTTGATCGAAGGGATCCGAGTCAATTCAGTACAGCAG  
CGTGTTCAGCGTTGATGAGCTGGAAAAAGCGGTTGGTGGTAAAAATCGCCGATCGTCAAGTGGCGTTATTTACAGTTTCCCG  
AAGTGGCGGTTTGGTCTGCTGCGCGTGAAGCCGATTTGAAAGCCCTCATGCCGAGCGGGAAGTGTCTTCCGAAACCG  
TTCCGACCGCTCTCTTTGATGTACAGAAAAATCCAGCGTCTGCATCAGGCGTTTCCAGCGCTTTATCGGCGATCATCTGGC  
GGTGGCGTTTGAAGTCTGACCCGGAAGCAGAAATCCGTCAACTGAACAGCCGTCGCTGCAACTGGAACGGCGGCGTGAAGTA  
ATCATGAAAATGATAACCAGCAGCAGCTATTCAGTTTGGAGCGGAAAGAGGGGCTTACGGCGCTGAACCGCATTTCTG  
CCGCGTCTCAACCTGTTGGCTGATGACAGCCTGGCGGATCGCGTGCATGAAATCCGCGAACGCTGTTGATGAAGCCAGGA  
AGCCGCGCGTTTTGTTTACGAGTTTGGCAATCAACTGGCGCAACTGGAACCGATCGTTTCCGTTATGACAGCGGACCCGG  
AACAGTTTCAACAGTTAAAAAAGAGATTACGCATACTCTCAGCAGATGCAGCGGATGCCCGTCAACAGCGGCTTGCCTTG  
ACGGAAGTGGTGCAGCGTCTGCGCACTTTAGCTACTCTGACTCGGCAAGAAATGCTTAGCGGTAACAGCGATCTCAACGA  
AAAAGTGGTGAACGCTTGAACAGGCGGAAGCGGAGGCTACGCGCGCTGCTGAAGCGTTGCGCGGACACGACGCGCAGT  
TGAATCAGTACAACAGGTGCTGGCTTCGCTGAAAAGTTGATGACACCAAAAAAGAGCTACTTAAACGATCTGCAACGCT  
GAATTCAGGATATCGGCTGCGTGTGATGATGAGCGGCGAAGAGAGCGGCGACGTTATTCGCGTGAACGAGTTCAGCGCA  
ACTGAGCAATAACCGTTTACGACGCAATCAACTGGAAAAAGCGCTTACATTTCTGCAAGCGGAGATGGACACCTGACCC  
GTAAGTGGCAGCTGGAGCGGATTAATTTGATGTCGCGAGCAGGTTAGTACCGCCAAAGCGGGCTGGTGTGCGGTTG  
ATGCGCATGGTGAAGATAATGGCGTTGAGCGTCCGTTACACCGTCTGAGCTGGCTTATCTCTCCGCTGATGATTTGGC  
TTCCATGTCGGAATAAGCGCTTGGTGGCTGCGTCTGGCGGTTGGCAGATAACGAACATCTGGCGGAGTTCGCGGATG  
CGGAAGATCAAAACGCTCCGGAACGTAATAATTCAGTTCTCTGCGGTTTATCAGCATCTGCGTGAACGATTTCTGCTCAG  
GATATTTCTGATCCGATGATCCGTTGGAAGCTATGCAACAGATGGAGATCGAGCTTAGCCGTTAGCCGGAAGAAATTAAC  
CTCCGTTGAACGAAACTGGCGATCAGTTCCCGCAGCGTGGCAACATCTTCCGAAAACATTCAGCCGAGGAGCAAC  
GTATCCGTTATGCTAAACCAAGGTTGCAAGACGATTCGTTTGGCCAGGTAACAGCGTGCCTCAACGTTGAACGTTGCGT  
GAAACGACGCCATGCTGCTGGATGCTCTCTGAACAGCATGAGCAACATCAGGATCTGTTTAAACAGCAACCGTCTGAC

CTTCTCAGAAGCACTGGCGAAACGTGATCAGCGTCTTAATCCGCAGATTGATATGGGGCAACGCACGCCGCGACCCATTG  
CGAAGAAGTCTGTCGATTACCGCACTAATCTGGAAATGGAAGTTGAGGTTAACCGTGGTCCGATGGCTGGTTCGCGCA  
GAGTCTGGTGCATTCGACCGGTGAGGCGATTGGTACCGGATGTCGATTCTGGTGTAGGTGTACAAGCTGGGAAGA  
TGAATCTCCCGCTCGCGGTAAGATATCTCTCTCCGCGCTGCTATTCCTCGATGAAGCAGCGGACTGGATGCC  
TTCCATCCGCACTGTTGAAATGTTGGAACGTTTGCAAATGCAGCTCATTATCGCAGCGCCGGAATAATCAGCCG  
GAGAAAGGCACCCTATAAACTGGTGCCTAAAGTCTTCCAGAATACCGAAACGTTCCAGCTCGTGGCCTGCGAGGATT  
TGCGCTCAACTCCTGAAACGTTCCAGGAAGTGACGAAGCGCTTCTCAGGCGAGTTAA

>Cluster\_49934

TTGAACTAGGTACTAAAAATACAAATGATGTCACAAAACAAGTTCTCCAGAGAAATAAGTAAAGAAAAAAACCTATTT  
TCTTGAAGAATAAGAAAAATAAACACTTGCTGTAGATGACATAATTTCTATAGGTGGAATATTACAGAGTAAATAA  
GAAGAACTCTGCATCCTTACCCTTACCTTACCTGCGACCACATCTGCCAGGAACTGGAAGTCGGTTATATTTCATTAT  
ATAGGTTGTTAATATCTAAACCTTTCAGATGCCATTTTTCTTATAATTTACAGCAGGAATCAAAAGATGTAACCTC  
GTTACCTAATCATATACGAGGAATAACAATGAGAACTTAATACCTACTGGTATCAAAGAACACCCTGAAATATGTAAGAG  
AAAAATAATATCAAACGCAAGTATTATATAAAGGGAGAGAAATACAAACAACATAAAAAAACAGAGGAGCTTATT  
CAAGCCAAGGAGAAAGACACAAAATATTCACTAATAGTGGATAACATAAAATATAAGATATTTGGTCATGTTGACTTT  
GCCCCCAAAGATAAGGAATTAATAAAACTTAAAGTGAATTAAGAACTATACAGGTTACCAGAAAAAACAGCA  
GAAAAGGCATTGAAAGTCAA AAAACCAAGTACGATTTTTGGAAAAACTTCGGGCAGATGCATCTCCAGCTCAAAGAT  
AACATATCTGAAATAATCACCTCATGTCATAACGAATAATAACTCACTTAAAGTGGAAATAGATAAAAAATTCATGTAAT  
TTGGATCGCTGGCGCACCTGAGACTATAACAAAATATGCAAAAGCATATAAAGCAGCCTATCCTGATTTTTCTTTTA  
ATTTGTGGATAGATCAACGCAATTTGCAGCTTATGAAATCAACTCACAATTAATAAATGTTAGCACTGAACATGCAAAA  
AGTGAAGTTTAAACAGTTTAACTATCGAGGAAATTAATATAATAAAAAATAAGGAACAACTGATGATTTTTTTCATGC  
TAAATTA AAAACGCTTTTTGAAACTAATTTAAGTCTGTTTACAGATCCAGACTCTGTGATGAAATATGATATA  
CTAGAGGAATATTAATTTACAGCATCAAGATCGAATTTTCTTTTGAAGAAATTTTACATTTATGATAACAGAAAAT  
GATAAGCTTAAAGGTTTATTCATAAAAACAAGATAAAAACATATTTCTGTTATAGTAAAGAGCAAGCTGAAATATAA  
AGGTAATTTTTCATATTCATGATGCAACAATGCTGCCAGATATGAAAAAGCACAATAAAAACAAGATATCAACAAGAA  
TGATATTGCGTGGCAATTTATGCATCTGCTACAGATCAATACGTTGTTATATACTCAAAGAACATGGTGGAAATATATA  
GATTATGACGCTCACTCTGCTTATGAAAAAACATCTACAAAATAATTCAGGAGCATAGTATTAATATGATTTCTTTAGA  
GAAAGAGCCACCAGGAGGCAATTAATGATGAGATTTCTTTCTGTTATAGTAAAGAGCAAGCTGAAATATAAATAA  
AACTCCCTGAACAAGATAGAAAACGCTCTCTGTTATCGTCGACAAGATAAAAAAACTTGACCCTAAAGATATATTTCT  
CCTATCGACACTATGATAATCAGAGACTCAATGGTGTATGTCAAAACGTTATCAATATTTGGGAAAGGAGAAAGCTGGAA  
TATTCGTGCAAAATAAATTTTCTTGCCACACATAAAGGAAGTAAAGTAACTGATTTTCGTAATAAACAGACAAGAAATAG  
CTTATAAAAAGACTTCTTGAGGTAAGAGAGAAGTTACGAGATACAGGCAACATAGCACACAACACTTCAGATAATATTAAT  
TCTCTTGATATCATCGAGGAGATAAAAAGGCAGAAGCAATTTGGTGGTATCGTGGGTGAGCATGCCGCGAACAAAGA  
GAAAAATAAAGAGGTTCTTAAAGACTTAAAAAAGACTTGGCAACATATGGAGCACTACTTGATAACAATGTAATGGAT  
TAAAACCTAAAGATATAGAGCAACAGAGGATTTCTTAAAGGCTATAGTTTACGAGATGAAAAAAAATAAATAAGCTTAA  
TTCCATAGGCATGTAACATTA AAAAGTTAGTTAAGCTGATGAAAAAAAATAAATAAGCTTAAAGTAAACAGCAAGAA  
AGCTATGGCCTATGAGATTGAAAAACGTCGCTTATGGCTACATTCATTTCTAATGTAGAAGATATCATAAGCTTTTCA  
ATAAAGTCTGATCAAAGGTTCTACGGATAAATATGCTGTTGAACTCTTGATACCAATATTTTCTTAAACCTTTTCA  
GAGCAAAACAAAGCTATTTCTGGAAAATCTATAATTCACAGCAGCGGTTAATAGTGAGCTAGTTTATATAGTGAAGTAG  
AAATAGCGAACGCAACAACACTGTTAACAAGCTTGGCTAACTTCATGCAAAAAATCCGTTGAGCTCTACCTTAACACAA  
ATATGAAAGAGAAAATAGTACATCAAACAGTTGAGCAAGTTATAGATTTAATAATCTCCCAAAAGCTACAGGTAATCC  
AGTTTTTATTGAAACTGGAGGCTCCTGTCATGCAATGGCTGCTTGGGCTATTGGTAACGATAAATGAGCAAGAAATGGGTT  
TTTTATGATGCAAAATGGTGGTGTGTTGAGTTTTTTCAGATACAGAAAAGTTAAAGAATAATGACAGAAATTTTTTCTGCT  
TCAGGATTGAATAAAGCTGAAAAATATCATTGAAAAAGCTTCCACTCATAAATATCTCTGCTTCGATCAGATTGTTTT  
ATTTGATGGTAAAAATATCGCAATATAAAACGAATTAATGATGATGCCATAAAGAAATATATGGATATTAATAAT  
TTGACAGTACAAGTAAAAAAGAAAGTGTAGCCAGTCAATAAAAAAAGACTTCAATTCAAAAAACAATTTCTGAAAAAT  
AGTCTCTTTTCAATATTCGAATGGACTCAATTTATCCCAAAAAATACAGTGCCTTTTTTATTTCTGGTCCGGATGCCAT  
TATGATGGCGATGAAGATTAATAATTCATTAAGGTGAGCTGGCGAGTCCGCAATGATAGAGAGGCCAGAAACTTCA  
AAGGATTTGGCGGAAGATTCATTTGATAGGAACTTAAAGTGTGAAAGTGGCAAAAGGTTTCAATATGACTGGGTTAAT  
GCTAACTCCGTTGTGTTAATGATGTTACGCCCTGACGATGCAAGTACCCTGGGTTGCTAAACTAGAGAGATAGAAAT  
ATTTTCTAATGTTGATAAATAAAGAAAGATTTGGATGGAATAAACCACAGAAATAAATAATCAAAGTTAACTG  
TTGGTTGGCCATCAGAAATAAAAAAACATAAAGAAAGGTTGGCCTGAAATGGAGGCTGACTATAATAGGATAATTAGT  
GGTAGTACTATAGATCTGGAAGATATATCTCAAATAGATCAAAGATAAGTAAAGTATTTGATATCTCAAACATAATGCT  
GTTAAATGGTGGTGGCATTCAATTAGCAGAACCACTGGCTGTGAAAAATAAAGCATCTTACACTCCCTATTGAAAATAAGA  
TACATTTATCTTATGTCAGATATTCATAAACAATTTAAAGATAACGTTCCAGTCTATAAACTCTCTTTTGGCAAGTATAGT  
AATACCGTTGATATATTTGGAACGATGATAATAAATAAATCTCTCATGTTGAGGGAGTTATGGATAATGAAATCCAG  
AAGCAATCAATTTATAAACTGCTAAATGGACAACATGATAAAAACGAGAGAGGTTAATTTGGAATATCTAAGCTGA  
AAGAAAAAGAACAGCTTGGTATTATTGATAAAAAATAGACAAGAAAGATTGGTTGATTATATCAACAAATCTTTCTGAAGAT  
GATTTCTTAAAGGCTAAATTAATCGACATAGAAAACAAAGCATTGCTTTCATCATTGAAAAAAATATCAGATAAGAGCGG  
AAACCCTATTAATATATATGATAAAAAAGATGTCGATACACTAACAAAAAATCTTAATGGATTATATAAGAAAAACATA  
TTAATATGCTATGGGATAAATAATATATCAAGAATAACAGAAAAATTAAGAAGCTATATAGTGATTTAAAGAAAGCGAA  
TTTTCTGATAGAGTTAAAGTAAAAAGAAATAAATGTTGAGTTAATGATGATAGTTAATAAAAAAGCATAAATCATGACGG  
TTATGATTTTGGGATATCGAAAGAAATGTTAAGTATTGATCATTAGCAAAGAGTCTGGAGTTGTTATACAAAATGCTG  
CCGTTTACAGCACCATAAAAAGAGCTAGTCGATATTTGATCCAAAATATGCAATTAACGTTCCGGTGTGGATACCCTACTATT  
TTAGATAAATATATAAATAAATTTTCTGATATCGAAGAGATGTTGCAAGAGATTTGCAAGGATTTCCAGCAAGCAAAGCAA  
GATCATTTGCTGGAGTATTAAGTATATCGATACAAAAATATAAATAGATATTTTGTATCGATCATGAATCAGAAATGTTG  
CTGGGCTGGGAGTAAAGTTTCTAATACGGGTAATGCTTTGTCGATGATGTAATTTATCTGGCATTAAAGAAATACAA  
GATAGTAAAAAGATATAGTTTTTGAATAATTA AAAAGTTAATTTTTCCGCTATATATTTGACTGGAACATAAATAAAAA  
CAAAGGTAATATTAATAATCAATCTTATAAATAATATAAATCAAGCAAAAAATCCATTGACTTTATGTTGCTGATGAGT  
ATATTACTAATTTTTAAGCAAGTCAAAGCAATATGAACATATATCTTAAAGTCTCTTAGTGAAGGATTAACGGGCAAC  
AGATCTTTTATCGACTGTATCTCATCTATCTGTCATAATAAACCTGCCAGCGTATCAGAAATCTCTTTAAGGAAAAAGA  
ATATAGACTTCCATCAATAATTTCTATAATGATTCATCATTTAGTTGATCCCGTAACATGGGAAAGTATAGGCTATACAG  
GAGGCGATGATTTAATAATCAACAAATATCATCTCCGACTTACATGATATTTCTATTCGGGCAAAAATATCGAGCGCTG  
GAATGGGGAACTTTTATGGGCACAATGCTAGATATGTTGATGAAACCTGATAAAATACTCCAGCAGTGAAGCCAAATA  
CCATCCACAGATGTTGCTTTTCCCAATGAAGGCGGTTGATTCGGTTTAAAGTGAAGTTATATCTTGTCTGACTATAAG  
AAAAATAATACGTTGCAAGAGAACTTGTATTAAATAAGCTCATTATATCAACAAGATATATCTGAAATGACATCTT  
TCAGAAAGTATCATGATTTTTTGA AAAACACTGTATCACAAATGAAATATTAACAAGCATGGTAAATAAATAATTT  
ACAGTCCGAGGCGTTGAAAGAAATACGGTTAAGTATTAAATACAGCCAGTGTGCTGTTATTTAAAGACAAAAACA

TAAATAATATTTCTGATAACCCAGAACATCACAGTCTTTGTAGTATCCGCTTTCGATGATGTGGTTCGTGTACAGATCCT  
AACTTCGGATATGCTGATTTTTTCATCTCTGGAACAATCATAGAAATTTATTGAGCGTTCTGTTATCATTTCTCCAGATAT  
AAAAGAAATCTATACGGGTAAGAAGGTGGTGTGCTATAGATATGTTTATCATGGAAGATAAATCAATGGGGAAAAATTA  
TTGATCATGATGCTGTCAACTTACATCAGTAAAAACATTTATCTTCAGTTGAAAAAATTGAGAAAGTTGAATATGATATTT  
CAACTTGGTGGATGAGATTTAAAGTTATCGATTTGTATAATTTAGCGTTTTCTTTAATGGTAAAAGATAGATGAAAA  
ATTTAGTATGTCAAAGCTTACATTTAATGAATTTTACAGATGACAATAAGTTTAGATATATTTGAAACAAATATATGATA  
CGCACCATATAACAGCAAAAGAACATGAAAAAATAAAATTTACTTATAAATGAAGTTAATAAGTATCAGAGAAGATAAA  
ATCCTTGTAAAGGATCTATTTCTAACAGATAACGTTGGTACTGGATTACTAAGTAAGTTCAGTTCAAGAAGAAATGGT  
TTTTGGAAATCTTAAGTGTATTTCCACAGAGAGTATCAGAAAAAATACGCAATAAATAATCCATAAAATATAGAATTAAT  
CGGTTAATCTAATAGTGAAGGTGATGGTGTAAACTATCGCTGTATGATTTAGATAAGAATAAAAAATATAAATGTTAAT  
ATTTGATATCTCAGATTTAAATATAACGATCAGACAAGGCTTGTATTCATAACAGAAGCCATTGATGAAATGAATATTGA  
TGGGATTAATGGCTATTTGTCGGTATTATCAATATATGAAAAATACGGGATATGGTGGTTATGTATCAGCGATAGACCATG  
CGAATTTCTGTACAGATATAAAGACAGTATGAGAAAAAGTTGTGGCAGGACCTGATGTTTATGGGATAAAAAATTC  
GGCACCAACGCTCTCAGATTCGTTAGAAACAATGGCTTCTATTACGTTATCTCAAGTTGCAACAAGACTTGGTGGAGT  
TCAAGGAAGAATTTATCTAAGATAGCTAATGTAAATTAAGTTTCTGTATCGATACAGCATTAAATTTATGGTCTCTTG  
GTGAATCTATTCAGATACACATCGGAGAAAAGTGAAGTTTGTAGATAAAATGTTAGCAGAAAATAGATGTTGCTTTTGA  
TCAACTTATACCGCGCTTACACTATCTAGTTTTCATTTCCCAATCCCACTCGCAATAGCCACTCTGCGCTTATTTTTTACA  
ACAAGACATAAAGACGTTTAAAGTACATCTTCACATGGAAAATGAGAGAAGAGACGCTTGGAAAAAGTTGAGCACTATC  
TAGATACCTCTGCAAGACCTAATGTTGTTAAAGTTGATACTTTCCGGGGTGTAAATAGACCTTTCCGGCAATGATATAAAT  
GGTGGTTTTAAACTAGATCTTTCAACAGAAAATGTGAAATTTCCGTTAATCTCTCATATAACAGAGGAAAAAATTTGG  
GAATGTTCCGATGATAGATAGATGTTAGAAAAAATAAGTAAATAATGCTGTGCTTGTGTTAATGATGATGACCTGC  
ATGTTCTAGTTTTGGCGGGGAGATAGAAGGGAAAGATGCCGAGAACATCTTTATCAGAATCAGGATAGTTCGCGGT  
TTTTGCAACAGGATATGGCTTTCACATGTACCGATGATAAAAAAGGGAAATTAATAACCGTGATATTGGGGTATTCCTC  
TCAAATTTGGCTTAATACAGAAGTAAATAGAATGGCTTGGAAAGATTTTCAAGAGGTTGCAAGAGAAAAATATCCTTTGG  
TTGAAGTAATAAATAAAAAATGCTGAGGTTGTTACAGGCAATAAAAAATGTTAAGGTAATCTTCTGTATTGGAACATGAT  
ATTTCTCTCCTAAAAATAGTGAAGACTTATATAATTTAAGTACGCATTTGGTTCAGGTTGCAAGAGGTTGAAAAAGGTGT  
TACTGTTTTCCCAATGGGGTTGGTAATTTAATATAGTAGGTCGCTTGGGAGCAAAAAACATACTATCATTTAGTCAAT  
TACCAGAAGGTTTTAATGTTTTTGTCAATTTAAACCAACAGATAAACCAACCGTGGCTGTTTTATCAATCTGAAGCTGAA  
TTAAACATGAACCTAATTCAAAAAATAAATAACCATTATAGGTTCTGATTATGGGGTAAATGTTTTTATTGGTAATAA  
ATTAGATAATCACTTTGTACAGGGCGCTCAGGCGCAACTATATACCCAGGACAAAGGCTCAAATATAAATAACCAATTCCTA  
AGAATATTAATAATTTTTTCATTTACTGACATTTTATTGGATGCTGATAGTCTTATCCAATATGTTCAACTTGAACACCCCT  
GTAAGCGATATAAAGCTTTTCATCCGGAAGCTAATAAAATAGTTTTTATCACATAAGAGGGAATCATAGTGGTTCTGTGA  
ACGCATTGAATTTCAAGGAATAATGGTGGCAATAAATAATGATTTTTTAGGGAGGATAGTAAATGTATACTCTTGATGGTA  
TAGAGTTAGAACATATCCGCTAATAAAGAAAGCCCGTAGTTGCAGCAAGATTGATATACCAAAATTCGAAAAATATCAT  
GGTATATTGGCATATTGGATCCTCTTAATATTTTAGAAAAATAAATCTTTATTTTCGCAAGAAAAATCAGTGAATTT  
TGATTTGGTAATTTATAGAGTTGTTTTCTTCCCAAGACAGCTTATATAACAAGTAAATAAATAAATAAATAAATAAATA  
TATCACAGGAAAACCATCACATATTTTTGGAGAGGGAGGATGCTACTACTATTTTAGTGGAGTAAAGCAACCGTCTCAT  
CTTATTTTCTTAAATAATGATAACAGAAATCCAGAGACTATTAATGATCAAGTTTCACAGAGACATCTGAGGAAAGTAAA  
AATAATTTGCTAATGCGAAAAAATAAATGCACCTTAAATTTATATGGCCCTATGGTTCTTTTCGAGTTGATATAAAGAC  
CAAGAAATAGCTTACGCATAGATTTAAATACATCGGAAACAAAAATATCTTTAAGTCAATGGCACTATGTTAATAAGAGAT  
ATATTCGAGTTATCTCAGCGATCTAGTGGGATGTTCTAATCTATAACTCTCTGGCAATATCATTA

>Cluster\_2704

ATGAACCGCAGTCCGCAAAACGTGAAAAAATGCGATGCGATTTAATCGCAAAATTTTTGAGTTCGGCTCTATGCCGG  
AATAATTAATCTGTACAGAGTCTTTAA

>Cluster\_17628

ATGGCGGTCAAGTTAGAAGTAAATATCTACCCGATGAAAAATGGCAGCCTTCGTGTCAGGAGTATGGGGGCTATTGATAA  
AAAGGATTTACGGATGAAGAGGTCCGGTGTAA

>Cluster\_67086

ATGAGTATGTTGTCGGGTACAATAAGCAAAAGTGGAAATGCCACATATGAGCATGCCCGTTTTCTGGATATTTTCAATAT  
CAGTAACATCATCAATATCTGA

>Cluster\_8764

ATGATGACCATCAGCGATATCATTTGAAATTTATGTCGTTTTGCGCACTGATATTTTTCCCGCTGGGCTATCTGGCGGGCA  
CTCTTTGCGACGCTTCCGCGACCTTACGTTTTGTTCTTTGCTAAACCTCGTTATGTTAAACCGCGGGACGTTACGCC  
GCACGAAAAAGCCAGGGCAACCAAAAAATGA

>Cluster\_64477

ATGCTGCGATGGCAACCGGGAGCAACTCTGCTCTCCGATTTGATATCAAAATTTGGCCGACTGTGCGCAGCGTCAAGAA  
ACAGACTTTGACCGAGTCTGATATTTGCCCGTGCCTGCAAGGCGCAGATGACCTGATTTACCGCATTATGAGGAAAGACC  
ATGAACGACCTGCTAACAGACCAGGAACCTGGTTGA

>Cluster\_11438

ATGCACAAAGCATCTCCTGTTGAGTTAAGAACGAGTATTGAGATGGCAGATAGCCTTGCTCAAATTTGGAGTCAAGTTTGT  
GCCAATACAGTAGAAAACAGACGAAGAAATTTATACGTTAGCCACATCCCTTTTCGAAAAAGCTGGAAATGATGGTGGCGA  
AAGCAGAAGCAGATGAGAGACCTGGTATGA

>Cluster\_10622

ATGAAAATGTTCAAAGGCCTTACCAACGAACCGGAGACAGCTTTTTCATCACATTTGCCGTTACTGTTGAAGCGGGTTAAT  
CATTTCCGGCTTCCGGTGAAGAATGTGATGAACTTTCCGATGATATCTTTTACTGGCACAACAATACGCCAGAGCG  
CATGCGATGCATTTAAGGAGCAAGAACATGA

>Cluster\_25975

ATGACAACCTGACGATATCGAAAGCTACTTCGGCAGTATTGAGAAAAGTTGCTGCTTTTTTCGGCATAACAACCTGAAGCCGT  
TTATCAGTGGCAGAAACCGTCCGGGCCAGTTAATTCAAAAGGACGCTGCAGCAGAAGCTGCATATAGAACTTGGCGACGGT  
TGCCATTTAAACCTGAGCTTTATGAAAAATCTAATGGATAA

>Cluster\_44882

ATGAAGCGTAAAAGTGTGGCTTTGTTACAGCCATTGGCTCGGTTATAGCCCTGAGCCCGACGGTCTGTTTCAGCAATGG  
CATGCCAGCAATCCAGTTTCCGCTTTGCGTCAAGATGCTGCGGCTATCAGAGGCGATTTCCAAAAGCAATGGTATCCG  
TTAACGTTGAAAAGCTGAACAATGCCAGATCAAAAAAGAAAGTGA

>Cluster\_39229

ATGTTTGAATTCATGCAAAAAGCCGAAAAATTTAGGTCAGGCGGCAAACTGATGATTTGGTATGCCGATTACGACAA  
CTATGTCGAACATATGCGGGTTAACCATCCGATCCAAACCGGATGACCTACGAAGAGTTTTTCCGTGAGCGGCGAGGACG  
CGCGCTACGGTGGAAAAGCGGCGCGCTGCTGCTAA

>Cluster\_59052

ATGAAAGCGTATTGGGACTCTTTAACCAAAGAACAGCAGGGCGAGTTGGCCGGAAAAGTTGGCTCAACACCTGGCTACTT  
ACGGCTGGTTTTTCATGGCTATAAAAAAGCCAGTTTTGTGCTGGCTAAAAAATTGAGCAATACACATCAGGTGCAATTA  
CGAAATCTGACTTAAGACCGGATATCTATCCGAAAGATTAG  
>Cluster\_11017  
ATGTCAGAAAGATGTTCCATTACCGAAAGTCAATCAGCGATACAAAGACGATCATGGTGCCTTGTACCCCTGACCAGTGT  
TGAGGAAACCCGGTGGTGTATATGACAGACGGCTATCCGCATCCCTGCATGCGACCGATGTACAACCTTCTGGGAAAAT  
TCAAACCCGAACCCGGGAAGAAACAGAATAA  
>Cluster\_32579  
ATGTTTATFGCCTGGTACTGGATGTATTAATTGTTCTACTGGCTGGTGGCTATTTCTCATCTTAAACGTTACTGTAA  
AGCTTTTCGCCATGACAGAGATGCGCTGTAGCTGCCGAAAGTAAATTAGATAAACGCTCCGATAAAGAAGTGTGTGAAA  
AGCATCAATAA  
>Cluster\_20980  
GTGATTGACCAAAAATCGAAGTTACGAACAAAGAAAGCGTCGAGCGAGCTTAAACGTGCGCTAACGCGGTCAGAAGCTGCA  
TGTGCTGGAAGTTCACGTGTGCTCCGATTGCTGCGCAGAACTGATGAGCGATCCGAATAGCTCAATGTACGAGGAAGAAG  
ACGATGGCTAA  
>Cluster\_22386  
ATGCATACCCCGATCGGGTAAAACCTGTAGCAGGATCAAAAGAGTGGCGGGAAGCGTGGCAAAAACGGGCTTTTGTCTCA  
CATTTCAAATGGTTATAAACATAATTTATATAGCGATTAATTCGCCAGAGATATTTCTGCTGGTTGTTTTCTCATCAGAA  
TTTTAA  
>Cluster\_51852  
ATGGGGTTAAAAGAAAAATGTGAGTATCACCCGCGAAAGCGAGGGCGAAGGAAAAAGAGAATTAACAACCTGAGCGAATG  
CTCAGAACCAGTTAATGGTGAATGGAAGAGTTTGGGGCGCGAAAAGATACACCGAATGAGTGGATTAACAACCCGTTTA  
CAGTATGA  
>Cluster\_32495  
ATGGAAGTTAAAACCAAAGAAAGACTGGCTGTATCAGTTCGGTCTGTTTCATCCCGGAGACACTGGAAAAAGTGATTAC  
CCGCACACGTTATAAACCTTACCCTGCGGAGCTGGAAGCCTTCGCGGTGATCGGCTGGCAGAACTGACGACAACTTT  
ACGCGTGTGGAGCCAGTCTGGTCACTGA  
>Cluster\_17530  
ATGAAAGTAAAATAACTGCTTCAACACCAGTTTTATTAGTGTGGTGTATACAGAAGTAATAACAACCATGATGG  
AACCAAGTTATGTGGTCTGATCTTTGTAAAAGATATGAGCGAGTTAGTTGGTGTAAACTCGTATGGGGCGCTGAATACG  
AAGAAATACCTGAAATGCATGACGAATAA  
>Cluster\_39473  
ATGACAAGCGTCTGTTGATCTTGGTAAGGAGAAGAAATCCCAATTACTCAAGAGCTATACGAGCGGCTGGAAAGCGTCA  
TCATGATTACGATGGTGAATCAGTTTATGCGAGGCGATTGGCACACTCGAATGCTGAAGCAGTCACTGATTGAAGGCG  
CGAAAGAGTCTCAGCCTGA  
>Cluster\_36253  
ATGAAGATATTACAGTTTAAATGTGCGACTCGCAGAAGTGGGGCGGAGGTGGCGTTAGATTGTCATCTTCGCGCGCT  
GGAAAAAGGGCTGTCGTCACGGTTTGTCTATGGCTATGGCAAAGGCGGTAAAAAGCGCCAGTCAAGCAATACCCACA  
GTTTATCAAATATACGCCGCGCTGA  
>Cluster\_62211  
TTGTCAGAACTACTCTCTTTCGCCCTTTTTCTCGCCTCTGTGCTGATTACGCATGGAAGCGGGACGTAACACCTGGTG  
GTTTGCAGCCACGTTAACCGGTGCTGGGGCTATTTGTGCTTTTAAATATCACCTGTTTGCAGCGACTATTTTACTGGCG  
ATGGTATTAACGACGCGGGTTCTCTATACCTTAAACACAGCTGACCGGTGCTGGCGTCAAGAAATACATTTTTCCGGGGT  
ATCGGCATTGTGCTGGGGCTGACAGCGGTGTTCCGGTGCCTGGGCTGGATCCTGCGCCGTCGTCGCCATCATCCGCCA  
TTTTGGTTACAGCCTGCTGGCGCTTACTTGGCGCTGGGTTCGGTGGACGCCAGCCCGGCTATTCGTCAGATAACGGAAC  
TGGTGAATCCCAGTACGCGACGGCGACCCGGACTTTGCGGCTTATTATAAAGAGCCGTCGAAAACTATCCCTGACCCG  
AAACTCAACCTGGTTTATATCTACGGCGAAAGTCTCGAGCGGACCTATTTTGAATAACGAGGCTTTCCCGGATCTCACGCC  
TGAAGTGGGGCGTTGAAAAATGAAGGCTGGATTTACGCCACACGACGAGCTGCGGGGAACAGATTACACGATTGCGG  
GCATGGTGGCTTCTCAGTGGCGCATACCGCTGTTTGCCTCTTGAAGCAACGCTCCGCTCTGTCGCCAGCTTCTTC  
CCGCGAACAATCTGCTGGGAGATATCCGAAAACTCGGGTTATCAGAACTATTTGTCGAGGGCGGAAATCGCGTTT  
TGCCGTAAGATGTGTTTCTGAAAGTCCGATGGCTTCGACCCACTTATACCGGCTCAGAAGAGCTGAAAAAGCGGTGAGCC  
ACCCGACTATCGCAACGACTGGGGATTCTACGACGATACCGTCTCGATGAAGCGTGGAAAAAGTTTGAAGAGCTTTCC  
CGCTCAGGTCAGCGATTTCACTGTTTACCTGACAGTGCATACCCATCACCCGGATGGTTTTATCTCCTGCTACCTGTAA  
CCGCAAAAAATGATTTTGCAGGTAACCCGAATCAGTCAATTCAGCGCGGTAAGTGCAGCCAGGAGAATCCGCGACGT  
TTATCAACAAAAATCAAGCGTCAACCGTGGTTTAAAGATACCGTCACTCGTCTCTTTCGACATTTAGCGATGAACAAC  
ACGGCGTGGAAATACCTCAATAAGCAGGATCGCAATAACCTGTTTTTGTCTGCTGGCGACAGCCGACGCAAGAGAC  
GCTGGCAGTGAAGCGTAACAGATGGATAACGGCGCGAGGCTGCTGGACATTCGCGTGGCGATAACTATCTCGGACTTG  
GTCATAGCAGTTTATCCGGGACGTCGATGTCGGAATCTTCAATCAATAAAGAGAAAAACATTGGCGTGAAGCAGAT  
ATCATCCGCTGTGGAATTTCCATAAGAGATGAAAGAGTTTACCATCGACAGCAGAAAAACATGATTGCCTTCTCGGG  
TAGCCATTTCCGTTTCCGCTGCTGTTGCGGGTTTACAGACAAACGCGTGGAACCGCTGCGGAAAGCGAATATCAGCAC  
CGTGGCTTCCAGCTGGCCGATTTCCGCTCCACGCGCAATTTGCTGCTGGGTTGACCGTTGCTACAAGATGGCACAACCTC  
TGGGCTCCGGAACCTGGCACTTTCCACCGACTGGTGTGCTCGCAAGGGCAGCTTGGCGGTGAGCAAAATGTTTCAGCATGT  
TGACAAAACAACATGGCAGGGCAAAAACGGCATTAAAGATACGGTCACTGACATGGCGGTTACAAAAGCAATGTGATA  
CGCTGAAGATTGTTGATAACGATATTCGCTACAAGCCGACAGTTTCACTTTAACGTCGCGGTCGCGCAGAAAGAGGTG  
AAACAGTTTAGCGGATTTCCCGTCCGGAGTCTGTTGGGGCCGCTGGTCCAACGCGCAGCTGGGCGATGAAGTAAAAATCGA  
GTACAAGCATCCGCTGCCGAGAAATTTGACCTGGTGAATACCGTATACCGCAAAAGCATACGGCAATAACGCGCCGCTCTATTC  
CGGTACGCGTAGGCAATGAAGAACAACCTTGTGCTGGGCAATGAAGTGACCACCACACATGCTTTCGATAACCCA  
ACCGATGCCGACACTGGTAATTTGTGCCGCGGAAACCTGTCTCAACCACGAAGGGAATATCTCCGCACTCGCCGCG  
TAAGCTCGGGATCGCATGGTGGAAATTAAGTGGTAGAACGTGAAGGTTAA  
>Cluster\_23031  
ATGGAAGCGCGGGAAGCAACCCGTACGGGTGAATCATGCATGCGCGTGCATGCCATTGCTAAGGTCACCGGGCGAGCAG  
ATATACTGACGATATATGTTATGGCGGGCATGTGTTACGCGAAATATGATACGTAGCCCTATCGCACATGTTATGCCGTA  
GTATTAATGATGAACAAGCCAGGAGTTTCCCGGGCTCCTGGCGATTTTACCCTGGGAAGATGTGCCGAAATCCCATT  
GCCACGGCAGGGCATCCCTGGACACTTTGACGAAAAACAAGCGGATACCTGCCGATCGCTGCCCTGCTAACGCGCCATGTT  
TCATCATGGCGACGCGTTGCCATCGTCTGTCGCGCGGATGAACTCACGGCAGAAAAAGCGGCAATTTGGTCAAGATTG  
AGTGGCAAGAAATACCCTGTTATCCTCCGCAAGCGCGCTGGCAGAAAGCCTGCAACCAATCCATTAACGGTGGCAAT  
TTACTGAAACAAGCAGATGTCGACGGTAAATGTCCAACAACAATCGATGCCGCGACTACCAAGGATACGGGCACTA  
TCAGACTCCCGTTTATCAACATTTGTCATATGGAAGCGGTGACATCGCTGGCATGGATGGAGGATGACTCGGCAATACCA  
TCGTTTCCAGACCCAGATCCCGCACATTTGTTCCGCGGCTGGTGGTCAAGCGCTGGATATCCCTGGTCACTGCGTACGA

GTCATCAAACCGTTTATCGGTGGCGGTTTTGGTAATAAACAGGATGTACTGGAAGAGCCAATGGCGGCATTCCTGACCAG  
CAAACCTTGGCGGCATTCGGGTGAAAGTTTTCCCTTAGCCGTGAAGAGTGTTCCTCGCAACCCGTACCCGCCACCGCTTTTA  
CTATGACGGGCAATGGGCGTGAACCCGACGGAACATGAAAGGTTATAGTCTGGATGTTCTGTCTAACACCGGGCGT  
TATGCATCTCACGGGCATCCATTTGCTTCTGCTGGGGGGAATAAAGTCGCTTACCTTTTATCCTCGTTGTCCTATGCTTA  
CAGTTCAAAGACCTTGCATATACCAACCTCCCTCGGTGGATGCGATGCGTGGTTATGGCGGCCACAAGTCTGATCAACGTT  
TTGAGTCTATGCTTGATGATGCCGCGACAGCGTTAGGTATGATCCTGTTGAAATTCGTTTACGCAACGCCGCCCGCGAA  
GGAGATGCTAATCCGCTCACGGGAAAACGTATTTACAGCGCAGGGTTGCCGAGTGTCTTGA AAAAGGCCGGA AAATCTT  
TGAATGGGAAAACCGCGTGCAGAGTGCAGAACAGCAAGGCAATTTACGTCGTGGCGTTGGCGTCCGCTGTTTTAGCT  
ACACCTCTAACACCTGGCTGTCCGCTAGAAAAGTAGCAGGCGCGCCCTGTTGATGAAATCAGGATGGAACCATCAACGTTG  
CAAAGCGGCGCAGGAAATCGGCCAGGGTGCAGACACCGTGTCTCGCAAAATGGTGGCAGAAACCGTGGGAGTTCCGGT  
CAGCGATGTTACGTTATTTCAACCCAGATACCGACGTTACACCATTGACCCCGGCCATTTCGCTCACGTGAGAGCT  
ATGTTGCCCGCCGTGCGCTGCGCAGTGCAGCAGTGTATTTAAAGAGAAAATCATCGCTCACGCCGAGTCTATGCTACAT  
CAGTCAGCGATGAACTGACCTGATAAAAAGCCATATCGTGTGATTGAAAGACCCGGAAGAACCCTTAAATGCTGTTAAA  
AGATTTGGCGATGGACGCTTTCTACCACCTGAACCGGGCGGCGAGCTCTCTGCCGAAAGCTCCATCAA AACCCACCTA  
ACCCACCGCGCTTTGGCTGTACCTTTGTTGATCTGACGCTGATATTGCACTGTGCAAAGTCAACATCAACCGCATCCTC  
AACGTTTATGATTCGGGCATATTTTAAATCCGCTGCTGGCAGAAGCTCAGGTACACGGCGGAATGGGAATGGGCATTGG  
CTGGCGCTTATTTGAAGAGATGATCATCGATGCGAAAAGCGCGTGGTCCGTAACCCAAATCTGCTGGATACAAAATGC  
CGACCATGCCGATCTGCCACAACCTGAAAAGCGGCTTCGTCGAAATCAATGAGCCGCAATCCGCATACGGACATAAGTCA  
CTGGGTGAGCCACCATAATTCCTGTAGCCGCTGCTATTCGTAACCGGTTGAAAGTGGCTACCGGTGTGCAATCAATAC  
ACTGCCCTAACGCCAAAACGATATATGAAGAATTCATCTGGCAGGATTGATTTGA

>Cluster\_17668

ATGGCCGGTAATTTCAAAGTTGGCATGACCTGACTGCGAAGGACGAAGCCTCGCAGGTTCTGAAAAGGGACAAAACA  
GGTTATCAAAGCCACCGAAGGTGTAACAAAGGCAACCCGGAAGGCGAGGCGCAGAGCAGCGTACCCGGCAGGAAAAGCG  
TTAACAGCAAGAAAAGCGGCAAAAGAGATACAGCTGCCCGCTGCCGGAAACGCTCGGTATTCCTGCGCAGACCT  
GAAATCCGGCGTGAATTTATCAGACGGTTGCCAGCTATAACCGTCTGCCCGCGCGGTTTTGAATCTGCGCAGGAGCA  
GGAGCGGCCATGACAGCCACCCGGGAAAAGCCGGGCACTAAGCGTGAACGTTGATGGCGTTACTCAGGCTCAGATGA  
AGATGGCGAAAACCGCTGTTATCCTGAAACCGGGCGTTTTGGCGGTGCGGCTGCATTTGGCGGGAATGCCATGACAATA  
GGCGCGGAATTTAGCAGGAGCGCCATTTAGCAGCAACAGTCAAGAAATCAATGAGTTATGAACGTCAGCAT  
GATGGCGAACACGGCGTTCAGTGTGTTGCTGGAAGCAGGCGATTTGGCGTGA AAAAGCTGAAAACAGTATCCGCG  
CGCGGTAACGTTAGTGGCGGAACGAAAAGAGGATGACGCTGAAGCAATGAATGAGATGTTGGCCAGCGGCGCTTTTTCC  
TGGGATACCGCAATAATCTCTTACCAGATTTGAAATTTGCTACTGCATCCGGCGCATCTCCACCGCATCTGGTCA  
TATGGCGGCAAGCTAAACAAAACATTTGGACTGACAGATGACGACCTCCCGCCATGTTTAAATATGGCTGCCAGCAG  
GTAAAGCGGGTAATTTGAGCTACGGGATATGGCGGAATATCTGGACCTCAGATGGCATTAGCTGGTAAACCGCGAATG  
AAAGGACTGGATGGACTCCAGAAATTAACGCAATTTAATGAGGTCGCAAGGATTCGCGCAGGCGAGCAGAGTGAAGCAG  
TAATAACGTTGTAACCTGCTGGCCAACTTTTTCAGTAGTGAATCAGCAACAAGGGCGAAAAGCATCAGGATGATGGCA  
AAGTATTGACTTACCTGTACGTTGACCCGAGTAAACCGGCAACCGGCAATTTGATCCGATAGAAGCATTGTTACCGCTACT  
GATAAAGTCAACCGCAACAACAACAATATCAGGAGCTTCAGAAGCGTCTGGCAGCAACAAAAGCAAAAGCCAGCAGGA  
CAAAATCTTAGATCTATGGCGAAAATCTTGGAGGGTTCCGTTGTTGGTGAATGACAGGCACTGAAGG  
CAATCTGGCTTACAGGAATAACCCGGAATACCGAAGCAGGTCGAAACTGAAATCAGTACGCAACGCAACCTGCCGGA  
GGTCAGCGCCCGGAGATCTGGAATTTTAAATTCATGTCAGTACGAAATGATTTTAAAACCGCAACAGCTAAAAACCGCT  
TGAATTTTCACAATGAGACGCTGAAAAGCTGGCTGATGCGTCCGGTGTGTTGGCCGATGCATAAGCTGGCGGGT  
AAAAGTTCCCGGACTGACACCGCAGTGGTGGGTGCCACGACCGCCATTTGAAGCGATACCGCAGCGCCCTGACATGG  
CCCGGATCAAAAATCTGACCCGGGGTAAACCCGTTGGGCAAGGCTGGCAGGTTGTCGGTGTGATGCTATTGAAAACCGGT  
CAAAAAGGCAAAAGGATTTAAATTTCCCGGCATCGCGGTAGCTGCTTTCTTTCCGTTGGCACCGTTACGGCACTGGCCA  
CCGCAACCGCCGGAGGAGACGCCGCTCGAAGGAAGCGAAGAACGCTGGAACCGCATCCGCGCCGATACACCCAG  
GAAGAAATCGACCGCCCGCAAAAATACAGCCATGGTGGCAGTTTGGGGAAGGCTATCCACCGAAAACGAAGAATG  
GTTGAGCGCTGGGAGGAGACAGGAAAAGCCGAGCTGATGCCATCACCAGCGAGGTTAACAAAGCCGATG  
GAAACAAAAGCTGAACCGGCATCAACTCAACCCGACGATCACCCAGCCGGAATACCTCACGCACTGGGGACCACCT  
GCCAGTCCATTAATTTCAACACACAACCTGGTGTCTGATGGTCAAGGTTGTGGCGGAGGAGTGAACAAATACAACCTTCA  
GGACGGTAACAGAGGTACGGGAGGAACTTACTGA

>Cluster\_6022

ATGAGCGAGCCGTTAATTTGTCGGCATCCGGCATCATAGTCCGGCTGCGCCCGGCTGGTGAATCGTTAATCGAAAGCCA  
GCGGCCACGATACGTTGATTGAAGGCCCGGCTGATTTTAAATGACCGGGTAGACGAACCTGTTTTAGCCACACGCTTC  
CGGTAGCTATTTACAGTTATGTCAGTATCAGGACGGTGCAGCCCGGGCGTGGTGCCTGGACGCCATTTGCTGAATTT  
TCGCGCGGATGGCAGCGCTACAAGCCGATCGCATTCAGGCAAAACTTACTTCACTGATTTGCTTGCCTGGCGGCGCA  
GAGTGAAGAAGAGGACGATTCGCTGATACGCAAGATGAAAGCCAGGCTTACTGCTGCGTGCACCCGCATGGATAACA  
GCGATACCTGTGGGATCACTTGTTCGAAGATGAAAGCCAGCAAACTGCATTTACCTCTGCGCTGGCGCACTATTTGGC  
CAACTCGGGGCGAGCCCTCCGGGATGCGCTCAATCGTCAGCGCAAGCCCTTATGGCCCGTGGATGGATGGCGAT  
GCAGCAAAAATATGGCGAGCTGTAGTTGTCTGCGGTGGCTGGCAGCTCCCGGCACTGGCAAAAGATGTGGCGGAATGCC  
CTCAGAAAATTAACAAGCCAGAATTCGCTGCTGGCAGATGCGTTCAGAGTTGTTATCTCACACCTTACAGTGA AAAAG  
CGCCTTGATGTGCTGGCAGGATACCTTTTCAAGAAATGCTGCCCCGATGAGCAAAAATGGTGTGCGAGTGGGGCTTGA  
GAAGCCCGGTGAACAACCTGCTAAAACATCCTTACCCTTTGGCCAGCACAATAATGGCCGCTTCTACCCGGATATGG  
CTGCCGCTCATCTGCATGCGATGGCGTGGCACAGTTGCGCGGTCATACACTACCGTTACGCACTGACTGGCTGGATGCC  
ATAGCAGGCTCGCTGATTAAGAAGCCGTAACGCGCCGTTGCCGTTGGAGCTATCGCGCGGTTATTCATCCCGATACCGA  
TCCGATTTCTGATACCTGATAGACACATTTAGCGGGTACGGAATTCGGTAAACTTGGCCCTTCTACGCCACAACCGCTC  
TGCCAAAAGATGTCACCTCGCAACTGGAACGTAACCGCAATCTCCCTTCCGCGGAGCTTACCTTAAATGCTTTACCC  
GATGGGCTGGCGCAAAGTCAAGTGTACATCGGCTGGCAATACGAGATCCCTGGGATTTGTACGCCAGCAGGGAAGTAC  
ACTGACACTTGCAGGCAACGGTGAAGAAGCTGAAAATTAACCCGCGCCCTTACCCAGCATGCGGCATTTGATTGAGGCG  
CCTGTTTTGGTGCACACTCCAGGAAGCCGACGCAATAAATAGAAGCCGATATGCTGGACGCGGGCGGAATCCGCACT  
ATCACACATGCTCTTAGCCAGCGCGCTTAGCGGGTTCAGCGCTTCCCTTCACTAGTCAACAATACTGGAGCACTACGAT  
AATCGCCAGGAAAATCAATTTGCCGAAATGGGCCAGGCGTGGAAAGTCTTTATGCCTTATGGCGGCTGGATGAAATTA  
GCGGTATGCAAGGCGCGAGATATTAACAACGAGCTTATGCGGCACTATCGATCGCACGCTGTGGCTGTGTAATCTAAC  
GGCAGCCGATGAAAAGGAGTTTACGCTCACCTGATGCTAGCTGGCAAGCGCTTGGCATATTTGCGCGCATCTACATAG  
CGCGGTTAATTTACCCGGCTTTCTCTTTCTGGCGGTTAGCTTACTGGAGCAGCAGTCAAGCAATTTATGCCCTTATG  
CGCTGGATCGCGCGCGGCTCTTTGGCGCACTAATGCGTCTGGAACATCCAACGCCAGTGCAGGAGCGGCGCTGACGATG  
CTGGCGAGTTATCCCGGCACAATCTGGTGGGCGTGCACGCTTGGTGGCGCTGGCCCGCATCAACTGGCCCTGTTCA  
GCCGCAATTTATCCCGGTTTTACGAGTCAATTAACAACTGAGTGAAGCCGATTTTATTAACGCCCTGCCCAATTTAC  
GCGCGGATGGCTGGCTACCAACAGGAAACCGGGAGCTGGCGCATCAGGTGCTTGGAGATATCAACTGGCGCAA  
CTTCCCGTTTCCGCGCTGCAAAATGCCGTTGATTTGCCACACAGGCCATTGCACATCATCAACAACCTCGACAGCAGG

ACTGGCATCGCTGCAAAACTGGGGAGTTTTCCATGTCTGA

>Cluster\_62139

ATGACGCCGTTACCGGTTTTTCGTAAAACAACACCTTTGGTTAACACCATTTCGCCGTGAGCCTGCTGCCGTGGCCGGTCT  
CTCGTTTTCCGCTTTTGGCTGCACAGGTTAATATCGCACCGGGATCGCTCGATAAAGCGCTCAATCAGTATGCCGCCACAGA  
GCGGATTTACCTCTCGCTGACGCCAGCTGACGCCGAGCAAGCAGAGCAACGCCCTGCACGGCGATFACGCGTCGAG  
AGCGGCTGCAACAACACTGCTGGACGGCAGCGGACTGCAGGTAAAACCGCTGGGAAATAACAGCTGGACGCTGGAGCCCGC  
GCCCGCACAAAAGAAGATGCCCTGACCGTGGTGGCGACTGGTGGGTGATGCGCGTGAAAACGACGATTTTGAACATG  
CTGGCGCGCTGACGCTGATCCCGCTGAGGATTTCCGCAAAACCGCGCAACCACCATGCGTGAAGTACTTAAACCGCATC  
CCTGGGCTCAGCGCGCCGAAAACAACCGCACCGGACCGCACACTGATGGTGGGCGGCACAGCGGACAACGGTTTTGGCACCC  
GCGCTCGCCAGCCGCTCGACCGTCTGATGGACGGCATCCCCGTCCCCTTCGCCCTTACGGTCAGCCGAGCTTTTAC  
TGGCTCCCCTTTCGCTCGGCAACATGGATGCCATTGACGTTGGTACGCGGTTGGTGGCGGTGCGTTACGGACCGCAGAGC  
GTGGGCGCGTGGTGAACTTTGTACCCGTGCCATTCCGACGAGCTTTGGTATCGAGGCGGGCGTGAAGGTCAGCTCAG  
CCCAACCTCTTCAACAACAACCCGAAAAGACGCACAACCTGATGGTGGGCGGCACAGCGGACAACGGTTTTGGCACCC  
CGCTGCTTACTCCGGCACGCGCGGAGTGACTGGCGGAGCACAGCGCCACCCGATCGACGACCTGATGCTGAAAAGC  
AAATATGCCCGGATGAGGTGCACACCTTCAACAGCCTGCTGCAATATACGACGGTGAAGCCGACATGCCCGTGGCT  
GTCTCGCGGATFACGACCGGATCGCTGGCAATCCACCCCGCTATGACCGCTTTCGGGTGCTGCAAGCTGGCGA  
GCTGGGCTACCGTTCCAGCCAGACAGCCAGATAAATTTCAACATTCAGGGGTTCTACACCCAAACCTGCGGACCGCG  
TACCTGGAGCAAGGCAACGCATCACCTCTCGCCGCTAACTACTGGTGGCGGTTATGAGCCAGCTACAGCCAGAT  
CTTATGATGCTGGCCCTTCCGCGCACGAAGTGGGCGTGGGCTATCGCTATTTGAATGAAACAACGATGAAATGCTTACT  
ACCCGCCACAGCAGCGGCGAGTTGCCGCTCAAGCCCTTACGACCGGATACGCGTTCCGGCACCGGCGCAC  
GCTGGTATCTGGATGACAAAATCGACATCGGCAACTGACACATCACGCGGGTATGCGTTTTGAAACATATCGAGTCATA  
CCAGAACAACGCCATCACAGGCACGACGAAGAAGTGAGCTATAACGCACCGCTTCCGGCGTTGAACGTGCTCTATCACC  
TGACTGACAGTGAATCTTATGCAAAACACTGAAGGCTCGTTCCGGCACCGTACAGTACAGCCAGATTGGCAAGGCTGTG  
CAAAGCGCAATGTGTAACCGGAAAAGCGGAACTGGGACCTGGGACCTCGGTACCGCACGACGCGCGCTGAGCCGCGGA  
AATGGGCTGTTCTGATTAACTTAACAATCAGTACGACTCCAACAGACCAACGACACCGTCACTGACGTTGGCAAAA  
CGCGCCATACCGGCTGGAAACGAGGCAGCTTACGATCTGGGTACGCTAACGCCAACGCTTGATAACGTTTTCCATCTAC  
GCCAGTATGCGTATGTGAACGCGGAAATCCGCGAGAAAGCGGACACCTACGGCAATCTGGTACCATTCTCCCGAAAACA  
TAAAGCCAGCTGGGCTGGACTACAAGCCGAAACTGGGACCTGGGACCTCGGTACCGCACGACGCGCGCTGAGCCGCTT  
CGGATAACGCCAATACGGTGAAGAGAGCGCGGACGCGAGTACCGCCGATTTCCGGCTTATGCTCTGGGGCGCACGC  
GTGGCGTATGACTTTGGCCCGCAGATGGCAGATCTGAACCTGGCATTCGGTGTAAAAACATCTTCGACCCAGGACTACT  
CATCCGCTCTTATGACGACAACAACAAGGCATCTATGACGGCCAGCCGCGCACGCTGTATATGACGGGGTCTGTTAAGT  
TCTGA

>Cluster\_25965

ATGGCATTAACTTACCCGATGACAGTTTATGCTCTCTTTGCGCTTAGAGGAAGACCTCCGTTCAATAGTTGTAAG  
TTACATCTGAAGCCAGATAAAGAATAAAACTACCAACGAACCTTTAGAAAAAGCTAAAAGAAGACTAGAAAAAG  
ACCTCGGCATGTGATGGATAGATAGAACTCAATGATTTAATAAGAAATTTTTGACCTTGGAGATACCTACCAATCATA  
AATCCAAATGAAAGGAAATCCCGATCACATAATAAATTCATAAAAATCCATTACCAAAGATTGGACTCTCTCGTTCT  
AATAAGAAACAGAGTTATGCATATTCGACCATTAGACGTAAGAATACCCCTACGCTTGCATCTATTTGCGAAAAGATA  
TAAAATCCGAAACAACTGTTGGTCTAACCTTACAGAAATCCCAAAAATAAATAACAACCCAGCTCTTGTGTTATCG  
ATGAAAAATTAAAAATTATGATGAAGAAAAAGCAAAATCAATTTTACCCTCCCTGATTTTGTATGAAACAGGATTTGATAG  
AAGCAAAGTCAATGCTCAAAAAGTAAACAACCTTTGCTATGGAGCGTTCCCTGTCATTCCATAGTTGAGAGAGGTGGCG  
TAGAAAAAATCGCGTGGCACTTAAAGTTGCTTATGAAATACGAGGATGAAGATAATCCTTTTGTATGCAATTTGTTGG  
GTTTTCTCAAAAACACAAAATAACTGTAAATGAAATAAAGAAATCAAAAAGACGCTATATCCGACTTACAGGGTTAT  
ACAGGAAATATCAAAATCAATAAATTGGAACGAGTGAAAAACAATCGAAATTTGAGAGATAATCGAATATCTTACGACAT  
TTAAATCGCTCTTTTCATGATAATCTCGAGACAATCTTGATGATAACATACGCGAATTTGTTGGTCTTTACCTCAA  
GGAAGTAAATAATAAATCAATCAAGAATCGGATTTGGGTGCAATTTGAGTATCCAGTGAAGTTGCAAGGTATCGATGAATC  
ATATGCTTCAAAATTAATGAGAAATTTGGCAAAAATAAGAGGTTGACTCCCTTAGAGAAAATAGAAGAAAATGAATGA  
GGAGTTATGTCAAATCGTATGTCGCGTAACCCAAGTTACATTAAGTGGTTCGTAAGTTCGGTTCAAACGGGATTGAGCCCT  
GAAGCAGTCTTCAAAAATCAAAATATGTTCTTGTATTTGCAATGTCAAATGTTATGAGTATTTATCTACAAATGCCAG  
GACACTTACTGCAGCCCTACAGTGTGCTCCCGTTTAAAGACGTACCTGAGCTATCTTATTTAACTGGATTTGACTCCC  
TTCAAACTCATCAATCATTTCAAGAATTTGATGGCTACAAAATGTTGTGTCACAATCATCAAAAACGAAAGGTGCAAGTGT  
AAAACCATTACCAATTAATCTGAATTAGCAAGTTATAATTTAGGCAAGAATCAAAAACCGACCAGACTTATCAAAAAG  
CATTCATGAAAAGCGGAACAAATTAATGCACCTTTTGAAAAACAGCTGATGTCGAGAAAGTGAAGATAAATAAATCCTC  
TGAATAAAAATCAGGGATAAATCTGATCGAGTTATTTGTGAAAATGCTTAGAGACTCTCAGTCAATTTATAAGAAATGGT  
CATCACGATAAAGACTTTGAATTTACTGACTGAATCACACAATTTATCCCGACACTATTTTGAAGTTGCTGCGGATGCG  
CTACTTACATCAACGAATGGTGAATTAGTATGCCCCGTGAGCAATACGAATGGCTATTTGATTTATCACCTGACACAC  
CTCAATTACACTACTGGTTTCGCAAAATCTTACTGCGTGAAGAGGATAATGTCGATGACGCTTTAACTCAAAATACAGCTA  
GCACATAATTTAGCCCAACATCTATTGAAGTATCTCTATCTTTGCAAGACTTATATGTTTCAACATAGATTTGATGA  
GGCTGAAAATGTTCTTCTACTCATAGAAATAGATATTAATAAACTCTAGTGAACATAAATAAAAAATTTAAAGATACAC  
ACATTCAAAATATCTTACCGGAGAGCTGATAATTTAGCTCAAAAAGGTGAGTATTTGAAAGCAATGTCATATCTAGAGAAA  
ATGCTTGAGCAATTTGAGGAACTACCCGATTTTACAAAGATGTGCATATAGAAAAAATATCGAAATGCGAATTTCT  
ATGAAAGCAATTTCTCGTAGTGAGATCAATTAATCTTACAGAGCTGATAATTTTAGAGAAATGGCTACAAAAGAAT  
GTGCTTAA

>Cluster\_41110

ATGACAGCTCCAGCTTTGATTTGGCACCGCTCGAATTAACGCCGCAAGTTTACTGGCAACCAGGCGAACAAGAGAGGCT  
TGCCGCCACAGAGTTTGGCCGTTATTTTCAGCACGGGATCTTTTACGGAACGCATGGAACGAAAAGTGGTTCGAGTTGTAC  
TACAGGAGCTAGGCTTTGGGGATGATGTATGGCTGTTTTTGAATTATATACTCCCGGAAAACGGATGCTGCACGCAAT  
TCACTCATTTGTTACAGTGGCATTACTACCAGGGGCGAGTTGAAGAGATCTGCAATGGCTGGAACGCCCGGAAAGCAAAAT  
AGCAGAACAGGCGCTTCGACGGGTCAGTGAAGGCTTAATTAACATATGGGAAAATGACAACTACTCAGTTATCGCTC  
CGAAAAGAGTGTCTGGAACCTGTATTTATGGCACAGTTGCCGCTGAGATGGCTTTGACTTTCTGGGCTGCTTCAAT  
GAGAAAAGCATCTATTCGCGGGTGAGGACTATTTCTCAGTATCTCCGGTTGGATACATTACCTGGCTGTTATTGGC  
TTTTTTCACATCATCAAAAACAACATTTCCGTTAATTTTAAATTTCCGGCGCAACGAACCTGGCCCTGCCGCTTCCCGCG  
TCTGGCGCGTTTTACGGCGCAGCGTGTCTGGCTGCCAGTGGATTTTACAATGGCCGGAACATACGGCTACTGCACCTT  
ATCCCTTTGCTTTTCAAAAACCCAGCGATAATAGCGAAGCTGCATTACTTGCCTTGCCTTTACTGTATGAACAAAGGCA  
TGCGGAATTAAGTCAAAACCGTGGCAACCGCTGGCAGCGTACAGATGTATGGCTGCCCTGGAGCAATTAATTAACCTGG  
GTCCAATAGAAAATTTACCCGGCAGCTATTTCAAAAAGCTCTGATTTCTGGCATCCGGCAATGTGGTCCAGGCGCGCTTT  
ATCAAGAATAATCAGCTGTACCGATGACGCTTGGAAATATTCGGGAAAATGCTGGCTTTTACCCAGGCGGACGTTTT  
TTATGGCGAACTGGAACAGCTGAAAACGTTTTGCGAGCCGCAACCGTGGCAGCTTTTGCCTGGGATCTTTTCCCGCAT  
GGCAACAAGCTGGAGCCCGCAAAAAGCAACTGGGCATTTCTGGCGTTAAGTCTCTTTGGTGGACGAAAAGCAGGCTCGG



GATCTGACGACACAGATCCTCGCCTGGCCACAAGAAGGCAAACTTGCCCGTGTGTGTCAGTGGCCTGAACATCCTTACCTT  
GATGAATAATGATATGGCCCTGATACAGCTGCACCATAATTTCCAACGGGCGAAATCCCGCTCCTTACGTGATAACGCGG  
CGGAATTTCTTCAGTGGTGCAGAAAAATCGCGGGCTAAGCCAGGAAGAGTTAGCGGACAGATAGTCCCAACACTGGGT  
CTTGATGATCCGACGGCTTGATTTTGGTCCACGGCAATTTACCGTTTCGATGAAAACTCAACCCGGT  
TATCTACGATCAAGATGAGTCCATTGACCTGCTGCAGATGCTCTGATTGGCATTGCCACCCGTTAGAAATGGCAGCAGAA  
CACTGGCCCGACTAAAAGGGCTAAAAAAGATGCCTCTCAGGTGAGCAAAAACCTGCTCCCGCTCTTGAACATGCCCTG  
CGCACCCCGACGCTGGTGCCTGGCAGATTTTCATTCCTGTGTTGTTAATCATCCCTTTACCCGCTGGTTACCCAGCG  
ATTAATATGGGGGTTTATCCGGCAAAATGAACCGCTGCTTACTCAACGCCCTTTCGTGTGGCCGAGAGGGGAGTTCT  
GCAATGCACAAGATGAGTCCATTGACCTGCTGCAGATGCTCTGATTGGCATTGCCACCCGTTAGAAATGGCAGCAGAA  
ATGCGCAGTGAATTTGCACAGCTTTTGGCCGATTACGAAATATGCGCCCTTTTCGCCAGTTGGCGGGCGCACGGTGT  
GCTCACACCTGACGAGTACGCCAGTAACAGCCTGACTGCTGGGAAAGTAAATCCGCTACCGTTGGTCAACTTATGGGAA  
TGGCATAACAAGGCTGGGAGTCAAGGCTATGAGGACGCAATTTGTCTATGACTTAGGTGCGTACCGGCTGGTCTTAAGTTT  
TCACCCGGCTTTAACCACTACAATGTTGATAGCAAAAGCCTAATGAGCTTCCGTTCTCCTCCGGGTTTACCGTGAACATA  
ATCCGTACTTTTGGCCAACTTGATGTGTTGATTTGAGTGAAGCGTTAAGCGCACCCGACGTTATTTTCCATTA

>Cluster\_32887

ATGAAAAAATTAACCATTTGGCTTAATTGGTAAATCCAAATTCGGCAAGACAACGTTATTTAACAGCTCACTGGCTCAGC  
TCAGCGTGTAGGTAACCTGGGCTGGCGTTACCCTCGAACGTAAGAAGGCAAAATTCACCACCGATCATCAGGTACCG  
TGGTGGACCTGCCCGGCACCTATTTCTGACCACCATCTCATCGCAGACCTCGCTCGATGAGCAAATCGCCTGTACTAC  
ATTTTGTAGTGGCGACGACAGCTGCTGATTAACGTTGGTGGATGCGTCTAACCTTGAGCGTAACCTGTACTGACGCTGCA  
ACTGTTGGAACCTCGCATTCATGCATCGTGGCCTGAACATGCTGACATTGGCCGAGAGCAAATAATTCGATGAA  
TTGATGCGCTGTCCGGCGCTTTGGCTGCCCGTCCCGCTGGTTTCAACCCGTTGGTTCGCGGTTTGAAGCGCTCAAG  
CTGGCGATTGATCGCTATAAAGCTAACGAGAATGTGGAACCTGGTGCATTACGCTCAGCCGCTGCTCAACGAAGCAGATTC  
ACTGGCAAAAGTATGCTTCCGACATCTCGCTGAAACAACTGCTGGCTGGGCTGCAAAATGCTGGAAGGCGATATCT  
ACAGCCGCGCTTACGCGGTGAAGCGTGCAGCATCTGGATGCGCCCTCGCCGCTGCGTAATGAGATGAGTACGAGCTCG  
GCGCTGCACATTGCCGATGCTCGTTACCAGTGCATTGCTGCCATCTGTGATGTGGTAAGCAACACCCCTGACGGCAGAACC  
CAGCGTTTACCCTGCGATAGATAAAATCGTCTCAACCGTTCCCTCGGCTCGCCGATTTTCTCTTTGTGATGTACC  
TGATGTTCTTGTGGCTATCAACATCGCGGGCGTTACAGCCGCTGTTGACGTGGCTCCGTAGCACTTTTGTGCT  
GGTATTCAGTGGTATGCTTACAGCTCCACTTCCGGATGGCTGACATCTTCTCCGCCAAAGCCTGGCGCGGTAT  
TAACACCGTGTGCCACTGGTGGCGCAGATCGGCATGATGTACTGTTCTCTCTCTTCCCTGAGGACTCCGGCTATATGG  
CGCTGCGCGCTTGTGATGGACGCTGATGCAGGCGTGGGCTTGGCGGGAAATCCTTTGTACCGCTGATCGTTGTT  
TTCGGTTGTAACGTACCGTGGTAAATGGGCGCAGTACGCTGATGCACCGGTAACGCTGATGACCATCATGATGGC  
ACCGTTTATGCTCCTCGCGCGCGCTCTGGCTATCTTCGAGTATTTGGCGCTGCCCTTTCGGCGAGAACCGTGGCTGG  
CGGCTTCTCGCTGATATGCTCGGTTATGATGGCGGTGCTGACTGGCCTGATGCTCAAGTACACCATCATGCGCGGT  
GAAGCGACCGCTTTGTGATGAGCTGCGGCTTACCATGTACCACAGCTTAAAGCCGATTATCCAGACCTGGCAGCG  
TCTGAAAGGCTTCGTTCTGCGTGTGGTAAAGTGAATATCATCTGACGATTTTCTGAGTGTTCACAGCCTTCTCTC  
TGAGCGGGAAATCTCGCTCAACATCAACGCACTGGCGCTGGCCTCGCTCAGCCGGTATCACCCCGTCTTCAAGCCA  
ATTTGGCGTGCATGAAGATAACTGGCAGGCAACGTTGGCTGTTTACAGGTGCCATGGCGAAAGAAGTGGTAGTGGGTAC  
GCTCAACACCTTACACCGCAGAAAATATTACAGCAGAAAGTTCAATCCGGCAGAGTTTAACTCCGTGAAGAGCTGT  
TCAGTCCGATAGATGAACCTGGCAGAGCTGAAAGACACTTCAGCTTAGCTAGTGAACCCCATGATGAACCCCATGAA  
AAAGCGCAGCGGAAATGGGTACCGGGCGATGGGCTGATGGATCAGAAAATCCGTTAGCGCAGCAGCAGCTTACAGCTA  
CCTGATTTTGTCTCTGCTGATGTACCATGTATCTCGGTGATGGGAGCATTCCGCGTGAATCAAGCGTGGCTGGATGG  
GCTTCTCCATCTGTGGGGCTGAATATCGCTTACTCGTGGCAACATGTTCTATCAGGTGCGCAGCTACAGCTACGAC  
CCAATTACAGCCTGGTGTGCTGCTGCGGTTATCTGTTTAACTATCTGTTTATCGGCTGCTGCGCGCGCGCTGAG  
CCGGTGGATATCGAACTGCTGGCAACCGCAAGTGGTAAAGCAGTTGCTGCGCAGCCAGCACCCCGGTGATTGCCATT  
AA

>Cluster\_64474

ATGACCAATTTTAAACGGCTTGTAGAAAGCGAAAAAGTGGCTCAAAAACGGCGCGATCCCGCGCTGGCCATCGCCAT  
CGACGCCCTAACAAAAAGTTGGCGAGAACATCATCATCGGCAAAATTTGGGAAAGCTACCCTGACCACGGCGACAAC  
ATTTCAAACCTAAATCTGGGAAGATGCCCGGGCCAAACCGCGCCAGCGCTCGGTGAGTTGATGAGACGTTTGGCCACA  
GAACACAGTTTTGGTGGCAGAGATGGGTAGTTAACACTCCTGTTGATTTCAGTTGACGTTTACGAGATATCTCACAGGT  
TAGCGACCTGATGAAACTGCTGCTGCTGAAACGCTTCCGCGCGCTGCTGCTGTTACGCCACGATGCCAACGAGTGCACA  
GTGAATGCTTGGCAGACGCGTGAATACCTGGAGATGCTCGACAACAGTGATACTGACAGTGGATGAGGTTGACGCG  
TTTTAACCGCATCGTTCTGATGCCATGGTGGCGTGAAGCCATCGAGTACATGCATATGCTGGATTGAATAATCTGTT  
ACATGCAATTTTGGCAAGTTGCGATACCAGAAACAAAACCGACAGTTGGACTATCTCAAATTTATAAAAAATGGG  
TAGAGAACTCCCGTAAACCGATGAAATGCTGGCGGATAAAACCGAAGAACAGCATCCGACGCTCTTACCAACAGACT  
CACGCCACTGGATCGTGAATGCTGCGCCCTGTTACCCGTTGGCCGGAAAAAATCACCCAGCATCTGAAAGC  
GGCAGACGAAATAATCAGTACAGGACAGGGAAGATTTTAAACGCTGGTCAATGGCTTGGCCACACCGGATCAGATCTTGG  
CCTATGACCGTGCATCAGTATTCGGTGTATTACAGAGCCGCCAAAAGACAGTACCACCTTCCCAACACTCCCTGGCG  
AGTCACATCGACAACCTGCAAGCTAACGGGCGAGCTGATGCAAAATGCTGTTGAAGAGAAGCCAAAGGAAGCAGCAC  
AAAGGATGATGTAAGTACCAACACGGCGGCGGACGATTCGAATGATGGGATGATGTCAGAAACACCTCAAATC  
AGGGCGAAAAAGCGAAGCTGCAATGCTGGAGAAGCTAGTTTGCAGCAGTTGGTGGAGCAGTTTGTACGCCCTCGCCAT  
GTGATGACGTACCTGAAAAATAACCGGATATCACAGAGGAAACCTGCAGCAATTAACCTGGCAGAAAGAGACTCCTCACA  
AGAAAACTTAGCGAGCAGGTAAGGATCTGGTGCAGAACCTTGCAGCGCTGGTTGAGCGGGTCCATACCGAAGAGCACA  
AGCGGCAGAAATGCAATCTCAGCTATCGAAACGGAGTTAAAGGACTCCGACGACACAGATAACCTGGCATTTGTGGAAGA  
GTATTTCAAACCGATGAGCGCTTACCAGTGTCTTCTCAGAACGGCGGGCAGATCCATCAACGGCACTTATATAGC  
GATGAAAGCGACTCGCGAATTTGGCCGTTTGGTATTTGGCTGAGGTTGAGAGTTGGTGAAGAGCGGTTTGTGAAAGCG  
CACCGATAGTTCCGAAAAAAGAGTTGGTGAAAAAATAGAATGGGATCTGATTCAAGACGGTGTGGCGGGTACCTATGT  
GAAATGCACCACACCATGAAAGTTAGAGTCTGGTACATATTGAATGGAGTGCAGCGGTGAGTCCGAGGCTTACGGATGCAC  
ACCTTATATCTACGACACTAAATACGGACCAACAAGCGGCAAGCGGCAAGCAAGAAATCCTGGACGGATGCTGTAAAGA  
AAGCGCTATCCCTCTCGGATTCAGCCGATATTTTCTGAGCTGATGGGCTGTACGCAATCCGGAATACCGCAGAGGAATAA  
GCTGAGTTTGTATCAAGAAATGCCAGCGAAATGCGGAAGATGCTACCCGCTGCTGCTAAGGAACTGGATGAGAAGCTTAT  
CAACGTTGCCAATACGCTGGCGCGCGGTAACCGCAACGAAGTAAACAAGGTTATTTGGCTCATCGCCGCGAAGTGG  
ATGTACACAGGAAAGCAGGAAAGCCAAAGCGATAAAGAAATATTCATGATCTGGGATCACGCTGCGCGGATATCAC  
GACATCAAACTGAACCGCTCGCCGCTACCCTGACAGGAAACCGCATGA

>Cluster\_11496

ATGGATCTTGTCTATAAAATGATTTATGGGTTATACGCCCTGGAGATTTAGCCCAATACCATAACGCTCTGTGTTAACCC  
GAAAGAAATTAACATAGATTTGATACAGACGGGACTGTGCTGGGATTAACGTATGGTTGCTTGGTAAATCTTTAG  
AACTAAAGGTAACACAGGTAAAAAACAATTTGATCGATTAACCTTTATTTTCTGCCCGCATAGTCTGGAGAGAGGAT  
GGAGCTCATTTTATCTGACTAAGATCAGTAAAGAAGTAAACAGATATCTTATTTTGTATTGGAGCAGCGAAATCCCGG

TGTTCTCGAACAGTCTGAGTTTGGAGCGTTATATCAGGGGCATATATTCTTATTGCTTCCCGTTCTTCTGTTACCGGGA  
AAC TGGCAAATTTGAC TTTACCTGGTTTATTCTGCCATTATAAAATACAGGAGAATATTTATTGAAACCC TTTGTTGTA  
TCTGTTTTTTTACAATTTATTTGCATTAATAACCCCTTTT TTTTTCAGGTGGT TATGGACAAAGTATTTAGTGCACAGGGG  
GTTTTTCAACCCCTTTAATGTTATTACTGTGCGCATTTATCTGTTTGTAGTAGTGT TTTGAAATTA TACTCAGCGGTTTAAAGAACTT  
ACATTTTTCGCACATAGTACAAGTCGGAATCAATCAATCTTCC TGGTGGGATCAGTAAACCGCGATTAACACTATAAAAGCTATGGC  
TCTTATTTTGGAGAGTCGTCGTGTTGGTGACTGTTGCGAGGGTAAGAGAATTAGACCAGATCCGTAATTTTCTGACAGG  
ACAGGCATTAACATCTGTTCTGGACTTATATTTCATTCATATTTTTTGGCGTAATGTTGATTTACAGCCCAAAGCTTA  
CTCTGGTGTATCTTATTTTCGCTGCCTGTTATGCTGCATGGTCTGTTTTTATTAGCCCATTTTGGCAGCTCGCCCTGAT  
GATAAGTTTTTACCGGAATCCGGATAATCAATCTTCC TGGTGGGATCAGTAAACCGCGATTAACACTATAAAAGCTATGGC  
AGTCTCACCTCAGATGACGAACATATGGGACAAACAATTGGCAGGATATGTTGCTGCAGGCTTTAAAGTGACAGTATTA  
CAACCATTGGTCAACAAGGAATACAGTTAATACAAAAGACTGTTATGATTATCAACCTATGGTTGGGAGCACACCTGGTT  
ATTTCCGGGGATTTAAGTATTGGTCAGTTAATGCTTTTAAATATGCTTGTGCTGAGATTGTTGCACCCGGTATTTCGCT  
TGCACAAATCTGGCAGGATTTCCAGCAGTTGGTATATCAGTTACCCGCTTGGTGTATGCTTAACTCTCAAAGTAA  
GTTATCATGGAAACTGGCATTACCGGAAATTAATGGTAAATACACTTTTCGTAATATCCGGTTTCGTATAAACCTGAT  
TCTCCAGTATTTTGGACAAATCAATCTTAGTATTAAGCAGGGGGAAGTTATGGTATTTGTCGGACGTTCTGTTTCAGG  
AAAAAGCACATAGCTAAATTAATCAACGTTTTTATAATTCGAAATGGCCAGGTTAATTTGATGAGCAACAGTGTGATTGAGT  
CGTTGGCTGATCCCTAATCGTTACGTCAGTGGTGGTGTGTTGCGAGGACAAATGCTGCTTAATCTGATGCTTAACT  
GATAATATCTCACTGGCTAATCC TGGCATGTCCTGCGAAAAAGTTATTTATGCGAGGAAATTAGCAGGCGCTCATGATTT  
TATTTCTGATTTGCGTGAGGGGTATAACACCATTTGTCGGGGAACAGGGGGCAGGATTA TCCGGAGGTC AACGTC AACGCA  
TCGCAATTGCAAGGGCGTGGTGAACAACCC TAAAATACTCATTTTGTATGAGCAACAGTGTGCTGATTGAGTATGAGT  
GAGCATGTCATGTCGCAATATGCACAAAATATGTAAGCGGAGAACCGTTATAATCATTTGCTCATCGTCTGTCTACAGT  
AAAAATGCAGACCGCATATTGTCATGAAAAAGGAAAATTTGTTGAACAGGTTAAACATAAGGAGCTGCTTCTGAA  
CGAAAGTTTATACAGTTACTTATATCAGTTACAGTACAGCTAA

>Cluster\_2762

GTGGTTCATTTTCGACCTGGTATTGGGGAGAACTGATCATCTTCTCCAGTTGTATGTAACCCCGGTGCGACCATATCCCG  
TGATAGTAAACTGAAAGCGCTGGGTAAGACGCCAAGTCCTATAACCCGGGACCGCAGGTCACCGGATTTGCTCAATGGA  
CCGGGATGTTGTTACTGAGCATGATTTTGGCCGCTGGTCAATGAACCGGATTTATGGCATCTGCGTGGGTACAGGCCAT  
GGCTGGCTGGCGCTGGACTGCGATAGCGAAGATGAAGACATTCAGGCAGATATTCGCAAAACGCTTGTGCAACTTCGGG  
GGAGTTGCCGCGCGACGCTGGCAGCAAAACAGTAATAAGTGTCTGTATCTGCTGGCCGTTGATGGTGTATTTCTGTAAGC  
GTATCCATCGCTGGCGGGGATATGGGCATTA TCGAGTTGCTGGCGAACGGG CAGCAGTTCGTTGCCGTGGTACGCAC  
AGCAGCGGCGCGCTATTGAATGGGACGGTGGTTTGGCCGATGAACCTCCGGCTATTACTGGTGGAGCTTGAACCGCT  
TGGCAGCCCTGGCTGAACAAC TCCCTGTGTCGGTAACCCAGGAGCGGCAACAGATGCGCGACCGATCAGCAT  
TCACGCCCGCGCGACGGATGATACAGCTGAATATCTTGTATGCCAATGGCTGGACGCTGCTGGATGGCGCAAATGGTGAA  
CGATATATCCGCTGCTCGTTTGAAGACGCCACAGTAGCGGGGCGATCCAACAGCAGCAGCTATTTTCTCGCGGAA  
CCGGGGCTTTGAGCAGGGCATTTTAAATGCCTGCATGCCAGTTGTGCGCATCGTGTGATGACGGAGATTTCTTAAATGCCA  
TCCGGATCCGCAACGAGATTTTTCGAAGATCTGACCAAGCAGTAAAGTGGCGGAACTTTTACCGCTGCTGCTGCGAGCT  
GATAAATGGGGCGTATCGAGGCAACCATCAGCAACGCAGCCAAAGCAGTAGTACGCCCTGATTTTGTGGACATCGATAT  
TCGCTTTGACAGTTTCCGCGACGAAATCATGTTTGCCTCTGCAGGATCCGGACAAATGGCGAGCATTACCGCATGCGGAT  
ATGCGCGCTGCGCATCAGATGGAAGCGGGGATTTAAACCTGTTGGTCTGTAACCTTATTCGCGATGTTGGTGTACTT  
CGACCGATGAACAACCATTTGATTCAGCGATTAACCTGCTGAGCGGGCTGGAGTGGGATGGCTGCCGCGCATGAATG  
TTTTTACCATACGCACTTCCGGTACAGCCGACACGCTTATACCCGTGCGGTGTCTATGTACATGTGGACCGCGTTGGCGG  
GGCGAGTACTGGAGCCAGGCATCAAAGCGGATATGGTGGCCGATCCTCGTTGGTCCGACGGGCTGCGGTAAGTCTTCCGGA  
TTGGAGGCACTAGGCCCTGATCCTTACTTTTGGCTGAGGCTCTGTTGAAATCTCTTTTGCAGAAAAGACGATGATCTGCGA  
CGCTACTCACGAAAAC TGGATCCGAAATACCGGGAGTTGCGCACCCAGTTTCTCGTCCGCTGGTGTCTGTTGGTACC  
ACCAATGAGGACGAATCTTTCGCGACAAGACTGGTAACCCGCTGCTGGCTCCCGTGGAAAGTGTGCAAGTTCGACGCTGAA  
AGCGATAAAAAGAGATCTCTTTTACTTTTGGCTGAGGCTCTGTTGAGGTTTTCAGCGTCTGGGGGTTTCCAGTTCCGTTG  
AGGCTGAACAAC TGGCAGCGAGTGTCCATGAACAGTACACCATCAAGGATGCTTGGCTTGAACCGGTAGAGAAATGGCTC  
GACACGCCAGACCTGATGACTAATGAAC TCCGCGAAATTCGCAATTTTACGCGCAAGTGTATTTTGGCTGATGCGAT  
TGGGCTAAATCTGACCGCATCGGAAAACCGCAAGAAATGCGAATTAGTAATGTTTTCGAAAATTTGGGGTATAAGCGGTG  
CCAAAAGGCGAATTTGGGGGAAAATGACTCGAATTTTGGAGCGGTTGCTCCAACTGTACCAGCTCAAATAG

>Cluster\_24984

ATGGCGAAAACAAC TAAATCGTTCTCGCGCTACTGCGCGCGGCAATCTCGCGGTGCCGCTGGTGTATCTGTGATTTCT  
GGCGATGGTTATTTCTGCCGCTGCCGCTGCCGCTGCTGGATATTTCTGTTCACTTCAACATGTGCTGGCGGTGATGGTCT  
TGCTGGTGGCGCTTCCGCGAAACGCTCCGCTGGAAATTCAGCTTGTCCCGGATATTTTGTGATCACCACTTAAATGGCC  
CTGACGCTTAACTGTTCTTACGCGCTGGTGTGCTGCACGGGCATCTCGCGCGGGCGCGGGGTAAGTGTATTGA  
GTCATTTGGTTCAGTGGTGTATTGGCGGCACTTTGTCGTCGGTTTCTGTTGTTATCATCTCTGATGATCATCACTTTA  
TTGTCGTACCAAAGGGCCGAGCGTATTTCCGAGGTTTCTGCCGCTTACCCTGGACGCGATGCCCGCAACAGATG  
CGGATTTGACCGGATCTTAAACGCGGATTTGATCAACAGGCGCAGGCGCAACCCGGGCTAAAGATGTTGCCAGCGAGG  
CGATTTCTACGGTGGGATGGACGGGCA TCGAAGTTTGTGCGCGGAGACGCCATCGCCGGGATGATGATTTCTGGCGATCA  
ACCTGATCGCGCGCTGTATCGGGATCTTCAAATACAACCTGAGCGCGGACGCCGCTTCCAGCAATATGTTGTGATG  
ACCATCGCGACGGATGGTGGCACAGATCCCTTCCCTGCTGCTCCACCGCAGCGGCGATTATCGTCAACCCGCTCAG  
CGATAATGGCGATATTGCCCATGACGTGCGCCACCAGTTGCTGGCAAGCCGTCGGTGTCTACACCGCTACCGGAATTA  
TGTGTTGCTGGCGGTGGTGGCGGGATGCCGCACTGCGGTTTTTGTGTTTACGCGCTGCTGGCTTTACCGGCTGG  
CGGATGAGCAAAACGCGGAGGCGGGGAGGAGGAAAAGCCTCGAAACGCTGACCCGAACCATCACCGAAACCG  
CGAGCAACAGGTCAGTTGGGAAAACCATTCGCTGATCGAGCCATCAGTTTAAAGCCTCGGCTACAAGCTGGGTGCTG  
TGGACAAAGCACAGGTTAACCGCTCACCCAGCGGATTCGCGGCTGCGGCGAGTGTATTCTGACGGCAACGGCTGCTG  
CTGCCGGAGATCCGCATTCGGGAAAAC TCCGCTCAAGCCAGCCAGTACGCCATTTTCATCAACGGCATTAAGGCTGA  
TGAAGCGGATTTCCGGCAGATAAATGATGGCCCTGCCCTCCAGCGAAACCTACGGCGAGATAGACGGCGTGTGGGA  
ACGACCCGGCTACGGGATGCGCGTCACTGGATTCAGCCCGCAGAAAAGCGAAGCGCTGAATATGCGGTATCAGGTTG  
ATCGACAGCGCCAGCGTAATGGCACCCATGTGAATAAGATTGTGCGCAGCTATATTCCTGATTTGTTTAACTATGACGA  
TATTACTCAGCTGATAAACC GTTTGTCGTCGATGGCACCGCACTGGCGGAAGATTTGAGCGCGCGCTCAATTAACAGC  
AGTTGCTGAAAGTGTACCCGGCGCTACTGACTGAAGCGTTTCCCTGCGGATATCGTCAACATCGCCACCGTGTGGT  
GCCAGTAGTGGGTTGACTAAAAGATCATAATCTGCTGGCGCGGATGTGCGCCTGGCGCTGCGGCGAGCATAACCTAC  
GTTCTGTCGCAAGCAGGAGCTGACGGTGTATACGCTGAATAATGAGCTGGAAAATCTGCTGACCAACGTTGGTGAATCAGG  
CGCAACAGGCCGCAAGGTGATGCTGATAGCGTGGCGGTTGACCCGAATATGCTCAACAGTTCAGATCAGATGCCG  
CAGGTGAAGGACAGATGAAGCGCGGGGAAAGATCCAGTGTGCTGGTGGCGCGCAGCTGCGCCCTGCGGCGG  
CTACGCAAGGTTGTTTGGCCGGGGCTGCATGCTGTCGTATAACGAAGTGCAGGAGGCTGGAGTTGAAGATATG  
GGCGTTGAGTTGA

>Cluster\_52603

ATGATGGAGAAACACGGAGCTGAATTGCTGTTACAGCGGATGTTAAGTAACACCAGCGCTACTTTCAGGGAAGGGCAATG  
GGAAGCTATAGATGCGGTGGTTAATCAGCGGCGAAAACACTGTTGTTACAGCGCACCGGCTGGGGGAAAAGTCCGCTGT  
ACTTCATCGCCAGTAAAACTTCCGCGATCGCGCGCTGGCCGACAAATATCATCTCTCCTTTGCTTCCCTGATGCGCT  
AACAGGTTGCGCCGCTGAACGGTTAGTATTACGGCTGGAACTTACAAACAGGGAAGAAATGGCAGCGCAT  
TAGCGATAAGTTGCTGCAAGGTGGCGTAGATTGCTGCTGATTACACCGTGAACGGTTGGCAATCAGGATTTTCTGAAA  
CGGTTTTATATCCAGTGCCTGACCGCATCGGTTTACTGGTGGTCGATGAGCGCACTGCATCTCTGATTGGGGCCACGAT  
TTTCGCCCCGATTACCGAGCTATATTAGATATTTTGGCCAACTGCCTGCGAATACCCCTATTCTGGGTACAACCGCGAC  
AGCGAATAACCGTGTCTGTTGAGGATATCCGTCAGCAATFGGCTGACATFGTGATTTCAGCGTGGAAACGCTGGCTCGCGAAA  
GTTTGGCGCTTGATGCCCTTAGTCTTAGGAGAACAGTCAATCCGCTGCGCATGGTTAGCAACGGTTATCCCTCAGTTTTCC  
AAATCGGGAAATTGTTATACCCCTGACGACTCGCGATGCTGAACCTGTCGCCGACTGGTTAAGGAAAAATGGTATCAGTGC  
ATTTGCTTATTACAGCGCGTGACTTGTGAAGTGGGAAAGATTCTAATACTGCCAGGGAGTATCTGGAGCAGGCACTGC  
TGGCAATAAAAAACAAAGTGTGCTGCGCAGCAGCGCATAGGTTATGGATTGATAAACTGATTTAGGTTTCTGTCAT  
CATTATCAGATGCCGGGCTTATTGTCGGTTACTACCAACAGGTGGGGCTGCCGGGCTGCTATAGATTCCGCACTGG  
CATATTGCTTTGTTGGTGGTGAAGACCGCTATTCATCAATCTTCCGTAAGAGCGCTTTCCTGCGGAGGCGCAAATTC  
ATGAAATACTCAACGACTTACGAGAAATGACGGTCTTACCCTACGAGCATTGAACAACGGCAATCTTCGTTATGGG  
CAAATAGAAAAGGCTGAATTTATTGTTAGTGTAGCTGAAATCCATCCGCTGTTGGTGTATACCGGAGAAATTTAGCCGAGAAC  
TATCGTCAGTTTTTCTCCTGATCATGAACGAATTAACCATTTGATGAATCAGAGAAAAAGTGAGTTGGCAGACGTTGAAA  
GCTATATACGACCAAGGAGTGCAAAATGCAATTTCTGCGCGCGCACTCGATGAGCCAGTGCAGCACTTTGGTAA  
TGTAGCAGTTGTTACAGTCCGCTGTTGTCGCGCCGACATTTGATGATGCGGCTTACTCCATGCGGCAAAATTTATTTATTA  
ACACGCTGCACTGCCATTAATCTCAATAAACAGGTGGGCTTTTACGCAATACGGATTTAAGAGGAACTTTC  
CTGCGGGTTTACAAGGATACGCGGGCAATCTTCTCGTTGGGAGATTCCGGGTGGGAAAAGCAGGTAGCCCAAGAG  
AAAAAAACGGGGCTTACGTGATGAACCTGGTGGAGGATGTCGGGAAATGGTTCCGCAACGCTGGAATCCCGCATCTGA  
ACCCACCTGGGTATGCTGGTCTTCTTCAATTAAGGCACTGACACTGGTTCCTGATTTTGGCCGGCACGCGCGGCAAC  
TTGGCTTACCTTTTATTGATGCCATTGAAAAGTCTGTGACAATCCACCGCAGAAAATGCAGCAAAACCGTTTTACCAG  
TGTCAAAATCTCGACGGGGCTTTGTGATTACCCCTCCTTTGATGCCAGGTCCGGCTGTGCTGTTGATGATATCGTGG  
TTCTGCATGGACGCTGACAGTTCTGACAGCACTGTTACGCCAGGAGGTTGCCGACGGTTTATCCTCTTGCCTTGCTT  
CTACCTCGTAAAAAATTGA

>Cluster\_67040

ATGAGCTCAACCAACATATTACGACGGGTGGGAGGTTTACGCTATATGCTGAATATGTTTCATGCAGGTAACAAACG  
TGTTTCATCTGGCTGATCTGGTTTTTTCGTTATCTTTTTGCGCTTATTTTTCTGGTTGCGTCTGCCCTGGGAACTATCC  
GTAATGGCCGGCTACTGCTGGTGGTGTCTACTTACTGCCGTGGAGAAAAGCGCTGTACCGGGTTCCGCTGTCTATGAC  
ATTCCTGGAACGGACAGGTGCTGCACGCAACGTCGGAGCAGATCCTGAAAGACGATTATATGGTTTGGGCGGCAATAT  
GTTCCCTCAGGAGCTGATCTGGCCCTGTTCTGGGCGTCTGTGGCAGTTGGTGTGCTGGCCTTCTGATTTTCCGTTTTCT  
TGGCTGCTTCCGGGAAAAACAGGACAGGATGAACGATATCGGAGGACGTTGAACTGACAGATGATGTGAAAGCCGTGGCG  
CGTGAATAACCGGGCTGTCGGCAAGCCTCATCCATCTGTATCGATAAGTTACCCTGCTGCTGAACAGTGAAGTGCAGTA  
TCTGATGATGTACGGCACCGGGGGCCGTAATCAACACGCTCAATAAACCTGCTGAAGCAATCCGGGCTCGTGGCG  
ATATGGCCATTTTACGATAAAGGCTGCTGCTCATTAAAAAGCATTTCAGCGAACAGGATGATGTTCTGCTTAAATGCA  
CTGGATCCGCGCTGTGCATACTGGGATATGTTCCGTTGAATTTAGTCCATTTCCGATTTTACAGCGCACGACGATACGCT  
GATCCCGATGGGCAAAAAGAAGATCCTTTCTGGCAGAGTTCTGCCCGCACCATTTTTTCTGCGTGGCGTATCGCCAGA  
AAAAGAACGGCATTCACCTCTACATGCCTGCTGCGCACGTTGCTGGCGATCGACCTGAAGGCCCTGCGTGAATACCTG  
ACCGGAACGGAGGCGAGTAACTGGTGGAAAGAGAAGGTGGAAGAAGACTGCCATCTCCATCCGCACTGCTGATCACTA  
CGTAAGGCATTACGTTAFTCTGCAGGTTATTGAACGTACCGGACGACGCTCCGTTTACCATTCGTAAGTGGATGACACGG  
TCAACGATCCGACAGTACCCGACACGGCTGGTTATGGGTACCCAGTAATGCCCGTACGATGAGTGGTGAAGCCATTA  
ATTTCCATGTGGCTGGCCAGGCAGCTAAGTGTCTGTTGGGATGGGAGAGAACCAGCATCGTGGATCTGGTTTATCTTA  
CGACGAACCTCCGTCGCTGAACAACTGCCTGAACCTGCCGGTGTGCTGGTGAAGCCGTAATTCGGGGGCTGTTTTG  
TGCTGGGTTTTACGGCCAAAAGCAGATGGACTACACCTACCGTAAAGAGTTTTGCCATGCCATGCTGGGATGGTGAAC  
ACCCGTTATTTCTCCGTTACCTTCCAGTACGGAAGCGGAATGGGTGCAGCGTGAGATTGGCCAGCGGGGGATAAGGT  
TTTCAGTGAACAGTACAGCTACGCTGCGGATACCGTGCCTGACGGTGTCTCCTTCAGCAAGGTGGAAGAACCGCTATC  
TGGTGAACACCGCATTCAGAACTGCCAACCTCCATGCTATGTCACGTTTCCCGGTGAGTATCCGGCTGCCGCTCCG  
ATGCGTATGCTTATGAAAAGATAAAGGACTCGCGCAGAAAGCACTGCTGTTGCGTGACATAAATGACAGCTCGACCGGA  
GATTGAATCTGAAATACCCGCTGCTGAGGATGAGGACGGCGATATGCTGCGTTACTGGACAGGATTGCACAGGGCAATG  
TCAGAAAAGATGACGAACAGAACAAAACGGCGCCAGCCTGAACAGGAGAAATCACTTAAACAATCCGCTACTGGCTGCA  
CGGTGACTCAGTGGCAGCAGCTGCGGTTACGGGCGGAACGGGTGAGAGCAACCCAGTGAAGAAAAGACCGCTGTGAC  
AGACTGACTGAATTTGTGGCAAAAAGAACCGGGGAACTCTGTATCCGGACGATGAGCGGATGACGAACTGCGAGG  
ATACCTGCCATGCACAGGAAGCAATGCGACAGGATGAACGCAATCTGGTGAATCACCAGACGAATGAAGCGCTGAACAG  
GATGATGACCGGAGGTTGAACCTGATA

>Cluster\_27423

ATGTTTGTGGAGCATAACCTGATAAAAAATATCAAGATATTACACTAGCGTTTACGCTCACCGTGGTACTTATTACGCT  
ATCCGGTTTTAATTTCCGCACTTGTGTTATCCATTCCAAATATATCTTTCTGGCGTGGATGCCACTGTGCGTAATGCTGT  
CAATCTTGTTTATCTTTGGCTGGCGTGGTGTGCTTCCATTTTATGCGGGATGTTTTGACCAATCTGTGGAACCTTCAT  
CTCACTTTTTACAGACCGCGCTCATGATCGGCAGCCAGCGTTGCACTCCTGTGTGCTGTGCAATATACCGTGGCA  
ATTTGGGGACCGGTTGGCGTTATGGGTTGACCAGCCGATACGCTGCGCAACGCTGTTCTGGCTTGGTTTTGGTGGCGCGGA  
TTGGCATAAATGCAGCATGATCTTGTGGGAAATTTCTTTGATTTTCCGCTAAAGATATCTACCTTTTTCCGGGATGG  
GATGCCATTTTACCGTCTGTTGATTTGCTAAGCCTTTTCCGCGAGTGTGATTTACAACATGCTTTTTTACTATCTCAC  
CGCATGATGTAAAGTCCACCTTGTGCACAGATTTGTGGCGTAGGATATCGCTCCGTCGTTGAGCAAAAGGAAACCGG  
CATTTACCTTAAGCTGGCTGGCAGCTCTTAGCGTGTGCTACTTCTGATGTGCACACCGTATGAAAATGACTTTATTGCC  
GGTACCTGGTACCTGTTTTCTTTATCATCTTTACCCTCGGTGCGGTAAAGCTTCGCTATCCGTTTTTAAATCTCACCTG  
GGCTGTTTCAACGCTTTGCTTCTGAATATAACCGAATTTTTTGAAGGGTACTAACCGAATATTCGCTGGCATTTA  
TTCTGCGACTACTGATTTTCTTTAGTGTTCGCTCATATATGGTGGCTATTATCATCTGATGTAATGGCTTAACCCG  
CGCTGGCATTTGACAGGCGTGCACGATCCGTTAACGCTCTACCCAACCTTTCGTCGTTGGAGCAAGCGCGGAGCAAGA  
GGCGGGCAAGAGTTTTTGTGCTGCGCATGATAATCTTGTGATTTATGATGCTCATACCGCTTAAATGATGCGCGTT  
ACTGATCCCGTCAATTTACCGTACGCTGCTGCCGTTGATCGAGGAAAACGAAAAGTTGATCAATTTCCGGGTAGTGAA  
CTGCTGTTTGTGAGTGGAGCCGAAACGGAAGGGCGACTCCAGCATATGGTTAAACATCTGAAATAGTCCGGCAATTA  
CTGGAACAAATACGGGCTGGATATGGGCTATGGTGTGCTGCTGGGGCATTTTGTGGAATCAGGAAACCTGCAACCT  
TGTGGGGCAGTTAAGCTGGTTGGCGGAGCAATCTGCGCACATCATATGCTGCGCTGGATAGCAGAGAGGAGATG  
GTTTTCCGGCAACACCAATAACAGGCTATTGCTGAAATACCAATTCGCACGGCGTTAGATCAGGGGATTTGCTGCTTA  
CGCCAGCAATTCGCAACAAAGAGGTTGAAGTTATGATGAGATCTCGCGCACTGAAAGTATGACGGCGCATTATGA  
CCCCGATAAGTTTTCTGCCCTTATTGCTCAGTTTAACTTAGCGCGCTTTTGAATTTGCAAGTGTGGAATCCTTGTG

AAATGGCTGGCAACACACCCTTGGCACA AAAAAGGCCACGATTTTTCAGTTAATTTAATGCCGCTCACGCTGCTGCAAAA  
GAATATTGCCGGGGGATTAATTCGCTCTGTTTAAAGCGTTATCACATCTCCCGCAGGCGGTCAATCTCGAGATCACCGAGG  
AGCAGGCGTTTTCTAACGCAGAAAGCAGCATGTATAACATCGAGCAGCTGCATAAGTTTGGTTTCCGGATTGCGATTGAT  
GACTTTGGCACCAGATATGCCCACTACGAAACGGTTAAAGCGTTTGCAGGCTGATATCAAAAATGATGGCGCTTTTGT  
GAAAGATATCGTCAACGACGCTGGATGCGATGTTGGAGTCAATTACCGATCTGGCGAAAGCGAAGCTGATGGTG  
TGGTCGGGAGTTTGTTCGAGACGCCACAGCAGCAGGCGTATGTCATAAACTTGGGGTCAATATCTGCAAGGGTATTTG  
ATTGGTCGCCCGCAGCCATTAGCTGATTA

>Cluster\_14969

ATGAGACTTTTTATTCGCAGAAAAACCCGACAGTAGCAAAATGATATGTTTAAAGCACTTGGTGGCAATTTTACCCGCCATGA  
TGGCTGGTTTGAAGTGATAACGCCATTGTGACTAAGTGTGTTTGGTCATATTAATCGAATCACAGCCGCGGAAAACTATA  
ATCCTGAATACAAAGCCTGGAAGGTTGAAACGCTTCCCTTACGCTTTTATCCCGTGAAGTATCAGCCTGTGAAAGTGA  
GCAAAAACAGGTTAAACAGATTCTCGAGCTTATCAGACGTGGAGACGTGACTGAAATGTTTACGCTGGCGATCTCGATGA  
TGAGGGACAGTACTTGTGATGAAGTCTGGAATATGAGGAAACACAAAACCCGTAAGCGCGTTCTGATTAAACGACA  
ACACGCTTCCGGCAGTGA AAAAGGCACTGGCAATCTTAAAGATAATCGTGATTTCAAAGGGCTTTACCTTAAGGCGCTG  
GCGCGTTACGTTGCTGATGCCGTCTATGGCTTCCATGACGCGTGTACACCATCCGGCAAAAAGCCAGAGGATATCA  
GGTGTCTGTCTGTGGCGCGCTCCAGACTCCCGTTCCTGGCTGATGTAATCGTACCCGTGTAACCAAGCACTATA  
AATCCAGTTTCTTACTACCATGACCCGAGTCTTTACGCTGGTGTCTGATGTTTATCAGGCGAACTGGAAAGCGAGGAA  
TTTTGCTCCGCTGACCGACCGTAAATTTGATAAAGCGTGGGACAGCGGAACGGCAGCATCCCTTGCAGGAAAAACGGC  
TACAGTTGAAAGCGCAGCAACTGATGATAAAAAACGGCTGCACCGTTGCCGTTTAACTGGTCCAGATCCAGCAATACA  
TGAAACAAAAGTTCAAATGACGGCACA AAAACACTGGATATACGCAACAATACGTGAAAAATATAAGCGATTACT  
TATAACCGCTCTGATTGCTCATATCTTTTGTGATGAACTTACGCGAAGCGCCGAGGTTATCGATGCCCTGAAATCAGT  
CTTTCTCAGTCGCTGGATATTGATTTCTGCACGTAAAAGCAAAGCGTTTAACTGCAAGGTTACTGCGCATCTGCAA  
TAATCCCGACCGCAGTGTGCCCTGATGTTAAACGCACTAGCAGCGATGAGCGCAATGTTTACCTGGCGATCGCACAAAC  
TATCTTGTTCAGTTACGCTGAAAAGATACAGGAGTATCCGTTGCCATTAGTGTGATGATGATGATGATGATGATGATG  
CCGTGCCAGAAAAACAACGACAGCGGATTTGAGGCGTTTCTTGGCGCGGAAACCACAGCAGAAAGGTAATCAGAAATA  
ATGATGATTTCCGCTTTTGAAGTCTCTGTAAAATTCGCACAGGAGAAACACTGACGACAAAAGAGTTGTCGTTAATGAG  
AAGAAAACAACCCCGCCATTATTTACCGAAGCCTCTTGTGCTGCTGCGCTTGTTCGCGTCCGGATTTTGTCACTGA  
CCCACGATTAAGAAATTTGCTGAAAGATAGGATAAAGACAAAAGATGAACATGGTGGCATTTGGTACGCCAGCTACCC  
GCGCAGCCATTCTGAAACACTGAAGAAAAGAACTATATCACGCTGGAAAAAGGAAACTTATTTCTACTGATACCGGA  
TATGCGCTTATTGATGCCCTGCCGTTAGCGGTTAACTCTGATATGACAGCATTATGGTCTGAAAAGCAGACAGCCAT  
TGAAAATGGCGACCTGACGGTTGAAGAGTTTATTAATGAGCTGACGGTGAACGACAGGATGATTTCTGATGTTGACC  
TGGCGAGATGAAGATTGAACCCGCTGCCAGCAGGGCAGTTTCAACGCTGGACTCTCCCTGCCCTCTCTGTGGTAAA  
CATATTGTTATCAGACAAAAGGTTATTTCTGTACCGGATGTGAATTTAAAATCTGGAGTGAGTTTCTGGTAAGAAAAT  
CACCCAGGCGCAGGCAGAAAAACTGGTTAAATCAGGAAAAACCGATTTGATTAAGGGATTTAAAAGAAAAGCGGTGGAA  
CGTATGATACAGTTCTTGTCTTGGAGTAAAGAAAACAGGGAAGCTGGGTTTTCCGGTAAGGGCTAAGAAGTGA

>Cluster\_60721

ATGCTTTTTAGCTTTTTTTCGAAATTTGTGCCGTTTTTGTATCGCGTTTCGCTTACGGGTGACACCCAGGCACTGAAGGG  
CGAGCGGTTCTAATTAACCCCTAATCACGCTCTCTTTTTATTGATGGCATTTTGTGACTGTTTTTACTTGTGCGTCCAG  
GTTTTGCGGTTTTACACCTCAATAAGCCAACAGTGTATATGCGTTGGCTGAAATCATTTATCGATTTTCTCTCCTCGAC  
CCGACGCAACCTATGGCTATTAACATCTGGTACGCTCTGGTGAACAGGGCCGACAGTGGTGAATTTTCCCTGAAGGACG  
CATCACACGACAGGCTCGCTGATGAAATCTACGATGGCGCGGTTTTGTGCGCGGCAAGTCTGGTGAACGGTTATTCT  
CTGTGCGTATTGAAGGGCGGAACTTACGCATTCAGCCGCTGAAAGGTCTGGTTAAACGCTCGCTTGTCCCGCAAAAT  
ACTCTGCATATTTTGGCACCACAGCGAGTGGCGATGCGCGATGCGCGCTGCCGCTGACCGTCCGCAAAATCGTGGCGA  
AATGCTGCATCAATAATGATGGAAGCGGAAATGGCGGTGCGCCGCGTGAACGCTGTACGAATCTTTACTGAGTGCAA  
TGTACCGCTTCGGAGCCGGAAGAAATGTCGAGAGCTCAACTTTACCCAGACTCTATCGCAAAATGCTTACGAAA  
ACGCTGTTTTGTTGGACGCATCTTGA AAAATACAGTGTGAAGGGCAACGCATCGGCTTAATGCTGCCAATGACGGCAT  
CAGTGGCGCAGTGAATTTTTGGGGCCATCGCCGCTGCCGATGCGCGCAATGATGAACFACACTGCGCGGGTAAAAGGGC  
TGACCAGTGTATTACGGCGGCTGAAATCAAACCATCTTCACTTCCCGCAGTTTTCTCGATAAAGGCAAACTCTGGCAT  
CTGCCGAGCAACTTACTCAGGTGCGCTGGGTCATCTGGAAGATTTAAAAGCAGATGTCACCACTGCCGACAAAGTATG  
GATCTTCCGCTATTGCTGATGCCGCTTGGCACAGGTTAAACAGCAGCCGGAAGAGAGGGCGTGAATCTTTTTTACT  
CCGCTTCTGAAGCCATCGAAAGCGCTCGTCCATAGCCATAAAAAGCATTTCTGGCGAATGTGCGAGCATTTAAACGATT  
GCCGACTTACCACCAACGATCGCTTTATGTCGGCGTTACCGCTGTTTCACTCCTTTGGGCTGACGGTAGGCCGTTTTAC  
GCCACTGCTTACAGGTGCAAGAGTGTCTTTATCCAAGCCGCTGCATTACCGCATTGTGCCGGAGTTGGTGTATGACC  
CGAGTTGCACCTGTTGTTCCGACCTCGACTTTCTCGGCTACTACGCGCTTTCGCAACCCGATGACTGATGATGATGAT  
CTACGCTATGTTGGTGGCAGCGCAGAAAATTAACAAGAAAGTACCAAAACAGCTTTGGCAGGATAAAATTTGGCTGCGCAT  
CCTTGAAGGCTACGGCGTACCGAATGCGCGCTGTGCTTTCTATCAACGTACCGATGGCGGCAACCCGGTACGGTAG  
GGCGTATTCTACAGGAATGGATGCGCGCTGTGTCGCTCCTGGTATCGAAGAGGGCGGACGCTGCAACTGAAAGGG  
CGAACATAATGAACCGCTATCTGCGGGTGGAGAAGCAGGTGACTGGAAGTCCACCAGGAGAAATGTTCCGCGGCA  
AATGGAGCCGCGCTGATGACACTGGCGATATTGTGCGTTTTGACGAGCAGGCTTTTGTGAGATTTAGGTTCCAGGCT  
AACGCTTTGCCAAAATTTGAGGCGAAATGGTGTGCTGGAATGGTGAACAACCTGGCACTTGGTGTTCGCCAGATAAA  
GTCATGCCACTGCGATTAAAGAGCGATGCCAGCAAGGGCAGGCACTGGTGTCTTTACCACAGATAACCAAGTACGCGC  
CGATAAGTTGCAACGATGTCGCCGAGCAGCGCTGCCAGGCTGCTGATACCGCGGATATTCGCTATCTGAAACAGA  
TGCCATTACTTGGCAGCGCAAACTGACTTTGTACGTTGAAAAGCTGGGTAGACGAAGCGGAAACAACGATGAGTGA

>Cluster\_60648

ATGGAACCTTTTAAATATATATGCCATTACTGGGGAAAATCCTCAAAAAGCTTGACGAAAGGAAATGATATTCATCTGTT  
AATTTATCATTTGCCCTTGATGTTGCTGCTGTTGACAGATTGCTGGTGGGATCAATCAGTCTACTGCAAAAATACTTTTTGCC  
GAAATGAAATGCTATCAAAAACAGAGGGTGAAGGCTGGCTGTTATTTTTTCACTGCTCTCATGATATTGAAAGTTTGTAT  
ATACGATTTCAATATAAATCAGCAGAAAAGTTGGCTGAAATTAATCCTGCAACGCCATCACTTAAATGGTCCATCAACACA  
AATGTGCCGTAATTTAATCATGGTGCAGCCGCTGTGATGTTTAAACAGGATCACTTTACAGAGCAATCTCTCGGGG  
ATTTTTTCACTTTTTTTGATGCGCCCTCCTCATTAATGAGTCTGTTTCCATGGGTTAGAGGCGCTTACAGGACATCAT  
GGTTTTTATATTACATTTCCAGGATCAAGATAAGTCCGCTGGGAAATGCCAGCTTCTTGGCATCTTATGCTGCGCAAGA  
TAAACAGGCTCGTGAGGAGTGGATATCTGACTGGAAGCATTAATTTTTAACGCGCAGCGGGTTATCTATAAACGATATAC  
CACCTGATTGTTCACTGTTAGCAGGTTTTTGTCTGCTGCTGACTGGTTAGGCTCTGGACTACAACGATAACCTTTT  
CTGTTTTAATGAGGATGCGCCTTCCGACATAAAATGCTCTGAGAACGATTTTCCAGGACCGACAGCAGGATGCGAGGGT  
ATTGGAGTTGAGTGGACTTGTATCAAAATAGCGATGTTATGAAGGTGTTTATGCACTACTGGACAATGGCTATCAACCCA  
GACAATTACAGGTTGTTGATGCTCTTCCAGTAGCTCCCGGCTGACGGTAATAGAGGCACCTACAGGCTCCGGTAA  
ACGGAACACGCGCTGGCCCTATGCTTGGAACTTATGATCAACAATAATGCGGATAGTGTATTTTTTGGCCCTCCCAACA  
AGCTACCGCAATGCTATGCTTACGAGAATGGAAGCAGCGCAGCCACTTATTTTCACTCCCAATCTTATTCTGCTC  
ATGGCAATCACGTTTTAACACCTCTTTCAATCAATAAAATCACGCGGATTAAGTGAACAGGGGCAAGAAGAAGCGTGG

GTTTCAGTGTGTGTCAGTGGTTGTGCACAAAGCAATAAGAAAGTGTTCCTGGGCAAAATCGGCGTTTGCACGATTGATCAGGT  
GTTGATATCGGTATTGCCAGTTAAACACCGCTTTATCCGTGGTTGGGAATTGGTTCGAAGTGTTTAAATTGTTGATGAAG  
TTCATGCTTACGACACCTATATGAACGGCTTGCCTGGAGGCAGTGTCAAGGCTCAGGCTGATGTTGGGAGGAGTGTATT  
CTTCTTTCCGCAACCTTACCAATGAAACAAAAACAGAAACTTCTGGATACTTATGGTCTGCATACAGATCCAGTGGAAAA  
TAACCTCCGATATCCACTATTAACCTGGCGAGGTGTGAATGTTGGCAACGCTTTGATCTGCTAGCTCATCCAGAACAAC  
TCCCGCCCGCTTTTCGATTTAGCCAGAACCTATTTGTTTAGCTGACATGTTACCTGACCTTACGATGTTAGAGCGAATG  
ATCGCAGCGGCAAAACCGGGTGCACAGGCTCTGTCTTATTTGCAATTTGGTTGACGTTGCACAAGTATGTTACCAACGGCT  
AAAGGAGCTAAATAACACGCAAGTAGATATAGATTTGTTTTCATGCGCGCTTACGCTGAACGATCGTCTGTAAAAAGAGA  
ATCGAGTTTATAGCAATTTTCGGCAAAAAATGGGAAGCGAAATGTTGGACGGATACTTGTTCGCAACCAGGCTGTGGAAACA  
TCACTCGACGTTGATTTTGTATTGGTTAATTACTCAGCATTGCTCTGCAGATTTGCTTTTCCAACGATTGGGCCGTTTACA  
TCCGCATCATCGCAAAATATCGTCCCGCTGGTTTGGAGATTCCTGTTGCCACCATTTTGTCTGCCGATGGCGAGGGTTACG  
GACGACATGACGATATTTATAGCAACGTTAGAGTCATGTGGCGGACGCAACATATGAGGAGCTTAATGGAGCATCC  
TTATTTTTCCCTGATGCTTACCGCAATGGCTGGATAGCATTTACGATGATGCGAAATGGATGAGCAGAACTGGTCCG  
CAATGGCATGGATAAATTTGAAAGCGCCGAGTGTGAAAAAGGTTCAAGGCTCGCAAGGCTCTGCAGTGGGCTGAAGAA  
ATAGCTTGCAGGATAACGATGAAACCATTTCTTGGCGTAAACGAGGGATGGGAAATGAGCCTGCCATTTATGCTTATGTA  
CAAACGCTTTCAGGTAACAACCTGCTCGATGGCCAGGTTACGAGGACCTAAGTCATGAACAGCAGTATGAGGCGCTTGC  
ACTTAATCCGCTCAATGTACCTTACCTTACCTGAAACCTGACTTTTTCTGAAGTAGTAGATGAAGATGGGTTACTTGTGCTG  
AAGGGAACAGAACTCGGATGGATGGGCTGCGCAGGTTAACAGTATTGTTATTACCTATACAGGGGATGAAGGATGACC  
AGAGTCATCCCTGCAAAATCCCAATAA

>Cluster\_23563

ATGCTGATTCCGTCAAAATTAAGTCGTCGGGTTGACTCGACCATACCGTGGTTGCTGAGCGCTGCTGGCTAAACTTTC  
CGGCGCAAAACACTTCCGGCTGGCGCTGATCACAAGTCTTCCGGGCTACGGAAGACCAGCTCATTTCCAGTGGGCGG  
CAGGCAAAACGATATCGGCTGGTACTCGCTGGATGAAGGTGATAACAGCAAGAGCGTTTCCGCCAGCTATCTCATTTGCC  
GCCATGCAACAGGCAACCAACGGTCACTGCGGATATGTGACGATGGCGCAAAACGGCAATATGCCAGCCTGACATC  
ACTCTTCCGCCAGCTTTTTCATTGAGCTGGCGGAATGGCATAGCCACTTTATCTGGTCACTGATGACTATCATCTGATCA  
CTAATCCTGTGATCCACGAGTCAATGCGCTTCTTTATTTCGCCATCAACAGAAAACTCACCCCTGGTGTGTTGTCACGC  
AACCTTCCGCAACTGGGCATTGCCAATCTGCGTGTTCGTGACCAAGCTGCTGGAATTTGGCAGTCAAGCACTGGCATTTAC  
CCATCAGGAAGCGCAACGATTTTTCGCTGTCGCGTGTGATGCGGATTTGAAGCTGCAGAAAGCAGTCAAGTTGTGATG  
ATGTTTCCGGTGGGCGACGGCACTGCAGCTAATCGCCCTCTCCGCCCGCAGAAATCTACTCAGCCATAAGTCCGGCA  
CGCCGCTTGGCGGAATCAATGCGCAGCCATCTTTCGGATTTATCTGGTCTGATGAGGTTTGGATAACCTGATCTCGCAAC  
CGCCATTTTCTGTTGAAAGCGCCATTTTGGCGTCAATGAACGATGCACTCATCACCCGTGTGACCGGCGAAGAAAAACG  
GGCAATGCGCCTCGAAGAGATTGAGCTCAGGGGCTGTTTTTACAGCGGATGGATGATACCGCGAGTGGTTTTGCTAT  
CACCCACTGTTTGGTAACTTCTGCGCCAGCGCTGCCAGTGGGAATGGCGGCGAGCTGCCGAAATCCACCGTGGCCG  
CGCAGAAAGCTGGATGGCCAGGATTTCCAGGCAAGCGATTATCATGCGCTGGCGGCGAGGCGATGCGCTGATGCTGC  
CGGATATTCTGTTAATCAGCCCTGGAGTTTGTTCACCATAGCGAATGTCGCTGCTGGAAGAGTCACTTAAGGCCCTG  
CCGTGGGACAGTTTGTCTGAAAAATCCCGAGTTGGTATTTCAGGCGTGGCTGATGCAAGGCGCATCTGCTGAGCGCA  
AGTTAACACCCCTGCTGGCCCGCTGAACATGAAATCAAGGACATCAGAGAAGGCACCATGCACGAGAAATTTAACGCTC  
TGGCGCCCGAGTGGCGATTAACGATGGTAAACCGGATGAAGCGGAACGGCTGGCAAAACTGGCACTGGAAGAGCTGGCC  
CCGGCTGGTCTATAGCCGCATTTGTGGCAACTCGGTGCTGGGTGAAGTGTTCGACTGCAAAAGGCGAATTTGACCCGCTC  
ACTGGCGTTAATGACGCAAAACCGAACAGATGGCAGCCAGCATGCTGCGACTACGCTTTTGTGGAGTTTAAATCCAGC  
AAAGTGAATTTCTGTTTGGCCAAAGGTTCTTGCACAAACCGGTTGGGAAACGAGGAAAGCGTTCAGCTGATCAACGAG  
CAGCATCTGGAACAGCTGCCAATGCATGAGTTTCTGGTGCATTTCTGCGCAGCTGTTATGGGCTTGGCCAGCGCTGGA  
TGAACCGAAGCGTTCGGCGCGCAGCGGATTTGAAGTCTGTGCTTTATCAGCCACAGCAACAGCTTCAAGTCTGGCA  
TGTGATTTCAATGCTCGCTGGCCGTTGATTTAGATAACGCCCGTAGCCAGCTGAACCGCTGGAACAACTGCTGGGG  
AATGGCAATATACAGGCACTGGATCTTAACGCCAAAGTCCGGGTGATTTACTGGCAATGACCGCGGATAAAGC  
CGCCGCTGCCAATGTTGCGTCAACGGCTAAACCGGAGTTTGGCAACAACTTCTGCAAGGTTCAATGGCGCAACA  
TTGCCCAGCAAACTTGTGCTGGCGAGTTTGAATCTGCGGAAATTTCTCGAAGAACTCAATGAAATGCCCGCAGT  
CTGCGGTTGATGAGCGATCTCAACCGTAACCTGTTGCTGCTTAATCAACTGTACTGGCAGGCGGACGTAAGTGCAGC  
CCAACGTTGTTGCTGGACGATTAACCTGCGCAATCCACCGGATTTATCAGTCATTTTGTGATCGAAGGCGAAGCGA  
TGGCGCAACAACCTGCGCAGCTTATTAACCTAATACGCTGCCGAGCTGGAACAGCATCGCGCACAGCGTATTTGCGA  
GAAATCAATCAACATCTCGGCATAAATTCGCCATTTTCGATGAGAAATTTCTGTTGAACGCTGCTGCAAACTACCCGCA  
GCCAGAGCTGATCCGCACTAGCCGTTGACCAACGTTAATGGCAGGCTCTGGGGCTGATTTACTCCGGTTACAGCAATG  
AGCAAATTCAGGCGAGCTGGAAGTGGCGGCAACCACTCAAAACGATATCCGTAATCTGTACCAAAACTCGGTGTC  
GCCACCGTCAAGCCGCGGTACAACACGCGCAGAACTGCTGAAGATGATGGGATATGGGGTGTGA

>Cluster\_28379

GTGAAGTTCGTAAAGTATTTTTTGTATCTTGCAGTCTGTGCAATCTGCTGGGAGCAGGCTCGATTTATGGCCTATACCG  
CTACATCGAGCCACAACCTGCCGGATGTGGCGACATTAAGAATGTTCCGCTGCAAAATCCGATGCAGATTTACAGCGCCG  
ATGGCGAGCTGATTGCTCAATACGGTGAGAAACGCTGATTTCCGGTTACGTTGGATCAAAATCCCGCGGAGATGGTGAAA  
GCCTTTATCGCGACGGAAGACAGCCGCTTCTACGAGCATCACGGCGTTGACCCGGTGGGATCTTCCGTGCGGCAAGCGT  
GGCGCTGTTCTCCGGTACGCGTCAAGGGGCGAGTACCATTACCAGCAGCTGGCGAGAAACTTCTTCCCTCAGTCCAG  
AACGCAGCTGATGCGCAAAATTAAGGAAGTCTTCCCTCGGATTCGCATTTGAACAGTTGCTGACGAAAGACGAGATCCTC  
GAGCTTTATCTGAACAAGATTTACCTCGGTTACCGCGCTATAGGTGTCGGTGCAGGCAAAAGTCTAATTTCCGTTAAAC  
GGTCGACCAACTGACGCTGAACGAAATGGCGGTGATAGCCGGCTGCCGAAAGCGCTTCCACCTTTAATCCGCTTACT  
CAATGGATCGTGGCGTCCGCGCGGTAACGTCGTAAGTCTGCGGATGCTGGATGAAGGTTATATCACCAACAACAGTTTC  
GATCAGACAGCACTGAGGCGATTAACGCTAATATCACGCGCGGAGATGCTTTCTCTGCGCGTACCTGAGCGAAAT  
GGTCCCGCAGGAGATGTTAACCCTTATGGCGAAAGTCCATGAAGACGCTTATCGCATTTTACCAACCACTACCCGCA  
AAGTACAGCAGGCGCACAGCAGGCACTAGCTAATAACGTTGACTACGACATGCGCCACGGCTATCGCGGCCCGGCA  
AATGTGCTGTGAAAGTGGCGAATCGGCGTGGGATAACAACAAGATTACCGATACGCTGAAGGCGCTGCCGACCTATGG  
TCCGCTGCTGCTGCGGCACTACCAGCGCAATCTCAGGAAGCAACGGCGATGCTGGCAGACGGGTGACCGTCTGAT  
TGAGTATGAAGGTTGTTCCGCTGGCGCGCTTACCCTTCCGATGATGACAGGAGGACCGCGCGCTTCTGACTGGCAGGAACT  
GTTCTGCAAAACGGGTGAGCAATCTGGGTTCTGCAAGTTGGCGATGCAATGGTGGCTGGCGCAAGTGGCGGAGTGAAC  
ACCGCCCACTCAGGCACTGCGTCAAGTGGGTTCCAACATCAACCGTTCTCTACACCGCGGATGGATAAAGGCTC  
ACGCTGGCAAGTATGTTGAAACGATGTGCCAATTTCCCGTGGGATGACAGGTTGCGGCTTCTGACTGGCAGGCAAGAACTC  
ACCACCGCAGTATGCCGGTCCAATTCGCTTACGCTAGGGGCTGGGTCAGTCGAAAACGTTGGTATGGTACCGCAATGC  
GGCGATGGGCGTCACTACGCTCAGAAATATCTGCAACGCTTCCGGTTCGCCGCAAAAACATTTGCTCACACCGAATTC  
CTGGCGCTGGGTTTACGCTTCCCTTACCCCAATGACAGTGGCGCGGCTACCGGCTATGGCGAACCGGCGCTTCTGCT  
GGACCCGTTGGTTTATCAGCAAAATGAAACAGTTACAGGCGCGCTGATTTTCGAAAGCAAAACGAAAGTAGCTGCCCCG  
AATGGGATATCCGGTATTTACGGTATACGAGAAATGAAACGCTGCAAGTGTGAAAAATACGATGTTGAAGATGTCGCTATC

TCCGCGAGCAGCAGAATGTTTCTGTACCAATGCCGAGCTGGAGCAGGCAAATCAGGCGTTAGTGGCGAAGACTGGCGC  
GCAGGAGTACGCACCGCAGCTCAACACTCCGCTGGCATTCTGATTAAGAGTGCCTTGAACACCAATATTTTTGGTG  
AACCAGGCTGGCAGGTTACTGGCTGGCAGCAGGTCGTGATTTACAACGGCATGATATAGGCGGAAAAACGGGTACCACT  
AACAGTTTCGAAAGATGCGTGGTTCTCGGTTTACGGTCCGGGCGTGTGACCTCGGTCTGGATTGGCTTTGATGATCACC  
TCGTAATCTCGGTATACAACGGCTTCGGGAGCATTAAGATCAGATCTCAGGTTACGAAGCGGTGCCAAGAGTCCCGC  
AGCCTGCATGGGACGCTTATATGAAAGCCGTTCTTGAAGGTGTGCCGGAGCAGCCGTGACGCCGCCACCGGGTATTGTG  
ACGGTGAATATCGATCGCAGCACCGGCAATTAGCTAATGGTGGCAACAGCCGGAAGAGTATTTTCATCGAAGTACGCA  
GCCGACACAACAGGCGGTGCACGAGGTGGGAACGACCAATTATCGATAATGGCGAGGCGCAGGAATGTTCTGA

>Cluster\_5132

GTGAAAAAATTTCTGAGCGTGTGGAGAACCTCACGAATGCTTTCCGTATGCCGGATGGTGCATCTGAGATGACGCGTAA  
TCTGGCCAGTCTGGATTTTCCGCGAGCTGACCAGCGTCCGCGGATCGCGACTATGACCGTACTCCGGGCTGTTTGTGA  
ACCGCAGTACGGTTGGTTTTCTGCTGCGGGGGAACCCCTTATCGGTGCTAACGAACAGATAGTGTATGTGCTGGAAGAC  
CTCATCAAAGCAAGCTGCGCGCTAAGACACCGATTTCCTTACCTGGTGTCCAGTAAGCTGATTGGCGAGCAGTGGGA  
TCGTGGCCTGTCTGAATCCGCTGGCAGGGTAAGCGTGGGATAAATTTAACCGTATCACGCGGGCGTTTTACCGGCGTG  
CTGCACAGCAGCAGTTCAACAGTCTACGGGGTTCGCGTGCACCTGCGGGACTACCGCTGTATATCTCCTACTGTGTG  
AAGCAAAAGAAACGCACGGCGGCTCATGACGGAGGTTGCCACACTGAAAGTTCCTGTTCTTCACTGGATGCGGC  
AAAAATTTTACACAGCAGCGGAGATGCTCAGGAACCTGCCACCGTGGTTCACGGGATGCTGAATGCCCGCATGATCAGT  
TGTATCCGGACGCTACGTGTCCGCAAAATTTGATGAACTGCATCAGCGCTGTATTGATCAGCGTATCGGTATCGATGTG  
CGTCTGACGATGTGCGTATCAGCTGGCTGACAGGACGGGAGTGTGACCACAAACGGGCCATGAACTTTATGCTGGA  
AAATACCCCGGATAATGTTTATGCTGTGGATGGGCGGCATAACCTATCAACTGCTCAGCCCGGACATGGCA  
GCCGTTTTCTCATACCATGGTAATGGAGGCGAGGACAGGTTGCAACGCAAGGGGAGGCCACGAAAGTATCTCGAC  
CGGACAAAAAAGCGAAATCCCTTATGCCACCTGTTTCCCGTGTGGCCAAACAGGCCAGGAGTGAAGGAATCCG  
CGAGCGTCTTAAACGAACACAGCCTGTATTGTTTCGTTTATTACTATAACATCACCACTTCTGTCCGGATACCGATGAGG  
ATGCGCTGTCTGCGAACAGCAGTTTCAACAGCTTCAAGAAAACGGTATAGAGCTGTTTTCCCGACCTATGCGAG  
TTCCGCAACTGGATAGCGATGATCCCTTCACTTGCATGCGGAAGGGCTCTGGGAGGACATTAATAATGGCGGAGCCACGTG  
CCGGGCGGAGAGTATCCAGGCGTGAATCTGCTGCCGGTGGTGGCCGACAACCGGCTGTGTCAGGGGGGACTGCTGACAC  
CGTCTACCGTAACAGCTGGCCTTCTCGATATCTACGGGACGGGATGGGCAACCAACTACAACATGGCGGTACCC  
GGTACTTCGGGGCAGGCAAGACCGGCTGGTGGCAGCTTATCTGCGCAGCGTGTGGACTCCGGTGGTATCGCTGGGT  
GTTTGACATGGGGACGGCTACAAATCGTTCTGTGAGAACGTGGTGGCACCTACCTTACGGTAAAGTCACTCAAATTA  
ATCCGTTTCCCAACATCTCAACATCAATGAGTCCGGGGAACGATCCGTGACAGCTGGCTGTGCTGGCAAGCCCTAAC  
GGTACGCTGGATGAAGTCCACCAGCCTGTGTTGCGCGGGTTCAGGAGGCTGGGAAGAACAGGAAACCGCCCG  
TATGACCATGTCTCATTAAGCTGACGCTATCCGTGAGCATGATAAATATCAGAATTCGCCGGGCATCACCAACCGAC  
TGGATGAAATTTATCGAGTACTCGGAAATACTGCTCCGGAATTTACGGTGAATATTTCAACAGCGATGAGCCGTC  
CTGACCGAGATGCCCGCTTTATGTCCTGGAGTGGGCGTCTGCAGGACAAGCCTGATCTGCTGGTTCGCGTAAATGTT  
TTCCCTCATCATCTACATTTGAGGACAAGATGTACCCGACCGCCGAGCTGAAGAAGTGTGACCATCGACGAAGGCT  
GAGGCTGTCTCAACTTTCAAATAAGAGGTCGGTGGTGGTATTTATTGAAACCGGCTACCGTACCGTGCAGCTCATCTGGC  
CGCTTATCACCATCAGCCAGAATCAAGGACTTTGATGCCGATGATGCTTCCGGTGCAGAAAAGCCGCTGGGGTAA  
CTCTGCCTTCAAGGTGGTTCCAAGCAGGATGCGTCCGAAATCAACAGTACAACAGAACCGCCCAACCACTGACGG  
AGCTGGAGCGCAGCTTATCTCTAAATTCGGGATGCCAAAGACCAAGTGGTTCCTTCTTATGCTGGCCTCAACGAT  
ACCTGAGTTTCCATCTCTTCTGCGACCCGCTCAGCCGGGCGATGTTTCAAGTTCAAAGGGGATGACTTCGAAATTA  
CCGCCAGTCCGGGAACAGAATGGATATCCATGACGCGCTACCTGCTGGCAACGCAACTTCCCTGATGAGATGC  
CGAACTGGAAGCGCTTGGCGAGGACGATGA

>Cluster\_63663

ATGGCAGAGCAAACCTCGCGTCTCGCAATAATTATTGATAGCACTGGAGCGAAAAATAATGCTGACAACTTGACCTCCTC  
ATTAGTCAAATGACGCAGGCTGGGAAACTGCTGCAATAGCGCAGGAAAGTACTAAGGCACAGAGATGAGAAGA  
ACGCGCTCGCAAAATTAAGAGCAGCTATTGATCCAGTTGGTGGCCGCAATTGATACTGTCCGGTGCAGCTATTCTGAATTA  
AAGAAATTTTTCGATAAAGGGCTTATTGATAAAGAAAGATATGAATTTCTGTCCGTAACTTAATGAAACCCAGCAGGA  
ATTGAGCGGGGTTGCGCAAGCGCAGAGAGAAGCCGAGAAGGCCGAAACTTGTCTGCCGCCAGCAGGAAGCGCAGGCTC  
AGGCTTTTCAAAGATGCTGGACAGATCGACCTCTGCTGCGGCGCTAAGAAATCTGAAACACAGCATGATGAACCT  
AATGCTCGCTTTGATCCGGGAAATAAATGTTTCTCAGTTTGGAGATTAAGCCGAAATAACAGAAACACGGCGAGA  
GCTTACCGGAGAGGCTCAGGCAGAGCGAGAAGCAGCAAAAGCCGATGATGAACAGGTTGTTGCTTTCAGCTGATG  
CTCAACTTGTATCTGCGAACTGCTTTTAACTGCTGTTGAGAACACAGAAACAGCTCAATGAAGCAAAAGCTAAGGGG  
ATGCTTTCTCCTGAAATGATGAGGAGCTTTCTGAAAACCTCTGCTATGCGGAGTGAAGCTTACTCAATCACA  
ATTAAGCAAAACCGGAATGTCGGCAAAACAAAGGCTTTTGTATGCGCATGTTGCCCTGCACAAATGACGGATATGTTG  
TTGGTTTGGTCCACTGGTCAAGTCCGCTTATGTTGTTAATGACGACGGGCGGCAAAAAGATATGTTCCGGTGGGAT  
GGCCCGGCGATCAAAGGTGATAGGTTCTTATGTTGCTGGGATTAATAATCTTTTACCTGGCCGAGCAGCCGTTGGGGT  
CTTAGACTGGCTTACTATAAAGGCTCTCAGGAGCAGGACGAATTAATAAATCTTTTACTTACCGGAAATCAGTTGG  
GGCAACACGGGCAATGGGCGATATAGCTCAACGTCCGGGAAATGGCGCTGATTCGACAACTGCTGCTGGGCGGA  
GTATTAATCAGCTTGTGCGTTCCGAAAAGGTAGCGAGCATTTGCTGGAGCAAGTGAACAGCAGCATAGTAAAGAACGAG  
CGAAGTAAACAGGAATATCAACCGAACAACTGGTTAATGACTTCAATGAAATGCAAAGGATCCGTGCTAGTCCATATCAA  
AACTTAATGATCAGTACCAATTTTCTGACTTGGCCTTATAACAGATTAAGGCGCTACAGGATGAAGGGAACAGCAG  
GAGGCCCGCCGATGCGCAGAGAAATACTCATCTCAATGATCCAGCGCACCAACAGATTAAGAAATACTTGGTTA  
TCTTGAGACTGCATGAAAGCTGTGCGAGACTCCGCAAAATGGGATGGGATTCATGCTGGATATTGGCCGTGAGGCT  
CCCTTGATCAAAAATCTCAGATGTTCTCCGTCAAATGATGAAATAGAAAAAATACCCGACCCGGAGTTTTCCGGTTA  
GGTGGCATTGGGATGGCGGAGCTCAAAATAAAGGCTGGCAGCATTAAGCAGCAATGGGCGTACTTCAAGCAGAAAA  
AATGCTCAGGACGCTCAAAATCATCAATAAACGATTACAACAGCGACAACAGGAAGGAAATGAACTCAGACAGAGAG  
CAGATGCCTTTTCAAACAATATCAGACCCGGGAGCAGCAGAGAGCTAGTGAACCTGCAAACTGAAAGGCTAAAGAA  
CAGTATTAAGGAAAGATATAATAATCTTATCCGCTCAATAAATGAGCGTTATAAGATCCAAAGCAACCAAGGCGAA  
AGGTTATTTGATGATGACGCCCAACGAATGATGATCATGTAATCAACGAATGCGTTACTAAGTTCAAGCTGAGT  
TGACGCTTAAATTAAGTTCCCTCTGAACAGGAACCTGGTTAAGTGGCTGACTGCGGATTCAGGACTTACAGGATGAT  
TCGAAATTAACCCAGGATCAGAAATCGCTTCTTACACCGGGAAGAAATAACCGGTTGATGGAGAAAAATGTTGGGAT  
TGAAAAGAAATAACAGGCTAATCAAGGAAATCCGCGGAAATAACAGCATGGCGTGTATTCATGACGCTTTCGATTGATAATC  
GTCAGCAGGGGATGATATTCAGATGCTGTTTATGGGTTGGCGATAAAAACTCAGCAACGCCAGCAGGAATTTACTGCGG  
ATTTGAACATGGATATAACAAATCAGCGTCTGCAACTTGAACGTGACTATGCAGATAAATCCCGTGAATGTCAGATGAT  
TTTTCAAGAGAAAAATGACGCTTGAATGATGCTTGGAAACGGGAAAAAGAAATGTCAGACAGAAAAACGAGCAGCTCG  
ATATTACGACGAGGACTGGGTTAGTGGTGCCTCCAGGGATCAATAACTGGCTGATGACACTAAGGATATCAGTGA  
CAGATAAATCAACACAGCTCAGATGTTTGTAGGATACCGATGCGCTGGTGTGATTTGTCACAGCAGGCAAGCAAA  
TTTTCGTTCTTTCGCTACTTCCGTGATTTCCGATCTTATGTCGAATGGCATTAAGGCTTCAATTAAGTGGGATTTTCGACA  
GCATTAGTAAACAGTCTTCTGCGGGGATTTTAGGAACTATCGGAGTGTATTAGTAAATTTATCCGATGCAAGGGC

GGTGTTTATGAGTCTCCGTCATTGAGCAGGTATTCGAACGGTATTTATGATCCCGCAATTTTTGCTTTTGCAAAAGG  
GGCTGGTGTTTTTGGTGAGGCTGGACCGGAAGCCATTAAGCCATAACACGAACCTCCGATGGTCTCTTGGTGTGAGAG  
CTATTAATAGTAAAAGTGGTAATGGAGGCGGAGATATTACCTATGCCCTGTATACCAATCACTATTTCAAAATGACGGC  
CAGAAATGGAGAGATTGGCCCTCAGGCAATAAAGCAGCTTATGGGGATGGTTGATCAGCGGGTGACGGGCAATCTGTTAAA  
TATCGGACGTGATGGGGAAATTAAGTGGCTAA

>Cluster\_27647

ATGAATAAAAATATACGCATTAATAATTTGTCACGCGACAGGGGGCTGATGCTGTATCCGAACCTGGCCTCCAGAGTTAT  
GAAGAAAGCCGCTCGCGGCGAGCCTTTTAGCATTTAATCTATCATTGTATGGTGTCTTTTTAAGCGCATCTCAGGCTG  
CTCAACTAAAATTTGATAATGTATGGGCTAGAGATTTAGACCTCGCACAAAATAAGGGGGTGTTTAAAGCTGGTGGC  
ACCAATGTTTCAATTTCAACTCAAGAATGGCCAGACGTTAATTTTCCAATGTTCCAATTTCTGATTTCTCGCCGGCCTC  
AAATAAAGCGCTACTACATCTATAGGTGGAGCTTATAGTGTACAGCAACCCATAACGGAACAACTCATGCAATAA  
GCACCCAAAATGGGGACAAAGCTCATATAAATATATAGACCGGATGACGAATGGAGATTTGCTGTAAACAGCACTTGAT  
AAGTTTGTGTGAAACCAACAGGGGTAAAAAATTCAGTATGATTTTCTCTCAATAGTCATGATGCTCTTGAACGTTATGG  
TGTGGAGATCAATGGTGAGAAAAAATCATTGGTTTTCAGGGTTGGGGCTGGGACGACTTATACCGTTCAAATGGTAATA  
CATATAGTACAGGACAGGTATACATCCCTTTTGTAAAGCGCTTCAATGTTTTCAGTTAACTGGGATAAACAAAAGACCA  
TATAATAACAGCACACCTTTTATAATGAACTACCGGTGGAGACAGTGGTTCGGTTCATCTGTATGATAACGTAATA  
AAAAGAATGGGTTATGCTTGGTACTTTTATTTGGAATAGCATCCAGTGGTGCAGATGTTTGGTCTATTTGAACTGATATG  
ATGAAAATACAGTTAATGGTTTAAAAAACAATTTACTCAAAAAGTCCAGTTAAACAATAATACAATGTCGCTTAATAGT  
GACAGTTTTACGTTAGCTGGTAATAACAGCAGTGGAAAAAATAATAAATACTATAAAGATCTAAGTTTTAGTGGTGG  
TGGAGTATAATTTGCAATGACGTAACATTTGGCTTGGTGTCTCATTTTGTATGCAGGGCATCATTTACTGTCAT  
CTGGTAATAAATAAACAATTTCAAGGGTGGCCGGCTGGATATGGTGGACAATACTACAGTGCAGTGGAAATGGAAGGGT  
GTCGGTGATAACCTGCATAAAAATGGTGCAGGTACATTGAATGTTAATGTTTCAAGGTAATAATCTTAAAACGGGGGA  
TGGTCTTGTGCTATTAATAGCGCTAATGCATTTGATAATATTTATATGGCCAGTGGTGTGTTGTAATAATTAATC  
ATAGTGGGACGCTTAACAGAACAAATGACTATAGAGGATTTTCTTACTGAAAATGGTGGTACTCTGGATTTAATGGT  
TATGACCAGAGTTTTAATAAAAATGACAGCAGATATAGGAGCACTCATAACAAATAGTGCAGTGCAGAAAGCAGTTCT  
TTCGTTAATAATCAGTCAAACTATATGTATCATGGTCTGTTTTCAGGTAATACAGAGATAAACCCACAGTTTGATACCC  
AAAAAATAATAGTGCCTGATTTCTGGACGGTAATGTCGATTTACAAATGACATTAACAATTAAGAATAGCCAGCTCACC  
ATGCAGGGACGCTTACATCTCATGCTGTTTTTAGAGAGGGTGGGGTACCTGCATGCTGCAGGGGATTTTTGTGAAA  
GGATTATGTTTTCAGGCATACAGCAACAGGAAAACCTCAGCCAATAAAAATAATAATACAGATTATAAGACCAATAATCAGG  
TATCATCATTTGACCAACCTGACGTTGGAAAATCCTGCTGTTAAGTTTAAAGACATGAACTGTGATAAATTCAGATTTTATC  
GTTGGCCGTAATGCTATTTGTTGTTGGTATATTTCTGCAATAATCCACTCTGTCTTAAAGTGGAAAAGATACAAAAGT  
ACATATTTGATATGATACGGCAAAAACATCACGGGAGATGGCTTCGGTTTTTCGGCAGGATATAAAGATGGTGTATCTG  
TTTTCTCTGAGAGCAGCAGTTATTTTGGAAATGTTACGCTGAATAATCACTCATTTACTGGATATTTGGTAATAATTTACC  
GGTGGTATCGAGGCTTATGACAGCTCCGTGAGTGTGACCTCACAGAATGCTGTTTTGATCGTGTGGCAGCTTTGTCAA  
CAGCAGCTGACCTCGAAAAGGAGCAAAAACCTAACGGCTCAGGGGGTATTTTTCAGCACGGGGCTGTGGAGCTAAAAG  
AAAATGCCCTCCCTGACGGGACACCTTCTGCAGAAAACAGGAGTATTACTCCCTGTGATTTCTACACGGAA  
GGGATTAACCTCGGAGATAAGGCCAGCCTTTCTGTTAAAAACATGGGCTATCTGAGTTCCGATATTCATGCAGGAACCC  
CGGCTTCTGAGTGGCAACATTTACGGGTGAGCAGATACGGTAAATATGAACAATGCTCTGTGGTACTCTGACGGAACTCA  
ACGATCGGAACGCTGAAGAGTACGGGGGACGAGTTGAACCTGGGGGGGGGAAAAGACTTTGCCACCTCGCGGTAATAAGA  
GCTTAACGCAAAATAACGCCACATTTCTGATGCATACCAACAACAGTCAAGGCTGACAGCTGAAATGTCAGGAATAAATCTGT  
TGGCAGTAAATAATACCGTCTGCTGACTTTTTAAACAAGCCAGCCAGTGAATGAACGTCAGCTGAAATACCGCACCG  
AAAGGAGTGCAGGAGAAAACGTTCACTGCAGGAACGCAGATTTGGTTTTAGTAAATGTCACGGCGGTAATCAGCAGAGA  
AAAAACGGATGATGCCACAAAATGGATGCTGACAGGGTATCAGACCGTCTCTGATGCCGGTGCCTCGAAAACCGCACCG  
ACTTATGCGCTCAGGTTATAAATCCTTCTGACAGAGTCAATAATCTGAACAGCGTATGGGTGACCTCGCGGATACCT  
CAGGGGATGCGCGGCTCTGGGCGGCATTTATGAACGGTACCGGTTCCGCGAGATGGTGGTTACAGCGATAACTACACTCA  
CGTTCAGATTGGTGGCAGAAAAGCATGAGCTGGACGCTGTGGATTTGTTTACGGGTTGCTACTGACTATACAGACA  
GCAATGCAAGCAGCCACGCCCTCAGTGGTAAAACCAAATCCGTGGGGGAGGGTGTACGCTTACGACTCTTTGATTTCC  
GGGCTTATTTGACCTGATTTGTAATATCTCCATCAGCAACATCAGTACACGGCGAGTTTTGCGTCTCTTGGTACAAA  
AGACTACAGCTCTCATTTCTGGTATGCGGGTGCAGAGGTCGGGTATCGTTACCACCTGTCGGAAGAGTCTGGGTGGAGC  
CACAGATGGAGCTGGTTTTACGGTCTGTGTGTCAGGAAAATCTTTTAGCTGGGAAGACCGGGGAATGGCCCTGAGCATGAAA  
GACAAGGATTATAACCCACTGATTTGGCCGTACCGGTGTGACGTTGGGAAGAACCTTCTCCGGAGCAGCTGGAAAATTAC  
CGCGCAGCCGGGCTGGGTTACAGTTCCAGCTGCTGGCGAACGGGAGAACCGTTCTGCGGGATGCATCCGGAGAGAAAC  
GTTTTGAAGGTGAAAAGGACAGCAGAATGCTGATGAATGTGGGATGAATCGGAAATTAAGGATAATATCGCTTTTGGC  
TTGGAGCTGGAATAATCGCGTTCCGGGAAATAAATACCTGGACAATGCGATAAACCGCTAACTTCCGTTATCTTTCTGA

>Cluster\_34172

ATGGCAAGAAAACATGCCAGGCTGCGGCCAACCCGCTACCGTGGGGTGGAAAGCCAATCTCAACGGTCTCACAGCAC  
CATGCTGTTGTCGACACCATTACCGCAATTTAGTGCAGCAACAAAGCCGCTTTCCGCCGTTGGAAGCCTTTGCTCG  
GTTCCGCGACGGCCTGTTTCAGGACTTCTCCGCACTGACACTTCTCCGATCGCGCAGCAGCGCAGCCAGTTGCGCGC  
GATACCGATGACGTGGTTCGATGCTCTGTTTGGCGAGCCGCGCGCGAGGTTCCGGGTGCGCCGCGCGCTCGCGCAGTGG  
GCTGGCCAGCCGATCAGCGAACAGTCCGAAGCCTTGTGTCAGGAGGCGCCAAACACGCTGCGCAATTTGGCCGCTCCG  
AGGTGGATACCGAACATCTGCTGTGCTGGCCTGGCCGACAGCAGCTGGTCAAGACCATCTTGGGTCAAGTCAAGTCAAG  
GTCGATGACCTCAAGCGGAGATCGAGTCTGAGGCCAAGCGGGGACAAAGCCCTTCAGAGGGCAGATCGCGCTGTGCGC  
GCGCGTGAAGGATGCGCTCAGCCGCGCTTCTGTTGCTTCAATGAACTCGGCCATTTCTTATGTGCGTCCAGAGCATTTCC  
TGATTTGCTGCGCGAGGAGGCGAAGGGCTGGCCGCAACCTGCTGCGCCGCTACGGCTGACGCGCGCAGGCTGCGC  
CAACAGCTCAGCAAGGTGCTGCGCAAGGGCGCCGAGGATGGACGCGCTGAGACGCCGACCAACACAGCCAGACTCGACA  
GTACTCGCGCAGCTGACCAAGATGGCGCGCAGCGCAAGCTCGACCCGGTGTGCGCCGCGCAGGAGATCGAAACCA  
CCATCGAGGTGCTGGCCCGCGCAAGAAGAACAAACCCGCTGCTGATCGCGAGCCGGTGTGGCAAGACCGCCATCGTCT  
GAAGGGCTGGCGCAGCGCATGTTGGCGGTGAAGTGGCCGAGCTTGGCGCACAAAGCCCTGGTGGAACTCAACATCAA  
GCCATGGTGGCCCGCGCCAAATATCGCGGAGTTCGAGGAGCGCTGCAAGAAGTGTGAAAGGAGGTGACCGAGCAC  
AGGGCAGCTGATTTTGTTCATCGACAGGTTGCACACCATCGTGGTGGCCGAGGGCGGTGGCGAAGGGCGGCTGGAC  
GTGGCCAACTGATTTCAAACCGATGATGGCGCGCGTGAACCTGATCGCGCCACGACGCTGAACGAGTACAGAA  
ATACATCGAGAAGGATGCCGACTGGAGCGGCTCCAGCCGTTGACGGTGCCTGAGCCGAGCCGACGGTGGCCGACCATCA  
TGATTTCTGCGCGGCTGCGCACACTTTCGAGGCGCACACAAGGTCAGCATCTCCGAGGACGATCATCTCGCGCGGCG  
GAGTTGTCGCGACCGCTACATCACGGCGCTTCTTCCGGACAAGGCGATCGACTGCTGACAGGCGCGCGCGCT  
GAAGCTGTGCGCCACGGCCCGGCTGGCCGTGCAGGAGTGGAGTCCGAACTGCACAGCTGCGGGCTGAACAGGAT  
ACGTGGCCGCGCAGGACGATCAGCAGGCGCGGCTGCGCAAGCGCATCGAAGCGCAAGGAGGCGGATCAAGAAAG  
CTCGTGCAGAACTGGGAGCGGGCGGCTCCGGCAGTGCAGAGGTCAGGCGGAACAGTGGCGCAGATCGTCTCGCG  
CCTGACCGCATCCCGTCAACGAGTTGACGGTGAAGAGCGCAAAAGTGTGACATTTGAAACACGGCTGCACGAGC

GCCTGGTGGGACAAGACGAGGGCGTCCGTGCCGTGGCCGATGCCGTGGGCTGTCCCGCGCCGCTGCGCGAAGGCAGC  
AAACCGGTGGCTACCTTCTGTTTCTGGGCCGACCGGGTGGCAAGACCGAGCTCGCCAAGCATTGGCCGAAATCGAT  
CTACGGCGATGAGCACGCCCTGTGCGCATCGACATGTCCGAAATATGGCGAACGCCATACCGTGGCGCGGCTGGTGGGG  
CGCTCCGGGCTATGTCCGTTACGACGAAGGCGGTGAGCTACCGAGAAGTTCGGCGCAAGCCCTACAGCGTCTGTGCT  
CTCGACGAGATCGCGTGGCGCGACCCCTGACGCTTACAACATCCTGTGCAAGTGTTCGACGACGGTCCGCTACCCGACGG  
CAAGGGCCGGGTGGTGGATTTCACCAACACCATCATCATCGCCACGTCACACCTGGGTTCGGACATCATCCAGCGACGGC  
TGAAGCGCGTGGGGCGCGACGAGGAGTACGAAAAGACCAAGCCGAGGTCATGGAGCTGCTGCGCGGCCACTTCCGG  
CCCAGATTCTCAACCGCATCGACGAGATCATCGTCTTCCATGCGCTGGGTAAGGAGGAGATCCGCCACATCGTCCGCT  
GCAGCTCGATCGCGTGGCGCGACGCCCGCGAGCCAGGCGTGACGCTCACTTTCGATCAGACGCTGATGACCAATTCG  
CGGAAGAAGGCTACAACCCGAGTTCGGTGGCGTGAACCAAGCGCTGATCCGACGAGCTGAAACTGCGCTGGCG  
CGCGAGATGCTCGGTGGCGGCATCGGCAAGGGCGATCACGCCAGCGCACGCTGGGACGACAAGCCGAACCGCTGGTGT  
CGAACGAAAAGAGCCACTGCAGACCCCGGCCGAGCCGGAGCAGCCGGATGCCGGAAGGCGACCGAGACGCGCGACGGCG  
ACGTGGCAAAGGCTCGCGCAAGAAGATCGCGGAGCGACGCATCTTGA

>Cluster\_38589

ATGGCCATTGATACCATTTACACGATTGCCGGTGGTGGCTTTCAGGATACGCTCAATGGCGTGGCATCGTTCCTCGA  
CAGCCGTGGCGGATCGCTGATTGGCATGGCCACCGCGTTCAGTCAATGTCGGCGTGCACCTTATATCCGGACCG  
GTAATATTTAGGATCTGGTCAAGTGGCGGGTTTTATGTTCTGGTCAATGGCTTTTATTGGCATAAACCGAAGCGTT  
CAGATTATTGACCTGTCTGAACCGGCCGATTATCAGGTGGATAATGTTCCGTCAGGCTGGCTGCGCCCGCCAGTAT  
GATTACCCGGATCCGTGGCGGATGGCACAGACGATACGATACATTTTTCGCCGCCCTGACGCGCTGACCTACAGTAAAA  
CCGGGATGCTTTTTGGTGGCAGCTGGCTGCAGGAGCAGTGAATTCGGTTCCTGAGCGGAGATTACGCGCATGTTT  
TCGGATTATGTTTCAACTGCGTGGTGGTGACATCATGCTGAACAACAAGTACACCATCGGGGAGCTGATGAAATGCGCG  
CGACCCCTATGCACTGATATTCAGCCGTCGAGTCCGCTGCGTGGCTTACGACAAAAATCGTAATTTCTGACCTGTG  
AACAGGCTGCCACCAGAATTAATACGGACTCCGGTGTATTTCCGGGGCGAATACGTCACCTTTTCTTCAACAGATCCTG  
AATACGCTGCACCGCTTCCCTGTACTGATTGTGCTTGGTGGTGGTGGTGGTGGTGGTGGTGGTGGTGGTGGTGGTGG  
TGACAGCTATAACTATTTTTCATCGTACTTCCCTGACATCCACGGAGATCATCCGAAAGAATGTGATAATGAACGGCTGC  
GCAGCGACTGGAGAGTTTTTCCGCACTGAGCGGGGATACGGCGGACTGGTGAATGTGGCCAGCAGACCTCAATGGCA  
AAAATGCGGCTGTGCGAGGCGACAGTGGTGGTGGTGGTGGTGGTGGTGGTGGTGGTGGTGGTGGTGGTGGTGGTGG  
GACAAATGCACTTTTCCCTGTACTGATTGTGCTTGGTGGTGGTGGTGGTGGTGGTGGTGGTGGTGGTGGTGGTGG  
ATACTATCGCCTATCTGCAGATGTTGGCCATCCTGTTTCCATCCTGAACCATGCCATGAACCTTCTATCTGCAGGTAAG  
CTCAGTGGTACGGCAGTAACGCTGGCTAATTTTTCAGCAGTACAGAATACCTACTCGGATATTGGCACAAACCGCGGCTG  
GCTGGCGCTGTCCATCCGTTTCACTCGCTTACGGGATGGTAAAAGGGCTGGGCGAGGTGGTATCGCAGGCGGGAACTATC  
TGGGCGAGACCTGCAGCTGCCCTCCACGCAATCCTCGTCTCAGGCGATTGACGGTAACCTGGCACTTCAACAATATGACG  
ACCGGGAACGTACAGGTAACAAGTGGGATACAACTACAGCCATCGTGAAGGCCATATGAGCAGTACGCTGGAGAGCGG  
GGCGATGAAAACGCTGACGAGCTCCGGGCGAGTCCGCTACAACACCACAGATGCGATTTCAAAACCTGCCGCTCGATATG  
CACTGGGTAACCCGCAACGAGCAGTGGCAGCAGCAACAGCTGATGCCATGAGCGAAGCGCAAGCCCTCACACACG  
CTGTGCGAGACATCCAGCTGGCGCGTCCGAGATGAGCCATGAGCAGTGGAGTGCAGCAGCGGGGCAACAGCGACACCCGTCG  
GGCAGTGACATCTCGAGCAGCAGCAATCTGACCAAAGCGTGAATACCATTTCAGTCGATTGGTAACCGCTATGCCCGG  
ATGAAAATGTCAGTCTGGCTGAAGCCGTGAGAGAAGCCGCGCAAAAAGTCAGGATATGAGTTTTGGTGCAGGTGGAAGC  
GCCAGGTTTCAATTTGATACAGACCCGTCACATTTCTGGTAAAATTTGGCGGCTGGCAACAGGACTTAAAGGTTCTGCTGA  
AGGCGATCTCAAGACGGATTATACAGCGCGAAGTGGCTCCTCGCACGGGACAGTTCGGATCTGACCCGGCAGGGCGGGA  
CCAGTAAAGGGTTAGTGTCTCAGGAGCTTAAAGATTTTCGCGATGCAATGGATGTGGTGGCTCCAGCGTGTACTGAC  
AGTGGTAGTACATAAACAATGAGTTCAGCTTCCCTGGCAGCCAGTTGTCGTCACCTTCTCCAGCTGAAGAGTTCAGG  
GTCAACAATATAATGATCGCGTTACCCGTAGCCATGAGTATGCCCGCTGGCCACTATGCAGAGAACAACAGAGGTTGGT  
TTAACAGAACTACTCGCAGGAGTTTGTGGGTATGTACCAGCCAGCGTCCGGGAGAGGCTGACAGCTGCTTTCTGAC  
ACTGCCAGCCGGAGTGGCGGCAAGCAGAAAGACTGGTGCAGGCTTTTGTGGAAGAGCGCATAAAGCCGCAAGTTGTT  
ACAGCAATTTGAGCAGAAACAAGGTCGTACCGGAGACGGGATTTGGAAACGTATCGGCACCAACAGTGGCTTCTGACCTGA  
AGGAGAAATACCGTTGAACAGCAGCTGACATGGAAAATAGCGCTGCGCACGACGCGCTAAAAGCAGAGGTTGGTGGT  
ACGGATGTCCAGAAATCAACGAGTAATGTTGAATCACAGGTCATGATGAAAAAATACTGTGATCTCATCTGGAGAATC  
TTCCGGTAAGGAATACAGAGACTTGCAGAAATGAACATGACCAGGTAAGAAAGCATTCGATGACGCTCAAAAGCCAGAAA  
ATGAAAGCAGAAAATCTATAAAAATGACTTTGTAATTAGTCAATGATGAAAATATTAACAAATCAAAAATGACATGAGT  
AATAGATTTAATGGAAAGACGTAA

>Cluster\_65627

ATGCCACAACGACACCACAGGGACATAAACGCACACCAGAAACAGTTGGCGCTCATCATCAAACGCTGTTTGGCCGATGGT  
GCTCACTGGCAGCGGCTTGGCTTTCGACTACCGCTAACGCCGAGAGATATTTTCGACCCCATATGCTGGAACTACAA  
AAAGTGGTATGCAAAACAACCTGATCTGTCACGTTTTTCAA AAAAATAACGCAACTACAGGAACTTATCAGGTTGATATC  
TGGCTGAATAAAAAGAAGTTTTCACAGAAAAAATACATTTACCGCCATGCAGAGCAACTTCTGCAGCCACAGTTTAC  
GGTAGAACAACTACGTGAGCTGGTATTAAGGTGGATGAAATCCCGGCGCTGGCTGAAAAAGATGACGATAGCGTGCATCA  
ACTCGTTGAACAAATCATTTCCGGTACAGCTGTGAAATTTCAATCATCAGCGACTTAAATTTGAGCATCTTCCCAA  
ATTTGCATGTACCGTGTGCAAGAGGTTACGTTCCCTTCTCGTTGGGACGATGGTATACCAACGCTGTTTACCAACTA  
CTCGTTTACAGTTCTGATAACCGTTACCGCCAGGGCAATCGTAGCCAACGACAGTACCTGAATATGCAAAAATGGTGCTA  
ATTTTGGCCCTGGCGATTACGTAACATTTCTACGTGGACACGCAACGATCAGGCGTCAAGCTGGAACACTATCAGTAGT  
TATTTACAACGCTGATATCAAGGCTTGAAGTCTCAGTTGCTTCTGGGAGAAAGCGCCACCAGCGGCGATATTTTCCAG  
CTACACCTTTACTGGCGTGAACCTCGTTCGACGATAATATGTTGCCAAACAGCCAGCGGGATTTGCCCAAACGGTAC  
GCGGTATCGCAAAACAGTAGTGCAATCGTACTATCAGGCAAAATGGTTATGTGATCTATCAAAGCAACGTCGACGCGGT  
GCCTTTGAAATTAACGATCTTACCCCTTCTCCAACAGCGGCGATTTAGAAGTACGATTTGAAGAAAGTACGCGTACGCA  
ACGTCGCTTATCCAGCCTTATTCTTCAATACCATGATGACGCGACCTGGGCACTAAAATAAAGCAACCCGCTGGAC  
GCTATCGCGCTGATGCAACAGTATGACAGGAAACCCGAATTTGCTGAAGCCAGGCAATATATGGTTTGAATAAATACT  
TTTACGCTGATGGCGGCTGCTCGGTTCTGAAGATATATGCTGCGTGGGATCGGATCGGCGGCACACTTGGCGCACT  
GGGCGGTTGTCGATGATATCAACAGAGCTGACACCCAATTCGATAACCGGCACTCTTTTCAATGGCTATCAATGGCGTA  
CCGACACATCAAAGATATCCCGGAAACCAACCAATATCGTGTAGCTACTATCGCTATACCAACGATATTTT  
AGTTTTGATGAAGCAATACCCGTAATTTGGGACTATAACAGTCCGCAAAAAGTGAATTTCAATCAACATCAGCCAGAC  
AATATTTGATGGGTAAGTCTGTATGCCCTCCGGTTCGAGCAAGACTATTTGGGCAATAACGATAAAAACAGGAATATCT  
CAGTTGGGCTTCCGCTCAGCAATGGGAAATGGTTACAGCTGAATTTCAATACAGTCCGCTACACGGATCAAAAAT  
ACCGCGCACTCTTTTGAATCTCAGTATTTCCGTTAGAACGCTGGTTACCGCGTAGCCGGGTTTCTTATCAGATGACCA  
CCGAAAGATCGCCAAACCAACATGAAATGCGTCTTGTATGGTCACTGCTGGATGATGGTGGCTGAGCTATAGCCTGG  
AACAAAGTCTGGATGACGATAAACCAACATAACAGTACGCTGAACGCGAGTACCGTTACCTTATGGCACCTGAGTGGC  
GGATACAGTACCGTAAATGACAGCAGCAATAACATTTACCGGCTTACCGCGGCGTGGTTATCCATCTTCCGCTGGAC  
GCTCTCGCAATATCTGGGCAACGCTTTTTCGCTTATCGATGCTAATGGGGCTTCTGGCGTGGGATACAAAATATCCGG  
GGATTGCTACTGATCCCTTTGGCTATGACAGTGGTTCCTTATCTCAGACTTACAGGAAAACCGTCTCTCGGTAGATACT



ACGCAGCTGCCCGATAACGTCGATCTTGAGCAAAACACAGTTTGTGGTGCCCAACAGAGGTGCAATGGTAGCGGGCGG  
TTTCAACGCCAATATCGGTTATCGCGTACTTGTACAGTCAGCGATCGCAACGGTAAACCGTTGCCCTTTGGCGCTCTTG  
CCAGCAACGATGAGACGGGGCAACAAAGTATCGTCGATGAGGGCGGCATACTATATCTCTCTGGGATATCGAGTAAATCA  
CAAAGCTGGACTGTACGCTGGGGAAATCAGGCAGATCAACAATGTCAGTTTGTCTTTAGTACACCGGATTCAGAACCAAC  
AACCTCTGTATTACAAGGACGGCGCAGTGCCATTAA

>Cluster\_38801

ATGGCAATTAACAATACCGGCTCGGGCGATTACTCGTCACGCTAACAGCCCTTTTGTGACGCGTTTGGCGGCTGTATCT  
ACTCATTTGGCGGAGGCTGGCTGGTCGCGATTGGCGGCTCCTGGTACTACCCATATCGCTGGCCTTGTGATGCTCGGGCTCG  
CCTGGATGCTGTGGCGCAGTAAACGCGCGCGCTTTGGCTGTACGCGAGCCCTGCTGCTCGGCATATGATTTGGGGCGTC  
TGGGAAGTTGGTTTTCGACTTCTGGGCGCTGACTCCGCGCAGCGACATTTCTGGTCTTCTTCGGCATCTGGCTGATCCTGCC  
GTTTGTCTGGCGTCGCTGGTCACTTCTGCCAGCGCGCAGTTGCCGCACTGGTGGTGGCGCTGTGATAGCGGTGGTA  
TCCTGACCTGGGCGGATTAACGATCCGAGGAAATCAGCGGCACCTTAAGCGCCGATAACCAGCCAGCAGAAAGCCATC  
TCCCCCGTTGGCGATCAGGACTGGCCTGCCTATGGTCGCAATAGGAAGGTCAACGCCTTTTCACTCTGAAACAAATTA  
CGCTGATAACGTCACAAGCTGAAAGAAGCCTGGGTGTCCGTACTGGCGATGTGAAGCAGCCGAACGATCCGGGGGAAA  
TCACCAATGAAGTACGCCAATTAAGTGGGCGACACCTTTACTGTGTACCGCGCACAACGCTCTGTTTGGCTGGAT  
CGCCGACGGCGGAAAGAGAAATGGCATTAACGATCCGAGTGAATAACCAACGAGTCTTCCAGCATGTAACTGCCGTGG  
GCTCTTTATCATGAAGCAAAAGCAGAACTGCCTCGCGGAAGTGTGGCGGATTGCCCGCTGATCCTATTCTCCGG  
TCAATGATGGTCCGCTGATTGCGATTAACGCTGAAACGGCAAGCTGTGCGAAACCTTCGCTAATAAAGGCGTGTCAAT  
CTGCAAAAGCAATATGCGCGACACCAACCGGGTCTGTATGAGCGACTTCGCCGCAATATACCGATAAAACCATCTCT  
GATGGCCGGTTTCAGTACCGATAACTTCTCAACCGCGAAGCTGTGGCGTGTACCGTGGTTTGTGATCAACACCGGGG  
AGCTGCTGTGGGCTTTTGTATCGGGCGGAAAGATCCGAAACGCAATCCCGTCTGACGAACACACCTTTTCACTTTAACTCA  
CCAACTCGTGGGACACGCGGCTATGACGCGAAGCTGGATCTGGTCTATCTGCCAATGGGCGTACACGCGGATAT  
CTGGGGCGTAAACGTAACCGGAACAGGAACGTTATGCCAGCTCGATTTCTGGCGTGAATGCCACTACCGGAAACTGG  
CGTGGATTCACACGACTGGCTACACGACTGTGGATATGGAATCTTCGCGCAGCCGACGCTGGCGGATATACCGTT  
AATGGTCAGAAGGTGCGGCTCATTTATGCTCCAGCGAAACCGCAACATTTTGTGCTCGATCGTCAATGGTGAAC  
GGTGGTTCCGGCCCGGAAAACCGGTTCCACAAGGTGACGCGAAAGGCGATTACGTCACCCGACCCAAACCGTTCTCTG  
AAGTGAAGTTCCTCCGACGAAAGATTTAAGCGGTGCGGATATGTTGGGAGCCACCATGTTGACGAGCTGGTGTGCCG  
GTGATGTTCCACAGATGGCTATGAAGCATTTCACCCCGCATCTGAACAGGGTACGCTGGTCTTCCCTGCTAACCT  
GGGGATGTTGCAATGGGGCGGATTTCCGTTGATCCGAATCGTGAAGTGGCGATTGCCAACCAATGGCACTGCCGTTG  
TTTCGAAACTGATCCACGCGGCTCTGGCAACCGATGGAGCAGCCGAAAGATGCCAAAGGACGCGGTACGGAATCCGGC  
ATCCAGCCGAGTACGGTGTACCGTATGGCGTCAAGCTCAACCGTCTCTCACCGTTTGGTCTGCCATGCAAAACAGCC  
AGCATGGGCTATATCTCGGCATTTGGATCTGAAAACCAATGAAGTGGTGTGGAAGAAACGATATGGTACGCGCAGACA  
GTATGCCATTCCCGATGCTGTACCGGTGCCGTTCAATATGGGTATGCCGATGCTTGGCGGGCAATCTCCACGGCGGT  
AACGTCGCTTTTATCGCCGCTACGGCAGATAACTACCTCGCGCTTACAAATGAGCAACGGTGAAGAACTGTGGCAGGG  
TCGTTTACCAGCGGGTGGTACGGTACGCCAATGACCTATGAAGTGAATGGCAAGCAGTATGTGGTGTATCTCCGACGGC  
GTCACGGTTCACTTTGGTACGAAGATGGGCGCATATTTGGCTTATGCTGCCGATGATGTGAAGTAA

>Cluster\_18925

ATGAGTGGATTTCATACCTGATGGAGCAGGGGCGAGAAACGCCACCCCTGCTCGTTTTACTGCAAAATAGCTTTTCTGACCT  
GTGCAACGCTATCTATCGCATCTGTGCAAAATTTCCATCACACAGGAAATGACGGATGAAGAACCGGCGCAAGAAAAGC  
AGAAACTGTACTGTTCTCGGCAACTACCCAGCAGGACGGGCGAGCAGTAAACCCGAAAACATGGCCTGTGCTTTTC  
GGTATGCTGGACATTGACGGCAGCACTCCCGGTGCAATCACAGCACTTGTACAGGTGTCCCGGATATCTCAATGCTGGT  
GTACCAGACGGCCAGCTATACGACGGATGAACCTCGTCTGCGTATTTGTGCGAGCTTTCCCGAGCGGTTGAATCTGACT  
ACCGCCGAGGCGACAGGCAATCCATAGAACTTTGTTGATGACAGGAGCTGGATTTCTCATTCGCCAGCTGGCGGATAAG  
AAAGCAGCTGGGAGAACGGCAGCGATTATGTTGCTTTGACCGCAATGTATACGGCGCTCAAAGCTATTGCTACTGTCC  
ACACTGAGCGCAAAAGCCAGAATTACGCGGGCGGGTAAATCAGCTAGGGGCGTTACCGGAACCCGCGCAGCCACAG  
CGAAGGCGGCAAAAGCAAGGCAAAAGAACAGCGCCAGCGTACGCGCGGCGGTAATAGATGCTGATTTGACGATCTG  
AGCGCCGACCGGATAACTTCCCTTATCGCCGACCTGCGCAGCAGCGCACTCTGGTTTCCCTCCATGCTGCAAAAGGATGGGA  
CAATGGGGCGTGGATTGAGCAGGGCTACCGCTTGCATCTCTCAAAGGACCGGATTTTGGAGCAGCGCGGCAACTGT  
GGTTCGAGTGGTCAATTGACCGCAGCGGATGGCTGGCCTGATGAAGAACTTGTATGAAGTGCAGCGCACACGCTGGAATGCT  
CTCGCCCTGACAAAACAGCTATAAAGCTATTTTACTGATGCTCAGGCGCAGGGGTTGAATAATCCGGGCAATGGCG  
AGCAAAAGCCCGGTACATTTGAGAAAATGGCCCGCAGCAGCGGTTGAATGACAGCGCGGTTAAAGGCAAAAGGATAAG  
TGAAAGCTGATGGCAACATGGTTTATCACTATACCGGGCAGGTGTGGGAGCACATCGCCGATGCCGAGTTGCGCCGCGCAG  
CTTTCGACAGATTTCAAAGATAACGGGGTCCCTTTACACCGTACGAGGTTAAAGCGCGGATTGAGGCTATGGGAATGCT  
TCTGCTTTAATGGGAGAACTCCTCGTAACCTGATTTGGCTTTGCCAACCGCGTTTATGATCTCGAGGCGCAGCGATTCC  
GCCCCACTTCCCGACAGATTGGCTGACCGACTAAGCGGTTGAATACAGCGAGCGGTTAAAGGCAAAAGGATAAG  
AACAAATGCCCCAAACTTCTGGCGTGGCTGCATATTCGCGAGGGGGCAGCTTCGACAAAATGGAGAGATCAAAGCCGC  
TCTGTATATGGTGTGGCAAAACCGCTACGACTGGCAACTGTTTCTACGAGGTTACCGGTGCTGGTGGCAGTGGTAAAAGCG  
GAAACGCGCATCTTTTGTGCGGCAAAAGCTGATCACCTACCCGACCAAGCAACATATACGGGTTCCGGGCGGATATCAA  
GGCTATAACGGGGCGGAGCTGGTAAGGATCGACCCAAAGCAGAAAAGCCATTCATACGGTTATTCGCGCGGTTGTCA  
TCGCAACAAACAGCAACCTATGCGTTTACCGAACGCAAGGCGGATATCGCGGCGCGGGTTATTTTCCGTTTAACT  
CATGAAGTGGCGGAGGCGGAACTGATCCCATCTGCTGATAAAATTAAGCGCAACTGCGGTTAATCGTCCGTTGGTCT  
GCTGATTGACTTCGAACAGCCAGGCAAAAGCCTTACTTATCGCGCAGCGTATTACGCGGAAGCGCTGCAGGTGA  
AGAAGATAACGACCCGATGATGGCTTTTGTCTTACTGCTAGGTTTGGCGAATCCCGAGGCGATGTACATGGGCGAT  
GGGCGCATGGCGGAGCCACGCACTACCTCTATCATGCTTATCTGGCCTATCTGGAAGCTACGGTTAATCAGAGA  
CCCCAACCCTACCGAAGTTACGGGAGATTACGGGACAGCTCAAGCCCTTTGGTATTACTCTGGCAGTAAAAGAGTA  
AAAAGGGCAAAAGATATAACGTCAAATTTGCTGACAGGGCACAAGAAATGGCTGGGAGAAAGCAACTCTACGCTGTGCC  
GACACATTGCAGTAA

>Cluster\_25840

ATGAAAAACGATATCCCCACTCTCTGGCCACCATGATGCCACCGCCCTTTATAGTCAACAGGGACTGGCAGCCGACCT  
CGCCTCACAGTGATGTTGGGCGTGCCAAGCTATGACCGTCTCTGGTACAGGGCGATACCAATGACTTACCCGTGACTA  
TCAATGCTGACACCGGAAAGGGGACTACCCGGATGACCCGCTTTTACTGGCAGCGTGGATAATGACAGGTTAACAGC  
CGTCTGACGGCGACGAAAGTGCAGCTCCATCAAAAAGAGGACACGAGCAACCGGAGCCGTTACGTTGATGCTGCT  
CGGTAATGTCATACGACGATAACAGGTGATCCTCAAAGGGCGGAAAGGCTGGGCGAATCTGAACACCAAGATACCA  
ACGCTGAGGAGGTTGATTACAGATGGTGGTCCGAGGGTCCGGTAAAGCGGACCTGATGAACAACGTTGGCGAAAAC  
CGCTATACCATTTGGATAACGGTAGCTTACCTCTGCTGCGGGTTCTGACACCTGGAGCGTGGTGGTACCGAAAT  
TATTCATGACCGGAAAGCAAGTTGCGGAGATCTGGAACCCGCTTTAAGGTTGGGTCGGGTACCGTACTTTTATAGCC  
CGTATTTGCAAGTTGCCGTTGGTGAACAACGCTCGCTCTGGTTTCTGATCCCGAACGCGAAGTACACCACCAACATAC  
TTTGAGTTTACTCTGCCATATTACTGGAACATCGGCCAAATATGGATGCCACCATCACGCGCATATATGATCGTCTG

TGGCAACATCATGTGGGAGAACGAATTCGCTACCTCTCCAGCGGGGCGCTGGCTTGATGGAACGGACTATCTGCCTT  
CAGATAAAGTCTATAAAGATGAACACCCGAACGATGACAGTTCACGTCGTTGGTTGTTCTACTGGAACCACTCCGGGGTC  
ATGGATCAGGTGTGGCGTTTCAACGTCGACTACACCAAGTCCAGCGATCCTAGCTACTTCAATGACTTCGATAACAAATA  
CGGTTCCAGTACCAGCGGTCACGCAACGCAAAAATTCAGCGTTGGCTATGCGGTGCAAAAATTTCAATGCCACCTTTTCAA  
CCAGCAGTTCACCGTTCAGCGAGCAGAACACCAGTACTCTCGGAGAACCGCAGTTAGACGTTAACTACTATCTTCAA  
AACGATGTCGGTCTTTTCGATACCGAAATTTACGGCCAGCGGTCGACTTTGTTAACACCAGAGACGATGCTGAAGC  
GACTCGTGTTCACCTGGAACCGACCATCAATCTGCCGCTCTTAATAACTGGGGCAGCATCAATACTGAGCGAAGTTGC  
TGGCAACCCATATCAGCAAAACCAATCTGACTGGTATAAATCCAGAAACAGGACCGGCTGGCAGAGTCCGCTAACCGT  
GTAATGCCGCGAGTTCAGGTAGACGGTGAATGGTCTTCGAGCCTGATATGGAATGCTGGCGCGGGCTATACCCGAGC  
ACTGGAACACCGCGCAGTATCTGTATGTCCATATCGCGATCAGAGCAAAAATCTATAACTACGACTCTTCGCTGCTGC  
AATCTGACTACTCCGGCTGTTCGCGGACCGGACTTACGGCGGCTTACCGCTATGCTCCGTAACAGGTCAGCACC  
GGTGTACATCTCGCATATATGATGATGCTGCCGTTGAACGTTTAAATATTTCCGTTGGTCAAATCTACTATTTACGGA  
GTCTCGCATGCGGATGACAACATAACATGGGAGAATGACGCAAAAACGGGCTCACTGGTATGGCAGCGATACTTACT  
GGCGCATCTGTATCGTTGGGATTCGCTGGCGGGATTACGTACGATACAGTCTGGATAACGTAGCGACAGTAACCTCC  
AGCATTGAATACCGTCCGGATGAAGACCGTCTGTACAGCTGAATACCGTTACGCCAGCCCGGAATATATTCAGGCAAC  
GCTGCCTAAGTACTATTTCCACTGCTGAGCAATAAAGAATGGTATTTCCGAGGTAGGTGCCGTCGCCAGCTGGCCAATG  
CCGATCGTTGGTCTATTTGGGCTACTACTACGACACCAATGCGAACAAGCAAGCCGACTCTATGTTAGGTTGCAAA  
TACAGCTCTGCTGTATGCGATTCGCGTCCGTTACGAGCGGAAGCTGAACGGTTGGGATAACGATAAACAACATGCGGT  
ATATGACAACGCAATCGGCTTTAACATCGAATTCGCGGCTGAGCTCCAACCTACGGTCTGGGTACGCAAGAGATGCTGC  
GTTCAACATTTCCGCTATCAAAACACTTTGTGA

>Cluster\_24759

ATGAAATTTAACCAATCTTTTATTTATTTCCACAAATATCTTGATGGCGACAACCTTCGACGAGGTACTGGAAGA  
GCTTCAAACCGAATCGCGGAACCGGTTTAAATTCATATCAGCACCAGATCTCTGATGGATTAATAATCATCGAAA  
AAGCCCCGCAATACAGCGGGATGGTTTTACTGGGAGCAGCAATCCGACCTTTCAGAGAAGACTACAGCATTTATC  
AGCATATTTCCGAAAAGAAATGCCACGACGCGCTGATAATTTCTCAGAACAGAATATACCAGTATCCCACTCGA  
CGTCTTAAAGAGGTGAGCAATATGTTTATCTGTCTCTGAATCCGACGCTTCACTGCCAATCGACTGTACTCTTAG  
TCCACCGCTATGGCGATAAGCTTCTTCCCTACTTTAAAACCTTAAGGACTTTACCGAGGACGGTACTTATTCAGG  
GACTCCCGGGCATATGGGGGAAATGGCTTACTGAAACCTCTGTTGGCATFGAGTTCATTAATCTTTGGCAGAAA  
CATGATGCGCGTGTATTTGGCGTGGCTACCGCGGAGATGGGGGATTAATCTGATCCACGCCGACCGCTAAAAAATCGG  
AAGAAATTCGCGCCGACTGTTTGGCTCTGATTGGACCTTCTACGGTGTTCGCGCTCATCGGGTTCGAAACCGTATTG  
GCCAGGCTGGCGTGGCGCAGATGAAATGGCATTATGACCGAAATGGCACAAGTCACTTAATCATGGCTGACCTT  
GTCTCAGGCAAGCCGGTTTACCTGAAACCTACCCGCAACCGTGGGGCTGATTGGGCTATCCGACCGGACGCTGA  
AGAAGGCCAGTATTGATGCGCTGGTGGCAACAGCCGACTGGCATCTGGTGGGTGAGCCAGTCCCGCTCCTACGCCGTG  
GTAACCAACTGCACCTATGATGGCTTCTGTTATAACGTGAACGATGTAGTCAGACACCTGGGTGAAAGCGCACCGCAT  
CCATTTGATGAAGCATGGTATGCCTATGCGGTTTCCATCCGCTATACCAGAGTCCGATGCAATGGACGGGAGGAAA  
CGCCAAATCGTCCAACCTTATTCGCGTACAGTCCACCCATAAAAATGCTGCCCTCACTCTCCATGGCCCAATGCTAT  
GTGAAGAAAAGCATCGCGCGCCGCTTAAATTCGATGACTTTAACGATGCCTTTATGATGCACGGCACGACTCACCTA  
CTACCCGATCATGTCATCAATGATGTGGCAGTAAAGCATGATGAGGGTGAATCCGGTTATTCGCTTGTGACGAGTCAA  
TTGAAGAAAAGTTCCTCCGTAAGCCGTTGTCAGCTCAAGCCAGCTCAGGCGCAGTCCAGGACGGAAGGTGACGCTGG  
TTCTTCGATGTGCTTCAGCCAACCGAAGTGCAGGACAGCATTTCTGGGAGCGGATACAGTTTTGAAAGGGCACCCGATC  
GCTGCTGAGCCACAGCGCGACTGCTGGTGGTCCGCTCCGGTGAAGCGTGGCACGGTTTTCGCGATGATGATCTGGTGC  
AAACCAACAGTATGCTCGATCCAGTAAAGTGAACCTGACTTTCGAGGATCCGTTCCAGGGATCCGTCGAAAGGAGAA  
GGTATTCGCGGATATTTGCTGACCGTTTTCTCGATGACCGTCCGATGAAATTCGCGCTACTGGTACTACCGTGGT  
GATCTGTTCTCCGTCGGCATCACCAAAGGCAAAATGGGAACTCTGATGAAAGCCTGCTGGCTTTAAAAAGCATTACG  
ACAATGACGATCTGGCCACAGATGCTATCCCGTCCGTTGAAGCGCATTCTCCACTACGACAGCTAACCCCTCAAGGAG  
CTATGTCAGATAATGCATGAAAAAATGGATGAGCTGGAGTGTGTCGATATCAACGACGCGGTAACACCGATCCGGA  
ACCAATGATGACCCCGGCAAGGCAAGCTATCAGAAAATCGTACGTTACAAAACCGAGCATATCCGCTGGATGATTTAGG  
GCAGAATTCGCGCCAGCATGCTCGTCCCATATCCCCAGGCATTCCTGTACTGATGCCGGGCAACGGATGCCGCAAGGT  
AACAGGGCATTATTTGGCTATCTGCGCGCCTGAGGAAATTCGATAAGCAATTCAGGTTTTGAACATGAGATCCAGGG  
CGTTAACGTCGATGAAAACGGGGACTTTCGGGTGAGAGCGATTTGGAAGAAGAACCGGATGGGCAGTCCGCTACCCGGCC  
ACATAACCTTTAAACGCCAGGCTCTGGTATTTAAAAAGGGCCGCAAGTAG

>Cluster\_27246

ATGAAACTCAGTCGTCGTAGCTTTATGAAAGCTAACGCCGTTGCGGCCGCTGCGCGGCTGCCGCTCAGCGTCCGGG  
CGTTGCCCGCGCGTGTGTTGGTCAGCAGGAAGCATTAAATGGGATAAAGCCCGTCCGCTTTCTGCGGTACGGGTTGCG  
CGGTTCTGGTCCGGAAGCAGCAGGGGCGTGGTGGCTGTCAGGGCGACCCGACGACCGGTTAACCGTGGCCGTAAC  
TGCAATTAAGGGCTATTTCTGCCCCAAAATCATGTACGGTAAAGACCGTTTACGACGAGCGCTGCTGCGTATGAAAACGG  
TAAATATGACAAAAGAGGCGAATTTACCCCAATCACCTGGGATCAGGCTTCGATGTGATGGAAGAGAAAATTCAAAACCG  
CCTGTAAGAAAAGAGGCGGAAATCGATCGGTTGTTCCGTTCTGGTCACTGACTATCTGGGAGGTTATGGCGCGCTCC  
AAGTTGTTCAAAGCGGGCTTCCGTTCAACAACATCGACCCGAACCGCGCTACTGTATGGCGTCCGCAAGTAGTTGGCTT  
TATGGCTACCTTTGGTATGGATGAGCCGATGGGCTGCTATGACGACATCGAGCAGGCTGACGCTTTGTGCTGTGGGGCT  
CCAACATGGCGGAGATGACCCGATCCTCTGGTCCGCGATCACTAACCGTCTTCTTAACCAAGAGGTCACCGTGGCG  
GTGCTTTCTACCTACCGCATCGTAGCTTCGAGCTGGCGGATAACGGCATCATCTTACGCGCAATCGACCTGGCAT  
CCTGAACTATATCGCAACTATATCATTTCAAAACAATCGGATAAATCAGGACTTCTTACGAAAACACGTTAACCTGCGCA  
AAGGAGTGCAGGACATCGGCTACGGTTTACGTCGACCCATCCGCTGGAAAAGCAGCGAAGAAATCCGGGTTCTGACGCG  
TCCGAACCAATGAGCTTTGAAGATTACAAAGCCTTCGTTCCGCGAGTATACGCTGGAAAAACCGCCGAAATGACTGGCGT  
ACCAAAGATCAGCTGGAACAACCTGGCGCAGCTGATGCGGATCCGAAACAAGAAAGTCACTCTCACTGGACGATGGGCT  
TCAACCGACATCTGTTGGCGTGTGGGCCAACAACTGGTCTACAACCTGCACCTGCTGACCGGCAAAAATTTCCAGCCG  
GGTTCGCGTCCGTTCTCCCTGACCGGGCAGCCTTCCGCGTGTGGTACTGCGCGTGAAGTGGGCACCTTTGCTCACCGTCT  
GCCTGGGACATGGTGGTAACTAACGAGAAACATCGTGATATCTGCGAGAAGAGTGGAAATATCCGAGCGGCACCATTC  
CGGCAAAAATCGCTGCTGATGCGGTGACCAAGACCTGCGCTGAAAGACGGCAAGCTGAATGTTTACTGGAACATGTT  
ACCAACAACATGCAGGCCGGGCCAACAATCAATGAAGAGCGTATGCGGGGCTGGCGCGATCCGCGCAACTTCATCATCGT  
TTCCGATCCGATCCGACCGTCACTCAATTTGCGCTCAGCAGGTACAGGACCGGGCGAAGCGAAATCGGATCTCTGG  
CAGTTAGTCCAGTTCTCCCGCGCTTCAAAAATGAAAGAAGTATGGCCGGAAGAGCTGCTGGCGAAGAACCCGAACTGCG  
TGGCAAAACGCTGTACGAAGTTCTGTATGCCACCCGGAAGTGAAGCAATTCGCTATCCGAACTGGCGGAAGATCAGC  
TGAACGATGAATCCCGCGAGCTGGGTTCTATCTGCAAAAAGGGCTGTTGCAAGAGTACGCAATGGTTTGGTCCGCGTAC  
GGTCACTGCTGGCAGCTTCGATGACTACCAAGACCGCGCTGCTGTTGGCGGTTGGTGAACGGTAAAGAACCGCA  
GTGGCGTTACAGCGAAGGTAACGACCCGTACGTTGAAAGCGGGCGAAGGCTACAAGTTCACGGTAAACCGGATGGCAAG  
CGGTGATTTTCGCGCTGCCTTTTCAACCGCGCGGGAAGCACCAGGATGAAGAGTACGACCTGTGGCTCTTACCGGGCCG

GTCTTGGAGCACTGGCATAACCGGCAGTATGACTCGCCGTGACCGGAACATGCATCGCGCTTCCCGGAAGCGGTCTGT  
TATTCACCCGCTGGATGCGAAAGCGCGCATCTCGCTCGTGGCGCAAAGTGAAGTGGTTTCGCGCTGGCGAAGTGA  
TCTCGATTGTCGAAACGCGCGGTGTAACCGTCCGCGCAGGGCTGGTGTACATGCCGTTCTTCGACGCCGACAGCTG  
GTTAAACAACTGACGCTGGATGCGACCGATCCGCTCTCGAAAGAGACGGACTTCAAGAAGTGC GCGGTCAAAC TGGAGAA  
GGTGTA

>Cluster\_58958

ATGCCCATCGCCGCAAGCGAGAAAGCGGCATTGCGGAAGACTGATATCCGCGCCGTTTCATCAGGCGTGGATGCCGAACA  
CCGCACCTGGGCGCGGAGGATGATCCCGCAAGGCTCGGTAAGGCGCGTCTGGAACAAGCCTGGCCAGATTCACTTG  
CTGATGGACAGTTAATTAAGACGACGAAGGGCGCATCAGCTGAAGGCGATGCCAGAACAACCGCTCCCTCGATGTTT  
CCCGACCCGTTGGCGTACCAACCCGGTAGGCCGTTTCTGGGATCGCTGCGTGGACGCGATGTCACGCCGCGTATCTGGC  
TCGTTTGACAAAGAGAGCAGGAGAGCGAGCAAAAGTGGCGTACCGTCCGTTACATCTGTTGATCC  
TGACGCTCGCGCAAACTGCGTCCGACCTGGTATATGAAGCATTCTTCTTATCAGGGTTGGGCGTGATTAATCCT  
ATGGATGGTGGTTCAGGATTTGTTGGTTCCTTATGAGCCTTCTGCTTATATGCTGCAAAACCGGTATCCGATCCCT  
CTTTGGGTAAGTCTGTTGTTGGGTGTCGCGCGGATTCTGGACGGGTTAATGGGCTTCTGCAACTGCTTATTTGGTCCG  
ATAAATACAGTATATCTGCGTCAACAGTTGGCGATGAACCATTAACCCGAGCATCGCACGGGTTGATCATGCCTATC  
TGTAACGAAGACGTGAACCGTGTGTTGCTGGCTGCGTGAACCTGGGAATCAGTAAAGCCACCGGAATGCCAAACA  
CTTTGATGCTACATTTAGTGACAGTTATAACCCGGATATCTGCGTCGACAGCAAAAAGCCTGGATGGAGCTTATCG  
CTGAAGTCGGTGGCAAGGTGAGATTTCTATCGCCGCGCGCTCGCCGCGTGAAGCGTAAAGCGGTAATATCGATGAC  
TTCGCGCTCGCTGGGCGAGCCAGTACAGCTACATGGTGGTGGTGGATGACTCGGTAATGACCGGTGATTTGTTG  
CGGGCTGGTGGCTGATGGAAGCAACCGAACGCGCGGATCATTCAGTCTGCGCGAAGCGTCCGGTATGGATACGC  
TGATGCGCGCTGTGACGAGTTCCGCGACCCGCTGATGGGCCACTGTTTACAGCCGTTTGCCTTCTGGCAACTTTGCG  
GAGTGCCTACTGGGACATAACGCGATATCCGCGTGAACCGTTTATCGACACTGCGCACTGGCTCCGCTGCCGGG  
CGAAGGTTCTTTGCCGTTCAATCCTGTACATGACTTCGTTGAAGCGCGCTGATGCGCGTGCAGGTTGGGGGTTCT  
GGATTCTTACAGTACTGCGGTTCTTATGAGAAATGGCGCTAACCTGCTTATGAGTAAAGCGTAAAGCGGATGG  
TGCCACGGTAACCTGATGAACCTCCGCTGTTCTGTTGAAAGGATGACACCCGGTCCACCGTCCGCTGTTCTGACGGG  
CGTGATGCTTATCTCCGCTCCGCTGTGGTTTATGTTCCCTCGCGCTCTACTGCAATGACAGGTAGTGCATGCGTTGA  
CCGAACCGCAATACTTCTGCAACCCAGGCGAGTTGTTCCAGTGTGGCCGAGTGGGCTCCTGAGCTGGCGATTGCACTT  
TTTGTCTTACAGTACTGCTGTTGTTCTCCGCGAAGTTTATGAGCATTGCTTATCTGTTGCAAAAGCGTAAAGAAATA  
CGGCGGCTTCTGGCGGTTACATATCGTTGCTGCTGGAAGTGTCTTTTCCGCTGCTGCGTCCGGTACGCATGCTGT  
TCCATACGCTTCTGTTGTCAGCGGTTCTTGGCTGGGAAAGTGGTGTGGAATTCACCGCAGCGTGTGATGACTCCACT  
TCTGGGGTGAAGCGTTCAAACGCCACGGCTCACAGCTGCTGTAGGGTTAGTGTGGGCTGTTGGGATGGCTGGCTGGA  
TCTGCGTTTCCGTTCTGCTGGCTGGCACCGATTGCTTCTGTTGATCTCTGTCACCGTTTGTTCGGTATTTCCAGCCGT  
CCACCGTTGGTCTGCGCACCAACGCTGGAACCTGTTCTGATCCCGAAGAGTATTCGCGCGCGAGGTGCTGGTTGAT  
ACCGATCGGTTCCCTGAGATGAATCGTCAACGCTCCCTGATGATGGCTTATGCACCGAGTGTAAACCCGTCATTTAA  
CGCTCTGGCAACCGCAATGGCGACCGCGCTCACCGCGCAGTAAAGTGTGGAATCGCCCGTACCGCCACGTTGAAC  
AGGCGCTGAACGAGACCGCAGAGAAGCTGAATCCGATCCGCTCGCTGCTGAAGCGATCCGCTGACAGTGGCCGCT  
CTGATTTCCGTTCTGGAATTCGCCGAGAGATATCTTCTCATGGGTGAGTTATACGAAGGGATAAAGCTCAATCCACT  
GGCATTGCGTAAACCCGGATGCGGCTTCGCAATA

>Cluster\_67100

ATGAAAAAATATGTGACAACAAAATCAGTGCAGCCAGTGGCGTTTCTGCTGACAACCCGAGTCTGGTTATGTCGGCGGT  
ACTGGGCAGCGCATCGGTTATTGCGCGTGA AAAACTGGATATGTCCTTATCCAGGGGGGGGGCGGGTTAATCCGGAAG  
TCTGGGCAGCCCTGAACCGCAGCTATGCGCCGGGGGCTTATCTGGTTGACCTGTCCTGAACGGGAAGGAGCCGGGAAA  
CAGATACTGAGTGTGACACCACAGGACAGTAATGAACCTGCTGACAGAGGCATGGCTGACGAAGGCCGGGATTAACCT  
CAGTGCAGATTACTTTCGTGAGGGGATGACGCCACACGGCAGTGTCTATGTGCTGACAAAAGCCCGTCAAGTGAAGTGG  
ATTTTGTATGTTCCACCCAGAGTCTGGCGCTGTCCCTTCCCGAAGGACTGTTGAAGATGCCGGAGAACGTTGGACTGG  
GATTACGGGGCAGTGCATTTCCGCTGAACTATAACCGCAACGCCAACACCGCCGTAATAACACCTCGGCTTTGGCTT  
AGCGGACCTGAAAGCCAAATATCGGGCACCTGGGTGGTGAAGTCTTCTGACCGCCAGCGCGGTGACAGCGGATAACT  
CCACCACGATAAATATGTTTACGGCCACCCGGCCATCCGCGCACTGAGTGGGACCTGGCGGTCGGGAAAACATCCACC  
GGGACAGTCTGCTGGGACGACGGGAACTGACGGCGTGTGCTGAGCCGGAACAACAGCATGAAGCCGGGCAATCTGG  
GTATACCCCGTGTTCAGCGCATTCGGAACCGGCGCTCGAGGGTGCACCTGACACAGAACCGGCGGTTGCTGCATCCGG  
AGATGGTCCGGCGGGTCCGTTCTCCATCAGGATGTCGCGCTGTACACCAAGTGGTGTGACCATGAAATACCCGCT  
GAAGACGGGCGGAGCAGGTACAGAACTTCCCGTTGTCGGTGTGAGGACGGCAGTTAAGTCCGGGGCAGCAGGATTCAG  
TGTGGCAGCCGTTTGCCTGACGATGACAGTGAAGGCGGTGTTGTTGCGCGCTCATACGGTTACGGTCTGGACG  
GACTGACGCTGCGAGCCGTTGGGTGTTCAACAGGACTGGCAGGGGGCAGTCCCGTGTGGTTGCCGGCTGGGTTAC  
CTGGGGCGGATCTGCTGACGGGGCTTATGCCACGGGCAAAATACCGTACGGCAGCCACAGCGGGAATAAGGTGACGCT  
GTCTGGAGTAAACAACTGGAGACGACGAACACCGGCTGCGGTAAGTGTGTCACGGCAGAGTGAAGGATATGAGGGCA  
TGTCTCTTTGACCCGACAGAGTGTGGTGCAGTCAATATAGGGCGCCGACGAAGGATGAATGGAATGCCGCTATC  
AGTACCGGTTGGCGGGTTGTTCACTGCTGCTGCTGCTGCTGCTGCTGCTGCTGCTGCTGCTGCTGCTGCTGCTGCTGCT  
TTACCGGTACAGCGATGACAACGGAAAAGAAACCGGATTTACCGGCACTGAGTACCCAGATAAAGGGTGTCACTGATGA  
ACCTGGGCTGGTCCGCTCCCGAACTCCGGGGGAGAAATACTGTTGCTGCGCTGCTGCTGCTGCTGCTGCTGCTGCTGCT  
CGGCTCACTGATGACCGTTTACGTATGGTCTGGCGGTTGGTCTGCTGACGGTGTGTTGGTACCAGAGTACCTGAACG  
CCTCATACAGTGGTGACCGGCTTATCTGAATGGTGTCTGAACCACTGCGAGTCCGGCGGAACAGTGGTCTGCTGCTG  
GTCAGCGTTCCGTTACTGGCAGTCCCGCGGCAAGACATCATGTTACCGCGCACGACCGGCGACAGGTTGGCGGTTGGT  
GAATGTGAAGGACACCGGGAGTGAAGGTGACGTCGGTGACGGACAGACTGACAGCGACGGCAACCTGGTGGTACC  
TGAACAGCTATGGCTGGAACACCGTGCAGATTGATGCGGGCACACTCCGCTGAGCAGCAACCTGACGAAACACAGTCA  
AAGGTGGTACCAGCGACAAGCGGTTGGTCTGGATGCCGTTTGTGATGCCCTGAAAGTAAAGCGTTACCTGCTGACGGTGA  
GCAGCGTACCGGTTGATTTGTCGCGGGGAACTGGGCACTGACAGTAAAGAACACACCGCTGGGCTTTGTAGCTAAACA  
ATGGTGTGCTGATGATTAACACGGTGGATGCGCCGGGTGATATCACCTGGGCCAGTCCGGATACTTCCGGCCAGACTG  
CAGGATACTGAGAAACTACAGGATACGTTGATGATA

>Cluster\_5380

ATGATGATTTTGGATTTCTCGCTACGGTGTCTGCTCGCGCGGTTGTTCTATCACCGCGTGGAGTTATTTATCAGCAG  
TCTGATTTTGGCTCGCTGGACAGCCGCTCGGCTGCTGCTGCTGCTGCTGCTGCTGCTGCTGCTGCTGCTGCTGCTGCT  
TCTCGTGGCATTAACTTTGCGCTATGCGTAAGCTGATGATTTCCGCGCGGTTATTTCCGCGGTTTCCGAGGTTGATG  
CCGCGGATGTCGCGCACTGAGAAAGAAGCGATTGATGCGGGCACCACTGGTGGGAGGGCGACTGTTCCAGGGCAAGCC  
GGACTGGA AAAAGTGCATAACTATCCGACCGCGCTGACCGCCGAAAGAGCAAGCGTTTCTCGACGGCCCGGTAGAAG  
AAGCTGCCGAGTGGCGAATGATTTCCAGTACCCATGAGCTGGCGGATCTGCGCGGAGTTGTCGGCGGACTTAAAG  
GAGCATCGTTTCTCGGATGATCATCAAAAAGAGTACGGCGGGCTGGAGTTCTCGGCTTATGCCAGTCTCGCGTGT  
GCAAAAACCTCCGGCGTGGAGCGGATCTGCGGATTACCGTCCGCGTGC AAACTCATTAGCCCGGGCAACTGTTG

AACATTACGGCACTGACGAGCAGAAAGATCACTATCTGCCGCGTCTGGCGGCTGGTCAGGAGATCCCCGCTTTGCACTG  
ACCAGCCCGAAGCGGGTCCGATGCGGGCGGATTCCGGACACCGGGATTGTCTGCATGGGCGAATGGCAGGGCCAGCA  
GGTGTGGGGATGCGTCTGACCTGGAACAAACGCTACATTACGCTGGCACCGATTGCGACCGTGTGGGCTGGCGTTTA  
AACTCTCCGACCCGGAAAATTACTCGGCGGTGAGAAGATTTAGGCATTACCTGTGCCTGATCCCAACCACCGCCG  
GGCGTGGAAATGGTCTGCTGCACCTCCCGTGAACGTTACCGTCCAGAACGGACCGACGCGCGGTAAAGATGTTCTCGT  
GCCGATCGATTACATCATCGCGGGCCGAAAATGGCGGGCAAGGCTGGCGGATGCTGGTGGAGTGCCTCTCGGTAGGCC  
GCGGCATCACCTGCCTTCAACCAACCGGCGGCTGAAATCGGTAGCGCTGGCAACCGGCGGTATGCTCACATTCGC  
CGTCAGTTCAAAATCTCTATTGGTAAGATGGAAGGGATTGAAGAGCCGCTGGCGCGTATTGCCGGTAATGCCACGTGAT  
GGATGCTGGCGCATGCTGATTACCTACCGCATTATGCTCGGCGAAAACCTGCCGTGCTGCGGTATCGTTAAGTATC  
ACTGTACCACCGCGGCGAGCAGTGCATTATTGATGCGATGGATATTACCGCGGTAAAGGCATTATGCTCGGGCAAAGC  
AACTTCTGGCGCGTGTACCAGGGCGCACCGATTGCCATCACCGTTGAAGGGGCTAACATTCTGACCCGCAGCATGAT  
GATCTTCGGACAAGGAGCGATTCTGTCATCCGTACGTGCTGGAAGAGATGGAAGCGGCGAAGAACAATGACGTCAACG  
CGTTCGATAAACTGTTGTTCAAACATATCGGTACGTCAGGTGATGCAACAAAGTTTCGACGCTTCTGGCTGGGCTGACGCG  
GGTTTAAACGACGACGCCAACCGGCGATGCCACTAAACGCTACTATCAGCACCTGAACCGCTGAGCGCAAACCTCGC  
CCTGCTTTCTGATGCTCGATGGCAGTGTGGCGGCGACCGTGAACGTCGCGAGCGCATCTCGGCCCTCTGGGGGATA  
TTTTAAGCAGCTTACCTCGCCTCTGCCGTGCTGAAGCGTTATGACGACGAAGGCGTAATGAAGCCGACCTGCCGCTG  
GTGCATGGGCGGTACAAGATCGCTGTATCAGGCTGAACAGGCGATGGATGATTTACTGCAAAAATTCGTTAACCGCT  
GGTTGCCGGGCTGCTGAATGTGGTGTCTTCCGACCGGACGCTATTATCTGGCACCTTCTGACAAGCTGGATCATAAAG  
TGGCGAAGATTTTACAAGTGGCGAACCGCACCGGTTCCCGCATTTGGTTCGCGGTGAGTACTGACGCGGAGCGAGCATAAT  
CCGGTTGGCTTGCCTGGAAGAGGCGCTGGTGGATGTGATGTCGCGGACCCAATTATCAGCGGATCTGTAAGAGCTGGG  
TAAAAACCTGCCGTTTACCGCTGCGATGAACCTGGCGACAACCGCTGGTGAAGGGGCTGATTGATAAAGATGAAGCGC  
CTATCTGGTGAAGCTGAAGAAAGCGCTGCGCAGTATTACGTTGATGACTTTGATCCGGAGAGCTGGCGACGAAG  
CCGTAAGTTGCCGAGAAAAGTGGGAAAAGTTGAAGCGCGTAA

>Cluster\_17756

ATGTGTATCGGCAGCAAGCCATCAGTGCAGCAGCGCCAGAAGTACAGGCTGCCCCACAGGAGCAGGATGCAGCAGTTGT  
CAGTTCTCGTGACGACGAAGAGCGCCGCGCGCAGCAGCAGGCGCAGCTCTACTCTGCTGACTGGTGCAGAGGGTG  
ACACTTCAACCGCAACACCAGCGGTAAACCGCTGCTTGGTCAGTAA

>Cluster\_35593

ATGGCTGTTAAAGGTATCAAGTTTCTGAAAGTCAAAGCAAAGCACTTGTCTAATCCTGACGTTAAAAAGGCTTACGATGA  
AGCCACGCAAGGAAGAAGACTCCGTGCAGTCTTCAATGAAATGAAGAAAGAGCGGATTAACAGCACCGAGATTGCAG  
CACGCATGGGAGTTAGCAACAGCTGTGAGCGCTTGTAGAGGAATGTATCAAGTGCAGCCTTACAACGTTACAACGT  
TATGCTGCAGCTTGTGGTATGCACATTAAGTTGTCTCTCAATAA

>Cluster\_47261

ATGCAGCTCAACATTACCGGAAATAACGTCGAGATCACCGAGGCACTGGCGGAATTTGTTACAGCCAAATTTGCCAACT  
TGAGCAATATTTGACCGAATCAACCAGGTTCTATGTTGTTCTGAAAGTGGAGAAAGTCAACCCACCTCAGATGCAACAC  
TGCATGTAACCGGTTGGTGAATTCATGCCAGCGGAAGGTCAGGACATGTACGCTGCCATTGATGGCTTAATTGATAAAG  
CTGGCACGCCAGTTGACCAACATAAAGATAAACTGAAACAACACTAA

>Cluster\_32990

ATGTTTGGGATTAATAAGCTAACAAATTCATACGATTACCGGAATGTGGGTGAGTATTGTGCTGTTCAAATGATGACGAA  
TGGCTGGAGTGGTTTCTACTTTCTAGTGTGTGTAAGCCTGGTATTCTGACGGTTAGCTGGTGTGTTGAGTGGTGAAT  
GGTTAGCAGGAAAGAGTAAGGCTGAACCTTACGTTCAACCTTACTCTCATTTACAGTTACGCTTTTTTAAAGCGGGCA  
AAGAGATGTTCCACTACAACGAAAAGACCGGAACGAAGTAA

>Cluster\_62658

ATGCTTCAAAGTAATGAGTACTTTTCCGGCAAAGTGAATCAATCGGCTTTTCCAGCAGCAGCACTGGTTCGGCCAGCGT  
GGGTGTTATGGTTGAAGGCGAATACACCTTTCAGCACCGCTGAGCCGGAAGAGATGACGGAATCAGTGGCGCGTGAATG  
TGTTACTGCCTGACGCGACCGACTGGCAGGTGTATGAAGCCGGTTCGGTGTAAATGTTCCCGGTACAGTGAAGTTTCAT  
CTGCAAGTTGCCGAACCCACCTTATCTGTGCCGCTATCTGTAA

>Cluster\_31584

ATGCTGTCAATATCTTTTATTGATGGTGTGCTATGCTGCCTGGTCTTAAAACTGCTCGTTCACGGGCAAATTTTAC  
TCAGGAAAAATAGGTGACTGGCTGGTATTGAAGAAGCTACCGCTCGGTCCCGCATACTCAGTATGAAAGCGGTATAC  
ACCGCCGACATTTGAAATGATGTGTGCATTTGCCAAAGTGTCTCAACGTTACCGGATGCTATTCTATACGGTCGATGAT  
AATTTGCCGAAGCGGTACTGGATCTTTATGTCCGGTGGGAAAGTAAATCTTGA

>Cluster\_33405

ATGAAATTAAGCGAAAAGATTAAGCCCTTGCCTGAGGCTGAAGGGCTAAGCCAATCAAATTCCTGTGAAATCATAGAGTT  
ACCGCTAAGCACACTTAAAAAATATGAAGGAGGAAACTTTGAACCCGGTGGCACAGCTTTGCTAAAAATCACTATGCATC  
CCACATTCAAAAATATGCTCTATGGCTTATGACAGATAAAACCGCGCGGACGAGGACAAATCGCACCGGCTCTCGCG  
CACATTGGGCCAGAGTCAACAGAGTCAACACTCCCGCAAAAAGGATTGGCTAA

>Cluster\_66871

ATGAAAGCCGTTAAACGAAAATGATTTCCGCGAGCTGATTGAGGCTAAACAATTTAATGGCTATACGCTGGTACAGCGGAGA  
AGACTGGCAGATACCCACGGCCACGAAATCCTGCTGGTACAGGGGCTTATCCCTGACTGACATCCAGCTGGCCAACC  
GCCTGGATGTGGACGAACGCACTATCCGCAAAATGGAAAACCGGACAGACCCGGATGGTGTACCACCTGGTGTCTG  
TGTGGCTGGCCGACTGGGATGCCGCTGGATAACCATCTCAGCGGTTAA

>Cluster\_66936

ATGAAAAGAGAAGGTTTCTGGCGATATGCAACACCGCCAGTCAACATCAGGGCGTACCTCTGCGGTTACCATTGATTTA  
TCTGTTTATATGCCCTTTTCCCTCCGAAACAACCTTCTGGATTGACCGGATCATTTTATTTTTCGTTATTCTCGACC  
TTTCAAGGCTGGACTGTGAGGACTATCTGTACACGCAATTTCTCAGCATTTGAGAGGGGCCATCGCCTCCGGTCTCCATGG  
TGGTATCGCCACCATAACGAATCACCACGAGACTGGACTGGCTCGATTAA

>Cluster\_20555

ATGAAAACGCTTATCTACCGTGCAGCCTTACGCAAGTGGGGCCGGAGAAAACACTGGCGAAGCTCGCCGAGGAAGCAGC  
CGAATCAGCGCCGCAACCGCGCTGGTTGACAGGCTTCTGTGACGAAGCTGTGCTGGCGGATGAAATGGCTGATGTGG  
AAATCATGATCGAACAGTTCCGGCAGAACGGTATGGAAAAGCTAATCGATTATCGCAAGCGAAAAGCTGGCGGACTG  
GCTGAATGGTTGGGGTAGTAAATGATGATGTTTGTAA

>Cluster\_15971

ATGTCCAGAAAAACAGAATTTAAAGGCACCTCAGCTTCTCGTCTGAGAGCTCGTCCGCAAACTGCAAAAGTCAGGAGGC  
GATTAGCTCCGACAAGCTACACAGACCAACCCCTCTCGAGTGGTCTTGAATGCAAGCGCAAACAGCAATGAGAGCAG  
AAGTAATAACACTGACAACGTTGACCAGAAAATATGAAGGCTCAACTTCTCTCCGAAAGCTAGCTCTTTACGCGGCAGGC  
TACCGGAAATCCAACAACACTGACAGCAAGATGA

>Cluster\_48586

ATGAGAGTTTATGTTCAAGTCTTACCAGCACTGTCTATGACGTGTTTCCGCTTTTTATGGTCAAAGCCGATGGCCTTAA

CGACGAAGAACTGACGCACTGATCCAGCGTATTTCTCGTTGAATATACAGGTCATGACGCTGATTCAGTGATGGTTGATG  
ATGATGGTGTGGTGGCATAACCGCAACTGTTGGTACGTAGAAGAGACTCAACAAATCAGTGATGAAGATGCCGCACAT  
CTTGAGCGTATTTAAGCATCAGCACTTTTGAGTGA  
>Cluster\_43551  
ATGAAAGGAAATGATTACGACAACTTCGTGCATTAATTCGCGCAAATGCCATAGCGCAAATCTGGTGTGACGCCGCA  
AGCGGTGAATCAGTGGTTTTCAAAAAACAATTCCTGCTCGTTTCGTTTACCGGTATGTGAAGTAGTTGCATGGAAGG  
TCACGCCACATGGCTTAAGGCCAGATCTTTATCCTCACCTGAAGATGGAATTCCTGATTCGTTACGCAAATTTCAAAT  
CCAAGCTTAGCGCACACAGAGGACGAGAAGTGA  
>Cluster\_3073  
ATGGATGAACTGCGTGCCCAAGGTTACCATTTTAAAGTAAAAACCGTGACGGAAAGCCTGCGCGTACCGGACTGAGGGC  
AAAAGCGTCTGGAAATTCAGTCCGGTCTGTTACTGCGCACACAGCCAGCCTGTGTGAGAAAATCTGCTGGAGCAGGAT  
TTTACGCCAGTGGCCGAACAGAGTGGGCGGAGACATCACGATTTGTGTGCCCGGAGTTCAGGGCAGCATGGAGGC  
TCAAATGAACCACGAGTCTGTCTGGAATATTGA  
>Cluster\_35640  
ATGCCAGATAACCTTTCTGAATTACTGAATGTGGCGTTATGCACGGTTATCGTGTGACGCTCTTTTTTTATCGTCGCCG  
TGATTCAGACATAAACCGCTGGTGTCTATGGCTGGCCTGGCTGCTGATGCTGCTGTATGCCTTTGCGCCCTCAGCTATC  
TGTGTGGTCCCGCTTAGCAACGGGCTGGCTGGAAGTGTTTTTAATCTGCTGTCTGCTGCTGGTGTATACGCGCACGC  
GGGAACGTCACAAAATCTTTCCATTGTTGAGGTGA  
>Cluster\_21562  
ATGAATATCCGAAATCAATATAATGAAGCCTTAAATAAATAGATGTTGATGTTAATGATGGTTTGGAGATTTAATAAA  
CATATATTGTGGCTATTGATTCTTTTAAAAATGATACTGTTGACTCGATTGCTTTATACGTGATTGATATGGAAAAATA  
AAGATACTTGTGATATCTACAAGAAATATTATCAGAGATAAAGATCCTTATTTAGTAAAGAGTTTAAATGTATGGATA  
AAAGAAATTAAGAAAAATTTAAATAAAAGCCGGTAA  
>Cluster\_29186  
ATGCCAACAGTTCCTCTCGCATGGCGATGCAACTCAAAAAACAGCCTGGATAAATCCCGTCTTCATGGTTTCGGGATG  
CTCATTATCTCCGCAATCCCGGTGATCGCGCTTATTATCCCGGCTGGTTTTCTGCGCCATTCGCCAGCCTTATTTTGA  
CGCTCATCAGAGGCAATTTATCAGCGGACAAATATCAATCTGGCATTTGTCCGGAATTTATTTATACCGCCCTTTTGTCT  
CTCTACGCCATGCTGTTCTGGCTGGTATTTTCTAA  
>Cluster\_66846  
ATGGAACCTGAAGTGGACAGTAAGCGCTTTCTGATTTGGCGCGTTATATGATTTCTGGTGTGACAGTAAACCTGC  
GGCCGCCAGAACGGTGCAGTCCCTGACACATGCTCCGGTCACTCTGTTAACTCATCCAGTATGGGAGAACAGTTGTTTC  
AGTTTGAACCCAGGGAGGTACAGCGGATTTTGTGCGGAGTACGAAATCCGTACGAACTTAATGGCCAGACTATTTAT  
GTATTGCGCTGTGGCACACAGAGAAACAGGTAG  
>Cluster\_28984  
ATGATCCGAAACCTTTGTCATGCAGGTAACCCCGACGCCACGAAGAGTATCAGCGTCCGCATAATCCCATCTGGCC  
GAACTGGAGCCGTGCTGAAATCTCACGGTGGCATAACTACGCCATCTATCTCGACAAAGCGGTAATCTGCTATTTG  
CCACGATAGAGATTGAATCTGAAGAGCGGTGGAATGCGGTTGCCAGTACAGATGTTTGCACACGTTGGTGGAAATATATG  
ACCGACGTTATGCCAGCTAACCCGGATAACAGCCAGTCACTAGCGAGCTGCAAGAAGTGTTTTACCTACCTTAA  
>Cluster\_40826  
ATGGTTCGATATTACCCGGGTACGCCGGAATCCCTGCGTGGAGTTTGTGTTGCGCTGAAACAAGACCCGCCCTTACAC  
CGCCAGCGAGACGCTGCTGCTGGATGTGTCCCGTGCATCTACCGGACACCACCCGCTGGAACCTGCGCCGCAACTGG  
ATTTATCTGGCTGACCGTAAATGTTGAGCTGGAGAAAAACCTTCTGCGGACTGGTTTGTGCTGACCTGACCCGCCCTGGC  
GTAGACCTGGTGGAAATACACCGTGAATGTGGTCCGGTATTGCCCGCCGGAAAAGTACTGGAGTGAATAA  
>Cluster\_48666  
ATGAAAAATCATTTGGTCTTGGTCTGGACAAAGACCAGAAGAGAAAAGAGAAGCCTGCACTGGTTGCTCAATTAACCTT  
GCTAGACATCGTTGCCAATGGAATCTTATTCTGCTGTTCCGTGAAACAGCGGTGCTTTTCGATAAAAAACCTTTACTC  
GTTATGTAATGAATGTTTCGTGCGCAGCGTGGAAAAGGATGGGTGGCATTTCAAAGAATGTGGCCGAAACATCAGCTCGAA  
CTGGCCTTGATGGAAGTTAACCGGCTGGCCAGCAAGAAATTCAGAGAGCATCAGTGATGGCAATAGCCTGA  
>Cluster\_62012  
ATGGATGACACCAGCCGGGACCCGGCAATAACCGAAGATGAAATCAGGGCGCTGCAATTTTCTGCGGGGATGTAGCGGA  
AATAGAGCAGACGATTCTCTTTTGTGCTGATGCTGCCACACCCGTAAGTGGCGATGGTGGTGGGTAGCACCATTAACA  
CCCTCAAAGATCGCGATGGTAAACGGTGGGAAACCTGCCGATATTTTATGCGCTTATCTTATCCGATGCTGTTTTT  
CGCGGGGAATTAGTGGGATACGGCGATTGTTTTGCTATGCGCTATAGCGAAATTAAGCGACCGGTTACCTTATGA  
>Cluster\_57502  
ATGGCTGAATGGAGCGGCAATATATCAGCCATACGCTGAGCAGGCAAGAAGAGTGAACAAGTCAAAAAGATTACGGT  
TTCCATTCCTCTTAAGGTGTTAAAAATCTCACCGATGAACGCAGCGTCTGCTCAGGTGAACAACCTGCGTACGCTACCA  
ACAGCGAGTGTGCTGCGAAGCGTTTCTGATGCTTTTACCGGCAACCTTTGCGGATGATGCCGATCTGCGTAAAGAG  
CGCAGCGAGAAATCCCGAAGCGGCAAAAGAGATCATGCGTGAGATGGGATTAACCGGAGACGTGGGAATACTAA  
>Cluster\_20494  
ATGATACGTGAGCGGATAGAAGAAAAATTAAGGGCGGCTTCCAAACCGTATTCTCGAAGTAGTGGATGAAAGCTATCG  
TCACAATGTCCCAGCCGGCTCTGAAAGCCATTTTAAAGTTGTGCTGGTTCAGCGATCGTTTACGGGTGAACGTTTCTGA  
ATCGTCATCGAATGATTTACAGTACTTTAGCGGAGAACTCTACTACCGTTTATGCGCTGGCTCTGCATACCTACACT  
ATTAAGGAGTGGGAAGGTTGACAGGACCCGCTTTGCTCTCTCTCCCTGCTGCGTGGAGCAGGAAGCATCGCGTAA  
>Cluster\_20537  
ATGATGTTGACAGATTGACTTCTGGGAGGTGATCTCGATGGCGCTGCTGTTTTTGGGCGTGTGGTGGCGCGGGGAAGAT  
GCTGCTGACCCAGATTGAGAAGCGCTCAACGAACGCTTTGAGTTCGCTGGAAGCGGACGTAAGGAGTCGGAATCCGGCT  
GGTACCGGCTGGAGCGGAGTTCCTGGAGTTCGCGCCGATATGCCGCTGAACATGTTGCGGCGTGGAGTACATCCGG  
GGACAACGGTTATCGAGGCCAAGCTGGACGCGCTGTATAACAAAATCGAACTGTGCAAGGGGTTGTTAAATGA  
>Cluster\_65787  
ATGATTCTGGAAGAACGCTGCTGTAAGGTGCTGCGTGCACCGCACGTTTCTGAAAAGCGTCTACTGCGATGGAATAATC  
CAACACCATCGTACTCAAAGTTGCTAAAGACCGGACCAAGCAGAAATCAAAGCTGCTGTGCAAGAACTGTTTGAAGTGC  
AAGTCGAAGTCTGTTAACCCCTGGTAGTTAAAGGGAAAGTTAAACGTCACGGACAGCGTATCGGTCGTCGTAGCGACTGG  
AAAAAGCTTACGTCACCTGAAAAGAAGGCCAGAATCTGGACTTCTGTTGGCGGCTGAGTAA  
>Cluster\_26873  
ATGAGCACCATCAACCACAGAAGCTACCGAACTGGCATTGTCCTGCAACGAATGGCAACGCCCTCAAAAATTAAGTGGC  
ATTTCCGCGCAATGCTCTGCGCTGCTGCTGCTGGCCTGCTGTAATGAGCTGGAGCACGCCAGAACCCAGGCTCCTGCCA  
TTCCGCTGACGCTCCATCATGAAATCGCTGATTTCTGCGCAACGCTGGGGGACCTGGCGCAACCGGAAACCGCCGAAGCA  
ATGACAGAAAGAGTGTGCAACGCATCGATAACGTTTTTGGATTTTTTCTGAAACAGTAA  
>Cluster\_56

ATGGACCTGATTACCATAGACGTATCTTTTATTTCTCTAAAAAATCCTTCCGGTTACACCGCCCTTCTTAAACCAGA  
AGGAAAGGCTTAGCCCTGATTAACCTCAATTTGAGGTAGGGCTAAACTTCTTAAAAAGGGTGGTTAAAGACCCCT  
GGTCCATAAAAAAGTGGTAGATGAAATCTGGGACTTTCTATCTCTTTAGGATTTTTACCTTTAGGAGTAGCTCAAAGC  
CCTATCTTTGGTCCCAAAGGAAACAAAGAGTTTTTTATTTTACTTGGTCTGCATACCTAA  
>Cluster\_9534  
ATGATAAAGCCATTTTCTGTGAGGTATGGTCATGTTGACGTTAGAGAGCATGTCCAGCTGAATGATCTTAATTTCTGATAC  
ACGCATGGCATTTGGAATTCGTATATCTTTTCTTTGGACTAACAACTGCTACAGCAAAAAATGTGCGC  
AGTCTGTGTGGATATATTTATCTAAATCAACCTGCGGATAATATTTCTCGTTATGAAAGTGGATACAAAAGTGATAAGACG  
TTGCTGACTGCTATCCGAGATTATATATGGGGAAGCATGGTATTTGGTATATGA  
>Cluster\_48775  
ATGAACGGTATAGATCCATTCAAACCAATCAGTAAAGCAACTTGATGTGGTATTACCACAACTGACAAAACACAACGACCT  
TCTGGATAAAGTGTTCCTTTTATATTTGCTGTTACCGCAAAATATCAGGTAACAACTCGAGAAGAGGTTCTCAAATATA  
ACATGCTGGCTTTAGAAAACAATTTTGGCTCAGAAAAAGCGGAAAAATCACCCAAAAGACTGGCAGAACTCTCAATTTGGCT  
TATATGACAAATATAAGAGTATCCGAAATCTTTGATAAGCTACCAGACATTGAATAA  
>Cluster\_19635  
ATGATAACCACGATTAATTAAGTGGCGGTACATCGAGACGCCCAATGACTGGCGCACTCGCTGACCTGAAACAGTG  
GGTAATGAATGCCGTAGACCTGAGCTTGGAGCTGAATTTCTGTAAGCTGCTGGGGCAGATGCGTCGCAATGGTATCAGTG  
ATGGGCGCGTAAATGCGGTGGCTGATGAGCTTTATGCTCTGGTATGCCAACGCCAGCGGGAAGAATACGAAGCTGCAAG  
CGGGCTGCCCTTGACAATGGAGACTTTGAAATCATGGTTACACGGACAGACCAGCTACTAA  
>Cluster\_17775  
ATGCACATTCAGCAATTCATAAACCCTGAAAAAATAGCCGCTCAGTTCAGCAGCGACTACCAGCTGTCTCAGAACTGTA  
TGACCGCCACGTTGAGCTGATCGAAGCAGTCTGCTGGTTGCGAAATGGAAGAGTCAATCAACCGGCCATTTCTCGGTGCCG  
GTGTTCTGCTATGAAGTCTGAGGCGCGCATTTGAAAGTATGATTTGCAAGAGCTGATGCTGCTCAATCAACGTAAGTTG  
ACTGGCGTCAATCGACGCTTTGACCTTGGCTGACAGATCGACAGCAAAAGGAATGCAGCATGA  
>Cluster\_51319  
ATGAAACGAAAAATTTCTGGCTTACTGCCAGCGCCCTCTCTCGCCCTGAAATCCGCCCGGGCATATTTTCAAAGATAA  
ATACGGCGGCACCTGTAACGATTAAGAGCGTGGTGGGACGGTGTGTTACTTACCGCCGTGATGGGTACGGCTATGACTGCG  
TGATGCTGTTTATCAGTTCCGGCTGATTTTTCTCTGTCAGAACGCAACCGCGGTAAGCCACCAGCAGGGAAAAA  
GCACGGGAAAAATATAAGAAAATAAAAAGCATGCTCAGCGCATCCAGAGGTAATAAATGA  
>Cluster\_67015  
ATGAGCGGTGAAGTGAAGATCGTTACATCTTTCTCAGACGCTGACCGAACAGAAACGCCCTCATCGGGATACCTCTCGA  
TGAGGCGTCTGTTGGCCTGACACCGCCCTGTGTGCGAAATTTACTTTAACAGAGCCTGGTCCGGTTGATGTTGGTCTTC  
TGTTCTGGTTTGGCTTGACCCATTTCAAAAAGGGAAGGGCACCTTCTGGCTTTTAAACATGTGTTACTGGCATCTGCCA  
GGGCTGAACGGGCAAGTTTAAAGTCTGCCGAAATCGGCCCTGGCCTGTGTGGCTTAAAGTAA  
>Cluster\_46479  
ATGGCGTTGGAATACCATAACGAAGAGTCTTTTTTTCATCACTGAGGAAGTGGAGGCGGACTGATCGCGGCGGGCATTT  
GTTTGAGCTACAGCCGATTTGCTGCGCTGACCGACTTCACGATGTGCTGGAGCGCATAACTGATGCCATGTTGCTACTGC  
AGCCGGGCGAGATCGCTGACGAAGATCGCAAGCAACGGCAGAACAGCCATGTTTCAGCTAGCTAA  
>Cluster\_7935  
ATGCTGAAAAGTGAACCGTCATTCGCGTCTCTGCTTGTAAAGCAAGCCCTGGCATGCATTACGGCCACGGCTGGATCGC  
AGGTAAGAACGGCAAGCGTGGCATCCAAGTAGCTCACAGTCCGAATTTATAAAGGACTGAAAACAAAGTCGCCAAAAT  
CGTCAGGTTTTTAAATTTATCGTATTTGCTCCACTTTGTTTATAAAGGGTGAACATGTCACGGCATGA  
>Cluster\_44383  
ATGGATATTCAGTGTACTCTTGCTAACACCTTTCTTAATGAACATCCGGAAGCCTTTATTTGGTTACGTCAGCGAAAA  
ATTTATTTGATAGATGGCACTGCATTCAACTGATTTGGTATTTGGTAAATGAGCAGGAGAGTTTGATTTTTACAGGCAATTT  
ATCCTGTGACAGGGGAGAGCACAAGGTTGAAGCCTTGATGTGGACGCATTTGGCTGCATAA  
>Cluster\_21535  
ATGTTTCCAGAATACCGAGATTTAATATCCCGTCTGAAAAACGAAATCCTCGCTTTATGTCCTTGTTTCGATAAACACAA  
TAAACTTGATCATGAAATTCGCAAGAAAGGTTCCGACGGTTCGAGGATACAATGCGGAAGTGGTCCGCATGAAAAAC  
AAAAGCTACAGTTAAAAGATGAGATGCTCAAAATCCTGACGAGGTGAGCGTCAAAGAGGTGTAA  
>Cluster\_48833  
ATGACTATTCACGATCGTTCCATTCCTGAGGATGTTTATCAATCTTTTGGCAGCTACCGGATTTCTGTTGATGGTTTTTC  
CGCCGTCGCCATCTAATCCCGATGGTGGAGGAGATGATTCGATTTTGTCTCTCTTGGTCAATTTGCTGCGGATGGTTT  
CTGACTCTCTCATGGCTGTCTTGATGTTCACTGGCGTTCTATCGCGATGCTGAATTCGTCAAACGCCTAA  
>Cluster\_39479  
ATGACACACATGATCTTTCTGTCATGGCGACATGAAGAAGTGAAGAGCGTTGGCTACGACTTTGAAATCGTGAAGCCGA  
AGAGCTTCAGGAATATCTGGATGCTGGTTGGTTTTTACATCTCTGATGACCTTTTGAAGGATGTTGTCAGAGCCAGAGCCAG  
AAGAAAAACAGCGTAAAAAGCCTGGTCGAAAACCTAAGCGGCGAGCATATGAACCTGACAACGAAGGGTGA  
>Cluster\_41190  
ATGCCACAAATTTCCCGTACAGTGAACAGGTTGAACAATGCTCGCAGAGCTGCTCAACATACTGGAAAAACATAA  
GGCTCCGACCGACCTTTCCCTGATGGTGTAGGCAACATGGTCACTAACCTTATCAACACCAGCATTTGCCCGGCCAAC  
GCCAGGCAATTCGCAACTTTTTGCCCGCCCTTACAGTCTCTATCAACGAAGACAAAGCGCACTAA  
>Cluster\_17635  
ATGAAAAATGAATTTTATGACCATGGGGTACCAGCAACTATCACTATTTCTTGTGGTCTGGGAGTTCCACCGTTACTT  
CAGAGTTGATAGTGTGCGCTGTTTGTGTCACCGGGAGCGTTACATCACAGTGAATCGGTATTTGTTATGAACACTGTCA  
TCAGCGGTAAAAACGGTCCGATGTTGCGGGCTTTAAAGTGGCAAAACAGGAGGCTGGCAATGGTCAATGA  
>Cluster\_20336  
ATGACCAACATCCAGCTCATTGAAGCGCAATGTGCGATCGAACAGGTTGAGACTGTTTTAGGGTTCTGGCTTGAAGGGGC  
CAGCCCAGCAACAGAGACAAGTTAATGATGGCGCGGTTATGTCACCTGCTCAATGGCGTACCAGAAGCTATTCAGGAAG  
CAGACGAATGTTGGGCAAAATATGAGTTACAGAATCATTCAGCGGAGGGCAAAACATGAATAA  
>Cluster\_51534  
ATGACATTAACAACTTACCCTATCACCGGGCATGCCCGCCACGGGCTACTGCTGACTTTTTGCAAGTAAAGCACAGTTAC  
TCTCTGGCGCTGGGAAAAAACAATCTGAATTTCCAAATCCACAGTATTTTCAAAACGGGTAACGTTTACGATGCAC  
AAGAAATTAGACAGTGGGTAAGCTCAATCTCAGATGATAAATAA  
>Cluster\_35568  
ATGAAAAAAGAAACAAAGCGCGGAGACACAACCGTAAGGATTAACGAAAAACAGAAAACTGGAGCTAAAACGAAGAGTGCT  
GAAATCGGTAATAAACAAGGTGAGCTACTAAACCATCAGAGATGATAAACCTTAATAGACAACCTACTTATGATGATG  
CGGTGAAAGATCTAATAAGCAAAGAAAGTAAAGAAAAAAGGCAATGTGA  
>Cluster\_19625

ATGACGAAATCTGAATTTGAAAATGAAACATGGCGAATGAAGGGCTTGCCTTTGGGGCGCTGATTCGCCGCTTGGAGGA  
AGATAAGGCTGGCGAGTCCGCGCATGGTCCAGCGGAGTTATCCAGTCCGCTCAACTTCCTTAAGGCCAACGCCGTAGAAG  
CGCCGGACACATCATTCAACAACGTGTTCCCGGAGGATGACGAAACATGA  
>Cluster\_1836  
ATGAACGAAGCAAAAAGAAAGTCTTGGGACTTATAAAAAATCAACCTTAAAACCTGAAAAATCACTCGGGATTATTT  
TTCAAACGATGAAATTACATTGATATATTTCTCAGAATATTCAAAAGAAATGTCCAAGAGGTTTTTGTGTTTTAATGTTG  
AAGCAAAAAGTAAAATAAAAGTTATAGGTATGATTCGATTAATTA  
>Cluster\_6026  
ATGATGATTTGCCACTGTGTGGAAGTGGCCCATACTCGCAGCAGTTTTTCAGGTATCTTCATTGACCAAAGAGCGTTA  
CAACCAGTGCAGAACATTAACTCGAGCCATACTTTTGTTACCCATGAAACTTTTGTTCGTTTCGATTGCAACGCCAAAAG  
AGTCAAATCCGGTTCAGCCGCATCCAATGAAATCAGGACAGGTGGCGCTCTCTTTTGA  
>Cluster\_66353  
ATGGCGATGAATAGCGTTTTTCTTCATTATCAGAAGAGGCAATTAACCGCTGAACAAACTTCGGGGCTGGCGTAAGGT  
TTCACGATCTGCAATTTTACGCGAAGCGGTTGAGCAATATCTGGAGCGGCAGCAATTTCCGGTGCCTAAAGCAAAGGGAG  
GCAGGCAAAGGGGGAGGTAGTTGGTGTGATGATCAGTGAAGGAGCATAAGGAATGA  
>Cluster\_30521  
ATGCAAACTCTTTCTGAACGCCCTCAAGAAGAGGCGAATTCGCTTAAAAATGACGCAAAACCGAACTGGCAACCAAAGCCGG  
TGTTAAACAGCAATCAATCAACTGATTTGAAGCTGGAGTAACCAAGCGACCGCGCTCTTGTGTTGAGATTGCTATGGCGC  
TTAACTGTGATCCGGTTTTGGTTACAGTACGGAACATAACCGCGTAAAGCCGCTTAA  
>Cluster\_15974  
ATGAGCAACCTACGAAAATATCGAGAGTCACTGAATATCTCTCAAACAACACTTGCTAAGGCAGTTGGATGCACACAGGG  
AGCTATCGGACATTTGGGAATCTGGTCTGCTGCTTCCAGACCTTAAACATGCCGTGCTCTTGTGCGTGTCTAAACAAGT  
TAGGCGCAAAAGTAAAGTCTTGATGACGTGTTCCCGCCGGAGCATAAAGCCGCTTAA  
>Cluster\_10974  
TTGTTTTTATCAGAAGGAATAACGGAAGTTGGCGTTTACCAGGTTATCCAGTTGTACTTACCAGATGCCGATTTTTTCAA  
ACTCCAGACCGAAGCGGATGTTGTCGCGAATTTCCGCATTCAGCCAAACATTCATGAGCATACGACCGTCTTTTTTACCC  
TTGATGCGTTTTTTCGCGGATGCATCACGCAGTACGGTTTACCCTTAGCCAGCAGGTCAAACGATAACCGATACCGTCC  
GCGGCGAGTGAAGAGATAATTGA  
>Cluster\_20335  
ATGAATATCAACTTAATTTATCGTCATCCGTGTGAGCTGGAAATGAATCATTGCTGGGGCTGAAGAGCCATATCCAGA  
CACATTCCTCCCGCAGATTTGCGCGACTGAACGGCTTACCAGAGCGCGCACAGGTCTGGTTCATGTGATGAATGAGATTA  
TTCCCTCGGTGGGAGGGGAACAGCGGACAGTAATCAATAGCTGGCTACAAAAAGTTACCTCCCTGATAGATATCAGTTTA  
ATCGATGTGGAGAGTGGCAATGA  
>Cluster\_39487  
ATGTACAGCAAATACGACGAGGCGCAGTTTCACTTGTAGACTTCCGCATGAACTCCACGCGAAAATTAACAGCGCGCGAA  
GATGAATAACAGGTCGCTGAACCTCAGAGATAATTCAGCGGATTGAAGAATCATTGGCTAAACAAAGCTCTGCATCAGTTT  
ACATTTGACGATGCAGAGCGTATGGCAGAAACAATCTGATATGGTTAAGAAAATGCTCTTGATACGCTCAAAGAGCTA  
TATAAAAAAGACAGCAGCTAA  
>Cluster\_31585  
ATGCTTCCCGTTCTCTCAAACAGCCCGTTACACGCTCGTCTGACTCAGGAAAAGCTGGGTGTTCTTGCTGGTATTGA  
GGAAGAACTGCACGTTCTCGCGTATCTCAGTACGAGGAGGGATACATCGCCCGACGTTTGAATGATGTGCGCATTTCG  
CGAAGGTGCTTAATGTGCCGGAATGCTATTTCTACGTGGTTAATGATGACTTCGCTGAAATGATTTCTGAAGCTTTATCAG  
GAATATTCGAACATTTCTGA  
>Cluster\_40840  
ATGAAATCCACCACAGGTATCAACCAGCAAATCAGCAAAGTGCAGTACGACCTATGCGGCTTAAAGGCAGCAACACGGA  
TGTACAAAGCATCACCATCAGGGGTAACAAACCTGTCAATCCGCGTTTCCCGGAGTGGCGATTGCATGCCGATGCTTGAGC  
AGGAAAGGCGCTGTTATCTGTATACCGGACATGACCACAGGGGATATTTCCGTCAGGGCGTTTTTCGAACTGCACGGCTGT  
CGCGTCTGTGGCCGGAATCTTTTGGTGA  
>Cluster\_26399  
ATGAAAGCCAATGCCCTGCCAGTTTTTTCATCATCTGCGGCATGGCGAATCGCATCTGCACAAAAATCGAGACGACGGTTAC  
GAATATATTCGCGGACCAACAAACCTTTATCGGCAAACTTTATCAGCGGTAGCGCTCTGCTGTAGCGTTCTGTTAGTG  
AAAAAGATGAAACCTCGGTGAGCTGCCTTCGCGGGTAGCCTGTATTTTCAACGTTTTGGCGGTTTTGAATATTGAG  
CAGGAGGTGTTAAGCCAATTTATCAGATAG  
>Cluster\_55576  
ATGTTTAAACCGAAACACGAGCTTACTTGTGTTGGGATGACTGATGAGCAGCTCAGAGACGCTCTGCAGAAAGCGCAGCA  
GGCTTATATCGACCTGACTACCGGACGCGTGGCGTCTCATTTCTCTATACGCAAGGTGATGGGACGCGCTCTGTCTCT  
ATCAGCAAAGCTCTCTCGCGACCTGCTGGCGTGATTGAGTTGCTGAGGCGCAACTGGAAATGTCGCCCGGCCACCG  
AAGCCAGTGAAGTTTCAGATCTGA  
>Cluster\_48591  
ATGCTTAAATCGATTATCAATGGCGCTACAACCACCCCTGCCAACTGGCAAAAGAGATTGCTTTTTATCACGGTGAGTA  
CGTGTCTATCGACTGCCGTTCAATTTAGGCGCTGCGGAAATGAAAGCGACAGATCGCGAGTTTTGGATTAGTCAGCGAGC  
AGGTCGTA AAAATCCTCGCTCGTGTATCCAGACTCCTTAAACAGATGCGATTGTATTTCGATGAATCCGCCGCTTTAAAA  
CGAATCAACGAAACAAAAGGAGCCTGA  
>Cluster\_46481  
ATGGCCAAAACCATCGTATTTTGTGATGACCAAGACCACGCGGAGCGTATGCGCCAAGAAGCGCTACTCGATAAAATTCGC  
CGACCACGCGGTGCAGGATATTGAAGATGCCAAAGCGCTGGAACCTACCACCGTTTGGACAGTTTCGGCAGTAAAACCCAAA  
TCCGGCGCGCATATTCGGCAGCGTCGAGCAATACCCGAAGCCCTGCAAGAGCAGGAACAAGCACTCTACGACCAAAAA  
GAATTGAAACAGGCTGA  
>Cluster\_66103  
ATGTCCCGAGTCTGCCAAGTTACTGGCAAGCGTCCGGTACCGGTAACAACCGTTCCACGCACTGAACGCGACTAAACG  
CCGTTTCTGCGCAACCTGCACCTCTCACCGTTTTCTGGGTTGAGAGCGAGAAGCGTTTTTGTACCCTGCGCGTATCTGCTA  
AAGGTATGCGTGTAAATCGATAAAAAAGGCATCGATACAGTTCTGGCTGAACTGCGTGCCTGGCGGAAAAGTACTAA  
>Cluster\_24247  
ATGAAAAAGTTCTGTATGGCATTTTTGCCATACTGCGCTTTCGCGGACTTCTGCGTGGGCTGCACCTGTACAGGTGGG  
CGAAGCGGAGGTTGCGGACCAACGTCGGTTTTCCGGCGGGAGTTCTCCGCGACCGAGCTCAGCACCTAAGCTCGGCGG  
TGGGGTTCGCGCTCGCGGCAACCGTGGCGGTGATGGTTCTAAATACCGGGACCACAACAACACGACCAACAGTACCCAG  
TAA  
>Cluster\_11545  
ATGAATCAGCAGAATAACATAAAGAGAAATTTATGCTTAAAGCAGGCTGATTTTTAAAAACAGACTCACCAAAAGACGAACA

CCATAGAGATGTATATAAGTTATGAAAATCATATCCGTTACGGGAAATACTGTGCTGAATACAGAGGATATTCATTTCT  
TTTTCTGATTCATCTGAGAAGAAAATAGACTGGCCCTGAATCTCCAGACAACCAATATCACTTAAATAAGTGA  
>Cluster\_48726  
GTGAACGCCCTGACAAACTGCCGCCGAGACGCGCAACCCGTTCCGGCTACCTGTGGGGTGCCTGGCCGTGTTGAC  
CTGCCCTGCCATCTGCCGATTCGCGCCGCTGTGGCCGGACGACGCGCGGTGCCCTCCTTGGCAGCATTTGGGGTG  
TTGCCGCGCTCGCGCTGACCGGCTTGTTCGTTCTGGCCGTAACGCGGCTGCTGCGCGCTTCCGGGGCGATCATGA  
>Cluster\_41732  
ATGCCTAACATCATTTCTGTGACACCAGTGAAGTGTGAGTGAACGAAAAAATCCTATGGCTACAGTCACTGCCC  
AGATGGTACCCTGTCCGATTCGCGCCGATTAACCGGAATCAGCCGCGCATTTCTACTGTGTGCCCTGCTGAAGTATGAAAGGATGC  
TTGATGCTCTGGATGACCAGGAAGTGGTGAACGAGCAATCAGCCACTGCATGATGTGGACCTGGAC  
AGTTATTTTATGA  
>Cluster\_7877  
GTGGATGGTAGCTGGCTTAATCAACTCAGGTTACTGCAGAAAACAGTGGTGTAAATCCTGGATGATCTGGAGCCTGTGAC  
AAACCAGCAGTGAATGACCTGTAGAGATCGTGAAGACAGATACGAACAAAGCAGTACCATCGTGATAAGCCAATTC  
CCGTAGATAAATGGTACGGACTGATGGAACCCGACGACAGCAACGCAATCCTAGACAGGCTGGTACATAACGCACAC  
AGACTGGTACTGTAG  
>Cluster\_49773  
ATGACAAATACAAAATGGTTTCAGGAAACGCTTAACAGATTATCAACTTTCTATTACTTAAAAAATTAGATGACAAGACTCC  
ACTACATCCTTCAAGCGATGTCTCCCGTCCGTGCCTAGTGTGAAAAAGCATTTATAGCAATGGGGAAATGGGGCC  
TTGTGACCAAAATCAAGAGAAGGTTCTGTATTACCGATAATGGCCGGAAATGATTGATTCTGCGGAGAGGGCATATAGC  
GAATGA  
>Cluster\_38395  
ATGCGTATTGAGATCTGCATAGCCAAAGAGAAAATGACTAAAAATGCCAAACCGGTGCTGTGGATGCGTTAAAGGAAGAATT  
AACCAGCAGTCAAGTAAAGCTTATGACGATGTAGAGGTGATCGTAAAAGCCAGCAACGATGGCCCTTCTGTACGC  
GCACCGCCGATAAAGATTGAGTAAAACCTTTGTTTCAGGAACTCTGAAAAGATACCTGGGAGTCTGCTGACGAGTGGTTT  
GTTCACTAA  
>Cluster\_39478  
ATGGCATTAAATGAAGGTCAACTGGTCACTGATGCTCTGGATGAAATCATCGAAACCGTCCAGAACCTGACGCCAATGGC  
GTCTAAAGTGACAAAATACACCCCTCCGGCAGAATCCATGCAGCGTTCAGCAACACCCTGTGGATGCTGTTGAGCAGG  
AAGCGCAACCCGACTGCGTGGGATTTAACTGGCAACCAACCGGATTTCTGGAATCTCCGTGAAATGCAACATGGCC  
GATCCGGATAACGATTTCTCGAGCTTCGTGCAGATGACCTGCCTGATGAGCGTTCTTACCCTCGCCGATCCAGGCATC  
CGCCAAAACCTGGCGAATAACATTTAGTCAAGGATTTGCCAAAACAGGCAACTGAAATGGGCTCGCTTGTGTTTACGATA  
CCCCGCAATTTGGTCCATCTACTGGCTGTCTGGCTGGGATTTTGTGTCTGATGCAGAGCGCTGATGTTCTCCCGTGA  
CTAAACCGCGATATGGGCATCAGTTACTTCCTGAAACCTGACGATTACCGCAAAGCAGGCCGCAACCTGGTAGATGGTGA  
CATCTTTGGGCGCTTTCTGAAGAAGCGTATCGCAACCGTACTATTACGCTGATGCTGGCTTTGATGAAATCTTTCT  
GCTACCGAAACTTCGGCGATTTACCAAGTCAACCGTACTGTTGTAACCTGTTCTGGTGCGCAGAAAGTTAAAGCCGAG  
GCATACACCCTTGATACCGATGGTAAACAAGAGAACGTGCAACCGTGTGCAACCGTGACCGTATCTCCACCACCGG  
ATTTAAAGCGCGGCAAAAATCAGCTTCACTGGTGTGAAATTCCTGTCTCAGATGGCGAAGAAGCTGCTGATGATGACG  
CGACTTTCTCACTACCCGTTGATCGATGGTACTCACATAAGTCAAGTCAAGCTGCGCGAAGCCGATTTGCGCTGGATGACGCTCA  
CTGACAAAAGAGAAAGGCTTACGCTAACGTAACACTTCTCTGTCTGATAGCACTCCGGTAAACGTTCTGAACTGGC  
AACACCACCGCTAACGTTCTGGGCTGATGACTCAATCCGTCTGCTGCTCAGCCGATCCCGGTAACCCATGAAGTGT  
TTGCTGGCATGAAAACGTTCTCCCTTACGATTCTTGGTATTGGTGTAAACGGCATCTTCGCAACGAGGGTATATCAAC  
ACTCTGTCTGGTAAGTCCGATTTGCTGTGTGTTTACAGCATGTCTGTACGACCAGAGCAATTTGGTGTGGTCTGCC  
TAACCAGACTGCGTGA  
>Cluster\_23745  
ATGGCTATCAAATACCTCCACGCTGATTCCTTTATCACAATTTATCGGGTGAGGAACCTCAGGCTCCTGCGCTTTAA  
CCGGTCAACCGATGAAAAAGGACGTTATCTACCTTTTGTAGTGTGAGTGTGATGATGATCAAAAAAGGAGAAAACCGCGAAG  
TGGCGTGGACGCTTACCCTGGCTGGCGCGCAACCGCGGATCCAGCGAATCAATTTATGCAATGAAGTGGGTGAACAGGCC  
GGATTCACATTTACCCTGGTGTGTCAGAACGCTGCGAGCTTGTGCGACAAACGCTGCTACCGCGCTGGCCGTGAAAGATCA  
GACTGAACGGTTACCGGGGGCGGAGCCGAGTTAAGCCAGTTACGCTGGAAGAGCCGATCACAGCTCCAGCTGGAAG  
GTGCGAATACCACACAGCTGGTGGCGAGAAAAATGCTGGAACACAGGCGGTGCGCCACGCACTGAAAGACGAGCATATGATT  
CGGGGAAATGCCCGCTGATGGCGGAAATTCGCGCACTTACTCGCAGAACCGCTGACACCTGCGCTTATTCGCCAGTTACA  
TGCCATTTGTATGGTGGAAATCAATGACCGGAAATATCTGCGGGGAAATTTGCTGAAACAGATGATGTTGATGATGCGCC  
ACTATGATGGCAATATAGTGCATCAACCCCGCTGCGGCAATTTACCGAACCGCTGAAAAAGTTTGCCAGTGGTTA  
AACAGCATGAAAGGTTATTTACCCGTTAATCCGTTAATCCGTTGATCTGCAATTTTATGCTGGCCCATGAACCTTCCG  
CGATGGCAACGGGCGACAGCTGCGGCGTGTTTTACTGGTATATGCTGAAATCGGGTACGATGCTTTAAATATATTT  
CCATCAGCCGTTTCTTCAATGCTGCACCGGTCAAATATGCCCGAGCTACCAGTACATGAAATCAGATGGTATGGATCTA  
ACTTATTTCTTGAATATCAGCGGGTGTATTAAACGTTCTGCAAAACTGGCAGCAGCATATCGTAAATATACACA  
ACGAAGCGCAAAACTCGATAGTGTGCTGTTTGTGTTAGCTCTGTTGTTGCTTAAACGCTGAAATCCCGCTCAGTAAACGCTCTGA  
ATGTTGATGCTCGCAATCCGGGGAAAGAGTACACAGTGTCTGAAATTAGCGCGAGCTGGGCGTCTCTGATAATACGGCT  
CGAGCTGATTTACGGACAATTTGTTAAAGAAGGGTTTGGCAAGAGAAGAAAATTAATGACCAGCAAGCGTGTACTTCCG  
ACATTTACCGCTGTAA  
>Cluster\_22945  
ATGGAAGACGACTGCGACATTATATATTTGTTGCGGGTATTTGCTGGCACCGCTTGGCGGTTACGCTGCGCGGAGCGGG  
TTTATCCGTTCTGTACTGGAACGAGCGGAGATTCGCCGCGCAAAAATCTTTCCGGCGGGCTTTATATACCATCCATCCGCG  
TCCGGAACCTCCTCCGCAATTTTCACTGACCGCGCCCTTGAACGACGCATCACTCACGAAAGTCTTTCTCTGTAAAG  
CCAGATGGCGCAACGACGTTTCCAGCTTACAGCCCGGCGGTGAATCCGAGTGTATTACGTTGCACGATTCGATCCGTG  
GCTGGTTGCCGAAGCCGAAAAAGAGGTTGCAATGCAATCCCGGTGCGGATGATGCACTGTATGAAAGAAAACGGCA  
GGTGTGTGGTGTATTTGTGGTACGATATTTCTGCGCCGTTATGTTGTTGCTGGCAGAAAGTGGCAACAGCGTCTCTG  
CGGCAACGCGACGGGTTAGTACCTGCTGCGGAGCGCATGGCATTGGGATCAAGAAGCGCTGGCCGCTGGCGCTGGC  
ATCCGCTATTGAAAGACGTTTTCATCTGGAGAATAACGAAGCGCAGCGTGTGCTTACGCGGCGGATCTGTGATGACT  
TACCAGGGCGCGATTTCTTTATACTAATAACAAACGCTCTGTTAGGATTTGTTGCGGCTCTCCCTTACCGCAA  
AGTCTGTTCCGGCAACGAGCTGTGACTCGCTTAAACGCACTCCGGCAGTCCGCGCTGGCCGCTTATCAAAAACCGGAATC  
ACTGGAGTATGGTGGCATCTGGTGGCAGAAAGTGGCTTGCAGATATGCCGTTGCAATACGCGCTAACGGCTGGCTG  
TGGTGGCGATGCGTTGGCGAGTGGCTCAATACCGGAATTTCCGTTGCGGGTATGGATATGGCGCTAACTGGCGCGCAG  
GCGGCGGCACAAACGCTGATAAGCGCTGCCAGCAGCGGCAAAATCTGTTCCGCTTTATCACTACAAACGCTAGA  
GCGAGCCTGCTGTGGGATGTTCTACAGCTTATCAGCATGTTCCGGCGCTTTTGGCAACGCCCTGGCTGGTATCCGGTGT  
GGCTGGGTTAATGACAGGATTTTCCCGTATTGATGGGATCAGGGAAATACACTGTTCCACCCTGCGCCAGTGGTCT  
TGGCTCATTTACGCTGCTCAGCGCTGTGGCATCTGACGGCGATGTTATCAGGATCTGCGATGCTGTAG



>Cluster\_41261

ATGAGCACCGCTTTGCTTGCAGCCGTGGTGAAGAAAAACCGCGCGCTTAATTCGGTTATGTTGGCGCTGTATGTGCT  
GGCGTTTCTCGACCGTTTCAATATTTGGTTTTCGCAACAGACCTACCAGATTGATACCGGGCTGAGTAATGAAGCTTATG  
CGCTGGGAGCAGGCAATTTCTTTTGGTATACCGCTTTCTGGGGTTCCGCGCAATCTTTTGATGCGCAAACTGGGGGCC  
AGAACCCTGGATTGTGACACACACTGCTGTGGGATTCTTTTCGGCTGCCATGGCATGGCCCACTACGAAAGAAACCT  
TCTGATCGTTTCGCACTCTGCTTGGTGTGCGGAGGCGGGTTTTTCCCTGGTATGATTATCTCACTTCGCAATGGTTTC  
CGCAGCGTAATCGCGCCAGCATTATGGGGCTGTCTATATGGGCGCACCGCTGGCGTTAACACGGGATCACCGCTTCC  
GGCGCGTGTGGAGATGCATGGATTTATGGGGCATCCCGCTGGTTCGGATGTTTGTGATTGAAGGATGTGTCGACGT  
CGGCGCTGGGTTACATTTCTTTGGCTTGTATGACACACCGGAGCAGGCACGTTTTCTGAGTAAACAAAGAAAAACCT  
TACTTATCAATCAACTGGCAAGTGAAGAACAACAGAAAGTGACTTCGCGACTGAGCGATGCGTTGCGTAATGGGCGAGTC  
TGGCAACTGGCGATTATCTACCTGACCATTTCAGGTGGCGGTTTACGGATTAATTTCTTCCTGCCGACCCAGGTGCTGC  
ATTGCTGGGACAAAAAGTGGGCTTTACGGCGTGGTGGTACCGCCATTCCGTGGGTGCGGCCTGTTTGGGACCTGGC  
TTATTCGCGCTACTCCGATAAAAACCGGCAACCGCGTAATGTGCGAGCGCTGACATTACTGGCGGGCGGCTATGGTATT  
GGTCTGTCCGGCTGCTTTCTCCAGTACTGGCGATCGTAGCGTGTGTGTCAGCCATCGGGTTTATTGCCGTGCAGCC  
GGTGTTCGGACGATGCCGACACAACTGCTTCCCGTACGGCGCTGGCTGCGGGGATTGGTTTGTAAACCTGTTTGGTG  
CAGTGGGCGGGTTTATTGCCCAATCTGCGCGTGAAGCAGAAACGTTATTTTCCAGCGATGCGGGGGATTACTGACG  
CTGGCAGCGGTGGCGCTATCGGTTCCGCTGATTATTTTCACTGCGTGTAAATCGCACTGTTGCGCAGACCCAGCTGGC  
ACATCATTTAA

>Cluster\_10951

ATGAATAATGCGCTCTGGAAAGTGACCGCAATTCAGTTGAAAAAAGTGAACCTCACCGGCAGTATGGTGCCTTTCAA  
CGGAGGAAAAACACTTTCATACACTGACTGTGATGAACTGACAACAGTAACAGTGCCTTTGTGATGCGAAACCAATA  
CACAACAGGCAGACCAGTTAATTTGTTAAAAACAACCTGGAAGGTGCAAAACACTGCTGTTAGTGCATTTTATTGAGAAA  
AAAGGAAACGCAAAAAACGGTTTGAACATCGATCTGGTTAAGGCTCTGAGAAATACCAGTAAGGATGTCTTCAAAACTGA  
AACACAGACCATTTGGTTTTCAGTGTATGTAACCCCTGAAATTAACAGCAGGAAAAAGATGGCAATCTGTCTGGACCTGA  
CCGGGTATAAAAACGGTGGCAATGCTGATGCTGCGAAAAAGGCAACATCACTGATGTCAGGCGGCTATAAAGCCTTCCTT  
GCAGAGGTCAACAACCTCAACAACGATGAGGTGATCTGCGTGCATTAACGGTGAAGGCGGTCATGGGCCCTATCAT  
GAGCGGAACCGGGTCTGCGCGGGTGGATTTCAGTGACAACCTACCCACGTTTACGGTGGTGGGATAACAAACATGAAC  
TCCATGCGCTTGCCTTTCACCGGGGTGACCATGACCTATACCAGCAGCCATGCAGGCAAGTATGCTTTCAGGCGTAA  
ACGAAGTCTGTGGGTGCGGCTCTATGCTCTGCCATGTTTGTAGTCCGGAGCATATACTGACCTCATCGGTAAGTACGT  
TCACCATGACAACGAGTATACCGCAACTTTCGCGCGCTTGGTACCAGAGACTACAGCTCCCACTCCTGGTATGCCGGTG  
CGGAAGTCCGTTACCGTTACCATGTAACCTGACTTCGATGGATTGAGCCGAGCGGAACTTGTTCAGGTGCTGTATCC  
GGAAACAGTTCTCCTGGAAAGGACAGGAAATGAACCTTACCATGAAGGATAAAGACTTAAATCCGCTGATTGGGCGTAC  
CGGTGTTGATGTGGGTAATCTTCTCCGGTAAGGACTGGAAGTACAGCCCGCGCCGCTTGGCTACCAGTTTGACC  
TGTTTGCCAACCGTGAACCGTACTGCGTGTGATGCGTCCGGTGAGAAACGATATCAAGGTGAAAAAGACGGCCGTATGCTC  
ATGAATGTTGGTCTGAATGCTGAGATTCGTGACAACGTAACGCTTGGTCTTGAGTTTGAGAAATCGGCATTTGGTAAGTA  
CAACGTGGATAACGCCATCAACGCCCAACTCCGTTACTCTTCTGA

>Cluster\_41615

ATGACGTGGAAGACAGGCTTCAGGATGCGTCAATTCGAGGTGTGCGGTTAAGGTTGAAGAAGAAAGTGGCGGAACCGG  
TCGCGCTGTGGAACACAGTGAATACCCGAACCGGACAAACCTTATACCGAAGATCTGGGAAAAGTCACTTTCCGCCCGT  
CCATCACAGCTTATGTGGTGGGAGATGACTGCTTTGACACGAGATGCCTGATGAAAGCGTGAATAAACCCCGGTCCTC  
GGCAGCTTGTCCACCCGACATATGGGTGAGCTGAAAGTCTGTGTTGACGGGGAAGTTCGGGTCAGCACATCGAAGAGTGA  
AGGGCGTATTTGCTCCGCTTTGACCTGAAGTTTGTGCAAGCGGGAAGTCTCTTACCCCACTTACGGTGGCGGACGGCC  
AGACGCTGATGTCATCTCTGCTGACTGGATGACTGCATGACAGTGCAGCTTACAGAGTTTTCAGTATGATGGCGGCGG  
GATTTCTGTCAGAACGACGCTGTTGGTAATGTCAGCACAAATGCTGGGTATGTTTCTGATGCGATGAAAGTGGTGGATT  
TGCCGTATCGGATGCTGCCAGGCTGTGTCAGGGGGATACTCGGTACTTCTGCGCCACCATGCTCAGGCAAAAACTCTG  
TTGAGCAGGTGCAGAAAATGTGGCGTACCGGAAACCGCTTATGTTAACGCCAGCGACTGGTCAACATGATCAAAACG  
CTTTCCGGTGTGTCAGCTCCGCGGACGATCTGCAACCGCGGTTGCTGGAAAACGGACAGTAAAACACCCGCACTGAC  
GCAGCAGCTAATGTGGTTGCCAGCACCTTCTGACAGCCGCAATCAGTGAAGCGGCGTATGCCGTACCCGATTGCCCTG  
CGCCAAACACTTCCGCGGTGATGAGAAATTCGCGAGTGGGCGAGGCAACAACCTGCCGAGAGCACTGGCTGGCCTTCC  
GTCACGATCCGGCACTGAACAATGCACCGCGGTGAAAAACAGGTTGACCTGCCGACGTGGGAAGAACTGACTGACAT  
TCCGCAACACTGAATACGGCAATGATGAAAGTGTGCTCCGTAACAACAGTATGCGCTGTTTCTGGCGCTGCGCCGG  
TGAAAGCAGATCTGAATGCGGATATCAACACCGCCTTGAACAGTCTGCACGGATCATTCAGCGCACCCGGATGAGGTT  
TTACCCGCGCTGTGCTGGCGGCGACCTGGTTTATAACCGCGCGCTGACGCGGACATATCCGCGCTAATGCCATTAC  
GCATCCCGGCTTTGTGCCGGTATCCCTCTGAAGGTGCCAGTGAATGA

>Cluster\_20682

ATGGTTTGGCTGGAATATATCTAGTACTTGGTGAATATTTTGGTATTCGCCAGGGGGAATCGGTATTGGTTTATG  
TGGCGGGCTTGGGCTGGCATTCTGACTCTGGGATTTGGTCTGCCATGGGGTTCGCGCCAGTGCAGCTGATCTGATTA  
TTATGACGTTTGTGTGGCGGCTCAGCTTACAGGCCGAGGCGGAATGGATTATCTGGTATGCGTCTGCTGATTTT  
ATGCGGCGTAAACCGAAATATATCAACATAAATCGCGCCGATTAACCTGGTCTATGACCAATTTATGGCCGCTACTGGGTT  
TATGTTTTTTTCCAGCTGCCGGTGTGCTGAAAGTGGCGAAAGATCCGGTATCCGCTCCTCCGCGACGCTTCCCGGTT  
CGGTTGTGCTGCTCGCAGGTTGCGATTTCGCGTTTCGCGATCAGCGCGCAATGGCGGCTATGCTCACTATATGGAGGTA  
AACGGTGTCAGTTTTATTCAAGTATGTCGGTATGCTTCCACCTCTTTTGTGTCGCGGATGGTCCGCTTTTATTGCT  
TTCCGACAGGGATGTGAGTTGCAAGGATGACGAGGCTTACCTTGAAGCGCTGCAAAAAGGACTGGTGCAAAAATACGAGA  
ATAATAGCAGCATCAAGCCAGGTGCGACGCTCTCCGTCGGATGTTCCGCTGCGGACGGTTCGCTATTGTTATCTGTTGCT  
GCCTTCCCAACTGCGTCCGGTTTTGTATCGGTAACCGATGGAAACACCGGATATCATTTATATCTGTATGCTCTC  
TGGCCCTGCTGATGGTGGTGTGTAAGACGGCAGCCGATGCCATTAATTCACCTCCACATTTCCGCTGCGGGATGA  
GTTGCTGGCGGTAATTCGCGCATTTGTAACGTTAGGCACCACTTTTATTGATGCGCATTTAACTGAGATTAAGATATT  
GCTGGTATATTTGTCAGGCGTATCCGATGTTGTTGGCGCTGGTCTTTTGGCACTTCCGCGCTGCTCTACTCGCAAGG  
TGCTACCAGCCGTTAATATCCCGCTTCCGCTGCGCTTACGCTGCCACCTGGGCAATCTGGCGCTTATGTTGGCCG  
TCACCGGATATTGTACTGCTCAACGATATCCCAACACTGCTGCTGCAATGGAAATTTGATACTACCGGCAACTCTGTTGA  
GGCAAAATATGCTGATCATCCATTTATGCTGCTGGGTTGGGGGAATTTATGCTGGAGTGGCATTAGGCTTTGTGAT  
TGGCCAAATGATTTTATG

>Cluster\_32590

ATGGCTCAGGAAATCGAATTAAGTTTATTGTTAATCACAGTGCCTTGAAGCGCTGCGTGCACATCTCAATACGCTGGG  
CGGCGAGCACCATGACCCCGTGCAGTTGCTGAATATTTACTACGAAACCGCGGATAATGGCTGCGTGGGCGACGACATGG  
GCTTGGCTATTCGTGGCGAAAACGGTCTGATGATGACATGAAAGTTGCGAGGAGAGTGACAGGCGGCTTACACCGG  
CGCCCGGAAATAAACGTTGGCTTGGAGCAACCGAGCTGCACCTGGCGAGTTACCAGCGAAGTCTGGCGCAACGGCGGA  
ATTGCTGCGGATCTGCTTCCCGGTCAGCCGCTGTTTAGCACCGATTTTTATCGCGAAAAATGGCTAGTAGAGGTCG  
ATGGCAGCGAATGAAATCGCTTTCGATCAGGGTGGAGTGAAGCGGTTGAATTTGCTGACCTATCTGTGAGCTGGAA

CTGGAAGTGCCTAGCGGCGACATGCGTGGCGTGTGAAACTGGCGAACCAACTGGTATCGCAAACCGGATACGCCAGGG  
CAGCTGAGCAAAGCAGCGCGTGGCTATCATCTGGCGCAGGGCAATCCGGCGCGTGAATCAAACCGACCACATTTTC  
ATGTTGCGGCAAAAGCTGATGTGGAACAGGGGCTGGAAGCGGCGCTCGAGCTGGCGTTAGCGCAATGGCAGTATCATGAA  
GAATGTGGGTACCGGCAACAGTACGGCGAAAGAGCAGGCTGGCGAGCCATTTGGCCCTGGTCCGTCATACACTGATGCT  
GTTCCGGCTATCGCGTAAAGCGGACCTACCTACCTGATCTGCTGACTCAATGCGAGGCGACCATTGCTTCTG  
CGGTTCTGCGGTAACGGCGGTCTACTCTACCGAAACGGCAATGGCGAAGCTGGCGTTGACCGAATGGCTGGTAAAGCAA  
GCCGCGCAGCCGTTTTAGATGTCAAAGCGCAGAGTAAATGAGCGATTCCTTCAAACGCTTTGCCGATATCCATCTTTC  
CCGCCATGCGCGTGAACGAAAAGCGTTTTCTGCCAGCCGTTAGGCGATCGCTACCGTACCAATGGCCAGCCTGACCG  
GTGATATTGACTCGGATCTGTTGCTGGCGGGTTACTACGATCCTGTGCTGCGCAAGCCTGGCTGGAGAAGCTGGCGAGGG  
CTGCGTACGCTATTGCGACCGGCAACGCATTGAAATGAACATTTCCGTAATGAGGCAAACAATCAGGAACCGTTCTG  
GTTGCACAGCGAAAACGTTAA

>Cluster\_20014

ATGAGTTTCAAGAGAGATCGCTATTTAATTTAGATTCCTGCGGAAATATCTGGTAAGGATCGCTATACCTAAGTATAT  
GCGTCATCTATTTGGTGGGCGATGCAGCTACGTTAAGAGCAGGGTACAAGAGATATTCGAGAAGCAGGTTGTTCCGTG  
ATGCGGTTGGCGCTGGAATGGATAAACTACGTAACAAGCTAAAGCCTCAACGTGAGAAAACATCGAAGATCGAGCAAAAT  
ATTACAGAACTACGGAAAGCTGGAACATATGCATTTCAAGTATCTGAATCATTAAATGATCTTCTATTTGGCTGCCCTTC  
TCTTTAAATATCGGGATCAGTACATTTCTCAGTTTTAGCGGAGGCAAGCTAACACTACGCTATCAAAGACAAAACAG  
CCGTAGAGGTGCTCTTAGAACATCTGAATAAACCGGATGTTACGCTTCGTGACGTTAACCGAACTATTGTTACTAGCTGG  
TTAGATAAACCATAAAAGAGCAACCAACAATACAAAACCTACATTAGTGCATTAGCCAGATTTGGGATCTTTC  
TCTAACCGCTACACGATGCACCACAAGATAACCTTTGGCGAGGTCACGGCTTGAAGCTAAAAGTAAAGTAAAGTAAAT  
ATGAAGCCTTAGCAATGATGAACCTGCGAAAAGTGTTCCTCAATCTGGCTGATGAAGAAGAAAATGCAAAAATATAACACTG  
ATCGGAATGTATACAGGTATGCGGATCAATGAGATAGCAAGCTCACAATAGACGATGTGAAGAGATCGAAGGTGTGCT  
GTGTTTTGAAATCACACAGGAAAGACGAAAGCTGGCGCAGCTGTTGTGCTGTACATAGCCTTATCACTCCGTTGGTGT  
TGTGCTGCGTGAAAAGCCTCATAATGGCTTTTTGTTCTATCACGCCAGCATCACAGAACGTGCAGAGGCAAGCGTTCC  
ACGTGGCACACGAGAGATTTACAAGAGCTAAACGAAAGGCTTTAGGGGAAAAGGAAACAGAAAGGAAGGTGTTTCATTC  
TCTGAGACACGGAGTAGCACAGCTTCTTGTATCGAAATCAAATCCAGAAGACAGGATCGCCCTTCTCCGCGGCATACAC  
CGGTAATACAGAGACATTCGCGACATATAGCAAGATGCAGCTTCTCCAGTAGAGCTAAAAACTATATTGAGCTTCTA  
CGTACCCCTGAAATAGAGAAAGGCTTATCAATCAATAAAAAATCAAATTTAAGCGGTAACAACACGCTGTAG

>Cluster\_19947

ATGGAAGTAAAGTAGTTGTTCCGGCACAGGCAGAAGATCACCTGCAAAAACGGCAAACTCAACGTTCCGTGAAAATCC  
GATTATCCCTTACATTGAAGGTGATGGAATCGGTGTAGATGTAACCCAGCCATGCTGAAAGTGGTCGACGCTGCAGTCCG  
AGAAAGCCTATAAAGCGGAGCGTAAATCTCCTGGATGAAAATTTACACCGGTGAAAATCCACACAGGTTTATGGTCAG  
GACGCTGGTTGCTGCTGAAACCTTGATCTGATCTGTAATATCGCGTTGCCATTAAGGCCCCTGACCACTCCGGT  
TGGTGGCGGATATTGCTCTCTGAACGTTGCCCTGCGCCAGGAAGTGCATCTACATCTGCCCTGCGTCCGGTACGTTACT  
ATCAGGGCCTCAAGCCGGTTAAACACCTGAACTGACCGATATGGTTATCTCCGTGAAAACCTCGGAAGACATTTAT  
CGGGTATCGAATGGAAGCAGACTCTGCGCAGCTGAGAAAGTGAATTAATTTCTGCGTGAAGAGATGCAAGAA  
AATTCGTTCCCGGAACATTTGCGGTATCGGTATTAAGCCGTGTTGCGAAGAGCACCAACGCTGGTTCGTGCAGCGA  
TCGAATACGCAATTTGCTAACGATCGTACTCTGTGACCTGGTGCACAAGGCACATCATGAAGTTCACCGAAGCGCG  
TTTTAAGACTTGGGCTACCAACTGGCGGTGAAGAATTTGGCGGTGAACGATGATCGAGCGCGCCCGCTGAAAGTTAA  
AAACCCGAAATCCGGCAAGAGATCGTCTATTAAGACGTTGATTGCTGATGCAATTCCTGCAACAGATCCGTGCGTCCGG  
CTGAATATGATGTTATCGCTGTATGAACCTGAACGGTACTACATTTCTGACGCCCTGGCAGCGCAGGTTGGTGGTATC  
GGTATCGCCCTGGCGCAAAACATCGGTGACGAATGCGCCCTGTTGAAGCCACCCAGGTTACTGCGCCGAAATATGCCGG  
ACAGGCAAAAGTAAACCCAGGCTTATTTACTCTCTCGCTGAGATGATGCTGCCCATATGGGTTGAGTGAAGCGGCT  
ACCTGATTGTTAAAGGTATGGAAGGCGCAATCAATGCGAAGACCGTAACCTATGACTTCGACGCTGATGGAAGGCGCT  
AAACTGCTGAAATGTTGAGGTTGGTGCAGCGATCATCAAGAAATATGTA

>Cluster\_21676

ATGTTCCGCGCTGCTTATCGCAACAGTCTGCTGATTTCTCGCGGCCCTTGGCGTTGCGGGTTTCGTCATGCGATGCT  
GCTACTGGAGTGGTTGTTCTCAATAATGACTCGGGCAGTCTGGTCAATGCAGCGACAAATCTTTCCCTGGCGACGGC  
TGCTAACTCCGGCGCTCGCGGACTGGCGCGGTTGTTGCTGATGGCTGGCAGAAATTTACCCAGCAACGCCCTCAT  
GCGCCGACGATTACATGGAAGCGTTGCAAAACCGATGGGCGAGTTGATTACGCAGCAAGCCTGGTTAAATCCCTGGCTC  
TCTGCTGGTAGTAACCGGCGCAGTGCATTTGGTGGCGAAGGTGCGATGATTTCTTTAGCTGCCCTGGCGCCCTGCTGTT  
TTGCGCAACGTTTTACGCCAGCCAGGAGTGAATAATGATGCTGCTGAGCTGCGCGGGGATGGCTGCGGCTAT  
CGCGCCCGCTTGTGCGAGTTTTATTTATAGCCGAAGTCTGTTGGCCTATGATGTTGGCTCTCTCGCCCGGTGAT  
TATTTCTGCCCTGCTGCTGCTGTTAGCAATCTGATTAATCATAGCGACGCTTACTCTACAGTGTACAACTCTCAG  
TGACGGTTAGGCTCGTACTATGCTGATTTACAGTACAGGTTGCTGCGCAGGCTGTGCGGACCACTGTTGTTAACG  
TTGATGAACGCTGTCATCGTGAATTTGTAAGTCTCAAGCTTGGCGGCCCTGGCAACTGGCACTGGGCGGGTTGATCGT  
GGGCTGCTTTCCCTGTTTACACCTGCAGTGTGGGCAACGGCTATAGCACCGTACAATCTTTTAAACCGCTCCGCCAC  
TGTTAATGATCATGCGGGATCTTCTCTGTAACGTTTGGCGGTGGCGAGTAGTGGTTTGGCGCGCCCGGTGGT  
GTCTTTACACCGGCTATTTATCGGCTTGGCATTGGCATGTTGATGGTGGTAGCTGGGATTTATGGTTCCCTGATGG  
CGAAGAAATACGCTTTTACTCGGATGACAGGATGGCGACACTGTTGGCGGCAACCAGCAGCGCGGATTTATGTCGA  
CGTTGATGATATGAAATGACCGGGAGTATCAGTACTCCCGGTTTTATTGATTGCTGCGTAATTCGCTCGGTAAT  
TCGCGGACTTTACCCGTACTCTATCTACCGCAGCACACTGCGCAGCATAGCTAA

>Cluster\_29640

ATGTTTACCAACGTAATGTTGATGTTGCAAAAACACCAGGATGCAAAAACCTGGGGTTGTTGAATAGCCAGGATATAT  
TGCACAAGGCAAAAATATTTATGTCGGGAATGCGGTTACTTGTTCCTGTGATATCTGAACGATCTCTTAATATTTATC  
GTAATCGTGTAACTATTTATCATGGAGAGGTTGGTTCCACAATGTTGAGCTTGGCGAAGCACATCTCTGAAAAGTATGC  
TATTCAGCTCAGGGGAGAGGAGATGATTTGTCATCATTTGTTCCAGAATTTTATCACTCTGGATCATGAAAATACAAC  
GCCCGGAAGAACACATTTAGCATGATGATTGAGCAAGCGCTTCACTGCGAGATATCCGTAATATTTACTTCTTAATA  
GCACAGGGCTTAAACCGTGAAGTGAACCTAGCCGGGAAGTAAACTATAAAGAAAGTTGCCAGTACTTCTTCTGCTTCT  
GATATTTCTCTGCTGCTACCCGCGCTTTTTCGCTAAAGTTAAACGGTAGTAAACAACACTATTTATAGTCTTGTACCAGCA  
AGAACAAGCGGTAGAGTCTGCTATTTTCAACAATTTATCTTCTATCAGCGGTAGAGTGCATTTATCAATATGCATCAA  
GTTATGAAGAGCGTTTGTCTCCAGGTACTGCGCATCACGTAACAACGAAGGATTTACTTACTATGCGCGGTGATACC  
TTATTTGATATGATATGTTGCGGGGATATACATCAAACGATCCGGGATGCTGGTGAATCGGTTCTTCCGGCTATA  
TCTGCAATTTGAACTGGTTAGAGCACTGACTGAAGCATATCTATAAATATTTAACACTACCTTGTACTGAGTCTTTA  
TATTAGCGGTTGCTGATGGCTAACTTACAGCACATTTCAAGCCGGTGCATATTTCTTGTGAAAGAACCGGGC  
GAGAAAACGACTCATTTATGATACCGCGCGGTTATTTTGGTGGTGGCGTGAAGAAATATGCTGGCGGTGATTTTC  
CCCGCTGATATTTCAGGCTGTTTGAACCTTACAGAAACAAGAAAGCAATGAAATGCGGTTATTGCGAGTTAGCA  
CGCGACTCGTTTTATCAACTTCTGGAGTCTCATCCCTTCTATCTTATTAACCGAATGTCGCTGCCAATGTTGTC  
TCCACATTAGATATTTTCAAGCATCTCTGGAATAAACAGCTATAG

>Cluster\_20852

ATGTCGATTTATCAAGGTGGTAAACAAGTTAAATGAGGATGATTTTCGTCTCACGTTTATTCCTGTGTCAATTAGATAAA  
TGTTGGCGTCTGTAGGTGCTGTTCTGTGCGTTGTTGGTGGGAAAACGATGAAAGATGTATGGAATCGTTAAGC  
AAAATACCTCGAGCTTTTGGGAGCACTTATGATAAAATATCTTCTGGTTTCGCAAAATGATTTCTGATAACAATTTGGTC  
AATGTTGAACCTTTGATAGATGAAGCAACTTAAATTTCTTCTGTAGCTAAAACTAGACGATGTGAAGATGCAAGGCGAAG  
ATTCAGGAAGATATTAAGTTCATATATAAAGAGGTTACGAAGGCTGCATTATTAACAGGAGAACAGTTTAGAGAGAAAA  
ATCAGGGTAAAAAGATGCGTTTAAATATCACAAAGAGTTAATTTCAAATTAATTTCAAATAGACAGCCCGGTCAGTCG  
GCTCCGGCAATTTTACAACAAATATGATTTGGCCTTAGAGTGGGCTGCAGAAGATTTAGGAATACAGTTGTTAATGG  
TTTTCTCGAGACCTCAAACAGCGTGTTCATAAAATGGTTCGTTTCGGTATATCATATAAAATAGAATAATATTAGGC  
CAAGATTCGGACATATCATGCGTATCTCTATAAAATACATGGCTCACCTACGTGGTATCAAATGATAGCTTGACTGTT  
AACGAAGTTAGTGCATCTCAAGCATATGATGAATATTAATGACATAATCAATAAAGATGACTTTATCGCGGTCAACA  
TTTGATTTATCCAGGGCGAATAAATATAGCCATACAATCGGCTTCGTTTATGGAGAGATGTTTAGACGTTTTGGGAGT  
TTAATTCGAAACCTCAAACAGCGTGTTCATAAAATGGTTCGTTTCGGTATATCATATAAAATAGAATAATATTAGGC  
GCGTTACTGAATCCATCTTTCCATGTTGTTATATATTAATCTGAAATGGAAAGAAGCAATACCAGAAAGTAAGGTTGG  
CGGTTCCGGAAGCTGAGAAAGCTATGTTACTTTAAAAACATGCGCTTCAATCAAGTAAGTGTAGTTGGGGGAGGAAGCA  
AGGCATATTTAATAGTTTCGTAGAACATCTACCATACCCTGTGCTCTTTCCACGAGATAAATGTTGATGAGTTGGTT  
GAAGCAATTCCTAATCTTTCTAAAGGAGAAGTAAATGCTCCCTTTTAA

>Cluster\_24440

ATGGCATTAAATCGGAGTGTATGCGGATTGGGAAGCCCTGGATGGTCCGGAGCGGATTGGTTATTTACACAGTCCGCCGC  
TCGGACCGGTGAGATATTTGAGTTGAGTACGATAAAAAGGCGCTTCAGATCCTTCACTTAATTTCAATTCAGTTAGATC  
CTGAAATAATGTTGATGAGGGAGCACAGTACCAATTCCTCAAAGGATAAAATTTGGTGCATTTAGTATTCTCCCGC  
GATCGTTGGGGCGTATGCTAATGAAGCTCGTTTGGAGAGGATATTCGAGACGGGTATGTGATAAAGACTCCACCT  
TTATGAGTCTGATATCTACTAGGTGTTTATGATGATCTTTTATCGGTTGGGGCTCTTCGATACAAACGTGAAGACCTGGAG  
AGTTTCTGATAAATCGCATTTGATGTTGACGCTCACCAATTTACCGAAATAGCGAGCTGGAAAGGGCTCCCGGGCAAT  
GAAGAAGATCCTGATAATAAAGAGCTAATGGGGCAAAAATGGTTAAGAATGCTAATCGCTCCGGGGGATCATTAGGAGG  
GGCAGCTCCGAAAGCCAGTGTGTTGATGAAGCTGGGCATCTCTACATCGCTAAATTTCCAGTGTAAAAGATGAGTATG  
ATGTTGGTGGATGGGAAATGGTCTGTTAATGCACCTGCTGTTGGCTGTGGACTGAATGTTGCACCTGCTCAGGCGCATAAA  
TTTGGCCAGCAATACCATTTGTTTTATGGTTCGTTTGGTTCGTTTGGACCCACATGTCGGGAAGGCGTCTGCAATTTGCTTCGG  
TATGACACTAACCCAGGCATCAGGATGGTGAAGATGCCTCTACAGGTGTGAGTTATCTGGAATTAGCAGATGTTCTTATCA  
GACATGGAGCGCAGACTAATCTGACCTTAAGGAACCTCGGTCAGGATGTTTAAATATCTTGTCTAATACCGAT  
GACCATTACGTAATCATGGATATATCTTGATACCGGGAAAAGGTTGGCGGCTTTCTGAGGCATATGATTTGAATCTGT  
TGCCAGGCTGACGGCTTAAAACCTCAATATTACAGAAAATGATAATGCACCTGATTTGGAATTAGCTCGAGAAGTTGGCG  
AGTATTTTCGACTTGGTTTGACAGAAGCAGATGACATTTATGCTAATTTTAGAGGATGTGACGTGAGTGGCGAATCATT  
GCCGAGCTCTGAGATTACCTGGTCTGAGCAAGAGTTAATGGCAGAGGCGTTAGGGGGCAATTTAG

>Cluster\_51532

ATGGCACTAAATGAGCTATCACCCAAGAAAGTTGAAAACGCTAAACCCAAAGAAACAGACTACAACTGACGGATGGGGG  
AAGCTGTATCTTTTAGTTAAAAAGAACGGGACCAAGGCATGGCGAATGAACACAGATTTAACGGCAAAACAGCTACGC  
TGGCTTTGGGCTTTTCCAGACGTTTCGCTGGCATTGCCCGTAAGCGTAGAGATGAAGCAAGGCACTTTTAGCCGAC  
GGTGTGATCCGAGATATCTAAAAAGCAGCGCAACAGAACCCTGCTGCTACATTCAGACAATCGCTTTAGAGTG  
GCATAAAGGCTCTATAGGCCATCCCTCATGGAAGAGATTTACCGCACTAAAATTTAAGAGAAATGGAATAATATATTT  
TCCATATATCGGAAATAAACCCATCGACTCATAAAAACAAGTGACCTGTTGCCATTTAGTTGAGGATGAGTGATCAG  
GGAATGGAGCAACAACGGAAGAGTGAAACTACTCTTGCAAGCGTTTTCGGGTACGCTATTCAGCGTGAATTTGTTGA  
ATACAATCTACCATGATCTAAGAGAGCAATTTCCAGCCAAAATAAAGCATCGCCCTGCCTTCCGTTAGAACGAT  
TACCCGAATTAATATCAAAAATTTGATAGCTATACAGGGAGGCCGTTAACTAAGCTGGCAGTATATTTTCTCTTACACT  
TTTGTTCGCTCCAGTGAACCTGAGACACGCAAGATGGGAGGAAATTAATTTGAAAATGCAATGTGGACTATTCCTGCTCA  
AAGAAAAGAATTTGATGGGGTAAAATATTCAGAGCGTGGGGCAAAAATGGGCAGTATTCATTAATGTTCCATTAATCAATG  
AAGCTATTTGATGTTCTCGAAGCTATTAAAAAATAAAGTGTGAGTATGAACTTATTTTCCCGGAGATAGTAACCTTAC  
AAACCAATGAGTGAGAACACAGTTAATAAGTCAATTAAGAATTAATGGGGTACGACACGCGAGGTGGACATTTGCCCTCATGG  
ATTTAGGGCAATGGCGTGTCTAGCCCTGACAGAATCAGGCTTATGGTCCAGGGATGACGTAGAACGGCAATAGCCATC  
AAGAACGAAATGAAGTGGCAGCCGCTTATGTACACTTAGCTCAGCATAATGATGACGTCGCTGGATGATGCAATGGTGG  
TCTAATTTATTTGAAGCTAACACTGATAGATATATTGCCCTTATAAAATGAAAAAATACGCTTGTGTTGA

>Cluster\_28870

ATGAGTTTTCGACCATTTCTGTATCGGACTGGGTTACATCGGGCTGCCTACAGCAGCTGCGTTTGCCTCAAGGCAAAA  
ACAGGTGATTTGTTGTCATATCAACCAACACCGGTTGATACCATCAATCGTGGCGAAATCCATATCGTCAACCTGAT  
TTGGCAGGCTAGTAAAAAATGCGCTGAGGCGGTTTTTTACGAGCGAGCACAGCCAGTTGAAAGCGGATGCTGGCTG  
ATTGCTGTACCCACGCGCTTAAAGGCGATCATGAGCCAGATATGACCTACGTTGAATCGGCTGCTCGCTCCATTCGCC  
AGTCTGAAAAAAGGCGCGCTGGTATCTTGAATCCACTCGCGGTTGGGTTCAACCAGAAAGATGGCAGAAATGGTTAG  
CAGAGATCGCTCCAGATCTCACTTCCACAGCAGGTGGGCGAGTTGGCGGATCAACATTTGCTTACGTCCGGAACGC  
GTGTTACCGGGCCAGGTTATGGTTCGAGCTGATTAATAAACGATCGCGTATGTTGTTATGACGCGGCTTTGTTCCGGCCG  
CGCCAGCAGACTGTACAAAATTTTCCCTCGAAGGTGAGTGTGCTGCTCACTAACCTCGCGGACGGCGAAATGTTGTAAGCTCA  
CCGAAAACAGCTTCCCGATGTGAATATCGCTTTTGTCAACGAACTGTGCTGATTTGTGCGGATCAGGGAATTAACGTC  
TGGGAACCTGATTCGCTGGCGAATCGTCACTCGCGTTAATAATTTCTCAGCTGGTCTGGCGTGGCGGCTCATGCTAT  
TGCAGTTGATCCGTGTTTATCGTGGCACAAGAACCCGACGAGGCGCGGCTTATCCGTACCGCGCGAAGTGAACGATC  
ACAAACCGTTCTGGGTTATCGATCAGGTGAAAGCGGCGGTTGCCGACTGCCTTGTGCTACCGATAAACCGCGCAGTGA  
CTGAAATCGCCTGCTTTGGTCTGGCGTTAAACCGAAATATGATGACCTGCGCGAAAGCCCGGATGGAATCGCTGA  
ACTGATCGCCCAAGTGGCAGCGCGCAACGCTGGTGGTTGAGGCTTAACATCCACCAGTTGGCGAAAACCTGACCGGCG  
TTTGTACTCTGGCGCAGCTTACGAGGCGCTGGCAACGGCAGATGTGCTGGTGTGTTGGTTCGATCATAGTCAAGTTCAAG  
GTTATCAATGGCGACAACCTCCATCAGCAGTATGTCGTGATGCCAAAGGAGTCTGGCGCTGA

>Cluster\_9129

ATGCTCACGAAAAAGAAATGGGCGTTATTTAGTCTATTAACACTGTGTGGCGGTACAATTTATAAATACCGTCCGCTGAA  
AGATGCGTTTTATATCCCGATGCAGGAATATTTCCATTTGACCAATGGTCAAATGGTAAATGCTATGTCGGTAAACTCAT  
TTGTCACCCAGTGGGCTTTTTCTGTCTATTTATTTTCCGATAAATACCGCGCAGATACACCATGTCATTCTCACCT  
ATTGCGACAGGATTTACTGGGTTTATTTGACGACAATGCCGGGATTTGGGGCATCTCTTTGCTGGGGCGTATTTGG  
CGTTACTTCCGACATGATGAACCTGGCGCTTTGCTCAAGTCCGTAAGTTCGATTTGGGCAATAGCGAACAACAAGGTCGCT  
TGTTTGGCTTCTCGAAACAGGCGTGGCATTGTCGATACCTGGTGGCATTCTGCGTTGGCAGTATTTACCTGGTTTT  
GGCAGTGGCTTATAGGTTTAAAGCAGGCATCTGGTTCTATTTCCCTTATGTTGATGTCGCTAGGCAATTTATTTCTT  
TGTCTGAAATGACAAAAGAAAGAGGACCGTCCGTTGAGGTTGAAAAAAGAAAGCAGGAGCATCGAAAACACCCAGTACGCT  
CGGTGCTGAAAGCAAAAATATCTGGCTTATCGCTTTTAACTGCTTCTTCTGTTTACCGGTTTACTGTGGCTGACATTC  
TTCATTCCATTTCTGAAAACATCTATCTATTGCCGTTGCGTGGTGGGGCTTACGGCATCATTAAACCAACTACTGTCT

GAAAATGATTGGTGGACCGATTGGTGGCATGATTTAGATAAGATCCTGAAATCGCCAAGTAAATATCTATGCTACACCT  
TTATCATTAGTACCGCTGCGCTCGTACTGTTGATTATGCTGCCGACGAAAGTATGCCGGTCTATTTAGGGATGGCATGT  
ACGCTGGGCTTTGGCGCGATAGTCTTTACACAGCGAGCCGATTTTTTGCACCTATCGGCGAAGCAAAAATTGCTGAAAA  
TAAAACAGGTGCGCGCATGGCGTTGGGTAGCTTTTATTGGTTACGCTCCGGCGATGTTCTGCTTCACTGTTATGGCTACA  
TTCTGGATTAAATCCGGGGATTATGGCTACAAAATCGTGTTTGGCATATTAGGCTGCTTCGATTCAGTGGTGGCGGTG  
GTTTCCGTAATGCTGGTTAAGCGTATTAGCCAAACGTAAGAAAGAGATGCTGGCGGCTGAAGCTTAA

>Cluster\_56087

ATGAAAAATAGTAAGTACCTTTTATAGTATCATTTCTTTCTTTCTATAAATGCCATGCTGGTCAATTAGATAG  
TAGCGGGCTACTTGTATCTTTATAGATAAGTTTCAACAGTAGCCAGTACATGGACAACAGTAATTGCTGACTATGCAA  
ATTGGCTCTTCTGGGGGCTGGTATTAATAAGTATGGTTTGGACATTTGGTATGATGGCGATGCAAGGGGAAGGGTTGACA  
GGCGTACTTGGCTGAAATAGTTCGCTTTTTTGGCTGTCATTTGGTTTTTTTATTATCTTTTAAATCAACGGCCATCCATATC  
GCAATCCATCATTAATCAATGAGACAACCTGCAGCAACCGCTTAGGAATAAGTACTGGTATTTCCGCTCAAGCATAG  
TTGATATGGCGTTTGCATATTAACAAAGGTCACTTTCAGCCGCATCAATTTGGTCGCCAATGATATCCACCATATGATA  
ACAGTCCGATAATCGTTTTGGTAGTAATGTCCCTTATAGCGATAAATATGCTAATCATGTTGGTTTCTGCATGGTACT  
ATGTTATGACAGGAGTTATATGCTTGGGTTTGGTGGTTTCAAAATGGACCTCTGACATAGCAATTAATTAATTAAGTACT  
TTTTATCGGTTGGCATTAATTTACGATGACATTAATTTGGGATTTGGACAATCATTTATAGATCAATTTTTCT  
CTTATTAAGATGATTTCTGATCTTAATAGTCTTATCGTTTTGCTTCTGGCGTCAATTAATCTGTTAGTGTAAACGAA  
TAAGTACCAGTGTGTTATCAGGTGTTGTAGGAGGGCTTCTTACAAGGATTTGGTGGATTTGGGGCGGTATGATTA  
CCGGCGTCCCGTACTGCCATCAGCGGTGCTGGAGCGATGGCAATGGGGGCATCAGCTCAAGTCAGCGCGGAGCCCTC  
GCATTAAGGCGCGTTCGAGTTCGCAAGCTGCCATGGCCGAAGAATCTGGTTCAGGCGTTGGAGCGGTTCCGGTGG  
AGGATTTGGCGCGGGGAAGATACCGGTTCTGTAGATACTTCTTGGCGCAACCTCAGGCGGTTCCGGTGGTTCTGCTG  
CTGGGAGCAGTTCAGGTAGCGCCAGCGGAGGAAGTCAAGGGTTTGGCTTCAATTCACGAGCTGGGCGCATGGCAAGCCAT  
ATGGGAAGCAGTATGGCTAACGGAGCTGCTGAATACCAGACAATGAGGCGAAGTAGCGATTTCTCTCGTCCAACGGAC  
TATTGGAGGGGAGTTGGCGACTCAGATACGTAACAAACAGCTACTCGTGGGATAACCGCAACATGATGATTTTGTG  
AAGATAGCTTATCCGGCAATAATAAATCTTGA

>Cluster\_23932

ATGAAAGCATTTCCAGAAACATTTCTTTGGGGTGGTGCAACAGCTGCCAATCAGATGGAAGGCGCTGGCAGGAAGATGG  
CAAAGGGATCACGACCTCAGATTTACAGCCTCATGGCGTAATGGGAAAAATGGAAACCGCGCATCTGGGGAAAGAGAATA  
TCAAAGATGTCGCCATCGATTTTATCACCGTTACCGGGAAGATATCGCGTTATTTGCCGAGATGGGCTTCACTGTCTG  
CGTATTTCCATTGGCTGGCGCGAATTTTCTCAGGGCGATGAAGCCGAACGAATGAAGCGGGGTTAGCATTTTACGA  
CGGCTGTTTGAATGAAATGGCGCAGGCGGGGATCAAGCCGCTGGTAACGTTATCCATACGAAATGCCATATGGGCTGG  
TGAAAACTACGGCGGTTGGGCTAATCGGGCGGTCATCGATCACTTCGAGCATACGCACGCGCGGCTTTACCGCTAC  
CAACATAAAGTTGCGTTATGGCTGACATTTAATGAAATCAACATGTCAATACACGCGCCATTCAGGGCGTGGGGCTGGC  
AGAAGAGAGTGGCGAGGCGGAAGTTTATCAGGCGATCCATCATCAACTGGTTGCCAGTCCGCGGGCAGTTAAAGCCTGT  
ATAGCTGATCCCGAAGCGAAATTTGGCAATATGCTTCTCGGTGGGCTGGTTTACCCCTCAGTCCAGCCAGCCAGGAT  
ATGTTGCGAGCCATGGAAGAGAACCAGCGCTGGATGTTCTTTGGTATGTTTACGGCGGCTGATGATGATGATGATGATGAT  
GCAGGTTTCTTCCGCGACCACAATATCACCATTGAGATGACTGAAAGTGACGAGAAGATTTAAACATACCCTAGATT  
TCATCTCTTTTAGTTATTACATGACCGGTTGTGTTTCCACGAGCAAGCATTAATAAAAAATGCGCAGGCGCAACATCTG  
AATATGATCCCAAAATCCGATCTGAAAAGTTTCAAGTGGGGTGGCAAAATGATCCGGTTGGATACCGGATCTGTTAAA  
TACGCTTTGGGATCGTTATCAAAAACCGTTATTTATTGTCGAGAACGGATTAGGCGCAAAAGACAGCGTTGAAGTGGATG  
GTTTCGATACAGGAGGATTTACGAATGCTTATTTAAACGATCACTGGTACAGGTAAGTGAAGCGATTGCCGATGGTGTG  
GATATTATGGGGTACACAGTTGGGGCCAATTTGATTTAGTCACTGATCTCAATTCACAAATGCTAAGCGCTACGGCTT  
TATTTATGTTGATGCTGATGATAATGTTGAAGGAAGCTCACAAGAACCGCAAGAAAAGCTTCGGATGGTATGCAGAAG  
TGATCAAGACGCGGGGCTGTCATTAAAAAATAA

>Cluster\_11571

ATGGCTATTAATCCACTGAATATTGCTGCGCAACCCGGCAAAACCCGCTCTGCGAAAACTACTGAAATTTGGGAGGT  
GGTAAATGATGGGCTGGCTATCTCACGCGCATGACCGTATTTGATACTTTTGGTATTGTCTCCGGCATTAGCCAGGCT  
ACGTTCCGGCGTCTATTTGCTGGCGCTGGCGGGCGTGTGTTTACCGCTATCAGCTACGGCAAACTGGTTCGCCAGTTT  
CCGGAGGCGGTTCCGGCTATACCTACGCGCAAAAGTCCGATTAATCCGACGTCGGATTTATGGTCCGGTGGTCACT  
GCTGGATTAATCTTTTTGCCAATGATCAACGTTTGTGGCGAAAATCTATCTCCTCCGCTCTTCCCGAAGTGGCCG  
CGTGGGTGGGTTGGTAACTTCCGCTCGCATTTTAAACCGCGGAATCTGAAGAGCGTCAACCTGGTCCGCTAATCAAT  
ACCTGTTTGTACTGGTCAAACTCTCATCATGGTGGTGTATTTCTTCTGGTGGTTCAGGACTGCATAAAGGAGAAG  
CGTGGCACCGTCTGGTCACTTACGCGGTTTATCAGCGAGAACCGCACCTGATCCCGATTTTACCGGTGCGACGATG  
TCTGTTCTCGTTCCTCGGTTTCGATGCGGTGACCAGCTTTCGGAAGAGACGCGGACGCGGACGCGGATGATCCGAAA  
GCCATTTCTGACGCGCGTATACGCGCGCTTATCTTTATCGCGCGTCTGTTCTTTATGCACTGTTTCTTCCGAT  
CAGCCGCTTAAAGACCCGACGCGCACTGCTGAAATTTGCGTGTACGTCGCGGCGAAGCTTTTACGTCGATTTTCC  
TCTGCACCAGTTTGTGAACACATTAGCCTCTGGCCTGGCTTACATGCCAGCGTGTCCGCTCTGCTGTATGATGGGG  
CGTGACAAATGTTTCCGAGCGCGTGTGGTGTATGTCACCCAAATGGCGGACTCAGGCACTCAACGTCATATGGT  
CGGATTTGTCGCGTGTCCGCGCTGTTCTTTGATTTAGTACCCGCGACAGCACTGATTAACCTCGGTTCTGGTGGGCT  
TTACCTTCGTGAATCTGTGCGGTTTAATCATTTCTGGCGCGTAAAGGAATGAATAAAGCTGGAAGGATCACTTCCAC  
TATTTGCTGATGCCGCTGGTGGCGCGTACGCGTGGTGTGCTGTTGTTAACTTAGAGTCAACGCTACTGACACTCGG  
TCTGGTATGGGCTTCTGTTAGCGCGCATATTTGTGGTATCTGATCCGCGCTATCGCAAGTCCGCTGTACGAAGGTG  
ACAGAACGCGGTGAGCGAAACGTAA

>Cluster\_23748

ATGACAACCGAAACGCGTTCCCTCTATAGTCAACTTCCGGCTATTGATCGCTTATTGCGCGATAGCTCCTTCTTTCTTT  
CCGTGATACTTATGGTCAACCCGCGTGGTGAATTTGCTGCGTCAAGTCTTACGAAAGCGCGAGAAGTGAATCGTGACA  
GCCAGACGCTGCCCGGCTGGTGTGAAAATGGGCGCAAGAAGTCAAGTCCCGGTTGACGAAAGAGGCGCAAGCGCGCTG  
CGTCCGGTAAATCAACCTGACGGGAACCGTGTGATACCAACCTGGGCGAGCTTTACAGGCGGAAGCGCGGTGAAGC  
CGTTACGAAGGCTATGCTTCCGAGTACCTCGAGTACGATCTGGACGACGCGGACGCGGACATCCGATCCGGCGC  
TGGCGAGCTGCTGTCCGCTATTACGGGGCGGAAGATGCTTCCAGTGGTATCGTTAATAAACAATGCGGCGGCTGTTATGATG  
TTGGCGGCACTGCCAGCGGAAAGAGGTGGTGGTTTCTCGCGGCAACTGGTGGAGATTGGCGGCGGTTTCTGATTTCC  
CGATGTTATGCGTACAGGAGGATGACCCCTACACGAAGTAGGGACCACCAACCGCACGCGCAAGTGAATGATGCTCAGG  
CGGTGAATGAAAATACCGCACTGTTGATGAAAGTACATACCAAGTAACTACAGCATTCAGGGGTTACCAAGGCGATAGAT  
GAAGCGGAACCTGGTGGCGTCCGCAAAAGAACTGGATGTTCCAGTGGTGAAGTATTTAGGCAAGTGGCTCCGCTGGTCACT  
TAGCCAGTACGGTTTCCGAAAGAGCCTGCGCAGGAGTTGATGCGGCGGCGTCACTGCTGGTGGCTTCTCCGGCG  
ACAAGCTGTTAGGCGGGCGCAGGAGGAAATTTGTTGGTAAAAAAGAAATGATCGCCCGCTGCAAGCCACCGCGCTG  
AAGCTGCATACCGCGGATATAAATGACCTCCGCGCGCTGGAAGCCAGTTGGCTCTTTATTTACACCTGAAGCTCT  
GAGTGAATAAATACCGACCTGCGCTGCTTACCCGACGCGCAGAGGTCATTCAAATCCAGGCAACGTTTACAGGCTC  
CCCTGCGCGCATTACGGCGCGGAGTTTGGGTTACAGTTATGCCATGCTTTTCCGAGATCGGCGAGTGGTTCGCTGCCG

GTTGATCGCTGCCGAGCGCGGCATTAACGTTTACCCCCATGATGGACGCGGTAGCCACCTTGAGTCATTAGCCGCCCC  
CTGGCGTGAATTGCCAGTCCCGGTGATTGGTCGTATTTATGACGACGATTTGGCTGGATTTACGCTGCCTTGAAGATG  
AGCAACGGTTTTTGGAGATGTTGTTGAAATGA

>Cluster\_42176

ATGACTCCGTTTATGACTGAAGATTTCCCTGTTAGATACCGAATTTGCCCGCGCTGTATCACGACTACGCAAAAGACCA  
GCCGATTTTCGATTACCATTGCCATTTGCCCGCCGAGCAGATTGCGGAAGACTATCGTTTAAAAACCTGTATGACATCT  
GGTTGAAGGGCGATCACAATAAGCGCGCTATGCGTACCAACGGGTGTCGCCGAGCGTCTGTGCACCGGTGATGCGTCT  
GACCGTGAATAATTTGACGCTGGGGCGGACTGTTCCGCATACTATCGGCAACCCGTTATACCCTGGACGCACCTCGA  
ACTGCGTCTCGTTCGTTGGTATCACTGGCAAATTTGCTTCTCCGTCACCTGCGGATGAAATCTGGAACGAATGTAAACGAAT  
TGCTGGCGCAGGATAATTTCTCTGCACGCGCATCATGCAGCAGATGAACGTGAAATGGTCGGCACCACCGATGACCCG  
ATCGATTTCTGGAGCATCACGCAGAGATCGCCAAAGATGGCTCTTTCACCATTAAGTGTCTGCCGAGCTGGCGTCCGGA  
CAAAGCCTTTAACATGAAACAGGCGACCTTTAACGACTACATGACGAAGTGGGCGAAGTTTCCGATACCGACATTCGCG  
GCTTTGCTGACCTGCAAAACAGCCCTGACTAAACCTGAGCACTTGGAGCACTTCCGCGCTCACGGCTGTAAGTGTCTGACCACGGC  
CTGGATGTAGTGTGTTGCTGAAGCGAACGAAGCGGAAGTGGACAGCATCTCGCGCGCGTCTGGCAGGCGAAACCT  
GAGCGAGCACGAAGTGGCACAGTTCAAAACCTGCGGTGCTGGTGTCTTCCGCGCTGAATACGCACGCTCGCGGCTGGGTAC  
AGCAGTACCACATTTGGCGCATGCGTAATAACAACCTGCTGAGTTTAACTGCTGGGCGCGATGTCGGCTTTGACTCC  
ATCAACGACCGTCCGATGGCGGAAGAGTGTCTAAGCTGCTGAGCAAGTGAAGCAAGCAAGAAACCTGCTGCCGAAACCAT  
TCTCTACTGCCTGAACCCGCGGATAACGAAGTGTGGGCACCATGATCGGTAACCTCCAGGGCGAAGGTATGCCGGGCA  
AAATGACGTTCCGTTCCGCTGGTGGTTTAAACGACAGAGGACGGTATGGAACGTCAGATGACCCAACTGGCGCAGCTC  
GGCTGCTGAGCGCTTTGTCGGTATGCTGACTGACGCGTACTGCTTCTGTCATACCCGCTACGAATACTTCCGCGG  
CATCTGTGTCAGATCGGTCGCTGGGTAGAAGCGGTGAAGCACCGCGGATACCAACCTGCTGGCGGATGTTGTTGTA  
AAAATATTTGCTTTAACAATGCGCGTACTACTTCCGCAATGAACTGAACTAA

>Cluster\_11497

ATGGGGTTTCAGCGAGTTCCTGTTGGCTATAAACTGTTTGGAGTGAAACATGAAAAATCCGGGAGCAATTAGATACTCC  
GGTACGTAAGGAGCAGAAAATGAATTTTACCCTCATCTGGAATTAATTGAAACGCCAGTATCCAGACGGCCGCTC  
TGGTTGCTTATTTTATTATGGGGTTCTGGTTATGCTTTTATTTATCTGTTTATAGGCCAAGTGAATAATGTTGCCACT  
GCAATGGGAAATTAACACACAGTGGGCGTAGTAAAGAAATTAACCTTATGAAAACCAATAGTTAAAGAAATATCTGT  
AAAAGAAGGAGAGTTCAGCCCGGAAGGGGATGTTTAAAGCTTACAGCACGTTGGGAGTGAAGCTGATACGTTAAAAA  
CACAGTCACTGTTTACAGGCCAGGCTGGAACAACTCGGTATCAAACTCTGAGCAGGTCAATTGAATTAATAAATA  
CCTGAACATAAGCTTCTTGAAGACCTTATTTTCAAGATGATCTGAAGAGGAAGTACGCGTTTAACTTCTTTGATAAA  
AGAACAGTTTTCACATGGCAAAATCAGAAGTATCAAAAAGAACTGAATCTGGATAAGAAAAGAGCAGAGCGATTAAACAG  
TACTTCCCGTATAAACCGTTTATGAAAATTTATCAAGGTTGAAAAAGCCGCTGGATGATTTTCAGTATTTTATGCAAT  
AAACAGGCAATGCAAAAACATGCTGTACTTGGAGCAGGAGATAAATACGTCGAAGCAGTAAATGAATACGAGTTTATAA  
ATCAACCTGGAGCAATTTGAGAGTGTAGATATTGCTGCAAAAAGAAATATCAGCTTGTACGACGCTTTTTAAAAATG  
AAATTTTAGATAAGTAAAGCAAAACAACAGCAACATTTGATTTTAACTCTGGAATTAGCAAAAATGAAGAGCGTCAA  
ACGGCTTCAAGTAACTCAGGCGCCAGTTTCCGGGAAAAGTTCAGCAACTGAAAGTTTACATACTGAAGGTTCATACTGA  
AGCGGAAACACTGATGGTCACTGCTTCCGGAAGATGACACGCTGGAGTTACTGCTCTGGTACAAAATAAAGATATGGTT  
TTATTAACCTCGGCAGAAATGCCATCAATAAGTGGAGGCAATTTCCCTTATACAGATAAGGTTATCTGGTGGGTAAGGTG  
AAAAATATAAATTTAGATGCAATAGAAGACAGAGACTGGGGCTGTTTAAATGTTATTTTATTTGAAGAGAATGG  
TTTTGCAACCGGGAATAAAAAACATTTTCAATAAGCTCGGATATGCGAGTCACTGCGAATAAAGACAGGATATGCGAAGT  
TAATCAGTTATCTTCTTAGTCTTTAGAAGAGTCAAGTAAAGAAAGTTTACGTTGAGCGTTAA

>Cluster\_25495

ATGCATCACTTTTCAAGACTTGATAAAGCTTTCTGCGCAAAGGGATCCAACCTTCCCGCGCCAAACAATATTGTTTCATT  
ATCTCGTCCATCAGGTGCCAGTGCCTGCTGCTGCGGACGAACTGCCGCTGGAAGAAAAAGCAGTAAACACAACCTC  
TTGATTTTGCAGAAAGTGAAGCTACCAGATCATCCAGGTTATGTACGCCAGACCTGTGCACGCGAGATTTTACCCCGCG  
AATGGCGTCCCGTAGGCGCGGTGGTCGCTTACGCCGATTTAGTCACTTCCGCGCCATCGGCACCGATATTTCTTG  
TGGCATGCGGCTGCTGACGACCGGATTAACCTTTGAGCAAGCCGAAGCAATAAAGAAATAAATCACTCAGCGGTTAACAC  
AAGTGTACTGCAAAATGAGCGGATGTTCCGTTATCCGCACGAGCGTTTACCAGCGCTTTTGGATGGCGGACCGGAGAT  
TGCAATGTCAGCCTTGCATCAGCAGGTCCTGGACACGACGAATATCCCCGAAATGTTACAAGAGATGACCGCTGCAT  
TGGGCTTAAACGAGCATAACAGTCACTCGGTTATGCCCCACCCGCTGCTGGCAACGGACCGCGCATTACTCCGCGATC  
CTTGTCTGGGTACGCCGGTTCAGGTAATCATTTTATTGAACTTCAGGTCGTTGATAGCGTGGTTGATCGCGGTTACAGCC  
TGGCAACAAGGGCTGAAAACAGGCGATATTGTTGGTGTATCCACAGTGGATCGCGAGATGTTGGCTTTTACGTCGGAAG  
ACGCTGGATGGATCGCCCGTGTGAATGGCCACCGGACATAAACAATCCACAAAGCGGTTATATGCTTGGCAGGCG  
GACTGGCGGAGGAATATCAACAGGATAGGAATGGCGCGGCTTACGATGGTTAAATCGCGTCACAATGCCGAAATG  
GTGCGGATGCTTTCGCAATCTTTTATCAGGCAATTCGATCTGGTGTGATGTCACATCAACATCACTTCTTCG  
CGAGCATGAAATGAATATTCATCGCAAAGCGCAACACCGGCACGAGTGGGCAATCTGGCGTTAATCCCGGTTCAATGG  
GCGATTTATCTGCTGGCTTGGGTTAGGTTGGCGCAACCCGGAGTGGCTGTGGTCAATGCAATGACGAGCAGGACGAGCCAG  
CGTGGCAGGCGCATGCGCTCACGCGCACTGAAGAGTCAACGTCGCGTGGCAATGCGTCAATGCGCGAAGAACGACG  
TTTTGAAGAAAGCGCAGCGCTTATAAAGATATTGGTCTCGGTTATCGAAGCCCAACAAGAAAGCGGATTAATACGCGCAG  
CGTCAAGATTTCCAGCGTGGTTAACGTTTAAAGGGTAA

>Cluster\_25732

ATGAGCGTTGTGCTGTAGCCGACTTCCAGGGCGCGTAGCGTTGACAGCGAAGTACCCTGCGCGGATGGGTACG  
TACCCGCGGAGATTCAAAAGCTGGCATCTCCTTCTCGCGTTTATGACGTTTCTGCTTGTATCCTGTACAGGCTGTCA  
TCAATAATTTCTTCCCAATACAAATGAAGACGTCCTGGCTGACCAACCGGCTGCTCGGTCATTTGTGACGGGTAAGTCT  
GTGGCGTCCGCGGCGGCAACAAATTTGAAATTCAGGCAACAAGGTTGAAGTGTGTTGGGTTGAAGATCCAGA  
CACTTACCAGATGGCGGCAAAAACGCCACAGCATGAGTATCTGCGTGAAGTTCGCTGCGTCACTGCGTCCGCGCAACA  
TTGGTGGCGTCCGCGCGGTTCCGCAATACGCTGGCGCAGGCGTGCATCGCTTCTTAAACGAGCAGGGATTTCTTGGGTT  
TCAACGCCACTGATTACCGCATCTGATACCGAAGGTGCAGGCGAAATGTTCCGTTGTTCTACGCTGGATCTGGAAAACCT  
GCCCGTAAACGATCAGGCAAGTGGATTTCCGCAAAAGACTTCTTTGGTAAAGAGTCTTTCTGACCGTATCTGGCCAGT  
TGAACGGCGAAACCTACGCTTGGCATTGTCGAAAATTTATACCTTCCGCGGACTTTCCGCTGCTGAAAACCAACAC  
AGCCGTCACCTGGCGGAATTTGATGCTGGAGCCGAAGTGGCGTTTGTAACTGAAACGATATCGCAGGTCGGCTGA  
AGCATGCTGAAATATGCTTCAAAGCGGTTCTCGAAGAACGCGCTGACGACATGAAATTTCTTCTGCTGAAACGCTAGATA  
AAGATGCCGTTTCCAGCTGGAACGCTTCAATGAGGCGGATTTCCGCGCAGGTGGATTAACCCGACGAGTACATTC  
GAAAACCTGGCGCAGGAAAGTTTGAAAAACCGGTTTACTGGGGGCTAGATCTCTTCTGAGCATGAGCGTTATCTGGCGGA  
AGAACCTTTAAAGCAGCGGTAGTGGTTAAAAACTATCCGAAAGATATTAAGCGTTCATATGCGCTTAAACGAAGACG  
GTAACACCGTTGGCGTATGAGCCTTTTGGCTCCGGGATCGGTGAGATCATCGGTGGCTCCAGGCTGAAGAACGCTCTG  
GACGTGCTGGACGAGGATGCTGGAAATGGGCTGAAACAAAGAAATTAAGTGGTGTATCGGATCTGCGTCTGCTGCGT  
TACTGTTCCGCAATCAGGTTTCCGTTTGGTGTGTAACGCTGATAGCTTACGTAACCTGGCGTCAAAAACGATGATG  
TTATTCGTTCCACGTAATCTCCGCTAACGCCAGCTTCTAA

>Cluster\_21700

ATGAATCAACAACCTCTCCGCGCCATCGTCCGCTACAGCCTCGGTGACGTCGCCAATAACTTCGCCTTCGCAATGGG  
GGCGCTCTTCCTGTTAGTACTACACCAGCTCGCTGGCGTCCGTCGCCGCTGCGGGGGACCATGCTGTTACTGGTGC  
GGGTATTTCGATGCTCCGCGATGCTTTGCGCGACGAGTGGTGGACAGTGTGAATACCCGATGGGGAAAAATCCGCCCC  
TTTTTACTCTTCGATTCGCGGTAATGATCTTCAGCGTCTGCTTAAATCGACGCGTGAAGATGGTACGATCGTGGCGC  
CAAAGTTGTGATGCATATTTGACCTACATGGGACTCGGGCTTTGCTACAGCCTGGTGAATATTCCTTATGGTTCACCTG  
CTACCGCGATGACCAACACCACAATCCGCGCCCGTCTGGGCGCGGCTCGCGGGATGCGCGTTCATTGACCTTTGTCT  
TGCCCTCGCATTTCTGATAGGACCGAGTATTAAGAACTCCAGCCGGAAGAGATGGTGTGCGGATATCATTTCTGGCCAAT  
TGTGCTGGCGATTGCGGGAATGGTCTTACTTCACTGCTTCAAATCGACGCGTGAAGATGGTACGATCGTGGCGC  
AGCCGTCATTGAAGATCAGTCTGCAAAACCTGAAACGGAATCGCCCGTGTTTATGTTGTGCATCGGTGCGGTGTGTGTG  
CTGATTTTCGACCTTCGCGGTGACGCGCTCGTCTGTTGCTACGTCGCGTATGTGTTAAATGATACCGGGCTGTTCACTGT  
GCTGGTACTGGTCAAAACCTGGTTCGCTACTGTGGCATCGGCACCGCTGGTGGCGGGGATGGTGGCGAGGATCGGTA  
AGAATACCTTCTGATTGGCGCTTTGCTGGGAACCTCGGTTATCTGCTGTTCTTCTGGGTTTTCCGCTCGGTCACCTGCCG  
GTGGCGTTGGTTGCGTTGGCCATCGCATCAATTTGGCCAGGGCGTTACCATGACCGTGTATGTTGGCACTGGAAGCTGATAC  
CGTAGAATACGGTGAATACCTGACCGCGCTGCGAATGAAGGGCTCACCTATTCACTATTCTCATTTACCCGTAATGGC  
GTCAGGCAATCGGAGTTCAATCTCTGCTTTATTTGGGATTAAGCGGATATATCGCAATCAGGCGCAAACCGCGGAA  
GTTATTATGGGCATCCGCAATCAATGGCTTAGTACCTTGGCGATTTATGCTACTGCGCATTCGTCATTCGTTTAA  
TCCGCTACGGATAAAAAATTCAAAGAAATCGTTGTTGAAATGTATAATCGTAAAAAAGTGCAGCAGCAATTAATCAACG  
ATATCACTAGTTAA

>Cluster\_42245

ATGAGTAATCGTAAATATTTTCGGTACCGATGGGATTCGTGGTCTGTTAGGGATGCGCCGATCACACCTGATTTTGTGCT  
TAAGTGGGTTGGGCGCGGGTAAAGTGTGGCGGCCACGGCTCCCGTAAGATATTTATGGTAAAGACACGGGATTTT  
CTGGCTATATGCTGGAGTCTGACTGGAAGCGGGGCTTTCGCGCAGCGGCTTTTCCGCGCTCTTCACTGGCCCCGATGCCA  
ACACCGCGCTGGCTATCTGACGCGTACTTCCGCGCAGGGTGAATTTGTAATTTCTGCATACCCATTCTA  
CGATAACGGCATTAATTTCTTTTCTATTGACGGTACTAAGCTGCCGGATGCGATTGAAGAAGCCATCGAAGCGGAAATGG  
AAAAAGAGATCAGCTGTGTTGATTCGCGCAGAACGTTGGTAAAGCAGCCGATCGTGTGATGCGCGGGTCTTATATCGAG  
TTTTGCAAAGCCAGTTCGCCAAGCAACTAGCCTCAGTGAACCTGAAGATTTGGTGGGATGCGCAAAATGGCGCGACTTA  
TCACATCGCGCCGAGTCTGCTGCTGAACCTGGGGCGAACGTTATCGCTATCGGTTGTGAGCGGAACCGCAATCA  
ATGCCGAAGTGGGGGCAACAGATGTTGCTGCGTTACAGGCGCGCTACTGGCTGAAAAAGCAGATCTTGGGATCGCTTT  
GACGGTGCAGCGCAGCGCTGATATGTTGACCATGAAGCAATAAAGTCTGATGGCGACCGATATGATATATCATCCG  
CGCGAAGGTCTGCGTCAAGGCCAACTGCGTGGTGGCGCGGTGGGTACATTGATGAGCAACATGGGGCTGGAACCTGCC  
TGAACAGCTAGGAATCCGTTTCTGCTCGTGCAGAAAGTGGCGCATCGCTACGTAAGTGAATAAATGCGAGGAAAGCTGG  
CGTATTGGTGCAGAGAACTCTGGTCACTGTGATCTGCTGGATAAAACCACAACCGGTGACGGCATCGTTGCTGGTTGCA  
GGTCTGGCGCGATGGCGCGTAACCATATGAGCCTGCACGACCTTTGCAAGTGTATGAAATGTTCCCGCAGATTTCTGG  
TTAACGTGCGTTACACCGCAGGTAGCGCGATCCGCTGGAGCATGAATCAGTCAAAGCTGTGACCGCAGAAGTTGAAGCG  
CGCTGGGTAGCCGTGGACGTGTGCTGTTGCTGCTGCGTAAATCCGCGACCCGAACTTAAATTCGCTGATGGTAGAAGCGCAAGA  
CGAAGCGCAGGTGACTGAATTTGCACACCGCATCGTGTGATGCAAGTAAAGCCGTTTAA

>Cluster\_20835

GTGAGCAATCTGTCGCTCGATTTTTCGGATAAATACTTTTCAACCTCTGGCCGCGGATGCGGCCAGAAAATTTAGCACA  
GTATATCGGCCAGCAACATTTGCTGGCTGCGGGGAAGCCGTTGCGCGCGCTATCGAAGCTGGGCATCTGCATTTCTATGA  
TCCCTTGGGGGCCCGGGTACCAGCAAAACACCCCTCGCTGAAGTGTATGCGCGCTATGCGAAGCTGATGTGGAACGT  
ATTTCTGCGCTCACTCTGGTGTGAAAGAGATTCGCGAGGCGATCGAGCGCGCTCGGCAAAACCGCAATGCAGGTGCGGC  
CACTATTTCTTTTGTGAGCAAGTTTACCGTTTCAACAAAAGCCAGCAGGATGATTTCTGCCACATATTTGACCGCA  
CCATCACTTTTATTTGGCGCAACCACTGAAAACCCGCTGTTGAGCTTAAATTCGGCATTGCTTTCCCGTGGCGGTGCTAT  
CTGTTGAAATCCCTGAGTACAGAGGATATGAGCAAGTACTAATCTCAGCGATGGAAGACAAAACCCGTTGGCTATGGTGG  
TCAGGATATTTGTTCTGCCAGATGAAACACGACGCGCAATTTGCTGAACCTGGTGAATGGCGACGCGCGCGGGGCTTAAATA  
CGCTGGAATGATGGCGGATATGGCCGAAGTTCGATGATGACGGTGAAGCGGCTGAGCGGCTGAAAGCTGAAATTAATTCAGCAAAATC  
GCCGGTGAACGTAGCGCCGCTTTGATAACAAAGCGATCGCTTTTACGATCTGATTTCCGCACTGCATAAGTCCGGTACG  
TGGTAGCGCACCCGATGCGCGCTCTACTGGTATGCGCGAATTTTACCGCGGTGGCGATCCGTTATATGTCGCGCGCT  
GTTGCTGGCAATTTGCTCCGAAGATGTCGGCAATGCCAGCCACGGCGATGCGAGGTGGCAATTTGGCGCTGGGATTTGCT  
TTTTACTCGCTTGGCCCGCGGAAGGTGAACGCGCATTTGCTCAGCGGATTTGTTACCCTGGCTGTCGCGCAAAAGCA  
CGCTGCTACTGCGTTTAAAGCCGCTGGCCGATGCTCGCAACGCTCCGATTTGACGTTCCGGTTCATTTGCGTA  
ATGCGCGACGAAATTAATGAAGGAAATGGGCTACGGGCGAGGAATATCGTTACGCTCATGATGAAGCAACCGTTATGCT  
GCCGGTAGGTTTACTTCCCGCGGAAATAGCACAAACAGCTATTTTCCGCAAAACAGGGCCTTGAAGGCAAGAT  
TGGCGAAAAGCTCGCTGGCTGAACAGGATCAAAATAGCCCATAAAACGCTACCGTTAA

>Cluster\_29269

ATGATGATTCGCATCAGAAATGGTGGTAGCGACGTTGCTGCTGCTGTGTCGCGCCGGTGGGTGCCGACGCTCTCTGA  
TATTCAGTTTCTAACGGTAAATCAACAGGACGGATAACGTTGAGTTTATTGGCGATCCTGATATGCGTTTAGCCATC  
AAAGCAAAACCGCTGGCGCTCGATATCAAAACAAACGGGGTAAATTCAGGGGCTGCCGTTGTTGTTTAGCGGCAATAAT  
CTGGTGAAGGCGATTCGCTTCGGAACGCTAAAGATGCACAAACGCTACGGCTGGTGGTGCATCTTACCGAAAATGGTAA  
AACCGAAGCGGTGAAGCGGCAAGATGGCAGCAATTAACCTGCTGCTTTTACGATTAACGCAGATGTGCCACCGCGCGCCG  
CCGTGGTTGCGAAAACCGCTTGAACCGCTGCGGTTGTCGACACCGCGCTCAGCGAACCAGCGGCAATCCGTTTAAAGC  
GAAAGTAACCGCACTACGGGTGTTATCAGCAGTAATACGGTAACCGCTCCGGCAGCGCGCGGACGGCTAACACAGGCGA  
TAAAATTAATCATCGCTATGATGCGGACACGGCGGTCAGGACCTGGCGCTATCGGCCCTGGTGGTACAGGAGAAAA  
ATGTCACCATCGCCATTCGCGCTAAATACGTAACCTGCTCAATAACGATCCGATGTTTAAAGGGCTTTTAAACCGCTGAC  
GGGATTAATCTTATCTCGTGTGATGGGGCGAGTGTGCGACGTAAGCAAAACCGCAATTTCTTCTGTCGATCGATCG  
CGATGCCGCAAAACCGTAGTGCCACCGGTGCTCTGTATGGGTGCTCTTAACCGTCCGCGCAACAGCGAAATGGCCA  
GCTGGCTGGAGCAGCAGAGAAACAGTCCGAGCTACTGGCGGAGCGGCGATGCTGCTGGCGAACAGTCACTGACCC  
TATTTAAGCCAGGCGGTGCTGGAATTTACAGTTCGGTCAATCCAGCGGGTAGGGTATGATGTAGCGACCGATGATGATCAG  
TCAGTTGCAACGCATTTGGCGAAATACATAAAACCGCAGCAACACGAGCTCGCGGCTTCCGCTTCGATCGATGATTC  
CGTCACTGCTGCTGAAACCGGTTTATCAGTAACACAGCGAAGACGTTTGTGGCGAGCGACGATACCAACACAG  
CTGGCAGAAAGCTTACAAAGGCTGCGCAATTAATTTCTTGGCATCCGATGCAATCTGCGCGCAGGGTGCACCGC  
ACAAACCGCCAGTACGGTACGACGCGCAGATCGCACGCTGCCAAACTAA

>Cluster\_42192

ATGGAATTCGATCGAATAAAGGGCTCATTCGACAGCCTTCGACCCCGCGGGTGGTGTGGAATGAGTGAGAGCGAGTG  
GCGAGAAGCGGATCAAAATTCGACAGTACTGACACCGCTGGGTGATTTAGTATCGGGATGGCGATGGCGCGGGGATG  
TTTTTCTCCCGTCCAGGTCGGTTTGTAGTGGGATTTGGTATTTTGTCTCATCGGTGATTTGGTTACCGGCAATGAT  
CTGTTTTCAGCGGTTGTTTATTAATACGCTGGCAGAAATCACCAGGAGTGAAGATTTATCCGAGCGTCACTCAGCGGTTATTT  
AGGTA AAAACTGGGGCATCTGTTAGGTGCACTCTATTTTCGTAATGCTGGTGAATTTGGATGTTGCTCTATTCCACCGCCA

TCACCAACGATAGTGCTTCTACCTGCATACCTTCGGCGTGACGGAAGGGTTGCTGTGACACAGTCCCTTTTATGGTCTG  
GTACTGATTTGCATTCTGGTGGCGATCTCTCACGCGGGGAGAAATTTGTTATTTCAAAAATTCGACCGGATGGTGGTGCAC  
CAAGCTGCTGGTGGTTCGGCGCTGGGGCTGTGATGGTGGGAATGTGGCATCTGTATAACGTCGGTTCGCTACCGCCGC  
TGGGGTGTCTGATGAAAAACGCCATTATACGCTGCGGTTTACCTTGACGTCGATTTCTGTTTATCCAGACGTTAAGCCCG  
ATGGTATCTTTATCTGCTGCGGGGAAAAATCAATTGAAGTGGCGGGGATAAAGCATTCGCGGCAATGAATATTCGCGT  
TGGCATTGTTGTTTGTACCGTCTTTTCTACGCGTGTGCTTACGCTGGCGATGGGACATGACGAAGCGGTAAGAGCCT  
ACGAGCAGAAATTTCCGGCTGGCGATTCGCGCACAGTTTATAGCGGTGATGGCGAGCGTGGGTGAAAGTAGTCAGC  
GTCATTCTCAATATCTTTGCTGTAATGACGGCATTTCTTTGGCGTCTATTTAGGCTTTCCGGAAGCAACGCAAGGGATCGT  
AATGAACATCTTCTGCTGCGCAAGATACCTGCCGAGAAATTAACGAAAACTCGTTACGCGCGGATCATGATTTTCGCCA  
TTTTGCTGGCCTGGAGCGCCATCGTACTGAACGCCCGGTGTTGAGCTTACCTCTATCTGTAGCCCGATTTTCGGCATG  
GTAGGGTGCCTGATCCCGCGTGGCTGGTTTACAAAGTACCGGATTCGACAAATACAAGGGATGTCCTGTACTGAT  
TATCGTACTGGTTGTTGCTTTGTGTTTCTCCGTTCTCGCATTTTCTTGA

>Cluster\_9567

GTGGAAAAAGAAAATATCACCATCGATCCGCGTCTTTCATTTACTCCATCTTCGTCGGCAGATATCCCGTGGCACCAGA  
TGGATTAGTTCAACGCAGTACCCGAATTAACGCATTCACACCGCATGTTGTTATATTTTTCGGCGGTAATCA  
ATTATCTCGACCCGAGTTCTGCTGCGGTAGCAAAATTAACGATTCGTAAGAAATGGGATTAAGTCCACCGAAATCCGC  
CCTTTGCTCTCCGTTGTTTTACTCGCTTACGGGATTCGCCAATCTTCTGCGGCCACTATTGGATCGTAAAGCGCCACG  
CCTGATGCTGAGACTGGGATGTTCTTCTGGTCACTGTTCCAGGCAATGTCTGGCATGGTGTACAACCTTACGCAGTTCCG  
TGTGGTGGCTATCGGATGGGGATGGTGAAGCGCGGATGAACCCATCGCGTAAAAGTCAATAACGATGGTTCAAC  
ATCAAAGAGCGCGACGCCGATGGGCTTCTTCAACGCAGCTTACCATTTGGCGTTGCCGTAACCCAGGATTTCTGGC  
GGGATGATGCTGGTGTGGGCTGGCGGGGATTTTATTTACCAATTGGTGTACTGGGGATTTTTCTCGCCATCGGCTGGT  
ATATGCTCTATCGCAACCGGAGCAGTAGAACGACTGCGTGGAGCAAGCTTATCTCAATGCAGGTAGCGTCAATGCC  
CGCCGAGATCCGCTCAGTTTTCGCGAATGGCGAGCCTGTTCCGTAACCGTACAAATGTGGGAAATGATGCTCGGATTCAG  
TGGCTCAACTGAGCTGGCTGATCTGCGTGGCTTCTTGGTTACCTGCAAAACGCTATAACGATGGATTTAAAAA  
GCACAGGGTGTGGCGGCTATCCCTTTCTGTTGGGGTGGCGGGATGCTGGTCAACGGTTACGTTACTGACTGGCTG  
GTCAAAGGGGAAATGGCTCCGATTAAGACCGTAAAGATCTGCATTTATGCGGGATGTTCTGTTCTGCGCCCTTTACGCT  
GGTCTGACCGAAGCGACAACATCCATGACAGCGGTTCTGCTGATGGCATGGCACTGTTCTGTATTACTTTTCCGGAA  
CATCTGCTGGGGCTGATCCACGCTGCCAGTTGCTTCTGCTGATGCTGCTGGTGGGAGTATCCAGAACTTTGCCAGC  
TTCATCTGCGCTCTTTTGGCGGATCATTTACTGGTTTTATTGTTGATACCACCCACTCATTCGCTTGGCACAATCAT  
CTGCGGTTGCGTACCGCAGCGGGGCACTGGCGTACATCTTCTCGTTCGTCAGCCGATCAACGACCACGTAAGATT  
AA

>Cluster\_28783

ATGAGCGATAATGACACTATCGTAGCCAGGCCAGCCTCCGGGACGTTGGCGGCTGGCATCTCGGCCCT  
CAAAGCCCGTGAAGTTGCCGAAACCGTGTGGTAAACTGCCTAAGCCACGCTACGCCGATTAATCTTCGCTTTAAAGACG  
CCGATGGCAGCGTGTGATCGAGGGATGGCGTATGGTTCCTGGCCGAACCTGTTACCGCGAAGATGTGCTGGAA  
CTGCAAGGTCATGGCGCTCCGCTGATCTCGACTGCTTTAAACGCATTTCTGACCATTCGCGCCCTCGGATTCGCGC  
CCCTGGTGAGTTTTCCGAACCGCATTTCTGAACGATAAACTCGACTTAGCCAGGCCAGGCGATTGCGGATCTTATCG  
ACGCCAGCTCGGAAACAGCGCCCGTTCGGCGCTAAACTCGCTGCAAGCGCGTTCCTCCGACGGGTCAACCATCTGGTG  
GAAGCCCTCACCACTTGGCATTTACGTCGAAGCGCAATGATTTCCCGGATGAAGAGATCGATTTCTCTCCGACGG  
CAAAATGAAGCCAGCTCAATAACGTAATGGCGATCTCGACGCGGTACGCGCGAAGCTCGTAGGTTAGTTTGTTCG  
GCGAAGGGATGAAAGTGGTGTGATTCGCGGAGCTCTAACGCCGTAATCGAGCCTGTTAAACGCAGTGGCGGGCGTGA  
GCAGCAATCGTAACCGATATCGCAGGAACACCGGTGACGTGCTGCGTGAATATCCACATTTACGGAATGCGGTTGA  
TATCATCGTATCCCGGGCTACGTGAAGCCAGTGAACGATTTGAACGATTTGGTATCGAGCGCGCATGGAACGAAATG  
AACAGGCAGACCGCGTGTGTTTATGGTGTGATGGCACCAGACAGACGCGGTTGATCCGGCAGAGATCTGGCCGAAATTT  
ATCGCCCGTCTGCGCGGAAACTGCCGATCACCCTGGTGGCATAAAAGCCGATATCACCGGCGAAACGTTGGGGATGAA  
CGAATGAACGGTCAATGCGTTAATTCGTTCTTTCGGCGGGACTGGCGAAGCGTGGATGTACTGCGTAACCATCTCAAC  
AGAGCATGGGCTTTGACACCAATATGGAAGCGGCTTCTGGCGCGTCTGCTCACCTACAGCGCTGGAACAGCGCGCA  
GAGCATTTGCAGCAAGGTAAGCGCAACTGTTAGGTGCTGGCGGGTGAACGCTGGCGGAAGATTGCGCCTGGCGCA  
GCAGAACTTAAGCGAGATCACCGGGAAATTTACTTCAGACGACCTACTGGGGCGGATTTCTCCAGTTTCTGTATCGGTA  
AGTAA

>Cluster\_7342

ATGCGCCACTCGGCACAATGTTGAGCTTTCCACGCGACATTACCTCCTACGCTGGGCTGGCGATCATCAAAGAGACCT  
CACCCGCGAATCACTGGCTGACTTTGGCTGGGATCTCTACACGGCATGGACAGAACGAGCGCACCCCGCAAAAGAGAAT  
GGGCATTTACCTCGTGGGGATTTAGGCAATGACGACACCGCGTAAACTAACCCCGCTCATCCGCGCTGGCGGGT  
GAATCCAGCATAAAGCCGCGGTTACGGCTGGATGTTAGCCAGTATCGGTAGCGACATTTGCGCTTATGTTAA  
TGGCATTGCGCAAAAGATTAATTCGTTGCAATACAGGAACATGCCAGCGACAGAATCAATATGGTCCGCAAAATCGCG  
GACTGACAAATGGCCGAACTGGAAGATCGCTGGCACCGGATTTAGGGCTGTGATAGCAGTGGCTCGCTGACACTGGATTT  
GGCCACGTCATTTACCGTTGGTTTTGACGAACTTTAAACTGTAGTGGCGACGCAACGGCAAAGTCTGAAAGA  
TTTTGCCAAACCAAACAGAGCGATGAAAAAACTCAGGCAACTGACGCGGTTAATCTCTTCAAACAGTTGAAAAAAGATG  
TACGGCCATAGCCAGCCAGCAGATTGATCGTCTGGAACAGGCTATGTGCCAGCGCAGACGCTGGACGGCAGAGCAGTTC  
CGCTGTTTCTGGTGGAGCATCCGCTGGTACGTTAACCCGACGGCTGTTATGGGGGTTTATAACGATGAAACCGC  
CCTTATCACTGTTTTCGCGTGGCAGAAGACAGCACTTACAGCGATGGCAGGATGAGTTATTACGCTGCCAGCAGGAA  
ACATCGGTATACCGCATGTGCTGGAATCCCCCTGAATCCGCGCTGCATTCAGGCAAAATTTACGTTGATTACGAACTG  
CTTCCCTTTCCAAACAGCTCGAACCGGTAGTTACCCTTGTGATTAACGAACGTAATGTCCATGAAATGTACGCTG  
GGACGGACGCTCTCTCAGGCGCGGACGCAATTTGCGGCTGGAACGAGAGGCTGGCAACGCTCTGGAAGAAAGCGGACG  
TCTATGCGATGCGCAAACTACCCCTTATGGTGTCTCTCGAACTTGAAACAGAACTTTTTCATTAATTTATGGGAAACG  
GGGTATAGCGACCTGCTGCTGCGAAAGCGTAAAAATCACCGCCCTTATGATCGCTATGGTAAACAATCTCACCCAC  
TTTCTCCGTGCTCGACGACATCACCGCCAGCGAGCTGATTAACGACATGAATCACTGTTTGTGATTA

>Cluster\_5073

ATGTTGAAATCCCCCTGTTCTGAAAAATGACCACCCTGTTGGTGCAGTATTGCTGTGTTGATTCCGATAATGCTGAT  
TCGGCAGGTGATTTGTCGAACGTCGGATACCGTAGCGATGTGGAAGATGCGATTCCGCCAAAGTACCAGCGGGCCGAAA  
AATCTGTTGGGCGCTTATCGCTATTCTGTGACCGAGCTTTTACGTTGACGGAAGAGGATAAAACCTGGAGCGGAAA  
CGAAGTTTTATCCATTTTGGTTACCTGAGTCAATGATGGTGGCAATCAGAAGCTGGAAGAACGCAAGTATAGGAT  
TTATACCGTCAAGTCTGGCAGTGTAACTTAACGCTAAAAGCCGATTTTCGATGTTTCGCGCTTAGCGAGCTCAATGCC  
CAAAATCATCTTAGGCAAGCCCTTATTTGATGATGAGCTCGGGATGCGCGTGGTATTTGGTGTGGTGAAGCGCCTGAA  
GTTAACGGAAACGGCACTGACCAATGAACCCGTTACCGGTTAGAGCAAGCGGGCAGGGCGTGCATATCCCTTTACCCGA  
AGGGGCTGGCGGAAGCAGAACTGAAGCTGAATATGGCCCTGAATTTAAGCGGTACCGCGATCTTTCTGTGGTCCGCTG  
CCGGGCTAATAGCGAAATGACCTTAACAGCAACTGGCCGATCCAGTTTTTTAGGTGATTTTTCGAGCCAAACCG  
GAAGTTAGCGAGTCAAGTTTTACGCGCAATGGCAAGCAGCTGGTTTCTAATAATCTCGGTGAGCGTTTTGCTTACG

CAATGATACCGGCTGGGAAAACCTCCCGCGTTTAGCGTGCAGTGACGACGCCAGCCGATCAATACCAATTAACGGACC  
GGCGACTAAGTAGCCATTCTGCTGATGACGACTTTTATGGCGTTCTTTGTTTTGAAACGCTCACCGCCAACT  
TTACACCAATGCAATATTTGCTGGTGGGGCTTTCATTGGTAAATGTTTTATTTGCTCTTGCTGGCGCTTCTGACATAT  
CGGTTTTACCGTGGCATGATAATCGCCAGTCTGATGGGGCGTTAAATGAACGGTATTTATTTGCAGGCGGTATGAAAG  
GCTGGCGCAACAGATGTTGTTTACCCTCGCGCTGTTGCTGGATGGTGTGATGTTGGGACGCTCAACTGCGCAT  
AGCGCGTGTGTTGGGAAACAGTGTGCTGGTGGTGGCGCTGGCCGCATGATGTTGTGACTCGTAAATATCGACTGGTA  
TGGTTTTACTGCGGAAAATGAAAGCCAGTAAAGAAGTTACAATGGACGATCAATTACGTATCTGGAATAA

>Cluster\_2353

ATGAAAAGAAAAGTTCTGGCAATGCTGGTCCCGCGTTATTAGTTGCTGGCGCAGCAAATGCGGCTGAAATTTACAATAA  
AGATGGCAATAAAGTTGATTTCTACGGCAAGATGGTGGCGAACGCATCTGGTCAAATACTGATGATAATAACAGCGAAA  
ACGAAGATACCTCCTATGCTCGTTTCGGTGTAAAGGTTGAAACCCAAATCACCAGCGAACTGACTGGTTTTGGTCAGTTT  
GAATACAACCTCGACGCCAGCAAGCCGAAGGCTCTAATCAGGAAAAAACCGTTAACCTTCGCAGGTTTGAATAATAA  
CGAGTTAGGATCTTTCGACTATGGTCTGTAACACTACGGTGTGCTTATGATGCGCGAGCTTATACCGATATGTTAGTTGAA  
GGGTGGTGTATCTGGGCTTCCGCTGACAACCTCATGAACGGTCTGACCAACGGTGTGCAACCTACCGTAACTCTGAT  
TTCCTTTGGTCTGGTTGATGGTCTGAATTTGCTGTGCAATATCAAGGTAAAGAACGCAATCTGGCGTTACTAAACAAA  
CGGTGATGGTATGCGTTGTCTGTAGACTACAACATCGAAGGTTTGGTTTTGTAGGTGCATATAGCAAACTGATCGTA  
CTAATGAACAAGCTGGTGGCAGGCTACGGTGAACGCTGAAGTGTGGCTATTAGCAGCCAAAGTATGATGCAAAATATATC  
TATGCAGCAATGATGTACGGTGAACCCGCAACATGACCGTTTTGGCTAATGATCATTTTGAATAAAACCCAAAACCTT  
TGAAGCTGTGTACAGTATCAGTTCCGACTTCGGTTTACGCTCGCTTTTAGGCTACGTAATTTCAAAGGCAAGATCTTT  
ATGCTCGTAATGGACATAAAGGTTGTGATGCTGACCGGTAATATATCGAAGTTGGTACCTGGTACTCTCAATAAG  
AACATGAACGCTTACACAGCATACAAAATTAACCTGCTGGATAAAGCAGATGACGCGATACCCGATGCGCAACTGATGA  
CCAGTTTGCAGTTGGTATCGTCTACCAGTTCTAA

>Cluster\_23153

ATGAATGTTTTTCAGTCGCTATTTAATCCGTCATCTCTTTCTCGGTTTTGCCGCGCGCAGGGCTATTGCTGCCGCTTTT  
TACCACCTTCAACCTGATTAACGAACTGGATGATGTCAGCCGGGGCGTTATCGCTGGACTCAGGCGGTGCTGGTGGTGC  
TGATGACCTTACCAGCTACTGGTCAACTTTCCGCGTTTATCGCCTTATTGGGAGGATTGTTGGCCTGGAGCAGTTA  
TCGAAAAACAGTGAAGTTTACCGCATTCGCAGCACTGGGTTTTCTATCTTCCGTTATTGCACTGGTGGCGCTGGTTGCCG  
GATATTGTGGACTGTTTCCGTTAGGCGCATGATGAGTGGTGGCGTGCCTATGCAAGCAACAGGCGCTGCAAAATCAA  
CGACTGCCACCGGCTGGGGGAGGACGATGACATTACCGCAATATGCTTTGGCCAGGCGCGGTAATGAATTTGTGACG  
GTGAAATCGCTGAACGAGCAGGCGCAGCGGTTGGGCGTGGAGATTTTTATTACCGCGATGATCTCTCGCTCGAATCCTA  
CATTTATGCGCGCAGTGCACCATTAAAGATGACAAAACGTTGGATCTGCAATGGTGTGAATCAAAAAATGGCTGAATG  
GCAAGAAAACGCTGAAACATCTGATAAATCTTGGCTGGCAATGACCTTACCAGTATGAATCTTGAAGATTTATGAT  
CCGGGAAATACTTTTCTGTCCGTCAGCTTAATCATTACATCCATTATTTGCAGGAAACCGGGCAACCCAGCAGCGAACA  
CCGCTTGCAGCTTGGGAAAAACGTTGGGCAACCCATCTGACCTGGCGATGATTTTGTGGCTGTGCCGTTTACCTTTA  
CGCCCGCGCTCGCCAGGATGGGTAGCCGCTCGCTGTAGCGCTCATCGTTGGCTTACTCACCTGGATCAGCTATCAA  
ATCATGGTCAATCTGGGATTTGTTATTTGCGTTGAGCGCACTGTTACCAGGCTCGGTTTTACCGGTAGCCTTTGGTGGT  
GGCCTTGGCCTGGTGTATTGGTATGACAGACAACATTA

>Cluster\_42160

ATGAAATTAATCACTGCACCATGCAGAGCATTACTTGGCTGCTGTTTTGCTACGCGTTTTCTGCGGTGCTGAAAGAAG  
TCGTCCGGCAGAACATGACGACACAAAAACCCCGCAATTACCTCGACATCTTCTCCTTCAATTTCTGTTTTTACCGCGAAT  
TAGGGGTTGGTGGGTATATGAGTTTAGAGGGTGAAGATAAACATAAATACAGCGACCGCACCTATATTGAAGGTGGCCTG  
GAGATGAAGTACGGCTCTGGTTCCGGCTGATTTACGGCGAAGGCTGGACCGTGCAGGCGCACACGCGTAATGCCTG  
GGTCCAGACCATGAAACGTTGGGTTGTTTCGAGGCGGAAATTAACCGTTTTCTATGGCGGTTATCGTACCAGATGGCAGC  
AAATCATGCTCAGTCTGCGTACGATTTCTCGTGGATGACCTGCAATGGTGGGGCGATTTACGCGCCGATCTGGGCTAC  
GTCATTCCCAATACCCGCGACATATGACTGCGCTGAAGGTGCAAGCTTAAAGCGCAACTTTCTGTTATAGCGTACCCG  
CACACCTGCCGACATCATGACGAAAGCAAAGCCTGGCTACATTTGGCAAGTACGATCGCTACGACGACAAAATACACCT  
ATCCGGCAATGATGAACGTTACATCTCAGTATGACCTTCCGCAAGGCATACCTGGATGAACGCTCTGCAAAATCACCGAC  
GGCACAGGACAACCTATCTGACGGGCTGCTTACCCCTAACTTTGCGCTCGCGCTGGCACCATACCGGACGCGCGGA  
CGGCTGGACGTACCGGGAAGTGAAGCGGGATGATGGTGAAGCGCATGATGAAAGCGTTAAAGGGCGTTTATCTCTCCA  
CCGCTTACACCTACGCCAAAACATCGCCCTGACCAGCTGACGATGAAACCACCTTTTCAATGCAAGTTTGGTATCTGGTAC  
GAATACGGCGGGGACGTTTTCGCAACCGCTTTTGTAGCGCTTCTATATGAAAAATGCCCTCACAGTCCACGCAACCA  
AATCTTCTGATGCAATATTTCTACTGGTAA

>Cluster\_29143

ATGTCATTACAAATAGCTGTGAAAAAGTGCCTTGGTTAGCTGCCGGGCTGCTGGAACCTAATGGCTGTGATGCCGATAT  
CGCTCAGGATGTGGCGGAACATATGATTGAAGCGGAACGTTATGGTTTTGCCAGCCACGGCGTACGCTGCTACCGAAAT  
ATCTGGAAAATATCGCTCGTGGCGATGTAACCGGAATGCCCGCCGGATGCTTAAACAGTGAAGGTAATTTACAACGT  
TTTTATGCCACAAATGGCTTTGGTCAACACGCCGAAAAGTGGCGGTAATATGCTGCCATCGAACAACAAAACACCGCGG  
TTTTGCTGTAAAGTTGTTGCCATGCGCATATTTAGGGCGTATGGGCAATACGGGCAAATGGTTGCTGATCAAGGCC  
TGGCGATGCTGGCCATGATAACGTCACCGGGCTTCCGCAACTGGTTCGCCCCGTTGGGGCGGTGCGGAACCCGATGACC  
ACTAACCTTTCTGCTTTGCTGGCCGTTTCACTGATGGCGCTCCGCGGATCTGGTTGATTTTGCACAGTAGCATGGC  
GCTAAATAAAGCAGCGGTAATGTGCTCCACCGGAAGCAGGCGCGCCGGGACAAATGATCGATGCACAGGGGAATCCAA  
GCAATGATCTGGGGTGTATTACAGCAATCTCCAGGGCGTTACTGCCATTTGGTGGAGCATAAAGGATTTGGCCTGGCA  
CTGATGATTGAAATGATGGCGGGATCTTATCTGGTGGTACACGATCGCCGAAGATCATCAGACGGATGGATCTGGCA  
TAATCATCTTTTTGCGTTGATTATCGATCTGATCAATTCACCAGTCTGGCAGGGGAGAAAGGCGAGTTCTTTGCGGAT  
ATCTGTTAGTACGACGCTCAACCTGGCGGCAATCGGTTGATTTACCCGCTATGCCAGAAGCTGCCAACCGGGAACGC  
AATGCGAAGATGATACGATCCAGATCATCTGCTGGTCTGGTGTGAAACATTACGCCCGCAAGGATTCGATTTGGG  
GTTACATCTCAGGAATCAGCATTAGCTGGATGA

>Cluster\_6736

ATGAATGCACCTTCTAGGGAAAATGCGAGGAGCAGTAGCAACCTTCTTTGTGCTCTTATTTGAATAAATTTTTTCAAC  
ATTTGCTATAGCAACCTTACTTAGCATATGAACATATATTAGAGCACACAACAACAAAGCATAAAGGATATACAGTCA  
TGTTACAGTTACGAACAAAGGAAAAGAAAAGAAAAACGTAACCAATACAATACCAAAAAGCAAGTCGATATCTCTT  
ATCTCAGCTAATAATGTTAGCATGAAATGTAAGATAACAATAATCAATTTGACCGCATCTTCCAAAGGAAAATATTAC  
TTTTGATGTTTTGGTTAAAAAGGTTGCCGTTCTATCGAAGCTAATTTACCAATATTGAATCTGAAGATGCTAATGGAA  
AGTGTATGACAGCATAAAGAAAATACCCTAGCCTTGGCCCTGCTTTCTTACGTTTTTCAATGTTTTATGCTATTTTTA  
GTATTAATGGGAGGACCATATACAAGGTTACGATCCCTTGAAGTAAACATATACGCAATATTTCAAATGAGATTCAC  
TCCTTTCTATGATAGAGTTTGGAAAATAATTCATAAAATCACTCCCTTACAAAACAATAATGATACATAAAAATCAG  
ACTTCCCGATTGATTAAGAGTCTTAATGTGAAGGATGGAAAATCGAGTATGTTTTCAATTAATGATAATAAACAAC  
TATAACCTTAGTGCAGCATGAAATTTATAGTTAGAGATGAAAACCAATATATGATGAGTTGGGAAAAGTATGAACAT  
TAGGAATGACGCTGATAGAGCTCAAGCTTACACGAACTAAGAGATAAATATCATGTTGCTGAAGATACTACAGGTGCTA



CATATTCAAATAAGTGAATGGATTGATAAGGGACAAAGAAAAGAAATAAAAATGACTCGCCAGTTGTGCAAGGCATCGAT  
TATAAGGATCTCGGTGTTGATATAAGGATAAGGAATGATGCAAAATGATGATAAATTATTACGGCGACTATCAATTTAAACC  
GGAACGCTCAGCAATAGCTAAAAATAAATGGATGCAGCAATTGCTACTCAACGTTTTCCGTTGAAATAG  
>Cluster\_40770  
ATGACCGACACCACATGAATTTGCTCAGTCAGGGCACAGACCCCGTGAATAATGCCGGATTTTGTATATTTCTCGGGAGGG  
TAAAACGCTGTCCGGCGTGGCAGAGCGCTGATGAGCCTGTGCTGACCGACAACCGGGGATTTGAGGCGGACCAGCTCA  
CCATCACGCTGGATGATGCGGATGGCCAGTTGCAGCTACCGCCACGGGGCGCGCTGACGGTTCTCATTGGCTGGAAA  
GGGGAACCGCTGCAGAAAAGGCACTTACATTTGTGATGAAATCGCTCACGAAGGACCGCGGACAGGCTGACTGTTTC  
AGCCAGAAGCGCAGATTTTCGGGATGAAATTAACGTTAAACGTCAGGTTGCTGGCATGATGTACCCTGAGCGTGTGG  
TATCCGCCATCGCTCATCGGTACGGTCTGAAACCAAAATCAGCGAAATGCTGATGGATATCGAAATCGACCACGCGGAC  
CAGACCGAAGAAAGCGACATGCTCTTCTTACGCGCATGGCGGAAATGCTGGGCGCAATCACCACGGTAAAAAGCGGTAA  
TCTGTTATTCATTTAGCCAGGGCGTGGCGTGAACGCACAGGGCCAGCCGTTGCCATCGTTCCGATCAGCGCAGCAGT  
GCGATCGCATCAGTTCCGCTTCCGCTGCTGACCGCGAAGCGTATACGGGGTACGCGCTTACTGGCTGATCTTAAATCACGG  
AAAAAGAAAAGTCAAGCTGAAACCGCCGAAACCGCCAAAACCCAAAAGGAGAAAAGCAGCAGCCGTGAAGGTGATTA  
TATGGAAGGTGCGGAAGGCAATGTTTGTGTTACGCAAGACTTATCAGAACGAGCAGCAGCAAGACCGCAGCGGGCG  
CAAAGTGGCAGCAGCTACAACCGCGGAGCCGATCATTCTCCATCACACTGGCAGTGGACCGCAGAACTTACCCCGAA  
ATGCATGGCAGCGTAAACGATTTAAAAGCGAGATTGATAAATCAGGACTGGATTATTGCAAAAAGCCGACACCATTTGA  
TAACAGTGGCTTTACCACACAGCTTGAGCTTGAGGCAAAAATCCCGAATGGATAGCGGAAAACAGAGTGA  
>Cluster\_10989  
ATGCAGCCACATGAAACATTTACCGGCTCATAACAGCCCGGTGACGTGGAATTTCTGCTAAAGCCGGTTGTCTATTGAGAT  
GACCGCGTTGAGAAAAAGAAACTGATTCAGTCCGGGAAGAAAATATTTCGACATGCTCAGCCAGGAGCCAGCGC  
CTACACAATGGCATCTTGATTTGTTTACCGGGCGCTGGATCGGGGCGCAGAGAGGCTTGCAAAAGAACTCACACAGCTC  
GCTATTGCTCTGGCCGAACGCTTTCGGTGTAGAGCCATTGTACTGGCCAGTCTTGTACAGGGCTGGCGTTCCGCTCGGCGT  
TATGCTGACCCAGGCTCGGTGACATGGGAAAACCTCATGGGATCAGGATACGGTATCAGCATTATCCGGGATCGTGAATG  
ACGGTGCAGCCCTCGACGTCATTGAAGAGCGGCATGGTACCAGCGGATTTGCTTTGTTGACGGATGGACAGGTAAAGGC  
GCAATTACCGGAGAGCTTGTACGCGCAGTGAAGATCGCCGGGCTATCCTGAGCAGCGCGACTGGTGTCTTGGCCGA  
TCCCTGTGGCTGCTCCTGGCTTGCCAGCCAGTGTGATGACTGGCTCATTCCTTTTGGCATCATGGGGCGCGGATCAG  
GCTGTGACCCAGGCTCGGTGCTTCTGTAAGGATTAACAGGATGACAGGTCATGGTTTGGCAGCAGTGAATGAACTGAA  
AGCCGGATGCTTGCCGATACCGTCCGTCATTTCCGTAAGAAGTAAACACCGTCATCCCTCGCTCCCTGAGCTGGAATAC  
GGAATCAGCCCGGCTTTATGGCAGACAAGTCCGCGACTTATCCGCTTCTGGCCGATGAATTTAAAGTGGACAGCGTCA  
ATCGTATTAACCCGGTATTGCTGAAGCAACCCGGGCTGATTTACGTCGGGTACCGGACCATGATTTTGTGCGTTCTATT  
GACGACCCGACGTTGCCCTGCTTGTAGGGCTTGTCTCGTGAAGGAAATAGTTGTTACAGAAATGGGGGATCCCTCGG  
CCAGTATCGGGCTGTAACCATTTATCAAGAAGGTACTCTGA  
>Cluster\_39678  
TTGAAAACAGCAAAATGAAAAACAGGGAAGAATTAACAGTCTTTGCAACGAACTTGTACTCAAATCAAGATGCAAAAC  
CAGCAGCAATTTAAATGATCTTTCTACAGCCCAAGAGAGCTCGCTATTGCCTTAATCAATCATGCTCGGGGAGAGCAGT  
TTGAGGATATGAATAGGATATCCAAAACACTACCTGGTCTCGACTATGTGCAACCGGGAAGCGCTTAGGTTTGCAAATG  
ACTGCCACTGCAAGAAAGTTAAGTATCAGAAAACATAGACAAAATTCGAAAATGAGAAAGTTAAAGGGTAAAGTTTGA  
CGAGATTTGGTTTTCTCGCTCACGGCTGAACGCTACTGATAACGTAACGTAACACCCCTGACGATTTTTCAGTGCAAAAT  
ATTTACATTTGTACGACCTAGTCAAAAAGGTAATGGGACAGACTTTAGAAATTTAGCGTGATTTTTCAGCCCTTGGCCGG  
AAAGAATACCTCGGATATTTCTCTCCTGGGACGTTGCTTTCAATCAGGGGATTTGTGTATCAGAAAACAAGCGATCCC  
CTTTGACTTGAGTCTTTTCAACGCGTAAATTCATACTAATGAATGGTTTGTATGATGTTGACGAAGGTGAGCAGATCGTAT  
ATGAATTTCTAGAACTTTTAAAATAGACTTCGCTCACTAATGACTTTATCTGCTAGAAAATCTTTTAAAGAAAATTAACAGT  
GAGATAAATATACCGAAGAGTACAAGCAGGAAATCGAGTTTCTGAAAAGCAACTTTTTCGGGCCACTAATGATTTGACGA  
TACAAACTATCAATCTTTTCAAAAGACCTTGATGATTTGTTGAGATGAGTCTTATTGAACGATGGGACAATATGTTG  
GAATGTACTATAAGGGTGTATGATGCATATATAAAAATGAACGATGATCAGCGGTGCTATTTCCAAAGATGAAACCGGAA  
ATGAATCTGTATGCGGCGTATATATCTTTTATGAAAATAAATCATGATATTGCAAAACTTGTGACGCAATTTGAAAATAG  
TGATTTTTCTCTGCTCGCTGACAGCACTTGCCAAAATAATTAG  
>Cluster\_19918  
ATGACCCCTCCGATACAGGCCAGCCTCGATCTGCAGGCATTAACAACAGAACTGTCCATTGTCCGCCAGGCGCGCCGTA  
CGCGCGCTCTGGTTCGGTGGTAAAAGCGAACGCTTACGGGCACGGTATGAGCGTATCTGGAGCGCGCTCGGGGCCACC  
ATGGCTTTGCAATTTGCTTAACTGGAAGAGGCAATAACGTTACGTGAGCGCGGCTGGAAGGACCGATCCTGATGCTGGAA  
GGATTTTTCCATGCTCAGGATCTGGAGATTTATGACCAGCACCCTGACCACCTGCGTACACAGCAACTGGCAGCTCAA  
AGCATGCAAAATGCGCGGCTAAAAGCACCGTTGGATATTTATCTTAAAGTGAACAGTGGGATGAATCGGTTGGGCTTCC  
AGCCCGACTCGCTTACCTTTCGCTGCGCAGTTCGGGCAATGGCGAATGTTGGCGAAATGACTCTGATGCTGCAATTTT  
GCCGAAGCGGAACATCTGATGGAATTTCCAGCGGATGGCGGCTGTTGACCAGCGCGGAGGGGCTGGAGTGTGACG  
CTGTTGCTTAACTCGGCGGCGACTCTGTTGGCACCCGGAAGCGCATTTTACTGGGTTTGGCTGTTATTTTGTATG  
GCGCTTCGCGCTCCGGTCACTGGCGTGTATCGCAATACCGGATACGTCGCGTGTGATGACGCTAAGCAGTGAATTTAT  
GGTGTCCAGACGCTAAAAGCGGGCGAGCGTGTGGCTACGGCGGCTGCTATACGCGCGGATGAACAGCGAATCGGCAT  
TGTGCGCGGAGGATACGCGGACGGTATCCGCGCCACGCGCTACCGGTACCCCTGTTTATGTTGAGCGGCTTCCGACCA  
TGACGGTAGGGACAGTCTCGATGGATATGCTGGCGGCTGATTTAACGCTTGCCTGCAAGCGGGTATTGGTACGCCAGTT  
GAGCTGTGGGTAAGGAGATCAAAATTTGATGATGTCGCGCGCTGCCGGAACGGTAGGCTATGAGTTGATGTGCGCGCT  
GGCGTTACCGCTCCCGTTGTGACGGTGTAA  
>Cluster\_24314  
ATGCTCTGCTGTTTTTCCACTCGCGGAGATGGCGAGGCAACCGCCCTCTGCTCGCGCTGTTGCAAGGCTGTTTACCCT  
TGCTCTGACGCTACTCGGCTGCTGCTGATTACCTTTGCGCTTTCGGCTCTCTCACCGGTGATCGGCTACTACAAAATCG  
TTGGCGATCAGCCAGCCAGTCCACCTATGATCAGGTACGCCACCAGTTAGGATTTGATCAACCGTTAGCCGTTCCAGTTC  
TGGCATTACCTGATGAATCTGGCACACGCGGATCTGGGATCAGCCAGCTCCACCGGGCAACAGTACTCCAGGACTGCT  
ATCAGCATTTCCGGCGACCATTTGAACGGCAACGTTGGCGCTTATGTCGGTGTGTTGTCGGGCTCATTTGGGGTGTAC  
TTTTGCCCGCTTATGCTCGGTTCTCCGCTGATTTACCGTGGCAACATTAACCTACTGGGAAATTCGCTCCCTTTTTT  
TGGCTTGGCTGCTGATGCTGGCGCTGTTCTACGCCAGACTGCAATGGAGTGCCTGGGCGGGCAGGCTGGATGATTTTTA  
TCAATTCACCATAGAACCCTGACGCGGATTTGGCTGATTTGATACGTGGCTTTCTGGGATCGCGAGGCAATTTACCAATG  
CAATCAACCATTTGATACTTCCGTTTTATTTACTGGCGTACTTCTGCTCGCCAGTATTACGCGCTGACTCTTCCGCT  
TGCTTTGGCGAAATGAAATAAAGAAATATAATTTGCTGGCGCGCCAAAAGGGGCGCAGGAGATGACAATTTTGTACGTC  
TGTTTTACCAACATTCGGGCGACCTTACTCACCGTTATCGCCCTGCTTATACATCAATGCTGGAAGCGCGGTTACTGA  
CAGAAACCGTCTTTTTCATGGCCAGGATTTGGGCGCTACTCTACTACAGCGCTCTTCGCGGGTGTATACCACAGCAATCATG  
GGAGAACGCTGCTGATTGGCGCTGCTTTGTGTTGATAAATAACTTAACCGACTGCTGCTCGGCTGACCGATCCGAG  
GTTACGCTGA  
>Cluster\_4820

TTGAGTAAAAATAAACTCTCCAAGGCCAGCAGCGCCGCTGAACGCCAATCACCAGCGTCTGTTAAAACGCTCTAAGGA  
GAAGCCCGACTACACGACAATCTGTTTTGGCGAGCCTGATGAAGGTATCGTCAACAGCCGCTTTGGTATGCACCGCTGATG  
TGGATCCGCGGATGGCGAGCTTACCCTGCAATATTCGCGCTACCATCCGTTGCTGGTAACCGGCGACCGCGTAGTC  
TGGCGTCCGGGTAACCCGCGCGGAAGCGTAATGTCAAAGGGATCGTGGAAGCGGTGCATGAGCGTACCTCGGTGTT  
GACCGTCTGGCGTCGGCAAAATCCAGCCTGCTGAATGCGTTGCTGGGGCTGCAAAAAGAGATCCGTGACCACCGATGCTCT  
CGGAGCTGTCGCTCAATATATGACCGCTTACCTGGTGGCCTGCGAAAACCTTGAGATGAGCCGATTATGTTGCTCAAC  
AAGATAGACTGCTGGACGACGAAGGCATGGCGTTCGTCACAGCAGATGGATATCTACCGCAATATCGGTTATCGCGT  
ATTTGATGGTTTCCAGCCATACTCAGGATGGGTAAAACCGCTGGAAGAGGGCTGACCGGGCGCATCAGCATTGTTGCGC  
GGCAGTCTGGCGTCGGCAAAATCCAGCCTGCTGAATGCGTTGCTGGGGCTGCAAAAAGAGATCCGTGACCACCGATGCTCT  
GACAACTCGGGGCTCGGTGAGCACCACGACCGCCGCTGGCTGTATCACTTCCCGCACGGCGGTGATGTTGATTGATTC  
CCCTGGTGTGCGTGTGCGCTTGGCCTTGGCAGCTGGAGCCGGAACAAATCACTCAGGGCTTTGTGGAATCCATGACTATT  
TAGGTCTGTGTAATATCGCGATTGCAACACGATACCGATCCGGGCTGCGCTATCCGGGAAGCGGTTGAGGAAGGGAAA  
ATCGCGAAACCCGTTTCGAAAACATATCACCGTATTCTGGAAGCATGGCGCAGGTAAAAACGCGTAAAAACTTTTCTGA  
TACGGATGACTGA

>Cluster\_23589

ATGGTCATTAACCTGCGCCTTTATTGGCTTCGGCAAAAGCACCACCCGTTACCATCTGCCGTATGTTACTTAAACCGCAAGGA  
TAGCTGGCATGTCGCGCATATTTTTTCGCGCCATGCGAAGCCGGAAGAACAGGCCCCCATTTATTTCCATATCCATTTCA  
CCAGCGATCTCGACGAAGTGCTAAACGATCCCGATGTTAAGCTGGTTGTCGCTGCACCCACGCGGACAGCCACTTCGAG  
TACCGGAAGCCGCGCTGGAAGCCGGAATAATGTGCTGGTTCGAAAACCGGTTCACTCCGACAATGGCGAGCGAAAGA  
GCTGTTTGACTGGCGAAAAGCAAGGGCTGATCGTTACGCGCTATCAGAATCGTTCGTTGATTCCTCTGACAG  
CGAAAAGCGCATGAAAAGCGCAAGCTGGGAGAGATTCTGAAAGTGGAAAAGCCATTTTGACTATTACCGCCCGTGGCA  
GAAACCAAACCGGGGCTACCGCAGGATGGCGGCTTCTATGGCTTGGTGTGCATACGATGGACAGATTATTTCTCTGTT  
CGGTCCGCGGATCACGTCGCTTATGACATCCGAGCCTGCGTAATAAAGCCAAATCCGAGCAGACCGTTGAAGCGCAGT  
TGTTTTATGGCGATCTAAAAGCCATCTGCAAAACCGCCATCTGGTGAATAATCGATTAATCCGAAATTTATCGTTACGGT  
AAGAAAGGTTGTTTATTAATAACGGTATCGACAGCAGGAACTAGCCTGAAGGCTAATATTTATGCCGGCGAACCCAGG  
ATTCGACGCGGATGATTCGGTGGTGTGCTGGAGTATGTCATGACGAGGGCGTGACGGTAAGAGAAGAGATGAAGCCAG  
AGATGGGCGATTATGGGCGGCTTATGATGCGTGTGATCAAACCATTACCAACGGTGGCCAAATACGTCAAGGAATCT  
GAAGTCTTACGAATCTGAAAATCCTTGACCGCGGTTTTGAGCAAGCTTCTCCCTCCGAGTGACTCTCGCGAGGTAA

>Cluster\_40745

ATGAGCAGAAAAATAAAAAAGTCCGCATGAGTTCACGCATGATCTCGCTGATGCGCTCAGGAAAGAATCGTCGCTCAG  
TGCATTAACCTTTGATGGTCTTATCGCCTGACCGGCATGATTTGGTGAATAATGTTACTGTGCTGATAACGGGCGGT  
GGTATGAAACCCCGGTGGACTGGTACGGTCTGGCAAGAGCTGCCCGCAACCTCCTGGCATCAGTCTGCGCTTACTTT  
AAGCGCAATGTTATGCTCGGTTGCTACATCCCGCACCCGCTGCTTTCCCGCAGGATTTCTCGCGCTGGCGTGGACTG  
GTTTGTGTCGGTAAACGATTCCTTGGCTTGGAGCAATATGCTCGGCGAACCACTTAAATACGGCACGACTGGCGA  
AATACATGCGACCGGAAAGCGATCTGAATCATGGTGGTATGTCAGGATGGCAAGGACGCGTTTCAAGTTTCGCGCTGGC  
AAAGTGTGCCACTGATGAATCCGGCAATTAACCGAATAATTTACGGCATGCCGGAATATCTTGGCGCATTAATCTCGC  
CAGCTGTCTCATTCGGCGGACATGTTTCAAAAAGCTGATTTACGACAATGGATCCACCGCGGTGCATCATCTACATCG  
GTGACGCGCAGGTAACCCGCAAGCATGGACTCCCTGAAAGAAACGTTACAGGGTGGCGTGGTGGTGGCGCTTTAAA  
AACGTCATCTCATCCAGCCCAACGGGGCAAGAGGGGTGCAAAATTTTGGCTTCCAGCAGATCACCGCAAGGATGA  
GTTTCAATGATTTAAGGCGGCATCCCGTGTGATGATGCTGGTGGCTGCGCACCGCGTTCCGCGCAACTGATGGGGCGATCG  
CGGGCAAAAAGTGGCTTTGGTGTGATGTGGAGAAGCCGCGGGTTTTACGCAATTAACGAGCTGATGCCGTCATGGAG  
GCCATGAAGCACATCAATGACTGGCTTGGCGAAGAGGTGATCCGCTTTAACCTTACGCACTGTTAGACACCCAGCCAC  
ATCCTGA

>Cluster\_48513

ATGAAAATATTAGTTACTGGTGGTGCAGGCTTTATTGGTCTCGCGGTTGTTCCGTCATATTATTAATAATACCAATGACGC  
TATTATTAATGTCGACAACTAATATGACAGGAAATTTAGAGTCCGTTAACTCTGTTTGTGAAAATAATCGCTATACAT  
TTATTTAAGCAGATATTGTTGATGCAAAAATTAATACGGATATATTTAAGCAACATCAACCCGATGCGATAATGCACCTA  
GCAGCTGAATCACATGTTGACCGTTCTATTGATGGCCAAAGTGAAGTTTATCCAAACCAATATCATTTGGTACTTACACATT  
ATTAGAAGCCGCGCCTAATATTGGAATCAACTCCCAACAGATAAAAAAGCCGCTTCCGCTTTCATCATATATCCACTG  
ATGAAGTCTATGGCGACCTTGAATCAACAACAGATCTTTTACTGAAATAACACCATAAGCCCAAGTAGCCCTTACTCT  
CGCTCAAAAAGCGTCTAGTGTATCTTTAGTCAGAGCCTGGCAACGCTATGTTGTTTACCAACCATCGTAAACCACTGCTC  
TAATAACTATGGTCCATTCCTACTACCCTGAAAAGCTGATCCCTTAAATCATCTTAAATGCATTAGAAGAAAAGCTCTGC  
CTGTTTACGGTAACGGACAAACAGATCAGAGATTGGTTATATGTAAGACCATGCACGAGCCTTATAAAGTGGTTACT  
GAAGTTAAGATTGGTGAACCTACAATATTTGGCGTCAACAATGAAAAGCCAACTTGGATGTTGTTAAAACCAATTTGTTAG  
CATCTTGAAGAATCTGTTACCAAAACCAACCGAATAATATTGAAATTAAGTACCTGATTAATGTTGACTGATGAGG  
CAGGCCAGACTTACGTTATGCCATTGATGCTACAAAATTAATAATGAACTGAACTGGGTACCGGATGAGACATTTGAA  
ACGGGCTACGTAACCGGTTGAATGGTATTTAAAGAACTCAGAATGGTGTGAATCAGTTCAAAAATAAATAATAATAG  
AGAAAGACTAGGGGCTTAA

>Cluster\_42297

ATGTTTGTGAAGCTTACGTTCCGTTGCGATTGGATTAATGTCGGCGCTATTTCTGCTGGTTGCCATGCCTTCGCTGCG  
CAGCCTTAAACCGCTTCCACTCCGCAATTTGACAGTACCGATGAGACGCTGCCAGCTATAATCTGGCGGTTCCGCGCG  
CCGCGCAGCGGTTAAGCTTTATAACCGCGGTTTGAACACCAACTCTCACAAACAGCTTGAGATCCGCAACCGCTGGGA  
TCTGGTGAATCATGGATCAACGCGGGTATATCATACCAATAAACACGCTGATCAACGACGCCGATCAGATCATCGTCCG  
CTTACAGGATGGACGTTGTTTGAAGCGTTACTGGTGGCTCTGACTCTTAACCGATCTGGCGGTGCTGAAAATTAACG  
CCACAGCGGTTTACCAACGATTCGATCAATCCACGCGGCTACCGCACATTTGGCGATGTTGGTTCGCGGATCGGTAAC  
CCGTACAACCTCGGCGAGACCATTACCAGGGATTTACAGTCCACGGGTGCAATCGGTCTGAACCCGACCGGCGGCA  
AACTTCCGCAACCGATGCTTCCATTAACACGGTAACCTTGGCGGCGGCTGGTGAACCTCGTGGCGCAACTGATGG  
GCATTAACACGCTGCTGTTGATAAGAGTAACGATGGCGAAACGCCGGAAGGTATCGGCTTTGCGATTCTTTCCAGTTA  
GCGACCAAAATTAAGATAAACTGATCCGTGATGGCGGTGATGATCCGTTGGCTACATTTGGCATTTGGTGGACGTGAGATCGC  
CCATACATGCGCAGAGTGGCGGATGGATCAACTGCAAGGATCTGTTTAAACGAAGTGTCCGCTGATGGCCAGCGG  
CAAATGCAGGATCCAGTCAACGATCTGATTAATCTCTGTGAATAACAAACCCGCTATTTCCGCTGGAGACAAATGGAT  
CAGGTCCGCGAAATTCGCGCTGGTTCGGTGTATCCGCTGCTGATGCGTGCAGATAAACAGTTAACTATGCAAGGTCAC  
CATTCAGGAATATCCGGCAGCAACTAA

>Cluster\_25531

ATGAAAAAATACCTGCGTGTGATGTCGAGGTTGGAACCTCGAGGGGCGGTTCTGTTAGCGGAACATCTACCCGAAGA  
TCAAACCGACCGGATAAAAATTTGATGGCAATTTATGGTTCCGGTAACGATCTGGAATGACGGTATTTGGCGCGGTA  
ATCCGCTGACAGTAAAGTCGCCATTATTAGCCCTCCAGCATCCGCGTGCAGATGTCGATTAATCTGTTGCTCAAGTT  
ATCGTCCATGAGCAACGTTGCTGATACACCGCTAACTGCGGCAATATGCTGCTGGCGTTGGGGCATTCGCCATTTGAAA  
TGGTTTGAATGTCAGCGACTTCGCCAGTTACCAGGCTACGATTCGCAACGCTCAATACGGGTACGCTATCTGAAGCTGATG

TGCAAACGCCAAATGGTGTGTGTCGAGTACGAGGTTAGCGCCAGAATTGACGGCGTACCGGGTACTGCCGCACCGGTTGCC  
CTCACTTTCTGAAATGCCGCCGGAACGAAAAACCGAAAAGTCTTCCCGACGGATAATCAGATTGATTATTTTACGATGT  
CCCGGTGACTGTATCGATATGGCGATGCCAGTTGTCAATATTTCTGCTGAATATCTGGGAAAAACAGGCTATGAATTAC  
CGGCAGAGCTGGATGCCGACAAAGCATTATAGCCCGCATGAAATCTATCCCGTCTACAAGCGGGTAAAGCAATGGGCTTA  
GGCGATGTCAGTAATATGGTATCACCAGGTGAAATCATTTATGTTGAAAAATGAGCGGGTATGTCCCTGATTTTTTACCGGTT  
TTTTATGCCGCATTTCTGCCATCGCGCTTTGGCGATAACCGGTGCTATGCTATTTCCAGTAGTTGTGCATTGGAAGGCA  
CCGTCACCGACAAATCGTCCCTTCTGTAGGATACGGCAATATCAATATTTGAACACCCAGTGGTGGCGTTCGACGTTCA  
TTAAGTAATGAAGGTCAGGATGCCACGAGTTACGGCATCTGTTATTTCCGACGACAAGAAAAATATTTTCCGGTGAAGT  
TTATCTTCCCTGA

>Cluster\_21624

ATGGCTATTAAGTGCATATATTTGGCGTGCAGGTTCTGGCAAATCTTATGAAGTGGTAAAGTCTGTTATTTATCCGGCTGT  
TGCATCCGGCCGAAGGATTTGCTCAAATATATACGGCATGAATCATGAGGCAATCATTGATTTGTTATAAAAAACAAC  
TGATAAGTGCATGATATTTTACCAGGTGAAATCATTTATGTTGAAAAATGAGCGGGTATGTCCCTGATTTTTTACCGGTT  
AAGGGAATCAGGATAAATCACTCTGCCAGCCAGGTGATTTAATTTCTCGATGAGTGTATCGTTTTTTTTTACATCAGA  
TAAAGCTTTGTCACTCTGATGCCCGTATCTTTGCTGCCGAGCATCGCATTATGCTGATGAAAAACCGGGCAACCTGGC  
ACCTTGTCTTATTAATCAGGCATTGACAACGTTGCCCTGCTTCTTCTGAGCGTATTGAGCAGACTTTCAGAAATGAAA  
AAAGCTGATTTGGTCTTTTCTCAATAAAAGTTATCGCTGTGATGTTTTTCGACGGTTCCAGAACCACAAAGGCAACGCATCTTT  
AAATATGCTGCGGTTACAGTAAAGATATTTACCGCTTTACAGCTCTCATGATGTTAAGGGAGCGGTGAAACAAGAA  
CTGACGCAAGGGCGGTTTTGTTTTAAACCGCAGGTTATTTCTTTTGTATTTTTCTTATATTTGCTTTCTGTTTATCTCTTC  
TTTTAGTTTTCTTTTGGCTTTTTTAAATCCGAGAAAAAACAAGACAGGCACAGCAGTACGCGCGTTACGTTCTTCCGCG  
GTCTTCGCGCTCGGTTAATGTTTTGCTTTCACCGGAGATAAAACCGCTCTGCTCTTCTCAAAAAGTGGTGCCTAATAG  
GGCGTTTTAATGACGGGACCGGAATAATGTTTTCTGCGGATACGGATAATCGCTTCGTAATGTTTCCGCAATAAA  
TTCAGGGGCTGAAATATTTATGCTTGAGGGAGAGGTGGACGGCGTGAAGGTTGTTGCATGGTCCGTAAATAATCCGGTTTC  
TTTACGGGGCAAAAATGA

>Cluster\_41002

TTGAAACGCCGCTTATTATTGCTGCTTCTTTGTTTCGTTTTTAATTTATCGTCTGGTTTTGCGCGGAAAAACATTCCTTT  
TTCACCTCAGCCTCCAGAGATTCATGCCGGTCTGGGTTATGATGGATTACACCACCGGTCAGATTTCTACCGCGGGTA  
ATGACATCAACAGCGCAATCCCGCAGCTGACAAAGCTGATGACGGGCTATGCTGGATCGCGCTATCGATGCTCAT  
CGCATTACGCCAGACGATATTTGTCACCGTGGGGCGTATGCGTGGGCGAAAGATAATCCGGTGTGTTGTCGGTTCTTCACT  
GATGTTTTTGAAGAGGGCGATCGGTAATCGGTACGTGATTTAAGCCGTGGTTTTAATTTGGATTTCCGGAAATGACGCTT  
GTGTTGCTCTGGCTGACTATATTTGCCGGTGGGCAACGGCAGTTTGTGAAATGATGAACAATATGCCGAGAAGTGCAT  
CTCAAGGATACGCATTTTTGAAACAGTGCATGGTCTGGATGACACTGGCCAGCATAGCTCGGCTTATGATTTAGCCGTCGT  
TTCTCGGCTATCATCCACGGGAGCCGAGTTTTATCATATGTACAGTGAGAAAAGCCTCACCTGGAACGGTATCACCC  
AGCAAAACCGTAACGGGTTATTTGTTGGAATAAAACCATGAATGTTGACGGCTGAAAACGGGTCATACTTCTGGTCCGGG  
TTTTAATCTATTGCTTCCGCTGTAGACGGGACGCTGCCCTCATTTGACGTGGTAAATGGGGGCTGACAGTGCAAAAGGTCG  
TGAGAAAGAGCAAGAAATTAACGCTTTGGGGCAACAAAACCTTACTACGGTGAATTTTTGCAACCGGGGAAAAAGG  
TCGGTACGGAACGCATCTGGTATGGCGATAAAGAAAATATCGCCCTGGGAACGGAACAAGAGTTCTGGATGGTGTACCG  
AAAGCCGAAATTTCCACATATCAAAGCCTAATATACCTTTGATGTTAAGAACTCACCGCCCAATTAGCGCCATCAGCG  
GGTAGGGGAAATGAACCTTACGACCTGATAAACAGGTGGCGACTGGCCGCTGGTTACCTTGAATCTGTCCGGGAAG  
GCAGCATGTTTTTCCCGCTGAGTGAATTTTACACATAAAGCCCTGA

>Cluster\_43466

ATGACAATTGACTATCAGGCACCTGCGTGAAGGAGCAGAGAAAGCAACTAAAGGAAGCTACATCGTAGGGCATAACATCTGT  
TAACCAACACCGCAATTTAAACAGAGTTTTTGTGTTCAAAAATGGAAAGGAGAACCCGGTGGCGTATTGCGGAATGTC  
ATGTTAACTGCCTGATTGAAACAGATGTTTACGGCTTATGCAAAACGCTGAAATTTATGCTGCTTTTAAATCCAAATGTTGCG  
CTGGCCTACTGGATGAACGGGAAAGAAACCAGCAATACATCAATCCCGCAGCAGGAGAACGAGGATATTGCGCTTAC  
GGTTGGGAAGCTGCGGTTGAGCTTGAAGCAGAAGAGAAAAATCAGCAGCCAGACTTGAAGGCTCGACCGCACCCACA  
AAATGTTTCCAAACGGGAACAATGCAAGGCAAGAGCCGAGAGAGCGTATTTGCTGAACTGGAGAAAGCGAAGCAACTC  
ATTAACGAGCGTACCATGCTGAATCTGCTTTAGCAGATATGTACTTTGACGCAACCGGGAACGAGCCGAGTGGAGTAA  
CTGTTTCACTTTTTTCAAGATGCTGTCGATGCCGTAGTTGACAGAAATGCTGATTTAGAAGCCAAACAGCCATCGCCAGTAG  
TGCCGGAGGAAATCAGTACGACCACACAATGCTGCCCGCATGAATGATCAGTTGATGGCTTCCGTTATGTGAAGGGG  
TGGAAATGCTGCCCGCGCCATGCTTCAAGGTTAGCCAACTGTAAGCCAAACTTACAAGTTGCCAGTTAATACACCTTG  
CCAAGATGCGCCAGCCATATCTGGCTGCAAAACAGCTGGAGTATGGCCAGAAGATGGCGAGTTAAGCGAATTAACGTGGT  
GCAGCCAAATCAGCACCATGATGACACGCTATATGTTGAGCTGACCTTGTGAAATGGCAACTCTCCGGTAATCCGGAT  
GGTTGGATAAGCTGTAGTGAGCGAATGCCGAACGATAAACAGTATGTTTGGTGTGGGGTAAGTCTTACGGCTGGACTGA  
GTGCGATACTCTTCAAGGTTATACAGTGTGTTTCGAGAAACAATGTTGGGCGAGTTACTGACAAATGGGGAAAGAACCGGCAT  
CGAAAGTAACCCACTGGATGCCGCTACCGGAGCCGCGCAGGAGGTGAAGTAA

>Cluster\_7946

ATGCGTAAAGAGACCCGTTTTAAATCAATCAGTACTGAGCGTATCGCCGAGCTGAACGGCATCGCGACCGGACCT  
CGACAAAAAATTCACCGTCGAGCCGTCGGTGCAGCAGACCCCTGTTTGACAAAAATCCAGCAGTCTCCAGCTTCTGAAAGC  
TCATCAACATGGTGACCGTTGGCGAGCTGACTGAAGAGAGGTCGGCATCGATGTGACCGGCTCCATTGCCAGACCGCT  
GACACCGACGGCGGCGTTCGAGGCTAAAACCGCTGATTTTCGCGAAAAATGGATGCGTACCCTATTTCTGTACCCCGGTGAA  
CTTCGACTATCACTGAAGTACAACAACCTGACCTGTGGCGCGTTTTTCAAGGATTTTCAAGATTCGATTCGCAACGCCA  
TCATCAAGCGTACGGCGTGGATTACATCACCATCGGCTTTAACGGCGTGAAGCGGGCGGCGACTGACCGTAGCAAA  
AACCCTTACTTCAAGGATGTCGCTGTCGCTGGTTGCAGAAATACCGCAATGACGCGCTGAGCGGCTGATGTCCAGCT  
CACCAGCGTGCAGCCAGCTAATTTTCGAACACCATCAAAGTGGGTAAGGGGGGCAATACGCCAACCCTGACGCGCTGG  
TCAATGATGCTTTTCGAGTCTGCTGCTGCGGAAATTCACCGCAACCCGGAATGGTGTCACTGTGGTCCGCGTATC  
CTGACCGACAATACTTCCCGATGATTAACAATTTCCAGGCAACAGCGAACAGCTCGCCGGTGAAGTATATCAGCCA  
GAAAACCATCGGTCAGCTTACAGGCGGTGCGCGCCGCTTCTTCCCGGCAACAGCGTTTTTCAATACACGCTGGATAACA  
TTTTGATTTATCTGTACGAGGACGGTACCCCGCCACATCGTCAAAAATCCTCAAACTCGACAGGTGAAAACCTACGAA  
CAGGTCAAAGTCGATTTTCTGTTATCGAGACTACGAGCCGCGGCTGATTGAAAATATCGAGATTTCTCGAGCCGGAAGA  
ACCCGCCACCTCTGAACAGTGAAGCGGAAAGTCTTTGCGGGCGCAATGGTCAAGGCGATGACGCTCTGACAGGCGAGC  
CACCCTGAAATTTGGCACCACTGACGGCAAGGAGCATAA

>Cluster\_28059

ATGGAAAGAGTCAATATTACCGAGCGCCCGACTGGCGCGAAAAAGCCACGAATACGGTTTTCAATTTTACACCATGTA  
CGGGAGCCGTACTGGTGTGAAGATGCTTACTACAAGTTGACCTCGCCAGGTTGAAAAGCTGGAAGAGTACCCGCCG  
AACTGCACAGATGTGCTGAAAGTGGTGGAAAAAGTGCATCGCCAGCATGAGCTGATGACCAAAATCCGCATACCAAAA  
CACACTGGAGTTTTTGTGCGCCAGTCAATGGCTGACGACAGCCATCGCTTTATTCGCGCTTTGATCTGGCTGGGATGG  
CACTGGCGAACCTAAACTTCTGGAAAAATACCGCGATACGCCAAGCTCACTATACGAGGCGGCTTCTTTTCAATGATCT  
GGTGGAAAGTACGCTTAAACCGGTAACCTTGGCGGAGGCGAGCAGCAGTTTAAAGTCTGCAAGAAAAGCTGATCGAT

CGCTTTGTCGAGCTGCGTGAACAGTATGGCTTCCAGTTGCTGCATCTCACCTGCTGTCGCGACACGGTGGAAAGATCGCGG  
AACCATTCAGTATTTGACGAGACTGCGCGACGGAAGCTGAAATCGCTACCGAGTTCTCTACATCGACGATATCGGGTTAG  
GTGAAAAAGGTCAGTTACAGGATTTACAGGATCAGGTGATTTCCAACCTGTTCAAGCTGTATCCGTGGGAATTTATGTTG  
CGTGAGATTTCTTACCAAGCTGGAGGATGACGGCGTACGCTGGCTGGAAACCGGCGTGGAAAGAGCATATCTCCAACAA  
AGCGCTTCTACCGTACTGTGGAGATGTTCCGGAATCACCCGAACCTGCTGCCGCTTATTTTGGCGAAGATGATCATC  
CGCAAAATGAAAAATATGTGGTTAAACCCTCTTCTCCCGTGAAGCGGCAACCGTGTGATCATTTGAGAACGGCAAAACC  
ATTGAAGCAGCGAAGGTCGGTATGGCGAAGAAGGGATGATTTGTTAGCAATTCACCCGTTACCGAAATTCGGCGACAG  
CTATATGCTGATTTGGTAGCTGGCTGGTGAACGATCAACCTGCCGGAATTTGGCATTCGTGAAGACCGTGCATTTGATCACC  
AGGATATGTTCTCGGTTTTATCCGCATATTTTGGTTGAGTAA

>Cluster\_22775

ATGGCGGTTGATATTAAGATGTGCAACAGGTCGCGCAGGAGCTGCAGCAGAAGTTTGACGACTTCAAAGCAAAGAACGA  
CAAGCGCGTGGATGCGATTTGAGCAGGAAAGGCAAGCTGTCGCGGCGAGGTGGAAACCTGAACGGGAAACTCAGCGAGC  
TGGAAAACCTCAAAGCGATCTTGAAGAGAGCTGCTTGGAGTGAACCTGCGCAGGTTGGTGGCGCAAAATAAACTGGCC  
ACCGAGCATAAAGAAGCGTTTGTGGGCTTCTGCGTAAAGCCGTGAAGATGGTCTGCGCGATCTGGAGCGCAAGGCATT  
ACAGGTGGGCACCGATGAAGACGGCGGCTATGCCATGCCGGAAGCACTGGATCGCAACATTTCTCACCCGCTGAAAGATG  
AAGTGGTGATGCGCCAGGAAGCCACGGTATCACCGTTGGTGGTTCGGACTACAAAAAATGGTGAATCTGGCGCGCACG  
GCTTCCGGATGGGTTGGTGAAGCTGACGCGCGCTCCAGACTGCCACCTCAAACCTGGGCTGATTGAACCTTTTCATGGG  
GGAATCTACGGTAAACCGCAGGCCACCCAGAAAATGCTGGATGATGCCTTTTTCAACGTGGAAGCATGGATCAACAGCG  
AGCTGGCAACCGAATTTGCGCAACAGGAAGAAATGGCTTTACACCGCGGATGGTACCAAGAAGCCGAAAGGGTTCCCTG  
CGGTATGAATCCACGGATGAACCGATAAGGTCGCGGCTTCGGCAAACTTCAGCATATGTAATCCGGCGCAGCGCACG  
GGTGAACCGCAGACCCATTATCAAACCTGATTTACACGCTGCGTAAGGCACACGGCACAGGCGGAAAGTTTCATGATGAACA  
ACAAATAGCTGTTTTGCCATCCGTCTGCTGAAAGACAGCGAGGGTAACTATCTGTGGCGTCCGGGGCTGGAGCTGGGGCAG  
CCGTCTCTGCGGGTTACGGTATCGCTGAAACGAAACGATGCGCGGATATCGCGCTGATCGCAAGCCATTTGCAAT  
TGGTAACTTCAAACGGGGTTACACCATCGTTGACCGTATCGGACCCGATTCGCGTGAACCAACCAAAACCTT  
TTGTGGTTTTTATACCACCAACCGCACCGCGCATGCTGGTGCATTCGACGGCCATCAAACCTGCTGAAGATTGACAGTG  
GCGTAA

>Cluster\_29507

ATGATGAGAAATGATTAACCTACTGACAGCATTTCTTTTTTACTTCCGCGTGTGTCATGCCTCGCTCCGGCTTTTTT  
TGTGACCGTATTCGCTCAATGCAGCGATACAGCTGGCTCAGGAAGATATTTTCAGGCGTCAGTATGCGTTGCCGCTG  
AATTTGCCAGCGATACCCGTCGCGTACGCTGGATTTAAGTCTGACGGCGATCAGAAAAACAGCGTGAAGAGTATGTG  
CGCTGGCTCAGACAACCTGAATATTTCTGTTGAGACTCGTAATGGTGGTGGATCATTATCGCTCGTTAAACCCGTGGCTG  
GCCGAAAAAAGCTGTTTCATGGGTATATACACCATTTAACCGTTCCGCGAGCTTATCTGGCCGCGCTGCTTCGGGTACA  
CGACAGGGCGCTCAGCACAGGTATCTTCAGAGAATGCGGCTGCATCGTCTCCGGTAACTTCGGCTCATTTCTATCAGGT  
GAGGGTGAATCAGTGGTTTTTCAGGGGACACGTTTCAGAACTGGCAGCCCTTAAGGAGCTGGTTCCGCTGGTTGATGTTCC  
GGCTCAGGGGTTGTTGTTAACGGGATATTTATGAGGTACAGACAGAGCGGCTCTGAAGTTCCGGGCTGGCAGCTGGCTG  
CAAACTCTTATCAGGCGTTTTGTTGCTCAGCGTGGGTTCTCTATCCGTCGATGGGGAATACATTTTCACTCAGCTCCG  
ACGCTGAATGCGATGTATGAGCTGTTTCAGCACGGATAACCGCTTAAAGTGGTATCCGCGCCGAGCTGCGCATGGATTC  
AGGCAAGGAGCGGATATTTCTCCGTCGCTGAGCAGGTTCCGGTTCTGGCAGCGTGTCTTATGAGGATGGTAAAGCCGTT  
ATGCTCGTACGTTATCGTATTCGGGGTATATTCAAAGTTAAGCCGTTACGCTGCTCGCTATCAGCTGAACGTC  
AATCAGCAGTTAAGTAACTTTGTTCAAACCGGATACGGGCGTGAATGATTCGCCAACGTTGCTCAAGCGTGAAGTGAAC  
GTCGCTGACTCTGAAAGATGGCGATATTTGTTGCTGGTGGTCTGGCAGAAAACAAGGATTCGACGGCCAGCACAGGAT  
TATCATTTCTGCCAAAGAGCTGGAGTCAAGGCTGACGAGAAGAGCCGACGGATATGGTTATCTGTTACAGGTCAA  
AAAGTTTGA

>Cluster\_27648

ATGATAAATGGCATTCTCAACTGAGGCTATTTCAGTCAAATTCAGCTCAGTCAAATTCAGCTTTATTTCGCTCTGGAATC  
GGTATTAGACGTAAGTCTTACCTGGAAAAAATACTGGTCTGACAAGTCATGGGCTGAGCGAATTCAGTACTTAGGTT  
TAAGCCATTTGATAGTTCGGATATAAAGGTGACGACCGATTTATTTGGATGATATAAGTATATAAACCAGATATACCA  
AGTAGTAATGAAGCAGGAAAAGTGCAGGCAAGTTTTTCGGATGGCTCCAGGCTAACCATTTTCAGTACAAAAAGTGAAGT  
GATTTGAAATAGCTGTTACTACCCAGAAAGGGATGAGGTTTTCCATATTTCTGAAAGAAAATAAACAAGATTTGTTACTGA  
AATCATTTACCTGTTGCTTTGCATATGCCATATAAATAAACAATCATTTCTTACCAGAAATGAGGTTGAATGGGGCTGAT  
GGCATCCGTTTTTTTATGTAATTTTGTGTCGCAAACTTTCAACAGCAATAGTTCTTATAGTGAAAAAACGAAATCCCTTT  
TGGCGTAAGCCCTGAATTTCTATATATGCAGTACGTTTCAGAGGGCTTGGAAACTCAGACGCTCTATTAATGGTGTAA  
GTTTATCTCGTGAAGCTCAGCAACTTCTTTGTCATTTTTATGGTCTTAAAGATACAGGCTCTTCTCTCCCTCAAACATC  
ATAAATAACGGTATTTGATATGATCAGGCTGTTATCTTTGGTCTTAAAGTCAATGTTGGAGAAGAAAAGCCCTTTTT  
GACTGGCGTACTGTTGTCAGCCTGAATTTGTTGCTGATATGTTGCTTCTTATCAATCGTTTACTGTTTCTGCTTTTT  
TGTTAATGATGAGCGAATATTTCTGCGCGCTCAGCATTTTTCAGAAAATCATAGTTTACCAAATGCACATTTTAGT  
ATAAATATATCGAATTTCAAATGGTGGACTCTATGTTTTAAACAATGTTGGTACCTTCATCATGGCTCCGGGAGAGAG  
AGGTGATGTTGCTGGTATTTACTATGAGAACATCTTATGAAATACCTTTGGGTACCAGGTGTAATACCTGAGCTCG  
TTCGAGTGATTAACCCATTTACAGTGCACTGGAAGATTTACGAGATTTACGAGAAATTTG

>Cluster\_39679

ATGAGTGAATCATCACGGCGTGCAGGATTAACGACGGCACCCGCGTCAATTTCCACCGTATCCACCGCCAT  
TGTTGGCATGGTCTGACCGGCAGCGATGCGGATGCGGAAATCTTCCCTCAATAAACCGGTGCTGATTAACCAATGTGC  
AGAGCGCAATTGCAAAGGCGGTAAAAAAGGCACGCTGGCGGCTGTTACAGGCCATCGCTGACCAGTCAAAACCGGTC  
ACCGTTGTCGTACGTTGGAAGACGGCACCGGCGAAGCAGAAACGAACTCGCGCAGACCGTTTCAATATCATCGG  
CACCACCGACGAAAACGGTCACTACACCGGACTGAAAGCCCTGCTGGCGGGGAGTCACTAACCGGTGTTAAACCGGCTA  
TTCTCGGCGTCCCGGACTGGACACCAAGAGGTGGCTGTTGCACTGGCATCAGTCTGTCAGAAGCTGCGCGCTTCGGG  
TATATCAGCGCATGGGGCTGAAGACATTTCCGAGGTGAAAGCCTACCGCCAGAATTTACGACGCGTGAGCTGATGGT  
CATCTGGCCGATTTCTCGCATGGGATACGGTCCGACGATACCACCGCCACCGGATGCCACCGCCGCTGCGCTGGGCC  
TGGCGCTAAAATCGACAGGAGCAGGCTGGCATAAAAACGCTGTTCAACGTCGGGGTAAACGGTGTACCAGCATCAGT  
GCCTGTTTTCTGGGATTTGACGAGGATCCGGCATAAAGCTGCTGACCTGTTGAACGAGTCAAGGTGTCAACAGCTGATTCG  
CCGTGACGGTTTCCGCTTCTGGGTAACCGTACCTGCTGATGACCCGCTGTTCTCTTTGAAAATACACCCGACCG  
CGCAGGTGCTGGCCGACAGATGGCTGAGGCGCACATGTTGGGCGTGGACAAGCCATCACTGCAACCGTGAATTCGCGAC  
ATCGTTGACCGCATCAATGCCAAATTCCTGAGCTGAAAACAAACCGCTATATCGTGGATGCGACCTGCTGGTTACGCGA  
AGAAATCAATGATGCGGAAACCTCAAAGCCGGAACCTGTATATCTGACTACGACTATACACCGGTTGCTCTCGAAA  
ACCTGACCTGCGCCAGCGTATTACCGATAAATACCTGGCAATCTGGTCACTTCGGTTAACAGCAATTA

>Cluster\_26047

ATGAATCCAGTACCCGCGAACGTGAATATTTCTCTGACTCCATCCGCGCTGGCTGATGTTGTTAGGATCCCTTTTCA  
TATTTCTTTAATCTATTCCAGCCATACATGGCATGTGAATAGCGCCGAACCGTCAATTTGGCTGACCCTTTTTAAAGACT  
TCATCCACTGCTTCCGATGACAGGATTTTTCTGTTATATCCGGTACTTTTCTACATGCTTTTTTACGCTATCCCTTG

AAAAATGGTGGAAAGTACGTGTGCGAACGTGTAGGTATCCCGATGTTAACAGCCATCCCCCTACTGACATTACCGCAATT  
TATTATGCTGCAATACGTCAAAGGGAAAGCGGAAAGTTGGCCTGGGCTATCATTTGTATGACAAATATAATACGTTGGTCT  
GGGAATTAATATCACACCTGTGGTTTTTACTGGTGTAGTAGTCATGACGACGCTGTGCGTATGGATAATTAACGCATC  
AGAAATAAATTTAGAAAATCTGATAAAAAGCAATAAAAATTTCTCGATGGTAAAACATATCGGTGATTTTTTTGTCCCTCGG  
CATCGGTTATGCGGTAATAAGAAGAACGATTTTTATTTGTATCCGCCATTCFAGATATGGCATGTTCAATTTTATG  
TCATGCAAACGCTATTTTTATTTGCCGTTCTTTATCCTAGGCGCACTGGCTTTCATTTTTCCCTCATCTTAAAGCCTTGTTT  
ACCAGCCGCTCTCGTGGCTGTACCTTGCAGCAGCATTGGCGTTGTGCGCTTATTTACTCAACAGCGCTATGGCAGTGG  
CGATGCCCTGGATGTACGAAACCGAGTCCGGTGTACCAATGGTCTCGGCTGTGGATGGTGAATGTGGTCTTCTCCTTTG  
GCCACGTTTGCCTAACCTTCCAGTCCAGCGCGGGTGCATTTATTTGTAAACGCATCGCTGTTTACTATCTGGTTCACCAC  
CCGTTAACGCTGTTTTTCCGGCGCATACATTACACCACACATCACCTCCAACCTGGCTTGGTTTTCTGTGGCTGATATT  
CGTAGTAGGATTGCGATAATTCGTATGAAATTCATTACGCATCCCATTATGAAGTTTTTGTCTCTGGTAAACCAG  
TTGTTAAGCGTGAGAACGATAAAGCACCTGCCGTTAA

>Cluster\_66870

ATGGATTACAAAAAATCAGCATGTGCTTTCACAGTGGGTGTTACGCAACTTTCGACGCGATGACACAGCCCTGTATGC  
AAAGGAAAAGCAGCGGGTATGGTGTACATACCGTGTACATGACGCCCCGAAAAGAAAATGTTCTCCACAGCAACCTCTGC  
CTATATCCAGTGTGGCAGTATCGAAAACTGCTTTCGTTTATTTGATGCTGAGACAGGACAACCTTTCGATATTTGAAGAC  
GAACCTGGGTCTACGAGCGCTGCTCGTGCATCGTGAACGATATTCATGAGCACAATTTCTCAGCCTTCCGTCAC  
CACACATCCCGATGATTTCCCGGTAGAGAAGCTCACAGCTTCCGGGTGATGCAGTTAATGCTAAATCTGCACAATCCGC  
AAAATAAAAATCCGTATAAGCAAGAAATGCTTGAACAGTTCATGCGGATATACAGGACCAATTTATCCGAATACATCCAT  
TCTATAAATCAGTTGCCACAGTAACCCAGAGTAAATGGATGATCATTTCTATCGTAAAATACTGCGTGTGGCAACTC  
AGCCTCTTCCGATGAGAAATAAATGCAGAGCACTTTTTGTGTTATTTGGCCTTTTATCCACCTGAATAAACCGACCTTT  
ACGATAAAAATCAACAAATTAAGGAATAATTTTTTACCAGTATCCATACCATTGAGGTCATTCATACAGGTCATGATTTT  
GACAGCACTGAACCGAGACTGCAATTCGCAATAGCACCTAATGTTTTTTCGATTTATAAAGATGAAAACAGAAATTTATCT  
TCCGTTATCTCATAAACCTGTGCTTCAATCTAGCAGTGCATTTACATTTACAGACCCCGCATAGATGCTTCTCTC  
CTCGTCCCGAGCGGCTGAAATGTTGCCACGACCGGAGTCTTAATTTTTATAATGTTTCTGTTGATTACATTGACAATGTG  
ATGACAACATTTGATATGATAAATGTGGGTACATCCAGCACATTTTATTCAGCCTATGAGTTGAGCAAACCTAATGAATA  
TCTGGATAAGCAGCAGCAGGATCATGACTATTATTATACGCGGAAAACTCTGTTAAATGGCAGCCTGCGCAGACGGTCA  
CCTAA

>Cluster\_11009

ATGCGAAAACGTAATCTTTTTATTTGGCCACCGCTGTACGGTTGTTATACCCATTGATTTCTCTGGTCAGGCCTTTTCG  
TGTAATTTGGACATGATGTAGTAATAGTAGCGCTGGCAAATTCGCGAATAAAGCAGCAGAGAAGCTGGACTGGTTGTTTTT  
ATGCAGTTCCAGGTTTAGATTACAGAGGCTGGATATCCGCATCAGGAAGAGTTGAGGAAAAAAGTAATATATTTGGTCAT  
TTCTCTTTTTTTAGCGATGAAATGGCAGATAACCTCATCGATTTTGCAGGAAAATGGAGGCCAGATTTAATAGTCTATCC  
CCCTCTTGATCCGGCAGGCCATTTGGTGTCTGCTAAATATAGAATTCCTTCAGTGATGCTGGCTGTTGGATTCCGCGCATA  
CATCTGCCATATTCAGATGTTAAACCGTCTTTAAGCAATGCTTACAGGCGGCATGGAGTCCAGCCTCCACTATGTGAT  
TTAGCATATGATTTGCTCTCCCAAGTATGAGCATTTTAAAAATGCTGGAGAACCAGGTTATCTCATAGATGATAAT  
TCTTATAACGGAGGTGCTGTAAGGAAACATGGTGGGACAGGATTCATGATCGGAAACGTTTACTTATCAGCCTTGGA  
CTGTAACAACCAATGGTTGATGGTCTGGAGCTGATTTTCAATGGGTTATGGATTCTGCAAAATGAAGTTGATCTGATATCAT  
TTGCAACTGCAATAAATGCTCGTACTGGTTTACGAAAACCTACCATCAAAATGACGCTGTTGACTGGATACCTATGGG  
TGATTTCTTAAATGAGCTGATGGATTTTCACTACAGCTGGCGCAGGTAATACCTGACAGCCTGATAGTGGAAATAC  
CACAGATTGTGTTTTGGCCAGAGTGCAGATCGCTCTGTTAATGCAGAAATGTTGCGAAGCGTGGGTGTGGGATTTATCCG  
GACAAGCATGGACTGACCAAGTATTTGGTAAATCGCCTTCTTTATGATGATTCACTACGCTTCTGTTCCAGATCAGGTAGC  
CGCTGAAAATGGCTGAACAACCAGTCTGCAGAGATTGCAGAGTTTTGATGAGAAAAATAAAAAACAACGGGAAACAAAT  
TGTAG

>Cluster\_3455

ATGACGCAAGATATCTATCAACAACCTGGGACTGAAACAGGTGATTAACGCTGCGGCAAGATGACGATTCCTGGGCTCTC  
CAGCGTCCGCGCCGAGGTGATGCAAGGCCACCGCGCGCGGCATCCTCTTTTCGTTGGAGATTGACCAGCTGGTGGACAAAA  
CCGGCGAGCTGGTCTCTCGCTTTACCGGGGGGAGGATAGCTACGTTACCTCCTGTGCTCAGCAGGGATCGCCATCGCT  
GTCGCCGCGCCATTACACGCGCGGACAAAGGCCGGGTGGCGCTCATGCGCGATAGCTCCGGCATGGCCAATGAAGTGT  
GATGCTGCGCGGCCATAACGTCGATTACGGTGCATCGATCCTCAGCGCGATCCGCTTAGGTGGCGGGCGGCTTGTGGAGG  
TGGTTTCAAGTAAACCTGGCGGCTCTCTGGCAGCTGGAGAGTGCATTAACGACGCGACCCGCGCTGTTGATGTAAG  
TCGCATCACTGCGTGCAGAAGGGAATGTTGAACATCGAGGACTTCGCACATGTGCGCAGATGTACAACCTGCCGCTGAT  
TGTGATGCCGCCGCCGAAGAGGATTTACGTGCTGGTGGTGGAGCGGAGCGGATATGGTGGTCTACAGCGGCCCAAAAG  
CCTTTAACCGCGCCACCTCCGGGTTTACTCTGGTAAAAAATCTGGATTGACGCTGCAAGCGCAGCATCACGGCAT  
CCTTGGCGGATGAAAATCGGCAAGGAAACATGTTGGCTGGTTTACCGCTGGAGAATTTATCAGGCGGAGGAGT  
CATCACCGGGAACAGCTCCAGCAGTGGTTGAAGCATTCTCGGATTCACGGGTTAACGGCTGATATTTGAGCAGGATG  
AAGCCGGGCTGCAATCTGGCGTATTCGTATTCAGTAATGCGCAGGAAATGGGAGTTGACGCTCGCTCGTCAAGGCG  
CAACTGCGTGGTGGGATAATCGCATTTATGCAAGCGGCTAATAACCTCACAGGGCGTTTTTACCTTGATCCCGCTAC  
GGTGGCGGAAGGGAAATGACACTTATCTGCGCGCAGTGAAGAGATTGCAGATCATGAAAAGATTTAA

>Cluster\_14908

ATGACTGATATGAAAAAACAGATGATTTAGTTGATGATGCGAATCAGTCAAAGCTGGAAAAGTAAACCCGTTTCATGATAT  
CGGTGATATCAGGAACAAAAATAATCGTATGCGTTCTGGCTTTCTGTTTGGTCTGATGGCTGTATTAGTTATTGGTATTT  
TTGCGCTGAAAACATATAAAAAATTTTTTGCAGATGACCAGCAGAAAGCATCAGAATCAACAGGCGATACCAGCATTTCT  
CAGGTAAGTAAAAATCCGTACTGGTCTTGGTTCAGAAATTTGACCCTGTTGAGAACAAAGCAATTTCAATCCAGGCGCTAC  
TGGTTCTGGTAATACTGTTTCTGACGGTCATAAAGAAGTGCACAGGAGGGTTTACAGGAAATAATTTGTCAATACCTGTTG  
CTGGTCAGGGAGGAGTACAGACTGGCGGAGTGGCAGCAGGACATCGCAGACATCAGAGCCACAGGAAAGGAA  
GAATCAAAAGAAAATGTGCCGTTAAATCAGGAATGAAAGTACTGCGATTAATCTCGATCCTGATCTTATATTGAGGA  
AAACAGGCTTATACCGTGTGCTTAAACACACGCTTTGTTTCTGATGTTGCAGGCTCGTATCAGTTGTGTTTTTACAGAAG  
ATGATGAGGAGTCTAATCACCACAAAAATTTACTGGAACAGGGAACCTAAGGCTTTTGGTCTTACCAGACCGGAACGCTG  
AATCATGGACAGGCGAATGTTTCTGTTATGTTGGAGCAGTTCGCGACGCTGATAAATAAACGAATCGATATGGTAAATAC  
AGCAGCGGCTGGTCCCTGGGGGAGCAGGCTTGTGATGGATGGATCGATTTCTACTTCTGGGAGCGTTTTTGGTGGTCTC  
TTATGCTCAGTATGGTTCCAGGATGATAGCGCGCGCGCGGTAATGCACCTGGTAAAGATCGTAATGTGGATTATACC  
GAAAACCTCAGCAGGCAATGGCTGAAATGGCTAAAGTTGCATTGAGAATTCGATAAATATTTCTCCAACAATGTATAA  
AAACCAAGGTGACATAATCACTATTATGTTGGGGAGACATTTGTTCTGATATCTATGAGTTAAAGGTAATAATAG

>Cluster\_45661

ATGAGTTCACTGTTATAGAAAGTCACTGACCGGATGACAACTGGTACCGTATCGCCAACGAATTTACTTAGCCGTCG  
CGGTATAGCCATTAACGGTTCTGCCCGCGGATATCTGTTGAAAACCCCGATTTTTTTAAACGGCTTCTGCAAGAA  
GCTCTTTGGGTTAGCGGAAAGTTATATGGATGGTGGTGGGAATGTGACCGACTGGATATGTTTTTTAGCAAAGCTTTA  
CGCGAGGTTCTGAGAACCAACTCCCCATCATTTCAAAGACAGCTGCGTATTTGCCAGCGCTCGTCTCTCAATCTGCA

GAGTAAAAACGTGCCTGGATAGTCGGCAAGGAGCATTACGATTTGGGTAATGACTTGTTCAGCCGATGCTTGTATCCCT  
TCATGCAATATTCCTGCGCTTACTGGAAGATGCGGATAATCTGGAATCTGCCAGCAGGCGAAGCTCAAAATGATTTGT  
GAAAATTCAGTAAAACAGGGATGCGGCTACTGGATATTGGCTGCGGCTGGGGCGGACTGGCGACTACATGGCATT  
TAACATATGACGTAAGCGTGGTGGCGCTACCAATTTCTGCCGACAGCAAAAAATGGCTCAGGAACGCTGTGAAGCCCTGG  
ATGTCACCATTTTGGTGAACAGATTCTCGCGCATGGCCAGAAATGCGGATAACTACAGTGAACGCTTTAAACGAATGTT  
GTCGGACCAGAAAATTACGATACCTATTTTGGCGTGGTGGATCGTAATTTGAAACCGGAAGGTATATTTCTGCTCCATAC  
TATCGGTTGAAAAAACCGATCGAATGTTGATCCCTGGATTATAAATATATTTTTCCGAAACGGTTGCCTGCCCTCTG  
TACGCCAGATTGCTCAATCCAGCGAACCCACTTCGTGATGGAAGACTGGCATAAATTCCGGTGTGATTACGATACTACG  
TTGATGGCGTGGTATGAACGATTTCTCGCGCATGGCCAGAAATGCGGATAACTACAGTGAACGCTTTAAACGAATGTT  
TACCTATTATCTGAATGCCTGTGCAGGTGCTTTCCGCGCCGATATTCAGCTCTGGCAGGTGCTGTTCTCACGCGGTG  
TTGAAACGGCTTCGAGTGCCTCGCTAA

>Cluster\_34601

ATGAGTCTGAAAGAAAAACACAATCTCTGTTTCCAACGCATTTGGTACCCGCGACTCACACCATTCAGGCGCTGG  
CCGCGTGAATTTGATTGGTGAACACACCGACTACAACGACGGTTTCGTTCTGCCCTGCGGATGATTATCAAACCGTGA  
TCAGTTGTGCACACGCGATGACCGTAAAGTTCGCGTGTGGCAGCCGATTATGAAAATCAGCTCGACGAGTTTCCCTC  
GATGCGCCATTCGCGCATGAAAATCAATGGGCTAACTACGTTTCGTGGCGTGGTGAACACATCTGCAACTGCGTAA  
CAACAGCTTCGGCTGGCTGACATGGTGTGATCGCGCAATGTGCCGAGGGTGCAGGGTTAAGTTCTTCCGCTCACTGG  
AAGTCGGGTGCGAACCGTATTGCAGCAGCTTTATCATCTGCCGTGGACGGCGCAAAATCGCGCTTAAACGGTCAAGAA  
GCAGAAAACGAGTTTGTAGGCTGTAACCTGCGGGATCATGGATCAGTAATTTCCGCGCTGGCAAGAAAGATCATGCCT  
GCTGATCGATTGCGCTCACTGGGCAAAAGCAGTTTCCATGCCAAAGGTGCGCTGTCGTCATCATCAACAGTAACT  
TCAAACGTACCTGCGTTGGCAGCGAATAACAACCCCGTGTGAACAGTGCAGAACCGGTGCGCTTTCTCCAGCAGCCA  
GCCCTGCGTGTATGTCACCATTTGAAGAGTCAACGCTGTGCGCATGAACTGGACCCGATCGTGGCAAAACGGTGCCTCA  
TATACTGACTGAAAACGCCCGCACCGTTGAAGCTGCCAGCGCGTGGAGCAAGCGCACCTGAAACGTAATGGGCGAGTTGA  
TGGCGGAGTCTATGCTCTATGCGCGATGATTTCGAAATACACCGTGCAGCAAAATGCACTCTGGTAGAATCTCAA  
GCTGTGATTGGCGACAAAGGTGGCGTACGCATGACCGCGCGGATTTGGCGCTGTATCGTCCGCTGATCCCGAAGA  
GCTGGTGCCTGCCGTACAGCAAGCTGTCTGCTGAACAATATGAAGCAAAAACAGGTATTTAAAGAGACTTTTACGTTTGT  
AACCATCACAAAGGACGAGCAGTGTCTGA

>Cluster\_50393

ATGGCGCGCCCGGAAAAATATAAAACCAATGTTCCGGGATTATCTCCGATTTTGGACAAAAGAAATAACAAAGTTTACTG  
GCGTTACAGGCATCCCATAAACAGCAAAAATCAGCGTCTCGGCAGTATGACAGAAACTGGCAGAACTATTGCAGCAG  
AAGCGAACACCGCTTTCGCCCGGAGCAAAATGGAACAAATGCTCAGCTGCAGGAGAAAAATATTAGTGATACCGGCGGT  
TCATCAACCGTTTACCATTTTCTGAATAATTACAGAAAATCAACAGGAAAGATATGAAAACCGCGAGATCAAACCTCAA  
CACGCTGAAAACAGAAAGCGGCCCTCTCAGGGTATTGATGAACGTTTTGGCACCAGACCGTTAGATGCCATAACCGTAA  
AAGATGTGTATCAGTACGGAAGAGTACAAGGCCAGAGGACATAACAGAATGGGACAAATTTTCAGGAAGGTACTGATC  
GATGTTTTCCGGGAAGCTCAGCAAAACGGCGATGTCGCCAGGCTTTAACCTGCAGAAATCGGCAAAAACCCGAGGT  
GCGGTGTTCAACAGCAGCTGACTTTTTGATGAGTGGATGATTATTAACAGCAGCGGAAAAGGATGGTACTTTTTTAC  
AGCGCGGTATGCTGCTGGCACTGATGACAGGCCAGCGCTTTCAGATAATTGCAAAATGCAATTTTCGGATATCCGGAT  
GGTTATCTTCAATGTCGAACAGCAAAAACAGGAACCCGGATGGCATCCCTCTGGCTCTGCGTTGCGATAAAATTAATCT  
CACCTGGATGATGTGGTGTCTATCTGCCGCGATGCGTCTTAGTCCGTGGCTATTGACACCACATCACGCGAAAGGGA  
CAGCTAAGCGCGCGGATGGTTAAGCCAGCAACATTAACCGTTGCAATTTAAAAAAGCCCGGGATTTCTGTGATTAACA  
TGGCGTGTAAATGGCACCCCTCCCTCTTTCCATGAGCAGAGATCTTTATCAGAGCGATTGTTTCAGAGAGCAGGGGTTGA  
TACAAAATTTTGTAGGCCATTGCAATCAAAAATGACCGATATTTACAACGACGCACCGGTAAGGAATGGAAAAAC  
TGGTCAATTTGA

>Cluster\_40030

ATGGGACAGAGTAAAAAATGAATAAACACCGAGTTCGCTTTCCAGCTGGTGAATTTGGCGGAAATTCGCAATGCTT  
TGATGGTAAAGAGGTCATTTCCAGCTGGATCTGACTATCAACAATGGCGAGTTCTCAGCTGCTTGGCCCTTCTGGCT  
GCGTAAAACAACCGTTCTTCCGCTGATTCAGGCTCTGGAAACTGTTGATTCCGGACGCATCATGTTGGATAACGAGGAC  
ATCACCCAGCTTCCGGCGGAAAACCGCTACGTGAACACTGTTTTCAAAGCTACGCACTTTTCCCCACATGACCGTGT  
CGAAAATGTGGCTTTGGGTTGCGCATGCAAAAACCCCGCTGCTGAAATACGCCCCGCGTATGGAAGCCCTGCGGA  
TGGTGCAGCTGAAAACCTTCGCTCAACGCAACCCGATCAGCTCTGTTGGTGGTCAACAGCAACCGCTGCCATTTGCCG  
GCGTGGTTAACAAGCTCGTCTGTTGTGCTGGATGATGCTGCTCCTCAGCGCTGGATTACAAAACCTGCGCAAGCAATGCA  
GAACGAGCTGAAAGCCTTACAGCGTAAGCTTGGTATTACATTCGTTGTTGTAACCTCACGACAGGAAGAAGCACTTACCA  
TGTCGGACAGGATCGTGGTGTGATGCGCGATGGTCCGATTGAGCAAGACGGCAGCGCGGTGAAATCTACGAAGACCGGAA  
AACCTGTTTGTGTCGGGTTTATTTGGCGAAATCAATATGTTTAAACCCACTGTCATCGAACGTTCTCGACGACGCGCT  
ACGCGCAACGTTGAAGCGCGCAATGTAATATCTACGTTAATTTAACCTTCAACCGTTGAACCGGGGCAAAAACCTGATCTTCT  
TGGCGCCGAAAGACTTACGTGTTGAAGAGATTAACGACGACAACCACCGCAAGGGCTGATTGGTTACGTTCCGGAGCGT  
AATACAAAGGATGACGCTGGAGTTCGTTGTTGAGCTGGAATGGAAGATGGTGTGTTGCTAGCGAATTTCTCAATGA  
AGCAGATCTGACTTTGACCACCTCTCTGACCAAAAATGGCCATTAATGGGTAGAAAGCTGGGAGTCTGACTGGCTG  
ATGAAGAACACAAGTAA

>Cluster\_2291

ATGAGTCTGTTAGTCTGATATCTAACCGGATTGCACCACAGACGACGCGCCAGTGCCTGGCTTGGCCTTGGCCTTGG  
CATACTGGGGGCACTGAAAGCCGACGGGACTGTGGTTTGGCTGGAGTGGTGAACAGGGAATGAGGATCAGCCGCTAA  
AAAAGGTGAAAAAAGGTAACATTACGTGGGCTCTTTTAACTCAGCGAACAGGACCTTGACGAATACTACAACCAATTC  
TCCAATGCGCTTCTTGGCCCGCTTTTCTATTATCGGCTCGATCTGGTGAATTTTCAGCGTCTTGCCTGGGACGGCTATCT  
ACGCGTAAATGCGTTGCTGGCAGATAAATTACTGCCGCTGTTGCAAGACGATGACATTTATCTGGATCCAGGATATCACC  
TGTGCCATTTGCGCATGAAATACGCAAACGGGAGTGAATAATTCGCAATGTTGTTCTTCTTCTGATATTTCTCCGACA  
CCGAAAATCTTCAACGCGTTCGCCACATATGACACCTTGTGTAACAGCTTTGTGATTATGATTGCTGGGTTTCCAGAC  
AGAAAACGATCGTCTGGCGTTCCTGGATGTCCTTCTAACCTGACCCGCTCAGCAGCAGTAGCGCAAAAAGCCATACAG  
CCTGGGCAAAAAGCATTTGCAACAGAAGTCTACCCGATCGGCATTTGAACCGAAAGAAATAGCAAAACAGGCTGCGCGGCA  
CTGCGCCCAAAAACCTGCGCAACCTTAAAGCGGCACTGAAAACCTGCAAAAATATCTTTTCTGTCGAACCGCTGGATTTCT  
CAAAGGTTTGGCAGAGCTTTTCTCGCTATGAAGCCTTGTGAAAAATATCCGACGATCATGGTAAAATTCGTTATA  
CCCAGATTGCACCAACGTCGCTGGTGTGTCAGCCATCAGGATATTCGTCATCAGCTCGAAAATGAAGCTGGACGA  
ATTAATGGTAAATCAGGGCAATTAGCTGGACGCGCTTTATTTAATGAAATCAGCATTGACCGTAAATTAATGATGAA  
AATATTCGCTACTCTGACGCTGGCTTAGTGACGCCACTGCGTGCAGGGATGAACTGGTAGCAAAAAGAGTATGTTGCTG  
CTCAGGACCCAGCAACCCGGGCTTCTTGTCTTTCGCAATTTGGGGAGCGCAACAGGTTAACGTCGGCTTAAT  
GTTAACCCCTACGATCTGACGAAGTTGACGCTGCGCTGGATGTCATGATGCTGCTGGCGAACGATTTTCCCG  
TCATGCAAAAATGCTGAGCTTATCGTGAAAAACGATATAATTAACCACTGGCAGGAGTCTTCAATGACGACCTAAAGCAGA  
TAGTTCCGCAAGCGCGGAAAGCCAGCAGCGGATAAAGTTGCTACCTTTCAAAGCTTTCGCTAG

>Cluster\_39366

ATGAGTCGTAACAACACTGGCGCTATTCGAACCAACACTTGTGCTTCAGGCGCTGAAAGAAGCGGTGAAAAAATTAACCC  
GCAGGCGCAATGGCGCAATCCGGTGATGTTTATCGTCTGGATCGGCAGTCTGCTGACCACTGTATTAGCATCGCGATGG  
CAAGCGATGTGATGCTGGCAATGCGCTGTTTACGCGCGCAATAGCGGCTGGCTGTGGGTCACCGTACTGTTTCGCTAAT  
TTCGCCGAGGCGTGGCAGAAGCCGCGAGTAAAGCGCAGGCGCAACAGTCTGAAAGGGGTGAAAAAACCGCTTTTGTCTCG  
CAAGTCGCGCAACGAAATATGGCGCTGGCGCGGACAAGTTCCTGCTGATCAACTGCGTAAAGGTGACATCGTGTGG  
TAGAAGCTGGCGATATTATCCCTGCGATGGTGAAGTCAATGAAGCGCGCATCGGTCGATGAAAGCGCCATCACCGGG  
GAATCGGCTCCGGTGATCCGTGAATCCGGCGGTGATTTGCGCTCCGTCCTGCGGCGCACGCGTATTCTTTCTGACTGGCT  
GGTGTAGTGCAGCGTTAACCCCGGCGAGACATTTCTGGATCGGATGATCGCGATGGTGAAGGTGCGCAGCGACGTA  
AAACGCGCAACGAGATTGCCCTGACATTTCTCGTATTGCGCTGACTATCGTCTTTTTACTGGCAACCGCACCGCTGTGG  
CCGTTTTCCGCGTGGGGCGTAATGCAGTACGCGTAACGGTACTGGTGGCACTGCTGGTCTGTCTGATCCCAACCACTAT  
TGGCGGCTGTTGTCAGCGATTGGCGTCCGGGATGAGTCGGATGCTGGGCGCGAATGTTATGCCCACCGCGGGCGCA  
CAGTTGAAGCAGCGGGTGTGTTGACGTTCTGCTGCTGGATAAAACCGGCACCATCACCTCGGTAACCGTACAGCGCTCA  
GAGTTTATCCCGCACAAGCGCTGGAGGAAAAGCGCTGGCCGACGCGCACAACTGGCTTCGCTGGCTGATGAAACGCC  
GGAAGGCCGAGTATTGTGATCCCGCAAGCAGCGTTTTAACCTGCGCGAGCGCGATGTGCAGTCCGTCATGCCACCT  
TTGTACCGTTTACTGCACAAGCCGATGAGCGGGATCAACATCGACAACCGCATGATCCGTAAGGTTCTGTGATGCC  
ATTCGCCGCCATGTGAGGCTAACCGCGTCACTTCCCTGCGGATGTTGATCAAAAAGTCGATCAGGTTGCGCGTCAGG  
AGCCACGCGCTGTTGGTGGTGAAGTTCTCGTGTGCTGGCGTTATGCGCTGAAAAGATATCGTCAACAGCGGTATTA  
AAGAGCGCTTCGCCAGCTGCGTAAAATGGCATTAAAACGGTGTGATTACCGCGGATAACCGCTGACTGCCGCGCG  
ATAGCTGCCGAAGCGGGTGTGATGATTTTCTGCCGAAGCAACCGGAGGCCAAGCTGGCACTGATTCGTCAGTATCA  
GGCGGAAGGCCGTTTGTGGCGATGACCGGCGATGGCACAACAGATGCTCCGGCGTGGCACAGGCGGATGTTGGCGTGG  
CGATGAACCTCCGGCACCCAGCGCGGAAAGCGGGCAATATGGTGGATCTCGACTCCAACCGACCAAGTTGATCGAG  
GTAGTGCACATTGGCAACAGATGCTGATGACCGTGGCTGTTGACCACTTACGATGTCACAGATGTGGCGAAATA  
CTTCGCCATTATTCAGCGCGGCTTCGCGGCAACGATATCCGAGTTAAATGCGCTGAAACATCATGCGCTGCATTCGCCG  
ACTCCGCACTTCAGTGGCGTCAATTTCAACGCTTGTGATATCGTCTTTTTGATTCCCTGGCGTTAAAGGGTGAAGT  
TATAAACCGCTTACCGCTTCTGCGCATGTTGCGCGTAACCTATGGATTACGGTCTGGGTGGGCTGCTGGTGCCTTTAT  
TGGTATCAAAGTCAATTGATTACTGCTAACCGTTTGGCGTCTGGTGTGA

>Cluster\_11077

ATGAGCAGATTTACAGTTGATAGTTTTATCGTTGAGCTAGGCTTCAATGAAAACGTTATTAAGGGACTGCAAAGAGTTGA  
AAAGGCAGCTTTCAGCTCAGCACAAAGAATTGAACGTAATTTGAATAGAGCGTTTAAAGTTAACCCAAAGAGCATGGATA  
AGGATTTAACAGCTCTTTGGGAAATATGGAAAAGAAGATTAACAGACTTTTTAATAAGCTGGAGGAAAGAGCCAAATCT  
ACGAAGGCTTTAAGTTCAAACCTCAGGTTGAAGAAACTGTTAAAGCAGCAAGACAGCCACGAATCAGCGGAAGCAGAGC  
AATTACAGCAGCGCATAGGCTGAATATGAGCAAGCTTCCGTGACTTTAATCCTATGCTTGAAGATATTAAAGAGCCAAAT  
ATTTACAGCTTAAGCAGTAAATCCAAGCACTTGGAAACGAAGCTTTAATCGTGTGATTAGCAAAGTTAAATCAGTCTCTT  
CGTGAAACACTTTCTAAGTTTAAATAAGACACCAGCAAAAATAATCACAGTGAATAATGCTTCGAATGGTCTGGATGATTT  
AGCTACAAGTGAATAAAGCAGGTACAGCCATTTATAGTTTTCAGACAGCTTAGAAGCTTAGAAGATTTAGAAAGATTATGGAGA  
TTGGCTGTGAAAAGAGCATACACAACGAGCGGCAATTTCTGTTTTAGGTGATGAAGGTGCTAAACAGCATACAGATTT  
GTTAAGAATCTTGTGATAGTAGTGGTGTAGACCAGATTGAACATTAAGCAGTTTGTGTAAGTTTCCGCTGGTGTGG  
TGATATGAATGACAGCAGAAAGAAATCCTTATTTTCTAATGTGATGGTACATCCAGATTAATGGGGCTAAGCACCAGT  
AAATTAACGGGATTTTAAAGCTTTCGAGCAGATGGCTTCTAAGGAAAGATTACAGCTGAAAGACTACCGGCTCAATTA  
GGTGACAGAAATGGCAGCTTTTCCAGTTATTTGCCAGAAAGCTTGGGATGACTACAGAAAGATTAGACAAGCCATGAA  
GGACGGGAAGGTTCTTTCTAAAGATGTTCTCCCTAAAGTATCCGCTGAAATGGGAAGGATGATTGATAAAGCTGGTGGAT  
GGGAAAAGATTTAATTAACCTACTCAGACGAGTTAGGCGCTTAAAGTAAATTAATGGAACAATAATCTAGCTTTAATGTT  
CAGCGTTCCAGGAAGGTTTAAACAGACTTTACAAGGTCAGTACTAATTTACTTAACTGCGGTCAATCTGATTA  
TCTTGGTGAACATTTTGGCGACTTGATGAAAAGCATGTCAAACGGTATTGATGATTTAACACGATTAGCTACCGAGTGC  
AGGATTTCTTTCAGAGTGAACCTTGTTCACAGAAATTAATGACACTCAAAAAGCTGTAGCTGATGGTATCGCAAT  
GGCCTGTTAAGTGCATTAAGGGACTTGTGGTATTGTGCTGTAAGGCTGGGATGGTGTGTTGGTGTGATCTGGAA  
CTTAAATTAGGGCTATTTCACGCTTGGAAATGTAGCAATACAGCAGCAGGAAGAAATCAATTCAGCTTCTGGTAGTG  
TTGAAGGTGGTAAAGGAAATTAATCTGTAGCTGATGCAATTAACAAAGTAAATGATGTCGGTATGGCAACTGATGTGATT  
AATCCATGTTAAACCACTCTATGAACGCTCAGATGAGTAAGTCAATCCAAATGATAAAGTTGTAAGGTCAAAGT  
GGAACCTACAGCAAGCAATGACTGGTGAATGAACTCTTACCGACTGTTTTATGGGCTATGTTTACGGGCAATCAA  
AAGATGTTCCACGATTTTCACTGAATCAATAATCTGAAAGGTCGAGTAGAAACATTCACAAGATTTAAAGGTT  
ATCAAGCGCTCAGTAAATATTCAGCTCAGACAATCAATATCAAACTCAGACGGTACTGATGGAAGGTTATTGATGA  
AAGAACCACATCGCATATTAATCGTATGCAAGAAAGATACCTTGATTAGCTCAGCTTACCAGAGGAATAA

>Cluster\_9133

ATGGATACGCCACGTCACAGTTATTAGATTTTCAATTCATCAGAATAACGACAGTTTACCCTACATTTTCAACAACG  
TCTTATTTTAAACCATAGCAAAGATAATCCTTGTATTGATGGATTGGCTCAGGTATAGCGGATATCGATATGTTCCGCGGTA  
ATTTACAGCATTAAGATAAACTACAGGAGAAAAATGCGCTTACCAGCGCATCGTCAGCCAGTACCGGATGGTGGTTA  
ATTCATTTACGCTGTTTTCGATATTAGCGCCAGCTGAATATCTCTGCCGACGATAGGGGCTTTATTGCTGGAAC  
ACAAAACGACAACCTTAAACCAACCGTATCTGGCTGCGCCTTCCGCTCAACCCAGAGGACATATCTACGGCTGCGGCG  
AACAGTTTCTTACTTTCGATCTGCGTGGCAAACCGTTCGCGCTATGGACCAAGTGAACAGGCGTGGTGGCAACAA  
ACCTATGTCACCTGGCAGGCGACTGCAAGAAAATGCGGGCGGCGACTATTACTGGACTTCTTCCCACAGCTACGTT  
TGTGACGACGAGAAGTATTACTGCCATGTTGATAACAGTGGTATATGAACCTTCGACTTGTAGTCCCGGAAATCAATG  
AACTGGCGCTGTGGGAAGACAAAGCAACGCTGCGTTTTGAATGTGCTGACACATACATTTCCCTGCTGAAAAATTAACC  
GCCCTGCTGGGACGCCAGCAGAACTGCCGACTGGAATTTATGACGGAGTAACGCTCGGCATTAGGGCGGGACGGAAGT  
GTGCCAGAAGAACTGGACACCAATGCGTAAAGCGGGCGTGAAGTCAACGGCATCTGGGCGCAGGACTGGTCCGGTATTC  
GATGACCTCTTTTGGCAAAACCGCTGATGTGGAACTGGAAGTGAACAGCGAAAACTACCCGCAACTGGATTCAGCAT  
AAGCAGTGAATCAGGAGGGCTGCACTTCTGGCCTATATCAACCCGTAATGTTGCCAGCGATAAAGATCTCTGCGAAGA  
AGCGGCACAACACGGCTATCTGGCAAAAGATGCTCTGCGCGTACTATCTGGTGGAGTTTGGCGAGTTTACGGCGGCG  
TTGTCGATCTCACTAATCCAGAAGCCTACGCTGGTTCAGGAAGTGAATCAAAAAGAACATGATTGAACTCGGCTGCGG  
GGCTGAGCTGACTTCCGCGAGTATCTGCCACGACGACTTTCGATAACCGCGCTCAGTCCGAAATATGCAATAA  
CGCTTGGCTGCGCTGTGGGCGAAGTGAATACGAAAGCCCTTGAAGAAACGGGCAAGCTCGGCGAGATCTTTTCTTTA  
TGGCGCGCGGTTCTACCGGTAGCCAGAAATACTCCACCATGATGTGGGCGGGGACGAGAACGTCGACTGGAGTCTGAC  
GATGGCTGGCGCTGGTGTGCTCCGGCGGCGCTGCTGCTGGCAATGACCGGACTGCGCTGCACACAGCGCATGTTGGCGG  
TTACACCACTGTTTGAAGATGAAGCGCAGCAAAAGAGCTGCTGCTGCGCTGGTGGATTTACGCGCTTACAGCCGATGA  
TGGCACCCACGAAGGTAACCTCTGGCGCAACTGGCAGTTTACGCGGACGCGAAGCAATCGCCATTTCCGCCGT  
ATGACCACTGCTTACCAACCTGAAACCTTACTGAAAGAGCGGCTGCGCTGAAATCGGAAGTCCGGCTGCGCGGTTAT  
CGCCCGCTGTTCTGCAATTAAGAGACATGCGCACACTTACCTGAAATATCAGTACTGTTAGTGTGCGGACATTC  
TGGTCTGCTCCGCTGATGAAGAAGCGGTAGCGACTGGACGCTCTATCTGCGGAGGATAACTGGGTCCACGCTGGACG  
GGTGAAGCCTTCCGGGCGGGGAAGTTACCGTTAATGCGCCATCGCAAGCCGCGGCTTTTTATCGCGCGGATAGCGA

ATGGGCGGCACTGTTTCGCGTCGTTAAAAAGCATCTAA

>Cluster\_8407

ATGGTACCTCAACATTTTCTCGTTTGAAGCGCGCGTGTCTGCCTGTTGTTCTGGCAGCCCTGATTTTCGCCGGTTG  
TGGACCCACTACTCCCGATCAGTCCACTGCTTATATGCAGGGACCGCGCAGGCTGATTCGCTTTTATCTTCAGCAGA  
TGCAGCAAAGCTCAATGATGATACACAGGATCAACTGGCAATTACTCGCAATTCGTCGACTGGTAAAGAAGGTAACACGGG  
CAGGCGGTTGAGTTGTTTAAACCACTACCGCAAGAAGTGAACGATGCTCAGCGTCGCGAGAAAACACTGCTGGCGGTAGA  
GATTAACATGGCGCAGAAAGATTGCTGGCGCGCAAACTTGTGGCGAAAATCACACCTGCGGATTAGAACAACAAACC  
AGCAAGCGCGTTACTGGCAGGCAAAAATCGATGCCAGCCAGGGGGCTCCTCCATTGATTTACTGGCGCGTTAATTGGCT  
CAGGAACCGCTGCTTGGCGGCAAAAGAAAACAGCAGAATATTGATGCCACCTGGCAGGCGCTCCTCCATGACTCAGGA  
ACAGGCGAATACGCTGGTGATCAACGCCGACGAAAATATTCTGCAAGGCTGGTGGATCTGCAGCGCTCTGGTTTGATA  
ACCGTAACGATCCCGACATGATGAAAGCGGGATCGCCGACTGGCAGAAACGTTATCCGAACAATCCGGGCGCAAAATG  
CTGCCAACGAGTTGGTTAAAGCTAAAAGCGTTTAAACAGCCTCGACCAACAAAATCGCCCTGCTGTTGCCACTGAATGG  
CCAGGACGCGTATTGGTCGCACTATTAGCAAGCTTGAAGCGGCAAAAATATCGGCACCTCAGCCAGTGAAGCAGCTC  
AGGTAGCTGCCGACCTGCCGACAGCTAGCTGAAACAACCTCAGCCGCAAAACCGTGGATGGCGTTGCCAGCCCGCACAA  
GCCTCGGTTAGCGATCTGACCGGTGAACAGCCTGCAGCCAGCCGGTGCCTGTAAAGCGCCCGCGCACAGCAGCCGACG  
GGTAAAGCGCACCCGAAATCCATCCGAGAGTGAATACTACGATACCTCATCAACCACTTAGCCAGATTTAAGCC  
AGGTTACGAGGATGGTGGTGGTGGTGGTGGTGGTGGTGGTGGTGGTGGTGGTGGTGGTGGTGGTGGTGGTGGTGGTGGT  
CCGCTGAACGACTGGCACTGAACAGCCGGAGAATATCGAAAATCGCGTCAATATTTGTTACTTCGCGCTTTCACCGGA  
AGACGAAGCGCGGATGCAGCGCTCATATTCTGACAGGGTAAACAAGCGCGCTGGTGTGATCCACGCGAGTTTCAAT  
TGGCGGATCGCTAGCAAATGCGTTTGGCGAAGAGTGGCAGAACTGGGCGGCGCACCGTTTGCACAAAATTTGGT  
TCCACAGCGAATACGCGCGGGTGTAAACGGCGGTTCTGGTATGCTTTAAACGGGTAGCCCGATTACTCTCAGAGCGAC  
AACCGACTCCGGCATGACGACCAACAATCCAACGCTGCAAAACAGCCAACCGATGACAGTTACCAATAATGGCGGT  
GTGTCGATCGGTTGATATTGTTGCAACGCCGGGTGAAATCGCTTTTATCAAAACCGATGATCGCCATCGGTAAACGGTAC  
CAGAGCGGTGCAACCGCTGACGCGCTCCCGAGTGGCAAGGGACCGCTGGCCCGGATTTCGCGGATGGAAGG  
CTTGACGATACAGGAAATCCCGATGCTGGCAGGCGGTAATCTACCGTTAATGCAGCAGGCACTCAGCGCGGTGAATAACG  
ATTATTACTGCGTTCGATGATGCGATGGCGCTGATGCTGCTGCGTGGCAATCATTTCTCACAATGCGCCAGGTT  
CAGGGTTTTGAAATCAACGGTAATACCGGAAGCCTGACGGCTAACCCGGATTGCGTGATTAACAGGAACCTATCATGGCT  
ACAGTACCAACAAGGTCAGGTAGTCCCGTCAGTTAA

>Cluster\_25299

GTGGACTGGCTTCTTGATGTTTTGCTACCTGGCTCTATGGCTTAAAAGTAATCGCGATAACGTTAGCGGTTCATCATGTT  
CATCAGCGGGTTGGACGATTTTTTATTGATGTCGCTACTGGGTACGCCGATTAACGCAAGTTGAGTGTATTATCGCC  
GCTACCCGGAATGAGTTACCCGCAACTGTATAAACAGATGAAAACCGTTAGCGATATGTTTCCGCGTGAATGAA  
ACGGGCGTATCGGCAATATGGCCGAGCTGGCGGCGACCAGCTCGACTACGAAAATCATATCTTTGTTGGCACCTA  
CCCCAACGACCCCGATACGAGCTGATGTTGACGAAAGTGTGCGCTCGCTTCCGAACTGCAATAAGGTAGTCTGCGCC  
GTCTTGGCCCCACGAAAGCGGACTGTCTGAACAACGTTGCTGGAGCCATCACCAATTTGAACGTAGCGCAATTTT  
GCTTTTGGTGGTTTTATTCTGACGCGCAAGATGTTTACCAGTGAATGCGCTGTGTTCAACTATCTGTTGCGA  
GCGTAAAGATCTGATTCAGATCCAGTGTATCCGTTGCAACGCGAATGGACGCACTTACCAGCATGACCTACATTGATG  
AGTTTTACAGAACTGCATGCAAAAGATGTTCCGGTGGTGAAGCCCTCGCCGACAGGTTGCCAGCGAGGCTCGGCA  
TGTTCAGCCCGCGCGCTGACCGCACTGTTAGCTGACGGTGACGGTATGCTTTCGACGTCAGAGTCTGACTGAAGA  
TTACGACATTTGGCTTCCGCTGAAAAGAGAAAGGATGACGCAAAATTTTTGTCGTTTTCCGGTGGTGGACGAAAG  
AACGGGAGCAGCTAAATTTTTACAGCATGCGCGGACGTCAAAATGATCTGCGTGGCGAATATTTCCCGATACCTTT  
TCGACTCGGTTCCGCAAAAATCTCGCTGGATCATCGGATGTTTTCCAGGGCTTTAAAACCCACAAATGGACTCCAG  
CCTGACGCTGAACACTTTCTCTGGCGCACCGCAAGGGCAATCAGTAACTTTGTCAGTTCTCTCGCGATGCTGTTGA  
TGATACAGCTTTTGTGTTGCTGGCGTATGAAAGTTTGGGCCGATGCTGGCATTTCTTTCTATTTTACGCGGACG  
GCATGGTTAATGACTCTGCTGTGGCTAAACTTTGGCTTGTATGATTAACCGCATGTCGAGCGGTTGTTCTGTTACTGG  
CTACTACGGCTGACGACAGGGGCTGCTATCTGTCTGCTGCTTTTCTGGGGCAACCTGATTAACCTTATGGCCAACTGGC  
GCGGTTAAAACAGGTACTTTCAACAGCGGATCCACGCTGTGCGGTGGGATAAAAACACGCAATGACTTTCCGACGCTG  
ACTGGCGATACCCGCTCGTTGCGTCCGTTAGGCCAAATCTGCTGGAAAATCAGGTCACTACTGAAGAACAACCTGATAC  
AGCATGCGTAATCGCTGCAAGGCCTACGCTGGCGGTTCAATGCTGATGCAGGGGCTGATAGCGCGGACAACTGG  
CACAGGCGCTGGCAGAGCAAAACGGCGTGGCGTGGAAATCCATCGATGCTGGCAGCTCCCTTCTCTGCTGATTTGCCGAA  
ATGCGCGCTCCGTCGCTGCAATATGCGGTACTGCCGCTGCTGACAAATGATGAGTTAATTGTCGCGCTGAAGA  
TGGTATTGACCCGGTTTCGCTGGCGCCCTGACCGGTAAGTTCGGACGCAAGTGCCTTACGTCATTTCTGCGGGGAC  
AAATTGTCACCGGATTACGCCACTGGTATGCACGCCGACGCGTACGATCCGCGGGCAATGTTGTACAAATGCAAGTTCA  
CATCAGTGGCTCACGGAACAGCAGGCGGTTGAAATCTGGCGCAATATGTTGCCGATCAGTTCTTCTCGCAGAAAT  
GACCAAGCTCGCTCATATTAATCTTACGCAATTAACGTTGTTGTTATTGCGCCATGAACGCAAGTTCTTCTCGGCTCGCA  
AGTTTTTGGTACCGAAGGCGTTATCAGCCAGGAAACGTTGGATCGCGTCTGACAATCAACGCGAATTAACAAGTTTTCG  
ATGCAATCACTATTACTCAAAGCAGGTTTTAAACACTGAACAGGTTGCACAACCTGGAGTCCGAAAATGAAGGAGAATAA

>Cluster\_27529

ATGCTGGCAGCCCGCTTTTATCATCATTTCTGGCAGCATGGGCAGCAGATAAACTCTGGCCTCTGCCATTGCAAGAAGT  
GAATCCTGCACGCGTGGTGGTGGCGCAGGATGGTACGCGCTCTGGCGTTTCGCGGATGCTGACGGCATCTGGCGTTATC  
CGGTAACAATCGAAGATGTTTCTCCACGTTACCTTGAAGCGCTGATCAATATGAAGATCGCTGGTTCTGGATGCATCCG  
GGGTGAATCCGTTCTCGGTGGCGGTGACGCTGGCAAGATCTCAGCTCGGGTGGGTCATTTCCGGCGGACGACGCT  
CACCATGCAGGTGGCGCGCTGCTTGTCTCATCCAAAACGTTTGGCGGCAAAAATTCGCCAGCTCTGGCGCGCTTGC  
AATGGAATGGCATCTGTCTAAGCGTGAATTTGACCTTGTATCTTAACCGTCCCGGTTGGCGGTACGTTGCAGGGG  
ATTGGTGGCGCAAGTTGGGCTTACTCGGGAAATCGCCTGCGAATTAAGCTATTTCCGAGGCGGCAATGCTGGCGGTGTT  
GCCCAAGCGCCAGCGCTTCTCCCGGATCGTTGGCGGAGCGTGCAGGCGTAAAGGCGGTAATAAAGTGTCTGCAACGGA  
TGGCGGTGCAAGGTGTGTTGCTCCGTTGAGCGGGTAAAAGAGTCAAGGGAAGAACCATCTGGCTGGCACCCCGACAAATG  
CCGCAACTGGCACCCTGTTTTCGCGCATGATGCTCGTTAAAAGCAAAAGCGCAAAAATCGTTACTACGCTGGATGCCG  
TCTTCAACGACGCTTGAAGAATGGCGCAAACTGGAAGGACGATTTGCCACCGCGCAGCTACTGGCGATGATCGTGG  
TTGATACAGGATATGCTGCTGCTGCTGCTGCTGCTGCTGCTGCTGCTGCTGCTGCTGCTGCTGCTGCTGCTGCTGCTGCT  
ATGGTCAATGCGATCCGATCGCCAGGATCGGTACTCAAACCGTTTGTATGTTGCTGGCGCTGGATGAAGGCTTGTATCCA  
CCCGGATCGCTGTTGCAAGACGTCCTCCGACGCAACCGGTTACTCCGACCTGGCAACTTTGACAGCGGTTTTTCTATGGC  
CGATCAGCATGAGTGAAGCGCTGGTGGATCGCTGAACCTACCTGCTGTCAGGTGCTGGAATCCTATGGACGCAACCG  
TTTTCGGCAAAAGTTACGCAATGTTGGAATGCGGTTGTAATCTGCCCCAACGGTGTGCAACGCAATCTTTCGCTCATCTCGG  
CGGCGTGGCGCAAACTGGAAGATATGGCGGACGCTATACCGGTTTGTCTGCGCACGGCAAGGAGGTAATTTGCGCT  
TACAGCTGACGATCCGCTGCTTGAACGCGCTTTAATGTCGCTGGGGGCTGCGTGGATCATTCGCCGATATGCTGAT  
GAAGCCAAACCTTGGCGGATGGTGGCTTGGCGCGCTGCGCCACTGGCATGGAAAAACGGGACGACGCTGCTGATCG  
TGATGCTTGGCGGATGGGGTTAACGCTCGCTATGTCATTTGGGATCTGGACTGGCAGACCGGACGCGCCCGCTGTTG  
GTCAGTTTGGCTTTCGACGTCGCGTACCCTGTTGAATCAGGTTAATAATATCTTACTGTCGCGCAGTGTGAATTTGCCG



GAAGACCACGTCCTGACTCTGTAAGTCGTGGCGTTATCTGCTGGCCGGGCGGACAGTCTTTCGCCGAAGGTGACGGTAA  
CTGTGCCCGCCGCTGGCAACCTGGCTGCTGGACGGGAGCCAGCCGCAACTCTATTACTGCCGGAGCAGGAAGGCATTA  
ATGGCATTGCTTTCCCATCTGGCTGGAATGAAAACGGCAACGCTGTTGCCGCTGATTGCCCTCAGGCGGACAAGAAATG  
ATAAATGCTGGCCGCTACCGCTGGAACCTGGCTGCCCGCATCAGAACGTCGCGCTGTGCGCTTGGCCACCGCTCGAC  
AATTTGCCCGCATACGTTACGATGCACAGTCCCCTGTCAGCTAACAGGTGTCGCGCATGGCGGATTTAAACGTT  
TACCGGGCGAGCGGAAGCGACTTTGCCGTTGCAATCAAGTGGAGGGGAGGTGAACGCTGGTGGTTTTCTGAACGGCGAA  
CCGTTAAGTGAACGTTGGCGCAACGTCACCTGCAATTTGACGGATAAAGCGGATATCAATTGCTGGTGGATGACGT  
GGGCAATAGCGACAGTGAATTTGTCATGCAATAG

>Cluster\_11866

ATGGGTTTTTCATCAGCCCGAAATTTGGGAAGGGACATATCGGCAGGATTTTCCCACCACGTCGCATGCCGATTTCCGA  
GGCTGTTAAAAATTCATGCGTGTTCACAGGGGGCTGGTAACFCGGTGCATGGGATCCTGAACTGACACCCCTACATCA  
TTGAGCCCATGAACCTGGCATCGCGTGAATACGATGCGGTGATTTTTGTTGGTCCGCGCAACAGGGAAGACCATT  
GGTCTGATCGATGGATGGATTGTCTATACCATCGTTTGGGATCCTTCGACATGCTCGTTGTGCAGATGACCGAAGATAA  
GGCCCGGAGCATTCTAAAAAGCGCTCGACAGAACGTTTCAAGCAGTGGCGGGTAAAGAAAAGATGAGTCCACGTC  
GTAACGACATAATGTCCATGATAAGACGTTACGGGATGGCTCGTTCCTAAAAATGGTGGCCCTCGGTCAACATTTATG  
TCGCTCGCGATTACCGGTTTGTGCGCTTAAACGATTACGACCGTTTTCGGGAGAATATCGACAGCGGGGTGATGGTTT  
CTCCCTGGCTCAAAACGTTACCACACATTTATGTCCGCGGGATGACTCTGGTGGAGAGCTCGCCGGGACGTGACATCT  
GGACAGCAATGGCGACGTAAGTCGCCCTATGAAGCGCCACCAGCAGTGGTATTCTTTCCCTTTACAATCGTGGTGC  
CGCCCGCGTGGTACTGGTCATGTCCGCACTGGCGTGAATTTTTCAGCCAGCCATGGATGCCATGACCGGCTACCGTAA  
TGAACCGGATCCCTTAAAGCAGTGGCGGCTACTTTGCGGCACTGCAGCGCATTTACATCGCTGGGAGAAAA  
AGCGTGAGCTCAATAGTGCAGGAGTCTGGTTGCGTGAAGTTCAGGTCATTTGATCGTAACGGCAACGTTTCCGGTGAACCG  
CGCCGCTCCCGTATCGCCAGTTTCTGGAATGGAAGGGCCAGCTGCTGCGTATCAGACCTGGGCGCAACTGGTTTACAAAT  
ACTGACTGCAGAACAGGATGTAAGCGACAGGAAGCGAAGAACACTCAGGGCGGTTTATCAACACCGATGGGGATTGCG  
CTTATCTTCCCTCGTCCGACGATGGCAACGAAAAGTGAACGCTGTTGAGCAGCGGGCAGAGCCAGTTCTTCCCGCAGT  
GTGCCGGATGGCGTTAATTTCTTGTGGCGACAGTGGATGTGCAGGCGGGACGTCATCGCCGTTTGTGGTTTCAAGTAA  
GGGTATGGCAGTGGTGGCAACGCTGGATTATGATCGTTACACATCACGCAGTCATGCGCAGTGCAGTGCAGCGGG  
AGAGCCAGCGAATGATCCGGCCAGCTATCCGGAAGACTGGGATGTCTGCTGACGGATGTTTTTCAAAAAGCTGGCCG  
CTGGCTCCGATCTTCTCAACAAATCGCAGTGTGGCCTGATGGCAATGGCGGTGACTCCGCGGTGAAGACCGGACTGATA  
TGCCATAAAATTCGCGCTGTTGCCGTCGTGATGGCTTGGTAAACGTAATTTACCTGTTTAAAGGTGACAGCATCCGGC  
CGCAAAACTGATCAGCCGTACATTCCTGATAACCCGGACGAAACGGCCGCGGGCGAGCCGAGGTCAGGTGATGTGCC  
CTCTGGCTTCTCAGACGGATGCCCTGAAAGACCGGGTGAATAACCGCTTATGGCGTACTCGCCAGGTCAGGCTATGT  
GCATTTCCCTGACTGGCTGGGAGCTGGTTTTACGACGAACGACTGACGATGAAGAGCGGAGCAGTGACCGGAAATGGAGTA  
AGCCGGTGGCGGTGCCAACGAAGCTTTTGACCTGATGGTGTATGCCGAGGCTCTGGTCAATTCGATGGATAACGAAAG  
ATCCGCTGGCCGGATGACCCGGAATGGGCGAGCCGGGAGACCTGGCTGGAGTGTGTCCAGGACAGTACCGAACCGTCAATC  
CTCACCGAACCGGATATCCACGCTGTTAAAAAACAAAACGGGAAGAAAACAGTAACTGACGATGTTAACCCCTGGCTGA  
CTTCCGGAGGATGGTTATGA

>Cluster\_36256

ATGACAGAAAAAGTTAAACAGTCTGCTGCGCCGTAACCCGCAATGATGAAATCGATAATGGTCTGCTGGTTGCAACGGT  
GGTGGAGGCCCGCTGGTGGTATTAGGCATTACACCGCTTTTGCATTTGTGTCGCGCGTCTACACACTGTTCCGCCACAC  
CCATCTACAGTGGCGAGCGGCTGGTGAATTTGAGCAAAATACCGAAATTCACTGGTGCAGGATATTGGCTCGCGCTTG  
TCGAACAAACCTCCGGCCTCGGAAAGCGGAATTCAGCTCATCCAGTCGCGTCTGGTATTAGGGAAAACGGTAGACGATCT  
TAACTCCGATATCGCCGTTACCAAAGATACATTTCCCTATTTTGGCGCGGGTGGGACCGGCTGATGGCCCGCAGAACG  
AAACGGTTAATAGTGCACACTTCACGTTGCCAAAAGGCAATGAATGAACAGACTTCACGCTCAATGTGTTGAATGACAAA  
AGCTATCAACTGGTACGAGTGCAGGGGTTTTAGCGCCCGGGGCAAGTCCGCAAGGTGTTGGAACATGATGGCGTGACGAT  
GCTCGTTGAGCGGATTCATGCCAGCCCGGAGAGCAATTTACCGTCAGCAAAATTCCTCCAGCTGGGATGATAAACACCC  
TGCAAAATAACCTGATGGTGCAGGAAACGGGCAAGACACCGGCTATTGAGCCTGACCTTTACCGGCGAAGACCGCGAG  
CAAACTCCGCGAGTCCCTGACAGTATTACCCGCAACTATCTGCAACAAAACGTTGGAACGTAATAACCGAAGAGGAAATGTT  
GTCAGGATAAAGACTCCGTTGGATTGCGGCTGGAGCCAAAGCGGTGCTGGATTTCGATGGTGAATATCGATGCCAGCTG  
AATGAACGACTTCAAGAAGCGGAGATTTCCAAGCTGTTACCAAAGCGCATCCGGCGTACCGCAGCTGCTGGAAAA  
ACGCCAGGCGTGGAAAGTGAAGAAAAGTAAAGTGAACCGGCGGTAACGGCGATGCTGAAAACCGAGCAGGAAATGTT  
GTCGACGCGTGTGAGGAGTCCGGTACGAGGCTATATGACGTTGCTGAAACAAGCTGAACGCTTTT  
GCCAGTACCGTTGGCGATGTGCGCATTTGCGATCCTGCCATTGCCAGCTGGCGTGTGAAGCCGAAACCGGCTGAT  
TATTTCCGCGAGTATCATTTTGTGATGCTTTCTGTGGTGGGCTACTGCTGCGTTCTCTGTTAATCGCGGATTTG  
AAAGCCCCCTGGCCTGGAAAGAGAGCATGGTATCAGCGTGTATGCGCATTTCCGCTATCTGAATGGCAAAAAGCGGCTGAT  
AACGTTACAGACATTAAGGTGTGAAACGCTACAAGCAAGCCAGCTGTTGGCGTGGGGAATCCAACGGATCTGCCAT  
AGAAGCGGTCCGAGCCTGCGTACAGTCTGCACTTTGCCATGATGCAGGCGGTAACACGATTTGATGCTGACCGGGC  
TCAGCCCATCGATTGGTAAAACGTTTGTCTGCGCAACTGCGGCGAGTCATAGCCAGCAACAAACGCGCTGCTGTTG  
ATCGATTGCGACATGGCGAAAGGCTATACCCACGAACTGCTGGGGACCAATAACGTCACAGGCTGTGAGATCCTGAT  
TGGTAAGGGGATATCTCATCCAGCGCAAAACGACATCGATTCCGCAATTTGATCTGATCCCTCGCGGTCAAGTCCCTC  
CCAATCTTCCGAGCTGTTGATGAGCGAGCGTTTCCGGCAACTGATTGCTGGCCAGCTCGCACTATGACCTGGTGTG  
ATTGACACCCCACTAATTTGCGGTTGACCGACGCGGCGATTGTTGGCGTCAATGTCGCGACCCAGCTGATGGTGGCGG  
TTATGCGGTCAACACGCTGAAAGAGGTGAAAACAGCTGAGTCTGAGTCAAAATGGCATCCAGGTGAAAGGGTGA  
TCCFCACTCGATATTCGCCGTTGCCAGCGGATACGATTACGGCTACTACGAATACGAATATACGTCGGATGCGAAA  
TAA

>Cluster\_2917

ATGGCTATGTCAGACGAGGCGATGTTTGGCCCGCCACAAGGAATAACAATGAAGCGGTAAACGGAATGCTCGCGGAGCG  
GTTAGCACAGAAACACGGTAAAGCGCTTTTATTACGCGCTTCATCCGATGCCGCGCGGTTTCCGCGGATCAACTTA  
TTGAACTGCATGTTCTCAAAAGCACTTCTATTACCGCTACCATGATGATGGCAGCGATGTGACGGCAACAACAGAGTAT  
ACGGCGAGATGGTCAATTTATTCGCGTACCGCTCTTCTCCGCAAGTGGGAAATGGCGGAGCTCAATTTATCTGATC  
CCACGGCAGCCGTTTACTCCCCAGGATGACACTGTTTAACTGGCTGGCGCGGATAATCACCCGGTTCTGCAATCAT  
GGCTCAATGATGAAGAACAGCAGGTGGCGCTGCGTTTTGCTGGGAAAGATCGCGATCATCATCGGGTACTGGTGGATAT  
ACTAATGCAGTGTCTACATTTTGTCTGACGATCTGATCGCTGACGTCGTCGTCGATCCATCATTTTTTTCGGTCT  
GGCTTCAGTCAGTATGGTACTGGCGATCATCGAAAAGACGAAAGTTTAGCCTGTTGGTGCAGCGCATCTTTCTGCCTCAC  
ATTGTCGCTGCTGCCACGAGTATGCTGGCGACAGTGTATTGCTGACACAAACGCTACAACCCGACACCCAGCTTG  
ACGACCGGTGCAGACGATCTGTTTCTCTGGCAACCGCACCCGTTATTACTCTTACTTGCATCTAACGGCTGCGAATCTGC  
GCTCTTATACCGTACTCTTGGCAACCATACCCGGTGCATTTGCTGGCGCATACCTCTTCACTCTCTTTAGTG  
AGGAAAATGCCAGTACTACAACACATACCGGATCGCATCGTATTGCGGTTGGCAATGCCGATGCTGGCGTAGCATG  
ACCGATTTGACGGAAGTTTGCAGCAAGAAAACACCAGCTTAGCGAGCAGCTCTTTTCAATCTGGGATCGGTGACAT

TATCTATCAAAGCCAGGCAATGGAAGACCTACTCCAGCAGGTAGATATTTGGCGAAGAGCGACAGTACGGTGTGATTT  
GCGGTGAAACCGGAACCGCAAGAGGATCGCCAGAGCGATCCATCACTTAGCCCGCAGCGACAGCCCTGGTC  
AAAATCAACTGCGCTGCCATCCCGCCAGTCTTCTGGAAGTGAAGTTATTCGGTCATGACAAAGGGCGTTTACTGGTGC  
GATTAATACCCTCGTGGTCTGTTTGAATTTGCCGATGCGCGCACGTTTCTTCGATGAAAATGGCGATCTGCGGTTAG  
AACTTCAGCTAACTGCTGCGCTATTGCAAGAACGGAGATTGAGCGTCTCGCGGGAGTAGAACGATCCCGGTAAT  
GTCAGAGTCAATTGCCCCACCAACCGTGAATTTGGCAAAATGGTTGAAGATCGCCAGTTTCGACGAGTCTCTTTATCG  
CCTGAATGCTTCCCACTGGAATGCGCGCGCTGCGCGACCGTCCGGAAGATAFCCCTCTTTAGCAAAGCATTTCACGC  
AAAAAATGGCGCGCCATATGAATCGTTCATTTGACGCCATCCCGACCGAGGCGCTACGCCAGTTGATGCTGTTGGGACTGG  
CCGGCAACGCTGCCGAGTGGAAAACGTTGATTGAGCGAGGCTACTGCTGACTCGCGGTAACAGTCTGAATTTACATCT  
TAATGTCCGACAAAGCCGTTTACTGCCGACGCTAAATGAAGATTACAGCGCTTCGACGTTCAATGGCGCAGTTGCTGCACC  
CGACGACGCCAGAGAAATGACGAAGAAGAACGTCAGCGCATTTGTCAGGTATTGCGGAGAAACCAATGGCATTGTTGCCGGG  
CCCCGTGGCGCGGACACGATTAGGGATGAAGCGCACCGCTGCTGTCACGAATGCAGCGTCTGGGAATCTCGGTTCCG  
CGAGGTGTGTAA

>Cluster\_54062

ATGCTGATCGTGGTATTGTCATCGGTCGCTGTATGCGCTTCCCAACCTGTTTGGGTGAGGATCCGGCTGTTTCAGATCAC  
TGGTGGCGCGGATCCCGCCGATGAGCAACCGCTGATCCAGTCCAGAAAACGTTACAAGAAGAAAAATAACTGCTA  
AGTCTGTGCGACTGGAAGAGGGCGCTATTTCTGGCGCTTTCGACTCCACTGACACCCAGCTGCCGCGCTGTAAGCTTA  
ATGGGCGTTATGGGTGACAAATACGTCGTTGGCGTTAACCTTGGCCCGGCAACGCCGCGTGGCTGGCAGTATTTCACGC  
TGAGCCGATGAAGCTCGGCTTACCTGCGTGGCGGCTTCACTTCTGATGGAAGTGGATATGGACACCGCGCTGGCA  
AATCCAGGAACAAAATATCGATAGCCTGCGCAGCGATTCGCGTGAAGAGGCAATCCGTTATACCAGTTTCGTTAAAGAA  
AACAACTACGGCCTGAGCATTACTTTCCGCGATGCTAAAGCTCGTGAAGCCATTGCGTATCTGAGCAAGCGCATCC  
GGACCTGGTATTAGTAGCCAGGCGAGCAACCGCTGCGTGGGTAATGAGCGATGCTGCTGAGTGAAGCGGCTGAAT  
ATGCGGTGACGAGCAATCAATATCTTCCGTAACCGTGTAAACCAACTTGGCGTGGCGGAGCCGGTGGTTCAGCGCTAG  
GGTCTGACCGTATCGCTGTTGAACTGCGAGGATTCAGGACTGCGCGTGGAAAGAGATTCTGGGTGGCAGCGCAAC  
GCTGGAATTCGCTGTTAAACCAACCGTTGACAGGCGCTGCGGCATCCGGTCCGCTACCGGCGACTCTGAAGTGA  
AACAGACCCGGAAGGTCAGCCAGTTGCTGTACAAACGCGTAATTCGACCGGTGACCATATCACCAGCTCCACTTCC  
AGCCAGGACGAATACAACCAACCGCAGGTTAACATCTCGCTCGATAGCGCTGGTGGTAACATCATGCTAACTTCACTAA  
GGCAACATTCGGCAACCGGATGGCAACCGTGTGTTGGGATACAAAGCAGCGGTAAGAAAGATGCAAAATGCAATTA  
TTCTGGTGAACAGGAAGGTTGATTAACATCGCAACATCCAGTCTGCTGCTGGTGGTAAACAGCTTCCGTTATCCCGGCATC  
AACAAACCCGAAAGCCGTCAGCTGCTGCTGCTGCGTGGCGGTCGCTGATCGCGCGGATTCAGATTGTTGAAGA  
ACGTACCATTGGCCCAACCTGGGTATGCGAACAATTAACAGGGGCTGGAGGCTTGCCTTGGCGGCTGCTGGTTCCTA  
TTCTGTTTCAATGATCATCTTCTATAAGAAGTTTGGTCTGATTGCGGACAGTGTCTGATGTCACCACTGATCTTAATCGTC  
GGCATTATGTCGCTGTTGCCAGGCGCAACGCTGAGTATGCCAGGTATCGCGGGTATCGCTTAAACCTTGGCGTGGCGGT  
CGATGCGAACGTAATGATCAACGAACTATTAAGAAGAGTTGAGCAACGCGACTACTGTTCAACAGGCAATTGATGAAG  
GTTATCGTGGCGCATTAGTCTTATCTTTCATGCGAACAATCACCAGCTGATTAAAGTCACTATCTGTCAGCAGTGGGT  
ACCGGGCAATTAAGGGTTCCGCAATTACTACCGGATTCGTTGGCGAGCTGATGTTTACCGCGATTGTCGGTACCGC  
TGCCATCGTAAACCTGCTATATGGCGCAAGCGCTCAAGAAGCTGTCAATCTGA

>Cluster\_20366

ATGTTAGAAATTAACACTTCTAAAATTAAGAACACAGTTACATTTAGTGTAGATAAAGACAGCTTAAAAAAGCGAAAGA  
CTCTATTACAGGCTTAAAGGAATTCGCAGAAAACATCAAGCCAGCTAAAATTAAGATTTGATAGCGTCACTAAAGGCTATA  
AGAAAGCACAAGTGAAGTAGACAGATTAACCCAGCAAAAGCAGAAAGCAAAATCAAGAGCACAAGCTGCC  
GCAGCAAGAGCAGGCAAGGCAACAGCAACAATAGCAGCAGTAAAGAGAAAGCAGAAATTAAGCTCCCTTGTATGTGTC  
AAGCTCTATTCAGTGCATGCAACCGCTCTCTGTAGCTGACAAACAATATAAAGCTATTCGACAGGCTAGAGATGCAAAAC  
AATATGAGCAAGGGGCTATCTCGCTGACGTAATGATGATGAGTAAACGCTTACAACAGCAACAACGTAAGATTAAT  
GGCAACAGAAAAGCTCAATTAGCCCGTTAAGGGAGGAGCAGGGAATTCGCGCACTATGGGCGCTCTGTTATTTGGAGG  
CGCTACGGCGGCTGCTGGCGTATGGCTGTTAGTAAAACCTCTGAATTTATGGCTAACAGCTTTCGGAATGCTGAAACGC  
AAGGGAGCTAAATCAACGCTGCAAGGCTGGCGGCTGATGACGTTAACAGATGATAAATATTACAGAAAGGCTGATAGA  
AACGGCGTTGACTCTATGATGGGTGATCAAGGGCTAGGAAATACCTGGATCAGATGAAAGATGTGCGTGAACGTTGCCG  
AAAATCCTATAGTGAAGCTGAATTTGGTGAAGCAAGAAAGGAAATTCGAATGGAAAGCGGTTGATAACGCTATTAATG  
AATTTCTAAAACATCGGTGTTATTAACAAAAGCGACCTTAAAAAATTTGCTGATAATCCAGCCGATTAATTTCTAAGGCT  
GTTAATGGAAATGATGAAAAGGTTTTCAGATTCTCAATTTGACAAACGTTTGAAGCTATTAAGAAATGTAATGATGCT  
TACATCAAAATATTGGCAACGTTCCGTTAAAGATGTACAAGAAAGTATTAATCAGCAAAAGCCTCTGGAAAATGGCTAA  
CAGAAACAGCAAGAATCTATCGTTAAATTCAGAGAATCAACAGACAGCTTTCACAGCTTTCTGATGCAAGCAAGTA  
GCATTCGTAGACGGGTTTATGAAATCTCTCGATCCAAAAGTACCGAAGAGTTTATGAAAACCTTTCTAATCTACTTC  
GTATTTTACGAAGCTGGGAGAAGCTATAGGAAGTCTCTTTGAAGCTATTAAGAAATGTAATGTAATGTAATGTAATG  
ATGATAAGACAGATGCTATTCAAAAAATATGGGTGATGCACCGCCATTAAGCAATGAAGGATGAAGAAGAAATTAGAT  
AATCTCGTTCTGATCAATATAAAGGCGCTGGCAGTGCACAACCTACACTGATAATAGTCAATCTCTCTTTAACACGAT  
TAAGGATGCTTTTCTGATGATAATCTTCTGTGTCAGATGAAAATGTCAGTTAGTGAAGCAGCAATCAACCTCA  
AACAGGTTGCTTTAAATAATCTTGCAATGACAACCTCCGGCTTAATAATTTATCTCTCTTCAATCTGAATCTGAATCT  
GAAGTGGTAAAGAGGTTCTCTTACTATTAATAGTGACATCAAGATTAAGCGATTATGTGGATTTTACAGCGAGAGC  
AAGTCGGGATAGCTTCTTGAATCATTAACATTAACAGCTTATCAGGACAATCTAACGGCGGGTAA

>Cluster\_29043

ATGCATTCACAGAAGTCCAGGCTAAACCCCTTTTCTAGCTGGAAGCCCTGGGTTGGGCACTGCTCTACTTTTGGTTTTT  
CTCTACTCTGCTACAGGCAATTAATACATCAGTGGTTATAGTGGCATAACGGCATTTCGCGACTCGCTGTTATTCAGTT  
CGCTGTGGTGTATCCCGGATTCCTCTTTCCGAAGCGGATTAATAATTTGCCGAGTATCGGCGTGGTGTATGGGCG  
GCCCTCTGGCGGCGCTGCTACTACGTCATCTACGGTCAGGAGTTCFCGACAGCGTCTCTGTTGTGATGTTTCGAAC  
CAACCAACGAAGCTAGCGAGTATTAAGCCAGTATTTACGCTGAAAATTTGTGCTTATCGCGCTGGCCTATACGGCGG  
TGGCAGTTCTGCTGTTGACACGCTGCGCCCGTCTATATCCAAAGCGTGGCGTTATGTTGCTCTTTTGGCCCTGCTT  
TATGGCTGATTCGATCGCATCCGATCGCATGAACACCATCAAAAGCAACCGATTGAAAAACCGCTGGATAGTCTGGC  
ATCCGAATGGAACCCGACGACCATGGCAATTTTCCGCTTGTATCTGACGACCGCTCGCTGATGAACATGATGAACAGGG  
AATTACTCAACGAAAACATGCGCTACCGCGCTGGCTAATTTCAAAGATGAATCGGGTAACGAACCGCGCACCTTAGTG  
CTGGTATTGGCGAGTCCAGCCAGCGTGGACGATGAGTCTGTACGGTTATCCGCTGAAAACCGCGGAGCTGGATGC  
GCTGCATAAAAACCGATCCGAATCTGACCGTGTTAATAACGTTGGTACGCTCTCGTTACCATTTGAAATCCCTGCAAC  
AGGCGTGAACCTTTGCCCAATGAAAAGAACCCGGATCTGTATCTGACGACCGCTCGCTGATGAACATGATGAACAGGG  
GGTTATAAAACCTTCTGGATCACCAACAGCAGAGATGACCGCCGCAATACCATGCTGACGGTATTTTCGCGCCAGC  
CGACAAGCAGTACTACATGAACAGCAACGATGACGAGTGGCGGTAATACGACCAACGCTGTAAGCCGTTCCAGG  
AAGTCTGAAGGACCTGGCGGAGAACTGATCATCTGTTTCACTGCTGGTACGCAATCAAGTACAAAGTACAGCTTAT  
CCGGAAGATCAGGCAAAATTTGACGGTAATACAGAGCATGTTCCACCGGATTAACCGCAGAAAGAGCTGGAGTCAATAA  
TGATTATGACAATGCTAACCTGTACACGATCAGTGGTTGCCAGCTGATTAAGACTTTAAAGCGACCGATCCGAAC

GTTTCTGGTTACTTCTCTGACCAGGTGAAGAGTTTACGACACGCCGCGCATAAAACCAGGGGCGTAACGAAGAC  
AACCCGACCGCTCATATGTACACCATTCGTTCTGCTGTGGAGCTCAGAAAAATGGCAGCGACTCATCCGCGTGATTT  
CTCACAGGATGTTGATCGTAAATACAGCTGGCGGAACGTATCCACACCTGGTACAGATTGGCGGGCTTATCTTACGACG  
GTTACGATCCAACCCGTTTCACTGGTGAATCCGCGAGTTCAAAGAAACTACCCGCTGGATTGGTAACCCGTATAAGAAAAAC  
GCACGTATCGATTACGACACTCTGCCGTATGGCGATCAGGTGGTAATCAGTAA

>Cluster\_9713

ATGAAACGTTATTTACCTCTGATACTGGCTCTGGTTGCCGGCATGGCAGAGCTGACAGCAACAGTGATTACCGGGCCGG  
TTCTGATTTTGCCTGATTCAGGGGCGAGTTACAGGCAGTATTCAGAGCTTAAAGCCACAGGAGAGTATCCCGGGCT  
ATAACCGAATCCGGACGAGACAAAATAATACGGTGGCGTGACTGCCGCGGGGATGGCGGCTGAAAAATGACGGCAC  
ACGGAATGGGCGACCGGTGAAACCGGAAAAACCATCACAGAGTCTTCATGAACAAGCCGAAAGACATTTCTGTACCAGGA  
TGCACCGTTTATTGACACCGGCAGGGATGTGGTGAACCGGGCTGACAGCATTTGGGAAACACCGGGCAGCAGTGCAGTG  
CGCAGGAGATTAGCAGGAGTGAATACACGAATTACACCTGTGAGCGGGATTACAGGTGGAGCAGTACTGCACACGAACT  
GCCCGTATGGAGCTGCAGGGGAGTACCACATGGGAAACCGGACCGCTGGAGTATGAAATGAGTCACTACCTGACCGTGA  
AGTGAATGGTCACTATGTTGTCTCCATGACCTCTCCCGTTACCGGTGAAATTTGTCGATGCGCATTACAGCTGGAGTCGTA  
CTTACCTGCAGAAGAGTGTACTATGACAAATTACAGTACTGGGAAACCCACTGAGCTGGAATGCCAAATACTCAGCAGAT  
GCCTCATTTACACAGTACGAAACACTGACTGCCGGTGTGGCTTTTACGTCACTCACCCCGTCCGGGTCGGGAATAC  
AAAATTCAGACGCTACCGCAATGGAAGCTGCGTCTGGTTGTACAGGTTAAAAAAGCCCTGCTACACCCCGTATGTTGTCT  
GGTCTGAAAGCTGCCCGTTACGCAAGGAGCTGGGAAACTGACAAAAACAGAAATGTACGGAGGCTGGCGGAAACAGGACG  
CTGGTGAAGAGCGCTCAGTCATACAGCATGTACAGAGCTGCTGGGCATACCGGGACAGTATGTACACAGTGCAGCAGA  
CAAGGGAACCTGTACAGCTACACCGCAATCCGGCTTACCTGGTGTACACAGTGCCTTTTACTCCGAAGAAG  
GTGCTGTCTGCATGAAATGCCACGTACTCTGTGAGTCAAAAAACATCCGGGAAAGTATGCTCTGTGGGGAGATGTC  
TTCGCTCGATGGCAATGCGATAAGGCTCAGAGCGGAAGAGTAATGATTTGCCGAGCTGTTTCTCAGCTGGCAGC  
ACTGGCCGCTGCAGGTAAGGATGTTGCCGCGCTGAACGGGGTGGATGTCCTGCTTTCACCGGTCAGGCGAAATTTTGTGA  
AGAAGCTGCAGCCGGATACAGCAACTGCTGTAAGGACAGCGGCTGGGACAGATATCGGGTCGGCAAATGACGACGT  
GATGAAAAAGCCCTGGCTAAAGCAAAATCAAACAACTGACCGTACGCTCGGGAGTCTGTTCGAAGAAAGTGTCTGGG  
TGTCTGTCTGGAGAAAAACGACGCTACTGTCACTTTGATTCGAAAGCTGGCGCAGATAGTCCAGCAGCAGGGGCGCAACG  
GTCAGCTGCGTATCAGTTTGGCCGTGCGAAGCATCTGACTGTGGGGGATTACGGTTGATGAGCTGCAGAAAAATTCAG  
TTCGACAGACTGGATTTTCACTAACTTCTACGAAGACTGATGAATAACAGAAAAATCCCGGACAGTGGCGTTCGACGCA  
GAAAGTGAAGAGCAGATTGCTGACCAGCTGAAACAGGACAGCAGTAA

>Cluster\_66218

ATGAGCACTGATAATAAGCAATCATTTGCCCGGATTACCTCGCGCGATTGGAGTTGTCTACGGCGATATTGGTACCAG  
CCCGTTATATACACTTCGTGAATGTTGTGCCGCGAGTTGGTTTGGCGTTGAACCGGATGCCGTGTTGGCTTTTTAT  
CGCTGATCTTCTGGCTGCTAATCTTTGTGGTTTCCATTAAATACTCACCTTCGTGATGCGGGCAGATAACGCCGGTGAG  
GGGGGATCCTGACGTTGATGTCGCTTCCGGGGGTAATACGTCGGCGGCAACCATCAATGCTGGTATTATGGGGCT  
AATCGGCGCGAGCTTTTCTATGGTGAAGTCTGCATACACACCCGCTATTTCCGTGATGTCAGCCATTGAAGGCTTGAA  
TCTGTCGCCCGCAGCTGGATACCTGGATAGTTCCCTCAATTTATCGTTCTCACTTTATTTATTTATGATGTTCAAACAT  
GGCAGGCTATGGTGGTAAGCTGTTTGGCGCGATCATGCTGACCTGGTTTTTGATTCGGCAGGACTGGGGTTACGTAG  
CATTTATGCTAACCCGGAAGTGTGCATGCGCTGAATCCAATGTGGGCGGTGCATTTCTTCTTGAATACAAAACGGTTT  
CTTTTATGCAATAGGGGAGTGGTGTGTCGATTACGGGGTTCGAGGCGCTGATGCTGATATGGGGCACTTTGTAAG  
TTCCCTATTTCGCTGGCGTGGTTTCCCGTCTGATTTACCTTCTTGGACCTTAAATTAATTCGCTCAGGGAGCGCTGTTGTT  
AAAGAACCAGGAGGATTAAGAACCCTTCTTCTGTTGGCAGCGGACTGGGCGCTGATCCCGCTGCTGATCATCGCCG  
CACTGGCGAGCGTAAATGGCTCGCAGGCGGTTATCTCTGGCGTCTTCTCATTGACCGCTCAGGCGGTACGCTGGGAT  
TTGCTCGGATCGGATTTTACACCTCCGAAATGGATGAGTACGGGCAAAATCATATTCGTTTGTGAACCTGGATGCTTA  
TGTGCGGGTCTGATGTTGATGTTGACGCTTTGAGCAGCTCCAGCAACCTGGCGGCGGCTACGGGATGCGGGTACCGGAA  
CCATGGTGTCTGACGCTTATCTCTGACCTACCGTGGCAGCTCAGAACTGGCACGGAATAAGTATTTTGTGCGCTGATC  
CTGATGCTTTCTTTGTGTCGATATTCATTTGTTACCGCTAACCTCGATAAACTGCTCTCCGGCGGCTGGTTGCCATT  
GAGCTCCGCTGATGATGTTTATCGTGTGACCACTGGAAGAGCGAGCGCTTTCCCGTTGCTGCGGGGATGATGAAAC  
ATGGTAACTCTCTGGAAGCGATGATGCTTCCGTTGGGAAATCACCCTGTTTCCGCTGCGGGGACCGGCTGTATATG  
TCCGCTGCAATCAACGCTATCCCTTTCGCTGATGCAATAACCTTAAACATAACAAGTATTGATGACGCGGTTGATTCT  
GTTAACTCTGCGTACCGAAGACGCGCATATGTCATAATGTCCTGCGGTACAGATTGAACAACCTGTGCGCCACTTTCT  
GGCGCTGGTGGCAAGTTATGGTTGGCGAGAAACGCAACCGTGAAGAAAGTTTCCACCGCTGCGGCTGCGGATTA  
AGTTGCCGATGATGAAACCTCTTCTTTATGTCGATGAGTCTGATCCTCGGCAACCGCCGTTGATTTTGGCTCT  
GCGCGCAAGCTGTACTTCTGCTGCAACGTAATGCGCTGCGTGCACAGATCAATTTGAAATTCGCCAAACAGGGTTA  
TCGAACTGGTACTCAGGTCGAAATCTAA

>Cluster\_25800

ATGGGTAAAATAATGGTATCGACCTGGTACTACCAACTCTTGTGTAGCGATTATGGATGGCACCACCTCTGCTGACT  
GGAGAACGCCGAAGGCGATCGCACACCGCTTCTATCATTTGCCATATACCAGGATGGTGAACCTTGGTTGGTCAAGCCG  
CTAAACGTCAGGAGTACGAAACCGCAAAACACCTGTTTGGATTAACCGCTGATTTGGCCGCGCTTCCAGGACGAA  
GAAGTACAGCGTATGTTTCCATCATGCGGTTCAAATAATTTGCTGCTGATAACCGCGACGATGGGTCGAAGTTAAAGG  
CCGAAAAATGGCAGCGCCGAGATCTCTGCTGAAGTGTGAAAAAATGAAGAAACCGCTGAAGATTACCTGGGTGAAC  
CGGTAACGAAAGTGTATACACCGTACCGGCTACTTTAACGATGCTCAGCGTCAAGCAACAAAGACGAGGCGGATC  
GCTGGTCTGGAAGTAAACGATCATCAACGAACCGACCGAGCTGCGCTGCGTTACCGTCTGGCAAAAGTACGCGCA  
CCGTAATATCGCGGTTTATGACCTGGGTGGTGGTACTTTTCGATATTTCTATTATCGAAATCGACGAAGTTGACGGCGAAA  
AAACCTTCGAAGTTCTGGCTACCAACGGTGTATACCCACTGGGTGGTGAAGACTTCGACAGCCGCTGATCAACTACCTG  
GTTGAAGAATTAAGAAGATCAGGGCAATTGACCTGCGCAACGATCCGCTGGCAATGCAGCGCTGAAAGAACGCGCAGA  
AAAAGCGAAAAATCGAATGTTTCCGCTCAGCAGACCGCAATTAACCTGCCGTACATCACTGCAGACGCGACCGGTCGA  
AACACATGAACATCAAAGTACTGCTGCGAAACGGAAGCCTGGTTGAAGATCTGGTAAACCGTTCCATTGAGCCGCTG  
AAAGTTGCACTGCAGGACGCTGGCTGTCCGATCTGATATCGACGAGCTTATCCTCGTTGGTGGTCACTGCTATGCC  
AATGGTTCAAGAAGAAAGTGTGAATTTTGGTAAAGAGCCGCTAAAGACGTTAACCCGACGAAGCTGTAGCAATCG  
GTGCTGCTGTTCAAGGTTGTTCTGACTGCTGAGTGAAGACGTAAGAGCAGTACTGCTGCTGGAGCTTACCCGCTGTGGGT  
ATCGAAACCATGGGCGGTGATGACGACGCTGATCGGAAAAACACCCTATCCCGACCAAGCACAGCCAGGTTTCTC  
TACCCTGTAAGACAAACGCTCTGCGGTAACCATCCACGCTGCTGACGGTGAACGTAACCGTGCAGGCTGATAACAAATCTC  
TGGGTCACTTCAACCTGGATGGTATCAACCCGGCACCGCGCGCATGCCGAGATCGAAGTTACCTTCGATATCATGATGCT  
GACGGTATCCTGCACTTTTCCGCAAGAGATAAAAAACCGCGGTAAGAGCAGAAAGATCACCATCAAGGCTTCTTCTGGTCT  
GAACGAAGATGAAATTCAGAAAAATGGTACGCGACGAGAGCTAACCGCAAGCTGACCGTAAAGTTGAAAGAGCTGGTAC  
AGACTCGCAACAGGGTACCATCTGCTGACACGACCCGCTAAGCAGGTTGAAGAAGCAGGCGCAAACTGCCGGCTGAC  
GACAAAACTGCTATFCGAGTCTGCGTACTGCACTGGAACCTGCTGAAAGGTTGAAGACAAAGCCGCTATCGCAAGCGAA  
AATGCAGGAACTGGCACAGGTTTCCAGAAACTGATGGAATCGCCAGCAGCAACATGCCAGCAGCAGACTGCCGGTGT  
CTGATGCTTCTGCAACAAACGCGAAAGATGACGATGTTGTCGACGCTGAAATTTGAAGAAGTCAAGACAAAAATAA

>Cluster\_22451

ATGAACATGCTTGGCCTTAACCATATATTTTGGCCATTGATTGGCTTCGTCCTGCTGGCGTTCTCCCGTGGGGCGTGGTCTGA  
AAACGCTCTCGGCATCGTCGGCGTTGGCTCTGTGGGCCGTCGGTAACCGCCTTTATCGGCGTTGACTTCTTTCG  
CTAACGGTGTAGCAGGCATACAGCCAGCCGCTGTGGACGTTGGATGTCGGTAGGCGACTTTAAACATTTGGTTTCAATCTGGTG  
CTGGACGGCTGTGCTGACCATGCTCTCAGTGGTACGTTGGTGGGTTTCTTATTCACATGATGCTGCTGCTGATGCTG  
GCGCGGAGAAAGGGCTACTCTCGCTTCTTCGCTTACACCAACTTGTTCATCGCCAGCATGGTAGTTCTGGTTCTCGCCG  
ATAACCTGTGTTGATGTACCTCGGCTGGGAAGGGCTGGGCCCTGTGCTCCTATCTGCTGATCGGTTTCTATTACACCGAT  
CCGAAGAATGGCGCAGCGGCAATGAAAGCGTTCGTCGTGACCCGCTGTGGGTGACGCTTCTCCTCGCTTTTGGCGTGTTCAT  
TCTTTTACAACGAATGGGCACCCCTGAACCTTCGCGGAAATGGTGGAACTGGCACCAGCGCACTTTGCTGATGGCAATAACA  
TGCTGATGTGGGCGACGCTGATGCTGCTGGGCGGTGCGGTGCGTAAATCTGCGCAGTTGCCGTTGACAGACATGGCTTGGC  
GACGCGATGGCGGGCCGACGCTGTCTCCGCGTGTATCCACGCGCAACGATGGTAACCGCGGGTGTACCTGATCGC  
CCGTACCCACGGCCTGTCTGATGACGCGGAAAGTTCGATCTGGTGGGCAATTGTTGGGCGGTTACGCTGCTGCTGG  
CCGTTTTTGGCGGCTGGTACAGACCACATCAAACGTTCTTCGCTTACTCTACCATGAGCCAGATTGGCTACATGTTCT  
CTCGCGCTTGGCGTGCAGGCATGGGATGCGGCGATTTTCCACTTGATGACTCACGCGTCTTTAAAGCGCTGCTGTTCT  
GGCATCCGCTTCCGCTATCTTGGCTGCGCATCAGCAACAGAATCTTCAAGATGGGCGGTTCTGCGTAAATCTATTCCCG  
TGGTTTATCTCTGCTTCTGGTGGGCGGCGCAGCACTGTCGGCACTGCGCTGGTCTGCTGCGGCTTCTTCAAGTAAAG  
GAGATCTCGCGGCTGGTACGCAATATCAATCTGATGGTGGCAGGTTCTGGTGGCGGTTACGCTGCTGCTGGC  
CTACACCTTCCGTATGATTTTCACTGCTTCCACGAAAGAACAAATTCACGCTCACGCGTGAAGGGGTAACACACA  
GCCTGCGGCTGATGTGCTGCTGATCTTCCACTTCCGTCGGCAGTATTGATACCGCGCTGCAGGGCGTCTTCCG  
CAAACGAGCGGCTGGCGCAGGCAGCATGTTGACCTGGAAATACCTTGGCGTGGTGGCGGTTGGCTGGCATCTGCT  
GGCTGCCCTGGCTGGCTGGGTAACAGTACTCTGGTGACCTCCATCGCAACAGTGGCGGGCGGCTGCTGGGTACCT  
GGTGTACACGCTGGGGCTTTGACTGGCTGTACGACAAAGTTCGCTCAAGCGGTTCTGGGTATTGCTGGTGTGCTG  
AAACGCGATCCGCTGAATCAATGATGAACATCCCGGCTGTCTTCCCGCTTTCAGGTAAGGTTCTGCTGTTAAGCGA  
GAACGGTTATCTCGCTGGTATGTGGCATCCATGACATCGGTGCGGCTGGTGGTGGCACTGTTGATGGTACTGCGTT  
GA

>Cluster\_2436

ATGAGACGATTTCTGACGACGCTGATGATACTCCTGGTCTGCTGGTGGCGGGTTATCTGCGTTAGTGTGGTGGAA  
TCCGAATGATTTCCGCGCATATATGGTCAAGCAAGTTGCTGCAGTAGCGGTTATCAATGACGCTCGACGGGCCACTGC  
GTTGGCACGCTTGGCCGAGCTTAGTATCTCTCCGGCGAATGTCTCACCGCCAGGGCGCAAGCCAGCCACTGGTT  
CGCGCCGACAACTGCGCTGTGACGTTGGCGCTTTTACCCTACTGAGTCACTCAACTGAGCGTTAAGCAGGTGATGCTAAA  
AGGGGCGATGATCAACTGACGCGCAGACGGAAGCGGTGGCAGTGAAGACGCTCCGGTGGCAGCGCGCAATACTT  
TGCCGGATCTGTACAGCATCGCGGATGGTCTGTTGATATATCCAGTCTAAAGGTGGCGGACAGCGTGGTGGTTCAG  
CATGAAGATGACGAGCAGGTGACAATCCGCAATATCCGCTGCAATGGAACAAGATCCCAACATCGTGGCTCAATTTGA  
GTTCTCCGGCGGGTTAATCGCGATCAGCGCATCTCAGCATATCCCTTAAACGTTACGGTAGATGCTTCTGATATCCCG  
ATGATTTAACGGCGGCTATTGAACAAATTAACCTGGCAGTTGACGGGTGCGAGTTTACCAAAACAAGGTATTACAGGGCAG  
GGGATTTCCAGGCGCAGTGGCAGGAGTCAATAAACGCTTTTCAATTTAACCAATCAGCTTGGACCGCAATAAGCAGCAC  
GCTGAGCGGGCAAGCACAGGTACGCTGACAGAGAACTGAATGGCAGTGAAGTGAATTTCCGCAACTGAATCTTG  
ACAACCTCATCCGCTTAAATGAAACAGCGAATGGTGAACCGGTGGCGCGCAGCAGGGGACAGGCAATCAACATTTGCC  
CGCCCGCTCATTTCTCGCTATTTGATGAACCGGCATATCAGGAGTGAAGGCTTTACGCTGATATTTGTTGACGGC  
CAGTAAACGCTGGCGCGGAATGAATTTTACAGATGTTTGGCAGCAATGACCAACAGTGGGTTTGGTGGAAATTA  
CTCAACTGACGGGCAAGCTTAAACGGTGGACAGGTTTCACTGCGGGCAGCTGGACGCGACATCAATAAATCCGCGGATA  
AATCTCCAGCCAGCGGTGAAAAACGTTGAGATTGGTACCATTTGAAGCGGTTAACTATCCGATTTCTGTTGACCGGAAA  
AATGTCACCTGGCTGGTGAATTTCTCCGGTGTGACATGATGCGCAGCATTTCCGCCAACTGGCAAGGACAGGCACATG  
TCGAAATGACCGACAGCGCATGGAAGGGATGAACTTCCAGCAGATGATTCAGCAAGCGGTAGAGCGTAATGGCGGTGAT  
GTGAAGGCGCTGAAAACTTTGATAACGTTGACGCGGCTTGGACGCTTTACCACCGATTGACGTTGAAGGATGGCGTCT  
GACGTTAAACGACATGAAGGTCAATCGCCATGCTGGCGCTTTCCGGGGTGGTACGTTGAATCTGGCGGAGCAACCT  
CGCACCCAGTTTGGTATTTCTGCTGTGATTTGGCGGCTGGAACTGGAAATAAACTGATTTGAATTCGAAAGAACGCCA  
GTACCCTGCGGGTTTATGGCAACTGGCAGCAACTCAATTTACAGCCTGCAAGTGGATCAGTTACTGCGCAACATCTACA  
GGACGAAGCGAAACGCTGCGCTGAATGACTGGGCGAGCGGAATAAAGATTCCCGTAATGGCAAGATGGAAGAGTTG  
TTGAGAAGATGTAG

>Cluster\_35348

ATGGCGACGTTACGTTGAATGATATCAAAATTTCCGCAATTCGAGTCAATCCAGTCCGAGATCCAGCGGGCTTCCCG  
CATGGGCACTGAATATTACCGGACCCCTGCAAGATGGCGGGCGTCAAGCTGCGCGAGTCCCGGGGAGCAGCGACGCGCC  
TGGCTGAGCTGAACAGCCAGTTGACGGAATCCGCGCTTCACTGCGGAAACGGCGGGGCTTTGACAGTGCCTTTGCC  
ACCGGACACTGATTTTCTTGGCGGATGAAATGGAGTTTCCGTAATGCCGACTGAAACAGCGCTGCGAGTCCCGGATA  
ATTTTCTGCTATCACAGAAAGTGTGATGATATCAGCCAGCGGACGGCAGCGCATTTTCAAGATAATGCGGCCCTGTTTG  
CCGCTCGCGAGCTCAATGCGTGAATAAGTTTACAGTCTGATGATGTTGCTGAAGGTGACGGAGGCCATTTCCACGGGG  
CTGAAATCTCCGTTGCCAGTACGGCAGGCGGGCTCGGTGATCACCAGTTCAGCCAGGCGTGGCACAGGCTGTGTT  
ACGCGGTGAGGAATTTAATTTCCGTTCAATGAAAGCGGAGACCGGATCTGACGTCAGTGGCTGCGGGTATGGCGGTGGCC  
GTAAAGCCTTAAGGCGATGGCGGACAGCGGCAAACTGACGGCGGATAAAGTCTTCCGCTTAAATCAGCCAGCTGGGG  
GTATTCGCTGATGAATATGCGCCATGCGGAAACGGTCTCTGACGGGATCACAAAGGTGAAACCGCCTTTATGGCCTG  
GGTGGTGGCGCAATGAAGCCAGCGGAGCGAGCAAAACGCTCTCCGGCGTGTGAACGGTGTGGCGGTAATATGATA  
ATGTGGCAACAGCCGCGGGGGCGTGGTTGCGGCTGGGGTGGCCGCTACTTTGGCAATATGGCTCCGGAGCGGTGTCT  
GCCACGGCAGGACTTGTGACGGCAGCAGTAAATGAAGTGGCAGTGGCGGAAGCACAGCTCAGGGGGACGAGATTGCCAC  
GGCGGGCAAGGGCAGCGGTGTACCGTGCACAGCAGGCTGTGGCGGACGCGCGGACGGAGATGCAGATTGCTGACAG  
AAGCCGCTTGGCGGCGCACAGGAACGCTGAACAGAAATATGCTGCCAGAACCGCAGCCAGAAATGCGCTGACAGT  
ACAACGGCGGTGGGCTCACGCTGATGACTGGTGGCTTGGGACTGGTGGTGGCGTACCCGACTGGTGTGCTGGGGG  
AGCAGCATGGTATACGCTGTACAGAAATCAGGAGCAGGCGAGGAGTCAAGCGCCAGTATGACTGACGATAGATGAAA  
TCGCGCATAAAACCGCTCAATGCTTTTGCCTGAAGCCTCAGATAATGAAGGACGAACACGGGCGGCGCTGGCAGGAC  
AACCGCTGATGATGAACAGGCGGCTGAAATCCCTGCGAGGAAAAAATCGCTGGATATCAGTATGTTCTGCTGCTAA  
CCCTGGCTGGACAACCGGTGACGGATTCATGATAAACCATCTGACATCGGTGAAGACCGTACGGAAGGGCTTTCTCAGG  
CAACAGAGCAGCTTGGCGTTGACGAGTCCGCTTGGCAGAGATGACGGAAGGCGAGTCCATTCAGGATGTGCTTGGC  
GGCTGGAAAGCAGCTGTGCTGGCTTAATCTGTCAGCAGGCGGACAGCAGAAATGAAGTGTACAGTCCATGCTGGTTAT  
GAACGCTCAGCATACGGAATTAACCGTCTGCTGGGGCTGGGTAATGAAGTGTTCAGCAGCGCGGAGGACTGGTGAATG  
TGCCGTTACGGCTGCCACAGGCCACTCTGGATGATAAACAGCAGAGTGCCTGACAAAAACAGAGCGTGAAGTGGCCCTG  
TCCAGACTGAAAGGGGAAGAAAAAGAGCGTGTCCGACTGGGATGCGCGGATGACCTCGGTTTGTGGGTGAACCGTA  
TCAGGAGGCGAGAACAGCTTATATCAGTAAATGCCCTGGAGGCTGGCGCAATAACGAGGCGAAATAACAAATCCCGGG  
GTGAAAAATCAGAGCAGGAAAAAGCGGAAGACAGTTTTCCCGGCTGCTGAAGCAGCAGAAAGAGCAATTTGGCACTTGG  
GGCAGAAATCAGAGCTGGCGAAGCTGAATACAGACTGCGCAGGGCAACTGAAACCGCTGACGGAGATGCAGAGCA

GGAACGTGCTGCGCAATGCGGCCCTGATTGACCAGCAAAAAATCCGGGAGCAGTTGCGGTCCCGGGAAGAGACCCCTGAAGA  
ATGATAATGTGGCTGCGCGTGCATCAAAATGAAGCGAACTGCTGGGGTACGGGAGGGAGAGCGGCTCCGTGAACGCATG  
CGGGAGTTGCAGCAGATCCGCGACAGTTCCGCCAGAAGGATGCGGACCTTCAGTCTCAGTATCAGACCGGGGATATCAG  
TGAGGATTTTACAGACAGGCTCTGGCAGAGAACCGCGAGTATCTGAGTGAACCTCTGAAAGAGCAGGAAAGCCTTTTATG  
CCGAATCGAATGGCGCGCTGCGGACTGGCAGAAAGGGCTGAGGAGGGATTCAGTAACTGGGTGGATAATGCGTCCGAT  
TACGCCTCACAGGCGACAGCTGGCGACGGAGGGTATCTCAGGGATGGTGAATAACATCACGGAGATGCTGAACGGAAA  
TAAAGTGGAAATGGCGCAGCTGGGCCTCATCAGTGTGCAGGAAATATCAAAAGTTCTTATGAATGCCCGGATTGTCAACG  
GGATCAAGACGGCGGCAACAGTATGTCGGAGCGGGAGGATTTATCGGCAGTATTGGTAGCTGGCTGGGCGGTGCGGTG  
GCCAATCGAAAAGCGCGCTGTATACCTCGGCAAACTGAGTGGCTACAGCAACAGCATTTGTGGACACGCCACGCTACTT  
TGGCTTTGCAAAAAGGGCGGGCTGATGGGGAAAGCGGACCTGAAGCATTATGCCCTGACCCGGGCGGGGATGGCT  
CGCTGGGCGTACGCGCGTGGGCGAGTATGAACGCGAGTCCCGTCTGGTGTATTTCCCGGTCTACCACATCGCATTCAG  
AATGACGGGGCTAACGGACAGATAGGGGCGGAGCGGCGAGGAGCTTTGTGCAGCTGATTGACCAGCGGGTGCAGGCGGT  
GATGCTGTCCATGCGACGTGACGGAGGAATGCTGAGTGCTGA

>Cluster\_22217

ATGAGCAAAACAATCACAGCATGTATTAATTGCCCTGCCACCACCGCTGCTTACCTGGTCAAGTTAGGTTTAGTCTCGTT  
TATCTTACCCTTTTCTCACTTGAGCTTTCGAGTTTGGCAACCAACTCGCCCACTGTTGGTCCCGACCTCCATCATGA  
TGGTGGCGTTTTTATCGCCATGCGCGGCTGTGGCGGAAATGCGCTGAGCTGCTCGCTGGGAAATGATCCGCGCATCC  
ATCCTGCTTTTTTCCACCAGCTCGCTGAACATGACCTGGACGACCATCAATATTTGTTGAAGCCGTGGTCCGGGAGTGT  
GCTACGTAATTTGCTGCGGTGTTATAACCCCTTGCAAAATCTGGCTGACTGGCTGGCTGGCCTCGGCAGCCCAATTA  
TTCCGCTCTGTTGGGGGTGTTCTGGTGTCTGCTGAGCCCGGAGACGATCCTCTCAGGGCATTTTGATATGGGTA  
CTGTCAGAAATCATCGCGCTCTGGCACTGGTGGCGTGGGATTTGTTATTTAAACCACATCTACTTCCGCCATCGCAA  
CCCAAGTTGCTTTTTGAGTGCCTGCTCAGTTAGCCATCACGCTGACGTTAAGTGGCTTTCGATGCTGTACCTGCCGT  
GGCTTTTTACTTTTATTATTTGCTGTTGATGTGGAGCGCCCTGCCCTGCCACGAAATGGAAGCCTTTTTGATCTTCCTT  
ACCACGCTGATGATGGCTGCGTGTATGATGGCCGGGATCCCTCCCTGCTTACGCTACGCGCGTACGTACTGATGAGCCA  
TATGCCGTGGCTACCGTTTTTGTGATCCTGCTGCCCGCAACATCATGACGATGGTGTATGATGCTTTCTGTCGGAAC  
GCAAAACATTTCCGAAAGCGAAACCCGCTTCCGGAACGCGATGGAATATCCGCTATCGGCATGGCGTTAGTGGGCACC  
GAGGGCAATGGCTGCAATCCAACAAAGCGCTCTGCCAGTTTCTCGGTTACAGTCAGGAAGAGCTGCGCGGACTCACCTT  
TCAGCAACTGACCTGGCCGGAGGATCTCAATAAAGATCTCAACAGGTTGAAAAGCTGATAAGCGGTGAATGAGCCCACT  
ATTCAATGGAAAAACGTTACTACAACCGCAATGGCGATGTTGCTGGGCGTGGCTGGCGTCTCACTGGTGGCCACACG  
GATGGCACGCCGCTCATTTTATCGCTCAGATTGAAGCATTAACGAGCTAAAACGCACCGAAAGGTCATCAGCAACT  
GATGGAGCGCATCAGCTGGCAACGAAGCGGGCGGATTTGGCATCTGGGAGTGGGAGCTGAAGCCGAATATTTTTAGTT  
GGGATAAGCGGATGTTCCGAGCTGTATGAATTCCTCCGATATCAAACCGAACTGGCAGGTGTGGTACGAGTGGCTGTG  
CCGGAAGATCGCCAGCACGCCGAAAAGTGATTCGTGATTCGTTGCAATCACGCTCGCCCTTTAACTGGAATTTCCGAT  
TGCCGTGAAAGATGGCATCCGCCATATCCGCGCCCTCGCAACCGGGTACTGAATAAAGAAAGCGAGGTCGAACGCCCTC  
TCGGCATTAAATGGATATGACGGAGGTTAAACAGCTTAAACGAGGATTTGTTTTCAGGAAAAGAGCGCTGCACATTACG  
CTGGCATCCATCGCGCAAGCCGTTGCTGTATTGATATGGCAATGAAAATACCTTTATGAATCCAGTGGCGGCGGATG  
GAGCGGCTGGACGAGGAAGCGTTAGGTGTTCCGCTCCTGACGGTGTGTCATATTACTTTTGGCGACAACGGACCAT  
TAATGGAGAACATTTACAGTGCAGCACCTCACGTTCCGCGATCGAACAGATGTTGGTGTGCACTGCCGAGCGCGCGC  
AGTTACGACGTGCATACAGTATTACGCTTAACTACTTGGACGCGCAGCAATATAGGCTCGGTACTGGTGTATTCAGGA  
CGTTACCGAATCACGCAAAATGCTGCGCCAGCTGAGCTACAGCGCCTCCCATGATGACTGACGCATCTCGCCAAATCGCG  
CCAGTTTTGAGAAGCACTACGCATCCTGCTGCAACCGTAAACAGTACACATCAGCGACATGCACTGGTGTATTATCGAT  
CTTGATCGCTTTAAAGCGGTGAATGACAGCGCCGGGACGCGCTGGCGACGCTTTACTGCGCGAACTGGCGCTATTGAT  
GCTGAGTATGCTGCGCTTGCAGCGAGCTGCTGGCGGATGCTGCTGGCGATGAATTTGGTCTGCTGCTGCTGATGATGAT  
TCGAAAAGTGGCGTTTTTATCGCTACACGCATTTACAGCGCCGTGAATGACTATCACTTTATCTGGGAAGGACGTGATC  
CGGTAGGTGCCAGTGCAGGGATTAACCTGATTGATGACAACATCATCAGGCGGCTGAAGTGTATGTCGAGGCTGATAT  
CGCCTGTTATGCCCTCAAAAATGGTGGACGGGGCGGGTGACGATTTACGAACCGCAGCAAGTTGCCGACATAGCGAAC  
GGCTGTGATGCTGCGCTTGAATGAACAGTGGCGGATGATTAAGAGAATCAGTTGATGATGATGATGATGATGATGATGATG  
CCGCGGATCCCGGAAGCGGTAATTTGTGGCTGATTTCACTTAACTGAGCTGAGGTTGCGAAGGCGAGATTTATGATGAACA  
AACATTTCCGTCGTAGCTTACGCGATCCGGCACTTAGCCATGCTTTGACCGACGGGATTTCCACGATTTTTTCCAGCAGG  
CCGCAAAAGCGATTGCCAGTAAAGGCTTAAAGCATCGCCCTCCCTTTCCGTTGCCGGTTTGGTAGCGCCACGCTGGTG  
AATGAACATAATTGAGCAGCTGGAATAATGCCCTTACCAACCGGTTAATACATCTGATTTATCCGGCAGACCGGATTTT  
AGATCACGAGAAAGCGTGAACAACTGCGGCTGGCGGATGTCGGATCGTATTCAGTCAAGTGGGCCGTGATCTGCAAA  
TCTTCAACTCGCTGAAAGCGAATATGGCAGATTACCTGCTACTTGGTGGTGGTATGCGCCAACTGCGAGGAAATTTG  
ATGGATGAGATGCTGATTACGATCATTCAGGGCACGCTCAGCGGCTCGGGATGAAGACCATCGCCGGGCCAGTCTGTTTT  
ACCCCTGGTGGATGATACGCTTTCTGGCATCGGCGTGCATCTGATTTATGCGGATGTTGATGGCGATGCCCAACCGCTGG  
ATTTGCTGGTGAATAGCAGTTATTTCCGATTAATACTAA

>Cluster\_30103

ATGATTGAATGGATTATTGCTCGCTCGGTGGCGAACCGTTTTCTGGTGTGATGGGCGGTTGTTTCTGAGTATCTGGGG  
CACCTGGACTATCATTAACACGCCAGTGGATGCACTGCCGATCTTTCCGATGTCAGGTGATTTATTAACACAGCTATC  
CCGGTACGGCACCAGCAATCGTTGAAAATCAGGTGACTTATCCGCTAACCCACCACCATGTTGTCGGTGGCTGGCGGAA  
ACTGTGCGCGGTTTTCTCGCAGTTTGGCGACTCTTATGTGTATGTCATTTTTCGAAGATGGCACCATCCGTACTGGGCGCG  
CTCGCGGTTGCTGGAGTACCTCAACAGGTACAGGGTAACTGCTGCGGGAGTACGCGCCAGCTGGGCGAGATGAGCCCA  
CGGGTGTGGCTGGATCTATGAATATGCACTGGTGGATCGCAGCGGTAAGCACGATCTGGCCGATTTACGCTCATGCGAG  
GACTGGTTTTCTCAAAATGAGCTAAAACCATCCCTGACGTTGCGGAAGTGGCGTGGTGGGCGGTGGTGAAGAGATTA  
TCAGGTGGTTATCGATCTCAGCGCTGGCGCAGTATGGCATCAGTCTCGCCGAAGTAAAAGCGCGCTGGATGCTTCAA  
ACCAGAAAGCGGGCGGTTCTGTCGATCGAATCGGCGGAAAGCGGAAATATATGGTGGCGCCAGCGCTATCTGCAACCGCT  
GACGACTTTAATCACATCGTTTTTAAAGCCAGTGAATAAGCGTGGCGTTCCTTATCTGCGTGTGTTGCGAAGGTCAGGT  
TGGCCCGGAGATGCGCGGGGCTTGGCGAATGAACGCGGAAAGCGGAAAGTGGCGGGCGGGTGGTGTCTGCTGCTTCCG  
GCAAAAACGCCCGTGAAGTATCGCCCGCTGAAGGACAACTGGAACGCTGAAAAGCAGTCTGCCGGAAGCGGTGGAG  
ATAGCTACAACATAGCAGTGCAGTCACTTATGACCGCGCAATGACAACTCAGCGCAAGTTGCTGGAAGAGATTTAT  
TGTGGTGGCGGTAGTCTGTGCGCTGTTTTCTGCGCATGTGCGCTCGGCGCTGGTGGCGATTTATTTCTGCTGCGCTGGGT  
TGTGATTTGCTTTTATTTGTCATGCACTTTACAGGACTGAACGCCAATATTTATGCTGTTGGGTGGCATTGCGATTGCCGCT  
GGGCGCATGGTTCGATCCGCTATCGTCTATGATCGGAAATGCGCATAAACCGCTGGAAGAGTGGCAGCACCCATCTGGA  
CGCCACGCTGGATAATAAAGCGCGCTGGCAGGTGATCAACCGATGATCATCTGTTGAAAGTGGGCGCGCGCTGGTTATCAGTC  
TGCTGATTTACGCTGTCTTTATCCGATTTTACCTTGAAGGGCAGGAGGGGCTGTTGTTGGCCGCTGGCGTTT  
ACCAAAACCTATGCGATGGCGGGCGCGGCTGCTGGCAGCTAGTGTATCCGATCTGATGGGCTACTGGAATCCGTTG  
CAAAATTCGCGCAAGAGCAGTAAACCGCTCAATCGCTTTTGTATTGCTGTTTATCATCCGCTGTTGCTGAAAGTACTG  
ACTGGCCGAAAACCGCTGTTGGTGGCAGCGCTTTCCGTTGCTGACGGTTCTCTGGCCGCTCAATAAAGTTGGCGGGAA  
TTTTTACCGCAGATCAATGAAGGCGACTTGTGTTATATGCCATCGACGCTGCCGGGATTTCCGACGCGGAGGCGCGGAG

TATGTCGCAAAAAACCGACAAGCTGATTATGAGCGTACCTGAAAGTGGCGGGGTTATTTGGCAAAAAACGGGAAAGCGGAA  
CCGCCACCGATTCTGCTCCACTGGAGATGGTAGAAACGACTATCCAGCTTAAGCCGAGGATCAGTGGCGGCCTGGCATG  
ACGATGGACAAAATCATTGAGGAACTGGATAACACCGTGCCTGCGGGGCTGGCGAATCTGTGGGTGCCGCAATTCG  
TAACCGTATCGATGCTCTCGACTGGCATTAAAGCCCTATCCGCATTAAGTTTCCGGCAGCTGTGCTGGCGGATATCG  
ACAGCATGGCGGAGCAAAATGAAGAAGTGGCGGAAACCGTGCAGCGTGGCTTCTGCCCTTGTGAGGCTTATATCGA  
GGCGCTATATCAACGTTGAGATTAACCGTGA AAAAGCGCGCTTACGGTATGACGGTGGCGGATGTGACGTTGTTTGT  
GACTTCTGGCGTGGCGGGGCGATGGTTGGCGAAACGGTGAAGGGATGCTCGTTATCCAATTAATCTGCGTTATCCGC  
AAAGTGGCGGATAGCCCGCAGGCACTGCGCCAGTTGCCGATCTCACGCCGATGAAGCAGCAAAATCACCTGGCAGAC  
GTGGCCAGCTTAAAGTCTTACC GGACCGTGCATGCTGAAAACCGAGAATGCGCGCCGACGAGCTGGATTATATCGA  
TGCCCGGATCGTGACATGGTGTGCGTGGTTACGATCTGCAAAAAGCGATAGCTGAAAAAGTGAATTA AAAACCGGGCA  
CCAGCGTGGCATTCTCGGGCAGTTCGAGCTACTGGAGCGCGCAACATAAGCTGAAACTGATGGTGGCGGATGACGCTG  
ATGATCATCTTCGTGCTGTGTATCTGGCGTCCGTCGGGTGGCGAAGCGTGTCTGATTATCAGCAGCGTACCGTTTGC  
GCTGGTGGCGGCTCTGCTGTGGTGGATGGCTTTCATCTTTCCGTTGGCGACGGGCACCGGTTTATTGCCCTG  
CCGGGTCGCGCCGAATTTGGCGTGGTGTGATGCTGATGATTTTACGTCACGCCATAGAGGCCGAGCCGCTGTTGAATAA  
CCGCAAACTTACGCGAGCAGAAGCTGGATGAGCGGTTATATCACGGCGCGTACTGCGCGTGCGCCGAAAGCGATGAC  
GGTGGCGGTGATTATCGTGGTCTGCTGCCGATCTGTGGGAACAGGAGCAGGGTCAGAGGTGATGACCGGATGGCG  
CGCCGATGATTGGCGCATGATCACCGCCCTTGTCTGCTGCTTTTATTATCCCGGCGCGCTATAAGCTGATGTGGCTG

>Cluster\_5521

ATGAAAATTTCTCAGCCTGCGCTGAAAAACCTGAACTCATTAAGAGCGAATGGAAGATTGATTTACCCGCGAGCCGTT  
CGCCAGCAACCGGCTGTTTGTCTATTACCGGCCAACAGTGGCGGGAAAAACACCCCTGCTGGACGCCATTTGTCTGGCGC  
TGTATCAGAAAATCCGCGTCTCTTAACGTTTCAAAATGCAAAAATGATCTCATGACCCGCGATACCCGGAATGTCTG  
GCGGAGTGGAGTTTGAAGTGAAGGTGAAGCGTACCGTGCATTTCTGGAGCCAGAATCGGGCGGTAACCAACCCGACGG  
TAATTTGCAAGTGGCCTGAGCTGGCGCGTGCAGCGGCAAAAATTCGCGGACAAAAGTGAAGTGAAGTGAAGTGAAGT  
AACTGACAGCGACTTAAACGGGCTGGATTACGGGCGCTTACCCGTTTCGATGCTGCTTTCGAGGGGCAATTTGCTGCC  
TTCTGAAATGCCAAACCCAAAGAACGCGCGAATTTGCTCGAGGAGTTAACCCGCACTGAAATCTACGGCAAAATCTCGGC  
GATGGTTTTTGTAGCAGCACAATCGGCCCGACAGAGTGGAGAAGTGAAGCGCAGGCCAGCGCGTACCGTTGCTCA  
CGCCGGAACAAGTGGCCTGACGCTGACGCGGTTTTCGAGCTACTGACGAAAGAAAACAGTTAATTTACCGGTCAGCG  
CAAGAACAACAATCGCTAAACTGGTTAACGCGTTCAGGACGAATTCAGCAAGAAGCCAGCCGCGTACGAGGCTTGA  
ACAGGCGTTAGCCGAAGAAGAAAAGCGCAACCTCAACTGGCGCGCTTAGTCTGGCAACAACCGCACGAAATCTTCGTC  
CACACTGGGAACGCATCGCAGAACAAGCGCGCGTGGCGCATATTCGCCAGCAGATTGAAGAAGTAAATACCTCGCTTA  
CAGAGCAAAATGGCGCTTCGCGCGAGCATTCGCCACACCGCGGAAGCAGTACGAGAATTACAGCAGCAGCAACAAG  
CCTGAATACCTGGTTACAGGAACACGACCGCTTCCGTCAGTGGAAACAACGACCGGGGTTGGCGTGCAGTTCTCCC  
AACAAACAGCGATCGCGAGCATCTGCGCAATGGCAGCAACAGTTAACCCATGCTGAGCAAAAATTAATGCGCTTGGC  
CGGATCACCTGACGTTAACCGCGATGAAGTTGCTACCGCCCTGGCGCAACATGCTGAGCAACCGCCATGCTGCAGCA  
CTGGTTCGCGCTGACATGGACAGATTGTTCCCAACAACAACTGTCGGCGAGTTACAGGTTCGCTATCCAGAATTCTCAC  
AAGAACAGACGCAACGTAACCGCGCACTTAACGAAATGCGCCAGCGTTATAAAGAAAAGACGCAACTTGCAGATGTG  
AAAACCTTTTGGAGCAGGAAGCGCGCAAAAACGCTGGAAGCTCAACGTGCACAGTTACAGCGGGTACAGCTTGCCT  
ACTTTGTGGTTCCACAGCCACCGCGCTGAGGCGTATCAGGCGCTGGACCTGGCGTTAATCAGTCTCGATTACTGG  
CGCTGGA AAAAGCTTAA AAAAGCTCGGTGAAGAAGGTGACGCTACGTTGGGCAACTGGACGCCATAACAAAAGCCTT  
CAGCGTATGAAAACGAAGCGCAAGCCCTCCGACAAGATGAGCAAGCACTTACCAACATGGCAAGCGTACGCGCCAG  
CCTCAATACACCTGACGCACTGGACGATATCAACCGTGGTGGATGACAAAGATGAGCAGCAACGCCAGCTGCGGT  
TACTCAGCAACCGCATGAAATTAACAAGGCGAGATTGCCGCGCAATAATCAGCAAAATATCCAGTATCAACAGCAAA  
CAACGCCAGCAACTACTTTTAAACGACATTGACGGGTTATGCACTGACATTGCCACAGGAAGATGAAGAAGAGAGCTGGTT  
GGCGACAGCTCAGCAAGAAGCGCAGAGCTGGCAGCAACGCCAGAACGAATTAACCGCGTGC AAAACCGTATTGAGCAG  
TGACGCGGATTTGGAACGTTGGCGAAAAGTGAATGAACTCCGCACTGCGAAGAAACTGTGGTATTGGAAAACCTGGCGG  
CAGGTACATGAAACAATGTCTCGCATTACACAGCCAGCAGCAGCTTACAGCAACAGGATGTTCTGGCGCGCAAAAGTCT  
GCAAAAAGCCAGGCGAGTTTACACCGCGTACAGGCCAGCGTCTTTGACGATCAGCAGGCGTTCCTTGGCGCGCTAA  
TGGATGAACAACACTAACGCAGCTGGAACAGCTCAAGCAGAATCTGGAAAACAGCGCGTCAAGCGCAAACTCTGGTC  
ACTCAGACAGCAAAACGCTGGCACAGCATCAACAACCCGACCTGACGACGGGTTGGCTCTCACTGTGACGGTGGAGCA  
GATTCAGCAAGAGTTAGCCGCAAACTCAACAAAAGTTGCGGTGAAAACACACAGTCAAGGCGAGATTCCGCGCAAGTGA  
AGCAGGATGCAGATAACCGTACGCAACAACAACCTTAATGCAGCAAAATGCTCAAATGACGCAGCAGGTTGAGGACTGG  
GGATATCTGAATTCGCTAATAGGTTCCAAAGAGGGCGATAAATTCGCAAGTTTGGCCAGGGGCTGACGCTGGATAATTT  
AGTCCATCTCGCTAATCAGCAACTTACCGGCTGCACGGGCGCTATCTGTTACAGCGCAAGCCAGCGAGGCGCTGGAAG  
TCGAGGTTTGTGATACCTGGCAGCAGATGCGGTTGACGATACCCGTAACCTTTCCGGCGCGCAAAAGTTTCTCGTTAGT  
CTGGCGTGGCGTGGCGTTCGCGATCTGGTACGCATAAAAACAGTATTGACTCGCTGTTCTTGTGAAAGTTTGG  
CAGCTGGATAGCGAAAACGCTGGATACCGCCCTTGTATGCGCTGGATGCCCTGAAACGCCAGTGGCAAAAACCTCGGTGTA  
TTAGCCAGTGAAGCGATGAAAGAGCTATTCCGGTGCAGATCAAAGTGA AAAAGATCAACGGCTGGGCTACAGCAAA  
CTGGAAAAGTACGTTTGCAGTGAATAA

>Cluster\_42036

ATGAAATAAGAAATTTAAATATAAGAAATCGCTTTTAGCGGCTATTTTAAAGCGCAACCCCTGTTAGCCGGTTGTGATGGTGG  
TGGTTACAGGATCGTCTCCGATACGCGCTCTGTAGATTCTGGATCAGGGACTTTGCGGGAAGTGAACCTGATCCAACAC  
CAAACCCGGAGCCGACGCGGACCCAGAACCTACACCGGACCCGACACCCGATCCAGAGCCGACACCAGAACCCGAGCCA  
GAACCTGTTCCACGAAAACGGGCTATCTGACTCTGGCGGAAGCCAGCGGATAACTGGTGTACTTGTAAATGGTGAATC  
CAGCGATGGCTTTACCTTACGCGAGGCGCAAAAGTCACTGTGTGGCAGGGAACAACAGCAAAATGCTACCTACCTTCGACA  
CCAGTCAAGAGCTGCGCGTAGCTGCGGTTGAAAAGTGTCTGTTAGTCTTGGAGCAGCGCAAGAACTGGCGGAG  
TCCAACGACAAGAAAGCAATGCGCTCTCACTGGTAACTGACAGTTCAGTTCAGCGGATACAGAACAGGTTGCGCT  
GACGTTCTCTCGGTGACCGAAAGTAAACGTTTGTACTCACTGATAAGCAAAATCGGCTGACACCGGACGAGTTCAAAA  
AGCTGGTCAATGAAGAGTGGAAAACAATGCTGCGACTGATAAAGCGCATCCACCCATACTCATCGGTCTGTGCCAGCT  
ACGACAGGGAACATAACCGGATCTCAACGCTAGCTTGTGCTAGCTAATGCGGAACAGTTTATCAGTATCACTAACCTAC  
GGAATCATCTTTCTGAAGGTCGACTGGTAGATAGCCAGGGGTATGGTGTGCTGGTGTAACTATTACACAGCTCTG  
GTCGCGGTGTAATGACGAAAACGGTAATTTCTCTTTTACTGGGCGAAACATTTCTTTCGTTATCGACACCTTCGAA  
CTGGGCTCGGTCGCGGTAATAAGTGCACCAATGGCTGACTGAACTGGGCGATGAAGTTCGCGGAGCAAAATTCGATCA  
GCTGATTCACCGCTATTTCGACGGCGGAAAATAATGATACCCGCTGTTGTTCCGAGCATGACGCAAGGTTCTTTCGGAAT  
ATCCCAACGTGATCAACGAGATTATCAATCTCTCGTTATCCAATGGTGGCAGCGTGGATGAAGCGGATCAAACGTTGTG  
TGCTCAACGAAATTTATCGAGCAGTTTAAAGCGGGTCAGGCAAGAGATCGATACCGGATTTGTGCGAAAACCGACGG  
TTGTAACGAGGCTCGTCTCGCTGACCAACCGCAATGTTAATGACGGCCAGATTGAGGGCTTATCAACAGCTGT  
GGGTTGTGATAAAGATTACAAATCAGTACGAAATTCACGCTTCCATGACTCCACCACTCTATGGCAGTACCGGT  
AACGCGCGGCTCAGCGGTTGGTAAATATCTCAACCGCGCATTCGGATCTGATGGCGGTAATGATAAAAACCTACTG

GCTGGCGTTTGGCGAAAAACGCGCTGGGATAAAAAATGAGCTGGCGTACATTACGGAAGCGCCTTCCATTGTGCAGCCAG  
AGAACGTTTACGCGGATACCGCCACCTTCAACCTGCGGTTTATTTCGCTGGGGCAAGTCGGTGGAGGGCAAACTGATGGTT  
ATCGGTAACCCGACTACAACAGCATTTTGCCTTGTCCGAACGGTTACAGCTGGAACGGGGGCTTAATAAAGACGGGCA  
GTGTACGCTCAGCGGTGATTCAGATGACATGAAGCATTATGACGAGAAGCTATGCGCTATCTGTCCGACGATAAATGGA  
CGCGGACGGAAAAACGTGATGAGCAATCTTAAGGAAAGAGAGCGCTCTGGTTTTGTGCGCTCTGTTGGATGCGGAGTCT  
AACAGCGTGAAGTTCCGGCTTTCATCCGGATTTTTCGGGTATCTCTGTTGAGCATTTAAGTAGCTATGGCGATCTCGATCC  
ACAGGAAATGCGCTACTGATCCTTAACGGCTTGGAGTATGTGACTCAGGTGGGGGGGATCCCTATGAGTGGCTCTGC  
GTGCAGATACCAGCAAACCGAAGCTGAGCCAGCAGGATGTGACCGATCTGATCGCCTATCTGAACAAAGTTGGATCGGTG  
CTGATCATGGAAAAACGTGATGAGCAATCTTAAGGAAAGAGAGCGCTCTGGTTTTGTGCGCTCTGTTGGATGCGGAGTCT  
GTCGATGGCACTGAACAAGTCGGTGGTGAATAACGATCCTCAAGGATTCGGGATCGCGTTCGTCAGCGTTCGCGGACTG  
GCATTTGGGTTTATGAACGTTATCTGCTGCAGACGGCGCAACCGCTACACCATCGACCAAATACAGGGGAAGTG  
ACCTGGAATACCAGCAAGCAACAAGCTGATGACAAGCCGAAACTGGAAGTTGCGAGCTGGCAGGAGGAAGTTGAGGG  
CAAAACAGGTAACCGTTTATGCCCTTATTGATGAAGCGGAATACACAACAAAAGAACTCTGGATGAACTGCAAGGAAAA  
TCTTTGAGAAGTTTCTGGATTACAGGAGTGAAGGATTCGACATATCACTACGAGGTCACCTGCCTGGAACATCGTCTT  
GGCAGCAAGCTTCCGGTAACCGGAGGATGTATGTTCCGCGCTATACGCAACTGAATCTCAGCGCCGACACCGGAAAGC  
GATGGTGCAGGCGGAGATTTAGGCACCAACATTCAGCGCTGTATCAGCAGGCTTTATTTCCGTACCAATGGTTCGCA  
AAGTGTAGCTGAGCAGCTGAGCAGCTGGAACGCTGTGTACAGAACATGTGCGTCTGGCTGTGGAATGAAATGAAATAC  
AGCTATGACAGCAGCAAGGAGGACGAGCTGGGCTTAAAACGTTTACCAGGTTCTGAACTGCTACGCCAACAAATGCTTA  
CACCAAAGGCACGAGTGTCTCCGAGAGCTGAAACAATCGCTTGTGATAACAAGATGATCTACGGAGATAAATCTGCCA  
AAGCCGCAATGATGAACCGAGCTATCCGCTCAACTATATGAAAAACCGCTGACGCGCTGATGCTGGTTCCTCTGG  
TGGGATCTGAACATCAAAGTTGATGTCGAGAAATATCCGGGAGCGGATTCGGCAGAAGGTGAGAAGGTTACTGAAACCA  
CAGCTGTACTCGAATCCGACCAAATGGTTTGGGGTAAACATGACGCTACTGGCCTATGGGCTCCGGCTCAGAAAGAGG  
TCACCATTTGAGTCTTCTGATCAGTTCCTGTGACTGTCCAGCTGGCGCTGGCCGACGACCTTACCAGGAGTGAAGGAT  
GAAGTCCGCTCGAATGAACTGACTTCTCAGGTGTAATGATGAAAGACGGTAAGCACCAGGATGTTTACTTAAAACTGA  
CGGGCCACAAGCATCGTTTACCAACGATGTGCAGATCTCCATCGGTGATGCGCACTCTGGTTATCCGGTAATGAACAGC  
AGCTTCTCGACGAACAGCACCACGCTGCCGACGACGCGCTGAACGACTGGCTGATCTGGCACGAAGTTGGTCAACAAC  
CGCGAAACGCGCTGACTGTTCTGGCGCAACTGAAGTAGCGAACACGCTGCTGGCGTGTACATGCAGGATCGTATCT  
TCGCCAAGATGAACCGTGTGCTGACGACATTAACCGTCCGCGGAAATATCTGGAGGAGAGCAACGGTCAGGCATGGCG  
CGCGGGTGGGGTGCAGCTGCTGATGTACGCACAGCTGAAAGAGTGGGCAGAGAAAAACTTGATATCAAAACAGTG  
GTATCCAGAGGTGACCTGCCTAAGTTCTACAGGATCGTGAAGGATGAAAGCTGGAACCTGTTCCAGTTGATGCACC  
GTAAGACGCGGGCTGAGGTTGGCAAAACAAAGTTGGCGAAAGAAATTACTGTGCCGAATCCAACGGTAAACGCTGCC  
GACAAAGTGCCTGCTGATCCTGGTCCGCGCAGCAGATCTTTCCGAGTTCTTTAAGAAATGGAAATCCGGCGCGAA  
TGCTTACCAGTTGCCGGGAGCGAGCGAGATGAACCTCGAGGGCGGTGTGAGCCAGTCCGGTTACGAGACTGGCGGCGC  
TTAATCTGCCAAACCGCAGCAAGGGCCGAAACCAATTAATCAGGTTACCAGCATAAGATGTGAGTAA

>Cluster\_23381

ATGACAGCAAAACCCGTCGCCAGCTCTTACTGTGCCGTCGCGAGCGGTTCCGAAAGTGGGGTTCCCGCAGAGCCTGGG  
GGAGGTTACGATATGTTTACGATAAAATCCCTTGAGAGGGATAACTGTGGTTTCGGCCTGATCGCCACATAGAAGGG  
AACCTAGCCACAAGGTAGTGCCTACTGCAATACAGCACTGGCCGCTGACGACACCGTGGCGGATTTCTCGCGATGGT  
AAAACCGGTGACGGTTGCGGCTTGTGTTTACAAAAACCGGATCGTTTTTTTTTCGATCTGTTGCGGAGGCGGCTGGCG  
TTTAGCAAAAACTACGCGTCCGGATGCTTCTCTGAATAAAGATCCTGAACTCGCCGCTGCCGACGCCGATCGTTG  
AAGAAAGCTGCAACCGCAACGTTGTGCTGATTTGGGCTGGCGTGTATGCCCCACTAACAAGGCGTGTGGGTGAAATC  
GCCCTCTCTCTCTGCGCAGCATTTGAGCAAAATTTTGTGAACGCCCCGGCAGGCTGGCGTCCGCGCATATGGAGCGCG  
TCTGTTTATCGCCGCGCCGATTTGAAAAGCGTCTCGAAGCCGACAAAAGACTTCTACGCTCTGTAGCCCTGTGAAATCG  
TCAATATTTATAAAGGCTGTGTATGCCGGGGATCTGCCGCGCTTCTACCTGGACCTCGCTGACCTGCGCTCTGGAATCG  
GCCATCTGCTGTTTACAGCGCTTTTCCACTAACACCGTACCGCGCTGGCCGCTGGCGCAGCGGTTCCGCTACCTCCG  
GCATAACGGTGAATCAACACCAACACCGGTAACCGCAATGGGCGGCTGGCGTACCTATAAATCCAGACACCGCTGA  
TCCCTGACCTGCAGCAGCGCGCGCTTGTGCTCAACGAAACCGGCTCTGACTCCAGTTCGATGGATAAATCAACACTC  
CTGCTGGCAGGCGGGATGGATATCATCCGTGCCATGCGTCTGTTAGTGCCACCCGCTGGCAGAACACCCGGATATGGA  
CCCGGAACTGCGTGCCTTCTTTGACTTTAACTCCATGATATGAGGCGTGGGATGGTCCGGCAGGGATCGTGTATGCTCC  
ATGGCCGTTTCCGCGCTGTAACCTGACCGTAAACGGTCTGCGTCCGGCGCTACGTCATCACCAGATAAGTCAAT  
ACCTGCGCTCTGAACTGGTATCTGGGATTAACGCTGACGAAAGTGGTTCGAAAAAGCCGCGTGGGCGCAACCT  
GATGGTTATCGACACCCGAGTGGGCTATTCTGCACTCGGCAGAAACCGATGACGATCTGAAAAGCCGCCACCTTATA  
AAGAGTGGATGGAGAAAAACGTCGCGCTTGGTACCGTTTGAAGATCTGCCGATGAAGAGTGGGTAGCCGGAACCTG  
GACGACGACAGCTTCCAGCTACCAAGAACTTAACTACAGCGCGAAGAGCTGGATTCTGTTGATCCGCTACTGGG  
TGAAAAACGCTCAGGAAAGCGTCCGTTCCGATGGGCGACGATACCCCACTTCCGCGTGTCTCCAGCCAGCCGCTATTT  
ACGACTACTTCCGCGAGCAGTTGCTCAGGTAACCAACCGCCAACTGACCCGCTGCGCGAAGCGCATGTTATGCTGCTC  
GCCACAGTATCGGTCGTGAAATGAACGCTTCTGTGAAGCAGAAAGCCAGGCGACCGTTAAGCTTTAAATCGCCGAT  
TCTGCTTATTCCGATTTCAAACAGCTACGACGATGAAAGAGGATCACTACCGCGCAGATACCTGGATATCACCTTTG  
ACGTCACATAAACCACTCGAAGCGACGGTGAAGAGCTGTGCGACAAAAGCCGAAAAAATGGTACGTAGTGGCACCGTG  
CTGCTGGTGTCTCCGACCGGAATATCGCTAAAGATCGCTGCCGTTCCGGCTCCGATGGCGGTTGGCGCATCCAGAC  
CCGTTTGTGCGAGCAAGCCTGCGTTCGATGCCAACATCATCTGTAAGAAACCGCCAGCGCCGCTGATCCGACCACTC  
CCGTTGCTGGTTTCCGCGCGACGGCTATTTATCTCATACTTGCCTATGAAACGCTGGGCGCTCTGTTGAGACCCAG  
GCGATTGCCAAAGATTATCGTACCGTGTGCTCAACTATCGTAACGGCATCAACAAGGCTTGTACAAAAATCATGTCCAA  
AATGGGCATCTCCACCATCGCTTATCGCTGCTGAAAACGTTTGAAGCGTCCGCTGACAGATGATGCTGTTGGCC  
TGTGCTTCCAGGGGGCGGTTAGCCGATTTGGGGGGGAGCTTTGAAGACTTCCAGCAGGACCTGCTGAATCTGTGAAA  
CGTCCCTGGCTGGCGGCTAAGCCCATACGCCAGGCGGCTGCTGAAAATACGCTGCACGCGCGGCAATACCCGCTACA  
CCCGGACGTTGGTGCACCGCTGCAACAGCGGTACAGAGCGCGAGTATAGCGACTATCAGGAATACGCGAAGCTGGTTA  
ATGAGCGTCCGGCAACACGCTACGCGATCTGCTGGCAATACGCCGGGTGAAAACCGGTCACAACTGCTGATGTTGAA  
CCGGCAAGCGAATTTGTTAAACGCTTCGATACCCGCGCATGTCTATCGGCGCTTAAGCCGGAAGCCACAGGCGCT  
GGCGAAGCGATGAACTCATCGCGGTAACCTCAAACTCCGGAAGCGGTTGAAGACCCGCGCTATGGCATAACA  
AAGTGTGCGCATCAAGCAGGTGGCGTCCGGTCTGCTTCCGGCTTACTCCGGCTACCTGGTCAATGCCGACGCTATTCAG  
ATAAAAGTCCGCGAGGCGCGAAGCCGGTGAAGTGGTTCAGTTACCGGGTGAATAAGTCACTCCTTACATTTGCCAACT  
GCGGATTTCCGCTGAGCTGATCTCCGCGCGCAGCAGCAGATATCTACTCTATTTAGGATTTAGCCACG  
TGATTTTCCAGCTCAAGCAGGTCATCCAAAAGCGATGATTTCCGTGAAGCTGGTTTCCGAACCGGGCTAGGACCATC  
GCGACTGGCGTGGCAAAAGCTTATGCCGATTTAATCACCATCGCAGGCTATGACGGCGCACCGGCGCAAGTCCGCTTTC

ATCGGTGAAATACGCAGGCTGTCCTGGGAGCTGGGGCTTGTGAAACCAACAGGCGTGGTTGCCAACGGCTTGGCT  
ACAAGATCCGTTTTTCAGGTCGATGGCGGCTGAAAACGGGTGTCGATATCATCAAAGCAGCGATTCTTGGCGCGGAAAGT  
TTTGGCTTCGGCACTGGCCCGATGGTAGCGCTTGGCTGTAATAATCTGCGAATTTGCCACCTGAACAACCTGGCCACGGG  
TGTAGCAACTCAGGATGACAAAACTCGCTAAGAACTACTATACCGCCCTGCCGTTCAAAGTGACTAATTTACTTTGAGTTTA  
TCGCCCTGAAACCCGCGAGCTGATGGCACAGCTGGGGTAAACCGGCTTACCGGCTCTGTTGGTATCTGATTTGGTCCGACCTGGCT  
AAAGAGCTGGACGGTTTACCAGCCAAACAGCAGAACTGGCACTGTGGAAGCTGCTGGAGACTGCCGAGCCGATCCTGG  
TAAAGCGCTTACTGACCGAAAACACCGCCGTTTGATAACGGCTGCTGAACCGCGAGTTGCTGCAACAGGCAAAAAC  
CGTTTGTGCGATGAACCCAGAGCAAAAACCTTCTGGTTCGATATCCGCAACACCAGCCGTTCTGTCGGCGCGTCCGTTTCA  
GGCTATATCGCCAGCAGCAGCGGATCAGGGCTGGCAGCCGATCCTATCAAAGCGTACTTCAACGGCAACCCGACGGCCA  
GAGCTTCGGCGTGTGGAACCGGGGCGGCTGGAACCTGTACTGACCGGTGATGCCAACGACTATGTTGGTAAAGGCATGG  
CAGGCGGCTTAATCGCCATTCGTCCTCCGGTTGGTTCGGCTTCCGACGCGATGAAGCAAGTATATCGGCAACACCTGC  
CTGATGAGCGGACCGGTGGTCTGATGTCGCGAGGCGCGGGTGAACGTTTCCGGCGTGGTAACTCCGGTGCAT  
CACCTGGTGAAGCACTGGCGCAACCGCTGTAATATATGACGGTGGTATCGTCTGTATCTCTGGTAAAACCGGCG  
TTAACTTCGGCGCGGCACTGACTGGCGGCTTCGCTTACGTTCTCGATGAAAGCGGCGATTTCCGCAACCGGTTAAACCG  
GAAGTGGTGGAGTCTTAAGCGTGAAGCATCTGGCGATCCATGAAGAGCATCTGCGTGGTCTTATCACCGAGCATGTTCA  
GATACCGGTTCCAGCGTGGTGAAGAGATTCTGGCGAAGTGGTCAACCTTCGCCACTAAATTTGGCGTGGTTAAACCGA  
AGTCCAGTGAATGAAAAGCACTGCTGGTCAACCGTAGCTAGCGCAGCAGAGTTGGCGGTGCAGGCGAGTAA

>Cluster\_40107

ATGAGTAAATTCCTGGACCGGTTTCGCTACTTCAAACGAAAGGGTGAACCTTTGCCGATGGGCATGGCCAGCTTCTCAA  
TACCACCGTACTGGGAGGATGGATATCGCCAGCGTTGGCAGCATGACAAAATCGTCCGCTCTACCCACGGGTAACCT  
GCACCGGCTCCTGCAGCTGGAATACTACGTCAAAACCGGCTTGGTCACTGGGAAACCCAGCAGACTGACTATCCGCGT  
ACTCGCCCGACTGCAACCACTGAACCTCGCGGCTGCCGCGCGGTGCCAGTACTCTGGTATCTATACAGCGCTAA  
CCGCTGAAATACCCGATGATGCGCAACCGCTGATGAAAATGTGGCGTGAAGCGAAGGCGCTGCATAGCAGTCCGGTTG  
AGGCTAGCTGGCTTCTATCAATGGAAGCAGCGGATAAAGCAAGCTTAAAGCAGGCGTGGACGCGGTTGTTGTTCTCT  
TCTTCTGGCAGGAAGTGAACGAACTGATCGCCGATCTAACGTTTACACCATCAAAAATACGGCCCGGACCGTGTCCG  
TGGTCTTCGCAATTCGGCAATGTCGATGGTTTCTTACGCATCGGGTGGCGCTATCTCTCGCTGATTTGGCGGTACTT  
GCTTAAAGTCTTACGACTGGTACTGCGACTGCCTCTTCCGCTTCCGCAACCTGGGGTGAGCAAACTGACGTACCGGAA  
TCTGCTGACTGGTACAACTCCAGCTACATCATCGCTGGGTTCAAACGTCCGCGACGCGCTACCCCGGATCACTT  
CTTACTGAAGTGCCTTACAAGGCACCAAACTGTGGCGTCAACCCAGACTACGCTGAAATCGCAAACTGTGCGATC  
TGTGGCTGCAACCGAAACAGGCGACCGATGCGGCAATGCGCTGGCGATGGGCGACGTAATGCTGCGTGAATTCACCTC  
GACAACCAAGCCAGTATTTACCGACTATGTGCGTTCGCTACCCGACATGCCGATGCTGGTATGCTGGAAGAGCGCGA  
CGGTACTACGCCCGCAGGTCGATGCTGCGCGCTGCCGATCTGGTGGATGCGCTGGGCGAGAAAACCAATCCGGAATGGA  
AACTGTGCGCTTAAATACCAATGGTGAATGGTTGCGCCGAAACGGTTCTATTGGCTTCCGCTGGGCGAGAAGGGCAA  
TGGAACTTGAAGCAGCGGACCGGCAAACTGGCGAAGAAACCGAGCTGCAACTGAGCCGCTGGGTAGCCAGGATGAGAT  
CGCTGAGTGGGTTCCCGTACTTTGGTGGCGATGGCAGGAACTCAACAAAGTGAAGTGGAACTGGAAAACGCTGCTGC  
ATAAGCTGCCCGTGAACCGCTGCAACTGGCTGATGGCAGCACCCTGGTGGTACCACCGTTTTATGATCTGACCTGGCA  
AACTACGGTCTGGAACGTGGCTGAACGACGTTAACTGTGCAACCAGCTATGACGATGTGAAAGCTTACACCCCTGCCTG  
GGCAGAGCAGATTAACGGCTTTCTCGCAGCCAGATTTCTGCACTCGCCGTAATTTGCCGATAACCGTATGAAAACCC  
ACCGTCTGTCGATGATATCTGTCGGCGCTGGGCTGAACCACTGGTATCACTGGACATGAACATATCGTGGTCTGATCAAC  
ATGCTGATTTTCTCGGCTGTGTGCGTCAAGAGCGCGGTGGCTGGGCGCACTATGTAGGTGAGGAAAACCTGCGTCCGGA  
AACCGGCTGGCAGCGCTGGCGTTTGGCCTCGACTGGCAGCGTCCGGCGGCTACATGAACAGTACCTCTATTTCTATA  
ACCACTCCAGCCAGTGGCGTTATGAAACCGTGAATGCGGAGAACTGCTGTCGCGGATGGCGGATAAACTCTCGCTATACC  
GGACACTTGAATCGACTTAACTTAACTCGGTGCAAGACGCACTGGCTGGCTGGCTGCGCGAGTTAGGCACTAACCCGCT  
GACTATCGCTCGGAAAGCAGAAAAGCCGGGATGAATCCGGTGGACTATACGGTGAATCCCTGAAAGAGGGTTCTATCC  
GTTTCGCTGCGGAAACAGCGGAAACCGTAAAAACCCCGCGTAATCTGTTCTATCTGCGGTTTAACTCTGCTCGGTTCT  
TCCGGTAAAGTCAAGTATGATTTATGCTCAAGTACCTGCTGGGAGCGGACCGGATCCAGGCGAAAGACTGGGGCAGCA  
GGCGCGGTGAAGCCGGAAGAGTGGACTGGCAGGACAACTGGTCTGGAAGGCAAGCTGGATCTGGTGGTGGTGGACT  
TCCGCTGTGTCGAGCACCTGTCTTATTCGACATCATTTTGGCGAGCGGACCTGGTACGAAAAGACGACATGAATACT  
TCGGATATGCATCCGTTTATTCACCCGCTGTCTGCGGCGGTCGATCCGCGCTGGGAAGCGAAAAGCGACTGGGAAATCTA  
CAAAGCCATCGGAAAGAAATTTCCGAAGTGTGCGTCCGCCATCTGGGTAAGAAACCGACATGCTACGCTGCCATCC  
AGCACGCTCTGCGCGCTGAACTGGCGCAACCGCTGGATGTGAAAGACTGGAAAAGGCGAATGCGACCTGCTCCAGCT  
AAAACGCAACCGCATTTATGGTCTGAGAGCGGATTAACAGCAACTTACGAACGCTTACCCTATCGGCCGCTGAT  
GGAGAAAATCGGTAAACCGCGTAAAGGAATGCTGGAACACCCAGAGCGAGATGGATCTGCTGCGTAAGCTCAACTACA  
CCAAAGCGGAAGTTCGGCAAAAGGCGAGCCGATGCTCAATACCGCAATGATGCGCGAGAGATGATCTGACGCTGGCA  
CCGAAAACCAATGCTGAGTAGCTGTAAGAGCTGGCTGGCTGGCTGAGGAGTTTACCGCGCTGACCAATACGCTATGCG  
GCTGAATAAAGAGACGAGAAGATTCGCTTCCGCGATATTCAGGCACAGCCGCGCAAAATCATCTCCAGCCGACATGGT  
CTGGCCTTGAAGTGAACACGTTTCTTACAACCGCGGTTACCAACGCTTACAGACTGATCCCGTGGCGTACGCTCTCT  
GGCGCTCAGCAGTGTATCAGGATACCAATGGATGCGTATTTCCGGTAAAGCCTGCTGGTTTATCGTCCGCGATCGA  
CACCCGTTCCGGTGAAGAAAGTGAATGGGCCAGAAAATCCTGCAACCCGAAAAGCGCTCAACTTCTGACGCCACACC  
AGAAGTGGGGTATCCACTCCACTACAGCGACAACCTGCTGATGCTGACTTTAGTTCGGGTGGTCCGGTGGTCTGGCTG  
AGTGAAGCCGATGCCAAAGAGCTGGGTATCGCCGATAACGACTGGATTGAAGTCTTCAACAGCAACCGTGCATGACTGC  
CCGTGGGTTGTTCAGCCAGCGTGTTCGGCAGGATGACCAATGATGATACCAGCGCAGGAACGATATCGTTAACTGCTG  
GTTCCGAAATTAACCAACAGCGTGGTGGTATCCATAACTCGGTCACCCGATACAGCCGAAAACCGACGATATGATCGGC  
GGCTATGCCCATCTGGCATATGGCTTAACTACTATGGCACCGTAGGTTCTAACCGCGATGAGTTTGTGTAGTGGCTAA  
GATGAAGAACATTTGACTGGTGTAGATGGCGAAGGCAATGACCAGGTACAGGAGAGCGTAAAATGA

>Cluster\_5690

ATGAGCCAGCATTTACCTTTGGTTCGCCGACAGCCCGGCTATGGATGGCAGAAAACGTCAGAAATACCTCCGCTG  
GAGCGTGGCGCATTACGTTGAGTTAACCGGAGAGGTTGATTCGCCATTACTGGCCCGCGCGGTGGTTGCCGACTAGCCG  
AAGCAGATAACGTCGGATGCGTTTTACGGAAGATAACGGCGAAGCTTGGCAGTGGGTGATGCGCTGACGTTGCAAA  
CTGCCGAAATTTACGACTACGAACCAACTGATCCGACCGGCTACTGCGAGGCAATTAATGACGGCGGATTTGCAACA  
AGATCTGCGCGTGCATAGCGGTAACCCTGGTCTTTCATCAGCTGATACAGGTGGCGGATAACCGCTGGTACTGGTATC  
AGCGTTATCACCATTTGCTGGTTCGATGGCTTTAGTTTCCGGCATTACCCGCGAGATCGCCAATATTTACTGCAATGG  
CTGCGTGGCGAACCACGCTGCTTCGCCATTTACGCTTTCGCTGATGTAGTGAAGAGTACAGCAATACCCGGAAG  
CGAAGCTGGCAGCGTATGGCGCATTTGGCGAAGACAGCTGCTCAACTGCGCGCCGCGCGCTCACTTTCCCGGAC  
CTTTACCGGGGCGAGCGCTCCGCGAGATATTCGCGCTGAAACTGGAATTTACCGACGGGAAATCCGCGAGCTGGCT  
ACGCAACTTTTCAAGTGTGACGCTACCGATTTAGCCCTTGGCTGGCAGCCTTGTGGCTGGGGCGATTTGCAATCGTAT  
GGACTACGCCCGCGGATTTATCTTTATGCGTGCAGCTGGGCTCGGCGGCTGACGGCTACCGGACCTGCTCAACGTTT  
TGCCGTTGGGTATTCACATTTGCGGCGAAGAAACGCTGCGGAACTGGCAACCCGACTGGCAGCAAACTGAAAAAATG  
CGTCTCATCACGTTACGATGCCGACAAATTTGCTGTCAGCGGGGCGAGCGGAGTGTGATGAAACCGTGTGGTCC



GGTACTCAATATCAAGGTATTTGATACCAACTGGATATTCCTGATGTTTCAGGCGCAAACCCATACCTGGCAACCGGTC  
CGGTTAATGACCTTGAACGCGCCTGTTCCCGGATGTACACGGTGATTTGAGTATTGAGATCCCGCCATAAACAGCGT  
TACGATGAGCACAACGTTAATCCAGCATGCTGAACGCCTGAAAAATGCTGATTGCCAGTTTCGCCGCGGATCCGGCGCTGTT  
GTGCGGCGATGTCGATATTTATGCTGCCAGGTGAGTATGCGCAGCTGGCGCAGCTCAACGCCACTCAGGTTGAGATTCCAG  
AAACACCGTTAGCGCGCTGGTGGCAGAACAGCGGCAAAACACCGGATGCTCGGCCGCTGGCAGATCCACCGAGGCGAGTGC  
TTCAGCTATCGGGAAATGCGCGAGCAGGTTGGTGGCGCTGGCAGTCTGCTGCGTGAGCGCGCGTTAAACCCAGGGGACAG  
CGTGGCGGTTGGCCTACCGCGCTCGGCTCTTTTACCCCTGGCAGCTCCATGCGATAGTTGAAGCTGGAGCGGCTGGCTAC  
CGTGGATACCGGCTATCCGGACGATCGCTGAAAAATGATGCTGGAAGATGCGCGTCCGTCGCTGTTAATACACCAGCAG  
GATCAACTGCCCGCTTTAGCGATGTTCCCAATTAACAAAGCCTTTCGATAAAGCGCCCGCTTACACCGAGGCGAGTGC  
GCCGCTGCAACTTTCACAAACCGCATCACACGGCTTATATCATCTTTACCTCTGGCTCCACCGCAGGCGAAAGGGGTAA  
TGGTCGGGCGAGAGGCTATCGCTAACCGCCTGCTTTGGATGCAAAATCATTATCCGCTTACAGCGCAAGATGTCGTTGCC  
CAAAAAACGCCGTCGACTTTGATGCTCTCGGTTGGGAGTTTTTCTGGCCGTTTATCGCAGGGGCAAAACTGGTGTAGGCG  
TGAACCGAAGCAGCAGCGACCCGCTCGCTATGCGCAATTTCTTGGCAATATGGCGTAACGACCGACCGCATTGTGCG  
CGTCGATGCTGGCGGCTTTGTTGCTCGCTGACGCGCAACCGCTCGCAGAGTTGCGCGACGTTGAAACAGGTTTTTC  
TGTAGTGGTGAGGCTTACCGGCTGATTATGCGCGCAATGGCAACAGTAACTGGCGCGCCGTTGCATAATCTATATGCG  
CCCAGCGAAGCGGCTAGATGTCAGCTGTTATCCGGCTTTGGCGAGGAACGGCACAGGTCGCGGCGCAGTGTGCG  
CGATTGGTTATCCCGTATGGAATACGGGCTGCTGATTCTTATGTCGATGATGCAATCCGTTGCCCGCGAGCGGCTTGTG  
GATCTCTATCTACTGGCATTAACTGGCGCAGGGCTATCTCGGACGCCCGATCTGACCAGCCGCTTTATTGCCGA  
TCCTTTTGGCCCGAGTGAACGGATGTACCGTACCGGAGACGTTGCCCGCTGGCTGGATAACCGCGCGGTTGGAGTACCT  
GGCGCAGTGATGATCAGCTAAAAATTCGGGGCAGCTATCGAAGTGGCGAAATCGATCGCGTGTGATCGCGGCTGCCG  
GATGTCGAACAAGCCGTTACCCACGCTGTGTGATTAAACAGGCGGCTGCCACCGGTTGATGCGCGTCAATTTGGTGGG  
CTATCTGGTGTGCAATCGGGCTGCCGTTGGATACCAGCGCATGTCAGGCGCAGCTTCTGTAACATGTCACCACATA  
TGGTACCGGTTGGTTCTGCTGCAACTTCCACAGTTACCCTTAGCGCAACCGCAAGCTGGATCGCAAGCCTTACCCTGTTG  
CCTGAATGAAGGCGAACCGCCAGGGCTGCGCGAAAGCGGCGAGTGAACGATTATCGCCGCGGCTTCTCGTCTGCT  
GCTGGGGTGTGACGTGACGAGTCCGATGCTGATTTCTTCCGCTTGGCGGCTATCGCTACTGGCAATGAACTGGCAG  
CGCAGTTAAGTCGCGAGGTTGCCCGCCAGGTGACGCGGGGCAAGTGTGTCGCGTCAACTGTCGCCAACTGGCAACG  
ATTATTTGATGCTGAAGAAGACAGCACCCGGGCTATGGGATTCGAAACCTTCTGCCGTTGGCTGAAGGTAATGGCCCGAC  
GCTGTTTTGTTTCCATCCCTGCGTCCGGTTGGCTGGCAGTTCAGCGTCTCTCGCTTATCTCGATCCAACTCGTCTGA  
TTATCGGCATTACGTACCGCGCCCAATGGCCCATGACAGCGGCGGCAAACTGGATGAAGTCTGCGAAGCGCATCTG  
GCAACGTTACTGAAACAACCCGATGGCCCTTATTACTGCTGGGGTATTCCCTGGCGGTACGCTGGCGCAGGGTAT  
TGGCGGCGACTGCGTGGCCGTTGGCGAACAGGTGGCATTCTTGGTTGCTGGATACCCTGGCCCGAGAAACGGCAAACT  
GGCAGAAAAAGAGCTAATGGTCTGGACCCGGAAGTGTGCGGAGATAACCGCAACCGAGGCGGCTTCTCTGCGAGCA  
CAGCAGGGAAGTACTTCAACGGAGTTGTTTACCACCTGAAGGCAACACGCTGATGCTGTGCGCCTGCTGACGACTGC  
TCATAGCCTACCGTTGACGGTAAAGCGCAGCTGTTTGTGCTGAACGCACACTTCAGGAAGGATGAGTCCCAGACCGG  
CCTGGTCGCCGTTGATAGCGGAGCTGATATCTATCTGAGGATTTGGCGCATGTTGATATTAATCTCTCCAGGACGTTT  
GAAAAAATTGGGCCGATTATTCGCGCAACGCTAAACAGTAA

>Cluster\_57092

ATGGCTAACTATTTATTGATCGCCCGGTTTTTGCCTGGTACTTCCATTATATGATGCTTGCAGGTTCTGGCGAT  
CATGAACCTACCGTTGCGCAGTATCCCGAGATTCGCGACCCGACACTTACCGTCAGCGCTACCTATCCAGTGGCCGATG  
CGCAAAACGGTAGAAGCTTCGGTCACTCAGGTGATTTAGCAAAAATGAAATGGGCTTGTAGGCTGATGTACATGCTTTCA  
ACCAGTATGCGCGGCGGCAATGCCTCTATCACTCTGACCTTCGAGACTGGGACATCTCCTGATATCGCACAGGTTCAAGT  
GCAAAAATAAAGTCAACTCGCTATGCCCTTCACTTACCTGAAGCAGTGCAGCAGCAGGGGATTAGCGTCGATTAAGTCGAGCA  
GTAATATCCCTGATGCTAGCGGCGGTTTTATTCTGATAACGGCAGCTCAACAGTACGATATCGCGGACTATGTCGCTCT  
AATATCAAAGACCCGCTAAGCGGTACCGCGGGCTTGGTAGCGTACAACCTTTTGGTTCCGAGTATGCCATGCGTATCTG  
GCTGGACCCGCAAACTCAATAAATATTAACCTGGTACCTTCGATGTTATTTCCAGATTAAAGTGCAAAACACCCAGA  
TTTTCCGGTGGTCAACTGGGTGGCATGCCACAGGCGGACAGCAGCAGTAAACGCCCTGATCATTTGTGCGAGCAGGCTG  
CAAACCGCGAAGAGATTTGGCAAAAATCCTTTGAAAGTTTCAGCAAGATGTTCCGAAGTGTGCTGCGTGGCTGCTGCG  
CGTCGAACCTGGGGCGAAGATTATCCACCGTGGCGCGCTATAACGGCAAACTGCTGCCGGGATCGCCATCAAACTGG  
CTGCCGAGCAAAACGCTGATACCTCGCGGGCAGTCAAGAGGAACGTAACCGCTTATCAGCCTATTTCCCGCAAGT  
CTGAAGACCGTTTATCTTACGACACCACCGCTTTATCGAAATTTCTATTCAGGAAGTTTTCAAACACTGGTTGAGGC  
TATCATCCCTAGCTTCTTCCCTGGTCAATGATCTGTTTTCGCAAAATTTCCGTTGCCAACAATCATCCCGGAGGTTGGC  
TGGTTATTTCTCGGACGTTTGGCATCTTTGTCGGCGGTCGGTTTACCATCAACACGTTGACTATGTTCCGGATGGTGC  
GCGATAGGTTACTGGTGGATGACGCCATCGTGGTGGTGGGAACGCTCGACGCTGTCATTCGGGAAGATAAGTACCGCC  
GAAGGAAGCGACGATAAATCGATGGGGCAGTCAACCTGCGCTGGTGGTATGCGCTGTTCTTTCCGAGTGTTTA  
TGCCGATGGCCCTTTATGAGCGGTCGCAACCGGGGAGATCTACCGCCAGTTCTCCATCAGCTGATCTCCCTCATGCT  
TCAGTATTTGTGGCAATGAGCTGACCCCTGCCCTGTGGCGCACCACTTCTGAAAGCCGCGCGGAAGGCGGTCAAAAC  
TAACGCCCTGTTCCGACGCTTCAACACGCTGTTTGAAAAAATCAACTCAACACTATACCGATAGCACCCGCTCGCTGTTCC  
GTTGTACCGGTCGATACATGGTGGTCTACCTGCTGATTTCGCGCGGATGGCGGTGCTGTTCCGTCGACCGGACCTT  
TTCTTACCAGAAGAGGATCAGGGGGTATTTATGACCACCGCGAGTTACCTTCCGGTGGCACCATGGTTAAACCCAGAA  
AGTGTGCAACAGGTTAGCGGATTATATCTGACTAAAGAGAAAGATAATGTCAGTCGCTGTTTACCGTTGGCGGCTTTG  
GCTTACCGGTCAGGGGCAAAACACCGCCTGGCGTTTTATCAGTCTCAAGCCGTTGGTCTGAACGTTGCTGGTGGGAAAC  
TCCGTTACCGGATCACTCAGCGGCAATGATTGCGTTAAGCAGTATCAATAAAGCCGTCGCTTCCCGTTCAACTACC  
CGCGGTTGGCTGAACGTTACCGCGTCAAGTTTGGATATGGAAGTCTGGACAACGGTAACTGGGCGACGAAAAACTAA  
CCCAGGCGGAAACGAGCTGTTATCACTGGCAGCGCAATCACCAGTACAGGTCACCGGGTACGCCGACCGCTGGAA  
GATACGCCGATGTTCAAAGTGAACGCTCAACGCTGCGAAAGCTGAAGCAGTGGGCGTGGCGCTGCTGATATCAACAGAC  
AATTTCCACCGCTTTGCGGACGAGCTACGTTGAAACGCTTCTCAACAGGCGGGTGAAAAAGTGTATGTCAGGCGAG  
GCACGCGTTCGCTATGTTGCGGATAACATCAACCAATGGTATGTACGCAACGCTCTGGCAGATGGCACCGCTTTCT  
GCCACTCGTCTACCGAATGGACCTATGGTTACCGCGGCTGGAACGCTACAACGGCATCCCGTCAATGGAGATTTTAG  
TGAAGCGGCGCGGAAAGTACCGGTGACGCCATGAAATTTATGGCAGACTGGTGGCTAACTTCCCGGACGGCGTCCG  
GCTACTCATGGACCGGACTATCGTATCAGGAAGCGTTATCTCAAAATCAGGCTCTGCGCTGATGCGGATTTACTGGT  
GTGGTGTCTTCGCCCCGCGACTCTATGAGAGCTGGTCAATTCGTTCTCGGTTGATGTTGGTGTGTTCCGTTAGGCGT  
CGTTGGCGCATTACTGGCCACCGATCTGCGCGGCTTAAGTAATGACGTTACTTCCAGGTTGGTTGCTGACCACCATCG  
GGTTTTCCGCAAAAACGCCATCTGATTTGCGAATTTGCCGTTGAGTATGATGAGAAAGGAAAGGAAACCGGCTGATAG  
GCAATCCTCGAAGCGCGCGGATGCGTTTTACGCGCAATCCTGATGACCTCTCTGGCCTTTATTTCTCGGCGGCTGCGCGT  
GGTTATCAGTCTATGGTGGCGGTTTGGCGCGCAAAACCGGTTAGGTACCGCGTGTGGCGGGATGTTTGGCGAACAG  
TGCTGGCAATTTACTTCCGTTCCGGTCTTTTTCGTTGTAGTGAACATCTCTTTGCCGCTTTAAAAAAGCGTAA

>Cluster\_23379

ATGAAGCAAATTCGTTGCTGGCGCAGTATTTGTTGACCTGATGATGAAGTTAGGTCGTTGGTGGCGTTCTCAATGTTGCT  
GGCGTGGCCCTGCTGTTCTGGCATTGTTGATAAATGGCGGTAAACATGGTGTGCTGATGTTGAGTGAAGCATTG

ATGTTATTTCGTTCTATCTTCTTTGGTTTGTCTGATTACGCCGTGGCGGCTTACTTTCTATCGGTGGTCTGAGCAACTG  
GAGGAGTCCACGACACGCTGTCTACGACTGGTGCAAAAAGTGGAGGAGATGCGCGAGCGGATTTGAGCCTCAACGTTCA  
GTTAAAGATAAATATTGCCAGCTAAATCAGGAAATCGCCGTTCTGTGAAAAGCGGAAGCAGAACTGCAGGAAACCTTCG  
CCTAACTGAAAATTGAAATCAAAGAGCGCGAAGAGACAAAATTCAGCTCGAGCAGCAATCCTCATTTCTACGTTCCCTTC  
TTGACGCTTACCCTGGTTTATCGTAACGAAGATTAAGAGTTTCCGGCTGTAAACCGCGCATCGAGCTGGAGCTGT  
GACCGGAAAAAGCGAAAAACAACCTGGTTTACCTGAAACCTGCTGATGTTACTCACCGGAAGCCGCTGCGAAAAGTCATG  
AAACCGGATGAAAAGTGTTCCTGATATAATGTGTCACTGACCTATGAGCAGTGGCTGGATATCCCGACGGACGAAAGCC  
TGCTTTGAAATCCGTAAGTACCGTACGACCGCGTGGTAAACCTCACGGTTTGTAGGGCTTTGGTCGCGACATTA  
CGAGCGTAAGCGGATCAGGATGCGCTTGAGCGCGCCAGCCGCGACAAAACGACGTTTATCTCCACCATCAGTCAAGAA  
TGCGTACACCGCTGAACGGTATCGTCCGCTGAGCCGCTTCTGCTGGATACTGAACTCACCGCCGAGCAGGAAAAATAT  
CTCAAAACCATCCATGTTTCGGCTGTACGCTGGGGAATATCTCAACGATATATCGACATGGATAAGTGGAAACGGCG  
CAAGTCCAGCTTGTAACTCAGCCGGTGTATTCACAGCTTCTTCCGATCTGGAAAATCTCTCCGATTCGACGGCGC  
AACAAAAGGATTCGCTTAAATCTGGAGCCGACGCTGCCATTTACCGCATCAGGTCATACCGACGGGACGCTTACCG  
CAGATCTTGTGGAACCTCATCAGTAACGCCGTAATTCACCTCAGCAAGGCCAGGTTACCGTGCCTGCGCTACGATGA  
AGCGGATATGCTGCAATTTGAAGTGAAGACTCTGGTATCGGCATTCCGAGGATGAGCTGGATAAAAATCTTCCGCTAT  
ATTACCAGTGAAGCAGCTCATGGCGGTAACCTGCCACCAGGACCGGATTTGGTCTGGCGCTTCTCGCTGCTGGCG  
AAAAATGCGGCGGATATTACGTTACCAGCAAGGCAAGGTTCAACCTTTACGTTGACGATCCAGCTCCAGCCGCT  
GGTAGCAGAAGAGTTGATGATGCGTTTGTGTAAGACGATATGCCCTTTACCGCGCTGAATGTCTGCTGGTGAAGACA  
TTGAACTGAAACGCTGATTTGCGCGCTCTGTGCTGGAAAATTTAGGTAACAGCGTTGATGTCGCCATGACCGGCAAGGCG  
CGCTGAGATGTTAAACCGGGCAATACGACCTGGTGTTCGTTGATATTCAGTTGCCAGATATGACCGGGCTGGATAT  
CTCTCGTGAAGTGAAGCGTTATCTCGCGGAGGATTTACCGCGCTGGTGGCTTAAACCGTAAACGCTGAGCTGAAAGACA  
AACAGAATACCTCAATGCTGGAATGGATGATGCTGAGTAAGCCGCTTCTGTTCCGGCGCTAACCGGATGATCAAG  
AAATTTCTGGGATACCAGGATGATGAGGAGAGTACGGTACGACAGAGAAGAAAGCAAGTAAATCAGAAGCATTTGCTGATAT  
TCCCATGCTGGAACAGTATCTCGAATTTAGGACCGAAGCTGATCACCGAGGATAGCGGTTTGAAGAAATGATCG  
CGGCTATGTCAGCGTGTGAGTCAATCTGACCGCGCAGGATAAAAAGGCATTTGTTGAGGAAGGGCATAAAAATTA  
GGTGCAGCGGGTTCAGTGGGTTACGCCATCTGCAACAGCTGGGTGAGCAAAATTCAGTCTCTGACCTTCCCGCTGGGA  
AGATAACGTCGGTGAATGGATTGAAGAGATGAAAGAAGAGTGGCGTACGACGCTAGAAGTACTGAAAGCGTGGGTGGCAA  
AAGCCACTAAAAATGA  
>Cluster\_40396  
ATGAAGGCTGAAATCAGCCGTAGAAGTCTGATGAAAACCTCCGCACTTGGCAGTCTCGCGCTGGCAAGCAGTGCCTTTCAC  
TCTGCCATTTTCCCAAATGGTCCGAGCGGCAGAGGCACCGGTAGAAGAGAAGCGGTGAGGTTCTGCACCGTTAACT  
GCGGAGCCGCTGCTGTACGTTTGCATGTGAAAGATGACACTGTGTACTGGGTGGAGTCTGATACGACAGGTTGACGC  
GTTTACGGTAATCATCAGGTTCCGGGCTCTTACCGGGCGCTCTATCCCGCAGCGGATGATCATCTGACAGGTTGAA  
ATATCCCATGAAGCGCGTCCGCAAGCGCGGTGAAGTAAATTTGAACGGATAAGTGGGACGAAGCTCGGATACCATCA  
GTGATAATCTCCGGGATCCTGAAAGATTACGGCAATGAGGCTGTACATGCTGTACGGAACAGCGCTAGATGGCGGA  
AACATCACCACTCAAACCTCCGTAACCTGATGAACTCTTCCGGTGGTTTTCTCAGTCCGATATGGTAGCTCAGTAC  
CGCACAGATCAGTCCCGGATGAGTTATATGTTCCGGTCCCAATGATGGCAACAGCCCGGATGATATCGCCAATACGAAAC  
TGGTCTGTTATGTTCCGAAATAACCCGGCAGAAACCGGGATGAGCGCGGTGGTGTCACTTACTACGTCGAGCAAGCCCGA  
GAACGTTCAAACCGCAGCATGATCGTCACTGATCCAGCTTATAACGACTGTCGCGGGCTGAAGATGAATGGTGGCC  
AATTCGCCAGCGCATGCGGCACTGGCCTGTGCGAATTTGCCCTGGGTTACTGATTAAGTAAACATGGTTCGATCAGCCAT  
TTCTCGCAAAATATGTTGTTGGTTACGATGAAAACCGTTCGCCGCAACGACACCGTAAACCGCATTTATAAGCCAT  
ATTTCTGGGCGAAGGGCTGACGGCATAGCTAAAACCGCGAATGGGCAGCAAAAATCACAGCATCCCGGCAGAAAAAT  
TATCCAGTTGGCAGCAGAGATCGGTTACGCAAACTGCTTATATTTGTCAGGTTGGGGCCACAACGACACTCAACG  
GCGAACAACGTCGCCGCTATTGCCATGCTTTCCGTTCTCACCGTAACGTCGGCATAAACCGCGGCAACTCAGGTGTA  
CGCGAAGGTAGCTGGGATCTGGGGTAGAATGGTTCCCGATGCTTGGAAATCCGTTAAAACGAGATTTCCGCTTTTAC  
ATGGACAGATGCCATCGACCAGGTCAGGAAATGACCGGACTCGTGTGGTGTTCGTTGAAAAGAAAAACTGGATGTCC  
CCATCAAGTTTTTATGGTGTACGCCAGTAAACACATTTGATCAATCAACATGGCGACATCAATCACACCATGAGTACT  
CAGGATGACAGCAAGTGCAGATGATTTGTCATGACCACTTATGACTGCCTCGGCTAAGTATTTGCGATATCTGTT  
GCCCGACCTGATGCCAACAGAGCAAGAAGCCTTATCTCTCACGAATCTGCCGGAAATATGGGCTATGTGATCTCGCC  
AACCCGCAACCTCAGCAAAATTTGAACGCAAAACCCATCTACTGGATGCTGAGCGAAGTCCGCAAAACGTTAGGACAGAC  
GTTTATCAAACCTTTACTGAAGCCGCGAGTCAACGATGGCTTCAAAATATCTCCATGCGAAAACGGAAGCAACCC  
TGAGATGCCCGACTACGAGGAGATGAAAACGACCGGATCTTTAAGAAAAATGCCGGAAGAACAACACTACGTCGCTTTCC  
GCGCATTCCTGGAAGATCCACAGGCAAAACCCATGAAAACACCTTCGGGAAAAATCGAAATTTATTTGAAACGACTGGCG  
AAGATTCGGGATACCTGGGAATGAAAAGATGAAATTTATCATCCCTTCCAGGCTATACCCAGGTTTGGATGGCTG  
GGCAGATGCCCTGCCGAAAACCTTTCCACTGCAGTAAAGCGGCTTCCACTACAAGCGGCTACCCACTCAGTTACGGCA  
ATATGATGATTTACAGCAAGCTGCCACAAGAGGTGAGTCAACCTATTTGATGCTCAGGACCGGATATCCGTCAT  
GGGATACAGTGGGGTATTTAAACAATAATGGAGAAATGTTGATTTGCCGCAAGGTGACTCCGCTATTTCTGCTGGCCT  
TACCGCATCGGGCAAGTGGCTGGTTAAAGCGGATAATGTTGGTGGACCGGTCGATCACGGCGGATCAATATTT  
TGACCTCGCACCGCTTACCGCTGGCAAGGAAACCCGCTGCACAGCAATCTTGTCCAGATCGAAAAGGTTTAA  
>Cluster\_48414  
ATGTCAGGAATGAAAGTCACTCAGGCGGTGAAGGCTGCCCGCGGTCCTGGGCGCGGATTTTCCAGCGCTGGGTGTGAA  
CATACTGAAAATTTGCCATCAGCCTTGTCCGGTCTCGCGCGGTAAGATCGTTTTTCGTTTCGAGATCTGGAAGGTCGTG  
GAACATGGTTCTGCAACCACTGCGGGGCTGGGGACGTTTACGCTTGTGACGAAGGACTGAAATGTGGATATCAGTGAA  
GCAGCAGACAGGATACATGGACTGACACATAGTCTGTCTTACGCTCTTCTGGAGTCTGGACGTCACCGCAGATACAGA  
TGGCGGAAAACAGCGCGCAGCAGCACTTCCCGCGGACTACTGCAAGCCTCGCGTGAATCTGCGGGAATACTATCTTAA  
CACATAAAGGTTTTCCCGGAGCATATTTGCCATGAGCTGACTTCCAGCTATAAAAACCGGTTGGGGTGTGTTTTCCCGCGG  
GATTTGATGCTCCGCTCTATAATGCTGACGGGGAGCTGGTGAATATTCAGCTTATCAGTGGCAATGGTAGCAAGTGT  
TCTTAAAGGAGGTGAGTTAAGGAGGCCATCATCTGATAGAAGGGGGCGGAGTTCTGTAAGAGGATGTGGATGCGG  
AAGGTTACGCCACGGCGCTTACTATTCATCATCTGACAGGAGAAGCCGTCATGGTGGCATTTTCGTCGGTAACTTTCT  
TCTTTGGCCAGAGTTGCCATAAACAGTATCCATCCACTACGAGTCTGGAGCTGGAAAGTGAATTTCTCAGTCAAGTTTGGC  
CCAGAACAGGGCTGAACTGCTGCAAAAGCGTGTGAGTGTGACATTTGCTGCCACCGGTTTTTGGTACTGGAATGATG  
CGCTTACCAATACGGAGAGGAAATCCACCGGAAAGCAATTTGAGGCTTTGAAAGCCACATAACGCCAGTCTTTTCGAC  
ACAATGAGTGAAGCAGAAATTCACAGCGATGAGTGTGACGAAAAGCTCAGAGGTTCTGAGCATTACGGGATGACT  
GGCGGTTGATCGAAGGGGACGCTTTTATCCACTACGAGTCTGGAGCTGGAAAGTGAATTTCTCAGTCAAGTTTGGC  
GAGATGTCGACGCCCTTTTCAGCGCTCGGTGACCGCTTTTCTCAGAAAATTTGCTCACGTTGGTGAACATTTAAAG  
TTAATTTGTTCCGACGAGCAAAAATCCCGGACGCTCATCTGATTTGTTTTCGTAATGGCGCTCGATACCGGAACAGGGCT  
TTTTAGTCCGCACTGTAAAGAGAACTGGCTGCGTGAAGTGTGAACTGATTTACCGCCACCGTAAAGGGAAACCG  
TTGAAACTCATGCCCGGATTTGCGGTTGGCTGGACCGGCGCGGACACAAGCCAGCAAAACGCGACATTTATCTT  
GCGGCTTATTTATGGTGTGGCAACCGCTATGACTGCGAGCTTTTCTGAAAGTACTGGCCCTGGTGGTAGTGGCAA

AAGTATTCTGGCTGAAATTCGACCATGCTTGTGGAGAGGATAACGCCACCTCTGCGACCATTGAAACGCTGGAGTCCC  
CGCGAGAAGCTGCGGCTCTGATAGGTTTTTCTCTTATTTCGCTGCCTGATCAGGAGAAGTGGAGCGGTGACGGCCGGG  
CTTAAGGCTATAACTGGTGGCGATGCGGTATCGGTGGACCCCAATATCAGAAATGCTTATCAACACATATTCGGCGGT  
TATCTGGCCGTAATAATAATCTATGCGCTTCACTGATCGTAGTGGTGGTGTGCCCGCGGAGAGTGATTCTGCATT  
TTCTGTAGCAGATAGCACCGGAAGACCGGATCCGCGAGCTGAAAGATAAAATTCACGAGAACATGGCTGTGATGTTCCG  
CAGCTCATGCAGCGTTTTCAGCGATCCGATGAGCGCCAGAACATGCTTTCAGTTCGAGCAGAAATTCAGATGAGGCTCTCAC  
CATCAAGCGTATGCTGATCCAGCATTTGATTTTTGTGGCTATCTTGAGGCATTACCTGACACCAACGGTATGTTTATGG  
GGAACGCCAATATGTTCCACGCGCAGCCAGTACATACCTTTACCATGCTACCTCGTATACATGGAGGCTAATGGCTAT  
AAAAACCCCTGAGTCTTACGATGTTTGGCAAAGGTTTCCGAGTATGCTGAAGGAGTACGGGTACATTTATGAGAAACG  
GCGAACTAATCAGGGAATGCAAATAACCTCACTTTGAAGAGGAGAGTAATGCAGACTGGCTGCCAAAGTGTGATGAGC  
CAATATTAATAATA

>Cluster\_42612

TTGGCCAACTCATCTCACGATATTCGGTTCTGACTGCCGCCACTGGGGCCATGCTGGTTGAAACCGACGGCGAAAC  
CGTGTTTAGCTCGCGTGGCGGTTAGCCACAGGAATGGAAACCTCTGCAGAGCGGGTTCGCGACCAGGTTACAGCA  
ATACGCGGGTGGCATTTCCAATGGTGGCGAAAGCTTTCTTGGCTCACCGGAAATCCGCATGGCATTGTTGGCAGGAT  
GAATTTGTTCCGCTGAGTTGGGATGAGGCGTGGAGCTTATTCACCATCAGCATAAACGCATTCGTGAGGCTTATGGTCC  
GGCATCGATTTTTCTGCTGGTTCTTACGGCTGGCGTTCAAACGGCGTCTGCATAAGCGTTCGACATTATTAACAAGCTATA  
TGGCGCTGGCAGGCGGTTATACCGGGCATCTGGGGGATTTATCGACCGCGCGGCACAGGCGATCATGCCGTATGTCGTG  
GGTGGCAGCGAAGTTTATCAACAGCAAACAGTTGGCCCTGGTGGTGGAAACATAGCGATGTCGTGGTCTGTGGAGTGC  
TAACCCACTCAATAGCTGAAATTCGCTGGAATGCATCCGATGAGCAGGGGCTTCTTACTTTCCGCACTGGTGCAC  
CGGGGAAAAGCTGATCTGCATTTGATCCATGCGATCGGAAACCATCGATTTCTTGGCGATAAAATGGAGTGGGTGGCA  
CCACACATGGGCACCGATTTGCGTTGATGCTGGGGATCGCCATACGCTGGTGGAAATGGTTGGCAGCAGCAAGCGTT  
TCTGGCGGTTGCAACAGGTTATGCCGCTTTCGCTCTTATTTGCTGGGCGAGAGTACGGTATAGCGAAAACCGCG  
AATGGCGGACAGAGATTTTGGTGTGGCGCAGAAAATCCGCGAGCTGGCGGCTATTTTCCACAAAATCAACATG  
CTGATGGCAGGCTGGGGAATGCAGCGCAACAGTTTGGTGAGCAAAAACACTGGATGCTGTCAGCTGGCGCAATGTT  
GGGCAAAATCGGCACACCGCGCGCGGTTTGGTCTTTCTTACATTTTGCATATGGTGGTAACCCACGCGCGCGCTG  
CGGTGCTCTTCCATGCAGGGCAGCTTGGCGGGTGGCACCGATGCGGTAGATAAAAATCCCTGTCGCCCGCATTTGTA  
GCATGGAAAACCCCTGGTGGCAGATATCAACATAACGGTATCGGACGACATTTCCCGGATATTCTGGTTATCTGGG  
GGGTGGTGCCAACTTACTCATCATCAGGATACCAATCGCTGATCCGTCGCTGGCAAAAACCGGAGCTGGTGGTATCT  
CCGAATGCTTTCGACGGCTGGCGGCAACACGCGGATATCGTTCGCTGCGACCACTCTTTTGGAGCGTAATGATCTC  
ACCATGACCGGTGATTACAGTAATCAGCATCTGGTGGCGATGAAGCAAGTGGTGGCCACGCGATGAAGCGCGTAATGA  
TTTTGATGTTTTTCCGACTTGGTGAACGTTGGCAGAAAGGGCGGTTATACACGTTTTTACGGAAGGAAAAGTGGAGCTC  
AATGGCTGGAACGTTTTATAACGTTGCCCGGACGCGGGGCAAGCCAGCAGGTTGAATGGCCGCAATTTGCTGAGTTC  
TGGCAAGCCAACAGTTAATTGAGATGCCGGAACCCGGACAGTGGAGCGGTTTATTCGCTTCGCCGATTTTCCCGCGCA  
TCCGCAAGCGCATCCATTAATAAACCCGCGGTAAGATTTGAATCTTCTCGCAGCGTATGGCGATTACGCTTATCCGG  
ATTCGCGCGGCGCATCCAATGTGGCTGGCGGACGATGGAGGCGGTTTACGCGGAGTGGCAACAGTTGAGGTAATTTCT  
GCTCATCCGGCGCATCTGCTGCACAGCCAGCTGAATTACAGTTCTTCTGCGCAATTTGACGCGTGGCAATCTGTAGCC  
TGTACCATTATCTTGCAGATGCCAGATGCGCGGATACAAGATGGCGATACTGTTCCGGCTGTTGAACTACGCGGGC  
AAATTTCTGGCGGCGTATTTAGCGAGGAAATTAACCTGGCGTATTTGATTTACGAAAGCGCATGGCCGATTTG  
GATTTAACCGTGGCGGCTTTTGAATAAACCGCGCAGTGAACGTTGCTGACCAAAAGATCTCCCGAGCTCGCGGTTGGGAA  
TGGCTGTGGCGGTAATACGGCGTGGCATGGCTGGAAAATACACCGTCCGGAAGTACACTTACAGCGTTTGAACCA  
CGCCAGCTCATAA

>Cluster\_25895

ATGTCAGAACGTTTCCAAATGACGTGGATCCGATCGAAACTCGCGACTGGCTCCAGGCGATCGAATCGGTATCCGTGA  
AGAAGGTGTTGAGCGTGCCTAGTATCTGATCGACCAACTGCTTGTGAAAGCCGCAAAAGGCGGTGCAACGTAGCCGAG  
GCACCGGTATCAGCAACTACATCAACACCATCCCGTTGAAGAACAACCGGAGTATCCGGGTAATCTGGAACGGAAACGC  
CGTATTCGTTACGCTATCCGCTGGAACCATATCAGCGTTCTGCGTGCCTGCAAAAAGACCTCGAATCGGCGGCA  
CATGGCGTCTTCCAGTCTTCCGCAACCATTTATGATGTTGCTTTAACCACTTCTTCCGTCAGCAGCAACGAGCAGGATG  
GCGCGACCTGGTTACTTCCAGGGCCACATCTCCCGGGCGTTACGCTCGTCTTCTTGGAAAGGTCGTCTGACTCAG  
GAGCAGCTGGAATAACTCCGTCAGGAAGTTCACGGCAATGGCTCTCTTCTTATCCGCACCCGAAACTGATGCCGGAAT  
CTGGCAGTTCCCGACCGTATCTATGGGTCTGGGTCCGATTTGGTGTATTTACCAGGCTAAATTTCTGAAATCTGGAAAC  
ACCGTGGCTGAAAGATACTCTTAAACAGACCGTTTACCGGTTCTTCCGCGACGGTGAATGGACGAACCCGGAATCCAAA  
GGTGGCATCACATCGCTACCCGTAAGAAACTGGATAAAGCTGCTTCTGTTATCAACTGTAACCTGCAGCGCTTGTACCG  
CCCGGTACCGGTAACGGCAAGATCATCAACGAACTGGAAGGCATTTTCAAGGTGCTGGTGGAAACGTATCAAAGTGA  
TGTGGGGTACCGGTTGGGATGAACTGCTGCGTAAAGATGACCGGTAAGCTGATCCAGCTGATGAACGAACCCGTTGAC  
GGCGACTACCAGACCTTCAAATCGAAAGATGGTGGTACGTTCTGTAACACTTCTTCCGTAATAATCTGAAACCCGACG  
ACTGGTTGACAGCTGGACTGACGAACAGATCTGGGCACTGAAACCGTGGTGGTACGATCCGAAGAAAATCTACCTGCA  
TTAAGAAAGCGCAGGAACCAAGGCAAGCGACGGTAATCTTGTCTATACCATTAAGGTTACGGCATGGCGTACGGCAACCGG  
GCTGAAGGTAATAAACATCGCGCACCCAGGTTAAGAAAATGAACATGGACGGCTGCGTCCATCCGCGACCGCTTCAATGT  
GCCGGTGTCTGATGAGATATCGAAAACCTGCGGTACATCACCTCCCGGAAGGTTCTGAAGAGCATACTATCTGCAGC  
CTCAGCGTCAGAACTGCAGGTTATCTGCCAAGCGCTCAGCCGAACTTACCAGAAAGCTTGGAGCTGGCGAGCCTGCAA  
GACTTCGGCGCGCTGCTGGAAGAGCAGAGCAAGAGATCTTACCACATCGCTTTCGTTCTGTCGCCCTGAACGTAATGCT  
GAAGAACAAGTCGATCAAAGACAGGCTGGTACCATCATCGCCGACGAAGCGGTAATTTCCGGTATGGAAGGTTGTTCC  
GTCAGATTTGGTATTTACAGCCGCAACGGTACAGCAGTACACCCGCGAGGACCGGAGCAGGTTGCTTACTATAAAGAAGAC  
GAGAAGGTCAGATTTCTGCAGGAAGGATCAACGAGCTGGGCGCAGGTTGTTCTGGCTGGCAGCGGCGACTCTTACAG  
CACCAACAATCTGCGCATGATTCGTTCTTACATCTATTTACGATGTTTCCGCTTCCAGCGTATCGGCGATCTGTGCTGG  
CGGCTGGCGACAGCAAGCGGTTGGCTTCTGATCGCGGTTACTTCCGGTCTGACCACCTGAAACGGTGAAGGCTGCGAG  
CAGGAAGATGGTACAGCCACATTCAGTCTGCTGACTATCCGAACTGATCTCTTACGACCCGCTTACGCTTACGAAGT  
TGCTGTATCATGATGACGGTCTGGAGCGTATGTCGGTGAAAAACAAGAGAAGCTTTACTACTACATCACTACGCTGA  
ACGAAAACCTACCACATCCGCAATGCGGAAAGTGTGAGGAAAGGATTCGCTAAAGGATCTACAAAACCTGAAACCAAT  
GAAGGTAGCAAAGGTAAGTTTACGCTGCTGGCTCCGGTTCTATCTGCTGCTACGCTCCGTTGAGCAGCTGAGATCTGGC  
GAAAGATTTACGGCGTAGGTTCTGACGTTTATAGCGTGCATCTTACCGAACGAGGCGGCTGATGGTCAAGATTTGTAAC  
GCTGGAACATGCTGCACCCGCTGGAACCTCCGCGGTTCCGTTACATCGCTCAGGTGATGAACGACGCTCCGGCAGTGGCA  
TCTACCGACTATATGAAACTGTTCTGCTGAGCAGGTCGTAATTCAGTACCGGCTGAGACTACCGGCTACCGGCTACGTA  
TGGCTTCCGTTCTCCGACAGCGTGGAACTGCGCTCACACTTCGAAAGTGTGATGCTTCTTATGTCGTGGTTGGCGCGC  
TGGCGAACTGGCTAAACGTTGGCGAAATCGATAAGAAAGTGGTTGCTGACGCAATCGCCAAATCAACATCGATGAGAT  
AAAGTTAACCCGCTCTGGCGTAA

>Cluster\_63859

GTGTTATGGCAGCCGAGATTTCTGGCGGCTTTTTTGTGGGGTGAATATGGCAGTAAAGATTTCAAGTGTACTGAAAGA

CGGTGCAGGTA AACCGATACAGA AACTGCACAATCCAGCTGAAAGCAAACGTAACAGCACCACGGTGGTGGTGAACACAG  
TGGCCTCAGAAAA TCCGGATGAAGCCGGCGCTTACAGCATGGACGTTGAGTACGGTCAGTACAGCGTTATTTCTGTTGGTG  
GTGGGATTC CCGCGCTCACATGCCGGGACCATCACCCTGCATGAAGATTC CCGACCCGGTACGCTGAATGATTTTCTCGG  
TGCCATGACGGAGGATGATGCCCGTCCGGAGGCACTGCCCGCTTTTGAAGTATGGTGGAAAGAGGTGGCGCGTAACCGCT  
CCGCAGTGGCAGCAAGAACCGGACCGCGAAGAAGTACGCCAGTGTGATGCCAGTGCATCAGCCAGCGAGCGGCAACTCAT  
GCAACCGATGCTG CAGGCTCAGCACGTCGCCCCAGCACGTCAGCCGGACAGGCTGCATCATCTGCTCAGTCAGCATCTTC  
CAGCGCAGGAACGGCATCAACAAAGGCCACTGAAGCATCAAAAAGTGC TGCCGCTGCAGAGTCTTCAAAAAGCGCGGCTG  
CCACAGTGCCCGTGC CGCTCAACAAGTGC CGGGCAGGCTCAGCCAGTGCACCCGCGCGGAAAAATCGGCAGAAAGC  
GCTGCCTCGTCCGCTTCAACAGCCACAACGAAGGCTGGCGAAGCCACTGAACAGGCCAGCGCAGCAGGCTGAGCTTC  
CGCAGCGAAGACATCCGAAACGAACGCGAAAGCTCGGAAACCAGCGCAGAAATCTCAAAAACGGCTGCCGCATCGTCCG  
CCAGTTCCGGCGGCTCATCGCCCTCATCGGCTGCTGCTTCAAAAAGATGAGGCAACTAAACAGGCGT CAGCAGCGAAGGGA  
ATCTGCAGCAACCGCGCCGAGACAGCAGCAAAAACGGCGGAGGATATGTCATCCGCGCTGGGCTTGAGGATCGGAGCA  
CGACGAAAAAGGGATCGTT CAGCTCAGTAGTCAACCAACAGTACATCTGAAACGCTTGCCGCGACACCGAAGGCGATT  
AAAGCAGCGAATGCAATGCGAATGGCAGGGTACCATCTAACCGAAAAGTTAACGGGAAAGCACTGACAGCGGATATAAC  
ATTAACCGGAAAGATATGGCACTTTCAATTCAGTAAACGATGCTTTTCTTGCGGGGCGAGGTTGGTTCAAATCGCTA  
CGGTTACCATGCCACAAGCGAGTTCCATTCGTTTACATTCAGTATTGATTGGTGGCGCTGGTTACAACCTCCCACAG  
CAGGCAGGCAATTCAGA AACTGGTTTTGCGAGCAGGCAATGAAATCCCAAAGGATTACTGGAGCTTTGTGAAAAGAAC  
AGGCGCAGGATTAACAAATTTCCGCTGGATCAACACATCCGGCGATACATATGATATTTACGTTGAGATTGGCAATTA  
CGCAGAGTAAATATCCATTGGGATTCGACTGCAATCGCTCAGTTTCTGTTTATACCTGCCAGCATATTCAGCGAGT  
AAGCCTTCCGCGCTTACCGATGGTGTGTTTTATACGATGTTTAGCTCACATCAGAAACCTACACCATCAGATTTGGAGC  
ACTGCCAACAACTGGAGGACTATTT CAGGTCCTGTTGTTACTGGCGGATCACC GGGGCACTGAAGGGGACCGCG  
CAACCGCCACAAATTCAGACAGCGAGAAAGCATTAACAAATGTGGCTTTTGACGGCACGAAAGATATAACTCTAACGCT  
GGTAAATGGGATGGTTATTCGCCAGTGGCGCAGGCTGAATAACACTGAGGATTCAGGCAATCGTTATCAGTATGAGT  
TATTACACTGCTGCAAAAATAACGGCGCATTTCAATCAGCGTACATGGATTGCTCGCTGTTCTGTTGGGCTTATGCTAATAACG  
CCTCAATACCGGATAGCGAAACAAATGCGGCACATTTCCGCTTGCTGGCGCACTGATGAAATAACAGCTTTGGCATG  
ACTAACTACACAATCAGGATCACCACCGCAACGACTACCAGCGTTTCCGGTGCAAAAGTAAACGCCGAATTTATTTACGTT  
TTACAATGGGATGGTTATTCGCCAGTGGCGCAGGCTGAATAACACTGAGGATTCAGGCAATCGTTATCAGTATGAGT  
CTTACAGCATATCGGAGATTAACAATTTAAACAGGAATTTTCTCACATCGTCAAGACTGAAGCTGGCTCGTTAGATGCA  
AATCTCCAGAGCTTAAC TGTATTGTTTGCAAAATATTCGACATTCAGACAACACCGGATAGTCTAACATGTTGCTAAG  
TCCGATGCTGGCTACAACATGGTTTTTCTGTTGACTTCATCCGTCGATACAAGACGGATATCGAGTCTTTAGAGGACA  
AGTACCGGATGAGCTGTTGAAACTTCGCTCTGATGGTATCGCTCGACTTGTGAAAGGGACAGAAAGGACTGGGACAT  
TATGGCCTTATTG CAGAAGAAGTCGGAGAGATAGCACCGCAATATGTTCACTGGCGCTCTTTACAGACAAAGATGATCC  
AGGTATAGCGTCTGATAATGGGATGGTTGCTGAAGGTGTGATGATGATCGTCTGGTTGTTCCGCTTATTACCATATTC  
AGAACTGACAAAAAGAGTTGATGAACTTGAGTCAGAAATTAAGTTGTTATCAACTTCCCGAAGCGATATCGGATAA

>Cluster\_17746

ATGGCTTTTAGCTGGATTCAACCGAGCTTTGCCGGTGGTGA AATTGGTCCGTCAGTGTATGGCCGATGATATGTCAAA  
GTATCAGGTGGCACTGCGCAAGTGC GATAAATTCATTTGTTCCGCAATAAGCGGCTGTAGAGAACAGGCGAGGTACGCGCT  
TTGTTGCTCCTGCTAAATACCTGATCGCAAGTGC CGGTTAATCCCGTTCAGTTCGACCGTACAGACATATGCTCTG  
GAGTTCCGGGCACAACATATGCGCGTTATCAAAGACGGCGAGTATGTTCTGACGACCAGCAATGATTTATGAGCTGGC  
GATGCCGTATGCTGACACTGACCTTTCCGTTAATAATTCACGAGAGCGCGGACGTTTCTGACGCTGGTGCATCCCGCAT  
ACCTCCGAAAGAATCGCCCGCTATGCGCAGCACAACGGCAGATCGTCGATGTCACCACAAAAACGGGCGCTTCGAA  
GATATCAACGTTGACGATCTGTGAAGTCTACCGCAAGCTGAGCAGCAGCAGCAACAAATACACTAACGGCAGTTCTGCAAT  
CTTCCGGTGTGAACAGGTAGGAAAAGTGTCTATCTCGAGCAGCCCGGTTGATTCCGCTCCAGTATGGGAAAACAGTA  
AAACCACAGCAATAACGACGTTTCTGCTGTCAGACAGCAACTACTACCGCGCAATATGTCAGGTAAGACCGGACCTTT  
CGCCCGTCTCACACTGAAGGTATGCTTTGGGATGGATGGGCGGTTACCGGATCAGATGATACCGGGATCCAGTGGGAGTA  
CCTGCACAGCGGTTTCCGGCATTTGCAAAAATAACAGCAGTGTCTGGCGATGGCCTCACAGCAACTGCCGATATCCGTTCTG  
TCATTTCCATCTCAGGTTGTTGGATCCGCTAACGCCAGTTATAAGTGGGCGAAATATGCGTGGAAACAGCGTTAACGGCTAC  
CCTAGTACCGTTGTTTACTACCAGCAGCGCCTGTAATTTGCCGCGTCTACCGCATATCCACAAACCATCTGGGCAAGCCG  
CACCAGGACTATAAAGACTTCGGTAAGAACAACCTTATTCAGGATGACGATCGCATCTACACCTACGAGGCGGCTC  
AGGTGATGAGTTCGCTACCTTATTGATGTTGGTAACCTGTTGCTGCTGACATCTGGCGGGAATATACGATATCCGG  
GACCAGAATAAGGTCCTCACGCCATCGGCGTTCGTT CAGCTCTCAGGGGAATAACGGATCAAGTAACGTACCACCTAT  
CGCCGTGGCAATATCGCGTTGTTTATCCAGGAGAAAGCAGCGTTGTCGCGATCTGGCCTACTCTTTCCGACTTGACG  
GATATCAGGGAAC TGACCTGACCATACTGGCAAACCTGTTCCAGAAGCATAGCATTTGTCGACTGGTCAATCTGCAT  
TTCGCTACAGCAGCGCTTTCTGCAATTCGGATGACGGCAAGTTGCTGGTGTCTCACCTATCTGCGCGATCAGCAGTTTT  
CGCATGGGCACCACAATCCAGCTCCGGGAAGTACGAAAGCACATGCTCAATCAGTGAAGGCAGCGAGGATGCTGTTTACT  
TCGTGGTTAACCGTAATATCAATGGGCAGACCGTACGTTACATCGAACGCTTTCCAGTCCGCTGTTTCCAAATGATGAA  
GACGATTTCTTTG TAGACTGCGGACTGAGCTACGACGGCGCAATACATCATACGCAACATGACCATCAGTGGAGGCAC  
CGGTGACTGGAAC TATCAGGTTGATTACCCGGTTACAGTAAGCGGTTGGTGCATTTCTGTTAATACTAGTGTAGGCGCTC  
AGATTCAGTTCCATATACCGGAAACAGATCCAGACACCAACGAACCGTGGCTAAAGAGCTGCAGGCGATATCATCTCT  
GTAACCAGCAATACCGGGTTACCGTCCGATTCAATCGAAACGTTGCCACCTGCGCTTCGCAATGTGGCCACAACCTAAGT  
GCAAAATGGCGCGCAGACATTCAGCGGACTGTCGCATCTCGAAGGCCAGACAGTCAACATTTCTTT CAGACGCGAGCGTTG  
AGCCTCAGAAGGTTGCTACTGGTGGCTCAGTACGCTGGAGTACCAGGTCAGTGTGTCATATTTGGATTGCCTATCACC  
GCTGAATTCGAAACACTGGATATCAACATCAACGGGCAGGAAACACTGCTGGATAAAAAGCAGGTCATTTCTACTGTCTAC  
GATGGTGGTCAACGCAACCGCGTGAATCTGGGCAACAACCTCTGGCGGAACTGGTATGAATACCGCGAGCGTGAATTTG  
AGTTCACGAGCATCTCTGTTGATGATGCTACAGCAAGGTTGAAAGTGA AACTGCAGCAACTGGGATAAAAACGAGCG  
GTTAAGGTTCCGAGCTTGACCCACTCCGCTTTCTGTTCTTGTGATTTGCCTCGCCCTACCGTCCGAGGCTTCTGA

>Cluster\_10176

GTGACTATAAAACCAACTAAAAATATCATAATCATCTGACCCGATCGCTACGTTTTGCGCGCTGCTGTATTGCAATAG  
TGCTTTCTGCTGAAC TGTGTAATATGACCATACCTTCCTGATGGGCGAGAATGCC TCAAAATATTGATCTCAGCCGGT  
ATAGTGAAGGTAACCTGCTATACCGGGTATGTACGACGTCAGTGTTTATGTCAACGATCAACCTATTTATTAACCAAAGC  
ATTTACATTTATTGAAATGAAGGAAAAAAAACGCACAAGCCTGTATCACACTAAGAATTTATTTGAGTTTCTATATAAA  
TTCTCCCGATATAAATAACGAAAAGCCGTTCTGCTGCCAGGATGAAACACTCGGCAATGGCTTAATTTGACGGAAA  
TTATCCCTCAGGCTTCTGTTCTGTTATGACGTTAACGACGCAACGCTCGGATATAGACGTTCTCTCAGGCAATGGGTAAGAA  
AATTACCAAAC TATGTTGATCCATGTTATGGGAAAATGGCATTAATCGGGCATGTTGTCATACAACCTCAACGGATA  
TCATAGTGAACCTCTGGTTCGAAAGAAATGACAGCATTTATGCTGCTTTTAAACGGTGGGATGAAATTTAGGTGAATGGCGAC  
TGCGTGCCCTCAGGCAACTACAAC TGGATGACCGATTTCTGGCAATTTATGATTTTAAAGATCGGTATATACAGCGGAT  
ATCGCCTCGCTGCTTCTCAACTCATTTCTGGTGTGCTTATACAACGGGCGAAACCTTTGATTTCTGTGAGTATACGCGG  
CATTCGTTTATACAGCGACAGCCGATGTTGCCCTCGACATTAGCGAGTTTGGCCCTATCATTCATGCGGTTGCTAATA

CCAACGCCAAAGTCACTATTACGCAAGGTGGCTATAAGATTTATGAAACGACTGTGCCGCCAGGCGCTTTCGTCATTGAT  
GATCTGAGTCCGTAGGTTACGGCAGCGATCTTTATTGTTACTGTGCGAAGAATCCGATGGCTCAAAGCGGACATTTCTCGCA  
ACCTTTTTTCATCGGTCGTTCAAATGTTACGCCCTGGCGTTGGACGTTGGGATATAGCGGCCGCCAGGCTTAAAGATG  
ATATTACAGGATGACGCTAATTTATTTACAGGCCAGCTACTACTACGGTCTGAATAACTATCTAACGGGTTATACCTGGTATT  
CAGGTCAGTATTAAACCAACCGCTAAAAATTTGAGAAAAAAGATTACGGTTCATTTTATCTTCCGGAAGTTGGTCCGATT  
GACTCACTCCAATGTTTCGTATACCGGATGATAAAAACATATCAGGGACAAAAGTTATCGTGTTCCTGGAACAAGTTATTTCG  
AAGAAACAAGTACTTACGTAATATCGCGCCATCGCTATTCGACACAGAATTACCTTGGTCTTAATGATGACTAACT  
CTAATTGATGAAGTGAACATCCCGAACAGATCTTGAACCGAAATCCATCGCTAATTAATCTCGCGCATGAAAAATCAGGT  
TACGGTCAGTATTAAACCAACCGCTAAAAATTTGAGAAAAAAGATTACGGTTCATTTTATCTTCCGGAAGTTGGTCCGATT  
ACTGGGCTTCCGGACAAAATCGTAGCAATTACTCTATTGGCTACAGTAACAGTGCATCCTGGGGCAGCTACAGTGTGAGT  
GCCACGCGTTCATGGAATGAAGACGGCGACACTGACGATAGCGTTTATCTCAGTTTACCATTCTATGAAAAATTACT  
TGGCATAAACAACCGGCTTACAGGTTCCAGAGTATTGATACTCAAATGAGCAGTGCATTTAAGGGTAATAACCAACTCA  
ACGTCAGTAGCAGTGGCTATAGTGATAACCGCTCCGCTCAGTTATAGCGTAAATACTGGCTATACGATGAATAAAGCAGC  
AAAGATTTGAGTTATGTTGGGGTTATGCCAGCTATGAATCACCGTGGGAAGCCTGGCAGGTTTCAAGTTCTGCAAAATAG  
CGATAACAGTCTGTAAGTGTCTCAGCACCGGCGGTTTGTATTGCATAGCGGGCGCTGACCTTCAAGTAAAGTACA  
GTTTTAGCGACTCCGATACACTGGCGGTAGTTCAGGCTCCAGGTGCTCAAGGAGCGGCAATAAATTTATGGCAACGACT  
ATCGATCGATGGGTTATGGTGTACACCGGCTCTTCTCTTCTTATCATGAAAAACCGTATCGCGCTGGATGAATAAAGCAGC  
TGAGAACGATGTTGAATTTAAAAGTACCAGTGCAGTAGCTGTACCGGCTCAGGTTTCAAGTCTTGTGATTTTGAAA  
CCGTGCAAGGGCAATCAGCCATTATGAACATCACACGAAGTGAAGTAAAAATATCCATTTGCTGCAGATATTTATGAT  
GAGCAAGGCAATGCTATGGTAAATGTTGGACAGGTTGGACAAGCATTTGTTCTGTTGATTTGAGCAGCAGGAAATATCAG  
CATTAAAAATGGCTCGAAGAAAGTAAACCCCTAAGTTGCTTTGCGCATTATCAACAAAAGTTCAGAAGCAGAAAAATAGCGC  
AATCTATTATTCTGAATGGAATTCGGTGTGATTCAGTAA

>Cluster\_20856

ATGCCAACAGTTCCTCAATTTCTATGAGAAAACCTTAAAGAAATCTTAGGCTTAAATACGGTGTGGACTCAGCCATCGACA  
AATTGGTCTGATCTTGAATCTCCCTTCCGTTGATCCAGATATGCTAATCGGGCGGCTCAACTTGGCATAAAGCAGT  
GGCCCTTACTACAGGATGGGATGATACAAAACCTAAACATGCGTTCCTTACAGCCAGGTTAAGATGAAGAAGCAGTCT  
CTGCTGACTGGGCTACAGTACACCGGGAACCTGCGTAATAAATGCGTGCAGCTGCAGCTACTTGGGAAGAATACTGTGA  
CGGTAATCCAGGCGGTTTTTACAGCTATAACCATTAAGTCTGCGGATGACCGTGAATGGCTCAAACCCATTCACCTCAA  
TGGCTCAGGTACATAAAGCTGGCGAAAACCTTTTCTGTTGATTACTGTGGACCTACCCTTGGCGTTACCAGCCCTGAGACC  
GGAGAAATGAAGTCTGCTCAGGTATCGTAGCTGTTCTCGGGCATCAAGTTACACATGGGCAGAGCCACCTGGTCTCA  
GCAGCTTGAAGACTGGGTGATGAGTCAATGTTGCTGCTCCAGTGGTGGGTGGCGTTCCTGAACTTGTGTTCCGGACA  
ATCTGAAAAGCGCCACATCCAGGCGATGTAAGTATGATCCTGACGTTAACCCTACCTACCAGCAGATGCTTGAACATTA  
AATGTCGAGTTTTCCCTGCGCGGCCACGTAACCGAAAGATAAAGCCAAAGCTGAAGTTGGCGTTCAGGTTGTTGAACG  
CTGGATCATGGCCGAATCAGGCATGAGATCTTCTACAGCCTTGCATCGCTTAATCAGCGCATTCGGGAGTTGCTGGAAA  
GACTGAATAAACAATAATGCAGAAGTTGGGTTATTCAGTGCAGAATCTTCACTCCAGCTTGATAAACCCGCACTGAAG  
CCTCTTCCGTAAGCGGTTTACAGTTTACACCTGGTGAAGAAAGTTCAGAGTTTCACTGCGGATTACCAGCTGGAAATCGACA  
ACATTAATACTACTCGGTTCCATGTTGCTGTTAGGCCAGCACTGGAAGCATGGATCTCCGGAGAAGTGGTAAGACTCTTCA  
ATCAGGGGAGGAGGTTGCTGTGACCCCGCAAGCGTACTTATGGCTACAGTACCAGCAACGAGCAGATGCCTGAAGT  
CATCAGCAGCATGCCACCTGGACGCCAGAGCGTCTTCTGGAATGGCGGGGACATAGGCAAGTAACTCATAGTATTG  
GCTTCATATACTGAACTCTCGTCCACATCCGGAACAAAGCTATCGCTTCTGCTTGGACTCCTGAACCTTCATAAAAAAT  
ACAGTAAAGCCAGACTTAATGCAGCATGTGCAAGAGCTCTGAAAACAAAGGATGCGGCTGTGAGGTTAATTCGATC  
CTGGAAAAGGCTCTGATAAACAACCTGTTTACAGGATCCAAAACAGATCTGTTATCCAGATGGAACAGAAAACGTAAGC  
CGCAGTGAATTAACCACTGA

>Cluster\_48790

ATGGTTCGTTCTTATTACCTTCTGAATGTCACGCTGATTTTGTGACTTTGAGCGTATCGAGGCTCTTAAACCTGCTAT  
TGAGGCTTGTGGCATTCTACTCTTTCTCAATCCCAATGCTTGGCTTCCATAAGCAGATGGATAACCCGATCAAGCTCT  
TGGAAAGATTTCTGTTTTCGTATGACGGGCGTTGAGTTTCGATAAATGGTGAATGATGATGTTGAGGCAATAAGGCTGT  
TCTGACGTTCTGATGAGTTTGTATCTGTTACTGAGAAGTTAATGGATGAATGGCACAATGCTACAATGTGCTCCCCA  
ACTTGATATTAATAACACTATAGACCACCGCCCGAAGGGGACGAAAAATGGTTTTATAGAGAAGCAGAGACGGTTACCC  
AGTTTTGCGCAAGCTGGCTGCTGAACGCCCTTAAAGGATATTCGCGATGAGTATAAATACCCCAAAAAGAAAGGTTAT  
AAGGATGAGTGTTCAGATTTGCTGGAGCCCTCCACTATGAAATCGCTAGAGGCTTTGCTATTACAGCGTTTGAATGC  
AATGCGACAGGCTCATGCTGATGGTTGGTTTATCGTTTTTGCACACTCTCAGTTGGCTGACGACCGATAGAGGCGTTTT  
ATGATAATCCCAATGCTTTCGCTGACTATTTTCTGATATTTGGTCTGATGTTTCTGCTGCGGAGGCTCGCAAGGCTAAT  
GATTCACAGCCGACTGCTATCAGTATTTTGTGTGCCCTGAGTATGTTACAGCTAATGGCCGCTTCTATTCCATCGGTT  
GCATTTTATGCGGACACTTCTTACAGTTAGCCTTGGCTAATTTTGGTCTGCGGTACGCAATTCGCCCGGCTGTAATA  
GCTTGCAAAATACGTTGGCTTATGGTTACAGTATGCCATCGCAGTTCGCTACAGCAGGACGCTTTTTACGTTCTGGT  
TGGTTGTGGCCTGTGATGCTAAAGGTGAGCCGCTTAAAGCTACCAGTTATATGGCTGTGTTTCTATGTGGCTAAATA  
CGTTAACAAAAGTCAAGATGAGCTTGTGCTAAAGGTTAGGAGCTAAAGATGGAACAACTCACATAAAAACCAAGC  
GTTCGCTACTTCCCAAGAAAGCTGTTTCAAGATCAGAATGAGACCGCAACTTCGGGATGAAAATGCTCAATGACAAATCTG  
TCCAGGAGTGTAAATCCAACTTACCAAGCTGGGTTAGCAGCGGACCGGTTCAACCAGATATGAAGCAGAAACGCAAA  
AAGAGAGATGAGATTGAGGCTGGGAAAAGTTACTGTAGCCGACGTTTTGGCGGCGCAACCTGTGACGACAAATCTGCTCA  
AATTTATGCGCGCTTCTGATAAATAATGATTGGCGTATCCAACTGCAGAGTTTTATCGCTTCCATGACGCAAGATTAACA  
CTTTCGGATATTTCTGATGAGTCAAAAAATATCTTGATAAAGCAGGAATTAATACTGCTGTTTACGAATTAATAATCGAA  
GTGGACTGCTGGCGGAAAATGA

>Cluster\_9596

ATGACGAGCTCACTTCTGACGATATCAATGCACTGAAACGCTCCTTCCGAAACAGGAGGCGTGAACCGTGCCTGCT  
GGAAAAGCTGAACGAGCGTGAACCGGAAATAGACCATCTGACGACAGCTGGATAAGCTGCGCGGATGAACCTCGGCA  
GCCGCTCCGAAAAGTCTCCCGTGTATCGCACAGATGGAAGCTGACCTGAAGGCACTTCAGAAAAGAAAGTGAACCTT  
ACCGGTCGGGTTGACGACCCGGCGTGCAGCGCCGCTGCTGCTCAAACCCGACCCGCAAAACCGTTCCCGAATCACTCCC  
CCGCGATGAAAACCGGCTGCTGCCGACGCTGCTGCCGGAATTTGGAGGCTCACTGAGCTATCTGGGTGAGGAT  
CCGCCGAACAGCTGGAGTTGATGCGCAGCGTCTTCCGGTTTATCCGACTGTACGTGAAAAGCATGCCGTACTCAGTGC  
GATGCCATCTGCAAGGCCCCGCGCTTACAGGCCCCATCGAGGCGGTTATCGAGGACCGGGGCTGCTGGCCCCGCTGCT  
GATCTCAAAGTATGACAGCACACCCGCTGTACCCGCTGTAAGTGTACGGCCGCGCAGGCGTGGAGTGTGAGTCTGCT  
CACTGTGTCGGGCTGGTGGATGATGCTGCGGCTACTGTCCAGCTTGGAAAGAGCGCTTACAGGATATGCTGACT  
GACGGTAAGCTCCATGCTGATGACACGCTGTCCCGGCTGCTGTTGCCAGGCAATAAGAAAACGAAGACCGGGCGTTATG  
GACTACGTTCTGACGACCGTAAACCGGGTCAACGCTGGCGCGGCGGTTGGTTCTGCTTACAGCCCGGAGAAAAG  
GCATCCATCCGACAGCCATCTTGGCGGTTTCAAGTGTGACTGCAGGCGGATGCATACGCGGGTTCAACGAGCTGTAC  
CGGGATGGCGGATAACGGAAGCCGCTGTTGGGCTCACGCTCCCGCTAAAATCCAGATGTGACGTTTGCACCCCGCTC  
AGCCCTGACGGAGGAAGCGCTGAAACGGATCGGCGAATGTACGCCATCGAGGCAAGATAGGGGAATGACGGCGGAGC

AGGCCTTGCCGAACGTCAGTTGAAAACGAAACCGCTGCTGAAATCCCTGGAAAGCTGGCTGCGTGAAAAGATGAAAACC  
CTGTCGCGACACTCAGAAGTGGCGAAAGCGTTTCGCATACGCCCTGAACCAAGTGGCCGGCGCTGACGTACTATGACAGATGA  
TGGTGGGCTGAGGCGGACAATAACATCGCTGAAAATGCGTTGCGGATGGTCAGTCTGGGCCGCAAAAACCTACCTGTTCT  
TCGGTTCCGATCATGGAGGAGAGCGGGGAGCGCTGCTGTACAGCTGATCGGGACGTGCAAACTGAACGGAGTGGAGCCA  
GAAAGCTACTCCGCTATGTCCTTGACGTCATAGCCGACTGGCCGATAAACCCGGTGGCGAACTGCTCCCTGGCGCGT  
AGCACTGCCGACTGAATAA

>Cluster\_39576

ATGGCAAGAGCTGTACACCGTAGTGGGTTAGTGGCGCTGGGCATTGCGACAGCGTTGATGGCATCTTGTGCATTCGCTGC  
CAAAGAGGTGGTGGTGGCGGTGGTTCGAACTTACCACGCTCGATCCGATGACGCAATGACACGTTATCTCAGGCCG  
TAGCGAAATCGTTTTACCAGGGGCTGTTCCGCTCGGATAAAGAGATGAAACTGAAAAACGTCGTCGGCGAGAGTTACACC  
GTTTCCGATGACGGCCTTACTTACACCGTGAAATGCGGGAAGGCATTAAATCCAGGATGGCACCGATTTCAACGCAGC  
GGCGGTGAAAGCGAATCTGGACCGGGCCAGCATCCGGCGAATCATCTTAAACGCTATAATCTGTATAAGAATATTTGCCA  
AAACGGAAAGCGATCGATCCGCAACCGTAAAGATTACCTCAAACAGCCATTCTCAGCGTTTATAAATATCTTCCCAT  
CCGGCGACCGGATGATTTACCAGGCGCTGGAAAAATATGGCAAGGAGATTGGTTTTTATCCGGTGGGAACCGGGCC  
GTATGAACCTGGATACTGGAATCAGACCGATTTGTGAAAGGTGAAAAATTCGCGGGTACTGGCAGCCAGGATTCGCCA  
AATGGACAGCATAACTTGGGCTCCGGTGGCGGATAACAACCCCGCGGCAATGCTGCAAAACCGGTGAAGCGCAGTTT  
GCTTTCACCATTTCCATCGAGCAGCGCGCATGCTGGAAAAAACAATAATATCGAGTTGATGGCCAGTCCGTCATTTAT  
GCAGGTTATATCAGTATGAACGTGACGCAAAAGCCGTTTCGATAACCCGAAGTCCGTCAGGCGCTGAATTACGCCATTA  
ACGCCCGCGCTGGTGAAGTGGCCTTCCGCGGCTATGCAACGCCAGTGTGGTGTGGTACCGCGAGTATCGCCTAC  
CGCAAAGTTATAAACCTGGCTTACGATCCAGTGAAGCGCGCAATTAAGTACTGAAAGAGCGGGATATCCCAACGGTTT  
CAGTACCACGCTGGTTCGTACATAACACAGCAGCCGCGCAGAAAGTCTGCAATTTACCAGCAGCAGTTAGCGCAGG  
TCGGGATTAAGCCAGGTGACTGCGATGGATGCCGACAGCGGGCGGAGAAAGTCAAGGTAAGGGCAAAAAGAGAGC  
GGCGTGGCGATTTTACTACTGGCTGGTCCGCTTCAACCGCGAAGCTGACTGGGCATATCGCCGCTGTTTGGCTTCGCA  
AACTGGCCACCGAGCTTTAATACCGGTTTACAGCAATAAACAGGTGGATGACTTCCCTGAGTCCAGGCTGAAAA  
CTAATGATCCGGCGAAAAAGACCGTTTATATAAGCGCGCAGGATATCATCTGGCAAGAGTCCGCGTGGATCCCGCTG  
GTGGTAGAAAACTGGTGTGGCACACAGTAAAAACCTGACCGTTTTTGGATCATGCCAGACACCGGTTACAGTTTTGA  
AGACGGGATTTGCAATAA

>Cluster\_66948

ATGGATAAATAAATCTGAAGGATGCTCTCCTTTTTATATCCCGGGAGACCCATGAAATCTTATAGAAACAACCA  
GCGGACAAGGCTGACGTACAAAGTAATCTCCAGGAGCTGCTAAAATTAATCCGGATATCAACCCAAAAGTAGTCTCCT  
TGTCGGAGTTACAGGAGGAGGTCAGGATGAGAAAAACAGAGGCCAGAAAGAAAGCAATTAATCATCTGAAAGACCTTGT  
GATGTCAGTGAAGGTGAGAAAGAAAGTTCTATCTTATTTGAAACTGCCAGAAAACCTGGTTCAGATATTCATTTCTT  
AATTTACAGTCTATTTTCAAAGTTCGCATGAGAAATATTCGGTGAAGTGCAGACTGTAGATGAAGATCAACAGCAGTGG  
GCTATTCACCTTTGCGCAACAGCCATTCTGTCAATGGCTGATGCTACTGAAACAGTTTCTTCCCTCAAAGGGAGCAGGAT  
GCGCGCTGTCCCAATTAATGCGAAAAATAGGAATATTTGGTGCACGCTACAGTCAACAGCCTACGGGAGCAGCGTCT  
GATTCAGTGAAGGTGAGAAAGAAAGTTCTATCTTATTTGAAACTGCCAGAAAACCTGGGCTTTTAAACAACCTGGGCTTT  
TCCCGTGGTGAACATAATGCTGCGCCCGCGGAAAGAAAAATAGTCCGTGTCAGGTCCCAACCGGTTCCGGTAAATCGACA  
ACGTTACGCGAGCGCTGCGGTGTATATCTTACGATAAATCAGGGGCGACACCTGCTAACAATCGAAGATCCCGTGAAGG  
ACAGATACTGGGAGCAACAGACTCCGATTTATCTGCGCAAAATCCGACGAAGATGCCGTTCAAACCTGGGATGGAGTGGG  
CTATTTTCACTCGGCAATGGCACTTACCCCTGATGCCATCATGGAAGGGGAAATCGCGCATTTATCTCGATGATGTCACCC  
ACCTACGGCGCACAGACCGGGCAGATAGTTCTGACGACATACATACAAACCTAGCTCGGGTATACCGGAGCGAATGAT  
TACGATGGGATGAATGCCGATCTTATTTGCGATGCGCAATTAAGTGGATGATCAGCCAGCGCTTGTACCAACT  
TGTGTCCTCTGCGGTATTTCCATGGGAAAAGCGAGCCTGAACTTAGCGACGACGAGCGGTGATTAACCTGAGCGGC  
TGCAATAAAGATTCACTCTGAGTACAGATAATATCTGGTCCGAAATCATCAGGATGCTCTGAATGTAATCAGGACGT  
AATCATTAACGGCAGAAAGCGCGGTGAAATAGGTAAAGCCCTACCGGAGGACTGTAATGCTGAGGTGATAGAACCTG  
ATAACCGCTTATTTAGATTTCTGAAAACAGCGGCAAAAGTGCAGCAGCTAAATACTGGTGGAAAACATGAAAGGCATC  
AGTCTGTAGAGCATCTTCTTCCCGTATCAATGAAGGCTGGTAGACCTCTTGAAGCCGACAGAATCATCCCTCTGGA  
CGAAGACGAGCGCTCAGCATCGATGATGCTAA

>Cluster\_21061

ATGACACAAAAAATCTTTTAAATCAAAATTAATGGGAGTTTTTACAAGTCTGGGAAAACCTTTATGTTCCCGGTTTT  
GCTTCTTGGCTTTATGGGATTTGCTGCTGGGTATCGGTAGTTTACGTACACAGCCCTTCCACCATTAAGTCTTTTCCCTTTC  
TGGGCGGCAATTTACCAGTTGACCTTTGGCTTTATCGCTATGGTGGTGGCTTTGCTTTTACCTATCTGCCGCTGATG  
TTTTGCCATGGCGATCCCATGGGCTTGGCAAGCGCAACAAGCGGTGCTGCTTTGCGGGTTCGTTGGCTACATGCT  
GATGAACATGAGCATTAATTAATACCTGACGGCTACCCACGCTTGGCAGCCCGCCACCATGAAACAGGTAGGACAAT  
CGATCGTGTGGCATTTCAAACCTGGAGATGGGGTATTAGTGGCATTTGGTGGGGTTACCTTATTTGCTGAT  
GACCGTTTTCAGGACACGGTTCTGCATGACGCTTCCGCTTCTTAGCGGCATTCGTTTTCGTCGGATTAATACCGGCT  
CACCTGTGCTGGTGGGCTGTTTCAATCCCATGCTGTGGAAATACGTCGCGCTGGGCATCGCGGGCATTTGGGATATCA  
TCCAGACACAGCGTTTTTCGGCCCTTCCCTTACGGCTGAGCGGTAGGCTGCTGCTTAAACCTTTTGGTTCGACCCATC  
CTGCTGGCGATGGTGGTTTTACCCAGCAGCGGCATGAAATGGTAAATGGCCATGAGGTCCCGGGCGCTGAATAT  
CTTCTACGGCGAGCTCAAAGCGGCTTCCGTTTTAGCCGCGACGTTACCGGTTCTGTCACAAGGGTTTATGCGGACCT  
TTATCTTCCGGTTTACCAGCGGCTTACGCCATCTACCGCACCGCGCTCCGGAAAAATCGGCGGCTCATTAAGGGGTTG  
CTGTTTTCCGGCGTGTGGTTTTCCGCTGTCACCGGTATTTACAGAGCCGATTGAGTTCCTGTTTCCCTGTTTACCGCCCG  
GCTTTACGCTTCCATATCGTATGCTTGGCTGGCGCTGATGGTAATGGCCCTGCTGGGAGTACCATCGGCAATACCG  
ACGGCGGATTTGATCTGCTGATTTTCCGCGTATGACAGGAAATGTCGACCAATGATGCTGCTTCCGGTGGT  
ATTGCTGGTGTGCCATCTACTTCTTCTCCGCTGGTACATCTCAAACAACAATCAAACCGCGGGCGCGAGGT  
GATGTTTCAAGGGCGACAGCAAGCCGCTGAGCGCAACACCCGCGCGGAAAAATCAAATAACGATCAGGCTATCTC  
TACGTGCGCTCGGAGGTAAGAGAAATGAGTTCGCTTGAATACTGATTAATACCAGCTTGGCTGTTGGTGGTAAAGATATG  
GGCCTTATCGATCAGCAGCGCTGAAAGCGGACGGCGCTTGTGAGTGGTGTGATGCTTGTGCGCATAGCGTGCAGGTGAT  
CATCGGACCGAGGTACAGAGCGTCAAACCGGCATTTGAAGCTTAATTTAA

>Cluster\_5580

GTGAGAACACGACATCTGGTCCGCTTATTTCCGGGAGTACTGATCTTTTACGATATGCTGCTGCTGGCTTAAGCATCTG  
GCTGGCCATCAGCAGGTAGAAACATCGTTTATGAAGAGCTGGATACCTATTTCTCCCGCTGCTATTTCCAGCCAAATA  
AGGTGGCGACAAAGGAAAGATCGCTGCAGGAGCTGAAAGATGGCAAGGCGTGCCTGTAGCGAAGCCATCTCATG  
GAAATGCGTCCGGTATCTTACAGTTATCGCTATATTCAGGAAGTGGCTTATATCGATAACAACGTTCCCGAGTGTTCGTC  
TCTGGAGCATGAAAGTCCGCGGATACCTTCCCGAGCAGGTAAAATTTCAAAGATGGTTATCGTGTCTGGTTAACA  
CGATAACGATTTAGGCAATTTACGTTACATGGTTCGCAATGGGAACGGCACATTTATGCTGCTATGATCAGCCGCTTCC  
TTTTATGATGCTCATTTCCATATAGCTCATGGCAAAATGATGCGCCATTTATGGCAATGCCATAAACGTTGTCTAACCAG  
CAGCGATGAAATTTGCTCAGGGAATTTATACCAGGCTACAAAAACACCCGGTGGAGCATATCGAAAATAATGGAATCATTT  
ACGATATCTGCGCTTACCAGGATGAATATTTGATCATCATATGGCTTCAACGAAAATGTTGCGAAGGCTGGCAT

CGGCAAGTCTTTATTTGGTTACCGCTCGGGTGGTGATTGGCCTGCTGGCAGCGATGTTTGTGCTGCGTATTTTGCGCCG  
TATTACAGTACCGCATCATCGGCTGCAGGATGCTATCGAAAATCGTGATATTTGCGTGCACTATCAGCCGATTGTCTCT  
TAGCCAATGGCAAATTTGTCGGTGCTGAGGCACGCGCGCTGGCCGACAGACAGCGTAGTTGGTTGTACCCAGATAGT  
TTTTATTCCGCTGGCAGCAAACGGGCTTTCTGAGCCATTGACGCTACTGATTATAAAGAAGCGCTTTTGAAGATATGGG  
CGACTGGCTGCAGTCCACAGCAGCATATTTCTGATCAATCTTGAATCCCCCGTGCTCACCTCGGAAAGATCCCCG  
AATGTGCTGCGTGACATGATCAATCACTACAGTTAATCCAGACAGATCGCGCTGAACTCACTGAACGCGAGTTTGGC  
GATCCGAAAACAGCGCCCGGATAATTTCTGCTACCGGGAGGCGGGCATGAAAATTTATCTTGATGATTTTGGTACGGG  
GTATTTCAAGTTTAAGTTATTTACAGGATCTGGATGTCGACATTTCTGAAGATCGATAAACTTTTCGTTGATGCGCTGGAAT  
ATAAAAATGTCAGCCGCATATCATCGAAAATGGCAAACACTGAAAACGAAAATGGTAGCGGAGGGAATCGAAAACGAT  
AAACAAGAAGAGTGGTTACGCCAGCATGGCGTGCACTACGGTCAGGGCTGGCTTACAGCAAGGCATTACCGAAAAGA  
TTTTCTACGCTGGCCGAGCAACATTTGTGA

>Cluster\_29029

ATGAAAAATAAAATACTTGTGCGGTTATCGTATTAACACTGCCGTTTCGGGCTGCGCTAAAAGATGTCACTATTATTTA  
TACCAACGACCTCCATGCGCATGTAGAACCTTATAAAGTGCCGTGGATCGCTGACGGTAAACGGGATATTGGCGGCTGGG  
CAAATATCACTACGCTGGTTAAGCAAGAAAAAGCAAAAAATAAAGCGACATGGTTTTTTGATGCGGGGACTATTTTACC  
GGCCATATATCAGCAGCTGACCAAGGTAAGGCTATTTATCGATATTTATGAATACTATGCGGTTTTGATGCGGTCACAAT  
AGGCAACCATGAATTTGACCTAGCTGGCAACACATTTATTACAGTTGAGCAAGCAAAAATCCCTATTGTGCAAGGCA  
ATATTTTTTATCAGAACAGCAGTAAATCATTTCTGGGATAAGCCATATACCATTATCGAAAAGACGGTGTGAAAAATAGG  
GTTATTTGGTTTGCACGGGATTTTTCCTTTAATGACACTGTCTCTGCTGCTACGCGCTGGGTATTGAAGCGGCGCATGA  
AATTAATGGTCAACAGTTATATCGATGAACTCAAAGCAAGTTGATTTGACCGCTGCCCTGATCCACGAAGGTGTTC  
CAGCCCGGAGTCCAGTATGAGGAGCAGATGTGCGTCCGCGTTGGATAAAGATATTCAGACGGCAAGTCAGGTGAAA  
GGGCTGGATATTTGATCACCAGCATGACATGTGGGTACGCGGAACCGATTAAAGTCGGCAATACGCTCATCTCTC  
CACTGACAGCCGGGGATTGATGTGGGCAAACTGGTTCTGACTACAAAAGAGAAGCCGCATAAATTTACGGTGAAAAAC  
TCCAGCTTAAACCAATTTACGCTGACGAGTGAAGCCCGATCCGCAACGAAAACAGGTGATCGACGGCTGGAATAAAAAG  
CTTGATGAAGTGGTGAACAACAGGTGGCGCAATCGCCGGTTGAATTAACACGTCCTATGGTGAATCGGCTTCCCTCGG  
GAACCTGGCGGCTGACGCTTTACTGGCAGCAGCGGGTAAAAATACCCAAGTGGGTTAACAAAACCTGCTGGTGGTATCCGCA  
ATGAGATCCCCGAGGGGCGATCAGATGGGCGGCTTATCAGTACGTTCCCGTTCCCAACGAACTGGTGACGATGGAA  
CTCAGCGTTAAACCAATTTACGCACTGATGGAACAGCGGCAAGTTTAAAGCAATGGCGCTTTTACAGGTATCGAAAGGCT  
GGAAATGAAGTACGACAGCAGCAAGCGGTTGGTACGCGGTAATCAGCTACTGAAATGGCAAACCCATTGAAGATG  
CGACGGTTTATCACAATTGCTACTCAGAGTTTCTTGTGATGGTGGAGATGGTTTTACCGCTTTACCGAAGGAAAGCG  
CGTAACACAACGGGCGGTTATTACGTTTATCACGCGGTGGTTGATTACTTCAAAGCGGCAACACCATTACGGATGAACA  
GCTCAACGGTATGCGCGTGAAGAATATCAATAA

>Cluster\_19920

ATGGCGACGATCGATTCTATGAATAAGGACACCACAGTTTGAGCGATGGACCCGACTGGACGTTTCGACCTGCTGGATGT  
TTATCTGGCAGAGATAGACCGGGTGGCGAAACTTACCAGGCTGGATACCTACCCGACCCAGATTGAAGTGAATACCTCAG  
AACAGATGATGGATGCTACTCCAGCTCCGCAATTAACATACTCCGCAATGTTCTATTCGGTAAAAAGTTTATTCAG  
ACTGAACGGCTGTATAAGCACGGTCAAGGACTGGCCTATGAATCGTCATTAACCTAACCCGTGATCGCTTACCT  
GATGGAAGAAAACACCATTACCATGCAAGCGCTGGTGTGGCAGCAGCTGCTATGGGCATAACTCTTTCTTCAAAAACA  
ATTACTTATTCCTAGCTGGACCGACCGTTCGATTTGATTCATTTGTTGCGGTAATATATATCCAGGATGC  
GAAGAGCGCTATGGTGTGGATGAAAGTAGAACCGGCTGCTGGACTGCTGCAATCGCTGATGAACTGAACTGGACCGTGGACCGGTA  
TAAACGCCCAAAAAAATCTGCTGCAAGAGGAGAAAGCCCGGAGAAAAGCCGGAAGAGTACTTGCAAAGTCAAGGTCA  
ATATGCTCTGGCTTACCTGCGGAAAGCGGAGGAAAGAAAACGGTTGCTGAAAGCGCGGCTATCCGTTCCGAGCCACA  
GAAAACCTGCTCTATTTTATGGAGAAAATGCGCCACTGCTGGAATCATGCGCGTGAATTTCTGCGTATTTGGTGTAA  
GGTGGAGCAGTATTTTATCCGCAAAAACAGACTCAGGTGATGAACGAAGGCTGGGCCACCTTCTGGCACTACACCATCC  
TTAACCATCTGATGATGAGGGAAAGTAAACGGAACTTTATGCTGGAGTTTTTGCAGACCCACACCATGTTGGTTTTTC  
CAGCCGCTTATAACAGCCCGTGGTACAGCGGAATAAACCCGTATGCGCTTGGTTTCGCCATGTTCCAGGATATTAACCG  
GATTTGTACGTGCTGCAACCGGAAGAGAACATACTGGTTCGCCGATATCGCCGTTCTGACTGGCTGGACACATTAACAT  
TTGCGATGCGTGATTTCAAAGATGAGAGCTTTATCAGTCACTCTCTGTCACCGAAAAGTATGCGGTGATTTCCGCTTCTTC  
ACCGTCTGCGACGATCGGCATAATTTCTGAGATTTCCGCTATTATGAAGAAAGTTATCGGGAGATCCGTA  
CCGGTTATCGTCGAATAAATTAAGTAATCTGGAGCCGAATATTCAGATCTGGAACGTGGATTTGCGCGGCGACCGTT  
CGCTGACGCTGCGTTACATTTCCACATAATCGCGCACCGCTGGATCGGGGCGCAAAAGAAAGTGTGAAGCATGTACATCC  
CTGTGGGATTTGATGATGCTGGAACAGCAAACGAAGACGGCAGCGTCAAGTTGCTGGAACGTTGCCCGCGGAGAA  
GGAAATCTGTAA

>Cluster\_64793

ATGAGCGATATTTTCATTTAAACGCGATCCCGTCAGATGTTTCGCGTTCCCTGACGTATAAAGATTGATAACAGTAATGC  
CGTCAGCGGAACACCGGCAACCCGTCAGCGCTGCTGATGTTCCGGCAAAGCGGAAGTAAAGCCAGTGGCGCACCAACG  
TGCCGTGTCGATCCGTTCCGGCTCACAGGCCAGTGGCGGTTGGTCAAGGTTCCATGCTGGCACTGATGGCAGATGCA  
TTCTGAACGCTAACCGCTGGCGGAGCTGTGGTGATCCCAGGGGAAACCGGTAATGCTGCTGCTGTTGAAAT  
CTCACTGCTGGAACCGGCAAGCGAAAACGGCTCGCTTTGACTTACATTTGCCGCTGAGCAGTGGCGATATCTGTCGAG  
CAGGTGCTACAGGGGCGCGCTGGCTGACCTGCTGGTTGCCGAATCAAAGGCGAGCCGATTACCGGTTGACGGCAGAA  
GTACGTGACAGACAGCGGTAAGTATGACACCCATGCAGATGTTGTTCTGAGTGCAAAATTTACGGGGCATTATCTGCCGT  
GGAGTGGCTGGAATAATTACGCGGGTGAACACCCCTTACCGGATTTACAGCATTTCAAAGCCGATCCGGGAAAA  
ACAGCAACCCGGATATCAGCGCCAGCATCGCGGGGATGGGTGATCTGCAATAAATAATTTGTGATGCTTACACCGAT  
GAACCAAACCTGAATCTGTTACGCACTGAAATTGCAGGAACCGTGGGGCCGTTCAATCAGGCTGATGGCTTTGCAGTAAC  
GGTGTGTCGGCAGTATGGGGACATTTCCAGCTTTGGTGTGCTGAGTACGCAACGATCTGATCTCTGATGGGGATTC  
CCGCTGACCGGAAACCGTCAATCTGTACGCGCCACCTGTGTGCGCTTCCAGTCAGCGCTTTCCATCGAACCGGG  
CGTCCACTCCAGACGCTGACGCTGCCCGGAAGAATGCCGCTGCGGTTGGTGTGCTTTACCCTGGTCAAGCAATGTC  
CCTGCTGTTTACGGCATCTCCAGCTTTAACGTAAGTATGGTGGTGAATGCAAGATTGAACGATGATCAGCATGTACC  
GCACAACAAGTACGGTGACAGCGATCCGCTTTATCTGAACGTAATACCATCGCCACCGTGAATTTCTGCTGTTATTCG  
TCCGAACCCGCACTACCGCAGAAATTCGCAACTACAACCTGGCAAGTGAAGTGGCAACCGCTTTGCCACTGAGCAGT  
GGTGACGCCATCCGTGATCAAAACAGAGCTGCTGGCACGTTTTGAAGAATGGGAAAACCGGGCTGGTGGAGATTTCCG  
ACAGCTTCAAAGAGGAGTGTATGTCGACGTAACAAGGACGACAAGACCGTCTGATGTTGTTGCGGCCGCAATCTG  
ATTAACAGTTCCGCAATTTTCGCGGCACAAGTTCAGTTCATTTCTGTAA

>Cluster\_2321

ATGGCACAAGTCAATAAACAACAGCTGTGCGTGTGACCCAGAATAACCTGAACAAATCTCAGTCTTCTCTGAGCTC  
CGCATTTGAACGCTCTCTTCTGGCCTGCGTATTAACAGTCTAAAGATGACGACAGGTCAGGCGATTTGCTAACCGTT  
TTACAGCAAATAATTAAGGTCTGACTCAGGCTTCCCGTAAACGCAATGATGTTATTTCTGTTGCGCAGACCACTGAGGT  
CGGCTGAATGAAATTAACAACAACCTGCAGCGTATTCGTAACCTTTCTGTTTACGGCAACTAACGGTACTAACCTGACAG  
TGACCTGACCTCCATCCAGTCCGAAATCCAGCAGCGTCTGAGTGAATGACCGTGTTCGTTGCTGAGACTCAGTTAAGC

GCCTTAAAGTGTGGCTTCTGATCAGGATATGACTATTCAGGTTGGTGCAAACGACGGCGAAACAATTACTATTTAACTG  
CAGGAAATTAATTCGACACACTGGGATATCTGGTTTTGGTATTAAGATCCCTACTAAATTTAAAGCGCAACGGCTGA  
AACACCTATTTTGGATCGACAGTTAAGCTTGTGACGCTAATACACTTGATGCAGATATTACAGCTACAGTTAAAGGCA  
CTACGACTCCGGGCAACGCTGACGGTAATATTTATGCTCTGATGCTAACGGTAAGTTGTACGTTAAAGTTGCCGGTTTCAGAT  
AAACCCGCTGAAATATTTATTAAGAGTTACTGTGGAGGATGATCCGACATCTCTGTGATGAGGTAAGCTGAAAGCGG  
GGCTCTAGCGGGTACCAGCCTCAAGCTGGTAATTTAAAGGAAGTCAACCGTGAAAGGGAAGGGGGCTATTGATGTTT  
AGTTGGGTACTGATACCGCAACCGCTTCTATCAGAGTGCAAAACCTTTAAGTTAGAAAGACGCCAATGGCAAAGATACT  
GGTTCATTTGCGTTGATTGGTGTGACGGTAAACAGTATGCAGCGAATGTTGATCAGAAAACAGGAGCAGTTTCCGTTAA  
AACAAATGCTTACACTGATGCTGACGGTGTCAAACACGACAATGTTAAAGTTGAACTGGGTGGAAAGCGATGGCAAACCG  
AAGTTGTAAGTCAACCGATGGCAAACCTTACAGTGTAGTGTATTTACAAGGTAAGAGCCTGAAAACCTGATTCATTGCA  
GCAATTTCTACGCAAGAAACAGAAAGATCCTTTGGCTGCTATCGATAAAGCACTGTCTCAGGTTGACTCGTTGCGTCTCAA  
CCTAGGTGCAATTTCAAATCGTTTTCGACTCTGCCATCACCACCTTGGCAACACCGTAAACAACCTGTCTTCTGCCCGTA  
GCCGATCGAAGATGCTGACTACGCGACCGAAGTGTCTAACATGTCTCTCGTGGCAGATCCTGCAACAAGCAGGTTACTTCT  
GTTCTGGCACAGGCTAACAGACCACGCAAGCTACTGTCTCTGCTGCGTTAA

>Cluster\_22116

ATGGCGATTTTCCACTCTGGATTTTAAAAATGTGAAACGAAGCGAGGGCATGACTTCCGTTGCGAAAGCTCCCTACCATGC  
CCGTACACGTATTTACAGATGATCGCATTGGCGAAACATTTGATTTTCAGCCACAGAACAGATCTTCATGGTCATATTATAT  
TAGCGCCCGTTTCCGCACCTGCTCATATTATTGAAAGCTCCTCAGCACCTTGGAAATGAAGTTGAAAGAGTGAACGCCAG  
AACACCGTCAAACAGCCCGTTATTTGATGTCGCTATTTCCCGTAGAAGTCAACAATGATGACAGAAAAAATTTGGTTCC  
CGAATACTGCCAGAAGAACTTTGTTGATAAAGGAATGATGCTGATATCGCATTCATGACTTAGACAGTAAGAACCAC  
ACGCTCACGTATGTTAACCTGAAAACCATCGGGCCGGAAGGCTTCGGTAAAAAAGACAGAAGTTGGAATGATAAGAAG  
ATGGTTGTTTCAAGTGGCTGAGTCTGTTGGCCACGATGTCAAACAGCTACCTTGAAGCCGACGGCAGTGAAGAACGTATCGA  
TCACCGTTTCTCTCAGAATCAATGTGCTGATGCCCTTGTCTCAGGCAGAGAAGCATTCAGTGTGAAAGAGAAAGCATTTCT  
GGCTTGCCTAAGGTCAGTAAAGTTGGTGTGCTGAGCTAAGAAATCCCTGTTTGGTTGACCTGAACAAAATAAATCCACTAA  
GAACAACGAGCTGCTGAACAAGCTCAACCGCATCAAAATGAGGAAGCAAGAAGGCTACGCCACATTCAGTGTGAGT  
ACCACTGGAAATCGTTGTTGATGTTGCTCTTACTCTGTTTACAGCTTCCCTGAACCGGAAGAGATCGTTCTCCCTGACT  
ACCCGGCAACAACAAGCAGCAACCGATTTCATGAGAGTCAAGAACCTACAGAAGACCAGCCGTAATAATTTACCATTGCC  
CCCAATAAGGTCAGTAAAGTTGGTGTGCTGAGCTAAGAAATCCCTGTTTGGTTGACCTGAACAAAATAAATCCACTAA  
ACTGAAAACCCCTTCTTCTCAAACACCAGAGCGATGAAGCGTCTCCTGTGAGGAGTAGGAAACAGACCAAGCCCGCC  
AGAATGGTTGTTTAAACGTTTTCAGCTACTGATAGTAGGATATAAAGAGAGAAATTTATATGGGCCAGAATGAAACCC  
GATACCCTGATGCTGACCATGATAAGCGTATCGCAGAGAATATGCTATGATGAAGTGTGGGTGTCAATGTTCCACG  
CTCAGAGTTTGAACAACGTTACCAATTTAACGATAGTAACATAAATTAACACCTAATGAGATCAAGCGTTTCCCAAGCC  
GTCTTAAGCGAGTTCAATTAGAGTCAAGAGCGGATGGATGCTCTCCCTAAAAATAATCAATTTAACCTGTCAAAAATA  
AACTTCGTCAAACCAATTTTAGATCATAA

>Cluster\_41851

ATGTTGAAAAAATACATCATAGGGATTGATGGCGGAAGTCAGAGCACAAAAGTGGTGTGTACGATCTGGAAGGTAATGT  
GGTTTGGCAAGGCAAAGGCTTATTGCAACCGATGCACACGCCAGATGCCGATACCCGACAGACATCCTGACGACGATTTAT  
GGGCATCATTTATGCTTTGCGCGCCACGATTTGATGAGCCAGTTTGGCGGAAATAAAGAAGATAATGTCGGCATTTGCCCTG  
GGCTCAATCCGTTGCTGCGCTGCTTATTGAAAGCCGATGGTACGCGCAGCCGCGCCGTTGATTAGTGGCAGGATGCAC  
CGTTTACACGCCCTTACGAACACACTAATCCTGACGTGGCCATGTCACCTCTTTTTCGGGTTATCTGACACATCGCTTAA  
CCGGCGAGTTTAAAGACAATATCGCAACTATTTTGGTGTGAGTGGCCGGTGGATTATAAGAGCTGGGCATGGAGCGAAAT  
GCCGCGTAAATGGAAAAGTTTAAATATCCCCCGCAGATGCTTTTTCAGCTGCAAAATCCGGGCACCATTTCTTGGGCAAT  
CACAACCAAGCCGCTGGCGACACATTTCCAGCTGGCTGCGGGTTGTTTGTACCACAGTGAATAAACCAGGATGATAAG  
CTCTGGGAGCCGGATTACTGGATGATGAAACGGCGGTGATTTCTTGGCACCTACATCGCGCTGATGATGAACGGTAA  
GCACCTGCCGAAAGATCCGTTAGCGTACTGGCCGATTTATGCTTCTATTCCGCAACCTTGTCTGATGAAGGTTACGGTAT  
TCGCAAAGGCATGTGGCAGGTTGAGTGGCTGCGCGACATGTTAGGCGAGTCTGTTAATTCAGGATGCCAAAACACAGGATC  
TTTTCACCGAAGATTTGCTCAACAAAAAAGCGTCTTGGCTGCCACCTGGTTGTAATGGGCTGATGACCGTGTGGACTGG  
CTGACCAATCCGTGGGAACCGTACAACCGGGATTATGATCGGTTTTGACTCCAGCATGGATTACGCATGGATTTATCG  
TTCGATACGGAAGCGTGGCGCTGACGCTGAAGAATAATACGACAATATGTTGATGAAATGAATCACTTTGCAAAAGC  
ATGTGATCATTACTGGCGCGGTTGCAACAGCGATCTGTTTATGCAGATTTTTCGCGAGTGTCAACCTTCCGGCACGC  
CGAAACGCCATTAACGGTTGTGCAAGTCTGGGGCTGCGCATCAATAACCGCGGTAGGTTGCGGGCTATACCCGGATTACAC  
AACGGCTGTGATAAATGGTTCCGCGTGAAGAATATCTTACATCCGATTGAGAGCAATGCCAAACGCTACGACCGGATGA  
ATAAAGGCATTTTCAAAGACCTAACCAACATACTGATGATGATCCTGAAAAAATCGTATGAAGTGTGATGATGGGAAATG  
GGGAATGGGATTCGATCCAGAGCTGGTCAATGCGTAA

>Cluster\_27551

ATGTTACGGCAACAGAGGCACTCCCGTAGCAAAAATGGTGGCAGGAAATAAGCGTTATCCCGCGCTCGTTGGCTGGA  
TAACGTTAACTTACAGCTCAATAAAGGCGAAGTTCTGTGCGCTGTTAGGCAAAAACGGTCCGGGAAAATCGACCTCATTC  
GAATGCTTACCCGTTAGCGAAGCTCCGATAGCGGTGATATCTGGATTGGCGAGACGACTGGAAGGTGACGAAGCTACG  
CTGACTCGCGCTGCCGTTGAACCTGGGGGTACGCGCGGTTTATCAGGAGTTAAGTCTGGTGAAGGGGTCAGAGTGGCGGA  
AAACCTCTGCCTCGGTGAGTGGCCCGCGCAACGGCATGATTGATTAATCTGCAAAATGGTGCAGGACGCCAACGTTGCT  
TGCAGGCGTTGGGCGTTGAGCTTAGTCTGAACAACCTTGTTCACACTAAGCCCGGCGCAAAAAGCAGCTGGTGGAAAT  
GCGCGGTTGATGAAGGGCGAGCCGCGGCTGGTCTTCTGATGAACCCACAGCTCGCTTGGCAGTGGGGAAGTTGAACT  
GGTGTATCAGCGCGGTGAAAAAGATGTCGGCACCTGGCGTGGCGGTGATTTATGTCAGCCACCGGATGGAAGAAATTCGCC  
GCATTTGCCCTCTGTGCCACCGTTATGCGCGATGGTCAAGTGGCGGCGATGTTGATGCTCGAAAACACCTTACGCATCAT  
ATTTGTGCTGCTAATGCTCGGGCGGATCAGCTTGTATTTGGCCGCTTGGCCCTCAGGAAATTTGGATCAAGCCGTGCT  
GAAAGTCCGTTGCGTTACGCTAAGCCATAAGCCCAAGCTGGAGGATATCAGCTTACGCTACGTCGCGGCGAAGTGTCCGATG  
CTGGCCTGCTGGGGCAGGGCGAGTGAATGCTGAAGCGGATGTTGGGCTGGAGACGATGAACAGGGCGAAATTTGTT  
ATCAACGGCGAGAAAATCAGCGCCCGATTACGGCGACATGCTGAAACCGCGCATTTGGCTATACGCCAGAAAACCGCAA  
AGAAGCGGGATCATCCCTGGTTGGCGGTTGACGAAAATACAGTGTGACCAATCGGCAAAAATCAGCGCCAACGGCG  
TACTGCAATGGTCCACCTCCGCGCCTGACCGAAGAGTGTATGACGCGGATGACGCTCAAGGCTGCCAGTGAACCAACCC  
CCCATCGGCACGCTTCTGGCGGTAATCAGCAAAAAGTGGTGTGCTGCTGGTCTATGCCCGCAGCCAGATTTTGT  
GCTCGACGAGCAACCGCGCGCTGATATCGAAGCCAAACAGCAGATTTACCGTATTTGCTCCGCGAGCTGGCTGCCGAAG  
GAAAAAGCGTGGTGTATATCCAGTGAAGTGGAGGATTCGGCTGGTGTGACCGCATCTGTTATTCAGCACGGC  
ACGTTCTCGCAGGAGTTTCACTCTCCGGTCAATGTGGTGTGAGCTGATGTCGCGCATTTCTGCTGTGCACTGA

>Cluster\_50531

ATGCTATGCGTAAACATATTTGCTTTCGCCAGTATGTTGATGGGATTTATTTGCTCAGCTTGTATTTCAAATTTGATC  
GTCATCCCTAAATGAAATAGGTGGTGGTCTGTCTCGCAGTAAAGACGAAATGGCTGGCTTCAGACAGCTATTTAATG  
CTGAGATTTATGTTATTCCGCTCTCTGGTGGCTGTACGGGTATTTTCCACTCGTTGGCTTTTACTCTATCCGCGGGA  
ATATTTACTTTAATGAGTATCGTTGTGGACTTGCATGGAATATTCAGATCATGATTTTCTTCTGCTTTACAGGGAGT



TGCTGGCGCATCCATGATCCCTTTAGTTTTACGACGGCGTTTATTTATACCAGGGTAAAGAGTTGGGGTTGGCTGCTG  
CGGTAGCCAGTGGCTGGCTCACTGTCCACCGACGCTAGGGCCAACTCTGGGGGGCTGGATCACTGATAACCTCGACTGG  
CGATGGCTATTTTATATCAATATATATACCGGGCATATATTTAGTTTGGAGTATTCCTTTCTGGTTAAATTTTGATAAACC  
TGATCTCTCTTTTACTGAAAGTTGCTGATATATCCGAGTATATCTCTGTTGGCCATGACACTGGGATGTCGGAATATACCC  
TTGAAGAAGGAGCGCTGGGATGGCTGGATGATAACTATTTTGC TGACATCAGTTCTGGCATGGTAAAGTTTATTT  
TTATTTGCTGCGGTACACTTAAAAATATCCAATCCGATAATGGATCTTTCATGCTTTTAAAGGATAAAAAATTCACACTGGG  
ATGTTTCTTTTCTTTTCTGAGGGGTTGGAATATTCTCTACTGTATATTTAATACCTGTGTTTGGGGCAGGTTCCGG  
GATTAATGCCGAAGAGATAGGTTTGGCGTTTGCACAACAGGTTATTTCCAGTTATTTCTGTTCCCTTTTACTCTCGG  
TTAAGTAAAAAGTAAATCTGCGATGGCTGTTGATGGCGGGCTGGTGGAGTTGTTGTTTCAATGTATCTTTTACCCC  
TATAACCCACGAATGGAGATGGCAGGAGTTACTGTTTCCACAGGCAATAGAGGGATTTCGCAGCAGTTTGGCATGGCCC  
CCATCGTAACATTACCGTGGGGGGAATCCAAAAGAAGCGCTGAAGTTAGCCCTGTTGTTAATTTAACACGTAAT  
CTTGGGGGCGCAATTTGGTATGGCCCTGTGTGGCTCTATTTCAATAATCGAAC TAATTTTCAATTTTCGAGAAATGGGTGA  
AAAAATGGTTCTGTTCCCATGCGGTGAATGACTTCAATTTCCAGAAGTGTCTTGTGTTTAAATCCGATGGAAAGTACC  
AGACATCGGAAATACTGGCTTCAACCAATTTATGAGTCAATTTGATGCTGAGGGAGGCGCAAATATGGCATTTCGGAT  
ACCTTTCTGCTAATCAGTGGTCTGTTATTTATCGCATTTTTGTGGTTCTGCTATGAATAAATCATCTGA

>Cluster\_27987

ATGAGCATCTTGTACGAAGAGCGTCTTGATGGCGCTTTACCGATGTCGACCGCACATCGGTACTGATGGCACTGTGTGA  
GCATGTCCTTGGACTGGAGATCCGTCATACCGATGAGGAGATCATTCCTTACGAGTGTGACGGGTTGAGCGGTATCGCA  
CGGCTCCATTAAGTGTGTTCTGCTAAGCAAAATGGAACAGGTGACAGCGATTCTGGCTGTTTGTACCGCTCGCTGTA  
CCGGTGTGACCGTGGTGCAGGCACCGGGCTTTCTGGTGGCGCGCTCCACTGGAAAAGGTTGTTGTTGGTATGGC  
GCGCTTTAAAGAGATCTTCGACATTAACCCCGTTGGTCCGCGCGCGGTCAGTCCGGCGTCCGTAACCTGGCGATCT  
CCCAGGCGTTGGCGCGCATATCTCTATACGCGCGGATCTTCTCCACAAAATCGCTGTTCAATTTGGCGCAATGTG  
GCGAAAAATGCGGTGGCGTTCACTGCTGAAATATGGTCTGACCGTACATAAACCCTGCTGAAAATGAAAGTGAACCGT  
GGATGGACGGCGTGGCTGACCTGGGATCGGACCGCTGGATTCCGCTGGTTTGGACTGCTGGCGCTGTTTACCGCTCG  
AAGGTATGCTCGGCGTACCACCGAAGTAAACGGTGAAGCTGTTGCCGAAGCGCCCGTGGCGGGGTTCTGTTAGCCAGC  
TTTGACTCGGTAGAAAAGCCGACTTGGGTTGGTGAATCATCGCCAAATGGCATTATCCCGGGCGGCTGGAGATGAT  
GGATAACCTGTGATTCGCGCGGCGGAAGATTTTATTCATGCGGTTATCCCGTGCATGCCGAAGCGATTTGTTATGGC  
AATGGACGGCTGGATGACGTACGAGTACGGAAGACTGGCAGGTTAACGACATCTTGTGAAACCGGCTGGACTGAC  
GTCGCTTGGCACAGGACGAAGCAGAGCGAGTACGTTTCTGGCGCGTGCAAAATGCGTTCGCGCGGTAGGACGTAT  
CTCCCCGATTACTACTGATGGATGGCACCATCCCGCGCCGCGCCCTGCCTGGCGTACTGGAAGGCATTTGCCGTTTAT  
CGCAGCAATATGATTTACGCGTTGCCAACGCTCTTTCATGCCGGAGACGGCAACATGCACCCGTTAATCTTTTCGATGCC  
AACGAACCCGGTGAATTTCCCGCGCGGAAGAACTGGCGGGAAGATCTCGAACTCTGCGTTGAAAGTTGGCGGACGAT  
CAGTGGGGAACATGGCATCGGGCGGAAAAATCAATCAAATGTGGCCAGTTCAACAGCGATGAAATCACGACCTTCC  
ATGCGGTCAAGGCGCGTTTACCCCGATGGTTGCTGAACCCGGAAGAAATCCACCGTACACCGCTGTGCTGAA  
TTTGGTGCATGCATGTCATCAGGTCATTTACCTTTCCCTGAACCTGGAGCGTTTCTGA

>Cluster\_44935

ATGACTCAAACCTCACTATTAAGTGAATCAATATTTTATTTGTTGTTCTTGTCTTTTATATAGCTGCAATCAAACGCAT  
CAAAAAATACAATAGAAATTAAGTGAATAGCAATCAAAAAATGAAGAATACAATCTCGCTTTCGAGATATTTTAAATG  
TAGAAGAAGAATTAAGAAAGCTTATTTAGAAAACAGAGCAAGAAATGCTCCATAATAAAGAAGAATCCCAAAAGTAAA  
AAAAATGCCAATAATGAAC TAACAAACCCATTGAAAAATGGATGGTATCAATAAAACAAATCAAGAGCTAAGAAAGAAC  
TTATAAAGAGAAGAAAGAAATATATGATAAACTAGTAAGGCAAAATTTCTATTTTATTCAGAAGATGTTGAGCTAGCCGAGC  
TAGGATTTTACGAACCTCAATTTTAAATTTGAAGATTCAGAGCAATTTAAAAACAAAATAAAATCCATCAGGGATGAACAG  
AAATTAATGCTGGCGGATAAAACCCACTCTGGCGAGTATTTGTACAACCAATGGACTGTTGAAGGCTCTCGACAGAGA  
GGGTAAAAAATGACAGACAGAAATATCAGGTTAACTACTAGAGCATTAAATAATGAATGTGATGCTGCAATTAGCAATT  
GCACGTGGAAAAATATCACTAAAATGGAAGAAGCAGATCACAAAGGCATTTGAGGCCATAAATAAACTAAACGAGCAAAAT  
CACATATATAAAACACTAAATACCTCAATAAAAAACTTGAGGAATTTGGGCTTACCCATGAATATCGTGAGCAAAAACA  
GAAAGAAAAAAGAAAGCAGGACAGAAATAAGGGCACAAATGAGAGAGAGGAGGCTGCACAACGAGAAATGAAAGGCCA  
TGCAAGACGACAGGAGGAGAGCGCGTTATAAAAAAGCAATGAAGCTGCAAGAAAGGAAATGGAAGAAAGTTACTGGT  
GACATGAAGCAGCGCCTCGAAAAATCGCATTTGCCGAACAGAGTTGTGCGCAGGCTGAATCAAAGCATCAAAGAC  
ATTTCCATGGCACAACAAACAAAGGTCATGTTTATTTATTTGCAACATAGGTTCTTTTGGGGAGAATGTTTATA  
AAATAGGCATGACACGACTCTTTGATCCCAAGACCGTGTGATAAATGAGCTCGGTGATGCATCTGTTCCATTTATTTGAT  
GTGATGCTATGATTTATTCGGAGGACGCTCCATCATTAGAAAAAACTACATGATGCTTTCGATAAAAAGAGAGTCAA  
TCTTGTAATCGTAGAAAAGAGTTTTCATGTTACTCTGGATGAGATCAAAGAGCTCTAAAAAACACTCTGATTCAG  
AAATGAAATTTATGAGACAGCAGTCCGAAAAGACTTTAATGAGTCAATGGCTATTCGTAATCAATGAAAAAAGAAAGT  
GACAAACAACACTCAATATTAACCTGAGCGAAAAACCCAGAGTTTTCGAGATGCAATTTAA

>Cluster\_44078

ATGAAATTTATGACGGGGGCTGGCGTTAGCGCTGTTTAAACACATTTACACTGGCGAGTGAAACTGCTCTGGCGTATGA  
GCAGGATAAAACCTACAAAATACAGTTCTGCATACCAATGATCATCTAGGCAATTTTGGCGCAATGAATATGGCGAAT  
ATGGTCTGGCGGGCAAAAAACCGTGGTGGATGGTATCCGCAAAAGAGGTTGGCGCTGAAAGCGGTAGCGTACTACTT  
TCCGGTGGCGACATTAACACTGGCGTGGCCGAGTCTGACTTACAGGATGCCGAACCTGATTTTCGCGGTATGAATCTGGT  
GGGCTATGACGCGATGGCGATCGGTAATCATGAATTTGATAATCCGCTCACCGTATTACGCCAGCAGGAAAAGTGGGCCA  
AGTTCCCGTGTCTTCCCGGAATATCTACCAGAAAAGTACTGGCGAGCGCTGTTTAAACCGTGGCGCTGTTTAAAGCT  
CAGGATCTGAAAATTTGCCGTCATTTGGGCTGACAACCGATGACACAGCAAAAAATGGTAACCCGGAATACTTCACTGATGT  
CGAATTTTCGTAAGCCCGGATGAAGCGAAGCTGGTGAATTCAGGAGCTGCAACAGACAGAAAAGCCAGACATTATATCG  
CGGCGACCATATGGGGCATTACGATAATGGTGAGCAGGCTCTAACGCACCGGGCGATGTGGAGATGGCAGCGCGCTG  
CCTGCCGGATCGCTGGCGATGATCGTGGTGGTCACTCCGAAGATCCGCTGTCATGGCGGCAAAAAACAAAGCAGT  
CGATTACGTGCCGGTACGCCATGCAAGCCAGATCAACAAAACGGCATCTGGATTGTGCAGGCGCATGAGTGGGGCAAT  
ACGTGGGACGGGCTGATTTTGTAGTTTCTGTAATGGCGAAATGAAAATGGTTAACTACCAGCTGATTCGGTGAACCTGAAG  
AAGAAAGTGACCTGGGAAGACGGGAAAAGCGAGCGGCTGTTTACACTCTGAAATCGCTGAAAACAGCAAAATGATCTC  
GCTGTTATCACCGTCTCAGAAACAAAGCAAGCCAGCTGAAAGTGAAGTGAAGTGAAGTGAAGTGAAGTGAAGTGAAGTGAAGT  
ATCGTGACAAAGTGGCTTTTGTACAGCAATAATGGGGCGGTTGATTTGGCAGCCAAATGGATCGCACTGGTGGCGAC  
TTTGGCGGTGATGAGCGGAGGCGGAATTCGTGATTTCTATCGAAGCAGGCGATATCAGCTATAAAAACGCTGCTGAAAGTGA  
GCCATTCGGCAATGTGGTGGTGTATGCCGACATGACCGTAAAGAGGTTGATTTACTGACCGCGTCCGCGAGATGA  
AGCCAGATTCAGGTGCTTACC CGCAATTTGGCAACGTTAGCTTTTGGCGGAAAAGACGGCAAACTGAACGACCTTAAAGTCA  
AAAGCGAACCCGTCGATCCGGGCAAAACTTACCGTATGGCGACATTAACCTTCAATGCCACCGCGGTGATGGATATCC  
GCGCTTGATAACAAACCGGCTATGTTGAATACCGCTTTATTTGATGCCGAAGTGTGAAAGCGTATAACGAAAAGCT  
CGCGCTGGATGTGAGTGTATTAACGAAAGGTTGAGGTGAGTGGCAGTAA

>Cluster\_43203

ATGAGCAATGCTATTAACGAAATGATAATACCGATTTAGTGTCTGTTTTCGGGTATAACCCGCGGATTTCCACCCAAT

CGTGGCGAATCACCTAATTAACGCTAAACGTAACGGGGCGAAAAATATCGTCTGCGATCCGCGCAAAAATGAAACCGCGC  
GCATTGCTGACATGCACATTGCATTGAAAAACGGCTCGAACATCGCGCTGTTGAATGCGATGGCCATGTCATTATTGAA  
GAAAACTGTACGACAAAGCGTTTCGTCGCTTCCCGTACAGAAGGCTTTGAAGAGTATCGTAAAAATCGTTGAAGGCTACAC  
GCCGGAGTCGGTTGAAGATATCACCGGCGTCAGCGCCAGTGTAGATTTCGTCAGGCGGCGCGGATGTATGCCAGGCAGAAA  
GCGCCGCATCTGTGGGCGATGGGGTAAACAGTTCATCAGGCGGTGGAACCGTGCCTTCTGACAGCTCGCG  
ATGCTGACCGGTAACCTCGGTAAGCCACATGCGGGTGTAAACCGGTTTCGTTGTCAGAACACGTCACAGGTTGCTGCGA  
TATGGGCGGCTGCGGATACGTATCCGGATACAGTACGTGAAAGATCCGGTAAACGTCGAGAAATTCGCCAAAGCCT  
GGGCGTGGAAAGCTGCCAGCGCATACCGGCTATCGCATCAGCGAGTACCGCACCGGTCGGCGATGGTGAAGTGAGA  
GCGCGTACATTATGGGCGAAGATCCCGCTGCAAACTGACGCGGAATGTCGGCAGTACGTAAGACCTTTGAAGATCTGGA  
ACTGGTTATCGTTACAGACATCTTTATGACAAAAACCGGTCGGGCGGATGTCATTTTACCGTCAACGTCGTTGGGCG  
AGCATGAAGGCGTGTACTGCGGCTGATCGTGGCTTCAGCGTTTCTTCAAGCGGTTGAGCGAAGTGGGATCTGAAA  
ACGGACTGGCAAAATCATCAGTGAATGGCCACTCGTATGGGTTATCCGATGCACTACAACAACACCCAGGAGATCTGGGA  
CGATTGCTCATCTGTGCCCGGATTTCTACGGTGCAGTTCAGAGAAAAATGGCGAACTGGGCTTCATTCAGTGGCCT  
GCCCGATACTTACAGTCCGATCAGGGGACTTCTTATCTGTTTAAAGAGAAGTTTGATACCCCGAACGGTCTGGCGCAG  
TTCCTCACCTGCGACTGGGTAGCGCAATCGACAACTCACCGACGAATACCCGATGGTACTGTCACCGTGCCTGAAGT  
TGGTCACTACTCTTCCGTTTCGATGACCGGTAACGTGTGCGGCACTGGCGGCGTGGCTGATGAACCTGGCTACGCACAAA  
TCAATACCAAGAGCGCAAACTGGTATTTGAAGATGAGGCATTGGTTTGGGTCGACTCGCGTAAAGAAATATC  
ACCCGTGCGCAGGTCAGCGATCGTCCGAACAAAGGGCGATTTACATGACCTACCAGTGGTGGATTGGTGCCTGTACGA  
GCTGGTTACCGAAAACTTAAAGCCGATACGAAACCGCGAATACAAATACTCGCCGTGCGCGTCGAGCCGATCGCCG  
ATCAGCGCGCCGCGAGCAGTACGTGATTGACGAGTACAACAAGTTGAAAACCTCGCCTGCGCGAAGCGGCACTGGCGTAA  
>Cluster\_22388

ATGAAAAAGTGAAGTGCATGCTTCTCGATGGCCGTGGGGCTTAATGCCGTTTCGATGGCGGCAAAAGCGAAAGCGTC  
CGAGGAGCAGGAACTGATGTACTGTTGATTTGGCGGCGCATTATGAGCGCCAGTTGGGGACCTATTTACGCGAGCTGG  
AGCCTGAATGCTGCTGTTTCGCGGTTATGCGGCTTGGAAAGTGTCCGCGAGGAGATTGCAACGGCTGGAAACAGCCCGGA  
ACCGGGCATTTCTGCACTGATGGAATCAATTACACCCCGCAAAATGTCGACGGCAGCATCAGTATGAAAAAGCAGTCCG  
CATTAACGAAGCATTTAGATTTCCCGCAGTTCTGGGCGCACAGGTCGAGCGCGGTGTGCTGCGTACTCCGCGTTCAT  
TTATCAATACCGTTCCGCATATGAGCTTTGCTTGGGGCGAGGATAACGTTAATTTCTGCGTGCCTTACCGCGGTTG  
CAACAAAGTCTGCTGTTTCGCGGTTACTCTGAAGATACGCGCAGATCAAAGAGTGGGCACTAGTGTAGTGA  
AGGGCGCGATCCGCAACGAAAGTAGCGCAACACGACAGAAATGGCACTGATGTAACTATGGCGAGATCACCCGCC  
AGTGTATCGCCTCTTACAGAAGAAATCAACTTCTCGTGCAGTACGACGCGAAGTCCGCGCCCTAAAGCGTAATGAC  
GATAACAGCTGGACCGTCAACGTTGCGGATCTGAAAAACCGCACTGCACAGAATATCCGCGCAAAATTTGCTTTATCGG  
CGCGGCGGTGCGCGCTGAAACTGTTTACAGAAATCGGGGATTTCCGGAGCGGAAAGACTACGCGGTTTCCCGTGGGTG  
GACAGTTCCTTGTTCGGAAAACCCGACGTTGTTAATCACCATCTGGCGAAGGTTTACGGTAAAGCATCCGTTGGCGCA  
CCACCGATGTCGGTTCGCGATATCGATACCCGTTCTTTCGAGGTAACCGCGTGTGCTGTTTGGGCCATTTGCCACCTT  
CTCAACCAAAATCTTCAAAAACGGTTCAATTATGGGATCTGATGAGTTCACCACCCTTACAGTGTATCCGATGATGC  
ACGTTGGGCTGGATAAATTTTCGATCTGGTGAATATCTGCTGAGTACGAGTGTGAGTGAAGAGGATCGTTTGAAGCG  
TTGAAAGAGTACTATCCGACGGCGAAAAAGAGGACTGGCGTTTGTGGCAAGCGGGCAGCGCTGCAGATTATCAAGCG  
TGATCCCGATAAAGGTGGCGTACTGCGTCTGGTACTGAAGTCTGAGTACGAGCAAGGACCATTTCCGCGCTCTTCG  
GGCATCCGCAAGGGGCTCAACCGCGCGGATATGTTGATCTGCTGGAAAAAGTATTTGGTGTAGCTGCCTTCCAGC  
CCGCAATGCGCAGGTCAGTTGAAAAGCGATCGTTCCGCTTATGAGCAGCAAGCTGAAACCGTGTATGAGCGCAACCGC  
CGAGTTGCAAGTACACAGCGAAGTGTGGGCTGAAATACGACAGCCGAGGAGCAGATAGTACCGCAAAACCGCAGT  
TGAACCGCAACCTGTTCAAAAAGAAAGTGGCGGATATTGCGTTGTGA  
>Cluster\_24246

ATGAAAAACATCAATCCAACGCAGACCGCTGCCGAGGCACTACAGAAACCTTCGATGAAATGAAAGACGTTACGAT  
CGCCGATCTTTTTGCTAAAGACGCGGATCGTTTTTCTAAGTTCFCCGCAACCTTCGACGATCAGATGCTGGTGGATTACT  
CCAAAAACCGCATCACTGAAGAGACGCTGGCGAAATTAACAAGATCTGGCGAAAGAGTGGCATCTGGCGGGCGGATTAAG  
TCCGATGTTCTCTGGCGAGAAAGATCAACCGCACTGAAAACCGCGGTAAGTGCAGTACGCTGAGCGTGCCTAACCGCAATAC  
CCCGATTTCTGGTTGATGGCAAGATGTTATGCCGGAAGTCAACCGGTCGTTGGAGAAGATGAAAACCTTCTCGGAAGCGA  
TTATTTCCGGTGAAGTGAAGGCTATACCGGCAAGCAATCACGACGTAGTGAACATCGGGATCGGGCGTTCTGACCTC  
GGCCGTCATGTTGACTGAAGCACTGCGTCCATACAAAAACCACTGAACATGCACTTTGTTTCTAACGTCGATGGGAC  
TCACATCGCGGAAGTGTGAAAAAAGTAAACCCGGAACCCAGCTGTTTCTGTTAGCACTAAAAACCTTCAACCTCAGG  
AAACCATGACCAACGCCACAGCGCGGTGACTGGTTCCTTAAAGCGGCAAGTGTGAGAAGCAGGTTGCGAAACACTTT  
GCGCGCTCTCAACCAACGCCAAAGCCGTTGGCGAGTTTGGTATTTGATGACTGCCAACATGTTCCGATTTCTGGGACTGGGT  
CGGCGGCTTACTCTTTGTTGTCAGCGATTTGGCTGTCGATTTGTTCTCTCCTCCTGCGCTTGTAACTTCTGTTGAACTGC  
TTTTCTGGCGCACACCGCATGGACAACTTTCTCCACCACCGCTGCTGCGAGAAAAACCTGCTGTACTGCTGGCGGAT  
GGCATCTGGTACAACAATTTCTTTGGCGGGAACCTGAAGCAGTCTGCGGATGACAGTATATGCACCGTTTCTGCGGC  
GTACTTCCAGCAGGGCAATATGGAATCCAACGGTAAAGTATGTTGACCGTAAACGGTAAAGTGTGGATTACCAGACTGGCC  
CGATATCTGGGTTGAACCTGGCACGAACCGTACGACCGGTTCTATCAGTATCCACCAGGAAACCAAAATGGTACCG  
TGCGATTTTCATCGCTCCGGCTATCACCCATAACCCGCTCTCTGATCATCACCAAGAACTGCTGTCTAACTTCTTGTCA  
GACCGAAGCGCTGGCGTTTGGTAAATCCCGCAAGTGGTTGAGCAGGAATATCGCGATCAGGGTAAAGATCCGGCAACCG  
TTGACTACGTTGGTCCGTTCAAAGTGTTCGAAGGTAACCCCGGACTAACTCCATCTGCTGCGTGAATCACTCCGTT  
AGCCTGGGTGCGTTGATTGCGCTGATGAGCACAAAATCTTACTCAGGCGGTGATCCTGAACATCTTTCACCTTCGACCA  
GTGGGCGGTGAACTGGGTAACAACTGGCGAACCGTATTTCTGCCAGAGCTGAAAGATGATAAAGAAATCAGCAGCCAGC  
ATAGCTCGACCAATGGTCTGATTAACCGCTATAAAGCGTGGCGCGGTTAA  
>Cluster\_148

ATGAGCACTCTCAAAATCACCGCATGACTTGGCACTCGTGGCAGTGCATGTCAAGGACGCCCTGGAGAAAGTGCCTGG  
CGTGCAATCAGCGGATGCTCTTACGCCAAGGGCAGCGCAAGCTCGCCATTGAGGTCGCGACGTCACCCGACGCGCTGA  
CGGCGCTGTAGCTGGACTCGGTTATCGGGCCAGCTGCGCGATGCCCTCAGTTTCGACCGCGGGCGGATTGCTCGCA  
AAGATCGCGCATCTGCTGGGCGAAGACGACAAGACGGGTAGCAGCGCGCATTTGCATATCGCCGTATCGGACGCGCGG  
GGCCGCGATGTCGACGCGGCTGAAGCCGTCGAGCAAGCGCAGCTGTACGCTGATCGAGCGCGCACCATCGCGGCA  
CCTGCGTCAATGTCGGTTGTGTCGCTCAAGATCATGATCCGCGCGCCCATATCGCCATCTGCGCGGGAAGCCCG  
TTGATGGCGGATCGCCGCTACACCGCGACCATCCAGCGCAGCGGCTGCTGGCCAGCAGCAGGCGCGCTCGATGA  
ACTGCGCACCGCAAGTACGAAGGCATCTTGGAGGGCAATCCGCGGATCACTGTGCTGACCGCTCCGCGGCTTTAAG  
ACAACTGCAACCTGATCGTGAACCTCAACGACGCGCGGAGCGGCTGGTGGCATTCGACCGCTGCCTGATCGCCACCGC  
GCGAGCCCGCGTCCGCGGATTTCCGCGCTGAAAGCACTCCGTACTGGACTTCCACTGAAGCGCTGGTACGCGAGC  
GATTTCTAAGCGCTGGCGGATTTGGCTCATCAGTGGTGGCGTGGAGCTGGCGCAGGCGTTCCGCGGACTCGGAGCGA  
AGGTGACGATCTCGGCTCGCAGCAGCTGTTCTTCCGCGAAGACCCAGCTATAGCGCAAGCCGTCACGCGCATTTCCG  
ATGGAGGCGATCAGGTTGAGGGAACACACCCAGCGCAGGTCGCGTATATCAATGGTGAAGGGGACGCGCAATTCGT  
GCTCACCGCGCGACGCGCACTGCGCGCGACAAGTGTGCTGCTGCCACCGCGCGCGCCCAACACAGCAAGCTGG

CACTGGATGCGAGGGCGTACGCTCACCCGCAAGGCGTATCGTCATCGACCCGGCATGCGTACAAGCGTGAACAC  
ATCTACGCCGAGGCGACTGCACCGACAGCCGAGTTCTGCTATGTGGCGGAGCGCCGGCCTCGCGCCGGATCAA  
CATGACCGGGGTGACGCGGCCGTAACCTGACCGCGATGCGCGCGTGGTGTACCCGACCCGCAAGTGGCGACCGTAG  
GCTACAGCGAGGCGGAAGCGCACCATGACGGCATCAAAACTGATAGTGCACGCTAACGCTGGACAACGTTGCCGCGGG  
CTCGGCAACTTCGCACCGCGGGTTCATCAAACTGGTGGTTGAAGAAGGCGAGCGGACGACTGATCGGGCTGACGGCAGT  
GGCCCCGGAAGCGGGCGAACTGATCCAGACGGCGCACTGGCGATTTCGCAACCGGATGACGGTGCAGGAAGTGGCCGACC  
AGTTGTTCCCTACTGACGATGGTGAAGGTTGAAGCTCGCGGCGAGACCTTCAACAAGGATGTGAAGCAGCTTCC  
TGCTGCGCCGGTGA

>Cluster\_50859

ATGATTATCGGTATCGACCTGGGTACAACAACTAACAGTTTGGCAGCTGTCTGGCGAAATGGACAAAGTGAACCTATCCCAA  
TGCGTTAGGTAAGTTTTTAAACCCAGCGTAGTTTGTGTTGACGAAAGTGGTATGGTTTTGACAGGGGAGGCGACTCGTG  
ACCTGCAACTCATCAAACCACAAAACGCGCATCAAAATTTAAACGCATTATGGGCACATCAAAGACGTTAAAACTGGGC  
GGACCGAAATTCGCTGAGGAGAGCTCTCATCGTTGATATTACGTGACGCTAAAAGAAGATGCAGAAAACCTATTTGGGCGA  
AGAAGTCACTGAAGCGGTGATTAGCGTTCGCCCATATTTTGGTGATATGCAACGTAAGCAACAAAAGCCGCTGCGACAA  
TGGCAGGCTTAAATGTCGAACTTAAATTAACGAAACCAACCGCGCTGCACTGGCGTATGGTTTGCATATAAAGGATGAT  
GAACATCAATTTCTGGTATTCGATTTAGGTGGTGGTACGTTTGTATGCTCCATACTGGAGTTGTTTGCATAATAAGGATGGA  
AGTACGTGCGCAGTCCGGGATAACTTTTTAGGTGGTGAAGATATTGTTCGATATCTGGATCGATGATGATGCTACGTC  
GGGATCTTCTGAAAATATTTGAATGGCGTGAACCGCACTCCAGCGGCATTACGATCGAGGCTGAGCGTGTCAACCGC  
GTGCTGAGTGTGGCAGATGAAGCCACTTTCAGTGTGGAGATTGAAGGAAGGCGATATTACTGGCATCTGACTACAGAAAA  
ATTTGAATTTTTTATTAACGACCTTTTTTCGAACGAATCCATATGCCACTGGAGCGGGCAATTCGCGATGCCAAAATTAATA  
TTAGCCAATTAGACAGGTTGTTCTTGTGGGTGGCACTACACGTTATGCCACTGATTCGCAAACTTGTGACACGATTAATTT  
TGTCGTATACCGCAATGCATTTAAACCGGATGAAGTCAATTGCCAGGGCGCGGCTATTCAGGCAGCACTTAAAGCGCG  
GCACAGCAATTACGAGATGTTGTAGTACTGATGTTTCCCTTATACGCTTGGCGTTGATACATCTAAATCGCTGGGGC  
ATCCCGCAAAATACGCTATTTTGCACCCGTTATTGAGCGTAAACAGAGTATTCTTGTAGTTCGGTTTCGCTGCTGCTTTAC  
ACGGCACATGATCAACAAACAGAGGTTAATTTAAAATCTACCAGGGTGAAGCAGGATGGTGGCTGATAATATTTTCT  
TGGCGAGTTGTGAGTGAATGTTCCGCAAAACCGCGGCTGATGTGCGTATTGATGTTTCTGTTTACGTCAGCATTAAGC  
GTATTTCTGATGTCGATATCAGCGTCCACTGACAGGTTCTAAAAATAGTCTGGTTATTGAACAGAATCCAGGGGCAATTA  
ACGGCAGAAATACAGCAGTCTGTGTCAAAATTAAGCTGTTTAAAAATCACCCACGCGATGAACAGATAAAGCAGG  
CTTTATTGCCCGTCTTGATAATCTCTATCAACTCACCTTGGCGGAAACCGGAGACTGGATAAGCAATTTCTCCCGTCAAT  
TCAGTTATCTACTCGAGAAGCAGGATCTGATCAACTTCTGATTTTTCCGACTAAAGTGAACCTACATTAGACTCTCTG  
GAAAGAGAAGCTGCAATGA

>Cluster\_34775

GTGAATATAAACGTCGCCGAATTTGTTAAATGGGAATTACATTCGTTATTTTGTGGTCTCCGCGCTTGGGCTATGTCT  
CGGAAAGTTACGACTTGGTTCGATCCAACCTGGGTAATCCATTGGCGTTTTAGTCGATCGCTGTTATTAGGCCAACAAAC  
ATTTACAGCAATTAACCCGATCGCTTAACTTTGGCTTATGCTGTTATTTTCTGCGTGGGGTGAAGCGGACCGCAAC  
TTTTTTTCCATTTTTTTTCGCGATGGGAAAAATTAACATTTAGCACTGGTGGTGGTGGCAGTGGCGGTTGATCGC  
CTTAGGTTAGTGAAGCTGTTTGGCTGGGATATTGGCTGACGCGCGGTATGTTAGCAGGCTCTATGACGTCGACACCGG  
TTCGTTGGTGGTGGCGATACACTGCGTCAATTCGGCATGGAAGACAGCGAGCTCTCACTGGCACTGATAATCTGAGC  
CTCGGTTATGCTTAACTTAAATCGGTCGTTGATTTGATGTTGGTGGCGTTACTTGGCGAAATTCAGCAGCTCA  
GGACTTACAGACCAAGCCAGCCAGCAAAATCGCCCGCAAGCTGGCCTGGACACTGATGCCAACCGTAAGGTTTATTTACCGG  
TGATCCGCGCTTATCGCGTCGGCCGGAACTGGTGGCTGGACCGACGCAAAATCTCGGTGAAGTGGGTTATTTATCGA  
CAAACCGGCTGCTACATTTGAACGTTATTCGACGTAACGGGATTTGGCAAAATCCAGACGGTGTGACCGTCTCAAAATGGG  
CGATGAAGTACCGTTGGTAGGCTATCCGACGCTTACCCGACTGATCCAGCTTCCGTAACCGGTAAGGTTAAAGTTTTCG  
ATCGTGACCTTCTCGACATGCGTATCGTCACTGAAGAAGTGGTGGTAAAAAACCATACCGCTGTAGGTAAACGCTCTCGCA  
CAACTGAAGTTGACCGATCACGGTTGCTTCCCTTAAACCGCTCAATCGTAGCCAGATTGAGATGCGGATAGATGCAACCT  
CGTGCTTAAACAAAGGTGACGTTTTACAAGTCAAGCGGCGATGCCCGCGGTAAAAACCATCGCCGATCGCATCGGCTTTA  
TCTCGATTCAAGCCAGGTCAGCTGACCTGCTGGCATTCGCGCTTCTTTGTTATTGGGCTGATGATCGGGATGACACC  
TTCCAGTTCAGCACATTCAGTTTCGGCATGGGGAACCGTGCAGGGTGTATTATTCGCGGAATTTATGCTGGGCTTTATGCG  
TGCTAACCCACCGACTTTCGTTACATTCGCGAGGGTGCATTAAGCATGGTGAAGAGTTCCGCTTGTGTTGTTTATGCG  
CAGGCGTGGTCTGAGCGCGGTAGCGGTATTAATAACGGCTGGGCGGATTTGGCGGTCAGATGTTGATGCGCGGATG  
ATTTGACGCTGGTGGCGGTTATCTGTTTCTGTTGCTGGTGTATGATTTGCAATGAACCGCGGCTGTTGTTTCGCG  
CGCAATGATGGGCGCACGTACTGCGCGCGGCAATGGAGATCATCAGTGATACAGCTCGCAGTAACATCCCGCGCTGG  
GCTATGCGGGCACCTATGCAATCCCAACGTCCTGCTGACGCTGGCAGGACAATCATCGTATGGTATGGCCAGGATTA  
GGATAA

>Cluster\_37753

ATGGCAAGTTCGGGCACAACATCGACGCGTAAGCGCTTACCAGCGCAGAAATTTATCGTTCATTTCTTGGAACAGCAGGG  
CATTAAGATTGTGACAGGCAATTCGCGCGGTTCTATCTGCTGTTTACGATGCTTAAAGCCAAAGCAGCGAAATCCGCG  
ATATCTGGCCGCTCATGAACAGGCGCGGGCTTATCGCTCAGGGAATGGCGCGCACCGAGCTAAACCGGGTCTGT  
ATGGCCTGTAGCGGACCGGGTGCAGCTAACCTGGTGCACGCAATTCGCGATGCGCGGGTGGACTCCATCCCGCTGATTTG  
CATCACTGGTCAGGTTCCGCGCTCGATGATCGGCACCGACGCTTCCAGGAAGTGGACACCTACGGCATCTCTATCCCCA  
TCACCAAAACAACATATCTGGTCAAGATATCGAAGAAGTCCCGCAGGTCATGAGCGATGCTTCCGCTATGGCAATCA  
GGCCCGCCAGGCCCGGTGGATAGACATTCCTAAGGATGTGCAAAACCGCAGTTTTTGGATTGAAACACAGCCCGCTAT  
GGCAGAAAAAGCCCGCCCGCTTTAGCGAAGAAAGCATTCTGACGCGAGCGGATGATTAACGCTGCCAAACGCC  
CGTGTCTTATCTGGCGCGGTTGATCAATGCGCCGACGCGGTGCGTGAACCTGGCGGAGAAAGCGCAACTGCCTACC  
ACCATGACTTAAATGGCGCTGGGATGTTGCCAAAAGCGCATCCGTTGTGCTGGGATGCTGGGGATGCACGGCGTGCG  
CAGCAACCAATATATTTTTTCAGGAGCGGATTTGTTGATGATGCTCGGTGCGCTTTTGGATGACCGGGCGATTTGGCAAAA  
CCGAGCAGTCTGTCGAAATGCCAAAATCATTCATGTCGATATCGACCGTGCAGAGCTGGGTAATCAAGCAGCCGAC  
GTGGCGATTACAGGCGGATTTGATGACGTGCTGGCGCAGTTGATCCCGCTGGTGAAGCGCAACCGCTGCAGAGTGGCA  
CCAGTTGGTAGGGATTTGACGCTGAGTTTCCGTTCCAAATCCCGAAAGCGTGGATCCGTTAAGCCATTACGGCTGAT  
TCAACGGTTGCGCCCTGCTGTCGATGACAATGCAATTAACACCCGACTTGGTGGTGGTGGTGGTGGTGGTGGTGGTGGT  
GCTTATCCGCTCAATCGCCACGCCAGTGGCTGACCTCCGGTGGGCTGGGACGATGGGTTTTGGCTGCTGCGCGGAT  
TGGCGCTGCGCTGGCGAACCCGGATCGCAAAAGTGTGTTGTTTCCCGCGACGCGAGCTGATGATGAATATTAGGAGA  
TGGCAGCCAGTGAATAACGCTGGATGTCAAAATCATTCGATGAACAACGAAGCGCTGGGGTGGTGGCTCAGCAA  
CAGAGTCTGTTCTACGAGCAAGGCTTTTTTGGCCCACTATCCGGCAAAATCAACTTTATGACAGTTGGCAGATTGGCAAAAT  
CGGCTCGAAACCTGTGATTTGAATAACGAAGCGATCCGAGGCTTCATTGCAAGAAATCATCAATCGCCCTGGCCCGG  
CGCTGATCCATGTGCGCATTTGATGCCGAAGAAAAAGTTTTACCAGATGGTGGCGCAGGTCGGCGAATACTGAAATGGT  
GGGAATAA

>Cluster\_21471

ATGGCCAGGATTTATCGTCTCTTTTGGTGATTGCTGGACTTGTGAGTGGTCAAGCAATCGCCGCGCTGATCCCCCC

GCATGCTGATATCCGTGACAGCGTTTTGTCTATTGCGTCAGCGGGCAAGTCAACACCTTAAACCCATCCAAAGCGAGCA  
GTGGGTTAATTTGCGATACCCTTCCCGCCAGTTTTATGATCGACTGCGGATGTCGATCCCTATACCTATCGCCTGATG  
CCGAACTTGCCGAAAGCTGGGAAGTACTGACACAGCGCGGACCTATCGCTTCCACCCTGCGTTCGGATGTTCCGTTTCA  
AAAAACCGACTGGTTTTACTCCCACTCGTAATAATGAATGCGACGATGTGGTGTTTACCTTCCAGCGGATTTTTGACCGCA  
ACAACCCGTGGCACAAGTCAACCGCAACAGTAACTTTCCCTATTTTCGACAGTCTGCAATTTGCGCGATAACGTGAAAGCGTC  
CGCAAGCTGGATAATCATAACCGTGGAGTTCCGCTCTCGCCAGCCGGATGCTTCTTTTTTTGTTGGCACCTCGCAGCCATTA  
TGCTTCGGTTCATGTCGGCAGAATATGACAGGAAGTTAGAGAAAAGAAATCGCCAGGAGCAACTCGACCCTCAACCGGTG  
GCACCGGTCCGATCAGTTGTGCGAATACCAGCGGGCAATATATTGCTTACAACTCAGTATGATGATTCTGGCGTGGT  
AAGCCGTTGATGCCAACAAGTGGTGGATTTAGGCTTGGCGGTACAGGACGATTTGTCGAAAACCTTCCGACCCGGGAAATG  
CGACGTTCTGCGCTTCCGTCAGCTATCCATTTTGGCTGACAGCCCGCGTTCGCTTTAACGCTGCGCCCG  
GGATGAACCTCGCTATCTGGCGTTAAACCGCTAAACCGCCGCTAAATAATCCGCGGTCCGCCATGCACTGGCACCTG  
CGGATTAATAACAGCGCCTGATGCAATCCATCTATTATGTTGTCAGGCTGAAACGGGCTGCCCTCTATTTACCAGCGACCTC  
GTGGCCCTATGACAAACAGCGTAATAATTAATAACATCCGCAAAATCCGCGCAACAGTTGAAGCGTTGGGGCTGG  
AAAACTTAACGCTCAAACGTGGGTTGCCACAGCTTCGACGGCTGGAACCCAGTCCACTGAAACCCGCGAAGCTGATT  
CAGCCGATATGGCACAGTGTGGGTAAGAAGTGGTGTATGTGCCGGTGAAGGTCGTTTTTTCAGGAGGCAGCGTGTGATGGA  
TATGAGCCATGATCTGCGTATTCCGTTGGGCGACGGACGTAACGACCCGGACAGTTCCTCCGCTCGTTACTGAGCT  
CGCAGCAATTCAATGACAGCCAACTCGCCCCTGGCGTATCCGCAAAATTCGACAGCGTATTGCGTAAGGCTGCGCTCT  
TCGACAGCAGTGGCGCGCTATTGAGCCTATGACGAAGCGCAAGTATTCTGGCGCAGGAATTACCTATTCGCGCT  
GGGCTCGTATTGCGTTTTGACAGGCTATCGGTACGATATCAAAGTCTGGTACTTAGCCCGTTGGTAACGCCTCTTTG  
CTGGGGTGATCGCGGAGAAAAGGATGAGGTGAAAAAGCCATGA

>Cluster\_40824

ATGACAAAATCATCCGGAGTGATTTTAAACCGCCTGGCGGGCCCCGAAGGATGAGTCCCATGGACGGGAGGAATAA  
CCTTGCTCCCGTTTTGCTGATACCCTCGCGCTGGATGCCCCCTCCCGTTCTGTGGCTTACCAGCAGCGCTGGGTGGCAG  
ACACTTCCCGTTAAGGTGATAGAAAAGAGCCGTCTGACCGGTTACATGGGCTGAGGCATCCGATAAGAGCGGCGT  
GCCGCTCTCTGCGCCAGCAGGCGGATGAATGTGATTTACATCGCTTATAACCAGGACATGACCGTCAATACATTCA  
GGCGTGTGCGATGTGGGCAGCGGATCAACTATGCGGCCAGTGAATAAGAAAGGATCTGGAAGAGGACGACGACG  
ACAAACACATCAAGACTTACACCATCAATTTCCCTGACTCCCGCTTTCGATTTGTGGCTCTCCAGCCGCGGCTAAC  
CTCGCTGGCCGTTAAGGTGATAGAAAAGAGCCGTCTGACGAAAGCGGCTTCCATGAGCAACTGGACGAACTGAAAGCGGCGT  
GGCGATGCTTATCTGGGGGGAAAGGTACGGCTTATCTCCACCATGACGGTGACGACAATCCGTTCAATACGCTTATCG  
GGGATATCCGTTGCCGACGTCAGGGAGGCATACATCGCATCACTTCCCGGAAAGCGTATCTGAGGGCTGTCCCG  
CGCGTCTGCTGCGCACCGGAAAGGATGTTCCGGAGGCATCCGAGCAGCCCTGGATGGCATCGGTTGATAAAATTCACGG  
TCCCGCGCATCCGAAGAGCTTGTAGCTGATTTCCGCGCAACGCTGGCGTGCCTGGCTGCCCCTGCCCTGATAGAGTCCC  
GCATGTCGCTGATACCGCCGATTGCGTCTGACCTGCAAGGAAGTTATGAACTGCTGTCTGATGAGGTTCCGTTCCGC  
GAGACGACAGGACTGGCTTATGATGATCTGAAACCCCTTGTGGAGGCCTCCCACTGATGCCCGCTCTTTCCGCGGCG  
CGACTTTGGCCGTAGCCGTTATTTGTTCGGTTGACTATCCCCCTGCTGCAGGAGAAAGAACCTGGTACGACCGCTGCCATTC  
TACTGGAGTCCGTAACGTTGCCGTTGAGCAGTAGGAGGAAACTCACTGGTATCTGATGGATGGCTGCCGCTGCGCTG  
GGTGCAGGCTTTGATGCCCGTGGTAATGGTGCTATCTGGCTGAATACGCCATGACGCGCTACGGCTCCGCGCGGTTCA  
GCAGGTGATGCCAACGAAGGCTGGTACCAGGAGCATATGCCCCTCGGTCAAAGCTGCACTGGAAGACGGTAACCTGGTGG  
ACTTACCAGGATGAAAGACACACTGGATGACCTCGGGCGGTTCCAGTGGTGAACGGTGCCTCCCGCGTATCCCGGAGCAA  
CGCTCAAAAAGCAAAAGCTGACGGTGGTAAACGACAGGAGTTCAGCCTCGCACTGGCGCTGGCGTATTTCCGCGAGCC  
TGAATTAACAAAGGCGGTTGAAGCAAGCTCACGCCGTCGTCGTCAGCGCGCCGATGCTGGAGGATTCGTA

>Cluster\_48322

ATGATTATGCAAAAAAATATTACGTATCGACAGTAACGATAATCTCATTGTGCGGTTGAAAGACTGACAGCTGGAGAATC  
GTACTCGTGGGATGACGACAACATAACGTTAGTAACTGATGTTAAGGCTAAACATAAGTTGCGACGCAAGATATTCCTC  
TGGATGGCATTGTTTCGATGTACGGTACGCCAGTTGGCAAGGCACGCGTCCCATCTAAGGAGAAGCGATTAACCGT  
GATAATATCGCCACTATGCAGCTCCTGTACACTGGAGGATGTTGAACCCCTACCACCTGGCAGGCACCGGATGCTCTGTA  
ATGGAGCACCCGACTTTTAAAGTTATGTCCGTTACAGTATGGTAGGTGGTACTGCCAGTTACTGGTTAGCTTTCCAT  
TGGTATTTTTGCGAGAACCGTAAATGTCAAGTTAAACAAATGCTTGAATGATGCTTTGGGTATACCAATAACTCACTG  
AAAAAGTTTGCTCTTAATCTGACGCTCCGTTAGCGATGAACTGATCGAAAACCGGAGAAATGTTCCCGCATATTGAGGTT  
TCGCTGTATTACGGTACCAGTGGTTGTGGTGGTGAACCTTCAGACTGAAACTATGTGGATGATATTAGCTGCTTATG  
CTGACCATCCGAATGTAACTGCGTATGACGGTATTCAGTATTAGGATGTTGAAAAGCGCAGCAGAAAATAATTTAAGGATCG  
CTGGCAGACGTAATCCTGAATTTGATAAACTCGCTTACTTTCTCCAACAGGAGTGGACAGCGAAGAGCGGATGAT  
GCAGACCGCTTACAGCAGACTTTCCAGGCAATGAAAGCGGTTGAGCCGACGAAAAGAGTGAAGGTCCCTCTTTCCCTGTC  
TCAAAGTGGGGATGAAGTGTGGTGGTTCCGATGGTTTTTCTGGTATCTCCGGCAACCTGCAATGGGGCTGGTTTCGAC  
TGGTGTGACAAAGCTTGGTGGCGCTTCCGGTTAGCAGAATTTCCAGAATTATGTTGGGGCAGAAAGTTGATTTAAGCG  
TTGTATTAATCTTAGGATAAAAAAAGTTCCTCAATCAATGCAAGGCTACGAAAAGACAGCGAACTTTTCGATACCA  
CCATTGGCGATAACCAAGTTTTTGGCAACATCGCGGATGGGTTGATTACTGACGCAATAAAATCTACCGGAGCAGCGAAA  
AAAGCGGGCAGCGCAATTTGTAGTGTATGCGATTCGCTGACCGATGCGCCGATGTAATGTTGGTATGCTTTGGTGTAC  
TCCGGCAAATGACCTGGACCGGTAACCGGATTTGGTAGCAGCAGGATGTAATGTTGGTTATCTTCTCGACGGGTCTGGTA  
CGCCACCGGTAACCGATGTTCCGGTGTAAAAATAATCCCAACAGCAGATGTCAGACGATGCTGATGATGATTGATTC  
GATTTGAGCTGTGGCCAGTATTGACGGCACTCCGCTGGAAGATGTGAGTGAAGATTAATTTGAAAAAGTTATTGAAAC  
TGCCAGTAAGACTACGTCGTGAAAGCAGCAAACTTGAACAGTTTGACTTTATGTTTGAAGCGGTGCTTAGACTTTG  
AG

>Cluster\_14406

ATGATTACTCGTATCCCTCGTAGTTCTTTCTCTGCAAATATTAATAATACAGCCAGACAAATGAACACCAACCCCTGAG  
TGAATTTTATATAAGAACTCGAGGATAAATTTCTGCAAGGAGCTGGCGACGCTTCTAATTAAGAGCTTCTCAGAGA  
ACTGTAGACAAAAATGGTTCATATCTTTAGCAACAAGGATTTTGTCATTAATTTTCCAGCTCCGCTTACAAGCTGAT  
AAGAAAGAAATACGATAAATAAATAAAACGAAACACGACACTTACTCAAACCATGCCCCAATATTTGAAGAAATACCT  
AATGGAAATTTTACCTCAACGCTCAGACTCTTGATAAACAAGAAATTAACCTAAAATCAGATAGAAAAGAAAAAGAAAT  
TCCCAAGAATAAATTAATGTTAATGTTAATTTTCCGGGGCAGCCCCAAAACCGTATAGTATGCTGACACTTGGTCGA  
CAATATATTAATGATTTTTATCAGAATGTTGATTACAAACCCATCAAGATGATTACTCTCAGCTGAAAAATTTCTCAC  
GCCTTCAACAAAATGCAAAAACAGACTTTGGCGTTGGTTTCCAGCGCTCTGAGGGGCGTTGCGTTGCTGCTGCG  
GTGATTTCCGGCTAGTTATGAAAGCATATTTGACAAGATGGAATCAAATGGCATCAGTGTATTGGCAGCCATATCTATG  
GTGATAAACCATGCTTTGACCGTCCCGCTAAAGAATAAAGAAACAACAATGAAAGGATGTACCCATTAACGTTGCTGTTTA  
TGATCCTAATGTAACAAAGATAAAAATAAGAAATATGAGCGAAAGCAAAGAGGATTAATAACACTATTTCTGATGGATT  
TTATGAATGTAGATTATAGCTTCTGAAATGGTCAAATGATCATGTTATAACCAACTGTTGGCAATAATGCAACTT  
CCGAAGAACAGCTTATGATGTTAAAGGATCTGTGATGAAATAACCCCTCCATTATCACCAGCAACATGAATGCTGTT  
AATGGCAATTTGGTCAAGATCAACAACTTACGCAACTGATGATTACGCTCCAGAAAATGCCAGAATAACATGAAACAGAAA  
TGTTGACTGCCTATAATAGTGGACATATGACGTTATTAAATACATTTTAAACGATTAACCACTCTGTTTAAATACGTTT

AAATTCGATAAAAAAATATGAAGCCCCCTCCTCCTGGCAAATAATCTAATGAATATCCCGGTTGTTTTTCAGCGATACA  
GCATAAACACAAATGTTGTAGAGACGGTTTTATCTTGTCTTTATCTGACCATGCACGCTGTTTGGATTACCCTGAAG  
ATATATGATGTTTTTGGCAACACAAAGCCCCACAAAAATCTCCTGCTTTGAGTTGGCTTTTGAATTGGGTCACCGGTT  
ATTGCTGAATTAATCTTTAATACATTAATAAGATGGCTGAAAGCTTTGGCTTTACGGATAACCCTCGATACATTCGGGA  
GAAAAATATATGGAAGCTTTACTCAAAAAAGCATCCCCATACCGTACGCTAA

>Cluster\_5371

ATGCACGACGAGCGGACCCACCCTACACTACGACAGCCAGCACCGCTGGTGTCTACACGCGGATACAGCACGGCGA  
ACACAGGTTGGAGAGCCGGTACCTCTATGACCCGCTGGGCCGCGGACGGGAAACCGGTATGGCGCGGGAGCGTGACC  
TGACGGGGTGGATGTCGCTGTGCGTAAACCGGAGGTGACATGTTACGGGTGGGACGGTGACAGGCTGACGACGGTACAG  
ACCGGCACCACGCGTATCCAGACGGTATACCAGCCGGGAGCTTACGCGCTCATCAGAATCGAAACAGAGAATGGCGA  
ACAGGCGAAGCGCGGCACCGGAGCCTGGCGGAGGTGTTGACGAGGACACGGGTGTGACGCTCCCGCGGAGCTGGCGG  
TGATGCTGGGAGGCTGGAGCGGAACTGCGCGCGGAGCGGTGAGTGGGAGAGTGAGGCTGGCTTGGCGAGTGGCGG  
CTGACGGCGAACAGATGTCGCGCAGATGGAGCGGAATACATCCCGGAGAGAACTTCATCTTTACCCTGACCA  
CCGGGACTGCCGACGGCTTATCAGCCCGAAGGGGAAACGGCGTGGTGGGGGAGTATGACGAATGGGAAACCTGC  
TGGCGAAACAGTGCAGCAGCACCTTCAACAGTCACTCCGCTGCTCCCGGGCAGCAGTATGATGAGGAGTGGGGCTGTAC  
TATAACCGGAACCGCTACTACGATCCGTTGACGGGAGCTATATCACCAGGATCCCATTTGGGCTGAAGGGGGATGGAA  
CCCTGTATGCGTATCCGCTGAACCCGCTGACGCGGGGATCCTCTTGGGTTGTCTGGTGAAGACTGGTCTTGGTTCTG  
CCACAACAGTAAACAGGAACAAAATTTGGGGGGCGTTACTTTCGGGTGGGGCGGACCTTTGATGCAGTACGACGGCT  
ATGGCGTCTGCTGCCCTGCTCTTGGAGCAATGGCTGTGGTGGTGGGCAATGGGATATGACCTTCTCGCTAATGATGG  
GCGTGGCGGAGGCTCTGAGCGATGGCAGTTAATAAATCTCAGGCTGAAATGTGTACTGGACAGTATGTTGCTCTT  
TAGATAGCCACATGAGAAATGATAATTCCTCAGGGAGTACCGGAATGTTGGGAAGGATTTGACGGATGAAGAGAAGAAC  
TGCTTGGCCGGCGGACGATACGGGAAGCCGGGAGGATGGGACAGAAAGATGAGAATAGCGCAAGGGATCGTATGACGA  
TGAACGGTATAAAGATGAAATGGGACAGAAAATGGGAAACCCGACGTTACAGATTCAAAATTTGAAAAATATTATAGACG  
ATCTTTATCGGCCAAATGCAAAAGTAGGAAGTGAAGCAGCAGCAGATGCTGTTGTTATGAAATGGCCACAGGTGAAAA  
GTTGGTGGTAGAGACATGTATTGAAAGCACAGGATTTACAAGGGCTTTACAGGATTTGGTTGGATAAGAATCCAACAGC  
ATCTCCAGGGGATCGAGCAGCAGCAAAAACGTTCTTACAGATTTACAGAATGCTTTGGGAGGCAAGTAA

>Cluster\_17501

ATGCCGTTACCATTTCCCTTCGATTTTTAAACATCTGATTACCAGATGGTTTTTGAATGGCGGATGGAACGCCTACAGCG  
CATTCGCCAGAATCTGAAATATTGCCGATTTGAAGCAGTTTTACCAGAACCAATCCGGCTCAGTTTATCATCGACTGGG  
GCATGACAACGGACCCGCGTAATATTGATATGGCCTGCCGTTGACCATTCCTGTTTTACTCTTCCCTAAGCAGGAGGAG  
TGGATCCACTGGATTATGGAACGCTGGGGCAATCGGAGAAATGTTATACCAGAAAATCCCGTGAATGGGGCTCAGTTG  
GACCGGATCGGACTGGCTGCTCGCTTGTCTCTTCAACAAAGAAATGGTTATCGGTTTCGGCTCCCGTAAAGAGAAAT  
ACGTCGACAGCACTGGTGACCCGAAAGCATTGTTCTGGAAGGCAGCAAGTTCGTGGAACCGTACCTGTAGAGTTTCGC  
GGTTCGTGGAGCGAGAAGAGCAGCGCCATATATCGCTGTTGAGTTTCTGAAACTGGTGGCCTTATCAAAGCGGAGGC  
TGGCGATAAATTTGGTCTGGTGACCGTACCACGCTTTATCTGGTTGATGAGGCTGCATTCCTCAGCGTCTCTGCTGA  
TTGATGCGCGCTTTGCTCACAAACGACGCGTGGCTATCCGACTGAGTTCAAGTTAACGGCATGGCTAACCCCTTCGCTCAG  
AAGCGTATGGCGGGAAGATACCGGATTTACATTCCTTGGCGGATGATCCCGCAAGGATGAAGAGTGGTATCGCAG  
GGAATCGGAGAAAATCGATAATCCGTTGGTGGTGGCAGTGAACCTGATGTAAGTACAGCGCATCAGCGGAAGGCGTTTC  
TGATTCATCCGAAATGGGTACAGGCTGCCGTTGATGCGCATACAACTGGGTATCCAGCCAAACAGGCAACGACTTGGC  
CGGATGGATGTCGCGCAGAAAGGCAGGGAACAAAATGCTTTTTCCACCGCTATGGCTTCTCCTGGAAAATGGCGGGA  
ATGGTCCGGTGTGGGCGAGGACATTTATCAGTCCGTCGAGAAGTTTTTCGGCTTTTGGCAACAGGACAACCTCGAAGAGT  
TTCGCTTTGATGAGGACGGGCTGGGCGCTGGCGTTTCGCGGCGATGACGCGCTATCAACGAACTGGCTAACCGTGGCGCT  
CGACCGTCAATATCTGCCACACCGTTTCGAGGTAGTGGCGGATTTTATCGGATGATGAAGCTGTTCGCGGGGCAAA  
CGGGCAAGCCGACGCTGTAACAAGGACTTCTTCGCTAACCCAAAGCCAGAGCTGGTGGCGGTTACGTAACCTTTTTTC  
AGAATACCTGGCGCGCGGTTGGTTGAAGGTATGGCTTACAAACCCGGACGAAATCATCTCAATCAGCAGTACGATGGCCTC  
AAAGATAAATCATCATCGAGCTTTCGACGCGGACCTATTCATTAATGGTGTGGGAAAAATCGTTATTGATAAACAGCC  
TGATGGAAACCGATCGCCAAACCTTGGCGACTCGGTGATGATCAACTATGCCCAATGAATTCAGCCCTGAACATCTGGG  
AGCTGCTAGGGAGACAGGCTGA

>Cluster\_43240

ATGTTGAAGCGCTACTAAAAGACCCCTCTTAAATTTATCTCCTGGTTATTACTTGTACTTTTTATATCTCAGTCTG  
CCTGAATATCGCCTTTTTTAAACAGGTGCTACAGGTGTTACCGTGGATTACATGCATAACGCTGCTGGTTTTCTTGTGCA  
TGCCGGTCTGTCGATTCAGCGTGAATTAATATTGCTGACACTAGGCTCTTTCATTATGGCTTAATCGTCCACTCGCCTGC  
CTGTTTATCTGGTGGTGGCGGCTGCACAAATTTTCATCATGACCTATGGCATCGTCAATGATCACCAA  
TATCATGATACCTACGCGGCGGAAAGTTATGCGTTGATGACGCCACGAAATGTTATTAACGCTGGGTTAAGTGGCGTGT  
TGGCCGCGATTATTTGCTGCTGGATCAAAATCAAACTCCACCCCTCAGCCTCGCGCAGGCTTCTTTCCGCGGGCAAC  
ATCCTGATTTCTGTACTGCTGATTTCTGCTGGTTGGCCGACTGTTCTACAAGACTATGCTCCTGCTGTTTCGCAACAACAA  
AGAATCGGTGAAATCTTTAAGCCGCTCCAACAGCATTGTTGCTAGCTGGTCTGCTGCTGCTCCTCACCAGCGGTACGCCAAC  
TGCCACTGATACGATTTGGTGAAGATGCTCACCCAACCCATTAATGCAAAAATGGGAAACGCAAAAACCTGACATTTTGT  
ATCGTCCGAGAAAACGTCGCGCGCAGAGAATTTCTCGTGAATGGTTATCCACGCGAAACCAATCCTCGCCTGGCAAAAGA  
TAACGTGGTCTATTTCCCTAATACCGCATCTTGTGGCAGCAACAGCGCTCAGTGGCGGTGATGTTCTCGGATATGC  
CGCGTGAGCACTACAAGAAGAGCTGGCACAGCACCAGGAAGGCGTGGATATCATCAGCGAGCGGGCATCAACGCTG  
CTGTGGAATGACAACAGTGGCGGCTGTAAGGCGTTTGGATGCTGCTACCTCACCAGAACGTCACCGCTGACCTGCC  
TGGTCACTGATCAACGGCGAATGCTATGATGAAGTGTGTTCCACGGGCTGGAAGATTACATCAATAACCTGCAGGGTG  
ATGGCGTATGTTCTTACACACCATCGGCGACCCAGGCGGACCTATTACAACCGCTATCCGCGCAGTTCAGGAAATTT  
ACCCCAACCTGCGACCTAACGAGATCCAGACCTGTACCCAAGAGCAACTGGTGAACACTTACGACAACCGCTGGTTTA  
CGTCGACTATATTGTTGATAAAGCGATTAACTGCTGAAAGAACATCAGGATAAAATTTACCACGCTGGTTATCTTT  
CTGACCACGGTGAATCGTTAGTGAATAAGGCACTATCTGCACGGTCTGCTTATGCAATCGCCCGGATAGCCAAAA  
CAGGTGCCAATGCTGCTGCTGGCTGTCGGAGGATTTCAAAAACGGTATCAGGTTGACCGAAGCTGCCTGCAAAAACAGGC  
GCAACGCAACACTATTCACAAGATAATTTATCTCCACGCTATTGGGATTAATGGGCTGAGACGAAGTATTAACAGG  
CTGCGGATGATATTTCTGCAAACTTCAGGAGTGAAGTGAATGA

>Cluster\_32376

ATGCTCAATTCAGAACCCTACCTTTATCAGCGTAAACGGTGTCTTTTACATCCGCTTTAGGATGAAGACCCTAGTCCGCT  
GACCGCTTCGCTTCTCTCACAAACGTTATAAACTAGCGTCACTATCTTTACGGACCAAGGATAGACGCTACCCTATGG  
CTCACTACCGGCACATCAAGTCAAGCTTAAAGCAATCCACGCAAGCAACCTAACCGCTTTATGAGGAGCTACGGGAA  
CACCTGAAGACCATGTCGAGTGGGAACCTAGTGTGACCGCGATGACCTGAACGACCTGAGTCTTACCAGCTCTACGT  
TGACAGTACGATGACATCAAGTCCAACCTTCGGGAAGCTGTAGCGACTGAGCATCTGACTGTAGACCAGCATCGCTATA  
TCAATGACGTTATCGGTGGCTTAAAGCGTGTGAGGATGACTCAAAGGCGATACCTTGGCTGTTGTTGCTTACCTTGAG  
CCTGAGACTGGCAGTCTAAGACCGTCCGCTCCTTATCTGATTTGGCAGAGCTGAAGTCCCGGAGCTAAAGCACTGAC  
CCTCGGCTCTCATTTGAGCAGTACGAGCAGGAGAAGCGCTCAGAACTGGAAGCAGCGACCCCTAAGCGAGACCGAGCGT

CTCACTCTACGTTAATCGAGATATTCGACTATCTGGATATTCAGGATGTCAGCAAGGCGACCCGTTTCCAGATATGCTCAGG  
GTCCGTGAAGTCCCTCCAGCAGATACCGAAGAACCGCAAGCAACGCTTTAAGTCTATGCCGCTGCTGACTGCTGAACCG  
GGAGTCTAAGACTGACTGTTGGATGTCGTTACCATCAACAATAAATATCTTATCAAGATGGCTGCTGTTTAAAGTGGG  
CGGTACGCAACGACTTGTAGTAAAGAACTGACCGAAGGCTTTGAGCTGAAAGTCCCGCAGCGTAAAGCCTCCGACGCT  
CGTATGAAAGGCTAAGGTTGATAATGCTATGGTATTCGATGGCTCAAGCTGATGAAGAACGGCTACGCTGAGCAGGTTA  
CTACCCTATTACGCTACTGCTCTGGCGGCAACTACTGGAGCAAGACTTAATGAGGTGGCTCAGCTTACAGGTCAAAGACG  
TCAGGACCTGAGGCGGGGACCGTGTATATCCATATCAACGAAGACGATAGCAGCCTACCGGTAAGAGCATCAAGAAC  
GCCCATAGTGACCGCTGTGCTCCGTTGGTAGATGGTGTATGGTTTTTATTGGCTGACTTTATGCTACTCGTGAAGA  
CCGTGAAAGGCTAAGGTTGATAATGCTATGGTATTCGATGGCTCAAGCTGATGAAGAACGGCTACGCTGAGCAGGTTA  
GCAAAATGGTTAACAGAAGCTTGTACTAAAGTCTCGCTGACCGTAGCGGCTTAGCGTTCCACTCATTAGACATACA  
GTGGCGACCCAGTTAAAACAACATGGGGTTCGGGTTAGCGTATGCTCAGCGGATATGGGTATAGCTCAGGGTGGATTAC  
CTATGACAGGTATGCGAAAGAAGTCGAGGTAGATAGATTGGTTAATGTGATGGCTGATGTTTATAAGGAGACTGGAGTAA  
ATGGCTGA

>Cluster\_58202

ATGGAAATCACTAACCCGATACTCACCGGCTTCAACCCGGACCCGCTCCCTGTGCGGCCAGGGCGAGGACTACTACATCGC  
CACCTCGACCTTCGAGTGGTTCGCGGCTGCGCATCTACCACCTCCCGTGACCTGAAAAACTGGTCCGCTGGTCCAGCACC  
CGTTGACCGCGTCTGATGCTGGACATGAAGGCAACCCGGACTCTGGCGGCGCATCTGGCGCCGCTGAGCTAGCTACGCC  
GACGGTAAATTTGGCTGCTCTACACCGACGTGAAGATTGTGACTCGCCGTGAAAAACGGCCGCAACTTCCCTGCTCAC  
CGGCCCTCCATCGAGGGCCATGGAGCGAGCCAAATCCCGATGGGCAACGGCGGGTTTACCCGCTCCCTGTTCCACGACG  
ACGATGGCCGCAAACTATATCTACCGCCGTGGGGCCGCGCCACCACAGCAACCCGCAACACCACTCGTGTGTACAG  
GCGTTTGAACCCGACAGCCGCTCTCGCCGAGCGCAAAACGCTGTTTACCGGCACGCGCTCTGTACACCGAAGG  
CGCGACCTGTATCGCCACGCGGGATGGTACTACTGTATGGCCGCGGAGGGCGGACAGCTACGAGCAGCGCTGCTGG  
TGCTGCGTTTCAAAAAATATCGACGGGCGTACGAGCTGACCCGGACGTAACGATGATGACAGCTGGACCTCCCGGGAG  
AACCCGCTCGCAGAAGAGCGCCACGGCTCGCTGCTGACGACGATACGGGTGAATGGTACATGGCCACCTACCGACCG  
CCCGCTGCGCCTGCCCGCGTGCCTGCTGGCCTCGCGCGGACGCGGCTACTGCCCGCTGGGGCGGAGACCGGATCG  
CCCGCATTGAATGGCGCAGCGCTGGCCGTACGTGAAGGCGGCAAGCAGCGCAGCTGACCGTGAAGGCGCCGAAGTA  
GCCGAGCAGCTGACCGGTTCCGGGCAACTGGCGGGACGATTTTCGACGCCAGTTTCGCTTACCCGGAGCTGCAGACCT  
CGCCATTCGTTCCGACGACCCCTCGGCTCGCTCACCGCGCCCGGCTTCTTACGGCTCTATGGCCACCTACGCTCA  
ATTCGACCTTACCCAATCGACCGTGGCGCGCCGCTGGCAGCACTTTCGCTTCCGGGCGAAGACGGGATGGAGTTCTCG  
CCGTGCACTTCCAGCAGAGCGCGGGCTGACCTGCTACTACAACAGCAAAAACTGGAGCTACTGCTTGTGGACTACGA  
GGAGGGACAGGTTAGAACCATCAAAGTTATCCAGCTCGACCACAACGTGCCGTGCTGGCGCTGCACGAGCAGCCATTC  
CGTGGCCGGAACATGCGGAGAGCTGCTGCTCGGGTGGACGCTGGATACGCTGCTTACCGCTACAGCTACTCCTTTGAT  
GGCGAGCGTGGCACACCGTGCCTGACGTATGAGGCGTGAAGCTGCTGGACGACTACATCGCGGGCGCGGCTTCTT  
CACCGCGCGTGTGGGCTGCACTGCGAGGACATCAGCGGCGACGGCTGCTACGCGGACTTCGACTACTTACCTACG  
AGCCGGTCTAA

>Cluster\_64452

ATGAGCAACAAGATTTTTCACTTTTTTATTTTGAACCATTGATCGGCTTACTTCCCTCGACAACACAATTTTTATGT  
TGCTGAAGCCAGAAAGCGTCTATTTTCGAGTTTAGCGATTCTGATCTTGAAGCTGAAGCCAGGCAGAGACAACAAGATT  
ACTATGAGGCGCCGCTAAGCGTTTTGACCCGATATGACACGCAAGGGCTATCTGTGAACAGGCTCATGATGAAGGA  
ATTTTACATTTGGATTGCTCTCAGTGATATGAAAAAATACGGTTTTCACTTCTGCTGACAGCAGGAATGTTTCATCAGTTTCA  
CAAGGAACCTAGAGAGAAGTGTATCAGAGAATTAGCCATTGGCTCGACGCTAAATCCGTAACATCGATGATCTGGGACA  
TTAGCTTCCCAAGCTAATGAAATTTTGAATTTGAAATGGATTGGATGGATATCACCAGCAAGGCTTATACGAAAAAATCGAT  
GCCGTGCGCAAGTGGTTAATGTTTATAAGCACGGTGTGGCCATGCCATCGGGTCTTCCGCTCGCCGCTGAGTA  
TTATCAGGATATCAATATTTCAAGAGGCTACAGATTTAGTCTACGCTCATGAGCAACTTGGAGTTACAGAAAACAGTTTA  
TAGAGTTTGCAGATGCGATTACAGCTTTCTGGAATGATATCCAACTACTGTATGCGCTCAGCTATTCGGGAAGAACCT  
GAATGGATAAAAGCGAATATAAAAAACATGAGAAGAAAGTTAAATGCTTCAGGACTAA

>Cluster\_25989

ATGGGAAGTATGAAAGAAGTCTGTTTGAATGCAGGAGGAACGGCGTACGAAATGGATTGCGGAAAAATATCCGGATGC  
TGAGGAAGGAACCTCTGAATGGGATGCGGCAGCGCAGGAATACAGCTGTTTCCAGGACTGGATGGAAGAGGCGGCTGAGC  
AGCAATATTTGAGGCTTCGCTTCCAGTATTCCTGACCCGCTGACGATGCAAGGCTGAACGGATGAGTTAGAGAGC  
CTGATGCACTTCAACCAACCCAGGATCGTAGAGCGGATGGCTTACGTTTATTGCGTGAGTGTACTGGACGCTTCTGAT  
GTACAGCGCAAGAGCACTTCTTAGTTCATCCCCGCAATTACAGAAGTTCTGACAGGCTGATTCGTTGGTTCCTAATA  
AGGAAGACAGAAGAAAATTACTTCTTCCAAATGGGTCCAGCAGGAGTCCGATAAAGACACTCCTGAGAAAGTTTATACC  
TGGCGAGCTCAGTCTTGTAGCGAAGAAGACATTTAGAGCCACAAGTGTAGGTCGGTATTTTCAAGGATGCTGAC  
AACCCACATGAGTGGCCATTGGAGGAGATTAAGGGTGTAAATCAAGACCCGAAACGCACTGGTACACCGTAATGGAGTTA  
CCGAATCTCTTGAACCCGTGTATATCAGTTCGGGGAGTGTGCAGAAATGCTATCTGCACGGTACGAGCATTTATACCGTG  
CGGCTGAAACCCCTTCTGACGGAAGATGCACTATACAGGACGGATGATGCGATATTTCTGA

>Cluster\_39422

ATGGCTCGTAAATGGTTGAACCTGTTTACCAGGGCGGCACTCTCTTTCGCTGTTGCTGGCAATGCACTGGCAGATGAAGG  
GAAAAATCAGGTTGTTGCGCGCCGATCACTGACTAACGCAATGCAGGACATTTGCTACGAGTATAAAAAAGAGAAAGGGG  
TGGATGTGGTTTCTTCTTTCGCTTCGTCATCTACTTTGGCCCGTCAGATTGAAGCGGGTGGCGCTGCGGATCTGTTTATT  
TCTGCCGATCAGAAATGGATGGATATGCGGTTGATAAAAAAGCGATCGATACGGCTTCGCGCCAGACACTGCTCGGCAA  
TAGCCTGGTCTGTAGTACCGAAGCCAGCGAGCAGAAAAGATTTCACCATCGACAGCAAAACCAACTGGACTTCGCTGC  
TGAATGGCGGTCGCTCGCGGTTGGTATCCGGAACATGCTCCGCTGCTGGCATTATGCGAAAGAGCACTGCAAAAACTG  
GGCGCATGGGATACGCTCTCCCCGAAACTGGCTCCGGCGGAAGATGTTGCTGGCGCGCTGGCGTTGGTCAAGCAAGTGA  
AGCGCCGCTGGGTATTGTTTACGTTCTGACGCAAGTTGCGCAGCAAAATGGGTAAAAGTGGTTGCCACTTCCCGGAAGTTA  
CACATAAAAAAGTGAATATCCGGTTCGCTGTTGTTGGAAGGGCATAACAATGCGACAGTGAAGCATTTTATGATTATCTG  
AAGGGCCCGCAGGCTGCGGAAATCTTTAAACGTTACGGATTTACAACCAAGTAA

>Cluster\_21082

ATGAAAAAATATAAATCTGAGTTTATCTCTGAATTTAAGAAAAATACCTTTCCCTGTTTACTGGTCTACATGGTTCCCT  
TTTGGGAATGATTGCAGGATTTTCAATGTTTCCCTTTCATTCAGAGATCCTGCTTGGCAAAAAATAGGGCGTTGGGCGG  
GCAGATTGAGCAAAAAGCTCGTCGACGGGCGAGATTAATTTTATCGCTTTGTTTCCAGAAAAGAGTATACAGAACGG  
GAAATAATTGTCGACAAAATGTTTGTCAAGCAATTCGAAATCCTATGATGATGGCAGAACTGGCAATTCGTTGCTCCGGA  
AAAGTTCCAGAAACGAGTGTCTTGAAAGGCTCGAAATTTCTTGGAGAAATTCGACACATAAATGAAATGTTGATTTTCT  
TGGTTCCCATGCTGAGCGTGGATATTCCTGCAATGTTGCTGGCAGCTCAGGGAAAAAATGGCCGCTATGTTTCAT  
CAGCAACGAAATCCAGTGTATGATGCTGGAATTCAGTACGGCGTAAATTCGGGGCGGCTTACATGCCCCGGGAGGA  
TGGATAAAAACCAATTTATTCAGTACGACGAGGATCTGGGATATACCTCCCGAGATCAGGATCATGGTCCGTAAT  
ACAGTGAATTTGCTGATTTTTCGACCTATAAAGCGACATTTACCAATCATTGGACGCTGATGAACATCAGTCAGGCT  
ATGATTATACCCTTTTCCGGTTTATGATGAAAAAACAATCTACTGACTATTGA

>Cluster\_6103

ATGCAGGATCGCAATTTTGTATGATATTGCGGAAAAGTTTCCCGTAACATTTACGGCACCACCAAGGGCAGCTTCGACA  
GGCTATTCGTGGCAGGATCTCGATCGCGTGTGGCGGAAATGGGCCCGCAAAAACCTGCGTGTGCTGGATGCTGGCGGTG  
GAGAAGGGCAGACCGCAATCAAAATGGCCGAGCGTGGGCAATCAGGTCATTTTATGCGATCTTTCTGCGCAGATGATCGAC  
CGCGCAAAAACAGGGCGGAGAAGCAAAAGGTGTAGCGCAACATGCAATTTATACATTGCGCCGCTCAGGATGTTGCTTC  
GCATTTGGAAACGCCGTTGATCTGATATTGTTCCATGCGGTGCTCGAGTGGGTGGCTGATCCCCGACGCTATTGCAGA  
CCCTGTGGTCAGTGTTCGCTCCAGGCGGCGTGTGTGCTTAATGTTCTACAATGCGCATGGTGTGTTGATGCATAACATG  
GTCGCGGGGAATTTGATTACGTGCAGGCGGGAATGCCGAAAAGAAAAACGGACGCTTTCGCCAGATTATCCACGCGCA  
CCCGGCGCAGGTTTATCTGTGGCTGGAAGAAGCTGGTTGGCAAAATATGGGTAAGACAGGCGTTCGCGGTGTTTCATGATT  
ATCTGCGCGAGAAACACCAGCAGCGGACTGCTATGAAGCATTTACTTGAATTAGAAACCGGTTATGCGCTCAGGAACCG  
TATATTACCCTGGGGCGTTATATTCATGTCACCGCGCGCAACCGCAGAGCAAGGATAAAGTATGA

>Cluster\_14839

ATGCTTTATGAAGTCGATACCGGTATGATCATGATTAATGGAGAGGAAGATCATCCATTAAGTTATCTAACCCGGCGGG  
GCGTCTGCTTTATGAACCTATCATCAATAATGGTAAAATTTCTCGACAGAGACGACCTGATAAAGAAGGTCTGGGAGGATC  
ATGGTTTATCTGGTCTTCTCGGTGAGTCTGAATGTTGCCATAAGTGAATCAGAAAAGCATTTCTGATACATTAGGATCGGCC  
CCTTTACTGATAAAAACGATACGTTGGCAAGGATTTAGCCTTGGCGGCATATTGAACACCACCGGTCAGGCGCGCGGT  
TGTTTCAACGCTTAAAGTGAACAATCTGCCCTGAAGCATTCGATACGCTAGCGCATAAGAAAAGATGCGCATCGCGCTAAAC  
AATTAATATCGCTGCACAGACTCTTTATTTCTCTGACGTTTATTACTGATTACCGTTATCGGCACCCTGTTTTACTG  
TTGCACCAACGGGATTTCTATGCGGAGAGTCTGAAAAGATTCTGATATGATCTGCTCGGTAAGTGGACCGGTGACGGT  
ATACCTGATCAATAATAATATGATCAGCCGCGACAGCACCTTTAATCAGTAAAAGAGGTCATCGCCAGTCAACATA  
TCGACTGTCAACATCAGGTTGCGAGATTTACTATTCCAGGTTTAAAAGTTCGAGATAGAAAATATTTTCTGGCCATT  
TGTTATCAGCAGGACAGTATCGACGATTATAAGAACTGCATTTCTACAGAAGACTGACCGGAAGTTAA

>Cluster\_65242

ATGATCCCAAATTTGGGTTACAGAACCAGTCGGTTTATCCCCGCTGGCGGGGAACTCGGACTTAAAGATCGCATCACA  
GTACTGGAGGGCGGTTTATCCCCGCTGGCGGGGAACTCATGAAATGCAGGAACGTGAATTTCTCGTCCGGCGGTTTAT  
CCCCGCTGGCGGGGAACTCGGGATAAATCGGCCCGCATTTGGCGGGCTTTGCGGTTTATCCCCGCTGGCGGGGAACT  
TCAAAGGCAATACGGCGGGCATTGAGTTGCCAGCCGTTTATCCCCGCTGGCGGGGAACTCCCGCAGCGTACGCACGA  
GAGTCAGTCAGTGGCGGTTTATCCCCGCTGGCGGGGAACTCCCCCTGATGAGGACGGCGGGCGAGCTTGTTCGCGT  
TTATCCCCGCTGGCGGGGAACTCGGCAATCCGTTGGATTATTGTTTTGTTGCTCCGGTTTATCCCCGCTGGCGGGG  
GAACCTCAATAACTCGCGTAAATGCTCTGCGGCGTACGCGGTTTATCCCCGCTGGCGGGGAACTCCCTCCTGTACCAC  
GATCGGCCCTCATACCCCGGTTTATCCCCGCTGGCGGGGAACTCCAAAAACGGCGGTTTTCGATTTTATCGG  
CGGTTTATCCCCGCTGGCGGGGAACTCTGTAACATAACTATTATTAATTAATGATTTTTTAAAGCAGTCACAATCT  
ACCAACTTTATAGTATCACACAAACAACACATCCATTATGTTAAAGAGCACTTAAATCCATTGA

>Cluster\_12707

GTGGGATCGCAATCCAGCACCAACCAGCACATACACCGAACACACTAAGTTTATCAGACTGACAATGCCACGCTCTG  
TCGTGGGAATGCGCTGGAATATGCGCGTGTGAGCGAGAAAGCATTTGATGCTTAATCCTGACCCGCTTACAGTT  
CGGTTGCGACACACAAGGCCGACGCACCAACCAGGCGCATTGCAAAATATCTGAACGGCGAGAACCTTACCCTGTT  
GATGGGTTTCGCGGTGAAAACATGGACGCGCTTCTGTTGGCTTACTGGACACAATTTGATGGCAGCAGGCAACCCGCG  
AGTCAGGCGGGCGGTTATGCCCTGGTATTTACTGACTGGCGCAACTACAGCTTTAACCCGATGCGCTTTCAGGCGATG  
GCTTTACATGGCGGCGCATTTGCGTGGAAACAAGGGAGGGGTCACGAACACCACATACCGGGTATTTCCGGCATCAG  
TGCAATACATCGTCTGGGGCAGCAAAGCCATTAGATAAATCGCTTCGGGACCGTTCGACGGCTGATGAGCTTCCC  
GGTTATCTCGTCAAAGAAAATGCACCCGACCGGAAAACAGAACTAATGGCGGAACTGGTCAGGATGTGAATAGTG  
CGGAAACAGTCTTGTATCCCTTTATGGGTCAGGGAACAAGGTTGGTTCGACTGAAAGCAGGACGCAATTTATTGGT  
ATAGAAAACAGTATCATTTATTTGATGTAGCAACACAACGGCTCAAAACGGCGATCGAACATAA

>Cluster\_24754

ATGAACGAAACGCTGAATGCACTGATTTGTGCGCACGCCCGTAACCTGCTGCTGGCGCAGGGCTGGCCGGAAGAGACGGA  
TGTTGACCCAGGAAATCCGAACATATCGGGCTGGATCAGCATTTACGTGCGGCTGGATGCGCCCGGCTGGCGACGTTAC  
TCGTTAACCGCCACGATGGCGTGTGCCCGCACCTGGCTCCACCATTCAGAAAACGACCGGAACCGGGCGGAACTG  
GTACTGTCCGCGAGTCAGTGGCAGTCTGCTGCCGCTACTTCCGGCAGACGGAACACAGGTGCTTTTCCGATGCGCGGTA  
GTGGCTGGCAGAGGACGAAATCAGGGCAGTCTTGTATGCGGTACGCGATGCGATGCGTGTGTCAGTTACCAGGTGGCAG  
AAGATACCGGCGTATCCGGCGGCGCTGACCAACAACCGGTGACGCTTACTGACCCGACAGCGCGGCTTTCGCGCTG  
GTCGTGAAGGAAAGCGATTACCCCTGCTGGCTTGTATGAAGATGACGAAAACCTGCCCGTGGTGTGATGCCATCCTGAA  
CCGGGGCGCAGCTTTTCCGGCGTGGAAATGATCTGGTCAGGATTTGATTTAGCATATCCTGTCCAGTGGGCTGGCCT  
CGGATGTGCTGCTATACCGGATGAACCGCCCGCGGTTGACCGTTGTGTTCTGCGGGAAGTTGTCCGGGAAGCC  
CGGCGGAAATCCGTAGCTGCGGATGCCCTGGCAAAAATCAGGGGCTGA

>Cluster\_60390

ATGAGTCCAGTGTACACAAATGTCAGCCAGCCATACGCTGGACGAGCAAAACGCAAAAGATGAAGCGGCATTTGCT  
ACAGGATATCCGTCGCTCGGCTTACGTTATCGGCTCGATTGCGCGGCTGCAACGCCGTGAAATCGAAATTTTGTGCTG  
CCATTACACAGATTTCCGACGAGAAGCTTTTGGCATTAAAGTTGTTTTCATCACCGCGTCACGCCGATATTTGTTATTT  
ACTGGCGAGTACCCCGGGGATGCGTATGCTGCACTTCGGGCGTATGATCTGCCCCGATCATAAAATTTGTTGTTTC  
CTACGGCGGCTGCGGTGTCGGCGGCGGTTATTTCCACGATCTCTACAGCGTCTGGGGCGGTAGCGACACCATTGTCCCA  
TTGATGTTTGGATCCCGGCTGCCGCAACACCGGCCACCATTCACGGTTTCGCGTGGCGCTCGGTTTGTGTCGAA  
CAGAAGATTACGCTGTGGATTATCGCGATCCCACGGGGTACTATGCAACCGTTGTGGCGGAGATCCCGCCATCACA  
GCGTATCGCCATTGAGCGAGAAGCGGGCGGCTGGCGGCTATCGTACGGGCGAGAAATTTGCGATCGGCTCCTGCGCC  
ATTTAAGCAGCATCCTACAGGAAATCGGGTAAACCTGTTGCGCGATGCCGACGATCCACGCTCAATAGTATCGTT  
CAGCAACTCTTTCCGCTACTCCGGGGTTACATGACTGA

>Cluster\_48798

ATGCAAAACAGTCTGTACCAGGCACTGCTTGGAGCCACTCACGCCCCCGGTTGGGGCTTACCGTCTGGAATGGCAGCGA  
TCCGGCCGTCGGTCTGCGGCTACCGTAATAATATCATGGCTCCTTAAACGGAAGCGCTGGCAGAAAACCTGCCCGGTC  
TGCAACGACAGTGTGGTGCAGAAATTTTTCGGCCATGTTGCTGAATTTATCCGTCAGCATCCACCTGCGCCGGTA  
TTGGCGGGTATGGACATGCTCTGCTGCTGGATAGCGTCTTTTCCCCTGGCTGAATGGCCGTTGGCTGGCCGATCT  
GACCCGACTGGAATATTGTTTATCGATGCGTTGCATGCGGCGGAGACGACGACCTCGTATCCGAAGAACAGTGGTGC  
GACTGGCGCAGACCGGATGTTGCTGCTGACTGCGGGCTGGTTCTTCTGTCGCACTTTTACGTCGCTTATGCGGATA  
TACAGCCTTGGGCACTCATCAGGAGGAGGACCTTTGTTGACCCCTGACGCGAGGACAGGTCGCTGTTGTTCCG  
TTTGGGGATGACGTGCGGATTACGCTTCTCAGCCCTGCCGACTTTTCGTTTATGGTGGCGGTACATGCCGCAATAAC  
TGGCGCAGCAACGTTGACGGCCAGAGCATGACTGCTGTTTTGAACCTGGCTCTCTGTGCTGCGCCTGCACCAGAAC  
AGGCTACTCGGGTGGCTGGCTGCACAGAGGAGAAATGA

>Cluster\_37722

ATGGGTAATCCGGTACAGGCAAAAGCAGTCTGTGTAATGCCATTTTTAGTCCCGTATCTGCGCCACACATCCTCTGAA

CGGCTGCACCCGCCAGGCTCATCGTCTTACCCTGCAACTCGGTGAACGCAGAATGACGCTGGTCGATCTGCCCGCATTC  
GTGAAACACCGCAGCATGATCAGGAATACCGGGCACTTTATCGTCAGCTGCTACCGGAACTGGATCTGATATCTGGATC  
CTGCGGGCTGATGAACGTGCGTATGCTGCCGATATGCGCATGCATCAGTTTTACTGAATGAAGGTGCAGATCCCTCGCG  
TTTTCTGTTTTGTTCTCAGCCATGCCGATCGCGTGTTCCTGCTGAAGAATGGAATGCCACAGAAAAATGCCCGTCCCGTC  
AGCAGCGCTCTCACTGGCGACGGTGACAGCCGGGTGCCAACCTGTTCCTTCATCATTCCCGTACTCTCCGTTGCT  
GCACCTGTGCGCTGCAACCTTCCAGCGTTTGTGTGCTGATGATCCACGCACTGCCACCACAGGCAACCAGCGCGGTGTA  
TTCACATATCCGGGGGAGAAAACCGCTCTGAACAGGCCAGAAAACAGCACACAGACTTTTGGTGAAACCATCCGGAAAA  
GTTTTGACGTGCGCGTTGCCGTTTTCAGTTTTCCCGCCTGGATGTTACAGCTTCTGCGTAAAGCCCGGACCGCATTATC  
CACCTGCTGATCACTGTGGGAGCGTCTGTTCTGA

>Cluster\_23030

TTGAGTGGGGACGCTGAATAAAAAATCTCTGGGTATCGTATGTTGTTATCGGTTGGACTGCTTTTGGCGGGCTGTTTC  
GGGTAGCAAATCATCCGATACAGGAACGATATCCGGCTCCGTTTACACCGTGAACCGGGGGATACGCTATATCGTATTT  
CGCGCACCCAGGGAACAGCGTAAAGAACTAGCGCGATGAACCGCAATTTCCCCCTTACACCATTGAAAGTGGTCCAG  
AACTAAACTGGGTGGGGCGAAAAGTAGCAGTAGTACACGTAATCAACCGCAAATCAACGACAAAACCGCATCGGT  
TACACCGTATCAGCGGTACCGAAATCTTCCCTGCCCGCAGTAGGGCTACGTTGTTGGTTATGGCCAACGACAGGAAAA  
TTATCATGCCGTAATTCGACAGCAGATGGCGGCAATAAAGGGATGATACTCAGCTCCACGAGGTACACCTATTTACGCC  
GCGGTCGCAAGAAAGTGTGTATGTGGGTAAACAGCTGCGGTGCTACCGTAACTCATCATGATTAACACAGTGAAGA  
TTACATTACGGCTTACGCTCATAATGACACGATGCTGGTAAATAATGGGCAAAGCGTGAAGCTGGGCAAAAAATCGCCA  
CTATGGGGAGCACTGATGCGGCATCTGTTCGCCGTCATTTCCAGATTGCTTACCGTGCACCGCAATTGATCCGCTACGT  
TACTTCCGCTCAGGCGACGCAAGCCAAAATGCTGA

>Cluster\_14663

ATGACTTTACGAAGTGAATACTGACGGTCACTTACGGGACAGACAAGGTAACGACGTTTCACTCTCAGTCCAAAC  
GGGAAGATCACCCCTGATCGTCTAACGGTTGCGGGAAATCGACGCTGTAAACTGTTTTTCCGCGGCTTTTAAATGC  
CGAGCTGGCAGCCGATTTTCCGCGATAATCCATAAATAGTCTCATCGCCAGTTGGCCCGCAGCTTTCGCTG  
CTGCCCTCAGCACCATTAAAGCCAGAGGGGATCAGAGTCCAGGAGCTGGTTTTCGATGGTTCGTAATCCCTGGCTGCTACT  
CTGGGGGCTCTCTCCGCTGAAGACAATGCACGAGTAAATGTCGCCATGAACAGACCCGGATCAATCATCTTCCCGTTC  
GTCGGTTAACCGAGCTTTCCGGCGGTGACGCCAGCGGCATTTCTGGCGATGGTCTGGCCAGAATACGCCGTTGTA  
TTACTGTGAGCCCAACCACTAATTGATATCAATCACCAGTGGACCTGATGCGGTTGATGGGCGAATCCGCTCA  
GGGAAAACGGTGGTTCGCTGTGCTGCACGACCTTAATCAGGCTAGCCGGTACTGCGATCAACTGGTGGTAATGGCAAACG  
GACATGTTATGGCGCAAGGCACACCAGAAGAGGTGATGACCCAGGATGCTGAGAACAGTATTCAGCGTGAAGCGGAA  
ATACACCCGAGCCGGTATCTGGCAGCCGATGTCCTAATGAGGTAG

>Cluster\_14985

ATGGCTCCTGCGTTAATACCTTCATATAACAAGGACTTGAACATTACGCCATTTGGCGAAAACGCTCTTATTGAGTCATT  
CTATTTTTTCACTGCCGAGGCTGGCTTACTGAGGGCTGATGAGTACATGTCAGTCTTGGTGAGTTTCACTACTACTTGG  
ATGTTATCAACTGGGATGTTCCACCGACGACTTTTTTTAGACTATGGCAGTACCTTCTTGGTTCGAAGGTTCCAAATG  
CAGGATCTGGTCAATACCTCTTGGGCTTGTATGTTAGACGATAAACAAAACGATAAAGAATAGGTTACATAGTGAATCA  
CGACTTTAATTTTATCGAAGAGAACGGTCAAGTATGACCGGAAAGCAAGTGAAGGCGCTGTTATCGCACAGGATTTCC  
AATCAGCAGGTTTGGCGGCTGAGATCTATAAATGCTTCCGCGAAAGCATGAGTTTCTCATCTGCGATAAATTCAAAGT  
ATTGGCGGTGCTCTTTGGGCTAGTAGCATCAATCGAATTCGCCAGGTACGGATACAATTCACGACGAAAGAAAT  
TATGGACATACTTGGCCAGGTGCGCGTGGCGTTTTCAGTACTTTGCCATGGAGTGCAGAAATGATCTGTCTGTAGATGAGA  
TTGTTTCGCTGGGGTGGTGGTATGATGATGAAAATGTTGTCGTCACATGTCATGTTATCTGTAAGGACCGACTCATT  
GACGATCAATTTATGATGATGTTTCGATAGGTGGCGGACAGATAA

>Cluster\_26476

ATGTCGCTCGTTTGTCTGTTATATTTATTCATCATGCCTTCAACGCTAACATTTTAGATAAAGATTACGCCCTTCTCTGA  
CGCGGAGATCCTGATGGTAGATAACGCTGTTCCGTACGCATTTTGAACCTTATGAGCGGATTTCAAAGAAATCGGATTTA  
ATGAAAATACCATTAATAAATATCTACAATGCACATAACATTCAGACAGTGACGGTGCCTGTTCTCGCAAGTTTTTACGT  
GCTTCAAATGTAACCGACTGGATTGCTTAATGAAATGATGCTTATCTCAACTCGGAAGAACGCAATCATCATAAATTTTTT  
AGAAGTTTTGCTTTTTTCTTGCCTGTCTATTTTTGCGCATGCAAAAGGTTTCACTTACACTATTAATAACCGTGTGCTAT  
CCGTTTTCCGGGAAAGTGAGAAATATTGTCAACATGAAGCTGGCGCACCCATGGAAGCTGAAAGATATTTGTGACTGCCTG  
TACATCAGTGAAGCCTGTTGAAGAAAAAATAAAGCAAGAGCAACGACATCTCACAGATTTCTTTAGATGCCAGAAAT  
GCAGCACGCAAAAAATTTGATACGCGTAGAAGGTTCACTGATAAATAAATGCGCAACAAATGTTGGTTATGCGGATACATCT  
ATTTTTATTTATGCGTTCCGCAACATTTCCGCAACAGTCCAAAGAGAGTTTCTAAGGAGTACCCTGTCAAAGGCACAG  
GGTATGAACATGGACAACACGATGAATGCTTTAGCTATTTGA

>Cluster\_64859

ATGAGTGGGAGTTTTGACAGTGTGAGAGTTTATATGCCATGGACAAGGTAACCGGTGCTGTAGCGAGCAGTGTTTTCAA  
TGTACGGTGATAACGCCAAAGGAGGTTGCATATGGGAAATATGATTTCTTGGCTATAAAGGCGATACGTTGCGGGTTA  
TTTTCTGGTCTGGGTCGGGTTACGCTCCAACTTTGGTACTGACTGACTTTGATACAATTAATAACTCAAATTTGCCCTGGC  
ATAGATACGAAAAATTTTCTGTCATATATGACGTTTAAAAATACCCTGCACTGATGATGATGTTGGTTGCCCTGGAT  
CGCATCTTTTATTCCTATACAGATTTACCCGGATTTGGAAGCTATACGGCCCTACAGTGCATAACACAATAATGCCCAA  
CGATACCGGTCGCTTCATACGATATCTCCTGGAGTGAAAATATGTCAGCCATAATAAGGCGTTACGAATTCAGTCCAGC  
GGGTCAACAGTGACCACCAGCTTTTCGACCTACTTGTGGAAGGCGGACAGCTCTGTGATGGCAGTAATTTTTCTGATAA  
TGATGGCAGAGGAGCATACGCGCGCGGTATCAGAAATGTTAACTTTACCTTACGTTTGGTGAATAAATCAACGGTAA  
CGGTTACGCCAACTCGTATCCGGTAACGGATAAAGTACTACAGGATATGTTGGTGAATGTAATACCAGTAGTGGGCAA  
CCGATTGATTCGAGTGTGCTTTTTCAGTATGATGTAATGAATGACTGTAG

>Cluster\_27997

ATGATGAGAAAATATTTCCCGCTGAGGCGAGCGCTATTTGTTGCGATGAAGAAGATGATGTTGTTGATGCACA  
GGTCAAGTTTCCCGCGACTATCGCACTAAGTTGTACCACCGAAATCATCCATGATAATACCGGTTATGCCTGAAATTTCT  
GGCTGGATGGTGTAAATCGTCAGGAGTTACTGCGTTTAAATCCGCAACAGGCGAAAGCGATGAGCTGACGACAGACGAG  
CGCAAAACAGTTTAAATACATGCGAGCGCGCTACAAGCATCTGCGTTTTTCCGCAACCGCTGTATTTAAGAAGCATCAGC  
TGGATTTTTTATCCGCAAAACAGCCTTTTTTCCGGCATTTTTTTCAGGATGGTTTTTCCGTAACCGTAAGAATAAATGTTG  
CGTTTTACGGTAACCTGTTACGTTGTTATTTGAGTTCCCTGTCTGGTGGCTGGTGAACATTTTATTCGCGCATAGCCAG  
TTAGAAAACCGTGAACGGTTTTATCGCCTACCAGCAAGCAAAATGATACCTTGAAGAGATTTATGCTAAACCGCAACT  
AATGGCAGGGAATTTTCATGATGTGCGAAAATCATCAGCCAGCAGTTTCTTATACGACACCTTAAGATCGCTTGATC  
CTGAAAATAAAGAGGCGTTACAGATTTTCCCGCTTCCCTCCGCGCATTAATGGGCTGATGGGGGATAAACACAGCAGCATG  
GTGGCGGATGATGAAAACCGCCAGTCTGATGACCCGATGGCGTGGATAGCGATATTCGCCAGCGCTTAGAACT  
GCTGATTTCCGCTTTCCGCTATAA

>Cluster\_27055

ATGAAAAGGTCGCAATTTGTCGGGTTAGGGTGGTTAGGCATGCCGCTGGCGATGTCATTTACGCGGAGGCTGGCAAGT  
CACCGGGAGTAAAACACACAAGATGGTGTGCAAGCGGCCGAATGAGTGGCATGATAGCTATCTGCTTCGATGGAGC



CTGAGTTAGTTTGGCATTCTGACGATCTGGATGCCCTTATGGATGCCGATGCCGTGGTCAATTACGCTTCCGGCACGTCGT  
AGCGGCCCGCGCATGAGTTCTATTTACAGCGGTACAAGAGTTAGTGGATAGCGCGTGGCCCATCGTATTCCCGAAT  
TATTTTTACCAGCTCAACATCTGTCTATGGCGACGCGCAAGGCACGGTTAAGAAACCACCCCGGTAATCCGGTAACCA  
ACAGTGGACGAGTATTAGAAGAACTCGAAGACTGGCTGCACAATTTACCCGGTACTTCCGGTCGATATTCTGCGCTTGGC  
GGCTGGTCGGACCGGACGCTCATCCCGACGCTTCTTTGCGGAAAAACCGCCCTGATGGTGAACATGGTGTAAATTT  
AGTCCATTTAGAAGATGTTATTGGCGCTATCACTCTGTGTTACAGGCACCTAAAGGCGGACACATCTATAATATATGTG  
CGCCAGCTCACCTGCGCGTAATGTTTTCTATCCGAGATGGCCGGTTTACTGGGGCTGCAACCTCCGAGTTAGAAAT  
AGTCTGGACAGCGCAAAGGTAAGATTTATGATGGCAGTCGGATTTGTAATGAACTGGGATTTGAATACAGTATCCCGA  
TCCGCTGGTAATGCCGCTGGAGTAA

>Cluster\_40822

ATGAGCGTGACAACGGCTGAACTGGCGTACTGCATGACGCTTCCCCGAGCGGGCAGTCAGTTACCTGAAAGTCCAAAGG  
GTATCAGATTACCTGGGACTGGGAAGAAATGTGGCAGGAGGCCATGCCCGCGCTTTACCGTTGCTAAAGTGACCCGGC  
TGGATATCTGGAAGATATTCCGCGGGCACTGCAGCAGGCTGTGATGAAGAAAAACCAGTATCGTGGTTCCGGCAGGAG  
CTGGAGCCGGTGTGAAGCGTAAGGGATGGTGGGGACCACGTGACACGACTGACCCGGTAACGGGTGAGCCGGTACCCAT  
TCAGCAGGGCAGTCCGTGGCGGCTCGATACCATCTTTCGCACCAATATGTCCGTACTCTACAGCGCCGGTCTGTGGGGCG  
AACAGATGGAACACGTGCAGCAGCAGGCGTACTGGATGTATACCCGGCATCAACGACAGCCATACCCGACAGGAGCCATCTG  
GCGTGCATGGTCTGGTCTGCGCTGGGATGACCCGTTCTGGCAGGCATTTTACC CGCGAACGGCTGGCGCTCCGCTG  
TAGTGTGATTGCCCTGAGTGGCGGGATGTACGTGCCCGTGGCTGAAGTTATCAGTCCGGCTCTGCCATGGGCCAGG  
AACTGAACTGGTCTCAGAGAAAACCGCGAAAATGCGGAACGTGGCCACCTTTAATACCGGCACCACGAAAGGTGACCACC  
GACGTCGGTGGTCTTATGCACCCGGGGCAGCATACCGTCCCGACCTGGCCCGTATCAGGGTACGCTTACGCCACTGGC  
ACAAACAGGAACTGAGAGGATAA

>Cluster\_23241

ATGAGCGTATGCACTCGCTGCTGATAGCGGCAATATTGGGTGTGGTGAAGGATTGACAGAAATTTCTGCCGGTATCCAG  
CAGGGCCATGATATTGTCGGTCACTTGTGGGATTTGAGGGCGACACGGCGAAAACCTTTGAGTCTGTATCCAGT  
TAGGATCAATTCTGGCGGTAGTAGTGATGTTCTGGCGCGCTCTGTTGGCCTGATGGCATCCACTTTGGCGCCCGTTG  
CAGCACGAAGGAGAAAGCAAAGGCGGTTAACGCTGATCCACATTTTGTGGGGATGATTCGGCGGGTGGTACTGGGGGT  
GTTGTTCCACGACACAATTAAGTCATTTGTTAACCCGATAAATGTGATGTATGCGCTGGTCTGTGGCGGTCTGTTGCTGA  
TTGCCCGCGAATGCTGAAACCAAAGAACCCGCTGGCGCGGTTCCGATGATATGACCTATCGTCAGGCTTTATGAT  
GGTGTGCTCCAGTGTCTGGCGCTGTGGCGGGTTCTCCCGTTCCGGGGCGACCAATTTACAGTGGGATGCTGATGGGGGT  
GAGCCGTTACGCTGCTTCCGAGTCTCGTTCCTGCTGGCGGTGCCGATGATGATGGGCACAACGGCGCTCGATCTTACA  
AAAGTGGGGCTTCTGACAAACCGCGATATCCCGATGTTGCGGTGGGTTTATCACCGCTTTTGTGGTGGCGCTGATA  
CGATTAACAACTTCTCTGCAATTGATTAAGCGCATTTCTGTTTATCCCTTTCGCCATTTATCGCTTTATGTTGGCGGCTG  
GGTGTATGCTGTTCTTTTGA

>Cluster\_19642

ATGCAAAACAGAAGTGAAGTCTTAACCGATCACAACGAGATAATTCGCTCGACCAATATTGAGCGTATCGTCACAGGACG  
TGATAGCGCATGAAGCTGATAGCGACGTAATCCAAAACCTGGATGATATCTCCAGTCTGACATCCAGTATTGGCGGTG  
ATGTGGCTGGAACCTGGGAATGCGTAATGGATATGCCTTGACTGCTGGCTGATGCAACCAACCGACAAGCGATGTGCG  
CGGATCACCGCAATATCGATCGCAGCATCTGGCGCGATCTCATGCTGAAGTCCGGGATGTTGACTCTGATGGATGGCGCA  
AGCCCGCAGTCAAGTGGGCAAGAACCTGGAGGAGGCGCATCTCCGGGATTTAGCGAAGCCAAACATCTGAGTACCTTTG  
AACAACTCCACCACAATAAGCATGATGTTTTCGAACGTGGGATTTATCAATGATTTAAGGGATTGAGCTGGGATTAACAA  
ACCAATAATCCCTGTTATTTCCGTAAGAAGATTATCGTTAACAACTCTGTTGAAGCATGACCGATGGGGTTACAGCCTGCA  
CTGGGGCTGGCGGCGAGATCAGCTTGGCGATCTGGAACGGATGTTCTATCTGCTGGATGGGAAGGCCATTTCCCGATAACC  
GGCATGATGTTGGGATTCGGTTATGACTTCTGTTAGTCTACCCGCATGAGCAGGTATTTAATGACGATTTATGTTGTC  
ATCCGCTATTACCAGAAAGGCGATGACATCACATTTCAAGCAGTGGATCTGGTGGATAAGATGAATGACATTTGTGGC  
GAAGCACTATCCGTCAGCGTTATCAGCAAAATGA

>Cluster\_43011

ATGACCGTATTACATAGTGTGGATTTTTTTCCGCTGTTAAGCGTCCGTTGGCAATAGAACCCCGCTCCCGCAGGCGGA  
TTTTCTTGAACATCATCATGATTTTTCATGAAATGTGATTTGTCGAACATGGCAGCGGTATTATGATTTAATGGGACG  
CCTATACCATCACCGGTGGGACGGTCTGTTTCGTACCGCATCATGATCGGCATCTGTATGAACATACCGATAATCTGTGT  
CTGACCAATGTGCTGATCGCTCGCCGGATCGATTTTCAGTTTCTCGCCGGGTGAATCAGTTGCTGCCACAAGAGCAGGA  
TGGCAGTATCCGCTCACTGGCGGTTAACACAGCGTATTGCGAGCAGGTGCCAGCAGCTGGTTCACACAGTGGCAACAGC  
AGGAAGGGGAAAAATGATTTACCTCGACCGCCAGTCCGAGATCTTATTTATGCAATTTATGCTCTTGTGCTGCTAAAAGC  
AGTTTGCAGGAGAACTGGAAAACAGCGCATCAGTCTCAACTGCTTCTGGCCTGGCTGGAGGACCAATTTGCGGATGA  
GGTGAATTTGGGACGCTGTGGCGGATCAATTTCTCTTTTACGTCAGCTGCAATCGCCAGCTTAAGCAGCAAAACGGGGC  
TGACGCTCAGCGTTACCTGAAACCGTCTGCGCATGATGAAAGCTGACATCTGCTACGCCACAGCCAGGCGAGGCTTACT  
GACATCGCTATCGCTGCGGATTCAGCGACAGTAACCACTTTTTCGACGCTTTTTCGCCGAGAGTTAACTGGTACCGCG  
TGATATTGCTCAGGACGGGATGGTTTTCTGCAATAA

>Cluster\_37968

ATGCAAAACATTACTCAGTCTGGTTTGTTCAGGGAATGATCAAAGCCACCACCGACGCTGGCTGAAAGGCTGGGATGA  
GCGCAACGGCGGCAACCTGACGCTACGCTGGATGACGCGGATATCGCACCATATCACGACAAATTTCCACCAACACCGC  
GCTATATCCCGCTCAGCCAGCCATGCCTTTACTGGCAATACACCGTTTATTGTACCGGCTCGGGCAAAATCTTCCGT  
AACGTCAGCTTGATCTGCGGCTAACCTAGGCATCGTAAAAGTGCACAGCGACGCGCGGGGTACCACATTTCTTTGGGG  
GTTAACCAACGAAGCGTCCCACTTCCGAACTTCCGGCTCACTTCTTTCCACTGCGAGCGCATTAAGCCACCAACG  
GCAAAGATCGGGTATCATGCACTGCCACGCCACCAACCTGATCGCCCTCACCTATGTAATGAAAACGACACCGCGGT  
TTCCTCGCAACTGTGGGAAGGCGACCGAGTGTCTGGTGGTATTTCCGGATGGCGTTGGCATTGTTGCGGTGGATGGT  
GCCCGCACGCAAAATCGGCCAGGCGACCCGCAAGAGATGCAAAAACATTCGCTGGTGTGTTGGCCCTTCCACGGCG  
TCTTCGCCAGCGGACCGACGCTGGATGAAACCTTCCGTTAATCGACACCGCAGAAAAATCAGCAAAAGTATTAGTGAAG  
GTTTATTCGATGGCGGCAATGAAACAGACCATCAGCCGTAAGAGTTGATAGCGCTCGGCAAGCGTTTTCGGCTTACGCC  
ACTCGCAGTGGCTGGCGCTGTAA

>Cluster\_28465

GTGAATTTTTCTCTCCTCCCGTGGTTCGGTTCGCTGGCGTGCATATTATCGCCCTGCTGGCACTGATTGGCTCAC  
CAGCCAGTGGTGGCTGCCGATGACCCGACGGCTATTGATTTGGCGTCTCGCCCTGCTCGCCGGATGCGCAGCACTGGC  
TGGCACCGCATTTAGGGCGGATTTTCTCGCACTGATGGCGGCGACCCGTTGTGCTCGCTCGGTTAATGGCC  
TGCTGCTGTTGGTGTGATGACATTTAGGGCTGATTTATGGCGGACCGCGGACTGATGGCGGGCGCTTGTACAGGCCAC  
CATGGCGTTCGGATATGTTTATGACCTTCCAACTCGATTCTGCTGTTCTTTATGGTTCGGGCTGCTGGCACCGGGT  
TGACCAACGTTGATTTATCGCTATCGCCCTTTCGCACTGGGATGTTACGCGCGCATGGTGGCAGTCTGGTGAATTTCACTG  
CGCCAGCGGATTTGTTGGCTGGCATCAGCGCTTTCGCGCGGGCCATGTGGGGTGTGTTGATCATCTGGCAGTGTG  
GGTGTATCCCTCGCTGCTGGTGTGGCGAGCTGGATATCGGTCATATGATGCTACAGCTCGCGGGATGTCCTTCTCG  
GCCTGGCGTGGCCGCGGACCGCGAAATGGGGCTGATGATTAACGACGCGGCTCAGTATATCTGGACCCAGCGCTG

CAAAATGTTCTGGCCGGGGCTGGCGCTGTTTATCAGCGTGATGGCCTTTAACCTGGTGGGTGACGCACTGCGCGATCATCT  
GGACCCTCATCTGGTGACGGAGCACGCACTAA  
>Cluster\_62545  
ATGCGATTAGCCAGCCGCTTTGGCCGTATAAACAGATACGACGTGACCGGCCCTAACCTACGAAGAGCTGATGAGTCA  
TGTCCCAGCGGTGTTCCGGGAGTGACAAACATGAATCTCGTTACAGACAGGTACACCTACATCCCAGCCATCACCTCCTCG  
AAAGCCTGCAGAGTGAAGGCTTTGAGCCGTTCTTTGCCTGCCAGACAAAAGTTTCGCGACCAGAGCAGGCGGGAGCACACC  
AAGCACATGCATCGACTCGGTCGCGACGGGCAACTGACCGGGCATCAGGTGCCGGAATCATTCTACTTAACAGCCATGA  
CGGCTCATCAAGTACCAGATGCTGCGGGGCTGTTTCGTTGGCGTCTGTACCAACGGCCTGGTCTGCGGCCAGTCAATTCG  
GAGAAGTGCGGGTACCCGCATAAAGGTAATGTCCGCGAGAAGGTGATTTGAAGGGGCTTACGAAGTGTCTGGTGTCTTTGAC  
CGAGTGGATGAGAAACGCGATGCAATGCAGTCACTGGTGTGCCAGCACCAGCCCGTACGCACTGGCGAATGCCGCGCT  
GAAATATCGCTTTGGCGAAGACCACAGCCGGTACGGTATCGCAGCTGCTGACTCCGCGTCTCGGGAGGACTACGGCG  
ATGACCTGTGGACTGTCTACCAGCGGTGCAGGAGAACCTGATGAAAGGAGGTCTGTACGGGCGAACCACAGGGGAAA  
AGCAGCCGCAACCGTGCCTTATCGGCATTGACGGCGATGTGAAGCTCAATCGCGCCCTGTGGGTTATGGCAGAAAACAT  
GCTCGAATTTTTCGGGCGTTAA  
>Cluster\_48561  
TTGAATCGAACTAATATTTTTTTTTGGTGAATCGCATTCTGACTGGTTGCCCTGTCAGAGCCGAGAATCTGGTGAATTTGT  
TTTTTCGACCTGGTACGGGCATGCCTTCGCGAAAATCGCACCTGCTTCCCGCCGCGGTGAGCTCGCTGGAGAGCGTGACC  
GCCTCATTTGGCTCAAAGGTCGAGGTGTGGCTTGCCTCCGAGGTCACTAACCTGGCAGGAGAACAGGAGGTTGCATGCTTG  
GTGATAACGGCAATTCGCGGAGTACCGCGGCTGATCTGTCTGGAGCGGATTTGCTCAAAGCGTGGCCCTCAATGGGGCA  
GCAACTTGGCGCTTTCACAGCCTATCGGTTGATCAATGTCGTTTGGCGCAGGCTGTCGCGAATGTTCCGACGCGCCG  
TTGATGTGTGTCTCCGCAATGCCCTCAATCCCGACTTCTTACCGAGCAGGACAAAGTACGCCCGCAGCTCGATCTTTTG  
GCTCGTGTGCAACGAGACTACCGGTGCGGCTCGACCAAGAGCGCACCGATATGGTTGTTGCCATGGTGATCCCTGCAT  
GCCGAACCTCATGGTGGACCCTAAAACCTTCAATGACCGGGTCTGATCGACCTTGGGCGGCTCGGAACAGCAGATCGCT  
ATGCCGATTTGGCATCTGATTTGCTAACGCCGAAGAGAACTGGCAGCGCCAGATGAAGCAGAGCGCCCTTCGCTGTCT  
CTATTCATATGATTTGGGGATCGAAGCCCGACCGCAACGCTTGCCTTCTATCTGCGATTGGACCCCTGACTTGGGG  
TTGA  
>Cluster\_29106  
ATGCAAAACGTGGTTAAATTTGCAAGGATAAAAATCATTATGTACCGGTGGCGCATCCGGCATTGGTCTGGCGATTGTGGA  
TGAATTATTAGCACAAAGCGCGAATGTACAGATGGTGCATATTCAGGTGGCGATGGTCAATATGAAAGCCATAAAGGTT  
ATCAGTTCTGGCCGACCGATATTTCCAGCGCCAAAGAGTAAATCATACGGTAGCAGAAATTAATCCAGCGTTTTGGTCCG  
ATCGACGGTCTGGTTAAACAACGCGGGTCAATTTCCCGCTCTGTGGTTCGATGAGAAAGCGCTGCCGGCAGTATGA  
ACTCAACGAAGCTGCATTGCAAAAATGGTCAATATCAACGAAAGGCGTTTTCTGATGTCCGAGGCGGTGGCGCGAC  
AGATGGTCAAACAACATGATGGCGTGAATGTGAATGTTTCTCAGAAAGTGGGCTGGAAGGCTCAGAAGGCCAAAGCTGT  
TACGCCGCGACCAAAGCCGCGCTCAATAGCTTACCGCGCTCCTGGTTCGAAAGAGCTGGGTAAGCACGGTATCCGTGTGT  
CGGTATCGCGCGGGATCTGGAAAAACAGGACTGCGCACCGCGGAATATGAAGAAGCGCTGGCGTGGACGCGCAATA  
TCACCGTCCAGCAGCTGCTGAAAGGCTATACCAAAAACGCCATTTCTTATGGGCGCGCCGGAAGATTAGCAGAAAGTGGCT  
GATTTGTTGTTATCTGCTGTCTGAACCGCCAGCTATATCACCGAGTAACCACTAACATTGCGGGCGGCAAAACGCG  
CGGCTAA  
>Cluster\_373  
ATGGCTATCTCAATCAAGACCCAGAGATATCGAAAAATGCGCGTCTGCTGGCCGACTGGCTGCCGAAGTGTGGAGAT  
GATCGAACCGTATGTTAAACCGGGCGTACGACCGCGAGCTGGATCGCATCTGTAATGATTACATTTGTTAATGAACAAC  
ACCGGTTTTCTGCTGCTGCTGCGGCTATCACGGCTATCCGAAATCCGTTTTGCATCTCTATTAATGAAGTGGTGTGCCACGGT  
ATCCCGGACGATGCTGCTGAAAGATGGCGATGCTGTTAACATGATGTACCCGTAATCAAAAGATGTTTCCACCG  
CGATACCTCGAAAATGTTTATCGTCCGTAAGCCGACCATCATGGGCGAACGTCTGTGCCGATCACGCAAGAAAGCCTGT  
ACCTGGCGTGGCGATGGTCAAACAGGATTAACCTGCGCGAAATCGGTGCGCGATTCAGAAGTTTTGTCGAAGCAGAA  
GGCTTCTCCGTCGTTCTGTAATATTGTGGACACGGTATTGGTTCGCGGCTTCCATGAAGAACCAGGCTGCTGCATATGA  
CTCCCGTGAACCAACAGTCTGCTGTAACCCGCGGATGACGTTCCATTTGAGCCAAATGGTCAACGCGGTTAAAAAGAGA  
TCCGCACCATGAAGATGGCTGGACGGTAAAAACCAAGATCGCAGCTTGTCTGCACAATATGAGCATACTATTGTGGTG  
ACTGATAACCGCTGCGAAATTTTACGCTACGCAAGGATGACACCATCCCGCGGATAATCTCGCACGACGAATAA  
>Cluster\_39289  
ATGAGACTGATCCCCCTGACTACCGCTGAACAGGTGCGCAAATGGGCTGCTCGCCATATCGTCAATCGTATCAATGCGTT  
CAAACCGACTGCCGATCGTCCGTTTGTACTGGGCTGCCGACTGGCGGCACGCCGATGACCACCTATAAAGCGTTAGTGC  
AAATGCATAAAGCAGGCAAGTCAAGTTTAAAGCAGTTTCTACCTTCAACATGGACGAATATGTCGGTCTGCCGAAAGAG  
CATCCGAAAGCTACTACAGCTTTATGCACCGTAATTTCTCGATCACGTTGATATTCAGCAGAAAAATCAACCTTCT  
CAACCGCAGCCGCTGCTGATCGACGCGCAATGCGCGGAGTACGTTTCAATGAAAGAAAAATCCGTTCTTACGGAATAATCACTCT  
TTATGGGCGGTGATGTAACGACGGTCAATTTGATTTAACGAACCGGCTTCTCTGGCTTCTGTAATCGTACTCGTATCAA  
ACCTGACTCATGACACTCGCTGCGCAACTCTGTTTTCTTTGATAACGATGTTAATCAGGTGCCAAAATATGCCCTGAC  
TGTGGTGTGGTACATTTGCTGGATGCCGAAGAGTGAATTTGTTGCTGGTGGTGGCAGAAAGCAGTGGCATCGCAGG  
CCGCCGTTGAAGGTTGCTGAAACACATGTGGACCATGCTGCTGACAGTGCATCCAAAAGCGATCATGGTGTGCGAT  
GAACCTTCCACCATGGAGTGAAGTAAAGCTTTAAGATATTTCAATGAATTAGAAGCAGAAAAATCAAGGTCTGTA  
A  
>Cluster\_14888  
TTGCTTATTAGCGAAAGTGTGATGCTGTGATGGATTTTCTCCTGGCGAAATGCGGGAAATGGCATTACCAGAATGCT  
TGAGCATCTTATGCAAGAGATGATCGGGATGAGCAGGAGACGGGATATCCCTCGGTTGTCCCAATGGGCTAATGGTCT  
AGGCTCATGGCTGGGTTTTGATAATGCTAAAGACACATTCATATTCAGCATGTCAATAATTTGGCATGATGACACC  
GAGTTTCTGATGATCCGATGGTATGTGCACCAATTTCTTCTACTGTGATTCGCATACGCGAGTCTTCTGACGGTCTG  
CGCTCTTGTATCTTCTGGATGAGTTCGAAATGGCTACAGGATGAAGCATTCAGCGACTTTGTCTATAACAAGCTGA  
AAACAATTCGTAAGCTGAACGGGCTGGTATTCGCGCAACTCAGTCTCCGGATGAAATACTGAAGAATAAGATTTACGG  
GCTGTGGTTGAAGTATGCAGCACCAGTATTTATCTGGCTAACCTGATGCCGATTACAATGATATGTGGAAGGGCTTAA  
GCTGACACCAGAAAGAAATTTAATATTGTTAAAAATCTTGTATGATTCGAGACAGTTCCTGATTAAAAAAAGCAGCTTA  
AAAAGGGGATGGTAAATCATTTTACGACTTGGCAGACTTGAATTTATCGGGACTTGGTGGATATCTGAAAATATTGTCT  
GCTAGTGCAGATAATCTGGAATTTTTGAAAGTATTTATCATGAAGGAATGGAGCCTGATGACTGGGTTCTGAAATATCT  
CGAACGGCAATCTGA  
>Cluster\_15440  
ATGAGCATATCCATCTTACTTGGCAGCCGTAGCGCACCGAATATCGCCAGTCTGGCGGTTAGCGGGAGTGTGGCG  
CGGGCGATTAACCTGATGACGGAAGCGGCAACTGTTAACGCTGCATCGCTCAGGGGAGTGGTTCCGCCCCCGCGGAT  
GGTGTCTCGCCGCGCAATTCGATGGTATGCGGTGATGCGGCAATGACCGCAATGAACGACCCAGGTTGTGGCAGAGG  
ATTCGCCCTCGGGCTTTCAGCGTTAAACAGCCACAGCGTTATTGTTGTTGCTACGTATTACGCCGCTGCGCATCTCAAGC  
GCTTGGCTGTCATGGATGCAACGCGCGGAGAAACCGGGCTTTTCCGGCCACTGGCATTTGGCGCAAGCGATCCGCTGC

CTGCTGAATTACGCCAGTTTCGTCAGTGTTCAGGCCGCGCTCAATGGCGTTAAGACCGACTGGCGGCACTGGCTGGGT  
AAAGGCCCGGATTAACGCCAAGTCATGATGACACGCTGAGCGGAATGCTGCTGGCGGCTGGTATTTAGCGCGTTTAGA  
TGCGCGCTCCGGTCGCCGTTTTTTGCTGTTCCGACAATCTTCAACTCGTTACCCTGCGGTGAGCGTCAGTATTTTAC  
GTTATGCCCGCAAGGATATTTCCGCTCGCCACTCCTGCACTTTGTTTCATGCTCTGAGTTGCCCGAAACGTACCGCAGCG  
CGGATCGATTTCGCTGCTGGCGCTGGGGCATACTGACAGGGCCGATACGCTGCTGGGGTCTGGCTTGGCCAACAATTAAT  
ACAAGGAAAACCATGA

>Cluster\_6980

ATGAAATTTGCTCTTTTAAATATCAACGGCCTGCGCGCCAGACCTCACCAGCTTGAAGCCATCGTCGAAAAGCACAACC  
GGATGTGATTTGGCTGACAGGAGACAAAAGTTTCATGACGATATGTTCCGCTCGAAGAGGTGGCGAAGCTCGGCTACAACG  
TGTTTTATCACGGGCAGAAAAGGCCATTATGGCGTGGCGCTGCTGACCAAAGAGACGCCGATTGCCGTGCGTCGCGGCTTT  
CCCGGTGACGACGAAAGAGGCGCAGCGGGGATTATATGGCGGAAATCCCTCCTACTGCTGGGTAAATGTACCCGTGATCAA  
CGGTTACTTCCCGCAGGGTGAAGCCGCGACCATCCGATAAAATTTCCCGGCAAAAGCGCAGTTTTATCAGAATCTGCAAA  
ACTACTTGAAAACCGAATCAAAACGTGATAATCCGGTACTGATATATGGCGGATATGAATATCAGCCCTCAGATCTGGAT  
ATCGGCATTGGCGAAGAAAACCGTAAGCGCTGGCTGCTACCGGTAATGCTCTTTCCGCGGAAGAGCGCGAATGGAT  
GGACAGGCTGATGAGCTGGGGTGGTGCATACCTCCGCCATGCGAATCCGCAAAACAGCAGATCGTTTCTCATGTTTGG  
ATTACCGCTCAAAAGTTTTGACGATAACCGTGGTCTGCGCATCGACCTGCTGCTCGCCAGCAACCGCTGGCAGAATGT  
TGCCTAGAAAACCGCATCGACTATGAAATCCGCGACATGGAAAACCGTCCGATCACGCCCCCGCTGGCGGACCTTCCG  
CCGCTAA

>Cluster\_26096

ATGTTCTTAATTAACGGTACATAAGCAGGAATCGCTGGCAGTAAGCGATCGGGCAACGCAGTTGGTGTAGTTGTTTTAC  
CACCGCCAGATTTATCGACGGTAAAGTCAAGTTTGTATCGCGCATATCCAGCGACTACAGGATGCTTGTGTCAGCGTTGA  
TGATTTCTGTGACTTCTGGCCTCAGCTTGAACAAGAGATGAAAACGCTGGCAGCAGAACAGCAAAATGGTGTACTGAAA  
GTGGTGTAGTCCGGTGTGGCGGGGAGGGTACAGCACATTGAACAGCGGACCGGCAACGCGGATTTCTCTCCGTTAC  
GGCTTATCTGCAAGTACGACCTTTCGTAACGAAAGGATGACGTTGGCGCTAAGCCCGGTGGCGGCGCAATC  
CTCATCTTGCAGGTATTAACATCTTAATCGGCTTGGCAAGTATTGATCCGCTCTCATCTTGGAGCAGACAAACGCTGAT  
GAGGCGCTGGTCCCTTGCAGCGAAGGGTGGGTTACGGAATGCTGTGCGCTAATTTGTTCTGGCGGAAGGGCAACGTAGT  
TTATACGCCCGGACTGGATCAGGCGAGGTGTTAACGGCATTATGCGACAATTTCTGTATCCGTTTGTGGCACAATCCTCTT  
ATCAGCTTCTGCAAGTGCAGCCCTCTCTGGAAGAGGCTTCTGAGCGAGATGAGATGGTTATTTGTAATGCGTAAAGCCA  
GTGATGCCCGTACGTGCCGTGGCGATGCTCCTTTTCGTCAGCAACGTTATATGAATATTTAGCCCCACTTTGTGAGCG  
CCCGAATTAG

>Cluster\_240

ATGGCCTTAGGAATATATTATTACAAAGTAGGAAGTATTTTTATACTTTTGTGTTGATAACTTAAATCGTACTGTTTTAT  
TTTACCCTCCGTTACTACTAAGTATTTTAGTTATGTA AAAACCATCCAGTGAGCCTGAGGTTAAATTTATTTTCTAA  
TCCTTTGTGGTTTAGGATTTCTTCTAACAAGCAGGAAGTGAAGCAGTTTACCAGCTTATTTAGTAGGGGCGAGTTCTT  
GCTGATCTCTTTGTA AAAACAGGGAATTTGGTAAAGAGAATGAGGGCGCTACCATAGCACTCTTAACCTCCCTTTATTT  
TTTTAAAGGCGAGGATGCTCGGTAGATTTTAAAGCTTTTGGCAAGTTTGGGGGTTTTAATAGTTCTCTTTTAAAGG  
TTATCTCTAAGTTTTTGGGCTTTTATCCAACGGGAAAAGGACTAAGTTTCTTTTCGGTTAAACATGTATAACTCTC  
TTAATGAGTACAGGCTTTACCTTTGGGACTATCTCATCCTTTATGGTCTAAAAAATGGTATAATAGACAAGAACCAGTA  
TTCATTACTGTAAATGGCTGTATCTTTCTGCTATCATCCCTACGCTTATTGCTCAAAAATTTTTTATCCAAGAAAA  
ACGAAATGAATATGAATTTTAAAGAAATAA

>Cluster\_14049

ATGAAAAAATCTCTTTTTCTATTATTGCTTTTAGTTGTGACAAATGCACATGCTGTATATGTTGATGTTCCGCATGAATA  
CCTTGATGATAGTAAAGCTAATATATGATCGTGGTATATCTCTCATCGTTTGGCTAACGGTTTTGGTTTTGCTATTGAGG  
CAATATCAAAATCGGGAGGTGATGATACGATAGACATTTAATGATCTTGAAGTTCAGGGGAATGAATATACTGTACGC  
TATCAGTTCAAAACAGGAGAAGTTGCCCTGGCAGCCGGGATTTGTGCTGAAAACAGGTAATGGTTATTTCAAACTATAAAC  
TTACCTCCGAGCAACATGGACGTTAAATGAAAGTTGGTGGGTTGGCGCTCGCTATCGATTTGAATATGTCGGGCGCTCTT  
CAGATGCCCGTGAAGATGATCTGTTAACCGTATGGATGATGCTAGACTATAAGTGAATAAATTTGATCGGACGATA  
GAAGGTATTTATAAGAAAGCCGATAAATATAATCTATATGATGGCGGCAAGATAAATATGAGTATAACTTCAGAACTGC  
ATACGCTATTGGGCGAGTGGACTCCATTTGTTGAAGTTGGTAACGTTTACGTTAATAGCACAGCGATGAGTGCCAGACTC  
GCTTCCGTGTCGGTTTTAGGTTATACCTTCTAA

>Cluster\_64453

ATGATAATTGACTTTATAAAAAGCAAGGAAGCCTTGCTAATATTGGCAATAACGTTCTATCTTATATGCTGCAATTTT  
ATTTGAATATGGCTATGCATATCATTGTTGATTATCTTATGAGTTTATAACGTTAGATTCTAAATTTTTTATTCGTGGGTA  
TGTCATATTTATTTTAAATAAATTTGTTGTTATGTTGATGTTTTTACTCCATGGCCGAAAAGTAAAGTAAAGCAGTT  
AAAGTTACTGTCAGTGTGTTTTTATCATGATGTTTTTATGTTTTCAGTCTTATAGCATAAAGCTGAATATGAGGTTTT  
TTTTGTTTTAAGTTTATCGATAGCAACAGTTACTTATATATATACAAAATTTGTTAAAAATCAATAACGTAATCCAAGTT  
ATTTAATTTGGTCTGCAACCTTTCCCTTATTGGCATAATGACATTTAGTTTCTTAAATTTGGTTTACAACAAGCGTCAATTA  
AAAAAAGAAATTTAGTTACTTTTATGATCAATCTAAAGACTACGTGATTTAGTTTGTATGACGGTAACCTTTGTCGTAA  
AGAAATAAATAAAAAGAGCGCAAGCTAGGGAGTGAGATATATATATACCTAGCTATAACCCAGCCCTATAACGTTAA  
ATAAATTTAAATAGAACAATAG

>Cluster\_25084

ATGAAAAAGCACCTTCTGCTCTCGCTCTGCTGTTTTCCGGAATATCACCGGCCAGGCGCTGGATGTCGGCGATATATC  
ATCGTTTTATGAACAGTGACAGCAGCAGCTGAGCAAAACGATCCAAAACAGTACCAGCAGTGGCCGCTCATCAATATCC  
GTCFCGAACGGCTCTCTTACCAGCTTGCAGCAGGGCAGGTTATCGCAATGGACAGCCGGATGAGTTGCTACTCACTCC  
GCCAGCTTGTGCTACCCGCCAAGCCAGCAGGATGATCCGCTTCTTCTATAAAGGACCAGCAGATGAAAAAGAGCGTTA  
CTACCCGATTTGCTGTTTTGATCAGGCCCTCAGTGATGCGCAGCGCATTAATGCAACCGTAGCGCTGCGCCAGCTT  
CCGCCGCTACGGCACCATTTCTGGTCTGCCCCCGCCAGGCGAATACCACTTTTCAGTACGCCAACGGCTCCCTGACA  
AATACAGGAAATGCGACGCTGCGGATCCCGCTACGGCCCTGCCTGAAAGCCGCAATGGTAAGGAGTGTAAAGAGAA  
TTACTACCTGATCGCGGCAAGTCCGCTGTTTTATCCGCTGGACACGGCGGATAACAAAGGACGGGTTGACTTTGGC  
AGGTGATAAGTTTCAATCCCGTGAATAG

>Cluster\_61521

ATGAACCCAAACGTTATGCACGCATCTGCGAAATGCTCGCCAGGCGGCGACCTGATCTGACCGTCTGCATGGAGCAGGT  
CCACAACCTCATAACGTTCTGCGATTAATCGTACCGCAGATGCCGTTGGCGTACATGAAGTTACAGCCGCTTGGCTG  
GTAGCCGATGCGCACATGGCTTTCGGCAGCGGGTAGTAACAGCTGGGTACAGGTGAAAACACACCGCCACCATTTGGC  
GATGCCGTGCTCATCTCAAAGGCCAGGCGATGAGATTTGGAACCCATCTTCTGATAACGCTGTGATTTCCGCGA  
AATGATTTACCTGCCCCGACTGCAATTTGATGGGACAGGAGAAAACGGGCATCACGAGGAAAGCATTGGCCCTGGCGG  
ATCAGGACATCATCATTTCCGATGATCGGATGGTGCAGTGCCTGAATGTTTCCGTTGCTCAGCCCTCATTTTACGAA  
GCCAGGCTCAGCGCAAAATGCAGGATGTACCTGCGTGAAAACAGCATGTTGCCGGAAGCAGAGCAACAACGCTGTT  
GTTTGAAGCGGCTATCCGGTCTGGCGAAGTCCGAAAACGCAAGGCTGCCTTATCCCAGCTCAATCAGCAAGGCG

AGATCGAAGCTGATGCCGACTGGTGGGCTACTATGCAGGCTGCAGGGTAA

>Cluster\_10624

ATGACATTTTCAGAACGACTTGATTTAGCTATGCGCAACGCAAAATTTACGCAAGGTAGGCTGGCCAAAAGAGTGGGTAT  
GGCTCAGTCCAGTGTAACTCAACTACTTTAAACAAAGCCAAACGGTTCCAGAAAAACAGTCAAAATAGCAAAAGTTTTGGGGC  
TTAACCCGGAATGGCTCGATCGGTGTGGCCGAATGAAATCGTGACCTCTGCAGACTCACACAAATACGTAACACT  
TCTGAAGATTGGGTACTGATTCGTATGTCTGGATGTTTTAGACATCAGATATAGTTGCGGACCTGGTAGTTATAACTC  
TGATTTTCCGTGATATTGTGAGATCTATAGCGATAGAACCAGGATACGCATCAAGAGTTTTGGCGGCAGACCAGCATCAG  
CAATCAAAGCAATAAACGCCACGGCGACAGTATGAAAGGCACAATAGACCTGAAGACTTGGTATTTGTAGATGTATCA  
GTTCCGCACATTTAATGGTGTATATACGCCTTTACATACTCTGGAACATCGCACATCAAAGACTTCAAATAATCAA  
AGATACTTAACGGTGATATCTGACAACCCAGCTTACAAGGATTGGGCTATCGAACCGGAAGACTTCGAACAACCTCACA  
TTGACGGAAGTAAATGTCAGTTGGCTATGACACTACACCGTTTTGCGATAA

>Cluster\_30774

ATGCGCGTACTGGTTGTTGAAGACAATGCGTTGTTACGTCACCATCTTAAAGTTCAGATTGAGGATGCTGGTCAATCAGGT  
CGATGACGCAGAAGATGCCAAAAGCCGATTATTATCTCAATGAACATTTACCGGATATTGCGATTGTCGATCTCGGTT  
TGCCTGACGAGGACGGTCTGTCACTGATTCGCCCTGGCGTAGCAATGATGTTTCACTGCCGATCTGTTTAAACCCGCC  
CGTGAAAGCTGGCAGGACAAAGTCAAGTATTAAGTGGCGGTGCTGATGATTACGTGACTAAACCGTTTTCAATTTGAAGA  
GGTGAAGCGCGCAATGCGAGCTAATGCGCGTAAATACCGGTCTGGCTTACAGGCTCATTTTCGCTACCCCGTTTTCAGG  
TTGATCTCTCCGCCGTGAATTTATCTAATGACGAAGTGTCAAACGACCGGTTCAATACACCATCATGGAACG  
TTGATACGCAATAATGGCAAAGTGGTGAAGCAAGATTCGTTAATGCTCCAACCTATCCGGATGCGGAGCTGGCGGAAAG  
TCATACCATAGATGATGATGGGACGCTGCGCAAAAAATACAGGCACAATATCCGCAAGAAGTGAATACCACCGTTT  
GCGCCAGGGCTATCTGTTTCAATGCGCTGA

>Cluster\_61083

ATGCTCAGACACATTTACATTCACGTATTTATAACAACATCAATGAATACCTTAGCCACAGGGATGGTTCCTGAAACATC  
AGTATTGCTGGTTGATGAAAAGCTGGTGAAGCTAGTATTAATTAAGAATACAGATGATCATCTTATTGCTTTTACA  
CCACCATTGTTGATTTGCTGAAAGCAATAAATCAATTCGTTTAAATCCCGACTCAGCCGTTATTCGTGTTGAAGCCGGT  
CAAGTACAACAGGTTTCGATTTTTACTTTCAGGCGACTGTTCCTTCGCAATCAGAAGAGCTGAAACCGGTAACGTTTCAAGG  
TATTCACCAAAAGATGACAAGAGCAGCAGAGTTACTGTTTCAATTCGTCAGGATCTACCTGTACTGATCCACCCGGCTT  
CCCTCCGGAAGAGCAGAGACCTGGAATTCCTGGAATGGCGTAAATAATGGCGACCAATTTGAGATTAGCAACCCAGT  
AATTATGTCGTTTCGTATGACCTTACAATTTAAAACGCTCCCTCAGGAAAAACGGGGCTATAAATAAGACCTATTTTCT  
ACACACACCAGTACAACACTGATTAACAAACGCTACGGATACAAAAGTCGAGTTTTACCCAGCCAGCCGATATGGTT  
ATCGCGGTAATAAATATGTCACGTAAATAA

>Cluster\_5920

ATGGACCTGATTTATTTCTCATCGATTTTATCTGCACATTGACGTGCATCTGGCAGAGCTGGTCCGGAGTACGGCGT  
CTGGGTTTATGCCATTTTCTTAAATTTGTTCTGTGAAACCGGCTGGTGGTAACCGGTTTTTACCGGGTATTCAT  
TGCTGTTTGTGGCGGAGCGTTGGCATCACTGGAACCAACGATCTCAACGTCATATGATGGTGGTGTGATGCTGATC  
GCGCGGATTTGGGTGACCGGTCATTAACACTTCGGCGGTTGTTTCGGTGAAGAGTTGTTTCAGTAAATCCCAATTCGAA  
AATTTCCGTCGCGATTATCTCGACAAAACCCATCAGTTTTATGAGAAACATGGCGGCAAAACGATTTATCTCGCCCGTT  
TTGTGCGGATCGTCAGAAGCTTCGCCCGTTTTGTTGCGGGAATGGGCCACATGTCGTACCGTCAATTTCCCGCTTATAAC  
GTGATCGGCGCAGCTGTTGTTGGTACTGCTTTTTACCTACGAGGCTATTTCTTCGGTACAATCCCGATGGTTCCAGATAA  
CCTTAAGCTGCTGATGATCGTGGGATTTATTTGTTTCTATTTTTCGGCGGCTCATCGAAATAATCCGTCACAAAACCGGCTG  
CGGACCGCGCCGAAAATAA

>Cluster\_36490

ATGAGTAAACCCGCTATCAGCCTTGGTTCAGATGCCACTTTTTCTCCCTTATGTGTATCCGCTGGGTGGCGTTGCA  
GGAAAAAGCCTGCTGTTTCATATCAAGACCATCGACCTCGACAGCGGTAACATTTGCGACCGGACGTTGGCAAGGTTACG  
GTCAGACACGCGGTGTCGCTTATACAAATCGATGATTTTGGTTGAGTGAATCTTCGCCATTTGCGGAGTATCTGGAA  
GATCGATTTGGCCACCAGCTGGGAACGATTTATCCGCTGATTTAGAAAACTGTCGCGGTCACGACAGATCTCAGGC  
CTGGTGGCGCAGCGATCTGATGCCATCCGCGAAGAGCCTCCGACGATGTTGTTCTTTGCGGGGGCAAAAAGCCGAC  
TAACGGCCGAGGAAAAGCCAGTGCAGAGAACTGTTCCGCGATGGCAGAACATTTGTTAGTACTGGGTGAGCCGAAATTTA  
TTTTGGTGAATGGTGCATTGCTGATCTGATCTGGCGCTAATGATTAACCGCCTGGTACTACATGGCGATGAGGTGCCAGA  
ACGCTGGTGGATATGCAACATTCAGTGGCAGCGAGCGTCTGTCCAGCGTTTTATTGCACTTTCCGCGAAGCAATCTG  
GCTGA

>Cluster\_10910

GTGCGCCCTCTTATTTTATCGATTTTTCGCACTATTTCTGCGGGATGTACGCACAGCCAGCAAAGTATGGTTCGATACATT  
TCGCGCCAGCCTTTTCGATAATCAGGATATCACCGTAGCGGATCAGCAGATCCAGGCGTTCCTTATTTCCAGATGATTT  
TACGCCCTTAATGAAGGGCAACGAATCTTTGTGGTACTGGGATATATAGAAACAAGAAACAAAGCAAAATGGTTATCCAGGAT  
AACGCCATGCTGGTTACCACAATGGACGCTTTTAAAAACCGTCAAACCTAATAATAATCTGCTGGAAGTGACAAATTC  
CGGCAGGACCTCTGCGTAAACGCGCTGGCAATAAAAGATGGCAGCGCTGGACGCGGATATTTCTCTGGAGTGAAGACA  
ACCATTTTTCGCTCTGCGACCCGAGTCTACTTTTTCTTTGCTGGATTAGAGACGCTGAATATGCGGGTTCGCAATGTG  
CTGTGTAATGCTTGGCAGGAAAGGTTGACTTCCACGCGCCGAGAAAAACAGTGGCAAAAACACATTTCTGGGTTCGATTCGCG  
TACTGGCCAGGTTCTCAAAGTCGGCAAAATGTTAGGCGCAGGGTTATTTCCCGTAGAAATGACGTTTTCTTAAACCCGCAC  
CATGA

>Cluster\_59005

ATGCGCAGTAAAGTATATCGTCATTGAGGGGCTGGAAGGCGCAGGCAAACTACCGCGGTAATGTGGTGGTTGAGACGCT  
CGAGCAACTGGGTATCCGCGACATGGTTTTTCACTCGGGAACTGGCGGTACGCAACTTCCGAAAAGTTAAGAAGCCTGG  
TGCTGGATATCAAAATCGGTAGGCGATGAAGTCAATACCAGTAAAGCCGAAAGTTCTGATGTTTTATCCCGCGCGGTTCAA  
CTGGTAGAAAACGGTGCATCAAAACAGCTCTGGCTAACCGGCTGGGTGATTGGCGATGCCACGATCTCTCCACTCAGGC  
GTATCAGGGCGCGGACGTTGGTATTGACCAACATATGCTGGCAACACTGCGTGTGCTGTTCTCGGGGATTTTCGCCCG  
ACTTAACGCTCTATCTCGATGTTACCCTGGAAGTTGGCTTAAACCGCGCGCTGCGCGCGGCGAGCTGGATCGTATTGAG  
CAAGAATCTTTCGATTTCTTAAATCGCACCCGCGCCGCTATCTGGAATGGCAGCACAAGATAAAGCATTCATACCAT  
TGATGCCACCCAGCGCTGGAGGCGGTGATGGAATCCCGACTACCGTGACCCACTGGGTGAAGGATTTGGACGCAT  
GA

>Cluster\_54253

TTGATCAGGATAAAAATTTCTGTCGCCAGCTCGGTCTTACGCTTACGAGCCAATCTCCAGGCTATGCATGAATTCAC  
CGATACCCGCGATGATAGTACCTTGTGAAATCTGGCTGGTTCGAGCACTATCCGGTATTCACCAAGGTCAGGCAGGAA  
AAGCGGAGCATTATTAATGCCGGTGTATTTCCGGTGTATCCAGAGCATCGCGGTGGCAGGTGACTTATCACGGGCCG  
GGGCAACAGGTGATGATGTTGCTTAACTGAAACCGCGTAAACTCGGTGTGCGTGAAGTGGTACTTGTCTTGGAGCA  
AACAGTGGTGAATACCTCGCTGAACCTGGGTATAGAAGCGCATCTCCGGCTGACGCGCCAGGTGCTTATGTTGGGGAAA  
AGAAAAATTTGCTCACTGGGTTTACGTATTCGACGCGGTTGTTTCAATCCAGGCTTGGCATTAAACGCTCAATATGGATCTT  
TCACCATTTTTACGTATTAATCTTGTGGGTATGCCGGAATGGAATGGCTAAAAATATCAAAATGGAACCCGAGGCGAC

GACTAATAATATTGCTCCACGTTTACTGGAAAATATTTTAGCGCTACTAAACAATCCGGACTTCGAATATATTACCGCTTAA

>Cluster\_41628

ATGCAGACGAAACACGCTCTTGATGTACCCTGAGTCTGAAATCTGTCTAGTACTCCGGTGTGATTTGAAGGGTATGGCTC  
CGTCTTTGGTGTAAAGGACAGCCACGATGATGTGGTGTGATGTCGGGGCATTGCTGCTCCCTGCGGGCTGGAGTGACA  
GAAAAGCGTTACCTGCGCTGCTCTGGCAGCACCAGCATGGATGAACCCATCGGTTTACTACTGAAATGAAGGAAGACGAT  
GTCGGGCTTTACGTCAGGGGACGGTGTGCTTATTGATGATGATCCCTCGCAAAACCGGCACATGCACACATGAAGGCCGG  
TTCGTTAACCGGCTTTCTATTGGGTACGCTCTGAAAGACTGGGAATACGACCCGGAGCAAGAAGCCTTTCTGCTGAAAG  
AAATGACCTCTGGGAAGTACGCTGGTGTGAGCTTCCCGTCTAACGACGAGGCGGGATCAGCGACCTCAAGAACGCACTG  
GCCCGGGGAAATCCCCGAACGAAAAAATCGAAAGAGTCTGCGTGTGATGTCGGACTCTCCCGTACCAGGCCAAAGC  
ATTCATGGCCGGGGCTATGGCGCACTGTCCCTGCGCGACGCTGAGGATGTGGCTCTGCACTGAATGCACTGAAAAATC  
TGAATTCTAA

>Cluster\_48761

ATGAAGTCTTTAGGTGAACGCTCATCAACGCACGGCAAAAAGCTGGGTTAACACAAGATGCGTTGGCTAAAAAGCTGG  
GATCACCAGAGTTGCAATCAGTAAAGCCGAGCAAGGCTTACAAAAAGTTTCAACGGTACACCTTTTAAAGTTGCGAG  
CTGCACCTGCGGTCTACCCGCTGCTTACCGCTGAGTGTGAGTGAAGGATAAGCATTGGGAAAATAATGTTAGAGCTGC  
CCACAGAGAGACAGCAGCACTCTTACCCTGTAATTAACCTGGGTTGAGGCAAGATTATTCGCAACTTCTGGTGACTA  
CAACATGTATGATCAGGATAAATGGAGGCTTCTGTAATAACGCTGGTGTGAGAGGGGGTCTGGCTGGAAGTGCACGGAG  
ACTCAATGACTTCCCGCTAGGAATAACATTTCTGAAGGAATGTCGATCCTTGTCAACCCAGATAAAGAAGTTTTC  
GGTGTACGTCATCGCCAGAAAAAATCTACCAATGAAGCAACATTCAAAAATATAATTTCTGACATGGGAAAGCGGTT  
TCTAAAGCCCTTAAATCCACAATATCCAATCATAGAAATGACAAATGATGCGAAATAGTAGGTGTTGTGGTTGATGCCA  
GGTGGGATATTTCTGA

>Cluster\_33700

ATGTCATTACCGATGTTACAAGTCGCGCTGGACAACACAGACTATGGATAGCGCTACGAAACACTCGCTGATTGCCGA  
AGAAGTCGACATTTATCGAAGTGGGACCATCTTTGCGTAGGGCAAGGCGTGCCTGCGGTTCGTGACCTGAAAGCGCTGT  
ACCCGCACAAAATCGTACTGGCTGACGCCAAAATGCGGATGCAAGGAAAATCCTTTCGCAATGTGCTTCGAAAGCCAA  
GCTGACTGGGTGACCGTAATTTGCTGTGCGGATATCAACACCGCCAAAGGCGGCTGGACGTGGCAAAAGAGTTAATGG  
CGAGCTGCAGATCGAACTGACCGCTACTGGACCTGAGGAAACAGGCGCAGCAGTGGCGGACGCGCATTTGGGAGGTTCA  
TTTATCACCGCAGCGTACGCGCAGGCGCAGGCGTGGCATGGGGCAAGCGGATATCACCGCGATCAACGCTTTTCC  
GATATGGGCTTCAAAGTTACCGTCACTGCTGGTCTGGCGCTGGAAGATCTGCCGTTGTTAAAGGCATTCGATTCATGT  
GTTTATCGCTGGTCGAGCATTCGTGATGCCGCTTCTCCGGTGGAGGCGCACGTCAGTTCAAACGTTCCATCGCTGAAC  
TGTGGGGCTAA

>Cluster\_40726

ATGGCCGTCAACTCAAACGGTTCAAACAATCGCGTTGCTGGGCGTGATTTTACGAAAAGAATATTCAGATAGAGCGATA  
TGATGGTCTCATACCTCAATATCGCAATCCCTTCGAATAATGATGATGACGATCGCCCTTTGCTTAAGGCTCAGCGTA  
AGGAGTAAATAGCTTGGTGTGCTGCTATTCGAGAACTAGCAATACTGAAGCGTTTATTTGGCAAAAAGTACATCGC  
GAGATTGGTGTAGCTGGTATGATGATAATGACAGTAAATCAATATAAAAACAGCGGAGAGTTTTCTGCATGCAATGCTTGA  
CCGATGTAAGAATCATGATGCTGTAAGGCTCTTGTAAAGTTTACTACGTAACAGTGAAGACTGTGGACTTCGACAAA  
AACCTTCGCGGTATGCCATATCAATTTCCGTACAGGAGCTTTAAACGATCTTACTCGTCTCAGTTACAGTTCGATTTG  
TCGTGGTTAGAGCAACAATCGGCATCAAGCCACACAGAGAGTTTCGACCTTACCAGAAAGTCCGACTTCGCTGCTTCA  
AATCCGACTTTATCCAAAAGAAATAATATCTTTATCTGCGTAGGGGTTTTGGTAGGGGTGTCAATTTTAGGGGTTTTT  
TTAATTTGTAA

>Cluster\_23593

ATGAGTAACTGGCCTTATCCCCGCATCGTCGCCATCGTGGTGGCGGTAAGCTGGCCCCGGAGAACACCTGGCGGCAAT  
CGAGCTCGGGGCAAAAATACGGTCTAAGATGATCGAATTTGACGCGAAGTTATCGAAAGATGGCGAGATCTTTCTGCTCC  
ATGACGACAATCTTGAACGCACCAGCAACGGCTGGGGCGTGCAGGTTGAACTGAACTGGCAGGATTTACTGCGCGTGGAT  
GCAGGCAAGTTGGTACAGCAAAAGCGTTTAAAGGTGAGCCGCTGCACTTTCGAGGTTGGCGGAACCGTGTCCGCAAA  
CGGGATGATGGCGAATATCGAAATCAAAACCCACTGGCACTGGACATTAACGGGCAAAACGGTGGCGTTGGCGGCAC  
CGCAACTGTCGACCGGATGACGCGCGGCTGCTGTGATGAGATTGATGCTTTAGAAGCCGCGCAACAGGCAGCA  
CCGAACTGCGCGTGGTTTATTGCTTGTGATGAAATGGCGGACGACTGGCGAGAATTGACCGCGCGGCTGGGCTGCGTCT  
TATTCATCTCAATCATAAAGTTGCTCGATAAAGCCGAGTGTGATGCAAGTTGAAAGACGCGGATACGGATTTCTGGTTATA  
CCGTCAATAAACCAGCGCGGCGAGAGTTGCTGCGCTGGGGCTGGATTGCATCTGTACCGATGCGATTGACGTGATT  
GGTCCGAACCTTACGGCCCAATAG

>Cluster\_6099

ATGAGTTTTGTGGTCAATTATTTCCCGCGCTACCGCTCCACGCGTCTGCCCGTAAACCATTGGTTGATATTAACGGCAA  
ACCCATGATGTTTATGTTCTTGAACGCGCGCTGAATCAGGTGCCGAGCGCATCATCGTGGCAACCGATCATGAGGATG  
TTGCCCGCCCGTTGAAGCCGCTGGCGGTGAAGTATGATGACGCGCGCGATCATCAGTCAGGAACGAAACGCTTGGCG  
GAAGTTGTCGAAAAATGCGCATTCAGCAGCAGCACGCTGATGTTAATGTGAGGTTGATGAAACCGATGATCCTCGCAC  
AATCATTGCTCAGGTTGCTGATAACCTCGCTCAGCGTCAAGTGGTATGGCGACTCTGGCGGTTCCACAAATGCGG  
AAGAAGCGTTTAAACCGAATGCGGTGAAAGTGGTCTCGACGCTGAAGGTTATGCACTGTACTTCTCTCGCGCCACCAT  
CCTTGGGATCGTGTGCTTTGCGAGAAGGCTTGAACCGTGGCGATAAATCTTCTGCGTCTGCTGCTGCTGCTGCTGCT  
CCGTGACGGCTTTATCCGTCGTTACGTTCAACTGGCAGCAAGTCCGTTAGAACACATGAAATGTTAGAGCAGCTTCGTT  
TTCTGTGGTACGGCGAAAAATCCATGTTGCTGTTGCTCAGGAAGTTCTGGCACAGGTGTTGGATACCCCTGAAGATCTT  
GAGCGGTTTCGCGCTGAAATGCGCTAA

>Cluster\_38626

ATGAAAACAAAAAATGATGATGGTGTGCACTGGTCTGCTTCCACTCTGCCCTTTTCAAGGTTGGTGGATGAGCACTGC  
AATCAAGAAGCGTAACTTGAAGTGAAGACTCAGATGAGTGTGAGACCATCTGGCTTAAACCCGCCAGCGAACGCACGGTAT  
TTCGTCAGATCAAAAACAGCTCTGATAAAGACATGAGTGGGCTGCAGGGCAAAAATGCTGATGCTGTGAAAGCAAAAGGA  
TATCAGGTGGTACTTCTCCGGATACAGCCTACTACTGGATTCAGGCGAATGTGCTGAAGGCCGATAAGATGGATCTGCG  
GGATCTCAGGGATGGCTGAACCGTGGTTATGAAGCGCAGCTGTTGGTGTGCAAGCTTAGGTGCGGATATACCGGATATA  
ACTCAAAATCTGCCGGTGCACACTCGGTGTGGGCTTGTGCTGCTGCTGCTGCTGCTGCTGCTGCTGCTGCTGCTGCTGCT  
GATGTGAATATACCATGATCAGGATGTGAGATGTCAGAGGCTACTAAGGCACCGTGACAACGGATAATGTTGCCCG  
CCTGCGTCAGGGCACATCAGGTGCGAAAAATTCAGACAGTACTGAAACGGGTAACCAGCATAAATACCAGACCCGGTGG  
TCTCAAAATGCGAACAGGTTAACCTGAAATTTGAAGAGCGCAAGCCTGTTCTCGAAGACAGCTGCGCAAAATCAATCGCA  
AACATTCTCTGA

>Cluster\_10772

ATGTCAGTTATTGGTTCGATTCCTCTTTGAATCCTGTGGAACCGTAGACGGCCAGGATTTGCTTTATCACCTTTTTT  
CCAGGGCTGCCTGATGCGCTGCTGATTTGTCATAACCGGACACCTGGGATACGATGGCGGTAAAGAAGTTACCGTTG  
AAGATTTAATGAAAGAGGTTGGTACCTATCGCCACTTTATGAACGCTTCCGGCGCGGCTTACCGCATCCGGCGGTGAG

GCAATCTACAAGCTGAGTTTGTTCGTGACTGGTTCCGCGCCTGCAAAAAAGAAGGCATTTCATACCTGTCTGGACACCAA  
CGGTTTTTGTTCGTGTTACGATCCGGTGTATGTAAGTCTGGAAGTAACCGACCTGGTAATGCTCGATCTCAAAACAGA  
TGAACGACGAGATCCACCAAATCTGGTTGGAGTTTCCAATCACCGCACGCTGGAGTTCCGCAATATCTGGCGAACAAA  
AATGTGAAGGTGTGGATCCGCTACGTTGTGTCCAGGCTGGTCTGACGATGACGATTTCAGCGCATCGCCTCGGTGAATT  
TACCGGTGATATGGCAACGTTGAGAAAATCGAGCTTCCCTTACCAGGCTGGGCAACACAAAATGGTGGCAATGG  
GTGAAGAGTACAACTCGACGGTGTAAACCACCGAAGAAAGAGACCATGGAACGCGTGAAGGCATTCTTGAGCAGTAC  
GGTATAAGGTAATGTTCTAA

>Cluster\_17675

ATGCAAAATCTGATGCCCCGATAAATACACCGGATCAATTGTTTCATGATGGTGACCCCACTCAGGGGATAGAAGGAAC  
CCTCGTACTGCTGGTTATTTAAACAATCAGCAGGGGGCAACCCGTGATTTACAGCAGGAACCTTAAATGTTCTGGTG  
GTGCACATATTCAACCTGACCCAAAAAACGGATCAGTACTTACCGCGCTTCGCGCGTTCGTTAAGCCGCAAGAAT  
CCGTTTGGCGATCAAAATGGACGGCACGGTGCAAAAGGCTTCGAAAACCTTGGTTTGGGAGAAGGTGCTCCAGCTAT  
TGGCGTTCGTTCTCTGGCCGTCCGCCCAATGCCAGATACCCTAATCGAAAAGCTGGTCCGGCATGGTGTGTTTGAAGT  
TCAACGGCGCAAAATCTCTGCCACTGATTACCTGTGCTGGCAAAAGTGTTCCTTCGCTGGTATTACCTGAAGCCCGC  
GGTGACTTCATTCTGATCTGGGATGATGGGCGAGGGGCGGACAGTGGGCGAGCATTATTAAGCTGGCAGGCAGCAACATC  
TTTATCGCAATTTGGTGGTAATATCCAGAAGGTCCGGCCATGCGATTGCTGATTACGATGGAATATCAGCACAGGAGC  
CAGGTTTCTCGATTTTCAGTACACCACTCAGTAGGAGATGGTGTAAATTTTGTGCTGTCCAGCCGCAAAATATT  
GCATTTAACTTTCTGGTGAGGGCTAAATAA

>Cluster\_39286

ATGACCATTAAAAATGTAATTTGCGATAATGACGGCGTGTGATGACAGATAACGTCGCCGTACCGGGTGCAGCGGAATT  
TTTGCACGGGATTTGGAATAAGCCCTGCCGCTGGTGTGCTGACCAACTATCCTTCGCAGACCGGGCAAGATCTGGCGA  
ACCGCTTTGCCACTGCTGGTGTGATGTACCGGATAGCGTGTGTTTATACCTCCCGGATGGCGACCGCCGATTTCTGCGT  
CGCCAGGAAGGCAAGAAAGCGTATGTGGTGGGCGAAGGCGCACTGATTTCATGAACTGTACAAAGCCGGTTTACTATTAC  
CGATGTGAACCTGATTTTGTGATTTTGGCGAAACGCTTCCCTACAACCTGGGACATGATGCAATAAGCAGCTTATTGCG  
TCGCTAACGGTGCACGTTTTATCGCCACCAACCGGACACCCAGGGCGCGGTTTTTATCCCGCTGTGGCGGTTGTGT  
GCAGGGATCGAGAAAATCTCCGGGCGCAACCGTTCTATGTTGAAAGCCGAGTCCGTGGATCATCCGCGCGGATTA  
CAAAATGCAGGCGCATTCGGAAGAAACGGTGTATGTCGGCGATAAATTGCGTACCGATATCTGGCGGGCTTCCAGGCCG  
GTCGTGGAGACGATTCGGTGTCTTCTGGTGTGTTTCTGCTCGCTCGACGATATCGACAGTATGCCGTTCCGCCAAGTTGGATT  
TACCCATCGGTGCTGAAATCGACGTTATCTGA

>Cluster\_54228

ATGTTAAAAAAGATACTTTTACTGGCTCTGCTTCTCGCAATCGCCTTCGCAGAGGAACCTTCTGCTCCAGTAAAAGCGAT  
TGAAAACACGGGCAATTACAATCAAAAACATTCGATGCCCGGAGGAATGAAAGGTTATCTCGAAAAGTATCAGGATA  
TGGGCGTACCATTCTACCTGACTCCAGATGGTAAGCACGCTATCTGTTTACATGTACAACGAGAAAGGTGAAAACCTG  
AGTAACACACTTATCGAAAAGAAATTTACGCACACGCGGACCGGAAATGTGGCAACGGATGGAACAATCCCACTGGCT  
CCTCGACGTAATAAAGATGCGCCGGTCAATGTCTACGTTCTCGCCGATCCGTTCTGCCCATATTGTAACACAGTTCTGGC  
AGCAGCGCGCCCGTGGTAGATTCTGGCAAAAGTGAATTAAGAACATTGTTGGTTGGGGTTATCAAAAGTAAAGCCCGC  
GCGACAGCAGCGCAATTTCTGCCCTCAAAGATCCCGCAAAACCTGGCAACAATATGAAGCCTCTGGTGGCAAGCTTAA  
GCTAAACGTCCTGCAACAGTAAGTACAGAGCAAAATGAAAGTGTAAAGTGACAATGAGAACTGATGGACGATCTGGGG  
CAAAATGTCACGCGGCTATCTATACATGAGTAAGGAAAATACGCTACAACAGCCGTTGGGTTGCCGATCAGAAAACG  
CTTAATATCATTATGGGGAATAATAA

>Cluster\_23924

ATGGCGACTCACTTTGCCGAGGGATTTAACGGAAGGACATCTGATTTCTGTTCTGCTCCTCCCTCCCTGTGTCATCAAGA  
AGCCCGAAACATTTCCCTCATCGTCAAAGCCGTTTTCTGGCGTCCAGAGGTTTACTCGCAGAACTGATGTTTCTGCTGT  
ATGGCATTGGCGAATTTGCCGAAATCGTCAACCTGCGGAAAGGAAAACCGGTTTTTCCAGCGATAAAAAATTTGCCCTCGT  
TCTATTTCTATGCGGGGAAATGTTGCGCGTGGCGTTAACAACCGAAGGTGAATGTGGCCTCGATATGGAATACAGCG  
TGGCAGCGCGGGTTTTATAGCCACACGCGCCGATAACACACCTTTTCCAGCAATGAATCGCTATGGATCAGTAAAC  
AAAACGATCCTAACGAAGCGCGGCGCAGCTCATCACGCTGCGCGGAGCGTGTAAAACCTAACCCGATGTTTGAAT  
GACGATCCGCGGATCTGCAACTACTGCCCATTTGCCGAGCCGTAAGTGTGCTCATGTAAATCATGTAGAAGCGTTATG  
CGACGCGGAGGACGCTGCTGGTGTGGTCCGTGGCGGTCAAGCCACGATGAAAAGCTCAGTGTCTGGGAGTTAGATGGCA  
AACACGGCTGAAAAGCCTGCCGATATTCACAGCCGCGCAACAATCCTACCAGCCGGATGATGCGTTTTGCCAGCTC  
TCTACCGTGAAGGCTTTTTTCGCCAAATTGA

>Cluster\_42567

ATGACTCATGCTCTGCTCGGTGATCCTCGTTCGTTTCATTCGATATTTCATCATGAACAGCAAAAAATATCGTTCATATA  
CGAGAGTATCTGCTGCTGGATAAAAAATTTGGCAGACGATTTTGGCTTTTGTTCACCTGGATACGCGACGGCTGGATATCG  
AAGAGCTGACAGTTTGCATTTACTTACAAAATATTCGTTAGTCCAGCAATTTAGGATTGCTATAGCAAAAGCCGTTT  
TTAATTAACAGTACCCCCATTCAGCTGGTACGGCGATTTTGTATAGTTTCAATGACCCCGGGTCAATTCGCCGAT  
ACTGAGCAAAATGCTCTACTCTTCTGTTTATCAATGTTTCTCATAAAGAAAGAACTGATCCCTTACTTTTCAATAGTA  
TCAGTACTGTTTTCAGGAAAAGTTGAACGCTTATAGCTTTGATATCGTAAACGTTGGTATCTACGCGATATCGCAGAA  
AGAAATGACACCGAGAGTCTCATCAAAAAAAGTTGCAAGGATGAAAATACCTGTTTTCAGTAAAAATATTACTCGCCTC  
CAGGATGTCGATGGCAGACGATTACTCGAGTTACGTCAAAATACCTCTGCATATATTGGGAAAATGTGGCTATAGCA  
GTACGTCATACTTTATAAATACATTTAGACAATATTATGGTGTAAACGCACATCAGTTTTTCGCAACATTCGCCGGTACC  
TTTTCTCTGA

>Cluster\_20346

ATGATTAATAATCTTCTTTAATATTATCCCTGTCATTATTGGCTGGATGCGTACAAAAACCGTTAGTAAACGGTCAATGC  
TTTATCTTCCGGGCAATCTGTCGGTAAGAAGTTCTGATCATCCCCGCAAGCAAGAACTTTGGAAACCAAAACAGATTG  
AATACACTCAAAATAGCTACGGTAGTAGCCGCAATTTTACAAGCAAGGATATACACAAGTAAAGATGAAAATTTGGCT  
GACCAGGTAATCTCTTGAACTTTTTGAAGCGGGGCCATTTCAAATACTCGTAATGTAACCATCCCAATATACGGGCA  
AATCGGTGAGCTCAGCAACAACGTAACGAACTCGAACACACCGTTCAATAGTTATGGTGGTGGCTACGGTACAGCTA  
ATACCACTGGAACGGCAACAACAGTTTATACGCTACTTATGGAATTAATGCGCGTATAACACAACCTGTGACGGACAG  
TTCTACGGCGCAGGGGTGATACTCCAGTCTGTTGATGCCAAGGCTATCTCAATAATAGGCAGATTAATATGTTGAA  
AGTTGGTAGCTCAGTCTGCTCGCAACAGTCTGATGGAATTGCTGATTACAAGGGTTGGCGAGAAATAGCCGCTAGCTATG  
CCGGGAAAATACGAAGGTGATATAACTTTTAAATGTTGACCTAAAGCACCAAAATTA

>Cluster\_61725

ATGGCGGAGAATCAATCCACCGTAGAAAATGCAAAAAGAGAAACTGGATCGGTGGTTGAAAAGTGGCATACCACGCGGGG  
TGGAAAACCTCTCAGAAAGAGAGCTGGGAGAACTGCTGGGCATTAACGATGACGCTGCGCCAGGCGTTGTTGAACC  
TCGAGGCAGAAATCAAAAATCTTCCGTAAGGATCGTAAGGGGTGGTTCGTGACCCAGCCGATTTAATACAGTCCGGAG  
CTGTCCGGCAGCTTTTACGGGGCGCAATTTGAGCAAGGGCGAGAGCTTCTTGGGGTTTACCAGAAAACCGTACAG  
CGATATTCCGAGACGCTCGCGCCACTGATGCAAGTACGCGCATCAACTGAACTCTATCGCATACCAGGCTGGGGGGCGC  
TGGAAGGACATAAAGTTTTCTATCACGAACATATATTAATCTGAAGTTGCTCCGGGTTTTATGAAACACTTGA

CACTCATTTTCTGCAGTCTGGGAAAAGTCTACCAAAAAGAGACGGTAGTAAAAAATTGATTTTCAAACCCGTCAGAAT  
GCCGGCGATATCAGCAAGTATCTTGGCGGTTCTGCGGGTATGCCAGCGATCTTAATTGAAAAGCATCCGCCGACCAGC  
AAGGCAATATTGTCCAAATAGATATTGAATATTGGCGATTGAGGCCGTAGACCTCATATTAATCTGTAG  
>Cluster\_13503  
ATGTCAAACGAAACATTCGCGGTGATAATAACCTTGTGTGTAGCTTCTGTATCGGCCAGGCGTTCAGGGGGTATCGT  
TTTACAGCGAACGCGAGTGTATGATGCCAGCCGAAAGAGCTGCGTTACCTGTGCGAAACAAAGGCGCAGAAACCC  
CTTATTTACTGCAATCATGGGTAGATAATATAGATGGTACAAGCCGTGCCCATTTATATAAACCCACCGCTATTTCTG  
CTTGAAGCTGGCGATGACTCATCTGCGAATTTATAAACAGCTGATAACCTGCCTGAAAAATAAGAGTTCGCTGTTCTA  
CATTAATGTTCTGTCGCAATTCAGCAAAAGAAAAATCAGATGATGTTAAAGTAAAGAGTTCGAGCTGGTATTTAAACAC  
GGATCAAATGTTTTATCGCCCCGCACACCTGAAGGGACGGGTAACGATGCGTGGACATCACTGGAATTTAAACGTAGT  
GACCATTCACTCAATATATAAACCACTGAATATTACGTGCTATTTGCCGGACTGGCAGTGCATAAAACCGATCTCAC  
AAGCAAAATTGAATATATCGGCCCGGAGAACATAACAGTTACCCTTCTGTCATCTGGCGGAAAGAACGTGAAATGGG  
CTGCAATCAATGATATTGCGCGCAGTTCCGGGACAGAACTCGTCCACTGCAATAA  
>Cluster\_23159  
ATGTCAATAATTAATTCACGCCAGTGCCTGTTATTGCCATTGTAGGATGTGATGGTTTCAAGTAAATCGACCCTCACGGC  
AAGCCTGGTAAATGAACCTGGCATCAAGATGCCAACGAGACACATTTATCTCGGGCAATCGTCCGGCGAATGGCGAAT  
GGATTTACAGCTACCTGTTATTGGCGCACCTTTGGCGGTTATTGCGAAGTAAAGCGGCACATGTGCACGAAAAGCC  
TCAACACCGCCTGGCAATATTACTGCGCTGGTTATCTATCTGCTTCCCTGCTGGCGGGGTACAAGTTTCGAAAATGTT  
GTGTAACAAACAGCAAGGCTATCTGCTCATCACGACCCCTACCCGACGGTTGAAGTGCCTGGGTTTTCGCTTTGATGGCC  
CGCAATTTGGCAAAAACACGGCGGTAACGGTTGGATAAAAATGTTAAGCAGCGCAGCTGAAGCTGTACCAATGGATG  
CGCTTTATTTGGCCGTTATGTTGATTCTCTTGGCATGATGAACAAACCCGCTTTGCGCGTAAACCTGACCACCACT  
GGCAGCTTACAGGAAAAATCGCCGTTACGCCCACTGACATTCATGGCGCAAAGATCCTTGAACGTGATGGTCCGGC  
AACCAGTCGATGAAATATGCAAGCGTCACTACCGCAATTCACGCCGCTTTTCCCTGA  
>Cluster\_927  
ATGGATTTTTTAGTGTGCAGAAATATCCTGGTACATATACCAATAGGGGACGGCGTTATGATCTCTCATGGATCGAAGC  
GGTAGGCAGGATCGCCGGGTTGCTGTGATTGGCCTTGCCAGTCTGGAGAAGATCAGCAACTACTTCTTTGGCCTGATCA  
ACGTCACCTTGTTTGGCATTATTTTCTTTCAGATTCAGCTGTATGCCAGCCTGCTATTACAGGTGTTTTTCTTTGCGCGC  
AATATTTACGGTTGGTATGCGTGTGTCGCGCAAAACAGCAGACGAGCGGAGTTGAAAATTCGGCTGGTGTTCGCGC  
GAAGGCACCTCAGCTGGTTGGCGGTTGCGGTTGTTTCGATTGGTCTGATGACGGTATTTATCAATCCGGTGTTCGATTTT  
TGACCCGCGTGGCAGTCAATGATCATGCAAGCATTAGGATTTACAGGTTGATGCTGACTGCAACCGGACGCTTTCCCG  
TTCGCGGATTCATGATGATGGTGTATCTATCGTGGCAATGATTCTGATGACGCGTAAGTATGTGAAAACTGGCTGTT  
GTGGGTGATTTAATACGCTGATTAGCGTCTTATTTTGGCACTTCAAGGCGTTTACGCCATGTCCTGGAGTACATCATCC  
TGACCTTTATGCGCTCAACGGCAGCCGGATGTGGATCAACAGCGCACGTGAAAGAGGCTCACGCGGCTGTCCATTAA  
>Cluster\_30385  
ATGACGCCAACCATTTGAACCTTATTTGTGGCCATCGCTCCATTCGCCATTTTCACTGATGAACCCATTTCCGAAGCGCAGCG  
TGAGCGGATTTAATACAGCGCCCGTGGCAGCTCCAGTTCCAGTTTTTTGTCAGTGCAGTAGCATTATTCCGATTACCGACA  
AAGCGTTACGTGAAGAACTGGTGACGCTGACCGCGGGGCAAAAACACGTAGCGCAAGCGCGGAGTTTTGGGTGTTCTGT  
GCCGACTTTAACCCTCATTTACAGATCTGTCGGATGCTCAGCTCGGCCCTGGCGGAACAACTGTTGCTCGGTGCTGTTGA  
TACGGCAATGATGGCGCAGAATGCATTAACCCAGCGGAATCGTGGGATTGGCGGGGTATATATCGCGCGCTGCGCA  
ATAATATTGAAGCGGTGACCGAACTGCTGAAAATTACCGCAGCATGTTTCTGCGCGTGTGGGGTGTGCTGCTGGCTGGCCT  
CGGATAATCCGGATCTTAAAGCCGCTTTACCGCCCTCCATTTGGTGTATGAAAACAGCTATCAACCACTGGATAAAGA  
CGCACTGGCGCAGTATGACGAGCAACTGGCGCAATATTACCTCACTCGTGGCAGCAATAATCGCCGGGATACCTGGAGCG  
ATCATATCCGCGAACAATCATTAAAGAAAGCCGCCATTTATCTGGATTATTGCAACAACAGGGTTGGGCACCGCGC  
TAA  
>Cluster\_55160  
ATGCCATACATATGTTCTATCATTTTGGTGTGAACTCGTTTGGTGTCCGAATTGGTAAAGAAGATATTTGTTTAAAAA  
AGGAAATGCTGTCTCATTTGAATACAATTTAAAAGATCTTTTTTCGTCAAATACAGATCATCTAATGATCGTAGATATTG  
AGGAGAAAACAGTTAATGATTTCTTTAAAACCTACACACTCTCACCTTTTTCTGTAAGAAGGTTTTATCCGTCATACTTG  
ATAGTAGAATGTGAAGATTTTTCATTGTTAAGGAACCTGGTGTGATGCTTGAATTGTGATAGCAAAACCGTGGATGTAGT  
TAGAAATCAAATACACTGTCATGCTTGTCTTATCTTTCAGAGAAAATAGTGCAAAAGTTTTTGTTCGGAAGTCTTA  
ATAGCTTAGGTTGTAAGTTAAGGCTATTTACTCGGATATCTCAGCGTCATGGAGACTTTGTGATATATCTTCAAGA  
TTATATATGAGCGAGAGTTTGTAAAAAGAAAAATAAAAGACGAAGGATATCGTTTAGTAAATTAATCTTGAAGAACG  
AATGATGATGGCGCAAAGATATTGATCTACAGTAATCATACTGTCGGCAAGGTGGCGGGAATATCGCGGATGACAATG  
CATCATATTTGTAAGTGTTTTTAGAGGATATTTGGTGTGCCCTCCGACCAATATTTATCAAGATTTTCTTAG  
>Cluster\_17781  
ATGAAAGAGCGCGAATGATTTTTAACGGAGAGATGGTGGCGCCCTGCTGGACGGACGGAAGACGCAGACCGGGAGACC  
TCTCAAATGGAAGCAAACTCGGTTTACTGAAATAGCTGAACGCGAAGACGCTGATGCCATTTGGCCGTGGAGTGGAGTGCAG  
AAAATGTGCGGATTTCTGGCATCCATGCCGTTCCGTTCCGTCGCGATCGCATCTGGGTGCGGGAGACGTTGGGGCGTA  
GTGAGTCAAGAACTGGATGAAGACGCGTCCGATTCAGCCATGGATCCCTGACCGACCTGCCACGCCATTCACGAGATGCC  
GTTTGGTAATGGCTACTATCTGCTCACGCTATCTACGCGCAGATGGTGTATTTACATGGGGTGTGATGATGATGGTTATG  
AAGATGGTTCGTTGCTGGAACCATCTATCCATATGCCACGCGCAGCATGTCGCTTCTGCTGGAGGTTACCGCGGTG  
CGGTGGAGCGCTTGAACGCTATCAGCGAAGAGATGCGCAGCAGAGAAGGAATTTAGCGGTGGCTGTCTCAATTTGCGG  
TGAACCTGAACCATGCGGTTGCGCTAATCCAGATCCTGACGCGACAGATGCCCTTCCGTTACCTGTGGCAATCGATCTATG  
GGCAGGAAAATGGAACGCAACCTTGGGTATGGGTATCGAGTTCAAGCGGTTGAAGCGGTTGCAGCATGA  
>Cluster\_55752  
ATGAAAATGCTCGAAGACCGCTGTTTTGAAGGCTGGCAGCAACGCTGGCGACACGACTCCAGTACCTTAAACTGCC  
GATGACGTTTCAATCTTCTCCCTCCACCTCGTGATCACACTCCGCCACCAGTGCTGTACTGGCTTTCCGGATTAACT  
GCAATGACGAGAATTTACCACCAGGCGGGTCCCAGCGGGTAGCGCGGAACTGGGGATTGTTACTGGTGTGATGCCAGAC  
ACCAGCCCGCGCGGCAAAAGGTTGCCAACGACGATGGTACGATTTAGGCCAGGGCGCAGGCTTTTATCTTAATGCCAC  
GCAACCCCGTGGCGCAGCATTACCAGGATGATGATTACTGCGCGATGAATTTACCGCGCTGGTTCAGTCCGAATTTA  
ATGTCAGCGACCGCTGCGCCATTAGCGGTCCTCAATGGTGGTACGGTGGCTGATTTAGGCGCTGAAAAATCCGGGT  
AAATACACCAAGCTTTCCGCTTTGCGCAATTTGTAATCCGTCAGCGTCCGTTGGGAATCAAGCGTTTAGCAGCTA  
TTTAGGTGAGGCAAAAATGCATGGTGAATGGGACAGTTCGCCACTGATGATGCAACGCGCAGGATGCGATCC  
CGACGCTTATCGATCAGGGCGATAATGATCAGTTTCTTCCGACCAAGTTGCAACCTCGGCTACGCGAAGCGCGC  
CAGAAAGCGTGGCCGATGACGCTGCGTATCTAGCCGGATGATGATCACAGTTACTACTTATCGCCTCTTTTATAGAGGA  
TCACCTGCGCTTCCATGCGCAGTATTTACTGAAGTGA  
>Cluster\_22430  
ATGTTTGAATCCACCTGTAAAGAAAGTCTCGGTGGTTATTCCGCTTTATAACGAGCAGGAAAGCTTACCGGAATTAAT  
CAGGCGCACCCGCGAGCTGTGAATCACTGGGAAAGAGTATGAAATCCTGCTGATTGATGACGGCAGTAGCGATAAT

CCGCGCATATGCTGGTCAAGCCTCACAAGCGGAGGGCAGCCATATTGTGCTATCTTGTAAACCGCAATTACGGGCAA  
CATTACAGCGATTATGGCGGGATTTCAGTCAAGTCCAGCGGACTTAATTTATTACCTCGATGCCGATCTCCAGAATCCGGC  
AGAGGAAATCCCCGCTCTGGTGGCAAAGCCGATGAAGTTACGACGTGGTAGGGACTGTACGCCAGAACCAGCCAGGACA  
GCTGGTTTTCGTAAACCGCTTCGAAGATGATTAACCGGCTTATTCAGCGCACCCTGGCAAAGCGATGGGTGACATTTGTT  
TGATGCTGGCGGCTATCGCCGTCATATGTCGATGCGATGTTGACATGCGCATGAACGAGCAGCCTTTATCCGATTTCT  
GGCAATATCTTCGCGCCGCGTGCATTGAAATTCAGTGCACCATGCCGAGCGTGAGTTGGTGAATCCAAATACAGCT  
TTATGCGCCTGATTAATTTGATGTACGACTGGTGACCCTGCTTACCACAACCGCGCTACGTAATGTTGAGTTTGTCTGGC  
AGCATTATGCGATTGGCGGTTTTAGCATTGCGGTGCTGCTGGTGATTTTACGCTGACCTTCGGACCACAATGGGCGGC  
AGAAGCGCTTTTATGCTATTTGCGGCTGCTGTTTACTTTTATTTGGCGCTCAGTTTATCGGCATGGGATTTGCTCGGTGAAT  
ATATCGGCAGGATCTACCCGATGTCGCGCCCGCTATTTGTTTACGCAAGTTATCCGTCATCCAGCAAGGAAATGAA  
TAA

>Cluster\_2174

ATGTCAGACTATCAAATGTTTGAAGTACAGGTGAGTCAAGTGGAAACCGCTTACCGAACAGGTGAAACGCTTACGCTGGT  
GGCAAACCGATGGCAAACCGCTGCCTGCGTTACCGGAGGAAGTACATCATTTGTGAGATGAGCGATGGTGATAACCAGT  
ACAGCAATGCGTATTCACCTACTGAGTTCGCCGATGACACCTCTGTTTATCAGATTGCCGTTCCGGCTGGAGGAAACTCG  
CGCGGCGGTTCCCGCTTTTGCATCAGCAGGTAAGGTTGGCGATCGGTTAACGATTTCAACGCCATAAACCTGCTTTGCG  
GCTAATTCCTCAGCCAGAAAGCATCTGTTTATCGCGGGCTATTGGTATCACCCCTTCTCTGTCGCACATGCGAGCAGC  
TGCAACACAGCGACTGCGACTGGCAGTACATTACTGCTCGGAAATCCAGAAAGTTGCGCATTTCTGATGAGCTAGTC  
CAGCATCCCGAGGCTGAGAAAGTTCACCTGTCATCACTCAACCGGAAACAGACTGGAATTAGCGCGATTTATGGCGGA  
TATCGAACCTGGCACACAGCTTTATACCTGTGGTCCGAGGCGCTAAATGAAGCGGTAAGAAGTGAAGTGAAGTGGCGCTGG  
ACATCGTCCCGATACGCTGCACCTTTGAGCAATTTGCTATCGAAAGCAAAAACCGCGATGCTTTTACCTGGTCTGGC  
CGTTCCGAAAAGAGTTTGTGGTCCCGAAGAGATGACTATTTTGCAGTTTATGAAAATAATAAAGCGCGAAAGTGGAA  
ATGTTTATGCTGTAAGGGGATGCGGAACTCGGAAACAGCAATACTGGAAGGTGAAGCTGACCATCGGGATCAGTATTT  
TTAGCGATGAAGAGCGTGCCAGCCAGCAAGTATGTTGATCTGTTGTTCCGCTGCGAAGGGTAAACGCTGGTGTGGAT  
TTGTAG

>Cluster\_26877

ATGAAAATTTGTATCGACGACGGCTCCACCAACATCAAGTGGCATGGACTGAGAACGGCGAACCGCGCAACGCCATCAG  
CCCGAACAGCTTCAAGTCCGAATGGTCTGCGCGTTCCGTTGGCAGCAGCCCGCGAACFACATGCTTGTGATGGCGTGGCT  
ATGGTTTTGATCCGGTACGCGATCGCTTTGTCCAGACGACCGACAGCAATACCAGTACAGCGATGTGAATGTCAATTGCC  
ATTCATCAGCGCTGGTCAAATCAGGATCAGCGCACAGGAGTGGATGTGGTTGTCAACCTGCCACTGAGCGAGTATTT  
CGACAAAACGACAGCCGGACATGGCCAAATCAACCGCAAAAAGCGAACGTCATGCGCCCGTGGAGTACCAGAAGC  
GCGAAGCATTCACCTATCCGTAACGTCGCGGTTATGCCGTAATCCCGCTGGCTTTAAGGCACTGGCTGACATGAGT  
CCGTTTGAATCCCTGCTGATTTGTTGATTTGGGCGGAACACCGTGGATGTGGCAAAGTTTCAAGGGCACTGGCAGGTAT  
CAGCCAGGTGTTTTGCGATCCACAGTAGCGCTTCTCTGATGGCCGATGCCCTACTGTCGGTGTGGCCACTAACGGTA  
TGCGCACCACTCACCACTCGCCAAATACCATTAATCGAATCGCCATGATGAAGCTGGCTGCGCCAGCACATCCAAAT  
GACCGCATTCACCTACCGCAGCTGATGGCGGTTATTCGTAAGAAAGGAAAGAACACTGAAACACCGCTGAAACACCGCTGCG  
GGTTTTTCCGGTTACGGTCCGGTGTGTTGTCGGTGGCGGGCGGAGATTGTTGGCACCCGCTATCCCGAAGCCTGCG  
GAGTTAATCGACTTTTACGCGGACGGGTTGCCACAGTTTGTCTGGTAAATGGGCTGTACGCAATGGACAAGGAGTAA  
>Cluster\_12320

ATGACGGAGTACCGCAAACGCAATCTGAAATCTTATTCACCAGTTGGTGGTGGGAAACCTGCAAACGATGGCAATAT  
TCCTGCTCAGTGTGAACCTGCTGCGTGTTCGTTGCGAGGAGGTATGGATATTTTGTCTGAGGGGGCCATTTTGGCGGC  
CAGAGACGTTGACGCTACACGACGATCTGGGCAGGATTAACCTTCTGTCATCTTGAAGGCACATCGCGCTTTGCGAT  
CAGGACTCCGGCCGACACCGACTGGGAGCTTGGCGCAATGCCATTACATTACCATAACGCGAGCTGTCCGGCAG  
CGCTCTTATTTGGCGGATTCGAGAGCATTACCTCTCCTTACGCCGTAACCCCTCGCGTGTGGGTGCGGATATTA  
GCGCGGTCATTAAGAATAAGATCGACTCCACTGCTGTGCGCAGCAGCAGCTGTAATGCTGAAACCACTAACCGGT  
CAGGCTTGGCTCAGCGCTGATGCGCATGCACGGCGGCTTCACTGATGAACAAAAGCGTGCACGCTATGGTTGCAGGG  
GCAAAGTCTGGTCACTCAGTCTGGTGTGGATGAACATCGCGAAGACGCGCAGTTGCTCTCCTGCCACTCAACCGGA  
TGGAACGCCAGAACTGCTGCGGGCGAAGGATCTGCTGCTGGCTGATCGACGCAAGCGCGGGCGTCCGGAGCTGGCC  
AGAGAGTCCGGTCTGAGCGTTCTCAAAATTAAGCGAGGCTTCCGCGTTCTGTTCAACAACAGCGCTATGCGCTGTTTCA  
GGTGAACGAATGCAGGAAGCCAGAAGACGCTGGCCAAACGGCAATACCTCCGTCATGACGGTGGCGGCGATCTGGGCT  
ATGCCAACGCCAGCCATTTCTTCCGACTTCCAGAAACAGTTTGGCGTAACTCCTTCCGACTTTAAACGCGGGATGTA  
>Cluster\_25913

ATGGATGCACCGAGTACCACACCCGATGATGCGGTGTTTAAACAATTTTAAATGCATGCGGAAACGGCTCGCGACTTTCT  
GGATATCCATTTGCCAGCGGAGCTACCGAACTGTGTGACCTGCACACGCTGCATCTTGTGAGTGGGGAGTTTTATGAA  
AAAGCCAGAAAGGGCCACAGCAGCTGACGCTGCTTTATTCGTTGCAATGCAAGGCAACCCCGGTTATTTGATGCTGGT  
GAACATCAAAGCAAGCCGATAAGAAAATGGCTTTTCGATGATGCGTTATTTCTATTGCTGCCATGCACCGGCATCTGGA  
GGCTGACCAGATAAGCTGCCGCTGGTGGTGCATTTCTGTTTTATCAGGGCGAGGCCACACCTTATCCGCTATCAATGT  
GCTGGTTTTGATGTTTTACTACCGGAACTGGCGCAGCGCTATAACAGTCTTTCCCGTGGTGATACACTATC  
ACCCGATGACGAAATCATGCAACATCGCGGATTTGCCATTCGAACTGTCGCAAAAACATATTCGCCAGCCGACTT  
AATGTTATGCTGGAGCAACTGGTACGCTGATGACGAAAGGTACACTAGCGGAAGTCAAGTATGTTGCCATGCAAAACT  
ATATGCTGCAACCGGCTCATACTGAACAAGCGGATTTGTTTTATGTTGTTGGTGTGGTGTGAGAGCAGGGAAACGGGAGGAGTCT  
ATGATGACGCTGGCGCAGTGGTTTTGAAGAGAAGGGATTGAAAAGGAATGGAGAAAGGGATTGAGCGGGGATTTGAGAA  
AGGAATGGTGAAGGAATAGAGATAGGAATGAGAAGGGGATTGAGCAAGGAAGCAGGAAGTAAAGTCAAGAAATTCGCC  
TGCGTCTTCTGATTAAGGAATGCTCGGGAAGACGTTGCAGAGATGGCAAAATTTACCTTGTGATGATGATAAAATG  
ATTAACTAA

>Cluster\_40187

ATGGCAGAAATACAAAGATAATTTACTCGGTGAGGGCAACAGCTTTCTCGAAGTGTGGAAACAGGTTTCGCATCTGCACC  
GCTGGACAACCGGTGCTCATCTCGGCGAGCGCGGCAACCGGTAAGAGCTGATCGCCAGCCGCTGCATTTCTCTCTCT  
CCCGTTGGCAAGGGCCGTTTATTTCCCTTAACTGCGCGGCTTAAATGAAAATTTGCTGGATTCCGAATGTTTGGTCA  
GAAGCGGGCGGTTTTACCGGTGCGCAAAAACGTCATCCAGGAGATTTGAACGTGCGCGACGGCGGCTACCTTTCTGA  
TGAACCTGCTACGGCACCGATGATGGTGCAGGAAAATTTATGCGTGTGATGAGTACGGTGAACCTGGAGCGGCTCGGCG  
GCAGCCAGCCATTCAGGTGAATGTGCGGTTGGTATGCGCGACGAATGCCGATCTCCGGCGATGGTCAATGAAGGGACT  
TTTTCGGCTGACCTGCTCGACCGACTAGCCTTCGATGTTGTGCAACTGCCGCACTACCGCAAGCTGAAAGCGACATTA  
GTTAATGGCAGAACACTTTTGCATCCAGATGTGTGGGAAATCAAGCTGCTCTGTTCCCGGTTTTTACCGGACGCCCA  
GAGAAACATGCTGAATTTATGCTGGCCGGGAAATATACGTGAATGAAAACGTTGGTGGACGTTTCAAGTGTATCGCCAC  
GGCACCAGGATTTATCCGCTTGTGACATCATTATGATCCCTTAAACGCGGCTCCATCTGAAAGAAGCCTCGCGGTTTT  
AGAAAACACTTCCGCTCCGACGCTGCACTGGATTTACGCGGATTTGATGATGACGAGGAAAAGAACTGCTCAGTCA  
GCTTTGGAACAAGGGAATATAACAGAACGCGCGGCTGAATTTGCTGGGTTAACCTATCATCAGTTCCGCGCTTGTCTG  
AAAAGCACCGACTTTAG



>Cluster\_37835

ATGACAACCCAGACTGTCTCTGGTCGCCGTTATTTACGAAAGCGTGGCTGATGGAGCAGAAATCGCTTATCGCTCTGCT  
GGTGTGATCGCGATTGTCTCGACGTTAAGCCCAACTTTTCCACCATCAATAACTTATCAATATTCAGCAACCT  
CAGTGAACGCCATATATGGCGGTGCGGATGACGCTGGTGTATCTGACGTCGGGCATCGACTTATCGGTAGGTTCTCTGTTG  
GCGCTGACCGCGCATGCTGCTGCATCTATCGTCGGCATATCGCTGCGCAATGCGCTGGTGGCTGTCCTGCTGCTGTTGTTG  
AGGTGCCGCAATTTGGTGGGTAACCGGGGTGATTTAGCGAAAGTTCGCGTCCAGGCGTTTATCGCTACGCTGGTTATGA  
TGCTTTTACTGCGCGGCTGACCATGGTTTATACCAACGGTAGCCAGTGAATACCGGCTTACTGAGAACCGCGATCTG  
TTTGGCTGGTTGGTATTGGTCTCCGCTGGGCTACCGACGCGAGTCTGGATCATGGGGATTGCTTCTCCGCGGCTG  
GTACATGCTGCATCACACGCGTCTGGGGCGTTACATCTACGCGTGGGCGGCAACGAAGCGGCAACGCGTCTTCTGTTG  
TCAACGCTCAATAAAATCAAAATCATCGTCTATTCTCTTTTGGTCTGCTGGCATCGCTGGCGGGATCATGAAGTGGCG  
CGTCTCTCTCCGCAACCCACGGCGGGGACTGGCTATGAGCTGGATGCTATGCTGCGGTGGTCTGGGCGGTACGAG  
TCTGGCGGGGAAAAGTTCGATTTGTTGGGACGTTGATCGGCGCATTAATTCCTGGCTTCTTAATAATGGATTGAATT  
TGTAGGTGTTTCTCTTATTACAGATGATCGTCAAAGCGGTGGTGAATTTGCTGGCGGTGCTGGTAGACAACAAAAAG  
CAGTAA

>Cluster\_7638

ATGACAAAGTATGCATTAGTCGGTGTGTTGGGCGGACCAACGCACGCTCTGCTCTGTGTGATATGCCAGTGGTGAAT  
CTCGCAGGCTAAGACCTATTTCAGGGCTTATTACCCAGCCTCGAAGCGGTCAATTCGCGTTTATCTTGAAGAACATAAGG  
TCGAGGTGAAAGACGGCTGTATTGCCATCGCTTGCCTAATACCGGTGACTGGTGGCGATGACCAACCATACCTGGGCG  
TTCTCAATTCGCGAAATGAAAAAGAATCTCGGTTTATAGCCATCTGGAAATATTAACGATTTTACCGCTGTATCGATGCG  
GATCCCGATGCTGAAAAAGAGCATCTGATTTCAGTTTGGTGGCGCAACCGTTCGAAGGTAAGCCTATTCGGGTTTACG  
GTGCGGAAACGGGCTTGGGGTTGCGCATCTGGTCCATCTGATAAGCGTTGGGTAAGCTTGCAGGCGAAGGCGGTAC  
GTTGATTTTGGCGCAATAGTGAAGAAGAGGCCATTATCTCGAAATATTCGCTGCGGAAATTTGGTCAATTTTCGGCGGA  
GCGCGTGTCTTTCGGCCCTGGGCTGGTGAATTTGTATCGCGCAATTTGTAAAGCTGACAAACCGCTGCGAGAAAATCTCA  
AGCAAAAGATATACCGAACGCGGCTGGCTGACAGCTGACCCGATGCGCGCATTTGCGCGCATTTGCGGCTGTTTGGCTCA  
ATGGGCGGTTTGGCGGCAATCTGGCGTCAATCTCGGACATTTGGCGGCTGTTTATTCGGGGCGGTATCGTCCGCG  
CTTCTTGGTTCCTCAAAGCCTCCGTTTCCGTCGCGCATTTGAAGATAAAGGGCGCTTAAAGAAATATGTCATGATA  
TTCCGGTGTATCTCATCGTCCATGACAAATCCGGGCTTCTCGGTTCCGGTGCACATTTACGCCAGACCTTAGGTACAT  
CTGTAA

>Cluster\_40819

ATGCTCTGATTACTTAAAAGGTAACGTTGCTGTTGATCCGGTACTGACCAGTATCGCCCGTGGCTATAAAAAATGCCGATT  
CATCGGCGAACGTTATTTCCCGTCGTCGACGACGGACAAGGAAGGCGTGCCTGACCGACTTCGGGAAAACCGCCTTTG  
TGAATATGACACCGAGCTGCGCTCGGGCGGACAGCAATGTTCTGGTCCGTGAAAAAACAGGCACCGCTGGACCTGGCTG  
CTGGGTGAACACGATCTGGCTGCGCGGTTGGACTATCGCGAGCAGGCGGAGTCCATGTTTAAAGAGAGCAAGGCCAT  
CCGTCGCGCCACGATGGCGTGAACCTGCGCGTGAACCTATCGCTGCGCGTCTGGCTCAGGATGAAAAGGTTACCGTA  
CCGGGCGCTCAAAAACCTGACAGCCAGTATCGCTGGGCGGTTGGTAAGGGGACCCCATCGGGGTGATGAAGCGGT  
ATGGAAGCCGTCCTGACCGCCACGGGGTCCGCTCCAACTGATGACCATGAGGCTGAGGCGCGGCTGATGGCGTGAAGT  
CCACCGGCGATTACGGCCGCCATCGGAGCCAACGAACGCAAGCGCATCACACAGAAATCTGCAGGACCTCTTTCAGA  
TCGAAGAGATCGTCTCGTGCCTGAGTCTCCCTGCGGTCATGAAAGCGGCAATGGAATAAGAACAGCTGCGCGCGGAT  
ATCTGGGGAGACAAATCTGATGCTGCATATGTCGCGAAACCGCAGCGGGGCGGACGCGGACGAGAACGACGCGCTC  
CTTCGGCTACACCTGCGTTCGTAAGGGGATGCTGTTGCGCACAAATACGACGAGCGGTTGGCAAGGTGAAGTACTGCC  
GTTATACCGATATCTACAAAGTCCGCGTGGTGGTGGCGATGCCGGTATCTCATTACCGGTATCAGTAAATAA

>Cluster\_28856

ATGACCACGAAGAAAGCTGATTACATTTGGTTCAATGGGGAGATGGTTCGCTGGGAAGACGCGAAGGTGCATGTGATGTC  
GCACGCGTGCATATGGCACCTCGGTTTGAAGGCATCCGTTGCTACGACTCGCACAAAGGACCGGTTGATTTCCGCC  
ATCGTGAGCATATGACGCGTCTGCATGACTCCGCCAAAATCTATCGTTTCCCGGTTTCGACAGCATTGATGAGCTGATG  
GAAGCTTGTGCTGACGCTGATCCGCAAAAACAATCTCACGAGCCCTATATCCGTCGCTGATCTTCGTTGGTGTGTTGG  
CATGGGTGTAACCCCGGCAACCGGATACCTAACCGAGCTGATTTATCGCGCTTTCGCGTGGGGGGCGTATCGGGCGAG  
AAGCACTGGAGCAGGGGATCGATGCGATGGTTTCTCTGGAACCGTGCAGCACCAACACCATCCCAACCGCGGCAAAA  
GCCGGTGTAACTACCTCTCTTCCCTGTTGGTGGGTAGCGAAGCGCGCCACGGTTATCAGGAAGGTATCGCGTTGGA  
TGTGAATGGTTATATCTGAAAGCGCAGGCGAAAACCTGTTTGAAGTGAAGACGGTGTGCTGTTACCCCCACCGTTCA  
CTTCTCCGCGCTCCGCGTATTACCCGTCGATGCCATCATCAAATAGCGAAAGAGCTGGAAATGAAGTGCCTGAGCAG  
GTGCTGTCGCGGCAATCCCTGTACTGGCGGATGAAGTCTTTATGTCGCGTACGGCGGAGAAATCACGCCAGTGCAG  
TGTAGATGTTTACAGTTGGTGAAGGCGTTCGCGCCGCTTACCAACGCATTCAGCAAGCCTTCTTCGCGCTCTTCA  
CTGGCGAAACCGAAGATAAATGGGGCTGGTTAGATCAAGTTAATCAATAA

>Cluster\_29348

ATGGCTAATCCGCTATATCAGAAACATATCATTTCATAAACGACCTTAGTCGGATGACCTTAATCTGGTGTGGCGAC  
AGCGGCGAAACTGAAAGCGAACCCGCAACCCAGAGCTGTTGAAGCACAAAGTTATGCCAGCTGTTTCTTCGAAGCCTTA  
CCCGCACCCGCTCTCTTTTCGAACTTCCATGCCACCGCTGGGTCGAGCGTGGTGGCTTCTCCGACAGCGCAATACA  
TCACTGGGTAAAAAGCGGAAACGCTGGCCGATACCATTTTCGTTATCAGCATTACGTCGATGCGATAGTGTGATGCGTCA  
TCCGAGGAAAGTGCAGCGCGCTGGCCACCGAGTTTTCGCGCAATGTACCGTACTGATGCGGTTGATGGCTCCAACC  
AACATCCGACGAAACCTTGTGACTTATTCACCATTCAGGAAACCCAGGGCGCTGGACAATCTCCACGTCGCAATG  
GTTGGTGAAGCTGAAATATGGCCGACCGTTACTCTTCCAGCCAGCGCTAGCGAAGTTCGACGGCAACCGTTTTCATCT  
TATCGCGCGGATGCGCTGGCAATGCGCAATACATTTGATATGCTCGATGAAAAAGGATCGCTGGAGTCTGCACA  
GCTCTATTGAAGAGTGTGCGGAAAGTAGACATCTTGTACATGACCCGCGTCAAAAAGAGCGTCTGGACCGCTCCGAG  
TACGCCAACGTGAAAGCGCAGTTTGTCTTTCGCGCCAGCGATCTCCACAACGCCAAAGCAATATGAAGTGTGATCC  
GCTGCCGCGTGTGATGAGATTGCGACGGATGTGGATAAAAACCGCTCACGCTGGTACTTCCAGCAAGCAGGCACCGGA  
TTTTGCTGCGCAGGCGTACTGGCACTGGTTCTGAATCGGATCTGGTACTGTAA

>Cluster\_37837

ATGCAAAAACGAGGACGCTCGTTGTTCTTGGCAGCATTAATGCTGACCACATTTTAATCTTCAATCTTTTCTACTCC  
AGGCGAAACCGTAACCGTTAACCTATCAGGTTGCATTTGGCGGCAAGCGCGAATCAGGCTGTGGCTGCTGGGCGTA  
GCGGTGCGAATATCGGTTTATGCTGTACGGGTGATGACAGCATTTGGTGTGAGCGTTCGCCAGCAGCTCGCCACTGAT  
AACATTGATATTACTCCGCTCAGCGTATCAAAGGCGAATCAACAGGTGTGGCGCTGATTTTTGTTAATGGCGAAGGTGA  
GAATGTCATCGGTATTCATGCGCGGCTAATGCTGCTCCCTTCCCGGCGTGGTGGAAAGCGCAACGTCGAGCTATGGCA  
ACCGCTCAGCATTTAATGTCAGCTGGAATCACCACTGAAAGTGTGATGGCAGCGGCAAAAATCGCCCATAAAATAAG  
ACTATCTGTTGCGTTAACCCGGCTCCGGCTCGCAACTTCTGACGAACTGCTGGCGTGGTGGACATTTATACGCCAAA  
CGAAACGGAGCAGAAAGCTCACCGTATTCGTTGAAAATGATGAAGATGACGCGAAGGCGGCGCAGGTACTGCAATG  
AAAAAGTATCCGTAAGTACTGATTAATTTAGGAAGTGTGTTGATGGCTAGCGTGAATGGTGAAGGTGAGGCTGCGGTT  
CCTGGATTCCGGGTGCGAGCTGTGATACCATTTGCTGCGGAGATACCTTAAACGCGGTTAATCACGGCGTTGCTGGA  
AGAAAACCATTTGCCAGAGCGATTCGTTTGGCCATGCTGCCGCTGCATTCGCGTAACACGTAAGGCGCACAACTT

CCGTACCGTGGCGTGAAGAGATCGACGCATTTTTAGACAGGCAGAGGTGA

>Cluster\_37553

ATGTCAAAAAGATTGCCGTGATTGGCGAATGCATGATTGAGCTTTCGAGAAAGCGCGGACGTTAAGCGGGTTTCGG  
CGCGGATACCCCTGAACACTTCCGGTCTATATCGCCCGTCAGGTCGATCCGCGGATTAACCGTTCATTACGTAACGGCC  
TGGAAACGGACAGATTTAGCCAGCAGATGCTGGACCCCTGGCACGGGAGACGTTGATACTTCCCTGACCCCAACGGAATG  
GAAAAACCGTCTGCCGGCCCTTTACTACATTTGAAACCGACAGCACCGCGGAGCGTACGTTCTACTACTGGCGGAACGAAGC  
CGCCGCCAAATTCGCGTGGAGAGTGGAGAGTCTGCGCGGATTTGCGAAGAGCTGGCGAATTTGATTATCTCTACCTGA  
CGGGGATTAGCCTGGCGATCTTAAGCCCGACCGCCGAAAGCTGCTTCCCTGCTGCGCGAATGCCGCGCAACCGC  
GGAAAGTGATTTTCGACAAATAACTATCTGCGCGCTTGGGCCAGCAAGAAGAGACACAGCAGGTGTACCAACAAAT  
GCTGGAATGCACGGATATCGCCTTCTGACGCTGGACGACGAAGACGCGCTGTGGGGTCAACAGCCGGTGAAGACGTTCA  
TTGCGCGCACCCATAACCGGGCGTGAAGAAGTGGTGGTGAACCGCGGGCGGATTTGCTGCGGTTCATTGCTGGC  
GAAGGGTTAGTGGATGTTCCGGCGGTGAAACTGCCGAAAGAAAAAGTGCATCGATACCACCGCAGCTGGCGACTCTTTCAG  
TGCCCGTTATCTGCGCGTACGCTGACAGCGCGCAGCGCGGAAGACGCGCGCAACCGTGGGCACCTGACCGCAAGTACCG  
TTATTTCAGTATCGCGCGCGATTATCCCGCGTGGCGGATGCCAGCGTAA

>Cluster\_38223

ATGAGTGATATCAGTAAGCGAGCCTGCCCTAAGCGATTTTTTTGATGGGGCCGACGGCTCCGGTAAACCGGGTTAGC  
CATGAGCTGCGTAAAAATTTTACAGTAGAGTTGATAAGCGTTGATTTGCCCCATTATTACAAAGGGATGGATATCGGA  
CGGCGAAGCCGAACGCTGAAGAGTTACTCGCCGCGCCGACCGATTGCTGGATATTCGCGATCCGTCGACGGCTTACTCG  
GCTGCTGATTTTCGCGCGGATGCGCTGGCGGAAATGGCGATATCACCGCGCGGGGGCGGATCCCACTGTTAGTGGGGCG  
TACGATGTTGATTTCAAGGCATTGCTGGAAGGTTGTGCGCGTACCCTCGGACAGCCGGAAGTACGGCCAGAATTG  
AGCAACAGCGCGGACAGCAAGGTTGGGAGTCAATGTCATCGTCAACTTCAGGAGTAGATCCGGTTCGCGCAGCAAGGAT  
CATCAAAATGATCCACAAAGGCTTTCGCGGCACTGGAAGTTTTTTTCAATTTCCGGTAAACTTTAACGGAACGACGCA  
AAGCTCAGGAGACGCTTACCGTATCAGGTGCATCAGTTTCGCCATCGCCCGCGGAGCCGTAAGTGCCTCAACGCA  
TTGAGCAGCGTTTTTCATCAGATGTTGGCTTCAGGTTTTGAAGCAGAAGTCCGGCGCTTTTTGCGCGAGGAGATTGCT  
ACGGACTTGCCTTCCATTGCTGGTGGTATCGCCAGATGTTGCTTACCTGAAGCGGAAATCTCATACGATGAAAT  
GGTTTATCGAGGTGTTTGGCCACGAGACAGTTGGCGAAGCGGAGATAACCTGGCTGCGTGGTGGGAGGGGTTCACT  
GGCTTGACAGTGAAGAACGAAACAGGCGCGTACGAAGTATTACAGGTTGTTGGTGCATCGCAGGCTGA

>Cluster\_39427

ATGAAGCATGAATTATCAAGTATGAAGGCATTTGTCATACTGGCAGAGTCCAGTTCATTTAACAAATGCTGCTAAATTACT  
CAATATTACGCAACCTGCATTAACCGCAAGAATAAAAAAATGGAGGAAGATTACACATTCAACTATTTGAGCGTACAA  
CTCGCAAGGTTACGTTAACAAAAGCAGGAAAAAGGTTGCTCCCGGAGGCGGGGAATTAATAAAAAAATTCGATGAAACG  
CTTTTTAATATTCGTGATATGAATGCTTATCATCGTGGTATGGTGACGTTAGCGTGTATTCGACCCGAGTATTTTATTT  
TTTACCGTGGCAATCGGTAAATTTAATGAGCTGTATCCCAATATTAAGTGGCGATTCTGGAACAAGGCACGAATAATT  
GCATGGAATCGGCTGCTGTAAACGAATCAGACTTTGGCATAAACATGAACAACGTCACAAATTCATCCATTGATTTTACC  
CCACTGGTCAACGAGCCGTTGCTGCTGGCCTGTGCGGTCGACCATCCATTGGCCAAAAGCAGCTTGTAGAATGGCAGGA  
GTTAGTGGGTTACAAAATGAGTATGGCTCAGCTCCGCGGCAACCGACTATTGATAGAACAAACAGCTAGCCGCAAGC  
CCTGGAAGCTGGACTGGTTTTACGAAGTGGCTCATTTTTGCGAGCTCATTAGGGCTGGTGGAGGCGGGACTGGGGATTTCCG  
GCGTTCCTGGTTCGGCAATGCCCATGCGCCCTATTTCTTCGATATTGGTATCCCACTGGTGGAAACCGTTATACGTCG  
GACATTGGGGATTTATTCGCGCAAGATGCCGCTGCTTTCGCGGACGTCGACGCTTTTTTGCCTTGCATGATTAATTTGT  
GGACTGACGATAAAGACAATTTGTGGACCAATATCGTCAACCGCAGAGACATGCGTTACAGGAGATAGGTTAA

>Cluster\_24242

ATGGAAAAAGTGCAGATATCCGTTTGGATTGTGAAGATTGCCCAACTCTATTACGAACAGGATATGACGAGCGGCAAAAT  
TGCGCGGAACTGGGTATTTTACCGCACCCATCAGCCGCTTGCTTAAACGAGGCGCGATCAGGGAATTTGTCACCATCG  
CCATCAACTATGACTACAACAAAATCTCTGGCTGGAGCAGCAAGTGAAGCAAAAGTTAGCCTGAAAGACGTTGTGGTG  
GTGTCAGGAAATGATGAGGATGAAGATACTCAACTGGCGATGATGGGGTTACACGGCGCAAACTGCTGGATCGCTTGT  
GGAACCTGGCGATATTTGCTGGTTTTTCCGCGGCGCGGCTGAGCGCACTGGTTGAAAATTTGCCGAGGCGAGGCAAT  
CGCGGAGTTAAATTTGCGTGGCGATTAATGGTGGCCGCTGCTGGTAAACTCGAAAGCGCTATCACGTAACACATTAACC  
TACAGCGCGCAGCAAGCTGAAGGGGAATCGCATCTCGGGATTTTCCGGCTGCTGCTGGATAACCCATTAATTCGTAA  
TGGGATCATGCAGTCTCAGCACTTAAACCATCTCTGCTACGCGGATAATCGGATGTCGCGCTGGTGGGAATGGCT  
CACCGGCCATTCGCGACGGCGCTAACTGGCATGCGTTTTATGGTGGTGAAGAGAGTACGACCTGAATGCCCGCCAGGTT  
GCTGGCGATATTTGCTCGCGCTTTTTGATATTACCGCGCAATGGTTGAAACGAATATGAGCGAAAAACACTCTCTAT  
CGAAATGAATAAATTAAGCAGGCAGGATTTCCATTGGCATTTGCCATGAGCGAAGAAAAATACAGCGGAATTTGTGGTG  
CACTGCGTGGAAAAATATATAATTTGCTGTTAAGCAATAGCAGCACAGCTGAAGTATTACTGAAATAA

>Cluster\_27948

ATGATCAAGCTCGGCATCGTGATGGACCCATCGCAAACATCAACATCAAGAAAGATTCCAGTTTCGCTATGTTGCTGGA  
AGCACAGCGTCTGGTTACGAACCTCACATATATGGAGATGGCCGATCTCTATTGATCAATGGTGAGGCTCGCGCTCGTA  
CCCGTACTTTGAGCGTCGAACAGAACTACGATAAATGGTACGAGTTACAGGTTGAGCAGGATCTGCCGCTGGCCGATCTC  
GATGATCTCTGATGCGTAAAGACCCGCGTTGATACCGATTATCTACGACCTATATTTGGAACGTCGCGAAGA  
GAAAGGGACGCTGATCGTTAAACAAGCCGCGAGGCTGCGGACTGCAACGAAAAACTGTTCACTGCTGGTTCTCTGACT  
TAACGCCAGAAACTGGTACGCGCAATAAAGCGCAGTTGAAAGCGTTTGGGAAAAACACAGCGACATCATTTTAAAG  
CCGCTGGACGGTATGGGCGGCGCTCGATTTTCGCGTGAAGAAGGTGATCCGAACCTCGGCGTATTGCCGAAACCCCT  
GACTGAGCATGGCACTCGTACTGCTATGGCGCAAAATTTACCTGCCAGCATTAAGATGGCGCAACAGCGCTGGTGTAG  
TGGATGGTGGCCGTTGCGTATTGCTTGGCGGATTTCCGCGAGGGGGCGAAACCCGTTGGCAATCTGGCTGCGGGTGGT  
CGCGGTGAACCTCGTCCGCTGACGGAAGTGCATGGAAATCGCCGTCAGATTGGGCGGACGCTGAAAGAAAAAGGGCT  
GATTTTGTGGTCTGGATATCATCGCGCAGGCTGACTGAAATTAACGTCACCAGCCCACTGTATTCTGTGAGATTG  
AAGCAGAGTTTCCGGTTCGATCACCGGAATGTTAATGGATGCCATCGAAGCAGCTTTACAGCAGCAGTAA

>Cluster\_62158

ATGGGATATTTACATATTGATGGTAGAGGCATGAAGCCAAATGGAGGGAGCCGTCATAACCCCTTTGAAGCTGAAACAAT  
AGCAGCATGGCTGGTGGACATAAGGATGATATAGAGCCCAATTACGGGGAACCACTGTACAAAGTTGTTGGTGTGTGA  
CCATTTTCGCGCAGGTTAATGCTATCAAAATGCTCATTTGCTTAAGCTGGAATTAATGGCAAGACGAGGCTTTA  
CTGACAGTGGGACTGTGCACTCCTTGCAGGGGGCGGAAAGGGCGATTGTTCTCTTTCTCTCTACTCAAAACATGA  
AGATGGCAGGTTTCTTGTAGAACAGCAGCTATCCTCAATGTTGCTGTCTCACGCGTAAAGATAGTTTTCTGTTATTTG  
CGGATATGGACCTTATCGAGATGCAGCCGCAATTTTCGCGCGAGGGTTATTGGCAAAATATCTTTTTCTCAGATAAT  
AATGCGTTGCAATTTGAGTTTCAGAAACGACAGGATTTAATTTCCGACATACAAAAATTTCAACGCTGCATGTTGGA  
GCAGCATGATGAATTTTGAACAAGACTCTTGCAGGACTCAAAAGAAAAAATACGATTAATTTCCCTTGGTTATCTGGC  
AAAAAGTGGAGCAACGGGATTTCTGGCATCAATGGCTTTGGCCGCTTCCCGGGGATTTGATATACCTGGTGGCAGGAT  
AAAAACTGCATATAGCCATGTGATGATGATGATGATGATGATGATGATGATGATGATGATGATGATGATGATGATGATGAT  
CAATAAGATGGGTATCGCTACGAAATGGTAAATCGTGTTCACAGCAAAATTTGATTGAGGATGAAGAACTGCTGTGTG  
TCGGATCTTTTAACTGGTTGCTGCTACAGGGAGATAAGTATCACGATACGATACGCTTTTGGTGTACCGTGGTGA

GCGGTAAAAAATGAAATAAAGGCAATATATGGTAGTCTGGATCAACGTCAGCTTTAA

>Cluster\_7267

ATGACTATACTTGTAAACAGCGGGCGCTGGTTATATTTGGTTCACATACCGTTCTACAATTAATTGAGGGCGGGTATGATGT  
TGTGTGCTTGTAAACCTGAGTAATTCATCCCAAGAGTCACTACATCGCGTTGGGCTTTGGTTTCGAAAAAATATCCAT  
TCATTAAGGCTGATATCAACGATAAACAAGCTTGAAGAAGTTTAAAAACFACGATATTGATGCGAGTATGATGTT  
GCAGGTTTAAAACTGTTGGTGAATCAGTAAAGAAACCATGGAATATACATTAATAATGTCAGTGGAAACCTTACCCT  
GCTTGAAGTTATGAAGCAAGCAATGTTTACAAATTCATTTTGTGCTGCTGCGACTGTTTATGGTAATCATTTCCCG  
TTCCCAATCTGGAGGAATATCCTATTGGAAATGCTTCATGCCCTATGGAACACTAAAGTCAATGCTGGAGCAGGTTTAA  
TCAGACTATGCGAAGTCAAGATGATAAAATTAATAATATTGCTCTGCGTTATTTTAACTCAGGTCGCATCCTGATGG  
TCTTATTGGGGAGGACCCGAACGGCATTCCAAACAATCTGTTCTTATATTTCTCAGGTTGCTATTGGCAAATAGAAA  
AATGTCCTGTTTATGGTGGCGATATGAACTATGATGGAACAGGAGTACGCGACTTTATCCATGTGGTAGATCTTGCC  
GCAGGCCATGTTAGTGTCTTAAAGTATATTGATAAATTACAAGGATATGACATTTTAACTCTGGTACTGGCACTGGTGT  
ATCAGTTTACAGCTAATCGATGCTTTTGA AAAAGCAAGTAAATCAGAAAAGTAAATATGAAATGTGCGCCAGACGTGAGG  
GCGATATAGGATCTTCTTGGGCTGATGTATCTAAAGCAGAAAGGATTTTAGGCTGGAATCCAAGTACAATATTGAAGAT  
ATGATGGTCCATACCTGGAATTGGCAAAAACAAAACCTAATGGCTATGGAAGTTAG

>Cluster\_21069

ATGAGTACGCGTATTTATTGTGGCGGGCGCTTTTGGCGAAAAACCTCGTATCTGCTGGAATAAGTATTACTGT  
CACGCTTTTTTCGCTATGACAGTGGTGTGCGAGGGCTTAAAATTGCAACAGCTGCGTGGACATTTAATTTCTTCCCTGGA  
TGGGGCAGATGATTTGGGATGCGCAATTTGATGGACACAGTCTCACCATGTGCAATATGTTTCCGCGAGCTAAACCGGGC  
ACAGAGGTGATAGAGACCTATGGCTGTTTGGCTTTTCATTCAGGTTTGTGGTAAATGGCTGCCATTCGCGGAAGATAC  
TCATCTGCTACACGGTGAATGGCTGTGCCGCGATGGATGAAGCATGGATGGAATTAGAGGGAGATAGTTTACGCTTFA  
CCGGGCTTACGAGTATGTAATGGGTTTCCGGCATCATATCTGGCTCAGCCAACAGTGGTCTTCAAAATCCTCTACA  
TTGTTTCGATATTAAGATGGCCGTAAACCAATCTGGCTTCTGTAGATATGCCACTACAATATATGTGCCACATGAATATGC  
ATATATACCAAACTGCTACGTTACGCGAATATACCGGCAAAATATTAAGGTTGCGTGAATCAGTACTCCGATGTTA  
ATCCACCAGCCAGTGGCTGGCGTTTAAATCAACGGATTATGCAGGGAGAAGCCTCTCTGTCGACGCTGAATCAACCGGAA  
TTTTATGATCCAGAAATAGTCTTCTTTCAGACAACTGGACGCTTACACAGATCAGCCAGAGTTTCGATGATCGCTCC  
CGATGGCACTACGTTTGTACTCGTTTCTCCAGTGTGAACTAAATATGTGACACGCTGGATCCTTTATAACGGCGAGC  
AACAGGTAGCCACCTTTGCAATTAACGCAACCTGCTGACGATGAGGTTTGGCGGCAACGTAATGGCACGCTGATT  
CAGGTTGCACCGCAGCAACCGCCTTTTACAGTACCACAGGATTTGAATAA

>Cluster\_27475

ATGATTATTGAACGTTGCTGTAACGTTGGCTTGGCAGCGCCCGCAGAGTAGTTTTTCCGGATGCGTTAGATCAACGTTG  
GCTGAAAGCTGCGCAATATTACATCAACAAGGCTGGCAACGCCATCTGGTCCCAATCCGTTTGAACCTCGTCAGT  
TTGCGCTCAGTATGCGGTGGCGATGGACGGGTACAGGTGATGATCCGATGGCAACCTCGCAATGCGGGAAGATTT  
GCTCATCGTGGCTGGCCGCGCGGGCGAAAAACGCCCGGATGCGCTGGA AAAACTTACCAGCCGCTGATGTTCCG  
CGCCGCAATGGTACGCGCGGTAAGCGGATGTCTGTATCGCGGGCAACCTCTCTCCAGCGGAATGTGCTGCGTGCCG  
GATTACGATTTACGCTTTCAGCCAGGCTGTA AAAACGCTCTCATCTTCTGATGCTGCCACAGTACAGCGGCTCG  
GCTTGGGCTTTGCCGATTGCGAGCTGGTGCCACAGCCGACGGCGGCACAACCTGGCGGATATCGCGCTTGGCAGCGCCGA  
AACCTGGCGGCCATCACCGGAGAAAGAACCGCGGTGGCGATGCTGCTGTTTTCCAGCAACGGTAGTGCCCGTCAACCT  
GCGTTGCCAACCTCAGCGGACAGAAATCGTCCGTGAGCGCGCACAAAGCTGGTTGTCGATGGCGAGTTGCACTTT  
GACCGCGCTTCGTTGCGGAAAGTGGCGGCGAAAAAGCCTGCCAGCCGTTACAGGCAAAAGCAATGTGATGTTT  
TCCGTCGCTGGAGGCAAGAAATATTGGCTACAAAATCGCACACGACTTGGCGGATATCGTGGCTGCGGCCATTGATAC  
AAGGACTTGGCGCGCGATGCACGATCTCTCTGTTGTAGCGTGCAGGAAATATCGAACGCGGCTGGTGGCAGCT  
GTGCCGCTCAGACAGAAGTGAACCGGAAAGCAGTTTACAAAACCTGTTGAATGA

>Cluster\_23020

ATGGCGACATAAAGGATGTAGCCGACTGGCAGGCGTTTTCAGTCCGACCGTTTCCCGGCTCATTAATAATTACCCAA  
AGCCAGCGAAGCTTCCCGGCTGGCTGTGCATAGTGCAATGGAGTCTCTTAGCTATCACCCGAACGCCAACGCCGTGGCG  
TGGCGCAGCAGACCACTGA AACCGTCCGGTCTGATCGTTGGTGTGTTTCCGATCCGTTTTCGTTGCAATGGTGAAGCG  
GTCGAACAGGTGGCTTATCACACTGGTAATTTTTTATTGATTGGCAACGGTTACCACAACGAACAAAAGAGCGTACGGC  
CATTGAGCAACTGATCCGCCATCGCTGTGCTGCGCTGGTTGTCCATGCCAAAATGATCCCGGATGCCGATTTAGCCTCGT  
TAATGAAACAAATGCCCGGTATGGTGTGATCAACCGTATCTGCTGGCTTTGAAAACCGTTGATTTGCTCTGGACGAT  
CGTTACGGTGGCTGGCTGGCAACCGCTCATTTAATTACGAAAGTCAATACCGCATTTGGTTATCTGTGCTTAACCACT  
TATTTCTGACCGCAAGATCGTCTGCAAGGATTTACGATGCCCTTGTGAAAGTGGTATCCGGCAATGACCGGCTGG  
TGACATTTGGCGAACAGACGAAAGCGGGGCGAACAGCAATGACCGAGCTTTTGGGACGAGGCAAGAAATTTCACTGGC  
TAGCCTGTTATAACGATTAATGGCGGGCGGATGGCGGTGCTCAATGATAAATGGTATTGATGTACCGGGTGGAT  
TTGCTTAATTTGGCTTTGATGATGTGCTGGTGTACGCTATGTGCTCCGCGCTGACCCAGCTGATCCCAATCGTGA  
CGATGGCGAGCAGGCTGCCAACTGGCTTTGGCGCTGGCGGATAATCGCCCTCTCCGGAATCACTAATGTCTTTAGT  
CCGACGCTGGTACGCTGCCATTCAGTGTCAACTCCGCTCGTGGAGCAAGTCAATGCAACAGCGACTAA

>Cluster\_27147

ATGGAAATTCGCAATAATGCTATTTATAGTAATGATGATGGTTATGCTGTGAGCTATGCGGCATGTTATAGTGAGTTATC  
TGTTTCAGCACAATTTGGTTGTTACAGGGGATTTTGCATTTACTCAAACACAAATGGCGACATATGAGCATAAATTTAATG  
ATTCGTCATGCGTGAGTACAAATACTATCACACCTATGAGCCGCTCGGATATTTATGTTGGACTTTATAACGATACCATT  
AAATTAATTTACATTTTGAATGGACCAATAAAAACAACATACGTTGTCAAATAATCAGACCAGTTTCCACAGTGGTTA  
TTCCGGTGACGGTGACACCTGCGGCCAGTAATGCAAAAGTGAATGTTTCTGCGGGGGCGGTTGTTTCACTGATGATTAATG  
GAGTTGCGACATTTCCAGTGTTCATCATCGACACGCGGGAGTGCAGTACAATTTCTACTGTGTTTATTAGGTGGT  
AAGTCAATGGGATGATGTAATAAGCTACAGAAATGCATTTGGCAAAAATGCAGGTTCTATTTCTTTAATCTGACAT  
GTCATACAACCCGATAAACCAACCTGCCAAACCGGACGATTTAATAATFACGTTAGAGAGTATTTCCCGTTTCAACAATT  
CAGCCATAGGTAACAAAACAATAAATAGTAAAAAGGGGATATTTCTGCGCTGTA AAAAATTTATTAGGTCAACAA  
AATCAAACATCACGAAATGCAAGTGTATTTATCAAGTTCTGACTTGTAAACCAACAGCAACACGATCCTGAAAGGTGC  
GGAAGATAATGGCGTAGGATTTATTTGAAAGTAATGGTACGCCAGTCACTTTTAAATATCACTAACGACGATAAG  
GATATACAAATTTAAAAGAAATTCGCGCAAACTCAAACTACAGATAACAACCGTTTCAATTCGATAACGCGCAATTAC  
TACGTTACGATACAACAAGTAAATCTGGCGCACTGGAGGCAACCGCATTAATCAACGTAATAACGACTAA

>Cluster\_64000

ATGGCAACAATAAAGATGTAGCGAAACGAGCAACGTTTCCACTACAACCTGTGTACACGTAATCAACAAAACAGTTT  
CGTCCGCTGAAGAAACCGCAACCGCTGTGGGCGAGCAATAAAGAATTACACTACTCCCTAGCGCGGTGGCGCTAGCC  
TGAAGGTTAACACACCAAGTCTATCGGTTTGTGGCGACAGCAGCAAGCGGCTATTTTCCGAGATCATTTGAAGCG  
GTTGAAAAAATGCTTCCAGAAAGGTTACACCTGATTTCTGGGTAATGCGTGGAAACAATCTTGAAGAACAGCGGCTT  
TCTGTGATGATGGCGCAAAACCGCTGATGGTGTGCTGCTGATGTTCTGAGTACCAGAGCGGCTGGCGGATG  
TGGAAAGATATCGCCATATCCCAATGGTGGTGTGACTGGGGTGAAGCAAAAGCTGACTTACCGATGCGGTCAATTGAT  
AACCGGTTCAAGGCGGCTACATGGCGGGCTTATCTGATTGACCGGTCACCGCAATCGCGCTATCCCGGCCC

GCTGGAACGTAACACCGGCGAGGCCCTTCCGGTTTTATGAAGCGATGGAAGAAGCGATGATCAAGGTGCCGGA  
GCTGGATTTCAGGGTACTTTGAACCGAATCTGGTTATCGCGCATGCAGCAAATACTGTGCGAGCCGATCGCCCT  
ACTGCCGTCTTCTGTGGTGGCGATATCATGGCAATGGGCGCACTTGTGCTGCTGATGAAATGGGTCTGCGGTCCCGCA  
GGATGTTTCGCTGATCGGTTATGATAACGTCGCGCAACGCGCTATTTTACGCGCGGCTGACCACAGTCCACCAGCCAA  
AAGATTCCGTGGGTAACAGCGTTCAACATGCTGTGGATCGTATCGTCAACAAACGTAAGAAACCGCAGTCCATTGAA  
GTGCATCCGCGCTTATTGAACCGCTCCGTGGTGCAGGCCGTTCCGCGACTATCGTCTGTTAA

>Cluster\_50530

ATGATAATTTCTAAAAACAGCTTATTGGGGTGGTAGCGATCGGTATTATTTGGCTGGCGTTGTCTTTTTATCTGGTG  
GGTAAGCAAAGGAAGATTATACAGACGCGGATGATGCTTACATTGGTGGTAATATCACACGGTGGCAAGTAAAGTTT  
CTGGTTATATTTCTGCTATAGAGGTGCGCGATAATCAGAGTGTAAAAAAGGCGATATATCTGCGTCTCGATGATCGG  
GATATCGTGCAGATGTCGCCAGGCTTGGAGCAAAAATAAAAAGTAGCAAGCAATCTCGAAAGCATCAAGCCACTAT  
TGGCATGCAGCAGTGCATAATCAAAGTCCAGTGAACATGGCAGGCAGTAAAAATGAGGAGCAAAAGCGCTGCGAG  
ATACTGAACGTTATGAAAAACTCGCACAAATCAGCGCAATATCGCAACAAATTTATGATAACGCCAGGTTTACTACAG  
CAGGTGCGAGCAAGGAGCGCAAGCCGCAACGATTTCTTGGTGGAGAAGCAACGGCTGGCAGTTTTATCTGCTCAGGA  
AGAAAACGTACGTCAAGTATCGAAGAAGTTCCAGGCGCTTTGACTCAGGCACACTGATGATCTGGAATATACCCTTGTTC  
GTGCGCCGATGATGGCATTTGTCGCAACCCGACGCGCCATACATGCAAGTGGGTGGAAGGCGCACATCGTTAGTTTTCA  
CTAGTACCAGTCACTGAGTTGTGGTTGATGCAAAATTAAGAAGAAAACCAATAGCGGGAATGAAGCCGAAATGAAGC  
TGAGATCCGTGCTGATATCTCAAAGGGGAAGTGTTCACGGTACATGAAAGCCTTTCCAGCGACAGGAGCCAGTT  
TCAGCTTGATCCGATAGAAAATGCCACTGGCAATTTCCAAAATTTGTTAGCGCGTCCCGGTACGGATTGCATTTGAC  
GACGCAAGGAATTAAGCAACTTCTCCGCGGGACTGTCCGTCACCGTCAGTGTGATGAGAGATGA

>Cluster\_48540

ATGAAAACCGCCACTGCGCGCTTACCACCGCTCGGTTCCGGTCAAGGTTCTGGACAGTTGCGTGAAGCGATACGCTACTT  
GCATTACAGCTTACGAACCGAAGGCTTATGTCCACTGGGTTCTGTCCTTCACTCCGTTTCCACGGGTGCGCTACCCCG  
CAACCTTGGGCGAGCAGCGAAGTTCGAGGCAATTTCTGTCCTGGCTGGCAAGCAGCGCAAGGTTTCGGTCTCCAGCCTCT  
CAGGCATTTGGCGGCTTGTCTTCTTACGGCAAGGTTGCTGTGCACGGATCTGCCCTGGCTTCCAGGAGATCGGAAGACC  
TCCGCGCTGCGCGGCTTCCCGGTTGGTGTGACCCCGGATGAAGTGGTTCGCATCCTCGGTTTTCTGGAAGGCGAGCATC  
GTTTGTTCGCCCAGCTTCTGTATGGAACGGGATGCGGATCAGTGAGGTTTGGCAACTGCGGGTCAAGGATCTGGATTTC  
GATCAGCGCAGCATCAGTGTGCGGGCAAGGCTCCAAAGGATCGGCTTGTATGTTACCCGAGAGCTTGGCACCCTC  
CTGCGGAGCAGCTGTGCGGTGCACGGCATGGTGGCTGAAGGACCAGGCGGAGGCGCAGCGGCTTGGCTTCCCG  
ACGCCCTTGGCGGAAGTATCCGCGCGCGGCAATTTCTGGCTGGTTCGCGCAGCACACGATTCGACC  
GATCCACGGAGCGGTGTGTCGCGTCCCATCATGTATGACAGACCTTTACGCGCGCTTCAAACGTGCGGTAGAACA  
AGCAGGCATCACGAAGCCGCGCACACCGCACACCTCCGCGCATCGTTGCGCAGCGGCTTGTCTCCGCGCGGTTACGACA  
TTCGAACCGTGCAGGATCTGCTCGGCCATTCGACGCTCTACGACGATGATTTACACGATGTGCTGAAAGTTGGCGGT  
GCCGGAGTGGCTCACCGCTTGTGCGCTGCGGCCCTCACTAGTGAGAGGTAG

>Cluster\_28138

ATGCATATTACATACAGTCTCCCGTTGCTATTGATGACATCATTTGAAGCAAAACAACGACTGGCTGGCGAATTTATAA  
AACAGGTATGCCTCGCTCAACTATTTTAGTGAACGTTGCAAAGGTGAAATATCTCAAAATCGAAAACATGCAGCGTA  
CCGTTTCAAATAATTCGTTGCTATTAATAAATTAAGTTACTGACTGATCGCGAAAAACGTAAGGTTGATGGGCC  
TGCTCTGCGGCAACCATGCGCAAGGGTTTCGCTCTCTGCGCGATGCTGGTATTGACGGTAAAGTTGTGATGCCAAA  
AGGTGCGCGAAATCCAAGTGCAGGCAACGTCGACTACTCCGCAAGAGTCTTTGTCATGGTATAACTTCAACGACA  
CTATTGCTAAAGTGAAGCAATTTGTCGAAATGGAAGGCGTATTTTATCCACCTTACGATGATCCGAAAGTATTGCT  
GGCCAGGGAACGATTTGCTGGAATTAATGGAAGATCTATGATGTCGATAACGTCGATTTGTCGCAATTTGGCGCGGCG  
TTTTAATTGCTGGTATTGCGGTGGCAATTAATCTATCAACCCGACCATCCGTTATTGGCGTACAGTCTGAAAACGTT  
ACGGCATGGCGGCTTCTTTCCACTCCGGAGAAATAACTACGCACCGAACTACCGCACCTGGCGGATGGTTGTGATGTC  
TCCCGCCGGTAATTTAACTTACGAAATCGTTTGTGATGATGATGATGATGATGATGATGATGATGATGATGATGATGAT  
AAACAGTATGATTTGCTTAAATTCAGCGCAATAAAGTCTACCGAAGGCGCAGGCGCTTGGCATGTGCTGCATTTATAA  
GCGTAAATTAGACCAATATATTCAAACAAGAAAACCGTCACTATTATTTCCGCGCGCAATATCGATCTTTCTCGCGT  
TCTCAAATCACCGGTTTCGTTGACGCTTAA

>Cluster\_24266

ATGCCAGCAGAATCACACACTGTTTATCCCGCTTACCCTTCTCGATTGCCCGGATGCTGACTGGACGGACAGACATTC  
CCGCTATTTCTTTCGCTCTGCTTTCCCGCAATACGTTGCTGTATATCCGAAATGGTGACACAGGGCGATTATTACGGTA  
AAGGTGATTACCTGGCGTACAGTGAAGAAGAATCCGGTAGCGTTGCAACTCGGGGGTAGTATCCGCGGCGCTGGCA  
CAGTGTGCGAAGCTGGCAGAAGCGCGTGGATACGATGATCAACCTGAATGTGCGCTGCCCGTCTGACCGGGTGCAGAA  
CGGCATGTTTGGTGGCTGTGATGGTAAATGCGCAGCTGGTTGCCACTGCGTGAAGCGATGCGCGATGTGGTGTGCA  
TTCCGGTGCAGGTAAGAGCGCTATTGGCATCGATGATCAGGACAGCATGAAATTTCTGCGATTTTCATCAACACGTT  
TCCGGCAAAGGTGAGTGTGAGATGTTTATCATCATCCAGCAGCTAAAGCTGGCTTCTGGGTTAAGTCCGAAAGAAAACCG  
TGAGATCCCGCTCTCGATTATCCCGTGTGATCAACTGAAGCGTGAATTTCCGATCTGACGATGTCGATTAACGGTG  
GCATCAAGTCCGCTGGAAGAGGCTAAAGGCATTTGCAACATATGGATGGCGTATGGTGGGCGGCAAGCGTATCAGAA  
CCGGGATTTCTGGCGGCGGTAGACCCGAGAGATTTTGGTTTCTCGGATACTGATGCTGATCCGGTGGCGGTAGTCCGCG  
CATGATCCGTACATTGAGCGTGAACCTAGCCAGGATAGTATCTCGGCCATATTAACCGCATATGCTGGGCTTGTTC  
AGGGTATTTCTGGCGCGGCGAGTGGCGGCTTATTTAAGTGAATAAGCCATAAAGCGGGTGCAGACATTAATGTGCTG  
GAACAGCGCTCAAACCTGGTGGCGGATAAGCGTTAA

>Cluster\_48298

ATGAGCGAAACGGCATCTCGGACGGAGCGCATCCATTCCTAACTTATTAACCGCGCGGCGATTATGGCGGAGATCCG  
TCGTTTCTTTCGCGATCTGGAGTGTGGAGTGGAGCGCTTGTATGAGCCAGGCGACGGTAAACCGATTGATTTGG  
TCCGTTTTCAGACACTGTTTCGTTGGCCCGGGCATTCGAGGGGATGAATCTGTTTAAAGACCGCCGAAATACCAT  
ATGAAACCGCTGCTGGTTGCGGTTGTGGGCGGTTATCCAGCTGTGCCGAGCTTCCGTAATGAAGAGATGGGGCGTTA  
TCACAACCTGAGTTACATATGCTGGAGTGGTATCGACCCCATATGATATGTACCGTTGATGAACGAGGTGGACGATC  
TCTTACAACAGGTGCTGGACTGCCCGGCGAGAAAGCCCTTCTTATCAACAAGCTTTCTGCGTTATCTGGAATTTGAC  
CCGCTCTCTCCGCAAAACGCAACTGCGGGAAGTGCAGCAAACTGGATTTGAGCAATGTTGCTGATACCGAAGAAGA  
CCGCGACACGCTGCTACAATGCTGTTTACCTTTGGGCTAGAGCCAAATATTGGCAAAGAAAACCGACCTTTGTGTACC  
ACTTTCAGCCAGCCAGGATCACTGGCGCAATCAGTACCGAAGATCATCGGTTGCTGAAACGCTTTGAGGTTTATTA  
AAAGTATTGAGCTGGCGAATGGTTTCCATGAATGACGGATGCCGCTGAGCAGCAACAACGCTTTGAAACAAGATAACCG  
TAAGCGCGCGGCGCGGTTTGGCGCAGCACCATTGACAGCAAACTGATTGAAAGCTTTGAAAGTCCGTTGCTGACT  
GTTCCGCGGTGGCATTAGTGTGATGCTGTTGCTGATGTTGGCGTGGGCGGAGACACTGGCTGAAGTCACTCGCTTT  
AGCGTTGACCGGGCATAA

>Cluster\_56909

ATGAATAATGAACAACCGCGCTGCGCTGCTCATTGTACTCATGTTACTGGCGCTCATGGCTGCTTGGCAGCAGACAT  
GACGCTCAGTTTTACAGCCAGCTTACGCGAACCCGAGGTAACCATCATCTGCAACGGCAATATGATATTGAACGTTG

CGGAGAACTTGGCCTTGCAGCCTCACCCAGGACGTTAAAGATAACGACAGACAGACCAGTTGACGAGTACTGGCA  
CAGCCACAACAGTTGCAGCTGGAAGATGGCAATACAGTGAAGTGGCAGTTACGCGATGCCAGCACTGTTTTAATCTCAA  
TGCGTTAGCAAAAATCTCTGACGACCCGCTGGCTTCCCTGATTTCCCGCCAGGTATTCAGTGCCTGCTGATTAACG  
CCGTTATCGATCGCGGAAACACCCGATGAGATCGTGCAATCAATCGTGAATATATGATGTCGATGACTCACCACGCTTT  
CACGGCGCAAGAGTACGTTTTACCAGGACGACCCCGCATAGTGCCTAATCAGATGCTTTTTCTGACTGGCGGA  
ATTACGTCAGATAAAAGGCATAACCGAAACATCTATCAGCGGCTTATCCCGTATGCTGCGTCTCCCGACCACGGAAC  
TTAGCATCAATCTTAATATGCTAACGGAGAACGATATTCGCTCTCAGAGCGTTATTCTCAATAACATCACGGATGCT  
GACGCTCGGGTCTTATTGCAAAAAGGCGAGGGAAGGCTGGCTAACCCAGGATGCATTTCTTTACTGGGCGCAGCAGGA  
TTTTCTCCGGTGTGAAGCCACTGGTGTCTCAGTGAAGGATCTCTTTCCCTATAGCCGCTATTTTACGCTGAGTACGG  
AAAGTATCAGCGACGAACAATCCAGGGATGGCAAAGCCATATTTTTTCAACCGTAAACAGCAGAGCGCCAAATCTAT  
CGCGTACGCTGCAACTCTACTAA

>Cluster\_12665

ATGTCAAATTAAGAAAGCTCGAAGATGGTCTGTTATTTGCTGGACATCAGGCCGAACGGACGCAAGGAAAGCGCTGCGTAA  
GGTATTTGACAAAAATCGGTAGCGGTGGCCACTGAACGCTACATCATGGCGAACGCTGAAAAGCGGGAATATATACAGG  
GCTACCGTGTATCGCCGAACGCTAAATGATTTGCTTGGTGTGGTGGATGATCACGGTCAACACAGGCGTAAGCGGAA  
GAAGACCGAAAACACTGTGCAACATAATCAATGAACCTGGCGCTGATATGCAGGCTGTGGATCTTGATAAGCTGAAAT  
TATCCGCTGGCTTCTCAAAGATAGCTGCTGGATTTAAACCGTCACTGCTAACAGGTACATGAACCCGACTACCGGCA  
TGTTTACTGTTCTGAAAAGAATAGGCCCTTTGGGATGCAGAACATCCGGTAAGGGGATCTCCAATCTTTATGTATCCCG  
CGAGAAATGGCTTTCCTGTCCAGAAAGGATAGCGCTATTGCTCGATACACTGGATGGCGACTACTGGCGTGTGGCGT  
TTTTGTTTAAAGCACAGGGCGCGCTGGAGTGAAGCTTGAAGCTTCTGTTGTAACAGATAGTTTCAATACCCGTAACGCT  
TTCTTGAACCAAAAATGGCCGAAAGAGAACAGTGCCTAATTTCCAGGCGATTTGTGAGGCGATCAAACACAGAGAAACA  
GGCGGCTTGTGAGGTGAAGTACCGGGAATTCGCTTGGCGCTGAAAAGAGTTAAGCCGATTTACAAAAGGCCAGGC  
TGCACATGTGCTGGGCATACGTTCCGACGCAATTTTGTGATGAACGGAGGAAACATTTATGGCTTCCAGAAATTTCTG  
GCCAGCAACCAATTCAGCAAAACAAATGGCATATGCACATTTTGCACCGGATTTACCTGCAGGATGCGGTGGCCCTTAATCCG  
CTGAAAGGTGGCGTGAAGTGTCCACGCGTGTCCACGGGGATTAA

>Cluster\_23692

ATGGCGAATTTGCTGATTTCTGTTAACGCCGTTGAATGAACGTGACGAACAGCGCGGATATTCGACACAGGGGTTGAAGCG  
ACTGAGCGGCACCTGCAAAAATGGAATCCTCGGCTGGGGTTTACGCGAACCTCAGTTTGTGAGGAACTTCCGCGTCAACAAA  
AAGGGATGAGTATTTCCGGTTACAGCCCAAATGCAATTAGTCTGGATGAAGGAGAGTTCCGCGCTGATGATCATCAG  
GGAATTTTATCCTTAAGCCCTCTCCAGCCGACTTTCCCGGTTTGGCCGAAAATGAACACGCAACAATGACATGATGTC  
TCGTTTGGGATTTGACGTACCTGTGCATGGCCTGTTGAGTTTTGCACCACAATCAGAGGAAGAGCTTGAATACGCAATTTG  
TTATCCGGCGCTATGACCGGGATTAACAAGGGGCTGCCAGTGCATCAGGAACAGCTTGAAGGCGGATGCAGATTAACAGAT  
AAATATGGCAAAACGGGGAATGATAACGAACAATATGTCAGCTATGAAACGCTGGCCGATTTTTTGTGCCCCATGTTAA  
CGACAACATCGCATTTAAAATCGATCTCTTTGCTCGCATGTTTACGCTGCTGCTGGGTAATAACGACATGCATTTAC  
GAACTTTGGTTTGTGTTAGTGTACTCCGATGGTTGACGCCAACGTTAGCGCCGGTGTATGACTTTGTTTCTGTGCTCCCTAT  
CCGGAATATTTTTTACTCAAACATCTCGGCTGCCCTTTGATGACGCGAGAAGAGCGGTCGGGAACCTGGGATTTACAGAT  
TCACAGTGAATATGGCGAGTATAATCGGGCAGGACTTTTTGCTGTTGGGTAATCAATGGGGTTAGCGCCAGATGCTGG  
AAAACTCTTTACAGGATATACGTAAGAAAATGCCATTTGTTGAAACGATGAGCAGTCTTTATGACTCAGGATCAT  
ATCCAGGCTGTGCTGCAATGCTATCGACATCGTCTGGGGCTGCTGTGA

>Cluster\_17796

ATGAAATTTATATACGGGGATCGCGCTGAACAATACATCGTGCACAAGCGTGGTGCATTTGTTGACGCTTACATGAAACC  
ACGCAACCAAAACAAAGAAAGAAAACAGCCAAACAGCCACATCAGAAAGCGCAAGTGGCTTTTTTCGATTTGACA  
GGCTTAGAGCCCTTCAAAGACGCTACTCTCTATCGATCTGATGTACACAAAGGTGGAACGATATTTGCTGACCTTA  
CGCCACGACAGTGCATCAGCCGGAGACTTTGAAAACGGCGATAACACATTCACACGCTCGCTTACGAGACGAGTAT  
TCCGTGGATATATTTGTTGAGTGGGCGCGGTTTCAGGATACCTACATTTACACATGATTTGAAAGTTCCAGATGAGA  
GCATAGCGAGAGACTGCTGGTTGCGTGGGTAAGCGCCAGCCATATGAGGGTCCGAAATAATTTAATTAATAAATCAAGAT  
GTTAGATTCGTTTTACAGTTTGAAGTCTTATCGTACTTACGTAACAAAAGGTAACAACTTAAAGGATTTAATGCGCAGAGC  
AGAAAAAAGCCCTACGACTGGTTATCAGTGTCCGATGAGGCGTATCCAGTAATGGGCAACGCACGCATCGCAGATCA  
TAACCCCAAGAGCAGCGGATATTTGAAGTACGGCGTACGCAAGTTGAAACTTGAAGGCTCAAAGCAAAAAGACCAGCG  
CAGCGCCGAGGATACAGCGAACACTGGCTGACTCACCCGAACGATCACAATGTAACCAATCATCGTTACATGTAGCGA  
TAAAACATACATACTAACCTTACAAACGCTAGCCCTCAGAAAAGCCGAGAGGTAGAGCGTGAAGAGCGCTGCAAGCCAGC  
AGTACTCACCGAAGCGGATAACGCTTTGTAATTTGTAAGAGTAAGCCGCTGTTGCTGGTGTGAGAAAAGCGCGCTTG  
AACATATCCAGAGAAAGAGGATGCGCAGTACTATTAG

>Cluster\_58204

ATGTCCGATTTATACAAAAAACAATTTCTGAAACTGCTCGACTTTACCCCTGCACAGTTCACCTCTCTGCTGACCCTTGC  
CGCACAGCTCAAAGCCGATAAAAAAATGGCAAGGAAGTACAGAAGCTTACCGGTAATAACATCGCGCTCATCTTCGAAA  
AAGACTCGACTCGTACCGGTTGCTTTTTCGAAGTTGCCGATTTGACAGGGCGCGCGGTTACCTATTTAGGGCCGAGC  
GGCAGCAGATTTGGGCATAAAGAGTCAATTAAGGACACCGCGGGTTCTCGGGCGATGATGACGGCATTCAGTATCG  
CGTACCGCCAGGAAGTGGTCAAAACGCTGGCGCAGTATCGGGCGTTCGCGGTTGGAACCGGCTGACCAACGAGTTCC  
ACCGACCCAGCTGCTGGCGGACCTGATGACCATGCAAGGACCTGCGGGCAAGGCGTTAAACGAGATGACGCTGGTCT  
TACGCGGGCGATGCGCGCAACAACATGGCAACTCGATGCTGGAAGCGGGCGGCTGACCGGGCTGGATCTGCGCCTGTT  
GGCCCGAAAGCCTGCTGGCCGGAAGAGAGCCTGGTGGCGGAGTGCAGCGCGTGGCGGAGAAGCACCGCGGGAAAAATTA  
CTCTGACGGAAGACGTGGCGGACGGCTTAAGGGCGGGACTTTATCTATACCGACGCTGTTGGTGTGATGGCGAGGCC  
AAAGAGAAGTGGGAGAGCGGATTTGCGCTGCTGCGGGTATCAGGTGAACGCGCAGATGATGGCGCTGACCGACAACCC  
GAACGTGAAGTTCCTGCACTGCTGCGGGCTTCCATGACGACAGCAGTACGCTCGGCAAGCAGATGGCGAAGGAGTTCC  
ATCTGACGGCGGATGGAGGTGACGACGAGGTTTGAAGTGGCGGCGAGCATCGTGTTCGACCGCGGAAAAACCGG  
ATGCATACGATTAAGCGGTTGATGATGGCAACGCTTGGGGAGTGA

>Cluster\_25393

ATGATGCCCTGGGATTTGCCACCAACCACCCGCTTCTTCTATCAATCTCGCGCTTCTTTTGGCGTTACGGCGACCGT  
ACTCGAAACCGCGGGTTTTCATCAGGAGATTTTCGATGGGGCGCTTTGCGCTGGTGAATCTCATATGTCAGCGCTTTCC  
TCGATGGAGTCTTATTGCTACCGTTTTCTTCCGGATCATCCATTTGCGGATGCTTCCGAGGATGCGCTGGCGGCACGC  
GAGGAAACGTTTTAACCCCTTCCGCTGCAAGAAATATTTGCACTATTTGCCGATTTGCTGTCAGCGTTATCGGCATGAT  
GCTAATGAACATTTGCGGAAATATCGCCTTCTGTTATTTCCGGTCTTGGGGTCTGCGGGTGGTGTGCTGATGATGATGACTGG  
ACTTCAAAGAGTTTCGCGATCATATGGGGCTCCGGCTATTTAATGATGGCGGGGTTGATCGGTGTAGCTGATGACTG  
GCGGCACCGGCTTTACGGCGATGGTTGGCGATGCCGTTGAGGTTGCTCGGTTCTGGCGTCTACCGTTTGTATTTAT  
TGTGCGCTTTGCTTTGCTTACCAGTACCTGCGCCACCTTACCGGTTTCAATAATGGGGTCAAGTATATATTTTTGCCCCCA  
TCGCCATTTGCCCTGTACTAGCCTTGGCTTAAACCGACCGTCCGCGGATTTGCGGTTGCTGGTGGTATTTCTGGCTGAATGGC  
GGCTATATGCTATTTGACGGAATGCCAGCATGATCTCGGAATGGGAAATACAAACTTCCGAAATTTGGGTTCTCT  
TGTACCAATGATCTCATCCGATCTTGGCGCTTGTGACAGGCGCTGTTTTTATCTTCCCAATGTAA

>Cluster\_48575

ATGAACTTTACCAAAGTACTGACCACCTGAAACTTGCCACCGATCGACTCATTTGGATTAAAGCCAGAACCATATGAGTT  
GCATGAAGGTCATGGTGTAGCTACTGAAAGTATTTACAAGATGGTTCGATCAGTTTCATGAACTTCCAGCATCCGAGAC  
GCGTTATGCCGACACAGAGCTGCTTCGCTCCGTCGAAAGCTGATTCATGAAGAAGCTGTAGTGGAAAGGTTATCCGAGCC  
GCAATGAATGGGGATTTAGCAACTGCTGGATGCAATGGCCGACTTTTATACGTGGTGGTGGTACATGGTCCGCAT  
CAAAGGTGGTATTTTACCGGCATGACCTATTACACGCAGGAACAGAGCATTGATCGCTTTATGCAGACAATTTTGTGC  
CTGGTAACACTGTTTTTCGATGATATGGCAATGCCATTTAGGAAGCTCGTGAGGCGTCAATGATGCTGAAAGAGCTGGCA  
GATAAACTTGAGAAACAAGACTGTTAAGGATTTCTGAGCTGATTCAGGAAGCTCGTGAGGCGTCAATGAAACAAAATCTATGTGGC  
GTGCATGATGACCTATCGACTGGCTGATTTCCCTCGGATGCAATGTCGTCGAGCTGGTTGGGAAATTCATCGGTCGAACA  
TGACAAAATTTATGGCCTGCAGATGCCGAAGAGCGTCGCCATGCTGTGGCCAACTGCAAAATACGACTCTTCTGACCTGGGA  
TTTTGCCATGCTGATGGCACCGATAAGATGATCGGTTTTCCGAATTTCCGATGGAAGATTTCTGAAGTCTCCAACCTATAG  
TGATGTCGATTTATCCTCTTTGTTGAGCAAGCTAAAGCCTCAGCAATGTACGGAATGATCAAAAATAA

>Cluster\_25953

ATGAAGAACACAAGTAAAGTTCAGAAATGTAGTGATTGTCACTATTGTCGGTTGGCTTGTGTTGTTTCTTTCTGCCAA  
CCTGATGATCATTGGCACCAGCTTTTGGACCGGACGACGCCAGTTTCGTCAAAATGGTCTTTACGCTGGATAACTACA  
CGCGTCTGCTCGATCCGCTCATTTTTGAAGTGCATTGCACTCGCTGAATATGGCGCTGATCGCCACCCTCGCTGCCCTG  
GTGCTGGGCTATCCTTTTCTGCTGGTTCCTGGCGAAGCTGCCACACAAGGTGCGTCCGCTGCTGCTGTTGATTTGT  
TCCGTTCTGGACCAACTCATTTGATTCGATTTACGGGCTGAAAATTTTCTCAGCACCAAGGCTATCTCAACGAGTTTT  
TGCTTGGCTGGGCGTTATCGATACACCATTCCGATCATGTTTACGCTAGTGCAGTATTATCGGCTCGTTTACATT  
CTGCTGCGTTTTATGGTGTAGTCCGCTGTACTCCAGTATCGAAAACCTGGATAAGCCGTTGCTTGGGCGCGCGCATCT  
CGGTGCCAGCAAGTTCAGACCTTTATCCGATCATTTCCACTAACGATGCCGGAATTTATGCGCGATGCTGCTGCTG  
TGATGCTGCCAGCGATGGGCTGTTCTATGTGTCCGACTGATGGGCGTGGCAAAACCTGCTGATCGGTAACGTCATC  
AAGGTACAGTTTCTCAATATTCGTGACTGGCGTTTGGTGCAGCCAGCATTACGCTGACTATCGTAATGGGCTGAT  
GTTGCTGGTTTACGGCGCTTCTCGTCTGCTGAATAAGAAGCAACAGAAATAGACGATTAG

>Cluster\_23799

ATGATCCGAGTATGACCGCTACGCCCGGCGTAAATCAAGGTTGAATGGGGGAGCGCAACCTGGGAAATGCGCTCGGT  
AAACCAGCGTTATCTGGAACCTTACTTTTCGCTGCGCGGAGCAGTTCCGTAGCCTTGAACCTGTGCTTCCGAGCGTATTC  
GTTCTCGCTGACCGCGGTAAGTGGAAATGATCCCTGCGCTATGAGCCAGATATTAGCGCGCAAGGTGAGCTGATCCCTC  
AACGAAAACCTGGCTAAACAGCTGGTAACTGCCGCAACTGGGTAAAATGCAGAGCGACGAAGGAGAAATCAACCCGCT  
TGATATTTACGCTGGCCGGGCTGATGCGAGCCAGGAGCAAGATCTCGACGCGATTGCAGCTGAAATTTCTCGCGGCT  
TGGATGGCACCTGGATGACTTTATCATCGCGCGCAAAACCGAAGGTGAGGCGTGAAGTGTGATTGAGCAGCGCTG  
GAAGCGCTCACCGCGAAGTGGTCAAAGTCCCGGCCCATATGCCGGAATCCTGCAATGGCAGCGTGGCGCTGATACG  
GAAGCTGGAAGATGCTCAGGTGCAACTGGAACAACCGCTTGGAGCAGGAGTTGGTTCTGCTGGCACACGAATGACG  
TTGCCGAAGAACTGGACCGCTCGAAGCGCATGTCAAAGAGACCTACAACATTTCTGAAGAAAAAGAGCCGTTGGTCTG  
CGTCTGGACTTTATGATGAGGAGTTCAACCGGAGTCCGAACACTCTTTCGCTGAAATCTATCAATGCCGAAGTGACGAA  
TTCTGCCATCGAGCTGAAAGTGTGATTGAGCAGATGCCGCGAGATCCAGAACATTTGAATAA

>Cluster\_23543

ATGCCGCAACATGACCAATTACATCGCTATCTGTTTGAACCTTTGCCGTTCCGCGGCAACTGGTAACCGTTTTCGGAAAC  
CTGCAACAGATCCTTGAGAATCAGATTTATCCGACCGCTTAAAACGTCGTCGAGAACTGCTGGTGGCAGCAGCC  
TGTTAACCCGTACCTTGAAGTTTGTATGGTATATCACCGTACAACCTGCAAGGCGACCGCCGATGAATCTGGCGGTTAT  
AACGGTAAACAACACAGCAGATGCGCGGTGTAGCGCGGTGCAGGGAGAAATTCAGAAAATGCCGACTGAAAACGCT  
GGTCCGCAATGGTTACGTTGGTGTATCACCATCACCCAAAGCAAGGCGAACGCTATCAGGGCGTGGTGGGCTCGGAAGGT  
ATACCTGGCGGCTGCCCTGGAAGATTACTTTATGCGTTCTGAACAGCTGCGGACGCGCTTTTATTCGCAACCGCGAC  
GTAGACGGCAACCCGCTGACAGGCGGAATGTTGTTGACAGTAAATGCTGCGCAAAATGCCAGCAGGACGACTTTGACCA  
CCTGGCGACGCTAACCGAAACCTCAAAACCGAAGAACCTGCTGACCTTACCAGCAACGAAGTGTGTTGGCGTTGATC  
ACGAAGAAGAGGTGACGGTTTACGATCCGAGGATGTGGAGTTCAAATGCACCTGCTCGCGTGAACGTTGCGCGGACGCG  
CTAAAACCGCTGCCGATGAAGAAGCTAGCATCTTCCGCGAAGATGGCGAAATGACATGCTATGTTGTTGCTGCGG  
TAACCACTATCTGTTCAATGCGATGGATATTGCTGAAATCCGCAATAACCGCTCTCCGCGAGATCCGCAAGTTCAATTA  
GA

>Cluster\_32403

ATGAAACAGGGGCTGGAAGATGTTTCTGGTCTGCTGGAACCTGGCTGTAGAAGCTGACGACGAAGAACCTTTAACGAAGC  
CGTTGCTGAACTCGACGCGCTGGAAGAAAACCTGGCGCAGCTTGGATTCCGCGTATGTTCTCTGCGCAATATGACAGCG  
CCGACTGCTACCTCGATATTCAGGCGGGTCTGGCGGTACGGAAGCACAGGACTGGGCGAGCATGCTTGGCGTATGAT  
CTGCGCTGGGCGAATCGCGTGGTTTCAAACCTGAAATCATCGAAGAGTCGGAAGGTGAAGTGGCGGGTATTAATACCT  
GACGATCAAAAATCCGGCGATTACGCTTATGGCTGGCTGCTACAGAAACCGGCTTACCCTGGTGGTGGTAAAGAGCC  
CGTTGACTCCGGCGGCTGCGCACACGCTGCTCAGCTCCGCGTTTGGTTTACCAGGAAAGTTGATGACGATATCGATATC  
GAAATCAACCCGGCGGATCTGCGCATTTGACGTTTATCGCGCTCCGGCGGGGGGCTCAGCACGTTAACCGTACCGAATC  
TGCGGTGCGTATTTACTACATCCCAACCGGATCGTGACCCAGTGCAGAAACGACCTTCCCAGCACAAAGAACAAAGACC  
AGGCCATGAAGCAGATGAAGCGAAGCTTTATGAACCTGGAGATGCAGAAAGAAAATGCCGAGAAGCGGATGGAAGAT  
AACAAATCGACATCGGCTGGGGCAGCCAGATTGCTTCTATGTCCTTGTATGACTCCCGCATTAAGATCTGCTACCGG  
GGTAGAAACCCGTAACACGAGGCGGCTGTTGACGGCAGCCTGGATCAATTTATCGAAGCAAGTTTGAAGCAGGGTTAT  
GA

>Cluster\_8080

ATGCGCTATTTACATACTAATGTTCACTTTCTGATGTTCTTTGTTGACGCCAACCAACTATTGTCCCACAATTACAGCA  
ACAAGTTACGGATCTTACGAGTAGCTTAAACTACAAGAAAAGAAAGAACTGACGCACAAAGTTAGAATCTATTTTCAATA  
ATACCAAAGTGCACAAATGGCGTATTAATGTTCCCAACCAAGACGAGACAATGAACAATATGCTACAAGAGTTTTT  
GACAAATGGCGTTTAGGAGATGCCAAACGTAATGATGGGATACGATGCTGTTGTTGCTTGGTGGTGGTATCGGATCGGAT  
CCAGGTAGGTTATGGGCTGGAAGAAAAGGTAACCGATGCTGCTGGTGGAGATATCATCCGTAGCAACATGATACCCGAT  
TTAAAACAACAAAATTAGCTAAGGGATTAGAGCTAGCTATAAACGCTTGAATAACCAACTCACTTCAACAACCAATAT  
CCGACTAATCCTTTCAGAAAGTGAATCAGCGTCTTCCAGTATCATTTACTTTGCTATTTTTGGGTTATTTGCAAGTAT  
GTTCTTCCCTTTCTGGTTTTTTCATACAGGCAAGTAAATTTTGTGCGCATGTAAAAGTTGGAGTCTGATTTTCAGCAATC  
ATCTTTTAGATTTATCTGTTCTCCGATAAAAATTTTTCCATGCTGATTTTTCTTCTTTTTACTTTCCACATATTT  
ATGGTCTTTACCTGTTTATGTTACTTTCAGAAAAGAGCATCTGGTAGAAGTTATCATTACAGACAAACAGCGGTTCCGCTGG  
AGGCTCAGATAGCGCGGATTTAGCGCGGGGGGCTTCTTGGAGGTGGCGGCGCATCCGCGCGCTGGTAA

>Cluster\_26497

ATGACGCTTCTGTTTCGTAATAATCGAATCGACTTTCACCTATTTTGAAGCGACAGGGGCTATATGAAATGCATGGTAA  
GCCACTGGCGCTTATAGCGACAAGCCAGTGTCTTCCAGGATCAACAATAAAAATGCCACTGGCGCGAAGGCGAAACCG  
AGTTTGGAGCTGACAGCAACTGAACTTCAACCACTGTGTCGAGAAACCGCGCAGCAAAAGGTCGTGTTGAGCGG  
GCGCATTAACCTTACAGACAGACTGGTCAAGGAACTCAGGCTTACAGGCGATCAGCACAAATGGAATCTGCTAACGCATT  
TGCCGAAGAGTTCAAGCAATTAACACCGAGCTTTTTCAAAGCGCTCGCCAGGAGTTCGATGTTTATCGGAACTGG

ATGTCGATGATGATCTTGATATGGTGTCTTACTTGGCGTGAAGCCCGCGGTGTCGAAATCACTACTGTGCAGTACGAC  
AAAGTGCCTTACCTCATTGAAGACAATGAGTTCAGTCGTCGGGCGATTGGTAAATACATTGATGTCTGGCATTACCCCTGA  
CGGACATAAAGAGCTCCGGCTTAATGGCGTATCACTTCCCTACCCACCTATGACAAACTGTCTGAAATCGATCAGGGTG  
CCATTGTGGACAATAAAGCTCTTGGCCGTGGCGTGGAGATGGCGCAACTTGTGTCAGGCGAACGGGATAATAACCGGTCA  
CAATCAGTGCCTCCCGTACGGCTTACCGAGGCGCAAGCCCTACGACGAAGAAATCCAGCGTCTTTGGACCA  
GGACGATATGTTCAATGCCTTTGAAAATTCAGACACGAGCTGAGGAGATTTTTGGTGAACGCAACCAAAAAATGA

>Cluster\_2095

ATGTGGCAGGCAATCAGTCGTCTTTGAGCGAGCAGTTAGGTGAAGGCGAAATCGAACTGCGTAATGAACTGCCTGGCGG  
AGAAGTCCATGCCGATGCCATTTCGCGCTATGCAGGACATGACTTTTTCGTCAAATGTGATGAAAGGGAACTGCTTCCCG  
GTTTTACCGCCGAAGCCGACCAACTGGAGTTACTGTGCGGTAGTAAAACCGTACCCTGCTTAAAGTTTTGGGCGTAGGC  
GCTGACCGTACTACAGTTTTCTGGTATGATGATATCTCCACCTCGTCCGCTGGATGCGCATAGCGCATTTATCTTTGG  
TCAGCAAATTCGCGCTTTACATCAATGGAGTGACCAACCAAAATTTGGCTCGATTTTGATAACTCGCTCTCCACAACCTC  
CACAGCCAAACACTGGCAACGCTCGCTGGTCAACGTTTTTGTGTAACACCGATTGGCTGGCAGTTGGAGTGGCAGCA  
GAGAAAGGATCGCTTTCCGCAATATCGACGCCATCGTCGAGCATATTCAGCAGCGTCTGGCTCGCATCAACCGCAGCC  
TTCTCTGTGTCAGCGGATTTATGGTCCGGCAACTGTGCGCTGGTCCGGATGGCCCGTACATTTTCGACCCTGCCTGCT  
ACTGGGGTACCGGAGTGGCAGCTGGCGATGTTACCGCTGCATCTGAAACAGCCGCCAAAATCTATGACGGCTATCAG  
TCAGTATCCCGCTACTCTGACGCTTTCTTGAACGCTCAACCGTTTTACCACTCTACACGCTTTAAATCGTGCAGAAAT  
ATTTGGCGTACGATTTGGTTATGCTCAGCAGTTCATGGATAGATTTATAGCAGCATGA

>Cluster\_15972

ATGAGTAAAGTTCGGGTGTGATATGAGTAGGCAAAATTAAGTGTTCGATGACACATCACAGTTAACATTTGATGATTTCCG  
TAGAGAAAACGTTTACTATTGGTTTTGCATCTGATTAGCGATGATGCTTGGATATAATGGCATGGATCAGATATTGA  
AAGCCATTAACAAAGCTACATCTGTATGTGTGAGCCTCGATATCCCTGTATACGATAACTTCACTCCAGATGCCCTCAGAA  
AATGCGAAAATGACTTTAAATTAACCTGTTTCCGCTTGTATCTGATTGTAATGAATGGTGCATCAGCAATCAAAAAGT  
TGCAAATGCACAAGCTTATTTGGTGGCTCGCAGCAGAAATACACACTACATATCATAAACCATGACCGAGTTAATCGAG  
TTTTATTTGGTGGCGAGATTACATCTAGAGAGAAAATCTCAGTCATGTAGCCATAAACACGGAGTAGTCTGACTATGGT  
CTATTTCAAATGCGGGCTACCGTGGGATGTACAAATGAATCTCTCAGATTGAAAGCTCGAAAAGGCTAACGTAATAAAA  
AGATGGAACGATGCTTGACTTCAATGGGAAGCGAAGAGCTCGCGCCAAATATATTCAGAATTACACAGCAGAAAGCAGAA  
TCGAAAACCGAACCCTGAAGGGACAGCTCAACTAGAGAAATGCTGCTGAGACCGTAGGAGATCTGTTCCGAAATGATG  
ATTTCTAACACTGGAACAGCCCCGAAAACATAAAAATTTCCCAAGAAAAAATTCAGAAAAGTTAGAAGCAGCATTAAGAA  
AACTCATAAAGCCCTAGCAAAGCAGACCAAAAAAACATAA

>Cluster\_20432

ATGAGTGAACGCTCGAGCATTACCCCGTGGGGCGTATATTGGTGCACAAAATACGGGGGCGACTTAACGCGCCCGTT  
AAGCGATAATCAGTTTGAACAGCTTACCATGCGGTGCTGCGCCATCAGGTGGTGTTCCTGCGCGATCAAGCTATTACGC  
CGCAGCAGCAACGCGCGCTGGCCACCGCTTTTGGCGAGCTGCATATTCACCCTGTTTACCCTCATGCTGAAGGGGTTGAC  
GAGATCACTGCTGGATAACCAATAACGATAATCCGCGGATAACGACAACGGCACCAGGATGTGACATTTATTTCAAAC  
GCCACCGCAGGGGCGATTCTGGCGGCAAGAGTTTACCCTCGACCGCGCGGATACGCTCTGGGCGAGTTGTTATGGCG  
CATATGAGGCGCTCTCTGTTCCTTCCGCCAGCTGTTGAGCGGGTGCCTGCGGAGCATGATTTCCGTAATCGTTCCCG  
GAATACAAGTACCCAAAACCGAGGCTGAGCATCAACGCTGGCGTGGCGGTCGCGAAAAATCCACCCTGCTTACATCC  
GGTGGTGCAGCAACGATCCGGTACCCGTTAAACAGGCGCTGTTTTGTGTAACGAAGTTTTTACCACAGAAATGTTGATGTC  
GCGGAAAAGAGAGAAAGCCTTGTAGGTTTTTTGTTGTTCCCATATCACTAAACCGGAGTTTCCAGTTCGCTGGCTGG  
CAACCGAATGATATTGCGATTGGGATAACCGCTGACTCAGCAGCTATGCCAATGCGGATTACCTGCCACAGCGCGGAT  
TATGATCGGGCAGCATCTTGGGGATATCCGTTTTATCGGGCGGGTAA

>Cluster\_27101

ATGAAAAGCAATCCGCTGATCTCAATCTATATGCCACCTGGAACCGCAACAACTGGCGATTCCGGGCGATAAAATCGGT  
CTTGCGCCAGGACTACAGTACTGGGAGATGATCATCGTGGATGATGCTCCAACCTCCGGGAACAACGCAACAGTACG  
TCACCGCCCTCAACGATCCGCGTATTACCTACATTCACAACGACATTAACAGCGGGGCGTGGCGGTACGTAACAGGCG  
ATTTATGCTGGCGCAAGGGGAATATATCACCGGGATCAGTATGATGATGAATGACACCAACCGTCTGAGCGCTTCCCT  
CGCCATAAACAGCAACTGGTACACACGCTTTTTTGTAGCTAACGACTACGTTTGGCAGGGCGAAGTCTATTTCCAAAC  
CAGCAAGTTTGCCACTGTATCCAAATCGCCGACTCAGCAGCGCTGTCTATAAACGCAATATCATTGGCAATCAGGTT  
TTTTACCTGGGCGTGGCGTTTCAAAGAGTCTTGTTCGATACCGAACTGAAAGCAGCACAGGATTACGACATCTTCTGCG  
GATGGTGGTGGAGTATGGCGAACCGTGGAAAAGTGAAGAGGCGACGAGATCTGCATATCAATCACGCTGAAATGCAGA  
TCACCTCGTACCGAAAAAATTCCTGGGTACTTCCACTTTTACCGAAGCACAAAGATAAATTTGACCGTGCAAGCAAA  
AAATATCAGCTGTTTACCCTTACCAGATCCGCAATAAACGATGACCTGGCGCACTTTGCTGACGCTGCTGCGGTGCG  
TAACGGCAAAACGCTGGCTGATGGTATTCCGGGGCGCTAA

>Cluster\_14717

TTGAAAAGCGCATCACCTTTATCGTTTTTCTTTGCGCATCGTGGCGGTGAGCTGTTTTTTGTGCAATCCTGCGTCCG  
TAAAAGCCAGCATGTCGCAAGGTTTTCAGAAATATCAGGCCACTATCGATGGTAAAGAGATTACAGGAGTAACTAAAAATA  
TCTCTCACTGACTGGTTCGCGAGAGCAATACCTTGTTAGCATAACAACACCTGCAACCATCTGAAATGACG  
ACCGAGGTTGACCTGACCTCGCACCATTCGCTCGATTTTGTAAAGGATCTCGAGACGATTGAAATACATTGGTGAATAAA  
ATTTGTATCAGTATGAAAGTACTACGCCATTTATGTGATTTCACTTAAACGCTGAGTCGGAAGTAAAGCATCTCAAAA  
AAATTAATAATCCATTGCAGGAAACCAACTAAGTGTGGCTTTGAAGGGCTGGCTTACTCTCTCAGGACCAATACCTTC  
TGGTTTTTTTAAAGAGAAAAATCCGATGAGGCTCAAAAAGTAAACCGGCTATTGCGTAGCGATGATTTGCATATCAGCAA  
AGATAAAGCGTTGACGCTCAGTTACTTTGGATGATGTTTCTGGCGGGAATTTAACCCACAGAAAAATACGTTGCTGG  
TGTGTGCATGAGTACGCGCCCTGCAGGAAGTACCGTGCAGGTTGACGCTGATCGCGGAAATGTCGTTAACCAAAGGC  
AAGTATGGCCTTTACACAACATCAAGCAGGCGGAAGGATAGCGATGGATGACAGCGGCAACATTTATATCGTTGGCGA  
ACCGAATCTTTTTTATCGCTTACGTCGACAAAAATCATGA

>Cluster\_54624

ATGAGCGAAACTTTTTCCATCTGCTGGGGCCAGGAACGCAACCGAAGCATGACAGTTTACAGCATGAATCCACTGCCGAT  
CACCTGTCAAGTGAATGATGAACCGAGTATGGCGGCCCTGGAGCAATGTGCTCACAGCCCGCAGGTGATTTGGCTGTTAA  
ACGAGTTACAACATCAACTAAGCGAACCGCAACCGTTTGGCGGAGTGTGGCAGCTGATCTGTTAAATCTCAACCGC  
GACGATCGTCACTTTATCAATACGCTTCTCGGGGAAGGGGAAGTGTCACTGCGCATTCAGCAGGCTGACGACAGTGAAG  
TGAATAACAGGAGCGATCTTCTCGGGATATGGCGGGTGGCGAGACGTCGCGCGGAAAGTTGCTGGAGGACAACTG  
AGGCTGGCTGCGCGGCTGGCGTTTGGCAGGCGGCAACGCAAAATCTTTGCCGACAGATTGCTGTTACCGCCGCCC  
ATTTGATGGCTGATGAATGGCTTACCGTTGGCGCATGATTTACTGGCACATGACGTAACCCGACCGCGCAGCCGACAG  
CATTAATCTGACGAATTAACCATCAGCAGGCTGATCGGCTTTTTCTCTCACGCTCTGTGGGCGGGAAATATTCAGA  
TTCTGATACATTTGGTATGGCGAGAGTATATCAACCGCCAGGGTTACGCCATGCTGGCATTTACGCTGTACGGACACC  
TTAAAAGGCCGTTACTGGAAAGTTATGAAATCTGCCCCAATACCGGAAGTGGTCTGCTGACGCGCCAGAAGATTTGGTCCA  
CTTGGCAGCGGCTTAGCGAGGATGTCAGTGGCTGGCGGAAGTGCACCGAGCTAA

>Cluster\_19789

ATGAAAATTACGGATCACAACTCCCTGAAGGTATTCGCCGTGACATTTCTGTGCCGGAAGGAAATATAAAACATCCTTT  
GATTCTCTTATGCCATGGATTTTTCGGGTATCCGGAATGTTCTGTGCTCCTTTGCGAATGCGTTTACAGAAGCCGGGT  
TTGCAACGATTACTTTTGATTATCGTGGATTCGGTGAGAGTGAAGGGGACGAGGTCGTCTGGTTCGGCAATGCAGACC  
GAAGATATTTATTCAGTTTCAATTTGGGCAGAAAAGCAGGTATGTATTTGATAATCAGCGTATAGGATTTGGGGAACATC  
GCTGGGTGGGTGATGATTTCAATGACGTGCCAGGATAAAAAGAGTGAAGAGTATTGTCAGCCAGCTGGCTTTTGCTG  
ACGGTGAGGTTCTGGTTACCGGAGAAAATGAATGAACTGGAGAAAAGCTTTCTTTCTGTCCACGCTGAATAAAATGGCAGAA  
AAGAAAAAATACCGGGAAGAGATGTTTGTGGGGTTACCCGGGTACTGAGTGATAATGAATCAAAGGTATTTCTTGA  
GAAGGTAAAAGGTCAGTATCCTGAAATGGATATAAAAAATACCTTTCTTACGGTTATGGAGACGTTGCAATATAAACCCG  
CAGAGAGCCGAGCAAAGTACAGTGCACAGTTTGGTGTGTTATGCGCGCCAGGATAGTGTAAATCCACCAGAACAGGGA  
AGAGCCTTATATGATGCTGTGCTTCTGGTACTAAGGAATATACGAGGAAGCTGACGCATGCCATTTATGATATTTATGA  
AGCGCGTTTGTGAACTGTGGCGGCAGTACAGACGCAATGGTTAAAAACATCTTTAA

>Cluster\_2247

ATGATCATTTCAAGACCAAATATGATTCTGCAATTCGGGACGTTACTGCTCAGGCACCTTATAAAGCGGGTGCCGG  
GCGTGAAACCCGAAATTCATATAGAGCACAAACCGGCTCATGCGGTTTTTCTGTGTCATGAGCATCGTTACGCCAAA  
TTATGGTGGGGCGTGCAGGGCCTTCCGTTGGGCGGGTTCATGTTGACCGGTATTTCCACCCTGTACGCTCACC  
ACCTATATGGTTCGGAAGCCCTGGTGGTGGTTCATGAAATCAACATAGGGGCTGTCACCATGACTACTCTCCAAAC  
CCAATCTCACCTTCAAGATCAGATTATCAATGGTCCGTTGTCACCACATCTCTTGCACTGTAATTAATCTTAAAC  
GGCATGAGCGGGTTTTAGATAGAATTAGAAACCTCGAATGTTCCGCTGAATTTACTGAACACAATTTTGTGTTAAGTGAA  
TACACCGACGCATCAGGCGCAAACCTACCTTGCATCAAAATCACCAGGATGGCTTCGCGTTCCTTGCCATGGGCTTCA  
TGGTAAACGTCGCGGTTCAAAGAGGCATACATCAACGCTTTAACCTGATGGAGAAGGTTTATCAGTGGCCGATA  
CGTCTGATATGTCAGCTGTCGACGAAACGCCAGAGGCTATACCTGCAATTTGCGTGAATCCATCAAATCTGGACAAGC  
CAGCTTTATCAAATGCTTAAAGCCGTTGATCTCCGCTGGCTAGCAAACGTGACGACCGTGTGGTGTGCTGTTTTGG  
CGCTGCACTTGTGATTCCAGGCTGAATGGTTCGACAAGGAGTTCCGCCATGA

>Cluster\_26230

ATGAAACAAAAGTGGTTAGCATTTGGCGACATCAACGTAGCAAATGACCTGCCGTTGCTACTGTTTGGCGGTATGAACGT  
GTTGGAATCTCGGCATCTGGCGATGCGCATTTGCGAGCACTACGTAACCGTGACCAGAACTGGGTATCCCTTACGTTG  
TCAAAGCCTCTTTTGACAAAGCCAAACCGCTCCTCCATCCTCCTTATCGTGGACCGGGCTGGAAGAAGGGATGAAAATC  
TCCAGGAGTTGAACGAGACTTTTGGCGTGAAAATTTATCACCGAGTTTACGACCAAGTCAAGGCACACCCGTTGCTGA  
TGTCGTGGATGTGATTAGTTCAGTTGCGCGGTTTTCTGTCTGCCAGACTGACCTGGTTGAAGCCATGGCGAAAACCGGTGCGG  
TAATTAACGCTCAAGAAACACAGTTTGTGAGCCGGGACAGATGGGTAATATCGTTGATAAAATCAAAGAAAGCGGCAAC  
GAAAAGTGATTTCTGGCATCGCGGTGCTAACCTCGGCTATGACAACCTGGTTGTCGATATGCTGGGCTTACGATCAT  
GAAGAAAAGTGTCTGGTAATTCGCGGTTGTTTTGACGTTTACCATGCACTGCAATGTCGCGATCCATTTGGCGCAGCTT  
CCGGCGGTGCGCGTGTCTCAGGTGGCTGAGCTGGCAAGAGCCGGTATGGCGGTAGGCTGCGGGGCTGTTTATTGAGCG  
CATCCGGATCCGGAAACATCGCAAATGTGATGGTCCATCCGCGTCCGCGTGGCTAAACTGGAACCGTTCTCAAGCAAAT  
GAAAGCGATTGATGATCTGGTGAAGGTTTCGAAGAATGGATACCAGCAAGTAA

>Cluster\_23207

ATGAAGAAATTTGATGTCGCGCTTTAGGCAGTGGAAATATAGATATTTTTTTTATCTATCCCGTCACTCCCCTCGTGG  
CGGTAAAGTGTGCGGACAGCTGCGGTGAAACAAGTGGCGGCACAGTCCGCAACAGTGCCTGTGCGATGGGCAACCTGG  
GTCCTCAATGTGTAATCTGTTTCAATGTTGGGCAATGATCATTACCTCAGCTCGATCATTCTTGATGATTTAAAAAATATCAT  
GTAATTTGATTTCTGTTTCAAGTAAATTCGGAATTTGTTGCAATACCGCATTTATCTTTATTGATGAATTAGGTGAAAA  
AACGTTGGTTTACFCGCTGGTAGTGATCATGAGTGGGATAAAGAAAAAGCCCTGCAGCAATTCGCGAAAGCGTTATTT  
TTTTATACGATCCAGCAGATATCGAGAAATTTCTGATGCTGGCCGAATATTTCCCGTAGCCAGATGACAAAAGTTGTCGTT  
GATATTGAACCTCATATCATATTGCAACACTGAACACTTGTCCAGAATTTTACACTTGTGATATTGCGATATTAAATTA  
TGACGGTTTTTATTCGTGGCTATGCAACAGAGCCAGATTTTACACTTCTGCATGATATAACAAGCAGGATCAACTTGACG  
CTGTCGTGGTTACGCTGGATGTTAGGGGAGTAAATGCACTCAAAGGCAATGAGCAAGTAAAAATAGGTAGTTATCAATTT  
CCCCTTATTGATACACAGGCGCTGGAGATACTTTAATGGTGCATTTGTTTATAGCTTAATAAAAAACATGCCCTTAAT  
TGAAGCACTAAAAATTTGCTTCTGCCACAGCAGCAATAAATATTACTGCATTAGGTGCCAGAGGTCATCTGCGGACACCAT  
CGGAGGTTAATCTTTTTCTTTCACAACACGACTAA

>Cluster\_670

ATGCTTATCTTTATCCCGATTCTCATTTTTTGTGCGGCTGGTCAATGTCGCGCGGGGCTCAAATCGTGGCGCAGGGCTA  
TCAATGGACGGTAGAACGTTTTGGTTCGCTATACAAAACGTTACAGCCGGGGCTCAGTCTGGTGGTGCCTTTTATGGATC  
GCATTTGGTCGCAAGATCAATATGATGGAGCAAGTGTCTCGATATCCCTTCCAGGAAGTTATCTCGAAAGATAACGCCAAC  
GTTACCATCGACGAGCTGTTTTATTCAGGTGATTGACGCGCGCGCGGCTTATGAAATCAGCAATCTGGAGCTGGC  
GATCATCAACCTGACCATGACTAACATCCGTACCGTGTGGGTTCAATGGAACCTGACGAAATGCTCTCTCAGCGCGACA  
GCATCAACTCACGCGCTGCTGCTATTTGTCGATGAAGCCAAACCCGTTGGGGATTAAGTCAACCGTATGAAATTTCCG  
GACGTGCGCCACCAGGAGCTTATCTTCAATGAACGCGCAGATGAAAGCGGAACGTACCAACCGGCTTACATTTCT  
TGAAGCGGAAGGGATCCGTCAGGCGAAATCTCAAAGCCGAAGGTGAAAAACAGTCCGAAATCTGAAAGCGGAAGGGC  
AACGTCAGTCCGCTTTTTACAGGCTGAAGCGGTGAACGTTCCGCGAAGCAGAAGCCGCGCCACAAAATGGTGTCT  
GAAGCTATCGCTCCGGTATATTCAGGCGGTGAACACTCTTCTGAGCGAGAAATACCCGAAGCCGTTACAGCAGATCCG  
TTCTCCAGTAACAGCAAAGTAGTGATGATGCCATTAGAGGCCAGCAGCTGATGGGGTGGATTCGCGGGATTGCGGAGC  
TGGTGAAGACAGCGCAACAAACCGACTCAGCCATGA

>Cluster\_7958

ATGCCAACCATCGACCTGAGCCAGCTCCCGCGCTGACGTGGTAGAAAACGCTGGATTTTGAACATTTCTCGCGGAACG  
CAAAGCGAGCTGGTCTCGCTTTACCCTGAAGAACAACAGGACGCTGTGCGCGAACTCTCGCCTTGAGTCTGATCCAC  
TGGTGAAGTATCTGGAGGAAAACGCTATCCGGAGGTTATCTGGCGTCAAGCTGTGAAACGATGCGCGAAAAGCTGCACA  
CTGGCTTACGCGAGTATAAACGACCTCGATGTTGATGGCCGGAACAAACACCGGGCAGAGATTGTGACGCGCGGA  
TGACAGCACTATCCCGCAACACCGCGCTCATGGAATCTGATGCCGATTTACGGTTACGCGCACAACAGGCTTATGAAG  
GGCTCAGCGTGGCTGGTCCGGTCCGGCAGATATGAATACACGGCGCAGCGCCGACGTTGGGTCGCTGATATCTCGGTT  
GTCAGCCCGTACCGGCTGTGTGACCATCAGCTACTGTCAAGCGAGGATGATGGCACCGCATCCGATGAACCTTCTGAC  
CATCGTTGAAAAGCACTAAATGCTGAAGAGGCTGCGCCGTTGGCGCAGAGGTTGACGAGGTTGACAGGTTGAAATCGTGC  
CGTATCAGATTGACGCCAGCTGTATTTTTATCCGGGGCCGAGGCGGAGCAATCCGTCAGGCGCAGAGGAAAACCTG  
AAGGCATACATCAGCGCACAACAGCGACTGGGTCCGACATTCGCCAGTCCGCAATCTATGCCCGCTGCAGCTTGAAGG  
TGTACAGCGTGTGCAACTGGCCGCGCACTGGCTGACATTTGTGCTCAGTAAATACCAGGCATCTGTTGCACCGAATACC  
GCATCGCTGACGGGGTGTGATGAGTGA

>Cluster\_17660

GTGTTAGTCAACGTTAAAAACGTTAAACAGATTTTTATCAATCTGAAGGTCACTTCCAGAAAGCCTTTGACCAGTACC  
ACTGACTGGCAGAGTGGCAATGGAAAGTGCATCAAACCGCAAGGAAAACGACTACAGCTGGTTAAGTCTGTTTCCCGA  
AAATGCGCGAGTGGATTGGTGACAAGGTCGTTAAATCACTGGCGCATTTAATACACCATCCGTAACAGGACTGGGAA  
GCCAGGTTGAAGTGCATCGTAACGACATCGAGGACGACAGATTATGGGCTATGCCCTTCCAGGCAAAAGGAGCCGGACA



GTCCGGCGCAGAACTCCCGGAGATATTGTGGCGTCCCTTATCAGTAACGGTTTTACCAATCCCTGTTACGACGGCCAGC  
CGTTCTTTGATACCGACCACTGGTTCGGCGGTAATAACGGTGTCCAAACAAAGGCCACAAAAAACAAGTTGGCTCGCTT  
GCCGAAGCGAAAGCCTCTACGGTGCAGGCAAGTGCATGCGTAGTCTGAAAGATGACGAAGGCGCATCCCTCAAAAT  
TCGCCCGAATCTGCTGGTTGTGCCACCGCGCTGGAGGATGACCGCAACTACCTGATGACCGCGGAGAAGTTCCCGGACG  
GTACGCGCAACCCGTACCGCAATACCGCGAAGTGTGGTGTGATGCCGGAGCTGGCGTCCGATTCTCGCTGCTTTT  
GACACCACCAACCCGGTGAACCCGCTGATTTATCAGCTGCGTAAAAAGCCGGTTTTTGTGGAGCAGACGGACTATAACAG  
CGACAACGTGTTCAAACGTAAGAAGTTCCTGTTTTGGTGTGAAGCGCGTGTAAACGGCGTTACGGCTTCTGCGAGATGG  
CATTTGGTCTGATGGTACGACGGAGTAA

>Cluster\_26506

GTGGCAGTCCCATGGATAATGCAATTTTAGAAAAATCTTGGCGCAAGTGGCGCGCTCATTTGGTACGGGTAAGTCCG  
GGATTATATCTCCGGCGCTGGCGACGGTTGATGGTTCGGGCTGGGCATGCTATCTGTACCGTTGACGGACAGCTTTTTTC  
AGCCCGGAGACGCACAAGAACGTTTTTCCATTCAGTCTATTTCCAAAGTGTGAGTCTCGTTGTCGCCATGCGTCATTAC  
TCCGAAGAGGAAATCTGGCAACCGCTGGCAAAAGATCCGTCTGGATCACCGTTCATTTCAATTTCTTTAGTGAACGAAATGGA  
GCAGGGTATTCCGCGTAATCCGTTTATTAATGCCGGTGCCTGGTGGTCTGCGATATGTTGCAAGGGCGATTAAGCGCTC  
CTCGGCAACGTATGCTGGAGTCTGCGCGGCTTAAGCGGTGTGTCTGATATTTCCCTACGATACGGTGGTAGCCGCTTCC  
GAATTTGAACACTCCCGCGAAATGCCGCTATCGCTGGTGTGAAGTGGTGGCAATTTCCATCATGACGTGACAAC  
CGTTCTGCAAAACTACTTTTCAATTTACTGCGCTCTGAAAAATGAGCTGTATAGAGCTGGCCCGGACGTTTTGTCTTCTGGCTA  
ATCAGGGGAAAGCTATTCAATTTGATGAACCTGTGGTACGCCAATGCAGGCGCGGCAAAATTAACCGCTGATGGCGACC  
AGTGGTATGTACAGAACCGGGGGAGTTTGCCTGGCGGGTGGGACTACCGGCAAAATCTGGCGTTGGTGGCGGTATTCTG  
GGGATTTGTCGCGATGAAATGGCCATCGCAGTCTGGAGCCCGGAACTGGATGATCCGGTAACTCGCTTGGCGGCATTG  
CTGTCTTTGAACAATTTAGCGAAACAATTTAGGGCTTCGGTTTATTA

>Cluster\_20712

ATGTCCGCCAGAAACCGGGGTTGCATCCCGCAACCGTATCACAGCCGCTACGATCTCGCCACGCTTTGTACGGTCAA  
TCTTGAACCTGACCAATTTCTCACGCTTACACCGCGCGGAGCAAAAGCGTAGACTTTGCCAATCCCGTGGCGGTGAAG  
CGCTCAATAAGGGCTTGTGCGCCATTTTTACGCGTAGCGAACTGGGATATCCCGGACGGTTTTTCTCTGCCACCAGTA  
CCGGGCGGGCGGATATATTCATCACCTTGGCGATTTACTGGCTGAAGCAAGCGGAAACAATTCAGCTAATGCCAGCAT  
TCTGGATATCGGGCTGGTGCAGTGTATTTATCCGCTGATTTGGCGTACATGAATATGGCTGGCGTTTTACCGGTAGTG  
AAACGACGACCGGAGTTAAGCAGTGGCGAGGATCATCAGTGTAAATCCGGGGCTTAACCGCCATTCGTTCCGCT  
CGGCAAAAAGAGAGTGGGGCGATTTTTAACGGCATCATCCATAAAAACGAGCAATACGATGCGACCTTGTGTAACCCGCC  
ATTCACGATTTCCGCGCTGCGGCACGGCAGGTAGTGAACGTAAACCGCGTAACTGGGGCTAAACAAGACGATGCAC  
TGAATTTTGGTGGTACGCAACAGGAGTTGTGGTGTGAAGGCGGTGAAGTGGTTTTATCAAAAAGATGATGAAGAGAGC  
AAAGGCTTCGCGAAGCAGGTGATGTGGTTACCTACTGGTATCTCGTGGTGAAAACTTACCGCGTTTTGCTTCTGGCTC  
GACGGACGTGGGCGCGTGAAGTGGTTAAAAAAGAGATGGCCAGGGGCAAAAGCAGAGTCCGTTTTATTTGCCGACCT  
TTATGAACGACGACGACCGCCCGTTTTGTCAATCGCCAGCGTTAA

>Cluster\_60172

ATGGAATTAATTTTTTTAGGTACTTACGCGGTGTGCCAACCCGACGCGCAATGTCACGGCAATATTGCTTAACTGCA  
ACATCCGACCCAGAGCGGACTTTGGTGTGTTGACTGCGGTGAAGGCACCCAGCATCAGTACTGCATACCGCTTTAACC  
CTGGAAACTGGACAAGATTTTTATCAGTCACTTTCATGGCGATCATCTTTTTGGTTTTACCGCGCTTGTGTGAGTCTGT  
TCTATGTCAGGCATTAATCCAACTTAAAGATTTATGGTCCGCAAGTATCCGTGAATTTGTGAAACCGCGCTGGCGAT  
TAGCGGCTCATGGACCGATTTATCCGCTGGAATAATGTCGAAATTTGGCGTGGCGAAATTTCTGATGATGCGCTGCGCAAAG  
TAACCGCTTATCCGCTGGAACACCCACTGGAATGTTATGGCTATCGTATTTGAAGAACATGATAAACCGGGTGCATTAAT  
GCCAGGCATTAAGAGTCTGCGCGTGCAGCTTGGCCACTGTTTTCAGGAATTAAGAGCGGGCAAAACAACTACGCTGGA  
AGATGGAAGGACGATTAACGGCGCAGATTACTTAGCTGCTCACTGCTAGGTAAGCGCTCGCTATTTTCCGGCATACCG  
GCCCTGCGATGCGCACCTTGCCTGAAAGGTGTCGATGTCATGGTGCACGAAGCAGCGTGGATATAACCATGGAA  
GCCAAAGCCAATAGTGCAGGCTTAGCTTACACGCGAGGCTGCGACACTAGCCCGTGGAGCTGGAGTCCGCAAGCTAAT  
CATTACCCAGCTCAGCTCGCGCTATGATGACAAAGGTTGTGACACCTGTTACGTTGAATGCAGGTCAATTTTCCCGGCGA  
CTGAACTGGCGAATGATTTACCGTGTTTAACGTTTAA

>Cluster\_29062

ATGACGCTTACCTACAGTTTACCGCAACCAAGTGGGCGAGCTGCGTGTATCCGTACCTATGACGTTATCGGAAGATGA  
GATCGCCGCTCTCAAAGTATTAATGAAGATCTCTCGTTAGAAGAAGTTGCCGAGATCTATTTACCTCTGTCACGTTTGC  
TGAACCTCTATATAAGCTCGAATCTGCGCCGTCAGGCACTTCTGGAACAGTTTTCTTGGTACCAACGGGCAACGCTTCT  
TACATTATCAGTATTGCTGGTAGTGTGCGGGTAGGAAAAGTACAACCCCGGTGATTTGACGGCGCTATTAAGCCGTTG  
GCCGGAACATCGTGTGTAACGATGATGACTACAGATGCTTCTTACCCCTAATCAGGTTCTGAAAGAACGTTGGTCTGA  
TGAAGAAGAAAGCTTCCCGAATCGTATGATGATGATGCTGCTGGTGAAGTTTTGTTCCGATCTCAAATCCCGCGTGGCA  
AACGTTACAGCCCTGTTTTACTCGCATCTTATTTATGATGTTGATCCCGGATGGAGATAAAAACGGTTGTTCCAGCTGAT  
TTTTAATCTTGAAGGTTAAATGCTTTACAGAGCGGGATGGATATCCACACGATCCACATCATGATTTGTTCTGAT  
TTGTGATTTTTTCGATATATGTTGATGACCCGGAAGACTTACTTACAGAGTGGTATATCAACCGTTTTTTGAAATTTCCCG  
GAAGGGCTTTTACAGACCCGGATTCCTATTTTACAACTACCGGAAATTAACTAAGAGAAGCTATTAAGACTGCCAT  
GACATTTGGAAGAGATCAACTGGCTGAACTTAAAGCAAAATTTACTACTCGCGAGCTGCGAGCTGCGAGTTTAAATCTTGA  
CTAAAAGTCTAATCATGACGATGAAGAGGTCAGACTACGCAAAATA

>Cluster\_21369

ATGATGTTAAGTAAGAAAACAGCGAGACGCTGGAATAATTCAGTGAAGAGCTGGAGGTCGAAGGGCGCAGCTTGTGGCA  
GGACGCACGTCGACGTTTTATGCATAACCGTGGCGGTTGCCAGTCTGATAGTGTGGTGTGATCGCGTTATTTGTAA  
TCTTGGCACCGATGCTTTTCGAGTTTGCCTATGATGATGACTGACTGGCGGATGATGTCAGCGCCCGGATATGGAGTCC  
GGTCACTACTTTGGTACTGACTCATCCGGTGCAGCCTGCTTGTGCGGTTGCGATTTGGCGGGCGTATCTCACTCATGTT  
CGGTGTTGCTGCGGCACTGGTGGCAGTGGTCTGTTGGGCACTTTATGGTTTCGCTTTCCGGTTATCTGGCGGCTAAGT  
ATTCGGTAATGATGCGTCTGCTGGAATCCTCAACTCCTTCCATTCATGTTCTTCTGTCATTTTGTGGTGACCTTTTTTC  
GGTCAAAACATCTGCTGATTTTTCGTGGCGATTGGCATGGTTTTCTGGCTGGATATGGCTCGTATTGTGCGTGGGCAAC  
CCTGAGTCTGAAGCGCAAAGAGTTTATTGAGGCGGCACAAGTTGGCGGTGATATCGACGCGGGCATTTGTTATTCGCACA  
TTGTGCGCAAGCTACTCGTGTGGTGGTCTATCGTGGTCTGCTTCCGTTCCGAGTATGATCCTCTTTTGAATTTTCCCT  
AGCTTCTGGGATTAGGTACGCAAGAGCCGTTAAGCAGCTGGGTGCAATTTGCTGAGTGTGGCGCAACTCGATGGAAGT  
CTCTCCATGGTTACTGTTGTTCCCTGCGGATTCTCGTGGTAAACGCTTTTTTGTTCACCTTATCGCGGACGCTTGC  
GTGATGCCCTCGACCCGAAAGATCGTTAA

>Cluster\_27083

ATGACGAATTTAAAGCAGTTTATACCGGTAGCAGGCTTGGGATGCATATGTTGCCCTGCCACTAAGGCGATTCCCAAAGA  
GATGCTACCGATGCTGCAAGCAAGCAATGATTCAGTACTTGTGACGAGATTTGGGTCAGGGATCAAGAAATCTCTCC  
TGTTAATCAGCGCTCAAAGACCGGTCGAAAACCACTTTCGACACTCTTATGAATTAAGAACTCTCTCTGAAACCGCG  
GTGAAGCGTCAACTGCTGGCGAAGTGCAGTCCATCTGTCCACCGGGCTGACCATTAAGACGTTGCGTACGGCGAACC  
TTTAGGTTTAGGCCACTCCATTTTGTGCGCGACCTGCCATTGGTGACAACCAATTTGCTGGTACTGCGCAGACGATG

TGATCGACAACGCCAGCGCCGACCCGCTGCGCTACAACCTTGCTGCCATGATTGCGCGCTTCAACGAAACGGGCCGAGC  
CAGGTGCTGGCAAACGATGCGGGGTGACCTCTCTGAATACTCCGTCATCCAGACCAAAGAGCCACTGGATCGTGAGGG  
TAAAGTCAGCCGATTTGTTGAATTTATCGAAAAACCGGATCAGCCGACAGCCTAGACTCAGACATCATGGCCGTTGGTC  
GCTATGTGCTTTCTGACAGATATTTGGCCGGAACGGAACGCTAGCTGCTGGTGCATGGGGACGATTTAGCTGACTGAT  
GCTATTGCTGAGCTGGGCAAAAACAGTCAAGTCAAGTCAAGTCAAGTCAAGTCAAGTCAAGTCAAGTCAAGTCAAGTCAAGT  
GGGTATATGCAAGCGTTCTGTAAGTATGGGCTGCGCAACCTAAAGGAAGGTGCGAAAATTTCTCAAGAATATTGAGCAAT  
TACTTGCTAAATAA

>Cluster\_44530

ATGGAAACAGCTGCGTGCCGAATTAAGCCATTTACTGGGCGAAAACTCAGTCGTATTGAGTGCCTCAATGAAAAAGCGGA  
TACGGCGTTGTGGGCTTTGTATGACAGCCAGGGAAACCAATGCCGTTAATGGCAAGAAGCTTTAGTACGCCCGGAAAG  
CCCACAACCTGGCATGGAACACCACCATGCTGGCAAGAAGTGGGACTGTCCTGATGCCACTATTTATGGTGTGATGACG  
CATGAAGAACACCCCGCCCGATGTCCTGCTACTGGAGCGGATGCGTGGTGTTCGGTGGAGGCACCAGCCGAAACACC  
AGAAGCTGGGAAACCACTCAAAGACCAAACTCGTTGAAGCCTTACTGGCCTGGCACCGTCAAGACAGTCCGCGTTGCGTGC  
GCGCGGTCGACAATACTCAGGAAAATTTCTGGCCCTCATGGTACCAGCAACATGTTGAAGTGCATGGACCACGCTCAAT  
CAGTTCAATAACACCGGCTGACGATGCAAGGATGAGCGGATCCTGTTTCGCACTCGCGAATGTCTCCGGCATTTATTTGA  
AGGCTTTAACGCAAAATTTGTGCTGATTCACGGTAACTCTGTTTACGACGATGTTGAAAGATTGCGGCAGCGATCAGT  
TACTGGCGATGGTCAGGCGGGACTAATGCTTTGGGACCGCTGAGAAATACGAACTGTTCCGACTAATGGATAATTTCTCTG  
GCGGAAGATTGCTCTGGAGTTACCTGCAACGCGCGCCAGTGGCGGAGTGGTTCATCTGGCGGCTGGTGTGATGTGTT  
ATGGGATGAAGTTGCGCAACTGGTAAATACCGGACGATTTAGTGGCGCAACTTCGATCTGGCATCAAATCACTCTTGC  
CGTGGCTCGCCTGA

>Cluster\_31452

ATGCAACAGTCTACCCGCTATCTCTCATTTTCGCGCATCGGTAACGTTTCCCGGCTTAAAGCGCTGACGGATATTAG  
TTTTGACTGCTATGCCGGTCAAGTTCATGCGTTGATGGGTGAAAATGGCGCAGGAAAAACAACCTCTCTTAAAAATCCTCA  
CGGAAACTATGCCGCAACCCAGGTTCTGTAGTATTGATGGCAGGAAATGTCCTTTCCGACACGCCGACACTT  
AACCGGGGGTGGCGATTATTTACCAGGAACTGCATCTCGTGCAGGAAATGACCGTCCGCGAAAAACATCTATCTCGGCCA  
GCTGCCGATATAAGGCGGATTTGTAATCGTTCATTTGTAATTTAGAGGAGGTTTACAAATTAACATCTTGGTATGG  
ATATTGACCCGGACACCGCTGAAATATCTCTCCATTGGTCAAGTGGCAGATGGTGAATCGCCAAAGCGCTGGCGCGT  
AACGCAAAATTTACGCTTTGATGAGCCAAACGCTCCCTCTGCGCGGAAATCGACAATCTTTCCGCTTATTCTG  
TGAAGTGCAGAAAGAGGGGCGGGTATCTTATACGTTTCTCACCGTATGGAAGAAATATTGCCCCAGCGATGCCATCA  
CCGTTCTTAAAGATGGGCGTTATGTCAAAACCTTTACCAGATATGCAGCAGGTTGACCAGACGACTGGTGCAGGCGATG  
GTCGGGCGAGACATTTGGCGATATCTACGGCTGGCAACCGCGTAGTTATGGCGAGGAGCGGCTGCGTCTGATGCTGTGAA  
AGCACAGCGCTGCGTACCCCAATAAGTCTGGCGGTTCCAGTGGAGAAATTTGTCGGTCCGCTGTTTGGTCTGGTCCGG  
GCAGGGCGTAG

>Cluster\_43139

ATGGCAATGGTCCAACCGAAATCGCAAAAAGCAGCTTTGTTTACTCACCTGCTACTGCTACTTTTTATCGCGGCGAT  
TATGTTCCCGCTGCTGATGGTTCGCTCCTCTGCTGCGTTCAGGGAACTTCGCGACCGGTAGTCTGATCCCGGAGCAAA  
TCTCTGGGATCACTGAAACTGGCGTTAGGTTTATGTTGGAACAGGCTGATGGTTCGATTACGCCACCGCCATTTCCG  
GTACTGCTGCTGGTGTGGAACCTCGTAAAGTTCGCCGGGATTTCCGCGATTGGCATTTGGCGCTCTCCACCACCTGGCC  
CTACGCTTTCCCGCTGATCGCTTTCCAGGCAAAAGCAGCAGCTGCTGAAAGGAATGCTGATTTTCCAGATTTCCCGCAG  
TACTTTCACTGGTTCGCTTTGATGCGTTTGTGATGCTGCTGGGTGAGTACATTTCCATTGTCCTGAAATCACTACGGC  
GGGTAATTTTCCGCTATCTGGTGGGATGCGCTGCACTGCTGGACCATCAAAGGTTATTTGAAACCATCGACAGTTC  
GCTGGAAGAAGCGGCGGCTGGATGGTTCGACACCGTGGCAGGCTTTCCGCTTGTCTGTTGCCGCTGTCAGTACCGA  
TTCTGGCGGTGGTGTTCATCTGCTGCTTTATGCTGCTGCTTACGTAAGTTCGCGTCCGCTGATTTACTGCTGACGTA  
AACAGCTACACCTGGCCGTTGGGATGCAGCAATACCTCAACCGCAAAAACCTGCTGGGGTACTTTGCCGCGCTGC  
CGTATGCTGCTGATACCGATCACCATGCTCTTCTGCTGGCTCAACGCTGGTGGTCAACGGCTGACGGCAGGTGGT  
TGAAAGGTTAA

>Cluster\_12385

ATGACAGACAACACTCGTTTACGCATAGCTATGCAGAAATCCGGCCGTTTAAAGTATGACTCACCGGAATTAATGGCGG  
CTGTGGCATTAAATCAATCTTACACCCAGCGCTGATCGCGATGGCAGAAAACATGCCGATGATATTTCTGCGCGTGC  
GTGACGACGACATTTCCGGTCTGGTAATGGACGGCGTGGTAGACTCTGGGATTATCGGCGAAAACGCTGGAAGAAGAG  
CTGCTTAAACCGCGCCAGGTTGAAGATCCACGCTACTTTACCCTGCGTCTGGATTTCGGCGGCTGCCGCTTTTC  
GCTGGCAACCGGTTGATGAAGCTGGGACGGCCGCTCTCTTAAACGGTAAACGATATGCCACCTCTTATCTCACC  
TGCTCAAGCGTTATCTCGACAGAAAGGATCTCTTTAAATCTGCTTACTGAACCGTTCTGTTGAAGTTCGCCCCGCT  
GCCGGACTGGCGGATGCGATTGCGATCTGGTTTCCACCGTGCACGCTGGAAGCAAACGGCTGGCGAAGTCAAGT  
TATCTACCCTCGAAAGCTTGCCTGATCCAGCGGATGGCGAAATGGAAGAATCCAAACAGCAGCTGATCGCAAACTGC  
TGACCCGATTTAGGGTGTGATCCAGGCGCGGAATCAAATACATCATGATGCACGACCGACCGAAGCTCTGGATGAA  
GTCATCGCCCTGCTGCCAGGTGCCAAGCCCAACCATTTCTGCGCTGGCGGGTGACCAACAACCGCTAGCGATGCACAT  
GGTCAAGTACGAAACCTGTTCTGGGAAACGATGGAAAAACGAAAGCCTGGGTGCCAGTTCAATCTGCTCTGCCGA  
TTGAGAAGATGATGGAGTGA

>Cluster\_38477

TTGAATAACGCGACTCTGAACTTTTCAACGACCGCTTACCGCACAGCCGCTACTTCTCGGATGATTTACACTTTGGTGT  
ACGCATTGCAAGGAAAGAACCGCCATTTGCGGAAATACATCCAGTTCAACAGCCGACGCTGTTCTGGGTTGGGAT  
TCGACGTCGATCGCACCGGTGCGCCATCGACTGGAGCGACCGGAAACGCGCTGCGCCACCGTACCATCACCAACCCG  
GAAAACGGACACCGCACCTGCTGACGCGCTGGAACCCCGTACGACCGCTCCTGATGGAAAAATGAAGCCGCTGCG  
CTACGCGCGCCGCTGGAGAACCGCTACGCAAAAATTAGAGGCTGACACGGGGTATTCGGGGTTAATCTGCAAAAATC  
CGAACACGGCCACTGGAAAATTTGCCGTATGGCAGCCGGAACCTACACGCTGACTGGCTGGCTGACTTTCTCGACCTG  
AACCGGCGAACGACAAAGAAATCGTTGCCGACTACGGCTTAGGCCGTAACCTGCACCCCTGTTTCGACAAAACCCGCAAGT  
GGCATAACCGTGCATCCGTCAGGCTGGCCTGAGTATGAACAGTGGCTGCAAGCTGCTATGAACGTCAGCGCCCTATA  
ACCTGCAATTCGCATCGCTCTGGATGAAAATGAGGTTATAGGCATAGCAAAGATATTTCAAATGGACGAGCCGAAAT  
TTATCTAAAACGAGTTTTTGAGGAATTTGTAGAAAACCTACATACTCAAAAATACAGCTCAAAAAGAGGATGAAAAGTAA  
AGGAGGTGGACGACCATCGTTGGGTGAGCCATGGAAGGATTTAGGTATAGCAGAAGGAGTATTTCTATTTAAAAAGA  
AGGGGACACCCCTTCTTAG

>Cluster\_58183

ATGAAGCTCTTAGCAAAAAGCACCTTAAATCTGTTACGCGCTTTGAAGCGGCTGGTCTACCGGAGCTTTTGGCTTGGC  
CGCTCTGAGTTGAACTGTCACCCAGTGGATCAGCCATGCCATCCGCAACTGGAAAACCTGCTTGTATGTACGCCCTTT  
TTACAGCGAGTACCGGAGAAATACGCTGACGAAAAGAGTGAATACTGCTTGGAGCATAACAGCGGGGATTTAACGAA  
TTACAGCGGGGTTGGCATTAGTGACGGTGTGATGAACTCAGGCTTTGGCGCTTACATACTGACCCAGTTTTGGCCATCA  
ATGGCTTTTACCAGCTCTTGGTAAGTTCATACGTGAGAAACCAAGCATCGATCTGCGACTTTCAGCCAGCAGAAATATG  
CACGTTTTGAAACAGGATGATTTTGTATCTCGATATAGTCTACGGTGAACCCCGCCATCACCTATGAGAAGATCCCGCTT

GCTGTTGAAGAACTTACGCCACTGTGTTCTCCCAACTGGCTGAGCGGCTAAAGAAACCAGAGGATCTCTATGCGTTGAC  
ATTGATTCAGTGGCATGTGCAGTTGTACCAGTGGAAAGGATGGTTGAGGCGAATAAGATGACGCCACCAATAATTTAG  
GCCTTCGATTTGACCGTAGCTTTATGGCGATTGCTGCCGAGTTGACGGCTTGGGAGTTGTGCTTGAATCAAACTACTG  
GCTGAACGTGAAATCGCTAGCGGTAAACTGGTATGCCCACTTGTAAACAGTACCAGCGAAATACATTACATCGGTCATTA  
TTTGGTTTTCCCCAGCACAACACATGCATTCGCGCTTGATGTGTTCAAACCTGGCTACTGAATGAATCAATCTGG  
GTAAATTCGTTGA  
>Cluster\_17152  
ATGTATTGCTGTCTATCCGGTGGGTTAGGTAATCAAATGTTCCAATATGCTGCAGCCTATATCCTTAAGCAACATTTTCC  
TGATACTATATTAGTGCCTTGATGATAGTTATTAATTTCAACCAGCCTCAAAAAGATACTATACGACATCTTGAGCTTGATC  
AATTTAAATTTATTTTGGATAGGTTAGTTCTAAAGATGAAAAAGTAAAAATAAATCGTTTGAGGAAACATAAAAAATA  
CCACTGCTTAACAGTTTTCTCAGTTCACGTCAATAACTGTGTAATAAATATTCATTAATGATGCTTCTTATTACAA  
TCCGGAATCAATAAAAACATTTGATGTTGCGTGTCTATTTTACCAAGATTCTAAATTTAATGAACATAGGG  
ATTTAATTTGCCCCTTTTTGAATAACGTGATGATCTTTCGCGTGTATGTCATAACCTACAAAATATATCCTTTAATTA  
GACTCTAAGAATATAACGTCAATTCATGTGCGACGTGGAGATTATGTAATAATAAACATGCTGCAAAATTTACAGGCAC  
TCTAAGTATGGATTTATTTATTTAGTGCATGGAATACATTTGAAAGTGAATGTGGCTCTCAGACATTTATAATCTTTACAG  
ATGATGTCATATGGGCAAGGAAAAATTTCTCAAAATATAGCAATTTGCTTGGTTGCTGATGCTGATGAAACAAATTTAGT  
GTAATTTGATGATTTAATGTCATTTGATGTAATAATAAATTTGTAATTTGCAAAACAGCACATATAGTTGTTGGTGGGCGCATGGCT  
AAACAGGTCAGAAGATAAGCTAGTCAATCGCGCTAAACAATGGTACATATCCGAAATGAATGCTCTCTTAAAAATGAAA  
ACTGGATAGCAATGTAG  
>Cluster\_44970  
ATGCCATTTGCTCGTTATTTCTGCATTTTCATAAACGTTGGTTTGGGAGAAGCGGCAAAACGGGATGTAGGGACAGGGGA  
AAATCAGATACCGGACATGGCCTCTTTTGCAGTGGTGTGGATGAAATACCCACGGTAAAAATCTGCAATATG  
GTCGAGGCGAGGCTATGCCGAAATTTATCGACGCAAAACATGAGGATTACATTTCTATCCCTTTCCCTAAAAAAGCGGAC  
TGGCCATTTCTTACCCATTTCTGGTGTGGGCTGGCCCTTTAGGCGCTGGGCGAGGGTTCTGTGATGACGTCAGAAAGGCC  
TACGTTAACCGGCTTTAATTTCTGCTTACAGAAGCTCATCAACCAGTGACACGGTATCTATGCATTACAGTTGGTGGGCTG  
TTGGTGGATGA  
>Cluster\_67123  
GTGCTGGAGTTGACGGAGGATATCCATATCCGCTCAATGATAATGTAATCCGAAAGTTTGAAGACTCAAACAAATAGG  
TGTGGAATGGCAATTTGATGATTTTGAACGAGATATGCAACTCACAGCTATGTGATGTGATCCCGTTGATCAGGTTA  
AAATCCCTGGTTTTTTTATTCACCAATTCATACAAAACAAAAATCGGAGAAAATTTATGATAATATCTATCTTGGCC  
AAGGAAATCGGAATAGACGTTATTCAGAAAGGCATCGAAACTGAAGCGCAGGAAATTAATGGCGAGTAAAAATGTAAA  
TTTTATTACAGGGGTATTTTATACTCGCCACCAATTCCTCCAGAGATTTTGTTCAAAAGTATTTTACAGGAAATACTGAAA  
GAACTCCCTTATGA  
>Cluster\_20979  
ATGAAGCAAACAATCTTCTCCGAACCTAAGCAACAACAGCAAGCCGCAATCAACGCCATCTCGCAACACCCTCGATAA  
AGACAAGCCAGTTACCATCCGCATTAAGTACTGACTACAAGCGCAACCTTGACCAGAACGCAAAAATTTACGCGATGCTCGCAG  
ATATCGCTAGGCAAGTTTCTAGTGGCGCGGCAATGGTTAAACCAGAACAAATGGAAGGTTTGTGATAAGCGGTCATGCA  
GTGGCAACGAAACAGGAAGCTGATGTTTTTACCCGGGCTTGAAGCGCAATGCGTCAACATTCGCGAAAGCAGCGCGCAGAT  
GAGTGTGAAGCGTATGGCAAGTCTGATTTAGTACACGACAGCATGGGCTATTGGTCTAGGGTGTGATTTACCGACAGGA  
GGTACGAATGA  
>Cluster\_38601  
ATGACAACCAACAGTAACCGGCTCCGGGTAACACCCGCCACCTTAATGATATGCGGTTCTGCTGTGAGAATCCGGGGAT  
GCGTGTCACTGTGTTGATGACGAGAGCGACTTCTGGCTCTCAGCGTCTCTGCGGTGCGCTACCGTCTTGGAGGGA  
AGTTGCGGATTTCTCAGGACGTAATTTGACTGACGCGGAAACGAGGCGACTGCTGTTCCCGGAACTCCGGGGGAGGT  
ATGAGCATAACCAACAACCGATGATACCGGTTTTTCTTGGCGAAGTCTGACGTCAGCCAGATTAAAGCAGTGTATAGCGG  
TGAGGACGGGGAGAGGCTGGCGGAGGTTATCCGTCAGAACTGCAACGTTCTGGTATCCGCTGAAGCCAGGGGACGGGCATC  
ATGATAAATAA  
>Cluster\_40734  
ATGAACGCAAGAGAAAAAATATATCAATACATTAATAAATAGTGTGACGAGACAAGCAAGCTGTCCAGGGCAGCCCA  
GAAAGATAATCAACATATGGCAGCGCTTTACGCACTGACCATCGCAATAGCCCCCTCTGAAGCAGCAAAAATTTATGAGG  
AACAGAGCAAGAAATCGACACTCTTAAACACAGTCAACAGTTGACGCAATGAAATCCGTCAGCAGTCCGACGCGCCGAT  
TACATTTCTGGTTCCGCAATAATGACGCAATACACCATTTTGGCGAACTGCACGGCAAAATACCTGATAACGCTTACCA  
CACAAAAGAGTCAAGCTTCTGACAAATCTCCGCTGATAGAACGATCTCAAGCTGTATTTGATGACGCGCAACGCTG  
CCGATTTAACGCATAG  
>Cluster\_49945  
ATGAGTGTGAAAAATAAATCCAGACGCTGCTCATTTGAACTTTTCCGGATGAACGGACAGGAGATAAGATAGCAGATGA  
GCTCATTTGCAAAATGAAAACTGAAGGAGCGGGGACGTTTCATGCGCGCATGTTAGTTACTGGTGGCGGTTTTGCAGCTA  
TAGATAAACGCTTCTTCTGATATCGGAGTTACTGACAGAAAAACGACTGGAATGATATAAATAGGTGATTTCC  
AGCGTGTACACAGGTGCTTTTTTCTGGTTGAAAAAGAAATTTGCTTGAATTAAGTGGAAACAAATCTGGTCTCCGATCTGT  
GGATTGACGACTCTCTTACAGAGCAGAGTCTGTGAGAAATGACGGTGAAGACCAGACCAGAAAGAAACGCTGAAAAATA  
TGTTCCGAGATGACTGA  
>Cluster\_26721  
ATGGCTAATAAACCTTCGGCAGAAGAACTGAAAAAAAATTTGTCCGAGATGCAGTTCTACGTGACGAGCAATCATGGGAC  
AGAACCAGCAATTTACGGTCTGTTTACTGCATAACAAGCGTGCAGGCGTATATCACTGTTGATCTGCGATGCCCGCTGT  
TTCATTTCCCAACAGTATGATTTCCGGCTGTGGCTGGCCAGTTTCTACGAACCGGTGAGTGAAGAACTATTTCTGTTAT  
ATCAAAGACTTGTCAACATGGAATGCAGCGCATAGAAATTCGTTGCGGTAAGTAACTGGAATGCGGATGCCATCTGGGCTCTCC  
TGACGGGCGCAGCAACGGGCAACGTTATTTGTTAACTCTGCTTCTTACGCTTCACTGATGGCGAAAACGGCGAAG  
AAATCAACGGTTGA  
>Cluster\_63894  
ATGACCCTATTACAGAGAAAAACGCGGAGATTAATCATTCACTGCTGTTTCTGAGCGACGCGGCGCAGGATAACCA  
ATCTTCAGACAGCTGCTTGTCTAATGTGTTTCTGATCGCGCTGGCATCGCTGGAAGTGAACCGGTGGCGTGGAAAGC  
CCTTCACGCAAAATGACCATGAAATATAATACGTTTACCGCTATGATTTCTGACAAAGCAGAAGCCGAACGGTGGGTGCGA  
CTGCATAAAGTCTGTTGTTTTTCCGGCAGAAATAACACCGCTTTACGACGCGCGCCAGCGATGGTACTGCTGATGAAAT  
GGATTTGCTTACCTGCGCATCTCGACGTTGTAACGAAACATATGCTGATGGTTGGAACGCTGCGCGCCGCTGCTTA  
AGGGAGATAAATAA  
>Cluster\_25429  
ATGAACATAAAAGAAAGACTCAAAAAAATACTCGCTGACAAAGCGTTATCAATCACTGATGCTGCCGACAGTGGGATAT  
CCCATATCGTTCTTACAAAACATCTGCGTGGCGAGCGAGAACCAATGCGGAGGCATTTGATCTCAATAGGTACCCAT  
TGGGTATAAATATTGATTGGCTGCTCACCGCAGAGGAGGAATGTATCTGCTGAACATGCGGATGTTTTGACTGAGCAG

C CGGAATACAGCCATGCGGATTTGAAGTTACTGGAATTTTGAATCAGTTGGAACCGGATGTACGAAAGGATTTGTTACG  
CAGTGCTGAAGAAAAACAGCGAGTGGCCGCCCTAGAAAAAAGATTAGAGGAATTGGCTTTAGAACTCGAAAGCCTAAAAAC  
GTTCCGGCGTAA  
>Cluster\_20759  
ATGACCATTATTTCCGTCGAGGGTAAATCGTTGGGGGACAGTTGGCTGTGTGGGGAGTCCCGCATAACTACGCTTTGGC  
ATTTGCAGAGAAAAGCACCAGTAAAAATGGTCGCATTGCGTTGCATCCATTCTCTTTAATGACACTGAGCACATGACTA  
ATCCGCGTCACTGGCTGGCAGTCAATGCCGCTTTCTGGTGGCTGGCTGTACCGCGAGGCGAAAGCAAAGACAGATT  
GAAGCGCTGGCTGGAATCCGCGCCATTTCTATACGGCCGGTGGCTGGTGGTGGCGAAATTAAGCACTGATCCAGGA  
GTGGTGGCGGACAACGTACGAGCTGCACCTTATTCAGCACCGAACCATTCGCGCGTGGCTGTACAACCCGCTTTTACT  
AA  
>Cluster\_34572  
ATGTGGCGTATTTCATGATAAGAAATGTGAAAAACAAGACCTGTAAATCTGGACCTACAGACCATCCGGTTCCTCCAT  
CACGGCGATAGCGTCCATCTCCATCGCCTTTCCGGTGTGATCACCTTTGTTGAGTGGGCATCCTGCTGTGGCTTCTGG  
GTACCAGCTCTCTTCCCTGAAGGTTTCGAGCAAGCTTCCGCGATTATGGGCAGCTTCTCGTCAAATTTATCATGTGG  
GGCATCTTACCGCTCTGGCGTATCACGTCGCTGATGTTATTCGCCACATGATGATGGATTTTGGCTATCTGGAAGAAAC  
ATTCGAAGCGGGTAAACGCTCCGCCAAAATCTCCTTTGTTATTACTGTGCTGCTTCACTTCTCGCAGGAGTCTCGTAT  
GGTAA  
>Cluster\_67059  
ATGAAAACTCAAATGAAAACTTGTACATGATTTTTATCAGGCTCTTGAAGGTTATGATTTTTTAACCTTAAATCACT  
TTGCTCCAGTACTTTGTTTCTATTACAGATAGATAAACCATTCAATGGAGTTGACGGTTTTATCGCATCTGAAACTG  
CCACACTTGTAGGATTTCCGGGGCTTCAGCATGAAGCTTGAAGTTCTTATCAGTGAAGCGGATAAAGTCGTAGCTTATGTT  
GTTTTTGAAGGTATCCACAATAATGAAATGCACGGATATAAACCAACCGGAAAAAGTACGTATTTCTGTGATGATGCT  
GCTGACTATTGAAGCGGGTAAAAATTAAGAAAAACGTGCGCATTGATTTATAACGATATCGTACGTCAGATTAGTTAA  
>Cluster\_1581  
ATGAAACACCGTGAATAACGACGGCAGTCTGTCTGCCTGAAAGACAATATTTCTGAGCGGGTGGCTGGTTGACGG  
CCGCCCGTTTTTATTGATGAACAGGAAGTCCCTGCTGTTGCTGTTTACTGACTGATGCGTCTGCTGCTGACGAGTTCC  
TTGATGAGGGGACCTGGGAGGCGACACTGCATATTGAAGTTTTCTCAGGGCAAAGAACCAGGACTCGGCCTGGATATG  
TGGATGGAAGAAAAATCCTTCCGCGCTGGAGGCGGTTCCCGCCCTCAGTGGCTTACGCTGAAGATGAATCTTCAGGG  
GTATGACTACCGCCGGATGATGAGTTTATGATGTGGGATCGGCAGATCTCCTGTGGAAAATTAACCTACGAGATGTGA  
>Cluster\_48511  
ATGAAACTAGTGAATACAATTAATTAAGAACTTGGTGTGATGATAGAGGTTCCGCTGGTTTTCAATAGAACAAAAATAAAA  
TATTCATTTGAAATTAACGATTTTATACATCTTGGCACTAAAGATGGGGTTTACGTTGGTTTTCATGCACATAAAG  
AGTTAAGACAGCTCGCTATATGTGTCCGTGGAAGCTGCCGTTTTGTTATGGATGATGGCAAATAAAGAAGAAATTTAT  
TTAAATTTCCGCATACAGGTTTTATGATGAGCCTATGCAATGGCACGAAATGATGATTTTTTCAGAGGACTGATTTGT  
CGTAGTTCTAGCAAACGACCACTATAATGAAAGTATTATATCCGTAATATAGTGATTTTCTACTTATAATAATTCCT  
TAGCTTAA  
>Cluster\_67055  
ATGTCTGGCAATAACGTTTTTGGGTTGTTTTGCCTGCCTGGATCGCGATATTGCCCGCAGCCATGGAACTCCATATT  
CATATACCATTTGATGACGATAAAAATAGTGAATCCCGCATTTAACGCCGTTTTCAAGAGTTTTATGCCTCTTAC  
GTAACGAATGGACACTGCTGACGTAGAGGAAAATAGCTGACGCGTATATGGGATAACGATTCAGATATCGAGAATTTTC  
GCAGATATTTCTCTGCCAGCCTCGACAGCGATATTAGTGGAGCATATCATGGGAATGCAACGCTCGGTGCTGCTGT  
AGCCGCTTACCTGGGATTTGATGCCATAGAAATGAACGATGAACACGGCACAAGTTACCTTATGTAAATCCACAAATTA  
AAGTGAATAA  
>Cluster\_59481  
ATGGAACAAAAATTTAACTATCGGCGAACGCATCAGGTATCGTCGGAAAACTCAAACACACCCAAAGGTTCTTTGC  
TAAAGCCCTGAAATCTCCCATGTGTCTGTATCACAATGGGAACGGGGTGATAGTGAACCTACAGGGAAGAACCTTTTTG  
CCCTCAGTAAAGTATTGCAATGCTCACCAACATGGATTCTATTTGGCCGATGAAGACAAGCAACCAACACCCTGTTGAG  
AAGCCAGTTGCCCTTATCCCCAAAGAACTAGAGCTCCTTGAGCTGTTTAAATGCCTGCCAGAATCAGAACAGGATACCCA  
GCTCGCCGAAATGCGAGCTCGAGTAAAAAATCAATAAACTTTGAAGAAATTAATAAAGCCGCTAGCGGACAAATA  
AAAGATAA  
>Cluster\_2133  
ATGAAAATGATTGAAGTTGTTGCCGCCATCATTGAACGTGATGGCAAATTTTACTCGCGCAACGCCCGCCAGAGCGA  
TCAGCGGGGATTTGGGAGTTTGGCCGGTAAAGTCCGAGCTGGATGAAAGCCAGCAGGCACTGGTGCCTGAGTTAA  
ACGAAGAATTTGGGCATCGAAGCAACTGTGGTGGTATGTTGCCAGCCATCAGCGAGAAGTTTCCGGCCGATTTATCCAT  
CTTCATGCTGGCAGTCCGACTTCCACGGGACCTTCCAGGCACATGAACATCAGGCGCTGGTCTGGTCTCACCTGA  
AGAGGCGCTGCAATATCCGCTGGCCCTGCTGACATTCACTATATAGAGGCGTTTATGGCTTTACGCGCCGACAGCAG  
CGGATTAG  
>Cluster\_39737  
ATGCGTACCGTTTTGAACATTCTGAACTTTGTGCTTGGCGGATTTGCCACCACCTGCGGCTGGCTGTTGGCGACTCTGGT  
CAGTATTTGCTGATTTTTACTTACCCTGACAGGATCCTGCTGGGAGATCACTAAACTGCTCTGTTGCCCTTATGGCA  
ATGAAGCTATTATGTCGATGAACTGAACCCGGCTGGCAAAAATGTGCTGCTAAATACTGGCGGTACGGTATTGAATATT  
TTCTGGCTGATTTTCTTTGGCTGGTGGTTATGCCTGATGCATGCAACGGGCATCGCAAAATGATTTCCATCATTGG  
CATTCCTGCTGGCATTGGCAACTTAAATTTGCGCTATTGCACTATGGCCGGTGGTGGTGGTGGTGGTGGTGGTGGTGG  
CAGCGCAAGCTGCGGCTGAAGCCAAATGCAGCTCGTCTTTGAATAA  
>Cluster\_60952  
ATGAGGATCATCGATAAATTAGAACAGTTCGCGCAGATTTACGCTCTGGCAAGAAGTGGCAACGCTGCGTTGAAGCGAT  
TGAAAATATCGACAACATTCAGCCTGGCGTGGCCACTCCATCGGTGACTCATGACTTACCGCGTGGAGACAGACTCCG  
CGACCGATGCGCTATTTACCGGGCATCGACGCTATTTTGAAGTGCATTTACTACCTGCAAGGGCAGCAAAAATGAAATAT  
GCGCCGAAAGACATTCAGGTTAGTGGAAATATATCGTGTGAACTGACCGTGAATATTTAAAGGCTGCGGAGAAAC  
CGTTGAGGTCACGAAGGCAAAATCGTTATTTGCGATATCCATGAAGCGTATCGGTTTTATCTGCAATAACCGGCTAAAA  
AAGTGGTTCTCAAAGTCAACATCGAAGATGGTTATTTCCATAACAATAA  
>Cluster\_43383  
ATGAAAAACGCAACGTTCTACCTTCTGGACAATGACACCACCGTTCGATGGCTTAAAGCGCGTTGAGCAGTTGGTGTGTA  
AATTGCCGAGAACGTTGGCGCAGTGGTAAAGCGGTACTCATCGCTGTGAAGATGAAAAGCAGGCTTACCGACTGGATG  
AAGCCCTGTGGGCGGCTCCGGCAGAAAGCTTTGTTCCGCATAATTTAGCGGGAGAAGGACCGCGCGGCTGCGCCGGT  
GAGATCGCTGGCCGCAAAAGCGCAGCAGCAGCCCGCGGATATTTGATTTAGTCTGCGAACAAGCTTTGCGATTTTTC  
CACCGCTTTCACAGAAAGTGGTAGACTTCGTTCTTATGAAAGATTTCTGAAACACTGGCGCGGACGCTATAAAGCCT  
ACCGCGTGGCTGGTTCAACCTGAATACGGCAACCTGGAAATAA  
>Cluster\_20866

ATGTCAAGGCTGATGACTGTGCTGGTTGTGTTGTTATCACTGGCGGTGGCCGGTCTGTTTCTGGTGAAACATAAAAAATGC  
CAGCTGCGCCGCTCGCTGGACAGGGCGAACAGTGTGCGCAGTGAAACAGCAGACGACCATCACCATGCTGAAAAATCAGC  
TTCATGTTGCGCTCACACAGGGCAGACAAAAACGAGCTGGCGCAGGTGGCTCTGCGTCAGGAACGGAGAAAGCCGCGAAG  
CGTGAAGCACAGCCGAGAAAAACCATCACAGAGTTACTTAATGAAAAAGAAATTTTCGCCGCTGGTACGGCGCTGACCT  
GCCTGATGCTGTGGCGCGTTGCCACGCGCCCGCTGCACCCAGCCAGTATTGTCCACAACGCTGCCCGAAAGTG  
AGTCTTTGCCCGATGCCGGGCGAGACCCGGAGACGAACGGTGA  
>Cluster\_25060  
ATGGTCTTTGCAATGAGCAAACTAATCTGGTCGCGTTCGCGATCCCATCTGAATGCGAGGATGAGTTTAATCGGTCTGT  
TCTCGCTTCTGGAGGAGATAAAACCTCCTGGCTTGTGATGCGATTGCGATGAAAGCTGGGGCAGCCGGAAGTCTATTG  
ATTACGAATGCTTGGGCTGGTGGAGCGCATGGAAAAAGCCGCTGCGTCTGCTTATTGCCGGAAGCCGAAACATCCACCA  
AAACCATATAACGAAACGCGAGTTATAAAGATCATTGCCGATACCATCAACAGGGATTTGATAATGGCGGTGATAGC  
TGAACGGATCAATGAAGCAGGCTATCAAAACAAAGCTGGTAAAGCGTGGGATAAAGATATTTACAGCGGTGGAAGCGTC  
AGGGAAGCAATGCTGAAAAAGCTAAAAGCAGTATTGATTGTAAGGTCAACGGTATAA  
>Cluster\_42696  
ATGATGAAAAAATCGACGTTAAGATTCGACCCGCGCTGGGAAGGAATTTCCGCTCCCGACTTATGCCACCTCTGG  
CTCTGCCGACTTACCTGCGTCTGTCTGACGACGCGGTAGAACTGGCTCCGGGTGACACTACGCTGGTTCGGACCG  
GGCTGGCGATTATGCGCATCTTCTACTGGCGGCAATGATGCTACCGCGTCCGGATTGGGACATAAGCAGCGTATC  
GTGCTTGGTAACCTGGTAGGATTGATCGATTCTGACTATCAGGCGCAGTTGATGATTTCCGCTGGAACCGTGGTCAGGA  
CAGCTTACCATTCAACCTGGCGAACGCATCGCCAGATGATTTTGTTCGGTAGTACAGGCTGAATTTAATCTGGTGG  
AAGATTTGACGCCACCGACCGCGGTGAAGCGGCTTTGGTCACTCTGGTCTGATGTA  
>Cluster\_44694  
ATGCAGAGGCAGAGAGGCTTTCTCCTCTGGTGGCGTTGGCTAATGAAATGTATATATCCGGGAATAAAAAACACGAAA  
ATGTGCGATTAAGATAAAAAATGCGCTTATGGCAAGTATGGAATGTGATATCGGTCTGGGGCCGCGGATTTGGTAAAGGCT  
TCTGTTGGCCCGCCATTGAGGTATCGTATTACGGTAATGTAAGATCGGTGAGAAATGATATATAGCGGACAGACCGG  
ACCATTTGGCGAAAAGGAATCTGACAGCAGAGAAAAATTAATTTGTTATTGGTGAATAATGTCGATGATAGGTGCCCATACGTG  
TATTATCGGGCTTAACGTAATAATAGGTAGTAATAAAAAATGGAGCGATGCTTTTATTATGGAAGATGTTCCGGATA  
ACTGTACTTATGTTACCAGGAAAGAACTTAGGGTAATAATGCGTCAACTATGA  
>Cluster\_24340  
ATGCACGCAGATACCGCGACCCGCCAGCACTGGATGTCCGTGCTGGCGCAGCCAAACCGGCTGAACTGGCAGCCCGCT  
GAAGGCGCTGAACATCAACGCGGATTATGAGGTGATCCGCGCCGCTGAAACTGGCCTGGTGCAGATTCAGGCGGAATGG  
CGGCACCGCGCAACGCTTTTTGCTGGCGACGCCAGCTCACCCGCGCCGCTGCGTCTGACTGACGGCACACTCGGC  
TATAGCTGGGACTTGGGGCGCGAACAACAGCACCCGGAACGCTGCGCGCTGATTGACCGCTGATGACGCGCTGATGACGCAAAACCGCA  
TTTTCAAACCTTATCAGAAACCTTATTGCCCCGCTGGACGCTAACCGTATGGCAGCATTGCCGCGCTCAGGCCGAAG  
TGAACGCCAGCCGGTGCAGCTTCTTTACGATGGTTCGCGGAGACAACGCATGA  
>Cluster\_27026  
ATGAAAAAGATAAAAAACCGAATCGATAGCTCTTTTTGCTCTTATCTGGAGATGTGGATCTGGCGAAACATCTGGCGGA  
AATATTGCCAATAACCTGTTTGTGGTGGTGGACTGGCAGCAAGATTTCCAGCCTTTTGACGGTGGGCTGTGCAATCGT  
TATCAGATGCGTATAGCGATTATTCAGTCTGCTATTGATAGCAGCTGAAAGCGAGATATCCGTACCAGAATGCTCGCT  
CATTTGAAAGAACGACGGTAATTTGATGTCAGAACCAATGCCCCCTTGGTCTGACTGGTCCGGCTGGTGGGGCTGTAGC  
ATTAATCCATTATCTGAATGAAATCTGTCTATTCCAGAAAAACCGCTGTCAATGACGCATTTTGTGCGGACGTTAACACGAG  
GAAGTCTGGCTATTCGCAATGCATCTCTTTTCGTAA  
>Cluster\_60884  
ATGGCAATGCATCTTAACGAAAACCTCGAGATAACCGCGAAATGCATGATATCAACGTGACGCGGTTTATCGACGTGAT  
GTTGGTCTGCTGATTATCTTTATGGTGGCGGCACCGTTAGCGACGGTAGATGTAAGGTGAACTGCGCTGCTTACCA  
GCACGCGCGAGCCGCGCCGGAACCGGTTTATCTGTCGGTGAAGGAGACAACTCGATGTTATCGGTAACGATCCG  
GTCACCGATGAAACAATGATTACGGCGTTGAATGCGTTAACCGAAGGCAAGAAAGACACCACCATCTTCTTCCGAGCGGA  
CAAAACCGTGCATTCAGGACGTTGATGAAGGTAATGGATACGCTGCATCAGGCGGGTTACCTGAAGATAGGTCTGGTCC  
GCGAAGAAACCGCAAGCGAAGTAA  
>Cluster\_41612  
ATGGAACCTGTGGCTGACGGTGAACGGTAAACGCACCTGCGCCAGCGCACAACTGGATCCGCTGACCCGCGCGGTTGGTGA  
TTCCCTGTTTACCTGGCGCGGGCGGAGCCTGATGACAACGCCGACGCTCCCGATGGGATGGTGGGGGATACCTGGCCTG  
CGGTACAGAATGACCGTTACGGCTCCCGACTGTGGTCTTACGCGCAGCAAACTGACCAATCAGCTGGTGCAGACGGTA  
AGGGGGTATATCCGCAATGCGCTGCAATGGATGATTGATGACGCGCTGGTGTCCCGTATTGATCTGGATATCCGCCGAC  
CGGATTAATGAACTGGGTAACGATATCACTCTCTGCGCTGCTGACGGACCGGTAATGATTTCTTTGATGATCTGTGGA  
GTGCGATAACGCATGGCGGACAGTGA  
>Cluster\_56135  
ATGAACACACTACGTTATTTGATTTTGGAGCTGCCGCCCGCTTTTGTATTAAATGCCCCGATCGCCGTGGCTTTAAT  
TTTCATTTATTTGGTTTTCCAAAATGATGGGCTTTGACGGTACGGTCCAATATATGGCTCTGTTGGCGCGCAATGC  
CGATGCTGCGACGGATTTATGCGGTAGTTATGGAAGTGCAGCGCGATATTAATCGTCTGGCTTTTTCACCCGCTCCG  
CTGGCGGTGCTGTTATTTCTACACGCTGGGTACGGCGGTGATGGTACCATTACTGGGATATGACCGCGCATGCGGT  
TGGGCCAAATATGATTAATTTCTGGAAGAAATGTCAGTATCGCTGGCGGCTTCTTGCTATTGGCAATTACCGGGCCGGGG  
CAATTTCTCTGATCGCGGTTAG  
>Cluster\_6734  
ATGAGTAGAAATAACGAAACAAGCGGCTTGAACCTGGTGTGCTGGGCATATTGCTTCTGTCTGGCAGTTGTTGCCTG  
GCTAATGAAAACCTTCGATGTTGAATGGCAACAGCTGGAACCTGCGCCTAGCCTGATAGTCTGGCTGCTTGTGTTG  
GGCGGGGATCTTTTTCGGGATCAAAAATGGAAACAGGCTTTGTCGCTGGGGTCTCCACTGGCGATTGCCCTTCTGAT  
CCGGTATTCAAACAATCTTAAGGAAGCTGCCGGAGTACGTGAAACGGGTGGATTTGCTGATGATATGGTTTCGTG  
GTATGGAACCTGGCTGGGGAATGTCGTTGATGTTTTCGGAATCTTATCATCGGATACGGGCTGCTTTATTGGTGGCACA  
GAAGAAATTCATATCACTGGTAA  
>Cluster\_25972  
ATGTCGGTAATATCTATACGCTGTACAAATCCACTGTGAAATGTTGGAAAGTATCGGGGCATTGAAATCAGTGGGGT  
AGTGTCTCAGTCGAAATAAGCAAGGTTGAATCAAGGGCAACATTACTTACTCTTCTGGACCTTGTCTTACATGAGCACC  
GAAAGAAATTCGGCACCCTCCTATAATCAGTTGAATGGGAAAAAGGCTCTGGTTACCTTATTCATGATGAGCATCACTGG  
ATGCCAAAACAGATTAATGAGATGAAATTTGATGAACTTCTTCTTCAATTCAGGATGAACTCACACTTGATAAAAATAG  
CGTAAACCGCCAGAAATTTTATGATTTACGAGACTGGAGATCACAAATTCATCACTTTGATGATTTGACGAAAATGAAT  
GGGATCTTAATTTGCTGCAACAATATCTAAAGTAA  
>Cluster\_49109  
ATGCGCATAAATACCGGTAACCGGTTATTTCTGCTGATTTTGGCATGTTTATTTTGGCTGGAGCATAACGCAATATGG  
AGGCATATCGCAGTATGGCGCTGGATTTATGCTTGCATCATCAGTGGATTGTTGTTGTTTTAGCGGCTATTGATGTAG

CGATAGATATTAACACCCGGCACCGTAACAAAGTTTCTTTAACGCTTGATGAAGTGAAAGCACTTTACTGGTTATTACA  
GTGGTACTGCTGTTTGTATTATTGTTAGATATTCTCGGTTTTGTAATTTGCTCATTTTTGTTGCTTTTTATTTAATGAA  
AATACGAGGTGTCAGACTTTTGCATTCCGTTATCGTTTCGATATCGGCATCTCTTATTATCTGGTTTATTTTTGCCAGAG  
TGTGTTGGTCGCTTTCTGAAGGAATCTGTTTAA  
>Cluster\_5995  
ATGAAGGATGGTGATATGCCCCAGATCATCAAAGAAATATGTGCAGAGCGCCCTGATATAGGGGCGCTAGCTTGTCTATTT  
GTATGATGAAATTTGGTGTGAGAGCAAAGAAATCGCCTAATATAGCTCTGAGTTATAAAGATTTATTTAGTATCGTTAATG  
GTTATAAAGGATGTATACAACCTGAAGCATATGAGCAGGTTGTGTACCCAGCTATACAATTTCTTTGTAGTCCAAAGGTT  
GAGTTTTTAAACCTCAATTTATTGGTTTATGTATGATTTTCATGATCCTATTGAGCTTGAGTTAGAAGATGTTATAGAGGC  
TGAAATTAATCAATCTTTAGTAAACCCATTTACAGGGGAGATTATGTATGACTATAAGTCTTTCGTCTTTCTTTTAA  
CATTAGATGAATCTAAATTAAGGATATTTGCTCTGA  
>Cluster\_48642  
ATGAAACCAGCAAAAATTTGTTTTATTAGAACCGCAATTTTCCGGTTATTCGGGAATGCTGTGTGGCGTTCAGTTCGAGAA  
CGGGGTATCCGTAGCGGAGTTGCCTTTTATCGATCAGCAGAGGATTTGTGCTTCAATGCGAGCGTCAACAGTAGAGGGCA  
AAAATGTTTCTCCGTCTGCGGCATACAGTGATCGTGGTGAATTTGACAGCAGACCTGATTTACCGAGCCAGCAGCGCCTGAC  
ATTTGTCCAATGAAACGTGGGACACCAGATGAACCGGCCAAACAGATCCAGACTTTCACACGAGAAGAGCTGGAGTCAAT  
TGCAGACAACGAAGGTATTGCGCGTTCACGAGTTATTGGTAATCAGGTTGGTGTCAAAGCGAAAGGAATTTGTCGAAATGA  
TTGACGGCATCTGAAAGCACAGGCGGTGAGTAA  
>Cluster\_14986  
ATGAGAACAGTAGCGAGAAGATCGATACAGACGATTGAGCGTCGGACTCAACTCGTCAGTCTTTTGTGACTCAAACAC  
AGCAAACGAGTTCTTCGTGAGAAGACTGAGTGTCTGCTCCCGGCACGTCAGCTGTTTATTGTGACATTTGAACAATG  
AGGTTCTGTGACGGTGTGACGTGATCCGTTTCGCTGAGATCGCCATGAACAAGAAAATTTGCGCTATGTTGTGAAGCCAGCA  
GATCAGTATCTCAGTATGTAAGCAGTAATCTGCTGAAGAAAATTTGAAGCGGCAATTTGCTCTATACATCAGAGAAGACTA  
CAGGAAATTAACCTACCATTAA  
>Cluster\_34146  
ATGAAAACCTTTACCTGCAACAACCTCAGCGGGCGGTGAAGCCCTGCCTGTACCCCGTGGCTGTCTGGCAATGTTACTGAC  
ACGCTGTGTTGAACAGCACTATGGTCTGACAATAAACGACAGCCATTCTGCAATGAGGCTGTGATTAAGGAACACATCG  
ATGCCGGTATCACCTAGCCGATGCCGTGAATTTCTGTGAGAAAATACGAGCTGGTTCGTAATCAGCAGGAAGGAAATTT  
AGCTGGCAGGAACAATCTCCTTATCTCCGGGCTGCAGACATTTGCGAGCGCGCAGGCAACTGGCTTGTGCGGCAAG  
CCGTAACAACGTAGTACGATGA  
>Cluster\_22254  
ATGACCATTAATAAATAAGATGTTGCTGGGTGCGCTTTTCTGTTTACCAGTGCAGCCCTGGGCCACACAGCCACCGCGGG  
TTCGACCAATACCTCGGGAATTTCTAAGTATGAGTTAAGCAGTTTCATTGCTGACTTTAAGCATTTCAAACAGGCGGATA  
CCGTCCAGAGATGTACCCACCCGATGAGTACAACATTAAGCAGTGGCAGTTACGTAACCTGCCCGCGCTGATGCCGGG  
ACGCACTGGACCTATATGGGTGGCGCTACGTGTTGATCAGCGACGCCGACGGTAAAAATCATTAAAGCCTACGACGGTGA  
GATTTTTTATCATCGCTAA  
>Cluster\_56147  
ATGAAAAGATGATGCGATTATAAAAACCTTCAAGCTGGACGATGTCGCGAAGCACTGGCCGAAGTCCGTTATACC  
CATGACGGTGTGACCGAAGTGAAGGCTTTGGTTCGCCAGAAGGCCATACCGAGCTGTACCGCGCGGAGTATATGTTGG  
ATTTTCTGCCGAAAGTGAATAAGATTTGAGATTTGCTGACCGGACGACATTTGTCGATACCTGTGTCGATACCATTTTCGCACG  
GCGCAAACCGGCAAATTCGGTGACGGTAAAATCTTCGCTTTTACGCTGGCAGGGTCAATTCGATCCGTACCGGTGAAGA  
GGACGACGCGCAATTTAA  
>Cluster\_14959  
ATGACAGCAACCAAAAATGTGAAGTGCAGAAAATGATTATTCCGGCATCCGTTGATCACAATGCCGCCATGATTGAAGA  
ATTGCGCGCAGATCCTGATTATGCAAACGCTTATCTTGTGTAATGCCCTGGAAGAAATAAACGAGCCTGGTGGTTAGGTG  
GTTTTCTTGTGCGCTACGTCAGGTAATCGAGGCGGAGGGGGGATTTCCGAAGCTGCCAGGAAATCTGGCCTTGCCCGT  
CAGAGTATTTACCGGCATTTATCCCCAACCCGACCATCACAACGCTTGCACAACCTTACATCCGTTAGCCGGATT  
ACAGTTCCTCTCAGTAAATCCAGCCACTAA  
>Cluster\_218  
ATGCATGAGTTTTTTATCGTTCAAACCTGATAAAAACCTGAGAAGACTTGTGTTAATCACCCTAAGAAAAAGTAGT  
AAAGGCGGTTTTGTTAATAGGAAGATTTTCTGGGTTGAGCCTGAGTTATTACAAACCGCCCTGATTTTTTTAAACAAG  
GAAGCGTTTTTAAAGATGCAGAAATCGTATAGAAATAGAAGACCTTAGGATGAGATGTCAGAAATGTCAGCAAGAATTT  
TCAAAGAGAAAATGGGATCTTACCTGTCTTTTTGTGGCTTTTTGAAACTGAGGTTCTTTACAGGAGAAGAGATGTTACT  
CAAAGCTTAGAATGGTTCGATGAGGATTAG  
>Cluster\_11232  
ATGACGGAGCGGATTTGTATCTCATCTGCGCATCTTGCAGCGGGCAGGTGTACCCGTATGTGGTCCCCCTGCTGGA  
TGGGAGGCGCTCGGTGGCGCTTCCGTGGTGGTTTTACGCTGATTTTCATCGGTGCTGCGGACGCTGATGGGCGGGCAGG  
CGGAGTCTCAGTGTGCGTGCAGATAGACGTTTATGCCGGGACTGTGACGAGCGCGTGCAGATACGTCAGGACGCGCTG  
GAAGCCATAATGCTGCTGCGCCCGGATCCGTCAGTGAATATGACGACATATATTCGGGAAAACCGCTGTTACCGTGAAC  
CCTGGAGTTTCAGGTCACGGTGTGA  
>Cluster\_26747  
ATGATGACTATCGTTTCGTATCGATGCTGAAGCCCGCTGGTCTGATGTGGTGTATCCACAACAACACGCTCTACTACACTGG  
TGTACCGGAAAACCTCGACGCGGATGCTTTTGTAGCAAACCGCCAACTCTGGCGCAGATTGACGCGCTGCTGGAAAAAC  
AGGGCAGCAATAAATCGAGCATTCTGGATGCCACCATTCTTCTGGCCGATAAAAACGACTTCCGCGCGATGAATAAAGCC  
TGGGATGCCTGGGTTGTGCGGGTTCATGCGCGGTTGCGCTGCACGGTACAAGCGGGTTTGTATGAACCCGAAGTATAAAGT  
TGAATTAAGATTGTTGGCTGTCAGTGTAA  
>Cluster\_47187  
ATGCCCGCTAATGCTCGCTCTCACGCTGTAAGTACCACCTGAATCAAAGGTCACGATACGCGGACAAACAACCTATCCCCG  
GCCAGTCCGTTGAGGCTTTAAACCTGAAGCCAGGCCAGGACGATTCATTACGAAATTTCTGCTGGTGGGCAAGTCTTTA  
TGTGCCGACTGGGAGATGAACAGGAGATCATATGATGATGATTTTTCGCTTTCTGGATGCAGATATCCAGAACAAC  
CCGCAAAAACCTCGTCCATTTCAACATTTCAACAAGGAAAGAACTTGTGCTGGCATGGACGTCACATTTGATGATGAGAT  
TGGCGACGACGAATAA  
>Cluster\_26887  
GTGAGCACCATTTCAAACAGGGATCACAGAGCAGGTTATTGCGTGGCTCTTTGACCACCTGCCAACGGTGTATGCAGTAGG  
CGCGGCGGTGAGCATTTCCGCGCTGATGAGTCTTTATGACGGACGAACACTGGTTCAGACCGTACCGGATCGCTGGCGT  
GCGGCTTTCTTGGCATGGCCGTGGCCGGTCTGTTGCGCTTCTTCCGGTTTCTTGAAGATGCCGTGACGTTTATCGGCGCA  
TCAATCGGTTTTATGGGCGCAGAAAAGCACGCCGACAAGTTATTGCGGCTTTAATCGCAGGTTGAAGGAGAAGGACGA  
ATGA  
>Cluster\_22667

ATGTCGATTACACTGAGCGACAGTGCAGCAGCGGAGTAAATACCTTTCTGGCTAACCGCGTAAAGGGTTTGGCCTGCG  
TCTGGCGGTGAGAACCTCCGGGTGTTACAGTATGGCTTATGTACTGGAATTTGTTGACGAACCGACGCGGAAGACATCG  
TGTTTGAAGACAAAGCGGTGAAAGTCTGGTTCGATGGCAAAGCCTGCAATTTCTGGACGGTACGCGCTGGACTTCGTC  
AAAGAAGGCTTAAACGAAGGGTTAAATTCACCAACCCGAACGTCAAAGATGAGTGTGGTTCGCGGCAAAGCTTCCACGT  
TTGA  
>Cluster\_56132  
ATGAATCGAATTTATGCGTGTCCCGTTGCGGATGTGCCGGAGGGTGGAGCTCTCCGGATCGATACCTCGCCCGTCATCGC  
CCTGTTCAACGTTGGCGGCGAGTTTATGCCATTAACGATCGTTGCAGCCATGGTAATGCGTCAATGTGAGAAGGGTATC  
TGGAAAGATGACGCCACGGTGGAGTGCCTGACACCGCCAGTTTTTCCTGAAAACGGGAAAGCGTTATGCTGCCCC  
GCCACCGATCCGCTACCACTTATCCAGTACACGTTGAAGGTGGTGACATTTTCATCGACTTACCGGAGGCGCAGCCATG  
A  
>Cluster\_6273  
ATGACAAAACGAAGTGAAGTAATACGCGCAGGCGGGTATCAGTCCGCTGTCTGCTGACGGCAGAAGAAGACCAGGA  
AATCAGAAAAAGGGTGTGATGCGGCAAGACCGTTTCTGGTTTTTACGGGCGGCAGCTCTCGGTAAGAAAGTAACT  
CACTGACTGATGACAGGGTGCCTTAAAGAAGTATGCGCCTGGGACGTTGCAGAAAAACTCTTATCGACGGCAAGCGT  
GTCGGGGACAGGGAGTATGCGGAGGTGCTGATAGCTATTACGGAGTATCACGGGCCCCGTTATCCAGGCTTATGGCAGA  
TTAG  
>Cluster\_54617  
ATGCTGATCTTCGAAGGTAAGAGATAGAAAACGATACCGAAGGCTATCTCAAAGAAAGCAGCCAGTGGAGTGAGCCGCT  
GGCTGTGGTGTGACAGAAACGAAGGATTTCCGCTGCACCGAACACTGGGAAGTGGTGGCTTTTGTGCGTGATTTCT  
ATCTGGAAATCAATACTTCTCCGCGATTCGTAATGCTGGTAAAACGATGGCGAATAAATTTGGCGAAGAAAAAGGTAAC  
AGCCGCTATTTATACCGACTGTTTCCGAAAGTCCGGCTAAGCAAGCCACCAAATTTGCTGGCTGCCAAAACCGGTAA  
ATGTAATTTAA  
>Cluster\_6262  
ATGTCTGTCACAATTCAGGGAAATACCTCAACCGTTATTTCAAACAACCTCCGCCCCGGAAGGAACATCAGAAATAGCCAA  
AATCACAAGACAAATTCAGGTGCTGACTGAAAAGCTTGGGAAATCTCATCGGAAGAGGGGATGACGACACAGCAGAAAA  
AAGAAATGGCTGCATTGGTACAGAAGCAAAATGAAAGCCTCTGGGCTCAACTGGAGCAGTTGTTAAGGCAGCAGGCAGAG  
AAAAAGAAATGAAGACGCGACAGTTCAGCTGATAAAAAAGAAGAGAAAAAGACGATACAAATACCGCTGGCACCATTGA  
TATTTACGCTAA  
>Cluster\_63683  
ATGAAGAAAACATTACTTCTTTGTGCGTTTTCTGTTGGGCTGGTAAGCAGCAATGTAATGGCATTGACTCTGGATGAAGC  
CAGAACTCAGGGCGGGTAGGTGAAACATTTTATGGTTATCTGGTTGCGCTGAAAACGGATGCTGAAAACAGAGAAATTAG  
TAACCGACATTAATGCCGAACGTAAGCAGGTTACCAACAACCTGGCAAAGCAAAAATATGTGCTGTAGATGATATCGCG  
AAACTCGCCGGGCAAAAGCTCGTAGCTCGGGCCAAACCGGGGAATATGTACAAGGGATAAACGGTAAATGGGTGCGAAA  
ATTTTAA  
>Cluster\_40136  
ATGGATATGGATCTAAACAATCGCCTGACTGAAGATGAAACGCTTGAGCAGGCCACGATATTTTCTCGAATGGCTGC  
CGACAATCTCGATCCAGCTGATGTTCTGCTGTTCAATCTTCAGTTTGAAGAGCGCGGCGCGGGAGTTATTCGATCCCG  
CGGAAGACTGGCAGGAACATGTTGATTTGATTTGAACCGGACTTTTTGCGGAAGTGGTGTATGGTCTGGCGGACAGT  
GAAGATGGTGAATAACAACGATGTTTTCGCGCGCATTTCTGTATGCCGCAAAAAGATACAAAACCTTGGCCATATCATCTG  
GCGGAATAA  
>Cluster\_11074  
ATGAACAATTACCAATGCAAAATATGGTTGATAACGACACCGCTATGATGGTGCAGGCTTTCCTGATTCCGGTGTATC  
AATTGACCTTGATAAATTAATAAGCTAATGGCTGAAAACCTCAGAAGCAATGAAAGATTTTATTCAGGAAATGAAAACCTG  
GTGACCCAGCTTTTATGTTTCTGTTACCGACTCAAACATGAAGCGCCTTATTATGAGGAACTAATCGATACAGCGTT  
AGCCCTGAAAAATATCTCAAGGCAGCTATAGCAATTTTGTACGCTGACAAATTTTGGTGGACGGATTGGAAGGTGGTGC  
ATTAATGGAGTTGGTATATCTGTTTTGTATTGGTTGGTATGATTGCAGGTGCGCTCTATTAAGTATAG  
>Cluster\_13477  
ATGAAAAAGATATTCGAAACGCAACGTTGCCCGAGCCGCAATCGGCCCTTATGTTCAGGGCGTTGATTTAGGCAGCATGGT  
CTTACCTCCGGGCAAAATCCGGTTTGCCTCGAGACCGGTGAGATCCCGGCTGATGTGCAAGATCAGGCGGTTAAGCC  
TCGAAAACGCTCAAAGCGATCGTGGTTGCTGCGCGGCTGAGCCTGGGCGATATCATCAAGATGACCGTGTTCATACCCGAT  
CTGAATGATTTTGCACCATCAATGAAGTCTATAAGCAGTTCTTCGATGAGCATCAGGCGACCTACCCGACCCGGAGCTG  
TGTGCAGGTTGCGGTTTTGCCGAAAGATGTGAAGCTGGAATTAAGCTATCGCAGTACGTAGTGCCTAA  
>Cluster\_47159  
ATGCAAAATACCTCGCATGTCGCTTCGCCAGCTAGCCTGGTCCGGCACTGTTTTACTTCTGGTCCGCACGCTGTTGCTGGC  
CTGGTCCGCGGTTCCGCCAGCAAGAGTCTACGCTGGCGATTCGTGCCGTTTCATCAAGGCACAACGATGCCAGACGGTTTTT  
CGATCTGGCATCACCTTGACGCTCATGGCATTCCTTTCAAAGTATCACCCCAAAAACGACACTCTGTTAATTAATTT  
GACTCCAGCGACAGAGCGCCGCAAAAGCGTCTCGACAGAACATGCCCCATGGCTACATCATTTGCGCAGCAGGA  
CAATAACAGTCAAGCTATGCAAGTGGCTGACCCGGTTACGGGATAACTCTCATCGCTTCGGATAA  
>Cluster\_11876  
ATGTCTGTCACAATTCAGGGAAATACCTCAACCGTTATTTCAAACAACCTCCGCCCCGGAAGGAACATCAGAAATAGCCAA  
AATCACAAGACAAATTCAGGTGCTGACTGAAAAGCTTGGGAAAATCTCATCGGAAGAGGGGATGACGACACAGCAGAAAA  
AAGAAATGGCTGCATTGGTACAGAAGCAAAATGAAAGCCTCAGGGCTCAACTGGAGCAGTTGTTAAGGCTGAACCGCCCC  
GGTTTTCTGGAGAGTATTTTATCTGTGAATCAGGCTGCCAGATCATGTTTCCGATGGAAGCATAAATAGCTTTTTCT  
GCTTCTGCCGGAGGAGTATGGCCAGCCTTCCAGCAATCGTCGATTTGTTATACCAGTCCACCACGTGA  
>Cluster\_9846  
ATGTGTGAAGGATATGTTGAAAAACCACTCTACTTGTAAATCGCCGAATGGATGATGGCTGAAAAACGGTGGGTGATAGC  
AAGAGAGATCTCTATTCAATTCGATATTGAACACAGCAAGCGGTTAATACCTGACTTATATCTGTGCGAAGTCCGAC  
AAATAAGCTGCGAAGTAAAGATGATCCCTAATAAGCTGGAAGGACGGGATGCCAGTCCAGCGACTGGTAAAGTGGTCT  
GATATCGATGAGCAAAATTTACGCGCGCCTGCGCAATAACAGCCGGGATAAATAGTCCGCGTAAGAAAGACGCGCGTAT  
TCCTGCCGTTCCGCTCACGGAACCTAACCGGAGCAGAAGTGGCAGATGATGTTGTCAAAGAGTATGCGTCTGTTAA  
>Cluster\_20790  
ATGACCAGAACAAGACAAAATGCTCTCCACCTAGGACAATTCGACGGAATCACCATCTACACCTCCCAAGAACTTCTAGA  
GGAAGTCAAAGGACACTTTTCTCATAAATATTTGCCTCTGAGCAAAAGTCTTTGTTTTCTGAAAAAGCACCAGATAAGC  
TATCCTTAGTGTGATATGTAGAAAAAGCAGAGAGGTAGCTAAAATATTTAGGGATTTATCAATCGAAATGACATA  
GAAATGAAATGATATGTTCCACACTTGACAACAACCAAGGTGTAACACGAGTAAAACTCAGAAAAAGCAGATGATATTGA  
TAAGTGCATGTTATTACTAGACAAATGCGCAGCAATATCTATCAATAACAAAACCTAAGCAGGAGTCCGAAAGAGAAATAA  
>Cluster\_7866  
ATGGTTATAATGATCGCTTATCTCGATGAACAAAACCGAATTTAATAAGAAAATATATATGTTGATTTACTTACTGT

TAATGCTGCTGTCTTGTCTGAAATTTGCACAACAGATGCAGGCAAGTGAAGGATAAAAACGAGTATTCGTGCGGACGAGC  
TTTCAGAAATCGCTGAAAGATAAAATTTGCTGGATATGATAATAGCATTACACCTGAATTTTGTATTAACCATGGGAAGGTT  
ATAGTCTATACAACCTTATCATTTTAAATATAGCCGTTATAAAGACAGCTCATTGTTCAACCTTTCAGACGTGCCGAATAG  
CGACAGATTAGCTTGTTCATAAATGATAATTCGGTATTCGATATTAATCAAAACATTCACAAAACGGGATAG  
>Cluster\_38630  
ATGATGACAGAAAACAAAAGAATCAGGAATTCAAAATCAGAAAAATTAACCGGAATATTGAGCGCAGTTGTGATAACGC  
CATAAAAATCTTCGAGCTTTTGTGGTTTCTTGTGGCGGATTCGCTTTATGGCACGGTATGCATGCTTTTTTCAGCG  
CCGGTATTGATTCGTGGAAAGCTGACCCGGAATTAATAAATTTGATTTATATGTGGAACATCCTGATGTATGCCATTCCG  
TATACGTTATATGCGCTTCGACCCGGGTTCTTGTTCACATCTTTCTGTCCCAATGTACGAATTAATATTCGGAATAT  
CATGATATTCAGCTGAAACGCCGTATGCGCCGGGAGAACACATTAAGGGAGGGCAGCAATAATGCTTCGCATTAA  
>Cluster\_33899  
ATGGCTGATGCGTCAAACCTTAGAACTAAAAGAACCCTAGTGGGTTGGGGGTACCCCGGGCCCGACGAAGTGGCTAC  
CAGCTTGAATGCGCTGAGATAGCTCCGGCTGTGCTGCCACTGATGTTTCAGAGACAACAGGCAGACTCATCGCCAGTGC  
ACCATGAGCCTGTGGTTACGCAACAGTGCAGGATATATACCCCGCGGATGGCCGTTCTGCCAGAAAACAAACAGG  
ACGCTGGCATTTCGCAACAGTGTACACCTGCTTTCGACCAAGAGATCCGGGATATCGCAGAGCGTGAGGGTTGAAACT  
GGTGAAGTTCGGAAAAAGCAGTTGAGGCATAAAGGAAAAACAGGGCTATTAA  
>Cluster\_16825  
ATGGCTCGCTAAAACGTGGTGTATTGACCGGCACGTCACAAGAAAATTTTGAACAAGCTAAAGGCTACTACGGTGC  
GCGTTCCTCCGCTATACCGGTTGCCCTTCCAGGCTGTTATCAAAGCTGGTCAGTATGCTTACCGCGACCCTCGTCAACGTA  
AGCGTCAGTTCGCTCAACTGTGGATTGCGCGTATCAACGCAGCAGCAGTGCAGAACGGTATTTCTTACAGCAAATTCATC  
AATGGCTGAAAAAAGCCCTCTGTTGAAATCGACCGTAAGATCCTGGCTGATATCGCAGTATTCGACAAAAGTAGCGTTTAC  
CGCTCTGGTTGAAAAAGCGAAAGCAGCTCTGGCATAA  
>Cluster\_43614  
ATGCGTGATATTCAGATGGTCTTGGAGCCTGGGGGCATGGGTGGCAATAACCACGAAGATGTTACTTGGTCTGCCAT  
TGCTGCCGGATTTAAGGGGTTGATTCGCTCAAAGGTTAAATCACGCCCGCAATGTGTGATGATGACGCAATGGTATCT  
GTGGTTGCATGGCTCGCTGAAAAAGAACACCCGTGACTTGCATGATCTGCTCGTGGATTATTACGTTGGGGGATGACT  
TTTATGGCGCTTGCAGGAAACATGGACGTTGAGATTGCTGGGTTGGTCTGTTGTGCAAAAAGCAGAGGGGATCGTGGC  
TGGTATGTTAATGATGTTGGATGTTAACTAGAGATGGAATGTTAA  
>Cluster\_36809  
ATGTCGGGCAAGCCTATCTCTCGTAAAAACTGACGATTAATAAATGATCGATCTTTATCAAGCGAAATGCCCGCAGGC  
GTCAGCGGAGCCGGAGCATTACGAGGCGTTGTTGTTTACGCGCAAAAGCGGCTGGATAAATGTGTGTTCCGGCAAGAGA  
AACCAGCCTGTAAGCAGTGTCCGGTGCCTGTTTACAGCCTGCAAAAGCCTGAAGAGATGAAACAGATTATGCGTTGGGCC  
GGGCCGAGAATGCTGTGGCGTCACTCCGATCTTAAACCGTGCCTCATCTCATCGATGACAAGCGTCCGGTCCAGAACTGCC  
GAAAAAATATCGTCCGAAAAAACCTCATGAATAG  
>Cluster\_25  
ATGAAAAATAAGCAAATCGCTTTTATCTGCGGTTGTCTCCGCTTGCCTGTCATTAAGCGGACCGACGTTTGGCTGCGCCTAC  
AATTATTGAACAGTTCAGACAATTATAGAACCAGACGGTTATAAAAACGTTCCGGTACGCCAGACTCAGCAGGGAGAAC  
AGGTGACGACCAACGTTCTTTTGGCTCAGATTCTGGCTGAGGTGATCAAGGCAACAGCCAGAAAGAGGATAAACGCTGT  
AGCGATGGTGAGAAGCACTATTCTCCGGCTACATCATCAGCACTGGCAAGCAACCGTGCCTGTGATATCAGCAGCGG  
CTATCCGGAGTGGTGGAAAGGAGGAACATTATGA  
>Cluster\_56213  
ATGCATAACGATAAAACCACAAAGCTAATGTTTTCATTAATAAGTTAACTGTCCAAAAAATGATAAAATGGATGGCAAT  
TGATGCGCTGAAAACCTTGTAAATGGTACACAGGATATAAATCAAGTTGTGTTTCATGCTAAATATAAGGAAAAGGATT  
TTGTTATATACAGCAGAAAAATATCGCTACTATTTTGTGAAACATGAATGGTCAATGGGCGGAAGGCTTAGTATTAGCAATT  
GTAACGCCAAGTTATAAAACACTTTTGGGAAACTTTTGGCAAAACACAAGCACTTAGAGACTTATCAATCTGTATCTAA  
ACAGGCATCTGGGTTAATGATATTGTAGAGGATCTGCTAAATATTTAA  
>Cluster\_17215  
GTGTTTGTGCGGGGGGCTATCAGTGATAACAATACCGCTGAGCGTTTACGCGGTTTGTGCGATGCTCATCAGGCGATTGG  
GTTAACTGTTCCGGATAATCATAAACTGGTTACCGGCTACTCTCCGCACGAGTGAAGGATTATTGAAAGACGTTTTTC  
ACTCTCAGCGATGCCGCTTACGGGCTGTTTGTCAACTCAACATTTCTCTTGAAGGCGTTGTGCGCTGGCTGGCGCAA  
ACGGGACAGACGGGGCCAAATCAACCCGCGATGGGCTGTTTGTGACTGGGATCCGTTTGTCTCTGCTGGGGCATGATAT  
CGACATGGTGCCTCAGGATGTGCCAGCCATGCTGGAGAAGGTGCTGA  
>Cluster\_14952  
ATGAAAACGTTAAAACAAGCCGCAATGCAGTTTGCATCTGATCTGCGTAATAATCGCTGTTTTAAAGCTGCTTATAATGA  
TGCTCTGTTAGAGCTTGAATCGGGAAAGATTAAATGCGCAATGTAACAATGCACATTTCTTTTGGACCAAAACGAACATTAG  
CCGAACCTGATAAATTAATAAAAAGATAGAAGTAGAAGAAGATATGAGTTTTGTGTATCCCTGATAAAGGTAATGGA  
TTACACGAAGTCAGAACTTTAAAAGTGAAGCTGAGGCTGGATGCTTATCGCATTTTGACCCTTTACGGATACACAGT  
AACTATAGAAAAGAGGAGGTAATGACTGGCTATTCAAGGTGTA  
>Cluster\_26921  
ATGAACCACGCACCGCATTTGTATTTCCGCTGGCAACAACTCGTCGAAAAAGCCAGCTCATGTTACGCTGGCAACGGA  
AGAACAATGGGACGAACTCATCGCCAGCGAAATGGCGTATGTGAATGCGGTGCAGGAGATGACATCTGACTGAAGAGA  
TTGCCCATCCACAGATGCAGGAGCAGCTCCGCCGATGCTGCGCTGATTCTCGACAACGAAAGCAAGATAAAGCAG  
TTATTACAGATTCGGATGGATGAACTGGCGAAACTGGTCCGTCAGTCACTCGGTGCAAAAATCGGTGTTAAGTGCCATGG  
CGATCAGGGCGGCTTTGTGCTGGCTCCGCAAGATAACTTCTCGTGA  
>Cluster\_6225  
ATGAAAAATATACTGGACAAGAAAACGATTCCTGAACTTTCAGCACTTCCACCTTCATTAAGAAAAGAAAAATTTACTGA  
CGCATATAATGCAGCATCTTCTCATATCGAATACTGGATAGGTGCTGGCGTCTCATTTATCTCGATGATGATTTTATCCA  
GAGTATATGACTTCTTTTACCCGCCAAGATACTTTCCCGGGTGATATCATCAGAAGTTTATGTGTTGTGTGCCATCC  
ATATTAATCTGGTTTTCAGTTTCCGGTATATGTCATGAGGAAATATACAGACATATTTCTGGTGGGAGGAAAAGAAACCGA  
AACCATTCAGAAAAGTTGATACGTGAGGCTGATACAGGAAATATGAACATGCGCTCCGGTCCGCTTTTCTTCCCA  
TTGTTTCTCATTTGTTCTATTAGGTTGCATTCATTCAGTATAACAATAAATAA  
>Cluster\_24858  
ATGGCGATAAAAAGGCTTGTATCAGGCGATTGAAAATCTGAGCCGGGTTGTAAAAACGCCATTCCGTCGGCTTACAGCAAT  
GGCTATTAAACCGCTGGCTACAACCGCGATTAAATCAGTCTTATCACAGGTTGCCCGGAGACAGGGTGAGCCGGAAC  
TGGTAAAGGAACGGTCCAGACTGAAACGGGCGACGGTCAAGAAATCCGAATGCCAGAATATCGTTAACCGCGGTGATCTC  
CCTGCTATTAAGCTGGGGATCAGGATGCTTGGTCACTGCTCCGAACAGCATACTTAAAGCCGGTCAAGCTGTTATCAGCG  
GGCATTATCCAGCGATTAAATAATGGGCGCTGGCATGTTATGCAACGTTTGCAGAAAGCCGGTATGCGAAGGGCAATG  
ACGATAAAGGAAGGAAAAAGCGTAATCGTCTTCCATTTCAGGTTGGTAAATTTCCGATGGCGGCCCACTGAAGCAGGCT  
TTTGTATGAGAAGCTTAAACCGTATCCGGCAGAACGCTTCCAAAAGAACTGGGCTATGCGTTGAAACAACACTAAGGAT



TGTGATAAAGCGATGA

>Cluster\_62534

ATGCACACTCCTTACCCTTTTAAATTCAGATACACGATGAACCTGGTTTCTACTGTCTCTGATCAATGACCACCTGAATCA  
GCTACTGAAACCGTACTCTCCGAAATACAGGCATCAGACTCGACCTGTTTCTATCAGAAAGGTACAGAGCCCTATAAACGCTC  
ATTTCATGGAATGAAACCGAAGTACGATAGCTGTTGAAACCGCTGACGACACGAATCTGCAGAGGTATTTT  
TGGGTACTCGAGAAGTCTGTAGACACCGCTGCCATGCCATATCGTGTCTTCTACTCGACAGGCACCTTAAACAGGCTAC  
CTACCCAATAGCTGAGAGAGTTGGAACAATATGGCGGAAATAACGCAACGAGAAGGCTATTACAACCGCTGCGAATACA  
AACCTACTTATGACGTCAGTATTGATAAGCCGGTGAACATATGATGATACCGAAGCCATCGATAACCTGCGCTACATCATC  
AGCTACCTTGGCCAAAGAGGCAAAAGCAGGTCATTATCATTACGGAGCCAGCGAGGTACCGCCGCCAGCGGACTGGG  
GCGTCTCGCACGGTGTAG

>Cluster\_46445

TTGACACTGTATCGCAACATTATCTGGTGTACTGCGTGGGTGCCGATCGCCCTGGAATTGTGAACACCATCACCCG  
TCATGTGAGTAGTTGCGGCTGTAATATTGAAGACAGTCGCCTGGCGATGCTGGGAGAAGAGTTACGTTTATTATGCTGC  
TTTCCGGTTCATGGAATGCCATTACTCTGATTGAATCAACGTTACCGTTGAAAGGTGCCGAACCTGGATCTTTTAAATCGTG  
ATGAAGCGCACGACGGCGCTCCGCGTCCGCCAATGCCAGCATCTGTCGGGTTACAGTTCGATGTGGCAGACTCCCCGA  
TTTTAATGAACCGTTCACAGCATTTCGACGCGCATCATATGAACATTGGCGAGCTGGTGTGCGGCACGCAACCTGCTG  
AAAATGAACGGGCTGCGCATTTGCATATTCAGATAACGCCACAGCCCGCATCTGCGGACGCAAAATATTGAGCAA  
GCGTTCAAAGCCCTATGTACAGAATCAATGCACAAGGAGTATTACGTCGTCAATTATCCCAACATGATGAACAGGA  
TGGAGTTAAGTAA

>Cluster\_34160

ATGACCCGTCATCATCCAGTGATCCGCGCACGGCGCTCTTGCAACACCGCTGGTCAACCGCTGCAGACCGGGCTGTT  
GGTCTGACCTGGTTCGGATCGCAGCCGACGAGGAGACTGCCGTTTGGGGAGGCTGCCTGTGGCTCGCGCTGTTT  
CCATTGACAGTGCCTGCTGCTGGAACCGGTAGCCGCTGCGGCTGAGCTTGGCGCTGTACCAGCTACGGGCTTGCAC  
CCGAAAGAACGCCCAAGATGTGGCCCTGTTGGCGAGCTGCGCCGCTGCGGTTTGGCCGACCGGGTGCAGGCTGCGCA  
CTATGTGCCAGTGCCTGCTCAACGCTTCGCGCACGGATCGAAGCAGGAGGATCGATCGCCCTACCGATGGCTGCG  
TGGCAGCTGAGCCACGCGAGCTGGCGACCCGAGGGCTGGCGTCCGTGCTGGCAAAAATCGAGCGGGTACGCGCT  
CCTGGCGTGCCTGGTATGGCCGGATGGGGCAATCCCGAGCACTCTGCTTGGCTACGCGTCCGGCAACGCAAGAGCGC  
ATCGCACGCTGCTGA

>Cluster\_4232

ATGACTCAAATAATCAGGCGGTTACCCCAATTCAAATATCATCCCAAGCCACTGGAAACAGGCGCATTGAAACAGGATAA  
AACCGTAGAGTGGATGCTGTGAAACAACAGACGTCAGTTTATTACTCGGGTCCCTTTTATTGCGTTGATGAAGTTGAAC  
ATCTCTGTCGCTGGTGTATTCGCGACGGTCTGCTGCTGCTGAAAGGTTTTCAGGTAGTTTTTCAGGATGATGCCAGCATAGAA  
GGTGTGAAATTTGAGTATGATGAAGAGGACGAATTTGCCGGTATTAAGAACACATATCTGATGAAATGCTGAAAGGTT  
GGTGAACCGCACGCCAGGTTATCATGATGGCAACAGGAATTCGGCTGCGCATTTGTCGCTTTTATCG  
GCTATGTGGGCTGGAATGATATAAAAGATCGCCTCGATGAATTTGCCAACCTTGAAGAAGATTGTGAGAAATTTCCGGTATT  
AGAAATTTGATCTAGCTAAATGCTGCAAAAGGGTGGTATTGTCAGGGTTATCTCTCCGCTGCTCCACTGCGGCA  
GCTGAGACTGTGGGGTATTTTTCTGAG

>Cluster\_55573

ATGGCGAAGAAAAGACTTTTGTGCTCATCTTATTGGCCGTGGCGGACTGCTTCCGAAGAGGAAGAGGACAAAAA  
GGCCAAAAAAGCGAAAGGCGCTCGCGCGAAGAGGATGAGCGGAAAGATGATGCCGGGACGATGAACCGCAAGATGACG  
CGGAAACGACGATCGTGTATGATGACGCTGAAGATGACGGTGAAGGCTGGATGCGGCTGAAGACGATGACGATTTCCGAA  
GATGACGGCGACGATGACCGCAAAGAAAGCAAAGCGGTGAAAAATGCCCGCGCCGCGAGCGTAAACGTTGCGCCGTTAT  
CTTCGGCAGTAAGCACGCTGCGGCGAATCCGTCCTGCGCGCAGAACAGTATGGCGATTTGCGGATGAGCTCACCCGCG  
CTATCGATGTTCTGGCATCCACGGCGCCAGCCTTGCAACCAAAGGCAACGCGCGGGCGCTCTCTCGATCAGCGCATGCAG  
GAAAGCCATGATGTCCTGTAATCCGGATGGCGGCAAGAAAGAGAACGGTAAATCGGCACTGTTAAACAGATGACCGG  
CCTCTACAACCTCAATTAAGGAGAGAAATA

>Cluster\_66921

ATGAATAAGTTACCGGAAAATTCAGACCAGACGAAAAACGTCAAAAATCACCATCCATAACCCGATAGCCACCCGGGG  
AATATTAACATTTTGTTCCTCTGATGGAGACTCGCCGATAACGAATCTGTACAGCACATGCTGGAAACAACAAAAAC  
GCAGACTGGACAGATTTCTGTCAGGTAATAATAAAAAGGCGCAACTCCACCTCACGTGGGAAGAAGCTCTGCAGGCCAGC  
CATATGTCAGTAGACATCTGGATCGTCTTTCCGCGCGCAGAACAGTATGGCGATTTCTGTGCTGCTGCTGCTGCTGCG  
CATCGCTTTGTTTCTCAGTGGTATGCTCTTTGCCGCTCTTCAATACCCTTACGACTCTGGTACGCGCCATCAGCCTC  
TTGTGCTGATCTGTCAGCGCTGCTCTTTGTGCTTCCAGAGCACTGATGTTACATACCGCTCTGGCAGTTGCATGAA  
CGAAAAGTCAGCGAACCCGAGCAGGGGACTTTTCTGATTTTCTGAACAACCGCAATGGCTGGCGCAATGCCACATTAAT  
TGCCGTAACCAAGTAAACAATACTGA

>Cluster\_27177

ATGAGCCATGCTGGGACTGTTTTCCCATCCCGATCGTGAATGCAGGTGATTAATCGCGAAAACGAAACGATTTCTCA  
CCATTACACCACACGTTTTGCTGATGGCGGCAATCCGGTATTGCGCCTTCAATTGGCCTACACAGATTGGCTGGA  
ATTTTGGCGATGGCACTATCCTGAAGTTATCCTGGTTTACCCGACTGGCGCTGGCTGTCTGTTTTTACGGCTTATGCTG  
GCTGGGGTTGCGGTGATGGGGCGGGTCACTGGTGGATGGCGGTAATATCCGAGCGTCCGTCACCTGCGCACTGCAT  
GGTCTTCGCGGGTACGTTGCAACTCCGCTGTTTTTAAAGCGGTCTGGTGGCGCTTTACCCGCTGGTCTGGTGTGTCGCG  
TGGTCGGCAAGGTTGGCGCTGTTTTACACCGGCTACCTGCTGATCTCGGTATTCCGAGCTTCTGAAATATCAACAAGAG  
GAAGGACTTAGCTTCTCCAGTTCGACACTGGCGATAGGCGTGTGGTGTGGAAGTGTGCTCGCCCTTACCGTTATACT  
ATGGGGCTACGGTTATCGTTTGTCTAG

>Cluster\_31271

TTGTTTCTGTAATAATACAGAGTTGGTATAGGTAGGGATAAAAACGAAACGTTGGTTTGGGGGAAGGCTCTGCATTGCC  
TGTTGGTGTACCGGTTCCGTGGCCACCACCACACCGCCAGAAGGCTGGTTAAAGTGCAGCGGGCGCGCTTTACAAAAG  
AACAAATATCCTGTCTGGCCAGAGCCTACCCGACCCCTCGTCTCCCGATTTACGCGGTGAGTTATCCGTGGATGGGAC  
GACGGGCGCAAAGTTGATACAGGACGTAAGTTGCTGTCCGCAACGAGGCAACGCTGTTAAGAACAGCAATGCTGGATTA  
TTATAACCAAGACACTACGGGAACCTCGGGATAGCTGGATGGGATTAACAATGAAGATTCCATTACAGACTCTGCTG  
AGGGCAGCTTAAAATGCCGGACGGGACAACATTCAGCGATCCTGCTGCGTGGCAATGTCAGACAATGGTATGCAGGCTACT  
ATTCTGACCTTATCAGAAGCGGGTATGGAAGGGTATCACTGTCAGACCCCGTAGCATTTGACTTAAATACATTTGTGAG  
GGCAGTTTAA

>Cluster\_19627

ATGACTTTGAGTATTACCGATATCCAGCGCATTAACCGCTGGCTCATAAGCACCTAAAGAACAATGAAGAGATTGCAGC  
GGAGACAGGTATACCTGACCGATATTGACGCTGTAATCCGTTGGCGTCTATGTCGATGACTTGGCCGAACATTTGGAAG  
ACGATGCTGATATTACTCTGGCGGAGTACAACGCCATCCGACCGCTATAAGCCCGCAAGTTGCACCGCATACAGAG  
TTTTATGATTTGCCCGGATATGCTGATTCGCCCTGAGACTGTGCTGGCTATCGCCCATTTCCCGCTTTAGCAACGCTCCAC  
GCACCCAGTCCGAAAGCCGTCAAAGCAAGCCGGAGAAGCGAAAGTAGTGCACAAGTTAGTGTCTTACTGATTTAGATG

AAATCCACAAGTTAGAGCGCTTCGGTTGGCCTGCTGCGGAGATCGCCGGGAAGCTGGGCGTCCCTGTTGAGGTCGTCGCG  
CATGTGCAACGCTGCCTGAGAAATCGTTGGTCGTACCCGATACTCTGGAGTCTGTTAACTCCAATTCAGCGAGGCTGA  
ATGA  
>Cluster\_1885  
ATGAAACTCAAACATGTTGGTATGATTGTCGTTTCTGTGTTGGCGATGTCGCTGCTGCGGTAAGCGCAGCCGAGGGTGA  
TGAATCAGTAACGACCCTGTTAATGGCGGTGTTATTCAATTTTAAAGGTGAAGTGGTAAATGCCGCTTGTGCAATTGATT  
CAGAAATCAATGAACCAAACGGTTGAGCTGGGTCAGGTTTCGTTCTTCGCTGCTAAAGCGGGTGACCTCAGCTCCGCC  
GTTGGCTTCAATATCAAGCTGAATGATTGTGATACCAATGTTTCCAGTAATGCAGCTGTTGCATTCTGGGTACTACTGT  
CACCAGTAATGACGATACGTTAGCGCTGCAGAGTTCAGCGGCAGGCTCTGCCCAAATGTGCGTATTCAAATTTGGACC  
GTACGGGTGAGGTATTAATACTTGTATGGGGCACTTTTGTGCTAAAACCGACTTGATTGATGGCACGAAATATACTGCCA  
TTCCAGGCTCGTTATATTGCTCTCGGGCAGTCCGTAGCTGGTACTGCAACCGCTGATGCGACCTTCAAAGTTCATATCT  
ATAA  
>Cluster\_27996  
ATGTCATCTCGTTTATTATTTGCGCTGATTATCATGCTCTTAGCCCCGGGTGTGCAGGCACACAATTTTCGTCACTGGTAA  
AACGGTTACCCCTGTTTATATCCCGGAAGGCGGCGAGCTGCTTCTGAATAGCGACGACGAAATTCACCTACCAAAAGTGA  
ACAGCACCAATTTGGCGGAAAGTTCGCATTTTTCAGTACATCGCCGGGCGTAAAGTGGCGAAGAAAAAGAACTCCTCT  
TTAATTAAGACGCGTTGAAGCGGCAAACTTTCCGCGAGGATCGTTTTCAGCCCAACCATTTGTGAACACGATGATGAT  
CTTTGGTACCGCTATTTTGTGCTTGGCAAAATCGAAAAAATAAACGCCGCTATCCGTGGGCGCAATTCGTTATTGACG  
GCAATGGTCTGGGACGCGTTGCCGGAATGGCGGAGCAGAGTTCAACCATTCTGGTATTGAATAAAGCCGGCGCAATT  
CAGTGGCAAAGGACGCGCAGCTGACACCGGAAGAGGTAGATCATGTCATTGCGCTGGCGCAGAACTGATCAATGAATA  
A  
>Cluster\_55578  
ATGACCACGATGAACAGAGTCAGTACGCGCAACATTCAGGCGTTCGATCGCAAGACTATTGGCCGATGGATCAAGGCTGG  
TCGGTTTATCGTCAATGGATGGCGACCTGATTGATGTTAGGCGCAGCGATGCGCGCTGAAGAAAAACCGTGATGGAAAAG  
ATCCGCGGGCATCAAACGCGAAGAAAGAAAAAGCCCCAGCACCCCGGAATGATGGCGACGATGAAATTTGATGAAACCGTT  
CGCCAGATAATGCTTACAGAAGGTGCAGTCTTTCAGGGAAGAGGCCGCGCGATCCGTGAAAAATTACATGGCCCTGCA  
GGCAAAGCTCCAGTATGAAAAAGACAGCGGCCAGACAAATGAAATTTGGCCATCGCCGAGGAGGTTCTGTTTAAACGCTTTC  
CCAGCAGCGTGAATGCTTGGCTGAACTGGCCTTTCAGCGTGGCACCCGCTGATAGCCCGCGATCTGAATGACCGCGGAC  
AGGATGACAGAGGTGCTGATTGAACATGTCACAAACATATCTCAGTCTCGGAGAACAGAGTTTAAACCGCGGAAGA  
TTGA  
>Cluster\_15138  
ATGAATAAAAAATTAATTTCTCTTTTAGTGTGAGGAAAGTTTATAGCAGCAGTAAAGTACAAGTATTGCTGCAGATAC  
TGGAGTGGTTAACTTTAACGGTAAAATTTGTTGCCGATACTTGCAGAAATTAATGTAACGATTCATAGTACAACAGGAA  
TTGTCACTTTTCAGATACCTTACCAGCGGATTTATCCGGAGATGGTACAGTCCGTACTTCAAAGATTTTAAAGATTGAG  
TTAATAAAATGCGATCCGTTGGTGACAAAACATAAACCTGACCTTTTCCGGAACAACAACGGATACAGGTTTCTTTCGTC  
GGAAAATAGCGAAACGGCTACCGCGAGCGCAACAAATGTTGTTATTACGGTGAAGCAATAAAAATGGCGGAACTAACAAATG  
TGAATTTGATGGTTCAGTTCCTGATGTATCCACCGATGTCGATAATGCTGGAGACAGCACCCCAACGATATTTAATTAC  
ACGGCAAATGTTATTCAGGTTGGTAAACAACCGCAACTGCGGGTAAATATGCCTCATCTGCGACTTTTCAAGTGTTTTA  
TCGTTAA  
>Cluster\_11214  
ATGAATATGATGGCCGTGCGGTTTACGGCAACTCTCTTTATGATGTTAACCATAAATGGCGAACCATACGTTCCCATGAA  
ACCTGTCGTTGCGGGGATGGGGCTGGCCGCAATCACAGTTGGCTAAAGTTAAGACAGCGTTTTGCGTCAACTATAACCG  
AAATCGTTATGGTTGCTGAGGATGGGAAACAACGCAATATGTTGTCATGCCACTTCGAAAACCTGCGGGCTGGCTACAA  
ACCATTAATCCCAACAAAGTAAAACCGGAAATCCCGGATAAAGGTCATCCGGTATCAGGAAGAGTGGCAGCATGTTCTTTA  
CGAGTACTGGACGAGGGTTTTGTCGTTAATCCCGTAAATGAGCGTATGGAAGAACTCAACCAGGCTTGTGCTGACA  
TGAACCGGATAAAAAATTTGCCAGTGTGTTGCTACCGGGCTGAATGAGTGGAAACAGGTTAAAGCCGCGCATGTATCA  
AAAATCCGTACGCTGGTAAATGAAGCGAATATGCTGATTGATTGTTGTCCTGGCTGATACAGGCAAGGAAAAATAACAAA  
GGCGGATTGA  
>Cluster\_6125  
ATGCGACGGCGTCTCTATTTTGTACTGTTTACCAGTGAAGGAGTGTGTTGAAACGGATAATCTGGATTCTGTTCTT  
ATTTGGGATTAACGTTGGGGCTGTGAGCTATTTGCCCATGATGGCACGGTCAACATTAGCGGATCGTTTTCCCGTAAATACAT  
CGGTGCTGGCACAGGATAGCAAGCAATCAATGTGAGTTCAGGCGATGTCGCTGACACGTTTTTCTCATGGGAATTAAT  
GGCCCGGAGAAATCTTTCATCATTAATTTGCAGGATTCGCGAACAGATGTCAGCACGGTTGACGTCACCTTTTCAGGAA  
CCCCGACGGAGTGCAGAGCGAAATGTTGTCATTTGAAAGTGGTACGGATGCAGCCAGCGGGCTGGCAATTCGCAATCTGG  
ATGATGCGAAGATATTGTTCCGCTTAAACAGCGAGTAAAGACTACAGCCTACATAGCGGTAAGGTTGCCATTAACCTTTT  
TATGCGCAATTCGACCTGTCAATAGCGATGTGACGTCGGGTAAGTGAATGCCAGCGGACATTTGTACTTCATTAATGA  
CTAA  
>Cluster\_43190  
ATGAGCGTATTACGTTTCGTTATTAACCTGCCGGGTGCTGGCGTGGGCTGTTGTTGGAGCCTGAACGGAATTACCGCTAC  
CCCTGCGGCGCAGGCATCTGATGATCGCTACGAAGTTACCCAGCAGCTAACCCGGATGCCGCTGTCTGGACTGTCATA  
AGCCAGATACCGAAGGATGTCATGGCAACATGCTTCTGTTATCAACCCGAATAACAAATGGCCGGTACCTGCACCAAC  
TGGCAGGTCAGCCATCACCAGCAACCCGCAAGGGGTGAAAGATGTGATGCGCTTAAACGAGCCGATGTACAAGGTTGG  
AGAGCAGAACAGCGTCTGTATGCTGCTGCTGCTGCGGAAACAGTTGCAAAAAGCGTTCTGGCCGACGATGTCACCGTAA  
CCAAAGTGGCGTGCAGCAGCTGCCATTCCTGCTATCCAGCAAGATACGATGCAGACGTTAAGTGAACAGGACGGATT  
AAGATTTGCGTCGATTGCCACAGCGATCAGCGCACCAATCCGAACCTTAAACCCGGGCTGTTTCCGTTGCTTAAAGGAGCA  
GCCATGA  
>Cluster\_53871  
ATGAGCGCTATAACCAAAGAACGATCAAAATTAATCAATTAATAAATCCGCTTGAACGACTTACTCGTGGCGAACAAAT  
GGAACCTGGCAGCAATGCACTGGCATCACTGGAACCGCAACAGATTCGCCACGAGCATGCCAAATGGTCTGACTCCACAT  
TTGGCTGCGCTGGCCCTTGGCCCTGCTGCAACATCTCTCAAAGAGGCACTGGAAGCCGACGCGCAACCAACGAGCTT  
AGCGAGTGGGCTGATATGCAAGTTTCTGTTGTTGGATGCACAGCGCCGCTGCTGGTATCAGTGTGCTGAAATACCCTGCT  
TATGGAAAATAAATTTGAAGATCAACATGGAACCGCAGTGGCTGAAACAAAAGATGGTGGAGCTGCTGTCATTAAG  
AACCGGCAACTCTCCGGTAACTCCGGTAGTTGGATAAGCTGTAGTGATGCAATGCCGGAAGACACCAAAATGTTACTG  
GCAATTTAGTCAAGGTGAAATCTGGCCGATATTTGAACTGGGTTGTAATCCAAATGATTTACAAAAATATAGAGCTTT  
CACGATTTATCAGGAAATATCTTGGATGACGTAACCTACTGGATGCCGCTGCCAGAACCCGGGACGAGGATGGTGAAT  
GA  
>Cluster\_67036  
ATGTCCGGCTATTAACGAAAAATTAACAACTTAACTGGAAGAGTACAGGCTACGATGTTGGCTGGTTGTAATC  
TGGTGTGACGATAACAGCATGTTGATTTTTCAGTATCATTTTTTATGACGTTATGTGCAGCCCTGGTTTACGGTAAAAATG

CTATGTGGCTATTAATATGTCTTCTGGTTGTGCACATTTTTCTCTGCAATTAATTACAATGTTGTGCTGTGGACATAACT  
TCTACTCAGTATGTTCTTATGAAAATAGAGCCTGAAACGGATATTAATTTCAAATCAGAACAACTGAAAAACGATGTGT  
ATTATCTGCCTGCAGAGTGGCCCTGGTCATTATCGCTGTGTCTGTTGGATTTGGACTGCAATTTGTCTTTTCTCGGGGG  
CGGTGTTTTCTTTATGGGGGCAATTTTTACATGTGTTTTCTTATAAAGTGAGAAAATATATCTTACGATTTTTGTCT  
CGAATTTGTTATGTTAATCTGCCGAGAGAGCGATCAAAAAGACGATGTGTGTTGTTCCAGTAGTAATGAAGTTAACCC  
GGCAACTGGACTTCTCATGTAGATGATACAATGATGTGGGGGGAAATGCTGGGGTAGTGATGACAATCGCTGGGATG  
ACCGTTGGTGA

>Cluster\_41490

ATGAATATFTGGTGGCTTATTTCCGGCAACGGAAGTAATTTGCAGGCAATTAATGACGCTGCAAAAACCAACAAATTA  
AGGCACCGTACGGGCAGTTTTTCAGCAATAAGGCCGACGCGTTCGGCTTGAACGCGCCCGCAGGCGGGTATTGCAACGC  
ATACGCTCATACCAGCGGTTTTGACAGTCGTGAAGCCTATGACCGGGAGTTGATTCATGAAATCGACATGTACGCACCC  
GATGTGGTCTGTGCTGGCTGGTTTTATGCGCATTTCTCAGCCCGGCTTTGTCTCCACTATGCCGGGCGTTTTGTGAACAT  
TCACCCCTTCTGTCTGCCAAAATATCCCGGATTACACACCCCATCGTCAGGCGCTGGAAAATGGCGATGAGGAGCAGGTA  
CATCGGTGCATTTCTGCACCGATGAACTGGACGGTGGCCCGGTTATTTTACAGGCGAAAGTCCCGGATTTGTGTTGAT  
ACGGAAGATGACATCACCGCCCGCTGCAAAACCAGGAACACGCTATTTATCCACTGGTGATTAGCTGTTTGGCGGATGG  
TCGTCTGAAAATGCACGAAAACGCCGCTGGCTGGATGGTCAACGCTCTGCCCGCAGGGCTACGCTGCCGACGAGTAA

>Cluster\_43135

GTGAAGCGACCTGCACCTATTCTTATCTGCCTGCTATTACAGGCTGTTACGCCACGACTAAAGAGCTGGGCAATTTACT  
GTGGGACAGTCTGTTCGGTACGCCAGGCATACAGCTGACGGACGATGATATTCAAAATATGCCCTACGCCAGCCAGTACA  
TGCAGCTTAAATGGCGGGCCGAGTTATTTGTGGTCTGGCTTCGCTGAAGACGGACAACAAAATGGTCTACTCAGGAT  
CAGGCCACCTTGTCTCACACAACATGGTCTGTGTTGAGCACTTTGCTTGGCGGCGACAACCTGATTGAAGTGAATAACCT  
TGCCGCCGACCCGCTGATTAACCCGCAACATATTGATGGTGAACCTGGACGCGCAGGATGGGCTGGACCGAGTACC  
AGCAGGTACGCTACGCCACCGCGCTCAGTCTTCAAATGGAATGGCACCCGATACCGTCAAGGTCGGCAGCGATGAAACC  
CCGGTTCCGGTGTCTGACGAAAGTCTTTACTGACAGGCGCTGGCATAACCGCTATTGGATCGACAGCGAAGGGCA  
AATTCGCCAGTCGGAACGATATCTCGGCGGGATTACTTCCGGTGAAAACACCCTCATCAAGGCGGCAAAACAATGA

>Cluster\_60198

GTGCGGTGCAAGGTTTTCTGTTGATCTTGATGGAACGCTGGTGGATTCCTGCTGCGGTAGAACGGGCGTGGAGCAA  
CTGGGCCAGAGCTCATGGGTTAGCGCCGGAAGGTTGCTGGCTTTCATTCACGGTAAACAGGCGATCACCTCTCTGCCGC  
ATTTTATGGCGGGCAATCCGAGGCTGATATTGCCGCCGAGTTTACGCGTCTGGAGCACATCGAGGCCACGGAACCGAA  
GGTATTACCGCGCTTCCGGGGCAATCGCCTTACTCAGTCAATTTGAATAAAGCAGGATATTCGGTGGGCATTTGACTTC  
TGGCTCCATGCGGTTAGCGCGAGCGCCATAAAAATAGCTGGGCTTCCCGCACCAGAGGTGTTTGAACCGCTGAGCGAG  
TGAAGCGCGAAAACCGAACCCTGATCGTATCTGTTAGCGCGCAGCTGCTGGGGCTTGCGCCGCGAGGAGTGTGGTG  
GTGGAAGATGCTCCCGTGGCGTCTTTCTGGCTGGCGGGGTTGTCATGTCATTGCGGTTAACGCTCCGGCAGATAC  
CCCGGCCGTAATGAGGTGATTTGGTCTCCACAGCTGAGGCAAAATTAAGTGAACCAACCCAAATGGCGATGTTA  
TTATTCAGTGA

>Cluster\_24532

ATGAATAAACTTCCCGACATCTTCCGGCGGATATATCATCGAAGCTATCCATTTATGGGATCGGGGAGAACTCATCA  
GTTCCAGCTGACCGGTTTATGAGATGAATAATCATGCGCGAGCTTACCCCTCGAAGCGGATTTGCTGTCATCCGAGCCA  
CATTTGATGACGGGACGCAATTTACCCCTGCGGATTTACCCGGGAAATAAAATCTAAATGCGTCAGGCTACTTATAGAT  
CAGGGATTTACATTTTATCAGGATAAAGCCGCTGCGGCTTCCCATAGCCGATGTTCTGTTCCCGGATGAGTTGCCGCGA  
GGGACCTACGTTGAAGGTGCGGCGATAAAGGTGACGGTAAACCGCTATGAACGCGATAAAAAAGCTCGCGAGAAGCAG  
TCGAACATCACGGATGCCAGTGCACGATGCGGCGTTGATCTGGTGAAGATCTATGGCGATAATCGCTGAGGGCTTTATC  
CATATGCACTACCGCTGCTGCGGCTTTCAGCCATTAAGAGGATTAACAGCTGGATCCAGTTAATGATTTACTCTGTGTG  
TCCTAATTTGCCATGCGATGTTGCACCGACGCAACCCAGCTTTACGCCGGAGGAGTTAAAGCGTTGATGGATGCGAATA  
AATCAAAATTA

>Cluster\_40828

GTGTGGCATCTGGTTAAAAGCTGCCGTGGCGGCGATTTCTGCTGGCCATTCTTATCAATGCCTTTCTGGTGGCCTGTA  
TGCCATGGGATACAGAAGTGGTCTGACCTCTGCAAAAGCGTGACGGTATACCGCGCTCAGTCAGTTGCGAGTCAGTATTTG  
ACCGGTACAAAACCGAGCAGGCAACGCTTGAGAATGCTGCGCTGCGGGCTGGGCCAGACGGTATCAGGAGCAGGTGGCC  
GCCGGCAGCGGGCTGAAGCCGGTTATCTTGGCAGATTTGCTCAACTGGAGAGCCGGAACAACTACAGGGGCAAT  
TAACGATGTCACACAGCGTGGATTGATGAAAAAGGTAAGAGTCACTCCATTGAGTGCCTGTTTACTCGCGGTTCTGTC  
GCCAGTACAACGCCGACCTCGGGTATGACAACGCATCCGTCGACACCGGTCATTACAGACTCAGTTGCCGCCACTGGCACC  
CGCTCTGGCAGCAGCGACCGGCAACCTGAAACCCTGACGCTGGCTACGCGACTCAGCGCTCCACGCGTACGCTTCT  
CGCAACATCATCGACAACGCGAGGCAATGTCGTCGCTGGCGGAACAGATAAACCGGCTACTGGATGAACGGGAAGGAT  
TACAGAAATGA

>Cluster\_27258

ATGAACAATATGAACTGAATTTATGCGGATGACCATCCGATAGTCTTGTTCGGTATTTCGAAAATCACTTGAGCAAAATGA  
GTGGTGAATGTTGTCGGGCAATTTGAAGACTTACAGACTGATCAACAATTCGCCGAACTGGATGGCATGTGTTGA  
TTACCGATCTGTCCATGCGTGGCGATAAGTACGGTATGGCATTACCTTAATCAAGTACATCAAGCGCAATTTCCCAAGC  
CTGTCGATCATTTGTTCTGACCATGAACAACAATCCGGGATTTCTAGTGGGTTATGGATCTGGATATCGAAGGGATCGT  
GCTGAAAACAAGGCGCACCAGCGATTTGCCGAAGGCTCTCGCCGCGCTGCAGAAAAGGGAAGAAATTTACCCCGGAAAGCG  
TTTTCTCGCCTGTTGGAAAAAATCAGTGTGTTGTTACGGTGACAAGCGTCTCTCGCCAAAAGAGAGTGAAGTTCTGGCC  
CTGTTTGGGAAGGCTTCTGTTGACCGAGATCGTAAAAAGCTGAACCGCAGTATTAACCATCAGTAGCCAGAAGAA  
ATCTGCGATGATGAAGCTGGGTGTCGAGAACGATATCGCCCTGTGAATTAATCTCTCTCAGTACGTTAAGTCCGGCAG  
ATAAAGACTAA

>Cluster\_65660

ATGACAGGTAAGAAGCGTTCTGCCAGCTCCAGCCGCTGGCTTCAGGAACACTTTAGCGATAAAATATGTTCAACAGGCACA  
GAAAAGGGGTTACGTTCCCGTGCCTGGTTTAAACTTGATGAAATACAGCAAAAGTACAAACTCTTTAAACCGGGAATGA  
CGGTTGTGCGACCTTGGTGTCTCCGGTGGTTGGTCAACAATATGTTGGTCAACCAATTTGGCGCAAGGCGGCATCATC  
GCTTGCATCTTTTACTATGGATCTATCCTGGTGGTGGACTTTCTTACAGGGCGATTTCTGATGAACTGGTGAATA  
AGCACTGCTGGAGCGGTTGGCGACAGCAAAAGTCCAGGTTGTCATGTCGGATAATGGCACCAACATGAGCGGAACACCGG  
CGTGGATATCCCGCTGCCATGATCTGGTGGAACTGGCGCTAGAAAATGTTGTCGTGATGATTTAGCGCCAGGTTGGCAGT  
TTTTGATGAAAGTGTTCAGGCGAAGGTTTCGATGAGTATTAAGGAAATTCGCTCCCTGTTTACGAAGGTCAAAGT  
TCGTAAGCCGACTCTTCTCGTGACGTTCCGGGAAAGTGTATATTTGATGACGACCGGGCGTAACCTAA

>Cluster\_25923

ATGGCTAAACCGCGGAAGGAAATGCAAAAATATGCAAGGAATGGTTTACCCGGCATTTCTCAAATCAGTGGTGGTGTGCTG  
CCGGCAACCGAACTCAATTAGCACTCGAACGACGAAAGTAAAGAACGCGAAAAGCGGAAAAGCAGAGAGAAGAAAC  
GACGACGAGATGAACAGAAAACAGAAAGTAAACTTAAGATTTCGAAAACCTCGCTTAAAGCCCCGAGTTACTGGATTAAG  
CAAGCCCAACAGCGTAACCGCTTATCAGAGAAAGAGACCGGACTTACCATGATCTCGTGGGACGCTCACGCT

TGCTCAGTGGGATGCCGGACATTACCGGACAACGCTGCGGCACCTCAACTCCGATTTGATGAACGCAATATTCACAAGC  
AATGCGTGTGTGCAACCGACACAAAAGCGGAAATCTCGTTCCGTATCGCGTCGAACGATTAGCCGCATCGGACAGGTA  
GCAGTAGAGGAAATCGAATCAAACCATAACCGCTATCGCTGGACTGTCGAAGAGTGCAGGGCCATCAAGCGGAGTATCA  
ACAGAAACTTAAAAAAGCTGCGAAACAGCAGAAGTGAGGTTGCATGA  
>Cluster\_32905  
ATGAATAAAATCAGACTTTATATTTCCCCCTGTAATTTTCGGTTTTGTTATCGTACCATTATTGGTATGGCCGACGGTTAT  
TGCCTTAGCCGTACTTATATTCAGTAACTTTCTGGCGGAAATAATATCTCTTTCCGCTTCTGGTTGTGGCTATTT  
CTCTTCAGGAATTACAACCTGAGTTATTGGTTGAATATGCACCTTTTTTTCAGTGAATGTGTGGCATCGGTTGGCAATTC  
TCCCAGAACCGCTCCTGAATTA AAAACAGGCTACATTTGCTGGCTGGTCTTTTCTCCGGTCTATTTCTGGTTAATCT  
CTCGAATTTCACTTTTATATTTCTCCAGAGAAATCAGCGTTGCTGGAAAATATCCGAAATTTCTTTCTGACGTTTGTCT  
GGCTTCCCTGAATTTTCCCTTTTGGCCGACGCGTGGACTGATTTTGTGCGCCGATTAGTGCACAGCTTGGTTTT  
GCGTTAGGATATTTATGCCAGTGGCGTAGCAAAAATAGAAGCCATAGGAAGAAGTGGGGCGATTGGGTAACTGCTTAA  
TTTTGGCGAATTTAGCTCTGGGGCCGTTATCAATATTTTACAATGA  
>Cluster\_58812  
ATGCAGTCTGAACGATTTATTTGGTATGGGCCATCCCGTCAATGATTCATTGACCGCACATATTGCTGATGCGATCCA  
TCAGCGGCAATGGAGCGGAAATACAGGTGACGGAATCGAATTTATATCGCGGTAATTTCAACCCAGTGTAGCAGCCGG  
AAGATGAACCGACTGGAAGAAATATGATAAACGTTATTTCTCCAGAGGTTCAATCAGCTTATTTCAGAGCTGCTTGAACAT  
GACACGTTAGTGGTGGTTTTTCTCTCTGTTGTTACAGCTTCCCGCAATGCTAAAAGGATATATTGACAGAGTATGGAA  
TAATGGGCTGGCTTATGGAGATGGGCACAAATACCATTCAATAAAGTTGCGTTGGGTGGCGCTGGTTGGAGGAGACAAAG  
AATCATTTGCTCAGATGGGCTGGGAAAAAATAAAGCATTATTTAAAAAATATGTGCAGTTATCTTGGTATTGAAGAT  
GCCATGTCACTTTCTTGTGTAATACAGTGGTATTCGATGGGGAAGAAGCTTACCGCAGCTATTTATCAGTCTGTTATTATC  
TCAGGTACGGGATATGGTAGATGCACTATAA  
>Cluster\_59934  
ATGATCTTAAACCTCGCTAAACGATATGGTCTCTGTGGTTTTATTCGGCTTGTAGAGATGCTTATTGACTCGTGTATT  
TTACCGGAACTGTAGAATTTATTCGATTTCCCTGCTATATTCGCAATGATGGTAGCATTAATTTTGGTGAATAATTCACAA  
GTGGAGTGGCTCAGGCTGGATGCATTTGGACGTGGCGTGTATTTTTTTTCCGATAATGTGCAAGTTAACGACTATGTT  
CATATCGCTCAATTTAGAGCGTTACGATAGGTCGGGATACGCTTATTGCAAGTAAAGTATTTATTACCGATCATAATCA  
CGGTTCCCTTAAAGCACTCTGATCCAAATGAGTTCCGCAATATACCTCCAGACATGCGCAGCTTCCAGTCTTCCAGCTGTTG  
TAATTTGGCCAGAGGGTTTTGGTTGGGTGAGAATGTGACGGTTTTGCTGGAAACAATTTATGGTAATGGAGTCTGATCGGC  
GCCAATTCGTTGTTAGAGGTTCTATTCGCAAAATACGTCATTCGCGGAGTACCAGCAAAAATCATAAAGAAATACAA  
TCATGAGACCAAAATATGGGAAAAAGCATAG  
>Cluster\_20983  
ATGAGACTCGAAAGCGTAGCTAAATTTCAATTCGCCAAAAGCCGATGATGAGCGACTCACACGGGCTACGGCTTCTGA  
CTCTCTTTCCGGTACTGATGTGATGGCTGCTATGGGGATGGCGCAATCAACGCGGATTCGGAATGGCTGCATTTCTGGC  
GTAAGCACGAACTCAGCCAGAACGACAAACAAAAGGCTATCACTATCTGATGCAATTTGCACACAAGGTATCGGGGAA  
TACCGTGGCGTGGCAAGCTTGAAGGAAATACTAAGGCAAAAGTACTGCAAGTCTCGCAACATTCGCTTATGCGGATA  
TTGCCGTAGTGGCGTACGCCGGGCGCAAGATGCAGAGATTGCCACGGTACAGGCGTGGCTGATATAGCCAAAACAG  
AGCAGTGGGGGATAGTTGCTGAGAAAGAGTGGCTAAGATGCAAAAGCGTGGCTATTCAGGATGCGCAGCAAGCGCCGA  
TATCGGCTGTAAACGATGCTAATCCAAACCTTACCAACCCCTGCTCAGCAGCTGTTAAGCCGCTGATGACGCTCT  
GGTTGTGCAATGCCACAAGAGTCAATCGCAGACAACTTTGAAATGCGATCACACGTTAG  
>Cluster\_34250  
ATGCACGCTTATCTTCACTGTCTTTCCCACTCGCCGCTGGTGGGGTATGTCGACCCGGCGCAAGAGGTGCTCGATGAGGT  
CAATGGCGGTGATTCGACGCGCCGCGAGCGTATTCGCGCATTCCTCCCTGAACTGGTGGTGTCTTTTGGCCAGATCACT  
ACAACGGCTTTTTCTATGACGTGATGCCACCGTTCTGTTTAGCGTGGAGCGACGGCAATGGTGATTTCCGCGAGTGGC  
GCAGGAGAGCTGCCCGTGGCTGTGGAGCTGGCGGAGGCTGTGCGCATGCCGTATGAAGAGCGGGATCGATCTTGCCGT  
TTCTTACTGTATGACAGTGGACCAGGGTTCCGCCAGCCGCTGGAGTTCCTGCTCGGTGGGCTGGATAAGGTGCCAGTTC  
TGCTGTGTTTCACTCAACGTTGTCGCCACCGCTGCGCGTTCCAGCTAACCCGATGTTGGGTGAAGCCATTTGGACCT  
TTCACCAGCACTCTCAATAAACGCGTGTGTTCTGGGTTCCGGTGGGCTTTCCCATCAGCCGCGGTGCCCATATGCGC  
GACCGTCTGTTGGGAGCGGAAAGATTTACCCCGAGTGGAGCGCAATTCGCTCAGCAACGGGTGA  
>Cluster\_32475  
GTGAGAAGGGCTCGCGCTGGTTTTACGTTACTGAAATGCTGGTGGCAATAGCCATTTTGGCTCACTGGCACTGATGGC  
GCAGCAGGTGACAAACGGCGTTACACCGGTGAATAGCGCGCTGCCGGACACGATCAAAAACCTAAACCTCATGCAGCAAA  
CGATGAGTTTTTTGAACACGATCTGACACAAATGATGCCGCTCCGGTAAAGAGCGATCAGGGCCAGCGTGAACACAGCG  
TTACTGGCGGGCGCTGGCGTGTGGCTCTGAGAGTGAAGGAATACGCTTTGTGCGCGGCGGCTGGTCAATCCGTTGAT  
GCGTGTGGCCGCGATGAAATCTGCTCACCTGCTACCGTTACCGATTTCCAGCTTCAATGTTGTTTATCTGAACCGGTTAGCTGGCCACTGA  
CTGATGCGGCGAGGACGCTGAAGCAACACGCAAAAATTAATCCCGGGGATTCGCTCCGTTGCGAGTTCACGACGGC  
ACCGCTGGCAGGAGAGCTGGTCACTAGTGCAGGCGATTCCTGTTGGCAGTACGCATAAACCTGCATTCGCCGCAATGGGG  
CGAAATGAACGCATCTGGTTGTTACCGGGCCGCAATTTATCATGA  
>Cluster\_200  
ATGTCTCTCGCAGCCGTTTTTAAAGCACGCTGTTTGAATTAGGAATGACTCAAGTGAAGTAGCGAATCTGACAGGGGT  
TAGCCAACAATCCATAGAATCCATCGAAAGTGGACGAACCAGAAAGCCAGCAATCTTCTGGATCTGGCTAAGGCCTTGA  
AATGTAGCCAGACTGGCTACTGAACGGTAAAAATATTTATGCTCTCGCGGAGATAAGTACCAGAGCATACCTATATTA  
AGTTACGTTACAGGAGGAGAGCTTACAGAAAGCAAGAGACATAACAGATCTGACAGGGGAAATTTGAATATATTTTGGCAGA  
CTCTGACATTCAGAAACATGCTTCGCATACGTTATGATGGCGACAGCATGCAACAGAGTTTAAAGAGGAGACATTTG  
TTATCATCGATCTGATCTATGCTCTGCACCAGGGGAGTTTGTGTCGCCAAAACGACGGTACGAAAGTACATTTAAA  
AAATACCGTCCATTAGGAATCGGATCGACGACTTTGAAATTAATCCCTAAATCTGATTTACCTATTTTTCGTAGTGC  
AGATATGAACTTACAGATCATAGGTGTAATGATCGAACACCGTATTTACCGCCGTAACGTTAG  
>Cluster\_42310  
GTGGCAGCTATCGTAGCCAGGACGCTGGGTAATCTGGCTCTCTTTCTCATTTGCGCTGTTGCTGCAATCATGCCCCTG  
GCCGGATAATCTGATTTGTTTTCCGGCAAACCTGGGTGTTACTCATCTTGTGTTGATTTGGATCCTGGCCTTGCCCATCGCG  
TAAATGTGGGCACAGTTTTGTGATGGGTGCCATACTGGATCTGATCAGCGGCTGACGCTGGCGTACGCGTATGGCG  
ATGAGCATCATTTGCTTACTTGGTGGCGTGAATACAGCTTTTTCCGCAACCTCGCATTTAGGAGCAGGCGCTGGTCT  
CATGTTGCTTTCGTTGGTGGGATATTTGTTTTCTGGGACAGTTTTTTAGTGATTAACGCTCTTTTACAGCCGGAAG  
TGTTCTGGAGTAGTGTAGTCAATGGCGTCTGCTGCGGTTTCTTGTGATGCGTAAAGTCCCGTACGAGTTGCA  
GTGCAATAA  
>Cluster\_216  
ATGCGAACTAAAAAAGCTAAAAAATGATGGATCATTTGATTTATAAAATGAAAGTTTGGCTTTATGCAATTAAGGAAGA  
AAGGGACTTTTTAAGCAAAGTTGAAGCAGAATATGAAAGAGAAATAGAAGCTCTTAAAGCAAAGTATTTACAGAAATTTG  
AGAAACGGAAAAAATCTTTGAAAAATTTAGAACAGGAGCTTGA AAAATTTGCTAAGGCTAATGCAGGAAAGTTATTTCAA

GATGGAGATATTGTTGAGACAAGTATAGGAAGGATCATAGAGAATAAAAAGTTGCAGTAAAGAGAGCAAGAGGGTTC  
TGAGAACTTGAACAACCTGGTTGGGATGAAGCGATTATCATCCAAAAGAAAGTAACTGGGATGTATTGGAAACATGGC  
CTGAGAAAAGTTAATAGCTTGCAGAACAGAAAGATAACAAAAGTAAAATTACATACGAATGTATGGGGAGGAGGAT  
GGCAATAGATAG  
>Cluster\_45228  
ATGTATCAAATGAGAGGTAACAGGGTGTACCCGATGCAAGAAGAAGAAATAGCCTACAGAGCTATAAACTTCTGTAATGC  
TATTGGTCTTACAGCCTCAAAGCGCAAAAGAAAGCGTTATGATATGTTCTTTGAAAGCCTGTCAATTTATGGGGTACTC  
TTGACGTGAGGACCGACAAGAGTGGGAGGCTCTGACGTATGATCTAACTATCGGACATTTGTGACCCCGCTTCTTAACA  
ATTACGGTTCCCAATAAAATATATGTGAATGCTTGGCTTGGGGAAGAGCATGCACCTGTGTATCTTCCACGAGCTAGG  
TCATTTGCTTCTTGGACACAAAGCAGTTTTTACACTTTTTCAGTTAAAGAACCTACTCGTATTGAGGATGCAAGATGGCAGG  
CAGATACATTTGCGGATATCGTACTGGAACAATTTGGCGTGAGAACACACAGATGTCTGCTTTCGATTTTTATATGTAA  
>Cluster\_12403  
ATGCTGCCAGTTTTATATGTAATATTATGGCTTATATGGTTTAAATATTTCAATAAAGGCGTAACTTTTTTTGAACC  
TACAGCAAGTAATATTGAACGTACGGGGATGATATATTATTTGGTTTTCACAGCTTGGTGATTATATATCCATGGTATGG  
GGACATTAATATTTCTTAAATAACGGCGGACAATAAAGACGTTATATGGACTTCCATCATTAATTCCTAATGACCCCTCAT  
GATTTTTTATACGGTCTTTATAAGTATTGGTGTGATAGGACATTTGGTTTATCATTTCTATATTTTTTGTTTTTTTTT  
GAGAAATCTTTCTTATTATATGAGAGAATGCTTTCATTGTTGTAAAGTTGTTTGTACTGTAAAGTTGTTTAA  
TTTTATACATTAACCCTTTTGATGCTTTTAAATCGATTGTTGCGGGCTTACAGTTGGAGTTGTTTATGGATTTGCAAAA  
ATTAGATAA  
>Cluster\_30790  
ATGCGCTATATCGATCCTGTAACGTAACAGGAGCGTTCAAGCCAACTTTGGCTACGTCAAATTTGGCGGCATAATGCCTG  
GCGTGACAGCAACGGACAGTTGAGAACGACCTCGGCACAGGCCATCTGGATGGGCGTCGATCATAATGCGCATACGGAAG  
CCAATGGCTCAGCTATTGAGAATGACGCAATAACAACATTCAGAGCCGACTTGGTTTCCGCACCTTTTAACTGACTCAG  
GAGAAAACAGCGGTCGCGACGGTGAACCTTTGAACTTTGTTGAAATGAACGGGATCCATAACAGTAAAGTTTTCG  
TGTCTCAATAAACGGTGTGAAAGTTGAACAAGACGGGGCGCTAATCTGGGGAAATGAAACATGGCGTAAATGGCAATC  
TGAATCCGGCGGCGAGCTTGGGTAATGTGGCGTGACGCTGGGTGATAATGGCTACAATGACACCCGAATGATGGTG  
GGCCTGAAATATAAGTTCTGA  
>Cluster\_7919  
ATGATTTACTGCCGTCGTGTGGACATGTTGCTCACACCCGTCGCGCACATTTTCATGGACGATGGCACCAGATAATGAT  
TGCACAGTGCCGGAAATTTATTGCTCTGCGACATTTGAAGCGAGTGAAGCTTTTTCCTGACAGTAAAGATTCAGGAA  
TGGAATACATTTACGGCAACAGAGATACCGGATTTACTGACGTCGGCCTCCGGCAGTATGAAACGCCGAAAGAAATG  
CTTGTACCAGGATATTGTTGTGCGAGATGTAAGGCCCTTGCACGTGTCAAGAACATCGCGCGCTGTCTCAGGAAGTCAC  
CGAGCGTTTTTATGTGTGACCGGATCCGGGCTGTGGTCTGGTGTTTAAAACGCTTACAGCCATCACCCGCTTCATTGTCC  
GCCGGTACAGCCGGACGAACTGGCAGAAGCCGTCATGAAAAACAGGAACTGCGCCAGTACGGTTAAAAACACAATCA  
TATTCGCTGCGTCTGGAATGA  
>Cluster\_66866  
GTGGGAACTATTCAGACTTTGAGACTGATTTTATCGAAAGAACACTGGCCCTAATCGATCAATATAACAATATGATTGA  
GGGGAAGCCCTTCCCTGAGCAGTACAACATATACGCTTACTCTGAACTGTCTTTTGGGCTAATCGTATGCGGAGAGAC  
GCGTGTTTTCTTACCTCCGTCGGATCGTCTAACCGCAGAGCTTAAAGCTGAAATTTGGGTTAAACGAGTCGCGAGTTACCG  
GGTGAAGAAATGAACTTAAAGAGAATGATTTATAAAAATGCGAAATTTCTGCGCATTTCTGTGTTCAGGTTGAATCTAT  
CAGCGATGACCGCTAGTTGATCAATCATCTTCAAAGAGACGATGGTGTGCGCGGCTTATGCAATTTTACAGTGCC  
CGGAGCTTCTCCATTTCTAAAAATATTACCGGGCTTTGTTGATCGCCAATATGAGACGCCATCGGGGTGTCCACGACT  
GACGTTGTGTAA  
>Cluster\_6417  
GTGAATCAGATATTCATGGTGATTTTCTCGTGTGTGTCAGGATTTATCGTCGGAAATGCTGGAGCGACCGAGGATGGCA  
AAAAAATGGGCGGAACGTGATGCTGCCGATTTATCACAGAGGTAATGCTCAATTTGCTGCTCGAATAATTGAACAGG  
GGCAACTATAGCCCGTATGAGCTGTAAAGATGCGCAACGAAATCTGCTGAAATTTCTGCCAGGCTGCTTATCTG  
TCTGATAGTGTAAACAGTTGCGTGCCGAAAGCAAAAAAATATGCCATACGCTTACGCGCAGCGAAGCATAACCGAGATCT  
TGCCGCTGCGGTCAGAGGCAAAACAACAAAACCGCGAAGGAATGCTCACCAACATGCTCGGAGATATTGACAGCAGAAG  
CTCAGCTTTATGCTGAAATGCTGACGAACGCTACATCGCAGGAGTACTTGTCAACAGATCTATGAATCTTTAAGAGAT  
AAAAAGCATCAAAATGTAG  
>Cluster\_3128  
ATGATATTTTGTGGATTTTTGTTGATGGAATTTGTTATGCCTCAGATTAGCCGGACCGCACTGGTACCCTACAGCGC  
GGAGCAATGTATCAGTTAGTGAATGACGTTTCACTTATCTCAGTTTTTGGCGGTTGTACCGGAAGTCCGATCTGG  
AGTCCACTCCTGGCCAGATGACTCGCGGAGATGCTCTTAAAGCTGGGATAGCAAAAACGTTTACTACCCGCAACCAG  
TTGACAGTAACCAAAGTATTTCTTATGAATCTGGTGGATGGGCGTTCAAGAAATGATGTTGGTGGATGGAAGTTTACGCC  
GCTGAGCCAGGAGCGTGTGCTATCGAGTTTCACTCAGCTTTTGGTTTTACCAATAAGTTGATGAACTCGCCTTTGGT  
CGGTTTTAAAGAGCTGGCGTCTAATATGGTCCAGGCTTTTACGGTTCGTGCGAAAGAGGTTTACAGTCCAGGTTAA  
>Cluster\_59972  
ATGAAAAAGATATTAATGTTGAGTCTGCTATTTTTTACTACCGCGGGCTTTAGTGAAGTTTCGGATACGTTAGTGAC  
GGGAGGTTATGATAAAACAAGCGATGCTGACGCGATTAACATGCGCGGAAAGAAACCATAAATTCATCGAGGTTATGA  
ATAAAAAAGATGCCGATACCTTTCGAGTCAAAGCCGATAACCGATACGGAAGAACCAGGATTTTCTGGCTTACGGAT  
GTCACCTTATTTAACGGCATGTTTATTGGCGTAATCAGCAATGACCCCTGGTATTGTTACAAACGTTAGAAATATGGCCAGGA  
GTGGAAAAATCAAGAAAGAAGATATTTCAGACTGGATGATACGCGCGGGGATAAAAATTTACGGCGGTTATACCATTGATC  
CTTTATTGGTCACTATCCAAAAGAAGAAGCCGACGAGCTAAGAGCAAAAATTAGTTTCGCTAA  
>Cluster\_5014  
ATGACAACCTCAGGTCGCAAAAACGTCATGGATATGTTTATCGATGGTGGCGCGCGTGGCTTTACTATCGCCACGACCAA  
CCTGCTGCCAAACGTGGTGTGGGCTTTGTCATCATTCAGGCGTGAAAAATTACCGGCTGCTCGACTGGGTGGGGCATA  
TCTGTGAACCCGTAATGGCGCTGTGGGGATTACCCGTTGAAGCGCAACCGTCTTTTAGCCGATTAATGAGTATGGGT  
GGCGAGTCGCTGTGTTGGCAACCCTGGCGATTAACCGGTCACGATGTCAGCCTTTTACTGCTCCCGCAT  
GTATTTAATGGGCAACCCGTTGCAAAATGTCGGTGGTGGCTGGGGACAGCCGAAGTGAATGCCAAATATTACCCGATA  
TCATTACGGTCTGCTGATTAACGCATTTCTGTGATCTGGGTTATGACGCTTATTGTTTAA  
>Cluster\_66939  
ATGAACCGTATTTATACCTGCGGGGTGCTTGGCCGCTTTTTCTGGCTGGCTGCAACTTCCCTTCTCAGCATACTCCTGT  
TCCGCGTAACTACGGTGTGCTCTGATGTGGCGTTACCCGGCACATCAGTACACATTTATGGGACAAGGTGTGTTTT  
CCGGCCAACCTCCGGTTTCAACGGGGTCTCATCTTCTGACAGCTAACAGCGATCGCCTTTCTTTGACTGGGAAGGTGAT  
GCAATTTGAATTTACGAACTGCGGAGTGCAGGAGTGCAGTTTAACTACAATGGTGTGCTCCGCTGCCGTTACCGAT  
CAACCTTACAGTCCGGATATGACGTTTTTCAATACGTTGAGACTTATTAAGCCAGACAGCCTGGAGGCAACAATCC  
ATCAATATCCCGGCTTGTACAGGTCAGCTTATGACGCGGAGAACCGGAAAAATGA

>Cluster\_62333

ATGTTCCGGGGAGCAACGTTAGTCAATCTCGACAGCAAAGGGCGCTTATCAGTGCCTACCCGTTACCGGGAACAGCTGCT  
TGAGAACGCTGCCGGTCAATAGTGTTCACCATTGACATTCATCACCCGTGCCGTGCTGCTTTACCCCTGCCTGAATGGG  
AAATATATCGAGCAAAAATATCGCGTCTGTCGAGCATGAACCCGGTTGAGCGCCGTGTGCAGCGCCTACTGTTAGGTCAAT  
GCCAGGAAATGTCAGGATGGCGCAGGTCGATGTTAACTCGCGCAGTACTGCGGCAACATGCCGGGCTGACAAAAGA  
AGTGATGCTGGTTGAGACAGTTCAACAAGTTTGGAGTGTGGGATGAAACAACTGGCATCAACAGGTCAAGGAAGATATCG  
ACGCAGAGCAGTTGGCTACCGGAGACTTATCGGAGCGACTGCAGGACTGTCTCTATAA

>Cluster\_38896

ATGCTTAAACAGGTAGAAAATTTTACCAGTGGTTCGTGCTGGGTAATCTGGACCTGGGGTTACCGCGCTATTTTACG  
CTATCGCGGACACGAGAAAACCTTTAGCGCTGGCTACACCCGCCACCACCAACACCGTATGGAGTTGATGGCCGCTATTG  
TCGCGCTGGAGGCGTTAAAAGAACATTCGGAAGTCATTTTGGTACCGACAGCCAGTATGTCCGCCAGGGTATCACCCAG  
TGGATCCATAACTGGAAAAACGTTGGCTGGAAAAACAGCAGCAAAAAACCAGTAAAAAATGTCGATCTCTGGCAACGCTCT  
TGATGCTGCTCTGGGCGAGCATCAAATCAAATGGGAATGGGTTAAAGGCCATGCCGGACACCCGAAAACGAAACGCTGTGT  
ATGAACTGGCTGCTGCTGCGGAATGAATCCCACACTGGAAGATACAGGCTATCAAGTCAAGTAA

>Cluster\_36639

ATGAATCCACTGAAAGCCGGTGATATCGCACCGAAATTTAGCTTGGCGGATCAAGACGGAGAACAAGTTAATTTGACCGA  
CTTCCAGGACAGCGTGTCTGTTTATTTCTACCCGAAAGCCATGACCCCGGCTGTACCGTACAGGCTGCGGCTTAC  
GCGATAACATGGATGAGTTGAAAAAGCGGGCGTTGATGTCTGGGTATCAGCACCGATAAACCCGAAAACTCTCCCGT  
TTTTCCGAAAAAGAGCTGCTTAACTTTACGCTCCTGTCTGATGAGGACCACAGGTGTCCGAACAATTCGGCCGCTGGGG  
TGAAAAGTCTTCAATGGGCAAAACCTACGATGGCATTCATCGCATGCTTCTGATGACGCTGATGGCAAAATCGAAC  
ATGCTTTTACAGATTTCAAACACGCAATCACCCAGCAGCTTGTGCTGAACTGGCTGAAAGAACACGCTTGA

>Cluster\_35373

ATGAAGCTCATTTCTGCGACGCGTAATTTATCTGGAATATGGTTTGGCTTTGTTACTGAAAGGATGCCGTGTAATTTCT  
GGCTCAAGAATTTTTTATGCCGGAATAATCGCAGGTTATTTCTGGATAGTAAAGAATCCGTTTAACTAATCTGTGATAGTC  
AGTTGGGCCATTTAATGCGCAGCATGTTTACAGGACGCGCTTTTATTCAGCTGGATCTGGAAGCGTTGAAAGGGGACAT  
GATATACATAATGCTGTGCGTAACAGATTTGTTGGACTGGAACAAAAAGCACGGGCATGACGATGTCAGAGATGGTGGT  
GATGTTTGGATATATCTACCGCTCAGTTGCGTCCGCTCCATCTCGCCAGTGAGATGAGGGTAAACATAAAAAAGTTAA  
CTTTCCCTGATTTACAGGGCTGGCGAAAAATGGGCTCAAAGAAGTAGTGAAGTTGCGGTTAA

>Cluster\_25411

ATGGACACATTAATCTATCGTCGATGACGTTGGTGGCGGACTGCCACCAAACCTCCCGGCGCTACAGGTGGAATATTTCCC  
GGAGAAGCCAGAAGGTTCCGGCTTAAACACCCGGCTGGCGCGGTGCTGGTGAGTTATATCAGCTCGAAGTACGACAACC  
CGGATGACACCTGTGCCGTCGTTTACGCCGACAGCCGTCACGCTGTGCCGCACTGTATATGCGCCAGCTTAAACGGGCGC  
GGTGGTGCAGTTGCGGTACTTGAACGTTGGTGGCGGCTGCGCTCGGGCGCTGGCGTCCGGTGAACGTCACCCGCCGATACG  
GCTGAAGCAGGACACGTTTATTGGCGAAGTGGCGGGACTCTGGCAGTACGCGCTGGAGTTCGTACCCGACACTATGTTTG  
TAGAGGACAGCGAGGCGGATGAACCTCCGCTGCTGGTCAAGCATCGATTATGAGGAAAAATATGA

>Cluster\_64795

ATGATTGCCACCACAGAAGTGTCTTGTCTGATGCTGTTGTTGGGTTGTTTCGGACGAACACTGCGGGATGTA AAAACGCA  
TCCCGGACCTGGTCTGATGCGCAATTA AAAAATCCTGATGCACCCGCTGCTGTTTATCTGGCCTGGCTGGGCTGGC  
GTGAAGGCGCCACCCCGTGAAGTGAAGCCGCTGGGTTTACGTGGTGGCAAAAATGCTGAACGGTTCGGGAAACC  
GACCGTCCGGGATTTACCAGATTGTTGAGCGCTGATTTCCCGGAATGAACGGACATACATTTGGCCCCACAACCGGCT  
GCGTCTGACGAGCTCCGCAACCTGTATACCGATGCCAGAGTAAATTCAGGAGTCGCATTTGTACGGTATCTATTTTAGTG  
GCATCAGCGCTTACCGTCCGCTGTTGATATGGACTCGCTGGAATGATTACGAGCGCCACTGGCAGACCTGGAATTTCCCG  
GACGAAACCCCGGAATTTGCCGCACATATCAATGTGAATCAGGAAAAGGATCATGATGCTGAAAATTA

>Cluster\_3317

GTGTACAAAAAGAGAGGAACAGGCCATTCGAAACCGCTGAAGAGGTTCTGGCATATCATAAGCGGAAAAAATACCCCTG  
TCTGGAGTGTGGCAAGTTGCTCATTTTTTTACC GCGCCATATCTGGTTTGTGCATGGAATACGCGCTGACGAATATCGTG  
TAAAATGGAACATACCGAAGCAGCATCGCACTGGCAGGATTTCCATATCTGGAGAAACAAAGTGAATATATGAAGCGAGA  
ATAGCAAAGGGAAGCTGGATCCCGCAGAACAAATAGCCATGATGAGAATAAAGGGAAGGCAACTAAAGTCAAGTCTCTGA  
CTGGCGTAAATCGCTCCGTTCTATATGAAGAAACAATATGCCCGACGAGATATCCTTAAAAACAGGGTATGGAAAGAT  
CTCCAGCATAAAAAGTGTCTCTGTGGAGTTGAAAACAGAAGCTATAAGGCGAATGAAAAACAGGAAGTCTGCTGGGGAA  
AAAGTCCAGGATATTGCCGATGACCTGAACGTATCTATCAGCAGATTGTATCACTGGCTAAAGATGTAG

>Cluster\_60506

ATGAGCAAACAACCTACCCGCGCAAGCACCTGTTGATCCCATCGTTTTGGGAAAAATGGGTTCTGCTTACGGTATTTCTGG  
GTGGCTCAGAGTGTTTCTTCCACCGAAGACGCCGAAAGCATTTTACTATCAGCCCTGGTTTATCCAGAAGGCGGGTCT  
AGTGGCAGCAAGTCCAGCTGGAAGCTGGAAGCACCAATCAGGACATGATCATCAAGCTGAAAGGCGTTGACGATCCT  
GATGCGGCAACCTGCTGACGAATGTGAAATTTGCTGGATTATCAGCAGCTGCCCTCAGCTTGAAGAGGGGGACTACTA  
CTGAAAAGACCTGATGGGCTGCCAGGTAGTAACCACTGAAGGCTACGATCTCGGTAAGTCTGATGATGAAAACCG  
GATCTAATGACGTTCTCGTCAATTAAGGCAACCTGAAAGATGCGTTTGGTATCAAGAACGCTCTGATGACCGTTCTCGAT  
GGCAGGTTATCAAGAAAGTCACTACTCTGTTCAATCAAGTAGATTGGATTCGATGCTGTTTAA

>Cluster\_27362

ATGAACAGTACACACCCTATGAGCAGTTGATTGAGATTTTAAATAGCTGCTTTGCCGATGAATTTAATACCCGCTGAT  
TAAAGGCGACGACGAACCGATCTATCTTCTGCTGATGCGGAAGTACCGTATAACAGAATCGTCTCGTCTATGGCTTTT  
ATGCCAGCGCCATCCACGAGATTTGCACTGGTGTATTGCCGGGAAAGCGCGCGTGAGCTGGTTGATTTCCGTTACTGG  
TATTCGCCGGACGCGGATGCCAGAGCAGCAAGTCAAGTTGAAAGTGTGAAAGTGAAGCCGAGGCGCTGGACTGGTT  
GTTCTGCGTGGCGGGGATATCCGTTTAAATGTTAGCTGCGCAACTTGGAGGGGATTTGAAACCGGACCGCTGGTGT  
TTCAACGGCGGTTACATGCGCAGGTGATGGATTATCTGGCAAAACGGCATCTTGAACGTCGGCAGCTTCAATTAAGCA  
CTACAAAATTTATACACAGCCGGAACCTACGGCGGAACAGTTCCCGTGGCCGGAAGCGCTCAACTGA

>Cluster\_10030

ATGACTGATTTCCCGGAAGCAATACTCTTCCGGAACATCGCGACAGCTGGCGCACACCACAGAGATTTTGTCTGCGCT  
TAATGCAAGATTCTGTTTTTCAACTTGATGCTGCGCCAGCGAAAAAACCAGCTATGTCGGCTTTTTTATCTCAGAGGAGC  
AGAACACATTAACCACTTTCATGGCTGAAGCAATGGGATATGCCCTCTGGTTATGCTGGTTGAATCCACCATAACGCAAT  
ATTTCCCTTTTGTGAAAAGGCGCCACTGAAAACAATTCAGTAGTGTGGGATGTGTAATGTTATTGCTGCTGACAC  
ATCTGTCCGATGGTTTTCATGAAGCATAACAACCGCAGTGGGTCAGATTCAATCACGGCAGGACACTGGCATTATTA  
ACCCACTCGATGAAAACCCGTCAGTGGAAATAATAAGGCTCGATGCTCATTATCTGGCACCCATACCCCGTACACAC  
TGCCACTTTACGACCGTTGATGCTGGAGAGTTGATGGCTTCCGCTCAAGGATTTCTTCCCGTGGGAGGCTGCATGA

>Cluster\_48235

ATGATGGGAAACTGATTTGGTTAATGGGGCGTCCGGCTCCGGGAAAGACAGCTGCTGGCGAACTCCGCTGCGGGA  
ACAAACGCAAGTACTGGTGGCGCATCGCTACATCACGCGCAGCCAGCGCGGAAAGTAAAAACCATATCGCCCTGAGTG  
AGCGGGAGTTTTTACC GCGCGGGGCAAAACCTGCTGGCCTTAAAGTGGCACGCTAACGGTCTGTATTTAGCGCTCGGC

ATCGAGATTGACCTCTGGCTGCACGCTGGATTTCGACGTAGTCGTCAACGGTTCACGGCGCATTTGCCGACGGCAGGGC  
GCGTATCAATCGCGCTCTGCCCCGTGTTTTACAGGTTTCGCCGAGATCCGCGCAGCGCTGGAAAACCGTGGCC  
GTGAAAACGCCAGTGAATTAACGCCCGCTGGCGCGCCGCCCGCTATACTCCACAGGATTGCCATACGCTCAACAAT  
GACGGCAGCTGCCCCAGTGGTTCGACACGCTGCTGACGCTGATCCATCAGAAGGAGAAAACCATGCCTGCTTGTGA  
>Cluster\_42174  
ATGACCGCTATTGGCTGGCCAGGGCGTGGGTGTCATCGCCTTCTGATTGGTATCACAACATTTTTCAATCGTGACGA  
ACGTCGCTTCAAAAAGCAACTTTTCGGTCTATAGCGCGTTATTGGCGTACATTTTTCTTCTGGGCACCTATCTGCGC  
GTGCCAGTGCATCTTAATGCCATTTCGTACATTGATTACCTTACGCACGGCAGCTTATGGGTAATGGCGATTTTTATT  
GTGCTGACTGGCGGAATGGCCCTCGCGAAGTTCATCATCTGTCGAACTATTGCCGGTAATGGCGACGATGTCAGTAC  
CTGGGCGCTGTTCCGCTGTAAGGGCTGACCATGCGCTGCGTAATGTGGTTTTCAACGTGTTGCTGGGTGATTCAAACT  
TCTGGGCGGGTTCGATAGCGCGCAGATGATTGAGGGAGTTTTCTGCTCATGAATGGCTGAATATCATCTCGTTCTGG  
CGTATGCAGAGAAGGGAATTGATCCGTTTAAAGTGGAGAAAACCCCTTCCGCGTAGACGAAAGGGGCTAA  
>Cluster\_17502  
ATGGCACTCACGACAAGCAAGAAATGTTCTGTCGCGAGTACCTCATCGATTTAAACGCCACGCAAGCGGCTATTTCGGGC  
GGGTACAGCGCAAGACAGCTAACCGTACCGCATCCGAAAACCTGTCAAAACCTGACATACAATTGAGAATCGCTGAAC  
TGAAGCGCAACGCAATGATCTTGTGGTATTAATGCAGAAATGACTTAAATCGCCTTATTGAAATCGACAGATGGAT  
GTGCTCGACATTTCTCTGCAAAAACGGTGAAGTAAAGCCATTAAGACTGGCCTAAGGTATGGCGCACAGCTCAGG  
AATGGATGTCGTGGAGATGGTATCCGAGATAGCGCCGACTTCTGAAGAAAATCAAATGGCCGATAAGGTTAAAAACC  
TTGAGTTGCTGGGCGTCTATGTTCTGTTTCAGGCGTTTTAAAGCAACCTCAAAAATGAAGTACTGGCCTGATGGAGGA  
CCAGTCAAGACAGAATTAACCACTTAAACGCGGAGCAGGCTGCAGAGGCGTATAGAAAAATGATGGGCTAA  
>Cluster\_48827  
ATGCCATCATGTTGGCGGCCAGGACGGCCAGCCGGATCGGGATACTGGTCTTACCAGAGCCACCGACCGAGCAACCCCT  
TCTCTATCAGATCGTTGACGAGTATTACCCGGCATTCGCTGCGCTTATGGCAGAGCAGGGAAAGGAATTCGCCGGGTATG  
TGCACCGGAATTTGAAGAAATTTCTCAATGCGGGCGGTGGAGCATGGCTTTTACCGGGTTCGCTGCGAGCTTGGCAC  
GCCGAGCACCTGGTGCCTTTCAGCTGTAAGCGTTCGCGTTTTCTGCCGAGCTGTTGGGCGCGCGGATGGCCGAAAGTGC  
CGCTTGCCTGGTTGATGAAGTACTGCTTGAACAACCCATGCGTCAAGTGGTGTGAGCTTCCCGTTTACGCTGCGTTTCC  
TGTTTGGGGTCTGTTGCGGGAAGGGCGGAATCTACGCTAAGGCTTTGGCCAGCGATATCTCCGGTGGATTTGATGTG  
TTCCAGGGGATAGGAGAAGTTCGCTTATCTAGTATGACGCTGTCGCACCTGCTTGA  
>Cluster\_41623  
ATGGCGACTCCCTTTTTTACGTTGATGTTTCAGCAGCCCGCGAGATGCGCTTAAACCGCCCGTGTCCGGCGGGCGTT  
TGTACAGATTGGGCAGCGTCATATGCGTGTATGCCGCTGGTGTATGCGCCGTGCGCGGTGGCACCAGGTTGAAAACC  
CCGTTTATCAGACCGGACCGCTGCTCGTTCGATTGGTATATGGTCCGAGAGCCAGTAAAAAGCGAGCCGTTTATG  
ACAGCATTGCCCTAACACGCGCAACGGGAAGGGGAACCGGATGATCTCTGGTACTTCTATCCGGCTTCTGTTTTT  
TGGTGTCCGGGAGGAGCAAAACGCTGCTGATGTCATCATCTGCGCGCATCCGGTGGCAGCGGTGGCAGTGGCTCCAC  
GTAATAACTTCAATGGTGAAGTCTTGAAGAAGCCAGCTGGACACGCTATTTTCTGGCGGGAAATTCGCTAAATCA  
CTGAAGCCGGAGCGACGACAGATGA  
>Cluster\_7951  
GTGGGCTCATTCGTTAAACGTTGCAAGTGTGGCCGCTGCTGGCGCTGGCGGCCTGGTGCCTGATTTTTCGTTTCTTCA  
CACCTCGCCGAGGGCTCGCGCTGATTGCGCAGCTCGAGGGTGGCGGTTGCGTCTTACCAGTGCAGCGGGTGTGT  
GGACCTCAGGCATCGCCACACTGCCGGGTGGTACCAGAAACGGGATATCACCAGAGAAGGAAGCCGCCGAAATCTGGT  
GCCGACGCTGTAAGCTCGAAGAACGACTCGCGGCTGCTGTTGCGCGGTGGACATGCCACCGCGCTTATGACGCGCTGGT  
CAGCTTCCGTTTTAACGTCGGCACCGCGCGGCTGCTGCTCGACGCTGGTGTATCACCTGAAACACCGCAATGGTGGC  
AGGCTGTGACCACTTACCCGCTGGGTGTTGTAATGGTGGAGTAATACCGGGCTCGAAAACCGCGCTTTCGCGAG  
CGTACTTACTGCCTGAAGGGGGCAATGA  
>Cluster\_41287  
ATGGGAATGATGGCTATTTGACAGAAATGACTCAGAAAAGATTAACCAACTGCTTGGTCTACTAAAAACCTTTGAT  
GGATAATATACATGACACGCTTTTTCAGGATACGCGACTGGATATTGATAAACGCTGGGATTTTTTACACTTTGGCCTGA  
CGGGTACATCTGCATTTGACCCCGGAAGAAATGACCCGCTAAGTCGCGCAGTGTGGTGAACACAGCTAGAAGATGGC  
ATAGATGGCTTCCGGAATGACTGGAATCAGGAGTTAGCCGCGACAATCGACCGACTGGAATCACTGGATCGAAGTGA  
GCTGCGTAAACAGTTTTCCATTAAGCGACTCAATGAAATGGAGATTTAATCCGGGAGTAACCTTTTTCAGAAAGATTAGAG  
GGCAACTCTTTGCTTTCGATCATGCTTGGATGGAAGAGCTGATTAGCGGCTATCGACGATATGCTGCGACAAGGAATCAT  
GCGCTGACGGTTATTGTTGGGTGA  
>Cluster\_23852  
ATGTCGTCATATTATCAGGTATAACATTTACTACTTCTTTGACAAGCCATGCGTTCATGGAATAAGTTGACCCGAACTCT  
TCATATATCAATGATGATATAGTAGATGAACGCAACTTAAAGCACGATGACGAGCTACCCACCGGTTTTTTCGAG  
GCATGATGACTATTCATATCAATTTTCGTGGAAGAAATATGCTGTCGCTTTCATTAAGATAAAGATAAATATGTTG  
TACAAAGTAAATAAGATAACTCAGGAAAGTGGATGTTTTCTCAAGGATAATTTAGCTTTTTGATGGAGGCGTTACGAAAGC  
CCTGGAAGTAAATAAATGAGAGACACATTAACGCCACTGCTTCAACCTGGTTTCTCGCACGTCGACTGGAAGGCTTTT  
TAACTGAAAGAGGCTCTCTTCTTTGTTTACGCTCGCTACAGAGGTTGTAACCCCTCCAGAGAATACTACATTA  
AATCTTTATCAGGTGTGACAGTTAA  
>Cluster\_21781  
TTGCCGTTGGTGTACCCGTTCCGTTGGCCCTCAGCTACACCGCAACGGGCTGGCTGAAATGTAAACGGCGCAGCATTTTC  
TTCTGAAGATTACCCAAACTGGCACAGGCTTACCCCGCAATAAATACCGGATCTACGGGGTGAATTTATCCGTGGCT  
GGGATGATGGACGTTGGCTTGGATGCTGGGCGTGCCTTGTAAAGTCTTACAGGATGACTCCTTTGAAAGCGCACAGGCATGAG  
TCCTTTTTTTATGCGGGTATTTACGTAATGAAACACCAATAAAAAATCTTCAAGTTTACAGCAGATGCTGACTTAAAG  
TTCCACAACCTAATGCGCTTCTCCCGGACAGTATGATGCTTCAACCTGTTTAAATGGTAAATGACGATTAACACTGCTTFA  
TCGAAGGGAATAAAAAATAACAAACGACAGCGACAGGACTGAGTACCAGTATTGTGCGCACAGCAGAAACACGCCCCCGC  
AACGTTGCATTAATTACATCGTAAGAGCCGATGA  
>Cluster\_67012  
ATGGCTAAACACAACCTATTGATCTATCTGCTGGATCTCAAGATCTTTCCTCACATTTTTATCAATATCATCGCCAGAC  
AGGCGGTATCTGGTACATTAATAATAGCAATGGACAATTTTTAGATTGCAGTAATGATTTCTGCGCGTTTTTTGTTCCC  
TGAATGATGTAAGTCAAGATGATTTTTTACAAAATCAGCCTGGAAATTTATTCGGTTTTTACGATAGGAAGCTAAAAGAG  
TATGAAAGCTTACTATTGCGGAGAATAAAAAATAAAAAATATGTTGGTTTCACTTATCTATAGACAGGACGAGTGTCCCTA  
TATTTGACATAAACCATTTCTCGACGGTATATGATGTAATAAAAAATGATACTTTTACATTTTCTCGGACAGAGAAAA  
TAATAGATGCGATATGCAACATCAATAAGAAAAATATATAGTGAATTAACAACACCAACGATTTCTATGGTGTAAATC  
CTTTCTGGATCTGATCTGATGATTGCTTGTGCGATGGCTAA  
>Cluster\_6005  
ATGAATCCATCAATCGTTAAACGCTGCCCTGTCGGGGCGTGGCTATTGCAGCTACGTTGCCGGTTTTTACGAGCT  
TCACACCTCCGTGGAGGGCTGAAACTAATTTGCCGATTACGAAGGCTGCCGCTGCGAGCGTATCAGTGCAGTGCAGGTG

TCTGGACCGACGGCATTGGTAATACATCGGGCGTCATTTCCCGGCAAAACAATCACGGAACGACAGGCAGCAGAAGGGCTG  
ATTTCCAACGTGCTGCGTGTGGAGCGGGCACTGGAAAGTGTGTGAAGCAACAGCCGCGCAAAGGTATGACGCGGT  
GGTGTGCTTTGCCCTTCAACGTGGGAACGGGCAATGCCTGCAGTTCACACTGGTGAATTAATCAATCAGCGGCTCTGGG  
CGGATGCGTGCAGACAGTTGCCGCGCTGGGTTTATGTTAAAGGTGTGTTAATCAGGGGCTGGATAACCCCGCTGCGCGG  
GAGATGGCCTGGTGTACAGGGAGCAAACCTGA  
>Cluster\_21218  
ATGAAAAAATCATAATATGCTCAGTTTACTGATACTCCTGCCTCTGACGGTAAACCAGTAAGCCATTGATTCCAATAAT  
GAAGACTCTTTTACGGATGTTACCGGTACTGTACCGGATGCCGAAGAGATCGCGCGTAAAGCCGAACCTTTTCGTCAAC  
AAACCGGATTCGCGCGTTTATCGTGGTGTACCTGGCGTTAATGAAGCAAGCTTCAGGCAAAATGGCAAAGCGATGCTG  
GCGCATGCGTCATCTTCAATTGAGTGATGTAAGGAAGTGTCTGTTACTTTTACTACCCGCGAGCCACGGTTAATTAT  
GATAACCAACGGCCAGGTTGAAAGCAGCATGGACGATAAATCTCGGCTTCGGTGAATAATCACACTCTGGCTTAT  
TACATGCAGATCTCTGGTATCAGGGAATCAATAATGCATTGGCTGTTTACAAGCACAGATATTAACAACCCGACGCGG  
CCACTGACATATTTACCGCATCCCGGACAAACAGTAG  
>Cluster\_26737  
ATGAGGCGTATTCACATCCTTTTGTATTGGTGATAACATGCGAATCGGTATTATTTTCCGGTTGTAATCTTTATTACAGC  
GGTCGATTTTACATGGTTTTTATTGGCGGCTATGCTGCCCGGGAGCATAA  
>Cluster\_29502  
ATGCTGACGCTGATTTTCTGAACCTTGTGTTTTATTGCTGCGCTGCAATGATTTTATTTCTCAGGTTTGGCATCGG  
AATAAACTGATTCGCGCTGTGACTCACAAGCATTACTGTTTCAAGCTTATTATGACTGA  
>Cluster\_16384  
ATGTCAGACAAAATCATAACGCCGCAAAGGCTCTGTGTGTGATTGTCGGTATTTCAATTTCACTAATGCTGGTTGCTCT  
TTTTCTGTCCCTCGCTGGGTGATGTTGCTTCTGTCGGGGCTGCTGGGGTGA  
>Cluster\_38320  
ATGGCGGGCTCTGTTTCGGATTGTGCGCAAAGTGTGCTTTGTTTATGCCAGATGCGACGCTGACGCGCTTATCTGGCCTA  
CAAAGGGCTAACGTCAGGTTTTTAGCTTACAGTAATATTGCTACCTGCATTAG  
>Cluster\_11179  
ATGGCGAAAAGCATCATTATTTGCTGAAGGTGAAATAACAAGTACTTGGGTTGGGTTGGATGATTTTGGCAATGAGCG  
TGAGCCGGATACATTCGAAAGTCCAGATGATTTGTAAGTGTCTAGAAAATTAATAAGGGGGTAAATGA  
>Cluster\_15165  
ATGGGGTTCGCTTTTGTGTAAGTATCGCCTGATATCTGCTTTTGTGTTAATACCCGTCGTCATCGCGCGTTGTTCTGT  
TGCCGCGGTTGGGTTCCGCAATGTAACGCTGGTGTCTGTATGCTGGCAGCGTGGGAATGGGACAGCTTAG  
>Cluster\_1535  
ATGACCATTATTACCAAAGAACGTAATTGAATTGTTTCAATTAATTTTTCAGGAGGCGGTACTGTGAGTGAATTAGCTATCA  
GGCTTCAATTACCGCTGGCATTGTCATCAAAGGAGAGGAGCATGGAAATAAACCCAGAGGATGA  
>Cluster\_48831  
ATGCCATCTGAATATGATGAACAACTGGATTGACTGATACGCAGCTTCCCGGCAATATGACCTTTTGGATTAATGGC  
GCAGGTTACTGAAGAGAACCTGCATGCCCTGTGGATTTTGGTTCGCTGTCGGCCGGAAGCCTTATAG  
>Cluster\_4964  
ATGAAAAGAGGCGTGTCCCGTAAATATAACGAATCATCGCAGGATATGCATTATCAGGTGATACCAGAGGCATTAACCT  
GTCGCCACGGATAAGAATATACAACATTTCTGATAACAAAACATCATAA  
>Cluster\_12546  
ATGTGTACCGGCTGTTTTATCGAATTAATTGCAGATATAAAAAAACCAACCGTAAAGGTTGGTTTTTCTTGGGATTAT  
TGGTCGGCACGAGAGGATTGA  
>Cluster\_67084  
ATGATTTTCTTTGCCCTGTGGACACTTACCATGATTTCCGTCAGGAAATGTTTCTCCATTATTTATCTTTTGGCAGATAA  
ATTGCCGATAGTCAGTCGCTGTGA  
>Cluster\_1920  
ATGCTGGGTAATATGAATGTTTTTATGGCCGACTGGGAATAATTTATTTTCTGGTTTTCTGGCCGCTATTTTACGCCA  
CAAATGGGATGACTAA  
>Cluster\_20347  
ATGACAATGTTTTATGCGGGTACACCAATCACATGTATCTGGTGTGATAAATCGCGTTACATGACCTCTCATGTTGTGCT  
GGTGGTTATCACGACGTTCTGA  
>Cluster\_3660  
ATGAAACGTGCTCTTTCTCTTTCGCAAAACATATGAAGCTGATGTAATTAAGGATATCAGCATTTAAAAAATGCTCA  
TTTTACGACGCGATTAAAGAGTGTAA  
>Cluster\_50396  
ATGGATTTTCGACACAATCATGAAAAGGCTTACGAAGAATACTTCGAAGGCCCTGCGGAAGCGAAGAAGCTCACAGCTT  
CAACGAATTAACAGGTTGCTTTCCAGTTCGGCAAAATCTAATGGCTGA  
>Cluster\_34145  
ATGCAACCAGAAGTTGAAGTATTAACCGATCATAATGAGCTAATTTGTTTCGAGCTTTATGAACACATTGCCAACACATT  
AAATTTAGGAGTGGGTACAACCTAA  
>Cluster\_43119  
ATGATAAAAATTGATGAAATAGATTTTTTGTCTTCGAAGGATGTTTACAGAGTCCGAAGTACTGAACTATTAGGAAAAA  
TCAACAGGTTATAATGATTGGATAA  
>Cluster\_11126  
ATGACGTGGCTACATAGTAATGCAGAATGGGTTTTCTCTGGTATTGGCGTTTATGCCATATCACTTATAGTATTAGCCAT  
CACAGCATTAATATTTAGAAAAAATAAAAACCGGCACCCAAAAGATCGCTAAGGTTTTTAAATTTGGATGGGGTAACA  
CAACAAATATTAACAAGATGATGGAAAATAA  
>Cluster\_41362  
ATGATTAATTACCTGACCCTAAAGACGACGAGAATATCTTGGCGCTGTCTGTACGCTTCTATCAGTTAAAGCGATA  
TATCCGAAGCTTTCTCCCTATAATAATCAGACCATCAATGGACGCAAGCGCCGGGTGGCTTGCCTCCAGCTTGTATC  
AATTTGCCGACAGATTTCTGGGGGGACGAAAATGA  
>Cluster\_17641  
ATGATGAAAAACCGTAAGGCAAGACTGCTGATAGCAAAGCCAGGGCAACTTATCCGTATCTCAAATCGACTTGTGTTTCA  
CTATAGATATCTTGGTTTTAGGGAGTGGTCTCTATTCGTTTTTACGGTGTCTGGCGAAACAGAAGCGCGACACAAAAC  
GCTGGAAGAATCACACTAACGCAAAGTAA  
>Cluster\_48687  
ATGAACTGGTTTTTCAAATCACTTTGGAAAAATTTGGCTGGCAATTTTGGCCCTCATGGCCCGGGTTGGGTATCGAACAT  
TATAAACCTGTTTTGCTCTGGCGATCTCCAGTTTTCAGGCTGGCATGACCTTGGCTCGTGTAGTTGGGATTTTTATTTTTT



CAGTCGGTTCGGTACTTGGTTATTTCTGA  
>Cluster\_67054  
ATGAATGCCCGTACACTCTCAGACTATATAGCCTTTTATCATAACGGGAATCAGGCTGAATTTGCCCGACATATGGGCGT  
AAACCGTCAACAGGTGACGAAATGGATAAAGGGCGGATGGATTGTATTAACCATCAGTTGTTTCCAGCCCTCAGCGTGACA  
TTCCCGAAAATATTAGCCATGGAGGATCAGCACTTTAG  
>Cluster\_21081  
ATGATGAAAAAACAATCTACTGACTATGAAATTCGGCCACCAATGGATGCTTGCATTTGCCAGCGCGGACAATAAAAC  
GATTGCCCGACAAATGAACAAAACAGTGGAAATTTTGGTGGGGCCACATCCGGAACAGTATGTCTGGGTTTTAAATTTGT  
TAAAAACACGCAAAATCAAACGAAGCGGACCCGTACCCCTGA  
>Cluster\_99  
ATGAACGAAGACCAGAACCGGGCGGTGGCGCTGCTGCTCGCTGAACTCTGGCAGGGGGATACCCGTGATATCCCGCC  
GGCGGCGTATGACCCGCTGTATTTGTGTCCCGTTGCGGCTGTGAGCTGCGGCTGATGTGCTGAGACAGCAGCGGATGG  
CGAACTACTGCCACTGGTGCCGTGGAGCAGAATAA  
>Cluster\_64805  
ATGGCTGTGAAACCAAAGAAAAACGCTCTGCGGAAATGCCCCGAAACTCAAACCCATCGTCAAGCGGCGCTGGCTGA  
GGAGGGCAATATTCATATCGTCAAAAAGCCGAATCATGTATCTGTTAATGCAGATTGTGGTTGGCCCGGCTATCGCGG  
GCCAGATCATCAGAGAGTCAAAAATTAATCAGTAA  
>Cluster\_3427  
ATGCATTTTCGCTCAGCGAGTTCCGCGCCCTGGTTGTGTTGAATGGCGTGGCGTTATTGCCCTCTGTTCCGACCGTGGAGCGG  
CATACCCAGACCGTTGTATGCTTTATTTGCGGGGCGAAAGGGGATGCCCGCATTTGCGGATATTTTATGGATGAGTTAA  
CCGCGCGGCTTGCCAACGGGGTCTGA  
>Cluster\_36667  
ATGAAAGACCGTAGTACAGGCGAGGCAATGGAAGAGCTTATCCACGCCGAACCGTCTTATATGGCGAAGCTGCTGGCCGA  
GGTTGTTTCATGATGGCAATGCGGATGAGTTGGCAATCATGGAGCAGCAGATGTGCGGTGCTTTTGCATGAGAGAAGTTA  
ACCCGGCGTCATGA  
>Cluster\_3239  
ATGTACCTCTCAAGAATAACCTTACATACCGGCCAGCTTTCGCTGCGCAGTTGCTGCATCTGGTGGATCGCGGTGAATA  
TGTGATGCATCAGTGGCTGTGGGATCTCTCCCTGGCGGCAAGAAAGCAATTTCTTTATCGTGGGAAGAACTCTAG  
>Cluster\_9  
ATGGATGTAAGAGTAGGAGGTATTTATAGGCTCTTGTGTTGGTGGGAGAGTATTTGGTTCTCCCTGGGGTATTAC  
TAACCAATCTTTTCTTAATTTATTTGTTCTCTGGTTAGGAGCTTTTTTTTTCTGCCAAATCTTTTAAAGAGTGTGGCTT  
AA  
>Cluster\_34011  
ATGTTTAAAGCTCCTTATCATCTGATTAACACAGGCGGACGTTTCGCCAGATGATTCATTCCTGGGAATATCCGAC  
TTATGACGATGCATGGCGTGTGCTGTGATGGCATATTCGCCAATGACAAAACAGGGGCGATTAAACCCACAAATGCG  
CAGCAAAAATCATGGAGGGGTAA  
>Cluster\_29477  
ATGCGAAAGTTTTAAATAATTTATGAAACGGGAATAGCCGGTGGAGATTTGAGGATGAATTCGAAAGTGGATGATGATGC  
GACGCCGTGATGAAATACATGACGAAGCAAAAAGATATTTTCTTTAACTACTGCAATTACTCATATCAGGAAATAAAGACG  
AAGAGGAAGAACAATAATGGCTGA  
>Cluster\_37723  
ATGCAGCAGAAAAAATTTCTTTAATTTATCTGATTTTTAAGCATGATTTTCATAAAAAGAAAGTGTCTGTTAATCCAGC  
GACACATCCTGTGCGCGTGAGTGTGTGAGAACAGACGCTCCACAGTGTGATCAGCAGGTGGATAATGCGGTCCCGGGCT  
TTACGCAGAAGCTGTAA  
>Cluster\_48607  
ATGATGCTCGGCTGGATGATTCATTTTTAGCAGTTGGTTTTTTCATCGGTATTTGTTGGTGTATGTCAGTTGCATCAATGA  
CTACATTAAGAGCGGTGTTATAGAAAGACGCGGTGCTATTTATCGCATTTGTAGAAATAACCAACCCGTGAAGGAGATTA  
AGGATGATCGTATTAAGTAA  
>Cluster\_38869  
ATGAACATCATTTGCCATTTATGGGACCGCATGGCGTCTTTTATAAAGATGAGCCATCAAAGAAGTGGAGTGGCGCTGGT  
GGCGCAAGGCTTTTTCAGATTTATCTGGCCACAAAACAGCGTTGATTTGCTGAAAGTTATCGAACATAACCCACGAATTTGGG  
CGGTGATTTTTGACTGGGATGAGTACAGTCTCGATTTATGTAGCGATATCAATCAACTAATGAATATCTCCCGCTTTAT  
GCTTTTCATCAACCCACTCGACGATGGATGTCAGCGTGCAGGATATGCGGATGGCGCTCTGGTTTTTGAATATGCGGT  
GGGCGAGGCGGAAGATATCGCCATTCGTATGCGTACAGTACCAACGAATATCTTGATAACATTACGCGCGGCTTACGCA  
AAGCCTTTGTTTACTACGTCAAGAGCGGAAGTACACCTTTTGTACGCGGGGCGATATGGCGCGCACCCGATATCAAAAA  
AGCCCGTTGGCTGTCTGTTTTATGATTTTTTCGGCGGGAATACCCCTCAAGGCGGACGCTCTATTTCCGTCACCGAGCT  
TGGTTCTGTTGCTCGACCACCGGGCCACACTGGAAGCGGAAGAGTACATCGCGCGGACGTTTGGCGCGGAACAGAGTT  
ATATCGTTACCAACGGAACATCGACGCTGAACAAAATTTGGGTATGTACGCGCGCCATCCGCGCAGTACGCTGTTGAT  
GACCGCAATTTGCATAAATCGCTGGCGCATCTGTTGATGATGAACGATGTAGTGCAGTCTGGCTGAAACCCGACCGGTAA  
TGGCTTGGGGATTTGGTGGGATCCCGCGCGTGAATTTACTCGCGACGATCGAAGAGAAAGTCTGCTGCCACCACCG  
AGGCACAATGGCCGGTTCATGCGGTGATCACCACCTCCACTATGATGGCTTGTCTACAACCCGACTGGATCAAACAG  
ACGCTGGATGTCGCGTGCATTCACCTCGATTTCTGCTGGTGGTGGTGGTGGTGGTGGTGGTGGTGGTGGTGGTGGTGGT  
TGGTATGAGCGGCGAGCGTGTGGCAGGAAAAGTGTATTTGAAACGACGTCGACCCACAAAATGCTGGCGGCTTATCGC  
AGGCTTCCGCTGATCCACATTAAGGCGAGTATGACGAGGAGCGTTTAAACGAAGCCTTTATGATGCATACTACACCTCG  
CCCAGTTATCCCATTTGTTGCTTCCGTTGAGACGGCGGCGGCGATGCTGCGTGGTAAATCCGGGCAACCGGCTGATTAACCG  
TTCAGTAGAAGCAGCTCTGCATTTTCGCAAGAGGTTCCAGCGGCTGCGGGAAGAGTCTGACGGCTGGTTTTTCGATATCT  
GGCAACCGCGCAGGTGGATGAAGCCGAATGCTGGCACGTTGCGCCTGGCGAACAGTGGCACGGCTTTAGCGATGCGGAT  
GCCAATCATATGTTCTCGATCCGGTAAAGTCACTATTTGACACCGGGAATGGACGAGCAGGGCAATATGAGCGGAGA  
GGGATCCCGCGGCGCTGGTGGCAAAATTCCTCGACGAACGTTGGGATCGTAGAGAAAACCGCCCTTATAACCTGC  
TGTTTTCTCTTATGATTTGGCATCGATAAACAAGCAATGGATTTATGCGGTTGACGGAATTTAAGCGCTCTTAC  
GATCTCAACTGCGGATCAAAAATATGCTACCCGATCTCTATGCTGAAGACCCGATTTCTACCGCAATATGCGTATTTCA  
GGATCTGGCGCAAGGGATCCATAAGCTGATTCGTAACACGATCTTTCCGGTTGATGTTGCGGGCATTTGATACCTTCC  
CGGATGATCATGACGCCACATCAGGCATGGCAGAGACAGATTAAGGCGAAGTGGAAACCATTTGCGCTGGAACAACCTG  
GTCGGTAGAGTATCGGCAAAATATGATCCTGCCCTTATCCACCGGCGTACCGCTGCTGATGCCAGGAGAAATGCTGACCAA  
AGAGAGCCGACGGTACTCGATTTCTACTGATGCTTTGTTCCGTAGGGCAACATTTACCCCGTTTTGAAACGGATATTC  
ACGGCGGAAACAGGACGAAGACGGCGTTTACCCTGACGAGTCTTAAAAATGGCGGGATAA  
>Cluster\_29235  
ATGAACGTTATTGCAATATTTGAATCACATGGGGTTTTATTTTAAAGAAGAACCCATCCGTGAACCTTATCGCGCGCTTGA  
ACGCTGAACTTCCAGATTTGTTTACCCGAACGACCGGTGACGACTTATTTAAACTGATCGAAAACATGCGCGTCTGTGGC

GCGTTATTTTACTGGGATAAATAATAATCTCGAGCTGTGCGAAGAAATAGCAAAATGAACGAGAACCCTGCCGTGTGAC  
GCGTTTCGTAATACGTATTCACCTCTCGATGTAAGCCTGAATGACCTGCGTTTACAGATTAGCTTCTTTGAATATGCGCT  
GGGTGCTGCTGATGATATGCTAACAAGATCAAGCAGACCCTGACGAATATATCAACACTATCTGCTCCGCTGACCA  
AAGCATGTTTAAATATGTTCTGTAAGGTAATAATACCTTTCTGTACTCTGGTACATGGGCGGTACTCATTCCAGAAA  
AGCCCGTAGTACGCTGTTCTATGATTCTTTGGTCCGAAACACCATGAAATCTGATATTTCCATTTCCAGTATGAACT  
GGTTCTCTGCTGGATCACAGTGGTCCACACAAGAAGCAGAACAGTATATCGCTCGCGTCTTTAACGCGAGCCGAGCT  
ACATGGTACCAACGGTACTTCCACTGCGAACAATTTGTTGGTATGACTCTGCTCCGGCAGGCAGCACCATTCTGATT  
GACCGTAACCTGCCAAAATCGCTGACCCACCTGATGATGATGAGCGATGTTACGCCAATCTATTTCCGCCCAGCCGTA  
CGCTTACCGTATTTCTGGTGGTATCCACAGAGTGAATTCAGCAGCAGCTACCATTGCTAAGCGCGTGAAGAACAACAA  
ACGCAACCTGGCCGTACATGCTGTAATTACCAACTCTACCTATGATGGTCTGCTGTACAACACCAGCTTCATCAAGAAA  
ACACTGGATGTGAAATCCATCCACTTTGACTCCGCGTGGGTGCCTTACACCACTTCTCACCGATTTACGAGGTAATG  
CGGTATGAGCGGTGGCCGTGTAGAAGGGAAGTGAATTTACGAAACCCAGTCTACTCACAACTGCTGGCGCGCTTCTCT  
AGGCTTCCATGATTCACCTTAAAGGTGACGTAACAGCAAACTTTAACGAAGCCTACATGATGCACACCACCTCT  
CCGCACTACGGTATCGTGGCGTCCACTGAAACCGCTGCGGCGATGATGAAAGGCAATGCAGGTAACGCTGTGATCAATGG  
TTCCATTGAAAGCTGCGATCAAATTCCTGTAAGAGATCAAACGCTGAGAACCGAATCTGATGGCTGGTCTTTGATGAT  
GGCAGCCGGATCATATCGATACGACTGAATGCTGGCCGCTGCTGCTGACAGCACCTGGCAGGCTTCAAAAACATCGAT  
AACGACACATGATTTTACCCGATCAAAGCTACCTGCTGACTCGGGGATGAAAAAGACGCGCAGTACGACCACTT  
TGGTATTCGGCCAGCATCTGGCGAAATACCTCGACGAACATGGCATCTGTTGTTGAGAAAACCGGTCGTATAACCTGC  
TGTTCTCTGTTAGCATCGTATCGATAAGACCAAAGCAGTCTGAGCCTGCTGCGTCTGACTGACTTCAACCGCGCTC  
GATCTGAACCTGCGTGTGAAAAACATGCTGCGCTCTCTGATCTGTAAGATCTGAAATCTATGAAAAACATGCGTATTC  
GAACTGGCTCAGAAATACCAAACTGATTTGTTACCAACATCTGCCGATCTGATGATCGCGCATTTGAAGTCTCTGC  
CGACTATGGTAATGACTCCGTATGCTGCGTTCCAGAAAGAGCTGCACGGTATGACCGAAGAAGTTTACCTCGACGAAATG  
GTCGGTCTGATTAACGCCAATATGATCTTCCATATCCGCCGGAGTTCTCTGGTAATGCGGGGTGAAATGATCACCGA  
AGAAAGCCTCGGTTCTGGAGTCTCGAGTCTGTGTAATCGGGCCTACTATCCGGGCTTTGAAACCGATATTC  
ACGGTGCATACCGTACGGCTGATGGCCGTATACCGTTAAGGTATTGAAAGAAGAAAGCAAAAAATAA

>Cluster\_43362

ATGACACCGCATGTGATGAAACGAGACGGCTGCAAAAGTGGCGTTTAAATCAGAGCGCATCAAAGAAGCGATTCTGCGTGC  
AGCTAAAGCAGCGGAAGTCGATGATGCCGATTTGCGCCACTGTTGCTGCGGTTGTCAGCGAGCAGATGCGAGGCGCGA  
ACCAGGTGGATATCAATGAGATCCAGACCGCAGTTGAAAACAGCTGATGTCGGGGCCATACAAAACCTGGCTCGTGCC  
TACATCGAGTACCGTACGATCGCGACATGAAACGTAAGAAACGCGGTGCGCTGAACAGGAGATCCGTTGGTCTGGTCCA  
GCAGACAACTCTCGTTGCTCAACGAAACGCCCAAAAGCAGCAAGGTGATTCCAACCCAGCGGACCTGCTGGCCG  
GGATCGTGGCTAAACACTATGACGCGCAGCACCTGCTGCGCGTGACGTTGGTGCAGGCACATGAGCGTGGCGATATTCAC  
TATCACGATCTCGATTACTCGCCGTTCTTCCGATGTTCAACTGCATGTTGATCGACCTGAAAGGATGCTGACCCAGGG  
CTTTAAGATGGGGAACCGCGAGATTGAACCGCCGAAAGTGCATCTTACGGCAACCGCTGTAACGCGCAGATTATGCTC  
AGGTCGCCAGCCATATTTATGGCGGCACCACCAATTAACCGTATCGATGAAGTCTGGCACCGTTTGTCCACCCGACGTAC  
AACAAAACATCGCAAGACCGCGAAGAGTGAACATCCCGGACGCGCAAGGCTACGCTAACTCTCGTACCATCAAAGAGTG  
CTACGATGCCCTCCAGTCTGGAGTACGAAGTAAACACCTGCACACCGCCAAACCGTCAAACACCGTTTGTGACCTTTG  
GTTTTGGTCTGGGACCAGCTGGGAGTCCGCTGATTGAGGATCTATCTGCGTAAACCGTATGCGCCGCTCGGTA  
AACCGTAAACAGCGGCTGTTCCGAAACCTGGTGTGTTGCGATTCGCGATTCCGCTGACCCATAAAAAGGCGATCCGA  
ACGATCAAACAGCTGGCGCTGGAGTGCCTAAGCAAGCAGCTGATCCGGATATCTGAACTACGATAGGTAAGTAAAG  
TCACCGGTTGCTTTAAACCCCGATGGGCTGCGCAGCTTCTCGCGTGTGGAAAAATGAAACCGGCGAGCAGATCCAC  
GATGGTCTGAACAACTCGCGTATGACGCTGAACTGCGCGTATTTGCTCTGGAAGCAAAAGGCGATGAAGCCACCT  
TCTGGAAGCTGCTGGATGAACTGTTGGTCTGGCAGTGAAGCTGATGACCCGATCTCGTCTGTTGAAAGGCTGAAAG  
CGCGCGTAGCCCCGATCTCTATATGGAAGGCGCTTGTGGCGTGCCTGAAATGCTGACGACGACGTTTCTGAAATATTC  
AAAAACGGTCTGCTGCTTATTTGCTGGGTTACATCGGATCCACGAAACATTAACCGCTGTTCCGGCGGAGCAGATGT  
TTACGACAACGAGCAGCTGCGCGGAAAGGATTTGCGATTGTTGAGCGTCTGCGTCAAGCGGTTGGATCAGTGGAAAGAAG  
AACTGGCTACGGTTTCCAGCTCTACAGTACGCGAGTGAAGCTGAGAACTGTCGACCGCTTCTGCGCTCATCTGAGT  
TTTTGGGCTGGTCCGGCGTACCGGATAAAGGTTACTACACCAACAGTTTCCACCTCGATGTGGAGAAGAAGTGAACCC  
GTACGACAAGATCGACTTGAAGCGCTTACCCGCCACTGCGCAACCGTGGCTTCATTGCTATGCGGAGTATCCAAACA  
TTCAGCACAACCTGAAGCGCTGGAAGATGCTGGGATTCAGCTATCAGCATGTACCCTATTACGGCACCAACACCCG  
ATCGATGAATGCTACGAGTGTGGCTTTACCGCGAGTTTGAAGTCAACAGCAAGGCTTCACTTGTCCGAAATGTGGTAA  
CCATGACACCTCCCGTGTGCTGGTACTCGCGCGTGTGCGGATATTTAGGTAGCCGGATGCACGTCGCTTTAACGCTG  
GTAAGCAGGAAGAAGTTAAGCGCCGCTTAAACATTTGGGAAATGGGCAGATAGGTTAA

>Cluster\_38506

ATGGACATTGAAATACGCCACTGCAATAACATCGTACGAGCACATATCACCTCACTGCCGATAAACTGAACATTAAGTT  
TGCGCCAAATGGTACTGGAAAAAGTACGCTGTACGGGCCATAAGCTGTGCGGCGCGGAGCAGATTCAGGGACTACAGG  
CACTGATGCCCTTCCGGCTGCGCGGAGAAAAACCCGATAGCACCGGGCCATTGTCATCGGTGCTGACGGGATTTGGGGAC  
GTGATGTGCTTCAACGAGGATACGTCAGTTTACGTTTCCAACCGGACGACTCATCAGTACAGCTTTAATATTTCT  
TATCCGCAATCAAGCCCATGCGGAAAGAGAGCGTGAATAAGAAATGACGCAAAAGATCCGGGCTGTTTCCAGGATC  
ACACTGAGGTGAACCTCTGATAGACATCTACAGGAACCTCAGTAATGCTTTCAAATCAACAGTTCGGGATTTACAGT  
TCTTCAACCGCATGAGAGGCTGTGTCAGCGGAAATAAATACACCACATTCGGGCTGGTCTTGAAGACTATCAACCTA  
CATCCGCACTGAAACCGCGTGGAAATGGATTGACTGCGAGACAAAGGACTCGAGTTTTCGCCCTTTCCGATGGCTGCT  
GTCGCTTCTGATCCGGTATATCACGGAAAGGACAAATTCGCCAAGTCAGAGAGGATACGATAAATCCACCATT  
AAAAACCTGACCGTATCATCAGACTGGTGGAAAACTCGGTAATACCTGACGGAGAGCGCCAGAGAACGCTTCTGGC  
CATCACTATGCTTCAAGACCGTCCGGAAGCCGAACATATCGAGTACCTAGTGGCGTTGAAACGCCAGCCGATACGCTGA  
CAGAAAACTCACTGCGCTGAGAGGCTTGAATGTTTCCAGCTGCAGGAACAGCAGAACGTTCCGGGAGTGTCAAGCC  
AGGTTGATTGACCTGCAGTCTTCCCTGATCTGCAATCCGAACATGACAGGGGATCACCGACAGACTGAACGCGGCCCT  
TATGGACCTGATAAACCCTGCGGACCGCTGCAGGGAAAAATTAACCGCACCGGGACAGCATGATCCGGCTGATCGCAC  
AGCACAACAAACATCAATAATTTCTCACTTATGACGGCTATAAATACAGGTTGGATAAGCCGGCGAGGGAGAGCAG  
AGAAAACCTCAGGCTACGACATAGATTTTACGGGTAGCTGACGGCGGTAGCCAGCATCTCAGTATGGAACCGGAA  
CGCCTTTGCGATTGTTTATTCATGATGAATGCCTGTCAAAAAACCCGGGACTGATTATCTTGTGATGATCCCATATCT  
CTTTTGATAAAAAACAGAAGTTTGCATTTCTTGAATGCTGTTGACAGCTGCAAGTGGTGAATGCCTGAAAGAACCGGACT  
GTACTTATGCTGACGATGACGTGGAGCTGTGATGACACGCTGAAGTCACTCAGAGGTTGTTTCACTATCAGGTTGAC  
CGCTTCTGCTGCGCTGCTGCTGGAGTATAGAAGAAATACCTGTTAACGACCGGCATATGATGATGATGATGATGATG  
TCTGCAAAATCCATCACCGCTCAGCAGACTGTGAGGAGATCATTAAGCTCATCTATCTTCTGCTGCTACTTTGAAATCGTT  
GACGAACGTTGGTATGCTTATCAGCTTCTATCCAAATATTCATTCAGCAGCTGCGCCCGCTGGATTTGCTGCGAGCTC  
CGTGGCGCTCGGCTATCCCAAATGGCTCCTGAGAAATTTACAGGCTTTCAGGCGCTTTCGGGATATCCGGGAGTATGGACA  
GTTTTGATTACCCGACTTACAGCTCTGCTCAGCAGCCAGATGAAATAAAAAACCTGATACCCTGCTGCTGTAACGGC  
TATGAAAACTGCAGGATTTCCGTTTACTGAACTGGATCAGGACCATCCGGTAAACGAAATTCGTTAACGAAACGTA

CCACATTGAAAATGAGTTCATCTGTCAACTAGATCCGTCAGATTTCGATCTCATCCCGGAGTACGTGATTATGGAATGTG  
ACAAGCTCATCGCCCTGCCACCGCAGCAAAACCAGAGCTCGGTTGCCCGTATCGCTTGA

>Cluster\_39628

ATGCTCAATCAAGAACTGGAACCTCAGTTTAAATATGGCTTTCGCCAGAGCGCGGAGCACCCGTCATGAGTTTATGACCGT  
CGAGCACTTGTCTTACCTGGCCGTGCTCAGTAACCCATCTGCCCGGAGCGCTGGAAGCGTGTTCCTGTGGATTGTTGGCC  
TCCGTCAGGAACCTGGAAGCCTTTATTGAACAAACACACCCGTTCTGCCCTGCCAGTGAAGAGGAGCGGACACACAGCCG  
ACGCTGAGTTTTCAGCGTGTACTGCAACGTGCGGCTTCCATGTCAGTCTCCGGTGCAGTGAAGGAGGAGCGGACACAGCCG  
CGTTCTGGTCGCTATCTTTAGCGAACAGGAGTGCAGGCGGCATATCTGTTGCCAAACATGAAGTACAGCCGTTGATG  
TGGTGAACCTTATCTCTCATGGCACGCGTAAAGACAGCGCACAGTCTTCTGATCCTGGCAGCCAGCCAAACAGCGAA  
GAACAAGCTGGTGGGAGGAACGTATGGAGAATTTACGACGAACCTGAATCAGCTTGGCGAGTGGGCGGAATCGACCC  
ACTGATTGGTCTGAGAAAGGAGCTGGAGCGTGCATTCAGGTTCTCTGCCGTGCCGTAACAAACACCCGCTGCTGGTGG  
GGGAGTCTGGTCTGGTAAACCCGCGATTGGGGAGGGGCTGCATGGCGAATGTTTCAGGGCGATGTGCCGGAAGTGTG  
GCTGACTGTACGATTTACTCTCTCGATATCGGTTCTCTGTTAGCGGGCACAAAATATCGCGGACTTTGAAAAACGCGAA  
TAAAGCGTTGCTCAAGCAGCTGGAGCAAGACATAATAGCATCTGTTTATTGATGAGATCCACACCATTTATCGGTGCGG  
GTGCGAGCTCTGGTGGCCAGGTCGATGCGGCTAACCTGATCAAACCGTTGCTCTCCAGCGGTAACAAACCCGCTAATGTT  
TCGACAACCTATCAGGAGTTCAGCAACATTTTGGAAAGCCGTTGCTCTGGCGCGTCCGTTCCAGAAAATGATATTTAC  
TGAACCGTCAATCGAAGAACTGTTCAATCATCAATGGCTGAAACCGAAGTATGAAGCGCACCCACGACTGGCTTATA  
CCGCAAAAGCGGTGCGTGGCGGTAGAGCTGGCGGTGAAATACATTAACGATCGTCACTGCGCGGATAAAGCGATTGAT  
GTTATCGAGCAAGCGGGCGCTCGCGCACGCTGATGCGCGTAAGCAACGCAAGAAAACCGTTAATGTGGCGGATATTGA  
ATCCGTGGTGGCCGATTTGCACGCATTCAGAGAAGAGTGTTCCTCAGAGTGACCGGATACCCGTAACAAACCTCGGG  
ATCCGCTGAAAATCTGGTCTTTCGTCAGGATAAAGCCATTGAGGCGCTGACTGAAGCCATTAAGATGCGCGCTGCAGGT  
TTAGGTCACGAACATAAACCCGCTCGGTTCTGTTCTGTTGCGCGCCCTACTGGGGTCGGGAAAACAGAGGTGACGGTACA  
GCTTTCGAAAAGCGTTGGGCAATTGAGCTTCTGCGCTTTGATATGTCGAGTATATGGAACGCCATACCCGTCAGCCGCTGTA  
TTGGTCCGCTCCGGAACATGTTGTTGATCAGGCGGTTTGTGACTGATGCGGTATCAAGCATCCACATGCGGGTGCAGT  
CTGCTGCTGGACGAAATCGAAGAGCGCACCCGAGCGTGTCAACATCTCTTTCAGGTGATGGACAACCGGTACACTGAC  
CGATAACAACGGAGCGCAAGCGGACTTCCGTAACGTGGTGTGCTGATGACCACTAACCGGGGTACGTTGAAACCGAGC  
GCAATCCATTGGTCTTATCCACAGGATAACAGCACCAGTGCATGGAAGAGATCAAGAAGATCTTTACACCGGAATTC  
CGTAACCGTCTCGAACAATATCTGTTTCGATCATCTCAACCGAGTGCATCCATCAGGTGGTGAATAAATTCATCGT  
CGAGTTCAGGTTTCAAGTGGATCAGAAAGGTGTTTCTCGAAGTGAGCCAGGAAGCGGTAACCTGGCTGGCCGAGAAAG  
GTTACGACCGGGCAATGGCGCACGCTCCGATGGCGCGTGTATCCAGGACAACCTGAAAAACCGCTCGCAACGAACTG  
CTGTTGGTTCGCTGGTGGACGGCGGTGAGTCAACCTCGCGCTGGATAAAGAGAAAAATGAGCTGACTTACGGATTCCA  
GAGTGCACAAAAGCACAAGGCGGAAGCAGCGCATTA

>Cluster\_58814

ATGTCGAGCTTAATGAAAAGTTAGCCACAGCCTGGGAAGGTTTACCAAGGTGACTGGCAGAATGAAGTAAACGTCGG  
TGACTTCAATTCAGAAAACCTACTCCGTACGAGGGTACGAGTCTTCTGGCTGGCGCTACTGAAGCGACCCACCC  
TGTGGGACAAAGTAAATGGAAGCGTTAAACTGGAAAACCTACACGCGCAAGTTGACTTTGACACCCGCTGTTCC  
ACCATCACCTCTCACGACGCTGGCTACATCAACAAGCAGCTTGAGAAAATCGTTGGTCTGCAGACTGAAGCTCCGCTGAA  
ACGTGCTCTTATCCGTTTCGGTGGTATCAAAAATGATCGAAGGTTCTCGAAAAGCGTACAAACCGCAACTGGATCCGATGA  
TCAAAAATCTTCTACTGAATAACCGTAAAACCTACAACAGGCGGTGTTTCGACTTTACACTCCGGACATCTGCTGCTG  
CGTAAATCTGGTCTTCTGACCGGCTGCGCAGATGCATATGGCCGTGGCCGTATCATCGGTGACTACCGTCCGCTGCGCT  
GTAGCGTATCGACTACCTGATGAAAGACAACTGGCACAGTTCCTTCTGCAAGGCTGATCTGGAAAACGGCGTAAACC  
TGGAAACAGACTATCCGCTGCGCGAAGAAAATCGTGAACAGCACCAGCGCTCTGGGTGATGAAAGAAAATGGCTGCGAAA  
TACGGCTACGACATCTCTGGTCCGCTACCAACCGTACAGAGACTATCCAGTGGACTTACTTCGGCTACTGGCTGCTGT  
TAAGTCTCAGAACGGTGTGCAATGTCCTTCGGTCTGACTCCACCTTCTGGATGTGTACATCGAACGTGACCTGAAAG  
CTGGCAAGATCACGAAACAGAAGCGCAGGAAATGGTTGACCACTGGTTCATGAAACTGCGTATGGTTGCTTCTGCTG  
ACTCCGGAATACGATGAACCTGTTCTGCGGACCCGATCTGGGCAACCGAATCTATCGGTGGTATGGGCTCGACGGTCTG  
TACCCTGGTTACCAAAAACAGCTTCCGTTTCTGAAACCCCTGTACACCATGGGTCCGCTCCGGAACCGAATGACCA  
TTCTGTGGTCTGAAAACCTGCCGTGAACCTCAAGAAATTCGCGCTAAAAGTTCATCGACACCTTCTCTGCAATG  
GAGAACGATGACCTGATGCGTCCGACTTCAACAAAGATGACTACGCTATTGCTGCTGCGTAAAGCCGATGATCGTTGG  
TAAACAAATGCAGTCTTCTCGGTGCGCGTGAACCTGGCGAAAACCATGCTGTACGCAATCAACGGCGCGTGTGACGAAA  
AATCGAAAATGCAGGTTGGTGGTCCGAAGTCTGAACCGATCAAAAGCGGATGCTGAACTATGATGAAGTGTGAGCGCATG  
GATCACTTATGACTGGCTGGCTAAACAGTACATCAGTGCATGAACATCATCCACTACATGCACGACAAGTACAGCTA  
CGAAGCCTCTGATGGCGCTGCACGACCGTACGCTTATCCGCAACATGGCGTGTGGTATCGTGGTCTGTCCGTTGCTG  
CTGACTCCCTGCTGCAATCAAAATGCGAAAAGTAAACCGATTCGTGACGAAGACGGTCTGGCTATCGACTTCGAAATC  
GAAGCGGAATACCGCAAGTTGGTAAACAATGACTCCGCGTGTAGATGACTGGCTGGTGGTACTGTAAGACTTTTCAATGAA  
GAAAATTCAGAACTGCACACCTACCGTACGCTATCCGACTCAGTCTGTTGACCATCACTTCTAACGTTGTGTATG  
GTAAGAAAACGGGTAACACCCAGACGGTCTGCTGCTGGCGGCCCTTCGGACCGGGTGTAAACCCGATGCACGGTCTG  
GACCAGAAAGGTCAGTAGCCCTCTGACTTCCGTTGCTAAACTGCGGTTTGCCTACGTTAAAGATGGTATCTCTTACAC  
CTTCTTATCGTTCCGAAACGCACTGGGTAAAGACGACGAAAGTTCGTAAGACCAACCTGGCTGGTGTGATGGTACTT  
TCCACCAGGACATCCATCGAAGGTGGTACGACCTGAAAGTAAACGTTGATGAAACCGTGAATGCTGCTGACGCGATG  
GAAAACCCGAAAAATATCCGAGCTGACCATCCGTTGATCTGGCTACGAGTACGTTTCAACTCGCTGACTAAAAGACA  
GCAGCAGGACGTTTACTCGTACCTTCACTCAATCTATGTA

>Cluster\_21988

ATGGCACAAATTTAAAGTTGATAGTTTTATCGTTGAGCTAGGCTTCAGCGAGAAGCTTATTAAGGGCTTGCAAGAGTTGA  
AAAGGCAGCTTTGCGACTCAGCACAAGAATGAACGTAATTTGAATAGAGCGTTTAAAGGTCGATACCAAGCACTTGACA  
GCAATCTGACAAGTCTTCTTTAGGCAACTTGAAGGAAAGTTTAAATAAGACCTTTGACAAGATTGAACAGAGCAAGAAAT  
ACTAAAGTTTCCGTTTCCAAAGTCAAGTCAAGTAAAGTACGCTATTAATCTCCAAAACAACCAAGACGCCACGAATAGCGG  
CAACAGAGCAATCACAGCAGCGCATAGTGTGAATATGTCTAAGCTTGGTATATTAATCCGCTGATGGCTAAAATGTTTA  
AAGCACAGTCTTACGATTAAGTAAAGTGGCAATATGGAAGTGAAGTTTAAACGCTGAACTTGAATAAATTAAT  
CAATCTCTTCTGTAAGCGTTGAATAAATCAGGTCACAGACAAAGGCCACCGATTAACAATGAAGCGCACGCTTAA  
TAATCTTGAAGCAATGCAATCAAGTTATCTGGTGCATTTTACTCTGTGATGGTGTCTTAAACGCTTACAGGCCATCA  
TGAATGCAGGCTTAAACGAGATTCGCGACAGAGAGCCGCTAAGTTTGTACTTGGTGAATAAGCATCTGAAGCTGAAACA  
TTTATCAGGGGACTGGCTGACAAGACAGGCTTAAATATCTGAAAGGCTATCAAGCTACGCTAAGTTTGCAGCAGGCTGC  
TCAGGGTTCTATGTCACAGGAACAGACAGGAGCTATTTGGTAAATGCAACGGCTATGAGTCTGCTTAAATGGGGCTAGTA  
ATGATGAGCTAAACGGCATCTGAAAGCTTTTGGAGCAATGGCTTCTAAGGGCAAGATTCAGGCTGAAGAATTACGTTGG  
CAGTTAGGTGACCGTATGGCTGGTGCATTTAAGCTATTCGCTGAAGCATTTGGGTATGACTGCTACAGAGCTTGAATAAGC  
GATGAAAGACGGGAAGATTTAAGTACTGATACCTTAAAGTGCCTAAACAGATGGCTTGAATGATGATGATGATGATGATG  
GTGGTTGGGCTGAAGTCTGTAAGGACTCAGACAGCTTTAGGTAAGTTAGCAAAACAACTGGGATGATACGATGGTTAAA  
ATCTTCTCAGGTTACAGGATGAGTTAAACGGCTTCTTATCCAGCCTGAGTAACTGCTTAGTGAATGGGTATGAGTTC

TTCTATCGTGGTATGCTATCGGTTGACTTATCGACATGCTTAAAGCTGGTGTAGATGACATCCGTATCTTTAAACAATC  
ACCTTGAAGGCTGGATTTTACAGACTAAGAAGTTCTATTACAGTCTTGATGACACTAAGCGAAAGCTACTTGATGAAGTC  
GGTATGGATTTTATCAACTTCGTCAAAGGTCCTTGTATAGCGTTATCTGCAAAGACACATTCAGTGTACTACAGGGGT  
TATGAACCTGACAAGAGCAATCAACAAGTTAGGTACAAGAGCTAATCAGGTGGCTGGTCAAGTACTGGTAAAGGTTG  
GTGAAAACCTGAAATGTGTAGCTGGTGGTGTAGGTAGTCTTGCAATTTGGTTATGCTGATGACGGTATGAACACGGC  
TTAGCATTAGCTTCAATGATTTCCACAAATCAGAGGTGTACTCTTGGTTTATATGCATGAAGAAAGCACTGGATTTTAT  
GAATCAGGAAGTAGTCAAAAACGCTAATATGCATCCATCTGGGGTAGGTGGTGTAGTACTTAAATCTGTGTATTCTG  
GTGACCCATAAAACCGAATGTGATTAACGAAGGATGGAGTAGAATTTTAGTTCAATGGGTGAATTTTAAACAATGCC  
ACAAATGAATATTGCAAGATTCAATCATCCAGAAATTTGATTACCATGAAACAAGATGCATCATTAAACGAGCACTGCATCCA  
AAATCTAAGAGATGAAATTAGTGCTTTGAGTAAGCGTATTTCAGGAACAGTGAAGTTTCACTTGGTGGTGAAGTTGCCA  
TTAAACCAGATGAACACGCTTTATGACCTTTAGCAGTAAATATCTACGACCAATATGCAGAGCTACGTTATTAAAGTTCA  
TCATTTCCAGAAGATGATTGA

>Cluster\_39555

ATGCGGTGGATCCTGTTTCATCTCTTCTGCTGCTGGGCGCACCTGCCTACGCGGTATCCATACCCGGCGTTACAACCAC  
AACGACAACCGACTCAACGACTGAACCGCCCGGAACCGGATATCGAACAAAAAAGCGGCCATGCGCGCATGGCCG  
ATGTACTGGATAATGACACCTCGCGTAAAGAGTTGATCGACCAAGTTGCGCACCGTCCGCGCTACGCCCTCGCGGAACCG  
GTACCGAAGATCGTACCACCGCTGGTTGAAGAGCAAAACCGTGTGCAAAAAGGTACCGGAAGTCAAGCCCATTAATG  
TGAAGCCCTTCCGCGCGCTTCCGGCAACTTTATCGCAATATCACCGCTCCCGCATAAGCCGTTTAAATCCACAACCT  
TCAGCAATCGCTGACCCACTTTTCAATGTTAGCGGATTAGTGTGTTTTTACTGGCTGATTCGTCTGTGCGCACTGAT  
CCGCTGTATCGCAAAATGGGCGAGTGGGCGCGCAAAAATCGTGAACGCGTAACTGGTTCAGCTTCCGCGCATGAT  
CATCGGGCGTTTTATTATCGACCTGCTGTTACTGGCACTGACATATTTTGTGCGCCAGTATTAAAGCGACAACCTGAATG  
CGGGCAGTCGCACCATCGCTTTTCAACAAGTTTGTGTTTCAACGCTTTCGCTGATGAATTTTCAAGCCGTACTA  
CGCTGATTTTTTCCCAACAGTACTGAACTGCGCCGTTTACAGATTATGACGAGACCGCCGTTACTGGAGTCTGTCG  
CCTGAGCTGGTTAAGCAGCTGATGGCTATGGTGTATGGTGTGCTGATTAATCTAATCAGGTTAGTCTGACAG  
TAGGTGCGCTGGCGAACGTCATCATTATGCTGTGCATGACCGTCTGGGCGTTGACTGATTTTTCGTAATAAAAAAGAG  
ATCACCCAGCATTGTCTCAACTTTGCGGAGCATTTCTTGGCCTTTTTCAGCCTGTTTATCCGCGCCTTTGCGCTGGTGTG  
GCACTGGCTGGCAAGCGCTATTTTATCGTGTGTTTTTCTTTTCTGTTGTTGCTGATCCGGGCAATAGCCTGAAATTTATGA  
TGGGTGCAACGGTTAGCAGCCTGCGCATGATTTGTTATCGCATGCTGATTTGTTTCCGCTGATTTTTCCGCGTGGCAGAA  
ACCATCACCTCTCGCCACATATCAGCGAAATATCCGGAGTGAACAAAACGGCTGAATGGCTGGCTTTCCGCGGCACT  
GAAAACAGCGCTATTCTGACCGTCTGCGTGGCGGTAATGCTGCTGTTGAGCGCATGGGGATTGTTGATTTCTGGAAC  
GGCTGCAAAAACGGCGCGGGGAGAAAACCGTAGATATCTGATCCGTAATCGCACTCATTTCTTTCTCGCGCGTGGC  
TGGACGGTCTCGCCAGTTTGTATCGAAAACCGGCTGGCTTCGGATATTATGCGCCCGCTACCAACAGCGCTGACCG  
AACCTGCTGACGCTGTTCCGTAACCGCTGGCGGTGATTATCAGTACCATCACCATCATGATTGTGTTGTCGGAAATCG  
GCGTCAATATCGCCCATTTGCTGGCAGGTGCGGGGCGATAGGTCTGGCTATCTCGTTTGGTTGCGAAACGCTGGTGA  
GATATCATTACCGGATTTTATTCAGTTTGAACCGCATGAACACTGGAGATTGGTACTATCGGGCCGTTGACCCG  
CACTGTGGAAACGGATGTCGATTCGCTCCGTTGGCGTGGCCAGGATACCGGGCGTATCACATCATTCCGTTGTTCCGA  
TAACCACCTTTGCTAACTTCGTCGCGGTATTGGTTGCGTGTAGTGGCAAAATATGATGTTGATCGCCATGAAGATGCTGAT  
AAAGCCAAATCAGGCATGAAAGATGCGGTAGCGGAATTAATGGAAAACGAAGAAATTCGCGGGCTGATTTATGGTGAACC  
GAAATTTGCGGGGATTTGCTGGCTTAAGCAATACCGCTTACACTGCGTGTTCGTTTACCACGCTGCCACTCAACAGT  
GGACGTTACGCTTTTCCCTCGACAGCCAGGTGAAAAACATTTTCGACCTGGCGGGCGTTTCGCGCGCAGTGCAGACTTAT  
CAGGTGCTGCCAGTCCGGGCGGACCCCGCTGAACCGTTGCGCGGGGGAACCAACGCTTTAA

>Cluster\_42021

ATGAAATCAATGAATATTGCGCCAGTAGTGAAGTGGTATCCCGACTTTTCTACTCATCGCTGCGTGGTGGGAGAG  
TACTGATTTTACGGACGTCGCGGAGTCTGATTTACCGCTGCGGATAGTCGAGTGGCATTTCTGCTTGGCTTAAAGCGCA  
CCGTTTTTTCATCTACCGTGTGTTTTGTTATTCGGAACATGCTGTGAAATACCTGCGGGCGTTACGGCGGTAATCAACGGC  
AACGAGCAGCAGTGGCTGGAGCTGGAATCCGACGCTGTGCAATGAAGAGAAATTTGCTGCCACCGTTTTATGACACGCT  
GACGAGTACGTTGAGATGGTAAATAGCACCTTTGCTTCCGCTGGACATCAACATGGTGGCTTTTAAAAAGCATCCCTG  
CCGGACGCCATTTTTACGATTTCTTTGGCGAGAACATCTTTCCGCGCGATATGTTAAGCTGACGTAATAATGGGCGAT  
CTGCTTATTCATGAAGGATCGGGGAAAGATCGCGAGAAATTCGAGCCAAAGTCTTTCATGCCGATAAAAACCTATTTTTGT  
GCTGAACGGCACATCGGCAGCAATAAAGTGGTACGAATGCGCTGTTAACCGCTGGCGATCTGGTGTCTTTCGACCGTA  
ACAACCATAAAGTCAATCATCACGGCGCTTGAATTCAGCGGGGGCGACGCGGCTCTATCTGGAAGCTTACAGTAAACCCG  
TTTTGTTTTATTGGCGGTATTGATGCGCACTGTTTTAATGAAGAGTATCTGCGCCAGCAAATTCGCGACGTTGTGCCAGA  
AAAAGCCGACTGCGCGCCCGTTTACCTGGCGATTTATCAGCTGGGAACCTATGACGGCACTGTCTATAACCCCGCT  
AGGTGATCGATACCGTTGGGCTCTGTGTGATTACATTTCTGTTGATTTCCGCTGGGTCGGTTACGACAGTATTATCCCG  
ATGATGGCGGATAGCTCGCCGCTGCTGTTGAACTTAAAGCAATGCTTACCGCTGGGATCCGGGATCTTTGTGACGAA  
ACAGCAGGCGGATTTCTCACAGACGTCGAGATCCATAAAAAAGATAACCATATCCGTTGGACAGGCGCTTTTTGCCCCG  
ATAAGCGGTTGAATAATGCTTTTATGCTCCATGCTTCTACAGCCGTTCTATCCGCTGTTCCGCGCCCTGGACGTTAAC  
GCCAAAATCATGAAGGGAGAGTGGGCTGCGGTGGCTGAGTGGCTTGAAGTGGTATTGAGTTCGCGCAAGCTAT  
TCTTGGCGCTGTAAGCTGTTCCGCGCTTTATCCCGCTGTTGTTGATGGCAAATTTGGCAGGATTTCCGACGTCAG  
TGTTAGCCAGCAGCGCGCTTTTTTTCAGTTTGGAGCGGGGGGAAAGTGGCACGGCTTGAAGGATATGCCGCGGATCAG  
TATTTTGTGATCCGTTGCAAGCTGTTACTACTACACAGGATCAATGCCGAAACTGGCGAAATATAGCGACTTTGGCGT  
TCCGCGACGATTTCCGCGCACTATCTGCTGAGAACGGCATTTGTCGGGAGAGTGGCATCTCAATTTCCATTTCTGTTCT  
TATTAACCTCCGGCGAAAGCCACGAGAAGCTGGCACAACCTGGTGGCGATGCTGGCGCAGTTTGAACAGCATATTGAGGAT  
GACTCGCCGCTGGTTGAGGTGTTGCCGAGCGTTTTATAACAATAATCCGCTGCGTTATCGCGACTACACCTGCGCCAGTT  
GTGTCAGGAGATGCACGATCTGTATGTCAGTTTCGACGTCAAAGACCTACAAAAGCGATGTTCCGCGCAGCAGTTC  
CGTCACTGGTGTGAAATCCAGGATGCCATAGCGCTTATATTCGCGGTGAAGTGGAGTTGGTGGGATTCGATGCG  
GAAGGGCAATTTGCGGCAAGGGGCGTTGCCCTATCCACAGGCGTCTTGGCTGGTACCCGAGAGTCTGGGGTGG  
GGCGGTTCAACGTTATTTCTTGGCTGGAAGAAGGGGTAATTTGTTGCCGGGATTTTCGCGCGGAGTGAACGTTGCT  
ATAGCGAAACCGATGCAGATGGCATGAACGATTTGACGGTTATGTTGTAAGTAA

>Cluster\_28253

ATGAGATTAACGACGAAATTTTCCGCTTTGTCACGCTGCTCACCGGTTAACAAATTTTGTGACTTTGCTGGGCTGTT  
GCTAAGTTTCTACACGCCATTCAGTATAAGTTTAGTCAATCGTGTTCAGGCGGTGGCGACGGCGATTGATACCTACCTT  
TGTCGAATGACTTCAGCACAATTAAGGCCACAATAACGAATTAATGATGTCGGCAGATACTGTTCTGTTAGACTGCT  
CATGGTGATAAGCAGGTTTTATACCTGGCCAGAAATGGTAGTTTATCGTCCGTTGGCAACCAACGATCTGTTCTGTA  
GAGGTTCCGTTGATAAAGCATCCGGGATGTCGCTGCGTCTGTTTATCAGGATCCGATGGGCAACTATTTCCATTTCT  
TAATGACTACCGCGCCGCTCACGGGGGCGATTTGGCTTTATCATTTTATGCTCTTCCGCGGTTACGCTGGTTACAACCG  
CAACTTGGCGGGCAAGAAATTTGCTGGAAACCGGGCTACCTGATCTTAAACGGTGGAGTGGCTGCTAAAGTTGGGA  
CATCTATGAATGGCCGCCAGAACAGCAGTGGCTGGATACGCTGCTTTGTTGAAATTCAGAACGACGCAACACACA  
GCCGCTTGTATACGCTGATCCGCTTTATGCGCCAGGACATGAAAACCGGCTCAATAACCGACTCTTTTTCGATAAT

CAGTTAGCAACGTTACTGGAAGATCAAGAGAAAGTAGGTACCACGGGATCGTGATGATTCGCTGCGGATTTCAA  
TATGTTGAGTGATACCTGGGGGACAGCCAGGTTGAAGAACAGTCTTCTCTGACGAACTCTGCTATCGACATTTATGA  
TGCGCTACCTGGCGCAGTGGTGGCGGTACCACCGCAGTGATTTTGTGCGCTGTTACCGCACGGGACGTTAAAGAG  
GCAGAGAGCATCGCCAGTCAGTTAATCAAAGCCGTCGATACCTTGCCGAACAATAAAATGCTCGATCGCGAGCATATGAT  
CCCATTTGTTATCGGAAGAGTATGACCCGCTGCAAAATCAGCCGCTTATTTCCACTATTGCGTTACTGGCCAGGAAAATCTG  
CGGATTGCGAGGGCGCAATAGCTGGGCTATTTACGATGACTCGTTGCCCTGAAAAAGGACCGGGTAATGTTGCGTGGCGT  
ACGCTTATCGAGCAATGCTCAGTCGCGGGCGCCGCGCTTTATCAAAAACCGCGGTTACTCGCAAGGCCAGGTTCA  
TCATCGTGAACATCATGTGCCATCTTTCGATGGTAATGAAGAGGTTAGCTCGGCAGAGTATATGCCGATGGTCTTGCAGT  
TTGGTTTATCGGAAGAGTATGACCCGCTGCAAAATCAGCCGCTTATTTCCACTATTGCGTTACTGGCCAGGAAAATCTG  
GCGATTACGAGTTACCGTTGAGTCGCTGATTCGCCCGCGTTTTACGCGTTGGCTGCGCGATACGTTAATGCAATGTGAAAA  
ATCGCAACGAAGACGCATAAATTATGAACTTGCAGAGGCCGATGTTGGTCAACATATCAGTCGCTTACACCTGTTATTC  
GTTTAGTGAATGCTTTAGGGGTACGGGTAGCCGTCACCCAGGCTGGTTTGACGCTGGTAAAGCACCAGTTGGATCAAAGAA  
CTTAATGTTGAGTTACTCAAGCTCCATCCGGGCTGGTCAGAAACATTTGAGAAGCGAACCGGAGAACCACTGCTGGTTCA  
AAGCCTGGTGAAGCCTGCTCCGGGACCAGCACCAGGTTTACGCCACCGCGTGGTTCGCGAAGCGAGTGGCAGACCC  
TGATTCAGCGTGGTGTACAGGTTGGCAAGGGGATTTTTTCGCGTCTCACAGCCACTTGATACTAACGTGAAAAAATAT  
TCACAAAGATACTCGGTTAA

>Cluster\_20784

ATGTCACAGACAGTTATCACGCTGGCGTTTTGAACACTGGAAGCGCAGCAGGGTGGCACCGGGGAGCCGGTGTACTGGA  
TGAATTTTGTGTTTCCGAAATGTGCCAGGGGTGAACCCGGATATTTCCCGTTGATCGCAGTGAAGCACTGCCGCTTTGGAAC  
AGATGTGACACCGCAACTGTTACCCGCACTGGAGTGGTGAATGAAAAATGGCGTGGTGTATTCCGCTTCTTCGGGCGCT  
GACGTGGGCGATTTTCAAGTTTCAACTGGATCGGACTGCTGAATAAGGCCAGCGAACTCTGGCCATGATTGTTTACGCGC  
TGTTACAGCAAAAGCTGAAAAACAGCGGAAGGGCAGCAGGGGAACGTTGCTTACCGTTTCGTTTCTGATGGAGTACACGGCG  
CACAGACTGAAACCGGGATTTACTACACCGGTGAAACCTGGCAGATTGATTTACGGCGCGTATGGCCGGAATGGATGAG  
CGTCAGCGCTGGAAATTCAGGCCAAAAGGGACGCTAAATGAGCAGGTGGCCAGCGATGCGCTGAAAAAGCGGTTAA  
TCAGTTCTTTGTACCAACGGCACTGGCTACGTTGCGAGGGCTGCGTACATCACTGGCCGCAAAATCAGAATATCACCGTGA  
CGACAAAACCGGTCAAAGTCTGGCTGGATGTGTGCTGGACGGGATCGCTTACCAGCGTGTGGAATACGCAGTGTAAAAT  
ACCGTTACGGAAAACCTGGCTGATTACGTGCAGAACGGTGTGCAGCATTATGTGTTGCTGTGGCCAGCATTTGATGTGAA  
TTGCAAAATTCAGGATTTACGGCCAAAAGGGACGCTAAATGAGCAGGTGGCCAGCGATGCGCTGAAAAAGCGGTTAA  
CCCCGAAATCATCTGATGCCACGACCAGCGAGAAGGGATTACCTCAGTTAAGTAAACGCGACAGACAGCGCCAGTGAAGGG  
CAAGCTGCAACACCGAAGCGGTAAAATAGCGATGGATAATGCAAACCGCGCTTTGCAAAAAGCGCTAATGTGCAGA  
CATCCCGAATCCACCGTTATTTGTTTCAAGATATTTGGTTTGCAGGATACGGTTAAACAGCGGATGGCGCAGTACAGAGAA  
CAGGATGTTCAAGCATCGCTGATGATGTAAACACTGGCCGCTCTGCTTACTAATGGCAGCGCAATTCACCCGTTACGAT  
GCAGCATCGAATGCAGAATGGGCTTTTACAATGACTCAAACAGCTTGCCAGCTAACGCAGTGAGCTTTGTTTTATTCGTC  
TGCCAGAAATTCACCCGGATATGAGGCGTCAGTTCTGGATATTTCCGGGCTTTCTGGTGTGAGTACCGAACACAAATTCGAG  
CAAGTTATACCCGTAACAAAATCAGTTTTCAGGACAAAACCGCGACAATAAATACTGGAATAACTGGTTTGAAGTTTAC  
CATAGTTGAAAATAAACTACCCCGCAGGATATAGGTTGCTCTGCGCGCATGGGTACTGGGTGGTGTCAACCCGTTACGAG  
TTTTGATGGTTTTACGACCGCGGTTTTTATTGGGTAAGCATTGATAATGCAGAAACCGTCGCAGGATGCGGTCACGTA  
CCAATGGAACCCATTTGCTATGGAATATGGTTCTTTACTTGTATTTCCGGCCGGAATGCATACCGCAAGTGTACATCAGT  
GATGCGGGAGATTTTGTCTACAAGCAATGGTGGGTAACCTGGCATCCCTGGAAATCCTTATAGTCCCGTATCTCAACC  
CAATCCCGGTGATATTTGGCGTTTATACGAAAGCAGAGTGTGCAGCCGTTATGTTGTGTCAGCTTACAGTTAGGAACGGGAA  
CGCGGGTTACAACATGGAATTCGCGAGGAGACTGGCCTAACTCCAGGCTATGTCATTACGTAGTAATAAAGACTGG  
ATGGATCAAAAACCTTGACGGGGTGAATTTATGCTCCACTCCAGAAAAGAATAGGTAATCAGTGGTATACCGTTATTTGGGG  
GACGCCATAA

>Cluster\_49404

ATGGGCATTTACTGACAAAGCCTATGCCGACAAATTAAGAAATTTAGAAACTCCTTTTCTTGTATGATCGCTATTTCTTTAT  
GACCATCAATCAGTGTGACGGTAATGGTAGCCCATGCTGACAGATATAAAAGTATGTACAACAGAATATGTGGTGCCTG  
AATATACAAGAAAATACTACTGTATGGCTTGATGAAACATTAACCACTGCTAAACGCTTAAACATTTATTTATTTAT  
CAATCTCCTTTACCCTATGATGATAAGAAAACAATGGAAGTTACCAGGATGGTATATCTCACTCAACTGATAATCCGTC  
TTCAACTAAACAGATTGCATTTGAAGGATATACAGACAGATAAATCTCCTCAATTTCAAAATTTATTTCTTCAATTTCAAT  
CCTGGTTTGAATAAGATAAAAAGCATTGTTAATATAAACCACAAGGAGAAGAGATGGAATAACGAAAATTTAT  
TACAATAGCAATGGTAATGCTATGAAATCTTAAGTTTCTTAATGGACTTATCAACGGCGAGTATATACATATATGA  
AAATGGGACCATTGAAAATAAACGTTATTTTAATAACGAAAATAAAGATGGTGAATGCCCTCATTTTTATGAAGATG  
GAAAATCAAACAGCAACATAGCTATCTGAATAGTAACTCGATGGTCCGGCATATGAATATTTATCTGATGGCAAACT  
ATGCAGGAAAATTTCTATCAGCAAAGTGAATGATTGAAAAGATACCAGTTACTACCAATCAGGAAAATAAACTCTAT  
ACCAATAGCAAAATTTCCGTTGCTAGTAAATTAACGAACTTAAAGGAACTTATAGTGAAGAGGTAAGTTACTGTCTAAATCCG  
TCTATAAAGACGGAAAACAATTTCTGTTCAAACCTGGTATGAAAATGGGCGAAGAAAGAGGAGAACAATTTTGTATGTG  
CAAGGCCAATTAATGGTTTGGTTAAGCAATGGTATAAAAATGGAATCTTGCAAAATCAAAAATAAACAATGACAT  
ACTCGATGGTATAGTGAAGAGTGGTACGAAAATGGCATCCCTGAGAGTCTGTATCCTTATAAGAATGAAAACCCGACG  
GCGTTGCCAAATCATGGAATAAGTATGGTAAATTAACCTATTTCAATCGAATACAAAATGGCGTAGAGAAATGGGGTATAT  
CGTAACTGGAGCAAAAACACAGGTAACCTAACCAAGAAACCCAGTACGTCATGGTATCAGGCGAGGGCGTGGAAAAGA  
GTTTAAACGATCGCACGGGTAAACTATTAACCGCCACGCAATACGTTAAATAAAAAGAATGGCACGGAGGAACTTATG  
ATCAAAATGGAATAAAAATAATTTACGTGCTATCAAAATGATGAGGAATTAATCGTCTTTTATCACTCCAACACAAATAAAA  
GATAATGCAACAAAAGGCAACTCCAGCGCTCAATTTACATTTAGGAAAATACGAATTCACCTGTGCAAAATATAGATGAAGG  
GATTAATGGTTAAACAAATCGGCAGAGCAAAAACACTGATGCGATATACCTTTTATAGCTACAGCCTACAAAAGGAAATG  
GCATACCTGCAACAATGAAAATAACATAACATATCTGCAACAAGCAGCAATGCTGGGCAATAGTAATGCACAGGCGGAA  
ATTTGGCTATTTATATCTCATCGGAAAAGAACTACCACGAACTGCTGATGCTGGTGTCTGGTTTAAAAAGCAGCTGC  
TCAGGGTAATTTTGTGACATTTCTACCTGGGAAAGATGATCAAAATGGTGTGCGGTTGAGAAAATATGGAAAAAG  
CCAGGTTTTCATCTAATGACAGCAGAAGGTGGAATAAAACCTGCGCTTAAAGCATTAAATGAACCTGAACTCAAAACA  
AAATAA

>Cluster\_67029

ATGAAACGCGTTATCGTGATGATGCTGGCTGCACTGACCATCTTCGGAACGGGATTCAGGCGCAGTGATAAATACGGTTC  
AGGAAAACAGTTTCCCGACAGCTGGAAGGGCAGTGGTTGAGGTCCTGAATAACTTTAATCCGGGAGAGGTTATTCGGC  
GCTATACCGGAAAATCCTCCGGAATCAGCGCATTACGGTGGGTGACATCATCAAACCTCAGCCAGCTCGAGGAGCGCAGGT  
GCCAGCGCCGTAATAATTCGGAAGTGGGAAAACCTGACCTCAGAAAGTCAATCATGAATCGCCCAAGACCCCAATTTCCAT  
GGATGCGCATTATCAGTGGTGGTTTTGATGTCCAGGATAAAGCCGATATCGTCCAGAACGGCAGTATGACAAATGTG  
AAACCGTGAATGTCAGTAAACGGAAAATCAGCTCGCATGCTGTGAGCGAACCGGGCGGCGGAGTTGACCTGCACCCGT  
AAGGCCAGATAAAGATAATGTTGTCGGAAAACGGTGGGAAAACCTTACCAGAAAGTTGTCACGCTTGGTTTACCAACG  
CAGAAAACGTAATAAGGAGTGGAGCATTCAATATCCCGGAAAAGGGCGCTGTTGTCATGTGGCTGTGATGGGAAACGGC  
TGGTGTTCATGAGATTCAAAATGTGACAGGGAGAGTGTGACATATGAGTGTAAAGCTTCAAGTTAAGGAAACACTCAGT

ATCATGGGAAAAGAACTGCCATAGATATTTCTCATGTATCCCCGGGAAGACAGTATCTGCTCCGGTGGCGTGAACACGCA  
CTGTACATAACCATAACCGGAACGGATGGGGGCAAAATCCATCAGCGTTTGTATACCGATATGCAGGTTTCTGCAGGGCAGT  
CGTTTCCGGTAGTGAACATCAAGACATTTAACTGGTACAGTAACAGGAGTCTGTGCAGGTGACAATAACCGTGACT  
CTGGATGTTGAGGTTACCGAACTAAGCCTTCTGTGGAGTGGGTGAAACCTGCCCGTTAATAAGGCAGAAAGGTTGTT  
GCAGGGAAGTGTAGTGTACCGAAGCCGAGGAAACAGGAGTAAATATCGACGGGAAACCTATACCGTTTACAGCGATG  
GCTGGGCTGGAAGACAGTATCTGAAACAGGAGGAGATAACCGGACAGTGTGTATATGAAGGATCCGGCCTGT  
ACGGTATCGCGCGTGAACGTGCCAGGAAAAGAGCGGCAGTGCCTGTCTGCAGGAAGAAGTGACCTTCTCCTGCGAGAAAA  
GGTGACCGGGGAAGCTCAACTATGCAGTGGTACAGTGGTTGTGCAACCGGTGAATGTGATGCCATTGAAAAAATAACGT  
CTGATGGTTTCGGTAAAGCTGTTTCGGCGCTGGTTCGGGTGACAGCGCGCCAAAGGATGTGGCTGCCATGAATGTATG  
AATGTCCGGGCGTTACCGGTAACCGGTGGAGTGCAGGATGGCCATTGCCGGATTACGCAACTGCTGTAAGGACTCCGG  
CTGGGACAGGGCATTGGTCTGGCACACTGCGACAGTGAAGAAAAGGCGCTGGGGAAAGCCAAAGAGAACTACTCACCG  
TTTATGTCCGCACATACTGCTCGAAGAAGGCGCTGGGCGTGTGCTGCAGAGAAAAAGGTTTACTGCCAGTTTGTATCG  
AAGCTGGCACAGATGTTTTCAGGCACAGGGCGTAAAGGCGTAAAGGCGTGGGTATCGGTTTGGCAGCGGTAAGCATCTGACTG  
CCGGGACATACGGTGAAGAGCTGCAGTGCCTGCGGTTTGTATCGGATGGATTTTACGTAACCTTACAGTGACCTGAATG  
CCGCACACCATTCCTGTCAGACAGTGAACGTGTGAAAGAACAGGTTGCTTCGGCGCTGCAGCAGTCTGCA  
GAAAGGGGACAGTAA

>Cluster\_35873

ATGAGTACCACAACAGAAAATTTAAAACCGTTATCACCGATACGGGTGCAAAAAAATAGCTCAGGCAGCCGCGCCAGA  
TGTTAAGCCTGTCCGCTGACTCATATGGCCGTGGGCGACCGTGGCGGCACGTTGCCACACAGCAGTAAGCAGACCC  
GTCGTGGTGCATGAGCTGGCGACACACTGTTAATCGCTCATCTGGACGCAACACATCAGAACCGCATTAATGTCGGGAG  
CTGGTTATTCCTCGTGAACCGGGCGGATTTGGATCCGGGAAATGGTGTATTTGATGAGCAGCGCGATTTAATCGCGT  
GGCAATACTGCCGAAAGTTACAAGCAACCGTTGCCGAGGGTCCGGACGTGCACAAACATTTGCAACATTTAACC  
TATCCAGCACTGCCACCGTGGCGCTTACCGTGGATAACACCATGGTGTGGCCACAGTGGATTACGTGGATGACAAACTG  
AAAGCAGTGCACAGCAGCGGACCAATAATACCCAAATCGCAAGCAGCGCTTTCGTTATGGCCGCGATTGCCGCACTG  
TAGACTCTTACCTGACGCACTGAACACGCTGAACGAGCTGGCGGGCGCTGGGCAACGACCCGAAATTTGCGACACC  
ATGACTAACCGCGTTGCGGGTAAACAACGAAAGATGCCACCTGACGCGCTGGCCGGGCTTGTACTGCGGAGACAG  
GTTTCCGTTATTTACGGGAATGATGTTGCCAGTCTGGCAACCTGACAGAAGTCGGGGGGGATAATTTGCGAAATCGA  
CCGTTGCCGCTGTTATCGAATACTCGGTTTACAGGAAACCGTAAATCAGGCTTCTGGCGCATTACAGAAAAACAGAAC  
GGCGCAGATATCCGGGGAAGATACCTTACCAAAAAATTTGGTGCCGCGCATATAGCTCATGGCTGAATATTGG  
TGGCGATAGTCAGTCTGGCAACCGCGCAATTTATTTGCTGGCTGGAGATCAGGGAGCATTAACCATCTTACTGGA  
TGTGCAAGGCTCATGGCTTATGCAAAATAAAGGTCATTACAGATACAGGTTGGGAAATAATTTGTCTGCGAGTGT  
CGGTTGGAAAGTTATGGCACTCGCGGCAATGACCATACCGGTTACCACGCGGAGCAGCTCCAGCGAAACAGAAC  
TAACGCTCAATTCATTTAATATCATGGTGTGCTTACGCTCCTGGCTGGCGACGAGACTACAACAGAAAAATCAAC  
AACCTGCATTTGCTTTAGGGCAACAGGAGCATGTCCGAAATGATAAAGCTGTTGGCTGGAAGTGGAAATAGCGGGGT  
TATAACCAAACTATGGTGGCGCATCGACATTAATCTCCACTTCAATATGAATACGGGAGCTGCCCTGCTGTACAGT  
CCGCGTGAATACAGGAACGGCGGATTTTTCGTTACGCGCTGATGGTTATGGAATTTGAGGCTGAGTGGTTCAGAGT  
TTTACACCAGACCGCAACCTTCTGCGGGAGATGTTGGTGCATACAGCAGGAGAAATGTAACCAAGGTTTATTACA  
GGTATTCGCTTGGCGGCTGTCTCATCTGTTTACAGATGGAATGGTCCCGGCTGGTCTGACAGGTCAGGTTATGCTGTTAC  
GGTTTCAGTTAACGGAACCGTGTGAAATTAATGATACAACCTCAGCAAGGCAATTCAGTATTGATTAATGGGACGT  
GGTATAACCGGGGAGTATTTAA

>Cluster\_28846

ATGAAGCGCGCACCAAACTTAAAGCACCAGCCAGCCGACAAAATGACGGAGGTTATCATCTTTGCGGGTAGTGATGCGTG  
GAGCCATGCGAAAAGAGTGGCAGGAAATGGGCAGGTAAGCATATTTGCCGCGACAATGTGCCACCTGTGCTGATG  
AACACCTGAAAGATATTACCGGTTATCAAAATTTGATGATAGCCGTAGTGTGCGTGTTTACCGCGCAGGGCACATC  
ACTGAACGTAGCCTTACACAGATCGTCACTGCTGGCTGTGGCTGGCGTGAAGACCGTATACGAATACCGGGTATAAC  
TGACACCAGCCGGCGGATTTATCCGACAGTTCCTCGCTCAAAGACGAATACGAGCGGGGAAAGTCTGGTGTGTC  
CTTTAAAGAAAAAATTTACAGAAAAGCCAGGGCGATGATGAATTAAGCCCGGCTTGAAGTCCGCGCATGGTGTGTT  
TGGTAAACGCAAAAAGTGGATAAGCAGTCAAGGCAAAATATCCGGCTGAGACGTGGTTATGTTCCCGCTTGAACACT  
GGGAACGGGGCAATCGTAAAGAGCATTACCGCGTGTGCGTGGAAAAAATAGCAAAACATGAAGTATCACAATGG  
CGGTTCCGTGGTGGCATTTGGCGACCTGACGGCTGGCGGCTGCTGAAAGACACCGGACTGAACGTAACAACATACGGC  
AAATACAGGGCTTCTTGGCTGACTGATGTCAGTTAAGCGGAAACCATGAGGAATGGCAGTTAAGCACAAACCGGGT  
GCATTTTGGCGGTACATCATGCGGACGGTTCGGTCAATGGTGTGCGAAAAAGCCAGCCCTGTTTACCGGAAAAACGG  
CTGCTGTTAATGGTATTTCCGTGGCAGGAACGGCGGAGGGTTGGCGGATACCGTGGCGCGGCTGGCTGGTGGTAAATCCG  
TCCATGATGCTGGGTGGCGGATCTGTTATCCGACCATTAATCGGGTGGTGGGGCTGACGGCTCGGGGTACATCT  
TTTCGAACAGTCACTCGGAGGGGAAACCCACACAGAACATCGCATCCAGTTTATGGGGAGAGCCGGACCAACACCGC  
TGACCTGGTACGGCAGCGGTTAGGTATCGCAACAGGCCGAAGCACATAATGACGGGCTGTACCCCTGGATGAAATA  
GGTCAGGCGGAAACCGCGGGGAGGTGTCCACGTCAGCCTATACGCTGTTTAAAGGTTTCGGGAAATACAGGGGGGAA  
GGAGCGGCAACAGGGAGATCAAAACACTGGCGCAGGTCAGCAATCAGCACCGGAGAAATGACGTTGAACATTTCTCA  
AAACGGAGGGGATAAAAAGTCAAGGCGGGGACGTTGTCGCGCTGCTTAACTGCGGATGGAAGAAAGCCAGCAGTTCAC  
GAATACAGCACCGGAAAGGCGCACGAGACGCTTAAAGGATGCTGGACAGAAAATCAGGGGCGGCGGGTTCGAGAGTG  
GGTAAATGGCTGGCAACACAGCAGGAAGCAAAAGGACAGGTAAGGGCATGCCGTGAACGGTGGCGCAACCTGATAC  
CGGAGAGCTACGGCGAACAGGTTACCGTGTGGGGAGCGATTTGCCATGCTTGAAGCGGCTTAGTGTGTCGCGTCA  
ATTACTGGCTGGGATGTTACGGCGTGGCGGATGCCATACAGCATAATTTAATGCTGGGTGAAGGAGTTCGGCACGGG  
TAACAGGGAAATTTAAACAGATGGTTGAACAGGCAGAGGCTTTTATAGCGTCTGCGGATTCAGCAGATACCTTCCGTGGC  
CCAACCCGACGAGCTGATTTACCGATTAAGAGCTTGGCGGATACAGAAAAGGAGTATCAGAAAAGGAGTACGAGCAG  
TTCCGTTTTTACGCTTCCCGCATGTGTTGAAGTGCATCGCACAGGGATTTAACCCGTGAGATTTTGGCAAGAGCGT  
TGATGGGCGGGGATGCTGGAAGGGGAAACCGCCGTTACAAGAAAAGGCGCTCAGCAAAATGGGGGGAAGCAGC  
ATGTTTTTTACGTGCTGATGTTCCAGCCTGAGGCGAAGATTTAA

>Cluster\_22624

ATGGCTGAACTGACTGCGCTTACACATTAACAGCGCAAAATGAAACGTGAAGGATCCGCCGCTTGTGGTGTGAGCGG  
GGAAGAGGTTGGTGTGTTTATCATGCGCTTAAAGTTGCGTGTGCTTACCTGGCGACTGGCTGTGGAATTCGCCGACG  
CAGATGCTGAAAACCACTGTTTCCCTGGCGCTACAACCTTACTTGGGCGGAGTTCGGCATGCGGTATTCGACCGC  
CGTACGGCTTGTGCTGCTTCTTGGCGCACTTACGGAAAGCTGGAAGCGGAAAGTGGCTGGTGTGTTACTCC  
TGATGGGATGAGTGGGAAAACCACTGATGCGACTCGCTGCGCTGGAGTGTGCTTACGCTTACGCTTACGACCGC  
ATTTTGTCCAGCATTTCAACAGCGTACTTACGGCAATACAGCAGCTATCCTTGGCGGCAAAACAGCGGTTCTCGTTG

GCGCATTTTACTCCCGTACTGACTGGCACCCCGGACCGGGCGACCACAACCAGAACAACAGCAACTCTTACAGCAGCT  
ACTGACCATGCGCGCGGGCGTGGCAGCGGTAACGCTGCGCGTGGGCGGGTAAGTCGCGCTTGGCAGGGCAACTCATTT  
CTCGTATTGCGGGCAGTGGCATTGTACCCGCGCCGCAAAGCGGCAACGGATGACTGGCACATTTGCGGGGAGAAAG  
TTTCGCTTTATTGCGCGGATGCTTGTAGCCAGCGATGAGCAAGCCGACTGGCTGGTGGTCGATGAAGCCGAGCTAT  
ACCTGCGCCACTACCGGACTCGCCGCTGGATTTACGCGCTTTCTCAGAACGTTGTTAACTACGGTGCAGGGCTAGAA  
CCGGACGCTGGTTTTTGTGTAATTTTGCCTCGCTTTCCGCAATTTACACCGTTTTGAACTACACAGCCGATCCGCTGG  
GCGCAGAGATGCCCCTGGAAAAATGGTTAGTGAGGCACTGGTGTGTTGACGATGAAAACCTTACCCATACACACAAGG  
CAATATCGTCATTTCCGCATTTGAAACAGACGTTATGGCGAAGTGGCCAGAAACGCGCTTAAAGGTTTTATCAGTTATTGT  
CTGGTGGCAGCTACCGGACTCGCCGCTGGATTTACGCGCTGATGGATGCACCAGGTCAACATTTTTTTACAGGCGGCT  
GGCGAAAACGAGATTGCCGGAGCGCTGTGGCTGGTGGATGAGGGCGGATTTATCTCAACAACCTCAGTCAGGCGGATGGGC  
GGGTTTTGCTGCGCCGCGGGTAATCTGGTGGCCAGTGGCTGGCGGCGCACGGCAGCAATCCACTGGCGGCGACATTGC  
GCGGACGGCGGGTAGCCGATAGCAGTTCATCCGGCTCGTACGCGGGAAGGCGCAGGGCGACAGCTTATTGTTGGTGTCT  
TTGCAATATACGATACGCTCGACTATCTTTGCTGAGTTTTGTTTACACCGGGGAGTTATGGCGTTTTTCCGCAACGCTG  
CGGTTTTGTGCTGGTGGCAATGGTAATCATCGTGAAGCCAGCAGCGGTTGCTATACGGCGATGGCGCTGTTACCGATGA  
GTGATGCGGGTAAACAGCTGGCTGAACGTGAGCATTACCGCTTACGTCGCGATGCGCAAGCTCFCGCGCAGTGAATGGC  
GAAATGCTTCTGTGATCCACTAAACGATGCCGCTCTTTCTGACGACGACTGGCTTGAACGGCCGTTTTGCTTTCCAC  
TCCCGCTGATCGTATGCTGGCTGGATTTCTCGCTTGAATCGTGAACCTGGATGCAGGTTATAACCGTGGCGCTGCTG  
GGCGTTTACAGAAAACGCCAGTGCAGCGCAGTTATGTACCACACTTAACTTTTACGGCCGTAAGCTGTTACTGGTTCGC  
CAGCGGGAAGAGGCGCGCAGGCGCTATTCGCACCTTGATGATGTTGCGACTGAGCGTCTGCGGATCGCATAACGCAATG  
GCAATTTTTTCACTGA

>Cluster\_53514

ATGACTCTTGTAGATAGTGTGCAAGCAGGTAGGCTAACGATTAGTGAATGATTGATGTCCTGGCGAAAAGATAAAAAATTA  
CACAGCTTCCAGATGGTATCAGCGATACCGTGCATTTACGACTTGTGCTACAGCAAACTCAACTTTTGTGCTGAGCTGCAA  
CAGATGGTCTGGTTGGTATGAGCGTGACACGGCATTGCAAGTATTCGCCAGGGCGTTCATCTTAGCA  
GAATATCAGCAAAGCCTGCCACTGCTTAGAGAATACTGAACGAATTCGGCAACAGCCGGATGAAGAACTTACCAATA  
TGTGGCAATGCCTTAAACAAGCTAAAGAAAACGGACTTCTCAAGCGTATGATTGGAGTTTGAAGAACTCGCGCTTTG  
CCGCGTCTCGCCAGAAAACACACAGTACTGTGGATGAGAAATGCTTTTAAATAAGCAGCAGAAATCTTAAATCAGCAC  
TTCCATCTCGGTTTGGTACTGACCGGAAATGGTTTACAGAAAACATGAAAGTGAACAAAGCCATACAGCCCGCTTCC  
TGATACAGATCCTTATTACGTGAATATGGCCATCTGGCATCTCTATGAATGCTCCGTGAACGCGATAATGAACAAAAGC  
AGGAGAAAGTAGCTAGCCTACATCCATTAACAGCAGTGGCCATCGAGAACAAGATCATCCATCACCACAACTAAC  
GTGATCTTCTTTGGCCCCCTGGCAGTGGCAAGACCTTCAAGTTGACGCAAAAAATGAAAGAGTACACTTCTCATGCTGT  
TCCCGCTGATCGTATGCTGGCTGGATTTCTCGCTTGAATCGTGAACCTGGATGCAGGTTATAACCGTGGCGCTGCTG  
ATCTTGGGAAACGAGCGAAAGTTTCGCCAAATTTATGAACATATGTTGTTTCAACGTAAGGCATTTATAACCGTCTGTAAT  
GGCAATCTATCGAATACCTGCTGGCAGCTTTGCAATCTATACAGATTTCCCGAGTCTGTTAACCGTTGATTATAAGAATCG  
CGGTGAGCCTGCGTATTTAAACAAAACAGATAACAGCGAATGGTTGCTAGTTGATTACAGCTCGAGCAAGTGGAGGATT  
TGGTAGAGCTTACCGCAACTTAAACGTCGGCCCTAAATCGTCCGAAGCCATCCAGCGCTTTGGTGGTGTACGTTCCAC  
CAATCTTACGGCTATGAAGAATTTATTGAAGGTATACGCGCTCGCTCTGACGAGAGTGGCAATATCTCTTATCCCATTTGA  
GCCGGGTATCTTTATGCGCCTTTGCCAAGCTGGCAATGCCGATCCAGGACATCGCTACGCCATTTTTTATGATGAGATCA  
ATCGCGCAACATATCAAGATCTTTGGTGAACCTGATCTACTCATTTGAAGTGCACAGCGTGCAGGCATGCCAATGCA  
ATGAGCCTGCAACTGGCTTTATAGCGGTGATCACTTACGCGTACCCGGCAATGTCGATATCATCGGAGCATGAATACAGC  
GGACCGTCTTTAGCTCTGATGGACACGGCTTTGGCGCTCGCTTTGACTTTGTCGAAATGATGCTGATCTCTCTTTAC  
TGAGTGGAGCTAAGGTGAAGGCATAGAGCTCGAGTCTGTTGTTAGAGAAACTCAATAGCCGCATCGAGGCTCTTTACGAT  
CGTGAACATACGCTGCGGCGATGCTTCTTATGCGGTAAGAAAATGCACCTCGATGTCGGGTGATGAAGAGCTTGTAA  
ACAATGAAGATCGCATTCAGAAAAGATCATTCGCTTTTACAGGAATACTTTTTCGATGACTGGAACAAGATCCGGT  
TGGTGTGCGCAGCAATCAAAAGCAAGACGACAACCTGCAATTCGTGATGAGAAAACCGACGATCTCGATACGCTTTTTT  
GGTAAACAACATGGTTTACGACGCCATGATCAGCAATCAACAGCTTATGAGCTCAAAGATTTGATCAAGAGATCTGGAA  
TATTCACAGGCTTATCGTTCAATTTATCAGCCCAACAGACTCCCTTGTATGAGCAGGCAGTAAATCATGGGTGA

>Cluster\_34076

ATGCTGAACCACGTTTTCGTACACCTGCGGGTGCACAGCGACTACTCGATGATCGATGGCCTGGCCAAAACCGCACCGTT  
GGTAAAAAAGCGGGCGCGTGGGTATGCCAGCACTGGCGCATCACCGATTTCCACCACTTTGTTGGTCTGGTGAAGTTCT  
ACGGACGGGACATGGCCGAGGATTAAGCCTATCGTCCGGGCGAGATTTAAACGTCAGTGGACCTGCTGGGTGATGAG  
TTAACCCACCTGACGGTACTGGCGGCAACAATACCGCTATCAGAATCTGACGTTGCTGATCATAAAGCGTATCAGCG  
CGGTACGCTGCCCGGGCCGATCATCGATCGCGACTGGCTTATCGAATTAACGAAGGGTTGATCCCTTTCCCGGCG  
GACGATGGGCGAGCTGGACGCGAGTCTTTGCGTGGTAAACAGCGCTGGTGGTGGTGGTGGTGGTGGTGGTGGTGGTGGT  
CACTTCCCGGATCGTATTTCTCGAGCTGATCCGACCGCGAGGCGGATGAAGAAAAGCTATCTGCACGGCGGCTGGA  
ACTGGCGGAAGCGCGGTTTGCCTGCTGGCGACCAACGACGTTGCGCTTTATCGACAGCAGCGACTTTGACGCACAG  
AAATCCCGCTGCGGATCCACGACGGCTTTACCTCGACGATCTAAACCCCGCGTAACTATTTGCGCGAGCAATATATG  
CGTAGCAAGAGGAGATGTTGAGCTGTTGCGACATCCCGAAGCCCTTGGCAACCGTTGAGATCGCAACAGCTG  
TAACGTAACCGTGGCTTTGGTGAATACTTCTTCCCGGACTTCCGACCGGGGACATGAGCACCGAAGATTTATCGTCA  
AGCGTGAAGAGGGCTTGAAGAGCGTCTGGCTTTTATTCCCTGATGAGGAAGAAGCTTTAAGCGCCGCGCGGAA  
TATGACGAACGCTGAGACTGAACTTCAAGTTATCAACAGATGGGCTTCCCGGGTACTTCTCATCGTTATGGAAT  
TATCCAGTGGTGAAGATAACCGGCTACCGGTAGGCGGAGCGGCTGGCTCGGTGCGGGTTCAGTGGTGGCTACCGCG  
TGAAAATCACCGACTCGATCCGCTGGAATTTGACCTGCTGTTGCAACGTTTCTTAAACCGGAACGTTCTCCATGCT  
GACTTCGAGCTTACTTCTGATGGAGAAACGCGATCAGGTTATCGAGCAGTACGCGGACATGACGGTCTGATGCGGT  
ATCGCAGATCATCACCTCGGTACAATGGCGGCAAGCGGTGATCCGCGAGCTAGGCGCGTGGTGGGCTGCTGGGCTGCT  
GCTTTGCGATCGTATCTCGAACTGATCCCGCCGATCCCGGATGACGCTGGCGAAAAGCTTTGAAGCGGCGGCGAG  
CTGCCGAAATCTACGAAGCGGATGAAGAAGTTAAGGCGCTGATCGACATGGCGCGCAAACTGGAAGGGTCAACCGTAA  
CGCCGGTAAGCACGCCGTTGGGTTGTTATCGCGCCGACAAAATACCGATTTGCGCGCTTACTGCGATGAAGAGG  
GCAAACTCCGGTCAACGATTTGATAAAAAGCGACTTGAATACCGCGGACTGGTGAAGTTCGACTTCTTGGTTGCGT  
ACGCTCACCATCAACTGGCGCTGGAGATGATCAACAAGCGCGGCAAGAATGGCGAGCGCCGCTGGATATCCG  
TGGATCCCGCTGGATGATAAGAAAAGCTTTCGACATGCTGCAACGCTCGGAAACCGCGGATTTCCAGCTTGAATCGC  
GCGCATGAAGGACTGATCAAGCTTCAACCTGACTGCTTGAAGATGATGATCGCCCTAGTGGCACTGTTCCGCCCC  
GGTCCGTTGCAATCAGGATGGTGGATAACTTTATCGACCGTAAACATGGTTCGTTGAAGAGATCTCTATCCGACGTTA  
GTGGCAGCATGAAGAGTGAACCGGTACTGGAGCAACCTACCGCATTTATCTGATCAGGAACAGGATGATGAGATG  
CGCAGGTGCTTTCTGTTTATACCTCGTGGCGGATATGCTGCGTCTGCGATGGTGAAGAAAAGCGGAAAGAGATG  
GCTAAGCAACGTTCTGATTTGCTGAAGGTGCAAGAAAGAAACGGAATCAACGCTGAACTGGCGATGAAAATCTTCGAT  
GGTGGAGAAATTCGCTGGTTACGGATTTAAACAATCGCACTCGCGCTATGCTTTGGTGTATATCAAAACGTTATGCG  
TGAAAGCGCACTTCTGCGGATTTATGGCGGCGGATGACCGCGATATGGACAACCGGAAAGGTGGTGGGCTG  
GTGGATGAGTCTGGCGGATGGGCTGAAAATCTGCCACCAGATATAAACTCCGGTCTTTACCATTTCCACGTCACGA

CGACGGCGAAATCGTGTATGGTATTTGGCGCGATCAAAGGGTTCGGTGAAGGTCGGATTGAGGCCATCATCGAAGCCCGTA  
ATAAAGGCGGCTACTTCCCGCAACTGTTTGTATCTTGCGCCCGTACCGACACCAAAAAGTTGAACCGTCCGCTGCTGGAA  
AAACTGATCATGTCCGGGGCTTTGACCGTCTTGGGCCACATCGCGCAGCGCTGATGAACTCGCTGGCGGATGCGTTAAA  
AGCGGCAGATCAACACGCGGAAAGCGGAAGCTATCGGTACGGCCGATATGTTCCGCGTGTGGCCGAAAGAGCCGGAACAAA  
TTGAACAAFTCCACGCGCTGCCAACGTGGCCGGAGAGGTGATTTAGATGGGAACTGAAACGTTAGGCGTGTAC  
CTGACCCGGACACCCATCAACCAGTATTTAAAAGAGATTTGAGCGTTATGTCCGAGGCGTAAGGCTGAAAGACATGCACCC  
GACAGAAGCTGGTAAAGTATCAGCGCTGCGGGGCTCGTTGTTGCCGCGCGGGTTATGGTACCAGCGCGGCAATCGTFA  
TCGGTATCTGCACGCTGGATGACCGTTCGCGGGCGGCTGGAAGTGTATGTTTACTGACGCCCTGGATAAATACCAGCAA  
TTGCTGGAAAAAGACCCGATACCTTATCGTACGCGGACAGGTGAGTTCAGTTCAGCGGTGGGCTTAAAATGACCCG  
TCGCGAAGTGTGGATATTGACGAAGCCCGGAAAAATATGCTCGCGGGCTTGTATCTCGTACGCGGACAGGCAAAATG  
ATGACCAGTTTTAAACCGACTCCGTGAGTCTCTGGAACCCACCGCTCTGGGACAATTCAGTACATCTCTACTATCAG  
AGGGCGGATGCACGCGCGGTTGCGTTTTGGCGGACGTTGCGGTCTCTCCGAGCGATCGTTTATTAACGATCTCCG  
TGGCTCATTTGGTTCGGAGCAGGTGGAAGTTTGACTAA

>Cluster\_14332

ATGAGCGGAAAACCGCGCGCGCTCAGGGCGACATGACGCAGTATGGCGGTAGCATTTGCCAGGGTTCAGCCGGGGTGGC  
CATCGGTGCCCCACCGGCTGGCTGTTCCGTTGCCCGGGGGTACGTCGGCCATCCGGTCAATCCCTGCTCG  
GTGCCAAAGTCCCTTCCCGGTGAAACCGACATCGCCCTGCCCGCCCGCTGCCGTTTCATCCTCTCCCGCACTACAGCAT  
TACCGGACAAAACCGCCCGCGCGTGGGGAGCCTCGGCCCGGCTGGAAAATGCTGCGGATATCCGCTTACAGCTGGC  
CGATAACACACTGATCTAGTATGATAACGGCGGAGAACCTGTATTTTGGAGCCTGTTTCCCGGTGAGGACGGTTACA  
GCCCGCAGGAGTCACTGTGGTGGTGGCGGGCGGCTGGCAAACTGGATGAAGTACCGGCTGGCGACTTGGCAG  
GCGTTCGCCGGAAGAACTCCGCTTAAAGTCCGCATCGTTATCTGGCGACAAAACAGTCCGCGAGGGGCGGTGGTGGCTCG  
CTGGTGTGAGCGGGTTCGCGAAGCGGATGAGGTGCTGCTGCGCGCTGCCGCGTACCGGGTACTGACCGGGTGGTGG  
ACCGCTTCGGGCGCACACAGACGTTCCACCGCGAAGCCCGGGTGAATTCAGCGGCGAAATACCGGGCTGACGGATGGT  
GCCGGCCGTCACCTCCCGGTGGTACTGACCCAGCGAGCGGCGGAGAGAAAGCCCGCAGCAGGCAATTAACGGCGG  
GACGGAACCGTCCGCTTTTCTGATACCCCTGCCGGTTACACCGAATATGGCCGGGACACCGCATCCGCTGCTGCTGCCG  
TGTGGCTGACGCACGACCGGAATACCCGGGAGATTTACTGCGCGCGCTGGTGGCTATGGTGGACGCCCGCGCGC  
GAACTGGCGGCGAGTATGACCGCAGCAATACACAGGTGCGCAGCTTTACTTACGATGATAAATACCGGGCCGGATGGT  
GCGCGACCGTACACCGGGCGGACCGGAAATCGTTTACCCTTACGACAGCGAGCGGCGGGTGGCAGAAACAGCTTAAACGG  
CAGGCTTAAAGTACACGATCAGTATGAGAAAGACCGCATCCACATCACCGACAGCCTGGACCGCGTGAAGTGTGCAC  
ACGCAGGGCGAAGCCGGGTGAAGCGGGTGGTGAAGGAAACACCGGACCGGAGCGTACGCGAGAGTACAGTTCAGTTCAGC  
GTGGGCGAGGCTTAAAGCACAGACGGATGCCGAGGCGGACAACAGAATACAGCCCGGATGTGGTACGCGGCTCACCA  
CGCCGGATGGCAGGGCATCGCGCTTTTACTATAACCCACACAACAGTAACTGCGGTGAAAGACACCGGGCTGACGGCTGGA  
TTGCGCGGGAATATGATGAATCCGGCGTCTGATTCAGGAACTGCCCTGACGGCGATATCACCCGCTACCGTTATGA  
TAATCCACACAGTACTTACCCTGCGCAACGGAAGATGCCACCGGCGAGCGGAAAACATGACGTGGAGCCGTTACCGT  
AGTTGCTGACCTTCACTGACTGTTCCGGTTATGTAACCCGCTATGACCATGACCGTTCGTTGGTACGGTACCGGGTGCAC  
CGCGGAAAGCCCTGAGCGTACCCAGTACAGCAGCGCTGACAGGAGTAACTGCGGTGAAAGACACCGGCGTACGAGGCTGA  
AACCGGTATGAATAACAATCGCCGGTACCTGACCGCGCTCATTTGCCCGGACGGCAGCAGAAACGGGACACAGTACG  
ATCGTGGGGAAAGGCCATCTGTACCACGAGGGCGGCTGACCGCAGTATGGAATACGATGCTGCCGGACGGGTATC  
CGCTTCCAGCTGAAACCGGACCCACCCACTTCCGTTACGATGTACTGACCGGCTGATACAGAAACCGGCTTTGA  
CGCGCGCACACAGGCTTACACCCAGCCTGACCGGAAACTTATCGCATCAGCAGCCCGCGCAGACCCGGAGTTACA  
GCTACAGCACACCGGCGAGGCTGACAGCGTTCACACCACCGCAGCAGTCTGGATATCCGCTACCCGTTAGCCACAGAC  
CCGGCAGGTAACCCGCTGCCGACCCGGAGCTGACCCGGACAGCACCCTCAGCATGTGGCCGGATAACCGTATCGCCCG  
TGACGCGCACTATCTTTACCGGTATGACCGTACCGGAGGCTGACAGAGAAAACCGACCTCATCCCGGAAGGGTATCC  
GCACGGATGATGAGCGGACTCACCGGTACCATTTACGACAGTACGACCGGCTGGTGCATACCGGGACACAATATGAA  
GAGCCGCTGGTCAAAGTGCCTATCTTTACGACCGCTGGCCGCGAGGTTGGCAAAACGGGTGGCGCGCTGACCGGGA  
CCTGACGGGCTGGATGCTGCTGTACGGAAACCGCAAGTGAACCTGGTACGGCTGGGACGGCGACCGGCTGACCCAGC  
AGAACACAGGAGCGCATCCAGACGATTTATCAGCCGGGAGCTTACGCGCACTCATCAGGGTTGAAACCGCAACCGGT  
GAGCAGGCGAAAACGAGCGCGCGACCTGGCGGATACCCCTCAGCAGTCCGGCGGCGAAGACGGTGGCAGTGTGGTGT  
CCCGCCGCTGCTGTGACAGTGCAGCGGCTGGAAAGTGAATCCTGGCTGACCGGTTGAGTGAAGAAAGCGCCGCT  
GGCTGGCATCGTGGCGCTGACCGTGGAGCAGATGCAAAACAGATGGACCGGTTGACACCGCGCGGAAAAATCCAC  
CTGTACCCTGCGACCATCGCGGCTGCCGCTGCGCTCATCAGCAGGAAAGGGCAACAGCGTGGTGGCGGAAATATGA  
TGAATGGGGCAACCTGCTGAATGAAGAGAACCCGCATCAGCTGCAGCAGCTTATCCGGCTGCCGGGCGAGCAGTATGATG  
AGGAGTCCCGCTGATTTACAACCGCCACCGCTATTATGACCCGCTGACGGGGCGGTATATCACTCAGGATCCGATTGG  
CTGAAGGGGGGATGGAACCTGTATACATATCCGCTGAGCCCGGTGAATAGCATGGATCCATTAGGATTTATGAATTTAA  
ATCAAAAATATAGATGATATTGGAATATTTGCTATGGCAATGTTGTAATGGAGAAATTAACGAGAAATAAAGAAATAG  
GTGGACTAATATGTAAGAAGCAAGTGAATATTTCCCATGAATCCGATAAGTCAAATGATAATGATAGTGTAGACTTG  
CGAAATATAAAATGCCCTGAAGTTTCAGAGAGATAGGCGATTATCACACTCAGCGTTTTTACTCTGACGATAAAGGAAA  
TAAAGTAAACAAAAGAAATGATGTTTATGATAGTCTAAATTTTCAAGCAAAGATTTAACGAATCTTATATGATGGAA  
TGGGAAAAAAGAAATACAGTGTACTTTGGGAAACACCAAAATACACCTATCTAAAATAATAATCCAAAGCTAAAGGAAAT  
GGATTACAATATCAGGCAAGGAGTAATTA

>Cluster\_40810

ATGTCGGGACAGTTTTCAGTCCGCGTGTATTCGGCGGGATGATTGGTAGCACATTCGTTCTGCAATGAGCGGTACCCG  
CCGTGCGCTTGATTCCTTGAGCGATACCTCACGCGCCTGCAGGAACGTCAGAACGCTTTAACCCGTGCAACGAAACGTT  
ATGGTCAACTGGGTTCTTCCCGGATGCAGCATCTCAACAGCGAGCTGCTGCGGGTAAGCCGACCATGGAGCAAAATGAG  
CGCCAGCAGCGCCCTCTGTCAGCGGCATCCGCTACCAGTGTGCGCTGAAAGCTAACCGCATGGCGCTGTATGGTCAAGG  
GATTTGAAGCGTATGGCATGGCACAGACTGTTTATCATAAGCGTTTCCCTGCGGTTTCCGCTTCCGCTTCCGCTTCCGCT  
AAATGATTGATATGTCGATCACCGCAAAATATGACAATAAAACCGGGATGGACTTGGCCGACAGATAAAGGCTGGGCG  
CTTAAATACAATCAGTATCAGGATGAGTTCAGGAGGCGGTTGGTTCCTCATCAGCGACAATATTGATAATGTGTGAGA  
TATCGGTTTTCTGATGCCGGATAATTGCCCGCGCGGCAACCGCACGCTGCTCAGGACTGGGCAAAAGTGGCCG  
CAGTCTGGCAAAACTCCCTGAAAGGTGCGGACAGATTTGGTGGCGTTTGAAGAAATATGAGTATGAGTATGAGTATGAG  
GGGTCAATTTGAAATTCGGATCAGGTCAGTGGATGCACTCCGCGCCCAATGATGGCGGTTATGGCAGTGGAAAAGA  
GGCTGTTGCTGAAATCGGGGCGAGTCTCCAGATAGCAAAATCGGTGCAAGTTCCACCGACGAAAGCAGCAATATTTTA  
AAAATTTCTTCAAAAATTTTTCGCCGATACTCAGAAACAGTTTGGCTGATCTGGTATTGATTGCGAGGATCTATT  
CGAGTTATAAAGCTGCGGGATCTCCGATTGAAAGGATGTTGAGTGTATAGAAGCTTACCTCAATGGCAAAAGCC  
CGAAGCGTGGCCGCTTCAATCAGCCATGAAAATAAAGAAATGATACGGCAAGAGATGAGGCACTTCCAGGCTTGGCGA  
AAAATTTGGTCTGGCGGATATGTTCCGGATATGCAAGTTCAGGATTTATCCGCGGATGCTGGCCAACTGGACAGA  
TATCGAGATCCGTGCGGCTGCTCAGGCTGCGGATTAACGATTTGCTTGGCAGTGTATGATCAGCGGCTGAAATC  
CCCCTTGAAGCCACTAAAACACTTATGGTACGAGTCCGATCTGGCAATACGCTGGCGATCAATTAGCTCCATCTT  
TTATTTCTTTGACTCAGGAACTGCTTCCACTCATTCAGGGGCAAAACACTGGGTAGCGACTCACCCGCAATTTGTCAGT



GGGGCTTTTAAGCTCATCAGTGCCTCTTTCGGATTAAGATAGCGACTGTGGTCTCAAACCTGGGGCTGAATCTCCTTAT  
TTCCCCCTTTGTAAGTGTCTGAAAAATGCTGTTTTACTTCGGGCCAACTGGCTTCGTCTGTCGCTCGCACTGGGGCAAG  
GCGGTAAGCTCCGCTGGCTGGTACCGGATTTAGCGCCGTCGCCAGAGGAGCCAGAACACTGAGTGGCGTGCTCTCCGGG  
GGGCTGGTTCCGGGAATTAAGCTCGCCGACGCTGCTGTTCTCGGATTTGGACGTGCGCTGATGATGAAATCCCATCGGTTCT  
CGTTATCACCGTTTCGCGGCAGCAGCTTACCTTATCTACCGCAACTGGGGGGCAGTCAGTGGCTGGTTAAACAGCGCT  
GGGCGAGACTTCAGGAAGCCTTTAACGGCGGCATTTGTGGGAATTTGGTAAGTTGCTGATTAACCTGGTCCGCGCAGGCCTG  
CTCTATAAAGCCTTTGCGGCTGCGCTGAAATATTTTCGGCGTGTCTGCGCGCAAAGTTCACCGACTTCGGTGGCCATCT  
TATCGACGGTCTGATTAACGGTATCAAAAAAATGGGGTTCGCTCAAATCCAGTGTAAACCGGAATGGGTGACAGCATCA  
GTAGCTGGTTAAACAGTCTGGCTGACATTCAGGAAGCCTTTAACGGCGGTATCGCGGAACTGGTAAAGTCTGTGATT  
AACTGGTCCGCGCAGGTTCTGCTCTATAAAGCCTTTGCAGCTGCGCTGAAATATCTTGGTGTGATCTGCCGGCAAAGTT  
CACCGACTTCGGTGGCCATCTTGTGACGGTCTGATTAACGGTATCAAAAAAATGGGAGTCTGCTCAAATCCAGTGTAA  
CCGGAATGGGTGACAGCATCAGTGGCTGGTTCAGTGAAGGCTGGGTATTCATTCGCCGAGCCGCTGTTTAAAGGCTTT  
GGTGACAATATCGCGCAGGGGGCGCCATTTGGCTGCGCGGACCACCTCCGCTTGCAGCTCTGGCCGGCAGGAAATGGC  
CAGTGAACGTCTCCCGAATGCCCGTGGCATTACAGGGGCCAGAAATACGGGATAACACTTCAGGTGTTCCGTTAGTA  
TGCCGTGGCCGATATCAACGGGTTTATGCTGCTGCTAAAAATGCGATCGGAGCCGTAATCAATAGTTTGTCTTCCATG  
CCCGCTATCCCGCTCTCCACCGGGCATCGATTTTACAGGGCAACGCTTGGCAATGAGATGACACCGGATGTTCCCGG  
TATCCCTCCGCTGAAATCATGGCTGCCGATATTCAGCCGTTGGTGCAGCTGCAACCGCGGTGGGAACTGGTAAAGTCTG  
TCCAGGTGAGTTTAACTCTCAGTTTTTCTCAATGGCAGGAAACCACAGCGCTGCCGGACTGACTGGCGCCTGAAT  
ATGAGCCTGCATGAGCTGAAAAAATGCTGGAGCTCTGCTGGCTCAGAAACAACGTAAGGAGTACCGCTGA

>Cluster\_28274

ATGGCAAACCTTTTTTATTTCGACGACCGATATTTGCATGGTGTGGCCATTATTTCTGATGATGGCGGGCGCACTGGCGAT  
CCTACAATTGCCCGTCGCCAGTATCCAACATTGGCGCGCTCGGTTTCTGTTTCGGCAAACCTATCCGGGTGCTGATG  
CGCAGACCGTGCAGGATACAGTGCAGCAGGTTATCGAACAAGATATGAACGGTATCGATAACCTGATGTATATGCTCCCTC  
ACCAGGATTCGGCTGTAACGATAAATACCTTACCTTCCAGTCCGGGACCGATCTGATATCGCGCAAGTACAGGT  
GCAGAACAACTCCAGCTCGCCACGCGGTTGCTGCCGACAGGAGTTTCAGCAGCAGGGGATCAGTGTGAAAAGTCCAGTA  
GCAGCTATTTGATGGTGGCGGGCTTTGCTCTGTATAACCTGGCACCACAGGACGATATCTCGGACTATGTGGCCTCT  
AACGTTAAAGATACGCTTAGCCGCTGTAATGGCGTGGTGACGTACAGCTTTTCGGCGCACAGTATGCGATGCGTATCTG  
GCTGGACGCGCTCGCTAACAATAAATACCTGACACCGTTGATGTGATTAACAGTTGAAGGTACAGAACGATCAGA  
TCGCTGCCGACAGTTGGGCGGAACGCCAGCGTTACAGGGCAACAGTTGAACGCCTCGATTATGCTCAGACCGGTTA  
AAAAATCCGGAAGAAATTCGGCAAAGTGAACCTGCGCTGAAACAGTGCAGGCTCGGTGGTGCCTGTAAGATGTCGCACG  
GGTTGAACCTGGCGGTGAAAACTATAACGTTATCGCTCGCATCAACGGAAAACCGCGGGGGCTGGGGATTAAGCTGG  
CAACCGGGCGAATGCTCTCGATACCGCGAAAGCCATTAAAGCAAAAACGGGGAATTAACAGCATTCTCCCGCAGGGA  
ATGAAGGTTCTTTACCTTATGACACCACGCTTTTCGTCAGCTTTCTATCCAGGAAGTGGTGAACCGCTGTTCCGAAAGC  
TATATACCTGGTATCTCGGTGATGATCTGTTCTTGCAGAACATGGCGGCAACATGATACCCACCATTTGCTGTACCTG  
TCGTTGTTAGGACATTTGCCATACCTGCGGCTTTTGGTTACTCCTCAATACGCTAACGATGTTGGGATGGTGGCTT  
GCCATCGGCTGCTCGTCTCGATGATGCGATAGTGGTGGTGGAGAACCTGAGCGCGTGTGATGAGGATAAGTCCCGCC  
AAAAGAAGCGACGAAAAATCAATGTCGCAAAATCCAGGGCGCGCTGGTAGGTATCGCGATGGTACTGTCCGGGTATTTA  
TTCCGATGGCATTCTTCGGTGGCTCAACAGGGGCAATTTATCGACAGTTCCTATCACTATTGTTTCAGCAATGGCGCTT  
TCAGTACTGGTTCGGCTGATTTCTCACCCCGCTTATGTGCAACATTTGCTGAAACAGTCTCTGCCGAGCATCACGAAAA  
TAAGGGGGGGTTCTTCGGCTGGTTTAACACCCTTTTCGATCATAGCGTTAACCCACTACACCAACAGCGTCCGGCAAATCC  
TCGGTTCACAGGACGATATTTACTGATCTATGCGCTGATTTGTCAGGAATGGTGGTGTGTTTTTACGCTCTCCGCTCT  
TCCTTCTTACCTGAAGAGGATCAGGGTGTCTTTCTGACCATGATTCAGTTACCCGCTGGCGGACGCAAGAGCGGACGCA  
AAAAGTGTGGATCAAGTGACGGATACATCTGAAGAAGCAAGAAAGCAGTGAAGTGTCTTTACAGTTAACGGAT  
TTAGCTTCAGCGCCAGGCACAAAACCGCGGATGCGCTTCGTCAGTCTGAAACCGTGGGAAGAGCGTAGTGGTGACGAA  
AACAGTGGGAAGCAGTAATCCATCGTGCAAAAATGGAATGGGCAAGATCCGTCAGCGTTTTGTCAATTCATCAATAT  
GCCAGCATTGTTGAACGGGTACGGCAACGGGTTTCGACTTTGAGTTAATGATCAGGCTGGGCTGGGTGACGATGCC  
TGACCCAGGCCCCGTAACCCAGTTGCTGGCATGGCGGCGCAACCTCTGCCAGCTTAGTCAGCGTGGCTGCTAAATGGGCTG  
GAAGACACCGCGCAGTTTAACTGGAAGTTGACAGGAAAAGGCGCAGGCATTAGGTGTTTCACTTTCTGACATCAATCA  
GACCATTTCAACGGCGTTGGGTGGGACTTACGTTAACGACTTCATCGACCGTGGTTCGCGTGAAGAAAGTGTATGTTCCAG  
CGGATGCCAAATCCGATGCTGCCAGAAATGTCGATAAATTTATGTCGCCAGCGCCAACGGCGAAATGGTGCCATTC  
TCTGCCCTTACCTTACCATTTACGATTTGGGTGATGGCTCTCCGCGACTGGAACGCTACAACCGTCTGCCGCTCAATGGGCTCA  
GGGGAAGCCGCGCAGGAACAGTTCCGGCGATGCTATGGCGTTGATGGAACCTTTCGCTCAAATTAACGGCGGGCA  
TTGGTTGACTGGACGGTATGTCATATCAGGAACGTTTATCGGGAACAGGCTCCCGCTCGGTAGCAATTTCTCTTT  
GTGGTGTGTTCTGTCGCTGCTGACCTCTATGAAAGCTGGTCAATTCCTGCTCGGTTATGTTGGTCTGCGCTGAGG  
GATTTCCGGCTGCTGACTGCGCGGCACTCTTTAATCAAAAAATGACGCTACTTTTATGGTGGGCTGCTAACGACAA  
TTGGCTGTGCGGTA AAAACGCTATTTTGAATTGTTGAGTTCGCTAAAGATCTCATGGAGAAAGAGGGTAAAGGTGTTGTT  
GAAGCGACTAATGGCAGTACGTATGCGCTGCGCTCCATCCGATGACCTCTCGCTTTTATCTCGGCTATTACC  
GCTGGCTATCAGTAACGGGCGCGAGTGGCGGCAAAACAGCTGATCGGGGTAATGGGCGGAAATGGTCTCTGCAA  
CGTTGCTGGCAATCTTCTTCGTCGACGTTCTTTGTTGATCCGTCATGCTGATGCTTTAAAGGATAA

>Cluster\_19659

ATGCTGGTACCTGAGGGCGTACGCTATCAGACCTACAAAACCTGCACGTTAGCCCTTTGTAGGCCAGATGCGCCAGCGTCT  
GCATCTGGCATAA

>Cluster\_48176

ATGTTGCTTGCAAAAATCGTGGCGATTTTATGTGCGCATCTCCACATTACCGCAATTTCTGTAACAGAGATCACACAAAG  
CAACGGTGGGGCGTAG

>Cluster\_49280

ATGAATAAAAATACGCTCTAAAATATTTGTTATATTACTAACACAGTAAAGGTTGCTCTGAACTAGCCCGAAGGGTATG  
TAAAGGGAGTACCCGACAGAGGAAAAGACTTTACAGTACTTACCTCTGGCACATCTGCATTACTCCCAACCGTTGCTG  
GTGCATCAACGGTTTGGTGGCAACAATCTTACCAGACATACCGCGACTTTGCAGAAAACAAGGGCAGTTTCAGGCTGGC  
GCAACAAACATTTCTATTTTAAATAAAGGGGAATTAGTAGGACATCTTGATAAAGCGCCCATGGTGTAGCTTTAGCAG  
TGTGAATGTAAGCTCAAATCCCGCGGTTGCAACATTAATTAACCCGCAATATAAGCCAGTGTAAACATAATAAAGGAT  
ATCAGAGCGTCAGCTTCGGTGTGGTGCAGAACGTTACCATATTTGGGATCGTAAATGAACACAGTTTCACTGTATCTCCAC  
ACACCAAGACTTGATAAGCTCGTAACCTGAGGTTGCTCCGGTACCGTAACAGCTCATCAACAGCTGATATATTAAGCC  
TTCAAAAATACTCCGATTTACAGGGGCTGGTTCCGGGAGCTAGTATATTTACAGGATAGTCAAGGTAAGCGACATTTGGGTA  
CAGGTGGGTATGGTTATCTGACAGGAGGAATACCCCGACATCACTTTTATCACGGCTCAGACGGCATTACAGCTGAT  
ATGGGGGGCAACATACATGATCATAGCATCTGCTCCCTTTTGGAGAGGCCGGCGACAGTGGTCTCCATATTTGGCTG  
GAATACGGCCAAAGGGCAGTGGGAATGCTGGTGTACTCGGGAGTAGGAGGGGGGACCAATTTGATATATTTCTCTTA  
TTCTCTCAGAGTTTCTCTCACAGATCTATTCAGAGGATAATGACGCTCCGCTCTTTTAAATGCTCATCCGGCGCCCC  
CTGCAATGAAAATTTGACAGCAGCACCGGCACTGGCTCTGAAACAGGGTTCGATGATATGCCATGCACGGGCAAAA

AGGTTCTGACCTGAACGCAGGTAATAAATCTGACATTCCTGGGACATAATGGTCAGATTGACCTGGAAAACCTGTCCACGC  
AGGGTGCCCGTTACTGACATTTACTGATGACTACACTGTACCACCTCAAACGGAAAGTACCTGGACCGGGGGCCGGTATT  
ATTGTGGACAAGGATGCCCTCCGTAACCTGGCAGGTTAATGGTGTGAAAGGTGACAACCTGCATAAAATCGGCGAAGGAAC  
CCTGGTTGTACAGGGAACCGGTGTTAATGAGGGCGGCCGAAAGTCTGGGGATGGGACCGTTGTCTCCTCAATCAGCAGGCTG  
ACAGTTACAGGACCGTTCAGGCATTCAGTACGCTGAAATATGGCCAGCGCCGCCGACAGTCTGGTGGCAGACAAACAG  
CAGGTTAATCCGGACAATATATCTGGGGTACCGGGGGGGTCTGGATGTTAACGGGAATGACCTGACATTTTATAA  
GCTGAATGCCCGGATTAATGGCGCAACTCTCGGTAACAGCAGTGATAAAAACGGTAATATCACCTGGATTATCAGACGC  
ATCCGGCAGACGTAAGTAAATGAATGGTTCATCAAAACAGGGGAACAGTAGGTTTCATATATATTTATAATAATCCC  
TATACTCATACCGTCTGATATTTTATCTTCAAAACAAGTAGTTATGGCTGGTTCCCTACCGGTGAGTAAACAGCA  
CTGGGAATATGTCGGACATGACCAGAACAGTGCACAGGCACTGCTTGCAAAACAGAATTAATAATAAAGGGTATCTGTATC  
ATGGCAAGTGTCTGGGAAATATTAATTTCTCAAATAAAGCAACCCCGGTACAACCGCGCATGGTTATGGACGGCTCA  
GCGAATATGTCGGTACATTTACTCAGGAAAACGGTCTGACCATTGACGGCCACCCGGTTATCCATGCTTCAACGCTC  
TCAGAGTATGCAAAATACAGTCTCGTCTGGGCGCAAAATCCGTTCTGACACAGCCCACTCATTTTACACAGCTGACT  
GGGAGAACAGGACGTTACGCTTTGGTTCGCTCGTGTAAAAGATACAGACTTTGGTCTGGCCGCAATGCCACACTGAAC  
ACAACCATCCAGGAGATAACTCCAGCGTCACGCTGGGCGACAGTCTGGGTATTATCGACAAAAAAGATGGCCAGGGAAC  
AGCATTACCTTGAAGAAGGCACATCTGTGCAACTAAAGATGCAGATAAAAGCGTCTTCAACGGCACCGTCAACCTGG  
ATAATCAGTCAGTCTGAATATCAATGAGATATCAATGGCGGAATACAGGCGAACAACAGTACCGTGAATATCTCCTCA  
GACAGTCCGTTCTGGAGAATCAACGCTGACCAGTACCGCCCTGAATCTGAACAAGGAGCAAAATGTTCTGGCCAGTCA  
GAGTTTTGTTTCTGACGGTCCGGTGAATATTTCTGATGCCACCTGAGTCTGAACAGCGCTCCGATGAGGATCTCACA  
CACATTTTACCTGTATACGATTAATGCGGGTTCATGGAACCTGAAGGAGACGATGCCCGCTGAACGTTGGGGTACAGT  
ATGTTGTCAAGGTAATCAATGTTTCAAGGATAAAGGACTGTCAACCTCGAGGGGAAGGGGAAGTGAATGCTGACAGTCA  
TCTTCAGAACTGTGATGTTGTACAGCCTGTTAACGGGTACCGCAATACCTGGAGCGGGAGCCTGAATGCACCGGATGCCA  
CCGTCAGACTGACAGACACCCAGTGGTTCGATGAACGGAACTCCACGGCAGGAAATGAAACTTAAACGGCAATAGTC  
GGTTTAAACGGGGGACACTCATCTGTTACGACACTGACAAAGATAATCTGGACGCGTTCAGTACAGCATTGTCAGTGG  
TACAGACCTTAAACAGGCAGACAACTGGTGATAAAACAAGTCGGCAACAGGTCATGACAACAGCATCTGGGTTAACTTCC  
TGAAAAAACCTCTGACAAAGGACAGCTTGATATTCCTGTTGAGCGCAGCTGAAGCGACAGCTGATAATCTGTTCAGG  
GCATCAACACGGGTTGTGGGATTGATGATGTCACCCCACTTAGTGTGAGAAAAGAGGACGGGAAAAAAGAGTGGGT  
CCTCGATGGTTACCGGAGCTTGCACGTAACAGCAGCGGCAAGGTAAGGCTGCCGCCACATTCATGACATCAGCTAACAAC  
TCATCACTGAAGTAAACAACCTGAACAACGCATGGGCGATTGAGGGATATTAACGGCGAAGCCGGTACGTGGGTGCGT  
CTGCTGAACGGTTCCGGCTCTGCTGATGGCGGTTTACCTGACCACTATACCTGCTGCAGATGGGGGTCGACGTAAGCA  
CGAACTGGGAAGTATGGACCTGTTTACCGGGTGTGATGGCCACTACACTGACACAGATGCGTCAAGCAGGCTGTACAGCG  
GTAACAACAAATCATGGGGTGGTGGTTTCTATGCGAGTGGTCTGTTCCGGTCCGGCGCTTACTTTGATTTGATTCGCAAA  
TATATTCACAATGAAAACAAATATGACCTGAACTTGCGGGAGCTGGTAAACAGAATCTCCGACGCAATTCATGTATGC  
AGGTGCAGAACTCGGATACCGTTATCATCTGACAGATACGACGTTTGTGAACCTCAGCGGAACTGGTCTGGGGAAGAC  
TGCAGGGCCAAACATTTAACTGGAACGACAGTGAATGGATGTCTCAATGCGTCTGTAACAGGTTAATCTCTGGTATGAGC  
AGAACCGGCTTGTGGTCCGTTAAACCTTCAAGTGGTAAACCTTCAAGTGGTGAACGCTGACAGCCGTCGCGCCGCTGATGAGT  
CGATCTGACGGACAGTGTGACGTTACCTGAAGGATGCAGCGGAGAACATCAGATTAAATGGCAGAAAAGACGGTCTGTA  
TGCTTTACGGTGTGGGTTAAATGCCCGGTTTGGCGACAAATACCGTCTGGGGTGGAAAGTTGAACGCTGATGATTCGGT  
AAATACAACACAGATGATGCGATAAACGCTAATATTCGTTATTCATTCGA

>Cluster\_22876

ATGAACGGGAGTAAAGCGAAAAGACAATGGAGTAAAGAGAAATTTGAGGGTGGCTCTACCAGTAAAGATGAGACGGC  
GAAAGATTAG

>Cluster\_66910

GTGAATGCAGTCAATCCGAAAAAGAGAAGGACGGCAAGTCTTCGTTGCAAGACCTGGTATCCTACGTTCTGTCCGGGA  
TGACATGACCGATGAGGAACTGGATTTATCTTCTTCGTCAGGCTGAACAACCGCACGAAAGCCGTTTCAGTCCGCTTG  
TTGATTTATGCGACAGCTTTCGAAATGAGTCAATTCGTTGGCGCTGGTGTGATGTCATGAAGGACGGCTGCGAATGGGTCAAC  
TTTTATGGTGTACCTGCTTTCATAACTGTACTTCTTTCGAAACTGCGCTGCAGATATGGAGTACATGTCCTGCAAGC  
ACACTATGCAAAAGATGACACTGATCTGTTTTTCACTACATCTTCTTGGCAGTACATGAAAGCCCGGTCGCGAAC  
AGATTTATGACAGTGTACGTCATACGCTGAAATCACTGGCCCTGCGGACCATCAGTATGTCCTGCGCTGCATACTGAT  
ACAGATAATCTGCACGTCATGTTGGTGTAAACCGGTTACACCTGAACCGGTTATCTGAACCGGTTATCTCTGGAGTCA  
GAAAAAATCTCAGTCTGCTGCCCTGCCGTGAGCTTGAACGAGCTTGGTTTGTCTCCGATAACGGTTGCTGGTGCAC  
CGGAAATCGTATCTGCAAAACCGGCTTGAACGTTGATCGCCAGAACCGGTCGACACGGGAAAAAACAACCTTTT  
CGCGAGTATGTCGCGCAGACAGCGGTCGCTGGTTACGCAAGTGAACCTGTAAGTGAAGTGGTTATCCCTGCATCTGCT  
TGCGGAAGATGTTCTGTACTGTCTCAGATGGACGGAAAAATCTGTTGATGGATGGCTGGATCGCAACAGGGAAGGTG  
TACAGTTTACTGCTTTGGTCCCTTGGTGTGCAAAAAATCATGAAAAAATGGGTGACTACACCGCAGTACCAAAA  
GACATTTTACGACAGGTGGAAGCACCAGGACGCTATAATCCGGACTTCATGTCAGTGTGTTGCGCCGAAAAAATCGC  
TGAACAGAAAGTCTGCAGCAGTATGCCGTGTCGTCATCTTGGAGAAGCTGTCGCGGAAATGGCAGGGAAAGGACGGCTG  
AAAATGCCAGGCTATTCACCGCACACTGGCTGAAGCGGATATGGAATGCGTGTTCAGCATGGTTCACCTGTATCTGT  
GACGGTTATGATCATAACAGACTCCCGTTCGCTGACAGCAGTATGGTCACTGCTGACGCTCGACAATGTGAATCAACT  
CGATGGTGGCTGGCAGCTGTACCAACAGATATTTTCCGCGAGTTACGCCAACAGAACGCTCCGTTGGTCTGCTGATGG  
AGAGCTGTCTGGACCGGATAAAGAAATGGCACCCTATGCGTACAGGTCAGGGGCGCAGGGGGCTATCAACCGCAACTG  
TTTTCTGACAAAAGAACTGTGGGGATACAGCATCAGCCTATGACCTCAGATTGAAGAAATGATCACAACAGGGTGA  
GTTTACTGGCTGCGTTGTCATGAGCTGTTTGCACAACAGGACTGATGCTACAGAAACAATCACGGGCTTGTGTGCG  
TTGATGCCTTAATCATGAGCAACCGCGTGAAGGCCAGCAGATTCATCTGATCTGACACTGGGGCGTGCAGAGCCA  
CAGGCGGACCTTTTGTGAGTGGCCAGCAGATTTGTTGACAGGGTGCACCTGAAAGTCTGCTATAAACCCGGAGTGGC  
CGTCAAGTACAGGATGAGGGGTGACAGTAAACGTTGACCAATGCTGCGCCGAGCAGCTGAAGCAGAGCTGAGGCC  
GTGCTGACCTGCGTGCCGCTATCTGGCATGGCGTGAACAATGGCGTAAACAGATCTGCGTTATGGGGAACGTTGTGCG  
GAAATTCATCAGGATGCCGCTGCGGAAAGTCAACATTCGCTGCGCAGTACGATGATCCGGCATACGTAAGTGCATTA  
TCACATGCAAGAGTTACGCAATGACGCAATGATCAGGCTGAAAGAAGACATCAGGATGAGCGACAGAACTTATTTG  
CTGACGGGAAATGTTGATCCCTTACCCTCAGTGGTCTGAAATTAAGCTGCTCAGGGAGCAGGGCTGCTGATATG  
CAGCTGAGAGGCTGGGATTAATCGGATCGCCGTAAGACAAGTCACTACAACAACGACAGACCGCTGTGCTGCTTTG  
TGAACCGGGCGGAAACCGGATACGGTAAATACCGGTGATCTCGAGGCCGCTGCAAGAAAGCAGGGAGTGTTCGTTTCC  
GTGACCGTCCGACGGGAGTGTGCTGTACGGATATGGTGCAGGGTGTGTTTCCGTAATCACCATGACCGCAATCGC  
CTGGCAGATAAACTGGATTTGATTCACCGGATATTTCCGGGCTGATCCACGATGGGTTTTGAAACAGAAAGGAAACGA  
CAAAACAATTAACAGGCTTTGCTGAAATGGTTCCTGGCATAATGTGACAGCCGTACCGTCAAGAGTACAGGA  
TTACGCGACCGGACGTTGATCATCACCGTGAAGGAAAGTGAACGCTACTACCGGATTAATCGCGGCAACAGCAACGAT  
GACGCATCACTGCTCCGCGGAGCAGGATAAACGCTGGGAACCGCTTCTCCAGGTTAA

>Cluster\_29125

ATGTCGGGCTGGCCAGAAATTTACTACAAATTAAGTAAATTCACATTAAGCATCCTGGTAAAAAGCAAGTCTATTCGGC

GGATCCTGCCCGGAACCTGGGGCTGGATACCTCTCGTCCAATTATGTACGTTTTACCGTACAACCTCGAAAGCTGACTTGC  
TGACGTTGCGCGCCAGTGTCTGGCACATGACCTGACCCGTTAGAGCCGCTGGAATCGACGGCAGCTACTGCGC  
CGTATGTGTTTCATTCACGGCGGGCCGCTGTGTTCACCTATTACACGCCGAAAGAAGAGTCTATTAAGCTGTCCACGA  
TTATCTCGATTTGACCGGAGCAACCCAAATCTGGATGTGCAGATGGTCCAGTATCGGTGATGTTTGGTCCGCGCCGG  
GCGGTGAAAAGCGCAGGAGAACCGGATTCGCTGATGCTTAACGGCTACAGAAATTTTTCGTGTACTGCGCCGCTGAC  
CGCGACAGTTTTGTGCGTTTCTCGCCGTGAGTTTCGCTGCCGCTATGGCGGATGAACACGGCAGGATAAAAATATCCG  
TCAGAACTGGCGCGCTAGCACGTATGCACCTTGGCCGTCACGCTCTGGCTGCGGTGGTCCACGCTGCGCTGCTCGT  
AGGATCTGTTAATAAGCTGCTCGCTCCCGCCGCTTGGCAAAGCGGTAGAAGATGAAGCACGCAAAAAATCTCC  
CATGAAAAGCGCAGGAGAACCGGATTCGCTGATGGAAGAGATGGCGGCAATTTCTCTACGAGATGATCCGCGAATCTG  
TGACCGCATTTCTGGGCTTACCCTGGAACCGACTTACCAGGGTATCAACGTCCATAACGCCGAGCGGTTCCGCCAGTGG  
CCCACGACGGCCATGAGCTAGTGTATGTGCTTGGCACCGCAGTCACATGGACTACCTGCTGCTTCTTACGCTGTGAT  
CACCAGGGCTGGTGGCCGCAATATCGCCGCGGGATCAACCTGAACCTTCTGGCCGGCCGGCCGATTTCCGCGCTCT  
GGGGCGTCTTTTATTCCGCGTACGTTTTAAAGGCAATAAACTTTATTCACCGTTTTCCGCTGAGTATCTCGCCGAATCT  
TCAGCCGTGGTTATTCGCTGAGTATTTCTGGAAGGCGGTGTTCCCGTACGGGGCTTGTGCTGATCCGAAAACCGGT  
ACGCTGTGCTGATGACCATTCAGGCGATGCTGCGTGGCGGCACTGCTCCGATTACGCTGATTCGGATCTATATCGGTATGA  
GCACGCTATGGAAGTGGTACTTACGCCAAGAACTGCGCGGTGCGAGAAAGAGAGAGAGCTGCGCAGATGCTGC  
GCGTTTTAAGCAAGCTGCCTAATCTCGGTACGGTTACGTTCAACTTCCGTTGAAACCAATCCCGTTGATCCGCTTAA  
CAGCAGTACCAGACTGGCGTGAATCTATCGATCCCATCGAAGCGGTGCTGCCGCTGGTTAACGCCGACGGTCAATAA  
TATTTGCTGCGCATCTGATGTTACGATTAACAACGCGAGCGCGCAACGCAATGAACCTGTGCTGTACTGCGCTTCTGG  
CGTCTGACGCGCTACTCACCCGCGAGCAGTTAACCGAGCAACTCAACTGCTACCTGGATCTGATGCGCAACGCTGCC  
TACTCCACGACTTACCGTTCCCTTACGCCAGCCGAGCGAGCTTATCGATCACGCGCTGCAATGAACCAAGTTTGAAGT  
TGAGAAGACACTATCGCGCACATCATCTTCTGCCGCGGAGCAAGCGGTGCTGATGACCTACTATCGCAACACATTTG  
CACATATGTTGGTGTGCTTCCGCTGATGGCGGCAATTTGTCACCCAGCATCGCCACATCTCCCGCAGCTATTGATGGAG  
CAGCTCAATGTGTTTACGCCAATGCTGAAAGCGGAGCTTCTGCGCTGGGATCGCGACGAGTTACCGGACGTTATTGA  
TGGCTGGCAAAATGAGATGCAACGTCAGGGCTGATTACCTGCAAGATGATGAGTTGCATATCAACCGCGCATTTCTC  
GCAGCTACAGCTGCTGGCCGAGCGCGCGCAACGCTGCAACGTTATGCCATCACCTTCTGGCTGTTGAGTGGCAAC  
CCGTGCTCAACCGCGGTACGCTGGAAAAGAGAGCGCACCGTCCGCGCAACGCTCTCTCCGCTGCTGCACGGTATCAACG  
GCCGGAGTTCTTTGCAAGGCGGTGTTTCAAGTTCTGCTGGTGCACCTGCGTATGAAAGGTAATACCGGATAGCGGG  
ACGCCAACCAGCAACGATGAAGGTGATCAGTTGCTGGCGGAGTTGATTACATCAGACGTCGCTTTCAGCATTGAG  
AGTGGCAGCGAGGCGAAGGGTAA

>Cluster\_29024

ATGAGTGTGATTGCGCAGCGAGGGCGAAAAGTTCGTTCACTGCATAAAATTTGGTGGCAGTAGTCTGGCTGATGTAAGTG  
TTATTTGCGTGTGCGGGCATTATGGCGGAGTACTCTCAGCCTGACGATATGATGGTGGTTTCCGCGCCGGTAGACCA  
CTAACAGTTGATTAACCTGGTTGAAACTAAGCCAGACCGATCGTCTCTGCGCATCAGGTTCAACAAACGCTGCGTCCG  
TATCAGTCCGATGATTAAGCGTCTGCTACCCGCTGAAGAAGCCGATAGCCTCATTAGCGCTTTTGTGAGGATCTTGA  
GCGCTGGCGCGCTGCTCGACAGCGGTTAATACGATCGCGTGTATGCGGAAGTGGTGGTTCAGGTTGAACTGCTG  
CGCGCTGATGCTGCGGTACTTAATCAACAAGGGCTGTCAGCGGCTGGCTTGTGACCCGCGAGTTTTTACGCGCTGAA  
CGCGCTGGCAACCGCAGGTTGATGAAGGGCTTTCTTACCCTGCTGCAACAGCTACTGGTACAACATCCGGGCAACG  
TCTGGTGGTGCAGGGTTTATCAGCCGTAACAACGCGGTTGAAACGGTCTGCTGCGGGCTAACGGTTCCGATTTCCG  
GCACAAAATCGGTGCGCTGGCGGGTGTCTTCTCGCGTAACTCTGGAGCGACGTCGCGGGGTATACAGTGGCCACCG  
CGTAAAGTAAAGATGCCCTGCTGCGTGTGCTGCGTCTGGATGAGGCCAGCGAATGGCGGCTGCGCGGCTCCCGT  
TCTTACCGCCGCTACTTTACAGCCAGTTTCTGGCAGCGAAATGACCTGCAACTGCGCTGTAGCTACACCGCGGATCAAG  
GTTCCACGGCATTTGAACCGGCTGCTGCGCTCAGGCTGCGGTGCTGCGGTATGTCACCAGCCAGATGATGCTGCTGATT  
GAGTTTACAGTGGCCCGCAGCCAGGATTTCAAACCTGGCGCATAAAGAGATCGACCAGATCCTGAAACGCTGCTCAGGTGCG  
CCCCTGGCGGTTGGCGTGCATAACGATCGCCAGTTGCTGCAATTTTGTACACCTCAGAAGTGGCCGACAGTGGCTGA  
AAATCTCGACGAAGCGGGATTACTGGCGAATGCGCTGCGTCAAGGGCTGGCGCTGGTGGCGATGGTGGGGCGGGC  
GTCACCGTTAACCGCTGCAATTTGCCACCGCTTCTGGCAGCAACTGAAAGGCGAGCCGCTGAGTTTACCTGCGCTGTA  
TGATAGCATCAGCCTGGTGGCAGTACTGCGCACCGCCGACGAAAGCCTGATTCAGGGGCTGCATCAGTCCGCTTCC  
GCGCGAAAACCGCATCGCCCTGATTTGTTCCGTAAGGGCAATATCGGTTCCCGCTGCGTGGAACTGTTCCGCCGCTGAG  
CAGAGTACGCTTTCCGCACTGACCGGCTTTGAAATTTGTGCTGGCAGCGGTGGTGGACAGCCGCGCAGCTGTTGAGCTA  
TGACGGGCTGGACCGCCAGCCGCGTTAGCCCTTCTCAACGATGAAGCGGTGAGCAGGATGAAGACTCGCTGTTCCCTGT  
GGATGGCGCCACCACCGTATGATGATTTAGTGGTGTGGACGTTACCGCCAGCCAGCAGCTGCTGACAGTATCTTGTGAT  
TTCCGACGACCGGTTTCCACGTCATCAGTGCCAAACAACTGGCAGGAGCGAGTGACAGCAATAAATATCGCCAGATCCA  
CGACGCTTTCGAAAACCGGGCTACTGGCTGTACAATGCCACTGTTGGTGGCGGTTTGGCGATCAACCACTACCGTGC  
CGGATCTGATCGACAGCGGCTATACCAATTTGCTGATAGTGGGATCTTCTGCGCAGCTCTCTGGCTGTTCCGCTGCA  
TTCGACGGTAGCGTGGCTTTACCGAATGGTGGATCAGGCGTGGCAGCAGGGCTTAAACCGGCTGACCCGCGTGTGATGA  
CCTTTCCGCAAGACGCTGATGCGCAAGCTGGTGTATTCGCGCGTGAAGCGGTTTACCAATGAAACCGGACCGAGTAC  
GATGTTGCACTGGTACCTGCCATTGGCAAGCGCGGCTGAGCTGACCAATTTCTTTGAAAATGGCGATGAATTAACGAG  
CAGATGGTGAACCGCTGGAAGCGCCCGGCTGGTGGCTGCGCTACGCTGCGCGGCTTTCGATGCTAATGGCA  
AGCGGCTGTTGGCGTGAAGCAGTGGCTGAAGACCATCGCTGGCGGCACTACTGCCATGCGATAACGCTTTTGGCATCG  
AAAGCGCTGGTATCGCGCAACCCGCTGGTGTACCGGGCCAGGTGACGGGCGCAGCTACCCGCGGGGCGATTACG  
TCGGATATTAACCGACTGGCGGATTTGTTGTAG

>Cluster\_28523

GTGGCTCTGGGATGAGTGGCTTCCCTCTTTCATGACGAGCGAGCCAGCAACCGAACCACTGATCAATGCTGAGCG  
AGCTGTAACCGCCAGGAGGCAAAATCCGAGGTGGGGCAAGTATGCCGGCGTGCAGGGCGCAGATGGCCAGTCCG  
TGGCGCAGAACGGTCTTCCGCTGATGTGAAGCTGACCTTTGCGCAAAATGCGCCGCGCCCGGCGCAGTATGGTCTACG  
GGCATTAAACCGAAGCGCAGCATTTAGTGTGGTATGCGCAGCGATGAAGTGGTACGAAAGCGGATGCTCAACCTCGAATA  
CAGCCATCGCCATCATTACTGCTGTCCAGTCCGAGTTAAAGTTTATCTCAATGATGAACCTGATGGCGGTGCTGCCAG  
TGACCAAGAAGACGTTGGTAAAAAACCGTGGCACAATGCCATTAAACCGCTGTTTACTGATTTCAACCGTGTG  
CGCTGGAGTTTGTGCGTCAATATCAGGACGTGTCGAAAACCGGCAACCGCTTGGCTGGATTTGGGCGGAG  
CAGTGGACTGGATCTGACCTATCAGACCTGAATGTGAAGATGACCTGTACACTTCCCGGTGCCATTTTTCAGCCGC  
GTGATAACCGCACCAACCTTCCGATGGTCTTTGCGGGTGGCCGGATGTTGGGCTGCAACAGCATCTGCCATTGTT  
GCCTCGTGGTTGGTTCGCTTCTGGCTGGCGTGGCGAAGCTTCCCGTGTCTATAAACCACTGCCGGATGCAATGC  
CATCGTTTTTGGCCCAATGACAAACCGCCGACTTCTGCGGATCATCCGCGGTTAAAAGCCCGGTTGATTGAAATGA  
TCAACCATCCGCAATCTTATGTCAAACCTGCTGGTGGTGTGTTGGTCTGACGACAAAGACCTGTTGACGAGCAGGAAA  
GGTATCGCTCAGGTAACATTTCTGTTCCGTTGAAAGCGTGGTAGTGAATGAAGTGAACCGCTGCTACCGCTAAGCC  
TACGATGGCGCAACTGGTGGTACCGATCGTCCGTTTACCTTTGGTGAACGAAAACCTATGAAGAACAGTTACAAT  
CCAGCGTCTTGACCGCAGCAGGATTAACGTTTCGCTAAACCTGCGCCGGATCTCTACCTGATGCGCAGTACCGCAT  
GATATGGATATTAATACCGCTACACCATGCCCGGTTGAAAGACAGTTGCGGATGATATCAGCCTGAATAACCGATT

CCTGCAATCCTTCAACCTGAGCAGCAAACAGGAGCGGAATCGCTGCTGCGGATTCCGGTATTACAAGGTTTGTGCG  
ATGGCAAAACGGATGTCTCTATTCCGGCGCTGAAACTGGGCGCTACCAACCAGCTGCGCTTTGACTTTGAGTATATGAAC  
CCGATGCCGGGGCGTTCCGGTGGATAACTGCATTACCTCCAGCCGGTGCAGAATCATGTGGTATTGGTGATGATCCAC  
CATCGACTTCTTGAAGTATTACCACTTCCATCCGATGCCGGATCTACGCGCCTTTGCTAACGCGGGCTTCCCGTTTCAGCC  
GGATGGCGGATTTGTCACAAACCATCACCGTATGCGGACCGGATGATGGCTTCCAGTCCGCGTATAACGACAGCTAGCGT  
GTTGGCTTTATCGGTGCGCAGACGGGCTTCCCGCGGATTAACCTGACGGTGACCGATGATGGCAGCACCATTACAGGGCAA  
AGATGCCGACATCATGATCGTGGTGGTATCCCGGACAACTGAAAGACGACAAGCAGATCGACTGTTGGTGCAGGGCGA  
CCGAAAGCTGGGTAACACGCGGATGCGCCAGACCCGTTCCCGGCATTGTACCGGACGAGAGCGATCGCGCGGCAGAA  
ACTCAGTCAACCGTGCCTTCCAGGTGCGATGGCAGCGGATGATGGCTTCCAGTCCGCGTATAACGACAGCTAGCGT  
GATTGGCTGCTGGCAGATAGCCACGCGGTTATGAAATGCTTAAACGATGCGGTGAACGATAGCGGCAACGCGCCACCA  
TGTTCGGTTCGGTTCGGTGGTATCCCGGAGTCCGGTATCAATAGCTGCGTGTGGCGAGCTCTATTACGTTGGCCATCTG  
CCGTGGTTCGAACGCTTATGGTATGCGCTGGCAAACCATCCGATTCTGCTGGCGGTGCTGGCGGCAATCAGCGTCTGCT  
GCTGGCATGGGTACTGTGGCGTCTGCTGCGTATTATCAGCCGCTGCTGCTTTAACCCGGATAACGAGTAA

>Cluster\_41366

ATGTCCTTTGCGTGGTAGGTTTAAAAAATTTGTTATGGTTCATATTAACGTTATTTGCACTGGGTTTGTGTAAGATTA  
TATTCGGAATAATACGATTTGCTTCATCTCTTAGCTATGATGAAAAAATTAATATGATCAACTTAGGTTGTACG  
CACAGATACTTTGCTATATTTTCAATATATTTGCTAATAGTATCATTCTAAGTGCAGGATATACAGCAGCTCCG  
CGAGATATATACAAATGCTTACTACCGAGCAGGTAGGTAATGTGATTCGCGGACTTTAGTGTCTTCTGCGGTGTTTTG  
TCTTAGTGCACCTCTCTCCACTTGTTCGGGGTGAACCCGGTCTTTTCGTTTATGCAATGGGAACATTGCTGACACTTG  
TTAGTCTTAGCTCTGTTCCCATTAGGTCAAAGATTAATCAATTTTTTTGACCTAAATCAGTGTAGCCGAAGTAAATA  
CTCCACGAAATGACACACATCGAAGGTGCGTCTAACTCCCAAGAAATTCAGTATCTTTAGCTAATCATCACTACTTAAAGC  
CGCACTTTGGCTTTGAGCAGTAAACACATGATGATGCGCTGATATGTAAGAAAGTAGGACTCGGAGATAATTTAC  
CTGCTCTCAGTAATGTTTTATTCGGCATTACTTCTTCACTTAACTAGAAACACAGAAATGATATCAAAAGTTACTGG  
TTCCCTAGACGAAATAAGCAATGGTTCCTTAGCTGCGGACAGTGAACATCCATGCTTTAAAAACAAGGAGCA  
ATTAACGGTTGAAGAAGAACCAATATCTTTGGTTAGAGAATGAAATATCAATAGGTTGGTAGGCCATATTGAACCTG  
CATTCAAAGCCGGTGAATTCAAGCTCGGGTGGATCTCATCAGTCTATCTCATCTCGTATATTAACCTATGCACAACAG  
TTTTAGTTCGATATTGGTATACGTTGAACTTCGAAAAATGAAGACGATCATTGAAAAAGCCTTTACACCGTCTGATGTCGT  
TAATATTTTGGAGAAAAGGTGATAAAGTTGGAAATGGGCTGCGGATGATGCGGCTGATTAGGCAGCAATCTTTGAAA  
TGTTACGCCGATGATTACTTTTGGAAAGAATGGAGCAGTCTTTAAAGATGATATCTGGACAGAGACCTCTCTACAC  
ACTTTGCCGTGCTTCTGAGGTTGAGTTGGCCCTTATCGTAGAACGATCGAATTCGAAAAAGAGATGAAGGACAGAG  
ATTATCCAAACAAAGTACGTCACGAGTGGCGGTTCCAGAAGTATTACAACAATATCTAAAAATTCGCCAGAAGTAT  
CGGATTTTTCAGTAAACATGGTTCCGATTTTCGTTAACTCACTGATAAACATGAAGATGCCGGAAGCCGCAACCGAAGT  
GTTCTCGTAGCCTACATAATCATTTGAAGTTTCCCATTTGGTTTAACTGAACTTCTCTGCTCTTGGAGAGATACAGAAA  
GTACGAGCACTACTCTGAAAAGCTATACGCAATACCAGAAATTAATATGCTGAAATGCTCAAACAGTGTGCTGTTAC  
AGGATGAAGCTATAGCTATCTTTGGTAGGGAGAAATTTGGGACATATCATTGAACAAGAGCAAGATGATGAACCTACC  
GATCATTTTGGACAGATATATTTGAGTTGGTTCGAGGATGATATACATGCGCTTGAACAAGAAATGATGAAAAATAA  
CAAGGATTTCCCTATGTTTATGTTCTCTCATTGCTGGCATCAGATACCAATTTGTAGATCCGAAACCGATATAAACA  
ACGAGTTTCGACTGCATCTCCTTTCATCCGCGATCAACGATCTGATGTCAGTTCAGGTTTGTATCTTTACAGTGTCT  
TATTTGATAATGCAAACTATCTAAACAGTACTGATAGTTTAAAGTTCAGTCTTGGCTCGAGTCTGTTCCCAACAACAGCA  
GATTTTGAAGAGAAATGATGATTTCTTCAAACTCCGCGCAATTTACGTTTGTGCGCATCACCGAGAGATATGATTCGCTT  
ACTGGAAAATGGAATTTGAGCGCGCGCAAGACATGATGGCTTTAGCGATCAAAATGGGAATGAATCGAGGGAATCTCAT  
ACGAAACAAAGTTGTCAGAGAGTTCTTAAACTCCATTACAGATGATCGCATCTCTTTTGTGCTCTCGAAAATTTCCCGCA  
ACTCGAGCAAATTGACTCAAGATCGATTACCATGTTAGTGAGTTGGCTGCTGCTTTTGGCGTGAATACGATAAGGATT  
TTGAATGA

>Cluster\_19856

ATGTATCCCGTATTTGAGAATGGCTCATGCTGGGTCAAGTTCGATTTTACCTTCATACCCGTGCAGACAAAGAATTTCC  
CTATGCCCGGCAATCCGACAGATATATTGCGGATACGTCGAATGCCCTCAAAGCGCGGAAAGTGAAGTGGCGGTGATCA  
CCAATCACAATAAATTCGATCCCGGCGAGTTTAAAGTATTGCGGAAAGCCGCGCGCGTGAAGGTATGGACCTGCTTCCC  
GGCGTGGAGCTGTCCGTTAATGATGGCCAGGCCGGCGTGCACAGCTCGTGGTGTGCTGATGAGTGGTTTATCAATCC  
ACAGCAGACGAACCATATTGAAAGTTTCCCTACGGCCACGTTTGGCGGCGTTGATAATTTGAGAATGAAAATGCCCGTT  
CAACAGAAAATATCACACAGACCATCCAGCGCCTTGACCGGATGAAAGGGATTACTTATTGTTATTTTCTCAGCTGGAG  
GCCAAAACGGGTTATGGGGCGGCTGAGCCAGGCCGGATCGGGGAGCTTTTGTATAATGACCTTGTCCGCCGGCGGT  
GACGGGATTTAGAGGTTGATGACCCACGACCTCGGGTCAAAATTAAGGACGTGCTCGGTGAGCGCTATCTGCCGAAG  
TCCAGGGATTCGATGCCAAAACGCTGGATCACAATGTTGTCGAAAAGTTCGCCAGTATCTGAAAGTGGGGGATACAGT  
TTTTGAAGCCGCTCCGCTTTCGCTGAGGATTTTCCGCTCGCGTACGCGGAGAGAAAACCGCCCTGACCCACGATAT  
CCGCCAGATAGCATTCGAGGGCGCGGTTGCTCGGTGGAACCGTGGTGAATATCTCCAGAATGAAACCCCTGATAG  
GGATCCCGGCGAGCGGCAATCTCCATCTTGAAGGGATCCGATATGCCCTGGACATTCCTGTTGGCGAGAAGCCCTCT  
GACCGGACTACAAGAAAATCTGGTCAAGTAACTGAAAAGCGGAGGAAAATACCGTTGATGCGGTGTGCCGCTCA  
CGGACGGGCTATCAGATAGTTTCGATTTTCCGTCAGGAGCCGAGTATTTTACGGCCAGGTCCGCGCAGGCGGGTGG  
CGTACGGGAAACGGTTCGCATAAGCCAGTGTATTTGGCCAGAAAGATCTGTCCAATACCGGTGCCGGATTGAAAC  
GATCTGATAGAAAACCTGGTGGTGAGCGTCTGGCTCCCGTACGAGAGAAAATCCGGCAGCAGAAATGCGGTGCTGCTCGA  
CAGGTTAGTACGCTTCCGCTGAAAACATCGGAGAAAGCGCTCCGAATGGCAGGCGAAAGAGAAAGATGCGCAGT  
TCCGCTGCGCTTCTATGCCAGCATGGCATGGAAGAAAACCTGGAGCGTACAGCACCTTCCGGCGGGATGAGCGCTAT  
CTCAGCAGCAGCACTTCCCTGGCAAGCCGAGCGTGGCAGCTGACGAGCAGGAAATCAGGAGACTCTGGACGGGCTGAA  
ACAGGAGCAGAAAATGAGTCAGCACATAAACAGGCGGATTTGATGATTATCGTGAGGGATAAGCCGCTTTACGACTC  
ATCTCAGCTTCCCTGAACCCATTTGTCAGCGGTGCCCGCAGATCCTAGATGAGCTCAACGTTAAGCAGCAGGCTTCCG  
CAGAAAAGCAGGCGCTGACGGAGGAATTTGCCGAAATAGAAGTGGCTTGCAGAAAGAGCTGCGGCTAGCCGGGTTGGA  
AAAAGCAGATCCCGGCACTTCCGAAAGCTGAAAGCAGGCGTGAAGTTGCGGAAACAAAATAGCCGAGTTGACCCGG  
CTGAAAGCAGCCAGCCTTACTGGAGAGAGCTGACAGAAGCGCTAAACCGATTGCTGAACTGTGGTGGAAAGATAT  
CAGGAAATTTGAAGCGTGTGGCTGCCATAACCGCATCCGATTAATGCTGTTTGTCTGAAATCAGCAGGACAAATGATGGTGA  
AAAAGCCATGCTGGCCGTTCTGAAAGAAGCCTGACTGGCAGCCGGTTGAGGGAAAGTACCTACCAGACCGTGGTTGACA  
GCTTCAGTAACTTTGGCGAGCTTGGCTGAACAGGGATAAATCCCGGGATTATCAATAGCTCTGCGGAGACGTTACG  
ATGATCTGGAGCAGCAGATAGAATCGTATTGCTGGCAGATCCGAAATACCTACATCATTGAATCCCGGGCAAAAC  
ACTGAAACAACACTTATGGGTCAACCGCATCCGATTAATGCTGTTTGTCTGAAATCAGCAGGACAAATGATGGTGA  
TCATCGATCAACCCGAAGACGACTGGACAATCAGACGATTTATGACGAGCTGATTAATAATCAGGGCGATGAAACCC  
CGCAGCAATTTATCTTTGCCACTCACAATGCCAAATATCCGGTGTCTCGGAGATGCAAAAATGCTGTGCCCTGTAATA  
TTCAGACGAAAGATCCAGATTTGTCGGCGGAGGCTGGATGCCCTCTTGTACAAACAGCAGCATATTTCCGTAATGGAAG  
GAGGGCGGAAAGCCTTCGAGCAGCAGGGAAGTTACGGCTCATGGCTCAGTAAAACCTGA

>Cluster\_27257

ATGCGTCAGAAAAGACAAACGGCCACGACCCGCTTTTCTACTCCTACCGGGAGCATTACCCGCTTCTTTTTACTGTTGAT  
CATTTGTTACTGGTACGATGGGGTAAATGATACAAAGTGCCTTAAACGCTGGCTGAAAGATAAAAGTTACAGATTG  
TCGACATTACCCACGCAATCCAAAAGCGCGTCGATACCTGGCGTTACGTGACCTGGCAGATCTACGACAACATTGCCGCG  
ACGACCTCCCCCTCTCCGGCGAAGTTTACAAGAGACGCGCTGAAACAGGATGTCTACTATCTGGAGAAACACCGCCG  
CAAAACGGAAACGTTAATCTTTGGCTCTCAGCAACTCAACGCTTGAGATGACTCAACGGATGTCACCTATCTGGACA  
CATTTGGGGCGCAGAAAATGTACCGTGGTCGATGATTAACCTGAATGGTCAGGATAACAGTCTGGTGTGATCTCAACC  
CTGCCCTCAAAGATCTCACTCCGGATTTAAAGAATCGACCTGACGACATTTGTTGATTCAGTCTGTCAGAGATGTT  
GCAACAGGCCAACCGCTCGATGAACGCGAAAGCTTTTCTAACATCGCGCCCTGGCTGGCAGAACGGTCATTACTTTA  
CCTTGGCTAACCTTTAACCGCGGACATCTGGCAACGGTTGGTGGCTTTTGTATCTGCCGATTAATGATTTGGATCCCA  
CCGGGATGCCGCTGGACAGTTTCCGCTTGGCCAGACGCGACGGCAACGGGAGACAATGATAATGAGAAAAGGGGAC  
GGATAGCGTCAGTATCCACTTTAACAGTACGAAGATTGAATTCCTCGGCATCAACTCTACCGATATGCGACTGGTCT  
GGCAGTTCTTACGGCACCTTACTGCTGGATACGTTGCAAAACATTCGCTGCCACTGCTGCTGAACATCGGTTTGGCTG  
CGCTGGCTTATTTGGCTATACACATTTCCGCTATTTCTCAGCCGAGTACAGAAAAGCGTCCCGACGCGGCTCAA  
TAATGAATTGGCATTTTACGGCAATTAATGAAGAGATAGTCTCACTGCTGCCGCTCGGCTGCTGGTTACGATCAGG  
AATCGAACCGCACGGTCATAAGTAAACAAATTTGCCGATCATTTGCTGCCGATTTGAATCTGCAAAACATCACCACCATG  
CGGAACAGCATCAGGGGATTTTACAGCGACGATCAATAACGAGCTGTATGAGATCCGATGTTCCGCGAGGTTGCG  
GCCGCGCACAAAATTTTATTTCGCGATCAGGATCGCAAGTGTCTGGTAAACAAGAAACTCAAGACGCGCACGGCTC  
TGTATGAGAAAACAGCAGGGGCGGATGACCTTTATGAAAACATTTGGCGATGCGCTGAAAGAACCCGACAGTCCCTG  
CGGAGAGCGCGCTAAACTCAACGCCCCGGAAGGCAACAACTGGCGAATCAGGCAGATGTGCTGGTCCGGCTGGTTCGA  
TGAATACAGTTAGCAACATGCTTGGGACGATAGCTGGAAAAGTGGACGGAGCTGTCTCCGTCAGGATTTAATTTG  
ATGAAGTTGCTGCTTCAATTTGCTGCTCAAGCGTAAAGGCTGCAACTGCTGATTAACAATCATCTGAAAGCACAC  
GATATGCCGCGCGGATCGCGATGCTTACGACGATTTTGTACTACTGATGCAATATGCCGTGACCTCAACGCAAT  
GGGAAAAATCACCTTGGAGTTGATCAGGATGAGTCTCCGAAGACCGCTGACGTTCCGATTTCTGGACACTGGAGAAG  
CGTAACCGCTATGAGAAATGGATAATTTGCACCTCCCGTTTATCAACAGACCCAAAACGATCGCTATGGCAGGCGGAC  
CCGCTGGCATTCTGGCTGAGCGATCAACTGGCGGTAACCTGGGCGGTCATTTAAACATCAAAACCGGGGATGGGCTTGG  
TACACGCTACTCTGTGCATATCAAAATGCTCGCAGCTGACCCGGAAGTTGAAGAGGAAGAGCGATTAAGTGGATGATG  
TCTGCGTAATGGTGGATGTTACTTCCGACAGAAATTCGGAATATTTGCTACTCGCCAGTTAGAAAATGGGGTGCACCTGT  
ATCACACCGCTATGAAAGATTAATAGTACAGATATGATATGATATTTTAAACGATAATCCGCTCAATCTACTGCTCG  
CTTGTCTTTAAGCGATGATGAGTCTGGCGTACGGGAAATTTGGGCTGGTCAATTTGTCGCTCAATTTCAATATGAGCAACG  
CTATGCGAAGCGGCTTACAATTAATGAAGTGAACCTGGCGCAGGAAAGAGGTGACAGAATCGCCTCTGGGCGGAGAT  
GAAAATGCGCAACTCCATGCCAGCGGCTATTATGCGCTTTTGTAGACACAGTACCGGATGATGTTAAGAGGCTATATAC  
TGAAGCAGCAACAGTGAATTTGCTGCGTTAGCCAAACGGCTCATCGTCTTAAAGCGCTATTGCCATGCTAAATCTGG  
TACCCGCAAGCAGTTATGTAACCGCTGGAACATCTGATTCGTGAGAAGGATGTTCCAGGAATAGAAAATACATCAGC  
GACATTGACAGTTATGTCAGAGCTTGTGCTAG

>Cluster\_54140

ATGTCACAAACTATCGACCTGACCTGGACGGCTGTCTGCGGTCACTGCGTTAAACGCGTGAAGAAAAGTCTTGAACA  
GCGCCCGGATGTTGAGCAGGCGGATGTGTCTATCACTGAAGCGCACGTTACCGGGACTGCCAGTGCAGAACAGCTGATCG  
AAACCATCAAAACAGCGGTTATGACGCATCTGTAAGCCACCCAAAGGCTAAACCGCTGGCGGAGTCAATCAATCCCGTGC  
GAAGCAGTCAGACGGTTTCTGAGCGCTTCCGCGACGACCCGCGATGACGATGACAGCCAGCAGTCTGCTGAGCGG  
CATGAGCTGCCAGGTTGTGTACCCCGCTACAAAATGCGCTGCAAAAGCGTACCGGGCTCACTCAGGACCGGTAACCC  
TGGCGGAGCGTACTGCGCTGGTGTATGGGAGTGCTCCCCACAAGATTTAGTGAGGCGGTGGAAAACCGGGCTACGGT  
GCGGAAGCGATTAAGATGACGCTAAACGCCGAGCGCGCAGCAAGAAAACCGCGTAGCTACGATGAAGCGCTTCCGCTG  
CGAGCAATTTGTTGCACTGGCTGTGGGTATCCCGTACCTGTCACGGATGATCGGCGATAAATGATGATGCTACCGCTG  
ACAACCGCAGCTTGTGGTTAGTTATCGGCTGATAACCTGGCAGTGTGTTTTCGCGCGGCGCATTTTACCAGCAGT  
GCATGGAAGACCTGCTGACCGGTGACGCGACGATGGAATACGCTGGTGGCGCTGGGAACGGGTGTGGCGTGGCTCTATTC  
GATGAGCGTCAACCTGTGGCGCAGTGGTTCCGATGGAAGCGCGGATCTTTACTATGAAGCCAGTGGCATGATATTCG  
GTCTGATTAATCTCGGCCATATGCTGGAAGCGCGCGCATGCTGACGCTTCTTCTAAGCGCTGGAGAAAATTAAGCTTTA  
ACCCACCGCAGCGCGGAGTGGTACCCGAGAGGGTGAAAAAGCGTGGCGTGGCGGAAAGTTCAGCCAGGATGTTACT  
GCGCTGACGACCGCGATCGCTGCGGTAGATGGCGAGATTACCAGGGCGAAGCATGGCTGGATGAAGCGATGCTGA  
CGGGCGAACCAATCCACAGCAAAAAGCGAAGCGAAGCGTCCATGCCGGACAGTGGTACAGGACGGCAGTGTGCTG  
TTTTGCGCAGTGGCTGGCAGCCATACCACGCTGTCACGGATCATTGCGATGGTGGCCAGGCGCCAGAGCAAGCC  
AGAAATCGGTGAGCTGGCGGATAAAAATCTCAGCCGATTTGTACTGTGGTGGTGGTATGCGCTGGTCACTGCGGCAA  
TCTGGTACTTCTTTGGTCCGGCACCGCAAAATGTTTATACCCTGGTGAATGCCACCACGGTACTGATTAATCGCTGTCCG  
TGTGCGCTGGGCTGGCAGCGGATGTCGATTTATTTCCGCGTGGGCGGGCGGCTGAGTTTGGCTGCTGGTGGCGGA  
CGCGACCGCTGCAACCGCGCAGTCACTGATACCGCTGTGTTGTTGATAAAAACCGGGACGCTGACCGAAGGCAAGCCG  
AGTTGTGCGCAGTGAACATTTGCTGATGTTGATGAAGCGCAGGCTTGGCTGTCGGCGGCGACTGGAACAAGGTTCC  
AGCCATCCGCTGGCAGCGGATCCTCGATAAAGCAGGCGATATGCGACTACCGAGGTCACCGTTTTCCGCATTTGGC  
CGGCTGGGCTGAGCGGTGAAGCTGAAGTCAATGCTGGCAATCAGGCTGTTTAAATGATCAGCAAGTGC  
ATACTAAAGCGATTAAGCCGATATTTACGCTCAGGCTCGCAAGGAGCAACCGCTGTGCTGCTGGCGATGACGGGAAA  
GCAGTAGCCCTGCTGGCTGACGCGATCATTGCGTAGTATGAGCGTGGCGGCTGCAACGCTGCATAAAGCGGATA  
TCGCTGGTGTGTTGACCGGGGATAACCAACACCGCAATCGCATCGCAAAAGAACAGGAGGATGATGAGGTGATCG  
CCGGGTGCTGCGGAGCGTAAAGCCGAAGCGATCAAAACATCTGCAAAAGTGAAGGACGTCAGGTGGCAATGGTGGCGC  
GGCATTAACGACGCGCAGCGCTGGCTCAGGCGGATGTCGGCATTGCGATGGGTGGCGGCGAGTGTGCTGATGAAAC  
CGCGGCGATTACCCTGATGCGCCATAGCCTGATGGCGCTTGGCGATGCGCTCGTATTTCCCGCGCAACGCTGCAACA  
TGAAGCAGAACCTGCTCGGTGCGTTTATCTACAACAGTATCGGTATTCGGCTGCGCGCGGATTTTGTGGCGGTTACT  
GAAACACTGCTTAAACCGGTAGTTGCCGAGCGCAATGGCGCTCTCGTGCATTAACCGTAGTGAGTAAACGCAACCGGTT  
GCTGCGGTTTAAACCGAAGGAATAA

>Cluster\_28524

ATGAGTATCTGACCCGGTGGTGTGCTTATCCCGCGGTCACGACCGGCTTATTTGGCGTTATCGCGATTAATCGTCTCA  
CGGCGCTGCGCTTTACGCGCAGCCTTGGCTGTTTCTGGATGATCCTGGCCTGGATTTTATTCGCTGGAGACCCCG  
GCTGGCAGCGTATTCGCGCAGAACATAAAAACCTGTATCCGATATCAACGCTCGGCTCGGCTCGGCTGGACCCGGT  
CGTTATCTTATTAACATGCTGGTTACTGATCGGTACATCGCGCAAGAAACGCCGAAACCGCGCAGCGGGCATTTT  
AGGCTACAAAATATCTGACGTTACATCAATGATGAACGAGCTGCCTGAGCGGTTAGCCATAAAAACACAGCATC  
TTGATGAGAAAAGAGCTCGGTCATTTGAGTCCGGGCGCGCGGTTGATCCTTGGTATCATCTGCTACCTTCTCGTG  
ATTTGCGGTTAATCTGCGTTACTCAGCGTTTAACCCGCTAGCGCAGTTTATCTTCTGATGCTGCTGTTGGGGGTAGC  
GCTGATCGTACGGCGGATGCCGGGCGCTTCTCGCGCTGATGCTGATTTGTGCTGCTGCTGACCGTTTCTTCCGTTATA  
TCTGGTGGCGTTACACTCGACGTTAAACTGGGACGATCCGCTCAGCTGGTGGTGGCGGCTTATCTGCTCTGCTGAA  
ACGTACGCGTGGATTTGCTGGTCTCGGCTATTTCCAGGTCGTATGGCTCTGAATCGTACCGGTTGCCATTTGCCGAA  
AGATATGCTGCTGTGGCGTGGTGGATATCTTTGTCGCGACTTACAACGAGATCTCAACGTTGGTGA AAAATACCATTT

ACGCTTCGCTGGGTATCGACTGGCCGAAAGACAAGCTGAACATCTGGATCCTCGATGACGGCGCAGGGAAGAGTTTCGC  
CAGTTTGCCCAAAACGTGGGGGTGAAATATATCGCCCGTACCCTCATGAACATGCGAAAGCGGGCAACATCAACAATGC  
GCTGAAATATGCCAAAGGCGAGTTCGTGTGATATTCGACTGCGACCAGTACCAACGCGATCGTTCCGCAAATGACCA  
TGGCTGGTTCCTGAAAGAGAAACAGCTGGCGATGATGAGACGCCCGACCCTTCTTCTCGCCGGACCCGTTTGAACGC  
AACCTGAGGGCGTTTTCGTAACACGCCGAAGGACGCTGTCTATGGTCTGGTGCAGGACGGCAATGATATGTGGGA  
TGCCACTTCTTCTGCGGCTCATGTGCGGTGATTCGCCGTAAGCCGCTGGATGAGATTGGCGGTATTGCTGTGAAACCG  
TAACCGAAGATGCGCACACTTCTCTGCGTCTGCACCGTGTGGTACACCTCCGCGTATATGCGTATTCCGCGAGCAGCG  
GGGCTGGCGACCGAAAGTCTCTCGGCGCATATCGGTACAGCTATTTCGCTGGGCGCGGGGATGGTGCAAAATCTTCGCT  
CGATAACCGCTCACCGGTAAAGGGCTGAAGTTTGGCTCAGCGGCTGTGCTATGTCAACGCCATGTTCCACTTCTGTCCG  
GCATTCCAGACTGATCTTCTGACTGCGCCGCTGGCGTTCCTGCTGTTTTCATGCCTACATCATCTACGCGCCAGCGTTG  
ATGATCGCCCTGTTCGTGTACCGCATATGATCCATGCCAGCTGACTAACTCGAAGATCCAGGGCAAATATCGCCACTC  
TTTCTGGAGTGAATCTACGAAACGGTGTGGCGTGTATATCGCACCACCGACGCTGGTGGCGCTGATTAACCCGCACA  
AAGCAAATTTAACGTACCGCCAAAGGTGGACTGGTGAAGAAAGAGTACGCTGACTGGGTGATCTCGCGGCCCTACATC  
TTCCTTGTCTGCTCAACCTGGTGGCGTAGCGGTTGGGATCTGGCGTACTTCTATGGTCCGCCAACCGAGATGCTCAC  
CGTGGTCTCAGTATGGTGTGGGTATTTACAACCTGATATTCTCGCGCGCGAGTCCGAGTATCGGTAGAAAGCAAAC  
AGGTACGCCGATCCGACCGCGTGGAGATGACGATGCCCGCAGCAATTGCCCGGAAGATGGTACCTTCTCGTGTACC  
GTTCAGGATTTTCCAGCGTGGTGGGATCAAGATCAACCGTCAAGCGCAGATTCGGAAGGGCAAAGTGTGATCT  
GTTGCTTAAACCGCGTACGAGGAATACGCTTTCGCCGCTCAGGTGGCGCGGTGATGGGTAATGAAGTTGGGCTGAAAT  
TAATGCCGCTCATTACCCAGCAACATATCGATTTTGTGCAAGTGTACGTTTCCCGTGGCGGATACATGGGCGCTCGGAG  
GACAGTACCCGGGAAGATAAGCCGCTGGAAAGTCTGCTGGATAATCTGAAGCTCGGCTTCCGTTCCGCTACCGCATCTGGC  
GGAATTTGCGCTTCTTCGTTGAAGGGCATATTCCGTTGCTGACTTCTGTTTCCGTTGTTTCCGTTGTTATTCGCG  
GCCGCCGAGCGGAGCGAAACGGCACAACCATCGGATCAGGCTTTGGCTCAACAATGA  
>Cluster\_42128  
ATGGATCATAGTCTTAATCTTTAAATAATTCGATTTTCTCGCGCTAGTTTGGCCAGAATGCACGAGAAGGTCGCC  
GGTCGATATTCTGGCCGTTACTGGTAACATGGATGAAGAACATAGAACCTGGTTTGGCCACGTTATGCTGTTATTGCC  
AACAGATGATGCAACACAGAGAACTTGAATTAGAACACTGA  
>Cluster\_44715  
GTGTTTAGTACCCGATTGTTGGTCTCGGCCATTACTTACTCTGAAATGCGCTTCGGTCCGCTCCGCTCCGAAAGGCTCCCC  
GCGTACGCTGCAACTGGTTGATAAATTCGCCGCTGCTCGATGCCATCTGTCTTGGGATCGCGCCGCGGTGGACGGCA  
CCACGGATATTAAGTGGCACTGCGCCAGGCGGGACCGGATCGGCCAGAACGATACGGCGATTGCCGGGCTGAAGCT  
GGAAGACTGGGTAATTAACATCGCCACACTCTGA  
>Cluster\_39802  
ATGCCAACACCAATCTCTGGCACCGGTGAAAGGTGCCGGAACCACTCTGTGGGTTTATAAGGGGAGCGGTGACCCTTA  
TGCGAACCCGCTTTCAGACGTTGACTGGTTCGCGTCTGGCAAAGTTAAAGACCTGACGCCCGCGGAACGACCGCGGAGC  
CCTATGACGACAGCTATCTCGATGATGAAGATGCGGACTGGACCGCAACCGGACAGGGGCAGAAATCCGCCGGAGATACC  
AGCTTACGCTGGCGTGGATTGTAGTGGCAGTAA  
>Cluster\_35149  
ATGAATCTTGGAGAAATATTGCATCATTCCGGTATAAATCAGAAAGCAATTTTGTGAAATGTTGGGGTAACCCAAAGGAT  
GGTAAGCCATGTCATTACCGGACGGCGAAACTTACGGGAAAAAATTTTACGCTGGTGCAGCAACAGGCTGGATAG  
TAATCCGACAGAGATTGATGGCAGTACTTATCCCAACCAACCGACGCTTACCTGTGAGTATCAGGCTAACACACAA  
CCAGAGCGGGGGTATTATGAAATCAAGCATGA  
>Cluster\_1682  
ATGAAGAAACACACTTTGACCCGATTTTCAAGGAAAGCTTTTAAACGAGCTTACCAGAATTAACAGAGCTACTAAGTTGCC  
TCATCAAATGTTATGACGCTTGCATCTCTAAAGTGGTCACTGAGTCCGATTACTTAGATATCCAGTCTCTAAAGGCC  
GCAAACACATCCGAATTACTCAGACGCTTTAGATACTTTGAAGGGACTAAACAACTTAAAAATGATATTGCCCGTCTA  
ATGAGTATCAAAATTCACAAATTAGCGATGGAGGTTAA  
>Cluster\_61378  
ATGAGGGATTTACAGACCAGCGGATAGTGGGGTTGTGAGCCAGTAAGGTGGGATACAGGCACAGTATCGACATGGTGA  
GGTCAACGCAAAAAAATGTTGCGGTTTGCACACAGTTCTGCCAGATTCGGGCAACGAAGGGTTTACTGGTGGAT  
ACACATACCAGGGGAATAAAGTCGTTTTAGCCTCTCTTTAGTAAATCACCGGGGTAATGAAATCAGCATCTGCATCCCT  
CGTCATGCCAGCCATCAATTTAGTTGCTTATGTCCCTGA  
>Cluster\_186  
ATGAAGAAACTGTTTGCCTCCCTTGCCCTCGCCCGCGTGTGGCCCGGTGTGGGCGCTACCCAGACCGTACGCTAGC  
GGTTCCCGCATGACTTGGCGCCGCTGCCGATCACAGTCAAGAAAGCGCTCTCAAGGTGCAAGGCGTGAGCAAGGTCG  
ATGTGGGCTTTCGAAAGCGGAGGCGTCTGCTCACTTTTACGACACCAAGGCCAGCTACAGAAGCTGACCAAGGCCACC  
GCAGACCGCGCTATCCGTCAGCGTCAAGCAGTGA  
>Cluster\_62153  
ATGAAAAGATCCTTGTGGCATGCGGTACCGCATGTGCACTTCAACATGATGTCACACAAGCTGCAAGAGTTCTGAC  
TGAACAGGGCATTTCAGCCACTACGCCCAATGCTGTGTAATGAGATCCCTCTTAACTGTAACGGTATGGACCTTATTG  
TAACCTCCATGCGAACCAACAGTATTACGGCATCCCTACGCTTAAATGGCGCCGCTGCTCACAGGATCAACGACGAC  
CGGTTAAAACAACAATCAAGGCTCTGTTAACTCAATAA  
>Cluster\_36707  
ATGGCTAACGATAGCTGGAGCGGGCAGGATAAAGCTCAACACTTATCGCCTCGGCGATGCTTTCGCGCCGCGGAAATGA  
ATATTCACAGCATCAGGGGATGAGCCGGGATCGCAGTGCATGTTGGATTGATGTTCTGTGAGTTTGGGGCGTCAA  
AAGAGCTTTGGGATAGCCGCCCCGAAGGAGCGGCTGGAGCTGGAAGGATTGGCCTGGGATGTCGCCGTTGCAAGCACC  
GGCTATACCGTCTGGCAACTGACCCGTCATAA  
>Cluster\_62812  
ATGAGTAAATAAACACTTGTAAAAAATCAAATAACTGTGTCGATGCATACGCCGACGCGTTTGGCTACTCTTCTGTTGG  
TGACGGCTCTCAGCGCTAGGTTCAATTTCTTTTTCATAATGTAACGTAATGGCCTGTGATGAAAGTACGATGTTG  
AGAACATAAAGTACAACATTTGCAACCATGAAATGCCGGAAGAAATGATGTTAAATTTGGCTGACTTCAATTCGCGACCAG  
CATGACAAAGCTAAAACAACATAA  
>Cluster\_40224  
ATGCGAGCAGGTTTGGTGGTGGTGTGCCGCTTTTATTGTTGTGCGGCTGTAGTGTGAACTGTTTACGAGGCGACTGC  
GGCGCAGTAGCGCCAGGTTTAAAGCGTGCATGTCCAGTGTGAGAGCAAAATGTTGCAATGATCGCGGTTTCGCTTT  
CTGTTGCCCGCAACTGGATGGTACGGCATTTGGGATGTGTGCATTACCAACGGCAAACGCTGTAGCGAACAGTCACTT  
GCCCGGGAGCTGTGGCAGCTATTA  
>Cluster\_43615  
TTGAACAACAGCAGATGACTTTTACCCCTGAACAATTACGTAACAGGCACAGGAAATGTTGCGACAGGCGGAAACAAC  
GAAAAAACAGGTGTAACAAAAGATGCCATTCTGTCGGGATATGTTGCCGCGCTCAGGAACTGATGCAGGCGAAACACC

GCGCACAAAAGCAGTGGATGAGCTGGTGGATTGTGTGGCAGAGCTGGAAACCAAAGTTGGAAAGTTGAAAACTGGTG  
CAGGAGGTACTGCCTGA  
>Cluster\_10977  
GTGAAACCGAATATCCATCCGGAATACCGTACAGTAGTATTTCCAGTACCAGTATTGATGAGTACTTCAGGATCGGTT  
GACGATCAAACCTACCGGTAATGAACTGGATGGTGAACCTACCCATATGTTACAATTGACGTTTCTTAAGTCGC  
ATCCGTTTTATACAGGTAACCTGAGAACTGTCGCTTCAGAAGGTAATGTTGCACGCTTACCAGCGTTTGGCGTTTT  
GTTGATGCGAAAAAGGTGGCTGA  
>Cluster\_20765  
ATGCGAGTTCGAAATCGAATGCCCGAATGCCGCTCAAAGGCTGTTATTCGTAACAAACCGGAAGCACCGGAGAT  
TGCGGATATTTACTGCGCTGTTCAGATGTGGAGTGTGGCCATACGTTTGTGATGAATCTGACGTTCTCCACACTCTCA  
GCCCCAGCGCAAAACGGGTGATGCAATGGTGCAGAAAATATTGAATGCACTGTCACCCGATCAGCGTCAAATGGCATT  
GACCTACTGAAAGCGACTCCCGCCGCTGA  
>Cluster\_17514  
ATGAGTGAATTTCTGAGCTTATTTCTTCAAAGACAGAGAAGAAATGCCGACTGAATCTGTCTATTACGTTCAACA  
CCGGAATAAACGCTCGGTGCTTGTATCAGGAGTTGGTTATACCAGGAGCTGGCATTCAGAACATATAAGGCCAGCATGG  
AAATGAAGGATTTCCCTAAATGTGGTTCGAAAGAGAAGCCGCTTAAAGCTGGCTGAGTGGATGCAGAGAATGGCTGCT  
GCAATGAGAATTAATGGAGTGAACATAA  
>Cluster\_22066  
ATGACACCTGAATCGGTCATGATGATGGAACTGAAGCGATGAAAGTCCGCTGGCAGTGGCAGCCCCGCTGTGCTGGT  
GGCGTGGTACGGGCTTATCATCAGTATTTTGCAGGACCGCAGATTAACGAAATGACGCTGTGCTTTATCCGA  
AAATCATCGCCGTTATTTATCGCCATTATATTGCCGACCGTGGATGCTCAATCTGTTGCTGGATTACGTCGACCTTG  
TTCATACTGCGGTATATCATCGGCTAG  
>Cluster\_54452  
ATGAATAAGTTTCAGCATCAGGGAGCGGAATTGCGCAACAGAGCCAAAGAATTGGCTTTATCCGACTTAAAACTCACCC  
AGATGCCCCAAAAACCGCAACGCGCTTAAAGCAAGCTGAGGATTTTCGCTAAGCGCCCTCGATTGGGAGAAAAACGGA  
AAGCAACAAGTTCGAACCAACAATATTGGGTTGTGCACATTTGCGTGAAGTGAAGAGGAGGGTTAGTCGAACAGATT  
GAAGATAGAGGCCCTGGCGTCTAAGGTAA  
>Cluster\_39650  
ATGTCCTGTTCTCATTCACTGTTGATTTACTGAATAACGCCTTAAAAATCGCCGTTATGAAAAATGGCGATTTGTCTCTTAT  
TCAACTTTTGTCTTATAAAGAAAAACGCACATCACTGAATCTGTTATCGCGATTATCAGAAATGAATTAAACCTCCTGT  
CTGATGTGGTCAATTTACTTGTAAACGCGCTGATTTCCACAAGCAAAATTTCCCTCAGTGGATGAAGTCAAAAAATTAACG  
ACAGAACTTGCAGTTATGCGCTGATGTATCCAGGAACTTAAACGATAAAAAGGAGCTGA  
>Cluster\_39918  
ATGATTTTCGACACAAATTTAACAGGGATAATCAACATCAAACCATCATCAAACCGTCACTCCTTCCCGTTGCATAGCACT  
GGCAGTATTACCTTCCGCGCTTTTGTGCACAGCCACTGAAGAAACGGTGAATGTTGAGGGTTACAGCCACAGCCCCAG  
ATGATGGCCAAAATGATTAACAGCGTAACGCTTACCTGCTGCGGGTACCAAAATCGAGATGACTCAACGATATATCCTCAG  
TCGGTCACTATTGTTAGTACAGCGAATGGAGGATCAGCAGTTACAAACGCTGGGCTAA  
>Cluster\_23284  
GTGAGCAGTAAAGTGAACGCTGAACGACGTAAGGCGCAACTGCTTAGCCAGATCCAGCAACAACGCGTGGATCTTTCCGC  
CAGTCGTCGTGAATGGCTGGAGGCAACAGGCGCTTACGATCGTTCGCTGGAATAATGCTGTTGAGTCTGCGCTCCGGGCGC  
TGGTTGGCAGTAGCGTATGCGCTATCTGGACGATTCGCGCATCCATAATGCTGTTCCGTTGGGCCAGACGCGGTTTTGGT  
GTATGGAGCGCTGGCTGTGGTGAACAACCCCTCAAGCAACAACAGCTTCCGCGTTAA  
>Cluster\_25294  
ATGAGGTGGAATGGCACAAGAGACTTACAAAAGAAATCAGGCCAAACGCTGATTGATGAGAGCCCCGAACACTGAAATC  
TGTCGTCAAATTTGCGCTGGTAACTGTTCTGAGAAAGTGAACATCATAAATCTGGAGTGGCAACAGATTGACATGCAGC  
GACAAGTTGCCAGGGTGAATCCAGAAGATAGCAAAATCAAACCGCGCAATTTGGTGTGGCGCTGAACGATACCGCTCTAAA  
GTGTTGCGTGATCAAAACAGGCAAGCATCAAAATGTGGGTGTACATACCAGGGCGGCTAA  
>Cluster\_18923  
ATGCTTAATCTCAATACATGGAATCTTTTACAGCTGCCGCTGAACGTTGGCGCAGCTGAGACAGCGCCGGACGATCTGCG  
TCTGCTGGCCGCTGTGGGGACGAGGCTCGCAACACTACCTGCGCGGTGTAAGCGCCATCGGCAATCTGATCTTCTGGG  
CATGTGATAACCCCAACTACCCGACCATCAAGCTGACCTGCCAGCGCTGGGCGCATTCTGAAACATACCCGCTGATATG  
GCGCGGCTGCCGAATTCATGGCAGGACATCTGGACTCACTGGCTGACGGCAAGAGGGAGGCAATAA  
>Cluster\_6731  
ATGCTCAATTAATGCTCTTTTTTGTAAAGGTAAATGCTTGGTGTCTGTCAGCGTAATAAAGTCAATGGTCAAGGCTATTA  
CAATGAAATTTGGTATCGGTTTAGAGATCCCTGATGGTTTTGGCGTACTAAGCAAGACCAATAATTAATTCGTGATAC  
AGTCCCTTGTGAACGCCGAGTCAATGAATCAAGCAATAGTTTTACGGGAAATAGTTCAAATCCCTGTATATGTTCTGT  
GTCGTTCAATGGAGGTTAGAGAAGGTGTGACTTATAATATTTTATCAGATGGTGGGATCACTGAAATAAAAGGTTAA  
>Cluster\_9428  
ATGTTTGTCTTATGCTGCATCTGGTTTATTGTGGCGTTCCTCTGGATAACCATCACTTCCGCGCTGGACAAAAGAGTGGAT  
GATTGATGGACGCGGGATTAACAACGCTTCGATGTTGATGATCTCGAAGAACGATACCCGCTGATGTTGGTGTGA  
TAATGACGTTACCCTCTTTTTCTCTCTGTTGCTGTTGTTGCGGAAAAAACGCGGCTGGTTTTATGTACGCCACC  
GCGTGGCTATTTTCCGCTACTGGCTGTGGCAGTTTTTTCTGCGCTATCAGTTTTGTTGTTGA  
>Cluster\_67027  
ATGAATATACGTAATATTTACTGCCGCTCTGTGCTGGATAAAACCGTATCAGATGATTTTATTCATGATGTTCTCAG  
TAATGACACCACAAGAATAATCTTTCTGCACCTAAGGAATCACTCCTGAATCGTTGCCGCTCAATTTTAATATGGCCG  
CTGTGGTGTGATGAAGAACCGTATGTCGAAGAGTTTATTTTCTTCTTCCGGAAATACAGCAGTCTTCGACAAACCCGCT  
GCAGGAAAAACGAATCTGATGGTCAATTCATTTCTTCTGTTGTTGGGAAATAAAAAAGGAGAAGTGA  
>Cluster\_67049  
ATGACATTCGCAAAATTTGATAAACACAATGAATCAAAGGGAACATTTCAATTAATCAGGCAAGAGATATGGTCCGTAA  
GACCATTCGCTTATTGATATAGGGTAGCTGAATCACATCCAGACTGCATCAGCGAGAGCTACTAATATCTCTTTTA  
CTGATGGAACAAAATTTGCCATTTCTATTTGGCTCAATGTTCAAATGTTATCAGTGCCTTAACCATAATGGCAAGGTT  
GACTTAAACCGAATGATTTCCATACAGATTTAGATCTAACTTGGCAGCGTTAA  
>Cluster\_160  
ATGAAAAAACAACCTCCACCGCATTACTGGCACTGACCTGGGAGCGTACTGGCAGCGGCCAGTGGCCCGCAATGGC  
CACTGGCGATAATATGAAAAATGTTACGGCTTTCGCTGAAAGGCAAAAACGACTGTAAGCCGCGCCGCGCACAACT  
GTGAGGCAACCGGAAATGGATTTATCAGGAAATGCCGAAACTGGTACCGCGGGCAGCTGCGTGAAGATGAAATCC  
CCGGTTCCCTTACCGCTATGGCCAGCTTGGAGCCTTAAAAACGCATAA  
>Cluster\_56526  
ATGAGTGGCGTAACAGTTAATGATGACGGTCTGTTTTACGGCTCTATATTCAGCCGAAAGCCAGCGGTATTCTATTGT

CGGTTTACATGGCGACGAAGTTAAAGTCGCCATTACCGCGCCCGCGTTGACGGCCAGGCCAACAGCCATCTGGTGAAGT  
TTCFCGGTAAGCAATTCCGGGTAGCCAAAAGCCAGGTGGTAATGAAAAAGGCGAACCTGGCCGCCACAAACAAATTTAA  
ATCATTAAATCCGCAACAAATCCCGCCAGAAATCGCGCGTTAATTAATTAG  
>Cluster\_60013  
ATGAATAAGTATTGGCTGTGAGGAATTATTTTTCTTGCCATGATGGCTTCTCCGCATTCCTTCAGAGACTGCCAC  
ATTAGCGATTAATGGCAGGATCAGTCCCCAACATGCAGTATGGCTATGGTTAATGGTCAACCTCAACAGCATTTGGTGC  
AGTTAACGTATAAATGTTGACACCGTCACTGTTTTCTTCGCCCGTCAAAGGTGTACGACAGAAAGTGGTTGTGTCAGGT  
AGCGATAGCAAACGTCAATCGTGTAAATCGCTACGATTA  
>Cluster\_16586  
ATGAAAATGGCCAATCATCCCGCCCGGGGACATTATCTGGAATCACTGGACGAACCTAATGTGAGCTGCGCGAGTT  
TGCCAGAGCAATGGAATTTGCGCCCTCAACGGCAAGCCGATTGCTGACCGGAAAAGCAGCTTTGACCGCAGAAATGGCAA  
TAAAATGTCCTGGTGTGACGGCAGTTCGCCGCAATGTGGCTGAATCTGCAAAATGCCTGGAGTCTGGCAGAGGCGGAA  
AAAACGGTGGATGTGTCGCGACTGCGCCCTCTGTTACGCAATA  
>Cluster\_49710  
ATGGTTCGTGCAACAAACGCAACGAGGCTCTACGAATCGAGAGTGCCTGCTTAACAAAATCGCAATGCTTGGAACTGA  
GAAGACAGCGGAAGCTGTGGGAGTTGATAAGTCGCAGATCAGCAGGTGGAAGAGGGATTGGATTCCAAAGTTCATATGC  
TGCTTGCTGTTCTTGAATGGGTGTGTCGACGACGACATGGCTCGATTGGCAGCACAAGTTGCTTCGATTCTCACCAAT  
AAAAACGCCCGCGGCAACCGAGCGTTCTGAACAAATCCAGATGGAATTTCTGA  
>Cluster\_14977  
ATGACTGAGCATGATGCTATCTGCATTTCTGCACTTCATCAAAATTTTGTAGTGAAGAACATTTGAGTGAGCAACAAA  
AGACATTAATCTGATGTACGCTTATGGCTATACCTGAATGAAATGCTGATTTCAAAGGACTAAAGCCTTCAACTGTCA  
GAAAATATCTTGATCTGTAAGAGCTGAACTGGGAGGTGTCTCGTTGGCAGGGATCAGAACACTGGTACTCATTCGGACT  
AATGCCCTTCTCGTCAAGTCTTTCAGGATCAGTGAGAGGGGAAATTTATGA  
>Cluster\_35146  
ATGCTGCCCATTTTATGGCTACCTTCTGCACGTGATGATTTACGTGAGATCGTAGCCTATATTGCTAAGGAAAACCTCC  
CGCTGCACGTAGACTAAAATACGCATTGAAACATCAGTTTGTGCTACTGAAACACCTTATCTGTACCCACCGAGCG  
AAAGAGTTCGAAGTCTTCGTGAGATAGTACTCATCTAACTACATAATACTTTACCGAGTAACAGCATCTAACATCGAG  
ATCGTAAATGTAGTTCACTCACGAAGACAGTATCCAAACAAAACCTGTTAA  
>Cluster\_53104  
ATGCATGTATCAGCCACAAAGCCTTTAAACGAGCGATAAAACGCTTTCCACCTTACGAAGGTGCATTTATTGATTTATT  
AAATCTTCTTGAGAAAACAGAGTTTAGCGATCCGGGTGAGATGAAGAGATATATTTCCCTCACTGGATAATTTTAAATACA  
GAGATAAATGGTGGGTATTAATATTGCAAGTAATCATTTACGGCTTATCGCATATATTGATTTCAGGCTCCAAAAATGT  
TTTATCAACATACTGTTATCTACAATGAATACGACAGATTACAACTAG  
>Cluster\_51085  
ATGGTTAGCATCAAAACAACTCAGAATATTTCAAGCAACAGGTTAAAAATAAACTGCACCCGAACAATGATAACGAC  
AGAAAACGCCCTTTTCCGAGCCACAAAATTAATTCGCATCTTATTTATGCTCAGTTAACGCCCTTGTATAACTCGAGCT  
CTCCACGGTATTTAACCTCTCTTCTGTTTAACTATAATTTCAAATAAATCTCGTCACTGA  
>Cluster\_66245  
ATGCCAAAACAGCCAGTGTTCAGTGGCGTTTGGCTTTTATATCTGTAATCTTAATGCCCGCTGGCGATGTTAGGAAA  
ATTCCTGGAAATTTGCTGGCATGTTATGCAATTTGCATATCAAAATGGTTAATTTTGCACAGGACTGGTGGGTTCCGAAAC  
GACTTTCCCTTCTGAATAAAGGTCTTCGTGGTTATACTTCTGCTAATAATTTTCTCTGA  
>Cluster\_40808  
ATGTTTCTTGAACATGTTACCCGTGACGGAGAGCGCTGGGATTGCTGGCATGGCAGTACTACGGTGACCCGCTGGGCTA  
TCCCGGATTTATGGCCCAATCCGCACGTGGCCATCAGCAGGCTGCTGCCCTCCGGGCTGTTGTTACTGATCCCGGTGA  
TTGAGGCTGAAGAAGCCGTACAGAAGAGGATATTGCCCATGGCTGAGATA  
>Cluster\_5097  
ATGAAGTGGCTTTTATTAATCACCTTGTGCTATATTTCTTTATTTGTCGAAAGTGGCTCCTGTGCATTGACCAATGTGCG  
TGAACAACGTGGAACATATATACCAAGCCACTGAGTATGAAAGGTAATCTAACCCGCCGAAAATGAAAACACCGGAAA  
TATCATTTGAGTGTACAGACTTGAAGAGACAACCAACGCCATTAAAGTTCATTTTTTAA  
>Cluster\_64460  
ATGTTTGGCGATAAACTGGAGTTACCACGGAACGGGCGGATAGTGCTCTATATTTAGATTACAAAGTAAACCAAGGCTGA  
GGTGTGGAACCGGAAAACATCTGGTACGTTACCGGACATTTAGATTGTATAAGCGGGTGGATATGTGGACTTGC  
ATCGCGATGATGTTCCCGTTGAGTGTATGGAATGTGAACACCGGAGGTTTGAAGTTGATTGA  
>Cluster\_64462  
ATGAACGAAATTTTACTCGCATTTATTTCCACGATTTATTAACGACAAAGTGGCGTTGAGTGCCGTTAATGATCAATACGA  
AATTTGATGCAGCATGATCGACATATCCCGGTGAGCAGTATGACGCGATGTGTGACCTGAAAATATTCACCTGGCTGG  
GTTGGGCCATTCGTGTGGAGAACAACAATAATTCGCCCGTTTGAAGCAGGAGGCTGTATGA  
>Cluster\_45324  
ATGTTTGTAAACGAGCAAAAAATGACCGCGGCTGTTCTGGCAATTAATTTGGCAATGTCTCTGAGTGCCTGTTCTAACTG  
GCTAAACGGGACCGCAACACCGCAATCGCGCGGGTGCAGGGGCATTAGCGGCTGACGACTGACCGATGGCAGTACGT  
TGGGTACATTTAGGTGGTGCAGCTGTCGGTGGTGTATTGGTACCAGGTCGGTAAATA  
>Cluster\_17495  
ATGGCAAAAAATAATGCAGTAATACACGTACATACCTGTTTGTGCTCAGCTTCCCGACGGTTCGCGGCGGAGTTTGT  
TAAAGGACGTATGCAGTGGAGGAAGACGTTGCCACGCACTGGTTCACTCGTGCACGCGGAAAGTATCCGTTGGCAAAG  
CCACAGACCGCGTAAACGAGTAAAAATGCCAAAGAATCAAAGTCTGCCAGCGGTAAGTGA  
>Cluster\_48606  
ATGATCGTATTAAGTAAACGGGAGAAGGAAACACTTCATGAAATCAGTAAAGTGGTCAGAGTTCCTGAGTACTGGAAGCC  
TAAAACGGGGCTAAGTTAGAGCGGTTAGGGTGGTTGCAAACTGTTGAAAACGAAAGTTCGGCCAACTACCAAGTTAA  
CTGATAAAGGAAAGTATTGCTACAGCAATTAGTAGAATCAGGAGTGTATA  
>Cluster\_29373  
ATGATTGGCTATATTCAGAAACACAATTTTTCAGATGATCCTGTCTGATGCAAAAACTATGCTGAGTTAATCCGGCT  
GGCAAAAGAAACGAAAGACTACGAAGCATTAGATCGTTACCGTGTAGTGCAGCTCAAGACACCTTTTAACTATCG  
TATTGAATATGATTAATGATGATTACAAGGAGAATACGCATA  
>Cluster\_41201  
ATGGCTGAAGAGAAAAAGCGGTTTTCGGTGTACATAAGCCCGGAAATCGTGGAGGTGCTCAAGCAGCGCCACAAAA  
AACTATGAGGCTGGCGTGGCGGCTGGACTGATCCGCTGATGACCGCGAGCGCTGATAGGTTCACTTGTACGCTCTT  
ATTTACTTGGCGGCTTGGGATGCATAAAAAATTTAGGGGTGAATA  
>Cluster\_48660  
ATGGTCAGCTATGACAAGATCCGCGCGAATATCGCGCAAGTATCGCGCTTATAAATGGAATTAATCGATGATTTGAT



CGCGCAACGCGACCAATTAATTTTACGTTTTCTGATTTGCTTAAACAGCAAGCGAGATTGCAAGCGCAAACGTGAATACT  
TACGTTTTAAGCGCATTAATCGGAAAACCTCAAATTTCTATTTAA  
>Cluster\_8500  
ATGAGTCTGTTTTCCCGTTATCGTGGTGTGGGGCTGCTCTCCACCGATATTTTTGAATTGCTTTTTACTGCGCAT  
TTTTCTGGCTGGTGGCGCGGTACTGTGCCAACAGGTACTACACTTTGTCTGGCATCCGGCGTGTGTCAACACCGCGC  
TCTATTGCTGCTTTTTATTTGATATCGGACTGTTCTGTTTTGA  
>Cluster\_22375  
ATGACCCCTGCATTTGCTTCTGGAATGAATTTTTTCGCAATGGGCGGTACGCCTTTTTGTCTGGCTGGCGGTGGTGTAT  
GACCGTTAATTCGCTGGTGGTTTTGGTCTGCTGACTCGGTGATGCAACATCGCGCAATTTCTGCTGGCGTGGCGCAACAGC  
GGGCGCGTGAGGTGCGTTTACGTGCTGCGCAACAGCAGGAGGCTGCATGA  
>Cluster\_11865  
ATGAACCAAGATGATATCGAAGCCATGATTCAGCGTTATACGGAAAGCTGAAATGGCGGTGCTGGACGGAAAATCCGTCAC  
CTTTAATGGTCAGCAGATGACCATGGAAAACCTTACTGAGATCCGGCAGGGACGGCAGAGTGGGAGCGCCGCTTGCGG  
CTCTGATTACACGACGACGGGGCATCCCGGTACCGGTGCGGAGGTTCTGA  
>Cluster\_5798  
ATGACGTTCTCAGTAAAAACCATTCCAGACATGCTCGTTGAAGCATACGGAAACCAGACAGAAGTAGCACGCGACTGAA  
ATGTAGTCCGCGTACCGTTCAGAAAATACGTTGATGATAAAGACGGGAAAATGCACGCCATCGTCAACGACGTTCTCATGG  
TTCATCGCGGATGGAGTGAAGAGATGCGCTATTACGAAAAAATTGA  
>Cluster\_27388  
GTGAAGAAAATTACTGGTAAACCGCAAAGCTCTTTAATGGAAGAATCCCGTTCAGATTTTACAGCGTGGTCTGTCTGGC  
TGAAGGTACATTCAGTGGTAAATGCACGGAATGTTATTACGAATATATGAAGTGGATGCCACGGATGAAGATATAACCG  
TTGAGTGTGATGCCGGGATGTTATCGGCCACATGCTTACATGGGTGA  
>Cluster\_10656  
ATGATTAAGTTCTTTTTCGCCAGGTGCGCGAGTTGGTGGAAACAGATGCAACCGAAGTGGCTGCGGATTTCCCAAC  
TGTTGAAGCGTTACGCCAGCACATGGCTGCGCAGAGCGATCGTGGGCGTGGCGCTGGAAGATGGCAAATTTACTGGCTG  
CCGTCAACAGACGCTGGTGGTGTGGACCATCGCTGACTGACGGCGACGAAGTAGCTTTCTTCCCGCGGTACCGGA  
GGTTAA  
>Cluster\_17778  
ATGAAAAGAGCATTGGCAAAAAGGAACGTATGGCAGTGGTGGCGGTATCGATGAGCACCATTGACCGCATGGAGCGCAA  
TGGCGAGTTCGCGAGCGCTTCTGGATCAGTAAACGTTGTGCATGGAATGCTGAAGAGGTGAGAACTGGCTTGATG  
AGCGTCAGGCCACCAGCCGGCAGAGTTCACGGAAAAGCCGCGGTTGATCAGCGTGTACCAGCCAGTAAAGTAA  
GCCCATGA  
>Cluster\_24464  
ATGTATACCTATAAAATGATTCAGGTGCCGCTAATATTTCTGTAAAAGCCAAGGATAATAAGTCTGGCGTAGCTGCTGC  
ATATCTTCAGGGGGTGGTCAATGAGCAGGCTGCTGAAGGTGGGAGTTTACGCGAGTTGATACCATTGGTATTGAAGAGC  
AGCCAGGATGTTTCAATGGCGGAAAAGCCAGGTTTTTTCAGTACTATGTGATTACTTTTCGAAAAAAGTGCCAGATGCT  
TAA  
>Cluster\_29503  
ATGAAAGTGAAAACTCTTGTATCTGGTCTGGCAACGACTGTTTCTGTGCTGCGCTTCTGCATCTGCCGAGTTC  
GGTTCGCTCTTTTATTTCTGCTGATACTGTTAAAGAAATGGCGACGCGCTCATCAGTGTGATTGGCATTCAGGTA  
CGCATTTGCGGTGCTCGGTGTTTCACTGGCCGCGCTGCGGTATCGGTATCATCAAAGGCTTCTTTCCCGCGCGACC  
TGA  
>Cluster\_35056  
ATGGAAAAAATAATGAAGTCATTCAGACTCATCCGCTCGTAGGGTGGGACATCAGCACCGTTGATAGCTATGATGCGCT  
GATGTTGCGTTTGCCTACTACCAGACCCAAATAAGTCCGAGCAGGAAGGACTGAAGTTGGTGCAGACGCTCTGGTTAACCA  
CTGATGTTGCCAGACAATTTATTTGATATTAGAAGCAGGAATCGCAAAATTTGAATCCGGTATTTCCAGGTAAACGAG  
TATCGGCGTCATTAA  
>Cluster\_65503  
ATGAAAACGATTTTCACCGTGGGAGCTGTTGTTCTGGCAACCTGCTTGCTCAGTGGCTGCGTCAATGAGCAAAAGGTCAA  
TCAGCTGGCGAGCAATGTGCAAACTTAATGCCAAAATCGCCCGGCTTGAGCAGGATATGAAAGCACACGCCACAAA  
TCTATGCTGCCAAATCCGAAGCTAACAGAGCCAATACCGGCTTGTGATGCTCAGGACTATTTTGATTGCTGCGCTGCTTG  
CGTATGTACGCAGAAATGA  
>Cluster\_49959  
ATGGATAAAGAAAGGGGTTTTCACTCAGCTATGAGCAACTGACCAGAATAGCGGAAAAAATAATCCGTTCAATGTGGCT  
GGACAGCCAGATCCGAGTGCATCAGTGAACGAAGGCTCAGCTTCTGCTGTTGGTATGAACGGCCATTATG  
GTGGCCACAGAACATCACGCACAGGCCAACGCATCGATACCGATTACAAGCGCTCAAAAACTCATCTGGCCGGAG  
GGTGACAGTTAA  
>Cluster\_14442  
ATGTTGAAGATAATACCCGGTGCAACTGGATACTTAATAAAACACTCAATTCAAATCAATTCGATAATGAAGATGCAAT  
CAAAGATAAATTAGATAATAGAGTTCAATCAAAGGTAATAAATAATATATGTTAAATCTATTGATTATGCAGCGC  
TGCGTATCGGGATATAATTTATGCAAAAATAGATTTGTTTATCAACGAATCAGCATAATTTATGGCATGCACGTAAA  
AAAATGTGTTTTTTAA  
>Cluster\_40732  
ATGGGCAAAGAATATAAACTCTCATTAAACAAAGCACTTGAACGATTTTATTTTCGCTTAAGTGCATCAGGCGCTCATGC  
TGAACATGCAGCCCGTATTCATTGACCAGGGCAATCCGGAGTTGTATGACGTTGCTTTTTACGCTGATGATCTGGATG  
CACTGAACGAACTTTCCGAGCTGATCTGTGCCGAGAAATGCGGGAACACATTGAACCGTATAAGCTGGGGAATATCGCA  
TGA  
>Cluster\_11065  
ATGCGTTTTAATGTGGTGAAGCATCATGGTACCTTGTGAGTGGCTGTGGCAGCATTATTAGTGCACATACCGGGGCA  
GGGCATGGCAACCAATATTATCCCGGTGCAATGGGATGTGCGTGACTCCGCTGGCGTTATGTACAGATCCTTGATC  
TGCCATTTCTCTGGTTTTTGATACTTTACTGCTGCCGATCGACATTCATCATGGCCGATGAGTGA  
>Cluster\_2896  
ATGGAAACTACTGTATTTTTAAGTAATCGCAGTCAAGCCGTCAGATTACCGAAAAGCGGTGCTCTGCCAGAAGACGTTAA  
GAAAGTAGAAAATTATGCGATTGTTGCTACAAGAAATCACTCCCGCGGTGAGTCCGGGACAGTTGGTTTTGATGGCG  
AAAATGTGAGTGGGATTTTATGGATATCCGTGATCAACCCGCAATGCAGGAAAAGGAAATCATTTTGA  
>Cluster\_48780  
ATGTTTAAATCAGACGTAATTAATTTTTACGGTACGAAAGCCAAAGTAGCGAAAGCTGCTGGCGTTGACCATCTGCTGT  
TTCTCAATGGCAAGAGCTAGTTCTGAAAGTCCGCGATGCGTCTACAGGAGGCATCTGGCGCGAGCTTCTGTATGATC  
CAAAGTTTTATGACGAATATCGTAAGACGAAGCGGGCGGGCGGTTGAACAATGAAAATCACTCTCTGA

>Cluster\_7595

ATGCAAAATCTTGATGAGCCGATTAAGGTGTCGGCATCCCTGAAAGTTGCGAAGGCTTGTGGAGTTAGCGAAAGGGCTGT  
CTATAAGTGGCTCAAAAACGGCTTCTCCCTAAGACTGAGTTTTTGGGAAAATAAAACGCATCAAAAATCGAAGAGA  
TTTTCTGGTGGCAAATATCAAGCAAGCGAAATGCTTGAAATAAGCAAAAAGAACCTTCTGGCTGCATAA

>Cluster\_26287

ATGGCAGATAATAACGAAGCAACAAGCAGCATTCTTGCAGACCCTTACGGTAAGATCTCACATAAAACGCTGGATATTAT  
TACCACAACATTAACACCCTGATGCTTCAACGGCTGAAACATAATATCAACGCATGGGTAAATGAAGAATTAAGTCCCT  
CCTGCTTATGGGATTTCTGTTACGCATGTCAGCAAAAAATGCGAATTTTCAACTTACTATACCAGCTCAGGTAG

>Cluster\_39329

ATGAAACCTACCGATTTAACCCCCAGCCAGCGCTACTGATTACGCCCTCATTGTCGCAATCAACTCCATACCACGGCAC  
GTTTATTCCGCCGCTTCCGCGTCAGCAGGGATTATCCGCATATAGCGTATTTCTGGTTGATGAGTTTCCGGGCTGAACG  
GCCCGGACGATCCAGGCAACATCACCTGTTCTGACCACATACATCAGCCGCATGTCCAACCACCTGGAGATGCATGCATGA

>Cluster\_48624

ATGAAAAGATTATTTCTAACAATAGCTGTTGTTCTCTCTTACTGGCTGTCAGAAATTGCCGACACCATATGTTATGG  
TGAGGCTATCATTGGTGGACAGGAGACGTCATACCCTATATGCTGTAAAAAGTGAACGACTATACCTTATACAAAAG  
CGGATAGCATCTAATACTGGCGATGGGTGGAGTAGGTGCTTTCTCATCAGTCCGTTGCAATGTTGAATGA

>Cluster\_19702

ATGTTGCAACGTACGCTGGGCGAGTGGCTGGGAGTGTGCTGCCGGATTGCTGATTGCAGGGCTGATGATGCGGATTT  
ATCCCGGATCAATGGCGGATTTGTCATTCTGATGGGATTTGATGACCCGGTGATGCTGTATCACAAAACAGTTACGGC  
ATTACGTTTTGCTACCATCGTGCCTGGCGCTTATTGCTGGCATCATGCTGATGATAATGAATTTGAATCAGGGGTGA

>Cluster\_26640

ATGGATTTTTCTTTAACTGAAGAACAAGAACTGCTGCTGGCCAGTATTCCGCAACTGATTACGACTAACTTTCCGGAAGA  
GTATTTCCGCACCTGCGATCAAAAACGGGACATACCCGCTGAGTTTATCGGGGCACTGGCGGATAACGGTATTTCCATGCT  
TTGGCGTCCGGAAAGATTTGGTGGTATCCCTGGCGATTACGTCACCCAAATGCTGGCCTGATGGAAGTTGCAAAATCG  
GGTGTCTCCGGCATTTTTGGATTACCAACGGTCAATGTATTACAGTATGCGCCGTTTCCGGTCTGCAGAGCAGCTACGTA  
AACGGCAGAGAGCACCTGGAAACGGGTGATCCCGCTATGCCCTGGCATTGACGGAGCCAGGCGCAGGCTCAGACAACA  
ACAGTGCCACTACCACTTACACGCGTAAAAACGGCAAGGTTTACATCAACGGACAGAAAACCTTTATTACCGGTGCGAAA  
AGTATCCATATATGTTGGTGGTGGTGGCGCGATCCGCAACCAGAAAGATCCGAAAAGGCTTTTACTCTGTGGTGGTCCGA  
CTCCAGTAAGCCCGCATTTAAAATCAATCCACTGCATAAAAATCGGCTGGCATAATGCTCAGCACCTGCGAAGTCTATCTCG  
ACAACGTGGAAGTTGAAGAGAGCGACATGGTGGCGAAGAAGGAAATGGTTTCTCAATGTGATGTACAATTTGAGATG  
GAGCGCTGATCAACGCCGCGCGCAGCACCGGCTTTGCCGAATGCGCATTGCAAGATGCCGCCGCTATGCCAACCGCG  
TATCGCTTTTGGTAAGCCATTTGGTTCATAACCCAGATGATCCGAGAAAACCTTGGCTGATGGCGATTAGATCGACAACA  
TGCGCAACATGGTGTGAAAGTGGCATGGCAAGCCGATCAGCATCAGTCACTGCGCACCGCGGGCTGGCAAACCTG  
TACTGCGCACGTACCGCAATGGAAGTCAATGATGATGCGATTCAAATCATGGCGGCTTGGGCTATACCGATGAGCGCGC  
CGTCTCCCGCTTCTGGCGTATGTCCTGTGAAACGTATCGGCGGGGTACAGACGAAATTTATGATTTACGTAGCAGGTC  
GGCAGATCCTGAAAGATTATCAGAACAATAA

>Cluster\_41268

ATGACGGATGGAAAAAAATGTCAGGATTTTTGCTTTTTTTCGCGACCAGCAATGGGCGTAGAGGAACTCGTGCAGTTAA  
AGAGGTTCTCGAATCCGTTGGATCACAACCGGTCGGAAGAATCAGCGCTTGAACAAGCTTTTTGCCAGTTGACGGGAA  
ATCAGCATGCCATCCGGTCAAGTTACAGCCACCGCGGAATGCATATCAGCTAATGGCGTTGGAAAATGGCAAGGGCGAT  
GAAGTGATTACGCTTCCCTGACCTGGGTTTCAACCTCAATATGATTTCCCTTGTGGTGGCAACGCCGTAATGGTGGGA  
TGTGCACTGCAATACGCTGATGGTACGCGCTGAAGCGATCGAAGCAGCCATTACGCCACGCATAAAGCCATCATTCGCG  
TGCATTATGCCGGTGGCGCAGCAGATATTGACGCCATTGCGCATTTGGCGAACGTTACGGCATTCAGGCAATGGAAGAT  
GCTGCCCATGCGCTCGGTACGATTTACAAAAGGGCGACATATTGGCGAAAAGGTAAGTCTTTTTTTCGTTTTCAGCCAT  
CAAAAATATTTACCTGTGCGGAAGGTGGCCTGATTTGTTACTGATTAATGAAAATCTTGGCCGCCAGCTGCGGATGCTGAAAT  
TTCACGGTCTGGGTGTCGATGCCATGACAGACATACCTGGGGCGTGCACCGCAGGCTGAAGTCTTAACGCCGGGCTAT  
AAGTACAATCTGACCGATATAACCGCGGATTGCCCTGACACAGTTAGTCAAATTAGAGCACCTCAACACCCGCTCGGGC  
CGAAATGGCCAGCAATATCAGCAAGCACTGGCAGCTCCTCCCTTTCAGCCATTAAGCCTTCCCGCTGGCCGACGTTTC  
ACGCTGGCATCTGTTTATTATTGCTGTCGATGAAAAAGTGTGGTATCAGTCCGCGATGCGTGTGATGGAAGCGTTAAAA  
GAAAGAGGCATTTGGTACCGGTTACATTTCCGCGCCGCTCACACAAAAAATATATCGCGAGCGTTTTCCACCGCTGTC  
GTTACCGAATACCGAATGGAATAGCGAACGCATCTGTTGCTGGCGCTTCCCGGATATGACCACCGCCGATGCCCGACC  
CGCTATCACAGCCCTTACGCAACTCGCAGGACAATGA

>Cluster\_23753

ATGAAAGCATTACATTTTGGCGCAGGTAATATCGGTGCTGGCTTTATCGGTAAACTGCTGGCGGACCGGGTATCCAAC  
GACGTTTTGCCGATGATAAATCAGGTGGTGTGATGCCCCGAAATGCCCGTCATAGCTATCAGGTTTCATGTTGGTTGGTGA  
CCGAGCAGGTAGATACCGTTTCTGGCGTGCATGCCGTCAGCAGCATTGGCGATGATGTCGTTGATCTGATGCTCAGGTC  
GATTTAGTCACTACCGCGCTTGGCCCTGTCGTGCTGGAACGATTTGCTCCGGCCATCGCCAAAAGGGCTGGTGAACGTA  
AGAACAAGGTAATGAATCCCACATGAACATCATCGCTGTGAAAACATGGTCCGCGCACCCAGCAGCTGAAAGGCCATG  
TGATGAACGCCCTTCCCGGAAAGATGCCAAAAGCGTGGGTAGAAGAACCGTTGGCTTTGTTGATTCCCGCGTGGACCGC  
GTACCGCTTCCGGCTTCCGCAACTAACGATCCGCTGGAAGTGACGGTGAAGAACCTTACGCGAATGGATTTGTCGATAAA  
GCAGTTCAAAGGCACGCTGCCAAACATCCCTGGCATGGAATTAACCGCAATCTGATGGCATTGTCGAAACGTAACCTCT  
TCACCCTGAATACAGGTACGCTATAACCGGCTACCTCGGAAACTGGCCGCTCATCAGACCATTCGTGACGCAATTTCT  
GACGAGAAAATCCGCGCGGTGGTAAAAGGGCAATGGAAGAAAGTGGTGCAGTATTGATCAAGCGCTACGGCTTTGATGC  
TGACAACATGCGGCATACATCCAGAAAATCCTCGGTGCTTTCGAGAACCCGTTACCTGAAAGATGATGTAGAAGCGCTAG  
GCCGTCAGCCGCTGCGTAAACTGAGTGCCTGGCGACCGTCTGATCAAGCCACTGCTTGGAAACCTGGAATATGGTCTGCCA  
CATAAAACCTGATTTGAAGGATTTGCGCTGCAATGCACTCCGAGTGAAGATGACCCGAGGCTCAGGAACCTGCGCAGC  
GCTGATTTCCGACAAAGGCCACAAGCCGCGCTGGCACAGATTTCCGGTCTTGTATGCCAACAGCGAGGTTGTATCCGAGG  
CGTAAACCGCTTATAAGCAATGCAATAA

>Cluster\_66937

ATGAATATTCCTGATGAGTTGGTCTTTTTTCCGTTTTCAGCGTTTCACTGCAGATGAACGCGACATTTCTTTGCTGGTG  
TGCCGCACATAAAGTCAAGTATGTTGGATCTGACCGGTGGATCACCTGTATCTGTCAGTCTGTTGGCCGACGGGTGCGTT  
GTTCCAGTCAACGTTACCAACCACACTCATGCTCCCTGATTTGATGAACGTTTCCGTCGGGAAAGTCAATCCCGCGGTT  
CTGGCAGGCAATCCGTTGACAGGACGATACAGATTAACGGGGATGCATCCGGTCCGCTATGGTCTTAAACCGGGAGAAC  
CATCCGGTTACGCTCCACCTCATTTAGGGCACATCTGGTGCAGAGGAGAAAGCAGTCTCAATAAACCATGCGTGTCAATCC  
CGACAGAAAATACCGGACATTTCTTCCATGAACATTTGAACAGACCTGCTTGAAGCAATGGTCTGCAAAAAGCGGCTGGGA  
TTTTGATGTTGGTGAACCGGGCTAGGAAAATCAACGCTGTTGTTGAGCACTGTACCGTTACATTTAGGACAATTTCCCGG  
CGCCAAAATCGTGCATATAAGAACCCGGTGAATATAATCTGGGAAAATGAAAACGATCTGCTCCACCGCATCCGACGAG  
AAATCGGGCGTGTGTTGAGTCTTTGCTGCGGACTGCGTCTGCTGTACGACGTAATCCGAAATTTATCGGTGTTGGT  
GAGATCAGGGATAACGAAACCGCGACGAGCGGTACAGGCGGCAACACCGGCATTACTGCTGAGCACCATGCATAC

GAAATCTCCTGGTGAACCGTGGCAGCTCTTCTTGGGCTGTTTCCCCCTGTCATCAGGGATTCGATGGCCTGGGCTGTCC  
TGTCAGTGTTCAGTTTCTTCTGGTTTCAGTTTCTGGTCAAGAACAAATGACGGTGGTTCGTAAGCCGTCGCGGAATATATC  
GTCATTAACGATGAGCTTCGCGACAATCTTCCGGAATGCCACATGCAGAGTGGGGGCATCACATTGATGCCATAATCCG  
GCAGGAAAACGTCGTATCCGGGATCAGATTCTGGAAATGTATATCCGGAATGAAGTTGACCGAAGAGAAGCGATCTTT  
TTATCCCGCCAGGGAGTTACGGTCATGA

>Cluster\_47817

ATGCAAAAAACGGGTACCACTCCATCAAAAAACTTGTATCTACTGCGCGGCATTTTACTTGTGCGCTTTCTGACGGG  
TATTGCGGGCGCTCTTACAGACTCCTACCCTAAGTATATCTCTCGCAGATGAACTGAAAGCCGTCCTATAATGGTAGGTT  
TTTTCTTACCGGTAGCGCTATTATGGGAATCTGGTCACTCAATTTCTGGCAAGGCACCTCCGATAAACCAAGGCGCCCT  
AAATTAAGTATCTGCTATGTTGCTTATTTGGAGTGTGGCCTGCACGCTTTTTGCGTGAATCGCAACTACTTCAATCT  
CCTCTCAACGGGCTACTTCTGAGTAGTTTGTCTCCACCGCAACCCGCAAAATGTTGCGCCCTCGCCCGTGAACACGCGC  
ACAGAACAGGCGGTGAGACGGTCACTGTTTACGTACATTTTACGTGCTCAGATCCTGCTGCGCTGGGTTATCGGGCCACCG  
CTCGCTTATGAACTGGCAATGGGATTTAGTTTAAAGTGTATCTCACCCGACCAATCGCATTTGTTGTTTGGCGACT  
GATAGTCTGGTGTTTTTGCCATCAATACAAAGAAATATCTCTGCTGTTACCCAAACCCGTAGAAATTTTACCCCTCACCC  
ACAGGAAGCGGGATACGCGGCTACTTTTTGTGGTCTGTCAATGATGTGGGCGCGCAATAATCTCTACATGATAAATATG  
CCGCTATTTATTTATGTAAGTGCATCTAACCGATAAAGTGGCTGGAGAAATGATTGGTATCGCTGCGCGTGGAAAT  
TCCGATGATGTTAATGCAAGCTTATACATGAAACGCTATGGCAAGCGACTATTAAGTCTCATGCTATGCTGAGTGAA  
TGTGTTTTTACGCCAGGCTACTCATGGCAGCAGCTCCGGCGGTTGAGCTGGAAATGCAAAATCTTAATGCCATCTTCTT  
GGTATTTCTGTGTTATCGGCATGCTTTATTTTTCAGGACTTGTATGCGCTGAAAAAATAGGCTCTCGCACACGTTATATGC  
AAATACTTACGCGTGGTGGATATCGCCGGCTCTGTTGACGGAATTAAGTTGAAATCTGGAGCTACCATGCGTTGT  
TCTGGCTGGCGATGTTGGGTATTCGATGATTTGCCCTGCTGTTTATTAAGATATTTAG

>Cluster\_9061

ATGACGGAAACAAGAAAAACCTCCGCGTGGTTGAAGAGCAGCGGAGGCCGTGGACACCACGTCACAACCTGTGCGAAC  
AGAAAAAAGAGTAAGAACAAATACCGCAATGATTTCTGACCGCGGTGGCTATCGCTATTGCTCTGGCGGGCGCATCGGTT  
TGATGGCTGGGGTAAACAACAGGCGTCAATCAGACCGCCACCGCGATGCCCTGGCTAACCAACTGACGGCATTGCAA  
AAAGCCAGGAGAGCCAAAAAGCGAGCTGGAAGGCATTTATTAAGCAACAAGCTGCACAACTTAAAGCAGGCGAATCGTCA  
GCAAGAAACGCTGGCAAAACAGTTGGATGAAGTCCAACAAAAGGTCGCCACCATTTCCGGCAGCGATGCTAAAACCTGGC  
TGCTGGCTCAGGCGGATTTTCTGTGTAAGCTCGCCGAGCGGAGCTGTGGAGCGATCAGGACGTCACGCGCTGACGGG  
TTGCTGAAAAGTGCAGACGCCAGCCTGGCGGATATGAATGACCCGAGTCTGATTACCGTTCTGTCGGGCAATTACCGATGA  
TATCGCCAGCCTTCTGCAAGTATCGCAGGTGGATATGACGGCATCATCTTAAGCTTAAATCAGCTTTCAAATCAGGTAG  
ATAACCTGCGTCTGGCCGATAATGACAGCGATGGTTCCGCGATGGATTGACAGCGTGAAGAGCTTCCAGTCCATCAGC  
GAATGGCGTATCAATCTGCAAAAAAGCTGGCAGAACTTTATGGACAACCTTCAATACGATTCGCGCTGATGACACCCG  
CGTACCGCTGTTAGCGCAAAATCAGGATATCTATCTGCGCGAAAAATATCTGCTCTCGCTGCTGGTTCGCAGCACAGCTG  
TACCGCGTACCAGGAAGAGACTTATCGCCAGGCGCTGGAGAAGCTCTCCACCTGGGTACGTTACTACGATACTGAT  
GATGCCACCACAAAGCCTTCTCGACGAGGTGGACCAATTAAGCCAGCAAAATATCTCGATGGATCTTCCGGAACCCCT  
GCAAGCCAGGCGATGCGAAAAAATGATGCAGACTCCGCTGCGTAACTTGGCAACCCGTCGGCAACCCGCGGAGCAACCG  
AAGCTAAACCTGCACCTGCACCTGCACCGCAAGCTGATACTCCGGCAGCCGCGCCGAAGGAGATAA

>Cluster\_27641

ATGGGCCAGACAAAACCTGCTCAAACTACCGCGCGGCTAACAAATCAGGAAACACCGCCTGGGGCAACGATCAATATAAC  
TTTTACCTATAAAGAGTTAAATGTCGTGAGCCTTTTTCCAATCTGGAAGTAAACCAAGAACAATAAATAACGCGGAGC  
GCACACTCGCGGAAATTCATAAATAGATCGAAAGGGGAACATTTATTTATGCGGAATATTTTCCCGTCTGCTGCTTTG  
AAAATTTTTGGTAATGCTGCTGCAAGCAAAACGGTAAAATGTACCTGGACGAATACCTTGAATCTCGCAACAGGAGAAA  
ACTTTACCCCTACAGATTGGGATTTATAAAAAATGCCGTAGTGGCTTACCTCCTCACATTTGGCCTGCAAGTAAT  
TAACACCAGCAATCTGAAAGCGTGGATTCAAAGCCAGAAAACGACCTTAAAAACAATTCGCAACAGTTATCTTCTCT  
CGGTACAGCACTTGTGTAAGCCGTAAACCGATGGGCTACTTCAAATTAACCCCGTATCGTTGGTAAGTGTCTGCGCTACCA  
AAGTGATAAGTCAAGAAGCAGAAAGCAGCTACGTTGGTGTATCCGCTATCACAGCAGAAAGTGTATGATGATTAAGTACGAGC  
CCGGAACAACAATAATGGGAAAATCTGTTCCGGTTCGCTATACATACAGGCTCGCTAGTTCTGAATTAATGTCGCCCTTCA  
TGGCGTGATATCGACTTTGTTGGAAAACTGCCATGTCCAGAGCGCAAGTGTGTCGGTGTATCAAAGGGACAAAGAC  
AAAAGCAGTACTCGAAAGTTGAAGTGCAGAGAAGAGCAATGTTGGCGCTGATAAATCAGAAGCCATTTACATTCATGA  
AGGATGCTACTGCTTTTGAAGATCCAAGACCAATAAGCCTGGGCAAGTGTGATGCAATTAGGAAAAAAGCATGGGTG  
CCAAGATTGCGAAAAGCGGATTTCTGTTACAGAAAACCCATATCAAAACAGGCATACATTCGCCACAGCCATATCGAGCG  
AGGAGCAAACTGTTTTGGCTTGCAGCTCAAATGGGCGATAAAGGGCCGAGATGCTTTTTCAGGCACTATGGTTCTGATC  
TTAAAGATGATGATAACTTTACATCGATAAATCATTTCGATAATCATAATTA

>Cluster\_6020

ATGGCTCAGGATTACCACCACGGGTGCGGCTTGTGAAAGTCAACGAAGGCACCCGATCCATTACCACGGTGAGCACCGC  
CATCGTGGGTATGGTCTGCACGGGCGATGATGCCGATGCAAAAATGTTTCCCTTAATAAACCCTGCTGATCACTGATG  
TGCTGACTGCCAGCGGTAAGACGGGTGAGTCCGGCAGCTGGCCGTTGCTGGATGCCATCGCTGACAGGCAAAACCC  
GTGACCGTTGTTGCTGTGCGGTGAGTGAAGCGGTAAGCAGGAAAGCAACACGCAATATCATCGGCGAGTACTGCTGA  
AGGTAATAAAGCAAGGATGAAAGCCCTGTTATCTGCCAGTCAAGCTCGGCGTTAAACCCGCGATTCTCGGCGTGCAG  
GCCAGCACCAAGGCGGTAGTACTGAGTGTGTTGGGCTGGCGCAAAAGCCTGCGTGGGTTGCTTACCTGTACGCGTAT  
GGTGAAGACTGTGACGAGGAGGATCACTTACCAGCAAACTTACGACGCGGCAAGGGATGCTGATCTGGCCTGACTT  
TACTGGCTGGGACAGGCTGCTGAATGCCAAGCAACGGCTTATGCCACCGCCGCTGGCTGGTCTGGCTGCGCAAAATG  
ATGATCAGACCGGATGGCACAAGCCTGTCCAATGTGGGCTTAAACGGTGTCACTGGAATTTCTGCTGATGTGTTCTGG  
GATCTGCAGGACACGGCAACCGATGCTGGACTGCTGAACAGCAAGCAGCTCACACCCCTTATCCGCAAGACGGTTTCCG  
CTTCTGGGTTCCCGCTGCTGAGTGTGATGACCCGCTCTTTGCCCTTCAAAACTACCCCGCACGGCGAGGTGCTGATGG  
ACAGGATGGCAGAAAGCAGCAGTGTGGGAGTGGCAAAACCGCTGAACCCGCTGCTGGCGCGGACATTTATCGAGGACCT  
CGCGCAAAATGCGCAGCCTGGTCACTGAGGGTATCTCATTTGGTGGTGTGTTGCTGGCTGGACGAGTCCGTTGAACGACAA  
AGACACTCTGAAAGCCGGAATAATCACCATCGACTACGACTACAGCCAGTGGCGCCACTTGAAAACCTGATGTTGCGCT  
AGCGCATCACCGATCAGTACCTGGTGAATTTCCGCGCAGGCTCAGCGGCTAA

>Cluster\_30184

ATGATGCAATTAACCCAGGCGCGGATCTTTACCAGCCAGCAATTTCTTGTATGACCACGGGTTGTTATCGCTGATGGCCT  
GATTAAGCGCTCTGTCGGTAGCGAACTGCCCGCAGAGATCGAAACAAGCTTCACTGAACGGGGCCATTTCTTCCCCCG  
GTTTTATCGATGTACAGTTAAACGGCTGCGCGGCTACAGTTTAAACGACACCCGCTGAAGCGGTCAGCGTGAAGACGCTG  
GAAATCATCGAAGAAAGCAATGAGAAATCAGGCTGTACTTAACCTATCTGCCAGCCTTATCACCAAGCGGATGAGCTGAT  
GAAACAGGCGGTGCGGCTTATGCGGAGTACTGGCAAAACATCCGAACAGGCGTTGGGCTGCTGATCTGGAAGTCCGT  
GGCTGAATCTGTTAAAAAAGCCACCAATCCGAATTTTGTGCGTAAGCCTGATGCCGCGCTGGTCTGATTTCTTCTGT  
GAGAACCCGAGCTGATTACCAAAAGTACTCTGGCACCAGAAAGGTTTCCAGCGGAAGTATCATACGAAACTGGCAATGC  
CGGATTTGTTGTTCTGCTGGTCACTCCACGCGAGCTGAAAGAAAGCAGGTTTCCGCGCGGGGATTAACCTTTG  
CCACCATCTCTACACGCGATGCGGTATATTACGGTCTGTAACCGGCTGGCGGGCGGATCCTCGACGAAGCTGAC

ATTTATTGCGGTATATTGTCTGATGGCCTGCATGTTGATTACGCCAACATTCGTAACGCTAAGCGTCTGAAAGGCGACAA  
ATTTGTCTGGTTACCGATGCCACCGCGCCAGCAGGTGCCAACATTGAACAGTTCATTTTTGCGGGTAAAAACAATATACT  
ACCGTAATGGACTTTGTGTGGATGAGAACGGTACGTTAAGCGGTTTCATCTTAACCATGATTGAGGCGTGCCTAATCTG  
GTCGAACATTGTGGTATCGCACTGGATGAAGTGTGCGGTATGGCGACGCTCTAATCCGGCAGCTGCGATTGGCGTTGAGAA  
ACGTTCTCGGCACGCTCGCCGACGTAAGTAGCCAACCTGACTGCATTACACCTGATTTTAAATCACCAGGACCATCG  
TTAACGGTAACGAGGTCGTAACCAATA

>Cluster\_29028

ATGTGCACTCTGTTTACGATTAATGCCTGTAAACCGTTCCGTTGCCGAAATTTGGGATTGGCCTCATCGGAAGATTACAG  
TTGGCCAGACTATAAACTGGGTTATCCGGCACTGCACCTGTCGGGCATGTGGCAGTTACCCGCCGTTGTTTACGAGCAAC  
AATTTCTGTGACTGGTTGTGCTGACTTGTCTACTTATGCAATTGAGAAAGGCCATTTCTGCCCGGTATGTTATGGCACA  
GACATGATTTGTTATGGTCAAAATCCACAGGGTTCGCAACGCATTCATGCGGTAACGCAAAAAGTCTGGACGCCATA  
AAAAATATCAGAAAGAAATACGCATCCCCAGGCCATTGAAACCGTTCAACTGTTTCATACCCCTTTCAAGGGGCCAGCGCAG  
TACAAAAACTGTATGTTTTAGTCACTGTGACGCCACTCGTGGCAACATTTCTCATCTCTCCAGAAATATACGCAACAT  
CAGACAGGAGACAGTCTGCGGTACAGTTACAAGGGCAACAGAACCAACTATGCACCATCGCGATATCGTGCAGAAGGT  
AGATATGCGTGAAGCGCAATTTCTGCGCGGAGCCAGTTCGATGAAATTCAGTATGGCAGTGCCTGATCAAGCGCAACG  
GTAAGGAGCCATACTACGCCCGGTTATCAGGCACACGGGCAATTCAGAATACTGAAAAATCCGCTATCCAGATGTCAAA  
ACGCATATATTTTACACGAATGTTTTCTAAGAGGGCGCAATTAATACAGCTTGGGCAGATCAGTTCCGCAACCAACAGG  
TGAACTTTGGTTCGTAGAAGAAGAAATCAGTGACAGTAACCGTGTATACGCCCTGGCATTTAAGGGAACGACATACCATG  
GTTGGTGGCAAAATCAGTGGCAGCGCTGGGAGCAGGGGAACTGCAAGATGGTCTGCCATCAGGGGAGCCAGCTTA  
GAAAGGGCGCAAAATGTTTTCTGCGCAACAGTCTGTTTTTATCACATGGCTGACAGGCCAACACGACTTTCCCAAAG  
CGCGTTATATCCGAGGTCGCGTAACGCAAAATGCTGACTGCGCTTAAATAACAATGAATCGCTTACCATCTTT  
GTTAG

>Cluster\_26934

ATGATTCGCTTAGCGCCCTTAATTACCGCGGACGTTGACACCACCACATTGCCTGGCGGCAAAGCCAGCGATGCTGCACA  
AGATTTTCTCGGTTGTTGAGCGAAGCATTAGCAGGCGAGACAACCTACCGACAAAGCGGCCCCAGTTGCTGGTGGCAA  
CAGATAAGCCACGACAAAAGGCGAGCCGCTGATCAGCGATATGTTTTCCGACGCGCAACAGCGGATTTACTGATCCCC  
GTGGATGAAACACTGCCTGTCTCAACGACGAACAATCCACATCAACCCGTTAACCCAGCTCAGACGATGACGTTGGC  
TGGCGTGGCTGACAAAAATACGCAAAAAGCAGAAAAGCGGATGATCTTAATGAAAGCGTACCAGCAAGCTGAGCGCC  
TTTTTGGCATGTTGCCGGGTTTTGACAATAACGCCCAAAGTGACTGATGCACCGTCAACCGTGTACCGGCAGAGAAACCA  
ACGCTCTTCAAAAATGACTTCTGCGCAACTCAACAGCAGCAGCTGATGATGCCCCGCGCACACAGCTCAGCCATT  
AACACCGCTGGTAGCAGAAGCCAGAGTAAAGCGGAAGTCACTAGCAGCCTACACCGGTGACCGCTGCCCGCAGCCCGC  
TAATCACTCCACACGACGACAGCCACTGCCACCGTCCCGCCGCTGTTTTGAGTGCACCGCTGGGTTCTCAGCAATGG  
CAACAATCATTAAGCCAGCATATTTCCGTTTACCCCGCAGGACAACAAGTGCAGAGTTGCGTCTGCACCCACAGGA  
TTTAGGTGAAGTGCAAATTTCCCTCAAAGTGGATGATAACAGGCGCAGATCCAGATGATTTACCAGCATCAGCAGTAC  
CGCGCCCTGGAAGCAGCGCTGCCGTTACTGCTACGCGTGGCCGAAAGTGGCATTCAGTTAGGGCAAAGCAACAT  
AGTGGCAAAAGCTTTAGTGGTACGAGCAGCGCCGCTTCCAGCAACAGCAAAAGCCACGCAAGCAAAACCTCT  
GGCGGGGAAGACGACGATACGCTTCCGTTCCGTTCTTTACAGGGCGTGTAAACAGGTAACAGGCGGTTGATATTT  
TCGCCTAA

>Cluster\_39747

ATGAATAACGAGGAAACATTTTACCAGGCCATGCGCGCTCAGGGCGTTACCCGGCGCAGCTTTCTCAAATATTGTAGTCT  
GGTGGCCAGTTCGCTGGGATTAGCGCGGGGAATGGCACAAAGATTGCCTGGGCGCTGGAGAACAAACCGCGCATCCCG  
TGGTGTGGATCCACGGTCTTGAATGCACCTGCTGTACCGAATCTTTTATCCGCTCCGCTCACCCACTGGCGAAGGACGTC  
ATCCCTTTCCCTGATTTCCCTCGATTACGACGATACTTTGATGGCTGCCCGGAAACCCAGCGAGAAGCTTTGAAAGA  
CATCATCAGCAATAACAATGGCAAAATATATCTCGCGTTGAAGGTAATCCGCGCTGGGCGAGCAGGGGATGTTCTGTA  
TCAGCAGCGGTGACCGTTTATTGAGAACTCAAACGTCGCCGCTGCCGAGCCAGTGCATTATCGCCGCGGGAACCTGCG  
CGCTCTGGGGCTGCGTGCAGGCGCGGACCCAAATCCGACGCGAGGCAACGCCATCGACAAAGTCACTACCCGACAAAC  
TATTAACAAGTACTGCTGGCTGCCCGGATCCGCGTGTGATGAGCGCATCATTAATGATGTTACATGGTACCTTTGATCGCT  
TGCCAGATGTCGACAGAATGGGCGTCCGTTGATGTTCTATGGTACGCAATCCACGATAAATGCTATCGCGCGCTCAC  
TTCGACGCGGAGAGTTCCGTTCCAGAGTTGGGATGATGACGCTGCCCGCAAGGTTACTGTCTGTACAAAATGGGCTGCAA  
AGGGCTTACCACCTATAACGCCCTGTTCCACACGCTGGAACGATGGCGTTTCTTCCGATCCAGTCCAGGTCACGGCT  
GCCGCGGTTGTGGCGGAAATGTTTTCTGGGATCCGCGTTGCTTCTACAGCCGCTGGTGCATATTCACCAAAATGGGTAAC  
CATTCACCGCGCACACCGTCCGTTTAAACCGCTTGGCGTGGTGGCAGCGGCTGTTGGTGTGCACGAGTCCGCGCGC  
CGTTGACAGCGCAGACGTCATAACCGCAACCTACAGAAACGAAATCAGCCAGGCAATGAGGATAAACAGGCATGA

>Cluster\_48504

ATGAAAGATATTTATATACTGTATTCCTAGTTTACATTCGCTGGCGGAATGGAACGAGTCTAACATTTAAAGCTAATTA  
TCTGGTAGAATGTTACAATTACAATATAACAATCATTACCTATCAGAAATAAGTAAATCTCCACCTTTTTTCCCTTTAC  
ATGAAAAAATTAATAATTTCAATTAATGAAAGATAGAAAGGAAATAATTTTTATACCTTATATCGGATTTGTAATGAA  
TTGACGCTGATTTATTTATTTCCCTCGGTGAACTGAAATAATGATATTTTCAATTTATATCCTTAATAACTAGTAT  
TCTAGAGTGGCATTTTTGTTATAATCAGCTATTTTAGAGACAAAACACTTTTTAATCCCTAACTAGAATTTCTTAT  
ACATACGAAAGAGAAAAGAAATGCTTATTTGCTAAGAAGTTTCAAAAATGGTCTGTTTACACAAAGAGACTATTTATTA  
TGGAAAAAAGAAAAATGAAATCTATAGAAGTTATTAATAACCCGTGAAATTCATTATACCGTGTTCACCATTTATACC  
TGAGCAAAAAAATTAATAAAAAAATAAATTTATTAGTGCAGGTAGACTCAACAACAAAAGCATTTCTAGAAATGATTG  
AAATTTTTAAACAATACTAGTTTTAAATAAAGTGGGAGCTTAATATATATGGTTCAGGTGAACTAGAAGATAAACTTAAG  
AAAGAAATTAAGAAATCTCCTTGGATAAATAATTTTTCATCCATCCTCCAGTTAAAAACTTACAAGATAAATTAAGAAA  
TTCTGACTTTTTTATATGACTTCTATTTACGAAGGATTGCCATGGTTCATTTGAAATCAATAGAAGTAGGATTAACCA  
TAATAGCTTTTAAATTTGATGATACAGGACCTCGGAAATTAAGAAAAAATAAAGTTAATGGTTATTTAATTTCCCAAAATA  
AATAAAGAAATTTTACAGCGGTTATCTACTTTATCCCTGACTCTGATTTATTTGAAATGTCAAAAAATGCTATCAAATC  
AGCCAGTAATTTTAAATATAGAAAAAATAGCGGAGTTATGAAATACATTTTATACATAAATAAGCAATAAAAGATAG

>Cluster\_58198

ATGCCCTGGGATGCGAGAGATACCATGTATTACGTACTGAGTTGTTTTGTTGCGCTCGCAGGACGGGGCAACATCCG  
TTCCCTCTGCCGTCGTTCCGGCATTTACCTGCCACCGGCTACAAGTGGCTCCAGCGCTGGGCTCAGGAAGGTGCCGCG  
GTCTTCAGGACCGCCGCGCATTCCGCAACATTTCCCGAACCGCTCATCTGACGACATCACGGCCCTGCTGCGTATGGCC  
CATGACCGTCAATGAACCGTGGGAGCCGCAAGATTAAGCGCTGGCTCGAGGACCAGGGGCACACCATGCCCGCTTCCAG  
CACCGTCCATAACTGATGGCCCGCATGGCTGCTGCCGGCGCTTCCAGGGCATTTCCCGCCACGGGCGGTTTCCGAAC  
ACGACGCGCGAACCCTCTGGCAGATGGATTTAAGGGCACTTTCTTTTTGGCGGTGGACGCTGCCATCCGCTCACC  
CTGCTGGACGACCACTCCGTTTTTCCCTGTGCTGGCGACTGATACCAGTGAACGGCGGAGACCGTGCAGCAGCAGCT  
GGTCCAGCTGTTTGGCGTTACGGCTTCCGGACCGGATGACCATGATAACCGGCTACCGTGGGCGCAGCACCAGCGCA  
CCTGGACGGCGTGGAGCTGTGGCTGATGCGCTGGGTATCCGGTGGGGCACTCCCGCCCTTATCATCCGACAGCAG  
GGGAGCTGGAGCGTTTTTACCGCAGCTGAAAGCGGAAGTGTGACGGGAAATGGTTCGACAGCAGCGGTGAACTGCA

GCGCGCTTCGACCCTGGCGGACGGTCTATAACCTTGAACGCCCGCACGAGGCGTGGATATGGCGGTACGGGGCTCGG  
GGTATCAGCCGTCAGCGCGCAGTACAGCGGCAACACAACGCCCGGAATACGATGAAGGGGTGATGGTCAGAAAAGTG  
GATATCAGCGGAAAGCTGAGCGTAAAGGGGTAAGTCTGAGCGCAGGCAAGGCGTTCAGGGGAGAACGGGTCGGGCTGAA  
GGAGATGCAGGAAGACGGCAGCTACGAGGTGTGGTGGTACAGCACGAAAGTGGGGGTGATCGACCTGAAGAAAAAGTCGA  
TCACCATGGGTAAGGATGTTAA

>Cluster\_63227

ATGAGTCTGAATATGTTCTGGTTTTTACCGACCCATGGTGACGGGCATATCTTGGAACGGAAGAAGGTTACGCCCGGT  
TGATCAGGGCTATCTGCAACAAATTGCGCAAGCGGGGGATCGTCTGGGCTATACCGGTGTGCTGATCCCAACGGGGCGAT  
CGTGTGAAGATGCGTGGCTGGTGGCGCGCTGATGATGATCCCGGTGACGCAGCGGCTGAAGTTTCTTGTCCCGCTCGCCCGC  
AGCGTAACCTCACCTACCGTTCGCGCTCGCCAGGCGCCACGCTTGACCGTCTCTCAATGGTCTGCGTGTGTTAATCT  
GGTACAGGCAGCGATCCACAAGAGCTGGCAGGCGACGCGGTTCCTTGGATCATAGCGAGCGTACGAAAGCCTCGGCGG  
AATTTACCCAGGTCGCGGGCGCTTATTTGCTGGGGAAACCGTCAATTTCAACGGTAAACATATTCATGTGCGCGGGAGCA  
AAACTGCTCTTCCCGCAATTCAACAGCCTTATCCTCCGCTTACTTTGGCGGATCGTCAGACGTCGCCACGAGGATGGC  
GGCAGAACAAAGTTGATCTCTACCTACCTGGGGCGAACCGCCAGAAGTAAAGAGAAAGATCGAACAAAGTGGCGGGCA  
AAGCTGCGCGCATGAGACGCAAAATTCGTTTTCGATTCGCTGCTGCATGTGATTGTTGCGTGAACCTAACGACGAAGCGTGG  
CAGGCGCGCAGCGGTTAATCTCGCATCTTGATGATGAAACTATCGCCAAAGCACAGGCGCATTCGCGCGGACGGATTC  
CAATGATGACAAACAGCGGCTTACGCGGCTTACACAGCGCAAGCGGACAACTTGGAGATCAGCCCAATATTTGGCGGGCG  
TTGGCTTAGTGGCGGGCGTGGCGAACGGCGTGGTGGGCGATGGTCTACGGTTCGTCGCGGAATCAACGAATACGCC  
GCGCTTGGCATCGACAGCTTTGTCTTTTCGGGCTATCCGCATCTGGAAGAAGCGTATCGGGTTCGCGGAGTTGCTGTTCC  
ACATCTGGATGTCGCAATTCGGAAATTTCCCGACGCGCAGCGCTGAATCCGCAAGCGGAAGCGGTGGCGAATGATTTTA  
TCCCCCGTAAAGTCGCGCAAGCTAA

>Cluster\_54210

ATGTCATCACTGAATATTAACAGGGAAGTGACGCTCATTTTCCCGATATCCTCTGGCGTCGCCAGTAATAATGAAAT  
TGATTTACTTAATCTAATCTCAGTTTATGGCGGGCAAAAAACGGTCATGGCGGTGCTTTTTGCGTTTGGCTGCGCAG  
GCTTGTGATCTCTTTCATCCTGCGCAAAAAATGGACAGCGCGGCTTGTACGCTCCAGAACCTGTTTCAAGTGGCAA  
GAGTTGGAGAAATCATCTACTAAGCTTCGTGTGCTGGATCTGGAATATCAAAATGATCGTACAGAAGCATTTAACCTGTT  
TATCAAGAAGTTTCACTCGGTTAGCTTGTGGAAGAGTACCTGCGTTCATCACCTTATGTGATGGACCAATTAAGAGAGG  
CGAAAATCGACCAACTGGATTTGATCAGCGCAATTTGCTCGCATTTAGCGGAAAAAATGAAAGCGGTTGATGACAAATGCCAGT  
AAGAAAAAAGATGAACCGTCACTGTATACCTCCGACGCTAAGTTTACCAGCGCAACAGTGAAGAGGCGCAGACCGT  
TTTGGCGGGTATATCGATTATATCTCTACGTTGGTGGTGAAGAGTCTGCTAGAAAACGCTCCGTAATAAACTGGAGATCA  
AAACCCAGTTGAAAAAGAAAACTGGCTCAGGATCGCATTAACGAAAAAATCAACTGATGCAAACTTACGCGCTC  
AATTATTCATCTCGACATTGCCAACCGCGCAGGAATTAAGAGCCGCTTACAGTAATGGTCAAGCCGTTAAAGATGACCC  
CGATTTTTCTATTTCTCTCGGTGCAGACGGTATGAACGCAACTGGAATAGAAAAAGCGGTCAGTACGTTGCGGAAC  
TGAACGGTGAATACGTAATCGGAGTATCTTGTGAGCAATTAACAAAAAGCAGATGTCAACGATGTGAATTTTACGCGC  
TTTAAATATCAGTTAAGCCCGTCAATGCCAGTAAAAAGACGGTCCGGGTAAGGCGATTATTTGATCCTTTCCGCGTT  
GATCGCGGGATGGTGGTGTGGTGGCTGTTGCGCTATGCGATGCCAGAAAAACAGGATGCCATGATGGGAC  
ACCACTTAGTTTAA

>Cluster\_28108

ATGAGCCACTTAGACAACGGTTTCCGTTCACTGACACTACAACGTTTTCCGGCAGCGATGACGTTAACCCGCTACAGGC  
GTGGGAAGCGCGGATGAATATTTGCTGCAACAGTTGGACGACACAGAAATCCGCGGCCGCGTGTGATCCTGAATGATG  
CCTTGTGGTGGTTAAGTTGTGCGCTGGCGGAACATAAGCCCTACAGCATTTGGCAGCTCATACATCAGCGAACTGGCGAGC  
CGCGAGAATTTACGCTCAACGGCATGATGAGTCGAGCGTGAAGTTCTCGACAGCACCGCCGACTACCCGCAACAGCC  
GGTGTGGTGGTGTGATCAAAAGTGCAGAAACACTGGCATTTGCTGGAACAACAACATGCGCGGCTGCGCAAGTGGTCACCG  
CAGATACGCGCATTTATGCGCGTGCAAAAGCCGTCGACATTCACACTTCCACGCTGGAATGTTTCGAAAAAGTGTGCGGT  
CCGACCACCACCGCTGGCATGGAAGAAAGCGCGCTGATTAAGTGCACCTTCAACGAAACCGCGGTTGGCCGATGCGCC  
GCAGACCGTTAGCTGGAAGTGGAAAGGCACTGACTGGACTATCCACAACCATGCGAATGTTTTCTCCGCACTGGGCTGG  
ATATTTGGCGCGCGCTTCTTTATGCAACTCTGCGCAGAGAACTCGAAGGTGAGATTGTGATCAGTCTGCGGTAATGGC  
GTTATTTGGCTGACATTTGCTCGATAAAAACCGCAGGCGAAAGTGGTGTGTTGTCGATGAATCACCAGTGGCGGTTGCTTC  
CAGCCGTTTGAACGTTGAACCAACATGCCCGAGGCGTGGATCGCTGCGAGTTTATGATCAACAACCGGCTCTCCGCGC  
TGGAGCCTTTCCGTTTAAATGCTGTGCTCTGCAACCCCGGTTTCACTAGCAACATGCGCTGACCGATAACGTCGCTGG  
GAGATGTTCCACCGCCGCGCTGCCGCGTGAATAAATCAACGCGAGCTGTATATCGTTGCCAACCGCTCACTGGATTACTT  
CCACAACATGAAGAAAATTTTCGGCAACTGCACCACATCGCCAGAAATAATAAATTTGTTGCTGAAAGCAGTGAAGC  
TGGGCGTTCGTCGTTAA

>Cluster\_40473

ATGGGATCTGATGCGAAAAACTTGATGAGCGACGGAACTGCAAAATGTTAAGACCGGCGAGGTTATGGCGCGACGCA  
ACTTACTGAAGCGAGTTGATTTGTTGAAGTGGCGGAAGAGCCGAAAAATACCGTGGTCAAGGGGGCTGGCTGGTTGAAAG  
TGGCAACCGGTGGGATAGCCAAATGCACACAGTACGGTAAACAATGGCAGCGTATCGGTGAGCGACGGTCCATTTGCCACA  
GATATTTGTTCACTCGAGGAGGCGCAATTAAGTCTCTACTCTGCTACGTTAATGGCCGCATCCGGAAGGTGAAT  
CAGCGTTGATAAAGGTTATGCTGCGGTTTGTGCTGGAAACCGCGGTAACCTGCGTGTACTGGAAGGCCATCGCGCG  
AAAAAATTTATCTCGATCAAGAGGTTGGCTGTTGGTCAATGGGACAACCTCAGCGGTGCTGGTAGATGAAGTGGTGA  
TTGTTGGTGTATCCAGTGGGGAAGCCAGCAATTTGATGATTAATCAGGGCGGCTTTTTATGCTGGCGGGAAAGCCAG  
TGATACATTTGCTGGTGGCACCATGAATAATCTCGGTGGTGAAGACTCTGACACTATTTGTTGAAATGGATGCCACTT  
ATCGTCTGGGACGGATGGTCTTACGCTCTACAGTTCGCGTAAGACGCAAAACCTGTCGCTTAAATGTTGGTGGTGGGCT  
GAAGTGCATGCGGTACGCTGGAATAATGCGGTAATACAAGTGGGACAGTCACTGTTGTTGCCCCACAGCGCGGACGA  
AAATTTGTCGTAGAGGAAGATCGCGCACCGGTTGAACAGTACCGGGAGTGTGCAATTAATGACGCGGCTCAATGATTA  
TTGGCTATGGCGCAGATCTGCAACAATCAACGATTAATCTACAGCAGGCGGCTGATTTGATTTCTGACGGCAGTACGGA  
AAAGGTGACGGTGTCACTTTAGTGTGGTAACATCAATCTAAATGGCGGAAACTGTGGCTAATCAGTGGTACGGCAAC  
GCATGTGCAACTGAAAGTGAACGCTGCGCGGAGAGGGGGCGATTTGCTGCAAAACAGTGGCGAAAGAAATTTACCTG  
ACTTCAATCAATGTAAAGGGGAAGTTACTGGTATATAAAGCTTGAGATAACAGATGCCAGTCCGCAAACTCTGTGTAAC  
GCAGTGAACATCAGCAGACGAAGATGGGCAACGCTCCAGCCTGCCTAA

>Cluster\_25282

ATGTTTACATCAGTGGCGCAAGCAATGCTGCGGTTATCGAACAAATTCGTCGCGCTCGTCCACACTGGCTGGATGTGCA  
ACCGGCTTCTTCAATATCAGCGAACTAAACAAGGGCAAAACACTGCTTACGCGGGCCGCAATGCGCTGGCGAGGAGA  
TGACCGGACCCATGACAAAGGGGCGTGGCTGGCGCATGTCTGTTTCAAGGCTGGGCGAAAGATGTAAGCGCAGGCTGGCA  
ATACTGGAGCAGGGGAAGTGAACCTTCACTCTTGTCCACATGTAATGCCGTGGGCAATGGGTGGCATTACTTCTGC  
CAGTATGCGCATGCTGGTGGTGGAGACGCTGACCGACGCAACCGGGCTACTGCAACCTCAACGAAGGTATCGGCAAG  
TGATGCGTTTGGCGCTTACGGCGAAGATGCTCTGACTGCCACTGCTGGATGCGCGATGTTGTTAATGCGCAGTATTAAG  
CGGCGCTTGGGCGCATGGAGCGGGTATCGATCTACGGCAATGATGGCGCAGGGCATTACCATGGGCGATGAGTTCCA  
TCAACGCAATATTTGCTTCTCTGCACTGTTAATGCGTGGCTGGCCCCACAAATGCTGCGCTCGATCATGATAACAGC

ACATTGCGGAAGTGATGGATTTCCCTCAGCGTGACCGATCAGTTCTTCCCTCAATCTCGGATGGCTTACGCAAGCGGGC  
ATGGATGCAAGCGCGATGATCCGCGCAGGCAGCATCGTTACGGCTATGACCCGCAACGGCAATATGTTTCGGGATTCGGGT  
AAGCGGGCTGGGTGAACGCTGGTTTACGGCGCTGTAAACACTCCCAAGGTCGTTTTTACCGGCTTCTCGCAGGATC  
AGCGCAACCCGGATATGGCGCAGCGCGATTACCGAAACCTTTGGTATTTGGCGGAGCGGCAATGATCGCAGCGCTTGC  
GTAACCGCTTTGTCGGTGGGGTGGCATGGAAGCGGCAGAGCGGTATCTGAAGAGATGGCGGAAATTTACCTTGAACG  
CAATATGCAATTGCGAGATCCCGGCTGGGATTTCCAGGGGGCGTGCTTGGGGTGGACATTCGTCGCGTGGTAGAAACCG  
GCATTACGCCACTCATCAATACCGGTATCGCCATAAAGAGACGGGATCGGGCAGATTTGGCGAGGCACCGTGGGGCA  
CCGCTGGCGTCTTTGAACAGCGCTGGAAGCACTGGCTGAAAGCATGGGGATTTGGTTGA

>Cluster\_25307

ATGCAGGATTTAATATCCAGGTTGAAGATTTAGCGGGTATTGAGATTGATCACACCCTCGATGGTGTGATTTTTCGG  
TATTTTTTTCTGACCGCGTGGTGCATATTTTTTTCACCTGGGTGGTACTGCGGACCTTCGAAAACCGCCATCG  
CCAGTTACCGGCTTTGGTTGCAATCATACCAGAATAAACTCTTCCACCGTTTAGCTTTTACCTTGCAGGGGATTA  
GTCAAATATPCAGGCGGTATTTCTGGCTACAAAAGGCACCGAAGTGGCAGATATTTCTGACTACCCTGCGCGGATTTGGAT  
CATGATGTATGCGCTGCTTTTCTGCTTCTCGTTGCTGGATGTGATTTTGAATCTGGCGCAGAAATCCCGGGCGCATCTC  
AGTTACCGCTGAAAGGGATTTTTTTCAGGGGATTAACCTGATCGCGCGATTTCTGGTTCGGCATTTTGTATGATCTCGCTGCTG  
ATTTGGTCACTGCGCAGGATTTGATCAGCGGCTTGGTGCATTTGGTGCCTGCTGATGTTGGTATTTAAAGATCCGAT  
TCTTTGGTCTGGTGGCAGGTATTTACGCTTTTCCCGGAACGATATGCTGAAACTGGCGCAGTGGCTGGAGATTCGAAATACG  
GCGCGGATGGCGGGTGTATCGATATTTGGTTAACCCCGTCAAAGTGCCTAACGGGACAATACCATTACCACATTTCCC  
ACCTGGTCTCTGGTTTCTGACTCTTTAAAAACTGGAGCGGGATGTCAGCATCTGGCGGACGAGCTATTAACCGCAGTAT  
CAGCATTTGATGTCACAGTATTTCTGTTTTTCTGATGAGAGCAAAATGCAACGGCTGAATAAGCGCAGCTTGTAAAGCTTT  
ATTTAACCGCGCATCAGGAAATTAATGAGTGAATCGCCAGCAAGGTTCTACGGAGTTCGGTATTTAAACCTGCGCCGA  
ATGACCAATATTGGAACCTTTCGTCCTATCTGACGAATATCTGCGGATCAATCCCGGATTCGCAAGATATGACCTT  
AATGGTGCCTCAATTAGCTCCGGGCGATAACGGTTTACCGCTTGAATCTACCGGTTTACTAATACCGTGGTGTGGCTGG  
AATATGAAAGCATTCAGGCTGATATTTTCGATACATATTTTCGATTTGCGATTGTCGAAGATTTGGTCTGCGACTTATCAGTGC  
CCAACCGCAATGATATTCGCTCTCTTGCAGGTGCATTTAAGCAGTAA

>Cluster\_42680

GTGGAAGTAAAAATTGAGCAATTTTCGAAATAACAGTTGTAATTTTTATTTTTTTATATATTAATCGGTTTGGTGTGTTGT  
GCCAATTGATCTAAATAATFACCCTAAAATAATTAATGCTACAGGTGCATTTTTCTTTTTTTATTAATTGTAATAACA  
AGCATAATTAATAAAAAATATCATTATATTAATTTCTGGCTTACTTCTTTTTGGTGCATGAATCTGATATGGTATGAG  
TTTTATAAAAACAGAGATGATGATATAGAAATGCTTATCGAGGCTATCTTGAGTCTGAAAACTATTAGTATTTAGCTC  
GTTGACATTTTTATTACTAAGTAAAAATAAATTCAGGCAAAATGAAAAGCTACATTTTATTTTACGATCTTAGTTCAA  
TAATCATGCTATGTAGAGCATATTTCAAGGGATATATTGTCATGCGAGCCGATTTCCCTCTCCGCCATGAATGGGAAT  
ATTTGGTCAGATGGGGCAGCGACTATTTGCGGCTTATGTGATTACATTCCTACTTTTATATTTCTCAATGTATTCATCAA  
AATGCAATCGAAATATAAATGTTTCTATTTTTATGCTAATTTTCTTTAAGCTTTGCGAGCAGTAAATGATGACAGGAACCG  
GTGGCGCAATTTTCCACTTTCCACTTATGATTAATGGCCATTTATTTCTTACGATCGTATCAAAAAGTGTTTTTTATTT  
AAAGGCTGAGTGGTGTTTTTTATTTGCTACTTCTGCTTGTGTTTTGATATTTAAAGGAAATTCAGAGGCGAAATTTATTC  
ATTTAAAGCTGATGTTTATTTTATATGCTACAAAAATAACAGTCAATCTCGGTCGGAGCAGCTTTTGAATGGTAAATG  
CAGGAATTAAGGAAAGTCTGATAGTTTTTAAATGGCAATCTCTTGAGCAGCGTCTGAAAAGATAAAAAGCAATTAAGTGA  
GAAAATAATATTTATAGTGGAGCTTTATTTCTTGTATGATGATGATGATAATGAAATGTTGAAGTCTTTCCACGAA  
AGGAAAAATTTGGTCTTCTTTGTTCTTATTTATGTTCTATGTTTGAATGATCTACTACTGATTCGGGGGAAAAATAATATAC  
TTTTGGTTTTTCCCTGCTTCTATTTATGTTATTTGGCATTAGTATGTCATACGATGCTAAACCAATACCGGCATCGTGG  
ATTTGTTGCTCTTCTCTGCTATATCGTTTTTGGAGTAAAAAAGAACCAATAA

>Cluster\_53538

ATGACCAGTAACTGGAACGTTGGATCACGCTGGCGTTATGTGGTATTGCCGGAAGTGAATATATAAATGTCCTTATTT  
ACGGGAAACCTATFACGAGCGATGCGAGGCTACAGGAGCGACTAATGCTGAACTTGGTTTTCTAATGACAGCCTATG  
GTCGTTGAACTTTTTATATATCTACCTGGCGGTTGGGCTGCCGATAGATTTTCTGACGTAATTAATGACCTTTTCA  
TTAATTTCCACCGGATAAGCGGTTTTTATATGCGACCTTCCCTCGTATACCATGATCTGTTTTGTTACATGCACTTTG  
GGCTGTTACAACCGTATTTACGTTTTTGGGCGTGTGTGTCGAATTTATCGTACCCTGGGAACAGCGAAGAACAAGGTC  
GCTTATACGGTACTGTTTTCTGGGTAAGGGATTAACCTCCATGTCAGGGATTTCTTTCCGTGCGCGTATTTGCCAAA  
TTTTGGCAAGGTTGATGGTTTTACGGGCGACAATTTTTTTTATCCGTAAGTACTATTTCTGGCCGGTGTTTTTAGCCTG  
GTTTTGTTGTCAGATGAAACGACAGCGAAGATAAAGCGAATTTCCGTCGCGAGATATGGCATTCCGTTGCTGGGCGT  
CGACGGTTTTGGCTGGCAGGTGTTGTGACCTTTTTGTATGTGGTCAATTTATATCGGCTTTGGCATGGTCACGCCGATCTC  
ACGCAGATCCTGCATATGGCGAATCGGAAGTGGCAGTTGCCAGTATTTCTCGCGCTATGTTTATTTGCGATGGGGGG  
ATTAATTTGGCGACAATGGCCGACCGCTGTGCTCAGCGACCGGTTTTATGATTTACGCTTTTATCGGCATGATGTTCT  
TTACTACGTTTTATTTCTTCTCGCGGTTGAGTCCGCTACGCTACTATTTGCGCTGGCGAATAATGTTGCTGGGCGT  
TTTTTTTACTCTGCGAATGCCGTGTTCTTCTCAATTTATGATGAGGTTCCGGATCCCGGCAAAAGTACAGGGACTGCTGC  
GGGCTGATCTCTTTACTGACCTATTTCCCGGAAATCTACTGCTACACGATGGTGGGCAATATGGTCCGACCGCAACCGG  
GTATTTCCGGTTATCAGGATGTTTTCTGTTCAATGTTGGTTCGCGATTTACGCGCTTATCGCGGCTGTTGCTCCAG  
CGTGTGAATCGTAAAAAGTAAAAATAAAGTAAATGAAATCACTGAAAACAAATGCGGATTCGCAATCCTGA

>Cluster\_9762

ATGCAGGCCTGTGGCTGGCTTGGAAACCCGATCCGAGACCCTGCTGACCACAACAGCTATGGTTTTCAGACCAAT  
GCGCAGCAGCATGACGCCATTGAGTCCATTTTTCTGCGGATGAGCCAGAAAGTATCGCCCAATGGATGACTGGAGGGCG  
ATATTAAGGGTGTTCGATAACATCAGCCATGACTGGCTGCTTTCCCATATTTCCGCTGGACAGGAACTTCTTAAAAAA  
TGGTTGAAAGCAGGTTACATGGAAGAGGCGTGTAAACCATACGAACAGCGGACACCGCAGGGAGGATCATATCCCC  
TGTTCTCGCAACATGGCTCTGGACGACTGGAGAAGGAATGATGCAAACTTCAGGAAAAGTGGTTATCAGTGGTCAA  
AGCACCAGTGAATTTATGTTGAGATATGCTGATGATTTTCTGTTTCAGGCGACTCCCGTGAATTTGCTGAAAATGAGGTC  
AGACCCTGATTGACGCTTTCATGCGGAAACGAGGGCTGGAACGTGCGGAAGAAAAAACCGGATCACACATATAGATAA  
AGGCTTCGACTTTTTAGGGCAGAAGCTCAGGAAGTACAACCGTAAAATGCTGATTAACCGCTGGAAGAAAACCTGAAGA  
ACTTCTCTGTAAGTACAGAGAATAATTAACGCAATCCGACGCTCCCGCATGGAACCTGATAGGCCAGCTAAACCCG  
GTGATCCGCGATGGGCTACCTATCACGACACCTGCTGGCGAAAGAAACATTTAATTTATGTCGACACCAACCTTGGCG  
AGCTATATGGCGATGGTGTGTAAGAAGGACCCCGGAAAGGATTTGGGTGGATCGCCGGACGATCTTCTCTTTGAAAG  
GCAGGCGCTGGATCTTTAAAGCCATAACCCCGGAGGGAAAATTTGACTCTCTTCCGGGCAATGGAACACCGATAAAG  
CGCATATAAAAAATCAAAGGCGAAGCAACACATACACCCCGGAATGAAATCTACTTTGAACGCTGCTGGATCTAAAT  
CTGGAAGGCAAAATCAAAGAAAGTGAAGACAGTAGTTCACTTGAAGAGGCGAGGGGAAACACTGTCCGCAATGGCGGAC  
AACCCATAACCAACAGACCGGATGGAATATACATCACCGGATCAGGAAAGTTATGGGCGCAGTGACGAACGACCAAT  
CTCGAGTTGTTACTACCGAATGCCACCACAGTTACACAGCAGGGAAGCCGGTGTCTACCGAAAGCATTTATAA

>Cluster\_60723

ATGCCACATTTACTGTTTACGACCGGATACCGATCTCACCGCGAAAATCTGCTGCGTTTTGCCCGCTGAATTTGGCTGCC  
GGTGTGGGCTACGATGCGCAAAATTTCTGCGCAGATTGCAGCGCTGAAACAGTTTTGATGTGGTGGCTTTGCACAGA

AAGCCTGTTCCAATATTCATATTTTGGCGTTAATGCGTGAGCAGGGCGTGAAAGTGGATTCCGTCCTCGTTAGGCGAAATA  
GAGCGTGCCTTGGCGGGGTTACAATCCGCAACCGACCCCGATGATATTGTTTTTACGGCAGATGTTATCGATCAGGC  
GACGCTTGAACGCGTCAGTGAATGCAAAATCCGGTGAATGCGGGTTCGTTGATATGTCGACCAACGAGGCGAGGTTT  
CGCCAGGGCATTGGGTATGGCTGCGCTTAATCCGGGTTTGGTTCACGGACATAGCCAAAAAACAATACCGGTGGCGAA  
AACACGAGCAGGATTTGGTACACCGATCTGCCCGCGCATGAGCAGTGAACAACGTCATCATCTCGAGGCGCGC  
CATTCACATGCACATTTGGTCTGCGCTTATTATGCCCATCTGGAAACAGGTGTGTGGTCTATGGTGCCTCAGGTCATCG  
AATTCGGTCAGGATTTACAGGCTATTTCGCGGGCGGTGGGCTTCTGTTCCCTTATCAACAGGGTGAAGAGGCGGTTGAT  
ACCGAACATTTATGGTCTGTGGAATGCCGCGGTGAGCAAAATCGCCCGCATTGGGCCACCTGTGAAACTGGAAT  
TGAACCGGTCGCTTCTGGTAGCGCAGTCTGGCGTATTAATTAATCTCAGGTGCGGAGCGTCAAACAAATGGGGAGCCGC  
ACTTTGTGCTGGTTGATGCCGGGTTCAACGATCTGATGCGCCCGCAATGTACGGTAGTTACCACCATATCAGTGCCTG  
GCAGCTGATGGTCTTCTCTGGAACACGCGCAACGGTGGAAACCGTCTGCGCGGACCGTTATGTGAATCGGGCGATGT  
CTTTACCAGCAGGAGGGGAAATGTTGAAACCGCGCTTGGCGGAAGTGAAGGAGGTCAGTATATCTGGTACTGCATG  
ATACAGGGCATATGGCGCATCAATGTCATCCAATCAATAGCCGTCGCTGTTACCAGAAGTTCCTGTTGATAATGGT  
CAGGCGGGTTGATTCGCGCTGCCAGACCATCGAAGAATTACTGGCGTGAATTCGTTAA

>Cluster\_45118

ATGAGCAACAATGAATCCATCAGCGTCGTTCTTCTGCTACCCACGCGGGGTTGGCGTGATGTGTAACCTTCTTCGCCCA  
GTCGGCAGAAAACCTACCGTGAAGGACGTAGAGGGCAACGAATACATCGATTTCGCCGAGGCAATTGGCGTGTGAATA  
CCGGGCATCGCCACCTGATCTGGTCCGCGGGTGGAGCAGCAATGCAACAGTTTACCCACAGCGGATCAGATTGTG  
CCGTACGAAAGCTACGTCACGCTGGCGGAGAAAATTAACGCCCTTGGCCAGTGAAGCGGGCAGGCTAAAACCGCATTCCT  
CACTACCGGTGCGGAAGCGGTGGAACGCGGTGAAAATGCTCGCGCCATACCGGACGACCTGGCGTGTGGCTTTA  
GCGGTGGCTTCCACGGTCTGATATATGACCATGGCGCTGACCGGAAAAGTTGCGCCGTACAAAATCGGCTTCCGCGC  
TTCCCTGGTTCGGTGTATCAGTACCTTATCCGTCAGATTTACAGGCAATTCACACAGGACTCCCTCGACGCCATCGA  
ACGCTTGTTTAAATCAGACATCGAAGCGAAGCAGGTGCGCGCCATTATTTTCGAACCGGTGACGGGCGAGGGCGGTTTCA  
ACGTTGCGCCAAAAGAGCTGGTTCGCCCATTCGCCGCTGTGTCGACGAGCAGGATTTGTGATGATGAGGCTGAGG  
CAAAGCGGCTTGGCGGTACCGGTAACCTGTTTCCCATGGATCATTACGCCGATAAGCCGGACTTAATGACGATGGCGAA  
AAGCCTCGCGGGGGATGCCGCTTTCGGCGTGGTTCGTAACCGCAATTTATGACGCGCCCGCGCGGGTGGGTTGG  
GTGGCACCTACGCCGGAACCCGCTGGCGGTGGCTGCCGCGCAGCGGTGCTCAATATATCGACAAAAGAACTACTCTGC  
GAACGCGCGCAATCAACTGGGCGCAGCTCTCAAAAACACGCTGTTGATGATGCAAAAGAAAAGCGTTCCGGCATTCGCGT  
ACGCGGCTGGGGTCGATGATTGCGGCAGAGTTAACGATCCGCAACGGGCAAGCCGTCAGCGGCGATTGCACAGAAAA  
TCCAGCAACGCGGCTGGCGCAGGGGCTGCTCCGCTGACTGTGGCGCATACGGCAACGTCATTCGTTCCCTGTATCCG  
CTGACCATCCGGATGTGAATTCGATGCGGCAATGAAAATTTTCAGGATGCGCTGAGCGATTAA

>Cluster\_24624

ATGTCGTCATTTGATTACCTGAAAACCTGCCATCAAGCAACAGGGCTGTACGCTACAGCAGGTAGCTGATGCCAGCGGTAT  
GACCAAAAGGGTATTTAAGCCAGTTACTGAAATGCCAAAATCAAAAAGCCCGAGCGCACAAAAGCTGGAGGCAATTGCCCGTT  
ATTTGGGACTTGAATTTCCCGGCGAGAAGAAAACGATCGGTTGCTGATTCGGTAAAGTTTACCCTGTCATCTGGACAT  
ATCTACCTTATCCAGCGCCCTGTAGCCAGTTGACGAGCTGCATATCATTATGGGTTTTGACGATACCCGCGCAGCGC  
ATTTGTCGAAGACAGCGCATGTGCGCAGCAGCCAGGTGCCGATCGTCTGCGCTGGCTATTGCAAACTTTAAATATC  
AGAAAAATATCCGTTATTCATGCCCTTCAACGAAGAGGGCATGGAGCCATATCCGCAACGGCTGGGATGTGTGGAGCAACGGC  
ATCAAAAAGTTTATGACGAAAAGGCATTCAGCCGATCTTATCTACACCTCAGAAGAAGCCGATGCCGCGCAGTATAT  
GAAACATCTGGGGATCGAGACGGTGTGATCGATCCGAAGCGTACCTTTATGAGTATACAGCGGTGCGCAGCTCCGCGAAA  
ACCCGTTCCGCTACTGGGAATATATTCCTACGGAAGTGAAGCGTTCCTTTGTGCGTACCGTGGCGATCCTTGGCGCGAG  
TCGAGCGGTAATCCACCCTGGTAAACAACTTGCATATCTCAACACTACAGTGCATGGGAATATGGTCCGCAATTA  
TGTCTTTTCGATCTGGCGCGATGAGATTGCATTGCAAGTATTCGACTACGATAAAAATCGCGCTGGGACAGCTCAAT  
ATATTGATTTGACGATAAAATATGCCAATAAAGTGGCGTTTATTGACACCGATTGTTGCTACTACCCAGCGGTTCTGCAAA  
AAGTACGAAGGGCGTGAAGCATCCGTTGCTGACGCGCTGATTGATGAATACCGTTTCGATCTGGTGTATCCTGCTGGAGAA  
CAACACGCGTGGGTGGCGGATGGTTTACGAGCCTCGGCAGTTCGGTGGATCGCAAAGAGTTCCAGAACTTGTGTTGG  
AGATGCTGGAAGAGAACAATATCGAATTTGTGCGGGTTGAAGAAGACGATTATGACAGCGGTTTCCTGCGCTGCGTGGAG  
CTGGTGGCGGAGATGATGGGGAGCAAGATAA

>Cluster\_22470

ATGTCGAGTAAAGTATGACTGGTTCGAACTGCGGTAGTTCTTCACTGAAATTTGCCATCATCGATGACGTAATGGTGA  
AGAGTACCTTTCTGGTTTACCGAATGTTTCCACTGCCCGAAGCAGCTATCAAATGGAATAATGGACGCAATAAACAGG  
AAGCGGCTTTAGGTGACAGCGCCGCTCACAGCGAAGCGCTCACTTTATCGTTAATACATTTCTGGCACAAAACAGAA  
CTGCTGCCAGCTGACTGCTATCGGTACCGTATCTGACAGCGCGGCAAAAGTATACAGCTCCGTAAGTATCGATGA  
GTCGTTATTCAGGATCAAAAGATGACGCTTCTTTGACCGCTGCACAACCCGGCTCACCTGATCGGATCGAAGAAG  
CTCTGAAATCTTTCCACAGCTGAAAGCAAAAACCGTGTGATTTGACACCGGTTCCACCAGACTATGCCGGAAGAG  
TCTTACCTTACGCCCTGCCGTACAACCTGTACAAGAGCAGCGCATCCGTCGTTACGGCGCGCAGGCACCAGCCACTT  
CTATGTAACCCAGGAAGCGGCAAAAATGCTGAACAAACCGGTAGAAGAAGTGAACATCATCACTGCCACCTGGGCAACG  
GTGGTTCGTTTCTGCTATCCGCAACGGTAAATGCGTTGACACTCTATGCGGCTGACCCCGTGAAGGCTGGTCTGTTG  
GGTACCCGATCTGGTGTATCGATCCGCGGATCATCTTCCACTGACAGACACCTGGGATGAGCGTTGACGCAATCAA  
CAAATGCTGACCAAGAGTCTGGCCTGCTGGGTCTGACCGAAGTGAACGAGCTGCGCTATGTTGAAGACAACACTAG  
CGACGAAAGAGACGCGAAGCGCAATGGACGTTTACTGCAACCGCTGGCCAAATACATCGGTGCCACTGCGCTG  
ATGGATGGTCTGTCAGCCTGTTGATTTACCGGTGGTATCGGTGAAAATGCCGCGATGGTTGCTGAACTGTCTCTGGG  
CAAATGGGCGTGTGGGCTTTGAAAGTTGATCATGAACGCAACCTGGTGCACGTTTCGGCAAAATCTGGTTTCATCAACA  
AAGAGGTACCCGTCCTGCGGTGTTATCCCAACCAAGAAAGTGGTTATCGCGCAAGACGCGAGCGCCTGACTGCC  
TGA

>Cluster\_66922

ATGCAAGAAAACATTACTCGCAGCCCTTATAGCTATCTGAAATGGAACGGCATACCAGGCTCATGCTTATTCAGTCAC  
CGTCGTCGCCAGCGTCCCGTTGAACAGCAGGTCGTCGCCAGAAATGGAGGCAATCAAAGGTGTGCTGAGTGACATACTGA  
GTACCCAGACCCGACGGTACCCTATCAATCAGAATCTGAAAAGCTGGCAAGTGTATTGCCAGAACGGACAGCGG  
ACACGTCAGCAGATGATTTTCAAGTAAACTCAGCGCCTCGAGGAGGCAGGAAAAGCTTACCCTGCCACCTCAT  
CTGCAGTGAATCCGATCAGGATTTGCAACAGAAAAGAAAAGTGCCTCAGCATCCGACGCTCAAACCTAGTAAAGGTG  
GCGGTGTGAGCAACCGTACGATCCGCGACCGTCTGGCCAGCGCAGCAAACTCTCCGTCGGGGAAGCTTATGATGGCGG  
GCCATACCGCAGTACTGTACAGAAGCAGAATATGCACTGTTTGGAGGAACCGCGTTTGTCTTCTGTGGCGGAAAT  
ACCAGTTGGAGACAGTACGCTACGCTGATTTTACCAGCGCAGGTACAGCGGACACACTGCGGCACTGACATGGGATC  
AGAAGCAAAATAGATGACGACTGCTTACATGAAAACACTTCCGCCCTCTGCCGTCGTTCTGGGTAAGGAGAA  
GTGAATACCAGAGTGGGCGAACCCTACGTCGGACTCCAGAAGCAATACAGGATCATTTGATTTCTGCTGCAATCCCA  
ACTGACGTTGATTTGCTGACAGCAGCCTAATGAAAGCACACTTAAAGCACTTGTGAAACACTGAGTACAGCTGACGCG  
CCGCTTACTTTCAGCAGGTGGCTTACCAGAAAGCAAAACCGGGATATATGAGTACCCGTCAGTTTGAAGCTTTTGA  
GCTGGCCGCGCTACGCCAACACAGCATACCTGTTGATTTACAGGAAATGACAGGGGATACCTGCTCCGTCGACTGTT

AAGAATCACTGCGCAAACTGAACTGGCAGTTGAACGATCTGAAAGAACAGATCCGCCAGGGTAATGTTATCTCTGGCCAGC  
AACTGGCTCTGACTGCCCGCAGTATTATGAAAAACAACCTCGGTAGCCTTGAGAAAAACAATCAATCAGGCAAAACGCACGT  
TGA

>Cluster\_24507

ATGAATGATGTAACATCGGGAAAGATAATTCTCGGCACTCGTTGTTTTACAGGCAAAGGTGGTGGTATTTTCTTAT  
TTGTCTTGTGAATTTTTACTGACAATTTACTCTGGGAATATATGGCCGTGGGCATTGATAAAAATGCCGTGTTATA  
TTTATCAACATGTGACACFCAAGGGGCAACCATTTAGTTATAAGGGAAACAGGTGGTGCATTTTGTAGCATGTACTT  
ATTGTGGTGGTTTATCTTCTCAGTATTTCTGTTTTGCAAGGTCAACACTTTGCGCTCGGTTTATTTCTGTTGCTCTCT  
GATCTGCGGTATTTCTTGTATGGCAGTGAAGAGCTACAGTATCAGGCAATATGACTTCACTAAATGGCATTGCTTTG  
GCTTTAATGCTCAATGCTCCGTGCATGGTGGGTTATGTTAGGCTGCGCAGTTTGTGGCATTAGCTTTTGGCTTGCA  
CTGTACCTTATTGCGCAAGTGCACATCGATAGTGGGTTATTTCTTAACTTAGTGCATTAAGTTTGTCTTCTGCCAT  
CGGGCTAGGTGTTGCTCAATGGTATAACCTATAGTAAATGGATGCCATTGCTGGGTAATAATGCAACTTTTGGCATT  
AGTTTTCTTATTGAGTAAACGTAAGAAATGCAATTAAGGTTGCATGCTCGCAATATTAAACCATGGTTTCTCATCAT  
GTGATTGGTATTATGATCGCACCAGTATTTAGCAGTTAATGATGATGACCATGTTGGGTAGGCTGATGCTGGCAGTGA  
GTTTGTATTACAATATTACCCGACAGATTATGGCTTCTTATTCTCTGATTTTGTGCGCATCTTGTGTTGGCAGTTATC  
TCTATGCTCAGTTACGAGTTTGTTCCTGAATAATCGACACTGGCAATGGCGCTATTCGTTTTCTCATCTGTTTACC  
CGCATCGGTATGCTTCTGCTTATTAATGTTGGGCTTAAATGAGGGGCTCAATTAACCTGTGGTCTGGCTTATCCTCGCTGAA  
AATGTGGATGTTAGCTGGATTGCTAACAATACCCATGCTCAGGGCGACCTTGATTGCTGGAGTTAACCAATGATGACA  
AACCCGAGGATAGCGGTTCTGTTAATGTGGATATCTCGCGTATTATGCGGTATGTTCCGTTTATCTAA

>Cluster\_61191

ATGAATTTATCGCTATCGGCCATGACCCAGGATGGTCAAAAATGCAAGGGATCATTGATGCTAACGATGAACGTGAGGC  
ACGACTGCGGCTCGGTGAAGAAGGGCTTTTCTGCTGGATATTCGCCCCAAAAAAGTTCGGGAGTAAAAACAGCTCGCC  
CGAGGATAGCCTAGTGAACACTGACGCTTTTCCACCCGGCAGTTGGCAACCTTAAAGCGCAGCGGATTACCCCTGGAAGAG  
AGCCTTGGCGTAATCGGTCAACAAGCAGTAATAAACAGTGGTGGTAAATCAGGTACGACGCGCCATCTTGA  
AGGGCATCCCTTTCCGATGCATTACAGCATTTTCCCACGCTTTTCGATTGCTCTATCGTACCTGGTAAAAAGCGGGC  
AAAAGAGCGGGCTGCTGGCCCGGTGTTGGAAAAGCTGGCTGATTACAATGAAAACCGGCAGAAAATCCGCAGCAAGCTC  
ATTCAGTCACTGATCTACCCCTGTATGCTCACTACGGTGGCAGTTGGGGTGGTGGTATTTCTCTCACTGCTGTGCTGCC  
CAAAATACCGAAACAGTTGCTGCATATGAGCAGCAACGCTGCGCTGAGTACACGCAATTTTAAACGACACCT  
TGCAACGTACCGGCCGACATTATTAGCAGCAGTGTATTATGCTGCTGATGTTTCTGGCTCTGGTAAAAACGCGCAAT  
AACCGCCACGTTTTCATGCCATGTTGCTGCGCTTGCCTCATCGGCCCGCTGATTTGCGCCATTAAACAGCGCAGCTA  
TCTCCGCACTTTAAGTATTTGCAATCCAGCGGCTCCCTGCTGGATGGATGAATTTGTCCACCAGAAAGCCTCAACA  
ACCTCGAAATTCGCCAGCTCTGGCAAAATGCGGCAGAGAACGTTTCGCCAGGGTAACAGCATTCATCTTTCGCTGGAACAA  
ACCGCAATTTTCCCGCCGATGATGCTCTACATGGTGGCTCTGGGCAAAAAGCGGGCAGCTCGGCACATTAAATGGTCAG  
AGCCGACAGATAACAGGAGACACTCCAACAATAACCGGATCGCCTTAAACCTCTCCATCTTCGAGCCAGCACTCATTTA  
CGATGGCACTGATCGCTCTGTTTATTGCTGCTGGTACTCCAACCTCTTCTCAACTAACTCAATGATTAATTA

>Cluster\_41051

ATGTCAACTTCTATCAGAACTGTAGTACCTCCTGCTGCCGTGATCTACCTGCTGGTTAACGTCAAAAACGCCAGCT  
TGGCGAAGTTTTCCCATCACTATCGTCACTTTTTTACCTGTCTTGTACTGCTGTTTTTAGAGCGCATCAGCTGTAAAA  
AATTGATGATTACCTTAGGATTTGGTGGCGGACTCACGGCTTCAACTATCTGTTTGGTCACTGGATGCCAGTAAA  
TACGTCACTTCAACCATGCTGTTTTGTCTATATTGTGATCATTATTGGCATGGTGGAGTATTGCTTTAAAAACGATTT  
GCCACACAACCATCGCAAGATATTACGTTCTTTTATCTGGTGGTGGGCTGGTGGTGGCGCTGGCGGGTGGAGATGG  
CGCAAAATTTCTCACCCTGGCAGCAGTATTATGGAGTGCATTTGCAAAATATCTGATTTATAGCAACAGCTATGTACTG  
AATTTCAATTAATTCGGCGGCAAGCGCACGACACTTTAATTTGCAACCGGCATTTTTGCTCTGGTAAATCTCAAT  
TTGGCTCAGCATCAACAGTTTGGTATCAAAACGCTAAAAACAGATGCTATGATTTCTCGCAGGATAAATATTATCCGGAT  
CGTTTTGAGGGTTATGACCTTTATCCTGTTTTATTGCTGGAGTGGGCAATTTCAATACTGAATAAAGAGGGCATTAA  
AAAAAGTTACCGTTAGCATTTGATTTCTGCGTGTATTCTGGTGGTGGTAAATCGCGTTTTCTTATATTTCCACCCG  
TCTGGCGGATTTAGGTACGGAAGGATCGTCACTTTATTATCTGATTTGCTGGTGGTGGTAAATCGCGTTTTCTTAT  
CCCATATTGACGGTGTAGTACAGATTTGGCTCACTTTATGAATAATGTCGCATCACTTCGGAATATTTAACGGTGGGATGTC  
GGAAAAACCATAGACAATGGTTTGTATCTGCTGATTTATTTTCCGTTGCGGTTGCTGTTTTATCACTGTGGTACAT  
GGGAAAGTGATAAAAATGATGATCAACGCTTTTGGTGATAACCGCAATTTTCGCGTGAATTTATATCTTTTTACTCCGG  
TATCGCTGTTTTTTTACCGGTTTCGATATTAGCCGGAAATATGCAATTTTTAATCTGCTGCTGGTATTATTTTCGGAAGCG  
TTAAATATTACGAGGTAA

>Cluster\_15116

ATGTACAAAACAGCTGTTATTTCTCTGCTGATGCTGTTTACCGCAAGCGTCAGTGCCGATTACCTGCCCGTTATATGCA  
AACCATCGAAAAATCGCGGCTCTGGCGCAAAATGGCGCAAAATGGTACCGTAGGGAAATATTCGGCCGGGCAAAATCA  
TTGCCGTGGAGCCACTGCCGAAGTTATACGTATTTAATTTGGCTTTGGTAAAGGGTTTATCGATAAAGGCCATCTC  
GAGCCGGTTACAGGGCGCAAAAAGTTGAAGATGGTTTGGGTGACCTAACAAGCCGCTGAGTAAATCAAAAATTAATAAC  
CTGGAAGATACCGGTTTATAACCGCGGAGTTTGGCAGTGGCCATTTGGAGTACTGGCGGCAATTTGGCTTATCGCTACC  
CGATTTTGCATAAACTGAAAGACAGGTTAAATCAAACTGGTATCAGATCCGTTATGGCGATCGACTGGCCCTATACAGC  
GCGTGGATGCCAATCCGATAATGGCTTGCCTGGTAACTATCACCATATTTTGGCGACGAAGAAAACACCCGTTT  
TCGCCATACTTCGACGACCCTCGGTACCGCTTTCAATAACAGATGGCTGGCTGGCGACAGGGGATACCGGCACAC  
TGAGCATGGCGCAGCTGGAAGGTTACGTGAGAATAAGATCAATCTCCCTGCGGAGCGGTTGTAATTAACCTTTGATGAT  
GGCTCAAGTCCGTGAGCCGCTATGCGTATCTGTTGAAACAATATGGTATGAAGCGACGGCTTTTATTGTTACCTC  
GCGCATCAACAGTCAACCGCAGAAATGGAACCCAAATCGCTGCAATTTATGAGCGTTTCTGAACTTAAAGAAATTCGG  
ATGATTTGATTTCCAGTCACTACTCATTTTTGTCATCGGTTGGATGGTTATCGCGGCTTATTTGCTGAGCCGTAGT  
GAGCAAAATTTCTGTTGATTTGACAGTTTACAGCTTACGCGGCTTGGCGCAATTTAATCACATGTTTTGTTCTTTA  
TCCATTTGGCGGATTTAATGACAAAAGCCGTAAGGCGCAAAAAGAGCCGATTTACCTGGCGGTGACGACCATGAAAG  
GCAAAGTAAAACCGGGGATAAATCCGTTGTACTAAAACGACTTATACTTAAAGAACGGATTGCTGGAGACGATGTGC  
CGGCTGGTGAATAACAGCCGACAGGATAA

>Cluster\_10987

ATGGGGTTACAGTTTCAAAAAGTCGATCAACATTTATCTGCGGTTGCGCTCAACCTGAGTAAAGGTGCACCGAGCCTGAG  
TGTGCGGGCAGAGGTTGCTTCCGTTTCTTTGGTAGCCGGGGACCTATGCCAATCTGGGCTTCCCGGTACCGGGCTGA  
GTTACCGTACCCGGCTTGACCGGGCCGCGCTTCCAGAGGTGAAAACCGGACGGCAACCGACCCGGGCTCAGACAGCG  
CTTGAGCAGAAAAGCCGCTGAACCTCATGTGACGGTAACCGCAATCCGTAATAATTCACGAGCTGACGCGGATCAAAAAC  
AGGCATCAGCTGGCAGAGCTGGAAGCAGTATACCTGCATAACAGAACGTCGCTTTTTCAGTTCCGGCACCGGTGCGT  
CAGAAAAGCCAGACTACCTTGTATTGCGGAAAAGCTGCCGAGAGCGAAGGCATTAGTTTTTTGGGTTAAATGGTTGAA  
TCGGAATCAGCTAAAGCTGAGCGCCACCGGAAAATCTTCCGCGGTGGCAGCAGGAGCTGATTTGATGTTGGAGCTGAGAA  
TACCTTTCGACAGCACCGTACCAGCAACAACGACGGCTGGGCCAAGCAGTATGCAAACTGGAAGTTTGAAGCTGAAG  
AACATGAAAACGGCTCGCCACGGCTCAGCAGATGCCGGCAGCAGTTCCGGACAGACCGCGTTTTTTCGAATCATAC



CTGGCGGGTGTGCTGGCAGAAAACGTAATGGCCGCTGAAACGCTTGTGTCATTTGAAGTAAAGCCGGAGCTATCAGCAGT  
CCTGCTGGACGTTGATTTAGCTGAGATTGAAGATTTCCCTGATAAAGATTACGGCGTTAATGCCCGGGAAACGGAGCTGA  
CGGAAAAAGCCATGACGCAAAAAGCCGTACGCGAAAACATGCCACACAGCTCCATGGCTGCTGTTCCGCCTGGTCCGGT  
ATCGTTTTACATACGCTACCTTTTCGACAACGTGATTGTGTAGCCTTTACGCAACGGGTCAGTAAAGCGGACCGGCTATCT  
GGAGGATGAGTATATCTCTCTGCAAAATGCACTCGCAGCCAGATGTCTGTCAGTAAATTTGCAGGCATAAAAACACATTG  
ATCCGGTTGAAGCGTTAGCGATCAACCGGTTATTCGAAAAGATGAGCAGTACCTTCATTTTTCAGCCTATTGAACACTA  
ACCCTTAA

>Cluster\_22207

ATGAATATTTCTGCAATTTAATGTGCGACTGGCGGAAAGCGGGGAGCAGGTTGGCGTTAGATCTCCACCAGCGTGGCGT  
GCAACAGGGGCTGGCGTACATTTTGTCTACGGTTACGGCAAAGGGGCAAAGAGAGCGTACGCCATCAGAACTATCCGC  
AGGTATCAACATACGCGCGGATGACCGCGATGGCGAATATGCCCTGTTTTCGTCTGTTAATCGCGATCTGTTTGGC  
AATTTCAATGAGTTATATCGCACCTTACTCGCACACCGGGTCCGGTGGTCTGCATTTTTCATGTGCTGCACAGCTACTG  
GCTAAATCTTAAGAGCGTGGTGCCTTTTTCGAAAAGTGAAAAACCAAAAACCGGACGTCACCTGGCTGGACCTGC  
ATGACCCTGGAGTGAACCGGACGCTGCGCCTTACCAGCGTTGCGAAGGCTGAAAAACGGGCTGCCAGGAATGCCCG  
ACCTTAAATAATTTACCGCGGTTGAAGATTGATCGCGCACACCAACTGGTGGCGGGCAAACCGCAGTTATTTTCGTGAGAT  
GCTGGCGTGGCTGTAGTTTATTTCCCGGACGAGCATGGTGTGCATGGCTTTCAATAGCCTGTACGGTCCAGGGCGTT  
GCCGGATTTAATAAGTGGCATTGATATGGCAACGAAAGCGGATTTCTGGCAGATCTGCCCTCCGGTGCAGCAACCGAGGT  
AAGCCGAAAATCGCGGTTGGCGCATGACCTGCGTTACGACGGCAAACCAACCAGCAACTGGTGGTGGATGATGGC  
GCTGGGCGCAAAATCGAAGTGCATACCTTTGGTAAAGTTCGCGGTTTCCCGTGGCAACGTTAATCAGCGCTTTG  
AACTGACAAGCGCAAGTTGATGAGCGCGCTCAATCAGATGGATGGCTGGCTGTTTCAGTTCCTGCGCTGCATAACTACCG  
CTGATTTTTGTGAGGCGTATCGATTGGTGGCGCTTATGGCACCATAGCGATGGCGCGGGGAGGTGGTGCAAAA  
ATCCGGCGTAAACTGTACGGAAGAAGACGCTGTGCAACTGGTGCAGTTAAGCAAACCGGAAATCGCGCAGGCGATAT  
TTGGTACCAGCTGGCTGAGTTAGCCACGACGCGCCGCTTACAGTGGACAACAGATGCTGGAGGATATGTC AAC  
TTCTATCAGAATCTGTAG

>Cluster\_6953

ATGAAAAAATCTATCTGACACTTATACTGCCGTCATTATTGTCGGCTGTGCCGGAATTTCCGGCGCAATAACGTGGC  
ACCATCAGATACGCTGCTGCTGGTTTTGTTGACGGACAAATCAGTGAGAGTGTGGCGTCTGGCACTTACGCAACAC  
GACTTTCTCCACCTTAAATAAATCAGCTCCGCGAGAGTACGCGTCCAGAGACAGTAAAAACAGCACAGCCAGTAAAGCGAA  
TCCCGACCGTTACCTTACCAACAATAAGTCAGAAATTTCTCCCGTTAATCATTACAGCAAGCCTGGTAGCACCCCTGT  
AACACTATCGCGACGGCCCGTAACCGGACCGTACGTCAGTGGATAAAAAATTAATCCTACCGGAAAGGATGGAAATTCAGAC  
AAGAGAATGCAGCCACGCCAAGCTGAATACCAAACTGGTTTCATGGTCTGCCAATGATCAGTGGACCGTTCCTCTGAAT  
CGTTGCTGGAAAGAACACACTATGGGCCATCTGGACTGGGATAAATAAACGTTGACCGTCAACAACATCAGCTGCTGC  
ACCGGCACAGGACACGGCAACCCTATCTGCCAGCAGCCATGGTAACCACATCCACTTCCCTGAATCTCAACAACAG  
CAATAGCCAGAAACCAACCGAAATCCATTAGAGGAAAACAGCGTATCTTGCACAACCCCGCGCCACCCGACTCCA  
ACCGGCTCCACAGTCAAGTCTATCCGCTCATGACCGGACGCTGTCAAACCGGATCTCAGGGTAAAGAGTGGCGTGC  
GCCGCGAGCCACCAATTAAGAGAGAACATTATTAAGTGGCGAGAAAGAAAACAAATGCGAAAGCATGCGGACACT  
GGATGGTCAATGGCCACTTCTGTAACCGATTACCGTCTGGATGGCCTTTGATGTTCCGGGGAGCATTTGAATCAGCC  
ATGGAGCAGGATTTGAGTTATATCGGACTGCGCAAAAACCTTTATACGACAGGCTTCTCGCATGACAGTACATTA  
AGTTTCTGATACAAGGGATGGTGCCTAA

>Cluster\_44552

ATGCAGATAATCTTTGGAGAAAAATGCGTGTATTACTACGACTATTTTTGGCCGCTTAAATGCTATGGTGGCTCA  
AAGTGTCTTATAGCGGCGAGTGTACATACCCTACGGGAATCCGATATATTGGCGTCAATTTTGGCGTTAAACCCCTGG  
AGGAAGAAGAAAAATACCGTGGAGTAGTTAAAGACAAATTTATATCAGTGGAAAGCATGAATGATTATATGTTTCTGT  
GATTGCGATAAAGACAATGTGAGAAGTGGCCGATGGGCATTCGCGCGGATTCACCGTATGCTATTTAGGCGACAACCTG  
GTACAAAAATTAATGACTATCTTCCCGCAAAAGTTTTATGTCAGGTTAAAGGCAGTTCTCTTACGCGGTTCTTTCGAAA  
ACGTGGGCACAGGGGAGATACACGATGGCATAATTTGGCATCCCGGCGGTCACGTTTAGGTGGCCAGGGGGTAGCGGT  
AATAGCGGTAGCTTTTCCCTGAAAATAATGACAGCGCTTGGTTGGTTGGTCTGCTCATTCTCCATGCGCTGGCGCGAAT  
ATTTGAATGCTACAACATACCCGACGGTATCTCTGCAGGCTACAGGTACATCGGTTTTAGTGTATTACCTGCTGGTA  
CGATCAATTCACCTTGGCTCATGTCCCGTCAATGCCGAGAGACTATCGAGGTGATCTGGGCGACGATTTGCGGCTAAC  
TTTCGTGTGTAGGGCATAAACCCCTTGGGGCAGAACGGCAGAACTCGCAATTCAGTCAAGGTGTAACAGGGAAACCG  
GGGTTAGTTAAGCTCAACCTGAGTCTGACGGCAACACAGACCCAGCTATCCCGAGCGATTAAGAGCTCAGCTCGC  
GCGTGGGCGTGGTGGTACCAGATAGCCAGAAACATTATTTCCCTGCTGGTGGAAACATTACCGCTCTTATCTCTGAT  
GATGACAGAGTATCGCGCGAATGAATGTCTATCCAGTCAGCAGACAGGTTACCACAGAAACCGGCGGATTTGAAGC  
CACGGCAACGGTGAATAAATTTGATTAA

>Cluster\_55649

ATGAAGATTCTTGTACCAGGTTGGTCAGGCTTTATCGGCTCTGCTGTAGTTTCGTCATATCATTGAAAATACCCGGGATGA  
AGTCCGCTGATGGACTGCTGACCTATGCCGGCAACCTCGAATCCCTGGCGCGGTTGGCCGGGAGCGAACGCTACTCCT  
TTTCCAGACGATACACCGATGCCGTGCCGTGGCGCCAGTTTCAGCGAGTTCGCGCCGATATCGTATGATCCTG  
GCGGCAGAAAGTCAATGTGGACCGTTCCATTGATGGCCCGCGGCTTCACTCCAGACCAACGTGATCGGACCTTCACT  
GCTGGAGGCGGCCGCTACTACTGGTCCGGGCTTGGGGACGCGAGAAGCAGGCTTCCGCTTCCACATATTTCCACCG  
ATGAGGTGTACGGCGACCTGCACGGCACCGATGACCTGTTACCGAAGAGACTCCGTAACGCCCGGAGCAGCCGTA  
GCTTCCAAAAGCGGGCAGCGACCACTGGTTCGCGCTGGAACCGCACCCTACGGCTGCGGTTGGTGGTACCACTGCTC  
CAACAATATGGTCCGATACCTTCCCGGAGAACTGATCCCGCTGACTATCCTAATGCCCTGGCGGGTAAACCCCTGC  
CGTGTATGGCAACGGGGAGCAGATCCGTTGACTGGCTGTATGTGAGGACCATGCCGTTGCGCTGTATAAAGTGGCGACC  
GAAGGCAAGAGCGGCAAACTACAATAATGGCGGTTCAACAGGCGTAAAAATATCGATGTGGTGGCCACCATGCGC  
CATTTCTCGAAGAGTGGTGGCGCAGAAGCGGCAACATCGCCACTTCTGCTGACCTGATCATTGTTGTCACCGGATCT  
CGGGACACGACCTGCGTTATGCCATTGATGCGCGAAAATTCAGCGCGATCTGGGCTGGTGGCGCAGGAGACGTTGAG  
AGCGGGATTGAAAACCGTGCAGTGGTATCTTAAACACAGGCTGGTGGCAGCGCGTGGTGGATGGTCTTATGCCCG  
TGAGCGTCTGGGCTAAATAACTGA

>Cluster\_22391

ATGAAATACGCCACATGCTTAACGACGATCAACGCTGGCAATCTGCTTAGCCCGGACTCGAATGCCGACGGCGAAT  
CGTTTTCCCGTGGCACCACGGGTATCTTTTTGCGCTCGCTTTCGCGAGCCAGACATGCCTTGGGGAAAATGCTCTCT  
TCTACGCAAAATCGCAGGAGCGCTTCCCGTGGCTTTCTGCTGCAAAACGTTGTCAGCCAGCAAAACGCAATCCCTG  
CAACATCGCCTTGAATAAATACCCAGCCTGCGGACTTCTGGAAACAGGAAACGCTTAACGCTGGAAGCCTTAGCCGA  
CCAGTGGCGATGAGTCCATTTCATTTGATCAGGTTGTTAAAGCGACTACCGGAATGACGCCATAAGCCTGGCAACAG  
CCTGGCGCGCTCGCCTTTGCGCGAATGCTGGCGAAAGGGGAGAGCGTACTACATCTATTCTTAACGCGGATCCCG  
GACAGCAGGATTAACCTACCGCAAAAGCGGACGAAAGCTGGGATGACCGCTAAACAATTCCTGACGGGCAAAATCT  
GGCGGTGCGTTACCGCTGGCTGATGTGAGCTGGGCCGTGCTGGTGGCAGAAAGTGGAGGGGATTTGCGCGATAT  
TACTGGGCGATGATGACGCGACTAATCAGCGAGTTACAGCAGATGTTTCCCGTGGCAGCAGCGCGCTTGTGATCTT

ACGTTTCAGCAACATGTGCGTGAAGTGATCGCCAGCCTCAATCAACCGGATACGCGCGTGACGTTACCGCTGGACATTCC  
CGGCACTGCTTTTTCAGCAACAAGTCTGGCAGGCACTGCCACGATACCTTGGCGTGAAACCGTCAGTTATCAGCAACTGG  
CTAATGCCATCGGCAACCGGAAAGCGGTACGGGCCGTTGCCAGCGCCTGTGCCGCCAACAGCTCGCTATCGTAATACCC  
TGTATCGGGTGGTCCGTTGGTATGGCACACTTTCCGGTTACCGCTGGGGCGTGTCCGCAAAAGCGCAACTGCTGCGCCG  
CGAAGCTGAAAATGAGGAAAGGTAA

>Cluster\_22762

ATGAACGACAATGTCACGCTACGGGTAAATGGCCGGGAGTGGAATGGCTGGACATCGGTGCGCATCGGTGCCGGTATTGA  
ACGGCTGGCGGGGATTTTCAGTGTGGAGATCACTCGCCAGTGGCCGGGAGATGAGGGTATCACACGCTTCAGCCGCGCA  
TTAAAAACGGTTCAAAGTGGAAAGTGTGATTTGGTGTGATGAGCTGGTGTATCACCGCTGGGTGGAGGCGACTCCCGTCCGT  
TACGATGCCCGTTCGGTACGACCCGGTATTGCCGGACGTAGTCTGACGGCTGACCTGATTGACTGTGCAGCCGAAACCGAC  
ACAGTTTAAACGGACGCTCGCTGGTGCAGATTGCCGAGGCGCTTGTGCCCTTTCCGGCATTGAGGTGGTGAACAGCGGTG  
CGCCGTCGGGTGTTATTCCTGATGTTACGCTGATCACGGTGAACCGGTGATTGAGGTAATCAACAAAATACCTCGGTGAG  
CAGCAGGCACTGGCTTACGACGACCCGCCACGGCAGGCTGGTGTATGGCGGTATTTGGCTCAACCGCGGACATACCTGCGCT  
GGTACTCGGGGAAAAATCCTTTCTGCGATACGGAGAAGATATCCGGGAGCGATTTTCTGTTTACCAGGTGGCGGGGC  
AGCGTGCCGGGAAACGACGATGATTTCCGGTGAGGCCACCCACCGCGCTGCCGGCCCGCACAGAGGACGCATTTATTGCC  
CGTTACCGTCCGATGATATCAGGCAGACAGGGCAGGCGACGGGGCAGGCTGTATTGCGCGTGTGACTTTGAAGCCCG  
ACAACGGGCGGCTGGTGAACCGATGAAACCTATTGTTGGTGCAGGGCTGGCCACAGGGTAACGGTACCGTGTGGCAGCCCA  
ACCAGCGGTGATTGCTTCCGATCCGGTCTGTGGTTTCGACAATACCGAACTGCTTGTCTCGGAAGTCAGTTCACTCAG  
GACCAGAACGGCACCATGACGGAATCCGTGTCCGCCACCTGATGCTTATCTGCCTGAACCCGAAGCCCGGCGCGCG  
GAAAAAGAAAAAGCCAGAGTACAGGAGACCCGTTCTGA

>Cluster\_17673

ATGCCGTTTCTGTTCCGGGCGTTGCTGAAAACACAGAAGCCAGCTACGTGATATCGCTAACGCCCTGCCGGGCGAAAC  
CATCGACACCGGCGCTGACAGCGATTACCGCATTCGTGCAAAATGCCGTATCCGGCGTGGCGGACGGACTGTATATGCATC  
AGGGTGGTACTCCGTCAGGTGTTTCCGATACGGCAGCCGTAATATCTGGAGTTGCACCTGCCGACCGCAATGTT  
TTTCGTA AAAAAGCAACGGCCTCATCCGGTCCGGCAGTGTATTACGGCACACCCGGTAAGACGCTGCCAGCCGGTGGCGA  
AATTCGTGGTGAAGGTGTGACCGTGGCCACCGCAGCAGACTGCACCGTCCGGTGTGAAGGCAGCGCAGAGGTGACGGTAA  
AAAGCACTGCCACGGGTGCACAGACGAATGCATCCAGCAGCAGACGGCAACGCTGGTCAAGCCACCTGAAGGCATCAAC  
AGCAGGTGACGATTAATCCCTGACCGCGGAAACGACGCGGAAAGCAGCGCCGCTGCTGGCGGTTATCTGGATAT  
TCTGCGCAGGCGCCCGCTGGCGGTAATAAATATGATTACAACGCTGGGCGTGGAAAGTGGATGGCGTTACGCTGCGGT  
ATGTGGAGCCGTTGCGTCTGGACTGGGACGGTGTGATGTGGCATTACGTCAGCCAAATGACCTCCCTTCGCGAGGAACGT  
ATTAATGCCGCTGCTGGCACATATGAGGAAGTCCGCCCGGTGACAGCGAAGGACACGATGGTGTGGCCCCGACGAAAAA  
AGCCGTTGATTTCCGTTGTCGGGTAAAAACCAAGTGGTCTACTGTTGAACAGATAAAAAACACAGATAAATGAAGTTATCA  
CGGATTTTATGAACCGGCTGGAGCCGGGCGAGGAATTAATTTTACAACCTGGAACCTCAGATTTTCAATTAATTTCTGGC  
ATCAGTGACCGGCAATTTATGCCGTGAGATAATGTAAAAGCAGTTGTCAATGAATCCACATGGGAGTGGTGGCTGCCGTC  
GGGAATATTGATATCCAGCCATTTCCCGGGAGAGTTAA

>Cluster\_66912

ATGACAATCGAGTACTTTGCAACACGCATTGCAAAACATATTTCCGTGACGGCAATCTGGCCGGATGGCAGGACAGAAAT  
TATTTGCCGTCCTTCCACGGGATGCCCTGTGAGGGCTGGTAAACAGGAAATTAATCAACTGATTCATATAGCCTTTGACGCCA  
TGGGCAACCGTAAACAGAGAAACCGTCTGATTGATAAACAGGAGCATAACGCTGACAGATATTCACGCTATTGATTTCC  
TGCCGCGCTTGAATACTGATGGAACCCGCTTCAGCAGAAACACCTTTGTTCCGCTGCAATAATCCGCGAGCTTGTACT  
GTTTCGTAATGGCAATGATTTGCCGCTCTCTGTTCCGCTATGTTGATCGTGTATTCTGGGATGATACACGCGCTGAAGCAG  
TACAGACGGCAGGTGAGCCAGCACTGCTCCCCCTCACCTGAATTAACCGCTGCCATTAATGAAGGCATTAACCTCCCG  
GTTACCCCGAAAAAAGAGCTCCAGGTACCGGAGAAAAACACTCAAGCAAAAAATCCGGAAAGCCGACGCTGCGGACATAA  
TCTGGCTGCTGTTCTGAAGCGGAAACCGGATCGAGGCAATGTTTACCCTCAACCTGTCACTCCGGTCAAGCAACCCCTTT  
ACGCAATTTCTGATTCCTGCTGTCTTAACCTGCAGACTTCTGGAGCCAGCTTAAAAACGCTGGCCAGCGACTTCAATGTC  
GTTATCTACCCGGTTTCAGTTATTTGGTGGAGAGGAATCCACCGACCGTGTGGCACCCTGCTGTGTGAAAAAGATGCTCA  
GAAACGCTGTCCCGCTGCGCACCGACTGTATTCCGCGAGATAACGGAATGATGACGCCATCAGAAACCAACCGCTGGCAG  
ATAAAACATGCTGAAAGCGGCCAGAGCTGCAATTTGATGTAACAATGTCCGCTTCCGTAAGTTCCGGATTTGCCGGTACC  
CCATGGGTGCTGTCCGACACCGGCTGGCATCTGCTACAGGAATCTGACAGGAACTGACAGGCTTAATTTATTCCTGAA  
AACCACCGACAGCGAGTCTGGCCATGAGTGA

>Cluster\_19350

ATGGCAGGTAAAGTTACGGAAACCGCTGTTGTGGGTGGCGTGGATACACATAAAGATCTGCACGTTGCCGCTGTCTGTAGA  
TCAGAAACATAAAGTCTTCCGGGACCCAGTTTTTCTCACAACACGGCAAGGTTACCGGAGATGCTGGCATGGATGACTT  
CGTTTGGGCAATTAAGCGAATTTGGTGTGAGTGTACAGGCACCTATGGATCAGGCTGCTTCCGCTATTTACAGAATGCC  
GGTTAGAGCTTCTTGGTGTGACTGCGGCAATCGGATCGGATCGGATCGGACGCAACCGGGTAAAAAGTGAACGATTTGATGCTGA  
ATGTGCCGCTCACGCCGATTTCTCCGGAATAAGAACCCTCACACCCAAACCGCAATGGCATGATTGAGTCTCTGCCGG  
TATTA AAAAATTTCCGAAAAACAGCAATATCAGCCCGCAGAGTCTGCTCCAGATTTATCCATTTCAATATTTATCTCTGCC  
CCGGATGAATTACGTGAACAGCTCAGAAATATGACCGCATGACGCTCATCAGGACTTGGGATCCTGGCGCTGATGC  
CAGTGAATACCGCAATGTTACCAACGTTTATCGTATTTTCAATTAAGTCCCTTGGCCGACGCTATCTCGAGTTACATGACG  
AAATCGCTGATTTGGATGTCATGATTTGCCGCAATTTGTCGATGAGCTGGCGCTGAACGATTAACAGTAAATGCTATTGGA  
TACGAAAGCGCTTCCGAGTGTGATCACGGCAGGAGCAATCCCAACGATTAAGATCAGAAATCAGGTTTGGCGCACT  
GTGTGGTGTGACCGCTGTTCCGATCTTCCGAAACCAAGCAATCGTTATCGACTTAACCGGGTGGAGATCGCTGCTGCA  
ATAGTGCATTTACATCATTTGCCATCGGACGTTTTCGAACTGACGATAAAAACGAAAGGAATATGTGCCAGACGAGTAGCG  
GAAGGGCATAAAAAATGGAAGCAATACGCTGCTGAAGCGCTATATCTCACGGAAGTTTATACATTTACTGCGTAAATCA  
AAACAGGCAGATCAACAGCATCCCGATAACGGCTTGA

>Cluster\_24868

GTGAGCAAAAATAGAATCTCTTTATGGTTTAAAAAACACCAACAGGAAAGAGAGCGATCTGTGGGAAAGAAACCAATTTAA  
CAGTTCTTTTCCACCTCTCTAGCATGTATATGAGAGACAACAAAATGAATCCGATTTATCTTTATTAGATAAGGATTT  
TAAAAGTGCATGCCAAAGAAGTATCTTTTGACTTCGTTTTTAAACAACATTA AAAAATAGTGATCTTGAATTTCAATTT  
GAGAAAAAATATGAAACCATCAACAGATGCTTATGATGACATAAAAAGGAATAGATAGTTATAAAAAGGAAACAAATAG  
TTTTTTAAAAGCACTAGAAATAAAATTAACCGTACTCCAGATAGCACGACATATAAAGAAAACGAGAGCGAATGGAGTT  
CAGAGATTTGAATTAAGACCTGCAAGCACTTCTTATTGTGCCCTTGGGCAATGCACTCTTGCAGCGATAAATCCATGAA  
ATAAGAAAAATTTGAATCCCATGCGAAAGCATACAGCACTGGGGAAATGAAACTGAAGTTCTTTCAAAAGAAAGAAAA  
TATATTAATTTGCTTAAACACTTTTCCAAGAAAAATTTCTTGTATTACCAGAAACCTTTTTTAATGCAACCATTAAGAAAA  
CAAAGGCCAAGAGCCCAATATTAGATCAAAATGCCTTTGACATATTCATCTGGAGTGAATTTGCTTTGTGTCGACCTTT  
ATTTGATAGATCTCATATAACAATTCATCTGCCAGCAGATAATGAGATCATCAGCCAGACTGCCAGAAATGGTGTATGA  
AATTTGCGAGCAAAAACAGACAAAACATCAATAGAAATTTATACTGAGATGAACCTTTGGATATCAAAGTGAATAAGGATTTCT  
CGTAAACGGAAAAATAACAAAAGCTTATATGGATCACCAAGAAAGCAAAAACCCATCTCCACCATCAGTATTA AAA  
GAAAATAATTTTAAATGGCGGGCAAAAATAAATTAAGCCAGAGAGACGCTTTGATCAAAGCGTTTATTACTGCATCTCA

CCTGTTTGATGAAATAAAGTAA

>Cluster\_60365

ATGGCGTATCGCATTTTCTCTCTTTTTTTTTTCGCTTTGTTGCCGACGCTTTGGTGTGGGGCCACCAGCGCAACGGGC  
GTTTTTCGACTGGCAGGTACCTGTAATAACCAAAAATTTCTGCGTGGCGCGTAATACGGGCGATCATAATGGACTGGTGA  
TGACCTACCGCGTGGATCAAGAAAGGGGCGCATACCGATGCCGTTTTACGTATTGAGCGCGCGGATGAAGTCCGGAGGG  
TCAGAAGGGGAGATAGCGCCACGGCTGCTGTTAGATGGCGAGCCGTTGGCGTTAAGTGGTGACAAGTGGCGGATTTACC  
ATGGTTATTAGTAACCGATGATACGGCAACCATCACCGGTTTTTGCAGATGATTGAGAAAGGAAGCAATCACCTTAC  
CGGATGGCGATCAGACCATTCTCTGAGTGGCTAAAAGCAGCGTTGTTGTTTTATTGATGCTCAGAAAAGCGCGTTGGC  
AGTGAACCGCGTGGATCAAGAAAGGGGACGAACCGCGCTCAGCGTACCGCCCGCGCTGCGCTGAAAGAGGTCCGCGT  
GGTTAAACCAACGCCGACCCACTCTCACTCGAAGAACGAACGATTTGCTGGATTATGGAACTGGCGGATGAATGGTC  
TGGCTGCTCGCTTGATCCATTGCGTCTGAGGTGAATGTCACGCGCTGACTGATGATAAAGCGCTGATGATGATTAGC  
TGTGAGGCGAGGGGCTATAACACCATTTGATTGGCATGGATTGTTGCGGTAAGAAAGCCACTAGCTTCGCGCCGGTTCCG  
GTTTCGTTTTGCGGTTCAACCAACCGTTCAGGAGCAAGTGAACGAACTGAACTGATGAACGCAACATTTGATGAGAAATCGCGT  
AACTGGTGACCTTAGCGAAAGGGCGGGATTAAGCGATTGTTGGCATTCAGGCGCGCTGGCGTTTTGACGGTCAGCGTTTT  
CGCTGGTGCCTTAGCCGAGAACCCACTGCGATAACTGGCATGGGCCAGACGCTGGCCACGTTGTGGATCACCCG  
TTAA

>Cluster\_41088

ATGACAGATATTGCGCAGTTGCTTGGCAAAGACGCCGACAACCTTTTACAGCACCGTTGTATGACTATTCCTTCTGACCA  
GCTTTATCTCCCGGACATGACTACGTAGACCGGTGATGATTGACAAATAATCGCCCGCAGCGGTGTACGTAATATGC  
AGACGTTGTACAACACCGGCGTCTGGCTGGCACAGGATATCTTCTATCTGCGCGTTGACCAGGCGTTGAGCACTCT  
GCCGAGCTTCAATTTGCCGCTAACCCGCTCTACTTTGACCCGAAAAACATTTGTTGAACGCGCATCGAAGCGGCTGTAA  
CTGTGTGGCGTCAACTTACGGCGTGGCTGGCATCGGTATCGCGCGTTACGCGCATCGCATTCATTCCTCGTCAAACCTTA  
ATCACAAACGAGACGCTAAGTTACCCGAAATACCTACGATCAAACGCTGTATGCCAGCGTGGAGCAGGCGTTCAACATGGGC  
GCGGTGGCGGTTGGTGGCTATCTATTTGGCTCGGAAGAGTACGTCGCGCGGCGGTTGATAAACTCCGCGGCTTTGA  
ACGTGCGCACGAGCTGGGCATGGTGACAGTGTGTGGGCTATTTGCGTAACTCCGCTTAAAGAAAGATGGCGTTGATT  
ACCATGTTTCCGCGACCTGACTGGTCAGGCGAACCATCTGGCGCAACCATAGGTGCAGATATCGTCAAACAAAAAATG  
GCGAAAAATAACGGCGGCTATAAAGCGATTAATACGGTTATACCGACGATCGAGTCTACAGCAAACTGACCAGTAAAA  
CCGATTTGACCTTACGTTATCAGTTAGCTAACTGCTATGGCGCGGCGGTTGATAAACTCCGCGGCTTTGCGGCTTGA  
GCGGTGAAACTGACCTCAGCGATGCAGTGCCTACTGCGGTTATCAACAAACGCGCAGGCGGAATGGGGCTGATTTGGA  
CGTAAGGCGTTCAAGAAATCGATGGCTGACGGCGTGAACCTGATTAACGCCGTCAGGACGTTTATCTCGATAGCAAAAT  
TACTATCGCCTGA

>Cluster\_1975

ATGAGCGACAACATCCGTTGGGTTGATTGGGTATGGTTATGCGAGCAAAACCTTCCATGCGCCCTGATTGCGGGCAC  
GCCCGGGTGAACCTGGCGGTAATCTCCAGCAGTGTGAAACAAAAGTAAAAGCCGACTGGCCAACGGTTACGGTTGTCT  
CTGAGCCGAAGCATCTGTTTAAACGATCCCAACATAGACCTGATTGTCAATTCCTACACCAACGATACCCATTTCCCGTTA  
GCCAAAGCGCGCTTGGTGGCTTAAACATGTGGTCTGTAATAAACCTTTACCGTGACACTGTCGAAGCGGAGAGCT  
GGATGCGCTGGCAAAAAGCCTGGGGCTGTGCTGTCTGTATTCCATAACCGTCTGGGATAGCGATTTCTTGACGCTAA  
AAGTTTTACTCGCGGAAGCGTGTGGTGAAGTTGCTTACTTTGAGTCTCATTTGACCGCTTCCGTCGCGAGGTGCC  
GATCGTTGGCTGTAACAGGGCGGCCAGGACGCGTATCTGGTACGATTTAGCACACATCTTCTTGTATCAGGCCATTAC  
GCTTTTTGGTTTTACCGTTCAGCATGACGGTAGATTTGGCAGAGTTACGGCCCGGAGCGAGTGCACCGATTAATTTCCAGC  
CCATCTTGTCTTACACAGCGCGAGTCAATTTACACGGTACCATGCTGGCAGCGCTGAGTGCAGCAGGATATATCGTG  
CATGGATCCCGAGGCACTTATGTGAAATATGGCCTCGATCCACAGGAAGAAGCTCTGAAAAATGGCAGCGCTCTACCGCA  
GGAAGACTGGGCTTACGATATGCTGTAGTGGCTACTTCCCGCTGGAAGGTGAGGAACGCTGTCGAAGAAAGTTCGTTGA  
CGGTGCTGGGAATATCCGCTTACTATGCGGCTATTCGTGATGCGTTAAATGGCGATGGTAAAAATCCGGTTCCGGCA  
AGCCAGGCAATCCAGGTAATGGAGTTGATTGAGCTGGGCATCGAATCCGCCAAACATCGCGGACTTTGTGCTTGCATG  
A

>Cluster\_3336

ATGCAATATCACCGTATACCCACAGTTCGCTGGAAGTCAAGCAGCTGGGGCTTGGCACGATGACGTTTGGTGAACAGAA  
CAGCGAAGCCGACGCCACAGCAACTCGACTATGCGGTCGCTCAGGGCATTAACTTATCGACGTTGCCGAAATGTACC  
CAGTACCTCCGCGCCCGAAACGCAAGGGTTAACCGAAACCTACGTCGGCAACTGGCTGGCGAAACATGGCAGCCGCGAA  
AAGTTAATTTATCGCTCCAAAGTGAAGCGGCTCGCGCAATAATGACAAAGGCATCCGCCCGGATCAGGCGCTGGATCG  
GAAGAATATCCGCGAAGCGTGCATGACAGCCTCAAGCGCTACAGACTGATTACCTCGATCTTTATCAGGTGCACTGGC  
CGCAGCGCCGACCAACTGCTTCGCGAAACTCGGTTATAGCTGGACGGATTCTCGCCGTCGCGTTTCCGCTGCTGGATAGC  
CTGGACGCACTGGCAGATTACCAACGCGCGGAAAAATTCGTTATATCGGCGTGTGCAACGAACTGCATTTGGCGTAAT  
CGCTACTCGCTTGGCGGCAAAACAGCATCTGCCGCTATTGTACCATTAGAACCCTTACAGTCTGTTAAACCGCA  
GTTTTGAAGTAGGCTGGCAGAAGTCAAGCAGTATGAAGGGTCAAGTGTGCTGGCCTATCTCGTGCCTGGGTTTCCGGCAG  
CTGACCGGAAATATCTCAATGGTGCAAAACCCGCTGGCGCAGTAATACGCTCTTTAGTCCGTTACCCGCTATAGCCG  
TGAGCAACGCAAAAAGCGTCCGCGGCTATGTTGATATGCCAGAGCTATGGCCTGGACCTGCTCAGATGGCGCTCG  
CGTTTGTACCGCTCAACCGTTTTGTTGCCAGCACTCTGCTGGCGCAACCAAGTGGATCAGCTGAAAACTAACATCGAA  
AGTTTGCATCTGGAGTTAAGCGAAGACGATTAGCTGAAATTAAGAGCGGTGCATCAGGTTTATACTTATCCGGCACCAT  
A

>Cluster\_41611

ATGGCGGACAGTGAATTTACAGCGCCGACGCTGGCAGAAAATATCAGTATGCTCCGTAACGATTTATTCGCCAGGCTGGA  
CGTCAGCGACACGCTCCGGCGCATGGATGAAGAGCTGCGGGCAAGGTGTATGCGCGCGCGCTGCATACGGTTTACGGTT  
ACATCGATTATCTGGCAATGAACATGCTGCCTGACCTGTGCGATGAGTCTGGCTGGCGCGACATGCTGCGATGAAACGG  
TGTCCGCGCAAGGGGGCCACGGCTGCCAGCGGTTATATCGCTGGGAAGGTGTGAGCGATGGCCTGAAGGTTACCGCCG  
GAGTGTATTATCAGCGCATGACCTGGTTCAGTACACGGCAACTGCCGATGCAACAGCTCCGGTGGTGTCTGCGCGTGC  
CGATCGCCTGCTCAAGTGCAGGTGCGGTCGGTAACCGTACGACGCGGTACGGCATTAATCCTGGTACGCGCGGTGAATGTT  
CTGCCGCTTTCGCTGTTGGCTGACACCTTACAGGCGGATTTGATACTGAAGAGCTGGAAACGTTGGCGCGCCGCTCAT  
TGAGCGGTTATTACTGACGCGCTCAGGCGGGGCTGACGGGACTATGCTGCTGGGCTAAAGAAAGTGCAGGCTTACCC  
GCGCATGGACATACCGTCACTGGATGGGAACGGGAACCTGCTGGTGTGATGATTGCCAGCAGTGCCTGATTAATCCCAT  
CCGGAAGAAATCAACGGAACGGCAGCAAGACAACATATCTGCTGCACTGGCCCGGTTGGCAGGCTCTGATTTGTATGAT  
CAGGCGGTTGGCACATACGGTGGATTTTCAATCCGCTGACGCGGACACACCAGAAATACGAGCCCATCACCGCGG  
AGTTGCGTTTCGTTTTCTGCTGATGGTTATCCGAGGGAAGTGAAGGTTATCGCTATCAGTGAGGCGATTTCCGCT  
GCGAACGGGAATATAGCCATCAGTTGCTTGCACCGCGCAGACAATATCTCCATTCGAAAAATGAACGCGGTTCTGG  
GACGATTTTATGACGCTGA

>Cluster\_48507

ATGAAAAAAAATCAGTTTAAATATACGGTGTAGTATAGTGGCTATGGGAAATCTTTAGTAAAAAGGTTTAGGGAATTAGG  
ATATAGTGGGAAGTTCTCAGTTTTTTTTGGTGTAGGTTTCAAGCAACTAAAGAGCGGGTTAATATTACAGGCAATAATA

AATTAACAAAATGCTATCTTTAATAAAAATATTACCAAAAATATTAATAATAAGAATATATTGGTTATGAACCCGGAG  
TTTTTTAATTTTAAATTTAGGGCCATTAATCCTATTGTTATTAAAGTAACAAATAAGAACATTATATTACTTTGTTG  
TGCGGATGATGTAGAGTTTATAAAAAGAGGTAAAAGTGGTGAAGTACCAAACTGGCCATACATAGATATACCATTACCTA  
AAAAAAGTACTATAGCCGGAAAGTGTACTTTTTATTAACTATATTGTTGCGTCCCTCCGCTAATAAAAATAAATTCCTGTC  
ATGTATGATTTATAGTAAAGCATGGAGATTATCAGGATTTTACATAAAGTAACAGAAACCATACCATTAGCATGTGATGG  
TAATCTACAAACCATTTCTTTAAAAAATTTAGCAATGAAAAAATAGTCAATTATGCACGGCATTAATCGTGAAGGATTCA  
AAGGAACATAAAATAAAAAAGGCATTATCTGAAATAGAGAGAAAATATGGTATAGGGTCAAAATTAATTACCAGAA  
AAATACCTTTTGTGTAATATCTTAAAGTCATGGAGTCTGCTGATATCGCTATGACCAAAACCAAGGCAACTCATATGG  
AATGAATGCAATAATAGTATGTTTGCAGGGCATATTGTTTTAGCTCCCTGCTAATGATATGTTTAAACCGCAGCTTATCAG  
TTAAAACTGCCCTATTATCACAAATAAATAGTGAGGATTCATTTTATCAACAATTATCGTTATTGATTAATAACTAT  
GGTTAAATTAATAAACTAAAGAAATGAAACTCAATCATATGCGCTTACCACACACGCGCTAAATTAATGTCAGAAAAAT  
ATCAAAGTACTTAAACTGA

>Cluster\_23145

ATGCTACGCGAGTGTGATTACAGCCAGGCGCTGCTGGAGCAGGTGAATCAGGCGATTAGCGATAAAACGCCGCTGGTGTAT  
TCAGGGCAGCAATAGCAAAGCCTTTTTAGGTGCTGCTGACCCGGGCAAAACGCTGGATGTGCGTTGTCATCGCGGCATTG  
TTAATTACGACCCGACCGAGCTGGTGATAACCCGCGCTGCCGGAACGCCGCTGGTGGCGATTGAAGCGCGCTGGAGAGC  
GCCGGCAAATGCTCCCTGCGAGCCACCATTAATGGTGAAGAACTACCTGGGCGGGGATGATCGCTCCGCTGCGCGTGC  
GGGCGCGCTGCGCCGTTGGAGCGGTTCCGTTCCGCTGCTGCGCAGTTCCTGCGCACCGCATCATACCAGGACTGAAAAACATC  
TGCGTTTTGGTGGCGAAGTGTGATAAAAAAGTGGTGGGATACGATCTCTCACGGTAAATGGCCGGAAGCTACGGTTGCTG  
GGTGTCTACTGAAATCTCGATGAAAGTGTACCAGCACCGCCACCTGAGTCTGCGTGGGAAATCAGCCTGCA  
AGAAGCCATGAATAAATCGCCAGTGGCACTCCAGCATTACCCATTAGTGGCTTATGTTACTTTCGACAATCGCTTGT  
GGATCCGCTTGGAGGCGGGAAGGATCGGTAAAAGCAGCGCTGAACGCTGGTGGCGAAGAGGTTGCGGGTCAAGTTC  
TGGCAGAAATGGCTGAACAACAACCTGCCGTTCTTCTGCTTCCAGGTAACCTTATGGCGCATTTCAATACCAGCAGTGC  
GCCGATGATGGATTACCAGCGGAGCACTGATCGACTGGGCGGGCGGCTTACGCTGGCTGAAATCGACAGCCGAGGACA  
ATCAAATCCATCGCATCGCCGCAACGCTGGCGGTCATGCGACCCGCTTATGTCGGGAGATGGTGGCTTGGCCCGCTA  
TCGGCTCCCTTATTCGCTATCACAGCAGCTTAAACAGCAGCTGACCCCTGGCGGCTGTTTAAATCCCGGTCGATGTA  
CGCGGAGCTTAA

>Cluster\_42535

ATGAATATATATATCGGATGGTGTGTTAAATTAATTCCTTTGCTGATGGGTATAAATATGCATCGCATTAGGTGTGTTTGT  
ATTAACCACTTCTGGGCAAAGTGAATATTTCTGTCAGGGCATGTTCTGATTTCTTCTGCGATATGCTGGCATTGTT  
TCACTACCGCATTTATTTATATATCTCAGTTAACTCACGGCATGAATAAATTCACAACAGGTTATTTCTGTTATTGGT  
TATGCCGGTCTGCTACAACATGATTTGGGATGGTCTACTGTTGGCAAGCAATAATGTGATGGCAGATGAATTTGCTCC  
CGGTATGTTATTTTGGCGTGGCATGATGGCGCTTGTGATCAACCGTAGCGGCATCTCCGGACATTTCTGTTGA  
TCCCCAAAACGCCCTCGGCAGTAAAGTGAAGGATGACGGCATTGCAGGCTATTTCTTCAACAATCGGTAAATGCTTAAAT  
GCCGTTCCCGTTCTGCTTACTCTCTTTGGTTTTCATTTGGTCACTACTGTTACGTAAGTGCAGATATCACACCACATTA  
TGTTGFCAGTCACTACTAATGGGATTAACGGCAATTTGCGCTTGTCTTATTGGCCTTGTGCGCATTTGTCATGCAAAA  
CGCGGAATACGTTCTCAGTGAAGAACAATGGCTGTGGTGCTATTTGGGTTATTTTGTCTGGCTCACTTACCATTATTTTT  
GGTATCTACGATTAATCAGTTCAGATGCAAGCGCCCGCTGGCCCGGCAATTTCTTCAATTTGCCCTGGGGATGATCTG  
CTACAGTATTTTCTCCAAAGTGTGGTGTAGCGCTGGTATGGCGACACATGTTCCGTAAGCAAGAATACCCATGA  
TTCCGGTATTTACTGCTGTTTTGTCTGTTCTTGTCTGCTGCTTCCGCTTCCGCTGAAATTCGCAAAACCGATATGGCTTACTTT  
ATTCCTTCGGGATCTGTTGGCTTAGGTGCAGTTTGTTTTACTGTTTCCATCGTTTCTATATTAGAAGCGGGTTC  
AGCGAAAAATAA

>Cluster\_35205

ATGCTGAAAACCGCAAAAAAGTAATCGTGGCATGTCGGCGGTGTCGATTCTCCGTTTCTGCCTGGCTGTGCAACA  
ACAGGGATATCAGTCTGAAGGCCGTTTTATGAAGAACTGGGAAGAAGACGACGGTGAAGAAATATGCAACAGCGCAGCGG  
ATCTGGCTGATGCCAGGCTGCTGCGACAAGCTCGGCATGAACTGCACACCGTTAACTTTGCTGCCGAGTACTGGGAC  
AACGCTTTCGAACCTGTTCTTGGCGAATATAAAGCCGGTGCACGCGCAATCCGGATATTTCTGTGCAACAAAGAGATCAA  
ATTTAAAGCCTTCTCGAATTTGCGCCGAAGATTTAGGTGCCGATTATATCGCTACCAGTACGTTACGTCGGGCGG  
ATGTCGATGGCAAGACGCCCTGCTGCGTGGTCTGGACAGCAATAAAGACCAGAGCTACTTCCCTTATACGCTCAGCCAT  
GAGCAGATTGGCAAAAGCCTGTTCCCGTGGCGAACTGAAAAACCGCAGGTGCGTAAGATTGCTGAAGATCTTGGTCT  
GGTCCAGCGAAGAAAAAAGACTCTACCGCATTTGCTTTCATTGGCGAACGTAATAATCCGCGAGTTCTTGGGCGTTATC  
TCCCGGCGCAACCGGCAAAATCATTACCGTCGATGGCGATGAAATTTGGTGAACACAGGGGCTGATGTATCACACTCTC  
GGTCAAGCTTAAAGTCTGGGTATCGGTGGCACCAGAAAGGATACCGAAGAACCGTGGTATGTGGTGGCAAAAGACGTCGA  
AAACAACATTTCTGTTGTCGCTCAGGGCCATGAACACCGCGGCTGATGTCGTCGGGTTGATTGCCAGCAGTTGCACT  
GGGTCAGTATTTCAACCGCTTACCGGCATATGCGTTGCAAGTAAAAACCCGCTATCGCCAGACCGATATCCCTTGACCC  
GTCAGGCGCTGGACGATGATCGCATTTGAAGTGAATTTTCGATGAACCGGTTGCGCGCTGACGCGGGCCAGTCTGCCGT  
CTTCTATAACGGTGAAGTGTGCCGCGTGGCGGTTATTAATGAGCAGGCTGCGCGCTGCGGCTGCA

>Cluster\_42582

ATGAATGTGTTGCGTAGTGGACTCGTGACGATGCTGCTGCTGGCTGCCTTTAGTGTTCAGGCAGCCTGTACTGGCCTGC  
CTGGGAGCAGTTTAAAAAGGATTACATCAGTCAGGAAGGGCGCTCATCGACCCAGCGACGCGGCAAAATCACCACCT  
CCGAAGGGCAAAGTTACGGCATGTTCTTTGCCCTGGCGGCTAACGACCGTGCAGCTTTTCGATAATCTTCTCGACTGGAGC  
CAGAACAATCTCGCTCAGGTTCTTTAAAGAACAATTTGCCCGCTGGCTGTTGGGCAAGAAAGAGAAAGATTAAGTGGGA  
AGTGTGGACAGCAATTCGGCTCCGATGGTGTGCTGGATGGCCTGGTCTGTTGCTGGAGGCGGGGCTTTGTGAAAG  
AGCAGGTTATACCGACATCGGCAGCGCATTTGCTAAAACGATATCGCGGGGAGGAAAGTGGTGAAGGCTGCTGGGCTGGGT  
TCCATGTTGTTGCCGGCAAAAGTGGGATTTGCGAGGATAACAGCTGGCGTTTTAAACCCAGCTACTTGCAGCGCAGCCT  
GGCCAGTATTTCAACCGCTTTGGCGCGCCGCTGGACTACGCTGCGCAAAACCAATCAACGTTTTATTACTGGAACCCGCC  
CGAAAGGCTTTTCCGACAGCTGGGTGCGCTATGAGAAAGCAAAAGGCTGGCAGCTAAAAGCCGAAAAAACATTGATCAGC  
AGCTACGACGCGATCCGCGTTTACATGTGGGTAGGCATGATGCTGACAGCGATCCGCAAAAGCGCGGATGCTCAATCG  
GTTTAAACCGATGGCGACATTCACCGAGAAAAACGGCTATCCGCCAGAAAAAGTGGATGTGGCTACGGGAAAGCGCAGG  
GTAAAGAACCGGCTCGTTTTTCTGCCCGCATGCTGCCCTTTTTTACAAAACCGGATGTCACAGGCGCTTACAGCCGCG  
GTGGCCGATAACTTTCTGGCAGCGATGCCATTTACAACATATGCTGCTGACCCGTTTGGACAAGGCTGGGATCAACACCG  
TTTTCCGCTTCTCGCAAAAAGGTGAGTTATACCTGACTGGGGCCAGGAATGCGCAAAATCACACTAA

>Cluster\_32337

ATGAAAGGACGTTGGGTAAGTACCTTCTTATGGGCACGGTTGTGGCAATGCTTGGCGCTGCTTCCAAAACCAACCGA  
TCGGGACAGCAATATAAGACGGGAAATTTACCCAGCCTTCTCTCTGGTGAACAGCCAGATGCCGTTGGCGCGCGGA  
TTAATGCCGGTGAATTTGGCGAGCAAAATTAACCATATCCGTAATTCGTCACCGGCTGCTGATGGCAACAGAGTAATGTT  
TATAACCGGTCGAAGAGTGGCTGGCGAGCGGATGATACCCGCAATATGCGCCAGTTCCGGCATTGATGTCGCTGGCAGAT  
GGAAGGTGTCGACAACTATGGTAACGTCAGTTTACAGGCTATACACCGGTAATTCAGGCGCGCCATACCCGTCAGG  
CGGATTCAGTATCCGATTTACCGTATGCCGCCAAAACGTTGGTCTGCTGCGGCTGCTGCGGAGATCTACGACAGGAGC

CTGAGTGATAAATATATTCTCGCTTACAGTAACTCCCTGATGGATAAATTCATTATGGATGTGCAGGGTAGCGGGTATAT  
CGACTTTGGTGATGGCAGTCCGCTTAACTTTTTTCAGCTATGCAGGGAAAAACGGTCATGCCTATCGCAGCATTGGTAAGG  
TGTTGATCGACCGTGGCGAAGTGAAGAAAGAGATATGTCGATGCAGGCGATTGCTCACTGGGGCGAAACACACAGTGAA  
GCTGAGGTTTCGGAGTTGCTGGAACAGAACCCGCTTTTCGCTTCTTTTAAACCCCAATCTTTTGCACCGGTGAAAGGGG  
AAGTCCGGTGGCGTGGTGGCGGTGCTTCTGTTGCTCCGATCGTTCATTAATTCGGCCAGGTACCTGCTGGCGAG  
AAGTCCGGTGGTGGATAAATACGGCAAATTTAACGGTTCAGTACGAAATGCGTCTGATGGTGGCGCTGGATGTCGGTGGC  
GCAATCAAAGGCCAACACTTCGATATCTATCAAGGGATCGGGCGGAAGCCGGACACCGCGTGGTTGGTACAACCCTA  
TGGACGTGTCTGGGTGCTGAAAACCGCCCGGGCGCAGGTAACGTCTTTAGCGGCTGA

>Cluster\_40692

ATGCGAGGGAAAAACGCATTGGGTTATTGTTTTGCTGATAGCGGTTGTTGGTGGTGGCGGGGTTATTGCTGGCGCA  
AAAAGCCTTACATAAAACGTCGGATACCGCATTTTGCTTTCGCTCGACTCGATGAGTAAACCTTTTGGAGAAATACAGG  
GAACTGTCCACTTTTCAAACAGAAAGGATACGTGCGGAATGTCGGATTGCCATATTCAAAGTCAGGGATGGATTAT  
TTAATTTGCTAAATTAAGCATCTAAAGATATTATCATGAAATTTGTTAGCGGCAAAAATAGACAGTACGATAAGTTCGA  
AGCTCATCGCCAGGAAATGGCCGAAACAGTATGGAAGAATTAAGCAACTGACTCTGCAACCTGCCGTAGTTGCCATT  
CTTTTGTATGCCATGGATATTGCCTCGCAAGTGAATCTGCGCAAAAAATGCATAATAAAGCGCAAAAGACGGCGAAACC  
TGTATCGATTGCCATAAAGGCATTGCCATTTCCGCCAGAAATAAAAATGGATGACAACCGGGCGCATGAGCTGGAAG  
TCAGCCCGCTACTTCACTAGTACTAATGGCCACATATTTCTTCAAACCTTCTCGCATAGGCGAACTGCCGTTCCGTTGA  
CTCCTGGTACCGATCTTACCGTCTGTGATGCCAGTGGCAACAGCCAAATGTTTGGTTCAGGGTTATCAAATGCAGGGC  
AGTGAACACAGCTTACCTGGCGCAGGCCAACGGCTGGCGCTCGCCACATTAAGTGAAGAAGGTATCAAGGCTTAC  
GTTAAACGGGAAATGGCAGGCTGACGAATACGGCAATCAATGGCGTCAAGCGCTTTTGCAGGGGGCGTTATCGATCCCG  
CATTAGCGGACCGTAAACCGCTATGGCAATACGCTGAAAAAATTGACGGTACCTATTGCGCTGGCTGCCATGCCCTATT  
GCCGCGACCATTAACCGTCAATACATGGCCGTCATTGCCAAAGGAATGGGGGGGCAACCAGCATGAGCGAAACGA  
ACTGGACATTTTGCAGCGGTACTTCCAGTACAACGCCAAAGATATTACCGAGAAACAGTGA

>Cluster\_20822

ATGAAAAAGCGGAAAAACCGTGAAGAAGCGTTACGTTATTGCGATGGTATAGTATCGCCGGGCTGATTACGTTATGGAG  
AATTTTAAACGCACCCGTCGCGACTTATCAGACGCTGATTGTGCGCCCGGTGATTTACAGCAAAAGCGTGTGGCGACCG  
GAAAGCTGGACCGCTGCGTAAGGTTGACGTGGGCGCGCAGGTGAGCGGTGAGTTGAAAAACGCTGTGGTGGCGATTGGC  
GATAAAGTAAAAAGAACACGCTTTTAGGGTTATTGATTCGAAACAGGCTGAAAAACAGATCAAGGAGGTGAAGCAAC  
GCTGATGGAGCTACGCGCGCAGCGCAGCAGGCGGAAGCGGAGCTGAAACTGGCGGGGTGACGATTTCCCGTACGCAAC  
GTCCTGCACAAACGCAAGCGGTTTCACAGCAGGATCTCGATAACGCGCGACGAGATGGCTGTGAAACAGGCCAAAT  
GGCACCATTGACGCGCAAAATCAAGCGCAATCAGGCCTCTCTGATAACGGCTAAAAACCAATCTCGATTACACCGCATCGT  
TGCCCGATGGCCGGGGAAGTCAAGCAATCAACACTCTGCAAGGCGACAGCGTATTGCCGCAACAACAGCACCGAACA  
TTCTGACGCTGGCAGATATGAGCACCATGCTGGTAAAAGCGCAGGTTTCTGAAGCGGATGTAATCCACCTGAAGCGGGG  
CAAAAAGCCTGGTTTACCGTGTTCGGCGATCCACTGACCGCTACGAGGGGCAAAATCAAGGATGTGCTACCGACCGCGA  
AAAGATTAACGACGCTATTTCTATTACGCCGTTTGAAGTACCCAAACCCCAATGGTTTACTGCGGCTGGATATGACCG  
CGCAAGTGCATATTCAGCTACCGATGAAAAAATGCTGACGATCCCTCTGTGCGGCTTAGGCGATCCGGTTGGCGAT  
AATCGTTATAAAGTCAAATGTTGCGTAATGGTGAACACGCGAGCGTGAAGTACGATTTGGCGCAGTAAACGATACCGA  
TGTGAGATTGTCAAAGGCTGGAAGCGGGCGATGAAGTGGTATTGGTGAGGCCAAACAGGAGCTGCGCAATGA

>Cluster\_63653

ATGATGCAAAACCGTGAATGAACGGCTGCGTATGAATCAATTGCTCATGCAGTCTGGATATCCCGCTATAGCACTGGCGT  
GGCTGCCAGAATGGTGAATAATGAAATGACAGCGATGCGGAACCTACGCTCGCTGCTGATAGCACGAGCAGCCTCG  
ATCCAGGTAATTTTACCGTTAAGCGCTGGAGTCACTTCTGGCGAGCGTCAGAAAGGTTAACCAGCTGCTATTAACAGC  
ATGTTTACCAGTCTCTCCGAGAGCTGAACGAGTGGCAATTTATGAGGCTGGTTATCAGTAAAGTCTGTTGATTTCT  
GCTACCTGATTTTGTGCTGATGTTACCCCTCTGGTTGGTATCTCTCTGATGCACTTTATGCCGCTGCAATGGCGGAC  
CATTCCAGGGACGACTGCTCAGTGAAGTGGCCCTCAGATCTTGAAGCGGATCGGCTCAGACGCAATAACAATACAGTGCCT  
CAGGGTTTTTGTGTTGGGGATACCAATGAGCAGATCGCAAGAAAAATTCGGGGACATGTCAGTAAAGGATTTCAAGATGG  
TGCAATGCAAGATGAGCCGGCTAATGCGCCAGCATTTGCAAAAAACAGCGGTTGGACATCTGCTGCTACTGCCCTGAGA  
GTTTTGCCAGCGCAATAATGATTTGATTAAGGGTAAGCAATGGTTATCAACGCTTGATAATCGTACTACGCCACAATGT  
CGAATCAGGGATCCGCTCAAATATACGCTGAATAATAAACCTGTAGGTACAGCGTGCCTTATTTGCAGGGGGCGGGAAA  
AATTCATTTCTGCTGCCGCTCAACGGAAACGTTCAATTCGAAATCAGCGAAGGAACTGGGTATTGATGTTCCGATATT  
CCCCGCTGAGCGGGCAGCATGGATGGCGTGGTGGCCGGATACAACCTACAGGGAATGGTTTTTGGCTGCTGCCCTTAC  
ACCAGAAAAACAGATTTGTTGGGGAAACCCGAGCAAAGCTGATTCGGGATGGTGGTATGTCGCCAGATGAATTTTACAC  
CGATAAAGGCGAATGGCTGACGCTGAAGCAGCTCCGTGAGCGTATGCACAGGATTTAGAAAAGCAGGGATTTAA

>Cluster\_41106

ATGAACGAACAATCCAGGCCAAATCACCAGAAGCCTTGCAGCAATGGTGCAGGGGACACTGGCCAATTTTACGACACC  
AACCTGAAGCATAACCTCACACGCTGAAAGCCTTGCACCATTGTCGCTGGATGGACGACACGCTGCATGTGGAACCTGG  
TTATGCCATTCGCTTGGCATAGCGGCTTCAAGAGTTAAAGAGCAATGTAGCGCCGAACCTGTCGCGCATACCGGAGCG  
AAAGCTATCGACTGGAACCTGTCGCATAACATAGCCACTCTGAAACGCTGGAAGAATACAGCGGAAATTAACGGCGTGAA  
GAACATTTATCGCGTCACTTCCGGTAAAGGTGGCGTGGTAAATCCTCCAGGGCGTAAACCTGGCGTTGGCAGCTGGCGG  
CGAAGGGGGGAAAGTCCGCTTCTGGACGCGCATATCTACGGCCCATCAATCCCTACCATGCTGGGGCGAGAAAATCAG  
CGTCCAATTCGCGGACGGTACCATATGGCACCGATTATGTCTCATGGCTGGCAACTAATCAATTTGGTTATCTGGT  
GACAGACGCAATGCGATGGTGTGGCGTGGCCCAATGGCGAGCAAGCGTTAATGCAAAATGTTGCAGGAAACCTGTGGC  
CGGATCTCGACTATCTGGTGTGATATGCCGCGAGGTACCGGTGACATTTCAATTGACATGGCACAAAAACATTCAGTA  
ACCGGTGCAGTCTGGTACCACCCGCGAGGACATCGGCTGATGCGGAAAAAGGCATTGTGATGTTGAGAAAGT  
CGAGGTTCCGGTCTCGGTTATGTCGAGAATGAGTGTGCATATTTGAGTAACTGTGGTCAACATGAACCGATTTTTCG  
GTACCGTGGTGCAGGAAACTGGCCGAGAAATACCACACACAGCTGCTGGGGCAGATGCCGTACACATCTCCTTACCT  
GAGGATCTCGATAAAGGCAGCCAAACGGTTATCAGCGCTCCTGAGAGCGAATTTACCGCTATCTACCGCCAGCTGGCTGA  
CCGCTTGCAGCTCAGCTACTTGCAGGGTGAAGTCAATTCAGGCGAGATTTCTTCCGCGCGTCTAA

>Cluster\_40941

ATGTCGTTAATGATGCCAAAAAATTCGGGATAAACTTTTCCCAATATTTGATGATGATGATATTTCTATCGTTGATAT  
TCCCCCTGAGCAGCGTCGATTGCATACCGAGACTTACGATTTTCAATATCAACACTCGTCCGACTATTTGAAAAATGGTA  
CTGTGTTTTATTCGATTTTCAAAGGAAATATGTTTGGAGTAGAGGGCAGGCATCAAGATTAATTTAGTCTTTAATAATC  
CAGTGTCTATCCCTGTTATTTAATTAACCAAGAGAAAGTAGAGTTTATCTGTTATTTGATGGTAATCAACGGTTGAC  
TTCAATTAACATTTTATTTAGGATGGTTTTGAATTTACAGGATTTGACAGCATATCCAGAATTTGGAGGGGAAATTCGTTTT  
CATCACTGGACGCGAGATTCCTGAGGATATTTTAAATCGCACATTTGAGATGCATAACCATATTAAGAAACATCACCT  
CAATTAATAATGATGTTTTTGAAGAAATAAATACAGGTGACGATCAATTAATCCTCAGGAGGTACGATGAGGATTTA  
TCATGGTCCATTTATTTACTATGATTTGAGAAATAAGTAGAGGAGAAAGTATGAGAGACTTAACAGGAAATTAATAAG  
CACGAATGAAGAATAAAGACTCATATTTGAGAGCATTCGCATTTTCAATATCTGTGACACCATATAAAAAACCATTAAG  
AAATTCCTTAATGATTTTGTCTGAAAAACAAAATATTGACCTGATTTGCTTGGAGTGGCGTAGTAGATTTCTTGG

TGCATTAACCTGTATTAATAAATGTTTGGTAAAAAGCATTAGAAATCTAAATGAAAACCTTAGAGCCTCAAGTAAGAA  
ATTTCAATCTGCTTTATTTGATGCTCTAATTTGCGGGTTATGGTATCAAAATTTAAATCAGGATATGATAAACGAACTT  
GATGCAACAAAACCTAAGGATTTCTTAATAGAGTTTCAAAGAATAACATCAGAGGAGCGTTTTAATGAGTCGATTACTTC  
TGGCACTTCGGCGACGCAATCGGTTCAATATCGTATTAGCACAATGAAAAATTTCAATTTGAACGGTATTTCAACTGA

>Cluster\_4660

ATGGCGTACTATAACATAGAGAAAACGACTAAAAATCCGATGGCACACCAGCTATCGCTGTAATGTGATTATCAAAAGAAA  
AGGTGTTATCACCTTACAGGGAAAGCAAAACATTCCCTAAACATGCTCATGCCAAAACATGGGGCACACAGAAAGTGATGG  
AATTAGATCTATATGGCATTCCATCATCAAATGCGATTTACAGGACTTACAGTCCGTTACTTACTACACAAATATTTAAAT  
GACCCAAATGCGCGAGGTAAAGCAGGCCGACTAAAAGATATGTGCTGGAACGCTTATGGATAGTGACATCTCCGCGAT  
CAAACATCTGAACTGACAGAAAATGACGTAATGAACATTCGAGGCTAAGAAAACACGCTGGTGCAGGTCCAGCTACAG  
TTAGCCACGATGTAGTTATCTTGGCAGTGTTCGGATGCTGCCAAATCTGTATATGGAAATTAATACACATCAAAACCA  
GCGAAAAGCGCTCGCCATATCTACTTAACTTGGTTTGGTATGGTAAATCAAAACCGCTGTAATCGTAGACCAGCATCTGA  
TGAACCTGGACATGCTCATTTGAAGGCCCTTCAACAACGATCTACTCATAAATGCTCAAAAATTCGGTTCTGATATCCCTCA  
AATTTTCTGTGTGGTCTGTATGCGGATCGGAGAAGTATGCCGGTTACGATGGGAAGATCTCGACCAGGAACAAAATCT  
ATACTCGTAAGAGACAGGAAAGATCCACGCAAAAAGGAAGGCAACCACATGAAAGTAGCCTTGGTTGGGAAGCCTGGGA  
TATCGTCCAACGACGCCAAAATAATCGGAATTCATTTTCCATATAACAGCAGCTTCTGTTACTGCAGGATTTCCAGAGGG  
TAAGAACGAAATTAGTATTAAGATCTCGCATATTTTCAATTTTCCGTTAGGATAGGAGGCGCAAGTCGTTATTTAGGCTGGT  
TTTAGTATTGAGGAAGTCGCTCAGGTTACAGGGCATCGTTCATTAACGTCGATGGCAGGTATATACCGAATGTATCC  
GAAATCTTTACATAATCGTTTTTGAAGAGCTCCAAGGAGCAGAAAATAAGACCTCTTGA

>Cluster\_66746

ATGGCTAGTGTGGATGCAGACTACTGCTACTCGTTTCCGGCTATACGTGGCATTACAGGCGGGTCGCCCCCTTCTACATTGC  
CACATGCCGATGCGTATCATCCCAAAATTTTAGCTTTGATGAAAATGATGTCGCCCGGAGTTGGGGCGCAACGCA  
CCCTCAATAAATCTCGCATCCCCGAAATGGTGGCGTATCTTCTGAAAACCCAAAGATATGATGATTTCTGCTACTAACA  
GCGTCCATGCGGTTGACGTCAGTTTGGATGAGTTTCCGGCAGCAATATCTAGGAGCTTATGTTGATGCTGCAACCGC  
GCAAACTTTGATCAACGACGGTACGATCGTAAAGCGATTGAAGACGCTTTAGACGCTCGCCGGAACCTGGGGCAGG  
ATAACATTTCTGTGCTGTTTTTGTGCGATGAAGGATTAACACGAGCCAAACAGATGTTTGGCGATCTGAATAAATATGCT  
ATTCGTCACGCCCCATCGTTGGCATCGTTGATGATCATCGGGATGCCAGTTCAAATCTGGCGGTTATCTGGCAATGTC  
CGTAGAGCCGTTTTGTCGGAATGACTGGATTGGAATAATCAGTATCAGTCAGCGGTCAAAATAAATTTTACGTTAAGCA  
GCATCAACAAGCTACTCGTGGCTTGTGGGAAAAGATCCTAAAGAGAGCGATTTTGAAGAATGTACCCAGATAGCAACT  
CGCTATTGGCAGGCTATTTATCATGTAATGCCGACTGCGAGTTAGCCGCAAAAAGGAAAGTTTCACCGGTTCAACTAGC  
TCAGGACTATGTTATGCTCAGGATTTGGTTTGCAGGCACTCGGCAACTGGGGTATACACTGCTGACAGATTAACCTG  
AGCAGTGGCTGATAAATTTGCTGCACCTCAAAGCGTTTTAATCTGGCGCAGAAAACAAATCCGGATCTTATCAAAACGTCGATG  
CAGCACGGCAAGTTGAGCAAAACAGTACGGCGATCCAGCTCACCTGCAATGCCGCTAAAAACGCACTCTCAATTCCTCT  
CACTCCTGAAGAACAGGAGCTTGAAGCTCAAATGGTTGCTTATGA

>Cluster\_32866

ATGGAGAGGATTGCTGTTACTCTCGGGGAACTAGTTACCCAATTACCATCGCATCTGGTTTTGTTAATGAACAGCTTC  
ATTTTACCCTGAAATCGGGGAGCAGGTCATGTTGGTTACCAACGAAACCCGCTCCTCTGTATCTCGATAAGGTC  
CGGGCGTACTTGAACAGGCGGGTGTAAACGTCGATAGCCTTATCCTCCTGACGGCGAGCAGTATAAAAGCCTGGCTGTA  
CTCGATACGCTCTTTACCGCGTTTACAAAAGCCGATGCTGCGGATACGCTGGTGGCGCTTGGCGCGCGCTGATG  
GGGCGATCTGACCGGCTTTGCGGGCGGAGTTATCAGCGCGGTGACGTTTCAATTTCAAGTCCCAGCAGCTTGGTGTCC  
AGGTGATTTCTCCTGCTGGCGGCAAACTGCGGTCACCATCCCTCGGTAAAAACATGATGGCGGCTTTTACCAGCCT  
GCTTCAGTGGTGGTATCTGACTGTCTGAAAACGCTTCCCGCGGTGAGTTAGCCTCGGGGCTGGCAGAAGTCATCAA  
ATACGGCAATTTCTGACGGTGCCTTTTTCAATTTGGCTGGAAGAAAATCTGGATGCGTTGTTGCGCTTCTGACGGTCCGG  
CAATGGCGTACTGTATTTGCGCGTTGTTGTAAGTGAAGGAGAGTTGTCGCGCCGACGAGCGGAAACCGGGTTACGT  
GCTTTACTGAATCTGGGACACACCTTTGGTTCATGCCATGAAAGCTGAAATGGGGTATGGCAATTTGGTTACATGTTGAAGC  
GGTCGCTGGCGGTATGGTATGGCGGCGGACGTCGGAACGCTCCTGGGCACTTGGTCTGCGGAAACGAGCGTATTA  
TAACCCCTGACCGCGGCTGGGTTACCGGTCATGGCGCGGCAAAATGTCGCGCAGGCGTATTTACCAGCATTTGCGGATG  
CGTGACAAGAAAGTCTTGGCGGAGAGATGGCGTTAATTTCTCCGTTGGCAATTTGGTAAGAGTGAAGTTGCGAGCGGCT  
TTGCGCAGGCTTGTCTTAAACGCCATTGCCGATTGTCAATCAGCGTAA

>Cluster\_27023

ATGCAAAATACTTGGCGATTACTGAATACGATCCAGCCATCGATCTGCCGCTATGTCGCGTGCACAACGGCATATTGA  
CGGGTTACTCAAACCTGTTGGTAGCCTGGGAAAGCTGGAGGCGTTGCCATACAACCTGGCAGGAATGCCGGGGTTGAATG  
GCATACCGCATGTGGGCAAAAAGCGGATGCTGGTTATGTTGTCGCGATCAGGGCCTGTTGGGAGGAAAGGGGTCGCTATTTCT  
CCAAAAGAAAGTGACAGCATAACAGGCTGAAAATATGACCCGGAACAACCGGCGTGTGTGCTGGCAGCACAAGCGGG  
CGCTAACGCTCAACGTAATTTGATGTTGTTGTTGATCTGCTGAGCCTATCCCGGGCTTATCAACATGCGGTGTCGACGAG  
GTAGCGGCAATATTGCTTACGCTCCGGCAATGAGTCCGCGTACGCTGAAAAGTGGCTTTTGGACGTCATATGTTATACG  
CGGGAGCTGGCAAAAACGGTGTACGCTGTTTTGGTGTAGGTGAACTGGGGATGGCAACACGACACCGGCGAGCGGCAAT  
AGTCAGCAACAATCTGCTGGGATCCTGAAGAAGTGGTTGGGATTGGCGCAAACTGCCGACAGATAAATGCTGCTGCTGCTG  
AAATTTGATGTTGTCGCGCGGGGATTTACGTTGAATCAACCAAAATCCTCAGGATGGCGTTGATGTCCTTGCAAAAGTGGGT  
GGATTTGATTTGGTGGAAATGGCTGGCGTGTGTTAGGCGCTGCGTCTGCGGTTTACCTGTTGCTGGATGGATTTCT  
TTCTTATGCTGCTGCGCTCGCAGCTGCCAGATGCTCTGCAATCAAACCGTATCTCATCTCTCACCTGTCGGCAG  
AAAAAGGGGCGGATAGCGCTGTGCGATTTGGGGCTGGAGCTTATCTCAATATGGAGATGCGTTTAGGTGAGGGGAGT  
GGCGCAGCTTGGCGATGCCATCATCGAAGCTGCTTGTGCGATATACAACAACATGGGCGAACTTGTGCGCAGTAATAT  
TGTCTACCGGGAAATACGACTTCTGATTTGAACAGTTAA

>Cluster\_7635

ATGACATTACTCGCTTCGCTGCGGACTGGCTTAAAGGCAACAACCTGGATGCAGTGCCTCTCCTCACGGCAGAACAA  
ACAGCCGATCTGGGGATCTCCACCGGATCAGGTTATGTTGGTATTAGCCGTGAAAGTGGCACAATCTGGTGGATTCCG  
GCTATTACGTTGAGGTGGAGCCGTCGCAAGGCTACAGCTGCATTTGCTTACGCGACGAAACAGCTTACCACATCT  
GTCAATCAAACTATTGCCGATGAACAGTTGCAACCGCTCGGTTTTGAGGGCCAGCAGGTGAGTTGGGAAACCGCGCACCG  
CTGGCAGTCTGAACCTCAATGCAAACTGGTATGCGCCAGCCGAGTGTGCTGCGGCAAAATCAAAACGCCAGGAGGCTGG  
AGAAAATCCGCTCGCTGTGGGATGCTGATCGCGGTGCAGAGCATAATCGCGCTTTATTCAGGCGGGGATGAGCGAG  
CGCGAGATAGCCGCTGAACCTGGAGTGGTTATGCGCCAGCAGGGCGCAGAAAAGCCTCTTTTACACCATTTGTCGCCAG  
TGGCTGGCGTGGGGCTGCGCACGGCAAGGACAGGATGTTGTCAGCGGGGAGTTTGTCTACTCTCGATTTCTG  
GTGCGTGTATCAGGGCTACTGCTCTGATATGACGCGCACTTCTGTTGTAATGGCGAAGGGGTGAGCCGCAATCTCAC  
CCGCTGTTTTAACGCTATCAAAATGTCCTGACGACAGCTCGCAGCAATCTCCGCGATTCGCCCGGGGTCGCTGCCA  
GCAGGTTAGCATGCCGCGCGGGGCTATACAGAAGCAGGTTATGGCGACTTATTCGGTCAAAACCGGCTCACGCTA  
TCGGCATTAAGGTTACATGAAGATCCGCGTTTTTACCAGGGCAGCACAGCAGCTACAGCCAGGCATCTGTTACTGACCGTG  
GAGCCGGGATTTATTTGCCAGGCAAGGGGCTGCGCATCGAAGATGTTGTTGCTGGTTACCCCGAAGGGCAGAAAGT  
GCTCTACGCCATGCCAAAACAGTGTGCTCACGGGAGAGGCATAA

>Cluster\_63650

ATGAGCAGACCGGACTGGGGGGCTTGCAGCAGAGTATATTGCTGAATACACCCGCTCCGGTATATCCTCCGGTGGCATG  
GTGTGAAGCAAGGGGACTGAATTACGCAACAGCCCGTCTTACATCAAAAAACTCCGAAAAATGCGCAGACAGAAATGT  
GCAAAAATCGCAAAAAAGTGCAGCAAAAAATCTGCGCAGACTGCACAAAAGCGGAACGAAAAATCTCAGGAAAAAAAG  
CCAGTATTGATGCGCGGTGAAATGAGGGCGACGCGGAGAAATTTCTGTTCTGTCFCCGATGAATTCGGCATTTCTGACCA  
GCAGGCTAAGTTTGCATGCTTGTGCTCAGGGTAAAAAGCCGACAGAGGCGTACCGACTAGCCGGTTATGAGGGGCAAG  
GTGCGACAGCTAACAGCAACGCCAGTCTGATGCTTAGAAAATGCAGGGTTTTTCGCGCTATCAGCTACTTCCGAATCAG  
TACCAGAAACGCTATACCGCAGACTGGATTTACTAGTGTGAGTCACTGATGGCTATTGCTCCTGGCCGACCCCAATCAGCT  
TGCACAAATTCGCGCGTGTAACTGCCGTTATTGCTGGGGCGAGAATCACTCTACCAGTGGCGCGATATAGCAGAAATTCG  
ACAAGGCAGCGCGCAGGCTTCCAGAGATGGCAAAACCCGAACCGAATATGGAGGCTCAGGCTTTGTTGATAACGCCATA  
CCCATCCGGACTGCCGAGTGTGCGGTGAGGGAACGGGACAGCTTTATATGGCTGATACCCTCTGCTTGTATGGGA  
TGCGCGCAATATATGCAAGGGGCAAAATTCGGAATTCGGCGTTGAGATCCTGCTGAGGATAAGGCTGCCGCCGGC  
GTGAATTTGCTGCGGTGTTTCTGCTGGCGGGCTTTATGTGCAGATAAACGGCTACAGGAACGGAATTAAGCAGCGCC  
AGAATGGAACAGCAAGCTGCGCAAGAGATCGAAACGGTGGAGATAATGAACATCCCCAGCTGTGGCGATCAATAT  
TAATGTGGTTGATGCCAGAGTAAGGAGTATGAAGATGATCTCTCCGACGCTTAA

>Cluster\_12535

ATGGGCGCTTACCTGATTGCGCGTCTGTGCTGGTGATCCCAACATTATGGGCGATTATCACCATCAACTTTTTTCATCGT  
GCAAATTCGCGCTGGCGGTCGGTGCACAGGCCATCGCCGCATTGAGTTGGTAATGCCGGAGTATACCCGGCGCAG  
GCGGTGAAGGTGTTCTGTCGACGATGCGCAACCGGGTGTCCGCAATATCAGCGACAGTAATACCGTGGCGGACCGGA  
TTAGATCCAGAAGTGCATGCTGAGATCACTATCGTACGGTTTTGATAAGCCGATCCAGAACGTTACTTCAAAATGCT  
CTGGGACTACATCCGCTTTGATTTTGGCGATAGCCTGTTTCGACGCGCTCGGTGCTGACGCTGATTAAGACAGCTCTGC  
CGTTTTCCATCACCTCCGATTGTTGGAGCAGCTGATTATCTATCTGGTGTGATTCGGTTAGGCATTGCAAGCTGTT  
TATAATGGGAGCCGCTTTGACGCTGAGTGTAGCGCATTTATCATCATCGGCTACGCCATTCGGCCTTTTTGTTTGCAT  
CCTGCTGATTTGTTTTCACCGGGCGCAGTATTTGAGCTGTCCCTCTACGCGGCTGGTTCCGCTAACCTTGATT  
CGTGCCTGTTGATCAGAAAATCACCGATTATCTGTGGCATATCAGCTGCGGCTGCGGACAGTATGGTGGCTTT  
GCGCGCTGACCATGCTGACAAAAACTCATTCCTTGAAGTGCAGCAAGCAATACGTTGGTACCGCGCGTGCAGAAAG  
GGTAAAGTAAAAAATATCTCTGGAACATGTGTTCCGCAACGCCATGCTGCTGGTATGCGGTTTTCCGGCGACGT  
TTATCAGCATGTTTTTTACCGGCTGCTGATTTGAGTGTGATTTTCACTCAATGGTCTGGCTTACTGGCTACGAA  
GCGACCGTCTCGCGGATATCTGTAATGTTTGGTACCTGTATATTTTACCCCTGATTGGCTGCTGCTGAATATTGT  
CAGTGATATCAGCTATACGCTGGTTGATCCGCGTATTGATTTTTGAGGGACGTTAA

>Cluster\_30579

ATGCTAAGCCAGCTTAACTGCGTTTTACAAAAAATTCGAGGCGCTGAAAACGCGTCCGGTAGGGAAAATACTTC  
GGTCAACGCCCTAGCCGAACGCTTCTCGATGACGGCTGAAAACGGTCCGCGCGGTGACGGGTATTTTTCAGCTCATTG  
CCGATCCGGAGGCCACCGTCCGGCAGCTGTACCGGCATATCATTTCTGGCCAGACCTTCGGCAGCTCAGCGCTCTCCCG  
GACGAACGCTGCTTTGCTTGGTTCAGCTCAGGAGGCTTCTTCCGCGGGCATAAATAGGCTGGCCACACTCCCGGCCCT  
GGACACGCTGCTGGACATCACTGGCACTGCGCTGGCAGGTGGAGCAGTATCGCTCTGTGGACGCTGACTACCTGA  
AGGGGATTTTCCGCTGGCCGGGAAAAACTGGACGGAAGAGTTTGAAGCTTCCGGGCAGCGTGCGCCCGTGGTGGAT  
CAGATGATGCGGAACACTCTCTGCTGCTGAGAACGCTTTTTGGCTGGCGGAGGTGCCGGACCGGTTGCTGCG  
AGAAATCTTACCCTCCCGGACGTAAGAGCTGTTTTCCGTTGATGCTGCGCGGCTGGACTGGAACACAGCAGGCA  
GAACGCTGGCACAGGAGCTGCGCCCGGTTATTTCTGCTGCTACGGAACCAATTGAGGCGCGCAGCTGCGCTGAGATC  
CGGTTGACGGCCAGCCCGGAGAACGCCGGGGCTGTTACACACACCCCGTCTGACCTGCTGATCAGCGGCCA  
GGACTTCCGTGGTCCGTCAGGCTGGGAAGCGTTATCCGAACTGCTGGGCTGTTACAGCTGATGCCCCGCAATCCGGAAG  
CCCTGACGCGAGCTGACAGGGGGAGTGTGATGTTCTCCCGCCGGAACGCTCAGCCGGAGGGCTTCTTCCGGATA  
GACGGCTGCGGATTTTTATGCCGGTGGAGGCTTTGAGACGCTGGTCCGGGAGCTCGCCACGCGGTGTAAGAAGGCC  
GCTGGCGGAGGCCCTGACCGGGCTGCGCTGCTGACGGAGATCTGTAA

>Cluster\_39045

ATGTCGCGGCTCAATCTATCTTCGCTGTCAATGTTGGCGGTTCTGATTTTTAGCGGGTGTAGTAGTCAGGCTCCGCA  
ACCGTTGAAAAGGGCGAAAAGCGATAGATGTGGCGAGTGTCTGCGGCAGAAAGATGCCGAGCGTGAAAGACCGCG  
ATGCTGGCGGAAAGATCTCGCCACCACCTTTGAAAGTCAAGGGCTGGCACCAGCTGGAAAACGCTGCTCCGTGCTG  
GCGGTGGCGCAGCAGGAGTCAAAATATCAGGCAGATCCGGCCGTTCCGGGCTTAAAGCAAGATCGCTGGCAAGAGATTGA  
CCGTCGCTGTAACCGGATGACACATTTCTGCTTTCTGGTGCATACCCGCTAAAAATCAAAATCGCAACCGCAAGCT  
ATAGCGAACGGTTAGATTCCGGTGCCTACAGAAAAGCAATTGAGTGCATTTTTGACGATCTGATCAGCATGGTCCAAATG  
GGGACAGCCTGTTTGGTTCGCTCAATCCGGTGCACCGGTTGGCCGATGACAGTCACTATTGCTTTTCCGGAACAGCA  
TACCAAGGGTATCCGTGAAAAATGGACGGTACAGTCCGTGAGAACTCTCAGTCCGCGCGGCTGTTGTTGTTGTTA  
CTTACCAATTTACGAAATTTCCCGCAGCTATAGCCGGCTGATACCTGTTTCTGATTTTAACTGCTGGTACCGC  
AGCCGTAATGCCGCTTTCAGAACCGGTCAGTAAGGCCAGCGGCTGAAAGCTGGCACGTTGACGGTGAATTAATCTGTTA  
CGACAGTAAAGAGCCCGGAAAAACCGAAGTGGCAACGCGCAAACTGGCGGAAAACTGGGGATGAGCGACAGCGAAATTC  
GCCGTCAGTTAGAAAAGGGGACGCTTCTTTTGGAGAGACGGCGCTGTACAAGAAAGTTTATCACTTGCAGGAGCG  
AAAACCGGTAATCACTACCCCGGAAATGTTGCTGGGATTTCACTGAAAAGCCGAAAAATCACCCGCAATCTGCATAC  
GGCTGGTTTGCAGAGCGGTAGACGAACGGCGGCGCTTGTATGAAAACAGTGA

>Cluster\_42503

ATGAAACCGATGCATATTGCAATGGCGTGTCTCTGCGCTATGTTCTTGTGCTGGCGGGCTCTTTATGGGCGTGCA  
ACTGGAGCTGGATGGCACAAACTGGTGGTGCACACGGCTCAGAGATCCGTTGGCAGTGGGTGTTTATCGGCACGGCGG  
TGGTCTTTTCTTCCAGCTTGTGCGGCCGCTTCCAGAAAGGGCTAAAAAGCGTTTCCGGGCGAAGTTTATCTGCCC  
GCGATTGATGGCTCCACGGTGAAGCAGAACTGTTCTCTGTCGGCGTGTGTTGCTGCTGAGTGGCGTGGCCATTTATGGT  
TCTCGCGGACCGTGGATATCGCCACCCTGACCATGATCTACATTAATCTTGGTCTCGGGCTGAACGTTGGTATGGC  
TTTTCTGGTCTGCTGGTGTGGGATACGGCGGCTTTTACGCCATCGCGCTTACACTTTTGGCGTGTCAATCACTATTAC  
GGTCTGGGCTTCTGGACCTGTCTGCCGATGCGGGGTTGATGGCGGCGCGCGGGCTTCTGCTCGGCTTCCCGGTTGTT  
CGCTGTCGCGGCTGACTATCTGGCGATCGTTACCTCGTTTCCGGGAAATTTGTCGATATTTGCTGCTCAATAACACTG  
AAATCACCGCGGTTCCGAACCGAATCAGTCAGATCCCCAACCCGACACTCTTCGGACTCGAGTCACTGCCCCG  
GAAGGCGGCTGGGACAGCTTCAATAATTTCTTTGGCTGAAATACGATCCCTCCGATCGCGTCAATTTCTCTACCTGGT  
GGGCTTGGTCTGCTGGTGTAAAGCCTGTTTGTGATTAACCCGCTGCTGCGGATGCGGCTGGGCGCGGCTGGGAAGCT  
TGGCTGAAGATGAAATCGTTGCTGCTGCGTGAAGCCGCTGATCAAGCTGACTGCTTTTACCATCAGTGGC  
CGGTTTGGCGGTTTTGCGGAAACGCTGTTGCGCGGCGCTCAGGGCTTTTGTGCTGAGTCCGGAATCTTACCTTTGCGAATC  
GGGTTTTGCTGCTGGGATAGTGGTGTCTCGCGGATGGGCTCGCAATTTGAGTGTATTTGGCGGAGTCTGCTGTTGGTGG  
TGTGCGCGAATTTGATGCTGATTTCAACGAATACAGCATGTTAATGCTTGGTGGTTTGTGTTGATGTTGATGATCTGG  
CGTCCGAGGGCTTGGCTGCCATGACGCGCCGCAACTGAAGCTGAAAACGGCGCAGGAAAGGAGACAGGATGA

>Cluster\_42524

ATGTTCTCTACACTCCGCGCACCTATTTGCGCTGCTGGCTTGTGCGTCTTTTATCGTCCATGCCGCTGCACAGATGA

AATCACCACCGCCTGGCCGGTGAATGTCGGGCCACTAAACCCGCACCTTTACACGCCCTAACCAATGTTGCCAGAGCA  
TGGTTTATGAACCCTGGTGAATATCAGGCAGACGGTTCGGTGATCCCGTGGCTGGCAAAAAGCTGGACTCATTAGAA  
GATGGTAAACCTGGACCTTACCCCTGCGTGATGACGTGAAATTCCTCAACGGCGAACCGTTTGATGCAGAGGGCGGGC  
AGAAAACCTTCCAGTCTCGATAACCGTCAACGTACCGCTGGCTGGAGCTGGCAAAACAGATTGTTGATCTCAAAG  
CCTCAGTAAAAAGCGCTATACCGCTCGATACCTTCCGCCGCTTACTATCCTTTCTGCAAGAACGGCCGCTTCCAGCC  
TTCCGTTTTATCGCACCTCGCAGTTTAAAAACCAGAAACATGAACGGAATAAAGCGCGGATGGCACCGGGCCGTG  
GGTTTTACAGGAATCGAACTGAATCAGTACGATGCTTTCGTCCTGTAACGAAAACCTACGGGGCGAAAAGCCGGGATTA  
AAAAGATCACTTTTAACTCATCCCGGACCCGACCCCGCAGTAGCGTTTGAACCTGGCGATATCGATCTGCTATAC  
GGTAATGAAGGGCTATTACCGCTCGATACCTTCCGCCGCTTACCGCAGAACCCGGCTTACCACACCACTGTCACAGCC  
GATCGAAACCGTGATGCTGGCGCTCAATACTGCAAAAGCCCCACCAACGAGCTGGCCGTACGTGAAGCGCTCAATTACG  
CGGTAAACAAAAATCGTGTATCGATAACCGCTTGTATGGCACCCAGCAGGTCGCCGACCCCTGTTTTGCCCTTCTGTG  
CCCTACGCCAACCTCGGCCTGAAACCGCCAGTACGATCCCGAGAAAGCGAAAGCGTTGCTGGAAAAAGCCGGTGGAC  
GCTGCCTGTGGCAAGACATCCCGGAGAAAAATGGTCCCGCTGCGCATTGAACTGTCGTTTATCGCGACCCGCTGCT  
TAAGCAAATCGATGGCGAAATCATTACGGCTGATATGCGCCAGATTGGCGCAGATGCTCGCTGATTGGCGAAGAAGAG  
AGCAGTATCTATGCTCGTACGCGCAGCGTCTGTTTTGGCATGATTTTCCACCCGACCTGGGGCGGCCATACGATCCACA  
CGCCTTCTGAGTCAATGCGCTACCGTCCGACGCTGACTCCAGGCACAGCAAGTTTAGCCGACAAGCCGCTGATTG  
ATAAAGAGATCAAGCGAGTGGCTGGCCAGCCATGACGAAACGCAACCTCAGCCGCTGATATCGCGACATTCACCCGCTG  
CATGACGAGGGGTTTTATCTGCCATCAGTTACATCTCAATGATGGTGGTTTCAAACCGGAACCTGGGTAACATCCCTA  
CGGCCGATCGCCACCGAAATCCCGTTCGAACAGATTAACCCGGTGAACCTTAA

>Cluster\_20413

ATGGCACATCCACCACGGCTGAATGACGACAAAACCGGTTATCTGGACGGTATCTGTAACCGCGCTGTTTCGAGCTGTTTTCG  
CGATATCAGCCTCGAGTTTGTATCCTTAGCGAATATCACCCCTATCCAGCTTGGCTTTGAAAAAGCGGTGACCTACATCC  
GCAAGAACTGGCCAAACGACGGTGGCAGCCCATCATCCTGCTGGCTTAACGGCGCATATCTTAAAAAGCCGCTGTCA  
GTGCCGCTGATTGATTAACCGAGCGGCTACGATGTTTACAGGCATGCCAAAAGCCGGAACCTACCTCTTCTAT  
CGGTGTTGTCACCTATCAGGAAACATTCAGCGCTGGTGGCGTTTCAAAGACCTTTAATTTGCGCCTCGACCAACGTA  
GTTACATCACGAAGAAGACGCCCGGGCAAAATCAATGAGTTGAAAGCAACGGCACCGAAGCGGTGCTGGCGCGGGG  
CTGATTACCGATCTGGCAGAAGAAGCCGGAATGACCCGAAATTTTATCTATTCGCGCCACCGTGGCCAGGCGTTAG  
CGATGGCGTGGATATGACGCGCATGTGTTACGCGCATAACACTCACGATGCCACCCGCAACGCCCTGCTGCTTACG  
TGCTGGCGATATGCTCGGTCAATCACCACAGATGGAACAGGTGGCGCAGACTATTTTGTGTATGCCCGCTCCAGTGGC  
GCGTGTGTTGATTGAGGGGAAACGGGGACGGGCAAGAGCTGGCGGCCAGGCATTCATCGGAATATTTTTCCCGCA  
CGATGGCGCAGGGCAAAAAGTCAATCCGTTTGTGGCGTCAACTGGGGCGATTGCCGAATCGCTGCTGGAAGCGG  
AGCTGTTTGGCTATGAGGAAGGGCGTTTACCGCTCGCGACCGGAGGACGCCCGGCTGTTGAAATCGCCACCGT  
GGCAGCTGTTTCTGACGAGATAGCGAAATGCCGCTGCCGTTGACACTCGGCTGCTGGGGTGTGGAAGAAAAAGA  
GGTCAACCCGCTCGCGGGCAGTACGCTGTTCCGGTGGATGTGCGGGTATTAGCGCCACTACTGCAATCTGGAAGAAG  
ATATGACGCAAGGGCAATTTCCCGTGCCTGTTTATCGGCTGAGTATTTGCGCTTACAACGGCCCGCTACCGGAG  
CGGTTGGCGAATATCTGCGCTGGCGAAAGCTTCTGAAAAGTGTCTCTGGCGCGCTCTCCGCCCTTTTCTGCCG  
ATTACGCCAGGGTTACAGTCAAGCAAAACATGCTGGTGGCTACGACTGGCCGGCAATATTCGTGAACCTGCGCAATA  
TGATGGAACGACTGGCACTATTTTAAAGTGTGGAACCGACCGGATTTAACGCGCAATTTTTGCGAGTGTACTGCGG  
GAATGGCGCGGAGTGGCGAAGACTCCCATTCAGGCTTGTGACAGCAACAGGCACTGGAGAATTTAATGGCGA  
TAAGACAGCAGCGGCAATTTATAGTATCAGCCGACGACTTCTGGCGCGGCTGAAAAGCTGA

>Cluster\_13876

GTGGACCTGTATCTCTATCGGTATCTCATCTATGGGATGAGCTGCGACATATGCCAGCAGGCGCGCTGTTGGTGT  
TAACGTCGATCGCCATGAAGATGCTATAGTCTGGCGAATCAAAACAATGTCATCCAGGCTGAAAACCGCACACGTCGCGG  
TCATTAGCATGGACAGCGATCCGGCGAAAATCTTTCAATTAGATGATTCTCAAGGGCCGAAAAAATAAAATTTATTTCA  
ATGCTAAATCATGAAAAGGCTATACCTATTTGACCCGTTGATTGCGAGTGTTCATTGATCCCATAAATACCTTTTTAT  
TCTTGTGTTGCGCAAAATACGCATGGCAAAACATCTCGCGAGCGGCTTCGCTCATGGTTGGATAAAATGAATAAATGGA  
CGAGTTAAACCTATGTTTCGCTTTTGGTAAATTAATCCGGAATAAACAATTTTCAATGTTGCTGAGGAA  
TACCGTTCACTTTTTGCTTGGCAGTTTGGCTTTTACGGGTGACCAACATTTGCTGGATATTTGCTTCTGGTGAACGA  
AAAAGGGTACGCGCCGTCAGCAGCTTACGCTTACGCAACAAATGTTATCTGGACATAGTTCAAAAGCGAAGAGGCGG  
AGATCCAACACGACGCGCAAAAACGCAATTCGAGTAAATGTTGCTACTGGAAGTGGCCGCGCTATCCGGAAC  
TGGCAACTGTTCAACAATAACGAAGTCTTGTTCAAATGAAGCCGCTACCGCTCAGGCGCGGACGGTGTCTTTTCTTACA  
GCAAAATGCGCAAAATCGAGCCACTGGCCCGCAGCATTCATACCTGCGTCGCCAGCGCGGTAGTGGATGAAAATCCTCG  
TGCGGGAATAACCGCTAGCCTGCGCGCCACCGATGAACGTTTGTATTTGGCTGCGGTGCAAAATATGTTATTCGCTG  
AATGCCCACTCTCCGTTGCTGACGATGATCGAAAGCGTGCAGGGCAGAAAGTTAGTCCGATGTTGCTGCGGGAAGAT  
CACTACTTGTCTGCAATACCCAGCGCTCAAACGCTGCTGTTTCCAGAAAGTGGGATGTTCTGTAATGCTGCAACA  
ACATGATGAATAACCTCTATTACCTGCCACGGTAAAGCGTTCGTTGCTTACGCTACGCTCGGTACCGGGTATCCGCT  
GAACAAGCCTGACGCTGTGTCGCCCTAACCTACCGCGATATCATGACCATGGCGGTAATCGGCTGGTGTGTTTTCT  
CTCATCTGTGATTAACGATCTGGATACCGCTTGAATCATATTTTCCATGCTACTGGCGACATTTCTCAAAC  
GTATGGTGTGTTTTGAGATGATCAAAATCAGTGGCGAGCTGGTGCAGATGCGCTTGTGTTGCCCGAACAATGGGCAATG  
CCGCTGCCCTTAAAGCAAGTCTAAACCGGTCATCAATGCGGACGATGTTGCGCCACTGGCGACGAATACCGAACC  
CATGCGACTGTTAGATGATGCTGTTGGAGCGCTCATCATGA

>Cluster\_42943

ATGAAAGTTAAATATAAAGTTTTTCAGTAATCTTTATCAGGACTCAGTTTCTCTGATGCAGATTTCGCGCAAAATCAGCAA  
GTTGCCCGGTTATCAACAGGCTCGGTGCTCATGGGAACGCCAAATAATCTCGAACAATTCGCGGATGCGGGTCTGGGTA  
ACGAAATCAACGCCACTCCCAATGATTTAGTGTGATGAGTGGGTGAAGAAGATTTGCAATGAAGCAGCTGGCACTG  
GCCAGCAACGCTCGACCAAGCAACCCGATGATGAAACGATAGTGGCATTTAAAACACCGGAAAAGTCAAGCTGGAAT  
GGCACTGGAAGCCGAACCGAAGCAACCTGGCACTCATTTCTGTACCAGGAGACTACGCCGCGCGAAGCAATGAAAG  
CGTTAAACCTCGGAATGAACGATGATGATGTTACGCGATAACGTCAGTATCGGGCAGGAAAATCCATCAAAACGCTTGGC  
CGAAGCCTCAGCGCATGTAATGGGACTGACTGTGGAACCGCCATTTGTTAACGGCAATTCGTTAGGCTTCGCTAATGT  
GTTGAAACCGCGGCAATTTGGTGTATTGGCGCTCAGCAGCCGGCTACAGGAAGTGAATGCTGCGCAATTCAGCACTG  
GAGCGGTTATTTCTAGGCGTTGGGAACAGGCGGACATGATCTCAGTGAAGAGATTGGTGGAAATTCGATGCTCTCGCT  
TTAGATGCGCTGGCGAAGCAGATGAAACTCGCGTGTATGTTGCTTATATCAAAACCGCTTACCGGATCGTTGCCCGGAC  
TATTTGAGCGTGGCGAGGCTTGTGAAAACCGTAGTGGTGAATTTCTCGGTGCGAATCCGCATGATCTGGCACGTC  
CCAATATCACCGCGCCACCACTTGGCAGCGCCCAACATCGCCGTTGGCGTTACTGAATGATCAACCACTTCGGGCT  
GTCGAGACCGAGATTTCTGCGCGATCTCACAATGTTACAAAACCGCTGTCAGCGCTGCCAGCCATGCCAGGCGAT  
ACCGGCTGTTTTCCCGGAGGAACCTTCTGCTACGAAGCGCACTTATCTGCCAACAAGGGATTCAGCGCAGCTTCCA  
ATACGCGATTGGCGGTAATCTGCTCTGGCAATATCTGGCAAGCGAAGATCACAGTTGATCGATATGGCGAGCAT  
GATTTACCCGTTGGCAACCGCATCCAATGATCGACCCGACTGCGCAATCAACGCTGCTCAACGAACTCAACGACTC  
ACACTGCGCTGCTGTTATTGACCTGTTACTGGTTATGGCGCTTCCAGACGCTGCCAGCGAATTTACTGGACCAAC



TTTCACACATCGACATGAATAACGCTCCGTTGCTGATTGCGCACGTTTGGCGAACGGAAGCTGATCCGCAAATACGCAGT  
CAGCAGATAAGCGCACTACAAAAATGCGGGCATCATCATTTGCCAGCAGCAATGCACAGGCGCGCTATGGGCCAGCGCCGT  
TGCGCAGACTCAGTTGCAGAAAAAGGGCTAAACGCATGA

>Cluster\_66593

ATGTCAAAACAACCCCTTTATCTACCAGGCACCTTTCCCGATGGGGAAAGACAATACCGAATACATCTACTACTTCCGA  
TTACGTTAGCGTTGCGGACTTTCGACGGCGAAACCATCCTGAAAGTGGAACAGAACCCCTGACCTGCTGGCGCAGCAAG  
CCTTTACGACGCTTCTTTTATGCTCCGCCCGCACACAGAAACAGGTTGCGGCTATTTCTTACGATCCAGAAGCCAGC  
GAAAACGACAAGTACGTGGCGCTGCAATTTCTTAAGAACTCCGAAATCGCCGCAAAGGCGTGTGCCGACTGCCAGGA  
TACCGGCACCGCGATCATCGTTCGTAATAAAGGCGAGCCGCTGGATGGACCGGCGGCTGATGAAGAAGCGTGTCAAAAG  
GCGTCTATAACACCTATATCGAAGATAACCTGCGCTATTCACAGAATGCGGCGCTGGACATGTACAAAGAGGTCAACACC  
GGCTAACTGCTGCGCAAATCGACCTGTACGCGGTAGATGGCGATGAGTACAAATTCCTTTGCGTTGCGAAAGGCGG  
AGAAAATCGCTACCTCGTACTGACGCTGCCCGCTACCATATCGCGTTTGTGATGGCGGTACGCTGCGGAAACC  
AACCTGAAAACCGTCAAGTTAGCAAGCGCTCATTACGATGAACTGCCGACGGAAGGAACGAACATGGTCAGGCGTT  
CCGCGATGTCAGCTGGAACAGGAACTGCTGGAAGAGGCCAGAACTCGGTCCTGGCGCGCAGTTTGGCGGTAATACT  
TCGCGCACGACATTCGCGTTATCCGCTGCCACGTCACGGCGCATCTGCCCGGTCGGCATGGGCGTCTCTGCTCCGCT  
GACCTAACATTAAGCGAAATCAACCGCAAGGTATCGGATCGAATAAAGGCTGGAACACAACCCAGGCGACTACCTCC  
ACAAGACTGCGCCAGGCGGTTGAAGGCGAAGCGGTGAAAGTTGACCTTAACCGCCGATGAAAGAGATCCTCGCCAGC  
TTTTCGCAATACCCCGTATCCACTCGTTTGTGCTCACCGGCACCATTAATCGTGGGCGGAGATATGCACACGCCAAGCTG  
AAAGAGCTGATTGACGCGGTAAGAACTTCGCGAGTACAAAGATCACCGATCTACTACGCGGTTCCGGCGAAAAAC  
CCCTGCGGTTATCCATCAGGTTCACTTGGCCAAACACGACGCGGATGGACTCCTACGTTGATGCTGCTGCAATCC  
ACGGCGCAGCATGATCATGCTGGCGAAAGGTAACCGCAGTCAGCAGGTTACCGACGCTGTCTATAAACCGGCGCTTC  
TACCTCGGTAGCATCGGCGGTCGGCGGCGGTTACTGGCGCAGCAGAGCATCAAGCATCTGGAATGCGCTGCTTATCCGGA  
GCTGGGTATGGAAGCTATCTGAAAATCGAAGTAGAAGATTTCCGCGGTTTATCTGCTGATGACAAGGTAACGACT  
TCTTCCAGCAAATCGTCAACAAACAGTGCAGCACTGACTAAGTAA

>Cluster\_64803

GTGAGCACAAAGAAAGCAAACTTAAAGCCCTTCATGCGCCCGCAAATCGACCTGCGTAAGGAAGCCGAACTGCTTGG  
CTGAAATACGTTGACGATATCGGGGAAGCACAGCCCGCAATGAAACCGGTTTTTCTGGGCTATCAGCGCCGCTGGTTTG  
AGGATGAAAGCCAGATTTGCATTGCTGAAAAATCCCGTCTGACCGGTCGACATGGGCGAAGCGGCGCAATGTCATG  
ACGCGCGCAAGCCGCGTCCGCGTGGTGTGCGAACGCTTTTATGTTGGTTCCCGTCAAGGAAATGGCGCTGGAATACAT  
CGCCGCTGTGCCCTGTTTGGCCGCGCTTAAACCAGCTGGCAAAGGCTGACGCTGCGGAGCAGACCTTCTGGGACAGCG  
ACAAAAAAGAAGAAATCCCTCACCTACATGATCCGCTTTCGGAATAGTGATTTAAGGCTGCAGGCGCTTCAAGCCGCG  
TCTAACCTGCGTGGTTTACAGGGGATGTTGTTGATGTAAGCGGCATTTTATGAGCCCTGGACGAACTCCTGAAAGC  
GGCCTTTGCGCTCACCATGTGGGTCGCCGCGTCCGGATCATATCGACACATAACGGCGTCGATAACCTGTTTAAACAGT  
ACATTCAGGATGCACGCGAGGGGCGAAGGATTACAGCGTTTACCGTATCACGCTGGACGATGCCATCGCTGACGGCGT  
TACCGCGTATGCTTTATGTTACGAATCAGCGTGGTCCAGGAAAGCGGAGAAAGCCTGGCGTATGGCTGATGGCTGACCGGAA  
CGCGCGAAACAAAGAGAGCGCCGACGAGGAATACGGCTGATTTCCAAAAAATCCGGTGGCGTTACCTGTCCCGTGTCC  
TGATTGAAGCTGCCATGACACCCGCGGGGATATCCCGTTCTGCGTTTTGAAGCCCGGACGATTTTGAATCCGCTGACA  
CCGAGATGCGCCAGCTATCGTTACGAGTGGTGAACAGGAGCTGCTCCGTTGCTGATGCGCTGTACCGCTCACTCAA  
TAAACAGTACTGGCGAAAGACTTTGACGCGGTTGGCGACTGACGGTGTGTTGTCGCGTGGCCATCATCCAGACTTAC  
GCAACAGCGAATGTTTCCGCGTGGAGCTGCGTAATGTGACCTATGACAGCAGCGACAATCCCTTTATTCATTCGTCC  
CGTTTGGCCCGTTTACCAGGCGTGCATTTGATGCCACCGTAAACGGCGGTTATCTGGCAGAAAGCCCGCTGTGATTTA  
TGGCCCGGAGATGATGACCTGCTGTGTAATCTGACAGCATCTGTTGATCAGGAGTGGATGCCAAAATGAAAGCGGATTTG  
AAGCGCAGAACATCACGATTGCCCGCACAGACCACACTGATGACCTGCTCCACATCAAGGTGGACAAAGGTATTCCG  
CAGATTGATAAGGGGCGCACAAAAGATGAAGGCGGTAAGGCGGACGACATGGCGACTTTGCCGTGGCGCTCTGTATGGC  
TGTGAGGGCGTCTTATATGAATGGTTTTGTTATCGACGAGGACAGCATACAGGCGCTGCCACCAGCCACCGTGGTATG  
ATGTTGATAACGATGATTTGATGATTAACACAGTTTGAACGAGGGGCTGGTAA

>Cluster\_64482

ATGTTAGCTCGTTAGGGAAAGGTAAGCATGGCTACGAAGAAGAGAAGTGGAGAAGAAATAAATGACCGACAAATATTATG  
CGGGATGGGAATTAACCTACCGCGCTTAACTGCGGGTACTGCTGATAACTCAACTTGGCTCCCTATGGCTGCGCGAG  
CACAGGTTGGTTAAACCGCGCAACCAACAACAGTCTCTGCACAATTCGCCATTGCAAAATGCCAATACCGGTACCTAT  
ACCTTTGGAGCGCTGGAATCGGCCCAAAGCGTTGCCGAACGCTTCCGTTATTCGGTGGCTGAGTTACGCAACTCAACCA  
GTTTCGATGCTTTGCTCGAGGTTTTGATAATGTCCGCCAGGTTGATGAACTGGATGTCGCCGCAAGTTAGTGAAAATA  
ATTTAACCCCGCCACCGGTAATAGCAGTGGCAACCTTGGCAACAGATAGCCAGTACTTACAGCAAACTCGGCTCTCTG  
CTGCCGGAAGATATGAAACAGCGCAAGCGCAAAATGCGCGCTGGATGGGCGCTTCTTACAGCTTACGCGCAATGAC  
AGACTGGTTAAGCCGCTTCGGTACCGCAAGAATCACGCTGGGCGTGGATGAAGATTTTACGCTGAAGAACTCCAGTTCC  
ATTTTCTCCATCCGTTGATGAAACCGCTGATAATCTCTTTTTTTCAGTACGATCTCTCCATCGTACTGACGAGCGTACG  
CAGATTAACAACCGCTTAGTTGGCGTCACTTCTACCTCCACATGGATGTCGGGATCAACTTCTTTTTGACACAGTACT  
TAGCCGTTACCACTCCCGCGCGGCAATGGCGCGAGTACTGGCGGACTATCTAAAAATTAAGCAGTAAACCGCTATTTGC  
GACTGACCAACTGGCGCAGCGCACTGAGCTGGACAACGATTAAGAAGCCCGCGGCAATGGCTGGATGTACGCGCA  
GAAGGCTGGCTACCCGCTGGCCGCACTTGGCGGTAACGGTGTCTATGAACAGTATTTATGGCGATGAAGTGGCCCTGTT  
CGATAAAGACGATCGGCAAGTAATCTCATGCCATAACCGCTGGACTTAACATATACCCCTTCCCGTATGATGACCTTCA  
GCGCGGAGCAACGCCAGGTTAAACAGGGCGAAAATGACACCGTTTTGCGCTCGATTTTACCTGGCAACCTGGCAGCGCA  
ATGCAAGAACAGCTTGAACCGCAAGTTCGCTGCACGGCGTAGCCTTGCAGGCGAGCGTATGATCTGGTGGATCGCAA  
CAACAACATCGTTCTGGAATACCGCAAAAAGAACTGGTTCCGCTGACCTGACAGACCCCGTACAGGGAAGTCAAGGAG  
AAGTGAATCATTTGTTTCTGCTCGTACAAACCAAATATGCCCTGAAAGGCTATAACGTCGAAGCCAGCCGCTGGAAGCT  
GCCGTTGGCAAGTGGTCAACCGGTAAGATATTTGTTTACCTGCGCGCTTACCGGTTACCGTACCGCAGAAC  
CGATAGCACTGGCCGATTGAAGTACCGCGAAGATGTCAAAGCAATTTGTCGAATCGTGAACAGAGCATGGTGGTCTG  
TCAGGCACCTACGCTAA

>Cluster\_41228

ATGGAACCTCTTGTACTTGTCTGGCGGCGATCGCTGGCCATTTATCAGTGTGATGGCGCTAAGCCTCGCCAGTGGCGG  
ATTAGGCAATTGGCTTAATTTGCTTTTATCAATCAGCGCTTATCGAAACGGCGGATACAGTCTGCTGGTGTCCGCGAGT  
TTCTGGGATTAATGCTGCTGTTGATGGCAGTCACTCTCGGATCGCAACTGGCGCTACCACTTTGGGGCATCTACTGCTG  
TACCGACTCGGTAGTGAATTTATCAAGCGGATTTGGAATACCATGTCGAGCGCATTAACAACCTTGGTAGCGCTCGTT  
GCTGGCGGGTTAAACAGCGATGTGCGCAATATCACCATGCTTTTGTGCGTCTGCCGAACTGGTGCAGGGGATCATTC  
TCACTATCGGTTACGCGGCTATTTGTTGATGCTGTGCGGCAAAATGTTGCTGGTAAACCGCTATCTGGATGGCAGTACC  
ATCTGGGGTGGTTTTATATCTGGTGGCGGCTGTAACAACATATGGCGACCTCGCTGAAACCAAGAAAGTAAAGTGTACAC  
GGATTTTCAAACCGTACTCGAAGGGCGCAAGAGCTGACTTGAACCGTGAACCGCGGAGTATGTTTAAACACCTCT  
ACATTCCTGATGCACAAGAGTATCGCCATCATATATCCGCGCAGACACCTTCCATCTTAGTGCCGTGAACTGGTCAAAC

ATCATGATGCTGGGCGCAATCGGCCCTGGTGTCTGGATGGCGAACAGTCTCGGTTGGGCTGATACCAACGTTGCCGCGAC  
CTATTCGTTGACGCTGTTTATTCCTGCGTACGCCCTGCTTTTCGGCGGTTGGCGCATTACCAGCCTGCTGACGCGCAGG  
TGGCGTTTAAACAGCTGAACAAATTCGCGCTCGCACCTTTCAAAGCAGAGTTTCCACGCCCGCAGGCGTTTCCCACTGG  
CAAACGCTGGAGCTGCGTAACGTGACGTTTAGCTATCAGGATAACCGGTTTTCGTTGGGCGGATTAACCTCACCATTAA  
ACGTGGCGAGCTGCTGTTTCTGATTTGGTGGCAACGGTAGTGGAAAACTGACGCTGGCGGATGTTGCTGAGCGGGTGTACC  
AGCCACAAAATGGCGAAATCTTGTGGATGGCAAACCTGTGACGCGGGAACAACCGGAAGATTATCGAAAACCTGTTTTCG  
GCAGTGTTTACCGATGCTGCGCTGTTGATCAACTGCTGGGGCGGAGGGGCAACCCGCTAACCCGCAACTGGTTGAGAA  
GTGGCTGGCTCAGCTGAAAATGGCTCATAAGCTTGAGTTAAGCAACGGGCGTATTGTTAACCTGAAGTTATCAAAAGGGC  
AGAAAAACCGCTGGCGCTGTTGCTGGCGCTGGCAGAAGAACCGGATATATCCTGCTGGATGAATGGCGGGCGGATCAG  
GATCCACACTTCCGTCGTGAGTTTTATCAGGTGCTGCTGCCGCTGATGCAGGAGATGGGTAACCTATTTTCGCCATCAG  
TCATGATGATCATTACTTTATCCACGCCGACCGCTGCTGGAAATGCGCAACGGGCAACTTAGCGAGCTGACAGCGGAAG  
AGCGCGATGCTGCTTCCGCTGATGCCGTTGCCCGGACGGCATAA

>Cluster\_3880

ATGCAACGTCGTGATTTCTTGAATATTCGCTCGCGCTGGGTGTGGCTTACGCTTGGCGCTGTGGAGCCGCGCAGTATT  
TGGCGCGGAACGCCAACGTTACCAATCCCTGATTTGCTCAGCACCAGTGCCTGTAATCGCATCAGTTAACTATTAGCG  
CAGGCGCAGTCCACCTTTGGCGGGAAAACCGCACTACCTGGGGCTATAACGGCAATCTGCTGGGGCGGCGGTGAAATTA  
CAGCGCGGCAAGCGTTACCGTTGATATCTACCAACCACTACGGAAGAGACGACGTTGCACTGGCATGGGCTGGAAGT  
ACCGGGTGAAGTGGACGGCGGCCGAGGGAATTTCCGCCAGGTGGCAAGCGCTCGGTGACGTTGAACGTTGATCAAC  
CTGCCGCTACCTGCTGGTTCCATCCACATCAACATGGCAAGACCGGACGCTCAGGTGGCGATGGGGCTGGCTGGTTGGTG  
GTGATTAAGATGACGAGATCTGAAATTAATGCTGCCAAAACAGTGGGGTATGATGATGTCCTGGGATTTGTTGTTGAG  
TAAAAATTTAAACGAGACGGGCGAGATTGATTAACAACCTGATGATGACCGCGCAGTGGGTTGGTTGGGATACGCT  
TGCTGACCAACGGTGAATCTACCCGCAACACGCTGCCCGCGTGGCTGGCTGCGCTTGGCTCAATGGCTGTAAT  
GCCCGCTCGCTCAATTTCCGCCACAGCGCAATCGCCGCTTTATGTTGATGGCAGCGACGGCGGCTGCTACCTGAACC  
GGTGAAGTGGCGGAGGATCCAGCTGCTGATGGCGGAGCTTTGAAAGTGTGGTGGAGGTTAACGACAACAAACCGGG  
ACCTGGTGGCGCTGCCGTCAGCAGATGGGATGGCGATTGCCCGCTTGGCAAGCCGATCCGGAATGCGGATTCAG  
CCGATTGCCATTAGTGCCCTGCTGGTGTCTTGGCAGACACATTAAGTAGCCTGCCGCTGCTTACCTTCGCTGGAAGGGCTGAC  
GGTACGCAAGCTGCAACTTTCTATGGACCAATGCTCGATATGATGGGATGCAGATGCTGATGGAGAAATATGGCGATC  
AGGCAATGGCGGAGGATCACAGCTGATGAGGCGATATGGGCGACGGCAATATGAATCATATGACCAACAAACCGGG  
AAGTTGATTTCCACCATGCCAACAAAATCAACGGTCAAGCGTTTGTATATGAACAAGCCGATGTTTGGCGGGCGAAAGG  
GCAGTACGAACGTTGGGTTATCTCTGGCGTGGCGACATGATGCTGCATCCGTTCCATATCCACGGTACGCGATTCCGTA  
TCTTGTGAGAAAATGGCAAACCGCCAGCGACGCTGCGCAGGCTGGAAGATACCGTTAAGGTAGAAGGTAATGTCAGC  
GAAGTGTGGTGAAGTTTAAATCACGAGCACCGAAAAGACATGCTTATATGGCGCACTGCCATCTGCTGGAGCATGAAGA  
TACGGGATGATGTTAGGTTTACGGTATAA

>Cluster\_38763

GTGGCAGATCGTAATTTGGCGACCTTCTTGTCTCCGTTGGGTCGACAGCGACCTTTCGCGAGCACTGCGAGAGATGACACT  
GCACAGCCTGTGGCTGGCGCGGCGATCTCTTTGTAGCTGTAGTAGGTCATCAGGCGGACGGCGCTCGATATATCCCGC  
AGCGGATAGCGCAAGGTGTGGCTGCCATTTATGACAGGCGGAAAGATGAGGCGACCGGCGGTAATCCGTGAAATGCAC  
GGCTACCGGTCATCTATCTCAGCCAGCTCAACGAGCGTTTATCTGCACTGGCGGGCCGCTTTTACAGTGAACCCCTGTA  
CAATTTACGCTCTCGTGGGCTAACGGGCAACCGGCAACACGACACTACCCAGCTGTGGCGCATGGAGCCCACTGCT  
TTGGCGAAACACCGCGGTAATGGGCACCGTTGGTAACGGCTGCTGGGAAAGTATCCCGACAGAAATACAAACCGGT  
TCGGCAGTCGATGTTTACGATGAGCTGGCGGGCTGGTGGATCAGGCGCGACTTTTTCGCAATGGAAGTTTATCCCA  
CGGGCTGGTACAACACCGTGTGGCGGCATTTGAAATTTGGCGGCTGGTCTTTTACCAACTTAAGCCGCGATCAGCTTGAT  
ATCATGTTGATATGGAACTACGAAGCGCTAAATGGCTGCTTTATTTGACACATCATGCGGTGCGGATTTATTAAC  
GCCGACGATGAAGTGGGCGCGCTGGCTGGCAAACTGCCGGACCGGTTGGCGTATCAATGGAAGATCATATCAATCC  
GAAGTGTACGAGCGCTGGTTGAAAGGGACCGAGCTGAACTATCACGACTGCGGTGTGACCATTCGCTTTAGCTCGAGTT  
GGGCGATGGGAAATTTGAAAGTGCCTGATGGGCGCATTTCAACGTCAGCAACCTGCTGCTGGTGTGGCGCACTGCTG  
GCATCTGGCTATCCGCTGGCTGATTTGCTGAAAACCGCGGCTGCTGCAACCGGTTTGGCGGATGGAAAGTGTTCAC  
TGCACAGGCAACCGACGGTGGTGGGATTACGGCATAACCGGATGACCTGGAAAAGCCTTACAGGCGGCGCGCC  
TGCACTGTGGCGCAAGCTGTGGTGCCTTTGGCTGCGGTGGCGATCCTGATAAAGGCAACGCTCCACTGATGGCGCA  
ATTGCTGAAGATTGCTGACGTTGGGTTGGTGGTGGGACGATAACCCGCTACCGAAGAGCCTCGTGCATCATCAACGA  
TATTTGGCGGGAATGTTAGATGCGGATATGCCAAAGTGTATGGAAGCCGCTGCTGAAAGCGGTGACTTGGCGGTTATGC  
AGGCTAAAGAGAATGATGTTGACTGGTGGCGGCAAGGCCATGAGGATTACAGATTGTTGGCAATCAGCGCTGGAC  
TACTCCGATCGCGTACCGTGGCGGCTGCTGGGGTATTGATGATG

>Cluster\_60948

ATGATAACCGAATTTGTGTTTATCCCGATTTTCGCGATCGCAGCCGAGTGGCGCAATCCCTGCAATACTTAAATCGGTA  
TCATGTGATACGCGAGCCTCCGGAGCATATTTTGAACAGGTTACCTTCGAGCGCATCGGCTTTAGCGTGCAGCGCCACG  
CCCTGAATCTCATTTGAGAAGCGAAGCTGGATCATGAGGAGATGAAAGCACTTAAACCGAGAGGTTGATTGAATCTTAAA  
GAGCATGCTCAATCCGGGTTTATAGATATCGCAACTGTTCACCGCGCGGGGATACGAGCCGTAGAGTGGCAAGC  
GGAAAGTTTAAATACGCTTTGTCGACACCCAGGGCAGGAGTTTATCGACTGCCTGGGAGGTTTGGAAATTTTCAACGTTG  
GGCACCGTAAATCCAGTTGGTTTCCGCGTACAGAATCAACTTGCAAAACAACCGCTGCACAGCCAGGAGCTGCTCGAT  
CCGTTACGGGCGATGTTGGCGAAAACCCCTGCTGCGCTAACGCCCGGTAACCTGAAATACAGCTTCTTCTGTAATAGCGG  
CACCGAGTCCGTTGAAGCAGCGCTGAAGCTGGCGAAAGCTTACAGTACCGCGCGCAAGTTTACTTTTATTTGCGCAACA  
CGGCGCGTTCCACGGTAAATCACTTGGCGCGCTGTCGGCCACGGCGAAATCGACCTTCCGCAACCGTTTATGCCGTTA  
CTGCCGGGCTCCGTCATGTGCCGTTTGGCAATATCGAAGCCTGCGCACGGCTTAAACAGTGCAGAAAACCGGTTGA  
TGATGTGGCTGCGGTGATCTCGAACCGATTAGGGTGAAGGTGGGTAATTTGCGCGCGCGGGCTATCTCACCGCGG  
TACCTAAGCTATGCGATGAGTTTGGCGCACTGATGATCTGATGAAAGTACAAACGGCATGGGCGCGCACGGCAAGATG  
TTCGCTGCGAGCATGAGAAGCTACAGCCGATATCTTCTGCCGTTGCCAAAGCGCTCGGCGCGGCGTGTGCGGATTGG  
CGCGACCATCGCCACTGAAGAGGTTTTCAGTTCTGTTGACAAACCTTCCGTCATACCACCACTTTGGCGGCAACCC  
CGCTGGCTGTGGCGGCGGCTGGCGACCATCAATGTTGTTGCTGGAGCAGAACTTACCGGCTCAGGCTGAGCAAAAAGGC  
GATATGTTGCTGGAGGTTTCCGTCACCTGGCGGGAATCCCGATCTGTTACAGGAAGCGGTTGTTAAAGGATGTT  
GATGGCGATTGAGTTTGTGATAACGAAATCGGCTATAACTTTGCCAGCGAGATGTTCCGCCAGCGGCTACTGGTGGCCG  
GAACGCTCAATAACGCCAAAACGATCCGATTTGAACCGCCACTGACACTGACCATTTGAACAGTGTGAACCTGGTATCAA  
CGGCGCGTAAGCGCTGGCGGCGATGCGAGTAAGTGTGCAAGAAGCGTAA

>Cluster\_26524

ATGGGAAATAATTTGTTATCAGCAAAAGCGACGCTCCCTGTTTATGATCGTAATAACCTGGCCCAAGAAATGTTTCATTT  
AGGCTTTGGTGCATTTCCAGCTGCGCATCAGGGTGTGATGCGGATATCTTGTACGGAAACATTTCACTGACTGGGGAT  
ATTTAGAGTCAATTTAACTGGCGGCAACAGCAATTTGCCGATTTACAAACAGCAAGATAATCTTTATACCGTTGCGGAA  
ATGTCGGCGATGCTGGACGGCTCGCGTGGTGGCGTGGTAAAGGCGCTTGCACGTACAGATTGATGGCTTAGAAAC  
CGTGTGGCTGCGATGTTGTAACCGCAATCGGATTTGCTCTGACAAACCGGAAAGGATTTTCCACTCTCCGG

CGACCGACAGTTAATGCTCGATCACCCGATGGTCTGGCCGACGTACAAAATCCCCACCAGCCGAAAACGCAACAGGG  
GTGATTTGTCGAGGCGCTGGCTCGCCGTAAGCGCGCAGGACTTCCCGCATTTACCGTCACTGTCATGTGACAACATGCCAGA  
AAACGGTCAAGTTATGCGTGCAGCTTGTCACTTCTGCGCGCAAGCTGTTGATGTAACACTGGCACAATGGATCGAAGAAA  
ACGTGACTTTCCCATCAACAATGGTGGACCGTATTTGTGCCCGCAGTGACAGAGGATACGCTGTCGAAAATCGAACACTT  
ACCGGTGTCGGCGATCTGCTGGCGTTGCTGTGAACCTTTCCCGCAGTGGGTAATAGAAGATAACTTTGTTGGCGAGC  
TCCGGAATGGGAAAAGCGGGAGCCGAACCTGGTTAGTGATGTGCTGCCATTATGAAGAGATGAAGTTGGCGATGCTCAATG  
GCAGTCATTCATTCTGGCGTATCTGGGGTATCTTGGCGGATATCAGCACATTAATGACTGCAATGGAAGATGAACATTA  
CGTCATGCAGCGTATGCCTTAATGTTGCTGGAACAAGCGCCGACGCTGAAAGTGCAGGGCGTTGATTTGCAAGATTACGC  
TAACCGATTAAATGAACGCTATAGCAACCCGGCGCTACGTCATCGAACCTGGCAGATTGCGATGGATGGCAGCCAGAAAT  
TGCCACAGCGGATGTTGGATTCTGTTGCTGGCATCTGGCGCATGACAGCAAGTTCGATCTGCTGGCGCTGGGCGTCGCA  
GGTGGGATGCATTATGTCGGTGGTGTGATGAACAGGGAAATCCGATAGAAAATCAGTGACCCACTGTTACCTGTTATTCA  
GAAGGCTGTACAAAGTAGTGCAGGAAAGCGCGCTCCAGTCATTGCTGGCGATTAAAGCGATCTTTGGTGTGATGATT  
TGCCAGACAATAGCTTGTACTGCAAAAAGTGACGGAAGCGTACTTGTCTTTATAGCCATGGTGGCAAGCGACCGGTG  
GCGAAAATATCCGTGAAGTAA

>Cluster\_40888

ATGACATCTACCATGATTTTATGAATCTGATTTCTCAGCCACATTATACCCATTA AAAACCAATCAAAATTA TACTCAA  
GCATCACTACAAGAGATGTCAGAAATATATTTATCAGAAGGTCATTAATCCTGCATATCCAACAGATAGTTTTCTGTCTC  
AGCAAAAAGTCTTTTCGACTAAACCTAAAGGTCATTTGAGACGAACTGTA AAAATAGATCCAGTAGCTGAGTATTTATA  
TATGATGTTATCTATCGAAAACAGAAAGATATTTAGGCCAGAAGTAAGCGAGTCCGAGAAAAGCTTTGGATATATTTT  
GAAACGGTAGCAGGATACCTATCCAGTTTCTTATAATGAATATAAACAAGCTTAAAAAATAATCTGAGCTATATTC  
ATAGTATACATTTTACATAGCATCTTATTTTAATAGTTTATATCACCATGATATTAACACTGGTTTGTAGCTCAAAA  
GGCGTTAGCCCTGCGGATGTTGAAGCTC GCGACAGTTTTCGCGAAAATTAACCTCAGGACGAAGTATCGATTTTATGCC  
CCAAGGAATTTATCCGGCAAAAATGATCGGTAATGAGTTTCTAAAAATCGTTGATTTACATGGTCCGCTAAAAATCCGCTC  
AATTAAGAGTCTGATGGATGACTTTACTATTTTGGTGGTGGTGGTGGTGGTGGTGGTGGTGGTGGTGGTGGTGGTGGT  
ATTAGGCAGATTTCCCAAATTAATAAACAATATTTATACGATCTGTTCCAGGTATTACCGATAAATCAGGATTAGTAAAA  
TATTTGCTCAACTATTTAAATACTAATAAATACTTTTATAGAATACTAATTTGTTTGGATTTGGAGCAATAGTTGAAGACT  
CTATTAGGTGATGATGATGATGATGATGATGATGATGATGATGATGATGATGATGATGATGATGATGATGATGATGATGAT  
AGTATTAGAGATACCCGGACAGGTTTGGTTTCAAAGAAATAAGGAATGAATACCTTAGAACCGGACAAATCAGATTGGT  
TATCATGGTCTTCGGCTATCGGTACGAGAAATCTAAATCAGCCGAGAGAACTATATCTTGATTATTTCTCAAAGGC  
TCACCAATAAATTAATCTTGTGCTCCTTGTGTCAGAAAATTTAA

>Cluster\_21986

ATGAAAACGTGTCATTTTCATACATTCGTTTCTCATCAGAGAAGCAAGCTAAAGGCGACTCACTCCGAGACAATCTAAGAT  
GGTCACTGATTTGGCTTAAGGCTCATCTGAGTACTACCTTGACCAAGATTTATCTTCCGTGATTTAGGTGTGAGTGGAT  
TCACTGGTAAAGCACTTGAAGAGTGGCTTAGGTGACTTCTTAAACCGCTATCGAGAAAAGGCTTGTAAAGCTGGTGTATCG  
CTCTGTAGAGAATCTTTGACCGTTTGTACGTCAGGACGTAGACCAAGCAAGTGAAGTACTCAGAAAACATTTCTCGCTC  
TGGTGTAGATGTTAGTCACTTGTCCGATGGTGAACATTAACAAGGGAATCTCTTAAAGACCCGTAGCTGTGATTAAGT  
CCATCTTGATTTATGCAAGAGCAGATGAAGAGAGTCTGCGTAAAGGCTGAGCGTATACAAGCTGATGGATGCAAGAAA  
GAAGCTGCTAAAGCTGGTATCAAGATTTCTAGGCGTTGCTGATGGTAAAGCTGAATGATGACCGTAAAGCACTTCTC  
TGTAAATCCCTGAGAAGGTAGCAGCGTAAAGCGATGCTTTACGCTACGCTTAGAGGTAAGTCTATCTGGGAGATTGTCA  
GAACTCTTAATGCAGAAGGTACACAGCCTTAAACCAATAAAGCGGGTTCATTTGGTCAAAGCTCAGTACAAGACCTT  
TTGAAGAATCGTTCTGTAATTTGGTTACTTCACACCTAAAGGCTGTGAGGAGATATCTAGTTATACCCGTCTGTAATTGA  
TGAGACAACATTTACAAGTCCAGCAACTATCACATTTCTGTTACGGTCAAAAACCTGTTTCAAGATAAACCATTGAGTG  
TGAATCTCTTTAAAGGTGTTATCGTTGTTCTGAAATGTTGTTGTTGTTGTTGTTGTTGTTGTTGTTGTTGTTGTTGTTG  
GGGATTTATCGTTGCTCTTCCGTAATGAAAACCGTTGATGCTAAAGGCTGTACGTAAGCAAACCGATGGTACATT  
GCTTACCCGTGCTATCTCGCTTGGACGATTTGATAGCGATATGACGAATACCATAGACACACTGAAGCTACCCGTGAAC  
ACATCTCAAGCAATATTGAAAAGCTGGTACAGTATCACTTGAATTTGAAGACTTGTCCGCTATTACCAGCAACTAAAG  
CAGTTAAAAGGTGAGCTATCACAGTTGATGCGGATATCGAAGAGGACACAACCGCTTAAATCTATGATGTTGGTTG  
TTTGTCTGATTTGACTTACTACAAGCGGGGAAGGATTGAAGCACAACCTGATAATCAAAGTGTCTGTTAAAGAGGTGCG  
TTTTAAATACTGCTAAACGCTCGCTGTAAGTAACCTTTTCAATAAGTAAGTCAATCACCTACCAATAACAGAAAACCC  
TCAGAAGACGTTACAGAGGCTATACAGTCTGCTTCTGAAGTCACTGAGAAGGGTTAAATAGACGTTGATGTAGTAGAGAT  
TTAG

>Cluster\_26377

ATGAGTATGTCATCCATACCGCTCGTCTCCCAATCCGGGAAGCTCTATGGCTGGGTGCAAAAAGAAATTTGGTAAACAAGGTTCC  
CCATCTTTTGGCTTTTATCTATTTGATTTATCGTACTGATGGTACGACGGCAATTTGTCGGCCTTTGGCGTCAGTG  
CGAAAACCCGACGATGGTACGCGGTTGCTGTA AAAACCTGCTCAGTGTGGAAGGATTTGCACTGGTTTTTACCCAAAT  
GTTATTA AAAAATTTAGCGGTTTGGCTCCACTTGGTGCATCTGCGCGTGGTTTGGTGGCGGCTGGCGGAGCGGCT  
AGGCTTACTGCCAGCGCTAATGGTAAAATGGCATCGCATGTTAATGCCCGCTACGCCAGTTATATGGTGTGTTTATTTG  
CTTTTTCAGCCACATTTCTCCGATGCGGCTTAGTGATCATGCCACCGATGGGTGCGCTGATTTTTCTGCGAGTGGCG  
AGGCATCCAGTTGACAGTTTACTGGCTGCCATTGACAGCGTAGGTTGCGGCTTTACGGCTAATTTACTGATTTGCACAAC  
CGAGTGTGCTGTCGGGATCAGCACGGAAGCGGCGCTGCGTTCAATCCGCAAAATGACGCTCAGTGTAAATGATAACT  
GGTATTTTATGGCCAGCTCCGATGCTACTGACGATTTGTTGGCGGCTGATAACCGCAAAAATCATCTGAGCCAGCGGTTA  
GGCAATGGCAGGGAACAGCGATGAGAAACTGACAGACTTACCGGAAAGTCAAGCTTTGGTTTACGCAATGACAGGTTG  
CGTATCGCTACTTTTATTTGCTGCGATTGCGCTGATGGTGTATCCCGAAAACGGGATATTGCGCGATCCGATTAATCACA  
CCGTGATTCATCCCTTTTATTAAGGTTATCGTGCCACTGATCATCTTTTTTTCTTTGTTGCTCGCTGGCTTATGGC  
ATCGCTACCCGCAAAATCGACGTCAGGCGGATTTACCGCATTTAATGATTGAACCGATGAAGAGATGGCGGGATTTTAT  
CGTGAAGTTTTCCTCCGCTTTTGTGCTGCTTAACTGGAAGTGAAGTGAAGTGAAGTGAAGTGAAGTGAAGTGAAGTGAAGT  
CCGATATACTGAAAAGTTACAGGCTTAGCGGCTCCCGGCTTTGTCGGTCTGGCGTTGCTTTCTCTTTCTTATGCATG  
TTTTATCGCCAGCGGTTCCGCAATCTGGTGCATTTGCGCCCTATTTTCGTACCGATGTTTATGCTACTTTGGCTTTACCC  
GGCATTGGCAGAACTCTCTTTCGATTTGCCACTCATCCGTAATGCTTTAGCCTTTAGCGCGGATATCTCTTTTGGCTTATC  
TTCTTGGATTCTCTGCAACCTTACAACCGACGCGAACTGGTACTTACTATTTGCTTAGTCTTACCTTACCTTACCTTATC  
TTTTTGGTGGTATGGCTGCTGATGTTGCTGGCGTGGTATCTTGTGCTGGCGATAGGTCGGGTATTCACCCAGTCTT  
GTCTTAA

>Cluster\_24760

ATGGCAGAGCAATCTTCAGATGTA AAAAATAGTGACAAATAGCGCGGAGGACATAAGCTGGGGCTTATATCCCTCATCGC  
TATTGTCGTTAGCTCCATGCTGGGAGGCGGCTTTTCAGTCTGCGCAAAAACAGCGGCGCTTCTGCACTAGGGCCAG

TAATCTTTGCATGGATTATTTGCCGGATCGGTATTTATTTATCGCAAACCTTTTCGGTACTATCAGATCTGCCGCC  
GACCTTCAGGCTGGAGTGTATATGTATGCCAGGAAGTTTTGGTTCCCTTTATTTGGCTTTAACGTCGCTGGGCTACTG  
GCTGATGACCGCATTTGGCAACGTTGCCTTTGGCGTAAATTTAATGGATGCTTTAATCAGTTTATGCCGGGGTTTTTA  
CGGATGGTAATAATCTGAACTCCATTATCTGGCGCTCAGTGTGATCTGGGGCTATAAATTTCTTGTCTGTCCGGGACG  
AAGTGGCCGATTTGTTAACACCTTGGGAACCATCGCAAGCTCGTCCTCTGATCCTATTCGTATTTCCCTTACCCTGCGG  
GCTGATCGATTATTCGGACCTGTTTAAAAAATTTTGGGAGAAATCACCCGCGATCCTCAGTGGCAACGGAAATGACGCCG  
CACCAGTATCGCTGCTGTCTCAGATTCTGGCACGATGACCGTAACGCCTTGGGCTTTATTGGCGTGGAGGGAGCGGTT  
GTTCTATCCGGACGTGCCAAAAATAAACAGGACGTAGGAAAGCCACACTGATCGGCTTTCTGCTGGCGCTAATTTATTA  
TATGTTAATGTCCATTTCTGCCCTTCGGTGTAAATGCTCAGGCAAGCTAGCGCAGGTCAGTAACCCCTTACCCTGCGGCG  
TGCTGCCACGTTGTTCGGTTCAGTGGGGGACTGGCTGATGAGCGGGGGCTGATTATTTCTGTTCTGGCCGGCTGGCTT  
GCCTGGACCATGCTATGCCGTGAAATACCGATGTTAGCAGGACAGAAAGGCGCTTCCCGCGCGCTTTGCCCGAACGAA  
CAGTAAACAGCGCGCAATGTGTCACTGTGGGTTAGTAGCTTTGTGATGCAGGCGGCCATGTTACTTGTATTTTCAA  
ATAATGTTGGACCCCAATGTATAAATCAGTGGCTGATGGTGTTCCTGGCTTATATACCACCGCTGTATCTGACC  
AGTATTTGCAGAAACGGAAATATGATCAGTATGCAAAAAAGGCCGAGGCTGGCTTTGTCCAGCGGTGTTTTAGGCTC  
GCTATTCTGTCTGTTATCTTTACGCCAGCCAGATGAGTATGTTGCATTAATTCCTATCCTGTTGACCTGTGGTCTGC  
CGGCTTTATCTGGTCAAGAAAAGAAAAATGATGGTCAGCCGATATTTACCAAAAAGAGCTGATTTATCTGATTATG  
CTGTTGCTGTGGATATTTACGCTGTTGCCCTGTTTATTTGGTGGATATTTAAAGGTATAA

>Cluster\_67057

GTGGAAGAAACGCGGTTTTCTTCCCGTAAGGGCAATTTTCAGCGGCTTTCATCTGATCACCGAAAAATACAGTACGTTGGC  
TAAATATGCCCGGTATGCTGTACGATTCAGTTTCATGGCGACACCTTCGGCGCAGGCGCTCAGCATGCGCTGGACA  
CATAACGGAAATCTACCGTAAACAATTCGTAAAGTGCAGCCATCAGCGCAACAGGTTTTATCCCTGAAAGCTGGCGA  
AACTGGTGTCTACGCTTTCAGGCATCGACCGCAAGTACTACGAGTTTTGCGTACTGAATGAACCAAGGTTGCATTACG  
TTCCGGTGTATCTGGGTAAGAGATCGCGCGCTACAAAAATTTTGTGATTTATCTCATCCGACTGCTGAGTTTGAGA  
AATCCCGACATAAGGACAGCTTACAGTTGGCCGTTTCAGCCGATAGCCAGGCATACCTTCAGGCCGATAGGCGGAAATC  
GCATCTCGGCTGGAAGAAGTTAACCGCATGGCGCTTGCCTGATTTGCCGATGTAGATATCTCAGATAAAGGGCTAAA  
AATCACTCCACTGGAGAACAGCGTTCCCTCAGGTGTTTTGCGCTTTCAGATTTGGTCTATGGCATGCTTCCCATCCGA  
AAATACGGAGATACTGGAGAAGTTGATAGCTGGACGGGATTTACGCGTCACTTCGCGCACCTCAAAAAATAAACGTC  
AGACCAAAAGACGGAAAGCTGTTGCTGACCACTTTCAGCCGATAGCCATCAACCTTGGGCTGACAAAAATGGCGGAAATC  
CTGCCCTGGGGCCACAAGATCGTCACTCGAAGGTATTCAGACATGGTACATCAGGGATAAAACTTATTCAGCGGCACTGG  
CCGAGCTGTCAACGCACAGAAAGAGCGGCTTTCGGCCGATTTGGGCGCAGGGGACAACTCGTCTCAGACGGGCGAG  
AATTTCCGGTAGGCAGTACGGACGTTATGCCGGTCAAGTCAATCTTAAATATGGTCAAGGAGCCGGGCTGCAAAATTA  
TACCATACTCTCAGACCAATACAGCCGTTCTACGCCAAAGTATCAGCCGGTGCAGCCGACTCAACCCACGTTGATG  
GCCTGCTGTACCATGAAAGCGATCTGGAATTTACCGAGCATTTACCCGATACCCGAGGCTTCACTGAACATGTTTTGCC  
CTGATGCACCTGCTGGGATTCGCTTTTGGCCAAAGGATCCGTGATCTTCATGACAAGCGGCTGTTTATTCATGAAAGGC  
CGAGCGCTATCCGGGCTTCAGTCTGTCTATCAACCACTTCCGCTGAATATCAAGACATGAGTCCGACTGGGATGAGG  
TATTCGGCTGGCAACCTCGATTAAGCAGGGGACAGTCAACCGCATCACTGATGATGAAAAAGTTAGGCACTTACCAGAA  
ACAGAATGGACTTGC AAAAGCGCTGAGAGAGATTTGGCCGATCGAACGGACACTATTTATGCTGGACTGGTCCGCTGA

>Cluster\_21924

GTGACGGACGATTTTGCACAAGACGGTCACTGGCGAAAGCGATACCAGGCTTTAAGCCGCGAGAACCACAGCGACAGAT  
GGCGGTAGCCGTCACCGAGCGATAGAAAAAGGCCAGCGCTGGTGGTGAAGCAGGAACCGGTACGGGCAAAACCTACG  
CTTACCTGGCCCTTCGCTGCGGGCGAAAAAGAAAGTCAATCTCAGCCGGCTCAAAAGCGTTGCAGGATCAGCTCTAC  
AGCCGCGATTTGCCAACGGTCTCAAAGGCATTTGAAATACAGCGGCAATGTGGCGCTGCTGAAAGGGCGCTCAAACCTACCT  
TGCTCTGAACTGTCTGAAACAGCAGCGCTGCGGGGGCGATCTGCGGTACAATACTTAAGCGATGTGATCTGCTGCTG  
GCTCTGCTTAATCAAAGTGTGATGGCGATATCAGCACCTGCGTCAAGGTTGGCGGAAGATTACAGGCGTGGCCGCTG  
GTCACCAGCACCAACGATAACTGCTCGGCAGTACTGCGCGATGATAAAGATTGCTTTGTGGTCAAAGCACGCAAAAA  
AGCGATGGACCGCGATGTTGGTGGTAAACATCATCTGTTTTCGGCGGATATGGTGGTGAAGAGAGCGGTTTTGGCG  
AACTGATCCCGGAAGCGGACGCTCATGATCTTCGACGAAGCCACAGCTGCCCCGACATTTGCCAGCAGTATTTGGTCA  
TCACTCTCCAGTCGACAACCTGCTCGACCTGGCAAAAGACATCACCATCGCTACCCGACCGAAATTAAGACACCCAGCA  
GTTACAAAAGTGCCTGACCGCTTTCGCCAGAGTGCAGGATTTTCGCTGCAACTCGGTGAGCCAGGTTATCGCGGTA  
ACCTGCGTGAAGTGTAGCTAATCCGCAATTCAGCGGCAATTTTACTGCTCGATGACACTTGGAACTTTGTTATGAC  
GTGGCGAAACTGCTCGTGGGGCGTTCCGCTTGTGATGCGGATTTGAGCGCGCCAGTTATATCGCACACGCTGGA  
ACGGCTAAAAGAGATCAATCAGCCGGCTACAGTACTGGTACGAATGCACCTTCGCGCAATTTTACTTGGCTCTCACGC  
CGCTCAGCGTGGCGGATAAATTCAAAGAGTTAATGGCGCAAAACCCGCTAGCTGGATCTTTACTCAGCAACCGCTGTG  
GTGAACAGCAGTATGCACTATTTACCTCGCGCTTGGCATTTGAACAGGCAGAGTCTGTTGCTGTTACCAGCCCTTTGTA  
TTACAGCCGACGCGTTACTCTGTGTCGCGCAACCTTCGCGCAAAACCAATCAACCGGTTCCGCAACCGGCACTGGCG  
CAATGCTGCGACCGATCATCGAAGCTAACACGGTCTGTTGTTTTATGCTTTGTACTTCGACGCCATGATGCGCGATCTG  
GCCGAGCAGTTTTCCGCTACCATGACGCTTCCGTTTTGTTGAGGGGAAACAGCAAAAGGGCAACTGTTGCAGCAAT  
TGTCAGTCCCGTAACCGCTTCTTGTGGCAACAGCAGCTTTCGGAAAGGGTGGATGTGCTGGGATACATGTCAT  
TGGTATTATCGACAAGTTGCCGTTTACCTCAGCGATGATCCACTATAAAGCGCGCATGGAAGATTGCCGTTTGGCT  
GGTGGTACCCGTTTCGATGAAGTACAATTCGCCGATGCGGTGATTACTCTCAAGCAGGAGTAGGGCGACTGATTCGCGA  
CGCCGACGATCGCGGCTGCTGGTGAATTTGCGATAATCGGCTGGTGTGCTCTTACGGTGCACCTTCCCTCGCGAGTC  
TGCCACCGCGCGCGCACCCGTTGACATTTGCCGCTGCGGTTTCCTTTCGATACCATCTCCAGGTAA

>Cluster\_8555

ATGAAAGGACTCAATAAAATCACCTGCTGCTTGTGGCAGCACTACTCATGCCCTTGTGCAGGACACGCTGAGAACGAACA  
ATACGGCGCGAACTTCAATAACGCCGATATCCGCCAGTTTCGTGGAAATAGTGGGTGAGCATCTTGGCAAAACGATCTTGA  
TCGACCTTTCGGTACAGGGAACCAATTTCCGTACGCAATATGATACGTTTACGCAACAGGAGTACTACAGTTCTTTTATA  
AGTATTTCTGATCTTTACGGTTATTTCCGTGATCAGCTGGACAATGGTTTTCTGAAAGTGGTTCGCTCAGCTAATGTAAA  
AACATCGCCAGGAGATGATGCTGACAGTCTCGTCCAGCGTAGGTGATGAGTTGGTCAACCGAATTTACCGCTTGGAGA  
ACGTTCTGCTCGTACCTGGCCCCCTGCTCCGCCAGATGATGATGCGGGTAGCGTGGTAATGTTGTGATTTATGAA  
CCCTCCAAGCTTCTTATTCTGACCGCTGCTCCCATTAATAAACTGATTTGAAGTCATAAAGCGCGCTGATGCTCAT  
CGGCACAGAGAAGCAGCAAAATTTATCTGGAATATGCGTCAAGGAAATCTCGCCGAGATCTTAAATCAATTAATCA  
GCGAAAGCCACGGTAAAAGCCAGATGCCAGCCCTCTTCCGCGAAGATTGTGGCGGATAAGCGAACCACCTCTTTATC  
ATCAGTGGACCGGAAAGCAGCCAGCCTCACTTCTTACGAAAGCTTGTATGTCGAAGAGAGCGAGGAAAGAAA  
TACCCGGGTTTACTTACCTGAAATATGCTAAAAGCCAGCAATCTGGTGGAAAGTGTAAACCGGTTTCCGAAAGCTGAAA  
ATGAAAAGGGAATGCGCGTAAGCCCTCTCTTTCGGCGGATGGATAACGCTCGCATTACCGCGATGAACAGACTAAC  
TCTCTGGTCAATACCGCTGACAGCTCCGTCAGGAAAACCTCGCCAGGTAATTTGGCGCTCTGGACATTCGCGCTGCACA  
GGTGGTGGTGGAGCAATCATCGTTGAAGTTCAAGTAAAGTAAACCTCGCGCTGCAATGGCGAATAAAGC  
TTGGCGCACAGCAATTTACCAATACCGGATTTACCGATTTTAAACGCTGCGCAAGGTGTGGCTGATATAAAGAAATGGT  
GGGATCACAGCGCAATCTGCTGGGATGATGTTTAGCCCTACAATGGCATGGCCGAGGCTTCTTCAATGGCGACTG

GGGAGTACTGCTTACCGCGCTGGCCAGTAAACAATAAAAAATGACATCCTCGCCACCCCAAGCATCGTAACGCTGGATAATA  
AACTCGCGTCTTCAACGTTGGGGCAGGATGTGCCGGTGTATCCGGGTACAGACCCTTACGGGGATACGCTTTTAAAT  
ACCGTCGAACGCAAAACGGTGGGACAAAACCTCAAAGTACTCCGCGAGGTCAATGAAGGCGACGCGGTGTGCTCGAAAT  
AGAGCAGGAAGTCTCCAGCGTTGACTCTTCTCTAACTCGAGCTCGGCCAGCTTTTAAATACCGTACTATTCAAACG  
CCGTGTGTTCAAAACCGTGAACCGTGGTCTTGGGGCGATGCTGGATGATTTTCTAAAGAGCAAGGTCTCAAAGGTT  
CCTCTGCTTGGCGATATTCTTTAGTGGGGCAACTCTTCCGCTATACCTCCACCGAGCGCGCTAAACGCAACCTGATGGT  
ATTTATCCGTCGACGATATCCGTCGACGATGATGTTTATCGCTCACTGTCAAAGAGAAATACACCCGTTACCGTCAGG  
AGCAACAACAGCGGATCGACGGGAAATCAAAGCGCTGGTGGCTCGGAAGATTTGCCGGTGTGGATGAAAACACGTTT  
AACAGTCACGCCCTGCGCCATCGTCACGGTGA

>Cluster\_62476

ATGGAATTTGAAGAACGCTATTTCCGGGAAGAAGTTCGATTACCTGCGCCAGCTCAGCAAGCTGCTGGCAACGGAAAAACC  
CCATCTGGCCCGCTTCTTGGCCGAAAAAGATGCGGATCCGGATATGAACGCCCTGCTGGAAGGGGTGGCTTTTCTTACCG  
GCAATCTCCGCGCAGAAAATGAGGATGAATCCAGAACTGACGCACGGGCTTATTAAGATGCTATGGCCTAATTAACCTG  
CGTCCGGTCCGGCAATGACCCCTATTGAATATACGCCGATATGGATAAGTCTTCTGTACCGGTGTTAATCCCCGTA  
TGAGCAGTTTACAACCAACGCGGGGAAATCAGAGTGTGATGAAGTGTGCCCTCTGATGCTAAAAAGGAGGAGCGCCTC  
CCTGTACCTTACCCCTGCGGGGATATCTGGCTGCTGCCCTGCGCTGGAGCAGATTGAAAACCGCAGTACGACCCGCT  
AATGGTGTATCAACATCACTTTTTCGGTGGCACCAGGAACTTCCGACCGTGGATCTGAACAACTTCCGCTTCTG  
GCTCGGCAATGACGACAATAACCCGTGACGAGCTTTATTTATGGTTCTGCGAATACCTGACGGGTGCCGACTGACTG  
TGGGTGAACAGCATATATCCGCTGCTGAGTTTATGCTAAAAGCTGTGCGTTTTGAGCCGAGGATGCCATGCTGCCCTG  
CCGAAAACGCTCACAGCGGTACCGGATCTTCCAGGATTTCTGTTACCCCGATGCGTTTTCTTTTGTGATCTTTG  
TGGTTGTCCGGCTTTGCTGACGGATTGACGGCGAATTTTACCCTGCAACTGCGTTTTTCCGCGCTTTGCGCCCTG  
ACATCCGGTTCGCGCGGATTCCTGCGCTGTATTGCGCACCCTGCAATTAATTTATTTATCCACCATGCAGAAGCCATC  
ACGCTGGACAACCGGGCGGACACTATCCGCTGGTTCAGGACCCCAATACCCACAACATACGATGATTTTTCCGTTAA  
CGGTGGTGGTGGCAGGTCAGGATGATGTTGAGGAAAAGATCTGGGGCTCCTGTTTCGACGAGGCGCGGCGCAGT  
GGCCAGCCTTTGAAAGTTTACGATCAGATGGAATACAGCGGAAAGGAGTGGTGTACTGGCATCACCGGACAAA  
ACATCCCTGTTCCATCGCGGCTTGTATCATACCTTGCCTTTATACATGCTGATGGCAGTTATCCGTCAGACGAATCTCT  
GCTCAGTAATGAAGTGGTTTCGGTATCGCTGACCTGTACCAACCGTGAGCTTCCGTCACAAAATCGTTCCGGTGTATCA  
CCGGCACAACCGGTAAGAAATGCGGCTGTGCTTCAATTCGCAACATTAACCCCGCAGCAACCACTCGGCCGCTCAAT  
GATGGCAGCTGCACTGGTCCCTGCTCTCGCCATGAACCTGAATATCTGTCTTACTGGATACGGACGCGCTGAAGCA  
GGTCATCGCAACTTTGATCGCCACGCAATCCATCATCGCAGACGCGCGGCTGTCAACAACAAAGCTGGATGCCATG  
AGCGTCTGGAGCCCGACCCGTTGATCGCTGTTTACGGGTATCCCGTTCCGGGGCTGGCTCCACGCTGTATCTGCAC  
CCGAGCCGTTTTGCTCTGTAAGGGGAAATGTATCTGCTCGGTACGGTGTCTTCCGATTTTCTGTCGCTATCCGACGCT  
TAACTCATCCACATGCTGACCGTTGTGAACACAGAAAGCCAGGAGACATGGAATGGACGGAAGAACCGGGCAGCATC  
CTCTTATCTGA

>Cluster\_64439

TTGCGCGTACGATACCGATGACGGGGTGTAGTGGGTGATAAATATTTTTATCTCCCTGAGGGCTCCAGCCACATCGC  
TGGCCACTGGACGACTCAGCCGGTCCAGGTAGTGTGATGCTCAATATGATGACTAACGACCGGATAAAAATCGTGTCTGTT  
GCAATACAGCTCGCTCGGTTATACAAAATACCTGCTCGCGGCTGCTCTATTTCCGTCGAGCACAAAACAGTAGTGGC  
GTGGTCTATACGCTATCGATGACGAATCGGATGGATTTGTTGCCGAGGTTGACCCCGCTATCGCGAAATGCGGGT  
GATTCAGAAAATTTTCCCGACTGGGATAAAAAGCAACGAGCTAACAATCTCCAGCGTAAAGAAATGAGCGCGCGATTA  
TTGATTTTTCGCGCGGAGTGCACCGAGGAAATTTCCGGCGACTAACGAAACAGGTTGTGAGGGTGTGACGAAGTTGACGGC  
TGGCCGCTGGAAGTTGCCAAAAAGGCAAGGCGAGGGCTCGCCATCGAACTGGCGCTGTTTCAATTAAGGGGCGAC  
GTACCCGAAGGCGATTTTCCGCTCGACGCAACCGTCCCGGAAAAGTCAATATGAAATGCTGGAGGATGCCCTGACC  
TGACGTTTTCGTTTTTACCTGAAATGTCGCAATTTGTCGAGGAGCAGGCTCCTGGTATTTGGTTTCGACGGCATCGAATAT  
GGCTCAATGGGATAATAGCCTGCAGACAAATGAGGCGAAATCGTCTCGGCTATTTACCAGTGTGCCACTGCTCTGA  
GCATTTTACTATCGCATCTCGAAAAATGGAGCTCGCGGGCGCTGGATAGCAGAGGACTGCACCTGGACGCGGGACG  
GTATTCGTTTTTTGATTCAGACGAGGTTGGTGTGCTTTCGCGCGGAAACACGCGGATCGTGAATAAACAAATCGTCTCG  
CTGAATCTCGACGGCTGGGGGAGATTGTACGAGGAGTGGTGAAGCGAAGGGCGATCCGCTCAAAGAAAAGACGTTTTCA  
TAACACGACGCTCGCGCAACTCTGGAGTACGATGACGACGCGAGCAGTGGAGCAGATATTTCTGGTTAATCGCCGGGAAA  
AATACGCCAGCAGGTTCTGACGGTGTGTTTTATCTGACCGCGGCACTGACTCTCAGACGCTCCGGTCTGACGAGTGT  
TACGTTGGGGCTGGGAGTGGAGGAGGAGTGTGGCTGATGATAAAAACAAATCGTCTCGGCTGACGACGAGGAGGA  
CACGCTGCAGCGCTCGACGGAGTATTGCAAAACAAATACCGGCGAGCAGCGGACCAATCGCGCTCAGTCTGCTGGG  
CGTGGGATACCGGTGGTATAGATGCGCAGGTCGTTTATAACCGCTCGCTGAAACTCGGTCCGCTGTGGGTCAATCCAAAT  
AAAGTGGCAGTTTACACGGTCAAGCAGTCTGTAATATGCCCGTACACGTAACGCGAATAAAGTCTATTTGTCGTTAAT  
CGGTACTGATACGCGCAAAAGATTTGCTCGAATGCGCTTCCGCTGGAACCGGATTTAAATCGGCGACCAAGTGGCA  
TTCAATTTTCCAACGACGACGAAATATTCGGCAGCAGAGGCAAAACAGCTCGTCTCTGAAGTCTGATCCCGAACTG  
ATTAACGGTCCGCTGCTTTATCGCTGGGACAACAGGGCCGGGAAATGAGGCGCTCGACTGTGGGTATACGCGCTGGC  
AGCGCTACGTATCAGTAAAATTCGTTTTCCAGCTCAATCTCGAGCCTCGCTGAGCAACGGAATAACAAAACAAAC  
TGTCTCTCGAGGATGGCCAGAAATGCTCGGAGGAGCTCATGA

>Cluster\_64829

ATGTTAACCCATTGGGTAACAGCGCAAGAATGCGTAGGAATGTATGCTTTCTTAAACATGAGGTGAGTATTCGCCGCAA  
TCTTGAAAAGCTTGCAGCCAAATCATCCAGAACTACGTGCAAGCTACGGGTTCAAAGGCTTTGGAATTTTCATATATCAG  
TTCTACCAGCGGACGACGCTGCTGAGTTGTTATTAATACTGAGCAATAGAAAACAGCCAGGGGATTTTGAATTCGCC  
CGCCCCACGCTGGAAGCCATGATATGATGCTGAGGCACTGTGGAGCAATGGGATAACGCCAGCGATTTCCAGCGCAC  
ACTTGTGAAAAATGGTTGCCTGCGGTTACGGCTGCAGACGAAATGCTGAACAGGGGATTTCAAACAAAACCGGCTTTG  
CGACCGTTGACAGGCAATACAGGTCAGCGCATCCACTTTGCGGGACAAGTATACCAGGTACAGAAGTTTGGCAAGCCT  
GACTGGGCGGCTGCGCTTGTGATGAGCAGTGGTGCATCCGCTCGCAACGTTTCAAAAAGTGAATTTGACGAGGATGCCCTG  
GCAGTTTCTGATTGACAGATATCTGCGACCGGAAAAACCGCTTCCGCAATGTTATGAGCGTCTGGAACCTGGCAGCCC  
CGGAGCATGGCTGGAGTATTCCTCCCGTGCACCGGCTTTCCGCGGATTCAGCAACTGGACGAGGCAATGGTTGTGCTG  
TGCCGTGAAGGTGAACATGCACTGATGATACCTGATACCGGACAGCAGCAAGTGTGGAAACACCTGGACGATGCAAGT  
GATCAACGGCGACGGTTATCTGCATAACGCTTTTGTACGCTGGTTAACGGTGTATGATCCGTCGAAAACATGGTTCT  
GGCAGGATGTGAAAACCGGAAAAATTTCCGGCTGGCGCTGCGATGTGAGCGAGAACATTTGATCAATTCGCTCTCGTT  
ATGGATGTTGTGACTCGTACGGTATCCCGGAGATTTTACATACCAATGATAACACCCGTTGGTGTGCGAATAAATG  
GCTGACGGGAGGCGCCCAATCGCTACCGCTTTAAAGTAAAAGGAGGACGATCCAAAAGGACTGTTTTTACTGATGGGG  
CGAAAATGCACTGGACAAGCGTTGTTGCGGTAAGGCTGGGGCCAGGCAAACTGTTGACGCTGCTTCCGTTGTTGGT  
GGGCTTGAGGAATACGTTGATAAGCATCCGGCACTGGCTGGCGCATATACGGGCTTAACTCCGAGGCAAAACGATGATA  
CTATGGCGACCGCTGTTGATGACAGCTGTTTCTGAAAACCTTGCAGGAGGTTGGGATGTTCAATGCCAGACAG  
GCCGTGAAAACAGAAATGTGCGGAGGCAAACTTTCTGTTTGTGATGAGCTTTTGTAGCGTGAATACGCCAGAACGATTTGCGT  
AAGCTACCGAAGAGCAAAAACGGATGCTGTTACTGCTGCGGAGGAGTGAACGTTTTACGTAAGGCGAGTTCCGCT

TAAAGTTGGTGGCTCCCTTAAAGGTGCGAAAAACGTTTATACAAACATGGCGTTAATGAATGCCGGAGTAAAAAAGTTG  
TGGTCAGATTTGATCCACAGCAGTTACACAGCACGGTTTATTGCTACACCCTTGACGGTCGGTTATCTGTGAAGCGGAA  
TGCTTGGCACCTGTGCGTTTAAATGATGCTGCGGCAGGCGTGAATATCGCCGCCAGAAACAACCTGAAATCTGCTAC  
GAAAGCAGCGATTAAGGCACAGAAACAAATGGATGCACCTGGAAGTGGCAGAGCTGCTGCCGAGATAGCCGAACCTGAA  
CACCAGAACTCAAAATTTGCGGCATTTCCGGCTTCCGGTAATACGGAACAGGTGAAGAATCAGGAGCGCTGATGAA  
TACGAAACTGAGCGTGATGAATACTGAATCATTCGCTGGATAATTCTGGAACAGAACAGAGCTAAAAAAGCATTTAA

>Cluster\_43406

ATGGAAAAAGTTTATGATACCCTAGAAATAGTAATCTTGCTAACGCCGAAACAGTTTGTCTTTTTTTTTGTGAGTA  
CATAAAAAGAGATGATATAGTATAGATATCGCCTTGGATGTGCTGAGAATATCTCCATCTATATAATAGATTTTCAG  
TCCAGACTGAAGTTGAGTATAACAATACATTCAAAAATGTATTAATGAGCTAGTAAACTCATTTCTGATAACATTTGAA  
CTAATCTCTGAGTTCGAGAGTCAATGTAATAATATGCATGATATAAATAATCTTACTTTGCTGCTACAAAATGTGCTGG  
TATTTGGCGTAAAAATACAAAAAATCACATGCATTAATACTTAATCTCATCATGTTTTGTGAGATGTTTTTATCATCAT  
TATCATCTCTGGTGTGTGGTCAATGATCCAAAAAATGAAGAGATTTTCCATATTTATCGTTTCTGAAAAATTAAT  
ATTCATGCTGAACCTGATATCGAATATTTTCGAGTTATCGATAGGGCATTTGATGAGGTAGCCAAATACACCGGAAGAAT  
ATTTTCTTATTTACGGACTCATGGGCCATTGAAACTAATCTTCTGTGTGAATAAAACAACTTCTTCAATGGGAGGGT  
ACCTAATGAGTGAATGTTTTGACTCATTAAGCAGAGTAAGAGACTTTTTCAGACTAAGTAGTGCAGTATTTACAAAA  
TTGGATAATAACATTTACTCTCTTCGAGTTGATAGTTTTGTTTATACCGAGATTATGAGATTGCAAGAAATAGACTAAT  
GATGAGAGCGTCACATCTATATAGCGAAGTTTCAATGATTTAGTAAACAACATTTTCATCTAAATAGTTGGGTAAAGGATC  
ATATGCCATCTTACTTAAATTTCTGATGGCGTTTTTAGCTATTTCATCTAAGCGAGTTGGAAAAATATGTCCTCTGATGAC  
TTTCATGAAGAATATGGGAATATATCATTTAATTTGTTGTTGATGCGTATCAATGTTTAGTCGAGTTTCTAAAGAGA  
AATGAGCAAAAGATTTTTCATCGACAAAACCTTATACCCCTACAGTTGGATCGCTGGCTGATCATAAAAAGCCGTGAGAGTT  
GGTTATCATCTTTTCAACGTAAGGGGATTCAGCAGATGCAGCAAAAAACTGATAGATTATTTTACCTTCAATTCAAAA  
TCACATGATCTTAAATGATTTGCCATTTTATCTCCCTGTATGGACGGTTTATGCTTAAATGCCTGCATTAATAGCAATAGCTC  
AGTGCATCCCTCTAATATGCTATTTTGGTTCAAAAGAATTTCTCAAGCAAGTAAAGGGCGATTTCATGAGCAACAAT  
TTATAAAACAAGTTCTGATGCGGGGATTAAGCTTCTCCAATTGATGCTCATGCTAATATCAGTGCAGTTGCGTGATT  
CTCCTGGATGATTGTTGATTTTTACAGAACTAAAATCAATGGTCAACCAATATATTTAGGTAAAGTACTATCAGCAAGT  
GTGTAACATCGTTGGAGATAGCTCATTAATACATGATCATAATAATAATAAATTTATGCGTCTTATTTTTCAACAAATAA  
ATCGAATTTCTGAACATTTAATCTTAACTCTTGGATGATCATTAAGAATTCGAACATACCATCAACATGAGCAACAAA  
GGTGTGTATAAGCTTATTTGTTACTACAACATGCTCGGTGGGAAATATCATGTGGATGATACATATGATAGCGGACAAATA  
TGCATTATCTAGTTTTTTTCAACGAATACCTGGAGTGAATATCAAACAAATGAAAATGGAAAAATGGCGAAAAATATCA  
TTGATGGGTTTGGTGTGCGAAGGGGAAATCACTATCGATAAGTTTATGGATTATCTTTCTCTTTGGCCAGTATTAAT  
GCTGTACGTAATAATAATAAAAAATTAACCTTATAGTGTTCGATTAATGAAAATTAGTCCATCACCCCTATTATGATTC  
TTGGACTTTTGGCCATATATTCGTAAGGGAAATGATTAG

>Cluster\_62145

ATGCTGTTCGCAATTTTTTGGCTGACGAGAGCCAGATATTTACACCCTCAGAACGCACGCCGATGGCCCGGACGGCGA  
ACTCCCAATTAACCCGAGAGATGCTTATCAACCGCCGAGCGGGGATCTGTTCCGATGACCATGAATGCCGGAATGGGT  
GGTCTCCGACGAGCTGGATCGGGACGGTATTTACTGCTCAGTACACTCGGTGGCTTACCGGCGCAGACGGTAAACCC  
GTGGCGTGGCGTTGCACCAGGGGCATTCGAACCTGGACATCCAGATGAAGCGGGCGGCGAGGTTATTAAGGCAACCA  
TGCCCTGCCCTATGCCGTACGCTCTCCGATCTTGTCAGCGGCTACTCAGGGTACAACGGGATGTTGATTCGCTAC  
CATACCGAAATGACGCATCGATGTAATGCGCCGCTTATTCGCTCTCTGCCGACGCGAAAGCAGTTATTTGGTGTGGCG  
AGTTGGGATAAAGGGGCTTCCGGCCACCATGATGGCACTCGCCGCGCAGCACAAATCGCAACCGTGTGGTCCCGGGCG  
CGCGACGCTGCCCGCAAGGATGGAGAAGCAACGGCAAGGTGCAAAACCATTTGGCGCACGCTTCCGCAATGGCGAATTA  
CTCTACAGGACGCACCGCTGCGGGCTGTAAGCTGTGCGCTTCTCCGGCGCGGCTGTCAATTTTTGGCGGCGCGGG  
ACATCTCAGGTGGTGGCCGAAGGATTTGGACTGGCAATCCACATTCAGCCCTGGCCCTTCCGGTGAGCCTGTGTGGCG  
GGAGATCGCCAGAGCTTCCGCGCGAGCTGCGCTGAACCTGAGTCAAAAAGGCATCACCCACCGGAAATTTCTACCGATA  
AAGCGATAGAGAATGCGATGACGGTCCATGCGCGTTCGGTGGTTCAACAAACCTGCTGTTACACATCCCGGCAATTTGCT  
CACAGGCAAGTTGGCAGATATCCGACCGTTGATGACTGGCATCCGATCAACAAGCGCGTGGCCCGCATTTGATGAGCGTACT  
GCCTAATGGCCCGGTTTATCATCAACGGTCAATGCTTTATGGCAGGTGGTGTGCCGGAAGTCAATGTCATCTGCGCA  
GCCTCGGATTTGTCATGAAGACGTTATGACGGTTACCGGCAGCACGCTGAAAGAAAACCTCGACTGGTGGGACACTCC  
GAACGGCGTCAGCGGTTCAAGCAACTCTGCTCGATCAGGAACAAATCAACGCTGACGAAGTATCATGTCCTCCGACGA  
AGCAAAAGCGCGCGGATTAACCTCAACTATCACCTTCCGCTGGGCAATATTGCGCAGAAAGTTCCGGTGCATCAATCCA  
CCGCCATTGACCCCTCGATGATTGATGAGCAAGGTATCTATTACCATAAAGGTGTGGCGAAGGTTTATCTGTCGAGAAA  
AGTGGCATTTACGATATCAAAATGACAAAGATCAAGCCGGCGATATTCTGGTCAATTTGCGGTTGGACCTTCAAGTAC  
AGGATGGAAGAAACCTACCAGTTACCAGTGCCTGAAGCATCTGTCAATACGGTAAGCATGTTTCGTTAATCACCGATG  
CAGTTTTCTCGGGCGTTTTACTGGCGCTGCACTGGCCATGTGGGCGCAGAAGCGCTGGCCGGAGGCGCCATCGGTA  
TTACGACCGGGGATTTAATGAAATTAATAATGATTGTGCGGAGCTTACCGGCAAGTCAATTTCTCGGAACCCGTTAG  
CGATGAACAATTTACCTTACAGGAGGAGCAACTGCAATATTAATAATGCCAGACCAGCCATCAGGATTTACTTCCCGATC  
CTGAATTGCCAGATGATCCCGGCTATGGGCAATGCTTTAGGCGGTGAGTGGTGGGACATGGACCGGTTGATTTATGAT  
GTAAAAAATTTGGCGCGCTTTGCGGATTTTATGAAATAAAAACTGA

>Cluster\_41465

ATGAATCGTTTTATATGGCCAACAGTCAGCAATGCTGGGTTGTCATGCTTGTGAAATCGCCTGTGTCATGGCTCACAA  
TGACGAGCAACATGTCTGAGCCAAACACCATTTTCATCCCGAATTCAGGTTATCAAAACATCAGCAGCAACGTAAGTGCAG  
TGACTGTACCATTGTTGAAGATGCGCCCTGCGCCCGTAGCTGCCCTAATGGCGCAATCAGCCAGCTTGTGACAGCAT  
CAGGTCAATCAGCAAAAGTGTATTTGGCTGTAATTCCTGGTGGTGGCCGTGCTCATTTGGTACGATGCAAAATCGTTCTGAC  
ACCCGTGCGGCGAGGAAAGTAAAGCCAGGCGCATAAATGCGACCTTTGTGTCAGGGCGCAAAAACGGTCTGCCTGTG  
TCGAAAACTGCCCAGGCGGACGCGCTGCAACTGGTCACTGACGCGCACCTCTCCGGCATGGCGAAATCCGCGCTTGGCG  
ACCGCACGTGAGGAACAACACCGTGGCATGCCAGTACCAGCGGCGCAAGAAATGCCGGTAAATGAGTAAAGTTCGAGCAAA  
GCAGGCAACGCCCCGCGCTGGCGAGCCAGATAAACTGGCGATTGAAGCGCGCAAAAACCGGTTTTGATGAAATTTATCTGC  
CATTTCCGTGCCGATCAGGCAACAACGGGAAGCTCGGCTGCCTTAAAGTGGCGGAGCACAGCGTTTTGTGAATGGACCTGC  
CCGTGCATAAACCATATAACCGCAGTGGATTGAACTGGTGAAGCGGAAACATCGACCGCCGCTCGACTTCTTCCATCA  
GACCAACACCTGCCGAAATTTACCGGACGCGTTTTGCCCGCAAGACCGTTTTGTGTGAAGGTGCTGTACTATTTCCGGATG  
AGCACGGCCAGTAACATTCGGCAACATGAAACGCTACATTTAGATCAGGCGTTGGCGAAAGGTTGGCGTCTGACTTA  
AGTCATGTCCAAAGTGGACAAGCGGGTGGCGATTATCGTGGCGGTTCCGGCAGGGTGGCTGTGCGGATGTTCTGAC  
CGCAATGGCGTGGCGGTTGACGGTACGATCGCCATCGCAATAACGAAATCGTTGGCTTGTCTACTTTTCCGCAATTTCT  
AACTGGATAAATCCCTGCTGGCACGCGCTGGGAAATCTTACGCGCATGGGGATTCACTTCGAACTCAATTTGTAAGT  
GGTAAAGATGCTCTTTGGATTGCTTTTTGGAACAATAAGACGGCTTCTGTTGGCGTAGGCACTTACCGTTCCATGAA  
AGCGGGTTTACCCAAATGAAGATGCGCGGGCTTTATGACGCGCTCCGTTCTCTCATGCCAAATACTAAACAGGTGATGG  
GACTCGAAGAGCTACCGGAAGAGCGGTTTTATCAATACTGCCGACTTAACTGCTGGTACTGGCGGCGGCGACACCGCG  
ATGGACTGTGTGCTACTGCGCTGCGCCAGGCGGAGTAACTGCTACCTGCGCTTATCTGCTGATGAAGCTAACATGCC

AGGCTCGAAGAAAGAGGTGAAGAACGCCCGTGAAGAGGGGGCCAACCTTCGAATTTAACGTCACGCCGGTGGCGCTTGAAC  
TGAATGAACAAGGTCACGCTGCGGGATTCGTTTCTGCGCACCGCTTGGCGAGCCGACGCCAGGGACGTCGGCCT  
CCAGTGCCGGTGGAGGCGAGTGAATTTGTCATGCCAGCCGATGCGGTGATTTATGGCGTTGGCTTCAATCCGCACGGGAT  
GCCGTGGCTGGAGTCGCACGGGTAAACGGTAGACAAAATGGGGCCGATCATCGCGGATGTGGAAGGCCAGTACCGTTACC  
AGACCAGAAATCCGAAATCTTCCAGACCAGAACTGGGAAATCTTCGCGGGTGGTACCCGCGTGGTGGTGGCGGATC  
TGGTGGTTACCGCAATGGCAGAAGGACGTCATGCGGCACAGGGGATCATTTGACTGGCTGGCGGTAA

>Cluster\_43292

ATGCCAATTCAGGCTTACCGCCACAACCTGGCGAACAGATGGCCGAGGTGAGGTGGTTCGAGCGACCTGCGTCGGTAGT  
CAAAGAACCTGGTGGAAAACAGCCCTCGATGCAGGTGCGACGCGTATCGATATTGATATCGAACCGGTTGGGCGAAACTTA  
TCCGCATTCGTGATAACGGCTGCGGTATCAAAAAAGATGAGCTGGCGCTGGCGTGGCTCGTCATGCCACCAGTAAAATC  
GCCCTCTGGACGATCTCGAAGCATTATCAGCCTGGGCTTTCGCGGTGAGGCGTGGCGAGTATCAGTTCGGTTTCCCG  
CCTGACCGCTCACCTCACGTACCCGAGAACAGCAGGAGGCTGGCAGGCTATGCCGAAGGGCGGATGAGCAGTGCAGG  
TAAAACCGCGCCGATCTGTGGGACGACGCTGGAGGTGCTGGATCTGTTCACAAACCCCGCGCGCGCAAAATTC  
CTGCGCACCGAGAAAACCGAATTTAACACATTTGATGAGATCATTCGCGCATTTGGCTGGCGCTTTCGACGTCACGAT  
CAACCTGTGCATAACGGTAAAATTTGTGCGTCACTACCGCGAGTCCGGAAGCGGGCAAAAAGAACGGCGCTTAGGGC  
CGATTTGGCGGACCGCTTTCGCAACAAGCGCTGGCGATGAATGGCAACCGGGGATCTCACGCTGCGCGCTGGGTG  
CCGATCCGCAATCACACCCGCGCACCTGGGAAATTCAGTATTGCTACGTAAGTGGTCCGATGATGATGATGATGATG  
GATCAATCATGCGATCCGCCAGGCTGCGAAGACAAAACGGGGCCGATCAACAACCGGCGTTTGTGTGTATCTGGAGA  
TCGACCCGATCAGGTGGACGTCACAGTACACCCCGCAACAGCAAGTGGCTTTCATCAGTCCGCTTGGTGCATGAT  
TTTATCTATCAGGCTACTGAGCGTGTACAACAGCAACTGGAAACCGGCTACCGCTGGACGATGAACCCCACTGC  
ACCGCGTGTATTCGGAACCCGCGTGGCGGGGGCAATCATTTTGGTGAACCGCGAGTTCGTGAGCCAGTAGCTC  
CGCTTTACACTCTGCGCCGCTCAGGAGTCTGTCGGCTGCCCTGGCCGATGCGCAGCAGGTTACCAGAAACAG  
CAAGGTGAAGTGTATCGCCAGCTTTTGGAAACGCCCGCCGATGCAAAAACAAAAGCGCCAGAACCCAGGAACTGC  
ACTTGCAGGCAAGTACAGGTTTGGTCGAGTACTGACTATCGTCCATTCGACTGTGCGTTGCTTGAGCTCAGCGGA  
ACATTTCACTTTTAGCCTTGCCAGTGGCAGAACGTTGGCTGCGTCAGGCACAATTGACGCCGGGTGAAGCGCCGTTTGC  
GCCAGCCGCTGCTGATTCCGCTGCGGCTAAAAGTTTTCGCGCAAGAAAATCTGCATTAGAAAAGCGCAGTCTGCCCT  
GGCGGAATGGGTATTGATTTCCAGTCCGATGCGCAGCATGTGACCATCAGGGCCGTCCTTTACCCTTACGCCAACAA  
ATTTCAAAATCTTGAATTCCTGAACCTGAGCTACCTGAGCAGTCCGATATTCGAACCTGAAAATATTGCGCAGTGG  
ATTGCACGAAATCTGATGAGCGAACATGCGCAGTGGTCAATGGCACAGGCCATAACCCGCTGGCGGACGTGGAACGGTT  
ATGTCGCAACTTGTGAAAACGCCGCGGGTGGTCTGTACAATCTGTGATTACATCCGGCGATAAAAAGCCCTGAAAG  
ATGAGTGA

>Cluster\_7917

ATGTTTCAGATATCAGCTGGAGTGTCTTTGATTTAGATAAAAAGAAAACACGATGGCACATTTGTTTTTTATTCAAA  
TGTGATGTCCTTCTCGGTGGAAAACACCTCCCTCTTTTTAAAGCAATAAAAATAAGTCATGATGATATAAACTGTT  
ATGTGGTAAACTATACTCTCCTGACCGAAAACAGAACGAAATGAAGCTGGAGTCTAGTATAGGGCTGGTATGAGGAT  
TATAGGCAACAATTTATTTTATTTGGAATTTCTATTTTGTGATTGTTGGCTAGAGTAGAAAAAGAAATCCGTTAAA  
ATGTGCATTTACAAATTTAATAAACATCACTCAAAAATGCGCTTGAAGTTGCCCATATTTAGTGGAGATTAATCGAA  
GAGTTTCAATTTGATGATGTCCTGGGTTTTCTGCTTTTATAAAGATGATGATGAATCTAAATAGATCTGCCTTAAATCT  
TTAATGCCAGCTTAAAATAAATAGTATGATTCAAAAGAAATCAATGTCAACCAACTTTGACCTGACTTATTCATGTTAGT  
CTATGCTTTGGAGTCTTTTGTCTCAAGAAATGATAACTATAAGTCTGATTTGGGATGACTACGATCAAAAACAGAGGTTG  
AATTAGAGTCTGATTTGAGCATATGCCTTGGTGAAGATGTTTGAATAAATAAATACTTATTTGAAGGCAACAATTC  
AGATTACAAAAGGTTCAAAGATTTTATACTGAAAATCTTGAAGAAAATTTCAATGAACAGAGAGATATCCAAT  
CCGCTATAGCTTCCCTAGTAGAGCTTTAGATAAATTTATACAAAATCAGGCTCTTCTTTTGTCCATGAGGCTTAAAGCCATA  
ATGCAATGATCTCGAAAGCCTACAATCTGTTGGTGTGCTGTTCTTTTGGCGAACCTCACTTCAGTTACTCTGGA  
TTGCTTCGACTTCTTCGCATGATATAAATTTTGGCGTAAAACACAGTCAAAAAGAGAGTCTGTTAATTTGGGT  
GATGGAACATCGGGTGTAAATGGTTGCAGAGATATCTGCACAATATGGCTCTGGAATGCAGACGGATTTACAGTAAAA  
GTATAGCGAAGTGTGTTAGTGAATACCTAAATAATGTTAAATTTAGCGAAGTCACTGATTTGATGATGATGATGATG  
AATTGAGATAATCTATGATCAATCAAAAAGAAATAAAAATGGGTTGTTGCATTTTTATTTCTTATATAACTTAATGCA  
TAATGGAATAAAGGTTGAATGGCTTGGTGGTGGTGGTGGTGGTGGTGGTGGTGGTGGTGGTGGTGGTGGTGGTGGTGGT  
GCTCTCCATTTATATAAATCAATTAATGTTTCAATGTTGATTTGCTGATATAAAAACATTTGAGAAAATTTTGTCT  
TGTTTTAAAGCAATATGATATAAAAATAAATTTAAGCAAAATCGTTTAAATCTCCCTGCAATGACCGAAGTAAATGATGTTGGC  
TTGCGCAGCAATTCATTTTCAAGATTTGAATGTATCAAGACATGTTTAAATGGGCAATAGAGCGATGAGAGAAATG  
CTTCAGTAAAAGATGATTTTATATATAAAAAGAACGATTAAGTAATTCACAACCTTATGAAATGGACGAGTGTGAGA  
TTGATAGAAAAAGGGGGCTAA

>Cluster\_25691

ATGCGCGCTTGTACCTATCTGGCAGTATATAACGTCATAAATGGATGTTAAGTCTTGGTATCGTGTGGCAATTTG  
CACGCTGCTCGCCAGTATCGGCTGTTGACACTTTCGGGCTGGTTCCTCTCCGCCCTCAGCGGTTGGCGGGGTTGCCGGG  
TGTACAGTCTCAACTATATGCTACCCGCTGCGGGCGTGGTGGCGCAGCAATACCCGCTACTGCGGGGTTATTTGAA  
CGTCTGGTAAAGTACAGCGGACTTTCGCGTGTGCGCATATACACCTTCAGCAAAATGCTGCCCTC  
CCCTGCGGACTGGCGCGTATCGTCAGGGCGAATTAACAACCGCGTGGTGGCGGATGTTGATACGCTCGATCATCTTT  
ACCTGCGGCTTATCTCGCGCTGGTGGGGGCTTTTGTGGTGTATGTTGGTGGTGAATCGGGTTAAGTTTCTTTGATTT  
ACCTCGCTTTACGCTGGGTGGCATTATGTTACTGACGCTTTTCTGATGCCACCGCTGTTTTATCGTGGGAAAAG  
CACAGGGCAAAATCTGACTATCTTCGCGGGCAGTATCGCAACAACCTGACGGCTGGCTGCAAGGGCAAGCTGAGCTGA  
CCATTTTTGGTGGCAGCGATCGTTATCGCACGAGTTAGAGAAATACCGAAATTCAGTGGCTGGAGCGCAACGCTGCTCAA  
TCTGAACCTGACCGGATTTGCGAAGCGATAATGCTGCTCATTTGGCGGTTAGCGGTGATCCTGATGCTGTGGATGGCGT  
TGGCGCGTGGCGGCAATGCTCAACCCGCGCTTAAATGCTTTCCTGCTTTCGCGGTTAGCGGCTTTGAAGCGC  
TGGCACAGTAACGGGTGCATTTACGATCTGGGGCAAGTCAATGCTCTGCGGTACGGATCACTGATTTAACGGATCAA  
AAACCGGAAGTCACTTCCCTGATACCAAACTCGTGTGCGGATCGGCTTTCGCTGACATTACGGGATGTTACGTTCA  
TTATCCGGAGCAATCCAAACAGGCACTTAAAGGATTTATCTTCAGGTAACCGCGGGAAACATATTCGATTTCTCGGG  
GAACCGGATGGCGGCAAAATCAACTGTTTACAACCTGCTGACCCGCGCATGGGACCCGCAACAGGGCGAGATTTTGCATA  
GATAGTCCATAGCCAGCTGAATGAAGCGCTCTACGACAGACCATCAGCGTTGTTCCCGAGGAGTGCATCTGTTTAG  
CGCCACGCTGCGTATAATCTGTTACTCGCTCGCTGCGCAGTGTGATGAGGCTCTGGCGGAGATCTTGGCTGCGGTTG  
GCTGGAGAAGTCTCGAGGATGCAGGCTCAACAGTGGTTAGTGAAGCGGACGCCAGCTCTCCGGTGGTGAATG  
CGCGCTGCTGCTATCGCCGCTGCTGTTACATGATGCGCCGCTGGTATGCTGGATGAACCTACAGAAAGCTTAGATG  
CACACCGAAAGTACAGTCTTGAATGCTTGCAGAAATGATGTCGAGAAAACGGTGTAAATGGTCAACCATCGACTTC  
GCGGACTCTCTGTTTCCAAATAAATAGTATGAGAACGGGCAAAATATTGAGCAAGGATCTCACGCAAGTCTGCTT  
GCCAGACGGGGCTTATTACAGTTTAAAGCAGGGTTGTAA

>Cluster\_34518

ATGGATAATGCAGAACTGCCATTTGGTATCGATCTCGTACTACCAATAGTTTAAATGGCGTCTGAAAAGACGGTGGCCG

GCAATTAATTCCAAATAAGTTCGGTGAATATTTAACACCATCCATAATTAGCATGGATGAAAAAATCATATTTTGTAGTCG  
GAAAACCGCGCTGTATACAGCGTACTTTCGCATCCGGATAAAAACGGCAGCGTTATTTAAACGTGCAATGGGCAGTAATACC  
AATFGCGGTTAGGCAGCGACACATTTAACCGCCAGAACTGTCTCTTTGGTATTACGCTCATATAAAGAAGATGCCGA  
AGAATTTTCGCAAGTCCGATTAAGATGTGGTGTATCCCGTTCGGCTTATTTTCAGCGATGAACAACGCAAGCATACC  
GTTTAGCAGCGGATTAATCGCCATTGCACATTCGCTGGCAGTATCAGGAAGAAACCGGGAATGCGAATTTTACGAGAACGA  
CATACCCAAACAAAATACCCGTTCCGCTGGTGTGTTGATCTCGGTGGCGGCACGTTTGACGTTACGGTGTGAGTACGCCAC  
GCCGGTGAATGAAGTTCACGCCCTCCGCTGGCGACAACCTTCTTGGTGGCGAAGATTTTACCCATATGCTGGTCTGATGAG  
TTTTAAAACCGCGGATGTGCCAGGACCACGCTTAACGAGAGTGAACGGCAGCCTTGTACGCCCTGTGTGGAAGCGGCA  
AAATGTAGCAATCAATCGCCATTGCACATTCGCTGGCAGTATCAGGAAGAAACCGGGAATGCGAATTTTACGAGAACGA  
ACTGGAAGATTTGTGGTTCGCGCTGCTCAATCGCTTGGCAGTGGCGATTGAACAGGCGTTGCGCGATGCGCGTCTGAAGC  
CGAGTCAAATCGACAGTCTGGTGTGGTGGCGCGCTCACAATGCCGCTGGTGCAGCGAATCGCCGTGCGTCTGTTT  
GGCAAAATACCGTATCAAGTTCAGATCCGAGCACCATTGTGCGCGTGGGCGCAGCAATCCAGGCCGCTGCCGCTTACG  
CAGTGAAGATATTTGAAGAGGTAATCCTCACTGATATTTGCCCTTACTCGTTGGCGGTTGAAAGTAAACCGCAGCGCTT  
CCGGCATTCTCGCCGATTATTTGAACGAAACACCCTGTGCCGCTGTGCGGTGTAGAAACTTATTAACCATGCACCCG  
GAACAGGATTCATTAACGTTAACGCTCTATCAGGGAGAAAACCAAAAGTTAAAAACAACATTTGGTGAATCCTTCCA  
TGTGCCGTTGAAGAAAACCGGGCTTATCAGTCGATTGATATTCGCTTATGATATCAACGGGTTGCTTGAAGTTG  
ACGTGCTTCTGGAAGACCGGACGCTTAAAGTCCAGAGTATTAACCAACAGCCCGGTAACATTTAGCGCGCATGGA  
GAGAGTCGGACGCGGTTATCCGCATTGAAAATTTATCCGCGCATATGCTCATCAATCGCACCTTAAAGCCAAACTGGA  
AGAGTTGTGGCGCGGGCCTGGGTGACGAGCGAGAAGAGATCGGCCGGTGTACCCGATTTTGTATGCGCGCTTGCAGT  
CAAACGATATGGCCCGCTGGATGAAGTTCGGCGCGGGCGAGCGATTATTTAGCCATGAGATCCCATAA

>Cluster\_48683

ATGAATACAGCCCTTCTATCATCGACGATGCCAGCTCAAACAGGCTATCGACTATCGTTCAGGAAATGAATGTCATCCA  
CGAAATCGTGGCCGAGTGGGAGAAAGAGATCGCCTTCAATGTATCAGGTACAGACTTCCGTTTATGGCGACGAACGCCACA  
ACATGATTAATCGCCTGCTGAGACTAAACCATGACCAAGATGAAGATCGCTCGGTTTAAATCGAGGTTGGTTGATATAA  
GTCGATCTGGAATGGGTGAAACAGAATATTTGGCCGAGTACTGGAGGAAGGTCACGGACATGACTAACGTTTTGCTGAT  
CATGCCAGCTTCCCGTCGAGATGAGTGGCGGAGCAGTTTATAGAGGGCAAACAGGAAGTCATCAAACTGACAGAACC  
GCTACCAGATGAAGTTAAAGAGTTCGTTGGTGTACCGGAGTTCAAAGCAGAAACGGTTCATACCCAGATGCTTAAATTTG  
CTGAAATGACAGCCCAAATATCTCTGAGCGCGGTGATAGGCTTGGTTTAAAGCGCTGAGTCTGCGCAAGACAATAA  
GACAAACGGTTTTCAGCGAGCGGCTGATAATCGCTGACTGCATTTCTGATTTCTGGCGGACAGCGTTAGCGTGAACATC  
GCAAAGAGGACTACATCGACGATCTGCGTGTCTTGCTTCAATTTCTCGCGCACAAAGAATTTATTAACCATCAACCGCCT  
GCTGAGGTGCTATCAGCTGCGTATAGGGCAAACGACTGCCAGACCGGCTGACTGGATGAACGTCGATGGAATCCTGATGCG  
CGCGAAGATGTTCAAGAACCGCAACGTTCACTTTGAAATACATCTGACGTTGGCTTGAAGTTGAATGAGGTTGCTGGCT  
ACAGTATGCCGTGCTGCAATCCCGCGCCATGCCGAACTGCGCCAAAACAGGGCACCAAGCAGTTCGGGTTAATCCAG  
AAGACGATCTCTGTGCGGTTCCGACTGCGCTTCTGTGACGGGCGATTGAGCAAAGACAAGGCGTATGTTACTTCTCTGA  
TTCAGTCTCCAGAAGTCGACGAGTGAAGAGCTTGAGCGCACACTGAGCTTCAATTTGCGCGGCTGCAGGAAAAAAGCCT  
GGCAGATTTCCCGTATGACATTCGGCCATACGTAATAATCGATTGTGCTACCGGTTTAAATACCGGATCAATAACACCG  
TTCATCCCTACCCACGCTTGATGCTGAGTACGTTGCCAGAGCCACTGAATGAAGTCTGGTGAAGAGTCTGAGGAGTCTG  
TCAAGCGGACGTTGGGATCTTCTGCGCTATATTAACCGCGATGTTGAAGATGTTACCTGCATAGAAATCGCACCTCTCT  
TCGCTGATATCTGCGCTGGAAGGTTATACGAACAGATTTGCTGCGACTTCATAAAGTGGTCTGAGGACAACGCGAT  
TATCAGTTTCGACAAAATCGTTATGAACCCGCGTACTCGCTTGGTCTGATAGAGAGCACAGATGGCTGCGCTGGGGCA  
TCTGAAAGTCGGCGGGCTTGTAGCAGTATTTGCCGGGCACTGCGCCAAATCGGACTGGATGACGATGGATAATTACG  
TTTTATGCCAGAGGAAAGTCTGTTTACCAACGAGTTTGAAGACACAGGATCACAGTTCAGCGTATACGTTTTCAAACCGCTT  
AAATGA

>Cluster\_24038

GTGAATGTGGCGCAGGCGGAAGTGTGAATCTGGAGTCCGGAGCTAAACAGGTTTACAGAAACCTTTGGCTACCAACA  
GTTTTCGCCCGGCGAGGAAGAAATATCGACACTGTGCTTTCGGTTCGCGATTGCCTGGTGTGTTATGCCCATGGTGGCG  
GAAAATCCCTTTGCTATCAAAATCCCTGCTTATTTGCTAAACCGGCTTACCCTGGTGTGCTCACCGCTGATTTCTGATG  
AAAGATCAGGTAGATCAACTGCAAGCAACGGCGTGGCGGGCGGCTGCTTAACTCGACGCAAAACCGCGAGCAGCAACT  
TGAAGTGTGACAGGCTGTGCGCACCGGGCAAATCCGCCGTCTTATATCGCGCGGAACGCTGATGCTGGATAACTTTC  
TTGAGCATCTGGCGCACTGGAATCCGGTGTATTTAGCCGTTGATGAAGCGCACGTATCTCCAAATGGGGGACAGATTT  
CGCCCGAATACCGCCGCTCGGTGAGCTGCGTCAAGCTTTCCTACTCTGCGGTTTATGGCGCTAACCGCCGCGCA  
CGACACCACGCGGAGGATATCGTGGCCTGCTGGGCTGAACGATCCGCTGATTCAAATCAGCAGTTTGTATCGCCGA  
ACATTCGCTACATGCTGATGGAGAAATCAAACCGCTCGATCAGTTGATGCGCTACGTCAGGAAACAACCGGTAAGTCA  
GGCATTATCTACTGCAACAGCCGGGCAAGTGAAGACACCGCTGCGCGCTGCAAGCAAGGAAATTAGCGCGGCGG  
CTATCATCCCGGCTGGAATAATATTCGCGTCAAGCTGCGAGGAAATAATTTACGCGGATGACCTGCAAAATTTGGTGG  
CGACCGTGGCGTTTGGCATGGGCATCAACAAGCTAACGTCGCTTCTGTTGCTCACTTTGATATCTCGCGCAATATCGAA  
TCTTATTTACAGGAACTGGACGCGCGGGGCTGATGGCTGCGCGGGAAGCGATGCTGTTTTACGATCCGGCTGATAT  
GGCTGGCTGCGCGTGTCTGGAAGAGAAGCGAGGCAATGTCAGGATATCGAGCGCATAAATCAATCGGATGCTGCTG  
GCGGTTTTGCCGAAGCGCAAACTTCCGCTGCTGTTGCTGAACTTTTGGCGAAGGGCGCGAGGAGGCTGCGGG  
AATGCGATATCTGCTCGATCCGCCAAACAATACGATGGTTCAACCGATGCTCAGATTGCCCTTCCACCATTGGTCTG  
GGTGAATCAGCGTTTGGTATGGGCTATGTTGGTGAAGTTATTTCCGGTGTCTAATAATCAGCGTATCCGCGACTATGGT  
ATGACAACTGAAAGCTATGGCATGGCCGTGATAAAAGCATGAACATTTGGTGGCGTATCCGCCAGCTGATTTAC  
CTCGGCTGGTACGCAAAATATTTGCCAGCATTTGCTTACACTGACAGAGGCGCGCGCCGCTGCTGCGCGGCA  
ATCTCTTTGCAACTTGGCGTGGCGGATCTGTTGGCTCAAACCGGAAAGCGATGCGAAATCCTTCCGCGCAACTATG  
ATCGCAAATGTTGCGCAAAATACGCAAACTGCGTAAATCGATTTGCCGATGAAAGCAATGTCGCGGCTGAGGTTAT  
AACGCGCAACTTTGATTGAGATGGCGGAACAGATGCCGATCACTGCCAGGAAATGCTCAGCGTTAACCGGCTGGGAT  
GCGCAAGCTGGAACGCTTTGGCAAACCGTTTATGGCGCTGATTCGTGCGCATGCTGATGGCGATGACGAAGAGTAG

>Cluster\_16051

ATGCGCACATTTACAATCTGTTGTATGATATTTGTACTGTTCTGGGTTGTTTCAGGGAAGGCGAGAACC CGGCACAA  
CGGGAAGACACTAATTTGAAATGCATCAAAAATCTGGGATCAACGTTACAATGCGATCAGTCGATTTATTGATGCTG  
AAGGGGTGTATAGTACAGGAGCAACGGCGGATCATATATGCCCGTATGAACTTTTATTTACATGATGAATTCCTATCCA  
GTTTCAATCCACACTAAAATCTGAAATCTTCCGAGCTATTTGCTGCGCACTTTTGGGGTATTTTCTTGTGTTGATGAT  
TTATAATACATACAGACAGAGAATGACTGCTTTTATATCATATTTATAATTTTACAGAAGTCGATTTGCTCTT  
GTCTTGTACTCTGATACAGAAAGCTGTAAGCTGTGTTAAACGTTATCTTCCGGAATATCTGGCTGAATGCAATTC  
AACAGGAAGATTTTTCATGAAAATGAAAGTTGTATGCTCTGGGAAATATACAGGAACTATTCGAGGGATAACGGGAA  
AAGCAAGAGTCTGATGAAAACATATATGCTTATCAAAAATGAAATAAAAAGGATTTATCGGGAGAAAGAACTGGATA  
AGGATGAACCTGGGAAATTTACTAGGAATTTGATAAATTTATAATGATTTTATTTACATTAAGTGTCTTACTGATATA  
CAACGAAAGACGAAGATACTTCAAAGCTTGCATATTTATCTCAGAGTGTGGTGAAGAAAGGGCTCTGGACTCATGGTTT  
ATATGGTTACGCTGAGCAATATCTTTATGACTTTACCAGCCTGGATACACGCTTATGCAAAAAAATTTACTGAAATGT



TTTATAAGTTTGAAAACAGTGCAGAAGGGACATTTGGCTCGTTATAATGTATCACTTGATGATAAATCTCAGGAATATATTT  
GCCCGTCTGAAAAGATCTTTTATTTAATAATTAATGAGAAGAATGGTTGTGATGACGCATATCTGAAAATGATTATAAGTCA  
TTTTGGGCGAGTTGCAGAATGAGGCTGTTTATGTGACCAGCTGCTACGGAACACTTGCGGTGTACATTTGTCTGATAAGGA  
AAAATAAAATTAATGATGTGCTGCATCATATGATGACATGGAAAAGAAAGGATTTGTTTGTGCTGAATTACCTTCAGGATAT  
ATCAGAGTAAAGAGTATGTTTGTGATGGTAAGACACTGGCTGAAAGTCAATATGGAGAACAAGTATATCCAGTCCGACGAGC  
TTATTTGGCTTGACCATGTAAAAGCTCATCAGGATGCATTTATTTGAATCAATACCACCTTATTTGAACCTGTATATAAGGAGG  
GTGAAATACAGTATGATGCGAACAAATTTACCCGTGATGCGTGTATTAAGATGTATAATTTGATGCTTAAAAGATCAGT  
ACGAAAACATATATAGCTCCCCATATATTACAGGTTTGTGATGACGTAGAGAAAAGTACTGGATAAGATAAATATTTCT  
GATAGATAAAGAGTATGTTTATGATGGTAAGACACTGGCTGAAAGTCAATATGGAGAACAAGTATATCCAGTCCGACGAGC  
GTAAAAGATACTATGATAGGGCTTTTACAGGCAGTAAGAAATATACTTTACTGCAATGTGTTGAGAAGCTTGGTGTATTA  
GTTCACTACGTGAAATCACCGGTGATGAAATTAATAATGTGATGATGTTGATGCGGATAAGGCCGAAAACAGGAACAG  
ACGCGAATGATATATGATGCGTTAACCATTTTGTGAGGATGATAACAGGGCTAAACCCCTGATCTGTCTGTGA

>Cluster\_39541

ATGAATGATGCCGTTATCACGCTGAACGGCCTGGAAAACGCTTTCCGGGCATGGACAAGCCCGCGTGCACCCTCGA  
CTGCACCATTACGCCGTTATGTGACGGGGCTGGTTGGGCGGACGGTGCAGGCAAAACACGCTGATGCGGATGCTGG  
CGGGATTACTGAAACCCGACGGCAGTGCACCGTGTATGGCTTTGATCCGATCAAAAACGACGGCGCGTGCACGCC  
GTGCTCGCTATATGTCGACAGAAATTCGCCTGTATGAAGATCTGACGGTGTGGAGAACCTCAATCTGACGCGATTT  
GCGCAGCTCACCGGCGAGGCACGGAAGCAAATTTTGTCTGCTGCTGGAGTTTACGCTCTCTTGGCCGTTTACCGGAC  
GCCTGGGCGGCAAGCTCTCCGGTGGGATGAAACAAAATCTGGCTGGCTGTACCCTGGTGGCGCAACCAGAAAGTGTG  
CTGCTCGATGAACCCGGCTTGGCTTGACCTATCTCACGGCGCAACTGTGGCAGATGGTGCATGAGCTGGCGGGCA  
AGGATGTTAATCTCTGGAGTACCTCGTATCTCGACGAAAGCCGAGCAGTGCCTGACGTTACTGATGAAAGGCG  
AGCTGCTGTATCAGGGAGAACCGACGGCCTGACTCAAATATGGCCGACGACGCTTCTGATGACCAGCCGACGAG  
GGCAACCGCAAACTGTTGCAACGGGCATTTGAAACTGCCGAGGTCAGCGACGGCATGATTCAGGGGAAATCGGTACGCT  
GATCTCAAAAAGAGACAGCCAGCATATTCGCCATTCGCCGACGGATGCGGAAATCGACATCAACGAAATCACCG  
CGGTTTTGAAGATGCGTTTATTTGATTTGCTGGGCGGTGCCGAACTCGAAATCGCCGCTGGGCGCAATATTACATACG  
GTAGAAGGCACACCGGCGAGACGGTATCGAAGCGAAGGAATTAACCAAGAAATTTGGTGTATTTGCCGCGCACCGATCA  
CGTCAACTTTGCCGTTAAACCGGGGAGATTTTGGTTTGTCTCGGACCAACGGCGGGTAAATCGACCCTTTAAGA  
TGATGTCCGGTTTGTGTTACCGACTCTGGCTGCTGGTGGTGGTGGTGGTGGTGGTGGTGGTGGTGGTGGTGGTGGT  
CGCCAGCATCTCGGCTATATGGCGCAAAAATTTTCGCTCTACGGCAACCTGACGGTGCAGACAGAAATTTACGCTTTTCTC  
TGGTGTGATGGCTTACCGGCTCGGCGCAGAACGAAAATCTCCCGTATGAGCGAGCGCTTCCGCCGAAAAGTATCG  
CTCCACGCGACCGATGAACCTGCCATTTAGGTTTAAACAGCGGCTGGCACTGGCCTGCTCGCTGATGATGAACCGGAC  
ATTCGTGTTCTCGACGAACCGACCTCGGCGTTGATCCCTCACCCCGCTGAATTTTGGCTACATATCAACAGTATG  
AGAGAAAGGCGTACGGTGTGTTACCACCACTTTATGATGAAAGCGAATATGCGACCGCATCGGCTGGTGTACC  
GTGGGAAATTAATCGCCAGCGGACGCGGACGATTTGAAAGCGCAGTCACTAACGATGAGCAACCCGATCCACGATG  
GAGCAGGCTTTATTCAGTTGATCCAGACTGGGATAAGGAGCATAGCAATGAGTAA

>Cluster\_5637

ATGGCAAAAATGAGAGCCGTTGACGCGCAATGTATGTGCTGGAGAAAGAGGATCACTACCCTTCCGGTGTCCGGG  
AGCTGCAATCAATCCGTTCTACTCAGCGATGCGTAAGCACGGGATTTCTGTCACATTTCCGCGCTCATGTGGAAGGTT  
CTTCGCACATGCGCGAAGTTATACCCGCGCAACGGCAAGGAATATCGGCGTATGCTCTGGGACTTCCGCTCCGCGG  
ACGGCATGATCACCGCGCTCTATTTCCGCTTCTGCTGATTTCCATTTCTATTTCTGTCATTTACCGGCCAGGCACCGCGC  
CCGTCTGCATAAAGAAGATTTTACAGCCGTAGATATGAAAGCAATTTGCTAAACCGGTCAGCAAAATGGCGGTTACAGTTC  
GTGAAGCGCGCTGCTGCTCGCGTGCATGCAACAGGCATTTTCACTGATGCGTCTGCTGGTCTCGGCTCCGCTCCGCTACTGGT  
GATTTACCGTTGACGCTTCAAGTTGCGGAAATCGATTTGATCTGACATGTGACGAAACCGCTCGGCTTACAAACTCG  
TGCCAGCCGATGACGATCGAAAAGCTGTAGAAAATGTTAATCCAGGCCGAAACGCTCCGGTGTGTTGCCGGGGGGGG  
TAAATTAATGCTGACGACGCTGCACTGTTACAACAGTTTGTGACTGACGAGCCTCCGGTGTACCAACGCTAATGGGC  
TGGGGCTGTATCCCGACGATCATGAACGTATGGCCGGATGTTGGTCTGCAAAACCGCGCATCGTTACGGTAACGCAAC  
GCTGCTGGCGCTGATGATGATGTTGGTATCGGTAACCGTTTGGTAAACCGTATGTTGCTAACCCTCATACCGGCTCGGTAGAGAAATACCG  
AAGGGCGCAAAATCGTTCAATTTGATATGAGCCGACGCAAAATGGTCCGCTGCTGTGTCGGATCTCGGTATTTGCTCT  
GATGCTAAAGCGGCTGACACTGCTGTTGAAGTGGCGCAGGAGATGCAAAAAGCGGCTGCTGCTGCCGTGCTGTAAGA  
ATGGGTCGCGGACTGCCAGCAGCTAAACGCATTTGCTGCGCAAAACCCACTTCGACAACGTTGCCGGTGAACCCGACG  
GCGTGTATGAAGAGATGAACAAAGCCTTTGGTCCGATGTTTGTATGTCACCACTTGGTCTGTCAAAATCGCTCGG  
GCACAAATGCTGCATGCTTTAAAGACCCGACGATCAACTGTGGTCAAGCTGGTCCGTTAGGCTGGACGATTTCCGGC  
TGGCTAGGGGTTTGTGCGCTGATCGAAACGCAATGTTGGTGGCGATTTCTGGCGACTTTGACTTCCAGTTCTGATG  
AAGAGTTAGCTGTTGGCGCAGTTCAACATTTCCGTACATCCATGCTGGTCAACAACGCTTATCGGGCTGATTTCTG  
CAGTCAACACCGCTTTTGGATGACATGGACTACTGGCTGCACTGCTTTCGAGAAATATCAACTCCAGTGAAGTGAAT  
CGGTGTTGACCACGTAAGAAGTAGCGGAAGTTTAGGTTGTAAGCTATTCGGGCTTCAACCCGGAAGATATTGCCAG  
CCTTTGAACAGGCGAAAGCCTTAATGGCGCAATATCGGTTACCGGTAGTCTGGAAGTATTCTCGAGCGTGTGACCAAT  
ATTTGATGGGCGGCAACTGGATAACGTCATGGAATTTGAAGATATCGCCGATAACGACGCGGACGACCCGACTGAAAC  
CTGCTTACGCACTATGAATAA

>Cluster\_35441

ATGCCACTTCTCAATGATCTGCTCGATTTCACTGACCATCCGCTTATGCCACCGCCCTCTGCACAACGTTTGCAGAGCA  
CCTTCCCGTCTGAGTGGATACAGCACTGTCTGACGCTTTCTGCGCATGCGACCGTTCCGCGCGCTGTTTACCGGAGGACA  
TGGTTATCTGGATGGTGGTGACCATGGCCTTTTCCGCAATGAGCCAATACCAGTGTGGTTCGCGCTCTGAACCTGAGC  
GCGGATGGCGAATCGGGGATCAACCTGCTGGCCCGCAGCGCTGTCACCAGGCGGTCAGCGCTGGGGGCGCCCGGCA  
GGAATGGCTCTTCCGCGACCGGCACAGACATGGGGCTCGGAACGTTACTGAAGGATGACTGGCACGGCTCGAGCTTT  
TTGCCATTTGATGGCGCACAGTTTCAGGACCTGATGAACCTGAGTTGCGTGAATATTTAGGCTCTGCCAACACATCCACT  
GAGCGGCAGAGCGCTACCCGCTCATGCGTCTGGTGGCGTTGATGAATCTGGGAAGCCACATTTTGTGATGCGGTGAC  
CGCGCCTTACCGGCGGAGCGAAACCGTGTGGCTCACTCCATGCTCGCCACCATCCCGGATAACTCCATTACGCTGTTT  
ACAAGCTCTTTTACAGCGCAGACCTGCTGCTGACGCTGAACACGAGGTTGTAACCGCCACTGGTACTGCTGCGTGG  
AAGAAATACGCGCGCAAAACAGAAAGTTCAGGTTCCGGAGACAGGCTTCTGAAACTGAAGGTGACGAGCGGAG  
GAAAAGAAATCTGCACTGCCAGAGTTCTGGTACGCCCCGGGCTGACTTATGAGGTGAACCGTGTGGAGAAAACGGGT  
TGACATCACTCCCGGCGAGCCGTACAAAGCAAAAGAGTACGGGAACCTTACCATTACGATGGGAAATCGAAGTCCGG  
TTCAGAACTGAAAAGCAGCTGCTGAAACAATGCCCTGGTGGCTGAGAAGCCGTAAGTTGAGCTGCTGGAACGAGG  
TGGGGCATGTTGCTGGCTTACAACCTGATACGGCTGAGGCAACAAAAGCGGCTGAGAAAACAAAAGAGCGGCTCAG  
AAATCAGCTTTAAGTTCCGCTTCCAGTTTATCGCGACAGAAATGATGCTGGGAAATACAGCATCACCGGGGACCATC  
CCGAAACGACTGGAGCATCTGCGGGGTGCTTGGAAAGTTGTGTTTACATAACAAAACGCCCCGACCATCAAGGCCGAGG  
AGTTAAGATATCAAAAACCGCTTATCCGGTGAACGACGACCCGCTCCGCTTAAAGCAACGGCATTGCGGTGA

>Cluster\_43359

ATGCCACTTGAATGAAAGTAACTCTCAAGTTGAAGCGCAGCGCAAGATTCTGGAAGAGCAGTTTCCGACTGCGCTGGA

GTTGGCCCTCAGGCAAATCGGACGGTGCAGAAGTTGCCGTACGCAAGACCACGGCATTAGCGTAAGCACGCGTTATGGTG  
AAGTGGAGAAATGTTGAAATCAATAGCGATGGCGCGCTGGGGATCACCGTTATACCAGAACCCTAAAGGTAGCGCATCG  
TCTACCGATTTAAGCCCGCAGGCCATTGCCCGACCGTACAGGGCGCGTGGATATTGCCCGTTATACCTCGCCAGATCC  
GTATGCAGCGCTGGCAGACAAAGAACTGCTGGCCTTTGACGCGCCGGACCTTGACTTGTTCACCCCTGGGACGTTTCTC  
CGGATGAAGCCGCGGTGATTTTGGCCAAATGAGTGGCAACAGGGCTTGCAGGCGGACAAACGCATACCCTAAGAGG  
GGTAGCTTTAACAGCCACTACGGTGTCAAAGTTTTTGGCAACAGCCACGGCATGTTGCAGGGTTACTGCTCAACCGCTCA  
TTCGCTCTCCAGTTGTGTAATCGCCGAAGAAAATGGCGATATGGAGCGTGATTACGCCACACCATTTGGGCGTGGCATGA  
CGGATCTGCAAACGCCAGAGTGGGTCGGGGCCGACTGTGCTCGCCGTACCTTATCGCGCTGTACCCGCTAAACTTTTCT  
ACCATGAAAGCCGCGGTGATTTTGGCCAAATGAGTGGCAACAGGGTTGTTGGTCAATTTGGTGGGGCGATAGCGGGTGG  
TGGCGTCTACCGTAAATCGACCTTCTTGTCTGACTCGCTCGGTAACAATAATTTGCCGGACTGGTACTATTGAAGAAC  
ATCCGCATCTGCTGAAAGGGCTGGCATCTACACCATTCGACAGCGAAGGTGTGCGCACCGAGCGCCGATATCGTCAA  
GATGGCATCTGACTCAGTGGCTGCTGACCAGCTATTCGGCGGAAACTGGGGCTGAAAAGCACCGGACATGCGGGCGG  
TATTCACAACTGGCGGATTTGCCGAGCAAGGGCTAAGCTTCGCAACAAATGCTCAAAGAGATGGGCACCGGGTGGTGA  
CGGAGCTAATGGCCAGGGCGTGAGTGCATTTACCGGTGATTTCCCGTGGTGCAGCGGGCTTCTGGGTAGAGAATGGC  
GAGATTAGTATCCGGTGGAGCAATACCATCGCTGGTAATTTAAAAGATATGTGGCCAAATATTGTACCCGTCGGTAA  
CGATATTGAAACACGCGATAATATACAGTGTGGTCTGTGCTGTTGCCGGAGATGAAAATCGCCGGCAGTAA

>Cluster\_33837

TTGTTTCTCGCACAAGAAATTTATTCGTA AAAAAGCTGATGGTTCATGCGCTGAGTGTGAAGAAATTCGTTTCTTTATCAA  
CGGCATTCGCGACAACTATCTCCGAAGGGCAGATTTGCCCGCTCGCGATGACCATTTTCTTCCACGATATGACAATCC  
CTGAGCGTCTCGCTGACCATGGCGATTCGAGATTCAGGAACCGTTCGACTGGAAAAGCCATGATCTGAAATGGCCG  
ATTTGTTGATAAACACTCGACCGGGCGGTGTCGGCGATGTGACTTTCGCTGATGTTGGGGCGATGGTTCGCTGCGCTCG  
CTATATTCGGATGATCTCCGGTTCGGGCTCGGTCATACTGGCGGTACGCTCGACAAACTGGAATCCATCCCTGGCTTCG  
ACATTTTCCCGGATGACAACCGTTCGCGGAAATTTATTAAGACGCTCGCGGTGGCGATTTATCGCCAGACAGCTCAGCTG  
CTCGCGCGGATAAAGCTTTCACGCGACCCCGGATTTACCGCAACCGTGGATTCATCCCGCTGATCACCCTCTAT  
TCTGGCGAAGAAGCTGGCGGAAGGTCTGGACGCGCTGGTGTGAGTGGAGTGGGTAGCGGCGCTTTATGCCGACCT  
ACGAATCTCTGAGGCCCTTGTGTAAGCGATTTGTTGGCGTGGCTAACGCGCTGGCGTGGCACCACCGCGCTGCTCACC  
GATATGAATCAGGTACTGGCCTCCAGTGCAGGTAACGCGGTTGAAGTTCGTGAAGCGGTGAGTTCCTGACGGGTGAATA  
TCGTAAACCCGCGTCTGTTTGTGATGTCACGATGGCCTGTCGCTGGAGATGCTGATCTCCAGCAACTGGCGAAGATGACG  
CCGAAGCGCGCGGAAATTCAGGCGGTGCTGGACAACGGTAAAGCGGCAAGTCTTTGGTCTGATGGTAGCGGCACAA  
AAAGGTCCGACCGACTTCGTTGAGAATACGCGAAGTATCTGCCGACAGCGATGCTGACGAAAAGCAGTCTATGCTGATA  
CGAAGGTTTTGTGAGTAAATGGATAACCGCGCTGGGGATGGCAGTGGTTCGAATGGGCGGGGACCGCTCAGGCAT  
CTGACACCATCGATACAGCGCTCGCTTTACTGATATGCGCGTCTGGGCGACCCAGGTAGACGCGTCAAGCTCCGCTGGCA  
GTTATCCACGCGAAAAGACGAAAACAGCTGGCAGGAAGCGGCAAGCGGTGAAAAGCGGCAATTAACCTGCGGATAAAG  
ACCGAAAAGCACACCAACTGTCTATCGCGTATCAGCGAATAA

>Cluster\_27044

ATGAACGTCGAGTTAAACCTCTGCGACGACCAGACCATCCGCGAGCGAGTACAAGCAGCAGGTGTCGTGGGTGCTGGCGG  
CGCAGGTTTTTCAAACCCATATTAAGCTACAAGCGCGTGTGACACGTTCTGGTGAATCGGGCGAATCGCAACCAATGT  
TGAAGTGGATCAACAGTTAATGGTGCAGCAAGCCAGCGCGCTGCTTCGCGGTGTTCACTATGCTATGAAAGCCACCGGG  
GCCAGTAGCGGAATCATCGCGCTGAAAGAGAAATATCAACGGGCAATAAACGCACTCACACCACTGTTACACCGGATAT  
CCGCTGCAATATTTTGGCCGATGTTTACCCCGCAGGAGACGAAGTGTGACCACTCTGGATGGCAACTGCTCGCGCTTC  
CACCCTGCTGATTTACCGCTTAGCGTCTGGTGTGGTCAATAAAGTTCAAACCTACTTAATATTTGCCAGAGCGCTCGAG  
CAACAGTATCCAGTGAAGCGCGCACACTCACTATTAATGGTGCAGTGGCGAAACCAATAACGGTAACCGTCCCCATCGG  
CATGCTTTTACGTTACGTCGCTGGCGCTGGCGGGCGGCAACAGTATGCTCTGCTGTTTATCAATGGCGGGCGGATGA  
TGGGAAGTTTGTACATCGCTCGACACCCCGTACGAAAACCACTGGCGGATTTGCTGGTTTTTACCCAACTCTCATTCA  
CTGATCCAACGTCGAATGCAAGATGACCGCAGCGTACTTGGCGTCCGAAAACCTGTTTGTGAGCAATCGCGCTGTGTAC  
CGATCTCTGCCACGTCATTTAGTCCGTCACGAACTGGCACCCCAATTTATAGTACGTTGCGGTTAACTACCAACAGCTCG  
CTACGCCCAACTGTTACTGACGGCGCTCACCTGTTCCGAGTGCACACGTCGCGCCAGCGTCCGCTGCTCGCTGAGGAAAT  
TCACCAATGCGCATAAACCGCTGCTTAAGCAGGAATACGCGCACAATACTCCGCTACGAAGGTGCTTAAATCTCTGC  
TGATCCCATGGCAAAATATCGACTGATTCCCGTAAAACGGCTGGTAACAGACTTGGCTTAAACCCGCTGGTATCAGGATG  
CGCCATTTGCTGAACAGGTGCTCAGACCGAAAAGTACGTTTATGTTACGCCAGCACATCGGTGCCAGCGCAATTCGG  
TGTGTACAAAAGCGGATCGCTGCTCATGGGCAATGTGTAGTCAAAATCCACACGGCACATATAGTGCACCCCAATTCA  
TGCCAGTATGATGGCATGGTACGCGATGTGACAGAAAACCGGATTACGCTTGTGAGAGGTTAA

>Cluster\_7776

ATGACCACACCTCAGATTTGAACATTTACCAACTGATTGACACCCAAAATGGTGGGTCACTCCCGTATTTTATACCGA  
CCCGGATTTTACCAACTGGAGCTTGGAGCTATTTTCGCTGCTGCTGCTATTTCTCGCCACGAAAGCCAGATCCCAA  
AACCCGGTGAATTTCTTAAACACTACATGGGAGAAGATGCGGTTGTCGTAAGTGCAGAAAGACGGCAGCATCAAGGG  
TTTTCTCAACCAATGCCGCCACCGGGCCATGCGTGTGAGTTATGAGATTTGCGGCAACACTCGCGCTTTTACTGCCCGTA  
TCACGGCTGGCTTATGGCATTAAACGGCGAGTTGATCGATGTAACCGTGAACCTCGCCCTACCCACAGGGTTGTGTA  
AATCCCACTGGGGACTAAACGAAAGTTCCTTGTGTTGGAGGTTAAAGGGCTAATTTTGGCAACTGGGATACCGCGCA  
CCGGCCCTGGGTGATTTACTGGGTGACATTTGCCGTTGATGATGCGATGCTGGATGCTCGCGAAGGGCGCACCGAAAT  
TGTGCGGGCGTACAAAAGTGGGTGATCAACTGTAACGGAAATTCGGCGCAGAGCAGTTCCGCAAGTACAGTATCATG  
CTCTGTTACGCCATGCTTCTGCGCTTCAAGTATTAGGGCGGAAAGATGATGGCAGCATAAAGCCCTCGGTGATGGACAA  
ACCGCCCGCCGGTGTGGGAAACCGCAAGATGCGCTGCAATTTGGTACGAGCGGTACGGTAGCGGTTCTTCTTTTAC  
TGAAAACCGGATGCTAATGCTGGGTGATGGCGCAGTTTCAAGCTATTTACCAGCAACCTATGCCGAGCAGAACCAAC  
GTTTAGGTGAAGTTTCGCGCCCTGGCGCTGGCGGGTCAATAAATAATTTTCCCAACGCTTTTATGGCTAAACGGCACTGCC  
ACACTCCGCTGCTGGCATCCGCGCGCCCTGATCAAGTTGAAGTGTGGCGGTTCTGTATTAAGTACGAAAAGCGGCTCCGA  
TGAAGTTAAAGCCGCTTTTGAACAGCGCCACTCGTGTCTTTGGTCCGCTGGTCTTCTCGAGCAGGATGACTCGGAGA  
ACTGGTGTGAAATCCAGAAATGCTTAAAGGCCACCGCGCCGCAACAGCAAACTGTGCTGGAATGGGGCTTGGTCAAG  
GAAAAGCGCGCGACGCGCATTTCCGGCTACTAATACTATCTTTTACAGAACTGCCGCTCGTGGAAATGTACCAACG  
CTGGCCGATTTCTGAGTAGCGAAAGCTGGCAGGAAGTACTCTGATAAAAACCGCGCTTACCAGCAGGAGGTGATGAAAT  
GA

>Cluster\_10646

ATGTGGAACCTTTTGGCGGCAACCCGAAAAACAGAAATCAGGACGTGATGTAAAAGAGGTGGGCTGGACCAGCCTGTT  
TCAGGCGGTGGCTGAGCCTTTTGGCGGTGCTTGGCAGCAGGGCGTGAAGCCGATCCGGAAAGTGTCTCTCCTTTTATG  
CGGTGTTTTCTTGCATTTTCGCTGATATCCAGGATATCGCCAAAATGCGACTGCGCTGATGCAGACCATACACAGGGG  
ATCCGCGGTGAAAACCGGACGGGGATTTGCCCGCTCTGCTGCTGCTCCAAATGCACAGCAGAACTCGGATCCAGTTTCT  
TGAATCTGGCTGAAACCGCAACTGCGCTCACGGCAATACGGTGGTGTGAAAATCCGTAACCTGGGGCGAGATCAAAG  
AACTGCGTATTTGACTGGAGCCGGTGAACCTCTGGTGGCGGATGACGGCGAGGTGTTCTATCGCATTACACCGGAC  
CGAACTGCGGGATCACGGAGCGGTGACGGTGCCTGCCGGGAGTATCCACGACCGGTTTACTGTTTTTTTCTCATCC

GCTTGTGGGGCTGCCGCGGTGATGCCGCGGGCTGGCGGCCACGCGAGGGGCATCATATTCAGGCAAATTCACAGCTCTT  
TTTTTCAGAAATGGCGGCAGGCGCTCCGGGGTGAATTGAGATCCCGGCAGTATAACGGAAGAAAATGCGAAAAACTGAAG  
AGCAACTGGGACAGCGGGTATACCGGCGAAAATGCGGGGAAAACGGCGATCCTGAGCAACGGGGCGAAATATAACCCAC  
GCGTTTTTACCGGTGATGCGCAGACGGTGGAAACAACGAAAGATGACGGCTGAAATTTGCTGTTCCGGTGTCCCGTGTCT  
GAGCTCAAGATTGGCGTTGGCCAGCGCTTCCAGTGACAACGCTGGAGCGCTGGAGCAGCAGTATATATTCAGGATGT  
CTGCAGACGCTGATGAGTCCATTGAGCTGTTACTGGATGAGGCGCTGGAACAGGGGAAAACGAGAGCAGGAGTTTGA  
CGTACCACGCTGCTGAGAAATGGACAGCGAACGTCGCATGAAAACGCTGGGTGAATCGGTGAAAAATACGCTTCTCACGC  
CCAATGAGGCCGTAAACGTGAGAACCTGCCGCCCTTTCGGCGGGTGTGACTGTATATTCAGCAGCAGAACTACAGT  
CTGGAGGCGCTGCTCCGTGATGCCCCGTGAGGATCCGTTCCGGCTTCCCGGAAAACGCTCGTCAGGCACACGCGCAGGA  
GGGCGCATCTGACGGTAATAAGGCCATAAGCGAAACAGAGCGTGTGCGGTGAAGGCGATGTTACGGGGATACTGAAAA  
AATGA

>Cluster\_22219

GTGTTTATGGTTTGTGATACGGTACAGCAAACGTTTCAGTGGCGGTCATGCGCGACGGTAAACCGCATTTGCTAAAAAT  
GGAAAACGACAGCAGCTGCTGCCTTCAATGCTTTGCGCGCAACCGGTGAAGCGGTAAGCGAATGGCTGTACCGCCATC  
ATGATGTTCCGGCAGACGAGATGAAACGACAGGCGCTGTTGCGTCGGGCGATTGTTATAACCGCGAAGAAAGATATCGAT  
GTTACGGCGAAAACGCTGCGATTCGGTCTTCTCACTGGCAGCAGTACATTGATGATCCAGAAGAAGTGTGGTTTGTGAA  
ATCACAAAATCGTTCTCGGTGCCAGCGCTTAAAACGCGCAGCAGCGTAGCGCTGTTTTGAGGATCTGGTTCGCCCAATGA  
TGTTGCACATTGCCAACAGGCGCAGGCGCAGCTGCCGAGGCAATTACTCAGGCGGTGATGGTTCGCCCGATCACTTC  
CAGGGGCTGGGCGGTGATGAAGCAACACCCAGGCGCAAGGGATTTCTGGAACGCGCGGCGAAGCGTGC CGGGTTAAGGA  
TGTGGTATTCAGTACGAGCCGGTCCGGCTGGGTGGATTACGAAGCACCTTGCAGGAAGAAAACGAGTGTGGTAG  
TGGATATCGGCGGTGTTACGACTGACTGTTCAATTGCTGTGATGGGGCGCAATGGCGTGC CGCCTCGATCGTGAAGCC  
AGCCTGCTGGGTCAATAGTGGTTGCCGTATTTGGTGGTAACGATCTGGATATCGCACTGGCGTTTAAAGAACCTGATGCCGT  
ACTGGGCATGGGTGGGAAAACCGAAAAGGCATCGCCCTGCCGATTTCTGCCGTGGTGAATGCCGTTGCCATCAACGACG  
TTCTTCCGCGAGATGATTTCTACAGTAGTCTAACGGTCTGCTTAACTGATGTTACGCGATGTTGTTACCGGATGCCGTAACGGA  
AAAGTGGCCCTGTTACAGAAAAGTCTGGCGTCCAGCGTTTAAAGCTATCGCCTGGTTCGCTAGCGCAGAAGAGAGCAAAATCGC  
CCTTTCAAGTGTAGCGGAAACCCGCGCTCACTGCCGTTTATCAGCGATGAACGCGTACGCTGATTAGCCAGCAAGGGC  
TGGAAAGCGCCCTCAGCCAGCCACTGGCGCGGATTTCTGGAACAGGTGCAACTGGCGCTGGATAACGCCAGGAAAAACCG  
GACGTTATCTACCTGACCGCGGTAGCGCCCTTCGCGCTGATTAATAAAGCGCTGGCAGAACAGCTCCGCGGATTC  
GATTGACGCGCGATGACTTTGGCTCCGTCACCGCGGGCTGGCAGCTGGGCGGAAGTGGTGTTCGTTAA

>Cluster\_22595

ATGAAACTAAAGACCACATTTGTTCCGCAATGTATATCAGTTTAAAGGATGTAAAAGAGGTGCTGGCTAAAGCCAACGAACT  
GCGTTCCGGGGATGTGCTGGCGGGCTTGCAGCGCAAGCTCACAGGAGCGCTGGCGCAAAGCAGGTGTTGTCGAAAA  
TGACCGTAGCGGACATCCGCAATAATCCGGTGAATGCCATGAAGATGACTGCGTGACGCGGCTGATTAGGACGATGTT  
AACGAAACGGCCTACAACCAGATTAATAACTGGAGCATCAGCGAAGTCCGTTGAGTATGTTGCTGAGCGATGAAACCGAGCT  
GGACGACATTTGCCCTTACTCGAAAGGGCTGACCTCGGAAGTGGTTCGCGGGGTTAGCGAAGATTTGCTCCAACCGCGACC  
TGATCTACGCGGGAAGAAAATGCCGTTGATCAAAAAGGCCAATACCACCATCGGTATTTCCGGGCACTTCAGCGCCCG  
TTGCAGCCAAACGACACCCGTGACGACGTGCAAAAGTATCGCCGCAAAATCTACGAAGGGCTTCTCTTCCGGGTGGGCGA  
TGGCGTATCGGCGTTAACCCGGTGACTGACGACGTTGAAAACCTTAAAGCCGCTGTTGGACACCATCTATGGCTGATCG  
ACAAATTCACATTTCCAGAGTATCTGCGGCAGCAAAAAGGGCTGAAAGAGTTTGGCGTAGAGCTGGCAGTGTGCTGATA  
GGCAGCGAGTGGGCGCGGAGTTCAACCGTATCGCCGGGAAAACCTGTTCTACTTCAAACCGGACAGGCTCGGCGC  
TATCCGCTGGCCCTAACCTTCGGCGCAGACCAGGTGACGATGAAAGCGGTAACATATGGGCTGGCGGCTCATTACGATCCG  
TTTTATCGTCAACCCGTTGCTGGTTTATTTGGCGCGGATATCTTACAAACGACCGCCAGATTATCCGCGCAGGCTTGA  
AGATCACTTTATGGCAAGCTGAGCGGCATCTCTATGGGCTGTGACTGCTGTACACCAACCAGCTGACGCTGACCCAGA  
ACCTCAACGAAAACCTGATGATCTGCTCGCCACCGCAGGCTGTAACATACATCATGGGATGCCGCTGGGCGATGACATC  
ATGCTCAACTATCAGACCACCGCATTCACGACACTGCCACTGTGCGTCACTGAAATCTGCGTCCGTCACCGGAGTT  
TGAACGCTGGCTGAAAGCATGGGCATTTATGGCAACCGTCCCTGACCAAACGGGCGGCGATCCGTTCACTGTTCTTCT  
GA

>Cluster\_12316

ATGAAAATCAGTGAATTTCTACATCTGGGCTTACCAGGAAACAATGGCTACCGACGATTTCTGGCGTTTACGCCAGTT  
CGCAGAAGAAGAGTGTATGCTATGAGCGTCAACCCTGTTGGTATTTAGGCAAAGGGTGCCAGGACAGGCTGCACATTA  
ATGCCGACGGAACGACGAGCGACATTTATGATGATGCCGGGAGCAAAAATGGGCGGTGGATTCCATTGCCGACTGCGCG  
CGTCTGTTTATGGCGCATCCTCAGGTGAAAGGACGTCGGGTATATGACAGGTTGGGTCAAACCTTTCGGCGCATGCGCG  
GGGATTTGCCCTTAAACCGGGGAGTGGCCGCTGCTGACGTTAACCTTCCCGTGAAGAATTTATTTTGAAGGGGAA  
ATGTCACCGTTTATGGCGACTCCCGCAGCGGTCGCGACTTTGTCGAGTGGGTAAGAGGGCCGGTACAACGACGCGAG  
AACGCACCACTGGCGGTGGATACCGCCCTCAATGGTGAGGCATATAAACAACAGGTTGCGCGCGCCGTTGCGGAGATCCG  
CCGTGGCGAGTATGTCAAAGTATGTTCTCGCGCGCAATTCCTTCCGATCGCGGATTGATATGCCCGCCACGCTGTTAT  
ACGGGCGCAGGCAACACGCTGTGCGTCTGTTATGTTCCGTCAGGAAGGACGCGAAGCGCTGGGCTTTAGCCGGAA  
CTGGTATGTCAGTACGGGCAATAAAGTGGTCTTAAACCGCTTGGCGGACCCGCGATCGCATGGGAAACCCGGAGCA  
TAATAAGGCGAAGAGGCAAGACTGCTGCACGACAGTAAAGAGGTGCTTGAGCATATCTTCTGTCAAAGAAGCTATG  
CTGAACTGGAGGCTGTTTGCAGCGGGGAGCGTGGTGGTGAAGATTTAATGTCGGTTCGCCAGCGCGGAGCGTTTACG  
CATCTGGGCTTGGCGTGAAGGTCAGCTTTCGGAACAAGGATGCTGGGATGCGTTTACCGTGTGTTTCCGTCGAT  
TACCGCTCAGGTATCCCTAAAAATGCTGCTTGAACGCGATTATGCAAAATGAGAAGACGCCGAGAGCTTTATTTCCG  
GCGCAATCTGCTGCTGGACGATACGCGCTTGTATGCGCGCTAGTTCTGCGTTCCGTTATTCAGGATAGCCAGCGCAGC  
TGGATACAGGCGGGGGCGGGAATCATCGCGCAATCTACGCCGGAACGCGAAGTACAGAAACCCGGGAGAAATTAGCGAG  
CATTCGCCCTATTTAATGGTGTAG

>Cluster\_431

ATGCCGGAAGAGAAACTACAGACGCTTTTCAATTGCAGGTCATTAACGGCAGTGAAGTGGAAAGCGGACGGGCGGCGCTG  
TCTGTTACACAGCAGGGAATGTCGGCATGGCCCGAATGCCACTGGTCCGTACAGGATCGTCAGCAGAGCAATCCCG  
CCAGGCTTTTACCGTTATCCTGACACATTTTGTCTGCGCCCGCAGACGCAACAACCTGGGCTGATTAACAGGA  
AAGTACAGCAACATCAGACCTAATACAGTTGCGCCAGGGCGATGAGATCCAGATCGGACGGCTGATGGTGAGGGTTCA  
TCTGAACCGGGGAGATATTTCCCTTACGATGAGGAAATGGCCACTCCGAAACCATCTGTTACCAATCGCGATATGCTCA  
CGGATACCTGCTATCAACGAGGGTACGCCACTATCCGGGAATGACTCACCGCAACCTTGCAGACACCGTGGTA  
AACGGTTTTTTCACCGCATCCACTCCAGGCACTTCACTCCGAAAGCTGATTAACACGGGCGATCCGCTTTTCAGGATTCG  
GGCTGTCGGCCATCGGCACCGTGTCCGATCCGGCAAGTAATGGGGGATCAATACTCCGTTTATGATCTGCCGCCA  
TTTTATGCCAGCCCGCGATCGTAAATGACGAGCTCTCTGCGGCAAGAAATGGGCGCAACGCCACCTTTCGCTTACCCCTTA  
CTGCGGGCTTGGCGGCTGCTTACCATGAGCAATTCGACGATGCGGATGATTTTCTGGAGGAGGCGGAGCGGTT  
ACAGGCGCAATAAAGGCTGCTGATTTGACGACGAGCGTAACAGCTCTCAGACAAACATTTGCGCCCGCTGGAAG  
ATAACCGCTGCGCTGAACATGATTACGCCACCGCGCTCGACTAATGTTTCCGAAAGGTAAGCCCGGTACATCTG

GCGGCTCCCGCCGCTCAGTGAAAGCCTGCGCAATGTCCGCCACCAGAAAGCTAACCGGGCAGCGATTGTGGAGTC  
GCTTCGTGTCCTGCTGGATGCTTTCTCACCACAAAATCTGCTGCGCCGCTTTGTGAGTACCGCCGACGCATGAACCTGC  
GCCAGCCGCTGGATGATGCCGGAGCATGGCAAAATGTACAGCCATATTTACGAAGAACTGGCCTCCGATCGCCAGCAGGGG  
TTTGAGATGCTGTTTAAACGAGGTCTACGCCAGGTCTATGACCGGGTGTTCGTGAAAAACAGCGGGAGCCGGAAGCATG  
A

>Cluster\_46478

ATGGCGATTAAACGGAGAGAACGGTGTAGTGCAGTCCCGTGGATGAACTACTCAAGCAAGGCCTTCGGATACCAAAC  
TCAACGCCCATACAGATTGGGATGTATCGACTGCTTACAACCTGGTGGATGATATCAGCGAAGCTCTTCGAGATACCGAAC  
GAAAAGATATTCCTATGTTTGGGTGCAATCATTTCTCACGATGGTGGATGATCTCAATGTAGTGCAGCGGGCAGCAG  
CGCCTGCTGACTTTGCGAATGATTTCTGCGGCCCTAGATCCGATAAATCATCAAATTTTCGATGCTGTTAACAGCGAAAC  
TCCTGTCTCCCTAGTTGGATAGAGCTTCAAAGCGCCCTGTCGAGTTGGAAGATAAAAAAGAGTTTTTGGATTTTATCT  
GTCACAAATGCTCAGTTGGTGCCTATTGTGACGGACGATATGATGAGGCATTTTCGTGCTTTGATTTCCGAACTATCGC  
GGCAACCGCTTGCCCTCAGCACTTGTCTCAAAGCACACCCTGCGCGAAATGCACGATGAGTCCCGTGTATGAAAGT  
GGCTGTGCTTGGAGCTTGGGAAGCCGTAACAGATGAGGATCTGGACAGGCTTTTTTCTACTTTTTTATACCGGATATCCA  
AGTGGTACAGAGCGAAAGCTCGCTCGAATTTACTATTTCGGGACATCGGCATGTTCAAGGGCATTTTCATCACGATCCAC  
AGGTCATTTTCGCAAAATCTGCGATATCACCTTGCAGCACAGCCGCTATGCCACTTCAAGTGCATGTTCCGGTATCCCTC  
TACACATGATGCGAAATGCGGGCGCAGCCGCTTTTCCAGTTTTCAGCTTGTATGCGCCCGATAAATCGCAGGACGCTGATTTCCGAGA  
TGGTGACATTCATGCTTACGAAATGAAGATATGGAACAAGAGGTTATTTGACAGAGGTTTCAAAAACTTTGGCCATCT  
CAAAGTCCGTACCGCTACGTTACGAAATGTTTCATTGCGCGCTGCTTTGCTATACAAACAAGTTTGGCGATGAAGATGT  
AGATGAAGTGCAGAAATAGTTTATTCGATGGCATAATGCTTGGGGTGGAGTTACTTCTGTTGCAATTTGATCTGCTG  
ACAAACGAGCGCAGGTAATAAACGATGCAAAATAAATCGCCTTTTGTGTTTGTCTACGTAATGCGATGACTGGAAGTGTGTC  
CGCAAACCTCCAATAACAAGTAAGCCATACAGCATAACCACGAAAGAACTCGTTGCTTTTATCAAGGGCTGCAATG  
A

>Cluster\_22953

ATGCAACCAACTCATATCGCCGTTGGATAACCCTCGCGATAATTAGTTTTAGCGCGGGCTTAGTTTTCGACCTGGCTTA  
TTTTAGCTTATATTTATCAAAATCCCATGGCAAAATTTATGGGATTCAGCAATACCGAGATAGGTTAATAATGAGTACCT  
TTGGTATTGGCGCTATTATTTCTTATGCCCCAGCGGCTTATTTCCGATAAAATTTTCACACCGCAAAATGATTAATCTCC  
CGCATGATCAATTACCAGGATTAACCGGATGATAATGGCAACATATCCACCGCTGTGGGTAATGCTCTGTATTCAGTCCG  
CTTTGCGATAACGACGATTTAATGCTGTGGTGGTGTGATTAAGCCGATCGTTGCTGGGCGATCATAGCAGCAAG  
GGAAAATTTAGGGCTGGATGGAAGGGCTGCGCGCGCTCGGTGTAATGTGCTGCGGCTGTTTACCATGTTGGGCTTTTTCT  
CGCTTTGCACCGGATGACAGCGCCAGCTGAAAACGGTCATTAATCATCTACAGTGTGGTTTACATTTCTGCTGGGCATTTT  
GTGTTGGTTTTTTGTTAGGATAACAACAATCTGCGCAGTCCCAATAAAGCAAGAAAAACAGTCAATCCGCTTACGCA  
TCCTGGCCGTTTTGCGCATCAGCACCACTGGTATTGCAGCATGGTAATTTTTGGTGTCTTACCATCTACGCCATTTCTG  
AGTTACTCCACCAACTATCTGACCGAAATGTACGGCATGTCGCTGGTGGCTGCGAGCTACATGGGGATTTGATCAACAA  
AATCTTCCGCGCTGTGCGGCCACTTTGGCGCATTTACCCACCTACAGTAAAGTAAATCCCTACCCGCGTGGTCC  
AAATCTTTCCATCATCGTTTGGCTGGCTTACAGCAATCTGCTGTCACGAACTCAACCCGCAATCCGCTCGGATGGGG  
ATTGGCTTGAATTTTACTGGGATTCACCTGTTACGCCCTCACCGGGCTGTACTGGGCTGTCTGGCGAAGCGAGAAC  
ACCGTCTTACATTTAGGGCACCAGGATAGTATTTGTTGCTGATTTGGATTTCTGCGGATGCTTCTGTTTACCCGATTA  
TCGGCTACTGGCAAGACCCCTGCCCCGTCAGAAAGCTTACCGCAACATGTGGCTAATGGGCAATGGCGGCTTGGCATG  
GTGATCATCTTTTACTGTTTTGCTTTCCAAAAAATTCGTACTGCTGATAGCCCGCAATGGCTAGCAGCAAGTAA  
>Cluster\_23306

GTGAAACATCTGACGAAATGGTGGACAGCACAAAGCGGGCAAAAACAAATGGGATTTATGCGGTTTTGTTCCGCACATCC  
GCTGGTGTGGAAGCTGCAATCCGCTACGCCAGTGCAAAACCAACCGCCTTACTGATTGAAGCAACCTCAATCAGGTGG  
ACCAGTTCCGGCGTTATACCGGAATGACGCCCGCGATTTTTCGCGGCTTTGTTTTGTCAGCTCGCCGACTCGTTGAATTT  
CCGAGGATGCGCTGATTTGGTGGTACCATCTGGGCGCAAAACCGCTGGCAAAACCTGCCCTGCCGCTCAGGCAATGGC  
CAATGCCGATGATTTGATTAAGTACGTTGGCGGAGGATTCAAAAAATTCACCTTGTATGTCAGATGTCCTGTCCAGG  
ACGATCCGATTTCCCTTAACTGATGACATCGTGGCTGAAACCGCCTCCCGCTGCGGAAAGTGGCGGAAGAAACCTGTCTT  
GAACACTTTGGCGAAGCCGATCTGGAGTATGTCATTTGGCACCGAAGTGGCGGCTGCTGGCGGCGCGCATGAAACCTTAA  
CGAGCTGGCGGTCACACGCCGATGCCGCCGCGCCAGCTGGAAGCCATCGTCACGCTTTTGAAGCAAGCGGCTCTGA  
ATGCCATTTGGCCACGCAATTTGCCCTGGTGGTTCAACCCGGCTCGAATTCGATCACACCAACGTTATGATTTATCAT  
CCGCCAAAAGCAGCCGCTTAAAGCCAGATGGTTCGAAAACCTACGAAACCGCTGATTTTTCGAAAGCGCACTTACCGATTA  
AACACCGCAATCGCTGCGCCAGCTGGTGTATGACCACTTTGCCATTTGAAAGTTGGCCCGGCGCTGACCTTTGCTCTGC  
GTGAAGCTCTGTTCTCTTGGCGCGGATGAAAGAAAGTGGTCCAGCAAAAGCCTGTTCTGGTCTGCGTCAAGTGTG  
GAAAACGTGATGCTGACCGCCGGAATACTGGCAAAGCCATACCACGGTGCAGGCAACCGCGCTGCTTGGCGGCTGG  
TTATAGCTACTCGGATCGGCTGCGCTAATTAAGTGGCGGACAGCCAGATTTGATGACGCTTTTCGCTCATCTGTTTCGTAATC  
TGGCGGATTCACCAATTCGCTGCGCTGATCAGTACGATCTGCGCTGACGTAAGTTCGCTCCGGCGAGCTG  
CAGTCAACGCCACGGAACTCATATCAACCATATTCAGGACATCTTGGCGAGTACCACACGCTGTGAAGGCCAATA  
A

>Cluster\_7825

ATGGCTGAAAGTACTGTAACGGCAGACAGCAAACTGACAAGTAGTGATACTCGTCGCCGATTTGGGGCATTTGGGGGGC  
CTCTTACAGTAATCTGGTCGAGTGGTTCGATTTCTATGCTACTCGTTCTGTTCACTCTACTTTGCCCAATCTTCTTCC  
CTTCCGGGAACACGACGATCAACTACTACAAACAGCAGGTGTTTTGCTGCGGGATTCTGATGCGCCCAATAGCGCGT  
TGGCTATTTGGCCGATAGCCGATAAATGTTGCGAAAAATCGATGCTGTTATCGGTGTGATGATGTTTTCGGATC  
GCTGGTTATCGCCTGCCCTCCAGGTTATGAAACTATAGGTACGTGGGCTCCGGCATTATGCTTCTCGCTCGTTTATTT  
AGGGATTAATCTGTTGGCGGAGAATATGGCACCAGCGCCACCTATATGAGTGAAGTTGCGGTTGAAGGGCGCAAGGTTTT  
TACGCATCATTTTCAAGTATGACGTTGATCGCGGACCACTGCTAGCCCTACTGGTTGTCGTGTTTTACAACACACCAT  
GGAAGACGCTGCACTCAGAGAGTGGGATGGCGTATTCCTTTTCGCGTTAGGAGCTGTGTTAGCTGTTGTTGGCGTTGTTG  
TACGCTGCTGATTTAGATGAAACTTCGCAACAAGAAACGCGCGCTTAAAAAGAAAGCTGGATCTCGAAAGGATTTAGGCC  
AATCGCGTGCATTCATCATGTTCTCGGTTTTACCCTGCGGCTCCCTTTGTTTCTATACCTTCACTACTTATATGCA  
GAAGTATGCTGTAATAACTTCGCGGAATGATGCCAAGTGGCGAGTGGCATTATGACTGCCGCAATGTTGTTGATTCATC  
TTATTCACCACTCATTTGGCGGCTGTCCGATAAGATTTGGTCCCGTACCTCAATGTTATGTTTCCGTTCCGCTGGCAGCC  
ATTTTTACCGTTCTATTTCTCTAGCATTCGAAACGTTTTCTCGCTTATGCGCTTTTGGTCTGGTGTGTTGCTGCT  
GCTGATGATGAGTTTTTATACATCAATCAGTGAATACGAAGCTGAGATGTTCCCGCACAGGTTCCGCGCATTAGGCG  
TTGGTCTGCTATAATGCGGTCGCTAATGCTATATTTGGTGGTTCGCGGAGTACGAGCTTGTGCTGAAATCAATAGGA  
ATGAAACAGCCTTCTTCTGGTATGTGACCTTGTGCGGTTGGTGGCTTCTGGTTTTCTTGTGCTACATCGCAAAG  
GAAGGGATGCGTCTTTAG

>Cluster\_9450

ATGGCTAATATAACCAATACGATAATCCGCTGTTGAATTCGCAATTCAAAAATCGTGGAAACGTTTGTAGTACCTTAAT  
GTTCAATAATGATTTTGTGCTTTATTTGATCGGGTAAATGTTGGCTTTGCCAAAGATGCAATGAACTGGATATTGGAT

TATCAGAGTCGGCATTCGCTCTCGGTGCAGGAATATTTTTTCGCTGCCTATGCACTTTTTCGGCATTCAGCTAACCTGATC  
CTCAATAAAATCGCGCACAAAAGTGGTTAAGTATTACACTGCAATTTGGGGCTTCTCTCGCAATGATGGGATTTGT  
CACCGGTGAACGCAATTTATTAATTTTCGCGCTTCTGTAGGGCTGGGCGAGGCGGGTCTATCCCGAATTTTACTGC  
TCGCATCCATTTATTTTCTAACAGGTTTCGCGGATCGTTCGTTGGGAAATTTTGTGTTGGGGTGCCTGCGCTTAACG  
CTCGTTCACAGGTTGCATCGGAGCTTTACTTGAACACATGACTGGATGGGACGTCAGGATGGTTCTGGATTTGTCTAT  
TGAGGGATTGCGCGCATFAGTGTGTTGGTATCTTTTACCTGGTTCTACCTTGATGATAATCCGACGAAAGCGCATTTCTTA  
CCCAGGAAGAAAAAGACGCTTTGAATAAGCAACTGGAATCTGAACGACAGAAAACAGAACAGTTCAGTGATTTTCAGCA  
TTGAAAAATGCCAAAGTTTGGCATCTGGCATTAATCTACGGCACCATCCAGATATCAGTATATGGTTTAAATGTTTTCCT  
TCCGTTACAGGTTGCATCGGCTGATGGGAGAAAGCTTGGCTTTAAGCAGTCATFAGTCCGCGCAATACCATGGGCGTGT  
CTGCTTGTGGGCTATTTACATTTCCGCAATTTGCTGACCGCAATCTTCCCGGCTGTGGCCATTTCCGGTTATGTGTATG  
TTGGCTGCTGCTGCGGCTTGCCTTTCCGCATTTGCGGGGCTGTTGTGGCGATTGGTGCACCTTTGTTAAGTGGCGT  
TGGTTTCTCTCAGTACAGCAATATTCGGACTTTCCCTCCACAACCTTCTTACTGGTCCGGCACTGGCTGGGGGATCG  
GTTTGTGCAACCAGTGGGCGCTTCTGCTCGTTCCTTCCCTTCTTATCCGTTGAGGTTGATCGGCAATCCGCAATGAC  
AGCATCGCCGATTGATGGCGTTGTCTGTAATTTACTATCGGCTGCGCATTTATTGATTGGATTGCTGCAAAAGAGCCAACA  
GGCAGCAAAAGCATAACAGTTAA

>Cluster\_28290

ATGAAAAACAACCTAATTTACGTAGCATGGCGGCCAGGCCATTGAACAAGTCGTTGAGCAAGGGCAATCAGTGAGCAA  
CATTTGCCACCGCTCCAGCAACAGTTTCCGATAAAGATAAAGCTCTTCTCCAGGAGTTATGCTTTGGCGTACTGCGTA  
CGCTCTCACAGTTAGAGTGGCTAATTAATAAGCTAATGGCACGTCGATGACAGGCAACAGCGTACTCTTACATACCTG  
ATTAATGGTTGGTTGTATCACTGCTTTATACCCGCTATCCACTATGCCGCTGGTGAAACGGTTGAAGTGTCTGT  
CGCAATTAAGCGTCCGCAACTTAAAGGGTTGATTAACGCGCTATTACGCCAGTTCCAACGTCAGCAAGAAGATTATTAG  
CCGAGTTTAAATGCCAGTGTGACGCTTATCTGCATCTTCTGTTGTGTAACGCTCTGCAAAAAGCGTATCCAGAGCAG  
TGGCAATCCATCGTAGAAGCAAATAACAGCGTCCGCCAATGTGGCTGCGCGTTAATCGTACGCATCATTTCCCGCAGAC  
TTGGCTTGCATTCGTTGATGAAGCAGGAATGAAGGTTTCCCGCATCGGATTAACCTGATGCTGTGTAAGAACAC  
CTGCACCTGTTTACGCGTACCTGGTTTTGAAGACGGATGGGTTACCGTTTCCAGGATGCATCAGCACAAGGTTGCATGACC  
TGGCTTGGCCACAAAAGGTTGAACACATCTGATGATCTTGTGCTGCCCGCGGTAACAAACGCATATCCCTTGGAGT  
GGCACCAGAAGCGCAGGTTGTTGGGTTGATATTGACGAAACAGCGCTCTCTCGGTTTACGCAATTTAAAACGCCTTG  
GTATGAAGCGCACCGTGAACAAGGTGATGGCCGCTACCTTCCCAATGGTGTGGCAAGCAACAGTTTGTATCGCATTTTA  
TTAGATGCGCCTTGTTCAGCAACGGGGTGATTCGTCGCCATCCGGATTAATAATGGTTACGTCGCGATCGCGATATCCC  
AGAATCGCGCAATTCAGTCTGAAATTTCTGACGCCATTTGGCCGATTTAAAATCCGGTGGAAACCCCTGGTCTATGCCA  
CCTGTTCCGGTGTACCAGGAGAGAAATAGCCTGCAGATTAAGCCTTTTTGCAACGTACCGCTGATGCCGAACCTTTGCGAA  
ACAGGAACACAGAGCAACCGGTAACAAAATCTGCCGTGGTCGCGAAGAGGGCGACGCTTCTTTTACGCTAAGCTAAT  
CAAAAAGTGA

>Cluster\_58118

ATGACACTCAGCTCAATAGACAACCTTCTACCTCACGCCAGATTCTGGTGGCCTTTAGCGGGGGCTTACTCCACCGT  
TCTGCTGCATCAGTTGGTGCAGTGGCGGACGAAAAATCCGGGTGTCGCTGCGCGCTATTTCATGTGCATCACGGTTTAA  
GTGCCAATGCCGATGCCTGGGTTACGCATTTGCGAAAACGCTGCCAACAGTGGCAGGTGCCGCTGGTGGTTCGAACCGGTA  
CAACTTGGCCAAAGAGGACTGGGCATTAGGGCCAGGCGCGGAGGACGCTTATCAGGCAATTTGCCCGCACCTTTGTTGCC  
CGGTGAAGTGTGCTGCTACCGGCAACATCTCAGCATCAATGTGAACCTTTCTGCTGGCGCTAAAACGCGCAGTGGCC  
CTGCCGGGCTTTCCGTTATGGCGGAAGTCTCGGAGTTTCCGGAAACGCGGCTTATTCGCCGTTGCTCGCCCGCAGCGG  
GGGAACTGGTGCAGTGGGCGGCTCAGTATGATTTACGCTGGATTGAAGACGAAAGTAATCAGGACGACTCATACGATCG  
TAACCTTTCTGCGCTGCGGCTAGTGCCTTATTGACGAGCGCTTGGCCGATTTTGGCGAAGCAACGCGCCGACGCGCC  
CACTTTGTGCTGAACAAGAGAGCCTGCTGGATGAACCTGCTGGCAGATGATTATGACACACTGTCAATCGCGGAGGGGAGC  
CTGCAGATTGTGCCAATGCTGGCGATGAGTGTGCCGCGCGCGGCGATTATCCGCCGCTGGCTGGCAGGGCAGAAATGC  
ACCGATGCTTCCCGCGACGCGTGGGTGAGGATCTGGCAGGAAGTGGCGCTGGCGCGGAAAGTGCCTCACCTGTTTAC  
GTTTGGCGCGCTTTGAAATCCGACGCTATCAGTGCACCTGTGGTGGATTAAATCCGTCACCGGGCAAGCGAAAAAT  
GTGCCGTTGCTGAGCTGGCTTCAACCGCTGGAATTACCGCGGGCTGGGAAGTGTACAGCTTAAATCGGGGAGGATAT  
TCGCCCTCCGCTGACAGCAAGCGGCTCAGCGTGCCTTCAAAGCGCCAGGATTGCTGCATATTGTGCGGGCTAACGGCG  
GACGTAAGCTAAAGAAAATCTGGCAAGAGCTGGGCGTCCGCCGCTGGCTACGTCACCCACGCACTGCTGTTTTATGCG  
GAAACGCTGATTGCGCGGCGCAGGGGATTTGTGACGCAAGAAGGTGGCTGAAGGTGAGAAATGGCGTAAATTTGTCTG  
GCAGAAAACGCTTAGTTAA

>Cluster\_62998

ATGTGGCCGGATAACCGTATCGCCCGTACGCGCCTACTCTTTACCGGTATGACCGTACGCGCAGGCTGACGGAGAAAA  
CGACCTCATCCCGAAGGGTTATCCGCACGGATGATGAGCGCACCCACCGGTACCATTACGACAGTCAGCACCGGCTGG  
TGCATACACCGGACCAATATGCAGAGCCGCTGGTTCGAAAGCGCTATCTTTACGACCCGCTGGGCGCAGGTTGGCA  
AAACGGGTATGGCGACGTGAACGGGACCTGACGGGCTGGATGTGCTGTACGGAACCGCAAGTGACCTGGTACGGCTG  
GGACGGGACCGGCTGACACCGATACAGAACGACAGGAGCCGATCCAGACGATTTATCAGCCGGGAGCTTACACCCAC  
TCATCAGAGTTGAAACTGCCACCGGTGAACTGGCCAGAACGACGCGCCAGCTGGCGGATGGCTTACAGATCCCGG  
GGGAAAGACGGTGGCAGTGGTGTTCCTCCGCTGCTGGTGCAGATGCTCGACCGGCTGGAAAGTGAATTCCTGGCTGA  
CCGGGTGAGTGAGGAAAGCGCGCTGGCTGGCATCTGCGGCTGACCGTGGAGCAGATGCAAAACAGATGGACCCGG  
TGTACACGCGCGCGCAAAAATCCACCTGTACCCTGCGGCTGCGGCTGGCGCTCATCAGCACGGAGGG  
GCAACAGCGTGGTGCAGAAATATGATGAATGGGGCAACCTGCTGAATGAAGAGAACCCGATCAGCTGCAGCAGCTTAT  
CCGCTGCGGGGACGAGTATGATGAGGAGTCCGGCTGTATTACAACCGCCACCGCTATTATGACCCGCTGCAGGGGA  
GGTATATCACTCAGGATCCGATTGGGCTGAAGGGGGATGGAATTTTTATCAGTATCCGCTGAATCCGTTTCACTATATA  
GATTCAAATGGGACTGGCATCAAAATATGGACACTTAAATAATGGCGGATATGGAGCGAGCCAAACAAACCTACGCC  
CGATCCAAGTAAATTTGCCGACATAGCGAAACAATTAAGACTGCCATATCTTATGACAGGCGAGTGTGCGCTAAATG  
TTTTCAAACATTTCTCAGAGTATTAAGCCCTTACGACTACACTGTATTGACGGAAGTGGGTAAAACCAAATCTGACT  
TGTACGCCACAGGATGATTTCCAGTATCCAGGGATGGATACAAAGACAGCAAGTGATTACCTGCCACAGCAAAATGGCC  
AACAACTCAATTAACACAGGATATACTTGTGCAGAACCTATTTATTTCCAGACATTAATAAACCGATGGGCCAGCAA  
CAGCAGGATAGATTGGGTGAAATTTAGCTAAAATGAACAGCAGCAACATTCGAGAGGAATAAGAAAATGA

>Cluster\_25944

ATGAAAAAGCCGTTGAACTGGCCCGCAGGGACCGGGCGCAAGCGGCATCACAGTGAAGTATACCGGAGAGGCGCA  
GAGGCGTATAGCGCTGCTGACGCCCTGGAGAAATATACCGCCGTCAGGAAGAACTGAATAAGGCATGAAAGACG  
GAAAAATCTGACGGCAGATTACAAACCGCTGATGGCGCGCGGCAAAAAGGACTATGAAGCGCAGCTGCAAAAAGGAA  
CAGTCCGGCTGAAGGTGTCTGCGGGCATCTGACGAAAGACAGTGTCTATGCTGCCCTGCTGACGCTTACAGGCAACT  
CCGGATGCTGGAGAAAGCTGCGGAGCAATGAGAAAAATCAGCCAGCAGCGTCCGATTTATGAAAGCGGAAAAATCAGT  
ATCGGCTCTGAAAAGAGGACGCCACGAAACGGCAGTTACTGAGCAGGAAAAATCCCTGCTGGCCATGAGAAAAGAGAGC  
CTGGAGTACAAACCGCAGTGGCTGAGCTGGGAGACAAAGTTGAACACAGAAACGGCTGAATCAGCTGGCACAGCAGG  
TGGCGGTTTGGAGCAGCAGGCGCGAAGCAGCGGCAATCAGTCCAGGCGCGGGCTCACCGACCGTCAAGGCGC

AGCGGGAGTCGGAAGAGCAGCGCCTTCGTGACGTGTACGGTGATAATCCGGATGCGCTGGCGAAGGCCACATCTGC ACTG  
AAGAACACCTGGTCTGCGGAGGAGCAGCTTCGTGGAAGCTGGAATGGCCGGTCTGAAAGTCCGGCTGGGGCGAGTGGGCAGA  
AAGTGCAGCGACAGTTTTTCGACAGTTAAAAGCGTGGCCACGACAGCTTTGACGGTATTGCACAGAATATGGCAGCGA  
TGCTGACGGCGCAGCGAAGCAGAACTGGCGTGGTTTACCCGCTTCTGTGCTCTCCATGCTGACAGAGATTTTTCTGAAGCAG  
CCGATGGTGGGATAGTCCGGAGTATCGGACGCCCATTTGGCGGTGCTTTCCGGTGGTGGTGGCTGCCCTCAGCCAGCGAC  
GGCCATTCAGGCTGCGGGCGGCAACTTCCATTTTCGCGACCGGGGATTTACGGGGACGGGGGTAATATGAACCTGCGG  
GAATGTTCATCGGGGAGTTTGTCTTACGAAAGGAACAACAGCCGGATTGGCGTGGCAACCTGTACCGCTGATG  
CGGGGCTATGCGGAAGGTGGTTATGTGGGCGGTGCCGGAAGTCCGGCGCAGATGCGGGCGGCTGAAGGCATTAATTTTAA  
TCAGAACAATCACGTGGTACATTCAGAAGATGCTGCAATGCTGCCAGGTCCACAGATGATGAAGGCAGTGTATGACA  
TGGCCCGCAAGGGTGCCCGTGTGAAATTCAGACACAGATGCGTGTATGGTGGCTGTTCTCCGGAGGTGGACGATGA

>Cluster\_40081

ATGGTAAACCTGGTACATAGTTTTCACATAGCAGCCGACTGGGAGAAGTGTGGTGAATTAGCCCGTCAGATGTTAATGAG  
TGATAGTTTAAAATCGCCATTGCGCGGGAATGACGATCCACATAATCCCATGGTACCGATGCGCTCAAAGTGATGG  
AGGCCATCGAATCTGTTGCCGATGCCGACCATGTGCTGGTTCATGATGGATATGGGTAGCGCATTTAGTGTCTGAACT  
GCGCTGGAATTTGCTGGCTCCCGAGATCGCCGAAAAGTACGTTTGTGTGCTGCCCGTGGTCCGAAGGTACACTGGCAGC  
AACGGTCAGCGCGCTCGGGCGGATATCGACAAAGTATCTTTGACGCCATGTCATGCGCTGGAAGCCAAACGTGAAC  
AACTGGGTTTACGCTCCTCCGACACTGAAATCTGACACATGTTCTCCGTACGATGAAGAAGCCGTTCTCTCGGTG  
GTCATAAAAAACCGTAAACCGCTGCATGTACGTCGGCCTCCCGCTGGTTTATACCTTATCGACATTTAATGCCGATAT  
GTTCTGGAGAAAACGGCAAAATGCGTTTACCCGGAGATATTAACAGATTCGCTTACTACAAGTTCCTATACAGTAA  
GCTGCGCTGATTTGCGAAAGGACCAAGCTGAAGAGCAGTGCATGCGCTCCGTCAGCTGGTGAAGATAACTTTGGT  
GAAACGGGAGAAAGTGTCTCCACTACTCTGCGTCCCGTTCGCGCTGTTTCCGGTAAAGCTTTTATTAACAACCTGTTT  
ATGTACGGTACAGGCAAAATCAACCTGACCGTGAAGAAGAACAAGAAGCATACGCCAGGCCATTGACTTCAGCTTAT  
TAGATCTGATGACATTAACAGCGAAAGCAGAAACAGCGGGCTTGACGATATTGCCGCAATCTTTCTGGTACCATACA  
CTGTTAGATGATCCGAACTGACGGCGGGCAAGCAACTCTTCAGCATGAACATTCACCGCAGAAATGCTCCGGA  
GCAAGTTCTTAAAGAACTTAGCCAGCAATACCAACAGCTGGATGATGAATATCTACAGGCTCGTATATCGATGTGGACG  
ATCTTCTGATCGCACCTTGGTCCACTGACCCAAACGAAAGAAGTCCCGCAGTTTAACTCGCAACTATTTCTACTG  
CGGAGAACATTTATCCCTCCACAGTACTGCAACTGGATCCAGCGGTTGTAAGGATATCTGCTTAGCGCCGGAAGTCC  
GCTATCCACAGTCCCTAATCGCCGTAACCTGGAAATGGCTGGATTTGCCAGCGGTTGAAAGTGTATGCGGATAC  
AACCAGAAGAAACGCTAACGCTGGACGTTAAAACGCAACGTTTCAACCATCAGGGTTAA

>Cluster\_40814

ATGGCAGCTAACTATCTGCATGGTCCCGAAACCATTAGGTTGGAAAACCGAGCCCGCGGTTAAAACGGTGAATCTGC  
CGTTATTGGCCTGATTGGTACCGCCCGATGGGGATGTCAAATACGCTGGTACAGTGCCTGTCGAGAAAAGACCGAGCGG  
CATTTGGCAGCCAGTTACCGGCTTTACCATTCCGAGCGGCTGGATGCGATTTATGACCATGGTGCAGGCACCGTTCTG  
GTCATTAACGTCCTCGACCCGGCGAAACATAAAACGGCGATCGAGGATGAGGTGGTTACCTTTGACAAATCGACAGGGCA  
GGCCAGACTGGCGCATCCGGTTGTCGCTAATGTGGTGGTGAAAAACAGTGAAGGCAGCACCCACCGGCAAGCACCGG  
ACTACCGTTTGTATGCGCAGCGGGTGTCTCAGCAACTGGGCAAGGCTTATGAGGCGGTTGCGAGCTGAAAGTGGAC  
TATGAGTACGCGGACCCGTCGAAGGTGACTGCGGCGGACATCATCGGCGGGTGAACAGCGCCGGAACCGAACCAGGCA  
GAAGCTGCTTAAACGACAGCTTCAACCTGTACGGCTATTTTCGCCAAAATCTGATTTGCGCGGTTCTTGCACCCAGAAGA  
GTGTCGCAAGTTGAGCTTATCGCCATGGCAGAGAAGCTGGGCGGTTAACCTACATTGATGCGCTGTGCGGTACCACCTTT  
GCACAGGCTCTGGCAGGTCGTGGCCCGGAAGGCACCATCAACTTCAATACCAGCTCCGACCGGCTCCGCTGTGCTATCC  
GCATGTGAAGGTATATGACCCGGTGACAACACAGAGCTCTGGAGCCGCTCAGCCAGGCTGCAGCAGGCTGCGGTGCCA  
GAGTCGATCTGGACAAGGGCTACTGGTGGTTCCTCCAACTCAGGAGATTTCTGGGGATCACCGGCTGGAGCGCCAGCTG  
TCCGGCGATTTGATGACCCGAGAGTGAAGTGAACCTGCTTAAACGAAACAGGGGATCACCCAGGTTATCAGACTCCGG  
CAGCGGCTTCTGCTGTGGGGTAAACCGGACGGCAGCATGGCACAAGGTCACCCATATGCGTAACTTTGAGAACGTTGCGC  
GCACCGGCTGATGTGATCAACGAGTCCATTCGTTTATTTAGCCAGCAGTACATCGACATGCCGATTACTCAGGCCTGATT  
GATGCACTGACGGAGTCCGGTCAACGCTACGGTTCGAAAATGACTGGTGTATGGTGGGCTACTGGGCTTCCGTTGCTGGTT  
TGATCCGGCCGCAATCCGGAGACGGAGTCCCGCGCCGCGACCTGTTGCTGAGCTACAATAATACAGCCACCCCGCCG  
TGGAGCGACTGACGTTTGGAGCTGAGATCACCTCGAAATACCTGTTAACCTGAAAGGGGGCAACTGA

>Cluster\_27017

ATGAATAATAAGGGCTCCGGTCTGAGCCAGCTCAGGCACCTGGATAAACTCGACGCGCTGTATGAGCAATCTGTAGTTGC  
TTTACGCAACCCATTTGGCAAATATATTACAAGTGGCGAATTAACCTGATGAAAACCGCCGCAAACAAGGCTTTTTTGTCT  
ATCCATCACTGACCGTAACTGGGACGGTAGCACAACTAATCCCCCAAACCGCGCATTTGGTCTGTTTACTCACGCA  
GGCAGTTACACCACACGATTACTCGCCCTACTCTCTTTTCGTTGATCTCAATGAACAACCTTACGTTGCTGTATCAGGA  
TTATGGTGGCATACTCTGTGCAACCTCGCAGCATGAAATCCCTTATCTTATGTCATCGATGGCTCTGAATGACAC  
TTGATCGCTCAATGAGCTGGTTAACTGCTACTTCCGACAAACGAACTGGCGCAAATCCGGGATGAAACTCGCAGAC  
GGCATTATCATCAACGGAATTTCTCCCGTTATCGCATTTTGTGCTCGCGGGTTGATTTTCCCTCGCACGGTTGGC  
CCATTATACCGGTACGCCAGTAGAACATTTTCAACCGTTGCTCTGTTTACCAACTACACAGTTATGTGGATGAATTCG  
TTCGTTGGGGATCGACGAGATCCTCGATCCTGATAGTCCCTACATTTGCCCTTTCTTGTGCTGGCGGAACTGGATCACT  
TCCGAAAACCGAAGCGCCAGAAAGCCATTTCCGACTTTCGATGGAAGAAAACCCAGATGCCAGCATTTAATTAAC  
CGCTGATGGTCAGGGTATTACTTGGTGAATATTTGGCGTGGGACCGTCCAATGCTAAAACCATCTGCGATCATCTGGCAG  
TGTTACGCCCGGATGCTGTTGATGATTTGGCCACTGTGGCGGATACGTTGAAAGCCAGGCCATTGGAGATTATGCTCTT  
GCACAGCTTATTTACGGATGACCAGTCTTTGATGCGGTTCTGCCCGCGATATTCCTATTCCGAGCATTTGCTGAAGT  
GCAACGTCGCTTTATGACGCTACCAAGTTAGTACGCGCAGGCTGGTGGAGAAAGTCAAACAGCGGCTGCGTACAGGTA  
CTGTGGTAAACACAGATGACAGGAAGTGGGAGTTACGTTACTAGCTTCTGCACTTCTGTTTAACTTAAAGCCGGCCGTA  
GCAATTTGATATGGAAGTGAACCATTTGCCGCGCAGGATATCGTTTCCGCGTCCATACGGGACACTACTGTGTGTTT  
AGATAAACCGTTACTGTTGAGATTAACCTTCCCGCCAGGCTAACCGTTTATGAAGGCGCTATTTCCGAACCTCG  
AAATTTGGCATTCCGGCGATCGATTTGCTGCGCGCAGAAGGCGACCGACTGCATTCACGTAATTAACAACCTTTAATGAG  
CCGCGTTCCGATAA

>Cluster\_36137

ATGGCACAGTCAATAACAAACAGCCTGTGCTGTTGACCCAGAATAACCTGAACAAATCTCAGTCTTCTCTTAGCTC  
TGCTATTGAGCGTCTCTCTTCTGGCCTGCGTATTAACAGTGTAAAGATGACGACGAGGTCAGGCGATTGCTAACCGTT  
TTACGGCAAATAATTAAGGCTGTACTCAGGCTTCCCGTAACGCGAATGATGGTATTTCTGTTGCGCAGACTACTGAAGT  
CGCTGAATGAAATTAACAACAACCTGCAGCGTGTACGTGAACTGACTGTTTACGGCAACTAACGGTACTACTGACAG  
CGATCTTTCTTCTTATTCAGGCAAGAAATTACTCAACCTTGAAGAAATGACCGTGTATCTGAGCAAACTCAGTTAAACG  
GCGTGAAGTCTTTGCCGAAATAATGAAATGAAATTCAGTTGGTGTAAATGATGGGAAACCATCACTATCAATCTG  
GCAAAAATTTGATCGGAAACTCTCGGCTGGACGGCTTAAATACGATGGCGCGCAGAAAGCAACTGGCAGTACGCTGAT  
TTCTAAATTTAAAGCGACAGGTAAGTAAATTAACAATTAACAGGTAACGCTGATAACTATACTGTTAATGATGATGGAG  
CAGTTCAAAATGAGGATGGTACGCAATTTTGTGTTAGCGCTACCGATGGTCTCTGACTACTAAGAGTGATACAAAAGTC  
GGTGGTACAGGATTTGATGCGACTGGGCTTGAAGAAGCGCAGTTCTTTAGCTAAAGATGCCCAATTAATACCAAG

TATTACTTTTACCAACAAGGCACTGATGCATTTGATGGCAGTGGTAACGGCACTCTAACCGCTAATATTTGATGGCAAG  
ATGTAACCTTTACTATTGATGCGACAGGGAAGGACGCAACATTAACAACTGCTGATCCGTTTTACAAAATAGTGCAGGT  
CAGTTCACACTAAGGTTGAAAACAAGCCGTACAGCATCGGATCTGGACTTAAATAACGCTAAAAAGTGGGTAG  
TTCTTTAGTTGTAATAGGCGCTGATTTAGAAAGTTAGCGCTGATGGTAAGACAGTAACTGGGCTTGGCAAAACTGATGATC  
TGAGCAAAATCAGAAAGTGTAGCCGATTTCTGGTAAAGAAAGATGCGAGCAAAATCGTTGCAATCTACTACCAACCCGCTC  
GAAACCATCGACAAGGCATTGGCTAAAGTTGACAATCTGCGTTTCTGACCTCGGTGACGACAAAACCGTTTCGACTCTGC  
TATCACAACCTTGGCAACCCGTAACACCTGTCTTCTGCCGTAGCCGATCGAAGATGCTGACTACGCGACCGAAG  
TGTCTAACATGCTCTGTCGCGAGATCTTCAACAAAGCGGGTACCTCTGTTCTGGCGCAGGCTAACAGACCACGCGAAG  
GTACTGTCTCTGCTGCGTTAA

>Cluster\_27694

ATGCTATTTGTTGGTGAATAAATTCATTGGGTTGGTCAACGCTGACTGGGAAGTGCCTGATTTTCACGGTACAGAATA  
TAAACCGCTGCGCGGACGCTACAACAGCTACCTCATCCGCGAAGAAAAAACGCTGATCGACACCGCTCGACCATA  
AATTCAGCCGCGAATTTTGCAGAACCTGCGTAATGAAATCGATCTGGCGGATATCGATTACATCGTAATTAACCATGCT  
GAAGAGGACCACGCCGGGCGCTGACCGAACTGATGGCACAATTTCCGATACGCCGATCTACTGTACTGCCAACGCTAT  
CGACTCGATAAATGGTCAACCATCATCCGGAGTGGAAATTTTAAATGTTGGTGAACCTGGCGACACGCTGGATATCGGCA  
ACGGCAACAACACTATTTTGTGAAACGCCAATGCTGCATGGCCGGACAGCATGATGACTTACCTGACAGGCGACGCG  
GTGCTGTTTCACTAAGTGGCTTTCGGTCACTACTGCGACGAGCATCTGTTCAACGATGAAGTGGATCGACAGCGAGCT  
TTTTGAGCAGTGCACGCTTACTACGCCAATATCTGACGCGCTTACGCGCTTGGTAACGCCGAAAAATACCAGATCC  
TGGGCTTTAACTTACCAGTCGATATGATAGCGACTCTCACGGCGTGGTATGGCGCGATAACCGACGCAAAATGTCGAG  
CTGTACTGAAATGGCGCGGATATCAGGAAGACAGAACTACCATTTTCTACGACCCATGCGAATAACACCCGAT  
GATGGCTGACGCTATCGCCAGGGGATTGCGGAAACCGACCCACGCGTGGCGGTGAAAAATTTTCAACGCTGCGCCGAAAGC  
ATAAAACGAAATCTGACCAATGTCTTCCGCTCAAAGGCGCTCTGGTGGCACCTCTACGATGAATAATGTGATGATG  
CCGAAAAATCGCCGGGCTGGTGGAGGAGATGACCGGATACGCTTCCGTAACAAACGCGCCAGCGCTTTTCGGCTCTCACGG  
CTGGAGCGGCGGTGGGTGGATCTGTTTCCACGCGCTGACGAGATGCGGGTTTCGAAATGTCGTTAGCCTGAAAGCCCA  
AATGGCGACAGACCAGGACGCTCTGGAGTTATGTCGTGAACCGGTCGCAAAATCGCCGCTCAGTGGGCGCTCGCGCCG  
CTGCGCAGAGCAGGTTGAAATACGGTGGTTGAAGAAAGAACTCTGCCGCCACGACGCGTACCTCGGCCACGGATGCA  
ATGCGACGCTGCGCAGTGGATTTACGATCCGGCAAAAGGCGAGCAATGCAAGACGTTGCGCCAGGAACGCGCTGGAGTG  
AAGTCCCGGATAACTTCTGTGCCGGAATGCTCTCGGCAAAAGATGCTTTTACGAACTGGCATCGGAGGCAAAATGA

>Cluster\_25127

ATGACAGCTCAAATCAACAACATTCGCCCGAATTTGATCGTGAATCGTTGATATCGTCGATACGTTGATGAACACGTA  
AATCAGCTCCAGAGTAGCCTACGACACCCGACATTAATGCCTGCTCGACACGCTCGGCTGTGGTCTGGAAGCTCTCGAAT  
ATCCGGCTGTAAAAAATGCTGGGGCAATTTGCCCGGACCCGCTACCCAAACGCGGTGCGCGTCCCGGAACTCAG  
TTTTAGCTCGACCCGCTCAGGCGGCATTTAACATCGGCACGATGATCCGTTGGTTCGATTTCAACGATACCTGGCTGGC  
GGCGGAGTGGGGGATCTTCTGACAACCTCGGCGGCATTTGCAACCGGCGACTGGCTTTCCGCGCAACGCGATCGCCA  
GCGCAAAAGCTCGGTTGACCATGAAACAGGTGCTGACCGCAATGATCAAAGCCCATGAAATTCAGGGCTGCATCGCGCTG  
GAAAACTCCTTTTAAACCGGTTGGTCTCGACACGCTTCTGTTAGTGAAGTGGCTTCCACCGCGCTGGTGGTGGTGGT  
CGGCTGACCCGCGAGGAAATTTCAACGCGTTTACGCGTGGTGGGACGCGCAGTGGTGGCAGCTATCGCCATG  
CGCCGAACACCGGACCGGTAATTCCTGGCGCGGGCGATGCTACTTCCCGCGCGGTACGCTGCGCATGATGGCGAAA  
ACCGCGAAATGGGTTATCCGCTCAGCCCTGACTGCGCTGTGTGGGCTTCTACGACGCTCTCCTTTAAAGCGAATCGTT  
CCGCTTCCAGCGCCGATGTTGTTTACGTTGATGGAATAATGTTGTTTCAAAATCTCCTTCCCGCGGAGTTTCACTCCC  
AGACGGCAGTTGAAGCAGCGATGACGCTCTATGAACAGATGCAGGCAGAGGCAAAACGGCGGCGATATCGAAAAGTG  
ACCATTCGACCCACGAAAGCCTGTATTCGATCATCGAATAAAAGGGCGCTCAATAACCGGCTGACCGCCACACTG  
CATTCAGTACATGTTGGGATCCCGCTGCTGTTTCCGGCGCTTAAACGGCGGAGATTACGAGGACAACGTTGCGCAAGATA  
AACGCATCGACGCGCTGCGCGAGAAGATCAATGCTTTGAAGATCCGGCGTTTACCGTGACTGCCACGACCCGAAAAA  
CGCGCCATCGCAATGCCATAACCTTGAAGTTCACCGACGCGCAGCGCTTTGAAGAAAGTGGTGGTGGAGTACCCATTGG  
TCATGCTCGCCGCGTACGAGTGGCATTTCCGAAGTGGTGCATAAATTCAAAATCAATCTCGCGCGCAGTTCGGGACTC  
GCCAGCAGCAGCGATTTCTGAGGTTTCTCTCGACAGAATCGCCTGGAACAGATGCCGCTCAATGAGTATCTCGACCTG  
TACGTCATTTAA

>Cluster\_23920

ATGAAAACTTTAAACATCTCCCTGAACCGTTCCGCATTCGTTTATTGAGCCAGTAAACGTTACCCTCGGCTTATCG  
TGAAGAGGCAATTTAATAATCCGATGTAACCCGTTCCGCTGGATAGCGAAGATGTTTATCGATTACTGACCGACA  
GCGGCACCGGGCGGTGACGCGAGATGACAGGCGCGATGATGCGCGCGACGAAGTTACAGCGGACGCGCAGCTAC  
TATGCGTTAGCCGAGTCACTGAAAAATATCTTTGGTTATCAATACACTATTCGACTCACAGGGCCGTTGGTGCAGAACA  
AATCTATATTTCCGCTACTGATTAATAAACCGGACGAGCAAAAGGCGCTGGATCGCAGCAAAATGGTGGCGTTCTCTA  
ATTTCTTTGATACACGCGGATAGCCAGATTAACGGCTGTTACCGTGCATGAGCTATATAAAGAAAGCCTCGAT  
ACTGGCGTGGTTACGACTTTAAAGGCAACTTTGACCTTGAGGATTTAGAACGCGGATTTGAAGAAGTTGGCCGAATAA  
CGTGCCGATATTTGTTGCAACCATCACAGTAACCTCGCAGGTTGGTACGCGGTTTCACTGGCAAACTTAAAGCGATG  
ATGACTCGCGAAGAAATACGATATTCGGTGGTCACTGACTCGCAGCTTTGCCGAAACGCTATTTCAATCAAGCAG  
CGTGAAGCAGAAATACAAAGACTGGACCATCGAGCAGATCACCCGCAAACTACAAATATGCCGATATGCTGGCGATG  
CGCAAGAAAGATGCGATGGTGCAGATGGCGGCGTGTGTCATGAAAGACGACAGCTTCTTTGATGTTGATACCGAAT  
GCAGAACCCTTTGCGTGGTGCAGGAAGGCTTCCCGACATATGGCGGCTGGAAGGCGGCGCTATGGAGCGTCTGGCGGTA  
GGTCTGTATGACGGCATGAATCTGGACTGGCTGGCTTATCGTATCGCGCAGGTGAGTATCTGGTCTGATGGTGGAAAG  
GATTTGGCGTGTCTGTCAGCAGGCGGGCGTACGCGGCATTCGTTGATGACGAGTAACTGTTGCCGATATCCCGGCG  
ATCAGTTCCCGGACAGGCGCTGGCCTGCGAGCTGATATAAGTTCGCGGATCCGTTGCGGTAGAAATGGCTCTTTCTG  
TTAGGCGCGATCCGAAACCGGTAACAACATGCCATGCCCGGCTGAACTGCTGCGTTTAACTTCCGCGCGCAACATA  
TACTCAACACATATGACTTCTATTGAAAGCTTTAAACATGTGAAAGAGAACGCGCGAATTTAAAGGGTTAACCT  
TTACTACGAACCGAAGTATTGCGTCACTTACCAGCAAACTGAAAGAGTTTAA

>Cluster\_31588

ATGAGTATTAATAAATTTATATAAGAACCTTAATGATGAATGGGAAGTATTTCCAAGAGAAGAAAAACAATAATATCT  
TTTTAATAAATCAACTTTTACTCCCATGCTATGGATGCTTAAATACTTCTTCCGAAATTTGAAGATATATCTTTAG  
AGGGCTTTGAAAGTTATATTAATGAAAGTGCATCACGGACAGTTATAGAGCGCAATTCATAGTGCATTAAGGATTA  
GATGCCGTTTACATAGCTTAAGAAATGCATTTGGGAAACCCACGAGATAATGAGCCTAGAATAGGAACCTATCTGAA  
TAAACATCTTGAATTAGATAATGAACTGATACAGGATATGTTGGTACCATGTTTATGGACATTAATGGTCTTACAAGC  
TAGGATTAATCATACTCGCCTTCAGATGATTTCTTTTAAAAACAATAATAATAACTGGGCTATTGAAACTAATGCA  
TTGATGGGATGTTTACAGGATCATGGGAGATGCTGTTATGGCTTCTTCCGAGCAGACAAAATGAAACAACATGATC  
TTTGGAGAACAGTGTATAGATGCAATTAATTTGCTGCTGATTTTCAATGAGGTCATGAATGAAATAGTGAACCCACAAA  
TAAAGAAAGTTGCTGATGAGAACATCGGTATACGAATGAGCATGATTTGGGGGAAACCAATTCGTAATTTGGGTAAT  
TATGGAATTCAGGCGTGAATGAAGTACTGCTGATCATCTTTTTTTGTTGATATAGCCTTAAATTTGCAACATAAAGCCCC  
CAAAAATTCATAATGCTTTGGCAGAACTGGTGTGAAAAACTGGTCTTACTGTAATGATTAATCTTACATATAAATAA

AGGATGGACAACCAGACCGTTACATAATGATTTACATCAAAAAATCAGTCAAGATTAAGATATAAACAATATTTATTA  
AACCAGAGTAAATATTTTTCAATATTGCCACATGGTTTTGAAACCATCAAGGATTAAGTTGTAATTTCTTATAGTAACGA  
TGAGCTAGGTCTGGTTAATAGAAAGGATATTTCAACTGTTCTCAGTTATTTCCAAAGGGCAAGTGGGTTAAGTTTCATG  
CCACCTTTTGTGAAGAATATGGCGAGCATATGAGTCATTTGAAATTTAAATTCAGAGTTGTAATAATGGACTTGATGCA  
AGTAAAAAAGATAATATGACAATCATGAGACGAAAAATAAAAAAAGCTTATGAAAAAAGAAAATGGTCTTTACTGC  
CATCCATAAGGAGCAAACCTCATATAAAGGCCTTCAACATATGTATATTTAGTAATTTCAAATGATACGGTAATGAAA  
GAGAAATCCCTTGTAGTATATTTATAAAAAATA

>Cluster\_8935

ATGCTGGCTTTCCTTAAACCAGGTTTCGCAAGCCGACCTGGACCTTCCGCTCGAAGTGGCGGCAAAATGTGGTTCAAACC  
GTTTCATGCAATCTACCTGGTGGTCTTTATCGGCTACCTGACGATGTACCTGATTCGCAAGAACTTTAACATCGCGCAGA  
ACGATATGATTTTCGACCTACGGGTTGAGCATGACGAGCTGGGGATGATCGGCCTGGGTTCTCCATCACTTATGGCGTG  
GGTAAAACGCTGGTTTCTACTACGCCGACGGCAAAAACCAAAATTCCTGCCGTTTCATGCTGATCCTCTCTGCTAT  
TTGTATGCTGGCTTACGTGCCAGTATGGCGACGGCTCGGTTAGCTTGTCTCGATGATTTGCCTTCTACGCCCTAAGCG  
GCTTTTTCCAGAGTACCGGGCGTTCTGTCAGTTACTCCACCATCACCAAATGGACGCCGCGTCTAAACGGGGACATTC  
CTCGGTTTCTGGAATATTTCTCAACAACCTTGGCGGTGCAGGCGCAGCAGGTGTGGCGCTGTTCCGGGGCAAAATACCTGTT  
CGATGGCCATGTCATCGGCATGTTATCTTCCCGTGCATTCGCGCTGATTGTCGGTTTTATCGGCCGCGTTACGGCA  
CCGACTCCCCGGAATCTTATGGCCCTCGGCAAAAGCTGAAGAACTGTTTCGGCGAGGAGATCAGCGAAGAGACA  
GAATCTACCGATATGACCAAGTGGCAGATCTTTGTTGAGTATGTGCTGAAAAACAAGTATCTGGCTGCTGTGCTTCGC  
CAACATTTTCTCTATGTGGTACGATTTGGTATCGACAGTGGTCAACCGTATACGCGTTCCAGGAACGAAACTCTCTA  
AAGCGTGGCGATTACGGGCTTTACGCTGTTGAAGCTGGTGGTGGTACGCTGCTGTGGGGCTGGCTCTCTGAC  
CTGGCGAACCGTTCGCGTGGCTTGGCGCTGCATCGCCTGGCGCTGATTATCGCCACGCTCGGTGTGTATCAACATGC  
CAGTAACGAATATACTATCTGGCTTCTCTCTTTGCGTGGGTTTCTGGTCTTTGGCCCGCAATTTGTTGATTTGGTGTGG  
CTGCTGTTGGCTTTGTACTAAAAAAGCGATTGGCGCTGCCAGTGGTATTAAGGACCTTTGCTTACCTGATTGGTGTGAC  
AGCTTTGCCAAGTTAGGCTGGGAATGATTGCCGATGGGACCGCGTATTCGGCTTACCGGCTGGGACGACCTTCGC  
CGCGCTGGATATCGCCGCGATTGGTGTATCTGCTGATGGCGATAGTGGCGTAATGGAAGAACGCAAAATCCGCGCG  
AGAAAAAATTCAGCAGTTGACAGTGGCATAA

>Cluster\_38604

ATGGCCAAACGTTAAACAAAATCGTTCGTCGTCGTCAGCTCGCTCGTTTTATCGCGCTTGTGCTGGGTATTTGGTGGGGTGG  
GGCAGGAACCTGGATGGTATCCGAGATGAACCTGAAGAAAGCCCGCCGGCAAAAGCACCAAAGGGCGAACCTGCGCCGG  
ATATGACTGGGGTGGTCAATCAGTCTTTGACAATAAAGTCCAGCGTTCCGCCATTGCGGAAGCCAGCGTCTGAACAAG  
GAAACGCAAGGCTGAAATTAAGAAAGTGCCTACAGAAATGGGATTTATCGGGCGTATCTGAAAGGCTCTCAGGAACGAT  
CCGTGAGCTGGAAGATGAAAATAAACTCTGCAGACACAAATCGAAGCCGGGAAGAACTTTGACTCTCTCAGTCTGAAAC  
CGTTGCCAGGGGCACTCGCCTCACAGGAAAAGCAGCGGTACAGGCGGTGAAGTCTGCCCCGACCAATTTGGCC  
GCCGGTGGTGGGAGGCTCCTGTGCACCGGTGATGACCCCGTTACGCGTCCGGGAATGATGGACAGTCAGGAGTTTAC  
TCTGCCGGAACCACTCCGCAAAAGCCCGTTTTCCGTTGATTTCTCCGCGAGTTTTGCCGAAGCAATTTGGTGGGAAG  
GTGGTGCATGCTAATGCTTACCTGCGGCAAAAATCAACCTGATGACGCTTCCGATGACGCTTCTGACCGCAAGTGTG  
CCTAACGATCAGGAATTTGATCTGACCGGGTGTGTTGTGACTCTGGAAGCTGGGGGATGTTTCCAGTGAACGGCCAT  
CGTCCGTACCCGCTCCATCAGTGCAGCTGGGTGATGACAATATCGACCCAGAAAGATTGCCGGTATGTGCTCTTTATGG  
GCAAGAACGGCATCAAGGGCAAGTGGTTCATGCTAATGCTCAAAATCTGCTGTATGCGGGGGGCTCAGGCTTCTTTGAT  
GGTATCGGAAGGGCAATTTAGAAAAGCCCTTCCACAACCTGGGGCTTTGGAGCCACTGCCAGCATGAGTGGCGGTGAAAT  
CGGTACGGCCGACTCGGGCGGAGTCACTTCCGCGCAAAACACTCTCTGATTTACATCAAACGTGCTGAACAGT  
ACCACCTGTTATCCGATTTGGTGGGGCAATGAAGTCAACCTGGTTTTCCAGGATGGCTTCCAGCTTGAACCGCTGGAA  
GAAGCCCGCGGAAAGCCGCTGCACGAGGAAAACAAAATCAACCATCAGCCTCATCTGGCCTGCTGCCATGCCCGCA  
CACGACGGACATGCTTAAACACCTGCAGGACTTACAGCTGGGGACACCGTCCGACCCGGCTACAGGCCAGGTTGTACGC  
AGTAA

>Cluster\_28661

ATGAAGAGTGAAGTGTGTTGCCGTTAAAGAGAAAATGGTTATGGCATGGGAGACGCCCGCAGCCACATATTTTTCGATAA  
CGTAATGTTATATATGATGTTCTTTTATACCGATATTTTGGCATTCCTGCGGATTTGTGCGAACCATGTTTTTGGTGC  
CTCGTGCACCTGGATGCGATTTCCGATCCTGTCATGGGGTGTGTTGGCCGATCGAACCGCTCTCGCTGGGGTAAATTTCT  
CCGTGGGTACTGTTTGGCGCACTGCCATTTGGGATCGTCTGTGTAAGTGGCCTATAGCACGCCAGATCTCAGTATGAACGG  
AAAAATGATTTTATGCAGCAATTACTTACCCCTACTTACTTACTTACTTACTTACTTACTTACTTACTTACTTACTTACTT  
GTGGTGAATACCAATGACCCGACTCAGCGTATCTCGCTGCAATCCTGGCGTTTTGTGCTGGCGACCCGGGAGGCATG  
CTCTCTACTGTTCTGATGATGCCACTGGTAAATTTAATTTGGTGGTGTATAATAAACCACTCGGTTTCCAGGGCGGTATCC  
GGTCTTTCCGTTGGTGGCATTATAATGCTGGCATTCTGTTTTTCCACTAAAGAACGCGTTGAAGCAACCACTACAA  
CGACCTCATGCGGGATGATTTTACGTTATCTGGCAAAACGACAGCTGGCGTATTTGCTGGTTTTCTGACCAATTTCAA  
ATCCTGGCGGTGTGCGTACGCGGTGGGGGATGATGATATACGTCACATGGATTTTGGGTACGCCGGAAGTGTGTTGTCG  
TTTTCTCACCACTTATTGGTGGGTAACCTGATTTGGTTCCGCACTGGCGAAACCGCTGACCGACTGGAATGTAAGTCA  
CTATCTTCTGAGTGACGAAACGCTTGGTGGCAGTATGCTGCGATGTTTCTGTTCTTATGACGCCAGCATCAC  
ATGTTTTGCTTCTTCTTCTGATTTGGTGTGTTGATCAACTGGTGGACACCTTCCAGTGGGTAATGATGTCGATACCGT  
CGACTACGGCGAGTGGTGAATGGTAAACGCTGACCGGGATCAGTTTTGCTGGCACGCTGTTTGTGCTCAAACCTGGGGT  
TGGCCTTCGGTGGTGGCCTTATCGGCTGGATGCTGGCTTATGGCGGATGATGTCGGCAGAAAAAGCGGAGAACAGCGTC  
ACAATTAGCATCATATTATCGCGCTATTACGATTTGTTCCGCGATCTGTTACTTGTGAGCGGATTTATCGCTAAACGCTA  
CTACTCACTACGACGCAATCTGAAAACCGTTATGGAACAGCTGGCTCAGGGCAACCGCGTTGCCAGCAACAATTTCA  
CCTCTCAAGAAGTGCAGAACTAA

>Cluster\_25856

ATGGCTAAGACGTTATACGAAAAATATTCGACGCTCAGTGTGACGAAGCCGAAAACGAAACCCCGCTGTATATAT  
CGACCCACCTGGTGCATGAAGTGACCTACCCGACGGCGTTCGATGGTCTGCGCGCCACGGTCCGCCGGTACGTCAGC  
CGGGCAAAACCTTCGCCACCATGGATCAACAACGTTCTTACCAGACGAAAGACATTAATGCTTCCGGTGAATGGCGCC  
ATCCAGATGCAGGAGCTGATCAAAAACGCAAGAAATTTGGCGTGCAGCTGTATGACCTGAATCACCCGATACAGGGGAT  
CGTCCACGTAATGGGCGGGAACAGGGCGGACTTGGCGGGGATGACCAATGTTCTGCGCGGACTCACATACCCACCC  
ACGGCGGCTTTGGCGCACTGGCTTTGGTATCGGCCTTCCGAAGTTGAACACGTAAGTGGCAACGCAAAACCTGAAACAG  
AGCCGGGGCAAGACCATGAAAATGGAAGTCCAGGGCAAGCCGCGCGGGCATTACCGCAAAAGATATCGTGTGGCAAT  
TATTTGTAACCCGACGCGCAGCGCTACCGGCATGTTGGTGAATTTGCGCGCAAGCAATCCGTGATTTAAGCATGG  
AAGGCTGATGACCTGTGTAATATGGCAATCGAAATGGGCGCAAAAGCCGGTCTGGTTGACCCGGAACCAACCTTT  
AATATGTTAAAGCCGCTGTCATGCGCGAAAGGCAAGATTTGACGACCGCTTGCATATCGAAACCTTGCAAAC  
CGACGAAGGAGCAACTTTGATACCGTTGCTACTGCAAGCAGAAAGATTTGCGCGCAGGTCACCTGGGGCAACCAAT  
CAGCGAGGTGATTTCTGTTGAGCAGCAATATCCGATCCGGCTTCTGTTGCGGATCCGGTTGAAACGCGCGCAGAA  
AAAGCGTGGCTTATATGGGGCTGAAACCGGGCATTCCGCTGACAGAAAGTGGCTATCGACAAAGTGTATCGGTTCTCTG  
TACTAATCGGCTATTGAAGATTTACGCGCGCAGCGAAATCGCAAAAGGGCGAAAGTTCGCGCCAGGCGTACAGCGC



TGGTGGTTCCCGGCTCCGCTCCGGTTAAAGCCAGGGCGGAAGCGAAGTCTGGACAAAATCTTTATTGAAGCCGGTTTT  
GAATGGCGTTTGGCTGGCTGCTCAATGTGTCTGGCGATGAATAACGACCGTCTGAATCCGGGGCAACGTTGTGCTCCAC  
CAGCAACCGTAACCTTTGAAGGCCCCAGGGCGTGGAGGGCGCACCCATCTGGTCAGCCCGCAATGGCTGCCGCTGCTG  
CGGTGACCGGACATTTCCGCCGACATTCGCAACATTAATAA

>Cluster\_22045

ATGGCAAGTATTTTCATCGCTGGGAGTCCGGTCCAGGCTGGATTAAAGTTCAATCCTTGATAGCCTCACCGCCGCGCAAAA  
AGCGACGCTAACCCCTATTTCAAATCAGCAATCGTCTGTTTACCCTTAACTTAGCGCTACCGTACGCTGAAAAGCGCGC  
TGACGACTTTCCAGACCGCAACTACTGCATTGTCTAAAGCCGATCTTTTTTCCGCCACCAGCACCACCAGCAGCACCACC  
GCGTTTCAAGTGCACACCAGCGGGTAAAGCCATCGCCGGGAAATACACCATCAGCGTCACCCATCTGGCGCATGCGCAAA  
CCTGACCACGCGCACCACCAGAGACGATACGAAAACGGCGATCGCCACCAGCGACAGCAAACTCACCATTTCAACAAGGCG  
GCGCAAAAGATCCGATTACCATTTGATATCAGCGCGGCTAACTCGTCTGTTAAGCGGGATCCGTTGATGCCATCAACAATGCA  
AAAGCAGGCGTAAGCGCAAGCATCATTAACGTGGGTAACGGTGAATATCGTCTGTGAGTCACATCAAAATGACCCGGCCT  
TGACAATCGGATGACGCTCTCGGTTAGCGGTGATGATGCGTACAAAAGTTTATGGGCTATGACGCGTCCAGCGAGCA  
ACGGTATGGAGGCTCTCGGTCGCCGCCAGAATGCGCAGCTGACGGTCAACAACGTCGCCATCGAGAACAGCAGCAACT  
ATCAGCGACGCGCTGGAACCATCACCTGAACTGAACTGACCGTCAACACGCGGCAACAGCGCTGACCATCACTCAGGA  
CACCTCCAAGCGCAACCGGATTAAGACTGGGTGAATGCTATAACTCGCTAATAGATACCTTCAGCAGCCTGACCA  
AATACACCCCGTAGATGCGGGAGCTGATAGCCAGTCTGATGCAATGGCGCACTGCTCGGCGACTCCAGCTCGGAGC  
ATTCAGACGAGTTGAAATCGATGCTGAGTAATACCGTCACTTCTCCAATAAAAACGCTGGCGCAGATTGGTATCAC  
GACCGATCCAGCGATGGCAAACTGGAAGTGGATGCGGACAAACTCACCGCTGCACTGAAAAAGATGCCAGCGCGGTAG  
GTGCATTGATTGTTGGCGATGGTAAAAAACCGGCATCAACACCCATCGGAGCAACTGACCAAGTGGCTTTCGACA  
ACGGCATTTAATAAGCCGCTACCGATGGCGTTAGTAAGACCTGAAATAGTTAACTAAAGACTACAACCGCGCAGCGA  
TCGATTGATGCGCAGGTGCTCGCTACAAGAACAATTTACCAACTGGAGCTTTAATGACCTCGTTAAACAGCACA  
GCAGTACTTAACGACGAGTTTCGAAAACAACAGTAATTTCAAGTAA

>Cluster\_23809

ATGTCTGTTTCCACCCTCGAGTCAGAAAATGCGCAACCGGTTGCGCAGACTCAAAAACAGCGAACTGATTTACCCTTGA  
AGATCGTCCGCGCTTCCCAAACCTGTTTGGCGCCTGTCAGCATTTGCTGGCGATGTTGCTGCGGTGATCAGCCAG  
CGTATTAATCTGCCAGGCGCTGGGTTTACCGGCACAAGACCGCAACACATTTAGTATGTCGCTGTTGCTCCGGT  
GTGGCATCGATTATTTCAAATTAAGCCCTGGGTTCCGGTGGCTCCGGTGGTGTCTATTCAGGGCACCAGCTTCAACTT  
TGTGCTCCGCTGATTATGGGCGCACAGCGTGAAGACCGGTTGGTGTGATGTTCTTACCATGATGGCAGCTTTGTTTCG  
GCAGTTGATGCTGGCAAGTTGTACCGAGATGGTGTATCTCCCGCTTCTGCATCTGGCGCGCCGATTATACGCCACTG  
GTTTCTGGCGTGTGGTGTGATGATATCGGCCTGTCGCTAATCAGGTTGGACTGACCTCCATTGGCGCGGTTACGCAGC  
CATGAGCGATAACACCTTCGCGCGCACGAAAATCTGCTGCTGGCAGCGTGGTCTTAGCCTTAATTAATCTGCTTAAAC  
GTCAACGTAACCTTACTTACCGCTGGCCTCACGTTGATGCGATGGCGGCCGATAATGCGCTGGCGTGGTTTATGGGC  
ATGTTGCCAGAAAACAACGAAACCGATGACACAAGAAGTATGTTGGTGCACACGCCGCTCTATACCGTCTTGGCATTGA  
ATGGAGTCTGCTGCTGGCGTGTGCTGTTTATGATCACTTCGCTGGAACCATTTGGCGATATCAGCGGACCTCTG  
ACGTTTCCGAAACAGCGTTCGCGCGCACGAAAATCTGCTGCTGGCAGCGTGGTCTTAAAGCGCGGCTACTGGCGAACCGCTGA  
TTTGTCTCGGCGGATTTAATACCTTCCCGAACCTGCTTCCGGCAGAACACCGGGTATCCAGTTAACCGGTTGTTTC  
CAGCCGCTATGTCGGTTTTGTCGTCGCGCTGATGTTGATGCTGCTGGTCTGTTCCCGCAGTGGCGGTTTTGTACAAC  
ACATTTCCAGAACCGGTTCTGGCGCGCAACGCTTGTAAATGTTTGGCACCATCGCCCTCCGCTGTCGCTGTTCT  
CGTAGCCGCTGAACCGGCTCCGGCGATTCTGATTATCGCGCTGTCGCTGGCGGTCGGTCTGGGCGTGTCTCAGCAGCGCT  
GATTTTGCAGTTTGGCCCTGAATGGCTGAAAACCTGCTCTCCCGGATTTCCCGGGCGGATTAATCTGCCATCGTGC  
TGAATCTGATTTTCCCCCGAAAAACAGTAA

>Cluster\_40102

TTGAGCCGTTTCGTTCCTCGCATTAATCCGTTTTATTTACTCTTGTGGCGCAGGCGGTACAGCTAACGCACAATCTAC  
CTTCGAGCAAAAAGCGGCAAACTCCTTTGATAAATAACATGATGGTCTGCCGGATTTAGGCATGGCACCTGAAAATCATG  
ATGGGGAAAAACACTTTGCTGAAATTTGAAAGATTTCCGGGAAACAGTATGAATGATAACGGGCTGATACCTGGCGAG  
CAGGCAAAAAGCTTTTCGATTTGGGAAAGGTTCCGCGACGCGCTTAGTCAACAGGTTAATCAGCACGTAGAGTCTCTGAT  
ACCGTGGGAAATGCCAGTGTGACGTCAAAGTGGATAACGAAGGACATTTACCGCGCAGTGGGAAAGTGGTTGTGTC  
CGTTACAAGATAATGATCGTTATCTCACCTGGAGCCAGCTTGGTCTTACTCAGCAGGATGATGGGCTGTTGAGCAATGTG  
GGCGTTGGGCAACCGTGGGCGCGCGCAGCTGGCTGGTGGGTTATAACACTTTTATGACAACCTGGCTGGACGAAAATCT  
TCAGCGAGCGGGCTTCGGTTCGCAAGCGTGGGCGCAATATTTGGCACTATCGGCAAACTTTTATCAGCCGTTTGTCTGAT  
GGCATGAACAGACAGCCACGAGAAACAACGGATGGCGCGGGTACGACCTGACAGCCGAAATGGCGATGCCGTTCTAT  
CAACACCTCAATACCAGTGTGAGCGTAGAACGATTTTGGTGTGATGTTGATTTGTTAACTCTGGTACCGGTTATCA  
CAATCCCGTCCGTTGAGTCTGGGATTAATAATACCCAGTGCCATTTAGTCACTGTGACGGCCAGCATAAACAGGGTG  
AAAGTGGCGGAAATAAAAATAACCTCGGACTGAATCTTAACTACCGCTTTGGTGTACCCCTCAAAAACAACCTTCTGCG  
GGCGAGTTGCCGAAAGTCACTGCTTACGTTGTTAGTCTGATGACAATCCGACGCAAAATAATCTGCCGACTCTGAGTA  
CCGACAGCGAAAACCTTAAACGGTGTCTTGGCGACACCTCCGTTGGGATCTAAAACCTGGCGAAAACAGTGGCGCTGAAAT  
TACAAATCCGCACTGTTACGTTACGTTATTCGCAACTGATTTGGCAGGCGATACGCAGATTAAGTTTACGCGGGCGCA  
CAAGCAACAGCGTGGAGGGCTGGACGCTGATGCTGACTGGCAGAACCGGGGAAAGGGCGAGCAATCACTGGCGATT  
GTCGGTGGTGGTGAAGATAACAGGGGAGCGTGTCTCTCCATGAGATCAGCTAACGCTTGTGCAACCGTTCGATG  
CATGTCAACAGCAACTGCGCTGGGAACCGTAA

>Cluster\_63654

ATGAAACTGAAAACGGTTCGAGATTAACGGAAAACAATACGCAGAAATGATACTGCTGGCCTGCCAGTTTATGTGCACGA  
CGATGGTAAAGAAATTTGGCTTCGATGCACCGCTGGCGCAAAAAAAATTAACAGAGCTTAAATGGCGAGGCAAAAAATCATC  
GCCTGGCTAAAGAAGTGCAGAGGAAAACCTGGCTAAGTTTGGCGCTATCGAAGACCCGAAGAAGCGGATCGAGGCATG  
GAAATGCTGTCAAAAATCGACCAAAAAGCTGCTGATGCGGGACAGGTTGACCAGGTTAAGCGGAAATTAAGCAAAAA  
TTTTACGACAGCAATFAGATGAAGAAAAGCAACGCTCTCAGATGCTGGAGAAGCAGCTTTACGATTCTATGATTGGCGGTA  
GTTTTGCGGGTTCAAAAATATATTGCCGATAAAAATGCGATCCCGGCGAGTTTATTAACAAGCCGCTTCGGGCGAGCATTC  
AAAGTGAAGAAGGGAGGATCGTTGCTTATGACGCTTCCGGCAACAAAATTTATTTCCCGCGCAAGCCAGGCGAACTGGC  
CGAGTTTGTATGAGCGCTGGAGTTCTTTGCTGCAAAAATTAACCTCAGAAAAGACTACATCTGAAAGCCAGTGGCAACTG  
GCGGCGCTCCCGTCCGACACAGCATGATATTGGTTCAGAAAACGATGAAACGCTCTGCTTTTGTGACTGGATGTTGCA  
GGTAAAGCAAAACGCAATTGAAAGCAGGATACACAATCGTTGATTAA

>Cluster\_32906

ATGCACCCACTCTGCCATGCAGGCATTAATGAGCAGATATATCATATTTTTCGCTGTTATCCGGCGCCGACGCAATT  
TGTGGTTTGTGTAATATGCTGAGTCAACAGGAACAAAAGCATTACGGAATACATCGTTGCGAGCGATTCTTATTT  
CCTTAATCAATGCTGGAATAGTGTCCAGGACTGATCCGCAAAAACAGCGATGAGGTTGCTTATTTTCTGCTGCTGTTA  
CTGGTGTGTTTGGTGGCAGGGGCGTTTGAACAATTTACGAAATTTTCTCTACGGCGTATAAACCTTGGCAGTAAAGA  
AAAATGGCGTGGAGTGAACGGGAAATATGACGAAATTTGCTTGGCAGTATATGACTGATTGGGCTCCGGGGATGAGG  
CTGTGCAATTAACGATACATGCTGAAAATGTTTTCCGTTGCCGATATCGCTCTTTCGCCATTGCTTGTGATGCCATTAATTC

GTTCACAGATTTTGGTCGGCAGCGTCTCTTGCCGTGTTTATGAATACGTATCGTGACGGTTATATCAGAGATAACCAGGA  
CGATATCGATAAAGCCATTACCCTCAAATACTTGGGCTAGTAATAATCAATCCATCCTGAAAGAACCGCGCGCGC  
AGGCGATTGAGAATCCGCTTAAGCAGTCCGAACAGGGCACACAGTATCAGGCCGGAAGACGAGTGGATGATGATGAG  
TGTTTATGTGCCATGTATGACGCATCATCCGAATCATCAGGACAATAA  
>Cluster\_50612  
GTGAAAGTTCAGTTTGGCCGGGATCGTTACGGTAAAGATGACGAAAACAGTTCCTGCTGGGTCCGTGTCAGTTATCCGTG  
GGCGGGTAAAGGATTCGGTGGCATTAGATCCCGGCATTGGTTCAGGAAAGTACGGTGGATTTCAAAAACGGTATCCGG  
ATTTACCGGATAATCGTTGGGCGTACCTACAACAGGACACCATGCCACCGTGGGGACTACCGGGCGCAGCGACGCAAAAGC  
GGGTTTTACAGCCACACTATCGCGCGGCCCAACCAATGCCAACGCACACTACGTTTGGAGGATAAACCTGGCCGTGAAGA  
GGTCTGGCTACATGCCGAAAAGATCAGCGGATGAAGTTAATAATAATGAAAGCCACTGGGTGGGCAATAATCGCCTTA  
AAGTCATTGATAAAAACAGAAACAGCGATAATTGGTGGAGAAACGTTCTTACAGTTCAGATGGATGATACCTCCCTTGCC  
GGCAAAAATAAACGATTACGGCCGACAGAATTTACGCCCTGCTGGGGAGATTCCATAATTTCTAGTTGTGGGAAAAC  
TATCCTGCAAAATGACAGTGCAGGAATAATTAATAATAACCTGTGAAGAAATTTAATAATTTACTGCAACAGAAAATGGAAAGA  
TAAATACACAATCAGGGCAGCTTGATTTAATAATGAATGACCGAGCGGCAGATATACCTCCACCTGGAACATCGGAGAAA  
ACAGCCCTTCAGTTGGCGATAGACGTACCTTTCATGAATAAATAA  
>Cluster\_67105  
ATGAAGAAGGTGACGTTGTTTCTGTTTGTGTGTCAGCCTCCTGCCTCCACTGTACTGGCCTGGAACACGCCGGGAGAAGA  
CTTCAGCGGAGAGCTTAAGCTGGAAGGGGCGGTGACCAGCACCCGTAATCCGTGGGTGTGAAAGTCGGACAGGGAAATG  
AAAGTCTGGAGGTTAAGCAGAGCGTGGTGTTCGTGACGGTGCAGGGAATTTCTGGTGCACGCGCGCTTACCCGTT  
TTACTGGGAAAACACCTGACACACCGGCAGGACGTGAGGGGCTTTCCCGGGGTCAGTTACGGAAAGGGGGCTGA  
GGGTTTTTCACTTGAATGACAGCGCCCGCATGCGCAAAAGTGCCTGCTGTCGACCGCGATAAAAATGTTCTGTCGG  
GGACATTCACCTCAGGATGACAGCGCGCGGGGTGTTGCGTCAATGACAGGACGGACAACCGGTGTATACCGCGGTGAT  
GACGACCTGAATGCGAATGGGCTGCCGGGTGAAAGCACAGCATAAGAGACTTCTGATAATTCGGGGACTCTGCAGACGAT  
GTTCAAGTGGTGAAGGTCCGCTCCTGGCTGCAGACAAATGACAGTCACTGGTATTTCGGGAGTGGTCAATTCAGTATGCGCT  
CCCTGCGTCAGGTTGAAGGTGTGTACGGCGCACAGATTGTGGCAGGCGGTGGTGAATTCATCTGACCGCGCGATGCCG  
GAACGCTGGCGGGTGTCACTGCCGTAAGTATTGAGTACCAGTAA  
>Cluster\_18888  
ATGAAGAATATTAGATACATTGACAAAAAGATGTTGAAAACCTGATTGAAAATAAAACATCTGATGATGTTATATTTTT  
TCTTTCTGGCCCTACATCGCAAAAAACACCTTTGTGTCAGCATTACGAACAAAGGATATTTATGCTGTCATGGTCTGCGC  
AATATTTGTTAAGTCATAATATCCTTCCCTTTATATATGACTTACAGATGTCGCGCTTTTACATCAGCGTCGTGATGAT  
TTTTATAAATTTAGCCAGAGAAGTCGTTATACCATAGTAAACGTTGACGTTTATGAACACGCTTCCAAAGAAGACAACT  
TTATATCCCTCCAGAACTGCCTCGTATTACGATCTTTTTACCAGGAGAAAAGCGGTTGATAAAGAAGATTAAATTTA  
ATATTTGAGCCAGATTCACAAAGAACTGCTGATCTCTGTACCGTTGTCTAAAAAAGGTCGCTGGTTGGATTTTGAAG  
GACATTAGCTTGGTTATGCTCATGCCATACTATTGCCTTCCGTGCAATTCAAATAGCATATTCACCTAAGTATGCAGC  
GATTATTTGTTCTGGTCTGATTAAACGGGTAAGTCTGCTGCTGCTATGACGAAAATAATAATCCCATGCCCCGGAAT  
TGAGTAAGGATTTATTCAAAATCTTGCCATTTTTTCCGTTTATGCTGATAATGTAGATGATAATAATTTTATAATTTG  
TCGGATGATACAGCAATTCATATGATATCATTCCATTTATGGAAGTGTCTATAA  
>Cluster\_60657  
ATGAACATTCGTTAGCGTTTAAAGCCGAACCGGATGCGGAATGCTGGCGGAAAAGAGTGGCAGGCGCGGCTCAGGG  
TAAAAGCGGACCGGATATTTTCGCTACTGCGAAGTTTACTCGGTGCTGATGAACAGGCCCTGCGCGCTGCTGTTGGCGC  
AGAGAAAAACCGTACGCGGATGCTTTAACCGGTTGAGCATGGGGATGAACGGGCATTGCACTGGCTGCGGTATCTC  
ATGGCTCTTGGGTTTGGAGAAAGCTGATTTGCTGGAGACGGCGGAGCATCTGCGCTTTGGCGCGGAATTTGTCGCTCGCCA  
TATTTCCGAATGGCAGCATCAGAATCCGCTGGATCTGATAAATACCAGGCTGCCAAAGCAGCAAGGGGCAATGGGCAAA  
CGCCATTTTTGCTGGCGGAAATGCTGGGCTGGCCCTGCTTACCAGGTTGGAGCGTTTCACTCTCGACCGCTGTTTATC  
ACCCTCGAACAGCGTACTGAACATGGGTTGCGTTGTTGCGGGTTGCTTGCCTGCGGTGATTGCCGTGCGTCACTGCGG  
TGAAGTGGCCTTGGCAGTACCGGAAATGCGCCAGCGAAATGGCTGCGGGGAAAGCAGAAATATCCGTA AAACTGTGCTG  
CCGAAATGCCAGCGATGCAAGTGTCTGCAACTGGCAAGCAGCAGCAACGACGCGGAGCAGCTGATTGATGGGCAAAACG  
GTAGCAGAAAAGCTCAAAAGCTATGGCAGGACTATTTACGCCAAAGGATGCAGCCATGA  
>Cluster\_45181  
ATGAGCGAAGTACTGCTCAGCCGTGACCAACAAGTATTGTTGCTGACCCCTAACCGTCCCGCCGACGTAATGCGCTAAA  
TAATGCCCTTCTGACGCAACTGGTAAATGAACTGGAAGCTGCGCTACCGATAGCAGCATTTCGGTCTGTGTGATTACCG  
GTAATGCACGCTTTTTTGGCCGTGGGGCCGATCACAAGAAATGGCAGAAAAGATCTCGCGCCACCCTAAACGATACA  
CGCCCGCAGCTATGGCGCGGATTGCAGGCTTCAACAACCTCTCATCGCAGCCGTCAACGGTTACCGCTTGGTGGCGG  
TTGCGAAGTGGCATTGTTGTCGATGTTGGTGGTTGCGGAGGAGAACCGCGCTTTGGTTTGGCGGAAATCACTCTCGCA  
TCATGCCAGCGCAGGAGGAACGCAACGTTTAAATCCGTTAGTGTGCTGCTGCTGCTGCTGCTGCTGCTGCTGCTGCTG  
GAAAGTATCACCGCTCAGCAAGCACAGCAGGCGGGCTGGTTAGCGACGCTTCCCAGCGATTAAACCTCGAATACGC  
CTTACAGCTGGCGTCGAAAATGGCAGCTCACTGCCGCTGGCCTTACAAGCGGCAAGCAAGCGCTGCGCCAGTGCAGG  
AAGTGGCTTTGCAAGCCGACTTGCCAGGAGCAGCTGATTACCTTACCTGCTGGCGCAACAGAAAGATCGTATGAAGG  
ATCTCCGCTTTCTTGCAAAAACGACCGCCGACTTTAAAGGACGCTAA  
>Cluster\_29820  
ATGACAACAATCCACCATGACCACGTAGAAAAGCAGTTTAGCTCTCAAGCTAGCGAATATTTGACTAGTACCGTACA  
TGCAATCCGACGAGATTTACAGCGCTGGCGGTGCGTCTGGCTGATTATCTGATGCAAGTGTACTTGATATGGGCTGCG  
GAGCAGGGCATGCCAGCTTTGTCGCTGCGCAAAAACGTGAGCACGGTGGTGGCGTATGACTTATCTGCCATATGCTGGAT  
GTCGTGGCACAAGCTGCCGAAGCCGGCAACTGAAAAATATCACCAACCGCCAGGGTTATGTCGAAAGCTGCCATTTGCA  
CGATAACGCATTTGATATTTGTTATCAGCCGTTATTTGCCCCACTCAGTGCATGATGTTGGTGCAGCAGTGCCTGAAAGTGA  
ACCGGATATTGAAAACCGGTTGGTCTGCTGATTTGATGATGACGTAATGTTCTCCGGGTCAACAGTGGCGGACATCTGGTFA  
CAGACGGTAGAAGCATTACGCGATACATCTCACATACGGAACACGCCAGCGGTGAGTGGTTGACGTTAATCAGTGAAGC  
CAATCTGATAGTTGATAATTTAATTACAGATAAGTTACCGCTGGAATTTCTTTCATGGGTAGCGAGAATGCGTACGCCAG  
AAGCGTTAGTAGACGCTATTCGCATTTACCAACAGAGCGCATCGACAGAGGTGAAAACGTAATTTGCTTGCAGAAATGAT  
GGCTTTTTCAACAGTATATCATATGATGATAAGCACAATAAAGCGGCATAA  
>Cluster\_50537  
ATGGTCCGCTGACTAAGTCAATCTTATTCGGCAATAAATTTTTTATTCTGACTGGATTTCCATTTGCAATGAGTGT  
TCTTTTTCGATGATTTGTATAACCGTACTATTTATATTTTAAAAAAGTATGGTCTGGGATGTTGGGAAAGATTTTAA  
TATCACTAATGGCCACTTTTATCATATAATTTTAAACAAATTTACCTCTCACGACATTTGGCTTTATGTCACACTGATCTTGA  
CCAAGTTTTTTAGTGAGTTTATTAATAATAGTAAGCATTTTTCTTACGCCCTCTGCTCTAATTTATATAGGTTTCCCT  
TTCGTTGTTTATTTGTTATACCTGAGTTTATAGGAATAACATTTTGTCTTGTTTTACCCCTATCAGAGAAAATTTCTCTGA  
GAAACAGATTA AAAACCCCTTACTGAATCTCTGTAAGAATGAGAAACGAAAGAGAATTGAGAGACTTACACCATCTGAG  
TTGGTATTGTTAAACTCAAAAGTTATGTTTTTTAGAACATTTTTCATCTCTGCTTGTGTTGCTTATTTTTTATTTGTT  
TTCGTTGGTTAGCAGTATCACAGGAGAAATATGGATACAATCGCAAGACGAGCACTTGTGATTTATTTATCACTCTT

CTAAGATTGATGATGTTTCCAGAATGAAATATTATAACTACGATAATGAGAAGTTTTCCACAGCAATATTTAATGGAGAG  
AAATTGGAGTTTTACTTTTAATGACAAATAATATATGA  
>Cluster\_54219  
ATGGATTTTCAGCGGTAAAAATGCTGGGTAACCCGGCGCAGGTAAGGTTATCGGCTACGCCACGGCGCTGGCGTTTGTGA  
GGCGGGAGCGAAAGTTTACAGGTTTTGATCAAGCGTTCACTCAGAGCAATATCCCTTTGCGACCGAAGTGATGGATGTTG  
CCGACGCTGCGCAGGTGCGCAAGTGTGTCAGCGACTGTTAGCTGAAACGGAGCGACTGGACGCGCTGGTCAATGCGGGC  
GGAATTTTACGCATGGGCGGACCGATCAGTCAAGTAAAGAGGACTGGCAGCAGACTTTTGGCGTTAACGTGCGGGTGC  
GTTTAACTGTTCCAGCAAAACATGAACAGTTTCGCCGTGAGCGGGGGGGCGATTGCTACTGTGGCGTCCGACGCGC  
CGCACACGGCGGTTATGGCATGAGTGCCTTATGGCGCATCGAAAGCGGCGCTGAAAAGCTGGCGTTGAGCGTGGCGCTG  
GAACTGGCGGGTAGCGCGTGCCTGTAATGTGGTTTTCGCTGGCTCCACCGACACCGATATGCAACGACCGTGTGGGT  
GAGCGATGACGCCGAAGAACAGCGTATTTCGCGGCTTTGGCGAGCAGTTTAAACTCGGCATTCGCTGGGAAAATCGCC  
GTCACAAGAGATCGCAACACGATTTTGTTCGCTCGCTGACCTCGCCAGCCATATACCTACAGGATATTTGGTGC  
GATGGCGGCTCAACGCTGGGGGCATAA  
>Cluster\_48637  
ATGTCTAATACCCATGTAATAAAACATCAAACTTGGTGCCTGTAAGGTGTCGTTTTGGTGGTGTGATTTGGGTTACACCAA  
AGGTGGTGTTCAGGTTGAAGTAGCCACTGAAACGCTGAAAGTCAACCGTCAGTTCAGTTGGGGCAGACCGTAATTTCCGAAT  
TAGTTTACGGGCGCAACATTTACCATACCGCGCTGAGCTGACTGTTACTCCAAAACATGGTTGACTGATCGCGCTGT  
TCTACTCTGAGCGAAGATGACAACCTCTGTCAGGATCACATCTGCACAGGGCGTTAACCTGATTTGATGTGGCGAAGGAGCT  
GGTTCGACTCCGAGGACACCCGACTATGTGTTGACCATCCGAAAGCGGCAACCGCGGGCAACTTCACTATGACCT  
ACCATCTGATGATGTTCTGTGTTCTCTGTTTCAGTTCAGCGCATACCTGATGACGAAGCGTTCCTGGGAAGAAATGAGC  
GGCCCTAAACCGTAAAAACTGTGTCGATCGCACCGGAACTTCCAAACGTAAGGCTGGAGAAACTGTGCAACTGACAGC  
CGAAATCACTCCAGCTGATGCCGACAGAAAACCGGTGTTGGGAATCCGAAGACCAGGAAAAGGCCACGGTAGATCAAA  
CGGGTCTTGTGCGCGGTGTGGCGCAGGGTACTGCAACATCTCTTACCAGCAATAGCGGTTCTAAGAAGGCTACTAAG  
TCAGTAACGATTAACCTCCGAGGTAA  
>Cluster\_25005  
ATGAGTTTTCAATTTTGCAGGCGGAAGTTTTATTTCTCTGGCGCTGGCCTTACCGGCTACGCCGCGTCCATCCCGT  
GCAGCACAGCGCGCGGAACAAGTCAACGCCAGGTAAGTCCCGCAGCCAAAAAATGAAATCGCTGGCGCAACAGC  
GGCGTGGCATGACTATCGCTACACTTTAAGGTTATATTTCCGTCGAGATTGCGACCGCGCGCGCTGTACTAAAAACA  
CCCGCGTTACGCTGACTTCGCCGCGGAAATCGCCCTAACCCGGATGAACTTCAACCGTCACTGCCCCGAAAGCTGGCA  
GATGAACGTCGCGGTGCGCCCGGATGTTCTGGTCCCGTGGTGTGCAAAAGTCACTGATGCCCCGATACGCCGCTCA  
CGGCAATGATGTGGAGCTGAAGCCCTACAACGTCAGCGCCAGCGCGGGATGTGCTGATGGAGCTCGATGACGCAATT  
GGTTAAGCAGTAAGCACCGCTTTCGCAACCGGGCAGACCAATCAACAAAAGAGCTGGTTTTCGCCAGTCTGGTCAACG  
CGATCAGCCGGTGTGATTTTACCAGAGCGCGGGATCACCGCTCGATGCCCGCGTGGCGCTGAAAAATGGTCGCA  
AAGGGAAATGGTGAAGTGCCTAACGCCAGCAGCCAGCGGTATTAGCGGATGGTGGCGAAAGCGCGTGGTGACA  
ACGGTAAGCGCGGAGTAA  
>Cluster\_39662  
ATGACGAGTCCCGCACAGCGCCACATGATGCGGTTCTCGGCAGCGATGACCGCGCAGCGGGAAGCCGCCCCGCTGCGACA  
TGCAACTGCTATGAGCAGATGCTGGTTAAGCTCGCCGAGACAGCGCACACTGAAAACGATTTATTTCAAAAGAGCTGA  
AGGCCCGGAAAAGCGCGCAACTGCTGCCGTTCTGGTTCGCTGGTGAACCGGCTGCTGGAGCAGGCGCAAGGCGCACAG  
GATGACATTTCTGATGACCGTCTGCTGTGGCTGGAATACCGCGGATATGCGCGTGCCTGGAGATTGCCCCTTACCC  
CCTGAAGTACGGTCTGACCATGCCGGTAAACACCGCCGACCCCGCGTACATGTTTACCGAGGAGGTGGCGCTCGCGC  
CCATGCGTGTGCTGACGCTGCCGTTGAGTCTGTGGATACCCGCTGCTGACGGAGACCCTCGAACTGACCGCCACGGTGC  
ATGCCGTGATGAAGTGCAGCGCAAGCTGCACAAAATCACCGCTGTTTTCTGCGTGACGCTGGTGTGATGCCCGGCTGCGCT  
GGCGCACCTGCAACGTGCGACACAGCTCGACTGTCAGGCGAGCGTCAAAAAAGAGATTGAACGACTGGAGCGGGAGCTGA  
AACCGAAGCGGAGCCGACGCCAAAGCGGTACCCCGCCCCGCTAAGACACGGAGCGTGACACCGCAAAACGTTGA  
CGCCCCAAAAGAAAGCCAGTAA  
>Cluster\_41359  
GTGACTAAGATGACAGGACTAGATGCGTTTTATAACGAGTCAAGAGATAAAATCTGGTTTTGGTAATCTGATCAGCGAACT  
GGCAAGACTAAACATGAAAATGAAAGAATGATCGCTGCCGCTATCTTAAAGTAACACAGATTGAGCAAAAGCTAAACCG  
ATACTTTAGGGGGGCTGGGCTTTTATCAGTTCGATTTGGGATCAGGTTTACAACATAAGCAGCTTTGAAAAGCAGTGT  
GTGGAGTTTTTATGCTTCTTGGCTATGGGCGATGAATACAGGGAGAGCCGATACCGGGGGAAGAAGGAGCTTTCAACCT  
TAGGAAAGGGGAAGACTTTTTATATCACGATGATGAGGATGATGGTATGGGTCTTACGATTCGTTTTATTTCAAGCGCT  
CCGAGGTTGTGAACCTTCTCCAGAACTGGATATGAATGTTCCAGATAACGAACAGAAATGGAGCACTGTCAAAAAA  
GTAGAAAGAGAACAACCTGGAGAGGAAAGATACGGCTTTAAAGATGATCGCCGGAATGGCGATTGCCTTATTTGAATC  
AAGCAAAAGATTTCCATAGTGGAGGAAACCTTAGTATCAATAGGTTAGTGGCCAAAGTAATAGAAAACAACATAATTTCC  
GGAACGATGAAGACAGCATACCCACCCAGATACATTTCCGAGATTGCTAACGAACGCTTTGGATAAGTACGCCCCCAA  
TTTTAAGAAAAGCAACCAAAAGCGTCAAAAAATA  
>Cluster\_51246  
ATGATCACTATTACCAAAGGGCGACTGCTGACAATCAAGCAGTGGCGGAAAACATACGGACCGGGTAGCAACGTTGTACT  
GCCAGCAGAAGAAGCGGAAGAACGTCAGCAATGTCAGTGGTATCGCTGGAAGCAGAGCCGGTGGCAAGATTATAGCTC  
ATTACCCATTAGGAGTTGACGTAAGGCAAAACAAAGTTCTGACAGGCAATTGGAGAGCTTCTGACTTTGGCGGATATCTA  
TTTGGCCGCCCGCAGCCGCTAGTGGCGGAAGAAGCAACTCCGAAAACGTAGAAATGCTCTGTTGGTATGTTTCCAC  
GTACAAAATTAACCGATAGCGAGCGCATATGCTGCGGAAATATGGAACGCTTCCGCGACCGCATGCTTCACTCCGAA  
ACTTTCGGGAAAGCAAGAATTCTGTCACCAATAATTTTCGGGAAATCCCGGAAGCGTCAACAGCTCTCCGGTAACTCCG  
GCTCTTCTGCCTGGTGGTTTACCATTGAGGAGGCGAAGGAATTACATGAAGACCTGGTACGACGCCACATAAGCAAGGC  
CTTAAAGTGGCGAAAAGATGAAAAGAAAGATCGCATGCTGATTTGGCGTGGATTTCATGGCTTATAGTTCCAGGACGCT  
GGTTTGTAAAAGCATCACTGGAGCAGAAATGCATATCGGGCAACTCTCCGGTAACCTCCGGATGGTTGGATAAGCTGTAGT  
GAGCGAATGCCGGACGACAGGACGAGGTTGAATCAATGA  
>Cluster\_38911  
ATGAAACGCGCTACTCAACTGACGCTGGGCTGGCGCTGCTGGCGCTCGCCCCGCTGGCGTTGGCCAGGGTGGCGATAT  
TGGCTGCTTACGTTGGTACCCACGGCAACACTCAGGAGTACAGCGTCAAAATTCAGGTAATGATTCGATGACCCCTCG  
TCGGTTTTGCTGCCGACATGGTGTGATGATGACCTGCTTACCGCTTTATTTATCGTGTGCTGCTGCGCTGCGCGAGGCG  
CTGGGCTGCAACAAACCGCCGGAACCGCATTTGATTTGGTATTTGCGTCTCACTACCCCTGCTGGTAACTGGCCCCCAT  
CTGGCTCAATATTTACGACCAACCGGTTAGTGCCTTAAAAACGATCAGATTACCCCTGACAGATGCGTTAAGCACCGCGC  
CGACGCGCTGAAAACGCTTTATGCTGGCGCAGACCGCAAAAAAGCGATGGCGCAAAATCATGACCATCGCGCGCGAAG  
GGCAATGCCCGCAGGAGGATCTCTCACTGCTGGTGGCGCTATGTTACTGAGCGAGCTGAAAACCGCTTCCAGATTTGG  
CTTTAGTATTACATCCGTTTCTGGTTATCGACTGATTTGTCGCCAGCTATTTGATGGCGATGGGATGATGATGCTGT  
CGCCGCTGATTTTCTGCTACCTTTAAACTGATGCTGTTTTGCTGATTTGACGGCTGGTTCGCTGACCATCGGCACGCTC  
ACCACAGCATTCGCGGGCTGGGCTGGGCTGA

>Cluster\_17217

ATGACTGCAACAAAACGTGCATCGGTGTCGATGTGGGTTAGGCAGCGTCCGGGCTGGGGCTTTGGATCTCCAGGGCAC  
ATTACTTGTCTACCGGGCACACAAAATCAGACCACCCGACGCGGTTAGCCGCGTCAACAGTCCAGTCCAGCAAACTCT  
GGCAGGTCCTTTGTTCAAGCATTTCGGGAGGCATTTGTCAAAGCGGATGTCCTGCACAGAGTGTCCGGGGTATTTGGCTTT  
GATGCTACCTCTCTGTTGGTGTGGATAAAAAATGGTGAACCGTTGCCGGTTCAGCCGGAAGGTGAAGCCGACGAAAA  
CATCATTTGCTGGATGGATCATCGTGTACCAACCAGGCAAGCGAATCAATGCCACACATCACCCGGTGTGAAATACG  
TCGGCGGGATCATTTACCGGAAATGGAACACCGAAGCTCCTGTGGCTTAAAGAAAAATGCCTGAAGTCTTCGATCGT  
GCTGGATATTTCTTCGATCTGGCTGATTTCTGTACCTGGCGGCCACGGGGGACCTGGCTCGTTCGGCTGTACCGTGCAC  
CTGCAAAATGGACGTGGCTGGCTCATGAAAATCGTGTGATCCGGACTACTTCCACACCATTGGCTGACAGCGTTAGCTG  
ATGAAGAATTTGCACGTATCGGTGAGCATATTGCATCGCCAGGAACGTCCTGTGGCAATGGCTCCGTTACCGATCCACT  
TTTTGTTCCCGCATCTGGGGACAGTACTATAA

>Cluster\_17769

ATGAGCAGACACGCAACAGAGTGGGCATGAAAAACAAATCCGGGCGAGTCATCACTGAAACTCATCTGCTCTCGATGGC  
TGATCGAGCCGATGAATATAACCTGTGTTATCCAAGCATCGAACGCTGGTTACCGACACAAGCCTGAATAAAAAACGG  
TTCAGGACAGGGCTGATTTTCGCTCATCGGTATGGGGTAAATTTACAGATACAGGAGAAAAGGGGCAACAAGAGGGTCT  
CGGGTTTTCTTTAAACATACCCAAAACGGTAATGTTACCAAAATTTGGGAGTATACCAAAAACGGTAATGTTACCAA  
AATTTGGGAGTATACCAAAAACGGGAAGTTGAATGATCCCAAAAACGGGAAGTTGAATGATCCCAAAAACGGGATGACGA  
ACCTATCAGTTAACAGTATATAACCAAGAGAAGGAGAGGGGCGATAAAAACCTGGTGGTTAGTACCGCTGACCTGAC  
GCCAACACGCGCTAATTAACAACCTTTGTCCCTCCTGGTGGACTTGGGCAATTCGGGAAATTTGTATGCATGAGCTCTG  
GTCACCATCGGATGATTTCTCCGGGTGTCATCTCTGCAGGTTATTAACCTGGATTGCCAGCCAACACCGCAGGAGCTTG  
CAGAGTTACAGGTTTACTGGATGGCCGAGGGTAAGGCTTTTCACCATTGCGCAATGGGAGCAAAAACCTGCCAGAGCTTG  
CAGATCAGCAGACAGAACAACTGACCTACCTGAAAACACGTAACCGACTGGAACAGTCCAGAGCGTGGGAGGATTT  
CCTGTGA

>Cluster\_28355

ATGTTTACAGACACTATTACTAAGTGTGCGGCTAACGCTGCGGCGATTGCACGCTGTCCGCAATAAACCCTCGGCTT  
TTGGGTCAGCTCCGCCATGGCGGGCGCTATGTGGGTCCTGGGATCATCTGATTTTCACGCTCGGTAATTTGCTCGACC  
CGTCCGTACGTCCTCTGGTGATGGGCGCGACCTTTGGTATCGCCTAACGCTGGTATATCGCCGGTCTGAAATGTTTC  
ACCGGACACACCAATGTTCCCTCACCTTTGGGGTGAAGCGGGCACCATTAGCCACGGGCAAAATGGGCAATCCTGCCGCA  
AACCTGGCTGGTAACTGGTCCGTTCCGTTCTGTTGCCATGCTTTATAGCTGGGCGGGGCTAGCCTGCTGCCGGTAG  
ATACCAGCATCGTTCACCTCCGTCGCGCTGGCTAAAACACCGCACCGGCAATGATATTATCTTCAAAGGCGCATTTGT  
AATGGCTGGTTGTTCTGGCTATCTGGATGGCATTTGCTACAGAAGGCGGGGAAATTTATCGCAATCTGGTGGTGTCT  
GCTGGCATTTATCCGCTCCGGCTACGAGACTCCATCGTAAACATGACGCTGTTCGCACTCTCCTGGTTCGGCAACCACA  
GCGAAGCTACACGCTGGCGGGCATTTGGTCATAACCTGCTGTGGGTGACGCTGGGTAATACTTTATCAGGTGCCGTATTC  
ATGGGATTGGGTTATTGGTATGCTACGCCGAAAGCGAATCGTCCGGTTGCGGCAAAATTTAATCAAACGAAACGGCTGC  
CGGTTAA

>Cluster\_21037

ATGAAACTTTCACCTCACCTCCCTTATGCTGATGCGCCCGTAGTGGTGTGATTTTCGGGCTTTGGCGGTAGCGGCAG  
TTACTGGTTCGCGCAACTGGCGGTGCTGGTTTCAGGAGTATCAGGTAGTCTGTTACGACAGCGCGGACCCGGCAATAATC  
CGCACACCTGCGCAGAAGATTACAGTATCGCCAGATGGCAGCGGAACATGCACTAGGCGCTGGTAGCCGAGGATTTGAG  
CGTTACGCGGTGGTTCGGCCATGCGCTCGGTGCGCTGGTGGAAATGCAAGTGGCTGGGATTTATCCCGCATCGGTAACCTGT  
GCTGGTACGGTTAACGGCTGGCTACAAATAAACCGCCATACGCGCCGCTGTTTTTCAGGTTCCGGAACAGTTACTACATA  
CGGGCGGCGCAGGCATGGGTGGAAGCGCAGCCGTTGTTCTCTATCCCGCCGACTGGATGGCGGCCCGCCACCTCCG  
CTTGAGGCAAGAAGTATCGCTGCGCTGCGACTGGCGCATTTTCAGGGCAAAAATAATTTACTGCTCGACTTAAGCCCTCAAACG  
CGTGACTTTAGTACCATTGCGGATCGTATCGCTGCCCGGTGCAAAATCATCTGCGCCAGTATGATGATCTGCTGGTGC  
CAGCATGTTCCAGTGAACCTTCATGCCGCTGCGCGATAGCCAGAAAATGGTGTATGCGCTATGGCGGACACGCTGCAAC  
GTGACCGATCCGAAACGTTAATGCTCTGTTACTCAACGGGCTTGCCAGCCTGTTACATCACCGTGAAGCCGCTCTGTA  
A

>Cluster\_56029

ATGAAAGATTTTATCACCGAAGCATGGCTAAGAGCGAACCATACGCTCAGCGAAGGCGCAGAGATCCATCTCCCTGCGGA  
CAGTCCGCTGACGCCCTTCGCCGGGAGTTGCTGGAAAGCCGCGCATCTGCGCATCAAGTTTATGACGAGCAGGGCGGCC  
TGTTTGTGACGATGAACAGCAGCAGCCGAGCCGTTTCATGGGCTGACCGATGCGATGAACATCCGACGGCTGCTCG  
GAATGTTGTCGCCAGCCGGTGGCAAAAAGCCGGATACGCTGACTCACCTGTCGGCGGAAAAAATGGTCCGCAAAAAGCGA  
TCCGCGCTGCGGTTTTTCGCCGCGTTCGACAGCACCATTGCGCTGGCAGTGTGGCTGCAAAATGAACTGGCGGAACCGT  
GGCAGCCGTTGGCTGGCGGATATCCGTTCCGCTCTGGCAACATTTAGCGCGCCGATGCGCTGGGGGAACCCGCTGGGCTGC  
CAGGCGATTGTCGGGCTTTCTGACGAAGATTTGATCGGCTTTCTCATCAGCCGCTGCGCTATCTCGACACGATCATCT  
GGTCCGGAAGCCAGCCAGGGCGCGATGCTGCTGCTCAATCTGCTACGCACCAAGTGGCGGAAACCGAAACCGTAG  
CGGCGCAGTCTTTATCACCCGAGCTTTGAAATATTACGCCCGGACATTTTTCAGGCGCTGAACCGCTTTTCGAGCAGC  
GCTACGTTGATGATGATCCTGAGCGTAACGAAGCAGCCGCTAACGGTGAAGCAGATCCAACAACGACTGGGGGAACGCA  
ATGA

>Cluster\_60733

ATGTAAGTATTATTAACGATAATATCGAGTTCCTGGCTGAGCACCAGAAAATTAATATCGGTACATAACCGCGATCTTAA  
CGTCTTCTGACAACGCCAGCTCGATGTTTATCACTTCTACTTGAAGCTTTTCTGATGTTGGTTGCACAACAAGATT  
TTTTACCCAGAGTCTGGGAAGAAGAAGGTATGCGTGTGCTACTAACCGTTATATCAGAACATATCCATTATCAGACGC  
GGATTTCCGCGCTGTTGGTGTATACCCACTCGCTAATTTGCAACCGTCCGAGAGAGGATTCAGATCCATAATGACAT  
TAACATACAAAATCATGTAATAAATCGTCAACAGACGCACATACACAATGCCCCACTGCCATAAAAATTAATGCGG  
GATACAAAAGAGAGCATTTGGTGGCGCAAGAATTTCAATAAACAAAATCCCAAACATATAAAAAGTCACTAATATGTTG  
AGCGCATTTGTCATAGGCGCATATTTGTCATATTTGGCTATGGAATAATAATCAACCGAAGCCATTTTTCAAGGATTACAA  
GACTGTTGCGGAAATTAATGGCTGCCATTTTAAATGTAACAGAAGATACAAATGATGGGTTGAAAGAGTTCGATAAATA  
AAACACGGATACTGGATTCGGGGATTAAGTAAAAAATCCTGTTGTTATCTCCCTTTGCAAAAATCCTCACCGGGG  
ATGATTGTTATGGCATGCAATAAAAACTATAACCAACATGAAGTGGCAAACTGTTTAAACCTGTCTTACCCTGAGGTTAA  
TCGTGATTGA

>Cluster\_19063

ATGGCTTCAGAAAATATGACGCCGAGGATACATAGGACACCCTGAATAACCTTCAGCTGGACCTGCGTACATTTCT  
GCTGGTGGATCCACATAAACCCTCAGCCACCTTCTGGACAATCAATATTGACTCCATGTTCTTCTCGGTGGTGTGGGTC  
TGTTGTTCTGTTTATTTCCGTAGTGTAGCAAAAAGGCAACAGCGCGGTCGCAAGTAACTTCAGACCGGATTTGAG  
CTGGTGTACCGCTTTGTTAATGGTAGCGTGAAAGACATGTACCATGGCAAAAGCAAGCTGATTGCTCCGCTGGCCTGTGAC  
GATCTTCGCTGGGTTTCTGATGAACCTGATGGATTACTGCTTATCGACCTGCTGCGGTACATTTGATGAACTGTAC  
TGGGTTGCTGCTGACTGCGTGTGGTTCCGTTGCTGACGTGAACGTAACGCTGCTATGGCACTGGGCGTATTTATCTG  
ATTTGTTCTACAGCATCAAATGAAAGCATCGCGGCTTACGAAAGATTGACGCTGACGCGGTTCAATCACTGGGC

GTTCATTCTGTCAACTTAATCCTTGAAGGGTAAAGCTGCTGTCCAAACAGTTTCACTCGGTTTGGGACTGTTGCGTA  
ACATGTATGCCGGTGAGCTGATTTTTCATCTGATTGCTGGTCTGTTGCCGTGGTGGTACAGTGGATCCTGAATGTGCCG  
TGGCCATTTTCCACATCTTGATCATTACGCTGCAAGCCTTTCATCTTTCATGGTCTTGACGATCGTCTATCTGTGATGGC  
GTCTGAAGAACATTA

>Cluster\_45866

ATGATACATTTGGTAAATAAATTTGATAAATTTTGGTTTCACTCGCACCAGTGCACAGGTTTACATCAGTCTGTTGAAAA  
CGGTCGTAGCAGTGGTTACAAGATAGCAAAAGAAATTTCACTTTCTCGTTCGTCTGTATACTCATCTATGTATAATCTTT  
ACAAGAACGGTTATATCTTTCTTGTGCGATGGTGAACCTAAAGAATATGAAGCAAAATCTCCTGAACTCATACTTTACAA  
ATTTGAAAAAGCACTATTGACAATATAAAATTTTAAAAAAGAAATTAACACAGATGATGTTTCAAGATGAACGTGAAT  
CATTTATAATGTCTCTGGTTTCGATAACTTACATCAGAAAAGCTAAAGAGATGCTTTCTTTCGACAGTGTGAAATTTACC  
TCAACACGGATTTTGACTTACATTTTTTAAAAATGAAATTTGTGAGGCTCTGAATCGACATGTTTCGAGTTATGTTTTT  
TCATTTATAATAACTTATTACTCCCGACCCAGTGTAGAAGTGTATTACCGCTTTAACCATGAAGAAGAAATATTACCTTC  
TCACCGTTTATGCTTGTGTTGATATGAAGACAGTAATGGTTTTTTCACAACGAGCTGAATCAGTGGGTTTACTCGA  
ATAATCGCTTGTATCAATATAAATGCGCAACATATCCATAGTGATATATCTAACCAAGTATCAGCAACAATATCCA  
GATGCCAATGCATTAATAAATACCTTGCATGAATCTGGCAATGATATGGTGCAGGATGAAAAACATTTGAGTGATAGCAA  
AACCGTTAA

>Cluster\_7055

ATGCTTTTTCTGTCCACTTTGCCATCAGCCTCTTTCGCGTGAAAAAACAGCTATATCTGTCCCAGCGACATCAGTT  
TGATATGGCGAAAGAAGGTATGTCATCTGCTGCCGTTTTCAGCATAAACGGTCTCGTATCCGGGCGACAGCGCGGAA  
TGATGCAAGCAGCCGCGCATTTAGATGCCGACATTTACAGCCGCTGCGTGTGCAATTTGTCGCCCACTGAGGAA  
CGGCTTGTATGATAAGGCCACGGCGGTGGATATGGCTGTGGTGAAGGGTATTACACACACGCATTTGGCCGATGCGTT  
GCCGAAATCACCAGTTTGGTCTGGATGTTTCGAAGGTAGCGATAAAAGCGGGCGGAAACGCTATCCGCGAGTCACTT  
TTTTGTGTCCTTCCAGCCACCGTTTGGCGTTTTCCGATACAGGATATGGACGCCATAATACGTAATTTACGCGCGTGTAA  
CGAGAAGAAATGACAGAGTGTGAAGCCGGCGGCTGGGTCTTACTGCCACGCCGGACCGCGCATTTGATGGAGT  
GAAGGGGTGATTTACAATGAAGTACATCTTATGACCTCATGCAGAACACTGGAAGGTTTTACATTACAGCAGAGTG  
CGGAGTTGTGTTATCCGATGCGTCTTCCGGTGTGAAGCCGTCGATTTATTGAGATGACGCGTTTTGCCTGGCGTGG  
AAGCCAGAAGTCTGGCAACACTGGCAGCAAAAGAGTGTTCGACTGCCAGACGGACTTAAATATTACCTCTGGCAGCG  
TTCTTATTTAA

>Cluster\_55562

ATGAGACTGATTTACACACTAACGACTGAATAACCCCTTACTCCCTGTGTACTCACAAACAGCGGCAGAGAAAGCGAT  
CTCAGAACTATCCCATCAGTATGGACACCAGTGAAGACAGAGTTTCTAAAAATGGGGTCTGGTGCAAAAGTAGTAGTA  
TCTCTAACCGATTAGATGGCGGACTTTTTCAAGTCACTGAGACCCCTCAGCCATCCACAAAGCTGAATGGTTCTGTTTTG  
CAGGGGCTTAATTTCTCCGGTGCATCCGGCATGGCTGGTGATACGGCGTGGTTATGGACGCAAAATCAATACTTTTGC  
ATTCATCTATCAGCTGCCAGGTGGGGCGCTTCCGGTACGCCACAGGACAGAGCGGTTATCGCAACCCAGGAAAGCAC  
CTCATGGCGTGGCATTCGTACAACGTCAGCAGGTTCTTCCGATTTTTCTGAATGGAGGATCGAGGCCATCTGGCA  
TTTTACTCTAACCAATATAGGGCAATCTTTTATCTGCGCTGATGATTATGTTGCTTAAACAAGCTCTGGATCCATGCAAT  
TGCAATACCAGCGTCAATCAGTCTGCAGTGACCAGCCGACAAGTGACGGGTATACAATCCAGCGTATAGCCCGTCTC  
AAAAAATGAGTATTTGGCGGAGCAGGCAATGGTTTCAAGTCTCCGTTAACATCCGTTTTGTGAGATGTTTGGTTTTCCCG  
GGCAATATGCATATGGGACCAGCACACTGGATGTCATCTGGCATATCTGATGGAGAGGATTTGAAAAATCAGCGCTA  
G

>Cluster\_53544

ATGGCAAAGTTTGCAGCGAATTTATCAATGCTTTTTACCAGCATCCATTTATGAACGTTTTTGGCAGGCAAGTCAACG  
AGGATTCACGGCGTTGAATATCTTTTTCCCTATGACTTTTCCACTGACGAGCTGGCTTCGCAACTGCATCAACATAATC  
TGACTCAGGTTTTGTTTAACTTCTCTGCGGTAAGTGGCAAGAGGTTGAACGGGTTATGATGTCATCTCTGGTCGGGCA  
AAAGAATTTCAAGGAGGTTTGTGAGAGCGATAGAATAAGCCAGCCCTTAATGTTTCAACAAGTAAATTTGCCCTGACAG  
AAAACATCCAGGTTGTTATTCGCATGAACAATGTCATGAACACTGGTCGAAAAATTTGGCGTATGCAGTAGATAAATGG  
CTTCTCATGGCATAAAGTTAGTTCTGGAAGCCATTAATACAAAAGATAATCCCGTTTTTTTGTAAACACACAGACAA  
GCTCTCAATATTTATGATGTAATCATCTGATTTTTCCGCTATCAATACGATATTTATCATATGCAAAATCATGGAAGG  
GAATATTGCTACAACAATCAAAAACAACCTGAATAACATTTGGACATATCAATTAGCCGATAACCCCTGGGCGTATGAAC  
CAGGGACGGGAGAAATTAATACCCGTTGTTGTTAAATATATAGACCAGATTGGTTATCAGGGATGGATTGGTTGCGAA  
TATATTCCATCTACGACAACGACTGAAAGTCTACGCTGGCTAAAAACAGAGACTCAATTTTAA

>Cluster\_20638

ATGCAGGCCGAAATCCTTCTCACCTTAAGCTCCAACAAAAATTTATTCGCGACCCGCGCCGATTTTCGCTACTAAAA  
CATTTGCGCTTTCGGTTCCATTTAGCCAGGGAGCGAAAGATGCCGTTTCCAGCTATAAAAGCGCTGGGATGCCATTAAC  
AGATGAATCAGTTAAGTGAAGCATATTTCTGGTTGAGCGCAACAGCGGTAAGGTTGGCGCGCGCATACTGACCCCG  
TATGGTCAGCGACTGATTCAGCTCTATGACTTACTGGCGCAAAATACAGCAAAAAGCCTTTGATGTGTTAAGTGAAGTGA  
CGCCCTGCGCTGAACAGCTGCTGGCCGCGATCTCAGCTTTTTCACTGCAAAACAGCGCCGTAACAGTGGTTTGGGA  
CCATCACCGCCCGGATCATGATGACCTTCAACAGCATGTTGATGCTTACTGGCTGATGGAAAAACACGCTGAAAGT  
GCAGTTACCAGCAAAAGCGCGCGCTTGGGGCTGGATGAAGGCAAAAGAAAGTGTGATATTGCTAAAAGCGCGTGGGT  
AGGTATTACTCAGACGATGCGGTCGCGCAAAACGCTGCAACCAATTAACAGGATTTATGATCATATTTGAGCGCGGG  
CAGAGCAGTGCAGATTAATGGCGCTACCCGACGGGCAAACTGTGCGCCACAGTCCCGTAAATGAAGCAACTTCT  
CTTACGCAAGGACAGAAATGTCACGGCCTACTTTAATGCCGACAGCGTGATTATCGCCACGCTGTGCTAA

>Cluster\_67017

ATGAAAAAGAAAAACCGCAGTAAACGGGAGATGTGGCTGAGCGCAGTCTGTTGTTGAGCCTGGCCTGTGGCGT  
ACAGGCTGCGCGCTGTCACAGTTGCGGTCAGGGTGCAGGTCAGTCCGGATGCAAGCGCGGATCGCGCTCAGCAATA  
CCAGCCCAACTGCTGGTTGTGCTGGCGATCCGATTTGCTGGCTGTTGGACAGTGCAGGGGACGTTTTACGAATGCCGG  
GACTACGGGACAGACAGGCATGGCGAACGGAGGTGTGGTGTGATGACGGAAAAACGACACCAATTTACATTTTATGTTTC  
CAGCGAAGGTGGTCTGGTGGTGTGCGTATCGGACAACACAGCCCGGGATGGTCCGGTATGTCACCTGATGAGTGACC  
AGCCAGTCCGCCAGAAGGCGGCTGCCCTTGGGAACGGGACAGCAATTTATGTTGGCTGCTGGTTGATGTCAGAAAGCC  
CTGCTGCGCGGGGAAGTACCACCGGGGTATGTGGCTTCCGCCGTTGTCGGTGAACCGGTTTTTTCGCTTCCGCGCGT  
GACGCTCCGGCTGAGCATATGTTGAGTGGTGTGCCCCGCGGTGTACCGCTACCGGTCAGTAACCGTCACTGAGG  
CAAGGGCTTTACCGGAGCCTCTCTTCAAGTGCAGCTGGCGTGGCTGCTGATGATACCGTGGGACAGAAACACTGCTC  
CCCGTGCAGCGCGGAAGTCTGGGTGACGGTGGAGCAGGAGGAGTGAACGGTGGCTAA

>Cluster\_48319

ATGGAACATAAGCTTACCATCCGGTGTAGAGATACTGGAAGCACTGGCAGCGGAGAAATCAGGGTGTTCATTAACCA  
CCTTTCCGAAAAACAGGCATCTGAAAGGAACGATTTTTTCCATCTCAAAACGCTGGTTGAACAGCGGTACATCAGTT  
ATGACCTAATACCAGCTTATAATCTGGGATCTCCGCTGATTTCTGTCCTGCTGCTTTCCGACAGATCTGACTGG  
TTAAAAATGGTTTACAAAGAGATGAACAACATTTGTCAAAGAGTGAATGAGGTTTGTGATGAGGATCCTGGACGGTGC  
AGATGTTTTATATATCAATAAGGTGCAGCGGCACAAACCGTACAACTGGTTTTACATATTGGGACTGCTGCTGCTGCTA

TCTATTCTGCGCTGGGAAAAGCCATATCTGTGAATACAGTGATCAACAAATTCAGAACTCTACCCGACGGTTTTGTT  
CCCATGACATCGTATAGCGTTACGACCCGGAACAATTCGCCAACAACTTGAGGATGCCAGAGTAAATGGGTATGCATT  
TGATAACAGGGAATCAATGAGGAGACGGTATGTTATGCTGTTGCCCTTAAACAGCGAAATAAACCGTTGCCGCCATCA  
GCATTTCAATACCCGTAATTTCTGTCGACAAAAGAAAAATTTGTCGATGTCACGCGTATCCTGCTGAATGCACGTTTCGCGT  
ATTGAACAGGAACCAACACCTTACAGGATATCAATATCGGTATTGATTCCCACCATTAA

>Cluster\_43125

ATGGAATAAGTACCCTACAATCATTTGCTATATTTCTTTTTCTTCTGATTGCCGGAATGGGCAGCGTCTGGATGAATT  
TCAGACTCATCGTCCGTTAATTGCTGTACGGTATTGGTTAATTTCTCGGTGATTTAAAACCGGAATTTCTGCTCGGTG  
GTACGCTGGAAATGATAGCTCTCGCTGGATGAACGTCGGCGGGCGCAATCTCCGGATTCTGCACCTGCCAGCATAAATC  
TCCGCCATTTCTGGTTATCGTTGGTCAGCAAAGCATCGCCACCGGAATCGCCATCGCGTTGCCGTGGCTGCTGCAGGCCA  
GGTCTGACGGTGTGGCCCGTACCATCACCGTGTTCAGCACGCGGGGATAAAGCAGCGGAAGAGCAGCGTTTC  
GCATCTCGATTTCTGCAATGTCGCCGCTTGGCGTCAAGGCACTGCGCGTTGCTATTCGGCACTGATGTTCTCGCTG  
TTCGTCAGCGATTGATGCTGAGCAATATGCTGAGCGCAATTCGCCAAATTTGTGACCCGTGGACTGCAGATTGGCGG  
TTTTATCGTGGTGGTTCGGTTACGCCATGGTCTCGCATGATGGCGTGAATATTTGATGCCTTTCTTTTTCTCGGT  
TCCTCGACGGTGGCTACCTCGATCTCAGTCTGCTGGCGTTTCGGTGGCGTGGCGTGCATGGCCCTGCTCTACATCCAG  
TTAAATCCACAGTGGCGTAAAGCTGAACCACATCCCAGACCACCCTATCACGCCCTTGACCAACTTGATGATTAA

>Cluster\_6925

ATGCAACACAGCATTAAAGACTTATGGTTGATCCCTTTCCGGAGATCGATGTGGTTCATACTCAGGAACCCTGTTACC  
GGAACCGGAATTAACAACCCCGGTGATGATCTGCTGCCGGAACCGTTCAGGCACCGTTTTCAGACTGGATGACTCAT  
GGCCACTCAGACAGCTTACCAACAATCAGTGACACAGAGTTCGCTTAATAAGGCCACAGAACATCTGGATAGGTTA  
AAAAAGCGTGGTGAACCGTCCGCAACCGGCAAAAGGAAAAGTACAACACGGCAGTAAAGGCCCTGAAACGGCGCTTGA  
GCAGGCCGCTGCTGTCGACAGCTCTTCACTCCGCCATGTACAGAAAGCTGAAATCACAGTACAGAGCCGTTGTCAG  
AGAAAGAGCAGGAAGTCTTCAATGAAGACGGCCCGCTTACAGCTTATGTCGTTCTGTCACGCTGGCATTCACTGAAT  
GGTTATGCCGACGACAGGGCGTTATGGTGGTACCAGCTTCCATCCATCCACAGTCTGGCCCTTAAACCGTCTGTT  
ATTACAGGAAGTTTTTCAATGATAAGTTCCGGTCCGGCGGGACGGGAAGCGCTCTGCACTGATGCAAAAACAGAC  
TGGCGGTTGAGGATAAATTCGCGAGTTTCCGCCCGCCGATTTGCTGACGTTTTTTCGTCGCTATCCACCTCCGGTCTG  
TCGCTCTGCGTGAATAAATGAACGGTATTGCCCTGATTTGACACCAGATTCATTCATCAAAAAAGAATACGTTGATTG  
A

>Cluster\_20915

ATGGCAACGCCAGTGAATAAGTGGTTATGCGCGTTGCCCTTGGTTTTTACCAGTGGGCATCGTGGCGGTGTGGCAACT  
GGCCTCTCAGTTGGTGGCTGTCAACGCGTATTTGCCCTCACCGGAAGGAGTGGTGTGGCGTTCTGGACGCTCTCCG  
CTAGCGCGCAATTTGGCAGCATCTGGCGATCAGCTCCTGGCGGGCGCTCATTGGCTTTCAATGGCGGATCCGCTGGGG  
TTGATTTTGGACTGATTAGCGGGCTATCTCGTGGGGAGAAGCAGTCTGGATACCTCCATTAGATGTTGCGTAACTG  
GCCGATCTGGCGCTGATCCCGTGGTGTATTTGTGGTTTGGCATTGATGAATCCGCAAAAATCTTCTGGTGGCGCTCG  
GTACGCTATTTCCCATTTATATCAACACCTGGCAGGCATCCGTAATTCGACCGTGGGCTGGTGGAGATGGCAGCTAGC  
TATGGATTATCCGGCATAACCGCTGTTTTATCCATGTGATCTGCTGGTGGCTGCCCTGCCCTCAATTTATGGTGGTGG  
TGCTTTGGGCTGATGTGGCTGACGCTGATCTGTCGCAAACTATTTCTGCCAATTCAGGCATTGGTTATCTGGCGATGA  
ATGCGCGGAGTTTCTGCAAAACGCGAGTGGTGGTAGTCCCATTTATTTTACGCCCTGCTCGCAAACTTGCTGACGCT  
AGCGCGCAGCTGTTAGAGCGTCTCTGTTGCGCTGGAACCCGGCTTATCATTTGAAGGAGGCCACGGTATGA

>Cluster\_64459

ATGACAACCAAGTATCCGACGAGCCATCTCCCGATTATCCACAACCAACTTCCCGTCTCACCCGAAATTAAGTCCG  
GAACCTCTATGGCAGCAGCGGATTAATCTGTAATAAACCAATAACCGGAACCTCAGAGCGGATTCGTTGGTGGGAAAGC  
ACTTTTGGCTGAAGGTGAGGAGTGGCGGAATTAAGCAGCAGATGCTTTAAGACTCTCTGTGAAAATCCGCAAGAAAT  
GTCCGCTCTCTCATCTCTGACAGAAATCGGGCAGCTCGCCATGCCAAAATGCTGGAAAACAGAACAGGCTGGGAAGT  
TTTCGAAAAGCTTGAAGATTGCTATTTTACGCGCTCAGAGAGGCGGAGTACAACCCAGTACCCGACCCCTTAC  
GTGATGCCGTTAATATGCTGGTCCGCAAGAAAGGCATGATGATCCCGATGCTTATACCATGATTCATCAACGCTTCGCC  
GTCCTCAGATGAAACCACTGTCACAGGCGCAAAATGTTAGAACGCAATTTGAATAACATCCACTGCTGCTCGATGAAA  
GCAGCAACCATTCAGATTTTTCTTTTATCACCACTATCAAAAATGGAAAAGTGACCAGGATGCGCCATGTTGCCAAAG  
GCGAATCTGATGACTTTTACGCTTTCAAAGAGATCGCTGAGCGGGCAGGTTATCTGGTATCCACAGCGACAACCTG  
CGAAGTATGACGCTGGATAAATGATGCTAATGGGGAAAAGTCCGGTGTATCTGTTGCTGATTCAGCATTGTA

>Cluster\_62538

ATGACTGAATGGCTTAATGCACATTTTGGTGCAGACGCGACTACTTATCTTAGCTTATTAGTCCGGCTACTGGCAGTGT  
TGGTATTGGGGGGCGTGTACATATAGAATCAGACAGCAAAACAACTTAAACAGAAGGCAAGAAAACCGAGGGTATG  
TGAACAGGCGGGCGGATATTAATCAGACCACCAACGTTTACCACACATCCAATGAATCTGCTGAGGACCTGTAAAA  
AAAAAGCAAGATGAACATGATCTGAAGATCATCGACAGATCCTTGAATTAAGTCTGCTTATGAGGATCACTCAATGGT  
TGAGCAGAGCTACTGAGCGGTATACGGCAAGATGTTTGTAAACATGAAAAGCTGAAAATTTAGCGGTGAAAAGT  
ATCGGTTATCAACTACTGAAGTGAATGGTGCAGAAAGCCTTTTTTGGACGCTATGACCGCATATGTAGATAGTACGTA  
CCGTTTATGAGTGTGATTACCGAACAAGCAGTATGCTAAGCTTCCCATGACTGGAAGAGTAAAGTGTGTA  
ATCGGAGGCAAACTTCCGCTTTCATCAGCAAAATGTGCGTGAACATCGGGGTGATGATTGCCGCGCTATGAGGATTTG  
TCAGGACATTTAAGGCTCATGGATTCAATAGCGATAAACTGTAA

>Cluster\_25712

ATGACGGCAATTTGCCCGGTTATTACCATTGATGGCCCAAGCGGTGCAGGAAAGGCACCTTGTGTAAGGCTATGGCGGA  
AGCGTTGCAATGGCATCTGCTGGATTCCGGTGCATTTTATCGCGTACTGGCAGTACGCGCATTACATCACCATGTTGATG  
TTGCATCGGAAGATGCGCTGGTGGCGTGGCATCCCATCTGGAATGATGTTTGTGTCACCAACGGCAATCTGGAAGT  
ATCCTCGAAGGGGAAGATGTCAGCGGCAAAATTCGATCAGGAGGTTGGCGAATGCTGCTTCAAAAGTCCGGCATTTCC  
ACGCTTCTGTAAGCATTATTGCTCGCCAACGCGCTTTTCGCGAATTTACCAGGCTGATTGCGCGATGGCGCGCATGG  
GAACGGTGGTATTTCCCTGATGCGCCAGTAAAAATTTCTTACGCGCTCCTCGGAAGAAGCTGCGCATCGCCGATGCTA  
CAGTTGCAGGAGAAGGGCTTTAGTGTAACTTTGAGCGCTTTTGGCCGAGATCAAAGAACGCGACGACCGCGATCGTAA  
CCGAGCGGTAGCGCCATGGTTCGGCAGCCGATGCTTTAGTGTGGATTCCACCACCTTAAAGATTGAGCAAGTATTG  
AAAAAGCGCTACAATACGCGCCGAAATTTGGCTCTCCATAA

>Cluster\_30333

ATGAATAATCCTGCCATGACAATCAAGGGTGAACAGGCGAAAAACAGCTGATTGCTGCGGCACTGGCACAGTTGGTGA  
ATATGGAATGAACGCCACCCCGGAGATAGCCGCGCCAGCGGGCAGAAATATCGCAGCCATCACCTACTACTCTCGGTT  
CGAAAGAGATTTGTACCTCGCTTCCGCGGAGTGGATTCTGATTTTATTTGGCGAGCAGTTCCGCTCCACACCGCGAAGAA  
GCCGAACTTTGTTGCGCAACACAGCCGGATCGGGTGCATCCGTTAACTGATCTTCCGCGCTGCAGAAACATGAT  
TAAGTGTCTACCCAGGATGACACCGTCAACCTCAGCAAAATTTATCTCCGCTGAGCAGTCTCTCCACCGGCAGCTACC  
ACCTGGTGCAGGAACGGTATTAGTCCGCTACACAGTCACTTACACGCTGATTGCGCGCTGGACCGGCTGGCGAGCT  
AGCGATACCCGATGATCTTATACCCATCGGTTGATTTGGTGGATTTGCGGTTTCGCTTTGGCAAAGAACTATTCT  
GTTACGTACCGGCTGGACCGGTTGATGAAGAAAAGACCGAATGATCAACCAGACGGTGCATATTGACCTGA

TTTTGCAAGGATTATCGCAAAGGAGTTTGTAG

>Cluster\_9490

ATGGATAAGTTTCTTATCAGTTTCAGCCTTAAAGATAACGGTGCCGAATATACAAATGACATTGCGAGGCACTGGATTGA  
ATACGAAGAAATCCCATAACAATAAATGAGTATAACTCATTTCATGGATTTCAAAAACCGCGAGTTTCGGTTAGAACAAA  
ACAGAAGATTGTAGCTGTGATATTTTGCAGAAAAAACAGTCTGACATACAAAAAGGATTAAGAGTTATATTTCCGCGAG  
CGCTTTGGTGACGTATCTTTTCGGTTATGCTTATTTGGAGGATAGTAAGCAAATTAACACGGGGTAAATTTGAACTCCA  
AATACCAGGCTGTGGAAATTAAGAAATGCATGGATGGTATATTACGAAAAATAATGATGATAATTTTGCATAGTCA  
TAGAATCTTTGGGCTTTGGCCTTAAATCTATGGAGGGGTGAACGTTTTCGTAATGGTTCTCTGTTGTTTGGAGGAT  
GAAGATTACTCTCTTATTTATAATTTTCTGGTTAATGCAGGTTGCCAACAACTCGAATTAGCCGAACAAGTGGATGCCAT  
AGTAAAGTGCGAATCTGGCCGAGATAGTAATATTACCAAAGAAAAAGATTGCGAGAAATATAAATCGACCATTGAGGCAT  
TTAAAAAGGCAACTAGCGTTACAGTATGA

>Cluster\_66226

ATGCCTTTAAGCGCACAAACAGTTAGCTGCACAGAAAACTTTTCGTATGTTCTGGCTGAGAAGCTGGCGCAACGCATCTT  
AAAAGGTGAATATGAACCCGGCACCATTTTGCTGGTGAGATTGAGCTGGCGGAGCAATTTGGAGTGAGTCTGACAGCGG  
TACCGGAAGCGGTCAAAACGTTAACGGCAAAAGGGATGGTTTTACCAGCGACCGCAATTTGGTACCCGGGTCTGACACAA  
TCAAACCTGGAATTTCTTGATCAGGAATGCTTACCTGGTGGATGACAGAAGAACTTTCATCAGGTCATCGATCACCTT  
TCTGGTTATGCGTATCTGCTGGAGCCGCAAGCTTGCCACTGCTGGCTGCAACGGTTGGCACCCGCGGAACGAAGGCGCATC  
TCAATACGTTAATGGCCGAAATGGCGGCATTAAGAGAACTTTCCGCTGAACGCTGGATCGAAGTGCATATGGCCTGG  
CATGAGCATATCTATGAAATGAGCGCAATCCGTTTTTACCTCATTCGCTCGCTATTCATTCGGTTTATCACACTTA  
CTTACGTCATTTACAGCGACACAGTGATAAAGCTGGATCTGCACAGCGGATGTCGATGCGATTGTCCAAAGCGATG  
GCGACGCGCATTTAAAGCTTGTGAGCGCTGCTACGCTCACCTGATAAGTGA

>Cluster\_14841

ATGCGCAAGGCAATTTTGTGTCAGGTTTACTGCTAAGCACCGGTCACCTGCGGGCAATATTGTCATTAATGGCACCCG  
TGCTCTTTTATCCTGAAAAATAACAAGAGGTGATCGTCCAGTTAATGAATACGGGCGATGCGCCCGCTCTGGTGCAATCCT  
GGATAGATGACGGTGATATTAATTCACGCCGGAACAGCCAATGTCGCTTTTGTGTCGCGCCAGTGATAAAGGTT  
AACGAACATAATGGCCAAACAGCTTCGTATTAAGAGCTGCCGTCCAGCTTGCCTGCGGATCGCGAATCCGCTCTTTTCT  
GAATGTTCTCGACATTCGCCCCAGACTGAAAACTGCAAAATCAGAAATACCGTTTTCAGCTGGCGATTAATCCCGTATCA  
AATCTTTTACCAGCCGCTGCGCTGAAAGGCAGCTGATGACGCGGTGGCGAACTGACGCTCGCAGCCGAGCGGAT  
CGCTTTTCGATTAACAATAACAGTCCGTTCCATATTACGGTCCGCAATATTTCGCTGGGTAAACGAAATGCTCCAGGA  
GTCCCTATGTTTCCCGCTTTGGGCGAGCTGACGGTCCGCGCAAAAAATACGGTTAAGCGCGGACAGACTTCCAGCTGA  
TGTATGGTGGATGATCTTGGCGGCTATAAAAAACCGGACTTTCACAGTCAAGTGA

>Cluster\_25068

ATGATTAATCAACTAATTTTACAAAACACTATGACACGTTTGATAATGTATCAAAGATTTATCTGATAAATCCCTCA  
AGGAAAAGATTTAGATCTATTACATATTGTCGTTTATTTCGATTCCTTAGTTATCAGAAAAACAACCTAATTTGTTATG  
AAAGTCACGAAACATAGCTAAGATTTTAAAGTCTTACGCGTCAACAATTAACGTAAGATAAACGATCTTAAAGAGATG  
GGATTTATGAAACATCCCAACATCTTGTATCTGATATTTTCTGATCTTTGATTTACAATGCTCTCCCTTCAAGATGACA  
TATTACTCCCCAGGAGAAATCATCACTCTCTGATCTTTCTGAGGCAGAAAGACAGGAACAACCTAAAGGCCATAAAC  
AGCCTTCTTTTGTGTTCTTGTATGATGGGATGCGCTTTTCCGCTGGGAGACGGAAAGAACACCTGTTTCATCAAGTGA  
AAGTAGCTAATGATAATGAGGAGGATGTTAGAGAATTTTGCATCTTATATCAAGCAGAAGAAATACGAGAACAGG  
AGGAGCATATTTATAGAAATTTGCAACATCGTTAGCCTATAAGCCTAAAGCTACCAAAATGGTATTTGAGGCATATTT  
TTTCTAAGAAATACCAAAATGTTATGATGACTTTGATATTCATTTTAA

>Cluster\_13402

ATGAAACGGACAAAAATCCATACGCCACGCATCGTTCCGCAAAAACTGGAGCGCGCCATCTGACACCAGTCTGCTCTCGC  
GGTTGCCACTGTTTTTATGCTGGCTGGCTGTGAAAAGAGTGTGAAACAGTGTCTCTATCAAAATGCTGACGACTGTT  
CAGCTGCAAAACCCAGGCAAAAGCGCCGAATGTACCACCGCGTACAACAATGCGCTGAAAGAAGCCGAACGTACTGCGCCG  
AAATACGCCACCCGTAAGACTGTGTTGCTGAAATTTGGTGAAGGTCAGTGCCAGCAGGACCAGCCAGGCTGGCATGGC  
ACCAGAAAACAGGCGCAGGCCAGCAATCCAGCGGGATTTCTGGATGCGCGTGTAGGCGCGGTTACATGATGGGGCGTC  
TGATGGGCGGCGCGGGGATTTGCACAGCAGCGCTGTTCTCCTCGAAAAACCCAGCCAGCCCGGCTTACGGTAAATAT  
ACCGACGCGACGGTAAAAACTATGGCGCAGCCAGCCAGGCCACCATGACCGTACCGAAGACAGCCATGGCACCAAA  
ACCGGCGACCCACTACCGTTACCCGTTGGCGGTTTTGGTGAATCTGTTGCCAAAACAAGCACATGACAGCGTAGCGCAA  
CTGGCACCTCTTCTCGTTCAATGGGTGGCTGA

>Cluster\_46903

ATGACGCAGGATGAATTTGAAAAAGCAGTAGGATGGGCGGCACCTCAGTATGTTTCAGCCCGGCACCATTGTTGGTGTAGG  
TACAGGTTCCACCCCGCACACTTTATTCAGCGCTCGGTACAATGAAAGGCCAGATTGAAGGGCGGTTTCCAGTTCCAG  
ATGCTTCCACTGAAAAACTGAAAAAGCCTCGGCATTCAGTTTTTGTGATCTCAACGAAGTCGACAGCCTTGGCATCTACGTT  
GATGGCGCAGATGAAATCAACGGCCACATGCAAAATGATCAAAGCGCGCGCGCGCTGACCCGTGAAAAAATCATTGC  
TTCCGTTGAGAAAAATTTATCTGATTTGCAGACGCTTCCAAGCAGTTGATAATCTGGGTAAATTTCCGCTGCGCAGTAG  
AAGTTATCCCGATGGCACGTAGTGCAGTGGCGCTCAGCTGAAACGAGGCGGTCGTCGGGAATACCGTACGGCGGTG  
GTGACCGATAAATGGCAACGTGATCTCGACGCTCCAGCGATGGAATCTTACCCGATAGCGATGGAACCGCATAAA  
TGCGATTCCTGGCGTGGTACTGTTGGCTGTTTGTCTAACCGTGGCGCGGACGTTGCGCTGATTGGCACACCTGACGGTG  
TCAAAACCATTTGTGAAATGA

>Cluster\_21294

ATGTATCAACATCAACTGGCAAGGTGCGCTGCTGGATTATCCGGTGAGTAAAGTAGTCTGTGTTGGCAGTAACTATGC  
CAAACATATTAAGAGATGGGCGAGCAGTACCAGAGGAGCAGTGTCTGTTTATTAACAGAAACCGCACTGTGCGATC  
TGGCGCAGCATTGGCGATCCCATCCGATTTTGGCTCAGTTCAATGAAAGTGAAGTGGCGGTGTTGATTGGCGCGACG  
CTGCTCAGGCTACGGAAGAGCATGTCGCAAAAGCCATTTGCCGTTTACGGCTGGCGCTGATCTGACATTTGGCTGATG  
TCAGGAAAAATGAAGAAAGCCGGCAGCCGTTGGGAAAAGGCCAAAGCCTTTGATAACTCTTGTCCGCTTTCCGGGTTTA  
TTCCCGCGCGGAAATTTACCGGCGACCCGCAAAATACAACGCTGGGCCGAGCGTAAACGGCGAGCAACGCCAGCAAGGT  
ACGACTGCGGACATGATTCATAAAATCGTTCCGCTGATCGCTTATATGAGCAAGTTTTTACCCTCAAGGCCGGTGACGT  
TGTGCTGACAGGCAAGCCTGATGGTGTCCGCGCCTTGCAAAAGCGGTGATGAGTCAACAGTCACTTTTCGATGGGCACTT  
TGACAACCTCGGTTTTGTAA

>Cluster\_28734

ATGAAACTTTATGAATTTAAAAATAAAAAATTTAGTGTACAGAAAGATATCATACCAGAGGATAAGTTACAGGA  
AATTTATCAATCTTATGATATTTACAACTGGCTCGAAAAAAACATAAGAATTTACTGAGGGCGAGGAGGAAATCGA  
AAGAAATTAAGACAGAATCCAGAAAAAAATTTGCCAGAAAAATGATTGTAATGAGAGAAGGATTCGAAAAAATAATAAA  
ATAAAATTAGATAAAGAGTTAACCAATCGATAAAATGGGTTAAAGATATCCAGGCTATCGAGTTGGTCTTAATGCGAGGA  
CATAAATGAATAAGGTTCAATTTGCTACTGACTAATGCATTTACATCTTTAGATACATCAAGAATAATTAATGGGATGAT  
TACTTAATGAAGTTGTAAGGAAACTCTATCTAATAACAATATTTGTCGGAGCTATTAAGATCACTAAAAACCCAGCAAT  
AACTTTGATCCTGGCGAGGCCAACATATACAGCTTATTAATGATGCAACACACCGCATAATAAATATAATAGAAAA

TGAATATATTAGAATAACTTTAGACCATTAGAGCAAATAAGTATTTTATTGAATTCATTTAAAGATAATTATCTTAGCA  
TTATTTCAGGAATGA  
>Cluster\_41741  
ATGTTTAGTATTAATAGTTGTGTGAGAAATTTCCCATATATCAAAAAATACCATACCCGTCGGATGAGTTTAAACAATGTC  
CATATCATTTCTCAGAACGGGAAAATAAATTTATATCAGATGCCATATTAATCTTGACAATGACAACATTATTGTTTGGC  
AAAGGCATGACCCGCAAAATGCTAGATTCTTTTTAATAAAATTAATTGAAAAGCGAAAAGTTGATAATATTTATCTTGAG  
CTTCCAGATCTTACATGCATCTGTTCCGAGGGGATGAACGAACGAAGTTCAGCATGTATTGAAACGGTTCGAAAATATGA  
TGATCAATGCAAGATCTTTTATTAATGAGTTTCTCCGATTGCTCAGCAATTAATGTCAGTAAAGATAATGAAATAT  
CTTTACCTACATTAATTTTATTGCAAAAATGCATTTGTTGGAATAACATTTTCATAGACAATAAAGTACCAAAAGAAAA  
AACATAATAGAAAAAGTTAAAGAGCGGAATGAAGGTATGGCTACATCATTTAAACAAGATAAAAAAGATAGTAACGGAGT  
TATTTTAGTTGGTCAAAATCATTGTAGATTAGATACAAAAATTTACATAAACCTCTGTGGAAATTCAGAACTTTAATAT  
ATGACCTCTCAGAGTAA  
>Cluster\_59044  
ATGGTACTTGCTTTGAACATAAATATGCACGGAGTTAATATTCGCTCAGAGAAATGCAGCAAAACCTCATACGATGCCCTC  
TAGATATCTTTGCGAGTATATTAGAAGCATTGAGAAAAATGGCCACGCCCTTGATTTTGGCTGCGGAAAACCTTAGATATT  
CTGATGAATTAATCAGTAAATTTGATGAAGTTACTTTTCTAGACTCGAAAAGGCAACTGAAAGAGAGCAAATTTATAGA  
GGAATTAATAACTAAAATTTTACTATTGCTTCCACGATATTGCTTATAAAAAATGCAAAATACAGTTGCTTTTCGAGGTTGCA  
AATAATTTGGGGTTACGATTTTCACTCTTTGCTCTAATGTTCTCTGCGGTTCTTGTGCGGATACAATCGACAAAATAG  
TTCTTAGCATCAAGAGATTACTAAAATCAGGAGGTGAGACTCTTATTGTAATCAATAAAAAGCTCACTTCAAAAA  
TACGAAACAGGAAGAAAACATCTTTACGGATACATTTCAAAAAATCAAAAAGTGTTCCTTACTATGGATTACTCGATGA  
ACTCGCAGTGCAGAAAATATGTTCTTACATGGCCTTGAATAATTAAGTCTGTGGAGTAAAGCAGGAAGTTTCATATGTCA  
CTGTTGGGAGTTGTAATGCAATATA  
>Cluster\_27032  
ATGGAAATTAACGAAAATTAACGCGTACGATTATCGAAGCGGTGCTGGCAGAAATGCAAAACAGCGACAAGTCCGTTTC  
ATTTCTGTCACCTGTCTCTGCAACTGTCTCTTCCAGTGCAGATACCGGAAATTTCTGACCGAAATTTGGCGAAGCCCAAC  
AAGGCACCTCAGCAAGATGAAGTCATTTGCTGTAGGCCCGGCGTTCGGCCTGGCGCAAAACCGTCAATATCATCGGTATT  
CCGCATAAAAACATTTTGGCGGAAGTGAATGCGGATCGAAGAAGAGGCATTAAGCCCGTGTGATTCGCTGCTTTAA  
ATCGTCCGATGTCGCATTTCTGAGCAGTCGAAGGAGATCTCTTATGTTGTTGAGTATTGCTATCGGTATTTCAGTCAAAAG  
GCACAACGGTTATCCACCAGCAGGGACTTCTCTCTGCTAACCCTGGAACCTTTCCACAAGCGCTTTGTTGACGCTG  
GATACTTATCGTACGATTGGCAAAACCGCGCGTATGCGAAGCGGAGTCTCCACAAACCGGTGCCGACCTCAACGA  
TCAATGGCGCGGCGAAATACCAGGCCAAATCTGCCATTTTGCATATTAAGAGACGAAGTACGTGGTCACTGGCAAAA  
AACCGCAAGAACCTGCGCGTACGTTTAA  
>Cluster\_22377  
ATGATGTTCTGGCGCATTTTCCGCTTGTAGCTGCGCGTGGCGTTTCGCCACAGCGCCGAAATCGCCAACCCGCTGTGGTT  
CTTCTGATTTGTAATTACCTTTTTCCGCTCAGTATCGGTCCAGAGCCGCAACTGCTGGCGGTATTGCGCGGGCGTTA  
TCTGGGTTGCGCGCTTTCTTCTCTGCTGAGCCTGGAGCGTCTGTTCCGTGACGATTTGCAAGGACGCGAGTTGAA  
CAATGTATGTTGTTGCGCTTACCCTTGGCCCGCTTGTGCTGGCGAAGGTGATGGCGCACTGGATGGTAACCGGTCTGCC  
GTTACTCATCTTTTCCGCACTGGTAGCAATGCTACTGGGAATGGATGTTTATGGCTGGCAAGTGTGCGCTGACGCTGC  
TGCTGGGAACGCTACGCTTGGCTTTCTCGGTGACCGGCGTGGCGTGCACAGTGGGACTTAAAGCGGTGGTGTGCTG  
CTCAGCATACTGGTGGTTACCGCTGACTATCCCATTAATCTACTCATTTTGGCAACCGCGGATGGACGCGGCTTCCATG  
GCGCTTGGAGGGTATCTGGCAATTTTAGCGCGTGTGCTGGCAGGCACCGCGACATTAAGTCTTTTGGACGCGGCGCAG  
CGTTACGAATCAGCATTTCAATA  
>Cluster\_3372  
ATGTCAAATAGCATTTTCGCTGATAGCGATATTATCATTATTTACACTATTGCCGTTTATAATAGCATCCGGGACATGTTT  
TATTAAATTCCTCGATTGTTTGTATTGTTCCGAAACCGCTGGGACTTCAGCAAGTGCATCAATATGACACTTAATG  
GGGTTGCTTTGCTATTGTTCAATGTTCTGTAATGATGCGGTTGGGAAGGAAATATAAATAACAGTCAAGATGAGAATCTT  
TCATTTCAATAATAGTACCATCGGTTGTTAATTTTGTGAGACAGCATGAGTGGTTATAAATCATATTTGATAAAAATATTC  
TGAACCTGAGTTGGTTAGCTTTTTTGAAGAATTCAGAAGGTGAATAGTTCTGAAGACAATGAAGAGATAATCGATGATG  
ATAATATTTCAATTTTCTGTTACTGCCCGCATATGCATTTAGTGAAGATAAAAAGTGCATTTATATAGGTTTATATATC  
TATTTACCTTTTGTGCTAGTGGATCTGGTTATAACCAGCTTCTGTTAACGTTAGGATGATGATGATGATGATGATGATGATG  
CATATCTACACCGATAAAAATTAATTTGTTGTCGCGATGGACGGTTGGACAATGTTATCAAAAAGGGCTCATTTTACAAT  
ATTTTACCTATCCATTAATCCCTGA  
>Cluster\_38583  
ATGAATCAGAGTAAATCCGTTGCTGTACAACAGTACAGCCAGCCCTTAATTTCTCCGCTGCAGCGGATGTTATCCG  
TATGGTGGCGTTTGTGGCGATGGTGGGGGACCATAGCCACTGCCTTTACAGTGGCTATGCCCTTCCGAAACATGGCGG  
GGCGTGTGCATTTCCCTGTTTGGCGTGGTACAGCGCTGCAACATGGCGGGTAAAACCTTACGTGACACAGCCCTAAC  
CGCTGTGGCTGATGGCACTCTTGGCACAGCCGGGATACTGGCTGGCTTCCGGGATGTCGGCTTGGTGGTGGCAACT  
GAATACCTGTTTACCTTTGCTGTGTTCAATGCAAGTGGCCCTTTCGCTGATGATGATGATGATGATGATGATGATGATGATG  
CTTTGCTTCCCTGGTGGGGTATCTGCCGCTTAGCTTACGGTACGGTATACGGGCTGCTGATGATGATGATGATGATGATGATG  
CTTCTTATCTGGCAGGTCCGGGACTCACATGCGGCCAGCCCTGTTGCTTTCTGGCTGTGCTGGTCTGCCCTGCTTAATGC  
CCGACATGGTGTGATGATGACGCTTCCGGTGTACTGCTGACGTTGACTGTGCTGTTTTGCGTGCATGGGCTGGTACCGG  
CTCCCGACGACGCTGCAGCCGGACGGTGGTTGACACAGCGTATGCCCTCATCTGCTGTGATTTGGTTTTATGGTTC  
AGTGTCTCTGA  
>Cluster\_29280  
ATGAGCGAAATGATTTACGGCATCCATGCAGTGCAGGCCCTGCTGGAGCGCGCCCTGAACTTTTTCAGGAAGTCTTTAT  
TTTAAAGCCGTTGAAGATAAACCTCTGTTTACCCTGATTACGCCCTTGAGTCTCAGGGCGTGGTTATCCAGTTGGCAA  
ACCGCAATATCTCGACGAGAAAAGCGACGGTGGCGTGCATCAGGGCATTTATCGCTCGTGTGAAGCCAGGACGGCAGTAT  
CAGGAAAACGATCTGCGGATCTGATCGCTTCCGCTGATCAACCGTTCCTGCTGATCCCGATGGCGTAACCGATCCGCA  
CAACCTCGGCGCTGCTGCGTAGCGGGACGCGCTGGTGTTCATGCGGTGATTTGTCGCGAAAGATGCTCCGCACAGC  
TCAACGCCACGGCGCAAAAAGTGGCTTGTGTCGCGCAAAAAGCTTCCGCTGATTCCGGTGACTAATCTGGCGCACACC  
ATGCGTATGTTGCAAGGAGAAATATCTGGATCGTGGTACGGCAGGCGGATCATACACTTATCAGAGCAAAAT  
GACCGGACGCTTGGCGTGGTGTGGGTGCGGAAGGTGAAGGTATGCGTCCGCTGACCGTGAACATTTGCGATGAGTTGA  
TCAGCATCCCAATGGCAGGAAGTGTTCCTTCCGTAACGTTTCCGTTGCAACCGGAATTTGCTTATTTGAAGCGGTTCCG  
CAGCGCAGCTAG  
>Cluster\_25376  
ATGATTACCTGAAAAATGTTTCAAAAATGGTATGGTCACTTTTCAAGTGTGACCGACTGCTCAACCGAAGTGAAAAAAGG  
CGAAGTTGTTGGTGGTTGGCGTCTGTTCCGGCAATCAACGCTGATTAACACCGTCAACGGGCTCGAACCCTGCG  
AGCAAGGTGAAATCACCGTGCATGGCATCGTGGTTAACGACAAGAAAACCGATCTGGCGAAAATGCGTTCCCGCTCGG  
ATGGTGTTCAGCATTTTCAGCTGTTCCCCATCTGCTGATTATCGAAAACCTGACCTGGCGCAGGTGAAAGTGTCTTAA



ACGCAATAAAGCGCCGGCTCGTGAAAAAGCATTGAAATGCTGGAGCGCTCGGGCTTCCGCACATGCCAATAAGTTTC  
CGGCGCAGTTTTCCGGCGCCAGCAGCAGCGTGTGGCGATCGCTCGCGCATTGTGCATGGATCCTATTGCCATGCTGTTTC  
GACGAACCAACGTCGGCGCTGGATCCGGAGATGATCAACGAAGTGCTGGACGTGATGGTGAAGTGGCGAACGAGGAAT  
GACGATGATGGTGGTGAACCCAGAAATGGGCTTTGCCCGTAAAGTGGCGAATCGGGTGTATCTTTATGGACGAGGGTAAAA  
TTGTGGAAGACTCGCCGAAAGACGCTTTCTTCGATGATCCGAAATCGGACCGCGCAAAAGACTTCTCGCAAAAATCTGT  
CATTAA

>Cluster\_8994

ATGGACAGTCTCAATCTTAATAAACATATTTCCGGCCAGTTCAACGCCGAACGGAAAGTATCCGCACGCAGGTGATGAC  
CATGGGCGGCATGGTGGAGCAGCAGCTTTCTGATGCAATCACCGGATGCATAACCAGGACAGCGATCTGGCGAAGCGCG  
TCATCGAAGGCGACAAGAAGCTCAACATGATGGAAGTGGCGATCGATGAAGCCTGCGTGCATTTATCGCAAACGTCAG  
CCGACGGCGAGCGACTGCGACTGGTTATGGTGTATGATGATAAAACCATTTGCCGAGCTGGAGCGTATGGCGACGTGGCGGA  
CAAAATCTGCCGTACTGCGCTGGAGAAATTTCTCCAGCAGCATCAGCCGTTGCTGGTAAGTCTGGAGTCTGCTGGGCGCTC  
ATACATCCAGATGTCACAGCAGCTGTGGACGCTTCCGCGGATGGACATTTGACGAAGCGGTACGTATTTATCTGTGAA  
GATAAAAAAGTTCGATCAGGAATACGAAGTATTGTTCTGCTCAACTGATGACCTACATGATGGAAGATTCGCGTACCATTCC  
GAGCGTACTTACTGCGCTTCTTCCGCGCTTCTATCGAACGATTTGGCGACCGCTGCCAGAAATTTGTGAGTTTATCT  
TCTACTACGTGAAGGGCAGGATTTCCGTCACGTGCGTGGCGATGAGCTGGATAAACTGCTGGCGGGGAAAGATAGCGAC  
AAATAA

>Cluster\_7631

GTGAAAGTCAATGTTTGAAGCAGAAATCCTGGCACAACGGAACCTGAGCTGGCTAATTAAGAGCAGCCAGATGGA  
GATTGTCCGCACCTTTGACGACGCTGGACGTTTGAAGTTTTCGAGCATAACCGCTCGACGCCATTTTCTGGATA  
TCAATATTCGTCGCTGGATGGCGTGTGCTGGCGCAAAACATCAGCCAGTTCCGCCATAAACCGTTTATGTTTCAATC  
ACCGCGTGGAAAGACATGCGGTAGAAGCGTTTGAACGGAGCGTTTACTACATTTCAAACCGTATCAGGAGTCAG  
TATTTACGGGATGCTGCAAAAACCTGGAAGCGGCTGGCAACAACAGCAGACCAGCAGTACGCTGCCGCGACGGTAAACCG  
GTGAGAATGACACCATTAATCTGGTGAAGATGAGCGAATAATCGTCAGCCAAATTAACGATATCTATTTACGCGAAGCG  
CACGAGAAAATGACCTTTGCTTATACGCGGCGTGAATCCTACGTAATGCGGATGAACATTTACCGAATTTTGCAGCAAACT  
GCCGCGTCCGATTTTTCCGCTGCCATCGCTCATTTTGTGCTCAATCTGAACAAAATACGCGAAATCGAACCGTGGTTTFA  
ATAACACCTACATTTCCGACTGAAAGATCTGGATTTTGAAGTCCCGTCCAGCCGAGCAAGTGAAGAATTTCCGCCAG  
TTAATGCATCTTTAA

>Cluster\_38625

ATGACATCAGACAATATCGCTGAATATGTTGGTGAATAATCAATTTACTGAGAAGCCTGTAACCTGAATACCCCCGGT  
GATACAGGATAATACAGTGACCACTAAAGACTATCTGTACAGCAATAATATTGATACTGACCTTTTAGTGGTTATCGGAG  
GGCTTATTGTTATATTGTTCTCATGATGCTTATCATGACTTTATTAATTTCTCAGGCATAAGGAATTAACCTGAAATA  
CTGAAAAAATATCTTTTCTGAAAAATCCGGGAGCAATTTGCTTAAACAGAGGCGGTCAGCTGTAATTTGTTGTCCCT  
GTGTGTGCTGGCACCAGGATTTCTGTACACCCAAAAAGCTGGCTGAAGTCTCCAGGGAGATCATCGTGGCGAGTCCGACAG  
AAATTCGATGGACCGCGGGGAGCAGTCTGATGATGCTCAGGGCGAAAATATTACCTGGTCTCTGTATCCGACGCT  
CCTGCCGATAAGTATGATCTCATCAATGAACCGTCCCGGTTTCTTCCGACAGTGGCCGTTTTTATGAACCCGACACAGT  
TCTGGATCCGCGTGAACGGGTACGCTTTTTTATTCAGATCCAGTTTCCGACGGGAGTACTGGTCTGAAGTATTGCGCC  
TGACTGACATTTGTACAGAGAAGGTTCTTCCGGCAGGGCTGCAGGCGGGTATCACCCGGCATAACAGGGTACACCTGG  
TCTGTTTCTGTGAATTA

>Cluster\_41995

ATGAAAAATGGAAGTACGTAGCGCTTGATAGCATTAGTCTGCTGCTGGCCGGTGTTCAGTAATGCGCAGTATAA  
TAGCAGTACATCGGGCAATGTCCGCACCCTGGGGTGGGGATGTGCACTCATCGGTTTCAGGGCGTATCTGCTGAGCGAG  
CCTGGCGCATCCGGCAGAGATGATGCTTATTAGTTATTCGACTAATGTTCCCTTCCGGCTACGACCGGTTTTATAGCAAT  
CGTATTAACGAACCTGGAATATGCTATTCGCGATAGTAATTTTAAATCTCTACCAATTACGCGGGTTTTATGATTATCCAA  
TAAFGAACACGCTATATTTGTCATGCCAGAGTCCGAAATGAATATCAATATATGTCGTAATTACAGTCTGTAACACCA  
ACTACGAGATCGTTGCTACGGTTGATGGCTGGATGTTCTGAAATGGTAAACAAGGTTCCGCTGAATAACAACGGTTATATT  
GTGAATGCCGAGATTCGTTAGCGATTAAGGATTCGCGAAAGATAAACATACCGAAGCGGCTTTTTCGTTCCGTAACCT  
TGCTGATTTCTACGACCAATTCGCGCAAGGCGATGTCGTAATACCGGTGTAATAGGCTTTTCCGCGCTTTGAAATTAC  
AAGGCCCGCGCAAAAACGCGCTCCGCGCTGCTCTGGACAAGCCTTTCCGGCAGATAACAATGGCTATGCGCCGCCACCG  
TGTCGGAATAG

>Cluster\_21431

ATGGTGTATCATCAGGCTCGGGACGATGAAATAAACTGAAGTAGGAAAGATGGATTTATAGATAAAAAGTTTCTTGA  
TTTTATTCCATCTAAGAAAAATAATATAGTATTGGACGATAAAGAGGATGATTTCAAAAAAGACGATGGCTCTAGTTCCA  
AAATGGCAGATTTATTTGTTATTTAATAACGATGTTATTTTAGAGCAAAAATTAATTTACAAATGACAGAATGATTTAATA  
AATGAAAAAATAATTAATGCTAGCTAAGACTGATGAATGGCTTAAAGAAAGTGGTTGCGGTAGGGTTTCAATTTAGGAAT  
GATTTCAAAAACACCCGACTCAGATGCTTTCAGAAAAAAGATAATGGAATATGCTTTATAGAAATATAAAAAGATCTTGTAG  
CAACCTCCAATAGACAGATTTAGAGTAACAAGGAATCTTTAAATATTCTAGAGCAGTCCGGTGGACTTGTATTTCTTAAT  
GAATGCATAATGCTTTATGAATCTGAAAAATGTAATGAAACACTTAATTTTCTTGTGAAATCCACATTTATGAACATGT  
TGATTTTGTCTTATATATCAGAACTACGTAGATCAACAGATAATGATTGATATGTCAGCAATTAATAAAAAGAGCT  
CTCCAAGATATGAGTTTGTAAACTGGTATATAAAAAACGTTTTTCTCATTCGATTTCCGTTTCAATTTTTTAAATCACCTATA  
CAATTTTTATAG

>Cluster\_42837

ATGAAATGATCATTACCAGAAATACCAGGAAATGAGCCGTGTCGGCGCATCATCTGCTTGGTTATATGTCAAAGAT  
GCGTCCGCTTAACCTGGCAATTACCGCCGTAGCACGCCAAAGGCATGTACGAAATATCTCATCACTCTGGTTAAAGGTA  
AGCCCTGGTACGATAACTGCTATTTCTACAATTTCCGATGAAATTCATTTCCGCGGCAAGAGGGAGAAGGCTAACGAT  
ACCAATCTCGGTAATCTGTTTTTCCACCTGCAAGGATAAAGAAAGAGAAATCCAGAAAGCTCACTATTTGTAATACCG  
CGAGCATGATCAGAAACTGGCGCGTGAAGGCGGCTGGATTTGGTGGTGTGGGATTAGGTGCAGATGGTCAATTTTGTG  
GCAATCTGCCAAATACGACCCATTTCCATGAGCAACCGTGGAGTTCGCCGATCCAGGGAGAGATGGTTGATTTGTGGCG  
CATGGCAGTTGGGCGCGACTTTTTCATTTAGTCCCTGACAGCTACGTGACGATGGGCGGAAAGCATCATGGCGCGGAA  
AAACTTGCATAAATTTGCTAGTGGCGCGGATAAGCGCAAGCACTGAAAAAATGTTCTGCAAGGTTCCGGTTACCGAAGATG  
TTCCAGTTCCTGTTGTCAGCTGCATCTTCCGTCATGTTAATCGTGTATAAAGCCGCTGCCGAGAAATAGCGCTCGGT  
TAA

>Cluster\_56524

ATGAACGATATTGCGCATAAACCCTGGCACAGGTCGGGACAAAACTCAGCGGCTGCAACCGCTTGGCGCGCTTCTCCAGA  
AGAAATTACGCTGCTTGCAGTCAAGTAAAAACAAACCTGCGAGCCCATCGCAGAGCCATTTGATGCCGGGCGAGCTCAAT  
TTGGTGAAAACTACGTTCCAGGAAGGGGTAGATAAAAATTCGCCACTTTCCAGGAACCTGGGCGTAAACAGGATTTAGAAATGGCAT  
TTTATTTGGCCGTTGCGAGTCTAATAAAAAGCCCGCTGGTGGCAGAGCATTTCCGACTGGTGTCAATACGACCTGACCGTTTGGC  
CATTTGCTACCCGCTCAACGATCAGCGCCCGCAGAACTTCCCCCTCTAACGTAAGTATCAAAATTAATATTAGTGTATG  
AAAACAGTAAAGTCCGGATTTCAACTGGCAGAACTGGACGAGCTGGCAGCGCGGTCGTTGACTACCGGCTTTACGCTCTG

CGCGGGCTGATGGCAATCCCTGCGCCTGAGTCAGAATATGTAAGGCAGTTTGAAGTTGCACGCCAAATGGCTGTAGCATT  
TGCCGGACTGAAAACCGCGTACCCGCATATCGACACGCCTCTCTGGGAATGTCGGACGATATGGAAGCCGCCATTGCGG  
CAGGTAGCAGATGGTTCGTATCGGCAC TGCAATTTTTGGTGC GCGTGATTACTCTAAAAATAA  
>Cluster\_42022  
GTGGTCATCGGCCCTTTTATCAACGCAAGTGCAGTCTTACTGGGTGGCGTTTTTCGGCGCACTCCTTAGCCAACGCTTACC  
GGAACGTATCCGCGTCTCCATGACATCAATTTTTGGTCTGGCATCGCTGGGGATTGGTATTTTACTGGTGGTGAATGCG  
CCAACCTTCCGGCGATGGTTTTAGCAACCTTACFCGGAGCATTAAATCGCGGAAATTTGCTGCTGGAAAAGCGGTCAAT  
ACAGTGGTCGCCAAAGCGCATAAATCTGTTTACCACCTCGCGTAAGAAGCCAGCGCATGAATCTTTATTCAGAATTTTGT  
CGCGATTATGTCCTGTTTTGCGCCAGCGCACCGGAACTCTCGGGCGATGAACGAAGGGATGACCCGCGATCCGAGTA  
TTTTAATCGCAAGTCAATTTCTTGATTTCTTACGGCGATGATCTTCGCTGCTGCTGGGTATTGCGGTGTCGGTGATT  
AGCATTCCATTACTGATCATCCAGTTAACACTGGCGTGGGCTGCGCGCTGATATTACCGCTGACCACACCGTCGATGAT  
GGCAGACTTACGCGCGTAGGCGGTTTTATTGCTGCTGGCAACCGGATTACGCATCTGTGGTATTAATAATGTTCCCGGTGG  
TCAACATGCTTCCAGCACCTCTTCTGGCAATGCCGCTTTCGCGCGCTGGACCGCTGTTTTGCGCTGA  
>Cluster\_36334  
ATGATGGCGAATATCTGGTGGTCAATACCGCTGACATTGATTGCTTTTTTTCGGCGCCGCAAACTGGCGGCACCGGTATAA  
GTTTCCCTTGCTTAAACCGTGTGCTGGTAGCAATGGTGGTGCATTCCTTTTTTAATGCTGACTGGCATCTCTTACGACA  
GCTACTTAAAGGTGAAGTGCATAACGATCTGCTGCAACCGCGCTGCTCGCGCTGCCTATCCTTTATATGACGAG  
CTACACCAGATCCGCGCGCTGGAATCGATCATCACCATCTGTTTTATCGGCAGCGTGGTTGCGATGGTGACGGGGAC  
TTCCGTGGCATTGTTGATGGGCGCTTACCGGAAATCGCGCGTCAATCCTGCGGAAATCAGTACCACCGCTATTGCAA  
TGGCGGTTGGCGGCAGTATGCGGATTTCCGGCAATCAGCGCAGTTTGGCTGATTTTCTGCGGCATCTCGCGCGGTA  
TTTTGGCCATACATTTGCTTAAATGCGATGCGTATTCTGACCAAGCTGCGCGCGTCTGGCAATGGGATCCCTCGCACGC  
CCTCGGTACGGCGCGCTGCGCGAGCTGGATTATCAGGAAGTGCATTTAGTTGCTAGCGCTGGTGTATGCGGGATAA  
TTACTTTCGTGATCGCACCGTTCCTTTTCCGATATTCTGGCAGTAATGGGCTAA  
>Cluster\_30730  
ATGTTAGAACCCAAAGAGTTATAATGAAATGTTGCCATGCTCCATAAAGGCGACTTTTATTACTACATTTATATTTTA  
CCTATCATTAGTCAATTTATGGCTACATGCCATTGGTTGGCATTAAATGCCAAGTATATCCTCCCGTTAAAGACTACGAGG  
AATTTATTAATGGATATTAACCTTTGGCATATTACCAATGTCATCTTCAAGTTTTTGGTTCAGTAATAGTGGAGCTTTA  
GATCTACATAAATAATGTAGCAAAAATTAATGGAATAAGGAAGAATGGGATAGTCAATTAATTAATAAACACTAGCAAA  
AATTCAGCGCTTACGAGAAAATTAATACTGATGAATCTCACAAGGTAATGAGTAAACTGTATTACCAGAAGTAAAG  
AGTTAAAAGACAACATTTACGTTGAACCTTTCTGGAACAAAGTTTATTACTTTTGGGTTTCTTTGAAACATACAGTAATC  
GCATTTGTTACTATTTTAATAATAAGCATCGCCAAATTAACAAATATATTTCTGTTACTGGCTCTTTAATTAATCTTTG  
GTTGTGGATTATTTCTCTTGTGCGATTTGACTTCTTATTTTCATAGCATCAGTTAAACCAAGAACAGAAAGCAAGTAA  
GACAAATACCTGATAGCAAAAATAAAGAATTTCTTTAACAAATAACATATTTTTTAA  
>Cluster\_39451  
ATGGAAAATAAAAAATCACTGACGACAGAACAGCTCGAAGACGCTAAGCGTCTTAAGGCTTTGTATGAGTCAAAAAGAA  
AGAATTTGGAATAAACCAATACTCAATCGCTGATGAAC TGGGTATCACCAAGGAGCGTAGGGCATTATCTTAAATGGCA  
GAAACGCGCTAAACGTTGAGGTTGCATCTGGTTTTGCACGATTGTTGCAAGTCTCAATGCTGATTTTAGCCAGTCAAT  
GCTCCAAAGGTTGCAAGACAGGCAAGAAACGCTTAAAGACGATGCAACGTAAGGTATGCAAGGGAATACAGACAGGAAA  
GAGGTAATCCGTTTAAAGCAGTATCCAGGCTGGCTGCTGTTGAAGCATGCGAACCATACACATTAAGACATAGATG  
TTTTGGTTGAGTCTGACCGCATATTTCAAGGTAATGCGTTCTGGCTTAAAGTGAAGGTTGATTCAATGACGGCACCGGTT  
GGGTTAAGCATTCAGAGGGAACATTCGTTCTTTTCGATACCGGAAGGAGGCGATCAACGGCAGCTTGGTCATAGCAA  
ACTTCTGACTCTAACGAAGCAACATTCAGAAGCTGATAATCAGCGCGGAAATAAATACCTCAAGGACTTAAATCTG  
CATGGCTCTCTGTCCAATCAATGGAAC TGAAGATTATAGGCGTTGCAATTGAGACAAAAC TAAGGCTGGTTTGA  
>Cluster\_25398  
ATGGATAAGTTACCGCTTCAACCGCGCTCGCCGGGATGAACGCTTTACCGGCTGGCAAACTTTCGCGCTGAACGCTT  
CGCACAACCTGATCTGACCGCGCTTCTGATTTACCTGGTGGATCTGGTGGATGCCACGGCGCTGCCGTGCTGGCAGAAC  
AGTTCCACGTTTCAAGGCTTGAAGGCTGGCTGCTTTGCCCGCATGAGCGACAAAAGCGCGATCTGATCAAGCAGCCATT  
GAGCTGCACCGCTATCGCGGTACGCCGTGGCAGTGGCTCAGGTAAGATTTGCGGTTGGACGGCGATATCAGCGA  
GTGGTTGAGTATGGCGTAAAGCGTACTTTTTCCGCATGGATGTCACGCTTGAGACGCGCGGCTGACTGAGGATGAAT  
TTAACGCGCTGATTTGCTGATCCATGAGTACAAGAACGTCGCTCAAAGCTGGAGATGCTGACTATCTGGCTGATTAAC  
CAGAGCCAGATCCCGGTTATCGCCAGTGTGTTTCAAGGCGCGAGATTGCTACCGTTCTGCGGTTGCGGAGAGCGT  
GAGTCACTGCTGCGGTTTATCTGGCGACGAGTGTGTTGAGTGCAGAGGTTAACGGTGTTCCTCCGCTGCATGGCA  
ATGTTGAGCAGACCGCTTATGAGTGTGGAGCGGGCTGCTGGAGTATTGAGTTTGTCACTGTTTACCCGGAGGAGTAA  
>Cluster\_43625  
ATGCTGGCCCTGCAACTGGCCGCACAGATTGCAGGCGGGCCGGATCTGCTGGAGTGGGCGAACTGCCACCGGCCCGGT  
GATCTACCTGCCCGCAAGACCGCCACCGCATTCATCACCGCTGCACGCCCTTGGGGCGCACCACGCGCGGAGG  
AACGGCAAGCCGTTGGCTGACGGCTGCTGATCCAGCGCTGATCGGCAGCTGCCCAACATCATGGCCCGGAGTGGTTTC  
GACGGCTCAAGCCGCGCCGAGGGCCCGCTGATGGTGTGGACACGCTGCGCCGTTCCACATCGAGGAAGAAAA  
CGCCAGCGCCCATGGCCAGGTCATCGGTCGATGGAGGCCATCGCCGCGATACCGGGTGTCTATCTGTTCTCTGC  
ACCATGCCAGCAAGGGCGCGCCATGATGGCGCAGGCGACGACGAGCAGCCAGCCGGGGCAGCTCGGTACTGGTGCAT  
AACATCCGCTGGCAGTCTTACTGTCGAGCATGACGAGCGCGAGGCGGAGGAATGGGGTGTGGACGACGACGAGCGCG  
GTTCTTCTGTCGCTTCCGTTGAGCAAGCCAACTATGGCCAGCCGTTGCTGATCGGTGGTTGCGGCGATGACGGCG  
GGGTGCTCAAGCCCGCGTGTGGAGAGGCGCAAGAGCAAGGGGTGCCCGTGGTGAAGCCTAA  
>Cluster\_9665  
ATGCAGACCCCGCACATTTTATCGTTGAAGACGAGTTGGTAACACGCAACAGCTTGAAGATTTTTCGAAGCGGAAGG  
CTATGATGTTTTTCAAGCGACAGATGGCGCGGAAATGCATCAGATCTCTCTGAATATGACATCAACCTGGTGTATCATGG  
ATATCAATCTGCCGGTAAGAAGGCTTCTGTTAGCGCGTGAATGCGCGAGCAGGCGAATGTTGCGTTGATGTTCTTG  
ACTGGCCGTGACAACGAAGTCTGATAAAATTTCTCGCCCTCGAAATCGGTCAGATGACTACATCAACAAACCTTCAACCC  
CGCTGAAC TGACGATTCGTGCACGCAACCTGCTGTCCTGATACCATGAATCTGGGTACTGTGAGCAAGAACGCTGATGCG  
TTGAAAGCTACAAGTTCAATGGTTGGGAAGTGAACATCAACAGCCGTTCTGTTGATCGCCCTGATGGCGGAGTACAAG  
CTGCCGCGCAGGAGTTCCGCGCATGCTTCTGTTGAAAACCCAGGCAAAATTCAGTCTGCTGTAACGCTGCTGAA  
GAAAATGACCGGGCGTGAAGTGAACACACGACCGTACTGTAGACGTCGACGATCCCGCGTATTCGTAACATTTTCAAT  
CTACCGCGGATACCGCGAAATCATCGCCACATCCACGGTGAAGTTATCGCTTCTGTTGATCTGGAAGATTA  
>Cluster\_67068  
GTGTCACAGTGTTCCTGTCACAATAAGAAAAGCACAGCCTTTTGCCTGCTGCATACCGCATTAATTTCCATCACCCGTC  
TACACCACAGGAGTGAATTTCCGTTGGAAGTGCATTTTCCGCGCGCTGGGGACGTTTGTGCAAGTCTCCCTGCCAT  
CGCTCGGGAGGCGCCATTTCTGTTCTGACTGCGGAGAGGGCTGGATAGACTGCTTATCCGCAATGCTCGGCAAGTG  
ACCGGCGCTTTTTTACCCTCCGTGAAGGCGACAGGTTATGGCTGCGTGGCTGCTATGGTAACGGCTACCCCTGTCGATGC  
TTTTCCGCCAAAATCTCTGGTGGTCAATGCGCGGGTACCGGCTTGACAGTCAAGGGCTGATGCGCTATTTCTGCTG

AAAACCCACAGGAAATCAACCGGCTTGACATGATTTTCGGTTACAGAAACCGGGACTGTGTGCTGTACAAGCAGGAGATG  
GCGATCTGGCACCCTGACCAATCTCATTTCTGACCCTGGATGAAGGCGAGGCGGATGAACGTTACCGTACCGGGCGGGT  
CACTGACCATCTGGCAGCACTGAGATTTGAAGATATCAGCACCATGCAGGCGATGTTGTTGGTCTCCCGTGATGATTA  
AATTCACCGTACAGTTGTTGCTGAAAAAAGGACTGCAGCCGGAACAAATCTGGGTGGATATGAACGCGGATGGCCTGT  
GCAGTGGGAAATGGCGTCACTGCCGATGGGGATGTACGCTGCGTCGATGGTCCGGTTTCAACTATGCCGTGGC  
CCGTCAGTTGCGACTGA

>Cluster\_543

ATGAGTAAAGCGTAAAGTCGCCATTATCGGTTCTGGCAACATTGGCACCAGTCTGATGATTAATAATTTTGGCTCACGGTCA  
GCATCTGGAGATGGCGGTGATGGTTCGGCATTGATCCTCAGTCCGACGGTCTGGCGCGTCCAGACGTATGGGCGTCGCCA  
CCACCCATGAAGGGGTGATCGGGCTGATGAACATGCCTGAATTTGCTGATATCGACATTTGATTTGATGCGACCAGCGCG  
GGCGCGCATGTGAAAAACGATGCCGCTTTACGCGAAGCGAAACCGGATATTCGCTTAATTTGACCTGACGCTGCTGCCAT  
CGGCCCTTACTGCGTGGCGGTGGTTAACCTCGAGGCGAAGCTCGATCAACTGAACGTCAACATGGTCACTGCGGCGCC  
AGGCCACCATTTCCAAATGGTGGCGCAGTTTACGCGGACGCGTGTTCATTACGCCGAAATTAATCGCTTCTATCGCCAGT  
AAATCTGCCGGACCTGGCAGCGTGCCAATATCGATGAATTTACGAAACCACTTCCCGAGCCATTGAAGTGGTGGGCGG  
CGCGGCAAAAGGGGAGGCGGATTTATGTGCTTAAACCCAGCAGAGCCACCGTTGATGATGCGTGAACCGTGTATGATTTGA  
GCGCAAGCTTCCACAAGATGATATCGAAGCTCAATCAATGAAATGGCTGAGGCGGTGCAGGCTTACGTACCCGGTTAT  
CGCTGAAACAGCGCGTGGTGGTGAAGTTTAAACCCAGGATAAACCGGTCAATTTACCGGCGTGGGCAAAATTCCTCCG  
ACTGAAACAGCGGTCTGGCTGGAAGTCAAGGCGCAGCGCATTTATCTGCTGCTATGCGGGCAACCTCGACATTTATGA  
CTTCCAGTGGCTGGCGACAGCGGAAAAATGGCCAGTCACTGGCGCAAGCAGGAGAAGCGGCATGA

>Cluster\_7261

ATGGAAAGATTAATAATTTGAGTGA AAAACCTGCTCACTCTTTACAGAAGCGGCTATTCATTGTGCCAGATATGCTAATAT  
CTTACATCTTGTAAAGATAAAGTAGTTCTCGACATTGCTGCGGCGAAGGATATGGCTCAGCACTATTAATGAAAGCTG  
GTGCTAAACGAGTTGTGGGGGTGGACATCTCTCAAGAGTCAATTTGAGCAGCGAAAGAAACTTTTTTGGGGGATATAATGTT  
GAGTTTATGTAAAGTGCATGTACCATCTCAGAGCGTTATGGTGAAGATTTTTTGTATGTTGTTCAATAGAGAC  
AATAGAACACATCAATACTCTGAAAGTTTTCTTAGTGTATCAAAAAAAGTCTAAAGAAAAATGCGATTTTCTATATAA  
CTTGCCCTAATGATTTATGGTATTTATCCAAATGATGAACAATCCAATCCGTACCATGTACGAAAAATATACTTTTCAAGAG  
TTCACCGAATCTAGTACAGTGTATTTGGGAAAGAAATGTTCAATGGGCAATATGGTGTGTTCTGCTTTTGGATTTTGTACAGT  
CTCAGCAAAATAATCGAGGTTTTGAAAAAATAGGTTCTTCAATGATGGAATAAGCGATTCGAAAAATCAATTTGTTT  
TAAATACAGATATTGACGAGTTAGTGA AAAATAATGTCAGTTTTTTTGGGCTTATGGAATGCACCTGAAACAAATTTT  
AGCAATAGTACATTTCCCAATAAGTATGAATGCTTATTCGCGCATGACAGAAAGTTCGAGTTCGAAATGTAAGTCTGGTACT  
TCGTGAGGAACAGGCAGAAAAATAAAAAAGCTATATCAATATTAACAAGATATGAAAAAGTTAACAATGGACCTGAGAA  
AATCAAACCTTTTATTTATTCGCATTA AAAATCGAAAAATGATGCTACTAATATTTCCGAATTGCAATAA

>Cluster\_35749

ATGAATATTTCCGATATTCGCGCAGGACTGCGCAGCTTGTAGAAAATGAAGAAACCACTTTTAAACAAATTTGCTCTTGA  
GAGCGGACTTCTACCGGAATATCAGTAGTTTTATCAATGATAAGTACAACGGGGATAACGAGCGTGTTCACAAATTCG  
TGCAACGCTGGCTGCAAAAATATCATGCTAGTTGACAGACTACCTGAACCCCGCTTTGTGGAAACGCTGACAGATAAAA  
CAAACTGGACAAGTATGCGTTTTGCGCAGCTGACTGAAAGTATGCTGTTGTATGTGGCAATCTGGTGTGGGCAAAAC  
CAAGCGGCGCCGTAATATCGCCGCAACATAACAATGCTGGATGATCACCATTACGCCATCTGTGCCAGCCTTCTCG  
AATGCTTTACTGAACTGGGCTTTGAGCTGGGAATGAAATGACGACCAACCGCTTAAGGGCCGCTCTCCGCGCCCTGCGA  
CGTCCCTTGAAGTACACAGGGCTGGTTATCATCGACGAAGCTGATCATCTTTGGTGCCGAAGTCTCTGGAAGAACTCCG  
CCTGTTACAGGAATCAACCGTATTTGGCCTTGTGCTGATGGGAAATCACCAGGTTTATTCAAATATGACGGGGGTAAAC  
GAACGGTTGAATTTGCCCGTCTGTTTTCCCGTATTTGCAAAAGCGCACTGCAATTAATAAAACCAAAAAAGCCGATGTA  
GCTATTCGGATGCTGGCAGATTAACGGCGAAAAAGAACTGAGTTATACAGCAGATTGCGCAGAAACAGTGGCGCT  
TCGCATTTGAAATCACTTCCGCTTGCAGCATGACGGCTCACGGTAAAGGTGAGCGTGTAAACGAAGTATATCTGC  
GTCAGGCTTTCGTTGAATFAGACTGGACGTTGATATTTCAACGCTGCTGCGTAAATTA

>Cluster\_45413

ATGAGTAACTTGTACTTTTATCCAACATGCTGTAACGCTGTTCCGGTCACTGGCAGATCTTTGATCTCCTCTCTGTA  
TGGTGATTCGCTTTCCATCGTGGTGGTGAATCTGGCTGGTGTGCTGGCTGCTTTGCTGGAAGGGCTGGGATTTGGTG  
AGCGTTTCGCTGCGCACCCTTTGTTTCGCTTAATAAAGAAAGGCTGGCTGGATGTTTCCCGCATCGGGCGACGAGTTTC  
TATAGCCTCAGTGATAAAGGCTTGGCCGACGCGAGGCGAGAAAGTAAATTTATCGCGCAGAGCAACCTGCATGGGA  
TGGTAAATGGCTCCCTGTTGCTCTCGGAAGTTTATGATAAATCAACGCTGGCTGATGTCAAAAAGCAGTGTGATCGCAAG  
GTTTTGGCGCACTGGCACCCAGCTGATGGCATCGCGTCGCAAAAACGCGGATGTACAGACACTTTTGCATGAAGCG  
GGGTGGCGGATAACGTGATTTGTTTGAAGCGCAATACCCTGGCGCTTTCGCTGACGACTGCGTGCAGAGTGA  
AGAGTGTGGCATTTAATGAACAAAATGCCATGTACGAAACCTTTATTCAGTCAATCCGCGCGTGGTGGCGCTGTTAA  
AAGAGCAGCAGAGAGTTAAACCCGAGCGTGCATTTATTCATTTACTGATCCATTTTACTGATCCATTTTATTCGCGTCTG  
CTTAAAGACCCATTTGTTGCCAGAGGAGTTGCTTCCGGCGCACTGGGCAAGGATACGGCGCTGAGTGTGATCAACAT  
TTATCAGCGCTGAGCGCTGCTGCTTTAGCGTTGTTAGTGA AAAAAGTGA AACCTCGGTGAGTGCCTGCGCCG  
GAAGCCTGATTTTCAACGTTTTGGCGGTTGAATATTGAACAGGAGGCGATATGCCAATTTACCAGATAG

>Cluster\_657

ATGAAGCCGGAAAAACAACTACCTGTTCTGGACCTTATTTCTGCTGAAATGAAGACCGTGTGTAATCTTTCAGCCGGA  
TTTACCCTCCTGGCCGCAACGGGAACGATGCTGAGCAACGACAGTATTACACGCTTGGCGCGGATTTGGAATCGCG  
GCGCTCAGAAAATGGCAACCGAGCTTACATGGTTCCAACAAAATATGGGCAAGTGGAAACAGCTCTCTTTTGTCCGAG  
CCAGATAGCCCGCGACGCTATTTTATTTGATGGAGGCGTTTTATTTCTCGGCAATCTCGATACCCAGCATCGCATCAT  
GCGCTGCTGGCAAGCTACAGCCAAATGACGGTGTGTTGATTGATTACCCCTTTTCACTGAAAGCGGTTTTCCGCAAG  
CGATAGAGGAAATTTGGCTGCTTGTGTTATTTCCACCAGGCGGAGGATTAATAATCAATATGTCCCGCATGGC  
TTTTCCGGTGTATTCGCGAGGTGCCATGCTGGCGCTCGCAGTGTGTTGTTGTTGTTGTTGTTGTTGTTGTTGTTGTTG  
AATGCGGGTGTGTTGCTGTGGTATGGGCTTTACGGATTACGGGATTCGCTGACTGCTGCTGTTGGGCGGTGCTGGG  
ATGGCTTAACGCAACAGGATTTGAGATGATGTAAGAGCGGATTTAAGCAACGACGCGGACCGGAGTCAACGATTA  
TGCTGTTTAAATAATGATCTCACTCGGAAGTTCCGCTGTTTATTTGCGGGGCGGAGTTCGATCCGCTGCTGGATGA  
CAGCCTCTGCTTTTACGACGTTAGCGGCGATCAGCAGCTGTGAGTTCAAACCTTACCCAGGCTGATGATGCTGCT  
TTTTGCATTTATTCAGAAATGATGAAAACCGCGACGAGGCTTCTCGGACGGCGCTCAGTTCTTTACCCTCAGCTTTAG  
>Cluster\_60813

>Cluster\_60813

ATGATGTCCTTGGCGTGGCCATTTATTCGCGTTACGGAACAGGACGCTTGGCTGCTGGCCGCAACCGGATGTGGCGA  
CAAAAATAAAATTTGATGGCTGGCGGTCACCGCATGCGCCAGGCAATTAACGACGCTGCTTTTTCGTTGGACGAGTGGTTA  
TCGGCGAAGGAGAAATGACCATGCGCCGATGCTGTGGATTGGCGAAGAGGTGGGCAAGGGCATGGGCCAGAAGTGCAT  
ATCGCGTTGATCCCATTTGAAGGCACGCGGATGTTGGCGATGGGGCAGAGCAATGCGCTGGCGGCTCATGGCTTTCCGCCC  
TCGAGATAGCCTGTTTACATGCGCCGATATGATATGAAAAAGCTGTTGTTAATCGGCTGGCGGCGGATGATGAT  
TGTCTTTGCTCTGACGGACAACCTGCGCAACGTTGGGCAAGCGTTAGGCAAAACCGCTGGATAAGCTGCGCATGTTACG  
CTGGATAAACCGCGCTGAGTGGCGGATTTGAGGAAGCAACAGCTGGGCGTGAAGGTTTTTTCGCTGCGGATGGCGA

TGTCGCCGCCAGCGTGTGACCTGCTGGCAGGATAATCCTTACGATGTGATGTACACCATCGGCGGTGCGCCAGAAGGCG  
TGATTTCTGCCTGTGCGGTAAAGCATTAGGCGGGGATATGCAGGCCGAGCTGATTGACTTTTTGCCAGGCTAAAGGGGAT  
TACACGAAAATCGGCAGATTGCAGAGCAGGAGCGCAAGCGTTGCAAGGCAATGGGCGTTGACGTTAACCGTGTGTACTC  
GCTCGATGAAGTGGTGGGGGAAACGATATCCTCTTTAGCGCTACGGGCGTGACGGGCGGTGAGCTGGTGAACGGTATCC  
AACAGACGGCGAATGGGTGCGGACGACAGATTACTGATCGGCGCGGACCAACGTGTAATATAATAGACTCCCTG  
CATTGA

>Cluster\_53913

ATGGCGGATTCGAATCTCAATGTGCCGGTAATCATTACAGGCTACACGGCTCGACACATCAGTCTTCCACGCAATATCTT  
CTCGCAGTCTGATCTGCTGTACGTTATCGCACAGGGCACTGATGTTGGTAAACGTGGCTAACAAAGCCAACGAGGCCGGAC  
AGGGCGCTTATGATGCACAGGTGAGAACGATGAGCAGGATGTACCCCTTGCAGACCATGAATCCAGAATTGAAGCTGCT  
GAAGCAACTCTCATCAATCATGAACATAGAATTGCAGCAGCGGAAAGCACTCTTGCAGAACATGAAACAGGATACGGA  
TGCTGAAACAGAGCTGGCTGATCAGGAGACGGAATTGCTGCCAATGAATCTGAGTTAGCAAACCATGATGCGCGCATAA  
CTCAGAATACAGCCGATATCGACGCACCTTGATACACAGGCTACACAGCGCAGAGGGAAGTATTTGACAGCTACAAAGCACA  
GTTGGTGTACTCAACAAGAATATCTGCGCTTGAGTATGCCACCCTCGAAGAAATCAGAGGTTGTTTACTCTGGCGT  
ATCTGTAACCATCCCGACAGCGCGACCAACCTTGTAGCCTGCTGAAAACGCTCACTCCGTCATCCGGCACGTTGGCAC  
CATTTCTCGACAGCTTAAACAAGATGGTGTGTTCAACGAGAACAAAACCTGTTCTCAAGCTGTCGATTGTCTGGG  
ACGTGGCCAGTGGAAACCGCAACAGGTCAATGCAGCTAACCTTTTCCGGCTCTGTTTCTGACACACTGTAAGCAGTCG  
CAACTCGGCGACAACGACCGATAACATCTGTTAGCTACGTTCTTACGCTGGATAAAGACGGCTTCTTGGCCAAAATG  
GCAGCACGTTAACCATTCAGTGAATGGTGGCGGTTTTACTGCCACAACCATCAAGATAATCGCGGAGCAGTAA

>Cluster\_18906

ATGGATGCTACCCGGATAACCCCTTCTGGCGCTTGTATTTGTTCCGGCTCGCCGGGCTGGAGCGCCGATAAAGAAATACAGCG  
GCTGTATGCGCTCAGTAATCATGCCGACGCCATTACCGACGGATTATTTCTTAAAGCGTACAGGGCGTTCAGCGGGTGG  
TGTAGCCCTAATTACTTGTCTAAAACCGTACAGCGCAACATTTCTTAAAGACGCTCTTTTCAAAATCCCTCTTTCCCT  
TTTGTACCGCTACCGCGGGTTCCTAATCGCTCAGCAATGCGCAGCCTCACTGCCAACAGCGCGAGATCCTGAAAGT  
CGATATCGAAAATTTTTCGATAGCATTAGCTGGTTACAGGCTGCGGCTGTTTTCGCGAGGCCAGTTGCCACGCAATG  
TGGTAAGCATGCTGACCTGGCTTGTGTTGATATAACGACGCGTTACCGCAGGGGACCAACTTCGCTGCCATTTCCAA  
CTTGTGATGTGCCGTTTTGATGAGCGCATAGGGGAATGGTGTACAGGCTCGGGGAATTACCTACACCGCTACTGCGATG  
CATGACCTTTTCCGGCTCAATCGCTGGTTAAAATAAAGTGTGCGGATTGTTAGCGGAGCTGGGCTGAAAC  
TCAATCAACGCAAAAGCTGCCTGGTTCGCGGCTGTAAGCGCCAGCAAGTAACCGGGATTGTTGTTAATCAAAACACAA  
CTCGCCCGGAAAGTGCAGGAGGCGACTGCGTACAGAAATGATTTGTGCAAAAATATGCGGCTATTTCCGATCTTAGTGC  
TCGTGGTGGCTTGTATCTTCTGGCGATCTTATGCACAGGCAACGGCGTATCTTATGCTTTGCAGGGAAGAATAA  
GGTATTGCAAAATCAACTCTGAGGATGAGGGTTTTAAACAGGCGAGGAGGGTGTAAAGCGAATGCTGTGGTATGGTAA

>Cluster\_27150

ATGTTGAGAAATGACCCACTTGCATCAGCAATCGTAGCGTTATGATCGGCATTGAAGCTTATGCAGCTGAAGAAACCTT  
TGATACCCATTTATGATAGGTGGAATGAAAGACCAGCAGGTTGCAAAATTCGCTTGAAGATAATCAGCCCTGCGCG  
GGCAGTATGACATCGATATTTATGTCAATAAGCAATGGCGGTGGGAAATATGAGATCATTTGTTAAAGCACAAACGAA  
ACATGTTTATCAAGGAAATGATCAAGCGGTTAGGCATTAATACCGATAACTTTGCCAGCGGTAAAGCAATGTTTAA  
TAAGCAACTTATTCAGGCGGGAGCTATACCTGGGATATCGGAGTTTTTCTGCTCGATTTCAGTGTCCCGCAAGCCTGG  
TGGAAAGACTGGAAGTGGCTATGTACCACTGAAAACGAGGCGGGTAAATGCGTTTTATACGCTTTTATATATATATG  
AGTCAGTATTACAGCGATTATAAAGCCTCCGGTAAATAGCAAGAGTACATATGATACGTTTTAACAGCGGTTAAATTTAT  
GGGTGGCAACTGATTCGATGCCAGTTTTCAGTAAAACAAATAAACATCCAGGGGTGGGAAAGCAATACCTGTATC  
TGGAAAGCTGGATTTCGCAACTTCTCGGACGCTTCGTTGGTGGTATGATGTACACATCAAGCGATATTTTGTATCTGTT  
CGCTTACGCGGTGGTGGTGGTGGTGGTGGTGGTGGTGGTGGTGGTGGTGGTGGTGGTGGTGGTGGTGGTGGTGGTGG  
GATTGCTCAGAGTAAACGCGTGGTAACTATGAACAGAAATGGTTTTGTGGTTTTATCAGAAAAGAGTTCTCCAGGCCGTT  
TGCGATTACAGATTTGCAGTTGGCGGTTGGTGGAGCGGATCTTGTATGTAGCGTGA

>Cluster\_54874

ATGTTAAAATTTATTTCTACGTCGCTGTCTGGAAGCGATTCCGACGCTATTTATTTCTTATTAATTTCTGTTCTTTATGAT  
GCGCCTCGCGCCGGGAAGCCCTTTTACCGGCGAACGTAATTTACCGCCAGAAGTATGGCCAATATCGAAGCGAAATATC  
ATCTTAATGATCCGATCATGACACAGTATTTACGCTACCTGAAACAACGCGCGACGGTATTTCGGTCCATCGTTTTAA  
TATAAAGATTTATTCGGTCAATGACTTGGTTGCATCCAGTTTTCCCGTTTTCTGCCAAACGAGGAGCCGAGCATTTTCC  
TCCGGTAATACTGGGTGGTGTAGTGTGGCGTTATGCGCATTAATAACAAAACAAAACAAAATGGGACTATACCGGTGATGG  
TGGCAATGACCGGGTGGTATCCCCAGTTTTGTTGGTTGCACCATTTAGTCAATGATATTTGCGATCATTTTGCATTGG  
CTGCCGGCGGTGGCTGGAATGGTGGGGCGCTTAAATTCATGATATGCGGATGGTGGCGTTGCACTCGCTTATATCC  
CAGTATTCGCGCTATACCCGTTGGCTCTATGATTGAAGTATTACACTCCAATTTTATTCGTACTGCCGGGCGAAAGGGT  
TACCTATGCGCGGATCATTTTACGTCACGCAATTAACACCTGCTGTTTACCGTCTCTTTATATGGCCCGCATTT  
GTCGGCATTTATCCGGTTCTATGGTTATCGAAACATTTATGGTTTTCGCGGGATTGGACAACGTTTCTGTTAATGGCG  
ATTTGAACCGTGAATTTCTTAGTGTAAAGCCTGACCATCTGTTGGTGGTGGTGGTGGTGGTGGTGGTGGTGGTGGTGG  
ATGTGCTATATGCGGTTATCGACCCGAAATCCGTTACTGA

>Cluster\_38487

ATGATGACAGCCAGACTCACCCCTGTGATCCCTTGCAGCACTGCTTCTGGTATGTGGAATGCGTGCTCCCGCCCG  
GGGAGGCATCAGCTGAAACCGGAGCATTTCCGGCAACTTCTGGCAGATAAACCCGATACGGGCTTTCTGAAATTCATG  
CAGAGAATTATCTGTGCGCGGGGGCCCTTCCACAGCGCTGACGGCCCTGTGTGAATGCTATCCCTGTCCATTCAC  
GGGGTGGGATGTCCATCGGTGGAGAACAACCGCTGAATACCGCACATCTGCAGCGGGTGGCGGCCCTGGTTGACCGTA  
TCAGCCGATTCATTTTCAGAGCATCTGGCCTGGTCCAGCATGATGATATTTTCTGATGATCTCCGCGGTTACCGT  
ACACACAGGCCAGCTGAACCGGGTATGTGAACATATCGATCAGTCCAGAAATACGCTGCGTCCGAGATATTGCTCGAG  
AATCGGCCACCTATGTTGAATTTCTTACCTCCACTTCACTGAGACCGATTATCTCCGTGAGGTGATCCACCGTACCG  
CTGCGGACTGTTGCTCGATGTGAATAACCTCTATATCAGCAGCGTGAATCACAATCGCGATCCGTACCAGATGTTGCATC  
AATGCCCCGAGCGGGTGGAGGAAATCCATCTTGCAGGCTATACCGAAAGCAGGACGGCGTGGTGGCCCGCTGCTT  
ATTTAGCAGTATGATAGCCCGGTGACGGTGCAGTCTGCGAGCTTTATGAGTCCGCCCTCACCGGCACAGGTGGGTCG  
CACCTGATCGAATGGGATGCCAGTATCCCCCGCTGACGCTCTGCTGGTGGGACGCAATGGCAGAAAACGAATGA  
AAGAAGGAGCCAGGCATGCAAAACAGTCTGTACCAGGCCTGCTTGA

>Cluster\_22932

ATGGATCAAAAACGACTTACCACCTGCGGCAACTGGAGGCGGAAAGCATCCACATTTATTCGCGAGGTGGCTGCAGAATT  
CTCAAATCCGGTGTGCTTACTCTATCGGTAAGATTCCAGCGTCACTGCTGATCTGGCGCGCAAGGCGTTTTATCCAG  
GTACGCTGCCCTTTCCGTTGCTGATGTGATACCGGCTGGAAATTCGCGAGATGATGAGTTCCCGGATCGTACGGCG  
AAAGCCTACGGCTCGAGCTGCTGGTGCATAAAAACCGGAAAGCGTGGCGATGGGATTAATCCATTTCGATACCGCGAG  
CGGAAACATACCGATATTATGAAAACCGAAGGCTGAAAACAGGCGCTGAACAAATACGGTTTTGATGCGCCGCTCGGTG  
CGCGCGCGGTGACGAAAGAGAAATCCCGCGCTAAAGAGCGAATCTACTCTTTCCGTTGACCGCTTCCATCGCTGGGATCCG  
AAAAATCAGCGCCCGGAGCTGTGGCACAACCTAACAGGGCAAAATTAACAAAGGCGAAAGCATCCGCGCTTCCCGCTCTC

TAAC TGACCGCAGGATATCTGGCAATACATCTGGCTGAAAAATATCGACATTTGTGCCGCTGTATCTCGCTGCCGAAC  
GTCCGGTTCTGGAACCGCAGCGGTATGTTGATGATGATTGATGACAACCGTATCGACCTGCAACCGGGCGAAGTGATTTAAA  
AAACGGATGGTGCCTTCCGTACGCTGGGCTGCTGGCCGCTGACCGGTGCGGTGGAGTCAAATGCACAACAC TGCCGGA  
GATCATCGAAGAGATGCTGGTTTTCCACCACAGTGAACGTCAGGGCCGCTGATTTGACCGCGACAGGCGGGGCTATG  
AGCTGAAAAAACGTCAGGGGTATTTTTAA

>Cluster\_28599

ATGAATAAAAATATTTAAAGTTATCTGGAATCCGGCAACAGGCAGTTACACCGTTGCCAGCGAAACGGCGAAGAGCCGTAG  
TAAAAAAGCGGGCGCAGTAAGCTATTAATTTCTGCACTGGTTGCGGGTGGGTTGTTGTCGTCATTTGGGGCGAGTGCCG  
AGTTGGCACTTGATGGAGGGGAAGGTATTTGAATCTCCAATAGAAAGCGATAAC TGGCTTGCAATTTGGTGAAGGTGCCAGG  
GCAACAACAAGACTGTTTCGGGTACGGCCATGGCGATAGGGCTACAGGCAC TAGCAGATGGAGAGGGGAGTACTGCATT  
CGCTATAAAAGCCTCATCGGGCGATCGCGCAATTTGCAATTTGGTCAACAATCAATAGCTGCGGGAAACCGATCCACAG  
CATTCGGTAGCGGTGCGAATGCCATTGCGGACTTTTCTTGTCTGCTGGGAGGAGCTACCTATACTGGAGGCTCTCTATTCC  
ACCCCAATAGGCGAGACTCAAGAGTCTGAAGATGGCGCTGATTATGCGCCAGTCTTTGGATACAAAGCCAAAGCGACAGG  
TATGTATAGCCTGGCATTGTTTTCAGAGGCAATGCGAGTGTCTTGACAGCTTTGCATTTGGCAGACTATCACTCGCCA  
GCGCAGCGAACGCTATTGCGATGGGGGAGACAGTCTGCGAGTTTGAACGATAACGCCATCGCGATTGGGAACAAAGCGCAA  
GCCTTGGGAATAAATCGACGGCCCTGGGTAAACGCAAGTCAGGCATCTGGCAATCCAGTATTGCATTTAGGTAACACAAG  
TGAAGCCAGCGAACAAAATGCGATTGCGCTGGGCAAGCGACATTGCAAGCAAAGTGAACCTCAATCGCGTTGGGCGAGTA  
ACAGTTCTGCTGACAGGAGAAAATGCCATCGCATTTGTGA

>Cluster\_38923

ATGAGTTTTATTGAATGTTACGAACCGGAATATGTGCGCAATTTTATGGCAGCCACCCCGATTTCGCCTTTATACGTCGG  
CAAGGTGTGAAAAACGAGATTTCGCTGAGCCTGATGCTGACAGAGCCAGAAAGCTGCGAAGCGGTGCTCAACGATGCGCT  
GCGCTTTGATTTACAGCTCACC TACCGCCCGGTGGAAGAAAATGCCGAGAACTCTCGCGCGCGATGCAATAGTAAAC  
CAGGTGATTTTGGAGTACCCTCACGCTCCCGATTTAACCCAGAGCTTTTCACTATATGCCATCGGAATTTGTGCTCTCCCG  
CGCGCCTGAAATGCGGGGAGAGACGGAGATATTTCTGCTGTTGACGACGCTGCCACAGGCCTGGCCGCGCAGATTAT  
AAAAAGGCACACTACAGGCACAGTTGCGCCAGCTCCCGCCCGTGCACAGCTGGCGCGCCAGTTGATGACGCTGCTCGGG  
AGTTTTACGTTTACTGCTGATTTCTACCGGAAAGCCACGCAAGCCCTGCTGCCGTTGACAGTTACCTTGCTGACGCT  
ACATGACGCCAACAGCAAAGCCCTGTTACAACAGCAGCTTAAGGTGACAGTGGCAAACACCTGGCAACAGCATTTTGCCA  
CGCGCCGTTGGATGCTGCTAAC TGGCTGATTTACCGCTTTACCATTGAGGTGATTGGACAGACAGACGGCGCAGATTAT  
TGCCCGCTGGTGTGCGATTTTTATCTTATCCGCACGTTAATCAGTTTATGGACGCTGGATGGTTCTCCGCTGCGACAGGA  
GGATATTTTCGCCCTCTTTCGCCATGTTTGAACGCTGGCGAGCCAGTGAATAATGCGGTGCTGATTCGCCAACAAATTCAGG  
CTGAATGTTCCGCGAGATCCCTGCTTTATGCGTTTTACTGCTGTCTTGTCTAA

>Cluster\_15532

ATGGCACTGCCAATTTCTGTTAGATTGCGACCCAGGTATGACGACGCTATCGCAATCGTTCTCGCCCTCGCCTCACCAGA  
GCTTGATGTCAAAGCAATTTACGCTCTCCGCCGGAACCCAGACACCGAAGAAACCTTACGCAATGTTCTGCGTATGCTGA  
CCTTGCTTAATGCGACCGATATTTCCGGTAGCAAGCGGTGCGGTTAAACCGTTAATGCGTAATTTGATTATGCGGACAAC  
GTGCAAGCGGCAAGCGCCCTGGACGGCCGCGCATTTCCGGAACCGGCATTTGCAACCGCAAAACGTACGGCGGTGGAGCT  
GATGGCGAAAACGCTGCGTGAAGTGAAGAACCTGTCACCATTGTTTCTACCGGACCGCAAC TAACGTTGCCTTGCTGC  
TCAATAGCCACCCGGAATGTCATAGCAAAATGCGCCGATTCGTTGATTATGGGGCGCGCAATGGGGCTTTGGTAAC TGGACG  
CTGCGGCTGAAATTAATAATTTACGTTGACCCGGAAGCGGCAAAATTTGCTTCCAGTCAAGAAATCCGGTGGTGGTGGC  
CGGTTGGAATGTTTACTCACAAGACAAAATCCAGTTGAAGACACTGAGCGTTTCCCGCGGATTTGGCAACCCCTGTTTCAA  
CCATTGTTGCCGAACTGCTGGAATTTCTTCTCGAATATCATAAAGACGAAAAATGGGGCTTTGTCGGCGCACCCTGCAAT  
GACCCATGCCACCCTGCGCTGGCTGTTGAAACCGGAGTTGTTTACCCTGTTGACGCGTGGGTTGGCGTGGAAACACAAGG  
GAAATATACCACAGGTATGACAGTTGTTGATTATTTATTTACTGACTGGCAATAAACCGAATGCCACCGTAATGGTTCGATG  
TTGATCGTCAGGGCTTTGTTGATTACTGGCTGATCGTCTGAAATTTTACGCTTAA

>Cluster\_39009

ATGAACTCAATTTTACCAGAGAGAATCTGTTGGCATTACTACCCTGCGCGTTTTGGCAGTTTTCAGTAAAGCCGCGAGA  
AGGTTGGGTTTAAACACTTCCGCCATTAGCTACACCTCAAGCGAATGGAAACAGGGCTGGATGTTGGTGTCTGTTTCACTC  
GCAGTACCAGCAAGCATTGAGTTAACGGAGTCCGGGCGTTATTTTTTCCGCAAGCTACCGATCTGCTGAATGATTTTTAT  
GCCATCAAACGTAAGTATCGATATATTTTCGACGGGATAGAAGCGCGTGTGCGCATTTGTATTAATCAGCTGCTTTATAC  
GCCAAACACACCCGACGCTTATTACAGGTGCTGAAAAGCAGTTTCTTACCTGCCAGATTACCGTACCACCCGAAAGTGT  
ATAACGGCGCTGCGGATGCGGATTATTAATAATCAGCAAAATATCGCTATCGGGCACCAGCAAGCTGCTGAGCGGTGGC  
GGCATTGATTACACGGAGATTGGCGGATTCGCTGGGCTTTTGGCATCGCCCGGATCACCCATTAGCCTTTGTGCGCGGA  
GCCGATCGCGGAAAGCAGCTGCGTCTCTACCCTAATATCATGTTGGAGGACACCGCGCATACGATTAATAAAAAAGTAG  
GCTGGTTGCTGCAATGGGCAGGAATCGATTCTGGTGCAGTTTCAACACCAAAATGTCAGTGCAGATTTTAGGTGAAGGA  
ATTGGTTTTTTGGCGGATTTACATGTTGTTGATTATTTACTGACTGGCAATAAACCGAATGCCACCGTAATGGTTCGATG  
CCAGGATTCACGCAATTTACTCGCAACCAGCACTCTGCCACCGGTGAGTGCAGTGGATTAAAAACAATTTGCGC  
CAAATGGCATATTAACGGGGATCTATCAGGATTTACTGCACTCGGGAGAATTA

>Cluster\_39374

ATGCTGAAGATTATTCGTCGGGCGATGATACCCTGTCAGGATGGCGGTGCTCACGGTTTTTCGCCAGTCCGGTATCAG  
CCACTGCGGGCGACTGGATATGCTGCGCTGCGCATTTGTAACCTGCTGGTGGGTAATGACGCCAACGCCCCCGCGCTGG  
AGATCACGCTCGGTGAGTTAACGGTTGAGTTCGAAAATGATGGGTGGTTTGCCTGACGGGTGCTGGTTGCGAAGCGCGG  
CTGGATGATAATGCGCTGTCGACCGCTGGCGATTGCCAATGAGAGCAGGCGAGCTTTAACGCTTAAACGCCCGCAGCA  
CGGGATGCGCAGTTATCTGGCGGTCGCGGGTGGTATTGATGTTCCGCCGTAATGGGATCATGCAGCACCGATCTCAAGG  
TGGGGATTGGCGGGCTGGAAGCCGTTTACTGAGGGATGGTGAACGACTCACGATTGGCAAAGCGAAGCGTGAATTTATG  
GAAGCGCAGGGCGTTAAACAGCTGCTGTGGAGCAACCGCATTCGCGCTTGGCGGGCCGGAATATCATGAGTTTCGATCG  
CGCTCGCAGGATCTTGGCTTTCGCGCTTCCGCTGGCAGCTTAGCTGCGCAAGTAACCGGATGGGCTATTCGCTTACAGGGG  
AAATTTTAAACGCACCACCGATCGCAACTGTTATCTCACGGTTTGTACCAGGTGTTGGTGCAGGTGCCGATAACGGG  
CAGCCATTTGTTGATGAAAGTGCAGCAACCCAGGTTGTTTACCAGGTTTACCAGGTTTACCAGGTTTACCAGGTTTACCAGG  
CCATCTGGCGCAAATTCGCTCGGTACCGGATTCATTTTGCACAGTGTTCAC TGGAAAGAGGCCTGAAAGCGCGGCAAG  
ATCAGCAACGTTATTTGCAACAATTAGCCTGAGCTGACCAATGAAAATTTGA

>Cluster\_64672

ATGAGTCTGGATATCAACAGATTTGCTGTCACAGCTTATCAAGCGTATGAGCAGAACCTTGGCTGGTGTGCGCGGA  
TTCAATGCTGGAACCGCAGAAACCGTCTGATGATGGTGGCAGAACTGCATCGGGCTATAGCGCAAAAAATTAAGCTT  
ACCGCTTTGTTAGCGAAGAGAGTGAAC TGGCGCAGACGCTGCGCTTACAGCGTCAGGGCGAAGAGGACTTTCTGGCAATTT  
AGCCGCGCGGCAACCGGGCGCTGCGTGAAGAAATAGCGAAATATCTTTTGTGACGGTGGATTCGTTGCTGTTTTGCCA  
CTACCGTTATCTGGCGGTGGAGTATCTGCTGGTGGCAGTTCTGAGCAACCTGAGCAGTATGCGCGTTAACGAAATCTCG  
ACATCAATCAACCAATATCTTATCAATCAATGCGGATTTGTTGCGGCTATCGATTTAACGAAATGGAAACCAAT  
CCAGAGTCCACCCGCTATCTCACTTTCTGAAAGGGCGAGTAGGGCGAAAGTGGCGGATTTCTTTATGGATTTCCTCGG  
GGCAGCGAAGGGTTAAACGCGAAAGCGCAAAACCGTGGGCTGTTGCAAGCGGTTGATGATTTCACTGCCAAGCACAAC

TGGATAAAGCAGACGGCAGAACCTGCGCCAGCAGGTTTATAGCTACTGTAATGAGCAGCTGCAGGCAGGCGAAGAGATC  
GAACTGGAGTTCGCTGTCGAAAGAGCTGGCAGGCGTCAGCGAAGTGAGTTTACGGAGTTTGGCGCTGAAAAAGGCTACGA  
ACTGGAAGAGAGCTTCCCGCAGACCGTAGCACACTGCGTCAGTTGACGAAGTTTGGCGGTAGCGGCGGTGGCTTGACTA  
TTAATTTTATGATGCGATGCTGTTAGGTGAACGCATCTTTCGGGATCCCGCAACCGATACCCGTGACCATTTAAAGGCACGCCG  
CCGAATTTGCGTGACCAATTGACAGCGCCGACGCTCTGGCGCAATTA

>Cluster\_32908

ATGCCAAAACGGAAAATGGATTTTACCTCGCTGGTAATGACTTTTTTTGGCATCCCATACTGGCGCAATTTTGGCAGC  
GGTTGTTGCCATGCTGGGGGCGGGCTTGGCGTATTTCTGAGGTTTGGCAATTTACTCTTTACGCCAACAAATTTATCTTC  
TACTCAACGCTCTTTATGCTGACGCTGGGGGCGATAATCATATTTTCTCTGGTCGCGTGTGGGCTGGTGATAGCGCACCA  
GAAAAAGAGAAATAGCCGCTGGCGACAATGCTTTTTTCTCTTACCCGCGCTATTAACCTTGGTTGGCTGGATAATCGC  
GCTACATCTGGCAGATTATCAATTTTCGCGAGATGGGAGCCGGTTGGTTGGCAAACCTTATGCTTCCCTGGTTGGGCGTTT  
TTACAGTCTCATTCGTCGGTGGTGGTACTGGTGGATAGTCATATTTCCCGTTGGCGGCATATCAGTTTTTCACTGGGA  
TACGGCTGGCTGACCAGACATCCCTTAAACCGCACCTCCGGTCTACGTTGCGGTAATTTACTTCTGTTTCTTCTCTCT  
ACTGGGTATTGTCGCTGGTTATCAGGCTTATTTATATAAACAGCTTAACTCCCGCGCTCGGTGTGCGTGAATAATGATA  
CCTGGGCTGGCGACCCGATAAACTTTATAATCAACTGACGCCACTGCGTGGTAAACCAAAATTTCAATTTACGCAAAA  
TGGCCGCGAAGCGATGGCGCTACGGCAGCGTATCCGCTTATGCTCTGCATTTTATGCACTAAGCGTTATACCGGAAGA  
TTTTTCATTCCTGGGAATATCTGACGAACTCTCGAACACAGAACGCTATAACAGGATCGTTAACCGGTGATGCAATTA  
TTTTCTGGCGCAACCTTCCGATGGGCAAAAAAACCGCTGAGAAATCGGGCTCACTTGCTGTACACGCCATTTGCC  
CGTGAAGCGTTTTTTTTCATCGTCAATGCGGATAATCGGTTAATTTCCCTGA

>Cluster\_19632

ATGGCCGATAACATTTACTCGCTGACCAGTTCGCGCCACATTATGGCGGGTGAATCTGACAATGATATTCACATCGA  
GGCTTATGACCGGGATGTCCAGACCCGTTTAGAGTCCAATCCGATTTTCTGGCCGAGGGGCTGTCTACATACAGGCCG  
TGAAGCCAGCAACCAATATCGTGTGATCGCCTGAGTGGTGAATCTGGAGGTGAAGGGCAGAACCCGAGGGCAATCGCTG  
GAGCTTCCGCTCTACTAGTGGGATAAGCTCGGTTATCTCTGATACGCTGAGTTATATCCGCATCCGATGACATCA  
GGATGACTGGACAGCACCCACCTTTCGCTCAGAGCTGAGCCGCAATATCGGTACTGCTCACGCTAAATTTACGACGAAG  
CGCACACCATCCAGCTAAACAAAGCGACTGACTTGTACCGCCGCGGACGTTGCAACCAACGTTTAAACCGCTGACGGAT  
AATGTTGTCTCGCTGACCTGACAGCGGGGAGCGAAGAGGACGCGCAACGAATTTGCTCACGCCGTTAAAAGCGGCTG  
TAATCGCTTTCTCCTACTAGTGAAGATATTTCCGGTGGCCGAGTGGTACTGCTTATCGACCCGGCTGATGCTGTA  
TGGAAACATAAGAAGCTGATGAACATCCGTTACAGCCGGGATAGTGGCAACGATTACGCATGGCGTCGAGTTGGCTATGTC  
GCTTGGGTACGAGTCAATTGAGCTGAACAGTTACCCGACGGGAGCCATTACCGGCATGAACGAGCGCTGATTATAATGT  
GACCGCAGGGGAAGCGCTGACACGGGCGACGCTGTTCCGGCTGCGTCTGTACTTGTGACAGTGAAGCGCAGAGCGTCA  
TCAATCGCCAGTGGGATGAGGAACCGCAAAATGACAATGGTATGGACTCATATCGCCTGTTCAATGTTGGGCTGCGCCG  
CCGACTGCGTTATCAATTTCCGACAAGCTGCATAA

>Cluster\_42621

ATGCAGCCCAAAATTTACTGGATTGATAAACCCTGCGAGGATAGCGTGTAAATGGTGGTATGATTCACACCCTACCTG  
GTATGTGACCAATGCTCATAGTGTAGCCCATCACCTGGGATATCGCAATGTTCTGAATTTGCTCTCGTGTACGG  
TGCCGCTATTTTTTATGATTTCCGGCTATCTCTTTTTTTGGCGAACGACGCGCCAGTCCGCGCATTTCTGCGTATCGGC  
TTATGCTGTTTTTTTTATAGCGCAATCGCGCTGCTTACATTTGCGCTGTTTACCTCCAATGTTGGAGTTAGCGCTGAA  
AAACCTGCTGCAAAAAGCCAGTGTTTTACATTTATGTTTTTCTCTGCGATTGTCAGTGTATTAATCTGGTTTCCCGCTGA  
TTACGGTGAAGAAGCTCGCGGGAATAATGTTGCTGTTTAAATGGTGGTATTGGTATCATCGCTAACCCAAATACTGTG  
CCGAGAAAAATCGACGGTTTTGATGGCTGCCAATTAACCTTATATATCAATGGCGATACTTTTACTACATCCTTTATG  
CATGTTGGGCCCGCTATAGGGATGATGGACACACAGCTAAAGCACTGCTGTTGGGTGAGCGCCGACTGTTTGGCAGCG  
GGTTTTTATATCTCTCGCGGACATTTATGAATACAGTGGCGGAAATTTTCCGATACCTGGTATTTACTGT  
GGCCGATGGTTTTTATCTGCGCAATCGCGTTATTGACTCTGGTTAAAAACACGCTGTATACGCGTACCATTTGCGGACT  
TGGCTTAACTCCCGCCATTCGTTAGGTATATACGGGTTCCATGCATTGATTAATCCATGCACCTGCGCACCCGGGGATG  
AGCTTAAAAACTGGCCAATACTCGATATTTTGGATCTTTTGGCGACGTTGGCAGCGAGTTTGTACTTTCTATGCTG  
GTACAACGAATCGACAGAAACAGATTAGTGAAGTTAG

>Cluster\_17476

ATGGCGAAAAATGACTTTAAAGCGTTTGAACCTGATCGAAATGCCAATGTTATGTGCGAGGAGGAATGGGAAGCGTTGCC  
TGCGCTTATATCCGGATTTACAGCAGGGAAGCATCCAGTGGCGAAGTCAATAAGGTTATTCGGCAGGCGAGCTTTATG  
CTGCAGCTCTGGCCAGTTTGTAAAGTATAAAACGCAACGGGATGTGCTTGATAATGGTGTATTCGCCGGTTTTGTTGAA  
TTGCTGGGATCGGGGTTTGTGTTGAATACCTGAGCCGAAGAATCCGTTTGGCGATACAAAATCGGATGGCACTGTGCA  
AACGGCTCTCGAAAACCTTGGTATTAATAAACGCATCAACAACAGAGTGGGTTTAGTCCGGTTAACGTCATCGCGGGTAT  
CGGTTGCAGAGGATATTCAGCCACAGCTAATGCTGTCCGCGCAAACTATACGGACATAAAAATCTTTGCAAAAACAACT  
CAGGATTTCAACTACGACACAGAAAGGAATTTGTTCAACTTACATCAAGGGTATCCGAATCTGAAACGCTTGTGCAAC  
AGCAAAAGCGGCAGCGATGAATTTAGCGGATATTTAGCTCTGCAAGGAAGACTAATGATGCAACCACTACAACAAGG  
GAATTTATCCCGCTATCTGATTTCCAGAATCAACAGAAATCTGGTGTGGCGCATCATCACTTGTGCAATCAAAAACATC  
TCAGATATAAAGGTTGTTTGGTCAATGCGGAATGAAATCTAGAAATCTCGGTGTCGTATACACCAACAGCCAGCTTT  
CGCCATATTTGTAAGCGTCAATGCGGTGATGCTGACGGTAGTTTCAATTTCTGAGCGCCGACGTTAATATGGATGTAAT  
TGGCTAATTTTCCGGCAATCAGACAACAAATCTTGCAGGGCAGAGCAACTATCGCATTCATGTTTCTGCGGTTGCG  
ACCTATGTCGTGCGGAGTTTTTACGAACTGTGTGATGTTACTGGCAGAGGTGGATAAAAAATGA

>Cluster\_14909

ATGAGTGGCGTTATCTGTCAGCATTAGCAATAAATCGCTCGATTTTTATAAAAAATCAAGTATTCAGTCTTTTCTTGA  
TATGAAAGGCTAACAGAAATGCTGTCAACCGTCTGGTGAATCTGGACGGAATTAATGGTACTGGACATTCCTATA  
ATAATGACGGTGTGACCTTTGATTTTTGTAACGTTTTTCTCAGACGCTGGCATACTTTTCCGGGAGATGAAATCGGCGAT  
ACCAAGCCATTTACTTTTTCAGCAACACTGGAAATCAGGAGAAGCTGTACAGTCTGTTTTTCTCTCCCTGATGAGAGAAATC  
TATTTCAATCACTATACGTAAACCATCGACACGGCAGATAACGCATAAAGAATATGTGGCGAACGGTTTTTATGATTATG  
TCCAGTCAGGAAAAAACACAGGACATACGATGATGAGCTTCTGATTATTCAGAGCGAGAAATATCGCTGCTTTTATG  
GAGCTTGGCGTAGCAGCAGGGAACCAATTTGATTTGCGCGGACAAACGGGTTCCGGTAAAAACAACCTATATGAAGAGTCT  
CATCGATTTCAATACGCAATTCAGCGGCTGATTACGATTGAAAGATGCGGAGGAAATCAAAATTTTTTATGATAAAAAAT  
ATGTGCATCTTTTTTACCCTTCGGAATCCGGCAGTGATTCGGCTCTATCATAACAGCAGCGAAATTAATCAAACTCTGT  
TTGAGAATGAAACCTGACAGAATTTTACGCGGAAATTAAGGTTGGCGATGCTGGGATTTTGTGAAAGTTGCTGGTT  
TGGTCACAGTGAAGCATGACGCTCAATTCAGCGGCTCGGCAAAAAGATGCCATCATGATGGTGACAAATGTTATC  
AGAACAGAGAAATGCAAAATCTTCTTTTGTGATTTCTTCTGTAATAATCATATGACAGTATTGATATTGTTGTTATGTA  
GGCAGGATGGTGTGTGACGCAATGACGACATCTATTACAAAGGGCTGAATGTGAAACTTTTAA

>Cluster\_28615

ATGAAAGCGTTATCCAAACTGAAAGCGGAAGAGGCGATTGGATGACCAGCTTCTGTACCGAACTCGGGCATAACGA  
TCTGCTGATTAATAATCCGTAAAACAGCCATCTGCGGACTGACGTTACATCTATAACTGGGATGAGTGGTCGCAAAATA  
CCATCCCGGTGCCGATGGTCTGGGCCATGAATATGTCGGTGAAGTGGTGGTATTGGTCAGGAAGTGAAGGCTTCAAG

ATTGGCGATCGCTTTCGGTGAAGGCCATATCACCTGCGGTCACGTGCGCAACTGTCGTTGGCGGTCGTACCCATCTGTG  
CCGCAACACGATCGCGCTCGGTGTTAACCGTCCGGGCTCCTTCGCCGAGTATCTGGTGATTCCGGCGTTCAACGCCTTCA  
AAATCCCAGACAATATCTCCGACGACCTGGCTTCCATTTTTGATCCCTTCGGTAAACGCTGTGCATACCCGCGTGTGTTT  
GATCTGGTTGGCGAGGATGTGCTGGTCTCTGGTGCAGGTCGAGTATGTTATGGTGCGGCGGTGGCGAAACACGTTGG  
TGCACGCAATGTGGTGTACTGATGTTAACGAATACCCGCTTGGCTGGCAGCAGCAAAATGGGTATACCCCGTGCAGTTA  
ACGTCGCTAAAGAAAACCTTAATGATGTGATGACAGAACTGGGCATGACCGAAGGCTTTGATGTGGTCTGGAATGTCC  
GGTGGCCGCCAGCGTTTCTGACCATGCTGACACCATGAACACGCTGGTGGTATTGGATGTGGGTATTCCACCGTCT  
CGATATGTCTATCGACTGGACAAAAGTAATCTTTAAAGGCTTGTTCATTAAGGTATTACCGTCTGTGAGATGTTGAAA  
CCTGGTACAAGATGGCGGCTGATTCAGTCTGGCCTCGATCTCTCCGCGATCATACCCTATCTTCTATCGATGAT  
TTCCAGAAGGGCTTTGACGCTATGCGTTCCGGCCAGTCCGGGAAAGTTATCTGAGCTGGGATTA

>Cluster\_48593

ATGTCTAAGACATTACTTGATTTGCTTAACAAAACCTCGTGAAGACATTGCCGCCAAACGTTGGCAACAACGTTGATCTGAC  
TCGTTTAAAAGACGGCGTCAACTATATCCGCATCTTCCGAAATAAGACGACCCAAACGGTAAGTCTTCCAGACTTTTCG  
GTATGCACACGTTAAGTATCAGAACGAGGAAGGTAAGAAGCAACCAACGCTTATATTTGTGAGCAACATACACGGT  
CGCGCTTGTACGCTATGCGAAATGGTGTGGAAGGTCGCGCTCGTACAGGGTAAACAAAGCAATGGAAGAACGCATCGG  
TCAAATCGCTGCCACTCCGCTACCTACCTGGTCAACGGCATCTTCTGCTGCTGAGGATTTCCGAGATGCTGAGAAATGCC  
AGTTAATCGCTCCGCTACTGTATTCTGATGATATCTGCAAAAGCAATCACCGAAGACATCGCTGATGATATCGGCAAT  
CCACTGAGCAAGAGGAAGGCTACGCATCTCTGATTAACGTAAGTGGCTTGGTCCGATACCAATATGACGCTCTGCC  
TAAGCGTAAAGTCTACAAAGGCGATATCGAAGATAAATCTGGAAACCCAGCATGATCTGATCGCATACGCAATACAG  
CTGATGAAACTCGTCTTCTGTCGACAGTTCGCACTATGGTCTGCTGATGGCATCGCTGCACCACTGCCAGCATCT  
GCACCAGCAATTTCTCAACCGCGAAACATCGGCTGGCGCACACTACCTGGATTGGCTCTGTCTGCTGATACAGAAAG  
AGCGACGGCTGTAGCAACCGCGCACACCCGGCTTCTGAACCAACAGTCTGGTGTGATGAAGAAATCCCTCGTCCGTTG  
AAACTGAATTTAAACAGAGGCAAGTTCGCTGCGGTTGCCGTATCAGTCAAAGAGTCTGAAGCAGTCCGACGACATCT  
GTAGCAACCGCATCTCGACGGAAGATGAAGTCTGGATGACCTACTGAGAGAGCTGGACTCTCTGTAA

>Cluster\_59935

ATGTATTTTTTGAATGATTTAAATTTCTCTAGACGCGATGCTGGATTTAAAGCAAGAAAAGATGCACCTGGACATTGCTTC  
AGATTATGAAAACATTTCTGTTGTTAACATTCCTCTATGGGGTGGAGTAGTCCAGAGAATATATAGTTCTGTTAAGCTTA  
GTACATTTCTCTCGGGTCTTGAATAAAGATGTTTAAATTTCAATTTCCCGATGGCCAAACATTTGGCATAATTTG  
TCATTTCTTCCACCGCTTCTAAAATTTAGAATAGTACCCTGATTCATGATATGATGAATTAAGAGGAGGAGGGGGTAG  
TGATTTCTGTGCGGCTTGTACCTGTGATATGGTCAATGCTCACAAATCCACAAATGACAAAGTACCTTAGTAAATATATGT  
CTCAGGATAAAATCAAAGACATAAAAATATTTGATTACCTCGTCTCATCTGATGTGGAGCATCGAGATGTTACGGATAAG  
CAACGAGGGGTATATATGCTGGCAACCTTTCTAGGCATAAATGTTCTTTTATATATACTGAAGGATGCGATTTACTCT  
CTTTGGTGTCAACTATGAAAATAAAGATAATCCAAATATCTTGAAGTTTGTGATGCTCAATCTCCGAAAAGATTAACC  
TCCAGGCGATGCAATTTGGACTCATTTGGGATGGAGATTTCTGTGAAACCTGTAGTGGTGCCTTTGGCGACTATTTAAAG  
TTTTAATAACCTCATAAGACATCTTTTATCTTTCAATGGAACCTTCCAGTATTTATATGGGATAAAGCCGCTTGGCGA  
TTTCAATTTAGATAAATAGAAATAGGATATGCAGTGGGATCAATCAAAAGAAATGCAAGAGATTTGTGACTGACAAATAG  
AACTTATAAGCAAATTAGTGAGAATACAAAATATTTCTCAGAAAATTCGAACAGGAAGTTACTTCCAGGATGTTCTT  
GAAGAGGTGATCGATGATCTTAAAACCTCGCTAA

>Cluster\_22702

ATGGCGAATATGTTTGCCTGATCTGGTGATTGCCACACTGGTGACGGGCATTTTATGGTGCCTGGATAAATCTTTTTT  
CGCACCTAAACGGCGGGAAGCTCAGGCAGCGGCGAGGCGGCTGCCGGTGACTCACTGGATAAAGCAACGCTGAAGAAAG  
TTGCGCGGAAGCGTGGCTGGTGAACCGGCTGCTTCTGTTTTCGGTGCTGGCTATCGTATGATTGTGCGTTCGTTT  
ATTTATGAACCGTTCCAGATCCCGTCAAGTTCGATGCGGACTCTGTTAATCGGTGATTTTATCTGGTAGAGAAGTT  
TGCTTATGGCATTAAAGATCCTATCTACAGAAAACGCTGATCGAAACCGGTCATCCGAAAACGCGCGATATCGTGGTCT  
TTAAATATCCGGAAGATCCAAAGCTTGATACATCAAGCGCGGCTGGGTTTCCGGCGGATAAAGTCACTTATGATCCG  
GTCCTAAAAGAGCTGACGATTTCAACCGGATGTCAGTTCGCGCCAGGCGTGTGAAAACGCGCTACCGGTCACCTACTCCAA  
CGTGAACCGGATGATTTCTGTTCCAGACCTTCTCAGCCGCTAATGGTGGGGAAGCGACACCGGATTTCTTTGAAGTCCGGA  
AAAACGAAACCAAGAAAATGGAATTCGCTTTCCGAGCGTAAAGAGACATGGGTGATGTGACGACCGTATTTCTGACA  
GTGCCGATTCGCGAGGACAGGTTGGGATGATTTACCAGCAGCGAGGCAACACTGGCAACCTGGATTTCTCCCGCGG  
ACAATCTTATGATGGGCGACAACCGCGACAACAGCGCGGACAGCGCTTACTGGGTTTGTGCTGAAGCGAATCTGG  
TCGGTCCGGCAACCGCTATCTGGATGAGCTTCGATAAGCAAGAGCGAATGGCCGACTGGGTGTCGCTTAAAGTCCGAT  
GGCGGATCCATTA

>Cluster\_51533

ATGAGCGATAATACACGATTAATGTTTGGAAAGGAATAGTATTCCTGTAATGGAATTTGCTCCCTAAAACGAGCTGC  
TGAACCTACTTAAATGGCCAAATGATGACCTTATCCATTTTGTCTCAAAATGGAAATATCGAATTTTGTGATAAATG  
GTTTGAAGCTGCGCTAATGATGATGCGTAAAGTGGAGATTTTAAAGATTGGGAAAACATGTACCACCCAGAGTATTA  
AATATAGTAAATAATCTGCATTAAGCCATTTCTATACAAAAGCAAAATTCGATATTGATATACAGAAGATAAGCCAT  
TTCACCTCAAAAACAAATATACATTTAGAAAACAAACAAATATAAAAAGCCATTAATCTTACTTTCTGGATGTGGT  
CTATATGTGCTATCAGCCCAACATCTTCTATATACAAAAGAACTAAAGGTATATGGTAAAGCAAGGCTATTAGCATGAT  
ATTTCTTTTAAAGAGCTAATATGCCATTCACATATGCTGCAATTTGGCAGTGTGAGTGGGTAATATTAAGCAATGTC  
TTTCGAAGGCTTATCATCAATAGAGGATAGTATCTCCATCTAATAAAAATATTTATGGAAATATAACACTGGATGATA  
TCTATTTAAACAAGTACCAAAATAGAAAATAGATAACGGTGTGGCAAGAGCTACCCAGCTATGTGAATGGTGGTGTG  
TCCAGCATCGAAAGCATCCGAAGAGTGCATGGTAAATGTTGAAGCATCAGCAACAAAAGAGAGGCGAGTACAAAAGCAGC  
TATTTATTGGTTACTAAATGACCCAGCATCTTCAATGAAAACGAGGAAAACCTGACTATTGACGCGTGGGCGAGATAAAA  
TCGTGGCAGAAAGAAAATCCAAAACAAAGTTGAACCTGGAAAAGATAAGATAAAAAGATGTCTTAGCTCATCTAAA  
GCAGGAAGATTTTTAA

>Cluster\_51543

ATGAATAGGAAATTTCAAGTTTTTCAATTCATCAACTTTTACAGACCTCATTGAAGAAAGGCAAGCTGCGGTAAGTGCCAT  
ATTAACCTGCCGGCATATACCTCGGGAAATGGAGCTATTTAAGCCTGGAGACAGAAGCCAGTTAGAAAATTTAATAGCGCT  
GGATAGATGAGTCAAGTACATATCTTATTTCTGGGAGCGGCTTATGGAACGATTTCCCGCGAGTATATGCTAT  
ACAGAGCTCGAATATGATATGCTTTAAGTACAAAACAACTCTATTTTTCGATAGTCAATGATGACGAATATCTAGATGA  
AAAAGTTAAAACAGTTGGTAAAGGAGTTCTTGAATTAGATAACCCGACAAAATATGAAGCTTTCAAACAAAAGGTCAGG  
GGTATCCGGTGGAAATTTTTCCGGATATTAAGATATACAAAATCAATTTATAAGACACTTCTCAAATGGTGTGCGAG  
AGAAATCTCTTGGTGGGTTTTCTGAAAGGAAATATCAGAGTCAAGTGTGTTAATAGAACAAATATCTAAAACGAA  
GGAAATGAAGCTTTAAAATCTGAGGTTGAACCTTCTCAGAGCTGCACGTTCTCTGAAAGTAAAGCTATAGTAAAAAAC  
CATCTGAGGAAGGTTCCAGTAAAATATAAAGCTATTTGAAAATACACAGTAAACGATCCCGACAAAATATCCGAAACT  
CCAGAGCCAGTTAAAACCAACAGCAATGCGACTATTTTCTGTATAGAGGAATATTTCTTCTGGTAAAGTCAAATCTC  
GACTGACTTAGCTGGTTTTTTGGTTAGAAATGTTTGCAGCTTAATGATGGTCCATGGCTACTCAAACCAACGCCAATAA  
TGGAAAATCGATATCTTCGATACGAGTTAACTGAGAAAGGTGCCGATTTTTCTCATATATCGATTTACGTAACCTTCCC

GATTAA

>Cluster\_23671

ATGTTAGAAAAACAATAAACAATGCGATATGCGCGCTACTGTTTCTGTTGTGAACAACAATCGGTCAAAGAAATGGATAA  
AATTCACGCAATGCGAGTTTTCATCAAAGTTCGCGGAGCTGGAAAGTTTTTCCCGCGCGCGGATTTCTTTGCTTTGCCAA  
AGGGAAGTGTTCGCGGAGATACAGCAGCTGGAACATCAACTGGCACCCAGCTTCTCCAGCGCAGCCAGGACGGT  
AAACTCACGCCAGAAAGCATGACCTATTTATCAACGGGCAAAAGATGTGTTGAGTAATCTCAGCGAACTGGACGGTCTGTT  
TCAACAGGATGCCACCAGTATCAGCGGTAATACGCATCGACATCCCGTCAGGAATCGCGAAAAGCCTGTTACTGCCCG  
GCTTGTGCGAATTTCTCTATCTGCATCCGGGAATTGAGCTGGAAGTGAAGTACGACCTGACCGTCCGGTAGATATTTCTCAT  
GATGGTTTTGATTGGCGTATACGCATCGCAGCTGGCGCATACCAGGAAGTGGCGTTATCGCCCGTTCTCTCGGCAAACTGACCAT  
GGTCAACTGTGCCAGTCCACACTATCTGACGCGCTTTGGTTATCCGCAAAAGCCCGATGATCTGACTTACACGCAATAG  
TGCGTTATACACCCGACCTGGGTGTACATCCGTAGGTTTGGAGTTGCCAGCGTTAATGGCGTCCAGTGGTTAAGTCT  
GGCGGCATGTTGACGGTAAACAGTAGCGAAAATATCTCGCGCGCGTATTGCCGGTCTGGGGATTATTCAGATCCCGCG  
CATFGCCGTGCGGAAGCCCTGCGTGGCGGGCGCTTATGAAAGTGTTCGCTGGCTACCGTGGCGAGCCGCTGTCCCTTT  
CACTGGTTTTATCCGACGCTGGGAGCTTTCCCGCGGTGTAACCTGTTTATGCAGTGGCTGGCTGGCGTAATGAAAGAG  
CACCTGGACTGA

>Cluster\_32368

ATGACGATTAAAGACGCTTTCAGTTCCGATTGAGCCAGTACGCATCACCGACACCGACAACATTACAGTCAATGAAGG  
TCTGCCGACTAACCGCGACCCGAGGTCATGCCCTCCAGTTAGCTAAGACGGTTAAGGCTATGCTGAACGGTACTTTA  
AAGACGCTCAAGAGAATCCCGTTCCCTGTAGAGTCTTCCGACCCGTAACAGCTTACCAGCCCAATCATTTGCTCAC  
ACTCTGCGTGACCGCTCTGTGGTCTTCTGCTGCTGGTGGCAAGCAGCTGAAGTCTGACCGTTCCGTCGGTCAAGG  
GATTTGTGGTGAACCGATTGAACAGGCTATTTCTCATCTGAGCGGACTAAACTGTGGGACGCTAAGTGCAGTACTGGTT  
TCACTCAGGGGACGCTCCAGCAAGATGCATTGAACATTTGTGAGAATGTGGTCCGTACATTAACCTCTAAGATGGTTGAC  
GTTCTGGAGTCTCTAAGCTGTTGAAGACAGTAGAGCTTCCCGTCTGACTGGTAGCCTGACCGCTAAGCGAGACACTAT  
CATGGACCGGCTGTATGAGAACCCGAGTCTTCTTTCGTTCTGAGTTACTGATTACGGTATCATCGCCATCGACTCAC  
ACCTCAAGGCTCTTTCCCGTCTGGCTGTAAAGCAGGGCTTCGGTGGCGAAGACGCTATTGTGATATGCTGGGTACAGAC  
ATCGCCTACTACAACGGTGCAGACCGTGGCGTCTTCATGATGGTAAGCGCTTACCGCTCTGAGCTTCCGTTGCTTCCG  
TCACGATGGCGAAAATATTACTGTGGTCTTATCCCGAGATGGCAACACCCAGTCTCACGACCTTGAGATTCTCGGTAAGG  
TCTTCGTTGGTCTGAGGCTGCAACGACTGTTAAGATGGGACTGGCAGCGCTGCTGCTGCTTGCCTGTAGTCAAACGC  
CTGAGCTTACTAAGACAAGCTAA

>Cluster\_25564

ATGGCTTCAACCTGACTGATGCATTTGCGCGTAAAGTTTTACTACTTGGCGCTGTGATTTACCAGTGTGTGTAACTTTCG  
TTGCACCTACTGCGTCCCGGATGGCTACAAACCGAGCGCGTCAACCAATAAAGGCTTTCTTACCCTCGATGAAATTCGCC  
GGGTTACGCGCGCTTCCGCGCTTGGCACCGAAAAGTCCGCTGACGGCGGTGAGCCATCTTACGCGCGACTTT  
ACCGATATCATCGCGCTGTGCGGGAAAACGACGCTATCCGCCAGATTGCGGTACCACCAATGGTTACCCTGGAACG  
CGATGTGGCGAATGGCGGATGCTGGACTTACGGTCAACGTCAGCGTTGATAGCCTTGACGCTGCCAGTTTCATG  
CCATTAACGGGCGAGATAAATTCACACGCTATGGCAGGATCGATGCTGCATTTGAGGCGGTTTTGAGAAGGTCAAA  
GTCAATACCGTGTGATGCTGATGTTAATCATCATCAGCTCGACACCTTTCTGAACGGATCCAGCATCGTCCCATCCA  
GCTGCGTTTTCACTGCACTGATGGAACGGGCGAGGGCAGCGAGCTTTCGTAAGCATCACATCTGTGTGAGTTCTGCG  
GTGACGAGTTACTGCGTGGCGCTGGATCCACCAATTACGTCACAGCAGCGACGGTCCCGCGCAAGCTTTTGTGATCCG  
GATTAAGCGGAGAGATTGGCTTATCATGTCGCGTATGAAAAGACTTCTGCGCCACTTGAACCGCTTCCGCGTTTCTC  
CATTTGGTAAACTCCATCTCTGCCGTGTTGGTGAAGCGCGGTTAACTGCGCGATCTGCTGGAAGACGATACCAGCAAC  
AGGCGCTGGAAGCGGATTTACAGCGCGCTGCGGGAGAAAAACAGACCCATTTCTGCATCAAAACAAACCGGATTT  
ACGAAAACCTATCGTACATTGGTGGCTAA

>Cluster\_16017

ATGCTTTCCACGATAAAGGACAACCTTTCCATAACTCAGTAAATATAGTGACAGATTACCCCTGTCAAACGGTTTCTTTTGC  
AGGAAAGGAATATGAGTTAAAGGTCATTTGATGAAAAACCGCTATTTCTTTTTCAGTGGTTGAACCTAATCTTGAACGAT  
ATAAGAAAGATGAGGTTCCCAATAGTTAACTAAGCAGCATCCCTAATTTAGATAATGTCAAAATGCGCGCAAGGATAGAG  
AGTGATCGTATGATAGGTTATTTTGTGATGGCGATTTTTCAGTCAACCAAAAGACTGCTTTTTCAAAATGGAACGAGA  
TTTTGAAAATGTAATGATATATCTATCGGGAAGATGTTGACTTCAAGTATGATGACAGAAAACCTATCAGATATTTATCATG  
ATATTATATGTGAACAAAGGTTACGAACGAAAGAGATGAATACTTGTGAACTGTTAGAGAAAGAGCTGAGG  
GAAATTTCAAAGGCGCAGGATTTCTGATTTCTATGTAAGCAAAAGAAAAGAAAATCATGATGGTTGATTTGATTTGAGAAA  
TTTTAGCCTTATTAAGCAGGAGAGATATTCAGGTGCACATATAATACAAGAAATCACGGTATTTTCATTCGGGGAGGGGT  
GTATCTATCTGATATGGATATGATACTTACAGGTAAGCTTGGTACAATATATGCTCCGATGGAATTTCAATGCATGTG  
GATCGTCTGATGATGATGATAATTTGAAAATAGTGCAATAATGTTAACCGTAGTAATCATCTGCTACTTTGAGGG  
ACTTTCTTTTATGCAATAGTAAAGTAGACTCATCCATATGATGGTTTGGGAAAGGAGTTAAGAAAATTTTAAAT  
TTACACCATACATAATTAATCATTTTGTGACTTTATGAGTTTAAACCACCTAATAATAATCATGAACACAAGTCA  
TATACATGCAAGTTTCAATGTTAA

>Cluster\_2403

ATGCTATAAAGTATAACAACATGTCCGGTCCGAGTACGATCCGGAACAGATTGATTGATTGATTTACTCATGCAAGT  
ATGGCGTGGGAAGGTAACGATTATATCTGCATTTGTTGGCAATAGCGTTGGCAGTAGGCTATTTGGCGGTGGCTAAGG  
AGAAATGGACCTCGATAGCTATCGTTACACAACCCGATGCTGGCCAGCTTGCAGCTACAATAATGCTATGGATGACTG  
TTTGGGGCTAACGCACCGAAAATGACAGATGTTTCCGCGGTTTATCGGGCGTTTTAGTTCGGCATTCTTCTGCACTGGC  
TGAAACGTTGGATAACCGACAAGAACCGGAAAACCTTTCAATTGATGCTGCTGTTAAAGGTCAGACTTGCCTTAAAGG  
TTTCTTATACCGCAAAACCTCTGAAGAGGCACAAAAACGCTGGCTCAGTATATCAACAAGTTGATGAAGGTTGTTGCT  
AAAGAGCTCAATGCTGACTTGTCAATGAGTATGGAACAAGACTGGCTGATTTGCAAAAATCTCTTGCAGCGCAGGAGGC  
AGTGGCGAAAAGAGCAGAAAACCCGCTGCTATTGCCAGATGACTCAAGCACTTAAAGTTGCGCAACAGTCAATATTAAGC  
TACCGCAGGTACAGCAGGTTGATCAAGTATCTCAGGATCTATGTTTATGCTGGGTAGTGAGGCTCTTCTCTCAATGGTT  
GAGAACGAAGCTACAGCTCTTTCGCTTTTCTGACGACTACCAACCGCTCAGAAATCTGTTGGAGGTGCAGGCATT  
AGAAGTGGCACCTGACAGCTGCACGCTTACCGTTATGTAATGAAACCAACGTTACCGATTCGCTGCTGACAGCCGAAAA  
AAGCGATTACCTCGTGTGGCAGTTCTGATCGGTGGGATGATGTTGCGGCTGTTGCTTGGGCGAAATGCTCTGCC  
GGTTACAAGCCAAAGCTGAGTAA

>Cluster\_25293

ATGGCAGCAAAGATATTGACGGTAAAACGATTGCGCAGCAGGTGCGCTCTGAAGTTGCTCAAAAAGTTACGGCGGAT  
TGCAGCCGACTGCGGGGCCAGGACTGCGCTTGTGCTGGTGGGTAGCAACCTGCATCGCAAAATTTATGTCGCAAGCA  
AACGCAAGGCTTGTGAAGAAGTCCGGTTCGCTCTCCCGCTTTATGACCTCCCGGAAACACCAGCGAAGCGGAGCTGCTG  
GAGCTTATCGATGCGCTGAATGCCGCAACACCATTTGATGGACTTCTGGTTCAACTGCGGTTACCGCGGGTATTGATAA  
CGTCAAAGTGTGCGGCAAGCTATTTCACTCCGCAAAAGACGTTGGACGTTTCCATCCTTACAACTGCTGCTGCTGCGCAGC  
GCGCGCCAGCTTGCCTCCCTGCACCCCGCGGATCTGCTACGCTGCTTGGCGTTACAACATTTGATACCTTTGGCCCTT  
AACCGCTGGTATTGGCGCATGAAATATCGTGGTCCCAATGAGCATGGAAGTGTGCTGGCAGGTTGCACCACTAC



CGTGACCACCGTTTACTAAAAATCTGCGTCACCACGTAGAAAATGCCGATCTACTGATCGTTGCCGTGGCAAGCCGG  
GCTTTATTCTGGTACTGGATCAAGAAAGCGCAATTTGATTGATGTCGGCATCAACCGTCTGGAAAATGGCAAAGTT  
GTGGGCGACGTCGTGTTGAAGACGCGGCTAAACGCGCCTCATACATTACGCCGTTCGGGGCGGCGTTGGCCGATGAC  
GTTTGGCCACGCTGATTGAAAACACGCTACAGGCGTGCCTGAAATATCATGATCCACAGGGTGAGTAA

>Cluster\_57388

ATGCGGACTCTGCAGGGTGGTTGTTGCGGGTGTATGTTGCCTATGGCAGTATATGCACAAGAGGCAACGGTGAAAGA  
GGTGCATGACCGCCAGCGGTGCGTGGCAGTATATCGCCAATATGCTGCAGGAGCATGACAAATCCGTTACAGCTCTATC  
CTTATGACACCAACTACCTCATTACACCCAAACAGCAGCATCTGAATAAAGAAGCGATTGCCAGTTACGACTGGGCGGAA  
AATGCGCGTAAAGGATGAAGTAAAGTTTTCAGTTGAGCCTGGCATTTCCGCTGTGGCGTGGGATTTTAGCCCAACTCGGT  
GTTGGGTGCGTCTTATACGCAAAAATCCTGGTGGCAACTGTCCAATAGCGAAGAGTCTTACCCTTTCGTGAAACCAACT  
ACGAACCGCAATTTCCCTCGGTTTGGCACCGATTACCGTTTTCAGGTTGGACGCTGCGCGATGTGGAGATGGGGTAT  
AACCACGACTAACCGGGCTCCGACCCGACCCTCCCGCAGCTGGAACCGCCTTATACTCGCTGATGGCAGAAAACGG  
TAACTGGCTGGTAGAAGTGAAGCGTGGTATGTGGTGGTAACTACTGACGATAACCCGATATACCAAAATATATGGGT  
ACTACCAGCTTAAATACGGCTATCACCTCGGTGATGCGGTGCTCAGTGCAGAAAGGACAGTACAACCTGGAACACCGGCTAC  
GGCGGCGCGGAGTTAGGCTTAAAGTTACCCGATCACCAACATGTGCGCCTTATACTCAGGTTTACAGCGGCTATGGCGA  
ATCGCTCATCGACTATAACTTCAACCAGACCCGTGTCGGTGTGGGGTATGCTAAACGATTTGTTTTGA

>Cluster\_41278

ATGATTTATCCTGATGAAGCAATGCTTTACGCACCGGTTGAATGGCAGACTGCTCCGAAGGTTTCGAGGACATTCGTTA  
TGAAAATCCACCAGCGTATCGCAAAAATCACCATTAATCGTCCGAGGTGCGCAATGCCTTCCGCTCTGACGGTAA  
AAGAGATGATCCAGCGCTGGCGGATGCGGTTATGACGACAACATCGGCGTATCTGATGCTGGTGCAGGCGATAAA  
CGGTTCTGCTCCGTTGGTACAGAAAGTACGTGGTATTTACGCGGCTATAAAGATGATTCGGCGTACATCACCTGAA  
CGTGCTGGACTTCCAGCGTCAGATCCGTACCTGTCCAAAACCGGTTGTGCGGATGGTGGCTGGTACTCCATCGGTGGCG  
GTCACGCTCTGCACATGATGTGCGACCTGACTATCGCGCTGATAATGCCATCTTCGGTACAGCTGGCCGCAAGGTCGGT  
TCCCTCGAGCGCGCTGGGCGCTTCCATATGGCGCATGTTGGGAGAAAAGCACGTGAAATCTGGTTCTGGTCTGGT  
CCGTACGACGCAAAAACAGGCGCTGGATATGGGCTGGTGAACACCGTTGTACCGCTGGCGGATCTGAAAAAGAGA  
CCGTCCGTTGGTGGCGTGAATGTTGCAAAAACAGCCGATGGCGCTGCGCTGCAAGCTGCGCTGAACGCGGACTGT  
GACGGGACGGGCGGCTGACAGGAGTGGCGGGCAACGCTACCATGCTGTTCTACATGACGGAAGAAGGTCAGGAAGGTCG  
CAATGCTTTCAACCAGAAACGTCAGCCTGATTTTACGCAAAATTTAACGGAATCCGTA

>Cluster\_24160

ATGTATATAAAAAAGCACTGGATAGCTTTATCCATTCTATTAATACCTTGCATGGAACCGCTCAGGAAATTAATAATGA  
TGAAAGCTGGTTACATCAAAGCTTGAATGTCTATGGTCGCACAGACTCTCGCTTTGGCCCAAGACTGACTAACGACCTCT  
ACCTGAATATACGTAGTACGAAAGAAAAGACTGGTTTATGTTATGTTATGTTGATCTACCGAAAATCTTTGGCGCT  
GGCAGTCACTATGATATTTGGGATCTGGGATGAGGGCTCACCATATTTACGGAATAGAACCTCGGTTTTCCATTGACAA  
ATTGACCGGATTAATATCTGCGTTCGGCCCATTTAAAGAAATGGTTCATGCAAAACATATGCTATGATATGGGTGACA  
ACCAGTCACTCCGGCAAAGTACATGGTATATGGGGCTTGGTACAGATATCGACACGGGCTTACCAATTAAGCTTTCTGCC  
AATATATACCGCAAAGTACAGTGGCAAAACTATGGTGGCTTAATGAAAATGAATGGGACGGATATCGATTTCAAATAAA  
ATATAGCATCCCTCTTACAAATTTATTCGGAGGGCGATTGGTATACAATAGTTTTACTAATTTGATTTTGGCTCCGATC  
TTGCGGACAGTCAACAATAATAAACGAACAGTAATGCTATTTGCTTCAAGCCATATCTTTCCCTTCTATATGAACAC  
TGGAATTTGCATTTACTACGTTATTTTACAACGGTGGCAATGGAATGCGGGAGAGAAGGTTAACTTCGGAGATGG  
TCCATTTGAATTAATAAATACAGGATGGGAAACCTATACACTATTGGTTATCAATTTTAA

>Cluster\_36601

ATGAGCACTTTTAAACCACTAAAAACTCACCTTCGCGCCGCCAGGTGCTGAAAGCCGGTTTGGCTGCCCTGACGTTGTC  
AGGAATGTCGCAAGCCATCGCCAAAGACGAACCTTTAAAAACAGCAACGGACACAGCAAGCCGAAAGCCAAAAATCTG  
GCGGCAACCGTGTGTTGTTCTCGATCCAGGCCAGGCGGAATTGATACCGGAGCGATCGGACCAACGGTTCGAAAGAA  
AAACATGTGGTGTGCGGATGCTAAAAACGTCGTTCCATTTGCGTAAATCATGGGATGATGCGCGTTTAAACGCGTTC  
TGGCGATACGTTTATCCCACTTTACGATCGCGTTGAAATCGCCATAAACATGGCGCAGATCTGTTTATGTCAATTCATG  
CCGATGGCTTTTACCAACCCGAAAGCTGCCGCTGCTTCGGTATTTGCCCTCTCTAACCGTGGGGCAAGTACGCAATGGG  
AAATACCTGTCTGAACCGGAAAACCGCGCGGATGAAGTTGCCGTTAAAAAGGCGACTGACAAGGATCACCTATTCAGCA  
AGTGTGTTGATCTGGTCAAAACCGATATAATAAAAACAGCCTGACGCTCGCTCGCATATCTGAAAAAGATTAAGC  
CGGTGCATAAACTGCACAGCCGCAACCCGAACAAGCCGCTTTGTTGGTGTGAAATCGCCGTCGGTTCCTTCGGTGTCTG  
GTGAAAACCTCGTTTATATCAACCAACCCGGAAGAAGAGCGCTGTTAGGACCGCGGCTTTCGTCAGAAAATCGCCACAGC  
GATTGCTGAAGCGTGTATGATTTTCCACTGGTTCGACAACCGAAAGCACATTCGAAAAAGCGATAA

>Cluster\_24243

ATGCTGCCGACATCAGTCCGTTTAAATAAATACATCAGCGAAAGCGGAATTTGCTCACGCGCGAAGCGGATCGCTA  
TATCGAGCAAGGCAATGTTTCCCTTAAATGGCAAGCGAGCCACCTATGGCGATCAGGTGAAACCCGCGACGTTGTGAAAG  
TAAACGGTCAAGTTGATGAGCCTCGGGAATCCGAAGATTTGGTACTTATCGCCTGAACAAGCCGTCGGTATTTGTCAGC  
ACCACCGAAGATGGCGAGCGGATAAATATGTCGATTTTCGTTAACACAGCAACCGGTTTCCCGATTTGGCCGCTGGA  
TAAAGATTTCCAGGGCTGATTTTCTCACCAATCACGCGCATCTGGTGAATAAGATCTCCGTCGGGTAAACGATCATG  
AGAAAAGATATCTGGTACCGTTGATAAAACCGATTACCGATGAATTTATTCGTTGATGGGGCGGGAGTACCGATCCTC  
GGGACGGTAACTAAAAGTGCAAAAGTCAAAAAGAAGCACCGTTTGTCTTCCGATTAACCTGGTGCAGGGGCTGAACCG  
TCAGATTCGTCGATGTGCGAGCACTTTGGTTACGAAGTGAAAAAGCTGGAACGTCACGCGATATGAACGTCAGCTTAA  
GCGGATTTCCGCTGGGTGAGTGGCGGATTTAACCGACGATGAGTTAATCGATCTCTTAAAGCTCATTTGAAAATTTCTCT  
TCCGAGGCAAAACCTAAAGCGAAGGCCAAAACCGTAAAGGATCAAAACGTCAGTCTTAAAGTGGAAAAAACGGC  
GGAAAAAGGCGGTCGCCGCGTCAACGGTAAAGCCTTTTACCTCGCCGGGGCAGAAAAGAAGGGGCGTTAA

>Cluster\_59766

ATGAATATGCTGGAAAAATCCAGTCTCAGCTGGAACATTTGAGCAAATCAGAGCGCAAAGTTGCCGAGGTCAATCTGGC  
TTCGCCCCGATAACCGGATCCATTCGAGTATGCTGCTATGGCACTGGAAGCCAAATGTTAGCGAACCGGCGTGAATCGTT  
TCTGTGCGAGCATGGACACGCGCGGTTTTCCTGATTTTAACTTCATCTGGCAGAGTCTGGCGAATGGCACCTCCCTAT  
GTTAATCGCAATGCAATGAAGATGACAGCGTTGAATCATACACAGGGAAAATATTTGAGTCCGCAATGGCAACGCTTGA  
TCATGCTCCGTCATTCGATAAATCTGCCATCAACCGCGCTGACTTGCCTCAGCTCAGGCAAAAAAATACCGCTTTT  
TCGGATTAGGCTCTTACGCCCGTTCGCCACGATGCGATGAATAAGTCTTTTCGTTTAAATGTTCCGGTGGTGTACTCC  
GATGATATCGTGTGCAACGATGAGTTGATGAATTTGAGCGACGGAGACGTTGGTGGTGTGATTTCTCACCTGGAAG  
AACAAAAATCTGGTGCAGCTGGCGCAGCTGGCACGCAAAACGACGCGCATGGTGTATGCCCCTCACCTTCGCGGTACCC  
CGCTCGCCCGGGAAGCAACCGTGGCAATACCCCTCGACGTACCGGAAGATGACATTTATATGCCCCATGGTTCTCGA  
CTTGACAGCTGACCGTGTATAGATGCTGGCGACAGGATTTACTTTGCGACGCGGTGCAAAAATCAGAGATAACTTGAA  
GCGGGTCAAGAAGCGCTGAAGGAATCGGTTTTGATAAGCAGTTACTTAAATTTAAGTACGATCGCTAA

>Cluster\_25491

ATGTCCATTTTAAATGATAAAAAACCAAGGTTATCTGCCAGGCTTTACCGGTAGCCAGGGGACTTTCCACTCAGAACA  
GGCCATTGCATACGGCAATAAATGGTTGGCGGCTAACCCAGGTAAAGCGGTAATACCCTCGCCCTGCGGCTGCGGTTG

TCAACACCGTGCCTGAAGCTGTTGCTGCTACTGGCGCTACCGCTCTGTTATCTACGTACCAGCACCGTTCTGCAAGAC  
TCCATTCTGGAAGCTATCGATGCAGGCATCAAACCTGATATACCATCCTGAAAGCATCCCGACGCTGGATATGCTGAT  
TGTGAAAGTGAAGCTGATGAAGCAGCGCTTCGATGATCGGCCCGAACTGCCAGCGCTTATCACCCGGGGGAATGCA  
AAATCGGTATCCAGCCGGGTACATTCACAAACAGGTAAGTGGGTATCGTTTCCCGTTCGGGTACGCTGACCTATGAA  
GCGGTTAAACAGACCCAGGATACGGTTTCGGTCACTGACCTGTGTTGGTATCGCGCGGACCCGATCCCTGGCTCTAA  
CTTTATCGACATCCTCGAAATGTTGCAAAAAGATCCGCAGACCTGAAGCGATCGTGATGATCGGTGAGATCGGCGGTAGCG  
CTGAAGAAGAAGCAGCGGCTACATCAAGGAGCAGTTACCAAGCCAGTTGTGGGTACATCGCTGGTGTGACGCGCCG  
AAAGGCAACGATATGGGTACGCAGGTGCGATCATTGCCGGTGGTAAAGGGACTGCGGATGAGAAATTCGCAGCTCTGGA  
AGCCGACGGCGTGAACACCGTTCCGACGCTGGCGGATATCGGTGAAGCACTGAAAACCTGTTCTGCAATAA

>Cluster\_51518

ATGAAAAAACTAACTTGTGTTTCGTCTTTTGATCCTGATGGTTTTTATGCTCGGTAGTCCGGCCGGATGGGGCAGAC  
ATTTTCGTAATGTGTATCTACTATGCTACGTTTGGCTGGAATACTCAGATCGAACTGTATCTTGATGTTGCTGAGGTTT  
CGAGTGTTTACTACGGTACTTATATCAAAGTAATATGTTATGACGCTGGCAACTTACCCAATCGCACATGCAGGA  
ACGGGCAGTTCTCTGCGCCGACGATTACGGTAAAAGATGGGACAACGTAAATAATTCATTTTGTCTGGCATGGAGGC  
ACTGGAAGCCAAAGACAGCCGCTGGGAATGTCTCAAGCTGCCTCTGGATATTACCGTCTGATGGTGATGGGGAGGCTGCC  
CGTGGTTAGTGTAGTATCAGAGCCACCAGCCAGTTGTGGTTCGTTGATAAAGATATCTATATGGACCAATGCA  
ACCGTGTCCGTGTGCCCAACCGTGTGAGTTACCGCTGATGATGTTTTCATGGGATGAATACTATATCAATAAAAACGAAAA  
ACTGTCTTTGCAATCGACGGCGGAGTAATTGAAAAACGCTTTCAACCTATCTGATGAAAGACGGCAAACTATGTGATG  
GCTCGCAATGAAAGAAGGGCGCTTACTGTCTGCTGGGTGGCAAAATGATCAGTTTTCATCATCAGGCTGTGATAAT  
GCTAATGTTACGGTGGCCAAACAGGCATCCATCAGCAAGCACTGACGACATGGTAGTGGTGTGCGATACCCAG  
TAGCCGCCAGCCGATGATTCACCTGCCGCTTCCAGTACACGCTCAACGAGCTGATG

>Cluster\_20426

ATGGAACCTCATTGAAAAATATGCCAGCTTTGGCGGCTGGCAAAATGTTGATCGGCATTATCCCAATCCTGAAATGTGA  
AATGAATGTCGGCGTCTATCTCCACCAAAAAGCCGAGAATAAAAATGGCCGGTGTGTACTGGCTTTCAGGCTGACCT  
GCAACGAGCAGAATTTTACTTAAATCGGGATGCAGCGTTACGCGGCTGAGCACAACATTTTGTGTTGCGCCGGAC  
ACCACTCCGCGAGGCAGTATGTCGAGATGCTGACCGTTACGATCTCGGGCAAGGAGCCGGGTTTACTGAAACGCGAC  
GCAAGCGCGTGGAAATGAACATTAACAAATGATGACTATATCCGCAACGAGCTGCCGAATTTAGTGATGCATCATTTTC  
CAGCAACGGCCAGAAAGTCTATCTCAGGTCATTCTATGGCGGGCTGGCGCGCTGGTGTGGCGTTACGTAACCCAGAT  
GAATATGTCAGCGTCTCGCGGTTTTTCGCCCATTTGCTCCCCATCGCAAGTACCGTGGGGACAGCAAGCCTTTGCCGATA  
TCTTGGGTGAAAATAAAGATGCCCTGGTTGGATTACGACCCGGTGTGATCTTATTTTCAAGGTCACCGCTTGGCGAAATCA  
TGGTTGATCAGGGGTTGAGTGATGATTTTACGCGAACAACCTGCGGACTCCAAATCTTGAAAAGATCTGCCAGGAGATG  
AATATCAAGACGTTAATCCGTTATCACAGGGTTATGATCACAGCTATATTTTGTCTCCAGTTTATATGGCGAGCATAT  
TGCGTACCACGCCAATAAATGAATATGCGTTGA

>Cluster\_50989

ATGAGTGATGGGTGGTTAGATTTACTATGCAAGCAATAAACGATAGGATTAAGGCCATTATGGGGATATATCATTCT  
TGCAATGGGTATGGTTCAACTGGCCTAACTTAGCAATGCTCTTTATGAGTGATGCGCCTGTTAAGTTTTCGAATAGATTATA  
TACTATCTCAGGAATTTTTTACGCTCATTATCTGCTTGTCTCTTTTTGGAGGTGTGCTAGCTGTTATTTACTCCT  
TATGCTCAATGGTTACTTCTCTGCTCAAAAATGGGCTACAGATAAACACAATGAAAATGTTTATCTTACAAAGAAAA  
AGAACTACTGGATTCAACTAGGTTAACGGGTTAAAGGTTACGGGCTGCCAGAGAAGAAGAGAAAAATGCTAAATTTG  
ATGCTGATATAAAGCGGAAGTAGAGCGTGGTAAGCGTGAAGAGCTGGTACAGAAAGACTACAGACAGAGAAGAAACTG  
ATTCAGAAAGAAATTAATAATTTAAAGCAGTTAGTATCTAAAGAAAAACAACCATGAAAATATCGAGATAGAAAAGA  
GAGACTACAGGATTTGATTTGTTGCCCTACTTGAGGTAATGGATGATTTCTTTAAAGTTGATAATAGCCGTTTCAATACAGC  
AATTGAAGAGTAGGGTAGAAGAAGCTTTTAAACAGTTTCTGATATGAAGCTTCTACCATCGTAACGCGTACAGCAAAAG  
AAAGAGCTAACTTCAATCACAGACAAATGAAAATGTTGATATGGTAGAGGCTAAAATTAAAAAGAAAAAGAAAAGGTA  
TGATATAGAGTCCGATGAATTAATAACCAATAA

>Cluster\_43124

ATGGAACAGAGAAAAATTAACAGCAGCGATCTGGTGAGCATGTTTCTGCGCTCCAACCTGCAACAGGCATCCTTTAACTT  
TGAACGATTTACGGGCTGGGTTTTTGTACGACATGATCCCCGCATCAAACGACTTTACCCATTAAGAGGATCAGG  
TTGCGCGCTCAGCGCACACCTGGTGTCTTCAATACCAGCCAGCCGATGTTGGCCCGTCACTGCGGCTCACGCGCC  
ATGGAAGAGGCGCGACCAACGGCGCGGAAATGATGACGGTACCATTAAACGGCATCAAAGTCCGGTCTGATGGGACCAT  
GGCAGGAGTTGGCGATCACTGGTCTGGGGAACGCTGCCCGGATTACCGCCGCTCGGCGCATCTCTGGCATTTCCGG  
GCAACATTTCTCGGCCCTGCTGTTCTTTTATTTTCAATGCAGTACGCTGGCAATGAAATGGTATGGGCTGCAACTG  
GGCTTTCTGTAAGGGGTGAATATCGTCAGCGATATGGCGGTAATTTGCTGCAAAAACGACCGAAGGCGCGTTGATTCT  
CGGGCTGTTGTAAATGGGCTACTGGTGACTAAATGGACATCGATCAACGTCGCTTGTAGTTTTCACAAACGCTGCCC  
CCGATGGTCCAGCTCAACATAACCGTACAGAACATCTCGACCAACTTTGCCCTGGTTGCTGCGGCTCGGCTCGGCTGACG  
CTGCTGATGGTTCGCTGCTCAACAAAAAATTAACCCGATGGCTGATTTTTCGCCCTGTTTGGTTTAGGATATTCGG  
TAATGCGCTGGGCTTCTGCTCTGTA

>Cluster\_28054

TTGAAAGCCTGTTAAACCTTCCCTGCGTGGTGGTGGGCGAGGTCAGGATTTTACAAATACCAGACCTACCTGTTTGC  
ACAAAGCAGAAAGCCCTGTTAGGGGTAACACCTGGGAAAGCTACCAGCGGTGCTGGAGGCGATTCGGCCACACCAGC  
ACGAATTCGACCTGATTTGTCGCGACAGGTGATTTAGCGCAGGATCAATCCTCTGCGGCCTATCAGCATTTCTGTAAGGC  
ATCGCAAGTTTTCGTCGCGCTGCTGCTGGTGGCGGCAACACGATTTCCAGCCCGCGATGTACAGCGCTTACAGGA  
TGCGGGTATCTCCCGCGGAAGCGGCTGTTTATTTGGTGGCAATGCGAAATCCTGTTGCTGGATAGCCAGGTGTTTGGCG  
TGCCGACGGTGGCTGAGCGAGTTTACGCTTGGTGGCTGGAACGTAACCTGGCCGATGCGCCAGAACGCCATACGTTG  
CTGCTGCTGCATCATACCGCTACCTGCGGTTGTAGTTGGCTGATCAACACAGCCTGCGTAAACGGGGGCAACTGGA  
TACCGTGTGGCGAAGTTTCCCGACGTCAAATACTTGTGCGGTCATATTCATCAGGAGCTGGATCTCGACTGGAACG  
GTCGCGCCTGCTGGCAACGCGCTGACCTGTGTGAGTTTAAAGCCGCTGTTTCAACTTTACGCTGGACACCATCGCG  
CCCGGCTGGCGTACTCTCGAGTTACATGCTGATGGCTGCTGACCAACGAGGTGCATCGCCTGGCGGACGACGCTTCCA  
ACCTGATACCGCTTCAAGAGGCTACTGA

>Cluster\_48563

GTGGTGAAGCCTAAGAACAAGCACAGCCTCAGCCAGTCCGGCAGCACCAGCGGCTGCTGGCCCCGGCTGTTCCG  
TGCCCTCAAGCGGGGCGAGCGCAAGCGCAGCAAGCTGGACGTGACGATGACTACGGCGACGGCAAGCGGATCGAGTTCA  
GCGGCCGGAACCCCTGGGCGTGTATGATCTGCGCATCTGCAAGGCTGGTGGCCATGGTGGGCTAATGGCTTAGTG  
CTTGGCCCCGAAACCAAGACCAAGCGGACGGCAGTCCGGCTGTTTCTGGAACCAAGTGGGAGGCGCTCACCGCTGA  
TGCCATGGTGGTCAAGGTAGTATCGGGCGTGGCAAGGAAATCGGGGCGAGGTCGATAGTGGTGGGCGCTCAAGC  
ACATACAGGACTGCATCGAGCGCTTTGGAAGGTATCCATCATCGCCAGAATGGCCGCAAGCGGCGAGGGTTTCGGCTG  
CTGTGCGGATCGCGCAGGACAGGCGGCGCTGATCGGCGCTGAAACCCCTTGTATCGCGAGGCGCTGATCGGCTGG  
TGCGGCCAGCATGTGCGCATCAGCATGGACGAGGTGCGGGCGTGGACAGCGAAACCCCGCCTGCTGACCAAGCGGC  
TGTGTGGCTGGATCGACCCGGCAACCGGCAAGGCTTCCATAGATACCTTGTGCGGCTATGCTGCGGCTCAGAGGCC

AGTGGTTCGACCATGCGCAAGCGCCGCGCAGCGGGTGCAGGCGTTCGCGGAGCTGGTTCGCGCTGGGCTGGACGGTAAC  
CGAGTTTCGCGCGGGCAAGTACGACATCACCCGCGCCAAGCGCGCAGGCTGA

>Cluster\_22673

ATGGCGCTGCCAGTGAACAAACGCGTTCTCAAAATTCCTGTTTATCTCTTTGTTGTTGCTTCTGCGTTTATTTAGTGCC  
GCGGCTCGCCATCAACTTCTTATTATCCTGACGATAAAAATATACGGTCCCGACCCCTGGTCGCGGGAATCCGTCGAAT  
TTACGGCTAAGGACGGTACTCGTCTGCAAGGCTGGTTTTATCTTCTTCGACGGGCCCTGCTGATAACGCCATTTGCTACC  
ATTTATTCATGCTACGGCAATGCGGAAATATGTCGCGCCACTGGCCGCTGGTTCAGTTGGTTACCCGAGCGTAATTTCAA  
CGTTTTTATGTTGATTATCGCGGGTTTGGTAAATCAAAGGCACGCCGTCAGGCGGATTGCTGGACGATACGCAAA  
GTGCCATCAATGTTGGTGCAGCCATCGCAGTGTAAACCCACAACGGCTGGTGTGTTTCGGGCAGAGTATGGCGGGGGC  
AATATTCGGATGTTATTTGGTCAAGGTCAGTGTGAAAGGCATACGTGCGGTGATCTCGACTCCACATTTGCTCTTATGC  
GACCATCGCAACAGATGATCCCGGCAGTGGTACTTACTTGTATGAGAGTTACAGCGGCGAAAATACATCGCCAGCG  
TCAGCCCGATCCCGCTTTACTGATTACGGTAAAGCTGATACGTTATCCCATGGCAGCACAGCGAAAAGTTGTATAGC  
CTGGCAAAAAGAGCCAAAACGGTTGATCCATAATCCCGATGGCGAACACATTTGATGCTTTTCCGATCGTCACGGCGATGT  
TTATCGCAACAGATGGTGGATTTTATCTTAGCGGTTGAATCCGAGAATAA

>Cluster\_29177

ATGACTGACTCAGCTTAGTATCAACAATCTCTGCGTCGATTATCCGGAGTCCCGGGTCTGCAACAATGTCAGTTTTTAC  
ATTAGGCAATGAACGCTCTGGCGTGGTTCGGTGAAGTCCATGACCCCGCGCCCTGATGGGGCTGG  
TGGTAAACCGGGTGTAGTAAACCGGACACACTTAACATTTCTGGGGCTGATGCACTCACCTTGACGCGGTGGATGG  
CAACAGTTGCGCGGTAACGATATCGCGATGGTATGCAAGATCCCGCTTACGCGCTTAATCCAGTAAAGACAGTAAACG  
GCAACTGGAGAGCGCTTACGCTCCATCAACGCTCTGAACCGCGGAGAAAGAGAAAATAAACACCGCAATTCAGG  
CTGTGCGCTCAATACGCGAGTACTGCAAGCTATCTCTGTAACCTTTCTGGCGCATGGGGCAGCGAGTGTATTGCA  
ATTGCGCTCATCAACGATCCCGGGTATTGATTGCGGATGAGCAACATCAGCACTGGATGTGCGCTGCGTAATCAGAT  
TCTGGAACTGCTGGTTACCAGTGTGAACAACGTCAGATGGCAATGTTGCTGATCAGTACAGCTGCACTAGTATGGCC  
AATTTTGCATCGGGTGTGGTGTATGATCAGGAAATAGAGTGGATGAAATGACCGTGTGCTGCTTACCTACGTAACG  
CATCTTACAGCGCACACTGTGGACTTGGCGCCAAATGCACAACTTACGGGCAGATGCTGCGACGCTGGACAGGAC  
GGCAATGACGCGGAGAAAATACCATGACGATTGTTGA

>Cluster\_66281

ATGAATAACATATTAATTCGCGCAATTAATATTTCCCTGTACACTTTTCGAAACTATTAGTTTATTCGATGATTTTTCTGC  
TGATGATATGCAATATGGTGATATGGTAGAACAAGACTTCTCTCACTCGGCCAAGCGATATCTCAGCAAAAGTTGATC  
CTTACAGACTTATTAATACCATTTCCTGCGCCAGGTTCTATTAATGTTGCTTTTAGTGCCCAAGTTCGCGAACAAAA  
ATATCACAACTGAAATGCACTGATATTTTATTTGAGAAATGAAAGAACTAGCAAAAATGTTTTCTTTTTTGGACAAAA  
TAAAACACTTATCGAAGATCTGATTGAACATTTAGATATGAAATGGCAGCAATTTTCATAGCAACAATAAATTTAT  
CTTTTCATGAAAAATAAATAAATATGGTTATAATAGTCCAATACGAATAATCAAGAATGTATCGAAAAATGGCATTAA  
TCAACTCCCTCGACAGGATACCAACCTCTTATCTGCAAGCATTAACCAAAATTAATCTTCACTAAGACTAAATAAAT  
TAATGACTCGAGGACGTTTAAATGGCTTAGGAATCAGTGTTCATGATATTTAGCTCAAAAATATCTCTTTAAGTT  
TTCAAAACTACGCTATAGGATGGAGTGAACAATTTCAATTTTGTAGCACAGGCAACTTCGCTTGTATGATCAAGTATC  
AAAAACAAGACTTACAGCAATAATAGATTTTTTTCGCATATGGTCTTTTTTACAACGGCATAAAGACTTTGCTTTCAAAC  
TTTTTTTCAACAATTTTAACTACTCGAAAGAATCGAAAATTAATCTATGA

>Cluster\_40376

ATGTGCGGAAAAGATGGGGTGTGGCGCTACTGGTAGTGGTTGTATGGGGCTAAATTTTGTGGTTCATCAAAGTGGGGCT  
TCATAACATGCCACCGCTGATGCTGGCCGTTTGGCTTTATGCTGGTTCGCTTCCCGGCCATCTTTTTTGTGCGCAGC  
CGAAAGTACCACGTAATTTGCTGCTGGGTATGGATTAACCATCAGTTTTCGCGAGTTTGGCTTTCTGTTCTGCGCCATT  
AATTTGGTATGCTCGACTGGCTTCGCTGGTGTACAGGCACAGGCGTTTTTACTATCGTGCTGGCGGCTTTAC  
TTTTGGTGGAGGACTGCTATGGCAAACAATTGGCGGGATCGCCTTAGCGATTTTTGGCGTACTGGTGTAAATCGAAGATA  
GTCGAAACGGTACGATGTTGGCGATGCTCGGCTTATGTTGACCTGGCGGCAGCATTAGTTGGCGGTGGCAACATC  
TTCAATAAAAAGTATGCTGCGCAGCAACGCGTCCGGCGGTGATGTCGCTGGTAAATCTGGAGCGCATTAATCCCAATCA  
TCCCTTCTTTTGGCTGCTGATTTCTCGATGGTTCCGCAACCATGATTCACAGTCTGGTTACTATCGATATGACCCACA  
TCTTGTCTCTGATGATCTGGCATTTGTGGCGACAATCGTTGGTTATGGGATCTGGGGAACACTGCTTGGACGCTATGAA  
ACCTGGCGGGTGGACCGTTATCGTTACTGGTGGCTGTAGTTGGACTGCAAGTGGCGCACTATTTGTTGGATGACGCTT  
AACGGGCTGCAATTTTTCGGTGCGGTGCTCATTATGACCGGGCTGTATATCAATGATTTGGCTTGGCGTGGCGTAAAG  
CGGTAAAAGTGGGAAGTTAA

>Cluster\_42931

GTGGCGCTACTTATCATACCACGATTCGTGGCCTTCTCTTACTGTTTATGGCGAGTACCTTGGCGGGCACGTCGA  
TAGCTATTTTGGGCTGCTGGTGCAGCTGGTCTGGCGGCACCTGTTTTTCTGCGTTCCTGCGCACCCGTGGCAATAGCC  
TGAAAACGGTTGGCTGTATATGCTGGTGGCGCGATGCAAGTGTGATGATGCTGAGTTTTCGCGGCTTTCGCGCTTCT  
TACCTGACGGTCTCCGAAGTGTGCTGTTACCGTACTGACGCGCTTACATCAGCTGATTTATGACATCATGAGTAA  
GCGCGCTGCGCTGGGGCTATGCTTTTACGCGCTTGTGGCGGTGATTTGGTGGCGGATTTATCGCTATGATCAGGTCA  
CCGACATTTCTGGACTGGCTTATGCTGGTGAACCTTCCGCAATCACTTTTGGCATCGGCATGGTGGGTTACAACGCT  
CTGATGGAACCTCGCCGATGCGCAGCATAACGCCCTTTGCTGTTTCTATCTTGGCGGCTTCTGGTGGCAGTATTGC  
ATGGTCTTGGTGGGAAATGCGCAGAAAATGCGCAAAACACGTTGCAATGGGGCATTCTGGTGTTCCTTGGCGTGGTGG  
CTTCCGGGATGGCTACTTTATGTGAACTACGGCGCAGCAGGTTGGACGCCGGAACGCTGGGCATTTATGAATAATATG  
CAGTTCCGCGAGGGTGTGGTAAACCTGCTATCTGGACCAACAGCCGACTGGCCACGTTTATACAGGCGCGCT  
GGTGTATCTGGCTCACTGTGGTGCATCGTAAAGTGGTGCCTCCGCGCTTTCACAAACGGCAGATGATCGCAGGCGTG  
ATTGCGCGCTGAACGAATAA

>Cluster\_48320

ATGAAAAGTTCGTTACATAACCCCGTTGTCACCATATTTGATGAACAAGGCGCAATCGATCCTGAGCAAAAACACTCAGGT  
TTATGATTTTATTAATAACACGCTGTCGGGTTTGTGTTGATGGGCGAGTACTGGTGTGTTTTTTCGCTTAATATGGAAA  
ACGCCCGCAAATGATTAATAACCTGTAGTGTAGTTTCCCGAGGCGATGAAGGTTTATGCGCGAGCCAGTCCGATGGAC  
GTCAATGAATCAATCACTGGCCAAATACGCTGGGAACAAGGATGGATGGTGTGATGATCATCAGTCTTATTTATTT  
CCCTCGGATGATGAAGCTATTTTTGATTTCTACAGTACGATTTGCAAGCCAAAACCCCGCTCATATTTTATTAACCT  
TCCCGGAGAGAACCGGTTACAGCTATCACCAGAGATTTGTTTACGACTGGCAGATAAATATCCCAATATTTATGGTATG  
AAAGATACCGTCCCTGATGCTTTCCATACTGCGCAGGTTATCAATACCGTAAAGAAAATATCCCTCATTTTGAAGTGT  
TGCAGGATATGACAAATATTTGCCCAACAATACTATCTGGTGGAGATGGCTGTATTTGGTGGTTTATCCAATATGTCC  
CTGAATTTTTTGGCTTCCGATGCAAGCATTTACGAAATGACGATTTACTTGCAGTCCGCGAGCATCAGCAATATGCTGAT  
CAACTAATGGCGTTTACAGCTGAATTTCTCTTTTATTTCCACTTTCAAAAAGCCCTCAGTTAAAGGGGTTATTTCA  
ATCAGAACGGTGTCTTCCACATTAATAATACTTGTATGATATTTCAATCCCGGAGATTGAGGAAAATTTTATCTGTACCG  
ATTATTAATAATAA

>Cluster\_51126

ATGACGGTCCCGAGTGTCTGACTACTGGTTCGACAACTACGCTCTACAACCTCAGAGAAAAGACCCAGGCACTTTA

CCGATCAACGGTTATGAAGCGCATGCATGACGCCCTTCCCTAATCGTCCGGCATCTTCTATCACGGTTAAGCAATGGGTTG  
ACCTGCTTACCGAAGAAGAAAAAGATAATCCACGCCGAGCAAGGCAGGTGCTAAGTCAACTAAGATCAGCAATTAGTTGG  
TGCATGCGCGCTCAGTTGATAGATAGTTGCGCAATATGAGCATCCAACCAAGGGACTTCGGCTCCCGCGCTGAGGTAGG  
GGATCGGGTACTGTCGTATCAGCAACTGGCTAAGATTTGGCTTGTCTATGAAAGAAGCCGTGCGTCTACGTCAAAATAAGC  
TCCCTCATCAGATGCTTAGTGTGGGGGGCAGGCTCTCAGAGCTTAGGCTGGCAACAAAGACAGAAATTTGACTCGCTG  
GAAAACGTTATGGACCTACCGAAAGAGCATAGCAAGATGGGTAATGTTATCCGCGCTCCAATCTTCGAACAAATTAAGCC  
TTTCTCGAAAAGGCCATGACAACTGATGATGTTCTTTCCCTGGAGAAGACATAAACAAACCGATCAGCATCGCTG  
CAGCAACCGATTTCGTAATAGAAATAAGGGGAGGGATGGATCTAGGTTACTGGCGAACACACGATTTTCAAGAAACGCTT  
GTTACACGCTGTCGAGATGAAATGTCGAGCCTCATGTTACTGAGCGAATGCTCGGTATGAACTTGGCGGGATAATGTC  
CGTATACAATAAACACGACTGGATAGAGGCTCAGCGCAAAGCGTATGAGCTTACGCTGATAAATGTTCTGGCACATCA  
GGAGCATTTCGTATTA

>Cluster\_32860

ATGCGTCGAACGTTTATCAAAAAAGAAGCGCTGTTATCACGACACTGGCCCGTTATTTGTTGGGTGAAAAGTGGCGTAA  
TCGACTGAAAACCATAGATGAGCTGGCAACTGAATGCCGTTTACGCGTTGGCCTGACGAGGCCGCGTTGAAAACGCTGG  
AATCAAGCGGAGCGATACGGATTGAACGCCGTGGGGCGCAATGGCAGTTTACTGCTGAGATGGATAACACGCATTGCTG  
ACTCATGTGGATCAACAACGTTGGTATGTGCGATGCCCTTGCCTATACCCGTTTGTACGAAGCCCTAGCGAGCGGAT  
GAAAGCCAGTTTTGATGACATTCCTTTTTTACTATGCGCATATGCGCGCGCGGATATTGCGGTGGAGTGTTCATTAATG  
GCGTGTATGACATGGCGGTGTTTCCGCGACTGGCGCGGAAAGTTATCTCACGCAAAAAGGATTAATGCTCGCGCTGGAG  
TTGGGACCGCATACCTACGTTGGCGAGCACCAGTTGATTTGCCGTAAGGCGAGTCCGCAACGTTGAAGCGCGTGGGGCT  
GGATAACGTTCCGCGGATCAGAAAATCATGACCGATGCTTTTTTGGCGATGATGTGGAACGAGTTCGATCTCTCTT  
ATCACGAGAGTTTTCAACACGCTTTAAAGGCGATGTTGACGCGGTTACTGGAACGTAAGTGGCGGAAAACGAACTGACC  
ATGCTGGGATTAGAAGCGACGCCCTCACAGACGATCCCGGATTTTTACAGGCCACCGAAGCCGTGGTCTGACGCGAGT  
CGATGATTACCAATGCAACAACCTGCTGCGTGCAGTTATGATAAACATGCCCTGCTTCTCATCAACAGCGAGTAGTCA  
GTGGGAAACAGGAACCCAGTTATTA

>Cluster\_34701

ATGCGCAATCGTACGCTGGCTGATCTTGATCGTGTGCTCCTCGCGGAGGGCATGGACTGGGACGCGTTCCTCATC  
ACTTTCGCTTTGGGTTCTGTTAAACGGGTATCGTCACCACCACCGATAATGGTGGCTCGACGGGGCGTATTCGCGGTT  
CAGAAGCGCGCATTTGCCTTGGGGCGATATCGCAACTGCCCTCAACCAGCTGATAACGGAACCGAGCGTCCGCTCGCGAT  
TTTGAATACCGTTTTTGGTGGCAATGGCGAACTTTCCGGTCATAATCTCGGAACTTGATGTTAAAGGCGCTGGATCACCT  
TAGCGTGGCGCTCTGGAAGCCATCAATTTAATTCGTAATCTGCTGAAAGTGGATACGCATTTGATTCATGTCAGAGC  
ATCCTGTTGATCTGATGGCGATTGACGATCAGGGGATGAAGTTACGGCGAGGTCAATATCGACCAGTTAATACGCCG  
ATTCAGAGTTATGTTAACGCCCTAATGTACCCTCAACCGCTGAGGCGGTTACGCTATCAATGAAGCGGATCTCATCAT  
TATTTGGGCTGGCAGTTTTTATACCAGCTGATGCCAATCTGCTGCTGAAGGAAATCGCCAGGCATTACGCCCGACGC  
CAGCGCGGATGGTTATATCGGCCAATCTGGGGCGTGGTTGAGTTTACCTGCGGCTAATTTGAAGCTGGAAGCAAGCTG  
GCAATATGGAGCAGTATGTTGGTAAAAGGTCATTGATGCGGTCATCGTCCGGCCAAAAGTGGATGTCTCGCGGGTAA  
AGAGCGGATTTGATCCAGGAGGATGGAGGCCAGCGATATTCGGTATCTGCTATGACCGCCAGTTGTTACATACACCGC  
TGGAAAAGGCGTTACAGGCTTTAGGTTAA

>Cluster\_61409

ATGTCACAGGTTACTGAAAATAAAGTGATTAGCGCACCGGTGCCGATGACCCCGTTACAGGAGTCTGGCACTATTTTAA  
ACGCAACAAAGGCGCGTTCGTCGGGCTGGTTTTACGTCGTCATCGTGTTCATCGCGATCTTTGCCAACTGGATTGCAC  
CCTATAACCCGGCGGAACAGTTCCGCGATGACATGCTCGCCCGCCAGCTGGCAGGAAGGCGCGCAGCATGGCGCACTTG  
CTGGGCACCGATGACGTAGGCGGTGATGTGCTGTCGCGCTGATGTACGCGTGGCGCGCTGTCGCTGCTGGTGGCTGTCT  
GGTAGTTGTTTACGCTGATTTATGGGCTTATTTCCGCTGATGTCGCGGTTACTTTGGCGGCTGGTTCGATACATCA  
TTATGCGCGTGGTCGATATCATGCTGGCGCTGCCAAGTCTGCTGCTGGCGCTGGTGTGGTGGCAATTTTCCGCCCGTGC  
ATTTGGTAAACCGCGCTGGCACTGACCTTCGTTGCCCTTCCCGCACTATGTCGCGTTAACCCCGCGCGCGTGTGGTGA  
AGTTAACCCGCTTACGTCACCGCGTCTCGCGTGGCGGGTCCCGGGGATGCGTTCAGATGTTTATTAACATCTTCCCGA  
ACTGCTTTGGCGCGCTGATTTGTTACGCGCTGCTCGGTTTCTTAACGCCATTCTCGATATGGCTGCTTGGTTTCTC  
GGCATGGGGGACAGCCGCCAACGCTGAGTGGGGCACCATGCTCTCCGACGTTGTCAGTTCCGCGCAAAGCGCTGGT  
GGTCTGACCTTCCCGGCTTGGCGATCTGCTGACGGTGTGCACTTAACCTGATGGGTGACGGTCTGCTGACCGC  
TCGATCCCAACTGAAGCAGTAA

>Cluster\_46758

ATGAAAAATTTAATCTTACTTCTTGTTCGATCTGTTTATCTGCGTTTGCAGTGAAGTCCAGTACCTGAATTCGCTAA  
GTATATAAATGATTTAACAGGGACATTAACCAGGGAGGAAGTAAGTACGCTGACCACTCAGATTAACACCTGACGCAAA  
AAAGCCACGCACAACCTGATCGTGTAGTAGTAGAACAACAGGCGATGAAACCATCGACCAATATGCAACACGAGTATTC  
GAGCGTTGGCAGCCCGCTCATAAGAATCTTGATGACGGTATTTTACTGGTAGTTGCCCTGGCAAGATCATACGATACAT  
TGAATTTGGCTACGGACTTGAGGTTATTTGACGGATGCGCAGTCCGGGCAAAATATACGCAACAGTATATTTCTGCGT  
TTAAAAGGGCGATCTTGTGTCGCGTTGCAACAGGTTATGGTGATAATGAAACCCGATATCAGAAAATCATTTAGTC  
AATAATACATGCCCGATATCTTTACCTTTAGCGGTTGGTGGGCTCTGTTAGTCTGGCGATAGTACTGACGTTTTAT  
TTCTGCCAGAGGATATGTCAAAACGCTGGGAGTGGTTTCTGCTGCCATAATACTGCGCTTTGACTTCCCATCGCTG  
GATATAGCGGGAGCTGGGGAGTTCTTGCACATTTATGTTTCCGCACTCCATCTTGGTGGTACGATATCGCTTTCAGC  
CCTTTCCGCGAAAAGGTGCGTGAATCAATGCGTAGCGCCAAACCGCTACGTTACGAAAGAAGCAACTCGGCCCTCCCG  
ACATTTCTCATCATCGTCACTTCTCTTCAACAAATGCAATTTACGCGGTGGTGGCGGTTTCACTCCGGCG  
GTGGCGCGCGCTCAGGAAGATGGTAA

>Cluster\_2409

ATGGATTTGCAAAAATAGATAAGTATACCTGTAATGGAAATTTAGACGCTCCACTTGTTCATAATCATATGCAACTTA  
TAATCTGAACTTGATATAGCTAAGTGTTCGCAATCGGTAACATCAATCTTATAAGAATATGAAATCATAATAATGG  
ATGGAGGATCTTCTGATAAAAACGCTTGATATGCAAAAACGTTAAAGACGACCGAATAAAAATAGTTTCAGAGAAAAGAT  
CGTGGAAATTTATGATGCCGGAATAAAGCAGTTGATTTATCATTGGTGGTGGTGGTGGTGGTGGTGGTGGTGGTGGT  
TTACTATCATAAGATGCAATTTGCTTCAATGATGAAGGGGTTATGGTATCTAATGGCGCCCCGTGGTGGTGGTGGTGGT  
CAGCGCACGAAGTCCCGATAGGAACATATCTGATTTTCAGGCAAGTGTACAACCTAACAGGATTTAAGTTAAT  
TATTACAAATGTAATTTACCATTGCCAATATGAGCGCAATATATCTCGTGAATTTCTCAGAAAACGAGTTTTGATAT  
TAAATTAATAAATTTGCTGACGCTGATTTGGTTCTGAGATGTTTCAATGGAGTAAAGAGAAGTCACTTATTTTAA  
TTAATGACACGACCCCTATGTTAGAATGGGATATGGTGGGTTTCGACTGATATTTCTCAAGTTAAAACCTACGCTA  
GAAAGTTTCAATTTGACGCAAAAAGAATAATATATCTGTTTAAACATACAGCTGATTTCTAGATATGCTAAAATTTCTG  
GATGGTAGCGATCAAAAATTTTTTGGCAATAATGTTTATAAATAATGCATAACGGGTATCATCTCCATAAGAAAATCA  
AGAATAAATAATGA

>Cluster\_7909

ATGAATAATCATTTCAAGTGTATGGCATTTGTTGGACACCCACGGCACCCACTGCCTGACAAACACATGAAATGCTCTA  
CCGCTGGCTGTGCACAAAAGGTTACGAGGTCATCGTTGAGCAACAATCGCTCAGCAACTGCAACTGAAGATGTGAAA

CTGGCACGCTCGCGGAGATTGGGCACTAGCTGATCTCGCGGTAGTCTGTTGGTGGCGACGGTAATATGCTGGGCGGGCA  
CGCACACTCGCCCTTACGATATAAAGTTATTGGAATCAACCGTGGCAACCTGGGTTTCCTGACTGACCTTGACCCCGA  
TAACGCCAGCAACAGTTAGCCGATGTGCTGGAAGGCCACTACATCAGCGAGAACAGTTTTTTGTGGAAGCGCAAGTCT  
GTCAGCAAGATTGCAGAAACGCATCAGCACCCGGATAAATGAAGTGGTGTCTTATCCAGGCAAGTGGCCCAATATGATT  
GAGTTCGAAGTGTATATCGACGAGATCTTTGCGTTTTCCTCAGCGATCTGATGGACTAATATTTCGACGCCAACAGGCT  
CACCGCTATTCCCTCTGTCAGCGGTCTTATCTGACCCCTCTCTGATGCGATTACCCTGGTGCCTATGTTCCCGC  
ATACGTTGTCAGCAGCAGCAGTGGTCATAAACAGCAGCAGCAGCAGTCCGCTGCGTTCGATCGCGTAAACGACCTG  
GAAATCAGTTGCGACAGCAGATAGCACTGCGGATTAGGAAGGTGAAGATGTCTGATTCTGCTGCTGATTACCATCT  
GAACTGATTCTATCCGAAAGATTACAGTTATTTCAACACATTAAGCACCAAGCTCGGCTGGTCAAAAAATTTATCTAA  
>Cluster\_40369

ATGGATCTGACCCAACTGGAGATGTTCAACGCGGTTGGCGAAGCTGGCAGCATTACCCAGGCTGCAGCAAAAGTGCATCG  
CGTGCCCTCGAATCTCACTACCCGCTACGCCAGCTGGAAACAGAACTGGGGTTGATCTGTTTATTCGCGAGAACTCAGC  
GTTTACGCTCTCGCCCTGCGGGCATAAATTTTTACGCTATAGCCAACAAATTCACGTTAGTGGATGAAGCGCGGAGC  
GTTGTGCTGCGGATGAGCCGAAGGTTATTTCTCTGGGATCGCTGGAAGCACCGCTGCAGTGCAGTTCGCGCCAC  
GCTGGCGGAATTTAACCGTCTGTTATCCAAAATTCAGTTTTCCTTCCACCGCCCTTCGCGCACTATGCTGGAAGGTG  
TGCTGGAGGAAACTGAATGCGGCGTTTATTGATGGCCCATTAACCATCTGCCATCGACGGGATACCGGTATACCCG  
GAGGAATAATGATCGTACGCCACAAGGACATCGCCAGTAACCCGTGCCAGTCAAGTGAATGGCAATTAACATTTATGC  
CTTCCGCGCAATTTGTCGATCGTCCGCACTTCGAAAGCTGGTTTCACTGCTGACGGTCCCGCTCCGGAACTATTACG  
AGATGGAGTCTTATCAGCGGATGTTGGCTGTGTGGTCCAGGAGCAGGCAATTGCGCTTATTCCACGCTCTATGCTGGA  
AGTATGCGGGGCAATCACAGGTTGAAGCGTGGCGTTAGCTGAGCAATGGCGTTGGTTAACAACTGGTGGTCTGGCG  
TCGTGGTGGCAAAACCGCTCGGCTGAGGCATTTATTAACATGCTGAGTCCGCTGACTCGGCAAAACAGGTTACCAAT  
GA

>Cluster\_67104  
ATGCTGGTTACTTTAAATTAATAATAGCGATTGTTTTTATTGTTATGTCCTGATAAAACAGAGAGATAAAGATGAA  
AATAACGCATCATTATAAATCCCTTCTTTCAGCATTATTTTCGGTGGCCCTTTTTTATTCGGCAGCGCCACATGCAGATA  
TTCCTGATGGTGGCGAAATTCAGTTTAAATGGCTTTGTCTACTGATGATGCCCAAAATGGACCTGGCAGATTAGTTCACCG  
GACCAGACTTGGGCTGTGGATACTGCCGATGCAGTACAGAGAACGGGCAACTGGTTTTGATTTGAGTGACAAAGGGCC  
CTGCGCTTTCTTGGGGGTATTGTTGATGAAGTGGCCGAGCGTGGCGGTTCCCGGATTCACGCTTTATTTACTTTTCAGCA  
GTAAACGACCGCCCTTCGCGGTAAGGAAGGCTGTGACACTTCAGTGCACAGTTCGCGCTCTGTCCCGTGGTGGTGC  
CCGAGACGGGAAACGCTGCGGGACAGCTTTCTTTCACCTGAATCAGGGGATGGCGTCAAGTACAGGTAACAGGAAGA  
GGGCGCTCCACGCTTCTGGTATGTCAGTGGTCAAGTGTGACGGATGTTCAAGTACAGGAGTCTTCCGCGAGG  
GGCTGAAGAACCGCTCTGCTGCCATTATTGCTGATGAATAAGGGTTTCGGTAATGGCATGAGTCCGCGAGGATAACGGAC  
GTTATCACTCAGGGGACTGCGTGACGGTCTGTGATGAATCAGGCTGCGGCATATGCCCTGCGGTGTGGATTTTGA  
ACTGCGGTTGCGCGGAAAGGCACACCGCCCGCTGGCAGGAGGGCTGAATGTGACAGTCACTGATCAGTGA  
>Cluster\_62539

ATGAATAAACCTGACGGCCTTACGGCCCTTGAACAACCGCTCGCGTTCGCGCACAGCTTCGCCAGCTTATTTCTTGA  
ACGATCCAGAACCTGACCCATTACGAGCCGTAATTGGCATCATGGGCAAAAGTGGTACAGGTAATCCTCTCTTTGCA  
ACGAACTTTTCGCGGTTGAGTGTCCCGGGTGAAGTGAACGCTTACTCGCGAGTACGCGCTTCGCGTTCGCGTGGCC  
AGCGTCTGTCAGCTGAGTGTGATTTACCGGGGTTGGTGAACGCGGCGGGGATCAAGAACTACCGTTCGCT  
GTACCGTCAATCTGCGGAACTGGATCTGGTGTGTTGGTCAATTAAGGCGGATGATCGGGCAATAACCGTGGACGAGC  
AGTCTGGCAGCGTGTGATGCAACCTTACAGGCAAAAGTACTGTTTGTGATTAAACAGGCGGACAAAATCGAACCTGT  
CATGAATGGGATACCCCTCACAGCAAACTTCAACACACCAACAGGAAATCTTAAAGCGAAGCAGGCTGCGATTATGCG  
GATGTTTAAACCGCATCACTCCGGTCTGTGCGGTGTCGCGCAGCTGGATGGGGCATGAGGATATGGTGGGAGGATA  
TGGCTGTCTGCTGACCGCGCCACCAGTCCGGTGGTGCACAACTGCACGGGAGACTCTGCACAGAGCCGGTAAAGTGC  
CAGGCCGTGACAGTTTCGGTGCAGCTGTGGGTTGTGTTTCGATACGGCTGAGTCACTGCTATCTCTGCTGCGCCACT  
GAAAACGGTGAATTCGAAACCGTGCGGGAAGCCGTGGTAACCGTTGCCGCTGCGGCTGCGGACTGGATTTTCTTATGA  
>Cluster\_42093

ATGATCCAGAAAGATAAAGTGGCGGTTGATATTTTTGGTGAGCGTTTTTCGACCTCGCGGAGTCAAGTAAACCGCTGGGTT  
AAGAGTTGTCGCCAGCTACATTAATGAGCATCGTGAAGTGGTACTCGAGCAAAACCGCGATGGAATTCGCGCCACGTTGA  
ACACTCCGATGCCACAGTTATCAGGGCTATACAGGCCCTGGGGTTTCGCGGCTGCGTGAATCGAACGCACCTGCGAA  
CAGTGGCTTGGTCCAGCCCTTAGTTTCAGCGAAAAGATGTCTACGACCGTGAAGTAACTGACGAGCGATGTTAACACCGC  
AATCGACTTTGTTCTGAAGGGCATTGTTATACCTGTAATGCTCTGTCAGAGCTGAAAACCGCCACGCGCTTGGCAAG  
CTGTAGCGTTGTTGGTGCAGGCAAGTCCGCTATTTTTGGCATTGGCGCTTCGGGTATTCGCGGACTATACCGCA  
CGACTATTCACCGCATAGGTTTGCCTGCCAGGCCTAAACCGTACGGGTTATGGCTTGCAGGCAACTGATCGCGCT  
TCAACCTGGCGATTTCTGATCATGATGGCGCAAAAATCTGCGCACCGGGAAGGGGTGACGACGCTTCTGTGAGGCGAGC  
GGCTGGGATCCCTGTTATTTGCTGACAAACGCGCTGGATTCCGCTTTTAGCAAAGACGCCAGTATCGTGTATTCATGTT  
CCGCGCGGGGATGAAAAGGGAAACCGCTACATGGTACGGTATTGTTGTGCTGGAATGATGTTCTGCTGGTGGTAC  
TTCCGAGTCCCGCAGCTGCGGTTAAACCATTAAGCAATTAACGATTTCCATCGAGGACTGAAAACGGGAAGAAAGA  
ATGGCTAA  
>Cluster\_48905

ATGTTTGAACAGTTAAAAAACTACGCACAACACGCAAAAGCGCAATTGCTCAACCGCAGGGCGGAACTGGAGGAGGA  
GATGCAGTTTGGCGGTGTCGGGAAGCGTCCGTGGCGCTGGAACACTGGCTGACAAGCGAGGATACTGCTGAGTGTGAGA  
AACACGGGAAATACACAGCTCTGGTGTGAAAGGGCCAGATGTTCTGGGAAACCATCAAACGGGTGCTGGTTGCCCG  
ACCTGCATTCGCAATGAGCTGGATCAGGTACAGGAGCGTTACGCATCTGAAAGTTCATGAATTAATCGACAGGGCTGG  
TATTGCCCGCCGCTTCCAGAACTGCGAGTTTGAAGATTTATCAGGCGGTGAATGCTGACGCACAGAGAAATCTTGGAGCT  
GTCCGCGCTATGCCGTTTCATGGGAGAAAGTGTCTTGTCTGCGGGTACCAGCATGCTCATGATTGGCAATTTGTTGCTGG  
AAAAATCATCTGGCTGTATCAATGGCAAAAATATTATTCGCCACCACAGGCGACCGTCAAAATACGGATGTTATGCG  
ACTGACCCGCGCTGTGAAAATACTTGGCGCCACAATTCAGAGCGTACCGAGGATGAAGTTCCTGCTCATTTCCGCTCAC  
TGGACTGCTGATCATGATGAGTTGGTGTGCAAGTTCGGCACCGCTACAGAGATCACCATCTGCAGGAAATCATAAAT  
CCGCGTTACGAAAGCGTTTTTACCAGCAATTTGATCAGCAACCTGACGTTTAAAGCAATTAAGAAATCCATTTGGTGAACG  
GATTGTTGATCGGTTACTGATGGTGGGTGTAACCTGCTGGTGTGTTGGTTGGGAAAGCTACCGTGGCAGATATCAGAGGTG  
TGGCAGCATGA  
>Cluster\_11781

ATGCCGGGCACTGAAAGAGCTCATAGAAAAAAGCTTTTAAACACAGCGATAAAGCGTGGTGGTCTGACTATCTGACCCG  
GCAGTTTGGCATGAGCTTACGCCAGGCTGCAGGACATTTGCTGCTGAGCAGGACGGTATTTCTGTTATCAGCCGATACGC  
GACGTGATGAGCCGGTATATGGCGTGCAGGCTGGCGGCTGAAAGCTATCCGCGATACGGATTTAAAGAGCTTTCTCAG  
GTACTTCGACAGAGGCAATAGCTGGAACATAAAGAGTTACCGTATTTACTGCTGCTGAACTGAATTTCTGCTG  
TAAGGGAACACAGCGCTTCCGGTACGTAATCCGGCTCCGCTGGCGAGCTCAGAAAGCGATGCACCAGAGCTGGTCCATCG  
ATTTTATGCACGATCGCTGGTGTGCGGACAGCCTTCCGACCTTCAACGATGTTGATGATTTTAAACCGTGAAGCGCTG

GCGATCGAAATTGACCTGAATATCCCGGCGCAGCGGGTCTGTAAGAGTGTGGACAGGATCGTGGCAAACCGGGTTATCC  
GCTGAAAAATGCGGATGGATAACGTTCCGGAGCTGGTCTCACTGACGCTGGCACAAATGGGCAGAAGAGCATGGAGTGATAC  
TGGAAATTTATCAGGCCCGGTAAGCCGACACAGAATGCGTTTATCGAAAGGTTCAACCCGACGTACCCGACAGAATACCTG  
GATTTTTTATTTATTCAGAACGCTGAATGAAGCAGCGGAAATTCAGAGCGCTGGCTGGCTGAAATATAACAGCGAACGGCC  
CCATGAATCGCTGAATAACCTGACGCGGGAAGAGTACCGGCTGATGACTGAAACTCCGAAATCTCAAAAAGTCCGCTGGA  
ACTAA

>Cluster\_19861

GTGTTTACGAAAACAGCGCAGCCCTGGCATAACGCCACGCCGATCCGCACTGGTGGCCCTGACCCCTGCTGGCCATCGA  
TGGTATGTTCTGGCGCACACCGGATACACCAGAGAACGATGACGCTTCCCCCGCCAGACACATGCCGGGAACCCGGCGC  
TCTACCCGCAAGTCAAATGGTCTGCCAGATGGAACCTGACCAGCCATCTGCTGACGACTGCAGCCTTCGGCAGCATGAAG  
AACAGCGGAAATGAGCTTGTGAGCAACTTATAGAACAAACCGCGGATAACACCTGACGTTAATGAATAAAGGTTATTA  
CTCACCAGACTGTTAAATACCTGGAGCCTGGCGGGAGAACACCGCCACTGGATGTTCCCTCTCAGAAAGGGAGCGCAAT  
ATGAAGAGATCAGAAAACCTGGGTAAAGGCGATCATCTGGTGAAGCTGAAAACAGCCCGCAGGCACGAAAAAAGTGGCCG  
GGACTGGGAAATGAGGTGACAGCCCGCTGCTGACCGTACGCGCAAAGGAAAAGTCTGCCATCTGCTGACATCGATGAC  
GGACGCCATGCGCTTACCAGGAGCTATACCGGAGCTGATGCGCGATCTTGCAAGTATGGGACAACTAGTGAAATTACCG  
ACAAGAAGGGAAGGGCCCTCCGAGAGTGGTAAAGGAGAGGCCCTGGAAATACCCACAGCCCGGAAAAAGAGCCAGTC  
AGTTGCTTAACTGACTGGCATTACCCCTTCTGGGGCGTTTTTTTTGTTTTTCCAAAAAGAACTTTTCCATAAACCCGCGAGCA  
TTGTCCTTACATATATTTGCGACGATGTATAACGCCTACACACAGCGATATTGTACTTTACAGGTTACAAGTCAATGTGCG  
GTGTATAA

>Cluster\_35794

ATGTTTTATATTGATAACGACAGCGCGTAACCATCATGCCGCCGATACCGCCAGCGTAGTGTATCGTTCTGCTGGTT  
TTCAGAAGGTGACGGGAATAATGTTATCATGCGCCGCGATGGACTGGTTTAAATATTGTCAGCGGAGTTATTAACA  
CGCTGGAAGAAGCCGGTATTCACCCGGATAAAAACAAAATTAACCAGCTTGCCTGTCCATTAAAGCCATTATGAGCAAT  
AACCGCTGCTGATAAAAAATAACCTCAGCGAAATTAACCTGCGGGGATCAGCACAGCTACAGCAGCTGAAATCT  
GGATATCTATGATGCCAGCTGAACAAAAAGGACTCGTTAGCTAACAGTGCCTGACAGCCCAAGTGAACCGTGG  
CAGCCACCACAAAAGCGTGAATAATGCGATGGATAATGCCAATGCCGCTTGCCAAAAGACCGGACGGAGCAGATATT  
CCCAATAAGCCGCTGTTTATCCAAAACCTCGGTTTACAGGAAACGGTAAACAAGGCTGGTAAACGCCGTTACAGCTTCCGG  
CGATAAAAATGACCGGAGAAATAACCTGGAACGATGAAACTGCGCTGCGAATTTTAAATGATGCTTCCGTTTATTTTCC  
GCCGTTCAGAAGAGTCCCTTCAATTTTATCCCTACGGCTGAAGGACAAGGCGAAAACGGTGATAATCGGCCCATTAAGGCCA  
TTCCGCTATAAATCTAAGAACAGGTGCTATATATGTCAGCCACGGGGCCAAAATGAAGGAGGCTAGCTATTGGTGTCTAC  
TGATAACGCATGGGTGAAAACCTCCATTTGTTCTGGGAGATAACGACACCGGATTTAGGCAAGATGGAGATGGTATTATTA  
GCTTCTATTCAAAATGGTTCCGCGCATCCGACATATGATGGGTTAGGATACATCTTTATAAAGATATTGAATCTAATTGC  
AGCAATTTTATGATTA AAAAGTAATTACCGCCACCACATTAATTCACCAACGAAGACGGAAAGTATTTCGATGTTTTTGTG  
GAAAGATAACCGTGGTGTGATGGTGTTCATATTAATAACGGTTCAGATGGTGGTGGTGTTCATTTTTTAAACAGATGGGG  
GATTTGCGCTGGGAAGTGGTGGCAAGTTGCGTCTAGTGGCGATATTTATGGTTCAGTGTGGGAAACAACTGGTATAGC  
ACATGGCTGCATAAATCATCTGTTCCGGGATATTGCTCTTTGGCAGCATTAATAA AAAACGATGCGCGGACTACGGCTT  
TGGCGATGCGTCAAGTTATGTTTTAACAGCCGCAATTAACGGCAATGCCGATGATCTTGTGACACTGTTGCCAGAAGGC  
CAATTCAGAAATGATTGGGGAAATATGTTACAACGTTGGGGAGTGTTTAA

>Cluster\_3849

ATGAAAAGATTAATTCCTGTGGCATTGCTCACCGCATTGCTGGCGGGCTGTGCTCACGATTCCGCCCTGCGTTCCGGTTTTA  
TGACGATCAGGGTCTGCTGGTTCACACCAATACCTGTAATGAAAGGCACGACTCAGGATAACTGGGAAACGGCTGGGGCTA  
TTGCCGGCGGGCAGCGGCTGTTGCTGGCTGACGATGGGGATCATCGCTCTGTGCAAAATA

>Cluster\_64471

ATGGAACCTCGTAAGGTTTCAATGCGGCGAGGAAGTGCCTGGTCCAGTAGCTTTGGCCTGGTTCGAGAATCTTCGCAA  
GATCTCAGGTGAACCTCAACGCTAAGGATGCAGGTGATGTTCTTGGCATATTAAGTGGCGCCATCGATAAGTTTATGGCG  
CGCAATGGATGAGGCTACTTTCTGGGAATCGGTTTGTAAATCAGTTACTAGAAGCAACTATTGTA

>Cluster\_7950

ATGGGACTGACTGTGGATAAAAATCAACACCTTTCTGACCTACTGGCTGTCAAGTGGTGTGCGGTAATTTCCGTTACGAGAC  
ACCGGAACGGCTCCGCGCTTATGTCGGGGGAAGCTGCGCCATTTTACCGCGCTGGTTAACTTCTGGTACCAGCGAAAGA  
AATACCGCTATCTGCTCGATGGGGATTGATAAGGGGGTTATTCGTTGGGCTCATTCTGTTAA

>Cluster\_48661

ATGTTTGTCTTATCGCTGGCGTTAACGCTCCATAATGAATATTATGTTAATCGCATCGCTGGGATCGCTGGTTACGCTGG  
GCGCGCAGTTCGAGCTTATAGATGAAACGACGCGCAAAATGACTTATTGAGCGACCAGGAGCGAAAAAAGCAGACGCTGA  
ACGACGCTGATATATTTTTAATGTTAAAAGCGTTTGTAGAAATGGGATTTAAAATCAGTTTACACAAAATA

>Cluster\_29491

GTGACGGAGCTGGAAGACATTTGCTGAACGCTTAGAGCAACTGCAACAGGACTATATGACGCGGCTGAACGAATGGGA  
GAGCGCCTTCGTGGAATTCAGAAAATGTTTTCTGCTTACGCAACAGGACAACCGGATGCTGAACGAGCAGGTCATGACG  
TGAGTCAGCAGTGCAGCACTTGAGCGAGCGGACAGAACGCTTACAGCCAGTTATACAGCGAGAACAGGAGATAA

>Cluster\_214

ATGAAAAGTTGTATAAGGTTCCAGAAATAGCGGAATATTTTACAGGTAAGTGAACGAACAGTGTATGGCTGGATAGAGAT  
GGGTTATTTCCGGGCGATCAAGGTTGGGTCGTTGATGGGAAAGGGACGGTTAGAGTTCCAGAGGATGCTTTAGAAGAAT  
TTATTAGAAATTTGCAAACTATTCCTATTCGTCCAAAAGGATAGTTCTTAAGGTTCCCTCAGGAATAG

>Cluster\_31789

ATGTGCAATAAAACACACCGGACGCGAGAGAAGCAATGCAATACTGATACGCTGCGCTCGTTGATGTTACCCACAT  
GGTGGAGATTATGGAGAAAATCACAGTCCGAGCAGCAAAAAGAAAACCTAAAACAATAAAAAATAATTGCCAAAACCT  
CGCTGATAAAAAGTTACAGACATCCTTAATGAGGACATTA AAAAGAAATAAGGGAGAAAATTTGTGATGCATAA

>Cluster\_11003

ATGTTTAAAGTATGACAGATGTTGATGGCGGAAGAAGATGATAAAGTATGTGAACTTATTTTTAAACAACAAGATAATTT  
GATTTTTAAAAATAAATGTTAGATTTCCAGAATAATTAATAAAGAAATACCGAACATTAACAAGTAAAGTGTATGGCTAT  
GGATATTGCGCAATTTGTTATTGAATGGTTAATGTTGTTGTTGGGTTAAACAGTTAG

>Cluster\_54458

ATGCTGACGAAAAGAACATCATTTCGATCGCTGCTGGTAAAACAAAGCCCGGCAATGCCTACGGTACCGGCTGGATCAT  
GGGTGAGGATGGTAAACGCTGGCATCCGTGCGGTTCCAAAGATGAATGCTGGCAGAACTATCTACGAAAAACGGGGGA  
ACAAATGGCTATTGAAGGCACTGCGGCGACTGTTCCATTAA

>Cluster\_40384

ATGACGACCTACGATCGTAAACGTAACGCAATCACCACTGGCAGCCGTTTATGGTTAGCGGCACCGGTCACACTGGCAA  
GATCCTGCGATTGATACCTGAAGGTTGACCGCTGAGCAAACTCCGCGGAAAAACCGTAGTTGTTGAAGGTTGTGAAG  
AGAAACTGGCACCTTGGACCTGATTCGCTCGGCATGAACTAA

>Cluster\_6250

ATGTTGACTACAACAAGCCACGACAGCGTATTTCTGCGTGCCGATAATTCCTGATCGACATGAACTATATACCAGTTT  
CACCGGTATGACCACAAAATGGTTTACAGTTGATCAGTGAAGGCCATTTCCCTAAACCATCAAACGGGGCGCAGCA  
GCCGCTGGTACAAAAGTGAAGTGGAGCAGTGAAGTGA  
>Cluster\_310  
ATGTCAGAAACTATTACGGTGAATTGCCAACCTGCGGGAAAAACGGTGGTGTGGGGTGAATCAGCCGTTTCGGCCATT  
TTGCTCCAAACGTTGTACAGCTGATCGACCTCGGAGAATGGGCTGCTGAAGAAAAACGAATCCCAGCAGTGGCGATCTTT  
CCGAAAGCGATGACTGGAGCGAAGGCCAAAGCAGTGA  
>Cluster\_6853  
ATGACTGTTTCAGGACTACTTATTAATAATTCGCAAAATCAGTTCACTCGAAAGTCTGGAAAACTCTACGACCATCTTAA  
TTACACCCTGACGGACGATCAGGAATGATCAATATGTATCGTGTGCGGATCACCGTCGCGCAGAGCTGGTTTCTGGCG  
GGCGTTTGTCTTACCTCGCCAGGTACCGAAGTCCGCTGCGCACTATGTCCAATAA  
>Cluster\_44982  
ATGAAACTGAAAAAACTCTCCGGGTTTAGTTTGGGACTTATTGCTCTGCGGTTGGGTAATGCATATGCAGAAGTTTAT  
TCAGCAGCATGAATATAAATCATGCTGTGGCAATAAAGATGAAAAAGTAAAGATATTGATAATGCGCTAGTTATAACAA  
CGGTAATGGAAGTTACGGGTATCCGTTGCAGGAGAGGGTAGCAAGTTAA  
>Cluster\_48584  
ATGGCATTAAACACTGGCAGGTCTGGAAATCGAGAAAAACAGCGCTACTGGCGTGCTAAGGGTTTCAAGCAACCTGGCAT  
TCTTGAGCGTCTGGAACGTGAAGATGGGTATATCGTCCACCAGCGCGTGAATGGCGTATGTACGATCCAGAAACAGGAA  
AATGACTACAAAAGCCGGAACACTTTGGGGTCTGTTAAAGAAAAATACACTAA  
>Cluster\_66906  
ATGACCGGCTGGGAACTGCGAATCTGGCGAAAAAGCATGCTCTGGTACCGCGAAAAAGCGTCCAGAGAATTTGGCGTGAC  
GCAGAGAATATGGCAGCCTGGGAAAAATGCGGAACAGGTGGACGTCACCGTCTGGAGGACCACCAGGCACTTTCAGTCC  
GTGACCTGCTCCACATGCAGGGGATGCGCAAGGCAGATATCATCAGGCGTCTGAAAAATGAACTGGGGGAAACGGCA  
GAGGATGTGTGA  
>Cluster\_67149  
ATGAGCAGAACACTCGAACAGAAGATTGCTGATGCTGAGGCCAGATTACAGCGCTGAAGCGAAGAGCAGGAGTCTGGA  
CACAGCGCAGAAGGTCATTGTGGGTGCAGCATTGCTGGCAAAGGTCAGAAAGCCGGAGGAGGTGCAGTTGCGTGCCTGGT  
TACTCCAGTTCTGAAGCAGAGGTGACACGACAGGCTGATGTGACCGCATACTACCCTGATTAACGAGCTGGAAGCG  
CTGCCAGGACAGTGA  
>Cluster\_4887  
ATGCGTATTACCATAAAAAGATGGGGGAACAGTGCAGGTATGGTCAATCCCAATATCGTAATGAAAGAACTTAACTTACA  
GCCGGGGCAGAGCTGGAAGCGCAGGTGAGCAACAACCACTGATTCTGACACCCATCTCCAGGCGTACTCGCTTGATG  
AACTGCTGGCACAGTGTGACATGAACGCCGCGGAACCTTAGCGAGCAGGATGCTGGGGTAAATCCACCCTGCGGGTGC  
GAAATATGGTAA  
>Cluster\_25313  
ATGAAGCCCCAGGAGATATTTCTATCAATCCTGGGGCTGCCACTCCAAACCCAAACAATTTGGATGGTAGTCCCTTCTTC  
GCATGGAGGCAATATAAATATGCTGACGAAATATGCCCTTGGCGCAGTCATAGTGTGTTTTAACGGTGTGGGATTTA  
CGCTTCTGCTCGGAGACTCGCTGTGTGAGTTTACGGTGAAGGAACGTAATATTGAGTTAAGGCTGTTCTCGTTACGAA  
CCGAAGACGTAG  
>Cluster\_43554  
ATGTTTTCGAACTTTTTTCATGGCTTCTCAGCTGACTTATATGTTCTGCTATATAGCGAGTCTCAGAAGTGTTTTTCATAT  
TGAGACTGTTTTCCGCAATGATTGATAAAAATGTTTCGCATGTACCTTGAAGGGCGAAGCGGCGATTATGTCACCATTGGTA  
TTGGTTCTTCCGCAAGAGCTTCGCGAGATAAAGGGCAAACCTGTTGAGATGCGTCAATGGTGTGCTGCTCCTCACTTT  
TTGGTTGCTCCGGAGGAGTAA  
>Cluster\_4757  
ATGAAACTGGCCCTGACGCTGGAAGCCGACAGCATTAAATGCGCAGACGCTGAACATGGGGCGCATTTGCTGTTGACGTCGA  
TAGTGTAAATCTCACTGAATGATTAACAAGGTCGCTGAAAACGGTTAATTCACCTCGTGGTGGACGACTCCGACCAAC  
AGTCAACCTGCACACCACCACCGTTTGCCTATTTTCATGAAAGGAGATCACTCAATAACTTCCATCGAGATCGGGTAATA  
ACATTTGAACAGATCGCTGAATAA  
>Cluster\_45475  
ATGACTCTGGTTAATGATACCGGCTTTGACCCGCTATTTTCCGGCTCTATCGTGAATCATGGCGTCAGCAGCCGTGCAC  
ACCATCCTATTGTTGTGACTGGGAGGCTGCCACCATGCTTCGCGCTTTCCCTCGGCGAAAAAGGGAGAAGGACGGGCC  
GTCTGCCTTCACTTTATGCCAGCTTCGGTAAGCTGGGTGAGACACCGACTCATGAAGATATCATTTGATAACAATCGATCC  
ATCAACTGGCCTGTATAA  
>Cluster\_48609  
ATGATGGTTGAAGAGATTCGTAAGGAGAATCTCTGTATTTGGAAGATATGACCGCCTCATTAAGGAGGTTGAAGAAG  
GAAATAAACAGCCAGAACTATAAAACGAAAACGTGACAGTGTAAACGATTAGTAGCATGGTTAAGAAAGCGCCACATCAC  
AAACAGCGATCACTGACGTGATGCGGCGTTGCTTGAAGAAACAACAAAAGAAACACATGAGCAAAATCGATCAACATATG  
GAGGCAAAACAACAATGA  
>Cluster\_11884  
ATGATGAACATCGAAGAAGTGGCTAAAAATTTTTGTGAAGATGGCCTCTATGCTGTGTGCGTTGAAAAATGAAATCTTGT  
TAGTCATTACCGCATTATGTGTTTTGCGAAAGAATGGGGCTGCGTTAATTAATTTGTGGATGCTCGGGTCACGGACGGAT  
TTATCTTGGCGAAGGTGAGTTTGTCACTTCAATACAGGCATTGAAAGAGATCGGAATAAAGCTGGCTTTTCTGCTTTT  
TCAGGAGAATAA  
>Cluster\_4955  
ATGGTTGCCCTCCGAGCAGTTTTCGGGTGATGCCTTTCCCGGAATGGATTGCCAGTGGGGACTGTGGAGCTTAATTC  
GGTGTGGTGGCTTTCCGTTGATTTTATGCCAACAGCCCCCTGTGACTGACAGGCTGCCCTCGTCATTCATTCGATCT  
CCAGTAACAGGGGTTGATTTGATTTTATTGTGCCGTTTCAGGTGTGCGTTTTCCCGGCGCTGTGCACCGGCTTAA  
>Cluster\_6263  
ATGGGTAGCATTAACCTGCGTATGACGATGAACCTAAAGCGGTTCTTACGCGCGCTTGAAAAAATGGGTGTAACCTCC  
TTCTGAAGCGCTTCTGCTCATGCTCGAGTATATCGTGCACATGAACGCTTCCGTTCAAACAGACACTCCTGAGTGATG  
AAGATGCTGAACTTGTGGAGATAGTGAAGAAGCGCTTCTGTAATCCTAAGCCAGTACGTGTGACGCTGGATGAACCTCTGA  
>Cluster\_17889  
ATGCTCGCTCTGACCGATATAGAGTTAGCTGAAGGGCAAAAAACGAATGTGTTACGTCATACATTTGCGAGTCACTTTAT  
GATGAATGGTGGGAACATTTTAGTACTGCAACGAATCTTGGGCCATTTAACATTAAGGAAACCATGAGATACGCTCATT  
TTGCACCAGATCATTTAGAAGAAGCTGTAACCTTAAACCTATTCTAATTTAACAGGATTTATATGATGAGTGA  
>Cluster\_46480  
ATGTCGAAAGAAGCTGTTTTACAGATGAAACTGGAGCTGAGTTGCGTGGCGAGTTTATGGCTGAAGCCGCCAGTGAGGA  
TCGGCCAGCATCTCAGATCATGCGGAGCTGATGCGGGCTATATCGTCAAGCGCCGAGCCGCGAATATAACAATC

ATTTCGCCACCGAATTGAAGATCGCCGTCCTCAACGTAAGTCCGATCCAGGCCAGTCAATGGGCGCAAATAG  
>Cluster\_51819  
ATGAGCAACGACATTTCAATTTCGTGTACAAAAGTGTATGGCGACACCAGCTGAGTTCGCGGAATGGGAAGGCTACTCTCG  
CGGTTTCGGTATATCAAAATGATTCATAATGGTAAGCTCGCTAAGTTTTTAGAAAAAAGGAAAAACCGAAAGACAGAGTAT  
GTATACGTTACCTTGAGTACAAAAGGAACAAGTCAGGAAAAACATGGGCCAATCCAATTTCAACTTTAATGTCATCGTT  
GGTGGTTAA  
>Cluster\_22292  
ATGACCGTTATCGAGTATATCCAGGAAAAATCCAGATTGCAGTAGAGAAGATATATCCCTCGCACTTGGAAAGAAGCGCAAC  
TTCTATCAGTAATGAATTTACAGGTTATGTGGAAATGGGTTAATAGTACGAACCTGGAGAAAAAACAAAATGATTCGT  
ACTGCGTAAACAATCTGCCGTTTGGATACAGCAATCCCTAAGTGTATGTTCAACCAGTTACTTAAACAGGTAAGAAAT  
GGCAACTGA  
>Cluster\_60343  
ATGGTTATCCGCCACGAATGTCCGTCATATTGCATTGCGCAGAAACGCGTGGCACTGAGGGAGTTTTCCGAATAGTTTT  
GGGACCCCTTTCCCTGCTTCTGGAGCAAAAGACGAACGGCAAATGCAGTGTCTCTTGTACGACTGCAGCGAAGAAGAAA  
AGCTGTTTTGTTAAGCGCTGAAGTTAATCAAAGCGGATATCCACGCCAGCTGAAGGCCTGTGATTGCATATTTCTGAA  
TGA  
>Cluster\_39471  
ATGGCAGAGATTATTTCCATGACTGAAGAACAGAAATTCAGTTAGAAATTTACCAGTGTCTATCTAAGAACAATTCAGC  
GGCAGAGGAAGCGTTTGCATTCATTGGTGTGACCAAGTTGAAACTGGAATTTGTTCAAGTTGCACTACAACGATGGCGGTG  
CAAATCCAGACTTCACATCTCGCACTATCGAAGCGGTGCGTAAATCGAAGGAAGCGTTAGACTGTTCACTACCGGAGGG  
TAA  
>Cluster\_5627  
ATGGCAGATGGCGCCCGTTACGATCTGAAGGGGCTGCCGTCGGGGAAAGTGCACACTACAGGAACAGAAAGAGGCGAGAGGC  
CCGGCTAATGGTGTGAATGACCGACAAAAGCCAGAAAACCTCGTTGA  
>Cluster\_66856  
ATGCGCACCCGTTGCCAGGACCCAACGCTGCCGAGATGCGCCGCTGCGGCTGCTGGAGATGGCGGACGCGATGGATAT  
GTTCTGCCAAGGGTTGGTTTGGCATTCACAGTTCTCCGCAAGAAATGA  
>Cluster\_10976  
ATGAAAACCAAAAAGTTATGATGATTGCAGTGGTCTGCGCTGGCTCTTTTCCAGGATGTGGAGCCATGGGCACAGC  
GATCAAAAACGAAATCTGGAAGTAAAAACCCAGATGAGTGAACCTGA  
>Cluster\_10978  
ATGCCGCAAAAACGATCATTGTGGGCATGTTATGCCCTGACCATGTTGCTGACCGTCTGGGTGTTACACGCATCACCGTG  
TGAATTCAGGGTAAGCTTATGTTGGTTCGGAATTTGCCGCTTCTTGCAGTGTAAACCGTAA  
>Cluster\_46029  
ATGAACGCCATCACCAATTTTCCCTCGATTATAAAAACCTTGAGTTATTCAGTAGTCTCCCCTCTTGCAACTCACACTCAA  
ACTGCCTAACGAAAAGTTAATTTTCAATCATATTGCTATCAGGATTTACATTTTTTTCGCTGTGCTAG  
>Cluster\_15968  
ATGATGCACCTTTCAGCTCGCGGGTAGCGCGCTCATGTCGGCTTTTACCCGCACGAATCTGAATTATCACGCCGAGTTAA  
ACAATTAATCAGAGCAGCAAAAGAAACAACCTGGAGGCGTTATGCGCAATGAAATAG  
>Cluster\_59268  
ATGGTGCATTACGAAGTAGTTTCAATTTGATGATTGTTGCGGTATCACTTACAACCAGGCTGTGCAGGCTTTACGCAG  
CAACGACTGGGATCTCTGCGAGGAGCAAGTTCGTATACGTAGCAACAAGATGTGA  
>Cluster\_67096  
ATGCTTCCCGTTTTGCGGATATTTTTTCCAGCAGGAAACCGCTGGCTTAACTGCCTGGAGAAGCAGCCGGAAGTTTCA  
GCTTCCAGAGGTGATTTGGCGTTTTTCGTAACGTTGCCCTATTAA  
>Cluster\_4479  
ATGAACAAAATATTTAAAGTTATCTGGAACCTGCGACAGGGAATTAATCTGTACCAGCGAAACGGCAAAAAGCCGTGG  
CAAGAAATCTGGGCGCAGTAAGCTGTTAATTTTCGCGTGGTTGCGGGTGGAAATGTTGTCGCTGTTTGGGGCATTGGCGA  
ATGCCGGGAATGACAACGCTCAGGGTGTGATTACGGTGTGATGAGTGCAGCTGGCGACCGGTTGGTGTGCTATAGGCAAAGG  
CGGAAAGCAAAATCTTTTATGAACACCAGTGGTCCAGTACTGCTGTGGGTTATGACGCTATAGCTGAAGGCCAATATAG  
CTCTGCAATCGGGTCAAAAACCCATGCGATTGGCGGTGCATCAATGGCCCTTTGGGGTTAGTGCATATCAGAAGCGGATA  
GAAGTATAGCACTGGGTGCTCTTCGTAATTCATTGGGCCAATACTCAATGGCCCTCGGCCGTTATTCAAAGCATTGGGT  
AAATTTGCTTATTGCTATGGGGGACTCTTCCAAAGCGGAAGGAGCAAAACGCCATTTGCCCTGGGAAATGCCACTAAAGCTAC  
TGAGATTATGAGTATGCTCTTGGCGACACCGCAATGCGTCAAAGCGTATTTCAATGGCGCTGGGAGCAAGTAGCGTCC  
CATCTGAAGAAAACCGCAATTTGCCCTGGGCGTAGCAGTGTAGCTAGCGGTACTGACAGCCCTCGCATTTTGGCAGACAATCA  
CTTGGCCAGCGCAGCGAACGCTATGCGATAGGTGCTGAGACCGAAGCCGCTGAAAATGCAACTGCTATTTGGCAATAATGC  
GAAGGCAAAAAGGACTAATAGCATGGCAATGGGGTTCGGAAGCCTTGGCGATAAAGTCAATACTATCGCATTAGGAAATG  
GCAGCCAGGCTCTGGCAGATAATGCAATCGCCATAGGCCAGGGCAACAAGCTGATGGCGTGGATGCCATGCTTGGGT  
AATGGTAGCCAGTTCGAGAGGCTTAAACACCAATTTGCCCTTAGGCACAGCCAGTAATGCAACTGGTGTGATAAGTCTTGGCT  
TGGTAGTAATAGCAGTGCACACGGTATTAACTCTGTGCGCTGGGCGCAGATTCCATTGCGGATTTAGACAATACCGTCT  
CTGTGCGCAATAGTTTCAAAAACGCAAGATCGTTAATGTGAAAAATGGCGCGATCAAGTCTGACAGTTACGATGCCATT  
AATGGTTACAGCTTTATGCCATTAGCGACTCGGTAGCAAAAAGGCTTGGAGGAGGGGCTGCAGTAGATGTTGATGACGG  
TACTGTTACAGCACCAACCTACAATTTAAAAAATGGTAGCAAAAATAACGTAGGGGCTGCGCTCGCTGACTTGTATGAAA  
ACACCCTGCAATGGGACCAAAACAAAGGCAAAATACAGCGCTGCTCATGTTACTAGTAGCCAACTGCCAGCGTAAATCACC  
GATGTTGCGGATGGCAGGATTTACGCTCCAGTAAAGGATGCGGTTAACGGTTCCTCAACTGAAAGCTACCAATGACGATGT  
CGAAGCCAAACCGCAATATCGTACTAATACAGCAACATTTGCCACGAATACGGCAAAATATGCCCACCAATACCAACA  
ATATCACCAACCTGACGGATTCCGTTGGTGACCTTACAGGCTGATGCCCTGCTCGAAGCAAACTAAAAGGCATTGAGT  
GCAGCTCACGGCCAGGATACCACAGCAAAATCACCAACGTTAAAGATGCCGACTGACGGCTGACAGCACTGATGCTGT  
TAACGGCTCTCAGTGTAAAACCAACCAAGATGCTGTGGCGACGAATACCACAATATCGCCAAATAACACTTCCAATATTG  
CCACTAACACCAACCAACTCTTAACTGACTGAGACGGTGAATCTTGGTGAAGATGCGCTGAAAATGGGATAAGGACAATGGT  
AATGGTGTATTACGGCAGCTATGGCACCCGAGACCACAGCAAAATCACCAACGTTAAAGATGGCGACTGACGACTGG  
CAGCACCGATGCCGTTAACGGCTCTCAGCTGAAAACCAACCAAGATGCCGTTGGCGACGAATACCACAATATCGCCACTA  
ACACCACCAACTCTTAATCTGACTGAGACGGTGAATCTTGGTGAAGATGCGCTGAAATGGGATAAGGACAATGGT  
GTCTTCACTGAGCTATGGCAACAATACCGCAAAAATCACCAATATCTTGGAGCGCACAGTCACTGCAACCAAGTTT  
CGATGCCATTAACGGTAGCCAGCTTTATGACTTAAGCAGCAATATCGCCACTTCTCGCGGCAATGCTTCTGTGAATA  
CTGACGGTGTGTTTACCGGTTCAACCTACAAAATCGGTTGAAACAAATTTATTAACGTCGGCGATACACTGGCTGCGATT  
AACTCTCATTTAGCAGTCTCTCGCGGATGCTGCTTTGGGATGCCACCGCAGGTAATTTAGTGCACAAACCGGTAC  
TAATGGTGAACGAGCGTGTACTGATGTCGACAGATGGTGAATTTACAGACTCCAGTTCTGACGCGTAAACCGGCTCAC  
AATCCACGGCGTAGCAGTTATGTTGTTGATGCGCTGGGGGTTGGTCCGAAGTCAATGACAGCGCACCATCACTGCG



CCGACGTACACCATGTCTAATGCTGATTACGATAATGTCGGTGATGCCCTGAATGCTATCGATACCACCTTTGACGACGC  
TCTGCTCTGGGATCGCGACGCCGTTGAAATGGTGCATTTAGCGCCGCTCACGAAAAGATAAAAAGTCCAGTGAATCA  
CTAACGTCGCTAACGGTGAATCTCTGTCGACGAGCAGCGATTAACGGCTCACAACCTCTATACCACCAATAAGTAC  
ATCGCTGATGCGCTGGGTGGTGAAGTCAACGCTCAACGCTGACGGCACCATTACCGCACCAGCTTACACCATTTGGCAACCG  
CGAGTACAACAACGCTCGGTGACGCCCTGGATGCGCTACAGCTATAGGTTATAACTCTGTCGCAAGCGATAGCAGCGTAGT  
CTGGAGCCTACAATGCCAGCCATGACGGTAAAGCCAGCATCATCACTAATGTCGCTAATGGCAGTATTAGTGAGGACAGT  
ACCGATGACGTGAACGGTCTCAGTTGAATGCGACGAATATGATGATTGAGCAGAACCCCAAATATCAATCAGCTCGC  
TGGTAAACCCGACGCAACCTATATCCAAGAAAACGGTGGCGGTATTAACCTATGTCGCTACTAACGACGACGGCTTAGCGT  
TCAACGACGCCAGCGCACAGGGTGTGGCGCTACAGCTATAGGTTATAACTCTGTCGCAAGCGATAGCAGCGTAGT  
ATTGGTACAGGCGAGCTACAGCGAGCTTGATACGGGTATCGCCCTGGGTAGCAGCTCTGTTTCCAGCCGAGTGAATTGCCAA  
AGGCTCCCGTACACCGCATAACGGAATGGCGTGGTATTGGTTACGACACCACGGATGGCGAATGCTCGGTGCAT  
TGCTATTCGTTGATGACGGTAAATATCGTCAAAATCATCAACCTAGCCGATGGTCCGGAAGCCATGACGCCGTTACGGTT  
CGTCAATTCGAGATTCGATTTGGTGGCTGCGAACCCGACTAAATACTTCCAGCTAATTCACGGAAGAGATT  
ACTGGCAGTGGAACTGACTCGTGGCAATGGGTGCGAAAACCATCGTGAATGGCGATAAAGGTATTGGTATCGGTTATG  
GTGCTACGTTGGACGCGAATGCACTTAAACGGCATTTGCCATTGGTAGCAATGCGCAAGTCAATCATGTCACAGTATTGGC  
ATAGGTAATGGTCTACGACCACTCGTGGCGCTCAAACCAATTAACCGCTACAACATGGACGACCCGACAGACTCTGT  
CGGTGAATTCCTCGTTCGATGTCGGGTCAACGCTCAGCTACTAACGTCAGCAGGTTCCGGTGTATACCGATCGCG  
TCAACGTTGGTCACTGAAAGTAAACGGATGGCAGGTTTCCAGAAATACCCAGAGCATTAACCTGGATAATCGGGTA  
ACGAATCTTGATTCACGCGCTACCAATATCGAAAACGGTATTGGCGATATCGTACCACCGGTAGCACCAGTACTTCAA  
GACCAATACCGATGGTGTAGATGCCAGCGCGAGGTAAGATAGCGTCCGATGGTCTGGTCCATTTGCTGCCGCGG  
ATAACAGCGTCCGACTGGGTACAGGGTCTGTGGCAACCGAAAATAACGATCTCTGTAGGCTCATCTACTAATCAACGT  
CGTATCACAACGTAGCCGAGGTAAAAACGACACCGATGCTGTTAACGTGGCACAGTGAAGTCTTCCGAAGCTGGCGG  
TGTGCGTTACGACACCAAGCTGATGGTCTTATCGACTATAGCAATATCACCTCGGTGGCGGCAACGGCGGTGACGACT  
GTATCAGCAACGCTCTCGTGGCTCAACAACAACGACGGGTGAATTAACGCGAGTTGAAGCAAGCGTTCAGGAAACG  
AAGCAATACCCGATCAGCGAATGGTTGAGATGGATAACAACCTGTCTAAAACGAAAGCAAGTTGAGCGGTGGTATCGC  
TTCGTCAATGGCAATGACCGGCTGCGCGAGGCTTATACACCGGTTGCGAGCATGGCTTCTATTTGGTGGCGGTACTTACA  
ACGGTGAATCGGCGAGTTGCTTTAGGTGTATCGATGGTGAAGCGCAATGGTCTGGTCTACAAAATTACAAGGTAGTACC  
AATAGCCAGGGTGAATACTCCGCCGACCTCGGTGCCGTTATTCAGTGGTAA

>Cluster\_41511

ATGAAAAAGTTACCGTAGCCGCTGCATGCTAATGCTGGCGTGGCAGGGTGGCACAACAACGATAACGCGCAACAGC  
GGTGA AAAAAGATGCGCCTTCTGAAGTTACTAAAGCGGCTCTTCAGAAAACGTGAGTTCAGCAAAAACCTTCCGCGCCGG  
AGGCACAAAACCTGGCCCAACAGAGTGGCGGTAAGCGCTGACATTGCTGGATCTCTCGAAGTTCAACTCGATGGCGCA  
GCCACGCTGGTGTGACGTTCTCCATACCTCTCGACCCGGATCAGGATTTCTCACGCTTATTATGTCGTCGATAAAAA  
AAGCGGCAAAAGTGGATGGTGCCTGGGAGCTGTCAGATAATCTTAAAGAGCTGCGTTTACGCCACCTCGAACCGAAACG  
ATTTGATCGTCACTAATGGCAAGGAGGTCAAAGCGCTCAATACGCAACCTTTAGTAAAGATGACGAAAAACATAAAT  
ACCCGCGATATCCAAACCGCTCGGTTTGGCAGTCCGTTGGTCTGGTCTTCCGTAAGGTGCTTGAAGGGTCCGCGT  
AATGGCGCTAACGTTAACAATGTCGATGTTAACTTCTCCGTTGAAACAGAAATCACTGCCCCTTTCTATTAGCCAGT  
GGGAATACCGCAATTCGCTGGCGAATGGCAGTCAAGTAACTGCTGCAGATGGCGGATCTGGTCTACACCGGACGGTTT  
GATCTCAATCTCGCGCTAACACCCGTTAAAAATTAATGCTGCGCTGGCGATATCAAAACCGCTTACAGAGCGCGGCT  
GTATCTGGCTGTGATGAAATCAGGCTGGAGCTTACGATTAACAGTAACTCCGCGACGCTGTTTACGTTAAGTGATATTGGC  
TTTCAGCTCACCGTTATCACAATCGTCTGGATATCTTTACCAAAGCTTGGAAAACGGCGCGCCAGCAAGGAATTGAA  
GTCTCTTTTAAATAGAAAAGGCGAGCTCTGACTCAGGCAACCGTACGCTCAGGGGATGTGACGCTGGAAAATGA  
TAAAAACCGCGCAATTTAGTCTGGCGCTAAAAACGGTCAAGCAACGCTGCTCGATTAAAACTCCCGCGCTGACCTTAG  
CGGAATTTAACATTGCTGGCGCGCGGGCTATAGCAACAGTTTTTTCATGTTTGGCCCGCGGATCTTTATCGCCGGGT  
GAAACGGTCACTCCTCAATGGTTTGTGCGTGTGACAGCGGTAAGCATTTGCCGATCAACCCATCAAGTTAGACGTGAT  
TAAACCCGACGGGCAAGTACTCAGGAGCGTCTGTTAGTACGCGGAGAAATGGCTCTACCACTTTACCTGGCCACTCGATA  
GCAATCGCGCAACCGTATGTTGGCATAATTCGCGCTAACACGGCGATAACCAAGTATCGGATGTTGGGATTTCCAGCTGAA  
GATTTTATGCCAGAGCGTATGGCGCTGAATCTGACCGGTGAGAAAACCCCGCTAACGCGGAAAGATGAAGTGAATTTCTC  
CGTGGTGGGGTACTACCTGTATGGCGCACCTGCTAATGTAATACTTTGCAAGGGCAACTTTTCTGCGCCACTGCGGTG  
AAGCTGTGTCAGCCTTACCTGGTTTGAATTTGGCGATATAGCTGCCGAAAATCTTCCCGCACGCTGGATGAAGTTGAG  
TTGACCTGGATGATAAAGGGCGCGCGAAGTTTCTACAGAAAGCCAGTGGAAAGGAAACGCAATTTCCCAATACAGGTTAT  
TTTCCAGGTTAGTTGCTGGAATCGGGCGTCCCGGTGACGCGCGTGTGAGCAGGCTATCTGGCTGCCGATGCAAT  
TGCCGGGGATCCGTCGCGAGTTCGCTCGAAATCGGTTTACGATTATCGCACTGACAGCACGGTGAACAGCCATTTGTT  
GATGAAGGCAAGTAAACCGCTTTTGACATCGTTTATAGCAGTGCAGAGGCGTAAAAAAGCCGTGTCGGCTTGCAGGT  
CGCGTGAATTCGCAACCGCGGATTACTAGTGAACCTGGTGGAAATGAAAGCTGCGAGTCAACAGTTTATGATCAAAAAG  
ATCTGATCGAAAATGAACAACCTCTGATCTGAAAGCGGACGAAACCGGTAAGGTCAGTTTCCCGGTAGAGTGGGGCGCT  
TATCGTCTGGAAGTTAAAGCGCCGAATGAAGCGGTGAGTGTGCGTTTCTGGGCTGGTTATAGCTGGCAGGATAACAG  
CGACGGGGTGTGACGTCGACCCGACCGGCTGACGCTGAACTGGATAAAGCCAGCTATCGCCCTGGCAGTACCATTA  
AGTTGATATTGCGCGCAACCGCGGGTAAAGGTTATGCGATGGTGGAGTCCAGTGAAGGGCGCTGTTGGTGGCAAGAG  
ATTGATGTTCCGGCTCAAGGGCTGGATCTGACGATTCGGTCAATAAAACCTGGAATCGTCATGATCTTTATTTAAGTAC  
GCTGGTGGTACGTCCTGGCGATAAATCTCGCTCCGCGACGCCAAAACCGCGAGTTGGGGTGTGATCTGCGCCTGGCG  
ATGAAAACCGTCTCGATCTGGCGTGGAAACCCCAACAAAATGCGCCCAATCAGCCATTAACCGTGAATAA  
GCCAGCAATAAAAATGGTGAATGCCAAAACAGGTGAATGTGCTGGTGTCTGCGCTGGATAGCGGTGTGCTGAATATTAC  
TGATACGTCACGCCAGATCCGTTGGCAGGCTTCTTTGGTCAAGAACGCTATGGCGCAGACATTTACGATATTACGGTCA  
AGGTCAATGAAGTCAAGGGCGCTTGGCAGCTCTGCGTTTGGTGGTGGTGGTGGTGGTGGTGGTGGTGGTGGTGGTGGT  
CCGCTCAATCAGCTCAATATTGTCGCGCAGCAGGCGTCCCGTAAACGCTCAATGAACAGGGAAGGCTCGGTTACACT  
GCCAATGGCGATTTAACGGTGAATGGCGCTCATGGCGCAAGCCTGGACGGCAGATGACTTCCGAAGTAAACGAAAGCA  
AAGTGAATGTTGCGCACCGGTTGCTGAACTGAACTGAACTGAACTGAACTGAACTGAACTGAACTGAACTGAACTGAACT  
TAATTTCCCGCACCTGTTGAATTAGCGCCAGGGTGCCTACTACGCTGTTTATCCCGGTGCGCTGATTCGCGGTTATG  
GCGATGGAGACATTCAGGCCACCATTAGCGGTTAGCGTTACCGGGGAAACCGTTGCCGATCAGCATAAGCAGTGGAAA  
ATCGGCGTCCGTCGGCATTCGCGCACAAACGGTCAATACGGTACGGCGTTGACGCTGGTGGAGCTGGGCGATTCC  
GGCTGATGGATGCAAAAACCTTCTCGCTGTTACGCTGGAAGGCAATTAATGTTGAGCGGCAACCCACCGCTGAACCTC  
CAGTTATATCAAAAGTTAAAAGCGTATCCGTCAGGCTGCTTTGAGCAAAACCCAGCGGCTGTTTCCCGTCACTTTAT  
ACCAATGCAGCCAACTGCAGCGTTGGGCATCAAAAGCGATAGTGTGAGAAAACCGCTGCAATCGGTCGATATCGGCAT  
TTCCCGTTTGTGCAAAATGCAACGTTGATAACGGCGGCTTTGCGCTGTGGGATAAAAACGGTGAAGAGTACTGGCTGA  
CGGTTACGTGATGGATTTCTGGTCCGCGCAGGCGAAAGGTTACAGCGTGGCGACAGACGCCATTAACCGGGTAAAT  
GAGCGTCTGCTGCGCTATTTACAAGATCCGGGATGATATCGATCCCGTACGCTGATAATCTCAAAGCGAGTAAATTCGC  
CGTACAGTCTTACGCTGCGCTGGTGTGGCCGCTCAGCAAAAAGCACCCTGGGTGCGCTGCGTGAATCTGGGAGCATC

GTGCAGATGCCGCTTCTGGTTTACCGCTGCTGCAACTTGGCGTTGCGCTGAAAACCATGGGTGATGCAATGCGTGGTGAA  
GAAGCGATTGTGCTGGCGCTGAAAACCGCGCTAATAGTGATGAGCGGATATGGCTGGGTGATTACCGTAGTCCACTGCG  
CGACAGCGGTTGATGCTCTCATGCTGGAAGAGAACAACACTGCTACCGGATGAGCAGTACTCCTGTTGAACACACTTT  
CGCAGCAGCGTTTGGTGAACGCTGGCTATCGACGCGAGAAAGTAACGCGTTGTTCTGGCTGCCCGTACTCTTCAGGAT  
TTACCGGGCAAAATGGCAGCGCAACACTTTCTGCTGAGCCGCTGACAGCGGAGAAAGCGCAACACAGCAATCTGAA  
TAGCGATCAACTTGCACCTTGCAGGTGACCAACAGTGGCGATCAGCCGTTATGGCTGCGTGTGGATGCCAGCGGTTATC  
CGCAATCCGCACTTTACCGCGAGCAATGTGCTGCAAAATTGAGCGTCAATTTCTGGTACTGACGGTAAAGAGCAAAATCG  
CTGGACTCGTTACGTAGCGGCGATCTGGTGTGGTGTGGTGTGAGTTAAAGCCAGTAACAGTGTACCGGATGCGTTAGT  
CGTGGATCTGTTGCTGCGGGCTGGAACCTGGAACCAAGCAATCTGGCGAACGCGAGCCAGCTGGAGCAAAATGGTGTG  
GTGAAGTGCAGAACTTGTGTAACAGATGCAGCAGGCGAGCATTAAGCACATAGAGTTCGGTACGATCGCTTTGTGGCG  
GCGGTTGCGGTTGATGAATACCAACCGGTAACGCTGGTGTATCTGGCGCGGGCGGTGACGCCGGGAACGATACAGGTGCC  
GCAGCCTATGGTGAATCAATGTATGTTCTCAATGGCGGGGACTGGTGGCGGTGACGATCTGTTGATAGTCAGACCGT  
AA

>Cluster\_5147

ATGGCAGTACGGATTTACAGTGTACTGAAAAGTGGCGCAGGTAAGCCGATACAAAACCTGCACCATTACAGTAAAGGCCAG  
CGCAACAGCACCCAGCGTGGTGAACACAGTGGCTCAGAAAACCCGGATGAAGCCGGGCTTACAGCATGGACGTTG  
AGTACCGTCAGTACAGCCTTATTCTGTTGGTGAAGGCTTCCGCCATCGCATGCCGAACCATCAGCTGTATGAAGAC  
TCACAACCGGTTACGCTGAATGATTTCTCGGTGCCATGACGGAGGATGATGTCGGTCCGGAGGCACTGCGCCGCTTTGA  
ACTGATGGTGAAGAGGTGGCGGTAACCGCTCCGAGTGGCAGCAACACCGGAGCCGCAAGAAAGTCAAGCAGTGTGAT  
CCGCACATCAGCCGTTAGGCGGCAACCCATGGACTGATGCTGCGGACTCCGCACGCGAGCCAGCTCAGCCGGA  
CAGGCGCGTCTGCTGCGTCACTGAGCTTCCAGCGCAGCAACCGGCAACAACAAAGGCTACTGAAGCATCAAAAAGTGC  
TGCCGCTGCAGAGTCTTCAAAAAGCGCGCAGCCACCAGTGGCGGTGCAGCAAAACGTCAGAAAACGAATGCCGAGCAT  
CACAAAATCTGGCGCACTTCTGCATCCACCGGACCAAGAAAGCTCAGAAAGTGCACCTCAGCCCGGATGCGTTCG  
GCTTCAAAAAGTGGCGGCAAAATCATCAAAAACGAGCGAGCTCGAGCCGCGGAGTGCAGCTTCTCGGCAACCGCGG  
AGGAAATTCGCGAAGGCGCAAAAACGCTGAGATGAATGCGGATAACAGCGCACAGGCGGAGCAGACTCACAAAATG  
CATCGGCAAAATTCGCGCAGCAGCCAAAATCAGAAAACCAAGCGAAAATAGTGAGTCAGCAGCAAAAGTCAAGCGAA  
ACCAACGCTAAAGCGTCAGAGAACAAGCGAAAGAATATCTCGACAAGGTGGGGGACTCGTCAAGCCGATGACGCAATA  
CGATTTGGCCGTTGTTACTGGTAATGAGTCTTTTACATAAAGATCGCAAACTTCCGATCCCGGAAGCAACAAATGGC  
ATGTAACGCTAATGGTTACTAACGGCGGTGACTACGGCTCCCTTACGAAAACATTGACTTTATCGAGATCTCGGCGCGC  
GGTCTGCCTTCTCGCTTACTGCTGATAATGTATCTCGTTACCTGAGTATACGCGGTTAGGGCAACCGGGCTAATCAA  
TAGCATGCAAAATGCGTTACGGCTGGTTAAAGATGATGGCTTTATTGAGGTTTGGGCTTCCAGCGTGCATTTATCAACG  
GCGCAAGGTTGCGGACTGGCGCAGACGCGCACCGCAAGTAATACATTCAGACGATTTGTTAAGCAAAACCGCGCG  
CCTTCTGGATATGTTGAAGCCCGTTGTAAGGATTTACGACCAGTTAAACAAGCCGACTAAAGCAGATTTGGGTCTTTC  
TAATGCTATGCTTACAGCGCTTTCGGTCTTGGCGGTAGCGGGATATCAACAAACGGCAAGATGAGCGATGTAGAGATCT  
TAAAAGCTCTGCGTGCAGAAAAGTGGTCAATTTCTGGCGGTTAAGCCGACCGGAAGCACGGCGACCATTTATAGCCAC  
GGTCTGGTATAATTTCTCGCGGTGCGGCTACGTTGGTCAAGCATCAATATCGACTACTCAACCGCAAGACTTAAGATCTA  
TGCCGGCAACGATGCCCGGCTTAAACAACGGGACTTTTAGCATCAATGAGCTATACGGCTCGGCAACAAGCCGTCGAAAT  
CGGATGTTGGACTTGGCAACGTAACGACGATGCGCAGTAAAAAAAACCGGGGATACAAATGACCGGTTGACTTGACAATC  
AAAAAGGTAACCTCAGTCTTCTCGGGCAGACAGTGGAGTCCCGCTTTGCGGTTTATACTGCGGATAACACAGA  
GCGCGGATAATCTATGCTTGGTCTAACACTGATTTGCTTGGCGAAAGTTGCAATCAGGGCAAGACAGCGGGGGACAT  
CAGGAGGGATCTTGTGTTCTGTCACGACGGGAGGGTTGAAGTCCGTGATCTCACAGTACGCTATAAAAATAAAAGCAGA  
ACGATTTGAGATTCGAAAATACCGTACTGACTCATCGGCAACTACGCTCAGCATCTATGGAGTACAGCACACCGTGGT  
TTTAAACGCGTCTGCTTCTGAAAATGTGTCATTTGGTTTAAAGTTAGACAACATGAACCCAAAGTATCTTGGAAATG  
ATACTAATGGGGATCTGGCTTTTGGTGAAGTCTGATCAGAAAACAAACAGCAAAATGATCAGCAAGCGAAACTCGAC  
AAGGGATTAACGATTTGGTGGTCAACTGGCTTTCAAAGGTACGACAGCGTTTTCAGCGGTTGCTACGTTTATTGCCGGAT  
AGCAGGAGCCATCGAGCCGAAAACATTTAGCGGCGAGCGGTTAATCTTAAACAACCTGACCATCATCAAGTCAGATGCCG  
GGCAGTTAAATGCTATATTTGTCATCCTCTGCAAGTGGTGCATAATATACCAATAAGCCTGACGGCATAGCGGTAAC  
TTTTTGTCCGTTGATAGTTCGACTCGTAAGGTTAGGGATTAGATTTATGCGAACATGCAAAACGCTGATTAACAGCGCAC  
AAAACGATATACGTTTCGCTTTGTTGTTAATGGAACCTGGACAGCGTGGAGTCAAGGTTGTTGTTCCGGATGGAATCAGG  
ATATAACTGTCAGTCTGTTAACCACATCTAGTCCGGTAAAAATCTGGCGGAGGGCGAATGATGTCCTTGAAGCAGCTCA  
GACTATAGCAAAAATGCTATTTGCTTGTACGTGGGTTTGTAGTACCGGTAATCTCTCGCGTGGCGGTTGGGTTTCAACG  
CGGCGTAAGTAAGATGCTGTCGCTAAAAAATTTCTTTAGCGGAGCTGAGATACGTTAAATGGTAATGACGGCACGGTTC  
AATCAAAAACAGGTGCTGTTAACGGGGCTACAGCGCAGCGCTCACTATCAACAGGAATGAGGTTAACTCAACTGTTGAT  
TTAACCTTACAAAACAAATCAGGACTGGCAATCGTTTTGTTTTACAGAACTCAGGTAATGCAGAACTACCGTTTCTGT  
CAGGTTGCGGGTTCCAGTACTCGACAAAACGTTTTTGGAGTTGGCAGCTCTGCTGCTATCTGTTTATCGCAAAAAA  
CGTACGAGCGCAGTTGTTGATGTAATGGCGTATTAATTTGCAACAACGCTGAATCAGTCACTCAGACCGCGACCTTAA  
GACGATATTTCTGTTATCAGCGACGCGAGAAAGCAATCCGTAATAATGAACGGATACACCTACAGCTCAGGGAACCGG  
AAGAGTTGACAGGTTCCGACCGTTGACGGCAACGAGCTACGCGAAGAAACCGCGTATCTTAATGTTGACTACGCCCGCTG  
ACGGGCTTACTTGTTCAGTTGCGCGGTGAAACAGATGATCGCGTTACCGCGTGGAGAGGAAAACACAAACGCTACGTC  
AAATCTGGCAACAGCAGACACCCGGATCAGCACTCTGGAATAACAGGTAAGCGAACTGGTGCCTTGTCCGGCAGTTAA  
CAGGAAGCGAACATTGA

>Cluster\_48629

ATGGAACAGTTCAGAAGAAAAATACCGCTTCTTATGCGCGTGTGGTGGCAAGAAAAGTAAAAGCTCCAGCCGTAC  
CCCAGTTGAAGCTGATGATACTGTAATTTCTCGTGCTATGGCAGCCATCTCGACCTTCTGGCGAGGGGTTATCGGTG  
GCTTGGTAAATGGCGCAAAAGTCGATCTTTCATCGACGATTTACCAGTCTTGAATGAAGATGGCTCTTCCAACTCAGCGGT  
ATTACATGGGATTTTCTGTCAGCGCTCACAAGACCAGACGCCAATGGCTGGTTTTGATTTTGTGCAAAACGCTAAGTCCGT  
AAATATTCAGCTTAAAAAACACACGACGTTACGGTTTCAATCGATAACGATGAAGCTGATCGGTTCTGTGTCATCATGA  
AATTCCTTCTTACGTAGCTGATAAAAAGCTTGGCGATACAAAATGGCACTACGGTGAAGTACAAAATTCAGATCGCC  
AACCGAGACGCAACATTTCTGATGTAGTGGCAGAAAGTGGAGAAAAGCGTTGATATCAGCTAACGCAAGAAAGAACCGG  
CGTGTATTACCGTAGCTATGAGCTGAAACTGCCTAACCTGGCCGTGCATACAAGGTTCCGGTGTATTCGTTTACGGATG  
ATAACAGTACCGATACCTTACACGATCTTGGGTTGATTCATCGGTGAGATTTGATACCCCATGAACTACCCCT  
AATCTGCATGTTGGCTTAAAGGTCATTCAGAGCAGTTGGTAGCACAATGCCTTCCGTTCCGTTATTTGATGCGCGG  
TATCAAAAATTCGAGTCCGCTCAAACTACAAAGATAACCAATACTTATGTCGCGGATGAGGACGGTACTTTTAAAGCTGT  
TGCTTCTTCAAAACCTGCGTGGATTTCTTACGATTTGCTTACCAATACTCGGTATGGTCTTGGGCAATTTGTGTCGGAA  
TCCATGATTGACCTCGGCCAGCTTACAGATTTGGTGCATATTTGTGACGAAGAGGTCGATGATGGCTTTGGGGGTAAAGA  
GAAACGTTTGCATAATACGACAGTACACAGTCCAGTCCAGCAAGCAGTAAATTAATCAGGATATTGGCGGATTTCC  
GCGCATGGTGTTTTGGGCTGGTGGCATGGTTAACATCATGACGATAGCCATCAGATCCAGTAAATGATGTTTACCAAC  
TCCACGTCAGATGAGTGGTACTGTTTACCTATAAAGTTCGCGCTAAAGATCGCCATCCGTTGCGCTCGTAACCTACAA

CAACAAGGAGGACGGTTATAAGCAAACATCGAGTACGTTGAAGATCAGGACGCAATGCGCCGTTATGGTGGAGCGTAAAA  
CAGAAGTCGTAGCAATTTGGATGTACAAGCCGAGGCCAGGCTCACCAGTTGGTTTGTGGCTTTTGTATACCGCCAGAATG  
GAGTCGGATGTAATTACATTTACGCGGCTTAGACGCTCATTTCTGATGCCCGGTGAAACCGTTCTGATTCAGAACAA  
ATATCGTGCAGGTAACGTAACCTCCGGTTCGAAATTTGGAGTTTACCAAAAAACAGCATCACTCTCGATGCGCCTGTGTCT  
TAGTAAAAGCGGCTTATTTCCGATATTGAATCAGGAAGGCAAAATCGTTGAGCGGATGTTCTTGAACCTGGCGAA  
AACATAACAAAGTTACGTTTTCAAAAGCTCTGTCGTAGCGGAAACGCTGTTTGAACGGTGTCTGGACAATTACAGA  
ACCAGATCTCGAACCTATGCGCGTTCGCATCGTTAACATCGCTCAGGGGAAACGTCGGGTAGCTTTGACATCACCGCTG  
TTGAAAACAATCCGTTAAATATGAGGCGATCGACAATGGTGCACGCTTATCCCGCAGAATACGACGGTATTGGACCCG  
ACTTACTCAAGCGCTTAAATTTGCAAACTCACTGAAGGACTTACCTCTCAAGCCCGGCAACCTGTCTAGTAAAACTGAC  
TGCAACATGGGAAGGAAATCTCCAGATATTGGATCAGTTGGCGACGTTCTGATGAAAACAATGTATCGAATGGCAAT  
CGCGCGGTGTAACCGAAGAGCAATACGAAATCGTTAATGTGCGGGAGAATGGACGCTACGACTTCCAATGTATGCGGTT  
TCATTTCAACGGTAAAAAACAGAAATATCAGTACCGTTTATCAGGTGCTGGGCACAAATGACACCGCCGGATGCACCAAC  
GTCAATTAACGGCCGTTGGAGACTATCGTAAATGTGATACGAAATGGGTAAATTCAGATTCGGTAGACCTTGTACATTA  
ATGTTTACGCATCCAGACCAACAATCTGGATACGGCGAAACTGATCGCAGAGTCTGCAAGCACCACCTTTACACATGCT  
GGTCTTGGGGATAGCGAAACGTTGATTTACTGGGTTTCGAGCATCGAACAGCGAGGTATGTTAAGCCCTCCGAATCAAA  
CTTGGGTACAGAGGCGCAACTCGCGATGTACTGTCTTCTGGCTGGCAAAATACATCTTCCGAGCTGGTTCAGGCTC  
TGCTTGAGCAATCAACAGCAAGCCCTCAAGAGACGTTTACGAGTTAAATGAGCATATCAACAGAGCTGCAATCT  
TTGGAGGGGGCGTAAACGACGTTAAGGAAGATATAGTGAATTAGATAAGCAGTTTACGCGATAACCTCGCGGTTTTGA  
AATAAAATTAACGAGCGTAGCGATGCTTTGGAGAAGCGCAAAACCGAGCTTAAAGGTGAGGTTTTCGGCAACGATCGACA  
AGGTCAATGAAGCGTTTGAATAAATGATGCTACTGATGCTGCAATTTGTAATCGAAAAACCGTATCTGAACACGAT  
AAAGCTCTCGCTAATACAGTTCGAGGCAATAAAGGCTGCAAGAGACGAAAGCGCGGCTCTTATTGCTAAGGAAAGGAGC  
TCGTGTTGAAGGTGATGCGCAACGCTAAACAACCTGGAAGTGTGTCAGTTCGACGGTAGAGGAAAGTTCCGACGCGTTG  
AAGAAATGAAAAAGACGGTTGACAGAGTTCGATCGTCCAGTGCAGAACTGACTACGAACATTTAGGCGTTAGCTAAAAACA  
AATATTGACTGGCTTTCGTCAGATGAAGACAGCAAGCAGATGTTGTCAGGACTTAAAGGAAGAGCAGAAAGCCGAGCAACGATCGAA  
AACCTTGTCTGATGATATGCTGCAATGGCCACGAAGTTGAGGAAATTCGCGTAGAAATGGCGAAGACATTAAGGCCA  
GTATTCTGGAAGAGTCCACCGCTCGTGGCGATGGCGATGAAGCGTTGGCAAAGCGTGTCACTAGCTGCAATCTAAGTTT  
GAAGGAGATATCAGCGCGGCTTAGTACAGAACAGGAGGCTGTACATCTGCGGATGAAGCTTTGACGAAACAAATAAC  
TCAGCTTGAAGTTCGAAAGTAAAGCAACGATATTGTCGACGACTTAAAGGAAGAGCAGAAAGCCGAGCAACGATTCGG  
CTCTGGCAAGCCAGATCACCAACTTCAGGCAAAAGTTGATGATGATATTTCTGCTGCAATACGCAGTGAAGCAGGAGGCG  
CGTGGCAGCGGAGACTCTGCGTTAGCTAAACAATAAACCAGCTTCAAGCAAAGGTTGACGGTATATATCCGCGCCAT  
CACTCAGGAGCAGGAGGCTAGAGCAAGTGTGACGAGGCGCTCAGCAGAAATTAACAGCTTGGGGCGCAGACCGGAA  
CTGACATTTCTCGAGCCGTTGCTGTAGAGACAAAGGCAAGGACTGACGCGGATAGTGCATTGTCCAGCCAGATACATCT  
CTTACAGCAAAAGCTAATGATCTCGAGGCTCTCTTGC AAAAGAAACAACGGCTCGTGCAGATGGCGATACCGCTTTAAC  
AAAAGAGGTTTCAAGTTTAAAAGCACAGACTGCGAAAGATATTAGTGGCGGCTTGCAGTGGAAACGCAAGGCTCGAAGCTG  
ATGCTGACTCGCGTGTGCTATCTCAGATCACCAAGCTGACCTCAATAACAAGAGGATATTAAGCCGCTGTAGCAACC  
GAAACGAAACCGCTCAGAGCAAGATGCGCAATTTGGGCACTTAACTCAAACTTAGAGTCTCAAACGAGCAGCAACAT  
TTCTGGCGGCTCAACTGAAACGACAGCGAGAACGCAAGCAGGATGATGCTCTAAGTGGGCGAATCGATACTCTGAAAG  
CAGAGGTGATGAAATACCGCGCAATTAACAGCAGGCAACAGCCATTTGCTGATACCAACAAAAAGTCTCAACCGCG  
TGGAGCTTAAAAAGGAGACTTCAACGAGCGGAGGCAAGATGTTGCGGTTATTGCGCTTGGTATCGACACCAACCGG  
CTTTCTCAGTTTTTGGTTCAGGCGGACGATTTGGTTTTGGTCAACTCTGTTAACGGGAAAGATCACCACGCTTGTGTTA  
TCGAAAACAGTATCGCTATATGAATGGTGCATATCAAGGATGGCAACATCAACAAAGTAGGCGATCTGCAA  
TCTACCAATTTGTTAGCGGTAGATCTGGATGGCGGTTTCGGCAAAATGGAACGCTTGAAGATCAACGGTAATAGCGGCG  
CAATGGGCGATGGTTATAAATGGTTCAGCGGATGACGTTTATGACGATAACAACGCTTACGAGTAAGAATTGGCCTTC  
TGTGA

>Cluster\_34274  
ATGCAGGCATTGGTGAGCAGGAAAAAGATCGTGTTTACGCGCCGTTACGTTTTTAACTATTTATGCACTAATTCGCC  
TTTTGCAATCCATCAATGAGTAG

>Cluster\_48792  
ATGCTTAAAGGTAACAAACGTTCTGGCGCTCGCCCTGGTCTCCGAGCCGTTGCGAGGTAATAAGGCAAGCGTAAAGG  
CGCTCGTCTTTGGTATGTAGGTGGTCAACAATTTAA

>Cluster\_66352  
ATGACCCGTAATCGTGTGAACGTCGCCACCCTATGATGCGATTAACAACTCATCGTCCGCTGATGATTGACGTCAA  
TGCTATCGGATGA

>Cluster\_4786  
ATGGGCGCGCAGAATATCCCTCATCCGGGTGTACCCGGGTTCTGAACCCGTTGGTAAACATCCCGCAATTTTTTGGC  
GGAATACCTCAGGTAA

>Cluster\_28314  
ATGAAAGCAAAAGAGCTGCGTGAGAAGAGCGTTGAAGAGCTGAACACCAGCTGCTGAACCTGCTGCGTGAGCAGTTCAA  
CCTGCGTATGCAAGGCTGCAAGTGGCCAGCTGCAACAGTCTCACCTGTTGAAGCAAGTGGCTCGCGATGTCGACGCGTTA  
AGACTTTACTGAACGAGAAGCGGGTGCCTAA

>Cluster\_11434  
ATGAACGGACAAATCTCAATGTTTCGACCGGAGCATGTGACGATGCGAGATACGAATGATTATTCGCTGCGGAGGGG  
GAAAAACAATACTGCTCTCATTACTCCAGAAAACTCGCATTAGCATTAACCGGAAAGTCAGACCTGCCAGTAGAGCTAA  
AGCTGCGAAATGTTGAGATTAAGGTGAAATAG

>Cluster\_35147  
ATGAGTACAGCCCTTTCCCGATATTTCTGAATTTGAAACAGTCAACAAGAAAAAGCTATAACGAATGGTTGCGAAC  
CAAAGTGGCAGCAAGCCTCTCAGATCCCGTCCGCAATTCACATGACGAGTAATGGTGAATGGAAACCTTATTG  
CTCAATTAGCTGCAACGAAACAGAGTGAGTAA

>Cluster\_40842  
ATGATATTTAAATGATTTCACTGCGAGAGGATATAACAGCCCTGCGTTTTTACAGCGCCATCGCCGTGATGTCGGTAA  
ATACCACATCCCTGCGGTACGCGTACCCCTGGTCTGCCGTTGTCAGCCAGCATTTTTTGGCAGACGTCGCCGTCATGG  
AATTTCCCGCCCTGACAGGGGAGTCTGCAATGA

>Cluster\_14924  
ATGGTTGCGGTAATCATATACCACACCTTGTACACACACAAACGGCCCTTTGTGTGGCGTTTTTCTGGCACTGAGTGGCGG  
AGAATCTCAATAATCCAGTAAACCGCTGGACGGAACGGAAGCGGTAACCGTTGCCGCTCAGGTTGTGTTGCTGTAT  
TCGCGCCCGTATTCGCCAGGGGTCACATCATGCGTAA

>Cluster\_1309  
ATGAATATCAGCACGAAACCCGCAAAATCTGCGTAAATACAAAGCTGTGATTAATGCACGACGCTGTAATGGGGCA  
GAAACCGCTCACCAGGCGCAGATGTTGATGAAATCTGCGATTTTGTGGCGAATCAGCAGGCTGATTTCTCGCGGCTC

AGTACATCCTTCAGGGCAGCAGAAACAGGTGA  
>Cluster\_3001  
ATGTCTAATATCGATAATAAGGGTTGGGGTCCCGCTCTGTCAAAAAAGCACATTTCTTTAATTCGGGGGAGCCAT  
ATCACTATGCGGAAAATGGATGTTTCATAGGTATCAGGATGATGAATGGCATGACCATCCTGAGAACTGCGCTATCTGCA  
TGAAGAAACGCAAAAAGCAGGAAGGCAGAAAGCTAA  
>Cluster\_64804  
ATGAAAGAAAAGCTGACCATTGACCAAAAAATTGAGATTGCAAAAAATAGCAAGTGACTTTGTTATCGCTGGCATGAATAC  
GAATAAACAGCCAGCGTGTCTTGGCGGTTCTGATCAAAAATGTGAAGTCAGAACGGGAGTTGTTAAAACATATTTATCAGT  
TGCTGGAGGCAATGATTAATGATTAA  
>Cluster\_63509  
ATGTCTATCTTTTCTGATACAGTTCAGTAGTGAAATGCACAATAATTAACAATTGATTATATTTAGCACTTCCCTC  
TACCAAAGGCAGTGGAAATTAATAATCATTCAATTAATTTCTCAGCAAGCCAGGATTAATGATGTGGCGAAAATAACAT  
GA  
>Cluster\_49693  
ATGCACCTCCGAGTCACAGGTGAATGGAATGGAGAACCATTCAACAGAGTTATCGAAGCAGAGAACATCAATGACTGCTA  
TGACCCTGGATGATATGGGCGCAGATAGCACATGCAGACATAACCAATATTCGAATTGAAGAAGTGAAGAAGAACCAAG  
CCGCCTGA  
>Cluster\_61423  
ATGCCGCGAAAATATAGATTACTTTCTTTAATAGTGATTGTTTTCACGCTTTTATTTTTCACCTGGATGATAAGAGATTC  
ACTGTGTGAATTGCATATTAACAGGAGAGTTATGAGCTGGCGGCTTTTAGCCTGCAAATTGAAAGAGTAA  
>Cluster\_20867  
ATGCCGGCAGCGACCCGGAGACGAACGGTGATTTAAGTGCCGATATCCGGCAGCTTGAGAACCGCTGGCGCGCTGTGC  
CAGCCAGGTAAAAATGATTAACACTGTGAGCAGAAAACGATGCTCAAACCCGACAGCTGCGCAGGGCGCTGACTGA  
>Cluster\_51535  
GTGTCAACACACAAGAACGAAAGACGTGGTAATCCACCATTCCAGTTCAGACTTGACCCTGAATTGCGTGAGTTAATGGA  
AGAAGCACAGCAGCAGGATGGTGATGAATCACTGGCTGCTGGATCAAACGCATTATCCGCAAAGAGCTACAAAGTCGTG  
GTTCCGAACCAAGAACTGA  
>Cluster\_25062  
ATGACACCACGCGAAATAGCCTTATTGACCATCGCCAACTTGAGCACGGAGGCCATCAGCTTACACAGGCAGATCAACG  
GGAGATAGAACGATCAGTTAATGCCGATATAGCCCGGCGCAGAGTTCCGCGAAATGATGCGAGCACCTGCCTACCAGT  
GGAAGAAGCCAGCGCCGCGCAGGTAG  
>Cluster\_53920  
ATGACTGAAAAGATATCTTCCATCAAGCCGCTGAGGTTGTTTTACAGAAAAGTTGATTACATATCCGCGAATCAGC  
AAAAAGATGCCATAGGTCAATTCAGGCAGAGATAGCTTATCGAATGGAGTTATGATGAAACTTGAGGCAAAGGGCGATG  
TTGTCATCCAATA  
>Cluster\_2760  
ATGGCTCTGATCAGCGTTCGCAACAGATTTGAAAGCTTATGGAACAGAGGTACCAGACCTGCTGTTGCAAGTCAAAG  
TAATATTGGCGCATCAATGAAGGCTCAACTTGGCATCGGATTTGAAACGAGAATTTGATGAACTTGAGGCAAAGGGCGATG  
TTCAGCAGTTCAGTTGA  
>Cluster\_39550  
ATGGCATCCGGTTGGGCTAACGATGACGCGTCAACGAACAGATCAACAGTACAATTGAAGATGCGATTGCCCGGCTCG  
GGGTGAAATTCGCGTGGCGAAAGCCTGTATGAATGTGAAGAGTGGGAGCCCCATCCGCAAGCCCGTGGGAAGCCA  
TTCTGTGTGCGCTTATGCATTATTGTCAGCAGGAGAAAGATTTACAAAACAGCTTATACAGGATATAATCGCAGA  
GGTTGCAAGACAGCCAGTTACGTTAA  
>Cluster\_40496  
ATGAACGCTTATGAACTCCAGGCCTTCGCCATATTTTTGCCATGACTATTGATGAATGCGCGACCTGGATTGCCAGAC  
CGGTAACAGTGAAGCTGGCGTCACTGGGAAAATGGCAAAATGCCCAATTCCTGATTGTGTAGTCGGGCAACTGTTGGCTA  
TGCGTCAGCAACGAAAAAATCTTTCATGCCATCATAGAGAAAATAAATAACCGCATCGGCAACAACACCATGCGTTTT  
TTCCCGACTTAAACCGCTTTCAACAAGTCTACCTGATGGCAATTTTATTGACTGGAAGATCTATCAATCGGTAGCCG  
TGAATTATATGCACAGATCTGGAGCGGCTTTGTTAA  
>Cluster\_26901  
ATGAAAGAGACGAAAACATCGATACCGAAAACACGGTCTGCTGACACTGTGAAAGAAACCAGTGAGCGTGGCGTAA  
ACTTACCCAACCAATTGAGCGAGCGCGGCAAAAATCAGTATGTGGAGATCACCGGGCTATTGAGCAGGCTGGATCTC  
TGCGAGATTTATCGCTGTCTGATGTCTGAATCTGAAAGCGGAATCCATGTTTACGCTGCTGTACCGCTGACATCACCG  
CGACTGGATGAAGTGACGATCAAAAAAATGGCATCCCGTATTTTACGTTTATGATGTTGTTGCGGTAATTTTTTTGAG  
CGGTGCGGACTCTGGCGGGAAGAACGAACAGGCAGCGAAGCCTGA  
>Cluster\_17672  
ATGGACGACGATTTACCTGCAACCGCGACTACGAACCGCTCGGATTTATACCTTCATAACCGGTTTATCTGCG  
ACTGGCGACGCGCTTGGCAGTTACTGGCGGATGCGTTGCTGGGGTACGCTGCACGAGCTGAAGCGGAAAAAGACG  
TTTCCCGTGTTCATAAGCTTGGCGGCGAGTATGCCAGCAGGCACTTACGCCCTGCTCGATGACGGGCGGCAAAATCC  
ATTACCGTTGACAAAAACCGGGCAGCGCGCTGTTGTTGCTGTTAATCACCGTCACGGATAACCGGGCACACCGCA  
GACGTTTGAACACCTGTGAGGATTAATGTA  
>Cluster\_26105  
ATGTCTCTGGCGTTGTTAGTGTGTTGGTGTGCTTCCATCCGAAATTCGGTGAATGATGAGCAATCGCTGGTGT  
GGAGTCACTTTTATTGGCTGGCGCATCAGTGCAGAAAAGCCGCTCTTTCGACATCTGATATCAACCTTCAGCATCCT  
CAACGCTTTATAACGAAAAGGCAAGAACCCTTACCCTTACGTTTACGTTTACGTTTACGTTTACGTTTACGTTTACGTT  
CATCTCTGGAAGGCCACGAGCGTTACCATTCCCGCACATTCGGCGGTACGCTGTACGGCAGCGCAATTTTCTGGG  
GGCGCAAAAGTCAGACTTATCTATATTTGTA  
>Cluster\_28697  
GTGTACAGACACACTTTCCGGGACACGCATCCCGATGACAATGACGACCATCCCTGGTGGGACTACCCTGCACAGTGAC  
GCCCTGTTTCCGGCCCGCTGTTGTCAGGAGGTAACCGTTGCATTACCTTGGCGACCGTGGCGGATCAGAGGCCGGT  
TCAGCGACCGGATGCATACCACCTGGACAGGCTTTCCGCTGCTGATGAAACAACCTGGAATCATGCTCACCAGCGGT  
GAATGAATCCCGCCATCAGCATACCATCAGCTGATGCGAAGGGCTGACCTGCGAAGCCGATACCCTTGGCAGTTG  
TGTTACGCTTATCTGGCTGTTTATCCGACACCGCATCCGCAACCGCAATCACCGTATA  
>Cluster\_14944  
ATGAAAAAAGATAAAAAATCAAAATGAAAGCAATAAAAAATAAAGATAAAACTTTATTTATTGTCTATGCTACTGATAT  
TTATAGCCCGAGCGAATTTTCTCAAAAATCGAATCCGACTTGAAGAAAAGAAAAGCAAGGGTGATGTTTTTTTTGATT  
TAATAATTCCTAACGGTGGAAAAAAGATCGTTTACGCTTATACGTCATTTAATGGCGAAGTTTCAAGTTACACATTA  
AACAAAGTTACGAAAACGATGAATATAATGATTTATCTGAGCTCTCGGCTTCTTTAAAAAAAACCTTTGATAAGAT

CAACGTAAACCTTCTATCCAAAGCCACATCATTTGCTTTGAAAAAAGGCATTCCAATATAA  
>Cluster\_67014  
ATGGCTGAAATGGCTGTTTTAAATAATGTTATGACAACGCTCTGCGAAAAACGTAAGCCGGGTTGTTGTCACGTTGTTTT  
GGCTGTTGTTAAATAAATCAACCGCCAAAGCCCTGGTGAATAATGTTGCTGCGCCGCTGGCTCTCTGGCTGGCTGCACAGG  
GCATGCGCGAGCCACTGACCTGGCATCCGCGTAAGCGGATGTTGGAGGCAACTTTTCGGTGAAGACTCCACCATGATG  
TATTACTTTCATGATGCGGAAAGTTTTCTGGTTTTTCATGATCTATCTGCGTAAACCACAACCCGGCCACGTTTGTGTTGAT  
CCCGGTATTTATGTTGGTGACCAAAGTTATCTTCAGCATGATTGCTCCCTGA  
>Cluster\_24860  
ATGGCAACGAAAGAGCAAAATCTGAAACGGCTTGTGAACTGGCCCTGATCTTGGGGCGTGAGCCGGATATATCCGGGAG  
TGCCGCAGAGATAGCGCAGCGGGTGGCAGAATGGGAAGAGGAAATGCAGTCATCCGGCGATGATGTACAGGTTATGAATA  
TGGATATCCGGGAGAGGAAAACGCGGCTCATGATGTTTCGTGAGGAAACATCCGGCGCTAACGCGCATCAGAGTTCTG  
ACCTGCCTCCATCTCTGTGGCGTTGATGGTGAACGGGGAAATCCGTTGAGCTTGGCGATGTTGGTGGGTTGATTCTGAT  
TATGTCTCAGATGCAAAAACACACGTTTATGGTGGAAATGGCTGTTTTATGCGTGA  
>Cluster\_12136  
ATGAATATTCAGTGCAAAACGCGTTTATGATCCGGCTGAACAGAGCGATGGTTATCGCTACTGGTTCGACCCGCTCTGGCC  
GCGCGGTATCAAAAAACCGATTTAGCCCTTGTAGTGGGATAAAGAAATCACGCGTCAACGGAACTGGCGAAAGCCCT  
TTCACGGCGAGTCGTGATTTTTGCAACCTTTCGCGAGCAATATCTTGCAGAACTGGCGCAACACGAGCAAGAAGAAAG  
CGGCTGGCGGACATCGCCAAAAACAGCCGCTGACCCTGCTCTACGAGCAAAAAACACCACGAGAACCATGCGCTGGT  
GCTGGCCGACTGGCTACGTAGCTTGTGA  
>Cluster\_47134  
ATGGAAACCGTGGCTTACGCTGATTTTGCACGCTCTGGAATGCGCGTCGGAAAGATTGTGGAAGTGAACGCCATGAAAA  
CGCCGACAAGCTGTACATCGTACAGGTTGATGTGGGGAAAAACACTGCAAAACCGTGACCAGCTGGTGCCGTACTACA  
CGGAAGAAGAGCTGATGGGGAAAACGGTGGTGGTCTTATGCAATCTGCAAAAAGCGAAATGCGTGGTGAACGTCGGAA  
TGCAATGCTGTTGTGTGCGGAAACCGATGACGGCAGTGAAGCGTGTGTTAACGCCGAGCGGATGATGCCTGGGGCGT  
ACGCGTCTGATAA  
>Cluster\_33885  
ATGGAAAGAGGGGAAATCTGGCTTGTCTCGCTTATCTACCGCAGGTCATGAGCAGCAGGGAACGCGCCGGTGTGAT  
TGTACACCGCGCGCCTTTAAATCGCGTGACCGCCTGCCTGTTGTTGTGCCCGTAAACAGCGGAGCAATTTTGGCCCGCA  
CTGCCGCTTTGCGGTGTGTTGGATGGTGTGGCATACTGACCAGGTTGTACGTTGCGATCAACCCGGGACAATT  
GATATGAAAGCACGGGGCGAAAACGACTCGAAACGGGTTCCGGAGACTATCATGAACGAAGTTCTTGGCCGCTGTCCAC  
TATTCTGACTTGA  
>Cluster\_40827  
ATGACACTGCAGGTTGAATCTGGACGGTGGTGGTGGTTTTTGTCTACCTTCATGGGTTTGTGGGAGGGCTCGCCAAATG  
GTTGTTCACTAAACAGAAAGAACGCCAGCGGCACGATTCGCCCTCTCTGAAACAGGCCCTGCAACAGTCCGCATCCAAC  
GGGGCAGCTGAAAAAGAAATTTATGCGATTTAAAGCGGATTTACCGTGAATATGTCCGTCGCGAGGATTAATCCGT  
GGCCAGACAGTCATCGAGGCCAACTGGACGCGCTTTATAACAAACTGGAAGTGGTACAGCAGTACCAGCAATACGGGAGG  
TCAATAA  
>Cluster\_20009  
ATGTCAAACGACGAAACTGAATATACGTTCAAACCTGTAATGCCAGGCGATGAAGGCATTAATAAACTCCCGGAATG  
GGTCCAGGTTGCATTCATACATGCAATGGATTCACTGACTACGAGTGGACCCGGGATGCCCATCGATCAATTTGACCG  
TCATCGGCCAGGCGTTATCGAGTTGAGGATCAATGGTCCGCCAGCTTATCGCTGTGTATCGCAGTAAAGCACCCGGC  
CAGGTGGATTTACTGCACGCTTCTGTCAAAACGTGCAATGGACCTGATAAGAAGAATATGGCGACTACTGCCTCACGCTA  
CAAGTTACTGTAA  
>Cluster\_46633  
ATGATGGAAGTGCACATCAACGACTGATGGCGCTCGCCGGCAGTTGCAACTGGAAAGCCTTATAAGCGCAGCGCTGC  
GCTGTCAACAGGCAAGTACAGGAAATGGAGTTATATGGACTTCTGGAGCATCTGCTTCAAGAAAAACTGGCAC  
GTCAATCAAGCTAAACAGGCGATGATACCCGAATGGCAGCAATTTCCGGCGGTGAAAACGTTGCAAGAGTATGACTTACA  
TTCCGCCACCGGAGCACCGCAGAAGCAACATGAGTTGAGTCTGTGCTGTACGAGTATTGTCATAAAACATGCTCTCCGT  
TCCAGTTTGTCTGATGATATAA  
>Cluster\_10159  
ATGAGTGTGACGTAGCACTGCCGCTGGAGTTTACCAGCAGCAGCAACAAAGTTAAAAGCCTGATCGCTGACGAAGA  
TAACCCGAATCTGAAATACGCGTGTATATCACCGTGGCGGTTGCAGCGGCTCCAGTATGGTTTACCTTTGATGATC  
AGGTGAACGAAGCGGATGACCATGAAAAACAGGCGGTTGGCTGGTGGTGTATCCGATGACCTGCAATATCTGGTC  
GGCGGTTCCGTTGATTAACGAAGTCTGGAAGGTTCTCGTTTATCTGACCAACCCGAACCGGAAAAGCACCTGGCG  
TTGCGGTTCTTCTTATGATATCTAA  
>Cluster\_31081  
ATGAAAAATGAGACTTTAAAGATAGTTTTGTTCAATTTGGTAAAAATGAAGATTGAGATACTGAATGGGCGAATGCTCA  
GGCTTGTCTACTACTTATTCATCTTCTCAGGCAGCAGGCGTGCATCTGCCGATTTGCTCCAGGAAAAATGATGTTA  
GTCTGATAAATAATCATTCCGTTGGATTGCGCCTTCTGATGATTTGAATTTTCCCGTGAACATGGTGGTTTTATATT  
GAGATTTTCCAGCTTATGGTATGAAGTCCAAAAAAGGAGCAATGGTTAGCGTCTTTTCTGACTATCAATTAATTTATCC  
TAAGCGGGATAAATAG  
>Cluster\_1470  
ATGAAGTGGATTGTGATTGATACAGTTATCCAGCCATCATGCGGAATATCTTTTTTTCAGTCATATGGAGTAAAAATAAAT  
AATAATCTGGTATCAATCGGATGCTTTCTTACCCTGAAAGTATATTACACTGACTCACACAGGATCATGCTCAATA  
ACAAAGTGTACCTGTAACCATTTACAACGTAGTACCATTCAATAAAACATTCGAAATTTAATCAAAAAACAGCCAGGAA  
TGCCCTACAAATACAGATAACGATTTGAATGAATGCTTTAATAACCGTTGCACCTGCAAAATATGTCCTTATGGGCTAAA  
ACAACAAAGTCCATAA  
>Cluster\_23143  
ATGAAAAATAAAGTCAATCTTAGCCAGCAAAATGGCGAGTGAATTTATGCGCGAGGTCAGGAAGAGGCGCAGAAAAATAA  
CTGGTCTGTTTCCATTGCTGTTGCCGATGACGGCGGTCATCTGCTGGCGTTAAGTCCGATGGACGATTGCGCGCGGATTG  
CGGCTTACATCTCCAGGAGAAAGCGGTACCGCCGCTGGGGCGTCTGAAACTAAGGGCTATGAAGAGATGGTGAAC  
AACGGACGTACCGGTTCTGCTGCTGCGCGTACTGACGCTGCTGGAAGGTTGGCGTACCGGTTGTTGTGGATGGGCAAT  
TATTGGTCCGCTGGGCGTTCTGCTTTAACCAGGACACAGGATGCGCAGGTCGCGAAAGCGGACGAGCGGTTGGCGA  
AATAA  
>Cluster\_54143  
ATGAACATCAGCGATGTAGCAAAAATACCGCCCTGACCAGCAAAAGCCATTCGCTTCTATGAAGAGAAGGGGCTGGTGAC  
GCCCGGATGCGCAGCAAGAAACGGTTATCGACCTACAGCAGCAGCATCTCAACGAACTGACCTTACTGCGCCAGGCAC  
GGCAGGTTGGGCTTTAACTGGAAGAGAGCGCGGAGCTGGTGAATCTGTTTAAACGACCCGAGCGGCACAGCGCCAGGTC  
AAACGGCGCAGCTGGAGAAGGTTGGCGGAGATCAACGACACATTTGAGGAGCTGCAATCCATGCGCGACCGAGTCTGGC

ACTGGCGAATGCCTGCCCTGGCGATGACAGCGCCGACTGCCGATATCGAAAATCTCTCCGGCTGCTGTCATCATCGGG  
CAGGTGA  
>Cluster\_42660  
ATGGCATCGGCCTGGTGCAGCTTATGGCACCAGCAGCCATATAGCAATTTTTCGTTTTGTTGTGCTGTGGCAACTGA  
AACCGTATTTGCTTGCATCTGTGGTFCGATCCTGCCCGATAGCGACAGAATTGTGCGTCTGCTGTCAGCCCTACACCGA  
TAGCGACAGAATCATTTGCCGTTTTGCCCTGGACTGGCTACCGAAAAGCAAGGCTGTTGCTGCCACCAGCGGCCTACCCTCT  
CACAAATGCGATGGCATTTTCTCCTGCGAGCAACTGTTACTGCCAACGCGATTGAGTTCACCTTGTCTGCAATGCTGCC  
TTGCCCCAGCGCAATCGCATTTTGTTCGCTGGCTTACTTGTGTTACCTAATGAATACTGGATTTCGCCAGATGCCTGA  
>Cluster\_38569  
ATGTCTGAGATAACCGTGCCAACAGTCATGTTTTGCTTTGCTCAAATGCTTCACTGATGAAGGGCTGCGGATCGACGC  
TGCAAGACATGGCCTTGAACAACAGGGCAATGCCCAAATGCCAAAGCCGGATGGGAAAAACTGACCCGAGACCAGA  
TTAAAGTTTGGCGTGGCGCTTTTTTCGTAAGCGGAACACCGTCCGTTGTGACTACGGCGCAGCGCAGTGATTCAGTTC  
AACGAGCACCAATTTATGGCCAAGGTGACATCGCCCGTCAACGTTGGCTTAAAGATGACGTAAAGCTTATTTGAGGAGGTCG  
TAAAATTGGATTTTTCTATTACGGCCCTCGATGGTGGATGGTCCGTTAAGTCGAGCCGTAGCAAATGGCATTAAAACT  
GA  
>Cluster\_10663  
ATGAAGTGGCAACAACGTTTCGTTGTCGCAACTGGTCTAAGTTGCTGGCAGATATATGTCATTTACTGGTAGTGGCGCT  
GCTGGTGGTGGCTGGATGAGTAAGACTCTGGTTCACGTCGGCTGGGATTATGCGCACTGTATTGTGTCACGGTAGTGA  
TGATGTTGGTGTTCAGCGCCACCCGAGCAACGCTGGCGTGGGAGGTCGAGCTGCTGGAAGAGCTGACACGACCTGG  
TATTTTGGCGCAGCGCTGATTGTGCTGTGGCTGTGTCCTGTTACTGGAAAACTTTTGTGTCGCAATTCGAGGGCT  
GGCAATCCTTGGCCGCGCGGTAGTGTCTTTGCTGGGAAAGATAAAGATTACATCACCTTACGTCTAAACATCGCG  
TACGCCGCTGA  
>Cluster\_42034  
ATGTCGATAAAAACAGATGCCAGGGAGGTTAATAATCGCTATTTGTTAGCGTTACAGGATTATTAAGTGGCTGCGCCAG  
CCATAATGAAAACGCCAGTTTACTGGCGAAAAACAGGCGCAAAATATCAGCCAAAACCTGCCGATTAATCTCGGGAT  
ATACCTTAGTGTGGCGCAAAGTGTGGCACGACGGTAAAAATGACCATTTATCAGCGAATCGGGTACTCAGACCACGCGAG  
ACACCTGATGCCTTTTTAACAGCTATCAACGCAAAATGTGCGCTGACCCGACGGTGAATTAATGATTACCGAGGGAAT  
TAATTACAGCATAACGATTAATGATACAGTACAGGTAACAGTATCAGCGGAACTGGATCGTACCACCTGTGGAATAG  
TCAAAGCATAA  
>Cluster\_26410  
ATGGGGCGCTGGCTTGGCCGAGGCTCATGAAAGAAGTGGACTGGTTCAGTTGCCAGCAGCCTGCCGACCGTTATAAACG  
AGGTGGTCTGAACATGTCACTATCCCGAATCACCTTGGCGCGCAGTTTCGCACTGACAGAGCCAAATCAGGTATGGTGGC  
GCGACGTGACGTACATCTGGACGGGAAACGTTGGCATACTTGGCTTGTTCGACCTGTTTGAAGGAAACCGGTA  
GGTGGGCAATGTCGTTCTCCTCCGACAGCAGACTGACCATCAAAGCGCTGAAAATGGCTGGGAAATCCGCGATAAAC  
AGCCGGGTAATGTTCCACAGCGATAGTAATAATGCCGGTATCAGTTTTATCATCACCTGTTTGTGCTGTTAACCAGAC  
TGGTGTGA  
>Cluster\_67089  
ATGAACTGAACACTAAAACCCGGTCCCGTATTGCTCGCCTTTTCTCTTATGACTCTGGGGGCAAAATCAGGCTCTCGCGCA  
CCACCGGGTTCAGGATATGAACGCTCCCCATCACACTCAGCAACAGGTGGCTGCGCAAAAATCTATGATGATTACT  
ACTCCCGGACCAAGTGCCTGCGACAGCAACTGGCTCCAGACGCTATGAATACAATGCCCTGTAAAGCGCCAGTTTCGCT  
GACAGCGCAGAAATAAATCGGTCGCAAGAGATGGAACGTTAAGGCAATCACTGGCTGAGCAGTTGGTTAAACGGGA  
TGTGGAGATGGCCCGGCGAGCGTACCAGTGGAACTCGCTGTGATGATCAACACCGCGGTGGTGGTCAATGATGAG  
AATACTGGTAA  
>Cluster\_15667  
ATGGTGAATTAGCCGATACGGAATAAAGTAAACATTTTCAAGACAAATCCAAATGGGCTGCTGCGGCTGGATATGA  
CTTTAATTTATTTGATTTGCTGTGTCAGTCGATGTTTGAACCTACCAATGTTGCTAACAAACATAATCGATGAATCTTGG  
ATTTTCCAGACTATCAGGTTCAGAGAGTTTCCTGCAATTTTGTGAAAGTATCTGTTGCTACAGCTCTGTTATTTTGTG  
TTATTTGCAATATCCATTGCTTGGCGTATTTGTTTATGTGAGATGCAAGCACTCAGAAAATGAATAACAGCGGAGAGCATA  
CGATATTACAGCCAAAATATGCGAGTGTGGTTGAGGAGATGCCAAGGAAATGGGGGAGAAGTCATGGCTAA  
>Cluster\_17667  
ATGACGATATCGCTACACAGACCGCGAAGTTCGCGATGGTCTGGTTTTTAAACGGCACCACTTATAAAAACTTTGAGCT  
CGCTGCGCGGTTCATGCGTGATAACGGGACGGCACTGGAAGAACTGAAGAACGCTTTCAGACAGTGGACGGCTTCGCGG  
CGGATTAATTAACCGCTGTGCGGTGATGGCGGCAACGCTGGTCCGCTGCGGGGATATCCCGAGGAAGAACTGACGGCG  
GAGCTGTTGACGACAACATGACCGCGAAGATTTAATAATTCGCTGGCATCAGCAACGCTTGAAGGTAAGCGGAA  
CGCGGGAATCCCGGACTCGCGGACTCGCATGCTTATCCTCGGGGCTACGGAATAA  
>Cluster\_41690  
ATGGCTAAGGTGAACCTGTATATCAGCAATGATGCCTATGAAAAATAAATGCGATTATTTGAGAAGCGTTCGACGGAAGG  
GGCAAGGGAAAAAGATGTCAGTTTTTTCAGCAACAGCTTCAATGCTTCACTGAACTGGGGCTTCGTTGATACAGGCTCAGA  
TGGAGCGTAAAAAGTCTGCATTTAATCAGACTGAGTTTTAATAAATGCTTCTTGAATGCGTTGAAAAACACAATCATCA  
GTAGCGAAAAATTTGGGTATTGAGTCTCTCAGTCTCAGTCTCGGAAATCCAAAGTTGAAATGCAATATGCGTTGA  
AGATATCAGGGAGAAGGTATCATCTGAGATGGAACGATTTTTTCCAAAAATGATGATGAATAA  
>Cluster\_22697  
ATGGCAATATTAGGTTTAGGTACGGATATTGTAGAGATCGCTCGCATAGAAGCGGTGATCGCCCGATCCGGTGGAGCGCT  
GGCAGCCCGCTATTAAGCGATAACGAATGGGAAATCTGGAAAACGCCACCAGCCAGTGGCTTTTTCGGCGAAGCGTT  
TTGCTGTGAAAGAAGCGGCGGCAAAAGCATTTGGCACAGGATCCGCAATGGTCTGGCGTTAATCAGTTTGAAGTATTC  
AATGATGAGCTCGGCAAAACACCGCTACGGCTATGGGGTGGAGCATTAATAACTGGCGGAAAAGCTCGCGTTGTAATA  
GCATGTAACGCTTGGCGATGAGCGCCACTATGCTTGTGCCACGGTAATATTGAAAGTTAA  
>Cluster\_43635  
GTGTCAAACATTTTCATCTATCTGATAAAAAACAAAAAACAAACAGTTGATATTTCTTTTGTGATTTACACAGACAA  
TCTCAGCAAAGGTTCTGCAAAAATCTCAGCAATAAACAAAAAAGAATAAATAGTAAAATCAAAGCGATACTTAAAT  
CGAGGAATGTAGCGTTCCGTTTCGACGCCGCCCTCTGATTGGAAGAGAAAAGTAGAACCTTTGCAATTTTCTTTCTGAA  
AAAAAGTTGTTTTTACATTAGGAGTAGTAACAAATTAAGATAGAGGACGGTTGGATAAATCATAAATCAGCGACAC  
AGAAGATGCCGCTTATCTGTTGAAAAATAATCAACCTTATAGAGGATTCACAGCATGGCTAA  
>Cluster\_39436  
ATGAGCACTATCACTAAAGAACGTATCGAATTGTTTCATTAATCCCGCTTGAAAACGGGCTTACCCGTGGCGAACAAAT  
GAACTGGCAGGATTTGCCTGCGTGGATCGCTGGAAGCCGAACTTGAAGCCAGACTTACAAAGTTGAACGAGATGTCGGGCA  
ACTATCCGGTAACFTCCGGATGGCTGGAATAGCTGTAGTACGCGAATACCGGATACCAAAAACAGCGCTTCTGTTGCGCAG  
GAGTTTACAGGAAAGGTGACTGGCGAATGAAATGGGCGACTTACATCCCGGGCATCTGACGCTAATGATGGTGGGT  
AATACCTGGTGGCTGTTGATACCATCACACTGGATGCCGCTACCAGAACCAGCGCAGGAGGCAAAATGA

>Cluster\_29439  
ATGAAAGAAAAAGAAATGATGCGGAACAAAAACAGAAAACTAAACGGAATTATGATTATGAACGCGAGGTTTCTGA  
TATATATTTTGTATCTGTTTTTTTGTGTTCTGTCGCCGAACTTTTTATGGGTGATTATGCACAGTATTTTTGATGCCT  
GTATTGATTCGTGGAAGCTGACCCAGCATTAAATAATTTTCGTTATATGTGGAACATCCTGATGTATCTATCCGAT  
ACGTTATGGGCTTTTACAGGTGATTTCCTTATCGTATACGTCAGGACCTTTAAATGAATTAATAAACGGGATCAG  
GATATCCGGCTGAAACGCGTATGCGCCGGGAGAACGTTTCAGGGAGGGGAATAACGATGCCTCGCATTA  
>Cluster\_26167  
ATGCCATTTGCTCGTTATTTCTGCATTTTCATAAACGTTGGTTTGGGAGAATTATCTCTGGCTGGCACTGCATCGGGTGT  
CATFGCCCTGAATGGGTATGTAACGATCCCGTTAATTAATTTTCAGGTTCCCGGAGAACAATGATTATTCAGTGGGGCAGG  
CGAGATTTGGTGGGTCTGGTGGTGAAGATGCCGGATATCTTAACGATTTTCCTTTTGCCTTTCCGTCAGCATGTTATGGA  
ATGATAGTTAGTCATGTGGGGCATAACCTTCAGGCGCAGGAATCCTGTCGGCTTCTGCAATTACATCAATCAGTTCCG  
CGGTTTTCAAGCATAGCGACTGCTGCAACGCTGTATTAGGTCGTTATATCGCTATAGGGGTGTA  
>Cluster\_40850  
ATGAGCGACTGAATCAGTTTCGAAGTAAGGGGCCGAACTCCTGGTGGAACTGGCACAGCATACTCTGAGACCGTTCCG  
CGAGATTTATGATATTGAGCCCGAAGTTGCCGACCAGATTGGTCAGGCCGTCGCGAACCGAATGATGCAGGTCGCGGGC  
GGCAAAACGTTTATTTCCCGATGGGCATGGTATGGAAGTTCAGTCAGCGCACCGGAAATCTTCAGGAGTTTAAACGGA  
CACAAACCCAGCAACTGCGCCGCAAAATTTGGTCTTCCCTTCAGTGGGTCTACAGCGTGGTTAAGCGGGTAAGAAAAGA  
AGAACTGGATCGGATGACGGCAAGCTATTTGCTGATGAACCCGATGCAGATACGGAGAAAAAGAGTAA  
>Cluster\_20350  
ATGATAAGGGACAGGAAAGCTGAAGAGCTGGAGTCAAAAGGGCTATACCGGAGAGCTGCCGCAGCATGGATGGAAGTCAT  
GCTGTTATGCAGCGAGGACGATGATCGGGAATGGATAAAGCGCCCGTGAACCGTGTCTGGAGAACGTAAGCGCCCGC  
CCGTGAAGTTGAGGAATTTGGCGACTGCATAAAGCTGTTACCGAAACGCAACACCGCATGGGGATAGCGCAACCGAAC  
GGTAAACGCTTCCGGTTAAATGGCGCAAGAGGCAAAGGTAG  
>Cluster\_33847  
ATGAGTTTTTTTGTAGTGTGAAAACCTCTCTGGAAGAGGCTGTGCGAGATTAACAAGGTTTAAAAGAACCTGCACGGGT  
GACCCGCTACGAAATTCGGGATGTTAAAGCTATTCGTGAGCAACTCAACGTTTTCGCAAAGTGAGATGGCAAAGCTCTGG  
GAACAGTGTGGATACCATTAAAGCTGGGAATCGAAGCGAAGAAATCTACGGGATTGGCTGCAAAAGTACTTGGCCACA  
ATTTAAAGAAAATCTGACTTTTTCCGGAACTTGCCTCCATTAA  
>Cluster\_38633  
ATGAGAAAATATAAATCTCTTTACCCCGCTTATATACGGGTATGTTGGGTATTTTCCCTGGGTGTCTGGTTTCATAT  
CGTCGCCCGCTTGTTCACAGCAAAACCCGGATGGCTTTTTTCTGGCGGAGCTGATTGCGGCCATCCTTGTGCTGTTCCG  
GCGCATACCAAGTGTGGATGCATGGATTGCCGTGTCAGCCGGGAAGAGCGTGAGGCACTGGAAGCCAGGCAACAGGCC  
ATGATGGAAGGGCAGCAGGAGGGCGGACATGCTCTCACTAA  
>Cluster\_39665  
ATGACAGCAGAAGAAAAAGCGTCTGTGCTTTTTCATGATTGGGGTGTGATTGTTGTGCGCAAGGTGCTTCCCGTGG  
TGAACCCATCACCCCGCTGTGTTTATCGGGCGCATGTTGCTCGGTGGTTTTGTTCTCGATGGTTGCCGCTGTTGTTCTCG  
TGCAGTTTCTGACCTGTCACTGCTGCGGTGTGCGGCATCGGCTCCATGCTGGGTATCGCCGTTATCAGGTGATTGAG  
ATTTGCCATTCAGCCCGCTTTAAGGGCAGGGGAAACCGTAA  
>Cluster\_46842  
ATGTCAGTAAGCAATATGCCACCTATTGATAGAGCTGAGCAATCAACTGCTCATGAAATACAGCAAGCGAAAGTGATTGA  
TTTTAATGACCGGTTTCTCAATCTTGACAACCCGGATGATAAATGATCTCCGTTTTTCCCAACTATGCTGTACAACCTG  
AAAATGGCAGCAAAATCGGTTACAAGCATTAAGGCTGTATAAAGAGGGGTTAACTCCTGAAAAATTAATAGTCTTGCAG  
GATCATGTGCTTAATTATAATGTGAGGTTTCATTGGTGGAAACATTAG  
>Cluster\_49158  
ATGTATAATTTTAAAGATAAAATAGAAGATTACACAGAGCGGGAATTCATTGAGTTGCTTGGCGAGTTTACAAATCCAAC  
CGGGGATAACGCTCAATTTAAAGGGGAAGAGCTTGACAAAATTTGGGATGATAGAGAACAATCTTACCAGAATTACAC  
AACATCCGTTGATGAGCGATCTTATCTACTATCCTGCAAGAAGGAGATGATAAGCCTGAAAACATCCTGAAAATCGTC  
AAAGAAATGGCGCGTTCCGAAGGATTGCCTTTGTTCAAAGATTCAAGATGA  
>Cluster\_3994  
ATGATTACTTATCAGCAGCATTCGCGAAAGCGAACATTACCTTGTGATGATGCAGATCTCCCGTGTGCTATTACTCTACA  
TGGACGCTTTAGCCAGGGTGGTATTTCTGTTTTCGAAGCACGAGAATTTCTCGAAACTGGAGATGAGGCCGCGCTTAG  
CTGGTAACGCACCTTTTATTTATGATAAAGACAGTGGTGAATTCATTCTTGGGAACGGCAAAGCCGCTGGAAGATAT  
CTACAGGATTACGAAATAAAAAAGGCTACCTTCGGCTTCCCTGA  
>Cluster\_29663  
ATGACTTCTCCCGTCAATGTGGACGTCAAACCTGGGCGTCAATAAATTCATGTCGATGAAGAGCATCCGCACATCGTTGT  
GAAGGCCGATGCCGATAAACAGGCCCTGGAGCTGCTGGTAAAAGCGTGCCTCCGAGGTCGTACAGAAGCAGGATGACG  
GCAGTGTGCGCTTCGATTACGCCGATGCTGGAGTGGGCACCTGTGCAATTTGGGCTGGGGTGGGGTGGGGTGGAAACAG  
TGGAAATACCCGCGGCACCTTTGGTGTGGAGTTCGTTACGGCTGA  
>Cluster\_11448  
GTGAGCGATAAACAAGAAGTTTCTTAGCACATATCAATGATGTGCTGGAGTCAAAAAATATATGAAACTAATGCTGA  
TGGGGTTGTAACCATCGGAACGGATAAATGGCTACGAAAGTTTTAACTTCGTTTTTCTCAATAGCACCCCTGTCTATCG  
GCCATATGAATGGCGAAATCGCAGTGGCAAGGAAATGCAGCGCACTAAGGTTGCGTCCGTTGACTTTAAGTAAACAGAAGGCC  
TTCGATTTCTATCAGTCTTGAAGGATGTTCCGAGGAATA  
>Cluster\_39449  
ATGGCAGTAGTCATTACATATCTGGCTGACGATAACGCCAGAAATCGCCGAGAGCACGAGACAGGCTCAACGTTGAGCA  
GGCAATGCAAGAACAAGCAGCGACTGGCGGAAAAATTCGCTTAAAGCTCTCTGGTTGCGTCAAGCAGACAAAGCAGCATCAC  
TCGGAAGCCTTTCGTCGAAGAAGGCAGATGAATGCAGTGAAGTATTTGCTGCCAAACGTTAGCCATTACCGCGCAGGC  
TACCGGAAATCAAAACAACCTGACGGCGAGATGA  
>Cluster\_49343  
ATGCCAGTACTCCGGAAGAGAAGAAAAAGGCTCTTACTCGAGTTCGTCGATTCGGGGGAGATTGATGCTCTGGAACG  
GTCGCTGGAGGTTGATGCCGAATGCCGTGCCATACTCCAACAGATCGCTGCCGTTCCGGGGCGGGCTAACGGGCTGATGG  
CAGAAGTGTCTGAAAGCCATATCCGGGAAACGTTTACCGGAAATGACTGCTACAGCCGGAAGTCAGCAATCCGTTGAC  
GACTATTGAACTGGTTCGTGCTATCTTAAATAG  
>Cluster\_28930  
ATGGGTGGTATCAGTATTTGGCAGTTATTGATTATTCGCTCATCGTTGACTGCTTTTTGGCACAAAAGCTCGGCTC  
CATCGGTTCCGATCTTGGTGCCTGATCAAGGCTTTAAAAAGCAATGAGCGATGATGAACCAAGCAGGATAAAACCA  
GTCAGGATGCTGATTTTACTGCGAAAATATCGCCGATAAGCAGCGGATACGAATCAGGAACAGGCTAAAACAGAAGAC  
CGGAAGCGCCACGATAAAGAGCAGGTGTAA  
>Cluster\_6251

GTGAGCTATCAGCCTGGTGGTCTGGTTTTGGCTGATTTAAGCCGCGTGGGTATTTGTCCAAGAATGCTTCAAGCTCCAA  
TCGTTTTGGCCTGGTGAATGGAGATGGGTTAAGCAAAGACTCTCGTTGCTGGTACTTTTTTCGCGCTGGCGCTCAAGCA  
TGGATAATGCGATTGCCGTAGTCTTCTCGTTAGTCAATGTCTGCACCTGGAAGCAATTTACCGGAGTACCTCACACTAC  
GGCAAAAATGTTTTATTGTTGCAACTTTCGCTAA  
>Cluster\_62802  
ATGTTTCAGAATCATTTTTCTAACACCTGGTACGTCGACCACCACGGCACTCCCTGCAAAAATCCTGCGTTCTACCCACAA  
CAAAAGTTCATACATCCGAAAAGCAGAACATGTATCGCCAGCATGTTCCGCTTAAATCATGACTTTGAACTGTGAATA  
AAGCTGATGCAGATCGGATAGCAGAAGAGATCGAAACGGCAGAACACATTAAGAAGTTACGTGACATGCGTTCAAAAAGC  
AGAGGTAACCATGGAATCATAACGCTCACACTCGATGA  
>Cluster\_9740  
ATGAACACCTGTTTTACTGATGGCTGAATTCATACCTCAAACATTGAACTCTCAGCAGTTAGCCAAAAGTACTTTGG  
TATGAGTCCAGCCACAGCAGAAGCAAAGCAAACGCTTGAAGTTGCCCGTTCCAACATAATCGCATCGGCACATCACAAA  
AAGCAAAAACGTTGCATCAATATTAGGATCTTGCAGAAATACATAGACAAAAGACGAGAAGAAGGACGTATCGAGTGGGAA  
CAGGTCAGAACAGGCAAACAGAAGGGCAAAGAATCACTAA  
>Cluster\_20850  
ATGAGTATTCGTTGAATTTGGCGAACGTTATGTCTGTTACCAGTGACAGCTTCCAGTTTATTCTCCAGGAGAAAAGAG  
AGCGGAAAAGCGTAAAAACGCGCTCAGGAATGGCTGGCGGTGGTTGTTATTACCGGAAATTAAGCCAGCTTGTTCGCG  
GCCTGATGCATCAGGATATCTGACCGGAAGCGCAAAGCTTTTGTCTGATTTAAACGGCAGGTTGAGCAACTCAGCAGG  
CGTTGTTACAGAGCTTTTGGCTCATATGGCCGTTAA  
>Cluster\_34981  
ATGCTGATCCCTTTTCCCGCTGGCAGCGCTATGGATGCGATCACGGTCAGAAAAGTGGGAAAAGACAGCCTCGATTAA  
TGATGTCGATATGACTGTGATCCCGGAGAAACACTGGCAGAGCTGAATGCTCTGTCCGGACCTGCGGCTCTCTGTTGG  
TGTTTTCTTCCGGGATACCGCCACGCGCGGGGATCGCGTTGTTATGACGGACAACATTTGACGGTCAACGGCATGAA  
CGCTTAAACGGTAAGCCAATGATCTTTATTGAGTAA  
>Cluster\_17636  
ATGGTCATTGATAAAACGATAACGATAGATGTAGCCATGAATACAGGCTGCGGCTTATCGGTTATGGCTATATCACTTT  
TATGTCTTACAGGTGGTTGATTTCTTCCGCTTTAAGCAGCGTGAACAAATCCTGTGTAAGCAAGCGCGGAAAGGCGC  
TAAATGCGTTTAAATGACGCTTTTGGATATGACCATATGCAACAGGGCGACCCCGCACGCGTAATTTACCGGGGAGATAT  
GTAATCTTGTGTACCGGAATGAAAAAATGAACAGGAGACAACCACTGAGTCAAGCAACAGAAATAGCGATAA  
>Cluster\_53935  
GTGATTTCTGACTGGGAAGATAGCCATCGGCGAATGATTTATTGGCAATCGATAAACAGGCAAAATAGTGGTTATCGA  
ATTAACACCTGATGAAACGGGACGCATATGGAGTTACAGGCACTACGATATGCGGCAATGATTTACACAATGAGTTTTG  
CGAAAGCATGTGAGTATTTTTCAGACGATTTTGAACAAACAAACCGCGATGCCGATGCGAAAGAAAAATGCGAAAGAAA  
AAATACTTGAATTTGTTGAGCTGGATGAAACTGAGCTTGTGATTTTGGGTAATGCTGCCAACTACTGATTTAG  
>Cluster\_63840  
ATGAAAAAATATTTAGTTTGGCTGCGGGCATGTCAACCAGTATGCTGGTTAAACGTATGATGATCATGCTAACGC  
TATTTCACTTGAAGTTAATATTTCCGCATTTGGCGATTGACAGGCTAAAGGGAAAATTAATAACGAAGTTGACGTTG  
TTTTACTTGGCCGCAAGTTTCGCTTTGAGAAACAGAGATTGAAGCCGTTGCACAGGGGAAAAATGCTGTAGCCGTTATC  
GAGATGAAAGACTACGGCACCATGAACGGACAGGCACTTCTGAATTTGCGATGAAACTACTGCAAGAGTAA  
>Cluster\_25022  
ATGAAAAACAACGAGGCAACTTTTTCGCACTGGTCGAGGCGATGAATGAAGCCCTCGACAAGCAACGCTGGCGACGCT  
TCCGGCACTGCATCAGCAGTTGATGCGCCAGTTTACAGATTACGCGCGCGGAAACCGATGCGGCGCAGTTGGATACCG  
TGAAAGCGCAGTTTGTACGGCGCTTTAATACCCTGATTAAACGGCGGAGCAGCGCGCAGAAAGTTGTAAGGCGCGTATG  
GAACAGCATCAGCGGCATCAGGAAGGCGTACTGGCTACTCAATTTGTTAATTTACTTTTCGGAGAAGTCATGA  
>Cluster\_17748  
ATGGATCTGGTAAACCTCAAACCGGCACCGCACCTATCAGGATGAGGAGGGTAAACCCAGACTCGTGATGATTTATCC  
GTGGGCGCTTTGCTATTGAATTGAACAACGAGAGCTTAGCCAAGCTAAAGGCAGCACCTCAATCTGCTGGCACTGAAGTAA  
TGATCACCGCAAAGGCAACTATTTGCTCAACTTCTACCGCGAAGCGGAAAGTTGGAATGCAGCATAACGCCAGTCTGCAG  
ATCACTGATATGGCGCTCAGTCCAGTATCAGGGAGCAACCGAAGTCAAGCAGCGCAAACTCTCTACGTTGGGAGGATGA  
TTAA  
>Cluster\_9736  
GTGTATATTAATGAAAATAATGAGAGCTACCTGAAAGCTCAGTTTGAATAATCTCAACGTGATATGAAGAAGTACCT  
GGGAGAGATGAAGCGTCTGGCTGATGGGGGAGAAATGAATTTTATGATGGCTATCTGGATAAGATGTCACATCTGGTGAATG  
AAGGAACGCTCGATCTGATATTTAAGCAAAATGCGAGATGCTGCACCACAATTAATTAGCTTCCGGAAGTCGTTTGGAC  
CCAACCTCAAAGGAAGAGATTAATAACTTACAGACACTTCTAAATTAATTTATGATTTGTTTCGGGGTAAATCGGAGAA  
ATAA  
>Cluster\_14895  
ATGCATGACATGACCAATTACCAGTACCTGATTAATCCGATTTTAACTGTGAGCATGATATGCTAAAAGGTTTATTC  
CGCTGCGGATGGGCTACTGACAATATAATCAATGGCTGTTTCGTCAAATGGTAGCCTGATGTGGTATGCGTCAGAAAATA  
AGGAATATGACGAAAAGGCCATGCGCATGATATGGGTAATATCGGTTTGTACTGGCAATGCTTGGACAGTTTGTATTT  
TCGTTACGGTGCACCATTGAAAATGCCACAGATGCATTAATGCTATAAAGAAAGCGAATACTGATTTAAATCGGGGATA  
A  
>Cluster\_34009  
ATGACTCAATCCGCATTCATTCACCAACTCCAGAACAGCGCCGACCATACTCGCCGAGTATGGTTTTGACTGCGAAGA  
ACGCATCAGGGAAGAGAAGTGTAAAAAGATGACCACGCTTTCACGCTCCCGCGCTGGGAACTGGAGAAGATCGGTGCTT  
TTCTCCCGCTCACTCTTTGGGGCGTTGCTCATGTACTGGCTGTTAAGTATGATTTTTGTTGGTGGCTGCGTAATCCGCCA  
GTTATTGCCAAAGTGAATAACCCATACGAAAACGCCAAAAGAAAAGGAGAGGGAATCCGGTAGCGCCAGGTTGAATA  
A  
>Cluster\_40836  
ATGAGTAAAGTAAATATTTCCAGTTCTGGGACCCGATCCTACGTGACTCAAAGCTCTACCGGTCATGCTCTGAACGG  
TGTTTCTAACGGTGAACCTGGCATCAGCCCTGGGGGAGTCCCGCGCAATATCAATCGAGCACTTAATACCCCTTATGAG  
AGGGACTGGCCATGAAATAGAGAACGGAGCTTTCGACCGGGAAATCCAGTTACTACAGATCGCCATGGCTCACAGTCA  
GAGATGGCGGTGCACAGGATCGTATTAACGAAATCAACCAACGAGTTATTTACAGGTAGTCTGTTGTAA  
>Cluster\_17766  
ATGGAATGCAAGTGAAGTATCTGGTAAAGCGCGGACATGATCAGTCCGAGAGCTGAAGGCATCATGCGGCGCGCTCGA  
TGTGCGAGACGTGGCACAACCTGATTTAGCGATCTGGCAACGCAAGTTGGAATGTGCAACTGCTCGTAGTAATGCTCTGGCTG  
CGGAAATGCGGGGCTGAAAGGAATTTGTCAAAACCTGTTTCCGCTGCTGCGGCTGATGGCGCATGCGCTGGATGGCGCTGAT  
ATTCAGGCGCTGACACTTGTATTAGAAAGCGCCCTGGCATTTGGCGTGAAGGGGAGATATGA  
>Cluster\_59479



ATGAAACTCTCAACCTGCTGTGCCGCGCTTCTGCTCGCCCTCGCCTCACCCGCGGTACTCGCCGCGCCGGATCCTGTGA  
GCGCATACAGAGCATATATACAGCGCATTATCAATAATGGCGTACCCGAAAGCAGCTTACGTTAAGTATTGTACCCA  
ATGACCAGTTGATCAGCTGATTCACAGCTCGTCGGCATTGGCCTAATGATACGCATAAAATCTCTATACCCGCACC  
ACCAGCGGTAACGCTCTCTGCCGCGAGTCTAGCCAGGATGGCGCGCTGCCGAACCCAGTAA  
>Cluster\_13609  
ATGTTTCAACAACCGCTAAATTTGACGCTACTGACCGTTTCTACCGTTAACTCTCAGGATCAGGTAACCCAAAAACCCCT  
GCGTGACTCGGTTAAACAGGCACGGAAGACTATTTTGTCTCAACTGAAATGGTCAAGGATGTGAATGACCTCTATGAGCTGG  
TACTGGCTGAAGTAGAACAGCCCTGTTGGACATGGTGTGCAATACACCCGTTGGTAACCCAGACCCGTTGCTGCGCTGATG  
ATGGGCATCAACCGTGGTACGCTGCGTAAAAAATGAAAAAATACGGCATGAACTAA  
>Cluster\_26307  
GTGTTGATGTTATTTACGCTCAAGACAAGCTGATAGCCTCGAAAAACGCCCTTTCGGTTCGTCGGGCACATTTAGCAGC  
TTTACAGTTACTGCATGATGAAGTCTGTTGTTGACCGCGCTCAATGCCAGCGGTAGACAGTAACGATCCAGGGGCTG  
CGGATTTACTGGCTCAACCGTTATTGCTGAATTTGAGTCTGGTGAAGCAGCTCAGGCTGGGCGGATGCTGACCCGTTAC  
GTAGCGGCAGGAGTCTATGAACAGCTTTCAGTGAACCATTAAAGAAAGTGTCTGA  
>Cluster\_29272  
ATGGCTAAGGGCAATCTTTACAAGATCCGTTCTTGAACGCATGCGTGGGAAACGTTCCAGTTTCTATTTATTTGGT  
GAATGGTATTAAAGCTCAAGGACAAATCGAGTCTTTTGTACTGTTCTGATCCCTGTTGAAAAACACGGTCAGCCAGATGG  
TTTACAAGCAGCGGATTTCTACTGTTGTCGCCGTTCTCGCCGGTTTCTCATCACAGTAACAACCGCGTGGCGGTACCAGC  
AGTAACTATCATCTAGTGTAGCAGCGCGAGAATACTTCCGCGCAACAGGACAGCGAAGAAACCGAATAA  
>Cluster\_32371  
ATGCCAAATTAGCTATTAGCTTTACTTTACTTGGCTGCTTTTATGCACTGGATATGGCGCTGGATATATAACAGG  
TGGATAACTTGGCACACACTGTATATGTTGAACGTATAATTACCGTAGCCCTACTTGCATTTCATCCAGTGTATTATCT  
TTGCGGCTTTATTTAAATGATCCAAAAGACAAGGAATAATAAAATCATTCTGTCTCAGCGATTAATTTAATCCCTTCG  
GCTATCGCATTACTTATAGGATTTACTGACGCACTGACCAGAAAGTTTCTTACTTATTTCTCGGTAA  
>Cluster\_58898  
ATGAAACACAAGCTTCTGCAATCCTTATGGCCCTCATGTTGACGACGCCAGCTGCGTTCGCTGCCCTGAAGCAACAAA  
CGGGACCGAGGCAACGACGGGTACTACTGGCACCAACAGCCACTACCGCGCAACCCAGCTGTACTACTACTGGTG  
CGGTGGCTGCTGGCGCTGTCGGCACGCGCAGTGTGCGGTGGTGGCAACCGCTGTTGGTGGTGGCGAGCTGGCAGTTGTT  
GCAGCAAATGACAGTGGCGATGGCGGTTCTCATAACACCTCAACCACCAGCTCCACTACAGCTAA  
>Cluster\_563  
ATGGCTGATTTACCCTGTCAAATCGCTGTTTAGCGGAAAAATATCGCAATGCCCTCTTCAACGCCCTGGCAACATTGCCTA  
TGGCTTGTGTGCTGTTTGTGCTTTTGGCTGGGGCGCAATTGCTGAACCTGTAGTGCATGCCCGCGCTGTATGAGC  
GTTAATGCAGGTCACGAAACAGGTCGCCACGGGTGGAATTTAGGTTAGGTGTCGGCACCATTTTCCGGCTGATCCCG  
TTTTTAGTAGGCTGCTCATTTTTGCACTGGTGGCGCTATGGCTGCATGGCGACATCGCCCGCAGTAA  
>Cluster\_25207  
ATGACAGATAAACCAGCAAGATGGCTCAGGCAAAATGCTGTATTGCTCTTTTTGCGGCAAAAAGCAGCATGAAGTGGCGAA  
GCTGATTGCCGCTCCATCCGTGTATATCTGCGACGAATGTGTTGATTTATGTAACGACATCATTCGCGAAGAGATTAAG  
AAGTTGCACCGCATCGTGAACGCAGTGCCTACCGACGCCGATGAAATTCGCAACCCCTGGACGATACGTTATCCGT  
CAGGAACAGCGCAAAAAGTGTGCGGTCAGCGGTATACAACACTACAACGCTGCGCAACCGGATACACGCAATGG  
CGTGCAGTTGGGCAAAAATAACTTCTGCTGATCGGTCGACCGGTTCCGGTAAAAACGCTGCTGGCCGAAACGCTGGCGC  
GCCTGCTGACGTTCCGTTACCATGGCTGACGCAACCCAGCTGACCGAAGCCGTTATGTTGGTGAAGACGTTGAAAAC  
ATCATTTCAAGCTGTTGCAAGAAGTGCATACGACGATACAGAAAGCGAGCGCGGGATTTGCTACATCGATAAATGA  
CAAGATTTCTGTAAGTCAAGCAACCCGTTCCATTACCCGACGTTTCCGTTGAAGGCTACAGCAGGCACTGTTGAAAC  
TGATCGAAGGTACGGTAGCTGCTGTTCCGCCGCAAGGTGGCGTAAACATCCGCAACAGGAATTTTTCAGGTTGATAACC  
TCTAAGATCCTGTTTATCTGTTGGCGGTGCTTTGCCGGTCTGGATAAAGTGATTTCCCATCGTGTAGAACCAGGTTCCCG  
CATTTGGTTTTGGCGCAGGTAAGAAGGCAAGTCCGCAAAAGCAAGCGAAGGCGAGCTGCTGGCGCAGGTTGAACCGGAAG  
ATCTGATCAAGTTTGGTCTGATCCTGAGTTCAATGGTCTGCTGCGGTTGTCGCAACGTTGAATGAATGAGCGAAGAA  
GCTCTGATTCAGATCCTCAAAGAGCCGAAAAACGCCCTGACCAAGCAGTATCAGGCGCTGTTTAACTGGAAGCGGTGGA  
TCTGGAATTCCTGACGAGCGCTGGATGCTATCGTAAGAAAGCGATGGCGGTAACCCGTTGCCGTGGCCTGCGTT  
CCATCGTAGAAGCCGACTGCTCGATACCATGTACGATCTGCCGTTCAAGGAAGCGTCAAAAAGTGGTTATCGACGAA  
TCGGTAATTGATGGTCAAAGCAAGCCGTGCTGATTTATGGCAAGCCGGAAGCGCAACAGGCATCTGGTGAATAA  
>Cluster\_26195  
ATGTTTGCCTCTGTGATGTAACCGCGTTTTATGCCAGCTGTGAGACGGTGTTCGCCCTGATTTATGGGTAACCCGGT  
GTTGTGCTATCGAATAATGACGGTTGCGTTATCGCCGAAACCGTGAAGCAAGCGCTGGCGTTAAAAATGGGCGCAT  
CCTGGTTCAAACAAAAGATCTGTTTCTGCTGCTGGCTGTTTGTCTTACAGCAATTTAGAGCTTTACCGCAGACATG  
AGTAATCCGGTGATGTCGACGCTGGAAGAACTATCGCCCGCGTGCAGATTTACAGTATGATGAGGCATTTCTGCGATCT  
GACAGGTGTCATAAATTTGCGGATCTGACTGATTTTGGCAGAGAAAATCGCGCAACCGTGTACAACGTAACCATCTTA  
CTGTTGGTGTGGGATCGCCAGACCAAAACGCTGGCTAAGCTTGCAATTTATCGCGCAAAAATGGCAGCGGCAGAGC  
GGCGGGTGGTGGATTTATCAAATCTGGAACGCCAGCGTAAATTAATGTTCTGCTCTCCCGTGGATGAAGTCTGGGGAT  
TGGACGGCGGATCAGCAAAAACGACGCGGATGGGATCAAAAACCGTTCTCGATTTGGCGGATTCAGATATCCGGTTTA  
TCCGTAACATTTAATGTCGTGCTCGAAAGAAGCGTGGTGAACCTGCGCGGTTGAACCTGTTTGAACCTGGAAGAGTTT  
GCACCGCAAGCAGGAAATATCTGTTCCCGCTGTTTGGTGAACGCATCACGGATTTCCGTCGATGCGGCAGGCCAT  
TTGTAGTTACGCTGCCCGGGCGCGAAAAAATTCGACGCGAGCATCAATATTGTCGGTTTATCTCCACGTTTATTAAGA  
CGTACCATTGCGTTCAATGAACCTTATACGGCAATAGCGCATCGGTAACCTGCTGACGCCCACTCAGGACAGCAGG  
GATATCATTAACCGCGCTACGCGATCTCTGGATGCCATCTGGCAAGCGGGCCATCGCTACCAAAAAGCGGGGCTGATGCT  
GGGGATTTCTTCAAGTCAAGGAGTCCGCGAGCTCAATTTATCTGATGACAACCGCACCGCCCGGAGTGAGCAATTGA  
TGGCGGTAATGGATACGCTGAATGCTAAAGAGGGCAGAGGAACACTCTATTTTCCGGGCGAGGGATCCAGCAACATGG  
CAGATGAAGCGTGCATGTTTACCATGTTATACAACCGAAGTCTGATTTACTGCGGGTCAATAA  
>Cluster\_7552  
ATGATTATCAAACGCACTCCTCAAGCCGCTGCGCTCTGGCTTCTGTTTCTATCTGAAAAACCTGCACAGTAAAAAC  
TATCGATCTCGGCTTGAGCGGTGAGCCTGGTCCGCGCGCTTGGCGTCCGAAACAGCGCCATTTGTGTTTACCG  
TTGCGGGTACGAATGGCAAAGGCCACCACTGCCGATACGCTGGAGTCTGATTTCTGATGGCGGCGAGGTACAAAGTGGCGCT  
TACAGTTCCGCTCATCTGGTGCCTTATACCGAGCGGCTAGGTTGTCAGGGCAGGAATGCGGAACTCGGCCACACCCG  
CTCTTTTGGGAGATTTGAATCGGCACCGCGTGAATTTTCTGACCTATTTTCGAGTACGCTGCTGCTGCTGCTGCTGCT  
TGTTCAAGCAGGCACAACCTGACGTTGGTATTCGGAAGTAGGGCTGGCGGTCGCTGGACGCAACCAATATTGTCGAC  
GCCGATGTCGCGTAGTAACCAAGTATTGCTGCTGATCATACCGACTGGCTGGTCCAGATCGCGAAAGTATTGGTGGCGCA  
GAAAGAGGCATCTTCCGACGCAAAAACCGGCAATTTGGTGGTGGCGGAAATGCTTACCATTTGATGCTGCGCG  
AGGAAAAAGGTGCACTGTTACAACGTCGGGGCTTTGAGTGGAACTATTCCGCTACCGATCATGACTGGCGGTTAGCGAT  
GCTCAGCGCAGCTGAAAAATCTGCCGTTGCCGCTTGTCCCGCAACCGAATGCCGCAACAGCGCTGGCGGCATGCGTGC

CAGCGGGCTGGAAGTCACTGAAAATGCCATTCGCGACGGGATTGCCAGCGCAATTTTCCGGGACGTTTCCAGATTGTGA  
GCGAGTCGCCACGGTTATTTTTGATGTCGCGCATAATCCACATGCGGGCGAATATCTCACGGGCGTATGAAAGCGCTA  
CCGAAAAACGGGCGGCTGCTGGCGGTTATCGGTATGCTACATGATAAAGATATGCGCGAAGCTTGGCTTGGTGGAAAG  
CGTGGTTGATGACTGGTATTTGTCGCCACTGGAAGGGCGCGCGGTGCCACGGCAGAACTGCTTGGACATTTGGGTA  
ACGGCAAAATCATTGATAGCGTTGCGCAGGCTGGCAGCAATGGCGGACGCTAAAGCGGAAGACACCGTCTGGTG  
TGTGGTTCTTTCCACACGGTGCACATGTCATGGAAGTATTGACGCGAGGAGAAGCGGTGGCAAGTAA

>Cluster\_50097

ATGAGTCAAGGATCAATAACGATATGACTGCCAGTAAACCGGCCATATCGTCAAAAAATCTGCGTTGGTGGATACTGGT  
CCTTTTTTGGTTCGGTGTACTGTCAACTACATCACGCGTAACFCGCTGGGTATTTCTCGCCCCGAACTGAAAAGCAACC  
TGGGGATTACCACCGAACAATATTCCTGGATTGTAGTGTCTTCCAGCTCGCCTATACCTATTTCCAACCGTTGTGTGGA  
TGGCTGATGACGTCATTGGCCTCAAACGGGCTTATGATCTGCGCGGACTGTGGGCACTGGCCTGTCTGATGTCATGC  
GGGGGGGAAACTGGGTACATCTGGCGTGTTCGCTTCTTTATGGGGGGTGGGAAGCCGAGCAACCCAGCAAAACG  
CCAAAACCATCGGGAAATGGTTTTCCAAAACGAGAACCGGCTGCGCGAGGCTGGGCAAGGCGTGGTTTTTCCATCGCG  
GCCATGCTGGCCCCGCGATTATCTATTTTTGCCACGCTTCATTCGGCTGGCAGGGCGCATTTATGTTCACTGGCATCCT  
GGCGATGCTGTGGTGGTGTCTGTGGTGGCGGTTCTATCAACCCGGATAAGCATCCGAACTCAGCAAAAGCCGAGCTGG  
ACTTTATCCGCAAGATAACGAAGCGCCCGGATTAATAACCTTTCGACCGCACTGAAAACCGTGGGCAAAAAATAAA  
CGCTTTTACGGTATCGTATCCCGCTTATGCGCAGAACCGGCTGGGCGGTGATGAGTTTTCTGGGTCGCTTATACCT  
GTCCAAAACCTATGGCATGGACCTGAAGCAGATCGCATTTTCGCTGGTGGCGTTCCTCGCCGCTGATCTTGGCAGTA  
TTGCCAGGGCTTCTGACCAAACTTTACACCCGCTGTTTGGGCTGAGTCTGTGAACTCCGTTGTGTCATCATCGGTC  
AGTGGCGCATTTGATGGTTTCGCTGGCGGTGATGGCCTTACCAATAACCGTATAATCGCCATCGCTTATTTCCAT  
CGGCGCTTCGCTCAGCAGATCATCTCCTCGCATGCTGACGCGCACTGGTGGTGGAAATCCTTCGACAAAGCTCAGATGGCCA  
CTGTTAACGGCATGGCGGTTCTGCGCGTGGATCGCAAGTTTCTGTCTCCTGATATCGGGGTTACCGCTGACAAA  
ATCGGCTTTAACCCCTGTTTATCGCCATGGGCTTCTTTGACCTGATTGGCGCTTCTTCTCCTGGTACCTTTATGCTGA  
ACGTCGCGCAAAACGGCCCTGA

>Cluster\_62152

ATGTTTGATTACATCCTGTCTCTCGGCGTACCCTTTTCGTCCTATCATCATGATCGTGATTGGCCTTATCTCCGCAT  
CCCCTGGTGCAGGCGATTAAGGCGGGGTAACGGTGGGATTTGGTTTTGTGCGGTATGGGACTGGTGTATGTCATGGCGA  
TCGACAGCCTCAGTCCCTATCAAAAGTATGATGATTGAGGTTTTCGGCTTAGCCTGCATGCTTTGACGTTGGCGCAGG  
CCTGCCTCCGGCTTGGTTATGCGACAGCCATTGGCGCATGATTATCCAGTATTTTTCTTCTCAATGTGCGCATGCT  
GGTCAACCGTCTGACAAAACGATGAACGTCGATATTTACAACTACTGCGCACTACGCCATTACGGGTACGGTGTCCAGC  
TTATGACCGGTAGCCTGATTTATGGTGTGCTGGGGCAATCTGCCATGCGGCGTATCGTTAAAAATGGCCGACTGGACG  
GCAAAACGGGTACAGAACATCGTCCGGCTGGAAGGATTTTCGATACCGCAAGGCTACGGTCCAGTTCAGTACCGCTTTT  
CGTTCTACTTGATGCTATCTATGAAAAATCCCTTTTCAATGAAGGGACGCAATAATCGATGCTCAGGAGATCCAGAAACGCT  
ACGGCATGGTCCGGCATCCGGTATTTATCGCGCTAGTGTCTGGTCTGATTTTTGGCCTGGCGGCTGGTGAAGGCTTTAAA  
GGTTGGCCGACTCTGATGATTACCGTTGCGGCAATCATGGTGTGTTCCCGCGCATGATCCGCTGATTTGTTGAGGGCCT  
GCTGCCCATCTCGACCGGTGCAAGAAAGTTCTTCCAGAAATTTCAAAGGACGTAAGTGTATATCGGCTCTGATGATG  
CTGTGACGCTGGGGCATCAACCACCATTTGCTGTGGTCTGCTACTGATACCCATTTATGTTAATCTGGCCAGCATTTTA  
CCGGGCAACAAAGTGTACCCCTCGCAGACCTCGCGGTAGCAGCCTTTTATCTGATGGCTACGGTTATCCACCGCGG  
AGACTGGTCAAGGCTTGATAAGCGGGTTCATCGTATGATTACCTGCTGATCGCCACCGACTTCGCGCTTACT  
TCACTGAAATGGCGCTCAAAGCGGTTTTAGTTTTGCGGTTGAAAGTGGCAGAAATCTAGCGTTGTCCGTTGGGCAATATG  
TTCCGTTGGTCTGATTTCTGAATTTGATGTGCTTGGGATTTATGGCGTTGCTGGCGGTCGGTATTGTGCGCCAGGCTGCT  
GCTGTTCTTACGTAACCGTAATTTATCGGAATAA

>Cluster\_41358

ATGTCCAGAAATACCCTCAACAAATTAACAGACCGTCACTGCAAAAGCAGTAAGCCACGAGACAAAACCTATAAATTTGTC  
TGATGGTGGTGGTCTTTATCTTGAAGTATCCAGACCGGTCGAAGTATTTGGCGAATGAAGTATCGCCGCCATCAGATA  
AGAAAGAAGACAGACTTGGCTTTTGGTGTATATCAACCATTAGCTTACAAGACGCCAGAGAAAAACGAGACAACCGCCAAA  
AAGTTTGTAGTCAAGGGATAGATCCCAAAGCAGAGCAAGAGCAGCAAAAGAGAAAGGCGCATTTCACTTTTGA  
GACAAATAGGACGTCATGGGTTGAAAGCCACAGATGTGGAACGAAGACCACCAGAAACCGGTACTTAGAAGCCTTGAAA  
TGTATATTTCCCTCACATTTGGCACTTCGGATATTCGCAAACTGGAGGCGATGCAAAATTTACCTTTGTTAAGAAGGTA  
GATGGCGCGGAAACACGATACAGCAACCGACTTAAACAACGAGTTAAGGACATCATACATAGCGCCGCTGAGCGG  
CATTAAGACAGAAATCATACGAATGATCTGATGTCGGTAAATGCAATATGAAACTAAGCATCACTCCGCTACATC  
CCAGAGATTTACCAGACTTTTCACTCGATTGGGCAGCTTAAAGGTAATCCTTACCCGCTTGGCATTGAGCTAACC  
ATGTTGACATTTGTTCTGTTCAAGCGAGTTAAGGTTTGGCCGTTGGAAAGATTTGACCTTGATCGGGCTGAGTGGATTAT  
CCCTAAAAAAGAGACCTATCGATGGTGTGAGGTTTTCCACCCGTTGGCACAACAAACGGGAAAGACGAAATATCGTGC  
TTCTTAGCCGCTCAGGCTGTTTTCTATTGTAAAGCAGTTGAGAGAACTAAGCGGAAGCTACGATGTTGTTTCCGAATGAA  
AGAAACACAAAGGCGTGTAGTGAAGACACGTTAAACAAGGATTTACGCTTAAATGGGCTATAACACGCAAGAGGACGT  
AACTGGACATGGATTCCGTTGCCACAGCTGTAGTTCCCTGATGGAGTCCGGTTTGTGGCAGGAGGACGAGTAGAGCGCC  
AGATGAGCCACAAAGAAATAAAGACGTTAAAGAGCCTACAAGCACAAGCTGATTACTTAGAAGAGCGCAAACTAATG  
CTTCAATGGTGGGCGAGATTTATCTGGACGCTAGAGAAATACATATAAGCCCTTACGAGTTCCGAAGGACACCGCGG  
TGACTAA

>Cluster\_25056

ATGGCGACATGGCAACTTGGCGGCTGCCTAGCATGGCACCGCAAAATGATAATGCTCCTCGTTCTCCGTTCTCAGCC  
TGTGACGATATCAGCAGCAGCAACGTAAGGTTTAAATGGCGCTACAGGGGCTAAGAGGCGTGTGAGATTAATCAGCAGG  
CACGTCAACAACAGCGTAAAGCAGAGTTTCAGAAAGCATATGCCGGGCTTTTGGATCTGGAGACAGAAACAAATGCGC  
AGTCTTATTTCTGATATCCAGAAGAATTTGAAAGCGTTTCAGAAAGGATGGGCTTTATTTGATGACGACCAGAGAAATTC  
TATTTGGTCACTTTGCGACTAGTGTCAAAATCGCATCTTCTCGGAACTGGGGCATTGGGAAATTTCAATGACGATAACG  
AAGATGAAATGCGTCTGTTGGAAATTTCTCCTGAGTCTGTTGCCGAAATGCATGTTAATGATCCACAGGGGTTCCAGCGG  
CTTGCTGGTAGTATGGCACTGTTTTCTCCTCGGTCATGAGAAGTATTTGATATCAAAGATCAAATGGAAGGTCGCTGACT  
TGAGCAAGGGGCACTGGATGAAAGTATGCTGAGCTCAGGCTGACATGGAGAACCGGAGGATGGGCAAAATCCAGAACGCTC  
AACTAGACAGGGCTTAAATGCTGGAACCGCCCTGTCGCGAGGCAAAAGGATAAACATTTGTTAACGCGCAAAATCAACGCCAA  
CCGTCAGCAGACTTAAATTAAGGATTAATTTCTGACATTAACAAATTTTGGCAAAATTTAATCTGTGACAGCGCGGCG  
AAACTCTCTGCAAGCCCTTAGCAAGGTAATAATCGGCGTGCACCACTTGGGATTTATCTTCAACTACATGAAATCTCTTTG  
ACCCGAGTCAGTCTGTTGTAAGGCGAACAGGTTTCAGGTAATCGGCTGATGGCATAATGGGCAAAATCAAAGGATAC  
ATAGACAGCTTAAATGCTGGAACCGCCCTGTCGCGAGGCAAAAGGATAAACATTTGTTAACGCGCAAAATCAACGCCAA  
TGCTATGGGGCAGCAGTTTAAACAGCAGTTGACGAGTATCTCGATACATATGGAGAACTATTTCTCAGGGGCTAAGAA  
AAAGCCTTTGAAAGAGGAAAGCGAAGCTATTTGACGATGTTTCCGGGAGCCTACATCACAGGCTGGCAGTGGACAGGCA  
AAAGCGCAACCGGAGGAAATATCAGAAGGCGCAACGGCAACCAACCTAAAACCTGGTTCAGAAATCATTTACAGGACCGG  
AAAATGGCAGCAATGATAA

>Cluster\_22915

ATGATCAAGATTGGCGTTATCGCCGATGATTTTACCGGCGGACGGATATCGCCAGTTTCTGGTGGAAAACGGTCTACC  
AACGGTACAAATTAACGGTGTTCACACAGGTAATAATGCCGGAAGCAATCGACGCACTGGTGATCAGCCTGAAAACCGGTT  
CCTGTCCGGTGGTTGAAGCCACACAGCAATCGCTGGCGGCTCTGAGCTGGTTGCAACAGCAAGGTTGCAACAGATCTAT  
TTCAAATCTGCTCTACTTTTCGACAGTACGGCGAAAGGAAATCGGGCCCGGTTACCGATGCAATTAATGGATGCTCTCGA  
CACGCCGTTTACCGTCTTCTCTCCGGCCCTGCCGTTACCGGTCACAGGACGTACGGTTTATCAGGGGATTTGTTGCTGAATCA  
AATGCTGGCCGAATCGGGATGCGCCATCACCCGGTAAATCCCATGACCGACAGCTATCTTCCCGTCTGGTTGAATCG  
CAATCCACAGGGGCTGCGGCGTCTGTTTTCAGCAGATGTTTTCGAAACAGGTGTGAAAGCCGTTCTGTCAGGAGCTGGCTCG  
CTTACAGCAAGAGGGCTATCGCTACGCGGTTGTTGATGCGCTGACCGAACACCATCTGGAAATTCAGGGAGAAGCCTTGC  
GCGATGCCCAATTCACAGCGGCGGTTCTGGTCTGGCGATGGCCCTTGCCCGGCAAGAAAACGGTAAACCG  
GCTCGCAAAGCAGGGCATCCGCTCGCTGGGCGGGGCTAGTGTCTCCGGTTCATGCTCTCAAATGACCAACCACAGGT  
AGCACATTACCGTCAAATTCACAGCCCGTGAAGTTGATGTGGCAGCTGCCCTCAACCGAAACTCGGCCGCTTATG  
CACACGAGCTGGCAGAGTGGGTTCTGGGCCAGGAAAGTACTTGCTCCACTGGTTTTTGGCACCGCCAGCACTGACGCA  
TTGGCAGCAATTCACAGCAATACGGGTGACAAAAAGCCAGTCCAGGCACTAGAAAATCTGTTTTCTCAAATGACGAGCGG  
GTTAGCAGCGGAAGGCGTACACGCTTTTATGTGCGAGGCGGTGAGACCTCCGGCGTAGTCACACAGAGCCTGGGCATAA  
AAGGTTTTTATATGCGCCCAACCATTTCCCGCGCGTCCGCTGGGTAACGCACTGGATAAGCCTGCTCACTCGCCCTT  
AAATCTGGCAACTTCGGTGATGAAGCCTTTTTTTCACGAGCCAAAGAGGTTTTTATCATGA

>Cluster\_48597

ATGACTACTACTGCACTGCAAAAATGAAAAAATCCTTCTGATTACCTTGTGTTGCAAGTGGTGGGAAAATCATTTACTA  
TTTTAAGTCCCATGTAGCCAATGGTAATTCGCGAGGGCATTCCTGAGTCAAGTAAAGATGCCGATCCTGACACCGTACTGA  
AAATGTACACAACGCAAGTTTCAGATGAGCCACGCTATGCAAAAAGGCACTTGATGCAATTCAGCTAACAGCTCCGAG  
CAAAAAAGCGAAATGGCCAAATCATCTGGCGTACCAATAGCCAGGCTATACAGGCAAGTTGAGTACAAGACAGATCT  
GGTCCGAGCTACGAACTGCTAAATGTAACGGTAAAGAACTCGGAACAAAACGTGGGACGCCGCTCATGGTTAGCGTCA  
ACGTCATACGCGCTTTCAGAGTTCGTTCCAGAAAGTGAAGAAGGGATACGTAATGCGGACTTCGAAGTGTCAAAGAC  
ATTTTCATGATGTTGAATTCGGCATACAGGCTATTTGTGGGTCATGCAAGGCAAGGCAAACTTCTTACATGACACA  
ACTATGTGCTTTGCTCAATCGTCCGTTAATCCGTGCCAACATACAGCATCAATGGAAGAGGCTCATGTTACGGGACAAA  
TTCGCGCGGTGATGGCTTACGTTATTCGAGCCTGGCTTGTCTGGCCTCGCAATGAAGCATGGCTGGGTTTACCTCGCG  
GATGAATACGACTTTCGCTTTCACAGATTTCTGGCGTGTATGACCCAGTGTGGAAGGTGAAGCGTTGGTCAATCAAAGA  
GGGCACTCAGAAATGGCGTTCGCTTCCGCAATGACCGGTTTCTTTCATTTGGCACTGGCAACACAGCAAGCTGGTG  
ATGAAACCGGCTTGTACAGGGTACAAACATCCAGAACGCCGTAACCTTTTCGCGTTTTGGCATCGTTTTGCAATGTGAAA  
TACATGAGCAAAGAGGACAGATCAGCATGTTGATAAATGCTGCGATCGTGGATGAATACGCTGAAAAGATGGTTAAGTT  
TGCCGGTATCGTTCCGATGGATACGAAGAACCTGATCAGTACAGCCGATGGCCCTCGTGAAGTTTTGTTGCGGCCA  
AGATTGGAATGATGCGAGGCGACTTTGTGACAGTATTGAGCGTTCTTTCATTAAACAACTCCCTTACGCTTTCGCGCAA  
GCGCACGTGAAGTTGTTCAAAAAATATTTGGTTAA

>Cluster\_808

ATGAAAGCATTGACTTATCACGCCCCATCACGTTCCAGTGAAGAAATGTTCCCGATCCGGGCATGAACAGGCAGATGA  
TATTATTCGCGTATTACGGCAACGGCGATCTGTGGCTCTGACCTCACTTTTATCGAGGCAAAATACCCAGGTTAAAC  
ATGGCGATATTTTTGGTCAATGAATTTATGGGGAGTCTGTGAAACCGGAAAGGACGTAAGAAATTTGCAAAAAGGCGAC  
CGGTGGTAAATCCGTTTTGCTATGCTTGTGGCGACTGTTTTTCTGTGCAATGCAGCAATATGCCCGCTGCCAAAATAC  
CAATGCGGGTAAAGGCGCTGCGCTCAATAAAAAACAGATACACAGCTCCCGCGGCAATGTTTGGTTATAGTCACTGTATG  
GTGGCTTTCCTGGTGGCAGGCGGAATATGTTCCGCTCCCTAAAGGAAATGTGGGCGGCTTAAAGTACCGCCTTGGCTT  
TCAGATGATAAAGCCTTTTCTTCTGATATTTGCAACCGGATGGCAGGACGCAAAAATGCGCAGATCCAAACAGG  
TTCAGCGTTGCACTTATGGTTCGCGCTCCAGTGGGATGTTGTAACCTCGCTGTGACCGGTTGCTCGGTCGCGACAGA  
TTTTTGTGTTGATGATCATCCCTACCGCTTGGCTTTCGCGCTGACCGCTACGGCGCATCCCGATTAATTTGATGAA  
GATAGCGATCCGGCACAGTCAATTTATGAAACAAACGGCAGGTCACCGGGGCGTGGATGCAAGTATAGACGCGCTCGGTTT  
TGAAGCGAAAGGACAGCACCGAAACGGTGTGACTAACCCTGAAACTGGAGGCGAGCAGCGTAAAGCGTTGCGCCAGT  
GTATTCGCGGCGTTCAGGCGTGGCGGCTTGTAGCGTACCGGGCGCTACGCTGGATTTATTCAGGTTTCTGTTGGC  
GACGCTTTGATAAAGGTTGACGTTTAAATGGGACAGACCCAGCTTCAACGATGGCTGGGAAATTTATACCGTTAAT  
TGAGAAAGGATTAAGAACAGAAATTTGTTACCCACTATATGCCGTTTGAAGAGGCGCCCGGGGATATGAGATTT  
TCGAAAAACGTTGAAGAGGAGTGCCTAAGGTGATCTGTGATCCCGGTGACAAAGCGCAGAGGCGCGCAGAGGCGGTT  
TCAGGCTGGTGAATGCGATGCCGGGGGAAACAATATGA

>Cluster\_14976

ATGGGTGTGATGTAGAACAGGAATACCGTATTTAAACGCGCTAAAGGGACTGGGCGTGATCCGAAATCTCCTAAGTTATC  
GGGAAGACATATACATGCCAGTAAATCGGCTTTTAAATCATAAAGTCAAGATGACACAGACAAGAAAGCATATACCTGGA  
CGCCAAACAAAAGTCACTTTTAAATCACAGGTTCAAGGAAAACGCGCAGGATCAAAAACGGTATGATTTACAT  
ACCCGTAATGGTGAACCTTGAAGGCTTACTGTTATGATGGAAAGGTTCCGAGCAAAACAGGGAAGGAGAGACTTTAAACAG  
GGAGTTTACTTCAACTTTATCTAAAGGAAATGATTAATCCAGAACATATCGTGGAGAAAACATCGATCATGTGAAAACA  
TGGTCTTTTACCACCACAGAGCTGGAGTAAGCAGGGAAGACGCTCTGAAAGCTACGATAGAAATTTCTTAAAGAGACT  
TATCCAAACCATGCTTTCGTTGCGTATACCATGATGATAAAGAGATCATCTCATGTACATGTTAATTTAACTTCG  
TGATGAAGAAAACAGGAAGAGATTAAGACTTACTAAGTCTGAAACAGGAAAGTTCAAGAAACCGGTTTTTATAGAAAAC  
AAGGTATGGGATATGATGTTACCGCTACATGAAAAAAGATCCCGAACGTAACCGGGAGATTGAGCGATTACAGGCTGAA  
AATCCGAAAAGACTCCGGAATGTTTACAAGGTTGTGGATTTTGGGGAGACTTCATATCAGAATAAGGCAGGGGAAAAAC  
AACACCTTTCCTCACTTATGAAACTTTAAAGGTTGAAAGAGGTTACGATTTGGGTTAAGAGACTGAAAATCATTTTCG  
AGTCTGAAAAGCTCCAGCCAGGAACGCTTATCAAAGTTAAAAAAGTGGCTCCTACGCTTGTACGTAGCCCGATGTTAAT  
GATGATGAACTGTTGACGCTACAGGGAACCGCATCGCAATAACTGGCAGATTGAAAATATTGCCCTTGAGCGGAACAG  
AGAAGCTCAGGTTTATGAGCGTGAACACAGGACGCGGAAAGAGAGCAGCTTAAAAAGCAGCTATCCAGAAAACATGAGC  
AAGTCAACAATATCGGGTTTGTCTTTGAACACGGGTTTACAAAGGATTCAGAAAGCAATAAAAAACTAAGAATACAGCAA  
GAGAGAACTGAAAAGGCTGGGATTTTAA

>Cluster\_5648

ATGATTACACTTTCCGTCAGCTATAGAAGAACCGTGCCTGGCTTTCCTCTTTTGGCGCTGACCCAGCGGGTGGGAT  
GACCCGTTTACTTTTATTCGCGGAATGGCTGGAACCCAGCAGCAATTTAAAAAAGAAATGGCAGCAACGCGGGCTGGA  
CACGTTTCGATGAAGTGGGAATTTATACGGTCCGCTGAATGGCACCGAATATCCACAGGAGTGGTTCTGAGCGGTTCCG  
CATATCGATACCGTGGTTAACCGCGGTAACCTTACGCGGCAATTCGGCGCGCTGGCGGCTGGCTGGCAATTCAGCTGGCT  
GAAAACGCAATACGGCGCGCGCTACGTACGGTCAAGTGGTGGCGATGGCAGAAAGAAAGCAGCGCTTCCCGTATG  
TCTTTCGGGCGAGTAAAAATATTTTTGGCTGGCGAATCTGACGACGTGGCGAATATCTGTGATGCCAAAGGAATAGT  
TTTTGTCGATGCGATGAAGGCTTGGGATTTACTCTCCGAAACGCCCCACTAACCTCCGCTCAGGATATTAAGCCTTTGT  
TGAAGTGCATATTGAACAGGGCTGTGTGCTGAAAAGTAAATGGGCAATCAATTTGGCGTGGTGAATGCAATTTGCTGGCAGC  
GCTGTTATACGTTAACGCTGAACGGCGAATCAAACCATCGGACACCGGATGGGTTATCGTCTGATCACTACAGTTTAC  
GCTTTCAGTCCGATTTGCCATCAGTCCGTCGAAAAAGCGAAAAGGATGGGCGATCCGCTGGTTCTGACCTTTGGCAAAGT  
AGAGCCGCGCCGAATACGGTAAATGTGTTGCCGGTAAACACGTTACCATTGATGTCGTCATACCGACGCTGCCG

TGCTGCGCGATTTCACCAACAGTTAGAAAACGACATGCGGGCGATTTCGGATGAAATGGACATTTGGTATTGATATCGAT  
TTATGGATGGACGAAGAACCCGTCGCCGATGAATAAGGAGCTGGTCCGCCACCCGACAGAAATTTGTGAAAGAGAAAACT  
GAATACCGGGTGTACACAGTGGTCCGGGACGACGCGCAAATTTTCGCGCTCGCGTACCAACCTGCATGATTTTTTA  
TCCCCAGCATCAACGGGATCAGCCATAACCCGGCGGAACGCACCAATATACCGACCTTGCCGAAGGGGTCAAACCGTTG  
GCACTCATGCTTTATCAACTTGCCCTGGCAGAAATAA

>Cluster\_42020

ATGAATCTTAAGCTGCAGCTGAAAACTCTCTTTCTGCAGTTCTGTCTGTGGGGAAGTTGGCTGACGACCCCTGGCTC  
CTATATGTTTGTACCCCTGAAGTTTGACGGTGCCTTCTATTGGCGCAGTTTATAGTTTACTGGGTATCGCCGCGGTCTTTA  
TGCCTGCGCTGCTGGGATTTGTGGCCGACAAATGGTTAAGTGGGAAATGGGTCTATGCCATTTGCCACACATTTGGCGCT  
ATCACGCTGTTTATGCGGGCACAGGTCACGACGCGGGAAGCGATGTTCTTGTGATATTGATTAACCTGTTTGGCTTATAT  
GCCAACGCTTGGGTTAATCAACACCATCTCTTACTATCGCCTGCAAAATGCGGGGATGGATATCGTTACTGACTTCCCGC  
CAATCCGTATCTGGGGCACCATCGGCTTATCATGGCAATGTTGGGTGGTGAGCCTGCTGGCTTCAATTAAGCCACATG  
CAGCTGTATATTGGCGCAGCACCTTTCGCGCATTCTGGTCTGTATTACCTGACTGCTGCCGATATTCCGGTTGCTAAACA  
GCAAGCGAATCAGAGCTGGACAACCCCTGCTGGGCTCGATGCATTGCGCTGTTTAAAAACAAGCGTATGGCAATCTTCT  
TCATCTTCTCAATGCTGCTGGGCGCGGAAGTGCAGATTACCAACATGTTCCGGTAAACACCTTCCGACAGCTTCGACAAA  
GATCCGATGTTTCCGAGCAGCTTTCATCGTGCAGATGCGTCAATCATGTCGATTTTCGAGATCTCTGAAACCCCTGTT  
CATTTGACCAATCCCGTCTTCTTAAAGCCGTACGGCATTAAAGAACATGATGATGATAGTATCGTGGCGTGGATCCTGCG  
GTTTTGCGCTGTTTTGCTTACGGCGACCCGACTCCGTTCCGGCACCGTACTGCTGGTCTGTCGATGATTTTACGGCTGC  
GCATTCGACTTCTCAACATCTCTGGTTCCGGTGTGTTGTCGAAAAGAAGTTAGCCCGGCAATTCGCGCAGTGCAGGG  
GATGTTCTGATGACTAACGGCTTCGGCTGTATCCTCGGCGGCATCGTGAGCGGTAAGTGGTTGAGATGATACACC  
AAAACGGCATTACGACTGGCAGACCGTATGGTTGATTTTCGCTGGTTACTCCGTTGCTGGCCTTCGCGCTTACGGC  
ATGTTCAAATATAAACACGTTCTGCTGCCGACAGGCACACAGCGGTGAGCCACTAA

>Cluster\_23619

ATGGTAAAAATGAAACACTGTTGTAATAATGTGGTGATCTCATGCCGAACCCGTAGCCGAACCCGCGCTAAACGGATT  
GCGCTGAATTTGCGCATTGTCTCCATTGTCTGTTAACTTCTGCTAGCTACCTTACCATCGGGTTCGCGCTCGCTGTAT  
TACCGGGCTATGTCCATGATGTAATGGGATTTAGTGCCCTTCTGGGCGAGGTTGGTTATCAGCCGCAATATTTTGGCCACC  
TTGCTGAGCCGCTCTCATGCCGGACGTTACGCCGATTTGCTGGGACCCAAAAAGATTGTCGCTTTCGGTTTATGCGGCTG  
CTTTTTGAGCGGTCTGGATATCTGACCGCAGGATTAACCCGCACTGCGCCGTCATCGCCGTCATCAGCCTGTTATATCTG  
GGCGCGTAATCTTGGGATTGGACAAAGTTTGGCGGAACGGGATCGACCCTGTTGGGGTGGTGGCGTGGTTGCGCTA  
CATATCGGGCGGGTGTATTCGTTGGAACGATTTGTCACCTTACGGGGCGATGGCGATGGGGCGCGGTTAGGTGTCGTT  
TTATCACCTGGGGCGGATTGCAGGCGTTAGCGTTAATCATATTATGGGCGTGGCGCTGGTGGCCATTTTGTGGCGATCCCG  
TCCGACCGTAAAGCCAGTAAAGGCAACCCGCTGCCGTTTTCGCTGGTGGTGGCGCTGGCTGTACGGTATGGCG  
CTGGCACTGGCTTCCGCGGATTTGGCGTTATCGCCACCTTTATCACGCTGTTTTATGACGCTAAAGTTGGGACGGTGC  
GGCTTTCGCGCTGACGCTGTTTAGCTGTGCGTTTGTGCGTACCGGTTTGTATTTCTAACCGCATTAACCGTATCGGG  
GCTTAAATGTTGGCGATTTGCTTTAGCGTTGAGATAACTGGCCTGCTACTGGTTGGCGTGGCGCATGCGCGTGGATG  
GCAAAATCGCGCTTACTTCCGCGGGCGGGGTTTTTCCGTTGTTTCCGCGATTGGGCGTAGTGGCGGCAAAAGCGGT  
TCCGACGCAAAATCAGGGGGCGGCGTGGCAACTTACACCGTATTTATGGATTTATCGCTTGGCGTGACCGGACCACTGG  
CTGGGCTGGTGTGATGAGTTGGGCGGGCGTCCCGGTGATTTATCTGGCGGGCGGGGACTGGTCGAATCGCGTTTACTG  
ACGTGGCGATTAATAAACCGCCCCGGTGAATAACCTGAGGCGCCCTCATCATCTTAA

>Cluster\_41192

ATGGCGAGAAAAACACCCATTAAACCACAGTGCAGATCAAAGCAGCCAGACCAGCGCAAAAGGAGTACACCTTCGAGGA  
CGCGGAGGGGCTTTTCTCTCTGGTCAAAACCGTCTGGATCAAAACTCTGGAGATTTTCTTACTACCGCATCGGACAAAA  
AAGAATATTTGCTGATTTTGGATCGCTTGAAGATGTTTCCCTGGCTGATGCCAGAAAACCGCTAGCAGTACAGGACG  
TTAATCAGTGCAGGAACTGACCCGACAGGACCACGAGAGGCAAAAAAGAGAGACAGAGGCCGGAAGACAAGGGAACAGCTT  
CGAAAATGTTGGCGCGGCGATGGTACCAGGTGAAAATCAGCCAGAACTTGGCCCAACACGATTAAGACATCTGGCGTT  
CGCTGGATAAATATGATTTCCCGTTCATCGGCAACACGCAATAGATACCCCTACCGCCCGAAGGTTGCTTGAAGTGCCT  
ACCCCATCAAGGAGCGGCGCAACCTGGAAACACTCAAGCGGGTTTTTACAGCGGTTAATGAGGTAATGGATTACGCCG  
CAACAGTGGGCTGATTTGATGCCAATCCGGCTATGAATGTGCGTAAAGCGTTTCCCTCACCTGTAAAAAACAATATGCCAA  
CAATCCGCCCCGAACAGCTGCGCGAGCTTATGCAGGCTTATACAGTATCGGCAACAGAACGCGAGACCAGATTACTGATT  
GAATGGCAGTTACTGACCGTAACCCGTCGCGCGAAGCGTATCAACGCGGTGGGATGAAATCAACCTGGACGCGAAGCA  
ATGGACGATACCTGCCGCGACGATGAAGATGCGCAGGATACCGTATCCCGCTTTCGCGTACGGCTATGGCGTGGCG  
AGGCCATGAAACCAATCAGCCACCACCGCAATTTACGTTTTCCCAAGCTGAAAGACCCACAGCAGCCGATGAACAGCCAG  
ACAGCTAACGCAGCATTTGCGCGCTATGGGATTCGCTGGCGTGTGGTGTCTCATGGATTACCGCCATATTCAGCACAGC  
AGCGAACGAGGAAGGATTCGAGCCGACGTAATAGAGCGGCACTTGCACAGTGCACACCAAGGTTAGACGGGCAT  
CAACCGGACCAACTACATAGAAAAACGATCGTGTGATGCGTGGTGGGCGAATTTGTGAGGCTGCGCGACGGCAGGGC  
GTAACCCCTCGCCAGTGGTAAAGGGGTATCCGAGCCGTGATG

>Cluster\_53909

ATGGCTAACCAATTAGCAAAAGACCTTGAATCATGTTGCAAAACTACGTTGAAGGCTTTGAGGCCGCTGCGTAGTTTC  
CCGTAACGCTAAAAAATCCGTCGCGGTGATACAGCAATGCAGCGAGCAGGTGATGTTCTGTATCGTCCGACGATTACC  
ACATGAACATTGAGGAAGCCCTGCATCTCAGCAGCAAAACGCCAACAGCACTGGTTACAGCGCTTGTCTCTCTGTGTTTC  
AAGGAGCCGAAAAACATTTCTGTACACTCTGGATGCGCGTGAATGCGTACCCGGAACATAAACTGAAGCTGGTTCGCGC  
CGCAGGTATGCGCCTTGCCTGCACAGATTGACTCTGACCTGATTTCCATGGTTACGACGCGTGTACTAACCTGATCACGA  
TGGCTGACTCAACCACAGGTTTACAGGGCCGTTGTTGTTGAACTGTGCGGCAGGTTATGATGCCACCATGACGGCGATT  
GGTGTACCTCAGGGTATCAACCGTGCCTCTTTCGGAACCCCTTCAACTACAAAGACCTTGTGGCGAGCTTGGTTCACCG  
TGCCATGCTCAGGGCACAACCCGACAGCATAAGAAAAGCGCAAACTCCCTCCGGTTGCGTCTTCGATAGCTACAAGA  
CGATATTTCTGGTGTGTTCCGAAGGTTACAGCAACTTCCATACGCTGCGCAGCAGCCTGCGCACAGGTTGAAGCC  
AAAGATGCTAACGATATGCCAGTGGATAACCGACAGGGGACCATTACGGTATCTGCTGAAAGTTTGCAGGTTGGCGATGC  
GTTTACCATCGCAGGGGTGAATTTCTGTACACAGATCACCAAGATACACCGGGCAGCCGAGGATTCGCGCTTCTGG  
CAGTAAGCGGAACGACAGTAACTATCTCCCGAAAAATCTGCGCCTGACAACGCGGATGTCGCCAGCCGACCATATGCA  
AACGTTGATGCTAATGCGGCAAGTACCGGCAACATCACACTTCAACAAAAATGCGCACCGGCTAACCTGTTCTGGC  
TGATGGTTCTGTTGAACTGATGTACGGCAAGCTGGCGTTCCGACTGGTCCAGGTTCCACAGGTAATGACAGCAACCCCG  
AGCAGGGCGCTACGCTGATGCTTACGCTTCCGACCAATCAAAGGTGTAACCACTGCGCGTTTACCACCCCTGTAC  
GTTGCTCTGACTGTTTCTGAAATATACGGGCATCGTTATTGCCGGGCGATGA

>Cluster\_21928

ATGAAGACGTTATCTCCCGCTGTGATTACTTTACCCCTGGCGTCAGGACGCGCTGAATTTTATTTCTCCGCTTAAAGCCA  
CCTGCCGTTGGGCGATGCTTTTACTCTCCGGCTATGCGGATCATCCGATAGCCGCTTTGATATTTGTTGGTCCGCCAGCCGA  
TTTTGCACCTTAAACACTTTTCGGTAAAGAACCGTTGTTAGTGAAGCGAAAAACGCACACACCACTGATGACCCGCTA  
CAGGTGCTCCAGCAGGTGCTGGATCGCGCAGACATTCACCCAGCGCATAACGAAGATTTGCCATTTACAGGGCGCGCGCT  
GGGTTGTTTGGCTACGATCTGGGCGCGGTTTTGAGTCACTGCCAGAAATGCGGAACAAGATATCGTTCTGCCGGATA

TGGCAGTGGGTATCTACGACTGGGCGTGGTGTGACCACCAGCGTCAAACAGTTTCTTTGCTGAGTCATAATGATGTC  
AATGCCCGTCGGGATGGCTGGAAGCCAGCAATTCTCCACAGGAAGATTTACGCTCACTTCCGACTGGCAATCCAA  
TATGACCCGCGAGCAGTACGGCGAAAAATTCGCCAGGTACAGGAATATCTGCACAGCGGTGATGCTATCAGGTGAATC  
TCGCCACGGTTTTTCATCGGACCTATTCGCGCATGAATGGCAGGCATTCCTTTCAGCTTAATCAGGCCAACCGCGCGCC  
TTTAGCGTTTTTTTACGCTTGAACAAGGCACGATTTTAAAGCTTTCGCCAGAGCGGTTTATCCTTTGTGATAACAGTGA  
AATCCAGACCAGGATTAAGGCACGCTACCCAGCCTGCCGATCCTCAGGAAGATAGCAACAAGCAGAGAACTGG  
CGAACTCAGCGAAAGATCGTGCCGAAAACTGATGATTGTCGATTTAAAGCGTAAATGATATCGGTCGTGTTGCCGTAGCA  
GGTTCCGTTAAAAGTACCAGAGCTGTTGTTGGTGAACCTTCCCTGCCGTGCATCATCTGGTCAGCACCATAACGGCGCA  
ACTACCAGAACAGTTTACAGCCAGCAGTCTGCTGCGCGCGCTTTTCCCTGGTGGCTCAATAACTGGGGCTCCGAAAGTAC  
GGGCTATGGAATATCGACGAAGTGAACCGCAGCGCAATGCTGGTGGCGCAGCATGGCTATTTGAGCTTTTGC  
GGCAACATGGACACCAGCATTACTATCCGACGCTGACTGCCATTAACGGACAATTTACTGCTTGGGGGGTGGAAAT  
TGTCCGCGATAGCCAGGAAGAAGCGGAATATCAGGAACCTTTTGATAAAGTTAATAAGATATTACGCCAAGTGGAGAAGT  
AA

>Cluster\_28833

TTGATTATAAATAGCGGATATGAATATCCGGCGAAAAAATCACCATCAACCTTGCTCCAGCCGATCTGCCAAAAAAGG  
GGGACGATATGATTTGCCATTCGCTATTTGCGTTACTGGCGGCCTCAGAACAGCTTACAGCCAAAGTTAGATGAATATG  
AATTAGTCCGGAACCTGGCGCTTACAGGCGCTCTGCGTGGCGTTCCCGCGCAATCTCCAGTGCAACTGAAGCTATTAAG  
TCGGGCGAAAAATATCGTCCGAAAGATAACGAAGTGAAGTGGGGCTAATTAACGGTGAAGGATGCTGTATAGCCGA  
TCATCTGCAGGCTGTCTGCGCGTTTCTGGAAGTGAAGCAGCTCTCAGAACCCGAAACCAACTAATGCAAGTATCCCGG  
CGCTACAACATGATCTCAGTGTGTTGTCGGTCAAGGCAAGGAAAGCAGGACTGGAATTAACCGCTGGCGGGCAGC  
AACCTTTTACTGATTTGGACCCGCGGAACAGGTAAAACAATGCTGCGCAGCGTATTAATGGCTTTTCCAGATTTAAG  
CAATGAAGAGGCACTGGAGAGCGTGCATATTAAGTCTGGTAAATGCTGAATCAGTACAAAAACAATGGCGCAGCGCC  
CGTTCCGCTCACCTCATCAGTGCCTGTTAACTGCGATGGTGGGCGGTGGTGAATTCAGGGCCAGGTGAAATTTCCG  
CTGGCGATAAACCGGTGCTTTTCTTGTGATGACTACCTGAAATTTGAACGGCGTACACTGGATGCTTCCGAGAGCCGAT  
TGAATCCGGGCGATCCATCTTTTACGCACAGCAGCAAAAATAACCTATCCAGCCGTTTCCAGCTTGTGCGGCAATGA  
ATCCAGCCCTACCGGACATATCAGGGAAACCATAACCGCTGCACACAGAACAGACATTACGTTATCTCAACCGGCTC  
TCGGGGCCCTTTCTGACCGCTTCGATCTCTACTGGAGATCCCATTAACCGCCCGGCAATTTTGTAGTAAAACGGTAGT  
GCCGGGAGAAAACAGCACCCTGTTAAAACAACGTTGAAATGGCCCGCAGAGAGCCCAATTTAAGCGGTGAAATTAACCTGA  
ACGCTGGCTGGATAATCCGAAATACGCCAATCTGCAAGCTTGAAGCGAAGATGCGCAGTGGCTGGAAGAAACGCTG  
ATCCATCTGGGGTTATCGATTCGTCCTGGCAGCGGTTATTGAAAGTTGCACGAACCATGCTGATATGATCAGTCTGA  
CATTATCACACGCTCAGCATTTGACAGGAGCAGTTAGCTATCTGCGATTGACCGTTTGTCTATCCATCTGAAAAACTAC  
TGACATAA

>Cluster\_39544

ATGTCTTTTCGATTTTGGGTTTAAAGCCCTGATATCTTCCGCGCGGTTGCCGAGCAGGGTTACCGTGAACCCACCCCTAT  
TCAGCAGCAGGCGATCCTTGGGTGCTGGAAGGCGCGACCTGATGGCCAGCGCCAGACCGGTACCGGTAACACAGCGG  
GCTTTACGCTGCCGCTTTGCAACACCTGATCACTCGCCAGCGCAACGAAAGGGCGTCTGCTCCGCTGGCTGCCGCTCAT  
CTTACCCCGACCCGTTGAAGTGGCGGCGAGATTGGCGAAAACGTCCTGATTACAGCAAAATACCTGAACATTCGTTCCGCT  
GGTGGTGTGTTGGCGGTGTCAGCATTAACCCGAGATGAAGTGCAGCGCGCGGCTTGTATGCTGGTGGCAACCGCGG  
GACGCTGCTGCTGGAACCTGGAACATAAAATGCAGTGAAGTGGATCAGTTGAAATCCCTGCTCTTGTGATGAGCTGACCCG  
ATGCTCGACATGGGCTTTTCCAGGATATCCGTCGCGTTTAAACAAAATGCGAGCGAAGCGCCAGAACCTGTTGTTCTC  
CGGACCTTCTCTCAGCATATTAAGCCCTGGCGGAAAACTGTTGCACAACCCGCTGGAATCGAAGTGGCAGCGCCGA  
ATACTGCGTCTGATCAGGTGACCCAGCAGCTTCACTTTTTCGATAAAGAACGCAACCGGAATGCTGTCGCATATGAT  
GGGAAAGGGAACCTGGCAGGCTGCTGGTGTAACTCCGTTGCAAAAACATGGCGTAAACCTTGGTGAACCAATTAATA  
AGACGGCATCCGTAGTGGCGGATCCACGGTAATAAATCGCAAGTGCCTGCTGCTGCGCTGGCCGATTTTAAATCGG  
GCGATATTCGTGTACTGGTGGCAACTGACATCGCTGCGCGCGTCTGGATATCGAAGAGTGGCCGACGTCGTAACAT  
GAGTTACCAACCTGACCGGAAGATTATGTTACCGTATCGGGCTACTGGCGTGGCGGCAACTGGCGAAGCATTTGTC  
GCTGGTGTGTGTTGATGACACAACTGCTGCGTGATATCGAAAAACCTGCTGAAAAAGAGATCCCGCAGCATTTGCGATC  
CGGGGTATGAGCCGACCCGTAATCAAAGCCGAACCGATCCAGAACGGTCCGACGAACGTTGGCGGCGGCTGTTGACAG  
GGCGGTGTCGCGCTCAACAGCAACACCGCTGCGGAAAGTGTACGAAGTCTGGTAAACCGCAAGCCGCGAGAAAAACC  
GTCTGCTGCTCTCGGCGATGCTAAACCGCAGGCGAACAACAGTCCGCGCGCTCCGCTAAACCTGCCGCTGCGCAGT  
AA

>Cluster\_30768

ATGCTTCTACATCGCAATTACGACCGACCGGGACATTTGCTCCTATCCCGTGAAACATCAGCAGACATCAAAAACCGA  
AATCACCAATTCAGATAGAAGAAGCGCGGCGAGTGGCTTATATCAAAAGATTGTGATATTGATATCTGCCAC  
AGTTACCAAAACGAAATAACATCAGTTACAAATCGAAAACTGCAACAACCTGACAACCTTACAGGATTCGCGGTTAATACA  
CAAAACCTCTCCGTTATTAAGTGAAAAAATTAACAATAACAGACATGCCATCAACCGTAAAAAATCTACATATGAAAT  
AATGATTACCAATTTATACATTTTATATCTGAAAGCATCGAGTGCCTGACGGTTTGGCACTGTATATATCTGGAGTGC  
CAGAGAGTGCCTTACCTGAAATAAAGGTAGCGCCACAGCAGCATAAAAAATATCCAAACGGGTTATCATCTCTC  
AGCATCAATAGCTATAACCCGGGAAATCAGGCCAGAAATGCAACCTGATATCACCGTCAAGACGCTATCGCTGAC  
TGGATGTAGCAATATTAAGTGCAGGAAACTTCCGGAGAGTGTGACATCGGTAACCATTCATGCGGAGCAGAAAACCA  
CGTGGAAACATCGGTGTTGAAGGGATGCTGATGGGCTGGATCTTGATTTACAAAATGTACTACTCTCTCCAGATGTAGTT  
AAAGCAAAAACATCACCTTTACGGGCAACTCTGATGATGGCTTACACTTTCGCGAGGGAGACATTTGCTATGAGACT  
ATCTTACCCAGAGAAAAACTTGTCAACAGCATCAAACTGGTTAACGACTTTTCCAAAAAAGATATTAATACTCAGAATA  
CGTTAACAAACGAGTATGGGACCCAGAACCTCGCAAAATATAAGCAAGATCCACTTATCAAAAGAGCATTAAATGAA  
CACGAAAGAGGGATAAAATTAACAACACTTAAAGAATCACAATAATATAATGTTACCATGGCCGACCTTTCCGTATA  
CAATCGCGCAAAATATGGGCAAAAAACAAGCAAGCGCCGCTGGAGTTTCAGACATTAACACGCAATAAAACCGGTTATTT  
TTTGTGGGATGAATTTGTAACCTCAACTCAAACTCATTGCTAACAAAGTCAAGTGGTTATGGTCAGAGTATTACAGCCAGC  
GAATTACGATGGAATTTATCGCAACAAGACAACGACAGATAATGAAAAACATAAAGTTTACTTGGCTGGGAAAGAGAT  
ACCAGCAGAAAAAATATTAGGCGCACAGAGTGAAGACTACAACCCAAATACTCTGGAGCCATATAAGTATTTCTT  
AA

>Cluster\_9057

ATGGCAGATAACAAACAGAGCTACAGCGTGGGCTGGAAGCTCGACATATCGAACTCATCGCCCTGGGGGGCACCATTGG  
CGTCGGCCTGTTTATGGGGCGCCAGTACCCTGAAATGGGCGGCCATCCGATTTGTTGGCTATATCATCGCCGGGCT  
GTTTCCGCTTTTTTTCATCGCTTCAATGGCGGAAATGTTGTTTCTCGAACCGGTTACCGGTTCCGCTTTCGCTTATGCG  
CATCGTTATATGAGCCGCTTCTTTGGCTATCTCACCGCTGGTCTTACTGGTTTATGTTGGATGGCGGTGGGGATCTCTGA  
AATCACCGCATTTGGCGTTTATGTCAGTCTGTTTCCCGGAGATGGCGCAGTGGATACCCGATTTGATCGCAGTGGCGC  
TGGTGGCGTGGGAAATCTGGCGGCGTGGGTTGACCGGCAAAATCGAGTTCGTTGGTTCGCGATGATCAAACTACCCAGC  
ATTTACTGTTGATGATGTCATTTGGCCTGGGCGTGGATTTTCTTTGGCTTTGGCAATGGCGGGCAGTGCATTTGGTTT  
TACGAA  
TCTCACAGACATGGCGGTTCTTTGCGGGTGGCTGGAAGGGTCTGACCGCTCTGTTGATTTGGTGGCGTCTTACC

AGGGCGTGGAGCTGATTGGCATTACTGCCGGTGAAGCGAAGAATCCGCAGGTGACGCTGCCAGTGGCCGTAGGCAAGGTG  
CTGTGGCGGATCCGTGATTTTCTACGTAGCGCGATTTTCTGTTATCGTCAACATCTTCCCGTGGAAATGAAATAGGCAGCAA  
CGGCAGCCCGTTCGTACTGACTTTTGGCCAAAATCGGTATATACCGCAGCGGGCGGATTTCAACTTTGTGGTGTGACGG  
CTGCGCTCTCTGGCTGTAACAGCGGCATGTACAGTTGCGGACGTATGCTCTACGCAGTGGCGAAAAACCGTCACTACCG  
GCGGCAATGGCGAAAGTTTCCCGTACCGGCTACCGGTTGCGGGTGTGCGAGATCTATGCTATTCTCGCTAATTGGCTC  
ATGCTGAACTACATCATCCCAATCCGCAGCGTGTGTTTGTCTACGTCTACAGTGCAGCGTCTCCGGGGATGGTGC  
CATGGTTTGTGATATTGATAAGCAGCTGCGTTTTCGGCGTGCACATAAAGCGCGGATGGCCAGCCATCCGTTCCGCTCA  
ATCCTGTTCCCGTGGGCAATTACGTAACAATGGCATTCTGATTTGCGTTTTGATCGGCATGTACTTTAATGAAGATAC  
GCGTATGTCGCTGTTTGTGGCATCTTTATGCTGGCGGTGACGGCGATTTATAAAGTTTTTGGCCTTAATCGCCACG  
GGAAAGCGCATAAATGGAGGAATAA

>Cluster\_26507

ATGACCATTACTCCGGCACTCATGCAATTTCCGATAAATCCTGCCACCGGTGAACAACTTTCTGTGCTGCCGTGGGCTGG  
TGTGACGATATCGAAAAACGCGCTTCAGCTGGCAGCAGAGGCTTTCGCGACTGGCGGAGGCAAAATAGATATATCGTG  
CTGAAAAACTGCGTGATATCGGTAAGGCTCTGCCGCGCCGTAGCGAAGAAATGGCGCAAATGATCACCCGTGAAATGGGC  
AAACCAATCAACAGCGCGCGCTGAAGTGGCGAAATCCGGCGAATTTGTGTGACTGGTATGCAGAACATGGTCCAGCAAT  
GCTGAAGGCAGAACCTACGCTGGTGGAAATCAGCAGCGGTTATTGAGTATGCAGCCGTTGGGGACGATTCGGCGATTA  
TGCCGTGGAAATTTCCGTTATGGCAGGTGATGCTGGCCGCTGTTCCCATCTTCTGCTGGTAACGGCTACTTACTTAAA  
CATGCGCCGAATGTGATGGGCTGTGCACAGTCTATGCCAGGTGTTTAAAGATGCGGGTATCCCAAGGCGTATATGG  
CTGGCTGAATGCCGACAACGACGCTGTCAGTCTGATGATTAAGACTCGCGCATTTGCTGCTGTACAGTGACCGGAAGTG  
TTCGTGCTGGAGCGGCTATTTGGCGCACAGGCTGGAGCGGCATGAAAAATGCGTACTGGAACGGGTTGGGTTCCGATCCG  
TTTTATTGCTTAAACGATCCGATCTGGAACCTGGCGGTGAAAGCGCGGTAGCCGACGTTATCAGAAATACCGGACAGGT  
TTGTGACGGGCAAAACGCTTTATATCGAAGAGGGAATGCTTCGGCATTTACCGAACGTTTTGTGGCAGCTGCCGACG  
CCTTGAAAAATGGGCGATCCCGTTCGACGAAGAGAAGCTCTCGGACCAATGGCTCGTTTTGATTACGATGAGCTGCAT  
CATCAGGTGGGAAAAACCTGGCGCAGGTTGCGGTTTGTACTGGGCGGGAAAAAGATGGCTGGGGCAGGTAACACTA  
TCCGCGCAGGTTCTGGCGAATGTTACCCAGAAATGACTGCGTTTCGGGAAGAAATGTTGGCCCGTTGCGGCAATCA  
CCATTGCGAAAGATGCAGAACATGCAGTGGAACTGGCTAATAAATAGCGAGTTCGGCCTTTCAGCGACCATTTTACCACC  
GACGAAACACGGGCCAGACAGATGGCGGCACGCTGGAATGCGGTGGGGTGTATCAATGGTTACTGTGCCAGCGACGC  
GCGAGTCGCTTTGGTGGCGTGAAGAAGATGGCTTTGGTCTGAACTTCCCATTTCCGTTTACATGAGTTCTGTAATA  
TCCAGACGGTGTGAAAGACCGGATCTGA

>Cluster\_21747

GTGCAGAAATATACAGTGAAGCGGCTCTGTTATTAGCATTAGCAATCCCGGTGATTTCTCGCGCAAATCGCCCAAATGC  
GATGGGTTTTGTGCGATAACCGTATGGCGGGCGGTATAGTGCCACCGCATGGCGGCGGTGCTATCGGAACTTCTATCT  
GGCTTCGGCGATCCTCTTTGGTACGGACTGCTGCTGGCATTAAACGCGGTTATCGCGCAATTAATGGTCCGGTTCGA  
CGTGAGCGCATTTGCGCATCAGGTGCGACAGGTTTCTGGCTGGCAGGTTTGTTCGCTTCTCATATGCTGGTACTGTG  
GAATGCGGGTTACATATCCGCTCCATGAAAAACATCGATCCGCTCTGGCGGACAAAGCCGTTGGGTTATCTGCGTGGCT  
TGCTATGGGGCGCCCGGCTATCTTTTCCAGGTTGCCCGTAAACAGTGTGAAGGTTGGCAAAAAACCAAGCCGGT  
ATGGTATGGGCTTTATCGGCTGCTGGTGAACATTCGGTAACTATATCTTTATTTATGGTCAATTCGGTATGCCCTGA  
GCTCGGTGGATTTGGTTGGCGTGGCTACTGCGGGGTTGATTTGGGTGATGTTCCCTTCCCATGGTTTCTTACATTAAC  
GCGCCCGCTCGATGCGCGATATTCGTAACGAAAAAGCCAGCCGATCCTGCGGTTATGAAACAGCATGATTCAA  
CTCGGTTTTGCAATTTGCGCTGGCAGTCTTTTGAAGTAAACGCTGTTTTGCCGCTGTTAGTGTCTCCGCTCGG  
TATTGTTGATGTCGAGGACATCAGATTGCCCTGAACTTTAGTTCACATGATGTTGCTGCTCCCATGTCGCTGGCGGACG  
CGGTAACCTACCGCTAGGTTACCGCTCTGGGTCAAGGCTCAACCGTGGATGCGCAAACCGCTGCGCGGACCGGCTTATG  
GTGGTGTCTGTATGGCAACCTGACGGCCATATTCAGCTGCTTTACTGCGGAGCAAAATCGCCTGTTGTGTAACAGCAA  
TCCGAGGTTGTAACGCTGGCTGCACATTTGATGTTGCTGGCGGGTATATCAGATTCTGACTCTATCCAGGTGATTG  
GCAGTGAATTTTGGTGGTTATAAAGATACGCGTTCATTTTCTATATCACCTTTACGGCTTACTGGGTGCTGGGCTTG  
CCAAGCGGCTATATTTGGCATTGACCGATCTGGTCTGTAACCTATGGGGCCAGCAGGCTTCTGGATAGGCTTTATTTAT  
TGGCTGACGTGCGGACCATTTATGATGATGCTGCGTATGCGGTTCCGCAACGCTCTGCGGTCAGCCATCATTTCTGCAAC  
GAGCATCCCGCTAA

>Cluster\_45183

ATGGGGGCGAGGCTTGTGTAAGTTGCCGCCAGTATGGACATCAGGTTTTACTGTATGACATTTCTGCTGAAGCGCTGAC  
CCGCGCAATCGACGGGATACACGCGCGGCTAAATTCACGCGTGACGCGGGAAAACTGACCGTGAACCTGTGAACGCA  
CATTTGAAACGCTGATCCCGGTGACCGATATTCACGCGTGGCAGCAGCGAATCTGGTTATTGAAGCGGCGTCTGAACGT  
CTGGAAGTTAAAAAGCGCTCTTTGACAACTGGCGGAAGTTTCCCGCCACAACCGCTATTGACCACTAACACTTCGCT  
AATCTCTATAACCGGATTTGCTGCGGAGTAAAAATCCTGAACGTTGCGGGGCTGCATTTTTTTAAACCGGCACCGG  
TGATGAAGTTGGTGGAGTGGTCTAGTGGCTGGCAACGCGAGCGGAAGTTGTCGAGCAGTTGTGTGAATGAGT  
TGGGTAAGCAGCAGTGGCTGTCATTCGACCCCGGATTTATCGTTAACCGTGTGGCGCTCTTATATTTCCGAGGC  
CTGGCGGGCACTGGAAGAGCAGGTTGCTGCACCAAGAAAGTATTGACGCTGCATTTGCGGATGGCGCTGTTTCCGATGG  
GGCGCTGGAATTAACCGATCTGATTTGGTTCAGGACGCTCAATTTGCTGTCACCTGTTCCGTTTAAACGCTTTCTGGC  
GAGCGCTGTTTTTTTACCTTCGCTGTTGGTGAACAGGAACTGGTATTGGTGGACCGTTGGGCAAGAAAAAGTGGGCTGGGCT  
GTACGACTGGCGCGGAAACGTTAGGCGAGTGTGGCTGGAAGCGGTAAGCGACAGTTTACGCCAATGAAAGTAGAAA  
AGAAAAAGTACGGCGTACGGAATGACGATGTTTTATTGATTGAGACACAAGGCGAGACGGCACAGGCGTGGCAATA  
CGACTGGCACGCGCGGTGTTAGTGGTTCGACAAAATGGCGGGCAAGTGGTGGCATTGCTGCGGACGGTGAACCCGGA  
CTCAGCGACCCGCAAGGCCATTTATACCTGCAACAGCAGGGCAAAACAGTGTGCAAAATGCAAGATTACCCAGGAATGC  
TGATTTGGCGAACGGTAGCAATGATCATCAATGAAGCCCTTGTATGCGCTGCAAAAAGGCGTGGCCTCTGAACAGGATATC  
GATACCGCATGCGTCTTTGGGTGAATTTATCCATATGGCCCGCTTGGCTGGGGAGCGCAACTTGGCTGGCAGCGAATAT  
AAGGCTCCTGGAATAATCTACAACATCATATGGCGAAGAACGCTATCGCCCATGTTTCAATGCTGCGCCAACGAGCGCTTC  
TGGAGAGCGGTTATGAGTCATAA

>Cluster\_21100

ATGAAAAGAAAAATTTCCCGTGTAAATCCGTTGTACGCTCTCTTTCTGCGCTGGCGGCACAACCTACGGCTGAGCG  
CTATGTCGTCAGTTTTTCCAGAAGGCACGACGTAACCTACGCCGCGCATTTGCCAGTGCATTTCCGAAACGGCTTCCGG  
TTGGGATAGGTTCTGGCTGCTGTTACCGGTAACAGGGCGATGCCCTGACATTCGCAACCAATACCGATCGCGGTCGG  
AACCGGATTTACCGAAAGAGGGGAAAAACGAACTAAATTTTCGTTACGCCAGATTTGCGCGCGCTGCTGATGACGAT  
TCGTTGACAAAACGGCAAGCGGAGGCCATCGATCCCGCTCTCTGATGACGATAAAGGCGGATCAACGGTCTGCCG  
TGGCAAGCGACGTTGATTTGGCTCCACCAATGAAAGTGGCTTTCAGCGACACGTTACATAGACTGAAGGGGATAAATCGCGG  
CTGGATACGGAAGGGATCACTCCGATGGTAAAGGAGTTACTGGCTGTGCGATGAGTATGGCCGTTCTCTGATTAACAT  
CGACAGTAAAGGAAAAATCCTGGCAATCCACGGTCCGCAAGCGCGGAAAGGGGAAAAAGCGATTGGCGGCGGTTTGGCAA  
ATATCCTCAAATGGCGTACGGCAACCGCGCTTTGAAGGCTCACCGTATGCGGACGGGCGTATTTATTGTCGCGCTG  
CAAAGTACGCTGGATATCAGCGCTAAGAGCAAGAAAAAGGCGCTGTTTACGCTGCTGGTGGCTTCTGATCCGCAAGCGG  
AAAAACCGGATGATCGGTTATCTATCGACAGCGCGCTACAGCAAAAACAGCGACGCTAAAAATCGGAGACATCGTGG

CGCTCGATAACCAGCACATCCTGCTGATCGAACAGGGAAGAGATAAAAAACAACAAGTTCGCTAACCTGATTTACGAGGTC  
GATCTCAATAAAGGCGAGGACCTGTCAGGCTTCGACAAGCCGGGTGAGTATCCGGAGTTTGTATGATGAGAAAAACCTGTC  
ACAGCGCGGATTAACCTTTCGCGCAGAAAACGCAGGTTGTTGATCTGCGCTCCTTGGGCTGGCAGCAGGAGAAGGCTGAAG  
GGTTGGGCGTGTATCGACAGCAAAACGCTGGCGGTGGCGAACAATAACGACTTTGGCGTGAAGGTGGCGATGCAACATCCG  
GTCGAGGCAAGACACTCAAGGATATCGGGTGAACGGAAGAAAGCTGACGCTTGACGACAAGCAGGTTGAACAGC  
CCTCAGAGTGAAGCCATTGAGAAAACCGGAGTCTGACAGTGAACGTGGATTGTGACGCTGCCGGAAGCGTTGAAATAA  
>Cluster\_28565

ATGCAAGCCTATTTTGACCAGCTCGATCGCGTTTCGTTATGAAGGCTCAAAAACCTCAAACCCGTTAGCATTCCTGCTACTA  
CAATCCCGACGAACCTGGTGTGGGCAAGCGTATGGAAGACACTTGCCTTTTGGCCGCTGCTACTGGCACACCTTCTGCT  
GGAACGGGGCGGATATGTTTGGTGTGGGAGCGTTAATCGTCCGTCGACGAGCTGGTGAGGCACTGGCGTTGGCGAAG  
CGTAAAGCAGATGTCGCATTTGAGTTTTTCCACAGTTACATGTGCCATTTTATGCTTCCACGATGTGGATGTTCCCC  
TGAGGGCGCGTTCGTTAAAAGAGTACATCAATAATTTGCGCAAAATGGTTGATGTAAGTGGCAGGCAAGCAAGAGAGAGCG  
GCGTGAAGCTGCTGTTGGGAACCTGCTAACTGCTTTACAACACCTTCGCTATGGCCGCGGTGGCGGCAACCCAGCTCT  
GAAGTCTTTCAGTTGGGCGGCAACGCAAGTTGTTACAGCGATGGAAGCAACCCATAAATGGGCGGTGAAAACCTATGCTCT  
GTGGGGTGGTCTGTAAGGTTACGAAACGCTGTTAAATACCGACCTGCGTCAGGAGCGTGAACAGCTGGGCCGCTTTATGC  
AGATGGTGGTTGAGCATAAAACATAAAATCGGTTCCAGGCGACGTTGCTTATCGAACCGAAACCGCAAGAACCCAGCAAA  
CATCAATATGATTACGATCTGCGACGCTGCTATGGCTTCTGAAACAGTTTGGTCTGGAAAAAGAGATTAAACTGAACAT  
TGAAGCTAACCCGCGACGCTGGCAGGTCATCTTCCATCATGAAATAGCCACCGCCATTCGCTTGGCCTGTTCCGGTT  
CAGTCGACGCCAACCGTGGCGATGCGCAACTGGGCTGGGACACCGACAGTTCCCGAACAGTGTGGAAGAGAAATGCGCTG  
GTGATGTATGAAATTCCTAAAGCAGGTGGTTTACCACCGGTGGTTCGAACTCGATGCCAAAGTACCAAGTCAAGATAC  
TGATAAATATGATCTGTTTTTACGCTCATATCGGCGCATGCGGATACGATGGCGTTGGCGCTGAAAAATTGACGCGCATGA  
TTGAAGATGGCGAGCTGGATAAACGCATCGCGACGCTTATTCGCGCTGGAATAGTGAATTAGGCCAGCAAACTCTGAAA  
GGCCAAATGCTACTGGCAGATTTAGCCAAATATGCTCAGGAACATAAATTTGTCGCCGTCATCAGAGTGGTCCGCGAGGA  
GCAACTGGAAATCTGGTAAATCATTATCTGTTTCGACAATAA  
>Cluster\_24025

ATGAATGGTCAAATAATCACTGTGCACTCATCTGTTGGGCGACATATTTCTGACGCTGCTGTACAGGCCATAGGGTT  
CGACTATTACAATGATCAGGCTGTTATGCTTACGGTAAAGGTTATGGGGAGGATGAGAAAAATCATTGCCAAATTTCCGA  
AGATGAACAGAGCGGATTTGCGCCTTGTGACAAATATAATCCGGGAGCGGGAGTTGGTGAAGGCTATATACCACCGAT  
GAAATAAGCATAAAAAATGAGGAATACCATTGGGTGACAGACGGCCACGTTATCTCTGGCGTGGCAAAATCGTTAGCAA  
CCCACCGGAACCCACCTGTCGATATTGCCAGCTTTCAGGCTATGGGCGCTTCGCGGTCGATAAATATAGCCTCTATT  
TTGACGGACAGCGCACCGAAAGTAAATAGCGGCGGTCAGTGTGATCTGGCGACACTAAAAGCTATCGAAGGTAACCT  
ACCACGCTGGTGGATAGTAAAAATCTCTATTGTTGCCGTCAGCTCAGGGGAGCAGCAGTAATGTTACTGTATAGAAAA  
AAGATGGTGGGTTAATACCAGCTTATGAGTGTAAACAGAAATTTGTATTCCAATGATCTGCTTATCCGCGATGGGC  
AGAATATTTATTTAAATGGCGTTACCTTACGGCGAATCCAGACTCATTTGAGATAATTCGCTGGATACCTCATTCACGT  
CTGGTTTTTCGCGACAATAAGGGTCTGCATCGTTATCCCTTTGGTCAATATCTGGCAAAGGATACCCGTAGATGATGA  
CGTCTTTTTGAAGTAGGGAAAGTCCGCTTCGCTGGCGTAAACAGCTCAGCTCCGACCGTCAGTGGAGCAAGTGTATG  
ACCTACCAGATATTGAACCTGAACAATTCATCTGATTACTGGCAATATTCGCAATAATAAGATCGGTTGTATGTAACA  
AAATTTATCGTCATTTGGTGAAGACAGCTTGGAGATAATCCCGTGGATACGCCAGACCTGGTCTATTGATCGCTCATTTAA  
TAGCGGCAAAACAGCATGCTTATTTTATCCGCAATTACGGTCAAAGAGCGTGCAAATTTATCCAGTTAACGGTCCGCTAA  
CTAAAAACAGCTCGCTTCGCTTATGACGATCGCAATGTTTTATACATGGACCGATACAGAGGTAAGGATTAAGCCCTCC  
TGCCCGGCAAAACAGCGCTCAGAGAAGAGAATGTGCGTGAACCTCACACAGAGACATATTATTCCGTTGACGGATGA  
ATCATGCCAGAACCAGCAGCAGAGCAAACTTTGAAGCCCTGA  
>Cluster\_39360

ATGAGTCAAGGCTAAATCGAACAAAAATGGGTGTCGTTTTCAGTTAACCTACTGACGATGGTCAACATGATGGGCTCCGGTAT  
CATCATGCTGCCGACAAAGCTTGGCGAAGTCCGGGACAACTCAATATCTCCTGGCTGGTACAGCCGTTAGGCTCAATGG  
CACTGGCATGGGCATTCGCAAAATGCGGTATGTTTCAGCCGTAATCAGGAGGATGGGCGGTTATGCCGAGTATGCTTTT  
GGTAAATCCGGTAACTTTATGGGCAACTATACCTACCGGCTCTCGCTGCTGATTTGCTAACGTCGCGATTCGCTTCGCG  
GGTTGGTTACGGCACCGAACTGCTCGGCGGAGTTTGTGCGCAGTGCAGATTGGTCTTGGCACCATCGGGGTGCTGTGGA  
TTTGTACCGTGGCTAACCTTGGTGGTGCAGCATTACCGGCAAAATCAGTAGCATTACCGTGTGGGGGTCATTTATCCG  
GTGGTAGGCTGTGATTTATCGGCTGGTCTGGTTTAGCCGACGCTTTACGTTGATTTCCGAAATCCGCATCATGCC  
CTTCTTTCAGTGGCTAGGTTTCTTCCATGCTATGACGCTGTGGGCTTTTCTTGGTCTGGAGTCTGCGTGTGCAATACCTG  
ATGATGAGGAAAACCCGGAACGTAATGTGCCAATCGCGGTAACGCGGTTAGGTTAGGTCGGCGGTTGATTTATATCGT  
TCCACCAACGCTGATTCGGGGATTTGTCGCAAAATATGGAGCTGGCAAAATCAACGGCACCAATTTGGTCTGGCCTTCGCGCA  
GATGTTACCGCGGAAGTGGGTAAGTCAATATGGCGCTGATGGTGTGATGCTTCTGCTGCGGTTCCGCTGCTTGGCTGGCAGT  
TCACCTTCCCGGATGTTAAATCTTTCATCTGATGAAGGCTACTTCCCTAAAATTTTTCTCCGTTAACCAAGTGGAT  
GCACCGGTGCAGGAATGTTGACCATTTGATTTATCCAGAGCGGTTGGCGCTGATGACGATTAGCCGTCGCTGAACAG  
TCAGTTCAACGCTGCTGGTTAACCTGGCCGTTGGTACCAATATCATTTCCGATATAATCTGTCATTTGGCGGATGATGATTA  
TTCAGAGGTCGCTAATGTTGCCCCCTCAAAGCGAAAGTTGCAAACTTTGTTGCTTTGTTGGCGCGATGACAGCTTT  
TATGCGCTGTACTCATCCGGGAAGCCATGCTATACGCTTCCATCTGACCTTCCCGGTTGGACACTGTATGGTCT  
GGTCTCACACGCTTTGAACTGAAAAATAAACACGGTTAA  
>Cluster\_20344

ATGGCGACATGGCAACTTGGCGGCTGCCTAGCATGGCACCGCAAAATGATAATGCTCCTCGTTCTTCCGTTCTCAGCC  
TGTGACGATATCAGCAGCAGCAACGTAAGGTTTAAATGGCGCTACAGGGGCTAAGAGGCGTTGCTGAGATTAATCAGCAGG  
CGCAAAATTTCCAGCAGCTAAAAGAATAATCAGGACAGTTGGGTAGTGGGATGATTAATGATCGTGTGGCGTGCAG  
AAGTTAATGGCCAGTATCCCGAGTTTATGGCTGATTTCAAAAAACAGATGGGATTCATTGATGCTGAGCAAAATCGGCA  
GACCGCTGACGCTGCCATGAATCTGCGTCTTGGCTCACAAAATCGGAGATCCACTGACCATGCAAGAGGCAATCAGCAGG  
CAAAATCCAGTATTACAGCGATTTGGTCTTCTGCTGAAGAGGTTTATCAGTCTTGGCAGAATGACCCACAGGAATTAAC  
AGAATCACGACCTCATCCACCTCCATGCTGATCCAAATAGTTACTTTAGTGTCAAGAGAAGCAGCAAGGGCAGAGTAT  
TGCACAGCAGAACGCAGATACATCTGCATATAATGCTCAGGTTAATGCGGAACAGGTTAATCGGCTCAGATGATGAGC  
AGTTCAAAGTCTTATCCGATAAACAGCTACGACGAGAGAAATGGTTCTGAAAAGCAGCACTGGACGCTCAAATGAC  
ATCGAGAGAGACAAGCTCAATGCTGAACGAGCAAGGTACAGCAGGCGAAAGTGGAGAAGATGAACGATAAAAATTAATAC  
TGTGTCAGGTAACATCGACTCCTTGAACCTGCGCTTGAAGTGGGTCATGAACGCGGGAAATTTGAGGGAAACATCCTT  
CGGCGTTAACCCGTTCCGCAACTATAACCCCTGACGCTGGGTTGGATTCTTCTTCTGATGATGAGCAGAACACAGCA  
AGCCTACGCGCAAAGCTGATGAATAACAACCTAAAGGTTATTTGCTAGCTCAAAGGGACTTTTGGCTCTAACCCAAAC  
CGAAGGGGAAGGGCTGCCCTTATGCAATCTCAAATGGCATTAAAGTACGCAACAGCAATGAGGCTTTTGGCAGAGT  
TGAATAAAGCGCAGGACGTAATTTACGAAATGCAAGAACAGCAGATTTCCGGGCTCGGTTATCTGTAACCAAAATCTAAG  
GACGAAGAACTGATACATAAAATGCTTTCAGGATCTTCTGTTAAGGATTAATGACCGCACATGGCTATCTGCC  
GAAAGTTACTATCAGGCAAAACTTAAAGGATGCAATGA  
>Cluster\_41101

ATGGTCGCGAATAAATTATTACGCGTTCACCTTTGGGGACTGGCTGGAATACACGCATTGGTGCCATTTCCGTCGATGCCAC  
GAAGTCGCATAGTAAACAAGACAACGGCGATGTGTTTTAGCGGGCAAAGTTATCAAATTCCTATAACAAATTTGTGAGCC  
AAACGTCGACACGTTTTGGTCTGGCGGCTTGGCGTTATTCGTCGCGTGATTACCGGACATTTAACGATCAGCTTTGGGCA  
AACAAATAAGATAAATTATCGCCGTGATGAAAACGATATCTATGACATTTGCCGATTTATACCAGAACGATTTTGGCCGTAA  
AAATAGCTTTTCTGCCAATATGAGCCAGTCAATGGCCAGAGGCTGGGGGCTCTGTGCCCTTAAGTATAGCTATGAGGAAATGAA  
ACTGGGGGCTAGCGGCAGCAGTAAGGATTTATCAGTTGAGTTATTCACAACCTGCGAAGGATAAGCTATACCCCTCGCG  
GCAAGCCATGCTTATGACGAGAAATCATCATGAAGAGAAACGTTTAAATATTTTATATCGATTCCCTTTGATTGGGGTGA  
TGACGTTACGACGCTCGTCGGCAAAATATATGTCTAACTCAACGACGTTTGTATGATCAGGGGGGTGCCCAAAATAA  
CGGGATTATCAGGAAACGTTGGAAGCCGGGATCAGTTTAACTATGGGGTCAACCTGAGTTATCAGTATCAGGGAAGCAAAATGAA  
ACGACAGCTGGGGCAATTTAACCTGGAACCGCGCGTTGCGACAGTGAATGGCAGTTATAGTCAGTCGAGTGCTTATCG  
ACAGGCTGGAGCCAGTGTTCAGGGGGCATTGTGCGCTGGTGGGTTAATCTGGCAAACCGTCTTCTGAAACGTT  
TTGCTGTGATGAATGGCCAGGAATTAAGATGCTTATGTCAATGGGCAAAAATATCGCACAACAAACCGTAATGGAGTG  
GTGGTATACGACGGAATCACACCTTATCGGGAATACTGATGTTGGATGTGTACAAAGCGATAGCGAAGCAGAAAT  
ACGTGGCAACCGGAAATTTGCCGCCCTTATCGCGCGCGGTTGACTGGTTAATTTTGATACCGATCAGCGCAAGCCAT  
GGTTTATAAAGCGTTAAGAGCGGATGGCAACCATTAACGTTTGGTTATGAAGTCAATGATATCCATGGTCATAATAT  
GGTGTGTGTCGGCCAGGGAAGCAGTTATTTATTCGCACCAATGAAGTACCGCCATCGGTTAATGTGGCAATTTGATAAGCA  
ACAAGGGCTTTTCAATGCACAATCACCTTCGGTAAAGAGATTGATGAAAGTAGAAATATATTTGCCAGTAA

>Cluster\_19473

ATGATGTCGACCCAAAATTACATTTATCGGGCTGGTTCGACGATTTTCGTTAAAAATATTTCTGGTGATGTGTTCCA  
TCGTGAGGCGGTGAAACGGCGCATATTGCCCTGATGGATATCGATCCACCCGCTGGAAGAGTCGCACATTTGGTGC  
GTAAGCTGATGGATTTCAGCAGGGGCCAGCGGCAAAATCACTGCCACACCCAAACAGAAAGCCTTACAGGATGCGCGAT  
TTTGTGGTGGTGGCATTTCAGATTGGCGGTTATGAACCTGACAGGCTGACTGATTTCAAGGCTGTAAGCGGCATGGTCT  
GGAACAAACCATTTGCCGATACGCTGGGGCCGGCGGCATTTATGCGTGCCTACGTACCATTCCGCACCTGTGGCAGATTT  
GCGAGGACATGACGGAACTGCCCCGATGCCACCATGCTCAACTATGTTAACCAATGGCGATGAATGCGGCGATG  
TATGCACGCTATCCGCATATCAAGCAGGTAGGGCTGTGCCATTCGGTGACGGGAACCGCGGAAGAGCTGGCGCGTGACCT  
CAATATCGATCCGGCTACGCTGCGTTACCGTTGCGCAGGTATCAACCATATGGCGTTTACCTGGAACCTGGAGCGTAAAA  
CCGCGAGCGGTAGCTACGTGAATCTCTATCCTGAATTTGCTGGCGGCTTATGAAGCAGGGCAGGCACCGAAGCCAAATATT  
CATGGTAATACTCGCTGCCAGAAATTTGTCGTTACGAAATGTTCAAAAAGCTGGGCTACTTCTGTCACAGATCGTCAGA  
ACATTTTGTGAGTACACACCGTGGTTTATTAAGCCAGGTCGTGAGGATTTGATTGAGCGTTATAAAGTACCGCTGGATG  
AGTACCGGAAACGCTGCGTCGAGCAGCTGGCGAACTGGCATAAAGAGCTGGAGGAGTATAAAGCCCTCCCGGATTTGAT  
ATTAACCGTACCGGAAATATGCCAGCACAATCATGAACGCTATCTGGACTGGCGAGCCGAGTGTGATTTATGGCAATGT  
CCGTAACGATGGCTTGATTGATAACCTGCCACAAGGATTTGCTGGTGAAGTGGCCTGTCTGGTTGATGCTAATGGCATTC  
AGCCGACCAAGCCGGTACGCTACCTTCGCATCTGGCCGCCCTGATGCAAAACCAATCAACGTACAGACGCTGCTGACA  
GAAGCTATTTACGAAATCGCGACCGTGTTTACCAGCCGCGATGATGGACCCGATACTGCCGCGTGTGGGCGAT  
TGACGAAATATGCTCTTTGTTGACGACCTGATTGCCGCCACGGGACTGGCTGCCAGGCTGGTTGCCACCGTTAA

>Cluster\_39581

ATGAGCAAAGTAACTCCCAGCCGAAAATCGGCTTTGTTTCCCTGGCTGCCGAAAACCTTGTGATTCAGAGCGTAT  
TCTCATCCGAATACGCACTGAAGGTTATGACGTGGTACCGAGTATGATGATGCGGACATGGTGTGTCGCAACACCTGGC  
GCTTTTATGACAGCGCGGTACAGAATCACTGGAAGCCATTTGGTGAAGCGTTGAATGAAAACCGCAAGTAAATTTGTACC  
GGTTTCTGGGGGAAAAGAAATCAGATCCCGGAAAGTCCACCCGAAAGTGTGGAATACACCGGCGCTCATAGCTATGA  
GCAGGTTCTGGAGCAGTTTCATCCTACGTTGCCAAAACGAAACACACCCATTCCTGAGCCTGGTGCAGAAACAGGTT  
TGAAGTACGCGCCGCTCATTTATGCTTATCTGAAAATTTCTGAAGGCTGTAATCACCGCTGCACCTTCTGCAATTTCCG  
TCTATGCGCGGACCTGGTGGAGCGCTCCGATTGGCGAAGTGTAAAGTGAAGCGAAACGCTGTTGTTGATGTCGGCGTTAA  
AGAAATTTGTTGATCTCGCAGGATACTTCCGCGTATGGCGTGTGTTAAACATCGTACTGGCTTCCACAACGGCGAGC  
CGGTAACCAACAGCATGGTTCAGCCTGTGCGAAGCAGTTATCGAAACTGGGGATCTGGACACGCTGACACTACGTTTACCCT  
TATCCGCTATGTTGACGAGCTCATCCACTGATGGCAGAGGGCAAAAATCCTGCCCTATCTGGACATTTCCGTTGCAGCACGC  
CAGCCCGGCTTCTCAAACCTGATGAAGCGTCCGGGTTCTGTAGATCGCAACCTGGCGCGCATCAAACAGCGCGGAAA  
TCTGCCCGGAACTGACCTACGCTCAACCTTTATTTGTTGGCTTCCCTGGCGAGACGGAAGAGATTTCCAGATGCTACTC  
GACTTCTGAAAGAGCAGCTCTGGATCCGCTTGGCTGCTTTAAATACAGCCGGTGAAGGTGCAGACGCCAATGCCCT  
GCCTGACAGGTTCCGGAAGAAGTGAAGAAGAAGCCTGGAACCGTTTATGTCAGTTGACGAGCAAAATTTCCGCGGAGC  
GCTGCAAGAGAAAGTGGCCGTGAAATTTCTGGTGAATTTATCGCAAGTGGAGGAAAGAGCGGATTTGGTCGCAATG  
GCAGATGCACCGGAAATCGACGGCGGGTTTATCTCAATGGTGAACCAACGTTAAGCCGGGTGATATCTGCGAGTGAA  
AGTCGAGCAGCCGATGAGTACGATTTGTGGGGTAGCCGGGTTAA

>Cluster\_57603

ATGGCATTCTCCTCACTTCTATGATAAAGCACTTGGCATCTCGCCTTACCATGATTTTCTCCAATATCACCGTTCCGTT  
GCTGGGACTGGTCGATACGGCGTAATTTGGTCACTTTGATAGCCCGGTTTATTTGGGGCGGCTGGCGGTTGGTGCACGG  
CGACCAAGCTTTCTCTTTATGCTGTGTGCTTTTTTACGCATGAGCACCACCGGGCTGACTGCGCAGGCTTATGGTGCCAAA  
AATCCTCAGGCATTAGCCGCTGCGCTGGTGAACCGCTGCTGTTGGCGTTGGGGCTGGGGCGTTAATTTGGCTGCTGG  
TACACCGATTATCGATCTGGCGCTGCATATTGTTGGCGGTAGTGAAGCGGCTCCGGAACAGGCGCGGCTTTCTGAAA  
TCCGCTGGTTAAGCGCTCCGCGCTGCTGGCGAATCTGTTATTTACTCGGTTGGTTACTCGCGCTGCAATATGCCGCTGG  
CCAGTAATTTGTTAGTGGTCCGCAATATCCTCAACATTTGTGCTGGATGTCTGGCTGGTATGGGGCTGCATATGAACGTT  
GCAGGCGGCGGCTGGCGACGGTTATTGCGGAATATGCAACATTTGCTGATTGGTCTGCTAATGGTGGCTAAAATCCTCA  
AATACGCGGAATTTCCGGCGAAATGCTGAAAACCTGCTGGCGAGGAACTTCCGTCGCTGCTGGCGCTTAACCGCGAT  
ATCATGCTGCGTTTCGCTGTTGTTGCAACTCTGTTTCGGCGCGATCACCCTACTTGGTGGCGACTGGGGAGTGACATTTG  
CGCTGTTAACCGGTTCTGATGACGCTACTCACCTTTACCGCTATGCGCTTGTGTTTGGCTACGCGGTTGAAGCGC  
ACTCCGGTACGGCATACGCTGCGCGCAGCGGTAGCTGATGATGATGATGATGATGATGATGATGATGATGATGATGATGATG  
GTAGCGTTACTGTTTTCGGTGGTTTATTTGCTGGCAGGGGAACACATCATTTGCGTTGCTGACGCTGTTAAACCCAGATTCA  
GCAGCTGGCTGACCGCTATCTTATCTGGCAGGTGATTTGCGGTTGGTTGGCGCTGTTGTTATCTGCTGGACGGCATGT  
TTATAGGCGCAACCGCTGCCCGGAAATGCGTAACAGTATGGCGGTGGCCGCGCAGGTTTGGCTGACGCTCTTACG  
CTGCCCTGGCTGGTAAATCATGGTTTGTGGCTGGCATTAGGCTTTTCTGGCGTTGCCGGGCTTTCTGCTGGCGGCTAT  
CTGGCGGCTCACTGGCGCAACGGTACCTGGTTTGGCGCAACGTGA

>Cluster\_10691

ATGAGCTGCTTTTTTACGACGCTGCAAGGCGATCGTTTTTTTTTTCAGTTATTAATTCCTGTTGGTATCGGATTAAGCTT  
TTTTCTGCTTTTTGCAACGAAATCCTGGCTGCTGCTATCGACTGGCACACCATCATCACCTTAAAGCGGCTGATGCTGC  
TGACCAAGGTTGGAGTTAAGCGGTTATTTGATGTTGCTGGGGCGAAAATGGTGGCGGCTTTGCTACGGAGCGTCCG  
CTGGCGATGTTTTATGGTGTGGCGGCGGCTGCTTTCTACCTTTCTGACCAACGATTCGCGCTGTTTATTTGTTGTTCC  
GCTGATATCAGCTTAAAAGACTGTGTGATATCCCGTTAATCCGCTGATTAATTTTGGAGGCTGGCAGTCAACGCTG  
GTTCTGCTACTGACGCAATTTGGCAACCCGCAAAATATTTCTTATCTGGGACGTTCTGGTCTTTCTGTTTGGCGGATTTAT  
GCCAAATGGCACCGCTGGCTGGCGCAATGATGCTGACGCTCTGCTCTGTGCTGGTGTGTTTCTTCCGAAAAGCGCT



GCAATACCATAACGGGGTGC AAACACCGGAGTGGAAACCGCGGCTGGTGTGGAGTTGTCTGGGGCTGTATATCGTCTTTT  
TGACGGCGCTGGAGTTCAAACAAGAGCTGTGGGACTGGTGATTTGGCGGCAGGCTTTGCGCTGCTGCGACGTCGCGTG  
GTGCTCAGTGTGGACTGGACGCTGCTGCTGGTGTATGGCGATGTTTATCGACGTCCATTTACTGACCCAGCTTCCAGC  
GTTTCAAGCGCTGTTGGGTAACGTGAGTCATCTATCTGAAACCGGGTTATGGTTAACGGCAATCGGTTTATCGCAGGTGA  
TCAGTAACCGTCCGAGTACCATAATTTGTTGCTGAACATATGTCGCCCGCTTTTATTAAGTATGGGCGGTAAACGTAGGT  
GGCTTTGGGTTATACCCGGATCGCTGGCAAATTTGATTTGGCTACGATGGCGAACGATCGCCGATCTGGTGGCGTTT  
CCATCTCTATTCAATACCGATGCTGTTGTGGCGCGTGGTGGGATATGTTTTGTTAGTTTACTCCCGCCAACTAG  
>Cluster\_48509

ATGATTCCCTTTTCTAGATTTAAATCTATAAATGATCAGTATCAAAATGAATTTAAAGAAGCATGTGATAGAGTTATAGA  
CTCAGGCTGGTATATAATGGGCAATGAGTTAAAAAATTTTGAAGAATTTTCAATTTATTGTAATGTGAAACACACTA  
TAGGTGTTGCCAATGGTTTATAGTGCCTTAACTTTAGTACTACGTGCATGGAAAGAACTTGGGAAAATAAAGGCTGGTGA  
GAAGTCATTTGCAAGCTAAATCTTATATAGCTTCGATACTGGCAATTTACTGAAAATGATTTAGTGCCAGTATTTGTAGA  
GCCGTATGCAAAATACCTCAAAATTTATCTATCGAAATTTACTGATGAAAACAAAAGTCAATTTACCAAG  
TACACCTTTATGGTCAAATCTCTCTATGCCTGAAATTTATGGCAATTTGCACAACAACACGGTCTATTAGTTTTAGAGAT  
TGTGCGCAATCACATGGGCTAGTATTGAGGTAAAAAGCAGGTAACGGGGAGATGCGCCGTTTATGTTTTATCC  
TGGAAAAAATCTCGGAGCATAGGTGATGCAGGTGCTATCACAATAATGATGATGAAATAGCGAAAACACTGCAAGCAC  
TGCCTAACTATGGCTCACATCAGAAATCTGAAATTTATCAAGGTGTTAATAGCCGACTGGATGAAATTCAGACGCA  
ATGCTAAATGTAATAAATAATCTTTGATAATGAACTCTAATTCGTCAAAAAGTAGCATTAACTTATTTAGAAAATAT  
TAATAACCCACTAATTAAGCTTCTTTGACTGCATGAGTATAGAAAATCAACAAAGCCATGATGGCATCTATTG  
TGATGCAACAAGCATAGAGATTTACTACAAAACATTTGACTGAAAATGGTATTCAACATTTGATCCATTTCCCTAT  
CCTCCTCATAAACACAGGCATACAGCCAAATAAACAACCTTTTATTGCAATTTACTGAAAATAACCAACGAAATTTCT  
AAGTATCCCAATCGGACCAACATGACTAATGAAGAAATATCTAAAGTATTGAAGCATGTAATTCATTTGTGAAAAAAT  
AA

>Cluster\_39941  
ATGTCACCGAGGCCAGAAAAACAGCACTGACGTAGCCGGTCTTTACGAAAAGTTTGTATCGCAGAACTGGCAGAGTTTA  
CTACCAGTATAAAAAATCCTGTGACTGGAATAATTTACCGGACTCGGAACAGACAAGGTAAAGGCAGAAAAATCGCTTCCA  
CAGCCAATCAGCGAATAGCTGCAGCAGAACTGAAATTTTATCGCAGAAAATTTGATGAAAAGTCCGTCAGCAACAAAACGT  
CGGGTATCAGATTAAGGCGATGGTTGATCGATATCTGAAAATACAGGACACGCGACTGAAAATGGGATATTTGCGAC  
TACAACCTCACAAGAAAAAATCGAATGGCTGCATACCTGGTTTCCCGTCTGGGAAACCCCAATGAAAAGAACTGGAAG  
TAAGAGACTTTGCATTAATACTGGATGAGTGGCTGGATAAAAGCATGGTCAGCACAGCGAGAGTAAATCGTGGATATGG  
GTTGATATTTATAAGAAGCACAGCATGACGGGAAAGTTTCTCTGGATGGAATCCTCCGGAGGCTACCCGTAACCCGAT  
CCATAAAGTAACCAAGAGCCAGGCTCACCATGGAAGACTGGCAAAAAATTTCAATGCAACGCCCTGAAAAACACTTTATCC  
GTAACGCAATGCTTCTTGGCATTGTTACTGGTCAGCGCGTGTATGACATTTGCCACATGCGTTTTTTCAGATGTGTGGAAC  
GAACACTTGCATATCACCCAGGGAAAAACCGGAATGCGTCTGGCGTTACCGCTTACACTACGCTGTGATGCCATTTGGGAT  
AACGTTAAAAGAAGTATTGATGGGTGCCGAGACAGAATTTAAGTCCATATCTAATCCATAGTCGGCACCAGAAAACA  
CGAAGCCGATGAGTAAAGACAACCTGAGCGACTACTTTGCCAAAAGCACGGGATCTGGCTGGGATAATTCACCCAGCAGGA  
AAAACCTCCGCAACATTTTATGAACAACGCTCTCTATCAGAACGGCTGTACCGTGCACAGGGTATCGATACAAAACAT  
ACTAGGACATAAAGTCCAGGCAACCACCGATCGCTATAACGATCTCGAGGTCAGGAAATGGGTTAAGTTGGTTATTTAA  
>Cluster\_26058

ATGAAATACGATCTCATCATTTATGGCAGCGGTTCCGTAGGCGCTGCCCGGGTATTATGCAACCCGCGCGGTTTAA  
CGTGCTAATGACCGACGCCATATGCCACCGCATCAACACGGCAGCCACCACGGGATACGCGATTAATTCGCGATGCTT  
ATGGTGAAGCGAAAAGTATGTCGCCGCTGGTCTCCCGCGCAAAATGCTGTGGGATGAACTTTCCCGCCACAACGAAGAT  
GATCCCATTTTGTGACGCTCTGGTTCATTAACCTTCGGTGGGCTGACTCCGCAATTTCTCGCCAACGTGCCACAGCGC  
CGACCAGTGGCAACTCAACGTTGAAAAGCTCGACGCGCAAGGGATTTATGGCCGCTGGCCAGAAAATACGCGTCCCGGACA  
ACTACATCGGTTTTATTTGAAACTGATTCGCGTTTTTTGCGCAGCGAACGGCGATTAACCTGGATCCAACTGGCGAAG  
GAAGCGGGCTGTGCGCAGCTGTTCAACTGCCCGGTACCAGCAATTCGTGATGACGATGATGGCGTAACTATTGAAACGGC  
AGACGGTGAATATCAGGCGAAAAGCGATTTGCTGCGCGGAAACATGGGTAAGAAAGACTACTCCCGGAGTCCGCTGTCC  
AGCCCGTACGCAAAAGTATTGCTGGTATCAGGCGGATGGCCGCTATAGCGTGAAGAATAAATCCCGGCATTTACCGGT  
GAACCTGCCAATGGCGATCAATATATGTTTTTCCGGCAGAAAACGACGCGTTGAAGATTGGCAACATAACGGAGGCCA  
GTTTATCCATTCAGCAGATGAACGTTCCGTTTTGCGGAAGTGGTCAGCGATGGTTCGGAAGCCTTCCCGTCTTGGCGCA  
ATGTTGTCGGGTTATCGCTGCTGCCTGACGCGCTGCTGACCTATGATAATTCGCTGACGAAAGATTTATTTATC  
GATACTTACCCGCCACGATAATACACTGCTCATTACCGGCTGAGTGGCAGCGTTTTAAATTTGCGTCACTTTTAG  
GAAAATAGCTGCCGATTTTGGCGCAAGACAAAAAAGCGATTTTGTATTTGACACCATTACAGGCTTTCCCGCTTCCAATAA  
>Cluster\_38953

ATGGGCAAAATATATTCGTCCTTATCCGATGCGGTATTACCATCGCATCTGATGACCTGTGGATCGAGAGTTTAGCGAT  
CCAACAATTACACACCACGGCAAAATTTACCAACATGCAGCGCTTGTGGGATGCCAGATTTACATCCCGGACGCGGCT  
ACCCGATTTGGCGAGCGTTCTTCTGTTGGTCTGTTTTTACCCGGCAATGGTTCGGCAATGATATCGGCTGCGGATGGCG  
CTATGGCAAACAGATATTTCTGCTCGCAAAATCAACCGCATTAAGTTTGAAGAAGCGATTTATCAGATCTGGATGACGTTG  
TGAAGAAAAGCTGGCTGGAGGAAAACCTGCGCTCAGCATTTGACAGCATCCGTTGGCGCAACTCGCTTGGCTCCATCGGTG  
GCGGTAACCACTTCGCAAGTGAACAGATTTGATCAAAATATCGACGCGGAACTGTTTGCACGCGTGGTCTGGATGCG  
CAGCATCTGCAACTGCTGGTTATAGCGGCTCGAGGGATTTGGGCGAGTCTATTTTACAGCGGCATATTGCCCTCGTTTTT  
GCATCATGGTTTGCCTGAAGGCGAGTGCAGCGCTACGGTATATTGGGAACATGACGATGCGCTGGGTTTGGCGCTA  
TTAATCGCCAGCTGATCGCTTTGCACATAATGCAACAAGTTAAGGCCACCGGAAGTCCGGTCTGGATGTGGCGCATAAC  
TTTTGTTAGCGGTTGCCAATCGCGGATCAACAGGGCTGGTTCATCGTAAAGGCGCCACGCGGATGACAACGGTCTGGT  
GATTATTTCCCGGTTACCGCGGATTTACTCCTGGCTGGTTAAACCTGTTGCGAACGAAAAACGCTCCACTCGCTGGCGC  
ATGGGCGGGGCTTAAATGGGGGCGCACCGAGTGAAGGGGCTGGCAGCGAAATACACGGCGCAACTCGCTCCGCG  
ACTGAACTTGGCAGTGGGTAATTTGTCGCGATAAACAACCTCATCTTTGAAGAAGCGCCACAAGCCTATAAATCGGCTGA  
AAGCGTGGTGAATGCTGCTGGTGGCTGGGTTAATTTATCTGCTGCGCGACTGCGCCGGTCTGACGCTCAAAAAACA  
GTGGAGGAAAAAAGGATGA

>Cluster\_4500  
ATGGTTGATAAAAAATAATTTACCGTTACTCCTATTTTTTCAATTCCTCCTCGCGGAGCGGCTGCTGTTGAAACGTGGAT  
GTATCAGGTTGCTCAGCTACCAATTTTCCAAATCGTATTTGTTGATCAAAAATCCAGGATCTCAAAATACACCTTTG  
TTAATGATAATTTAGTATTCATAGGTTGGATTCAGTCGATATATAAGCGGTTATTTCAAAAATGGACAAGACTTTGAT  
CCTCTTCCATATTCAGAGAAATTTGAATATTGCACATGATTTTCTATAACGAAAAGAAAGTGTATTGTTAGTTTATAA  
TAGCATGAAGCTATACACTCAAAATTCGTAAGCGAGCTCCTCAGGCAAGAGTGGTTATACATATGCATAATGCATTTGAAC  
CAAAATTTGCTTGAGCAAAAATGTTAAAATGATATGCTAGTTTACTTTGAAAAGATATTTACCAATCTTTATTTAGCAAA  
GCAGATATTGAGATTTGACCAAAATGGAATTTGATTTAGAACCCTATCAATCTAATTTTACGCGGATCACTAGAAGCAACT  
TAATATCTCCCTGAAGAGAAAAATTTTATTTTATGCTGGGCTATCGTCCCTGACAAAAGGCAATATGCTGTTGATGCAAT  
CATTTGAAAATTTGGCGCTGCTCAAAAAATTTAAAATTTAGTTGTGATTTGGTATTATACAGAAATGAGTAAAAGTGAC

AAAGGTGCATATCAACGCAATGTCAGGAAATTCGAAAACGTTTGAAGGATCGTTGCATATGTTAGGAAGCATAACGCC  
TGAAAAGATGCATTTGTTATACCCACTGGCAGATTTAGTCGTCATTTCCCTCCAGTTCCAGGAACCATTTTGCATGGTGG  
CAATGAAGCTATGGGTGCTGGTAAGCCTGTTTTAGTGAGTACCGGTGGGGGATGACGGAATTTGTCAAAGAAAATACT  
ACGGGATTCATTTAAAAGAACCTATGACTGCAGACTCCATAAGCAGCGATATTTAAAACGTTAGCGAATCCTGAATT  
AACAGCAGTTGCAAAGCAAGGTCAGGACTTTGTGTTGAACACTACAGTTGGGATGGCGTAACCAAGATTCGAAGAGG  
TTATTCATAAATGGTTTGAATAA

>Cluster\_18556

ATGGTTCGATACAGAAATTTGGCTGCGTTAATGAGCATCAGCAGCTTGTATGGCGATGATATGGTCCGTATAGCTCACTG  
GCTGGCAAAAACAGTTCGCATATTTGATGCGGTTGTATTGTCAGCAAACTGGGCTTACATTCGCGCAGGCACAACGCTTCTTT  
CATTTCCGCGAAAGAGTATCGAAAGCTCACTTTCTTGGTTGGAGCAACCAACCATCATTTAATTCCTGCGGACAGCGAA  
TTTTATCCTCCTCAACTTCTGGCGACGACAGATTACCCCGCGCACTGTTGTGAAGGAGAACTGCACGCGCTGCATTC  
ATTTACAGTTCGCGTAGTGGGAGTTCGGCGCATTCATGGTATGGCGAGCGATGGGAGCAGATTATTTGCGAAACTCTGG  
CGACGCTGGAGTGACAATTTACGAGTGGACTGGCGCTGGAATCGATGGTGTGGCGCATAAAGCGGCCTTACAGGTAATA  
GGCGTCAGCATTTGCTGTATTAGGAATGGACTTAATACCATTTCATCCGCTCGCCATGCCGACTGGCTACCAGTTTGTCT  
TGAACATGGTGGGCTCTTGTCTCGAATTTCCCTCGATGTTCCACCCTTGTCTACAAATTTCCACGAAAGAAATCGCA  
TTATCAGTGGTCTAAGTAAAGGTGACTGGTGGTGAAGCGGCTTGGCGAGTGGTTCGCTGGTGACAGCAGCTTGTGGC  
CTTGAGCAGGGGCTGAAGTTTTTGCCTTCCGCGGCTCATATTAGGGAATCCGGGAAGCGAAGGGCTCAGTGGTTAATAAA  
ACAAGGTGCGATTCTTGTGACGGAACCGGAAGAAATTCGAAAACCTTGAATTTGGATTGCACTGGTGGCAGACGCC  
CTGAAAATTCATTTTATTACCAGATCAGGAAGACGTGGCATTGCCATTTCTGAGCTCCTGGCTAACGTAGGAGATGAG  
GTAACACCTGTTGACGTCGTCGCTGAACGTGCGGCAACCTGTCGAGAGGTAGTAACCTCACTCACTGCAACTGGAGTT  
AGCAGGATGGATCGCAGCTGTACCCGGCGCTATGTCCTATTGAGGAGGCGCATGCCATGTTTCGACTACTAATGTATTTG  
TTGA

>Cluster\_45329

ATGGAACAACGCCCATCACCAGGCAAAAGCCACTGGTATCATGAAACGCAATCCAGTACTGCGGAGTATGACGTTCTGCC  
TCTGGTCCCGGAAGCGCAAAAGTTCAGCGATCCCTTTCTGCTCGAGCTGATCCTTGTATGAAGAAACGCTGGCTCCCTTCC  
TTTCATGGCTGATCCCTGCGCGCTTCTGTCAGTGAATTTGTTCCCTGACCAGCTTACCGTGACCCGTTACAGACCTTC  
ACCGCTTATGAACGCTTGTCTACGGCCTGACGGTGTGCTCAGGTTTGGCGGCTCCAGCGGTTATGTAACCTATTTCCGG  
GCGACTTACGCGCTCCCGCGCTGATTCCTCCAGGGAAGCAATCATAGGTTGGCAAAAATCAGCAATATCCCGCGC  
AACTGGCTAGCTCGCTTCTATTATCGACAACCGATCGCGCCAGCATCTGAATGACGTCGGTCTTACTGCCGGGACTGT  
GTGATCATTAACCAATCATTTGGTTTTATTTGGCTTTCAGGCGCGGACATTGCGACATTTTCAGGCTTATCTCGGCACCC  
GGTACGCTGGTTACCCGGTCTGGAATAACAAAACCTACGCGGACGCGTCACTGTTTGTGATGAATCAATACGCTGGCGAA  
CGAGCTATGAGGTGGAATAACTACTGAAGAGTACACAAAAGTTCAACAGCAGAACTTGGCAACTGGCCGAAACACTC  
TCTCTCCACCCTATTTCACTTTCCCTTCTCGAAAGGTTGTTAAACAGTACACGGGTTAATACACAGCCGGATAATAAGCT  
TGGCGGCTGTTTATGCGCGCGGATAAATGGCAGTCTGCTGTTTGGCGCTGTATGGATTCATCAATGAATATAAAA  
AAATCAGCCCCCTTCTGCGCAAGGGCGAAAATAAAATTAACCAATGGGCTGACCGTCAATCTGTTGAGCAGCTACCGTT  
CAGCGATACAATGCTGACCCGAGACCCGATCCTTTAGCGCGCCAGTTTACGCTTACTCGAACAGAAAATC  
ATCAACGCAGATTATTAATCTGCTGGTATGGAGCGGCTGTGTGGCTGGATAAATCGCTTAAAAATCGCGTTGGGTGAGA  
CATATTA

>Cluster\_31610

ATGAAAACTTTTTACTGCAGACGCGTTTATACAGCGGAACGGGAAGTCTCAACATACTGAGCGTTTTACGAATAGGCA  
CATCTGGATTATTTGCGAGCTCTTCTGGCACACTCACCACTCATGACAGCTGTCATCAGGCGTGCAGGAGTAATC  
GTCTCAGTATTTTAGCGAAATAACGCCGACCAACTATCCAGACCGTGGTGAAGGCAATGCGCAATGCAGACTTTA  
CGCCCGGATGTGGTTTACGGTTTTGGCGGCGGTTTGCCTTCCAGCCGCGCAAAAGCGATTGTCCTGGTTCCGTCAGGAG  
TGGCATGAAATGAAACCTGCGTAGCCATTCTACCACAGCGGTACCGGTTCCGAAGTGACAGTGTCTGTGTCATCA  
GCGATCCTGAGAAAGGATTAATATCCCTTTTCGATATATGCACTTTATCCGGATATCGCGATCCTTGTATCCATCTTTG  
GTCGTCAGCGTGCACCAGCGATAACGGCAATACCGGGATGGATGTTTTAACCCATGCGCTTGAAGCTTATGTTTCTCC  
CCGCGCAACGCAATGACACCGGATGCACTGGTTCGAAAAGCGGTCGCAAAATGTTTTTCAATACCTGCCCACTGCAGTGAAGA  
AAGCGATTGCTTTGCCACCCGTTGGCAAAATGCATAATGCATCGACGCTTGCAGGAATAGCCTTTAGCCAGGCGGACTC  
GGTTTAAACCATGCACTTCTCATCAACTCGGCGGACAGTTTCTATCTGCGCAGCGGCTGGCGAATGCACTCCTGCTCAC  
GGCGGTAATCCGCTTAAATGCTGGCGATCCGCGCGCAGCAACGCTACGCCCCGCTGGCGAAAACGTTGCCATTTATGCC  
CCGTAACGCCAATGACACCGCCAGCCTGAATGCACTTATTCAACATATTGAACAGCTTAAACAACCTGTACCTGCGCA  
ACTCTTGCAATGCGCTGAAAGAAAAAAGCAGAATGGTCAATACGCATACCAGATAAGGTTACGCGAGCGCTGGCGGA  
TGCACGTTGCGTACCAACCCGCTGCGGCTGATGCTCCGCGATTGCAAGCTGCTCGAGGAGTTGTTATGA

>Cluster\_39689

ATGGCTCAAATCTTCAATTTAGTCTGGTCCGGCAATGCTACCGGCAGAGGTGCTTAAACAGGCTCAACAGGAACTGCG  
GACTGGAACGCTTGGTACGTCGGTGTGGAAGTGAAGTACCGTGGCAAGAGTTCATTCAGGTTGCAGAGGAAGCCG  
AGAAGGATTTTCGCGATCTTCTTAACTCCCTCCAACATAAAGTATGTTCTGCCATGGCGGTGGTCCGCGTCAATTT  
CCTGCAGTACCGTTGAATTTCTTGGTGATAAAAACCACTGCAGATTATGTTGATGCGGTTACTGGGAGCAAGTGTAT  
CAAAGAAGCGAAAAAATATGCACACCAATGTGTTGATGCGAAAGTACCGGTTGATGGTCTTCGCGCAGTTAAGCCAA  
TGAGTGAATGGCAACTCTCTGATAATGCTGCTTATATGATTAATGCTGCGCGAAGCAACCATGACGGTATCGCTATCGAT  
GAAACACCAGACTTCGGTAAAGACGTTGGTGGTCCGCGTGCATCTCTTCAACCATTTCTCCCGTCCGATTGATGTCAG  
CCGTTATGGTGAATTTACGCTGGCGCGCAGAAAAATATCGGCCGCGTGGCTGACAATCGTCATCGTTCTGTGAAGATT  
TGCTGGGCAAGCGAATATCGCTGCCATCGATTCTGGATTACTCCATCCTCAACGATAACGATTCCATGTTCAACACG  
CCGCGACATTTGCTGTTACTTATCTGGCTGGTCTTCAAATGGCTGAAAGCGAAGCGGCTGGTGGTGAATGGATAA  
GATCAATCAGAAAAGCAGAACTGCTGTATGGGGTGAATTGATAACAGCGATTCTACCGCAATGATGTGGCGAAAAGCTA  
ACCGTTCCGCGATGAACTGCGGTTCCAGTTGGCGGATGCGGCTTGATAAATGTTTCTCCGAAAGAGTCTTTCCGTCG  
GGCTTACATGCGCTGAAAGGTCACCGAGTGGTCCGCGGAAATGCGTGTCTTATTTATAACGCCATGCCGCTGGAAGGTG  
TAAAGCCTGACAGACTTCATGGTTGAGTTCAACGCTGCTACCGGCTAA

>Cluster\_25267

ATGCAAGAGAGACACACGGAAACAGGACTATCGTCCCTGCTGATTGCTGATACGCCCATTTATTGATGTTCCGCGCCCCAT  
CGAGTTTGGCAAGGCGCAATGCCCGCGCTATCAACTGCGGTTAATGAATAACGATGAACGCGCGCGCTTGGCATCT  
GCTATAAACAGCAAGGGTCAGACCGCGGCTGGCACTGGGGCAATAAATGGTGGCGGGTGAATTCGTCAGCAGCGCATG  
GACGCTGGCGGCGAGCTGCTGCAAAATCCGACGCTTCTCTGCTGCGCCGTTGGCGGTCAGCGCTCACATATTGT  
GCAACGCTGGTTGCACTGACCGCGGGGATTGATTAATCCGCTGGTGGAAAGCGGTTATAAGGCACCTGCCAGACCGCATTC  
AGGAACCAATTGAACTGGCACAAAACCGATAGTGTGATTGGCGGTTTACCAGCGGTAAGACGCTGTTAGTACAA  
CAACAGCCGAAGCGTGTGATCTGGAAGGGTGGCGCGCTACCGGTTCTGCTTTTGGTTCGACGTTTACAACCGCACT  
TAGCGAGCGAGTTTTGAAAACCTGCTGGCTGGCGAAATGCTAAAACCGACCGCCATCAGGATTTGGCGCTGGGTCG  
TGGAAGATGAAAGCGGATGATCGGTTCAATCACCTGCCGAAATGCTGCGGCAACGATGACTCAGCGCAGGATTGCG  
GTGTTAGAAGATCCGTTTGGATCCGCTTGAACGCTGAACGAAATAATTTCTGCGTATGATCATGATTTTACCCA

CGCTTATGGCGACGAACAGGGCTGGCAGGAGTATTGCGAATACCTGCATCACGGGCTTTCGGCGATTAACAGTCGGCTGG  
GACTACAACGCTATAACGAACTGGCTGCAGGGCTGGATCGGGCGCTGACAACGCAACTCACCACGGCAGCACCAGCGT  
CATCTGGCTTGGCTGGTGCCTTACTTGAAGAATATTACGACCGGATGTATCGCTATCAGCTTGAAGAAAAAGCGGAAAA  
AGTTGCTTTTACGGTGAGTGGCGGAAGTGGCGGAATGGGTTAAGACGCAGTGA

>Cluster\_44375

GTGAAAGTGACACGAACCGATCTCCATCGATGTTACTCACCGATCTCCTTACGGTAATACGCACCGTTGGCAAAATCGGC  
ATTCGTGGAGGCCGCTGGTTCGGGCGAGCGATGATGCGGAAGGTTACCTGGATTTTTTCAAAGGCAAGATAACCGAATCCC  
ATCTTGGTAAAGAGCTGCTGGAAAAAGTCGACCTGACGGAGGATAACGCCAGCAAACTGGAGCAGTTTTTCGAAAGAGTGG  
AAGGATGCTAACGATAAGTGAATGCCATGTGGGGCTCAAAAATTGAGCAGACCAAAGACGGCAAAACATTATGTTCGGGG  
TATTGGCTCAGCATGGAGGACACGGAGGAAGGCAAACTGAGCCAGTTTCTGGTTGCCGCAATCGTATCGCGTTTATTG  
ACCCGGCAACCGGAATGAAACGCCGATGTTTGTGGCGCAGGGCAACCAGATATTCATGAACGACGTGTTCTTGAAGCGC  
CTGACGGCCCCACCATTACCAGCGGTGAAATCCACCGCATTTTCCCTGACACCGGACGGAAAAGCTGACTGCTAAAAA  
TGGGATATCAGTGGCAGTGTGAATGCGAACTCCGGGACGCTCAACAACGTCACGATTAATGAGAATGTCAGATTAAGG  
GGAACTGTCAGCAACAGATTGAAGCGGATATAGTCAAACAGTGGGTAAGGCTTTTCCGGGGACTCCCGGGCACC  
GAGCGGTGGCCATCAGGGACCATACCGTCAGGGTTTATGACGATCAGCCGTTGACCGGCAGATTGTATTCCGGCGGT  
GGCATTACGGCGCTAAGCATGAGAGAGACATACTGATATTTACTCCTCATGCCGTCTGATAGTGGGAAAAACGGT  
CTGAAATTTATAACCGTCCCGCTGGATGATAACGCTGATTTTACAGTGGCTTATTGATATGCCTGCCGTCACGGTAC  
ATAACGCTGGAGTTTTCGGTATCAGCATGGCTGGTGAATAACTGGTATCCACAGCAAGTATCAGCGATTGCTGGTTGT  
GGTATGAAGAAAGCCACCGCAGGCATCAGTATCAGCTGA

>Cluster\_21329

ATGAAGCCTTCTATCGTTGCCAACTGGAAGCCCTGCATGAACGCCATGAAGAAGTTCAGGCGCTGCTGGGTGATGCGCA  
AACCATCGCTGACCAGGAACGTTTTTCGGCATTATCTCGTGAATATGCGCAGTAAAGTATGTTTCGGCTGTTTTACCG  
ACTGGCAACAGGTTTCAGGAAGATATCGAAACCGCACAGATGATGCTCGACGATCCTGAAATGCGTGAGATGGCGCAGGAT  
GAACCTGCGGAACTAAAGAAAAAGCGAGCAACTGGAACAGCAATACATGTTCTGTACTACCAAAGATGATGACGATGA  
CGAACGTAACGCCTTCTCGAAGTTCGTGCCGGAACCGGGCGGACGAAAGCGCGCTGTTTCGGTGGCGATCTGTTCCGTA  
TGTACAGCCGTTAGCCGGAAGCCCGCGCTGGCGTGTAGAAATCATGAGCGCCAGCGAGGGTGAACATGGTGGTTATAAA  
GAGATCATCGCAAAATAGCGGTGACGGTGTATATGGTCTTTGAAATTCGAATCTGGCGGTTCATCGCGTGCAGCGTGT  
TCCGTGCGGAACTCGAGGGTCTGATTTCTATCCTGCTGACCTGACCGTTCGGTTCGCGTAAATGCCAGAATGCTGATGCA  
TGCCGGACATCAACCCAGCAGATTGCGCATTTGATACTTTCCGCTCGTCAGGGGCGGGGGGCGAGCACGTTAACACCACC  
GATTCGGCAATTCGTATTACTCACTTGCAGCCGGAATGTTGTTGAATGTCAGGACGAACTTCACAACATAAAAAACAA  
AGCTAAAGCACTTCTGTACTCGGTGCTCGCATCCACGCTGCTGAAATGGCAAAACGGCAACAGGCGGAAGCGTCTACCC  
GTGTAACCTGCTGGGAGTGGCGATCGCAGCGACCGTAAACCGTACTTACAACCTCCCGCAGGGGCGCTTACCGATCAC  
CGCATCAACCTGACGCTTACCAGCTGGATGAAGTATGGAAGGTAAGCTGGATATGCTGATTGAACCGATTATCCAGGA  
ACATCAGGCGGACCAACTGGCGGCTTTCGCGACAGGAATAA

>Cluster\_63083

ATGTTTTCATCGCTTATGGACGTTAATCCGCAAGAGTTGACGTCGCTGCTGCGCAACCGCAAACCCGCGGATCTGAT  
TTTACCTGTGCTTATTACAGGTGATTTCTGTTCCGTTTCGCGCCACGCTGGAAGTACTAACGCCACCATCGCCATCTACG  
ATGAAGATAACGGCGAGCATTCGGTGGAGCTGACCCAAAGTTTTGCCCCGCGCCAGCGCTTTACTCATGTGCTGCTGCTG  
AAAAGCCACAGGAGATCCGCCCCAACCATCGACACACAAAAGCGGTTACTACTGGTGCCTTCCCGGCTGACTTCTCGCG  
CAAATGGATACCTTCCAGACCGCGCGTTGCACTTGTCTCGCTGACCGGTAACCTCAACAGTGGCGCAAAATTCGCCCA  
ACTACCTGCAACAGATCGTCAAAAATTTATCAGCAGGAGTGTGGAAGGAAACCGGAAACCTAACACAGCGAGCTGGTG  
GTACGCAACTGGTATAACCCGAACTTGTACTACAAATGGTTGTTGGTGCCTGCTGATCGCCATGATCACCATATCGG  
CGTAATGATCGTCACTTCACTTTCCGTCGCGGCAACGTTGAACAAGTACGTCGATCAGCTACTGGTTTCGCGCTCA  
CCACCTGGCAGATCTTATCGGCAAGCGGTACCGCGTTAATTTGTCGCCACCTTCCAGGCCACCATTGTGCTGGCGATT  
GGTATCTGGCGTATCAAAATCCCTTCGCGGATCGCTGGCGCTGTTCTACTTTACGATGGTGTATTACGGTTTATCGCT  
GGTGGGATTCGGTCTGTTGATTTTATCACTCTGCTCGACACAACAGCAGGCGTTTATCGGCGTGTGTTTATGATGC  
CCGCAATTCCTTTCCGTTACGTTTCTCCGGTGGAAAAAGTACGAGTATGGCTGCAAAACCTGACGTTGAAACCT  
ATTCGCCACTTTACGGACATTACCAAGCAGATTTATTTGAAGGATGCGAGTCTGGATATTTGTGTTGAATAGTTTGTGGCC  
GCTACTGTTGATAACGGCCACGACAGGTCAGCGCGTACGCGATGTTTAGACCTAAGGTGATGTA

>Cluster\_40449

ATGAAATCGGGCCGCTTTATTGGCGTTATGTAGCAGCACCAGCCTTGATGGTGTGATGTTGTGTTGGCGACAATTGATGA  
ACACCGGGTGCACAGCTGGCAAGTTTGGAGTGGCCGATCCCGGTGCTCTGAAACAGGCTGTACTGGATATTTGCCAGG  
GCCAGCAGCTTACACTTTCGAGTGGACAGCTTGATACTCAACTCGGGCGACTTTTTGCTGATGCGGTCAATGCCCTTG  
CTTAAGGAAACAAAACCTGACGGCAGAGATATAGTTGCCATCGGCTGTACGGTCAAACCGTCTGGCATGAACCGATGGG  
CGTGGCGCCACACACTTTACAGATTGGCGATAACAATCAAATTTGTCGCGCACCGGAAATTACGGTTTCGCGTATTTTC  
GCCGTCGCGATATTGCCCTGGGAGGACAAGGTGCACCGCTGGTACCTGCTTCCATCATGCGCTGCTGGCTCACCCAACC  
GAGCGACGAATGGTGTCAATAATTGGCGGCATCGCAATCTGTACTGCTCATTTCCCTGGCCAGCCGGTTGGGGGCTACGA  
TACCGTCTCGTAAACATGCTGATGGATGCTGGATCTGGCTCAGGCGGTAACCTTACGATAAAGATGCCAGTGGG  
CACGGGCGGTAAGTTATTTCTCCACTGCTGCAAAATATGCTCAGCGACCCATATTTCTCGCAACCCGACCCGAAAAGC  
ACGGGACGGAACTTTAACTACGGCTGGCTGGAGCGCATTTCGCGCATTTTCCGGGTGTTGATCCCGTGTATGTGA  
GGCCACTGGCAGAATCACCAGCGTACCATTCTGAAACAAGTTTTGTTGAGCGGTGGCTGCGAACGATGATGGTAT  
GTGGTGGAGGTAGTCTAATCCGTAATCATGGCGCTGCGCGCATTAATGCGGCAAGGATGCTGCGGCAAGGATGATGATG  
GCCGTTGGCATTAGTGGCGATGACATGGAAGCATTTGGCGTTCGCTGGCTGCTGGCGAACGCTGGCGGGATTACCAGG  
AAATCTGCTACCGTCACTGGCGCAAGCAGGAGCAGGTAAGTGGGGCTATTTTCCCCGCTAACCCGTTGA

>Cluster\_25013

ATGCAAACTGGATAAAGCGCGCAGCGATCGCTGTAAGTCTGACGCTGCCCGGCTGGCGCTGGCGCAATCGCTGGAGTC  
GTTGGTCAACGTACAGGGCTGCGTGAAAACCAACTGGTCCGCTACAGCCTGGTGGTAGGCTCGACGGTACTGGCGATA  
AAAACAGGTCAAATTCACCAACAGACCATCACAATATGCTGCGTCAAGTTGGTGTCAACCTGCCAAATAAAATCGAC  
CCGAAGGTGAAAAACGTCGCGCGGTTGGCGGTGAGCGGCACATTCGCGCGGATGACTCGCGGGGAGACCATTTGATGT  
CACTGTTTCGTCGATTTGGCGATGCCAAAAGTATTCGTCGCGGCACTTTGTTGCTGACCAAGTTCGACCGCGGATGGCG  
AAGTTTATGCGCTGGCGCAGGGCAGCGTGGTGGTGGCGGGATGAATGCCACCGGGGCCAGCGGTTTCGAGCGTAAACGGT  
AATACGCCAACCGCGGGTTAATTCCTAACGGCGCAACGGTAGAGCGCGAGATCCCAGCGATTTCAGATGGCGCAC  
TATCACTTCAACCTGAAACGTCCTGTTTAAAGATGCCAAATATTCGCGCGGATTAATGCTCGTCTGTTGGCGCA  
TTGCTACTCCGACAGCTCCACCAACGTCAGCGTGGCGCGCCACCAGCCCGGCGCGGGTGGCATTTATGTCGCA  
CTGGATGATGTACAGGTGCAGGCAGAGAAAATCCGCGCCGCTGGTGTAACTCGCGTACCAGCGGCGGTTGATGGG  
CGATGGCGTTCGCTGACCGCGCGCGGCTGTCGACCGCAGTTTTCGCTGCTGATTAACGAAACCGCAACGTCAGCC  
AGCCAAATGCTTTTGGCGGGGCGCGCAGCGGTAACGCGCAGAGCAATATCGCGGTGAATCATGCGCGCCCGGGCGTG  
GTGAGTTTGGCGGAGTCAGTAGCTGAAAACGCTGGTCAATGCGTTGAAACGTTTGGCGCGCAGCCGGACGACATTAT  
GTCGATTTTACAGGCGCTGCATGAAGCGGGCGCGCTGGATGCTGACCTGGGGTGTATCTGA

>Cluster\_28447

ATGAACATAAAGGTTAAAGCGTTACTGGCAGGATGTATCGCGCTGGCATTAGCAATATGGCTCTGGCAGAAGATATTA  
AGTCGCCGTCGTAGGCGCAATGTCCGGTCCGGTGGCGCAGTACGGTGACCAGGAGTTTACTGGCGCAGAGCAGGCGGTTG  
CGGATATCAATGCTAAAGTGGTATCAAAAGGTAACAACTGCAAAATCGTAAAAATATGACGATGCTGTGACCCGAAACAG  
CGGTTCCGGTGGCGAAGAGTGTAAAGCGGCAATTAACAGCGCATTAATACTGTGATTGGTACCCTCTGCTCTTCAACAGCAGC  
AGCGTCTGACATCTACGAAGACGAAGGCATTTTAAATGATACCCAGCGGCAACCGCACCAGAGCTGACCGCCCGTGGCT  
ATCAGCTGATCTCGCGCACCACCGGCTGGACTCCGACAGGGGCCAGCGCGCGGAAATATAATCTTCTGAGAAAGTGAAA  
CCGCAACGCATTTGCTATCGTTACGACAAAACAGCAGTACGGCGAAGGTTCTGGCGCTGCAAGTGCAGGACGGCTGAAGAA  
AGGCAATGCTAACGTTGGTGTCTTTGATGGCATCACCGCCGGGAAAAAGATTCTCTACCCTGGTGGCGGCTTTGAAGA  
AAGAGAATATCGATTTCTGTTTACTACGGCGGTTATCACCCGAAATGGGGCAAAATCCTGCGTCAGGCACGCGCGGAGGG  
CTGAAAACCTCAGTTTATGGGGCCAGAAGCGTGGCTAACGTCCTCGCTGCTAACATTGGCGGGCAATCAGCGGAAGGGCT  
GCTGGTAGCAAGCCGAAGAACTACGATCAGGTTCCGGCGAACAAACCGATTGTTGACGCGATCAAAGCGAAAAAACAGG  
ACCCAAAGCGCGCTGCTCTGGACCACCTACGCCGCGCTGCAATCTTTGCAAGCGGGGCTGAATCAGTCTGACGATCCG  
GCGGAGATCGCTAAATACCTGAAAGCGAACTCGGTGGATACCGTGATGGGGCCGCTGACCTGGGATGAGAAAGCGGATCT  
GAAAGGCTTTGAGTTCCGGTGTGTTGACTGGCACGCGCAACGGCACGGCGACTGATGCGAAGTAA

>Cluster\_48717

GTGAAACCCAACAGACCCTGATCGTAATTCTGAGCACTGTGCGCTCGACGCTGTGCGCATCGCCCTGATTATGCCGGT  
GCTGCCGGGCTCCTGCGCATCTGGTTCACTCGAACGACGTACCGCCACTATGGCATTCTGCTGGCGCTGTATGCGT  
TGATGCAATTTGCTGCGCACCCTGCTGCTGGCGCGCTGTCGGATCGTTTCGGCGCGCGCCGGTCTTGTCTGCTCTCGCT  
GCCGCGCTGCTGCTGACTACGCCATCATGGCGACGGCGCTTTCTTTGGGTTCTCTATATCGGGCGGATCGTGCCCG  
CATCACCGGGCGACTGGGGCGGTAGCCGGCGCTTATAATTGCCGATATCACTGATGGCGATGAGCGCGCGGCACCTTCG  
GCTTCATGAGCGCTGTTTCCGGTTCGGGATGGTCCGGGACCTGTGCTCGGTGGGCTGATGGCGGTTTCTCCCCCAC  
GCTCCGTTCTTCGGCGCGCAGCCTTGAACGGCTCAATTTCTCGACGGGCTGTTTCTCTTTGCGGAGTTCGACAAAGG  
CGAACCGCGCGCTTACCGCGGAGGCTCTCAACCGCTGCTTCGGTTCGGTTCGGTGGCGCGGGGATGACCTCTCGCG  
CCCTGATGGCGGCTTCTTTCATCATGCAACTTGTCCGACAGGTGCCGGCGCGCTTTGGGTCATTTTCGGCGAGGATCGC  
TTTCACTGGGACGGACACGATCGGCATTTCCGTTGCCGATTTGGCATTCTGCATTCACTGCCACAGGCAATGATCAC  
CGGCCCTGTAGCCGCGCGCTCGGCGAAAGCGGGCACTCATGCTCGGAATGATTGCCGACGGCACAGGCTACATCTGTC  
TTGCTTCCGCGCATCGGGATGGATGGCTTCCGATGCTTCCGCTGCTGCTTTCGGGTGGCATCGGAATCTCGCGCTG  
CAAGCAATGTTGTCAGGACAGGTGGATGAGGAACGTCAGGGCAGCTGCAAGGCTCACGCGCGCTCACAGCCTGAC  
CTCGATCGTCGACCCCTCTCTTTCACGCGCATCTATGCGGCTTCTATAACAACGTTGGAACGGGTGGGATGGATTGCG  
GCGCTGCCCTTACTTGTCTGCTGCGCGCGCTGCGTCCGGGCTTTGGAGCGGCGCAGGGCAACGAGCCGATCGCTGA

>Cluster\_27912

ATGCAAGTGTGATGTAGCCATTGTTGGCGCGGCATGGTCCGGCTGGCGGTTGCCCTGCGGCTTACAGGGTAGCGGCTT  
ACCGGTTGCCGCTACTGGAGCAGCGCGTACCGGAACTCTGGCGCGGATGCACCACCACAACCTGCGCGCTTCCGGCTATCA  
ATGCCCGCAGGAAAAATTACTACCCGCTTGGCGCTCGCAGGACATTTCTCTCTCGTAGGGCTGTTGCTATCACGGT  
ATGGAAGTGTGGGATAAAGACAGTTTTGGTCACTCTGGTTGACGATCAAAGCATAGGGCTATAGCCATCTGGGCGCAT  
CGTTGAAAATTCAGTGATTCACACGCGCTGTGGAACAAAGCGCAGCAGTCTGTCAGATATCACCTGTTGGCCCCGCG  
AATTAACAGCAGGTCGCTGGGGAGAAAAAGAAACCTTCTGACGTTGAAAGATGGCAGCATGTTAACGGCGCGCTGGGT  
ATTGGCGCGGACCGCTAATCTCTGTTGCGCAACAAAGCGATATTCGCTGACTTCTGGGATTAACAGCATTACAGC  
GCTGGTGGCGACCATTCGACCGGAAGAACCGCATGATGCGGTGGCGCGCAGGTTTTCATGGCGAAGGCATTTCTGGCT  
TTTTACCCTTAGCGATCCGCATCTTGTCTGATGTCCTGCTACTGTCGCCAGAGGAAGCGCAGCGGATGCAGCAGGCA  
GGGGAAGACGAATTAATCGCGCTTAAATATCGCTTTTGATAATCGCCTGGGCTTATGCAAGGTTGAGAGTGAGCGTCA  
GGTGTTCGCGCTGACGGGGCTTATGCGCGCAGTTTGGCGCGCACCGTCTGGTGTGGTGGGCGCAGCGCGCATCA  
TTACCCGCTGGCGGGCAGGGGTAATCTCGGCTTTATGGATGCTGACAGCTGATTGCTGAACTGAAACGGTTGCA  
CGTCAGGGTAAAGACATCGGGCAGTACATTTACCTGCGTCGCTATGAGCGTAGCCGCAAGCACAGCGCGCGCTGATGCT  
GGCTGGTATGCAGGGATTCCGCGATCTGTTTCCGGGGTAATCCGGCGAAAAAATGCTGCGTGATATTGGTCTGAAAC  
TGGCTGATACGCTTCTGGCGTTAAGCCACAACCTTATTCGTGAGCAATGGGATTAACAGATTTCCTGAATGGCTGCGT  
TAA

>Cluster\_21630

ATGAAGCCGGTTCAGGAAACCATACGTCAGCTTTCATAGACCATTGCTTTCACTTTTCCAATAAGTGAGCTTAAAGAA  
TCTTGAGACTTTTCGACGGTGTCTATTCAGTTCTGGCGTAAGTATGGTTCATGCGCGCTGCTGCGTGATTTTCTGCCCGGTC  
GTGATGCCCTTCTTCTGATGTGGTTGATCCTGAAACTCGATGCTGGGTTCTGATGATGCGGAATCAGATAAAATTTGT  
AGCGGATTTCTGGCGATAGAGCGTTAATTGAACATCAAAATGAACAATAAATCAGGCTGTTTCCAGGCTGCGTATTTGCA  
TCGCTTAAAAATCTGTTATCCAGTCTTTCGGTTGAGTATGGGACCTGAACGGGACCGTGGTGGCTTAAATTAATCTGTT  
GTTCTGCGCATTTTCTGATGATGGCGGTAATAATCTACATGGCTTTGCAATCTGGGTTGGAACAAACAGCAGGTA  
TATAACAGATTTCCGGTCTGGGATGTGCTCATGATTTAGTGGTACTGAGCTCAGGATGATTCAAATGGTTGAAACA  
TCTGAATATTACTACGCTCAAGCGTATTGATTTGGCTGTTGATGATTTGATGTTTACTGATGTTTACTGCGATGCACTGTT  
GCAATATTAAGCAGGAGATGTACACGTTTGGTTCCCGGCAATCGCGTGTACTGGCGTATCTATAATAAAGCGCTTGA  
ACAAAAGTCAAGTGGTACGTTGAAATCGTTCTGAGGTCGAGCTTAAAGGGGTTCTGTTGATGTTACTGCTTGTATGCGG  
GTTATTTTACGGGATGTTGATGATGCTGCACAAATCAATCCAGCTAAACCACGCAAGTTAATCTTATCGTCTGAC  
TTAGCGGACGAAAAAAGGCAATTAATGCACTGGAACATAATGTTCACTGGTTACGTAAGCAGTCTCAATCTGTTGCG  
AAAGTATTTCTCTCTCGGTAATGATGATGAGGCGGTTTACTGCCATTGTCAGACATGAGGATATACAGGATGAGA  
AGATTAGATTTTCAATACCGGATGTTTATCGGCAGGTGATTGCAAGTAAATTCATAAATCGTTTCAATTTTAA

>Cluster\_20225

ATGAAGCAACTCACCATTTCTGGGCTCGACCGGCTCGATGTTGCTGACGACGCTGGACGTGGTGCGCCATAATCCGAAACA  
CTTCCGCTGATTTGCGCTGGTGGCAGGCAAAAATGTCACCTCGCATGGTAGAACAGTGCCTGGAATTTCTCTCCCGCTATG  
CCGTAATGGACGATGAAGCGAGTCCGAAACTCTTAAATGATGCTACAGCAACAGGGGAGCCGACCGAAGTCTTAAGT  
GGGCAACAAGCCGCTTGGCATATGGTCCGCTTGGAGTGTGATGATGATGATGATGATGATGATGATGATGATGATGATGAT  
GTTACTGCGCTTCTGCTGATCCGCGCGGTAACCAATTTTGGTGGCCAAATAAAGAACTCACTGGTTACTTCCGCGGCTG  
TGTTTATGGACGCGGTAAGCAGAGCAAGCGCAATTTGTTACCGGTCGATAGCGAACATAACGCTATTTTTCAGAGTTTA  
CCGCAACCTATCCAGCATAAATTTGGGATACGCTGACCTTGGAGCAAAATGGCGTGGTGTCCATTTTACTTACCGGGTCTGG  
TGGCCTTTCCGCTGAGACGCCATTGCGGATTTGGCAACAATGACGCCGATCAAGCTGCGCTCATCCGAATGTTGTCGA  
TGGGACGTAATAATTTCTCGTCGATTCGGCTACCATGATGAAACAAGGCTTGGAAATACATTGAAGCGCGTGGCTGTTTAA  
GCCAGCGCAGCCAGATGGAAGTGTGATTCACCCGACGTGATGATTTACTCAATGGTGCCTACCAGGACGGCAGTGT  
TCTGGCGCAGCTGGGTTAACCGGATATGCTGACGCAATTTGCTCACACCATGGCATGGCCGAAATCGCGTGAACCTTGGCG  
TGAAGCGCTGATTTTTCGCAAACTAAGTGGTGGTGGCAATTTGCTCCGACCGGATTTATGATGTTTATCTGCTGAAACTG  
GCGATGGAGGCGTTGCAACAAGGCGAGGACGACAGCATGAAATGCCGCAACGAAATCACCGTGGCTGCTTTTCT  
TGGCAACAATCCGCTTACGGATATCGCTGCGTTGAAATTTACTGTAAGAAAAATGGATATGCGCGAACCAAT

GTGTGGATGATGTTATCTGTTGATGCGAACGCGCGTGAAGTCGCCAGAAAAGAGGTGATGCGTCTCGCAAGCTGA

>Cluster\_18915

ATGAGCCGAGGCGTCGCCGAATTTCAACCGGGCAGGTTAGCACAGGTACTAGCCGCCCGGGCGGTATCACAACTCAATT  
AGCTACTATGGTGGGTGATACACAGCAACCATAGCAAAATGGCGTTCGGGTCAACAGGCTCCAGAGTCTGAGGCTTTAG  
AACGTCTGGCCACTGTTATCGTAAATGTTACACCTGAATGGTTCACGCGCCTCTGTTGAAGGGGATGTCAAAGCCTCTGTT  
AGAAGCAATGCATCAGCTCATGTAGCTGCACGACAATGTTAGAACTCGAATCCATTGGGCTAATGAGTTAGTTACTAA  
GCTGACTGAGTTTGTAGATCTGCCGAGCTAAAACCTACCGCTCGTAGCTTTACAAACATTGATGAAATTAGTGATGCAG  
ATATTGAAGACGCTGCTAATGAGTGCCTGCTCTTTGGAACTTTGGTACAAAGGAAATACCGGATCTTGCTTTAGCCGCA  
GAGAGTAATGGTATTATCGTTATTAGAGAAGAAACAGGCTTGCAGGATTTGAAGGGCTTCTGCTGGAGTGAAGACTTT  
AGGTGTTCTTTTGTCTCTCTCTTTCAGATAAAGGTAATGCTTTTCGTAGCAGATTTGACCTTGCTCACGAAATGGTC  
ATCTGATCCTTACCCTGATGTTGGCAACGAACTCGAAGCCGAACTTATAAGCTGAAGGAAAGTCAAGGCTCATAAATTT  
GCGGGAGCACTGCTGCTTCTGCTGAGACATTTGCCGAAGAAATAGGACCCCGGTAACATTAGATAGCTTGCTTTTAAAT  
TAAACAACGCTATGGTATTTCGTTGCGCAAGTATCATGCTTTACATGTGCTGCATATTATACGGAAGAGAAAC  
AAAATCTTTATAAGCGTCTTACGACGTTGGGAGCGAAATCAGAGCCGGAGATGATTATCGTGAGCTGAAAAACA  
CGTTTGTGAAACCTACTATTGAATTGCTGGCATCGCTGGAATCATTTCAGTTGAACGGCTTCTGCTGATTCCGAGGTTT  
ATCTGCTATTGATGTGAAATGATTGCTGGTTTCCCGAGGGGTACCTGACTGGCAAGAGGCTGCTGTTGTGCATCTGG  
CAAAATTAATACTATGTTGGTTGAGCATCGTGTATGTGCAGGCTAACGATCATAAAGGGGCTTTAGTGCAATTTACGCGA  
TCGCCAAGCGCTCTAATTTCTAA

>Cluster\_42040

ATGCAAACCCCAATTAACCGAAGAGATGCGGCAGAACGCGCGGGCGCTGGAAGCCGACAGCATCTGCGCGCTGTGTTCA  
CTGCGGATTTTGTACCGCAACCTGCCAACCTATCAGCTCCTGGCGATGAACGAGCGGGCCGCGGGCGCATCTATC  
TGATTAACAGGTCGTTGGAAGTAAACGAGTACAGCTTAAACACAGGAGCATCTCGATCGCTGCTCACTTGGCCCAAT  
TGTGAAACCACTGCTCTTCTGGTGTGCGCTATCACAATTTGCTCGATATCGGGCGTGAATTTGTCGAGCAGAAAGTGA  
ACGCCAACCTGCGGAGCAATGCTGCGCAAGGATTGCGCGGGCGGCAATAATATTGATGCTGCTGGCGGCTTGGAGTGCAGC  
AGGTAGGGCTGGTGTGCGACCGTTTACCAGGAGCAGGTGAGAGCAAAATGCTGCGGAAACGGTGAAGCTAAACCG  
CGTCCGCGCTGCGCCATAAGCGTGGGTTTAAATGCTGGAAGGCTGCGCCAGCCTACGCTTTCGCCCAACACCAACCG  
GGCAACTCGCGAGTGTGGATCGTCTGGGATCAGCGTGACGCCAGCTAACGAAAGCAGGCTGTTGTGGCGGGTGGACT  
ATCATCTTAAATGCGCAAGAGAAAGGTTAGCGGGCGGCAATAATAATTGATGCTGCTGGCGGCTGCGGATGAAAGTGC  
GCCGAGGCAATTTGCAACCGCAGCGGTTGTGGCGGTTGCTCAAAGAGTATGGGCAGATGCTGAAAAACGATGCGTT  
ATATGCCGATAAAGCGCTCAGGTCAGTGGGCTGGCGGTCGATTTAGTCGAATTTCTGCGCGAGGAACCGCTGAAAAAC  
TGGCAATTCGAGGCGATAAAAACTGGCCTTCCACTGCGCGTACCTTACAACATGCGCAAAAGCTGAACGGCGAAGTG  
GAAAAGTGTACTTCTGCTTGGATTTACCTTAACGGATGTTCCCGACAGCCATCTGTGCTGCGGCTCAGCGGGAACATA  
TGCGTTAACGCATCCGATCTGGCAGCTCAGCTGCGGGATAACAAAATGAATGCGCTGGAAGCGGCAACCGGAAATGA  
TCGTCACCGCAACATTTGGTTGCCAGACGCATCTGGCGAGCGCGTCTACCTCTGTGCTGCTACTGGATTGAAATTTGA  
GAACAAGCCCTTGAAGAATAA

>Cluster\_29463

ATGACGAATAACCTACCGATGACAGCAGACCATGGTCGGTCTTTCTTATTTTTCTGCGGCTTGGATTGACATCTTTTGG  
CGGCCCATTTGCGCACTTTGGGCTACTTCCGCGCGAATTTGTCACACGCGCGGCTGGCTCTCCGAACGGAGCTATGCTG  
ACTTGGTTCGGCTTTGTCAGTCTTTCGACGGGCTGCAAGCAGGTCGGCATAGGACTGCTCGGGCTGGA  
TACAGCGGGGCGCTGGCTGCTTGGGCTGGCTTACGCTCCGCTGCTGCCATAGCCTTGAATCTTTTGGCGCATCTC  
CAGCTATGGCGATTACGCTCTGCGAGGCGGTTGCATGGCTTAAAGTGGTGGCTGTGGCCGTTGGTCAAGCAGTAT  
GGGCACTGGCGCTAACCTATGCAAGGATGGGCTGCGATCACCATCATGGCAATGCTACCTGCGCTGTTTTACTTTGTG  
CCGTCCGCTGGGAGCAGTTGGCTGATGCTATCGCAGGATCGCAGGCGGTTATGTTCAAGCCAGCAAGTTGT  
TGAGCATGACCCCTACCTATCAGGTCAGTACCGGGCGGCGTGTGCTGCTCGCTGTTCTTTGCTTGGCTGATTG  
GCCTGCGGCTGTTGGCGCACTGATGCCAAGTCAAAACATGGCAATGGTGGATTCCTTCTATCGTGTGCGGATCACTGGTG  
TTCGGCGGTGGTCACTTGTGCTGCCATTAAGCAGGCGAAGTGGTGGCTCCCGCTGGGTCAACAATGAATCTTTCT  
CGCGGGTACGGGGCAGCTCAAGCGGCTGCCCGCTTTGTTACGTTACGTTTCGCGCGCTTCTTGGTGCATGAACACCG  
CCCCGTCGGGCTGGATCGGGCGCATTTGTGTCTGCTGGCTATCTTCGCGCCCTGTTCTTGTGCTGCTGCGGATCAATG  
CCATTTTGGGAGCCTTTGCGCGCAATACAGGCATCAAGCTGCGCTGCGCGGATCAATGCCCTGTAGTCCGCTTGT  
GCTGGCGCGCTGATCAGCCTGATGGACTAGCGCATCTTTACGCCAAGACTTCCGGCTTGGCATTAGTTGCCCTTG  
TCGCACTTATGTTCTGGAAGCTCCCGCGTGGCTTGTCTCGTACGGTTCAGCTGGGTGGCTGTTGAGGTCGCT

>Cluster\_66091

ATGACCTCAACATTTATTTCTCTCTCGAGAAAAAACTGGATAGCGTACTGGAACAGAGCTCTCGTATCTTATTCA  
TACCACCTATTTTGGGTTGGGATTAACAAGTATAAACATCTTATTGTTATTCTTATGACAATAACGACAATCGTCTATC  
TCTGCAACCGCCAAAACACTATCTCTCACTATTTAAACATTTCTTTTGGTAGTGTGCCATATTAACATATTGCTGCA  
TTGCTGTCACTTCTTCAATCCCTGATGCGAGTCTAGCATGAAGGAAATTTCAAAGCTATTTATGAGAATACTTTACT  
ATGCACAATAGCAATACCGATCATATTGAGAGCAGAGAAAAGAGAAGATGTCGAAAAAATCGTTTCTTCTCATTTATTA  
GTGCTTGGGCTTACGCTGTTTTCTGAATTGATTACCTATTATAAGGACTATCAACAAGGGATAATGCCATTCGAGAT  
TATAGACACCGTAGCATTCTGACTCGATGGTCTTTTTATCCCTGCATTTGTTAAATCTTGGCTTATCAAATCAGCAAA  
ATACCGCATTTCTTTTGTGGTCTAAGCGTATTTTTATTTTTCTGATATTAGGAACTTTATCCAGAGGGGCTGGCTTT  
CCGTGTTAGTCAATGGATTAATATGGATTCGATGTTTAAACAATGGAAGTTACTATTAGTAGGATAATGGTTGCCAT  
ATTGCATTTGTCGGTATTTTTACACATAAGGAGATGACCGCAAAGCTAACGATAAACTTCAACAACATAATAGTCTTTA  
TCGCTATGCAAAATGGTACTCAAGGCAGGCACTCGATCTAATATTAGAAAATCCTGTTATTGGTTATGTTACGGTAACG  
TTGCAATAAAGATGCTATAATAAACGTGCTATTGATTATCCAGAATGGACCTTTAGACAATCAATAGGGCCACATAAT  
TTTGGCTATTCTATCTGTTTGGCACTGTTTATTAGGCTGTTAAGTCTTATGATGCTATACTGTGCAATATGAAAGA  
GTGTATAAAAAATGGCGTCAAGAATAAATATCGCTCACCATATAATGCATATTATATAATCTTACTATCTTTTATAGGTT  
ATTTTGTATCCGTGGAACGTTAGAACAAATTTATTAGCGGTTTACGCGGCTTATTATTAGCGATGAAA  
AACAAAGTAA

>Cluster\_41537

ATGCTTGACGCTCAAACCATCGTACAGTAAAAGCCACATCCCTTTACTGGTGGAAACGGGGCCAAAGTTAACCGCCCA  
TTTCTACGACCGTATGTTTACTCATAACCCAGAATCAAGAAATTTTAAACATGAGTAACAGCGCAATGGCGATCAAC  
GTGAAGCCCTGTTAACGCTATTGCCGCTACGCCAGTAAATTTGAAAACCTGCTGCGCTGCTGCCAGCGGTAGAAAA  
ATCGCGCAGAAGTCAACCCAGTTTCCAGATCAAACCGGAACAGTAAACATTTGTCGGTGAACACCTGTTGGCGCTGGA  
CGAAATGTTACGCCCGGGCAGGAAGTGTGGACGCTGGGTTAAAGCTATGGCGTACTGGCTAATGATTTTATCAATC  
GCGAGGCGGAAATCTATAACGAAACCGCAGCAAGCCGGTGGCTGGGAAAGTACTCGCGATTTCCGCATTTGGCTTAA  
ACACCGCAGCGGCTTATCACAGCTTCCGAACTGGAGCCGGTGCACGGTGGCGCAGTGGCAGAAATCCGTCGGGGCA  
ATATCTCGCGCTGCTGTAAGCGGAAGGTTTCCCGCATCAGGAAATTCGTCAGTACTCTTTGACTCGCAACCGGATG  
GCAAGGCTATCGTATTGCGGTGAAACGGAAGAGGTTGGCAGGATCCAATGCGCTGCACAATCACGCCAATGTTGGC

GATGTCGTGAAACTGGTCGCTCCGGCAGGTGATTTCTTTATGGCTATCGCAGATGACACACCAGTGACGTTAATCTCTGC  
CGGTGTCGCTCAAACGCCAATGCTGGCAATGCTCGACAGCTGGCAAAAAGCAGGCCACACAGCACAAAGTGAACGGTTCC  
ATGCGGCAGAAAAATGGCAATGTTACAGCCTTTGCGCATGAAGTTAAGGAAGTGGGGCAAGCACGCGCGCTTTACCGCG  
CACACCTGATATCGTCAGCAAGCGAAGCCGATCGCGCTAAAGGTCAGTTTGAAGCGAAGGTTGATGGATTTGAGCAA  
ACTGGAAGAAAATATTAGTATCACTTTACAAAATTAAGTTTACAGACATATGAAAAGTCTATCTTCGCGGCCGGTTGGCTT  
CATGCAAGTTTGGCGGAAAC  
AGTTAGTGGATCTGGCGGTGAAGCAGGAAAAACATTCATTACGAATGCTTTGGTCCGCATAAGGTGCTGTGA

>Cluster\_7262

ATGAAAAATAGCATTAAATCGGTACTACAGCAGAAAAGTCTAATCCAATTCAGAAAAGAACTGATTAATTTATTACATAAAAA  
TGGCCATGTTGTGTTATGCGTTTGAATTTGATGATGTAACAAAAGAAAAGTTAAATCATTTGGTGCATACCAG  
TACATTACTGTTTTCAGTCGAACAGGGCTAAATCCATTTTCTGATATTAATCAATACCTATAAATATATAAGATTCTAAAA  
TCACTTAAGTTGGACTTGGTATTTTCATATTTTCAAAGCCAGCCATTTTGGTACTTTAGCAGCAAAAATTTGCAAGAAT  
ACAGAAGCGTTATGCGATGCTTGAAGGGCTTGGTTTTTCTTTACCAATTCCTGGAGGGCAGGTTTCATTACGGAAATAAT  
TACTAAAAGAAAATATTAGTATCACTTTTACAAAATTAAGTTTACAGACATATGAAAAGTCTATCTTGGTTAATGCGGATGAT  
AAGCGAGACCTTTTAGTTAATGCAAAAATTCAGTCAAAAAGGTTTCATATATTAAGGGGGATTGGATTAATAATGCTCTGA  
TTACCCCTACTGCCACCAGCCTGTTGATCCAGTGTCTTTCATTTTGTGCTAGATTTTACAAGAAAAGGGAGTTTATG  
AATTTATTGAGGCTGCACAAGTAGTCAAAAAGAAATTTCTGAAACTCATTTTGCATGCTGGGTTCATCTGGATCTCCAT  
AATCCGGGAGCTTAACTACAGAGCGCTTAATGATTTGAAAGTGAATAACATCATTTAGTTAGTTACCTGGCCAGCTTGATAA  
CGTGCAGGAGTGGCTTGTAAAGCGAGTGTATTTGTATTCCTTCTGGCGTGAAGGGTTTCCGAGGAGTACACAGGAGG  
CGATGGCAATGGGACGTGCTGCTATAACAGCGATGTGCCAGGCTGCCGAGATACAGTAGTTGATGGTGTAAATGGATTT  
TTGATTAAGCCAGTTCCTTCTCATGCGTTAGCGGAAAAATGCTCTGTTTTTACATCAACCTGAGCTAATTACCCAAAT  
GGGAATGCAAGTCAACAAATAGCTTTTACAACAATTTGACTCATATATAGTTAATTCAAAACCTTATGAAAATACTGCGCG  
TAGATGATGAAAATACAAAGTCTAATGACTGTTAA

>Cluster\_29778

ATGGCTGGCTGGCATCTTGATACAAAATGGCGCAGGATATCGTGGCAGTACCATGCGCATCATCGATACCAATATCAA  
CGTAATGGATGCCCGGGCGAATTATCGGCAGCGCGATCGTGGCAGTATTGGTGAATTGCACGAAGGAGCATTGCTGG  
TACTTTCACAAGGACGAGTCGTCGATATCGATGACGCGGTGGCAGCTCATCTGACCGTGTGGCGCAGGGATTAATCTA  
CCGTTACGGCTGGAAAGGTGAAATTTGTCGGCGTAATTTGGCTGACAGGTGAACAGAGAATCTGCGTAAATATGGCGAAT  
GGTCTGCATGACCGCTGAAATGATGCTGGAACAGTCCGCGTTGATGCACTGTTGGCGCAGGATAGCCGTTTGGCGGAAG  
AATCGGTGATGAACCTCATTACAGCTGAGGAGAATACTCCGCACTTACTGAAATGGGCGCAACGGCTGGGGATCGATCTC  
AATCAACCAGGAGTGGTGGCTATTTGTTGAGGTCGACAGCGGTCAGCTTGGCGTGGACAGCGCAATGGCGGAGTTACAGCA  
ACTGCAAAAATGCGCTGACTACGCCCGAGCGTAATAATCTGGTGGCGATTGCTCGCTAACGAAAATGGTGGTGTGAAAG  
CGCGTTGAACTCTTTTGGGCGCTGGGACCGCAGAAAGATCATCGTAAGCGAGTTGAACAACCTGATACCCGATGAAAGAG  
TATGGCCAGCTGCGTTTTTCGCGTTTCGCTGGGCAACTATTTTACCGGCTCTGGCAGTATTGCCCGATCTATCGTACGGC  
GAAAACGACGATGGTGGTGGGTAACAGCGGATGCCAGAAAGTCCGCTGCTATTTTATCAGGATCTGATGTTACCTGTGT  
TACTCGACAGTTTGGCTGGCGACTGGCAGGCCAACGAACTGGCGCGACCGCTGGCGCGGCTGAAAGCGATGGACAATAAC  
GGCTTGCCTGGCGCAACGCTGGCGCGCTGGTTTCGCCCAACTGTGCAACCGCTGGCAACGCTCAAGGGCTTGTGTTATTA  
TCGTAATACTCTGGAATATCGGCTTAATCGTATATCGGAACTGACCGGCTTGATTTGGGCAATTTGATGACAGGTTGC  
TGCTGATGTTGGCTTACAACTGGATGAAGAGCGGTAG

>Cluster\_17490

ATGGCACAGGGCTTGCCTGTATCAAACGTTGTTAATGTTGATGTGATCATGTCGCGCGTGCAGCATCAGGGCGAAAATTT  
TGGTGCATTACTCATCTCGGCCGTCACAATCATTCGGTAAAGTGAAGGCAATTCGCGGTTATCTGCGCGGAAGATA  
TTGAAAAGAAATTTGGCGTGAAATCACCAGAATATAAGGCTGCCAGGTTGTTTTCTCTCAATCACCGAAACCTCAGGAG  
GTTTTTGTGGTCTGTTGGCTGAAAACGAAAGGGAGACAGCGGAACAGGCCACGCTGAGAGCCTGAGAGCAGGCTGTAAGTC  
CATGCTTGATTACTTTCATGGTATGGGCTGGGGATTGCGAGCAGTGCAGATAATCCGGATGCAGACTGGCTGAAAGTGG  
CTGCGCGCATCGAATCCTTCTGTAAGCGTATCTGCGCATACGACAAGCGATGAGAAAATGCCCTGCAGACTGCATCC  
AGAGATGATTTGGCATCAAACTGAAAACCGCCGGATATTCACGCACTTTTATTCAGTATTCATCGGGTAATAAATACGC  
TGGCTTATCTGCATTTTGGCGGGCATTCACGGTTAATTTCAATGGCAGTAAATACCGCGATTACGCTCAAGTTAAGCAGG  
AGCCGGGTGTCGGGTATGAAAACACTGACAGTACAGCCAGGCATCGGCACCTGACGCAAAAAACTGCAATGTGTTGCTGTAC  
TACCAGAATGATACGGCTATCCTCCAGCAGGAGTGTGGCTAACGGCGATTTCTTTGATGAACGCCACCGCCCTGGACTG  
GTTACAGAAATATGTCAGACCAACCTCTATAACCTGCTTTACACCAGCACCACAAAATCCCGCAGACTGATGCCGGTG  
TGACCCGCTGCTTCTTCAACGTTGAACAGTCCATGGATCAGTCCGTCACGAAACGGTCTGGTAGCGGCTGGCGGATGGAAT  
GGTGGCCCTATCGGACAGCTGAAATTCGGCGGATACGCTGACCAAAAGTTATTACGTTGATGCGCAACCTCTGTCCGAACA  
GGCGCAGGCGGACCGAGAAGCTCGCAAAACACCTTAATTCAGTGGCGTGAAGCTGGCTGGCGCAGTTCATTATGCCG  
ATGTGCAGATCAACGTCGTTCCGCTAA

>Cluster\_58112

ATGACTGAAACAGCGTCCATTAACGATTGCCCTGGTCCGCGGAGAAACCTCCGGCGATATCCTGGGGCGGGTTTTAATCCG  
CGCTCTGAAAAGAACATGTCGCCAACGCCGCTTTGTTGGTGTGTTGCCGGGCCAAGTGCAGGCTGAAGGCTGCGAAGCCT  
GGTACGAAAATGAAAGACTGGCGGTGATGGCATTTGTTGAAGTCTCGCTGCTGCGCTACTGATATTCGTTGCGG  
GATCTGACAAAAGCGTTTTTGGCGAACTGAAAGCCAGATGTTTTTGGTTGGTATTGATGCGCCTGACTTCAATATTACTCTTGA  
AGGTAACCTCAAAAAGCAGGGTATCAAAACCATTCATTACGTCAGTCCGTCAGTCTGGCGGTGGCGACAGAAACGTTGTT  
TCAAAAATAGGCAGAGCCACCGATCTGGTGTCTGCTGCTTTTCGAAAAGCGTTTTTATGACAAAATACAACGTAACCG  
TGCCGTTTTATCGGTCATACCATGGCTGATGCCATGCCATTAGATCAGATAAAAATGCGCCCGTGTGTTGCTGGGGAT  
CCCTCACGATGCCCACTGCCTGGCGTTGCTACCGGGGAGCCGTTGGTGCAGAAGTTGAAATGCTTAGTCCGATTTCTTGA  
AAACGGCCAGCTTTTGGCCAGACATACCGGATCTCGAAATCGTGGTGGCCACTGGTGAATGCCAAACGCGCGGAGCAG  
TTTGAACGCATCAAAGCTGAAGTCCGCGCAGACCTTTTCAGTTCATTTGCTGGATGGGATGGGCGGTGAGGCGATGGTCCG  
CAGCGATGCGCGCTACTGGCGTGGGTACGGCAGCCCTGGAGTGTATGCTGGCGAAAATGCCCGATGGTGGGATATC  
GCATGAAGCCTTTTACCTTCTGGTTGGCGAAGCGGCTGGTGAAAAAGTATGTTGCTGCTGCGCAAACTGCTGGCGGGC  
AGAGAGTTAGTCAAGAATATTGTCAGGAAAGTGTGAGCCGCAAAAACCTGGCTGCGCGCTGTTACCGCTGTTGGCGAA  
CGGAAAACAGCCAGCGATGCAGGATACCTTCCGTGAAGTGCATCAGCAGATCCGCTGCAATGCCGATGAGCAGGCGG  
CACAAAGCCGTTCTGGAGTTAGCAATA

>Cluster\_51146

ATGAGAAAATTCTTTTTATTTTGTGATGATCTGCCCTTTCCAAGAGATAAGAACGGTATTACGCTTATTGATTATGAGAT  
TCTTACTCGTTTACCAGCTGATTATATAATGATATATAATTTAAATCATGGTGAAGTGAAGTAAAGATAAAGAAC  
TATTTAATGTTGATATTTCCAAAGAGTTCAATCTGTCCACCATCAGAAAACATAAATAAATGAAAGTGTACATTAATAAAT  
AGTCGTGCTTTTTCAATTTTCTGTATTTACGTCCTTAAAGATATCGGCCCTCAAAGTATATTGATGGTTTTGATGTTGT  
TTATATAAGCTCTGATCAATGATTTAGATGTAAGAAAATAAAAACCTCCTGTTTTTTTTTAAATGATGATTTCTTTTT  
CTAAATTAACCTACGAGAGTGGCAGTTAGTGGTAAACTTTATCTCGGGTAAAATAATATCTATATAAATAAATAATGAG  
AGATACATCTTAAATATTGTTGATGATTTAATCTTGTGAGTAAAAAGATAAAGAGTTTATGTTGCAATACATAAAAA  
TAATAAATAAATAAATACCAACATTAATATTGGTGTGATTCAAGTCGTTTTTCATTGTAAGTCAGAGTGTGGATATTCAC

AAGAAGATAAAAAACATTTAATATATATTTTTAGGGAATTTTGATTATAATCCTAATGCGGACGCCGCAAGTTTTTA  
TGTAACGAAATATATCCGTCGCTACAGTCAATGTATATGGATGTAAAAGTTTTATTTGTCGGCAAAAATCCTCCAATGA  
TTTTATTGGATTCAAAAAATATCATCAGGACTGGTTTTGTAGTGATGTATCAGTGATACAGAAATGGCTACTGTTTTTA  
TATGCCCTCTGAAACTTGGCGCAGGAATGAAAAATAAAATTTTGAAGCTATGGCAACAGGATGGCCAATATATCATCC  
GACGTTGGATTGAAGGAATTGATGGACTTACTGATGGTAGGAAAATACCTGAGAGCTAACACATGCAATGCGATGTAGA  
TGCCATTACTAGATGTCATAAATCCATTGCTAGGCGATGGGCTTGGAGAAAAGCTGCTAAGCTTATTTCTGAAAAAT  
ATGATTGGCAAAATATTGTGGACAGATACGTTACAAGCTACAAGATAATTTCCGACACACAATAA

>Cluster\_37633

ATGATTATTTCCGACGCCAGCGATTATCGCGCCGACGCAACGCATTCTGCCCGCTTCCTGTTCCTACTATATGGATGG  
TGGTGCATATTTGAAATACAGCTGCGCCGCAACGTGGAAAGTTTGTGAGAAGTGGCGCTGCGCCAGCGTATTCTGAAAA  
ACATGTCCGACTTAAAGCTGGAAACGACGCTGTTAATGAGAAATGTGCGATGCCGGTGGCACGCGCTCCGGTGGGTTTG  
TGTGGCATGTATCCGCTCGTGGCGAAGTTTACGACGCAAGCGCGGACGCGCATGGTATTCCGTTTACTCTCTCGAC  
GGTTTTCCGTTTGGCCGATTTGAAGAGTTCGCGCCAGCCATAAGCGCCCAATGTGGTTCCAGCTTTATGTACTGTCGCGAT  
GCGGCTTTATGCGTAACGCGCTGGAGCGAGCAAAAGCAGCGGGTTGTTGACGCTGGTTTTACCGTGGATATGCCGACA  
CCGGGCGCAGCTACCGTGTATGCGCATTGAGGTATGAGCGGCCGAAACGCGGCAATGCGCCGCTACTTGAAGCGGTGAC  
ACATCCGCAATGGGCGTGGGATGTGGGCTGAACGGTCTCCACATGATTTAGGTAATATCTCAGCTTATCTCGGCAAC  
CGACGGACTGGAAAGATTACATCGCTGGCTGGGGAATAACTTCCGATCCGTTCAATCTCATGAAAAGACCTTGAATGGATC  
CGGATTTCTGGGATGGCCCGATGGTGTCAAAAGGATCCTCGATCCGGAAGATGCGCGCGATGCAGTACGTTTTGGTGC  
TGATGAAATTTGGTTTTCAACCAGGTTGGCCGCGAGCTGGACGGTGTACTCTCTCCGCCGCTGACGCTGCTGCTATTG  
CAGATGCGGTGAAAGGTGATATAGCCATTTGGCGGATAGCGGAATTCGTAACGGGCTTGATGTCGTGGCTATGATTGCG  
CTCGGTGCGCACCGTACTGCTGGGCTGCTTTCTTTGATGCTGGCAACAGCGGGCCAGGCGGGTGAATTAACCT  
GCTAAATCTGATCGAAAAAGAGATGAAAGTGGCGATGACGCTGACTGGCGCAAAATCGATCAGCGAAATACGCAAGATT  
CGCTGGTGCAGGGCTGGTAAAGAGTTCCCTGCGGCACTGGCTCCATGGCGAAAGGGAATGCGGCATAG

>Cluster\_40648

ATGACGTTATTAGGCACGCGCTGCGTCCGGCAGCAACTCGCGTGATGTTATTAGGCTCCGGTGAACGGGTAAGAAGT  
GGCAATCGAGTGTGAGCGTCTCGCGTAGAGGTGATGCGCTGATCGCTATGCCGACGACCCAGCCATGCATGTCGCGC  
ATCGCTCCCATGCTAATATATGCTGTGATGGTGTGATGATACGCGCGTGTGGTTGAACTGGAAAAACACATTATATCGTG  
CCGGAGATCGAAGCTATTGGCCACCGATAATGCTGATCCAACTGGAAGAGGAAAGGACTGAATGTTGTCCCTCCGCTCGCG  
AACGAAATTAACGATGAATCGCGAGGGTATCCGTCGCTGGCGGCAAGAGCTGCAGCTGCCCACTTCCACTTATCGTT  
TTGCCGATAGCGAAAACCTTTTCCGCGAAGCGGTTGCCGCCATGGCTACCCCTGTATGTTAAACCGGTGATGAGTTCT  
TCCGGTAAAGGGCAGACGTTTATCTGTTCTGCAGAGCAACTGCTCATGCATGGGAGTACGCTCAGCAAGGTGGTTCGCGC  
CGGAGCGGCCCGGTAATGTTGAAGCGCTCGTTAAGTTTGAATTTCCGAAATTAACCTGCTAACCGTCAAGCGGTGGATG  
GCTCCATTTCTGTGACCGGTAGGTCAATCGCCAGGAAGATGGCGACTATCGTGAATCCTGGCAACCACAACAAATGAGC  
CCGTTGCCCTTGAACGTGCGCAGGAGATTGCCCGTAAAGTGGTGTGCTGGCACTGGCGGTTATGGGCTGTTTGGTGTGCA  
GCTGTTGCTCTGTGATGAGGTGATTTTCAAGTGTCTCCCTCGCCCGCATGACACCGGATGGTGCAGCTAATTT  
CTCAGGATCTGTCGGGTTTCCCTGCAATGCTGACGTCCTTCTCCGACTTCCGTTGGCGGGATGCGCCAGTATGCTCT  
GCTGCTTCTGCCGTTATCCTGCCCAACTGACCACTCAGAAATGTCACGTTTGAATAATGTCAGAAATGCCGTAGGCGCAGA  
TTTACAGATTCGTTTATTTGGTAAAGCGGAAATGATGATAGCGCTGCTGCGGGTACGACTGGCTACTGCAGAGAGTG  
TTGTTGACGCCATTGAACCGCGAAGCAGCGCCGCGACAGGTAAGTACAGGGTTAA

>Cluster\_36762

ATGACTAAACCTAATCATGAGCTTAGCCCGCGCTGATCGTGTGATGCTATCGCCACCGGTCTGGCGGTCCGCGAGTAA  
CTATTACGCTCAGCCATTGCTCGACACCATCGCGGTAACCTTTCCCTTTCCGCCAGTTCGGCAGGCTTTATTGTTACCG  
CCGGCAATTTGGCTATTGACGAGGTCTGCTGTTTTCTTCCCTCCGCTGATATGTTTGAACCGCCGCGCTGATTGCT  
TCGATGACCTTACTGGCGCAGGCGGCATGTTAATCAGTCCAGCAGTCAAGTCCGCTGGCGATGATGATCCTCGGTACGGC  
ATTAACCGGTTTATCTCTGTCGTCGGCACAATTTCTGGTTCCGCTGGCAGCAGCGCTGGCTTCCACCGACAAACCGCGCA  
AAGTGGTTGGCACTATTATGAGCGGTCTGCTGTTGGGGATCTTGTGTCAGCGGACAGTTGCGGATGCTGGCGAATCTC  
GGCGCTGGCGCACCGTCTTTTGGGTTGCTTCGGTGTAAATGGCACTGATGGCGCTGGCATTATGGCGTGGTCTGCCACA  
AATGAAATCAGAAACCCACTCAACTACCCACAGTGTGTTGGGTTCCGTTTTTCAAGTATGTTTATCAGCGATAAAATCTGTC  
GTACCCGCGGCTTCTGGGCTGCTGACCTTTGGCAATTTTCAAGTATCTTGGACTTCCGCTGCTGCTGCTATTACTTTTCAAGT  
CCACTTTTAACTACAGCGATGGTGAATTTGGTCTGTTTGGACTTGGCGGAGCTGCGGAGCGTTGGGCGCTGCTCCGCG  
GGCGGTTTTTGGCATAAGGGCAAAATCGCACACACCAACTTCCGTTCTGCTGCTGCTGCTGCTGCTGCTGCTGCTGCTGCT  
TCTGGTTTTGGTCACTTCCGTTACTGGCGTTGATTTACGGAATCCTGGTGTGATCTCACCGTGCAGGGCGTGCATATC  
ACTAACGACAGCGTAATTTATCGGATACATCCTGATGCCGCAATCGCCTGACCGCAGGTTACATGACTAGCTACTTTAT  
TGGCGGTGCCCGCGTTTCGCTAATTTACGCTCAGCTGGCAACTGCGGTTGGGCTGGGCTGGGCTGGGCTGGGCTGGGCGGA  
CGATTTGCCCTGGTTAACTTACTGGTGTGGTGGCGAGGTTTTTCATCGTCAAGAAAGCCGCAAAATTA

>Cluster\_3004

ATGAAATAGCATATTCACCCAGAGTTTATCAAAACCTCATAATCAATCAACAAACTAACATTTCTGCGCGCAACATCTG  
GGCGGTTATGGGAAATGGGTAACCCGTTGGCAACGCTCCTGCTGGAAGATCTTTTATGGCAGGGGCAGAAACATGCC  
CCGCACTGGTCTCGCGCCGCTGCGCTGGCTGCCAGCACATGGCCGGATGAAGCACTGAAGTGGGCAATTTGCGCAAT  
ATCGAGGTGCAGCAATTTATGGTAATGCCAAAGCGCGCTCTATGGCGCTGACGAACGCAACGCAAGCGTGTTCACCAT  
CAACTACGATAACCTTGTCTGGCTGATTGAAGAATTTGGGAGAACGATGGCGGTTCCGTTACTGTTCATTCAGATGAAAGCA  
CCCGGCTAAAATCCTTCCGCTGCGCGGTGGTGGTAAGCGCGCGCGGCTGGGCAAAAGTGGCGCAATAAGTATGTCGCG  
CGTGGATAAAATCTACCGGTACGCCAGCACCGAACCGCTGGTAGATTTGTGGGGACAATCGTGGTTTTTGGACCAGGG  
GCAACGCTCCTGGGCGCACTTACGGCGGTTTACCTCAGCGTGGTTCAACTCGATACAGTTTCCGGGCGAGAGCTGGACCA  
AATGGAGCTTTTGTCTACTCAGAGGTGAAATACAGCGAGCGTTAGCCGATGTAACCTCTCGGTGGATGCGGCGGAC  
TGGTTCTGATCAAAAGACCCATCCATAACGTAATCCGCGTGGATATGCCAACGAGGCGCGTCAAGCACTGCGGAAAT  
GGAAAAGGAAATGTTCTCGAGCTGAATGGCGAAGGATCGAAGCACCAGCGCGGCAAAAGACACTGAAGTGTCTGTC  
AAATCGCCAGCGCGCAGTATACACAGATGACACCGGAAAGTGGTGCAGAACTGCATGACACCAAACTACAGGCGCTGGAC  
AGCATACTGACCGAAGCAGCTGGCGCACCTGTGCTGGTGTCTTACTGGAACACGATCTTGAACGCTTGTCTTAAAGC  
ATTCCTCCGCTGCTCAGCTCAGCAGGATCCACAGACTGCGCGACTGGAATTCGGAAAGACTTCTGTTCTTTT  
CACACCCAGCCAGCGGGCCACGGCTGAACATGCAGGACGGCGGAAATATACTGGTATTTTTCTCACACTGGTGGGAC  
CTGGAGCAATATCAGCAAAATTTGAACGATATCGGCCACACAGGAGATACAGGCGGACACAAATCGTCCGTTATTTAT  
TCACCACATATTTGCTGCCGACACTATGGATGAAATGGTATGGAGCGGCGCAACTCAAAACGAAACAGTGCAGGACATCC  
TGCTCGATGCCATGAAAAGAGAGGTATAGCATGA

>Cluster\_16615

ATGAGCGATAAATTTGACGCTTAGAAAAATTTGTTCCATGGCCAAACCAAGAATCCGTTTTATCTTTTTTTCATCCGG  
TATTAATGTGATTTGTGGGCTTCGATACCGGCAAACTATCTGGCAGAACTCGGATTTTATGCTGGGTTGAACCG  
AGCTCAGGAAATACAGAAATAGCTGCTTATGCGAATAAATCTCGATTTTGTACAGTGTGTTGCAAGTTGGCGT  
CTTCAACGTGCACTGCGGGAATTTCAAGTTAATGATTTGGATGAGCCAGACTCGGAACCTATCGTGTAAAACA

GAAGTACGTTCCGGGTA AAAACGGATAATATCTCCAGTTTTTACTTGAACAGATTGGCTTGCCGAATAAGGAGATTTTGA  
AAAGTAGTACCAAAGCGAGACTCAGGGACTGAGCTTCGCAATCTGGCGAGACTTGCTCTGGTTTCAGGAAGATGAAAT  
CAGCATAAAGGCTCTCCCTTTTGGAGTGGGCGATTACAAACCAAACCGCTGAACTGGCAACGGTCAAACCTGCTGCTGAC  
AGGGGGTGTATGATCTTCCGGTCTGTCAGTGTAGTGGCGATGGTGTAAAGCAATACGCTCTCAGATTATGTTGATGATGAGT  
TAATTTCCGGAGTTATCTCATTGAAATTAAGGATATGGGAGAAAGCGGTGATGATCTGGCTTCCCAACTGACCCCGCTGAA  
CAATCTATGAGAGTCAACGTGAATCGCTCACTGCCGACAGCAGCAACTAGAGCAGTTATTACAACAAAGGGGACTGGC  
CTTTGATGAGCAAACAAAATCCAGGGAGACTGGATGAGATACCGAACCTGTCAGATTACACTTCTGATGAGC  
ATTATGTTATAGATATCAACCGTCTGAAATCCATTCAGGAGTGTGGCTTGCTCTTCATGCATATTGACGCTGATTCCTTGC  
CCTCATTGTGGAGTGTAGTCCAGCTCACCACCACTGGAAACAAATATGTGATGGAGATGTAGATTCAATCATTACTTCAGC  
AACTGCCGAGATGCAAAAGACCGAACGACTTTTGGCAGAGCTGAATTTGTACAGTCAGAGATCTTGTGACGCAAAAGCAAC  
GCCTTGAGAGCAATACATTTGCTCATGAAGAGGATTTTTCGCTTGTATAAAGCCATTCGGGAAACTATTGCTCCTGAA  
GTTGACAGTTTTCAGGACCTCGTATGCTGAACGTGATCGACGAAACGGGCGAGTGTCCAGCAATCTATTGATTTGTTCTCAAG  
ATTTGGACCGGTTGAAAGCAGGAAAGTGGCATTACAAAGCGATACTCCGGTAAAAAAGAAAAAGTGGGCTGCAAAACG  
GCATTCCAGAGTCTGTTGCCATAGTCTGCTGTTAAAAATCTCCTCTATATTAAGAACTGGCATTTCCTCCGGAGCATGC  
CAGGTATTTTTTGCACAAAGATATCTCGGATTTTTGTAATTTGATGAAAAACCTCGCGGTAGCCGGGAAAGGGGCTACGAGC  
AATTACCACTCGGCAGTGTGCGACTACTGAGTTTTGCAAGAAAAATGGGCTATCGCATCCGGGATTCCTAGTTT  
TGGATTTCCCTCTACTGGCTTACTACAAACCAAGAGGTGAAGATGATGTAGCTTTGCAAGGTACTGACTTGAAGAGAAAA  
TTCTATGATTATCTTGTGAAGCACCATAATGAAGATAGTCAGATCCTTATATAGAAAAATCCGCATCCACCGCAAAGCAT  
GAATAAACAGATTACTATGACGGTATTCCTAGGTAATCTAGGGTTGGCCGTTTCGGATGCTTTGA

>Cluster\_69

ATGAAACGATACCTTCTTTACTGATGCTGGCGGCATCTTTCTGCCTGGTACAGCCGCTTGTGCAAAATGAGCAGTTTAA  
CCAGGGAATGAATCTGAGTAGCCAGAATAAGGGACAGGGGGCCAGTGCATTCAGGGGTTAATCCTGCGGAGGTTCATCC  
CGGGTTATACCACTCCCTCTGAAAGCGGGTATTACGGTGGCGTGACTCCTCTGGCGTGCATATGACCCCGCCGGGT  
TCAGCAGCGCTGAACACATCTGAAGCGGTAAAATAATACCGAGTCCACTTCAATACGCGCGGATAAACAAGCGT  
GCTGGATGCGCCGTTTATTTTCAAGGGCTGGCCATGAAGATAAGGCGGAGGCCATTACCGGTGGTGGATTTGATGGTT  
GTGTGGATCAGGTTGCTGGCTTACGGAATCACCACACACCAGTCCCTGCGGACACGAAAAATGAACAGTACTGTACC  
CGTACAGCGACCATCAGTGGGTACTATGAGGATACGACAGAAATCAAACAGATAGTGAATCTTCTCCTCGATTCGGTT  
CACTGAAAAGCAACAACTTTTTTCTGGTGAATTTAAGGTCAGCAGTGGAGGAAAGTGCATGCTGCTGACCGCGTACT  
CCTGGAATAAGAACTTGTCTACGGCAACGATCACTGGTTCATGAGAGTGACCAGCCATTGGTTTAAATTTCAATGGAT  
GATTTCTGAGGGGAGCGTACCGTCTGAGTTCCGGGCTGAATATAACAGATGGGCAGTCAATGCGCTTTTCCATAACGAATAG  
ACGCAACAAACCTACAGTGTCTTCCATCTGGTATAGCTCAAATATGAAGTACCCTTACCATTACGCTGACGATTCAGG  
TTCTTTCCAGAAAATGGGTACTTACCTGAGGTTGTCTGGACAGAAAGCTGCCCGTTTCAGCAAGTCTGAAGGTCAATGACCGGA  
TCTCAGTGTGTAGAGTACAGGAGCACCCGGACCGTCTGTTGACGGAACCTACAGCATCCACCAGGACTGCTGGAC  
GTGGCAGGACACATATCTGACACAGACCAGAACTGAGGGAACCTGCGGTGAGTATATGAAGAACCTGCTGTACGGTTG  
TACGAAGTCAGTGTCCGATACGGTGGATGGTTTTTGTGTAGCCAGCAGGTCACCTACTCCTGTGAGCGTAAAAAAGAG  
GAAACCGCCAGATTTTCCGGCGGGGATTTCTTCTGCAAGAGCCGCAAGTGTGTCAGGCGCAGACAGGCAATGAT  
GTTTGGTCAGGCAGTGTACGCGTGGCGGCGAGTGGCTGCTGCCGGAGAGGATGTGGCGAACTGAACGGCGGAGATGTCA  
GGGCATTCCTGCGCAAGCCAAATCTTGAAGAAGTTTCTGCGGGTTTAAACAAATGCTGTAAGGATTTCTGGCTGGGGC  
CAGGATATCCGGCTGTCCAGTTGACAGTGTGATAAGAGCACTGGGTAAAGGATAAGGAAACCTGACGCTTATGT  
AGGGAAATACGCAACAAAAAGTGTGGGGTATGCTCTGGAGAAAGAACCGGGTATGCGTGTGACTCCAAACTGG  
CACGATTTGCTCAGGAGCAGGGACGCGTGGACAGCTGGGCATTTGGTTCGGCAGTGGCAATCTCCGGACTGCTGGGGC  
ATCACGGTGGATGAACTGCAGAAGCTGGACTTTGGTGTGATGAATTTACAGCATTTCTATGATGATCTTAATGCCGGCAG  
CGATATCCCGGAAGACAGGCCCTTGCTGAAGAAAGCACAGGACATTATGCTGAAAAGATGAAGGAGAACCGCCATGA

>Cluster\_46192

ATGGTAATCATGCTCAGCGCTACCGTGA AAAAGTCTCCAGATGGTCACTGGGGGACTGGTTGCACTGTTCAATAT  
TCTGCTTTCCGCTCGTCAATGGCAGCCGTTACCTGTTTATCGCCGACTGGCCGACAACGCTTGCCTGGTCCGATTTATCTCT  
ACGTAAGCATATACGGCCATTTACGTTCTCGGTTCTGCCACTACTTGTCTGATCCTCTCCCGCTGACCTTTATCGCTC  
GGCTCCAGAGGCTGATGAGGTTTTTGTCCGTCATTTCTGGCAACGGCGGGAATGACGCTATTACTGATCGATAGCGAAGT  
CTTTACTCGTTTTCCATCTCCATCTTAATCCCATCGTCTGGCAACTGGTATCAACCCAGACGAAAATGAGATGGCGCGCG  
ACTGGCAGTGTGTTCTCAGCTGACGCTGCGGTTATTTTTATTGCTTGAACGGTGTGTTGCGACGTTGGAGCTGGCAAAAGCTG  
CGACCGCTGACGCTCGTCCGCGCTTCCGCGCCCGCTGGCGCATCTTATTATCGCTTTTATCGCTTCCGCTCGCATGTTG  
GTATATCTGGCCGATGCCAACTTCTATCGCCGATCACCATGCAGCGCGCTAACCTGCCGCTTTCGTACCCGATGACGG  
CGCGACGTTTTCTGAGAAGCATGGTCTGCTTGTATGCGGAGGATATCAACGCGCTTATTAGCAAGGTAATCCAGAC  
GCCGTTCCGTTTCTAGTATCCGTTAAGCGAAGTCCGCTATCGCGATATGGGCACCGGCGAATGTGCTGTTGATTAATCT  
CGATGGCCTGAACCTACTCAGCTTCCGAGAGCAGATGCTCGCTGGCAGGTTTGTGAGCAAAATATTTCCGTTCAACG  
GCCATATGAGCTCCGGCAACACTACAGACAACGGCATCTTTGGCTGTTCTATGGCATCTCGCGAGCTATATGGACGGC  
ATTTCTGTCGACCCGTACCCCTGCGGCTTAATTTACTGCGCTTAATCAGCAAGGCTATCAGCTGGGATTAATCTCATCAGA  
TGGCTTTACAGCCGCTGTATCGCCAGGCATTTGTCAGATTTCTGATGCCGAGGTCACGACCCAACTCCGACGAGC  
AGACCCCAAGCAGTGGATCAACTGGCTGGGCGCTACGCAACAAGATAACCGCTGGTTCCTGTTGGTCTCTTTCAAT  
GGCAATAATTGACGACAGCAATCAGCAGGCATTTGACGGAATAATAGCCGGGCGGAGGCAATGTGATGACAGGAT  
CAACCGCTGCTCAATGCACTGCGTGTATCTGGCAAACTGGACAATACGGTGGTGAATTAATCACTGCGGCTGGGGTATTC  
CGCTGAGGGAAGACGAAAGAAACCTTTGACTGGTCCACGGTCACTGCAAGGTGCCAATAGTGAATTCAGTGGGCTGCGT  
CCGGCGCAGCGTATTAATGCTCTGACTGATCATACCGATCTGATGACGACGCTGATGCAACGCTGCTACATGTCAGCAC  
ACCTGCCAGCGAATATTCGCAAGGTCAGGATTTGTTCAACCTCAACGCGCTATTAATGAGGTTACTGAGCGGATAACG  
ATACGCTGGCAATTAACACCCGAAAAAGACGCTGGTGTGAACAATAACGGTAAATACCGCACTTACAACCTACGTTGGT  
GAAAGAGTGAAAGATGAAAAACCAAGTAAAGTTGTTATTGCAAGTGTGACAGACGAGAAGCGTTTTATCGCTAACCTG  
A

>Cluster\_28748

ATGAATAATTTCTATTAACCAATAAATTTTCATCACATTAGCCGGGCTGAATACCAGGAATGTTAGCCGTTTCCCGTGGAGA  
CGCTGTTGCGGATATATATATTGATAATGCTCTTATTCGACCTGATCAATGGCGGAGAAAATTTCCGGCCCAATTTGTA  
TTAAAGGACGTTACATTTGCCGTTGTTGGCGCAGAAATACGCTGATGCTCCGGCTTTGACGCGGATTTGATGCCCGCGGCGCA  
ACGGCGGTTCCAGGGTTTTATGATGCTCCTGATATTTGAATCCAGCATGATGACGCGCATCTTTTGAACCCCGCGAC  
CTGCCCGCGGCTGACGACCGTTATTTGCGACCCCTCATGAAATCGTCAACGTGATGGGAGAAAGCGGATTCGCTGGT  
TTGCCCCGTTGCGCGAACAGGCAAGGCAAAAACCACTTACAGGTCAGCTCTTGGCTACCCGCTTGAAGGCTGCGAT  
GTTAACGGTGCAGTTTTTACCCTTGAACAGATGCTGCTGCGTGGCGGACCATCCGAGGTTACCGGCTTGCAGAAATGAT  
GGACTCCCTGGCGTAATTTAGCGGGCAGAAATGCGCTGCTGATAAACTGGACGATTTTCGCACTGACACTGGACGGT  
ACTGCCCGGTTGGGTTGGTAAAGAACTTAACGGCTATATGCTGCGGGTATTGAAAACCTGCCACGAAAGTTATCAGTTG  
GAAGAAGGACCCGAAATTTGAACCTCGGCATGTCATTTGATGATCCGTTGAAGGTTCCGCGAGCCGCAATCTCAACGCGT  
GGCACCGTTGATCAACGAATTTAACAGCCGCAATGCATGCTGTTACCGATGACCGTAACCCGTTGGAGATCGCCATG



AAGGACACATCGATGCCTTAATTCGCCCTGATCGAACACACAATGTACCGCTGCATGTGGCATATCGCGTAGCCAGC  
TGGTCGACGGCGCCCAATTTGGTCTGAATCACCTCGGCTTACGGCACCCGGCAAGCAGGCCGATATCGTCCGTTGAG  
CGATGCGCGTAAGGTCACGGTGCAGCAGTACTGGTGAAGGCGAGCCGATCGATGCACAACCTTACAGGCGGAAGAGT  
CGGGGAGACTGGCAACAATCCGCCCGCCATATGGCAATACCAATGGATCGCCAGCCAGTTTCCGCCAGCAGCTTTGCCCTG  
CAATTTACCCCGGAAAAACGCTATCGCGTATTGAGGTAATCCATAACGAACGTATCACGCACATCCCGCTCCAGCGCTTA  
CAGCGAAAACGGTTTTCATCGCGATGATGTGTGCTTTATTCGCCGTTCTGAGCGTTACGGACAACGACTGGCTCCGGCCT  
GTGGTTTGTCTCGCGGCTTTGGCCTGAATGAAGGTGCGTGGCGGCGACGGTACGCCATGACAGCCATAATATGTGGTG  
ATCGGTCTAGCGCAGAAGAGATGGCGTGGCGGTCAATCAGGTGATTGAGGATGGCGGCGGGCTGTGCGTGGTCCGTAA  
CGGCCAGGTACAAAGTCACTACCGTTGCCATTGCGCGGCTAATGAGCACCGACAGCGCAGTCACTGGCCGAGCAAA  
TTGACGCCCTGAAAGCGCCCGCTGAATGCGGTCCGTTACCGGATGAGCGGTTATTCAGATGGCGTTCTTTCCCTG  
CCAGTGATCCCGCGCTGAAACTAACAGTACAGGGCTGTTTGTATGGCGAGAAGTTTGCCTTACTACGCTGGAAATTCAC  
GGAATA

>Cluster\_40267

GTGGCTAAAATAGCCGCATTTTTCAGTACTGGATAAGAAGTGACCGTATCTTCTCATCGTCTGAACTGTAAAGCC  
GGCAGCGATGCCCACATTCGCCGCAAGCTATTTGACGGTGCCGATGCTGTTATATCGCGGCCCTGGTTTGGTG  
CCCGTCATAATGCCAGTAATAGCCTGAAGATAATTGCCGAGTTGGTGGCGTTTGCCTATCGTTATGGTGCAAAAATTTTC  
GTCACCGTTAACACCATTTGATGATGATGAGTGAACCCGCGCAACCGCTGATTACTGACCTTACAGCAGACGGGTG  
CGATGCGCTGATTTGTTGAGGATATGGGGATTCTGGAACTTGATATTCGCCGATTTGAACTGCACGCCAGTACGCAGTGGC  
ATATTCGTACAGTAGAAAAGCGAAGTTCCTCTGATGTTGGCTTACGCAGATTGTGCTGGCGCAGAGCTGAATCTT  
GAGCAGATCCCGGATTCACAGGCCAGGACGCGACCATTTGAAATCTTTATTCATGGCGCATGTGCGTGGCCTATTC  
GGTTCAGTCTACATTTCTCATGCGCAACAGGGCGTAGCGCCAACCGTGGCGATTGCTCGCAGCGCTGCCGTTGCCAT  
ACACATTGAAAGACGATCAGGGGCGGTGGTTTCTATGAAAACATCTGCTGTGATGAAAGATAACGATCAGACTGCC  
AATCTCGGCGCTGATTGATGCTGGCGTACGCTCTTCAAGATTGAAGGGCGTTACAAAAGATATGAGTACGTGAAGAA  
TATCACCGCCATATTCGTGAGATGCTGATGCCATTTGAAAGAACGTTGGCGATCTGGCGCGCTTATCATCGCTGTA  
CTGAACATTTCTTTGTTCCATCGACGAAAAGACTTTCACCGTGGTAGCACAGATTAATTTGTTAATGCCCGTAAAGGC  
GATATTGGCGCTTCGATTCGCCGAAATTTATCGCCCTGCCGTTGGCGAAGTATTGAAAGTAGCGAAAAGATCATATTGA  
TGTGCGCTTACCGAGCCACTGGCAAAATGGCGATGGCCTGAACGTTGATTAACAGTGAAGTGTGCGGTTTTCGTGCCA  
ATACGGTAGAGAAAACCGGAGAAAATCAGTACGCTGCGCTTGCAGAAATGAAATGCCAGCAGATTGACAAAATTCGCCCG  
CATCACCCACTAAACCGTAATCTTGATCATAACGGCAGCAGGACTGACAAAACCTCCAGCGAACGTCGGGTGGCGGT  
AGACATTGAACTGGCGGCTGGCAGGAACAATGATTCGACCTCACAGTGAAGAGGGTGTGATATCACACATACCG  
TGGACGGGCGATTGACGAAGCCAATAACCGCGAAAAGCAATGAACAATCTGAAGGATGGTCTGGCAAACTGGGGCAA  
ACCATCTATACGCCCGCAATGTGCAAAATAATTTGCCGGGGCGCTGTTTGTACCAACAGTCTGTTAAACAGTTCG  
CCGTGAAGCCCGATATGCTTGTGCTGCGCTTGGCAGTTACCAGCGCGCAGCCGTAACCGGTTGCTGATCCTG  
CGCCGTTTATCCGCAACGCATCTGAGTTTCCGCGAACGATACAAACAGAAAGCGCTGAAATTTATCATCGCTAT  
GGTGTGCAACTGATTGACGCGCGTATGAGGCACATGAAGAAAGGGCGAAGTCCCGTGTGATCACAAGCATTTGCT  
CGCTTGGCTTCAATGCTGCCGAAAACAGGCGAAAAGCAATATCAAAGCTGGAAGGCGACGCCAATGGTTA  
ACGGCGATGAAGTATTAACGCTAAAGTTTGTATTGCCGCCATGCGAGATGCACGTCATTGGCAAAATCAAATAACATA  
CTGAAAATGCCGTTATCGGGAAGCGTAGTGGCATCCGTAAGTCCGGATGATCTGTGAAAACATTTGCCGAAGAAAAGG  
GTAA

>Cluster\_66744

GTGCTCATTAACAATAGTGTACATAATTTTCGAGTATTTAACGGTACTCACACAATTGACCTTGCTCCAAGAAAGCG  
TCCGCATGAAGTAATCTCGCCGATTTGTTCTATTTGGTGGTTAAATGGTGCGAGGAAAACATCTATTTTTCGCGCAA  
TTTCGACTGGCACTGTATGGCGGTTTTCGCTTTGGCCGGTATGCAGCAGCAGGAGTATGTTGAACAACCTCGGAGCTG  
GTGCACAACGGGACGTATACAGCAGAGCGTCCGGATGAGGCGCAGTAGAAGTACCTTTACCTACAACAAAACGGCCA  
TGAGACTGAAATTCACCGTACGCGAAGCTGGAAGAAAGGAAAGAAAGTCTCTCTTTGCAACAGGATGGACAACCGC  
GTAGTGAAGTCACTGATGACAGTGCAGGGGTTTGAATGAATTAATTCCTCACGGTGTGGCGATCTTTCTTTT  
GATGGAGAGAAGATTGCGGAGTTGGCGGAAGATGAATCCGGTAAATTTCTGCGTACAGCAGTGCCTCGTTGTTAGGACT  
GGATCTGATCGCCAGACTGCAAAATGACCTGATGATTTTGTCAAACGCCAACAAACCGCACAGTTAGGTGGCTCCAGC  
AACAGCAGTCTGAAGCGCTTGAACAAAGATTAACACGCTTGGCGGTCAGGCTGAGAAATGCTAGAAGAGGCGACTTC  
GTCAACTCGCGGATTTGAATTTTATCCAGGACATTTTCGCCATGAGGGATTGTTAAATGCACAGGGCGGTGCATTTGC  
CCAGTCAAAGCACAGGAAAACAGAAAAGTTGAAACGCTGTGTTAAAAGAAAAGAGCGCTGGAAAAAGCGCTTACGACAGG  
AATGTGATGGATCGTTGCCCTATGCGTTAGCGCTAATACGTTGTCGCGGTTGCTGGAAAAAATTTGCCAATGAAGCGCAG  
ATCAAGCAGCGGAAAATTTTGGAGCGGAGTTAAATCAATTTTAACTCAACTCAAAAATGATATTGCGTTCGCTCCAG  
CAGTGAAGCAGTACGAGAGCCATGCTACCGAAGCGATTACCAATAATTTGGAAGCATAATGGCAGCAAAACAAAAG  
GTGATTTGCTGTTGATATTTTCGAAAGCTGAAGCGGTTTCCAGAGTCCATTGAGCAAGCAGTCCATTGAGCAAGCAGG  
CAGCGTTTGTATGATACCGCAACAATTAGCGGATATGAAACAACACTGGAGCAGGCGCAGCTAATATTGCTCGTGC  
CCGGGAAGACGAGCAGTTAATGGATCTCTTTGACGATTTACGCGAGCTCGACATAAGCGTGAAAAACAGCGGCAAAAAT  
ACCCTCACTGTGGAAGAGCTAAACGAGCAAAACAGCAGCAACTGGACTGTTTCTGTCAGGTACAGAAAGCAGCATGAC  
ATCACCCGTAGCCAAACATGGTTTGAAGCAGCGCATTTAAAATATGCGCAGGAAAACCTAACCTGCTCGATTACTACAGCA  
TGTACTTACGCGGCGAGTGAAAAATTTATCGGCTAATTTGAAATGCGCTACCACAACTGGCTCGTAAAGAGGATT  
TACAGCTTAATGCGCATATAAATCCGAGACATTTGATGTTGAACTGGTGGATGAAAAGGGTTTCGGTGTAAATCGTAAG  
CTGCTTTCTGCGGTTGAAAAGCAGATTTATGCGATTGCCATTTGAGGCGCTGGCAAAAACCTTGGCGGTGATTTCC  
GGTGTATTATGATACCGGTTAGGGGCTGTTGATTTCTAGCATCGGATAAATGATTAAATCATTTATTTCCGGGAAGCCA  
GCCATCAGGTTGTGCTGCTATCCACGATCTGAAAGTGGACGAGCGTTATTTGCTCGATCAACTGCGTGTGATATTTCT  
CATGCTTATGAGATTGTGTTAATGCGCATACTAAATCATCTGCGCTGAAGCTGGCTATTTCTGGGAATTAACAAGGA  
GGCTGCTTAA

>Cluster\_6131

ATGTCATTAAATCAGTATGCATGGCGCATGGCTGCTGCTCAGCGACGCGCGCTTCTCGATAACCGAGAAGTGCATATCGA  
AGATAACGAACGTTGTTGCTGGTGGCGCAACCGCGCAGGCAAACTGACGTTAATGAAAATCCTCAACCGTGAACAAG  
GGCTGGATGACGGTTCGATTTTACGAGCAAGATTTGATTTGAGCGCTGCTCAACAGGATTCGCGCGGTAACGTTGAG  
GGTAGCGTTTATGATTTGCTTGGCGAAGGCATTTGAAGAACAAGCGGAATATCTGAAACGCTATCACGATATTTCCGCCCT  
GGTGTGAAACGACCCGAGCGGAGAAAATCTCAACGAACGTCGGAAGGTTTCAGGAACAGCTGGATCACCAACCTGTGGC  
AGCTGGAAAAACGCATCAACGAAGTCTGGCGCAACTGGGTTAGACTTAACCTTACGCTGTGCTGCTTCCCGGCGC  
TGGTTGGTAAAAGCGGCATTTAGGACGCGCTGTTGAGTAAATCCGCGCTGCTGTTGATGAACCGCAACAACCT  
GGATATTGAAACCATGACTGGCTGGAAGGTTTGTGAAAATTTCAACGGGACGATTTTTCATCTCCACGACCGTT  
CGTTATCCGCAATATGGCGAGCGCATTTGTTGATCTGATCGCGGCAAGCTGGTACCTATCCAGGGAATACGACCA  
TACCTGCTGGAAAAAGAAAGCCTGCGCGTGAAGAAATACAAAATGCCAGTTCGATCGCAAACTGGCGCAGGCAAGA  
GGTGTGGATCCGCCAGGGGATCAAGACGCGCTGACCCGTAATGAAGGCGCGTACGCGCCTGAAAGCGATGCGTCCG  
AACGTTGGTGAACGTCGCAAGTGTGGTACCGCAAGATGCAGGTGGAAGAGGCCAGCGCTCCGGTAAAATCGTTTTCT

GAAATGGAAGACGTTTGGCTACCAGGTTAACGGTAAGCAACTGGTGAAGATTTTTCTGCCAGGTTCTACGTGGCGACAA  
AATTGCCCTGATTGGTCCGAATGGGTGCCGCAAAACCAGCTGCTAAAAGTATGCTCGGTACAGTTCAGCGGACAGCG  
GGCGTATTCAGTTGGCACCACAACTGGAAGTGGCTTATTTGATCAGCACCGCGCGGAAGTGGATCCCGATAAAACGGTG  
ATGGATAACCTTGGCGAAGGTAAGCAAGAGGTGATGGTTAACGGCAAGCCAGCCAGCTATTGGGCTATTGCGAGGACTT  
TCTGTTCCATCCGAACCGGCGATGACCGCGTACGTGGCTTTCTGGCGGTGAGCGGAACCGCTTGGTGGCGCGT  
TGTTCCTCAAACCAAGCAACTTATTGATCTTGGACGAACCGACCAACGATCTTGTATGTCGAAACGCTGGAACGCTGGAA  
GAAGTATCGACAGCTATCAGGGCACGGTATTGCTGGTTAGCCAGCATGTCAGTTGTCGATAACACCGTTACAGAATG  
TTGGATCTTCAAGGCGGCGTAAAAATGGTCGTTATGTCGGCGGTTATCATGATGCCCGTGGTCAGCAAGAGCAGTATG  
TGGCGCTCAAACCGAAGCTGGCGTAAAAAACCGAAGAAGCCGCGCGGCAAAAGCAGAACTGTAAAAACGACAGTACG  
AAACTAAGCTATAAATGTCAGCGCGAAGTGGAGCAGCTACCGCAATTGCTCGAAGATCTGGAGGCGAAGCTGGAAGCCCT  
ACAGACGCAAGTGGCGGATGCTTCTTCTCAGTCAGCCGATGAGCAGACGCAAAAGTGTCTGCTGATATGGCTGCTG  
CAGAGCAGGAGCTGGAGCAAGCCTTTGAACGCTGGGAGTATCTTGAAGCGTAAAAAATGGTGGCTGA

>Cluster\_38837

GTGAGTAAACGAATTGCGCTTTTTCCGGTGTATTGCTGGCGTGTGGTGGTGGTGGTGGCGGCTTACCTGGATGAA  
CTTCTCGCAGGCGCTGCCGCGCAGCCAGTGGGCGCAGGCGCCGCTGGTCCCGGATATTGACGTCATCGAGCAGATGATTT  
TTCCTACAGCTTGTGTCCGCTGCTGGCGATTTCCGCTGCTGGTGGGCGCGGCTGGGGCTGGTGGGCTGCTGTTTTCAG  
CAAGTCTCGCTAACCCGCTGCCGGAACCGACGACATTTGGTGTGTCGAACAGCGCGCAACTGGGGATTACCGTCACCA  
GCTCTGGCAATCCCGGCGGATGGCGAGCCAGTTTGTGCTGGCTGGCAGGGCTTGTGTTGTTGGCTTAATCGTCTTTG  
GCGTCGCGTGGGGAAACCGCTTTCGCCGTTACGCTGATCTCGCGGGCTGGTAGTGAGCCTTTATGCGCGCAATC  
AATCAGTTACTGTTATCTTCATATGACCAACTGCAAGCATGTTCTGTGGAGCACCGGAACGCTGACGCAACCGA  
CTGGGCGCGCTTGGAGCTTTATGGCGCAGCTGCTGGCGCGTGTGCTGACGTTATTGCTACTTCCCGCTTAACCT  
TGATGGGCTTGATGATGGCGTGGCGCAATCTCGGGTGGCTTGTGCTGCTGCTGCTGCTGGCGGCTTGTGCTGGCG  
ATTTGTCATCAGTGCCTGCTGGTGAACGCGGTTGGGATTTATCGGCTTTATCGGGTGTTCGCGCGCTGCTGGCGAAAT  
GCTGGGCGCGCGGCTTTGTTGCCAGGTTGATGCTGGATGCTGATGGCTGGCTTAATTTCTGTGGCTTCTGTATCAA  
TCATCCTCTGGCTGACTCGCGTGTGGATGGAAGTGTCCACCGTTCCGTCACGCTTGTGATCGGTGCGCGCTGCTACTG  
TGGTGTGCTGCCGCTTACGCGCATTAGCGCGCGGATGAAGGTCACGATCGTTCGCGACTGAACGCCAACACGCT  
GCTGGCGTTTGCCTCGCGGCGCGCTGCTGCTGTTGATGGCTGTGGTGGTGGCGCTGCTGTTGGTCTGATGCGCACG  
GCTGGACGTGGGCGAGCGGGCGTGGCTCGAGGATTTGATGCTGAGCCTGGCGCTGGCGCAATTAAGCTTCTGTGG  
GGCGTCATGCTGGCGGTGGCGGCTGTATTATTAGCGGCTGACCGGAAACCGATGGCAAGCCCGAAGTGTGGGGAT  
TAGCTCCGCGCGCGCTTTGGCGTGGTGTAAATGCTGTTCTGCTGCGGGTAATGCCCTTGGCTGGCTGTTACCCGAG  
GCAGTCTCGGCGCGCGGTGACGCTGTTGATCATTATGATCGCGCGGACGCGGTTGGATTTTCCCACACCGCATGTTA  
CTGGCGGATGGGCTTAAGTACCGCTTACCATGCTTTTATGATGATGTTGACGCAAGTGGTGGTGGCGCAATGGCGCA  
AGTTCGACCTGGATTTCCGGTTCGACCTACAACCGCACCGATGCGCAGGCTTGGCGTACCGGAATTGTGATGGTATTT  
TGCTGGCGGTTACCCCGCTGTGCCGCGCTGGCTGACCATTTTACCCTGGGAGGTGATACCGCACGACCGCTGGGGATG  
GCGCTGACCGCGCAATGGCGCTGCTGCTGTTAGCGGCTTGCTGACAGCGACTGCGCAATGACCATTTGGACCGTT  
GAGTTTTGTTGGTTAATGGCACCGCATTTGCCGCGGATGGGCTTTTCGACGCGAGTATGCCACATCTGTAATTTCCG  
CGCTGGTGGTGGTTTACTGCTGTTGCTGCTGACTGGTGTGGCGGATGGTATGTTTCCATTCAGATCCCGCGGGG  
CTGCTGTCGACCTTTATCGCGCGCCATATTTTATCTATTTGTTGAGAAAGCAGAGCCGTTAA

>Cluster\_40337

GTGGTCAGAGTTTGTAAAGTTGAAATTCGGAACCTCCGTTCTATTCGTTTACTGACCTGGCAGCCTTCCGAGGGCTCAA  
CTGCTCATTTGGTCCAGGGGACAGTGGCAAGACCAATTCCTTACGCTATAGATTTGTGCTGGGGGACGAGCTAATG  
TCAGTTTTCAGCGACACCGATTTTTTTGGTCTCGATGTGAGTCAGCCATCAGCATTACCTGACCTGGGTTTCATTTGCC  
GATGTGCTGAAGCAATGGAAACCTACGGCAATTTATTTGCGAGGCTTCAATAGCGCGACGCGGGCTGATTCAGGAAGCG  
TCAGCTCGGGCTGGAAACGGTTTTTGTGCTGCGGCTTAGTGTGACAGTGAACGAGCCAACTGGACGCTGGTGTCTC  
AGCGTCCGGAAGCACTGGGTCATGAACGTAATCTGGCCGGAAGATCGGCTGCTCATCGCACCGCGAGACTTGGCACC  
TATGCAAGCTCAAATTTGCTGGGCTCGTGGATCGGTTGCTTAATCGGCTCACGGAGGAACCGCCATACTTTGGAGCTGA  
GCTGTCAAATGCTGCACGTCAGGCGCCGAACGCTTTGGTGGTCAAGCTATCGGCACAGCTGGCGCAACGCTGGACGCT  
TTACTCAGAAGGCTAATGAGCTGGGTGTACCTGTCGGTGGTCAAGCTCAGGCTTACTGGACGCTCACGAGTTTCCATC  
GGCGATGTGCAATTTGCGCTGCACAACCGCAGCCGCTGTCGCTGCTTCTTGGTACGGGGTCTGCTCCGCTTCTGCT  
GGCAGGAATGCAGCTGCTGCAGCGCAACGGGCTCCGTTGGCGCTGGTGCATGAAGTTGAATACGGACTGGAACCGCATC  
GGCTAACCCGCTTACTGAACCTACTGGGGCGCAGGAAACACCGCCCACTCAGGTTTTTCTGACCAACACACTCTCCC  
GTGGCGTGGCTGAGCTTAATGGCAACAGCTCTTTGCTGTCGGGGCCATCCGACAGCCCCACCTGGTGTGCGGCT  
GGGATTTGCCGATGATATCAAAGTACGGTCCGGGTCGACCCGAAAGCCTTTCTGGCGGTAGCGTATGCTGTGAAAG  
GGCGGACCGAGGTAGGTTAATACGCGGCTGGATCATTTAGCAGCCCTCAACGGTAATTCATGCTGAGTGCAGGA  
ACCGCATTCGTAATTTGGTGGAGGAGAGCTGACCGATTTTGTGCTGGGCTAGCACTGCTGCTGCTGCTGCTTATCG  
TGTGCTGGTCTGGTGGATGCGGATAAGCCGCCACCCCGCGACAGTCAAGGCTTCCGAGGCGCGGGTGGAGAATATA  
TCACCTGGCGAGCCGCTATGCGCTGGAGGATGAAGTGTATGAGCTGCTGATGCAAGGCTGACGCGCTGCTTCCAG  
CGGGTATTGATCTTATGGAGGAGGAACCTGGTGGCGCACATCCAGACGCACTCAACGGTCAAGTTACGGTTACGCT  
TATCCGGAACAGCGCAACTGATTTGGGGGGCTTATTTCTGAAATACGCAACTATTTGGGACTCACTGCGCGTAACC  
GACGCAACGGGTGGTTAAATCGGTGACCGGTATGAAGATGTGGCTACGATATCTTGGTCTCATCTCCCGCGTCT  
GATGCGGATTCGAAGCTGATTAACCGGCTTACTGGTGGGACATGCCGCTGA

>Cluster\_33813

ATGGAATAACTTTTAAACAATTTTAAATCTTACGTTGGTAGTATCATTAAACAGCGTGTACACGCTCTGTCTCTGTCCA  
GATACCCTTCCCTTAAATCCAGATTGCCGCTGGTGCAGTACTGGCCAGCCTATATTTGGTCTGCATGTGGAATTCATC  
CTGAACCTTTTCTCTTATTTGTTTATACCACCCCTGTTGTTGCTGAAAGTTCAAAAATACAACCTAAAGAAATGATCAAG  
CACAGCCGGAAATTTATCAGCTTGGCACTTGTGTTGGTACTAATCACTATTTTGGTGTGCGGCTATGTGATTTACT  
CTTACCAGATGTGCCGCTCATCGCTGCTTTCGATTAGCCCGGCTGTTGTCGCTACCGATGCGGTTGGCGTGGTGGGA  
TTGTCGGGAAAGGCGTATCAGCAAAAACATCCAGGAAGTGTGCAAGGCGAAGCGTTGATGAATGATGCTTCCGCGCTG  
GTGGCTTGAATTTGCTGTTGCAAGTACGATGCGGAACGATGGAATTCAGCGTTCAATGGCGCAACCAATGGCTTTTGT  
CGTGGCTTGGGCGGATTTGCCGCTGGGGATCGCTTACTCGGTTATATGGTAAAGGGCTGCTGTTGATCAGCCGATATG  
CTCAGGATGAACCTTCCATTCAGATTGATGATGCTTCTGTTGCCGTTTATTGTTTATCTGGTTGCGGAACATTTGGC  
TTATCTGGCATTTCTGCCGCTGTCGCGCGGGGTTAACAAACAGTGCATTTGGCGTAGTCCACCACGCGCCTATTCGCT  
GAGAATTAAGCTAAAAGTAGCTGGTCGATGCTTGAATATGCTTTAACGGCATGGTGTCTGATTTTAGGCTTACAAC  
TCCGGGCTATTTTCCGGAATCACTGATCCGTCGAGAAATCCACTTGGTGGACACCGGATCGCTGCTTAAATGTC  
ATTTGGATCTACCTGGCGTTAATGGTTGTCGCTGGGCTGGCTTTGGCTGATGCGCTGATAGCCGTAACGACCCGG  
CAAACATCCGATGCTGTTTGTGGATATAAAACCGCTCATATGCTGCTGGCGACCTTTGCGGGGGTGGCGGAGCTATCA  
CGCTTGGCGGGGGCTTTCTATCCGTTATTGCTGCGGATGGCACACCTTTTCCGGGGCTTACTTGTGTTTCTG  
GCCACAGGTGTGATCTCTTTTCCGCTGGTTGCGGCTATTTATCTGCGCTTATTTAGGGGAAAAATGTTGGGATTTT  
CAGCGATAACCGACAAAAGAGAGGAGTGGCGATCTGTTTATGGCTAAAATGGCCATACTGAGTGTGCAAAAGACCG

AGCAACGTTTGTGCGCGCCAGAACAGAAAACCTCGATAACGAGTTGATTATGGAACGGGGCCAGAGTTATCGGTTAT  
ATGCGACATAGTGAAGAGGATATGTCGCTAATGATAAATTCCTGTCATATGCAGCGTGCAGAGCTGGAAGAACAATTTAA  
TCTGGCGCGTAAATGCCAACGCGCGCTATTTACCAGATGCGCGCAAGGCAAGAAGTCAGTGATGAAACACTGGCAA  
AAATAGTCAAGTAAATAGATGTGCTGGAACGTTAATCATGGATAGCCGATAA

>Cluster\_10627

ATGGAGCTGACGATCACGCCGAATTTGACAGGAAACGAGCGTTAAACATGTTGCGCCGTGACTGGAAGGCAAACGACAC  
CTTCATGGTTTACFCGCCAACAGGTAGCGGTAAACCGGTCTGCGAGCCTTCATAGTTGCTGGTTTGTGACGCGTGGTA  
TGGTGTCTGTTCTGTGTTCCGTACACCATCTGATTGGTCAGACGGCTAATCGGTTCTGTCAGTATGGTTTACCTGGA  
GATGAAATCGGTTATATCTGGCGGATCACCGAATCAGCATCGGACCGGAAATTCAGATTGCCAGCGCTGACACGCT  
TATTCGTGTTTTCCTGAAAATATCGATCTGCTGATTATCGACGAAGCGCACCTGCGTAAAAACGCATCCTGAAGG  
ATATCGAACGCTCTGCGCGCAAAGGCGTAAAGGTGATTGGCCTGTCGGTACTCCGTTTCTCCGTTCTGGGCAAATAC  
TATGACCGGATTAAGCCGACCACATCGGCGAGTTAATCCAGCGTGGCGATCTGAGTAAATACGAATTTTACGCGCC  
AATTAAGCCGATGTAAGAGGTGTTAAACACACATCTTCTGCTTGTAGTACGCGCCGATACAAACGAAACACAGCTGGCTG  
AAATCATGTGCGGCTCTACGCTGGTGGCGACATCGTACAGAATGGCTGGGAAATGGTGGGATTACCTACCATCGCT  
TTCGCGTCAACGTAGCTCAGCCAAATATCTGACAATCCAGTTAACCCTGGCGGGTGTAAACCTGAGGTAATGACCCG  
CGACACTCCGCTGATGAGCGCCAGACCATATTCACCGCTTTGAAACCGGTGCAACGAAATCATCGTTAGTGTGGCGG  
TTCGTTGGTGGCGGCTTGTAGTGTGCTGCTGCTGCTGCTGCTGCTGCTGCTGCTGCTGCTGCTGCTGCTGCTGCTGCTG  
GCTCTCGGGCGTGGGCTGCGCACCGCACCGGTAAAGAGTCTGCTTATCTTCTGATCACAGCGGCACCGTGCACCGTT  
GGTTATCCGGATTAATCGAGTACGACGAGCTTCCCGTAAGTCTGACGGCATGGAGGAAAGCGCGCCGGGCGAGTTG  
AGGAACGGGCGAAAACCTGCCACATGAATGCCCTCAATGCCACTACATGAAGCCAGCAGGCGTCTATGTTTCCCGCAA  
TGTGGACACAAGCCGCTGCGAGGTGAAGAGCTTGTATGATGACACTAGCCGCAAACCTTAATAAGCTGGTAAAAATCAGCA  
TCAGTGCAGGAAGCCAGAGAACAGTCCGGTGGAGTCAAGTCAAAATTTATCAGCGCCAGCGTCTCGCTGGGCGT  
CAGTCACTGACGGATGGTGTGCTCACACTTCCGGGAAAAGTTCCGGTGGTGGCTGACGGACTGAGTAACTTTCCGATG  
GAAATACCCTTGGGTAATAAATCAGACACAACTGATCCGGTTGCAAAGGCCACAGCGGTTCAAGAGT  
CACTGAAAACGCACAAAACAGATTGATTATCTCAGGAACGTTGATGAACGACGTTGAGTACCGGCGAGCAGTGGGCT  
GGCGCATCATGCAGGCAAAGCACCACTCCAGAAAATATAAACAGTCTGAGTCAAGTAA

>Cluster\_38916

ATGAATGCACAAATAAAGAGTTAACCCAGCGCTTCCGGCTTTCGACTGCGCTTTCAGATAAACAAACGCTGGGCATT  
GATGGTGGGAGTGGGCTTCCGCTTGGCGGACGGCGATTATCGTCAAGCTGCTGTTGGACCGTAATCGGGCTACGTT  
CGCTCTACGGACGCCAGGAAAATCTGCCGCTGTCGAGATTGTCACCGTGTGACGGTGAAGAGCTCAGCTACCGCAT  
GACCCGACAGCGGGCTAATTTCTGGTGGCGGAAGACGCGTGTGCGAAAACGCGCATGACCTTCCCGCAAAGCGTGC  
GGGATATTTGCCAGCGGCTACGAGCTGATGGATAAAGACGAAGTGTCTCGGACAGTCAAGTTCTGCTGAGAAGCTG  
ACAAACGCGCCTCGAAGGGAGCTGGCGCAGAGCATCATGCTGCGTGGACGCGGTGGAAGCGCGGGTGCATCTGGCG  
CTCAACGAAAGAGCTCGTTTGTGCTGATGAGCCACAAAACAGCGCCTCGGTGGTGGTGGCTTGCATTACGGCGC  
GAAGTGAATATGGACAGGTGACCGCATTTGTCATCTGGTGTCCGGCAGTATTCGGGGCTACAGGCCAGTAAAGTCA  
GCTGGTTCGATCAGCGGGGAAATCTGCTGACGACGGCATTTGGCGCAGGCGAGGCGTTTCTGCGCGCAGGCTAAACCG  
GATCAGATCTCAAAGATATTCAGGACAAAACCGTGCACGCTGGCGAACGTTGCTGGATTGCTGGTTGGCACGGGGAA  
TTACCGGCTCAGTGTGATGCCGGATCTCGACTCAGCACCATCGACGAAACCCAGGAACACTACGGTGCAGCGCCGAAA  
TCAACCGGAAGAGAGCTGCTGGACAGCACAATCAGTTGGCGATGGGCGTGGCTGCTGCTGCTGCTGCTGCTGCTGCTG  
CCGATTGCAAGCATCAGATGAGCAACGGTACGGAAAGAAAACCGCTCGCGGAAAGCGCTTTCAAAACACAGCGAAAGTAA  
GCGCGACTACTCTTACGACCGCAGCGTCCAGCATATTCAGCATCCCGGCTTCGCGGTGAAACGCTCAACGTTGGCGGTG  
TACTCAATCAAACCGCTCCGGCGTGA AAAACCTGGAAGCGGAGCAAAACCGCAACTGACCGGTTGCTGCAAACTGCC  
GCCGGATCGACCGCCAGCGTGGTGAACAATCTCACCTTACCTCAACTTTGTGCGCAGGCGGCTGCTGCTGCTGCTG  
GGTTATTTCCACTTTGAAAGATGACAGTGTACTGGCGTGGGTCGGCTGATTGGCTGCGGCTGCTGCGCTGTTGCTG  
TGTCTTTTGGTACGCCGCTGATGAAACGACTGACGCGGTTAGGTGCGCCAGTTATCACACAGAGCCGGAAGCCATC  
AGCGAACCGTGGATCGCCGTTGCCGGAAGAGGAGCGTAAAAACGTCGACCTGCCGTCGCTGCGTGGCGATGACAGCCTGCC  
TCCAGAGTTTCTGGCTCGAAGTGAACCTCAGTTCCGTAAGAACTGGCCATGAGCGATACCGATCGGCTTGGCGAAG  
TTCTCAGACAATGGATTACCAGCAATGAGCGAATTGACAATAAATAA

>Cluster\_28854

ATGAATGGCGCACAGTGGTGGTACATGCGTTGCGGGCACAGGTTGTAACACCGTTTTTCGGTTATCCGGGTGGCGCAAT  
TATGCCGTTTACGATGCAATTGTATGACGGTGGCGTGGAAACCTGCTGTTGCGGACACAGGCAAGGTGAGCAATGGCGG  
CTATCGGTTATGCCCGTGTACCGGCAAACCTGGCGTTTGCATCGCCAGCTCTGGCCAGGTGCAACCAACCTGATAACC  
GGGCTTGGCGACGCGCTGTAGATTCCATCCCGTGTGTTGCTATCACCCTGAGTATCCGACCGGTTTATCGGCACTGA  
CGCATTTAGGAGTGGATATTTGGGTTGCTGTTAGCTGACCAAGCAGTTCCTGGTGAATCACTGGAAGAGT  
TACCGCTATCATGGCCGAAAGCGTTGACGTCGCGAGCTGTGGTCTGCTGCTGCTGCTGCTGCTGCTGCTGCTGCTGCTG  
ATCCAGTTAGCCAGCGGATCTGGAACCGTGGTTCACCAGTGTGAAAACGAAGTGAATTTCCACATGCGGAGTTCGA  
GCAAGCGCTCAGATGCTGGCAAAGCGCAAACCGATGCTGTACGTTGGCGGTGGCGTGGGATGGCGCAGGCAAGTTT  
CGGTTTGGCTGAAATTTCTGCTGCCAAAAATGCTGCCACTGTACGTTGAAAGGCTGGGCGCAGTAGAAGCAGAT  
TATCCGTTACTATCTGGGATGCTGGGATGTCACGGCACCAAGCGCGAACTTCGAGTGCAGGAGTGCATCTACGATG  
CGCGTGGGTGACGTTTTGATGACCGGTTGACGGCAAACCTGAAACCTTCGACCACACGCGAGGTTATCCATATGG  
ATATCGATCCGGCAGAAATGAACAAGCTGCGTCAAGGACATGTGGCATTACAGGTTGATTTAAATGCTCTGTTACCAGCA  
TTACAGCAGCGTTAAATATCGATGACGTCAGCAACTGCGCGCAACTGCGTGTGATGAACATGCCTGGCGTTACAGCA  
TCCTAGTGACGCTATCTACGCGCGTGTGTTGTTAAAACAACTGTCGGATCGTAAACCTGCGGATTGCATCGTACACAG  
ATGTTGGGCGACACAGATGTTGGCTGCCAGCACATCTCCACTGCGCCGAAAACCTTCACTACCTCCAGCGGCTTA  
GGCACCATGGTTTCGGTTTACCGCGCGGTTGGCGCACAGTTCGCGGACCGAAACGATACTGCTGCTGCTATCTCCGG  
TGACCGATCTTTCAATGAATGTGCAAGAGTGGCACCAAGTGAAGAGTTCAGGTTGAAAACGAAAGTTCAGTTACTCG  
ATAACCAACGGTTAGGATGGTTCGACAATGGCAGCAACTGTTTTTCCAGAACGATACAGCGAAACCCCTTACCGAT  
AACCCGATTTCTCATGTTAGCCAGCGCTTCGGCATCCCTGGCAAACATCACCCATAAAGACAGGTTGAAAGCGG  
ACTCGACACCATGCTGAACAGTGTGGCCATACCTGCTTATGCTCAATCGACGAACCTGAGAACGCTTGGCGGCTGG  
TGGCGCTGGTGGCAGTAACTTGAATGTTGGAGAAATATCATGA

>Cluster\_43446

ATGTTAAAACGATACAAAATTTGACAGCCTACTGCTGGTTTTGGCCGTTTTTGGCTTTTACAACCTGACATCAGCGCG  
TCTGTTCTTTAATGCCTTAAAGAAATGACAAAGAAAATTTCACTGTTTTACAACCACTTCGCCAGCAGCAATCCACGCTGA  
ATGGACGCTGGGTTGCGTTTGTGTCAGACCGGTAACACCTCAACCGCGCGGTTATCCGCTACATGATGATCAGAATAAT  
ATTGGTAGCGTTCAACCGTTGCTGAGCTGATGACAGTGGCAGTATTTGCTGAAACAGGCGGAAAAAACTGGGCGGA  
TTACGAAGCGTTGCGCGTACCGCGCTCAGAGCACCGCGCAGCTCAGAGTCAAACGTAATACGATATTTATCACA  
ATGCGCTGGAGGAGTGAATCAACTGTTAGGTGACGCAAAATCAACGAGTTCCTTTGATCAACCGACAGGATATCAG  
GACGGTTTCGAGAGCAGTATGTTGGCTTACATGAGGCAAAACGATCGGCTCTATGATATCGCCGTCAGCGATAAATGC  
CTCTACAGCCAGGCGATGTTGATCTGTTGGGCTGATGATGCTGCTACTGGCGGCTATCTTCCGCTGCTGGTTGCGTA

TTAAAGCCTCGTTGGTAGCGCAATGAATCGCCTGATTGACAGCATTCGTATATGTCAGGGCGGCGATCTGGTGAACCCG  
ATAGAGGTGGATGGCTCTAATGAGATGGGGCAACTGGCAGAGAGTTTGGCCATATGTCAGGGAGAGCTGATGCGTACCGT  
CGGTGATGTGCGCAACGGGGCAATGCCATCTATAGCGGTGCCAGCGAAATCGCTACCGGCAATAACGATCTCTCTTCGC  
GCACCGAGCAACAGGCGCGTTCGCTGGAAGAGAGCGGCAGCCAGCATGGAGCAACTGACCGCAACGGTGAAGCAGAACGCC  
GAAAATGGCCGCTACGCTACGCTGGTGAAGAGCGCGGGGAAACAATGGCGGAGATGTCAGTGCCTGACCCGCGTACCGG  
GGTGCAGACCATGCGCGATATCTCCACCAGTTCGCGAGAAAATCGCCGATATTATCAGCGTAATGACGGCATTGCTTTCC  
AGACCAATATTCTGGCTTTGAACGCGCGGTGAGGCTGCGCGCGGGGTGAGCAAGGGCGCGGTTTTGCGGTGGTCCGG  
GGCGAAGTGCATAATCTGGCCAGCGCAGCGCTCAGGCGGCTCGTGAATTAAGGCTGATTGAAGACTCGGTGGGGAA  
AGTGGATGTTGGCTCTACGCTGGTGAAGAGCGCGGGGAAACAATGGCGGAGATGTCAGTGCCTGACCCGCGTACCGG  
ACATTATGGGCGAAAATTGCTTCGGCTTCGATGAGCAGAGCGGTGATATCGATCAGGTTGGCTTAGCGGTGCTGAGATG  
GACAGAGTAACCCACAGAACGCTGCGCTGGTGAAGAATCTGCGCTGCCCGCGCGCTGGAAGAGCAGGCCAGTCCG  
CCTGACCGAAGCTGTGGCAGTGTCCGGATTACAGCAACAGCAGCAACATCAGCGTGAACATCGGCTGTGGTAAAAACCG  
TGACGCCAGCTGCCCGCTAAAATGGCGTGGCAGATAGCGGGGAGAACTGGGAAACGTTTTAA

>Cluster\_36798

ATGTCTGAAGAAAAATAGGTCAACATTATCTCGCCGCTGAATGAGGCATTTCGCGGCGTCTGCTGGACCACGCCG  
GCAGACCAAGACTCAGTGCATCACCCTAAAGGTGAACCTACTCGCGGAAGTGGTGGAGTTTCTTTACTACAAACAGG  
TACTGCTGGCTGTCCGTTGTTTGGTAAACGCAACGCAAACTGAATGGTCAATACGCCGTTTACTAGCTGCTCGATG  
GAGAAGGGCACTAAGTGTGGATTACGGTTCGCGTCAAGTTGACGCCAACAAACCGGAATATCCGTCGTCGACGCCG  
CGTTCGCGCGCGGTGTGGGGCAGCGTGAAGTGCAGATATGTACGGTTGATTCGCGTGGTCTGCGGATGAACGTC  
GTCGTGGTTCGCGGATGACTGGCCGATGAACTTTATCCGCTGCGTAAAGACAGCATGGATTATCGCTCAGCTCCGCA  
CCGACCACCGATGCTGAAACCTACGAGTTCATCAACGAACCTGGCGCACAAGAAAAACAACGTCGTCGCGATTGGTCCG  
GCAGTCACTTCTGATGAACCGGGCCACTTCGCTCTGTTCGTCGATGGCGAAAACATTATCGACGCCGACTACCGTCTGT  
TCTACGTCATCGCGCATGGAAAACTGGCGGAAACCGTATGGGTTATAACGAAAGTACCTTCCTCTCTGACCGTGTG  
TGGGATCTGCGGCTTTGCCACAGCAGCGCTACACAGTGGTGGTGAAGAACGCGATGGGTTATCAGGTGCCAGAACG  
TGCGCAGATGATCCGCGCATTTCTGCTGGAGGTAGAAGCTTGCCTCGCATCTGCTCAACCTTGGCTGGCTGCTACT  
TTACCGGCTTCGACTCCGCTTTATGCACTTTCGCGGTGCGTGAACCTCCATGAAAATGGCAGAGATCCTTACCGGT  
CGCGTAAAACTACGGCTGAACCTGATCGCGGGATTCGTCGCGATCTGCTGAAAGACGACATGATCCAGCCCGCCA  
GCTGGCACAAACAGATGCGTGAAGTGCAGGAGCTGGTGGATGTCGCTGAGCATTCCGAAACATGAGCAGCAGCTG  
TCGGCATTGGTCTGCTGGACCGGAAATCGCTCGGACTCAGTAACGTCGGCCCGATGGTCCGTCGACGGTCCAGCC  
CGTGATACCGCGCGATCACCGTTTGTGCGCTATGGCTGCTGCCAATGGAAGTCCACAGCAGCAGGCTCGGACGT  
TATTTCCGCTGTAAGTGCATCAACGAAGTCTATACCGCGTGAACATGATCGACTACGGTCTGGATAACCTGCCGG  
GTGGCCACTGATGGTGAAGGCTTTACCTACATTCGCGACCGCTTTGCGCTGGGCTTTGCCGAAAGCGCCGCGCGCAT  
GATATCCACTGGAGCATGACCGGCGACAACCAGAAGCTGTACCCTGGCGTGGCGTGGCGGACCTACCGGAACCTGGCC  
GACCTGCGCTACATGCTGCGCGCAACACCGTTTCGATGCGCGCTGATTATCGGTAGCCTCGACCCTTGCTACTCCT  
GTACCAGCCGATGACCGTGGTGCATGTGCGTAAGAAGAAGAGCAAAGTGGTCCGTCACAAAGAACTCGAGCGTTACAG  
ATTGAGCGTAAAAACTCGCCGCTGAAATAA

>Cluster\_21591

ATGTTGATAGCAAAAGTATCTCTGCTGCTGAAGCCCTTTTGGCTGCGTAAAGAAATAATAAACTTCAGTGTGTTAATCAT  
TATTTACTTCGCCATGATCCTTGGTGTGGTAAAAATTCAGTCTGGTAAACGACTGGAATAATGATTTTTTCAATGCGC  
TAAGCCAGAAAGAACTGATAAGCTTTGGCAGCTTGTCTTTGGTTCCCTGCCCTGCTGGGGATCTTTTGTATTAATATCC  
GTAACAACAAACATGGTAAATTAACCTACGACTATTGCTGGCGGAAATGGTTAACAGATTACTACCTTAATCGCTGGT  
TGCAGATAAAAACCTACTACTTCACGAGATCTACGGCGAGCATAAAAAATACAGATAACCTGACCAACGATATCGCTGAAG  
ACATTTCTTACTGATCAGCAAAAGCTCAGCTTTCATTTGGCTTCATCCAGTCACTTAGCATGCTGATCCTTACTTACC  
GTTATTTCTTTGGCAAAGCGGGTACGCTCTCAATTCAGTGTGGTGAAGTGAATGGAGTATCCAGGGGTATATGGTCTA  
TACCGTCTGCTCATTGTGATCGGTGGAACCTTTATTTACCCATAAGGTTGGTAAACGATATTCGTCACCTAATGTGAAA  
AACACGTAAGCAAGCGACATTTGCAACTAATCTTGTGCGCATAATAAGCAGGACAGTGAATGCGCTAAGCAATGGT  
GAGTCTCTACACCGCAGGAGTTGAGCGAAAATTTTCAATCCATTAAGAGAACTGGCATCGTATTAAGTAAAGTACGCT  
GTGGCTTGATTACTGGCAGAATATTTATTCGCGCTCGCTTAGCGTTCTTCCCTACTTTCTGTTATGCGCGAGTTATTA  
GCGGACAGATCAATCTGGCGGACTGATGAAATCGCGCAGGCATTTATGCTGATCGCAACAATTTAAGCTGGTTTTAT  
TATAAATATGATGAACCTGCTGAACCTGGCTGGGTTATCGATCGCTGATGAGTTCATCAACTCACCGAACAGCGCCC  
TACGAATAAGCTTAAAAATTTGCTAACATGCGGTACAGTGGCTGACCGGAGTATTCGCTACTCCTGATAAATAAGTACAT  
TAGAGAACCTGAACCTTTCATGTTTCCGCGGCAAAATGGCTATTGCTGAAAGGTTACTCTGGTGGCGGAAAACACACTG  
CTTAAAAACATTAACCTGCTGGCCGTTGGTTAAAGGTGATATTTCTCTCCGCTGACAGTGGTATGTTGTACAAAAC  
ACCGTTAATCAAAAACCGGCTTACTGAAAGAGATTTATTTGTAAGCATTCCCTGTCGCTAGACGATAAATCGTTGAGT  
AAGTACTGATCAGGTTGGCTGGGAAATTTGGCTACGCTGATTAATTCGATGACCAACGATCGCTGGGAGATATCTTTCCAGC  
GGCGAAAACAACGATATCGCCCTGGCAGATTAATTTTACGAGTCCGAAATGGATATTTCTTGACGAAACTACCTCTCA  
TCTTTGAGGAACAAGAGCAATCCGCTTACTGCGTTTAGTGGGAGAAAACCTCCCAAGCGCGCTCATTTATGGTTACAC  
ATCAACCGGTGCTGGAACCTGGTGCATGATATTTGTGACATTAGCGCGGTTATATAA

>Cluster\_55475

ATGATTAACCGTATCCGCGTAGTCACGCTGTTGGTAATGGTGTGGGGTATTGCGACTGTTACAGCTTATTTCCGGCAG  
TCTGTTTTTTTCTTCCCTTACCATAGCCAGAAGAGCTTTGTGGTTTCCAATCAATTACGGGAACAGCAGGGCGAGCTGA  
CGTCAACCTGGGATTAATGCTGCAACGCGCATTAACCTGAGTCTGTCAGCGGTACGGATGATGATGGATTCCTCCAAT  
CAACAAAGTAACGCCAAAGTTGAATGCTCGATAGCGCCAGGAAAACATTGGCGCAGGACGCGACGATTTATAAAAAATT  
CAAAAGCATGGCACCGTTTACCTGAAATGGTTCGCTACCAGTCTGTAATTTGATGAAAAATATAAAAACTATACACAGCT  
TAATGAACTGATGATATCTAGATTAATGGCAACTTGGAGCTTATTTGCTCAGCAACCCAGGGAATGCAAAAATGCA  
ATGGCGAAGCGTTTGTCTAGTACGCCCCCAGCAGTGAAGAAATGATATCGCGATATCGTCACTGACAACGAGATGATTA  
CCGATTTGCCAGTGGCAACTGGCGGTTATCGCGCTGGTGGTGGTATTGATTCGCTGGTGGCGTGGTACGGCATTCGCC  
GTATGTTGCTTACTCCGCTGGCAAAAATTTATGCTCACATTCGCGAAAATCGCCGGTGGTAACCTGGCGAATACCTGACC  
ATTTGACGGGCGCAGTGAAGTGGGCGACCTGGCGCAGAGCGTTTACATATGCAACGCTCTTTGACTGACACCGCTACTCA  
TGTCCCGAAGGTTTCAGATGCCATCTATGCGGTTACCCGTTGAAATTGCGCGGCAACACCGATCTTTTCCCTCCGCTACTG  
AACAGCAGGCATCCGCGCTGGAAGAACTGCGCCAGCATGGAGCAGTCAACCGCAGCTGAAAGCAAAACGCGGATAAC  
GCCCGCCAGGCTCGCAACTGGCGCAAAGTGCCTCCGACACCGCCAGCAGCGGCAAAAGTGGTGGATGGCGTAGTGA  
AACGATGATGATGATCGCGATGTTGAAAGAAAATGCGCCATTTACGAGTATTCAGCGTTATCGACGGTATGCTTCCAGACTA  
ATATCTCTCGCTGAATGCGCGGTTGAAAGCGCGCGGTTGAACAGGGCGTGGTTTTGCGTGGTGGCGGTTGAA  
GTGCGTAATCTTGCAGTCCGAGCGCCAGCGGCAAAAGAGATCAAAAGCCTCATTTGAAAGTCCGTTCTCACGCGTTGA  
TACCGGTTCCGTTGCTGGTGAAGCGCGGGGAAACAATGAAACAAATCGTCAATGCTGCTCAGCTGACTGACGACTGACATTA  
TGGCGAGATTTGCATCGGATCGGATGAACAGAGCCGTTGGCATCGATCAAGTCCGATTTGGCGGTTTCGAAATGGATCG  
GTCACGCAACAGAACGATCGCTGGTGCAGGAATCAGCTGCGCGCGCGCTGCGCTGGAAGAACAGGCGAGTCTGTTAAC  
GCAAGCGGTTTCCGCTTCCGCTGTCGCGCAGCCACTACCAATAAAACCGCAACACCATCCGCTCTGCCAGTGAGC

AACCACGGCACAGCCAGACTGCGAATTGCTGAACAAGATCCAAACTGGGAAACATTTTGA

>Cluster\_26471

ATGAGAAACCTCTGTTTCTTACTGACGTTAGTGGCAACTCTGTTGCTCCCGGGCGACTGATTGCCGCGCCTTACCGCA  
GGATGAAAAGTTAATACCGGGCAACTGGCAATGGCTGCGATATCTGATTTATCCGCATGCTCAACCAAAGCATCAGG  
TAAATTTATGGCTGCAAAATTCATACCGGTTTATGTCAGGAAAGCAATGAGCGCGCGCTGGCTGATTTGTAGAACA  
ATGATGTTTAAACGGCACAAAACATGGCCGGGTAATAAAGTCAATCGAAACATTTGAGTCAATGGCCCTGCGTTTTGGTGC  
CGATGTTAATGCCTATACAGCTATGACGAAACAGTGTATCAGGTGAGTTTGGCGACTACGCAGAAACAAAATCTGCAA  
AAGTGATGGCAATCTTCAAGTAAAGTAAATGCGCAACCTTTGAAAAACTCGAAGTAGACGCTGAACGCGCGTAAT  
ACTGAGGAATGGCTGCCATCAGGATGCGAAATGGCGCACTCTCAGGCGCGCCCTTTCCTGCTGGCAAAATACCCG  
TAATTTAGACCGTGAACCTATCGGCCTGATGGATACCGTCGCCACGGTCAACCGGCACAATTTGCGCAATTTTATCAAC  
GCTGGTATCAACCAATAATATGACCTTTATTTGTTGGTCCGCGATATCGACAGTAAAGAAGCGCTGGCGCTGATAAAGGAT  
AATTTAAGTAAGCTTCCGGCTAACAAAGCAGCTGAAAAATCGAGTCTGGCCGACAAAAGCCGAAACCCTGCGCTTTAA  
TATCATCAATGATAAAAGAAACCGGGTGAACGGCATCGCACTCTATTATCGCCTGCAATGGTACAAGTGAACGATGAGC  
AAAGCTTTATCGAACAGCTGAATGGAGCATGTTGGTTCAGTGTCAACCAACGCTCTGCAGGAACGCATACAGTCCGGC  
GAGTTGAAGACTATTTCTGGCGGCACTGCGCGCAGCGTCAAAATGCAACCCGATATCAGTCCGCTATTTTCCGCTGATA  
TGCAGGAGACGATAATATGCAAGTGTGCGAATGCATTAATGGCAGAGTTGGCAACCATGATCAGCATGGTTTTCTCTG  
CTGAAGAACTCGATGATGTTAAATCTACCCGCTTACTTGGCTGAAAAATGGCGTTGATCAGCAAGCTGAGCGATTTTA  
CGTATGCTGACCACTGCGCTGGCATCCAGCTCATTAATAATACGCCGTTCTTGTGCGCGGAAGACATATCAACTTTC  
GAAACGCTCTGTGGCAGCAAAATACCGTGCAAAATGCTGGCGGAAAAATGGCAGCAGTTAAGAAAGAACAGGACCGCAT  
GGGAGCAAAATGGTAAACAAATGAAGTTGGCGCAAAAAGCATTTGCTCTGCGGCTATCTGGCGCTGAAAAAGAGTAC  
GCCAACAAAAGCTGGCGCTTACATCTTCCAGCGCAAAATTTATCGTTAACAGTAGACGCTGACCCACAGGCGGAAAT  
TAGCAGCAAGAAACGCTGGCTGAGAATCTGACATCATTAACACTTTCATGTTGCTAAGGTTATTCGGCAAAATCCG  
CGGTTGAAGAGCAAAAGCTACAAATTTATGGCGTATCTAATAAAGGCGATTTAAGTTTCCCTGCCAGCAAAATCACTT  
ATCCGCTGGCTTAACCGCAAGAAATCAGATTTGCACAGTTTACTGCGCAGATGCGCTGGCTGGCTGGCTGGCTGGG  
AAACTCGGTAACCATGAGCAGTAAAGTCAAGTGGCATGAATACGTTGCTCTCCGTTAGCGCGGCGACTAATAACCTGAC  
CTGGTTTCCAGTTGATTAACAGCGAATCAACACAGCAGATTAACGACAATATTTGGGCATCGCTACAAAATGCTCAA  
ATTCAGGCGTTGAAAACGCTCGACCGGCTCCAGCGGAAAAATTCGCCAGCAGGTGATGAGACGCGCTATGCCGATGA  
CCGCAGAAATTAACCGCAAGAAATCAGATTTGCACAGTTTACTGCGCAGATGCGCTGGCTGGCTGGCTGGCTGGG  
CATCTCCAGCGGATATCAGTCTTGTCTGTTGCGGTAATGTCGCAAGACAAACTCGTGGCGTTAATTACGCGTTACTTA  
GGATCTATCAAACTCTGATTCGCCATTAGCCGCAAGTAAACATTAACCTCGCGCAGCGGACACGCATCGGTTACTGT  
AAAAGAACAAAATGAACAGTGGCACAGGTTTACAGTGGAGCGTTAATAATCCCGGACACCTGTTAATCTGGCGACGC  
GTATGGCGCTTGATGCTTTAACTGCGCACTGGCAAAAGATCTACGCATTAATATTCGTAACAGGCATCTGGGCGCATA  
AGCGTTTCTTCTCGCTCTCGGTTGATCCTCAGGCCAAAGATATCAGTCAATTTGCTGGCTTTTACTTGTCAACCAGAACG  
ACATGATGAACCTGTTAACGTTAGCGAATGAAGTATGTTAAGCGTCTGGCCAAAGGGATCAGTGAGCAAGAACTGAACG  
AATACCAGCAAAACGTTACGCGCAGCCTCGATATCCAACAGCGTAGCGTTCAACAATTAGCGAACACCATTTGTAATAGT  
CTTATTCATATGACAGCCTGCAAGTATGAGCAGGCAAAAGTGTGTAACAAAATGACCGTAGAGAATGTTAACAC  
TGCTGTTAAACAATATCTTCTCATCCGGTGAATACCTATACCCGAGTATTTATGCCAAAATAA

>Cluster\_35024

ATGATTGGTACAACACCTTATCATGCGAAATATTTGCGCATGAACCTTTCATTTCTTCAATCAACAATGGGGTGGACCG  
TCTGTCTCAATCGCTGTTTGGATGCAAGCGTAGATCTAAACCTCATCAAAATGAGGCGGCTCTTTTGTATCGAAAAATC  
CGTAAAGCAAGGTTGTTGGCTTCCGATGAAGTTGGTTTGGGTAACCAATTAAGCTGGACTAGTGTCTTGGCAGTTG  
TGGGCTGAAAAGAAACGTAACCTGTTGATCATTTGCTCTGCTTCACTGCGTCGCCAATGGGCGAGCGAGTTTACAGAAAA  
GTTCAATCTACTTCTAGGTTGGACCGGAAAAATGATAGCAGCTTCAAAAAGAAAGGATCCATAATCTTAAATA  
ATAAATCGATCACTATCATGTCATACCCTATGCTGCTCGGTTAGAAGAGAAATGGTGGCTGAAATGTGGGATCTGGTT  
GTTATCGAGCAAGCCATAAATGCGTAATGCTCATCGAGAAAGCAACAAAATGGGGCAAGCGTTAAAGCGTGGCGTTGA  
TGGGCGGAAGAAATTACTACTGACCGCAACGCCTTTACAGAATCGTTGATGGAATGATGCGCATGTCGACGCTTATAG  
ATGAACATACTTCCGGCAAGTTAAAGCGTTCAGAAAGCAATAATGCAAGCGAGATAGCGATATGCGGATTAAGAGGG  
CGATTGTCGCGTTTTATCAAAACGAACTCAGCAAGAAATGTCGAGTATATCAAGTATACAGAACGTAAGCGATCAC  
TATTCCTTCTATCCGAGCGAACAGGAGCAGGATCTTTATGAACGCGTACAAAATGCTTGAACGTAAGGATAGCTATG  
CCTTACAAAACGACACCGGCATCTGACGGGCTTATACTCAGAAAACACTTTCTCAAGTACGAAAGCCGATTTGAAT  
AACTTGCAGATCTTAAAGACTCGTTAGAAAGTTAAAGCTGGAAGGTATCGTTGAAGATGATATGGACATCTTCAAACA  
GATCATAAATGGATGATGATCTTGAAGATGACATCGTTGAAGATGCCAATCAGTAGCGCCAGATACAGAGTGCAAATCTG  
TGGATTAGATGCGCTTCCAGCGAAGAAATCAATGAGCTGGAATCACTCATTTGTCAAAGCAGAACAGATTGGCACTGATACC  
AAATCAAAAGAGTTGCTTTCTGGCTGGAGCAAGGTTTGCACAGCTTGGCGAAATGGGGCTGCAAAAAGTCAATCAT  
TTCCAGGATCGATGCGAACTCAACAGTACTTTCACATTTTCTGAAAAACAATGGCTACCAGGGAAGATGATGAACT  
TTAGTGGCAAAACAATACACCGCAGGCAAAACAAGATCTACCAGCAATGGCGGAGGAATATCAGGATCTTCTCGTATT  
ACCGGGTCCGGCAAAATGATAAACGCTCGGCTTTGATCGACACTTCAAAGTATGCTGAAATCATGATAGCTACAGA  
AGCTGCAGTGAAGGGTGAACCTGCAATTTTGTTCGCTACTGATCAATACGATTTACCCTGGAACCCACAACGCAATG  
AACAGCGTATGGACCTTGTACCGATACCGGCAAAAATTTGATGTTGGTTGTTATTAATCTTCTCAATCAGCGAAACCG  
GCCGATCAACGCGTCTTGAACCTTAACTGAAAAGTTAGCCTGTTGATGGCGTGTGGCGCATCGGATAGTGTGCT  
TGGCAGCATAGAAAATGGTGTGGATTTTAAAAAAGGATCCAGTCAATTTATGAGTCAATGCGCTACCCCGAGGAGATAG  
AGCTGGCTTTTGAAGGTTGCAAGAAAGCTGGAAGATGAAATCAATCTCAAGATGCAAGAGCAGCAAGAACAGTGTCT  
GAGCATTTTATGATGAAGATATTCAGGATATCTTAAAAAAGGCTTGTGAAAGCTGGGAGCGCTGGATAAAGTGGTCCG  
TTGGTTTTGGGCGGCTGACCTGTCAGCAGCTCAAAACAATATGCTGATTTGATCATGAGCATCATGCTTTCATTTACGTT  
AATCAGTCAATGAACCTGCTGCGGCAAGTACCAGCTTGTGCGCAAGATGGCAGGCAAAATAGTGGCTTACAAATGCA  
GATCAACCAAGTTTGTGATATCGGATCAATCATCCGCTGGGTGAGTACGCTCATGAGGAGCCAAAGCCAGGAGCAGAA  
AACAGCTGAAGTCACTTTCGATTACAGTAAACACACAAGAAAGTTTCCGTTGGCTGAGCAGCTGAAAGGGCAATCAGGAT  
GGTTAACACTAAATTTGCTTACTGTTGATGCGTTTAAACAGGCAAGCAATTTTATGCTTACCGGAAAACGCAACGGA  
CGTGTGGTAGATGGTGAAGCTTGTAAACGCTCTGTTCAACTTGTCTGCAATAACCAACGAAAAGCTGGATAAATCGGCAAG  
TTTAGATGCAATTACCTGATGACTTGTACTTCAAGCAAGGCAAAATGACCGCCAGGCTTGCAGAAAGTTTGGAGCAGA  
ACTATGCTCTTTTGAAGCGAAAGAGATAAGCTGGAAAAATGGGCTGAAGACATGATCTTGGCGGGAAGAAAGCATTA  
CGCGATACAAAATGCAAAATCAAGTCTGTAAGCGAGAGCCAGGCTGGCGCAATCGATCGAAGAACAAAAGCAAAACCA  
GAAAAGCTTAAAGTACTGGAACCGCAGCAGAGCGTCAACGATGAAAATTTTACATGAAAGTGAAGTGAAGTGAAGTGA  
AGAGGGATGAACCTATCAGTGCCTTGAAGAGCGGATGAAAGAGCAGGATATCACCGAGCTGTTTACCCTCCGCTGG  
AAAGTTATTTAA

>Cluster\_26295

ATGGCTGTTACTAATGTCGCTGAACTTAAAGCACTGCTAGAGCGGTGTAAGAAAGCCAGCGTGAATATGCCAGTTTCA  
TCAAGAGCAAGTAGACAAAATCTTCCGCGCCGCGCTCTGGCTGCTGCAAGTGTGCAATCCACTCGCGAAAATGGCGG  
TTGCCAATCCGGCATGGGTATCGTCAAGATAAAGTATGATCAAAAACCACTTTGCTTCTGAATATATCTCAACGCTTAT

AAAGATGAAAAAACCTGTGGTGTCTGTCTGAAGACGACACTTTTGGTACCATCACTATCGTGAACCCATCGGTATTAT  
TTGGCGTATCGTTCCGACCCTAACCCGACTTCAACTGCTATCTTCAAATCGCTGATCAGCCTGAAGACCCGTAACGCCA  
TTATCTTCTCCCGCACCCTGCGTGAACAAAGATGCAACCAACAAAGCGGTGATATCGTCTACAGGCTGCTATCGCTGCC  
GGTCTCCGAAAGATCTGATCGGCTGGATCGATCAACCTTCTGTTGAACTGTCTAAACGCACTGATGCACCACCCAGACAT  
CAACCTGATCGTTGGTCAGCCAGCCTATAAAATTTGCTGAACTGGCAGGCTTCTCTGTACCAGAAAACCAAGATTCTGATC  
CGGGCAACACTCCGGTTGTATCGATGAAACAGCTGATATCAAACGTGCGATTGCATCTGTACTGATGTCAAAAACCTTC  
GACAAACGGGTAATCTGTGCTTCTGAACAGTCTGTTGTTGTTGACCTGTGTTATGACGCGAGTACGTGACGTTTCCG  
AACCCACGGCGGTATCTGTGACGGTAAAGAGCTGAAAGCTGTTACAGGACGTTATCTGAAAAACGGTGGCGTGAACG  
CGGCTATCGTTGGTCAGCCAGCCTATAAAATTTGCTGAACTGGCAGGCTTCTCTGTACCAGAAAACCAAGATTCTGATC  
GGTGAAGTGACCGTTGTTGATGAAAGCGAACCGTTGCGACATGAAAAACTGTCCCGACTCTGGCAATGTACCAGCGTAA  
AGATTTCCGAGACGCGGTAGAAAAGCAGAGAAACTGGTGTGCTATGGCGGATTCGGTTCATACCTCTTGCCTGTACACTG  
ACCAGGATAACCAACCGCTCGCGTTTCTTACTTCGGTCAAGAAATGAAAAACGGCTCGTATCTGATTAACACCCCGCT  
TCTCAGGGTGGTATCGGTGACCTGTATAACTTCAAACCTGCACCTTCCCTGACTCTGGGTTGTGGTTCCCTGGGTTGATC  
CTCCATCTCTGAAAACTGGTCCGAAACACTGATCAACAAGAAAACCGTTGCTAAGCGAGCTGAAAACATGTTGTGGC  
ACAAACTTCCGAAATCTATCTACTTCCGCGTGGCTCCCTGCCAATCGCGCTGGATGAAGTGAATGATGATGGCCACAAA  
CGTGGCTCATCGTACTGACCGTCTTCTGTTCAACAATGGTTATGCTGATCAGATCACTTCCGTATTGAAAGCAGCAGG  
CGTTGAAAGTCAAGTCTTCTTCCGAAAGTGAAGCTGCAACCGCTGACCCGATATGGCATTCGTAAAGGTGCGAACTGGCA  
CCTTCAAACAGAGCTGATATCGCGCTGGTGGTGGTTCCCGATGGACGCTGCGAAGATCATGTGGTTATGTACGAA  
CATCCGAAACTCACTTCCGAAAGTGGCGCTGGCTTATGGATATCCGTAACGTAATCTACAGTTCCCGAAATGGG  
TGTGAAAGCGAAAATGATCGTGTACCACACTTCTGGTACAGGTTCTGAAGTCACTCCGTTTGGGTTGTAACCTGACG  
ACACTACTGGTCAAGAAATCCACTGGCAGACTATGCACTGACCCGGATATGGCGATTGTCGACGCCAACCTGGTTATG  
GACATGCCGAAGTCCCTGTGTGCTTTCGGTGGTCTGGACGAGTAACTCAGCCATGGAAGCTTATGTTTCTGTACTGGC  
ATCTGAGTTCTCTGATGGTCAAGGCTCTGACGGCACTGAAACTACTGAAAGAATATCTGCCAGGCTCCTACCACGAAAGGT  
CTAAAATCCGGTACGCGGTGAACTGGTTCACAGTGCAGGCACTATCGGGTATCGCGTTTGGCAACGACTTCCGCGGT  
GTATGCTCACTCAATGGCGCAAACTGGGTTCCAGTTCATATTCGCGACGGTCTGGCAACGCCCTGCTGATTTGTAA  
CGTTATTCGCTACACGCGAATGCAACCCGACCAAGCAGACTGCATTGAGCCAGTATGACCGTCCGCGAGGCTCGCCGTC  
GTTATGCTGAAATTTGCTGACCACTGGGTTCTGAGCGCACCGGGCGACCGTACTGCAGCTAAGATCGAGAACTGCTGGCA  
TGGCTGAAACCGCTGAAAGCTGAACTGGTATTCCGAAATCTCCGTTGAAGCTGGCGTTGAGGAGCAGACTTCTCGC  
GAACGTTGATAAACTGTCTGAAGATGCATTGATGACAGTGCACCGCGCTAACCCGCTTACCCTGATCTCCGAGC  
TGAAACAGATTCTGCTGGATACCTACTACGGTCTGATATGTAGAAGCGGAAACTGCAGCGAAGAAAGAGCTGCTCCG  
GCTAAAGCTGAGAAAAAGCGAAAAAATCCGCTTAA

>Cluster\_11785

GTGTGCCACTACAGTGGCTTATTTCTCGGACGATATTTACTAGAAAGAGGGGATTCTTCAATTACGTTTCTACCCAGACGA  
AACGACGATCCGGGGGGATGAAGACACGGAAAGAAATATTTGGATGGCAAGTTTTCAGTAACCGAGCTAGCCGACACAGACT  
GGGATCTCACGCTCGTCCGCGGAAAGAAATGAATTACTTAACCGCTGAAACCTTTTCAAAAAGCGTCTGACCCAGGT  
TATGTCGATCAGCTTTCCCAAAATGCTCTTATTTTCCGCGGACGCAAGTAAAGCAATCGATTAACTTACCTTAGCCCGCA  
TGACGTGCAGGCCAAGGGCTACATCCGGATTAGCGATCTTGTCTATGGCAGGATCGTCCGGGTGTCGCGTTGGTAAAC  
CCGATGTCCCTTATAATTCACACGTGAACCTCCAACCCGGCGATATCTTATTTACGCTCAGGGACAATTTGGTAAAAAT  
GCCGTTGTCTAGTGAAGTGAACCGGGCGCTGGCAGGACAGGGCTTATGTCATTGCGCCTGATAAAAATTAATTTAGA  
CTCTGATTTACTTCTGATATATAATAAATAGCCCGCTGTCAAATTTGGTTTTTCAGCGCACGCTCGCGGTACAGCAATTC  
AAAACATTAATCGTGATACCGTTTGTAAATTACCATTCTGTGCTCCCTTACTATACAGAGACGCGCAGTACCCAGA  
TACCAGCAATCAGGTACTGATATCTTACTCTTATTTTCAGCGCTGCCAATTAAGCGAGATGGATACCTTTGGCAGCTT  
GGTTCTTGAGATTGAAAGCCAGCTCCCGGTTTCGTTCTCAGGAGTGGAGGCCAGCCTTCTTTTGGATCTGCTTAACTCA  
CTGTGATTTGGTTGTAATGCCAGAAATACCCTTGGCCTCTTATTTGACGAGCGGTGTCGAGGAGTATTTCCCT  
TTTTCTCCAGGCTGTTTCTTACTTGAAGATGTAGGGAAAATTTCCCGGGGACAGGACTGCTCAACGATATACAGGAATC  
AGAACCGGTATTTATTTTCACTTCAATGAAAATCTGCTTAAATGACACGCCGTTACGGTATGGCGTGAACGTTTACGAG  
TATGGCTAAAAGCCGCCAATAACTGACCTTTAGCCAGTGTGAACCTTGAAGCTTTTAAAGCACCAAGTATCACTTCA  
GATAGCTATCATTCGTTTTTATTTGAAATTTGAGAACCCGGCGTTTTTACCCTAAGGGGCTCCGGATTCAAACCTCAACC  
TGACTGGGGATCCGAATATCTGGCTTATCTTCCGAAAAGTCCAGTTTCTCACAAACCTGCGCGGCGACACCCCAAG  
TCGAAGGTGCTTAAATATAGTCTACAATGGCAAGCCATTTGGCTTATCTGGACGGGAAAACAACGGAATCATAGAATC  
GCATTTATAGTTTCCGAAACCCGCGAGGTAAGCAGGTTTACCAGTACAGGATCTCAGCAGTATGCTTATGTAAGAGGTAG  
TCCTTTAGAGCCAGAGAGTGACATAATGTGTTCTTTGGCCGCAAGTTATTTCTGAGCGTATCTGTCGACAAATATCAA  
CCCATGAAAATGTCGATTTACTCGAAGGAAACCGACGCGCCGGGAAAACCTTCCATATTAACACTTGGAGGGCAAGGAT  
ATTAATCCCGCTGGCTATCAGTATCTGAGCTGCAAGGTGTCGGTGGGCAATCGAATGTCGCGCGGCTTCTCTCGGT  
CGAAGTATTCAGAGTATGGCCAGAAATGTCACAGCCTTAAATAAAAACAGTATCGATCTGCCTTTACTTACCGGAA  
ATATGATACCGGGTGGGCTCAACAGTTAGGTACCGCACGCTTATATCAAAGCCTGCGCGAAGGTATCAGTGAAGCA  
GAACCTTTTGTGATTTTTCAGTGTATCTGGATGACATAGATAAGGTTATGTCCTTGTAAATTTGGGTTCTGTTTAAAT  
GCTGGACAGTTCGATAAGCTCCAGGAAGTATTTGATAGCGGCAATAACTCACCCAGGTGCCGAAAACATCACTTATC  
TGATAAAAATAATCCTCGTTTCTGCTGCAATTTCAACCGTTCGCGGACTTAAACGATTTAGAGAAAGAGTACTGGTCC  
GCATTTCTGGCTTGGGCACTAGCGTTCAGGTCACAGCACTTGATAAGCTCAATGCTAGTAAAGTTGTACCGAACCCGT  
CCGTGACAGACTTATTTTGTGCTGATGCAAGTGAACAAAGCACTGCAACTCACTGCCATGCATCTTATCTGTTGCACT  
GTTTGTGTAATAAGGTTTTTGTATTTCTCGATTGAACTCGCAGTAAAACATCACCCAGTTTATTGACAGCTGTGGC  
AAAGAGCTGGCTCGTGACAACGAACATTTTGAACCTTTATGGGATTTGCGGGGCAAGGCTTCTGCTACCGGATATATCG  
CCGACAATTAGTGTAAATGCTTTGCACCCAGTCCAGTCCGAAATTAAGAACCTTACGTTTGGTTTCAATACAGGAGCTAC  
TCACGCAAAATGGTGTGATGTGATGAGGATGCTTTGGATACAGATTTGGCCTATCTCAGAGAACTTGAGTTAAATGAT  
TATTCAGGCAACCTTGTATGGTGGAGAAATCAGCTCCACTCCACTCATGGTGAATGGATAGCTCAGCAGCAGGATAT  
TAATGTCGTGTTAAGTACGCCCCGACAGAAGCAGAGGAAGAAAATGTCTGA

>Cluster\_23043

ATGGGGGATATTTGCGTCCCATCCGTTTGGAGAACTTTTACGCGCATATTTGATGAATACCAACAACACCGTCAAT  
CTTTGGTATTCGAGACCAAGTTTTACTCACCCGTAAGAAATAAAACGTTAGCGCTTCCGGTGAACCTGTGCCACTC  
CCGTGGCCCTGCGCTGGCCCGCACACGCAACTTGGCAAAATATTTGCTACTTCTGGCTGACTGGCGGACGCTTCATC  
GAACATAAAACCGTCAAATTTTGAACCGCTGGAGCTGGAAGCCCTGTATCGATGCCGAAGCAGTGTCTTAAACAC  
CGAATGGTCTACCAATTTACCTGCTTAAAGCTGGGATGAATACCTCAAAGCCTGGTTTGCCTGCACTTCTCGAA  
CGATGTTCCAGCCTTCTGATTTCCGGTAAATCTTCACTTAAATATGAGCGCTGGTTTAAACCTGCAAGGATTAAGAG  
CCGCGGATGCAGCAGTTCATCGACAATATGATGGACGATCTGACCATCCGAAATTCGCTCAATACCGGATGCACTTAA  
TAAGCTACTCCAGGATGAGGCAATTTTACCGCCGACGATGAGGAAAACCGGAAAGCTTGAAGCTTCAAGCTTCCGCTC  
GCATCCCCACAGATGGTACAAGGTTCACCCCTCCACCATGCACCGCTGTCTCCGATGAAATCGAAGCTTACCTTGC  
CGTACATGCTGGAGAAAAGGACTCAACACCTTTGTGAACTCAACCCGACTTACTGGGTTACGCGGCTGTTCTGTGA  
GATCTCGATGCTGCGGTTTCGGTTACATCGGCTTAAAAGAAAGAGTCAATTTGATCAGACCTCAAGTGCAGCAAGCAC

TGGAAATGCTGGAAACGCTGATGGCACTGGCAAAAAGAAAATCACTCGGCTTTGGCGTAAAACGACTAACACTCTCGGC  
ACCATTAATAACAAAGGCCACTGCCTGGTGAAGAGATGATATAGTCAAGGCCGTCGCGTGTCCCGCTCTCCAACAACGT  
TGCAGCAGTCTCTCTCGCGCCTTTGACGGCAACTGCCCATTTCTTATTCGGTGGTGCAGTCAGTCGACTATCCGGG  
ATATTTTTGATACCTGGTATTCGCCCTATTAATAAGCAACCGACTGCTGAAACCTGGCGGCTATCTGCGCTTAAAGTGGC  
TGCATGCGGAGCTGGAAAGGCTCCGACGCTGGGACTTACCATGTTGACGTCGAACGACTGAACAGACTGGCAAGGAG  
CGCGTAACCATGGAATACACCCAGAAACACTGGAAGCCAGAAGCGTATTGAAGTGGCTGAAGACCTGCCGCTGACCG  
ATTGCTACGTTGCCCTCTGTTACTGCTGCGTATCAAGCAAGATATTCGGGAATACATCCGCTGCTGTTGGCGAACAC  
CGTATGCCGACGCGCTGGAACCTCATCTATCAACGCAACGCCCTGCCCGCCATTACCGGCTCATATTTGGCATCACAGTG  
CCAATAACAACCTGACCCGCTGGATTACGACAGTGCCTGAAATATCCGCGAACGAAAAAAGTCCGCGTGGAAAAAGGTT  
GGGATGAATATAAGCAACGCTGGCACAACCCAGCCGGTTCTGGTTACGCCATCCGGTTGCCGTTGATTGGTGCAGGTCGG  
GCGGGTCTGGCAGCAGGTTACTTCTTCCAGAGCGGGCCATCCGGTTACGCTGTTTGAACGCGAAGCCAAATGCCGGCGG  
CGTGGTAAAAAATATCATTTCTCAGTTCCTGATTTCTTCCAGAGTAAATTCAGCACGATATCGATTTTGTGGCGATCAGC  
GCGTGAATTTGATACGTTGCTCACCGGATCTGACCTGCAACAGTAAAAAAATCAGGGCTTCCACTATGTTCTGATT  
GCCACCGTACCATAAAAAATAGCGGTGTGAACTGGCGGGGACAAACAAAAATGCTGGAAATCACTCCCTTCTGCG  
TGAATACAACAAGGCCACCGCGTCAAGCTGGGCAACATGTGGTCTGTGCGGGCGGGTAAACCCGCAATGGACTGGC  
CTCGTGGCGGCTTACCGGTTCCAGGCGTAGAAAAAGCAACGCTGTTTACCGTCTTACTGCAAGAGATGCCAGCATGG  
CGGAAGAGATGAAGAAGCGTTGCACGACGCGCTGAGTTCCTTTTTCTGAATAATCCGGAACGTTTTCGATGCTGATG  
CACCTAACCTTGGCGGTTATGTCGCTTGGCGAACCTGATGAGAAAGTCTGCGCGTCCGGTAGAAACCAACGAAACAG  
TAACACTGCATGTAGACGCTGATCACCGCATTTGGTGAACAGCAGGATACTGAAGCCCTGAATGCGATGGCGTGGCG  
CTGGAAAAAACCGGCTGGCCAGAGCTGACCATTAATGGCGAAACGCTGAGTGACGCTTTTATGATCGGCGACTACA  
GCGCGGACCATCTCAATTTGTCGCTGCTGTCGGAACCGCGCTCGGGCAGCGATGCCATCCCTGAGTAGGGAAAAATACC  
GTTCCACCAGAAGCATAAATACGGAATAACGTCATCCGGCGAAATCTATCAACGTAAGGGGATATCTCTATCACT  
CTGGTGAACAGTACGATCGTACGCGCTTTGTCGCGCAGGAAGCCGCTCGCTGCCCTTGAATGTAACACTGTTTGCAGAA  
ATTGTTGGATGCTCTGCCGAAACCGCGCAACGCTCTCAATTTGCGGTTCCGCTTCCAGAACCGTTTCCAGAGTCAAC  
TCGACGCTTACTGTAACGAATGTGGCAACTGCGCCCAATTTCTGCCGTTGGAACGGTAAACCGTACAAAGACAAAAATCACC  
GTCCTCAGCCTGTGCAAGACTTTGATAACAGCAGCAACCCAGGCTTCCCTGTGGAAGATGCGGGTACGCGTACGTC  
GAATAACCAAGCTGGGTGTTAAACATCGACAGCGAAGGTCAGTTCAACAACGTACCACCGGAGCTGAACGATATGTGCC  
GCATCATTAGCCATGTCCACCAGCATCATATTATCTGCTGGTTCGCGTGGAGGTGATA

>Cluster\_62202

ATGATGAATAAATCCAATTTTGAATTCGAAAGGGCGTCAACGACTTCACTTATGCCATCGCCTGTGCCGCGAAAAATA  
CTACCCGGATGATCCCAACAGCAGCTGATTAATAATCGGTATGTTGGCGAAGCCACAGCGAAACATCTTGGTCTGTATC  
TCAACATCCCCCTTGTGAGAATCAACACGATCTCCTGGTGAACCTCGCAAAATCGCCTTTGTTGATGACAACATCCCT  
TCTGTATTTACAAATACGCCGATTTGGTAACCAGGCGGTGCACGAATATCATAACGATCTCAACGATGCCAGATGTG  
CCTGCGACTCGGGTTCGCGCTGGCTGCTGTTACTACCGTCTGGTCACTAAAGATATGACTTCCCGGTGCCGCTGTTT  
TGTTGCCGGAACGTTGGTAAAACCTCTATCACAGGAAGTGTGACGCTAAAACAACAGCTTGAACAGCAGGTTGCGAGAA  
AAAGCGCAGACTCAGGCAAGCTGAAGCGCAACAGCAGTGGTTGCCCTGAACCGCTATATCGCCATTTGGAAGG  
CAACAGCAGGAAACCGAAGCGCAACCCAGGCTCGCTTGGCGCACTGGAAGCACAGCTCGCCGAGAAGAACCGGAAAC  
TGGCAAAACAGACGCAAGGAAACGTAAGGCTTACCACAAAGAAATTACCGATCAGGCCATCAAGCGCACACTCAACCTT  
AGCAAGAAGAGAGCTGCTTCTGATTTGATGCGCAACTGCGTAAAGCAGGCTGGCAGGCCGACAGCAAAACCTTGGCCTT  
CTCAAAAGCGCACGCTCCGGAACCCGGCTCAATAAAGCAATTGCCGAATGGCGACCGGAAAAGATGAAACGGGTAATC  
AGGGCTTTGGGATATGTTGCTGTTTGTGCGCTCAAAACCCATCGCGTGGTAGAGGCAACGTAACAAATATCGACGTT  
CCCGCCAGGCTCAATGAGTCGATGCTACAGTAAATGTTTTCGATAATGGCTTCTTCCGCGGAAACCTTCTGCTGAGCACTA  
CTACCCGGATGAAGTGCATGAAGCAGTGCACAGTATGAACCAACAGTGCAGGACACAGCGGCAACACACGTTTAAAA  
TCCCTTCTGCTACTCGACCAACGGCGCGAATACCGGCAACAAATGAAGACCAAAAGCGGCACTCTGGTATCGCGACGTG  
CGTGATACCCGCAATATGTCGAAAGCCTTACCAGGAGTGCACCGCCGGAAGAGCTGCTGGAATGCTCGGCAGCGAACC  
GCAAAAACAGAATCAGTGGTTTGGCGATAACCCGCGATGAGCGAGCTGGGCTGCGTTATTAATCAGGAAGATGCCGTC  
GCGCGTTGAAAAGGCAATCGTCAAGGGGCAACAGAGATCCTGCTGGCGATGGCAGCGGTACCAGTAAAACCTGACG  
GCAATCGCCATGATGTTCCGCTGATCCAGTCCAGGCTTTTAAACGCAATCTCTTCTTGTGACCGCGCTTCTTGG  
CGAACAGGCGCTGGCGCGTTTGAAAGATACGCGTATTAACGGCGACACCTTCAACAGCATTTTTCGACATTAAGGGCTGA  
CGGATAAATTCGCGAAGACAGCACAAATTCAGTTGCCACCGTACAGTCCGTTGGTGAACGCACCTTGAATCAGAT  
GAACCGATGCCCGTGGCCGTTACGACTGTATCGTCTGTCGAAAGCGCATCGCGCTATATTCTCGATAAAGAGCAGAC  
CGAAGGCGAAGTGCAGTTCGCGACGCTGGATTACGCTCTGCTTACCCTGCGATTTCTCGATCACTTCGATGCGGTAA  
AAATCGCTCTCACCGCCACCCGCGCTACATACTGTGAGATTTTCCGCGAGCGGTTTACCCTTATACCTACCGTACC  
CGGTTATCGACGGTTTCTGATCGACAGGATCCGCTTATTCAGATCATCACCGCAACCGCGAGGGGTTTATCT  
CTCCAAGCGCAGGAGTGAAGCGCATACGCCCCAGGAGCAAGTGTATCAATGACACCTTGAAGAGCAGTACGATTTT  
AAGTCCGCACTTTAACCGTGGCTGGTATCCGCGCTTAAACCGCGCTGTAACGAACTACCAATTAATCTTGGAC  
CCGACCGGATCGCAAAAACGCTGGTCTTCTGCGTACCAATGCCATGCCGATATGGTGGTGAAGAGCTGCTGCCCC  
GTTCAAGAAAAGTATCCGCAACTGGAGCACGCGATCAAGATCACCGTGTATGCCGATAAAGACCGCGCAAG  
TGCAGACCATGATCACCCGCTTCAATAAAGAGCGGCTGCCAATATCGTGGTAACCGTCCGACCTGCTGACGACCGCGT  
GATATCCGTCGATCTGTAATATCGTGTCTTCCGCTAAAGTACGACGCGCATTTCTGACGAACAGATGAAAGCCGCGC  
CACGCGCTTATGCCCGGAGGTGAATAAACCCAGCTTAAAGATTTTGAAGTGTGTCGATATCTACAGCACGCTGGAGAGCG  
TCGACACCATGCGTCCGGTGGTGGTGGCGCCGAAAGTGAACCTGCAACCGCTGGTCAATGAAATACCAGTTCAGAAACC  
TATAAAATCACCGAAGCGGATGGCCGAGTTTTGCGGACACAGCCATGAACAACCTGGTGGCGAAGCTCCAGCGTATCAT  
CGTCTGGCCACGTTTAAACCGTACCGCAGCGAACGATAGATAAACAGGTGCGTCTGTTGATGAGCTATGCCAGGACG  
CGCGGGCGTGAACCTTAAACGGCTTCCGCTCGCGCTCGCGGAAAAAGGGCGCACTGGAGCGCGCAAGTCTTTAACAAA  
CTCGCTGGCTTTATCGCCGCTTGGAAAAGCTGAAAACCGGACATCAACAACTGAATGATGCGCGCATCTTCTCGATAT  
CGACGATGAAGTGGTGGTGAATAACGCTGTACGGTATTACGACACCGCGAGGATTTCTCGAAGCCTTTGACTCGC  
TGGTGAACGTTCCCGAAGCGCAACCGCATTGCAGGAGTATTAATCGCCGCGCGATCACCCTGAAAGGGCTG  
GTCGAGCTACAGGAGTGGTTGACCCGACGACTTTGAGGAATCTTCCCTGCGCAAGCATGGAAGAGAGACCGCAATGA  
AGATATCGCCGCGCTGATTGGTCAATATTCGCGCGCTGCGGTGGCGGATGCGCTGAAACCGTTTTGAGGAAGGTGCG  
ATCACGCGTACCGCGCATTAAGGGGCAAAACGACTGGAGCAGCGAGCAATTAAGCTGGCTCGATCGTTTACGCGAGGCG  
CTGAAAGAGAAAGTGGTGTGACGACGATGCTTTCAAAACCGCAACTTCCACCGTCCGCGCGGGAAGCGGATGCTGCA  
AAGAACCTTTGACGATAATCTCGATACCTGCTGGGCAAAATCAGCGATATATCTGGGACGAGCTGGCCTGA

>Cluster\_39196

ATGAAGGAGAATAACCTTAATCGGTCATCGGATGGTCTGGTTTACTGCTGACATCTTTATTGAGTACAGCGCACTCGC  
AGACAATATCGGCCACAGCGCAGAAGGCTGGGGCTGAGCGATATCGCCATTTTGTATTTATCCCGCTCTCGATAAGG  
CGCTGAAGGCACGAAAAATAACGACGAAAGCAACCGCATCCGCAATTTGAATATATACACCAGCAGGTCGGGATAAT  
ATTCGCTGACTTTATACCTTGGCGAAGCCTATCGCCATTTTGGTTCATGATGACCGGGCGCGGCTGTTGCTTGGATCA  
ACTGAAACGTCACCTGGAGATGACCGGCTTGGCGCAGTCTGGCGGCTATTCAGTGAAGTAAAAGCGTTACGACTG

TTGAAGAACTGCTTGCCAGCAAAAAGCGTGCATGCTGCCGACCCCTGCGTTGTCGAGTGAAGTCGGGCAGAATGCC  
CTGCGGCTGGCACAAATTACTGTGCCAGAGCGCAACTTAAACGATGCGACGTTTGTCTGCATCGCCGGAAGAAAAACGTT  
GCGAACCGATCTGCTGCAACGGGAATCTACCTGAAACAATGGTCCAGGCAGATACGCTATATAATGAAGCAGCCAGC  
AGAACAACATTAAGCGCGGAGAAACCGCGTCACTGCTGTTTACGCTGCTTCTTGGCGGGCAGTTGGATGATCGGATCCTGGGG  
CTGCAATACAGGGGATCTTACCGGATCTCAGTCAATATTAATCTACCGGACCGCGCTGGCTTATCGTGGCGAATAAGC  
ACGCTCCAGCATATCTCATTTGAAAATAAGCCGCTGTTTACCACGGACGCACAAGAGAAAAGTTGGCTCTATCTGTTTAT  
CTAAATACAGCGCAACCCGTTTACGGCGTTGGCGAATATACGGTGCAGTTTGGCGATAACCCGCGATGTTGTTGGC  
GTGACGCTACCGGTGCTGTTAAAAGAAGTTCAGTACGACGCGAGCGCAAAAACCTACTCGCCACCCTCCCGCAATGAAAT  
GCTTGGAGGAGCTTATGCCGTTAGCGTAGCCGACCGCTAACCAAGCTGAAGCTCTGCGTCTGGCAGATGCTGCTATCAGC  
AAGAACCAGCAAACTTACCAGCTGGATCAACTGACCTGGCAACTGATGCAGAACGGGCAGTACGCGAAGCTGCCGAT  
TTATGCTGCAACGCTATCTTTCCAGGACGATGCGCGTGTGACCGAGACGTTAATGGCGGACTGGCGTCTCTGCTGGA  
AAGTCATCTTACTGGCAACCGCGGGAAGGTGGCAATTTTATCGAAACCTTACCCTGGCGGAGCAACGTCAGTGGC  
AAAGTCAGTTGCGGGTATGCTGATAAATGCCCCTAATAGTTCGCTTGGTGGCGATATGCTGGCGGATGCTGCTACGATGCT  
GCCGCTGGAAACCGTCTGGCAAAGTGTATCGGGACACGCTACCCGCTGGCGTGTATGCATGGCTTACGGCCGAACA  
ACGACAACCGAACGCTTGGCAACATCTGCGGTAAGCCTATCAGCGTATCAGGTTGAGGACTACGCCACCGCACTGGCGG  
CCTGGCAGAAAATCAGTCTTACGACATGAGCAATGAGGATCTGCTTGGTGGCCAAATACCGCCAGGCGGAGGAAAT  
GAGCGGCTCGCATGCTGTTTACAACAGCGCAACACTGGACTGGAAACAAGTGGCTTACTGGTGGCTGCTGCTGCTGCTG  
GCAACGTTACATCTTGGTACGCGGAACCTGCACTGAACGATCTCAGCGCTCAATCAATATGCGCTTCTGCCAACG  
CTTACGTTGCGCGGGCGACAATTTATCGCAACGCTCATAATGTCCCGCGGCGGTGAGTGATTTGCGCGCCGCGCTGGAA  
CTGGAACGAATAATAGCAACACCCAGGACGCTCGGTTACGCTTGTGGGATAGCGGTGATATGCAAGCTGCGGAGGAA  
AATGCTCGAACAGCGCATAAAGGGCTACCGGACGATCCGGCACTTATCCGACAACTGGCTACGTTGCAACAGCGCTGCG  
ATGACATGCTGCGACGACGACTACGCCGCGTGGTGTATGATGACATGATAATCAGGCGTGATAACCCCACTGACC  
CCAGAGCAAAATCAGCAACGCTTCAATTTCCCGCGTCTGCATGAGGAGGTCGGTCCGCGTGGACGTTTCAATTTCCGATTC  
TTCTTACGCTTGGCTTCCGCGCAATGAGTACCGTAACTAATGTCCGCGGCGAGCGCCAGGAAAGCTATCGTA  
GCTACGGGCAACTGGAAGCCGAGTACCGCTCGGACGCAATATGCTGCTGGAAGGCGACTGCTCAGTTTATAGCCGC  
GTCCTTGGCGATACCGGAGAAAACGGGGTGTATGATGCCGGTGAATAATCCGATGTCCGACCGGCTGCGCTGGAAGCC  
GCTGCGGATCAGATCTTTTCTCGCCGTCGAACAGCAGTGTGCCGCTGAACGGGCAAAATGGCGCATCCGATACCTATGC  
TTCCGCGCAGCGCTCACTTCTTTAATGGCGCAATACAGCAGCAATAATGTCCGCGGCGAGCGCCAGGAAAGCTATCGTA  
AACCTGTACTCGATGCGCGCAATATGTCGCGCAGGATATCAGGCGTGGACGGCAGATTATCGCGTAAGCTGGCATCA  
GAAGGTGGCGAACGGACAGACTATGAGCCTTACGCTCACGTTTCCGCAACGCTTATCGTGAATAAGGCACTCAGGGCG  
CGCAGCTTGGCGGTGTCGGGGTCCGCTGGAATACTGGACCGGAGACGCACTACGACGCTGGCCGCAAAAGTCACT  
CTCGCGTCAATAATCAACATACCTTTAAGCGGATTAATCAACGTAACCGGAGAGCGCAACAACCGCTTCTCACCATGG  
AGTGCACCTGGTAA

>Cluster\_7343

ATGAAAACCTATATTTATCAGGACGAAAAATCACATAAATCTGGGCGTGGAGCAGCAGAGAAAACGAGCTGCATATCAA  
CTGGGGCAAAGTCGGCACTAACGGGCAAAGTCAAGTAAAAGCTTTGCTGATGCTGCGCGGCGAGAAAAGCGGAACCTGA  
AGCTGATTGCGGAGAAGGTGAAGAAGGGTATGTGGAGCAAGTAGACGCTAACGCTCACTCACATGATGCCTCAGCAAAG  
AAAGTCTTAGTACAGAGGAAAAAGCCTCAATAAATCACCAGGACGAACTAATGGTTTACCTGGCTGGCAGACAACGA  
TCCCATTTCTTCCCGGAATATGCCCAGTGGCTTACGACCGCTTTGGCGGGAGAGCCAGTAAAACAAACCA  
CAAACCCGAGAAAACAAATTTAATTTCCGATTTGGCAATCGTACTTATCATATTAATAAAAAATCTGACTTTTCGATTAC  
AGCTCATGCTCTGATGAAATGGGCTGATGCGATTAGCCAGGCAATCAGCTTAATTAAGGCCAAAAGACTGAGATACCCGC  
CGTACTATGGCGGCTACTTACTTTCTGAAAATATGTTTGTGTCAGGGCTGGAATGATGAAACCTCATCCGAGTTGCTGG  
ATGAAATTTGAGCACTTTCGGTATCGAATACGCAACTGAACTGTCATCTTCTGGTGGCAAAATGATTTTCGATTGAC  
TATAAAGATGAACATTTGACTTTCTTTAATATATGATAGATAGCAGCAAGGACAGTTATAGAAGGAATAACGACAAAT  
TAGTTTACGCTCTGCTGAAACATTTATCACTAGCAGAAGAAGTATGGCAAAATGCTATGCAAAATTAAGCTGCTGCGT  
TACCAGATATACACTATCGCCAACCGTAAATTTGCCATTTAATGCCAGAAATACCCGAGTGGCCATGAGATCGTA  
CACTGTTTACACCGAGTTCGAGATGTTCCACAACGTTGAAACTGTTGAAACTGGTAGCGACAGATCCATCAGCTCGAAAT  
ACTGGAGAACTATCAATACATTTGATGATTTAACACCTATGGTGGCAGTTGGTTCAGCTACGGTATTACGGGAACAAGGTA  
TAGCGGCACTGGCTCGCTGGCTTCCATGCTGAAAGAATAATGCGGTGACGTAAGTAAATGATTAATCACTCCGTTG  
GCCATACCGGCACTCATCGAAGCCGCGGATACTAATAACCGTGTATGAACGACTAATAAAAAAGTGGCGAAAATTTTCC  
TTCTGCCACGATAGCGGCAATTAGCCGAAGCATTGGTAAAAGAGATGATAAACGCAAAACATACGTTGCTGTTTATTAC  
TTAATGCAAAATCTTTATTTGGTTCGAAAATTAGTCACTCGGATTTATCGTGCAGCGGCAAAATTTATTGCAACAATGTCAG  
CAATTTGCTGAATAGTTCGCAATGAAGATTTGCAAACTCAGAAATTTTACCAATGGTACTAGTCTCGCCGCCCTGGGAAAC  
TCAAAATAAAAAATACGACAACAGTCTTGTGGTAAATACCCGCGGAAAATCCCCCTTACCCTTGTTTTATCAACCTC  
CATTATGGACTCGCCAAAACCTCAAAAATAGCAGCAAGTACTGCCAGATAACGCCCTCTCCACTCCGTTGAAATGCTC  
CGCTTCCCTCAGGAAGAGGCCCTGTATCCGGGATATTTGCAAGTGAAGATGCTGTACCGGCACTCACTGGCTGAAT  
TGCTTGGGATCTGTTTACCCTGGCTGACTGCGGGCGCACCGTCAAGAGAGTGGGCGTTCACTGCGTTAGGCGTTT  
TTGGTAAAGATGACACCGCCGCAAACTGACGCAATTAATACCGCCTGGCTGGTGAATCCCAGCATAAACCGCCACC  
TTGGGTTGGATATTTCTCGCCGCTATCGGTAGTATCGCCCTGATGAGCTTAAACGGTATTGCCCAGAAAATGAAAT  
CAAAGCATTACAGGAGCGGGCAAAAGAAAAAATGCGGACATTTGCCGAAAGCCGGAACCTACGGTGGCAGAGCTGAAAG  
ATCGGTTAGCACCAGGATCTGGTCTGGATGATAACGGTTCGTTGCTGCTGGATTTCCGGCTCACGCCAGTTACCCGTCAGC  
TTTGTGAAACCTTAAAACCGTTTGTGCTGATGTTTCCGCGCCGCTGAAAGACCTGAAAAGACCTGCCCAGCAACCAAAAGCGA  
TGATGAATCACAGGCAACGATGCTGTTAACCGCTACAACTGCTGAAAAAAGATGCGCGTACCGTCCGCGCCAGCAGG  
TAGCAAGGCTGGAATCCGCGATGTCCTGCGTCCGCTGGTCAACCGGAAAATTTTACGCTCTTCTGTTGAGCATCCG  
CTAGTTCCGCCACTTAAACCCGCTGATTTGGGGCTTATAGCGCCGAAAACAGCTACTGGCCTGTTTCCGGGTAGC  
GGAAGATAACAGCTACAGCACCGCTGACGATGATCTTTTACCCTGCCGGAAGCGGATATCTCTGTTGGTATTTCTCACG  
TTCTGAAAATATCACCGACGGATGCCGCGCATTTGGGCAGCTTTTGGCGACTACGAACTGCTACCGCGCTTCCGCCAA  
CTCGACCGTAACAGTTACGCCCTGACAGAAACCGAGCGCAATGCCAGCGAACTGACCCGCTGGCAGGAGGAAATGCC  
GAGCGTCCGGTAAATGGGCTGGCGAATAAAGGCTGGAATAAAGGGGCAACCACAGGATGGAGGCTGGATCCGCTGGATGA  
TCAAACCTTGGCGCTGGCTGTTAATCATGGAATCATGAAAGCTTGGCGGTAGGATGCTCCGCGCAACTGAGT  
GCCGAGAACTCTTAAGCAAGCTGTGGCTATGGGAAGGCAAGCGGAAAGCTATGGCTGGGGAGTAAATCAACACAGGA  
AGCGCAGCTCTCCGACTCGATGCCATCCCGCAGCGAGCTAATTAACGATAATGAAGCCCTGTTTGAATAA

>Cluster\_34015

ATGAAATCTGACATCAGAAAAGAGATTAATAACCGTCTTATCCGTTATCAACTTCAAAGAAGAAAATAACTACCTCCG  
GTATGGTGTGTTGTCGCAATGTGGAAGAAAGAGTGTGTTACCAGCCTTGAAGGCGCTACATCGTACTGTGGGCGG  
AAAATAAATGCGGTACAGACCTGCTGACCAAAAGAACTTTACCCGGATGTTGTTTTCATCATGTTGATGATGATACAGC  
ACGAAAGATGAGCCATATCGAGCGCGGAGCTTATCTTACGGAAGCGCGCAATATGCTGTTGGGCGCACTGAAAGCGG  
ATTTACTCAGGAGGATACAGGACAAGAAAACGGGCAACAGCCGCTACTGTGCGTTTACGCTGGCTGACGGCGTGT  
GGTGGGAGCGCATATAGACCGCGGAGCCTTCCGCGCAAGCGCAATTTTCCGCGAGCTACAGGGGTTGTTGGTGG



GCTTATCCGGGAGCAGATTTAAGCAAGGCCAAAGAAATCTGGATTGTGAGGGCATCTTTGATGCTATCAGCCTTAACCA  
GAATGGCATTGCGCCGTTTCTGTCATGCTGCGTGAACCTGATAAAGCGCTGGAAGAGCTGGCGAAGCTGTGCG  
GGGATAATCCCCGTCGGGTTATTGTGTGGGCCCTGGATAACGGGCGTGGGGTGAACGTTACGCGAAAAACATGCGAGAA  
CGCAGCGCCGAAGCGCTGGAGAACGGCAGCGCGCTTCCAGGTAATAAACAATAAAGCGACTGGAATGATTTTACA  
CATCGCCGAAAGCTGCGTGGCCATGATGTGAAAAGATACCGTTATTACGGTGATTTATGCTGGCGAAATCTCAAGAG  
ATAAGGCATAATAATGTTTTCCCTTTCGTGAGCGGAAAGAAATTCATTTTACTTTTGATAACCGTGTCTTCTGGTTCAAG  
CTGGACATGAGCGCCATATGAAGGCTGTGTAGCGTGTATTAATGAGCGAAATGTTGACGAAGACGAAGCGCGCAAAAT  
TGCCTTAAGGAATCCCGCGCTGTAAAAGAAATCGAAACTGTAAACCCAGTGGCGCTTTATTACATTCGAAACAAATGACA  
CGGATGAAGCATGTTACTTCTCCGCTTACATTCGCCGATGGTGTACGGTGAAAAACACCTTTACATCAGGCAATTA  
ACATCCTCATCTGAATTTAAAAAACGCCGTGCTGCACGTGGCAAAAGCGGTATTTATACCGGAACGACTACGCAGCTTGA  
CGCATTAATAAAAAATGACCTTCCCGCAATAAAAAGAGGTTATTGGTCAGGATTTTATCGGATACAACAAGGAAATGGGG  
CATGGCTGTTAATGATATGCGCTTACAAGGGTAAACTTATGAAATCAATGATGAGGATTTTGTAAATGATGAGG  
ATAAACGCAAAACATTAAGCGAAAAACACATTAACAGATTAACATACAAAAACCGGATGAATTTACAGCGTCTGGGT  
GGAAGATCTCTGGCTGGCTTTTGGTGAAGAGGAAATTTACCTGGCTTTCTGGTTGGGCTCCCTGTTCAGCGAACAAA  
TCCGGGATAAAGAAAGAAATCCTTCCCTTCTTGAAGTCAACGGGAGCCGGAACGGGTAAATCAACACTGATGATTTT  
TGCTGGCGGCTGTGGCTGCTGACACTATGAAGGCTGTATCAACCAAGGATCAGAGCGGGCTGGAAGCGCACCTT  
TGGACAGGTGCGCCGATTAACCTGTTGTTCTGATGAAGCGGACCGGGAGACAATGCGCAAAAAAGAGCTGCGTTGACT  
TCGATAACCTGAAAAGTCTCTATAATGGCGGTGGTATCGCGCTTCTGGTGTAAAGGCCAACAAACACCTATGAT  
CCGGATTTAAGGGCGCTATCGTGTATGCGCAGAAATGCGCGGGTAAACGCCCTCCCGCAATTTATGAGCGCTGATACG  
CATATACCCGATAAAAAACGCCATTCACCTGATACCCGCTGGCGGAGACGGCTGGAATTTACCCGCTGAGAAGG  
TATCTGGGTTTATTCACCGGGCGTAAAGTCAAGAACCGGCGATTTATGCAACCGTTCCTGGAAGTATTCCTCAGCTGAAACG  
GAACGCCCTTGGCGATGCGAAAAATTCGCCATCCCCGATCGCCAAAAATCAGCACAACCTTATCGCGCTGGTCAAGG  
GCTGAAATGCGTTATTGATATCCCGGATGAATGGCTTGTATGCCACATGCTGGAACCTGGAACAAATGGCAACCGCGAG  
TTAAAGCGGGCGGCTGATTTACCGGAAGTATGGAGTTCTGGGAGCGTTCGACTTCTGGAGCATAACAAAAATC  
GGTGAACCACCTACGGCAAGGGATGCCGCGAGGGGATGCTATCAGTATTCGCAACTGGCAGAGGCTGCCGCTATTCA  
CCGCGTGGAGATCCGAACCTGACCGCAAAATGATGAGTTGCTCGGAGCGGACGTTCCCGACCTTTGACAGGCGCAAAA  
CCATTCGTAGTGAGGCTCCAGACAGGCAAAACCGCGGAAGAGGGGTCGCCGAGGCCAGAGAGCCGGAAGTACTGAAATGC  
CGGATATTCAAGTTACAAGGAGGGCGTTAA

>Cluster\_54608

ATGGCCTTTATGCTAAGTCTTTGCTCAACGCATACCTGGAACAGCGCCTGGCTGTATTACGCGCTATTTTTATTGC  
GCTTTGTGGAACACAGCGTTTCCGTGGTGGCTGGGTGATGTAACCTGACGATTCGGCTAACGCTGGGGATGGTGGCAG  
CGCGCTGACCGATCTCGATGACCGACTGGCGGACGTTTGGCTAACCTCATCATTACGCTGTCTGCTTTTTTATCGCG  
TCGGCCTCAGTAGAATGCTGTTTCCCTGGCCCTGGCTATTGCGATTGGCTTAAACGCTCTTACCAGCGCTTCATTTT  
GCTCGCGCTCTGGTCAACGCTATGCAACAATGCGCTTCGGTGCATTGCTGATCGCCATTTACACTATGTTGGGAACAT  
CACTGTATGAGCACTGGTATCAGCAGCCGATGTATCTGCTGGCCGGTCCGCTCGGTACAACGCTCCTGACACTATTGGT  
CATCTGCTGTTTCCCGTCCCGCTGCGCCGCTGACGCAACCTGGCGCTTGCATGAACAACCTGGCGCGTTATCTTGAAGCTCAA  
GTCGCGCATGTTGATCCTGATATGAAGATCAAAGCCAGGCACCGCTGTACGATTTGGCTCTCGCAACGGTCTGCTGA  
TGGCGACATTTGAATCAGACGAAACTCTCGCTGCTGACCCGCTTACGTTGGCGATCGTGGTCAACGGGGAACGCTCGCAGC  
CTGCATTTATTAATCTTGTGCGCACAGGATATTCACGAGCGTCCAGCTCTTCTCATATTCAGTATCAACATATGCGTGAACA  
TTTTGCCACAGCAGCGTCTGTTCCGTTTTCAGCGGCTGATGTCGATGACAGGCGCAGGCGTCCAGCAACTGTACGCT  
GTATTTTGTGCGTCAAGCTTATCAACATGATCGCATTTTGGCGCGCTTTTACGCATATTGATGCTGCGCTGGAGCGG  
ATGCGCGATAACCGCGCACCCCGCATTTACTCAAACACTGGGATTTTGTGAAACAATTTACGCGCCATTTGATGCCCCA  
ACTGGCAACAATTTGAATCAAGAACAGCCAGCCTACCCATAATAATGACGAAAAATGAGCTCGCTGATGACAGCCCGC  
ACGGGTTGAGTATATCTGGCTGCGTCTTAGCCGCTACCTTACGCGGAAATCCGCCCTCTCCGCTATGCGGTAAAGATG  
TCCGTTGGTGTGTGCTTCCGCTACGCCATCATTAGATTAACCGGAATGATCAGGGTATTGGATCTTCTGACAAAGTTT  
GTTTGTCTGCCAGCCAACTATAACGCCAGCGCCACCGCTGAAGTTAAGGATTTATTGGTACGCTGGTAGGTTATCGCCA  
TTGGCATTCTGTGCTGTGGTTTGTGCCATCAGTGAAGGGCAGCTGGTGTGCTGGTATTACCGGCTGCTCTTTTTT  
GCCTTCCGTAACGTGCAATACGCTCATGCAACGATGTTTACATCACACTTTTGGTGTACTGTGTTTTAACTTACTGGGTGA  
AGGTTTGAAGTACGCTTACCTCGCGTAATCGATACGCTGATTGGTGTGCGCATGCGTGGGCGGAGTGAAGTACATCT  
GGCTGACTGGCAGTTTCGCAATCTGCCGCGCATGCTCGAACCGGCCACAGAGGCCAACTGTCCGGTATCTCGATGCCATA  
CTGGACCAATAACCATCAGGGGCGTGATAACCGCTGCGCTGATCTGATTTGCGCGGATGACACACAACCGGATGCTGA  
GCTGGCGTGGTGGTATCAAATATGTCAGCGAGCCGAACGTTACCCGCAAAATTCGCGAAGCCGCTTTCGGTTGCTGT  
GCCTTAACCATACGTTTACCAGCTATATCTCAGCCCTCGGTGCTCACCAGGAGGATTAACCTTAACTTCTGAAATTTCCGGC  
TTTCTTGTGACGCGATTTGCTATGTTGATGACCGCTTACATCAACCTGCTGATGAAGAACGCGTCAATGAGGCAAT  
AGCTAACCGGATGCGAAGCTTGAACCTGAAACCGGACAGCAGCAAAAGAACCTTGGTGTACAAAGTGGAT  
TATTGATTGCATTACTGCTGAGATTGGTGTCTGCAACGCCAGATTACTCAAGTTCCGCGAGAACTCCTGTTTCCGGC  
TAA

>Cluster\_48405

ATGGCAGAGTATGAACATTTACGACTTGTAAAATTCCTCAGCAATTAGAAAAGAAAAAACCAGGATATGGTTACAGC  
TCCAAAACGTAACCTCAGGAAAGAACATACATGGAACATCTTAATTCATCAAAATGATAGTACAGTTGCATATGTTTC  
GAAGTAAACGATTTCTGGAACATTTGATCCATCATGATGATGAAGTTAAATATGATGGGTCTGCTGCCGATGAAGAC  
TGGTTAAGGCTTGGGTTACAGTTCTATCTCAGCAGATGATAAACTTTAGTATTAATTTCTTCTAACGATCACTGGC  
CGATTTAAAAGATAGAATTAATGCCCTACTCAGGGCCTATACCCGCAAAAACAAAAGAACCCATCTACAATAATTTCTG  
GTAATTTAATTTCAATTTGAAACCTTACAGTACAGACAGAATAGGAATCCGTTTAAAGAACTGGTTTTAAATGCCATA  
GATGATTTCCGATGAAATGGAAAAATTAATTTGTCGATATGAAATTTGGGATTTTGGAGGAAGAAATAGAAAGAGAAAGCGAA  
AAATGAAACCTTTAAAACCTTATTTGTTTAAATGTTGGGAGATTTTCTAGATTCTATATTTGGCCCTCAATTTCAATTA  
TGAGGGCACAGTGAATATATCCGATTTAAAATAGTATTTAGAAATACCAGAAGTCTATACCATTGACTTACCCCCATG  
CCAGATATGGAGACCGAAAAATCTTTAAATTTGAATTTAGATGATACCCACAACCCATTTGATGCATATGAAGATTTACC  
AATTAATAGTATAAATGACAGTGGATTAACAATCATCTTTTGTAGATAACGTAATTTGTCGGAACCGTGTCTTACCTAA  
ATGATCTGGTCAAGCTTTGGGACATGGCACTTCCGTTCCGGGAGTTGCAAGTTTTTGGAGACTTACGACATCAACTG  
GCTCAGAACCAACTGATTCGTTACGCTAGAATAATGCTCGGCTAAAGTTGATGATGAAGGACGTTTTCCAGACGATGT  
AGTAAATCCCAAATTAATGCTCGCAAGCAATTAGACAGCTTTCATCAAACTTTAATTTGATGATTTCAATATTTCACTCG  
GTGATCTTAAAGCTCTTTCAAGGGTATCGAAATGGGCAATGGGCTCAATTTCTCGATGACTTAGCTAGAGATCTTGAT  
ATATTTGATTAAGTTTCCGCTGGAAATGGTTCTTTTGGGGGCGAACCAGAGGATGCAATTTCTGAAATTCAAAACATA  
TTTTAATAGAAAAGAGAAATAGATTTCTTGAACCGCAGGTGCAAGTATTAACGGTAGGTTCTTATCTCATGAGG  
ATGGATTACCTCTGATCTAGCAGAATAATGTTGGAGTCTCCCTACCGCAAGAAATGATGAGCCTTCGATTTTTACCAGA  
TCTGGCCCGGGGATTTTAGGAATGTGTAACCCGACTTGTGCTGATACGGCGAACTGCGCTTTACGACACAGCCATA  
TAATATAAGGCCCTGGTGGAGATATCTGAAATCCGGCATATTAAGTTTAAACAATAAATTTAGATAGTCTTTTAAAG  
CTTCTCTGGTACATCAGTTGCGCGCCTATGGTAGCTAATAAGGCTGCATTAATGTTGAAACAATAACCAATAGTACG

GCTAACTTACTGAGAGCCTTGTAGTAAACGCCCTTCTCATCCTTTAGAGAATCAAAGCGCATTAATTTACTTGTATGG  
AAAATCCAAAATGACATCTATGAAAAGGATTGGTAAAGAGTAAAAAATTAATCTCATCCGAAGATAATCGAGTAGTAT  
TATACTCTCAAGATGTTTTACAGCCTGATATTTTCGCTGTATATGAAAATACCAATCCAGATAACTTCAAGAACACCAA  
GGTAAAAAAAATATCAGTATTAACACTTGCCCTTTGACCCACCGGTTAGACATACAGAAAAGATATCTTTGGCTGTGAAAT  
GAACCTCAGGTAAATAAGAGGTAATAACTGCCAGCATTTCAACTTTTTCAAAGTAAAAGAGGAAGGTGATGCTATCT  
CTGAAATGCCTAAAAATATAATTTGTGATCTGAAGCCAGGCGCAAATTTAGAGATTTTGCAACAATACAATCGGCTTCG  
GTCAGTTATGATAATGCCATAGAGAATTTAGAAAATACGTACCATCTTGTGTACGTTGCCAAGCCGGTTGGGCTGATTT  
TATTCAGCAACAACGTTATGCTATTTGTAGTTCAGGCTCAGCATACTGAGAATGTAATATTTACCAGACCATTTCAGCAA  
GAGTTCAGCCAAGAGTACAAAACAGAAATCGAAATTTAA

>Cluster\_23265

ATGAGCTACCCGTCGCTGTTTCGCCCGCTGGATTAGGTTTTACCACGTTAAAAAACCGCGTGTGATGGGCTCAATGCA  
CACCGGCTGGAGGAATACCCGAACGGCGCTGAACGGCTGGCAGCGTTTTATGCCGAACGGCCCGTACGGCGTGGCGT  
TGATTTGTCAGCGCGGTATCGCACCAGATTTAACAGGCTTTGGTATGGAAGCGGTGCAATGCTCAATGACGCCAACAG  
ATCCACACCATCGCACCATTACCGAAGCCGTACATCAGGAAGGCGGCAAATCGCCCTGCAATTTTGCATACCGGGCG  
CTACAGCTACCAACCGCATCTGGTCGCTCCCTCCGATTCGAGGCCCATCAACCGTTTCGTTCCTCACGAACCTCACCC  
ATGAAGAGATCTGCAACTGATCGACGATTTCCGCCAATTCGCGCAATTCGCGGCAATTCGCGGAGGAGGATACGACGTCGAG  
GTGATGGGTCGGAAGGTTATTTGATCAACGAATTTCTGACGCTGCGCACCAATCAGCGTAGTGACCGTGGGCGGGCA  
TTACCGAACCGGATGCGGTTTTCGCGTAGAAGTAGTGCCTGCGGTGCGCGAACGTTGTCGCAACGACTTCATTATATCT  
ACCGACTGTCGATCTCGACCTGGTCGAAGGCGCGGCTACTTTTCCGCAATGTTAGAGTTGGCGCAGGCCATTGAAGCG  
GCGGCGCGACCATATCAACACCGGCAATTCGCTGGCATGAAGCACGATTTCCGACCATGCCACGCGCGTGGCGCGG  
TGCCCTTTAGCTGGGTCACGCGCAAACCTGAAAGGCCAGTTTCGCTGCGCTGGTGACCACCAACCGGATTAACGATCCGC  
AGGTTGCCGACGATATCTCTCGCGCGGCGATGCCGATATGGTATCGATGGCGCGGCCGTTTCTGCTGATGCGGAACCTG  
CTGTCAAAAAGCGCAATCGGGACGAGCCGATGAGATCAACACTTTGATTTGGCTGCAACCGCCCTGCTCGATAGATCTCT  
CGTTGGCAAAAGTCACTCTGCTGGTGAATTCGCGCTGCCATGAAACCAAATGCAATCCTTCTGCTGCTGCA  
AAAAAATCTGGCGGTGGTGGTGGGACCTGCTGGGCTGGCGTTTGCATTAACGCGGCGGACGTTGGTCAATCAGGTA  
ACGTTGTTTGTGATGCTCACAGTGAATCGCGGTCAGTTTAAATATCGCCAAACAGATCCCTGGCAAGAGGAGTTTACGA  
AACGCTGGCCTATTACCGCCGGATGATCGAAGTACGCGGTGTGACGCTAAAACCTCAATCACACCGTGACAGCGGATCAGT  
TACAGGCGTTTCGATGAAACGATCTCGCAGGTGGGATCTCGCGCGCTCCGCTATCGACGGGATCGATCCGAA  
GTATTGAGTTATCTCGATGACTGCGCGACAAAGCGCGGTGGGCAACAAAGTTGCCATCATCGGTTGTTGGCGGAATGG  
TTTTGATACGGCGATGATTTAAGTCAGCCGGCGAATCCACCAGCCAGAATATCGCCGGGTTCTGTAATGAGTGGGGA  
TCGACAGTAGCTGCAACAGGCGGGGTTTGGTCCGCAAGGATGCAAAATCCCCGCTAGCCACGGCAGATTTGTGATG  
CTCCAGCGCAAAGCCAGCAAACCCAGGACAAAGGTTAGGCAAAACCCCGCTGGATCCATCGCACCCGCTGCTCTCGCG  
CGGCGTGAATAATGATCCAGGCGTAAGTTACCAGAAGATCGACGATGACGGGCTGCATGTAGTATCAACGGCGAAACGC  
AGGTATTAGCAGTGGACAATGTGGTGTCTGCGCAGGGCAAGAGCCAAACCGCCATTGGCGCAACCGCTGATTGATAGT  
GGGAAAATGTGCATTTAATTTGGCGGCTGCGATGTAGCTATGGAGCTGGACGCACGGCGGCAATTTGCCAGGGAACACG  
GCTGGCGTGGAGATTTAA

>Cluster\_36808

ATGTCATATACACCGATGAGTGTCTCGGACAACAAGGTTTTCGACATCACTCGGACACTATTGCAGCAGCCGATCT  
GGCTCGCTGTGTGAGGCTCTTTTCGCACTGGTAAAGCCTTCTGCGCTCGCGACAACCGCGCTATTGTTGTGGCAAG  
CGCAGACTCAACCGTGGCTCTTATACGCGTTCGCTGAAAGAGACACCCCATTAATAATGAAAGACGAAACTGTTCTGGCA  
CAGGTCGGGTACGAGCATTTTGTGCGCCCTGATACGCTGCATTCAGTTACGAAGATTTTGTGAAACCTGGCCGCA  
GCTGGACGAGGTTGGCTATACCCAAAAATTTGGTCACTATGCTGATGCCACTGGCGGCGGAAGGGCATATTTTGGTG  
GCTGTGAAATTTATTCGTTATGACGATCGCCCTGGAGCGAAAGAGTTCAATCGTCTGCAAAACATTTACGCGATCGTT  
TCTGTGCTCACCGAACAATCCAGAGCCGCTGTTAAACAATGTGACATGATGAGTTGTTATGCCGGAAACCGGATTA  
CCGATCCCTGGTCCGATCACCAACCGGCTGCTTTCCGCTGATATGGACGAACTGGTCAGCGAAGTCGCCAAAGAAA  
TCCATTACTATTTTCGACATTTGACGATATCAGTATCGTCTTACGCGCCACCGTAAAAACAACCTCAACATCTACTCCACT  
CACTATCTTGATAAACAAGCATCCCGCCACGAACAGAGCGAAGTTCGATGAAAGCCGAAACCCCTCACGAACCGGTGTTCAA  
AAGTAAAGAGATGCTGCTGATCAATCTCCAGAGCGGGACGATTTAGCCCCCTATGAACGATGTTGTTTCGACACCTGGG  
GCAACAGATTTAAACCTTGTGCTGTTACCCTGATGCTGGCGACACCATGCTGGGCGTGTGAAACTGGGCAATGC  
GAAGAGAAAGTGTACCCTACCAATCTGAATTTACTGCGCCAGATTGCCGAACGTTGGCAATCGCTGTCGATAACGC  
CCTCGCCTATCAGGAAATCCATCTCTGAAAGAACGGCTGGTTGATGAAACCTCGCCCTGACCGGAGCTCAACAATG  
TTGATAGTGAATTTGGCGAGATTTAGGCCGACGGAAGCCATGTACAGCGTGTAAACAAGTTGAAATGGTGGCGCAA  
AGTGACAGTACCGTGTGATCTCGGTGAAACTGGCACGGGTAAGAGCTGATTGCCCGTGGCATCAATAATCTCAGTGG  
CGGTAATAATCGCCGATGGTCAAAAAGTGAACGCGCGGCGATGCTGCGGATTTGCTGAAAGCGATCTGTTTGGCTATG  
AGCGTGGGCTTTTACCGGTGCCAGCGCCAGGCTGCTGTTTGAAGTGGCGGATGAAAGCTCCCTGTTTCCCTGAC  
GAAGTGGGCGATATGCCACTGGAGTTACAGCCGAAGTTGCTGCTGATTTGCAGGAACAGGAGTTGAAACGCTCTGGCAG  
CAACAAAATCACTTACAGCGGACGTCGCTTAATCGCCGCGACTAACCGGATCTGAAAAAATGGTCCGCGACCGTGAGT  
TCCGTAGCGATCTTATTAACCGCTGAACGATTTCCGATTACCTGCGCCACTACCGGAGCTCCGGAAGATATTCG  
CTGTTGGCGAAAGCCTTTACCTTCAAAAATTTGCCGCTGCTGGGGCGCAATATCGACAGCATTTCTGCGGAGACGCTGCG  
CACCTTGAGCAACATGGAGTGGCGGGTAACGTACGCGAACTGAAAAACGTCATTTGAGCGCGGATTTGCTAACACGGG  
GTAACGCTGCTGACGCTGCTATTGCCAGATTTGTTTTACCGGAACCTGAAACGCGCCCTGCGGCAACGGTTGTCGCCCTG  
GAGGGCAAGATGAATATCAGTTGATTTGTCGCGTGTGAAAGAAACCAACGGCGTGGTTGCCGGCCATAAGGCGCTG  
GCAACGCTGTTGGGCTGAAACGCACGACCTGCTGTCACGGATGAAGCGGCTGGGAATTTGATAAATCGGCATTGATTTAA

>Cluster\_22408

ATGAGCGA~~C~~CTTGGCAGAGAAATACACCGGTCAACATTGAGGAAGAGCTGAAGAGCTCCTATCTGGATTATGCGATGTC  
GGTCAATTTGGCCGTGGCTGCGCAGATGTCGAGATGGCCTGAAGCCGTTACACCGTTCGCTACTTTTACGCCATGAACG  
TACTAGGCAATGACTGGAACAAAGCCTATAAAAAATCTGCCCGTGTGCTTGGTGAAGTAAATCGGTAATACCATCCCAT  
GGTGACTCGCGGTTTATGACACGATCGTCCGATGAGCGCAGCCATTCGCTGCGTTACATGCTGGTAGACGCTCAGG  
TAACCTCGGTTCCATCGACGGGACTCTGCGCGGCAATGCGTTATACGGAATCCGCTTGGCGAAAAATGGCCATGAAC  
TGATGGCTGACTCTGAAAAAGAGACGCTGATTTTCGTTGATAACTATGACGGCACGGAATAAATTCGCGGATGCCA  
ACCAAAATTCCTAACCTGCTGGTGAACGGTCTTCCGGTATCGCCGTAGGATGGCAACCAACATCCCGCGCACACCT  
GACGGAAGTATCAACGGTTGCTGCGGCTATATCGATGATGAAGACATCAGCATTTGAAGGGCTGATGGAACACATCCCGG  
GGCCGACTCTCCGACGGCGGCAATCAATTAACGGTCTGCGGATTTGAAGAAGCTTACCGTACCCTGCGCGCAAGGTA  
TATATCCGCGCTGCTGCGGAAGTAGAAGTTGACGCCAAACCGGACGTTGAAACCATTTCTGCTCACGAAATTCGATCA  
GGTAAACAAGCACGCTGATCGAAAAAATTCGCGAACGTTAAAGAAAAACCGGTTGAAGGATCAGCGCGCTGCGTG  
ACGAGTCTGACAAAAGCGGTATGCGCATCTGATTTGAAGTGAACCGGATGCGGTCGGTGAAGTTGTGCTCAACAACCT  
TACTCCAGACCTCCGAGGTTTCTTCGGTATCAACATGGTGGCATTTGCACCATGGTCAGCGGAAGATCGTAACCT  
GAAAGATATCATCGCGGCTTTGTTCTGCTCACCGCGTGAAGTAGTGACCCGCTGACTATTTTCAACTGCGTAAAGCTC  
CGCATCTGCTCATATCTTGAAGCATTAGCCGTGGCGTGGCAACATCGACCCGATCATCGAAGTATGCTCATGGC

CCGACGCCTGCAGAAGCGAAACCGCGCTGGTTGCAAAATCCGTGGCAGCTGGGCAACGTTGCTGCGATGCTGGAACGTGC  
GGCGACGATGCTCGCGCTCCGGAATGGCTGGAGCCAGAGTTCGGCGTGCCTGATGGTCTGTACTACCTGACCGAACAGC  
AAGCTCAGGCGATCTCGATCTGCGTCTGCAGAACTGACCGGCTTGAGCACGAAAACTGCTCGACGAATACAAGAG  
CTGCTGGATCAGATTCGCGAACTGTTGCGTATTCTGGTAGCGCCGATCGTCTGATGGAAGTGTCCGTAAGAGCTGGA  
GTTGGTTCGTGACAGATCGTTCGGTGACAAACGCTGACGAAATACCGCTAACAGCGCCGACATCAACCTGGAAGATCTGA  
TCACCCAGGAAGATGTGGTGGTACGCTTTCTCACCAGGGTACGTGAAGTATCAGCCGCTTTCTGAATACGAAGCGCAG  
CGTCTGGCGGGAAGGTAATCTGCGGCACGATTAAGAAGAAGACTTATCGACCGACTGCTGGTGGCGAACACTCA  
CGACCATATCTGTGCTTCTCCAGCCGTTGGCGCGTCTATTGATGAAGGTCTACCAGTTACCAGAAGCTACTCGTGGCG  
CAGTGGTCTGCGGATCGTCAATCTGCTGCCGCTGGAACAGGACGAACGATATCACCGGATCCTGCGGTTGACCGATTT  
GAAGAAGGCGTGAAGTCTTCAATGGCGACCGCTAACGGTACTGTGAAGAAAACCGTCTCACCGAGTTCAACCGTCTGCG  
TACCGCCGTAAGTGGCGATCAAACTGGTGAAGGTGATGAGCTGATCGGCGTTGACCTGACAGCGCGGAAGCAGAA  
TAATGCTGTTCCCGTGAAGGTAAGTGGTGGCTTTAAAGAGTCTTCTGTCGCGTGGATGGGCTGCAACACCACCGGT  
GTTCTGGTATTCTGTTAAGCGAAGCGATAAAGTCTGCTCTCTGATCGTGCCTGCTGGCGATGGCGCAATCTCCAGC  
AACGCAGAACGGTTATGGTAAACGTACCGCAGTGGCGGAATACCAACCAAGTCCGCTGCGACGAAAGGGTTATCTCCA  
TCAAGGTTACCAGACGTAAACGGTTGGTGGTGGCGCGGTGCAGGTAGATGACTGCGATCAGATCATGATGATCACCAG  
CCTGGTACGCTGGTACTCGCTGTGCGAATCAGTATCGTAGCCGTAACACCCAGGGCGTAATCTCATCCGTTAC  
TCCGGAAGATGAAAACGTTGGGCTGCGAACGTTGCTGCAACCGTTGATGAGGAAGATCTGGATCCATCGACGGCA  
GTGCCGGAAGGGGACGATGAAATCGTCCGGAAGTGGACGTTGACGACGAGCCAGAAGAGATAA

>Cluster\_20609

ATGAAAGCGGTATCTCGCGTTCACATCACCCCGCATATGCACTGGGATCGGGAGTGGTATTTACCACCGAAGAGTCAG  
CATCTGCTGGTCAATAATATGGAAGAGATCCTGTGCCGACTGGAACAGGACAACGAATACAAATATTTACGTACTCGACG  
GGCAACCGGCGATCCTCGAAGATATTTTCGCGGTGAAACCGGAAAACAAGACCGTGTGAAGAAACAGGTAGAAGCAGGC  
AAGTTGATTTATCGGCCCTGGTATACCCAGACCGATACACGATTTGTTTCTGCGGAATCCATCGTCCGTAATCTGATGTA  
CGGAATTCGCGGATCGCTGCTGCGGTTGGCGAGCCGATGAAATAGGTTATTTCCAGATTCCTTTGGCAATCCGGCAAC  
TGCCGCATATTTACAATGGATTTGGCATTACCCGACCATGTTCTGGCGCGGATGTTCTGAGCGCCACGGTACTGATAAA  
ACCGAGTTTTTTGGCAAAGCAGTGCAGGTAGCGAAGTGCAGCGCAGGTGCTGCCGCTGGGCTACGCATCGGTAAAGTA  
CTTACCTGCGGACGAAGACGGATTACGCAACCGCTCGACAGTTATTTGATGTGCTGAAAAAGCGTCAAGTAAACAAAG  
AAATTTTATGCGCAATGGTCTATGACCCAGTCCATGCGAATGCGAATAATCTTCCGAAAGTGGATGGAATGATGATC  
TACCCCAACGTAAGTTTGTGATGAGCCGCTTTGAAGAGGTATTTGAGAAGATCGAAGCGCAGCGAGATAATCTGGCAAC  
CCTGAAAGGGGAATTTATGATGCAAAATATATGCGCGTGCATCGCACCATCGGTTCTACGCGTATGGATATCAAAATG  
CCCACGCGGTATGAAAATAAGATTGTTAATCTGCTGGAACCGCTGGCAACACTGGCCTGGACGTTGGGTTTTGAATAC  
CACCACGGCTTACTGGAGAAAATGTGGAAGAGATCTTAAAAAATCATGCCACGACAGTATCGGTTGTTGTTCCAGTGA  
CAAAGTTCATCGGAAATCGTCCGCCGTTGAACTGGCTGAAGACATGGCGGATAATCTACTGCGTTTTTACATGCGCA  
AAATGCGCGATAACATGCCACAGAGTATGCGGACAAACTCGTCTGTTAACCCTGATGCCCTGGCCGCGGGAAGAGT  
ATCAACCACTGTGCGGCTGCGCGTAGCCAGTTAATTTGCGGGACGATCGCGGTGACGCTGTACCCTGATTTATTTCTG  
CCATGCCCTGAGATCGATCTCGCCTAATCTGACGCAAACTGTTCAATACGTAATACGATCCCTTTATGAGATTTG  
ATATTCAGATCAACCAGATGTCCCTTCTATGGGCTATCGCACGCTTTATATCGAAGCGAATCAGCCTGGCAACGTGAT  
GCGGCAAAAAGTGCAGCTGAAGGATATGGAATAATGCTTTCTGGCAAATGCGCTCAATGAGGATGGAACGCTACAAC  
ATTTACCCGCAAAAGAGAGTGGTAAATTAATTTCCGCGCAAGCGAAACCGCAATGCGGAGATTACTCATGAGCGTGGCAG  
AGTAGGGCTGTTATCCGCTATGACATGGCGGTGCGCGTAATCTGCATGAACGACGCGAAGACAATCCACTGGCAGAGT  
AGGGTGGAGTTGGCTGTCACTCTGAGTGATAACAGCAGCGCATGATGTTGGATATCAACCTTGATAACAGCGCTGACG  
ATCATCTGCTTCCGCTCCTGGTCCCTACACCTTTAACACCGCAGAGTGTCTGCGCGATACCCAGTTTGGTTCGCTAACG  
CGCCCGTGAACGACAGTGAATGAACAACCTGGCAGCAAGAAGCTGGAAGAAGCGCGGTTCCGGTATGGAATATGCT  
CAACTATGCTGCCCTTACAGGAAGGGCGTAACGGTCTGGCTGCTTTAGCGAAGGGCTACGTGAATTTGAGTCACTCGGT  
AAGAGAAGAAAACCTTTGCCATTACGTTGCTGCGTGGCGTGGGCTTACTGGGAAAGAAGATCTGCTTTAAGGCTGGA  
CGTCTTCCAGGAATAAAAATGCGGTTGCCGATTCACAATATACGTTGGCTCCTTTAGCTGCCGCTGAGGCTGTTAGTTA  
TACAGGTACGCCCTTCCAGCCCGGTGTAGCCAGCAGCGCGCATGGCTGACGCCAGTACAGTGTACAACAAAATCC  
CGTGGGATCGGATGAAGTTAAATAAAGCGGATTAATGTGCCGAAAGCTATAGCTTCTGAAAATGCCCTGTGGGA  
TGCCGTGATTAGCGCTCTTAAAAAAGCGGAAGACCGCAAGAAGTGGTATTGCGACTGTTAATCCGGCAGAATCGACAAC  
CTGTGAGGCAACTGTCGCGTTCACTGCTGAGGTGATTTCTACGCAACGATGATGGATGAAAGCATCAGCACGCGG  
AAAGAGATAATTTAAAGAACTGGGGCATTTTTACCAGGGCAGTACGGACATTTAGCTACCCTTGGCTGA

>Cluster\_24639

ATGCGAGTGTGAAGTTCGGCGGTACATCAGTGGCAAATGCAAGACGTTTTCTGCGTGTGCGGATATTTGGAAGCAA  
TGCCAGGCAGGGGACAGTGGCCACCCTCTCTGCCCCCGCAAAATCACCAACCACCTGGTGGCGATGATTGAAAAA  
CCATTAGCGGCCAGGATGCTTTACCCAAATATCAGCGATGCCGAACGATTTTTGCGGAACTTCTGACGGGACTCGCCGC  
GCCAGCGGGGTTCCCGCTGGCGCAATGAAAACCTTTCTGCTGATCAGGAATTTGCCCAATAAAAACATGCTCTGCATGG  
CATTAGTTTGGTGGGCGAGTGGCCGATAGCATCAACCGGCACTGATTTGCCGTTGGCAGAAAATGTCGATGCCCATTA  
TGGCCGGGCTATTAGAAGCGCGCGTCAACAACGTTACCCTTATCGATCCGGTTCGAAAAACTGCTGGCAGTGGGCAATTA  
CTCGAATCTACCCTGATATTGCTGAGTCCACCAGCGGATTTGGCGAAGTCTGATTTCCGGCTGATCAGATGGTGTGAT  
GGCAGTTTTACCAGCGGTAATGAAAAAGGCGAACTGGTGGTCTGGACGCAACGGTTCCGACTACTCTGCTGCGGTGCT  
TGGCTCCCTGTTTACCGCGGATTTGTTGCGAGATTTGGACGAGCTTACGGGCTTATACCTGCGACCCGCGTCAAGT  
CCCAGTGGGAGTTGTTGAAGTCTGATGCTTACCAGGAAGCGATGGAGCTTCTACTTCCGGCTAAAAGTCTTCAACC  
CCGCACCATACCCTTACCGCCAGTTCAGATCCCTTGCCTGATTAATAATACCGGAAATCTCAAGCACCAGGTACGC  
TCATTTGGTCCAGCGGTGATGAAGACGAAATACCGGTCAAGGGCAATTTCCAATCTGAATAACATGGCAATTTTCAAGCT  
TCTGGTCCAGGATGAAAGGAATGGTCCGATGGCGCGCGCTTTTGCAGCGATGTCACGCGCGGATTTTCCGTTGGT  
GCTGATTACGCAATCATCTTCCGAATACAGTATCAGTTTCTGCGTTCGCAAAAGCGACTGTGTGCGAGCTGAACGGGCAA  
TGCAGGAAGAGTTTACCTGGAACGTAAGAAGGCTTACTGGAGCCGCTGGCGGTGACGGAACGGCTGGCCATTTATCTCG  
GTGGTAGGTGATGGTATGCGCACCTTGCCTGGGATCTCCGCGAAATTTCTTGGCCGCTGGCCCGGCAATATCAACAT  
TGTCCGCTTGTCTCAGGATCTTCTGAACGTTCAATCTCCGCTGTTCAATAACGATGATGCGCACCACTGGCTGGCGG  
TTACTCATCAGATGCTGTTCAATACCGATCAGGTTATCGAAGTGTGTTGATTTGGCTGGTGGCGTTGGCGGTGCGCTG  
CTGGAGCAACTGAAGCGTCAAGAACTGGTTGAAGAAATAACATATCGACTTACGTTCTGCGGTGTTGCTAATCTGAA  
GGCACTGCTACCAATGTACATGGCTTAACTGGAAAACCTGGCAGGAAGAACGGCGCAAGCAAAGAGCCGTTTAACT  
TCGGCGCTTAAATTCGCTCGTGAAGAATAATCATCTGCTGAAACCGGTCATTTGTTGACTGTACTTCCAGCCAGGCAATG  
GCGGATCAATATGCGGACTTCTGCGCGAAGGTTTCCACGTTGTTACGCCGAACAAAAGGCCAACACTCTGTCGATGGA  
TTACTACCATCAGTTGCGTTATGCGCGGAAAAATCGCGGCTAAATTTCTCTATGACACCAACGTTGGGGCTGGATTA  
CGTTTATGAGAACCTGCAAAATCTGCTCAATGCTGGTATGATGAAGTTCTCCGCAATTTCTCAGGTTCTGCTT  
TCTTATATCTTCCGCAAGTTAGACGAAGCATGAGTTTCTCCAGGCGACCACTGGCGCGGAAATGGGTTATACCGA  
ACCGGATCCGCGAGATGATCTTTCTGGTATGGATGTGGCGGTAACATTTGATTTCTGCTGTAACGGGACGTGAAC

TGGAGCTGGCGGATATTGAAATGAACCTGTGCTGCCCGCAGAGTTTAAACGCCGAGGGTATGTTGCCGCTTTTATGGCC  
AATCTGTACAGCTCGACGATCTTTTCCGCGCGCGTGGCGAAGGCCGTGATGAAGAAAAGTTTTGCGCTATGTTGG  
CAATATTGATGAAGATGGCGTCTGCCGCTGAAGATTGCCGAAGTGGATGGTAATGATCCGCTGTTCAAAGTGAAAAATG  
GCGAAAACGCCCTGGCCTTCTATAGCCACTATTATCAGCCGCTGCCGTTGGTACTGCGCGGATATGGTGGGGCAATGAC  
GTTACAGCTGGCGGTCTTTGCTGATCTGCTACGTACCCTCTCATGGAAGTTAGGAGTCTGA

>Cluster\_55638

TTGCATATTTGATTGATGTCACAGGTTACCAGTCGGAAGTAAAGTCCCGGATATTGGTCGAGTACCTGGCCATGAG  
CCGCGCCATTATTGAAAAATGCCGGTGGAGCATCGCGTCAAGTATTTGATCAATGGTATGATCCCATGGATAATTAATG  
ATGTTAAAATGGCCTATCGGGACCTGCTGACGGATGAAGATATGTTCACTTCTCAGCCGTCGCGCAACAGCCTATCGT  
CATATTGAAAACCATGGCCGAGTAAAGCGGCCAGGCCGCGCATATCGTATCGCAATATCGCGCTGATATCGT  
CTATGTTATAGCTTCTTCGAGGGGCATAGCGATAGTTATACCGTGTCTATTCGCGCGATAAATGTGCCGTGGAAAACGG  
TGTGCGTATGCCAGCATGATCCCGCTGTTAAATAAAGAGCGTTATCTCGCGCATCCGAATTTCCGTGAGTTTATATG  
AATAAGCTGGCGGAATTTGAGCGGGCAGCGCATCTTCCGCAATTCGCACTTCGAGCTCAGGAAGTATCGAATATAC  
CGACATCGCCAGCGATCGGGTACTGAACATCTCCTCGCGGTGGGCGAAGAGTTTGGGTGATCGATTATTCGCTGAGC  
GTATTCAGTCTTTAAAAGACAAATACAGCCTGCCGATGAGTTTATCTGTGCTGCGGATGATCGAGCCGCGAAAAAT  
ATTGAAGCGCTTATTACCGCTACAGCTTGTGCTGCCGAGCTGCAGCAGCGTATCCGATGGTGTGGCGTATAAAGT  
CGACCGAACAACCTGAGCGGATCCTGCTGCTGGCGGAAGCTATGGTTTGTACAGCCAGCTTATCTTTACTGGT  
TCCTGACCGACGATCTGATTGCCCTGTACAACCTGTGCAAACTGTTTGTGTTCCCGTCCGTCATGAAGTTTCGGC  
CTGCCCGCCTGGAAAGCATGCGCTGCGGGGCGCGACTTAGGTTCAAACATTACCAGCCTGCCGGAAGTCAATGGCTG  
GAAAGTCCATGTTCAATCCACATGATGTGACGACATTCGCCGGTTCATGGAGAAGGCGTACCAGTGGCGGCTTT  
ATCGTGTGAGTGAAGCGCATGCTCTCGCGCAGTCGCCAAATTTCTGTGGCCAAATCCGCCCCTGCGCATGGAGGT  
TTCCTGCTGTCGTCAGTCTGCCAAGAGACGGATGCCGGGAGCGGAAAGCGTGACCGCTCCCGCTCCAGATGAT  
GCAGAAAATCGATGCGCTGAGCGAAGTCCAGCCTTGTGCTGGCATGGCGGTTGCGCGCAATAGCTTTAAGCGCCATA  
CCCGCAAGCTGCTGGTGGACATTTCCGTTTGGCGCAGCATACGCGAAGACCGGATCCAGCGCTCTCGCGCATC  
CTCAGCGAATTACTGAAATCTGGCGTGGCGGTTACGAGGTTTCCGCGTCTACTACACCCCTGGCGAGTGTATCGTA  
CGCAACCAATATCTGTCCAGTCAATTTCCCGGGCGAATTTGGTGTGACGAAACCGGTGCTGTTAGCAAGACGATGTC  
TTATTTGCCACCGATCTGACCGCGCATCTTCCCGGAGCTGGTGCAGCAAAATGACAGCATGCCGCGCGCGGGGCTTC  
CCGCAAGCTGCTGGTGGATGATATCTGCCATTACCGCGTGGAGTGAAGCATCGAAGGCATTCAGCGTGGTCCGAT  
CTGGCTGTCTGCTCGCAGAGCAGCCGACCGGCTGATCTGCGTCTGCGCAGCGTCCCGAGGATGTAAAGCGTGG  
TTGCGGAAAATCGCCATTGGGTGAACCGAACCCTGCGAGACCGTCAAGCAACTTCCATCTGGGAGCCGACCTCGATGCC  
AGCGTACCCTCCACTGGCATGCCGATAATGCACAGCGCTGTAGCAGCGATGGCTGCAGCTCCGTCATTTATCATGGT  
GGTACCATGGAGCCGCAAGGCGCACGCCACGACGCTGGCCGCTTCGAGGAACTGTGGCGCGAGGCAAGACTACA  
ACTTGTTTATCTGCGCAAAACAGGGCTGGAACGTTGACAGCTTGTGCGAAAAATACGCCATCATCCGACGTGAACAA  
AAGCTCTTCTGGCTGCAGAAATACAGCGACGAGTTTTTGGCGGAGCTATACGCTCGTTACGCGCGCTGATCTTTGCCT  
CGAGGAGAAGGCTTTGGCTGCCGTTGATTGAAGCGCGCAGAAAAAGCTGCCGGTATTTTCGCGACATTCGGTGT  
TTAAAAGAGATTTGCTCAGGAACATGCCTGGTATTTTCCCGTGAAGCGCGCTCCGATATCGCGAAGCGGATAGAGCTG  
TTAGCCCTGTACGAGCAAAACCGCATCTCTGTTCCGAAAATATCAACTGGTTAACCTGGAACAGAGCGCGAATTTCT  
CCTGAAAACCTGCCGATATCGCGCCAGCCGCGAAGCAATAA

>Cluster\_53503

GTGAATATAAAAATCAGCACATTTTTTGGCAGGGACGAATAAACGCCTTGGTGACAAAATACCTGTTACTTGAATGCCTTGG  
TGATGGCAGCCATGGCTGGGTATGGCGGGCGAAGCCCTGAAAGATGGAATAAATGTCGCGAGTAAAAATCCCTAAGGATA  
TTACTCGGGAAGACCGTCAAGCTTGGCGAAGGTAAGAGCTTTTAAACGTCGAGCGCAGCAAAAATATGTTGCAAAATTTT  
GATATGGGCGGTATAGATAAATGTTCTATATTTGAATGAGTATTTTCCAGCAAAACCTGGCGCAAACTCGA  
TGACAGGCAGCGTAATTTTGGCCAGACCTATGAACGTTGTTTCAAGATATATCGTCAAGTGTCTGTGCTGTGCATTT  
TGGCCGAATTACCAGTGCATAATACCCATGGAGATATTAAGCCACATAACATTTTGGTGGAGAGCGGACCTGGTGAAG  
TTGACGGACTTTGGCAGCTCAGCTTTACAGAAAGAAATTTACGTTTCTGTTACCGTGAAATGGCGGGACTGTGCTGATTC  
GGCCCAAGATTTCTCAAGCTCGATAGCCGTAGAGGCGACTGGAAGAGCTACTATTGGCGCAGCATCTAAGCTTAGGTT  
TTTTGCTATACCAGTGTGACAGGAAAGCTGCCCATGATACGCCAGCAAGTTACGCGCCAGCACCTTTCAAGCTT  
CCGACAGAGATTAATAGCTCTATTCATACGACCTGGAACAAGTGGTCTTACTTGTTTACAAAACGAGCGGAGGATCG  
CTTTTCCACTATTTCCGACTTAATTCATGCATTTGATTCTGCTGCCACTAAGCAATTAAGGTTGGTGTATTTGCTCCCG  
TTTTTCAAACCTAAACCTGCTCAGGACTGGTCAAGTGGCTGCTTGAAGCAATGTTCCGATCAATCTTACCAAAAAGCTGCT  
CAATTAGCGTCCGAGGATATAGCCGAGTAAAGATCTACAAGCTTTACATCAGCAACTTATTGCTTGTATCGCGCCAA  
TCGCTTATTCGACTTTGAAAAAGTTGTAGAAGATAAAGCGGATCTTACTTGGAGGTAATTTGACTCAACCAGCAGCTT  
GTTCCGAGTGTAGTTAAGGCAAACTACAGTTACGCAATATCAGTCAAGCAAAATTTCTGGCTGTGCAAGAAAGCAA  
GCTGAAGCAGAAAACCGCCCAACTATTTAGAATCTATCTATCTTGGCTTGAAGCGAATAATTTGAAAGCAAGAT  
ACTATTGGAGAAAGTAAACCAAACTCAATGAAGTCCATGTTAAGCCAACTCAATTTAGTTTGGCAGCAATGCT  
GTGATTAATCTGTTGTCAGCGGCTTATTTGAAAGCGCATTTGCGAGTAGCACCATTGGAATAACAGCATGAAAGAGAAAAA  
GAATGTATGCAAGCTTGGAGTTATTTGA

>Cluster\_24758

ATGCATATCGATTGACTGAAAAAATAATAAACAAAAGTTGGGCTTGGTTCGCTAACATCCATTGTCGTGAGCTCGAT  
GATCGGCAGCGGCTTGACGGACTCCCCAGAAATATGGCGGAGAAATCTGCCGTGGGCGCGGTGGCGATAGCATGGATAG  
TCTGTGGTATCGGCATGTTTTTCACTCCAGAACTTTTATCGTGTCTCAAACATTAGACCTGATCTCCAGTACGAGGAT  
TATATGTTATGCCGGGAAGGTTTCGGCCGATTTACGGCATTAAACGTCGCTGGGGCTACTGGCTGATGACTATATTCAG  
CAACGTCGCTTTGCCATTTATGGTGTGATGATACGCTGAATTTTCTTACCAGGTGATTTCAAGGAGGGAACAAATATTC  
CTTCCGTTATCGGTCCTTTTGTGATATGGGGATTTCACTTTTATGCTCTCCGTTACCCGATTCGCGGGTTCGAT  
AACATCGTCCGACCGCTGCGCAAACTGATCCCGTGGTGGCTTTATTTATTTCTCATGCTTTTATGAAGTAAAGCAAC  
GTTCCGAGATAACGTCGGGGCACAGCGGAGTAAAGCCAGTCAGGACCTAGGCTCTATTTTCTCACAGGTAACCTCAC  
CGCTTAGCGTGGCACTCTGGAGCTTCATCGCGCTTGGGGGCTGTGCTCTTCCCGTCCGCGCAAAAATAAACCGCAC  
GTGGTAAAGCCACTAATTTGGCTTCGTTGATCACTGATTACTGTCTGCTGGTCTCCATCCTGCCGTTGGCGTGGCT  
GACTAACATGAGCTCAGCGCAATTTCAACCCGCTCAACCGGATTTCTGAAGATTTGTCGCTGATGAGTAAAGGGAAGA  
TTATGATTAATCTTGGGGTGTGATTTCCGTTGCTTACCAGCTGGCTGGCGTGGACCATCTGCGCCGAACTGCCTATG  
GTGGCCGCGCAGAACGGCACATTTCCGAAACCGTTACGAAAAAAATGTGAAGGTTTCGGCTCGGTTTCGCTTTATAT  
AAGCAGTGGCTTTTACGCAAACTGCTGACTTCTGCTTACTTTCTAACGATGCTGGCTGCAATGCTGGCTATCTCTA  
CCCTGACCTTTTACTGCGTATTTAATGACCCAGGCACTGTTTAAACTATGATTTAGCGCGGATGATGCGCATAT  
ACCAGCAATCACAGCCGACGCGCGCTGGTACGAGTATTAATGCGCTTTGATTTCTGCTGTTTATGTTCTACGCCAG  
TGAATAAATATCTGGCGATGGTTCAGTGTCTTACGCTGGCGTGGCCCTGTTTATCTGGGCAAGAAAAAAGACG  
ATCGCGCAGATAAAAATTTACGCTACGCGAAGTGGCAATTTTATTTTACTGCTGGTCTCGACATCATTGTTTTTAT  
CTACTGCATATAAAAACGATACATTTTTAG

>Cluster\_23247

ATGAAACCTTCCACTGAATGGTGGCGATACCTTGGCCGCTGGCGGTCATCGCCATTATGCTCTACTTCCGCTTCCCGG  
AGGGCTGGAGAGTACATACTGGCTCTACTTTGCTGTTTTTACTGGCGTGATCGTTGGACTGATCCTCGAACCCGTGCCGG  
GTGCCGTGGTGGCGATGGTGGGTATATCCATCATCGCCATTCTTTCGCGTGGCTGCTGTTTAGCCCGGAGCAGCTCGCC  
CAGCCAGGTTTTAAGTTCCACCGCAAATCCCTCTCCTGGGCGGTTTTCTGGTTTTTCTAATTCAGTTATCTGGCTGATTTTT  
CGCCGCTTTATGTTTTGGTACGGCTATGAAAAACCGGGCTTGGACGTCGCATCGCGCTGATTTGGTGAAAAAATGG  
GGCATCGCAGCTGTTTTCTCGGCTATGCAGTGTCTTCCGAGCTGATACTCGCCCTGTAACACCGTCCAACCTCGGCG  
CGTGGTGGGGGATATCTATCCCATCATCCGTAACTGCCACCGCTCTATCAATCACAAACAGCAGCAGTTCGGC  
CAGCATTGGCTCGTACATCATGTGGATGGGGATGTTGGCGATTGGCTGACCAGCGCCATTTTCTGACGGCGATGGCTC  
CAAATTTGCTGTTAATTTGGACTGATGAAAAGCGCATCTAACGCCACGCTGAGCTGGGGCGACTGGTTCCTCGGCTGTTG  
CCGCTCAGTATTTTACTGGTCTGCTGGTCCCTGGCTGGCTTACGTGCTGTACC CGCCGGTACTGAAGTCTGGTGATCA  
GGTGCCCGCTGGGCAGAGACAGAACTGACGGCAATGGGCCGCTCTGTTTCGCGTGAAAAACGGATGCTGGGGCTGATGG  
TAGGCGCGCTGGTGTGTGGATTTTCGGCGGTGATTATATCGATGCGCGATGGTTCGGTTACAGCGTGGTGGCGCTGATG  
CTGCTTCTGCGCATATCATAGTTGGGACGACATTGTCTAGTAATAAAGCCGCTGGAACGTTTTTCTTCTGGCTGGCTCGCT  
TATCACCTCGCTACCGACTCAACAACACCGGTTTTATTAGCTGGTTTGGCAAACCTGTTAGCAGGCAGCTTAAAGCGGTT  
ATTCGCCAACGATAGTGTGGTGGCGTTGATTTGGTCTTTTATCTACTGCGCTACTTTTTTCGCCAGCGCCACGGCGTAT  
ACCTCCGCTCTCGCGCGATGATGATGCGCGCGCTGGCGATGCGGAAATCCCGTGCCGGTGTCTCGCTGATGGT  
TGGCCCGGCAATTTGGTCTGGGAGCATTCTTACCCATACGCCACCGCCAGTCCGATTTACTAGCCGATTTTACT  
TGCCAACGGTGGATTACTGGCGACTGGGGCAAATTTTGGGCTGATATCTCTGATTGCTGGTGATTACCGGCTTACTG  
TGGATGCCCGTGGTGTGCTTTAA

>Cluster\_15501

ATGTCTTTAGCAAAGATAATATATGGAATTTATGGCGCCCCGGTGGTGATGGGTGTCATGTTTTCTTATCCCTGTACC  
TGACGGTATGCCCGCAGGCGTGGCATTACTTTGCAGTGTGTTGGCAATGATGTCGGCATGATCCFCGAGCCAATTC  
CGGCAACGGCGATCAGTTTTATTGCGGTTACTATTTGCGTATTTGGCAGTAATACCTGCTCTTTGATGCCAAAGAAATTA  
GCTGACCCAGCTTTAATGCGCAAAAACAGGCGTGAATGGGCTTGGCTGGTTTTTCCAGCACCGGATCGGTCGGT  
ATTTGGCGCATTTATTTTTGCATTAGGGTATGAAGTTTCCGGTTAGGCGCTGATTTGCCCTTTTCTGGTGAATTTCA  
TGGCAAACGCACGCTGACGTTGGGTTATGCGATTGTCTATATCGACATTTCTGTGGCACCGTTTACACCGTCCAACACC  
CGCGTACCGGGGTCAGGTTTTTCCGGTCAATAAAACCTGCCGCGCTGTTTAAATCATTTCCGAACGATCCGTCGCG  
GCTGCGTATGGCGGCTAATTTGATGGGATGATGGTCAATAGTACCAGTCTGAGTTCATGTTTGCACCGGATCGGCG  
CACCAAACGTGCTGGGCTGAGTTCGTCAGCAAAATGGCGGTTACAGATTAGCTGGTTCAGTGGTTCCTCTGCTTC  
CTGCCGTTGGGGTATCTTGTCTATCATTTGCGCGCTGCTTTCTACTGCTGTACAAACCGGAAATCACACACAGTGA  
AGAAGTGGCAACCTGGGCGGTTGATGAACTAAAACCATGGGTGCGCTGACGCGCAGAGAGTGGACGCTGATTGGCCTTG  
TATTTGCTCAGCTTAGGTTTGTGGTATTTGGCAGTGAAGTCAATTAATGCTACTGCGGTAGGTCGCTGGCAGTTTCGCTG  
ATGCTGGCGCTGCACGTTGTGCCGTGGAAGACATTACTCGCTATAACAGCGCATGGAACACGCTGGTCAACCTGGCAAC  
GCTGGTTGTATGGCAATGGCCTGACCGTTCTGGCTTATCGACTGGTTCGCCAACACGATGAGTACGCACCTGGAAG  
GCTTCTCACCAAACGCAACGGTGTATGTTACTGGTTCGGTCTTACTTTGGCCACTACCTGTTTGGCAGCTGTCTGGC  
CACCCGCAACCATGGTTCGGGTTATTTCCGCGCTGGTAAAGGGATTTCCGGCGTACCAATGGAACACCATGTTCTCT  
GCTGGTGTCTATCGGTATCATGGGCTGTCTGACGCTTATGCAACCGGCTCTGGGGTGTATTTTACGGCTGTGGCT  
ATGTGAAATCAAAGATTACTGGCGTCTTGGCGCAATCTTCCGGGTGATTTACATCTCTATGCTGCTGTTGGTTGGCTGG  
CCGATTCTCGCCATGTGGAATAA

>Cluster\_53048

ATGTTTGAAGTGAACCTTTTAACTCAGGGTTTTTTCGACATTACTCAATAATCCTCAGGCGCTGCTGTTTGGCACTTTTGG  
GGTGTGCTGGGTATTTGATTTGGCGCTTTGCCGCTGACAGCGACCATGGGTGTGGCGATTTTGTGCTTTTACCT  
ATGGCATGGACCTGTGTTTTCTGGCTGTTGATGATTTGCGCGCTTTTTTGGTGGCGTCTACGGTGTCTATCACCGCA  
ATTTTGTCTCAAAATTTCCCGAACGCTGCGCCGACGACCGCTATTGATGGTTATGAGCTGACGAAACAGGAAAAAGC  
AGGGCTGGCATTTAGTGGCGCCAGTTCCTCTCTTATGTTGGCGGAACGCTCAGCATTATCGTGTGATGTTTCTCTCTC  
CGGTACTTGGCAGTTGGGCGTGAATTTAGTGCTCGGAGTCTTCCGCCGTTGCAACCTTCCGACTGAGCATTATTTGCC  
AGTATTTCCGGTGAAGTCTGATTAAGGGGCTGATTGCCGGGGTGGCGGATTGCTGATCGCAACGATAGGCGTTGATCC  
AATGGGCGGTTTTCCACGGTTTACAGTGGATTTGTGGAGCTGATGAAATGTGCCATTTATCCCGGTGATGATTTGGTTAT  
TTGCTGCTTCAGAAAGCATTTCCGCTCTATGGAGCAAAACAGCAAAATTCCTCGGGCGCGAAGTGGCTATCGGAGTCTG  
TTACTGCCCTGGCAAACTACGCCGATCGCATTAACATTTTGGCTCATCAGGATTAGGGGTTTTTATCGGCATGAT  
CCCGGCTGGGGGCGGATATTTGACGCTTTTGTGCTTATAACGAAACTCGTCTGTTTACAGTAAAGACACCGAAACTTTG  
GTAAGGGTGAATTAAGCTGTGGCTCTGTGAGGCAAGGCGCAATGGCTGCACCGGTTGGCGCATTTGTTACCTATGCTG  
ACGCTGGGGATCCCTGGCGATGCGGTAACCGCCATCATGCTGGGCGGTTAACGTTACAGGGAATGCAACAGCCCGCT  
GATGTTTACCGACCAAGTGTATGTTTATACGCTGTTTTCGGCATGATCTTCTGTTACTTATGCTACTAGTCTCTTG  
GACTGCTCTCTTTTGAAGTCACTCGGTAATGTTGGTGAATTTCCCGCAATATTCTCACACCGATCTCGCATCTTTG  
GTGGTGGGACTTATGCACTGAACAACAGCCTGTTGATGTCGGCATTTATGTTGATTGGGGCTAGTGGGCTATTTTCAT  
GCAGAAAGGGGATATCCGGCGTCCGAGTGGTCTTGGCATTTATGGGGCAATGGCGGAAAGTAAATTTTCCCGGTG  
CGTGTGCTTTACAGGGGTTCACTCGACTTTCTGTATACCGACCGATCACTTGGCATTGCTGACTTGGCCGCTTT  
ACGCTACTGACCAATAATCCGCAAAATAATCGTTTTACGGCTCAATAA

>Cluster\_41620

ATGACGATAAGCTTTAACACCATTCGCTCGAATACGCTGGTTCGCTGTTTTATGCGGAAATGGATAACTCGGCGCGAA  
TACTGCACAGGACAGCGGAGCATCGCTGCTGATTGGTCAATGCCAATAACCGTGCAGAGATTGTTGGCAACAGTCTGGTGC  
TGATGCCGCTGGCAGACTATGCACGCCAGATTTGTTGGTGGGGAAGTCACTGGCGCTATGGTGGAGCTTATCGCCAG  
ACTGACCCGTTTGGCGAGCTGTATGTGATTGCCGTTCCGGAAGCCACAGGCGCGCGCAACGGTTACGCTGACGGTGC  
CGGGGCGCAACCGAAACCGGCACGGTGAATGTTATGTTGGGACGTACCGCGTGCAGGCACCGGTGACCAACGGCGATA  
ACGTCACGACGATTTGGCGGAGTATCAAAGATGCCATTAATGCGCTTCCGGCTGCTGCGGCTTTACGGCTCATCTCGGA  
GGCGTGGTACGCTGACCGCGCTCATAAGGGGCTTTGGCGGAATGAAATTTCTGTCAGCCTCAATTACTACGGCTTTGG  
TGGGGGCAAGTGTGCCAGCGGCGTACAGATTGCCGTTGGCGACGGGACCGCGGAAACGGGCGCTCCGTTTCTCACCG  
CGCGGTTGGCTGCAATACGGGATGAGCCGTTGATTATATCGGCTGCGGTTCAACGACACGGCTCCGTTAACACGCTG  
GTGACGAGATGAACGATACCGAGCTCGTGGAGCTATGCCGCTGAGCTGATGTTGCTATGCTATACGGCAAAACCGCT  
CACGCTGTGCAACTGGTACCGCAGGTGACAGTTTAAACAGCAGCACATTACCTGGCGGGTACGAAAAAGAGACC  
AGACCGTCCGACGAACTGGCGGCAAGCGTACCGCCGCGCAGCGGTTTTTATTCGCAACGATCCGGCAGCTCCACG  
CAGACCGTTGAGCTGGTGGGATGCTGCTTGGCGGAAAGGGGAAACGGTTACGATGACCGAACAACAGACCTGCTGCT  
TCATGGCGTGGCAACCGGCTATGTCGAAAGCGGGTACTGCGCATTTACGCTGATGTTGCTACCGCTACAGGAAACCGCT  
ACGGGTTTGGGATAACAGCTACTAGACAGTGAAGTCTGTCATACAGCGGCTATGTTACTGCGCAAACTGAAATCCGCT  
ATTTACAGTAAGTACGGGCTCACAAGCTTGGCAGTGAAGTACCGCTTTTGGTCCCGGTGAGGCAATTTGCTACCCGCG  
GGTATCAAAGGGGACCTGCTGGCAACCTACCGTCAAGTGTGAGCGTGGGGATCGTGGAAACTACGACTGTTTAAAG  
AGTACCTAGTTGTGGAGCTGATGCCAGGATCCGAACCGCTGAAACAGCTGTTCCCGCTGACTATGTTAACAGTTG  
CGTGTCTTTGCCGTTGGTTAACAGTTCCGCTCTTCAATATTCAGAGGAGTCCGCAATA

>Cluster\_22048

ATGCGTAATCCCACGCTGTTACAATGTTTTCTACTGGTATTACCCGGAAGGCGGTAAGCTCTGGCCTGAACTGGCCGAGCG  
CGCCGACGGTTTTAATGATATTGGTATCAATATGGTCTGGTTGCCGCCGCCCTATAAAGGCGCATCGGGCGGGTATTCCGG  
TCGGCTACGACTCCTATGATTTATTTGATTTAGGCGAGTTTGATCAGAAAGGCGAGCATCCCTACTAAAATATGGCGATAAAA  
ACACAACCTGCTGGCCGCAATTGACGCTCTGAAACGTAATGACATTCGCGTGCTGCTGGACGTGGTAGTCAATCAACAAAAT  
GGGCGCGGATGAAAAAGAAGCTATTTCGCGTGCAGCGTGTAAATGCTGACGATCGTACGCAAAATGACGAAAGAAATCATTTG  
AGTGCGAAGGCTGGACGCGTTACACCTTCCCGCAGCTGCCGGCAACTACTCGAGTTTATCTGGGATTTTAAATGTTTTT  
AGCGGTATCGACCATATCGAAAACCTGATGAAGATGGCATTTTTAAAATTTGTTAACGACTACACCGCGAAGGCTGGAA  
CGATCAGGTTGATGATGAACCTCGTAAATTCGATTACCTGATGGGCGAGAATAFCGATTTCCGCAATCATGCCGCTGACCG  
AAGAGATTAATACTGGGCGCGCTGGGTGATGGAACAAACGCAATGCGACGGTTTTCTGCTTGTATGCGGTCAAACATATT  
CCGGCGTGGTTTTATAAAGAGTGGATCGAACACGTACAGGAAGTTGCACCAAGCCGCTATTTATTTGGTGAATACATG  
GTCGATGAAGTCGATAAATGCAACGCTATATTGATCAGGTGGAAGGCAAAACCATGCTGTTTGTATGCGCCGCTGCAGA  
TGAATTCATGAAGCATCGCGCATGGGCGCGACTACGACATGACGCGAGATTTTCACGGGTACATTAGTGGAAAGCCGAT  
CCTTTCACGCGCTAACCTCGTTGCCAATCATGACACCAACCGTTGCAAGCCCTCGAAGCGCCGGTCAACCGTGGTT  
TAAACCGCTGGCGTATGCTCTAATTTTGTTCGGGAAAATGGCGTTCCCTCGGTGTTCTATCCGGACCTACCGTGGCC  
ATTACGAAGATGTCGGTGGTACGGGCAACCTATCCGATAGATATGCCAATAATCGAACAGCTTGTATGAGTTAATTTCTC  
CCCGCTCAGCGTTTTGCCCAACCGTGTACAGAGTTATTTTTCTGACCATCCGAACTGCATTTGCCCTTAGCCGCTGACCG  
TGACGAATATCCCGCTGCTGGTGGTTCATGTCGAACGGGATGATGGCGAAAAAACCATTCATCTGGGAGAGAAATTACG  
GCAATAAACCTGGCGTATTTTTCTGGGAAACGGCAAGAGAGCGTAGTGACCGACGAAAAACGGCGAAGCAACCTTCTTT  
TGCAACAGCGCGAGCTCAGCGTGTGGTTATCGAAGAGGTGATTTAA

>Cluster\_28226

ATGAGTACTACAACCAGAATATCCCGTGGTATCGCCATCTTAAACCGCGCAATGGCGGGCATTTTCGCTGCTCGTGGTT  
GGGATATCTGCTTACCGTTTTGATTTTCGTTTTAATCGCCCTGGTACTCACCGAAGTACAGGGTGAATTCGGGCTGACGA  
CGGTGACGGCGCAAGTCTGGTATTCGCGTCCGCGACTTATCTCGCTGGTTTCGGCGCCCTGATGCTCGGCCATCATGGTGC  
CGTACGGGCGTCTGCTGGCAATGGTACCAGCATCGTTCTCTCTCGGCCGGGACGCTGGCCGCGGCTTTCGCCCAGG  
CTACATCACCATGTTTATCGCTCGTCTGGTTCATCGGCATGGGGATGGCGGGTGAATACGGTTCAGCGCCACCTATGTCA  
TTGAAAGCTGGCCAAAGCATCTGCGTAAACAAAGCCAGTGGTTTTCTGATTTACAGGCTTCTCAGTGGGGCCGCTGGTTGCC  
TCTCAGGTCTATAGTCTGGTGGTTCGGTCTGGGCTGGAGCGCTGTTCTTTATCGGCATTTTGGCAATCATCTTTGCTG  
TCTCTGGCTGCGTAAAAACATCCCGGAAGCGGAAGACTGGAAAGAGAAACACGGGGGTAAGCACCAGTACGCACGATGG  
TAGACATTTCTTACCGTGGTGAACATCGCATTTGCCAATATCGTAAATGACACTGCGCGCGGCTACTGCGCTGTGGTCTCTC  
TTCGCGGTAACCTGCAAAATGCCGCGATCGTCTGCTGACTCGGGCTGTTATGCGCGCAATCTTTATCAGCTTTATGGT  
GCAAAGTACGGGCAACCGTGGCCAACGGGCGTAAATGCTGATGGTGGTCTGTTGTTTTGCTTTCTCTACTCATGGCCGA  
TTCAGGCGCTGCTGCCAAGTATCTGAAAACCGATCTGGCTTATGACCCGCTACTGTCGCCAATGTGCTGTTCTTTAGT  
GGCTTTGGCGCGCGGTTGGGTGCTGCGTGGTGGCTTCTCGGTGACTGGCTGGGAACCCGCAAGCGTACGTTTGTAG  
TCTGCTGGCTCGCAGCTGCTGATTTATCCGGTATTTGGCATTTGGCGCGCAACGCTGCGGTGCTCGGTGCTGTTACTGT  
TCTTCCAGCAAACTGCTGGTACGGGCTACTCAGGATTTTACCAGAACTGATCGCGGTTATTTTCGATACCCGCAACGCT  
GCGCGGGGCTGGGCTTTACCTACAACGTTGGCGACTGGGCGTGCATAGCTCCAATCTCGCGCGCTGATCGCTCA  
ACGCTGGATCTGGGAACGGCACTTGGCTCGCTCTCGTTAGTTTAACTTTGTTGGTGTATCTGCTGATTTGGTCTGGATA  
TGCTTCTCGTCTCAGCTTGGTTCGCGCCGGAAGCATTCGCTACTCATGACGCTATCGACGGCAAAACCATTTAGCGGT  
GCCGTGCCGTTTTGGCAGCCCAAAAACGATTTAGTCAAACCAAAAAGTTAA

>Cluster\_27080

ATGTCTGATAAGTCAATCATAGCTGTAGTTATGGCAGGAGGACTGGAAGTAGATTTATGGCCGCTATCAGCTGAGTTATA  
TCCAAAACAGTTTTTAAAAAATGGTGGTGAATTTATCGCTGCTTACGTC AACGTTGAATAGACTTCTAAATATCATTTG  
ATGCCCCCTGGTTATTACTAATGACAAATCATCGCTTTATTTAGTACGAGCAGTTAAGGCAGATGAATCAACTTAGTGGT  
AATATAACTCGAACCTTGTGGCAAAAATCTGCACAGCGATGCTTTAGCCGCTTTTTCAGCCCTTAAAGCGTGATAA  
AAATAAAGACCCTATCTTATTAGTGTCTGCTGCAGACCATATAATAAAAAAATGAAGAAGCATTTTGTGAAGCGATAAAAT  
CGGCTATGTTTTATGGCTGAAGAAGATAAAAATTTGCATTTTGGTATAAATACCAACTTATGCTGAAACGGGATATGGTTAC  
ATAAATATTGGAGCGAGAGTTGAATCTAATATCGAAGTCGATAACGCTCATTTTTACGTGGCAAAAAAGTTTGTAGAAAA  
ACCTGAACGCTGAACCTTGCCTGAGAAATATTTGTTCTTCAAAAAAATTTTATGGAATAGCGGAATGTTTATGTTCAAGCTT  
CAGTCTTCTTATCAGAGTTGAAAAATACTGACCTGATTTTTGAAATATGCGAAGAAGCCATATCGGCATCATCTAAA  
GATTTAGATTTTATAGCTTACCTGAGAGAATGTTTTGAGAAATGCTTCTGAGTCAATCGATTTTGTGTAATGGAAAA  
CACAAAACGTTGTGTTGTGCTGTTGATATCGGATGGAGTGTGTTGGCTCGTGGCAATCATTTATGGGAGCTCAGTG  
ATAAAGTCCATCAGGTGATGATGATAAAGGTGATACCTTAACTACAACAAAAAATAATTTATTTACTCTGATTCT  
CGCTAGTTGCTGCTGATAGTGTGAGAAATTTGTCATAGTGCAACTAAGGATGCAATTTAGTAGCAAAATAAATCTGA  
GTTTCAAGATGTAAGAAAAAATCGTTGATCTACTTAAAAAATAAATCGCACAGAGCATTTACTCATAGAGAAGTATTTA  
GACCATGGGGAAAGTTTGACTCTATAGATCAGGTTGACAGATAACTGTAAAAAATAAGTAGTGAACCCGGCGAAGGG  
CTTTCTTTGCGTATGCATCACCACGTTTCTGAACATTTGATTTGTTGCTGGCACAGCAAAAGTCACTTTTGAAGGTAC  
AGAAAAGCTAATACGGTAAATGAATCAATTTATTTCTTGGGCAATCTATAGTTTAAAAAATCAGGTGTTTATAC  
CATTAATATTAATAGAAAGTAAAGCTGTGGTGAATTTCTTGGTGAAGATGATTTCTCGGCAGAAAAGAAAGATATAAAAAAG  
AAGATTAACCATGAATAA

>Cluster\_53481

ATGGGTAAATCAAATTTCCACCGCTTATACCATCTTGTTCGTGCTGATTTGCGTTAGTTGCGCAATGACCTGGATTGT  
ACCTGCGGGAAAAATATCAGATGGTGACAAATGCCGCACTGGGAAAGGAAGTTCCTGTTGACAGGCACTTACGCACCTGTTG  
AGGCACAACCACAGGGTATTACGGCTGTCTGTAGCGCCATCGACGGCTTGTACAACCATCAACCTTACCTGCGGGGA  
GCGATGATGTCGCGCTGTTTGTCTGATCATCGGTGGATTTTTGGGAGTAGTAAATAAAACCGGGCAATAGATGCGCGG  
TATCGAACGAGTGCAACTCGCCCTAATGGTTCGGGAAGAGTGGATGATTTCCGATCTCTGATGGCGCTCTTCCGCTGCGG  
GTACTATTTATGGGATGGCGGAAGAACTACTCCCTTCTACACGTTGCTGGTGGCCGCTCATGATGGCTGCCCGCTTTGAT  
CCTCTGGTCTGCGCCACAGTGTATTTGGGATCGGGCATTTGACAGCTGGGCTCAACCATTAACCCATTTGCTACCGT  
CATTTGCTGCCAACCGCGGGAATCCCTTTACTCAGGGCATTTTGTCTGCGTGTATTTTGTGTTAGTAGGCTACGTGA  
TTTTGTTTTGTTGGTTATGCGTTATGCGCCGCAAAAGTTTCGCAACAGCTCCGGAAGCTTATCGTGGCGGATAAGATGGCT  
GAAAACAGGGCGCATTTTCTGGGAAATCGTTTCAAGAACGATGCTGGAATTTACCCCAACGGCAAGCGATCTGATACT  
TTTTGCTGATCTTTGCTTTATGATCTACGGCGTAGCGTACTGGGTTGGTGGATGGCGGAAATCTCTGCTGCTTTTC  
TGGCAGCTGCGGCTCATCTGGGTGTCATTGCCCGCATGGGCAAGAAACCTTACCAGTACCTTTATTGACCGCGCGCGG  
GATCTCTTTGGTGGTGGCAGTATATCGCATCGCCGCGGATTTGTGGTCTGATGATAACGGCATGATTCGCACAC  
AATTTGCAACAGTGTGAGAATCTGGTTTTAGGGCTTTCCACCACTGTTTTCATCAACGTGACCTATTGGCTGGAAGTAT  
TGCTCTCTTTTCTGGTTCCCTCATCTTCCGCGCTTGCAGTGTTTAACGATGGCAATATTGGCTCCACTCGCTGATTTGGT  
CATGTACAACGGCATCTGGTGGTGACCGTATCAGTCTGTTCCGGGTTAATTTGATTACGCCAACCTTCCGCGT  
AGTGATGGGCGTCTGGCGATTGCCGTTACCTGGTCCGTTATCTGAGATGGGTAGCACCCTACTGCTGATTTCTCA  
CGATGTTGAATATGATTTGCTGAGTATCGCCGCGATGATTTAA

>Cluster\_29438

ATGTCTGAATTTGAATTGCTCGTGAAAGATCTTCTTTTAAATCAGAAGAAGACGAGAAAAAGCGACAAGAAAAAGATCG  
AGAATTAATTTCAAAGTCTTGAATCTATGATCAAAAATATGTTGCAGAACCTCAGAAAAGTAGGAAAAATGAAT  
GGAGCAGAGAAAACCTTAACCGTTGGATAAATGGTAAGGTAAACCTAAACAAATTAACCTTCTGCTGAGGAAACCTTACTT  
CGAAAGATGCTTCCAGAACCCTCCGAACATCATCTAACATATACATTTTCGTTTTATTGATTTATTCGCGAGGATTTGGTGG  
TATTCGTAAGGCTTCGAAAGTATTTGGTGGCAGTGTGTTTTTACTAGCGAATGGAATAAAGAAGCGGTAAGAACCCTACA  
AAGCTAATTTGGTTTAAATGATGAACATAAATCATAAATTTAATCTTGATATACGAGAAGTCACTTAAAGTATAGAGATGAT  
GTTTCCGAAATGGAAGCCTATAATCATATAGACAAAAATATCCAGATCATGATGTCCTTCTGGCCGGTTTTCCATGTCA  
GCCCTTTAGTCTGGCTGGGTAAGCAAGAAAAATCTCTGGGCGGTGCACATGTTTTGAATGTGAGCAAGGAAAC  
TATTTTTTGATGTCGCTCGAATTTAATAATCAAAAAACCAGCTATTTTTGTGCTTGAGAATGTGAGAACCCTAAAAGT  
CATGATAAAGGTAAGACTTTTAAAGTCATCATGAAAACACTCAATGAATTAGGGTATGAAATGCGCCGATGCTGGTGGCAG  
GTAGGGATCTGAATATTCACAAGGATTTACGTTACGAAATATAACCGCTTTTACCTCAAAAACAGGCCAACATTTGGT  
GAATTTAGATCATAATGTTGACGACAAATATATTTGACTCCAAGGTTATGGGAATATCTTTACAATTTATGCAAAAA  
ACATGCAGCAAAAGGAAATGGGTTGGTTTGGTTTAGTTGATCCTAAAAATCCAGATAGTATCGCACGAACGCTGTCTG  
CTCGTTACCATAAAGATGGCTGAAATACTGATCGATCGTGGCTGGGATAAGGCTGTGGTGAATCGATTTTAGTAAT  
CCAGCAATCAAGGAATGACCCAGAACCTGACACCTGATGAATGTGCCAGGTTAATGGGTTTTGAAAAACCAGGGGG  
AAGACCTTTTGAATACCGGTATCAGATACTCAAGCTTATAGGCAATTTGGAACTCAGTTGTTGTGCCAGTATTGAAG  
CTGTAGCAAGATTACAGAACCGTATATACAAAAGCTGTCAGCATGCAAGTTATTAACGATTA

>Cluster\_42569

ATGAAAATGGTCTCACGTATTACCGCGATCGGCCCTGGCTGGCGTCGCGATTTGCTATTTAGGGTTATCTGGTTATGTGTG  
GTACCACGATAATAAACCGAGTAAACAGGCCGATGTTCCAGGCATCTGCTGTCAGTGAAAATAAAGGTTTTAGGCTTTC  
TCCGCGAAAAAGGATGCGATTATTGGCCATACGCTTCCGCGAGAATTAACCTGCCTATTTATATATTTCCGGCGCGAAACAG  
TTGATGGATTACGACATAAAGCTTGGATATAAATCTTTAACCTCGAGCCGTCGCTGGCGCTCTGCTGGCTATGAAACC  
CGTTTCGCAAAAGCGATCTGAATAAGATTGAATGGGTGATGAGTATGAAACTATGCGGCCAACCGGTTATACCGCGTAC  
ACTGGGCGGGTAAAGTGAAGTGAAGAGCGGGCGGAAATACTGGCTGGATTGCAAAAACAGCGCGCGAATATTACGCC  
AGCAATGATACTGCTCGGAGCATCGCAATGAACCGGTGCAGCCATCCCGAAAAACTGCCATACCGATGCGCAAAAAGT  
GGCTTGGGTTTTGGCGTGTATCAGATCCCGTTTTTACCGCGGATAGCACCATTTCATGCGCTCATCTGCTGGTGA  
ATGCGGGGGCGTCGATGGCAGAAAAACATCGATTGGTGTGGTGGCGCAGTTGGGCCGATTAAACCGCGCGACGGTATTT  
AATCAGTATTTAACGTTGAGCAGTTCTGGGATGGTCTGCGGCAACATTCAGGATCAGGCGGGTGGACCGCGTTGAA  
CCCGATTGAAATGGCGTCGAAATCCTGGGACGAAATATTGCTAAGCTGGAAAAAGATCCGACGCTTAAAGCGCAGTTCC  
TCGAAGTCTATCCCAAGGTTTTCAGTGGCGAAAAATATTACTGATGCCATTGCTGAATTTGAGAAAAACATTAATTACGCCG  
GATTTCCCATTTGATAAATGGTTGCGTGGAGATGAGAAATGCTCTGACGGCGCAACAGAAAAAGGCTATCAATTTATTTAA  
AGATAATAAATGTCACCTTGTCTATGGTGGTATTTATTCGCGCGGACGTTCTTTGAACCGTTGGGGCTGAAAAAAGACT  
TTAATTTGGTGAATTTACGGCGCGGATTTGGTCTGATGAATGTTACTAAAGAAGAGCGGTGATAAATTTGCGTCAGAA  
GTACCCGGTTTACCGTAACGTTGCTTTAACCGCACCGTACTTCCATCGCGGTGACGTGCCGACGCTGGACGGGGCGGTGAA  
ACTGATGCTGCGCTATCAGGTAGGCAAGAGCTGCCGAGGAGATGTGGATGATATCTGAGCTTTCCGTCACAGTCTGA  
ACGGGGTTTACACCGCTATATGCAAGGATAAACATAA

>Cluster\_13857

ATGGACCAGAAGCTGTTAACGGATTTCCGCTCAGAACTACTCGATTACGTTTTGGCGCAAAGGCCATTTCTACTATCGC  
GGAGTCAAAAACGATTTCCGCTGCAGAAATGCGCGATGATGTCGATTCCAGATTATCAATGATGAATTTATCTTGATG  
GCAACGCTCGTCAGAACCTGGCCACTTTCTGCCAGACCTGGGACGACGAAAAACGTCATAAATGATGGATTTGTGCGATC  
AATAAAAACCTGGATCGCACAAGAAGAATAATCCGCAATCCGACCCATCGACCTGCTGCTGCGTAAATATGCGGATCT  
GTGGCATGCGCTGCGCCGAAAAATGGTCAAGCCGTTGGCACCACACCATTTGGTCTTCCGAGGCTGTATGCTCGCGC  
GGATGGCGATGAAATGGCGTTGGCGCAAGCGTATGGAAGCTGCAGGCAACCAACGGATAAACCAAACCTGGTGTGCGGT  
CCGGTACAAATCTGCTGGCATAAATTCGCCCGCTACTGGGATGTGGAGCTGCGTGAGATCCCTATGCGCCCGGTGAGTT  
GTTTATGGACCCGAAACCGCATGATTGAAGCTGTGACGAAAAACACCATCGCGCTGGTGGCGACTTTCCGCGGTGACCTACA  
CCGGTAACTATGAGTTCCCAACAACCGCTGCACGATGCGCTGGATAAATCCAGGCCGACACCGGTATCGACATCGACATG  
CACATCGACGCTGCCAGCGGTGGCTTCCGCGACCGTTCTGCGCCCGGATATCGTCTGGGACTTCCGCTGCGCGCTGT  
GAAATCGATCAGTCTCAGGCCATAAATTCGGTCTGGCTCGCTGGGCTGCGGCTGGGTTATCTGGCGTGACGAAGAAG  
CGCTGCGCAGGAATGGTGTTCACAGTTGACTACTGGTGGTCAAATTTGGTACTTTTGCACAACTTCTCCCGCCCGC  
CGGGTCAAGTAAATGACAGTACTATGAATTCCTGCGCTCGGTCGTGAAGCTATACCAAAGTACAGAACCGCTCTTA  
CCAGTTGCGCTTATCTGGCGGATGAAATCGCAAACCTGGGGCGTATGAGTTTATCTGACGGTCCCGCGACGAAG  
GCATCCCGCGGTTTGTCTCAAATGAAAGTGGTGAAGATCCGGGATACACCTGTACGACCTCTCTGAACGCTGTGCGT  
CTGCGCGGTGGCAATTTCCGCTTCACTCTCGCGGGTGAAGCCACCGACATCGTGGTGTGATGCGATGCTGCTGCGT  
CGGCTCGAAATGGAATTTGCTGAACTGTGCTGGAAGACTACAAAGCTCCCTGAAATATCTCAGCGATCACCCGAAAC  
TGCAGGTTATGCCAGCAGAACAGCTTTAAACACACCTGA

>Cluster\_12405

ATGTCTCAATGCTTTTACCTGTAATTTATGCGGAGGAACCGGAAGCGCTATGGCCGTTGCTCGAGTATTATACCC  
TAAACAATTTTAAATTTAGTTGGGATTTCTACAATGTTGCAAAACAACATTACCGCTTTGGATGGCATCGAATGCGAAA  
ATCCAATTTGTTATCTGCAATGAAGATCACCGATTTATTTGATGACAGAGCAATTACGACAGATTTGGTAAGCTAACCAAGAT  
ATTAATCTGAGCCGAAAGGCGTAATACTGCACCTGCCATGACTTTAGCTGCTTTTATCGCTCAGAAGAATAATCTCAA  
TGACGACCTTTATTTAGTACTTGGCGCAGACCCTCTATAAATAATGAAAAAGCATTTTCGAGAGTCAATAATAAAG  
CTATGCCGTTATGCAACTTCTGGGAGTTAGTAACATTTGGAATTTATCCGACACGCGAAATACTGGTATGGATATAT  
AAGAGAAGTTCTCAGCTGATCCTAATAAAGAAATCCAGCATATAATGTTGCGGAGTTTGTAGAAAAACAGATGTTAA  
AACGACACAGGAATATATTTGAGTGGGAAATTAATCTGGAATAGCGGAATGTTTTATTTTCGCGCAAATGATCTTTG  
ATGAACTACGAAATTTAGACAGATATTTATCATAGCTGTGAATGTGCAACCGCTACAGCAAAATATAGATATGGACTTT  
GTCCGAATTAACGAGGCTGAGTTTATTAATTTGCTGAAAGACTATCGATTATGCTGTGATGAAAAAACAAGGACCC  
TGTAGTTCTTCGATAGATATTGGCTGGAATGACGTGGGTTCTTGGTCATCACTTTGGGATATAAGCCAAAAGGATTTGCC  
ATGTAATGTTGCGCATGGGATGTGCTCAATCATGATGGAGAAAAATAGTTTTTATTTACTCTGAGTCAAGTCTGGTGGC  
ACAGTCCGAGTAAGTAAATTTAGTAAATGTCCAAACCAAGGATGCTGTACTGGTGGCGACCGTATAAGTCCAAATGT  
TAAAAACATAGTTGACGATCTAAAAAAGAGAAAACGTTGAACTACTACATGCATCGTGCAGTTTTCGCCCTTTGGGGTA  
AATTCGATGCAATAGCAACAGGCGATAGATATAGATAAAAAATAATAGTTAAACAGGAGAAGGGTTAGATTTAAG  
ATGCATCATCTAGGCGACAGCATTTGATTTGTTGATCCCGTACTGCTAAAGTTTACATAGGTAGTGAAGTTAAACTAT  
AGTTTCTAATGAGTCTATATATATCCCTCAGGAGCAAAATATAGTCTTGAGAATCCAGGCGTAAATACCTTTGCATCTAA  
TTGAAGTAAGTTCTGGTGAATTTACCTGAAATCAGATGATATAGTGGCTTTTACTGACAGTATAACAGTAAACAATTTCTA  
AAGCGAGATTGA

>Cluster\_25274

ATGGAACATCAGAGAAAACATTTCCAGCAACCGGCTATAGCGAAGATCTACTGCCGAAAACGCAAGTACGCGGACCTG

GAAAACATTTAACTATTTTACCTTATGGATGGGTTTCGGTTCATAACGTTCCCAATATATGTATGGTTGGCGGCTTTTTTA  
TTCTCGGCTTGTCTACCTTTAGTATTATGCTGGCAATATCCTCAGTGCCTTTTTTCATGCGCGGTAATGGTATTAAC  
GGTACTGCGGGCAGTAAATACGGCGTACCGTTTGCATGATCCGCGTCTTACGGCGTACGTGGTGCACGTGTTCC  
CGGATTAATAAGAGCGGATTTGCTGCCATATGTGGTTTGGCCTGCAATGTTACGCGGGGTACTGGCCTGCTTGATTC  
TGATTGGCAAATCTGGCCGGGATTTTACTCTCGGTGGCGATTTCAACGCTGTTAGGCCCTTTCTACTCCGGGATTAAT  
ACTTTTTTACTCTTCTGGCTGGTTAACGTTGGTATTGGTTTGGCGGCGGAAAAGTTTTAAATAAATTAAGTCCACTGCCATTCT  
TAACCCGTGCATCTATATCGTTTTGCGCGGTATGGCGATTTGGCGGATTTGCGTGGTCCGGATCGGTCGAATCTTTGACT  
ACATTCGCGGGCGTATTCAGAAAGCAGAAAAACAGTGGCTTCTGTTTCTGGTGGTGATAAACCGGGTGGTGGCGGCTGCG  
GCGGACCGGGCGGTGAGCGCATCCGACTTTACGCAAAACGCCACTCGTTTCTGAGCAGGCGCTGGGCAACCGTGGG  
TTTGTGTTGGCTATATTTCTGTTTGGCGTGGCGGGGATGTATTATGCGGGAGCCAGTATTCATTACGGCGCTGACA  
CCTGGAACGTGCTGGATATGTTTTCAGCGTTGGGACAGCCTGTTGCGCTCGTCTTTGCGGTACTGGTTATCTGATGAGC  
ACTATCTCTACTAACCCACCGGTAATATTTATCCGGCTGGTTATCAGATTGCGGCCATTGCACCGACGAAACGACCTA  
TAAAAACGGCGTACTGATTTGCCAGTATTATCAGCTGCTGATCTGCGCGTGGAAATTAATGGAAATCAGGCAATGTT  
ATCTGTTCTCGATATTTACGGCGGAATGCTTGGTCCGGTAATGGTGTGATGATGGCGCATTATTTTGGTGGTATGCGT  
GGGCAAAATAATCTTGATGAACGTACACCGCAGCTGGCGATTATAAATATTACGATAACGGTTTTAACTCACCAGCGT  
TTCAGTAACTCTGGTGGCGGTTATTTTACTCTTGGCGGTAAGTTTATCCCTTATGGAACCGTTATCAGTGTTCAT  
GGTTGTGCGCGTCACTGCTGCTTTGGCGCTACGCCCTTATTTAAAGAAACGTACAACAGCAGAAAAACAGGAGAACA  
AAAACCATAGGTTAA

>Cluster\_43535

ATGCGTATCGGCATGCGGTGTTGCTGGGCTATTTTTTACTGGTGGCGGTGGCAGCCTGGTTCGTAAGTGTCCATTTTTGT  
CAAAGAAGTTAAACCGGGCGTGCAGAGCAACGAGGGGACGTTGATCGACACCGCAACGTTGCTGGCGGAGCTGGCCG  
GTCCCGATTTGCTCTCTGGGACCAACGCATGGGCAACTGGCGCAGGCGTTTAAATCAGCTACAACATCGCCGTTTCGC  
GCCAATATCGGTGGCATTAAACAAAGTGCCAATGAATATCATGCTATATGACCGATGCGCAGGGCAAAGTATTTGTTCCA  
TTCCGCAAAATAAGCCGTTGGACAGGATTTATCCGGCTGGAATGACGCTGCGCTTAACGTTGGTGGTCAAGTATGGCGC  
GCAGCAGTTGCAAAATTTCTGCCGATCCGAAAGTTGCGGTGATGATGTTGCCGCGCCGATTATGGACGGCTCGCGGCTT  
ATTTGGCGTTTTGAGCGTAGGCAAAACGAAACGCGCGGATGGCTCCGGTCAATAACGCAGCGAGCGCGCAATTTTATGGGC  
CAGCGCATTTTTGTTGGGGATTGCACTGGTGGTGGCGCAGGCGATGGTTGGTGGATCAACCGCTCCATTGCCCGGCTCA  
CTTCGATGCTGATCCGCTGACTGACAAATAAGCCGTTCTTCCCGATCTCGGTAGTAGCGAGCTAGGTAACCTGCG  
CAGGCGCTGGAAAGTATGCGCGTGAAGCTGGAAGGGAAAACTATATTGAGCAGTATGTTTATGCGTTAACCCATGAGCT  
AAAAAGCCCACTGCGCGGATTCGTTGGCGCGGCAAAATTTTACGCGAAGGTCGCGCGCGGAAAGTGGTGGCTCGTTTTA  
CTGACAACATTTGACGCAAAATGCGCGTATGCAGGCAATTGGTAGAAACGTTACTACGCCAGGCAAGACTGGAGAATCGT  
CAGGAAGTCTGTTGACTGCTGTTGATGTTGGCGCATTATTTCCCGCGCTCAGCGAAGCGCGCACCCGTCAGTTGGCAGA  
AAAAAAATCACTCTGCATGTTACGCCACCGAGGTTAACGTTGCTGCTGAACCGGCTTACTGGAGCAGGCGCTGGGAA  
ATTTACTGGATAACGCCATCGATTTTACCCCGAGAGCGGTTGCATCAGCCTAAGCGCGAAGTGGATCAGGAACACGTC  
ACGCTAAGGTGCTGGATAACCGTAGTGGTATTTCTGACTACGCGCTTTCACGATTTTTTGAACGCTTTTACTCTTTGCC  
TCGTTGCAAAATGGGCAAAAAGCAGCGGTTGGGCTGGCGTTTCTGCTAGTAGGCGCTTTGTTTAAACGGCGAAGTCA  
CGCTGCGCAACGTGCAGGAAGTGGCGTGGCTCGCTTCGACTTACCGTCACTTACATAG

>Cluster\_843

ATGAAAAATGCTGGAAGATTCTCGAAATAGAGGAAACGACTGACGTCGATATTTACCGCGCGCTTATCTGGCGCTGTT  
ACCGTCTTTTCATCCAGAAACCGATCCGCAAGGTTTTTAAACAACCTTCGTCAGGCGTATGAGGAGGCGCTACGGATGCGC  
AGTCGCTGCTAAATCTGTTTGGCAACCAGAAGATATGAGGTAGCAGAACATGAAATTTCTGCTCGCTTTCTGTCGTTA  
CTTGCCCTCTGATAGCGAAGTTTTCTGCGCTCCGCTGGCAGGATTCATTCAGCAATTAATTTATGCTCGATGGAAGA  
GATGATGAATTTACGCTGCTGCTGCTGCAAAATGCGCAACTGCAACTGCAACTGCCATTTATCCTTCGAGTGGCGTGGTTATG  
CAGAAAGATTGCGGTGGTTGCGAGGAGAAAACTCGGGGAAATAGACGAAAGAAAGAACTGGAATCCTTTTTATATGCCATT  
GCCAAGGGGAATGTTTTTAACTTCCAGACCATTCTGCACTGCGCGTTGCCGTGCAAAATGACACCATCGATTTTACCA  
AATGTTGCTCGCTCGGATTTGGTCACTCGCATCCAGAATGGCTGACATTTGATTTAGCGCAACATCGCGCAGTATTTACCCG  
ATGATGCAAAACTGCACAGAAATTTACTCCGCTGGTATAGCGCAGGTCGCTGGGAATTTCCGAACTCTGATTTACGCC  
CGGTGCTGGCGGGAAGCTGAATCTGATAATGAAGATGCGCGTTATTTATGAATACGCACAACCGCTCTATTGTGGAGAAGG  
CGAAAGCTTGCTGGCAGAACTTTGACTACTGCGCGAGTATCCCTCCACCCAGGCGGATGCTTTAATATTGCAATGTT  
GCCCTCAGCATCGGGTTCGATTTATCCCGTTAGTGGTATGATGATTTAAGCTCGTGAACGTTAACGATCAGGGA  
CCGCTACTTTATATATCCCGCGCAGCGCCGTCAGCGTTTTTCAATTTATACGAAATACCTCAGCGATGAAAACTCTCTGC  
TCTGGGCGTTACTGGTTCGAGATGGTTTTGCACAAGGACGTAAGCCGCGGATCTCACTCACGCGTATACAGAACATC  
CCTTATGGCCATTATATTAGTTGCCAAACAATAGTGCAGGCGAACCAACCAACCGAAGAAATCATTAAATGCCGATTGTTG  
AGCCGCTTATGATGAGAAGATCGTTGCTCCACTGGAAGCAATTAATTTCTGCTGATTTAATTCAGCGGGCGAATTTTAC  
CGAAGCAAACTGTTGAACCGGAGCCGCAACCGCAACTGCGGCTTACGCGTGGCGGCTGCTGGCGGATGCTGGCGATCA  
TTAAATTTATTTCTATATTTTTATCTTTGCTGGTTTGTATAGGAAAAACTCCATCTGTTTCGGTTGA

>Cluster\_62201

ATGAACAATAACGATCTGGTTCGGAAGCTGTGGAAGCTGTGCGACAACCTGCGCGATGGCGGCTTCTTATCAAACCTA  
CGTCAATGAACTCGCTCGCTGCTGTTTTTGAATAATGTTAAAGAGACCGGTCAGGAAGCGGAATACCTGCCGGAAGGTT  
ACCGCTGGGATGACCTGAAATCCCGCATCGGCCAGGAGCAGTTGCAGTTCTACGAAAAATGCTCGTGCATTTAGCGGAA  
GATGACAAAAAGCTGGTACAGGCAGTTTTTCTAATATGTTAGTACCACCATCACCGAGCCGAAACAAATAACCGCACTGGT  
CAGCAATATGGATTTCGCTGGACTGTTACAAACGGCGCGCAGGTAAGTGCAGCGATGACTTCGGCGATGATGACGAAAGGCG  
TGTTGCGAAGAAGCAGCAATGAAACCAAGTCTGGTGCAGGCGAGTCTCACCCCGCTCGCTGATTTAAACCATTTATT  
CATCTGCTGAAACCGCAGCCGCTGAAGTGGTGCAGGACCCGCGCGCAGGTACGGCGGCTTTTTGATGGAAGCCGACCG  
CTATGTTAAGTGCACCAATGATCTGGACGACCTTGTGCGGACACGAGGATTTCCAGATCCACCGCGCTTTATCG  
GCTCGAACTGGTGGCGCACCCGCTGCTGGCAGTGAAGTGAAGTGAAGTGAAGTGAAGTGAAGTGAAGTGAAGTGAAGTGAAGT  
GGCGGCGCAATCCGTTGGGCAACACTCTGGGTAGCGACGGTGAACCTGCGGAAAGGCGCATATGTCGCCACTAACCC  
GCCGTTTGGCAGCGCCGAGGCAACCAACATTACCCGACCTTTGTTTACCCGACCGAGCAACAAACAGTTGTGCTTTATGC  
AGCATATTATCGAAACCTGCATCCCGCGGCTGTCGCGCGTGGTGGTGGCGGATAACGTCGTTTGAAGGCGGCAAA  
GGCAACCATTCGCTGCTGACTGATGGATAAGTGTCACTGACACACCATTTCTGCTGCTGCGCGGATTTTATCCG  
TCAGGCGGTGAGACCAACGTCGTTCTTTACCAAGGGACGGTGGCGAACCGAATCAGGATAAGAACTGTACCGATG  
ATGTTGGGTGATGACCTGCGTACCAATATGCGAGTTTTCGGCAAGCGCACACCGTTTACCGACGAGCATTTGACGCGC  
TTTGGCGCGTGTATGGCGAAGACCCGACCGTTTTAAGCCCGCAGCTGAAGTGAATGGAGTTTAAACCGGAGAGAC  
GGAAGTTGCGCACAGCGAAGAGAAACAAACACCGACCATCTTGTACAGCCGCTGGCGCAAGTTTACGCGGTGAGT  
GGATCCGACCGCAAAATCCGATTCGCTGGATACTCTTGGCTGAAAGATAAAGACAGTATTGATGCCGACAGCTGCCG  
GAGCCGATGATTTAGCGGCGAAGCGATGGGCGAACTGGTACAGGCGCTGCTGAACTGGATGCGCTGATGCGTGAAC  
GGGCGGAGCGATGAGCCGATTTGCAGCGTCACTTGTGGAAGAAGCGTTTGGTGGGTTGAAGGAATGA

>Cluster\_28410

ATGCGTAAAAACAGTGGCTTTTTGGCTTTTGTGCGAACGGTGTGGATTATGCCGGCGCGGCGAGTCAGCGCTGGTCAAATG



GCGTCCGACACTCTGTCTATGCCAGCAAGAATCGTTAGTTATCGATCGGCTGGAATTATGACAGACGCCCGCTCGCGCT  
CGCTGTTCCGAAACCTTAAACCGGATATCGCCAGCGTTTCGCCAGAAACAGAAGTGGTGGCGCTTGAGATAGAAGTGCAT  
AACCTTTGGGATTTGAAAGAGTTTACGCCCTGCCTGCATGATTTGCCCGTGGTTACGCGTTCAGCCAGAAAAAGAAGA  
CTATTTAATTCACATCACACCAGGTTACCCACGTCGCGCAGATTTGTTGGTTTCTGCTGGCAGAAAGCGCTTACCTCGCCG  
CCCGTTGTGGAAGTGAATCTCACCCGCGCAAAAGAACACCCGCGCCGATACCGCCATGTCGACGCTGTTGGTCATGTAAGCGCGT  
TTAAGCCGTTATAACGCCATCGCCAGCCGCTTTGCCGAGGAACGCCAGCAACGCTTGATTTTCTTAAGTCCGGCATTGC  
CACGGCTAATCCCACTTCAACCCGATGATTGAGCAGATTTGAAAAAGTGGCGATAAAATCCCGCGCACCGATCCTGCTTA  
ACGGCCGAGCCGGTGCAGGTAAGTCATTTCTGGCAGCAGCATCTTCGAGCTAAAAACAGGCGCGGCATCAGTTTAGCGCG  
GCGTTTGTGGAAGTGAATCTGCGCCACCCGCGCGGATACCGCCATGTCGACGCTGTTGGTCATGTAAGCGCGCT  
TACCGGGGCGGGGAATCGCGTGAAGGATTTATACGACGCGCAACGGCGGAATGTTGTTTCTTGATGAGATTGGCGAAC  
TGGGCGCAGACGAACAGGCAATGCTGCTGAAAGCCATTGAAAGAAAACTTTTACCCGTTTGGCAGCGATCGCCAGGTG  
AGCAGTGAATTTACGTTTATCGCCGGAACGGTGCAGGATTTGCCAGTGGTTGCCGAAGGCAAAATTTGCTGAAGACCT  
GTACGCGCAATAAATCTGAGCTTCACTTCCCTTCCAGGATTAACGCAACGCAAGGAAGATATGAACCCGAACCTGAT  
ATGAAGTGGAGCGCCACGCTCACTCACTGGCGACAGCGTGCCTTTTAAACCCGAAGCGCGCGTGCCTGGCTGGCTTT  
GCGACCTTCCCAAGCAACATGGCGCGCAACTTTCCGGAACCTTCTGCCAGCGTCAAGCGGATGGCCACCTTTGCCAC  
TAGCGGACGCATCACATGGATACGGTGAAGATGAGATCAACCGTCTGCGCTATAACTGGCAGGAGAGTCCGCCCTCCG  
CGCTTACGCGCTTCCAGGTCACAGGCGAAGAACATCCGACTCTTCCAGCGTATGCAACTGGAAGAACTTATGCGCGT  
TGCTGTCAGGCAAGTGCCTTTCTGCTGCCGACGACAGCTTTTGTATGTTTCCGCGCAGGTAAGCCAGCGTCAATGA  
CGGGATCGGCTACGCAAAATACCTGGCGCGTTTTGGTCTGACATGGGAAGCAATGCAGGATCAGCACAGCTCCAGTTGA

>Cluster\_22646

ATGACGGAAAAATTCATAAGCATCGCATCCTCATTTCTGGACTTCGGTTCCAGTATACTCAACTGGTTGGCGCCGCGT  
GCGTGAACGGGGTTTACTGCGAAGTGGGGCTGGGATGTGACAGAAGCACAAATTCGTGACTTCAATCCAAGCGGCA  
TTATTTTCCGGCGCCGAAAGTACTACTGAAAGAAAACAGCCCGCTGCGCCGAGTATGCTTTTGAAGAGCGGTA  
CCGGTATTCGCGATTGCTATGGATGCAGACCATGGCAGTGGCGGTCACGTTGGGCTCCAAATGAACGTGA  
ATTTGGCTACGCGCAGGTTGAAGTCGTAACACGACAGTGCAGTGGTTCGCGGATCGAAGATGCGCTGACCGCAGATGGTA  
AACCGCTGCTGGAGCTTGGATGAGCCAGCGGATAAAGTTACCGCTATCCCGTCCGACTTCGTCACCGTAGCCAGCACC  
GAAAGCTGCCGTTTGCATCATGGCAACGAAGAAAAACGCTTCTATGGCGTACAGTTCACCCGGAAGTGAAGTCAAC  
CCGCAAGGTATGCGCATGCTGAGGAGCTTTGTGCGGTGATATCTGCGCATGTGAAGCCCTGTGGAGCGAAAAATTA  
TCGACGACGCTGTAGCCGATCCGCGAGCAGGTAGGCGACGATAAAGTCACTCCTCGGCTCTCTGGTGGCGTAGATTCC  
TCCGTAACCGCAATGCTGTTGCACCGCGCTATCCGTAACCACTGACTTGCCTATTCGTCGACAAAGCGCTGCTGCGTCT  
CAACGAAGCAGAGCAGGTTCTGGATATGTTTGGCGATCACTTTGGTCTGAATATTTGTTACGTTACCGGCAAGATCGCT  
TCTTGTGCGCGCTGGCTGGCGAAAACGATCCGGAAGCAAAACGTAATAATCATCGGTCGCGTTTTCTGTTGAAGTATTCGAT  
GAAGAAGCGCTGAACTGGAAGATGTGAAGTGGCTGGCGCAGGTTACTATCTACCCGATGTTATCGAATCTGCCGCATC  
AGCAACCGTAAAGCGCAGCTCATCAAACTCACCACAACGTTGGCGGCTGCCGAAAGAGATGAAGATGGGCGCTGGTTG  
AACCGCTGAAAGAGCTGTTCAAAGACGAAGTGCCTAAGATGGTCTGGAGTGGGCTGCCGTACGACATGCTGTACCGT  
CACCCGTTCCCGGACAGGCTCGCGGTTCTGTTTCTGGTGAAGTGAAGAAAGAGTACTGTGATCTGCTGCGCGCTC  
TGACGCCATCTTCAATGAAGAACGCGTAAAGCGGACCTGTACGACAAAGTACGCGAGCGGTTACCGCTTCTCTGCCAG  
TACGTTCCGTTGGCGTAATGGGCGATGGTCTGTAAGTATGACTGGGTTGTTTCTCTGCGTGTGCGAAACCATCGACTTT  
ATGACCGCACACTGGGCACATCTGCCGTACGATTTCTCGTGGTTCGCTTTTCCAAACCGCATATCAATGAAGTGAATGGTAT  
TTCCCGCTGGTGTATGACATCAGCGGCAAGCCACAGCAACTATTGAGTGGGAATGA

>Cluster\_27105

ATGGAATGGATTCCGATCCGCTCATCTGGGCTGGGTTAATCACGCTGATTTGTGATCGAACTGGTCTCGGCATTGTAA  
CCTGGTCTTTATTGGCCATCCTCGCGAAAAACTACCGCTAAGCAGCGCGACCGCGCAGGGTTACCGGGCTCCTGCTGG  
CGATGTTAATGCGCCTGTTACTGCTGGCGTCAATCTCCTGGCTGGTACCCTGACTCAACCGCTGTTACAGCTTCCGCTCG  
TTTACCTTTAGCGCCCGGATTTAATCATGCTGTTTGGTGGTTTCTTCTGCTGTTCAAAGCCACGATGGAGCTGAACGA  
ACGGCTGGAAGGAAAGACAGCAATAACCCACCAACGCAAAAGTGGCAAGTTCGCGGGGTTGGTGACAAATTTGTGG  
TACTGGACGCCATCTTCACTCACTGACTCGGTGATTAACCGCTCGGGATGGTGCACATTTACTGCTCATGATGGCCGCG  
GTGGTTATCGCTATCAGCCTGATGTTGATGGCCAGCAAGCCGTTAACCAGTTCGTTAACAGTCAACCGACGATCGTTAT  
TCTCTGCTTAAAGCTTCTGTTGATGATTGGCTTTAGCCGTTGGTGGCGGAAGGTTTCGGCTTCGTCATCCGAAAGGCTACC  
TGTACGCTGCCATTGGTTTCTCGGTGATGATCGAGGCGCTCAATCAGTTGGCTATCTTTAACCGGCGAGCTTTCTTTCC  
GCTAACCAAGCGCTGCGCCAGCGGACTACCGAAGCCGTTAATGCCCTGCTTAGCGGGCAAAAGAAAGATGCGGAACTGGA  
CGCCGAAACCGGCTCCATGCTGGTGGATCATGGCAACCAGCAGATCTTAAATCCGAGGAACGGCGGATGATTGAACGGG  
TACTTAATCTTAAACAGGCTACCGTCAAGCAGATATGACGTCGCGCCACGATATTGAGCATAATCGATCTCAACCGCGCG  
GAAGACGAGATCCCGCAGTTACTGGAGCGAAATCAGCATACCGGCTTGTGTTACTGATGGCGATGACGAGAAAGATTT  
GCTCGGTGTTGTTTCACTGCTTATCGACCTGCTCAACAGGTTACTGCGCGGCAACCGCTAACCTGCGGGTGTGATTGCG  
AGCCGCTGGTGTTCGCGAAACCTTGGCTTGTACCTGCCCTGGAGCAGTTCCGTAATGCCCGCACACACTTTGCTTTT  
GTGGTGGATGAGTTTGGCTCGGTGGAAGGATTTGACATTAAGTGAAGTCACTGAAACCATTTGCCGTTAACTTACCGAA  
CGAAGTGGAAAGATGACGCGCCGATGATATTCAGAAAGATTCGCGAGGTTCTGGATTGCGAATGGTCAATGCGCG  
TGGAAAGATCTGGTCAATATGTCGCTTCCGCTGGATGAAAGAAACGTTGAATATCACACCATTTGCCGGGCTATTGATGGAA  
TATTTGCAGCGTATTTCAAACCTGGCGAAGAAAGTTACGTTGGGGATTTATTTGCTTAAACGTTGCAGGTAGAAAGCCA  
TCGCGTGCAGAAAGTGCAGATTAATCCGCTGCGTAAGGATGGCGAGATGGAGTACGAGGTGTA

>Cluster\_3375

ATGAAAGGGAAATCTGCATTAACCTTCTGCTCGCTGGTATATTTTCTGTCGCGCACATGCCAGGCGACAGGGGCGAGAAGT  
GACGAGTGAATCTGTATTTAACATCTTAAATTCACGGGGCAGCAACAGATAAAAGTTATTTATCGTTAAATCCAGATA  
AGTATCTTAATATCGCTCTTTGATTTACTCAGCCAAATTAACAAATGAAATAAAGAGCCACTATACCAAGACGAAAT  
CAAGGATTCCTAACATTAACAGAAAAACACAGAAAGTTAACGTTGACGAGAAACCTTGGGAAACGTTTATTTGCTTCT  
TACTTTGAAAGATGACAAAAACAGCGCAGAAACCCACTATGATGCTGCTGCGTGGCTGAGGATAGTTTATGGGCTATATGG  
CATTAGTATCAGATCAGGGAATAGTGTAGCCGCAAAAGGTTCTGCTCACCCGTGGGATTAATGCTACGCCCGAC  
CAGATTAAGCGGATGCAGGACGCTATAGCAACCCCAACGACTGGATGGAGTTCCCGGGCAATGAATGTTGTCATAT  
CCGATTTGACAGCAACTCCCGCTGATGGCAGATGTGCAAGGAAGCAAGCCGAGCTGTGGAACCAATAAAGAAATG  
ATGCGTTAGGCTTTATCTGATCTCTTATACAAGCAATCGACACTGATACAATTAACGCTGAAGATGGCAAAAAGG  
GACCGATTAATAAGCGGTTCCGCTGCTGATTTGCTTATCTGGATAAAGCCAAATTTCTATGTTATGGAAGATTCGGAGCATG  
GAAAGAAGTCCCGATTAACACATCTTCCGTTGCACCTGGTGCCTGACTGGAACGTTTGTGCAACTTACTCTCGA  
AGAAAGACTCTGTTTCTCTGATTTACTACGCGAAGCTAAAGCCAAATGAAGTGAACCTTTTCAACCAACGAGG  
TTGAACCACTCATAGATAAAGGTTATGAAAGAATAACGTTACAGCTTGAATTTAGGGGAGAAATCCCAAGTTATCTGGA  
AAAAGATAAACATTTACAGAGAAGCCGATCGCGCTTACTTAATGTTATTTATCTGCAAACTTTGCAAGATAAACCA  
GAGAAAAAGAGCAGGTTCTTAAATAAGTTAAAAAACACTAGCAGTCCGTTATGGTATAAAAAGATACGAGAAAGGATAAT  
CAGTCGCGAAATTTTGGTTCAATGATATTAAAAACGATACCGATCAAAATTCACATGCGAAAAGAGAAAAGAGCTTCA  
TCCATCAACAGAAGCAGAAATGGTTTTTTACTCATGTTATGCAAAATCAGCAGCAATGTTTATAAAGATCAAGAAAG

AAGAGTATTTGAATGACTCAGTGAATTTATGAATAGATCATTGGCCAAATAACAGGCGAGAATATGATTTGGTGAAT  
GGCAGGAGTGTACTGAAATGGCACTTCCGAAAAGCTAATACTATATCCACAAGTCGGGAACCTTGCATGAAGCGCCAAG  
CCCTATCATTCGGCTAAATTTGGTCGAAAGCTTCAATGACTCTCATGTTGAAAGAGATGTCCAACCTTATCAATGATGAGG  
GAATTAATAG

>Cluster\_3309

ATGCGGAAGAATACGGGGAAGACGCCGATGAGTGAACGTTGCGAAAAGCTGACCCGTAGCTGTTTTGTCGACCGGGATGC  
ACTGGATGTGGCGGAACACAGGCGAGCGTGTGGCAGACATGGCTGTGCCGGTGACGGCAAAATACGCCGGTCCGGGAAAG  
ACCCCGGTACCACGACGATTTCTGCTATCCGCGACGAGATGAACAACTTCCGGCGGGATACGGACCTCATCTGC  
CAGCTTGGCGAATCCCTGCTGCTGACGCAGGCAAAAGCTGCGCATGCCACTTACTACATCTGGGCGGACTGCACCG  
CGACGGTGAGCGGGACTGGCTGAGGGGCTGGCGTACTGACCGGACTGGTGGAAACGCTTCGGTACGCAACTGCTGCCCT  
CGCGACCGGCCAGCGGAAAATGGCGCTGGAGTGGCTGGCAGGGGAAAAGATGCTCGACAGCTTGGCCGCTACCCGGAA  
GTGGCAAAAGAGGATTTTGGCAACATTTGCTGCCCTCAGTCACTGACGGTTCCTTCACTGCATGGCCCCGAAGACCA  
GCATTTCCCTCCTGATGCTGCTGATTAAACGCGCTGGAATCAGTCTGGCGCAGTCGGGCGGGATGAACCGCTGGTGC  
CGCAAAACAGCAGCAGCGTTCCTGCACCGTATCCCGGTGGATGGCCACAGGTACAGACCATCACCCTCCGGGCGTGAC  
CTGCTCGACCGAGGCGAAAGTGTGGCCGCTTATCTGAACGAACAGCGCGAGGGCTGGCTTTCGGCGCACCGGGCTGATGAA  
AACCTTCCGCTGGGACACAGTGCATGAACGCGCCGATGTGGAGCGGCAAAACCCGGCTGGCCCCGGCGCACCGAGT  
CACGCAACAGCTTAAAGCGCTGTATGCCGACGAGAAGCTGGACGGAACCTGCTGGAGCAGGCGGACCTGATGTTTGCCTG  
GGCGTACGCAATTTCTGGCTGGATATCCAGTGGTATCTGCATCAGGCGCTGACTAAGGCGGGCGACCGTGGGACAGGTG  
GACAGCGTATCCGTGACGACCTGGCGCTGCTGCTGGAACGCTGCGAGGGCTGGAAAATCTGGCATGGAACGACGACA  
CACCGTTCGGCGACGAGGTGACCGCAACTGGATAGCGCAGCAGGTCAATGATCGGGAAAGACGGCGCATGGCTTGCAGG  
AAAGCCGCTGTACAGCAGACGACGCGCAAAATGACGCTAGCTGGCGCTGGAGCCGGAAGCACTGGAGATGGCAGACAGTCA  
GGGCTGGAAAGCGCTCTGGGCTGGATACAGACCGCTCCGGGATCACACGGCACGCGACGCGCTGTATTGGGACTGC  
TGATGGCGGGTGGCGGAACAGTACGGTAAAAACGAAATGGCGCTCCTGCTGCTGGAAGAACGGAATACCGCCGACGAC  
GGGTGACACTGACGCACTGGGAGCCGGACCTGCTGTTGAGGTAAAAAGCCGACACTGAAACTGCGCCGCTGGCGGG  
GCACCGCTATGCGGATAAAGCCCTGCTGAACCGAAAATGAAATCCTGCTGGAAACGCTGGTACAATCGATCCGGTAC  
GGCAGCGGTATTGTTGATACGCAACATAAGGACTGA

>Cluster\_23190

ATGTATACGCGAAAATTTATGCTGGTGCAGCTGGTAAAGTGGCGCTCCTCTATACGCTGCTGACGTTCCCGCAACAC  
ACCGCTCGCCCGCAACAAGTCTTTCGTTACAACAATCATAGCAGCCAGGTACGCTCGACCCGAAAAGGTGGAGGAGA  
ATACTGCCCGCAGATTTGCTGATCTGTTGAAAGTCTGGTATGGATGGACGGTGAAGGCCAGGTGAGCCGCTCAG  
GCTGAACGCTGGGAGATACTGGACGGCGCAAGCGCTATATTTCCATCTGCGTAGCGGTTTGCAGTGGTACAGCGTCA  
GCCTTAACCGCAGAGGATTTTGTCTCGCTGGCAGCGCGGTTGACCCGAAAACGCAAGCCCTTTGCTGGCTATC  
TGGCACAGGCGCACATTAACAATGCTGCGGCTATTGTTGCGGGTAAAGCAGATGTACATCGCTGGGTGTCAAAGCGATG  
GATGATCGTACTCTTGAAGTTACGCTTGAAGTGGCGGTTCCCTGGTTCACGACGATGCTCGCCGCGGACGCTGTTC  
GGTCCCTATCATGTCATCGGAAAATATGGCGATAGCTGGAGTAAAGCTGGCATATGGTTTACAACGGTGCCTTTGTC  
TTGATAAATGGGTAGTTTAAACGAAAAGATTACTGCACGCAAAAATCCAAAGTACCGCGATGCGCAACATACAGTATGCAA  
CAGGTTGAGTATCTGGCGTGGATAATTCGGTACCGGCTATAACCGCTATCGCGGGGAGAGGTCGATCTCACCTGGGT  
TCCGGCGCAGCAATTTCCGCCATTTGAAAATCTACTGCTGGCGAGCTACGAAATATCCCGGCTGAAACGGAATATT  
ACAATTTAACCTTGAAGAACCGCCATTTACGATGTGCGGGTGCCTGGGCGTATACTTACGGTTGATCGCAGCTT  
ATTCGCGAAAAGGTTACTGGGTTGAGAACGCGCCGCAACACGCTGACGCGCCAGAGGTAAGGCTTTAGCGCGACGAC  
GTTTCGATGAACTGCAAAAGCCAAATGAGTGAAGCGCTCGGATGGCAAAAGTCTTGGCTCAAACAGGCGGATACGACGCT  
CTCATCCGCTACGCTTTGAGCTGTTCTACAACAAGTACGATGTCATGAAAAGACCGGATAGCGTGTCTCCGAATGG  
AAAAATGGCTGGGTGACAGGTGACGCTGCGCACAATGGAGTGGAAAACCTATCTTGAATGCGCCGACGCGCGGATTT  
CATGCTGTCTCGGAGTGTGGGATGCGACGTACAATGATGCTCCAGCTTCTGAACAGCTCAAAGCGATAGTGAAG  
AAAACGTCGGTCACTGGAATAATGCGCAGTATGACGCTTACTAAACAGGCGACGAGATCACTGATGCGACAAAGCGT  
AATGCGTTGATCAGCAGGCAAGTATCATCAACAGCAGGACCGCTGATTTCCATCTACTATCAGCGTTAATCAA  
ACTGCTTAAACCCCTACGTTGGCGGTTTTCCGCTGCATAATCCCAGGATATGTTCTACAGCAAAGAGTTGTATATCAAGG  
CACATTGA

>Cluster\_39317

ATGAAACCTTTAAGCAGCACCCTCCGATTTGTTGACTGGGAGGAACTGCCGCCAGAGCCAGAGATATCCGGCTGGTTT  
TAACCCAATGACCGCAGCGGTTCTGATGAAACATCAGGTGGATGCTCTGAAAATCAGAAAAGTCGATTTCTCGCTGTGCCTA  
AAGGCCGTCGAATGGCATCACCTTTGCCCTTTGGCTTTGAAGCTGTCCGACCGCAGCCGCGGAAAAGCAGCGGAGGT  
ATGGACGTTTACTACATCGCGATACCAAGAGAAAGGCTGGAGTTTATCGGTTACTGCGCCAAATTTCTCTCGTGTAT  
TGCCGAACAACAGGCGGATTTCTGCTCCAGCATGAAGAGTCTTGTGTTGACGATCAGGACGAGGATGGCAACACCCGCA  
AAATCACCGCTTCTGCTGCTGCGCTATGCTCAGTGTGTTTTCAGACTGTCGCACTATCATCCGCTTCCGAAATTTCTGGT  
TTGCAAGGATGTTGATCATAGACGAAGCTGCGTTCATCAGGATGTTCAAGGGGTACTGGACCGGCAACGGCACTTCT  
CATCTGGGGGGTAGGATTTGTTGATCTCCTCGCATAAAGGAAAATCGAACCGCTTCAACGCTTTATTTATGATATTG  
AAAACGGCTTATACGGCGAGGATGACGCGTTTATACCGTGACTTTCGATGATGCTGTAACGGGTTGACGAGCGC  
GTCTGTTTTATGCAAGGGCGAAGAACCTACGCTGGAGGGGAAAACCGCTGGTACAGTGCATCCGTAATGGCTATGGCCC  
GCGTAAAGCGCCATGCGCGAGGAACTGGACGCGATCCCGCGACGGCAATGGCATCTGTATTCTGGGATCTGGATAG  
AAGCCGATGCGCCGGGAGACGACCGGCAATACTGCGGCTGACGCTGGATGAGGGTTTACGGCGGAAAATCCAGGAAG  
GAGCGGAAGAGTACGTCACCGACTGATCATGCGTTAFTTGGAGCCGGTATCGCCGGCTTGTATATCAGCCTGCGTTA  
TGCAATGGGGATGACTTTGCCCGCCACCGGATTTTTCCGCAATGTTGCTGATGGCCATCATGCCAACCTGTACCGCC  
GCGTGGCGCTGATTTATGAAATGCAAGGTTCCACCGCCAAACAGGAGCAATCCTGTGGTATCTGCTGCGGCTCTG  
CGGTGTTTTTCCGGGGCGATGGATGCCACCGGGCGGGGAGCAGCTGGCAGAGTATACCGCGATGAGTTCGGCACCCAG  
CCGATACGCGCAGGTTAACTTACTGCTGTTCCGTTGATGGGTTGGATGCCAAAGCTGATTCAGGCAATTTGAAGATGGCG  
TGCTGACATTACCAGCGGATGAGAACGTCGGCAGGATCTGCATTCGGTCCGAGGATATTGACGGTATTCGGATGGTTCC  
TCGGTGCCTAAAGAGACCTTAAAGACCGGAGCTGTTCCGCCGCGGATACGGCTATTGCGCTGGCGCTGGCATGGTT  
TGCACTGTCCGCATACATACCGGCCGGTGACGGTGAACCTCCCGCCGCTGCCAGTCCGACGATTAAGGAACT  
ATCACTGA

>Cluster\_23818

ATGCAAAATGATTACTCGCGACAAAACAGATTATTACGATTTCTTTTACCTCGAAGGGAATATACGACTATTGTTACGAT  
TGCCGGCTATTTAAATTTTCGGAAAAACCATCAACGTGATTTACGTTTACTTTGAGCAATGGCTGGGACAAATGGAGAA  
TAAATGTTGAGAAGCGTGTCCGCGGGTGTGATGTTAAGTGGCGGAGAAATATTGCTGATTTGCTGCATTTGATTTG  
TTGGTGGCAGAATGTGAAGAGATTGATGTTGTAATGAATAATCCAGGCGCTTAAAAAGCGTGCAGTTATTAAGTGA  
AACACCGAATGAAACGTCGATCAGTAAATTTGTCAGAACCTACTTTATCAGCGGAGCCTCTATTTGTTAATGACTGAGAG  
TAAATGAGTCTGGCTGGCCGCTGGGGTTATCGTTGATCAGCAGCTCAAGTGGTACGCATATTTGAAGTACGTAAGGG  
CAAGTCCGACAGGCAATGGCATTACTGATTAACGGCATTTATTAACCATTAATGAGCCGCAAGGTGCTGTTATTCAGTCT  
GGATCCCGAAGCTATAAAGCATTAGTCCATTATTTGGAGAAGAAGAGGTGTTATTTGCTCAGTCACTGTTACTGGATA

TGGAAAATGAATTAAGTTGGTCTTTGGGAGAATCTTATTACGTTAACATTTTTACTCACATCCTTATTATGATGTATCGC AACACGCACGGGAATGCGTTATCAGAGAAAGATCAAACCAGACAAATATGATGAAAATATCTTTAATGTTGCCAGTCA GATGATTCATAAGATAGAACAACGAATGACACATACATGCCCCGATGATGAAGCTGGTTATTTATCAATATATCATTT CATCAGGTTGGCGGATTTGATGGCAAAAAGATGTTAGCATTTATTTACATATGACAGCCAGCAATGAAGCCGGCTGAT ACCTGGCGTTAATTTACGTTATTAGTGACATCTGGAGTGGATTTTAGTGAAGACAGCCATATATATGATGCTTATT GGTGCATATTAAGCCGCTGATTAACCGTCTAAATTTATCGCATTCATATCCGTAATCCATTGCTGGAAGATATTAAGCAG AATTAGCCGATGCTGGCGGTTGACGCAATATGTTGGTGAATCAGGTATTTAAAACCTGGGGTGAAGTGCAGTGAAGCAG GATGAAGTGGGTTACCTGACCGTTCATTTTCAGGCTGGCAGTGGAGCCGCAAAATGCCCCGTAACCGTGTATTACTGGTCTG TTCAACCCGGAATCGGAAGTTCCGCATCTACTGAAAAGCCGTTATTCTGCGAGCATTTCTTGAATGACGATGTTGATGATTA TTTACAGCAGCAATTTATCACAGGTTTTGCCTGACAATATCGAACTGATTTATTTCGACCATTAATTTGCCCTACAGTCACT ATGCCGGTTCGCTTATGTTACCGCTTTTTTTAATGATGCCGATATTAAGCCGGTCACTGAAATGTTGATACCGAAAAAT ACATCATGCGACGCTCCTCGGGTCTGAAATTTAA

>Cluster\_43387

ATGAGCGAACCCCTGTTAATTTGCCCGACTCCGGACACAGAATGTTTTACTGCCCCGGAATGGCTAACCCGTCACGGGCT GATTTACTGGCGCAACGGGGACGGGTAATAACTGTACGCTGCAAAAACCTGGCAGAGTCATTTGTCGGAAATCGGTTCTCCGG TGTTTATGGCCGATGTGAAAGCCGATCTGACCCGCACTCCGCGAGTCAGGAACGGCGTCCGAAAAACCTGCTCCGCAAGCTT AAAAATATCGCCGCTCAACGATGGCAACCGCATGCCAATCCCGTGGTGGTGGGATATCTTTTGGCGGAAAGCCACCC GGTGCGGGCAGCGTTTCGGATCTGGGGCCGCTGTTGCTGGCGCGGCTGTTGAATCTCAACGATGTGCAATCTGGCGTGC TGAATATTTATCTTCCGCATTTGCGGACGATCAGGGATTTGTTGCTGCTCGACTTTAAAGATTTGCGGGCGATTAACCCAGTAC ATCCGCGATAACGCCAAATCTTCCAGAATCAGTACGGAATAATCAGTAGCGCATCGGTTGGTGGCCTCCAGCCGCGGAT ACTGTCGCTGGAGCAACAAGGTGCGCGCATTTCTTTGGCGAGCCGATGCTGGATATCAAAAGACTGGATGCGCAACGATG CTAACGGTAAAGCGTTATCAATATCTCAGCGCCGAAAAGCTTTATCAGATGCCATAACTGTACGCCCCAGCTGCTG TGGATGCTTTAGAGTTGTATGAACAATGCCCCTGAAGCCGGCGATCTGGAGAAACCAAACTGGTGTTTTCTTCGACGCA GGCACATCTGCTGTTAAGCATGACCCGAGGTACTGCTGGATAAGATTGAGCAGGTGATAAGGCTTATTCGCTCAAAA GCGTGGCGCTGCTGGTTTCGCAAAAACCCGCTGATATTCGGATAATGTGCTCGGCCAGCTCGGTAATCGCGTTCAA CACGCTTTGCGTGTCTTTACGCCATAAGATCAGAAAGCAGTGAAGGCAGCGGCCAAACCATGCGGGCCAAATCCAAACATT TGATACCGAAAAGGCAATCCAGGAACCTGGGGACAGGCGAGGCGTTAATCTCGTTTCTCGATGCGAAAGGAAGCCCTTTCAG TGGTGAACCGGGCAGTGGTGGATTTGCCCTGTTTACGAAATGGGCGGTTGACGGAAGATGAGGCAATGGCTTATTAAC CACTCCCCGGTGTATGGCAAGTACGAGGATGACGTGGACCCGGGAATCCGCCTATGAGATGTTGCAAAAAGGCTTTTCAGGC CAGTATCGAGCAGCAAAATAACTCTCCCGCAAAAGGAAAGAGGTGGCGGTGGATGACGGTATTTCTCGGTGGATGAAGG ATATTTTGTTCGGCACTACCCGACCACCGCGGGGAAAGAAAGATGGTGTGGTGAACAATGGCAAAAAGCCGCGCCCGC CAGGTGACGAATCAGATTTGCGCGGGATGTTGGGGAGTTTGTGGGGGGGAGAAAAAGATAA

>Cluster\_62195

TTGGGTCAATCAGAAATACATTTTCATGGGTAAAAATGACTTCTGGCTAAGTAACCTTTGTGAATCTTAGAGGGTTGAGACA ACCGGATGGCCCTCTCTTTATGAATATCATGCAACCAATGATGATAATACCAATTAACGCAGCTACTCCGTCAGCTG CTTCAATCAACTCTAATATATGTTAATAGGCACTTTCGCTGTTTTTGTCTTTTGTCTGAGTGGATACCCGAGGGAT TATGAACGGCAATCGGATGGACGTGGGACCTATATAAAAAAATAGGGATTTTATTCACCACCACAGAGCTTGGTAC TATCGTACCGAAAGGGATGGAAGATTACTGGCTGCGCCCAATTCGATTTTATGAATCTGAACGACGCAATTTTCTCGGAA CATTTATTCAGTGAAGTGGTTTTACTTTCCGGCTACTCAAAGAATCAGACAGTCCGTTTCTGGCTGTTTTCTCCAGGATC CTTTGGCAATATGAGCAAGCAAGCAGTCAAGTGTGTTTTCTGCCCCTTCGCTGGCAAGAGCTGTCTATAGAAAAATCAGCGCT GCCAACTGTTTTTACGGAAGATACCTCTGTAGAACTTATCAGTCAATGGCTGATAACCTCAATTCCTTAGTACTTACTC ACAACCTAATAAATCACAAGAACCAGTACAACAGCTTGAAGAGGTTACCCCTACCTGGCGAAGCGAGTTTCCAAATACCC TTAGATGATGAAACAGGAACGCATTTTTTGAATGGACTGCTATGCGCAGCTCTGTAGAGCTAAGCCCTGACTACAAAA AAATAAGAGTACGCGTTGCCAATTTCTATTGGTCAAGAAAGCATCCAGATGAGCTTAGGGTGATAGTATCTCTTCCGGACG AAGTTTCCCTTCTGTAACAAGCAGCCGCTCAACTACCGGCTTGAACCTGGCAATTTGTAAGATGGTGAAGGATGCTCT GGCCTTGGGCCAGCCTATGCTTCTTGGAAAACAGACAGGCAACAGTTGATTTACGTAAGGCAAGTGAAGTGTGGCAG GCAAAATCCATCCGACAGGTTTTGCTGTTAGTGGCTCGTGTGGAGGATGATTGTTGGGAGCATTAACCTTGATGACATG AAATTGCCATTGGTGAGGTGCGGTTAACCTTCACTGTTGATGACAGATCAATGGCTGTTACAGGGACAGGCTTCTTGCAGT GTGCGAAGCAGCGATGTTCTGATGTTGCCCTCGGGATAATAGCAATGTTGCTGGTTTTGATGGCCAATCGAGGGCAGT AAACGTATTAGGACTAAAAGCATTACCTGTGAAGGATGTCAGGACGTTACAGTTACAGCAAAATGAACCTTATCGGATTC GCACCCGAAAGAGAAACAAATCAGCATCCGGAAGGTTTTGCTCTAAATGGAAGCCTGCAAGCTGGTTTTGCTATCCAGATGAA ACATTTATTGGTGTACAAAAGTCAATTTCTACTACTACCCGATATTTCAAAGCATGATGTAACGCTTACAGTGTGTA

>Cluster\_45173

ATGACAGAGCCCGATGTAGCAGTATTAAGCCAGGTCACACAGTTTCTCGATCGTCAACACGGTCTTTATATTGATGGTGC TCCAGGCCCGCACAAGTGAAAAACGATTTGGCGATCTTTGATCCGGCCACCGGGCAAGAAATGCGTCTACTGCTGATG CCAACGAAGCGGATGTAGATAACGCAGTCAATGCTGCTGGCGGGCTTTGCTCGCGTCTGGGCCGGGCGATTACCC GCAGAGCGTGAACGATTTCTGCTACGTTTTGCGGATCTGGTGAACAGCACAGTGAAGGAGCTGGCGCAACTGGAACCCCT GGAGCAAGGCAAGTCAATTTGCCATTTCCCGTCTTTGAAGTGGCTGTACGTTGATGATGATGATGATGATGATGATGATG TAACGACCAAAAATCGCGGGTAAAACGCTGGACTTGGATTTCCCTTACCCAGGGGGCGGTTATCAGGCGCCGCT AAAGAGCCGGTTGGCGTAGTGGCGGAATGTTGCCATGGAACCTTCCGTTGATGATGTTGATGTTGGAAGGTGATGCCAGC ACTGGCAGCAGGCTGTTCAATCGTGATTAAGCCCTTCGGAACCCAGCCACTGACGATGTTGCGCGTGGCGGAACCTGGCCA GCGAGCTGGTATCCCTGATGGCGTTTTAATGTCGTCACCGGTCAGGTGCTGTATGCGGCGCGCCCTGACGTCACAT CCTCATGTTGCGAAAATCAGTTTTACCGGTTCAACCGCAGCGGAAAAGGATTTGCCAGAATGCTGCTGATCACTTAA CCGTGTAAACGCTGGAACCTGGCGGTAATAACCCGGCAATTTGATTAATAAGATGCTGATCCGCAATGGGTTATTGAAGGCT TGATGACCGGAAGCTTCTGAAATCAAGGGCAAGTATGCGCCCGCAGTTCCGCAATTTATATTGAAGCCGCTGTTTGGAC ACGCTGGTTAGTGGATTTGAGCAGGCGGTAATACTGTTGCAAGTGGGACCGGGGATGTCACCTGTTGCAAGATTAACCC TTTGGTTTTCTGCTGCGCACTGCGACAAAGTGTGTTTCAATCTCGACGATGCGCAGGCACAGCAAGCAGAGCTGATTCGG GGTGCAATGGACAGCCGAGAGGGGATTTATGTTGCGCAACCGCTGGTGGTAATCCCGATGCTAAATTTGCGCTTAACT CGTGAAGAGGTGTTTTGGTCCGTTGTAACCTGGTGGCGAGTACCGGATGGGAAGAGGCGTTACAACCTGGCAACGACAC GAAATATGCGCTTAACTGCAAGTGTCTGGACGCAAAATCTCTCCAGGCTCTGGAATATAGCGATCGCTTACAGCAGGGA CCGTGTGGGTAACAGCCATACCTAATGACGCTAACCTACCGTTTGGTGGGATGAAGCAGTCAAGAACGGGCCGCTGAT TTTGGCCCGACTGGCTGGACGGTGGTGAATAACTGCGTGGTGTACGGTATTTAA

>Cluster\_29142

ATGTCATCAATATCACATGGCGCACCAAAAAGCGTCGAATTAATCCCTAATCCCGGCTGTGGTTGGCGATCATTTGCCGG AATTATTATTAATCTTCTGCGCTTGGCGATACCTTGCCTGCTGGACAAAATATGATCGCAATTCGGTGTTTGCCA TTATTTGCTGGATCAGCAAGCGATGGAATACACCCGAGTGAATGTTATTTCCGCACTGATTTATCTTTATGGTGGT TTTGCCCGGATAGCAATACCCGGACAGATCTTGGCAGCCGAAAGCGCTGAAAATGACTCTGCGGGTTTTCTTAA TTTGCTCTGCGGCTGGTGGCAGCAGCAATGTTTATCGCGCGGCAATGACCATTAACCGGCTGGATAAACGCATGGCC TGTTTACTATGTCGAAAATAGGTGCCAGCAGCCGAGCATTATATCGGTGCCATTGTTGGTGACCATGCTCCTGAGCCTG

GTCGTACCCAGTGCCACTGCCGCTACGGCTTGCCTGGTGGCCGATTATGATGGGGTCATTGCGGCATTTAAGGTGGATAA  
ACATTACGTTTACGGCGCTCAATGATGATTTATCGCCAGGCGACCAGTATCTGGAACGTTGGTATTCAAACCTCCGG  
CGGGCAAAACCTGCTTTTCTATCGGTTTATCAATAAAAACCTTTCGGGCGCCGGCATTTCTGTCAGCTGGCTTGAAGGTGG  
TTAGCGGGCGCGGCTGGAGCCTCACCATGTCGGTGATCCTCTATTTCTCGCACGTAATTTGTTGCCGCCAGAAACGGGA  
AGCTTTGAAGGGGAGCGAGGCCATTAAAAAGCACATTGCAGAGTTAGGGCAACCCTGGTAAAGAAAACGCTTTGA  
TCGGTATTTTCGCTATTGTTACTGCTCTTTTGGTCTACTGGCGGAAAATACACAGTATTGATACCACCTCTGTACCCTT  
GCCGGACTGGCGATTATGTTGCTGCCAGGCATCGGTGTAATGAGCTGGAAGAGGTGCAAAACGTTGTCAGTGGGGCAC  
GTTGCTTATGTTTGGTATTGGTATCAGCTGGGGTCCACGCTGCTGATACGCAGGCAGCTTCATGGATGGCGAACTATG  
TGGTGAAGGGTTTTGGTTCTCGATGGCTTGGCATATTAGCCATTTCTCGGATTCTCGCGCTTTCTTTGATAAATCATTAC  
CTGGGGTTTGGCAGTGGCACTGCGCTAACTGCGCATTTGCTGCCATCTGATTAGCCTGTTAAGCAGTCTGCCGCCAGA  
ACTCGGCTTAACCCGGTCCGCATGACCATTCTGCTCGCTTCACTGTGAGTTTGGCTTCATCCTGCCGATTAAACGGC  
CACAAAATATGGTGTGTATGGGTACGGATACCTTCACGCCACGCCAGTTTACCCTGTTGGGACTGTACCTGACGGTGTG  
GGCTACCTGTTGTGCTACTGTTTGGCGCACCTGGTGAAAAATTTTAGGTCATAATGTGA

>Cluster\_34524

ATGGCTTTGCGCTCATTAATGAACGCCAGCGCATTCGCTGCTGCTGGCGTTATTATTCGGTGCTCGGGAACGCTGGC  
CTTCTCTCCTTACGACGCTTGGCTGGCGGATTATTTTCGCTGATGGGGCTTCAGGCGTTGACCTTTAACCGCGTCCAC  
TCCAGTCTCCCGCTATTGGCTTTTGGCTTGGCCATTTGTCCTTTCGGCAGCGGTATAAAGCTGGTCTATGTGACATCGCG  
ACCTTTGGCGGAAATGCTTGGCCGGTTAACATCTTCCTGGTGGTGTGCTGGCGGGCTATTGTGCTGTATACCGGACT  
GTTTGGCTGGCGTGTGTCGGCTGTGGGGGAAAACACTGGCTGCGGTAGCGATTGCGGCCCTGCCCTTGGCAAG  
TGACCGAGTTTCTGGCGGTTGGTACTGACCGCTTCCGCTGTTACAGTTCCGGCTATAGCCAGATTGATGGCCGGTTA  
AAAGGGCTGGCACCGATAATGGGCTGGAGCCATTAACCTTCCTGCTGATGATGGTTAGTGGCTGCTGGCGTT  
GGTCAAACGCAACTGGCGTCCGCTGGTGGTGGCGTCTGCTGTTTGCCTTCCTTCCCGCTGGCTTACATCCAGTGGT  
TTACCCCAACAACCGGAGAAAACCTTACAGTTCGATGGTTCCAGGCGGATATTCGCAATCGCTGAAATGGGAGGAGGC  
CAGCTCTCTTAATCGGCTGAAGATTTACTACAACGCAACGCGCATGATGGGCAATCATCGTTGATTATCTGGCCGGA  
GTCGGCGATAACCGATCTGGAAATTAATCAGCAACCGTTCTCAAAGCACTGGACGGTGGATGGGCGATAAAGGTAGCT  
CGCTGGTAAACCGGATTTGTCGACGCGCTCATAAAGCAGAACCGCTACGATACCTACAACACCATCATCACCTGGGT  
AAAGGTGGCGCTACAGTACGAATCAGCCGATCGCTATAACAAAACCTCTGGTGCCGTTTGGCGAGTTTGTCCGCT  
GGACTCGATTTCTGGCTGGCTTAGCCGTTTCTTTGATCCTGGCGATGCTGCTTCAGCCGTTGGGCAATATACCGGCT  
CGCTGTGGCAATGGTATTGAGCTTACGCGCTATTTGCTACGAGATCATTTCTCGGCGAGCAAGTGGCGGATAACTTC  
CGCCCGATACCGACTATCTGCTGACTATCTCAACGATGCGTGGTGGTAAATCTATGGTCCATGCAACACTTCCA  
GATGGCGGAATGCTGCGCTGGAGCTGGGCGGCCACTGTTGCGCAGCACCAACAACGGCATTACGGCGGTGATTGGCC  
CGCAGGGTGAATTCAGCGGATGATCCCGCAGTTACCCGCGAGGTGTTAACCCTAAGCTGACGCGCACCCGACTC  
ACACCATAACGACCTACCGCAACTGGCCGCTGTTGGTGTGACGGCATTTGTTGGTTTTGCTGTGTTGATGAGTCT  
CGCTACGGACGTAATAA

>Cluster\_66821

ATGCCACTTCTCATGAAAATGCCTGCAACAACCTGGCCAGCAAAATGTCACAGCCAGTCTTAGCCCGGAGCAGAA  
GCGCATTTCCTGGCACTGGAAGCAGAAAACAATCTGCCTTACCACAGCTTCTTCCGGAAGCCCGCCGCGCTGGATG  
AGGTTGAATTCGCGATGTTTTGAAGGTCATCGCCGTTACAAACCGCGCTATGCTTACCCGATTACCCCGGTTTTTCG  
GCGAACGGTTCCTGAATGGCTGGAGTGGGAGGCGGAAAGATCTGTGATGACGCACTCTCTGCTGCTGACCTTTTACC  
CCAGTACCGTCCGCTCACATCGATGCGCGTCTACTGGGCAACTGGATGCGTTGTTGAACCGTATGTTAGAAATCTAA  
CACAGACGAGATCGATGTTGAATAAACGTTTCTGGCGTTACTCGACAGAACCCTGCCAGACGCTTTATGCACGCC  
AATATCGGCCCATCTGATTCGCCATTACCCGCGCAATCTTACGTCGACAGCAGAGTTGAAGCAGGTTTACCCGAACCT  
GACCTTTATCTACGATCCCTGAAATCACCCTGATGACCTACTGCTGGAAGTGGCGAAGAATCATCTGTGAATGAGCAAC  
CGCATCGCAACGCGTCCGGTGATGATAAAAATTTTCAAAAAGGGGCTACGGGATTGTGAGCTGTTACAACCTCACTG  
CCGCTGGCGGGTGGTGGCAGCAGCTGGTACGCTTAACTGAAAGCCATTGCGAGGCGAGCGAATCGCTGGATGACTT  
CTTTACGCGCACTTACCAGCCTACTGCGCAGCAGATCGCCATCATCGATGCGCGGTGTAATTCCTCTATCAACAT  
CACACTTCTTTGAGAAATAGCTTCTCTGGTGAAGAAAGGGATTGACCTGAACGTTTTGTTGCAATGTTGGCATGAT  
GGGCTGGCGGAAAGCGTTAACTTGTGTAAGAAAGGATTGCGCGGCTACGGTAAAGAAAGCGCGCAAAATGA  
AGTGGGTATTCGATCAGCGGCAACTGGCGGAGTTTGTGCGCAATACCCCGTGAATAATGGCTGGCAAAAACGCGCCA  
TGTTACAGCAGTGGGGGATCAGTTCCGATACTGGCCACCAGCGCGCGCGTTTGGCGTATGGCGATGAGCCAGAT  
CCGATACCCCTGTCGAAACTGTCGCCCGCATGCTTATTATTTTTCGCGCATCAGCGACATTCTGACGCTCGACGA  
AACCATCAAACGTAACCCGCGAGGCTGGTACGCTTTGCTCGGTGCTTTAAAGCCGGAATGCGTGAATTTACCGCCA  
ATGTCAGCGGTAACGATCTGGTTCCGTTACCGGTATATGGTCCGTTTGTGCGACTTAGAAAAATATCGCGCGAAGGT  
TCACGCAACAACCCACTGGCTGGGCGAAGAAGCCGACGCAACACTCGATTCTGGAACGCCAGCCCGCGGTGATAAG  
CCATGAACAGCAGATGCGCTTTAGTCAGTAA

>Cluster\_15782

GTGAAATGTTGGTATTTGTAATTGGAACCTGGGATGAAGAAATACCTTTTATATTAGACGACGAAAGGAAATTTCTTCCAA  
AGACAACTTAATCGGAGACACTATGCAAGAATCTATATTTTATCTTAAGGAAAAGGGGCAAAAGCAACACGGTAA  
TCAACCTTAATGCAGAATGGGGAGCTGGTAAAGTTTTTTTATAAAGGATTTATAACTCAATAAAAAGATGCACACCCA  
TGCGTTTACATTTGATGCTGGGAAGCAAGACTTTTCTGATGATGATTTTAAACCTTTTCTCTTTGTGACACAAT  
GCAACATATGCAAGAAACTTGATGCTCGATTGATACAAAGCGGCATGCTATCGGACGCTTACAAGAGGTGTTCTAC  
CTGAAATCATATCTGGCCATTAATCAAGACTTATGCAAGAGTATAGTAACGTTAGGTGATATAGCCAAAAGCCTCATTAATA  
ATGCTGAAGGAACACCAGGAAAACTGAAGAGCATTAAAGTTAAAAAAGAACTAACGTTATGGTCTAGGTTGGCATA  
TGAATAATGTTTTTCATGCTCTATTTATCTTTATAGATGAAATGACAGATGCAAGGCGAGATTATGCAATTTCTCTTT  
TAGAGATTGTTAAACATATATTCGATATAAAAATTTTGTCTTTATTATTGCTACTGACACAGATCAATTAACAATCA  
ATCAAAGATGTTTTACGGTAAATGATTTTTCCGCAATGACTATTTAGGCGTTTTTTTTCATAGAAGATTCTTAAAAA  
ACCTGAGCTTAAAGATTTAATTAATGGTGTGTTGGTATTATTTGGTACCGATTTTAAAAATATCACATCAAAAACAC  
ACCCACTAACAGCAACATAGAGAAGCTTTTCAATAAATATTCCAAACGTTATTTGAAGCATTTGGGTTAAATCTAAGAGAC  
TCAATCCGAATACTGAAAGGTTAATAGACATTCTAAATCTGATTTAGTCAAAAAGAAAGTATGATTAATTTTTATAAT  
TTCCGTAATGATTAATGATATAAGGAACTGCAAAATTAAGTGGACTAATGTTGCTCAAGAAATGCAAGAAATGCAAGCTTCA  
CTGATTCGATAAAGCAAAGCTCCAAATTTAAAGGTTTCTCAAGCCTACCTTGAATTTAAATCTGATACAAATCAGCAA  
AGAAATAGGTGTCATTTATCTATAGAACGCGGAGCAGTAGATTTATCTACAGATTGAGCCAAAATAAATTTAAT  
ATTAATAAATTTACTGATGTTGCTATGTTATTTATTAAATAATAAACAATGCTTAAATCAAGTATAAAAACCAATGGGC  
AAAATTCACATAAGTATTATCTCAACGCGCTATTTAGGAGTGAATAGCAAGCTATAAAGTATTTGGCAAGGCCCCATA  
GAGAAATGCTGAAATACATCTTTTTATGCTTACATAAATACATTGAATTAATGAACGGCCACATCAATTTGATTAA

>Cluster\_29191

ATGGCCAGCCATATATGATGCGGAGGATCGGCAAGTCCCTTGGTCCGGTTACGCAATTAAGTCGGTTAATTTAAC  
GGTTATCTCTGTTGAAATACATGCTACTAGGAGAAAATGGCGGGTAAATCCACGCTAATGAAAGTGTATTCCGGA  
TACATGAGCAACCAAGGCCACTTACCATTAATAACATTAACATAAAGCTGGATCAATAATAGCGGACAACTC

GGTATCGGGATCATTTATCAGGAACCTACGCGTTATGTAGAAATTAACCGTACTGGAAAATTTATATATTGGTCGTATCT  
GACGAAAAAATCTGTGGCGTCAATATTTACTGACTGGCGAGAAATGCGTGTCCCGGCCCATGATGTTATTACGCGTGG  
GCTTGAAAGTTGATTTAGATGAGAAAGTGGCGAACTTATCTATCAGCCACAAGCAGATGCTGGAATTTGCCAAAACGCTG  
ATGCTCGACGCCAAAAGTCAATCATGATGAAACCCACTCTCTCACTACCAATAAAGAGGTGGACTATCTGTTTCTGAT  
CATGAATCAGTTGGCTAAAAGGGTACGGCCATCGCTGATATATCTCGCATAAAGTTGGCGGAAAATTCGCGGTATTGGCACC  
GCTATACGGTGTGAAAGACGGCAGCAGCGTTTTGCAGCGCATGGTGAGCGATGTGTCAAATGACGATATCGTCCGTCTG  
ATGGTAGGCGCGAACTGCAAAAACCGTTTTAACGCGATGAAGGAGAATGTCAGCAACCTTGGCGACGATACGGTTTTGA  
GGTGGCAACGTCACCAGCCGTGACAGAAAAAGTCCGGGATATCTCATTTAGCGTCTGGCGGGGAGAAAATATTAGGCT  
TTGGCCGACTGGTGGTTCCGGACGTACTGAACTGATGAACTGCTGTTGGCGTTGATAAACCGCTGGCGGAGAAAATC  
CGTCTTAATGACAAAATATCTCTCCACGCTCACCCCTGGATGCCGTGAAAAAGGGATGGCTTACATCACTGAAAGCCG  
CCGGGATAACGGTTTTTTCCCAACTTTTCCATCGCTCAGAACATGGCGATCAGCCGAGTCTGAAAGACGGCGGCTATA  
AAGGCGGATGGGCTGTGTTTTCATGAAGTTGACGAGCAACGTACCGCTGAAAATCAACGCGAACGTGGCGCTGAAATGT  
CATTCGATAAAACAGAATATCACCGAACTCTCCGGGGGAAATCAGCAGAAAAGTCTGATCTCCAAATGGCTGGCTGTCA  
CCCCGAAGTATCATTTTTGATGAACCTACCCGTGGCATCGACGTTGGCGGAAAGCCGAAATTTACAAAAGTATGCGCC  
AATGGCGGACGACGAAAAGTCACTCTGATGGTGTCTGAACTACCTGAAATTTACCCGCTGCGACCCGATCGCC  
GTGTTCTGCGAAGGACGACTGACGCAATCTTGACCAATCGCGATGACATGAGCGAAGAGGAGATTATGGCATGGGCTTT  
ACCACAAGAGTAA

>Cluster\_48650

ATGACGGACATCATTAATAACCGTACCGCCCTGAAGAGTTTCCGCGTCACTGGACTTTCTGGAGCGAATGACTGTTTAC  
AAAGGGAACGTAGAGGACTGGCAGCTTTAAGTGCCTTACATACAAAACAGACGGCAACCTTTCCGCGCAACTTACT  
ATCGCTGCGAACTTGGATGACCGTCTGGTGGCGTCTGTTTATGGCTTACCCGAACTACTGTTGGCACTCGCCACCCG  
ATGTTTCCTAAGTTGAAACCAACCTAATACCACCGTGGCTAACAGTACTGGGTCGGTACGTGAATAACAACCTTTCG  
GGTATCAGTCTGCTCAGTTGTGGATACTCAGTATCGTGGCGTAGGCGTCTCTTATCGAATGATTAACCTGGTTAGCAGGA  
TGCATGACCGGCCAATCATTTGAGATCCAGTCTCGATGAGTAAATCAATCCCTTCCGATGAAAGCAGGTTTAAAGTTT  
ATCCGCCCTGAGCGACCGAAGAGCTATGAAAGTGCCTGCGTGTATTCCAGCGCCATTTCCGTTCCGACCCGGGTGATAA  
CGAGGCGATCGTCAAAGAGTTGTTGCGAATGAGCGAGTCTCGTCTGCGCGTGCAGTGGTGTGATCTGGTGGCGGACTACC  
ACAAGAACAGTTCCTTGGCAAAAGCTGGGCGGAATCGTGGCAGCAGATTCAGGACATTCGCGACAGTCTGGTGGACGAG  
GCCAGCATTTGTGAAGTTGCTCAAGGACATTCACAACTTACGTTTACGTTCTCCGTTGTATGGGGTGTATCGAAACCTGA  
CTTTGGTCTGCTGACTGCCGTGACAGCTGCCACTGCTGGCATTCGACAAAACACCTTTGGATAAACCGTTAGAAATGCTT  
TACCGGCATAA

>Cluster\_51506

ATGAAAAATATAAATTTTTCTATAGGTGCATCATTTATATCAATAGTGTACTGCCTGTTACGCAGCAACTGAACATAA  
TAACCTCAATGCAGTACTCCAGTCCGAGCAATAGAAAATAATAAGACAGACTTTCTTGTACGATAAGTCAATACAAC  
CGACTCGAACGAAAGTTGCTGAAAAATTCGAAAGCAGAGATCAATGCCCTGATGAGAAAGATGATGACAGACGTTTATCT  
TGTATGATCGTTTTTTTCTCCAACATTTACTCCATCTGTAACCTAAAATCAAATGAAAGCCAGTAAACAACAGA  
GGCTCAGCAACCAAACTTTTCTGAGATACTAAATGCCGAGCAGAAAATGATAAAGAACCCAGACTAACTGCTACGATA  
AACTATTTCCACAGGATAAAGCTGTTCAAGCTGAATCAAATTTAGAGAAAGCCACAGATGTAGGAAAAATGGCACACATCC  
ATTACTACATCGCCAATTTGATGATTCGAAAAATGTAATTTTATCGTTAGAAAGTGTGATGATATATCAGAACTCCATTTTCG  
AGAAGCGTACTCCCACTCTGTTTATAGCTTGGCGAGAAAAGAAAACCGAAGTATTTCTAGTTGGATGTATATTTAG  
GCCTTGAACAAACACAGCATGCTTTTATCGTCTTGAATAAACAGAAAGCAGTTGAGCGAAACTGGCTAGTATCTACAGATA  
AAGCTGTTTTTTATAAAGGTAATGACATTTGATTTTATCGGAAACTAGCCAACTCAAACAAAATGATATCAAAAATAAC  
TCCTTATAATGAGAGCCCTGTAAGTGAACCTTTCAATTTAAACGGCTGTCAAACCGCTAAAACCACTTCAAGCTGCTT  
GTAAGTGGAAATAG

>Cluster\_65039

ATGGAACCTACGGCATTACGCTATTTCCGTCGACGTTGGCGCAGGCACTGAACTTTACCCGTCGGCGGAAAAATGCATAC  
CTCACAGCCTTCGTTAAGCAGCCAGATCCGCGATCTTGAAAACCTGTGTGGTGTTCGGTTACTGGTGAGGGATAAGCGCA  
AAGTCCGCTTACAGCGCGGGGAGAATGTTTTCTCCAGAGCAGCGCTGGCAATCCTCGAACAAGCGGAAAATGCCAAATTA  
CGGGCGGGAAAAATGTTTCAGGAAGACAGACAATTAACCATTTGGCTTTGTGCCATCGGCGGAAGTGAATTTACTGCCAAA  
AGTATTACCGATGTTTCTGCTCAGACAGCCAGACACTTGATTGAGCTGGTGAAGTTAATCACCACGCACAGGAGGAAA  
AAATTCGCGGTGGTGAACTCGACGTCGGCTTAAATGGCCATCTGTTTATAGCCCGGAGATTTGATTTACTGGAGCTTTTT  
GACGAACCATTAGTGGTTGTTTACCAGTGTGATCACCTTTTAGCACATGAAAAAGAGATCACCCGCGCAACTGGATGG  
CGTGAATTTCTCAGTACCAGTCCGGCTATTTCCGGTTCGTTGCGCCGATCGTTAAAGCGTGGTTTGGCGAAGAAAACA  
GCCAGCCAAATATCGTCCAGGTGGCAACGAATATTTCTGGTGACCATGAATCTGGTGGGATGGGGCTGGGCGTCACTTTG  
ATACCCGGTTATATGAATAATTTAATACCAGGACAGTTGTTTTCTGCTCCATTTGCCGAAATGTGCTTCCATTTGCTTT  
ACTGATGGCGTGGAAAGAAAGGGGAGATGAAGCCGGCATTACGCGATTTTATCGCAATTTGTCAGGAACGTTTGGCAAGCG  
TAACGGCATAA

>Cluster\_43215

ATGAGCCAGTACAGATTTGATTCAGCGCTTCCGAACGGTATCGGGTTAGCGCCTTACCTGCGAATGAAGCAGGAAGGAAT  
GACAGAAAACGAAAGCCGATCGTGGAGTGGTTACTCAAACCCGGTAACTGAGTTGTGCACCCGCAATTAAGATGTGCG  
CAGAAGCTCTGGCGGTATCTGAAGCGATGATCGTTAAGGTATCAAAGCTGCTGGGGTTTAGCGGCTTTTCGTAACCTTACCG  
AGTGGCGTGGAAAGATTATTTTTCTCAGTCAAGACAGGTATTTGCCGTCAGGTTGGCTTTTGTGAAAGCGCCGAGGATGT  
GGTGAATAAGGTATTTAATCACTTTTACGCACTTATGCAACCTTATGCAAGGTCAAGTCAAGCTGATGATGATGATGATGATG  
CCGCCCGCTTTTTCTATCAGGCCAGACAGCGGGATTTGTACGGTGGCGGAGGATCAAATGCTATCTGTGCTGATGTACAG  
CACAAAGTTTTTACGATTTGGCGTACGCTGCCAGGCTATCCGGACGCTCACATCATGATGATGCTGCTTCTGTTGTTACA  
GGAAGGAGATGTGGTGTGGTGGTGACCAATCCGGCGCAACAGTGTGATAAAGCGGCTGTAGAAGTGGCAAAAAAGA  
ACGGGGCAAAGATATTTTGTATAACGCATAGCTACCATTACCAGATGCGAAGCTGGCCGATTTATTTTGTCTCAGCG  
GCCCGGAAACACCGTTATTTAGTCTGTAATGCCGCGCAAGAATAATTACAACCTAACTTTGCTGGAGCGGTTTTTTGCTCT  
TGTGCGCCAGCTCAACATGAAACAGCTAATATTAATATGCAAAAACCGCGCAATTTGATTTCTTCTCACCAGGCG  
CGCTGAAATAA

>Cluster\_33814

ATGAGTCTGTCGAGAAATTTACGTCATAGCGTCATAAATCAGGTGATTGAAGATATGGCGAGGGGCAATATTCCTTCTCC  
GCTGCCTTCAAAAGCGGACTGGCAGAAATGATAAATCAGTGCACCTACCGTACGCCACATACTCCAGCATTTAAGCG  
CATGTGGCGTGTCAACCTGGTGGGAAAAATTTATGTTATCGCCCGCAAAACCGAACAAGACGATGGATTTGATTTGATC  
ACGGCTCGTGAAGAGCAAAAACCGTCTTTTTGAGCAGGCAATTTTTCACTGATTAACCTGCGCAGTACCGCCCG  
AGAAAGCTTTTCCGAACCTCAGTGGCGGAGCGGCAAGCGTCACTCCGGTAGTGGTACGAGAAATATCTTTTGAATTCG  
GTCGTTATAATCTTATTCAAAGCGAAAAGCGGCCAATGGAGCATGAAGCAGTTTCGATCAATCTTACGCCGAGCAGCTG  
TTTGAGCTACGCGAAATGCTCGAAACACATTTCCGTGCAACACTTCTCAACCTTCCCGATGATGACCCCTGCTGTGCA  
GGCGAAAACCATGCTCGAACGTCACAGGACATTTGCGGACAGCATTTGGCAACAACCTTTGAAATTTTCTCAATTAGACC  
GTGATTTTCTATGCGATGCTGTTATCCGCTGCTGACACATCTTTTTTAATCAATCACTTGAATTTATATCGGTGATCTTT

CATTTTACTATCAATGGGATGAAAGCGATCTCAAACAGCGCAATATCATTTGCTGTTGATGAACATATGACCATTCTCAG  
CGCCTGATTTGCGGTAGCGATTAGATGCAATAACGGCGTTGCGAAACCATCTGGATACCGCAAACATCAATGATTC  
GTTCCATCAGGCAACATCAACAATA

>Cluster\_39091

ATGAAAATTACCGTATTGGGATGCGGTGCCTTAGGGCAATTATGGCTTACAGCACTTTGTAACAGGGTCACGACGTTCA  
GGGCTGGCTGCGGTACCACAACCTTATGTAGCGTGAATCTGGTTGAGACAGATGGTTTCGATATTTAACGAATCGCTGA  
CCGCCAACGATCCCGATTCTCGCCACAGCGATCTGCTCTGGTGACGCTGAAAGCATGGCAGGTTTCCGATGCCGTC  
AAAAGCCTCGCGTCCACACTGCCTGTAACCACGCCAATFACTGTAAATTCACAACGGCATGGGCACCATCGAAGAGTTGCA  
AAACATTCAGCGCATTACTGATGGGCACCACCCATCCATGCGCCCGCCGCGACGGCAATGTCATTATTCATGTGGCAA  
ACGGTATCAGCATATTGGTCCGGCACGGCAACAGGACGGCGATTACAGTTATCTGGCGGATATTTTGCAAACCGTATTG  
CCTGACGTCGCGTGGCATAACAATATTCGCGCTGAGTTGTGGCGCAAGCTGGCAGTCAACTGTGTGATTAATCCACTGAC  
CGCCATCTGGAATTGCCGAATGGTGAATTACGTCATCATCCGCAAGAAATATGTCAGATATGCGAAGAAGTCCGGCAG  
TGATCGAACCGCAAGGCATCATACTTCAGCAGAAGATTGCGTGAATTACGTGATGACGGTGAATTGATCGAACCGGAA  
AATATCTCGTCGATGTTGCAGGATATCCGCGCGCTGCGCCACACCGAAATCGACTATATCAATGGTTTTCTCTTACGCCG  
CGCCCGCGCATGGGATGCGCTACCGGAAAACACCCGCTGTTGAAATGGTAAAAAGAAAGGAGTGAATATGAGC  
GCATCGGCACTGGTTGCCTCGCCCTGGTAG

>Cluster\_1091

ATGATTTTCAATATTCAGCGCTACTCGACCCATGATGGCCCCGATCCGCACGGTCTGATTTTCTAAAGGCTGTTCGCT  
GGGCTGCCCTGGTGTGAGAACCCGAAAGCCGCGCCCGCAGGATCTGCTGTATGACGCACGACTGTGTCTGGAAG  
GCTCGAGCTGTGCGCTAAGCCGCGCGGAAGTGAATTGAGCGCGCGCTGAATGGTTTGTCTATCATCGGAAAGTAA  
ACCCCGGACATCTGACGCGTTAACCGACTGCTGCCGACACAGGCATTAACCGTGTGTGGTGAAGTGAAGCGGTTGA  
GGAGATCATGACGACCGTTCTGCGCGATAAACCGTTTTACGATCGCAGCGCGCGGTTAACGCTTTCGGGTGGTGAGC  
CCTTTATGACGCGGAAATGGCGATGGCGCTACTGCAAGCCAGCCAGGCGAGGCATTCATACTGCGGTAGAAACCTGT  
CTGATGTGCGCTGGAAATATATCGCCCTTCTGCGCTATATFCGATCTGTTTCTGCGGATTTAAACACCGTTGCCGA  
CGCGCGTTTAAACAGTGGACCGGTAACCGCGCCAGAGTGTGGATAACCTGAAAAAACTCGCCGAGCGGGCAAAA  
AAATCATTATCCGCGTGCCTGATTCAGGCTTTAATGCCGAGCAACCTCTGTAAAAGCCATTACCGATTTTGGCGCC  
GACGAGTGCACGTTGGCGAAATTCATTTCTGCCCTACCACACGCTGGGCATCAACAAATATCACTTACTTAATCTGCC  
CTATGACGCCCCGAAAAACCGCTTGATGCGCCAGAATGCTCGACTTTGCCAGCAGTATGCCGCGCAAGGGTTAA  
CCGCGACCTACGAGGATAA

>Cluster\_58266

ATGCTCTCTCGACATATCAATATTTTCTGCGGTGGCTGAACATGGCAGCTTACCCGTCGCCGCGAGTGGCTTGCACGT  
CTCCCAACCTGCGTTCCTCCAGCAGATTGCGCAGTTAGAGGAGAGTTTAGGCGTGCCTGTTTACCTTAGCCGAGCGGAA  
CGATTCTGCTCACTGATGACGAGAGAAGTCTGGCGACAGTACGCCAGCCGGCGTTACAGGAACGGGGCGGGTAAACGG  
GCGATTATGATGTTGCCGATCTGACGCGAGGATGCGTGCATGCGCCCTACCCCACTTTACGAGCTACTTTATCGG  
CCCCTTAATGGCGGATTTCTATGCGCGTATCCAGCATCACGCTCCAGTACAGGAAATGTCGCGAGGAAATTCGAGG  
ATATGCTTTTGGCGCAGAGTTGGACGTTGGGATGCTTCCGCGCTGTCATTCGCCGAGCTGGAGGCAAAATCTCTTTA  
CTGACAGAAAGTTTAGCGTTAGTCTGCGCAACATCATCCGCTGGCCGTCATGAACAGGTGGCGTTGAGTCTGCTTGA  
TGATGAAAAATGGTCTCTGCTCAGCGCGGAATTTGCCACGACAGGAAATGAACTACTGCGAGAAAGCGGGGCTAC  
ATCCACAGGTGGTCTTAGGCGCAACTCAATTAGCGCGTCTGGAGCTGATTCGCGCACTCCCTTCCACATGTTA  
CCAGAGGATTGGCACACAACATGACGGCTTTAAAGCTATTTCTTTGCCCGCCACTACTGGAGAGAACCGGGTTTTT  
GTTGGCGGGAAAAATAGCTGGCAGACAGCCGCGCAAGGCATTTTTGCACATGGCGTGGATAAATGCGCGTTGTTG  
CGGAAATGAATCACGGTAG

>Cluster\_42990

ATGAAAATGAACGAAAAACGAGCATTACCTGGCGCTACAACAGGCGTTTGACGCGCATGGCTGGGCTGTAGGAGA  
GTTAGTGACGCTGAAAAAGGCAATATTCACCTGCAGATTTATCCGCATGATGGTGCAGGATAACCTCGTTAAAGGCAT  
TTGGTTCTGAAGTATTACGCCAATGGCAGCCGACGCGCAGAGCTTTTCAGTATGGCTGTTTCCCAATGGTGGCGTGGGCA  
GGCCGACTGGGGAATGCGACGCTGAATGCTGGTGGCAATGTTTATCTTTACCAGCAATAAACCCACCCATCGCTTGA  
TGGTATGGCTTGTACTCAACGTTGGAAATCATCGACAAAACAGCAGATTCCCTGACTTTACGTATGCCCTGGCTTAC  
CGTGGCCCTGGCAAGGGGAGTGTATTGACTTTTTGCTGGAGAACGATGCGCTGGTTTTGCAACTGGAAGTCCATTCA  
TATGCCGATACATTTCCGGCCTCCGAGGCTGGCATCCGTTGGTTGCGAAAAAGCTGACTCCGCAAAATACAGAAATCGTT  
GCAGGTGCTTTTTGATGCGGACTGGCAAGAAGAAGCGGGTAGTATGAACTGCCAATGGAAATCGTATCTCTCCCAAG  
TCGGTCCCTGGGATGACTGTTTTGGTTTTTATGACGGGTGAAGTTAAGTTACTGTGGCCTGGTAAACTCGCGATGACC  
ATGACCTCTCTGCAACAGTCTGGTGGTATTTGATAAACAGCCGATGCCACCTGTATTAACCCGCTGACTCAGGCACC  
TAACGCAATAAATCAACCGCGAATTTGTGACACCAGATAAGCCGCTGGTCAATCGAACTCGTTGGCAATTTACACCTG  
AATCTTAA

>Cluster\_48476

ATGAACAGCAGATGCGCTTAGTTCAGTAAGATTATCCCTTCTCTGCGTTGACGGGCCAGGCAGTCTGCTGGCTGTT  
TTTGCAGGCTGCAATCTGCGCTGCAAAAACCTGTCAACAATCCGTTGGACGATGGGACGTGCAATGACTGTGGGAGTGG  
TGCCACAGTGTCCGATCAGCGCTTGCAGATTGTTGACGGCAAAAGTGGTGGAAACGCTGTGGTTTGCAGCAGTGTGAT  
ACCTGCTGAAGAGGTGTCGCAACATGCCACGCCAATGGCGCAATCCATGAGCGTGGATGAGGTGCTTAGCCATATCCG  
CAAAGCGGTGCTGTTATTGAAGGGATAACGGTAAAGCGCGGCAAGCCACGACCCAACTGCCGTTTGTAGTGGCGCTAT  
TTACAGCCATCAAAAACGATCCGCAACTGCGCCACCTCACCTGCTCGTGGACAGTAACGGTATGTTGAGCAGAAACCGG  
TGGAAAAAATTAATCCCGGTGTCGACGCGCGGATGCTCGATCTCAAAGCGTGGGGGAGCGAATGTCATCAGCAATTAAC  
CGGACCGGATAATCAGCAGATTAAGCGCAGCATCTGTTTGGCTGGCAGAGCGCGGTAAGCTGGCGGAACGCGTTTGTGG  
TAATTCAGACAGGTTGATTTGATCATCATCGATGAGCTGGCAGCTTTATCAAGAGACTTGGCGATGTTCCGGTT  
CGCCTGAATGCGTTTATGCCACGCGCTGATGCGCAGCGCAAGCTGGGCGAGCGCCACGCGGAAGACGTTGAGCC  
GTTGGCTGATGCGTTAAAGTGGCGGGGTGAGCCGTTGATATTTCCGGCGCTATTTGTGA

>Cluster\_33539

ATGGAGTGGAGTCTGACGCAATAAGCTGCTGGCGTTTTCATCGCTTAATGCGTACGGATAAGCCAATTTGGCGGTTACT  
GCTGCTTGGCCAACTTATGGCGTTTGGGTTGGCGACACCGGGCTTCCCCAGCTTGGATCCTGGCGGTTTGTGTCG  
CGGGCTGCTGGCTGATGCGCGCTGCTGGTTGCGTGGTGAATGATTATGCTGACCGCAAGTTGATGGTCAATGTTAAGCGC  
ACGGCGAACCGACCACTTCCAGCGCGCGGTAACGGGAAAGAGGCGCGCGCTGTTTGTAGTGTGTTACTGATTTT  
ATTTTACTGTTGCTGACGCTGAATACGATGACTATTTCTGTTGCTGATTTGCCGCTGGCGCTGGCGTGGCTGGGTTACCCGT  
TTATGAAGCGGTTATACCATCTACCGCAAGTGGTGTGCTGGGCGCGGCTTTGGCTGGTTCGATTTCCAATGGCTTTTGGCGT  
GTGAGTGGTGGTGCATGAGTGTGTTGTTTCTCGCAATATTTCTTGGGCGGTGGCTTACGACACGCGAGTA  
TGCGATGGTTTACCGCATGATGATGTTGAAGATTGGCATTAATCCACCGCAATCTGTTTGGGCAATACGATAAATGGA  
TTATTTGGTATTTGCGAGATTGGCGTACTAGCGCTGATGGCATACCGGTGAGTTAAATGGCTTAGGCTGGGATATTAC  
TGGTCAATTTTGGTGGCTGGCGCGCTGTTGTTTATCAACAAAACGATGTTGCCAACCAGCGGAGCTGAAGCTGCTTTAA  
AGCATTTATGAATAAATACTATGTTGGTCTGGTACTGTTTTTAGGCTGGCAATGAGTTACTGGCATTCTGTA



GAACGCGAAGCGATTTGTTGATGAGATGTTTGGCCACCGCGCCGCAAGCGATGGCAATGATGGCTGAGTTGGCAATACGCGG  
GCCGGAGAAAATTCAGCCCGCGTTGACTGGCAAGGGCTGGAGATCATCGAAGAGATGCGGCGTAATAACGAGAAAAGTTA  
TCTTCTGGTGGCCACGGTTGGGCCGTCGATATTCCTGCCATGCTGATGGCCTCGCAAGGGCAGAAAATGGCAGCGATG  
TTCCATAATCAGGGCAACCCGGTTTGGATTATGCTGGAACACGGTGGCTCGTCGCTTTGGCGGTGCTGTCATGCGAG  
AAATGACGGTATTAACAACATTCATCCAGTCCGTACGTCAAGGGTACTGGGGATATATTTACCAGTACAGGATCATGGCC  
CAGAGCACAGCGAATTTTGGATTCTTTGGCCACCTATAAAGCGACGTTGCCCGGATTTGGTCTGTTGATGAAAGTGTGC  
CGTGGCGCGTGTACCGCTGTTTCCGATTTATGATGGCAAGACGCATCGTCTGACGATTCAGGTGCGCCACCGATGGA  
TGATCTGTAGAGGGGATGATCATACGATTCGCGCGGATGAATGAAGAAGTCGAGATTTTGTGGTCCGCGACCAG  
AACAAATACACTGGATACTAAAAATGCTGAAAACTCGCAACCCGGCGAAATCCAGCCGTATAAGCGCAAGATCTTTAT  
CCCATCAATAA

>Cluster\_49946

ATGAAAATCTTTATTGATGATGGTTCTACCAACATTAACCTTGCCTGGTTGGAGGATGGTGACGTGAAAACGTTAATCAG  
CCCTTAACAGCTTTAAACCCGGAATGGTCTTTTAGTTTACTGGATGATGCTGCCCGGCTAATTACGAGATCGACGGCGAGA  
AGTTTTTCAATTTGATCCATTAAGTGTGATGCTGCTGTAACGACTGAAACACCGTATCAGTACAGTGTGAATGTTGTG  
GCCATTACAGCATGCGCTACAGCAGACCGGCTGAAAGCGCAGACTGTTGATGTCATCGTCACATTTGCCGATCTCTGAATA  
CCTTGACGCGCAACAATCAGAAAATAAGCAAAACATTTGAAAGAAAAGAAAAAATGTGATGCGTGAAGTACGGGTGCAGG  
GGATGATGCAATTTGTTAATTCGCAGTGTTCCTGGTTTTTCTGAAAGTATTTCCCGTGGTTTCAGTGTCTTGGCGGGCTT  
GAGGATGATGAATCCCTTTGATCGTAGATCTCGGTGGTACAACCTTTGATGTGTGCGCATGTTCTGTAGCAAAATGACAGG  
GATTAACAAAACCTGGTGTGATCCGAATATCGGCGTGTCCCTGATACATCGGGGTTAAGGAACAGATGGCGTACATG  
CTAATAACAAGAGTGAAGTCAATTCAGGCTGACAAATATCATTGTGCACCGTAATGAACCTGACTACCTTTCCCGTGCAT  
TATAATGCTGAACAGCGTGAAGTCTATCAATTAATGTTATCAATGAACCGCAGAAGTTGCTTATTAACAGAGTTAATGATG  
CATCAGCCGTTTCCAGCTATACACATGTAATGTGTGTTGGTGGTGGGGCTGAAATTTGTGGCGAGGCTGTGAAGAACC  
TGACTAAGGTTCCCTGATGAGCGCTTTTATCTGAGCTCAACCCGAGTTTGTATTTAGTTCATGGGAATGATAAAAAATGAAA  
GGTGGTGTGACTAATGAGTGA

>Cluster\_13965

TTGTTTCCATTTGCTCGTAAAGTCTTTCGATTTGCCGCTCTGTTGGCGCTCTCCTCCCGGCTACTTGGTGGCAAACTTGC  
CATCGTCATTTGATGATTTTGGGTATCGCCCGCACAACGAAAACAGGTTGCTGGCGATGCCCTCCGCTATCTCCGTCGCTG  
TATFATCCGATTTCCCGCAGCCAGGAGAGATAAGCGCAAGGCGCATAACAGCGGGCAGAAAGTTGATTTGATTTCACTCCCG  
ATGGCACCCTGAGTAAACAGCCGCTGGAGAAAATACGCTGCCCGGAGATGAGCAGCGACGAAATGAGCGCATTTAT  
TCGTAGTGGGTCATAAAGCTGCCCTATGCCGTGGGATCAACAAACCATGGTAGCAAGATGACCTTAACCTGTTTGT  
GTATGCAGAAAGTGTAGCAGGCACTGGAGCGTTACAATCTTACTTCCTCGACAGCGTAACCATCGGTAATACCCAGGCG  
ATGCGCGCCGCGCAAGGTAAGTACTGGCGTGAAGGTGATCAACCGGAAGGTGTTCTCCGACGATTCGAGAAAGCGGACAT  
CCGTGTGCAATTTAATCGCGCAATTGATCTGGCGCGTCCGCAACGGTTCAACCATTTGCCATTGGGCATCTCACCCTTCAA  
CGGTACCGCTGCTACAACAGATGGTTTATAACCTGCCCGCAGACATTACGCTGGTGAAGCCAGCAGCTTGTGTAATGAA  
CCGAGGTTGATACTTCTACCCGCCGAAAACCGTGTGCTGATGCACCGGTAATCCGTTCCGTTGGCGTGAAGCTGTG  
CAAACCGAAGAACCTTCAAGAACCTGTTTATGCTAATCCGCTTTTGAAGTATTAAGCGAAAGCATCACCCAGCAGCAGC  
TGATCGTTTACTTCCAGCATCAGTGGCAAGGCTGGGGCAAACAGCCGAAAGCGCGGAAGTTTAAACGCTAGCGCAATTA

>Cluster\_65665

ATGAAGCAGCAGGCAAGCATTTGGCATCTTTTGGCGCTCACACAGCAATTTGCTGGGGGGCGTTGCCAATCGCAATGAA  
GCAGGTGCTGGAGGTGATGGAACCTCCGACAATCGTGTTTTACCGTTTCTTGATGGCGAGTATTTGGCCTTGGTGCATTC  
TTGGCGTGAAGAAGAGTTGCCCGCATTACGCGTGTTCGTAAGCCACGCTGGTTGATTTTGTGGCAGTGGCGACCGCC  
GGGCTGTTTGGGAACCTCATCTGTTGAGTCACTTTCGAAATACCTGAGTCCGACCGCTTCGAGGTGATTTGGCAACT  
CTCGCAGTTGGCATGATGGTGGCAGCGTATTTATCCGAAAGAAAATGCGCAGCACTCAGGTTGATGGGCAATTTGA  
TGCTCTGAGCGGCTGGTGTGATTTTTTAAACACAGTCTGGTGGAGATATTTACAAAGCTCACCGATTACACCTGGGGA  
GTTATCTTTGGGTCGGTGGCGGACGGTTTGGGTGAGTTATGGCGTGGCGCAAAAGGTTTATTTGCGTCGGCTGGCCTC  
ACCGCAGATCTGTTTTTACTGTACACTTATGTACAATTGCGCTCTTCCCTCGGCAAAAGCTGGAGTGTATAGCGCAGC  
TTAGCCACTGGCAGCTCGCATGTTTAAATTTTTTGGCGACTGAAATACATTTGGTAGGATATGGCGCCTTGGCGGAAGC  
GCTCGCTGGCAGGCGAGGCTGAGCGGATCATCACGCTCACCCACTGTTTACGCTGTTTTTTTTCAGATCTTTTATC  
ACTGGCCTGGCCGATTTCTTCCGAGACCGATGTTAAACCTTTTAGGTTATCTCGGTGCGTTTGTGCGGTTGCGGGCG  
CGATGATTTCCGCATTTGGTTCATGATTTGGGGCGGATTACGTAAGCATACAACGGTGGTATCGCAACCCCGCGCAGG  
GAATGA

>Cluster\_41176

GTGACCAGAACCAACCTCATCACCGGTTTTCTCGGAGCGGAAAACCTACGTCGATTTCTCATCTGTTAGCCATAAAGA  
TCCCACTGAAAATGGGCGGCTACTGGTTAATGAAATTTGGGGAAGTCGGAATGATGGTGCCTTTGCTCGCGGATAGCGGCG  
CACTGCTGAAAGAGATCCCGCGGTTGATGCTGCTGCTTAAATGTTTACCCATGCAAGTGGGTTGAAATACCTTACTG  
CGTACGGGAAAACAGACCGCTTGTGATAGAGCCGACCGGGTGGGCATCCGAAACAGATCTTCGATCTCTTAAACCGC  
ACCGCTCATGAACCGTGGATAGATCTGCGCGCCACGTTGTGCAATTTTCGATCCACGCTGTTGCTGGACGAAAAAGG  
CCAGCAATGAAAATTCCTGACGAGTGGCTGGCGCAGACATTTATGTCGCAATAAATCCGACCGTGGCAGCCGAA  
AGTGAGCAAGCGCTAGAGCGTGGTGGCAAAAATGGTGGCGATCGGCAATTAATTCACAGCGAGCATGGAAAAAATTTGA  
CGGTATCTTCTGGATTTGCCGCTGCAATTTAGCCGAGTTGCCCGCAGCGCGCGCATTCATCATCAGCATAGCGTGA  
AAAAAGGTTAGCAGCGTTAAGCCTGCCAGAGCATCAACGCTGGCGTCCGAGTCTGAACAGCGGACAAGGGCATCAGGCC  
TGTGGCTGGATATTCGAGCTGATACGGTATTCGACACCATTTGGTATTTGGAATGGGCGGACTTGCACCGTGGAAAG  
CGTCAAAGGCGTGTGCTATTTCCGAAGGGCTGGTGGCAATCAACCGTCAAGGGCGATGACCTGCACATTTGAAACGAAA  
ACGTTGCGCCACCGGACGTCGATTTAGCTGATTTCCAGCAGCGAAGCTGACTGGAATGCCCTTCGAGAGCGGCTGTTG  
AAGCTTCGTTTAGCGACTACCGGTAA

>Cluster\_42863

ATGAAAACCGCTTACATTTGCCAAACAACGTCAAATTTAGCTTCGTGAAATCTCACTTTTCTCGTCAACTGGAAGAACGCTC  
GGGCTGATCGAAGTCCAGGCGCGGATTTCTAGCCGTGGGGGATGGCACGAGGATAATTTGTCGGGCTGTGAAAAAG  
CGGTGACGTTAAAGTGAAGCTCTGCTGATGCCAGTTCGAAGTGGTTCACTTACCTGGCGAAGTGGAAACGTCAGACC  
TTAGGCAACACGACTTACGCGCGGGCGAAGGGCTGTACACACATGAAAGCCCTTCCGCCGATGAAGACTGCTTTT  
CCCGTTGCACTCGGTTATGTAGACCAGTGGGACTGGGAACCGGTAATGGGCGACGGCGAGGTCATTTCTGACTCTGA  
AAAGCAGGTTAGAGGCGATCTGGGGGGGAAATTAAGCAACCGAAGCTGCGGTTAGCGAAGAGTTTGGCTGGCACCGTT  
CTGCCGATCAGATCCACTTCGTACACAGCCAGGAGTACTGTCTCTGTTATCCGGATCTCGATGCCAAAGGCGGTGAGCG  
GGGATTTGCGAAAGACTTTGGCGGGTATTTCTCTCGTGGGATTTGGCGCAAGTTGAGTGTGATGGTTCATGCTCACGCTC  
GCGCACCGGATTTATGATGACTGGAGCACCCGTCAGAGCTGGGCCATGCGGGTCTGAACGGCGATATTTGTTGTGGAAC  
CCGTTACTGGAAGATGCGTTTGGCTTTCTTCCATGGGATCCCGCTGGATGCCGACAGCTGAAGCATCAGCTGGCGCT  
GACCGGTGACAGAGATCGCTGGAGCTGGAGTGGCATCAGCCGCTGCTGGCGGTTGAAATGGCGCAGACCATCGCGGGG  
GTATCGGCCAGTCTGTTTACCATGCTGCTGTGCAACTGCCACATATCGGCCAGGTTTCAAGTGTGGTGTATGGCGGCA  
GCTGTTGCGGAGAGGCTCCCTTCTGCTGTAA



>Cluster\_23200

ATGATGCGCACAGGGCTGGTTACTGTAATTTTCCTCGCCTTACTGCTGGTGGGATGCGTGGTATATCCAGGGATGGTGC  
CCGATTTATGACCCACAACCGTGTGACAGGCATTTCTTCATTTTGATCCGCAAACTTCGATCACAACGTAATTTGTA  
GACTCCGTTTGGCCGGTTTACGGCAGCATTGCTTACCGGTGCTTCTCTTGGTGTGCTGGTGTCTTGGTGCAGGCTGTC  
ATTTCGTAACCCATGGGTAGCCACATATTTTAGGCTTAAATGCGGGAGCCGCTTGTGTGCTGTTGCCCCCTTAAACA  
TGGACTGGCCTTTCCGGTTGGACGCCACTGCTGGCATCTACGGGGGGCGCTTATTGTTCTCTGTTGATATTGCTGCTTT  
CCTCCGACGGGCTTACAGGTTAACGCCAATGAAAGTTACTTTATGCGGCGTGGCGCTATCGGCGTTCGTGTCCTCAATA  
ACGGCTGCAATCTGATTTCTGACGAACAAACTGCTGGCGATGCGGACATGGCTAGCAGGTGATTTAGCGGGGACGGA  
TTGGCGTACCTGGGTAGCTCCGCTGGTTCCTGGGGGATTTGTGTAGCCCTTACCTTGCACCCCTTAAACA  
TGTGGCACTGGGCGATCGCATGGCGCAGGGGCTGGGCGTCTGTACTCCGACGCGAACATTCACCTGCTTGGCATC  
GCCTGCTCTGTGGCGCAGCCGATCGATCGCTGGCCCATTTGGTTTTGTGCGCTGCTAGTACCAGCATTTGCCGGC  
TCTGGTATCAGCGGATCTGCGGCTTCTGCTCCCTCTTTCAGCTTGTGTGCGGCGCTTTTGTATTACTGGCAGATATTA  
TTGCCCGGACGCTTTTACGCCCATGATTTAGCGACCGGTGTATGACGGCGTTAGTTGGTGGCCTTTTTTGTTCATT  
ATGGCGACGAGGATGTTCAAATGA

>Cluster\_62143

GTGGATAGAGATCAAAACAACAGCAGCCTGTTCAATGATGATCCCGTACTTTCATGCAACATGGCTGTACTATCAGGAAG  
CAAAAGCCAGACTGAAGTTGACAGTATCATGGGGTGTCCCGCTCACGGTTGTCAAATACCTGCAAAACAGCCCGGAA  
ATGGACTGGTTTATATCAACCTGGATGTGAATGCTTTTGGCTCTATCGACGCTGCTTTGCAAAATTCGGATAAATTCAT  
CTCCAGAGAGTATCATCGTCCGGATGGCGAACATGCCGGAACCTGATGATACAAAGCTGATGCGGACTGCCCTTTC  
ACGTGGCGTGGCATGTATCTGAATCAGGTGATGAGAATGGTGTGATGTGCTGGGGTTCCTGGGGAAGAACAATCCATC  
AGATGAGCAAAACATGACGCCGAAGTCAATGTAATAATGTCACCGTTTACAGATGCTCGGTTCCATGCCATCTCAGCCA  
GACCTGACGATCATGAACTCTCATCGCAATCGCCTACAAGCTTTCAGGCGGTGTCGCTCGCTGCAGTGCCTGCCGCT  
GGTATCAAGCCAGACTGGCCTGAGGTTACAGGCAGAGCCTATTATTCGATCGAATTTTGACGTTCTGACTCGCTGTA  
CGAAAGCCTTTTTTGTGCGGGTAAACCGCTTGTGATGAAATCCCTGATTCGGGTGGCGTGTGATAAAGAGAAATG  
CAGACGTATCGGGATTTAGGCGCAGTAGGTGCTATTGTTGGTCTCTATGACAAGGAAGGGATGCCCGTCTGGCTGA  
TGTGACCAAGCTATTCTGGGAATCAGTCTGGCTCAGCTAAGGAGATGAAACGGAAGATCTTCTTGTGTTGGGGAAA  
GAGGCTATGACGCAACGTTGGGTGCCCTGCTGGGAGGATATGTCACGGACCTGATGTTGATGAAAGAACGGCAGAGTTT  
TTGCTGGCGTGTGAATTAACACACTAA

>Cluster\_56240

ATGAACTCTCACGATACAGCGCATCAACTGGAACAAGATATCTGACGATAAAGATCTGGAGGTGTGGAATCGCCTGAC  
CAGCAATTTCTGGCTACCAGAAAAGGTGCCGCTGTGCAACGATATCTTGCCTGGCAGACATTAACCTGCTGAGAACAAC  
AAGTACAGATGCGCGTTTTTACTGGCCTGACGCTGCTCGACACGCTGCAAAAATGTTATCGGCGCGCCTTCTCTGATGCC  
GATGCACTCACGCTCATGAAGAAGCGGATTTATCGAATATCAGCTTTATGGAAGCGGTTTCATGCCCGCTTCTACAGTTC  
GATTTTCTCGACGCTATGCCAGACCAAGATGTCGATGCGCCTACGCTGGAGTGAAGAAAACGCACCGTTGCAGCGAA  
AAGCTCAGATTTTACCAACATTTACCGGTTGATGATCCGCTGAAAAGAAAATCGCCAGTGTGTTTTCTGAACTTTTT  
TTGTTCTATTCGGTTTTTGGCTGCCGATGATTTTTCCAGCCGCGGAAAGCTGACCAATACCGCGGACTTCTCTGATCCG  
GATTTACCGGATGAAGCAGTCCACGGTTACTACATAGGCTATAAATATCAGAAAACATGAAAAGATATCTCTGGGAC  
AAGTGAAGAGTTGAAGAGTTTTCCGCTTTCGATTTGTTGCTGGAACCTACGACAAACGAGTTCGCAATACACCGATGAGCTG  
TACGCCGAAACCCGTTGGCTGACGATGTGAAAGCGTTTTCTCTGTACAAACGCAATAAGGCTTTGATGAATGAGGCTA  
CGAACCGTTATTTCCCGCAAAATGGCGGAAAGTGAAGCTGCGCAATCTCGCCGCGCTTTCGCCGAATGCCGATGAAAG  
ACGATTTCTTTCCGGTTACGGCTCCTTATGATGATGGGAAAGCGGTTGAAACAGAAGATGAAGACTGGAATTTCTGA  
>Cluster\_4576

ATGGCTACTTTAAFGGAAAAGATGCACTTTTAAACGGAGCCAGTCAAGTGCATCGCGTTTTTATCAAATATCATTGATAA  
TTGCTCAGTTTCGTCGCATCAGGATTCAGGCGATGCTCTCAAGCGATTAGTCAAGTATCGCGATTATCTTTATCTACCC  
CCGCTGAACCTGTTGATTTTACACAAGGTAAGATTTCTCTTACAGCAGGTAAGAACTCAATATCAGCATGAATTCACAAT  
ACTACGCTTTCAGAAAATAAGCATTTTTGATTTCTATTTGGCAGCGTCTGACAAATCATGAAGTACACCGCAACAGCA  
TCTCATTGTTTTTTGTTTTAGGTGGGCAACCCGGAGCAGGATAAATCATCTCTGATGAAATAGCCAAAAGAGAGCAAAAG  
ATAATATAATGATTTAATACGGTGTGATTTTTCGATTTCTACACCCTGATTTTAAATTAATCTACAAAATTTATGGGGAT  
GATTTTGTACCCATACAGCGAAATTTTTCCGGCGAAACCGTTCGAACTGAGAGAGCGATAGTCAAGTAACTCAA  
CATTTGTTGCAAGGAACATTTTCGTAATGCCCGCAGCCGTTACAAACATTAATAAATCAAGATGCAGGCTACCAA  
CAGAAGTCAATGATAAAAACAACCTCAGCCGCAATTAAGCTGGGAAAGCAACCAATGAACGTTATAGTAAGGACAAAGAGCGG  
GAAAATTTGCCGAAAAGTGGATAAAAACCACCATGATATCGTCACCGTTTTGCTGGCAGAAAATGCCCGCAAGGTGTT  
TGCTTCGAACCTGTCAGATAAGTTTGGCGTGTATTCGCGTGGAGAGATGATATTTAGTTCACAAGCGGCAACGATGAC  
ATATGCAACACTTATACAGAATGAAATCAGCGGGAATACACAATA

>Cluster\_32386

ATGAGTAAGAAAATGTTCTCGCCCTGGGCGGGAATGCGCTGGGCGATGACCTGGCTGGGCAATGAAAGCGGTAATAAT  
TACTTCTCAGGCAATTTGTTGATTTAATTTGCCAGGGACATGAGGTCATCGTCACTCATGGCAACGGGCCACAGGTGGGCA  
TGATTAACAGGCTTTGTAAGCTGCAGCAAAAACCTGAGGCGACTCGCAATGCTGCCGATGTCTGCTGTGCTTGCCTTA  
AGCCAGGTTATATTTGGTTACGATCTACAAAACGCCCTTAAAGAGAAGAAGTCTTCTCTGTTGGCATTAAATAAAGCTGATG  
AACGCTGGTTACCCAGGTGCAAGTGCATGCTAACGATCCGGCATCTCAACCCGACCAAGCCGATTTGTTCTGTTCTTTA  
CCGAGCAAGAAGCAGAGCTACTGACAAAACAGGGTTACTCTGAAAGAAGATGCGGGTCCGGCTATCGTCTGTTCTGTT  
GCTTCGCCAAAACCGGTTGATATCATTTGAAAAGAAACGGTTAAAGCTGTTGATGATGCGGACAGGTTGGTATCACCT  
TGGCGGTGGTGGTATCCCTGTTATTCGTTGAAGTAAACCTCTGCGTGGTGCCAGCGCGGTTATCGATAAAGACTGGGCCA  
GCGCCGTTTAGCAGAAATGATCGATGCGGATATGCTGATCATTTCTGACTGCGGTAGAAAAGTGGCCATTAACCTCGGA  
AAAGAGAATGAACAGTGGCTCGATCGCTGCTGTTAAGTGTGCTGAAACGCTTTATCGAAGAAGGTCAATTTGCGAAAGG  
TTCTATGCTGCCATAAAGTGAAGCTGCCGCTGTTGCTCGCTCGCGCAGTGTGAAAGCACTGATTTACCGTATTGA  
GCAAAGCGAAAAGGATTTGAAGGAAAACCGGAAACGGTGTATTGTTCAGTAA

>Cluster\_40837

ATGGGACGCACCAATCACCCGTTAACTGAACTGAAATGTTGAGGTTCCGCTGTGAGATAACATCAATGTCATTTGAA  
CGCTATGACACAGCATCGCATGGAATTTATGACAGCTTTGGTGTGATGGACTGCCTTATGAACGTGATCCGATTGTTACAG  
AAGCAGTTTTTATATGCGCAGAGTGTGAATCTATGCTGGAAGCGGTAAGCGGCTGATCATCTTAAAGAAAATGAG  
CCACACGGTGAATTTACAAAACATTTAGAAAATGAACTCGGACTTGCACCAAGTGTGCTCGCCGATGATGCAAGCCAG  
TATGAAGTTTTTGGGAAAGGTGATGAGCCAACAAAACGCTCAACGTTGAGCGTTTTGGGGAAAGCCAACTGTACGACC  
TGATGGTTCTGGATAAATGAAGAACTTGATGAAATGGCCGACGGCGCACAGTTGCCCGCTGACGCTTACGACGCTTGTAT  
CGCATGTACGTGAATTTGCGTCAAGCCCTGCGCGAAGCGCGGAAACCAACGAGCAACACAGCGGTACTGCGCGA  
CAAAAATGAAAATAGATTTCACTCTCCACAGACTGGAGAAAATCCCGTATTCAGCCGCTGAGCCTGATGAGGAGG  
TTAAGAAGCTGCGGCGGAAAGTAAACGATTTAGCGGTTGAGCGGAAATCTGCTATCGCCGCTCCGACTGTCAGCGCTTTT  
GAGACGCTGTGCGCATATTTGTGCTGAAAACATGATTTGATACCCCAAGAGACTTTCATGGCAGGCTGGTCTGTCAACTGGA  
AAGCAGCGGCTAGCCTGCGCTCCACATTTGACTGCGGACGAGCCAAACAGCAATGCAGCGCTTTCATGGCTGACTG

AGCCGACGCCACAGATTAACGGGCTGGAGGCATAA

>Cluster\_26949

ATGCGTTTCCGCCAGTTGTTACCGCTTTTGGCGCGCTGTTTGGCTTGTATATCATTTGGGGCTCAACCTATTTTGTGCAT  
TCGGATTGGCGTGGAAAGCTGGCCCTCCGTTAATGATGGCGGGCTTCGATTCCTGGCAGCCGGTATTTTATTGCTGGCAT  
TTTTGCTACTGGCGGCACAAAACCTCCCGCTACGTCGGCTCAATGCCGCGCTGATTGGCTGTTATTGCTGGCT  
GTCGGTAATGGCATGGTACCGGTTGCCGAACATCAAAATGTTCCCTCCGGCATCGCCGCGTAGTGGTTGCAACCGTGCC  
CCTCTTACCCTGTGCTTACGCCCTGTTTGGCATTAACACGGCAAACTGGAAATGGGTGGGTATCGCCATTGGGCTTG  
CCGGAATCATGCTCAATAGCGGTGGAAATTAAGCGGCAATCCGTGGGGCGGATTCGATTTTAAATCGGCTCGATT  
AGCTGGCGGTTGGCTGCTTTATGGCTCGCGCATTCCTTACCTGTAGGGATGATGGCGGGTCCGATFGAGATGGCTGGC  
GGCAGGCGTGGTGTAAATGATCGCATCGATGATTGGGGTGGAAAACTGACGGCGCTCCCTTCCCTGTGAGGCTTCTTG  
CGTTCGGCTATCTGGCGTGTGGTTCGATTATCGCCATTAACGCTTATATGATTTTAAATCCGTAATGTCAGTCCGGCT  
CTCGCCACCAGCTACGCCACGTTAACCCGGTGGTCCGGCTTGTGCTGGGTACGGGACTGGGTGGCGAAACCGTGTGCAA  
AATFGAATGGCTGGCGCTCGCGCTAATTTTTCGCGGTGGTACTGGTACGTTGGGAAAAATATCTCTTCCCGCCAAAAC  
CCGTTGTCCGCCAGTTATTTCAGGATGCATCAAGCGAGTAA

>Cluster\_31581

GTGAATTTCCAACAATAAGATAATCCCGGAGGCTGCACGTCAGGATTACAACCTGACAGAGGTTGCGAATAATGCTTTT  
TACCTCACAGTCAGCGCTTAGCCGTCATATTCCGGAACTGGAGGATGAACTTGGCATCGAAATATTTGTTTCGACGAGGTA  
AGCGACTGCTGGGCATGACTGAACCGGGCAAAGCATTACTGGTCAATGCGAAGCTATCTGAATGAAGCCAGTAATGTT  
CGTCCGGCTGACAGCTTGTATTACCAACGATACGCTGGTGTTCCTACTATTGCAACGACGCATACTCAGGCACGTTATAG  
CTTGCCAGAGGCTAATAAGCTTTTCGCGAACTTTCCCGGAGGTTCCGGTTCGAGCTAATCCAGGGTACGCCACAGGAAA  
TTGGCAGCTTGTTCGAAATGGCGAAGCTGATAATGGTATCGCCAGCGAGCGTTTGGTAATGACCCGAGCTCGTCGCGC  
TTCCCGTGGTTTTGTTGGCACCATAGTTTGGCTTGTTCCTACTCGATCATCCCTAACGCAATTAATCATCTGACGCTGGA  
ATCAATAGCGAAGTGGCCGTTAATTAATTTACCTACCGACAGGGGATTACGGGGCGCTCACGCATGATGACGCAATTTGCCCGCA  
AAGTTTTGCCCGGAGATATTTGATTAAGTGCACAGGATTTCTGATGCTAATGATGCTAATAAACCTATGTTGCTCTGGGCTGGGATC  
GGATTAGTTGCCGAACAATCCAGCGCGCACAAGAGGAAGAGAATTTAATCCGCTGGATACGCGGCATCTTTTTCGATGC  
TAATACTGCTGTTGGGACTGAAGCGAGGACAATTCAGCGTAACTATGCTGCTGGCGCTTCTTGGAACTCTGTAATGCAG  
GACTGTGCTGAGGATATCAAGCGCCAGGTGATGAAAAACAGTGAAGAGGAAATGATTATCAGATATAG

>Cluster\_17790

ATGAAACTGGAAAGTAATCGTAATTTAAGAAAGGTTGTGCTGGCGTGGCTGTTGGGGGTTATGTGCCATTCCTGCAAT  
TGCATCTGCAGCATGGACCCTGACCGAGAGTACTGGCGCAATTAACAGTACGGTACCGTGGATTACAGGACTTCCG  
CGACACCTGTTGATCACCACGTTAGTATTAGTGCAAAACGCGGTGGCAGCAAAATCAACAGCACAACTGGCTGTTGGTGAT  
GAAGTGACGGTACATTTGGGACTCGCTGATGCTGAAGGCATACCGATGCTAATGATGCGTTCGCAAAAGCTACCATTAA  
GTGGCTGCGTAATGGTACAGGAAATAGCGGAGCCGAAGGCGAACTTATACCCACAGCGCTGATGCGGGTAAAAAAA  
TTGGTATCAAAATTACCCTACCACCGCAGCGGATTTCCGGCTGTGGGTGCAGAGTTGACGCTGGCAGATATTAATAAT  
GGTCCGGGTGACAAATGATGGTTCGGTGGCAGTATGGCACAGGTTGATGGTTCGGGTTCTGGTATGGTGGTGGTCTCTGC  
AAGCGATGATATCCAGCGGTCGGGTTGTTGATAAACAATGTAAGAGTTGTTATTTACAAAACAGATGACACATAAAGA  
AAAACCTGCTGGTACTACGGACATTTCCGGCAGCAAAACCTCTACAGTGTGATCCTGTACTCTGATGCGAACAACAAC  
AACAAAGTTGATACAGCGGAGGATGTTACCAGCCAGTACGACTACCGTTGGCGCTTCTCCGGCACAGCGCGCAGGGTAC  
TGGCGGTGGTGGTAAAGATACTGGAACAACACTGCATGGTATTTCGGCAACCACTCCGAAGCGGCTACTGCAAT  
TCAACAGCTCCAGCTTACTCTCCGCGTACGCGGTCAGGGGTACAGCTTGGCCATCGATTATCAAAATCAATAA

>Cluster\_24883

ATGAGTACAGAAAATAAGAATAAAAACAGGCGAGTGAGAGTTGGTTTTTTTACTGGTAATGGAAGCAAAAAGATGGCAC  
ATCTGCTGCAAAAACCTAGCCTTTGAGCAAAATGACACAGCAGATGTAACCTTTTCAATAACTTACACAACAGACACCC  
CAAGTCGAGGGTTAAAGTTAGTATTCTTCAAAAAGATACCACACTGCAATGTTACTTTGGTTACGTAATCGTGGAGAAGG  
GAATGCCCTACTACCGTTCATCGAGGATGCTACAGGTAGTGAAGAAACAATCCCTTAAATGATAAAGATTCCTGATGTTGA  
AAGAACATATTTTATCTATTACTACGAAACGGACTTATTAGCTATGACCTCAACCATATAGGGCCCAAAAGTAAATGATC  
TGGCATTTCAATTTGATAAACAACAATGATTTAAAAGGCTCACTTTTGAAAGCATTGGAAGCAACAGAGCATGAAGGAA  
CTGCTTGAGGACGGAAATATCTACGTAGTTTCGATCTTATAGTTGCTGCTCCAAGAACTTTAAACAAGCTAATATAA  
GATTAAAAACCTTTAGCTAATGAAATTTATGACATGGTGTGGTATGGGCGGGTCGCATCTAAGATTAATATGCGAG  
GTCGGATTCGCCGAAAAACAAGGTTAACTATCTAAAACCTCTGTCACCGATGCTATTAAGGAACACTTGAACCT  
TTTTCAAAAAGGTTCTGAGGCTTAAAAATTAAAAATTTGATGTAACAGAGCCATCCAATAGAAGCCCAAAAGCTACT  
TGACCAAGTATTGGTACGTAACAAGACAATCATTTGCAAAAGCGGTTATCCATCCGATCTGATATCAGAACGGCGATGA  
TATCTGCTAAAATGATAACGCGAACTATCTTGACAGTATGAGCTCGTACGAGACTAA

>Cluster\_27402

ATGCTAACATTTTTTATTGGCGATTTATGCTTATTATCGTAATCATGCTGTTGGGTTATTTTAGCGGACAGCAGAAAAC  
TTTTTCAGAAGATCAAGCCCGGCAATTTAATAAAGTGGTATTAACACTACGCTCTCCTGCGGCTCTATTTGTATCTATTA  
CCAGGGCAAAACAGGAAATGATTTTTGCGGACACGCGTCTGACCTTGTATCACTTGTGGTTATTTGTCGGATGTTCTTT  
TTCCTGGTTCGGTTCGCTACAAATTTTTAAACGCTACTCATGAGAGCAGCAGTATGTCATTAATTCAGGTTTACC  
TACCATTGGATTCTCGGATTTGCAGTTCTCGATCCTATTTATGGTATTCGGTATCAACAGGTTTATGTTAGCAATTA  
TTTTTATTTATGTTAACGCAATTAATTTCTGCGGCAAAAGAACAGTAGTATGGGCACCTATTTGCAACGATCTGTTGCT  
GGTTGGGGTAAAAATTCGGGACGATGGGACCAACCTTTAATCTGATTCGGAAGGCTAACTCAGGGGTAGCGAAATTCG  
CTGCGGGTTGACTCTGGCTGCACATAAATTCGAGTTCAGTGCAGAAATGCTTATAACACTTCTGAAAGCTGATTCTG  
ATGCCACTGGCGCTGCTTCTCGTGGTATGGCATGTCATTTGAATAGCGAACATTTGCAGATGATGGTACTGGCAGGCGC  
ATTACCGCCGGCATTTTTCCGGAATCATTTATGCCAGTCCGGTTAATGTCTACACCCGCACTGGTACAGCGCTATTGGCTG  
TGAGCGTACTGGGTTTTGCTGTCACGGCTCCCTTGTGGATTTATGTCAGTCTGACTGGTTTCATAA

>Cluster\_9814

ATGACTAAAAGCTTTGATAGGATATACCGGGTTTTGTTGGCACAACGCTCTTAAGGCAAAACCAAAATTTGATGATTTTTATCG  
TTCACAAAATTAATGATTAAGGTTAAAAAATTTGATCTGGTGGTTTTGTCCGGTTCGCCAGCGAAAAAATGGATCG  
CGAATGCCGATCCAAAGCGATCAGGAAACCAATTTGCTGCTGATTGAATGCTTAAATAACATTTGAGTGAAGAAACGTTG  
ATCCTCATCAGCACTGTGGATGTGTTTAAATCGCCCAATGGTGTGATGAGAAATCCGTGATCGATACGACGGGGCTGCA  
TGCATATGGTTTTGATCGTTATCGCCTTGCAGCGGTTTTGTCGGAAGCGATTCCAAACAATCTGATCGTACGGCTTCCAG  
GTTTGGTTCGGTCCAGGCTACGTAAGAATATTTTGGATTTCTTAAATGACAATAATGTAGAGAAAAATCGAAAGCCGC  
AGTATTTTTCCAGTTTTTCCGATGGTTAACCTCTGGTTTCGATATTAAGTCCGACTTGGAGAACAATAATTAATCTTATTA  
TCTGACAGCAGCCCACTTTCGGTGGCGGAAATGCTCTCGATGGTTTTGGTATTAATTTGATATGCAGCAGGCGGCAC  
AACCTGTTTTTTACGATATGCGTGTGTTGATGGTCAATGTTTTGGCGGACGCGCATTACCATAATTCGGTAAAAAGAT  
ACGTTGCAGGCTGTGAGCATTTATGCGCAGTCAGAACCAAAAAAAGAGCAGGAATACATAA

>Cluster\_67030

ATGAAAGTCGGCGATGCTGTATCTGGTTGGCACAATAAGTCTGCTGATATCCGGTTCAGACAGGTCGCAACGTTGACCGGT

CCGTACCTATGTGGACGAACCGATAGTGGGCTGGCACTGGTACAACGAACCTCAGAAACAGGATGAGGAGGAAATACCTC  
CACCGCCACTGTTCCCTGACATCTCTCCTCCGACAGCAGATGAAGGTCCTTCAGCGAATGACAGAGGAGCGGCTG  
AATACCGCATTCTTACCCGACAGTGGAGAATTTACGGCTACATGAAGATGCAGAACTTCGGACCAGTCAGGCCAG  
TCGCTTTCAGTGGCCGTCACCAATCCCTGCTGATGCATCCGGAACCTGGATTACAACCTGCAGTACAGTCACTACAACA  
GCACAGTTCCCGTGCAGCTGCAGGCTGACCAGAACCTCAGTGGCTGCCATTTCGTACGCTGGCCAGTCACTAGCGGCTG  
TTCTTCTTTTACCAGGGGAAATGATGCATGAGTGGTGAAGGTTGCAAGGTTGGTGCAGCGTTTCTCTGATGAATAACAACGT  
TGCATGATTCCGGTGCATGATGGACGGTCCCGGAGCAGGACTGCCGACAGCGCTCTGACAGCGGGCAGGCTCAGC  
GGTGGGCGTGACGCATCTGCCGGCCTTTTCTGGTTGAACCGGGGGCAGAGCGTTACCAGCCGCTGGCTTATGGCTTT  
ATGACGCAGGATGACCTGATGAAACGATTTTAAAGTGTGGCGACAGATTTTGCGCCACGGTTCGTGA

>Cluster\_25394

ATGAAAACATTACCATTATTCCTGGCCGGCGGTAAGCGTCTGCTGGCCAAAAGTTATTACCCTTATTCCTGAGCA  
CCAGTGTATGTAGAGCCATTCGCGCGGTGCAGCCTTGTATTTTCATGAAGGAGCCGGTTGAAGCTGAAGTCTGAACG  
ATATCAACGGCGAATCTGTACCGTGTGGTTAAAAATCATCTTGAAGAGTTTGTGCCAGTTCAAGTGGGGC  
TTGAGCAGCAGGAGATTTTGAATGGTGAAGTACCATCCCGGAGACGCTAACTGATATTCAGCGTGCAGCGGGT  
TTATTTATCTCCAGAGCAATCATTCGGAGGGAAAGTGGAAATCAGACAGTATGGAACGGCGACCACTTCTGCACCACGGC  
TTAATCTGCTAAGGCTGGAAGAGGAGTTGAGCGCCGCCATTTGCGGCTATCACGCAGTGTGTAGAACATTTACCCTGG  
CGTACCTGATGAGAAAGTATGATCGCCCGCACACATCTTCTATTGCGATCCCCCGTATTGGGGAAACGGAGGCTACCG  
TGTGAAATTTGACTGGAGCAGTACCCCAACTTGCAGAGTTGGCCAGAACGATAAAAGGCAGGATGTTGATCAGTGTGA  
ACGATATCCCGGAGATGCGTGAACCTTTGCGGACTTGTGATGATACGGTATGATATTCGCTATACGTTGAGCGGTGGG  
CCTAATGCTAATCGCTCGAAAGTACGCCGTGAGCTGGTCACTTCGTAACGTGTA

>Cluster\_12576

ATGGAAAGATTTTTCTTCCGTTGTACTGGTGGCACTTTCGCCCTGCTCGCTCACAGTGAAGGTGTGCAGGAAGTCGAGAT  
TGACGCACCGCTCTCTGGCTGGCATCCGGCAGAGGGCGAAGATGCCAGTTTTTCACAATCGATCAATTAACCGCGCTGT  
CCGTCACCCATGGCAGATCAAAAATATCTCAGCGCAGTCCGCGGCAAAAATAAAGAAATATGCTGCGCGGGTAAAGTT  
CAGCAGGGCCGGTGGTGGTCAACGGTGCAGTATGCCGACAGAGTTGAATCCGATGGTTCATTTGCACGCCCTTATAT  
TTTTCACTGAAGGCAGCAACAGCGTGCAGTTCATCAGCCGGATGGGCAAGCCGACAAAAATGCAGTTTTACTCAACGC  
CGGGTACAGGAACGATTCGTGCAGTTCACGGCTGGTCTCTCGTGGGATACGGACAATACCGATCTCGATCTCCATGTT  
GTCACGCCATGGCGAAGCAGCCTGGTACGGTAAACACCGTCTGAAAAACAGTGGTGCAGTGTGATGATGGTGCAGCAG  
GGGTACGGACCCGAGATTTTCGCCATGCCAGCACCAGTTCACGGGCGTATCAGGTGATATCAACTACTATGGTGGGC  
GCAGCGAAACGGAATTGACGACCCCAACTGACGCTGATCACCGATGAAGGATCGGTCAATGAGAAACAGGAAACATTT  
ATTGTACCATGCGTAATGCTGGCGAGCTGACGCTGGTGAAGTTTGTACTGGTGA

>Cluster\_7970

TTGATTCATTCATTAAGATCCAGTAACAAAAGAACGTAACAAATCCATCCAGAAGATATACATCTCACTGCAAAAAGA  
CTTCGAAGCAAGTAAAGATAACATCTCTAAGGATGAATGGGAAAACCTCCATGCATTAAGAAAGAAAGCGTTTAAATGGAA  
TGCCATAAACAACACCAAAAGTACAGGTTATATGTTGCAAAAATCAATACGTTTCGTGAAATGCGAAAATATGGCGTA  
CGAGTTTTACGTTATGATCGCGCAAAACACTCAAAAACGTGAACAAATAGAAAGATCAATAACCCCAACGGCTTAAATTA  
TAATGAGCGGTTACACAATACTAATTTAATTAACCCAAAATATCATAAAAAGCCGTTATGAATTACATGGAATATCTGG  
TAACCTGTGAGTTGGATGAACAACAATGTCATCACTGCTTTATGAAAGAGATGATTTAAGCGCCATTGATTTTTCTATTG  
CTCATGAAAACGATAAAAGCCTTTTTCATTTGGTGGAGATCTTCAAACCTTGCATCAAACCGGGTTCACAAATCTCAAG  
TATCCCATCAGAAAGCAGGATATGATTAACATTAACACAGATTTTCCTAACAATGGTAAATCTTTTCAATGACTTCTAT  
TTAACCATCAACAAGATGAACAATTAGCAATGGATATATAGCGCTCTGCGGTTTCAGCAGGCTTTAGTTTACTGGGAT  
GGCAAGTATTAATAACCAAGCTGAAATTAATAAATATGATGGTCCACGCTGTGCGCGGTGAGGCGTAG

>Cluster\_43333

ATGAAATCCACTCGTCTGTTGGCGTATTACCGGAGCCGCTCGTGGTATTGGAAAGGGTGTGCGCTGGAGCTTGGCGG  
TGGCGGATTTAATCTGCTGATTAATGATCGTCCGGATGCGGATAGCGTAGAAAAATTACATGCCACACAAAGAATGTC  
TGGCGGAAGGCGTGAAGTGAATTTGCTTCCCTGCTGATGTTGGCGGATCTCTCCCTGCATGAAGAGATGCTCGACGCAGCG  
CAAAAACAGTGGGACGCTCGACTGCCCTGCTCAACAAGCAGGCATTTTCAGTGAAAAACCGGGTGAATCTTCTCGACCT  
CGAACACAGCAGCTTCGACCAAAATATTGCCATTAACACCCGCGCACCCTTCTTCCCTCGCTCAGGCATTCAGTAAGCGCT  
TACTGGCAGCAGCCGAAACCGGAAGCAGAACTGCCGACCGCTCGATTTTTCGCTCAGTTCATCAACGCCATCATGCTG  
GCGATGAATCGCGGCAATATACCATTGCCAAAACCTGCCGCTCTGCGGCTGCTCGTCTGTTTGTGCTCGCCTTTGTAA  
TGAACAAATTTGGCTTTTATGAAAGTGCCTGCTCATCAAAAACCGATGACTATTCCGGCAACCGGCTTATTCAGCAG  
AATGATTTGCCAAAGGCTGTTGGTCCGTTGGGACGTTGGGGTTATCCGGCTGATATGCTTCCACTGCTCGCGCGATGGCG  
GAAGGTAACCTGATTTACACCTGTGGTCAAGCGGCTCGCCATCGACGGCGGCTTAAAGTATGCCGCGCTTCTGA

>Cluster\_26031

ATGGGAAGACAAAAGCAGTATCAAAGCTCGTCCGAGGCAAAACGTGTGCTGAGACGGGATTCGCGCAGCCATAAGCA  
GCGTGAAGAAGAATCGTCACTCGCTTGTGCAGATGAGCGGCTAGAAGCCATGGTATGGCCCGGACAGTCGCGATA  
CCTCGCCATCTCGCGCAAAATGAAGCGCAATTCGACTATCTGAAGGCTATTGAGAGTAAGCAGTGTATTCGCCACC  
GGCAGCGGGTCCGGAATAACCTGATCAGTCCGCAAAAGCGGAGGCGCTGATACATAAGGATTCGACAGGAT  
TATCGTTACCCGTCAGTTCTGCAAGCCGATGAAGATCTTGGCTTCTTACCTGGAGATATCGCAGAAAAGTTTGTCCCT  
ATTTTCGTCGGGTACGACGCTGCTGGTCCGGCGCTTAGGGGCTTCTTATGAGTACTGCCGTCGACCGGAAATAGGG  
AAGGTGAAATCGCGCGCTTGCCTATATGCGTGGACGTACCTTTGAAAATGCAGTCTGCTATTCTTGACGAGGCGCAGAA  
TGTGACTGCCCGCAAAATGAAAATGTTTTTAAACCGCCTCGGGGAGAACGTTGACGCTTATCGTCAACCGTGTATCACGC  
AATGCGATTTGCCCTCGCGCGTGCCTCCGATTAAGTACGCGCTGGAACGTTTCAAGAAGATGAAATGGTCCGGATC  
GTCCGATTCGGTAAAGAGATTGCGTACGTTCCGCACTTTGCCAACGTACGCTACATGCATACAGTTAA

>Cluster\_67126

ATGATTTTGGTGGCGAAACTGAGGAGCATCTGTCCCGGATACAGCAGGGGATTAATGCGTTCCGGGTGCGTCTGCTGTC  
GGTCCGAGTTTGTCTGTTGTTTTTCGGCAACGACGCTGGCTGCAGAGTTTCCCGGAATACGTTTGGATTACATCCACAC  
GCATTTATTTCAATGAAAAGGGAAATAGGGCTCCTCAGTATCATTTGTAATAACACAAACAAAACATATCTTGTGGC  
CCTGCGGTTATGAAGCAGATAAAAACGGCAATAAAAGTGCAGTGAAGGAGCCGGGCTTTGTGGTTTCCGCAATTTTAA  
AAAATCACAACTTTTCTGAGGATGACTGAAAATTTGTCGTTACCGGGGAAAGGTTACCAGGATGATGACAGAAAAGCTGT  
TTTTATTTATCGTCTGTTCTGATACCGTCCCGGACGCTCATCAGTCCGGAGCGAATGGCGTTGATGTGGGTTACAGGTGG  
AACATGAAAATATGATCGCCCTGAGCCTGAAAAGTGAACATCAGCAATCGCTTGAAGAAATTAAGGTTTAA  
AGAAGGAAACCGGATAAACTTATTAACAACAGTCCCTGTGGATGACGGTTGTTAATGTGAAAGTAAATGACAGTACAG  
TTAATGAGGGGGCGGCTTATGATTTTCGCCCTTTCGCTGCTGCTTATTAATGAAACCGCAGTCTCAGCGACTTCTGTG  
AGTCTGACGTTAGTGGATGAGAGCGGACATCGTATCCAGGTTACGGAAGAGATTTACGTTTGTGCTTAA

>Cluster\_41795

TTGAAACATCAAAAACAGGGATGTGCGCTTTTTTATTTAGGCTTAGTGTGCTGCACAGGCCACCAGCTTTACCGAATATCT  
GCCAATGAGTGACAGCGAATACGCGCAAAAGCGGGCGTGAAACCTCTCTGACCATGCCTTATGATGCGGATCAAAAAC  
GGCATTATGAAAAGTGGCGGTTGACGGCTAACGCTTGAAGAATGCCAAATGAAGATGATTACTGGCGATTACCGCT

AAGGACCGTGCCGGTAAATCCTGGTTTGTGCCGTGGGTGTGCTGCAAAAATATGGCGGTAATGCCGAATTTTACCGTGC  
TGACCTCGATCGTAATGGCAATTCAGGATTTGGTTATCTGGCGAGGTGTTTCGGGAAACGGGCTGGCGCCTTCCTGTTTT  
TGATCCTGATGACCTTTAATCAGCAAGGTCGCCGTGTGTTTTCCAGGTCGATGGTTTTACACCGCAACGAAACTGGC  
GTTGATGATTTGCTGATTTACAAGGCAATGGTCACACGCAATTTGCTGGATATGCAGTTTGATTCGGTTACTGGATAAC  
CAGTTTTGTATCAGGTAAGAGGGCCAAATGGCAGCGGTTACCGGTGGTTGGCAAGTTAAGCTACCCGCACTCACGC  
GTTTTACCTATACCTCCAACCGTAACTCGTCATTAACCTGTGCGCGGACGTAACCCGCAACGAAAGATCTGGTGTGCTG  
ACACAGCGTTGTTAATAAAGGGTGATGTGCTTGTATGGGGTGAATCAGAACTGA

>Cluster\_3000

ATGCAGGAACTAACTGAAATGCCGATCACCTATCCATACCCGAGAGAAACTTTTCCTGACTTTTTGAGGGAGTGTGGGTT  
CACCAATTTTTCCACGAAACAGCGTGAGACTTGTGACTGCTATCGTTTAAACGAATGGCGTAATGTTAACCTTTACACCA  
CCCCGACCATTCAGTTTCAAGGTAAACCTCAAGAACGTCCTCAATGTTGAAACTGCAATATGACCCATTTAGGAAACGCCG  
CCCACGGCAACACCCTAGCCGTAGAACAGCCATCTGAGCTCCCCAAAAGATATTCATTGTTACGGCCATGACCATAC  
TGCAAAAGGACCAACTTGAAGCTAATCCTTCAAAAACCTGGATTACCAGACCATTTCATTTGCGAATAACGGGAGGGACTG  
GACTCACCATTTGAAGAGCTTGAACGTGAAATTTGGGCAAGGACAACTGCTACCCGTTTCGGGATTGTTCTTTTGACA  
CCTGATGATATGGGATATCAAAAGCGCGCGGTGAAGCAGAAATCCAACCCCGCGCAAGACAGAACGTTGTACTCGAGAT  
GGGTATGCTTCTTTCGCTTCTAGGGCGCAGCAATGTAGCAATCTTCAGAAACAGCACCTAGAACAGCCTTCTGATGCTA  
ACGGGATTTTGTATCTGAATTTCAACGACCATGTACGTGAACAGTTTCTCTGCTAGTGCACCGTTACAAAATTTCTGGT  
TTCGAATTTACAAAGCTCAATAGCTAACGCTTCTCTGTA

>Cluster\_51153

TTGAAAACATATATATCCATTTATTTCCATGGGCATATTGAGCTTATTAATAAAATTTAGGATGTCTAAATAAATAGCAGA  
GGAATTTTACCGTTATAGTAAAGTTAAATAAAAAGAAAAGATACTTCAGATGACATACTTTTAAAAAATACTAGTTTT  
TAGATGAGAAATATAATCGCGGATTTGGAGAAAATAATAATATCGTATCAACTATTGTAAGGAAAGTTAGGATGGAT  
AAAAATGATATTTTATCGTTTTAAATCCAGACGTATATGTAGAAACGGCAACTATAAGAAAACCTTTTCAAGAGTATTTG  
TTCCGACCAGGTACGCATAGCTACAATTAATTTGTTAAGGATAGTGGTTACACTATATATGATAACTCAATAAGGAAAT  
ACCCTAATTTATTCGATTTTATTAAGTCATTTTATTTGGTAGTAAAAAAAACAATTTATGATAAAAAATAATAAATGAA  
CCCAAAGCAGTTGACTGGGGAGCTGGTTTCTTTCGCTTCAAAGCTGAACACTATAATAATTTAGCTGGATTTAGTGA  
ACAATACTATATGATTTGTAAGATATAGATATTTGTTATCGAAGTAAGATAATGGGATATCCCTTATATATATATCCTC  
AATATAAGGCTATTCATCTTGCCTGTGCATAAAGAAATAGGTTCTGTTTTTACGAAACATTTCTATTGGCATTTCGAGTGCT  
TTGATTTTACATTTATGAAAAAAGATTTGGAGTACAGATGA

>Cluster\_39345

ATGTTTTTGTGGTTTATGCAGCCAGATATCTGGCTCACCTTAAATTTACCCTCACCTTTCTGGAATTTATCTTGGGGTGG  
TAATATTTATTTTCTTCACTGGTGGTGGCAAAACTTCCGTTATCACAAACAAATATGGCGCTAAACGGGTTAAGCT  
GCGCGATGATTTATCGGATATTTATGCTGATATCCATTGCGTGGCTTTTACATATTTACCAGCCGCTTTTACCGTGC  
ACGCTGGAGATTTCTGTTCCGCACGTTGATCTGCTCGGGGGCGGGCTGTTCTGATTTATAAAGCGATACAGGAGATACG  
CGAAGACTGTCCCGCCGAGGAAAGCAACATGGCAGCGGATCCGCGCAACTGTGCTTGTGCGGTGCCATTTGTACAGA  
TAATGCTGCTCGATATCGGTTTACGCTGGATTCCGTTACCCGCTCGGCTTTTTCAGCATATATTTATCATGATTT  
GCCCGCTAATGATTTGCCGTCGGTGTGATGTTTGGCGGAAAACAATTTGGTATTCTGTTAACGCCACGCCGCTCAAT  
AAAAATCTGCGGTTAACCTTTTTTATTTGTTTGTGCTGTTGTTGCTGGTTCGCGATAGTCTCAACATTCATATTGCCAAAG  
AGTATCTTACTTCCGATATTTTCTCATTAAGTGTGAGACTCAATATTTATCCGTAAGAAAGAAAATAAAAAAGTT  
TCGACATTTGATCGAAACGCATGAATCGCACTCGCATTA

>Cluster\_41922

ATGATTTTAAAGTGCAATTTCTCTCGAAGTAAAGTTGCGGTGCTCACTGGTTGTGATACTGGGCTGGGCCAGGGGATGGC  
GTTGGGGCTGGCGCAAGCGGGCTGTGACATTTGTTGGCATTAAACATCGTTGAACCGCATGAAACCATCAAGCAGGTCACGG  
CGCTGGGGCGTCTTTTTTAAAGCCTGACCGCGATCTGCGAAAGATTGATGGCATTCAGCACTGCTGGATCGCGCGGTA  
GCTGAGTTTGGTCAATTTGATATCTGGTGAATAACGCCGATTTGATTGCGCGGAAAGACGCTCTCGAATTCAGCGAAAA  
AGACTGGGACGATGTCATGAACCTGAATATCAAGAGCGTATTTCTCATGTCTCAGGCAGCGGGGAAACACTTTTATCGCGC  
AAGCAATGGCGGCAAGATATCAATATCGCGTCAATGCTCTCCTTCCAGGGCGGGATCCGTTGCTTCTTATACCGCA  
TCAAAAAGCGGTGTGATGGGCGTGACGCGATTGATGGCGAACGAATGGGCTAAACACAACATTAATGTTAATGCGATAGC  
TCCGGGTTACATGGCGACCAACAATACTCAACAACGCGGGCAGATGAACAACGATAGCGCGGAAATTCGACCGCATTC  
CAGCTGGCCGTTGGGGACTGCCGAGTGACCTGATGGGGCGGTGGTTTCTTGCCTCCAGCGCTTACAGATTAATGTAAT  
GGTTATACCATTTGCCGTTGGATGGCGGTTGGCTGGCGCGCTTA

>Cluster\_5616

ATGCAAAATCGGCTTAAATACCGGATGTTCCAGTGGAAATGGCCTGGAAGCGCGCTCGAATTAACCGCCAGGGTTT  
TCATGTGCTGGCAGGTTGCCGAAACCGGATGATGTTGAGCGCATGAACAGCATGGGATTTACCGCGTGTGATCGATC  
TGGATTCACGAAAGTTGATCGCGCAGCGGATGATCGCCCTGACCGATAATTTGCTGATTTGGGATCTTTAAC  
AATGCCGATTCGGCATGTATGGCCCCCTTCCACCATCAGCCGTGCGCAGATGGAACAGCAGTTTCCGCCAACTTTTT  
CGGCGCACACCAGTCCCATGCGCTGTTACCAGCGATGTTACCAGCGGTAAGGGCGTATTTGATGACATCATCGG  
TGATGGGATTAATCTCACGCGGGTCTGTCGCTTACGCGCAGTAAATATGCGCTGGAGGGCTGGTCAGACGCATG  
CGCATGGAGCTGCCACAGCGGAATTAAGTCAAGCTGATCGAACCCGCTCCATTCGACTCTCAGCCCTCACGCAACG  
CAACCAGAGCAGAAAGTGAATAACAGTCAAAAATCCCGGCATCGCCGCGCTTTACGTTGGGACCGGAAAGCGGTGGTGG  
ACAAAGTACGCCATGCTTTTATAGCGAAGCGAAGATGCGCTATCCGGTACGCTGGTGACCTGGGCGGTAATGGTG  
CTTAAGCGCTGCTGCCGGGCGCGTGATGGACAAAATATTGCAGGGGTA

>Cluster\_65351

GTGAAAAGTATAGTTGACCCATCGGCATTTAGTCAATGATTTAGGTGCGCAGAAACGTCACCTGATTTCTGTTGTTGG  
TGCTGGGGGAAACAGCTTGCCTTTTTTGGCTGGCAAGACTGCTCCAGGCTAGCGCAGGCGTGTGTTAATCAGCAGCA  
CGACATATGTTTATGCCCACAGTCTCACTGGCCGTTGTTTTCTGTGATCCCGCATGCTTCCATGCTCTCTCT  
ACATCCCCATTTTCAATTTGTTTTACAGCTGGAAAGCGAACAGGAAAAGTGCAGGGATTTACGCCAGAAGCGATTGA  
TGCACTGGTGCAACGACAGAGTGTGACGTAATTTCTCATTGAAGCAGATGGCTCGCGTGAATGCCGTTAAAAGCGCCTG  
ATGAGCACGAACCTTGCATACCCAAAAGCAGTTGCTGCGTGATTTGCTGTGATGGGAGGACATACTTTGGGCGCGAAAGT  
AGCACGAAAATGTCATCGCTGCTGCGAGTTTCTGATATTAACCGGGTAAACACCTGATGCAACCTTGAACGAGCA  
TCTCGTTGCGCTGGTTGCCACCTCAGGGGGCTTTAAAACGTTACCAGGATTTGCTGGCGAGTCTGGTTCAATTAAC  
GTTTTTCTCAATGTGAGAATGCGATTGCAAAAAGCGAGTCTTCAACCGCTGCAACAACACGAGTACAGGCAATCTGG  
CTGGGCGATATAAAGAACATCTTCAATCGCGCGCAGATTTGTAATTAG

>Cluster\_66961

ATGAAGTATAGAAAACACAACTTAAATTTGTGTCGCTTTGGGGTAAATGCTTTTACTGTGAATGCAGCACCTTCAGA  
TGTAACCTGTTTTCAGGCAACGATGTTGTTGATTTCTGGGGGAAAGCGGTGCTATCTATCCGTTAGATTTCAATGGTGGC  
TAGTTTTCTGTGGATAAATCCAGGATTAATCTGTTCTGATTTACAGACTGCTGTTTTTGTGAGAATAAATCAGAGCGGCT  
CCTTTTGTGCTCACCCACCTTTTGTCCGTTGGATGCCAAAACAGGAGTTCTGCGCTTAAACCGAGCCGTTGGCAG  
TTTTTCTGCTGATAAAGAAGCTGCAATGGTTATGCGTGAAGGATTTCCGCGAAAGAGGATGACCTTTGGGTTGGCG

ATAAGGGAAAGGAAAGAGCCCTGGCTCCGGTGTGCGAATTCGTTACAAATTGCCATCGATAACTGTATCAAAATTATG  
GTTCCGCCCAATGAACCTTAAAGGAAATCCTTCTCAATTTGCCGAGATTGGTTTGGAAAATTGATGGGCAGAAATTAGT  
TGCGGAGAACCTGACACCGTTTTATATGAATTTAGGAAAAGTTACTTTTGTGAAAAGAGGTTTACCTCACTTGTGC  
CCCGAAATCAAAGTGGATGTTTGTATCTGCCAAAAGGAACTTCAGGGCAAGGTCATGTTCTCGGCAATCATTAATGAT  
CAAGGGGGCTAAGTCAGACATATTCGAAGAATGTAATTTTTTAA

>Cluster\_61391

ATGATAAGGCAGGTTATCCAGCGAATAAGCAACCTGAAGCAAGCATCGAGAGCTTGCAGGAACGGCGTTTTTGGTTGCA  
GTGTGAGCGTGTACACCTGGCAGCCGATCTATCAAACTATGCCGGCGGTTAATGGCCGTGGAGCTATTAACGGTGGTCA  
CGCATCCCTTGAACCCCTTCGCAACCGCTGCCCGGATCGCTATTTTACTGAAATCACCGTCAGCCATCGGATGGAGGTT  
GTGAAAGAGCAGATTGATTTGCTGGCGCAAAAAGCCGACTTCTTTATAGAGCACGGCCTGCTGGCATCGGTCAATATTGA  
TGGCCCTACGCTCATCGCCCTGCGTCAGCAACCAAAAATCCTGCGCCAGATTGAGCGTCTCCCTGGCTGCGTTTCGAAC  
TGGTGGAGCATATCCGCTGCGGAAAGATTCAACCTTTGCCTCGATGTGTGAATTTGGCCCGCTGTGGCTGGATGATTTT  
GGTACCGGATGGCAAAATTTCTCTGCGCTAAGTGAAGTGCCTTTATGACTACATCAAAATCGCGCGAGAATGTTTGTGAT  
GCTGCGTCAGTCGCGGAAGGACGCACACTTTTTCTCAGTTTTTACATCTAATGAATCGCTATTGTGCGGGGTGATTTG  
TCGAGGGCTAGAAACGCCGGAAGAGTGGCGTGTGTTGAGAATCGCCCGCATTCGCGCACAAAGGCTGGTTCTTTTCA  
CGCCCGCACCGATAGAAACCGTGAATACGGCGGTTCTGGCGCTATAA

>Cluster\_15657

GTGATTACCTCCCTTCAAGGGTGGGAGGCCATCGCAAAACAATCAGAAGGTGTTTTGCAGGAAGTACAGGGGCTAATAT  
CCTTGATATATCGGTGATGTTGCGCGATTAGAAAGCAGGAAGCCTTTATGAAGATATTGTTATTAACCTCCTCTTTGGTA  
GCCAAGAAGAAATGCAAGTTTCTTGGCGCTCATGCAAAAGATCGGAAATGGGAAAATGAGAAACGCTCTCGTTGGT  
GCTGTTGTTATTGGTCTGGTTGGATATGGCTTAGTTCTAGCAACTAAGGCTATGGCTCCAAGCAACACCTCCCCTTTGA  
AGCAATAACAATAACAATCATCAATATTGGTGCAGGCTAGGCTAATATTTACCTGACCGTCTCAAGCAATCATAGAAA  
GCACGGTAACCAATAAGAAAGACTTTCGCAAAAGTTCCATTAAGACGCTTGCAGCCAGCTAGGGCAGACGAAGGATCTACG  
ATGGTCAATAGGTACAGGGGTGGTACAGTGACCATTCGCTGAAACCATTAAGAAAGCCCAACTGAAGTTGCTTCCAC  
ACCAGAGTCATATACTCAGGATCATTTTGTGATGTTGAAATCCGTCATTAGACCTCGACAATCCAGAGAAAGGTT  
GGGCGCTGTTATCCCTGGATTAATAGATCGAAGAGTAAATATGGTTCCTGGCCCAACGTAACCCATCAGATTTTGA  
GGTAAATTTGCTGTACGTGTGATATAACAATAACGTACCAGCTCAATCATCAGATAAAAAATACCAACCGAAAAGGAT  
CTTTATAAAGAAATAATCAAAATAA

>Cluster\_20307

ATGAGTATATTATCAACAACCTGGCGGATGGACCCGTCGCTTAATGCCTTAATACATTGCGAAACGGGTGAAACACGTCG  
TCTCGCGAATACCATTTTATTTGCTGGAAACATTAGCAAAAATGCCGATGTTGTTTTATCGCGATCTTATTTATGTG  
CCGAAGTATGGAAGAACCCTATTGTCGCGGTAACAGCCTGCCGACGGCGATCCATGCGTTGCGGTTGCTATCGATGAT  
GATGGCAAAACAGAACATTATTAACAATTCGAAGAAGGGTATCTGTGCAATAAAGAGTATGTGCTTTTCCGGA  
GTCATCGCCTGCGGAAGCGCTGATATTACCAGCAGATACAGAAAACACCGCAGAAGAGATATCTTCGACAACACCCG  
CTGTACCTGTAGAAAAAACAATAAAGGACTGATGGGGCTGGCGTTGACCGCGGCTGTTATATTGGTTGGCTCAACCGTG  
GGGTTATTCACATTTGAAAAGTACACTGACCCCGCACTGGTAAAGAGTCAATTAACAGTCCAAGAAATAAATAATTT  
TCATCTTAGTTCTGGAAGGAAAATAATCCGTACCGTACTGTCAAAACCCCGCACAGGAAAAGACAACTCGATA  
ATTTATTTGTCAGCCATAATATGACAATGACAACCTATTAATAATGTTTCGTAACCGACTGGAAGCGATATTGTTCTG  
CGCAACAGTGCACCGCAGCTGGCAATTAACCTTTAATGTGGAAGGTTGGCAGAACAGCGATATTAATAGCGGATGTA  
TCGAATTTAGAGAAGTTGTTAAATACTGTGCAAAAATGCTGA

>Cluster\_20103

ATGAATAATCGAGTCCACCAGGGCCACTTAGCCCGTAAACGCTTCGGGCAAAACTTTCTCAACGATCAGTTGCTGATCGA  
CAGCATTTGTTCTCGCATTAAACCGCAGAAGGGCCAGGCGATGGTCAAAATCGGCCCGGCTGCGCGGATTGACCGAAC  
CGGTGCGGCAACGCTTGGACCAGCTGACGGTCACTGAACCTGACCGCGATCTGGCGGCAGCTGCAACCGCATCCATTC  
TTAGGCCCGAACTGACGATTTATCAGCAGGATGCGATGACCTTTAACCTTTGGCGAACGTCGCGGCAAAATGGCCAGCC  
GCTGCGTGTTCGGCAACCTGCTTATAACATCTCCAGCCGTTGATGTTCCATCTGTTTAGCTATACTGATGCCATTG  
CCGACATGCACTTTATGTTGCAAAAAGAGGTGGTGAATCGTCTGGTTGCAAGGACCAGCAGCAAGCGGATGGTCAATTA  
AGCGTCATGGCGCAATACTATTGCAACGTGATCCCGGTGCTGGAAGTACCGCCGTCAGCCTTTACACCACCACCAAAGT  
GGATTCGCGCGTCTGTCGCGCTGGTTCCTCATACACGATGCGCTCACCCGGTTAAAGATGTTGCGGTGTGAGCCGATCA  
CCACCGAAGCCTTTAACAGCGCTGTAACCAATTCGTAACAGCCTCGGCAACCTGTTTAGCGTCGAGGTGTTAACGGGA  
ATGGGGATCGACCCGCGATGCGAGCGGAAAATATCTCTGTGCGCAATATTGCCAGATGGCGAACTATCTGGCGGAGAG  
CGCGCCTTTGAGGAGAGTTAA

>Cluster\_14972

TTGAGTGACTTACCAGCAGCATTTTCCAGATTTACGCTAGCAGCCCTGGAATTTAACCATCTCTCCCGATGACGCCCC  
TAATATGCGGGATCTTGATCAGATGCGCAGGAAATGCAAAAATACTGATAGCACCAGGAGTCTCACTGCTTCTCT  
CCTACATCGATGATCTGAACATACGTATGACTTTGAGAGCCTCTGGAATACCGGAGCAGACTGAACGAAGCTCTGGCG  
CTGAAACCTGCCGATTTTATGCTGACTCCGACGGCGAGTACCAGCAACCCGTTGGTATCCTGAAAACACTCAAGCAACG  
TCTAAAAGAAGCAGAAAGAACAGCAGGAGCTCCGACACAGCATCCACCATTAACCTGATCCGATACAGAAAAC  
CACCAGAGCCTGCTGTAAGGCTGGTTCCTGTTCTGGATGCCCGGATACGCAATTCGCTATGCGGGAAATACCTGGCGACCTG  
AAAAAGCGGATCAACATCAGCCTGTGTGGGACATAACATCGAGACAGACCCGCTGAACTGGATAAACACCGGAGTGGC  
ACGGGAGAGCGTACGGCGTAACATTTTCCGGTTCCGGTCACTCCTCACAGTTCCGCGCACAGCTACGCCATGACCTGTA  
CAATGAGTGGCGTTTCTCGCGCGCTCCTGCAATCCTGACAGCAGCCTGTTGCAAGAAGCAGGATTTACACCCCG  
GTTTTTTCTGCTGGACGCTCTTACAGGAAGTGGCCTGCTCTTACCTGCGATCCACAGCTTGCAAAAACAGCTTCTGGGTA  
CCCTGAGCGCTTAAATAATGAGTAA

>Cluster\_21326

ATGCGGACACAGTGGCCCTCTCCGGCAAAACTTAACTGTTTTATACATTACCGGTCAGCGTGGGATGTTTACCACAC  
GCTGCAACGCTGTTTTCAGTTTCTGATTACGGCGACACCATCAGCATGAGCTTCGTGACGATGGGGATATTGCTCTGT  
TAACGCGCGTTGAAGCGTGAACATGAAGATAACCTGATGTTGCGCGCAGCGAGGTTGTTGATGAAAACCTGCGGAGAG  
AGCGGGCGTCTTTGACGGGAAGCGGTGCAATATCAGCATTGACAAGCGTTTCCGATGGGCGGGGCTGCTCGCGGTTG  
TTCATCCAATGCCCGCAGGTTCTGGTGGCTTAAATCATCTCTGGCAATGCGGACTAAGCATGGATGCTGCGCGGAAA  
TGGGGCTGACGCTGGGCGAGATGTTCTGTCTTTGTTCTGTTGATGCGCGGTTGCGGAGGCGTTGGTGAATACTA  
ACGCGGTTGGATCCGCGAGAGAAGTGGTATCTGGTGGCGCACCTGGTGAAGTATTCCGACACCGGTTGATTTTAAAGA  
TCTGAACTCCCGCAATACGCCAAAAGGTTCAATAGAAAAGTTGCTAAAATGTGAATTCAGCAATGATGCGAGGTTA  
TCGCAAGAAAACGTTTTTCCGAGGTTGATGCGGTTGTTTCTGCTGTTAGAAATACGCCCGCTGACCTGCGGAGACA  
GGGCGTGTGCTTTGCTGAATTTGATACAGAGTCTGAAGCCCGCAGGTTGCTAGAGCAAGCCCGGAATGGCTCAATGG  
CTTTTGGCGAAAGCGTTAATCTTTCCCATTCACAGAGCCATGCTTTAA

>Cluster\_23422

ATGTATATTTATTTCAAGCAAAAACATGCTGAAAAAGCCAGTCAGAGGGATATGCGGTCCTGCTTTCAACATTCATAA  
CCTTGAACTTTACAGGTAGTTGTTGAGAGCGTGCACAACTTCGCTCTCCGTTATGTTGGCGGAAACCCCGGTACAT

ATCGTTATGGTGGCGTGGGAAGTTTAAATTCGTTAGTACAATCGCTGGCTCGCGAGTACAACCTGCCGTTAGTCTGCAT  
CTCGACCATCATGAAGAGAGTGTGACATTTTTTAAACAAGGTTTCGCGCAGGGATCCGTTCTGTATGATGATGGCTCCCA  
TTTGCCATTTGAAGACAACATTTGCGCGAGTGCAAGAAGTTACCACCTTTTGCCATCGCTTTGATGTTAGCGTTGAGGCCG  
AGCTAGGGCGTCTTGGCGGCCAGGAGGACGATCTGCGGGTGGATGAAAAAGATTCGCTTATACCTCGCCAGCCGACGCT  
GCAGAGTTTGTTCACGCTACCAAAATTTGACTCCTCGCGGTAGCAATCCGCGACAGCACATGGTTTATATGCGCATGAACC  
ACGATGGATTTTGTGGCGTGGAAACAGATTCTGACGAGTGGAGATTCGCTGGTGTGATGTTGCGTTCGGGCTTAT  
CGGAACAGGACGTTGACGACTGTATTCTGCGCGTATTGTAAAGTGAATGTCGCGACAGAATGAAAAATGCGTTTGGC  
GATGCGTTAAAAGGATATTTCTACAACAATCCTGCGGCAATGATCCACGCTACTATATGACAGCCGCAAAAGGCCCAT  
GAAAGAAGTCGTAATTCGTATTATTTGGCTCTGTGGTAGTGAAGGAAAAATTTAA

>Cluster\_40289

ATGACGCCATTCGAATCATTATTTTGCCCGTATTAACCTGGTGGGAGCTGCTGCGGCAATATTGATACGCTGCGTGC  
ATTGCACCTGAAACACAATTTGCACCATTCCGTTTGAATACTCGACGTTTGTGCGGAGGAAATACAGCTTGTATGATC  
AATCGCTGGAAAGAAAATGGTGTATAGCCGCTCGTGGCGGTTACTGTTTGTAGCAGAATGGCGTGTGTTGAGCGTGTTA  
CGCGAGCTGGGGTTAACGTTTCGACGCTTGTAGGGCGGTAGTGTATCAAATCCGCCAGCATTACC GCCCGCACCCA  
TCGTTTGTGTTGGTGGAACTGGAGGGGAAAAATGGATTGCTGATGTCGTTTTCGGTGGGACAGCGTAACGCCGCCGA  
TTGTTTAAATCCGGATATCATGCAAAACACGCCACCGGAGATTCGTTGTTGCAAGAGGGTGTATGGGTATTG  
CAGTTTAAATCATCATCAGCACTGGCAGTGCATGACGTTTTCGTTTGTATCTGCGAGCAGCAACAAAGCGATTATGTTGATGG  
CAATTTCTGGTGGCGCACTGGCCGAGTGCATTTTCGCCATCATTTGCTGATGTGTCGCCATTTGCCGGACGGTGGCA  
AGCTAACGCTGACCAATTTTCATTTTACCATTATGAAAAATGGGACAGCGATTGAGCAGCGAAATCTACCAGATGTGGCG  
TCGTTATATGCGGTGATGCAGGAACAGTTTGGTCTGGGCGTAGATGCGAAACATGGCTTTACTGTGGATGAGTTAGC  
GCTGGTATGGCGCGGTTTGATACGCACCCGGAGGCGGAAAAATA

>Cluster\_66793

ATGGGTAAGTTAGCGTTAGCCGCAAGATCAGCGACGTAACCGTCGATGTATCTCTGAACTGCCAGGAAAAACCCGG  
TTGCCGCCAGGGCGGATCGACGGGCATAAAGAGATCAGCAAGCGTTGCCGGGAAATGGCGTCGATACCATTATCGTTT  
TCGATACCCACTGGCTGGTCAACAGTGCATTATCACATCAACTGTGCGAGCATTTTGAAGCGCTACACCAGCAACGAG  
CTGCCGATTTTATCCGCGATATGACCTACAACCTACGAGGGCAACCCGGAGTTGGGGCAGCTTATGCGGATGAAGCCTT  
AAAGCTCGGCGTGGCGGCAAAAGCGCACAACTTCCAGCTGAAACTGGAATACGGCAGCGTGGTGCATTCGCTACA  
TGAATGAAGACAGGACCTTCAAAGTGGTTTCCATTTCACTGTTTCTGCACTGTTTTCAGGATTTTGGCCAGACCGCAAGCTG  
GGCGAGGCGATTCTGAAAGCGATCGAACAGTACGACGGCACCGTGGCGGTCCTTGGCAGCGGTTGCTTATCGCACCGCTT  
TATGACGATCAGCGAGCGAAGAGGGATGAACAGCTACACCCGCGAGTTGACCGCCAGATGGACGAGCGTGTGGTGA  
AGCTGTGGCGCAAGGCCAGTTCAAAGAGTTTCTGCAATATGCTGCCGGAGTACGCCGACTACTGCTACGGCGAAGGCAAT  
ATGCACGACAGCGTGTATGCTGCTGGGATGCTCGCTGGGATAAATACGACGCAAGGTGGAGTTTATCACCCAGCTATT  
CCCAAGCTCTGGCACCGGTCAGGTTAACGCTGTTTTCCCGCTTCCCGCTAA

>Cluster\_38393

ATGAAAAAATTTATTTCTGTTAATGATTTTGGCGGATATTTCTTTTGCAGATTTAAGCGATTTTAAAGTTGCAACCTG  
GAATTTGAGGGTTCAAATGCACCGACAGAAAAATAATGGAACACACATGTCGCAACTTGTACGGGAAGTGGTGTG  
TTGATATCTGTATGGTTTCAAGAGGAGGGGAGTACCAGCTTCTGCAACGTTGACTGAGCGAGATTTAGCACCTCTGGT  
ATTCGATATAGATATATCTGGAATACCGGAACCAATAGCTGCCACAGGAGTTGTTTATATATTTCTCACGTGTTGA  
TGCATTCGTAACAGATAAATCTTGGCATTGTTTCAAACAGAAAGAGCTGATGAGTGATTTGATTTACTCTCCCACTG  
TTGTATCAGCAGGATCATCGGCATTGAAATTTGTAATGATGTTTCTTCTCAACCCATGCAATGGCGAATCGGGCGG  
GATTCAGGAGCAATTTAAATAGTGTGTTTGGTCTTCAACAGACAAACGGATCCTATAAGACAGGCGCTAACTGGAT  
GATGACGAGATTTTAAACGTTTACCGGCTACACTATTTTCAACTCTGAAACAGGGATTCGCAATCATGTAATAATTA  
TTGCTCACCGAGTACCAAGCGAAGCGAGTGGTGGTGTGTTGATTATGCAAGTGGTGGAAATTCAGTGGCTTTGCTCT  
CCTCTGTTGAGGGCTCGTTGTTTATTCGGATTATTAAGAGGGCAAAATGCCTCTGATCATTTTCCGGTTGGCTTTATTC  
TGGAAAGAGGAGCAAGAAGATGA

>Cluster\_40750

ATGATTACTCTCTGCACAGCAACTGGCAGAACGTTGATGGCACAGCGCAGGCGGGGCAATGAAGGCGCGGACCACGC  
CGCGGCTACCGCGCATGAAGAGGTGCTGTATCGTCTGCGTCTGGCACAGGCCCGGCTTAAAGGCGTACAGGCCAGAAGCG  
CGAAAGCCGCCATCAAAAAGAGTTGTTGCCGACTTTTCCGGCTGGATTGAGGGAACGCTGGAGGCTGACGGCGGGCAG  
CAGGACGAAGTATTGCCACGCTGATGGTGTGGGCGATTGACTGCGGCGATCTTCCGCTGGCGCTGCGTATCGGGGCGTA  
TGTGGTCCGTCATAAACCCTCATGTCGGGATAAATTTGGCCGTAACCTTGGCCGTAACCTGTCGACAGTGTGACCGAAGAAATCTGCAACC  
CGTACTGACCGGGCCGGGACGGATGCCGACGCGGATTTGTCCGCTTTATCGAACCCTGAAATACCTCCGGGAGATT  
GTCACAGACCAGGACATGCCGGACGAAGTGCGCCCAAATATGCAAGGCGTGCCTTTTCCCGCCGTTGGCTGAGTGA  
TGGGACAGCATGGCCCTGTCTACTGAAGTGTGCGCGAAGCAATGCACCTGAAACCGAAGCAGGTTGTAACCGCGAGA  
TTGCAACCCCTTTCCCGCCCTGAAAAAAGCGATTCCCGAGCCGACCCAGAAAGACGACGCGCAGCGCAGGACAGGAC  
GAAAGCAGCAAAAGTAAAAAGACACCGGGAAGCTGCGACACGAAAAACCCGCGACGAGAGGCGAAACCGGTTA  
A

>Cluster\_36437

ATGAACGCATTATTAAGCAATCCCTTTAAAGAAGCTTTACGCAAGGGCGAAGTGCAAATGGTCTGTGGTTAAGCTCAAC  
GACTGCCTATATGGCAGAAATGGCGCCACTTCTGGTTATGACTGGTGTGATGACGGGGAGCAGCGCCAAACACCA  
TTCAGGATCTTTATCATCAGCTACAGGCGGTAGCGCCCTATGCCAGCAACCCGTTGATCCGCTCGGTTGGAAGGCGAGTAA  
CCGCTGATTAACAAGTCTCGGATATTGGCGCGCAACCTACTGATCCCGATGGTTCGATACCTGCCGAACAGGACGCTCA  
GGTGGTGTCTGCCACGCGCTATCCTCCCTACGGTGGAGCGTGGTGTGCGGGCCAGTGTGGCACGGGCTGCGCGTGGGGAC  
GCATTGAGAAATCATGCGCAAGTAAACGATTCTGCTTGTGCTGTTGTCAGGTTGAAAGTAAACCGCACTGGATAAC  
CTGGACGAAATCTCGACGTCGAAGGATTGATGGCGTGTATTGTAACCTGCGGATCTTCTGCGCTGTTGGGCTACCC  
GGATAACCGCCGGGCAAGGAGTGCAGCGAAATATTGAAACAGTATTCGCGGATCCGTCGCGGATCCGTCGCGGTTAAAGCGGCTG  
GTTTTCTGGCTGTGGCTCCTGATATGGCGCAGCAATGCCTGGCGTGGGAGCGAACTTTGTCGCTGTTGGCGTTGACACG  
ATGCTCTACAGCGATGCCCTGGATCAACGACTGGCGATGTTTAAATCAGGCAAAAATGGGCCACGCATAAAAGGTAGTTA  
TTGA

>Cluster\_14046

ATGGAACGATCTCTGTTTATACGCACAGTAATGCTAACCTTGTCTTTTACGGTTTCTTCTTCTCAGAGGCGAAACAAC  
ACTCCGACTGGCTTATGCGGAAAACAGTCAAGGTTAAAGATGCTCTGCATTTTTCGTTCAACAAGTAGAAGAGAAAA  
CCGGGGGTGAAATAAAGTGTCTACTTTCTGATGGTCACTCGGTTGGTGGAGCGCAACTGGTTGAACTAATAACAAGCC  
AATGCAGTAGATATCACAAAAGTTTTCATCAGGGCTGATGGAAAGTTTCTCTCTGATACGGTATTTTTTCTTACCGTA  
TCTTTTTAGTAATGCCGATGAATATTAAGAATATGGATAACCAAAAATAATGGACCCAGTGTATCAGTCAACGGCAG  
CGCAAGGATTTATAGGATTCGGTTGGTATGATTCCGGCCAGCTAACTTTTATATGATGATAAATCACCAATCAAAAAGTATT  
GAAGATTTACCGGAAAAAATAATCCGCTCATTCAGAGCGACGCTACTTATCAGACACTTAAACTCTGGGAGCATCTCC  
CATTTGCAATGAGTCAAGCTGAAGTTTATACCTCCCTCAGCAAGGATTTCTTGTATGGAGCAGAAAAATAACGAATTTGCTT  
TAACGATTGCCCGTATGGTGGAGTTGCAGGTTACTATACTTATGATATGCACACCCGATTTCTGACGTTTTACTAATG

AGCACTGCAACATTAGCAAACTGACGCTGAACAGCGTACCATTGTTAAAGATGCCATCCGCGCTTCCATCGAATTGA  
>Cluster\_48631  
ATGGGTAATAAAGCAATCCCTGAGCTTGGCTCTGACGTTATGCAGCAAATCTATCTCTGCGCCATAAAATCGCTACCCTAA  
TGAAGCGTGTGGCTTTCTGGTTAGAACAATGGCGCAAAATATCGCTTTATGGAAGCGCGGAATGTTTTCGGAGAACCCCG  
AGAACACTTTTGTAAATGACAGTTGACGACATTTATGGCGCAGAGGATGCGGGTATGTTATCGCAATCTGCACAT  
ACTGATGAATCAGCAGAAGCATCTGATGCCGATCGTGCAGGCTGCGAAGCGACGGAAGTTCCGTTGGATGATTTGGCTAT  
TCGCAAGAAATGTTGAGGGAGATGCCCTTTCCATTTTACGAGATGAAATGTGATCACACCTGATGGTTTCGAAATGCCAT  
ACCTGGGCAGACCGTATGATTTGGCGTATTGATGCTGATGTTGTGTGCGGACTATTTGAAGCGTGGATTTAACGTC  
GAACATAAACCAGACACACCTGCATATCCATCGTGGTACACCGCGGATAACGCACATTTCTGACCAGAACCTACCGAAA  
CGAAGGATTTGGTACGGCTTGGCGCCGGAACAGAGCCTCAACGTTGGGACATCTTTTATCCAATACGGGAAAATGCCTG  
ACCACTGCGCGGTTATATCGCGGATGGAATGATTTCTTATCACCAGATCGACCGCTTAGTTGTCGTGCTTATACGGC  
GGAATGTATCAGAAACATACGACGCATCACTTGGCTCACAGAGACTTGGCTCAAGGGAGATGAGACGTGCTGAGTTAG  
>Cluster\_42691  
ATGCCGTAATTACCCGAAGTTGAAACCAGCCGTCGCGGCATAGAACCGCATCTCGTTGGTGCAACCATTCTTCATGCGGT  
GGTGGCAACGGACGCTTGGCTGGCGGTTTCCAGAAGAGATCTACCGTTAAGCGACCAACCAGTGCCTAGCGTGCAGC  
GCCGGCTAAATCTGCTGCTGGAGCTGCCTGAGGGCTGGATTATCATTTATTTGGGATGTTCTGGCAGCTGCCATC  
CTTCCAGAAGAACTTCCCTTGAAGACATGACATGTGGATTTGGTGATGAGCAACGGCAAAAGTGCCTGACCCGCA  
TCCGCGCCGCTTTGGTGCCTGGCTATGGACAAAGAGCTGGAAGGGCACACCGTGTGCGCCATCTTGGACGGAGCCGC  
TTAGTGACGATTTCAACGGTGTGATCCTGCATCAGAAGTGGCGGAAAGAAAAACGGCGATTAACACCGTGGCTGATGGAT  
ACAAGCTGGTGGTAGCGTAGGAAATATCTATGCCAGCGAATCGCTGTTTGGCGGGGGATCCATCCGGATCCGGTGGC  
GTCACTACTGTTGCTGGCAGAGTGCGAATTTGGCTGCGGTGATTAAGCGGTTGTTGCTGCGTTTCGATTGAGAGGGCG  
GTACAACGCTGAAAGATTTCTGCAAGCGACGGTAAACCGGGCTATTTGCTCAAGAATTACAGGTTTACGGCGGAAAA  
GGTGAGCCGTGTCGGGTGTGCGGTACGCGATTGTGGCGACTAAACATGCGCAGCGGGCAACGTTTTATTTGTCGCGAGTG  
CCAGAAGTAA  
>Cluster\_44045  
ATGGCTCGTCTGGCAGCATTGATATGGATGGCACTTTATTTGATGCTGACCATCATTAGGTGAGAAAAACCTCTCTAC  
TTTGGCGCGACTGCGTGAACGGACATTTACCTCACTTTTCCACGGGGCGTCATGCGCTGGAGATGCAGCATATTTCTCG  
GGCGCTATCGCTGGATGCATATTTGATTACCGCAACGGAAACGGCGTGCATTTCTCTGGAAGGTGAACCTTTACCTCT  
GATGATTTACCTGCGGATGTGCGGGAGCTGGTGTGTATCAGCAATGGGATACCCGAGCCAGCATGCATATCTTCAATGA  
CGACGGTTGGTTTACCGGAAAGAGATCCTGCGTGTGTCAGGCATTTGCTATAGCGGTTTTCGTTATCAGATAATCG  
ATGTCAAAAAATGCCACTCGGCAGCGTCAACAAGATCTGCTTCTGTGGCGATCACGACGATCTTACACGCTTGCAGATC  
CAGCTATACGAAGCATTAGGCGAGCGTGCACATTTGTGTTTTTCCGCAACGGATTGCCGAAAGTGCCTGCGGTTGCGG  
CAATAAAGGGCTGCATTGACGGTGTGACCCAACATTTAGGTTTATCGTTGCGGATGTCATGGCCTTTGGTGTGCGA  
TGAACGATCGCAAAATTTAGGCGAGCGTGGTACGGGATTTATTTATGGCAATCGCATGCCGCAACTGCGCGCGGAGCTC  
CCGATTTACCGGTGATTGGACATTTGCCAAATCAGGCTGTCTCTACATTTTACGCACTGGCTGGACTATCCACATCT  
ACCTTATTTCCCGGAATAA  
>Cluster\_44729  
ATGTTTAGTGCTGAATTTCCAATTTGGTGTAAATAGACTCAGGTGTAGGTGGATTGACATCGGTAAGGAAATAATTAATTT  
GCTTCTGGCGAAGATATTTATCTATTTGTGGAGATAATACGAATGCACCTTATGGCAACCGTTCTGCGCATGATATCATCA  
GTTTGGACTAAAAAATGCTGACTTTTTTACAGTCAAGGAATGTCAAACTAGTTGCTGTGTCATGTAATACTATATCTCA  
ACTTTGGAATCCGAAAGATACAGCGGATATGCTAAGAGCTTCCGTTTCTATCTTATCCATCATTGAACCTGCAAGTAGA  
AGATGTGATTCGCGCAGCTATAAAAAATGTGGTATTTATCGTACCGAGTTTACTATTTAAACGGGGTGTCAAAAGAGC  
TAATAAAAAAATTTGAAACCAACAATAAATTTGGAGAACAACGAAATAAATCTGCAATGTTAATTGAGGAAGTAAAT  
CTTAATGCTCCTGCAATATTTGAATGATATCAAAAAACATGTTAACATTTAATTTCCCTCCATCCAGTAAATGAAATTTAT  
TCTCGGCTGACTCACTATCCAATTTGTTTCAAGATTTATTTGAAGCAGTTGCACCGGATATAAAATTTATTAATCCTGCAC  
ATGATCAGGCTATCTTATTAATAATCACTTGGGACAGCTAAATTTATTAACCTCCTCAAATATAGGAACCTTTGCAATA  
AATACTAGTGGAAATGATGGAGATCTACAAAATGGTACTAGGGGAATTGAGCATTACGAAACCTCATACATTCAGTATCAG  
GCAGTTTTAA  
>Cluster\_25156  
ATGGAAAAGAAAATCGGTTTTATTGGCTGCGGCAATATGGGAAAAGCCATTCTCGGCGGTCTGATTGCCAGCGCTCAGGT  
GCTTCCAGGGCAAAATCTGGGTATATACCCCTCCCGGATAAAGTCAACCGTCCGTCATGACCAGTTCCGCATCAACCGCG  
CAGAATCGGCGAAGAAGTAGCGCAAAATCGCGACATCATTTTGCGCGGTTAAACCAGGCATCATGATTAAGTGCCTT  
AGCGAAATCACCTCCAGCTGAATAAAGACTCTCTGGTGTCTTATTTGCTGCAGGATACAGCTCGACCGCTTGGCCG  
CGCGTGGCCGCTGACCGGAAAATTTATCCGCGCATGCCGAACACTCCCGCGTGGTTAATGCCGGGATGACCTCCGTA  
GCCAAACCGCTGGTAACCCCAAGATACCGCTGATGTGCTGAATAATTTTCCGCTGCTTTGGCGAAGCGGAAGTGAAT  
GCTGAGCCGATGATCCACCGGTGGTGGTGTGAGCGTCTTCCGCGAGCTTACGCTTTATGTTTATCGAAGCGATGGC  
CGACGCGCGCTGCTGGCGGGATGCCACGCGCCAGGCGTATAAATTTGCGGCTCAGGCGGTAATGGCTCCGCAAAAA  
TGGTGTGGAACGGGAGAACATCCGGGACACTGAAAGATATGGTCTGCTCACCGGGAGGCCACCATTTGAGGCGGTA  
CGGCTACTGGAAGGAAAAGGCTTCCGTTGCCAGTGTATCGAAGCGATGACGAAAGTGTATGGAAAATCAGAAAAACTCAG  
CAAATCCTGA  
>Cluster\_24477  
ATGTCGATTAAGAAAGCTCGCTAATGGCAAATTTTGTGTGGACGTGCGGCCAGCTGGATCAGAAGGAAAAAGATTCAGGCG  
CGGATTTGATACTCGTGGTGAGGCTGTTTTGTATGAGCGTCATGTATTGCAGCATTACCACGCAAAAGATTTGGGTGATA  
AGCCAACGAAACGGCGCTCGCTGAGGGAGTTGCTGGATTTGTTGGTGGCTATACACGGGAAAAATCATCCTTACGGTGGC  
ATGGAGCGAGTGGCTATTTCTGCGGTCATTAGTGTATTTGAAAGTATTAATGTTACACGCAAGTACCACTTACTCGTAA  
GAACATAAATTAATTTATCGTATTTGTTGCTTAACTCGCGGATAAACAATCCACGGTTAATCGTTATTGCGCAATGATA  
GTGGTTTCTTCAAAAACAAATTTAGCGCAGAGGAATATTTGGGGCTAATCCGTTTATGATGTGAAAAAATTAATATC  
AAACAGCCTGAAATGGCTTATTTGTATCATGAAGATATCCACGATTTACTGGAGTTGTTATCTGGTGTGAAATTAAGC  
CGCTTGTGTGCTTGGCAACAGGTGGAAGATGGAGTGGAGTTGCAAAATCAAGGGGAGCATGTTATTTAGCGGCAAA  
TCATTTTTATGGAACCAAAAAATGGGAAGCGCTCCGTTATACCTATATCGTCAGAACTGGAGTGCATGATTAATAAACAAG  
GCCACTGGTCTGTTAATTTATCCAAGTTATGCAGCTGTGAGAGCTGCTATCAGAAAGGTGAGGCTGATCTTCTTGAAGG  
GCAGTCGATACATGTTTTACGGCATACTTTGCCACTACTTCTATGATTAATGGTGGGAAATATCATCACTTTGCGAGAA  
TACTTGGACATAGCACTATTCAGCAGACGATGACTTATGCCATTTTGGCGCGGATTAATCTACAGGATGCTGTGCGCTTT  
AATCCTGTGGCTGAGTTGTCAGATATTTGCCATAA  
>Cluster\_57833  
ATGCAAAACAAACCCAGAGAAGTGTATTTTTTGTGATATTTCCCTTTGATAAAGGTAGCCTAGAGCATGTATTTCCCTAGTGC  
GTTAGGTGGAAGAAATACCACAACACATGCGACATGCAAAAGTTGCAACAATTTATTTTTCAGAAGCGAGTTTCAGATGCGG  
TTGAGATCGCTCTGGCTGATAACTTTATTTATATCAGGAATGCTTTGAATGTTTGGTCTGGAAGAGGAAACCCACCACA  
ACAATAAAGGAAGCAGGTGATTTGATGATGGCATCAAGTATGATCTCGCACCAAACTTGACACCTATTTGTGCTAAGTC

AAGAATACCCTCAAAGATGAAACTGATAGCAATACAGTCTTTGATTTGCTTGCCTCAAGATGTAGGTGATGCTAATAGGA  
TTGTAGGAATTTTAAAGAGCGCGCCTTAATATAGGGGATATTAATGC AAAAATATGTTACAACCTAAGGCTCCGTTTATA  
AGAGCTAGCATTAAGTTTGAAGGAAATAAGATTTTTCGTGCTATAGCGAAAATGCTGTAGTCTCCTATGTTGTTTGT  
TGCAATTCGCGAGCAAGAACCGATATCTATCAGAGCCTTAGGGGATCCATACGAAAGTGGAGAACCTGACATCAAAAAT  
ATTGCGGATGAGCACTATACAAAATGATTTTCTGTCATTACAAAATTTACACCCACACGAAAAAACCCTGACCCATTTCAA  
TGTGTTTTGAACACACTGATTTATAAATAAATGTAATACCAAATTTGTTGCTTATATAAAGCTTTTGGTGCATTTAA  
TTTCTCTATTATTAGGTAATCATTGAGTATATCACCTAAATGCTTGTGCTAAATCCTACAGCAGAAAACTCCTCAA  
GGTTTAACGTTTTATTAAACCCGCCATTAAGTTACATACCTAAAAATATTGACTCATTCAAAAATGAACATGAATCCGTT  
AGGAAACATGTTTCAAGTATGCAATGAGTTCTATAGTAGAGCACTGTCAAAGTTTATCGACCGAAGAATATATTGAAGCCT  
CAGCCAAGAGTTAATGATTTCTGTTCAAACCTGCATCCGTTGACTCTGACATATCTGAAATAATCAGATCATTTTCAGAGA  
AGCTTGCTCATATAGAAAATGGATTGGCGTGGGAGGAAAGAAATTAATATTGAATAA

>Cluster\_49748

ATGAATCCCTTCCGCGAGCAAAACAAAAGCTATCAATTCTATTACGATGAATCAATAACGTTTCGTAAACTATATCTATC  
CAAACAAATTTGATGGTTATAACATTGACCATGATCCAGACAAGCACACAGCGTAAACTTCGTGTTAGCCGGTGTGCTC  
ATACTGGTTCCTCATCCAGTGCCGACTTTGATGATTTAGCAGCGCATACAGCTACAGGCGCAACGCAAGAGTTTAAAG  
CTGAAACATTTAGCCAAAGGCGACTTCCGACTATGCTACAGTCAAGGAAAGCTCAGCGTTCCTTGTAGTGGCTTCTCTA  
TGGTACCTATACACTACACTTCCACTGAATATGGAGTATTTGGGATACTGAGACATCATTGATGATTTGATCCTCT  
TCGGACGTGAGAAGGCTTCATCCCGAAATGAGTATGAAACAGTCTTATGGCTACATGTTGGCAACAAGGATGCTCTA  
CACACCTACGTTAAGGCTAAACAGGTTCCCTTCCATCCAGTTCCCAAGTCCTATGACTTCCCATACATCGAGGGGAGGGA  
ACAGGCTTTCATACAGGGCTATTAGTCAGATCTCCGCTCATTGCGTAAACCCTCTATACAGCTACCAATAGAGATGAGT  
TTTCCAGTTCGTTTGTGCTTCCGCTCCTGAGCTCCTGATGGCTGCTCTGACCAAAACATAGATGATATGACACTACT  
ATGGATATTAGGGATGAACCGCTACAGACGACGACAACCGCTTGTGATGGTTTGTCTATTCTACCAGAACCGGGC  
GCAAATGTTTCGAGGCTTCCAGCCATATCTTTGACATAGAGAAGTGTGGAAGCAGATCTTCAAAGGCGAGGAAAGCCA  
ACCTTAATCTAACGCTTAATTAATCTTTCGCTGATTCAAAGCTAAATCCTCTGGTCAAGTGAAGTGTGGCTGGC  
TTTATGACGACTATTTTGATTATCTCAATAGCCATAGCTACGAAACAGATTAACATGACAGAAAACAGCTTAAACGAAAG  
GCAAAGATTAAATATGAGGTTTTTAAAGGCTCCTGATAAACAATCTCATGATAATAACCAACATTATTACATTTGTGTTA  
TGTCAGCTTTAGAGCATGAAAAACATAAAAATTTACTTACCCGGATGAACATAA

>Cluster\_41377

GTGGAACAGATTAATTCAAATGAAAACATTCTGACAGAGAAGGATTTTGTCTTGTAGCGGTAGTTTATTATTATGCG  
GTTTTTCAGGTGCCATATGCCTATTGGTCAATGGAATTAAGACATGATTAGTACAGATGACGCTATGTCACGGGAAATG  
CAGATCCAATTTTCGACAAAGTCTCAGGAGTGTACTGTCGTTAATCATAAAGATACGAACTACGTTTCGACAAAGGTGAC  
ATTTTAGTTCACCTGAGATAAAAACGATGCCACTATCCGACTCAATAAAGCTAAAAATAATCTGCAAAATATTGTGTCGGA  
AACGAATAAACTATACTTACAGGATAAACAATACAGTCCGAAAGTCCGCTCAGCAGTATTGATATCAACAATCTTTAG  
AAGATTATAACCGTCGTGTCCTTTAGCGAAGCAAGGGTATTTCAAAAGAAACGCTGGAGCATACCAAGGATACGTTA  
ATAAGTACGAAACGGCCTTGAATGCTGCTATCCAGGCTTATAAAGCGAAATAAAGCTTTAGTAATGAACACACCATTAAA  
CCGTCAGCCACAAGTAGTTGAAAGCTGCAGATGCAAGCAAGGCTGTTGGCCTTAAACGTAACGGATATTAAAGAGT  
CGGTTACCGGTTATATTGCCAAAAGAGTTCAGGTCGGCGAAACAGTGAAGTCCCGGACAATCGTTAATGGCTGTCGTA  
CCGGCGGCTCAAAATGTTGGTTAAATGCCAACTTTAAAGAAACCAACTCAGGATGTACGGATTTGGTCAATCGGTCAAT  
TATCAGCATCTTTATGTTGAAAATGTTGTGTTTTCATGTTCCGGTGCAGGGATCAATATGGGAACCGCAATCGGCTTCT  
CCTTATTACCTGCAAAAATGCGCAGGGAACCTGGATGCAAAAATCGTTTACGCTGTTACCGTTGAAAGTTTCTCTGGATCCA  
AAAGAACTCATGGAACACCTTTGCGCATTTGGTTTATCGATGACTGCTACTATTGATACGAAGATGAAGACATTGCCGA  
GATGCCGATCTGGCTTCAACCGTGACGTCATGCCTGCTTATACCAGTATGGCTTTAGTTATCGATACCAGTCCGATAG  
AAAAAGAAATAGCAACATTATTTCGCATAATGGACAACCTTAA

>Cluster\_24552

ATGATTGATTAATCCGCGACCGGTTTTACCCTGCTGCAGGGAGCGCATTTGATGCGCGGAAAGTATCGGGAAATTTGCGA  
TGTCCTCATCGCTAACGGCAAAAATTTATGCGTTGCAGCAACATCCCTTCTGACATTTGACCGGCTGCACGGTGTGTCG  
ATCTCAGCGGGCAGATCCCTGTGCCAGGTTTTATTGATCAACACGTCCTCATTGATTGGTGGTGGCGGCAAGCAGGTCCG  
ACGACACGCAACCGGAAGTGGCGTTAAGTCTGTGACGGAAGCGGGCATTACGTCAGTGGTGGTCTGCTGGGTACCGA  
CTCTATCTCTCGCCACCCGGAATCCCTGCTCGCCAAAGCCGTCGCTCAATGAAGAAGGCATCAGCGCTGGATGCTGA  
CCGGCGCTTATCATGTCCCTTCCCGCACTATTACGGTTCCGTTGGAAAAGACGTTGGCGATTAATCGATCCGCTGATTTGGT  
GTGAAATCGCCCATCTGATCACCGTTTTCGCGCACCCAGGCTTATCACCTGGCTAATATGGCGGCGGAATCCCGCGT  
TGGTGGTTTGTCTCGCGGTAACCTGGCGTCACCGTGTCCACATGGGTGACAGCAAAAAGGCGTTACAGCCCATCTATG  
ACCTTATTGAGAACTGCGACGTCCTTATCAGCAAGTGTGTCGCCACCCAGTTAACCGCAACGTTCCGTTGTTGAGCAG  
CGCTGGAGTTTCGCGCGCAAGGCGGCCACCATCGACATCACAGCAGCATGACGAACCGTTCGCCCTGCCCAGGAT  
TGCCCGCGCTTCAAGCGGCTTATCCGCTGCGCAGCGCTCACTCAGCTCCGACGGCAACGGTAGCCGTTCTTTT  
ATGACGAAGGCAATTAACCCATATCGGTGTTGCAGTTTGAACATTTGCTGGAACCGTGCAGGTGTGGTCAAAGAC  
TATGATTTGATATCAGCGATGCGCTGCGCCGCTCACAGTAGCGTAGCCGTTTCTTAACCTGACCGGAAAGGCGA  
AATTTGCGCAGGCAATGACGCAGACTTACTGCTATGACGCTGAATTTGCGCATTTGACAGGTATACGCTCGCGGCAAC  
TGATGTTCAAAGACCGCAAGCCTGCGTGAAAGCAAGTTTGAACCGGATAA

>Cluster\_27876

ATGAAAACCTGTTAATGAGCTGATTAAGGATATCAATTCGCTGACCTCTCACCTGCATGAAAAAGATTTTTTGTAAACGTG  
GAAACAGACGCGCAGACGAATGAAAACAGTACTGGACGTTGCGCCGCGTTAAAAGCACTGCGTGTGAAAACATCTCAA  
CCAAAAGTCTTAAATAGTGGATTAGGATTTCCGTATTCCGCGACAATTCACCCGTACCCGCTTCTCTTATGCTTCCGCA  
CTTAAACCTACTCGGCTTGCACAACAAGATCTTTCGAGGAAATCAAAAATCGCTCAGGCGAAACCGTGCCTGAAAC  
CGCAATATGATCTCCTTCTGCGCTGACGCTATCGGATTTGCGGACGATATGATATGTTGGGCGCAGGCAACCGCTATATGC  
GTGAAGTTGGCGCGCACTTTGATGACGGTACAAACAAGGGTCTTCCGACAGCGTCCGGCTTAGTGAACCTCAAAATGC  
GATATTGACCACCCGACTCAATCAATGGCTGATCTGGCATGGTTACGTGAACACTTTGGTTCACTGGAACCTGAAAGG  
TAAAAAATCGCCATGACCTGGGCTTACCCTAACGCTATGGCAAAACCGCTCTCTGTACCACAAGGCATCATCCGCTGTA  
TGACCCGCTTCCGATGATGATGATCACCCTGGCCATCCGGAAGGCTACGACCTGATCCCGATGCTGTTGAAGTTGTCTAAA  
AACAAATGCTAAAAGCCTCCGGTGGTGAATTTCCGTCAGGTCACCAGCATGGAAGAAGCCTTCAAAGACGCAAGCTGTTTA  
TCCGAAGTCAATGGCACCTTACAAAGTATGGAAGAGCGTACTGAATTTGCTGCGTGGCAACGACCACGAAGGCTTAAAG  
CACTGGAAAAACAGTGTCTGGCAGACAAGCGCAACACAAGACTGGCATTGTACTGAAGAGATGATGGAACCTGACCCGT  
GATGGCGAAGCCTGTACATGCACTGCCCTGCCAGTGAATCACGCGGCTACTCTGTAAGAAGGTTGAAGTGAAGTGAAGG  
CGTATTCAAAGAAATACCGTATCGCAACCTTACAAAGAAGCAGCTTGAAGCCTTATATCATCGCCGCTGATCCTGTCC  
GTAATATCGCAAAACAGGTTGACTGCTCGAGCACTGCTGAAAGAAGCGCAAGAACGGTGAATAA

>Cluster\_58842

ATGACACAATTCGCTTCTCTGTCTGCACTCGTTGCTGGATACAGATGCTTATAAGTTGCATATGACGCAAGCGGTGTT  
TCATCACTATTACGATGTGCATGTCCGGCGGAGTTTCGTTGCGAGGAGTACGATCTGCTGGGTTATTATGCCGATGCTA  
TTCGTGAACAGGTTTCAAGGATGACGACCTGCGCTGCAGGATGATGAAATACAGTGGCTTTCTGCCCTGCCCTTCTT



AAGGCCGACTATCTTAACCTGGTTACGCGAGTTCGCTTTAACCCGGAACAAGTACCGGTGCCAACGATAATGGCAAGCT  
GGATATTCGTTTTAAGCGGCCCGTGGCGTGAAGTCACTCCCTGCGGAAGTTCCTTTGCTGGCGGTATCAGTGAAATGGTAC  
ATCGCTATCGCTCACCGCAGGCCGACGTTGCGCAAGCCCTCGACACGCTGGAAAGCAAATAGTGCATCTCTCGCGGTTA  
ACCGCGGCTTTGATATGTCGCGCTTCCATCTGATGGATTTTGGCACCCGTCGCGCTTTTCTCGCGAAGTACAGAAGAA  
CATCGTTAAGCTCTGCAACAGGAATCCCTGGTTTGTGGGCACCAAGCACTACGATCTGGCGCGTCCGCTTCCCTCACGC  
CGATGGGAACACAGGCACACGAATGGTTCCAGGCACATCAGCAAAATCAGCCCGGATCTAGCCAACAGCCAGCGAGCTGCA  
CTTGCTGCTGGCTGGAAGAGTATCCCGACCACTGGCATTTGATTAACCGACTGCATCACTATGGATGCTTTCCTGGC  
TGATTTCCGTTGTCGAGTTCGCTAGTCCGTTATCAGGGCTGCGTCACTGCTGGCGACCCGGTTGAATGGGGTAAAAAG  
CCATTGCAATTAAGAAAGCTGGGAATGATCCACAGAGTAAACGCTGGTTTCTCTGACAATCTGGATTTACGCAAA  
GCGGTTGAGCTATACCGCCACTTCTCTTCCGCGTGAATTAAGTTTGGTATTGGGACTCGCCTGACCTGCGATATCCC  
CCAGGTAAACCCCTGAATATTGTCATTAAAGTTGGTAGAGTGTAAACGGTAAACCGGTGGCGAAACTTTCTGACAGCCCTG  
GCAAAACTATCTGCCATGATAAAGCGTTTGTTCGGGCGTGGCGAAAGCGTTCGACCTTCCGCATATTAAGAAAGCCAGT  
TAA

>Cluster\_28662

ATGGCATTAAACCGATATCAAAGTAAAAACCGCAAAACCCAAAGACAAACCCCTATAAGCTTGCTGATGGCGGCGGTATGTA  
TCTACTGATTAACACTAATGGTTCTAAATCTGGCGCATGAAGTACCGCTTTGCTGGTAAAGAAAAGATGCTTTCTATTG  
GCGTATACCCCGATGCGTTAGCCGATGCTCGCGGAAACCGCAGTGAAGCCAGGAAACTCCCTCGCTGCTGGAGCGAT  
CCAGGGGAGGCAAAAAGGAAGAAAAATCGCGCAGCAAAATGAGTCTGAAAAATACGTTTCGAGGCTATTGCTCGCAATG  
GCACCAAGTCAAAGCTGATCGGTGGTCAATACGCTATCGTATGAAATCATTTGATAACCTTTGAAAAAGACATTTTCCCT  
ACATGGCAAGCGCCCTATGCGGAAATCAAACCAATGGAGTTACTGGAAGCACTACGTAATAATGGAACCGTGGAGCT  
CTGGAGAAAATGCGCAAGTTCGCGCAGCCTGTGGTGGAGTGTTCGCTATGCAATTTGTTACTGGCCGGCAGACTATAA  
CCCAGCCCCGATCTTGCCAGTGTCTTAGCTACACGAAAAAGTACATTTTCCCTTTCTTACTGCTAATGAACCTCCCC  
ACTTCTCAACGATCTGGCGGTTATACCGGAAGTATAATCACTAAGACAGCTACTCAGATCATTTATGTTAAACCGCGTA  
CGAACACAAGAAGTGCAGTTTGCAGCTGGGAAGATATCGATTTGAGACAAAATTTGGGAGATCCCGGCAGAAGTAAT  
GAAGATGAAGCGACTCATATTGTGCGCTCTCTGAGCAGGTCATTTATGCTATTTAAGCAGCTGAACCAATCTCAAAAC  
ATCATCCCTAGTCTTTATCGGTAGAAATGATCCCGCAAAACCAATTAGTAAGGAAAGCATTAACCAAGTAATGAATTA  
CTTGGATATAAGGGAAGACTCACAGGGCAGGTTTTCAGACACACCATGAGTACAATTTGCTGATGAACAAGGCTTAAATTC  
CGCTGGATTGAAATGCAGTTAGCTCATGTGGATAAAAATCCATCAGGGGTACTATAATCATGCCCCGTATCTCGATG  
GCCCGCTGAAATGATGCAATGGTACGCTGATTACATTGATTCACTCTCCAGCCGGGAAAGTTAA

>Cluster\_40769

ATGAGTGAATCGTTTTTCATGGTGGCCGTTTACGGAAGTACCGACCTGGTAAACAGCGATTAATGATGTTGATTCCAG  
TGTATCGGTATCGTGGCAACCGCGGATGATGCGGATGCGGAGTGTTCGCGTGAACAAAGCCACACTGCTGACCCGCG  
TCAATGACGCTGCTGGAAAAATGCGGAACAACGGGGACGCTTTATCGTGGCTTAAAGCCATCGCAGACCAGGTGAGCACA  
AAGGTGATCGTCTGCGTGGCTGAACACAAAGAAAGAGCGGAAAGACGCAAGGATCAACTGGTTATCGGTGTTCTGA  
GGATGACGGCAGCTATACGGGATGATGCGCTGCTTGTGCGAGCAGGATGAAAGCATCGGATACCGTCCGCGTATTC  
TGGCCGCGGAGCTGGACACGGAGGCGTAAACAAAATCCCTGTGCGTATTGCGGGTAAACTGCGCCGTTTGTGTAT  
GCCTCATGTACGGCTGCAACACGATGGCTGAGGCGATTACCTACCGCAGAAATCAACGAGCGTGAGGTGATGCTCTT  
ATGGCCGGACTTTCATCGCTACAACCCGAAAAGTGGCAAAAACGAAACGTTCCCGCGCTGCTATGCGTGGCCCTTC  
GTGCTACATTTGACATGAGCAGGCTGGCACAATCGCTGTCACACTGTCGCTTAAATATGCTGGGATGTCAGG  
CATGTGTTTTTGGTGTGAGGCGAAGCAGTGTGCAACAGCCTCAACAACAAAGAAATCAGCACCATTATTCGTCG  
CAACGGGTTCCGCTTCTGGGGCAACCGCACACCGGAAACGACGCTTACATCTTTGAGGTGTATACCCGAACCGCACAG  
TGCTGGCTGATTCATTTGCGGAAGCGCAGTTTGAACCACTCGACAGTCCACTGACGCTGCGAACGTAAGAGATGTTATC  
AGTGGCACTAGGGCAAAATCGGATTCATGCTTACTGCGGGAACTGATTGGCGCGGAGTGTGTTGATGACATCGTGA  
TAACAGCACACGAAATTTACGTCAGGGGCGGCTGCGTATTCGCTACAAATATACGCTGTTCCCGCTTGAAGACATGG  
AGCTTTACAGTCTTTACTGATGAATTTTGTGTCGCCATTTGCGGTGCTGGGAGGTGCTTGA

>Cluster\_32858

ATGTTTGTAGAAGCATTGAAACGCCAGAACCCGCGCTGATTTCCGCCACTAAGTTTGTGGCAGCAGGGCAAGATCGC  
CCCCGACAGTTGGGTGATCGACGTTGATCAAGTTCTGGAAAACGGCAAGCGGCTGATTGAGACGGCGCGGCTTTACGGCA  
TTGAACCTGATCTGATGACCAACAATTCGCTGTAATCCGTTGCTGGCAGAAAACTGCTGGCTCTGGGCTACAGCGCC  
ATTGTGGCGGTGGATTACAAAGAGGCGCGAGTCACTGCGCGCGCGGTTTCCCGGTAGCGCATCAGGGGCATCTGGTACA  
AATCCCTTGTCTATCGGCTCTGACGCGCTTGAACAGGAAACCGACGTCATCACTGTGTTTACCCCTCGACAAAGCGCGG  
AAATTTCTGCGGCAGCGGTGAAGACCGGACGTTTGCAGTCTGTGCTGCTCAAAGTTTATAGCGACGATGATTTCTTTAT  
CCGGGGCAGGAGCGGTTTTGTACAGCATTGCTGACGAGGTGGTTGCTGAAATCCAGAATCTGCCGGGCTACATTT  
GGCGGACTTACCAATTTCCCTTGCCTTGGGATGAGGCTGCCGGGAAAGTTTGGCCGACCCGAATCTTCAACGCG  
TGGTACAAGCACGGGATCAACTGGCAGAAATCTGGTATTGCGATTGAGTAACTGAAACGCGCTTTCAGCGACCGCTGACG  
TCGCTGCCATTTGCTGGCGAATACGGTGTGACTCATACCGAACCCGCTATGCGCTGACGGGTACTATTCGGCAAAATCA  
ACAGGGCGATCAGCCTGAACGTAATCGCGATGCTCTGGTTAAGTGAATCTCCATCATTTCCGTTGGCGACAGCTACTGCT  
ACGGCGCGGTTACTACCGTCTGTTGTCACGCGCAACATCGCTGGTGTTCACGCCAGAAAATCAAGAAATTACTGAAACA  
TATCTCAACCGCGTTGATGACAGCAGTATCGACTACACCCGCTGCGCTGGCAGGCGAGCATCCGGTAAGCAGTGCAGTGT  
GCTCTGTTTTTCGACGCGATTTTTATCACCCGTAGCGATGTGGTGTGGTGTCCGGTATTCACCGTGGCGAACAGAAA  
TAGTTGGTCTTATGACAGCCTCGGCAACCCCTCGGAGGCGTAA

>Cluster\_22922

ATGAGCGCGGAAGCCAAAATTCACCGTTTCGCGCATTTGCGGCTTTGCTACTGGTTTCGCTATGGCTGGCAGGCTGTTT  
TGACACTTCAAATCCACCGGCACCGGTCAGCTCCGTTAATGGCAATGCGCCTACAAAATACCAATCTGGTATGTTGATTA  
CGCCGCGCGGAAAATGGGGACGACGCTACAGCGCAGCAACCGCAAATTCAGCCGTTACAGCAGCCAAATTCAGGCT  
ACTCAACAACCGCAAAATCCAGCCTGTGTCAGCAGTACGCTCAGCAGCCGCTACAGATGGAAAACGGACGAATCTGCTACA  
CCGTCAGTATGGGAACATTCGAAAGGCGATTATAGCGCAGTACATACCCGTGAAAAAAGGCGACACGCTTTTCTATA  
TCGCTGGATTACTGGCAACGATTTCCGTTGACCTGCTCAGCGCAACAATATTAGGCACCATACGCGCTGAACGCTCGGT  
CAGACCTTACAGTGGGTAATGCTTCCGTTACGCCAATCAGCGCGGAAATGCCATTACCCAGGCGCAGCAGCAGAGCA  
AGGATTTGTGATCAAGCTGCAACAAAATTCACCGTTTCCGCTGTTGCTGCCAACCAGCAATTACGATTTCTGAGTCTCCG  
GTGAACAGAGTGTAAACAAAATGTTGCCGAACAATAAGCCAATGCGACCAGGTCACAGCGCTGTAACGGTACCAACA  
GCAAGCACAAACCGAGCGGCTGTCAGCAGTACATCAACCACTGACGCTTATCTCCACTGGCGCTGGCCGACTGAGGGCAA  
AGTATCGAAACCTTTGGCGCTTCTGAGGGGGCAACAAGGGGATGATATCGCAGGCGCAAAAGGACAGGCAATTTATCG  
CACCCGACAGTGGCGCGTTGTTTTATGCGCGTAACCGCTGCGCGGCTACGGTAAATCTGATTAATCAACATAATGAT  
GATTACTGAGTGCCTACGCCATAACGACACAATGCTGGTCCGGGAACAACAAGAGTGAAGCGGGGCAAAAATAGC  
AACCATGGGTAGCACCGGAACAGTTCAACACGCTTGCATTTTGAATTCGTTACAAGGGGAAATCCGTAAACCCGCTGC  
GTTATTTGCCGACGGATAA

>Cluster\_63655

ATGGCTGGAATACCCCTGACCGGTTGATCCCGACTATTTATACCGCCCTGGATGTTGATCCCGTGGCAGGTTAGGTTT

TATCCCTGCGGTAGCAAAAAACGCAAAAGCTGACGCCGACGCAAAAGATCAGACGGTAACCGGCCAGTTGCGCCTGAGG  
CGAAAAACCGAAGATATCGTACCGGGGCCGTGAGCTCCGAATACCGGTGATCAAAATATTTGGCACTGTTGATGTAAAAAT  
ACTAAATCCAAAATGGCACCGGTTAAATGGAATGGTGAAGAACAACCTGGCTCTTGGCCCTCAGGGACTTACAACACCAT  
TCTGGCTGATCAGTTCAAGCAGGCTTTTCGCGCCCTTGCAGGAGGTTGAGGCTGATCTGGTGCCTGTATATTTCCGGTG  
CTTCCCGCGATGTTCTTATTTCCATTGATACTGGTTCCGGGAGTATTTCTGCAGGTCAGATGTTTACGTTCCGCTGGT  
GTTCTGGAGGATAACGGCGCACCGCATCTGCAGATGGTGCTTGGCTCCACTGCCATTGCTAAATTTGCGCGGAAA  
ACAGTCTGTATTGTTAAAGTGAATGAATCCGGCACTGAACAGTACTGCGTGAAGGCGTGTGGGGCGTCTGGAGGGAT  
TCAATATTTACAGTTCCGGCAGGTGTAAACGAGCGCAAAAGGTTGCTGCAACTGGTTATCTCGTGAATGGAGAGAAAAA  
GAAGCGATGTTCTTATTTCCATTGATACTGGTTCCGGGAGTATTTCTGCAGGTCAGATGTTTACGTTCCGCTGGT  
GAATCAGTATGTTGTGGCAGCAGCGACCACTGATTACTTGCAGCGCCCGACTGCGTCAGGATCTGGCCGATG  
ATACTGCCATCACAGTTGTTGGGCTTTACCGCAAAATATGGCGTTGATCGCAACGCGTTTCTGCTGCCATCCCGTACT  
CCGGCAATGCCGAAGGTGGCGATAATGCTGATGATGAATGTTACGGACCCGATTTACAGGATACGTTCCAGAT  
TGCATGATCGTCACTATCGCCAGGTGCGCTATGAAGTTGGACTGGCATGGGGTGTTCATCAGTGAAGCCGGCACATG  
GTTGCTGATTCTTGGTTAA

>Cluster\_41946

ATGGGGTTATGGGCAATTTGCCAATGGCGATTGGTTGCGCAATTTCCCTTACCGGCTTTACCGCATTAGTCTGGTACT  
CGGCAACAAAATTAGCGTTCCTGTCGCACTGGGCGCAGTCTTTCTGATGGCGTCATCTTACCGCTATTTCCGTAACCG  
GTGTGCGTACCTGGATCTTACGTAATTTGCCGATGGGGATCGCTCACGGTACAGGTATCGGATACGGCCTGTTCTGCTG  
CTGATTGCTGCTAACCGTGTGGGAATGGTTATCAAAAACCCGATTGAAGGCTTCCAGTGGCGCTCGGTGCGTTTACCTC  
CTTCCCGGTGATGATGAGTTACTGGGGTGGCGTCACTTCCGCTGGAAGTGGCGGCTACCGCGGATCTTTGT  
TGGTGATTATTGCAATTTTCGATCATCGGCTTAACTTTTACCCAGCGGTGAAGTACCAGGCTTGGTGCAATGCCAAGC  
CTGACTGGCGAAGATGGTAAGTCTCTGATTTTACGCTCGATAATATGGGCGCACTCCAGCAACTGTACTTCCGAGTGT  
ACTGGCATTGGTGTGATGACCGCAGTGTTCGACGCCACTGGCACCATCGTGGCGTCCGCGGTCAGGCGAATTTGTTGGATA  
AAGACAACAGATCATCAACGGCGCAAGCCCTGACCACTGACTAGTAAAGTCAATATTTCTCGGCTGGTGGCGCA  
GCGCCCGCGGCTTTATATCGAATCAGCGCAGGAACCGCGCGGGGGAAAAACCGGTTAAACCGCAACCGTGGTTGG  
TGTGTTGTTCCGTGATGATCTGTTTATCACCGTATCGTTTCTGATCCCGGTTATGCCACAGCTCCCGCACTGATGT  
ACGTGGGTTGCTGATGTTAAGCAACGCTCTCGAAGCTGGATTTCAACGATTTTATGACGCAATGGCTGGCCTGGTGTGT  
GCCGTGTTCACTCGTTGACTTGAATATCGTTTACCGGATTAATGCTGGGCTTTGTAACACTGGTGGGTCGCGTCTT  
TGCGCGCAATGGCAAAAGCTGAATATTTGGTACGGTATCATTACTGCCGCACTGGTCCGCTTTTACGCGGTTGGTGGG  
CAATCTAA

>Cluster\_22621

ATGTCGTGCCCGTTATTAGAGCTGACACAACAGCTTATTCGCCGCCCTTCCCTGAGTCTGATGACGCAGGATGCCAGGC  
TTTGTGATTGAACGTTTGCAGGCGATCGGTTTTACCGTTGAACGCATGGACTTTGCCGATACGCAGAATTTTGGGCAT  
GGCGTGGCGAGGTGAAACGTTAGCCTTTGCCGGGCATACCGAGTGGTGGCGCTGGCGACGCCGACCGTTGGATCAAT  
CCGCGCTTGAACCAACCATTCGTGACGGCATGTTATTTCCGGCGCGTGGCGCAGATGAAAGGCTCGCTGGCGCGGAT  
GGTGCATGGCGCAGAACGCTTTTGCACAAACATCCCAACCATACGGGGCGCATGGCATTTCTGATCACCTGATGAAG  
AAGCTAGTGCCCAATGGTACGGTAAAAGTCGTGAAGCGTTAATGGCGCGTAAAGAGCGTCTCGATTACTGCTGGTT  
GGCGAACCGTTCGAGTATCGAAGTGGTAGGTGATGTTGTTGAAATGGTGGTGGCGGATCGTTAACCTGCAACCTTACCAT  
TCATGGCGTTACGGGCGATGTTGCTTACCACATCTGGCTGACAACTCCGGTACATCGCGCAGCACTTCAATTAATGAA  
TAGTGGCTATTGAGTGGGATCAGGGTAAAGTCTTTCCGGCGCAGTATGAGATTGCCAATATTCAGGCGGAAACG  
GGCAGTAAACAGCTTATTCAGGTGAACGTTTGTGCGATTAACTTCCGCTTATGACCCGAACTGACGGATGAGATGAT  
CAAAGCGCAGGTGCTTGCCTGCTTGA AAAACATCAACTGCGCTATACGGTGGATGGTGGCTTTCCGGCGCAGCACTTT  
TGACCGCGCGGCTTAAACTGGTGGATCGGTCGTTAACCGGTTGAGCAGTATAATGAAATTAACCGCAGCTACGACC  
ACAGGCGGAACGTCGACGGCGCTTTATTTGCCCGATGGGGCGCAGGTGGTGAACCTGGGCGGCTCAATGCCACGAT  
TCATAAAATTAATGAATGTTGAACGCTGCCGACTGCAGTACTTGGCCGATGATATCAACGATCATGGAACAGCTCG  
TCGCCTGA

>Cluster\_35356

ATGTATAGCTCACATCAGAAACCTACACCATCAGATATTGGAGCGCTGCCAACGACTGGAGGGACTGTTTCAGGTCCGTT  
GTCGTGTTACTGGTGGGTTCACTGGGGCACTGAAGGGGAACGCCGATACCGCGACGAAACTTGGCGCAGTCCCAAAAATTA  
ACGGTGTAAAGTTTGATGGCTCGGCGGATATTAACCTCACGCCGAAATATTTGGTGCATTTGCCCGAGTTCGACGGGG  
GCTTATGCGGATTCGGATGGAGCCGTTCCCTGGAAATGCCGAATCAGGCGCTTACAATGTCACCCGCTTGGCGCAGCTA  
TATTCTGGTTAATTTCTATACCGGAGTCGGAAGTTGCCGGACCTGCAGATGAAGGGCATTACAGAAATCGTGGTCTGT  
TCTACCGTCTTCAAGAGACGGTTATGGTTTGGAGGAAGACTGGCGAAGTTTATACCTCGAAAAATCTTCCACCAGAA  
AGCTAACCCAGTCCGGCGACCAATCCCGTGGCCTCAGATACCGTTCGCTGTTATGCCCTGATGACGGGCGCAGACTTT  
TGACAAAATCTGCTTACCGGAACTTGCAGTCTGCTTACCTGAGGCGTGCATCCCTGATATGCGTGGCTGGAGGATTAAG  
GCAACCTGCGCAGTGGTCCGCGCTATTGCTCAGGAACAGGACGGCATTAAATCGCACACCCACAGCGCCAGTGCATCC  
AGTACGGATTTGGGGACGAAACACGCTCGTCTGTTGATTTATGTTACTAAGTCTTCAATGCCACTGGTGACCATAACCA  
CAGCGAGGCACTATGGAAATACCGTACTCTCGGTTACTTACAGAGTATGATGCGGTAATTTCTATACAGCAAGTGGAG  
CATTTACACTGGGTGGCTTCCGCGCAGCCATGGATTTACGGGCTCTCAATTTACTTATGGTGTTCCTGTAAACTTTAAC  
GCTTCCAGAACCTGGTCTGGTGCACAAGCACTACAGGTAACCATGCGCACTCTGTTCCAATTTGGTGTCTATGGCAGCTC  
CGTTGCGATTGGTTACATGGACACACCATACCGTTAACGCTGCTGGTAAACCGGAAAAACCGTCAAAAACATCGCAT  
TTAACTATATTGTGAGGCTTGCATAA

>Cluster\_24180

ATGAAAAACAAATACCGCCATTATCGAGATTACCGTGCTCTGATTGCCACACCTTCAATAAGCGCCACGGAAGAGGC  
ACTCGATCAAAGCAATCGAGATTTAATCACTCTGCTGGCGGACTGGTTAAGGATTTAGGCTTCAATGTGGAAGTACAGC  
CTGTGCCAGGAACCTCGCAACAAATTAATATGCTGGCCAGTTGTCGGACAGGGGGCTGGCGGTTGTTGCTGGCGGGCAT  
ACCGATACGGTGCCATTTGATGACGGACGCTGGACGCGGATCCATTTACGTTGACGGAGCATGACGGCAAGCTTTACGG  
CTTAGGCACCGCCGACATGAAAGGCTTTTTCGCTTTATCCTTATGCTGCTACCGGATGTCGAGCTCAGCAAGCTTGCAA  
AACCGCTTACATTTGCGGACTGCCGATGAAGAAACAGTATGGCCGGAGCGGTTAATTTGCCGAACTACCGCCCTG  
CGCCCGGATTCGCGCATATTGGCGAGCAACGTCGCAACCGGATACGCGCATAAAGGTCATATCTTAAACCCAT  
CCGTATTCAGGGCAGTCCGGCCACTCCAGGATCCAGCACGGGAGTTAACGCTATCGAACTGATGCACGACGCCATAG  
GGCATATTTTGAATTTGCCGATTAACCTGAAAGAACGTTATCACTACGACGCTTTACCGTGCATACCTACGCTAAC  
CTCGGGCATATCCACGGCGGCGATGCATTAACCGTATTGCGCTGTTGTTGAGTTGATGAGTATGATATTCGTCGCTGCC  
AGGCATGACACTAATGAACTTAAACGTTTGTCTCAACGATGCAATGGCTCCAGTGGAGGCAACGCTGGCGGGTCCCTGA  
CGGTGACGAGCTGCATCCGCGGATCCCTGGCTATGAATGCCACCGAATCATCAACTGGTTGAGTGGTTGAGAAATTTG  
CTGGAGCAAGACCGAAGTGGTGAATTTACTGTACCGAAGCGCGTTTATTTCAACGTTATGCCCCGACGCTGGTTCTGGG  
GCTTGGCTCAATTAATCAGGCTCATCAGCTGATGAATATCTGGAGACGAGTTTATCAAGCCACCCCGCAACTGATCA  
CCCAGGTGATTTACCATTTTGTGTCGATTA

>Cluster\_28707

ATGCTTGAGACAAAAGCGATATCTGTCTACAACCTCAGGGCTAATAGCACTACGTTTATTTTCAGATATCAATCAATC  
TGAGCGGACTTCAACGCTGGATTACAATTGGTTAAATCCAGCGTTGCGTCAGTAAGTAAGGCTGATACTGGCATTTCAC  
CGGTACCCCGCGGGTCAATGATAGTAAACCCATCTGCTGCTGAAGATATTTCTGAGCAACTTTTGGCGGCATCAGT  
GGTGATGTTATTAGTCACTACTAGTGAGGAGAAATCACAGAGTAGTACACGAAGTACAACCTGGCTATCTTTATCTTCTCA  
GGTAAATAACGTTTACCTCAGCCATGATGATGACAGACTCTGTTTATCCCTGGATGCCTCAGCGCAGAGAGTTGCCA  
GTATGAAGAACTCCAACGAGATCTACACGGATGGACAAAATAAAGCGCTGGAAAATAAAGCGTGGAGTTAAAAAACAG  
CTTGAAGAAACAAGAAAGCTGAAGAGAAAGCACAATAAAGTAAATTTGTTGGTCAGGCTTTTGGTTGGTTAGGGGTTGC  
AGCAACTGCTATTGACAGTATTTTAAACCCAGCGCTTTTGGCTGTTGTTGCTATTAGTGAACAGCAATGGCACTGCAAA  
CTGCACTTGGATGTTATGGCGATAAAGCTCCGACGGCTTAAAAACAGCAGCGCAAGCTTTTGGCGGTCTATCTCTGGC  
GCAGGTATTCTGACAGCCGGCATTTGGCGGGGTGCTTCACTTATATCTAAAGTTGGCGATGTCGCTAACAAAGTTGGTTC  
AAACATCGTAAAAGCAGTCACTACGCTGGCCGACACTTTTGTGACAATGTTGCATCGAAAATTTTCGGCAGTGGCAATG  
GTTAACTACTTCTTCGCGCTCTATTGGTACAACCTGTGCTGAATAATGACGCAGCGTATTATAATGTGTTATCACAGGTT  
TCTGCTTTTGGCTGGAAAATTTAACTCGACAAAGTACTGACTTAAAGTCAAGTGCAGAGTGCAGGCGAGCTGGAAAAGCTAC  
TCTCGAGCTGCAAAACAGGCGAATTATATACAGAGTCTTCTCAGCTGATGTCTGATCTGCGCGAGTGAATAGCCGTA  
TTGTCAGCGGTTCGAGTTTAA

>Cluster\_48576

ATGTCATATTCAACGTTCCGTTTGGGTGCTAATGATGCAACCAAAGAGCCTATGTTCCCGGACAATCTGTCAACGTGGC  
ACGTTACGATCAGCAAAAATACCGTGATTTGAAAAGTTGATTGAACGTCAATGTCTTTCTTCTGGCGGCCGGAAGAAG  
TTGATATTTCGAGCGATCGTATCGACTTCAACACGAAGCTGCGGGACACGAACGTCAATTTTTCTGAGCAATCTCCGT  
TATCAACGTTACTCGATTCAGTTCAGGGACGTAGCCAAATGCAACGTTGCTGCCCTTATCTCTATTTCTGCACTGGA  
AACGTGGGTTGAAACATGGTCTTTCTCTGAGACTATCCATAGCCGAGCTACACCCACATTTATTCGTGGCATGGTGGACG  
ATCCGAGCATTTGTTTTGACGGTATTGTTACGGATGAAGAAATCATCAACCGAGCGATCAGTATCTCTGCTGAATATGAC  
AGGCTTTATGGGATGACCTGCGAGCGCCAGTCTGTTAGGTCAGAAAGGAGTTTGAACGCTGTTACGTAATAATGAAATGGCTG  
GGAGCAGCGCTTTCGATCGCCGTCAGCTTTCCGACGTTGGTGGTGCATTAATGCGCTTGGAGCCATCCGTTTCTGATAA  
GTTTTGCACTGACGTTTGGCTTTGGCGAACGGAAGTTGCTGAGGGTAACACCAAAATATGCGCTTTTATGCCCCGTGAT  
GAAGCTCTGCATTGCGAAGGAACGAACGCATGCTCCGTTTACGCTACCGGTCGCGAAGGTTTATTGTGAAAAGAGAT  
TGCTGCTGATGAAGAAAACGTCATTTACGACACCATGAAATCAGTCCGCGAACAAAGAAATGAACTGGGCGAGCTATCTCT  
TCAAAGACGGTTCGATGATTTGGTTAAACCGGATTTCAAACCTATGTAATAATCCGCAACATCGGCAATCGGCTATGAAT  
CGTCTTGGCTGAAGGCTTTATTTCCAGAGGTTACCACCGATCCGCTGGTCTGGATGAACAAGTGGTTGTTAACCGCAC  
ACTGCAAAATGCAACCACAAGAGGAGAGCAAAGCACATATCTGTTAGGTCAGATCGATCTTACCGTGGATAAAGCTTCTC  
TAAGCCAGTTTGTGACCTGTAA

>Cluster\_60351

ATGGGAATTAACGAAATCATCATGTACATCATGATGTTCTTTATGCTGATAGCTGCCGTAGACAGGATCCTGTGCGAGTT  
CGGCGGTTCTGCTCGTTTCCGCTAAGTTCCGTTAAAAGTATCGAAGGATCAGCGCGTCAAGTTCGAAGAGGCTTTATG  
CAATGGGCGCATGGGCTGGCGATGGTCGGTATGACCCGCTGGCACCAGGTTGCTGCTACGTTCTCGGCGCGGTAAT  
ATTCGCGTTTACGAAATGCTCGGCGCTAACCCATCGATGTTCCGCGGAACACTGCTGGCGTGGCATATGGCGGCTTCT  
CCTCGCAAAGAGCTGGCGGGCGGCGACGTAGCCGCTGGCTATACTCTGGGTTAATTTCTCGGTCGATGATGGGCCCCA  
CGATTTGTTTTTCCATTTCCGTTGGCGCTCGGCATTTATCGAACCTTCTGACCGTCTTATCTGGCGCTCGGCGTCTGGC  
GCAATTTGACCATTTCCGATTTGGTTGATTCGCTGGTGGTCTGTTGCTATGTACTCCGTTGTCAGATCAACCGCCAGCC  
GGTGAATTCACTTTCGCCCTGATCTCGATGAACATGATCCCGGTGATCATTGTTGCGATTTCTGGTGGCGCTGGGCTGA  
AATTCATCCCGGAAAATGATCAACGGCTTCCAGATCTTCGCAAAATTCCTCGTTGCAATGATCACCTCGGCTTGGC  
GCTGCGGTAGTGAATTTCTGCTTGGCTGGAACTGATCCCGGCTGTTGATCCATCTTTATGGCCCCGGCGATAAACC  
CGGTGAGGTGATGCGCGCCATTTGAAGTTATCGGTTCTAFTCTTCCGCTTCTGTTAGGGGCGTATCCGATGTTGCTG  
TGACTCGTGGTTTGAAAAACCGCTGATGAGCGTGGTAAAGTACTGAATATGAACAACATCGCGGACGCGCGATGGTG  
GCAACGCTTGCACAACATCCGATGTTCCGCGATGATGAAGCAGATGATACCGCGCAAGTCACTCAACTGCGCCTT  
CGCCGTTTCCGCTGCTTTCCGCCGCGGACCACTTAGGCTTCCGCGCTGCCAACATGAACCGCATGATCTTCCCGATGA  
TTGTCGGCAAGTTGATCGCGCGCTAACCGCGATTGGCGTGGCGATGATGCTGGTGGCAAAAAGAACGCGACCGCGACT  
AAAACCGAAGCGGAGGCACAATCGTGA

>Cluster\_42423

ATGGCGCGATTGTTGGTGTAGTATTGATAGCTTTGGCGTAGGGCAATGAAAGATGTCACGTTGGTGGCTCCGCGAGGA  
TGCCGGGGCAATACCTGTGGTCAACATCTGAGCCAGTTGCGCGATTTGCAGCTACCAACGCTGGAGACGCTGGGGCTAA  
TCAACGCATTTGGTTATGCGCTGGCGATATGCAGCCGTCAGACTCCGCAACCCTGGGCGTGGCAGAGCTGCAACATGAA  
GGTGGCGATACCTTTATGGGCGATCAGGAAATTTTAGGTACGCGCCGTTACCAGCGCTGCGGATGCCCTTTCTGATGAT  
GATTGACCGTTGAGCAGGCAATTTAGTTCCGCTGGCTGGCAGGTTGAGCGTCTGGCGATGATCTGCAATTTCTGTGGG  
TCAATCAGCGGTTGCGATTTGGCGATAAATCTCGAGCGGATTTAGGCCAAGTCTATAACATCACGCCAATCTCTCTGTG  
ATCTCTTTTACGACGCAATCAAAATGGTTCGATCTGTCGCTGAGCAGGTACAGGTCGGTTCGGTTCATTTACATTTGGTGG  
CCTGTTAACCGACAGCCAGTGCATCTCGATGCGCAGAAAGCAAGAAAGGGCGCTTTTATGGCATCAATGCGCGCGGTT  
CTGGCGCTATGCAACCGTTTCCAGGTTATGCACATGGCTACGGTGTGATGAAAAGTGCAGGTGGCGCAAAAACCTG  
TATGAAGCGGGCGTGCACACCGTCTGTTGGGTAAGGTGGCAGATATCGTCAGCAATCTTATGGCGTGGCTGGCAAAA  
CCTGGTGGATAGCCAGCGGATATGATATCACCTCAACGAATTTAACACCTATCCGACGGGCTTTATTTGTACCAATA  
TCCAGGAAACCGACTCGCTGGTTCATGCAAGACGCTGCGACGTTATGCGCAACGTTTGCAGGTCGTTGACCGTAACTT  
GCCCGCTTGTGGAGCGATGACCGAGATGATGCTGCTGATGGCGGATCACGGTACAGTACCGACCATGGCAAAA  
CAGCCACCATACCGCGAAGTGGTGGCAGTGTGGTTTATCAGCAAGGACTGGTGCCTACGACGCTCGGTGTGGCACCA  
CGCTTCTGATGTTGGGGTACCGTGTGTAATTTTCCGTTGCCACCGCCACAAAATGGTCTGCTTTTCTTTCTCTCC  
TTCCGGTTTTCAGGAGACTCCCTATGA

>Cluster\_62513

ATGACCGGATATCTAGAGATCAATACGCTGCAGGTGAACAGGGCTTAGGGTATATCTATCAGCCTCGTTTTGCGCTACT  
TAAGCTTCTACAGTGGCCAGAAGATACATCTGTTTGTGCGAAAAGATGATGACCTAGACTTTCGTCATTTCTAATGGTG  
TCAAAACACTGGCATCGTCAAAACAAAGGAGATGGGATCTTAAACCGCTGCTACCGATTTCTGGAAGTCACTC  
CGCATCTGGCTGGACCGCTATAAATCGTGTGTTAAACCGAAGCAAAATCTTCTGTTTCTGTTTACGACCGGAACTAT  
CTCAAACCGCTCGTCTGCAACATTTTTTAGTCAAGCGCAACAAAAGACGATAATTCAGTATCAATAACTCAACTCG  
CCAATACAGCTCTGGCTAGAAGCAAGTCAAAACTGATCAGGCAATAGCGGATGATTTCAATAAACTTACTGATGAGCA  
AAAGATGACTTCTTATCAGGATAAACATATTTGATGGCGGGCTCGCATGAAAGCTCCCAACAATTTATAAAACTCA  
GCACATCGCTATCATTAGACGCGATAAACCGAGACGCTATTTTTGAAACGACTTGAAGGGTGGTGAATAACATCATAGTGC  
ATCTACTAACAGGAAACGTAAGAGGCGATTTTTGGTTATGAGATTTCCGACAACTTGCAGATTTTCTGAAGAGTAT  
AAATCTGACAATCTGCGGATTAAGTTCAGAGAAAATGCCCGTTGGAGAAAATCGATGCTATGAATGATCAACAGGCTT  
GTTGTGCACTGCTGTAATAGGATTTCTCTAATCGAATCCGAAATGCGATTTCTGACTACTACCGAGCAATTTGAG  
AGCGTCTTTCATGGGCTCGTGAACCTTTTGGTTACAGGAGAGATAGAAGATTTATGAAGACCGCTTGTGATGAATGG  
AGTCTGATAAAGACGCTGTTTTTGAAGAATTAGATGAAAATTCAGCTGACGAAAGTACTTATTACTGCGGGAAAAGCAAT

GTATCAATGGGCGGATCTTGAAAGTGGTAATATTTACTCATTGCGTATCCGAGAACGAGTGACTGAGCCTTATGTAGTTC  
GAGGAGGATTTTCACATCCTTGCGAACAGTAGACCCTACCCAAAATTTTCTGGCATCCCCACTTCTAAATAGAGTTGGT  
CAATGTTGGGAGCCCAAGCATGA

>Cluster\_28915

ATGCGTAAAAAAGAGAACTCTGAATACGGCATTGAGGATGCGTATTGCCATGATTTTGGCTGGGATTTGCCGTCACACC  
TGFACTGTTGTATCCTCAAGCCTCGGCAATCAACTTTCCAGCAGCAGTTTAAATAGCGTCGTATTGTTAGGCGGCGTCA  
TTCTGACCTTACTTTTACGCCATCACCATTAGCGTGGGAGAAAAAGCCGCTGCCAACGTATGGCATTGTGAAATATTCC  
TTTGGCGAAAAAGGGCCATCGCCATTAACATTTTGTATGGCGATAAGTCTGTTCCGGCTGGATTGCCGTTACCGCCAATAT  
GTTTGGTCAATTCGGTACATGACTTACTGGCTCAACATGGACTGGAAAGTCCACTGGCACTGTTAGTGGCGGCTGGCTGTG  
TCATTTTTGTGCGCTCTACGGCATTGGCTTTACCGTTCTGGGAAAAATTTGCCAGGTTGCCGTGCCGGTTATCGCGCTG  
GTGCTGTGTACATCCTCTATGTGGCAACCATAACCGAAGTGGCAGTACCAGCGGCGATTTGTGGAGATGAATACAGGTGT  
CGCCGTTTCCACCGTGTGGCACCATTATGTGTGGTGGCACACTGCCTGATTTCCGGTAGTTTGTGCATAAACC  
AACATGCGCTGATTTGGCGCAGGCGTACCTTTCTGGTTGCCACTCCCTCTGCTCTACTGGCGGGTGCACACCGCC  
ATTAGTGGTCAGGATCTTTACTGGGTGCGATGGCGGTTATTCGGTGGGTTCTGCCTGCCGCGCTGTTGTGATTTTCGC  
CTGCGTCAACCGGTAACGCCGGGCAATATGTTCCAGGGCAGCTGGTGGTTCCACACTGCTTACCGCTTTCCAAATGGC  
AGATTACCGTGGCGTGGGTATCCCTTTCCGCCATCGTAGGCAGTATGGATATTATGGCGTGGTTATTTCCGTTTCTGCTG  
TTCTCGGATCGCCACCGCACCCTGGTGGCAATTTATATCGCTGACTTTTTCTTTATCGCCGTAATGGCTCAAGA  
GTCAGTGTAGCCAGGAGTACAGATTAAGTGTGACATTCGCAGCATGGATCATAGGCGCAGCGGTTGGCTTTATGA  
CCGTAAGAGGCTTATTCACCTGACGACGATCCCTTCGGTAGACTCGATTTCTGGTGGCATGATCGCGTATGCGATTCTC  
AGTCGGCAAGTCAACCGCTAA

>Cluster\_28745

ATGTTAAAGTGGTGGCTTTCCCTCTGAAACATGCCACGGGTAACACCATGAGTGAATTTATGCTGAAAACCGGGCGC  
GGATGCCATCACCCGACCGAACTGGTACGCCGTTTCTCAGTGGCGTTTTCGCTCGCCTGTCTGATTAATCGTTGAGTTT  
TGCTGTCTGCTTCTTTGACGCCAATGGCCAGGATTTAGGCAATTCGGAAGGGTTGCCGGCCAAATCGGTGACCGTAACC  
GCCTTTGTGGCGATGTTTGTAGTTTGTATTATACCAGACCATTACAGCCACTGACCGCCGTACGTTGTCTATTCTGTT  
CGCCGTTTTGCTGACGCTTTCTGTTGCTGGTTTCCCTTTGCCAACTCATTAGTCTGTCTGTTAATCGGTGCGCCTGT  
TGGGGTGGCGCTGGGCGGGTCTGGGCGATATCGGCGTGCCTGACCATGCGTCTGGTACCGCGCGTACGGTGGCGAAG  
CGCTGTGCGGTGATTTTGGCGCGGTTTCTATTGCGCTAGGTATGCTGCGCGTGGGAGTTTGTAGGCGAGTTTAT  
CGGTTGGCGCAATGTCTTTAATGCGGCGGCGGCGATGGGTGTGCTGTGATTTTCTGGATTATCAAATCACTGCCCTCGC  
TGCCAGGTGAACCTTCGCATCAGAAACAAATACTTTCCGCTTATTACACCGTCCGGGAGTATGGCCGGGATGATCGCC  
ATCTTTATGTCCTTTGCCGGACAGTTGCTTTTTTACCTTATATTCGCCAGTGTATATGAATCTGGCGGGATTCGGTGT  
TGATGGCTTAACCCCTGGTCTGCTGAGTTTTGGTATCGCCAGCTTTGCTGGGACATCGCTTTCCGCTTATTCTCAAAC  
GTTCCGGTGAACCTGGCCTTAGCGGGCGCACCCTTTGTGCTCGCCCTGAGCGCGCTGGTACTGACGCTGTGGGGAAGCGAT  
AAAATTTGTTGCTACTGGTGTGGCGATTATCTGGGGCTGACCTTTGCTTAAATCCCGTTGGCTGGTCAACGTGGATCAC  
TCGCTCACTGGCGATCAGGCAGAAAAGCCGGATCTATTCAGGTGGCGGTTATTCAGCTTGCCAATACCTGCGGTGGCG  
CAATCGGGCGTTATGCGTTGGATAAACATTTGGTCTGACTTTCCCGCTGATGTTGTCGGCACATGATGTTGCTGACTGCA  
TTGTTGGTAACTGCAAGGTGAAAATGAAGAAATCTCTGA

>Cluster\_41400

ATGACGAACTATCGCGTTGAGAGTAGCAGCGGACGGGCGCGCAAGATGAGGCTCGCATTAATGGGACCTGCGTTTCAT  
TGCGGCGATTGGTTATATCGATCCCGTAACCTTTGCGACCAATATTCAGCGGGTGCAGCTTCGGCTATCAGTTATTGT  
GGGTTGTCTGTTGGGCTAACCTGATGGCGATGCTGATTCAAATCCTCTCGGCCAACTGGGGATTGCCACCGTAAAAAT  
CTGGCGGAGCAGATTCGCGATCACTACCCGCGTCCCCTGCTGTGGTTCTATTGGGTTCCAGGCAGAAAATATTGCGATGGC  
AACCGACCTTCGGGAATTTATTTGGTGGCGGATCGGTTTTAAACTCATTCTGGTGTTCGTTGTTGCGGGCGGCTG  
TGACGGGATCGCGACTTTCTTTATTTAATGCTGCAACGTCGCGGGCAAAAACCGCTGGAGAAAAGTATGGCGGGTTA  
CTGTTGTTTGGTGGCGGCTTACATTTGTCAGTTGATTTTCTCCAGCTAACCTGGCGCAGCTGGGTAAGGAATGTT  
AATCCGAGTTTACTACTTCGGAGGCGGCTTCTTGGCGCGGGGCTGTTAGGGGCGACGATATGCCGATGTGATTT  
ATTTGCACTTTCGCTCACTCAGCATTTACATGTTGGTTTCGCGTCAACACGTTATTCTGCCACCAATGGGATGGGCT  
ATCGCTATGACTATTGCCGTTTTGTCAATCTGGCGATGATGGCTACGGCTGCGGGCGGCTTCCACTTTTCCGGTCAAC  
TGGCGTTGCCGATCTTATGATGAGGCTTATCTGACGCTGCACCGTTGTTAAGCCATGCTGCGGCACCGTCTTTGGTTAA  
GCTTGGTTGCTGCGGGACTGCTCAACGGTTGTGGGACACTGGCGGGCAGGTAGTATGCAGGGCTTCATTGCTTTC  
CATATCCGCTGTGGGTGCGTCTGACAGTACCATGTTCCCGCTATTATTGTTGATTCGATGGGATGATGCGGACAG  
GATTTGTTATGAGTACGTTGTTAAGTTTTGGTATCGCCCTGGCGCTGGTTCCTGCTGATTTTACCAGTGACA  
GCAAGTTGATGGGCGATCTGGTGAACAGCAACCGGTAACAGACAGGCTGGGTGATGTTAGTGTCTGGTGGCGCTG  
AATATCTGGTTGTTGGTGGGACGGCGCTGGGATTTGAT

>Cluster\_225

ATGCTGGATAAACAACTATCCCTTAAAGAGGCTTAAACCTTCTTTTACAGCAAGTCCCGTTAAAAATCTCTCTAT  
CGAGGAAATCCCTATAGAAAGAGCCTATTTTAGGGTCTCTGCAGAAAGACATTTTCTCCTGAAAGACCTCCCTGGGTTTA  
GACGTTCTACGGTAGATGTTTGGCGTAAGATCAAGACACTTTGGGCTAAGGATACCATGCCTACCTACCTATG  
GTAAAAGCGAGGTGTTGATGGGAGAAAGCCCTCTTTTGGAGTTAAACCCAGGAGAGGAGCTTATATACCTACCGGTTG  
GATGCTTCTAAGGGAGCAGATGCGGTTGTGATGGTAGAACATGTAACAGTAGTATCCCTCAGACCTGATAGAGGTTTTAA  
AACAGTAGGTCCTTTAGAAAAGCTTATCTTGGAAAGTGAAGATATTAAAAAAGGAGAGCTTGTATCCTTGCAGGAACC  
AACTTAAACCTCATATATAGGAGGCTTTCAGGGTTAGGCTTTACTAAAAATAAAGGTGGTCTCAAAACCTAAAGTAGG  
AATTATTTCTACCGGAGACGAGATCATCCTCATCATGAAAAGGTGCTCCTCGGGGAAAGTTAGAGACATAAACTCCTTTA  
CCTTAGCAGGAATGATTATAGAAAGGTTGGTATACCTGTTAAGTTTGGTATAGTTCAAGATGACTATCAAGCATAAAA  
GAGTGGTTACCAAGCCACCGTCAACACAGACATAGTCTTATTACCGTGGGACAGTGCAGGGACCAAGACGTAAC  
CGCTAAAATAATAGAAAGAACTTGGTCTTCCAGGGTTCTTTTTTATGGGTTCTATAAAAACAGGCAACCTGTTATCG  
CCGGGATATGCAACCATAAACCTGTATTTGGATTGCCAGGACATCCTGTAGCCGTATACATCTGCTTTTTTCTTTTTGTT  
AGACCTGTATGCAAGATGATGGGATATCCCTCAAAAACATAACCCCTTTTGTCAAAGCTAAAATGGCTAAAAGTAT  
CCAATCTCAAGCAGGTAGAATGACTTTATCCGGTTTTATCTTGGGAAAAAACGGAGAACTTTACGCCGCTCCCTCTTC  
TTTTCTAAATCAGGCTTATATGTCGTTGGTTAAAGCTGATGGATTGCTAATCATCCCTGATGACCTCTTGGAGTAGAA  
AAAGACGAAGAAGTAGAAATCTGCTTTTGTCTAA

>Cluster\_41149

ATGTTAACGAAAGATCTTTGATTAATTTTTGCGGCGTGAAGTTTCCCAACCGTCTGCTTTCTTCTCGCGGTTAGG  
CACTGCTATGAGATGTGCGCCAAAGCCTACGACACAGGTTGGGGCGGCTGGTGTAAAAACGATCGGTTTTTTTATCG  
CCAACGAAGTCTCGCCGCTTTTGTATCATCTGGTGAAGAAGATACCGGTTTTATCGGCTTCAAAAATATGGAGCAGATT  
GCTGAACATCCGTTGGAAGAGAACTTGGCCGCTGCGTGGCTGAAAGAAGATACCCGGACAAAGTATGATGCTGCTTC  
AATCATGGGCAAAAATGACGACCAATGGGAAGAGCTGGCGGCTGTTGTCGAAGAAGCTGGCGCGGATGATGATGAGTGA  
ACTTCTCTGTCGCCAAATGACTTCTCATGCGATGGGTAGCGATGTGCGGCAAGCCCGGAGCTGGTAGAAAAATATTGT  
CGGCGAGTAAACGTTGGTCCACGCTGCCAATGCTGGCGAAGATGACGCCGAATATTGGTATGATGTCGAAGTGGCGCT

GGCGCGAAGCGCGGCGCGCAGATGGCATGCGCGGATTAACACCGTTAAATCCATCACCAATATCGATCTTAATCAGA  
AAATTGGTATGCCATCGTTAACGGTAAATCGAGTATTTCCGGATATTCGGTAAAGCGGTAACCGCATCGCCCTACCC  
TTTATTCAGCAAAATGCGCACCCATCCAGAACTGCGCGATTTCCGGATCAGCGGTATCGCGCGCATGAAACCTGGGAAGA  
TGCGCGGAGTTTTATTTCTCGGTGACAGCGACTGCGAGGTGACACCGGCATATGAGTAGTCGGGTATCGGATAGTGG  
AAGATATGGCAAGCGGTTGTCTCGCATTAATCTCGCGGATCAAGGGTTGATTCTGTCAGGAGATGGTAGGTCTGGCGAAT  
CACAAATATGTCGCCGGCGGAAGATTTAGACCGCAGTTATATGTCATCCCCATATCAATCTTGATAAATGTGTGGCTG  
TGGACGCTGTATATTTCTGTACGACGGCGTACCAGGCGATGGAATGGAGCGAGAAAACCGCACACCGCATTTGTA  
ATACCGAGAAATGCGTGGGTTGTCTGCTTTGTGGTCAATGTCTGCCGGTAGGTTGTATGATCTGGGGAAAGTGAAGTTT  
AAGAAAGCGGAGAAACACCCGGTAACTGGTAA

>Cluster\_53484

ATGAAAAGCATTATGTTGGTTCGAAATTGGACAACCTACGCAGCGTTATGTTGCATCGCCAAATCTCAGTCTGAAACG  
TCTAACACCATCCAATTGCCAGGAGTTGTTATTTGACGATGATATGTTCCGTTGAGCGGGCAGGTGAAGAGCATGATATTT  
TCGCAATACCGTTCGCGCACCAAGGGATAGAAGTTCTGTTACTACTGATTTACTAACACAAACATTGGATCTCGCGAA  
GCCAAAAGCTGGTACTGGAAACACAAATATCAGATTACCGACTCGGCCCTACGTTTGTACTGACGTTGACCTGGCT  
TGCAGAGATGTCACACCGGGACCTGCTCGTCAATTAAGTGGTGGGCTGACTTATAGTGAAATTCGCGCTCAATAAAA  
ATATGGTGGTGTATACCCAGCATATAATGATTTCAATTAAGAGCGTTACCGAATCAATTTATTTACGCGTGTATACCTCA  
TGCTGGATTTATAACCGTTATCGATTAATCAATGCGCAAAACCTGCTCGCAACGTGAAACCAATAAATCTACCGCTAT  
TTATCGCTGGCACCCAAATTTGCTGGCGGCAATTTATTAATAATTTTCGGGACGAGAAATTAATTTATGACCAGCCA  
CGTTAGAAGGTGGTGTATGCTGGTGTGGTTCGGGGGCGCTGTTGATCGGCATGTCGTAACGCCACCAGCCACAAGGA  
ATCGAGTTCTTGTCTCAGGCAATTTTAACACTCGTCAGGCTGACGGGTAATCGCTGTGAGCTGCCFAAACCGCTC  
CTGTATGCACTTTGACACCGTTATGACTCATATCGATACTCGACACTTCTCGGTTATCCCGAAGTTGTGGCGCGGATG  
TTAATTTGCTGGACGCTAACACCTGACGGTCACGGCGGCTGAAACGTACTCAAGAAAGCACACTCCTCATGCTATCGAA  
AAAGCCCTCGGTATTTGACAGGTAACGTTTAATCACCACGGGGGTGATGCTTTGAGGCAGAACCGCAACAGTGAATGA  
CGCTAACAAATGTGCTACGCTTCGGCCGGGAGTGGTAGTGGGCTACGAGCGCAACATCTGGACTAACGAAAAATGACA  
AAGCAGGCATCACCGTTTACCATCCCGGTGATGAATAGGCGCGGACGTTGGCGGCACGTTGTCATGAGTTGCCCT  
TTGCATCGTGACGTTATCTAA

>Cluster\_45411

ATGCGTGAAGCCTTTATCTGTGACGGAATTCGTACGCCAATTTGGCGCTATGGTGGGGCATTATCAGGTGTTCCGGCTGA  
CGATCTGGCTGTATCCCTTTGCGGGAGCTGCTGGTGCAGAACCCCGCTCGATGCGGAGTGTATCGATGATGTGATCC  
TCCGCTGTCTAATCAGGCGGGAGAAGCAACCGTAACCTAGCCCGGATGGCGACGTTACTGGCGGGGTGCCGAGAGT  
GTTTCCGGCACAACCATTAACCGCTTGTGTTCCGGGCTGGACGACTGGGGTTCGGCGACGGGCGATTAAGCGGG  
CGATGGCGATTGGCTGATCGCTGGTGGTGGTCAATGTCTCGGGCACCCTTGTATGGGCAAGGCAACAGTGCAT  
TTTCTCGTCAGGCTGAGATGTTGATACCCTATTGGCTGGCGATTGTTGAACCGCTCATGGCTCAACAATTTGGAAT  
GACAGCATCCCGAAACGGCAGAGAATGTAGCTGAACCTTTAAATAATCGCGAGAAGATCAAGATAGTTTGGCTACG  
CAGTCAGCACTACCGCAAAGCGCAATCCTCAGGCAATTCCTGGCTGAGGAGATGTTCCGGTGTGTTGAAAAACAAGA  
AAGCGCTTATAACAGAAATACAACATGATGAGCATGTCGCCCGAAACCGACTGGAACAGTGAACAGTTCAGTGGT  
CCATTTGCTGCCAATGGGGTGTATACCGCAGGCAATGCTTCCGGGTGAAATGACGGAGCCGCTGCGTTGATTTGCCAG  
TGAACAGATGGCAGCAGCGCAAGGACTGACACCGCGGCGCGAATCTGAGCATTGGAACCGCGGGGTGGAACCGCGCC  
TGATGGGGCTTGGTCCGTTGCCAATCGCCGGGTCGTAACCGCGGGGCTGAGTATTCAGATATGGACGCTGAT  
GAACCTGAACGAAAGCGTTCCGGCCAGCGTTGGGTGACTACCGCAATTTGGGGTGCCTGATGATGCCCCACATGTTAA  
CCCCAACGGAGCGCTATCGCTTAGGCGCATCCGTTGGGAATGATGGTGGCCGCTTGCCTGGCTGCCAGCATGAGC  
TGATCGGGCGTAACGGTCTGTACGATTTGTGACCATGTCATCGGTGTCGGTCCAGGCATCGCCATGATTTCCGAGCGT  
GTTTGA

>Cluster\_32384

ATGGCTAAGAATATTCATTCAAAGTATCTTTGAAAAAGCAAAGATTACCAGGCAGACATGACTCGCTTCCCTGCGCGA  
TATGGTTGCTATTTCCAGTGAAAGCTGCGACGAGAAACCGGTAGTACATCGTATTAAGAAAGAGATGGAAAAAGTCCGGCT  
TCGATAAAGTTGAAATCGACCCAAATGGGCAACGTTCTCGGTTATATCGGCCACCGCCGCTCTGGTGGTAATGGACGCT  
CATATCGACACCGCTCGGCATTTGGCAACATCAAAAACCTGGGACTTCGATCCGTATGAAGGCATGGAAACCGACGAGCTGAT  
CGTGGTTCGCGGTAATCCGACCAGGAAGCGCGCATGGCATCTATGTTTATGCGCGTAAAATCATTAAGACCTCGGTC  
TGGAAAGATGAATATACCTGCTGGTTACCGTACTGTGCGAGGAAGAAGACTGCGACGGTCTGTGCTGGCAATACATTAT  
GAACAATCCGGCATTTCCCGCGAATTTGGTTCAGTACCAGCAACCGACTGCCAGTATACGGTGGTCAACCGGCTCG  
TATGAAATTCGATTGATGTTCAAGGTGTAGCTGCCAGGTTCCGCCACCAGAACGTTGGTATACGCCATTTTCAAAA  
TGGTCCAAATTTTCGGCAATTACAGGAAGTGTCTCAACGTTCTGGGCTATGACGAATTCCTCGCAAAGGTACCGTACT  
GTTTCCGAAATTTTCCACCTCCCAAGTCTGTGCGCTGTGCGAGTAGCTGCGCAGTTCATTTATGACCGCGCTCTCAC  
CTGGGGCGAAACATGGGAAGCGCGCTGGACGATCCGCGCTACTACCTGCAATACAGAAAGCTAACCGGTTGTTCCTA  
TGTAACAATACGACCGCCGCTTGGACTGGCTGGTTTACCAACCGAATGCTACTTCCGACCTGGAAGTGAAGAA  
GATCACTTCCAGTAAAGCACTGGTGAATGCTTATGAAGGGCTGTTTGGTAAAGCGCTGTCGTGATAAGTGGACCTT  
CTCGACTAATGGGTATCCATCATGGGTGCGCACGGCATCCGCTTTCGGCTGGTAAAGCAACCGGAAAGCG  
ACCGCCAAACGAAAAACCTGGAATCTCACCTGGTAACCTGTGCGCTATGTACGCTGCAATCCCATTAAGCTGGCTG  
GCAACCGAATAA

>Cluster\_25887

ATGGCGAGTAAGCAACTCTGGCGTGGCGTGGCATAACCGCGCAGGCAATGCGCAAGATGGGATGCTATGGGCAGAGAG  
CCGTGCTTTGCTGCTCATGGACTACAGCAACAGATGGTTACCCACTAAGCCTGAAGCGAATCGCCATCAATTTGCGGC  
AGTGGCGAGGAGATAAAAGCGCGGAAGTCAATCATCACTGGCGACGCTACTCAAGCGGGTTAACGCTTTCTGAAGGG  
CTGGCTGTCTGGCGGAACAGCATCCAGTAAGCAGTGGCAAGCGTTGCTGCAATCCTGCGCAGCATCTTGAACAGGG  
CGTTGCCTTTTCCTAATGCTTATACCTGGTTCAGAGGTTATTTCCGCGCTCTATCAGGCGATGATCCGCGGTTGAAAC  
TGACCGGTAAGCTGGATGAATGCTGTTGAACTGGCGCGTCAGCAAAAAGCCAGCGTCAGTTGACCGACAAAGTGAAA  
TCAGCGTTACGTTATCCATTATCAATTTAGCGATGGCAATCATGGTGGTGTGGCAATGCTGATTTGTTCTGCGCGA  
GTTTGGCGCTATCTATAAGACCTTAACTACCTCCGCTACCGCGCTAACGCAGGGGATCATGACGCTGGCAAGTTTTAGTG  
CGAATGGGGTGGTGTGGTGTATTCGGCTTTCTGCTGGGATAGCAATAAAGCTGCTGATGCGCCACCCAAACCG  
CTTATCGCACGGCAGAAATGCTGTTACGCATCCCGATTTAGGTTTCACTGATCGGGGACAAAACTCACGCAGATCTT  
TACGATTTGACGCTGACACAAAGTGACAGGCATTTCTTTTTTACAGGGCGTTGAGAGGCTCAGAGAAACATGCGCTGCC  
CGTACTGGGTGCAACTTCTGACACAAATCCAGCAGGATACGTAACGGTACCCATCTGGCTGGCGTAAAAATGCC  
GCTGAGTTTACCGCTGTTTTCGAAATAGTAGAAGCAGGAGGCAATCCGGCTCGTGGATCTCATGTTAGACAACT  
CGCCATCATATCGGGATAACAAATGGCGCTGGCGGATAACCTCGCAGCTTACTGGAACCGCGTTGCTGATCATAA  
CGGAGGAATATCGGTACGCTGGTGGTGGCAATGATCTGCCAATTTTCATTTAGGCGATGCGATGAGTGGAAATGGGA  
TAA

>Cluster\_40790

ATGTCATGGCAGCAATTAACACGCGCTGGTTGATTAATTTCCGGCACCATCCCTGCGGCTATCGCGCGGGTATTTCT

CTCCACTTACTACTTTGGCATCACTGGCACCTTTTGGGCTGTACGGGTGAATTTACCCGTTGGGGCGGTGAGTCTCTGC  
AGCTGTTTCGGCGTCCATGCTGAAGAGTGGGGTTATTTTTAAAAATATCCATCTGGAAGGATCGCCATTAACCCGCATCGAC  
GGCATGATGATCCTCGGTATGTTTGGCGGCTGCTTGTGTCAGCGCTGTGGGCCAACAAATGTCAAACACGATGCGCGG  
CAGCCGATTCGGCATTAATGCAGGCCATTTATGGCGGCATATTCGCCGGTTTTGGCGCGCGTCTGGCAATGGGGTGAAC  
TGGCGGCTTCTTTTACCGAATTCACAGTTCTCGCTGACCGCTGCTTCCATCGCCACTGCGCATTTGGTATGGTCAATG  
TTTGGCGCGCTTTACCTGCTGCCATCTTCCGTATTCCTGTGAAAATGCAGAAAATTTCTGCTGCCTCACCGTTGAC  
GCAAAAACCGGATCAGGCGCGGCTGCTTTTCTGCTCGGGATGCTGCTTTTTTCGGCATGCTGGGCTGGGCGGTGCTGA  
CGGCGATGAACAGCCAAAACGGGGTGGCAATGCTGTTTGGCGTGGCTTTGGTTTACTGATTGAACGTGCGCAAACT  
TGCTTTACTTTCGGGCTTCCGCGATATGTGGATCACCGGATACCACATATGGCGAAAAGCAATCATATCGGTATGGCGGT  
GAGTGCCATCGGGATCTTACGTTACGTACAGTTAGGCGTTGAACCCAAAATCATGTGGGCGGGACCAAACCGGTAATTG  
GTGTTTACTGTTTGGTTTGGCATGCTGCTGGCAGGCGGCTGCGAAAACCGGCTGGATGTACCAGCGGTTAGAAGGCCAG  
GTGCACTACTGGTGGGCGGCTGGGCAACGTGATCGGCTCAACGATTTCTGGCGTATTACTGGGATGATTTCCGCTCCGGC  
GCTGGCCACCGACTGGGCAAAAATCAACCTGCTGAAAACCTTTTGGCCGATGGGTGGCCTGCTGGTGAATTTGCTGCT  
TGTTTGTGCGCTGATGTTGATTATCGGCTGGGAAAACGCTTCTCCGCGTGGGCAACCGACTGCTAAGGAGATC  
GCATGA

>Cluster\_6908

ATGATTTTTTCCGTCGACAAAAGTGGGGCCGACTTTCGGTGTCTTCGCGTGAGGTAACGGTTTGGCGTGGCTTATCT  
CGACAGCGCCCGCAGTGGCGAGAAACCGAGCCAGGTGATTGACCGGAGGCGGAGTTTTATCGTATGGCTACGCGGCGG  
TGCATCGTGGTATTCATACCTTAAGCGCCAGGCGACCGAGAAAATGGAGAAGCTGCGCAAGCGGGCATCGCTGTTTTAT  
AATGCCCTTCGGCGGAAGAGCTGGTGTCTGCTCGCGGACGACGGAAGGATCAATCTGGTCCCAATAGCTGGGGCAA  
CAGCAACGTGCGGGCGGGGATAACATCATCATGATCAGTCAAGTGGAGCACCAGCTAACATTTGTTCCCTGGCAGATGCTTT  
GCGCACGCGTTGGCGCAGAGCTGCGTGTGATCCCGCTCAATCCGATGTTACGTTGCAACTGGAGACGCTGCCACGCTG  
TTTTGATGAGAAAATCTGCCCTGCTGGCAATTAATCATGCTCTCAACGTTGCTGGCACAGAAAATCCACTGGCGGAAATGAT  
CACGCTTGGCGCACCGACTGAGCAAAAAGTGTGTTGGTGGTGGCGCTCAGGCGGTGATGATCATCTCCGCTATCAGG  
CGTGGATTGCGACTTTTACGTTTCTCCGGCATAAACTGATGGCCCCACCGAATGGCATTTCTTTATGTGAAAGAA  
GCCTTGTGTCAGGAGATGCGCGCGTGGGAGGGGGCGTTCTATGATCGCCACCGTACGCTGAGTGAAGGCATACCTG  
GACCAAGCACCATTGGCGGTTTGAAGCCGGTACCCAAATACCGGGGGCATCATTTGGTCTTGGCGCGGCGCTGGAGTATG  
TTTTCGGCGCTGGGCTTAATAACATAGCCGAGTATGAACAGAACTGATGATGCAATATCGCTATCACAGCTGGAATCTGTA  
CCGGATCTCACTCTCTATGGCCCAAAAACAGGCTTGGCGTTATGCTTTTAACTCGGTAACACCACGCTATGATGT  
TGGCAGTTTCTCGATAAATACGGCATTTGCTGTGCGTACCGGACATCACTGCGCAATGCCATTGATGGCTATTAACAAG  
TCCTGCGATGTGTCGGGCGTGGTGGCCATGTATAACACCATGAAGAAGTGGATCGTCTGGTGACCGGCTGCAACGT  
ATTCACCGTTTGTGGGATAA

>Cluster\_23507

ATGGCAATGAACAAACAGCAATACACGCTCGACTTTCGATGAAGTATCCTGCCGATTTATGCTCCGGCAGAGTTTTAT  
TCCGGTAAAAGGTGAGGAGCCGAATCTGGGATCAACAGGCGAAGGATATGTCGATTTCCGGGGTGGCATTTGACAGTTA  
CGCGCTTGGCCATTTGCCATCTCGCTGCTGAAACCGTTAAAACCCAGGGCGAAAACCTGTGGCATATTAAGTAAAGTT  
TTCACCAATGAGCCGGCGTGGCTTGGCCGTAACCTGATTGAGGCAACGTTTGGCGAACCGGTGGTGTATTAAGACTC  
CGGCACGGAAAGCTAACGAAACCGCTTTAACTGGCACGCTTACGCTGTGTGCGTATAGCCGTTCAAAAACAAAA  
TTATTTGCTTCCATAACGCTTTTTCATGGTGTGCTGCTTACCGTTTTCGTTGGTGGGAGCCAAAATATTCGCGAGGC  
TTTTGGCCAAAACCGCAGACATCATCCACGTGCTTTTTAACGATCTTTCACGCAAGTAAAGCCGTGATGATGACCATAC  
CTGTGCGGTGGTGGTTGAGCCGATTACGGGCGAGGCGCGGCTGACGGCAGCAGCCAGAGTTTTTGCAGGGCTTGGCGG  
AGTGTGTGATCAGCATCAGGCATTTATGGTGTGTTGATGAAGTGCAGTGGGGATGGGCGGACCGGCGCATGTTGTGT  
TATATGCACTACTGCGTGGTGGGCGGATATCTGACCTCTGAAGAGCGCTAGGCGCGGCTTCCCGGTTAGCGGCTGCT  
GACCACGGCGGAGATTGCTTCCGCGTTTTCATCTGCTTTCACGGTTCACCTACGGCGGTAATCCTCTGGCTGTGCG  
TAGCGGGCGCGGCTTTGATATCATCAATACCCCTGAAGTGTGGAAGGATTTAGGCGAAAACGCCAGCGTTTTTGTGAC  
CATTTGCAGAAGATCGATCAGCAGTACGATGTTTGGCGATTTCCGCGTATGGGGCTGTTGATGGGCGCAGAGCTGAA  
ACCACAGTACAAAAGGTGCGGCGCGTGAATTTCTGTATGCGGTTGCGAGGGAAGGCGTAATGGTGTGATGATGCGGCGCTG  
ATGTGATGCGTTTTTGGCGCTGCTGGTGGTGGAAAGTGGGATATCGATGAAGGATGATCGTTTCCGCCACGCGGTG  
GCAAGGTGATTGGGGCGTAA

>Cluster\_52015

GTGTCGATCAAGAGCCCAAGCATACTTATTTAAGAGAAAAGATGGGATCGGATGTTTCAGATTTTGTTCCTAAAATACTT  
ACGCCATCTTTACCCTTACAAGTTGTGGAGAAAAGCACATCTACACGAGATCTGAATGAGGCGAGAAGATTCAGAAACC  
ATCTGTTATTAGAAATGGGAGGAACATAAAGCGGAAACATAATCTGATAACCCGAAAGGAGGTTACAAAAGCTATTGAA  
TCCTTACATTCAGAGGCAAGGGCCAATAAAAACAGCAGAAAGCGGTAACCGGTTATGATCGCTTCCATGCTT  
AATACGTGACGAATACCGCAATGCTACAGAGCGCTCTTCACTACTCAACATAACAGAAATCAGAAAGGCGGCTGAGC  
TATTTTTACAAGCATTCAGAAAGATGATATTCATATTGAGAAAATAGGAGACGGCTTGTAAACGATATCTTAGATGAC  
CAGAAGCAACGAGGAGCAGCCGATCAATCTGCTCAAACTGGCTTACATGCTTAGGATCGCTCTATGAATTTGCTAAACG  
CCGTTATGACGGAATACAGCAGTAACCTTTTACGGTCTAACTACGAGCAGTCCGACAAATCGAGAGTTATCAAC  
CGTTTACACCTGAACAAATGCAAAAAGCTACTTGTGATGACGAGCAGCCGAGATCAGAAAATATTAATTTAATGGGCTGTTT  
TCAGGATGAGATTAGACGAACTGGCAAGCCTGAAAAGTGCAGAGGTTGTAACGTGGAGGAATACGCTGTTTTTATAT  
CAGCAAGAGTAAGACTAAAGCAGGGATCAGACAGTTCGGATACATTCGAGACTATCGATTATTTGCGATGAATTTTAA  
ATCATAAATTATGGTGAATATTTGTTCCCTCACTCGAACAAAGTAAAAGAATCGACGGCAAGAAAGCCGCTTCTATTCT  
CAAGCATTTCTACGTTTACGTCGTAGCGTCTTGCCAACTCGCTACAGATAGACAATGCTTTACAGCTTGGCGGGGATGTT  
TATCACTTGTCTTGTATCGTGGCGGATTTAGCGAGACCAGGATCGGCGATTATCGGGCCACACTGAGCAAAAAGCCAAA  
CAGAAGCCTTTCCGACCTACTCAAGGGGCAAGCATTCAGAAATAGCTGAATATGTAGAATTAGTAAGATATGAATTA  
AATATTGATTTTAAAGCGTAA

>Cluster\_22194

ATGAAGGTGCGCTTCTTCTTATTGAAATTTCCGCTGTCGTCAGAAAACCTTCGTTCTTAACCAAATCACGCGTTTATTGA  
TATGGGCTTTGAAGTGGAGATTGTCGCGTTGCAAAAAGGCGATACAGAGAACCCACCGCGCTTGGACGAAATACAACC  
TTGCTGCCAGAACCCGCTGGTTACAGACGCAACCTCAGGCAAAAGTGGCGAAAACCTGCCACCCAGCCAGCCGACTTA  
CGCGGATTCATCGTAAAAATACCTGGCAGGCGCTCAACCTCAAAACGCTATGGTGGCGAGTCCGGAACCTGATTTTGT  
TGCTATTTGCGGGCAGGTCGAACACCAATTTTATGCGGATGTGTTTCACTGCTCATTTTGGTCCAGCGGGGTAACCGGAG  
CAAACTCCGCAACTGGGTGTCATTCGCGGCAAAAATGCCACTATCTTCCACGGTATTGATATCTCCAGTCCGGAAGTG  
CTCAACCACTACACTCCGGAATACAGCAACTGTTCCGCGTGGCGACCTGATGCTACCGATAAGCGATCTGTGGGCGG  
AAGGTGCAAAAATGGGCTGCCGAGGGAAAAATTTGCCGATCGCGTATGGTGTGGACATGACGCGCTTTAGCCCGC  
GTCCGGTGAAGCCCGCCGCAACGCGCTGGAAATCATTTCCTGCGACGCTTAACCGAGAAAAGGCGCTACATGTGGCG  
ATCGAAGCCTGCGCTGAATTGAAAAGAGCTGGGCGTGGCATTTCCGATATCGCATCTCGGCATTTGGCCGTTGGGAAAGC  
CCTGCGCACCTCATCGAACAAATCAACTGGAAGATGTGGTAGAGATGCCGGCTTTAAACCAGCCAGCAAGTGAAG  
CGATGCTCGACGACGCGGATGCTTCTGTTGCCATCGGTACGGGCGGATGGCGATATGGAAGCATTCCGGTAGCG

CTGATGGAAGCGATGGCGGTGCGTATTCCAGTAGTTTCCACTCTGCATAGCGGAATACCGGAACGGTGGAGGCCGATAA  
ATCCGGCTGGCTGGTGCCTGAGAACGATGCTCGCGCATTTGGCGCAACGACTGGCGCGTTTAGCCAACGGACACCGACG  
AATGGCTCCTGTCTGCAACGCTGCTCGGAAAAAGTCGAACACGATTTTAAACAGCAGGTGATCAATCGAGAACTCGCC  
AGCTTGCTGCAAGCTTTATAG

>Cluster\_50374

ATGCTCATTTGGACAGGCCCTTGATTTGATATCCCGTTACGATTCTCTGCGTAACCCACTGACTTCTCTGGGGATTACCT  
CGCCCCGAACTCATCTCTCGTTGCTTGCCTGCCGAATCAGGTACTGTAACGCTACACAAGCGCGCTTCCCTCGAAATGA  
TGGTCTGGTGTATTGTTGGCATGGCGCTTGAGCGTAAAGAACCTCTTACCAGATTGCGAATCGCCTGGACATCATGCTG  
CCGGCAATCGCCCTTCGTTGCCCCAGTGCCGTTATTCAGACCCGCCAGCGTCTGGGAATTGAGGCTGTCCGCCCGCT  
GTTACGAAAAACAGCGCAGCTCTGGCATAACGCCACTCCGCATCCGACTGGTGGCGCTGACCTGCTGGCCATCGATG  
GTGTGTTCTGGCGCACACCGGATACACCAGAGAACGATGCAGCCTTCCCGCGCAGACACATGCCGGGAACCCGGCGCTC  
TACCCGCAAGTAAAAATGGTCTGCCAGATGGAACGACCGCATCTGCTGACGGCTGCAGCCTTCGGCAGATGAAGAA  
CAGCGAAAATGAGCTTGTGAGCAACTTATAGAACAACCCGCGGATAAACACTCTGACGTTAATGGATAAAGGTTATTACT  
CACCAGGACTGTTAAATGCCTGGAGCCTGGCGGAGAACACCGCCACTGGATGATCCCTCTCAGAAAGGGAGCGCAATAT  
GAAGAGATTAGAAAACCTGGGTAAGGCGATCATCTGGTGAAGCTGAAAACAGCCCGCAGGCACGAAAAAAGTGGCCGGG  
ACTGGGAAATGAGGTGACAGCCCGCTGCTGACCGTGCAGCGCAAAAGGAAAAGTCTGCCATCTGCTGACGCTGATGACGG  
ACGCCATACGCTTCCCGAGGACTATACCGGAGCTGATCGCGCATTTGCAAGTATGGGACAACCCAGTGAATAACCGAC  
AAGAAGGGAAGGGCCTTCCCGAGAGTGGTAAAGGAGAGGCCCTGGAATAACCCACAGCCCCGAATAA

>Cluster\_7263

ATGCAGGTAGTAGAAGTCTTCTCGAGCTTAAACGGTGTGGGCATTTCTGTTCCGTTAATTTCCGTTACACCACAGTTGA  
TTTGATCGATAGGCTAAATAGAAAATAACATCCCTGTTGTTTCATTTGGGGATGAAGTCCAAATTAGGTTTACCATTGCTG  
CATTTAAATAGCCAGTTGATGAGACAGAATTTCCAGATATGTGCATTCGCATATGTTTCATGCCAATATCCTAGTA  
CGTCTGTAAAGATATTTTGGTGGATAGTACATCTATTTTGTACTGCGCACAGCATTCGTGAAGGTGGCAGTGTCTAG  
AGACTGGCTTATGCGGTTGACTAATAAATAAGTGAATACAGTCTGTAAGGATGCGGCACGGCTGCGGTTTATTG  
ACGACAAAGTATTTCCATCAGAGAAAACACTTACTGTTTATAATTGATCAATATGATCATTTTTCGTATCATTGATAGA  
CAAAAGCAGGAAACGATTTTCGCTGGGTAACCGTTGGGCGCTTGTAAAAGTAAAAAATCAACTTTTGATTTTGCAGCGAT  
GATGAAGTTGCCACTTAGTGAATCATATAATTGGAGAAGGCGAGGAACGACTCTCATTACAAAATTTATCGATCAAA  
ATTTCTTAAGCGAGCGGTTACTCTCTTGGTAAAGGATAAAGTGTGTTGATTTATTAATCATGATTTCTGATGTTGG  
CTGGCCTCAGACTATGAAGGATTTGCACCTGCTGCTGGCCGAGCTATGGCATGCGGATTTGCCAGTTGTCGCAACAACTG  
TGGTGGGCTGCTGAAAATTTATGGAAATGGACAGGATTTTGGCATAACAAATTTCCGTTAATGATGTACATCACTTAACCG  
CTGCGATGCAACAAATTAATCATTAGATGTTGAACAGCGTAGAGGAAGTGGCTATCGTGCTCGGAAAGAGTCAATTGAG  
AAATTTTCTACTAAAAAATCGTATCTCAATGGGAAGATATCTACCTGCGCATACAGAAAAACAGAATTTAG

>Cluster\_43449

ATGCTACAAATGAATGTTTAAATTTGCCAGCAGCCGAAAGAATTAGTCTGGAACAACCGGAGATACCTATTCCGGGTGA  
CAATGAAGCATTAAATAAAATTAAGTCTGTCCGGATTTCCGGTACCAGATTTTCATGCTGGGGTGAATCAACATTTT  
TTAGTTATCCACCGGTTTATAGCCATGAAATATGTGGGAGATTTGTTGGCTGGGTAAAAAATATTTGCTGATCTAAAAA  
GGTCAGCAAGTTGCTGTGATCCCTTATGTTGCCGTGTCAGCAATGTCGGCGGTGTAAGACGGGCGTACCAATTTGCTGTGA  
AAAAATTTCACTATTTGGCGTGCATCAGGATGGCGGTTTGTAGTGAATTTGAGCGTGGCGGTGGCGAACATTTTGGCCG  
CAGACGTTATGACCCACAGCGCGCAGCATTTGATGAACTTTTCGCTATTAGCGCTCATGCGGTGCTGCGCGCAGCCATT  
GCTCCCGGCGAGCAGGTGCTGTTGGTGGCGGGGCGGCAATCGGCTGCGGCGCGGCAATCGCTAAAGCCGATGGCC  
ACAGGTGGTAGTGGCGGATACCAGTCCGGCGCGCGTGAACATGTGGCAACCGCTGGAATTTACCTGTACTGGACCCGT  
CAGCCGAAGATTTGACCGCAGCTGCGGGCGCAGTTTGGTGGTTTCGCTGGCGCAGAAAGTGAATGACGCGCAGGTAAT  
CAACATCCGATGAATAACACCGTAAATCTGATTCTGTCAGCGCGCAGCGTGTATTTGTCGGTCTGTTTAAAGGTGAGTT  
GCAGTTCTCCGATCCGGAATTTCCATAAAAAAGAAACGACGATGATGGGCGAGCCGCAACGCCACGCCGGAAGATTTGCTA  
AAGTCCGGTCCGACTGATGGCGGAAGGAAAAATCACTGCCGACATGATGTTAACCCATCGTACCCTTCCGACGCTGGCA  
GAAACCTACGAGCGTGATGTTAACAATCGTGAATGATTAAAGGTGTAATTACTTTCTGA

>Cluster\_51821

ATGACGATCAGAAAAACAGCCGAAAGTGGTTATGTAATGCTACCCAAACGGGAGAGATGGCAAACCGGTACGCCAA  
ACAATTTGCGACGAAAGCGAAGCCATTGCGTTTGAGAAATTTCCACCATGGATGAGGTAACAAGAAACCTTGGCTGGGAG  
AAAAGGAAGATCGGCGACCACTGTCAGAAAGTATTTGAGCAATGGTATTTCCCTGTACGGTCAGACACTCGCTGACCCCTAAG  
CGATTAATGGCTAAGCTAAAAATCATTTGTAATGGCTTTGGCGATCCCATCGCTTCTGAATTTGACAGCAGGTTGTTTAC  
AAGTACCAGGAAAGCAGATTTAAAGGTGAGATCAAAAACGAAGATGGCGTGCATGTCACCGGTTAAGCCCGCACGG  
TAAACCTTGAACAACGCAATCTGTATCGGTTTCGGTACATTTGAAAAACTAGGGCACTGGTCCGCACCAAAACCCACTG  
GCAGGCTTCCAACTTCAAATTTGCTGAAGGTGAATTTGGCTTTTCTTTCCACGGACGAAATCAAACGCTGCTTAATGC  
CTGCGCGAATTAACAAACACCCAGCTACTAATGATTTGCAAAAAATATGCTGGCTACTGGTGGCGGATGGAGTGAAGCAG  
AAAACCTACAGGGCCACCAATATCGAAATACCGAATTTACTTATACAAAGACCAAGGCAAGAAAAACAGAACAGTACCC  
ATATCACAGGAGCTGATGACGAACTCCAAAGAACAGAGGGAAGTTATTTCTACCATGTAGAAAAGCCTTTGAAACGAGC  
AGTAAAACGGGCAAGTATAGATCTACCGAGGGCAATGCACCCAGCTACTGCGCCATACATTCGCTAGCCATTTTATGA  
TGAACGGCGAAACATACTCGTGTTCGCGGACATCCTTGGTCACTCGGATATAAAAAATGACTATGGTTTATGACATTTT  
GCACCTGATCATTAGAGGATGCAGTATCAAAAACCCCTTTATATAGATTAATAATGGACCACACCATGA

>Cluster\_6732

ATGATCGACTGGTTTACCAGAACTTCTCCTTGCACACACCGACCGTTACCAGCGGTTAGTGTCTGCTGAGCGTTGATGCTGA  
CGGTGACGTTGGAGTGGGAAACAGTAAAGCGGTTGACCGTTTCGCGGTTACATACGAAATCCACAATGAAAGTACGATCTGTTG  
GATCAGACGGGAGGGCCGGCAACTCATCTTTATATTGACGGAATCCGTCAAAATTTCTTACGGGGCATTCCTGTTATT  
GGCTCCGATGATTTGAGGGGCTGGTATTAACCGCTTACGCAAGAATAATTGGCATTACTTCATATTTCTCATGATCTACC  
ATCCTATCTCAGTAAATGGCAGGGCAATTTAAGATCTCACGCAATGATTAACATACATGATTTCAATTTTACATCTGAA  
AAAATGTCGCGCATGGCTATATGCCGAGAATTAAGGCTAAAACCTGCCATGGTGGCGCTGTGGTAAAGGTGGAAC  
GTTTACTTAGGAAAAACCTCCCGCGGTTGAGCCTGAAATTTTATTCAAATAATGATGAGCATATTTCTGGTAAAAAAGG  
ACACCAGATAGCAGAAGAGTTTGTAAAGTGGCTTACTTACTGTTGTTAAAGATAAATACGAATTTGAAATTTGACGCTAA  
GAACAACGAATTAATTTGACTTAAACCTTACGCTTGGCAGTAACTGGAATATCGATACTCCAAACAAATTTATCTCTGAA  
TATGTAGGAGAAATAGAAATGAATCAAAATGCCATTTTACCAGATGAAAAAATAGTTAACTGCCGAGAAAAATACAATC  
AACATATTTACTGTGGAAGCAGGGCGCAACATGAAAGAAATGCTTCCAAAGCAACATTTTACAGGCACCGAAAAAGAA  
TATTTGCTTTCCGGATAGATATTAATTTTATTTGTAATCCCTGATTTCAAATAATGTTGTTCCATTTAGTAAGAACACTT  
GAAGCTAAACAGCCAAATCCCTACATGGGTTTATGAGAAAAGGTTTTATTTTGGATTACAACCGTATTTCCACATGCCAG  
TAACTGGCATTAA

>Cluster\_7445

ATGGAATAAGCTTTACCAGCGTGGCCTGCTGGTGGCGGCTTCTTCTTGTGGTGGGATCAAAAACACAAACCCG  
CAAAACCCAGCTACTGAAGTTACCGTTCTTGAAGGCAAACTATGGGTACCTTCTGGCGTGGCAGCATCCCGGGCATTTG  
ACGCCAAACGAGCGCGCAACTTAAAGAAAAGATTCAGACCCAACTGGACGCCGACGATCAGCTGCTTTCGACCTATAAA

AAAGATTCGCGCTGATGCGCTTTAACGACTCGCAAAGTTTATCGCCGTGGCCGGTAAGTGAAGCGATGGCCGATATCGT  
CACCACCTCGCTGCGCATTTGGCGCGAAGACCGATGGCGCGATGGATATAACCGTCGGGCGCTGGTGAATCTGTGGGGCT  
TTGGCCCGAACAACAGCCGGTTCAAATTCGAGCCAGGAACAGATCGATGCGATGAAAGCCAAACCCGGCTTACAGCAC  
CTGACGGTTCATCAATCAGTCGCATCAGCAATATCTGCAAAAAGACCTGCGCGATTTATATGTCGATCTCTCCACCGTCCG  
CGAAGCGTATGCGCGGATCATTTGGCAGCCTTGATGGAGCAGGAAGGATTTCCCGCTATCTGGTGTGGTGGCGCGG  
CGCTGAACAGCCGTGGTATGAACGGTGAAGCCCTGCGGTGGCGGGTAGCGATTCAAAAACCAACCGATAAAAGAAAACGCG  
GTTACAGGCTGTGGTGGATATCAACGGTCTATGGGATTAGCACCTCTGGCAGCTACCGTAACTATTACGAACTGGACGGCAA  
ACGCTTTTCCCATGTTATCGATCCGCAACCCGGCGTCCCATCGAACCAATCTGGTATCCGTGACGGTGGATTGCTCCGA  
CGCGCTGGAAAGCCGCTGGGATACCTGGCTTGATGGTACTCGGGCAGGAAAGCTAAAGAGGTTGTTCCGCGGGAA  
GGGCTGGCGGTTTATATGATCACCAGAAAGGCGATAGCTTTAAACCTGGATGTCACCACAGTTTAAAGCTTCTTGT  
CAGCGAAAAAATTA

>Cluster\_65725

ATGTTGAAAAAATTTCTCGTGGCATGTTTTCCAATGACTTGTCCATTGACCTGGGTACTGCGAATACCCCTCATTTATGTAAA  
AGGACAAGGCATCGTATTGAATGAGCCTTCCGTGGTGGCCATTCTGTCAGGATCGTCCGGTTCACCGAAAAGCGTAGCTG  
CAGTAGGTCATGACGCGAAGCAGATGCTGGGCCGATCGCCGGCAATATGCTGCCATTCGCCAATGAAAGACGGCGGT  
ATCGCCGACTTCTGCTGATGAAAAATGCTCCAGCACTTCAAAACAAGTGCACAGCAACAGCTTTATGCGTCCAAG  
CCCGCGCTTCTTGGTTGTACCGGTTGGCGCAGCCAGTTGAACGCCCGCAATTCGTGAATCCGCGAGCGCGCTG  
GTGCCCGTGAAGTCTTCCGTATTGAAGAACCGATGGCTGCCGCAATTGGTGTGGCTGCCGGTTCTGAAGCGACCGGT  
TCTATGGTGGTGTATCGTGGTGGTACCAGTGAAGTTGCTGTATCTCCTTGAACGGCGTGGTTACTCCTCTTCCGT  
GCGCATGGTGTGATCGTTTCGACGAAGCTATCACTATGTGCGTGTAAATACGGTTCCTGTGATCGGTGAAGCCA  
CCGCAAACTGATCAAGCAGAAATCGGTTCCGGTTCGGCTTACCGGGCGATGAAGTCCGTGAAATCGAAGTTCTGGCGGTAAC  
CTGGCAGAAGGTGTTCCACGCGGTTTACCTGAACTCCAACGAAATCTCGAAGCACGTCAGGAACCGCTGACCGGTAT  
TGTGAGCGCGGTAATGGTTGCACGGAACAGTGCAGCGGCAACTGGCTTCCGACATCTCCGAGCGCGCATGTTGCTCA  
CCGGTGGTGGCGCATGCTGCGTAACCTTGACCTTGTGTTAATGGAAGAAACCGCATTCAGTCTGTTGCTGAGAC  
CCGCTGACCTGTGTGGCGCGGTTGGCGCAAAGCGCTGGAATGATGACATGCACGCGCGGACCTGTTACGCGAAGA  
GTAA

>Cluster\_27958

ATGGAGTTTTTCAAAGACGGCACTTGGCGACTGGTATGGGTTTTAGTGGTGCAGCATTGGCATTACCCAATATCAC  
CATTTTAGCAACCGCGGGACATTGCCGGTGGTGGTACTCCGCAACCAATCTAACACACAGCGGTAAGTTGGCG  
TAGAAAATCTGGTTAATGCGGTGCCGCAACTGAAGGACATTGCGAAGCTTAAAGGCGAGCAGGTAGTGAATATGGCTCC  
CAGGACATGAACGATGATGCTGGCTGACACTGGCGAAAAAATAACACCGACTGCGATAAACTGACGGTTCGTGAT  
TACCCACGTTACGACACGATGGAAGAAACCGCTTACTTCTCGACTGACGGTGAATGCGCAAAACCGGTGGTGTG  
TCGGTGAATGCGCCCGTCCACGCTATGAGCGCAGACGGTCCATTCAACCTGTATAACGCGGTAGTGACCGCAGCTGAT  
AAAGCCTCCGCTAATCTGGCGTACTGGTAGTGAACGACACCGGTGCTGATGGCCGTGATGTCACCAAAACCAACAC  
CACCAGCTAGCGACCTCAAGTCTGTTAACTACGGTCTCTGGGTTACATTCACAACGGTAAAGTTGACTACCAACGTA  
CCCCGCGCAGTAAAGCAGCACCGGACACCGGTTCCGATGCTCTAAGCTGAATGAATGCGCAAAAGTCCGCGGTAAG  
AACTACGCTAACGCATCCGATCTTCCGGCTAAAGCACTGGTAGATGCGGGCTATGATGGCATCGTTAGCGCTGGCGTGG  
TAAACGGCAACCTGTATAAACTGATATTTGACACCTTGCACCGCTGCGAAAAACGGCAGTGCAGTAGTGGCTTCTTCC  
CGTACCGACGCGCGCTACCACCTCAGATGCGGAAGTGGATGATGCGAAATACGGCTTCGTGCGCTTGGCAGCTTGAAC  
CCGCAAAAAGCGCGGTTCTGCTGCAACTGGCTTGCACCAACCAAGATCCGCGCAGATCCAGCATCTTCAATCA  
GTACTAA

>Cluster\_43354

ATGCCTCAATCTCTCCCGGACACTACGCGCGGAAAAGCGTTTTCTGCTGGCCAACAGGAATGCCGAGCTGGCGGCACT  
GTTGCTGGTGTGCTGGTTCGATAGCCTGGTGGCCCCGATTTCTGGCAGGTGGTGGTTCAGGATGGGCGTTTGTTCGGTA  
GCCCTATCGCATCTTAAACCGTGGCGCCCCGTTGCGTACTGGCGATTGGCATGACGCTGGTTATCGCCACCGGTGG  
ATTGATCTCTCCGTAGGGGCGGTGATGGCTATCGCCGGAGCCACAACGGTGCATGACGGTTCGCGGGATTACGCTGGC  
AATGTTTTTGTAAAGCGCCTGGGCACTGGCATCTTGGCAGGATTTGGAACCGCATACTGGTAGCGTCTCAAATTC  
AGCCGTTTTGTGCGCACCCCTGATCCTGATGGTTCGCGGGCGGGCTGGCGCAACTGATCACCTCCGGACAGATCGTACA  
TTTAACTCACCGGATCTCTCCTGGTTCCGCGAGCGGATCGCTGTGTTCTGCCAACCGCAGTCAATATGCGGTGCTGAC  
GCTTCTCCTGTCTGGCTGTGACCCGCAAAACGGCACTGGGGATGTTTATCGAAGCCGTGGTATCAATATCCGGCGG  
CAAAAATGCCGGGTAAACACCGCAATCTTGTCTATGCTCACCTACGTTGAGCGGGCTATGTGCGCGATTGCGGGC  
ATTATCGTGGCGGCGATATTCGCGGTGCCGATGCCAATAACGCGGGTTATGGCTGGAGCTGGACGCCATTCGCGGT  
GGTATTGGCGGGCGATCGCTGATGGGCGGGCGTTTTAACTGCTGCTTTCGGTAGTGGGGCGCTGATTATTCAGGGAA  
TGAACACCGGAATTTGCTTCTGGCTTCCGCGGAGATGAACAGGTGGTGAAGCGGTGGTGGTCTTTCGCTGCTG  
ATTGCTCAGTCCGCAACCGTTTATCAGTCTGATTAAGGGGTACGTAACCGTGATAAAACGTA

>Cluster\_7931

ATGACTGTCCGTA AAAATCCGGCTGGCGGTTGGATTTGTGAGCTTACCCAAACGGTGCAAAAGGCAACCGTATCAGAAA  
GAAATTCGCTAAAGGCGAGGCGCTGGCGTTGAGCAGTACACCGTTCAAACCCGTTGGCAGGAAGAAAGGAAAGACA  
GGCGCACGTTAAAAGAGTTGGTTGATTCATGGTATAGCGCTCATGGCATTACACTGAAAGACGGCTTGAACCGCAGCTA  
GCCATGCACCATGCTTTTGGAGTGTATGGGCAACCACTTACACGCGATTTCGATGCGCAGATGTTTCCCGCTACCGAGA  
AAAACGGTTAAAAGGCGAGTACGCCGTTCAAACAGAGTGAAGAGGTTATCGCCTCGCACGCTTAATCTTGAGCTGGCCT  
ACTTCCGGGCTGTGTTCAATGAGCTAAACCGCCTCGGAGAATGGAAGGTTGAAAACCCACTGAAAACATGCGCCATTC  
CGCACAGAAGAAATGAAATGGCTGGCTGACTCACGACCAGATTTGCTACTGCTCGGAGAGTGAACGGCATGACCA  
CCCTGATTTAGAACTGTGGTAAGAAATTTGCTCGCCACTGGCGCACGGTGGTCTGAGGCCGAGAACCCTGAGAAAAGCC  
AGCTTCCGAAATACAAAATCACATACCAACAGAAAGGCAAGAAAACCGCACCGCTTCAAATAGCAAAAGAGCTCTAT  
GATTTCTCGCTGATGATAAAAAGCGAGGTTGTTAGTGTATTTGATGGCGCTTCCGGTCTCGCTGCGGAAAGACAGG  
CATCGAATTACGGCAGGGCAACTTACCATGTTTTACGCCACACCTTCCGCGTACCTTTATGATGAATGGTGGTAATA  
TTCGCTGCTTGCACGCGCTGCTCGGTATACCGACATCAAAATGACAATGCGTTACGCACATTTCCGCCACAGCATCTG  
GAGGATGCAGTAAGGCTAAACCCACTGAACAACAACAGAGATTAG

>Cluster\_27798

GTGAGAAAACCAACCGCTTACTATTAAGACATTTGCTGAACGCGGGAGTGTGAAAGCAACCGCCAGTCTGGTTCT  
CAATGGTCTGGCAAGAGATTACGTTGTCGCGAGGAAACCGCTGAGCGTGTGCTGAGTATTGCCAACAGCAGTATTATC  
AGCCAGCATCTATGCCGCTCATTACGGGACAACCGCAGCTATACCATTTGGTCTCGTCTTCTGAAATCATACTACT  
GGATTTGCGAGTATTTCCCATGAACTGGAACAATTTGTTGCGGAAAGCGGGCTCCAGCTCCTCATATCTGTACTGATGA  
AAATCCTTACAGGAAACAATGGTGGTGAACAATATGATGCGCGCCAGGTTGATGGGTTAATCGTGCATCCAGTATGC  
TGCATGATAATGATATCAAAAACCTTAGCGAGCAATACCTGTTGTTGTTGTTGATCGCCACATGAAAGGCGATGATCT  
CCATTTGGTCAATACTGACTCTGTTTCTCCACCGCGCTTGGTGGCAGATATGACCGGAGTCAACCGGATGAAATCTTA  
TTTTCTGGCGGACAACCCGTTTGTGACCGACTCGCGATCGACTGGAAGGATTTACACAAGGCTTGCAGCAAGCCGGAG  
TAAAGCTACACCTGAATGGATTATTCAGGTAATTTATCATCCGAGCTCAGGCTATGAAATGTTTGGCGGCTATGCGCT



CGTTTAGGACGTCCCCCTAAAGCCTTATTTACTGCGCCTTGTGGATTACTGGAAGGCGTTCTGCGCTATATGAGCCAATA  
TAAATTTACTCGACAGTAAATACACCTGGCGAGTTTTGATGATCATTACTTGTATGATTCACFTTTCGGTAAGAATCGACA  
CAATACAACAGGATAATCGCCAACCTTGCCTTTTACTGCTTTGAACTTATTTTCGCAACTGATTGAAGGTAAACGCCATCC  
CCATTACAGCGTTATCTTCTGCGAGTCTACAAAAACGCTACCGATAA

>Cluster\_66975

GTGCACAAGAAACTGCTGGATGCGCTGCCTTTTCTGTGCGCGGATCCTTCAGCTTGCCGGTGGGTGTGCCTGCAGGAGGA  
CCTGCTGTGTGCTCCAAACACCATTGATGCCTATGCCCCGTGGCGTCAATGACTGGCTCGCTTTCTGTCACTCTGTTGCC  
TGACGGCTGCTGTGCTGGACGTGATACGGTCGCACTTATGTCCGACGCTGCATACCGGTCGCCAGCTGGCAGCTGCC  
ACTATCCGCCACCGGCTGACGGTGGTACGACTGTACAACGATTTGGCTTTGTGAGGAGGGGATACGGGAGAGAAATCCTGT  
CAGACGAGGTGTCTGAAAAACGGAGGAAAGGAAAAGCTGGTATAGTCCGTTGACGCGGGCTACCGTGGATCCCGG  
ATGATGCGGAGTGGTTGCGCTTTCTTGAGGTAGCCGCAAGCTGATATCCGTAATCGCTTTTATGCTGGCACTGGCCTAC  
GACTGCGGATTACGCAGAGAAGAACTTTGCACAGTAGTACCGGAGATATTGACCCTTCTCAACGCTTGTCTACTGTGCG  
CGCTGAGCATACCAAAAACCGCTTTGGTCCGGTGTGCCCTATTTCTCCGTGACGCGGGAACCTACACAGCATCCGCTCA  
CTGAACGTCGTATGCTAAGCTCATCTCGCGGTCGGTGTGTTCTCTCACGCTCTCCGCTAATCGGGCAGAACCTATTAGC  
AATGAGCTTGGTCAAAAGTAGTTCGCGGTTTACGTATTAAGGCTGATCTTCCACTCATCAGCACCCACACATTCGACA  
TCTTTGCTGACAGAAGTGGACGCGTGGGTGGGACATCCACGAAATGCTGCATTCGCTGGCCACCGTTCGTATCCAGT  
CAACTCTGCTCTATATTCATCTCAGCGACGTGATCTGAGTAGTGGTTTCAATACACGGTCGCATCTTGCATACTTGC  
CGCTTACTGTACTACAACAGCAGGATCCTTCTCCATGA

>Cluster\_7597

TTGAAATCAGCACGGCGGTTTATTCATTCCGAAGAAGATGCTTTGCGTTTTGTTGAGATGTACATCGCTGGGCAAGATCT  
TCCTGATGGAATACATTTGAAAGGTGGCCTAACTTAACTTCCGCTTACTGGTGACAAATTCATGGCAGTTTGCATC  
CTTCTGTCAATGAAGGTTTTGTTGAAATGCAGGCCAAATAAACCGAGCTTATGCATTGTTAAAGTACGGAGTTCTGAC  
CCAAGAAAGCTTTCAAAAGAGAAGGAAAGCTATCGAAATTCAGGTGAATGTTGAGAATGGCTCGCTCTGTAGAGAAT  
TAAATGTCAGGCTGATACAGCTCAGTTATACAACCTGGTGGTAAAGTGGGCCCTCAAGAGATCGTTATTACAGTTT  
TAGGGGTCGCTCTTATATGGGGCGGCTCGTCTTATCAAAAAATATCTAGAAGACCGCAAAGAGATTGCGATGGCAGAA  
GTAAAAAGCGAGTCTGAGCGTGAACACCTTTCGCGACCATGCGCTTCATGCTGAGCAGGAAACAAAACGAGTGAATTAAT  
GACTCAGATTATTAGCGAAAAACCAAGCTAGACAACATGGAAGACTTGTCTCATGACGCAAAAAACCGACATAGTTAAAT  
CATTTGTCAGGCTGATACAGCTCAGATGATGGCTGGTGGTAAAGTGGGCCCTCAAGAGATCGTTATTACAGTTT  
AGGCGGAAATCAATGGAGATCCGCTTGTGGAATTAATCGCATTTGAAAAGGTTGACTCCACTGATCCAGAGAGCTTCAA  
AGTGCAAGTGAAGAAATGTTGACTCCGATTAAGAAATATCGTGCATAGTACAAGATGTTTCTCGACGATCCGAGCATA  
AAAAAGCTTTCAGCAAGCTGAGTGGGATAGAAAAACGATTTTATTTGCAATCAACGCAAAAGAACTAGATGGTGAATA  
AAGTCCCGGATAAATACTTTATGTCAAAGAGATAACATAA

>Cluster\_24620

ATGTCCACATTACGCTGCTCATCTCTGACTCTTACGACCCGTTGGTTTTAACCTGGCGGTAGAGGAGTGATTTTTTCGCCA  
GATGCCGGCCACGCGCTGCTTCTGTTCTGCGGCAATCCGACACGGTAGTGATTGGTCGCGCGCAGAACCCGTTGGA  
AAGAGTGAATAACCCGGCGGATGGAAGAGATAACCTCCGCTTGGCGCGCGCAGTAGCGGTGCGCGCGCAGTTCCAC  
GATCTCGCAATACCTGTTTTACCTTTATGGCTGGCAAGCCGGAGTACGATAAAACCATCTCCACGTCGATTTGTCTCAA  
TGGCTGAAACCGCTTGGCGTCAAGCGCGGAAGCTTCCGGCGTAAACGATCTGGTGGTGAAGAACCGCGAAGCGACCGTA  
AAGTCTCAGGCTCGGCTATCTCAATCCGATAAAAAAGAACTTCCGCGGCAAAAGGCATTACCTCAGTGGCTTCCCGCTGAC  
CGCTGGCAAACTATCTCAATCCGATAAAAAAGAACTTCCGCGGCAAAAGGCATTACCTCAGTGGCTTCCCGCTGACCAA  
TCTGACCGAATTTGCTACCGGGGATCACCATGAGCAGGTTTGGAGGCATAAACCAGGCTTTTTCGCCCATTTATGGGG  
AGCGCGTGAAGCGGAAATCATCTCCCCGACAAAACCGCAGACTTGCAAAACCTTCCCGAAACCTTTGCCCGCCAGAGT  
AGCTGGAAATGGAATCTCGGTCAAGCTCCGCTCCGCTTCCGATCTGCTGATGTAAGCCTTTACCTGGGGCGGCGTGAAGT  
GCATTTGACGTTGAAAAAGGCCATATCACCAGCGCCAGGTTTACCGATAGCCTCAACCCGACCTCTGGAAGCTC  
TCGCGGGGACTGCAAGGCTGCTGTACCGCGGATATGCTGCAACAGGAGTGCAGGCGTGTGGTTGACTTCCCG  
GAACAGGAAAAAGACTACGGGAGTTGTGACGCTGGATAGCGGGGCGGTAAGGTA

>Cluster\_10837

ATGGGAAGACCAAGAAAAATAAAAAAGATAATGTACTGCCACCGGGTTAGATCGAATGGTTACAGTTACGTTGTTGAA  
ACCAGAAGGAAGTACAAGAACTATAGGGCTAGGAAGAGTGCAGGAAAACAGCGTAGCTAAAGTCTGGCAAAATATGAAC  
TGGAAAAACCAAACTCCACAACATAATGACCGTAGCTAAATATGGCACATGTTTATGGACTCCCCTGCATTTACAGAA  
TGGCCCCCGCAACCCAAAAAGATTATCGACAACATCAGAAGCGGTTGCTGATGGTATTCGGAAAAAGTCTGCTGATAA  
TGTCAAAACCTGAGCAGGTAAGAAATTTTCATGGATAAACGAGGGCTTGGAGCAAGACCAGGCAAAATCATGAAGTGGCAA  
GCCTGAGTGCAGTATACCGGTTGGGATATGAGCGTGGTATGTGAAGAAATAACCCATGCAAAAGGATCAGAAAATTTCTCT  
CTTAAAGCCCGCATGTTTACATCACCAGTGAACAGTATGCGGCGATATATGCGGAAGCAATTCACAGTTACGCATTTGC  
AATGGAGATTTCTCTATCTCTGTGCGGCAAGACTCGGTGATGTGCTTGGTGAATGGCAGGATATTTGATAAAGGGA  
TCTACATTTAGCAAAAACAAAACCGGCACCAACAAATCAAGAAATGGTACCAGGATTTACGTACAGCATCCAGTTAGCC  
CGAAATGTATCTTCTGTACATGCGAATATGTGATCAATACAAACAAAGCGGGAAGTCAATAGCTAAAACGCTGAATAA  
CTGGTGAATCAGCTAAAACGCGCAGCCGAGCAAAAAGTTGGCTTCCGTTCCGGTGCATTTTACGACATAAAAGCCA  
AGGGGATCTCAGATTACGAAGGCAGCAGTCCGCGACAAAACAAATTTTTCAGCGGGCATAAAAACAGAAAATCAGGTGTGAT  
TACGATCGTAAAACAAAATCACACCAACTGGATTTGCGGCTCGTGGTTAGCAAGTAG

>Cluster\_41150

ATGAGTGCCTTAAATAAGAAAAGTTTTCTTACTTACCTGAAAGAGGGCGGATTTACGTCGTTCTTTTATGTTTTGCTGGC  
GATTATTTATTTCCAGGACCAACATTTTAAAGTCTGTGAACTTAAAGTAAATTTCTCACCCAGTCTCGGTGCGTATTA  
TTATCGCGCTTGGTGTGGCAGGGTTAATTTGTCACCCAGGGGACTGACCTTTCCGAGGTCGCCAGGTGGGGCTGGCGGCA  
GTAGTAGCAGCAGCTTATTGCACTTATGATGATGATGATGATGATGATGATGATGATGATGATGATGATGATGATGATGAT  
GGTATTCTGCTGCTGTGCGGCAAGTATCGGTGCTGCTGCTGCTGCTGCTGCTGCTGCTGCTGCTGCTGCTGCTGCTGCT  
CGTTTACCTACCACGCTCGGCACGATGATATTCGCTACGGCATTAACCTGCTCTATTACGACTTTGTGCGGGCGTGGCA  
ATTTCCCGTTTTGACAGTGGCTTCTCACTTTTCCCAAGGCTTATTGCGCTGGGGAGTTTCCGCTCTCTTTACATCAC  
CTTCTACGCGTTGATGCGGTGGTGTGTTGCTGGGTGTTATGGAACAAAACCCGCTTCCGCAAGAAATTTTGGCATTG  
CGGTAACCCGGAAGCGGCAAGTATCTGGTGTCACTGCGCTCGGCTGAACTGCTGATGATGATGATGATGATGATGATGATGAT  
TTCATAGCCTTCCGCGGGATGTTGGAAGCCGACGATCGGCTTGCACCAACAACTCGGCTTTATGATGAGCTGGA  
TGCTATCGCGGCTGCGTGGTAGCGGCTATCGTTACGCGGCGGTGTTGGGACGCTAATTTGGTGGTGGACCGGGTAA  
TTATTTTACCGCTATTAATATGGCTGACGATATATCGGCTAAACCCGACTGGCAGTACATCATCAAAGGGGCAAT  
ATTTATCTTTGCGCGTGGCTGGATTCTACGAAAGTACGCGGTAAGAAATGA

>Cluster\_26710

ATGCAAAAAGAAATCAATTTACGTCGCTACACGGGCGGACCATCGGGATGACGCGTTCCGAGCAGGGTTATATTTCCGGT  
GTCAGGTCATCTACAGCGCAACTGGCGCTGATGCCGGAATTCATCGCCCGGAGATGCCAGATTTTACCATTATGAAT  
ATACGCCATTTGATGGATTCTTCTGATATGACGCCAGAAGACTGGCAGCATATTGCTGAAGATAATTAAGCGCACTATGAC  
GACTATGATGTTTTGTCACTTCTGCACGGCACAGACAGATGGCGTATACCGCTCTGCACTGTGCTTCAATGCTCGAGAA

TCTCGGTAACACCGCTCATTTGTGACAGGGTCACAAATCCCGCTGGCTGAGTTACGCTCTGACGGACAAATTAATCTACTGA  
ATGCGTTTGTACGTTGCGGGGAATATCCATCAACGAAGTAACCTCTTTTTTAATAATCGACTGTATCGTGGAACCCGA  
ACCACCAAAGCCATGCCGATGGTTTTGTATGCGTTTGCCTCTCCAACCTTCCCTCCGTTACTGGAAGCAGGTATCCATAT  
TCGTGCTTTGAATACGCCACCCGCCCCGACGGTGAAGGGAAATGATCGTTTCAATCACGCCGCAACCAATGGGG  
TAGTGCAGATTTATCGGGGATTTCTGACGCTGCGGCAATTTCTGCGCCAACCTGTGAAAGCATTTGATTTGCGC  
TCATATGGCGTGGGTAATGCGCCACAAAACAAAGCCTTCTGACAGGAATTACAAGAAGCCAGCGATCGCGGATTTGTGGT  
GGTCAACCTGACACAATGTATGTCGGTAAAGTGAACATGGGTGGTTATGCCACTGGTAAACGCTCGCCATGCCGGG  
TTATTTGGCGGTGCAGATATGACTGTAGAAGCCAGCTAACCAAATGCATTACCTGCTTAGCCAGGAACCTTGATACTGAA  
ACCATTCCGAAGCCATGAGCCAAAACCTGCGTGGCGAACTGACGCCGGATGATTAA

>Cluster\_25183

GTGACAGGACGAGTATTACATGGCGCGGGCGCTAAAGCTGGCGCAACGAGGACGTTTACCACGCATCCCAACCCGAATGT  
CGGGTGGCTCATTTGTCAAAGATGGCGAAATTTGTCGGTGAAGGTTACCATCACCGTGTGGTGAACCACACGCCGGAAGTAC  
ATGCGTTGCGTATTTGCGGAGAAAAAGCAAAGGTGCGACTGCGTATGTGACACTCGAACCTTGACAGCTCGCCGCT  
ACGCCGCTTGTGTGATGCATTAATTTGCCGAGGTGTGGCGCGGTGGTTCGCTCGATGCAAGATCCTAACCCGAGGT  
AGCTGGGGCAGGGCTATATCGCTGCAACAGGCTGGCATTTGACGCTCAGCCACGGGCTGATGATGAGTGAAGCCGAGCAAT  
TGAATAAAGGCTTTCTCAAACGGATGCGCACCGGCTTTCTTATATTTCAATTAACAACTGGCGCATCGCTGATGGTCCG  
ACGGCATGACGAGTGGCGAAAGCCAGTGGATCTTCCGCTCAGGCGCGACGCGATGTACAACGACTGCGCGCAAAAG  
TCATGCCATTTTAAACAGCAGCGCCACGGTGTGGCGGATGATCCAGCCTTAACAGTGGCTGGTCTGAACTGGATGAAC  
AAACTCAGCGCTTTATCCGCAACAAAATCTCCGTCAGCCGATACGATTTGTGATGATAGCCAAAATCGCGTACCGCG  
GAACATCGCATTTGTGACGACGCCGCGCAACCTGGTTCGCGCTACGAGGAAGATTCTCGTGAAGTGGCGAAACGGT  
GCGTACCTTGTGATTTCCAGAGCATAAAGGTCATCTGGATCTGGTGTACTGATGATGCAACTGGGTAACAGCAAAATTA  
ACAGCATCTGGGTGGAAGCGGGCCAACGCTCGCTGGCGCATTTGCTACAGGCTGGTTAGTTGATGAGCTGATTTCTAT  
ATCGCACCTAAACTATTAGGCAACGACGCCCGTGGATTATGACAGATGCCAGGACTTGAGAAATTAGCCGACGCCCCCA  
ATTTAAATTCAAAGAGATACGTCATGTAGCCCGGATGTTGCCCTGCAATTTAGTGGGTGCATGA

>Cluster\_8507

ATGAAGCCAAATTTTAGCCGTGGCCGTCGCTACAGATTCGCCCTTATTCTGGCGGTGCTGGTGGCGCTCGGCATTATTAT  
TGCCGACAGCCGCTGGGGACGTTTCAAGTCCGACTTATATGGATACGCCGCTCAGTCCCTTTCTACTTTGTGTTCCA  
ATGCTCCTCGTGAATTTGCTGGATGGCTATCGCAGAGCTGGCCTCGCGTGAACCAATAGAACTTGAAAACCGGGCTTA  
CGTCAGGAAGTGTGCTGAAAAACAGTGAAGTGTGATGCTGGACAATAACAACAGGAGAACGCGGCTGCGCGAGCT  
GCTGGGTTCCCGCTGCGTCAGGATGAGCAGAAATGGTACTCAGGTTATCTCCACGCTTAACGATCCTTATAGCGATC  
AAGTTGTTATCGATAAAGGTAGCGTTAATGGCGTTTATGAAGGCCAGCCGGTCAACGCGACAAAGGTTGTTGGTTCAG  
GTGCTGGCCGTCGCTAAACTGACAGCTGCGGTGCTGCTGATTTGATGCGACCCACGCGCTGCCAATCCAGGTGCTGCG  
CAACGATATCCCGTAATTTGACGCGGTAACGGTGTACGGATGATTTGACGCTTACGATCTGCCGGCAATACGGATA  
TTCGTGTTGGTGTGCTGGTACTTCCGGTCTGGGCGGTGCTTCCCGGAAGGCTATCCCGTCCGCGTGTGCTCTTCC  
GTAACACTCGATACCCAGCGCGCTTACTGTGATTCAGGCGGTCGACTGCAGGGCTGCAACGTTTGGCTTATCTGCT  
GCTGCTGGCCGTCGCTAAACTGACAGCTGACAGCTGACCCGATGACGCGGAAGGGTGCATCGTGTGCTAATGACGCTCA  
TGCAGATGATGCCGAGGATTTGCCCTTCCGACGCGATGGGGCCAAAGTTACCTGAACCGCAACGGGGATCGCTCAG  
CCGACTCCGACGCAACCGCGCACAGGAAATGACGCTACTGCGCTGCTGCGCCGACACAGCCTGCTGCTAATCGCTCTCC  
ACAAAGGGCTACGCCCGCCAAAGTGGTGTCAACCGCTGCGCGTGGCGGGAGGGCAATAG

>Cluster\_40098

ATGTCAAATGCTCAAAGGGGTAACAAACCCGCCACAAGGAGACTTCGCTTATTTTCCCGGTTCTGGCGCTGGTAGTGT  
GTTCTGTGGGGAAGCAGCCAGACACTACCAGTGGTCAATGCCATCAATCTTCTTGGCTTATGGTATTTTAAAGTAGCG  
CCTTTAGTGTGTCGCTATGCGGACGTTATAGCCATCGCTGGGAGAACCTTACGGTTCGCTTATTTCTAGCTTTCA  
GTGGTTATTTGAAAGTCAAGTGTGATTTAGCTTTAATGGCAACCGGCGACGCGCGCAACGCTAATGCGTGATACGCT  
CTATTCAAATCATTATGATTTGTTACAGGTGGGCTGGTGGCTTTTCAATTTGTTGGGCGGACGTAAGTTTGGCCACCAAT  
ATATGAATCTGTTGGTATCAAGCAGTATTTAATTTGCGCTGTTCCCTTGGCGATAATCGTACTGGTATTTCCAATGGCT  
CTGCTTGGCGGAATTTTCAACAGGTCAGGCGTACTGGTAGCATTAATTTCTGCGCAATGATGGCTGATTTGCT  
GATCCAGACCAAAACACATCAAAGTTTGTGTTGCTACGAGCACGAAGTAGCAGTGTGATGACGACCCGACCAACGGTA  
AACCGTCTGCCATAGCAGCCTTGGCATGCCATCTGGTGTGATTTGCTCATCTGATTGCGCTTATGACGCTACCAAAATG  
AACGCCAGCCCGTGGAGACATTTGCTCGACAGCATGAATGGCCTGTGCGCTTACTGGCTTCTGGTGGCTCTGTTGAT  
TCTGCTGCGCGGAATTTAGGTTGCTTAAAGCAGTGTGTAATAACAGGTCAGCGCGGATGAATCTGTTCTTTGGTT  
CAGTGTGGCAACCAATTTGCTTACCGTACCTGCTGCTACGCTAATTTGCTTTTATGACGGGTAACGAATTTGAGTTGCA  
CTTGGTGGCCAGAAATGGTGGTGTGTTGGCTCTTTAGTACTGTGCCATATCTCTTCTCCACCGGACCAACTAACGT  
GCTCAATGGCGCAGCGCATCTGGCACTGTTGCCGCTATTTGATGACGATATTTGCCGTA

>Cluster\_12323

ATGATGCCGTCGCGCTCCCAAAAACACGCGTACTGATTTGGGGCCAAATTTGGCGAAATGTACTGAATGCCTTTAT  
GCAGCCCGGAGGGGCTGGAACCTGGTTCGCGCTGCTGGCGCAGGGAAGCGCCGTTCAAGAGAGCTGGCTCATGCTTTG  
GCATTCCTGTTATACCTCGCGAAGACAGATAACAGGATACCGGATATCGCTGATTTGCTGTCGCTGACCGCTCGC  
GGAGAACCGGTACGCGAGCTTGGCAGACACTTTCTGACGCGCGGCTACACGTCATTTAGGAGCATCCCTCCACCCGGA  
TGACATCAGTTTCTTACAACGCTGGCGCAGGAACAGGCTGCTGCTATTTGGTAAACAGGTTTATCCGCATACGCGG  
CGGGACGCACATGGCTTCGCGATGCGCAGCAGCTGCGTTCCTGGCTAAGACGCCCGGCTAGTCCACGCCACCACC  
AGCCGACGTTGCTACTTCCACTTGGATTTGTTGTTGCTGGCTTGGCGCTGATGCGCCCGCTGGAGTGCAGCT  
GGTTGGCAGCTTTAGCGATTTTCACTGTCTGAGACTCTTCTGGCCGAGGGGAGAAGCCTGCCCTGCTGCTTACGCGTATC  
TCGATCCTGACGATCCAGATATGCATAGCCTTATCATGACCGCTGCTGCTGGGCTGGCCGGAAGGTCATCTTTGCTG  
GAGGCGAGCTACGGCCCCGTCATCTGGTCACTAGCCTGTTTGTGCGAGACATCAGGAGAACGCCACAGCCTCTACCG  
CAGACCCGAGATCCTGCGCGATCTGCGGGTCTGACGCGCAGCGCGGCCCTTGAGCTGGCGCGCATCTGCGCAACCG  
TCGGGCGGAGGGCGTCAAGTGGTGTACACAGTTGCGCAGCCATCTGGCGGGCAACATCCACCAGCGGCTGCCAA  
AGCGTACATCAGATCGCGCTTATCAGGTTTATGGCAGCAGATTTACGTAAGACCGGCAATGCGGAGATCAGACCTGAC  
GCCCGCACACGACCGGTTAGCCGTTTCTACAACGATGATGATAAGGAGGCGCTGTGA

>Cluster\_45963

GTGAAATTAGGAAGAAATGATAAGTGTGTTGTAATTCAGGACTTAAGTATAAAAAGTGCATCTTGGTGCAGATCGTGA  
AATCCCGTATCCAAAGCCGAGGCACTGAAATTTTCAAAGTCTCTCTCGCAGAGAAAGGCATGTTATGCGCCAGCATCCA  
TGCACGAAGATTTGATAAACGCATCGTTTCAAGGCGATACGATATCAAGAGCAGTAGCCTTAAGCGATCGCCGACTCC  
AGCAATCAGCTATGGGGGTGATAATGAACCTTAGCAAGCTGATGAGAAAACAACGGAAATGGCTTCCCGAGAAGATCGG  
TATCAATCAGGCATCCACTTTTACAGGATTTTGTGCGATTCATGACAGAACTTATTTTATGCTAGAGAACGAAAAAT  
TTACAGGCACGGACGAGCAGTGTCTTGGCTTAAATGTTTCTGTTTCAATTTGCTAAAGAAAATTTATGCCAAAGAGGGGATG  
CTAFTCTTCTGATTTTGTCTAAAAATGCGGATAAAGGAAAGCTAACAGTTGAACAGTATTTATTTAGAAAATTAAGTACCA  
GCACCAAAAGTGGCTTAAATGACAGCAATAATGAATTAATAATCTTAAACTAGCCTCGACCGCATCTACTTAGCAGGC  
AATTTTTCAGAAATGAAAGTGTATCTTCACTTTTGCAGAGCCTTACCAATTTGATGTTTCTGCAATTTCTTACCGGAG

AGGGATTTTCGATGGGACCAAAATTCAGGATTTGAGCGATCTTACAGTGTGGCGGAACAAGTATGTTTCAATGCTTTTTTC  
CTGCGGAGGTAAAGGATATGTAGTGTTCAGTTGGCTGAGAACCTCAACAAATATCAGACGTTTTATACGGACACTAAATTA  
AGATCCAGCTAACAGGATGTTCAATACCTTCTGTATTTTTTTCACAAAGGCCGAAAATACATATTCATCCCTGAG  
TGGTGGGACAGGCTCAGTGATAAACAGCGAGAGAAATATCGGCAACATGATATATGTCAGGGGTTGAATTTTTTGGCAGACC  
TACATCAGGTTGATCATTCGGTTGATTATAACGCGCTGCACCTGAAGAGATAACATGCAGCAACAACGAAATTTGCA  
GCTGA

>Cluster\_39334

ATGCAGATTAACAACAGTTGCGCCAGCTGGCCATCCTCAGGCAGCAGTAGCACAGGCTACCGGAGTTTCCGCGAGCGGT  
TATCGCGCAGATGGTTAAATCACGGCCTGTGGCCGAAAAAGAAAGAACTACGGGAGCGCATCAGCACATTTTTTTCAGAAA  
AAGGTATTGAAGTGAAGGAGGCGCAGACGGCGCCACCCTGCACCGGTACATCATCCAGTGAGGACGAAAATATGTTA  
CTGGCAAAACAGGTATTAATCCAGCGCGAAGAACATTTTGGGTTGTTCCGCGACCCGTTCCGCGATGAGGTTATGCA  
GAGTGGCGCAGCAGTGTTCACCACGCCAGATATCCGCTACGTGCGTGAAGCACGTATCAGACCGCGGACATGGCGGAT  
TTATCTGGCTAGTTGGCGAATCCGGCAGGAAAAACACGCTACGCCGTGACCTGGCTGATCGCATCAACCTGAAAAAC  
GCGCCAGTTATCTCATCGAACCTACATCATTTGCGATGGAAGACAACGACGCCAAAGGCAAACTCTGAAAGCGGCGTC  
GATTTGGCGAGGCCATCATCAACACCATCGCACCCGCTGGAGAACGCTCAACCGCTCGCAGGAGGCCGTTACCAGCGATTGC  
ACCGGTTGCTGAAAGCTCGGCCGCGCGGTTCTCACATTTGCTGTTATTGAAGAGGCGCACTCGCTACCGGTTGCCG  
ACGCTCAAGCATTTGAAGCGGTTCTTTGAGCTGGAGGACCGGCTTAAAAAACTGCTGTGCTGGTGTGTTGATTAAGGAGC  
GGAGCTAAAGCTGAAACTTTCTGAACTAATCAGGAGGTGGCGAAGTGTACAGCGCTGCGAGGTCGTCGAACTGCTGC  
CGCTGGATAACTATCTGGAGCGTTCTGGCGTTCAAATTTACAGCGTACCGGGAAGGTTTCCGAGGTGCTGGATGAT  
AGCACGCCGATGCTATCCGCGCCGATATGTAATTCATCCGACCGGTTGACGTCAGTCTGCTTTATCCGCTGGCGCT  
GGGAATCTGGTTATCGCCGCAATGAATCTGCTGTATATCGCGTGGCGGTTGTTGATTAAGGAG  
TGTGA

>Cluster\_25643

ATGCATCGACAATCTTTTTCTTGTGCCCCTTATTTGCTTTTCTCCGCTCTCTGGGACGCTCCTGCAACGTTAAATGT  
CGAAGTACTGCAAGACAACTCGACCATCCCTGGGCGTGGCCTTTTTACCCGATAATCACGGTATGTTAATCACTCTGC  
GCGCGCGGAGTTGCGTCACTGGCAAGCAGGAAAAGGATTTATCTGCGCGCTTTCGCGGAGTGCAGGACGTTTGGGCGC  
GGGCGAGGCGGCTGCTGGACGTTGTTTAGCGCCGATTTTGTCTCAGTCGCGCCGATCTGGTTAAGTTATTTCCGAAGT  
TGGCGATGATGGCAAGGCGGAACTGCTGTGGTTATGGCCGTTAAGTGATGATCTCTCAAAAGTACCGACCTCCGCA  
CCGCTTTTCGTCAGATGCCAAAACCTGCTACCGGCAACCATTTTGGCGGGCGGATGGTATTCGACGGTAAAGGTTATCTT  
TTTTATTGCTCTGGCGCAAAACAATCAGCGCCGACGGCGCAGGATCTGGATAAAATACAGGGCAAACTGGTGCCTGAC  
CGACTGGGAGAAATCCCGGATGATAATCTTTTATAAAGGAAATCCGGTGTGCGCGCCGAGATCTGGTCTTATGGCATTC  
GTAATCCGCAAGGAATGGCGATGAATCCGTTGGAGTAATGCACCTATGGCTGAATGAACATGGCCCGCGGTTGGTATGAA  
ATTAATATTTCCGCAAAAAGGCAAAAACCTACGGCTGGCCGCTGGCAACCTGGGGAATCAACTATTTCCGGCTTTAAGATACC  
GGAAGCGAAAGGGGAGATCGTCCGCGGACCGAGCAACCTGTTTTTACTGGAAGATTCGCCCGCGGTGAGCGGCATGG  
CCTTCTATAACAGCGCAAAATCCCCAGTGGCAGCAAAAATTTATTTATTTGGCGCGCTGAAAGATAAAGATGTCATTGTG  
ATGAGCTCAACGGCAGAAAGTACAGAAAGTACAGAAAGTACCGGTTATTTTAAACGACAGAGGGCAGCGAATTCGTTCCGC  
TGGACCCGACGGTTATTTATACGTTCTCACCGACGAGTCCAGTGGGAAATTTACTTAAAGTTAGCCACGCAATTAG

>Cluster\_41232

ATGAAAGTTAAAGTACTGTCCCTCCTGGTCCAGCTCTGCTGGTAGCAGGCGCAGCAACCGTCTGCTGAAATTTACAACAA  
AGACGGCAACAAATTAGATCTGTACGGTAAAGTTGACGCGCTGCACATTTCTCCGATAACGACTCTAAAGATGGCGACA  
AGACTACATGCGTCTTGGCTTCAAAGGTGAAACTCAGGTTACGTGATCAACTGACCGGTTATGGTCAAGTGGGAATATCAG  
ATTTCAAGGTAACGAACTGAAAGTGACAATAGTTCTTGACCCGCTGTGGCATTTCGCTGGTCTGAAATTTCCAGGACGTTGG  
TCTTTTGTAGTATGGTCTGTAACCTACGGCTGTTTATGACGTAACATCTGGACCGCATGCTGCCAGAAATTCGGTGGT  
ACACCTACAGCTCTGACAACCTCATGCAGCAGCGTGGTAAACGGCTTCGCGACCTACCGTAAACCCGACTTCTTCGGTCTG  
GTTGATGGCTGAACTTTGCTGTTCAGTACCAGGTTAAAAACGGTAGCCGCTCGCGCAAGGTTAGTACGTTGGTGTGACCAA  
CAATGGTCTGTGATGTTCTGGAACAGAACGGTGCAGCGGTTGGTGGTCTATCACTTATGACATCGGTGAAGGCTTCAGCT  
TCGGTGGTGCAAATCTCCAGCTCCAAACGTACCAGCAGAGCAAAACAATTTAGGCATCGGTAACGGCATCGTCAGAGAAAC  
TACACTGGTGGTCTGAAATACGACGCTAACAATGTATACCTGGCTGCTCAGTACACCCAGACTTACAACGCAACTCTGGC  
TGGTGAATTTAGGTTGGGCGAACAAGCTCAGAACTTTGAAAGTGGTGCACAGTACCAGTTCGACTTCGGTCTGCGTCTCT  
CTGTAGCTTACCTGCAGTCCAAAGTAAAAACCTGAATGCCAACATCGCTGGTCTGACTTACGACGACGAAAGATCTGCTG  
AAATATGTTGATGTTGGTGGCAGCTACTTCTCAACAAAAACATGTCCACCTACGTTGACTACAAAATCAACCTGCTGGA  
CGACAACCGATTCCTGCTGACGCTGGCATCAACACTGATAACATCGTAGCTCTGGGCTGGTTTACCAGTTCTAA

>Cluster\_60645

ATGCTAACTTTATCAATATTCATGTTCTGATCTCTCACAGCCCTTATGCTCTGAACCGGACGATATGAACATGCGAGAA  
AGACGCTATTTTCGCGGCAAAAAGCAGGATAAGAAATTTCAAGTCAAAGCCTTAAACGTCGATGCGTAAAGTGGTTATTT  
ACGCACAAAATATTTGGTGAATCCAGTCTCAGAACCATTATCTTGACAAATACGTGATGTTCTTCGCAAAAACCTGGT  
GAACGTTTTGACCAAAAATCATCGATAAGACATTAGCGCTGCTTCCGGTAAATCAGTTGATGAAGCCGAAAAGATTTTC  
TGCCGATCGGTTACTCCTGGGTTGTTGGGAGAAATAGCCTGGTCTCTGTGAGCAGGTTGCAAAAAGCAGGCTGATAATC  
TGGATGATAAAAAGCTCCTCAAAGTTCTTAAAGGAAGATATTGCCGCCATACGTGTGAATTTACAGCAGGGTGTGATATTT  
GCGCTTAGTGAAGAATGGCAACAGCGCATGATGACTGAGTTGGGAAAAGTTGATGGTGAATGTCATTGGCGATGC  
GATCACTACTCATCAGGTTGATTTCTGATATTGACTGGTTACCCTGTAGATGATTTACAGGAACAAGGTTCTGCACATC  
TGGGAACCTCAGAAATTTTATCGGGTGTTTTTTATCGTTATGCCAACATTAACCTCGCTCAACTTCAAGAAAATTTAGGT  
GGTGCCTCCAGGAGCAGGCTCTGGAAATTTGCAACCCATGTTGTTTATGCTGGCAACAGAGGTTCCCTGGAGCAAAAACA  
GCGTACTTTATCGGCTTTTAAACCTGCGGATATGGTAATGGTTAATTTCTCCGATATGCCACTTTCTATGGCAAAATGCTT  
TTGAAAAGCGGTTAAAGCGAAAGATGGCTTTTTGCAACCGCTATACAGGCGTTTAAATCAATATTTGGGATCGCGTTGCC  
AATGGATATGGTCTGAACCGGAGCTGCTGCGCAATTCAGCTTATCTGATGTAAGCCCAATTAAGTCTGCTCAAGTTAAACAAAT  
GCCTACTTTAGAAGCTTAAATCCTGGGTTGTAATAATGGCGAGGCGTGA

>Cluster\_16075

ATGATCACATATACCAAGCAATTTACTGGACGACCCGGTGAAGCTCTGGTGAATACGGTTAATACCGTCCGTTGTCAT  
GGGAAAAGCAGTCCGTTGATGTTTAAAGAGCGCTTCCCGCAAAATATGAAAGTCTATGCCCTCGCCTGCAAAACAAAAGC  
AGGTGATCACCGGCAAAATGTTCAATACCGAAACCGGGAACTGATGGGACCGCGCTGGATTGTTAATTTCCGACCAAA  
CAGCACTGGCGCGCTGATTTCCCGCATGGAGTGGATTGAAGATGGCTTGCAGGACTTACGCCGCTTTTTGATTGAAGAGAA  
CGTGCAGTCCATGCCATTTCCACCCTGGGCGCAGGCAACCGTGGTTGAACTGGCCGGACGTTCCGGGCGCAGATGAAAT  
CTTCCCTTGGCGACCTTACAGGCTTGAATATCTTCAACCGACTGAAATAACAGAAATACAGAACTTCCGCAAAAGCACT  
GGCGTAAAAAGCTCACTCCCGCAGAGCCGCAATCGTGAACGGTGGCTGCTACTGGGTATTTGGGATGGAGTGCAG  
CCTACTGGAATCCAGAACTGGCCTGGCTGTTTCAACCGCCATTTGAGCAGCATCAACAGGACGATACTCTAACTGAC  
GGTTTGAAGCTCACTAATTTAGCCCTATGCGCCATGCGCAATCTGAACCATCTGCTTAAATGCTGGACGGCAGCCTATCTTAA  
GCCGAGAAACGATCCCGGACAGCAACCGCTGGATGTTGATCTGGTTTAAACGATCAGAAAAAGAACCGTTAATGCGTGA  
TCTGAACAACGAAGCCAGAGAGTGGCTACCTGCGCTGGAGCAGGTCAGCCAGTTAATTTGACGGCTTTGATCGCGGTTT

GTCTGGAGTTGCTGGCAACCGTAGACTGGTTGCTGAGCCGTGGCGAATGTCAACCAACCGTGGACTCCGTTAAGGAAGGG  
CTGCACCAGTGGCCTGCGGGCGAACCGTGGGCCAGCCGTAAGTTGAGGCTGTTTGATAATAATAATCTGCAATTTGCCAT  
TAACCGCGTAATGGAGTTCCATTGCTGA  
>Cluster\_41011  
ATGAGCACCGTACTATTACCGATTTAGCGCGTGAAAACGTCCGCAACCTGACGCCGTATCAGTCAGCGCGTCTGCTGGG  
CGGTAACGGCGATGCTCTGGCTGAACGCCAACGAATATCCCACTGCCGTGGAGTTTTCAGCTCAGCAACCGCTCAACC  
GCTATCCGGAATGCCAACCGAAAGTGGTATGAAAATACCGCAATATGCAGCGTAAAACCGGAACAGGTGCTGGTTC  
AGCCGTGGCGGGACGAAGGCATTGAACTGCTGATTCGCGCTTTTTCGGAACCGGGTAAAAGACGCCATCCTCTACTGCC  
GCCAACGTACGGCATGTACAGCGTACAGCGTGAACCAATTTGGCGTGCAGTGCAGCGACAGTGCAGCGTGGACAACCTGGC  
AACTGGACTTACAGGGCATTTCGACAAGCTGGATGGCGTAAAAGTGGTCTATGCTTGCAGCCCAACAACCCGACCGGG  
CAACTGATCAACCCGAGGATTTTCGCACCCCTGCTGGAGTTAACCCGCGGTAAGGCGATGTGTGTTGCCGATGAAGCTTA  
TATCGAGTTTTCGCCCGAGGCATCGTGGCTGGCTGGCGGGAATACCGCACCTGGCGATTTTTCGCGACACTGTCCA  
AAGCTTTTGTCTTGGCGGGCTTTCGTTGCGGATTTACGCTGGCAACGAAGACGTCATCAACCTGCTGATGAAAAGTGATC  
GCCCCCTACCCGCTCTCGACGCCGTTGCCGACATTGCCGACAGGCGTTAAGCCCGAGGGAATCGTCGCCATGGCGGA  
ACGGGTGGCGCAAATATTCGAGAACCGCAATACCTGATTGCCGCACTGCAAGAGATCCCTCGGTGGAGCAGGTTTTTG  
ACTCTGAAACCACTACATTTCTGGCGCTTTAAAGCCTCCAGTGCAGTGTAAATCTTTGTGGGATCAGGGCATTATC  
TTACGTGATCAGAATAAACCAACCCCTTTTAAAGCGCTGCCTGCAATTACCGTCGGAACCCGTGAAGAAAGCCAGCGCT  
CATTGACGCCCTTACGTGGGAGCAAGTTTGA  
>Cluster\_8006  
ATGGCTATCGACGAAAACAACAGAAAGCGTTGGCGGCAGCCTGGGCCAGATTGAGAACAATTTGGTAAAGGCTCCAT  
CATGCGCCTGGGTGAAGACCGTTCCATGGATGTGAAACCATCTTACCGGTTTCGCTTTCAGTGGATAFCGCGCTTGGGG  
CAGGTGGTTCGCCGATGGGCCGTATCGTCGAAATCTACGGACCGGAATCTTCCGGTAAAACACGCTGACGCTGCAGGTG  
ATCGCCGAGCGAGCGTGAAGGTAAAACCTGTGCTTATCGATGCTGAAACAGCGCTGGACCCAATCTACGACGTA  
ACTGGCGTGAATTTACGCAACCTGCTGTGCTCCAGCCGACACCGCGGAGCAGGCACTGGAATCTGTGACCCCTGG  
CGGTTCTGGCGCAGTAGACGTTATCGTCTGACTCCGTTGGCGGCACTGACGCCGAAAGCGGAAATCGAAGCGAAATC  
GGGCACTCTCACATGGGCCCTTGGCGCACGATGATGAGCCAGGCGATGCGTAAGCTGGCGGGTAACTGAAGCAGTCCAA  
CACGCTGTGATCTTCAACAGATCCGATGAAAATTTGGTGTGATGTTCCGGTAAACCGGAAACCACTACCGGTGGTA  
ACGGCTGAAATTTACGCAACCTGCTGTGCTCGACATCCGCTGATCGGCGCGGTGAAAGAGGGCGAAAACCGGGT  
AGCGAAACCCGCGTGAAGTGGTGAAGAACAATACTGCTGCGCGTAAACAGGCTGAAATCCAGATCCTCTACGGCGA  
AGGTATCAACTTCTACGGCGAACGTTGACCTGGCGCTAAAAGAGAAGCTGATCGAGAAAGCAGGCGGTGGTACAGCT  
ACAAAGGTGAGAAGATCGGTGAGGTAAGCGAATGCGACTGCCTGGCTGAAAGATAACCCGGAAACCGCGAAAGAGATC  
GAGAAGAAAGTACGTGAGTTGCTGCTGAGCAACCCGAACTCAACGCCGATTTCTCTGTAGATGATAGCGAAGCGGTAGC  
AGAACTAACGAAGATTTTTAA  
>Cluster\_14843  
ATGTTACGATCATTATGTTCTCTGCTCCTACCAGCGTTAGCGGAATGAGCTATGCCTCCTGCGCCGGCAGCGGCATCGT  
TTATGGCACACCGATTACCATTTGATTTATCGGATAAGTTGAGCCCGGCCACGCCACATGGACCGGCAGCTTACCACCC  
AGTACAGCGGCTCGTTCAACTGTACGACCGGTAAACAGTGAATTTTCTTACACGCCGATCCTCTCGACCGACGACAATAC  
CGGACCATCTCGGATTCAGCAACAAGTATATGGTCCGGCGGAGATCACCAATCCCCGGCAAATAAAAACCCCTGTC  
TGACCGCGCTCACCATACCGGCTGAGTGAATACACCGTTTACGGTTCGCTTACCCTCGTTAACAGAGCGGCACCA  
CCCTGACGGGGGATACGGCGAACATGAGCGACGTTCTGTTCTGCTCAGCGACATGAGCGGTTATCTTTCTTGGAAATC  
GCCTGGCCAAATCAAGCAGCTCGTCAAGATAGTGCAGTGGTTATCAACGGGTTCAAGTGGCCTTACGACAACCGGAT  
GTTTGGTCAGCCGATGATCAATAACCGCCAAAACCTGACTACCTGTTCTTGTATAATGCGGGGCTGACCGTGGCGC  
TGCCGACGCTCGGCATTCACAGCTCAGCATCCTCAGCCGGGGCTGACGCCCTTTTTCAGTGAACATGAGTGTCTAG  
AACGTCGGGGTAAATGGCAATTCGATCGGGCAATGAGATGTTCTGTCAGCGCGCAGCTGCTTTCGACCGACAGCTC  
GGTGTGATCGACAGCAGCAGTAGCGCGCGCAGGGCGTGGGGCTCGCCTGATAAAAAGTGCAGCCCGCAACCGCGG  
TGACCTTCTTACCTCAACCATCAGCCGTTGGCAACGCCACAATAATCTTACGCGTGGCGGCTGGCGGGCGCTGGACGAA  
CATTTACCCCTTCCGATGGCGGCTACTATTACGTGTGGGCACCCGCCAGGTAAGCCAGGTAAGATCAATACATCGGC  
TACGCTGAATATTATCTACCCCTGA  
>Cluster\_41341  
ATGGCTGGAAATACAATGGACAACCTTTTCGCGTAAACACCTTTCGGCGAATCGCACGGGCTGGCGCTCGGCTGCATCGT  
CGATGGTGTTCGCGCAGGCATTTCGCTGACGGAAGCGGACCTGCAACATGACCTTGATCGTCTGCGCCTGGGACATCCG  
GCTATACCACCCAGCGCCGCGAGCCGATCAGGTCAAATTTCTTCCGGTGTTTTGAAGGTGTTACTACTGGCACCAGC  
ATCGGATTTGATCGAAAATACCGACAGCGTTCAGGATTAAGTGCATTAAGGACGTTTTCGCTCCAGGTATGCTC  
CGATTACACCTATGAACAATAACCGCTGCGCGATTATCGCGGCGTGGCGGTTCTTCCGCCGTTGAAACCGCTATGC  
CGGTTGACGAGGGCGGATTTGCCAAAATAATCTGCGCGAATAATTTGGCAATTTGAGATTTGAGATTTGCGGTTGCT  
GGCGACATTCGCTGGAAATCAAAGACTGGTCTGTTGAAACAAAATCCGTTTCTTCCCGGACCCGGACAAAATCGA  
CGGTTAGATGAACTGATGCGCGCGCTGAAAAAAGAGGGCGACTCCATCGGCGTAAAGTACCGTGTGTCAGTGGCG  
TTCTTCCGGACTTGGAGCCGCTTTGATCGCTTATGATGACATGCGCCATGCGCTAATGAGCATTAACGCGGTTG  
AAAGGTGTGAAATTTGGTGTGTTTGGACGTGTTAGCGCTGCTGCGAGCCAGAACCGGACGAAATCACCAGAGCGG  
TTTCCAGAGCAACCATGCGGGCGCATTCTTGGTGGTATCAGCAGCGGCGAGCAATCATTTGCCATATGGCGCTGAAGC  
CAACCTCCAGTATTACCGTGGCAGGCGCACTATTAACCGCTTTGGCGAAGAAGTTGAGATGATCACCAGGCGGCTCAC  
GATCCTTGTGTTGGGATCCGCGCGGTCCGATCGCAGAAGCGATGCTGGCGATCGTTTTGATGATCAGCTGCTACGGCA  
CGGGGCGAAAATGCCGATGTGAAGACTGATATTCCACGCTGGTAA  
>Cluster\_20123  
ATGTGCAAGAATTACCATATTGCCGTTTTGCGCCGAGATGGGATCGGGCCGGAAGTGATGACCAGGCGCTGAAAGTGCT  
GGATGCGGTGCGCAACCGCTTTGCGATGCGCATCACACCAGCCATTATGATGTAGCGCGCAGCCATTGATAACCAGC  
GGCAGCCGCTGCCGCTGCGACGGTTGAAGTTGTGAGCAAGCCGATGCCGTGCTGTTTGGCTCGGTAGGCGGTCGGAAG  
TGGGAACATTTACCACAGACGACGAAACGAGACCGCGCGCTGCTGCCCTGCGTAAGCACTTCAAATATTCAGCAA  
CCTGCGCCCGGAAAACGTATCAGGGGCTGGAAGCATTTCTGCTGCGTGCAGACATGCGCTAACGGCTTCGACA  
TCCGTGCGTGGCGGAACTGACCCGCGCATCTATTTCGCTGACGCAAAAAGCCGCAAGGTAGCGGCAAAA  
GCGTTTGAATACCGAGGTGATCACCGTTTTGAGATCGAGCGTATTGCCCGCATCGGTTTGAATCTGCTCGTAAACGTCG  
CCATAAAGTGACGTCGATGATAAAGCCAACGCTGCTGCATCTATTTTATGGCGTAAATCGTCAACGAGATCGCCA  
CGGAATACCCGGATGTCGAATGGCGCATATGTAACGACGCAACCGCACCATGCGAGCTGATTAAGATCCATCACAGTTT  
GAGCTTCTGCTGCTCCAACTGTTTGGCGACATTTCTGCTGACGAGTGGCGAATGATCACTGGCTGATGGGATGTT  
GCCTTCCCGCAGCTGAACGAGCAAGTTTTGGACTGTATGAACCGCGGGCGGCTCGGCACCCGATATCGCAGTAAAA  
ACATCGCCAACCCGATTCGCAAAATTTCTGCTGCTGGCACTGCTGCTGCGTTACAGCCTGGATGCGGATGATGCGGCTTCC  
GCCATTGAACCGCGCATTAACCGCATTAGAAGAAGGATTCGCACGGGATTTAGCCCGTGGCGCTGCGCGGCTTAG  
CACCGATGAAATGGCGATATCATTTGCCGCTATGTGGCAGAAAGGGTGTAA  
>Cluster\_36290

ATGGGAAGAAGGCGAAGTCATGAGCGCCGGGATTTACCCCTAACCTTTATATAAGAAACAATGGATATTACTGCTACAG  
GGACCCAAGGACGGGTAAAGAGTTTCGGATTAGGCAGAGACAGGAGGATAGCAATCACTGAAGCAATACAGGCCAACATTG  
AGTTACTCTCAGACAGCGGACGGGAGTCACTGATAGACAGAATTAAGGCGCTGACACAATCACTCTTATACGTTGGCTT  
GCCGATATGAAACAATCTCACCGAAAGGGGATCAGACCGAAAACCTACTCGACTACGCCAGCAAAATCAGGGCAAT  
CCGAAGAAAATTGCCGGCAAAACCGCTCACTGACATATCAACGAAAGAGGTGGCTGCAATGCTAAACACCTACGCTCGCAG  
AAGTAAAGCAGCGTCCGCAAGAGTAATCAGGTCACCCCTGTGACGTTTTTTCGTGAGGCAATAGCCGAGGGGCATGTG  
GCAACGAATCCGGTAAACGCAACCGCGCAGCAAAGTCAAGAGTAAGGCGCTCAAGGCTGACAGCTAATGAGTATGTCCG  
GATTTACCATGACGCCGAACATCTCCCAATCTGGCTGAGGCTGGCAATGGATTGGCTGTCTGTTACAGGGCAGAGAGTGA  
GCGATTTATGCAAGTAAATGGTCAGACATAAACGACAAACCACTTTCACATTGAGCAGGGTAAACACAGGGGCTAAGCTC  
GCCATTCCGCTGACGCTAACGATTGACGCGCTCAATATCTCATTGGCTGATACACTACAGAAATGCAGGGAGGCCAGCGG  
CAGTGAACAATAATGTCATCAACGCATCACGAACCGCTTCCCGGAAAACAGTATCTAAGTATTTTACAAAGGCGAGAA  
ATGCATCTGGACTCTCATTGTGATGGAGACCCGCCAACATTCATGAACGCGTAGCCTGTCCGGCAGGGCTATACCGGAAT  
CAGATTGGCGATAAAGTTTCTCAACGCTTCTCGGGCATAAATCAGATCAATGGCGGCGCGGTATAGGGACAGCCGAGG  
GAGAGAATGGGACAAAATGAAATCAATAAATGA

>Cluster\_36996

ATGAAAAAATATCTCGCGCTGGCTTTGATTGCGCCGTTGCTCATCTCTGTTTCGACGACCAAAAAAGGCGATACCTATAA  
CGAAGCCTGGGTCAAAGATACCAACGGTTTTGATATTCGATGGGGCAATTTGCCACAAATATGAGAACATCTGGGGCT  
TCAAAGAGGTGGTGATCGCTGGTCTAAGGACTACGTGAAATACACCGATCAATATCAGACCCGACGCCATCACTTC  
GATGACGGTACGATTAATCTGAAACCAATCGCCGGGACAGAACCTGCCGCGCATTTGCCCGGGCAATATCAAACCGTT  
ATTGATGGGTGACGATCCGAGTTCCGTCGATCTTATCCGACGTTGATGATAATCAGATTTCGAAAGAACCTTCTCTTT  
ACGGTCAGGTGGTGGACAACCGGGCAGCCGATTCGCTGGGAAGGTCGCGCAAGCAACTTCGCGGATTAATCTCTGAAA  
AACCGTCTGAAGAGCCGACGCAACGGGCTGCGTATCATCTACAGCGTACCATTAAATGGTGGCGAACCCACCTTGATAA  
ACGTGGCGCAAAATATCTCGGCAATGGTCCGCCAGGCGTACGGAATAATGGCGTTGATGAGTCCGCTGATTTCTGGCAATTA  
TGCAGACCGAATCTTCTTTAACCGTATGCGGTCAGCGCTCCGATGCGCTGGGATTAATGCAGGTGGTACAACATACT  
GCCGGGAAAGATGTGTTCCGCTCGCAGGGGAAATCCGGCAGCCGAGCCGAGTTCTTGTGTTGATCTGCCAGCAATAT  
TGATACCGGCACCGGCTATCTGGCGATGCTGAACAATGTTTATCTCGCGGAATGATAACCCAAATCGCGGCTTATG  
CCGTCATCACCGCTATAACGGCGGCGCAGGACGCGTGTGCGAGTCTTTTCGAATGATAAGATTGAGGCTGCCAATATT  
ATTAACACCATGACCGCGGCGATGTTTATCAGACGTCAGCAGCCGCCATCCCTCTGCGGAATCTCGCGGTTATCTTTA  
TAAAGTGAATACCGCGCAAAAATCTACCGCGCGGATAA

>Cluster\_34619

ATGGGAAGAAGGCGAAGTCATGAGCGCCGGGATTTACCCCTAACCTTTATATAAGAAACAATGGATATTACTGCTACAG  
GGACCCAAGGACGGGTAAAGAGTTTGGTTTAGGCCGAGACAGGCGAATCGCAATCACTGAAGCAATACAGGCCAACATTG  
AGTTATTTTTCAGGACACAAAACAAGCCCTGACAGCGAGAATCAACAGTGATAATCCGTTACGTTACATTCATGGCTT  
GATCGCTACGAAAAAATCTTGGCCAGCAGAGGAATCAAGCAGAAGACACTCATAAATACATGAGCAAAATTAAGCAAT  
AAGGAGGGGCTCTGCTGATGCTCCACTTGAAGACATCACCAAAAAGAAATGGCGCAATGCTCAATGGATACATAGACG  
AGGCAAGGCGGGCTCAGCCAAAGTTAATCAGATCAACACTGAGCGATGCATTCGAGAGGCAATTAAGCCGCCCGGGAA  
TCCTGGAGACTAACTCCCTGAGAAAGAGGTAA

>Cluster\_9706

ATGAAACAGATTTCTTTCTTTATTTCTCTGCTGGGACCTTATTACTTTCCGGCTGTGCCGGAACAGTACGGAATTTGA  
GTGTAACGCCACCATCCGATACCTGTATGACGATGGAGCAGGCCAATGAGAAGGCCAAAAACTGGAGCAGTCCCTCAG  
AAGCAAAGCCGGTTGCGGGATCACTGCCGCGCTGGCTGAAGGAACTTCCGGACAATGCCGGTGCAGACCGTACCCGG  
ACCACTCCGTCGGCAGCAGACCTGCGGTGACAGCACATCCGGAGCAGAACTGCTGGCACCTCGCCCGCTGTTTACCGC  
TGCCCGGGAAGTGAACCGGTTGTTCCGGTCAGTTTACGTTTACCGGCTAACACTCCTCGTCCGCTAAGAACCGGTCAGC  
AGACGGCAGCATTTAGGATAGCGCTTATATTGATAACAGGATGTTTATCATCAGCCATCCAGCGTGTTTTTTGTATT  
AAACCGTCTGCGTGGGAAAACACGATTAATTA

>Cluster\_25472

ATGAATCAACAACCTTTTGTGATGACAGCACCTTATCCGCAATTTTGTCTTTCATGATGAGTTACACAACTCAAAGATCGAGG  
ACTAACCGCGGGGGCGTCTTCGATTATCACAGCCGCTATAAACTCGTCTTTCGCGCATTCACAGCCGAGTACCGCA  
AATTTGGCCCGTTTGTGGCTGATATTACCGGTTGGCAAAGTCTGGATGACTATTAACAACAGTACCGCCAAACCGGTAAT  
GTTTTGCTTCTCACCTGCCAACCGGCGTATACATAACGTTTTGATGACAGTTCAGGATAATTTTCGCCACATAT  
TGATTTCCAGAAAGCCAGCAGCTGGCAGCGCTTATCGACAGTTATCGCCGTTGGCGAGCAACCGCTTCTTGGCCCGCTGA  
TGCGTATCAAACACTATATGGCGCTTATCTGACGCTGGCTTTCAGGGCAGCGTATTTTCGAACCTTTGGCCGCGTGTG  
ATTAACCTGCGCATGACAGGATTTTATGA

>Cluster\_41986

ATGGCGACGCTGACAGAAGATGATGTGCTGAGCAACTGGATGACAGGACAAATTTATTTTATTTATGAAAACCTGCGCA  
TTCATTTTGTCTCAGGGGATACGCCAGTTTCTGCGCTCGCTGTTTGTGATAACGATGAAGAGATCGTGAATATGCAG  
TGAAGCCGTTACTCGCCAAAGCGGCCGCTTGGACGATATGATGTTGCGCTGCGTTTTGATTTATGCGCTGGGAAAAATG  
GATAAATGGCTGTACCGGATATCAGCATTTTCCAGTTTGGCATTACCTGAACGAAACAGGATGAACAGCCCGGAT  
TGCCGATGACATGACCTGGGATTTTATCAGCAACGCTCAATAGCATAAATGCAATGCGACGCTCTATGACCGCTTGAAG  
CGATGAAGTTGCGCGATTTGCGCGTCTGGTCAGAGGCGGTTTTAGCGGGATGGTCAAACCGGCGTACGCTGGCAGTA  
ACGACCACCTTAAAGGAATTAACGCCGTGA

>Cluster\_59449

GTGAACATTAATAGAGATAAAAATGTACAACCTGTAGATACCGATACTATTGAAAACCTGACATCCGCGTTGAGTCAAAG  
ACTTATCGCGGATCAATTAACGTTAACTACCGCGAATCATGCACCGCGGTAAGTTGGCTAGCGCCCTGTGTGCAGCTG  
AAGATACACCAAAATTTACGGTGCAGGCTTTGTTACTTTACCGATCAGGCAAAAGATGAAAACTCCTCAGCGTAAAGCCAG  
CAATCTCTTGAACGATATCTGCGGTGAGTGAGAAAGTGGCAGCAGAAATGGCAACCGGTCGCAATGAGCGTGGCAGTGC  
TGATGTCAGTATTGCCATTACCGGCTACGGCGGACCGGAGGCGGTTGAAGATGGTACGCCAGCGGGTACCGTCTGGTTT  
CGTGGCATATTAAGGCCAGAACTACACTGCGGTTATGCAATTTGCTGCGGACTGCGAAACCGTATTAGCTTTAGCGGTT  
AGGTTTGGCCCTGCCAGCTGCTGCAATTAAGCTATAA

>Cluster\_9577

ATGTCATCCGTTTTGCCCAGAAAGCGGATTTGCTGCTGCCATTGCGGAAATTTATAACCACCGCGTGTGTATACGGCGG  
TATCTGGAATGACAAACGGTTGATGACAGATAACCGCATTCGCTGGTTTGAAGCGCGGACCATAGCAGGTTATCCGGTGC  
TGGTGAAGTGAAGAAGATGGCGTAGTGCAGGATATGCCCTGTTTTGGCGACTGGCGTAGTTTCGATGGTTTTCGCCATACC  
GTGGAACATTCGGTTTATGCTCCATCCCGATCATCAGGGCAAAAGTCTGGGGCTAAATTTGTTAAGCGGATGATGATGA  
AGCGCGGATTTGCCGGAAGCATGTCATGGTCCGCGGATCGAATCGCAAATCAGGCTCGCTGCATTCGACCAGTCCG  
TGGGATTTGCTGCTCACCGCAAAATGCCGAGTGGGCACTAAATTTGGGCGCTGGCTGGATCTGACATTTATGCAATTG  
CAACTCGACGACGCACTGAACCGGACGCGATTGGATGA

>Cluster\_62799

ATGAGAAGAGACTCTTTAGCTGTTTCTGCGGGTTACTGTGGATTTCCAGTGGATGGGCGACTGACCCCTTTGGGAACGAT

TAATATCAAAATTTGCACGGTAACGTTGTTGATTTCTCCTGTACCCTAAACACTGCGGATATTGATAAGACGGTAGATTTAG  
GCAGATGGCTACACACAAATTACTGAACGCTGGCGATACCACGGCACTCGTCCCTTTTAGCCTGCGGGTGGAGGGATGT  
CCTCCGGGTTAGTTGCGATTTTATTTACGGGAACCGCGCATCCGATACCACTGCTGGCTCTGGATGATCCCGCAAT  
GGCGCAAACCATCCGCATCGAATACGTAATAGCGATCCCTCCGGCTCGCACTGGGAGCGGGGAGCCGACTGAGGAAG  
TAGATGCAAAATGGCAATGTCACACTAAACTTTTTGCAATATCGAGCGTTAGCCAGCGGTGTTCCGGCCAGGTGTGGCG  
AAAGCGGATGCGATATTTATGATCAATTTAATAATTA

>Cluster\_48519

ATGCCAACACCGTGTATATCTCCATCACTGGTCAGACCCAGGAAATATTACTGCAGGTGCATTTACCCTGATTTCTGT  
CGGCAACATCTATGTGACGGGGCACGAAGACGAGATGCTGGTGACGAATTCCTGCATAACGTTACTGTCCCGACCGATC  
CTCAGTCCGGTACGCTGCGGGTACGCGTGCTCACAAGCCTTTTACCTTTTACCCTGGCGTGAACAAAGCGGTTCCGCTG  
ATGTACAACGCACTGGCTCCGGCGAAATGCTGCCAACCACTGAACCTTCACTGGTGGCGTACCTCTGTGGAAGCAAAACA  
GGAGCATTTACTACTACCCGCTGACTGATTCGACGATTTGTCGATATGAAACTGCATATGCCGCTTCCAGGACCCGG  
CGAAACGCGGACTTACCAGTTGCTGCAAGTTTCACTGGCCTACCAGCAAAATTAAGTGGGAACACGTCAAATCTGGCACC  
TCCGGTGGCAGACTGGCGCGCACCCTGGAAGCATA

>Cluster\_65567

ATGAAACAATCTTACTTTATCTTACGGGTTATCCCGAGCAGTACTTTCCAGGTGCGAACGCTGATTAACGAACAGCGTCT  
GGCGGATGTGCTGCAAAACGCTATCCGGGAACACAGACTACGCCACCGATAAAGCCCTCTGGCAATATACTCAGGATC  
TGAAAAATCAGTTTCTGCGTAATGCCCGCCGATCAATAAAGTGTATGACAATAAGATCCATGTGCTAAAAAACGCG  
CTCGGGTTACATACCGCTTTTCTCGTGTCAGGGCGGCAAGCTGAAAGCAAAAGCAGAGATCCCGCTCGCTACTGTGTT  
TCGCAACGCGCCGGAACCGTTTTTACGTATGATCGTGGTGCACGAACCTGGCGCACCTGAGGAGAAAGAGCATAACAAAG  
CGTTTTTACCAGTTGTGCTGCAATATGGAGCCGACACCGCAGCTTGTAGTTGACACCCGGCTGTGGCTAACCGCATTTG  
TCGTTGGCAGGACAAAATCTGA

>Cluster\_32105

ATGAGACTGACATCTAAAGGGCGTATGCGGTGACCGCAATGCTTGACGTTGCGCTCAACTCTGAAGCGGGCCCGGTACC  
GTTGGCTGATATTTCCGAACGTCAGGGAATTTCCCTTTCTTATCTGGAACAACGTTTTTCCCGTCTGCGTAAAAATGGTC  
TGGTTTCCAGCTACGTGGACAGCGGTTGTTTCTGTTAGGCAAAGATGCCAGCAGATCGCGTTGGCGAAGTGAT  
AGCGCGTTGACGAATCTGTAGATGCCACCCGTTGTCAGGGTAAAGCGGGCTGCCAGGGCGGCGATAAATGCCTGACCCA  
CGCGTGTGGCGTGATTTGAGCGACCGTCTTACCGGTTTTCTCAATAACATTACTTTAGGCGAAGTGGTTAATAACCGAG  
AAGTGTGGATGTGCTGGTCTGACATACTCAGACGCGCCACGACCCCGCACACAAGACGCGATCGAGTTAAGTTA  
CGCGCTTAA

>Cluster\_23051

ATGAAATCGTTAATTTATCGTTAATCCGGTACGATGTTGCGTCCGCTACTTGTGAAGTGGCTGTGTGGTCTGCTACCC  
TTCAGAACAGGAGTTGAATGCCGATATCTTTTTACCCCGCTGAAGGTACAACGGCTGGATAGCATCAGTGGCCCGTGA  
TGTGCCATCAGTGTGAAAACGCCCTTGTGTTGGCGCTGCCCCGTGGGGCGCTGACGATGGGCGAGCAGGTGGTGCAG  
GCCAATTCGCCCGTTGTATGGCTGTGAGGTTGCGTTCAGTTCGCGTCCGCTTTGGAAATGATCACCATTGAGTCAATGCG  
GGGGATACCCGGCAACAAATCGTGAATGCGATCTCTGTGAACAGCGGGAAGAGGGGCGCCGCTGCGTTGAATCTGGCC  
CGACACAGGCGTTGACGTTGCTGACTGAAAGAGAACTCAGGCGAGTCCGCCAGCAGGTTATTGCTGCCAGCGGTGAGAA  
CCTCTGTGA

>Cluster\_39474

ATGGCAGCACAAAGGGCAACCGATTTTGGGAGCCCGCAGTAGTATGGGAGAAAACCTAAATTCGAATCGCCTGAGGC  
GCTGTGGGTGCTGTGTTGGAATACTTCGAGTGGGCTGATGATAACCCACTATGGGAGGGTAAGGTATTTTCATATCAGG  
GAGAAATAATTAAGGCTAATGTCCCTAAGATGCGAGCCATGACTATTTTCAAGATTTGTGTACCTTCCTTGATATCACCAGG  
CAAACGTGGGGAACCTTCCGGTCAATGGAAGTTTTTCTGACGTCACATCACAGCGGAAGACATCATCTACGACGAA  
ATTTCTTGGCGCAGCCGCTGACCTTCTCAACGCTAACATAATCGCCCGGATTTGGGCTCAAAGAGCAGTCCGCAAGTTG  
AAGACGTGACACCTGATAAGGGAGATCGCGATAAGCGACGCTCTCGTATCAAGGAGCTTTTCAACCGTGGAACTGGACCG  
GATTTTGA

>Cluster\_62514

ATGAAGCAATGGGATCAGCGTCCATTCGAGATAAGAAATCTTTTCAATCCTGCATTTTGTGGTGTGTGCTATTTAGAGC  
AATGCAGAGCTACGAAGAGGAAAACCTCACAGGGCATGCCATTTTCTCTGGCTCTTTTAGTTTTTACCATTATGTCTGCAA  
AAGATTTCTGCCAAGTGTGTTGCTGAAAATCCTCGCCGCTACCTTTTGAACCTATAGAAAACAATCCCAAATTTACTCGTT  
AATTTTGTGTAACCGCTCAATAATATGCTTCCATTTACGCTTGAAGCTTTTGGAAATGCTCATGGAACGAGGATGTTTTGT  
TGTAACACAAGACGGCCGGTTGAAAACAGTACCTAATAAAGTTGCAAAATCGGTCATAGGGACTGAAGAACTATCTCAT  
GCCAGCGTGTGCAAGCTATATAGGAAAAGAAATTTGCCGATTTGCTGATCGCCTTACGGTATACACGACCTTTGGAATA  
CGCCATGA

>Cluster\_45405

ATGCAACGCTGCGCCACCATTCACCGCCACAGGTTTATGAGATATGGGCGCTACTCAGCCAGATCCCGGACCCGGAGAT  
CCCGGTGCTGACCATTTACCGATTTAGGCATGGTGCCTAATGTGACACAGATGGGAGAAGGATGGGTGATCGGCTTTACCG  
CGACTTATTTCCGGTTGTCGGCAACGGAACATTTGATTGGCGCGATACGTGAGGCAATGACAACCCACGGGTTTACCC  
GTTTCAAGTTGTGCTGCAACTCGACCCGGCATGGACCCGACTGGATGACCCCGATGCCCCGCTGAGCGCTGCGACAGTA  
TGGCATTAGCCCGCCGCGGACACAGTTGCCATGCCATTTGCGCCAGAAGTACGTTGCCCGGCTGCGCCAGCGTCC  
ATACCACACTTATCAGTGAATTTGGTTCCACGGCTGCAAAAGCATTTGATCGCTGCGATAGTTGCCCGCAACCTTTTCGAT  
TATTTCAAATGATTTGA

>Cluster\_31

ATGCTTCTCAGATCAAACAGTATGAACTGGAAAGATTACCTGAATTTTGGCAGAATATGGTATAAGAGAAATCATAGT  
TAGCCTTCTTATGTTTCTCCCTCTAAAGATTTAGAGGAGGAAATGCTTTGCTCCTCAAACCTGAAGAGGATTTTAACTCC  
TTAAAAAGCGGGCTTAAAGTTTAAAGTGGCTGAAAAGCTAAAATCTTGGCTTAAAGATGATTTTCAACCTACCGCTTCTG  
TCTCAAGGAAGGGTATGTAGCGAAAACCGATAAAAAGCCTTTTCAATTAACCTCCCTTGGAAATGGTATCCCATGCGTGT  
TACAGGAATTTCCAGTCAAACAAAACAAACGCTTATTTGGTAAACATCCATCAAGAAACCTTAAAGGCTATATGGAATA  
AACAGGAATATAAAGAGTTTCGAGAGGCTATCTTTCTCGAGCTAAACCACCGGTTTGTGCAACCTGTCCAAAGCAAGG  
ATTGAGTTAGTCTTTTAA

>Cluster\_46619

ATGAGATGTTTAAACCATATTGCTTTGGTAACGGTGATACAGTTTATCGCCTGTTATCTGGCTGGTTGGGGGAATGCCGA  
ACAATTTTATGCTGTTCTTCAATAGTACTATGGCAGGACTGTTTATATGGTTGTTCTCTCAAATACGAAAACGAAACGGA  
ATGTTGCGGATGAGTTTAAAGTTTAAAGGCGTTGGTATATAACGATGCCAGTATCTTCCCTTACTCTCTCCATTTATTA  
AACCTGATGGTTTTTATCATTTGGTACACTATACGAATTAAGCGAGTTAGTGGTTGCATAAGCATAAAAAAATGGGGTCA  
AAATCAACTCAAAAACCAATATGATGGGAGTGAAGTTAGACTTCCGGGGCATTTGAACAGCCCCAACGACCTACTATA  
ACCCTTCAACCGGATACCTATGATGGAGGCTTGGACTACGCGGAAACTTTTGGGACTGTTGGCAGGATATTTAT  
GACAGGCAATAA

>Cluster\_22385

GTGAAGATTGATGCATCTCGTCGGGGCATACTCAGTGGTGGTGGCGCAAAGCCAGTAAACGGTATCCGTCGGCCCTGGTC  
CGGTGATGAATCTCATTTTCTGACCCATTGCACTCGCTGCGACGCTGTATTAATGCTTGTGAAAACAACATTCTGCAAC  
GCGGCGGGGTGGCTATCCGAGCGTTAATTTCAAAAATAACGAGTGCAGCTTCTGTTACGCTGCGCGCAGGCTTGCCCC  
GAATCGCTATTTTCTCCGCGCCACACAGGGCCCTGGGATTTGCGAGTTCACCATTTGGGGACGCGTGCCTGGCGTATCAAA  
AGTTGAATGCGCGCGCTGTCAGGATAGCTGAGCAACCTGAGCAATTTCTCCCGCAGCCTCTCCGGGATCTACAGC  
CGCAACTTAATAGCAACTTTGCAACGGATGTGGAGCATGTGCGAGCAGCTGTCCGGTATCAGCCATAAGTGGGAGTAT  
CTCCATGCACACTAA

>Cluster\_35886

ATGACAACGACAGTTTTCGTTGCTGGCTCGATAACCATAAAAAGCTCGACCCGCTTATCGTTGAGCGCTTAAAGAAGAT  
TGTTGACAAGAACTTAATGTTATCGTCGGTGACGCTCTGGCGTTGACTCTTCCGTACAGCTGGAACATAACAATTTGG  
GTTATAGCGCAACCACTGTGTTACTAGTGATGCCAAGCCACGAAACAATTTTGGTGCATGGCCCGTGAACCTCGTTAA  
TCAAATCTCCGACCCGGAACCTCGAGATTTCTACACAGCCAAAGATATAAAGATGGCAGAAACAGCAGACTGTGGCCCTAT  
GGTTTGGGATACAAAAGTCCGGGAACACTGAGCAACCTGAGTTCAGTTGCTATCAAGAAAAGAAAACCTCAGCTGTTTTCA  
TTAATAAGACAAGGGAGTTTGTCTTATCAAAGAACCTAAAGATATTGATAAGCTGATTAGCTTTATGTCAGCATCATCG  
CTGGAAAAAGTTGAAGATAAGATAAAACGTCTGAAAGATTGGAGAAGCTAAATAATCAGCAGATAGCCCTAATCTGA

>Cluster\_41211

ATGAAGCGCAAGTATTGTTAATCCGTTGATTATCTTCTGGCGATTGCCGCGCGCTGCTGTGGCAGCTGGCGCGTAA  
TGCCGAAGGGGATGATCCGACCAATCTGGAATCGGCGCTCATTGGCAAGCCAGTGCAGGAGTTTCCGCTCGAATCACTGG  
ACAATCCGGGGCAGTTTTTATCAGCGGATGTGCTGACTCAGGGCAAACCGGTGCTGCTAACGCTTGGCGCAGCTGGTGT  
CCGACCTCCGCTGGCAACATCAATATCTGAATCAGCTTCTGCGCAGGGCATCCGCTGGCTGGCATGAATATAAAGA  
CGATCCGCAAGGAAGCACTCAGCTGGCTGAAAGAGCTGGCAATCCTTACGCGCTAAGCCTGTTTGGATGGCGACGCGATG  
TAGGGCTGGATCTCGGTGCTATGGCGCGCCAGAAACGTTCTTATTGACGGCAACGGCATCATTCGCTATCGCCATGCG  
GGGATCTCAATCCTCGCGTCTGGGAAGAAGAGATCAAGCCACTGTGGGAGAAATACAGTAAGGAGGCCGACCAATGA

>Cluster\_23055

ATGCAAAACGGAACACGTCATTTTATTGAATGCACAGGGAGTTCACCGGGTACGCTGGAAAAGTATGCCGCACACACGGC  
AGACACCCCTTACATCTCGCGTTTCCAGTTGGCTGTTAATGCCAAAAGGGCAATTATAGTTACCCGCCGCGCCCTTFA  
GCAAAAAGCATGGCCTGGCGTGTGGACTAACTCGGTTTGTGGGCACCCACAACCTGGGAGAAAGCAACGCAGAGGGCGGTG  
ATCCGCGGTTGCCGCTTATGAGCTTGGCGTAGAAAATTACGCTCCTGAATCTATCTATCCTGGCTTTCGCTACCGCGCCAC  
CGATCCGAATGGCATTGTGGAAAATGAAGTGTGCCGTTATTTGCCGCACTCACGACCAGTGCCTTACAGATCAACGATG  
ATGAAGTGATGGATTATCAATGGTGTGATTTAGCAGCGTTTTACGCGTATTGATGCTACGCGTGGCGGTTAGTCCG  
TGGATGGTGTGATGCAGGGCACAATCGCGAAGCCAGAAAACGATTATCTGCATTTACCCAGCTTAAATAA

>Cluster\_41649

GTGGGTAAGCATCACTGGAAAGTAGAAAAACAGCCTGAGTGGTACGTGAAAGCTGTCAGAAAACTATCGCAGCGTTGCC  
GGGGGGTACGCTGAAGCTGCTGACTGGCTGGATGTAACAGAGAACGCATTATTTAACCGCCTTCGCTGTAGATGGCGATC  
AGATTTCCCGCTGGGATGGCAATGATTTGCAACGCTGCTGGTGGAACTCACCTTATTGCTGACGCTGTGGCGCAGCT  
GCAATGGCGCTTTTGTGCTCTTCTTCTGATGTCGAGGATGTGGACAAACCGCGATATCAACCAACGCTCTGGAGGTCAT  
TGAACAGATCGGCAGTTATTCAAAACAGATTCTGTTAGCAATTGAAGACGGTGTAGTGAACCGCATGAGAAGACAGCAA  
TTAACGACGAGCTGTACCTCTCAATTTGCAAGCTGCAGGAGCATGCAGCACTGGTCTACAAAATTTTTTGCATTTTCAGAA  
AGTAATGACGCGCGGAGTGTGCAGCTCCGGGCGCGTGGCGTGTCTGACTGTGGAGAACTAACGCATGA

>Cluster\_48684

ATGTGCGAAGAAATGCAAGCAATAGCTGATGAACAAAACGCCCTATTGCAAGAAATGGATGCTAATGAACTTGTCAAAAT  
GTTATCCATCTTCGAGGAATAGAAGACGTTTCCATATTTGAGAGACTGTTTACAATACTTAATTTTAAATTCACCTTTG  
AAGAGCCAACTCAGATTGTAGCTTTGGCACACCAATTTCCGTTTACCTTGTGAAAAGAGAGAGACTGATAAGTTG  
CAAGCGACTTTGGATATGGTGTAGCGAGACTCAAGGAACGTATGACGGTAAACAAAAGTGAAGACGATATTGCCAGCAAAGA  
TCGTGAAATTTGCCGGCTTAAATCCTCTCAACGATGTTGATGCTGCATCAACCTTATGCTTCTAAAGCAGGTTATA  
AAATGCCATCACTAAACAGCGACGATCCGATGGCCGTTTCGCCAGCTTTTAGGTGCAATGGCCGACGACTCGACGACACA  
AAGAGTCCGCTTGAAGACATGATGCGGGAGCTCACGCATCGCCATGACTTGAATAAGCAGCCGACAAAACGCAATACGC  
ACTCTAA

>Cluster\_58637

ATGTTTAAAGGCAAAAAACATTGGCCGCACTGGCCGTATCTCTGCTGTTTACCTGACCTGTTTATGCTGCTGATGAAG  
TTCGCGGAAATCACTTTAAGGGGAGGTTATTGAAGCACCTTGTGAAATTCATCCAGAAGATATTGATAAAAAACATAG  
ATCTTGGACAAGTACGACAACCCATATAAACCCGGGAGCATCATAGCAATAAAGTGGCCGTCGACATTCGCTTGTATCAAC  
TGTGATCTGCTGCTTCTGACAACGGTATGCGGAATGCCGATCCAAAGTTGGCGTAACTTTCGATAGCACGGCTAAGAC  
AATGGTGTCTACGCTTTGTTGAGCAACACCAGTGCAGGCGAAGCAACTGGGGTGGTGTACGACTGATGGACAAAAATG  
ACGGTAACATCGTATTAGTTTACGCGCCAGATCTTGACTGATGCAAGCTCATAGTACAAGCAGCAGCTGAACTTTTTTC  
GCCTGGATGGAACAAATTGATAATGCAGTGCATGTCACGGCAGGTGAAGTAAACCGCTAACGCAACCTACGCTGCTGATTA  
TAAATAA

>Cluster\_23132

GTGCTGAACCGGATTACACTTCTGGAATCATGCTGGTATTCTTCTTATCGGCCCTGCCAGTGGCGGCGTGGTACA  
GACGTTTGGCAGCCGCTTACAGAGCCGCCGCGAAAAAGCGGCGCAGGATTTCTGACTCGCTTGGCGAGTTTAAAGACA  
GGGCGATGATCGACGGGACAGACTCGGTGTACTAATCGACCCGCTGGCTATCAGTTTATGACGCGTGTGACGCGGAG  
TGGTTGCCGTTTCTGCGACCCGTTATCGGCACAGGTTACGGTGGCGGAAACAGGTGCAGATGCTGTTACAACCCGGAAG  
TGATATCTGGCAGAAGGAATATGCGCTGGAGTGCACGCTGCTGCGCTGACGCTGCACGATATTGAACTGGAGTTGCAAA  
AAGAGCGAAAAAGAGACGCGCAGATCCGTTTTTTCGCTTTTGAACCCGCCAGCCGTTTACGCTGCGCTTTTACTCG  
GCGGCGCAAAAACATGTTGGGCGGTAAGCTGGCACACGATGGCAGCTTATCCCTCAATCAATGTGATGAGAGGATGCC  
ATGA

>Cluster\_64210

ATGAATATCACTGCTACTGTTCTTCTTGCCTTTGGTATGTCGATGGATGCATTGCTGCATCAATCGGTAAAGGTGCCAC  
CCTCCATAAACCGAAATTTCTGAAGCATTTGCAACCGGCCCTTATTTTGGTGGCGTCAAAACCTGACGCGCGTGTATCG  
GCTGGGAAATGGGCAATGTTAGCCAGCGGTTTGTCTTGAATGGAACACTGGATTGCGTTTGTGCTGCTGATATTCCTC  
GGCGGGCAATGATATTGAGGGTTTCTGTCGCGCAGATGATGAAGATGAAGACCGCGCCGTCGGCACGGTTTCTGGCT  
ACTGGTAAACACCGGATTTGCCACCAGCCTGGATGCCATGGCTGTGGGTGTTGGTCTTCTTCTGCAAGTCAACATTA  
TCGCGACCGCATTTGGCCATTGGTTGTGCAACCTGATTATGTCGACATTAGGGATGATGGTTGGTCTGCTTTATCGGCTCA  
ATTTATGGGAAAAAGCGGAAATTTCTGCGCGGCTGGTCTGATCGGCATCGGCTCAGATCTTGGACGCATCTTCA  
CGGTTAA

>Cluster\_20989

ATGGAAGTCAACAAAAGCAGCTGGCTGACATTTTTCGGCGGAGTATCCGTACCATTCAGAACTGGCAGGAGCAGGGAAT  
GCCCGTTCTGCGAGGCGGTGGGAAGGGTAAATGAGGTGCTTTATGACTCTGCCGCGCTCATAAAATGGTATGCCGAAAGGG  
ATGCTGAAATTTGAGAACGAAAAGCTGCGCGGGAGTTGAAGAACTGCGGCTGGCCAGCGAGGAGATCTTACCCCGGA

ACACTTGAATTTGAGCGCCATCGCCTGACTCGTGCTCAGGCGACAGCGCAGGAATGAAAAATGCCAAAGAATCGGCTGA  
AGTGGTGGAAACCCGATTTCTGTACTTTCTGTCTGCGGTATAGCAAGGAAATATCCAGTATTCGACGGTATTCCTC  
TGTCGGTGCAGCGAGCTTTCTGAGCTGGATAACCGGCATATGATTTCTGAAACGGGATATCATCAAAGCCATGAAC  
AAAGCAGCCGCACTGGATGAACGTGATACCGGGTGTCTGAGTGAATATATCGAACAGTCAAGTGA  
>Cluster\_52605  
TTGAGCACGACTAACCATGATCACCACATTTACGCTTTGATGGGCGTATCGGGCAGCGGCAAACTGCGGTCGCCAGTGA  
AGTGGCGCATCAACTTCATGCGCGTTCCTTGTATGGCGATTTCTCCATCCGCGCTGCAATATCGAAAAATGGCGTCTG  
GCGAACCGCTGAATGACGACGATCGCAAACCGTGGTTGAGGCGCTGAACGACGCCGCTTTGCTATGACGCGCAAAAT  
AAAGTATCGCTGATCGCTGTTCTGACACTGAAAAAACACTATCGCGACTGCTGCGTGAAGGTAATCCTAATCTCTCTTT  
CATCTACCTGAAAGGCGATTTTGTATGTGATGAAAGCCGCTGAAAGCGCGCAAAAGGCCATTTCTTTAAACCCAAATGC  
TGGTGACGAGTTTGAACGCTGAGGACCGGGTGGCGACGAAACCGATGTACTGGTGGTGAATTTGATCAACCGCTG  
GAAGTGTGTGGCAAGCACCATTGAGGTTATTAATAAAGGCAATAA  
>Cluster\_60342  
ATGCTGTATATGCTAGCAGTAGAACAAGAAACAAACATGATGTTCTGCAATTTTAAACAAAATTAACGAGTTACGGAA  
TAAAGCACCACAAAACGAAGAGACTAAACACGAAGAACACAGCCAGATAATCACGAGGAAACAGATCATCACGAGGCAA  
AACAGCAGGAGCAAGCCTGGCGTGGCAACCTGCGCTACCTGGACACATTAACCCGACTGATGAAGTATTTGCCCGCAAA  
CTGTACGAAAGATGGGAGAAAGAACATACAGTCAACGACGAGGCTGTGCTACGCTCTTTGTACTTCTGCTGCTACTGG  
CAAAAACCTCACAGTTGGGATGGTGCAGGTTGGTAGGGAAACAATCGACAACGAGCCAGGCTATCAAAAACACGGTTA  
AAAAATGCCTCGATCGTCTGGTCAACCCTTCAAACCTGTTGAGCGTACTGAAGGCTATATACAGGATCGGCAGAAAGG  
GAGTGAACGAATACCAGTTATTATTCAAGCCGTACAACATGAATAA  
>Cluster\_62792  
ATGCCAACCGTTATTACGCACGCGCGCTTCCCTATGCATTGGTTTAGGGTTGGGTTGAAAGTCATCCCTCCGCGTCT  
GTTATTTGCCGGAATCATCTGGCGATGCTGCCGAGCGCGAGCTATTGCTGTTAAATTTGGCGTTGCTTACGGCAATG  
TTTTTGGTCATCGGGGTTTACCATTCCGCTGGTGTTCGGTTTGGTTGTTGTTCCGCTGTTATGTGTGTTGATGGACCGGA  
TGGTTACGGGCTGGGCTGATTCGCTGCTGGCTGTTTTAACCGTCTCGTTGCTATCGCACAGCTTGTGGATTCCGGTAA  
CACGCGGCTAAGGGCTGGCTGGCTGGCTGGCTGGCTGGCTGGCTGGCTGGCTGGCTGGCTGGCTGGCTGGCTGGCTGGCT  
GGGATGGTCTTATGGGAATGTTGTTGGTGGCGCAGGCGATAA  
>Cluster\_31508  
ATGGTCATTAATTAACAAGCAGTTAAGAGAAAAACGGGAGCAGGTAAAGGAGAGCTTTCGCCGCAATGAAGATCTGACCCC  
GCTTGTACGCTTGGCCAGGCAATGTTGATGCTTATGAAATCTCGCTGGAGCTGCCATCACAGACCTGGACAGATAGCG  
ACGTAATCGCCAGCATTACGTTTCATGCGGACTGGAAGCAGCCGAAGGATTTCCGAGAATGCCTTTATCCAGATCCCT  
GCCGCTACCCCAAGCATGGGGCAGCAATGATGAGCGAAAACGACTTTTAGTATTGAAACGGTGGTTGACGACACACC  
TGGCGAAGTCGCGTTCTGTACACACTCCTGTTTCGATCGCAATGTATAACGATGAAATACAGGTTCCGCTTAATAATAA  
TCGTGCCACTTAAGAAGGTAATCACCTACACCACCGTTTGTGAAGCATTCAATATTACGTTCTCTGAAATTTGAT  
AATCTCAAGCCTGACGGCACCCAGAAAATGGTTCAACTCTGGTAA  
>Cluster\_40260  
ATGACTGAAACGATAAAAAGTAAGCGAATCACTTGAATTACATGCTGTTGCGGAAAGTCATGTCACACCTCTTTATCAGTT  
AATCTGTAATAAATAAAGTAACTTACAGCAGTCTAACTGGCCGCTTTGTTCAAAGTGAAGAGGACACCGGAAAAA  
CGGTGACAGGTAATGTGATGTTGATCAACGCGCTATGCCAAAATGTTTCATGATTTTCAAAGAAAGTGAACCTTATCGGC  
GTTATCTCTTTAATCCTGATTAACACTGAAATAAACCGCTGAAATCGGCTACTGGCTGACGAATCTCATCAGGGGCA  
GGGATCATTTCTCAGGCGCTGCAGGCAATGATTCATCATACCTACGCTCAGTCTGGTGAACCTTAGACGCTTCCGTGATCA  
GTCGGGTGGACAATTCGCAAGCAACAGGTAGCGTTGCGCAATGTTTATCTTGAAGGTTGCCGTAACAGGCTGAG  
TTTCTGAATGATGCTATGATGATGTAAGTATACGCGGCTATTATCGATTACAATAA  
>Cluster\_7334  
ATGAAACATTTCAATTTATGCTGCTGCTGCTTATCTTCTGATTTATGAGTGCCTGGTATTTTCGCTGCTGAAGTAGATAC  
CGAACTTTAACCATTAAGGTAATATTGCTGAATCACCATGTACATTTGTCGCTGGCGGTGATTCAGTCAGTATTAATA  
TGCCGACTGTACCACCCTGATTTGATGGTAAAGCGAAATATTCAACTTATGATGGCGGGTGGTGTAAACAGCAGT  
ATGCTGAAATTAATCTGTCGGAAGACTATGATGGCGTAAAACCTTTCGTTGATCACCACGAGAAAATCTTGGTAATGA  
TAAGGCAATATCCAGTAGTAATGACACAGTTGGATACTATCTTATTTGGGAGATAGCAGTACGCTAGGATATTTCCG  
CACATTTAATATTGAAAGTTATAAAAACCTGCTGATGGACAATGTAACCTTTAAGGCAAAAATATCTGAAGTTGACT  
GACAGTGGTGTGCTACTGTTAATCTTCACTTGGTTATGCGTGTGCCAGGATTA  
>Cluster\_43453  
ATGCTTCCAGAGTTTGGACCCCGGACGCTGTTGGTATTGACGCCCTGATACAGATCACCAAACCGTTCTGGCAAAAGC  
TGAAGCGGTGTGGTTGGCTATTTGCTAACAAATGCCCGCGCTTTTATGCGCTCACGCTGCACGCCGGCTGAACCTGC  
TGGCGCTGGAAGAAAAGCTGGCGCTCCGGGAAGCGATGTCGCTCTGGACGATCAACTCTATCAGGAACCGCAAGCCGCT  
CCGTTGCTGTACCCATGGGAAATTCGCCATGTACCCAGACTGGCAACCCGATGCGGACTTTTATCCGCTGGCGGCGCT  
ATGGGCGTGGCACTAAAAGAGCCGCTGACCACGAAGAACTGGCTCATTTCACTGCTACTGGCAGCGGAAGGTAAGT  
TCTTTACCATGTGCACTGGCAACAAAACCTGGCGCAGCCTGCAAAATCGGTCGTCGAGCAACGGCGGACTGCCGAAA  
CGAGATGTGAATACGGTCACTGAACTGACAGCCAAATTCACCAGGATTCAGAGGTTAA  
>Cluster\_57545  
ATGAAACAGGAAGTGGAAAAGTGGCAGCTTTTGGACATCCGGATGGTGAATTCGCTGATTTATCATTCTTGTATGCTCA  
TCAGGCTGTCTACGTTACGATCATGAGGGCAAAGAGCCTTTAGAGTATCGCTTTTGGGTTACCTACTCTCTTCACTGCT  
TCACAAAAGATTAATGAACATCAGACGAAGAAAACAATCGTTAATGTACACGCGCTAAAGAAATCTCGTCCCTTC  
TGGCAGCACCGTTATAACTTAGCGCGCACACACTTAAAGAACTATTTTGGCGCTGCCAGAAAGCAACGTTATTCATGC  
CGGTATGGTAGCTATGCCGTTGATGAGGTGGACTTAGACGAGGAGATAAGGCAATTTACTTTGTTGCTTACGGCTT  
TCAGGAAAAGAAAACCTCCGTTTGCATGTAACCTAGCGCTTATCCATTTCTGAAAACAGAAAGGTAATCAGTGAAA  
TTTTTACCATTGCTCAACTTATTGAGAAAATAGCAGCTTCTCAGCCCTCAAAATAA  
>Cluster\_24885  
ATGGAAAATAATTTGGAAAACCTGACCATTGGCGTTTTTGGCAAGCGCGCGGGTCAACGTGGAGACAATCCGCTTCTA  
TCAGCGCAAGGGCTTGTGGCGGAACCGGACAAGCCTTACGGCAGCATCCGCCCTATGGGGAGGCGGACGTGGTTCCGG  
TGAATTCCTGAAATCGGCACAGCGGCTGGGGTTCACTGACGAGATGCGGAGCTGTTGGGCTCGACGATGGCACC  
CACTGCGAGGAGCCAGCCTGGCCGAACAAGCTCAAGGACGTGCGCGAGAAGATGGCCGACTTGGCGCGCATGGA  
AACCTGCTGTCTGAACCTGCTGCGCCTGCCATGACGAAAGGGGAATGTTTTCTGCGGTTGATCGGCTACTACAG  
GCGAAGCAGGCTGGCAAGGTCAGCTATGCCTTAG  
>Cluster\_27103  
ATGTTTAAACAACATCTTAGTTGTCTGTGCTGGCAATATTGCGGTTCCCGACGGCGGAACGCTTACTGCAACGTTATCA  
CCCGAACTGAAAGTGGAGTCCGCTGGACTCGGCGCGCTGGTCCGTAAGGGCGCTGATCCTACCCTATCAGCGTCCGCG  
CAGAACATCAACTGTCTCTGGAAGGTCAGTGTGACGCGCAATCAGCCCGCTGTGTGTCGCAACTATGACCTGATTTT



ACCATGGAAGCGCCATATCGAACCGTTATGCGAGATGGCACCTGAGATGCGCGGCAAAGTGATGCTGTTGGTCACTG  
GGATAACGAATGTGAAATCCCGATCCGATCGCAAAAGCGGGAAACGTTTGACGCGGTGTACACATTACTTGAACGGT  
CTGCCCGCAGTGGGCGCAGGCATGAACGCAGAGCAGGTATAA  
>Cluster\_4605  
ATGCATCTAGAAGTCTCTATTAATCCAGAACTAGAGCTGAATTTTTTGTAGTAAAGTTTTTCTCAAATCCCGAGCTAGA  
GTCTTCTATCATTGATGATTTCAAGAGATACAAAGCAACCGGTGAGCTTCCGCATTATTTCCGGTAGGGACGTTGCGTATA  
CTCAGCCTTATGGTGTCTTTCCGGCTGGGTGATGCATATCCATCTTTGTCTACCGCCAAACAAGTTTCCCGAGAACTT  
CCACAACCGGATAGGGTCTGCAAGAAAGGTGATCCTGATAATGATGCTTGTCTTGTGTATGTCCAAGGTGAGCTTTATGA  
GAATAAATATTCATCTATGCTATTTATGATATCCCGATGCACATGAAAAAGCAAGAAACATGATGTGATGAGCTATCTGG  
CGCAATTGCCAGAATTATAAAGATGAAAACTAA  
>Cluster\_29627  
ATGTACGGAAACATGCGAAACGCTCTGCCGTGAGCTGGCAGCAAAGTATCCGGGAAACACGCCGTGATGCTGCTTATCTG  
TCTCCGGGAGAGATTCAGGCCCTCGCTGACGGAATGGATATTTCCCTGTCCGATCATGAAATCAGGACTGTCTGGCCG  
GCCTGGAGGACATCCCGAAGACCAGCGGACTGAATCCGGTATTTCTTCCGCCGTGCGATGGAGATTATCAGCAACGTG  
AGCGAAAACCGCCAGGTGACCGTCTCTGCTGAACCTCTGGCGTCCCTGATTACAGCCGCTGAACAGGCCTGTGGAAACG  
TGAATGGGCCCGCTGATAACGGCCTTCCCGTCCCGGAATGTGTACCCGCGCTCAGGCAGTGATTAATCAGGTCCGCA  
CCCTGCTGAAAAACAACACACAGAAAACTGA  
>Cluster\_47003  
ATGAACAATAATAATGGCATTGTTAAGAATGATAGTACTGGCTAACGGCTCTTGATTTTGTAAAAGATGTCAAAGGTTT  
ACCAAGCATCTTACTTTTCATATCTATCAAAAAATGCCTTCTACACGACTTTGGAAGTTACTGGGTCTGTATATCG  
AGCTTAATGGCGATTTTCCGAGGTTCACACAGATACCTTTCATCAGACTCTGTAAATATTTCCGGCGTTAGTAAAGAATAT  
AAACAATGGGCATTTTTCAATCTAATAAAAAATGGTATCTTTGCCAAGTGTAAATAAGATAATAATCATCGCGCAA  
CATGTCAAAGCAATAATGCAACACACTCGCCTCTTTGCTTGAACAAGCAATTTGATAAGTTAGAGCAAGCATCTACAT  
CAGATACAACGATGCTTCAACACATTTGTTTTCTGATATAGGACGAATGTGTAA  
>Cluster\_40834  
ATGAGAACTATTGTTCTCATTTGTCAATGAGGTTTATGTGAATTTGATTTCTCTTTGCGCGTCCGGTTCAAAGCTGAGCG  
TTCGCGGTTTACTCAAGCAGGCTGAAGTAGCAGCCCTTGTGGCGTTTCAAGAGAAATGTGGGGAAATATGAACGAG  
GGTTGCTGTTCCCGGAGGTGAGTTACTTTGCAAGAAATGGGGCCAAATGTACAGTTTACTTCCAGCGGGGAG  
TCATCAGGTATAACTTTATCAGTGATGAAATGGAGTTACTGCAGCCTACCGGCAGGCACCATACAGGTCAAAGGTTT  
AGTTTGTGCGCCTTACTACTGCTCCAGAGAACGGCGGAAACAGGTTATTCATGGAGATGTTTGGGGAAATGTTA  
TCAAAGTTAACGTAACCATAGGAACAGGTGGAATAATGAACAAAAATACCAAGAGAAGATGA  
>Cluster\_40817  
ATGTACTGCACCTGGAGGATTTGCTTGGCAGGTGCCGGAGCGGACGCTTATCGAGCTACCAGTGAAGAGATGGACTT  
CGACTCGCCTGCAACAGTGAATACCCGTGTGGTGGACGCTGTATCCGCTATGCCGACGAGCTGATGATGCCCATCTGC  
GCGGACGCTATATCTGCCACTGGCAGAGATACCGACTGTTCTGCGGGACATTGCCATCAGCTGGTCCGTTACCGGCTC  
TACCGCCCGCCCGGAGGTGACCTCCCGGATACGGTGAAGGATGACCACAAAGAAAGTGTGCGGCACTCAGGGAGTT  
ACGTGATAACAGGCTCAGCTGGGGTCCCGTCCACTCAGAAAGATGTGCTGAGCCTGGCGAGTTTCTGTACGAGTC  
GCCCGCCACTTTCCGGCGTGTGACGGTTTACTGGAGAAATACTGA  
>Cluster\_58260  
ATGCGACGCTATGCGCTTATCCGACCTACAGTTACAGTTACCCCGTAGGCTGATAAGTCCGCTCAGCGGCGCATCAGG  
CATCGGTTGTCGGATGCGACGCTATGCGTCTTATCCGACTACAGTTACAGTGCACCCCGTAGGCTGATAAGTCCGCTCA  
GCGGCGCATCAGGCATCGGTTGTGCGATGCGACGCTATGCGTCTTATCCGACCTACAGTTTACAGTGCACCCCGTAGGCTG  
ATAAGTACGCTCAGCGGCGCATCAGGCATCGGTTGTGCGATGCGACGCTCCGCTTATCCGACTACAGTTTACGCTGCA  
CCTCGTAGGCTGATAAGTCCGCTCAGCGACGCTCAGGCATCGGCTGTGAAATACAATCAACGGGCGTTTTTTTATTTCA  
CCTGGCTACGGGCAACAGGTTGTCGAGCTTCTCTTCTGACTGTTG  
>Cluster\_9785  
ATGGTACCGGTGAGTCCGCTCATCATCCGTGCGGATAACCCCTTCCGGGATGAGGTGCGTTTTTCTCTGTCAGCCTGCCGT  
GACGGTCATACCGGTAAGATAGTGGCGTACCGGGGATACGGTTATCCGGCCACATGCTGAGGGTGTGTCGGGTGTC  
AGCTCCGGTCCGGCAGGCGGTTACCTGCGGGTCTGTGGCATACGGGATGCGGATATCCAGATTCCGTCGCGTGGTGTG  
AACCGCGTACGCTGCCGTTGGTGTGTAGCTGTAACCCGGTCTGGCGGGGCTGCTGATGCGGATGAGTTCCGCGT  
TGTGTTCCAGGTGTAATCGCGGTGACAGCAGGCTGTTCTGTATACCGCGTCAAGTACATCGTAACGGAAGGTGTT  
GTGGTCCGTTTTTACTGGTACGGCGGATGA  
>Cluster\_59591  
ATGGCTTTATGCGGATAAAGAAAAGTTGCTGCGTAATTTTTTACGCTGCGCAACTGGGAAGAGAAATATCTCTACAT  
TATGAGCTGGGCGACGCTGTCGAGAAATACGCGACGAGACAGAAAGTCCACAAAATAGCATTCAGGCTGTGAGAGTC  
AGGTGTGATTTGTCATGCGCCAGAAATGCCAGGAAATTTAATGAATTACAGGGCAGCAGGATGCGGCGATTGTGAAAGGG  
CTTATGCGGTCGCTTTTATCTTACGATCAGATGACGCCGAGGATATTTGTAATTTCCGATGTGCGTCCGTTGTTGA  
AAAAATGGCGCTCACCAACATCTACCCCATCTCGTTACAAGGCTGGAAGCGATGATTCGCGCAATTCGCGCAAAG  
CCGCTGCACTTAGCTAA  
>Cluster\_43830  
ATGATTTGATTTCCCGACATGTTGCTATTTCCGATGGTGGAGCTTGAGATCACCGCCATTCGTGCGCAGGGCGCGGGCGG  
GCAGCATGTTAATAAGACTCAACCGCCATTCACTGCGTTTTGACATTCGGGCGTCCAGCCTGCCAGATATTACAAG  
AGCGTCTACTCGCCGACGCTATTTGATCAGCAGTGTGCGTGTGTCATTAAGGCACAGGAATACCGCAGTCAG  
GAACGAAACCGGAGCCGCGCTAGCCCGGCTGGTGGCAGTGAATAAAGATTTAACAACAGAAACAAAAGCCGACGACC  
CACGCGCCACCCGTGCATCGAAAGAGCGCAGGCTGGCATCGAAAGCACAATAAAGCTGAAGCGATGCGCGGCA  
AAGTACGACGCGGTTCGGGAATAA  
>Cluster\_10393  
ATGTCCAGACCACTATCATATTAACGACCTGGATGCCGAACGCATCGATATCTGCTGGAGCAACCCGCTATGCTGTG  
TTTGCCAAATCGCCGACCGGTTAAACGAGAGTTGGATCGCGCCAAATGTGTTCCGAGAAAGATGCCACACGACGTTG  
TGACAATGAACAGCCGGGTTAAATTCGCAATCTTAGCGATGGCGAAGTGCCTGTGCGCACGCTGTTATCCGCGAAA  
ATGACCGATAGCAATACTCAGCTTTCCGTTATGGCTCCGGTAGGTGCCGACTGCTGGGGTGGCGTTGGCGATTCCAT  
TCACTGGGAATTCGGGGCGGCTTGAACCCACTTGAAGTGTGGAAGTCAAGTACAGCCAGAAGCTGCTGGCGACT  
ACCTGCTTTAA  
>Cluster\_35171  
ATGGTAAAAGTTTTTACTCCGAAACAGGGAAGAAGTAAAGGCGCTATTTGGAACGGTACGAGAGATGGTAGGAA  
AACCGGTAACAACCTGGAATAAAGCAAGGGCGACGACATCTGATGGAAGTTCTGGCGAAAGAACTGGTAGACAGTG  
GTGTTGATATGTTTACGGCATGGAATTTCCCTTCTGAGCAGCAGTAAAGACTGGATAAAAAGCCATAAAGAGATG  
TCTAAAGGTGACGAGAAAGAGAGCGACCTGGCTGATTTATTCATTAACAGATGGAGAGATACGCCACTACGACAG  
GCGTCAGAACATAATCTGCTCAGTGGCGAAAGCAAGTTATGCAGCGTGTGCTGGCGTTTTATCAGGTTAATTTTC

AGGAGGTGATGGCGTGA

>Cluster\_39667

ATGAAGAAATATCCCTTCTACTGATGCTGAACGTGTCGCTGGCGATGATGCTGGCAGTGTCCCTGATTTACCCGAGAG  
CCGTGGCCGTCAGTTTGTTCGCGCCTGGGCGAATCTGGCGACGCTTATCTGTGTGGTTGCCGGTGGTGTCCGGCTGTATG  
CACCGAGATGTAAGTACGTAACGCTACGGCGGGAGCTGGCCGGAATCGCTGGCCATGAAGATTTGTCACGCTCGCTGTTT  
TTGAGCCGGTGGCGTGGCGCAGACGGGCGAGTGGCTCTGGTAGTGGTGGTGGCGACGTTATCTCGCTGGTGGTGGCGG  
GTGGATTTTACCAGGCTGATTTATCTTGTGGCATCGGTGTTCTCCGGCTGATACGTACGGCTGCTGTACAGGTTTTG  
AGGGGGGGGAACCATGTCAAGGCTGA

>Cluster\_11191

ATGTTTGGTATTTTCAAAAAGAAAACCCGAGAGCAGCAACTGAAATTAAGTGGTGGAGAACCGGATCTGGCAGAGG  
GGTATTAATGCTGCCTACTGGTGGCCATGACAGATGGTGAATGTGAGACTTACAGAGAAAGCGAAGATCGAACAGGAT  
TACGTAACAGCCAGCATTTGTCGCATTTACGTCAGAAATTAATGCCATCAGTGCACGATCACAGGTCAGCTTGACACC  
AATTTTAAAATTTGGTCTGCTGCAGCGTTGCGTGAATTTGAAGATGTGAAACACGATACGCGTGAAGCGGAAGATGTGCT  
GGATGTGGCGGTGGCCATTTGCTGAAGCAGATGGTGAATTTAGCCGGAAGAGCGTAAGGTTCTGGAAGAGATTGCTGGTG  
TTCCTGGCCTGCGACTGGAGAACCACCTGTGA

>Cluster\_7470

ATGGAATTACAGGACTGGCGAAAAGAACCTCGTAAAACTATTGAAATGAATCAAACCTCGTATGGTGAACCTGGCAGC  
ACAACCTGGAGCTTGTGTGCACAGATTGCACGTGAAAATGGCGTCAATGATAATGTTATTTTCAAATGGCTCAGGCTCT  
GGCAGAACGAAGGGCGTGTTCGCGCGCTTCCGCTAACGACCTCTTCTGACACTGGCGTTGAAATTAATACCTGTAGAA  
ATAACCCGGATGAGCAGAAAGAACCTTGGCGGCCATTTGGCGCTCTTATCCACTTCCACTCAGACCAGAGTCAGTGC  
CAGTTCTGCAAGGTGGAATTCCTGACGGTAACATGACGTTGAAAATCCATCGCCAGAGCTGCTCACAGTGTGTATCC  
GTGAACTGACCGGGAGGGAAGATGA

>Cluster\_10562

ATGCGTGATATTCAGAGGTGCTTGAACCTGGGGCGCATGGGTGGCCAAATCATGAGGATGTGAGCTGGTGGCCAT  
TGCCGCGGATTTAAGGGGCTGATCCCGTCAAAGGTTAAATCACGGCTCAGTGTACCGATGACGATGCGCTGATATCA  
GCAATTGCATGGCGCACTGACGCTCAACAACAGCGATTGTCATGATTTCTGTATGATTTATGTTTCCGGATGAGC  
CTTATGTCACTGGGCCGTAAGCATGAGCGCTCTGATTTGCTGGGCGGGCGGGTACTGCAAAAAGCAGAAGGTGTTATTGA  
GGGATGTTGATCATGACGGGAGTAAAGCTGGAATGGACAGGTACGTTGAGCGTGAACCATCAGGATCACAGGCCAGTC  
AGTTTGGCGGACGTGGGGAATTTGA

>Cluster\_11793

ATGACTGGTGATATGGTTGAAAATGTATATCGCATAGTCTACCAAGTTCAAACATAAAAATAAATTTCTAAACCCCTT  
CCCTCTGGATTCATTAGTTTCGCAATATTTAATTAATGCGGTAATGCTCAACTATGGACTGCGTGTGGTGGAGCTGT  
TATTGCTAGAATGCGTGTCCGTAAAAATTCGGGAATTTATTTTGAATCCGTCAGCGATTTTGTATGATAAGCATATT  
CATAATGAGGGAGATGAATGGCTTTTTTATTACTCAGGAAATACCAGCCCTTTCTTGTATGGTACCACAGGATGTATT  
AGATAGCATCTCTAAAGAAGTCGATGAGCTGATAGCGGTGTCAGATAGTGTGCGTAATGCTCAAACTCACTAATTTCTA  
TCCACGAGTCCAGCCAAATAGAAATCAAGTCAGTATTGCCCGTTGTCATTTGTCATAACGTCAAAGGTTGTGGGAAATGA

>Cluster\_41346

ATGAAACGACTCGCATGGTGTCTAATTTACGGTTTTGCTGGCCGTCGGCGAGGCGCGATTAACGACGTTACTTTTACGG  
CACGCTGAGTTTCCGCCCGCTGTACCATCAGCGATGTAAGACGATCGAAGTTGAGTTTCGCAACGTCATTTATCGACA  
ACATTTAAGGGCGATAAATTTCCGTGAGGATGTGCTTACACCATCACATGTGACCCGATATGCGCGACGACGCTGGGAG  
ATGAGCCTGACCTGGACGGGCGCAAAACCCCTTATGATGATTCCGCCATTGAAACGGACGTTAGCGGCTGGGGATTGA  
GCTACAGCAAAACGGCCAGCCGTTTAAAGCTGGGAACACCGTTGAAAATGACCCGTCACCGCCCAACGCTGCAAGCTG  
TGCCGGTGAAGCCAATGATGCGGCGCTCAGCGACGGAACCTTTCTGCTACGCAACATTACAGGTGGATTACCAATGA

>Cluster\_37339

ATGAAAGGTGATCTAAAGTTATAAATTTATCTCAACAACTGTTGGGAAATGAGCTTGTGCGCAATCAATCAGTACTTTCT  
CCATGCCCGAATGTTAAAAACTGGGGTCTCAAACGCTCAATGATGTGGAGTATCATGAATCCATTGATGAGATGAAAC  
ACGCCGATCGTTAATTTAGCGCATTTCTTTTCTGGAAGGCTTCCAAAATTCAGGACCTGGGCAAACTGAACATTGGT  
GAAGATGTTGAGGAAATGCTGCGTTCTGATCTGGCACTTGGAGTGGATGGCGGAAGAATTTGCGTGAGGCAATTTGTTA  
TGCCGATAGCGTTTATGATTACGTCAGCGCGATATGATGATAGAAATTTTGGCTGATGAAGAAGGCCATATCGACTGGC  
TGGAAACGGAACCTGATCTGATTAGAAGATGGGCTGCAAAATATCTGCAAGCACAGATCCGCGAAGAAGGTTGA

>Cluster\_17644

ATGATGAAAAAATGGTTGTTTGTAGTAGGGTTATTTTCTCTGTCTGTGCTGGCAGACAGAGGAACAGGCGCA  
AAAGGAACGAAACGTTATCAGGATATGAAGCCATTGGCTGAACAGATGCTTCCGGAAAGTGGAAAACCTTTATACGCTA  
TGCCAGAAGCTGCATCGCAGTATCAGCAGGGAATATTGAAGAGTGAAGAATATCAAAAAGGACTAAAACAACCTGGAT  
GAACAGGCCAGTAAACTGGGGGACGACCCGCTTGTATCTGCTGATGCTGCTGATAAAAATGAAAACCCAGCTACAGGA  
TTACTGGTCTAACGTTATCAGGATGACAGGCAGTTTCTGGAGCTTCAAGAAATCAGTTAAAGAATATCGTATGGATT  
GTTTTGATTCGTTTTGTTTGGTAAAGAGCAATAGAAATCAAGAAAAGGCTGGTTATCTTAGACCTGACTAAATAA

>Cluster\_27619

ATGACGAAGAAAAAGCACATAAACCTGGTTACGCGACCATCGCGCTTAAACAAGCGCGCCCGTACGAATACTTTATCGA  
AGAAGAGTTGCAAGCGGACTTGCCTGCAAGGCTGGGAGGTTAAATCCCTGCGCGCAGGAAAAGCCAATATCAGCGACA  
GCTATGCTCTTCTGCGGACGGAGAGGCATTTCTGTTTGGCGTAACATCAGCCCAATGGCTGTGGCTCCACGCATGTG  
GTGTGCGATCCTACCCGTACCCGCAAGTTACTTCTCAACCAGCGCAACTGGACTCATTTGACGCTCGGCTCAATCGAGA  
AGGTTATACCGTAGTAGCGCTCTCCCTGACTGAAAAAATGCCTGGTGCAAAAGTGAAGTAAAGTAAAGTAAAGTAAAG  
AACAGCACGATAAACGTTAGATATCAAGAAGCGAATGGCAGGTGGATAAAGCGGCTATCATGAAAACGCCCATCGT  
TAA

>Cluster\_236

GTGCTTTCAAGTGCCTTTTTTATCGCTTCTTATTATCATGTGCCTATAGGGCTTACGCTGCACATTTAGTACTAAATGG  
AATGGTAGGGATACTCCTTGGCTGGAATTCCTTTGTAGCCATTTTTAGGTTTATTGCTTCAAGCCCTTTTTTTTCAAT  
TTGGAGGTTTTACCGCTTAGGTATAAATACCTTAAATATGCTTTCCCTGGTGTGATCTTACTACTTTTTAAAAGA  
TTTTATCAGAGGAGAAAACCAAAAATCTTTTTATCTCTGGGTTCTTAGCTGGCTTTCTAAGTATGTTAGGAGCAGGATT  
TTTTACAGCGCTCTCTTTATCTCACAGAAAAAAGTTTTGATACTCTGTGAAACCTTATCATAGCCATATACCTA  
TTGCCGTGTTAGAAGTTTTGGTAACAGGTTTTATTTGTTGATATCTGTTAAAATAAAGCCAGAGGTTTAAAATGAG  
GTTAA

>Cluster\_26978

ATGAGAAAAGTAAAACAGACAACAGTGAATTAATCGAATACATAAATACAATCAAAGAACTAAAAAACCATATTTTCGAT  
AGAAGAATACAGAAATGAATATCGCAAACTGCGTTCTGATGATATCCATTGGTTAAGGCTCAGAAAATTTAAATCTGCAC  
ATACCGAACTTCGACAGTTGAAAAGAGAGGAAATCTCTATTGAATACTTTATGATGAGTTAAATCCCATCAGCAGT  
TCAAAAAGCTAACACATCAGCGAGATCACTGGTAAATCTCGATTTATTTAACGAACCGGTGTTATACCGTAAGGCCATTT  
AGAAAAGAGTGAAGAAATAGTAGCTTAGTCATAAAAACAACGACAGAGCGGCTTTGAGTTCCAGCGTTCAATTTG

AACAGAGTCTTGAGCAACTATCTCGTATCTCGTCAAAGTTCGAACCAGCAAGCAAAAGCGCAGGAAAATGTCTCTTTAA  
>Cluster\_56219  
ATGTTAGTTAGTAAAAGCAACGGATTTAACCGCTAGCGCAGTTTTGGGTAGTGGAGTTATAATGAAAATAAATCTTCTAA  
ACACATGGGACTACTAGCTCATAGTATTTTAAATTAATTTGTGAAAGTGCATCAGAGACGTATCCGGTCTCTTTG  
AAACTTTACAAAATAATGATGTCTGAATGTATATATCAAGAAGCAACCGCTTTGTCTATATGGGAAACAATTA  
AAACGTATAAATATGAAGTTGGTGAATAAATTAAGGATTAACCTGACACTTTAATAAATATACAGAGTTAGTTAG  
TTCTGGTGAAGCTGACGTAATATGTTAAGCAAGCAGGTTCTGGAAAACTTCTCATTAAACTAAAGCTGAAAAACAATG  
AAAATGTGTTTTCTGAACTAAAAAATTTATCGAATAAAAAATAATGCGGATCAGTTTTTTGAATGCGCTAAAAGAAATGAA  
TAG  
>Cluster\_6728  
ATGGCCAGTGAGATTCATGATAAGTTAACAGAAAAAGACACCTCATCTGATGATAAAAAATCGGCTGATGAACAGACTAA  
AAATAATAAATAAATCGTCTGGTGACGCTATAAATAACCTTACTCGGGAGCCGACGTTTTGCTGATCCTTCTGGCGGTG  
ATTTCTCGTATATGGGAAAGGGATTCGGAATTAGACAGTCTTCAACATTTGGCTGAATCCGAATTAGGAATAGCTAAAGAT  
TCTCATGGTGCTTTATGGGAAGCATTCCGTAATAAAGGTGCTATGCTCCCTAGTTTACCTAATGGTAATGGTTGTTCTGA  
ACTTGTATTTTTCCCGGTGAAATTTATCAGATGATATTTGAATGCGATAAATTACTTACTATCAAAGATGCGCTTTTCAT  
GGATTTTTTATGCTTACCTTCTGGTATGATTTACGCTTTTAACTCATTACTTCGTAAAGGAGGTGAGTAA  
>Cluster\_27767  
ATGTATAAACAGGCAACAGAATTAATGCTGAACTTTAAAGACCGCATTTCTGATTAAGGGGGAAGAAGATACCGGCAAGTC  
AATCTCTGACTGAAATAAGAAATCAGTAATAGTATTCCCGGTATTACAACCTTAAACTCTTAACCTGCGGGGTACA  
ACCGGCTTTGTGATGAAATATTGATAATTTGATTTTCTGAATACACCTGAAAGACGTTAATCTTGTGATGGAGTCAGG  
CTGTGTGAAAAGAAAATGACATCAAAAGTTATCAGGTTAATTAACAGGCAAGAAAATATCATAAACGCTGGTTGTGGT  
TGCAGACTCATGTGAGTCTGAGTTTATCGAACTGTTGTTGATGGGCTTATTGCAATTGCTTCAATGCTGACAGAGAAA  
GGAGCTGCAATGTTTATACGCCATCAAGGTGCTGTAATACAGATAATACTCTCCATAAATAATGA  
>Cluster\_23484  
ATGGACGCTACCTTCCCTTTCTGATTTTGTACGCTTGTATTCTGCCCTACTTTTTTTCTGGGATGCAAGCATGGCTT  
GTTACCTGACAGATTTACTGCTCCGTTACTCTGGTCAAGTCTTTTGTCTACCAGGTTTGTATCTGACGGTTTAGCCG  
ATGCGTTATGGGGGGCGATTATTGGTTACAGCACATTCGCTGTCTTTACTGGGGTATCGCATACTGCGTCAATAAGAA  
GGATTAGGCTATGGTGTGATGAAAGTTTCTCGCCGCTTCTGGCTGGCATACTGACCTTATTGCGCACGTTTCT  
CCTTGTGCTCATTTCGCTGCGGAGCCGATGTTATTGGTCTGCTCATGAGAGAAAAGAGTCAATAAAAAACCGCTG  
CATTTGGGCCATTTCTGGCGGCTGCGGGTTCTGTTGGCTGGGATAGTTTGTGCGCGCCGTTAA  
>Cluster\_15228  
ATGATAAAAAGTATACCGGCATATTACTATCTGCTGTGGAACATTACCCCGGTGGTTACTGCGGATTTCCAGGCCA  
TTTTACGCGCTTTGATGGTCACTGCTGTCTGGAGAGAACGACATTGCCCAACCTACCGGTTTCTTCAACAGGTCG  
AGAACAACGGCAAGGATGCCCAACGTTTCCCGCTCAGATGTACGTCACGTCGCGCCACCATACTGATTTGGCTCTGT  
CACTGCAACTGCGCCCAAGGTGATTCGGGATGATGACATGTTACGACACCTCGTTTATAACGGTGGCAGGCTCAT  
GAAAGAACTGACCAGTCCAGTTCTTTCATGAGCTGCGGCAAGCAGCCCACTTCTGAAGCCTATCAGGGTTGCGCA  
TTGTGGCGATGCTTCTGCCCCGCGAACCATGGCTGATGTTATGCAACTCAAGTACCTGA  
>Cluster\_46126  
ATGAAGGCTTTCAATAAGCTGTTTTCCCTCGTGTGTCATCTGTTCTGTTTTCTCTTGTGGCTGCGGTGACAAAGA  
AGAACTGAAGAAATTCAGCGCAATCTGAACGGCACTGAAATGCCATTACCTATGCTTACAAAGGTGACAAAGTGTCTTA  
AGCAATCTTCTGAACCAAAATCAATTTGCTTCTATTGGTGCAACCAAGAAAGACGCTGCCAAGACACTTGAGCCG  
TTAAGCGCCAAATACAAAACATCGCGGGTGTGAAAGAAAATTAACCTATACAGATACTACGCGCAGGAAAACGTGAC  
TATCAGATGGAAGAAAGTGGATTTAAAGCCCTGACGGGTATTTCAGGAATAACGTTTCTGCTGAAGATGCCAAAAAG  
GTATCACTATGGCGCAATGGAAGTGGTGTGAAAGCCGCTGGTTTTAAAGAAGTGAATAA  
>Cluster\_56276  
GTGACTGACGTTTTACTCTGTGTTGGCAATAGCATGATGGGCGATGATGGCGCAGGTCGCTGCTGGCGGAAAAGTGGCG  
CGCCGCGCGAAAGGTAACCTGGGTGGTGTATTGACGCGGTAGCGCACCGGAAAACGACATCGTCTGCTATCCGTGAACGTC  
GCCGACACGACTGCTGATTGTCGACGCGCACGGATATGGGGCTAAACCCCGCGGAGATCCGCATCATCGACCCGGATGAT  
ATCGCCGAGATGTTATGATGACTACCCATAACATGCCGTTGAATTACCTTATCGACAGTTGAAAGAAAGATATTGGCGA  
AGTGATTTTCTCGGCATTCAGCCGGATATCGTCCGCTTTTACTACCCGATGACCCAGCCGATTAAGATGCGGTAGAAA  
CCGTTTTATCAACGACTGGAAGGCTGGGAAGGAAATGGCGGCTTCCGCGAGTTAGCGGTGGAAGAAGAGTAG  
>Cluster\_34355  
ATGACCGAAATACACCGCTGCTGACCGAAACGATTGAGTCTCTGAATACCCCGGAAAACCGGACAAACACCCCGCTT  
TAGTATCAGTTTTTATCCGTAACATCCGGGCTGTTTTATCGGTATGACGTTGCTTTTTTGCACCCCTGGCGGTGATGT  
TGCAGTCCGAAACGCTGTACGGCTGTCTGGCTACTGTTGATTTATTTATCTGCTGCTTAATGGTTTTCTTTTTCTGAT  
GTCACCCAGCTACCGCTATGAAGATATCGACGCTGCTGGATTTCCGCTTTGCTATAACGGCAATGTTACAACACGCG  
CTTTGTACTTCCCGCTGTTGAAAGCCATCTTGAACCTCTCCGCTGTCGCGGATGTTTATAAGGAACAACCTGCAAAAA  
TGATCGTCCGTAAGGTGAACGTTCTTTTTACGATATTTTTACCTCGCTCGCGCCGAATCAACATCTTAA  
>Cluster\_34745  
ATGAGTCTGCGCGAGGTACGCCAACAGCAAAAAAGTACGCGAGTTAGTGAACGTGGAAGAGCAGTTGAAGGGTCCG  
CCAGGTGACAGAGGGCGCATCGGCGGAGCTTATGATGATTACGTTGAGCTGATTTCTGACTTGATCAGGGAAGTGGGG  
AAGCTCTGAGGTGGACATGGCTGCTGCTGGGAGTTTTGCAACCGAGCGGTGGCTAAAATGCTTAAAGCGCTGGCAACC  
ATGGGGCTGATTGAAATGATCCCTGGCGTGGCGTGTTTTTAACGGCAGAAGGAGAGAAGCTGGCGCAGGAAAGCCGCGA  
GCGACATCAGATAGTCAAAAATTTCTTGTGGTGTGGGCGTCACTCCGAAATCGCCGCTCGCGACGCGGAAGGCATGG  
AGCACCATGTTAGTGAAGAGACGCTCGACGCTTTCTGTTGTTTACCAGAAACAGGTGCCAAATGA  
>Cluster\_44240  
ATGAGTCAAGTATCCTCGATTTACAACGGCATGTAAGATAATCCGGGTTACCGGAAGAGAGCCAGTTTCAACATG  
GCTGAATCGGGTGTATCCCGAGTTTACGAAAGAAATCGGAAGTACTATTCGCGTGGTGCATACCGCGAAAGCCACAGTC  
TGAATCTGACCTATCGCGGTAAGGATAAGCCGACCAACGTCCTCTTCCCGTTTGAAGTGGCGCTGGCATGGAATG  
TCCGCTACTGGCGGATCTGGTTATCTGCGCTCAGGTGGTTGAGAAGGAAAGCTCAGGAGCAAGGCAAAACCTGAGGCGCA  
CTGGGCGCATATGGTGGTGCACGGCAGTCTGCAATTTGTTAGGTTACGATCACATCGAAGATGACGAGCAGAAGAAATGG  
AAGCCCTCGAAACAGAGATTATGCTTGGCTTGGGCTATGAGGATCCGTACATTGCCGAGAAAGAAATAA  
>Cluster\_62541  
ATGAAGAAAATACTGACTACAACGGCGCTGGCCGCTCAGTCTCTGCGCAGGCGCTACCTTTCCGCGCTGCTGAAACTGT  
CGTGGGTACCGTCAAATTTCTGGCAGTACATGACGGCGGATGGCTGGAAATCAGCAGATGGCATGGACAACGACGCGCTGA  
ACAATACGCTCTATCAGGCGAGTGTGATTGGCAATTAATCCCTGGACAGGCAATTTCTGCTGCTCAGCGTGGTGGCGGT  
GTATATTTTTCTCGCGGATAAGAAAACGATACCGTGGCAAGCTGAATCTGAAACCTGCCAGCGTTATTACTCCGATCT  
GACCTCGGCTATCAGAGTGAAGACCAGGGGAAAGGTTACTTCTATCATCGACACCCAGTATCAGCTGGGGCTGG  
CTGATGTACCTCACAGCAACAGGTGCTTGGCGATTCGCGAAAACGTGTCAACAAACAGCAGCAAGCTGCCCTGGCG

GCGAAGCGTTCTGCCTCAGAGCAGAACTGCAGCAGTGGGTAGCTCAACAGAGTCTGGCAGAGTTGTGCCGAGCACCGG  
CAATTGCTGA  
>Cluster\_34424  
ATGATGACTAAAATAAAGTTATTGATGCTCATTATATTTTATTTAATCATTTTCGGCCAGCGCCATGCTGCCGAGGGAT  
CGCATTAGTGCCACCGCTATTATTTATCCCGTGATGCTAAACAGACTGCGGTATGGATTAGAAATAGCCATACCAATG  
AGCGCTTTCTGGTCAATTCGTGGATTGAAAACAGCAGCGGTGTAAGAAAAGTCAATTCATCATTTACACCGCCACTGTTT  
GTTAGTGAACCCAAAAGCGAAAATACTTTGCGTATTATTTACACCGGTCCACCCTGGCAGCAGATCGTGAGTCTCTGTT  
CTGGATGAATGTTAAGACGATCCCTTCGGTAGATAAAAATGCATTGAACGGCAGGAATGTTTTGCAACTGGCGATTTTAT  
CGCGCATGAAATTTATTTCCGTCCAATTCAAATFACAAGAAATACCCGCGAAGCGCCGGACACTCAAGTTTTCGCGA  
TCCGGTAACTATATCAATGTTTATAATCCATCACCTTTTTATGTCACCCTGGTTAACTTACAAGTGGGCGACCAAAAGTT  
GGGAATGCTATGGCTGCACCCAGAGTTAATTCACAAATTCCTTACCCTCAGGAGTGCAAGGAAAGCTGAAATTTTACA  
CCGTTAATGATTATGGTTCAGTAACTCCGGTCAGAGAAGTGAACCTTAACTAA  
>Cluster\_23782  
ATGATTACAAGTATACGCTATCGCGGCTTCTCATTTTTATTACAAAGATAACGATAATAAATATAAAGAAATCTTTGATGA  
AATACTGGCCTATAATTTTAAAACAGTAAAAGTATTACGTAATATTGATGATACCAAAGTATCGTTGATTGATACGAAAT  
ATGGTTCGCTATGTTTAAAGTCTTTGCCCGGAAAACGAAAAGGAATGAACGTTTTTTAAAATCTTTTGTAAAAGGTGAC  
TACTATCAGAATTTGATGTTGAAAACCGATCGTGTGAGAAAGTGCAGGCTTACTTTTTTCCCTAATGATTTTATTTTCTGG  
TGAGCGTAAAATTTTCAACTATGCCAGTGTTTTTATCATGCTTATCGAGTATGTCGAGGGCGTAGAGCTCAATGATATGC  
CGATTATTCAGAAAGATGTTAAAGCAGAAATTAAGGCTTCAATGGAAAATTTGATGCTTAAATATGCTATCGGGCGAC  
CCACACCGGGTAACTTTATCGTTAGTAAAGATGGTGTGAGGATAAATGACCTATCCGGTAAAAGCTGTACGGCAGAGCG  
GAAAAGCCGTGATCGTCTGGCATGGAACGTCACCTGGGTATTGCCAACGAAAATAAAGATTATGGTACTATTCAGTAA  
TCTACAGAACCAACTACGCAAAATTTATTAATAAATTAAGGCAAGCGTAA  
>Cluster\_22057  
ATGCTGATAAATCTGCCGTGAAAACCTGGACGCCAGAGATCTCGCGCCACCACCGGCAGAGTTTGTCCAATGGCCGA  
GTCGGAAGAAACCATTATTGAAGAGGTCGAACCCAGCCTTGAGCAGCAACTGGCGCAACTGCAAAATGCAGGCCACGAGC  
AGGGTTATCAGGCGGGGATTGCCGAAGTTCGCCAGCAAGGTCACGAAACAGGGCTATCAGGAAGACTGGCCAGGGGCTG  
GAGCAAGGCTGGCAGAGGCGAAGGCTCAACAAGCGCAATTCATGCCCGGATGCAGCAACTGGTTCAGCGAATTTCAAC  
TACCCTTGATGCGCTTGATAGTGTGATAGCTTCGCGCCTGATGTCAGATGGCGCTGGAGGCAGCAGCTCAGGTCATAGGTC  
AGACGCCAACAGTGGATAACTCGGCACCTGATCAACAGATCCAACAGTGTGTCAGCAAGAACCCTTATTCAGCGGGAAA  
CCACAGCTGCGCGTACACCCGGATGATCTGCAACGCTGGATGATATGCTCGGCGCACTTTAAGTTTGCATGGCTGGCG  
CTTGCGGGGCGATCCACCCTCCATCTGGCGGCTGTAAGATCTCCGCGATGAAGGCGATCTCGACGCCAGTGTGCCA  
CCGCTGGCAAGAACTCTGCCGTGGCAGCACAGGAGTGGTGTAA  
>Cluster\_19620  
ATGATCGAATTCATCACACAGCATATAGATACTATAAGCACAATGATCTCTGCTTTTGACGACTGCTAACAGCAGTTGC  
TACGTTTCTTGTGGAGAGTAAACAGGCTATTAGCAACGAAACGAAAAGGATGGTTGACGCATCAGTTCAACCACATG  
TTGTTGTGACTCTGGAACCAAACTCTGGGCTGCTTTTTTATTTTGACATTAATATCGTAATACTGGAATGCACAGCC  
TATGATATAGCGGTGCAATTTGATCCCCCTCTCGTTAATGCAGAACATAGAAAAATAGAGGCTACCATTTAGCAAGGT  
CAGCGTATTAAAAACGGACACTCTCTCAACAGCAATCTCTGCAAGTATGAGCAAAATTAAGGATCAAAATTTATTTCTATTA  
GTGTCAGTTGGTCAAAACAGCCGGATCTACAGAAAGAGAATCAATGAATATTTCTTATGATATGGCTTCTTTTCGAGGGG  
GTTAGCTATTTAGAGCAAGGAGTCCAAATGACAAAATAGCCGAGCAAGTGAAGAAAATAGAGAGGACTGGAGCCGAT  
ATCCAAGGAGCCAAAGAAAATTAAAACAGATAATTAACAACAGCAGACGAAACGAGGAAAAGAAATAATGAAGAAA  
GATATCAGAGCACTTAAAAGAAATGGGAAGATAAGAAGAAAAGGCTGAATAA  
>Cluster\_19237  
ATGAATAAAAATCCTGTTAGTTGATGATGACCGAGAGCTGACTTCCCTATTAAGGAGCTGCTCGAGATGGAAGGCTTCAA  
CGTGAATGTTGCCACGATGGGGAACAGCGCTTGATCTTCTGGACGACAGCATTTGATTTACTTTTGCCTTGATGTAATGA  
TGCCGAAGAAAAATGGTATCGACACATTAAGCACTTCGCCAGACACACCAGACGCCCTGTCATTTATGTTGACGGCGCGC  
GGCAGTGAATTTGATCGCTTCTCGGGCTTGAGCTGGGCGCAGATGACTATCTCCAAAACCGTTTAAATGATCGTGAGT  
GGTGGCACGTTATCGCGCATCTCGCGCTTCCGACTGGAGCGAACAACAGCAAAACAACGACAACGGTTTACCCGACAC  
TGGAAAGTTGATGCTTAAAGTCTCAATCTGGTCCGAGGAGGAGCTTCGACGGGCAACACATGGAGTTAACCGGTACT  
GAGTTTACCCTGCTCTATTTGCTGGCACAGCATCTGGGTCAGGTTGTTTCCCGTGAGCATTTAAGCCAGGAAGTGTGGG  
CAAGCGCCTGACGCGCTTTCGACCGCGCTATCGATATGCACATTTCCAACCTCGCTGTAACACTGCCGGATCGTAAAGATG  
GTCACCCGTGGTTTAAAACCTCGCTGGTGGTGGCTATCTGATGGTTTCTGCTTCTATGA  
>Cluster\_58076  
ATGGAATTTTCTCCCTCTACAGCGCGCAGCCTAATTCAGCCTTACAACGTTTTTTTAGCCGATGTGATCACACCCGA  
TGGTCCGGAATTAACGCTACACTGCCGAATACGGGTGCGATGACCGGTTGTGCAACCGCTGGCGATACCGCTGTTGATTT  
CGACTTCAGACAACCAACAGGAAATACCCACACACTGGGAATTAACCTCAAAGCCAGAGCGGCGCATTTATTTGCGT  
AACACGCTTTGGGTAAACAGGTTGACGAAAAGAGCTATCCTTAATGAATCAATTTTCAAGACTGTCAGGCTATAGCTCGCT  
GAAAAGCGAAGTAAAATACGGCGCAGAACGCGGATTTGACTTTATGTTGACAGGCGGATTCGCGTCAGACTGCTATA  
TTGAAAGTGAATTCGTTACGTTAGCGGAGAACGAAACAGGGATAATTTCCCGATCGGCTCACTGAAACGAGGTCAGAAAC  
CTTCGGGAGTTGATGAGCGTAGCGGCTGAAGGCGAGCGTTCGCGTTATCTTTTTCGCGGTGCTGATTCAGCCATTACAG  
GTTTTTACCCGCGCCACATCGATGAGAAATACGCGCAACTATTTGTCAGAAGCTCAACAGAGGGGGTAGAAATTTCTGG  
CTTACAAAGCGGAAATTTCTGCTGAAGGATGGCTCTTAAAAAATCACTGCCGTTTACATTGTAG  
>Cluster\_20394  
ATGGATAATCGGAGCGAATTTTGAATAACGTTGCTCAGGCACTGGGTGCGCCGACGACTTGAACCGCAAGCAGAAGA  
TGCCCGCTAAACAACATATGCTAACGAGCGGCTTACCGAATTAACCAACAGCAGCGCTGTGACGCGTTTATCCAGTTT  
CCAGCGATGTTATGTTGACCGCGTGTGAACCTGACGAGCGAGGCGCAGGCGCAGAAAGCTGCAATACGCTGTGTGAAAGAG  
CTGGGAGATCAGTCGATCGTATGAGCGGTGACACGAGGCTGGAGGAATGGGGATTAGCGAACGTTTGCAGCAGGAATG  
CAATGCGCTGTTTGGGATCCGGCGAAAGGATTTGAGAACATATCACAAGCAGAGCAGGCTAAAAGTGGGCGTCTGATATG  
CTGAATATGTTTAAACGAATCGGGAGGCGTGGTTCTTTTTCCGCGCGGGGCGGGGCGTTTATTGAGCTGCTCCTCCG  
GAATTTCTCTTTTTTATCTGCTGCGTAAAAGCACTATCTCCGCGCTGTAGCGCAACTCGCAGAAAATTCGACATAGAAAGC  
GCAGGCGGTGAACGAATGCTTCTGCTAATCAATTAAGCGGCCAGTTTCAACGGCGGATATTGAGCTTATCAAG  
TCGTCGGAGTTTACGCGCGGTGAAAGCGGTGATCTGATTATTGAGGATTGTTGA  
>Cluster\_26745  
ATGCGAATTTCTGGCTATCGATACCGCGACAGAGCCTGCTCTGTCGCCCTGTGGAACGACGGTACTGTCAACGCTCATTT  
TGAGCTTTGCCCTCGTGAACATACTCAACGAATTTTACCGATGGTGCAGGATATCCTGACCACAGCGGAATTTCCCTGA  
CTGACATAAATGCTCTGGCATAACGGCGCGGCCCGGTTACGCTTTACCGCGCTGCGCATTTGGTATTGGCATTGGCACAAGGA  
CTGGCACTTGGCGCAGAGCTGCCGATGATTTGGCTCTCACGCTAATGACGATGGCGCAAGGGGCGTGGCGCAAAACGG  
CGCAACCCGCTGCTGGCAGCCATGACGCGCAATGGCGAAGTTTACTGGGCGCAATATCAGCGTGTGAAAACGGTA  
TCTGGCATGGTGAAGAAACCGAAGCGTACTCAACCCGAACTGGTTCATGAACGAATGCACAGCTTTCCGGCGAATGG

GTGACGGTAGGGACGGGCTGGCAAGCCTGGCCGGATCTCGGTAAAGAGAGCGGTTTGGCCCTGCGCGATGGCGAAGTGT  
ACTGCCCGTGCAGAAAGATATGCTGCCGATTGCTGTAGATGTTTGGCGAGGTTAAACGGTGGCGGTGGAACATGCC  
AACCGGTTTATTTACGTAAACACGTCGCATGGAAGAACTTCCGGGCAAGAAATGA  
>Cluster\_47586  
ATGAAACGTTATTAGCTTTGCTGTGCTGGCACTTTTAAATGACCCGACACAGTGTGTTGCTGGTGGCGTAGCCTTAAAGCAC  
GACGCGTGTATTATGATGGCGCAAGAAAGAACGCTGCTGACCGTTGAAAACCATAATAAAAAATGAAGAGTTTTTGA  
TCCAGTCATGGATTGATGATGTGAATGGCAATAAAAAACACCGTTTATTTATACACCGCCATTTATCAAACTTGATCCT  
GATAAAAAATAACGCTTACGTATCGTCAATATTGAAGATACCTTACCTAAAAGATCGTGAATCCGTTTACTGGATTAATGT  
AAAGGCCATTCTCCGCAAAAGTGTGAAAATGAAAATAAAAAACGCTTACAGATAGCCGTTCCGACCCGTTTGAAGTTGT  
TCTATCGTCCAAAAGGTTTCCGGGAAGCAACCTCGAGGCCATGAAACAGTTACGTTTCCAGTGTCAAATAACCAAAT  
GTGGTTAATAACGACTCCGCTTATAACCTGACCTTAAATCAGTTTCCATTAATGGACAAAAGATTGAACGGCGGGAAT  
GGTTCTCGGAAAGGAAAGTTAAACATTAACCTTCCAGCCGTTACAGGCAACGCGCACGAAGTGAATACAGCATTATTA  
ATGATTTCCGTTGTGCTGGCGAAATGCTGACGAAGCCGATTAACCTGA  
>Cluster\_21794  
ATGTCCTTCACTCGACGCAAAATTTGTTCTGGGGATGGGAACAGTAATCTTTTTACTGGTCTTCTGCTTCTCTGTAGC  
GAATACGAGGCAAGAAAAGGAAGTTCGGTATGCCATGATTCATGACGAGTACGGTGCATGGCTGTAATATCTGCC  
CGCATCCGCTAAAACACCTAACCCGCTCCCGCTCAGGGAAGCCGTTTATCGATAGCACATTTCCAGTACCTCAACGAC  
AATGGAACGCGATACATTTTTTCGCCAGTCAATGTCAGCACTGCGAAGATGCTCCTTGCATCGACGTTTGGCCGACAG  
GGCGTCTGGCGTATGAGCAGGGGATCGTCCGGGTAGAAAAATCGCAGTGCATCGGCTGCAGTTATTGCATTTGGCGTT  
GCCGTTACCAGTTCTGTTACCTTAACCTGTCATAAAGTGGCAGATAAATGTGATTTTGGCTGAGACCCGACTGGCA  
AAAGGCTTTCCGCCCATTTGCGTCACTGCTGCTGCCGGAACAGCATTTGATCTTTGGTTCGAAAGATAGCCAGAAATCA  
GGCGTGGTTGCAGAAAATAAATACTATCAATATCAGTACCTGGCCGGGAAACCGCATCTGTATCGCCGTTCCGTC  
AACATTTGATTAAGAAAGAAATGTATGA  
>Cluster\_4781  
ATGATTAATCCTGTTACTAATACTCAGGGCGTGTCCCTATAAATACTAAATATGCTGAACATGTGGTGAATAATTTA  
CCCAGAAATTAACATGATTACTTTAATGAATCACCATAATATATGATAAGAAATATATCCGGTATAACAGAGGAG  
TAGCTGAACATAAACAGGAAGAAATTTGTTAACGAGAAAGCCAGACGGTTTTCTTATATGAAGACTATGTATTCTGTATGT  
CCGAAAGCGTTTGAACCTTATTTCCAGAAATGAAGCCAGTACACCGGAAGGAAGCTGGCTAACAGTTATATCCGGAACG  
CCCAATGGGGCAGTTTTCTGTAGATAGTTTATAACAATCCTGATTTACATGCATTAATGTGAGCTTCCGGACATTTGTTGTA  
AGATCTTCCCTAAAAGAAAATAATGATTTTATACATAGTTGTGTGTACAGAAATGACAGCCCTCTAGGAGAAACAGCG  
GCAATAGATTTATAGAATTAATAATAAAGAGATATCATGCAGAAATTAATTTATGAGTTACCAGAGTTAAAGGC  
AGTAAAATCTGAAATGATTTATCGCACGTGAAATGGGAGAAATCTTTAGTACATGCTCCGCGGAAATAGACAGTTATATGA  
AATACATAAATAAATAACTTTCTAAAATGAGTAG  
>Cluster\_24677  
ATGGGAAAATCATTACAGTTGCTGGGCATAAAGCGGCATTGGCAAAAGCACCGTGTCTTGTCTTATGTGTGTGTGT  
CATCAAAAAGGGAAAACAGCCTTTTCTGGAAAACAGATTACAGGGAAAGCATCAAGGATTTTATTGAGGAACGTCAGG  
CTAACGCCAGTCTGTCCGAAATACCGTATTACGAGTGTACACAGATAATCCGGCGATGGTGCAAAAACCTGGCTGCCCGT  
TTTTGATTTGTGTTCTGTCGATACGCTGTTGATGAAATCTCCGGCATTCGTAAGAGCATGAGTTGTGCTGATATCGTCT  
CACATTCGTAGAACCAGGATCCGGCATCGAGATCAACACGCTGGGACGGTGGTTTTCGACATTAACACAGCAGGCGG  
GAGTCAATCCGTCATGAAAGCATGGATCGTTCTGAATAAGTGCACAAACCAATCCGTCAGACAGTGAAGCGTCAGAACTA  
CGCAATCAACTTAATGATGATCCGACTGGCTTCTGTTCCACGTCAGCGCATCTATATGCGCCTGCGCATAAAAAGC  
CTATAACTGTGGTATGGCGGTACATGAATACAAACGACAAACAGGAAACAAAGCCCGTGGCGAGATTGAATTAAGTTAA  
AAGAAACGAATATCATATAG  
>Cluster\_48652  
ATGACAAAAGTTTGAATCGTATATCGCGACCCGGCAGATCTTATCCCTATGAGATGAATGCCAAAAGCATGATGA  
ACAGCAGTCCGAGATCTAGCCGAGCCATTAAGAAAGCGCGGATTTGACCAGCCAAATACGGTTCGATAAGAACAGCGTAA  
TTATTAAGTGGCCAGCCGCGCTGAGGCTGCAATTTTCTGGACTTGAGCGCTACCGGTTATGTTCCGATGATCTC  
AGTGATGACGAGGTTCTGTCGAAGCGCTTGAAGATAACCGACTTGGCAGCATTTGATTACGATGCAATTAAGCTACAGAA  
AGAGCTTGAAGTCTGTTCTGACGATATCGAGGTTTTCGGCTTGAAGAGCGTGAAGTTGAATGTTCTCGTTGGCAGTA  
TGACAGAAGAAATGGACACCGACTCGCTAGTTATCGATCTTGGCGAAGAACTAAACGACAGAAGGATGAACACACCGGAG  
ATCAGTCTGTAAGTTGACGCGGAAGAGTACGTTGTCGACGTTTGGGCTTAAACCGCTCCCTGCTGGCTGCCAT  
TGTGTTGGTGTATTTGCTTGGCCACATGGAAGAAATGACGGGAGAAAGCGGGTAGACGATTTGTGGCATATGCGGAGA  
AGATCTCTCCGGGAGATGGCTCCATGA  
>Cluster\_37724  
ATGTCTGATAATCGTTCCCGCATGATCGCTGGCGGTTGCTTATCACTCATATACGCGACTGATGGCCGGAGAATC  
TCTGTCACTAAAACACTGTCAGATGAATTTGGCGTTACAGAAGCTACTTTACAGCGGATTTTATCAGCGTCTGGTTC  
ACCTGGATTTTAGAGTACAGAAATGGCAGGTACAGCCTCAGACGACAGAGCAGCCAGGTGCGATCCCTGAAATGCTTTCT  
TTTATACAGAATACCGGATCGCAGGATCTCCGCTCCGGAACGACGATGATAACCTGTCTTACGCAACACAGGA  
GCCCTCTCCCTGCTTATCTGGCTACCGGCGCGGATATCACTGCAACGTTCCCGGAGTGTCTTCTGCAACTCATCTGG  
CAATAAGACAGTGTATCCACATCTCTGATGACTGAGCGATGGTATCCGTCCTGAGGACCTGCCGGTCTATTTATTAC  
AGCGGTAGCTGGTATCTGATCGGTTACAGAAGGAAAACCTGCAGGCTTTTCTCTGGCAGATATCAAATCAGTTAGCCT  
GACATCAGAAGGTTTGAACGAGAGCCACATCCACAGTCTGGTGCCTGAAGAGCGTTTATCTCCGCCCTGCCACAT  
TCTCTTTTATCCATAAACTTATCAACACCTTTAACCTGTGA  
>Cluster\_46558  
ATGAACCCATAGTAAATTAATCGGCTTCAACGGAAGCTGGGCTACACTTTTAAATCATCAGGAAGTGTGACGAGGCATT  
AATCATCTAGTCCAGCAGTAAACATTAACGAGCGTTTGAATTTTTAGGCGACTCTATTCTGAGCTACGTTATCGCCA  
ATGCGCTTTATCACCGTTTCCCTCGTGTGGATGAAGGCGATATGAGCCGATGCGCGCCACGCTGGTCCGTGGCAATACG  
CTGGCGAACTGGCGCGCAATTTGAGTTAGGCGAGTGTACGTTTATAGGCGCAGGTGAACCTAAAAGCGGTGGATTTTCG  
TCGTGAGTCAATCTCGCCGACACCGTCGAAGCATTAAATGGTGGCGTATCTCGACAGTGAATTTCAAACCGTTCGAGA  
AATTAATCTCAACTGATCAAACTCGTTTGGACGAATATGCCAGGCGATAAACAAGAAATCCGAAAACCGGCTTTCG  
CAAGAATAATTTGACGGGTCGCCATCTGCCGCTGCCACTTATCTGGTAGTCCAGGTACGTTGGCAAGCGCACGATCAGGA  
ATTTACTATCCACTGCCAGGTACGCGGCTGAGTGAACCGGTGTTGGCACAGGTTCAAGCCGCTGTAAGGCTGAGCAGG  
CTGCCCGCAACAGGCGTTGAAAAACTGGAGCTGGAATGA  
>Cluster\_62990  
GTGACAAACGTTCTGATTGTTGAAGATGAACAGGCTATTGCTGCTTTCTGCGCACGGCGCTGGAGGGGACGGGATGCG  
CGTCTATGAGGCGGAAACGCTGCAACGCGGCTTGTGGAAGCGGCTACCCGTAAGCCAGATTTGATTTCTCTGCATCTCG  
GCCTGCGGATGGTGGATGGGATTTAGTTTATCCGACCTGCGCCAGTGGAGCGGCTGCCGGTGGATTTCTCCGCA  
CGCAGCGAAGAGAGCGACAAAATCGCCGCTGGATGCCGAGCGGATGATTAATCTGAGTAAGCCGTTTGGCATTTGGCGA  
ATTTGACGGCCGCTGCGCGTCTGCTTTACGCGCCACTCCGCCACCGCGCGCCGATCCGCTGGTGAATTTTCCGATG

TTACCGTCGATTTAGCCGCCCGGTGATTACCGGGGTGAGGAAGAGGTGCATCTCACGCCGATTGAGTTCGCCCTGCTG  
GCGGTGCTCTGAATAATGCCGGGAAAGTGCTCACCCAGCGCCAGTTACTCAATCAGGTGTGGGGGCCAAACGGGTGCA  
ACACAGTCACTATTTGCGTATTTATATGGGACATCTGCGACAAAACTGGAACAGGATCCCGCTCGCCCCGCCATTTCA  
TTACTGAAACCGGTATTGGGTATCGGTTTATGCCATGA

>Cluster\_25541

GTGAGTAAACGTTATTTTGTACCGGAACGGATAACCGAAGTGGGGAAAACCGTCGCCAGTTGTGCACCTTTTACAAGCCGC  
AAAGGCAGTAGGCTACCGGACGGCAGGTTATAAACCGGTGCGCTCTGGCAGCGAAAAGACCCCGGAAGGCTTACGTAATA  
GCGACGCGTGGCGTTACAGCGCAACAGCAGCCTGCAGCTGGATTACGCAACGGTAAATCCTTACACCTTCGCGAACC  
ACCTCGCCGCACATCATCAGCGCACAAAGAGGGCAGGCCGATAGAATCATTTGGTAATGAGCGCCGGATTACGCGCGTTGA  
ACAACAGGCTGACTGGGTGTAGTGAAGGTGCTGGCGGCTGGTTACGCCGCTTCTGACACTTTTACTTTTGGCGATT  
GGGTAAACACAGGAACAACCTGCCGGTGATCTGGTAGTTGGTGTGAAACTCGGCTGTATTAATCAGCGATGTTGACGGCA  
CAGGCAATACAACAGCCGGACTGACTTGGCGGGTGGGTGGCGAATGATGTACGCCCTCTGGAAAACGTCACGCTGA  
ATATATGACCACGCTCACCCGATGATCCCGCTCCGCTGCTGGCGGAAATTCCTGGCTTGCAGAAAATCCAGAAAATG  
CGGCAACCGGAAAGTACATCAATCTTGCCTTAATGTAG

>Cluster\_58776

ATGAGTATTCATTAACCGCATTAATTTGCTTCTACGGCGGCATCAGGCGCTGTTTCGATATCACGCTGGATTGCCACA  
GGCGGAAACGGCTGTTACTTGGCCCCAGCGCGCGGTAATAAGCTCGCTGCTGCGTACTCAATCTGCTTGGATGC  
CGCGCTCCGGTACGCTCAACATTTGCAGGCAACCATTTTCGATTTTACCAAAAACACCTCTGACAAAAGGATTTCGGATTG  
CGTCGTAACGTTGGCATGTTGTTTCAGCAATACAACTGTGGCGCATCTGACCGTGCAGCAAACTGATTGAGCGCC  
CTGCCGTGTACTGGGTGTAGTAAAGATCAGGCGCTGGCCGTGCAGAAAACCTGGAACGCTGCGCTCAACCTT  
ATAGCGATCGTTTACCCGCTGCATCTTCTGGTGGTCAGCAGCAGCGTGTGCTTATGCGCCGTGCGTTGATGATGAAACCG  
CAGGTACTGCTGTTGATGAACGACCGCGCCTGGACCCGGAATTAAGGCAAAAATGCTCAGCATCATTCGTGAGCT  
GGCAGAAAAGAAATATTACCAGGTGATCGTACCCACGAAAGTTGAAAGTGGCGGTAATAACCGCCAGCCGAGTGGTGTATA  
TGGAAAATGGTCAATCGTAGAACAGGGCAGCGGAGCTGCTTACCAGCGCAACCGAAGCATTTAAAAACTATCTC  
TCTCACTAA

>Cluster\_40072

GTGAGTCAATTACCATGAGCAGTTCCTGAAACAAAATCCGTTAGCCGCTCTGGCGGTGTTACGCGATTTCACAAAAGCCGC  
AATTCCTTTGCGGTATCAGCTGGAATGGCGGGCAGCTGATCAGCAAAAATCTGGCAATAACTCCGGATAAAGTGGTCTGG  
ATTTCCGCGAGCCAGGCCGAAGACAACATCGCGTGCTAAAGGCGCAGCACATTAACATTAACCGCGAAACTCAGGGTGGC  
AAAGTCGAGTTTACTGTTGAAACAACATACAGCAGAGTGAATCTGCGAGCTTCCGGCATTTATTAACCGTACCGCTCCAC  
CTTATGGTTGTACAACGACCGCATTTTCCGCATCACCGCCCACTCCATCCGCTTATTTTGGCAGACCAAACTGG  
CGGATAACAGTACGTTACGTTTCCGCTGTATGATTTGTCGTTAGCGCGCATGGGCGCATTACTGGAACACAGCAAGCCT  
GCCGAATTACACGAAGGCATGCGCTTCCGCTCAGATTGAAGTCAACATGGGGCAATGGGGGATTTTCACTTTGACGCCA  
ATTAATCTCCATCAGCGAGCGCAAGTGAATGATGGCAAGAATGAAACCATCACCACTCCCGCTGAGCTTCCGTTTTC  
TTAACGTCAGCCGACGGTGGAGCGCAATTACAGCGGATTATTTCTCTCAGCGGGAAGCCCGGAGAAAGCGGCC  
AAAGTGGCGACTGA

>Cluster\_26553

ATGGGTAAGTCCAGCCCTTGCCAATATTAATTACTGGCGGTGGTTCGTCGCATCGGCCCTCGCCCTCGCCTGGCATTTCAT  
TAATCAAAAGCAACCGGTGATTGTCAGTATCGGACGCACTATCCCGCATTTGATGGACTGATTAACGAGGTGGCAGT  
GTATTCAGGCTGATTTTTTCGACCAACGACGGTGTGATGCGGTTTTGCGGATGAAGTACTAAAAAGCACCATGGCCTGCGT  
GCTATTTTGCATAAGCCAGCGCGTGGATGGCAGAAAACAGGTACACCACCTGACCGAGCTACTGGCTTGCATGATGCA  
GATCCACGTTAATACCCCAATACCTACTCAACCATGCACTGGAAGAATTAAGTGGTGGGACGGACAGCCGCGCAGCGATA  
TCATTCACCTTACCGATTATGTTGGTGGAGCGGTTAGCAGCAAAACATATGTCATGCTGCAAGCAAGCGCCGATGAT  
AATATGACCCGCTCGTTTCCCGCAAGCTGGCACCAGGAGTGAAGTGAATTCATTTGCGCCATCGCTAATCTGTTTAA  
TGAACATGATGATGCCAATATCGACAACAGCGCTGAATAAATCACTGATGAAAACAGCGCCGCGCGGAAAGAGTGA  
TCGACCTGGTTCGATTACTTACTTACCAGCTGCTTGTACCAGGACGAGTCTCCCACTGATGGCGGTGCTATCTGCGT  
TAA

>Cluster\_53

ATGACCACCGATACCTTCCCAAGATAGCTTATCGAAGTTTAAAAACGGGATTTCTATCCTTGGGATAGCTAAAGGGGC  
AGGGATGATAGCCCAACATGGAACATATGCTTGGTTTTATCCTTACAGATGCAAAGGTTTCTAAAGATACGTTGAAAA  
AGGTCCTTCCCAAGATAGTAGACATAGCTTTAACAGATAAACCGTTGATGGAGATACTAGCACCAACGATACCGTTTAC  
ATGCTTTGTAGTAAACAGAAAGCCTCAAAAACGGAAGACTTTGAAAAAGCTGTTTGTAGAGGTAGCACAAGAACTGGC  
CTATCTTATCGTAAAAGACGGTGAAGGTGCAAGTAAAGTTATAAAAAATATGTTAAAAGGAGCTAAAACCAAGAAAGATG  
CAAAGACTTTTGCCTTTTCTGTAGCCAACTCCCTTTAGTAAAAACTGCAATTTACGGAGAAGACGCAAACTGGGGGAGG  
ATTTTGTGCTGCCCTGGGAAAACGACATTTCTTTGATTTTTCGAAAAGGTTGAAATCTATCTTAATGGAATCCCTGGGT  
AAAAACCTGCAGGTAATCACTGACGAAGAAATCTAAGAAAAGAACTCAAAAAGAGGTAGTTGAAATACAGATCAAGT  
TAAAAGAGGGTAAAAAGGTTTTGAGGTTTGGGCAAGCGACCTTACCAGAAATACATCAAAAATAACGCCCATATCTCC  
ACATAG

>Cluster\_28525

ATGGCCGTACTGGGATTGACAGGGGTTTCGGGAGGCGTGGGGACAACAACCATCACCGCGCATTAGCCTGGTCAATTACA  
AATGTTGGGAGAAAATGCTCTGGTGGTGCATGCTGCCCGGACAACTTGTGCGCCTGTCATTTAACGTTGATTTTACCC  
ACCGTCAGGTTGGGCGAGAGCTATGCTGGATGGCCAGGACTGGCGTGACCGGGTTGCGCTATACCCTCGCAGCTCGAT  
TTGCTGCTTTTGGTTCAGTTATCCATTGAAGAACAAGAAAATCCACAGCACTGGCAAACCCGGCTGAGCGATATTTGCAC  
CGGCTTACAGCACTAAAAGCCAGCGGGCGTTACCAGTGGATTTAATTTGACTTACCGCGTATGCTTGCAGATAACCC  
ACCAGCTTCAGTGTGTTGTGCGATCACTCGCTGGCAATCGTAAATGTTGGATGCAACTGCCATAACCGACTGCATCAGCAA  
CGCTTCCGCGATGGTGCACATATTTGATTAATGACTTCCGATTTGCGAAGGTTGAAATCTATCTTAATGGAATCCCTGGGT  
GTTGCAAAGCCAGCGCGGATGCTGCGGATGCTCATTCATCGTATGAAGCGATGGCTGAATGCTGCGCAGCTAAGCAAC  
CAGTCGGTGAATTCGCGAGTATGCGCTGGCGGTGAAGAAAATACTGACGCTGGCGAACTGGTGCCTGTTGAACTATTTCC  
GGGCTGAAAACGCCAGTCCGGAGTGCATCATGA

>Cluster\_20270

ATGTCCTTATGCTTCTGCTTCTTGCACGGCAGATTTCTGCATCCAGGCGTGTTCGTTATGCGTTTTGCTCCCTTACT  
CGCCAGCGCCACCACATACATATCTCTTTTAGCTACGCCCGCCAGCGGATGCAAAAACCGTGGCGCTTTTATTAAC  
AGTACCAAACTCTTGA AAAAGCAGCCAGCTATATTTGTGGAAGGCAATGTCGAAAGCAGAAGGGCGCTGCGCCAGCAC  
AAACCGCAACAGATAAAAACAGCATCCAGAAATGGTTTCCGCGCTCTCAAAAGCAACCGCAGCTGCGCGCTGGGT  
GGAGAATAATCATTTCTTAAGCAGCGACATCTACATAACATCCAGAAAGTGGCGATTACCGCTGGAGCAGCAGCTAG  
GTAAGCCTTATATCTGGGGGGCAGCGGCCCTGATAAAGGCTTCGACTGAGCGGTTGGTTTTTATGCCTACAACAAG  
ATCCTTAGGCTAAGCTCCCGCGCAGGCCAATGAGATGTACCACCTACCGTGGGCAACGATTTGTTGTAATACGACCT  
CGCGCGGGAGATTTGCTGTTTTTCCATATCCAGCTCGTGAAGTAGCCGACCATATGGCGTATATCTTGGAGACGGTC  
AGTTTATCGAGTACCGCGCACCGGGGAAACCATTCGGGTAAGTGGTTAGCTGAACCTTCTGGCAGGATCACTTTTTG

GGTGCGCGCAGGATTTTGACGGAAGAGACGATTTTGATA

>Cluster\_3592

ATGCTATATATCTTTCTGCTTATTATTACCGTGATTTACAGCATCTTAGTCTGTGTATTCGGCTCCATTTACTGCCTTTT  
CAGCCCAGCTAACCCGAAACATGTGGCCACCTTTGGGCATATGTTGGCCGCTTTCGGCCGCTGTTCGGCTGAAAGTTG  
AGTGCCGCAACCTTACGCGGATGCTGAAAGCTACGGCAATGCTATCTATATCGCTAACACCAGAACAACATGACATGGTG  
ACAGCATCGAACATTTGTGCAACCGCCGACGGTACGGTAAAGAGCTTCTGTGGATCCCTTCTTCGGGCGATT  
GTACTGGTTAACCGGCACTTATGATCGACAGAAACAATCGACTAAAGCTACGGCACCATTGCGGAGAGTCTGGAATC  
ATTTCAAAAAACCGCGTATTTCCATCTGGATGTTCCCGGAAGGAAACCCGAGCCGTTGGTTCGGCCCTGCTACCGTTCAAG  
ACTGGAGCATTTTACGCGGCAATTCGCGCGGGCTCCCGATTATTCCTGTGTGCTCTACAACCTCGAATAAGATTAA  
TCTTAATCGACTGCACAACGGTCTGGTATTGTCGAAATGCTGCCCAATTGACGTCAGTACGATGGCAAAGATCAGG  
TTCGTGAGCTGGCTGCCATTGCTGTTGATAATGGAACAAAAATCGCCGAGCTCGATAAAGAGTCCGAGAACCGCAA  
GCCCGGAAAAGTTAA

>Cluster\_16976

ATGGCATTACTGGAATTTGCTGTTACAGCATGGAATGCGCGCTAACGGCGCAGCAAAACGGCGCTGACAGAGTTGAATT  
ATGCGCAGCTCAAAAAGAGGGGGCTTAAAGCCGCTGTTGGGGTACTGAAATCCGTGCGCCAGCGGGTGACGATCCCG  
TGCATCCGATTACCGCCAGCGGTGGTATTGCTGACAGCGAGTGGTGGTTCGATGTTGACGGGAATGCTCGATGGAATGGA  
ACAGTCCGCGAATTAGGTTTTCTGGTGGTACGGGGTTCCTGATGTTGACGGGAATGCTCGATGGAATGGA  
AAAAATAATGGCTGCTGCCGGTCCGCTGGCAGTGACTTTTCATCGCCCTTCGATATGTGCGCTAACCTTTAAATACAC  
TCAATAATCTTACGGAATTTGGGCTTGGCCGGTACTGACATCGAGGCAAAAATCAGACGCACATGCAAGGTTTATCAAAA  
ATTAATGGAATTTATGCCATCGTATGCTCAATCATGTCGGCGGAGCAGGAGTCCGTGCGGAAAACCTGCACCATT  
CCTCGATGCCGGAGTGTGGAAGTCCATAGCTCCGCGGAGCTGGCAAGCTCACCGATGCGTTATCGTAATCAAGGAT  
TGTCATGTCATCAGATGCACACGGGACGAGTATTCGCTTATGTCGTAGACGGGGCGGGTGTCTGAAATGAAAGGA  
ATCATTTGAACCCATCAGGCCAAATGA

>Cluster\_17878

ATGCTCATTTGGCAGGCACTTGATTTGGTATCCCGTTACGATTCTCTGCGTAACCCACTGACTTCTCTGGGGATTACCT  
CGACCCGAACTCATCTCTCGTTGCTTGCCTGCGAATCAGGACTGTAACGCTACGCAAGCGCGCTTCCCTCGAAATGA  
TGGTCTGGTGTATTGTTGGCATGGCGTTGGGCGTAAAGAACCCTTCCACCAGATTGTGAATCGCCTGGACATCATGCTG  
CCGGCAATCGCCCTTCCGTTGCCCCGCTGCTTATTCAGGCCCGCAGCGTCTGGGAAGTGAAGGCTGTCGCCGCT  
GTTACGAAAACAGCGCAGCTCTGGCATAACGCCACGGCCGATCCGACTGGTGGCGCTGACCTGCTGGCCATTGATG  
GTGTTGTTGCGCGCACACCGGATACACCAGAGAAGCATGCAGCCTTCCCGCCGAGACACATGCGGGAAACCCGGCGCT  
TATCCGAGGTCAAAATGGTCTGCCAGATGGAACCTGACTAGCCATCTGCTGACGTCGATGACGGACGCCATGCGCTTCCC  
CGAGGAGAAATGGCGGATCTGTACAGTCTGCTGGGAAATCGAACTGGGATACAGGGAGATAAAACAGACGATGCAAC  
TGAGCAGGCTGACGCTGAGAAGTAAAGCCGAGCTTGTGGAGCAAGAGCTGTGGGTGCTTACTGGCTTATAAAGTGG  
TGA

>Cluster\_41477

ATGCAAAAGCAAGCTGAGTTGTATCGTGGTAAAGCGAAAACCGTATACAGCACGAAAACCCGGACCTGTTGGTGTCTGA  
ATTCCGCAATGATACGTCAGCAGGGGATGGCGCGCATTTGAGCAGTTTGTATCGCAAAGGATGGTGAACAACAAGTTCA  
ACTACTTCTATATGAGCAAACTGGCTGAAGCGGATCCCGACTCAAAATGGAGCGTCTGCTCTCCGATACCGAATGCTG  
GTGAAAAGCTGATGATGGTGGCGGTTGAGTGTCTGTCGTCGTAACCGTGTCTGCTGCTCTGTTGAAACGCTTGGAAAT  
CGAAGAAGTATTGAGCTGAACCCGCGCTGTTTCGATCTGTTTCTGAAAACAGACGCCATGCACGATCCGATGTTCAACG  
AATCTTACGCAAACTTTGGCTGGGTGAGCAAGAGAACCTGGCGCAATGAAAGAGCTGACTACAAAGCGAACGAC  
GTGCTGAAAAAAGTGTTCGATGATGCTGGTCTGATTTTGGTGGCTTTAAGCTGGAGTTTGGCCTGTACAAAGGTGAAGT  
GGTACTGGCGGATGAGTTCTCCCGGACGGCAGCGCTGTTGGGACAAAAGAACGCTGGAGAAAATGGACAAAGACCGTT  
TCCGCCAGAGCCTCGGTGGCTGATCGAGGCCATGAAGCCGTGCGCCGCGCTGGGTGTACAGCTGGACTGA

>Cluster\_62097

ATGGGCGCTTTTACAGGTAAGACAGTCTCATCTCGGTGGCAGTCTGGTATCGGTGCCCTATCGTACGTCGTTTCGT  
CACCGATGGGCAATGATACGATTCACCTATGCGGGTTCGAAAAGATGCGCTAAACGCTGCGCAACAGACTGGAGCGA  
CAGCAGTATTCACAGATAGTGTGACAGAGACGCTGTCTATGATGTCGTTTCGTAAGAGCGGCGCATTTGGATATCTGGTG  
GTAATGCAAGTATTTGGCTCTTTGGCGAGGCCCTGGAATTAATGCCGACGATATGATCGCCTTTTCAAAATCAATAT  
TCATGCTCCTTATCATGCTCTGTTGAAGCCGCGCGCAGATGCCGAAAGGGGGCGCATTTAATCATCGGCTCCGTGA  
ATGGCGATCGTATGCTGTTGACGGCATGGCTGCTTATGCGCCGAGCAAAATCTGCCCTGCAAGGCATGCGCGCGGCTG  
GCCCGTATTTGGACCGCTGGGATCACCATTAACGTCGTCAGCCAGGGCCAAATTGATACCGACGCTAATCCCGCCAA  
CGGGCCAATGCGGATATGTTGCATAGTTTGTGGCTATCAAAAAGACATGGGCAACCGGAAGAGGTGCTGGTATGGTCG  
CATGGTTAGCAGGCGCAGAACCCAGTTTTGTACCAGCCGATGCATACCATTTGATGGCGCTTTGGCGCATAA

>Cluster\_134

ATGAGTGCCTATCCCTCTTATCTTAAACTGATGGAACCGGAGAGATAGATAAAAAGGATAGAAATCTTTTATGCCAAGCT  
TGAAGTTGTGACCTTTTGCCTCAATCGGTGTTGGGTTAAACAGGCTCAAGGGGAAAGAGGTTTTTGAAGGTTTTTACATA  
AGCCTATGATTTCAAGTTATGGCCCTCATTTGGAGAAGAAAGACCTCTGGTAGGGGAAAACGTTCTGGAGCTATCTTT  
TTTACTTACTCAATATGGCTTGTGTTTATGGCAGAACTGGGAAATCAGTCAATTTAGGAGAAGGGGACTTATTAGAAGT  
AGAGGATTTAGCAAGGATCATGATATCTTACAGTCTGGGCTGTCTAACAATCAACTTAGTTACTCTACCCATCAAG  
TTCCTTTCAATGTAAGGCTATAAAGTTAGCAGCAGAAATGGGCTAAGGCTTCCGATGTTTTATAACTGCGGAGGTTAT  
GAATCTTTAGAACTTTAAGATTATTGGAAGACATAGTAGATAATTACATGCTGATATCAAAATATATGGATGATAAAAT  
TGCTTTAAAACCTTTCAAAAGTAAAAACTACTCTTCTGTGGTAAGGGAAGCTGAAAAGAGATGCATAGACAGGTGGGAG  
ATTTGGTGTATAGAAAGGGGTATAGCCAAAAGAAAGTTTATTGATTGAAGACATTTAGTTTTACCTGA

>Cluster\_65405

ATGCATCCATTTACTCTATTAACACTGTGGCATTGGCGCCTGCACCAGCTTATCCGCCCCGCGCAGACCATTTTGGC  
GATCTATAGCGCGGCGACCTTTTCTGCTTATTTGGCTAAAGGCCACGCGACGGCGGCAAAATATGTCGCTGCGTGA  
TGTCTCGCTGGGAGCGGGCTGGCTGGTACCGGTGGCTGGCTACAGAAATGGCTAAGCGGCACGCCACGCTCGCCA  
GAACGGTGGTGCATGCTATTACGCTCTGGTGGGATCTGGCGATTGTTTCAACCTCACAGTTGTGGATGCGAGTACGT  
CCCCGTCGAATGTTTTATGCGCGCTGTTGCTTCTGCTGCCGCCAGCGCTGCTTATCTGTTTGGCGGGCGTTAT  
TGGCTGTTGAGCAGTTAAAACGGCAATTAGCGATTATTCATGAAGCGCAGCGTCCCGTGGCGTGGCGTGGATGAGGGC  
TGGTATCAGCGTTTACGTCGATGCCCGGTTAATATTTCCGCTAACACACAATGCGCTAAACGATCTGGCTATCCGTTG  
TGGCGGCTGGATATGCGGGCATTTCCGATCCACAACCGACGAAACAGCTGTGGGACCAGCCGATAGCACCTTAAAC  
CGGTAGCGGTTACACCATGATCTGCTGATGCTGACAGAATTCGGAGCGTGGATATGGTTACGTTAG

>Cluster\_10954

ATGGCAGTATTGACGGATACGAAAGCAAGACATATCAAACTGATGACAAACCTGACAAACCTGCCCCATGGGGAAATACCGGACT  
GACCTTTCATCTTCTTCTAGTAAAGGGGGGGGAAATGGGTTTTTCTGTTATGTAAGTCCGGTACACACAAAAAGACGTA  
ATGCTGGATTGGAACTTACCCAGAGGTCAGTATGCTGAAGCTGCACGTAATGCCCCGATAATGCGAGAGCAACTTGTCT  
GCAGGTGATGATCTCTGGAGATTAAAAGGCTGAATCTGAGAAAGTCTGATCCCAACATTTGCCGATGCGAGCCAGGCG

TGTACATGCAGAAGTGTCTCCTGGATGGGAAAAATCCAAAGCATGTAAGGCAGTGGTTATCGACGCTTGAGAATTACGCGT  
TTCCTCAACTGGGAGCAAAAACGCTGGATTTCGATTACGCTGCGGACGTGGCAGAAACACTGCGTCCAGTCTGGTTAAAC  
TTGTCAGAAACGGCAAGCCGGTTAAACAGCGCATTATGTTGTTATGCAGTGGGGATGGGCGCAGGTTTTTGTGTAGC  
AAATCCTGTGTAGTGTGGTTGACCATTTGCTTCCCTCAGCAGACAAGAGGACGTGATGAACCAACCCGCAATGCCTGGA  
GGCAGTTACCGCTTTTTTGGCGACCAGTGTGTATACCGATGACCTTAATATGTTACCGCGCACTGTTATTA  
>Cluster\_55875  
ATGGAATGGTTAAGTGAAATTCGTAAATTCGGAAGAAGCTACCTGTCCGGTATCCAGGTTGCCAGACGTTTGTAGAGAG  
GACTGGCGGTGATGTTGATGAAGCCATCAAGTTGTTTCATATTGACCAAAATCAATATATTGACGGCAAAAGCAGACGTCA  
CTCATCAGGAAGCAGAGAATGTTTTGTTGGCTACAAAATATGATATTGCAGAAAGCTCTTCGGCGTATTGATGAACAACGC  
TATACACTGACGGAAATGATTTTTGCGTAAAAAATAGGATGCCGGAGATGCCTTAAACAATATAGCATTGGCGATTGAATA  
TGAGTGGGATCTCAAGCGTAAGTTTTGGTTGGTTTGCAGATATCCAATATTACCGCCAGTTTTACAAACATTTATGC  
TGGTTTATGAATGGCATGAATATGTTGGTTGGGAAGGAATGGAGTGTGGGATATTTTTGAAAGTGATCATATCACCAG  
CAATGTCAAAGCTTTGGGGTTATTAGAATCGCCCAAAAATGGTTACTGCAAGAATCCGATATGATGATGACGTAAGACAA  
GGCCGAAAATTTTACAGAGATTACAGAGGATGACATATTCAAATGCTTATAATACATTGTGACCAACTTGAAGAGAGG  
TTGATTTATATTACTGCAATTTGTGAAGGACAATATTGATGTTTTCCCGTGTGCCATAACAGACACGAGTTATAA  
>Cluster\_53562  
ATGCTGAAGATGATTAAGATTTTAAATTCAAAAAATACATTAAAAAATTACGTGAAGAAGGTTGTTATTTTTATGTTTC  
TTTTCGGATTTATATTACATTGTTAATGGAAGTTGATGATCGATTACCGTACTATCTTCAACAAGACTTCTTTTTTGATA  
CACTTATAGGATTTATGCCAATCAATATATTCCTTTGTTTTGATTGTCACATATATATTTTTCAATGCCGTCCATGGCGTT  
ATTTCCACCTATAAATTTCAAAGAATTTGGTGGAAATTCCTCTGAACTTGATAAAAAGAACACAACAAATTTGGCTTTAT  
TATTTCAATTCATATGTTTTTGGCATGACTTTGTTTTGTGCACTGGTGTGGTTGCTGTTTTTGTATGAATACTGAAAGTT  
ACTACGCAAAATATACATTAATTTTTAGCTGCTTTTATTTATGATTATAATTTCTTCAGCAGTTAATCCAGTAATG  
AACAGAATATTCCAAAAATGAAGGAATCAGACTCACATGGAAATTCAAAAATAAATCTTATAATATAATCATTTATATT  
ATTTGCTATTATACCAATCGCGTGGTTATCAATAAAAAATAAAAATGAAATCAACATTAAGAAAGAAATTTATCAGC  
AAATAAAAGAAAAACAAGATGAACCTGAAGATTATATCAAAAAATGATTACTGATATTAATTTCAACTGA  
>Cluster\_17524  
ATGAGCGCAAAAAAGAACCATTAACACAAGAGCAGCTTGAGGACGCAGTCCGCTTAAAGCTATTTATGAAAAAAGAA  
AAATGAACCTTGGCTTATCCAGGAATCTGTCGACAGACAAGATGGGGATGGGACAGTCAGGCGTTGGTGTCTTTATTTAATG  
GCATCAATGCATTAATGCTTATAACGCCGATTTGCTTGCAAAAATTCACACGTTAGCGTTGAAGAAATTTAGCCCTTCA  
ATCGCCAGAGAAATCTACAGATGATGTAAGCGGTTAGTATGCAGCGTCACTTAGAAGTGAGTATGATACCTGTTTT  
TTCCTATGTTACGCGGGATGTTCTCGCTGAGCTTAGAACCTTACCAAAGGTGATGCGGAGAGATGGGTAAGCACAA  
CAAAAAAGCCAGTGTATTCGCATTTGCTTGGCTTGAAGTTGAAGTAAATCCATGACCCGCCAACAGGATCCAAACCTAGT  
TTTTCTGACGGATGTTAATTTGCTTGGCTTGGCTTGGCTTGGCTTGGCTTGGCTTGGCTTGGCTTGGCTTGGCTTGGCT  
TGATGAGTTTACCTTCAAGAAATGATCAGGGATAGCGGTGAGTGTTTTTTACAACTAAACCCACAGTACCAATGA  
TCCCATGCAATGAGAGTTGTTCCGTTGTGGGAAAGTTATCGCCAGCAGTGGCTGAAGAGACGTTTGGATAA  
>Cluster\_33395  
ATGGCTGATATTGATTTATCTGGACAGTCCCAGAGCAAGGAACCACTCCTAAGGGCGATTTAGATCCGATATCCTTAT  
AAGCGGATAGACGGGATGTTATAGAGCGTAGAAGTATGCGATTAGTGTCTCTGCGGTTGTGCTTTTGTGCTTTGTA  
CATTTCTATGGCAGGGGTTAATTTGCTTTGGCTTGGCTTGGCTTGGCTTGGCTTGGCTTGGCTTGGCTTGGCTTGGCT  
ATAACACAAAAAGTAGATGCACAAAATTTGTTTTGCTTGGCTTGGCTTGGCTTGGCTTGGCTTGGCTTGGCTTGGCT  
TGAGAGGATAACACCATCTTACAGACATAAAGTTAGAAAAATCTATTTCTGTTTATCCACCGATTGGTTATCGGCCA  
GTTCTCTAATAGCTATTGTTGCATTTCTTGGTGTGGGTTAACTTTGCTTTTGTACTTCTTAAATCAGCATTTCAA  
CACCCGACAGATAAAGACTTTAGAACAAGTGCACATCTAATACTATTGAGTTGGCCACGCCAATCAGTGAATTAATAAT  
TGTTGTTCTGAATATAATTAAGACAAACTATCTAAGTAA  
>Cluster\_41267  
GTGTTAGCTTTTTGCGGATCTTCTGTTGAAGTCAAAAAATATTTATCATTTTTACTGGCGCTCGCTGCAATTGCCGGACT  
GGTACTCATGCCGCTGGAGTAGCAATGGTTTTGCCACGCATCGACAATAAAAACACTGGCCAGACTGGCACAGCAGCACC  
CGGTTGCTGTTTTGTTTTGCCATGCTGAACGTTGCGATCGTTCAACCAATCAATGCTTGTGATGATAAAACAGGATTTACG  
GTCAAAGGTACCCAGGATGCCCGTGAACGTTGGGCAACGCTTTTAGTGCTGATATCCCTGATTTTGTATCTATTCCAGTAA  
TACCGTCCGGACTATTAGTCCGGCAGCTGGTTTTTGGCGGGTAAAAAGCTGACGGTAGATAAACGATTTCTCAATGCG  
GTAATGAGATTTATAGTACAATTAAGACTTACACGCAAAAGCAACCTGATAAAAAATATCGTTATTTTTCCATAATCAT  
TGCTTGCATATATTGCTAAAGATAAGCGTGTGCGACATTTAAACCTGATTATCTGGATGGTTTAGTCATGCATGTGGA  
AAAAGGCAAGATTTATCTGGATGGGAAATTCGTTAACCCTAA  
>Cluster\_24537  
GTGAGTAAACGTCGTTATCTTACCGGTAAGAAGTTTACGGCCATGATGCAGGCGGTGTTTACGGGGCAACGGGAGCAAG  
AGATATTGCTTTATTTCTGTTGGCATATCGGCAATGGGATGCGTATTAGTGAACGCTTGTGATCTGCATTTACAGGATCTTG  
ACCTTAATGAAGTTCGAATAAATATTCGCCGACTGAAGAACGGATTTTCTACCGTTACCCGTTACGTTTGTATGAGCGT  
GAAGCGTGAACGCTGGACCCAGGAACGTGCTAAGTGAAGGCGCTGACCGGACCGAGCTATATTTTATTTTATTTCCGCG  
TGGGAGTCCGCTTTCTCGCCAGCAGGCTTATCGCATTTATCGGATGCCGGTATTGAAGCTGGAACCGTAAACCGAGACTC  
ATCCTCATATGTTAAGGCATGCTTGTGGTTATGAACTGGCGGAGCGTGTGTCAGATACCGGTTAATTCAGGATTTATCTC  
GGCATCGAAATATTCGCCATATGTTGCGGTTATACCGCCAGTAATGCTGCTGTTTTGCGGATTTATGGGAAAGAAATAA  
TCTCATAAACGAAAAATTAAGAGAGAAGGTTTGA  
>Cluster\_66345  
ATGCTCTATATCTTTGATTTAGGTAATGTGATTGTCGATATCGACTTTAACCGTGTGCTGGGAGCCTGGAGCGATTTAAC  
CGGATTTCCGCTGGCATCGCTTAAAGAAGAGTTTTCATATGGGGGAGCGTTTTCATCAGCATGAGCGTGGGAAATTAGCG  
ACGAAGCGTTTCGACAGAGCGCTGTGTCATGAGATGGCTTCTACCCTAAGCTACGAGCAGTCTCTCTCACGCGTGGCAGCG  
GTGTTTTGTTGGCTGCGCCCGGAAGTATCGCCATCATGCATAAACTGCGTGAGCAGGGGATCGCGTGGTGGTGGCTTTC  
CAATACCAACCGCTGCATACCACTTCTGGCCGGAAGAAATACCGGAAATTCGTTGATGCTGCTGACCATATCTATCTGT  
CGCAAGATCTGGGATGCGCAAACTGAAGCAGAAATTTACAGCATGTTTTGAGCGGGAAGGTTTTTACCCAGCGAT  
ACGCTTTTTTTCGACGATAACGCCGATAATATAAGAAGGCAACCAATCAGCTGGCATTACAGTATTCTGGTGAAGATAA  
AACCCATCTCCGACTATTTCCGGAAGGTTTATGCTAA  
>Cluster\_50436  
ATGGATAAAAATGTAGAGCATGATTTAGTTGATGCAATGAAAAAATAGCAATCTTAAACAGTCTTTACTTAGGAGGGAG  
CCAGCCCGAACATTAAGGAATATTTCTCCGATTAGTATAAATGGGATAAAGTTGCGGGCAAGATGCCATAGTTCTGGAG  
CAGTAAAGGTTTTCAATCTGGGAAAATACAGTTACCCAGTAACTCTCGCGGATATCTATGCACTATGGAGATTTAGAA  
GTTAAAGCTTATGAGACGATGACAGGCTAAATGACAACCTTTCATGCCCCTTTATCTTGAAGGACGATGGGTTGTTGATTT  
TAATGAGCATCTGCTTTGCTTTATTTGATTTTTTAAAAACGGGAAACGAAAAAAGCGCATTTATGGCAATTAAGGATTC  
GGGAAAGAGATGAAGAGAAAAATAAACAGGTTAACAAATGATATTGGTATATCTGGAACAGTATTCTGAGAAATCC  
CGAATCCCAAAAGACGACCATGGGTAGTGGTTGGTCCCGAACGAGGAAATACAGTACTTTATCACTTTGGACAGGC



TGCTACAGCGTTTTTTGAGAGGCTTTCGTTGATAGCATCCGGCCTGGAAGATAAATTGA

>Cluster\_33717

ATGACCACCCAACTTTTGCACCATCGAAGCGCAAGCAAGCTACGGCATTGGTTTGCAGGTAGGGCAACAACCTGAGTGA  
ATCTGGCCTGGAAGGGCTGCTGCCAGAACGACTGGTTGACGGCATTGCCGATGCGCTGGAAGGCAAACATCCGGCTGTTTC  
CGGTTGATGTGGTGCACCGGCGCTGCGTGAAATCCACGAAACCGCCGATGCCGTTTCGTCGTCAGCGTTTCCAGACGATG  
GCTGCTGAAAGGTGTGAAATACCTGGAAGAAAACGCCAAAAGAAAGGTTGTAATAGCACCGAATCTGGCCTGCAATTCGG  
CGTGATCAACCAGGGCGAAGGCGCAATTCGGGACGTCACCGCGCTTCGTTTACACCGGAAAACCTGATCGACG  
GCACCGTGTGTTGACAGCTCCGTTGCTCGCGGAGCCAGCTGAATTCGCCGTTAACCGCGTGATCCCTGGCTGGATTGAA  
GCACCTGACTGTGATGCCCGGTAGGTTCTAAATGGGAAGCTGACTATCCCGCAGGAAGTGGCATATGGCGAGCGTGGCGCAGG  
CGCGTCCATCCCTCCGTTGACGACCCCTGGTGTTTGAGTGAAGTGAAGTGCCTGGAATCCTCTAA

>Cluster\_58247

ATGAGTATAAAAAATCTACCTGCCGACTATTTTATGGCTGCACAACAGGGTGATATCGATAAAGTAAAAACCTGCCTTGC  
GCTGGGTGTCGATATTAATACCTGCGATCGTCAGGGGAAAACGGCAATACGCTGGCAAGTTTATATACGCAATATGCTT  
GCGTTACGGCATTAAATGATGCCGGAGCGGATATTAATAAGCAAGATCATACCTGTTTAAATCCTTTTTTAAATAGCTGT  
CTGAACGATGATTTAACGCTACTACGAATATTTTACC GGCTAAACCCGATCTTAATTGCGTAACCCGTTTGGCGGTGT  
CGGCTGACGCTGCCTGTGAAAAGGCCATTTAAGTATTGTAAGAGAGCTTTTGGCGCATACGGAGATTAACGTTAAC  
AGACAACCATGATGAGTGCAGCGCTACTGGAAGCGATGTTGCTTAATGATGGTGGTATTAAACAGCAGCGGATTTG  
CAGTTATTGCTGGAACACGGTGCACGCCGATCTGACCGATAAATATGGCAAAACGCCACTGGAAGTGGCGGGGAACG  
GGGCTTTGAAGAGATTGGCAGTACTGATTTGCCGAGGTGCATAA

>Cluster\_32597

ATGAGTGCAAATCGCGCCTGGAATGATCCTCATCGCTACCTCTCGGGTCCATTTCAGTGCCATTCTGGTTTGGCGCTT  
GTGTGGGTTGCCGATCCGCGAACCAGCGGCTCCGGCAATCCAGGCGCAACCAATGTGTACGTATCGGTGGCAGGGGAG  
CAGCGTAGCAGTACTGATTTTTCGACGTTCTGAAAAGGAATGTTGCCCGTCTGGGGCGGATGAAATTAGGTGTGAGCCCC  
TTCTGGCTAGGCTTAATGGCATCGCGCTGTCTTGGACACATCTGGCCGTTTCTTCGGTTTAAAGAGGAAAAGG  
CGTTGCTACCGCTTTTGGTGCCATCGCACCAATTTGGCTGGGATCTTACCGGAGTAATGGCGGGAACCTGGTTACTGACCG  
TGCTATTGAGTGGTTACTCGTGGTGGGAGCGATGTGCTAGTGCCTGATGCTCCGTTTATGTTCTGGTGGTTTAAAGCCA  
CAATTCACCTTCCCGGTTTCGATGCTCTCTTGCCTGATCCTGCTGCGTATCATGACAACATCCAGCGTCTGTGGCGTCCG  
TCAGGAGACAAAATCTGGACGAAATTCAAAAGAAAGCGGAAAAGGATCCCGAGTGA

>Cluster\_37959

ATGCAGGTGAGCAGAAGGCGATTTCTTAAGATCTGCGCTGGCGGTATGGCAGGCACCACGGCAGCGGCGACTGGGTTTTGC  
ACCCAGCGTAGCATCGCGGAAACCCGGCAGTATAAATGCTGCGCACCCGCGAAACCCGTAATACCTGCACCTATTGTT  
CCGTAGGCTGTGGCTGTGATGTACAGCCTCGGTGACGGAGCAAAAACGCCAAAAGCATCTATCTTCCATATCGAAGGC  
GATCCGGATCACCCGGTCAACCGCGGTGCATTTGTCCGAAAGGCGCTGGCCTGGTGGATTTCCATCCACTCCGAAAGCCG  
TCTGAAGTTTCCGGAATACCGTGCGCCAGGTTCTGATAAATGGCAGCAAAATCAGTTGGGAAGAGGCGTTTGTGCGATCG  
CCAAACTGATGAAAGAAGACCGCGATGCTAACTACATTTGCCGAAAACGCCGAAAGGCGTACTGTTAACCGTGGCTCTCC  
ACCGGGATGCTGTGCTTCCCGCTCAGTAACGAAACCGGCTATTTAACGCAAAAATCTCCCGCGCTGGGTATGCT  
CGCGGTCGACAACAGCGCGGTGTCTGA

>Cluster\_26602

ATGTCATTGCAATACCTGCACCTACCATATGCTAAAGATGCTCTGGCACCGCACATTTCTGCGGAAACCATCGAGTATCA  
CTACGGCAAGCATCATCAGACTTATGTCCTACTAACTGAAACAACCTGATCAAAGGTACCGGTTTGAAGGTAAATCACTGG  
AAGAGATTATTCGAGCTCTGAAGTGGCGTATTCACAAACGCAGCTCAGGTCGGAACCATATTTCTACTGGAACCTGC  
CTGGCACCGAAGCGGGTGGCGAACCGACTGGAAGAGTGCCTGAAAGTATCGCCGATCTTTTGGCAGCTTTGGCGATTT  
CAAAGCTCAGTTTACTGATGACGCGATCAAAAACCTTTGGTTCTGGCTGAGCTGGCTGGTGAAAAACAGCGATGGCAAC  
TGGCTATCGTTTCAACCTCTAACCGGGTACTCCACTGACACCGATGCGACTCCGCTGCTGACCGTTGATGTCTGGGAA  
CACGCTTATACATCGACTATCGCAATGCACGCTCTGGCTATCTGGAGCACTTCTGGGCGCTGTTGAACTGGGAAATTCGT  
AGCGAAAATCTCGCTGCATAA

>Cluster\_55569

ATGAATCAAAATTTAAAGAAATCGGCCACGCGCATCGCCGGCATGCTGGGCATTGGCCGTATTACCACGCAGAAAGATAG  
CGGGGTTGTCAGGAAATCCAGTACCAGACTCCGCTGGAAGTGGCCAGCGCCACCGCTCTCTGATTTGGTTTTTTCAT  
CGGGGTTACCGCGGGGATCGGATGTGCTTATTGCTTTCTCGCGGGGACCGCTCCAGTCTGTCGTCATTGCCCTCTAAC  
CATCAAAGCTTCCGGTATACCGGGCTTAAAGCAGGCGAAACCGTGGTCTATAACCAGCAGGGGATGAAATATTCATCTGAC  
CGAGGAGGAAATTTTCAATGATGCGAAAGGCAAGATGTAGAGATCAATAATGCCAGAAACATCACCGCGACGGCAACGG  
AACAGGTAAGAGCTGGTTACCCCCAACTCCTGGTGACGGGTGACATCATCGATAACTGCGAGACGAAACATTCACCGCTC  
AAAGCGCTGCGGGATGCTCACACGATCATGACCATGACGTTAAAAAGTTTCACTCCGGCGATAGCACGATCATAAGCGA  
AAAAACAGAGAGTCAAGTATGA

>Cluster\_20254

GTGGCGAAGAGCGTACCCGCAATTTTTCTTGACCGTGATGGCACCATTAAATGTCGATCACGGCTATGTCATGAGATCGA  
CACTTTGAAATTTATCGACGGTGTATTGACGCGATGCGCGAGTAAAAAAAATGGGCTTTCGCTGGTGGTAGTAACCA  
ACCAGTCTGGCATTTGCTCGCGGTAATTTACTGAAAGCACAGTTTGAACGCTGACCGAGTGGATGGATGGTCTGGCG  
GACCGGATGTCGATCTGGATGGTATCTATTATTGCCCGCATCATCCGAGGGTAGTGTGAAGAGTTTCCGCCAGGTCTG  
CGACTGCCGAAACACATCCGGGGATGCTTTTATCGGCACGCGATTAATTTGCATATTGATATGGCGGCTTCTTATATGG  
TGGCGATAAATTAAGAGATATGACGGCAGCGGCTGCGGCAACCGTGGGAACAAAAGTGTGGTGGTACGGGTAAACCT  
GTTACGCTGAAGCAGAAACCGCGGATGGGTGTTAAATAGCCTGGCAGACTGCCGCAAGCGATAAAAAAGCAGCA  
AAAACCGCGTAA

>Cluster\_6729

ATGAAAAGGAAAATATTAATTTATTTCCGCTATTCTTATTTCTTTTTCACATGCTGATTCATGGGAAAGCATTACTAA  
ATCTACTTTTCAAAGCTCTGCCTATTCTGAAAGTAAGCAAATAACCAACCAAGATGGCACTAAACAACTGTTTATTATA  
TTGATGACGATATGACAGGCTTCTGCCTGTCAGGGGCTAAAGACAGTGTCTCAGGGTGTTTTACTCAGGTTAAACCACT  
TATGAGGAGTATGGCTAACTCTGAATTCGCTTGTGTTTCTGACGCTTGTACTACAGCGACTCTCCGGCCAGAA  
AGATAAATTAAGAAATTTAACCGCTTATATTAATCTGGTATATTGACGCTTCTATTCTGATGAAAAACCTCCGACCTA  
CACCTGAAGAAATTTGTGAAGCTAAACCTCCTGAAGAAGGTGATTTAATAATGTCTATCTTATGATGGTGTATGTTATA  
TTTTATTAAACGGTGTGAAATATGAGGCCACTGGCGTCTATTGTTGCCAGGGTATGGCACTGTTTGTGCGGCGACATG  
AAGCTACCGAACCGTGA

>Cluster\_19991

ATGGCAAATAATATGCTGCTCCGCTCAGGCGTGCATGCGCGCCGGTATGTTGTGCGCCGGGTTCTGCGAGGACTGTTCTG  
GTGCTGAAAGTACACCTCATTTCTGCCACTGGCCACAATGGCCCTGATGGCTCTGTTTGTTTTATGGAAGGACAAACCA  
CGCCAGGGCAGTTACTGGTTTCAGGAAATGACTTTCGTAAGACAACAGCCCTGCCGGGAGTTTCTCTGTAAGAGAGTGT  
TTGCTTCTGCTGATGATCTTCCAGGAGCAGAAAGAAATCTGCCGTTACCGTGTGCTGATGCTGACGATTTATGTCAG  
GGAGACTGACCGGCTACTGATGCAACTGTTTACCGCATTTATGGCAACACTGGCATTGATGATGCTCACTGGCAGTTA

TCTCCGGAAATATCCGGTCTGCCGGAAAAATGAAATGTATCCGGGGGTAACCGCAGATGAACGCTGACCGAAGTT  
TATACGGAAAGACGCTTCCCTGCCGGAAAAATCAGGAAATGCCCTGTTTATTTTCTGATGACAGAACAACAGAAACAA  
CGGAGATAAAAATGAACATGCGTAA  
>Cluster\_5084  
ATGAATACTTTACGTATTGGCTTAGTTCATCTCTGATCGCGCATCCAGCGCGTTTATCAGGATAAAGGCATCCCTGC  
GCTGGAAGAAATGGCTGACATCGGCGCTAACACGCCGTTTGAACCTGGAACCCGCTTAATCCCGATGAGCAGCGATCA  
TCGAGCAAACGTTGTGTGAGCTAGTGGATGAAATGAGTTGCCATCTGGTGCTACCACGGGCGGAACGGCCCGCGCT  
CGTGACGTAACGCCGATGCGACGCTGGCAGTAGCGGACCCGAGATGCCGCTTGGTGAACAGATGCGCCAGATCAG  
CCTGCATTTTGTACCAACTGCGATCCTTTCGCGTCAGGTGGCGTGATTCGCAACAGGCGCTGATCCTTAACCTACCCG  
GTCAGCCGAAGTCTATTAAGAGACGCTGGAAGGTGTGAAGGACGCTGCCGGTAACTGTTGGTACACGGTATTTTGGC  
AGCGTACCGTACTGCATTGCTGGAGGGCCATACGTTGAAACGCCACCGGAAGTGGTTGCAGCATTACAGCCGAA  
GAGTGCAAGACGCGAGCTTAGCGAATAA  
>Cluster\_22215  
ATGCGTCTGTGTGACCGAGATATTGAAGCCTGGCTTGATGAAGGCCGTTTGTGCGATCAACCCACGTCGCCAGTGGAGCG  
TATTAACGGCGCGACGGTGGATGTGCGCCTGGGCAATAAATTTTCGTACCTCCGTTGGTACACGGCAGCGTTTATCGATC  
TGAGCGGTCCTCAAGATGAAGTGAAGCGCGCTTGACCGCTGATGAGCGATGAAATCGTGCCTGACGAGGGCGAGCGG  
TTTTTACTTCCACCGAGGACGCTGGCGTGGCTGGAGTGGCTGACGCTGCCAGCCGATGTTGGTGGCTGGCTGGCT  
GGACGGCGTCTTCTACTGGCGCTCTGGGCTGATGGTGCACGTCACCGCGCACCGTATCGATCCGGCTGGTCTGGCT  
GCATTTGTGCTGGAGTTTTACAACCTCCGGTAAGCTGCCGCTGGCGCTGCCGCTCCGGGATGTTAATTTGGTGGCTGAGCTTT  
GAGCCGCTCTCCGGCCGGCGCGACCTTACAACCGCGTGAAGATGCGAAATATCGCAACAGCAGGGCGCGGTAGC  
CAGCCGAATCGATAAAGACTAA  
>Cluster\_9214  
ATGCGCAAGTATCGCATCCGACATTTATGCGGCACTGGAGTTTGGCAACAGTCCGGATGCGGCGGAGCGCCTTATCCG  
GCCTACAGTTGGGCATCGTTTGGTACCTGTCGGTCCGATAAGATGCGCAAGTATCGCATCCGACATTTATGCGCACATG  
GAGTTTGGCAACAGTCCGGATGCGGCGGAGCGCCTTATCCGGCTACAGTTGGGCATCGTTTGGTACTGTCGGTCCG  
GATAAGATGCGCAAGTATCGCATCCGACATTTATGCGGCACTGGAGTTTGGCAACAGTCCGGATGCGGCGGAGCGCCT  
TATCCGGCTACAGTTGGGCATCGTTTGGTACTGTCGGTCCGATAAGATGCGCAAGTATCGCATCCGACATTTATGCG  
GCATGGAGTTTGGCAACAGTCCGGATGCGGCGGAGCGCTTATCCGGCTACGGTTGGGCATCGTTTGGTACTGTCGG  
AGGTCCGATAAGATGCGCAAGCATCGCATCCGACATTTATGCGGCACTGGAGTTTGGCAACAGCAGCGCGGATGCGGCGG  
GCGCCTTATCCGGCTACGTTTTTAA  
>Cluster\_2990  
ATGAGTGAATTTAGTAATCTTTTAAATAGCATACTGGATGGTATCCCTCCCTCACAGCTCTAGTTGGTACTCTTAT  
TGGCGGATGGTTTACCCTAAAAGGAGTTACCAACAAGCTAAGCTGTCTAAAGTAGAGACAGAAAGAGAAATCCCTTGAA  
TACAACCTTCAGTATTAAGAGGAGTTAAGGGAGAGGTTTTCACCTAATCAATTTATATAATAAAGGATGAAAACACAC  
ATGATAATATAAAAACGGGACAAATGTTGATTTCTCACATCCCTGTAGGGGATGATAATTTACATCTTATGAGCAAAA  
TGGCAATGTCATTTGCAAAACTAATGATTCGTGCTAGAGACTCAATAAATAACATATACACATATTCACCTGATTAATAC  
AATCATTTAAAGGAAACAACAACCTCATGAGGATTTGAAAAATCCCTTATTTGGCATGGCAGACAATAACAAGATAAA  
ACCATGATAAAGAGATTACATGATGCAAAAATAAATGTAATGGTAGATTATGCTCAAGGGATAAAAAATATTGATGCAGC  
GCTAAGAGATGCTGCTCAATAAGGATTCGACATTTATCGACCAAGAAGTAAAGTCACTACAATGAAATTAACAATTAG  
CTTCATAG  
>Cluster\_26700  
ATGCTCTGCGTGAATAATGTTTCGCTACGTTTACCAGAAAGCCGCTTGTGACAAAACGTTAATTTACGTTGGATAAAGG  
TGACATTTGCACGTTAATGGGGCGTCTGGCTGTGAAAAATCTACACTGTTTTCATGGATGATTTGGTGGACTGGCCGGAC  
AGTTTTCTGTACAGGGGAGCTATGGCTAAATGAGCAACGGATTGACATGCTACCCACCGCACAGCGTCAAGTTGGCATT  
CTTTCCAGGATGCACTGTTATTTGATCAGTTACGCTCGGGCAAAATTTACTGCTGGCGCTACCAGCGACACTTAAAGG  
GAATGCCCCAGCTAATGCCGTGAATGATGCACTTGAGCGTTTCCAGGCTTGACGGAGCTTTCCATCAGGATCTTCCACTT  
TGTCTGGCGGTGAGCGAGCGCGCTTGCCTAGTACGCGCCCTTCTCGCTCAGCCAAAAGCGTTGCTACTGGATGAGCCA  
TTCAGCCGCTTGTATGTAGCTCTGCGGATAAATTTCCGCAAGTGGGTGTTAGCGAAGTTCCGCGCCCTGGCGATCCCGT  
CGTTCAGGTAACGCAGATCTCCAGGATGTTCCGCTGATAGTTCTGTCTGGATATGCGCGAGTGGTCAAGAAATTACA  
ACAACTGCGATAA  
>Cluster\_38691  
ATGCCGTATTATTGCTAATACGCATCCCAAAGGTGGTGTGGGTAAGACAACCTTCATCCGTAAACATTTGTTGGTGAATGAA  
GTCGTGATACAGTTGATCTGGATACTCATACCGGCTTTCTATCTTCTGGGCTGAGACCTGAAGGAAAAGAAATTTCCG  
TGAAGTACCCAAAACAGTGGATGAGTTAATCGAAATTTACTCCCTACAAGAACAGCGATAAGACGTTACTTTATTGAC  
TGTGGGGGATTTGACTCAGATCTTACCCGACTGCGATTGCTTTCAGACTGCGTTATTTGTCCTTCAAAAGACTCCCT  
GACTGAACGATTTGGTTTGTATGCAATTTTGTGAGTACTGGACGAAATCAGCTCTATCATGGGACCGATATAACTGCTC  
ACCTGTATCTCTGTAAGTTAATCCTAACAAAGAAGAAATTCCTAAGCTTGTGCAATCCTGCCATCGTTCAAAACATCTG  
AAGCTGATGAAGCGCAATTTCTGCTGTCGAGAATTTGAGGATGTCATTGAGACTGGATGGGATCACTGAGTCTGT  
TCATGGGCGCTATTCCGGCAGGAGTAAGGAAGTTATTGCCCTGATCGAAGAAATCAATCATCTGATTGAAAATAACAAC  
AGTAA  
>Cluster\_27632  
ATGAAAATCGCCGATCTCGTGAAGCGATAGGAGTAGATGCGGCAACATCTCGCGCTTAGAAAACGGGTAAGCAAAAACA  
ATTTACCGAACAACACTGAGTAATATTGCCAAGAGCTTAGGTGTGATATTGCTGATCTCTTTACCCTGCCCAAAAA  
GTAATACTGTATATAAAAACAGTAATAATGAGGATGTTGCGCAGGTGAAGGATGTTCCGATTTGAAATGCTGGATATC  
AGTGCCAGTCCGGGAAAATGGCCTTATCCAGGGCGGTGATGTCATTGATGTGATTCATGCCATCGAATCAGACAGATGATA  
TGCCTGATCAATGTTTCGGCGGACGACAGCAATCAACAAAGTTATCAACGTTTCGTTGGGACAGTATGTGTCCAACA  
TTGAGCCAGGAGATCTCATCTTCCGTTGATGTCAGCATCAATCAGTTTGTGATGGTATATATGCTTTGGTTTTGAT  
GATAAAAATATACGTTAAAAGACTTCAAAATGATTCCTGACAAACTGCTGGTGTATTCTGATAACAGATTTACCCTGAATG  
GGGAATTACTAGCAAAACGAACACCGATTCATGGTCTTTGAAAAGGCTTAAATCAGTCACTCGCAACCCCTTAAAGAGAC  
ATAATTA  
>Cluster\_39373  
GTGCAACGAGCGGCTTGTATCTGATAGGTGAAACGGCGGTAGTACTGGAACCTGGAACCCGCGGTGACGCTGGCCAGCCA  
GAAACGGATCTGGCGACTGGCACAGCTCTGGTGGATGTCGCAATGTTGGTGAAGCCATCTCCGCGATGAACAATATCA  
CGGTGATTTTCCGTAATCCTGAGTCGCTGGCGCTGGATGCCATAGAGCGTTTGCACACGCTGGTGGAGGAGAGTGGCG  
CTGGAGCCGAGTCTCGCTTTATGAAATTCGGTATTTACGGTGGCGCAGCCGACCGGATTTGGCGGTGGTCCGGC  
GCATTTGTGATTTAGCGGAAAACAGTTTGTGAAATGCACTCCCTCCGTTGAAATCAGTGGTCTGGTTTTTGGTTTTGAT  
CGCTGATCCCGTATCTCCGGAGTTTCCGGAAACACTACACAGCCACGGCGCTGAACCGCTTGGCAGTTTCCGCA  
GGTTCTGTGCGGATCGGCGGGCCGAGACCGGTTTATCCGCTGGCAACCCGGGTGGCTGGCAGTTGATTTGGTCTATC  
CTACTCAGCCTGTTTGTATCCGGCTGTGACGAACCCATCTTATACGCTCCGGAGACAGCGTGGCTTTGTACCCAGA

AGGAGGGAGTATGCTGA

>Cluster\_26585

ATGTCGTGATAACGACGAATTCGACGAAATCGCGCATCTGCGCCGTGAATACACCAAAGCGGGTTACGCCGCCGGATCT  
ACCCGCCGATCCATTAACCCCTTTTGAACGTTGGCTCTCTCAGGCTTGTGAAGCCAAACTGGCTGACCCCTACCCGCGATGG  
TGGTCGCTACCGTGGATGAACATGGTCAGCCTTACAGCGCATCGTTTTACTCAAACATACGACGAAAAAGGCATGGTG  
TTTTACACCAACCTCGGCAGCCGTAAAGCACATCAAATCGAAAATAATCCGCGCGTTAGCCTGCTGTTCCCGTGGCATA  
CCTTGAACGCCAGGTGATGGTATCGGTAAAGCGGAACGACTTTCGACCTCGAAGTATGAAATATTTTCATAGCCGCC  
CGCGTATAGCCAGATTTGGTGCATGGGTTTCGAAGCAGTCCAGTTCGATTTCTGCCCGCGGTATCCTTGAAAGTAAATTC  
CTGGAGCTGAAGCAGAAGTTTCAACAGGGCGAAGTGCATTTGCCAAGTTTTTGGGGTGGTTTTTCGCGTCAGCCTTGAACA  
GATTGAGTTCTGGCAGGGCGGTGAGCATCGCCTGCATGACCGCTTTTTGTACCAGCGTAAAAATGATGCGTGGAAAGATTG  
ATCGTCTTGACCCCTGA

>Cluster\_47104

ATGAATCAGACGCTACTTTTCCTCTTTTGGTACGCTTTTGAACGTTGTTGAAAATGCACGCGTTCGCTGCGTGAAGGACG  
CGGTGTAATGGTCTTATGATGAAGACCGTGAACGAAAGCGATATGATCTTCCCGGCAGAAACCATGACCGTTGAGC  
AGATGGCGCTGACCATTCGCCACCGTAGCGGTATGTTTGCCTGTGCATCACTGAAGATCGCCGTAACCAACTTGATCTG  
CCAATGATGGTAGAAATAAACACCGCCCTATGGCACCGTTTTACCGTGACCATGAAGCGGCTGAAGGTGTGACTAC  
CGGTGTTTCTGCCCTGATCGTATTACGACCTTTCGCGCAGCGATTGCCGATGGCGCAAAACCTTCTGATCTGAATCGCC  
CGGGCCACGTTTTCCACTTCGCGCGCAGGCGAGTGGTGTACTGACCGTGGCGGTCACTACTGAAGCGACTATTGATTTG  
ATGACGCTGGCAGGCTTTAAACCGGCTGGTGTGCTGTGTGAGCTGACTAATGACGATGGCAGCATGGCGCGTGCACCAGA  
GTGCATTGAGTTTGCCAAATAACACAATATGGCGCTCGTGACTATTGAAGACCTGGTGGCATAACCGTCAGGCACATGAGC  
GTAAGCCAGCTGA

>Cluster\_8467

ATGAAGAAAATGGCGTAATTTCTGAGCGGATGCGCGCTCTATGACCGTCTTGAATTCATGAAGCGGTGTTGACGTTGTT  
AGCTATTTTCACGCAGCGGTGCGCAGGCGGTCTGCTTTGCACCGGATAAGCAGCAGGTTGATGTTATCAACCATTAACCTG  
GCGAAGCGATGACGGAAACGCGCAATGTCTGATTGAAGCGGCACGAATAACGCGCGGTGAAATCCGTCCTCTGGCCAG  
GCCGATGCCGCTGAACTGGATGCGTTGATTGTGCGCGGGGGTTTGGCGCGCGAAGAATTTAAGCAATTTTGGCAGTCT  
TGGTAGCGAATGCACCGTTGACCGTGAATTAAGGCGCTGGCACAAGCGATGCATCAGGCCGGAAAACCGCTTGGTTTTTA  
TGTGATTTGCCCGCGGATGCTGCCGAAAATTTTCGATTTCCCGTGGCTTTGACCATCGGTAATCGTACTGATCGATCGCA  
GAAGTGTGGAAGAGATGGGCGCGGAGCATGTGCCGTGCTGTCGATGATATCGTGGTTGATGAAGACAATAAGATTGT  
CACCACCCAGCATATATGCTGGCGCAGAACATTCGAGAAGCGCGAGCGGCATGATGAAGCTGGTTTTCCCGCTGCTGG  
TTCTGGCTGAATGA

>Cluster\_18916

GTGAAAAATCCAAAGTGGCAGATCTCATCGTTGAGAATGTTTCAAAACAACCTTTCATGGCCCTTTCTGACGCGATTTA  
CGCGGCATCAAAGCGTTCTACGATTATGCTCAAAAGAAGAAGCTAGATCACAGATCGACCGCCTTGGTTATGATCGTCT  
ATTTAAACCTGAATGAACTATTTATGAGGTGTTTGGGCCAACCGTTGTAATCCTGGAAAGCTGCGTGGTAACCGTATT  
GTAGAAGGCCATGTTGGTATATTCAGATTGTTTCGTGAAAGCTACAATGATAAACAGTGAAGAGATTTATCCGTAGCAA  
ACGTAAGCAAGAACTCATTTCTGAGAACGTTGTTGGAAAAATGGTGAACCGGATTTATTTCTCGATGGTTCTGATG  
TGCCAAAAGCTACACTGTTTCGTAGTATGCGGTTTTTCCGGTTCGTTGCAGATTGACCTGAAAGCTCCGATGCTATAGAG  
CTTGTGTTACCAAGTTCTGATGGGAAGCGCTGGTTTTTTCATGAGCCTTGAACCTTTTAAACCGGATGATGATGATG  
TCCGTCCTCAAGAAGATAATGCATTTCCCTGGGCTCAAAAGGGGCTTATCAGAAAAAGATGGAACCGAGGAAGATAATGAT  
GA

>Cluster\_53051

ATGCCATTTAATAGCCTTTTGCAAAAAACCGGGTTAGTCGCCATTTTACGCGGTGTTGAAACCGGATGAGATTGTCGCCAT  
CGGTGAAAAACTGTACGCCCGCGGATTCGCCCTGATTGAGATTCTATGAACTCGCCGGAGGCGTGCAAAAGTATCAGTT  
TACTGCGCGACGCCCTGCCTAAGGACTGCCTGGTTCGGAGCCGGAACCTGCTTTCGGTAGAGCAGGTTGCGGTTAAA  
GAGGCTGGGGGCCAGATTATCGTATGCGCATTTGCATCTGCGGTGATCCGTCGCGCCCGTGCCTGGGTATGATTTG  
TGCGCTGGCGTCCGCCAACGACCCGAAAGCCTTTGCTGCTGACTTGAACATGGTGTGTAATGCCATCAAGCTGTTCCCGGCTG  
AACAAATACGCCAGAAGTTACCAAGCCTGGCGTGGGTTATCCACAATCCGTTCCGATGTTACCGGTTGGCGGTATC  
ACACCGGAAACCATGGCGCGTTATCTGAGCCACGGCGCAACCGCTTTGGCCTCGGTTCTGCGCTATATCACCCCGGCAT  
GACGCCAGAGCAAGTCTATGAAAATGCAGTACTGTTTATGAACGCATGGAACAATTTAAATAGCAACTAA

>Cluster\_66683

ATGCCTGGGCGCTTTGAACTAAAACCACTCTGGTGAANAATCTGGCACGCCAGATAACTTTTCGCTCATGGACCCGTT  
GCCGCCATGTCATCGCCGGGAAATCATTATTGCGGCAATAGTGTGATATCGGTATTCTTCTGCCTGGAGATGAAACAC  
GCCAGATGCTGTTGTCACCCGGAAGCGCAGTTAGATATGCAATCACCCCCCGAGTGAAGCACAGTACAGGCACAT  
TTAGTGAAGCCGCAAAACGATCCGGATCAGGTCGCCCGGCTGCGCCGGAACCTATTTCAGGAAGGTCAACTGAAGACC  
ACCTGTTGCAGAGACACAATCTTTCCAACCGGAAAGTGGTATCGATCAACAGTGGCGGACATATCGCGTAGAACAGGCA  
AGACCCCTTCCCAGCTGTTCCGCGACCAATAATTTGCGCGCTACAGATGTTGACCTATGGCCAGGTCAGGGCGCGGAT  
AAACCGCTCAGTAACTGCAAAATGGTTCAGATTGTTAAAATCCGCTCAAAATGGCAATGGGGTGGTTACCGGCTTAACCAT  
TGATACGGGAAATTAATCAGCAAGTACTGTTTACCCCGCAACCTGATGGTAAATTCATCCGCGCACGCTGA

>Cluster\_22109

ATGCGCCAGAATGCGCTGTTGCTTGGAGGAAAACCTGCTGTACCGCCATCGAAACGGGCACATACAGGCAGAGTGGCCGT  
GAAAGAAAGCAATCAGCGATGGTGTCTGACGGGTTTCGAGTTCTGCTGTGATAACGGAGAGAGATGCGGTGTCACGTTTCG  
CGTGGACTGCTGTGATCGTGAGGCACCTGCACCTGGCGGCTTCAACAGTGAACAGTACAGGACGTC  
ATGCTGGGAGCGTGAACGCGCTTCGGCAACGATCTTCCGTCGCTCCAGTGGAGTGGCTGACGGATAATGTTTCATG  
CTACCGGGCTAATGAAACAGCCAGTTCGCCCGGATGTTGGGACTTGAACCGAAGAACACGGCGGTGCGGAGTCCGGAGA  
GTAACGGAAATAGCAGAGGCTTCTGAAAACGATAAAGCGTGAATACATCAGTATCATGTCCAAACAGCAGCGGTTAACG  
GCAGCAAAGAACCCTGCAGAGGCGTTCGAGCATTAACGAATGGCATCCGCATAGTGGCGTGGGTTATCGCTCGCCACG  
GGAATATCTGCGGACGCGGCTTGAATGGGTTAAGTGATAACAGATGCTTGGAAATATAG

>Cluster\_20150

ATGAGGTATATAGTTGCCTTAACGGGAGGCATTGGCAGTGGCAAGAGTACCCTTGCCAATGCGTTTGTGATCTCGGAAT  
TAACGTCATGATGCCGATATTTATGCGCGTCAAGTGGTTGAACAGGTCACCTGCGCTACATGCCATTGCTGATCACT  
TTGGCGCTAACATGATGCTGCTGATGGAACATTCGACGCGCGGGCTTTCGCGGAGCGGATCTTCGCCAACCCGGAAGAG  
AAAACTGGCTTAAACCCCTGCTGCATCCGCTGATTTCAGCAAGAGACGCAACACCAGATCCAGCGAGCTACTTCCCCCTA  
TGTACTATGGGTTGTGCCATTGCTGGTAGAAAACCTCACTGTATAAAAAAGCGAATCGAGTGTGGTGGTGAATGTCAGCC  
CAGAAACGCAACTTAAAGCGCACCATGACGCGCAGCATGTAACCTGCGAGCATGTCGAACAAATCCTTGTGCTCAGGCA  
ACGCGCGAAGCTCCGCTTCCGCTGGCAGATGACGCTATTGATAATAACGGCGCACCGGATGCTATCGCATCGGATGTTTC  
CCGCTGCAGCACACTATTTGCAGCTTGGCTCGCAGTTGCTCACAGGAAAAACCGTAA

>Cluster\_32126

TTGGCACTCACGAGCGTGTGGTGTTTTTTGACTTAGATGGAACATTCATCAGCAGGATATGTTCCGCGATTTTTTT

GCGTTATTTACTGCGTCGCCAACCGCTGAATGCGTTACTTGTCTGCGGTGTTGCGGATCATAGCCATTGCGTTATTGA  
TAAAAGGTCGTGCGGCACCTGGCCGATGAGTCTGCTTCTGTGGGGATGCACTTTTGGTCACAATGAAGCGCGTTTGCAG  
GCGTTGCAGGCCGATTTTCGTACGCTGGTTTCGTGACAAATGTTACCGCTTTCGCTGGTTCAGGAGCGATTAAACCACCTA  
CCTGTTAAGTTCGATGCTGATACTGTTGATACCGGCTCTCCGACGCCGCTGGTTGAAGCGGTTTTATTTTCGATACCC  
CCTGGCTGCCGCGGGTTAATCTTATCGCCAGTCAAGATTACGCGTGGCTATGGTGGTTGGTATTGACGATGCGTTGCTCG  
GGACATGAAAAGGTCGCGCAACTGGAGCGCAAAATCGGCACGCCGCTGCGGCTGTACAGTGGCTATAGCGACAGTAATCA  
GGACAACCGCTGCTTTATTTCTGTCAGCATCGTTGGCGAGTAACCTCCGCGCGGTGAACTCCAGCAACTGGAATAG  
>Cluster\_11449  
ATGCATGAAATTTATCGGGAAAGGATCAAGTCCCTTAGAGAAGCTAAAGGACTTAGCCAGGCTCAATTGGCCAAGCTTTG  
CGGCTGGGCTGCGCCTTACGCTGCGGAACTACGAGTTAGGAACAAGAAAGGTTAGCGCGGATGACGCGCTGGTCTTTG  
GGCGGCACTCGCGTATCTCCGCAAAAATAATGTTTGGCGAGGATTAGACGCCGTTTTCGCAATATGAATACCCG  
TTATTTCTTTCAGTGCAGGCCGGCCATTTTCGGAGGTGGGAAGCTACACAGCCAGCGATGCAAAGGCATGGGTCCCAAC  
GACCAAAAAGCCAGCAAAAAGCTTTCTGGCTTGAGGTGAAGGGGCATCAATGACGCGCCTCAGGGGGTTCTGTCCTAA  
GTTTTCCGGAAGGCATGCTGATACTCGTTGATCCGGCTGAGCCGGTAGAGTCTGGGATTTCTGCGTGGCTTCTGCAAA  
GGTATTACAGAGGCAACGTTCAAGAAGTATGAGAAGGATGACAGGGGTTAGTTACTTGGTACCTTTAAACCCCGCATATAG  
AACCTGGATTGCGACCATAGCTGCCGATCATAGGCAAGGTAGTTAAGGCGCAGTGGCTGAAGAGACGTTTGGCTGA  
>Cluster\_21318  
ATGTCCTGAGCAGAACTCAAAATGTTAACTGGCTCACCTGTTGGCGATATTTTCAGCACCGAGAGCGAGTATCTTAC  
TGGACTGGATCGCGAGATTGGCGACGCTGACCACGGGCTAAATATGAATCGAGGCTTTAGCAAAGTGGTGGAAAACTCC  
CTGCTATCGCAGATAAAGATATCGGTTTCATTCGAAGAATACCGGCATGACGCTACTTTCAGCGCTCGGAGGTGCCAG  
GGTCCGCTGTTTCGCTACCTTCTTTATCCGCGCCGACAGACAACCCAGGCACGGCAAAAGCCTGACGCTGGAAAGAGCTTTA  
TCAGATGTTCCGCGATGGCGCGGACGGCTAATCAGTCCGGGAAAGCCGAACCTGGCGATAAAAACATGTGTGATGTGT  
GGGTGCCGGTGGTGAATCGTTACGTCAGTCTCCGAGCAAAAATCTCCCTGTTCCGGCGCGCTCGACGCTGCCAGTAGC  
ATCCGCAATCCGCTGCACAAAGTACGATTACGATGCAAGCCCGCAAAAGCCGCGCAGTTATCTCGGTGACAGCAGTAT  
TGGTACCAGGATCCCGCGCAGCTCGGTGATGTTTATGATGCAAAATGTTGGCGTTAGCCGCAAAAGAGTAA  
>Cluster\_41384  
ATGAAACGTTTAAATATGGCTACGATGGTCCACAGCAATTTGGCATCTTCAACTGTATGGGCTACTGATAATGCACCGGT  
AGCGGCACAACAGCAAACTCAGCAAGTTAAGCAAAACCCAGAAAACGGCAGCAGCAGAGCGTATCTCTGAACAAGGTTTAT  
ATGCGATGCGTGCAGTGCAGGTAGCGCGCTGGCTCTGTTTATGCGGATCCGAAAAGGCAAAAAGAACTGACCAATGAA  
GC'T'CCGCTTTGCTGTCAGATGATAGTACCGAATGGGCAAAAGTTCGCTAAACAGGTAAAAGACCACTCAATGATGA  
CAAATATATTTGTCATTAATGCATCTGTCGGAATTTCTGAGAGTTATGTAGCAACCCCGAAAAGAGCCGCGATAAAAA  
TTGCCAACGAAAAAATGGCGAAAAGGGGATAAAAAGGGTCAATGGAAGAGCTTCGCTGGCCGGTGTGGTGTAAATGGAA  
AACCAATATTTGATGCCGCTTAAACAGACTCGTAATGCCTTGTGATGCACAGAAACTGCTTGAATAAAAGCAATAC  
TAGAGCAAACTGGCGCTTAAAGGTGCGGAAGATGGAATCATCGTCGATAGCGAAGCACTGTTTGTGAACTAA  
>Cluster\_51536  
ATGGCTAAACAGAAGTGTACCTGGTTATTTGCGCGCATCAACCGCAGTCAACGCAATGCCCGTCTGTGATGTTAAGGAT  
CACCGCAGATAACGAGCGCTCAGCGCGGCGCAGACTTGCCCGGACTATGTGCTGAGCTTTGCCGGTTCGATTTCCCTGTG  
GAGGTGAACATGCGTAA  
>Cluster\_14979  
ATGAAGGAGAAAACAGATAAAGTCAATCGGAAAAAGGGGTTTATGTACACAATAAACTCGATCCAAGGTTGAATGCATTTAT  
CGAAGAGAAAACGAAAACATCTTTGCTTAGTAAGAGGAAAGCAAAATATTTACTTATTAATGCAGAGTATGCGTATTGATG  
GATATATGGAGCGTTAG  
>Cluster\_49770  
ATGAACGAGCCTCGTTGTATTGCTCAGTTATTGCGTAACGAAAGCCCGAGGGGATTGACTTCCACATTACCCACGGTAA  
GGGCGTAAGGGAATCATTTATCCGCACTAAAAACAGAGTCCGTTAAAAAGGCTCTGACCTTTCTGAAAAGCCGGAGGG  
TATGGAAATGA  
>Cluster\_57687  
ATGGCACTATTCTCTAAATATTAATTTTTTATGTGATTGGTGTGAACATATCCTTTGTCAATTATCTGGTTTATCTCACA  
TGAGAAAACACATATTCTTTACTTAGTGCATTCTGGTCGGAATAACCTGGCCAATGAGTCTGCCTGTGGCATTACTTT  
TTTCTCTCTTTTAG  
>Cluster\_11032  
ATGTATAATTGTGGTGAATCATATTCAGAATACGACATATCATTTACTGACGATGAAAACATGACGATGACTATATTCG  
TGAACGCCGCTGTCGGGAGAAAGTTTTCGCTATGATAAATACTGAGGATAATGATGAGCGGCATCTGATTATGCATTA  
AAATAAATGAAAACCTCTGATTAA  
>Cluster\_11439  
ATGAAGCATCTCAGATAATATCCGCTAGGCACGATCACTTTCGCTACTCCGTTACGAAGCGAGGCTGGGTATTTCC  
CGGCTTTCTGTTATCCGAAATCCGCTGAAAGCCAGCGCTGGCTGAGGAGATAAATAAATAACGGGAGGCGATATGCA  
CAAAGCATCTCCTTTGAGTTAA  
>Cluster\_50654  
ATGTTCTGGAACCTGAAGTAATAACGACGACCGAAAATCGCTTCGCATCACTCAAATTTCAATTTAACAATAATATACAT  
TATGCGCACCAACATAAACAAGGAGAAATCCAGTCTGGCGGTTATGATGTTCTGCTCATTAACAACGACAAAA  
CCCATATCTTACTTAA  
>Cluster\_66149  
ATGAGTCAGCAAGTGGCGGTGAAAAAATGGTCTGGACGCTGGGAACAGCGTTTATATCAGCACCTGTGGCAGGCGAT  
TACGTTGTCGAAAACGGTACCGAGCGCTCGGTCGCCAAAGCTATTCTGGATGAGTTGCTGGAGGCCAACAAAGCGTACT  
GGCAGAGTTACGTTAA  
>Cluster\_48867  
ATGACTAAAAACATACCCCTCAAACCTCGCCCTGCTGGTAAGTTATTTCGGGTATATGTTGGATGGGATCGTTTATGAAGA  
GTTGAGAAAAATAGCCAAGAAGGATCCAGAAAATATACCAAGACTGCTGCGCTTAAATGAAGAGGCTTTGGGAATGA  
AGGAGTAA  
>Cluster\_55868  
ATGAATTTGGAAAAAAGCTGAAGATATCTTTTACCATATTGTTAGAAAACCAACAAATGAGACCCATATCGATTATCCGG  
TAATGACTCCAATTTATGATAGTGTGTTTATGTTTACAGATAATGCCGATGACTTTGTGATGACGCTCCACCGATTTGA  
>Cluster\_13137  
ATGGTGGTTTATCCCGCTGGCGGGGGAGCTCAACATCGGAAACGGCTTCGCGCGGGCGGCTCCGGTTTATCCCGCT  
GGCGCGGGGAGCTTACGTGAAGAATAATTTGCAACACCCGCAAGAAGGTTTATCCCGCTGGCGGGGGAGCACAAC  
GA  
>Cluster\_46838  
ATGGGAAAAATTAATAATGATGTTTACAGATCAGCAGCCGTTTATGATTGATGGGATAATGGAATTTCTCGACATTATCC

TGATTTATATGAGGTTGTTGGGGCTATAAAGATCTGAAGAAAGCTATAGCGGAGTGTAAACAAATCTACAGCCTAA  
>Cluster\_4971  
ATGCCGGTGTGTACATCAGCTTTATGCCCCGAAGGCCCTTCTCACGCGAACAGGCTGTGCGCTCAAACAGCTTACCG  
CAATGTGTTACTGAAGATGACCAGGGAACATAATCCCGCTGGTTATCCGTAATGCTGAAGGTCAGTTGCGCTGGTGA  
>Cluster\_50394  
ATGAACCACTACCTCGCGTGCCTTTTCGCGTTATGGTCTGACTTTTCAGGGAAATATCCTTTCAGTAAACTGTCAGTG  
CCGGATGCTCACCGTGTCCGGCGCAAGCACTCCACCTCACCCGTGGAGAACTCCTTAATTACCAACCTTAGCTTCGTTG  
GTTAG  
>Cluster\_46284  
ATGTTGTTGAATCGTGTCCGTTGTGAAGCAATGGAAAAATACGGGCTATATTTTGACAGGAATTTGTGTCGATTCCTCCC  
CCAAAAGAGAGTATTTTCTTGTACTGTGACACGCTTTTGTCAATCCATAACAAAACGAGCAACAAATTTACGTATTT  
TTTAA  
>Cluster\_48985  
ATGAAATCATAATTGCTGATGTTATCGGGCTGACTGGTTTTGGCCTGCTTACGTGCGGAGTTTACCTGCAGTTTGGTAT  
GGCTCCGGCTCTGATTTTGTCCGGTGTACTGCTGGTGGGAGCACTGGTTATGGTCAAGAGGGGACGCGTCTGCTT  
GA  
>Cluster\_17793  
ATGCAGGAATTACGGGCTACTCTAAACCTATCCCCAATCTCCTGAAGAAAACCACTTCTAGATGATAATCTAACGGA  
AGAACTCGATAATGAGGAAATTCGACAACATCTGGAAATAGATTCGGATGGATGGATGCAGTGGACACTAGCCAGATAA  
TTTGA  
>Cluster\_57179  
ATGGGCAAATTAGGTGAAAACGTTCCGCTTCTTATCGATAAAGCCGTAGATTTTCATGGCATCAAGCCAGGCGTTCCGGGA  
GTATCTGAAAAAATCTCCCTCCCGTAACGCGATTCCTGCGGAAATACCCGATGAAAGCGTCCGCTTATATCTACAACGTC  
TGGAGTATTATCTGCGGCTTTATCGGCCAAGCAGGTAGAGGGGCAGTAA  
>Cluster\_10608  
ATGGGGCTGGATTGCGTGCTATATCAACCTACTGCGCGACGCGGGAGAAACGGTTGATGCCGTTAAACAAACGGATACA  
AAGAGGAATATGGAAAGAAGGGTTTATGTATTTAAAGTCGACGGAGTTAAAGAACGCTGGGTCGACTTAATAGAGGTTT  
CAAAATGGGCAAGAAAGAACAAGATTATATCTCTGCAAGAGGAGTAA  
>Cluster\_45813  
ATGTTTAACTCCCGTTTAAACAACCATGGAGTATAGGGCAGTAGCCCGAGTATGGATCGTCACCGACGTCATTTACAGCAT  
CAGGCCTTTTAAACGCTACCTTTCTGGCTCTCTATGCCGACCTTTTCGTTGTCATTTTGTGCTTACGCTGCATTTTTC  
TGGCGTCGAATAGCTATTTCTTAAGCAGGAGCTTGTCAATGGAATCTTAA  
>Cluster\_1686  
ATGATTGATTTGCAACAGCGTTATGAACTATTAAGTCGGCTTGTGAAAACTTAAAGTTACAAGCCAATCCAGCCTTAA  
AATTAACAAACAGCTCAAGTTATCACCTCACGCAACCAAAACACGCAAGATTCAAAAGTGGTGTATTGACCGTATTC  
CTTCTGATGCTCAAAATCATAGGTGAAACGGAATACATTTATCTTGTCCGACATTA  
>Cluster\_46501  
ATGGAACGCAATTTCCACAATGTCAGCATGTGCTTGTATCAGGATAACGGCCATGCGCGTTGCCATCTGCGGGGAAAT  
TATTGAAATGAAAGCTCTTTGTCAGCATGCCATCAACCGTTGAGGTTTAAAGCCTGCGGTGCAGTAGATTACTTCT  
GTCAGCACGGGCATGGCTTGATATCGAAAAACGCGTTGAATTCGTGCTGGCTTAA  
>Cluster\_25604  
ATGCCAAGAAAAAACAATACTGGCAGTGAAAAATCCCGTTAAAAACGCCGAGGAATCAACCCCGACACATCAGGTAT  
CCCGACGCAAAATAGCATTAAATTTGCGTGGAAACCGAATCCGAATTAACAGACATGAAACTTAATCTTATCTTTACCAGC  
GGGAGTGCACCCAGCGCTGACCGTCAAAACGTTTATGAGCCGGAATAA  
>Cluster\_37618  
ATGTGCTGTCTGGTTTTTCAACAGGACGAGGTTTATCATATTGAAATAGTGGAACTATTGGCCAACTAATGAATAACTC  
CAGTAAAAACATCCACAGTACAGATTAAGCGTATTAACCTTCAATATCTACCGTTTATGCTGATTGGCCTCGGATCAC  
CAATGGTATTACGGCTGGTTGCGCCGCTCACCATCGAAACGCGAGATTAA  
>Cluster\_44268  
ATGGAACCTACAGAGAATATCCTGCATGGCTTATCTTTTTACGCGCTACTTATGCGGTTGCAGCGGGGCTTCTGGCGCT  
GCCTTTTATGCTTTTCTGGAAAGACCGCGCCGCTTTTACAGCTACCTGCATCGCGTCTGGTCAAAAACAGCGATAAAC  
CGGTGTGGATGGATCAGGCCGAAAAGGCAACTGGTGTATTTTATTGA  
>Cluster\_29368  
ATGAAGTATTTACTCCCAGGATGTAGTTGAAGCCTGGAAACGTTGGTGAATCAATCGTTTTTAAAGTAAGGATGAACAG  
GAACACAGCGCGACGCTGTGGTTATCCAGAGCGTGAAAAATGTTTGACGATGCACTAAAAATATTGATGAACGCGTA  
AGGACAGGACAGAGAAGAATAA  
>Cluster\_50043  
ATGGGCATTATGTCATGTCGAAATTTTCTGGTGCCTGTATGCCATTGCGCAGTCTCTCAGCGGCATTGTCCATTTCTG  
TGACGCGGCTGGATTGCCAGCCACACCCTTTTACCACCTCCATCCATGCAACAAATCCACTACACTGGATAAAAATTA  
CTAAATTTTACTTAAATACCACATAA  
>Cluster\_61745  
ATGGGAAAAAATGATGTCATCAGATTGCTGACAACTGCGCGTTGTTTATGCGGATGCGGGCTGAACGCCCTTATCCGG  
CCTACAAAGTCGTATAAATCAATGTATTGAGTTTATGGTAGGCTGATAAGCGCAGCGCATCAGGCAATCTTACGCT  
TGTATCAGTCTCATGCCATAA  
>Cluster\_32374  
ATGAGTTTATCTTTGTTATGGATTGTGTTATCACAAATCCAAATAAGAAGAACTTAAAGTCCAGCCTCCAGTCTGTCAGTC  
CGAAGTAACTATGGTGCCTATAATATGATCTCCATACCTCGGGTCTCACTGGAAGTCTGAACACTTTCGAGTCAAGTT  
CTCCGAAGTTCATTTACTGTTTGA  
>Cluster\_40677  
ATGTTTGAATTAACGGAACGCTATGAACTTATTAAGCAATAGCGAGAGATTGAAAGAACAAACCAACAAACAAACG  
AATCAATCATCCACCTTAGGCAAAATAGCAGAATCAGAAGAATCGCTAAATGGTGTCTTGATAAATTACCAAGTATT  
GTCAGATTGCTCGGTGAAGATGGTAATTTATCTGATTAGATAA  
>Cluster\_7949  
ATGAACGTCATCGCGCATCAGGGCGACACGCTCGACACGTTATGTCAGCGCCATTACGGGCTACTGAAGGTGTGGTCA  
GGCGTATTGCTGGCTAATCCGGGCTCGCCGAGCTGGGTGCTGCTTCCACATGGCAGCGGGTCACTGCTGCTGAA  
TCGACGCCGACCGGATCGGAGACCGTGAATTTATGGGACTGA  
>Cluster\_48411  
ATGGCTACGATCCTCGCCCTTACATCTCAATTTATATTTGTTTTGCGCCCATTCGTCGTCAGAACGTAACACAG  
TATCAGTATGCTGCTATCGTCGCCAGCAATGAGCATCATGACGCTTTCACGTCATGAGTATGTGCTTTGCTTGGCTT

CTGCTCGCCTGCCTGTCCGGGAGGTGATGTGA

>Cluster\_30501

ATGACAGGAATTGTCAAAACCTTTGATCGCAAAAGCGGCAAGGATTCATTATCCCTCCGACGGTTCGTAAGAAGTCCA  
GGTCCATATTTCCGCATTTCACTCCCGCGACGCAGAAAGTGTATTATACCAGGATACGCGTGGAATTTTCCCGCGTAAATG  
GCCTGCGTGGACCAACAGCGGCAATGTTTATCTCTCTTAA

>Cluster\_23003

ATGCCCCGAGCACTCTGGTTCAAAGCATTATTGTTGTTTGTGGCCTCTGGGCACCCTTAAAGTCAGGCAGAAACGGGATG  
GCAGCCGATTCAGAAACCATCCGTAAGTGAATAAGATAACCGCCAGTATCAGGCTATACGCTCTGGATAACCGGTATGG  
TGGTCTTACTGGTTCTGTATCCGACGGCAGTTAAATCGCTCTCGGCGTGGTGGTGGCCTGGGTTCGTTGGAAGATCCT  
GAGGCGTACCAGGGGCTGGCACATTACCTTGAACATATGAGTCTGATGGGGTCGAAAAAGTATCCGACGGCTGACAGTCT  
GGCCGAATATCTCAAATGCACGGCGGCAGTCACAATGCCAGCACGGCACCGTATCGCACGGCTTCTATCTGGAAGTTG  
AGAAGCAGCCCTTGGCCGGTGGCGTAGACCGCTGGCGGACGCTATTGCAGAACCTTGTCTGACAAGAAATACGCCGAA  
CGTGAACGTAATGCAGTGAATGCCGAATTAACCATGGCGCTACGCGTGACGGGATGCGCATGCGCACAGGTCAAGCGCAGA  
AACCATTAACCCGGCACACCCCGGTTCAAAGTTTTCTGGTGGTAACTCGAACTTTAAGCGACAACACAGGTAATCCGG  
TACAGCAGCGCTGAAAGATTTCCACGAGAAGTACTATTCGCCAATCTGATGAAGGCGGTTATTTACAGCAATAACCG  
TTGCCGAGTTCGCCGAAATGGCGGGGACACCTTTGGTCCGCTGGCGAACAAAGAGAGCAAAAAACCGGAATCACCGT  
CCCGTAGTCCGACGGCAAAAGGGCATTTATCATTCATTCACGTCGCCGCTGGCGGTAAAGTTCTGGCCTTGGTGGT  
TTCCGATCGATAACAATTCAGCGAAGTTCCGTAGTAAACGGATGAATGATTACCTATCTGATTGGTAACTCGACGCC  
GGTACACTTCTGACTGGCTGCAAAAGCAGGGATAGTTGAGGGTATTAGCGCAATTCGGATCCTATCTGTAACGGCAA  
CAGCGGCTATTAGCGATCTGCGCTTTAACCGATAAAGCTCTGGCAATCGCGATCAGTTGTGGCGCCATTTTTTA  
GCTACCTCAATCTGTACGTGAAAAAGGATCGATAAACAATACTTCGATGAACCTGGCGAATGTGCTGGATAATTGACTTC  
CGTTATCCGTCATCACCGTGATATGGATTACGTCGAATGGCTGGCTGATACCATGATTCGCTTCTGTTGAGCATA  
ACTGGATGCAGTCAATATGGCCGATCGGTACGATGCTAAAGCAGTAAAGAAGCTCTGGCGATGATGACGGCGAGAATG  
CGGTATCTGGTATATCGCCGAAAGAGCCGCAACAATAACCGCTTATTTGTCGATGCGCGTATCAAGTCAAGTCAAAA  
ATCAGCGAACAACCTTTCGCGGACTGGCAGAAAAAGCCGCAATATTTGCGTCTCCTTACCGGAGCTTAAACCCATAT  
TCTGACGATTTCTCGCTGATTAAGTCAGAGAAGAAATACGACCATCCAGAGTTGATTGTTGATGAGTGAATCTGCGCG  
TGGTGTATGCGCAAGCCGTTATTTTGGCAGTGAAGCCAAAGCTGATGTCAGCCTGATTTTGGCATAATCCGAAAGCCATG  
GACAGCCCGCCCAATCAGGTGATGTTTGGCGCTCAATGATTATTCGCGAGGCTGGCGCTGATCAGCTTAAAGCAGC  
GTCGGTGGTGGCATAAGTTTTTCCACCAATGCTAACACCGCCCTTATGGTAAATGCCAATGGTTACTCAGCGCCTGC  
CGCAGCTGTTCCAGGCTCTGCTGGAGGGTACTTTAGCTATACCGCTACGGAAGATCAGCTTGGAGCAGCGAAGTCTGG  
TATAACAGATGATGGATTCCGCGAAGAAAGGCAAGCGTTTGGAGCAGCGATATGCCCCGCGAGATGCTCTCGCAAGT  
GCCGTACTTCTCGCGAGATGAACCGCGCAAAATTTTGGCCTCCATTACGTTGAAAGAGGTGCTGGCCTATCCGACCGCT  
TAAAAATCAGGGGCTAGACCAGAGTTTATGGTTATCGGCAACATGACTGAAGCCAGGCAACAACGCTGGCAGCCATGTG  
CAAAAACAGTTGGCGCTGATGGTTTCCAGAGTGGTGTGTAACAAGATGTCGTGGTGCATAAAAAACAATCCGTCATCTT  
TGAAAAAGCTGGTAAACAGCTCCGACTCCGACTGGCAGCGGTTATTTGTACCGACTGGCTACGATGAATACACAGTTTCA  
CGTATAGTTCTCTCGCGAGATGAACCGCGCAAAATTTTGGCCTCCATTACGTTGAAAGAGGTGCTGGCCTATCCGACCGCT  
TAAAAATCAGGGGCTAGACCAGAGTTTATGGTTATCGGCAACATGACTGAAGCCAGGCAACAACGCTGGCAGCCATGTG  
CAAAAACAGTTGGCGCTGATGGTTTCCAGAGTGGTGTGTAACAAGATGTCGTGGTGCATAAAAAACAATCCGTCATCTT  
TGAAAAAGCTGGTAAACAGCTCCGACTCCGACTGGCAGCGGTTATTTGTACCGACTGGCTACGATGAATACACAGTTTCA  
CGTATAGTTCTCTCGCGAGATGAACCGCGCAAAATTTTGGCCTCCATTACGTTGAAAGAGGTGCTGGCCTATCCGACCGCT  
GTGTTCCGCTTCCAATGAGCGTAGGGCTCAGTGGGGTATGGCTTCTGCTGCAAGCAACGAAAAACAGCCATCGTA  
TCTGTGGGAGCTTACAAGGCGTTTTTCCGACCGCAGAAAGCAAACTCGGGCGATGAAGCCAGAAGAGTTTCCGCAAA  
TCCAGCAGGCGGTAATACCAGATGCTGCAGGCACCGCAACAGCTCGGCGAAGAAGCATGAAAGTAAAGATTTTCCG  
GATCGCGCAATATGCGCTTTCGATTCGCGTGAATAAATCGTGGCCAGATAAAAACCTGACGCGCGCAAAAACCTTGTCTGA  
TTTTTCCATCAGCGGTGGTTCGAGCCGCAAGGTATGGTATTCTGTCGAGATTTCCGCGAGCCAGAAGCGGAAAGCCG  
AATATGTGCATCTGAAGGCTGGAAGTGTGGGAGAAGCTCAGCGCTGACGCAAAACATGCCCTGATGAGTGAAGAAAG  
AATGAGTGA

>Cluster\_4776

ATGTTCTGGAAATATAGGGGCAAAATCCAGGAGAATATGACACCATAATTTCTGGGCTACGGTCCACAGTATCAGGCCAATAC  
GGAAATAGAATATCTGTCTAATCGGATGTTGATGGCGGGAAGCCGTACCAGACAGTACTTCCCGCCACAAAACCTCTCTCT  
TGGAGTTCTTAATAGTCAAGTGTACTGTATAGTGGAGAGCGTAAAAACACAGTACTTCCCTGAGAGTCTCAGCGAT  
CTGACACCCGAATGCACAGAACAGGCTATATCGTTAAAGATTATAAATTCATACTGAGAGGGGGAAGCGGTGGGCTGGC  
TGTTCAGGTCGGTGGCGCAGGATATATGATATGATGCAAAATCCTGTGGCAAAAGAAAATACGCTCTCTTTTCCGCGGC  
TACCGGAAGAGTTTCCGCTCACCTTTGATTTATCAAACAACACAGTCCGGTCACTGCTGAAAACACAGACGATGAGGTG  
CCGGTAATGACCAATACCAGAAAGGGAATAAACACCCCTGGTAGTACAGCCCGGTAAGACCGCAATAATCCGTAACGA  
TAAGGACAATACCTTCCATACAAGCTCTGGCGGCGGTACAGTCACTCCGAGGCGGGAATAACCGCTATATTTATCCCC  
GGGATTTAAAAACCGCTTGGACTGACCTGTCCAGTAACTCAGTCTCTCACGAAATCTTTCTGCCAGAAACAAACCTTA  
GCTGAATTAACCTGTCCGCTTTGAGCTGAGTTGATTTACTGGCCGGGAACAATAAATGTTCAACAGGAGGATGA  
AGCAAAACCTTGGCCGAAACTTGGCGGAACTTCAAGGTGATACCCGCTGATGGCATGACTCTGGAGCGGTTTCCGCGGAAA  
ATGGTATTTCACTGGCGATTTCAATATGATGTTTCAACGCTGGCAGGCTGTTTATCCGGAAGAAAATAACAGACCGGAT  
GCCATACTGGACAGGCTGATGATATGGGCTGGAGTCTGACACAGAAGTCCGGTTCGAAGGAGGAGAAAACAAAGTCA  
CTATGATCCCTGACTCAGTCACTCGTTTACAGCTTACAGCGGTTACTCTGATTTCCAGTTGGCCTAGTCCGACCA  
ATACCAGGCTGTAACCGGAACCTCCGGAAGCCGATACATATCATGAAGCCAGTTACAAACACAGATAATACCAGACAAA  
ATCATACTGGCTGGTGAATGACCATCCGGAAGGATGATTTACTGGAAGCTAGTCTGTTCTGGTTGAAGGGAAAAA  
AGCAAAAACAGCGTGAATTAACGATTTGCTACGATTCAGTATTCCTTCAACTGACAATATCCGGGATCGAAGAATCCG  
TGCCGAGACACCCGTTGGCAATTCAGCCTCAGGATACCCGTTTACTGGGTGACGTACTCCGGATCTTACCAGATAAT  
GGTAACTGGTGGGATTTTCCGAGTGGTCAACACACCGTAAACCGGCTGGAAAATTTGATGGCACTGAATCAGGT  
AATGACGTTCTGCCCAGGATCCGGAAGTGCAGAGCAGGATATGCTCGAAAACCTAGGTGGCGTAAAGGAAAAAAG  
TGGAGGGGAGTTACTGTCAGGGAAGCTGAAAGGTGCGTGGAAAGCCGAAAGGTGAACCTACTGTTCCGGTAAATATCTCA  
GATCTAAGTATCCACCTATTCACGCTGATCTGATTTTGAAGGAAAAATAATGTTGTTGCTACGAGTAAAGTACA  
TGCAGCTCCGTTGAAAAATAACATCCGAGGAGATGCAAGTTATCTGAAAGGCAGTGGCAACAGCAGGAAACATATTTG  
TCAAGCCGACAAAGGACCCCTCATTAACTCAGTGAATTCGCTGTTTCACTATTTTCATCGGATAAAACATTTTTCT  
TTAAAATGATGTCGCATCAGGATGATGGTCCGATCGACCCGATCAATATCCGCTCAGATTGTTCTATCTGCGTGAACA  
GCCAGTATCCGCGAATTTACGCTGACAGATTTTTTTCACAGAAAGTGAAGTAAACAGGACAGGAAATCTCG  
AGAAAGGCTGAGACCAATCTGATAGGAGATACACACCGTTTTATCAACGCTGCATACAAAATCATCTGAATATCCAG  
TTAGGAGATGGCGTCTGAACTGGCAGACATTTGTCGGAATACGCCGATTTCAAAAGGAAGAAACATCAAAAATATTT  
GTATCAATATCAAGGTGCCATGAAAAAAAACAGATGGACCATCTGTGGTAGAAGATGCCATATGACCACACTGTCTCA  
CAACAGATTCAGGTGAACATTTCCCTACCTTCCACCGTGGTATACAGATGATTTATCAGGGCGTTATAAAGCGCTACCT  
ATGGCAAGAAAAGCAGATACTTTGTATCACTGACACCAAAAGGTGATCTACAGATAAATATATCAGGTAGCTACAAAAT  
GGTGAATCAGGCGATGATTTGATCCCTGCCAACTACCAGCAGAGTGGGAAAAATATAATTTAAGCATCTTATCCGAAA  
TCCCTCAGAAAATAAATCTGTTTACATTTCAATCTCAGGTTAATGGCCCCACAATGCAGGTGCGCACAAATGACTAC  
AGAGGAACGGATGAAAAAATCCCATAGTATCTTTTTCAGATAACAACCTTCAATCAATGGTGAACAGATGTTGAGTTATGA  
CTCGCATTCATCAGGGCAGTCTATTCAGAGAAGAAATATATGATGTTGGAAATGACGACAGGGTATCAGAAGCTTCCA

GTGCCGGACACAGGATTACTGGCTGATGGATGCAGCGGTAAGAAACGGAGAATGGAAGATCACACCAGAATTATACGT  
CACACACCGGGATATATCCGGAGTACGGTATCGAAATGGTCCAGAGGATGGCTGAAAACCGGCACAATACTCCAGACTCC  
AGAAGACAGAAATACGGATGTATACCTGACTACCATACAGAACAATGTATTTAGTCTGACAGGGGGGGCTACCAAGTGT  
ATTTATCGGATTGATGGAATGGCTGGTGCAGATATAGCGGATAATGCACAGGGGAAACCCGCTGCACCCTCAGCCCGGA  
ACATGTTTTGAAAGTGACAAGTGTGGATGAAAGGCAATTAAGATGGAATATCATTTATGTCACGCTGAAAACCTGTGGCTG  
GAGCCGAAATGGCCAAAGCAAACCGCGAATGGTGACAACCTTTTAACTAA

>Cluster\_24284

ATGGATAAGATCGAAGTTCGGGGCGCCCGCACCATAATCTCAAAAACATCAACCTCGTTATCCCCCGGACAAAGTCCAT  
TGTCGTGACCGGGCTTTCGGGTTTCGGCAAATCCTCGCTCGCTTTCGACACCTTATATGCCGAAGGGCAGCGCGTTACG  
TTGAATCCCTTTCGGCTACGCACGGCAGTTTCTGTACTGATGGAAGCCGGACGTCGATCATATTTAGGGGCTTTCT  
CCTGCCATCTCAATTGAGCAGAAATCAACGTCTCATAACCCGGCTTCTACGGTGGGGACAATCACCGAAATCCACGACTA  
TTTGCGTTTGTGTTTCGGCCGCTCGGCGAGCCGCGTGTCCGGACCACGACGTCGCCGTGGCGGGCAGAAACCGTACGCC  
AGATGGTGGATAACGTGCTGTACAGCCGGAAGCAAGCTCTGATGCTGCTTTCGGCCAAATCATTAAGAGCGCAAGGC  
GAACACACAAAACGCTGGAGAACCTGGCAAGCCAGGGTTACATCCGTGCTGATTTGATGGCGAAGTCTGCGATCTTTC  
CGATCCGCGGAAACTGGAATTGCAAAAAGAAACATACCATTGAAGTGGTGGTGTGATCGCTTCAAAGTGCCTGACGATCTTA  
CCCAACGCTTTCGGCAGTCTGTTGAAACCCGCGTGGAGCTTTCGGTGGTACCAGCGTGTGGCGGATATGGACGACCCG  
AAAGCCGGAAGCTGCTGTTCTCCGCAACTTTGCTGCCGATTTGCGGTTACAGTATGCGCCGAGCTGGAACCTCCGCT  
GTTTTCATTTAAACACCCGGCGGAGCTGCCGACCTGTGACGGTCTTGGCGTACAGCAATAATTTGATCCTGACCGCG  
TGATCCAGAAATCCGGAAATGTGCTGGCTGGCGGTGCGATCCGTTGGCTGGGATCGCCGCAACTTCTATTTATTTCCAGATG  
CTGAAATCGTGGCAGACTACTATAAGTTCGACGTCGAAGCCGCTGGGGCAGCTGAGCGGACGTCGATAAAGTGGT  
GTTGTACGGTTCCTGGCAAAGAAAACATTTGAATTCAAATACATGAACGATCGTGGCGATACCTCCATTCCTGCTCATCCGT  
TCGAAGCGTGTGTCACAATATGGAGCGCGTTATAAAGAGACGGAATCCAGCGCGGTACGTGAAGAATTAGCCAAGTTT  
ATCAGCAATCGTCCGTGCCCGAGCTGCGAAGGAACCCGCTGCTGCTGGGAAGCAGCCACGCTGATGTCGAGAAATACGCC  
GCTGCCCGCCATCTCCGACATGACCATCGTTCATGCGATGGAATTTCAACAATCTCAAACCTCGCAGCTGACGGCGGA  
AGATTGCAGAAAAAATCCTTAAAGAGATCGCGGATCGTCTGAAATTCCTGTTAACGTCGGCTGAATTACCTGACACTT  
TCCCGCTCAGCAGAGACACTTTCGGCGGTGAAGCCACGCGTATTCGTCTGGCGAGCCAGATTGGTGCAGGCCCTGGTTGG  
CGTGATGTACGTGCTGGATGAGCCGCTTATCGGCTGCACCAGCGCGATAACGAGCGCTGCTGGGTACGCTTATCCATC  
TGCGGATCTCGGTAAGTACCGTGTGTTGGTGGAGCAGCAGCAAGACGCGATTCGCGCCGCTGATCATGTGATCATG  
GGTCCGGGTGCGGGTGTTCACGGCGGTGAAGTCTGCGGGAAGTCCGCTGGAAGCAATAATGGCGGTGCCAGAGTCTGTT  
GACCGGGCAGTACATGAGCGGTAACGCAAGATGGAAGTGCAGGAAGCGCGCTTCCGGCAAATCCGGAAAAAGTGTCTGA  
AACTGACAGGGCCACGCGGCAACAACCTGAAAGACGTGACGCTGACGCTGCGCGTGGGTCTGTTTACTTGCATCACAGGG  
GTTTCAGGTTCCGGTAAATCGACACTGATTAACGACACACTGTTCCCGATTGCCAACCCAGTGAATGGTGGCGACCAT  
CGCCGAACCGGCACCGTATCGGATATTCAGGGACTGGAGCATTCGATAAAGTATCGATATCGACCAAGCCCAATTTG  
GTCGTACTCCGCTTCTAACCCGCGGACCTATACCGGCGTGTTCACCTGTGCGCGAACTGTTTCCGGCGTACCAGGAA  
TCCCGTGGCGCGGCTATACGCCAGGACTTTCAGCTTTAACGTCGCTGGCGGACGCTGCGAGGCTGTCAGGCGCAGCG  
CGTATCAAAGTGGAGTGCACACTTTCGCGGACATTTACGTCACCTGCGGACAGTGCAGGCAAGCCAGTGAATGGTGGCGACCAT  
AAACGCTGGAGATTAAGTACAAGGCAAAACCTCCACGAAGTCTGGATATGACCATCGAAGAGGCGCTGAGTCTCTTT  
GATCGCGTCCAGCTCTGGCGGTAAAGTGCAAACGTTGATGGAGCTTGGCCTGACGTACATTCGCTCGGGCAGTCCCG  
AACACACTTTCGTTGGTGAAGCCAGCGGTGAAGCTGGCGGTGAGCTGTCAAACCGCGCACCGGCGAGCAGCTGT  
ATATTTGACGAGCCGACCCAGGCTGCACTTTCGCGGATATTCAGCAACTGCTCGACGTAATGCAAAAACCTGCGCGAT  
CAGGGCAATACCATTTGTGGTAATGAGCACAATCTCGAGCTGATCAAAACCGCTGACTGGATTGTCGACTGGACCGGA  
AGGCGCAGTGGGGGGCGGAAATCCTCGTCTCCGGTACGCCAGAAACCGTCCGAGAGTGCAGAGCTTTCGATACGGCGC  
GCTTCTCAAGCCGATGCTGTAA

>Cluster\_3460

GTGTATGTTCTGAACAACATTTGTTTTTAAAGCGTAAAGAAATGAGACGGATTGATGTTATTACAAGGAGCTGGAGCG  
GCTGACGATATGGGCTGGAATGTTCTGATTTAGCGAAGGAGAAAGCATTACTGCTGAGGCGATTGGTTTTAACCTTGGGC  
TGGCAGCAACTCGGTTAGTAAAGATCTTAATCAATTAAGGAAAGGCGCTGGTGGTAAAAAGTCAAGGACGCTGCTGTT  
TTTTTTCTACATCGTACGCACTAGAATGCTCATTAATCGAAAACCTGGATGATTGCGAATGCATAGTTTCAATTCAGTGGC  
TAGTTTATGCGCAAAGAAAGAAAATATACAGATGATGATCCGTTTTCCGGACTTATCCGATACGACCGTAGTCTCCGTT  
ATGCGGTAGAAAAAGGCCGCGCAGCGGTGCTTTATCCACGGACTACATGTGCTGTTAACCGGTGCATCTGGTGTGGC  
AAAACACTTCTTGTGCTGAGTTAATGCATTTGCTTCCGCTGCAAGCACACCATAGGTTCCGCACTCCGTTGGTTTTAA  
CTGTGCCGAATATGCTCATAATCCGGAGTTGCTTTCCTCACATCTGTTTGGTACCATAAGAGGGCATTTACCGGGCAA  
GTGAGAATAAAACGGGATTTGGTGGAGCAAGCTGACGGAGGTTATTTACTTCTGGATGAAGTGCATCGCTCCCGTACGAA  
GGACAAGAGAAGCTTTTCTATTCGATAAAGGTGAATACCCGCCACTTGGTTCAAGTGGGCAACATTTCAATTTCT  
GGTCCGCTTTCGCGCCACTACAGAGTCCGCTCAACTCCGCACTATTCGCTACCTTCCAGCGGCTATCCAGTATGTA  
TTGACTTACCGGATTTCCGCGAGCTTCCGTCGAGGAGCAGCTCGAATGATTGTAAGCTTCTTTCAGCGTGAAGTCTGT  
AAAATGAACTGATACATAAGCCTTGATAAAACGCTTTCGATTTGGTTGTTAAGTAAACCCCTGGAAGGCAATATCGGCCA  
GCTTAAAGTGTATTTAGTTCTTGTGCGCGAGCGTGGCGTGGGAATGACCGAGCGTAAATGATACGCTAGAGTTAG  
ATAAACGACTGGCGGAGATGTCGTTAATACACCGCAGCAGCGCTGCTGGTGCATGCGCTTGGTTGGCGGTAAGAT  
CGTCTGAACGTTGATGCGGCTACGTTGCCGCGTTAAAAAATTCGTTGGCGACGAGCGGAAATAGAAAGAGCGACCT  
GTTTTACAGTTTCTGACTCGTGAATATGTCAATCTGCGCAACAGTAACTGCGCCCGCAGAAACCGTGGCTATCTCTGA  
AAAACAAACCTAGTTGCTGATTTTTGAATATGGTCTTTATAGCCGCAATAGTGGCGGCAATCCACCGGCTATGGCGATCA  
ATTGAGGAGCGTGTGACGCTGCTGATCGGTTACGTTGGAGCAGGATTTAGGATTTACATTTGCCAGAAAACCTGGCGAACCC  
GTTACGTAACACTTTCCTGCGCTGATTGGCTATGTGCGGCGAGGGCTTATACCTCAACTCTATTTCAATCCAGCCTGATTC  
TGGATCGCTGTAAGATGAGTATGACAAATGCCACGCTTCTGTGCGGCAAAATCAATGAGTGTGTGCATATTTCACTGCCCCG  
CGCAGCGAGGTGGTCTGGCTGTGCTGTTCTGAAAGAGTGTCCGCCACTACCGCCAGCGCATCGACACAGCCGCGGATTTG  
CGGCGTGTATTTAATCGCTCACGGTGGCACCACCGCAACGAGCCAGGCGCAATATGTGAACCGGGTGTGGAGCGGATC  
TGTTCACGCAATGATATGCCATTTGAGCAGTCCGTTGATGACACCCGGAACCCCTGACCCGGATGATTACGAGCCGG  
TGCTGGCAGCGGCTGATACTGATGGTGGATATCGGAACCGTGGTCCATTTTGGCAGCACCATCAGCAAGCTGTTCCAGAT  
TGACTTCTGTTGTTGTTGCCAAATATCAGCTGACCATGCTGCTGAGGTTGGGTTGAGTTAAGTATCGAAATCGAAACTG  
TATCGCAATTTGGCTGTGCTTATGACAGATAAAAATATCCCTTGTGCGCTGTCACGCGCCAGCAAGAGAGCGGTGGCAA  
GTGCTGGTTATCTCATGATAACCGGATGGGGACGGCGGAAAGATCAAAAAGTGTGAGGAGAGCTTTGGCGAGCT  
GATGTCGACGACACGCTATGGTATTTCTGACTATAACGAGGTGCGCAGCTGGAGCGTATTCAGCAGGCGCTTAATG  
CCAGTGAACGGCTGGCAGGATGCTCGGCACTTCCAGCCGGACTGCGGATATACCGTTTATCTCGCTGGGAACTG  
TTTTCCGAGCAAGGGCCGAGCTGGTGTGCTGACCTGCTGACGCGGATCTCTCAGCAGCGAGCGCCGACTGGAGATGGA  
GCGCAGCGCATCGCTTTTATCAGCGCTGACCATGGAGGATCATCAACCATATTTCCGGTGTCAACCCGACGCGAA  
TTCTGAAAGAGATCGAGGATGTTCTGAACTACTTAACCAACAGCTCTCCCTGAAACCGAGCCGCGAGCTGACACTG  
TTTTCTGATCCACTGCTGCTGATGGTGGAGCTATCGTATTAACCGCAAAACCGTTACAGATGGCGTGAAGAACCGGCT  
TGATCTGGAGCTGCTGCTTTAGCGCTATCAAACTCTCTTTTTGCGGATTGAAGAGGCTTACGCTATCCGTTTATCGG

ACGCAGAATATTTTTATATCTACGAACTGCTCTACAGCTGA

>Cluster\_41899

ATGAGTGTATGTCGCCGAGACACTAGATCCTTTGCGCTTGCCCTTACAGGGCGAGCGCTGATTGAAGCCTCTGCCGGCAC  
AGGCCAAAACCTTTTACGATTTGCGGGCGCTCTATTTTGCAGCTGTTACTTGGACTAGGCGGTTCTGCCGCCCTTTCCCGCCCGCC  
TGACCTTTGAAGAACTGCTGGTGGTGACCTTTACCGAGCTGCCACGGCAGAAATGCGTGGTGTGATACCGGCAATATC  
CACGAGTTGCGCATCGCTTGTCTGCGTGAACCACCGACAATCCACTGTACAAACGCCTGCTGGAAGAGATCGAGATAA  
AGCGCAAGCCGCGAGTGGTGTGTGTAGCCGAGCGGAGATGGATGAAGCGGAGTCTTTACATATTCACGGCTTTTGGC  
AGCGCATGCTCAACCTGAATGCCCTTGAATCCGGCATGCTGTTGAGCAGCAGCTGATTGAAGATGAGTCTCTGCTACGC  
TACCAGGCTGCGCGGATTTCTGCGCTGCCACTGCTACCCGCTGCCGCGTGAATTTGCCAGGCTGCTTTGAAACCTG  
GAAAGGGCCGAGGCGTTGCTGCGGATATTAATCGTTATCTGCAAGGCGAAGCGCGGTTATCAAAACACCGCCCGCCG  
ATGATGAAACCGCTGGCTTCCCGCCACGCGCAAAATGTTGGCGGCTATTGATGCCGTAACACAGCAGTGGCGCGACGCGATG  
GGTGAACCTGGATGCGCTGATCGAATCTTCTGGTATTGATCGACGCAAGTTAACCGTAGCAATCAGGCTAAATGGATCGA  
GAAGATCAGCGCTGGGCAAGAAGAAGACCAACAGCTATCAGTTGCCGGAGTGCCTGGAATAATCTCTCAGCGTTTCT  
TAGAAGATCGCACGAAAGCCGGGGGAAACCCCGGACATCCACTGTTTGGAGTGTGCAACAATGCTTGCAGAACCA  
TTGTCGATCCGCGATCTGGTGTACTCTCGCGCATTTGGCTGAGATCCCGGAAACAGTAGCGCTGAAAAACGCCCGCTGG  
CGAATTGGGTTTTGATGACATGTTAAGTCGGCTCGATTTCCGCGCTGCGTAGTGAAGCGGCGAGGATTTGGCAGCGCGGA  
TCCGTAGCGGATTTCCCGTGGCAATGATCGATGAATTTTCAAGTTACGATACCGACCCCAACAGTATCGAATTTTTCGCTATC  
TGGCACCATCAGCCGAAACCGCATTTGTTGCTGATTGGCGACCCGAAACAGGCCATATATGCATTTCCGGGGTGGCGATAT  
CTTCACTTATATGAAGGCGCGTAGCGAAGTTTACTGCTACTACCTTAGATACCAACAGCGCTTCCGCGATCCGGGAATGG  
TGAACAGCGTTAACAACTTTTACGACTGATGACGCGTTTCACTGTTTCTGTAATACCGTTTATTTCTGTAATCT  
GCCGCGAAAACTCAGGCGTTACGTTTGTATTTAAAGTTGAAACGCGAGCTGCGATGAAAAATGTTGGCTGATGGAAGGCGA  
AAGCTGCGGCGTTGGCGACTATCAAAGTACCATGGCGCAGGATATGTGCTGCGCAATCCGCGACTGGTTACAAGCCGGGC  
AACGCGGCGAAGCGTTGCTGATGAACGGCGACGACGCGGCTCCGGTGGCTGCTTCCGACATCAGTGTGCTGGTGGCGCAGC  
CGCCAGGCGGCTAGGTGCGGATGCTTAAAGCTGAGGAACTCCCTCAGTTTACCTTTCGAAACCGCGCAGCTGT  
TTTTGAAACTCTGGAAGCACAGGAGATGCTTTGGCTGTGACGCGGCTGATGACACCCGAACGTGAGAACACCCCTGCGCA  
GTGCGCTGGCAACGCTCAATGATGGGCTGAATGCGCTGGATATGAAACGCTGAATAATGACGAACATGCGTGGGATGGC  
GTAGTCAAGAGTTGATGGTTATCGGCAAACTGCGCGCAACGTTGGCGTTATGCCGATGCTGCGGGCGCTGATGTCCGGC  
CGCTAACATTTGCGAAACTTTGCGCAACGGCAGCGGCTGAGCGGCTTACCAGATATCTTCCGATATCTTCCGACAGCTG  
TACAAGAAGCCGGAACGCGAGCTGGAAGTGAACATGCGCTGGTACGCTGGTTATCGCAACATACTCCGAGCCAGACAGT  
AATGCTCCAGCCAAACAATGCGCTCGAAAGTGAATAACATCTGGTGCAGATGTGTCAGGATACACAATCAAAAGGGCT  
GGAATATCCGCTGGTCTGGTTGCCATTTATTACCAATTTCCGCGTCCAGGATCAGGCGTTTATACAGATCGCCACTCGT  
TTGAGGCGATTTTGGATCTTAACGCTCGCCGAGAAAGTGTGCACTCGCGGAGGCGCAACGCTGCGCGGATGATCTGCGT  
TTACTTTACGTTGGCGCTGACGCGTTCCGTTTGGCATTTGCAGTCTCGGCGTTGCACCGCTGGTGGCGGCTGTTGGCGATAA  
AAAAGGTGATACCAGCTCCACCAAAGTGGCTCGGGCGTTTGTGCAAAAAGGAGAACCAGGATGCGGCGAGGCGCTTC  
GTACCTGTATTAAGCGTTGTGCAATGATGATATTGCTTGCACAAACGACACAATTTGGTGATAACCAGCCCTGGCAGGTT  
AATGATGATTAACCTGACGAACATGAATGCGAGGACCTGCAACAGATTGCGCCGGGATAACTGGCGGTGTCACCAGCTACTC  
CGGTTGACAGCAGCTGGTACGGTATCGCTCAGGATCTGATGCCACGGCTGGATGTTGATGCCGAGGCGTGGTTCAGCG  
TCGTTGAAGAACCAGCTTAAACACCGCATCAGTTCCCGCGCGGTCGCTCACCGGGGACATTTCTGCAAGTTTGTGTTGAA  
GACCTCGATTTTACCAGCCGTTGACCCGAACTGGGTACAGGAAACTGGAGCTCGGTGGCTTTGAAACCGCAGTGGGA  
ACCGGTGTTGACTGAGTGGATCACAACCTGCTTCTGGCACCTCTCAATGAAACGGGTATTAGCTGAGCTCAGCTTTCCG  
ACCGGATAAACAGGTGGAGATGGAGTTTACCTGCGCAATTAGCGAACCGCTCATCGCAGCCAGCTTATGACTAAT  
CGCCAGTTTACCCGCTATCCGCTGGCTGCCCGCGCTGGAGTTTCACTGACGATGCTGGAAGGCTTTATTTGA  
CTGGTGTTCGCGCACGAAGGCGTTATTACTGCTCGACTATAAATCAACTGGTGGGTGAAGCAGTTCGCGTTACA  
CCCAACAGGCTATGGCAGCGCAATGACAGGACACCGCTATGATCTGCAATATCAGCTTTATACCCTGGCGCTGCACCGT  
TATCTGCGCCATCGTATTGCTGATTACGACTATGAGCGCCACTTTGGCGGCGTTATTTATCTGTTCTGCGTGGCGTTGA  
TAAAGAACATCCGCAACAAGGATCTACGCGACCCGACCCACGCCGGGTTGATTGACCTGATGGATGAGATGTTTGGCG  
GTATGACCCCTGGAGGCGCTAA

>Cluster\_56084

ATGACTGATGATTCCTCCCTTCATCCCGGTTCCCTATGTTCCGAAAAACGTCCTTGATCCTCGTGGGCTCACGGTTAC  
TGAGGTGGCGAAGTTGATCGGCGTTAGCCGCGCCGGCCATCGAATTTCTCAATGGGAAGGTATCTGCAACCGCCGATA  
TGGCTGCACGCTTTGAACGCTGCTTTCCGGATTTCCGCCAAGGCCATTCTCGATTGTCAGACAGAATATGACCGCGAGGTT  
GATAAAACGGCAGGCGAGCTCAAAGGCGGCTACTTACGTGCCCTTTTAAATGTCGAAGCAACGATCTCGTAAA  
TTGGTTCAACAACGCAATTTCTTGGCGCCTAAGCTGTGCTGCTGCGAAGCCTCATTCCTCCAGGGAGCTGATC  
TTCAGAAAGTAGATTTCCCGGTAACGACGATGCCGAGCTGCCGCTGGGATGGCTTCAATTGAGGCCAGTTCCCGGCACA  
CCTTGGATACCTTTGCTGCTTGGTGGGAGTTCCGTTTACCAGCGGACATCAAGGCCAAGGCGAGCGGGATTTTTC  
AAAAAGCGTCCGGCTATCAAGAGCGCTGAAAGGGCAATATTTAGCTTTGTCTTTGTCACTCCAAGCGGTGGCCGGGTA  
AGACGGCTGGGTGCGGATATGAAGAGCAAAAAGCTTTGGAAGACATTCGTGCATACGACCGCAGTGTATCTTGGAGCAG  
TGGATGGAGCAACTACTCGCGCCAGACCTGGTTTGGCAACAGCAGGATCGTCTTCAATGGTGTGAGAACCTTGA  
GCGTTGCTGGAGCGAATTGGGCAACCTAGCGGCCCGCCGCTTCTCTTTTACTACGCGAATGAGGCGTGGGA  
ACGACAAGATCAAACTTCTTGGGAAAGACGATGCGAATCCCTAGTAATAGCGGCTGACTCCGTTGAAGAGGCGCTG  
CGGTTTTTAAATCAAGCTTGGCCCCCGGAGTTTGAACAGTATAGGGATCGGGTGTGGTATTTGACAAGGCGAGGAGT  
ACTCCGAAACTCGCCCAAGGCACTACCGATTTTCAATGACAGTACCCTATACCGGGAAAGTGGAGCGTGGCTTGGCCCT  
ACAGCACATCGTGCGAACCATTTGTTGTTATCCCGCAATGCTACTAGCGTGGAGCCTCATGTGCTGTTGGAGCCGCTC  
GGGTTGAGCGCTTCACTAAAGCTTGGAAAGCGATGGGAAAATCGCGGATGACATAGCGAAACTAGCTAACCGCTCGGG  
CGCTTCTGTTGACGCTTCTTCCGAGTCAACTCTGCAATATTTCCGGCAATCCACACACCTGCTTGGGCTGAAGATCCAAGAA  
TCCGATCCGGGATTTGTTCCGCTTGTCTTGTGTCGGCGATGGGACGCTCAGAACAGGCGGATCAAACTCTCTCCCAT  
CTGGCTGAGGACCTTTTGGAGTGTGGAAAAGCGCATTTGATTGTTGCGGCTCAACGATTTCCAGTCTGGTCAAT  
TGGTGGGATATCGGGGGTGTATTTGAAAATCGACTCCCTCTTCCGAAATGCGGACACGGTCTCCAAGGCTGATCTTGACC  
GCTTTCTTACGTTGCGCGGACTGTACTGGTGAAGATGATCTGCCCCGACTTGGCCGAGAAAGATCGTTGGGCGGCG  
GCCATTCATGGCAAAAAGACGAGAGTTCGCGGGCTGCGGAAAGCGGTTTCCGAGACTTTGGTTTTGCTGGCTGTGA  
CGGCAAGAACTCTTCTGGGAAGCACCTTGGCTTGTGATGGGAAATTTGAAGCCGCAAAAATCGTGGTGTATCTTGTGTC  
CTGTAACGACTAGAAAGCTAGAGGCTAATGGGCGGACCTTCCACTTTATGCAAGAGCTGCTCCCGCGGAGTTCTTGTAT  
ATCATCGAGCTGATCTGCGAGCAGAAAAGTCCGAAGTCAATGGCTGCTGAGGCTACCAGTACCGGCTTTTGTGGCTC  
ATGTCGCGCAGCTGACTGCTTTGGGCTCTCAAGGACTTGTCTTGGAAATCCGACCACTTTCCGCGGTTAGTGAAGATTC  
TGGCCAGCTTTCTGAGGTAGAGATTAACGATAACTGGGCAAAATAGCCTATCGAATCGCTTGGTTCCATCTTCCGCGCA  
TGGATGCCGAGACGCGCGCAAAACAGGATGCGCTGAGGCGGCTAGCATGCTTTTGGATAAGCACCCGCGGCTCGG  
GTGGAGGTTTGGCTTCCAGCAGTTCCGTTGATTAACGGCAGTGGCGCTGCGGCTATAGCCATAAGCCGAAAGTGGCGCTC  
ACGCTACGGGTTTGGGAGCCTTTCAAAAACATGGGCAACATCCATGCAATCTGTCAGAGAGATGGTAAAAGTCCGCGTA  
AGCAGGCGCTTCACTGTCGAGATGTTATGCGACCTTGTGTCAAGGCTGCATGCACTGCGCGGAGGATCAGCGCGC



CGTATGGGAGATTATCGACGAGTGGCGCAACTCGGGCGCCTTGACGAGGAAGTTGCGAAGATCCGCGAGAAAAATTCGTG  
TGACTGTTCTCTCFCGCCGGGGCGTAAAAAGGTCAATGAGGAAGCCAGCGAGCCTGACGGAGAAAGCCAAAGCGAGTC  
TATGCGGAGTTGCAGCCAAAGACATTTGTAATAAGTATGAATGGCTGTTTCGGCAGGGATGGGTTGAGGAGTCCGGCAGA  
CGAACTCGCAGGAGCAGATGGACTTCCGAGCCGCTGACCAACGCATAGAAAAGCTCCGCGTTGAAGCCCTGCACGACA  
TTGTGAAGCTCGGAGTCTTCCGGGCATTTCCGACTCTGCTGAAAAAGGAAATTTCCCAACGCCAAATCGGTCTCACCTG  
GTGTCCGGCATACTTACCAGCAGCAGATTGAAGATTTGATCTTGAATGCTTCCGCTCCGGCAGAAAAATTTATTCGGGTCG  
TGATGGCATTGTCCCGGGCGCTCTGGTGGTGGACGAGGATAGGAGAAAGGCCATATATGCGGGCTTCGGGATAAAG  
TGGTCAAGAGGAAACGCTCCGTCTCTTGTGCTTACCTTACCGGGCTTCTACGTGGGTGCTTGTAGATCACTTTTCG  
GCTGAAGCTCGGAGTCTTACTGGGTTGAAGTAGTTCCACAATATGTTTTTACTGCTGAGGAAAAACATGAGAGCGT  
TCGCCGCTGCTTGAAGTCAACGTCGAGGGCAGCCTTCGCATCAATACATTTCAAGCTTGAAGAAATACACCCACCTC  
TCCTAGTGCAGACTCTATCTGCCATGGCGAAAAATAGTCAGGATAAAGCTGGGGAGTACCAGCTGCACGACTACGATGTG  
CGGCGGCTTCCAGCTCTCAATCGCAACTCAGACTCCTCCTAGAGGAAAAAGCTGGACTGGAATTCGCATATTTAGA  
GGTTCTGGCTCGCTTTTCCGAGGGGAGACAGCAGCAGATTCCAAACCTTGAAGCGTACATTTGAGGAACATTCGAAC  
TATTCGTGCAGGCTGTAGTGTGGCCTATAAGCGCAAGGATCGTGGCGAAGATCCCGCGAGTTTCGCATTACAGAAGGT  
CGCGAGCATATGGCAGCGCGGGTACCCTCCTTGAAGCATTGAAGCTATCCCTGGTCAAGATAAAGCAACTAAAGA  
GGAACAGCAGGAAAGCTCGCAGAAATGGGTTGCAACGGTAAAGCGGCTTGTGCTGAACTTACCAGCGGGAGATCGCGG  
ACGTGTGCCTTGAAGACTATTCTCAACGCACGGCTGGCAGGATGGCGAGTGGCGAAGCTGGTGGTGGTGGTGGTGGT  
ATGGAGGATCTACGGTCTGAGGACATCAGCAGCGGGCACATACGGGTTTATACAACGCGCGGGCGGTTTATTGGCGGG  
GGAAGGCGGTGGTCAAGAGCGGGAGCTTGCAGACAAGTATCGCGCTGGGCGGACACCTTGAATTTACGCATCCCTTCG  
TGGGCTCATGTTGCTGATGTCGATGGTCAATACGTATGAGCGTGAAGCTGAGCAACAGGATACTGAAGCCGGTATCCGT  
CGTCGGTTAAGGCATTA

>Cluster\_27846

ATGTTAAGGGTCTACCATTTCAATCGTCTGGACGTGCTGGAAGCGTTGATGGAGTTTATTTGTCGAACGCGAACGGCTGGA  
CGATCCCTTTCGAACCCAGAGATGATTTCTGGTCAAGTACCGGTATGGCACAGTGGCTGCAAAATGACCCGTGCGAAAAGT  
TTGGTATTTCGGGCAAAACATTGATTTTCCGCTGCCAGCGAGCTTTATCTGGGATATGTTCCGTCGGGTTTACCAGGATC  
CCCAAAGAGAGCGCTTTAAACAACAGAGCATGAGCTGGAACCTGATGACTCTGCTGCCGCAACTGTTGGAGCGCGAAGA  
CTTTACCCTGTTCGGCATTATCTGACTGACGATAGTGACAAGCGAAAAGCTTCCAGCTTTCTTCAAAGCGGGCGGACC  
TGTTTGCACAGTATCTGGTCTATCTGCTCCGGACTGGCTGCCACAGTGGGAAACAGGACATCTGGTGAAGGGTTGGGAGA  
GCACAGGCTTGGCAAGCGCGCTTGTGGAAGCGTGGTGGAAATATACCAGCAACTTGGGCAACCGCGCTGGCACCAGCGC  
CAATCTCTATCAGCGCTTATCGAAACGCTGGAGTCCGCGACGACCTGCCCGCGGGTTACCTTCGCGGCTCTTTATAT  
CGGGTATTTCCGCGTTACCCTGTTTATCTCCAGGCGCTACAGGCGCTGGGTAACATAATTGAAATCCATCTCTGTTT  
ACCAACCCCTGCCGTTATTTACTGGGGCAGCATTAAAGATCCCGCTTATCTGGCGAAACTACTGACTCGCCAGCGGACA  
CAGTTTGAAGATCGGAATACCCTGCTATTTCCGACAGCGAAAAATGCCGGCAGCTCTTAAACAGCGATGGTGAACAGG  
ATGTCGGCAACCCGCTGCTGGCTTCATGGGCAAGCTTGGGCGGACTACATTTATCTCTTTCTGACTGGAGAGCAGC  
CAGGAGCTGGACGCTTTTGTGATGTGATGCCAGATAACCTGATGCATAACATTCAGTCTGACATCTGGAATGGAAAA  
CCGCGCGTTGCTGGTGAACATCGAAGAGTTTCCGCTAGCGATAACAAACGCCCGCTTGAATCCACTGGATAGCAGTA  
TCACCTTCCAGTTTGCATAGCCCGCAGCGTGAAGTTGAAGTTTACACGATCGCTGCTGGCGATGCTGGAGGAAGAC  
CCGACACTTACTCCGCGGACATCATCGTATGGTGGCTGATATCGACAGCTACAGTCCGTTTTATTCAGGCTGTGTTTGG  
TAGGCGACTTGGGATCGTTACTCTGCTTACGCCATTTCCGACCGTCCGGCGCGGAGTCCGATCTCTGACTTGAAGCGT  
TTATCAGCTGTTTACTGCTGCCAGACAGCGCTTTGTTGTCGGAAGACGTGCTGGCATTACTGGATGTGCGCGTGGCA  
GCGCGTTTGGATCACCAGAAAGGGCTGCGTATTTACGCCAGTGGGTCAACGAGTCCGGCATTGCTTGGGGGATAGA  
TGACGACAACGTTTCGAGAGCTGGAACCTCCCGCTACCGGTCAACACACCTGGCGGTTTGGCTGACGCGCATGTTGCTGG  
GCTACCGGATGGAGAGCGCGCAGGGCAGTGGCAATCGGTTCTACTTATGATGAATCAGAGCGCTTAATTCAGAACTG  
GTGGGCTATCTGCTTACTGCTAATGCAGCTAAACATCTGGGCTCGCGGGCTGGCGAGGAGCGTCCGCTGGAAGAGTG  
GTTGCCGTTTGTGCGATATGCTCAACGCTTCTTCCGCGGATGCGGAAACCGAAGCAGCGATGACGCTGATCGAAC  
AACAAATGGCAGGCGATTTATCGCCGAAGTTTAGGTGCGCAGTATGGCGACCGGTTGCCGCTGTCACTATTGCGTGA  
CTGGCAGCGCCTGGATCAAGAACGATCAGCCAGCGTTTCTTCGCGGACCGGTTAACATTTGTACTGTTGTTGTTGTTG  
CGCTTCAATTCGTTCAAGTGGTTGCTGCTGGGAATGAACGAGCGGCTTTATCCAGCTCAGCTTGGCGCATTTGGGCT  
TTGATCTGATGAGCCAGAAACCGAAGCGTGGCGACCGTACCGCTGCGGATGACGACCGCTATCTGTTCTGGAAGCGTTA  
ATTTCCGCGCAGCAAAACTCTATATCAGCTATATCGGGCTTCCATTTAGGATAACAGTGAACGTTTCCGCTCGGTACT  
GGTCAAGGAACTGATTTGACTACATCTCGGGCAAGCATTATCTACCGGGCGATGAAGCGCTCAACTGTGATGAAAGCAGG  
CAAGGTTAAAGCGCATCTTACTTGCCTCCATACCCGAATGCCGTTTGTATCCAAAACTACCAGCCAGGCGAACGACAA  
AGCTATGCTCGTGAATGGTACCTGCGGGCAGCCAGGCTGGTAAAGCAGATTTGAAATTTGTTTCCAGCCCTGCCATTTAC  
CTTACCAGAAACCGTGCACCTGGAACGCTACAACGATTTCCGGCAGTCCGGTGCAGGCACTTTTCCAGATGCGTTTGC  
AGGTGAACCTTCCGTAAGCAAGCAGCGAAATCCCGACACCGAACCTTTTATTTCTGAAAGGGCTTGAAGCTTAAATTC  
AACAGCAGTTATTAATGTACTGGTTGAGCAGGATGATGCCGACGCTGTTTCCGCGATTCGGGCGGCGAGGTGATTT  
GCCGATGTTGCTTTGGTGAATTTTCTGGGAAACGCAAGTGTGAGGATGACGAACTTGGCGACAGAGTCAATGGCT  
GTGCCAGCCAGGCGAGTATGGAGATGATCTGCCCTGCAACGCTGTGCAGATAACCTGGCTGGTCCGCGAGTGGCAG  
CCGGATGGCTGTTGCGCTGGCGTCCCTCTTTTAAAGTGTGGCGCAGGGAATGCAACTTGGCTGGAACACCTTGTCTA  
CTGTGCCAGCGGTTGTAATGGTGAAGTGCCTTTTCTACGCAAGAGCGGCGAGTGGGCTTTCCGCGCTTGCAGCGG  
AACAGGCTTTCGATTTACCTCTCAAACTGATTTAGGGGTTATCGTGAAGGAATGTCGCGCCATTTGCTGGTGTACCTGAA  
AGTGGCGGCGCTGGCTAAAAACCTGTTATGACGCGCAAAACGATGCTGGATGACATTCACGCTTGGTGGTGGAAAAAGC  
CCGTACGAAATTCCTTACGCTTACGAAGGCAACATGATGGTGGTGGCGAAGGTGATGATATCTGGTATCAACGGCTCT  
GGCGGCAATTAACACCAGAGACAATGGAGGCTATCGTTGAACAGTCCGACCGTTTCTGTTACCGCTGTTTCGCTTTAAT  
CAGTCATGA

>Cluster\_51242

ATGCCAACAGTCTCTAATATCCATTTCAATATAGCCCAATATACTCATCGAAAACAAAGCTCCCAACATGGGACACCAA  
CAACTATCTAAGAAAGCTATCAGAAATTAATCATGACATTTATTTTAAATGATCAAAATCTAAAAATAACAAAAACAAT  
ACACTTTTGTAGTGAAGTAGCAAGAAATGAAAAAATAAATAATTTAAATTTTACGACATTTCTTTTATCCCAAGATGAT  
ATCATGAAGACCAATTAAGTGAAGTAAATATACAGCACCAATATTTCCGATAGTCCAAACCTCAGAAAGATTAGTAACTATTA  
CATAGACAGCTTACCAGAACTGATATAAATAAATGTCAAATACATATGCAAACTATGATATAAATAAAAAAGAA  
ATAACATAAGCGAATTTGTTTATTTGCCGTTGATGAAAAAGGATATCTAAATCGTCCCAAAAAGAAACATCAGAGATAGAA  
ATATCTCCAGAAAAAATTTACTAAATTTCTTCAAAAACATATAAATAAATCTTGAGAACTTGGTTATAATGATATTA  
TGATATACTAACAATTTTAAAGAAATAAACCACAGGCAATGGCAGATTTCTTCAGAACTTTTACGATATATCTG  
TTGGGAAGGAAAAACAATTTTCGATAGCGAAACATCAGAGATGTTAACAGATAATATCGAACAGGTAATATCAAGGGA  
AAAGCTTTCAGAAAGATTTTGTGATAGTTATATAGAAAAATAAAGAACTTACCTATTTACCAGCAATCAGATGGAGT  
TCAGCTATAAAAAAATCGCACTTAATGGACTTAACTAGCTCAGGAAATTTAAACATAAACAACAACCACTCAAACTAT  
ACAGCGGTCATGGAATCTATTTAATGAAATTAATATCAGACACTCAAGATCTCTTCCAGAAAGCAATCGGCGACCGCT  
GAAAAATTTGGGTGTTCTTACTGCAAAAAAGCTAGAAGAAATCAATAGCACCAAACTCATGCCATTTTACATTTGTTAAC

AAAAATTAGAGAAAGAACAAGAGCAAGAACATTACATTAGGGGATATCATGAATTGCTTACTTTTTCTCAAACAGGAATAT  
GGAATCGCAATGGCAGAGTGTGCAAGAGATTACATAGTTGAATTAATAAAGGATCATTATTACAGATTGCAAAATAGGA  
TCCGATAATAGAAAATCCATTTTCTTTAGAGATTTCATAAAAGATAACCGAGAGCATGAGTTCATATTTATAAAACAAT  
TGCACGAGATATAATTGTACACCTCTGCCATTTTCATTTGGACTACGCTCCCCCAAAAAGGTTGAGCTATTATAAAC  
AACAGAAAATCATTATATGCAAAACAGTGAAGTTTTCACCTTAGTACACCCTACTTTTTGATGATCATTATACGGT  
AAAGAATCCATATATCTAACACTAGAATGAATAATTTAAGATCAAAATAGAAAATCAAAACAAAAGAAAATTTTGAACATAT  
ATTCAAATGTGCGCAATTAGTAATTCGTATTTATCAAAAGATGGTGGAGACAAAATACTGTGTCTCCCAATGGAGTTA  
AACACCATCGCCTCATATTAAGTGAGATTGTAGCACAGTGCAGACATTATCAGAGACATTTTAATAATATGTAGTAAAC  
AACATATCAAAAATAATCATAAGAAACAGTGAATTTTCCAGCCTTGAATCAGTAATATCAAGTTCAGATAGACATTA  
TTTCAATTCATGGCTAATGAAATAGCTGTAGAAAAACAATTTGTCATGGGCAGAAAACACACTATAAAGCACAAAATCATA  
TTGAGAATCATATTCAGGATTTGTGAATTAAGTACTAGGCCTAATGGATGTAACAAAATGCTCAGAGATGCTATTACAGTTTT  
GTTTCATCAGATTAGTGAATAACAGAATCTAGCTGGATGTCATCGGAAGAACAACATACAAAAACAATTCAGGCTCTCGA  
GATGTTCAAAACAAAATAATCATCTATGAATGGAGTCAAGCGTTTGTATGTTTTAATAAAGTCACTCAAGAAGGCG  
TTGGGGACTAATCGAGTTAAGTTTTGATATTGACGATACCAGACATCATCGTACATCATCTTCACTTAGTCCCGCATCA  
AGAAGTGGCTGCATCTATAGGTACTACTCTGGAAATATAGTTATGAGTGCAGCACAGGATTTAATGCATTAGCAGGAAC  
TAGCAGTATACTGAATCTAGCAGTTGTTGAAAAATCTACGGATGTATGTAGCTACATGCAGGATGTAATACGTATTGGTA  
TGGAAAGCAATTCAGCAGCTGAATCGAATTCACAAAAGATCATCAAATGCAAAAATACACAGGCCTTCGTTTTTCCGAA  
GAAAAATAAACAATAATAATTAATGAACCTCAGCAACGTGGCTCATCTTATAGAGTGTAGAAATCGATAGAAAATAC  
TGATTTTTATTTATCAAAAAGCACAAGGAAAATCTTGGAAATAGCAAGCATGGAAGGTAATGAATTTTATAGCCCATG  
GATTTAATAATGAAAATAATGGAATACTATAAACGTTCTGGTACGGTTTTTATAGAAAACAACACTCATATCAGCCGTTA  
TCCAATGAGATGCCAACAAAATAAATAAATAAATAGAGAGTTAGAAATTAACAAAAGAAATCAAACTCGAATATCTATT  
AGGTACATTTACCATAACGGCAAGAATTCATTAGTAAAGTTTTATAAAGACTTAATGGTAACTTTTATCAAGCTGACG  
GATTAAGAGAGGTTGACTTATTCGACATACGGATAAACCATATTCAGAACTGAAAGAGGTTATAGGATATGATGAG  
GAGCTTACGATATTACTGATGACTCCTGAGTTAGAGTAAAGCCTTGGCCGATATCAGAGGACTTATATCTAGCAGCA  
AGAAGAAAATGTACAAAATATCTACAGAAAATTCAGAAGTGGTGTATCATGATGCAGGAATGACAGAGGTAACATTTAGCC  
GAGGAATATTGCCTCTCAGGCTGAAAACATTTGTTCTTATAGTACTGACGGGGGGCGAGATTGCAAAACCCAAATGTA  
AGTCCGGTTTCTGAAGATACTGCAAACTGCAAAATAAAGTGGTGAATTAAGCAGAAATACACAACAGATATTAGCGT  
TGCTGACCGATTTAGCCGTGGACATTACTTAGTTATCGTCAAAAGCAAAAGTTAAATATCTTACAAAGAGCAGTACAGT  
AAAGTGGTTGGATCATTTCCCAAAATGCCCCGTAGAACCAGTAGGATTAATGACAGGACATTTGGCCAATCAGAAAAC  
ATACAACAAGCAATGCATCAAAATAA

>Cluster\_21444

ATGGGTAAAGCTCTGTGCATCGTTGAGTCCCGGCAAAAAGCAAAACGATCAACAAGTATCTGGGTAGTGACTACGTGGT  
GAAATCCAGCGTCGGTCACATCCGCGATTTGCCGACAGTGGCTCAGCTGCCAAAAGAGTGGCGACTTACCTCCACCA  
AGACGGCTAAAAAGCCTAAAAAGGATGAACGTGGCGCTCTCGTCAACCGTATGGGGTTGACCCGTGGCACAATTTGGGAG  
CGCCTATGAAGTGTGGCTGGTAAAGAGAAGTTCGCTCTGAACGAAAACACTGGCTGAAAAGCCGACACATCTA  
TCTCGCAACCGACTTGGCCGGAAGGGAAGCCATTGGCACTGGCAGCTGCGGGGAAGTATGGTGGTGTATGACGCGCT  
ATAGCCGAGTGGTGTAAACGAAAATTAACAAAACCGCATCCGCCAGGATTTAACAAAACCGGGTGGAGTGAATATTGAT  
CGTGTAAATGCCAGCAGCGCGCTCGCTTTATGGACCGCGTGGTGGGGTATATGGTTTTCGCCGCTGCTATGAAAAAAGAT  
CGCTCGTGGTGTCTGCTGCCGCTGTGTGAGTCCGTTGGTGGTGGTGGTGGTGGTGGTGGTGGTGGTGGTGGTGGTGGT  
TCGTGCGGAAGAGTTCGGAAGTTCGATGCGCAGCAGCACGCCATCTGGTGAAGCGTTGGCGTTACAGGTCACCTCAT  
CAGAACGACAACCGTTCGCGCCGCTCAACAGAGAACAACACTCAGGCTGCGGTAAAGTCTGCTGAAAAAGCGCGCTACAG  
CGTCTGGAAACGTGAAGACAACCGACAACAGTAAACAGGCGCTCCTTTTATACCTCTACGCTGCAACAAGCTGCCA  
GCACCCGCTTGGATTTGGCGTGAAAAACCATGATGATGCGCAGCGTGGTGGTGGTGGTGGTGGTGGTGGTGGTGGTGGT  
CGTACCGACTCCACTAACCTGAGTACAGGACGCGGTAATATGGTTCGCGGTTATATCAGCGATAATTTTGGTAAGAAATA  
TCTGCCGGAAGTCCGAATCAGTACGCCAGCAAGAAAACACTCAGAGGAAGCGCACGAAGCGATTCGCCCTTCTGACGTC  
ATGTGATGGCGGAATCGTGAAGGATATGGAAGCAGATGCGCAGAAACTGTACAGTTAATCTGGCGTCAGTTCGTTGCT  
TGCCAGATGACCCAGCGAAATAAGTACTCCACGACGCTGACGCGGAAAGGTTGGTGGTGGTGGTGGTGGTGGTGGTGGT  
TATTTTGGCGTTTGTAGGCTGGACAAAAGTGTGCTGCAGTGCCTGAAAGCGATGAAGATCGTATCTTACCGGCAGTGC  
ATAAAGGCGATGCTCTGACGCTCGTTGAACTGACACAGCCAGCAGCTTACCACAAACCGCCAGCCGTTTTCAGTGAAGCA  
TCGCTGGTTAAAGAGCTTGAAAAACCGGATCGGTCGCTCCTACCTATGCGTTCGATCATTTCGACCATTACAGGACCG  
TGGCTATGTTGCGAGTGAAAAATCGTCTGTTTCTACGCGGAAGAAATGGTGAATAATGTCACCGATCGCCCTTGAAGAAAT  
TCCGTGAGTTAATGAACTACGACTTACCGCACAGATGAAAAACAGCTCGACCAGGTGGCAATCACGAAGCAGAGTGG  
AAAGCTGTACTGGATCACTTCTTCTCGGATTTCACTCAGCAGTTAGATAAAGCTGAAAAAGATCCGGAAGAGGGTGGTAT  
CGCCGGAACCGATGCTTCTGACAGTATGACTGCCCGACTTGGTGGTGGTGGTGGTGGTGGTGGTGGTGGTGGTGGTGGT  
GGGATTAATCTGGCTGTTTGGTTATGCGCTGCCCGGAAGAGCGTTGCAAAAACCACTTAACCTGCTGCGGAAAC  
GAAGTGTGAACGTGCTGGAAGGGAAGAGCGTGAACCAACGCGCTGCGCGCAAAACGCTGCTGCCCCGAAATGCGGCAC  
GGCGATGGACAGCTATCTCATCGATCCGAAACGTAAGTTGCATGCTGTGGTAATAACCAACCTGCGACGGTTACGAGA  
TCGAAGAGGGCGAATTCGCATTAAGGTTATGACGCGCGATCGTTGAGTGTGAAAAATGTGGCTCGAAATGCACCTG  
AAAATGGGCGTTTTCGTTAAATACATGGCTGCAACCAAGAGTGTAAAAACACACGTAAGATTTTACGTAACGGCGA  
AGTGGCACCCGAAAGAGATCCGGTGCATTAACCTGAGCTGCGGTGCGAAAAATCAGATGCTTATTTGCTGCTGCGTG  
ACGGTGTGCCGGTGTGTTCTGGCGGCAATACCTTCCGAAATCGCGTGAACACGCTGCGCCACTGGTGGAAAGAGCTT  
TATCGTTCCCGCAGCTGCGGAAACCTGCTTATCTGCGGATGCGCCACAGCAGGATCCGGAAGGTAATAAGAC  
CATGGTTCGCTTTAGCCGTAAAAACCAACAGCAATATGTCTCTCGGAAAAAGACGGAAGGCGACTGGCTGGTCAGCAT  
TTTTATGTTGATGGCAATGGGTTGAAGGAAAAATAA

>Cluster\_51493

ATGAGTACCACAACAGAAAATTTAAAACCGTTATCACCGATACGGGTGAAAAAAAATAGCGCAGGCAGCCACACCAGA  
TGGTAAACCGGTCCGCTGACTCACATGGCCGTGGGTGACGGCGGGCAGCTTGCCTCGCCAGACAGTAAGCAGACCC  
GTCCTGTGATGAGGTGTGGCGACACACTGTTAATCGCGTCATCCTGGACGCAACACATCAGAACCGCATTTATGCGAG  
CTGGTTATCTCCTGAAACGGCGGATTTCTGGATCCGGAAATTTGGTGTATTTGATGAGCAGCGGATTTAATCGCGGT  
GGCAATACTGCCGAAAGTTACAACCAACCACTTGCAGAAAGGTTCCGAGCTGCACAAAACATTTCCGACCACTTCCGACG  
TATCCAGCACGGCCACCGTGGCGTTACCGTGGATAACACCATGGTGTAGGCCACAGTGGATTACGTGGATGACAACCTG  
AAAGAGCATGAACAGTACGACGTCACCGGACGCTCGCTGACTGCAAAAAGGCTTTGTTCAACTCAGTAGCGCCACCAA  
CAGCAGCTTGAAGCAGTGGCGCAACCGGAAAGCGGTCAAGGACGCTATGACCTTGTCAACGGGAAATATACCGCAC  
AGGACGCCACTACAGCGCGAAAGGACTTGTCCAGCTCAGTAGCGCCACCAACAGCGATTCAGAAAACGCTGCGGCAACA  
CCAATGGCGGTAAAGGCAGCATAAGACTTGTCTAACGGGAAATATACTGCGCAGGATGCCACCACAGCGGAAAGGCT  
TGTCCAGCTCAGTAGCGCCACCAACAGCAGCTGAAACGCTGCGCGCAACGCAAAAGTCCGGTAAAGGACGCTATGACC  
TTGCTAACGGGAAATATACCGCTCAGGACGCTACGACAGCACAAGAAATTTGCTCAGCTAAGCAGCGGCAATACAGC  
GCATCTGAAACGCTTGTGCGACACCGAAAGCAGTGAAGCAGCTAATGACAATGCGAATGGTGGGTTACTTCTGCCG  
TAAGGTGAATGGTAAAGGCGTTTACGCGGATATAACACTGACACCGAAAGATATTTGGTACGCTTAACTCAACAACATGT

CATTAGAGGTTGGTCTGGTTGGTTCAAATTAGCAACGGTAAACATGCCACAGGCGAGTTCTGTTGTTTCAATTACGTTG  
ATTGGTGGCGCTGGATATAACGTCGGTTTACCTCAACAGGCGAGTATATCTGAAATTTGTTTGGCGTGCAGGTAATGGTAA  
TCCGAAAGGGGATTACTGGTGTCTTATGGCAGCGCATCGGCAGGGTTTACAAATTTTGGCAGGGTCAATACATCTGGTG  
ATACTTACGATATTTACGTTGCAATCGGAAATTTAGCGACTGGTGTAAATATTTCAATGGGATTATACCGTAATGCCAGC  
GTAACGATTCATCCGTACCAGCATATTTCTGCTAAATAAGCCGGAAGGGTTAACGGACGGTACAGTTTATTCACCTTATAC  
GCCATCAGAGCAGTTTTATCCGCTGGCGCACCAATCCCGTGGCCATCGGATACCGTTCCGCTGTTTATGCCCTGATGC  
AGGGGCGACTTTTGACAAATCTGCCTACCCGAACTTGCAGTCGCTTATCCGTCAGGCGTATCCCTGATATGCGTGGC  
TGGACGATTAAGGGCAAACTGCCAGTGGTGGGCGCTATTGTCTCAGGAAACAGGACGGCATTAAATCCGCACACCCACAG  
CGCCAGCGCATCCAGTACGGATTGGGGACGAAACCATCGTCTGTTGATTACGGAACATAATCCAAATAACACCG  
GAGCACATACACACAACCTTGTCTACAACAATACTTACGATACGCAGAACTCCCGGTACCGGTGGTGAATGCATGCA  
ACTAACACAGCAAGGCAGCAAGTAATCGCGTATTAAGCGCAGGAGCTCATATCACACAGTAGCAATAGGTGCGCATAC  
ACATACGCTCGCTATTGGTTGCGCACACACACCAATTACCATTGCCGCTTATGGCAACGGGAAAAACCCGTAATAAACA  
TCGCATTTAACTATATTGTGAGGCTTGCATAA

>Cluster\_55639

ATGACTAAAGACTTAAACACGCTGGTTAGCGAATTACCTGAGATTTATCAAATATTTTGGCCATCCCGAATGGGATGG  
CGAGCGCCCTCGTGTGTAATCAACGCCCTCGATTGTAATCCGAAACAGTACGATAACTTATCCCGTGGCGTGGGGCGCC  
CGCTTAACGTTCTCGATCTAGGCTGCGCGCAGGGCTTTTTAGCTGAGTCTGGCAAGCAAAGGCGCATATCGTTGGT  
ATCGATTTCCAGCAGGAAATATTAACGTGTGCCGCGCGCTGGCCGAGAGAACCCCGATTTTGGCGCGAGTTCCGGGT  
AGGCAGAAATGAAGAGGTGATCGCCGCGTGGAAAGAGGCGAGTTGATCTGGCCATTGGCTTAAAGCGTGTTCACCATA  
TTGTTCACTTCAATGGTATCGATGAAGTTAAACGTCTGCTCAGCGCCGCGGATGTACCCAGGCGGTGATCCTTGAG  
TGGCGGTGAAAGAAAGAACCGCTTACTGGGGCTTTCTAGCCGACGACCCGCGCAACTGATTGAGCAGTGGCGGT  
TTATCGCTGATCGGTGAGTTTACACCCATTTATCCCGGTACCGCGCCGATGTACCTGGTACGAAACACCGGGTGC  
TGATCAACGATTTTAAATAGCCGTTCCAGCACTGGCAGAAATCAGCCCTATGCCGGGGCGGCCGTCGGCGATAAGCCAGC  
GCTCGCTACTCTTTGGCGAAGATTATGTATGCAAGTTTCTTATTACGACATGCCCAACGGCATCTTACGCGCGAAGA  
GAGCCAGCGTAATAAACATGAATGCATAATGAAATAAAGTTCCTGACGCAACCGCCAGCGGGCTTTGACGCGCGGCGAG  
TACTGGCCACGGCGAAATGCTCAGTCTGGCTGGCTGGTGTGATGGAATACTCCGGGTGCTTTGCTGAGCGATATGCTG  
GCAGCCGGGGAGGAGATCGATCGTGAATAAATCCTCGGTAGCTTGCTTCGTTCCCTAGCGGCGCTGGAGAAAAAGGGTT  
CTGGCATGACGATGACGCGCCGTTGAAACGTGATGGTCTGATGCCGACAGCATGCCCGCTTAATCGACTTCGGCTCATCG  
TTACCACGCGCAGGACTGCAGCTGGCCGACGAACTTGTCCAGTCTGTTCTCGTGTGTTGTAATGAGCTGTTTGGCGAA  
AACAAAAGCTGGAACGGTTTCTGGCGCTCGGCGCTGTTCATCGTTTAACTGCCTCAGCCGTGGTCTAACTGGCTGTA  
TGGCGTCTGGCAGGAGCCGGTTGAACGCTGGAACCTTGGCCCTGCTGTTGGCGCTGTTGAGAAAGAAAGCGAGCTGCCGT  
CAGCTGAACAGCAGCGCGGGCGACGGAACAGTGGATCATCGTACGAGAGACGGTGTCTGGAGCTCCAGTCCCGGGTG  
CGAAATGAAAGCGCCGGCTCAGAAGCTTTGGCGGCCAAATCCATACCTGGAGCAGCAGATGGCTCAGCTGCAGTCCGC  
TCAGGATGCGTTCCTGAGAAAGCTCAACAGCCAGTGGAAATCAGCCATGAATCACCCTGGCTGGTGAAGATATGGAGC  
AATGGCGGCGCTGTGACAGCGCGGCAAGCGCACGCCAGGCTGACGTTACGCCGAGTTGCCCCCTGAAACCGCTGAG  
CTACTGCAGCGACTTGAACCGCTTAACCGGAGATCCACATTTAAGCAACGAAACAAAGCTTCCGCGAGAAATGA  
AAAAATCCATCGCAGCCGTTCTGGAGAATGACCAAGGTTATCGTTATCTGGGCTGCAGATCCATTTGCTGAGGCAGT  
ATGGTTTCTGTCAGCGGTGTAACATTTTATTAAGCGCTCCTCGGTTTGTGTTTCTCATTTATGAGAAAAATCCCGAG  
GTAACACATACCGCGTAAATGGTTTACATAAGCTGGGGCTTTATCAGCCGCTATCGTTTGTATCGTGTGATGAATCC  
ACTGCCGACAGCCAGTATCAGGCTGATGCGCAGATTTTATCGCAGACTGAACGTAAGTGTATGCATCGGAGCTTTTAC  
CTCGGAGGTTTATGAAATTTATCTCAAATAACGAAAAATAAATA

>Cluster\_14718

ATGGGCTCCCTAAACATATACCAAGATATCTCCCAACTCAACATGTATTCAGGACTGAAACCTTGTATAACAAAA  
CAACCAATCATCTGATGATATTAACCTCGGAAATGAAACCATACAAAAACAAATTAATATGATATAAATCATTTGAATG  
ATGGTTGATTAAGCGTGTATTGAATCTTTTTATTCACCTTATTTCTAATCCCGACAACTCAGAAATTAACCTTAAATCGT  
TATTCATCAACAACAGAACAAATCATCGCCAAACCAAAAGAAATGGTTTACATGAGTTTGAATTGACGATCTAAAAAT  
AATATTTAATCGACAAGATGATAATGAAAGCTATTAACCTGTTAAAGATAAAGATCTAAGTCACTCATTGATTAATA  
CCGAGCAACTGCAGCAGTTTATTAATAATGGAACAAAAAGCGCAACTACCAATCTATATTGACAAGAACAAATTTGAAA  
GAGAGTATTTTCTGTTTTCACAATGACCCACAACCGTAGATAAAGATCAACACCTTCCCTGTGAAAGTTTAAAA  
ACATGGCTGCAAAAGTTCAAATTCATTTGAAGTGAATTAGATGCCACTCATCAATATCGACATCTGAATAACTTCATGA  
TTGCTTTTACCCATTAGAAAATCAATTAACCATACGGGATTAACAATAACGAGACTGAAACTTCTCGTTTCAACAACTA  
CAATGGGAAATGTGCTGCAATACTACAAGAAAACAGCAGCAGCCAAATATAGCAGGATCAGGAAATCTCAGGATAA  
TAGAGATAAAATTAATAATCAATATCCACTCTGAAATTAATGAGTGGCCCTCTCCTGAAATGAAGTAGCGCTCCTGA  
ACGATCTTTATAGCATTTGCTAATTTCTCCCGGACAATACTGAAACCAATGAGAGCTGAAAAGATTTTGTATACA  
TGGGAGCGCTTTTACGATGCTCAGAAGAGTATCTACTGGAAGATAAGAGTGAACGCTTACGCGAAAAGTCTTCTCATA  
TGCAGGAATTACAATGACCTTCAAGATAGGTGATGTTGTCATCAATATATTAGCACTGCTATTCCTAAGATGAATCGG  
GTCATATGGTGTATAGAAGGGTTGAATTTAGCGGGAATGATTTAACCGGCATAGACTTGTCTAAAATGGTTCTAAGGAAT  
GTCATTTTAAATGGCAGCATTTTAGAAATGCCAAGTTCTCCGGTACGATCTGTGAAGCGGTGATTTTACGATTGTGA  
TCTGCGTAAATGCAAAATCGAAAATGCCCTATTAGAAAAAATCGATTTTCTGTAAGCTCGTCACTTGTAAATATAAAT  
TTACAAATGCAAACTACGGAACAGTAACCTCAGCGGAAAAGTTCTACTGGCGTTAATTTACTGGAAGTGACCTTAGT  
AACGCTTATCTGCACACATAGATTTCAAAAAGTGATTTCTTTCCGCTATTAAATATTGGAGCGGTATTGATATTC  
CAATCTATCAGAGAAAATCTTTAGACAAGATCTTACTAATATTAGCTGCATGATACCAATTTTACTAACGCTAAT  
TAACAAAATGCAAACTCTTAAATACAACTTTTCCGCTGCAAAATGGACAATACTAATTTTACTGGTACAGAAGTTCT  
AATATCTATTTAACATGCATGGTGTCAATACGATATTTATAGATACGATTTTAAAAATGCCTGTTTTTCAATGC  
CAAAGTGAATAATGTTTCTTAAAGATGCATATCTTTACAATGATAATCAATAAAAAAGCCAATGACAGTGCCGAGA  
AACAACTAGTGAACAGTATCGAGAAAACAGCCAGTGCAGATCGAGAAAACAGCCAGTGCAGAGTACCGAATAAACGCC  
AGTGACAGTATCGAGAAAACAGCAATGACAGTACCGATAAACAGCAAGCAAGTACCGAGCAACAGGACAGTACCGAG  
TTTTAATGAAGCCGTTTAAAGAAAAGTGAATAGCAGTTTTTCCATTCGGGTTTAAAGCTTATACGCAACTTATA  
TAGTTGAAGAATAG

>Cluster\_53567

ATGAAAGCCACCGAAGCCGATTACTCGATTTTCTAAACGCTCTCAGCAATTCGTTATTTCCATTTATCAGCGTACTTA  
TTCATGGTCAGAGGAACAGTGCAGCCAGCTCTGGGACGATGTAATACGTCGGGCGAGCGTGTGATATCCCGCGCAT  
TTATCGGCTCGTGGTGTATATCGAACAGGGCTTATATCAGTTCTCGGGATCTCTCCCTTACTGGTGTGACGGTCAG  
CAACGCTGACAAACCGCGATGTTTATGCTGGAAGCGTTGCTCAGACACTTGGCGGATGACGAGGTGATGGATGTTTCT  
CGCATGAAATTACGAACTATTTATCTGCTCAATCCGATGAATCGGGCGAGCGTGGTTTAAAGTTACTGCTTACGAAA  
CGGACAGAGAGCGCTGCTGGCATGATAGACAAAAACCGCTGGCAGAAAATGCTCTTACGCTGAAAGGAAATTTT  
GAGTTTTTCCATGACGAAATAGGCAAACTCCAGCGAATTTCCAGCGTTATGTCAGGGCTTTTCCAACTGCTGATTGT  
GGATGTAGCTTGAATCGCGGTGAGATAATCCGCAACTAATCTTTGAAAGCATGAATCAACAGGAAAAGCGCTGAGTC  
AGCGGATCTGGTTCGAACTATGTTCTGATGGGCTGGAGCCAGAACATCAAAGCAACTGTACGATGATTACTGGCGG

CCCATGGAGCTGGCATTGGTTCAGAAAGGATACACTGACTATTTTCGACAGTTTTATGCGTAATTACCTGACGGTAAAAAC  
AGGTGAGATTCGCGAATTTGGTGTATGTCATGAAGCCTTTAAACGCTATGCGCGAAAAACAGGAGTGAAGGATAGCGGGA  
TGGAGGCGTGGTTGCGGATATTCGTACCTATGCGGATATTTTTGTGCGATGGCGCTGGATAGCGAAAAAGACAAAATA  
TTAAAGATGGCCTTTACAGATCTACGTGAGCTGAAAGTCGATGCGCGCTGGCCGTTCCTGTTGGTGTCTTTATCCAGCACTA  
TAAACAAGAAATTTCTTTGCGCGGATTTTTTAAGTGGCCACGCGTTTTAATTGAGTCGTATATCTTCCGGCCGAGCTCT  
GTGCCATTTCCACCAACTCATTTACTAAAACCTTTCCGCCAGTTTTTACAAAAGTGTGGATAAAAGAGCGTTATCTGGAGAGC  
ATTGGCGGCATTTGCTGGAACCTGCTTACCTACCGTCTGTTCCCGGATGATGATGAATTTCAACGTGAACTGAAAACCTG  
CGATCTCTACAACCTCCGTAATCGCAGCTATTGGCTACGCAGATTTGAAAACCTACGATCGTAAAGAACGGGTCTATGTTG  
ACACTTATACGATTTGAACATATCATGCGCGAACCCTAATTTATCGCGAAGTGGCGGATGACCTTTCCGGCCGGAATGG  
AAGCGTATCCATAAAAAGTGGCTCCATACGTTGGGTAATTTAAGCTTAACTGGCTATAACTCAAGCTACAGCGACCGTCC  
ATTTGCGAAGAAGCGAGATATAAAAAGTGGCTTTAAGGAAAGTCCATTACGCCGTAACACGGGTTAGGGCAATGTGAAA  
TATGGGATCGTGCACGATATAAAAAGAGAGCGGAACGCTGCGCCGAGCTGGCAATAGACGCTCTGGGCGATCCCCAACTT  
TCGGAAGACGCTGTTGGCTCGTTATCGCACCCGCTGTTGAACGAGGAACCGGATATGTCTTACTGATTTTCCGCAACTTGA  
AGAAGGTACGCACATCTGCGTACTTTTTGACAGCCTTTCTGATGCCGTTATGACGCTGGACGCTGGGGTTACGCGAGAAA  
TATGGAAGCTCTATGTTGCCCTTCAAAGCGGAGAGCAATTTTGTGATGTGGTGCAGAAAAAGTCCGCTTACGTTTATCA  
CTAAATATGCCATTCATGAACCTGGTTGACCCAAAATGTATGGCTAAAGATGTACAGATATAGGCCGTTGGGGCAATGG  
CGATGTTGAAGTAGGTTTCACGATCTTTCTGAGCTTCTTATGTGATGGGATTAATTCGTGAGGATTTGAAAAGCAGA  
TGGATAACCGGATGGCTTAA

>Cluster\_40521

ATGAAATTCAGTGAACCTGTGGTTACGCGAATGGGTGAACCCGGGATGATAGCGACGCGCTGGCAAATCAAATCACGAT  
GGCGGCCCTGGAAGTTGATGGGTGAGAACCCTGGCCGTAGCTTCCACGCGCTGGTCTGTTGGTGAAGTGGTTGAGTGTG  
CACAGCATCCGAACGCTGACAAACTGCGTGTGACAAAAGTGAATGTCGGCGGCGATCGCTGCTGGACATCGTCTGCGGT  
GCGCAAACCTGCGCTCAGGGCTGCGTGTGGCGGTAGCGACCAATTTGGTGTCTGTTCCGCGGTGATTTCAAATAATAAGC  
CGCGCATCTTGGCCGTGTTGGTAAAAGCTGTAAGGATGCTGTCTCTTCGAGCTGGGAATTTCTGACGATATAACGCGGA  
TTATCGAGCTGCTGCGGATGCGCGGATTTGGCACCGACATCCGCGAATACCTGAAACTCGATGACAACACCATCGAAAT  
AGCGTGACGCCAAACCGTCCGACTGCTTAGGTATCATTTGGTGTGCGCGCGACGCTTCCGCTGCTGAACCGAGTTGCCGCT  
GGTTGAACCGGAAATCGTTCCGGTTGGTGCACCATCGACGACGCTGCCGATGTCAGTAGAAGCGCCGGATGCCTGCC  
CGCGCATCTTGGCCGTGTTGGTAAAAGCTTAACTGATTAACGTTAAGCGCAAACCTCGCTGTGGATGAAAAGAAAACCTGCGT  
TGGCGGATCCGTTCTATCGATGACAGTTGTTGACGTCACCAACTATGTGCTGCTCGAACGCGCCAGCAATGCACGCTTT  
CGATAAAGATCGCATTAAGGCGGCAATTTGGTGCAGATGGCAAAAAGGGGTGAAACGCTGGTATTGCTCGATGGTACG  
AAGCGAAGCTGAATGCTGACACCCTGGTATCGCCGACCAACAAGGCGCTGGCGATGGGCGGCATCTTTGGTGGCGAA  
CACTTGGCGTGAATGACGAAACGCAAAACGCTCCTGCTGGAATGCGCTTTCTTTCAGCCCGCTGTCTATCACCGCTCGTC  
TCGCTGCTATGGCTGCATACTGATGCGTCTCACCGTTATGAGCGTGGCGTTGATCCGGCACTGCAGCACAAAGCGATGG  
AACGTGCGACCCGCTGCTGATCGACATCTGCGGTGGTGAAGCGGGTCCGGTAATGATATCACTAACGAAGCAACGCTG  
CCGAAGCGTGCAACCATCACTTTACGCTGAGCAAACTGGATCGCCTGATCGGCCATCATATTGCTGATGACGAGGTTAC  
AGACATTTCTGCGTCTCGCTGCGGCTGCGGAGTACCGAAGCAAGACGAGTGGCAGGCGAGTTGCCCGAGCTGGCGTTTTCC  
ACATGGAGATTAAGAAGATCTGGTCAAGAAGTCCGCGGTGTTTACGGCTACAAACAATCCCGGATGAGCCGGTACAG  
GCAAGCTGATTAAGGGGACTCACCGTGAAGCTGACCTGCTGCTCAAGCGCTGAAAAACGCTGCTCAACGCAATAAAGGCTA  
TCAGGAAGTGAATGACCTACAGCTTCGTTGATCCGAAAGTGCAGCAGATGATCCATCCAGGCGTTGAAGCTTACTGCTGC  
CAAGCCCGATCTCTGTTGAAATGTCAGCAATGCGCTTTTTCTCTGTGGACCGCCCTGCTGGCAACCGTGGTGTACAACCG  
AACCGTACGAGAAATCGTGTACGATTTTCGAAAGCGGCTGCGTTCTGTCGACAGATACTCAGGCACCGTTGGTATTTCG  
TCAGGATCTGATGTTAGCCGGTGTGATTTGCGGTAACCGTTACGAAAGACACTGGAACCTGGCAAAAAGAGACCCTGAT  
TCTATGATTTGAAAAGCGATCTTGAATCCGTTCTGACCTGACCGGTAACCTGAATGAGGTTGAGTTCCGTCAGAAAGG  
AATCCGGCACTGCATCCGGGGCAATCCGCGAGGATTTATCTGAAAAGTGAACGATTTGGTTTTGTGGGGTTGTTATCC  
TGAAGTGGAACTGAACTGGATCTTAACGGTCCGACTCTGGTGTTCGAACTGGAGTGGAAACAGCTCCGAGACCGCGTGG  
TGCCCTCAGGCGCGGAGATTTCTCGCTTCCCGCGCAACCGTCTGACATCGCGGTTGGTGGTCCGAGAAAACCTTCCCGCA  
CGCGATATTTTATCCGAATGTAAGAAGTGGCGTAAACTCAGGTAGTTGGCGTAAACTTATTTGACGTTACCGGGTAA  
GGGTGTTGGCGAGGGGTATAAGAGCCTCGCCATAAGCCTGATCTGCAAGATACCAGCCGTACACTCGAAGAAGAGGAGA  
TTGCCGCTACCGTCCGCAATGTGTAGAGGCATTAAGAAGAGGATCCAGGCATCATTGAGGGATTGA

>Cluster\_14842

ATGAAAATGAAACAAAACAGACTCTGCTGCTGGCAGTCTGCACGCTTCTGCTTTCGCATAAAATCAGGGGCGCTCTCGTT  
TGATCCCTCCCTGCTTGGTGGCGCATCTGGTGAAGTCCGATCTCTCTCGCTTTTCCGAAAACAACGCCATGCCTGCCGGCA  
GTCAGGAGATGATATCTACGTAACCGGAGCTGGAAGGGAGCTTATACCGCTCATCTACGCGGAGCAGCGTGCAGACATC  
CGCATTGCTGGAAGATGCCGGTTCGCTTGGCATCAACACCAGCTCCGTCGCTGCGCCCGCAATGGCCAGCGGCGAGT  
TCAGCTGCGCGATCTGGTTACGGCGGTGAAGTCAAAAACCGATACCAGCACCTGAGTCTGGCGCTTACCGTTCCGCGAGG  
CGGCCGCTGCTGCGTACTGAAGAAGGTTACATTTGCCCCAGTTCTGGGACGAGGGATACCGGCGCTTATGCTCTCGTGG  
AACACGACCTGGTACAACACCGCGCGGAAAGGCGCTGCGAAAGACACAATGATGATTTTATGCCGGCTGGATTTCCGG  
CGCTAACCTGTTCCGCTGGCAGTTTCGCGACAGCAGCGCTGGCGGAAAACGGCCAGCGGAGAGTACGTGCGCAGAAATA  
ATACCCGCTACCTGCGCGCTCCCTGGCTCGTGAATCCAACTGACGCTGGGTGACTTTTATATTTCCCTGCGCATCTG  
TTTGTATCCCTGCGCGTGGCGGGCTGCTGCTGGCGTGGACATGAAGATGCGCCAAATTCACAGCAGGGTTTTTACC  
TGTGGTTACGGCGTGGCAGGACGAAACCGCTGGTGAAGTTATCCAGAATGGCAACGCTGATCTATCAGGAGAAATGTG  
CGCGGGCCAGTTTACCCTCGACAGCATTCAGCTACCGCTCCGCGGGGATTTGCTGGTGTGTTGGTGGCTGAAGCGGAC  
GGTTCACAGCAGTCTTACGGTGGCGTTTTCCGCCGTACCGGGATGCTAAAAGAAGGGGTGAGTACGACGCTGGT  
GGCGGGTAAAGTGCATCAGAACAGCTCGATGCGCAACCGCATTCATGACGCGCACGCTGCGCTACGGGTTTAAATAAC  
TCATCACCGGGTATACCGGGACGATTTAGCGATAACTACAGGCGGGCTTGTGCGTACCGGGTGAACCTTCCCTTT  
GCGCGGCTCTGTTGATGTCACCCAGCCAAAACACTCTACAGGATCGCACAGCAGCGGTGAGGTTATCCGCTGTC  
GTACAGCAAAATTTATCGATACCACCGCCACCAACTTACCCTGGCGGCTATCGCTATTCACATAAAGGCTATTACAGCT  
TCAGCGACCGCTCTATTGCGCGGAAGGATATCAGCGCTGAGAGCGCAGTACGACGACTATGAGATCGGTTTGGCGTT  
GCGCCGACATGCTGCTAAGCACCTGGGACGCTTGGTGGCGCAGCCAGAATACTTTACGCTTAACTTAACTAATCA  
CGCGCTGCTCAATAACTGGGGCACGCTGTTGCTCGCACACACCGGATTTACTGGAACCTACAGCAAAACCGCGG  
AATACCAGATGGGCTATTCCAACGCCATCGCCCGCCAGCTATACCTGTCGGCCAGCGGGTACGGAAACGGGACAGT  
GAAGAAGAGACCGCCTTTACCTCTCCCTCAGCTGCGCTGCGCTGTTGATAATAATGCGTGGATCACTCCAGCCT  
GACGGCCAGCGATTCGATACGAGCAGGAAATATCAGCATGAGCGGAAACGCGCTGGCGTCAACCGACTGAGCTACA  
CCCTTCCGGCGTAATAACGCGGGGGGAAAATGCGCAAGCTTAAACGCCGCTACCGTTTCAAACTTCGAACTTC  
GGTGGCTCTTACAGCGAATCCACCGACTACCGCAGACCGGGTTAGCGGACGCGGACGCTGGTGGCTACCGTGGCA  
CTGTTTGGCTTAAACGAAACCGGCAACCATGACTATGCTGATGCGCCAAAGCGGAGGGGCTGATGGTGAACGGCG  
ATGAAAGCATTATGACGAACCGGATGGCTGGCGCTTACGCCAACCCGATTCGCAAAAACGGCATTCAGTTA  
ACTGAAACGGAAACAGCGCTGGCGGGAGGTGATCGGCAATATGGCTAACCTGGCTCCTTACGACGGGGCGGTGAGCTA  
TATCCGCTTTGAAACCGACAGCGCCAGTTCATGGTACTTCATGCGACGCGCGCCAGGCAAAACCGCTGCCCTTTGGCA

CCGAAGTGTGGATGAACATGGTGAATCTGTGGGTATGTGCGACAGGCCAGCGTACTGTATATCCGTGCTGAACGGCCG  
CCACGCGCCTCAACGTGCATCTCCGCGCGGAAAGTGCGAAATCTCCTCCCCGCTGGGGGCTGAACAGCCCTCATC  
GGTTTGCCATTAA  
>Cluster\_27668  
TTGGCAACGACAACCGCAGAACCGCTGACGACGAAACGATGGATTATCACGCTCTGAATGCGATGCTTAAACCTTTACGA  
TAGCGCAGGTTCGATTTCAGTTTCGATAAAGACAGCCAGGCCGTTGACGCTTTATGACGACGCATGTGCGTCCGAAACAGTG  
TGGCTTACGTAGCCAGCAGCAGCGCTGAACCTGGCTGGTTAACGAAGGTTACTATGATGAAAGCGTCTTAATFCGCTAC  
TCTCGCGATTTTGTTCATTACGCTGTTTGGCCACGCGCAGCCAGCGGTTTTCGTTTCCAGACATTCCTCGGAGCATGGAA  
GTTTTACACCAGCTATACGTTGAAGACATTCGACGGTAAGCGTTATCTGGAAGATTTTCCGATCGCGTACCGATGGTGG  
CGTGACGCTGGCACAAGGCGATGAAACACTGGCGACGCGCTACTGATGAGATGCTGTGAGGACGCTTTCAGCCAGCC  
ACGCCAACATTCCTCAACTGCGGTAAGCAGCAGCGCGGAACCTGGTTTCCTGTTTTCGCTGCGTATGAAAGACAATAT  
GGAGTCGATTTGGCCGGGAGTAAATCCGCACTACAACCTGTCGAAACGCGGCGCGGCGTACGATTTTGTGCTGCAATC  
TGCCGGAAGCGCGCGCAATTAACCGTATTGAAATCAATCTTCTGCGGTGATTCGGGTGATGAAATATCCGCAAGAC  
GCATTTTCTATGCCAACCAACTCGCGCGCGTACGGGGGCTGGGGCAGTCTATTTACATGCTCATCATCCCGATATTCT  
GCGTTTTCGATACAAAACGGGAAAATGCCGACGAAAAAATCCGCATTAACAACACTGTCGCTGGGCGTGGTGTATCCCG  
ATATCACTTTCCATCTGCGCAAGAGAATGCGCAGATGGCGCTGTTTTCGCCATGACGCTAGAGCGAGTTTATGGCAAG  
CCGTTTGGCGATTCGCCATAGTGAACACTATGACGAACCTGTTGCCGATGAAACGCATCCGCAAAAAATATCCGCAACG  
CCGTGATTTCTCCAGCGACTGGCAGAAATCCAGTTTGGAGTCCGGCTATCCCTACATCATGTATGAAGACACGGTTAAC  
GTGCTAACCCATTCGCGGGCGCATAAATATGAGCAATCTCTGCTCAGAAATTTGACAGTTAACAGCGCCTCAGAATAT  
GACGAGAATCTCGACTGCTCGTACAGGACATGATATTTCCGCAATCTAGGCTGTTGAATATTTGCCACACCCATGGA  
TTCCCCGACTTTTCCCGCAGCGTAGAGACTGCGTACGCGTTAACGCGGTTGTCAGATATGAGTCAATATCCGACGCG  
TGCCGTCCATCGAAGCCGAAATGCCGCTCGCATGCCATCGGCTGGGGCAGATGAAATTTACAGGTTATCTGGCGCGA  
GAAGGCATCGTTATGGTTCGCCGGAAGCACTGGATTTACCAATCTCTATTTCTATACCATCACCTGGCAGCGTCTGGC  
TACCTCGATGTTGGTGGCGCGAACCGGTGAACTTTCGCCGGTTCAAACAGTCACGCTATGCGAGGTTGAATAT  
TCAGCCAATATCTGCAAGGTAATGGCAGCCGAAACGGCAAGTTGGCGAACTGTTTGGCCGTAGCGGTATTACGTTA  
CCTACCGTGGATGTGGCGCAGCTGCGGACGACGCTGATGCGCTATGGCATATACAACAGAAATCTCCAGGCGGTGCC  
GCCAACCGGTTCTATCTTATATCAACCATGCCAGCTCGAGTATTCTCCGATTTGTGGCGAAAGTAGAGATACGCAAG  
AGGCAAAAACAGGACCGGTTTACTCCCTCCCGTTTACGTAACGAAATCTGCGCTGTATCAGGACGCTTACGAA  
ATCGGCGCAGAAAAGATCATCGACACCTACGCGGAGGCGACTGCCATGTCGATCAGGGGCTGTCGCTGACGCTGTTTTT  
CCCCGATACCGCCACCTCGCGATATCAACAAAGCGCAGATTACGCTGGCGCAAGGTTATCAAAACGCTCTATTACA  
TTCGCTGCGTACAGTGGCGTGGAAAGCACTGAAATGAAGGCTGCGTCTCCTGTGCACTTTAA  
>Cluster\_2523  
GTGAGTCTGGCCGTCAGCCAGCACTGGCGGATGATTTATTCGGCAACCATCCATTAACGCCCGAAGCGGGGATGCGTT  
CGTCACCGAAGTCTTAAGAAAATGACAGTTGATGAGAAAATGGTCAGCTGCGCTTAATCAGCGTCCGCCCGGATAACC  
GAAAAGAGGCGATCCCGAGATGATCAAGACGGTCAAGTTGGGGCGATTTTCAACACCGTACCCGTCAGGATATCCGC  
CGCATGCGAGTACAGTTGAAATTAAGCCGCTGAAATTCCTTTTCTTTGCTTACGACGCTGCACCGTCAAGC  
CACGGTGTCCCGATTAGCTCGGCTGCGCTCTTTTAACTCGATGCAAGCGGTCGGACGCTGCTCTGCTT  
ATGAAGCGGCAGATGATGGCCTGAATATGACCTGGGACCGGATGGTTCGATGTCGCGCGATCCCGCTGGGGACGTTGCT  
TCCGAAGTTTGGCGAAGATACGTTACTCACCTCAACAATGGGTAACCAATGGTGGAAAGCGATGCAGGTTAAAAGCCC  
GGCAGATGCTACTCGGTTGATGACCGCTCAAAACACTTTGCCGATACCGCGCGGTAGAAGGCGGTAAGAGATACAACA  
CCGTGATATGAGTCCGACGCGCTGTTTAAATGATATATGCGCCGTACAAAGCGGGCTGGACGACGCGAGCGCGG  
GTGATGGTGGCGTGAACCTGCTGAACGGCAGCGCAGCCACTCCGATTCCTGGCTGCTGAAAGATGTTCTGCGCGACCA  
GTGGGCTTTTAAAGCCTACCCGTTCCGATCAGGTGCAACTAAAGAGCTGATTAACATGCGACGCGGCGAGCCCG  
AAGATGCGGTGCGCGTGGCGTGAATCCGAAATCAACATGAGTATGAGCGACGAGTATTACTCGAAGTATCTGCGTGGG  
TTGATCAAAATCCGCAAAAGTACGATGGAAGAGCTGGACGATGCTGCCCGCATGTACTGAACGTTAAATATGATATGG  
ATTTGTTTAAAGCCATACAGCCATTTGGGGCCGAAAGAGTCTGACCCGGTGGATACCAATGCCGAAAGCCGCTGCACC  
GTAAGAAGCGCGCTGAAGTGGCGCGCAAGCCCTGGTGTGCTGAAACCGTCTCGAAACGTTACCGTGAAAAAATCG  
GCCACCATTTGGGTGGTGGGCCACTGGCGGACAGTAAACGTGACGCTGATGGGCAGCTGGTCCGACGCGGTTGGCGA  
TCAATCCGTGACCGTACTGACCGGATTAATAATTCGCTCGGTGAAACCGGTAAGTGTGTATGCCAAAGGGCGAAGC  
TTACCAGTGACAAAGCATATCGATTTCTGAAATCAGTATGAAGAAGCGGTCAAAGTGCATCCCGTTCGCCGCAAGAG  
ATGATGATGAAGCGGTCAGACGCGCAAACTCTGATGTTGGTGGTGGCTGATGCTGCGTGAAGCAAGGGGATGGCGCA  
CGAAGCCTCCAGCCGACCGATATCACTATTCGCCAAAGCCACCTGACTTGATTTGGCGCTGAAAGCCACCGGTAAC  
CGCTGGTGTGCTGATGAAACGGGCTCCGCTGGCGCTGGTGAAGAGATCAGCAGGCTGATGCGATTTCCGAAACC  
TGGTTTGGCGGACTGAAGGCGGTAATGCAATTTGCCGATGATTTGGCGATTACAACCCGTCGGCAAGCTGCCAAT  
GTCTTCCCGCTTCTGCTGGCGAGATCCCGTGTACTAGCCATCGAATACCGGTCGCCCCGATAATCCGCAAGC  
CGAACAATAACATTCGCTTATTTGATGAAGCTAACGGGCGTGTATCCGTTCCGCTATGGGCTGAGCTACACCACT  
TTCACCGTCTGATGTTGAACTTTCTGCGCGACCATGAAGCTGACGGCAAGTACTGCCAGCTGCAGGTGACGAA  
CACCGTAAAGCGGAGGGGCGCAGGTAGTGCAGTACTTGCAGATGTGACGCGCTCCATGAGTGCCTCCGCTGTGAAAC  
AGCTGAAAGGCTTTGAGAAAATCACCTGAAACCGGGCGAAACTCAGACTGTGAGCTTCCCGATGATATTGAGCGCTG  
AAGTCTGGAATCAACAGATGAAATATGACGCCGAGCTGGCAAGTTCATGTATTTATCGGCACTGATTCGCGACGCGT  
TAAGAAAGCGGATTTGAGTTGCTGTAA  
>Cluster\_14958  
ATGCGTGTGTTAATGCTAATGTATGCATACATTAGCATTAACATAGAGCAGATTCTGGCGGTTGCGCCGATGTTCCGCT  
GATGCTCACACGCGCAGTACAGCGCCCCGCTCTGTTGCGACGCACCAGGACGGCGTAA  
>Cluster\_20649  
ATGAAAGGCATTTGAAGTGGAGACGCCAGCCAGTCTGGATTAAACAAGAGCGGCAGCTTTTGCCATTTCGTATTGTGGCCAT  
TGCTGTTCTGGTCTGGGCAATCCGTTGGTGGTGA  
>Cluster\_50961  
ATGCGTATTGAAATCTGCATAGCCAAAGAGAAAATGACTAAAAATGCCAAACGGTGTGCTGGATGCGCTACCACAAAAAGA  
TAGTATTGCAATTTATATTATCCATGCGCTCTAA  
>Cluster\_6565  
ATGAAAAATGGCCTTGAACGAAAGCGCCTGTAACCTGATGACATCAGCAGAGCACTGGCTTTTGCATTAAGTGGGTGGC  
GGTCCGTTGTGCTGTCCCCGATGCTGATGGGCTGGCAAACTGGTCAATTCGCTTGAATTCGTGA  
>Cluster\_17651  
ATGGTGTCTGCTGAACGCATCACCCATTTTACCGTCACTACGCTACACATGATGGCAGGCTCATTGAACTGGATACCGG  
GAAAAACGTGTTTCTTCTGAAATCCCGACGAAAGTTACGCGCAGGATGAAACAGGCTCAGAAGGACACTTAA  
>Cluster\_19503  
ATGGTGAAGAAGACAATTGACGAGGATTTTCTGTTCTGGTGTCTTCAACAGTATTAACCTGCCGCAACACCACCGGTTGG  
CGTTGGTGAAGACATTTCTGATGGCGGTACCGGATTTCTGGCGCAGCAACGAAAGCGCAGCAATAA

>Cluster\_26057

ATGCGTCGGCTGTGCACTATCTCATCAATAATATTCGCGAGCATCTGATGCTTTATCTTTTTCTCTGGGGATGTTTGGC  
AATTATGGATCTGATCTATGTGTTTTATTTTTAG

>Cluster\_34186

ATGAGCTGGCGGCCCTTTTTGTATCTGATTATTAATCCCACCCGCTATTAAGCGCCCGCGGGCATCTGCGTCTGGT  
GCAGGGTTGA

>Cluster\_59186

ATGATCAACACAAATATGAAATATTTGGTCTGGATGGGCGCGTTTTCTCTGTCGATGCTTCTTGGGCCGAACCTCTCTG  
GATCATTACTCACTGA

>Cluster\_29070

GTGAAAGATTTATTAAGTTTCTGAAAGCGCAGACTAAAACCGAAGAGTTTGATGCGATCAAAATTGCTCTGGCTTCGCC  
AGACATGATCCGTTTACGGTCTTTCCGGTGAAGTTAAAAAGCCGGAACCATCAACTACCGTACGTTCAAACAGAAACGCTG  
ACGGCCTTTTCTGCGCCGATCTTTGGCGCGTAAAAGATTACGAGTGCCTGTGCGGTAAGTACAAGCGCCTGAAACAC  
CGTGGCGTCACTGTGAGAAAGTGGCGGTTGAAGTGACCCAGACTAAAGTACGCCGTGAGCGTATGGGCCACATCGAACT  
GGCTTCCCGACTGCGCAGACTCTGGTTCCTGAAATCGCTGCGGTCGCCGTATCGGCCTGCTGCTCGATATGGCGCTGCGCG  
ATATCGAAGCGGCTGTCTGAAATCTGATGTTGTTATCGAAGGCGGTATGACCAACTGGAACGCTCAGCAGATCTCTG  
ACTGAAGACAGTATCTGAGCAGCTGGAAGAGTTCCGGTACGAAATTCGACCGGAAGATGGGGGCGCAACTCCAGGC  
CCTGCTGAAGAGCATGGATCTGGAGCAAGAGTGCGAACAGCTGCGTGAAGAGCTGAACGAAACCAACTCCGAAACCAAGC  
GTAAAAGCTGACCAAGCCTATCAAACTGCTGGAAGCGTTCGTTTCAGTCTGGTAAACAAACAGAGTGGATGATCCTGACC  
GTTCTCGCGTACTGCGCCAGATCTGCTGTCGCTGCGTGGTTCGCTGAGGCGGTATGACCAACTTTCGCGACTTTCGACGA  
TCTGTATCTGCTGCGCTCATTAAACCGTAACAAACCGTCTGAAACGACTGCTGGACCTGGCTGCGCCGGATAATCATCTGAT  
ACGAAAACGATGCTGCGAGGAAGCGGTAGACGCCCTGCTGGATAACGGTCTGCGCGTCTGCAATCACCGGTTCTAAC  
AAGCGTCTCTGAAATCTTTGGCCGACATGATCAAAAGTAAACAGGGTCTGTTCCGTCAGAACCTGCTCGGTAAGCGTGT  
TGACTACTCCGGTCTGTTGTAATCACCCTAGGTCATACCTGCGTCTGCATCAGTGCCTGCTCCGGAAGAAAATGGCCG  
TGGAGCTGTTCAAACCGTTCATCTACGGCAAGCTGGAAGTGGTGGTCTGCTACCACCATCAAAGCTGCGAAGAAAATG  
GTTGAGCGGGAAGAGCTGCTGTTGGGATATCTGAGCAGAGTATCGCGAACACCCGGTACTGCTGAACCGTGCACC  
GACTCTGCACCGTCTGGGTATCCAGGCATTTGAACCGGTACTGATCGAAGGTAAGCTATCCAGCTGCACCCGCTGGTGT  
GTGCGGCATATAACCGCCGACTTCGATGGTGACCGAGATGGCTGTTACCGTACCGCTGACGCTGGAAGCCAGCTGGAAGCG  
CGTGGCGTATGATGCTTACCAACAACATCCTGTCCCGCGCAAGCGGCAACCAATCATCGTTCGCTCAGGACGTTGT  
ACTGGGTCGTACTACATGACCCGCGACTGTGTTAACGCCAAAGGCGAAGGCAATGGTGTGACTGCGCCGAAAGAACG  
AACGTCGTATCGCTGGTCTGGCTTCTGCTGATGCGCGGTTAAAGTGCCTATCACCGAGTATGAAAAGATGCTAAC  
GGTGAATTAGTAGCAAAAACAGCCTGAAAAGCACGACTGTGTGCGCTGCCATCTCTGTGGATGATTGTACCCGAAAGGCT  
GCCTTACACCATCGTCAACAGGCGCTGGGTAAAAGCAATCTCCAAAATGCTGAACACCTGCTACCGCATTCTCGGTC  
TGAACCGACCGTATTTTTGCGGACAGATCATGTATACCGGCTTTGATATGACGCGGCTTCTGGTGCATCTGTTGGT  
ATCGATGACATGCTATCCCGGAGAAGAACGAAATCATCTCCGAGGCAGAAGCAAGTTGCTGAAATCTCAGGACGA  
GTTCCAGTCTGGTCTGGTAACTGCGGGCAACGCTACAACAAAGTTATCGATACTGGGCTGCGCGCAACGCTGTTAT  
CCAAAGCGATGATGGATAAACCCTGCAACCTGAAACCGTTATTAACCGTGACGGTACGGAAGAGAAGCAGGTTTCTTCAAC  
AGCATCTACATGATGGCCGACTCCGGTGGCGGTTCTGCGGCACAGATTCGTCAGCTTGTGGTATGCGTGGTCTGAT  
GGCGAACCAGGATGGCTCCATCATCGAAACGCCAATCACCGGCAACTCCGCTGAAGGCTGGAACGTAACGTAACCTCA  
TCTCCACCCAGGTTGCTCGTAAAGGTTCTGGCGGATACCCGACTGAAAACCGCGAAGCTCCGGTTACCTGACTCGTCTG  
GTTGACGTTGGCGCAGGACCTGGTGGTTACCGAAGCAGATTGTGGTACCATGAAGGATCATGATGACTCCGGTTATCGA  
GGTGGTGGAGCTTAAAGAGCCGCTGCGCGATCGCGTATGGGTGCTGTAAGTGTGTAAGTGTGTAAGACGTTCTGAAAGC  
CTGATATCTCGTTTCCCGCAACACGCTGCTGCAAGCAAGGTTGTTGACTGCTGGAAGAGAAGTCTGCTCGCGCGGTT  
AAAGTACGTTCTGTTGATCTTTGTGACACCGACTTTGGTGTATGTGCGCACTGCTACGGTCTGACCTGGCGGTTGGCCA  
CCTCATCAACAAAGGTGAAGCAATCGGTTGTTATCGCGGACAGTCCATCGGTGAACCGGGTACACAGCTGACCATGCGT  
CGTTCCACATCGGTGGTGGCGCATCTCGTGGCGTCTGTAATCCAGCATCCAGGTGAAAACAAAGGTAGCATCAAGCTC  
AGCAACGTAAGTCCGTTGTGAACTCCAGCGGTAACCTGGTTATCACTTCCCGTAACACCGAAGTGAACCTGATCGACGA  
ATTCGGTCTGACCAAGAAAGCTACAAGTACCTTACGGTGGGTTACGGGAAAGCGGATGGCGAACAGGTTGCTGGCG  
GCGAAACCGTTGCAAACTGGGACCCGACACCATGCGGTTATCACCGAAGTAAGCGGTTTGTACGCTTTACTGACATG  
ATCGACGGCCAGACATTACTCGTCAGACCGGCAATTGACAGGTTCTGCTTCCGCTGGTGGTTCTGGATTCCGCGAAGC  
TACCGCAGGTGGTAAAGATCTGCGCTGCGCACTGAAAATCGTTGATGCTCAGGTAACAGGACTGCTGATCTCCGCGGACCG  
ATATGCTGCGCAGTACTTCTGCGGGTAAAGCGATTGTTACGCTGGAAGATGGCGTACAGATCAGCTCTGGTGACACC  
CTGGCGGCTATTCGCGAGGAATCCGGCGGTACCAAGGACATCACCGGTTGCTGCCGCGGTTGCGGACCTGTTTCAAGC  
ACGTCGTCGAAAGAGCCGGCAATCTGGCTGAAATCAGCGGTTATCGTTTCTTCCGTTAAAGAAACCAAGGTAAACGTC  
GCTGGTTATCCCGGTAAGCGGTTAGACGTTAGCGGATCGTACGAAAGAGATGATTCGAAATGGCGTCAAGCTGTTGAA  
GGTGAACGTTGTAACGTTGAGCTGAGTAAATTTCCGACGGTCCGGAAGCGCGCACGACATCTGCGTCTGCGTGGTGTTC  
TGCTGTGACTCGTTACATCGTTAACAAGTACAGGACGTTATACCGTCTGACGGCGTTAAGATTAAACGATAAACACATCG  
AAGTTACTCTCGTCAAGATCGCAAAACCGCAACTGGAAGCGAAGCGGAAAGTGGGTGCAACTTACTCCCGGCTGCT  
GGGTATCACCAAGCGTCTGCGCAACCGAGTCTTCACTCCGCGGATCGTTCCAGGAGACCACTGCGGTGCTGACCG  
AAGCAGCCGTTGCGGGCAACCGGATGAACTGCGCGGCTGAAAGAGAAGCTTATCGTGGGTCGCTGATCCCGGAGGT  
ACCGGTTACCGGTAACCGGATCGTATGCGTCCGCGTCTGCGGGTGAAGCTCCGCGTCCAGCGAGGTCAGCTGACGAG  
AGACGATCTGCCAGCTGGCAGAACTGCTGAACCGAGGTTGGGCGGTTCTGATAACGAGTAA

>Cluster\_41724

ATGATGAGTATCGCGCAGGTCAGATCGGCCGGAAGTGCCGGTAACTATTAACCGACAAGGATAATTATGTTGCTGGG  
CAGCATGGGAGAACGCTGGGCGGCAAGGGGGCTGAACAGCTGGGACTGCAGGCGAGTGTGATAAAGGATGTTTTTACC  
GCTTCTGGAGGGAAGGCTGCCGAGCGGAGCGGATCTAAGCCGATGCAGGATGGCAGTAATAAGCATCGTCCCGGCTAC  
GACCTGACCTTCTCCGCCCCAAAAGTGTCTCCATGATGGCCATGCTCGGGGGGACAAACGCTTATGAAAGCACATAA  
CCAGGCCGTGGACTTTGCTGTTGCTCAGGTGGAGGCGCTGGCTCCACACGGGTGATGACGGACGGACAGTCAGAAACGG  
TACTGACCGGTAATCTGGTGTAGTGGCACTGTTTAAACCGACACCAAGCTGCGGATCAGGAACCCAGTTACATACCATCGG  
GTGGTGGCTAATGTCACGCAGCATAACGGTGTGGAAGACACTGAGCAGTGACAAGTGGGGAAAACGGGTTTATTGA  
GAAATGTTGACGCTAATCAGATTGCTTTGGCAGGCTTACCAGGAAAACGAAAGAGAGGTTGAGGCGCTGGGCTATG  
AAACCGAAGTGGTGGGTAAGCACGGTATGTTGGGAGATGCCGGGCTACCGGTGGAGGCTTTTTCCGGACGCTCACAGACT  
ATCCGGAGGCTGCGGGGAAGATGCTTCTGTAATCCCGGATGTTGGCGGCTGGAATACCGGAAAATCAAACAGCA  
CGTCGATCTGAAGTCAAGATGGTGAATGGATGCAGACGCTGAAGGAAACCGGGTTCGACATCCGGGATATCGTGACG  
CGCGGATCAGCGTGGGAGATCCGACGCGAGGCGCCCGGCGGAGCTTACAGGACGGGCGGATGTGCGAGCAGCGGCTG  
ACACAGGCAATGGCGGATTAAGTGAACGAAAGTGCAGTTACGTCACGAGCAGTGTGGCCAGGACGCTGCGGATGCTG  
GCCCGGAAAATGGTGTGATTGAACGGGACGCGCGGTTATCGATGAGGCAATCAGCGGTGAGCAGCTTATCCCTTCG  
ATCGTGAGAAAGGGCTGTTACGCTCCGGATTCATGTGCTGATGACTGTCAGTCCGGGCACTCAGTCCGATATCATG

AAACAGAACCGGGTGACCGTACATCCGGAGAAAAGTGTCCCCGAACGGCCGGTTACAGCGATGCCGTACAGTGTCTGGC  
ACAGGATCCGCCCGTCGCTGGCCATTGTGTCCGGGCAGGGCGGTGCAGCCGGGCAGCGTGAGCGGGTGGCTGAACTGGCAA  
TGATGGCCCGGGAGCAGGGGCGGAGGTGCAGATTATCGCCCGTGACCGTGCCTCGCAGATGAACCTGAAGCAGGATGAA  
CGGTGTCCGGTGTAGCTGATAACCGGACGCTGCTCAGTCTCGTGAAGGCATGGCTTTCACGCGGGCAGTACCGTTATCTGT  
TGACCGAGTGGCTGAAAACCGCAGGGCGTCTCGGACACCCCTGAGGTAAACATGACTGCCTGTACCCTGCTGGTGGAC  
TAACCGACAGCGGACAGCGAACCGGTACAGGCAGTGGCTGATGGCCATGAAGGATGCCGGGGTGAACACATATCGCTGG  
CAGGGGGGAGAACAGCAGCCGGCAACCATCATCAGTGAACCGGACCGTAAATATCCGCTATGCCCGGCTGGCCGGAGATTT  
TGGCCGAGTGTGAAAGCCGGAGAAGAGAGCGTGGCACAGGTACGCGGGTACGGGAACAGGCATACTGACACAGGCCA  
TTCGCGAGTGGCTGAAAACCGCAGGGCGTCTCGGACACCCCTGAGGTAAACATGACTGCCTGTACCCTGCTGGTGGAC  
AGCCGGAGCCGTTATCTGCGGGATATGTACCCTCCGGGATGGTATGGAGCAGTGGAACCCGGAGACACGCAGTCAATGA  
CCGCTATGTGATAGACCGGGTGCAGCGCAGAGTACAGCCCTGACCGTGCAGGATGCCAGGGCGAAACGCAGTGGTGC  
GTATTTCCCTCCCTGGACAGCAGCTGGTCCGTGTCCGGCCGAAAAATGCGGGTGGCAGACGGCGAGCGACTGAGGGTG  
ACAGGGAAAATTCGCCGATCCCGCTCCCGCTCCCGGGTGAACCGCTGCAGGTGGCATCCCTCAGTGAAGATGCGATGACGCT  
TGTTGTGCCGGGGCGGGCTGAACCGCCCTCCCTGCCTGTGAGCTATTCACCATTACGGCAGTGAAGCTGGAGAACGGCT  
GGTGGAAAACCGCCGGGATTTCCGCTCAGTGCAGCTGCGACGGTGTTCGCTCCGCTCACACAGATGGCAATGGACAACGCC  
ACCTTGAACGGTCTGGCCCGCAGCGGTCTGTATGTCCGGCTGTATTCCCTCACTGGATGAAACCGTACTGCGGAAAAACT  
TGCCCGCCATCCCTCTTTACGGTGGTTTCTGAGCAGATAAAGCGCCGGCCGGCTGAGACATCGCTGGAACCGCTATCA  
GTCTGCAGAAAACCGGGTGCACACCGCCGCACAGCAGGCCATTATCTGGCCCTTCCCTGTGCTGGAAAGTAAAAACTG  
GCCTTCAGCATGGTGGACCTGCTGACAGAGCGGAAGTCTTTGCTGCAGAAAGAACCGGTTTTACTGAACTGGGAGGGGA  
AATCAATACGCAGATAAAAACCGGTGACTTACTGTATGTGGATGTGGCAAAAGGCTATGGCACAGGCCCTGGTGGTTCC  
GTGCTGCTATGAGCGAGAAAAGTATTTCTGCCATATTTCTGAAGGTAAGGAGGGCTACGCGCGTGTATGGAGAGA  
GTACCCGGGAACCTATGGAGACGTTAACGTCGGGACAGCGTCCGCCACCCGATGATACTGAAACGTCCGACCGTTT  
CACGGTGTACAGGGTTATGCCGGTGTGGGTAAGACCACACAGTTCGGGGCGGTGATGTCAGCCGTGAACATGCTGCCG  
CAGGTGAGGTCCTCATGAGGATTTGGGGTGGGGCCACGCGCCGACTGCGGTGAGATGCCAGCGCCGGCTGGTAACTGGA  
CAGACGCTGGCGTCTTTCTGCATGACACGCAGCTGCAGCAGCGCAGCGGAGAAAACCGCGATTTAGCAACACGCTGTT  
CCTGCTCGATGAGAGCTCAATGGTGGGCAATACCGACATGGCAGCGGCATACGCCCTGATGCGGGCGGTGGCGGTGCTG  
CTGTGGCCAGCGGTGACACGGCAGCTGCAGGCCATCGCCCGGTACGCCCTTCCGCTCCAGCAGACGGCAGTGTCT  
GCCGATGGTGTCCATGAGGAGATTGTGGCTCAGACGCCGAACTGCGGGAGCGGTATACAGCTGATTAACCGGGA  
TGTGAAAGGGCACTGTCCGGCTTGGAGTGTGAAACCGTCTCAGGTTCCCGTCCAGGAGGGCGCATGGCACCGGAGC  
ACTCCGTGACGGAGTTCAGTGCAGCCAGGAAGCGAACTGGCAGAAGCGCAGCAGAAAGCGATGCTGAAAGCGAGGCT  
TTCCCGGATGTCCCATGACACTGTATGAAGCCATTGTCCGCGACTATACCGGAGGACACCGGAAGCACGGGAGCAGAC  
CTGATTTGCACCGACCTGAATGAGGACCGCGCTGACCTTACGAAAGTGAACCGGGAGCGCGGTTATGTGGCCAAACGC  
TGGGAAAGAGCAGGTCATGGTGCCTGTCTGAACTGCGAATAACCGCAGGGGAGCTGCGTCTCTCCACTGG  
GAGACTCATCGGGAGCAGCTTGTCTGTGGATAATGTGTATCACCGGATGCGGATCAGTAAAGGATGACGGGCTGAT  
AACCTGGAGGATGCGGAAGGTAACACCGCGCTGATTTCCGCCGGAGGGCGGTGGCTGAAGGCGTCACTGTACCC  
CGGACACCATCCGGGTGGGAACCGGTGACCGGATGCGCTTACGAAAGTGAACCGGGAGCGCGGTTATGTGGCCAAACGC  
GTCTGGACGGTGACAGCGGTTTCTGGTGCAGTGTACACTTTCTGACGGTGCAGCAGACCCGGGTGATTCGCCCGCCCA  
GGAGCGGGCAGAGCAACATATTGACCTGGCCTATGCCATCACCCCTCACGGTGCAGCGGGGCAAGTGAACCTTTGGCA  
TCGCGCTTGAAGCTACGGAAGGCAGCCGAAACAGATGGCCGGCTTTGAGTCAAGCTACGCTGGCCCTGTCCGATGAA  
CAGCATGTGCAGGTGTACACCGATAACCGTACGGGCTGGACGGATGCCATCAACAATGCCGTACAGAAAGAACTGCCA  
CGATGTGTTTGGCCGAAACCGGACCGGAGGTGATGATGCAGAGCGCTGTTAGTACGGCGGGGAGCTGGGGGAGC  
TGGCGGACGGCCGTCTTTCTGCTCAGCGGGGCTGGCCGGGGAGACAGTCTGCAGGTTTATTGCACCGGGGCGC  
AAATATCCACAGCCGATGTGGCCTGCGGCTTTGACCGTAAAGGCAAGTCAAGCAGGATATCTGGCTGAACCTGAC  
CACGGATGACGGAACCGGCTGCGGGGATTCAGTGGTGAAGGCGGTGTGAAAGCAGTGGGGATGGCAGTTCGTGGCC  
TGCAGGGCAGCCGTAACGGAGAGAGCTTCTGGCTGATATATGCAGGATGGCGTCCGGATGCCCCGTGATAACCCGAC  
AGTGGTGTGGTGGTAAGAATCGCCGGTGAAGGTGCGCCGTGGAATCCCGGTGCCATCACCGGTGGCCGGTGTGGGGGA  
TATCCCGGACACAGCTCCAGCCGGTGGCCGAAATGGCAGAACCGGCTCACGGCAGAGGTAAGTGGCACAGCGCAGGCTG  
AAGAGGCTATCCGCCGTGAAACGGAAACCGCGCAGATGAAATGTCCGTAATAATGGCAGAGAAACAACTGACCTGCCG  
GATGGCAAAACAGAGCTGCTGTGAGGAAATTCGCCGGCAGGAGCTGACCGGGCTGCCATACTGAACGGGAAAGCCG  
GCTGCCGAGAGTGTACTGCGTGAACCAACGGGAACGGGAAGCGGTCCCGGAGGTTGCCGGGAAACCTGCTGCAGG  
AGCGACTGCAGCAGATGGAGCGGATATGGTTCGTGACCTGCAGAAAAGAGAAAACCTTGGGCGGAGACTGA

>Cluster\_11728

ATGAGAATGATTATAGTATTAGCAATGAACACGCAGAGAAAATTTATCAGTCTTTAGTGTGGGTGTTTATATTCTAT  
TGAATAAAGCAATATCTATAG

>Cluster\_48011

ATGCTGGAATCAATAATTAATCTGGTATCGAGTGGCGCAGTTGACAGCCACACACCGCAACTGCCGTGCTGCCGTGCT  
GTGTGCCGCAATGATTGGCTGTTTAGTTGA

>Cluster\_29157

ATGGCCAATGATTATGACCTGATGGCGGAGTTTGTGCAGGATCCCGGTGATCTGCACAAACAAATGATTAAGACCTA  
CAGTTTGAATGTAATCTGA

>Cluster\_62177

ATGCCGTGTAATGGTATTTTGGATGATTTGATATGTTATCAATTTATATTTACAACTAATTTGTTTCAAATAATAC  
ATGGCTGATTATGCCGAAATAA

>Cluster\_29598

ATGCATACCTTTATTTTCTGTGCTGATAAAAAATATTAACGGTGGCGGAAGCTGGAATATTACCCCATGCCAAATAC  
GGACGTATGCCGTGAGGTTCTTCGGACAATCGAATCACACGGAGGCGAGGGCTTTGGAATAACAGGGGAATGATTGAG  
TTAAAACAAATAACCTTTGAACAACGTGATGGATACACTGAATGGGGGCAATGA

>Cluster\_48636

ATGACCAAATTAATCGATCTCGATTCCATTCTGCCTCCGAAGAAAAGCATCAAAATTTGGCGGTGAGGAATATCCCATCTG  
TGAATGACCGTAGGTTTGTCTTCCATCAAGCAGATGGAAGGCAAAAGATTCATGAACATGTCTCTGTTGAGCAAG  
TGACAGCTTATGCAGATCTGGTTCGTAAGGTTATCCCTCAGTGCCTGATGAAGTCTTTGAAAACTGACTGTTCCGCA  
CTCCAGCAGATCTTACCTTCGCTATGGAAGTGTATGTAAGAAAACGAAAAGCGGCTGGCGAAGGGGCAAAAGTAA

>Cluster\_6425

ATGAAAAAAGATAACTATTCAATCAACAGGCTTGTGCTGTTGTGCGTGGGCAATCAGCAATGGCTAGGCTTTTAGGTGT  
ATCTCTCAAGCGTAAATCAATGGATCAAGGTGTACGTCAGTTACCTGCTGAGAGATGCTCGCATGAAACGAGCAA  
CAAAGGTTGGTGTCTGTGTGAAGAATTCGCTCCTGATGTTGATGAGACATACTTACGACGCTCGTCAATGTTATTCGAG  
AATATGTCGATGAAGCAACCAATGACGAAAACGATCATACCCGAAGCATCAAGAGGCAATGATTCATGAAAATCAAAC  
ATGA

>Cluster\_26928

ATGTCAGCGATACAGGGGATTTAAGGGGTTATCAGCCAGTTACAGACCACGGCGATGAGTGC CGCGTGGCAGGAATCACT  
GCCCAACCGACCATTAGTTTTGCGGGGAGCTGCACGCCGCGCTCGATCGCATAAGCGATACACAAACAGCCCGCCGCA  
CGCAGGCAGAAAAATTCACCTCGGTGAACCCGGCGTGGCGCTAAACGATGTGATGACCGATATGCAAAAAGCCTCAGTT  
TCTATGCAAAATGGGGATTACAGTGCCTAATAAGCTGGTGGCGCGTATCAGGAAGTATGAGCATGCAGGTGTAG  
>Cluster\_23984  
ATGAAAAAGAAAAATTCCTGGCTTACTGCCAGCGGTACGCTCGCCCTGAAATCCGCCCGGGGATATTTCCGGGATAA  
ATACGGCAGCAGATAACGATTAACACCGCTCGATGATTTTCGCGTGACCTATATCCCGGAAGGTTATGCGCATCCCTGGC  
TGTCGTGCGATATGCGCTTTGAAAGGGAGTTCCTCCCTGGTAAGCAAAGCACCACCAGCAGAATTAAGCGACATCGACAGA  
ATCATGCGCGTTACAGGAATGGAACGCATTAAGGCAGTACGTGAAATTTTCGTGACGGGAAAGGCAAAATGA  
>Cluster\_17  
ATGTGTGTTTTAGGGGCTGTAGCTGAAGGCAAAACGATCCTTAAAGGGGCTCCACATCTTAGGTTTAAAGAAACAGACCG  
TATAAAAGCTATGGTGCATGAATACAGAAAGATAGGAGTTAATGCTCAAGAACCTCCTGACGGAGCTGTGATAGAAGGTA  
CCAGGATTTTCAGCCCGCAGAGATAGAAACTTATGATGACCACCGCAATAGCTATGTCCTTTGCGCTTTTAGGGTTAAAG  
ACCGGAAAGATTAATAATAAACCTGAAATGTGTAACATAATCTTTCTGATTTTTGGGAATATCTGGAAGCTCTTTA  
TGGATAA  
>Cluster\_36754  
ATGTTTAAACCGACCGCAACCGCAACGACGTTGATGATGGCGTGCAGGATATCCAGAATGATGTCAATCAATTAGCTGACAG  
CCTCGAATCTGTATTGAAGTCTTGGGGCAGCGACGCCAAAGGGGAAGCTGAAGCCGACGCGAGTAAAGCTCAGGCATTGC  
TGAAAGAAACAGGGCGGAATGCATGGTCTGACTCGCGTCCAGCAAGCCGCGCGCATGCCGTTGGCTGCGCGGATTTCT  
TTTGTTCGTGAAAGACCTGGTGTAGCGTGGGTACAGCAGCTGCGGTAGGTATTTTATCGCGCAGCTGTTAAGCATGCG  
CAAAATCGTAG  
>Cluster\_4640  
ATGGCAAAGAATTTGTAGAAGAAGGAAAAACGGTGGCGATTGTTGCCAGTGCAGCCATCAGCAGCGGAGATCTGGTGCA  
GGTGGGTGATGTTTTTGGCGTGGCGCTGACCGATATTCACAGGGTGAACAGCGCAGCGCATGACCGAAGGTGTGTTTA  
TGCTGCCCTAAGCTGAAAACGGATGACATGAAAACGGGTAAAGAGGTTTATCTGAAAGTCCGAAAAAGTTGAGCTGACTAAC  
AGCGGCTCTGATCCGCTGGTGGGGTTGCTGGGCAGATGCCGGAACAGTGCAGAAGAGTCCGGTAAAACCAATGT  
CTGA  
>Cluster\_11229  
ATGACGGCATTACTGACACTGGAAGAGATCAAGGCACATCTGCGTGTGACCATGACGCGGATGATGACATGCTGATGGA  
CAAGGTTCGCTCAGGCTACCGCCGTGCTGCTGGCCTACATTCAGGGCAGCCGGGATAAGGTGATTCGCTGAGGACGGTGAAC  
TGATCCCGGGCGAGGCATTAACCCGGATGAAGGGGGTCCATGCGACTGACCGGGATGCTGTACCAGGAAATCCGGATCTT  
GCGGAGCGGGAAGAAGTATTACGGGGGAGCTGCCGTTTTCTGTTTCCGCTGCTGATTTACGATTTGCGTGTGCCGACGGT  
GTTATGA  
>Cluster\_43608  
ATGTGTGAAAAGAAGACCGGAGCTGAAAAATAGCACAGCAACTGGTACTCGAGTTCTACCGTATTTCTGAAAACCCAAAATAA  
ATCACTGCTAAGCAAGTTGGTTCACTCGAGTCCACGAAAGCGGTTACAGCAGAACTTCGCGCGTGGCGCGGGGATGGAAG  
CCGATACTGCGGCTATATGTGAGGCAATCAGCAGTCCGCTGGAGTAATGGTGTGTCGAAGGTCATGTAATCGCCTGAAG  
ATGCTGAAACGCCAGATGATGGTTCGAGCCGGATTTGAACTACTCAGGCAGAGGGTATGAGTCCGCTGGCATGA  
>Cluster\_2905  
ATGGCCCCGTCAGGCAATGGCGTATGACAGTGCCTGCGTGTGGTCTTTTCTGCGCTATTTCTGCTACGACAACAGTTTCGA  
CCCTACGCTGAGGCTAAATAAAGGTCTTGGCGCAGTCCAGCCAGGGCTCAGAGCACAGAACCCTTCTGGGATGAGCGGG  
TGATCCGCCCCATCGTGAGCGCCACCAACGGCTGGCCAAAGAAATACAGCATCTGAAAAGCGCGACTTTCGCTCTAT  
TGCTGTATGTGGTGGCGCGCACTGGTTGTGCTGTAATCGCTATTGCGCTCTAA  
>Cluster\_17075  
ATGAATACATTTAAAAATAAAAACTGAAATCTTTTATATTGTGCTTGCATATCTACGCGGAGCTTTTAACTCAA  
GGATAAAACAACAGTAATATGATTATAACGCATGTAATGGATCATGAGTTTGTCTGTAAGCTAATCGATTTGGCGATGA  
GAAATGCTGAGAAGCATCTTCTGAAAAAGCATGGAAAAAGAACGCTGCTGAAAAACTGTCTGAGGTGATTTTAAAGGG  
GTTAAGCAGGCATTAGCTAAAATGCATTATACGGTTCTGGCGGAATCAATATGTTGA  
>Cluster\_63900  
GTGAATATCGACACAACAATAACGATTGATACAGCCCTCAACACGGGGTTGGCCCTGCTTGGTTGGTTTTACATCATGTT  
CAGCGCGGGGAAGTGGGTGACCTCTGTTTTTCTGAGGCAGTGGGAAAAAGCGCCGCAAAACAGGAGAGACGCCAGAAAGTGT  
TAGATGAGTCTGCGATGCATTTGACCTTAGCAGCATAAGACCTGGTACAACAGCCAGGGTAGCAACAAAAGATGGCCCTG  
ATGATCGTATGTTCCGACAGGAGGCAGCAACAGTGAAGCAAAATTA  
>Cluster\_3848  
ATGACAAATTTATGTAATGTAAAAATAGTGAAGGGAGCGGAACTATAGAAAGTTTTTAAAGAGTGAAGTGAAGAATAT  
CTTATTAATTTTTATGGGTTTCACTGAAAAATAAAGGCACCGAAAGTGCCTTTATGTTTCTGATTTATCCCTTAAAG  
CAACGGCGGATCACCAAAAGAACCGGTACGAAAGAGATTGCCAGCAACGTTGCAGAGACCATTCCGCCCATTACCCC  
GATACCCACTGCGTCTGCGCGCCACTGCCGACCGTTACTGATAGCTAG  
>Cluster\_32585  
ATGATTGACCCGAAAAAATTTAGCAAAATCGCTCGCCAGGTTACGAATCAATGCCTAAAGGAATCAGGGAGTTCCGGGA  
AGATGTGGGAGAAAAAATCCGCCAAACCTACAAGCGCAGCTGACGCGTCTCGATCTGGTAAGCCGGAAGAATTCGACG  
TTCAGACGCAAGTCTTACGGACTCGTGA AAAACTGGCGTTACTAGAGCAGCGCATCAGCGAACTGGAAGCGCGCAAT  
AATCCGGTAGCAGAACTTCAATCTCTCCGCTATCCGCCAGTTGATAAAGCAGAATAA  
>Cluster\_64818  
ATGAATAATGGCGTATTTACAAAATCAGAAGAAGTTACAGCCCTGCTGATTTGCCGGTGGTTTACCAGAAAACAGGGTCAA  
CGACTTTGTTGGCTTTGTTATATGCCCCCTCTTACGAACAGGCTATTGATGAGGTCATGGCGTACCCGATGGGCATTGTTG  
CTGAGTCACTGAGTCTCTCACTGGATTATGAAAATCTCCGACATTTGCTGATGGCAACGATAAAGTGGCGGCTGTCGCC  
GCCCTTGTATGTGCTGCAACGATGAACCGGAATATTCAATCCGAGTTCTTTTAAAGAAACGAGGTTAA  
>Cluster\_39845  
ATGGTAACGTCCTGTTCTGGACAATGTTTTGTTAAGCAAGGCTCCACCCTCGCGGAGATTTCTCCTCCGGTAGCAACTT  
CGTCACTCTGTATTTTTCTTACTTCTCTCTTTACTCGTGTACCAGCGCCGCAACGGTGTGCGTAGCCGTTTTTCGGC  
ATTTTATCCAAAAGCAAACTATGGCTTACAAGGAAGCCAACCTCTGATGTTCTGTCGCATAAATCGCGCTGCCAACGGCG  
CGTGTGATGAATAACAACAACCTCAAGGTGCTCTCCATGGGAAGACAAAAGCAGTGA  
>Cluster\_6811  
ATGACAGAAGAACTTATCACCTTGAAGAAGTGAAGTCCATTGCCGCATCGATGGCGACGAGGAAGACCAGTTAATCAG  
CGGATACATTGCCGCATCGCTTGAAGGCTGCCAGATACATATAGGCAGGCGCTTTGATGACGGGCTGGAGTTACGCCAG  
CCATAAAGATTGGCTGCATGATGTTTATCGCTCACCTGTACGAAATGCCAGTGGTAGCGGATAACGCAAAAACGGCG  
GTACCCATGACGATTTGGCGCGCTCTGGACGGCTTACCCTGATGTGGGGGTACTGA  
>Cluster\_32859



ATGGAACCAGACTCAACCTGCTTTGCGATGCAGGCGTTATTGATAAGGACATCTGCAAAGGCATGATGCAGGTCGTCAA  
TGTACTGGAAACAGAGTGCATCTACCGGTGCGCAGTGAGCAAGAACGATGGCGATGACACATATGGCGAGTGCACCTGA  
TGCGCAGTCGCCGTGGTGAAGAAATAGAACCCTGGATAACGAATTGCTGGCAGAGCTGGCGCAATCCAGCCACTGGCAA  
GCCGTTGTGCAATTCGATCAGGTGTGTTGAAGGAATTCGCACCTGGAAGTTAACCCGTGTGAAGAAGGCTATTTGCTGGC  
CAACCTTTATGGATTATGGATGGCTGCTAACGAAGAGGTTTGA  
>Cluster\_21291  
ATGAATATGATGCGTATTTTTTATATCGGATTGTCAGGTGGGGATGATGTTTCTCATCAATGGCGTCTGGAAATGACGC  
TGGCGGACTTCAATCTCCGGCGTGGCGGTTGTTTGGACCCGTATATTTGTGTGAACCTCAGATGGCATTTCGCCAGAGT  
TAAACAAGGAAATATCTCGCGCAAAAAGCCGTGAAAACCTTACAATCATTACAAGGCTACGATCCAGCGAATTTACATTC  
GCTAACGGTGTATTTGCGATGTTAAAGAAAAATATGTCGTGATGATCGTTATTTGGTGTGGATGGTAAGCGGAGTGG  
AAAAATCAATCAACCACCACAAAGATGTTATTTATGTGTCGTGAGTGA  
>Cluster\_28331  
ATGAAACGAATTGGCTTTTCTACTGCGCTCATGGTACAACCTGCAGGCCGGGAAAGTTAGATGCTTTACTGGC  
AACCTCCGATTAACCTGACGATCTGGCCGTCTTCTTTATTGCTGATGGCGTTTTTTCAGCTGCTGCCAGGACAAAAGCCCG  
ATGCAGTGTGGCGCGTATTACATTGCCACTTTAAATGTTGGGTCGTACGATATGAAACAGTGCAGGATTTGCGCG  
GCTTCACTGCGCAACGTGGGTTAGATCCGACAGACCCCTTTGTTGGTGAAGCCAGCCGCTCGAAGCAGATGCCTTACG  
CCGCAACTCGCCAACTGCGATGTTATTTTGGAGTTTTGA  
>Cluster\_28454  
ATGAGTAAACCACCTCTTTTCTTTATTGTTATCATTTGGCTTAATCATCGTCGCCGCATCGTTTTCGTTTTATGCAACAACG  
ACGGGAAAAGCTGATAATGATATGGCACCCCTCCAGCAAAAGCTGGTGGTGGTGAGCAACAAGCGGGAAAAACCGGATTA  
ACGATCGCCGTTCCGCCAGCAGGAAGTCACTCCGGCAGCACCAGTATGCGCTATGAGGCAAGCTTCAAACCAGCAAGC  
GGAGGAATGGAGCAGACGTTTCGCCCTCGACGCCAGCAGCACCAGCCCTGACAGTGGCGGATAAAGGTACGCTGAGCTA  
TAAAGGAACCGCTTTTGTGAGCTTTGATAGCGCAACAATA  
>Cluster\_5372  
ATGAACCAATATATTGCTAGTTATATAGAAAAATGGCATCATTTCCACTGTTTTGTCTGAGACAGTCTCATTAGCTAA  
TGAATACTGGCATCCAGAAACGCCACCGTGGTTATGTTGTTCTCAGTTGGAAAAACGATTTGTAATAAATTTTATG  
AAATGGGGATATTGAAAGAGAAAAATATTTAAACATGTCGAAGATGGTATGGTCTCGCTTGTATGATGAATTTGGCCACA  
TTTGTAGCTTACAGGGCTTATAGAGGCAATAGTCACTGGCAGCGATAGCAATTCCTTACCTTTGGCAAGATGTAAGTAAAT  
TCTGGGTGACAAATCAAAGTCTCATGCATTAGTGTGAAAAATTTGGTCAAGGAGTGA  
>Cluster\_57384  
ATGAGTAAAGGAATATGAACGATGGTTCATTAAGTGAATAAAGGAAATACCGATTTAATTTTTATGATCAACATGGTTT  
TCCTGGATTTCTGGGGGGCAACACCAGAAATATAAAGCAGCATTTAAAGCATTAAAAGTAAGACAACGCTTAACTATTCAA  
TGAATTTCAATGCTTTCTTCTGTTCTGGATATATTTATTTGCTGGGGTTATGAAAAAGCAATTTATAGTCTATTA  
CTTGGTATCTATCTCTATTTGTTGGTGCATAATTGGCGTTAACATTTCTGGGAATGGCGTAGCAGCCTATGTTGCTGT  
TAACACGAACAAATGGTTCATGAGAAAGAGGTTAAAGGGTTAAATACCTGGAGCCTTTGA  
>Cluster\_10860  
ATGGCGCGTGATATCCAGATGGTTCCTGAGCGATGGGGGGCATGGGCAGCAATAATCATGAAGATGTAACATGGCCCTC  
GATAGTGTGTTGTTTTAAAGGATTAATCCCGACTAAAGTGAAATCAGCTCCTCAGTGTCTGATGATGACGCCATGATAA  
TTTTGTTGTTGATGGCAGATTAACAAGAATAATCAGTATTTGCAAGATTTGTTGGTGGATTTACGTAAGTGGAAATG  
ACATTTATGGCTCTTGCACGTAAGCATAGATGTTCTGATGGGCTTATTGGTAAAAGGCTTTATAAAGCGGAAGGATTTAT  
TGAAGGAATGCTTATGGCTCTGAATGTCGGGTTAGATATGGATATGCGGTA  
>Cluster\_47374  
ATGGCAACAGTTAACAGCTGGTACGCAAAACCAGTGCFCGAAAGTTGCGAAAAGCAACGTGCTGCGCTGGAAGCATG  
CCCGCAAAAACGTGGCGTATGTAAGTGTATATACTACCCTCCTAAAAAACCGAACCCTCGCGCTGCGTAAAGTATGCC  
GTGTTCTGCTGACTAACCGTTTTCGAAGTGAATCCTACATCGGTTGGTGAAGGTCACAACCTGCAGGAGCACTCCGTGATC  
CTGATCCGTGGCGGTGTTAAAGACCTCCCGGGTGTTCGTTACCACACCGTACGTTGGTGGCGCTTACTGCTCCGGCGT  
TAAAGACCGTAAGCAGGCTCGTTCCAAGTATGGCGTGAAGCGTCTTAAGGCTTAA  
>Cluster\_41633  
ATGCCACCACGAACCCAAAAGCCTGCCGTGTTTCGCGGTGCCGCTCTACAACCACAGACCCGTCAGGCTACTGCGAAAG  
CCACAAAAGCGAAGGCTGGAAGCAATACAAGCCAGGTCAAGTCCCGTCAATCAGCGCGGTTATGGTTGCAAGTGGGACGCTA  
TCCGCGCGCGTGTGCTGAAGCGTGACAAAAGGTTTATGTCAGTTATGTCGCGTCCCGTGGTGGTGGTGGTGGTGGTGGTGGT  
GTTGACCACATCATCCCTAAAGCGCATGGCGGCACTGATGCCGACTGTAATCTGCAGAGTCTGTGTTGGCCGTGCATAA  
GGCGAAGACGCGCCGTGAACGGTTAAAGTGA  
>Cluster\_52972  
ATGGCGAAAGCTTTACGACGACTAATCGATATTTGACAATAAACAATATCCAGTGGATTCTCTGCTCATGGTACTT  
CACCATCAAAGAGGCACAACCTGCTTGGCGTCAATGGTTATGCTTCAATGAGTTGGATCTTGGCAAACCGAGCCGGTTA  
CCGAGGAAGAGAACTCTTCGTAGCAGTATGCCGTGGCGAAGCTGAACAGTGCAGAGAAGCAGAACCGGTGTGGTCCAG  
TATATGACGCGTATCAAGCGTCCAAAACGTTTTACACCCTTTCCGGCGGTAACCCGAGGTTGAAGGTGCTGAAGACTA  
CACCGATTCTGACGATTA  
>Cluster\_21062  
GTGAAACATCTGACAGAAATGGTGAAGCAGCACAAAGCGGGCAAAAACAATGGAATTTATGCCGTTTGTTTTGGCCGCTT  
TGTGCTGCATGGGGCGAGCGATGTGCCGGATGAGTATGTTTCGTGCGACCATTTGGCCAGGCGTCTGCAAAAGTGCAGCTTG  
CAACCAGTTGAAGATCGCTTCTGACGCTATCAAAGCTTGGTTTGGTGTGAAATCAGCAGAGCAACGATCCGCGCTTT  
TACATGCGGGTTGGCATGGACGCGATGAAAGAGTGGTGAAGCAAAAATCGCCGCTCTGCGGCTGGCAAAATCGATTACG  
GCTACCGCGGAGGCTGA  
>Cluster\_48585  
ATGAAGGCCATCCATTCCGCGTGTGTTCTTTCTTCGATCGTTGTGGCCGACACCCTGTTTATCAGTGTGAAATGTC  
TGTAGCCGAGTTAAGAATGGCGCTCTTACCAGCTCATAAAGCACCATATGGAGCGATGGTGTGACAGCGCGGCGACC  
AGTTCTATGTTGTGCGTACGATCGAGTATGTCATCCCATATCTCACAACCGTAATGGCAAAATTAACCGCGCTCGGA  
GAAGACCCTTCTATACAAACAATAACAAGGGCTTCTATGGCGTTCACGCTTCTCAGCAAAAGTACCTTTTTCGATGACTG  
CAAGGAGGTTGGATAA  
>Cluster\_36764  
ATGAGCTATGAGGTTCTGCTGCTTGGGTTACTAGTTGGCGTGGCAATTAATGCTTCCGCTATTTGCCGCTGCGCCTGCG  
TGTGGGTAATGCCGCCAACCAACAGTGGCGCGTAGGATTTTGTCTGACACCATTGGCATCGCTCGATATGCGCTC  
TGCTGGTTGCTCTACCGCACAGAAAGTATGACAGATACACGCGTTTCTGTTGCCACGCTGGTGGCTGCGGTTGCGGTTACTG  
GGTGCAGTTTCTATAAAAACAGCAGCATTATCATCCCAACACTGCTTATGTCGCTGGCTATGGGCTGCGCTGGAAAGT  
GATGGCGATTATATAA  
>Cluster\_49386  
ATGGCTATCATCCAAAAAACTATGCGCGGTTAGAAGCGGCTATCGCGAAAAAGCATTAATAAATCTATCCGTGGGCTCTG

CGGTCGCTGTTCCCGCGAGTTTGTATTATCCAACTGCGTGAACCTACCGTTCACCACATTTGATCAGCACCATACTAATA  
ACCCGGAAGATGGCAGTAACTGGGAATTACTTTTCTCTATTGCCACGATCATGAGCATTCGAAATACACCGAAGCGGAT  
CAGTATGGTACGACCGTTATCGCAGGGGAAGATGCGCAGAAAGATGTCGGTGAAGCGAAGTACAACCCATTGCTGATTT  
GAAAGCGATGATGAACAAGAAGAAGTGA  
>Cluster\_18227  
ATGATAACGCTGCCAACCGGTACAGAACTGGATCATCGCTGGCATCACAGATATGCGTTGTGGCTTCAACGGCCTGGC  
TTCGAAGGTGCAGAACACGCTGAAAGATGCCCGTCTCCGGGCATATCTCGTCTCCGGGGCCGAGTGGCAAAATGG  
TGAATAACTGTGGGCGGATCGTGACGGGTTATGCCTGTTCGCAAAACGCTGGAAACGGGGCCGCTTCGCTGCGCGGTA  
ACCCGGGAAGGAAAGTGCACCTGACGCCAGCTCAGTTATCCATGCTACTGGAGGGGATCGCATGGCAACATCCAAACG  
GACAGAACGGCTGGCATCCGGATATAA  
>Cluster\_18864  
ATGCTGGCTATTGATGCGGTTGAAATGGCAGTTTATTTCGTATTTCGCTGGTCAACCTATTAAGTGTTCGCCATCAAA  
TATTGGCTTTCATGCAACATGGGGTAATGAAAAACCCACCGATGCCAAAGCACGGCGAAATGGCAACAATTACTTTTCA  
ACACCACCTGAATTCCTCTGCAATTAATGCCTGGTCAATGGCAAGACATTAATCTGACATTAAGAGCGTCTCGCT  
AATAACCTGAAGTATCTGAAGTTGCTCATCAATATGGCTAATCTCCAGTTCAAACTGTTCACCTGCTGAAACCCGGCA  
CGGAAAAACAAAAATAA  
>Cluster\_43063  
ATGGCATACTGGTGGCAGTAAACCGCTGCGTCAGTGGCGTGGCGCATACTTATATGGCGCGGAACGGCTGGAAAAGTT  
GTGCTGTAGAGAGTGGGGCGTCAGCATTGAAACTAGGGCCGCTGGGAACGGAGAAATCGTTAGCGGACGAGGATA  
TCCGTCGGGCGGATGTTGCTCTGTGATTACGGATATCGAGCTGCGGTCGCGAGCATTGAAACATGCGGCTACGTG  
CAATGCGACATCTACGCTTTCCTGCGTGAGCCGAGCGGGTGTGAGCGCGGTACGCAAAAGTGTTCCTGCGCCGAGCA  
AACCCATCTCATTCTGGAGTAG  
>Cluster\_26094  
ATGAGCACTATCGAAGAACGCGTTAAGAAAATTATCGCGCAACAGCTGGGCGTTAAGCAGGAAGAAGTTACCAACAATGC  
TTCTTTCGTTGAAGACCTGGGCGCGGATTTCTTTGACACCGTTGAGCTGGTAATGGCTCTGGAAGAAGAGTTTGATACTG  
AGATTCGGACGAAAGCTGAGAAAATCACACCGTTAGGCTGCCATTGATTACATCAACGCCACCAGGCGTAA  
>Cluster\_6877  
GTGGCGGAGCAATTAGAGTTCTTTCCCGTCCAGAGCCCGTCCGGGGAATTTGCCAGTCTGACGAACGGGGTTTTGTGCG  
CGGCTGTTTTCTAGTCTGATGAGCGTTTTAACTGGAATAAAATGAGCGATGGCGAAAAACAAGAGGTGCTGCGCTTT  
GTCGGCAGCGATTAAATGCCAAAATTACGCGCAATAAGCCAGCGTCATCAGACGAACCGGAGCAACCATCACTTTTTGA  
>Cluster\_64438  
ATGATGTCGCGCGAGGTTTAAACAGAACGGCTGCTGGAAGCTGAAATGCCCTGCACAAATTTAACGGGTAGATCGAC  
TGTATCGCTGTCTACGGCGATTACGGGAAATAACCGGAGCTATCAATACTCACAGGCGAGTATTGAACAGCTCCGAA  
CGTACATTATCGAGCTGAAATCACAGCTCGGCTGAGTACGGGACGCCCGCTCCCGTGGGAGTTCGATTATGA  
>Cluster\_64463  
ATGACTGGCGCAGATTATCTCCCGCTGGGTTGCCACACAACAGGGCAGCATGGCCGAGGATCAAACTGGAACA  
TTACGATTTGCGCGCCCGGGCTGATTGCCAGTTATACGAAAACGAATACCACGGCCACGGTTACAGAGGCGTTGA  
AAAATACTCCTGATAAATTACCGGAGTTTTTCAGGGACCGACTGAATTAAGAGAGGGGAACGAGAAAAATGA  
>Cluster\_24670  
ATGAGAAAAACAAAGGGCGATTGACTTATTATCTTGAAGTGTGATAAAAAATACCATTTTGTAAAAAAAATAAGCAG  
TTATTCAAAGGAGTTTACCTGACGGAAAAACAAAAGAACAAAGAGAACGTTAAGTGAAGTGGTTTTAATGAAAGTGAGG  
TCGAGGCAATAGACTTTACAAAAAATGGTTAAGACCTGTTGATAAGAATATTTCTTAACTATGGTGAAGAATATAAG  
GAGAGTATGCATGA  
>Cluster\_17872  
ATGGATAAGACGTGCCAGCGTCGCATCCGGCATTATTCCGCACCAACGCAAAAAAGCCAGTCTCCGACTGGGCCTTT  
CGCTAAATTTGATGCCTGGCAGTTCCCTACTCTCGCATGGGAGACCCACACTACCATCGGCGCTACGGCGTTTCACTT  
CTGAGTTCCGCATGGGTCAGGTGGGACACCGCGCTAAGGCCCGCAGGCAAAATCTGTTTTATCAACACGTCACGTTAT  
GACCTGTGATTTAA  
>Cluster\_35167  
ATGAGCAGAAGGGGTACACAGTTTAGTAACGCAAAAGTTACAACCCAAATGTTAAGAATCCCTTTTTCCAGTAGTGACTT  
GGGTGCAATAGTAAACGCTGGCGTGGGGCAAAGGTATTGGTTGATGTAACAGCCGAATATAGACAAGGGCTAGTAAGAA  
ATTTAACAACCAGTAAACATTATTTAGAATCAAACCTTTCAGAGTACCCTGGAAGTTTGGGTGATGCTGCCAATTACTG  
ATTTAG  
>Cluster\_6724  
ATGCTGTAAAAAAGCAGGGTGGCGATCGACTCCCGAGTGGTTCGCATGAAGTCTTACCCTGCTGTTAGTTACATTTTAC  
CAGTTGTTCCAGGTGGTTTGATAAATCACCGTCTGGTATCGCAATATGATGATGACCCGGCCAGAGCGCCGTAAGTCA  
GAAAGCTTCTTAATCAGGCTTTGCGTGGTGTGATGCTGACGGTATCGCATTTCTGTGAGTAAACAGCCGTTTGCATGG  
TGGTGGTGA  
>Cluster\_62814  
ATGACAAATCAAACCATTCAACTCGCAATCAGTATTACAGGTAGTCAAAAACGACTGGCAGATCTATGCGGTGTAGCCCA  
ACCCACAGTTTGGCGTTGGCTACACGGTGGCGGAATTGATGCCCGCTATGTAATGAAATTTGCTCAGCCACTGGTGGAA  
AGATTAAACCAGCATATTCGTCCCGACTCGCACCATGTTTAAACGGAGTAAATTCGCCGCTAA  
>Cluster\_49751  
ATGGCCAAAGAAGACAATATTGAAATGCAAGGTACCGTCTTGAACGTTGCCTAATACCATGTTCCGCGTAGAGTTAGA  
AAACGGTCACGTGGTTACTGCACACATCTCCGGTAAAAAGCGCAAAACTACATCCGCATCTGACGGGCGACAAAGTGA  
CTGTTGAACTGACCCCTACGACTGAGCAAAGGCCGCAATTGTCTTCCGTAGTCTGCTGA  
>Cluster\_28737  
ATGATAACGATAACTGAGCTGGAAGACGAAATAAAAAAATAAAGAAGCCGCAATGTTTTTATTGAAAAAATAAACGA  
CAAAAAGAACGAAATCCATGAAAAATGAAACACCTTTGGATAAAGTTACCTACAATGAAGCAAAGGAACTGCTCATTTG  
CATGTGATCGCGCAATTAGGACTATAGAGATAATGAGAATCAGGATTAATAATAAATAG  
>Cluster\_40340  
ATGAATCATTTATGAGAAAGGGCGGCATGTCCTCCGATATTGATACGCTTCGACGGATGGCGTTAGAGTTAAACGTGCCGTT  
AACTACTTTTTTTGTGATGATCAGACCACAGCAGAACTTGCATTACTCATATCCCGGATGACAGAAGAAGAGCGAAGTA  
ATCTTATCGAAGCACTCAAACGCTTTCAGGTGTAACCATGGTGGTAAACACTGA  
>Cluster\_61639  
GTGGCGATTAAATTCAGCCCTAAGGTTGGTGAATAACTGGAATGCAACTTTGGTAACTTCTGTTAGCCAAAATGGACC  
GTTACAGCAGCAGTATTCAGATGGCCGATTCCTCTGAAATGATAAAAAACAGGTTAGTTGTGCTGCTCAACGGAAAAA  
TTAATGGCAACGCATGCTGCTTCCATTATCAACCCTCGCGACCAGACAAGTTAA  
>Cluster\_62479

ATGACGGCACACAAAAATATCTCCGGGACATACCACCTCTCTGTGTCAGACATTTTCAGGTTGTTTACCAGGTATGTTT  
CAGCCCGTCCGTTGAAATCAACCAGGATGGTGTGGCTGCGCTGATTACAACTGGATCGCCGTATCAGTGATCTATTGG  
ATGAGATTATCCATTTTTGTGAGTTTTCAGCAGAGCGCTGCGACTGGCAGCGCTACTTCACTGA  
>Cluster\_43588  
ATGATCCGGCACATCGTTAATTCCTGTATCACCGATAACAACCGTTGCCCCGCTGGGGCAGTGGTTCGCCACCAGCAA  
CGGTCACGTTCTGCGGGTTTGCCTAGTCAACGCTGAAAGCCAGAAAGTCTGTGCGAACTACAGGGGCGTAGCTACACCA  
TCAGTTACCCTCTGGCGGTAATTTCTGTCTGAAAAATGTTAAGCGTCTGGGAGGTGTGGCGTGA  
>Cluster\_62869  
ATGGCTCTTGACTTGGCTCGGCTGAGTTAGAGTTAAGGAAATTCCTTATATAAAAATAGTCTACATGCCAATTACAG  
CTATAAATCTATTAGTATTGGTTCTAAGCAAGGTTGGTTAATTTTCAGCGAAATAAAAAGTCCCTGAAACTTTTGGCCTG  
ATATGATATTTATGAGATATCTGACCCAGAAGTTTTTATTAATTTCTGATGATTTATAA  
>Cluster\_16063  
GTGTPCATCATCAGTGATGATCTGGTTGATTCCAACAAGGAACAACCTGGGCTACACAGCAGAAGAAATGCCTGATGATAT  
CACTTTTAAAGCGACAGTACGGCCAGAGCCTGAGCGTAGTTGCTGTGTTTGTGCGAGCATGGTAATAAAATAACGGTACAGC  
TCGCCATTCTGAGCTCAATAGTATCCATGCCACTGAGCTTACAGGCTTTATCTGGGCGGATAG  
>Cluster\_40812  
GTGAGTGTGAACTGACGGATAAAGGAGGACGATGTGCGGCACCTGGGCATGTCAAATGGTACGTGGTTTACCCTCCTTGA  
TATTCGGGGGTGGAACCCCTTTTAAATACCCGTAAAACCAATGACCCGATTGACTGCACACGTTCAAAGGCCGCAAAAC  
TGGCGGATTTGATGAAGCATGGGAGCCTCCCGACCCTGGTTCTCCGGCATCGGCAAATCTGAGGGAAGACGCTTCTC  
ATCGCTTCTCCTGCTAACTGCAAGGGGTTTCGCACTTGCTGA  
>Cluster\_34174  
ATGAAAGCGCACCTACAGGTGATTTTCAGGCTCGATGAATTTGGCTGCGTACTTGAAGTGGCAGCGGACGCTTTATCG  
GCTCGCCGACACGGGAAATTCGGCTTTCAAGGTGGGCGGGACGTTGGCGGCTTCGTCAAAGTGAAATCGATCAGTGCA  
TCAATGATCAGACCCGAGCCGAGCAAGAAGGAGGTGATGCGCAAGCGTGAACAGCAGAAGTATCCGAGCAGCCCGTG  
TCGCTGGGCGCACTGCCGTCGCGAGCAGGCAAAGGGCTTGA  
>Cluster\_53851  
ATGATTCAAAAGGATATTGAATACTCGGGACAATTTTCAAAGGATGTAAAACCTGCACAAAAGCGTCATAAGGATATGAA  
TAAATGAAATATCTTATGACGCTTCTTCAATAATGCTTTACCGCTTCCAGCTGTTTATAAAGACCACCCGCTGCAAG  
GTTTATGGAAGGTTATCGCGATGCTCATGTGCAACCGGACTGGATCCTGATTTACAACTTACCATAAACTTTTACGA  
TTTGGAGAACTGGAACCTCACGCGCGCTCTTTGGGTAA  
>Cluster\_11503  
ATGAGGTATCAGGTAAAAATTCAGGGAAGATGCGCTGAAAGAGTGGCAAAAACCTGGACAAGACTATTACAGCAACAGTTTGC  
GAAAAAGCTAAAAAGTGTGTGACAATCCGCATATTCCTTCCGCAAACTGCGCGGGATAAAGGACTGCTACAAAATAA  
AATTACGTCGCTCAGGTTTTCTGCTTGGTCTATCAGGTGATTGACGAACAATTAATATCGCTGTTGTAGCTGTGGGTAA  
CGTGAGCGTAGTGACGTTTATAATCTTGCCAGTGAAGAATGAGATAA  
>Cluster\_64823  
ATGAAGTGTATACGTAAGCGCTGGTACGCAAAAGACCGGGAGTTTATCGAAGCCAACGTCGGGAAATGACCGTCAAGA  
AATGGCGAAAAAATGAAAGTCCGCCACAACCGCCCTCCGGGCACATGCCAGAAGACACGGAATATCATTGTGTGTATACC  
GAATCAGTGAACATGACAAGTATTTATGTGCTGAACTTTATAAAGAAGGCTGGATATTCATGTCATTGCCCGAAAGATG  
GAATTAAGCAATCGTGTATCCAGCATTTGATACAGCGGATATAA  
>Cluster\_64422  
ATGGAATCCTTATCAGACAGTATGACTATTACGCTCTCTCGACCGTTTATTATTAAGGGCAGAGCTGCGATAACAATTAC  
TATTCGCGAACCAAAATTCGCGACCCGCTTATGTTTATGTTTACGATAAAAAGCGGCTTTGAAGAGCGGACAGCGACAATGC  
TGGCGCGCTGGCAAATCTGGAGAGAGAGGATTTATATGCGCTCCCGCGTGCATTACGATCAACTGGAGGCCGCGTTT  
AACGAACTGGTAAAGCACCCGAAAGACCACATCAGATATAG  
>Cluster\_38476  
ATGAGTTTTTTTGGACGAGCTGAAAGCATCGCTGGAAGAAGCCGTTGAAATCAAAAACGCGCTCAGAGAGCCTGCCGCGT  
CACCCGTTACGAGCTGGCAGACGTGAAAGCCATCAGGGCAGCTGAACGTATCTCAGAGCGAGATGGCGAAAGTGTGTTG  
GAACCAGCCTCGACACCATCAAGAGCTGGGAAACCGGACGCGCTAACCCGACCGGACTGGCGGGAAGTACTGGCAACC  
ATCCAGGCGAACCCGAAATTTCTCCAGGAACCTGGCGGCGCACTAA  
>Cluster\_21882  
GTGAGTCGAGCATTGATCGCCGTAGTATTAGCATTTCCATTAATTACACTGGCTAACCCGATTTATCATCCGGACGTGGA  
GGTAAACGTACCGCCAGAAGTGTTCAGTTACAGGCGGGCAGTACGCGCAGCCCTGACTCAGTGTGCGTTTATCAGGATC  
AAAATTTCTGAAAGGGCGGTAATTAAGCCGAAGGAATACTGCTGCAATGCCAACGGGATGACAAAACCCCTAAGCACT  
AATCCGCTGGTCTGGCGGCGCTGAAGCCATAA  
>Cluster\_54408  
ATGAAAAAGTGCCTCACACTACTGATTGCCACCGTCTGAGCGGAATCTCTCTCACGGCTTATGCCGCGCAACCGATGAG  
TAACCTGGACAGCGGTGAGTACGCGCCGCGGTACCGTTTCGGCAACTGGCGCATCAAACCTAAGCATCTGGAGGATA  
AACTGGCAGAAAAAGCGCGCAACAAGGCGGAAAGTTATGTCATTAATTTCCGAGGCGGAAATGACCAGATGTTCCGGT  
ACTGCAACCATCTACAAATAA  
>Cluster\_59277  
ATGAGCGAGAAATTAAGATAGTCTATCGCCATTACAAGAATGTACCAGTATGCGCACAACGCCAGGACGCACAGTAC  
TGAGCAGGTGGCACAACCTGGTAGAAAATTAAGCAATTCGGCTGGACTAATCCGGTGTGATTGACGAAAAGGGCGAAA  
TTATTTGCGGGTACGGTCTGTTATGGCGGCTGAAATGCTCAAATGGATTCTGTTCCGGTCAATGTTCTGTCTGGCCTG  
ACGGATGAGCAGAAGCAGCGATAA  
>Cluster\_11543  
ATGTCGACAGCAGAAAATGCAGTACTTCTCATCTGCGCAGAAAACGAGCATAACGAAAGGTAACCTTTGAGTGAAGC  
AGAACGACAGAGAGCAGCTTCTGCGCGCAACGATCTGTATGTAAGAGATCAAGGTTTTCTGTCAGACCAGAACTGAAAA  
ACTACCTTACCAGTCTGTGTGACAGGAAGGGGTAACCTCAGGCAGAGTTGATAGAAAGGCTTATCGAGAAAGAGGCGCTGT  
CACAGGAACATGATGTGA  
>Cluster\_63602  
ATGATTATGGCGAAACTGAAAGTACGCGAAAGGGAAGAAATTTCTTTGGTTTGTGGCGGTTTTTATATTGCGGCGTC  
GGTTGTGACTCGCGGACTATCGCGGCGTTATAGAACAGTACAATATTCGCTGTCTGAGTGGACGACATCAATGTATG  
TGATTCAGTCATCGATGATTTTTGTTTTATAGCCTGGTCTTTACTGTGTGGTGGCAATCCCGTGGGAATTTATTTCTTT  
GGCGGCAAGAGCAGTAA  
>Cluster\_52412  
ATGAATATTTATACCTTTGATTTTGGATGAGATTGAGAGTACAGGAGATTTTATCGTGACTTTAGCCAAACCTTTGGTCT  
GGCGAAAGATAAGGTACGCGATCTGACTCACTATGGGATGTGTTAATGAACGATGCTCTGCCGCTACCACCTTGGATTTG  
AATTTGTTTATCTGGGAGAGAAAACGCGTCCGCTTTTGGCGGTTAATATTGCTGTTTGGATGAGGCAGAGGAAGAGCTG



TAAAGCAAATTTGAAGCACTCTCCGGCCATCTGTGCTTTATCTTCCCCGGCGAATACAATCAGGATAAATGCATGAGCGAC  
AGCACGATTAATAAAGCATTACGCGTGTAGGGCTACGACACCCAAAAGACGCTCTGCGGCCACGGTTTTCCGGGAATGGC  
GTGCAGCGCGCTGAGTGAATCGGGGCTATGGAGCAAAGAAGCCATTGAAAAGCAGATGAGCCATCAGGAAAGAAGACAGCG  
TCCGCGCTCTTATATCCATAAGGCTGAATATCTGGAGAAACGGGTCGCGATGATGCAGTGGTGGGCGAATATCTGGAT  
GCGAATCTCGGCGGTATATTTACCTTATCAGTACGCTGCCCCCTGAAAAACGTTGTCGTAA

>Cluster\_27545

ATGATGCCTACGCTTGTCTCCACCATCTGTCTTTCCGGCTCCCCAGCGCGCTGCCAGATCTTGTGTGACGCTCTTTCAGCC  
GGGGTTGACCGCCACCACGGCACTTTCAGCGAGCTTAATGGTGTGGATGATGATATTGCCAGTCTTGATATCAGCGAAA  
CAGGACGGGAGATCTTCCGCTATCATCAACTCACACTGACTACTGGTTATGACGGCAGCTACCGGGTTGAAGGTACAGTG  
CTTAACCAACGTTTGTGTTTATTTCACTGGCTACGACGTTGGTTTCCGCTGTGTCCGTCATTTATACCAGCCATTTTAC  
CCCCGCTTGAAGAGTGAAGTGAAGCGCGCGGAAATTCGCGCTAACTTTTACGACGATACCAATCTACAGCGTTAGTGA  
ATCTCTGCTCCCGACGGCTGCAAAAACGCTTTGAAACGCGCGATATTCATTTCTGTGTCTGTATTGCAATATTGTTTG  
TTGCAACATCAAGTGAATACGCTTCAAGTTTAAATCCACCTTCAACGCTCGCTGGGCGGAATCCGCTTGAATTTGAGT  
AGCGCAGGAAATGGACGCCACTGGCAGCGTCCGGGCTCCAGCTGTACCGCTGATGAGCCACTATTTATGGCACTAC  
TTTTTTCCATGTTTCCGGGTTCCCGATCCACTGCGGGATGCGCATCAGCGGGACAGACAAGTGCCTATCAAACCT  
CTGGTAAACCATTTTCTGTGAGCTGGAAATGTTCTGTTTATGATGAACAGGGGTTATGCGATCAGCTTTATACCACCT  
CAGCCAGGCTTAAATCGAGTTTGTGCTTCCATCGTATTGATAACACCTCGCGGAAGAGTTTCGCCCCCTGATCCAC  
ACCTGGTGCACACCACCGCGCGGCTGGCTGGATTTGAAAGTGAATACGGCTCCATCTTTCTGATGAGGAAAGCGGT  
CTGGTCCGGTGTATTTTGGTGCCTGGCTAATGCAGGAAAACGACTGCATGAGAAAACAGATTATTTCTACTGACCGGAA  
TGATAGCGAGCGGAGAGCGAGATGAGCAGCAGCTACGCGAATAACCTTACGCGCTCAACATTAACATATCGTCGG  
TAAAGGTATTTTTGCAGTACGGCTCCGCGCGCGCAGCTGATTATGCTCTTATACCATGACCGTTACCCTCTTT  
TCACCACCGCTGATCTATACGACCTGACGCTGACAACACATCAACAGGAGCAATCCGCAAAATGCTCGAATCAGCATG  
A

>Cluster\_51250

ATGAGTAA<sup>C</sup>GCATCATACCCGACAGGCGTTGAAAACCATGGAGGATCACTCCGTATATGGTTTCACTATAATGGCAAACG  
TGTGAGAGAAAACCTCGGTGTTCTGACACAGCCAAAACCGGAAGATCGCTGGTGAACCTCGCACTTCCGTTTGTGTTTG  
CAATCAGAATGGGGAGTTTTCGACTACGCGCGCAGTTCCCTAATTTCCCTAACCTGAAACACTTTGGTCTGGGAAAAAGA  
GAGATAACCGTTAAGGCCTTTTCGGAATAATGGTTGAGCCTTAAAGAAAATGAGATTTGTGCGAATGCATTAACGTTA  
CCAGTCAGTAATTAACCAATGTTGCTTATGTTGGGTGAGAAAAAAGTGGTTTCACTCCATAACAAAAGAGGATTTACTTT  
TCGCAAGGAGAGATTTGTGACCGGTTACCAAAAAGCTTCTAATGGAAGATTTCTTCCATAAAAAGGGCGCTCAGTGGTC  
ACAGTAACTACTATATGACAACCATAGCTGGAATGTTCAATTTGCAACAGATAATGGTTATACCTCAGGAAACCCATT  
TAACGGTCTGGCACCTTAAAAAAGTCCAGGTAACACAGAGGAAATATGGGAGAAGTACTGTGCATAAATGCACCTTTGTT  
CTTGCCGTCATCAACAAACAAAACCTGTGGATTCTCGCTGTATACACGGGTATTCGTCACGGGGAGCTGGTATCGCTG  
GCATGGGAAGATATAGATCTTAAAGCAAGGACTATAACCATCCGTAGGAATTTATACAAAACCTTGGCGAATTCCTCCACC  
AAAAACCGATGCTGGCACCGGAAGGACAATTCATCTGGTTCAACCAGCTATTGATGCTCTTAAAAGTCAAGCGGAAATGA  
CCATGCTTGGAAAGCAACATTTCTGTAGAGTAAAGCAGAGGAAATATGGGAGAAGTACTGTGCATAAATGCACCTTTGTT  
TTTTAGTCTCAGTAAATAAAAACAGCGGCAGTTTTCCGGACCGCACTATAAGGTTGACTCCATCAGGGAGTCATGGACAAG  
TATCTTAAAACGCGCAGGTTCTGAGACACAGAAAATCGTACCAATCCAGGCATACTTATGCATGCTGGTCACTTCCCGCTG  
GAGTAATCTAGTTTATTCGCAAGCAGATGGGCCACAAAACGCACAAATGGTATTTCAATGTTTACGGAGCATGGATG  
AAGACAACAATCAACGAAAGATAGAACCTTTAAACAAAAGACTATCTGAAAAGTGTATCCCATGTATGCCCATTAAGAAAC  
TGGGTAA

>Cluster\_27087

ATGAAATTA<sup>C</sup>TATTTCTGGGCAACCACACTTGC<sup>C</sup>GGCAATCGTGGCGACAGCGCATCTCGCGGGCTTACTTGATGCCAT  
CAACATCTCAATCCACATACCGAAGTGGAGCTGATGAGCCGCTATCCGGTCACTTCTTCTGCTGCTCAACCGCCCGG  
TAAATGGGGCATCCGCTGTTCCTGCAAAATGAAACAAACACACAGCGCGCGGGCGTTGTGCGGGCGGTTAAAAAAGTCCTC  
CGTCGCGCTATCAGCACCAGGTATTGCTCTCACGCGTCAACCGACACTGGCAAGCTGCGCAATATCGCCATCGCCAGGG  
ATTTACCGACTTCTGTGCGCTGCTGTCAAGTTACGAGCCATTTATCCAGGTGCGCGGATCGTTTGTGTCGATCTCTATG  
GCTGCGCGAGTTTGAACATGCACCTTTCACGTTTATGGGCAAAAAGCGGCTGTTTATGATGGTTCACAGTGTGGCCCG  
TTCCAGGATGAGCAATTTAACCAACTGGCAACACTACGTTTGGTTCATGCGACGCGCTGATCTCGCGAATCGGTGAG  
CCTTGATTTGATGAAACGCGCAATATCACCCCGCAAAAGTGAACATGGCGTCGATACCGCGTGGCTGGTGGATCACC  
ACACAGAAGATTTCCCGCCAGCTATGCGCTCCAAACACTGGCTGGAGCTTGGCGCAACACAGAAAACCGTACGCAATACC  
TTGCGGCAACTGGCACCGTTCGACAACGCTCTCGGCACCCTCAACAAGCGTATGAAAAGCCTTTGGCGGGTGGTCAA  
TCGCATTTCTGATGAAGGTATCAGGTGATTGCGCTCTCCACCTGTACGGGATCGACAGCTATAACAAAAGACACCGCA  
TGGTGGCGCTCAACCTCGCCAGCATATCAGCGATCTTCCCGGTTACACGCTAGTGTGATGATGAACTAACGATCTGGAA  
ATGGGCAAAATTTCTCGTCCGCTGTAACACTCACCGTTGGTACCGCTGCTGCACTCCGCTATTATCTCAATGAACTTGTAC  
TCCGGCATGTCATCAACTATGAACATAAATCCGCGGGATTTATGCAACAACGGGGCTGCCAGAGATGGCGATTGATA  
TCCGTCATTTACTGGACGCTAGCTGCAAGCGATGGTTGCGGATACCTTAGGCGAGCTTCCGGCGCTGAACACACGACTT  
ACGAAGCCGTCAGTCCGCAACGTCAGACGGAAATGCAGATGGTGAATCTGTGCTTGGAGCATCGGGGAGGTGAAATG  
A

>Cluster\_24918

ATGAGTAA<sup>G</sup>TCTGAAAATCTTTACAGCGCAGCGCGAGCTGATCCCTGGCGGTGTTGAACTCCCTGTTCCGCGCTTTTAC  
TGGCGTGGCGCGCACTCCACTGTTTATCGAAAAAGCGGACCGGCTTATCTGTACGATGTTGATGGCAAGCCATATATCG  
ATTATGTCGGTTCCTGGGGCCGATGGTGTGGCCATAAACCATCCGGCGATCCGCAATGCCGTGATTGAAGCCCGGAG  
CGTGGTTTAAAGCTTTGGTGCACCAACCGAAATGGAAGTGAATAAGGCGCAACTGGTGAACCGAATGGTCCCGACCATGGA  
TATGGTGGCATGGTGAACCTCCGGCACTGAAGCGACGATGAGCGCCATCCGCTGGCCCGTGGTTTTACCGGTCGCGACA  
AAATTTAAATTTGAAGTGTGTTACCAAGCTTACCGTCAAGCTGCTGCTGCTGGTGAAGCGGTTCTGGCGCATCAGCTTA  
GGCCAGCCAAATTCGCGGGGCTTCCGGCAGATTTCCGCAACATACCTTAACTGTACTTATAACGATCTGGCTCTGT  
ACGCGCGGCTTTGAGCAATACCGCAAGAGATGCGCTGATTTATCTGCGAGCGGTGGCAGGCAATGAACTGCGCTTC  
CACCCTGCGCAGATTTCTGCAAGCTTCCGCGCGCTGTCGACGAATTTGGCGGCTGCTGATCATCGATGAAGTGAATG  
ACCGGTTTCCGCGTACCGCTAGCTGGCGCACAGGATTTACGGTGTGGAACCGGATCTCACCTGCCTGCAAAAATCAT  
CGGCGGTGGAATGCCGTAGGCGCATTCGGTGGTCTGCTGATGTAATGGATGCGCTGGCCCCGACCGGTCGGTCTATC  
AGCGGGTACGCTTTCCGGTAACCGGATTCGATGGCTGCTGGTTCCGCTGTCTGAAATGAAGTCGCACAGCCGGCGCT  
CACGAGCGCTGGATGAGCTGACAACGCTTGGCAGAAGCTTGGCGGAAGCGGACAGGAGGAGCCGAAATCCCGTGGT  
GGTAAACCGCTTGGCGGATGTTCCGTTATTTCTTTACAGCCGAGTCCGTCAGCTGCTATCAGGATGTTGATGGCT  
GTGACGTGGAACGCTTAAAGCTTCTTCCATATGATGCTGGACGAAGTGTATCTGGCACCGTCAGGTTTGAAGCG  
GGCTTTATGCTGTGGCGCACAGATGGAAGATATCAATAACACCATCGATGCTGCACCTCGGTTGTTGCGAAGTTGTA  
A

>Cluster\_61492

ATGCTAACATCTTTAAACTTCA<sup>T</sup>TCA<sup>T</sup>TGAAACCTTACACTCTGAAATCATCAATGATTTTATAGATAATAACTTATAT

ATTATGTTTTTTTTCAATGATAATTGCATTCGTCGATAAATACTTTCAGCATAAAAAATATAATAATCACTGCTATAGTTT  
GCTTATTGTCACATAATTTTACGTGGCAGACAAGAAAATATAATAAAAAACCTTATCTTCCCTTTCTATATTTTTTA  
ATAGGCTTGCTTGATTAATTTGGTATTCTGCGTTTAAAGTAGATAATTCGCCATTTCTGCTACTTACCATAGTTATTT  
AAATACTGCCAAAATATTTATATTTGGTTCTTTTATTTGTTTTCTTGACACTAAGCTAGCCAGCTAAAAATCAAAAAGGAGA  
GTGTTATATACAAATTTGTATTTCTGTCATTTCTAATGCTGGATATGCAATGTATATTAATAGCATTATGAAATGAC  
CGCATTTCTTTTGGTGTAGGAACGGCAACAGGAGCAGCATATTTCAACAATGCTAATAGGGATAGTTAGTGGCGTTGCGAT  
TCTTTATACATAAGAAAAATCATCTTTTTTATTTTATTTAAATAGTTGCGCGTACTTTATGTCTGCGCTAACACAAA  
CCAGAGCAACCCCTACTCTGTTCCCTATAAATTTGTGTTGCTGCATTAATAGCTTATTAATAAATACCCCAAGAAATTC  
ACTTCCTCTATTGTTCTACTAATTTGCTATATTAGCTAGCATTGTTATTTATTTAATAAACCAATACAGAATCCGCTATAA  
TGAAGCATTAATGACTTAAACAGTTATACCAATGCTAATAGTGTACTTCCCTAGGTGCAAGACTGGCAATGTACGAAA  
TTGGTTTAAATATATTCATAAAGTCACCTTTTTTATTTAGATCAGCAGAGTCACGCGTGAAAGTATGAAATTTGTAGTT  
GCAGAACAATAAGGCTAAGAGGGCATTTGGAGTTTTCTAACGTACATCTACATAATGAGATAATGAAGCAGGGTCACT  
GAAAGGCTCGATGGGAATTTTTCCACACTTTTCTCTATTTTTTACCTATTTTTATATAGCATAAAAAACAGGCTTTGG  
GTTTGTGATATTAACGCTTGGCATTGTGGGATTGGACTCAGTGATGTATCATATGGGCACGAGCATTCCAATTATC  
ATTATATCCGCTATAGTCTCTTACTCGTCATTAATAATCGTAACAATACAATTAATTA

>Cluster\_7225

ATGAAATTTGAACGCCATCATGAAATATGAAACGACTCAGTAAATTCGGTTCGTAAAAGTATCCGATCTGTCCAATAG  
CCTCAATGTAACGAAAGAACTATTCGTTCCAGATCTTAATGAACTTGCAGGCTGGCTATCTGACTCGATGTATGGCG  
GTGCTTTTTATCGTCTAGACTCGCTTGACTATTGCGAAAAATGAAATCGCTTATGCGCTTGAAAAATATGATACAGCC  
CAGGGAATAAAAAAGGCCACTCAACTATGAAAAGTCAAGTATGCGTTATTTGTTGTTAATGTTGATATCATCAGTTA  
TTTTCCGAGGCTTCCACTATCGGAGAAATCGCTTTCGGCAAGTAAATTTTATATTTTCCCGGGGGGAAAGGCTGTAACC  
AGGCGCTGGCAGCAAGCTTTGCGGATACGTATGTTTATTTTCAACAAAAGTAGGTACAGATCACTTTAGTGATATGCG  
ATCAACTTTTATGAAATTCGCTAAGATTTTATAAAGTATAATTTTATCAACGAAAGAAACGCAACCCGAACTGCCAGAT  
CCTGTGTTAATGAAAGTACTGGCGATAATGTTATTTGCGATCTATCCCGTGCCAAACATGCAATGTCTCCGATGAAATA  
CTATTCAGAAAGAAGCGATTATTAATTTCTGATGTCATACTTCTGAGCTCGAAACAAATATACCGCTCTGCAACAAGCG  
ATCACATTGGCGCAAAAAACAGTATCCCGGTCATTATTAACCGGCACCCCTATAATGATATCGTCAACGAACTTATTCA  
GGATGTTGATATATCACCCCAATGAAACAGAAGCTGGTTTACTGTCCGGCATAGACGTACACGATCTTGAATCAGTA  
AACGAGCTCGAAGAGTATCCACATAAAGGGGTAAAAAACAGGTTATCACGCTCGGTAGCAAGGGCTCGCTCGCATTT  
GATGGCAAAAAATTCATTCATTTCCGCGAGCTTTCCAGCGGTCGTTAAAAATACGGCAGGAGCCGGGATGCGTTTAAACGG  
CTCTCTGGCATCAGGACTTGGCAAGGAAATCACTGGAAATCAGCACTGTGTTATGCCAGCGCTTTGATCCCTAGCGG  
TGGAGACAAGCAATGCTTCCGACATGCCGAACATGAATCTGTGATACATCGAATTCAGAGTATACATATACAGCAAAT  
ATTTTTACGCATTA

>Cluster\_62125

ATGGCAACAGCATGGTATAAACAAGTAAATCCACCACAACGGAAAGCTTTTTTTCCGATGGCTTGGATATGTATTTGA  
TGGCTTTGATTTTATGATGATATTTACATTTCTATATTAATAAAGCAGATCTGGCATTACGGATATTCAGGCTACTTT  
TAAATAGGCAGTGGCTTTCATAGCCAGACTTATGGAGTGGTTTTTTTTGGTCCCATGGCTGATAAATATGGTGGTAAAG  
CCAATGATGATGTGGCAATTTTCAATTTACTCAGTCGGAACAGGCTTAGCGGATTTGCTACAACTTATATATGCTCGC  
AGTTTGGCTTTTTTATGTTGGCTTAGGGATGCTGGTGAATATGCATGTGCTTCAACTTATGCGGTAGAAAAGTTGGCCTA  
AAAAATCTCAACTAAAGTACTGCTTTTTTGGTAAAGTGGTTTTTCTGTGTTGAAAATATATTTGGCGCAAAAATACTCT  
CAGTTTGGCTGAAGTATATGATGAGAAACTCTTTTTTATAGCCGCTGTACCAGTTTTTACTAGTCTTTTGGATCAGAAA  
AAGTGTCCAGAAAGTACAGGAGTGGATTGAAGATAAATAAGGATAAATCAACATTTTTTGTCTGTCTTCAGAAAACAC  
ATCTTTCAATCTATGATCGTTTTCTCTGCTGTTTTTGTCTATTTGGTGCAAACTGGCCGATAAACGGACTACTTCTCT  
TCCCTAGCAGATAAAGGAGTAAATACAGTGGCTTTTCAACTCTGATGACAAATAGCAGTTTAGGAAACACGTACAGG  
TACAATATTTTTTGGTTTTTGGTGGTAAAGATTGGTGTAAAAAAGCCTTTGTAGTCCGCTAAATACTTCAATTTATTT  
TCCTTTGTCTCTTTTTTTTATTTCTGTGAAAAACTCTTCTCTATAGGATTAATGCTCTTTGGATTAATGTTTACAAAT  
TTAGGTATTCAGGGTGGTTCAAAATTTATATATGATTACTTTCCAACAAAATTAAGAGGATTAGGGACCGGCTTTAT  
TTATAACTTAGGGCAACTGGAGGAATGGCCACCTGTATTAGCTACATACATTTCCAGGATATATAGGCTTAGGCTTT  
CATTATTCATTGTTACGGTTGCATTTCTGCTTATTAATTTTTGTTAGTTGGTTTTGATATTCAGGTAATAATTTATAAA  
CTATCCGTGGCTAAATGA

>Cluster\_20749

ATGACCGTAAATTTCTCACGTAATGCATGAAACGCGAACCTGGGCGCTGTTTTATGTCTTCTTTTTGCGGGCCTGTT  
AATGGCGTCTGGCAACCCGTACGCTGCTATCCGATATTTCTTCTGTTTTCGATCGCTGAAATGGGCGGAGTCTCTCT  
TTGGTCTGTGATCGGTTCAATGAGCGGTATTTCTGCTCGGCGTGGTTAGTGAACCGCTTTGGGACCGGTAATGTATC  
CTGGTCCAGATGCTCTGCGCATTTGATTTGGATGATGATATTAAGTCTGGCACTCTGGCTGACATCGCCCTGCTTTGCG  
CGTTGGTCTCGGCTCTTTTGGGGCTAGTTTTGGTCTGCGGAAGTGGCGATAAACGTTGAAGGTTGGCGGCTGAGAGAG  
AAATGAATAAGACGGTTTTACCAGTATGCACGGTTTTTATAGCTGGGCACTCTGGCAGGCGAGGTGTCGGGATGGCA  
CTTACGGCTTTTGGCGTTCCGGCAACGGTGCATATTTTATGGCGGCGTGGTAGGCATCGCACCTATTTATATCGCCAT  
TCAGGCAATCCCTGACGGTACGGCAAAAATGCTGCGATGGCACCCAGCATGGTGAAGAGGCTACTTTTTTATCCGGG  
ATATCCAGTTGCTGCTGATTTGGTGTGTTGGTGTGCTGGCGATGGCCTTTGCGCAAGGTTCTGCCAACGATGGTTACCTTA  
TTAATGGTTGACGGTACGGTTTTAGCCCTACTTCCGGCTCGCTGATTATGCGGTTTTACCCTGGGATGACCGTTGG  
ACGCTTTACGGCGGTTGGTTCAATTGACCGTTACAGTCCGCTTGGCTGGTTCGGGCCAGTGCATAATGGGGCGGTTGG  
GTATTTGGGCTGATTTATTTTGTGATAGCCCTGGGTCCTGGGTTGCTGTTGTTACTTTGGGACTGGGTCCTCGTTG  
GGCTTCCGCTGACTATTTTCTGCGCCAGGATACCGGCCCGATGCACCAACCCGCTCAGCGTGGTAGCTACGACCGG  
TTATCTGGCTTTCTCTGTCGGGCGCCGCTACTGGGCTATCTCGGCAACATTATGGATTACGTAGTGAATGATGGTTG  
TACTGGCGCTGGTTATTTCTGCGGCTATTTGTCGGAAGCCGTCGCCAAACCCGATACCAAAACGAGCGGCGATGGAG  
AATAGTTGA

>Cluster\_54785

ATGCTTACCACCCCTTATTTATCGTAGCCATATACGTGACGACGAACTGTCAAAAAATCGAAGAAATGGTTTCGATAGC  
AAATCGCAGGAACATCGAGTCTGACGTAACAGGATCTTACTGTTTAAATGGTTCTCATTTTTTCCAGCTTCTGGAAGGTC  
CGGAAGACAGGTTAAATGATAATATCGGGCTATATCGCAGGATCCACGGCACTATAAATATTGTTGAGCTGCTGCGAT  
TACCGCCTGCTCGCCGTTTTGGCAAAGCGGGAATGGAATTTATTTGATTTGCGCTGCACGAGCGAGATGACGTTTTACA  
GGCCGATTTGCAAAAGGCACATCAAAATTTACGTAACCTTATGATGACAGAGCGCTACAATTTTTTCTACTTTTGTCT  
TTGCAACCGAACAATAACCTATTTTCGATATCCCTGCGGAAGACTCTGGCTTTTTATCGTGCAGGATCTGATAAAGAA  
CTTGATTTCTGTGCTTTTCAACCACTATAAACGACCACTTTTGGCTTTTCTATCTTATTTGCTGATCTTCTGCGGCGGAT  
AATCGTTTTTGAAGCATTGTGCAAAAAATGAAGATAGCCATCAGCCATAGCGGTTGGGACGCGTAAAGACGGGAA  
TCTACACAGCGGATCTCAAAAGTAAAGGCTGTGATTCAGTGGCACAGCACTTGAAGCTCGGTGATAAAATGATTTTCA  
ATCAATCTTATACCTATGACCTGGTTAACGAACCTGACGACTCTTTTTTACTTAATGAAATAAAGCCCAATGCTCT  
GGTGCCTGAACAATCATCGTTGAAATTTACTGAAAGTGAAGTCAATATCTCGGTTTGTAGGTTTGGCAAGCGATTAAT  
CGTAAAGGCTGCTGGTATCAGTGTAGCAATTTGATCATTTTGGCGAGTTTTGCTGGTTTTGTTACTCTGTCAGCTTC

CAGCCTGACAGAATTAATAACAGTCAGGAATTGATTACCAATGTTTCATAAAAAGTGGGCCACGGCAGGCAATTATTCAGGC  
GATCATAAAAATGCTGTACATCATTGAAATTCAGTCACTGCTATGGCGTGGCAACACCAGAAGAGTGGATGTGGCTTG  
AATCCGCAGGAATTGAGATGTTTCAGGGAGATCTGTTTGTAAAGCTAAATTGAATGGTATCCCTTCCATAGCGTGGCA  
GAGAAAAATAA

>Cluster\_7629

ATGGCTGACACTCGCCCTGAACGTCGCTTTACGCGCATTTGATCGTCTCCGCCCTACGTTTTTAAACATCACCGCTGAAC  
GAAAATGGCTGCGCGTGGCGCGGCGAAGATATATCGATTTCAGCATGGGTAACCCGGACGGTGCAGCTCCGCGGCATA  
TCGTCGAAAAAATTATGTACTGTGGCCACGCGCCGGACACGCATGGTTACTCCACTTCACGCGGCATTCGCGGTTACGT  
CGCGCCATTTCCCGCTGGTATCAGGATCGTACGACGTTGAAAATCGACCCGGAATCAGAAGCCATCGTACATTTGGTTC  
GAAAGAGGGCCTGGCGCATCTGATGCTGGCGACGCTGGATCATGGTGACACGGTGTGGTGCCGAATCCAAGTTACCCGA  
TCCATATTTATGGCGCGGTGATTGCCGGGGCGCAGGTACGCTCAGTGGCGCTGGTGGAAAGGTGTCGATTTCTTCAACGAA  
CTGGAGCGAGCCATTCGTGAAAGTTATCCGAAACCGAAGATGATGATCCTCGGCTTCCCGTCAAACCAACCGCGCAATG  
CGTGAACCTGGAGTTCCTTTCGAAAAAGTAGTGGCGCTGGCGAAAACGCTACGATGTGCTGGTCCATGACATGGCCCTATG  
CCGATATCGTCTACGATGGCTGGAAAGCGCCGTCATTTATGACAGGTACCGGTCACGCGATGTGGCAGTTCGAGTTCCTT  
ACGCTGTCCGAAAAGCTACACATGGCGGGCTGGCGTATCGGCTTATGGTTGGCAACAAAACGCTGGTTCAGCGCCCTGGC  
TCGTATTAAGAGCTATCAGGATACGGCACCTTTACGCGCTTCAGGTGGCGGCGATTGGCGGCTGGAGGGCGATCAAC  
AGTGCCTGGCGACATTCGCGAACAGTACAAAACCGCCGCTGATGATGTTGGTTAAAGGGCTGCATGAAGCGGGCTGGATG  
GTTGAAATGCCGAAGGCTTCGATGATGCTGGGCGAAAATCCCGAACCATATGGCGCCATGGGATCGCTGGAAATTTGC  
CAAGAAGCTCCTTAAACGAAGCGAAGGTTTGTGTCTCGCGGGGATTGGCTTTGGCGACTATGGTGATACGCATGTTCCGT  
TTGACTGATTGAAAACCGCGACCGTATTCGTCAGGCCATCAGAGGATTAAGAGCGATGTTCCGTGCCGACGGTTACTA  
CCGCCAGCAGCAAAACATATTCAGAAAACCGGAATA

>Cluster\_21680

GTGAGCCGTACTACAACCTGTTGATGGCGCTCCGGCAAGCGACACTGACAAGCAAAGCATTTCTCAGCCAAATCAATTTAT  
TAAACCGGTACCGCGCAATTTATGCGCTCACCTGCGCTTTTCTCTGCGGACTGGCAACTTTTCGCACTTCTCTATT  
GTGTGCAACCTATCCTTCCGGTGTCTTTCACAAGAGTTTGGCTTAAACGCCCGGAAACAGTAGTATTTACTGTCCATTTCA  
ACGGCGATGTTGGTATCGGTTTGTCTGTTACTGGCCGCTATCCGATGCCATTTGGTGCAAAACAGTATGGTTCACGGC  
GCTACTGTTGGCTCCATTTGTACGTTACTTTCGACATGATGACAGCTGGCAGGCATTTTGTATTGCGCGCTTGA  
TTGGGCTTTTCGTTAAGTGGCGTAGCAGCTGTTGGCATGCTTATCTTACGAGGAAATCCACCCGATTTTCGTTGGCTTT  
TCAATGGGGTGTATATCAGCGGCAACTCAATTGGCGGCATGAGCGGACGCTTAAATTAGCGGTGTCTTACGGACTTCTT  
TAACTGGCGAATGCTCTGGCGCAATCGGTTGTTTCGATTTGGCCTCGCGTGTGATGTTCTGAAAAATCCTCCTGAA  
CACGCCATTTTCGCGGACTTCGCTGCGCCCTAAGACGTTATTCATCAACTTTCTGCTGCACTGGCGTGGCGGGGATTA  
CCGTATTTTTCGAGAAAGGCTTTTTCGATGGGGCTTCGTCACGCTGTTTAAATTACATCGGCTATAGGTTGATGCT  
TTCCCCCTGGCATGTGATCAGTCAGGCGGTGGTGGCTTATATCGCTGGCTTATTTGACCGGTACATGGAGCTCACCCAAAG  
CCGGAACCATGACCACCCGCTATGGACGCGGTCCGGTGTGTTGTTTTCGACGAGGGTATGCTGTTTGGTTTACTGATG  
ACCTATTCAGCTCGCTGCTGGCTGATCTTTGCCGGAATGTACTCTTTCAGCCGGATTTCTCGCAGCCCATCCGTTGC  
CAGCACTGGATCGGCCCCCGCAAAAACCGCTTAAAGCCAGGCCCTCCTCGTGTATCTGTTCACTTACTATCGGGT  
CGAGTATTGCCGGACGCTGGTGGTGTCTTTCGCGATAACTATGGCTGGAACGGGCTCGGCGCATTTTATGCTCTGATG  
CTGGTATGCTCTGCTGGTGGGACGCGTTTGCATCATCGTCTGCACGCTGA

>Cluster\_35661

GTGGTTGCTGAAAACAGCCTGGGCACATTTGATCAAATAAAGCAGACCAACCGGGCGCGGTTTATCGCTGATTTGATCA  
GCTTGGTCCAGTCTCGCTGATCGATCTTCCCGTCTGGCGCAACTGGCTCCTGCCAGTATCACATAAAATTTGTCGGTGAGA  
TGCTCGAAGCACACCTGGTGCAAGAGCTGGAATCAAAGAGCGGGGAACCGTGGCCGTCGCGCGGTGGGGCTGGTGGTT  
GAAACTGAAAGCTGGCACTATCTTCTCTGCGCATTAGTTCGCGGGGAGATTTTCTTGTCTCGCGCATTCGGCGCAAA  
ACTGGTGGTGAAGAGTTCGAGGAACTGGCGTTAAAAGATGACTTGCATTTGCTGGATCGTATTTATTTCCCATATCGATC  
AGTTTTTTATCCGCCACAGAAAAAATTTGAGCGTCTAATCTCGATTTGCCATAACCTTCCCGGAATTTATGATACGGAA  
AATGGTATTTGATATCGCATGCCGTTTACGAGGATGTAAGAGAGATGGCGCTCGGCGAGGCGCTGGAGCAGCATACCGG  
CGTTCCGGTTTATATTCAGCATGATATCAGCGCATGGCAGTGGCAGGCGCTTGTGTTGGTGCCTCACCGGGGCGCGG  
ATGTGATTCAGGTGGTTATCGATCAACAGTGGGGGCGGGCTCATTACCGATGGTCACTGCTACACGCAGGACGAGT  
AGTCTCGTGGAAATAGGCCACACACAGTTCGACCCGATGGGAAACGCTGTTATTTGCGGGAATCACGGCTGCCTCGAAAC  
CATCGCAGCGTGGACAGTATTTGAGCTGGCACAGCTGCGTCTTAAATCAATCCATGAGCTCGATGTTACATGGACAAC  
CGTTAACCGTGGACTCATTTGTGTGTCAGGCGCATTTGCGCGGCGATCTACGCAAAAAGACATCATACCGGGTGGCGCGG  
CATGTCGGGCGCATTTCTTCCCATCATGGTGAATTTATTTAAACCACAAAAAATACTGATTGGCTCACCGTTAAGTAAAGC  
GGCAGATATCCTCTTCCGGTCACTCAGACAGCATCCGTCAGCAGGCCCTTCTCGCTATAGTACAGCACATCAGCGTTG  
AGAGTACTCAGTTTTCTAACCAGGGCAGATGGCAGGCGCTGCCTGGTAAAAGACCGGATGTATAACGGTCTTTGTTG  
ATTCGCTGTTTGCAGGGTTAA

>Cluster\_23989

GTGAGCAGAGCGCTTAAACAACTGAACGATACATTTGTTAAGAAAACTTTATGGTAAGCCAGCGGAGAAAAATACGTTCTA  
TAGCGATGGCGTAATCTGAGCGTGAAATATTTAACATCAGTAAATGACCTGGTACCTCACCTACAGGGCTGGAACCG  
GAAGGGATACCACACCGGAACCGCTGAAGCTGGGAAACATATCCCGATCTGAGCCTTAAAGCAGCCAGGAAAAAGCCGCA  
AAGTGTGCTGATGGCTGGCAGAAAGGAAAAACCCACGTCATGAACTGAACTACACTGTGCAGGAAGCGTTAAAACCCGT  
AACGGTTGGCGATGCGATCAGTTACTGGCTGGAACCGCACGTAAGGAAAAACCGTGTGATTTATGATGCTGAAAAGTCT  
GCCGTAATAATCACGCTAATACAGCACATCGGTAACATGGCCTGGATAAATGCGAATACGTCACCTGGCTGGCTGTTT  
GACCGGATACGCAAAAAATCCCGTAACGCTTGGTACATGATGACGCGTGCAAAACAGGCGCTTAAATCTGTGCTGTA  
ACGCGCTATGCGCTCAGTAACGCTCTGGATGATCTCAACGTTGGTGGACGTTGGTAAAAAACAGGCATAAGCGAACCGG  
TGCTTAGTAACAAGAAGACTGGGCGAATTTATACAGGCGCTGGATAAAAAAATAATCCCGCCCTACTACAGCGACTAATC  
CGCTCCTGATTTGTTGGTTGGTGGCAACCGGAACTGAGGCTGTGCGAGATCAGGGAGTGGGATTTTAAAGGAAATGCT  
CTGGACAGTACCGAAGGAGCACAGCAAAACGAAGGTAGCCATAATTCAGGCCAATACCGGAAAGCATTTTACCGTTCTGCA  
CACGGCTGGTGGAGCAGAACCGACACAGGGCTATTAATCTCGGGAACTGAAAACAGGAAGCCAGCGTGTGCAATACCGG  
AGATTCACGCACAAAAAATTAACCATCCGCACTGGTCACTACAGGATATACGGCGCACGTTTACCACGATGCTGAATGA  
TTTAGCCGTGGATCCGCTATTTGTCGAACAACCTCCGCTCACCAGATGCCAGGGATGACGGAGTCTATAACCACTCC  
GTTATCTCGATGCGAAACGTAATGCGCTGGACATGTGGACAGAGCGGTTAGAGATACTGGCAGTACTCACGAAAACGTA  
ACCACACTGCCAATAGCCAGAGAAATATAA

>Cluster\_46348

ATGGAAAACGCTAAAATGAACTCGCTCATCGCCAGTATCCGTTGGTAAAGGATCTGGTTGCTCTTAAAGAAACACCTG  
GTTAATCCTGGCAGACCTCATTTGGCTGAAGGTTTACCTTATGTTGGCTGACCGAACAGGATGTTACAGGACGCCCATG  
CGCGCTTATCCCGTTTGGCACCTTATCTGGCAAAAGCATTTCTGAAACTGCTGCCACTGGGGGATTTATGAAATCAGAA  
CTGGTTGCCATTCAGCATGCAAAAACCGCTGGAAAAAGAAATATCAGCAACCGATCAGCGGGCAACTGTACTGAAAAA  
AGATAGCCATTTGCCATTTCCGCTCCATAAAAGCACGCGGGGATTTATGAAAGTCTGGCACACGAGAAAAACTGG  
CTCTGGAAGCGGGTTGCTGACGCTTGTGATGACTACAGCAACTGCTTTCTCCGGATTTAAACAGTCTTTTAGCCAA

TACAGCATTGCTGTGGGCTCAACCGGAAATCTGGGGTTATCAATCGGCATTATGAGCGCCCGCATTGGCTTTAAGGTGAC  
AGTTCATATGTCTCTGATGCCCCGGCATGGAAGAAAGCGAACTGCGCAGCCATGGCGTTACGGTCGTGGAATATGAGC  
AAGATTATGGTGTGCGCTGAGGAAGGACGTAAGCAGCGCAGTCTGACCCGAACTGTTCTTTATTGATGACGAAAAAT  
TCCCGCACGTTGTTCTTTGGGATTTCCGTCGCTGGCCAGCGCTTAAAGCGCAATTTGCCAGCAAGGCCGATTCGTCGA  
TGTGTAACCCCTCTGTTTGTCTATCTGCGGTGTGGTGTGGCGGTGCTTGGTGGCGTGCATTCGGGCTTAACTGG  
CGTTTGGCGCATGTTCACTGCTTTTTTGGCGAACCAACGCACTCCCTTGTATGTTGTTAGCGCTCCATACAGGATTA  
CACGATCAGATTTCTGTTTACGATATTGGTATCGACAACCTTACCGCAGCGGATGGCCTTGCAGTTGGTCGCGCATCAGG  
CTTTGTGCGGGCGGCAATGGAGCGTCTGCTGGATGGCTTCTATACCTTAGCGATCAAACCATGTATGACATGCTTGGCT  
GGCTGGCGCAGGAAGAAGGTATTCTGCTTTGAACCTTCGCACCTGGCGGATGGCCGGACCTCAGCGCTGTGTGCATCA  
GTAAGTTACCAACAGATGCACGGTTTACGCGCAGAACTGCGTAATACCACCTATCTGGTGTGGGCGACGGGAGGTGG  
AATGGTGGCGGAAGAAGATGAATCAATATCTGGCAAAGGCCGTTAA

>Cluster\_32339

GTGGTAAAGGAACGTAAAACCGAGCTGGTCGAGGGATTCCGCCATTCCGTTCCCTATATCAATACCACCGGGGAAAAAC  
GTTTGTATCATGCTCGCGGTGAAGCCATTGAGCATGAGAATTTCTCCAGTATCGTTAATGATATCGGGTTGTTGCACA  
GCCTCGGCATCCGCTGTTGGTGGTCTATGGCGCACGTCGCAGATCGACGCAAACTTGGCTGCACATCACCAGAACCG  
CTGTATCAAGAATATACGTTGACCCAGCCAAAACGCTGGAAGCTGGTGAAGCAGGCTGCAGGAACATGCAACTGGA  
TATTACTGCTCCGCTGTCTCAATAACACACCGCTCAGAGGGCGCATATCAACGTCGTGCTTAATTTTA  
TTATTGCCAGCCGCTGGGCGTCGATGACGCGGTGATTAATGCTATAGCGGGGCTATCCGGCGGATTGATGAAGACGG  
ATCCATCGTCAACTGGACAGCGGTGCAATAGTGTAAATGGGGCGGTCGCTGTTTCCGTCACCTGGCGAGAGCTTAACT  
GACCTTGAAGAGATTGCCACTCAACTGGCCATCAAAGCTGAAAGCTGAAAAATGATTGGTTTTGCTCTCCAGGGCG  
TCACATAAGCAGCGGTGATATTGCTCTCGAACTTTTCCCTAACGAAGCGCAAGCAGGATAGAACCCAGGAAGAAAA  
GGCGATTACAACCTCCGTTAGGTCGCTTTTTGCGTGGCGCAGTGAAGCCTGCCGACGCGGCTGCGTCGCTGCTATTT  
AATCAGTTATCAGGAAGATGGCGCGCTGTTGCAAGAGTTGTTTCCAGCGACGGTATCCGTACCGAGATTGTTGATGAAA  
GCGCCGAGCAGATTGCTCGCGCAACAATCAACGATATTGGGCTTATTCGAGTTGATTGCGCCGCTGGAGCAACAGGT  
ATTTCTGGTACCGCTTCTCGCGACGCTGGAGATGGAATCGACAAATTCACCATTATTCAGCGCGATAACACGACTAT  
TGCCTGCGCGCGCTTATCCGTTCCCGGAAGAGAATTGGGAAATGGCCTGTGTGCAGTTTACCAGGATTGATTACTGCCG  
GCTCATACGCGGGCGAGGTTCTGCTGGAACGCAATTGCCGCTCAGGCGAAGCAGAGCGGCTAAGCAAAATGTTTGTGCTG  
ACCAGCGCAGTATTCACTGGTTCCAGGAACGTGGATTACCCTCAGTGGATTTGATTACTGCCGAGCAAAAAGCA  
GTTGTACAACCTACCAGCTAAATCAAAGTGTGATGGCGGATTGGGGTAA

>Cluster\_48608

ATGAAAAAGTTGATCGCACTTAAAGCATAAGCTGGACGAAATGAAAGCTATGGGAACCAATGCAAAAAAGAGGCATTGGC  
CAACATGGATGACTTTGAACAAAGCATGTTTCAATTGATGCTCAACCCCTTTCATCCGTTTGGGGTAAAGAAATACAAAG  
TGGCAGAGCCGCTTAGTGAGTCCGTCCTCAAGTACGAAAAAGCCATTGATGACTGAATAAGCTGGCCCTCCGAGCTG  
ACGGGGAACGCAGCAATAGCAGCTGTTGAGTCTATCTGGCGTCAATGTGCGCCGATGGCGAGACGCTTCCGTCGTTT  
CCTCTTAAAGACCCGAAAGCAGGTGTTGGGATTAGCCTATGCAACAAGTTTTTGAAAAATCCATTCGAAATTCGAGT  
TGCAGTTGGCGCTCCGTTAATAAGAAAAAGGCGCAAAATACCCTTCAAGCAAATCCTAAAGCAAAATGGCCGATGATT  
GGCAGTCTTAAAGCTCGATGGTTTGGGAGTAATTTGGGAGTTATGTTGACGAGGAAGAGGTTAACTTCTTCTCGTAC  
TGGTAATCAATCACTCTCTCGATCACCTAAAGCCAGCAATGCTCGAATTAGGCAAACTTTCAGGCCACAAACACATCT  
TCTTCGATGGTGAAGGAACAGCCGTTCAATTAACAGTCTGTATCTGCATTCGCGCAAAAAGAACGTCAGGCAATGGC  
GCTATTTTATCATGTTTTTCACTTCTTCCACCGGAATGGCGGACAGGCTAAATCCAAAGATGATGCAAAAGCAGGAT  
GAAGCTGAAAGAGCGCTTAGCTATGCTGGTGGCTGTTTAAAGCAGTGCAGTGAAGGCTACGCACAAGACATTACC  
TGCATCCGTTCTATATCACTCCATAGCCAGAAAGATTTCACTGAACGCTTCATGAAACGCTTAGACGATAACGAAGAAGG  
GAGATGGGCAAAAGATCCGAACCTCTGTTTACGAGTTTAAACGTAACCGCAGCTGGTGGAAAGTAAAGAGCAGAAGTTCAGA  
AGATGGTGAATTTATCGACTTTGAGCGGGTGACCCGGACTCTGGTTTTGCAACACGCTGGAAAAATGTTTATTCGCC  
TTGAAAACGGTGTGATTGTTCTGCTGCGAGCGGCATTAAGCATAAATATCTGGACGAGATCTGGAACAACAAAGAGAAGTAC  
CGTGGTCTGATTGTCGAGGTTCAATTGTCACGAGAAAACGCCGGATGGCAGCTTACGCCACCACGACTGAAATGGCCGG  
TTGCTTACGCGATACAGAAGATCGAATCGGAGATAAAGAATGA

>Cluster\_54669

ATGATTAATCGCATCGTATCGTTTTTTTATATATGCTGGTGTATGCATACCCCTATGCGTAGCGTACTTTCACTCTGG  
TGAAGTATGATGAGGTTCTGTTTTCTTCCGCGGTTTTTTATGTCATTATGTTGGATTGTTGGCGGCTCTATTTCTGGG  
TCTATCGTGAACGCCACTGGCCGTGGGGAGAAAAACGCAACCCAGCTCCCGAGTTGAAAGATAATCCGCTCTATCTCCATTATC  
ATTCCTGTTTTTAAAGGAGAAAAACGTTGAGGAAACCATACACCGCCGTTTTAGCACAGCGTTATGAGAACATTGAAGT  
TATTCGCGTAAATGACGGTTCAACAGATAAAACCCGTCGCATCTCGAATCGCATGGCTGCACAAATTCCCATTGCGGG  
TCATTCATCTGGCGCAAAACAGGGGAAAGCCATTGCGCTTAAACCGGAGCTGCCGCGGCAAAAAGTGAATATCTGGTG  
TGCATTGATGGCGATCGGTTATTAGACCGGATGCGCGGCTATATATTGTTGAAACCGATGTTGTTACAACCCGCTGTTGG  
TGCCGTAACCGGTAATCCTCGTATTCGAACACGTTCTACCCTGGTGGGTAATAATCAGGTTGGCGAGTATTCCTCAATTA  
TTGTTTTGATCAAGCGAACCCAGCGTATCTATGAAACGATTTTACCCTTCCGGTGTATTGCGCGATTTCTGTCGACG  
GCCCTGGCAGAAGTGGTTACTGGAGTGACGATATGATCACGAAAGATTTGATATTAGTGGAGCTGCAGTTGATCA  
GTGGACGATTTTTTACGAGCCACGGGCACTGTGCTGGATATTAATGCTGAAACGTTAAAGGGCTGTGAAACAGCGCC  
TGGCTGGGCTCAGGGCGGTGCAGAAGTATCTCAAAAATATGACAAGGTTGTGGCGCAAGAAAACCTTCGAATGTGG  
CCGCTGTTTTTTGAAATACTGCCTGACGACAATATGGGCCTTCACTGCTGGTGGTGGTTCATTATTTACGAGTCCA  
TGGCGGTGATCCGTTAAATATTGAATTGACACATATCGTGCAGACATATCGCGGAATATTATTGTTGATCGTTATGTT  
TACTGCAATTTATTGTCAGCCTGATGATCGAGAATCGCTATGAGCATAATCTGACTTCATCGCTTTTCTGGATTATTTGG  
TTCCCGGTTATTTCTGGATGCTGAGCCTGGCAACGACATTGGTATCAATTTACAGAGTCATGTTGATGCCTAAAAGCA  
ACGCGCCCGTTGGGTAAGTCCGATCGCGGGATTCTGAGAGGTTAA

>Cluster\_24256

ATGATTACTCTGCGCAAACCTTCCCTGCGGGTTGCCGTCGAGCGGGCGTAATGTCTGCTCAGGCAATGGCTGTTGATTT  
CCACGGCTATGACAGTTCGCGTATTTGGCTGGACAGGTAGCGGGCGGCAACAACAGTGTTCAGACTACCGGTGCTCAA  
GTAATACCGTCTTGGCAACGAATGTGAAACTTATGCTGAATTTAAATTTGGGTCAGGAAGTGTGAAAGAGGGCGATAAG  
AGCTCTATTTTCGACACTAACGTCGCTTATCCGTCGCAACAGAATGACTGGGAAGCTACCGATCCGCGTCCGCTGA  
AGCAAACGTCAGGGTAAAAACTTGTATCGAATGGCTGCCAGGCTCCACCATCTGGGCAAGTAAAGCGTTCTACCAACGTC  
ATGACGTTTCAATATGATCGACTTCTACTACTGGGATATTCTGGTCTGGTGGCGGCTCGGAAAACATCGATGTTGGCTTC  
GTTAAACTCTCTGCGAGCAACCCGCTCCTCTGAAGCGGGTGGTCTTCTCTTTCGCCAGCAACAATTTATGACTA  
TACCACGAAACCCGCAACCGAGCTTTTTGATGTCGTTTTAGCGCAGATGGAATCAACCCGGGCGCACATTAAGACTGG  
GTGTGACTACGGTCTGCAACCTGCGTGATAACTATCGTCTGGTTGATGGCGCATCGAAAGACGGCTGGTTATTTACT  
GCTGAACATACTCAGAGTCTCTGAAGGCTTTTAAAGTGTGTTGTTTCACTGACTACTGACTCGATGACTCGACGCGAGG  
TAAAGGCTGTGCGAGGGTTCTGGCGTCCGTTTGATAACGAAAAATTTGCTTACAATATCAACAACACCGCTCATGCT  
TGGCTATCCTCGACACGGTGGATCTCCATGGGCGCAACTGGGACATGATGTACGTTGGGATGTTACAGGATATCAAC  
TGGGATAACGACAACGGCACCAAGTGGTGGACCGTGGTATTGCGCCGATGTACAAGTGGACGCCAATCATGAGCACCGT



GATGGAAATCGGCTACGACAACGTCGAATCCCAGCGCACCGGCGACAAGAACAATCAGTACAAAATTACCCCTCGCACAA  
AATGGCAGGCTGGCGACAGCATCTGGTCAAGTCCGGCTATTTCGTCTTCGCAACCTACGCCAAGTGGGATGAGAAAATGG  
GGTTATGACTACACCGGTAGCTCTCAACCAACCCATACTACGGCAAGGCTGTGTCGGCTGATTTCAACGGCGGTAGCTT  
CGGTCGTGGCGACAGCAGGAGTGGACCTTCGGTGCAGATGAAAATCTGGTGGTAA

>Cluster\_23342

ATGACGACGATTCTCAAGCATCTCCCGGTAGGTCAACGTTATGGTATCGCTTTTTCCGGCGGTCTGGACACCAGTGCCCG  
ACTGCTGTGGATGGCAGAAAAGGAGCGGTTCCCTATGATATACTGCAAACTGGGGCAGCCAGACGAAGAGATTATG  
ATGCGATCCCTCGTCGAGCCATGGAATAACGGCGGGAGAACGCACGCTGATCGACTGCGCAGAACTGGTGGCGGAA  
GGTATTGCCGCTATTTCAGTGTGGCGCATTTTCAACACCACTGGTGGACTGACCTATTTCAACACGACGCCGCTGGCGCG  
CGCCGTGACCGGCACCATGCTGGTGTCTGCTATGAAAGAAGATGGCGTGAATACTGGGGTGACGGCAGCACCTATAAAG  
GAAACGATATCGAACGTTTCTACCGTTACGGTCTGCTGACCAATGCTGAACTGCAGATTTACAACCCGTGGCTTGATACC  
AACTTTATGATGAACGGGGCGGCTCATGAGATGCTGAAATTTATGATTGCTGCGGTTTCCGACTCAAAAATGCTGTG  
CGAAAAGCTTACTCCACGGACTCCAACATGCTTGGTGCACGATGAAGCGAAGGATCTGGAATAACCTCCAGCGG  
TCAAAAATCGTCAACCAATTATGGGCGTGAAGTTTGGGATGAGAGCGTGAAAATCCCGTCAGAAGAAGTACAGTACGC  
TTTGAGCAAGGTCATCCGGTGGCGCTGAAACGTTTACCGTACGCTGAGAAATGATGCTGGAAGCTAACCGCAT  
CGGCGGTGCTGACGGCTGGGCATGAGCGACAGATTGAAAACCGTATCATCGAAGCAAAAAGCCGGCATTATGAAG  
CCCTGGGATGGCACTGCTGCACATTGCGTATGAACGTTTGTGACCGGTATTCAACCGAAGACACCAATTGACGAGTAT  
CACGCGCATGGTCTGCTGAGTTGGGCGCTGCTGTACCAGGGACGTTGGTTGATTCCAGGCGCTGATGCTGCGTACTC  
TCTGCAACCGTGGGTTGGCAGCCAGATCACTGGTGAAGTACTCTGGAGCTGGCCGCGGGAACGATTATCAATCCTGA  
ATACCGCTCAGAGAACCCTGACCTACAAGCCAGAGCTGTACGATGGAAGAAAGGCGACTCGGTGTTTCGCCAGATGAT  
CGTATCGGTCAACTGACCATGCGTAACTGGATATCACGATACCCGCGAGAAAATTTTCGGTTATGCCAAAACCTGGCT  
GCTCTCTCTCTGCGGCTTCAGGGTGGCGCAGGTGGAGAATCTGAAAATAAAGGCCAGTAA

>Cluster\_42099

ATGAAACTGACAATAAATGAAAAGATAGGTTTTGGTGCAGGTGATATGGCTATTGCGATAGTAATGATGCTTTTAGCCAT  
GATCATCACTTATTTTTACACGGATGATTTGGTCTGAAACCCGTCGACTTAGGCATTCTGTTATTTTTCCGTACGTATCC  
TTGATGCTGTGATGATCAGGTTGTGGGAACAATGACGACAGAACGAATACAGTTGGGGAAAATATCGGCCGTGGTTG  
CTTTTTATGTCAATACCGTTTGGGATAAGCAATTTGGTTGATGTTTACCACACCTGATACCGATTATTCAGTTAAGCTTTT  
ATGGCCCTGGGCTACCTATGTTACTTACCTTACCTATACGTTAATCGTATTCCTTATGTTTCAATTAACCGTTA  
TCACGGATGATCCACAAGAGCGATTGAGCGCAATGGTTACCGTTTTGTTATGACAAAAATGGCCATGTTCCGCGTAACA  
ATTTATGTTCTTATCTGCAATGATCTTGGGAAGAATAACGTACAACCTGGGTTATCAAAATAGCAATGGGGCAATGGG  
AATCTGGCAACGTTTATGCTGATTTGTTTTTTAGCGTGAAGAGCGCATCTACCATCCAAAACCCAGTCTCGGTA  
TGGCCGCGCAGTTTCGGTTACTGATCAAAAATGATCAATGGCTCATTTTGGCGCTGTAATTGCGATCATATATGTTTGGC  
GGGATTATTCGTAACCTCTGCTGTCATATATGCAAAAATATTACCTGAATGGTGGGGATGCTTTAATTTACCGTTTTT  
AACTTCAGGCGTGTATGCGCTCTGTTCTGGCTATGATCGCTTGCACCTGGCTTACTCGACTCTACGACAAAAATAAAAAT  
TTCCGTTATACCAATTAAGTGGCGTTCTGGTGGTGGTGGTGGTGGTGGTGGTGGTGGTGGTGGTGGTGGTGGTGGTGGT  
ACATTTTATATGTTTTCGGTACTGATTTTTCGACTGATTTTTCGACTGATTTTTCGACTGATTTTTCGACTGATTTTTCG  
TGGTGAATGAAAACGGGGCAACGTTTTCGGACTGGCATTGGCGGGATTCCTTTTTTCAAAGTTTGGTATGGGAC  
TGGCGGGAGGTTTTATCGGAATCGCTTTAGCGTTTATGACTATCAACCTGGCGTAGAACAAACACCAGGCGTTGTGG  
GGGATGCTGCTGTTAATGACGATCATTTCCCGGATACTTAACCTGATACCGGACTCATATGAGATTTTATCTGATTTAA  
TAATGAATATACGAACAGATTAAGGTGTTTTACAGCTTAAAATATATGA

>Cluster\_42553

ATGAACACAAAATAACACCCCTGGATCTCACGCCACATTTTGGCTTAGACGGTGTACAGCCCTTTAAAGACAGGCGGCCAT  
GATGCCGTTTTCTGGGGCCATTCGGTTGCCAAAGAGCAACTGGCAGACAGCTGGCAAGAGATGATCAATCAACCGTAT  
CACCACGTAAGCGACTGGTTTACCTACACATTCCTTTTTTGTGCGACACACTGCACGTTTTGTGGTTTTTATCAGAACCGT  
TTTTAATGAAGATGCGTGTCTCATATACCGACGCCCTGATTCGTGAAATAGAAATGGAAGCAGACAGCGTATTCGATCA  
GTCTGCCCCATCCACCGGCTTATTTCCGGTGGCGGTACGCCCTTCCGCGCTTTCCGGCAGCAGATTGGCCAGAAATATCA  
ACACATTAAGAGAAAAGCTGCCACTGGCCCTGATTGTGAAATCACTATCGAAGGCGGGTACTGAAATTTTACGCTGAG  
CGAATCGATGCTTGCCTTGTATGACAGGAGCAACCGCTTCTCAATTTGGTATTAGTCTGTTAACAGCAAAAATCCGCAAGAA  
AATGGCCCGCACCTCGGATGGCCCAACCGCTATGCGTTTATGAAAAGCTGGTCAAACCGCGACCGGTGCGCGGTGGTCT  
GTGACCTGCTGTTTGGTCTGCGGGTCAAGATGCGCAACCTGGGAGAAAGATCTGGCTATTGCTCGCGATATCGGCTC  
ACAGGCGTGCATCTCTATGCGCTCAATGCTGCGTCAATGCTGCGCAATGACACCGCTGGGCAAGCGTGGAAAATGGCGCTACCT  
GCCCTCTCCGGCAGAACGTCGCGATCTTACCTGCAAGGGTGTGATTTTATGGACGATGCCGGTTGGCGCTGCATCAGTA  
ACAGCCACTGGGGCGTACACACCGCAACGCAATCTCTATAAACCCTGCTGATTAACAAGGTGCGGATTTGCTGGCCTTT  
GGTTCCGGAGCCGCGGTTGATTAATGGGTACTCTGGATGAACGAACGCAATCTTACAGACTGGCATGAATCCGTCGC  
AGCAGCAAAAACCCGCTGATGATGATCGTAAACCGCGAAGCGTAAACCGCGAGTGGCGTCAATCTTACGCTGGGCA  
TTGAAACGGCGCTGTACCGCTGGACGAACTTACGCCACATGCCGAAAACCTCGCGCTTACGCGCCAGTGGCACCAA  
AAAGGCTTAAAGCCCGATGCGTCAACGTCTGCGGTTGACCAATGAAGGTGCTTTCTGGGCAAGCAACATTTTCGAGTC  
TCTTAATGAACGATTCAGGTACTTAATGCGCCAGCAATTCGCGTTGAAAACCATAA

>Cluster\_64801

ATGCGCGCAGCAGACCATTTGATCTGGCGTATGCCGACGCTCCCGCAAGGAGGCTGTGCGGTTATTCGGCGCAAAGG  
CTACAACATCACCTGGAACCTGGTACGAACAACCTGGCAGACGCGCACGCGCCGTTACCGTTGCCAAAAGCTGCCCGGA  
TGGATGCTCTGACCAACAATCCGTGAGGAAGTGGAGCGGCTGTGAGTGGGATACCCGCTGAGGAATTTACCCGCACA  
CTGGCTCCCGGTTGCCAAAAGCTCGGATGGTGGGGAAAACAAATCATCTGGATGACAGGGGAAACCGGAAGGAAATCGA  
ACTGGGCAGTCCCGCTGCTGTCGCAACCTTTATAACGTCAAATACCCGTACAGCGTACGGGCGGGACGTTATGCACAGA  
TGATGAATACCGCAGACCTGTATCCGTACTGGCAGTATGTGCGGTTATGACAGCAGAAACCGCGGCAACATGCCCGG  
CTGCATAATATGATTTTCCGGTATGACGATATTTCTGCGCACACATATACCCGCCAATGGCTGGGAGCTGTGCTGGCG  
CGTTCTGTCGATATCTGCGGCCCCGAATGAAAGAAGTGGGATTACAGGTCAGCTATGGTCTTCAATTCATGGATACCCGG  
AAGTGGAGCCCGGACGGATGAAAAGCACAGGAGAGATTTTCCGACATCGTCAACCGCTTGGACAACGGTCCGGTAAAA  
ATGACGCCGACGTTGGTGGTCAATAAACCCTGGTCCGCGGCTTCCGCGGCTTCCGTTACTGATCAGGCGCTGATTCGAAA  
GAAAGTTTACGCGCACGCTGCGTGGTGGTGGTGGTGGTGGTGGTGGTGGTGGTGGTGGTGGTGGTGGTGGTGGTGGTGGT  
TGTGGCTTAATCGTCTGGCGAAATCACGTCACGCGGGCGTGGATCCGGGCTGGGTTTTATGACGGAATCCGTAGCT  
GAAGCCGTACATACGCGACCGGGAATATGCCAGCCGTTTACTGGTGTGATGAAAGGAGAAAGTCTGGCTACCGCTGCTGA  
TGCTGCCCTGAAAGCAGAGGATTTACAGCGTCTGCCCTCTGATGGCAGAACACAGGCGGTTATGTTGGGACGAAAA  
ATCACCGCTGCTGACGTTGTTGGCAACCCGTCAGGCGCACGCGCCAAAATTTGGTGTGAAACATCACAGACGTCGCGAGG  
CAGAAATGACCGGCTGATGCTGGTCAATACGCGGCTATCTGCACAGTCTGTAAGCCCGGATGCTGACGGGAT  
GATTGACGTAAGGAGGATGTTGGAGTGAATAAGTGA

>Cluster\_25537

ATGACAACGGACGATCTTGCCTTTGACCAACGCCATATCTGGCACCATACACATCCATGACCTCCCGCTGCCGTTTTA  
TCCGGTGGCAAGCGCGAAGGTTGCGAGCTAATTTTGTCTGACGGCAGACGCTGGTTGACGGTATGCTGCTCGTGGTGG

CGGGATCCACGGTTACAATACCCCGCAGCTTAATGCGGGCATGAAGTCGCAAAATGATGCTATGTCGCATGTGATGTTTT  
GGGGTATACCCATGCGCCCGCCATTGAGCTGTGCGGCAAAATGGTGGCAATGACGCGCAACCCTGGAATCGCTTTTT  
TCTCGGGACTCCGGCTCCGTAGCGGTAGAAGTGGCGATGAAAATGGCGTTGACGTACGGCAGGCCAAAGGCGAAGCGC  
GCCAGCGTTTTCTAACCTTCCCGCAATGGTTATCATGGCGATACCTTTGGCGCGATGTCGGTATGCGATCCGGACAACCTCA  
ATGCACAACCTGTGGAAAGGCTATCTGCCAGAAAACCTGTTGCTCCCGCCCGCAAAAGCGTATGGATGGCGAATGGGA  
TGAGCCGATATGGTGGGCTTTGCCCGCTGATGGCGGCGCATCGTCATGAAATCGCGCGGTTGATCATTTGAACCGATTG  
TCCAGGGCGCAGGCGGATGCGCATGTACCATCCGGAATGGTTAAAACGAATCCGCAAAATGTGCGATCGCGAAGGTATC  
TTGCTGATTGCCGACGAGATCGCCACCGGATTTGGTCGTACCGGCAAACTGTTTGCCTGTGAACATGCAGAAATCGCGCC  
GGATATTTTATGTCCTCGGTAAAGCCTTAACCGGCGGCAAAATGACCTTTCCCGCCACGCTCACACGCGGAGGTTGCCG  
AAACCATCAGTAACGCGGAAGCCGGCTGCTTTATGTCATGGGCCAACTTTTATGGGCAATCCGCTGGCTGCGCAGCAGCA  
AACGCCAGCTGGCGATTCTTGAATCTGGCGACTGGCAGCATCAGGTGGCGGCTATTGAAGCGCAGCTACGCGAGCAACT  
TGCCCCCGCTGTGACGCGGAAATGGTTGCCGATGTGCGGCTACTGGGGGCAATCGCGGTGGTGAACCACTCGTCCGG  
TGAATATGGCAGCGCTGCAAAAATCTTTGTGCAACAGGGTGTCTGGATCCGGCTTTTGGCAAAATGATTTACCTGATG  
CCGCCCTATATTTCTCCCGCAACAGTTGACGCTGTGACCGCAGCGGTTAACCGTGGGTCAGGATGAAACATTTTT  
TTGCCAATAA

>Cluster\_34177

ATGGACGACAAACAATTGACAGGCTCTGGCTAACGAACTGGCCAAAATCTCAAAACCCTGAAGATCTCAGTCAGTTCGA  
TCGCCTGCTCAAGAAAATCAGTGTGAGGCTGCTCTCAACGCTGAACTGACTCACCATCTGGGACATGATAAAAATCAGC  
CCAAATTTGGGAACCAACTCCCGTAAATGGCTATTCCACGAAAACCGTCAACACTACCGACGGGCGATGGAATACGTACT  
CCACGTGATCGTGTGGTTCTTGAACCAACTGTTGGAAGAAAATCAGACCGCATACCGGCATGGCAACAGAT  
CCTGGCGCTGTATGCCAGAGGATGACTACCGCGAAAATTACCTCAGTCTTCAAAGAAATGTACGATGACGGCTCTCTC  
CGGGCTGATATCGAAAGTACCGATGCGCAATCGACAGGTTGTAGATGGCAAAACCGCTCTCTGGATGCGATTTAT  
CCCATTGTTTATCTTGAATGTATGTCTGAAAGTACGGCAGGACAGCGGGTTATCAACAGAGCGGTTCTTCCGCT  
GGGTTTAACTTGAATGGTTCAGAAAGAGTCCAGGTATGTTGCTGGCGGAAAATGAAGGTGCAAAAGTTCCGGCTGAAATG  
TACTGACGGAACGAAAATCGCGGGCTGAACGATATCCTTATCGCTGTGTGACGCGCTGAAAGGCTTCCCGAAGCG  
ATTAATGCCGCTTACCGGAGACGAGATCCAGTTGTGATAGTACACATGGCAGCAACAGCCTGCGGTTCTTGGCGTG  
GAAAGACTATAAAGCGGTAAACCGTACCTGAAACAGGTTTACCGCGCAGCCGGAAGAAGGCGGTTGACGGCGCTGG  
ATGCGTTCCGGGAAGGATGGGATGCACGGTACCGCAGATAAGTTCGCACTGGCGGCAAACTGGCCGAATGTTGCCAAC  
TTCTTCTGTATTCGGAGGCGATCCGCAAGGTTATCTACACCACTAACGCAATCGAATCGCTGAATAGCGTATCAGACA  
TGCGATAAAGAAACGGAAGTGTCCCGATAGATGAATCGGTGAAAAAGTGTAGAGGCTGGCTATCCAGTCAGCATCAC  
AGAAATGGACGATGCCACTTACGACTGGCGGATAGCCATGAGTCGCTTTATTTATCGAGTTCGGTGACTGTTGTAGTCAA  
CTAAAACCTGGCCACCGCTTAGAGTTTTTCCAGTATCGTTTTCTGATTCGTTTGGTGGTAACCCACCATTATATTCGTC  
CGGCTTAGTGCGCTGTAA

>Cluster\_16765

ATGTCGGATGACAAATTTGATGCCATTGTGGTCGGTGGCGGCTTGGCGGTAGCGTTGCCGACTGGTCAATGGCGGAGC  
CGGGCTGGATGTCCTGGTATAGAACCGCGGACAGTCCGGATGTA AAAACATGACCGCGGGCGCTTTTATGCCACACA  
CACTCGAAGCAATTTATCCAGGCTTTCAGCATCAGCGCCGATAGAACGCAAGGTCACACGCGAGAAAATCTCTCTCTTA  
ACCGAAGAAAGCGCGCTTACCTCGATTTTACCGGAGCAACAGATGTTCCGCAACACGCGCTTATACCGTATTGGC  
TAATCGTCTGGACCCGTTGATGGAACAAGCGAGCAGGCGGCGCAGTTTATCCCGGGCTACCGCTGATGCAC  
TGGTTCTGTAAGGAACAAGTCTACCTGGCTCCAGGCCGGGATGATATTTCTGAAAGCAATGTTGGTATCTGGCTGAT  
GGCGTTAACTCGATGCTTGGCCGCTCGCTGGGAATGGTTTCCGCTTCCGATCCGCATCATTACGCTGTGGTGTAAAGA  
GGTTATAGCCCTGACACCAAGATCAACGATCGCTTAAATGTTACGGCGAGGAAGGTGCCGCTGGCTGTTTGGCG  
GTTCCCTTCTGACCGCTGATGGCGGGGATTCCTCTATACCAACAAGGATTCCTGATCGTTGGGGCTGGTTGTGGA  
TTGGGTGATATCGCCATGCGCAAAAAGCGTGGCGAAAATGCTGGAAGATTTTAAACAACACCCCGCATTCGCCCCGT  
GATTAGCGCGGCAAACTGCTTGAATATTCGCGCATATGGTGGCGGAGGCGGCTGTCGCAATGGTGGCGCAGCTGGTTA  
ACGATGGCGTGTATGATGTTGGTACGCGCGAGGCTTCTGCTGAAATTTGGGTTTACAGTTCGCGGCATGGATTTAGCC  
ATTCATCAGCTCAGGCTGCGCCGCAACAAGGATGATCGCGCAAAAGAACGCGGATTTCTCCGACAGCAGTTCGCGCA  
ATACAACCTGAGCTGGAACAAGTGTGTTATGCGGATATGCAGCATTTCCGCAAGATCCCGCGCTGATGGAACAAC  
CGCGCTGTTTAGCAATACCCAGCAATGGTGGCGGATCATGAACGATATGTTACCATGACGGCAAAACCAACAG  
CCGGTACGCAAAATGATCATGGGACACGGAAGAAAATGGGCTGATCAACTTCTGTAAGATGGCATTAAGGGAGCAAC  
CGCGCTATGA

>Cluster\_61367

ATGTTACTGGCAGCGCTATCTTTGTCCGACCATCGTATTGGTTATCTGGCAGCCGAAAGGTTAGGCATCGGCTGGAG  
TGCAACGCTCGGCGCACTAGTGGCTTAGTTACGGCGTGGTCCATCCGGTGATATTCGGTGGTGGGAATATCGTCT  
GGAACGCGAGGCTGCGTTTATCGCCGCTATTAATCATAGCTAGCTGCTGCTGATGAGTCCGCGCTTTTTGAAATGGCGGCG  
CTGCAGCTCTACGCTGGGTAATGGTCTGTTGCTGCTTACCTGGATGTCCTGCTCGGTCGCTGGCTTGGCTTGGCGC  
CCTGTTTGGCAATGATGGCGCGGCTTATTTTACACCGATGTCATCGCCATGCTGCTGGCTTTAGGGTTAGTAAG  
GCACTACGCTGGGTTCTGATGGCGGCGGATTCATTGCCGATACCGCGAGCTGCCGCTTATGTCFCAACCTGGTG  
AATATCGTTTCCGCTTCTTTGGCTCGGCTTTCGCGAATACGCTCGGTTGATGGTGGCGGATGATCGCCGCGAT  
TGTGGCAGGCTGGTGTATGATCTCTATTTTCGCAAGATATCCGCAAGACTACGATATGGCGCTGCTGAAATCTC  
CCGCAAGCGATCAAAGATCTGCTACGTTCAAACTGGTGGGTTGTTTACTGCTTCTGCTGGTGGGATTTTTCGTC  
CTGGAACCGCTCGGCTTCCGTTAGCGGCTTTCAGCTGTCGCGGCTGATATATTTGTCGTCGTAACCGGCTGCA  
TGCGATTAATACGGGTAAGTCTGCGCGGTCGCCCTGGCAGATGTCATCTTCTCGCTCGGATGATCTGGTGGTTT  
ATGGCCTGCGCAATGCGGATTAACGGAATATCTTTCTGGCGTACTCAACGCTGCTGGCGGATAACGGCTGTGGGCGGCG  
ACGCTCGGCACCGGATTCCTCACCGCTTCTCTCTTATTAAGAACAATATGCCGACGGTACTGGTTGGCGGTTGTC  
CATGATGGCAGCACGCGATCTGGCGTTATCAAAGAAGCGATGGTTTATGCGCAATGGTATGGCTGGGTTGGGACCGA  
AAATTAACCCAAATGGTAGCCTGGCTACGCTACTCTGGCTGCAGCTACTTTCGCAAGAATAATGACTATCAGCTGGGGA  
TATTACTTCCGTACAGGATATCATGACCTGCTGTCTGTTGTGACGCTGGCTGCGCTGGCGCTACGCTCTCTCTT  
CACTTTGTAA

>Cluster\_41944

ATGTCAGGAGAACACAGCTTAAAGCGGTACGAGGAGTTTTATTTGATGTCACCCGTACGGTCGATAACCCGGAAGAAAT  
TGCCCTCTGCGCTGCGGTTTTATTGAGGATGGTTTTATTACTCATTAAACAGGGAAGTGAATGGTTTGGCGAATGGGAAG  
ACGGAAGCATCAAAATCTTACACCATTCGCGTGGCGACTACCGGCAAACTGATAGTACCGGCTTTGTCGATACA  
CATATCCATTATTCGCAAAAGTAAATGGTGGGGCTATGGTGAACAATTTGCTGGAGTGGTTGAATAAACACACCTTCCC  
TACTGAACGCTGTTATGAGGATTTAGAGTACGCGCGGAGATGTCGGCTTCTTATCAAGCAGCTTTTACGTACCGGAA  
CCACCACGGCGCTGGTGTGGACTGTTTCAATCCAAATCCGTTGATGCGCTGTTTGAAGCCGCGAGTATCAATCAATG  
CGTATGATGCGGTAAGGTGATGATGGACCAAGCAGCGGATTTATCTGCTGCAACTGCCGAAAGCAGTATCACCACA  
AAGCAAGAACTGATTTGAACGCTGGCACAAAATGGTCTGCTGTTGATGCGATTACGCCAGCTTCCGCCCCTACCTCAT  
CTCTGAAACAGATGGCGATGGCGCAACGCTGAAAGAAGAAATATCCGGATACATGGGTACATACCCATCTCTGTGAAAC

AAAGATGAAATTGCCTGGGTGAAATCGCTTTATCTGACCATGATGGTTATCTTGATGTTTACCATCAGTACGGCCTGAC  
CGGTAAAAACTGCGTCTTTGCTCCTGCTCCTGCTCACTCGAAGAAAAAGAGTGGGATCGTCTCAGCGAAACCAAATCCAGCA  
TTGCTTTCTGTCGACCTCCAACCTTTACCTCGGCAGCGGCTTATTCAACTTGAAAAAAGCATGGCAGAAAGAGTCAA  
GTGGGCATGGGAACAGATATCGGTGCGGAAACAACTTTTAAACATGCTGCAACCGCTGAACGAAGCCTACAAGGTATTGCA  
ATTACAAGGCTACGCTCTCGGCATATGAAGCGTTTACCTGGCCAGCTCGGCGGTGCGAAATCTCTGGGCTTGACG  
ATTTGATTGGCAACTTTTACCTGGCAAGAGGCTGATTTCTGTTGATGGAACCCACTGCCACTCCGCTACAGCAGCTG  
CGCTATGACAACCTGTTTCTTTAGTCGACAAATGTTCTGATGATGACGTTGGGCGATGACCGTTCGATCTACCGCAC  
CTACGTTGATGGTCTGCTGGTGTACGAACGCAACTAA

>Cluster\_33470

ATGACGGCGATCGTAAATGAAACCGTGAGTGTGAAGAAAAAGCCAGCGGCGGGTATCTTTCCTCGGCGTTTGG  
CAATGCGCTCGAATTTTTGATTGTTGGCGTCTACAACCTTTTTGTTGGTCTATATCAGTACGCTTTTCTTCCCACCCAGTG  
CCGATCATAACGTCGCGCTTACTGGCATTGCAACGTTTGGTGTGAGCTTTTTATGCGTCCGCTCGGTGGGATTATC  
GTTGGTCCCTGGGCGATCGCTTGGGCGTAAACCGGCATGGTGTTCATACTATGCTCTGATGAGCCTCGGTACGCTGAT  
GATCGGCATCGCACCGAGCTATGAAACGGGCGGCTATTGGGAACCGCAACGCTGGTGTGGCGGCTAATTCAGGGTG  
TTGCGGCAGGTGGTGAAGTCGGGCTTCAATGTGCTACTGGTGGAGTCAAGCTCCGGCAAAATCGTCCGGCTTTTACAGC  
AGTTGGTCACTGGCGACTCAAGGCTGGCAACAACCTTTTGGCGGTGTTGTCGCTTTAGGTTTAAAGCGCATGGTACCGTT  
CGCCACAGGTTTCAAGAACCGTAATGGCAGAATGGGCTGGCGTGTGCCGTTTTTATTGGCGTGTATTAGCACCTATCG  
GTTGCTGGTTCGCTGAGCCTGGAATAAGCTACCTGAGCCAGTGGCAATAAAAAAGCTGCTACCAGCGAAAGCGCG  
TTTTCTCTGCTCCTGCAACATAAGGCGACTATCGTTAATGGCGTTTTACTCGCTATTGGTAGCAGGTTAGCAACCTATAT  
TTCCCTCTTTTACTATGGCACATGGGCGGCAAGTATCTGGCAATGCCCAACTATCTCAATGCGAGCGATGTTACTGG  
CGGGGTTAATTACGTTTGGTGGGCGCTGTTGGTGGGATGCTATGTGATTGCGTTGGGCGTAAAAAGCTGATTTTAAATC  
TCCCGTGTGATGGTCTTCTCTGTAGCTGGCGCTATTCTGGCTGTTGGTGAATACCAGCCCTGGCATGTTGCTGAC  
GGTGGTTTTCTGATGTTGCTGAGCTTTACCAGCTTTGGCGGTGTGCCAGTGTGTTGTTGATCTCTGAACTGTTGGCGAAAC  
GGATTTCGGGCATTAGGTTTCGCGCTGGTTATAGCATTGGCGTAGCAATCTTTGGCGGTTTTGGCGCAATATTTCCGCAAG  
CAATCCATCGTGTGCTGGATAGTCTGACGGCTCCGGCGTGGTATCTGGTGGAGGCAGTTGCTGTCGATGCTGGCGTT  
GTTGTACGTAAAAGAACCGGCCAAAGAATTGCAGTAA

>Cluster\_27377

ATGGGTCAAGTTTTTACCCTGGTTACCCGCCAGGGCGATCGTATCGCCATTGTTAGCGGTTTACGTACGCCTTTTGGCCG  
ACAGGCGACGGCTTTTTCATGGCATTCCCGCGGGTATTAGGGAAGATGGTGGTAGGCGAAGTGTGCGCACGCACCGAGA  
TCCCGCTGAAGTATTGAACAACCTGGTCTTTGGTTCAGTCTGTCAGATGCCGTAAGCCCAACATTGCGCGTGAATTTG  
GTTCTCGGTACTGGAATGAATGTGCATACCGATGCTTACAGCGTTAGCCGCGCTTGGCTACCAGTTTCCAGGCGGTTGC  
AAACGTCGAGAAAGCTTATGGCGGAACTATTCGAGCGGGATTGCGCGTGGGCGAGATTCTCTTCCGATTTGCCAA  
TTGGCGTCAGTAAAAAATGGCGCGCTGCTGGTGTGATGTCACAAAGCCGCAATGAGCCAGCGCTGAAACTCTTCT  
TCTCGCTCGCTTTCGCGCACTTAAATGCCCGTACCGCCGTCGCGTAGCAGAATATTTCTACCGGCTTGGCGATGGGGACAC  
CGCAGAGCAATGGCGAAACCTACGGCATCACCCGAGAACGACAGATGCACGCGCACCGTTCCGATCAGCGTGGCG  
CTCAGGCGTGGTTCAGAAAGCTGATGGCGGAACTCAAAGAAGAGGTGATGACTGCCCTTATCCCGCTTATAAACAACCGCTG  
GACAACAATATTCGCGGTAATCTCTCTTCTGCTGATTACGCAAAAGCTGCGTCCGGCTTTGATCGTAAACACGGGACGGT  
AACGGCGGCAACAGTACCGCGCTGACCGATGGCGCGGAGCGGTGATCTGATGACTGAATCCCGGGCGAAAGAAATAG  
GGCTGGTACCCTGGGTTATCTGCGCAGTACGCATTTACTGCGATAGATGCTGCGCAGGACATGTTGCTCGGTCAGCG  
TGGTCAACACCGCTGGCGCTGGAACCTGCGGATTTGACGATGAGCGATCTGACATTTGATGATGACGAAAGCTTTTTC  
CGCCAGAGCTGGCGCAATATTCAGTTGCTTGGCAGCGAACGTTTTGCTCGCGACGTTTGGGCGGTGACATGCCACTG  
CGAAGTGGACGAGAGCAAAATTTAACGTTGCTTGGCGGTTTCGATTTGCTTATGGGATCCCTTCCGAGCGACCGCGCGCGG  
ATGATTACCAGACATTTGCATGAACTTCGCCGCTGGCGGTGGATTTGGTTTTAGTGACCGCTGTGCTGCGGGTGGGCT  
TGGCGCAGCAATGGTCTTGGAGGCGGAATAA

>Cluster\_36087

ATGGATAAAGTCAAATATCCAACAGGCGTCGAAAACACGGCGGCACATTACGCATCTGGTTTAAATTTTAAAGGTAACG  
TGTACGGGAAAATCTTGGTGTCCCTGACACTGCGCAAGAACAGGAAGATCGCCGGGAACTGCGGACATCAGTATGTTTTG  
CCATCCGCACAGGAAGCTTTGATATGCTGCACAGTTCCTGACTCCCGCAACCTTCAGACTTTTGGGGTAAGTAAAAAA  
GAAATACCGTGAAGGAACCTTGAAGAAAAGTGGCTGGATCTGAAACGAATGGAATCTCTGCAATGCATTCAATCGCTA  
TGAATCCGTTGCAAGAACGATGGTTCCGAAAATGGAGGCAAGTACTGGTGTGATCGGTAACCAAGAGGAATTTGCTGT  
ATATCAGGAAAGATTTGCTTACCGGTTATCAGAAATCAACGAAAAAACAAGTAGCAGCAAAAAGGACGGAGCGTCTTACT  
GTAATTTATACATGACGACAATCGTGGAAATGTTTCACTTGTGCTGACATCAGGTTACTTAGAAGCAAAATCCCTTCCA  
GGGAATTAAGCCTCTTAAAGAGCCAGGCGAGCCAGATCCGCTAACCTGCTGACGAATTTATTCGCTGATAGATGCTT  
GCCGACATCAGCAGACGAAAACCTGTTGCTATTGGCTGTGTACACAGGAATGCGTACCGTGAATGCTTCCCTGCGGCT  
TGGGAAGATATCGATGAAAAGGCAAGCAATTTACCTACGGCGCAATATACGAAACTTGGTGAAGTCTACTCTACCGAA  
AATGAAGCAAGCACAACAGGTTGTGCACCTTATCCAGCCGCTATCAGTGTCTGAAAAATCAGGCTGAAATGACAA  
GACTGGGTAAAGCAGTACAACATCAAGGTGCAACTACGTTGAATATAGACGTTTCACTGAAACCATGAAATGACTTTTCTGTTT  
AACCTCAAGTGGTTAGAAAAGCGAACAGGTAGGTTTTGCTACAAAGTGCATCTGTTAGTGAATGCTGAGGAAACAGC  
CATTAAGCGTGCAGGATCAGGCATCGAAAGGCATACCAAGTCAAGCAGACACTTATGCGTGGTGTATATCTGCGCGGAG  
CAAACCAAGCTTCAATTGCCAGCAGATGGGCCATGCAAGTGCAGATGGTATTTCAATGTATACGGAGCATGGATGACT  
GACAGCAATGCAGAACAGATCGCAATGCTGAATCAGAAGTGCAGATTTATGTCCCAATGATGCCCAATAGTACCAAAAG  
TGACACCAGAGGCTTATTAATAACAGTAAGTTAA

>Cluster\_57950

ATGAATTACTCTACGATAAAGTGGTTCAGCAATTTGGCCCATATTTGGTAAAGCCGAAGAACTGGATACTTCGGCACGTA  
TGCCGGGGCTCTAACCCCGCCGCGAAATTCGTGATGCTGCAACTCTGCTACGTTGGGGCTGGCTTACGGCCCGGGG  
GGATGCTATTACGTGAAAGTCACTGCATGGGCTCAGCTCATACGTTGCAACATTTATCTGACGTGGCTCTCTGAAAGCG  
CTGCGGAATGCCCGGACTGGTTTGGCATACTTGGCGCAAAACACTTGTGTACGCGCGCAGTTACGGGTTGTACAAG  
CGGAAAGAGATTGCGTCTTGTGATGGAACAGCAATCAGTGGCGCCGGGGCGGCGAGCCTGAATGGCGACTACATATGG  
GATATGATCTCATACCTGTGCTTCTGATTTTGGTACCTGACAGCAGAGAGCGTGAACGGCTGGACCGGATTTGGCG  
CAAACGGCAGCAGATGACGATGCTGACCGGGGATTCGTTTCCGCTCCCGCAATGATCCGCTCACTTTTGGAGA  
AGCTGATTATATCGTCCGGGTTCACTGGCGAGGATTTGGCTGTTAACGTCAGAAAGGAAATGCGCTTTGACATGATGGGTT  
TTCTGCGCGGGCTGGATTCGCGTAAAGAACGGTGAACCACTGTAAATGATAGGCATTTAGGTAATAAAAAAGCCGGAGCT  
CCCTTCCGGCACGTTCAATGCGTATCACTTCCCTCCGAAAAAGCATTAATCAGTAAAACCCGACTGCTCAGCGAGAA  
TCCGTGAAAAGGACGAGTATGTTCCAGCGGAAACGCTGGAAAGCAGCGGGCCATGTTGCTAATGCTAACATCATTACCGGAA  
ATGAATATTCAGCAGAGCAAGTGGCTGATGTTACCGTCTGCGATGGCAATTTAACTGGCTTTAAGCGGCTCAAAGT  
TTGCTGCACCTGGATGCTTTGCGTGAAGAAACCTGAACTCGGAAAGCGTGGATTTTGTAACTACTCGCGCATTT  
TTAATTGACGACATAATCCAGCATCGTGGATTTCCCGCCAGAAAGTGCAGGATCCGAAAAGAAAGAACTAA

>Cluster\_25155

ATGTTCCCAAAAATAATGAATGATGAAAACCTTTTCAAAAAGCGGCGGCATGGGGAGAACTCCCTTAACTCCTCA

AAACGAACATCAGCGGTCCGGGCTGCGCTTTGCCCGTCGCGTCAGACTACCCCGCGCGTTGGCTGGCTGGCATGTTCT  
TACCGATTGCTTACACGCTGGTTTCGCATCCCGTCGCGGGCTGGTGGTGGCTGTTGTTGGTCGCGTGGCGCTTCGTCTCG  
CCGATTTAGCCTGGCAAAATAGCGAGCAGGGCCGTCGATCCGCTTAGCCGGGAAATTTACAACATAAAAACCGATGCAGT  
ATTAGCGGGAATGTTGGGTAGGCGTAATGGGCGTAAACGCATGCTCCACCGCGATGTTGATGATTAATGTGTGTAAT  
TGATGGGCGCAGGCGCCCGCTGTTTGTGCGGGTGTGGTGTGATGGTGGTCTCCCTGCCCTGTACCCCTGATGAAGC  
ACGGGCATCACCGTGTCTTCAATAGCGCACCGCTGGAATGGTGGCTCTCCCTTCCCATTTATGTCAATTTATCTCTGCT  
GTTTGGCTGGGTACGCTACCAGACGGCGACTAACTGGCGGAAATAAACGCAGGTTGAGGTCATGAGTACCGCGAGC  
GTATGACGGGCGTGTATAACCGACGTCATTTGGGAACTATGTTACGCAATGAATTTGATAACTGTCCGCGGCAATAATCGC  
GATGCAACGTTACTGATTTATCGATATCGACCAATTTCAAGAGCATCAACGATACCTGGGCGCATGATGTGGGTGATGAAGC  
GATTTGGCGCTTACCCGACAGTTACAATTTACCTGCGCGGTAGCGATGTGATTTGGTGGTGGCGGCGATGAGTTTG  
CAGTAATCATGTCCGGTACGCCAGCTGAGAGCGCCATCCCGCATGTTACGGGTGCATGAAGGGCTAAACACGTTACGC  
TTGCCGAATACGCCACAGGTAACTTACGGATTAGTGTGGGGTTGCGCGCTGAATCCAAATGAGTCACTATCGCGA  
GTGTTGAAATCGGCAGATTTGGCGCTCTACAAAGCAAAGAAAGCCGGACGTAACCCGACCCGAAGTGGCGGCTGA

>Cluster\_66947

ATGCGTGAATGAATTTCACTCAACGGCTGAGGCGTTCATTTGCAGAAAAACGTTACAGCGCCCTACAGGGTGCAGTT  
TTACGAAGCCCTGCGTTTTCGCTGGAATAAACAGCCATTAAGACCCGACGTTGAACAGATGCGGGATGCCGCGACAG  
ACTTTGGACGAAATGGCATCCCTTTGCTGAACCTGGCCACAGACTGCATTTAGTCTCTTCGTGAAAACAGTGGCGGAAAC  
TCTCTGGAATATACTCTTAGTTTATGGGTTCTCAGGAAGAGGCGCAGTAATCAGCGCCGGGATAAGAAGTGGTTCAAT  
TGTGGATGGACTGCAATTCGCCACCCTCTTACAGATGCAAAAGAAACAAATCCATCAGGCTATATGGCAATGGCTATTT  
ATCCGGTGGGATTTAATCATGATGACGGGACATTTATGTTCTGAATACAGAGCTAATACCTGAATGAGCAGCAAAATA  
AGCTCCCCGATTTCATGGAGTGGTGTCTCTGGTTTCTTTATGATTATCTGTTTGGTTCGATAAATACCGGCTATATG  
TTCCGTTCTTTTTCAGTGTATCACAGGTTAATATCATGGTCTCTGCCAACTGGAAAAGCCCTGACAGTGTTCGTACTT  
TTGCCGACAAATGATGCAATGGAGTATTTATCAGGATATACAGGGAGCAACATTTCTCTGAAATATAGCTGCCTTCTG  
AAAGCCAAAATGACGAGCTCAACTCGCTAAACATTTCTCAGGAGTTTGCATACCATGGTTAAGCACAGCTTTCAGC  
CATTATTTACCGGTCGCCAGGGGATCATCTGGACTGGCTTTCGCTCAGTGGGTTATCAGTTCCCATCCAGGGAAG  
CAGCAACTTCTGTCTTTATTACAGGGAGATGGCGCAACAGAGCTAATCAGCAATTAATGGTCAACGATGGCTTAGTCAA  
ACACTTCAACGTGTAAGAAACGGGCAACGATGTTTAAATATGCTGATATTTCTTGTCTATGCTCTCATGTTACT  
GGTTTTGGCATTATGGATTTACGCTCTATTAGTGACAACAGCATGGGTAACTTTAA

>Cluster\_19302

ATGACCCCGAACACCTTCCAACAGAACAGTATGAAGCGCAGTTAGCCGAAAAAGTGGTACGTTTGCAAAAGTATGATGGC  
ACCGTTTTCTGACCTGGTTCGGGAAGTGTTCGCTCGCGGTCAGTCAATACCGGATGCGTGGGAGTTCGCGCATCTGGC  
ACGATGGCGATGACCTGTATCACATCATTTTCGATCAACAAACCAAAGCCGATCCGCGTGGATAGCTTCCCGCCGCG  
AGTGAACCTTATCAACCAGTTGATGACGGCGATGATGCGGGTGTGCGTAATAATCCCGTTCTGCGCCACAAGTTGTTCCA  
GATGATTAACCTCACACGCTGAGTAATCAGGCGGTGGTTCCCTGCTGTACCATAAAGAGCTGGATGATGAGTGGCGTC  
AGCAGGCGGAAGCCCTCGCGATGCACTGCGCGCGCAGATACTGAATGTGCATCTGATTTGGTGGGCAACGAAAACAAA  
ATCGAGCTGGAAAGAAATTTACATCGATGACAGCTCTGCGGTCGAGGGAAAGAGATGATCTACCGTCAAGGAAACAG  
CTTTACCCAGCCGAACCGCGGATGAATATTCAGATGCTGGAATGGGCGCTGGACGTCACCAAAGGCTCAAAGGCGATT  
TACTGGAGCTGTATTCGGCAACCGTAACTTCTCATTAGCCCTGGCGGCAATTTGATCGGGTATTAGCCACCGAAATC  
GCCAAGCTTTCGGTTCGCGCAACATAACAATTCGCGTAAACATATGATAACGTTCAAATTTATTCGTATGCGCGC  
AGAAGAAATTTACTCAGGCGATGAAATGGTGTGCGGAGTTTAAATCGCTGCAAGGGATGCACTTGAAGGATTTATCAGTGGC  
AAACCATTTTTGTGACCCAGCGCAGCGGTCGAGAGTGAACCGAGAAAATGGTGCAGGCGTATCCACGTTATCTG  
TATATCTCTGCAATCCGAAAACGTTATGCAAGAACTTGAAACATTAAGCCAGACGCAACAGGTCGAACGCTCTGGCTCT  
ATTTGATCAGTTCCCTACAGCACCATATGGAGTGGCGGTATTACTGACCCGGAAGTAA

>Cluster\_22730

ATGTTGCTGAATGACCGCATTACGCGATCAAAATGATGAAGTCGATAAAGCGCTGCTGAATTTATTAGCGAAGCGTCT  
GGAAGTGGTGTGTAAGTGGGCGAGGTGAAAAGCCGTTTGGACTGCTATTTATGTTCCGGAGCGCGAGGCATCTATGT  
TGGCTTCGCGTCTGTCAGAGGCGGAAGCTCTGGGTGTACCCAGATCTGATGAGGATGTTTTGCGTCCGGTGTGCGCT  
GAATCTTACTCCAGTGAACAGCAAAAGGATTTAAAACGCTTTGTCCGTCAGTGGCCCGGTTATCGTCCGGTGGTGG  
CGTTCAGATGGGACGCTCTGTTGAGAAAGATGCTGACACTCTCGGGTATCAGGTGCGGATTTCTGGAGCAACATGACTGG  
ATCGAGCGGCTGATATGTTTCCGATGCGGAAATGGTATTGTTAGTGTGCCATCCAGTACTGAGCAAGTTATCGGC  
AAATTACCGCTTTTACCGAAAGATTTGATTTCTGGTTGATCTGGCATCGGTGAAAATGGACATTCAGCGGCTGTGGC  
GGCGCACGATGGCCCGTGTGGGGTTACACCCGATGTTCCGCCCGGACAGCGGTAGCTGGCAAAGCAAGTTGTGGTCT  
GGTGTGATGGACGTAAGCCGGAAGCATAACAATGGTTTCTGGAGCAAATTCAGGTCTGGGCGCTCGGCTGCATCGTATT  
AGCGCTGTCGAGCAGATCAGAAATATGGCGTTTATTCAGGCTCTGCGCCACTTTGCTACTTTTGTCTATGGGCTGCACCT  
GGCAAGAAAGAAATTTTTCAGCTTGGACAAATTTCCGCGCTCTCTTCGCGGATTTACCGCTTGAACCTGGGATGGTGGC  
GACTGTTTGTCTCAGGATCCGAGCTTTATGCGGACATTTATGTCGTGAGAGCTAATCTGGCGTTAATCAAACGTTAC  
TATAAGCGTTTTCGGCGAGCGATGAGTTGCTGGAGCAGGGCGATAAGCAGGCGTTTATGACAGTTTCCGCAAGGTTGA  
GCACTGGTTCGGCATACGCACAGCGTTTTCAGAGTGAAGCCGCGTGTATTGCGTCAGGCAATGACAACCGCCACT  
AA

>Cluster\_22203

ATGTCAAAAGTCTCATCACCGGTGTAACCCGACAAGACGGTCTTACCTGGCAGAGTTTCTGCTGGAAAAAGGTTA  
CGAGGTGCATGGTATTAAGCGTCGCGCATCGTCAATCAACCCGAGCGGTGGATCACATTTATCAGGATCCGACACCT  
GCAACCCGAAATTCATCTGCATTTATGGCGACCTGAGTGATACCTCTAACCTGACCGCATTTTGGTGAAGTACAGCCG  
GATGAAGTGTACAACCTGGGCGCAATGAGCCAGTTCGGTCTCTTTGAGTCAACAGAAATATACCGTGCAGCTGCAGC  
GATGGGTACGCTGCGCTGCTGGAGGCGATCCGCTTCTCGGCTGCGAAAAGAAAACCTGTTTCTATCAGGCTTCCACT  
CTGAACCTGATGGTCTGGTGCAGGAAATTCGCGAGAAACGAGCAGCACGCGCTTCTACCCGCGATCTCCGATGCGGTCGCC  
AAACTGTACGCTACTGGATCACCGTTAACTACCGTGAATCTACGGCATGTACGCTGTAAACGAAATCTCTTCAACCA  
TGAATCCCGCGCGCGCGGCAACCTTTCGTTACCCGCAAAATCAACCCGCAATCGCCAAACATCGCCAGGGGCTGGAGT  
CGTGCTGTACTTCGGCAATATGGATTTCCCTGCGTGACTGGGGCCAGCCAAAGACTACGTAAAAATGCAGTGGATGATG  
CTGCAACAGGAAACAGCGGAAAGATTTCTGTTATCCGCGAGCGGCTTCACTACTCCGTCGCTCAGTTCTGGAATGGCGCG  
AGCACAGCTGGGCATCAAACCTGCGCTTTGAAGGCACGGGCGTTGAAGAGAAGGCAATTTGGTTTCCGTCACCGGCTG  
ACGCGCGGGCGTTAAACCGGGTGTGATGATTTACGCTGTTGACCCGCGTACTTCCGTCGGGCTGAAGTTGAACCGTGT  
CTCGGCGACCCGACAAAGCGCACGAAAAACTGGGCTGAAACCGGAAATCACCTCAGAGAGATGGTGTCTGAAATGGT  
GGCTAATGACTCGAAGCGGCAAAAACACTCTCTGAGTGAATCTCACGGCTACGAGCTGGCGATGGGATGAGTCAAT  
AA

>Cluster\_29120

ATGGCGAGCTACAGCTGCAAAATGTAACGAAAGCCTGGGCGAGGTCGTTGATCGAAAAGATATCAATCTCGATATCCA  
TGAAGGTGAATTCGTTGGTGTGTTGTCGGACCGTCTGGCTGCGGTAAATCAGACTTACTGCGCATGATTGCGGGCTGAGA  
CGATCACAGCGGCGACTGTTTCATCGGTGAGAAACGATGAATGACACTCCGCTGCAGACGCGGCTTGGTATGGTG

TTTCAGTCTTACGCGCTCTATCCCCACCTGTACGTAGCAGAAAAATGTCATTTGGCCTGAAACTGGCTGGCGGAAAA  
AGAAGTGATTAACACGAGTTAACAGGTTGCGGAAGTGCTGCAACTGGCGCATTTGCTGGATCGCAACCGAAAGCC  
TCTCCGGTGGTCAGCGTACGCTGTGGCGATTGGCCGTACGCTGGTGGCCGAGCCAAGCGTATTTTGTCTGATGAACCG  
CTCTCCAACTCGATGCTGCACTGCGTGTGCAAAATGCGTATCGAAATCTCCCGTCTGCATAAACCGCTGGGCGCACAAT  
GATTTACGTCACCCAGTACAGGTCGAGGTCGAGCGTACGCGTACGCGACAAAATCGTGGTGTGGACGCTGGTCCGCGCG  
AGGTTGGGAAACCCTGGAGCTGTACTATCCGGCAGATCGTTTTGTCGCCGATTATCGGTTCCGCAAGATGAAC  
TTCTCGCCAGTAAAAGTGACCTCCACCGCAATCGATCAAGTGCAGGTGGAGCTGCCGATGCCAAATCGTCAGCAAGTCTG  
GCTACCTGTTGAAAGCCGTGATGTCAGGTGGGAGCAATATGTCGCTGGGATTTCCGCCGGAACATCTACTGCCGAGTG  
ATATCGCTGACGTCATCCTTTGAGGTTAAGTTCAGGTCGTCGAGCAACTCGGC AACGAAACCCAAATCCATATCCAGATC  
CCTTCCATTCGTCAAACCTGGTGTACCGCCAGAACGACGTGGTGTGGTAGAAGAAGGTGCCACATTCGCTATCGGTC  
GCCGCCAGAGCGTTGCCATCTGTCCGTGAGGATGGCAGTGCATGTCGTCGACTGCATAGGAGCCGGCGGCTTTAA  
>Cluster\_44160

ATGCCATTACCCGATTTTCAATGTTCTGAACCTTTTACCTCGGTATTGAACGGAAATGCAGGTGGTAAATCCGCGGG  
CTATGACTTAAGCCAGGACTCTTCAATGCTGATTGACGCGGTTAAAAATGAGATCACGGCCGGAGAGGTAAAGCAGGATA  
TCACCGAAAAGTATGCTGGAGCTGGCGACGGATGTTTGGCGTATATCAACCAGGCTGCCGGGAGTTTTACAGCATGCAG  
AAAGTCGTATTGCAGGACGCGCAGCATCATCTGAAATTTGGCGGTGGCAGCACCCGTTTCAGAAATGGCAGCG  
TCAGAGGTATGCCGACAAACGCTATCAACGAACTGGA AAAAATTTGGCTATCTCATCCAGCAGGCGACCTTTTTG  
GTCAGCATGTCCATGTTGGCTGCCAGTGGCGATGACGCCATTTATTTGCTGCACGGCTGTACGGTTGTGCCGCAC  
TTCATCGCCCTTTCCGCCGCTGCCGATATGACGGGAACGGATACGCGTTTTGCTCCTCACGACCGAATATTTTTTC  
CGCCTTTCCCGATAATGGCCGATGCCGTGGTCACTGAGTAACTGGCAACAATTTGAAGCCTGTTTCGCTGCTGATTA  
CCACGATGATCGCAGCATTAAGATCTGCAGTGGGATATTCGCCCGAGTCTCATTTTGGCAGGTTGGAGTTCCGGTG  
ATGGATACCCGTTAACCTTAGCCACGCGGTAATATGGCGGATTAATTCAGGCCACCGCCACTGGTTACTGACGGA  
ACGCCGTTTAAACATCAGGAGAAAAGTTACCTGCTGTATAAAATTCACCGTTTCCAGGCTGCCGCTATGGGCTGGAAG  
CGGTCATTACCGATCCGACACTGGCGATCGTCCGATCGCAGGAAAGATACCTTTGCGATTGTCGAAAATAATCCGCCCT  
TCCGCACATAAAAATGGGTGCATCGAGCGGATTGAGGCCCTGCATCGCAGGTCGTCAGCGGTTGAATGAAGCGCAGCT  
GATGCGGATTTCTGTCGCCGATGTTGGCTCGCTGATTGGGCTGGTAAAAAGCATTGTGAGATCTGGCCGGTGACTAA  
>Cluster\_26022

ATGAAAATTTGGCGTATTCTGACCTATTGGCAACACCGGTGGCTCATTTCGACCCACGCGCCGAGTACATGCCGACCTT  
TGAAGTGAATAAAGCCATTGTGCAAAAAGCGGAGCACTACCATTTCGATTTTCGCCCTGTCGATGATCAAACTGCGTGGCT  
TTGGCGGCAAACTGAGTCTTGGGATCAACAACCTTGGTTCGTTCACTTTGATGGCGGGGCTGGCAGCCGTGACCTCGCC  
ATTCAGATATACGCGACAGCTGCCACCTAACGTTACCTCCGGCAATCGTCCGCCGATAGGCCCAACCATCGACTCCAT  
CTCTGGCGGCGTTTTGGCGTCAACCTCGTACCTGGCTGGCAGAAAGCCGAGTATGAGCAGATGGGGATCTGGCTGGCG  
ATGACTATTTCTCCCGTCTTACGACTATCTCACCGAATATGTTTCAAGTGTGTCGCGACCTGTGGGGCTCGGGGAAAAGC  
GATTTTAAAGCGGATTTTTTCACTATGGATGTTGTGCGGTGAGTCCGCAACCGAGTGTCCCATGAAAGTGTATGCGC  
CGGGCAAAGCAGCGTGGCATGGCGTTCGCCCGGATGCCGATTTTAACTTCTGTTTCGGCAAAGCGTAAATACAC  
CCACGGCTTTTCGCCCGGCTGCCGAGTAAACAGCCGAGAGCCGAGAAAGCCGAGTATGAGCAGATGGGGATCTGGCTGGCG  
TTTTATGGTGATTGCCGACGAAACCGACGATGCCGCTCGTGCAAAATGGGAACACTACAAAGCGGGCGCGGATGAAGGGC  
GTTAAGCTGGTAACTGAACAAAGTCAAGAAATACCCGCTCAGGTACTGACACCAACGTCGTCAGATGGCCGATCCCA  
CTTCGGCGGTAACACATAATGGGGAGTGTAGTGGTCTTACGCGAGTGTGCGCGCATGTTAGATGAAGTCGCAAA  
GTGCTGGTGGCGAAAGCGTGTCTTGAACCTTCGATGATTTTTCTGTCGGGAATCGAAAACCTTCGCCGAGCGCATTTCAACC  
ACTGATGCTGTGCCGCGCCATCTCCCTGCGCTGACTCAGGAGGTGGCATGA  
>Cluster\_17737

ATGATATTGTCAATTACAGTATTTAAGAGGGATAGCGGCGATACGGTAGTCTTTTACCATTATCGCGGTGAGTTAAATGC  
ATCATATGCACAAAAGGACTTGGGGATCTCTTTTTAGCAATGGGTATATAGGTGTAGATTTATTTTTTATGGTTAGCG  
GGTTGTTTATCATGCTATCAACGAAAAAGATAAATCATCTTTATCGTTTGGCATTAAAAGAACTTTTAGGCTATATCCA  
GTATATATAGTTTGTCTTATTTTATGCACATATCTCTATCAAAGCCAATAGATTTAAGCTTCTATAAGTCTGTTGTTTT  
TATACATATACATGAACCTCACAGCCATGGTTGGGTATTCACCTGATATATACATGATGATGATGATGATGATGATG  
TTATATTTTACTTTATTTTTTCAATTTTCAATGATGGCATCATGGAGATATCGCGGGTTAATTTGCTCGGCTGTCTTGTG  
GCGTACCTTTTTTAAATCGGATATATTTATAAATAGATTTTATTAAGTGGATATGACGCTGTAATAGCGCATACAGG  
TATTTATTTTTTTGACAGCGCTATCCGATGTTGTGCTTCCACCTATGTTTATGAGTTTGCAGTTGGCATATTAATTTATG  
AAATATACAAAGAGATACGCAATAGATTTTTTCAAGTTAGTATCAACAGGAATGGTAATTAATTTCTTTGCTATTGTTAT  
CTATATTACATTACTGGTGTAAATGGTGGGATGGAATAAATCAAGCGGATGTTTGCAGCTTTATTACTATTTATCTCT  
TACAGTTTATGAAAAAACCATCCAATAAAACCAATTAATATCAATAAACTTTTTAGGTGATATTTCAATATCTCTATACC  
TCCCCATCCAATAAATAACAATCAATAACAATTTGTTTTTCTGTTTCAAGCATATATTTCCCAAATGGTGGGTTTGGAA  
AATGTTTTATATAAGTTGATTAATTTGCGTTTATCTTCACTTCTATACAGTAGAAAAGCCCTTTTGTGTTAATCT  
AGGAAGAAAGATAAATTAATAAGATTCGAAGATG  
>Cluster\_47780

ATGAACAAGTATATCAACAGTGTGCTTTGCTGTGTTTTATGCTCTCGTTAAGTAGTGTAGCACTTGCAGCTCTTAAAGG  
TATCTGTACCCCTGATAATGGCGTATTTTACAGTACGCTTGATTCTCGGGATATCTTATTACCGCAACGAAAATAAGG  
TTGGAACGACATTTAACACCACGTAACTAATGGATCCFCATATCCTGGACGCTGTCAATGTGTACTGGTAACGTAGGA  
GAATTTCCCTATATCTATATACGTCAAAAATAAACAGGCAATTAACCTATGCTGGGGTTCACTCTAAATTAATATTA  
TGATCTTAAATCCGAACCTTGATGTTGGGATGCTATAGATATTTCTGGGGTTGGGTATGTGAATGCACCTTTTGAATATC  
ATGCTAACACCCGCTCTGGTAATACAAAGTACAATGCAACCGCATGGAACCTTTAAGTATATCTAGTGGGGTAAAGCG  
ATAGTATATTTTTATATCAAGAAGCATTTGCGAGAAAATGATTTTCTGAAACAAAGATAGTGACATTTGATGGAAC  
AATTAGCCGTGACACCCCGTGGATTACTCACAGCCGATGGCTGATGTTTATATTTCTGGGGGATAATTACAGCTCCGCAA  
GTTGCGAAAATAAATAATTTACAGCCAGTTATTTGATTTTAAAGAAAATACCAGCTGAGATTTTTCATCTGTGTTGGA  
AGTGGCGTAAACAACATAAAATTAATAAACGGTCACTATTGAGTGTGAAAACCTGGGGATACTGAATACCGATGATAT  
CAGTACGCTTTTTATGCTACCGAACCCAAATACGGACAATCAATGGTGTGAACTTCAAACCTTAACGTTGGGGATAAAAA  
TTTTACGACAAAATAAATAAGGAATCAAGTGAACGGTGGTGAAGTGCACAGACATGGGTAATCAACAGTGTATGGT  
GAAAATCAGGTAGTGTAACTTTTTACGCTGCTCCGAGCCCTACTGGAGCTGACCCGAGCCCGGGGCAATTTACTGC  
AACAGCGACGATAACTGTTGAGATTTGTGCGCTAA  
>Cluster\_40956

ATGGCTAACGCCTGGCTCAGATTATGGCATGACATGCCAAATGACCCTAAGTGGCGAACAAATGCCAGGGTGTCAAGGCA  
GCCAATTTGCAACAGTGTGGCAGTGTATATCCACCTCCCTGGTGGAGCGGCTCACGAAATGTCACGCGAGGTACATTTGATG  
TCACGACAGAAGATTTGGCAAGTGGCTCGACGTAACAGAAGAGGTAATGATTCATTTTGCAGACGATGCAGGGGCGG  
GTACTTGTGGTGAATTTAATCACTGGATGGGAAAAACGCGAAGTGCTTAAAGAGGACAAACGGCAATATATCGCAAAACCG  
AAAATCTCTGAGAGCTCAAGAGGGCGAGCGAGAGAGGAAAGAAAGCGGGAACAAAATGGCGATTTGTCACTGTGTTGGA  
CACGAAATGTCACGACATGTACGACGAGTACGACAGATAAAGATACAGATAAAGATACAGATCAAGAAGATCAAAAT  
ACTATGGTCCATGGCGTAAAAAACGCCACGACAGGCGAGGGATGTTCAAGCCGTCATCTGGTCAAGCAGGACGAC

GACACCGGAAGCCGATTACAGCGTATGCGCTGAAAGCCGATTCCGGCGCTGTGCAGCAGGTGATGACCCGAAGGCCGGAGC  
AATCACACCAACTGCAGCAGCCTGAAGCCGATTCCGCCATTACGCGGGAAGCCGATCGGGTAGTTCGGAAAAACACCGGG  
CAGTCTGTGGGACGAGTGGATTATCCGGATGTGTTCGAACAGGCTGCGGGGAGTACCGTTGCGTGTGGGGCAACCC  
GAAGAAATCCGCTTTTCAGTGCCTGGAAGCCAGATTACCGGAGGGGGTCCACAGAGGCCATGCTGGATGGCGTAGGC  
GTTACGCAAGATACTGGCGCTACCGGAAAGCGGGAACGAAATTTGTTACGCGAGCAGACGCTTTTGTGGACGGAC  
CGGAATTTTGAACCCCTGGTTGCTCCCGTAAGCGGTACGAATAACACGCGTTGCGTGAATCACATTTCTGAACCAGA  
TACCGAAATTCACCGGGCTTCAGGGGGTAA

>Cluster\_35493

ATGACAACGTTTTCATTCCCTTAACAGTGGCAAAGTCGAGCCGGAACCCGTGATGCGGTGACCATTACCTTTGCGGTGCC  
CCAGCCTTTGAGGAGGCGTATCGCTTTCCGCCCGGTCAACATTTGACCTTAAAAGCCAGTCTTGATGGTGAAGAATTAC  
GCCGTTGTACTCCATTTGCCGAGCTACTGCTGCGGAAATAGTGTGGCGGTGAAAGCCATTGAAGGCGGACGTTTC  
TCCCGTATGCCCCGGAACACATCCGCCAGGATGAGCGTGGAGTTCATGGTCCCGCAGGGGCAATTTCCGGCTATCAGCC  
ACAGCCGGAACCGCCGCTATCTGGCTATGAGAGCGGAAAGCCCTTAAAAGCACTGGGAATGCCAGATAAAAACCATCAT  
CTTTACAACCGAGCCTGAAAGTCAGTTCACCTGATCTACGGTAACCGTACCAGCCAGAGCATGATGTTTCGCCAGGCA  
CTGGCAGACCTGAAAGACAAATATCTCAGCGTTTACAGTGTGTGTGCATTTTCAGTCAAGAAACCCCTGACAGCGCAT  
GCTTACCGGGCGTATGACGGTGAATAATACAGTCACTGGGGCCTCGCTCAATTAATTTTCGCTTTTATGATGAGGCAT  
TTATTTGTGGTCCCGCGGCGATGATGGATGAGACGGAAGCCCTTAAAAGCACTGGGAATGCCAGATAAAAACCATCAT  
CTGGAGCGGTTAATACGCCCTGGCAGCGCGCTCAAACGTAGCGTTAACGTGCAAAGTGACGGACAAAAAGTACTGTACG  
TCAGGATGGCGGGATCGGGAAATCGTGTCTAATGCGGACGATGAAAGCATTCGATGCGGCATTGGCCAGGGGGGTG  
ATCTGCGCTATGCTGCAAAGCGCGCTGTGTGGACCTGCAAAATGCAAAGTGTGCGGCAAAAGTGGCGATGGAAC  
AATTCAGCTGGAACCGGATGAACTGGCCGAGGCTATGTGTGAGTTGCCAGGCACGTGCCGCTGACCGATGTGGT  
GGTTGACTTTGACCGGAAGGGGATGGCATGA

>Cluster\_7032

ATGATGAAAACGATGCGTATTGCTGCGATCCCGGGAGACGGGATTGGCAAAGAAGTCCCTTCTGAAGGGATTCCGCTGTT  
ACAGGCTGCGCTGAGCGCTGGGGCTTCGCCTTGAGTTTGTAGCAAATGGAGTGGCGGAGCTGCGAGTATTACAGCCATC  
ACGGTAAAATGATGCCGGACGACTGGCATGAGCAACTTAGCCGTTTCGACGCCATCTATTTTGTGCGGCTCGGCTGGCCG  
GATACCGTTCCGGACCATATTTCTGTTGTGGGGTTCGCTGCTGAAATTTTCGTCGTAATTCGACAGTACGTCACCTGGC  
CCCGTTCCGCTCTTTTCCCTGGCGTTCCCTGCCCCGTTGGGGAAAAACAGCCTGGCCGACATCGATTTTACGTGGTCAGGG  
AAAACACCGAAGGCGAATATTCCTCGCTCGCGGTAGAGTGAATGAAGGTACAGAGCATGAAGTCGTCATTCAGGAATCG  
GTATTTACCCGCGTGGTGTGATCGCATTTTTCGCTTATGCTTCGAACTTGCACAAAGCCGTTCCACGTAAGACACTAAC  
TTCGCACTAAATCGAACGGTTTAGCCATCAGCATGCCGATGGGATGAGCGAGTGAAGCAATGGCCGAGAATTACC  
CGAGATCCGCTGGGACAGCAGCATATGATATTTCTGCGCCGTTTGTGATGACCGCGGAACGATTCGATGTGGTG  
GTGGCGTCAATTTGTTGGCGATATCTTTCCGATCTTGGCCCGGCTGCACCGGCACCATTTGGCATTGCCCATCCGC  
CAACCTGAATCCGGAACGCACTTTCCCGTGCCTCTCGAGCCTGTCCAGGTTCCGCGCGGATATCTACGGGAAAAATA  
TTGCTAACCTATCGCACGATTTGGGCCGGGCAATGATGCTCGATTTTCTCGGCAATGGCGATGAGCGTTTCCAGCAA  
CGCATAACCGGTTATCTGCGAGCAATTTGAAGAAGTATTGCTACGGGCCAAAAACCTGATATGAAAGGCAATGCCAC  
CACGCCACAGGTTGCCGACGATTTGCAAATATTTTTCGCTTAA

>Cluster\_28656

ATGAAAGACAATAAAAATCCCGTTTACAGGAAATAAAAACATTTATTAACCGGCATCTCGTGGATGATACCCTTAT  
TGTGGCCGCGGGATATGATTGCGTTGGGGCAAGTTCCTTGGCGGTACAGATGTTGGTGAATAAACAGGAACAATCCCGT  
GGATGCTTAATCAGATTGGCGGCTGGGGATGGGGCTGATTTGTCCCGTGAATAGCGCGGCAATTCGCTATTCTATTGCC  
GATCGTCCCGGATTTGCCCGGGCTGATTTGTCGCGTTTCTCTGCGGGCAAATCCATACCGGATTTATTTGGCGGTATGTT  
GGTGGTTTTCCTGGTGGGCTACACCATTGCTACTTAAACGCTATATCCGCTGCGCGAGTCGATGCAAGCATCATGC  
CAATCATGGTGTGGCGGTTAAGCACCATTTACGGTGGGCTGTTAATGATGACGCTGATTGGTAAACCCATCGCCTGG  
TTACAAGAAGCACTGATTCAATTTGCTCGAGTCGATGACGGCGGATCGCGCTTCTGATGGGGCCATACTTGGCGCGAT  
GGCAACCTTCGATTTCCGGTGGTCCGGTCAACAAAAACATGTCGCTGTTTTCGATGGCTGGTGGTCACTGGCGTCTACG  
GACCAAGAAGCCGTGAAATTTGTCGCGCTCAATCACTCCCTCCGTTTGGCATTACACTTTCGTTCTTACTACACGCATAAA  
TACACCCGTGGGAGCGGAGGCGCTGAAAGCCGCGTTTCCGATGGGGATCTGCATGATCACTGAAGGAGTCAATCCGAT  
CGCCGCGGCTGACCTGCTGCGAGTTGTGGGATCTGTGTGGTGGCATTGGCGGTCGCGGGCGGCTTAATCATGTTGTGG  
CGGTGGAGAGTCCGGTCCCGATGGCGGCTGTTGTTGTGCTCTGTTACCCATCCCTGCTGTTTTGCTGGCGCTG  
GGTATAGGCAGCGTGAATTTGTGGCGTGAATGCTTTCATCTGGAAGAAACCGGTAACGGAACGCGACGAAGAGTTGACGA  
ACTGAGCGATCAAAAGTGAAGATGAAGATCACTTTACCTCGAATAA

>Cluster\_48590

ATGGCAAAAGGAAATCCGCACTGGCCTGCTCTGAAAAGAAAATCCGTTAGCAACGACGAAATTCAGAAAGTAACTCA  
TTGGATTGATACAGGCTTTCCACCGTTAAACAAAGCTATTTCTGGTGGTACGATGGCGGCTTCCCATGTTGGTGTATCG  
TCGAAGTATTCGGTCTCAAGTGCAGGAAAAACGTTCTTGAACAGCAGCGATGATCTCCGCTCAAAAACAAGATGGT  
CTGGCGGTTATTCCTCGATCATGAAAACGTTTTGACGTTGGCTGGCTGATAGCAATGGCCTGAAACGAGATGAGGATGA  
CGTCACTGGGTTACAAGCAGCTGACACCTTGAAGACTCTGATAGTTGATCGGCACAATACTTAAATTTGTTACGTTG  
ATGAAGAGCTTATCCCTGAATCAGCACCTATCTGTATCTGGTGGCTGACTCACTTTCGCTATGGTTCCGAACTCCAAAGCC  
GAGAAGTTCGAAAAGATGGCTGAAGGCACTGCCAAAGCAAAGATCAGCTAAACATGAACGACAAATACGGCCTGGCTCG  
TGGCAAAAGTGGCAACTTCCCTACTCTGGCTTTGTGGGACGCAAAATACAACGCTGCATCATCTTCTGAATCAGGTTG  
GCACAAAAATCCGGTGAATGTTTGGCGACCTACTACGTCGCGGAGTGGAGATTACCCGAAGTTCTACGCTTCTGTACGT  
ATCCGCTTTGGTGCATCGGTGATGAAGGATGGTAAAGAGAAGATCGGCCAGGACGTAGGCGCAGAAATGCATCAAAAACAA  
AGTTGCACCCGCTATGGCAAATGCACCTGGAAATTTACTTTCATCTGATCTACTCGTGGCCTCGAGCTTATCGAATCGCTCG  
TCGAGTACATGCTGGAAGAAGGATACCTGCCAAAGAAGCCAGCGGGCGAGTTGAAATTTGGTGAAGAAATACACAAA  
TCCGAGATCGTCCGAGATGATCGGGAGAAGCCACTGGCTGAAATCATTGCGGCTTTGACGGCAATCGACGACCGAAGAGC  
AAAAGACAACCCACCGAGTCACTAGAGAGTAA

>Cluster\_53537

ATGGATAAGATTATTAAGTCCGGCTAAATATATCCAGGAAATGGTTCTCTGGATAATATTGCTACATATCGCGGAT  
TTTGGGAACAGAAACATTAATTTGTCAGATGAATTTGTGACCGGCTGGTGGGTGACAGAGTAAAGCCAGAGCTTTGCAA  
AAGAAAATATTAATGCAGATTTTGTATCTTTTGTGGTGAATGCTCGCAAATGAAATTTCTCGAATTCGTGAGAAATTT  
AATCAGCGTAAATATAATGCTGTTATTTGTTATTTGGCGGCGTAAACGTTGGATACGGCAAAAGCCGTTAGCGTATTACCA  
AAAAATCCCGTGGTGGTGGTGGCGACAATGCTTCCACAGATGCGCAACCACTTCTCTGGCAGTAAATTTACACCCCGG  
ATGGTCAGTTTAGCGAATATCTGTTTTTCCGAAAAACCCGATATGGTGAATTTGGATGACTGGCGCTCATTTACCGCGG  
CCAGTGGCTGCTGTTGGTGGCGGATGGGAGATGCATTTGCAACCTGGTTTGGAGCGAGACCAATCAGGCGTCAAGAAA  
AGCCACAATGGCAGGTTGGGGCGTGCACACTGGCGGCATGGCTATTGGCCGACTCTGTTATACACGCTACTGGAAGATG  
GCTATAAGGCAAAAAGTCGGGTTGAACAAGGTTGAGCAACAAAGCGGTAGAGAATATATCGAAGCTAAATACCTATCTT  
AGCGGCATTTGAAATGAGCGGCTGGCGGACGCTCATGCCATTCATAACGGCATGACGCAACTGGAGGAATGTCA  
TCATGCTACACGGTGAAGAAGTGGCATTTGGCGTCTGGTACAGCTCGTACTGGAAACGACACACAGGAGAAATTTG

AAACCGTACTCAATTTCTGCCATAGCGTTGGCTTGGCCGACAAATCTTCATATGTTAGGCGTGAAGGAAATTAATAAAGAT  
AAATTACGGGCAGTGGCTAAAGCCGCGACTGCTGAAGGGGAAATATCCATAATATGCCATTCGTAGTAAACAGCGCAGGA  
CGTCTTTTGGCGAATTTTAACTGCACATCATTTGGGACTTTAA  
>Cluster\_66855  
ATGAAATCTAACATGCGCTCATCGTCATCCTCGGCACCGTCACCCTGGATGCTGTAGGCATAGGCTTGGTTATGCCGGT  
ACTGCCGGGCTCTTGGGGGATATCGTCCATTCGACAGCATCGCCAGTCACTATGGCGTGTCTGTAGCGCTATATGCCGT  
TGATGCAATTTCTATGCGCACCGCTTCTCGGAGCACTGTCGACCGCTTGGCCGCGCCAGTCTGTCTCGCTTCGCTA  
CTTGGAGCCACTATCGACTACGGCATATGGCGACCACCCCGTCTTGGATCCTCTACGCCGGACGCATCGTGGCCGG  
CATCACCGGCGCCACAGGTGGCGTGTCTGGCGCCTATATFCGCGGACATCACCGATGGGGAAGATCGGGCTCGCCACTTCG  
GGCTCATGAGCGCTTGTTCGGCGTGGGTATGGTGGCAGGCCCGTGGCCGGGGGACTGTGGGCGCCATCTCCTTGCAT  
GCACCATTCTTGGCGCGCGGTGCTCAACGGCCTCAACCTACTACTGGGCTGTCTCCTAATGAGGAGTTCGATAAGGG  
AGAGCGTCGACCGATGCCCTTGAGAGCCTTCAACCCAGTCAGCTCCTCCGGTGGGCGCGGGGCATGACTATCGTTCGCG  
CACTTATGACTGTCTTCTTATCATGCAACTCGTAGGACAGGTGCCGGCAGCGCTCTGGGTCAATTTTCGGCGAGGCC  
TTTCGCTGGAGCGCAGCATGATCGGCCGTGCTGCTTGGGATTCGGAATCTTGCACGCCCTCGCTCAAGCCTTCGTAC  
TGGTCCCGCCACCAACCTTTCGGCGGAGAGCAGGCATATTCGCCGGCATGGCGGCCGACGCCTGGGCTACGCTTTCG  
TGGCGTTCGCGACCGGAGGTGGATGGCCTTCCCATTATGATCTTCTCGCTTCCGGCGGCATCGGGATGCCCGCGTTG  
CAGGCCATGCTGTCAGGTCAGGTAGATGACGACAGCTTCAAGGATCGCTCGCGGCTCTTACGCCCTAAC  
TTCGATCATTTGACCGCTGATCTTACGGCGATTTATGCCGCTCGCGGACACATGGAACGGGTGGCATGGATTGTAG  
CGCCGCCCTATACCTTGTCTGCCCTCCCGCGTTCGCTCGCGGTGCATGGAGCCGGGCCACTCGACCTGA  
>Cluster\_22684  
ATGAGAGCCTGCATTAATAATCAACAGATTTCGCCACCATAACAAATGCGTGATTTTGGAACTGCTGTACCGGCAAAAGCG  
CGCAATAAATCAACGCTGGCCCGGCTGGCGCAAAATTTTCGATTCGGCAGTCAGTAATATTTTGCAGGAACTGAAAGCG  
AAAAACGGGTGGTGAATATCGACGATGAAAGCCAGACGCGCGGCATAGTAGCGGTACATGGCTGATTTCGCCGGAAGGT  
GACTGGACCTGCTGCTTACGCTGACGCGCCACAGTATTFAGTGTAGTTCGCTTAACCGCTGTTTAAAGCTGAAAGGTGA  
ATTTGAGTATTTACAGATTGATGACCCGACGCCGAGCGCTGTCTCGAAATCGAAAAATGCTGGCATCGCCACCCTGA  
AATGTGGCCGACCGTACCATCAACCTGGCGCTGGCAATCCACGGTCAAGTTGATCCGGTACTGGCGTGTCCGCAAAAC  
ATGCCGCAAGCGCGTGGACAACGCCGGTGGAGTAAAGTATCTGCTGGAAAGAGAAGCTCGGCATTCGGGTGATGGTTCGA  
TAATGACTGCGCGATCTGGCGTGGCGGAGAAATTAATTCGAGGAAACGGGATTTCTGCGGTGAAAGTGT  
ATTACGGTATTTGGCTCGTCTGCTGATTAACGAGCAAAATTTACGCGGAGTTCGATGGTAGCGGACAGATTGGTTCAC  
ACCATCGTAAATCCGGATGGTGTGCTGCTGCGACTGCGGACGTTATGGCTGCCGAAACCGCTCGCTCGTAAAGCGCAT  
AAAAAACAGGCGCGGTATGGCTAAATCAACACCGGTTAATACTCAGCTTGTATCTGAAAAACTGACTACCGCGCAGT  
TAATCGCTGCCAGAGTGGAGAACCGTGGATCACCAGTGGGTGATCGCTGCGCAACGCCATTTGGTGTGAGTCTG  
TATAACTTCTCAACATCTCAATATTAATCAGATTGGTGTGACGGTGCAGTTGTGCCCTTTGGTGAGAAGTGGCTTAA  
TACCATTATTCGCCAGACGGGATTTAACCCGTTTCGACCGGACGAAAGGACCGAGCGTGAAGCGACGCAAAATGGCTTTC  
GGCAATTAAGCCCGCCCAACAGGTGCTGGAAATGGCTATTTGTATGTTGAGGCGCAGTTACGGCAGATTGA  
>Cluster\_18834  
ATGTCGAAAAGCAATCCGCTGAAAGTGAATTAGCCGTACCGACATCCGGTGGCTTTTCCGGGTGAAATCAGTGAATTT  
GCAGGCTTTCGTGATGATTCAGCTATCATCGCAATCATGCTGTCTTTCACCTGGACCACCGATGGTGCCTACTTAAAGCG  
CCCGTAACCTTCCCAACGTTTACGCCAAACCGGATACCGGCATCTCGCGGTAGGAATGGTGTTCGTATAATTTCT  
GCTGAAATCGACTTTCCGCTCGGCTCAATGATGGGGCTTTAGGTGGCGTTCGCGGCGATTTGTGACGCTTGGCTG  
GCCTTTGCCACTTACCATCATTTGACGTTGGTTCGGAAGTCTTTCGCGGAGCTGGAACGGATGGTGGGTTCGGTACC  
GCAAAGTCCCTCATTTATGTCACCCCTCGCGGCATGTTGGCATTTCTGTCGATACTCATTTGGCATCACCAACCGCACG  
ACTGTTTCCCCACCGCCGCGATGTCACAAATGGCGCAAAAGTATCTACCTGCGCAGCAGCGCTTACATCATTTGGCGC  
GCTTGGCTTAATGGCTTTTGTGGTGGCAATGGCGGGAAGAAATGCGCGTCAAGGCTTTGGGTTTGCAGTCTCCGGCT  
CTACCGCAGTAGTCCGTCGCCAGGCTTTAACCGTATCATCTGATTTAGCGCAATCTGGCTGTGAATGATTACCGTGT  
GTTCCACTCCTGTCTGCTGCTGACGTTGCTTACTCGCGGAAATGTTTATGGCAACCGCGGACGGCATTTGGACGACG  
CATTTATGCCATGCGCAATCTGGAAGCGGCACGCTCTCCGGGATTAACGTTGAACGCAACCAACTTGCCTGTTCCG  
CTATTAACGGATTAATGGTAGCCATCGCCGGATTAATCCTCAGTTCTCGACTCGCGCTGGTTACCTTCTGCGGGAAT  
ATCGCCGAGCTGGACGCAATTCAGCATGTGTGATTGGCGGCACAGTCTGGCAGCGCGCTCGGAGCGTGGCTGGACG  
AGTAATGGGGCATTCATCATGGCTTACTGGATAACGGCATGAGTATGATGGATGTACCACCTTCTGGCAGTATATCG  
TTAAAGGTGCGATTTCTGTGCTGCGCATGATGGATGGAC'TCCGCAACCAACCGCGTTCCTGA  
>Cluster\_17685  
ATGCAAAAGTGAATTCGCAACGGCGCTTTTTCAGGCGTTCGATACCCCTGAATCTGCAACGGGTA AAAACATTTAGCGTTCC  
ACCGTGCAGCTTTTGGCGTCCGGCGCGGTGAGCAGTTTCGGGCGAGCAAGCGCAACCGTGGGTGAAAACATCTGTTCCG  
TGATGGCAGACAGCTTTTTCATCAGGACGGGATGACCCCGGCTGACACGATGCCCTGGCCGTTAAAGGATCGCCAT  
ACGCTCTGGCCATGTCGGTGGGCGAACCGTGCATCACCGACGTGTGTGACGCGTGGCGAGTTCGCTGAATCAGGTTG  
TGACGGGGTGTATCGGTTTGGCGCGGCTCGGTGCTGGATGCGCGGAAAGCCGTGGCGTGTCTGGTGCAGAACCCGGATA  
GCACGCTGGCAGAAATGTCAGAAACAGCGTTCGCAACCGCGCTCGGTTGATTGCATTCACACGACCCCGGAAAC  
GGCTCTGAAACGACTAACGTCAGCGTATATCAGCGCGTGAGCGGGCGCAAGCAGGTGTTAGCCCCACGCCCTGAT  
GCCGGATGTGGCGATTCTCGACGCTGTGCTGACCGAAGCGGTGCCGTGCATGTCACGGCGATGACTGGCATTGATGCGT  
TAACCCATGCCATTGAAGCGTACAGCGCTGAACGCTTACCCGTTTACCGACAGCCTGGCGATTGGTGCATTTGCGATG  
ATTGGCAAACTACTGCGAAAGCGGTGGGCTACGGCATGACCTTGGCGCGGAGAGCATGTTGCTGGCTTCATGAT  
GGCGGAAATGGCGTTTCCAGCGCGGGCTTGGGTTATGCCACCGCATGGCGCATCAGCCAGGGGGCGCGCTGCATATTC  
CGCACGGTCTGGCGAACGCCATGTTGTTGCCAAGGTTGATGGAATTTAACCGGATGGTTCGCTGATCGGTTTATGTCAG  
ATTGGTTCGGGCGCTGCGAACTAAAAAATCCGACGATCGTGACGCTATTAACCGGTAAGTGAAGTGGTGAAGTTGG  
GATTGGTAAACGACTGGCGATGTTGGTGGCAGATCTGCGCATTCGCGCATACGGCGCATGGGCGCAGGCGCGCTGGAA  
GTCTGCGCAGTAACCCGCTACCGCCAGCTGGAGCAGATTGTGCGCTGTACGACGCGCGCAATAA  
>Cluster\_38926  
ATGTCAGGATTACAAGATTGGCTGCTTGATAAGGTGCGTGGTAACAACATATCTCTATAATTAACGCTCTTTTTCAGCAACCA  
CACTGGTGCACACGAGGCGCATCAGGTAGGATATATATCCCTTCCGGTATCGTTGCTGAACCTTTTCCCATCTATAGATC  
ATACGTCAGAAAAAATCCTTTCGGTTTTATTCGCGCAACTTATCTCTCATGAATGTGTAGATAGTGAAGTTTCGCGCT  
ATTTACTACAATAAAGTATTTTCGGGCAACAAGAAATGAAAAACGATACCTCGGTTGGGGGCTGGCAGTCCCTTACA  
GGATCCGGAAAAATACAGGTGCTTTGCTGTGCTTGCCTTGAACATGAGCTAGGGAGAGACAGCAAAAGTGTGTGATGAT  
GGGTTTGTGTAAGCCAGAAAGAGGATGTACTGGAACTCAGCTGTTGGGGAGATCATTTCTGGAACCTTAAATGTTGGG  
ACTGCCAGTGAATACTTGGTGTACTCGCATCAAGGCCAAAAATCTCTCAAAAGGAATATGTTATTCGGAAAGCTGGAA  
ACATAGCTTTCCCTTTCGGCTTAGAGATTATTCATATGCGCAGGTTATTAACCAACAGGCGTAACAGCTCCAGATGACC  
AATTTTGAACCGCCGCTTATGAATATGATCTTTCTAATGTTGAAGAAATTCAGTACTGAGACATCATCCGCTCAA  
GGGTTTGGTTCGTAGATGATTTTATAGCTATGGCTAACTCTGTTAGTAAATAGAAGAAATTCAGAGCCGAAAAATCAT  
GGAGCTACATCTTGAGCAAAATTTTATTTAGCATGGACTGCATCATTTTGTACTCAATGATTTACTGAGGAAAAAAGA

AACCCGATTTTCTTTTCCATCAGCGGCAGCTTACCATGATGATCACTTTCCAAGAGAAAACTCCGTATGCTTGGCTGTA  
AAAACAACATGTAAGGACCGGTGGCGTCAAGCCTCAATGAAGCAAATAAAATCAACAAAATAATTTTGTTCCTTGA  
AGAGGGGCTCTCAGTTGCTCAATTAACGAAATGAGAGCTGAAGGTGTACCTTGGTTGATACCTCCCTCTTATAAAA  
AATATCCGGAGAAATCAGAGAGGGATTATTAACGTTAGAGGGTTTTATCACACAGTTAATAACGCTGTATGAAGATTC  
GTATAA

>Cluster\_60341

TTGAGCAAGACACTCACAGCAAAGGCCATAGACGCCGACAGCCGAGGACAAGCCCTATAAACTCACCGATTCCT  
GACGCCGGGGCTGTTTTTGTGGTGCATCCCAACGGTTCGAAATACTGGCGATTCAGGTATTGGCTGAATAAACGAGAGT  
TTTTTGCAGGCCATTTGGAGTTTACCCTAATCACTCAAAAGAACGACGAGCGCGCCACGGAGAGCAGATCCCTTATT  
GCCAATGGAATTAACCCAGTGGAAACAAGCCCGCAAGGAAAAAGCCATTGATGCGCTCAACATGGCGGCAGGATTAAGAA  
GGTGGCGGAAGACTGGTTTGGCTACCAGGGTGGAGGGTGGTCCGAATCTATGCAAAAAGGTCAGATCGGCCTAGAAA  
AAGACGCTATCCGGTACTTGGCAAGCGGTGATTGTCGATATAACCGCCCGTACGCTGCTGGCATTACTCCAGAAGAAA  
GAACGTACCAGCAGCGGACAGGCCCGCAAGCTACGCCGCGCATCGGTGAGATCTCAAGTTTTGCCCTATCCCGAACT  
GGTAACGAGGAATCCGGTTGAGATCTTGATACGGCCTGAAGGCCCGCGACCTGGTCAACACGCGTGGATACCGATTA  
GTGAAATTCGGCCCTTCTACAAAGCCCTTGAGAGGGCCGGGAGCGTCCAGATTGAGACGGCAATACGTTTGGCTTATATTA  
ACGGCATTAAAGACCCGCAACTGCGTTTGTGCCGTTGGGAATGGATAAACCTGGAGGACGCAACAATCACATTTGCCG  
TGAAGTCATGAAGGCCCGCCCGCATGTGGTCCCGCTATCACGCGAGCGGTGCGAGCTATTGCAAGCTTCCACAC  
GCAGCGGATACAGTGTCTTTCGCTTTCAGGCCGATTCATGGATAAACCTTGTACGCGAGCGGATACTTAAAGCGCTT  
GAGCGTATCGGGTACAAGTCGATAGCCACAGGCCACGGTGGCGCACAACGTTTACGACCCGCACTTAAACGAATCAGGCAG  
ATACTGCCGGATTGGATTGAGATCCAATAGCCACGCTCCGGAAGGGAATAAGGGGCTTTATAACAGGCTGCCTACC  
TGAAGCAACCGCGAGCAATGATGACGAGATTACGCCGACGCTATTGATTCAATAATTGGCAGGTAACCGCAATCTAGAA  
CCGGAATGA

>Cluster\_34360

ATGAACAAAAACAGAGGGTTTACGCTCTGGCGGTGCTTCTGATGCTCTCAGGACGCTTAGCCCTAACAGGATGTGACGA  
CAAAACAGGCCCAACAAGGTGGCCAGCAGATGCCCGCGTTGGCGTAGTAACAGTCAAACTGAACCTTGCAGATCACAA  
CCGAGCTTCCGGTTCGACACAGTGCCTACCGGATCGCAGAAGTTCGCTCTCAAGTTAGCGGGATTATCTGAAGCGTAAT  
TTCAAAGAAGGTAGCGACATCGAAGCAGGTGTCTCTCTATCAGATTGATCTGCGACCTATCAGGCGACATACGACAG  
TGGCAAAGGTGATCTGGCGAAAGCCAGGCTGCAGCCAATTCGCGCAATTGACGGTGAATCGTTATCAGAACTGCTCG  
GTACTCAGTACATCAGTAAGCAAGAGTACGATCAGGCTTGGCTGATGCGCAACAGGCGAATGCTGCGGTAACGCGGCG  
AAAGCTGCCGTTGAAACTGCGCGGATCAATCTGGCTTACACCAAAGTCACTCTCCGATTAGCGGTGCGATTGTTAAGTC  
GAACGTGACGGAAGGCGCATTTGTACAGAACGGTACGGCAGCTGCGCTGGCAACCGTGCAGCAACTTGTATCCGATCTACG  
TTGATGTGACCCAGTCCAGCAACGACTTCTGCGCTGAAACAGGAACGCGAATGGCAGCGTGAACCAAGAGAACGCG  
AAAGCCAAAGTGTACTGATCACAGTACGCGCATTAAGTTCCCGCAGGACGGTACGCTGGAATTTCTGACGTTACCGT  
TGATCAGACCACTGGGTCTATCACCTACGCGCTATCTCCCGAACCCGGATCACACTGCTGCCGGGTATGTTCTGTC  
GCGCAGCTTGAAGAAGGGCTTAAATCCAAACGCTATTTAGTCCCGCAACAGGGCGTAAACCGTACGCCCGGTGGCGAT  
GCCACGCTAGTGGTAGTTGGCGCGGATGACAAAGTGAACCCCGTCCGATCGTTGCAAGCCAGGCTATTGGCGGATAAGT  
GCTGGTGACAGAAGTCTGAAAGCAGGCGATCGCGTAGTAATAAGTGGGCTGCAGAAAGTGGCTCTGTTGCTCCAGGTAA  
AAGCAAGAAGTTACCCTGATAATAACCGCAAGCCCAAGCGGTGCTCAGCTGAACAGTCCAAGTCTTAA

>Cluster\_66941

ATGAAGAAAAATCATATTACCAGCACCATCATTGCATCTGCTGTATTATTTCTTTAACGCTGCAGCAGCGACGCTCATA  
TTTTGAAGCGGTAAAGATGCAATGGGTGGCACCGGGTAGCATCTTCCATTATGGTGTGGCACCTTGGCAAAACCCGG  
CTTTACTGACAAAAGCACAACAGCAATGATGATTTCAGCCTTCTTCTGCGCTGTTGGGGCACAAAGTTGCTGATCCTGAT  
GATGTATCAATAAAGATGATGTTAAAGATGACTGGATTGTTTACAGTGTCTGATATAACAGCAGTCCGCTACATA  
ACAGGCGAGCGGCAATCTTAAACATCGTCTGCAGGAATTCGCAATATCAATGCAGATGCTCAGGTAGGTGATCAGCTG  
TAGCAGCCATGGCAATGACACTCTGCCGTTTGGCCTTATGGTCAAGTCTTACGGAACGTCAGCGTAAACGGAAAAGT  
AACGATGCAGACCTGGATTATCTGGACAAAGTTGCCAATGGAACAATACCGAGCTCGATAAGAATGCCCTGACCTCACG  
CGCATTCGGGCGTGCAGCTGTAATTACCAGCTGCGAATTTCAATTTGCCAAAGAACTGGAACCGCCGCAAAAATGCT  
CTCTTGGCGTACACAAAATATCAGCGTGTGGACCTGTTAACTACAACGTAACGGTTCGTGATTACGACAAAGACGAT  
TTTGACCGTGCAGAGTACCAACACGAAAACGGATTCAACCGCGATATTGGTGTCTTATACAGACCTGAATGACAAC  
GACTGTCCGCTTGTGCCCAGAATCATCTCCAGCAGTATTGATATAAAGTGCCTAATGGCTTAAAGAAACCTTCA  
AAGTTCTCCACAGGCAACCGCGGTATCTTGGCATAATGACTGTTTACCCTGCTTGGAGCTTACTGACTCTGACTCCT  
GCCAGTGGCTTACTTCTGACAGCAACGTCAGTTGCAAGTGTGGTGTGAAATTAACGCAATGGAATGGGCGCAAT  
GCGTGCAGGTTATCGTCAAGCAATGGCATCAAACCTCCGGAAGCGCCTTACCAGCTGGCGTGGTATCTCTCCATTTGACG  
TCGTACATATCGATGTTCCGGCTGGTAGGAAGTACACGATACGGTGAATGGCACAACCTCAGTTCACCTTCTGA

>Cluster\_10994

ATGAACCTGACCGGGGGGCAATGCCCGGTTCCAGCCAGGAGTTGGGGTCCGGATCACCTCGGGCGGCCAGGTGGA  
TGCTTCCGGCTTTCCGCTGATGCGGACGGGAAGGTGCAGGTTGATGCGGACATGGGTGTTTTATGGTACGCCAGTAAAC  
ATGATGGTACCTGACCTGGTCAAGGAGGCTGATCAACTTTACTGTCGCGCTCAACCGGCTGAAACCTGATGTC  
CAGAAAAATGCGTTCACCGTGCCTGTGACGGTGGGACAGCGTTCGCTTTCGTAATCTTTCCATCGACGTTGAGCA  
AGGGGCTACCGGCTGGTTAGCGGCAAGTGCAGTGAAGTGAAGCGGCTCAGGAAGCAGCTTAATTTGGGGGAAATTTACC  
GTCGTAATAATGACTGGAATTCGCTTCCGTTGCGCAGGGGTTCAACGGTGGACTTAAACCGCTGGCAGAGCATTTCCGG  
GTAATAATTGCGGACGAACCGGCTCCCGCAGCCCAACTCCCGCTGGTTGTAACCCCTCCGCGAGTTGAGACAAAATCAG  
CCTGAGCAAGGTATCGTGCAGAAAAGAGAGCCTGCAATCAGCCTGACCAACGGGATAAATTCGGTGAATCCGGATCA  
ACCTGAACCTGGCAGCGGGGAGTACAAATCAGGCTTTGCAGGTATGTTCCGCTCCAAAGGAATCGACCTGGATTCGGG  
GCCTTTGTTGAGCTTACAGGACGGGTATAAATCGGTCATTCAGGCGCTCGGTAATGCATTCGGTGAATTCGCGATGAAC  
CATGTTTCAAGTCAAGGGCGATGACCGGACGGGTGATGATATCAGACGGCGAGTGGCTGATATCAATGAGCATTGGA  
AGCATATCCGCGAAGTGTGATTACGCCCTTATTTATGAAGGTGTTCCAGCTGGGACAAGACTGATGGTGTAGTACAC  
ATTCATGTCCCGGATCAACCGCCATTTAGACCCGCTGACCGAAGGTGAGAACCCTGCGACATTTGTGCGCCATTTGCCAG  
ACTCGTAAACGAAAACGGCGCAATTAAGTTCAGCGAATTAACAGTACTTCAAAGGCCAGGACGAAATGGACCGGGCAT  
TTGGCTGGGATTTGCTGGAGCCGCTTAAATAA

>Cluster\_20952

ATGTTTGAATTAATAACATTTGCGCTTCACTGTTGGTGGCTGCTGATTTGGTGTGATCCTGGTGGTCTTTATGATCTCCGACGG  
ATTTGACATGGGGATCGGCTGCTGCTGCCGCTGGTGGCGCTAATGATGATGAACCTCGGATAGTGAATAACAGCGCTTG  
GCGCGCACTGGGAAGGCAATCAGTCTGGTTGATCCTCGAGGTGGGGCATTATTTGCCGCTTGGCGGAGTGTATGCA  
GCGGCTTTTCCGGCTTTTATGTTGGCGATGATTCTGGTGTGCTGCTGCTGTTCTTCCGCCCGTGGCCTTTGATTATCG  
CGGAAAAATCGCCGATGCAGCTGCGGTAATAATGTTGGGATGCGGACTGGTCACTCGGAGCTTGGTGGCGGCTGAGTCT  
TCGGTATTGCAATTCGGCAACTTGTGCTCGGTTGCGCTTTCACACCGCAATACCGGTGGAATAATCTCGGACG  
TTCTGGCAACTGTGACGCCATTTCCCTTATTGTTGTTGGATTGCTCAGTCTTGGGATGGTGAATTTGCAAGGTGGCGTCTG  
GTTACAACGAAAACGTTGGTGTGATTCACTGCGTTTACAGCTGGCGACCAACCGCGCCACTACTGGTGTGCTGT



GCTTTTTGCTGGCGGGTTACTGGCTGTGGGTTGGTATTGATGGCTTTGTACTGCTCGCCAGGATGCTAACGGTCTCTCC  
AATCCGTTAATGAACTGGTGGCAGTGCTACCTGGTGCCTGGATGAATAATTTCTGCGAATCGCCCGTTTTGTGGATCTT  
CCCCTGCTGGGGTTCTTCTGCCATTGCTGACGGTGATGGCGATTTATCGTGGTCCGCCGGTGGGGATTTTTGATGG  
CGTCATTGATGCAATTTGGCGTGATTTTACGGCAGGCATCACGCTGTCCCTTTTGTTCATGCCGTCAAGCGTGAATCCG  
ATCTCCAGCTGACGTTGGGACAGCACTTCCAGTCACTGACGCTGACGATTTATGTTGGTAATCGTCTGATATTTTT  
GCCATTGTGTTGCTCTACACTCTCTGGAGCTACTACAAAATGTGGGGCGCATGACGACAGAACTCTCCGCGTAACG  
AAAACGAGCTGTACTAA

>Cluster\_40270

ATGAGCAAGACATTTGCCCGCAGCAGCCTGTGTGCGCTCAGCATGACAATAATGACCGCTCACGCCGCGAACCCCTAC  
CAATTTAGAGAATCCGGAAGGGGACTGGATATTTATCGCTGGCCGGGATACATCGAACGCGGACAACTGATAAAACAAT  
ACGACTGGGTAACGCAATTCGAAAAAGAGCAGGCTGCGCGGTGAATGTTAAAACCGCGCGACTTCCGATGAAATGGTC  
AGTCTGATGGCCAAAGGGGGTTACGATCTGGTTACGGCATCCGGCGATGCCTCGCTGCGTTTGGATTATGGGCAACCGCT  
GCAGCCGATTAATACCGCTTGGATTTCCAACTGGAAAGCGCTGATCCGCGCGTGGTTAAAGGCGACTGGTTTTAACGTTG  
GCGGCAAAGTTTACGGCACACCTTACCAATGGGGGCGAACCTGCTGATGTACAACACTAAAACCTTCCCGACGCGCGG  
GATAGCTGGCAAGTGGTTTTTGTGAGCAGAATCTGCCGGACGCAAGAGCAATAAAGCCGGTACAGGCTTATGATGG  
CCCTATCTACATTCGGGATGGCGGTTTGTTCGTCAAAGCCAGCAGCCACAGTTGGGCATCAGTGATCCGATCAACTCA  
CCGAAGAACAGTATCAGGCGGCTGAAAGTGCCTGCGCCATCAACATAATTTGATCCATCGCTACTGGCATGACACTACC  
GTGCAATGAGCGATTTCAAAAACGAGGGTGTGGTTGCTTCCAGTGATGGCCCTATCAGGCCAACGCCCTGAAAGCCGA  
AGGCCAGCTGTCTACCGTTTTTCCCGAAGGAGGGCGTTACCGTTGGGCTGACACCACCATGCTACATAGCGAAGCGCA  
AACATCCGTTTGGCGTACAAATGGATGAACCTGGTCAATCCCAAAAAGTGCAGGCGATGTTGGCGCTGGTTTTGGC  
TCGTTACAGTAGTGGCGCAAGGGTGTAAAGCCAGTCCGTTATTTAGGCGAGAAAGTTGTGAAACAAACGGTTTTAACTA  
TTTTGATAAAATCGCTTCTGAAAACGCCCTATAGCAGAAGGGGGCAAGTTTGTTCCTACAGTCTGGACGAGGATT  
ACATTTGCCATTATGGCGGTCGCTAA

>Cluster\_32956

ATGCGCCATTTACGTAATATTTTTAATCTGGGTATCAAAGAGTTGCGCAGTCTGCTCGGTGATAAAGCGATGCTGACGCT  
GATGTCTTCTCGTTTACGGTATCGGTGATTCGCTCAGCGACCGTTACGCCAGGATCGTTGAACCTCGCGCAATCGCCA  
TTGCCGATATGGATCAATCGCAGTTATCGAACCGGATCGTTAACAGCTTCTATCGCCCGTGGTTTTTGGCCACCGGAGATG  
ATCACCGCCGATGAGATGGATGCGGGCTGGACGCCGGAGCTTATACCTTCGCGATAAATATTCGCGCTAATTTTCAGCG  
TGATGTCTCGCCGACGCCAGCGGATATTCAGTGAACGTTGATGCCACGCGCATGAGCCAGGCAATTTACCGGCAATG  
GGTATATCCAGAATATTTAACAACGGTGAAGTGAACAGCTTGTGCGCGCTACCGTGATAACAGCGAACCGTTGGTATCG  
CTGGAAACACGGATGCGCTTTAACCCGAACCTTGATCCCGCTGGTTCCGGTGGGGTATGGCGATCATCAACAACATTAC  
CATGCTGGCGATTTGATTTGACCGGATCGCGCTGATCCGCGAGCGTGAACACGCGCAGCGTGAACACTTACTGGTATGC  
CGATAACGCCGTTTGGATCATGATGGCAAGGCTGCTGGTGCATGGGGTGGTGGTGTGTTGATCGGGATTTATCGCTG  
GTGCTGATGGTGAAGGCCGCTGCTGGCGCTACCGATAGAAGGCTCGATCCCGCTGTTTATGCTGGCGTGGCGCTCAGTCT  
GTTTGGCACCAGTCAATCGGCAATTTTTATGGGACGATAGCGCGTTCAATGCCGCAACTGGGGCTGCTGGTGATTTGG  
TGCTGTCCGCTGCAAAATGCTTTCCGGTGGTTCCAGCGCGGCAAGATATGCCGAGATGGTGTGACATTTATGCTG  
ACCATGCCGACGACACACTTTGTAGCTCGCGCAGGCCATTTCTACCGTGGTGGCGGATTCGAAATCGTCTGGCCGCA  
GTTCTGACGCTGATGGCAATTTGCGCGGCGGTTTTTCCACCATCGCACTGCTGCGATTCAGGAAGCAGATTGGGCAATGG  
CGTAA

>Cluster\_36242

ATGAAGATTGTTTATATAATAACCGGGCTACTTGTGGTGGAGCCGAACCTCTTATGACGCGATTAGCAGACCAATGTT  
TATACGCGGGCATGATGTTAATATTTTGTCTAACTGGTATATCTGAGGTAAGCCAAACACAAAATATTAATATTCATT  
ATGTTAATAGGATAAAAATTTTGAAGCTTTTTAGAGCTTTATTTCAAGTAAAAAAAATAATTTGTCCGCTTAAAGCCA  
GATATAATACATAGTCAATATGTTTCATGCTAATATTTTTAGTCTGTTTTATAGGATGCTGATTTCCAGCGGTGCCCTGAT  
ATGTACCGCACACAGCAAAAATGAAGGTGGCAATGCAAGGATGTTTTGTTATCGACTGAGTGATTTTTAGCTTCTATTA  
CTACAAATGTAAGTAAAGAGGCTGTTCAAGAGTTTATAGCAAGAAAGGCTACACCTAAAAATAAAATAGTAGAGATTCCG  
AATTTTAAATAACAAATAAATTTGATTTTGGATTAATGATTAATGTCAGAAAGAAAACGCGAGATGCTTTTAAATTTGAAAGCAG  
TACAGCAGTACTGCTCGCAGTAGGAAGACTTGTGTAAGCAAAAGACTATCCGAACCTTATTAATGCAATAAATCATTTGA  
TTCCTTTCAAAAACATCAAAATGTAATGATTTTATTTTGGCTTATTTGCTGCGGATGGCGCATTAAGAAAATAAATTTGAT  
TTGGTTTGTCAATGAACTTGTGGATAAAGTTTTCTTCTTGGGGCAAGAAGTGATAATAAAGAATTAATGTGTGCTGC  
AGATCTTTTTTGTGTTTGGTCTGAGTGGGAAGTTTTGGTCTCGTTGTTGTCAGAAAGCTATGGCGTGTGAACGCTCCGTTG  
TTGCTACCGATTTCTGGTGGAGTTAAAGAAGTCTGGACCTCAATGATGTTATCCCCTGTCAGTAATCATATTTCTGTTG  
GCAGAGAAAATCGCTGAGACACTTAAAATAGATGATAACGCAAGAAAATAAATAGGATGAAAATAAGAGATATATTTGT  
TTCCAATTTTCAATTAACAGTATGAGTGAAGTGGGAGCGCTTATATTTTAAATATTTCCAAGCGTAATAATATAATTG  
ATTGA

>Cluster\_42647

ATGGCAGCTTCAACCTTTTTTATTCCTTCCGTTGAATGTTATTGGTGTGATTCATTGAATGATGCAATGAATATGATGGC  
AGATTAATGATTTACCCGTACCTTAATTTGTCACCGACAACATGTTAACGAAATGGGATGAGCGGGTATGTGCAAAAAG  
CACTGGAAGAAGCAATATTTTTAGCGTTATTTATGATGGCACCACCAACCTAACCCACCGGAAAACGTCGCTGACAGT  
TTGAAATTACTTAAAGAAAATAATGCGATAGCGTGATCTCCTTAGGCGGTGGTTCTCCGACGACTGCGCAAAAGGAT  
TGGCTGGTGGCAGCAATGGCGCGGATATTCGCGATTACGAAGGCGTTGACCGCTCTGCAAAACCGAGCTGCCGATGA  
TCGCCATCAATACCACGCGGGTACGGCTCTGAAATGACCCGTTCTGCAATCATCACTGACGAAAGCGGTCATATCAAA  
ATGGCGATTGTTGATAAACAATGTAACCTCCGTTGCTTCTGTCAATGACTCATCTCTGATGGTCCGGTATGCCGAAGTCACT  
GACCGCCGCAACGGGATGGATGCTTAAACGCAGCTATCGAAGCGTATGTTTCTATTGCCGCGACGCGATCACTGACG  
CTTGTGCACTGAAAGCCGTGACCATGATGCGGAAAACCTGCGGTTAGCCGTTGAAGATGGCAGTAATGCGAAAGCGGCT  
GAAGCAATGGCTTATGCCAGTTCTCGCCGCTGATGGCGTTCAATAATGCTTCTGTTGTTATGTTCAATGAGGCGCA  
CCAGCTGGGCGGTTTCTACAACCTGCCACACGGTGTATGTAACCGGTTTGTGTCGCGCATGTTTCAAGTATTTCAACAGCA  
AAGTCGCCGCTGACGCTGCGTGTGTCGCGTGAATGGGCGTGAACGCTGACAGGTAAAAACGACCGGAAAGGTTGCT  
GAAGCCTGCATTAACGCCATCCGTGAACCTGGCGAAGAAAGTGGATATCCCGGCGAGGCTACCGGACCTGAACGTGAAAGA  
AGAAAGATTTGCGGTTTCTGGCGACTAATGCCCTGAAAAGATGCCGCGGTTTACTAACCCGATCCAGGCAACTCACGAAG  
AAATTTGGCGATTATCGCGCAGCGATGTA

>Cluster\_24273

ATGATCGAAATTACTGTCCCTGTATTACCGAATCTGTACCGGAAGGACCGCTGACAACCTGGTGTAAACAAGAGGCGA  
GCACGTAACCGCATGATGTGATTGCCGAGCTGGAAACCGATAAAGTCAATTCGGAATAACCGCCCGCACGATGGCG  
TGTTAAGCAATATTTATCGTACGGAAGGTAGCAGGTCAGCTCCGCGCACTGTTGGCGCATCTAAGCCGCAAGCTGTC  
ATAGAAGAAACCTGCACACAGTCAACGAAACCTGACGATGCTTCCGACGCGCTGGAGGCACAGCGTAGTGGTGTGCGA  
ACTTGTGACGTTTACCGGGAGCGGGGAGAAATGGACGTAATCTGAAAGAGGATGTCAGCGCGTTACTCTGCACCGCA  
TTACGCTGAACGGTGGCGGAGATGTTGCCAGCTAAACCTTTGACACCGGTTGCTCGTCAAGAACGTCGTGAGCCGATG  
TCGCGCTTACGTCAGCAATTTGCTGAGGCTGCTGCTGGCTTCCCAACAAAATAATGCCATTTCTTACCACATTTCAACGAAGT

AAACATGCAGAGCGTGATGGATTTACGCGCCCGCTGGAAGATCGTTTTGCCGAGAAGCACGGCGTGAAGCTGGGCTTTA  
TGTCCTTCTTTGTTAAGGCCGTTACCGGGCGCTGGAGCGCTTCCCTGTAGTGAATGCCAGCGTTGATGGCAACGAGATT  
ATCTGGCGTGATTTATGGCATATCGGCATTCAGTGTAGCAGCAACCGCGGCTGGTAGTGCCTGTGTTACGCAATGCGCA  
ATCACTCTCTTTGGTGGAAATGAACGGCAAAATGCGGAATACGCCACACAGGCACGCAATGGCAAAATGCGCGTGGAGG  
CGTTACAGGGCGAGGCTTCTCTATCAACCAACGGCGGCTCTTTGGTTTCGATGATGTCACGCCAATCATTAACCCGCGC  
CAGTCGGCCATTTCTGGGATGCATGCCATCACGCGCGCCCGTGCAGAAAAAGGCGGAGGTTGTTATTCGCTCCCATGAT  
GTACTTGTCTCTAGCTATGACCATCGCATTATCGATGGTCAGGAAGCGTGCAGACATTTGGTGGCAATACGTGAGCTAC  
TGGAAATCACCGGAACAACGTTGCTGGATCTTTAA

>Cluster\_41881

ATGGCTAACAGAATGATTTCTGAACGAAACGGCATGGTTTTGGTCGAGGTGCTGTTGGAGCTTTAACCGATGAAGTGAACG  
CCGTGGTTATCAGAAGGCGCTGATCGTCCCGATAAAACGCTGGTGCATGCGGCGTGGTGGCGAAAGTATCGATAAGA  
TGGATGGCGGAGGACTGGCATGGGCGATTTACGACGGCGTAGTACCTAACCCAACAATTAAGTGTCAAAAGAAGGCGTC  
GATGATTTCCAGAATAGCGGCGGATTACCTGATCGCTATTTGGTGGTGGTTCCACAGGATACGTGTAAAGCGTAAAGCT  
CATTATCAGCAACAACCCGGAGTTTGGCGATGTGCGTAGCCTGGAAGGCTTTCCCGACCAATAAACCCAGTGTACCGA  
TTCTGGCAATCCCCACACAGCAGGCACATGCGGCGAAGTGCACATTAACCTACGTGATCACTGACGAAGAGAAACGGCC  
AAGTTGTTGGCTTGCATCCGCATGATATCCCGCAGGTGGCTTTATTGACGCTGACATGATGGATGGTATGCCTCCAGC  
GCTGAAAGGCGCGAGCGGTGTCGATCGCTCACTCATGCTATTGAGGGGTATATTAACCGTGGCGCGTGGCGCTAACCG  
ATGCGCTGCACATTAAGCGATTGAAATCATTTGCTGGGCGCTGCGAGGATCGGTGCTGGTATAAGGATGCGCGAGAA  
GAAATGGCGCTCGGGCAGTATGTTGCGGGTATGGGATTTCTGAAATGTTGGGTTAGGGTTGGTGCATGGTATGGCGCATCC  
ACTGGGCGGTTTTACAACACGCCACACGGTGTTCGAACGCCATCCTGTTACCGCATGTCATGCGCTATAACGCTGACT  
TTACCGGTGAGAAGTACCGCGATATCGCGCGGTTATGGGCGTGAAGTGAAGGATGAGCCTGGAAGAGGCGCGTAAT  
GCCGCTGTTGAAGCGGTGTTGCTCTCAACCGTATGTCGGTATTCGCCACATTTACGTGATTTGGTGTACGCAAGGA  
AGACATTCGGGCACTGGCGCAGGCGGCACTGGATGATGTTGTTACCGTGGCAACCCGCGTGAAGCAACGCTTGGAGATA  
TTGTAGAGCTTTACCATACCGCTGGTAA

>Cluster\_64425

ATGGCTGAAAATAAAATTTACGCTGTGTTAACTGATCGTGGCGCGCAGTTAGAAGCTGCGGCGTGGCGTCAAGGATGCG  
GGTAGTGTAAATAAAATTCGTTATTTGGTACGCGAAGCGAAACGACGACGTAACGCCAGACCCGGCCGAAACGGCATTTAA  
TTCACGAGCGTATTCGCGGAGATATAAATCGTCAAGAAATACCGGTAATCAAGTCATTTTTTACATATACGTACCGTAC  
GAAACCGGCGGTATACTATCCGTGAGGTGGGAATATAACCGACAAGGTGAAGTGTACTCTGTAGCGCGTTGCGCGGA  
TATTTTAAACCTACGGACAGTAACGGCGCACTGATTTCAATCAGTATAAATACCCCTCGCGGTGTCCAGCACATCTA  
CTGTTAACGTAGTTATTGATAACAGTAGCGGAATGAACAGGCAGATGCTGATAAGCGCTATTTGCAGATAAGCAAAAT  
TTATCTGAAATTAATAAATAGGGCGAATCCGCTCAACGAGCAGGCGGAGAACTCTCGTATTGATTTAGACGATATTA  
CGATAAACTGAGATTGATAGCAAAATTTACTGATATTGATGAAGATATAATAATAAATAAATAAACAACCTGTTCTTA  
CAGTAAATAATATACAGCCTGATGCTACTGGGAATGTAATAACAGGTTCCGGATTTGCAAAACCAACGGCGATGGGGCG  
TTTTAATCTGGTTATGTTATACGGCGGTGACCACGTAGTGTACTCTCGCATGACAACTCGTAACAGGTTATGATGTAATC  
CCCTACCGGATAAATCCAAACATGTAACCGCGATTTGGAAACTTATTTGCGCGTGGTGGATGACGTTAGCGGCA  
CGAGTGAATAAGCGTTAGTATGGCGCAGCGAATTTCCATTTGGGAATATAAATAAATAAATAAACAACCTGTTCTTA  
TACCCGATAAACAGGAAACCGTTAACTCATATGATCACAATTTATATCTGCGTTAAATGTAATATTGAAGGAATAGATAA  
TGACATCATATTTACGTCAAATCTGAAGACGTTGAGGAATATGGTGTGACAGGTTTCCAGAACGCCAAAATGGTATTT  
ACGGCACCGTTATAGACGAAGGTCATTGA

>Cluster\_29110

ATGTCGAAATGTTGCTCCAAATTTGGCGGTACCAGCGTAGCTGATTTTACGCCATGAACCCGAGCGCTGATATTTGT  
GCTTCTGATGCCAAGCTGGCTTTAGTTGTCTCTCGGCTTCTGCTGGTATCACTAATCTGCTGGTCTTTAGCTGAAG  
GACTGGAACCTGGCGAGCGATTGAAAACTCGACGCAATCCGCAATATCCAGTTTGGCATTCTGGAACGCTCTGCGTTAC  
CCGAACGTTATCCGTGAAGAGATGAACGCTGCTGGGAGAACATTAAGTCTGCTGGCAGAACGCGCGGCTGGCAACGTC  
TCCGGCGTGACAGATGAACTGGTCAGCCACGGCGAGCTGATGTCGACCTGCTGTTTGTGCAAAATCTGCGCGAACGCG  
ATGTTACAGCACAGTGGTTTGTATGATGACGTAAGTGTGCTACCAACGACCGATTTGGTCTGTCAGAGCCAGATGAGCC  
GCGCTGGCGGAACGCGCGCTGACGCTGCTCCACGCTCAATGAAGGCTTAGTATCACCCAGGGATTTATCGGCAG  
CGAAAATAAAGGTCGTACACGACGCTTGGCGGTGGAGCAGCGATTATACGGCAGCCTGCTGGCGGAGGCTTTACACG  
CATCTCGTGTGATATCTGGACGACGCTCCCGGCATCTACACCAGGATCCACGCGTGGTTTCCGACGCAAAACGCAAT  
GATGAAATCGCGTTTGGCGAAGCGGACAGAGATGCGCAACTTTGGTGCAAAAGTACTGCATCCGCGCAACGTTGCTCCCG  
AGTACGACGATATCCCGGCTTTGTCGCGCTCCAGCAAAGCCACGCGAGGTTGGTACGCTGGTGTGCAATAAAGCTG  
AAAATCCGCGCTGTTCCGCGCGCTGGCGCTTCTGCTGCAATCAGACTGCTCACTTTGCACAGCCTGAAATGCTGCAAT  
TCTCGCGGTTCTCGCGGAAGTTTTCGGCATCTCGCGCGGCAATAATTTCCGGTAGACTTAATCACCACTGAGAAAT  
GAGCGTGGCATTAACTTTGATACCCGCTTCAACCTCACCTGGCGATACGTTGCTGACGCAATCTGCTGATGGAGC  
TGCTGCACTGTGCGGGTGAAGTGAAGAGGCTGCGCGCTGGTGGTGGTATGGCAATGACCTGTCAAAAGCCTGCG  
GGCGTTGGCAAAGAGGTTATCGGCGTACTGGAACCGTTCAACATTCGCATGATTTGTTACGGCGCATCCAGCCATAACCT  
GTGCTTCTGGTGGCGGCAAGATGCCGAGCAGGTGGTGCAAAACTGCATTTAATTTGTTGAGTAA

>Cluster\_59779

ATGCGTACAGAATATTTGGACAGCTCCGTTTGTCCACGTGGGGCAGCAGGTGACTCTGTGTTGGTGGGTCACCGTGC  
TCGTGATCTTGGTAGCCTGATCTTATCATGATATGCGCGACCGCAAGGATATCGTGCAGGATTTTTTCGATCCGGATCGTG  
CGGACGCGTTAAAGCTGGCTCTGAACCTGCGTAATGATTTCTGCAATCAGTACCGGGCACCGTACGTGCGCGTGCAGAA  
AAAAATATTAACCGCATATGGCGACCGCGAAATCGAAGTGTGGCGTCTCGCTGACTATCATCAACCGCGCAGATGT  
TCTGCGCTTACTCTAACACAGTCAACACCGAAGAGCGCTGAAATACCGCTACCTCGACTGCGTCTGCGGAA  
TGGCTCAGCGCTGAAAACCGCGCTAAAATCACAGCCTGGTGGCGGTTTTATGGATGACCACGGCTTCTCTGACATC  
GAAACTCCGATGCTGACCAAGGCACGCGGAAGGCGCGGCTGACTACCTGGTGCCTTCTGCTGTCGACAAAGTAAAT  
CTACGCACTGCGCAATCCCGCAGTTGTTCAACAGCTGCTGATGATGTCGGTTTTGACCGTTACTATCAGATCGTTA  
AATGCTTCCGTGACGAAGACCTGCGTGTGACCGTCAAGCTGAAATTTACTCAGATCGATGGAAGACTTCTTTTATGACC  
GCGCGCAAGTGGTGAAGTGAAGAGCGTGGTGGTCACTGTGGCTGGAAGTGAAGGTTGGATCTGGGCGATTT  
CCCGTAATGACTTTGCGGAAGCAGAAGCCGTTATGGTTCTGATAAACCGGATCTGCGTAACCGCATGACTGACTG  
ACGTTGCTGATCTGCTGAAATCTGTTGAGTTTGTGTAATTTGACAGGCTCCGGCGAACGATCCGAAAGGTCGCTAGCGGCT  
CTGCGGTTCCGGGCGGCGCATCGCTGACCCGTAAGCAGATCGACGAATACGGTAACTTCTGTTAAAATCTACGGCGGAA  
AGGCTGGCTTACATCAAAGTTAACGAACCGCGAAAGGTTGGAAGGATCAACAGCCCGTAGCGAAGTCTCTTAATG  
CAGAAATCATGAAAGACTCTTGGATCGTACTGCGCGCAAGATGGCGGATGATTTTTCTTCGGTGGCGAACAAGAAA  
ATTTGTTGCCGACGCGATGGGTGCACTGCGCTGAAAGTGGGTAAGACCTTGGTCTGACCGACGAAAGCAATGGGCACC  
GCTGTGGGTTATCGACTTCCGATGTTTTGAAGCAGCGGTGAAGGCGGCTGACGGCAATGCACCATCGCTCAACCTCAC  
CGAAAGATATGACCGCTGAGAACTGAAAGCTGCACCGGAAATGCGGTTGGCGAACGCTTACGATATGTTTCACTAAGG  
TACGAAGTGGGCGGTGGTTACGTACGATATCCATAATGGTGATATGACGAGACGCTGTTGGTATTTGGGATCAACGA  
AGAGAACAGCGGAGAAATTCGGCTTCTGCTGACGCTTGAATAACGGTACTCCGCGCACGAGGCTGGCATTTCG

GTCTTGACCGTCTGACCATGCTGCTGACCGGACCGACAATATCCGTGACGTTATCGCCTTCCGAAAAACACGGCGGCA  
GCGTGTCTGATGACTGAAGCACCGAGCTTTGCTAACCCGACTGCACTGGCTGAGCTGAGCATTCAGGTTGTGAAGAAGGC  
TGAGAATAACTGA  
>Cluster\_27826  
ATGAAAAAATCAGCTTACCAGAAAATGGTATCCGCCCGGTTATGACGGTCTGCGCATGGGTGTTCTGAGTGCCTTGA  
AGAACAAAATGAATATGGCGAAAGCCACGGCTGCACTGCTGACCGAGAAAATGCGCCATGCCTGTGGAGCTGCCGTG  
AGTGTGTCATTTCCGATACCTGTATCGCGGGTATGGCTGAAGCGCTGCTTGCAGAAAATTCAGCAGTCAGAATGTA  
GGCCTCACCATACGGTAACCCCTTGTGGTGTATGGCAGTGAACCATCGATATGGATCCAACCCGCCCCGAAAGCCAT  
TTGGGGCTTTAACCGGCACTGAACGCTCCCGGCGCTGTTTACCTGGCAGCGGCTTGGCAGCTCACAGCCAGAAAGGCATCC  
CGGCATTTCCATTTACGGTTCATGACGTTTACGGATGCCGATGACACATCGATTCTGCGGATGTTGAAGAAAACTGCTG  
CGCTTTGCCCGCGCGGTTTAGCAGTCCGACGATGAAAGGTAAGGCTATCTGTCGCTGGCGGCGTTTCGATGGGTAT  
CGCCGGTTCATCGTTGATCACAACCTTTTGAATCCTGGTGGGAATGAAAGTCCAGGCGGTGGATATGACCGAACTGC  
GTCGCCGTATCGATCGAAGAGATTACGACGAAACCGTAAAGTGGAAATGGCGCTGGCTGGCTGATAAAAAATTCGCTAT  
GGCGAAGATGAAAATAACAAACAGTATCAACGCAATGCCGAGCAAAGCCGCGCAGTTCTGCGGAAAGTTTACTGATGGC  
GATGTGATTCGCGGACATGATGCAAGGCAACAGCAAACCTGGCCGATATGGTCCGCTGGAAGAATCACCTGGCTACAACG  
CCATCGCTGACAGGCTTCCAGGGCAACGCTACCTGGACGATCAATATCCCAATGGCGATACCGCTGAAGCGATCCTCAAC  
AGTTCATTTGACTGAAATGGCGTCCGCAACCGTTTGTGCTGGCGACGAAAACGACAGCTTTAACCGCGTGGCAATGTT  
AATGGGCCACCAGCTCACCGGCACCGCTCAGGTATTTGCCGATGTCGGTACCTACTGGTACCAGAAGCAATTGAGCGTG  
TAACGGGGCATAAACTGGACGGGCTGGCAGAACACGGCATCATCCATTTGATCAACTCCGGTTCTGCTCGCTGGACGCT  
TCCTGTAAACAACGCGACAGCAAGGTAACCGACGATGAAGCCGACCTGGAAATCTCTCAGCAAGAGGCTGACGCTTG  
CCTCGCCGTACCGAATGTTGCCGCGATCCAGCAATCTTCCGTTGGCGGCGGTTACTCTTCCCGTTCTTACCAGAAAG  
GCGGCGTCCCGTTACCATGACTCGTGTCAACATCATCAAGGCTGGGACCGGCTACTGCAAAATCGCGAAGGCTGGAGC  
GTGAAATGCCGAAGGATGTGATGACATCTCAACAAACGACCAACTCAACCTGGCAACCCAGCTGGTCTGACCCGCG  
CCTCACCGGTAAAGGCGGTTTACGGATGTGACTCGGTAATGGCGAAGTGGGCGCTAACCCGCGGTTTGGACCATCG  
GCCAGTTGGCGCAGACTTATCACTCTTCCCTCCATGCTGCGTATCCCGGATGATGACACAACGTTGAAGAGACAAA  
GTGTATCGTCTTCTGCTGGGCGCGCACGGCATGGATATTGAAGCCAGGATACCAGGCTTGCCAGAATACGGCCC  
GTTGTACAAGCGTTAA

>Cluster\_59391  
ATGGAACCAAAAACAAAAAACAGCGTTTCGCTTTATATCCCTTACGCTGGCCCTGTACTGCTGGAATTTCCGTTGTTGAA  
TAAAGGCAGTGCCTTTCAGCATGGAAGAAGCCGTAACCTCAACCTGCTGGGGTTACTGCCGGAAGTGGTGCAGAACCATCG  
AAGAACAAGCGGAACGAGCATGGATCCAGTATCAGGGATTCAAAACCGAAATCGAACAACACATCTACCTGCGTAACATC  
CAGGACACTAACGAAACCCCTTCTTACCGTCTGGTAAACAATCATCTTATGATGAGATGATGCCTGTTATTTATACCCCAAC  
CGTCGGCGCAGCCTGTGAGCGTTTTTCTGAGATCTACCGCGTTACGCGCGGCTGTTTATCTCTTACCAGAACCGGCACA  
ATATGGACGATATCTGCAAAACGTCGCGAACCATAATATAAAGTGAATGTTGGTGTGACTGACGGTGAACGCATTTCTGGGG  
CTTGGTGACACGGGCTCGGCGGATGGGCATCCGATCGGTAACCTGTCGCTTATAACCGCTGTGGCGGCATCAGCCC  
GGGTATATACCTTTCCGGTGGTGGATTCGGAACCAACCAACCAACAGCTGCTTAAACGATCCGCTGTATATGGCTGGC  
GTAATCCGCGTACTGACGACGAATACTATGAATTCGTTGATGAATTTATCCAGGCTGTGAAACAACGCTGGCCAGAC  
GTGCTGTTTCAGTTTGAAGACTTTGCTCAAAAAAATGCGATGCGGTTACTTAAACCGCTATCGCAATGAAATTTGTTCTTT  
TAACGATGACATTCAGGCACTGCGCGGTAACAGTCCGACACTGATCGCAGCAAGCCGCGCGCAGGTGGTCAAGTTAA  
CGGAGAAAAAATCGCTTTCTTGGCGCAGGTTTCCAGCGGATGCGGCAATGCGGAAATGATCATCTCCAGACCCAGCGC  
GAAGGATTAAGCGAGGAAGCGCGCGGCAAGAGTCTTTATGGTGCATCGCTTTGGCTTGCTGACTGACAAGATGCCGAA  
CCTGCTGCCTTTCCAGCAAACTGGTGAGAAAGCGGAAACCTCAGTGAAGTACCGACAGCGATGTGCTGTGCTAC  
TGCTGGATGGTGGCGCAATGTAAACACAGATATTCGATGCTGAGTTCAGGACAGACCGGCTGTTTACGAAAGAGAT  
ATCCGTGAGATGCATAAACACTGTCCGCGTCCGATCGTGTGATGCGGCTGTCTAAACCGACGTCACGCGTGGAGCCACACC  
GCAGGACATATCGCTGAGCAGGAGGTAACGCGCTGGTCCGCGGCGAGCCGTTTAACTCCAGTGGTATGGAAGATA  
AAATCTACCTATCGCCAGTGTAAACAACGCTTTATTTTCCGGGCACTCGGCTGGGTTGTTATGCTTCCGGCGCGTCA  
CGTATCACCGATGAGATGATGTGCGCAAGTGAACAGTGGCGCAGTATTCACCATGGTGTGCTGAAAGTGGCGCAGCAG  
GGTACTGCCGGAAGTGAAGATAATTCAGAAAGTCTCCCGCGCAATGCGTTTGGCGGTTGGCAAAATGGCGCAGCAGCAAG  
GCGTGGCGGTGAAAACCTCTGCCAAGCCCTGCAACAGGCCATGACGATAATTTCTGGCAAGCCGAATACCGCGACTAC  
CGCCGTACCTCCATCTAA

>Cluster\_39295  
ATGGCGAGTGAATTTTTTACCATTTTAAACCGCGCTGGCCGCGCAAGATTGCTGCGGCGCTGGCGGAACAAAAGCAGAT  
AGTGTGCAAAACATGGTGGTGGCGACGGCGGCGGCGAGTATGCCGAACCGAAAGAGAGCCAGACAAAAGGTGGTGCCTG  
AAGTCTGGCGGGGCTACTGAATACGCTGAAAATCGCCCGGAAAACCGCGGTTGGTGAATGCGGAGGCGGCTACTGCCG  
GAAGCCAAAGCGGCTGGTATATCCGAGGTGGGATCGCTGGATATGGACGGCGTGTGATTGCCATCGGCAAGTCTCC  
GAAACCTATAAGCCGAAGTGCCTGCCGGGCGAGTAAGCAAAATGTTGATCCGCGCTGTGATGGAAGTGACGAACGCGG  
CGGCGGTAACGCTGATGGTTGATCCGTCGCTGGTGTGATGCAACCGGTAGATATGTTGACTCCAGTATTTGAAGAGCACGAA  
AGATCACATAATCACCCGACGCAACGCTGACTCAGAAAGCTTTACGACGCTTAAACGCTCCACCAATAGCACGCTGGA  
AACGCAAGGCAACGCGGAGGCGGTAAGGCGGCGATGGATAAGGCGAATGAGGCACTGGAAGAAAGCTGGGCGTGTATA  
AAGCGCATAAACATCCGTTGGGCGGATATACCGGGGTGCCGATGGGACAACGCGCGAGAAGGGGTTGTGAAGCTTAAT  
AGCTCAACGAACAGTACCAGTACGACGGAGGCTGCGACACCGAGTGGCGTTAAGGCGGCAATGACCTGGCGAATGGTAA  
GGCGCGGGGAGCCATAAACATGCTGGGCGGATATTACCGGGTACCAGGATGCGCATACGCGCAAAAGGGATCGTAA  
AGCTCAACAGCGGACGAACAGCACCAGTACTACCGAAGCGGCCACGCGCGGCGAGTGAAGGCGGCTATGACCTGGCG  
AACGGGAAAGCGGCTTCCAGCCATCTACGCAATGAGTACGATTAACGGCGTACCAGGATGCAACTACAGCGCAAAAAGG  
GTTGTGAAGCTTAATAGCGCGACGAACAGTACCAGTACGACTGAAGCCGCAACCGGAGCGGTTAAGGCGGCGTATG  
ACAAGGCAATACAGCAATCTCCAGTTTTGCTCTTTTACGCTGAATGGGACGTTTACGGTGCAGCTGGGCTAACGAAA  
GTGATGGTGGAAATGATTGGAGGTGGAGGTGGTGGCGGCGGCGGTTGGTGGTGGTGGAGCAATGGTTATCCGAC  
AGCAGGTAACCATCACCTTTTGTTCAGGGATGTTGCTGTGTAACCTGAGCAAAAATGTAACCGTCAAGTCCGCGGAG  
CGGTTGTTGGGGATCATCAAAAGTAGACTGTTGGTGGTTCGATGACCGGGAGTAAAGGTTACGCGGAGGAACTCA  
ATTTCTTAAACGCTCACCTTCTGTTGGTGGTGGGCGGCGGCGGCTGATGCGCAAGATTTGCTGGCAGATTTGCTGGC  
TGAGCCAGGTTCTGATTCACAGCATGGCTATGGCGGGGGACTAAGTATAACTCGCAGAAAAATGCCGTAGGTTATGGTT  
CGAGTGGTGGGCTGGTACTCTAAAGGCGTCAGAACTGTTGAAGGGGACTCTACAGCAGGTGCAATGGTGTCTCAGGT  
TTTGTGCAATATGGTGGTAA

>Cluster\_27260  
ATGCATTATATGAAGTGGATTTATCCACGCGCTTACGCAATCAATGATTTCTGATGGCAATCCTGATGGTCAATGTGCC  
AACGCTTACTATTTGGTTATATCGTAGAAACAGAAAGGACGTTTACGAGTCTTATCTGAAAAAGGAAAAAACTTTCTGGCC  
TGGTCAACCTGCTTAACTAGGCGCTAGGCAATCGCTACGATCTCACATCGACTTACCGCTGAGGAGCGTATCCGCGCA  
TTAAATGCAGAACTTGCCTCCATACCGAAAATACCTACGCGCTTCCCTGGCATCGGCGTGGTTATTAACAACAAAAC  
GCTGGATGCGATAATCACCTACGCGCTTACGCGCTATATCAGAAATATGTTGGCGGTTACCATTCGCGCAGATCACCTG

GTCCGGAAGTCATGCGGTACAAATACCCCTTTGGTTTATTTCAGGCAGGCAGGTGCGCGCGGATATTTTGAATTCATGATT  
CCCATTGAGCGTAATGGTGAATCCTCGCTATATCTGGGCCAATGAATTAACCGAAGATATTCGCGCCAGGCTGGAA  
AATGGATGTGAGGATTATCATTTGCTCACCGCCGGTTTGGCTGATAAGCTGCTGTTGATTGCTCTTTTCCCGTCGCC  
TGAGCGCCAAATATAGATATCATCACCAGTGGCCCTCTCGACTCTGGCTCAAAAATATCCCACTCGATTACCACAATGGCC  
GGTAAATCGGGCAATCATAGTCAGTCAACAGCTTAACAACTCGCCAGGCACTGCGTGAACCGCAACACTTAACTGCCGTGAT  
TATGAAAACGCTCCCGATGGCGTCATTGCCATTGACCGCCAGGGTGTGTAACCACCATGAACCCAGCAGCAGAAGTCA  
TCACTGGCTATCAACGTCATGAACCTGGTAGGGCAGCCTTACTCCATGTTGTTCCACAATACTAGTTCTACAGTCCCCTA  
CTGGATACGCTGGAACATGGCACCGAACATGTAGCACTGGAGATCAGTTTCCAGGCCGTGACCGCACCATTGAACTCAG  
TGTACGACCAGTCGTATTCATAACACGACCGGTGAAATGATAGGTGCTTTGGTGTATTTCTCTGATTTAACTGCCCGCA  
AAGAAACCCAGCGCCGATGGCGCAAGCAGAACGCCTCGCCACACTGGGTGAGCTGATGGCTGGCGTCCGCGCATGAAGTA  
CGTAAATCCGCTAACGGCTATTCTGGTTTATGTACAGATCTTGGCCCAACAAACCCGTGACCCAATACATCAGGAATATCT  
GTCCGTAGTACTCAAAGAAATCGATTCAATTAACAAAGTTATTTCAGCAATTGCTCGAATTTTCAGCCACGCCACAGTC  
AATGGCAACAAGTCAAGCTCAATGCATTGGTTGAAGAAACTCTGGTACTGGTACAACCCGCGCGTACAAGCCGCGGTC  
GACTTCATAAGCGAACTGGATAATGAATTAAGCCGATTAACGCCGATCGTGAACCTGCTCAAACAGGTACTACTGAATAT  
CCTGATCAATGCCGCTCAGGCTATCAGTGCACGAGGAAAATTGCGATTCGAACCTGGCAGTATAGCGACTCGCAACAGG  
CCATTTGATAGAGGCAACGGCAGTGGCATTGATCTCTCGCTGCAAAAAAAGATCTTCGATCCCTTTTCTACTACCAA  
GCCTCAGGAACCGCGCTTGGTCTGGCTTAAGTCAACGGCATTAATGCCCATCAGGGTGTATTTCCGCGTCCGCGAGTTT  
GCCGGCTACGGCGCAACCTTACGCTTATTTTACCAGTCAACCCGAGGAAATCAGACTGTATGA

>Cluster\_38570

GTGGCGATTCAATGGATAGAAAGCGAAGCGGATATTCAAGTCCGTGTCATGTCATCGATGGTTCATCGTAGTTTGGGATGAT  
AGCCGGCGAGGCGCGGCAAGACTAGTTCACTGGTAGATGCTCTTGGCCGGTTTCGGGATAATGAAGTAATGTCCTTA  
GAAAGCATGGTCAACGCATGCTTGTATTACCTTTACCAAGCGTGGGTTGAGGTCATCAAGAAAAGATTGGGGTTTGTAT  
GAGTTGTACTAGTTTTCGACTCTTCATGGATTTCTGTGGGGTTGATTAGCCATTTCCACGAAAATATTCGTCAGCGGTT  
ATATGAAATCCGCTATTCGCGGGTGTAGAACTTCTATGATGGTAAAGTAAAGTAAAGTAAAGTAAAGTAAAGTAAAGTAAAG  
CCCGTGAACAAAATAGAACGACTGACAGAACAGCTTTCCTTCTCGAAGCAGTCAATCATTTTGGACTATTCTGACACTAGC  
TTCAGTGATTACGAAAAGGACAGATTGGGCATGATGATGTCATAGAAATGCAACCTACTTGGCTAAAAATAATCAAAAC  
ACTTAGACGGATCATTTGGCTGCGTTTCCCTTACATCTTCGTCGACGAAGCACAGGACACATTTGAGGGAATCGTCTCAG  
GACTCAATCTCGTCTGTGGGGTGTAGAACTTCTATGATGGTAAAGTAAAGTAAAGTAAAGTAAAGTAAAGTAAAGTAAAGTAAAG  
AGTGCCGGTGTATTTTTCGCCACCAGACAAAGTAAAGTAAAGTAAAGTAAAGTAAAGTAAAGTAAAGTAAAGTAAAGTAAAGTAAAG  
CCGACTTCTCAATGCTTATCGTGGAGATGTTGAGCAGTATGCTGCTGGCGAAAATGCTGAATGTAAGGCAGTGTGAAT  
TTTTGCTAATTAAGCAGAAGAGCCAACAGAACCAGCAGGCGCTATTGAGAAGACAGATTGAGCGGGCGCTAGCTCGT  
ATGGATGCTGCAAGTCAAAAACCTGGGGTTGGCGAGGTGCGCAGCATGTCATGAAGCTCTTCTTGGCACATCAAAATGATCCG  
GCGACGGCTTGGCTTCCGTGATCTCAATCGCTTCTACTGGAGACTATGCCTCATCAAGGGCTCAAGATGCTTTTGAGG  
AAGGAACGCATTTCTTCTTAAACCATTTCTTTTCGACGATTTGGCCCTCATAACAGCTCAAAGCCAAAGGTGACGATCGA  
AAAATTAATTAATCTACTTCGTAGAGATAGTCTGCTTTTCGCGAGCAATGGATTAATGCGGAAAAGTCACTGAAAGTGA  
GATTGAGACTTCGAGGCTTTGGTAAAGCAGTTACATGCTTTTGGGATACCGAAAACGATTGGAACGATTCCTTCACTTTT  
GCGTCGAGATGACAGATAATCCAGCCCTCAGAAAGATTGAGTGAGCATCTTGAACGCTCCACGTAAGGCTTTCAGT  
GAGGAGCTTACAGTTTTCGACAAAAGGAGACTGGCTGCGAGACTCATTTTTTAAATGGCCACAGGGGGAGTCTCCCGTA  
TTTTATGATGATGTCGAAGCAGCATGGAACCAATACAGCTTTTAAAGTAAAGTAAAGTAAAGTAAAGTAAAGTAAAGTAAAGTAAAG  
GATCGGCAACGCTCTGTAACCTCAGAAGCTCGTGTATGTCTGTTTCCCGTGTGAGGAGGATCTACGTAATGACTTTT  
CACAGCTAATCCAGAGGGAGCTCAAGCTGAACATAATTGAAAGTAAACTATTGTGCGCTGATCAAAATACGAATTTAGCCCT  
GA

>Cluster\_46482

ATGAATCTCAGCAGTACCATCAATCCATTTCAGGACATCATGCGCAAGGACGACGGCGTGCAGGGCGACGCCAACGCCT  
TGGCCAACCTCACCTGGATGCTCTTCTCAAAGTATTCGATCAACGAGAAGAAGAGTGGGAAGATGATAACCAGCAATATC  
AATCACCGCTGCCCGAGGCTACCGCTGGCGTAACTGGGCTGCTTATATTTGTTGACGCTGACGGCAAAAAGAAAGCCGAC  
ATCGCCGCGAGGACTTGGTGGCCCTTCGTTAAACACGAACCTTTTCTGCTCTGAAAGAACAAATCGACGCCAGCCAGAG  
CCACAGCACAAGGCTCTCAAACAGGTTTGAAGACGCCAACAACTTATGAAATCCGGCCGCAAAATGCTGGCCGTA  
TCGAAAAATGGAAGACGCCATCAACTCCACGATTTCAAACCCGCGCAACCTAGGCGATGTTTACGAACAGATGCTC  
AACGACTTTCGCGCGTGCAGGCAATGCCGCTGAGTTTACACCCCGCGGCCATCACCGCTTCAATGGCCGATCGCGTTAA  
TCCACGCTGGATAAACGCGAAAGCGTGTGAGCACCAGGATGTTGGCACCGGGCTTCTTGGCCGCGCCATCGACCAT  
TCCGCCATCAGCTCAGTACCAAGTCCAGCGCGAAGACAGCAGCCATGAAAACCTTATCCACGGCATCGAGAAAAAA  
CAGCTGCCCATCTGCTGTGCACCACCAATATGCTGCTGCACGGCATCGACGTACCAGCCAGATCGAACAAAAAAC  
CTTGGCCATCGCTGGAACGAATGGAGCGCTAACGCAAGCTGATGATCATCAACCAACCCACTTTTGGCGGCTATG  
AAGACGATGGAGTGGGCGAGGATACCCGGCTGATCTGCGCACCCGCGAAACCCGCGACATGTTTATGGCGCTCATCATC  
AAAAAATGCTGAAAGAAAATGGCCGCGCGCCGCTGGTCTACCCGATGGCTTTTGGTTTGGCGATGGCATCAAAGGCAC  
ACTGAAAAAATGCTGCTGCGTGTATGCAAACTACACACTATCCGTTGCTGCCCCAAAGCGGCTTTCGCCCCCTACACTA  
CCATCAAGACCAACCTGTTGTTCTTACCAAAGGCAGCACCCTGGATGACGGCACCCGAGCATTCCACACCGATACCATC  
TGGTCTTACGAGCACCTTACCCTGCGAGCTACAAAAGTATTTCCAAAATAAGCCATCCGGCTTGAAGAAATCAAGCC  
TGAGCAGGAATGGTGGGGCAACGAGTCCAAATGATTTTGGCGAGCGAGTGGAGAACGAATTCGCTGGAAGGTGGATTTCA  
AAACCAAGGCGGAACCGCAAGCCGCGCACAAACCGTGGCAACGCGGGAAGATCTGAATAACCGAATTCGCGCC  
TTGGAAGGTAAGGCTCGCGACCTGCGCAACAGTTTGGTAGGCAGCACCATGCGCTTACCAGGAAAAAATCGACGCCCA  
GATTCGCCAACTGCGCGCCAGGCGGAACCTTTGCGCTGCAAGCGCGGGATGCGCAGGCGCGGGGGATCGCTCTACT  
GGCCGATCTTCAACCTGATTTGAAAAATCCCAACGTACAGGAAGAAGAAACACACGACCCAGTTCTGCTGCTGGAGAAG  
TACAAAAAATCTTGGGCGAGATTGAAGAACTGAAAACAGCTCAAGAGCGAACTGGCAGCAGCGCTGGCGCATCACATT  
TGTGGGTGAGGACGCTGA

>Cluster\_14910

ATGCTTGTGGCGCATGGTTTTCAGGTTTCAATTTTCTTTGCTTTACTTTCAGCCAGATAAAGAATCTGAAACCATT  
GAAGCTGTGTTTCAGATCCATTGATGCTACAGGATGGATATTTTACAGACAGCCTTACTTTTATCTGTTGTGACTACGG  
ATATCAGAGTTTTAGCCTTTGTTGCACTTGGAGCAGGATTTGTCGTGCTCTTATATCCCTGTTGCGGCGTTGATAAAA  
CTGAACGAGAAGAAAGATAATATTTTGGTGTGCGGATTTGCGACAATAATGATAATTCGTGAGTCAACAGTTTTCAC  
GCTTGCAGGTTGACGAAAAGACGGGATTTATCGTTGGTATAAAGACAAGAAAATCATACGCTATGTTGGGAGCAGCATTC  
GTCGATGGGAGCGGAACCAAGGCTGGTAAAGTGGCAGGTATAGTCACTAATCTTATGAAGTACTGGTGGAGTGT  
ATTATCTCGATCCAAAAGGAGTGTTTAATATCACAGCTTATCAGGAAGTGTATTTAGGTCATGAGGTTTATAA  
ATTTGATCCCTTTAGTCCGGTAAACGACCGCTTTAAACCTTTGTTATTTATGTCAGCATGGGAACGAGTGAAGGTTTAACT  
AGCTTGAAAATCTTGGCTTGTATTTTACCCTATAAGACAGATGGTGGGATGCTGGTACTATCTTAAATAGACGGCG  
GGGGTGTTTTAAATCTTATGCTGCTGCTTATGTTTATGATTAAGAAATGTAAGGCTGGACTAAAAACGCTTGTAT  
TGAGCCTGCTTCTCAATGCTTAAATTAATCAGCTTTTGGAGGTCAGACCCGAACATCTCTTTTCAATTCATGAATG

ATATTCGTTT CAGAATTAAGGGGAAAGACAAAACGCTTGTGATATTGGTGTGCGTGGCCTTAAGGCATTCATTGAGATG  
GAGGATAAAAACAAAGCACAACTCAAAGCAACTTTCTTAATGGATTATCACCGTTTGTCTAACCCCAATGTGGCAAATGC  
TACTGATGGAATGATTTTGATTGCGGCGAGTGCAGAAAAGCGGATGACAAATTTATTTCTGTATTTCTGGTGATAATG  
CCAGTTGGCTGAAAAATAACAATAATTTCTTTTCAGCTTGTATACAGGTGAATCTTGAAAAGATGCCAACGGATGAT  
ATCAGAAAAGCCTTATTGAGCGCTCACTGTAACAACAAATGAACTACTTACACTGAAAATTTAGTGAAGAAAATCCTGGCAA  
TGGACTCATTGCTGGTTACAAGCTGAAATTTGTTGATTGTTTACCAGGTGCGCTCTCAGCTTGAGGAAAATCTACAGTTATG  
CAGGCAGTAAAACATTACGGAAGTGCACCTGTAAAATCGTTTATTCCGCTTCTGATGTTAAAGATGCGCGGGAGTTA  
TCAGAAGCGATGGGAAACGGAACAGTAACATATCGGTTCCGAAAAGCAAAAGTCTGATGCTGGAGGAACATCGAGATCTGA  
ATCAGAAAAGCCTTATTGAGCGCTCACTGTAACAACAAATGAACTACTTACACTGAAAATTTAGTGAAGAAAATCCTGGCAA  
TGAAGGGAGAAAACCCGATTCGTTGTGAAAAGGCATTTCTACTATCTCCATGAGTATTTCTTTGGTGATTTTGTGAAGGTT  
GCTCCGGAATTCGAAAATTTTCCCGAGGAAAGGAAAGTTGGTTATGCCGCCACAGAAAGTATTTGAAAATGAAAT  
CGTCGCAAAAGGATATCTGGCAGTAAAAGAAAGTTCTGATCTCGATAAAGCGGCATAA

>Cluster\_7419

ATGCAATCGTGGGAAAGGATACGGTACGAAAGTGCAGGCAAAATGCGGTATATGATCTCGGTGATCATATCAGAATGG  
AAGTATACGATATTCCTCAAAGCCATCTCTGAAAATATGGTTATCAACAATGCGCGCCTAACGCTCTGGGCTGGCACA  
TGGTTAACGTTTTCAGTACAGGGAATGATGGCATTCTTGGAGTCAAGAGCCGCAAAATAAATATGCACCCGCAATGTTG  
GTGGGTAAGGTAAGTGGTTTCTGAGGCGCTTCTTTAGAACGCATGGTGCCTGGATACCAGCAAGGAGCCTTCCGCT  
CGAAAATAGCGTATGGACCATCATTTGCCGATATCACTACGACGAACAAAACACCCCTCTCAACTTAGCCACCTTGCGA  
TGTCTGACGCAAAATGTGATTTATGATGGAATGAGCCAGTACTCGTTTATCAGTACGCGCAAGTGCAGGAAAATTTCAATTAG  
TTGACCAACCAATCCCTGTGCGGAAACGGCAATTTTATATGCGTACCAGATATGGCTAATCATCAGAGCGATCAGCTCAA  
CGTACCGGTCAGGCAACAGGTGATTTTCAAATATTCGTGACGAGCACCGGTGCCAGCCCGGACGAGGAGATAGCCTTA  
CACTGGTAAACAACGGGCGGCGGTGATGCTGCATTTACGTTGGGCAATGCCGAGGCGTGTGTTGATATCGGTACGATGAA  
TATACTTTGCTGGATAATGGCAACCATAGCTGGAGTCTGGCAGAGAATCGCGCAAAATACCCCTTCAACCATGATGT  
GCTGAATAGGAGCCTCAGAACCGCTGCTATGTTGATGGGTGAGTGCAGAACTGGACACCGTGCCTGAGCGTCTTGGTAAAG  
CGGTTAGTTACGATACGGCGATGTTGGAGTTCCGCAATTAACACCCGCAACAACGTTGACCACTGATGCGGGAGCTGGTTTT  
GAGCAACATTGACGGGCTGACGCTCGGTATCGATAGCCGTTTCTCCGTAAGAAAGCAGTACAATTCGCGGCTTGAT  
CTTTGGTTACTCTCATTCTGATATTTGGTTTGTATGCGCGGCGCAAGGTAATATCGATAGCTATACCCCTGGGGCTTATG  
CCGTTGGGAGCATAAGAACCGTGCCTATGTTGATGGGTGAGTGCAGAAAGTTGACCGTTTGGCAACACCATCCATGGCAA  
ATGAGTAATGGGGCAACAGCGTTTGGCGATTACAATAGTAACGGCGGGTGCCTATGTTGAGAGCGGTTCCGTTGGGT  
TGACGGATGTTGGAGTGTAGACCTATCTGGCCTTACCGGCTTACACAGATGGTACGACTACAGTTATCAAACG  
GCATGCGCGGATGTTGGGAAATACCCGGATATACCGCTGAAGCGGGAACGGCGTAAAGTATCACATGGACCTGCAA  
AACGGTACGACGCTGGAACCCCTGGCTGAAAGCGCCGTCGCTAGGAATACGCCGATTCTAACCCAGGTGAAAGTAAATGA  
CGATGGCAAAATTAATAATGATGTTGGCTGGAACAGTGGCGTTTATCAGGCTGGTATAAGGTCATCGTTTACCCGACGT  
TAAGCGGTCATTTGTCAGTACGATGGAATGGCGCAGGGGTAGAATCGCCGTGGAATACTCAGGCGGTTGGTCTGG  
ACGTTCTGA

>Cluster\_40420

ATGTCAAAACAACCCCTTTCATTATCAGGCTCCTTTTCCACTCAAAAAGATGATACTGAGTATTACCTGCTAACCCAGCGA  
ACAGTTTACGCTATCTGAAATTTGAAAGGGCAGGAGATTTGAAAGTGCACCCGAAAGCGTTAACCTCTGTTGGCGCGTCAGG  
CGTTTCATGATGCGTCTTATGCTGCGTCCGGTCCACCAACAGGTGGCCGACATTTCTGCTGACCCGAGGCGCAGC  
GAAAATGATAAAATAGTGGCGCTGCAATTTCTTCCGTAACCTCGACATCGCGGCAAAAAGCGTTTCTGCCAACCTGTGAGGA  
TACCGGCACCGCATATTTGTTGGTAAAAGGGCAGCGTGTATGGACCGGTGCGGTTGATGAAAGCGGCTGGCACCGG  
GTGCTATAAACAATTTATTCGAAGATAAATCTGCGCTACTGCAAAAACCGCGCGTGGATATGTATAAAGAGGTGAATACC  
GGCACCACTTGCAGCGCAGATCGATCTTTATGCGCGTTCGATGGCAGCAGTACAATAATTCCTCTGTATGCCAAAGTGG  
CGGTTCCGGCAACAAGACGATCTCTATCAGGAAACAAAAGCGTTACTGACGCGGGAAAACGAAAATTACCTGGTTG  
AGAAGATGCGCACGCTGGGTACGCGCGCTGTCTCCGTTATCATATTGCGTTCGTTATTTGGTGAACCTCTGCGAGAAACG  
AATCTTAAAACGGTGAACCTCGCTTCCGCTAAGTACTATGATGAACTGCCAACGGAAGGGAATGAGCAGCGTACGGCGTT  
CCGCGATGTTGAACTGGAAAAGAAATTTGCTGATCGAAGCGCAAAATCTTGGTCTGGGTCGCGATTTGGTGGTAAATACT  
TCGCTCATGACATCCGCGTATTCGCTGCCACGTCACGGCGCATCTGCCCGGTGCGTATGGGCGTCTCCTGTTCTGCT  
GACCGTAAATCAAAGCGAAGATCAACCGTACGGGATCTGGATCGAAAACGGAACATAATCCAGGCAAAATATATCCC  
GGAAGAGCTGCGCAAAAGCAGGAGAAGGCGAAGCGGTGCGGCTTACCTTAAACCGTCCGATGAAAGAGATCCTCGCACAGT  
TGTGCGCAGTATCCCGTCTTACAGCTTATCGCTTAAACGGCAGCATTATCGTCCGTCGATATTTGCTCAGCCAAACCT  
AAAGAGCGGATGGATAACCGTGAAGGGTGCAGCAGTACATTAAGATCATCCGATTTACTACGCGGTCGCGCAAAAC  
GCCGGAAGGTTATGCTTCCGCTTCTTTGGCCAACGACCGCGGACGGATGGATTTCTATGTCGATCAACTGCAAGCCG  
AGGCGGAAGTATGATCATGCTGGCGAAAGGCAACCGCAGCAGGTCAGGATGCTGTAAAAAACACGGCGGCTTCT  
TACCTCGGCATATCGTGGTCCGCGAGCTGATTTGGCGAGGGAATTAAGAGCCTGGAATGTTGAAATATCCGGA  
ACTGGGAATGGAAGCCATCTGAAAATTTGAAGTGAAGATTTCCCGGCTTTATCTTGTGGATGATAAAGAAAATGACT  
TCTTCCAGCAGATACAACACCAATGCACCCGCTGTGTAATAA

>Cluster\_29163

ATGGAAATCTTCTTACCATACTGATAATGACCCTCGTGGTCTCGCTGTCGGGGTGGTCACTCGTGTGATGCCCTTTTCA  
GATCCCGCTTCCGCTATGCAAAATCGCCATCGGTGCGCTACTGGCGTGGCCGACGTTTGGTTTGCATGTTGGAGTTGATC  
CTGAACTCTTTTTAGTCTTGTATTTATCCCGCGTGTGCTGTTGCTGATGGTGGAAAACGCCGACCCGTTGAATTTCTCGAA  
CATGGCCGAGAGATTTTCGGCTTGGCGTGGCGTGGTGGTCAACCGTGGTGGCATGGCTTCTTATTTACTGGGT  
GGTGGCGGCAATTCGCTGATCCCGCTTTCGCTGGCTGCGGTGCTTCTCCGACCGATGCTGTAGCGCTCTCCGGGA  
TTGTTGGCGAGGGCGCATCCCGAAAAAATCATGGGCATTTTGCAGGGCGAAGCGTTGATGAAATGACGCTTCCGGCCTG  
GTGCTGTTGAAGTTTGGCGTGGCAGTGGCGATGGGACAATGATCTTACCGTCCGCGGTGCGACGGTCAATTTATGAA  
AGTGGCAATAGCCCGGATTTCTCGCCGTTTGTGGTGGTGGTGGTGGTGGTGGTGGTGGTGGTGGTGGTGGTGGTGGTGGT  
GCGGTGATGAACCCGCGACGAGATCGTTCTGCTGTTCTGCTGCCATTCGCTTCTTATCTGATTGCGGAACATAATGGC  
GTTTCCCGCATCTCGCTGCGGTGCGCGCGGGATGACCATACCCCGTCCGCTGATGCGCGCTGCGCCGCTGGCAAT  
GCGCTGCGCGCAAAACAGCACCTGGCGATGCTGGAATTTGCTTTAACGGCATGGTGTCTTCTGCTGTTAGGCTGCAAT  
TGCCGGGATTTCTGGAGACGCTCGCTGATGGCGGCAAAAATCAGCCCTAACCTCGAAAATCTGGAATGCTGTTACCGGATAT  
ATTTGATATATGCGGCGCTGATGCTGGTCCGTTTCCGCTGGCTGGTGGACGATGAAAAGTTTCAAGCAACCGCTTCTGAA  
GAAGAAGCCGATGGAGTTTGGTTCTGTTGACTACAGGAAATCTGATCGCGTCTTTCGCGGGGTGCGTGGGCGCATCA  
CTTGGCGGTTGCTCTATCTCCGCTTCTTTCGCGGATGGTAACTCTTCCCTGCGCGCTATGAGTGGTGTCTCTG  
GCGCTGGCGCTATTTCTCTTCTGTTGTTGTTGCGCGGATGGTGGTGGTGGTGGTGGTGGTGGTGGTGGTGGTGGTGGTGGT  
CCATTCGCAACAATGAAAAGAGGACGATTTGCACGAGCGGCAACGGCAGAAGTGGCGATTTGGCGATCCAGAAAATGG  
AGGAGCCTTTGGCGCGGATACCGAAGAGAATATCGATAAACAGCTGCTCACAGAGTTAGTTCTCGCTCATTTGGTAACT  
CTGCTCGTCCGCGGATGGACGTAATGATGTAGAAGTTCAATCTGGAAGAGAACCTGGAGGCTCGCTTCCGCTGGC  
GGCATTGGCTTCTGAACGTGCTGAACTGTACCATCTGCGCGCCACGGGAGATCAGTAAACGAAACGCTGCAAAAATTA  
TGCAGATCTCGATTTGCTTGAAGCGTTGCTGATTTGAAGAGAACAATAA

>Cluster\_24363

ATGAGACATTCATGCCCCACCGTATGTACGCAACCGTCCGATGAAATTGAGTACCCTGTGATCTTAAATGGTCAGCGC  
GGTACTGTCTCGGTAATTTGGTGGTGCATCTGATTTACTTCTCGCAATCAGTGATATGACGCGAGACGGGTAGCTA  
ACAAGGCTCTGGCAGTAGCGCGTACCCTCGCCGATCGCCGAGAATCCGTCAGGGCTTGCAGAAAAACCGCAGGAGAGT  
GGAATCCAGGCGATCGCGAAGCGTGCACAAACGCAACGATCTGCTGTTTATGTCGTTACCAGATATGCACAGCTCTCG  
CTACTCGCATCTGAAGCCAGCGTATTGGTACGCCATTTAAAGGTGATGACATCCTTAAAGCGCTGAATGGCGAAGAAA  
ATGTCGCTATCAATCGCGGTTTTCTGGCGCAGGCTTACGCGTATTACCCCATCTACGATGAAATCATAAACAAAT  
GGCGTGGTGGCGATCGGCTTGAGTTAAGCCGCGTACCCCAACAGATCAATGACAGTCCGCTGGAGCATATCTGGTGGT  
ACTATTTGGCATGCTGGTCGGACTGATCGGCACCTGCATTTCTGGTTAACTGACGTAATGGCGTTATCATCGGTCCTTCAACC  
CCTACGAAATCTCCACACTGTTTGGCAACGCCAGGCCATGTTGACGTCATCAAGAAGGCGTGGTGGCGTGGACGAT  
CGCGGCGAGGTCACGCTGATCAACGATCGCGCACAAGAATTGCTGAATACCGTAAGTCCGAGACGATGAGAACTGTC  
GACGCTAAGCCACTCGTGGTACAGGTGGTAGATGTCGGAAGTGTACGCGACGGAACCCACGCCGCGCAGGAGAGA  
TTACGATTAAGGACCGACTATTACTGATCAACACCGTTCCGGTCCGAGTAATGGCGTTATCATCGGTCCTTCAACC  
TTCAGGGACAAAATGAAGTACGTAACGATGACGAGGACTCGACGGTCTGGTCAACTATGCTGACGCACTTCGTGAACG  
ATCCCACGAAATTTATGAATAAATGTCATGATGTCGATTTCTCGGATTTGTCATCTGAAGAGTTATAAGCAGTTGGAAGATTACA  
TTCTCAAAAACGCAATAACTATCAGGAAGAGATTGGCTCTCTGCTGGGTAAGATCAATCTCCGGTTATCGCTGGTTTT  
TTAATCGAAGATTAACCGCGCCAGCGATTAGGCGCATACTGCTAAATTTAAACAGTGAAGGCCAGTCCGACGAGCGG  
TAGTGAGGATCAGGTCGCGACGCTGATTACCACGTTGGGAAATCTGATAGAAAACGCGCTGGAGGCATTAGGACCGGAAC  
CCGGTGGCGAAATTAGCGTAACATGTCACCTACCGCTACGGCTGGCTGCTGCGAAGTTAACGATGATGGACCGGGGATC  
GCACCCGACAAAATCGAATACATTTTGGCAAAAGGTGTCGACAAAAGGAAGCGAGCGAGGCTCGGTTTAGCACTTGT  
CAAAACACAGGTAGAAAATCTCGCGGCGACATCGCCGTTGAAATCGGAACCCCGGATTTTACACAAATTTTGTCCAGA  
TACCTGGACGGGAGAGGTCGAACAGATGA

>Cluster\_11684

ATGAATACAACTCCCTCACATCGATTAGGTTTTTTCATCACATCAGGCTGGTTCCGTTATTTGCCTGCATCTTGGCGG  
TATCTTAGTTCTATTCGCATTAAGTCTGCTCTGGCTGGCTATTTCTCTGGCAGGCCGATCGCGATCAGCGTATGTTA  
CTGCGGAGATTGAGATTCGGACCGGTTAGCGAACAGTTTCAGATTTTTTGGCTTCAGCCCGATCAATATGATTCAGGCC  
GGGGTGGCAGTCTGATTCGGGAAATGGAAGCAATGAAGCGCAATATTCGCGAAGCCGAAATCGGAGATTAACAGTTCGCA  
GCAAGGTTATCGTCTTACAGAAATCGGCGGTAACACTCTGCTGATGAAGCCCTGCACACTGAATTAACAGCT  
TTCAGGCTTATATCACGGGTATGCAACCTATGTTGAAATATGCCAAAATGGCATGTTTGAAGCGATTATCAATCATGAA  
AGTGAGCAGATCCGACCGCTGGATAATGCTTATACCGATATTTGAACAAAGCGTTAAGATACGTAGCACCAGAGCCAA  
CCTACTGGCGAACTGGCCCATCAGCGCACCGCTGGTGGGATGTTTATGATTGGCGGTTTGTGCTTGCCTGGTCA  
TGACGCTGATAACATTTATGGTGTACGTCGGATCGCTATTCTCCACTGCAACATGCCGACACACGATTAAGAAAATC  
GCCAGTGGCGATCTGACGATGAATGATGAACCTCGGGTCTGTAATGAATCGGTCGCTTAAGTCTGATTTACAGCAAT  
GCAGCATTCACTGGGATGACAGTAGGGACTGTTGACAGGGCGCGGAAGAGATTTATCGTGGCACCAGCGAAATTTACG  
CTGGCAATGGCAGCTGTCATCTCGCACGAAGAACAAGCGGGCTATCGAACAACTGCCGCCAGCATGGAGCACTC  
ACTCGCAGGTTGAAACGAAATCGGATAACCGCATCATGCGCAAACTGGCGCAAGAGGCTTCTATTAAGGCCAGCGA  
TGGCGGGCAGACGGTTCCGGTGTAGTAAAACGATGGCGCTATCTCAAGTTGCAAGAAAATTTCCGAGATCACCG  
CCGTCATCAACAGTATTGCTTTCCAGACGAATATTTGTCACACTGAATGCTGCCGTTGAAGCCGCGAGCGGGTGGAGCA  
GGCCGTGGATTGGCTGTTGCTGCCAGCGAAGTACGGACTCGCAAGCCGAGCGCCAAAGCGCGAAGAGATTTGAAG  
CTTGACGATGAATCAGTCAAGTTAATTTGACTGGGTCGGATGAGGTTGGCAACCGCGAGGAAAACATGAGACTAATTTG  
TTGATGCGCTCGCGAGTGTACACATATCATGCAAGAAATCGCCGCGCTCGGATGAACAAAGTAGAGGCATAACTCAG  
GTTAGCCAGGCGATTTCTGAAATGGATAAGGTGACGCAACAGAAATGCTTCTCTGGTAGAAGAGGCTCAGCAGCGCGGT  
GTCCCTGGAAGAACAGGCGGACGATTAACGTAGGCGGTGAGCATTTCCGCTGCAACAAATCTCTGTGTCGGCAGAAC  
CTCGCGGAGCGGTTGAACAGTTAGTTTCGCTACGGTGTGA

>Cluster\_60388

GTGAACGTTAATTCATCGTCAAATCGTGGCGAAGCGATTTCTCGCCGCTGAAAACCGCAGTTCGCCGCGCGGTTGCTGGA  
TGAAGAGCGCAAAACCGCTGAACAGGTCACCAATACGGTGAATAAATCAATCTGCTGCTGACGTTGTACAGTATCTTTAT  
ATCAACATGATGGCTGGCTTCCGGTCTGTTTGGCAACGACGAGCGGACACTTAAACGGTCAATACGCGGTTTATTTATGCC  
CTTTCAATGGAAGGGGCCGAAAATGCTGGATTGTTGGTGAAGCGCTGCTCGATGCCGACAGTCCGGAGTTTCCGCTCAGT  
CACACCGCGCTCCCTGCCGCGTCTGGGGCAGCGAGAAATTCGCGATATGTACGGGCTGATTCGGTTGGCTGCCG  
ATCAGCGTCCGCTGGTGTTCGCCGATGACTGGCCGGAAGATATGATCATCCGCTGCGCAAAAGATGCGATGATTTACGACTG  
CGCCCTGAACCGACGACTGATTCGGAACGATCCGTTTATCAATGAGGGCAACAGCGATGCCGCGGTGATCCCTGTCCG  
CCCCTGCATATCACTCCGATGAACCGGGTCACTTCCGCTGTTTGTGGATGGCGAGCAAAATGTCGATGCTGATTACC  
CGCTGTTTTATGCTTCCATCGCGCATGGAGAACTGGCAGAAACCGGATGGGCTACAACGAAGTGACCTTCTTATCGGAC  
CGCGTGTGGGATTTGGGTTTTGCCACAGTGTGGCTATACCAATTCGGTTGAAAATGCACTGGGATGAGGTTGCC  
GCAACGAGCACATACTATTCGCTCGATTCTGCTGGAAGTGAACGGCTACACAGTCAATTTGCTTAACCTGGCTCTCT  
GCCATTTCTGTTGTTTTGATACCGGCTTTATGCAATTTTTTCCGCTGCGGGAAAAGTGCATGACGATGGCGGAAATGCTG  
ATCGGTCGCGTAAAACCTACGGTCTGAATCTGATTTGGTGTGTCGCGCGATTTCTCAAAGAGCAACGCTGCAAAAC  
GCTGAAAACCTGGTGCAGGATGCGCGGACGCTGTCGGAGCTGGTAGAGATGCTGCTTGTACGCCGAATATGGAACAAAC  
GCACCTCAGGCGATTTGGCATTCTCGACCGCAAAATCGCCGCTGATTTGCGCTTTGATCACCCCTACGCCGACTACGGCAAT  
ATTTCAAAAACACTGTTTACCTTTACCGGCGGCGATGTTTTCTCCGCGTGTGGTCCGCTGCAAGAGACGTTTGTATTC  
GCTGGCAATGCTGGAATTTGCCCTCGACAACATGCCGGAATCCCACTGCTGACCGAAGGCTTTAGCTATAAAACCTCAG  
CATTCGCGCTGGGCTTTGTTGAAGCGCCACGCGGTGAAGACGTCACCTGGAGCATGCTCGGTGATAACAAAATTTGTT  
CGCTGGCGTGGCGTGGCGCCACCTACGCCAACCTGGCCGGTGTGGCTTACATGCTGCGCGCAATACCGTTTCTGACGC  
ACCGCTGATTTATCGGTAGCCTTGTATCCCTGCTACTCTGTACCAGCGTGTGACGCTGGTAGATGTGCGCAAGCGCCAGT  
CAAAAACCGTGGCGTATAAAGAGATCGAACGCTACGGCATTGATCGTAACCGTTCCGCCCTGAAGTAA

>Cluster\_28643

ATGAAAGTATGGATGGCGATATTAATAAGTATCTTGTGCTGGCAATCATCGGCGTGGGCGGTCGTCCGGCCTGGTCCGC  
AGCCAGAGCACAGGAAGAAATTTCCGCTGCAACAGCAATAAACAAGTGGGACGATGACTACTGGAAGGAAGGAAAA  
GTGAGGTGGAAGAGCGGTTTACGATCAGTTAAGCGCCGCTCACGAGTGGCAACGCTGTTTGGGAAACGAGACTCCG  
GATGTGATGATGCCGCTTTAAACGGTGGGTTATGATCCGGTTGCCATACGGGTGTACGCAAAATGGCGGATAAAAA  
CGCATTAAGTCTGTGGATCGCGAACGATAGCGATCTTTGGTGCAGCCAAAAGTTGATGGCGTTGGGTAACCTGGTTTT  
ATCGGACGGGAAACTGAACAAAGCAATCAGTCCGGCAATGGCCTGAAAAGGCGAGGATGGACGAGAAAGTTCCGTTA  
ATTTCCGCTGTGCGCAAAACCTTTAGCGGGCTTTAGCCAAACAGTACGCTTACGGGGGAAAATTTCTCAAACCGGAGG  
GCATATCCAACAACAAATGGGGGAATAAATGCCCGCGCAAAAGTTGCTGGTCTGATGATGCGCCAGGACGATAGCGACA  
CGCTGAATTTCTTGGCGGTTTTTGTCTGGGCAATGGCCGATGGACCGAGTTAATACCGATCGTTTAAAGAGCTGGCT  
ACCGCTGGTTTTACTCTAAACGACGATATACCGCTGGTGGTAAAAATGCTGATGAAGTTGGCGCGCTACGCAATCGCTG  
GTGAAAACGAAATTTACCTTCCGTCACCGATGGCGTGGTTGTGCGAGCGCGAAAAGAACCCGAATCCCGCATTTGGCTAC  
CAGGCCAGGCAAGTGGTGGTGGCTGAAAATATCAACCTGTAGCTCAGGTTGCCGAAGTGAAGCGATTAGTTTGGC

GTGGGTAAGAGCGGTAATAATATCGGTGGTTGCGTCACTCGCACCTGTTCATGCTTGTATGATAAAAAAGTCCAGCGGGTAA  
TATTGGTTCCGTCAGGCGTGGCAGGAGTGGAAATATTGCGCCTGGTGAATCAGATCCTCGTCAGCCTTCCGGTTCAGGGTA  
TTCTTCGCATTGATGATGTTGGTGTGGCGGGTGCAGAAGTACAAAACCGACACCGCCAGAAAACCGCTTTAACTCGTTG  
ACCTGCTACTTTGCTTCTGATGTTTGTAGGAACAGTTTCATTTACGCTTAGTCTGGCTGGGGTCAAAAACAGGTTCTTTG  
GCTGGATGGCAATGGTGAAGCGGCTGGCGCTGCATCAGACTCATCGCTTTGAGCATATCTTTCTGGCTTTTAT  
TAACGCCAGAGCAATTACAGAACACGCCGGGATCGCGAAAAGTAAAAGTGGCGAGTATGGCATCAGTTTAACTGGCT  
CGTCAGCAGCCTTTTACTCGCTGGGTGATGGCAATGGGAATACCGTAACCCGGGGCGGCTTAAATGCAGTGTGAACG  
GTCCTGGTCGCAACTTTTATTGAGCAGGAGCAGTTCTGGCAGCAGTCCCGGGGACTGGATCGGGGCTGTGACAGCAG  
TTATTGAATGGAAGAAAATGCGCAATCAAGAAGCTGGCAGTTGGCTGGCTGCCAGCAGATCACAGGTTTTGACCT  
TAG

>Cluster\_14076

ATGAGTGAATAGCATTAACGGTCAGTATTCTGGCTTTGGTGGCAGTCGTCGGTTTGTATTATCGGCAATGTCAAATTTCC  
CGCATAGGATTAGGTATTGGCGCGTGTGTTTGGTGGGATCATCGTCGGCCATTTTGTTCAGGCGGGGATGACAT  
TAAGTAGCGATATGCTGCATGTTATTACAGGAATTTGGCTGATCTGTTCGTTTATACATCGGGATTAGGAGGGCCG  
GGCTTCTTTGCGCTCATTTGGCGCTCTCCGGATTACGCCCTCAACCTGTTTGTCTGTCTGATCGTCATCATCGGTGTCTGT  
TACCGCATCTCGATAAAGTGTGATATCCACTGCCGCTAGTGTGGGATTTTCTCCGGTGGGTTACCAATACCG  
CAGCGCTGGGGGAGGCGAGCAGATTTTTCGCGCTGGGATACCAATGGAATGGTGCATCAGATGAGTATGATTAC  
GCGATGGCGTATCCATTCGGCATTTGGGGATTTTGTTCACCATGTGGATGTTGCGGGTATTTCGCGCTCAATGTGCA  
GACAGAAGCTCAGCAGCAGAGTCTTACCGCACCAATGGCGGGCGCTGATCAAGACTATCAATATTCGCGTTGAGAACC  
CTAACCTGCATGATTTAGCCATTAAGATGTACCGATTCTCAACGGCGCAAAAATATCTGCTCGCTGAAACGCGAA  
GAAACCTTAAAGTTCCTTCGCGCAGATACCATTTCACTGGGCGATTGCTGCATCTGGTGGGTCAGCCAGCGGATTT  
ACATAATGGCAACTGGTGATTTGGTTCAGGAGTGCATCTTCGCTGTCCAGAAAGGCACTGATTTGCGCGTCGAGCGTG  
TGGTGGTCAACATGAAAACGTCGCGAAAACGTTTTCGCGACTTGCCTTTAAAGAAGCTATGACGTTGTTATCTCG  
CGCTGAACCGTCCGCTCGCGGTCGAACTGGTGGGATGCGGATGCGCTGTCGCTGAGTTCGCGGATATCTCAATCTGGTGG  
CGCTCCGTCGCAATTGATGCGGTTGCCAATGTGCTGGGGAATGCGCAGCAAAAAGTGAACAGGTTAGATGCTGCCAG  
TGTATTATTGGCATCGGGCTGGCGTATTGTTAGGTTCTATCCCGTCTTTGTGCTGGGTTCCCGCCGCGTTGAAACG  
GGGCTGGCGGGCGGCTCCGCTGATTTAGCGTTGATCTTCGGGCGTATCGGCAGTATCGGCAAGCTGTACTGGTTATGCC  
CGCAAGTGGCAACTCGCCTCGCGGTCGAACTGGTGGGATGCGGCTGTTCTCTCGGTCGTTGGTCTGAAATCTGGTGG  
TTGTGAATACCTGGTCAATGGCGAAGGGCTAAGCTGGATTGGTTATGGTGCCTGATCACCGCGGTTCCGCTGATTACT  
GTTGGCATCTGGCGGGATGTTAGCCAAAATGAATTACTGACCATGTGCGGGATGCTGGCAGGTTCCATGACCGGATCC  
TCCGGCGCTGGCGTTGCTAATAATCTTCAATCAACAGTGGTGGCGGGCGCTCTTACGCCACTGTCTATCCGTTAG  
TGATGTTTTCTGCGCATTTACCCCCCAATTACTGGCGGTGCTCTTCTGGAGTATCGGTTAA

>Cluster\_58598

ATGAGTGAAGCAGAAAGCCCGCCGACTAATTTATCCGTCAGATCATCGATGAAGATCTGGCCAGTGGTAAGCACACCAC  
AGTACACACCCGTTTCCCGCGGAGCCGAATGGCTATCTGCATATGGCCATGCGAAATCTATCTGCCGTAACCTTCGGGA  
TCCCGCAGACTATAAAGCCAGTGCACCTGCGTTTCAGCAGCACTAACCCGTAAGAAAGATATCGAGTATGTTAG  
TCGATCAAAAACGACGTAGAGTGGTTAGGTTTTACTGGTCTGGTAACGTCGCTTACTCTCCGATTTATTTGATCAGCT  
CCAGCCTATGCGATCGAATGATCAATAAAGGCTGGCGTACGTTGATGAATGACGCGGGAACAGATCCCGCAATACC  
CGCGCACCTTACGCACTGAACTGAAACAGCCCTGACCGCGACCGTGAAGAGAACCTGGCGCTGTTGCGAAAAA  
ATGCGTGGCGGTTGTTTTGAAGAAGGTAAGCCCTGCTGCGTGGCAAAAATCGACATGGCTTCACCGTTTATCGGTAGCG  
CGATCCGGTGTGTAACGTTAATAATTTGCTGAACACCAGACTGGCAACAAGTGGTGCATCTACCCGATGTACGACT  
TCACCCACTGCATCAGCGATGCCCTGGAAGGTTATACGCACTCTCTGTGATGAGTTCAGGACAAACCTGCTCTG  
TACGACTGGTACTGAGCAACATCACGATTCCTGTTCACTCCCGCAGTATGAGTTCGCGCTGGAATACAC  
CGTGATGTCCAAGCGTAAGTTGAACCTGCTGGTACCGACAAGCAGTGAAGGCTGGGATGACCCGCGTATGCCAGCA  
TTTTCCGGTCTGCGTGTGTTACACTGCGGCTTCTATCGTGAGTTCGCAACCGATCGCGGTGACCAAGCAGGAC  
AACACCATTGAGATGGCGTGCCTGGAATCTGCATCCGTAAGATCTCAACGAAAATGCGCGCGGCAATGGCGGTTAT  
CGATCCGGTGAACCTGGTTATCGAAAACATCAGGGCGAAGGCAAAATGGTTACCATGCGCAACCATAAACCCG  
AAATGGGCAGCCGTCAGGTGCGGTTTAGCGGTGAGATTTGGATTGATCGCGCCGATTTCCGCGAAGAAGCTAACAGCAG  
TACAAACGCTCTGGTGTGGTAAAGAGTGCCTGCGTAAATGCTTATGTGATTAAGGAGAACCGCTCGAGAAAGATGC  
CGAAGGTAATATCACCCACTCTTCTGTACTTATGACGCGGATACCTTAAAGCAAGATCCGGCAGATGGTCTGTAAGTCA  
AAGGTGTTTACTCAGTGGTGGTGGGACAGTACGCTGCGGTTGAAAATCCGTTTGTATGACCGCTCTGTCTGCGCT  
AACCCAGGTGCTGCGGATGATTTCTGTGCTGATTAACCCGGAATCGCTGGTGTGATCAAAACAGGGCTTTGCTGAAACGCT  
GCTGAAAGATGCGGTTGGCGGTAAGCATTTCCAGTTTGGAGCTGAAGGTTACTTCTGCTCGATAGCCGCATTTCTACCG  
CGGAAAACCGGTTAATAACCCGACCTGGGCTGCGTATACCTGGCGAAAAGTAGGCGAGTAA

>Cluster\_55563

ATGGACAAAAGATATAATACCGCAATCAAGACCTTCAATAGCATGAAGATCTGAATGATAACGCCCTGGCGTACGA  
TGATTTCTGAAACAGCGAAGCGATACCTTTATAGATCGTTTTGGTAAACGCCAGGATACGATAATTGGGGCTACTAAAA  
AAATGGCAGCTGCTACCGAGCTGTTATTTGATGAAGCCGCAAAAACCTGATCCTCTCAGCCGGCAGTACATGACGCTG  
GCGGCGGCGCAGGCGGATATTGCGAATAATTCGGCAGGTTCAACAACCTATGTCCGCGAGTCAGGACGGAAGCTCTGCG  
CGATGAGTATATCAACCTCGCTGGAACGCTGCAGCCAAACCGGACGGCGGATGGTTCGTGACGACTACGCATACAGGAT  
CGCCAGACAGCGTACCCGAGCAGATATGATCCGGAGACTTCCCGCGTGGCTCCATTTTAAATACAAGCGGCGAGATTA  
ATTCAAATCGGTCTGACGGAATAATTTACGAACCTTTTAAACCAAGAATCCGAACCTATGCGCTGGGCGGGAGGG  
TTCTATACCGCAGTTTATTGGCGGTGAAAAAGTGTGGCGGATGACGGTTGATTCAACCACAAACAGATCGTTGAAGCTT  
ATACGGTTGGTGGGAAGCACTGGATTTACTCAGACGGTGGCTGGTAGCTGTTAATAACGGAATGGCGGTGGTGGTGC  
GACGATGATGCCAACCTGACTGCTGAGTATGACTTTTGTGAGGTTCTACTGTGTACCCCTACTCAGAGCAGTGCCT  
GATGTTTTTATCTTTGACTGCTGGGCAATCAACGCTCAAGGATATGCTCCTGACGCCGATCAAAACCTGTCGAG  
CAACGCCGATATATCCTGATAACGCTTTTATGCTCAGCGGGGGGTTAGGCGTACAGGGACACGACGACTACTCTGGT  
CCACTGGTGGAGGAGTAAAGTGGGACAGATAAAGAAAACGGCGCAAGCGGCTCGCGAACACCTTCAATCGCGATATGG  
TGCAGTACCGGAATCATGCCGCGCAGCTATCAATCGATATGTGCGCAGTCTGGTCAAGCTTACGAGTACAGAAACGGG  
GTAACAGTATATCAGTATCTGCTCAGTTCAATCGAAGTTCGTAACCGGCTGTAAGCAAGCAGCGGCTGGGCGGAT  
GTTCTCTGCGTTGACTGGATGACAGGAGAGTCCGACGAGGACTGGTCAAGGATTACGAGAAGGAATGTATGATACCGGAT  
GAGGCAGTACAGAGCAAAATCACAGCGACATCATCGCAAGAAGCGGTCAAAACGAACCGCGGATTTACGCCATTAACC  
AGCTGGGTTATGTAACGCGGATGGTGCATTTACAGGCGAGTACGCGGACTGGCTCGACGCGATGACGCGATGACGCGAA  
AGCAAACTCAGGCTGGTCAATAGTTTGTACAGTACGATTTTATTTTACAGCGGCTGCACTTTGACGCTGGCGGCGAGAA  
CCGGCGGAGCAGCTGTGGCAGAGCGCTTCTCCAGGAGTGGTTACAGCGGCTGGTCAAGGATGGTTCGACAGGAT  
TCGTGTGGAATCAACCCAGCAGATACAAATCAATGTCCAGGCTATACGAACTGGTCTGGACAGCAGTACGATCAAC  
ACCTCCGGTCTGGGCAATACCGCTTTAGCTACCGGATGAGACTGGTCTCCACTGCTATATACGAGCAGTCCGATCAG  
CTCGGACGGCAAGGGCTGTGATTAACCTGGCAGCGCCCTCTGGACGTTTGGGCGGCTTCTTATGCGACAGCAG  
AAAACCACTTACAGAGCGGCACTGTGTAACCTCCGGCGGACTCTTGGTGAAGAGGTTGTTGATCTTCCGCT

GGAATCATATGGGTGATGACACATCCGTGACTCTTTACGACTGGCTCCCCGCTTTTCGTATTAACGTTTTCTGA

>Cluster\_28862

ATGCGTCTAAACCCCGGCCAACAAACAGCTGTGCAATTCGTTACCGGCCCTGCTGGTGCTGGCGGGCGGGTTCCGG  
TAAAACTCGTGTATACCAATAAAATCAGCCACTGATCCCGGTTGCGGTTATCAGCGCGACATATCGCGCGGTGA  
CCTTTACCAATAAAGCGGGCGGAGATGAAAGAGCGTTCGGGACAGCGCTGGGGCGCAAGAGCGCGCTGATG  
ATCTCCACCTTCCACACGCTGGGATATCATCAAACCGAGATGCGGCGCTGGGGATGAAGGTAACTTTTCGCT  
GTTTGACGATACCGATCAGCTTGTCTTAAAGAGTTGACCGAGGGCTGATGAAGATGACAAAGTTCTCTGCAAC  
AGCTAATTTGACCTCCAACCTGGAAGAAGATCTCAAACACCGGCGCAGGCGGGCAGAGGCAAGGGCGAGCGG  
GACCGTATTTTGGCCATTTGTTATGGGCTGATGATGCACACCTGAAAGCCTGTAACGTTCTCGATTTTCGATG  
TTTTATTGCCAACGTTGCTGCTGCAACGCAATGAAGAAGTCCGCGAGCGCTGGCAGAACAAAATTCGCTACCTGCTGGTGG  
ATGAGTATCAGGACCAACACCAGCCAGTATGAACTGGTGAAGTGCCTGGTGGGCGAGCCGCGCGCTTTACCGTGGT  
GGCGATGACGACCGATCTACTCTTGGCGGGCGCAGCTCCGAGAACTTGGTGCCTGCTGAGCCAGGATTTTCCGGC  
GCTGAAGGTGATTAAGCTTGAGCAGAATACCCTCTTCCGACGCTATTTGAAAGCGGCAACATCCCTGCAATA  
ACCCGACGCTTTTGAAGCGTCTGTTCTCCGAACTGGGTTACGGCACAGAGCTAAAAGTTTTAAGCGCAATAACGAG  
GAACATGAAGCGAGCGCTCACCGCGAGCTGATCGCCATCACTTCTGCAATAAAACGCAAGTACAAAGATTACGCCAT  
TCTTTATCGCGCAACCTCAGTCGCGGATTTGAAAAATCTGATGCAAAACCGCATCCCGTACAAAATTTCTGGTG  
GTACCGTCTTTTCTCTCTGCTGAAATCAAGGACTTGTGGCTTATTCGCGCTGCTGACTAACCCGATGCAACG  
GCATTTCTGCGTATCGTTAACACGCCGAAGCGAGAGATGGCCCGGCGAGCTGAAAAGCTAGGTGAATGGCGATGAC  
GCGCAATAAAGCATGTTTACCGCCAGCTTTGATATGGCCCTGAGTGCAGACGCTTAGCGGACGTTGGTTATGAACATGA  
CCCGCTTTACTACTGCTGGCAGAAATCCAGCTCTGGCGAGCGGGAGCCGATTGCCGCGTGGCGATCTGATCC  
GGCATGGATATGAATCTTGGCTGACGAAACATCGCCAGTCCGAAAGCTGCGCAATGCGCATGAAGAACGTCACCA  
ACTGTTTAGCTGGATGACGGAGATGCTCGAAGGACGCAACTGGATGAGCCGATGACGCTCACCCAGTGGTGAACGCGT  
TTACTTTGCGCGACATGATGGAGCGCGGAGAGTGAGGAAGAGCTGGATCAGGTGCAACTGATGACTTTGACCGCGTCA  
AAGGACTGGAGTTTCCCTATGTCTACATGGTGGTGGTGAAGAAAGGATTTTTGCCCCACAGAGCATGATGCAAGA  
TAATATCGATGAGGAGCGCGGCTGGCTATGTGCGCATTACCCGCGCCAGAAGGAATTGACCTTTACGCTGTGTAAG  
AACGCCGTGATGAGCGCAACTGGTGCAGCCGAGCGAGCGCTTCTGCTGGAGCTGCCGAGGATGATTTGATTTGG  
GAACAGGAGCGCAAGTGGTTCAGCGCGAAGAACGGATGCAGAAAGGGCAAAGCCATCTGGCGAATCTGAAAGCGATGAT  
GGCGGCAAAACGAGGAAATAA

>Cluster\_27941

ATGCTGACGACATGCTATGGGTTTGCCTTCGTCAGCGGGCGAACACGGTGTACTACGCTCCATGCAGGAGGTTGCAAT  
GAGCTCCAGGAAGCCAGCAAGATGCTGCGTACTTACAATATTGCTGGTGGGCAATAACTACTATGACGTTAACGAGC  
TGGCCACATCAGCGTGTCCCGGACCCGAGCTCCCGGAAGCTCGCGTCGATCTCGCGCAGTATGATGAAAACTCGCGAA  
GCACAGGGTACGCGTCTGCCGCACTGTTCTGTTTCCACAGATCCTGCAGCACCGTTTGGCTTCCATTAACGCCGCGT  
CAAACGAGCGCGGAATCCTACGGCTATAACGGCGATTACTTCTCTGTTATCCGATCAAAGTAAACAGCACCGCCGCG  
TGATGATCCCTGATTCATTCGGGCGAACCCGCTGGCCCTGGAAGCCGGTTCCAAAGCTGAGTTGATGGCGGTGCTGGCA  
CATGCTGGCATGACCCGTCAGCTCATCGTTCGCAACGGTATATAAGGACCGCAATATATCCGCTGGCATTAATGGCGA  
GAAGATGGCCACAAGGCTATCTGGTCAATGAGAAGATGTCAGAAATGCCATTTGCTGGATGAAGCAGAACGACTGA  
ATGTCGTTTCTGCTGGGCGTGCCTGCAGTCTGGCGTCGCAAGGCTCGGGTAAATGGCAGTCTCCGCGGGGAAAAA  
TCGAAGTTTGGCTGGCGGCACTCAGGACTGCTGAAACGCTGCGTGAAGCCGGGCTCGACAGCGCTGCA  
ACTGCTGCATTTCCACTCGGTTTCGAGATGGCGAATATTCGCGATATCGCGACAGGCTTCGTTGAATCCGCGGTTTTCT  
ATGTTGAACTGCACAAGCTGGGCGTCAATATTCAGTGCCTCGAGCTCGGCGGGCTCGGGCGTGGACTATGAAGGCACC  
CGTTGCGAGTCCGACTGCTGGTGAACCTACGGCTCAATGAATACGCCAACAAACATCTGCGGATGTTGGTGTGCTGT  
TGAAGAAAATGCTGCCCACATCCGACAGTAATCACCGATCCGAGTGGTGGTGCAGTACGCGCATCACCCGCTGGTGT  
CAAATATCATCGCGTGGAACTAACGAATACAGGTTGCCGCTGCGCTGCAGAAAGCGCACCGCGCATTGCAAAGC  
ATGTTGGAAACCTGGCAGGAGATGCACGAAACCGGAACTCGCCGTTCTGCTGCGTGAATGGTTACACGACAGCCAGATGA  
TCTGCAGGATATTCATATCGGCTACTCTCCGGCACCTTAGCCTGCAAGAAGCGCATGGGCTGAGCAGCTTTAATTTGA  
GCATGTGCCATGAAGTGCAAAAGCAGCTGGATCCGCAAAAGCTGCTCATCTCCGATTTATCGACGAGCTGCAGGAACCT  
ATGGCGGACAAAATGTACGTAACCTTCTGCTGTTCCAGTTCGATGCGGATGCGTGGGGATCGACAGTGTGTTCCCGGT  
TCTGCCGCTGGAAGGGCTGGATCAAGTCCGGAACCGCGCTGTGCTGCTGGATATTACCTGTGACTCAGACCGTGTCT  
TCGACCATATATGATGGTGACGGTATTGCCACGCAATGCCATGCGCGGATACGATCCGAGAAATCCCGCATGCTC  
GGTTTCTTATGTTGCGGCGCATATCAGGAGATCCTCGGCAATATGCACAACTGTTTCGGTGTATCCGAGCGTTGACCT  
GTTCTGCTTCCCTGACGGCAGCTAGAAGTAGAAGTGTCTGACGAAGGCGATACCGTGGCGGACATGCTGCAATATGTAC  
AGCTCGATCCGAAACGCTGTTAACCCAGTTCGCGATCAAGTGAAGAAAACCGATCTGATGCTGAATGCAACAACAG  
TTCCTTGAAGATTCGAGGACGGTTGTACGGTTATACCTATCTTGAAGATGAATAA

>Cluster\_45101

ATGAAAACCGTTAGGAGTCCACAACGTTGTACAACCTTCTCGGATCGCACAATCCATACTGGCGGTTGACGGAAGCAG  
CGATGTTTTGCGCTTTTCTACCACCGAAACCACAGAACCTGATCGTACATTCAGTATCTGCGCAAGCAGGCTGCTCGGA  
TCAGGAAATGACGGTCAACCTCCAGCTGATGATGACTGACCGTTCGATGAAAGCGATCTTCTGTGATCTGGTA  
GGACGAAAATCAATAAACCGGAAATGGGCTGGCAACCGCTGCTGATGGCATGACACACCGCGGTTGCTGATGTTATC  
ACAGGGCTTTCTTTGCTGAGCAGGTAGTTTCTGAAGCAGATCCCGCAATAGTGATTCTCGACAGCGGGGGAATATCC  
AACGCTTCAATCGGTTATGTGAAGATTACACAGGGTTGAAAGAACACGACGTCATGGGCAAAAGCGTGTAAACTGTTT  
ATGAGCCGTCGTGAAGCTGCGGCATCCAGGCGCAATAACCGTGTATTTTTTCGAAGCGGCAATGCATATGAAGTGAAGT  
GTGGATACCAACATGTAAGGCCAGCGGCTGTTTCTGTTTTCGCAATAAATTTGTCACAGCGGAGTGGCAAAAACGAGA  
TTTTTTTAACTGTTTCCGGCACCACATACCGAAGAGCGCGCTCAGGAGCGACTGCGTATCTGCGCAAAATACCGAC  
AGTATCACCGGACTGCGGAATCGTAACGCAATGACGAGTTAATCGATCAGCTATTAATCATGCAGATAACAATAAAGT  
TGGGTTGTGATCTGATTTGGATAAATTTCAAAGAGTTTCAACGACGCTATGGGCAATTTGTTTGGTGACGATTTAC  
GCGAGCTGCTATGGCTATTTAAGCTGCTCGAACATGACAGGTTGTTGGCGCTCCAGGTTGGGGATGAGTTTCTGGTA  
CTGGCATCCAACCTCACAAGCGCGCTGGAAGCAATGGCATCACGAATTTTACCCGCTTACGGCTCCCTTTTCGAT  
TGGTTAATGAAGTTATACAGCTGTTTCAAGTGTGACTTCTCCGAAACATGGTTCCAGACGACGACGCTATTA  
TTCCTCACCGGACAGCAATGTACACAGCGAAGGAGCGGACGAGGACAAATTTGCGTTTTTACCACAGAAATGAAT  
CAACGGGATTTGAATATCTCTGGCTGGATACCAACTTGGCTAAAGCACTGGAACGATCAGTTGGTTATTCATATCA  
ACCGAAAATCACCTGGCGTGGCGAAGTGCAGTCTGGAAGCACTAGTACGTTGGCAGTACCTGAACGTTGGGTTGATTC  
CACCGTTGACTTCAATTTCTACGCCAAGAGTCAAGGCTAATTTGCTTAAAGCCGTTGGGTTGATTTCTGATGCTGTA  
CGCCAGTGGCAAAAGTGGCGGATAAAGGCATAAACCTGCGAGTGGCGGTAATAATTTCTGACGCTCAGCTCCGCA  
AACATTTTACCAGCTTCAACAGGTTTCTCCAGGAACCAATTTGAACTGCCCATAGATGTTGAACTGACAGAGA  
GTTGCTGATTTGAAGATGATGAACTGGCAGTCTGTTAATCAACAATTTAGCCAACTAGGTGCGCAAGTGCATCTGGAT  
GATTTGGTACCAGTACTTCTACTTTCCGAACTGGCGGCTTTCCGATCGATGCCATCAAACTTACCAGGTTTGTG  
TCGAGATATTCACAAACACTGCTCAGCTACTGGTCCGGCGATCGTCTGCTGTTGGCCAGGATGAACTTCCAGG  
TGATCGCGAAGGTTGAGAGGTGCAAGGAAGATGCTTTTTTAAACCAAGACGGGATCAATGAGCGGCAAGGATTTTTG



TTTGCCAAACCGATGCCCGCGTCGCCCTTGAACGCTGGTATAAACGCTATCTGAAGCGGCATAA

>Cluster\_61426

ATGTCGTGAGAAAACCTTTTCTGGTGGAAATCGGCACTGAAGAGCTGCCACCAAAAGCCTGCGCAGCCTGGCTGAGTCCTT  
TGCTGCGAACTTTTACTGCGGAGCTGGATAACGCTGGCCCTCGCACACGGCACCGTTCAATGGTTTGCTGCTCCGGCTCGCT  
TGGCGCTGAAAGTAACTAACCCTGGCGGAAGCGCAACCGATCGTGAATTCGAAAACCGCGCCCGCGGATTCGCGAGGG  
TTCGACGCTGAAGGCAAACCGAGCAAAGCGGCAGAAGTTGGGCGCGTGGTTGCGGTATTACCCTGACCAGGCTGAGCG  
TCTGACTACCGATAAAGGCGAATGGCTGCTGTATCGCGCCCATGTGAAGGGCGAAAGCACCGAAGCAGCTGCTGCCGAATA  
TGGTTGCGACTTCTCTGGCGAAACTGCCGATCCCGAACTGATGCGTTGGGGCGCAAGCGACGTCACCTTCGTGCGTCCG  
GTGCACACCGTACCCTGCTGGCGCAAAAGTCAATTCGCGCAACCATTTCTGGGCATTCAGTCCGATCGCGTGGATTCCG  
CGGCCACCGCTTTATGGGCGAGCCGGAATTCACCATCGATAACGCCGATCAGTATCCGGAAATTTCTGCGTGAGCGTGGGA  
AAGTCATCGCGGATACGAGAAGCTAAGGCGAAGATTAAAGCCGATGCCGAAGAAGCAGCGCTAAGATTGGCGGTAAC  
GCTGACTTAAGCCAAAGCCTGCTGGAAGAAGTGGCTTCGCTGGTGGAGTGGCCGGTCTGTTCTGACCGAAAATTCGAAGA  
GAAATTCCTCGCGGTGAGCGCTGAAGCTGGTTTACACCATGAAAGGTGACAGAAAATACTTCCCGGTGATGCGAAGC  
ACGGCAAACCTGCTGCCGAACCTTTATCTTCTGGTCCCAACATCGAATCGAAAGATCCGACGAGATTATCTCCGGTAACGAG  
AAAGTCGTTCGCTCCGCGTCTGGCGGATGCCGAGTTCTTCTTCAACACCGACCGTAAAAAACGCTTGAAGATAACCTGCC  
CGCCTGCAAAACCGTGTGTCTCAGCAACAGTTGGGACGCTGCGCGCAAAACTGACCGCATCCAGGCGCTGGCTGGCT  
GGATTCCCTGAACAGATGCTGACGTTAACCCAGCTAACCCGTCGCGGTCTGCTGCTAAGTCCGATGATGACCAAC  
ATGGTCTTCGAGTTCACCGACACCCAGGGCGTTATGGGATGCACTATGCGCGTACGATGGCGAAGCGGAAGATGTCGC  
GGTGGCGCTGAATGAGCAGTATACGCGCGTTCCTTCTTCAACACCGACCGTAAAAAACGCTTGAAGATAACCTGCC  
TTGCTGACAAGATGGATACCTTGGCGGATCTTTCGGTATCGGTGATCGGTGATCGGTGATCGGTGATCGGTGATCGGTG  
CGTCTGCGCGCTTGGCGTCTGCGAATTTATCTGTTGAGAAGAACCACCTTGTGATCTGCAAAACGTCACCGAAGAAGC  
GGTGGCTGTGATGGCGATAAGCTGACTAATGCCAACGTAGTTGATGATGTTATCGACTTTATGCTCGGTGCTTCCGG  
CCTGGTATCAGGACGAAGGTTATACCGTTGACACCATCCAGGCGGTACTGGCGCGTCTGCTCCGACTCGTCCGGTGTATTC  
GATGCCCGTATGAAAGCGGTATCGCATTTCCTGACTCCCTGACGCTGCTGCTGCTGCTGCTGCTGCTGCTGCTGCTGCT  
TAACATTTCTGGCGAAATCTGACGAAAGTGTGAGCGACCGCGTGAATGCCTCTACCTGAAAGACCGGAAGAAATTAAC  
TGGCGATGCAAGTTGTGGTGTCTACGTGACAAGCTGGAGCGTACTTTACGGAAGGTCGTTACAGGATGCGCTGGTCGAA  
CTGGCTGAGCTGCGTGAACCGGTTGATGCTTCTTTCGATAAAGTGTGATGGTTCATGGTTGATGACAAAGAATTCGCTATCAA  
CCGCTGACCATGCTGGAAACTGCGCGAAGCTTTCCTGCGCGTTGCGGATATTTCTGCTGTTGCAATAA

>Cluster\_42462

ATGGAAAGCAAACGCTCTGGATAATGCCCGCGTGGCGGCGGGGATTAGCCCAATTACATCAATGCCACGGTAAACCGCA  
GTCGATTAGCGCCGAAACCAAACGGCGTTTGGCTGACGCGATGCATCAACGTACCGCCACGAAAGTGGCGGTAACACCGA  
TCCCGAATGTCTATGGTTTATACACGCGCAAAAAAATGCCGATGGTGGTGGAGGGCAGCGCGCAATATAGCTGGCTGCTG  
ACCACCGAAGAAGGAACGAGTACAAGGCCATGTAAAGGGGGCAAAGCGTTCAATCTACCGACGAAGCTGCCGGAAGG  
TTATCACACGCTGATACTCACCCAGGACGACAGCGCGCGCATTCGCGGGTGTGTCGCCCGGAAACGCTGTACGAAAC  
CGCAGGCGTTGCTGAAACAAACAAAGCTGTGGGGTGCCTGCGTTCAGCTTTATACGCTGCGATCGGAAAAAACTGGGGT  
ATTTGGGGATTTTGGCGATCTCAAAGCGATGCTGGTGGATGTGGCGAAACGTTGGCGGGTCTGTTCTCGGTTCAACCCGAT  
TCATGCGCTCTATCCGGCAAATCCGAAAGTGCAGCCGCTATAGCCCTCTTCTCGCGTTGGCTGAATGTGATTTATA  
TCGACGTTAACCGCGTTGAAGATTTCACTTCTTAGCGAAGAGGCTCTGGCTGGTGAAGTTGGCGACACGCAACAGAGC  
CTGCAACAGCGCGGGATGCCACTGGGTTGATTACTCACGGTTACCGCCCTAAAAATGACAGCATACGAATGGCGGTG  
GAAAGGTTTCGCGCAACGTTGATGATGAGCAGATGACCGCGTTTCGCGAGTTTGTGTCAGAGCAGGCGCAGCGCTGTTCT  
GGCAGGCGCGGTTTGGACGCGCTACATGCCAGCAAGTGAAGAGGACGAAATGCGCTGGGGCTGGCCAGCATGGCCAGCG  
ATGATCAGAACGTTGATTCACCAAGAGTGCAGCTTCTGCGAAGAATCGTGTGATGACGCTGATTTTATCTCTGGTT  
GCAGTGGCTGGCTTACAGCCAGTTTGCCTGCTGGGAGATAAGCAGGCGTATGAAATGGCGATTGGCTGTATCTGCTG  
ATCTGGCCGTTGGTGTAGCAGAAGTGGGGCAGAAACCTGGTGCAGCCGTAAGTGTATTCGCTGAAAGCGCTCGGTTGGC  
GCGCGCCGGATATCCTCGGCCGCTGGGGCAGAACTGGGGATTCGCGCAATGGACCGCATATCATCACCGCGCGTGC  
CTATGAGCCGTTTATCGAGCTGTTCGCTGCCAATATGCAAACTGCGGCGCATACGAATGATCAGCTGATGTCGATGC  
TGCCTTTGTGGTGGATACCGTATGGCGAGCGGAGATCAGGGCGCTATGTTCACTATCCGGTAGATGATCTGCTCG  
ATTTCTGGCACTCGAAAGTAAAGCGCCATCGCTGCATGGTGTGTTGGAAGACCTCGGCACTGTACCGGTAGAGATTGTCGG  
TAAACTGCCAGCAGCGGTGTGTACTCCTACAAAGTGCCTATTTCTGAAAGCGACACGAGAAGCATTCGCGCGCGCA  
AAGCGTATCCGAGCAGTCGATGGCGGTTGGCGGACACACGACCTGCCTACACTGCGTGGCTACTGGGAGAGCGGGGAT  
TTAACACTGGGTAAACCGCTGGGCTGTACCCGATGAAAGTGGTATTGCGCGGCTGTGATCAGGATCGCGAATCGCGAA  
GCAAGGTTGCTGGATGCACTGCATAAACATGGTTGCCGCAAAACGTCGGGGCATAAGGCATCGTTAATGTCGATGA  
CGCCGATGCTTAATCGTGGTTTGAACGTTATATCGCTGATAGTAACAGTGTCTGTTAGGGCTTACGCCAGAAGACTGG  
CTGGATATGGCCGAACCGGTAATAATTCCTGGCACCAGTACCAGTACAAAACCTGGCGACGCAAGCTTTCGCAACGCT  
TGAGACGATGTTTCCCGATGATGGCGTGAACAAGTTGCTGAAGGATTTGGACAGACGGCGCAGAGCGGCGAGCGAAGA  
AGTAG

>Cluster\_57146

ATGAACTCGCCGCTGTTTCTGACACTCCTTCTGGTTTCGCGTTGCGCGCAGCTGGACTTCTCCGGGTTTCCCGC  
CTTTAGCGAACAGGGACAGGAACATTTGTCAGCCACGCGAGTTGCCCAAAGGTACGCGTCCACTAACGCTAAATTTTG  
ACCAACAGTGTGCGAGCCTGCGGATGCGATAAAACTCAATCAGATGCTTTCCTGCAACCTTGTAGCAACACGCGCCT  
CAATGGCGATTGTTACAGGACGGCGAATATACGCTGCAAAATAGACACCCGCTCCGGTACGCCAACATTTGATGATTTCCAT  
CCAGAACCGCGCGAAGCGGTAGCAAGCCTGGTCCGTGAATGCCGAAATGGGATGGATTACCGCTCACAGTGGATGCA  
GCGCCACTTTCGCGAAGGAGCCGCGTACGGGATTTACAGCCAGCAAAATTCGATAGTGAAGAAGCGTCAAAATATG  
TTACAACCCGCTGCCACAGCAACGTTTACTCCTGCTGGAACGGGCGAAGCTGACACATCCGCCCTTTCGACTGGCA  
TAACGCCACGCTTACTTTGTGCTGACAGATCGTTTCGAAAACGGCGATCCAGTAATGACAGAGTTACGACGCTGATA  
AAGACGGTATGGCGGAAATTTGGCACTTTTACCGCGCGGATTTACCGCGCTGACCAAAACGTTGATTTACCTCAGCAG  
TTGGGCGTTAATGCTTTATGGATAAGCGCCCAATTTGAGCAAAATTCACGGCTGGGTCGGCGCGGTACAAAAGCGGATTT  
CCCGCATTTAGCTTACACGCTTATTACACACAGGACTGGACGAACTTGTATGCCAATATGGGCAACGAGCCGATCTAC  
GGACGCTGGTGTATAGCGCACATCAGCGCGTATTCGTATTTCTTGTGATGTCGTGATGAACACACCGGCTATGCGCACG  
CTGGCGGATATGCAAGGATATCAGTTTGGCGGCTATATCTTCTGTTGACGAAAGTGAATAAAATTCGCTGGGTAACGCT  
GAGCGACTGGAACCTGCCCGCGGGCAAACTGGCATAAGCTTTAACGATTTACATTAATTTACGCGCAAAACAGGCTGGG  
ATAAATGGTGGGAAAAAACTGGATCAGAACGGATATCGCGGATACGCAAACTTGGATTCGACGATCTCACTATGTCG  
CTAGCTTTTTCGGGATAATCAAAACCGAATCAACTACCGCTTCTGGTCTGCGGGTGTCTATAAAAAAACTGGATAC  
CCACGCAAAAGCCTTACCGGCTATACCGCGCGGATTTAACCCTGCTGTTAAGTCAAGTGGTGGTCCCGGACTTGGGA  
TTGATGGTTTTTCGGTTCGATACCGCAAACATGTTGAGTTGCCCGCTGGCAGCAACTGAAAACCGAAGCCAGCGCGCG  
CTTCGCGAATGGAAGAAAGCTAACCCGCAAAAGCATTTAGATGACAAACCTTTCTGATGACCGGTGAAAGCTGGGCGCA  
CGCGCTGATGCAAGTCACTACTATCGCCACGGCTTCGATGCGATCAATTTGATTTACGAGGATACAGGCGCGGAAAG  
CAGTGCAGTGTTCGGCGCAGATGGATACGACCTGGCAGCAAAATGGCGGAGAAATTCAGGGTTTCAACGTTGTGAGCTAC  
CTCTGCTGCGATGATACCCGCTTTCCTGTAAGGGGGCGCAAAAGCAGCAGATTACTATTTAGCGCCAGCGCGGTT

ACAAATCTTTTATGGTGATGAATCTCGCGTCCGTTCCGTTCTACAGGTTCTGATCCGCTGCAAGGTACACGTTCCGGATA  
TGAAGTGGCAGGATGTTAGCGGTAATCTGCGCCAGCGTCCGCGACTGGCAGAAAATCAGCCAGTTCCGCGCCCGCCAT  
CCCGAATGGCGCGGGCAAAACACGACACTTTTGCTGAAGCAGGGCTACGGCTTTGTTCTGAGCATGGCGACGATAA  
AGTGTGGTCTGGGCAAGGCAACAGTAA

>Cluster\_21945

ATGAACATGTTTTTTAGGCTTACCAGGTTAGCTGGCCTGCTTGAATAGCAGGCCAGACCTTCCGCTGTAGAAGATATCAC  
GCGTGTGATCAAAATCCGGTATTAAGGAAGAGACGCAGCATGCGACGGTGAGTGAGCGGTAACGTCGCGCTTACC  
GTTCTCATTATCGCCAGTTCGACCTCGATCAGGCATTTTCGGTCAAAAATCTTTGACCGCTACCTGAATCTGCTCGATTAC  
AGCCCAAATGTGCTGCTGGCAAGCGATGTTGAACAGTTCGCGAAAAGAAAACFGAGTTAGGCGATGAATGCGGTTCCAGG  
TAAACTCGACGTTTTCTACGATCTTACAATCTGGCGCAAAAGCGCGTTTTGAAACGTTACCAGTACGCTTTGTCCGTTAC  
TGGAAAAGCCGATGGATTTCACCGGCAACGACACTTATAACCTTGACCGCAGCAAGCGCCCTGGCCGAAAACGAGGCT  
GAGTTGAACCGCGTGTGGGACAGTAAAGTCAAATTCGACGAGTTAAGCCTGAAGCTGACAGGAAAACGGATAAGGAAAT  
TCCGTGAAACCCCTGACCGCTTACAATTTGCCATTCGCTGCTGCGCAAAACCAACAGCGAAGATGTTTTCTCCGTTGG  
CAATGACGGCGTTTTGACGTTGAATCGACCCGCATACCAACTATCTTTCCCGCGTAATACCGAACAGTTCAACACTGAA  
ATGAGTTTTGCTGCGTGAAGGATTTGGCGCAGTGTGCAATGGATGATGACTACACCGTTATCAATTCGATGGTGGCAGG  
AGGTCGGCAGCGAAGAGCAAGCTATCAGCGTTGGTGACAAAATTTGTCGGTGTGGTCAAACAGGCAAGCCGATGGTTG  
ACGTGATTTGGCTGGCTCTGATGATGTGGTGGCCTTAATTAAGGGCCCTAAGGGCAGTAAGGTTCTGTTGAAAATTTTA  
CCTGCTGGTAAAGGGACCAAGACCCGTTACGGTAACTGACCGTGAACGTTATCTGCTCGAAGACCGCGCGTTAAAT  
GTCGGTGAAGACCGTCCGTTAAAGAGAAAGTCCGCGTGTGGATATTCGGGCTTCTATGTTGGGTTTGACAGACGATGTCA  
AAGTGCACCTGCAGAACTGGAAAACAGAATGTCAGCAGTGTGATTAATGACCTGCGTAGCAATGGTGGTGGGCGGTTG  
ACTGAAGCCGATGCTCTCCGGTCTGTTTCAATTCACCGCCGATTTGTTCCAGTCCCGGATAACAACGGCAAGGTTCCG  
TGAAGACAGCGACACCGACGGACAGGCTTCTATAAAGGCCCGTGGTGGTGTGGTTGACCGCTTCACTGCTCCGCTT  
CAGAAATCTTTGCGCGGCAATGACGATTTACGGTCTGCTCCCTGGTTGGGTTGAACCGACATTTGGTAAAGGCCACGTT  
CAGCAGTACCGTATCTGCAACCGTATTTACGATCAGATGTTACGCTGCTGAATGGCCAGCGCTGGGATCTGTACAGTAC  
GATCCAGAAATTTCTATCGCGTTAACGGCGCAGTACGCAACGTAAGGCGTAACGCCAGACATCATATGCCGACGGGTA  
ATGAAGAAAACGGAACCGGTTGAGAAATTCGAAGATAACGCGCTGCCGTTGGGATAGCATCGATCGCCGACCTATGTGAAA  
TCAGGAGATTTAACCGGCTTTGAACCGGAGCTGTGAAGGAACATAATGCGCGTATCGCGAAAGATCTGAGTTCCAGAA  
CATCATGAAGGATATCGCGCGCTTCAACGCCATGAAGGACAAAGCGCAATATCGTTTCTGAAATACGTTGCGGTGAG  
AAGAGAATAATGAAGATGATGCGACGCGTCTGGCGGTTTTGAACGACGCTTTAAACGCGAAGGTAACCGGAGTTGAAG  
AAACTGGATGATCTACCGAAAAGTATACCAGGAGCCGGATCCTTATCTGGATGAGACGGTGAATATCGCACTCGATCTGCG  
GAAGCTTGAAAAAGCCAGACCCGCGGAACAACCCGCTCCCGTCAAGTAA

>Cluster\_23402

ATGGGTATTTTCTCCATTGCTAATCAACATATTCGCTTTGCGGTAACCTGGCGACCGCCATTGTTACTGGCGCTGTTTGT  
TGGCTTTCACTTCCAGCTGGAAACGCCACGCTGGGCGGTTACTGACAGCGCGGATGTTGCCCGCGGTCGCGCCTTTGCTG  
CGGGAGGTGAACCGTATTTCTGGCGCCATTCGCTATCGTGGTTTTTGGCGATCATCGGCACATTTATTTGGCTGATTTGCC  
GGACTGGTAATCATCTGCGATGATCCGCGCACCAATTTATGATGATTTCTGGTGTGCTGTATCTGCGGCGGTTTTGTTAC  
CTGGATATCTCTGCTGGTACGAATAGAAAACCTGATGCTGGGGCTGGCCGTTATACCGCGCTGATCATTGTGATCA  
CTATTCAGCCGGAACCATTTGCTTACGCCGAGTTTGCCTGCAACGTTGATAGCGAGATCGTTATCGGTTATGTTGTGTGCA  
ATTTATGGCGGATTTGCTCTTTCTCCGCGATCGATCAAAACAAGAGTGGATGAGAGCTGGAAAATTTGCTGGTGGCGCA  
ATATCAATTAATGAACCTCTGATCAAGCATGGCGATGGTGAAGTTGTCGATAAAAGCCCTGGGGCGATCTGGTGGCAGCGA  
CCAGCGGCTTACAAGGATGCGCAGCAACCTGAATATGGAATCTTCCGCTGGGCGCGGCAATCGAGCTTTAAAGCG  
ATCAATACGCTATCGTACTCTGATTAACCAATCTCGGAACTTATCTTATCAGAATACGCGCCCGAAATTCGATCAC  
TGATACTTTCCGCGAATTTTGGACAGCGGCTAGAAAACCGCGCAGGACGCTCCACAAGCAGCTCAAACGCGGATGGGAGAG  
TTATCGCTGGACCGGGAAACGGGAAACGCTGTACCATTTATAGCTGGGTGCGGGCGCAACCGCTTATCAGCTTCTC  
AAGCGCGGCTTATCAGTAAACAAAATCAACGCCACGAAAGAGATCCTGCAAGCGCAACCGGAAAGTCAAAGTAGA  
GTCAGCGAACGTCATATCGGATGGTTAACTTCTGGGAAACACACTTCTGCTGATTTCTGGGACGCTTTTCTGGCTGT  
GGACGGCTGGACTTCCGCTAGTGGTGCATGGTGGTATGTTGCGGTAGTGGACGTTCACTGGCAATGGCTTTCCGGAATCA  
CGCATGGTGGCGATCGACTTTATCTACGGGACGCTGGCAGCGCTGCCGTTAGGGCTGCTCTACTTTTTGGTGTATATCCC  
TAATACTCAACAGAGCATGTTGCTGCTGTATAGCCTGGCAGTGTGGGATTTCTTCCCTCGGTATAGAAAGTACAGAAA  
GGCGACTGGGCTCGATGGGGCGCTGGCCAGCACATAAATATATCGTGTGGATAACCCGATGACTTTCCATTTTCACT  
CAGTTTCTCGACAGCGCATTTAGGCAAAATCGTCCGCTGTGTCGCGTTACCGGTTATTTGCTGGTGGTGGGATAAAATC  
GCGCGACAGGACTGGACGTGTACTGCTTAATCAGTTTGTCTGCGCTGTTTTCCGCGATGACTACCAATGTGGCAGCTC  
GTAAGAGAAATCACTCCCGCACTTTATCAGCAGCTGTTTTTCTGATGAATAAGTTCCAGGGGATTTGCCGAAATTT  
CGCTGGCGCTGACGATGATATCGCGCACAGCAGCACTGCGGCTGGGATGATGCGCGGATCCCGGTTAACGAGGATTTATCGGCGTT  
TCACCGCAAAATGCGCGCACAGCAGCACTGCGCGGCTGGGCAAAATGGCCGCGCTTACCGGTTATTTGCTGGTGGTGGGATA  
TGCTGGAAGAACTGGAATCTACAGGAAAAGCTACGATCTGGCAAGCGCCACCGCAGGTGACGGAACAGTACATCGG  
CTTACGGGTATGCTCCATAAGTATCAACATGCGTTGACCGATAGTAA

>Cluster\_20418

ATGCTTTTTAGCGAATTTTATCAGCGTTTCGATTAACGAACCGGAGCAGTTCTGGGCCGAGCAGGCCCGGCGTATTGACTG  
GCAGACGCCCTTTACGCAACAGCTCGACACAGCAACCGCGGTTTGCCTGTTGGTTTTGTGAAGGCCGAACAACTTGT  
GTCACAACGCTATCGATCGCTGGCTGGAGAAACAGCCAGAGGCGCTGGCATTGATGCGCTCTCTTCCGAAAACAGAGGAA  
GAGCTACCTTTACCTTCCGCGAGTTACATGACGAAGTGAATGCGGTGGCGTCAATGCTGCGCTCACCTGGGCGTGCAGCG  
TGGCGATCGGGTGTGGTGTATATGCGGATGATTGCGGAAGCGCATATACCTGCTGGCCTGCGCGGCATTGGCGCTA  
TTCATTCCGTTGGTGTGGGGGATTTGCTTTCGACAGCGTGGCGGCGCAATGATGACGCTAAACCGGTTGCTGATTTGCT  
TCGGCTGATGCGGGGCGCGGGCGGTAATAATCATTCCGTAATAAAAAATGCTCGACGATGCGATAAGTCAGGACAGCA  
TCAGCCGCTCACGTTTTTACTGGTGGATCGCGGCTGGGCAAAATGGCCGCGCTTACGGGCGGATGTCGATTTCCGCT  
CGTTGGCCATCAGCACATCGGCGCGGGTGGCGGTTGGCATGGTGGAAATCCAACGAAACCTCTGCACTTCTACACC  
TCCGGCACGACCGCAAACTAAAGGTGTCAGCGTGTGTCGCGGATATGCGGTGGCGCTGGCGACCTCGATGGACAC  
CATTTTGGCGGCAAAAGCGGGCGGCTGTTCTTTGCTGCTGGATATCGGCTGGTGGTAGGGCATTCGATATATCGTTT  
ACGCGCGCTGCTCAAGCGGGATGGCGACTCATGTTTACGAAGGATTGCCGACCTGGCGGACTGGCGGCTGGTGGGAAA  
ATTTGTCGAGAAATATCAGGTTAGCCGATGTTCTCAGCGCCGACCGCATTCGCTGCTGAAAAAATCCCTACCGCTGA  
AATTCGAAAACAGCATTTCTGCTGCTGGAAGTCTCTATCTGGCTGGAGAACCTCTGGACGAGCCGACCGCCAGTTGGG  
TGAGCAATACGCTGGATGTGCGGTCATCGCAACTACTGGCAGACCGAATCCGGCTGGCCGATTAAGCGGATTTGCTCG  
GGTCTGGATGACAGCGCGCTGGAAGGCGTGGGAAAGCGGCTGGGATGATGGCTATAACGTCGAGTTGCTCAATGAAGT  
CACCGGCAACCGTGTGGCTCAATGAGAAAGGATGCTGGTAGTGGAGGGGCAATTCGCGCCAGGCTGTATTCAGACCA  
TCTGGGGGACGACGACCGCTTTGTTGAAGAGCTACTGGTCTGTTTTCCCGTCCGGTACGCGCACTTTTACTGCTGGG  
ATCCGCGATGCTGACGGTTATCACTTTATCTCCGGCGACTGACGATGATTAACGTTGCGCGACATCGGCTGGGTTAC  
CGGTGAGATTTGAAGAGATATCTCCAGTCTATCCGGCGTTGCCGAAAGTGGCGGTTGGGTTGAAAGATGCGCTGAAAG  
GGCAGGTGGCGGTTGGCTTTGCTATACCGAAAGAGAGCGACAGTCTGGAAGACCGCGAGCTGGCACACTTGAAGAGAAG

GCAATATATGGCGCTGGTAGACAGCCAGATTGGCAACTTTGGCCGCCCGGCGCACGTCTGGTTTGTCTCGCAATTGCCAAA  
AACCGCATCCGAAAAATGCTGCCCGCACGATCCAGGCGATTTCGGAAGGACCGCATCCGGGGGATCTGACGCCAATTG  
ATGATCCGGCGTCTGGATCAGATCCGCCAGGCGATGGAAGAGTAG

>Cluster\_26320

ATGATGGCAGGGATATATCGCTGCATTTTGGCTGTGTAGCAGGGCTGTTTGTATCATCTCTAAGTTATGCGAAAAACAC  
GGAGATCCCTTCTATGAAGAAGGGATCCTGCTCTTTGATGTTGAAGCCACTCTGCAACCGAATGGGGTGCTCGACATCA  
AAGAGAACATTCATTTTCAGGCGGAAATCAGCAGATTAAACCGGATTTTATCGTGATTTACACGACTCTGGATGCAG  
TCTGTATGGGGACGCTGCACTGCTGAACATATCATATTGTTGGCGTCACCCGTGATGGTATTCTTGACCCCTGGCATCTTGA  
CTGGCATACTCGGGTAAATGAGTATTGCTGTGGCGGATAAAACAACGTTTCTGCTCAAGGCGACTATCATATCAAATTC  
ATTATCAGGTTAAAAATGCTTCTGCTGAGGGGGATCTGTATCTGCTAATCTGGAACGTGACCCGTAACCACTGGCCG  
TTTGAATTTATAAGACCTATTTTCACTCAAGTTGCCGTGATATTGCGGGTAAATCCATTTAGCGAAATCGATCTCTTTAC  
TGGAGAAGAGGGCGCACATATCGAAATGGCCGCATCTTGAGGACGGAAGAAATGAAATCCCGCATCCGTTTTATCTGTG  
AAGATTTACGGTACTTACCCTGCGCTCACGCTTACTTAGCAATGCCCGGCTCCACAAAACGACGAATATTTTACG  
CATCTTCTTTTACCCTCCACGTCATCGTTGTTAATTTGGTTTCTTGTCTATTCTGGTTTGTGGATGTTATATCTCTG  
GAAGCGCAGGCGCAATTTACGCGGATAGATGTGATGAAACCGATGTATTCCGCCAGATTACACGCCCGGCATGTTAC  
GTCCTGATGCGAAGCTGGTTTACGACGATAAAGTTTGTGCGGATATCGTAAATCTGATTTGAAAGGAAAAATTCAT  
CTGGAGAATCAGTATGATAAAGAACCGCAATCTGATTCGTGTTAATGAAGGTGCCACAAGAAATAATCGGTTACTACT  
GCCCGCAGAGCAGTTATTACTGGAAGCGTTATTTCTGTAAGGCGATAAGGTCGTTCTTACGGGAGACGCAACAGAGTCT  
TACCGAGGCGATTTTACGGATGCAAGAAATTTTATCTGCGCGTAAAAAGTCTTCGTTTTATCGACCAGATGCGTTTTTGG  
CAATGGGGTGGACTGGCAATTTGGCGGTCATTTCTACGGTAACCTGAGTCCCGTAGGTTGGGCAGGAATGAGTCTGGT  
AGGCGATATGTTTTATGATCTGCTGGATTATCTCTTTTATTTGTTCCCTTGAGCTTTTTGTTTGGCCGATGATG  
ACAAGCCTTGGCTAATCGTGTAATCATCACTTTGTTTTTACCCTGATTTGTTTACGGCGTGGCTTTTACTCTCTCTAT  
ATCAATGTCGGAGATGATTTCTTTTACTGGTATATGCCAGCGGTTATTTTAGCGCTGTTTTCTGACCGGCTATCTCAC  
TGGCATGGGGTATATTTTCTGCCAAAGTTTACCACAACTGGGCGAGCAACGTTATGCCACGGTGAAGCTATCTGTAAC  
ATCTTGGCGTAAAGAGGCGACACACAGTGGGCGTGGCGGAAAGGGGAAACACGGAACTGGATTACGCGTGTGTA  
GGTTGGGCGAGTCTCGGCAACCTTGGCAGAGAAATGGGCGACGATATCACCGCTCACACAGCGGCTGTTCCGCGCCCC  
GGAAATGGCCGTAGTGGCGTTTTATTTCTATTACAGACGCACCTGAGTTGCGGGGCCATATCAGTTTGTGGGGCGGA  
GCTATTCGGTGGTGGTTTGGCGCTGGTGGCGGAGGCGGTAGTGGCTGGTAA

>Cluster\_23162

ATGAGCAAAGGAAACGACCAGCCAGGATGCCCGTTCGGGACATATTGGGCTACGCCCCAGGTGGGGTAGCAATCTACTC  
TTCAGATTACAGTTCTCTCGATCCGAGGAATACGAAGATGACGCCGATTTCCGTAGCTATATCGACGATGAATATATGG  
GCCACAAATGGCAATGCGTGAATTTGCTCGCCGTTTTCTTTCTGAACACTACGGTGTAGTCTTCACTGACGCTGGGTATG  
GCATGGGAGATTTTCTCACTGCGCTTCTTGGCTGAAGTGGTCAATGACAACATCCTGCCATTGCAGGCATTTCTTACCG  
TTCGCCCGCTGCACCGGTAGCGGGGCGCTTCTTATCTGGGATAAAGCGGTTGAATTTAAAGACTGCGCATGTCGCCA  
TCATTACCAATGTCATGGCAACAAGTCCGTAATTCGGAACAGAACGTTGATTCTTCCCGTTGCCGAAGGGCAACAG  
TGGACACGCGAGCTGGAGATGGTGGTTCGAAACCGCTGCTATACCTTGAAGACACCTTCGATGACACCACTATTCTGG  
CTGGATGATCCAGACGGAAGATACTGAATACAGCTTACCAGCGCCGAAATGTCAGGCGAGCTGCTGAAAATCAGCGGAG  
CGGCTCTGAAAAACAAGGCCAGTTTGCAGGTAATGGCTGGATGAAAAGATCCGCTACAAAACGCCATGTCGAGGCC  
AACGGTCAGTAAATCAATCAGGATCCGTATCACTACCACTACCCAGAGCGCAGAGCAGGAGCTGATTAAGAGCCAC  
CAACGAATGTCACCTGATGATCTTACGCAACCGACAAGGTGCTGAAAAGATGACAACCTGCTGGCGCTTTTTCGACATCC  
CAAAAATCCTCTGGCCAGCTTTGCGTCTCTCTGGCAGCGTCCGCTACCATATGATTACCGGTCGATGGAATTTCTGT  
ATGGACGAACGTTGCCGTAAGGTTACGAAATACACCGCCAGCTCCGCTCCTGTCATACCGAAGCTGGCTGATCTCCGA  
ACGTTGGGGAGGACGAGGCTATAAAGGCAACCGGCTTCAATCTGCGGAAGGACTGATTAACCAATCGGCTGGCTGGTA  
AACACAGTCTGCACGTCGCTTTGTCATATATGACGACAAAGATACTGAGGAAAATCAGCGCGAGTTTATGGAG  
CAGGCGCTGCATCAGCGGGCTTTGAAACGCGTATCTTGGCTGGTGGATGAACTGGGCTGGGATGCTGCCGGGCAACT  
GATTGATGGGGAAGGGCAGTGGTTAATGCGTATGAAAAACCTGGGCGTGGGAAACGGCATTGATCAAAATCCGCGAAG  
TGAGCGACCGTGAATTTGCGCAGTGGCATCCGATCCGGCATCCACAAAATGAAGTTCGCTGTATAGACGTTGTTA  
CGCCCGAAGTGTGGTTTTTGGAGCGCTATGGACGGTATCCCGGTAACAAAGCGATTCTGCCGATCTCTGGTCTCT  
GTTCCCGCACCATCGTTATCTGTGGATACTGACTTACCCTGGAATGATGAGCTGGTGAACCGGTTATGCCGTTAAAC  
CGATCGCCGGTCTGTGGCAGTAAATCGACCTCGTCCGCAATCATGAAGAGGTGCTGGACAAAACAGCGGTAATTT  
GCCGAGCAGAAAACATCTATCAGCAACTGTGGTGGTTTCCGAAAAGTGGACGTTAAATACATTAGGATGATCTCCAC  
CGTTGGCGCAACTACGGTGGACTTGCCTACGCGGTGATGAATCACTGGTCACTAAAAAGAGAGTGATATTGAGCCGT  
TAATTTGGTGAAGAGTAA

>Cluster\_53564

ATGAGCAACGACATTTACAAAAGAGCTCAACCTGCAAAAACGACATCATCGCCAGATGGTAGAAAAAGCTGGATTGTCCG  
CAAAGGTGACACCTACGACAGAGAGCTGCACTATACGCACAAGACACTTAAACTTCGTACAACACCCCAACCGCAGG  
AGTGGGAGAAATTCGCCCGCTTTTACCACAACGACACCGAGCGCATTTCTCTGACGCGCTGGTCGCGCAGCTTAAAAAA  
CCGACAGCAACCAACGATATCCAGTCCGCAACAGGGTACGCTCGGCGTACTTCTGACGGCTGAAATCCGCA  
TGCCCGTTTTTCTGCTGTGTCAGTTTAAACCGGAAACATAATCTCAACCCGAAACGCTGGCGGCTATCAGCAGAAATCT  
GCCGTTTGTGCCGGAATGCTTACAGCCGATGCCCTCAAATAGCGTCTTTCAGAAACCGGCGTGAAGGCCAAAAAA  
TGGCGCATCGACCTGGTGTGTTTATCAACGGCTGCCAATTTGTCAGCTGGAGCTGAAATCCGAATTCAAACAGGCGGT  
GCAGAACGCGATTGGCGAGTACAAAAGACCCGCTCCGCAAGATCCCGCACCAATAAACCGGAACCGCTGTGACCT  
TTAAGCGCGGCGCTGGTGCATTTTGGCGTACGCGATGACGCTTTTATGACCACCAAACTCGCGGGTGACAGCACC  
TTCTTCTGCGGTTTAAACAAAGGACCAAGACGGAGGCGCAGGCAACGAGATCCCGAAGATACCCACCGCTACGCCAC  
CGATTATCTGTGGAATGAAGTGTACTGCGCGCAACTTATTAATAATCTCGCCAGTTTGTCCATTTGCAGATGAAAG  
AAAAAGAGGACTGGAACCGGCTGAAAGCGAAGAAAGAGAGCTGATTTTCCGCGTTATCACCAGTGGGATGTTGGTCAAC  
AACTGCTGGAGGCGCAACGGTCAAGGACCCGGCATAAATACCTGATCCAGCACAGCGCCGGTTCGGTAAATCGAA  
CTCCATTGCTGGACCGCCACAGCTTCTCGTCTGTACGACGTAACCGGGGAAAAACAGTTCCACTCCGTTATCTGTG  
TGACGGACCGCAGGCTGGACGACAGCTTACAGGACCACTTGGCAGTTCGAACATGCCGACGGCTGGTGGGCGC  
ATCAATAACAGAGAGGCGGCTTAAATCGGAAACCGCTCGCAACCGCTGGAAAACCTCGCAGGCGGATGATCTCCCT  
CACCATCCAGACATTTCCGTTCTGTGCTGAAAGCCTCGAAAACAGGCTCAGCTGAAAGCAGGTAATACGGGTGATG  
CCGACGAAGCACACTCTCTGACAGCGGTTCTACCGCCGTCAGCTTAAAGAAGTGTGATGAGCGAAGAAATGGATGAT  
GACTTGGTACTGCTCAGAAAGATACTGGATGCGACATTTGCCCGGAAAGGCGAGCAGTAACCTGAATCTACTACGC  
CTTTTACCGCCAGCAAAAATCAAAAACCTCGAACTTTTGGTTCGCGTCCACGTTCCCGATGAAACCGGCTCAAAAATA  
ATAAACCAGGCTTCCAGCTTACTCTATGCGCCAGGCAATCGAAGAGGCTTTATCTCGACGCTGTGAAAACCTAC  
ACCAACTACAAGTGGCGTATCAGTTGCTGCAAAAAGTTGGAAGATAAAGACCGGAAAGTGCATAGCAACCGGCGAAGAT  
AAAGTCAACAGTGGGTGATATCGCAGCACAATACTCTCAGAAGGTGAAGGTGATTTGGAGCACTTCCGCAAA  
ATGTGATGCACCTGCTTGGCGGCTAG

>Cluster\_53564

ATGAATAAAGAGTCTGATCATAATGATCTAAAAATAAATGGAAAATGTTTGTAAAGCATGGTTGGGTCGCGACAAATTC  
GACTAATCATGTGATGCTGAGGTCATGGCAAAAATGTCACAGCATTTGACCCCTCGCCACTGGAACACGCCCTGTCAAAG  
CTTCCGGGCAACAAATGTCAGACGATTTTTCTCGTAAACGAAGAGTTTATAGAAATTCACAAAGAGTTGTTGAAGACCAT  
TTCACCCCTGGCTGTGACGACCGGTTGGCATTGATCATTTGACCCACACCGGCTGGGTTCTATCGTTGAATGCAGCAGG  
CGATTATTCAGTCAATTCGAGAGTTAGGAATGAACTGTTGATGTCATGGGCCGAAGATGGCAATGGAACCAATGTTAT  
ATAGTCTTTGTCGGGAAACAAATTTATATACACAACTGGAAGGAGCAGAACATTTAGTGAACAGCTACATTTGTTATGCG  
ATGAGCGCTGCTCCGGTCATTGATTATTTATGGTAAATACATGGATACATTTGATGTAATAATTGAAACACCCGCGAGCT  
TGTAAATTAACAAATCATATTTGATGTCACAGAAATCGCTAAATATATCTATATTGAGAAATGAAACAAAAGTTAATAA  
ACAAAGTACTTTGGCCAGCATAATGCTGTGATTGAAATGATGGATGACCGGTTTTATTTGTTGGAATAGTCATCTTAAAT  
ACGATGGTTAATTTCTCAAGCACAAACACTACTGAAATTTGATAAAGAAAGTTTAAATGGTTCAGAACATCCGAAAAGGATT  
CGTATTTCCGCGGATTTTGAATGAGGCAATACACAACGAAACAACTATCGCAAAAGCAAATGTCCTCGAATGCCGCTG  
GCGAATTTATGAACTTATGGTTACCCCTCGCCCGTTAAGCGATGGTTCGTTTTGCTTTTCTTCCATCCATTAGACAAA  
ATCAGGAAAATGCCCAACAGCAATAAGCACTAATGCAAAATTTACCTTTGACAGTTTACATCGCGCTTCAGTGGTAT  
GAAGCAGGTATTACTTATCGCTCGCCGGCAATTAATCCATCTCTCCGATTTTGTATCAATGGCGAAGAAGGTGTGGGAA  
AATGAGTTTGGCGATGGCAATACATAATGAGAGCGAGCAACGTCATGGGCCATTTATTTCTGTAGATGTCAGATGCTA  
TCACCAGAAAATCTTACACGAACTTCTGGCTCTGATGTTGGCCCTTCGCCATCGAAATTTGAACTGGCTCATAATGG  
ACCTTATATCTGATAAAGTCCGAATATCTATCAGGGGAAGTTTACAGAGTGTTTTATTTGAAAGTATTGAAAACGGGCTG  
TTACTCGCTCAGACGCCATCGTTTGTATCCCGTACGCTTTCGCTGATTACATGTACCAGTAGTCTTTACGTGAGTAC  
GTGCAACAAGGGGCTTTTAGCCGACAGCTATATTTATGAGATCTCCATGAAATGAAATTTCCGCCATTTGCCCAAACG  
TCGTGAAGATCTCAAGCAAATGATGACGATTTATTTGATAAGTATCAGGAGCGCATCGAAAAAAATGACAAATCACGC  
CTGACGCAAATTCAGTTCTGCTTGTGAGTACCGCTTGGCCCTGGGAACATCTCCGAGTTCAAATAATCGAATGGAGAAGTAT  
ATTAACGCAATCGACTTGTCTCGGTTAGAGAAATTTCTCTGGATATCCGACAAAATAACAGTAGTGGCGACGATGA  
TATCCCTCATTTACTTCACTGGCAGAAATGGAGATGCAAGCTATTGAGCATAACATGTCGTGCTCGCAATGGAAATCTAA  
CTAAAGCAGCTGAAGTATTAATAAATTTGGTCGTACAACATTTAGGGCAAACTTAAATCTATAATCTCTATCCAAATGTT  
GAGCATGCAGATTGA

>Cluster\_35620

ATGGCTGACAGTTTTCAGCTGAAGGCGATCATCACTGCCGTGGATAAGGTTGTCGGCACCGCTGAAGGGAATGCAGCGCCA  
GCTGAAAGGTTTTAAAAAGGAGTTTCCAGCCTGTACATGGGCGCAGCGGGTGCAGGAAACCGCAGTACTGGGGCGCTGG  
CGCTCCCGGTCAAATCTGCCATTGCCCTTGAATCAAAAATGGCGGATGTCGGGAAAGTGGTGGATGGTCTGGATACGCCG  
GAAGCGTTTAAAGCAATGACGAGCAGGTCGCGCACCCTGTCAACAGAGCTGCCCATGTCGGCGGAAGGTATCGCCGAAAT  
TGTGGCGGGGGTGGTCAGGCTGGCATCGCCGTCGACGAGTGTGTCAGTTTACTGACGACCGCTGAAGATGGGCGTGG  
CTTTTACACCCAGCGCAGAAGAATCCGGTCAGATGATGGCACAGTGGCCACTGCTTTAAACGTACACAGGGAGAGTG  
GCAGGACTTGGGACAAGATTAACATATCTTGGTAATACCGGCTCTGCAAGTGGCAAAAAGATTTCTGATGTTGTGACCCG  
TATTTGGCCCTTTAGCGGTGTTGCGGGTGTGGCCTCGGAGAGATTTGCCGCAATGGGGCAACCATTTGCCGGAATGGGG  
TGGAGTCAGAAATTTGCTGCGACGGGATAAAGAAATTTTATGCTGTCGTCGACAGCGGGAAATTTCTGCCACCAATCGCAG  
AAAAAAGCCCTTCCCTGTTGCGCATTTGACCCGAAAAAATGCTGGCGGGATATCGAGAAAAGACGCCCTGGCCACCATGCT  
GCAGTACTGGATTTCTTGGCGAAAGTGGCGAAAAGAAAAACAGGCTGCTGTGTTGAATCGCTGTTCCGGGAAGGAATCTC  
TGGGAGCCATTTGCCCGCTACTCAGAAATCTGGATTTGTTGCGAACCAACTTTAATCGTGTGGCGGATGCGCAGCAT  
GGCGGCTCAATGCAGAAAAGAAATATGCCGCGCTCGCCGACAGCAAAAATCAGTTGTTGCTGTCGAGAACACAGGTCAG  
TGGCAATTTCTTCCAGCTTGGGGGAAACCTTCTGCTTCACTCAATGAAAGCAATAAAGAGATGAAGCCTTTTCTGGAGG  
AAGTGGCAGCTTTGTCAGAGAAAATCTGAGGTCGTAATAAACCATCGGAAAACGGGCTGGCGCTGCTGACATTTGTT  
GTTGCCATTTGGCTCGCTGTCGCGGATGGGAAAAATCTTAGTGGCGTGTGAAATATGACGCGGCAAAAGGGAATTAATTCG  
GCTTCTCGTGGTGGCGCATATCTCATAATTTGATAACTGGGAAACGTCGCTCGGTTGTGAAAAGTCTGGCAGGAGG  
TTGATCTGGTTGTGTCAGAGCAATGGGGGATGGGAAACAGACAGTAAAAATAATAGCAACGGTTTCTGCCCTGTATATTGGT  
GTGAAGGCGGTGGCAAGTATTCGTGCGGCAACAGTCGCCAGAAATCAATGGACAGCGGCGGCAAGAAAACAGCGCTGAA  
ATTAAGGGCCTCGGAAAGATCAGTCTGATTTGGTGGATTGCTTGAACCTGGGCATGATGGCGCAGGAGTTTGA AAAAAGAAC  
ATCCCTGGCTTGTAAAAATTTTGGCTGATGCACTGACAGTGGATTGGTCTGAATGATAAGTTCCGACAGTGGGCG  
AAACAGCTCCATGATTTTGTCTATGACATGACCGGATGGCAGATGCCACGTGGTGTGATGGGATTTATCTCCCGATAAACG  
CTACACCCGAATGTATCACTGGAAGGAATCAGCTGTTAAGCCTTGCATCTTACCGCAACCCGACGCAACTTAAGG  
TGACGTTTGAACAACGCGCCGCTGGAATGCGGCTTATCGATTTGCCGAAAACAGGCGATCCCTTTATGAAAATCACCCAT  
GACGTTGGGTATTACCTTTTCAGGCGTTAA

>Cluster\_23211

ATGACGAAAATTTATAACGCTGATGCCATTGAGGTAATCACCAGGCTTACCGGGCTTGGCCGGTTCGCGCCGCTCCGGGGATGTATAC  
CGATACCCTACCCCTAACCAATTTGGGGCAAGAAGTTATTTGATAACAGTGTGATGAAGCACTGGCGGGTACCGCAAAA  
CGGTGGCTAATCTTACATGCTGACAGCTGTTAGAAGTATTGACGATGGGCGCGGGATGCCGTTGGATTTACCCCG  
GAAGAGGGTGTACCGGGGTTGAACTGATCTTTGCGCTGTCATGCAGGCGGTAATTTCTTACAAAATTTACCAGTT  
CTCTGGCGGCTGATGGCGTGGGGATTTCCGTTGGTTAACGCCCTGTGCAAGCGCTGAGAAGTTAACGTACCGCCGATG  
GTCAGGTTTTATAACATCGCTTTGAAAATGGCGAAAAGGTCAGGATTTACAGTTTGTGGCACTTGGCGTAAAGCAGT  
ACCGGTACCAGCGTGCATTTCTGGCCGGATGAAACCTTCTTTGACAGCCCGGTTTTTTCTGTTTACCGCTGACACATGT  
GCTGAAAGCCAAAGCGGTAATGTCCTGTTGAGATCACCCTTAAAGATGAGATCAACAACCCGAAACAGCGCTGGT  
GCTATCAGGACGGTCTGAATGATTACCTGGCGGAAGCGGTAACCGGTTTACCAACGCTGCCAGAAAACCGTTTATCGGT  
AATTTCCGCTGGCGATACTGAAGCGGTGGACTGGCGCTACTGTGGCTGCCGGAAGCGGTGAACCTGCTGACCGAAAAGCTA  
CGTCAACCTGATCCCAACGATGCAGGTTGGTACGCAGTTAATGGCTTGGCTCAGGGCTGCTGGATGCGATGCGCGAGT  
TCTGTGAATATCGCAACATTTCTGCCGCGCGGCTGAAGCTGTGCGCGGAAGATATCTGGGATCGCTGCGCCTATGTGCTG  
TCAGTAAAAATGCAGGATCCCGAGTTTGGCGGGCAGACCAAGAAGCTCTCTTTCGCGTCAAGTGTGCGGATTCGTTT  
GGCGTGGTGAAGAAGATGCTTCACTCTGTTGCTGAAACAGAACGTTTCAAGCGCGGAGCTGTTGGCAGAGATGGCGATT  
CCAGCGCCAGCGTGTATGCGTGGGCTAAAAAGTGGTGGCTAAAAAGCTAACAGCGGCCCGGCTTGGCTGGCAAA  
CTGGCTGACTGTACCGCGCAGGACCTTAACCGTACCAGCTGTTCTTGTGGAAGGTGACTCCGACGGCGGATCTGCCAA  
GCAGGCGCGGATCGCAATATCAGGCGATCATGCCACTGAAAGGTAAGATCTTAAACCTGGGAAGTCTCTTCCGACG  
AAGTCTGGCTTCCGAGGAAGTGCACGATATTTTGGCTACGATCTCGGATCCTGACAGCGACGATTTGAGCCAGCTT  
CGTTACGGCAAGATCTGTATCTTGGCGGATGCTGACTCCGATGGTCTGCACATTTGCCACGCTGCTCTGCGCTTTGTTTGT  
AAAACACTTCCGCGCATTTGGTGAACACGGTCACTTTTACGTTGCACTGCCACCGCTCTACCGTATTGACCTCGGGAAG  
AGGTTTATTACCGCTGACGGAAGAAGAAAAGGGCGTACTTGAGCAATTAACACGCAAGAAAGCAAGCCAAACGCTC  
CAGCGTTTTAAAGTCTCGGGGAAATGAACCGATGCAATTTGCCGAAAACCGCTTGTGATCGCAACACTGCGCTGTG  
GCAGTTGACTATCGATGATGAAGACGATCAGCTACGGACGCGATGATGGATATGCTGCTGGCAAGAAGCGCTCGGAAG  
ATCGCCGCAACTGTTGCAAGAGAAAGGCGACATGGCAGAGATTGAGGTCGTA

>Cluster\_27893

ATGAATAAGTTTTATCGTGTGTAAGCTGCGGAATGTATAGGCTGCCATGCCTGTGAAATTTGCCGTGCGGTAGCACACAA  
TCAAGAAAATGGCGCTGAGTACAGTACTTTGACCCCGTATCCACATTTGTTGGGAGGGCCAGGCTGCGAATCCGG

TGGCTGCCATCATGCAACAATGCCCTGCGTTACGGCTTGTCCGGTTATGCTCTGACTTCCAGTCCGATAGCGTA  
CAACTGGACGAGCAAAAAATGATTTGGTTGTAAGATGCGCAATCGCTTGGCCCTTTGGCGTCTGGATGGTCGATAC  
GATTGCACAGAAATGCGACCTTTGTAACAGCGCAGTTCGGCAGCGCAAGCCTGTATTGACGCTGCGCAACACAGGCGT  
TACGGCTGATGGACGATAAAGGGTTGCAGCAGATAAAGTTGGCCCGCAGCGCAAAACGGCAGGAAAAGCGTCTTCA  
GACCTCAGCCATCTCGCAGTGCAGCTTGGCTCCCGTTAACTCGCGTAAAGGGCAGATAAAAATTCAGCGAGTGAACG  
GAAAACCCACTTTGGCGAAATCTATTGGCGGCTGGATCCACAACAAGCAGCTTATGAGAGTGACCGCTGTGTTTATTGTG  
CCGAAAAGCTAACTGCAACTGGCATTTGCCGTCGATACAGCTATTCCGGATTACATCCGTCGGTACAGGAAGGAAA  
ATTATTGAAGCGGAGAACTTTGCCACCAGACAGTTCCTTACCAGAAATCTGCGGCAGGGTATGTCCACAGGACCGTCT  
TTGTGAAGCGCATGTACTTTGAAAGATCACTCTGGCGCAGTCTCTATCGGTAATCTGGAACGCTACATCAGCCGATACGT  
CGTGGCGATGGGCTGGCGTCCCGATGTGAGCAAAAGTTGTTCCCGTAGCGAAAAAGTGGCGGTGATTGGCGCTGGACCT  
GCAGGATTAGGGTGTGCTGATATTCTGGCGCGCGGGAGTTCAGGTTGATGTCTTTGATCGCCATCCAGAAATGGCGG  
TATGCTGACTTTTGGCATTCCTCCTTTCAAACCTGATAAAAACGGTATTAAAGCCAGCGGCGAGAGATATTCATCGCAATGG  
GAATGATTTCCATCTCAACTGTGAAATGGCCGCGATATCTCTTTCAACGAATTAACGGCGGAATATGATGCTGTTTTC  
CTCGCGTGGGACTTACGGGATGATGCGAGCAGATCTGCCGATGAAGATGCGCCTGGTGTCTTACAGCGTTACCCTT  
CCTGACCGCCCATACCGCCAGCTCATGGGATTGCCGGAGTCTGCAGAGTATCCGCTGACGGATGTGGAAAGGTAAAGCGAG  
TTGTGGTATTGGCGGTGGCGATACGCAATGGATTGTTTGGGACTTCCATCCGCTTAATGCTGCCAGCGTACCTGT  
CGGTATCGTGTGATGAAGTCAAGTTCAGTTCGCGGTTTCGCGCAAGAGGTTGGTCAATGCCCCGAGGAAGGTTGATTGCA  
GTTCAATGTTTACCGCAATATATCGCTTGTGATGAAGATGGACGCTTAAAGCGGTTGGGCTGATTCGTACCCTATGG  
GTGAGCGGGGCGGATGGCCGCGTCTGCTCGTCCGTTGCGGGTTCAGAGTTGAATGGCCGCGATGTTCTCAT  
ATGGCTTTGGTTCCAGGCACATACCATGCGGTGGTTGCGGAGGCGGAATTAACTCGATAAATGGGCGCTGATTC  
AACCAGCGAGCTGGGTTATTACCACCCAGACGATCTGAAAAAAGTCTTTGCTGGTGTGATGACGTTTATGGCGCGG  
ATCTGTTGCTACTGCAATGGCCGAGGAAGCAGCGCGCGGATATGTTAACTCTGTTGATACGAAGCATCGTGA

>Cluster\_25385

ATGACCAAAAACCTCCATATTAACACTGGGGCTGTGATGAAAGTACGATTTCATCGAAGATGGCCGATCTGCTGGA  
TGCCACCCACGGTATCAACTGACCGACGTGGCGGAAGAGCGGATGTGCTGCTGCTGAACACCTGCTCAATCCGCGAGA  
AGGCTCAGGAAAAAGTCTTCCATCAGTTGGGTCGCTGGAACCTGTTAAAAGAGAAATCCAGACCTGATATCGCGCTC  
GGCGTTGCGTGGCATCGCAAGAAGGCGAGCACATTGCCAGCGCGCCACTATGTCGATATTTTGGGCGGCAAAAC  
GCTGCACCGCTGCCGAGATGATCAACTCCGTCGCGCGGACCGCGGTTGTAGATATCAGCTTCCCGGAAATCG  
AGAAGTTTACCGCTGCGCAGAACCGCGCGGAGGGCGGACCGGTTTGTCTCCATCATGGAAGGCTGCAATAAATAT  
TGCACCTACTGCGTGGTGCCTTACACCCGTTGTTGAAGGTAAGCCGTCGCTCGACGATATTTCTGTTGAGATCGCCCA  
GCTTGGCGCTCAGGGCTGCGTGAAGTCAACCTGCTCGGTGCAAGTGTGAATGCTGGCGTGGTGAAGTACGACGGCA  
CCACCGAAGCTTTGCCGATCTGCTGCGTCTGGTTGCCGCCATCGACGGGATCGATCGTATTCGCTTTACCCAGCCAT  
CCGATCGAATTCACCGACGATATCATCGAAGTGTATCGCGACACCGGAGCTGGTGAAGTTCCTGCACCTGCCGGTACA  
GAGCGGTTCCGATCGCATTTCTGAACCTGATGGGCGTACTCACACGGCGCTGGAGTACAAAGCATATCCGTAACCTGC  
GTGCGCGCTCCGGATATTCAGATCAGTTCTGACTTCATCGTTGGCTTCCCTGGCGAAACCACCGACTTCGAGAAA  
ACGATGAAGCTGATTGCCGATCTGCTGCGTCTGGTTGCCGCCATCAGCTTTATCTTCTGCGACGCTCCGGTTACCCAGCC  
CGATATGGTTGATGATGTTCCGGAAGAAGAGAAGCAGCGTCTGTATATTCGCAAGAGCGCATTAATCAGCAAGCGA  
TGGCATGGAGCGCGGATGCTCGCACCCAGCGCATTTCTGGTAGAAGGGACTTACGTAAGAGCATCATGGAGCTT  
TCCGCTGCGACTGAAAATAACCGGTGGTTAACTTTCAGGGCACACCGGATATGATCGGTAATTCGCTGATGATAAAT  
TACCGACGTTACCCGAATCTCTGCGCGTAAAGTGGTGCAGAACTGAAAGATGAAATGGGCTGCGCGTGGCAAAAC  
CGAATCGGTTGATGCGCGTACCGCAAAAGAAAACGACTTGGCGTGGTTATTTATCAGCCGTA

>Cluster\_55657

ATGAGCTTCTCGTAAAGAAATGTATAGTATACATTTGGCTTTATCAGATTTTCATTTTCATTTCTTTTATA  
CATAGCGTTGGATGTGTTGTCATTAATTTAGTAAAGAAATGATATTTTATTTAACTAATGAAATGATGGGTGGTTTT  
TACTTTCATTTGGATTTCTCGGTGTTTGTGTTGTTAGGCTGGTATTCAGTTAGACTAAGGCATTTATTTTATCGTAAACCATTT  
TGGTTTGAACTTAAAGAAATCTTCAACCTTGGTTATTTTGGCAATAATCGAAATGCTGTTATGGCTTTTACCACCTG  
GTCATTTCTCAGTTACTTTATGGGTGATAACGTGGTATTTGTAATCATACTTGTTCATTTGTCAGAAATGGTAAACAA  
CCTTATTGAATAAAGCGGGGTGTGGCAAGAGATACTTGGATAGTAGGTAGTAGTGAATGCTCATGAAGCATATAAA  
GCAATTAGCGGAGAAAAAATAGTTTAAACATTTGTCGTTTCATATCAAGTCTGCGGAGTTCCATCAGGAGAGGC  
AATTGATGGTATACCACTGATTGAAAATAATCTAGAATGGCTTAATGATATTTGATCCCAAAACACAATTCATTTGTTGCT  
TTGATCTCATCAAAGTAAATAAAGAAATGCGTGGCTTAAAGAACTTTATGATTAAGGCTATCGATATGCTCAGTTATT  
CCAACATTTGCGTGAATGCCTCTTGTATGACACAGATATGTCATTCATATTTAGTCAAGGTTATGATTTTCTGTTGTA  
GCAAAATCTAGCCAAATGGTCTCAAGAATTTCAAAAGACTTTTGTATATTAGGCTCATTGCTATAATTTACTCTTC  
TTTACCAGTATTTATATAATAAGTCTTAAAGTAAAAAAGATGGAGCCCGCAATATATGGTCAAGAAAGGATCGGG  
AAAGAGGTAACCTTTAAAGTGTTTAAAGTTCAGGCTTATGGTAAATCAATTCAAAGAAAGTCTTGAAGAACTTTAA  
TAACGATATAAATGCGCGAGAAGAAATGGAATTTAACATTCAAATGAAAACGACCCAAAGAAATAACTAAGATAGGCGGTT  
TCCTTAGAAGGACAAAGCTGGATGAATTTGCCGAGTATTTAAATGATTAAGAAAGGGAATGAGTTTGTGGACCAAGG  
CCTATCATTACTGCTGAGTTAGAAGATACAATGAAGAAGTGTGATTTATTTATGAGCAAAACAGGATGACAGGCT  
ATGGCAAGTTAGTGGCGGTAGTGTGATGATGAGACAGCGCTTTATCTTGTGATGCTTGGTACGTTAAAAAATGGTCAA  
TGTGGAATGATATCGGATTTTATTTAAACTGTGGGTGTTGATTTAAAAAGAGACGGTGGTATTAA

>Cluster\_45339

ATGGAAACCAATATCGTTGAAGTAGAGAACTTTGTTACGACGTGAGAAGAGAGCGGGTAGCGCCTTACGCAGGAAGT  
GAAACGCTACCTGGAGCGTACCCGAATACGCAATATGTTGATGTTTTACTTACTGATTTGAATGGTTGCTTCCGTGGAA  
AACGATATCCCTGTTTCAAGCCTGAAGAAGTTGGAGAAAGGGTGTATTTCGCGCCTCGGTGTTGCAATGGATATTCCTG  
GGCAACGTAGTAGAAGAAGCGGGTCTGGGTGAGGAAATGGGCGAGCGGATCGTACTTGTGTTCTGTTCTCGGTTCCCT  
AACCCCTTCTGCCCGCATCCAGAGTTTATCGGTCAGATGCTCCTGACCATGGTTCGATGAAGATGGCGCTCCCTTGAAG  
TTGAGCCGGAACGTTCTTAAACCGCTGTGGCAGCAGTACGCCAGCGGGATTGTTCCCGTTGTAGCGGTAGAGCTG  
GAGTTCTATTTACTGGATCGTCAAGCGCAGCTGAAGGATATCTGCAACCGCCTGCGCGCCCGGACCGATGACCGCAA  
TACAAAAGCCAGGTTTACTCCGTTGATAACCTCAACCACTTCGCCGATGTGCTCAATGATATTTGATGAACCTGGCGAGT  
TACAGTTAATTTCCCGCGAGGTCGCGTTCGCGGAGCCTTCGCGGGTCAAGTTTGAATCAACCTTTACCATACCGATAAC  
GTGCTGGAAGCCTGCGATGATGCGCTGGCGCTAAAACCGCTGGTGGTCTGATGGCAGAAAAGCATAAGATGCACGCCAC  
TTTTATGGCGAAGCGTATGAAGAGCACCGGGCAGCGAATGATATCCATATCAGTATGCAAAAATAACCGTGGCGAGA  
ACGTGCTTTCTGACGCGGAAGCGAAGATTCGCGCTGCTGAAAAAGATGCTCGCCGGGATGATGACTGATGCTGCTCA  
TCAAATGGGCTTGGTGGCAACAAACGTTGAACTCGTATCGCCGCTTCCAGCCGGAAATGATGTCGCGCAGCGAGGCTG  
GGCCATAAACAACCGCACCGTCCGCTGCTGATTTCCGTTGCGGACCGCTCATAAATCACCGCTGGAATATCGCGTGGCGG  
GTGCGGATGCAACCCATATCTGGTGTGGCAGGATTTTTCGCGGATTTTGTGATGCTTGGATAACGAGCTGCGGTTG  
CAGGAAGAAGTCAAGGCAACGGCTGGAACAGGAAGGCTTACCCTCCGATTCGCGCAGGATGACCGCTGGGTCAGGTT  
TATCGAAGATGATCACCCTGCGCCGCTATTTAGGCGAACGGTTTGGCATGTGATACCGCTGAAAAATGATGAGCTGT  
TGCAGTTTGAAGCGCTCATCACAGAACAGAAATGAGTGGATGTTGAAAACCGGTA

>Cluster\_3310

ATGGGAACAGGCTACTTTCTGGTCAGGGGGGACAAAACCACCTGCGGGCGGAAGATTATGGAGGCGGGACGACCATAC  
GATCATGGGTATCCACAGGCACGGGATATGGACCGGGTCACCTGCGGCAGATATCCGGGAATGTTTATTTATTTGGGGG  
CGGTTCCTGAAACAGATATTCACGGCAGGCTGATGGCGGGGACCTGGACAGCCAGAGCAGTTGCCCTGTAAGGCACGG  
TTTATTGGCTGATGATGATGATACGTATGAGACGGATGACGGGGGAAGTGAAGCGGAACAACATGCCGACTCGCGGAA  
AAAGGATCTGACTTCTGGTTCTGATTCATCCTCTGATGATGATAAACTGGATTACAGAATTAATATCAGGTAATAAGA  
TACTGACGCCACTGAATATACCTGATTATAAGAAATGATAAGCGGTGGTAGTACGAAGAATACAGAAAAAATAGATTTT  
ACTATCACAAATAAAGGCGATGAGGCTGAAGGACTTCTCTGGAAGTGGTGTAGTGGTAATGAAGTGAATTTACAGTGAACA  
GCAGACCGGTAAATATTTGATAAGGGAGAGCATGCCCTGGCAATGGGAATGGCTACAGTAACTCAAGGCATCTGGATACAA  
CTAAGCTAAAAAGCAATCACTACTCGTAAGACTGATTGCTTTATGTGGTGATATGATGATAAAAAGTTGATTATCCACTT  
CATAATTCACAGAGGAACAAAAATGGGTGCGATGTAAGGTAGACAGAAAAACAAAAACAGTAGATATAATATGGCGACT  
GGCAGTTAGTGTGGAGGATAAAAGGAAGTAATCCTAAGTTATCCCCAGTTCCCTATAACGACTTGGTTAACCTGACCA  
AAAATGGAGTTGAATTTTATTGGTCTCGAAATGGAAGTGCAGGGGGGATTTGGTAAAAATATGTTACAGCGATTGGT  
GTTTTTAAAGTAATGTAAGGCTGAGATAAATATTACTCCATCCATGCGAACTTTTTCTTTGATATCATATTAGATCC  
TGACTTTCAGGCATCCGTTAGTCTATCAGGATTGAAAAAATATATTATAACTACGGTGATAGTTATAAGGATATTCAAG  
ATGAATTACAGGCGCTTCTGACGCTAATAACAGATATAAATGGGATAGTGTCTCATGAAATGGGGCATAAAGTACTCGAT  
GAATATGGAGAGGCTTCTGATGTTATTCGTTGACTCATAAAGGAACATCTACTCTTATGCAAAAAAATACACAGG  
GAATGTTATGCCCGCTCAGGGAGAGATTGATGTAATGAAATATGGAAATATCGTCTGACATGTATACTCGATTGGTTG  
CAGCAGATGAAGATGTTTCAGGGATTGATCTGGTTAAGCAGGATAAAAATTTGATGACTAG

>Cluster\_41963

GTGAAAAAATCACCTTACCAGAAAGATTCTTTATGGGGCGGCGCAGTTGCCGCTCATCAGGTCGAAGGCGGCTGGAACAA  
AGGGGCAAAGGGCCGAGCATTTGTGACGTTTTGACCGTGGCGCACACGGCGTGCCGCGGAAATCACCAGAAAGTGTG  
TGCTGGCAAAATCTATCCAAACCATGAAGCCGTTGATTTTTATGGTCACTACAGGAGGACATCAAGCTATTTGGCGAA  
ATGGGCTTCAAATGTTTCTGACTTCCATCGCCCTGGCAGCGCATTTTTCCAAAAGCGGATGAAGCTCAGCCAAACGAAGA  
AGGGCTGAAGTTCTACGATGATATGATCGATGAACTGCTGAAATACAACATCGAACCGGTGATCACCCCTCCCACTTTG  
AAATGCCGCTGCATCTGGTGCAGCAATATGGTAGCTGGCCAAACCGTAAAGTGGTTGATTTCTTTGTCGTTTCGCGGAA  
GTGGTATTTGAACGCTATAAGCATAAAGTCAAATACTGGATGACCTTCAACGAAATTAACAACAGCGTAACTGGCGTGC  
ACCGCTGTTCCGGTFACTGCTCGGCTGGTGTATATCCGATGAAACCCGGAAGAGACGATGATCAGTGGCTCGC  
ATCACAGTTTGTGCGCCAGCGCCCTGGCGGTGAAAGCCGCGCATCGCATCAACCCGAGATGAAAGTGGTTGTATGCTG  
GCGATGGTGCCGCTCTATCCTTACTCTGTAACCCGAGCAGATGTGATGTTGCCAGGAGTGCATGCGCGAACGTTACGT  
CTTTACCGATGTGCGAGTTGCGTGGCTATTACCCGCTCTATGTGTTGAACGAGTGGGAACGCGCGGATTAACATCAAAA  
TGGAAAGCGGATCTGGATGTAAGTGCAGGCAAGGCAACCTGCGATTATCTCGGCTTCCAGCTATTACATGACCAACGCGGTG  
AAGGCCGAAGGGCCACCGGCGATGCGATCTCTGGTTTTGAAGGCGAGTACCAGAACCGTATGTTAAAGCGTCTGACTG  
GGGCTGGCAGATTGATCCGTTGGTCTGCGTTCAGCGCTTTGCGAGCTGATGAGCGTACCAGAAGCGCTGTTTATTG  
TCGAAAACGGTTTTGGCGCTTACGACAAAGTGGAAAGATGATGGCAGCATCAATGACGATTACCAGATTGACTACCTGGCG  
GCCCATATTGAAGAGATGAAAAAGCGGTGACTTACGATGGCGTGGATCTGATGGGCTACACACCCGTTGGGCTGCACTCA  
CTGCGTGTCTTACTACCGGCGAGTACAGCAAACGCTACGGCTTTATCTATGTGAATAAACATGACGACGGTACTGGCG  
ATATGTCGCGTTCAGTAAGAAGAGCTTTGACTGTTACAAAGAGGTGATTGCCAGCAACGCGGAGAATCTGTAA

>Cluster\_53891

ATGACCGATAAATTTTATGCGCCGCCCATAGCATCGAGGCAGAGCAGCGGTGATTGGTGGATTGCTTCTGGATGATGA  
CAGCAGTGAGCGCTCCAGAAAGTCTGGCGATGCTGAAGCCTGATTCATTTTACAGCCGACCACACAAAATCATTTTCG  
AAGAAATAACAGAAATGCACCGGGAGCAAAAGCCAGTAGATGGCTGACGCTTTTTCGATGAACGGAGCGTAAATCGTTA  
ACGGCGTCTGTGGCGGTTTTGCTTATATCGCTGATCGCAAAAGAACCGCCAAAGCGCGCAAAATCGTTGGCTTATCG  
AATGCAGGTTTCGCAAAACCGCAATGGAACGCTACGCCATCAACCGCATGACTGAAAGCGACGGAATGCTCTATTCCCGCA  
ACGGAATGACTGCACGCAAGATACGAAGCTATTTCAGCGGATTTTCAGCAACTGACAGACCATGCAAAAACCGGATCG  
CGTCCGGGCTTCGCTCATTTGGTGAGGTCATGGAAGACTGGGTTAGCGACCTTGAGAAGCGATTTGACCCGCTCAGGCGA  
ACAACGAGGAATGAGCACAGGATGCCATCTCTGGACAGATGCTGTCAACGAAAGCTGGTGAAGGCTCTCTGTTCTG  
TCATTGGCGCTCGCCCTAAGATGGGGAAAACGACGCTATACAGCCAGATGGCAATCAACTGCGCAGTGCATGAGAAAAAG  
CCCCTCTGATGTTGAGTCTGAAATGCCTGGCGACGATACGGAAGGCTGGTAGGACAGAAATCAGGTTTAAACC  
GAATATTTTTTACCTTCCGGCGCAAAATGACCGCATGACGGCTATCAGGGTGTATTACGATGGTGACTTCAACAGGGCGA  
TCGAAAACGCAAAATCGCTTGTAGTGAATCGACATGCTTTTACATCGACGACACCGCGGATTTATCTCTGCTCAAACTGCT  
AGCGAAAGCGCTCGAATCAAGCGAGAAAAAGGATGTGTTGGCATGATTCTGGTGTGATTACTGACACTAATGACCGCTGA  
GAAGGCGGATCGCAACGACCTTGTCTACGGCATGATCACAAAGGACTGAAGAACCTTCCCAAAGAGCTTGTATGCGTTG  
TTGTGCTTCTGACACAGCTTAAACCGGCATGGAAGCCGAACCAATAAACGCCATTTACCAAGTACTCAGGATACA  
GGGCAAGATTGACAGGATTTGCGATTTATGGTGGGATCCATCGTGAAGGTTGCTTTTGTGATGACAGTTCACCTGGTGA  
AACCGAATTAATCTTCTGCTCAATCGTATGGCAATACCGGCAGGTTGATTGCAATCAGGCAATGGCGCTATTTATG  
ACACAGACCAACAGTCTGCTGAAATGCGCCGCTGACAGCGAGGAACCGCAATCCAAGAAGAAAGGAGGATTCTGA

>Cluster\_9089

GTGGATTTCTCAATCATGGTTTACGCGATTATTGCGTTGGTGGGTGGCAATGGCTGGCTGTTTGCCAGTTATCAACA  
TGCGCAGCAAAAAGCGGAGCAATTAGCTGAACGTGAAGAGATGGTGCAGGAGTTAAGCGGGCAAAAACAAATATACC  
AAAGCGAGCACTGGCGTGAGAGTGCAGGTTACTCAATAACGAAGTGCAGCAGCTGCAAAAGTATTAACACCTCTCTGGAG  
GCCGATCTGCGTGAAGTAACACCGGATGGAAGCCGACAGCAACATGCTGACGATAAAAATTCGCGAGATGATTAACAG  
CGAGCAGCGCTCAGTGAGCAGTTTGAAACTCGCAACCGTATTTTTGAGCACAGCAATCGCCGGTTGATGAGCAAAA  
ACCGTACAGTCTGAACAGCCTGTTGTGCGCCGTACGTGAACAACCTGGACGGTTTCCGCGGTCAGGTTGAGGACAGCTTC  
GGTAAAGAAGCACAAGAACGCCATACCTGACCACGAAATTCGCAATCTCCAGCAACTCAACGCGCAAAATGGCCAGGA  
AGCGATCAACTGACGCGCGCTGAAAGGCGACAATAAACCAGGGCAACTGGGGCGAGGTAGTATTTGAGTGAAGGCTG  
TGGAGGCTTCCGGTCTGCGTGAAGGATGAAATATGAAACCCAGGTCAGCATCGAAAAATGACGCGCCGCTCGCGGATG  
CCGGATGTCATCGTGCCTGCGCAGGAAAGATGTTGGTGTGACGCCAAATGACGCTGGTGCCTATGAAACGTTA  
TTTTAACGCCGAAGACGACTACACCCGAAAGCGCGCTACAGGAACATATCGGCTGGTGGCTAACCATATCCGTTTTC  
TGGAGCCTAAAGATTATATAACAGCTGCGCGGCTGCGGACTCTGGATTACTGCTGATGTTTATTTCCCTTGAACCCGCT  
TTTTTACTGGCGCTTACCAGCAGCGGAGTGTACCCGAGCGTTGAAAAACAACATCATGCTGGTTAGCCGACTAC  
GCTGCTGGTGGCGCTGCGCACTATCGCCAACTGTGGCTTATGAGCATCAAAAGCCGCAACGCGCAGCAATGCCGATC  
GTGCCAGCAAGTGTACGACAAGATGCGTTTGTTCATCGATGACATGTCGCGATTTGGTCAAAGTCTCGCAAAAGCGCAG  
GATAATTTATCGGCAAGCAATGAAAAACTCTCTTCAGGCGCGGAAATGTGCTGGCGAGCAGGAGGCTTTCGCGGTTT  
AGGAGTAGAAATTAACCGGAGATTAATCCGGATTTGGTGAACAGCGGTGAGCCAGGATGAAGAGTATCGACTTCGGT  
CGGTTCCGGAGCAGCCGAATGATGAAGCTTATCAACCGCATGATGAATATAATCAGCAGTTCGCGCTAG

>Cluster\_28948

ATGATACGTAAGTACAGTACAGGTTGCTATTTGTTGCGTTAGCCGTAATCTGGGGTGGTGGCACATGGTACACAGGTACGCA  
AATTCACCTGGTGTGAAAAGTTTATTAAGGTTTTAACGATGCTAAAAAGAAAGGTGAACATGCCCTACGATATGACGT

TAAGTTATAAAAAATTTTGACAAAGGCTTTTTTAATCCCGTTTTCAAATGCAAAATGACATTTGATAACGGTGCACCCGAT  
CTCGATATCAAGCCAGGCCAGAAAATTTGATTTGATGTGGATGTTGAGCACGGTCCGTTGCCCATCACAAATGTTAATGCG  
TGGAATGTCATCCCCGACTGGCAGCGGCAAAAGTGAATTAGTGAATAATGAACTGACACAACCGCTATTTATCGCCG  
CGAAAAATAAATGCCCGTGAAGAGCAGCATTTGCCGATTTCCGCTTTGGTGGCTCATTTCTCCACGACATTAGATTTGCCCT  
CGAGATGAGAAATTTCTTTTGGTGAAGCGAGTTACTTTAATGTTGATGATAGTTCAATGTTCAACCTGGAATAT  
TGAAGGCAAAGTCAAGATATTGTTCTGCAATTTTACCAATGAACAAAGTAACGGCGAAAAGTTTTACCATTAAATCTC  
TGGCGGATTAGAAGAAAAGAAATTTCCGGTGGTGAAGCGAGTCAAAATTTAATCAGGTTAATATTATCAACCAAGG  
GAAGTCGTTGCCAAATCGATGCTTTCGTTGCAAAAACAGGCTGGATCGCGTTAAAGACAAAGATTATCAATGTCAA  
TCTGACCTACGAACCTTGATAAGTTAATAAAAGGGAATCAGCAACTCGGTAGTGGTGGTCAATGATTGCTCGCAATTA  
TTGATCCATCAGCGGTGCGCCAATTTATCATCCAGTATAACATTTGCGATGCGAAGCAGCTTGTGTCACACCCCGAGTTA  
GCAACGATGAAGTGTCTGCAAGAAGTGAATGCTGCATTTCAAAGAGTATTTACCGTTATACAAAAAGTGGAGCC  
GACCATTAACAACCCGGCAAGATGGAAGAATGCACTCGGCAACTAAATGCCAAACTGGATATCAGTATTGCCGACCCAG  
CCAAATCTCATCATCCACAACAAAGATATTAATCTCAATTTGATATGAAGTTACCGCTAATGCTCGCCACAGAA  
ACCGCAAAACAGCTTAATTTATCTGAAGGGATGGATGCGGAAAAGCGCAAAAGCAGGCTGATAAACAATCAGCGGGAT  
GATGACCTTAGGTGAGATGTTTCAGTTAATCAGGATGACAACAAATACCGCTCGCTGCAACTGCGTTATACCCGGGTA  
AAGTTGCTTTAACGGACAGGAGATGAGCGAAGAAGAAATTTATGTCCTGTCGGGACGTTTTGTTTATTA

>Cluster\_62198

ATGAGGAAGGCATATCTTATGGAATCTATTTCAACCTGGATTGAAAAATTTATTAAGCAAGCACAGCAACACGTTCCGA  
ATCCACTAAAGATTTATCCACGCTTACCGTAACCTGCGAGTAAATTTGAGTTTCGGTTATGGTAATTTTACGCTATTC  
CTGGTTGTCATTTCTGGAGAAGTCAAGGAGTCTTACCGTATATATCCGTTATTTCTCTATTATAAAGATTTTGGAT  
GAGTTGGTTTGGCTTATGGTATAAGCGACAGCAATGAACACATGCCAATGGCAGTTCTCTTCAGACATACCTAAAAC  
AATCGCAGATTTTTTACGGCAACTTCCGGTGTATATCTTAAAAAATACGGACAGTCCATTACGCTTTCCTCCAAAAAG  
TCTCACAGGGTATGATTACACCCGATTTGCCCTTATGCTGGCAACAATAATCAACGACTATAAATTAATTTAATTTCT  
GGCAAGAGTGTATTCTCAACCTATGTCAAAACTGAATCATATCTGCTGGAGAGTGGCTTAAATGATTTTATTTCCCTGA  
AACCAATAGAGACGATACTCAACGATTAACCATCAAAAAAATATTTATCTCCAGGGGCCCGCGGCTTGGAAAAA  
CCTTTGTTGACCGCGTCTGGCTTACTTGTGACAGGAGAAAAGGCTCCGCAACGCGTCAATATGGTTTCAATCCATCAA  
TCTTATAGCTATGAGGATTTTATACAGGGCTATCGTCCGAATGGCGTCCGCTTCCGACGTAAGACGGCATAATTTTACAA  
TTTTTGTGACGAACTGAAAGAGCGCCAGAGAAAAGTATTTTATATAGATGAAATCAATCTGGCAATTTCTGCTGCAAT  
AAGTATTTGGCGAAGTGTATGTTAATGGAACATGATAAACGAGGTGAAAACGTTGCTGTTCCCTAACCTACTCCGAA  
AACGATGAAGAACGATTTCTATGTCGGGAGAAATGTTTATATCATCGGTTAATGAATACTGCCGATCGCTCTCGGCCGT  
TGTGACTATGCCCTACGACAGCAGATTTCTTTTATAGATATTGAGCCAGGTTTTGATACACCACAGTTCCGGAAATTTT  
TACTGAATAAAAAAGCAGAACCTTCAATTTGTTGAGTCTTTATGCAAAAAAATGAACGAGTTGAACAGGAAATCAGCAA  
GAGGCCATATCTTGGGAAAGGATTCGCAATTTGGCATAGTTACTTCTGCTGTTGGTGGGAAAGATGGACCTCTCCGGA  
TACGCAATGGCTTAATGAATTTGATGACGGATATCGCCCTTACTCGAAGAATATTTCTTTGATGACCCCTATAAAC  
AACAGAAATGGACCAACAAATTTATAGGGGACTCATAG

>Cluster\_16077

ATGGTGGATTTAATGCTGAATGAGCAACGGTCCGGTACGGTGGGAAAGGTGTGCTGCGGGGTATAAGCTGACTGAGAT  
GGAGATGATTTCTGAGGATTTGGGTTGATTCACGATATTAACCTGACAAACATAATGATTATCGCGGCAAGAACTC  
CCAAAAAATTTGGAATGGATTGGGGGATGGGGATATCGTTGCCCTTTCTGCTGCTAATGTTAAAAAGGATATATAGAT  
TTATCTACTGAATTTACTTTGGTTCCGAAAGAACTATAAAGCGCTGGATGACATCCGGTCAATCCCAAAAGGGGACAT  
AGCTTTTACAATGGAAGCCCTCTGGGGATGACAGCATATTTCTGATAAACAAAAAATATATTTAGCCAGAGAACAA  
TTCTTTTACAAATAGATAGAGAAATTTTCTCCATCACTAATAACTCCAAATCTTATTTATCAGAGCGTTTCAATCATAT  
ATTTCTGAAAGCCGACTGGTTCACGGCCAAAGGATTAACAGCTTCAAGTTTATAGAGAAGTTATGCATATCTGATCCGAA  
AAATATCGTAGAGCAAAAGGCTATTGCTAATGTATTAACCAATGTTGATAGCTTGTATCTATCCCTAGAAAAATTTACTCT  
CAAAAAACAGTCCATCAAACTGCCACATGACAGCACTACTGACTGGTAAAACCGTTTGCACAGTTTGGCTTGGCC  
AAAGATGGCTCTGCTAAGGGATATAAAAAAGAGCGAGTTGGGGCGATTTCTGAAGATTGGGTAGTCAACAAGCATTTGGACA  
ATTTACTGACTGCTGTGCTGGTGAACCTCCGAGTACTAAATTTTCAAGTATTTGGGAGGAACTTCAACAGATTGGAT  
CCGGCGAATTACACCTAAAACAGGTGTATGCTGTAGCCGATTATAAACCAGCAAGGGCTTGTAACTCCAGTACAAAG  
TATGTGCCATAAAATTTCTGATTTAGTGGATTTGCGAGGACAAGGAAAGACTCGAGGGACTGTAGCAATTAATCCGATTGA  
ATTTATGACTAATCAGTCTATTGCTGCGATTTTCCAGCAAAACATCAATCCACAGAAATTTCTGTTCTATAACCTCGACA  
GTCGTTATGAGGAACCTGAGAAAGTTATCTTCTGATGGGGCGTGGTGAATCTTACTAATTTATCAGGAAATTA  
CATCTTGCAATTTCCGCCAAAAGAAGAACAAACCCCATCGCCACCATCTCTCCGATATGGACAAGGAAATTCAGACCT  
GCAACAGCTCTGACAAAACCCCTCAGCTTAAACAGGGGATGATGACAGGAGTTGTTAACCGGAAAACCCGCTTAATAT  
AG

>Cluster\_29335

ATGCGCATTCATATTTTAGGAATTTGTGGCAGCTTTATGGGCGGTCTGGCGATGCTGGCGGCCAGTTAGGCCATGAAGT  
AACGGGTTCCGACGCCAATGTGTATCCGCGATGAGCACCTTACTTGAGAAGCAAGGCATGAACTGATTCAGGGTTACG  
ATGCCAGCCAGCTCGATCCACAGCCGATCTGGTGATTTGGTAAACCGCATGACCCGTTGAAATCCGTTGTGGAAGCG  
GTACTGGAAAAAATCCCTTATATGTCAGTCCGCGAGTTCGACGATTTTGTGCTGCGCGACCCGTTGGTGGCTGGC  
CGTTGCCGTTACACAGGCAAAACACCACGGCGGAAATGGCGACCTGGATTTGGAACAATGCGGTTACAAACCGGGAT  
TTGTGATCGCGGTGTGCGGGGAACTTTGAGGTTTCCGCGCTGTTGGCGAAAAGCGACTTCTTTGTTATCGAAGCGGAT  
GAGTACGACTGCGCTTCTTGCACAAACGCTCTAAATTTGTCATTACTGCCCCTGACGCTGATCTCAACAACTTTGA  
GTTTCGATCAGCCGATATCTTTGACGACTGAAAGCGATCCAGAAAAGTTCACCATCTGGTGGCTATCGTTCCGGGGC  
AGGGCCGATTTATCTGGCCGAAAACGACATCAACCTGAAACAGACCATGGCGATGGGCTGTTGGAGCGAGCAGGAGCTG  
GTGGGCGAGCAAGTCACTGGCAGGCGAAAAGCTGACCATGACGCTTCCGAATGGGAAGTCTTGGTGGATGGCGAAAA  
AGTGGGCGAAGTGAATGTTGCTGCTGGTGGCGAACATAATGTCACAAACCGCTGATGGCGATTTGCGCGCTGCCATG  
TTGGTGTAGCGCCGAGATGCGCTAACGCGCTGGGTTGCTTTAATTAACGCTGCTGCGCCCTGGAGTTGCGTGGTGA  
GCGAATGGCGTCAAGGATATGACGATTTCCGCCATCACCCGACGCGGATTTGGCAACGCTGCGCGGCTGCGTGGCAA  
AGTTGGCGGTACGGCGCGCATTTATGCGTGTGGAGCCGCTTCCGAATACCATGAAAATGGGATCTGCAAAAGACGATC  
TGGCACTTCAATTAGTGTGCGGATGAAGCTTCTGCTGCAACCGGACATATTTCCGTTGGCAGCAAGTGGCA  
GAAGCTGCGTTACGCTGACACTGGAGTGGCGATGTGGATACGCTGGCAGATATGGTGGTGAACCCGCTCAGCTGG  
CGACCATATTTCTGTTGATGAGCAACGGCGGTTTTGGTGGGATCCATCAGAAAATGCTGATGGCTGGCGAAGAGGCGG  
AAGCTGCGCAGTAA

>Cluster\_53825

ATGAATAGTAACGTAAGTACTGACACAACATATCGTTTACCGGAGTACCCGCGGGCTGCGGAAATTCAGTGCCATCCGGA  
GGAATAAACAAGCCAGCCACCGCTCAGACCTGAGCTGAACTGGAATGGTGGAGTCCGTTGGCACTGGCGATTTTTTA  
AAGCCAACGGTGGATTTTACACACCGCCTACTATACGCTTCCGCGGACAGGACACAGGACTGGCGGGATTTCTCG  
GAAGGTGCGGAATGCTGGCGGCAATGGTAAGCCAGACTGGGATAAGTTCTGGCCGAGGGCGGCGGCGGCTGTA  
AATGCTGGACTGGTTAACTCCGAACCGCAATATTTGCGTCAAGAAATCTCTTTGCGGAATCCGACCTACCACTGA

TCTACCGCACAGAGCGGGCATTGCAGCTTATCTGCGATAAGCTCCAGCAGGTGGAACGAAGCGGTTCCCGCGGTGGAG  
AATCTGCTCTATTTTATGCAGAACACCGCTAAACCGGCTTGAACCCAGCTGAAGAGTAACACTGAGAACCGCGCACAGAC  
CACGGTCAGAACGCTGATTTATGCCCGGAAACACAGGCATCTTCCACACCAGAGCGGTAGTGCCCTCCCTGCCCGGCC  
TGCCGTGAGATGAAAGTGGAGTGCAGCTGTCAGAGAGATAACCCACAGGCCAGTGTGATAAAGCAAGGCATGACGGTA  
AGAGGGTTTATGCGAGGATCGCCTGTTCAGTGGCTGCGCTCAGCATTTGTGGTGGTGGCAGGTCTATFCGGTAGCA  
GCAACTGTTACAGGTTAACGACACCGCTCAGGGCGCAGCAACGGTGTGGATGGCTCACCTGAACTCGAAAAATATGAGC  
GCAGGCTGCAACAACCTTCTTGATACCTCCCGGTACAGCGCTGGAAACCGGGATGCAGATGATGCGTGTTCGCGACAGT  
CGTGGCCGGAAAGCCTGCAACAGCAACAGGCCCTGCACACAATGGAATGAGGCACTCAAAACCCGCGCACAGAGTAGCCC  
GCAGTTGCGTGGCTGGTTGCAGACCCCGCAGGACTTACATGCTTTTGCAGATCTAGTGATGCAGCGCAGAAAGAGGGAC  
TAACCCTTTCCTATATCAAAAATGTCATCTGGCAGGCGGAGCGGGGACTGGGGCAGGAAACACCCGTTGAGTCTCTGTTG  
ACGAGTACAGGATGCCCGTGCAGAACAGCAGATACAGATGCGCTGAAAAACAAATTAATGAGCGACTCGAAGCGGT  
GTTAAGCCGCTGGCTGCTGCTGAAGAATAACGTCATGCCAGAGGGCGCAACCGGTACCACGGCCGAAAAATAA

>Cluster\_23548

ATGAGGCGATTGCGCTTCTGCCACGAAGTTCATTTGCCCGTACGTTATTGCTCATCGTCACCTTGTGTTGCTCAGCCT  
GGTGACGACTTATCTGGTGGTGCAGACTTCCGCGATTTTGCAGGCTCCAGCAGTAAATAAAGTCCFCGCGTACGAAG  
TGCTGATGTTGATGACGACAACTGCAACTGGAGGACGGCAGGCAGTGGTTGTGCCCTCCGCTTCCGTCGGGAGATC  
TACCGTGAGCTGGGGATCTCTCTATTCCAACGAAGCTGCCGAAGAGGCAAGTCTGCGTTGGGCACAACACTGAAT  
CTTAAGCCATCAGATGGCGCAGCAACTGGGCGGCCGACGGAAGTGCAGCTGAGGTTAACAAAAGTTCGCTGTGCTCT  
GGCTGAAAACCTGGTTGTCGCCAATATCTGGGTACGCGTGCCTAACCGAAATTCATCAGGGCGATTTCTCCCGCTG  
TTCCGTTATACGTTGGCGATTATGCTATTGGCGATAGGCGGGCGTGGTGTATTTCGTTATCCAGAACCGACCGTGGT  
CGATCTCGAACACGACGCTTGCAGGTGGTAAAGGATTAATTCGCGCCGCTGCGTGAATAAGGCGCTTCGGAGTGC  
GTTCCGTTACCCGCGCTTTAACCATATGGCGGTGGTGTAAAGCACTGGCGGATGACCGCACGCTGCTGATGGCGGG  
GTAAGCCATGATCTGCCGACGCGCTGACGCGTATTCGCTGCGGACCGAGATGATGAGCGAGCAGGATGGCTACCTGCG  
AGAATCGATCAATAAAGATATCGAAGATGCAACGCGCATCTATTGAGCAGTTTATCGACTACCTGCGCGGAGGAGA  
TGCCGATGGAATGGCGGATCTCAACGCACTCAGGTTAGGTTATTGCTGCCGAAAGTGGCTATGAGCGGAAATGAA  
ACTGCGCTTTACCCCGGAAGCATGAGGTGAAAATGCACCCGCTGTCGATCAACCGCGGATAGCAATATGGTGGTAA  
CGCCCGCGCTATGGCAACGGCTGGATCAAAGTCAAGCAGCGGACGGAGCCGAATCGCGCTGGTCCAGGTAGAAGATG  
ACGGCCCGGATTTGGCAGAACAGCAGTAAAGCCTGTTCAGCCGTTTTCGTTGCGGACAGTGCAGCAGCATTAGC  
GGCAGGGATTAGGGCTGGCGATTGTGCAGCGTATCTGGATAACCATAACGGCATGTTGGAGCTTGGCACCAGCGAGCG  
GGCGGGCTTCCATTCCGCGCTGGCTGCCAGTCCCGTAAACGGGCGCAGGCATGACAAAAGAAGGGTAA

>Cluster\_62929

ATGCTGACATTCATTGAACTCCTTATTGGGGTTGTGGTATTGTTGGGTGATGCTACATCATTAAAGGGTATTCCGC  
CACTGGTGTGTTATTGTCGGTGGCCTGTTATTGCTGATTATCAGTGCCATTAATGGGGCAAAAGTGTACCGTCCAGCC  
AGGCTTCAACAGGCTACAGCGCCACGGATATCGTTGAATACGTTAAAATATTACTAATGAGCCGCGGGCGACTCCGC  
ATGATGATTATGATGCTGTGGATTGGCCCTTACATGACCATATCGGGCGAATGATATGGTGGTCAAGCTGGCGTC  
AAAACCATTTGCGATATATAAATCCTTACCTGATGATTGCGCCTATTTTGTCCGCTGCTGATGTTCTGGCGC  
TCTCTCCGCAACCGGCTGGTGTGTTGCTGATGGCAACCTTATTCGCGTATGGTAAACGTTGGTATCAGTCTGGC  
GCAGTGTGCTTGTGCTTCCCGCGCGGATTAATTCGCAACGACTTACAGGGATGTTGGTGTGCTGGCGCGCAACG  
TTCCGAAATGCTCGTTCATTGACTTGCCTTCAAAACGACGCTGCTATCTCAATGCTGCAATTAATCGCATGGCAGT  
CCCACTTCTTGGCAACGTTATCTGGATAAAAAGAGACATCTCTCATGAAATGTTAGATGTCAGTGAATCACCACC  
ACTGCTCCGCTTTTATGCCATTTTGCCTTACGCGCATCATCGGTGACTGATTTTGGAGGTAATGGGTCCGCA  
ATTAACATCATCACTACTTCTGGTATTGTTGATGCTGATTTGCCATCTTGGAGTCTCTCCGAGCTTTAATACCCAGA  
AAGTTTCTTCTGGTCTGGAAGTGGCTTATCGCGAATGGCAGATGCGTGTGCTAACGTGGTGTGATGCTGTTCCGCT  
GGGGTATTGCTCAGGGGCTTAGCACCATCGGCTTATTAAGTCTGATTTCTATCGCTACCTGTTGGTTCGGCGAG  
TATCATCCGATGCTGGTATTGGTATTCTGACCATGCTGGCGCAGTACAGCCGTTACAGCAATGCGCCGTTTATG  
CGTTGTTGAGATGATCCGAACTGGCGCACTTCCGGCATTAACCCGGCTATTTGACTATCCCGATGCTGCAGGCG  
TCAAACCTGGCGCTTTCGCCGTTTCTGGCGTGTGCTGGGATGGCGAAGATCTCGCGTTTGA  
AGTCGTAACACGCACTCGGTACCGGTGCTGTTGGTGGTGGTATTGTTATCGTTGCTACAGAGCTGATGGTCCAGGAA  
CGGCAGCAGCGGTACAGGCAAGTAA

>Cluster\_41989

ATGGAAAAAAGTCTGCTCGTGCAGAAAGTCCAGGCTTTTGGGGCTTTTGGTACGCAATGGTCAATCCCAATATCGGTGC  
TTTTATTGCTGGGATTTATAACGGCATTATTTATTTCCACCAGCTGGCTGCCGAATGAACATTTCCGCAAAATGTTG  
GTCCGATGATTACCTATTTATTGCCCGTATGATTGGTCTACCGGTGGTCACTGGTGGCGGTAACCGCGCGCGGT  
ATGGCGGAATGGTACGATTGGTGTGATCGTGGCGCAGAGATCCGATGTTCTTGGCTCAATGATCATGGGACCGTT  
AGGTGGGCTGGTCAAAAATATGTCGATAAGGCATGGAAACGCAATACCTGCTGGTTTGGAGATGGTATTCAATAACT  
TCTCATTAGGTATCGCGGGATGCTCCTTGTCTGCTGGGTTTGAAGTTATCGGCCCGCGGTGTTAATGCTAATACT  
TTCGTCAAAAGAGTATTTAGGCGCTGGTACATCGGGTTATCTGCCCTTGTCTGCTCAGTCATCAATGAACCGGCAAGT  
GCTTTTCTTAATAATCGATCGATCAGGCGCTATTAATGCTCGCTGGGAATGCAACAGGCTTCGGTAAACGGTAATCCA  
TCTTCTTCAATGGTGGCTTCAACCCAGGTCCTGGTGGGGCTGCTGGCGTTTACCTTGTGTTAAAGGGATGAGT  
AAAGCTTCTGCGCCGGGGGATGATTATTCATCTCCTGGTGGGATCCAGCAACTGATTTCCCGTATGTCGATGAA  
GCCGCTGACCATTTATGGCCATGATTGCGGGCGTATGCTGGCACCTGGATGTTAATTAATGACGGTGGTCTGGTGG  
CTGGCCAAAGTCCGGGCTATCTTTGCTTACCTGGCGCTGACGCCGAAAGGCTCATTCTGGCGCAATGCTGGTGGT  
ACGGTAGGTACCTGGTGTCTTTGCTATCACTTCCGCTGATACTGAAGATGGAAAAACGGTGGAAACGGAGAACGAAGA  
TGAGTTTGTCTCAGTCAGCAATGCGGTTAAGGCGATGAAACAAGAGGGGCAATCTCGTTAAGCCGGTTAAGCGTATCG  
CCTTTGTTGCGATGCGGGGATGGGCTCAGCGCGATGGGCGCAACCACTTCCGTAACCGCTGGAAAAAGCGGGGCTG  
GCAATGAAAGTAAAAAATFACGCCATAGAAAACGTCGCGGATGCGGATATCGCTTACTCACGCAGTCTGGGAAGG  
GCGCGTGAACGTTGACGGATAAACCACTGATATTGATTAATAACTATAATGGCGATCCAAAACCTGACACTTTATTTA  
ATCAATTAACCGCTGAACATAAACACTGA

>Cluster\_26718

ATGGAAACAGATAACAAAACCGCATTGTGGTGCACGGCTGGATCGCTTACCAGGATTGCCGCTGGCATTGCTCAATGTTTGC  
CATCGTCGCTTTGGCTTGTCTGCTGGAGTAATGCCGTTGGTGGCTTGATCTCCGCGCAGCTGAAAGCGTTGGGCT  
GGACAGATAAATCCACCCTGCCACATTTCTCAGCAATCAGACCGCGGAATGTTTCTCGGTGCGCTGGTGGCGGCATC  
ATCGGTGACAAAACCGCTCGCAGAAATGCGTTATCTCTATGAGGCACTTCAATTTGCTTCGATGGTTGCTGGTGTCT  
CTCACCGAATATGAGTTTCTTATTTGCTTGCCTTTTGTGATGGCGCTTGGGCTGGGAGCTTTACTGGTTACACTGTTT  
CTGGTTTCCAGCAATATATGCCCGGAAGAAATCGCGGAACGTTGGTCCAGTCCGGTTTCTTTATGGTAACTGGTCAAT  
CTGCTGCTGTTCAATGATTGCGATGGGACTCAGCCGCTGATTAGTGCAGAGTGGAACTGGCGGTTACACTGCTTATCCC  
TGCAATATTGCTCACTTATCGCTACGGCTGGCGCTACTTCTGAAATCCCGCGCTGGCTGGAACTCGCGCGGAC  
GGTATCAGGAAGCGAGAAAGTCAATGCGGAGTATAGAAAGAGCGTCAATCGCCAGACGGGTAACCTTTGCCGCTGTG  
GTTATTGCTGATGACGGTAAAGCACCACAAGCGGTGCCGTTACTGACAGGAGTATTACTGAAACCGGTGAT



ATTAGGCTCTTGTGTGCTGATTGCCATGAACGTTGTGTCAGTACACACTAATTAACGTTGGTGGCAACGATATTCATGACCC  
AGGGAATTAATTTAAAGACTCGATTGTTTAAATACCATGAGTATGTTGGCGGCCATTTGGTATTTTTATTGCCATG  
CTGGTATGGATAAAATTCGCGTAAAACAATGGGTGTGGGCTATTAATCCTGATTGCGGTGCTCGGATATATCTATTC  
ACTGCAAAACAGTATGTTGCTCAAAACGCTGATGGTTTCTTCTGATTAATCTGCTATATGTACGTTTGGTATGCTC  
CGGCACTGATGTCCTGAGATCTGGCCGACAGAGCCAACTCCGTGGCTCCGGTCTGGCAATGGCGGAAATC  
AGTGGTATGCGCGCCTTATGCGTGGTGTGCTGCTCAGTAGTTATGGCGTAACGGGAGTCTTTATCTTCTGGGGC  
TGTTTCAATATTGTCGCAATTGCTATCGCCACCATTTGAATTGAAACCAAAGGTGCTCCGTGAAAGTTTAAAGTATTG  
ATGCAAGTAGCAATAAATAA

>Cluster\_58201

ATGACGCAATTAACCATGAAAGACAAAATTGGCTACGGGTGGGAGACACCGCTGCGGTTCGTCTGGCAGGCCACGAT  
GTTCTGCTGGCTATTTTACACCGACGCTTTCGGCTGTGGCGGGGATTAAGGCACGCTGTTTTGGTCTCCCGC  
TGCTCGACGCCCTCACCGACCGCTGATGGGCTGTGGTAGACCGCACCGGCACGGCCAGTTCCGCGCCAGAT  
CTGCTGTGGGGCCATCCCGTTCCGGCATCGCTGCGTGTGCTGACCTTCTACACGCCGACTTCTCCGACAGGCAAGAT  
CATCTACGCCCTGCGTACCTACATTTCTCTGACCTGGTCTACACCTTCGTTAACGTGCCGTACTGCGCCATGCCGGCG  
TCATCACCGCCGACCCGAAAGAGCGTCAAGCCCTGCAGTCTGGCGTCTTCTCTGCGCGCGGGCTCGCTCGCTATC  
AGCGGCATCGCGCTGCGCTGGTGTGAGCATCATCGGCAAGGGGACGAGCAGGTGGGCTACTTCCGGCCATGTGCGTGT  
GGGCTGAGCGCGCTGGTGTGCTTACGCTGCTTCTTACGACCAAAGAGCGCTACACCTTTGAGGTGATCGCCGGCT  
CGTGGTGGCGAAAGACCTTAAGTGTGCTGGGCAACAGCCAGTGGCGCATCATGTGCGGTTCAAGATGATGGCGACC  
TGCTCCAACTGGTGGCGCGGGGGCGAGCTCTACTTCTGTAATACTGATGGATCACCGGAGTTGGCGACCCAGTT  
TTTACTTTAGCGCACCTCGCCACCATGTTCCGGTCTGCTTTCCTTCCACGCAAAAGAGCGCTACACCTTTGAGGTGATCGCCGGCT  
CCTTCAAGTGGATCATCGTCCGCTACTCGTGTGATCAGCTGCTGATTTTCGTACCCCGCGGAGCACATCGCGCTCAT  
TTTGGCTCAACATCTGTTCTGTTCTTTAATACCACCGCCGTGCAGTGGCTGATGGCTTCGACGTGGTGGGA  
CTACGAGGAGAGCCGACGGCTCGCCGCTCGACGGCTGGTGTTCCTCACCTACCTGTTGAGCTGAAAGATGGCCTGG  
CGATTGGCGGGGGCGGTGGTGGCTGGATCTGGCTGAGTCAACTATTCCGCCAGCAGCAGCGTGCAGCGGTTGAGGTG  
CTCACCCATCAAAATCTGTTCTGCGTGGTGGCGGTGGTGTCTACCGCGCATGTTATCATGCTGTGCTCTACAA  
GCTCACCGATGCCCGGTGGAGGCCATCAGCCGCGAGTGAATTAAGCACCGCGCGCGAGGGCGAGCGGTTCCCGACG  
CCGCGACAGCCGATCCCATTA

>Cluster\_22485

ATGTGCGGTATTGTCGGTATCGCCGGTGTATGCGGGTAAACCAGTCGATTTATGATGCCTTAACGGTCTCAGCATCG  
CGGTCAGGATGCCGCCGGCATCATCACCATTTGATGCCAATAACGCTTCCGTTTGGCTAAAGCGAACGGGCTGGTGGCG  
ATGATTTGAAGCTCGCCATATGCGAGCTTTCAGGGCAATATGGGCAATTGGTCAATGTGCGTTACCCACGGCTGGTAGC  
TCCAGCCCTCTGAAGCGCAGCCGTTTTACGTTAACTCCCGTATGGCATTACTCTTGGCCACACGGCAACTGACCAA  
CGCTCACGAGTTGCGTAAAAAATGTTTGAAGAAAACCGCCACATCAACACCCTCCGACTCGGAAATTCGCTTA  
ATATCTTCCGACGAGCTGGACAACTTCCGCCACTACCGCTGGAAGCCGACAACTCTTCCCGCCATCGTGTCTACA  
AACCGCTTAATCCGCGCGCGTATGCTGTGGCGATGATTAACGGCACGGTATGGTGGCTTTCGCGCATCTAACCG  
TATTCGTCGCTGGTATCGGGGAAACGTCATATCGACGCAAACTCGCACAGAATATATGGTTCGCTTCCGAAAGCTTGGCC  
TCGATACCTGGGCTTTGAGTTCCTGCGTGTGTCGCCCGAGGCGAGGATTTACATCACTGAAGAAGGGCAGTTGTTT  
ACCGTCACTGCGCTGACAAACCGGTGACGAATCCATGCTGTTTCGAGTATGTTACTTTGCCCGACAGACTCGTTTCA  
CGCAAAATTTCCGTTTACAGCGCGCTGTGAATATGGGCAACCAAGCTGGGCGAGAAAATGCTGCTGAATGGGAAGATC  
TGGATATGACGCTGGTATCCCAATTCGGAAACCTCTTGTGATATCGCGCTGGAAATCGCCGATTTCTGGGCAAAACCG  
TACCGCCAGGGCTTCGTTAAAAACCGCTATGTTGGCGCACCTTCATCATGCGGGTCAAGCAGTGGCTGTAAGTCCGT  
CGCGCTAAACTGAACGCCAACCGCGCCGAGTTCCGCGATAAAAAAGCTCTGCTGGTGCAGACTCTATCGTCCGTGGCA  
CCACTTCTGAGCAGATTAFCGAGATGGCACGCGGAGCCGGAAGAAAGTGTACTCGCTTCTGGCGGACGGAAATTCG  
CGTTCGCGAACGTTTACGGTATCGATATGCGGAGCGCCAGGAACTGATCGCTCACGGTGCAGGAGTAGATGAAATTCG  
CCAGATCATCGGTGCTGACGGGTTGATTTTCCAGGATCTGAACGATCTGATCGAAGCGGTTCCGCTGAAAACCGGATA  
TCCAGCAGTTGAATGCTCGGTGTTCAACGGCGTCTACGTCACCAAAGACGTTGATCAGGGCTACCTCGATTTCTCGAT  
ACTTTACGTAATGACGACCCAAAGCAGTGAACGTCAGAACGAGCGGAAAATCTCGAATGCATAACGAAGGATGA

>Cluster\_41853

ATGTATAAAAAACAACCTTTGGCAGTGTAAATGCTTTGCTGACCGGTGCTACACCGTACATGCGCAACCGGATATTAG  
CAGTATCGAATCTCGACTGGCGGCATTGGAACAACGTTTAAAAAATGCGGAATCCCGCGCCAGGGCGCAGAAGCAAGG  
CFAAAACAGCTGAATACAGGTTTCAAGAACTGGCTGAAACACAAACAACAAAATCAGCTAACAACTCAAGAAAGTACACAG  
AGAACAGTTTACGTCGAACAGAAATCCGCGAAGAAACAGTGGTTTTGAGTTTCAATGGCTATGCCCGTTCGCGGTTACTGAT  
GAATGATGCGGCTTCCAGTAGCAAAAGTGGCCGATATCTGACTCCCGCAGGTGAAACTGGTGGAGCTGTTGGCGCTGCG  
GAAATGAAGCCGATACCTATGTCGAGTTAAATGTAGAACAATAAACAACACTGGATAACGGTGCAGCACACCGCTTTAA  
GCAATGTTGGCTGACGCAAAAGAGATTAACAACGACTGACTGGCGGCTCCAGTAACCTGAATATCCGACAGGCTTTTTC  
CGAAGTGGGCGCATACCAAGTTTACCAGGAGCATTCAAGACAGTACTGCTGGGCTGGAAAACGCTTTGATCGCGACA  
ATTTTGATATTCAGTGGTTAGACTCCGATGTCGATTTTTTAGCGGAAACGGCGGGGCTATCTATGACGTAATAATGGAAC  
GATACTCCGAGTAACTTTCTCTACGGACGTAATTTCCGGATCTTGTATGATATCGACATAACGTTTCAAGATA  
CATCTCACCATGAATCATATGACAGCCCTTCCAGTTGATGGTTAGCGGATACCGGCAAAAGATAATGATGATCGAA  
AAGATGCCAATGGTATCTCATTCAAATGATGCTGCAAAATCTGGCTACATGCGTTAGTTGGTCTGCAAAATGACTCT  
TTCTATGGCTGCGTGAAGGACGGCAAAACAGCACTGCTATATGGCCATGGCTGGGTGGGAAAGTCAAAGGGATTGG  
CTCCGATGGCGCTGCTGTCTGAGGCGAATACCTGGCGCTGCTGCTTACCGCACAAACACTTCCGGAAGCGGTTGGT  
ATGTTGGCCAGCAATTTCTGCACAAAGCAGTAAAGATCGTTACGTCAAAGGCGATAGCTACGAATGGGTGACCTTCAAT  
ACAGCTCTGATCAAAGAGGTAACACAGAATTTTGTCTGGCCTTTGAGGGTAGCTATCAATATATGATGATCTGAAGCCAAA  
GGGTATCAAACCAACCGCGTAAACGGCAGCTTCTATAAATCACTTTCGCTCAACTCTAAAAGCTAACGATTAACATA  
ATAATTTCTTAGCCGCTCCGAGCTTCCGCTGTTGCCACTGGATGGACTGGAGCAGCAAACTTGTGATGATTTTGGCAGC  
AATGACGCTTTCGCGAGCAGTGGTTCAATACTGGCGGAGAGTGAATTTGGTGTCCAAATGGAACCTGGTTTTAA

>Cluster\_21698

ATGAATAAATCGTGGTAGCGGTAGGCGTCAATGTTGCGCTAGGCGTAGTCTGGACAGCGCGGCATGGTATACAGGC  
AAGATGAAACCCATCTCGAAGACATGGTGCAGCAGGCGAACCGCAACTCAAATGACAGCTCCTGAATCCAACTGG  
AAGTCACTTATCAAACTATCATCGCGGCTATTCAGCAGCCAGTTGCAACTGTTGGTGAACCCATTGCCGAAAAGTA  
AATCCGTGGATTAAGAGCGGTGACAGCGTCACTTCAACGAATCGGTTGATCATGGTCCCTTCCGCTTCCCGAGCTTAA  
AAAATGAACTGATCCCGTCAATGGCATCAATCAAAACCGCTGGTTAATAACGAAGTAAGCAAACCACTGTTTGATA  
TGGCAAAAGGTAACCGCTTTTGGAGATTAACCTCCGCTTGGTTACAGCGGAGATTCCAGTTCCGACATTTCCGCTCAAG  
CCACTGAATACGAGCAAAAGGATGAAAAGTGCCTTTAGCGCGCGGAGTTCCAGTTAAATGCAGACAGAGACGGCAA  
AGCTATCTCCTTTCCGCGGGAGGCGAAAGTGGTGGATAGACCGGTTAACGAAATACAAACGAAAGTGCAGTTAACT  
TTAAATCTGAAAACCGAGCTTCCAGCAGCTGGCAAGTTTGGTGGAGCGGTAGGAAACAAAATCTGCTCGTGGAA  
AAAATGACCATTTTCACTGGAGGGCAAAGACTGGCACTGCTGGAAGGCATGGAGATCAGCGGTAATCGGATCTGGTCAA  
TGACGGTAAACCGTCAATAGCCAACTGGATTACTGCTAAACAGCCTGAAGGTACAGATCAGGATCTGGGCGAGTGGCA

AGCTGACTTTAAAGTCGGCCAAATGATGGCGAAGCCTGGCATCAGTTTAGCCAGCAATATAACGCACAACCTCAGGCG  
CTGCTGGCACAGCCAGAAATGGCCAACATCCCGAACCTTATCAGGAGAAAGTACGGGAGCCTTCTTTAGCGCTCTGCC  
GCTGATGCTGAAAGCGATCCGGTGATTAATATCGCGCGCTAAGCTGAAAAACAGTCAAGGTTGAAAGTCTGTAATC  
TGTGCTGTTTCTGAAAGATCCGGCAACAGCAATAAAGAACCGCCCAAACGCTGGCGCAGGAAGTGGACCGCTCGGTTAAA  
TCTCTGGATGCGAATGACCATCCGGTGGATATGGCAACTGAGTTGATGACTCAGGTTAGCGAAGTGGGAGGTTATCA  
GGAAGATCAAGCGAAAAAAGTGGCGAAACAGCAAGTTGAAAGTGCATCAGCAATGGGGCAGATGTTCCGCTGACCACT  
TGCAGGACAAATACCATCACCACAGCCTGCAATATGCTAACGGTCAGATAACGTTAAACGGGCAGAAAAATGCCACTGGAA  
GATTTCTGGGTATGTTTGGCATGCCGGCATTAACAGTTCCGGCTGTACCCGCTATTTCCGAGCAGTAA

>Cluster\_41787

ATGAGTTTTTCCGTTGATGTGCTGGCGAATATCGCCATCGAATTCAGCGTGGGATTGGTTCATCAGGATCGTTTTTCAGCG  
CCTGATCACCACGCTGCGTCAGGTGCTGGAGTGGCATGCGTCTGCGTTGCTACGTTACGACTCAGCGGAGTTTATCCGC  
TTGCCATCGACGGGCTGGCGAAGGATGTAATCGGTAGGCGCTTTGCGCTGGAAGGGCATCCACGGCTGGAAGCGATTGCC  
CGCGCGGTGATGTTGGTGCCTTTCCCGCAGACAGCAATGGCCGATCCTTATGACGCTTTGATTCCAGGGCAGGAGAG  
TCTGAAGGTTACGCTGCTGGTTGGTTTGGCGTTGTTTGGCGGCAAAACCTGATCGGTGCCTTGACGCTCGACGGGATGC  
AGCCCGATCAGTTGATGTTTTCAGCGAGCAAGAGTACGGCTGATGCGGCACTGGCGGCGGAGCGTTAAGCAATGCA  
TTGCTGATTAACAACAAGCAATATGCTGCCAGGCGATGCCGCGCTTTGAAGCGGTGAAACAGACGCAGAT  
GATTTGTTTGTCCCTGGCATACGCAATGAAAAAAGAGATTGAGATTGTGGCGGCATCCGATCTCAACGTTTAAATTA  
GCGGTGAGACGGGAACCGGTAAGGAGCTGGTGGCGAAAGCGATTATGAAAGCTCGCCAGGGCGGTGAATCCGCTGGTC  
TATCTCACTGTGCCGACTGCCGGAAGTGTGGCGAAAGTGAAGTTGTTTGGGCATGTGAAAGGGGCGTTTACTGGTGC  
TATCAGTAACCGCAGCGGAAGTTGAAATGGCGGATAACGGCACGCTGTTTCGATGAGATCGGCGAGTTGTCTGGT  
CATTGGCAGGCCAAGCTGCTGAGGTTGTTGACGATGGCGATATCAACGCTTGGCGATGACCGCAGTTTGGGGTTCGAT  
GTGGCGTGTGGCGGCACTAATCGTGACTTACGCGAAGAGTACTGGCAGGGCGATTTCGCGCTGACTTGTTCACCG  
CCTGAGCGTGTTCACCTTTCAGTGGCGCGCTGCGTGAAGCGGGCGATGATGTCATTCTGTTGGCGGGTATTTCTGGC  
AGCAGTGTGTTTGGCGGTGGGCTCTCCGCGTGGTATTAAGTGCAGGAGCGGAAATTTACTGCAACACTAATTTT  
CCGGGAACGTTCTGTAACGGAACATGCTATTTCATCGGGCGTAGTGTGGCAGAGCCACCGCAGCGCGGATGAAGT  
GATTTCTGAGCGCAACATTTTGTCTTTCTGAGGTGACGTTGGCGCCGAGAGTGGCGGCGGTGCCGCTTGTAAAGC  
AAAACCTGCGTGAAGCGACAGAAGCGTTCCAGCGTGAACCATTCGTCAGGCACTGGCGCAAAATCATCAACTGGGCC  
GCTGTGGCGGATGCTGAAACCGACGTCGCCAACCTGCATCGGCTGGCGAAACGCTTGGGGTGAAGGATTA

>Cluster\_43110

ATGCAACAACGTCGTCAGTCCGCGCGCTCTGCTCAGTGTCTTCTGACAAAGCAGGATTCGTCGAATTCGCCAGGCACT  
TTCCGACCGCGTGTGGAGTGTCTTACAGGGGCACTGCCGCTGTTAGCAGAAAAAGTCTGCCGTTAACCGAAG  
TTTTCCGATTAACCGGTTTCCCGAGATGATGGATGGACGCTGGAAGACCCCTGCATCCGAAAGTACATGGTGAATTCG  
GGCGTCCGCGCCAGGACGATACCATTAAGGAAGAACATCAGATCCAGCCTATCGATAAGGTTGTTAACCTGTATCC  
GTTCCGCCAGACCGTTCGTCGTGAAGGCTGCTCCTGGAGATGCGGTTGAGAACATCGATATCGCGGCCAACAGATGG  
TGGCTCCCGCCGCAAGAACCATAAAGATGTCGCCATCGTGGTGAAGAGCAGGACTACGACGCCATCATTAAGAGATG  
GATGCAACGAAAGATCGCTTCTGCTTGAACCCGTTTCGCTATCAAGCCTTTGAACATACCGCCCTACGA  
CAGCATGATTGCCAATCTTCCGCGCATGTTCCGGCTTACCAGGTGAAAGCAAGAAGCCGCGGTGCTTCCAC  
GCACGTGAACCTGAACCTTCAATTAAGAAGCAGGATATGCTTACGGCGAGAACAGCCACAGCAGGCTGCCTTATATTA  
GAAGAGAATGCTCAAGAAGCCTCCGTTGCTACCGCAACCCAGTTTCAGGTTAAATCCCTCTCTATAACAACATCCCGGA  
TACCGATGCGCGCTGGAGTGGCTGAAAGAGTTCCCGGAGCGCATGTTGTGATTTGTGAAGCAGCCCAACCTTGGCGCG  
TGGCTATCCGCCATTCATTTCTGATGCTTACGATCGCGGTTACAAAACCGACCAACCTCCGCTTCCGCGGATTAATC  
GCCTTAAACCGGAGCTGGATGCGGAAACCGCACAGGCCATCATTTCTGCTCAGTTTGTGCAAGTGAATTTGCGCGCTC  
CGCAGCGAAGAAGCTCTGAAATCACCAGCGCAACAGCAAGAGCTGACGCTTCCGATTCGACCTGGCGGAGCGGCTG  
TTCCGGGCTTGAATTTCAACAGCGTGAACGCGGCTCCTGGTTAGGATCGCGACCTGGGATGTTGCGGAGGAGAA  
CTGCGCGTCTCACCAGCGTACCGGACTGAAACAGAGCTGCGTGTGCGCTGTTCTGCTGGAAGTGGCGAAGTCTCT  
GAAATCAACGCCATTTGCTATGCAAAAAAATATGACCATCGGCTTGGCGGCGGCGAGATGAGCCGCGTGTACTCCG  
CGAAAATCGCCGGTATTAAGCTGCTGATGAAGGCTGGAAGTGAAGGTTCCGATGGCTTCTGACGCTTCTGACGCTTCCCG  
TTCCGCGACGGTATTTGATGCGCGCGGCTGCGGGGCTGACCTGCGTAATCCAGCCTGGCGGTTCTATCCGCTGATGACGA  
AGTGTATGCGCGCCGAGCAGGACGGTATTGCAATGCTTTCACCGACATGCGCCACTTCCGCCATTA

>Cluster\_34475

ATGATGATGTTTAAAGCCAGGAGATAAACATGCTCGACACAAATATGAAAATCAACTCAAGGCTTACCTTGAGAAATT  
GACCAAGCCTGTTGAGTTAATTGCCACGCTGGATGACAGCGCTAAATCGGCAGAAATCAAGGAAGTGTGGCTGAAATCG  
CAGAACTGTCAGACAAAGTCACTTTAAAGAAAGATAACAGCTTCCCGGTGCGTAAAGCCGCTTTTCTGATCACCACCCA  
GGTTCCAACAGGGGCGCACGTTTTGACGGCTCCCGCTGGGCGCAGGTTACCTCGTGGTACTGGCTGCTGCTGGGAC  
CGGTGGTCACTCCGTCGAAAGAGCGCATGCTTCTGCTGGAGCAGATTCCGCCATATTCAGCGTGAATTTGAAATGAAACCT  
ATTACTCGCTCTCTTGCACAACGCGCCGACGTGGTGCAGGCGCTGAACCTGATGAGCGTACGAAACCGCGCATCAAG  
CACACTGCAATGACGGCGGCACCTTCCAGAAGCAAAATCACCGATCGCAACGCTGATGGCGGTTCCGGCAGTGTTCGTA  
CGGAAAGAGTTTGGTCAAGGCGCGATGACGTTGACTGAAATCGTTGCCAAAATGATACTGGCGCGGAAAAACGTCGGC  
CAGAAGAGCTGAACAAGCGTATGCTTATGACGTTAATTAATCGTGGTTCCGGCCGCGGCGGAGCGGACGCAATTTAC  
TCCGACGCTAAAGGCATCCGTACCGTCTGATGGCGAAGCTTTTGGTGGTGCAGATCCGATACCGTTGATATCGAAAA  
CTACATTTCTGTACCGAAGACTGAAGGGCAGAAGTGGCAGGCGCACTGAAAGTTACGTTGATGAATACGACGTTGATG  
TGATCGACAGCCAGAGCGCCAGCAAACTGATCCAGCAGCAGTTGAAGGTGGTTCGATCAGATTGAAACAGCTTCTGGC  
GCGGTACTGAAAGCAGCAGCATTATCGTGGCGACCGGTGCAAAATGGCGCAACATGAACGTTCCGGGCGAAGATCAGTA  
TCGCACAAAGGCGTACCTACTGCCCGCACTGCGACGCGCCGCTGTTTAAAGGTTAAACGCGTACGCGTTATCGCGGGC  
GTAACCTCCGGGCTGGAAGCGGCAATGACCTGGCGGTTATCGTTGAGCAGCTAACGCTGCTGGAATTTGCGCCAGAAATG  
AAAGCCGACAGGTTCTGACGACAAACCTGCGCAGCTTGAAAAACCTGCACATTTATTCGAATCGCAGCAACCGAAGT  
GAAAGGCGACGGCAGCAAGTCTGTTGGTCTGGAATATCGAGATCGTGTGACGCGGATATTCACAACATCGAACTGGCCG  
GTATTTCTGCTCAGATTTGCTGCTGCCGAACCAACCTGGCTCGAAGCGCAGTCAACGTAACCGCATGGCGGAGATT  
ATCATTGATGCGAAATGCGAAACCAACGTTGAAGGCGGTTTCGAGCGGGTACTGTACGACGCTTCCGTACAAGCAGAT  
CATCATCGCCACTGCGAAGGTGCCAAAGCCTCTCTGAGTGCCTTTGACTACCTGATTCCGACCAAAACTGCATAA

>Cluster\_11276

ATGCGCAATACATCATAACCATCCTCGTTGCGATATGCTTGTATTACCCTGTCGCTATTTTGAACATCCAGCTCTG  
GATTTCCGCAAAAGCAGGTTACCTGGCGGAGCAGATATGCCCCCAACAATCAATCATATACTTGAAGAAGCGTCAC  
AAGCGACTCAAAACAGCGTTAACATTTGCCGGGAAGGAAATGCAACCTCGAGGAGCAATATCAGCTTGGCCTGAAGCAGT  
CTGAAACCTCACCTGCGCAATCATCATTTCAACAGGGAATAGTCTGGTGTACATCCCTGCTGGGAATCGGGTCTCT  
GTTGCTCTGATTTCTGTTTCCCGGACAGTAAATTTACTGTTGGCTCCAGCAATCGACACCTTAAATAGATTACATATCC  
TGCTCTATCAGAACCAATTTGCAGATACCGCATTTTGGTTAGATAGCGGATCAGCATATTCGTGGGCGACTTAAATGTA  
CCCTTGAAGGGGTAAGGTATGTTTACCGTGGCGGATGACATTTATGGACCAACGGGTGATGATGACGCTTAAATGG  
ACATTTCCCTATACCGAGAAGGTTCACTCCACAAAATATCATTTCACTATTATCTTTAACCCGCGGCACTCTTTAGCT

TCTACAGACTTATCGATAAAGGCTTTGGGATTTTAATATTTATTTCTGTTAATCGCCTGCGCCGCTGCCTTCTGCTTGAT  
AGATATTTTCAATAAAGGCCAACGCCTGAGAGATCCTCGACGGGCAATAAATAATGGGAGATCGTCCCTTTTACCA  
ACCTGTGGTAAATGGTCGGGAAGGGACATTCGCGGGGAGTTGAGGTGTTAGCCCGCTGGAACAACCTCACGGTGGATATA  
TATCACCCCGGGCATTTTATCCACTTGCAGAAAATCCGGATTAATCGTTCGGCTTACGCAAAGCCTGATGAAACAGGTT  
GCCAGACAGATGAACGCTATCGCGAGTAATTCGCGGAATTTTCATATTGGAATTAATTTTAGCGCTTCCGATATAT  
TTCGCCGACGTTTTGTCGACGAGTGTAAATTTCCGTGACAGTTTTACCCGCCGATTTAAACCTTGTCTGGAAGTCA  
CCGAGCGTGAGCCATTGAATGTTGATGAAAGTCTGGTTGAGCGGTTGAACATTTCGATGAAAATGGTTTTGTGATCGGG  
CTGGATGATTTCCGTACTGGCTACTCAGGGCTTTCTTATCTTCATGACCTGCATATTGATATATCAAAATTTGATCACAG  
TTTTCGTTGGCCCGCTAAACGCGACCCAGAATCAACCCGAATTTGATTTGTTGATTGGATCTGGCGCTTAAACCTTCCGA  
TCAGTATCGTCGCTGAAGGTGTCGAAACGAAAGAACTTACTATCTGAACCAAAATAATATCACATTTACAGCAGGGT  
TATATTTTCTATAAACCCTGTACATACATCGACCTGGTCAAAATATCTTTCTAAACCGAAGGTGAAGGTTGTTGTTGA  
GTGA

>Cluster\_40561

ATGGCTACACCGTTACGGTACGCATTAATCTTTTTGCTGTGGGCGATGATGGCGGTGATTTATGCACCCTGATCCCGGC  
AATCTCACGCTGATATCGCCTGCTTTATCGTTGACACACTGGCAGGCGTTATTTGCCGATCCACAGTTACCGCAGGCAT  
TACTGGCAACGCTGGTTCGCAACACCTCGCGCGGTCGGGCGTGTGATTGCCTTGTGGTATTGTTGGCCGTGTGG  
CCTGGCCGAAATGGCAGCGATATGTCGCCCTGCTGCCGTGCTCGCCATTTCCCATATGGGCTTTGGCCAGCCG  
CCTTCTGCTTTTTGCTGACGAGGGCTGCTTTATGACTATTTCCCGTATTTCACTCCGCCAATGGACAAATGGGTATTG  
GGCTGGGCTCACCTGGCGGTGAAAGAAAGCGCATTTCTGCTGTGATCTTAGCGGCAGTATTGAGCGAAAACGGGCTG  
TTGACAGAAATTTGTTGCTGGAATTCACCTGGGCTACAGCCCTGGCAATGTTTTGAAGTGGCTGCTTTTGGCCCTGTCG  
GCCTGGCTGGCAATGGCGATGCTGGCGATTGTAGCCTGGTCTGCTGCTGCTGCTGCTGCTGCTGCTGCTGCTGCTGCTG  
GTAATCCCGCAGCTGGCGGTAATTAGCTGGCAGTGGTAACTCAGGGCGACGCCGATCAACAACGAAAGGGCGACTC  
GCCAGCCTGCTGCTGATGCTGTTACTCGCCGCTACGTTTTGCTGGGCTATCTGCTATGGCGTAGCTGGCGGCTACTAT  
TCCCGCGTAGAGCTGTTTCGTAAGCCTGCCACGCTTTTATGGCAGGATTAACGCTGGCGAGTTTTTTTACCGTTAAGCG  
GTGTGCTGTGTGGTCTGCTGGCGATCCTCGCGATCAGTCGACGATCAATAGTGAAGCGCTCATCAACAGCCTGACA  
ATGGGGCTGGTGGCGACATTCATCGCTTTGCTCCTGTTACTGCTGTGGTGGAAATGGGGGCCACAGCGTCGCCAGTTGTG  
GCTATGGTTGCCCATTTTTATTACCGCTCTGCCACTGGTGGCGGGCAGTACACGCTGGCGCTATGGCTAAACCTGGATG  
GAAGCTGGACGGCGGTGGTCTGGGCGCATCTGCTGGTAAATGCTGGATGCTGTTTTATCCTGCAACCCGCTGGCAG  
CGCATTGATTACGGTTAATTTGATTGCGCAACACTGGGCTGGTGGCGGGCAAAATCTTCTTTTACGTAAAATGCCC  
ACTCATGTTGCGCCCTGCGCTGATTGCCCTCGCGGTGGGATTTTCAGTCAGTATTGCGCAGTATATGCCGACGCTGTGGC  
TGGGCGGGGGCTTTTTCCGACGCTCACACTGAGGCGGTGGCATTAAAGCAGCGGGCGAGCAACGGTATTCTCGCCGCC  
CAGGCTTTATGGCAACTGCTATTACCGCTTATTATTTTTGCCCCGACCCGCTTAGTCGCAAAATGGGTAGGTTATGTCAG  
ACAAGGACTCCGCTAA

>Cluster\_35410

ATGAATTTTTCATCATCTGGCTTACTGGCAGGATAAAGCGTTAAGTCTCGCCATTGAAAACCGCTTATTTATTAACGGTGA  
ATATACTGCTGCGCGGAAAATGAAACCTTTGAAACCGTTGATCCGGTCAACAGGCACCGCTGGCGAAAATTTGCCCGCG  
GCAAGAGCGTCGATATCGACCGTGGCATGAGCGCAGCAGCGGCGTATTTGAACGCGGCGACTGGTCACTCTCTTCTCCG  
GCTAAACGTTAAACCGGTACTGAAATAAATCGCCGATTTAATGGAAGCCACGCGAAGAGCTGGCACTGCTGGAACCTCT  
CGACACGGAAACCGGATTCGTCACAGTCTGCGTGATGATATTTCCCGCGCGGCGCCCATTCGCTGGTGGCCGAAAG  
CGATCGACAAAGTGTATGGCGAAGTGGCGACCACCAAGTACGATGAGCTGGCGATGATCGTGCCTGAAACCTGGCGGTG  
ATTGCCGCGCATCGTGGCGTGAACCTTCCGCTGTTGCTGACTTCTGTTGAAACTCGGCCGCGCGTGGCGGGGAAACAG  
CGTGATTTCAAACCGCTGAAAATAACCGCTCAGTGGCATTCGCTCTCGCGGGGCTGGCGAAAAGAGCAGGCTTGGCCGG  
ATGGTGTGTTGAACGCTGGTGGTGGGCTTTGGTCAATGAAGCGGGCAGGCGCTGTCGCGTCAATAACGATATCGACGCAAT  
GCCTTTACCGGTTCAACCGTACCGGAAAACAGCTGCTGAAAGATGCGGGCGACAGCAACATGAAAACCGCTTGGCTGGA  
AGCGGGCGGCAAAAGCGCAACATCGTTTTGCTGACTGCCCGGATTTGCAACAGCGCGCAAGCGCCACCGCAGCAGGCA  
TTTTCTACAACAGGACAGGTGTCATCGCGGAAACGCGCTGTTGCTGGAAGAGAGCATCGCCGATGAATTTCTTAGCC  
CTGTTAAAACAGCAGCGCGCAAAAACCTGGCAGCGGGCCATCCACTTGATCCCGCAACCAACCATGGGCACTTAAATCGACTG  
CGCCACGCGGACTCGGTCCATAGCTTTATTCGGGAAGGCGAAAGCAAAGGGCAACTGTTGTTGGATGGCCGTAACGCCG  
GGCTGGCTGCCGCTATCGCCCGACCATCTTTGTTGGATGTGGACCCGAATGCGTCCCTAAGTCCGGAAGAGATTTTCGCT  
CCGGTGTGGTGGTCAACGCTTTTACATCAGAAGAACAGGCGCTACAGCTTGGCAACGACAGCCAGTACGGCTTGGCCG  
GGCGGATGGACGCGCGACCTCTCCGCGCGCACCGCATGAGCCGACCGCTGAAAAGCCGCTTCCGCTCTTCGCTCAATAACT  
ACAACGACGGGATATGACCGTGGCTTTGGCGCTATAAGCAGAGCGGCAACGGTTCGCGCAAAATCCCTGCATGCCCTT  
GAAAATTTCACTGAACTGAAAACCATCTGGATAAGCCTGGAGGCTGA

>Cluster\_17158

ATGTCTGATGTACCGTTGATTTGCTGTTGTAATGGCTGGTGGTACGGGTAGCCGCTTTTGGCCCTCTCAAGAGAGCACTA  
TCCGAAGCAATTTCTGCAATTATCAGGTGAGAATACTTTATTACAGTCAACTTTATTACGACTATCCCGCTTTCTTGGC  
AACTCCATTAGTAATAACTAACGAGCAGCATCGTTTTGTGGTGCAGAACAAATGCGTCAAAATAAACCAATTAAGCGAT  
AACATTTCTTGAACCATGTGGAAGAAATACTGCACCAGTATAGCACTTTCAGCATTTACAGCCTTAAAGCGTAAATGA  
ACAACAAGATCCTATACCTTTAGTTCTTTCAGCTGACCATGTTTATAAACAACAGATGTTTTTTGTAATGCTATAAAA  
ATTCATTTCAATTTGTTGAACAAGGAAATATTTAAACATTTGGTATTATTCCTGATTAATGCAAGAACTGGTTACGGTTAT  
ATAGAAAAAGGGAGTATAGTTAAAGAATCAACAGTGGAGTTGGTAATACATTTCTATACGTTGAAACAATTTGTTGAAAA  
ACCTAATCGCTCAAGGGCTGAAGAGTATATCTCCTCAGTAAATATCTCTGGAATAGTGGGATGTTTTATGTTCAAGCAT  
CAGTATATTTAGAGGAGTTAAAAAATACAGACCTGATATATACGATATATGTTGAAAAAAGCTTTCTTCTGCTCTACCAT  
GATCTTGAATTTTATACGACTTTTCAAAGATGTTTTTCAAATTTGCTCATCGGAATCAATTTGATTTTGCAGTAAATGAAAA  
AACAAAGCTTTGATAGTCTATCCGTTGATTTGGTTGGAACGATGTTGGATCTTGGCAATCATTTGGGACGTTAGTG  
ATAAAACTCCTACAGGGGACGTTTGAAGGTTGATATCTGACTGATATCTGACTTATAATAAACAACAAATAATTTATATTCA  
GCCCTTAGTAGCCGCTGATGGTGGAGGATTTGTTATTTGTTTACAGACGAAAGATGCAATTTCTAGTTTCAAAAAATCCGA  
AGTTACAGGATGTTAAGAAAATTTTCAAATGCTTAAAATGCAAGAAGCTTCTGAAATATCTATCACATCGCGAGGAAATTC  
GTCCTTGGGAAAGTTGATGCTATAGAACAGGAGATCGATAAAGTCAAAAAGATGTCGTTAAACCGGGAAGGG  
CTATCCTTACGTATGATCATCATCTGCTCAGAGCATTTGATTTGCTTTTTCAGGTACAGCAAAAGTAAACCTTAAATAATA  
AACTTTCTTAGTTACTGCTAATGAATCCGTTTATATTCCTCTGGGTGCTACTTATAGCCTTGAATAACAGGTATAATTC  
CTCTCAATCTTATGAAGTTAGTTACAGGAGATTTATTTAGGTGAGGATGATATTTGTTGCTCAAAAAGAACGTTACAAAAATA  
GATGACTAA

>Cluster\_61125

ATGCAGCTTGAAGTAATTTACCGCTGGTGCCTATCTGGTGGTGGTGTTCGGTATCTCGGTTTATGCGATGCGTAAACG  
GAGCACCGGCACCTTCTTAAATGAGTATTTCTCGGCAGCGCTCTATGGGCGGATTTGTTGCTGGCGATGACGCTCACCG  
CGACCTATATCAGTGCAGTTCTGTTTATCGGCGGGCCAGGAGCTGTTATAAATACGGGCTGGGCTGGGTTATTTGCGGG  
ATGATTCAGCTTCTGCACTGCTGGCTTTCACTCGGATTTCTCGGCAAGAAGTTTGGCATTTCTTGGCGCGCGCTACAATGC  
AGTGACGCTGACGATATGCTGTTGCCCCCTACCAGAGTCTGCTTCTGGTGTGGCTGGCGAGTTGAGTTTGTGTTGTTG

CGTTCGTTGGTGCATGACCGTGCAGTTTATCGCGCGTGCAGCCCTGCTGGAACCCGCGGGGTTATCCCTTATGAAACC  
GGGCTGCTGATTTTTGGTATCAGCATTCGCTTATATACCGCCCTTGGTGGCTTTCGCGCCAGCGTGTGAACGACACCAT  
GCAAGGGCTTGTGATGCTGATTGGCACCCTTGTGCTGCTTATTGGCGTAGTACATGCCCTGGCGGCTTAAGTAAACGAG  
TACAGACCTTGCAAACCATCGATCCGCAACTGGTTACGCCCAAGGGCGTGCAGATATCTGTGCGCTGCTTTATGACG  
TCGTTCTGGGTGCTGTTGGTGGTGGTGGCTGCGCATACTGCGGTGCGCTGTATCTCTTATAAAGACAGCAA  
AGCCGTACATCGGGGATCATCATCGGTACGATGTGGTGCAGTATCTGATGTTTCGGTATGCACCTGGCCGAGCGTTAG  
GTCGGGCGGTGATCCCGATCTCACCGTACCGGACCTGGTGTATCCCAAGTAAAGTAAAGTGCACCGCTTGGT  
GCCGGGATCTTCTGGCTGCACCGATGGCTGCGATCATGTCGACAATTAACGCCCAACTGCTGCAAAGTTCGCGTACGAT  
CATTAAGATCTCTATCTGAATATCCCGTCCGGATCAAATGCAAAACGAGACGCGTCTGAAGCGGATGTCCGGCGTAATTA  
CGTTAGTTCTCGGCGGTTGCTGCTGCTTGCAGCCGCGGAGCCGAGAAATGATCATCTGGTGAATTTGTTGGCCTTC  
GGTGGGCTGGAAGCCGTTTTCTGTGGCCGCTGGTGTGGGCTTTTACGCGGAAACGCGCAACGCCAAAGCGCGCTAAG  
TGCGATGATCGTTGGCGGCTGCTGTATGCCGTACTCGCGACGCTGAATATTCAGTACCTGGGCTTCCACCCTATCGTGC  
CCTCGTTACTACTAAGTTTGTGCTGCTTTCTGGTGCAGAACCGTTTCGGTACATCCGTCCCGCAAGCTACCGTTTTGACT  
ACTGATAAATAA

>Cluster\_56825

ATGAGTCTTAACTGGTAAGTGAACAATGCTAGCGCGGAACGGCCTGAAACATCAGGACTTGTTCGGATCTCCGGTCA  
ACTGGCCGAACTCGCCTTGATTATGGCGATCTCTATTTTTAGTCGAGCTATCACGAATCCTGGGTTTTAGAAGACCGCA  
TTATTAAGATGGTCTTTACAACATCGATCAGGGCGTTGGTGTGCGTGAATCAGCGGTGAAAAACCGGATTTGCTTAC  
GCTGACCAAAATCAGCCTGCTGGCGCTGGAACAGAGTGCAGCAAGCGCGCGCACCATCGTCCGTGATAGTGGTGTGTTAA  
AGTACAGACGCTGGCGCGGTAGAGCATAGCCCGTTGTATACCTCGGTAGATCCGCTGCAAAGCATGAGCCGTGAAGAGA  
AGCTGGATATCTCGCTGCGCTGATAAGTTGCCCGCAAGCGGACAAGCGCTACAGGAAGTACTGCCAGCCAGCTCAGT  
GGTGTCTATGAATTAATTTTTGGTTCGCGCCACCAGCGCACGCTAGCGCGGATGTCCTGCTCGCTGGTGGCTTTCCGT  
GAGCGTTCTCGTCAAGAAAGATGGCAAACGCGAAGCGGTGCCAGTGGCGGCGCGGCTGTTTTGGTTATGAATTTCTTCC  
TTGCCGCTGATTTAGAACGCAAGTCCGTGCGGATGCTGCAAGAAAGAGCAGTGCATGCGTATGGCGTGGTAACTTCTGCG  
GTTGCTGCACCAGCGGCACCATGCCGCTAGTACTTGGCGCAGGTTGGCCGGCGTGTGTTGCATGAAGCGGTTGGTCA  
CGTCTGGAAGGCGACTTCAACCGCCGTGGCATTCTAGTATTTAGTGGACAGGTCGGGAGCTGGTGGCTTCCAGAACTGT  
GTACCGTGGTGTGATGATGGCAGGATGGTGCATCGCCGAGGTTCCGTTGGCGATTGATGACGAAGGTACGCCAGGCCAGTAC  
AACGGTCTGATTTAGAACGCAAGTCTTGAAGGCTACATCGCAGGATAAACTCAACGCGCGTTTGGTGGGCTTCTGCGTGC  
TGGCAACGGTTCGCGTGAATCTACGCCATCTGCCATGCGCGTATGACCAACACCTATATGCTGCCGGGTAATCGA  
CCCCGAGGAAATTTATGATCCGTTGAGTACGGTATCTATGCACCGAACTTTGGTGGCGGTCAGGTGATATCACCTCC  
GGCAAATTCGTTTTCTCCACTTCAAGAGCATATCTGATGAAAACGGTAAAGTAAAGCAAGCGGTTGAAAGCGCAACGTT  
GATGGTTCCGGTATCGAAACCATGCGAGCATTTCTGATGGTTGGCAACGACCTGAAACTGGATAACCGCGTGGGTGCT  
GCGGTAAGAAGGCAAAGTTTCCGCGTTGGCGTGGCCAGCCAACTGAAAGTCGATAACCTGACTGTTGGCGGTACT  
GCGTAA

>Cluster\_35468

ATGCAGGAAATCTATCGTTTTATCGACGATGCGATTGAAGCCGATCGCCAACGTTATACCGATATTGCCGATCAAATCTG  
GGATCATCCAGAAACACGTTTTGAAGAGTCTGGTTCAGCGGAGCATCTGGCTTCGGCGCTGGAATCTGCAGGCTTACC  
TTACCCGCAACGTTAGGCAATATCCAAATGCCCTTATTGCTTCTGTTGGTCAAGGCAACCCGGTTATGCCCTGCTGGGA  
GAATATGACGCGCTGGCAGGTTAAGTACGCAAGCAGGTTGCGCGCAACCTACATCCGTGACGCGCCGTTGAAATGTTCA  
CGGTTGCGGACACAAATTTCTGGGAACCCGCGCTTTGCCGCTGCAATAGCCGTCAGAAATGGCTGGAAACATATGGGC  
AAGGGCGCAGGTTGGCTTTTATGGTTGCTTGGCGAAGAAAGGCGGCTCGGGTAAAACGTTTATGTTTCGCGAGGGGGTA  
TTTTGATGATGTTGATGCGGCACTCACCTGGCACCCGGAAGCCTTGGCCGTTATGTTCAATACCCGACGCTGGCAAACT  
TCAGGATCATGGCGCTTTAAAGGATGCGCAGCATGCGCGAATTCCTCTCATTTGGGACGACGCGCTTGTATGCGG  
TAACGTTGATGACCACTGGCACCACCTTCTCAACGAACATATTTATGAAAAAGCGCGGTACACTATGCCATCAAAAT  
AGCGGGCGGATCTCGCCAACGTTGGTCCAGGCGCAGGCAAGTGTCTTATCTTATCCGCGCCCGAAATGACCGACCT  
GCAGCATATTTATGATCGGGTCGCCAAAATCGCCGAAGGTTGGCATTGATGACCGAAACACCGTTGAATGCCGCTTCG  
ACAAAGCCCTGTTCAGTTATCTCCGAATCGCACTTAGAAAAATGCCATGTACAGGCGCTATCCCATTTTGGTACCCCG  
GAATGGAACCTCGAAGAACTGGCTTTTGGCAACAAATTCAGGCTACGCTCACCTCCAACGATCGGCAAAACAGTCTGAA  
TAATATCGCCGCAACCGTTGGCGAAAACGGCAAGGTTTTGCACTACGTCATCGTGAACCGTACTGGCGAATGAAGTGC  
CTCCATATGCCGCCACCGATAACGTTGCTGCGGCATCGACTGATGTCGGCGACGTCAGTTGAAAACGCTGTTGCCCCAG  
TGTTTACGCCCCCTTTTTGCGCTGCGTACACCGTACATACGTTGGCAACTGGTTAGCCAGGGCGCAACATCTATTGCTCA  
TAAAGGAATGCTGCTGGCGGCGAAAATATGGCAGCAACCACAGTCAATCTCTTCTTATTCAGGGCTATTGCAAGAA  
GCCAACAAGAGATCAGCAAGTAACGGACACGCAACCGTATCAGTGCCTATCCGAAAAACGTTGACACCGCTCACCTTTA  
AAATAA

>Cluster\_37491

ATGAATACAACAACCCATGGGGATGCTGCAGCAACCTCGCCATTTTTTCATGATCTTTTTTGTGCGAGTTATGGGAGCG  
ATTCGGCTACTACGGCGTGCAGGGCGTACTGGCGGTTTTCTTCGTTAAACAGCTTGGATTCTCGCAAGAGCAGGCTTTT  
TCACTTTTGGTGTCTTTGCTGCGTGGTCTATGGCCTCATTTCCATTTGGCGGCTATGTGCGCGACCACTGCTGGGAC  
AAACGACCAATGTTCTTGGTGCCTTGTGCTGGCGATTGGCTACTTCCATGACCGGCAATGTCGCTACTTAAGCCTGACCT  
GATTTTCAFCGCGCTGGGACTATCGCTGTAGGTAACGGCCTGTTTAAAGCTAACCCAGCCAGCTTGTCTTCAAGTGGT  
ATCCCGCGAAAGATCCGCGGCTTGTATGGCGCATTCACCCTGTTCTATATGTCGATCAACATCGGCTCGTTGATAGCGTTA  
TCGCTGGCCCTGTGATCGCTGATGATTCGGTTATTCAGTACCTACAACCTGTGCGGGCGGGGTTAATTTATCGCAAT  
ACTGGTTTACATCGCCTGTGCTGGAATGGTGAAGACATTTGGTCTGAAACCGACTTCCGCGCAATGAGCTTACGAAAC  
TGTGTACGTTTACTTGGCAGCGTGGTGTATGATCTTCGATGCGCATGGCTGATGCACAACCTGAAAGTGCAGCAATCTG  
GTGCTGATGTTCTCTCCATCGTCTCACCATCATCTTCTTTCGTCAGGCAATCAAGCTGGATAAAAACCGGGCGCAATAA  
AATGTTTTGTCGCTTGTCTGATGCTCGAAGCGGTGGTGTTTTACATTTCTTACGCCAGCTGCTGCAACATCGCTGAACT  
TCTTTGCCATCAACAACGTGCATCATGAAATTCGCGTTTTTCCATCAACCCGGTTCAGCTTCCAGGCGCTTAAACCGTTC  
TGGGTGGTACTCGCCAGCCAACTACTGGCAGGCAATTTACAGCATCTGGGTAACAAAGGCAAAAGACCTCTCGATGCGGAT  
GAAATTTACTCTCGCATGTTTATGTCGCTACTGGGCTTTTTTACGGCGGCGAGCTGCGGGAATGTGGTTTGGCGGATGCAC  
AAGGCTGCACATGCCCATGTTTATCGCTGCTGTTTATTCAGAGCTTAGGTGAACTGTTTATTAGCCGCTTGGC  
CTGGCGATGATGCTGCCCTGGTGGCGCAGATTTGATGGGCTTTATTTCTGGGATGTGGTTCCTGACGCGAGGCTGCCG  
GTTCTTGTGGGCGGCTATGTTGGCAACATTTACCGCGTGGCGGCAACATTACCGATCCGCTTGGAGAGCTTGGCCGCT  
ATACCAACGTTTGGTAAGATTTGGTCAAGCTGGCTGGGCGTGGCAGTAGTGTGCTGTTGATGGTGGCGGCTGAAA  
CGCATGATTGCGACGCGGAAAGCCATTA

>Cluster\_17758

ATGACAGCCGAAAGCCTGTCGCCGGAAGAGCAGCTCGTTGAGGATATCGCCTCGTTCACGATGACCCGCTGGGCTATGC  
GCTGACCGGTTTTCCGTTGGGAGAGGATGGCACAGAGCTGGCGCACGACAGGTCACAGGTCAGAAAGTGGCAGGCTGACGCT  
TCCGCGAGATACGCGATCACCTCCAGAACCAGCGACGCTCACAGCCTTTGATGCTGGCGCGCATCCGGCCATGGT  
ATCGGCAAACTGCTTTTCACTCTGATGCTGATTAACTGGGCACTGCCACTGCGAGGACTGCAGGTTGGTGGTGGACCG

CAACACCGACAATCAGTTGCGTACCAAGACATGGCCGGAAATCATCAAATGGTGAACCTGGCTATTACGAAAGAGTGGT  
TCACCTGCACCGCCACAGCGATGTACAGCAACGATCCCGGTACAGATAAACCGCTGGCGCGCTGACGCAATCCCATGGTCT  
GAACACAACACCGAGGCGTTGCGAGGGTGCACAACGAGCGCAAGCGCATCATCGTGGTATTGCGACGAAGCATCCAACAT  
TGCCGATCTGGTGTGGGAGGTAGCTGAAGGGGCGCTGACGGGACGAAGACACCGAAATCATCTGGGTGGCGTTCCGGTAACC  
CGACCGTAACACCGCGGCTTCCGTGAATGTTCCCGCAAGTACAACACCGCTGGAAGTGGCGCGGATGACAGCCG  
ACCGTGGAAGGCACCAACAGCAGCAACTGCAAAAAGTGGTGGACGACTACGGCGAAGACAGCGACTTTCGTGAAGGTTTCG  
CGTGCGCGGGGATCTTCCCTGATGCGTCTGAAAACAGTTCATTCCGTCGCGCTGACTCAGCCAGCTGTTGGCAGGGTTA  
TTACTCCGGCACAGGTTGACGACGCTGCTGAGTTCTTGGCGTCGACCCGCTCACCAGGGTAAAGACCCGGCGGTTATC  
TATCTTCCGCGAGGACTGCACTGTAAGAACTCGGGGAGTGGCAACGCACCACGACGACGATGTTGTTGCCAAAATAAT  
TGCCGACTTCGAGGACCAGTACCAGGCCGATGCTGTGTTTATCGATTACGGGTACGGGACCGGGCTTAAATCAGTTGGCG  
ATAACTGGGGGCGAAACTGGACGCTGATTCAGTTCGGAAGCGGTACCGCGGATCCCGAGATGGGCAATAGCGCGGGGAG  
ATGTACAAATCAGCCCGCAGCAGCTGAAGTTGGGGCGCAACTGGATAGCCAGAACCCTGGCGATGAGCTGAGTGGCGC  
GGAGTCAAGTCAAGTCCGCTGAAGGACAGCAGGAAGATTTTCAGGACAAGGAAGAGTCAAAAGAGTTGCTTGGCCAAAATA  
CGAACGATGCCGACGCTACGTGCTGACATATGCCGCGCGGTACCAAAAAACAGTTTAACTATGGGCGACGAACAGAGC  
CAACAGGGCAAGGCTCTCACAGAGTACGATCCCTATGCATGA

>Cluster\_17211

ATGTATCTGGGTATCGATCTGGGAACATCGGAAGTTAAGCGCTGGTCAATTGATGAAAACAATGAAATAGTCGCCACACA  
TAGCGCGCGCTGACTATTCAGCGGCCCATCCACACTGGTACAGAAACATCGCCGAGGCTGGTGGGAGGCGACGGAAT  
ACCTGATGTCAACGCTACGGGAAAAATGCGGTCAGCATTGGCAAGCGATTAAGCGGATGGCCCTTCTGGTCAGATGCAC  
GGCGCAACTGCTGCTGAGTGGCGGGGAAAGGTGATTCGTCGGCGGATTTTATGGAACGATACCCGCGAGTCTTGAGTG  
TACGGAACTGGAAGAGATTGCACCAGAGTGCATCAAGTGGCTGGCAACCTGGCGATGCCCGGATTTACCGCGCGAAAC  
TGTTGTGGGTACGGAACCATGAACCGCAGCATTTCGACGATTCGCGACGGTGTACTGCCGAAAGACTATTTGGCGTTC  
AAAATGACTGGCAAAAAGTCTCCGATATGTCGGATTCGGCGGGCAGCTTGTGGCTCGACGTGAAAAACGCTGACTGGTTC  
AGACTTAGCCGCTGAAAGTGGCTGAGCAGCGGCAATATCGCGAACTGGTGGAAAGTGGTGTGATGCTTCCGCAACG  
TCGAAACCGTGTGAGCCGACGCTGGGGGCTGACGCTTCCGCTGATGGTGGCTGGTGGCGGAGGGGATAACCGGTTAGC  
GCCATCGTGTGGGCGCAGTATCTCCCGCGATGCGTTTATTTCTCTGGGACATCGGCGGTTCTGTTTGTGGTACTGA  
TGCTTATCGTCCGGCCCGCAATCAGCCGCTCCAGCATTTCGATGCTGCGCAATTTATGGCATCAGATGAGCGTCA  
TGCTTAGCCGCTGCAAGTGGCTTGCATGTTTTCGCGTCTGGTGGCGTTACCGAAACAGAACTACTGAAAGAGATAGCC  
CAGCTTTCGCGCAGCAGAAAAAGCAGTGCCCCGATGTTTCTGCCATATCTTCCGGAGAACGGACTCCCATAACGACTC  
GGATGCCAGAGGGATGTTCTGGGACTGACCCATTCCAGCCAGCGAGCAGTATGGGCTATGCCGTACTGGAAGGTGTGA  
GTTTTGGTATTGCTGACGGACTGCGTGTCTGCAAGAGAGTGGAAACGGCTATTGAACAATGTTGCTGGTGGGGGAGGG  
GCGAAGTCCGTTCTGGGCGCAACTGCTGGCGGATATCTCAACATGCCGTTGTAACGCATAAAGGTGGGGAAACCG  
TGGTGGCTTGGCGCGCGCTGCGTCTGCTAGCCGAGGTAACCGCTGACGGCGGCTGCGAAAAACCGGAAATCT  
ACCAAACTGGCACAGCGATGCTGAACGCCATCAGGCTTGTATGCAACGTTATCAACAGTTTAAACGCGCTATACAACAAC  
GATCTTAACTATCGCAACCAATAA

>Cluster\_24318

ATGATCAATCGTCAACTTTCACGCTGCTGTTGTGCGACATTCCTGGCAGCACGACGCTGATTTCCGGCTGTGCCCTGGT  
ACGTAAGGATTCGCGCTCATCAACAGCTCAAACCGGAACAATCAAACCTGGCCGATGATATTCATCTTGCAGCTCCG  
GCTGGCGAGGCGCATGGTGGAAACAACCTCAATGACCCGAGTGGATGCGCTGATCCAACGGCAGTAACTGGTTCA  
CACACCTTCGCGAAGCGAAACTGCGGGGAAAGAAAAAGCAGTCCCAGGCCGATTTGTTAGATGCCGGTTACACAAATTA  
GGTCGACGCTTAGGGATGCTCAACCGCAACGCTCTCGCGAACGGCTTTTAAAGCCTTATGCGATGGATGCGCCAG  
CACTGGGTATGGACGGCGCTACTATACGGAAGCCACAGTCCGTTTGTGTTGCCGGACTGGATCTCGATTTGTGGGGTGTG  
CATCGCTCAGCGGTTGCTGCCCGCATTTGGCGCGATAAATGGCTGGCAGTGGCAGAAACCGCAGCAGTAGAGCTGAC  
CACGGGCTAGCGCAGCTTTATTTACAGTATGACAGCCAGTATCAGATGCTCGATCTGTTAGAACAAACTCGCGATGTGA  
TTGATTACGCGGTGAAAGCGCACAGAGTAAAGTGGCGCACGGTCTGGAAGCGCAAGTGCCTTCCACGGCGCGCGGCA  
CAGATCTGGCGGTCGATAAAACAAATGCTGCCGTCAAAGGGCAATCACTGAAACCGGAGAACTCTCTGCGTGCATTTGAT  
TGGCGCGGAGCCAGCATATGCGGAGATCAAACCGTGGCATTACCACGAGTACAGACCGGCTATCCGCAACCTCTCT  
CTTATGAGTTGCTCGCCAGACGCCCGGATCTGCAAGCCATGCGCTGGTATGTTACGGCGTCATTAGATCAGGTGGATTCC  
GCGCGGGGCTGTTCTACCCGAGCTTGTATATCAAAAGCCTTTTCGGTCTGGACTCCATCCACCTGGATACCTTATTCAA  
AAAAACAGTCCGAGTTCAACTTCATCCCGGCTGAAATTCGCGCTGTTGACGGTGGACGGTGAATGCCAATCTCG  
AAGGCATCGCGCGCCAGCAACATGATGATTGAACGTTTACAACCGACTCAGTACTGAACGCGGTGCGTGCAGCTTCCGCT  
AACGGCACACGCTGCAAAACGCTCAACGACGAGCGAGAGATGCAGGCAGAACCGCTGGAAGCAACCGCTTCAACCCAGCG  
CGCAGCCGAGGCCCTATCAGCGCGGCTTAAACAGCCGCTTACAGGCCACCGAAGCCGCTTCCAGTGCCTTCCGAAAG  
AGATGTCATTACTGATGCTGGACAGCCCGGGTATCCAAAGCATTCAGTTGATGAAATCGCTGGGCGCGGGTATCAG  
GCGCTCCCGTCTGCGAGAAAAATAA

>Cluster\_22316

ATGGCACAGGTCGGGATAATTACCGCCTCCGATTCGGGGATCGGCAAAAGAGTGGCGCTTATTACTGGCGCAGCAGGGGTT  
TGATATTGGCATTACCTGGCCTCAGATGAAGAAGGGGCAAAAGATACCGCGCTGAGGTGGTGGTGGTGGTGGTGGTGGT  
CGGAGATCGTGGCAACTGGATCTCGCAATCTACCAGAAGGTGGCAGGCGCTGGAGAACTTATTCACCGCTGGGGCGC  
ATCGATGTGCTGGTGAATAATGCGGGCACAATGACCAAGCGCGTTCCTTGATATGGCTTCGATGAGTGGCGCAAGAT  
TTTTACCGTTGATGTTGATGGTGCATTTTTATGCTCGCAAAATTCGCGCCCGCCAGATGGTGAACAAGGGCAGGGCGGTC  
GCATCAACAATTACCTGGTACATGAACATACGCGCTGCCGATGCCAGCGCTATACAGCGCTAAACATGCACCT  
GGTGGCTAAACAAAGCGATGGCGCTTGGCTGGTTCAGGCATAAGATTTTGGTGAATGCAGTGCACCTGGGGCGATCGC  
CACGCAATGAACGGCATGGATGGCGGCGACGTTGAAGCCGACGCGGAGCCTTCGATTCCTTGCAGCTTTTGGCACA  
CGCATGAGATTGCCAGCTGGTGGTATGGCTTTGTTCCGAGGGCGCAAAATACACCACCGGCGAGTTCGTTGATAGTGGAT  
GGCGCTTTATGTTGGCGAATCCGAGTCAACCCAGAATAA

>Cluster\_8472

ATGTTTTTCAAAAAGAACCTCACACAGCTGCTATTTGTGCGACACTTCTGTGCGACATTCAGTGCATGGCAACAGA  
TTCAACTGATACAGAATTAACATCATCGCGGAGTATACCCCTGGTGCATGATCCCAAGTGTGTACGGGCGCGGCGATG  
TTGACTATGGGAAACATCAACAGTGCCTGAATCCGACCGTAAAGATAAATAACTGGTTCACTGGGCGCGCAAAAA  
AGCACATTAATAATAACCTGCACAGCACCAACGCTAATGCTGTAACCTCCAAGGATAACCGTCAGTCGACCATTTGTAGC  
GTTAAACGACACATCTTATATTGAAAAAGCTTATGATCTCTCGTAGATATGAAGGGAACGAAAAACGCTTTGGTTTTAG  
GTTCTAGGCTAATGGACAAAAAATGGCGCTGCATCCATTTGATTTGACAGGCTAATGGTGGGATTCACGCGGCGGAC  
GATACCGTCAAGATTTCTGTGACCTGATTTCAAACGACCACTGGTCAGCAGGACCCACATGAAAGCTTCACTAA  
TGGCGCATTTGCTGCTGACAAAGTTCAGCAATCGAGCGCGGTTATCTGTGTAACAAACAGGGGAACTGACACCTG  
TTGCCATTAACAGCGGTCACCTTCCCGTTACTGATTTGATGCTGCGGTAATGACAATACTATTCTTGGTCTGATGAAACG  
ATCAAACCTGGATGGTAACTGACTATCAGCGTTTCAATTTATAA

>Cluster\_6867

ATGTTTACTCTCGATTGTTTCAACAGATCTCAGCGCTGCTTTCACTTTCATCCGTTTTGGTTGTAGTGAATGGAGCT

AAAAAAGGTTTTGTATCTCTCGATCTTGAGCAGATTTACGAGACGGATCATTCCATTATGATCGATTACAGACAGTATC  
TGAGAGAGTACGATGTAGGAACTGGGTATTCCGGGTGAGTTACCACCGCATACTGGTTTCATGGTACCCGCACTTCT  
GCTGATAACTTTTTGAAAATGGTTACTTGCCTGAACCAAACTGAGTCACTGGTGTGACATGCTGGTAAATCTGGC  
TCCAGACGCTGAGTCAAAGAGAAATTACAGGCTGGAATTTTTATGCAGGCGTACCTGATCACTGTTTTCGGACCCGAA  
CCAGGGATAAAATGCCTGGGACCATATGGTCACTTGTGCGGGAGTCCATCTCATGCACGTAATCTTGGCAGCAC  
GACTATGTACGGTGCAGGAGTGGTAGAGGATGTCTGCAATGCTTACAAAAAAATATGGGCAGGATCTTACAGGACA  
TTATCTTGGAGTACTGAAACCTTGCATAGTCTGTTTTCAGGCGGATATGATTATGAAAAGGGTGCCTTGAAGCTGCC  
TTAGTTACGCATACAGTCTGTTAGAGAATTGCCACCGGATAGTGGCGCTGTGTTCCGTTATTGATCGACATGGTAAATCC  
GTTTCTGTGATGAAATTTGAAATGTTGAAATTCATATGA

>Cluster\_62522

ATGGATCTAAATCTGAAACCCGCACAGCCATCGTACCAGGTGGAGCCACGGGGCTTGGCCGGGAATTTGTCCCTTCCCT  
GGCTAAAGAAGGCGTCAATATCTGTTTTCAGTACCTCGCTGATGAAGAGTGCCTGGGAATTTACTGATTGAACAGGTGAAAT  
CCACCCTGACGCTCAAAATTTATTGCGCTGAAAACCCGATCTTGGCCGATGAGAAAAGCCGGGAGCATCTCTTTGGCCGCACTC  
ATTGAGCAGATGGGAAAGCCGACATTTCTGGTCAATAACGCCGTATCTGGCTCAGTGGCTACGTCACCGAGATAACCC  
ACAGGACTGGGACTTGGTAAATGAATGTGAACCTGAAAGCGGTATTCATTTAAGCCAAATGTTTGTGAATCACGCTGC  
AACAAAGTACAGGCGAGCAGATTTTGAATATTACCTCACAGGCTGCATTTCCATGGATCCACAACCGGCCATGCCATTTAC  
CGCCAGTAAAGCGGGCTGGTAGCTTCTCTATCTCCCTGCGCAAGAGAGGTAGCAAAAACAAAATATCAACGTCGACAAA  
CATCGCTGTGGGATTTATGGACACCGGATGATCCGTAATAATTTGAACAGGACCCAGCCTATTACGTCAGCCGGATTC  
CAGTAGGTCGGGTAGCTCAGCAAAATGAAATGCGGACATCGGGTCTTCATGGTTTCTCTAAAACAGCTATATGACG  
GGAGCAACTGTGGATGTCACCGCGGTATGTTGATGCGTTAA

>Cluster\_178

ATGGCAGAAAACGGGATCTTTGATGAGGTTTTGGGGTTGCTGGGATGGTACAGGATATGGAGAAGACCATACCGTTTG  
GGGAGGAGAGTTTTCTGATGAAAAGGGAAATAGTATCAGAGGTTGGCCATTTTAAGCATTTTAGGTTAATAGGAGGAG  
AAAAAGCCGTAAAAGAACTAAAAGAGTAGCCTTAAAGTTAGTGTGTTGAACTTTTAGGAGAAAACCTTCGACTCTCC  
TTACCTTTTTTAAAAGAGTTTACCAAACAGGAGTTGACACTTCTTTATCAAGCCTGAAAAAGGGTATAAATTCACCTT  
AACCTTCTTGTGGAAGGCTTTTTGATGGGGTGGCTGCGCTAACAGGTTTAAACTTTGTAAACCATATGAGGGAGAGT  
CTGCGATGCACTTGAAGACCTATTTTTGTATGATTTAGAAGATGCTTACGCAATAAGAATAGAGGAAAAAGAAATC  
CTGATTTTTGACTGGGAAAGTATGATAGAGAGATGCTTTTGGAAAAGAGCCTTTACCAAGTAAAGCTTCCAAATTTAT  
CAACACTTTGGCTAAGGTTTGCAGAGATAGCTACGAGAATAGGGATAGAAAAGGTATGCTTTTCTGGTGGGGTTATGA  
TGAACAAGCCTCTGGTAGAAAGGTTAGAGAAAGGCTTCTAAAAGGATTTAAGGCTATCTACAAAAGAAAAGTTCTC  
CCCAACGACGGAGTCTTTCTTTGGGACAAGCTCTATATCCCAATCTTTAA

>Cluster\_24213

ATGGATCGTATAATTGAAAAATTAGATCACGGCTGGTGGGTCGTACGCCATGAACAAAAATATGGTTGCCGAAGGGAGA  
ATTTGCCATATGGCGAAGCGGCAAAATTTTCGATCTTGTGGGTGAGCGCGACTACAAATCGCGCAATGGCAGGGGAACTG  
TTTTGGTTAGTACAACCTCAGCGCGCTCACGATATGGGGTCGGTACGTCAGGTCATGATCTCGATGTTGGGCTGTTTCAA  
CTGCGCCGACTGCTGCAACTGGCGGAGTTTTACCGATCGCATAAACTACTGTGGTTACTGCGGGCATGAAATGTAATC  
AAGCAAACTGAATGGGCGATGCTGTGCAGCCATTGCCGTGAGCGTTACTACCGCAAAATCGCCCCCTGCATTATGTTG  
CCATCCGTGCGATGATTCGATCTCTCTCGCCAGCATACCGCCATCGTAACGGTGTCCATACAGTACTTGGCGGATTC  
GTCAAGTGGGTGAAAACCTCAGCAGGAGTGCAGCGGGAAGTGAAGAGAGCGGAATTAAGTTAAAACCTTGGC  
TTACGTGACCTCCCAACCGTGGCCGTTTTCTCAGTCTTTAATGACCGGCTTTATGGCGGAATATGACGTCGGCGAGATCG  
TGATCGACCGGAAAGAAATGCTTGGAGGCAACTGGTATCGCTATGACGATTTGCCGTTACTCCCGCCCGCCGACCGTA  
GCGCGCCTCTGATAGAAGATACAGTGGCGATGTTGCGGGCAGAGTATGAGTGA

>Cluster\_13731

ATGAATAACATCTGGTGGCAGACCAAAGGTCAGGGGAATGTTTCATCTTGTGCTGCTGCACGGATGGGGACTGAATGCCGA  
AGTGTGGCGTTGCATTGACGAGGAACTTAGCTCGCATTTTACGCTGCACCTTGTGACCTGCCCGGCTTCGGGCGTAGCC  
GGGGATTTGGTGGCTGTCACTTGTGATATGGCCGAAGCGTGTGCAACAGGCACCTGATAAAGCCATTTGGTTAGGC  
TGGAGTCTGGGCGGGCTGGTGGCAAGCCAAATTTGTTTAAACCATCCGAGCGTGTTCAGGCGCTGGTACCCGTGGCGTC  
GTCACCTTGTTTTAGTGCCTGACGAGTGGCCGGGATAAAAACCGGACGTGCTGGCGGGATTTACGACGCAACTCAGTG  
ATGATTTTTCAGCTACAGTGGAGCGGTTCTGGCGTTTACAACCATGGGACTGAAACGGCGCCAGGATGCGCGGGCG  
TTGAAGAAAACCGTTCTGGCGTTACCGATGCCGAGGTTGACGTGCTTAAATGGCGGGCTGGAATCTGAAAACCGGTCGA  
TCTCCGTGACCGCTGCAAAACGTTCCATCGGTTTTTTCGATGTTGATGGCTATCTCGACGGTGTGGTGGTGGCGGCAAG  
TGGTGGCGATGCTGGATAAACTTTGGCCTCACAGGCAATCATAATCTTCGCCAAAGCGGCCATGCGCGGTTTTATTTCC  
CATCCGGTTCGAGTTTTGTCACCTGCTGGTGGCGTTGAAGCAGAGGGTGTAG

>Cluster\_23655

ATGATCAGCGCCCAAGAACTGGTTTATAGCCTTACGGGCGGGCTGACTGATAATGTCCTGCTGACTTTTCCCGGTGG  
GAAATTTGTGCCATCTCGGGCTAATGGTGCAGGAAAATCTACGCTGCTTCGCCAGCTAACCGGCTATCTTCAACCTG  
ATAGCGGCAATGTCGGTTGTTTTAATAAGCCATTAATGAATGTTGATTTACTGAACTGGCGAAAACCGGGCGTGTATG  
CTCAAAAATAGCCACATGGCGTTTCCATTCAGCTACAAGAATTATTCAGATGGGGCGGCATCCGATCGCACTGGTAA  
TCAGGATAATGAAAACAGCAAAAATTAATGGCGTTATGTGACTGTCAGGCGTTAGCAAAACCGCGATATCGGCAATTTCCG  
GTGGTGAACAACAGCGCTGCAATTAGCGCGCTGCTGGTGAACCTCTGGGAACCTTACCCCTCACCGAAATGTTATTT  
CTTGATGAACCAACTTCGGCGCTGGATATTCACCATCAGCAGCACTTGTTCGTTTATTACGCCAGTTAGTTACGAACG  
GCAGTTCAATGTTTTGCTGCGTATTGCACGATTAATCTTCCCGCGGTTATGACAGCGGTGTTGATTAATGCAAAAAG  
GAAAGGTTATCGCAAAATGGTAAGCCGAGGACGATTTGACACAGCAGGCGCTGCAATGCTCTACGGCGGGATATTACC  
GTACTTAAAGATCTGCCAACCATTCACCACTGATCGTCTCGATCATTTAA

>Cluster\_40362

ATGCTGACTGGAACCCCTCTTTATATCTGCACTTTGGCGCTGAACGATCGCGTCCAGCGGTGGAGCTGCTTGGCAGAGT  
GCCGCTGGAGAATATCAAAATACGCTGCCGATCTTGGCTGTGGCCAGGTAACAGCACCGCCCTGCTGCATCAACGTTGGC  
CTGCGGCCAGGATAACAGGCATCGACTCGTCTCCGGCGATGATGCTGAAAGCGCGAGTGTCTTGGCAGACTGCCAGTTC  
GTGGAAGCAGACATCCGCAACTGGCAACCGGAACAGGCACCTCGATCTGATTTTTGCTAATGCTCACTGCAATGGTGGC  
CGACCACTACGAATTTGTTCCCTCATCTGTTTCTTTACTTAAATTCGCATGTTGTTGGCAATACAGAGTCCAGATAACT  
GGCTAGAGCCAACCCATGTGCTCATGCGGAAGTCCCTGGGAACAAAATTTATCCGGATCGCGGGCGTGGCCGCTGGCT  
GGCGTTACTGCTTACTACGATATCTTGGCGAAGCCGGATGTTGAGGTCGATATCTGGGAAACCTTACTATCACAGAT  
GCCGTCGACACAGGCGATTTATCGATGGGTGACCGCACTGGATTTACGTCCTGGTTCAGGATCTGACCGAGAGCGAAC  
AGCAGCAATTTCTTACCGGCTACCATCAGATGCTGGAAGAGCAGTATCCACTGCAAGAGAAGCGGAGAGATACTGCTGGCA  
TTTTCCGCTGTGTTATTGTTGCCCGGCTACGTA

>Cluster\_47487

ATGCATTTATGCGGTTGCTGCTATGCTTGAACGCTTGTGCTGATTTACCGCTTACCGTACCGGACAAGAGCGGTATTGGAT  
TTTTATCATCTTCTGTTTTCCGGTGAATGGTTGCGTGGCGTATTTGTCATGGTGTGCTGCCAGAAAACGGGCGCTGACC  
GTCAGGGCGCACCTTTCTGATGCGCTGCAGGACAAAATCAACCCGGAACGCCACCTGCGCAAAATTAACCGAAGAGCTG

GCGATTGCCGAGACCAATCAAAACCACTATCAACTTGCCAACGAGCTGGCGCGTCTGGAGCGTTACCACGAAGCCGTTC  
CCATTATCAGCAGCGTTAAGCGGGATATTCGCCCATGAGCGGCAATGATGTTAAGCCTGGCGCAGGCGAGTTTGCCA  
TCCAGGAGTTCGCCGCTGTGACGAGCCTGGAAGATGTGATGCGTTATAACCCGATTTTCAGTCCGCGAGCGGGCAT  
TTGTTATTTGCCAGAGCGTTAGCCGCACAAAGAAAATACGCTGATGCGGAAAGTGAGTTTGAAGTGTGGTTTCTTATTA  
CCCCCGCCGACGCGGTATTTACTATCGCGAAATGCTGGAGAAAATGAGTCCGTTACGTGAAGCCACGCGTTATCACC  
TTGCTGTAGTTGATACGGCTAAACGCTCAAGACCTCATATAGAAAACACCACCGGAATGGATTAAGACCGCCAATGAA  
CGGTTGAAGCAGAGTGTGGTGCAATGA

>Cluster\_45178

ATGAATCAGTTAACGGCTTACACCTTGCCTGGCGGATAACTGTCTGGTGTCTCCAGCGGTTGGGGGAATGGTGGCG  
TCACGCACCGGAATGGAATCGATCTCGCACTGGCAACATTTGGCTCGATTTATTAGGTCAGGCACGTAACCTCTTAT  
CGTATGCCGCTGAATTAGCGGGGAGAGGTGATGAAGATACCCTGGCTTCACCCGAGACGAGCGCCAGTTCAGCAACTTA  
TTGTTGGTTGAACAACCAACCGCAATTTTGCCGACACCATTCACGCGCAGTATTTTCAATCGATGCATGGCATGTGGCGCT  
CTTTACCCGCTGTGATGGAAGCCGTGATCCGCAACTGGCGCGGATTTTCGCCAAAGCAATTAAGAAGCGCGTTATCACC  
TGCGTTTTAGTCTGGCTGGCTGGAGCGACTGGGCAATGGTACTGACGTATCAGGGCAAAAGATGCAGCAGGCCATCGAC  
AAGTTGTGGCGTTTACTGCCGAAGTGTGATGCCGACGAGATGATATTGCACTGAGTGAAGAGGGTATTGCGGTTGA  
TCCACGCATTTACGGCGAGCGTGGGAAGCCGAAGTTTTTGCCGGAATCAACGAAGCCACATTTGAACGTACCGCAAGAGC  
AGGCGTATCGCACTGGCGGTAAAAAAGACTGCATACCGAACACCTTGAGCCATGCTGGCAGAAAATGCAGTATCTCCAG  
CGTGTCTTGGCCGCTCAGCAATGGTAA

>Cluster\_23823

ATGGCAAAGCAAAAGTTTAAATCACCAACTGGTCACTTACAACAAGGCACTCAGACAGCGTGGTTCGCTGACGATCTG  
GCTTGATGAATCTGCTATTGCTGCTGACTGACTGCGCAAAGCCTGAAGGTCGTTGGTCCGACTCTCCACTACACTATA  
TGGCGATCACCACGGTTCGATGATGAAGCGCGTGTAACTGCTCCACCTCCGGCATTACAGGGCTTCGTTGACTCGATT  
TTTTACGCTGATGGCTCTGCCGCTGCGTTGCCCGGACTACTCTCTGGTCAAGCAACATGCAAGAGCGTTAACATCAGCAT  
AAAAACGCCAACCAGGGGTGAAATCTCGCATCTGGTTATCGATGCTACTGGCTGAAGGCTTTCCGGGAAGCGCAATGGA  
AAGTCAGGCAACATGGGGCTGACAGGCGCAGAGTATGGCGCAACTTCATCTGGCTGCAGACGGTGTGACGCATGAGATA  
ATCTGTGGCGATTATCGCTCAGCGGTACGACAGATGCCGAGGCACTGCCGGGCTGATTAACAGACCCACCGAAAAAT  
AAGAGAAGCTTACGACAGCGCGCTTATGACACGCGCAACTGTGATGCGTTGCTGAGGAAAAAATCAGGCCACTTA  
TCCCTCCAGAAACGGGGCGCAATCTGCGCGGCGAGATACCATGAACGTAACCATGCCGTGGCTAATCAGCATCTGAGC  
GGTGGCAATGATGTATGA

>Cluster\_7098

ATGGCAGGTCATAGTAAATGGGCCAACACCAGACATCGTAAAGCTGCGCAGGATGCTAAGCGCGTAAAACTTCACTAA  
AATCATTTCTGAGCTGGTAACCGCGCTAAGCTGGCGGTGGCGATCCGGACGCTAACCCGCTCTGCGTGGCGCGGTGG  
ATAAAGCACTGTCTAACACATGACCCGTGACACACTGAACCGCGCAATTCACGCTGGTGTGGCGGTGATGATGCA  
AACATGGAACCATCATCTACGAAGGTTACGGTCTGGCGCGCAGGCAATCATGATTAATGTCTGCTGACAAACCGCAA  
CCGTACCGTTGCTGAAGTGGCTCATGATTTAGCAAATGTGGCGGTAACCTCGGTACTGATGGTTCCGTTGCTATCTGT  
TCAGCAAAAAAGGCGTATCTCCTTCAGAAAAGGCGATGCAACCACTATCATGGAAGAGCACATTCAGAAACCGGTAAG  
GACGTTGTGACCTATGATGACGGCGGATGATGTCTACTGCTGGAAGAAAATGGGTAAGTGGCGGACGCTCTGGA  
AGGGCAGGCTTGAAGCAGACAGCGCGGAAGTTTCCATGATCCGCTTACCAAAGCTGATATGGATGCAAAAACCGCAC  
GAAAATGATGCGTCTGATCGATATGCTGGAAGATTGCGACGAGTGCAGGAAGTTTACCATAACCGTGAATCTCTGAT  
GAGTCCGACGCACTCTCTGA

>Cluster\_42100

ATGATAAAAAATTTATAAAGCCAGTAAAGGTCAGCTAAAGCATCGTAAATTTTTGATGACATAAAGAAAAAGATTGATAA  
CGTTGAAATGGAAAGAAAGCAAGCTATACCAACAGAAAGAACTGGCTGAACATTATTGAGCAGCAGAAACAACATTC  
GGAAAAAATAGAAAGTTTGAACAACCGCGATACCTGCATAGTGTCCACGGGCAAGGAACATTTACATTTACCTGCTCGC  
AGTCGGGAAAATCATTTATACATAGTTTACTGATGACATTAAGGCTCGTGGCGCGCTACCGGCACAGAATATCTTGA  
AATAGGTTATATCTCTCAGTGAAGTATCAGAAAAATCTGCAACTTGATATCCATGTCCATACCGTTTCTGCAATA  
AACGCATTCGCTATATGGGAAGTACGCCGCTGGGTATTGAGACATCATGGCTTGCCTTAAATGACGGCAAAAAATAACT  
CAGGAAGAACTGCTGGCGACGGTTGCTCTATATTTACTGGAAGAAAACTCGCTATTAACCTTTAGAAGCAACGGGA  
AGTTATCTCTGCCCGCTTCCCTCGCCCTTGAAGGCTAATTAAGTGAAGTACTGCAACTGACTGCCGATGATGTCGATTAAGTTGTA  
CCCCGCTCAGGTTATCCGTGGAACGCAACCAATGGAGTATGTAGAGATGGTGTATCCCGCAAGCCGGTACTCTTACAAA  
GCACGAAATACAAAAGACAGTTTTAGCGTGA

>Cluster\_12723

ATGTCGATTTACTTTGCTCTGCCAAATTTGGGTGCTACGACGCTAGCGTTACTGCTTAGCGCTGCCAGTTTGTCTGCCCA  
GGCTTCTGTAACGCCAGATCGTACCCGTTGATATTTAATGAAAGCGCAAAATCAATCAGCGTACGCTGCGCAATAACG  
ATCCGAAACTGCTTACTTGGCCCAAAGCTGATCGAAGATGAAAAGGTAACAAAGATCAGTTACCCGTTAAGCTTCTG  
CCACCGGTGCAACGCATCGATTCATGATGAACGGGCGAGTAAAAGTGCAGGGATGCGGATATCAACAATTTGCTGCTG  
CGATCGTGAAGGCTGTTTACTTCAACGCTGCGTGAGATCCCGCCAAAATCAACAAGCCCAACGCTGCAAAATAGCAC  
TACAACCGCTATTAAGTTGTTCTGGCGACCAAGGCGCTGGAGAACGTCAGCATGAAAACCCCTGGCAATTAAGGTT  
ACTTTAACCCGCAACCGTCAAGAAATTTACCGTCAATAACCCGACACCGTATTACGCTCAATTTTACAGTAATGCGCACACA  
GAAAATGGCAATCCGGCAGCGGTTTCTCGCCAAATGATGATGCGCCGAAAACCTCTGCACCCTGATGTGAAGATGG  
GTAGCGTGGCGTACTGACCTATGTCAACGACTATGGCGCTCGGATGCCGCTCTTTTTCACTTGAACGGTAACAGTTGC  
CAGGTCGATGAAGAGCAGAGCCGCAAGGCTGA

>Cluster\_26375

ATGATCCCGGAAAAGCGAATTTACGGCGCATTGAGTCTGGCGGTTGTGCTATCCATTGCCAGGATTGCAGCATCAGCCA  
GCTTTGCATCCCGTTCACTCAACGAACATGAGCTTGATCAGCTTGATAATATCATTTGAGCGGAAGAGCCATTCAGA  
AAGCCAGACGCTGTTTAAAGCTGGTGATGAACCTTAAATCGCTTTATGATCCATCCGCTCCGTTACGATTAAGTTTATACC  
ATCACTGAGCAAGGCGACGAGCAAAATTAAGTGTTCATTTAGCAGGCGACCTGGTGGGATTTGATGCCATCGGCAGCGG  
TCATCACCCGAGCTTCCGCGAGGCGCTGGAACCTCGATGGTATGTGAAATCCCGTTCGAAACGCTGGACGATTTGTCCG  
GTAATAATGCCAATCTGCGTCAGCAATGATGCGTCTGATGAGCGGTGAAATCAAAGGCGATCAGGACATGATCCTGCTG  
TTGTCGAAGAAAAATCCGAGGAACTCTGGCTCATCTACAACCTGTCCCGCTGTTTTGCTCCCAACGGGCTTCTC  
CCCTCGTGAATTTCCGCTGACGATGACTCGTGGCGATATCGGTAACATCTGGGCTGACGGTAGAACCATCAGCCGCT  
TGCTGGGTCGTTCCAGAAAAGCGGATGCTGGCAGTCAAAGTAAATACATCACTATCGAAAATAACGATGCGCTGGCC  
CAGCTTGTGCTCATACGCGTAACGTTGCTGTA

>Cluster\_52593

ATGAAATGATATTATGGAATAAAAAATGGGTTTTGTTGATTACAGGATGAATTAAGATACAAAAATTTATACGCTC  
AGGATTTCTTTTTTACTATCGATATTTATTAATAATGCGTCCCGCGGGCGGGTTGGCTCGGCGTAACGAGATTTGA  
TTTTATCCGGCAGAAAGTAAGCAAAATCACTCAGTGTGCAAAAATAGCGGTGACAAACAGTATTTAATCAATCATGG  
GTTGATGACAGTAAAACGGAAAAAAGGCCAGGATTTGTTATCACTCCTCCCTCTTTATGTTGCCAACCGGTAAGA  
AGCTTCATTACGATCATGTTTCTGGTAAAGTAATTTGCCGACCGATCGTGAACCTTTGATTTGGATGAATGTTAAAG

CAATTCGCCAACAGATGAGAAAAATACACAGAAGAATACCTTACAGTTGGCATTACAAAACAAAATCAAGCTATTTTAT  
CGCCCGAAAAATCTGCCCTGTGCAACCAGAAAAAGCAGCAAAATAGTTGCGGTTTAAAGTATGAGGGCAAACAACAAAAAGT  
TATCAATCCTTCGCCCTTATACCTGACACTGACAGGAATAAAGTACAAGGGAGTAAATACCAATACGTTTGTACCAC  
CGAAAAAGTATATACCGTCTTGTGCGCCAGTGACGTTGGCTGGTGAAATACCTTATCAAAACAATTAATGACTTTGGCGCT  
ACGACGGAGCGGCAGAAAGGAATAATGCAGTAA

>Cluster\_715

ATGCATAACAGAAAGACGAAAGAAATATGGAAACAGAAAGTTCAGGCCCCATCAGGAAAGGTAAAGAACCGCTGTTTA  
TGAACCAAAGCCAGTATCAACTCAGACAAAGGCAAAAGCATCTTCCCATGATAAAGGCCATCTCCGTGCTGCAGAACGCG  
ACTGGAAGTGGCTGGAAAAAGCGCTGTCTCATCAAGATACAGCGGTGAGAAACAGCGAGTCAGATGGTGGAAAAAGGAG  
GAAGCAAAACGCCCTTATGATGAGTGCCCGAACCACTGAAATCTGTCTCAAGTTTGGCGTGGCAACTGGTCTGAGAAA  
GTCGAACATCATAAATCTGGAATGGCAAAATCGACATGCAGCGACGAGTTGGCTGGGTGAATCCAGAAAGAGAGCAAT  
CAAACCGGCCATTTGGTGGCGCTGAACGATACCGCTGTAAAGTGTGCGTGATCAAAATAGCAAGCATCAAAATGG  
GTGTTTGTACATACAAAGCGCGCTAAGCGAGCAGATGGAACATCAACGCTTCCGGTTCAGGAAGATGCGCATCGAAGCAA  
GACATCATGGCTATCAGCTTGTCTGCTGCAGGAATGAAGATTTCCGTTTCCATGACCTCAGACACACCTGGGCAAGCT  
GGCTGATCCAGTACAGCGCTCCCATATCTGTGCTTACAGAAATGGGCGGATGGGAGTCCATAGAAATGGTTCGTAGGTAT  
GCTCACCTTGGCCTAATCATTTGACAGAGCATGCAAGAAAAATAGACGACATTTTGGTGATAATGTCCAAATATGTC  
CCACTGTGGAATTAATGGAGATATAAAAGAAGCGCTAA

>Cluster\_65308

GTGGACGTAAGACAGAGCATCCACAGTGCACGCAAAAACGCTGGATACCCAAGGGCTGCGCAATGAATTTTGGTTGA  
AGAGGTATTTGTCGCCGATGAGTACACCATGGTTTACAGCCACATGACCGAATATTTGTTGGCGCATATGCCGATAA  
CTAAAACGGTTTCCGTTGGCGGGGAAAGTTGGTAAACAACCTCGGCGTAAGCTATTTCTTGAACGTCGCGAGTTAGGTGTT  
ATCAATATTTGGCGGTGCGGTACGATTACTGTCTGATGGCAATGCTATGAAATCGGTCACCGGACGCGCTGTATGTGGG  
TAAAGGTGCAAAAGAAGTTGCTTTTCCAGTATTTGATACCGCCACTCCGGCAAAGTTTATTACAATTCGCGACCCGCGC  
ATAGCAGCTATCCCAAGCAAAAGTACACCGGACGAAATCTCCAGTACGTTAGGGGATAACCTCACAGTAACCTT  
CGCACAATTAACAATATTTTGTCCCGGATGTGCTGGAACCTGCCAATTTGATGATGGGGCTGACGGAGCTGGCTCCAGG  
TAACTTGTGGAACACCATGCCGTGTACACTCAGGAGCGCGGATGGAAGTTTATTTCTATTTCAATATGGATGATGACG  
CCTGCGTTTTCACATGATGGGGCAGCCGCAAGAAACGCGTACATTTGTGATGATAACGAGCAGGCGGTGATCTCCCG  
AGCTGGTTCGATTCATTTCCGGCTGCGAACCAGCTTATACCTTATCTGCGGATGGTGGTGAACCAAGGCTTTTGA  
TGATATGGACCATGTGGCGGTTAAAGATTTGCGCTAG

>Cluster\_44972

ATGCATGTTTGTGATAATAATGGAATGAACTGAAAGCTGAGTGTTCGATAGGTGAAGAGGATGGTGTATGGTCTAAT  
CCTTGAGTCTGGGGCCGGGTGACAGAAACAAGATTACAATATCGCTCTTGATTATATCATGTAACGTTGGTTGATT  
CTGGTGTATCCCAAGTCGTAGTATATCTGGCGTATCATCAGTCAGAAAAATATGCATTTTGGATGAAAGAAAAATC  
CATCCTGGTGAATATTTTACTTTGATTTGTAATAGCCCGCGATATACGCTTGAAGATGTGTGGTTATCAGGCTTATTT  
TAGTCGTACGGGAGAAAGGAAATTCCTTCCGGCAATGAAAGCAAAAGCAATATGATAAATGTCCAGGTATTTATAGTG  
ACAGTTTGGGCTCTATAAATACGTGGAGAACTATCAGAGCTTTCACAGCCTACAGATGATGAATCGTCTTCAATATG  
AGGTTAGTAAATTAATTAAGAAAACGTTGAGTCAACCCGAGGGCTCCAGGAAACAGTTGAGGTAGAAAAGCTACAAAA  
AGTTTATGTCGAGACCCGATGGTAAAAGCTTGGATTTTACAGCAAGTAAAGGTATAATGTAACCTGTTGTTAAAAATG  
CTCCGTTTTTAAATGATGAAACCCATATTTGGAAGTGATCATGTAATTTCCCTGTCTTCAAGTGGTGTGATACAC  
ACAGATAACTGTGTTGCCCTTTGTCGAATGGCATAGAGAAATTCACATATAGTAAAAATGCAAAAGAACTAATCGAGAT  
GCTTTACGTTAATAAACCATTACAGAAATA

>Cluster\_27471

ATGGCGCACGACGAAACAATGGCTCACCCACGCTGCAAAACGGCGGCAACGCTGTGTAACAGACGCCCGCGGACGGA  
ATCTCCGCTGTGGCTGGGGTGGATCTGGGCACCTGCGATGTGGTGTGATGGTTGTCGACCGCGACGGTCAGCCGGTGG  
CGGTATGCCTCGACTGGGCGGATGTGGTCCGCGACGGCATCGTCTGGGATTTCTTCGGTGGGTCACCATTTGTCGTCG  
CATCTCGACACCTTGGAGCAGCAATTCGGTCCGCTTTTAGCCATGCGGCGACCTCATTTCTTCTGGTACGGACCCGCG  
TATTTCCATCAACGTGCTGGAGTCTGCCGACTGGAAGTGAGCCATGTGCTGGATGAGCAACCGAGTTGGGATCTG  
TGCAACTGGACAACCGCGGTGTAGTGGATATCGGCGCGGACCTACCGGCAATGCCATCGTGAACAAAGGGCAAGTGACG  
TACTCGGCGGATGAGGCCACCGCGGACATCACATCTCTGACTCTCGCCGGAATCCCGCTATTTCCCTGGAAGAGGC  
AGAGCAGTACAAACGCGGTACGGTGACGAGATTTGGCCCGGTTGAAACCGGTGACGAAAAATGGCGGACATTTGTTG  
CCCGCATATTAAGGGGACGGGCAATTACGGATTTATGGCTGGCGGGCTTCCGTGATGCAACCGGGCTAGCGGCGCTG  
TTTTGCAAAACATTTCCGGCTTACAGGTGCATTTACCGCAGCACAGTTTGTATATGACCCCGCTGGCAATCGCCAGTAG  
TGGCGGAGAGAAACGGGAGGATCTATGCAAAAGTGA

>Cluster\_26679

ATGCAGCCAGTGATTAACCGCCGAAATGGCCACTGCCGAGAACAGCAGTGTGTTAATGGCAAAAACCTCCATGTGTT  
TATCTACAATAAACTGAGAGTATCAGCGGACTGCATCAGCAGACTATATGAATTTACTCTGGTATTAACCGGGCGTT  
ATTTCCAGGAGATTAACGGTAAGCGCGTGTACTGGAACGGGGCGATTTGTTTTTATTTCCGTTAGGTTTCGACCATCAA  
AGTTTTTATGAATTTGGTCCACGCGTATTTGAACGTTGGGATCAGTAAACGCTTTTTTGGAGCAGTATTAACCGCTT  
GTTGCCTTATTTGCTTTGTTAGCTTTCGACAGTATACCGAACCATAACGCTTTTCTCACCTATGTGGAACAGTATTTCTT  
CATTGAATTTCCGGAAACAGGGCTGGAAGAGTTGTTGATGATGGTACTTTTTATGTATTAACCGTTTACGTCATTAC  
CGGAAAGAACAGGTGATTTGATGATATACCGCAGTGGCTGAAAAGTACGGTAGAAAAATGCATGATAAAGAGCAGTTTCA  
TGAGTCCGGCTGGAGAAATATGGTACGTTGTCAGCAAAATCAGAGAAATTTGACCGGAGCAACTCAACGATATTAATG  
GTAAAACGCCAATGCAGATTTAATGAATCCGATTTAATTTGCAAAAAACAACCTGGAATGACCAACTATTTACGTTG  
ACGGATATTTGCGTTTGGAGCCGGTTATAGCAGCCGAGCTTGTATTATAAACGTTTAAAGAAATTAACGTCCTTTACGCC  
TAAGAGCTATCGTAAGAAATTAAGTGAATTTAATCAGTAA

>Cluster\_46779

TTGCGAGGCTCTTCCGATTTCTCATCCAGCCGTAGCCTGTTCCGGCATCGAATGTTACCTTATCGCCTGATCTTTAA  
GGGGTTATCGTGCTGTTCATTTGCTTATTGTGATGCACTGAATCTTATTCGTCGCAATTCATGCCGTTTCAGGGATCCG  
CCTGTGTCGAAACCTGCCAGCATGCGCTCGATCAGCTCATATGACAGCCAGCAACCCACGCGGTTCGCCGTTTTGAT  
GATGAAAACCGGATGAGCGGCTGCGCTCATACGCTTTACCAGATTACAAAGCGGGTTCGACCGCAATGCCGGAAGGAT  
GCACGACGAGATGCTTGCATTACGCGCCGCTTTGAGCAACGCGGCTCCCGTGTGGTCAACCGCGGCAACGAAGCCG  
ATGACTTAGCCGCAACGCTGGCGGTCAAAGTGACACAGCCGCGGATCAGGCAACGATTTGTTTTCGACAGATAAAGGCTAC  
TGTCAGTTACTTCCAGCATTACGTTATCTGATTTACTCCAGAAACGTTGGCTGGATGCGCCATTTATCGATAAAGA  
ATTTGGCGTTCAACCGCAGCAGTTGCCGATTTACTGGGACTTCCGGGATCAGCAGTTCAAAAGGATCCGCGGTTGCGG  
GAATCGGACCAAAAAGCGCCACGAGCTGCTGGTGGTTCAGAGTCTGGAAGGATATATGAGAATCTGGATGCGGTT  
GCCGAAAAGTGGCGCAAAAAATTAAGAAACCCATAAAGAGATGGCGTTTCTGTGCGCGATATTTGCCCGCTTACAAACCGA  
TTTGCATATCGACGGCAATTTACAGCAATTCGCGTTGGTACGGTAA

>Cluster\_57297

ATGAACATGCAAAATCACCAAAATTTCTCAACAATAATGTTGTGGTGGTTATTGATGATCAACAGCGGAAAAAGTGCAT



GGGGCGGGAATTGGCTTTCAAACACGGCTGGCGAAAGAATTAAGTCAAGTGAATAGAAAAAGAGTATGCCCTTGAGCA  
GTCATGAAGTGAACGGGGCATTAAAGCGAAGTCTTAAGTCAATATTCCTCTTGAGGTGATGGCAACCTGTGATCGTATTATC  
TCTTTAGCGCAGGAGCGCTTGGGAAAATACAGGACAGTATTTATATCTCGCTAACTGACCATTGCCAGTTTGGGATTAA  
ACGGTTTACGCAAAACCGTGTGCTGCCAACCCGTTGCTGTGGGATATCCAGCGGCTTTACCCGAAAGAGTTCCAGTCA  
GGCAATGTCGGGAAACGTTAACTTATTGATAAACCGTTGGCGTGCAGTTACCGAAAGATGAAGTGGGCTTTATGCCATGCAT  
CTGGTCAAGTGCACAAATGAGCGGAAATATGGAGGATGTTGAGGTGTCACGCAGTTAATGCGCGAAATGCTGCAATTAAT  
AAAATTTCAAGTTCAGCCTTAATTAACAGGAAGAAAGCTTGAGTTATACAGCGACTGGTTACACATCTGAAGTTTTATCCT  
GGCGTATTTCTGAACATGCTTCAATTAACGATAGTGTGAATCATTACAACAAGCAGTAAAACAAAATTAACCCGCAAGCA  
TGGCAATGTCGGGAAACGGATCGCCATTTTATTGGTTGCGAGTATCAACGTAAAATTTACCCGCGAGAGATTATGTTTTT  
AGCCATAAATATAGAGCGGTGCGCAAAGAACACTGA

>Cluster\_48560

ATGTTTCATGCGCCTGTTTTCTTCTGCTCATTTGGCAGCTTTCGCAACCTGTTCTCATTTGCGGACACCTTTTCCAGCCTCGT  
TTGGAAGTTTCAATGCGCAGACGGGACTCCTGCAATCGTCAAGGGATTGAAACCTATAGAAAGACATTGCTGATGAAGTGC  
GCGGGGCGGACTATCTGGTATGGCGCAATGGGAGGGGAGCAGTCCGGTTGCTCGGTGAGAACAACTGATGTTGCTC  
GAATATGCGGGGAGCGAATGCTCTCTCACATCGTTGCCGAGCAGGCGACTACCAGGCGACCAGAAATGCGAGCGGAAT  
AATGGCGAAGTGTATGCGCATCTGAGGAACCCCTGCTTCTGCCCTTCTCCCGATCCGGGATCGCTTTGACGCTTTGT  
TTCAGCGGCGCGGATGATCAAAACCGCAGGTTGTCAAACACTGACTACGTCACGCGGCGGATTATAGCCGATCAATGATG  
AGCAATGCCTCGGAAGTGCCTGGCTACATGGCGATCTGCATCATGAAAACATCATGTTCTCCAGTCCGCGCTGGCTGGT  
GATAGATCCCGTCCGCTCGGTGAGTGGGCTTTGGCGCCGCAATATGTTCTACGATCCGGCTGACAGAGACGACC  
TTTGTCTGATCTAGACGATTGACAGATGGCGGACGATTTCTCTGTCGCTGGAGTGCATCCGCTCGCTGCTGCTGCT  
GACAGGCGTACGCTTATGGGTGCTTTTCCGACGCTTGGAAACGGGATGGAGAAGAGGAGCAACGCGATCTAGTATCGC  
GGCCGATCAAGCAGTGGCAGACGACGTCATACTAG

>Cluster\_43623

ATGAATAAATCGCTCATCATTTTTTCGGCATCGTCAACATAACCTCGGACAGTTTCTCCGATGGAGGCGGTTATCTGGCGCC  
AGACGCGAGCATTGCGCAGGCGGTAAGCTGATGGCGAGGGGCGAGATGTGATCGACCTCGGTCCGGCATCCAGCAACC  
CCGACGCGCGCCTGTTTTCTGTCGACACAGAAATCGAGCGTATCGCGCGGTGCTGGACGCGCTCAAGGCAGATGGCATT  
CCCGTCTCGCTCGACAGTTATCAACCCGCGACGCAAGCCTATGCTTGTGCGGTGGTGGCTATCTCAATGATTTCCG  
CGTTTTTCCAGACGCTGCGTTCTATCCGCAATTTGGCGAAATCATCTGCCAAACCTGCTGTTATGCAATTCGGTGAAGACG  
GGCAGGACAGATCGGCGGAGGACCCCGTGGCGACATCATGGATCACATTGCGCGGTTCTTTGACGCGCGCATCGGGCG  
CTGACGGTGGCGGATCAAAACGCAACCCGCTTGTCTTGTATCCGCGCATGGGTTTTTCTGGGGGCTGCTCCCGAAAC  
CTCGCTCTCGGTGCTGGCGGGTTCGATGAATTTGGCGTGGCCTTCGATTTGGCGGCTTCTGTCTGTTTCCGCGCAAT  
CCTTTCTGCGCGCCTCACAGGCGTGGTCCGGGGATGTCGGGGCGGACACTCGCTGCAGAGCTTCCCGCGCCGCA  
GGTGGAGTGAATTCATCCGCACACAGAGCCGCGCCCTTGGCGGACGGGCTGGCGGATTGGCGGCGCTAAAAGAAAC  
CGCAAGAATTCGTTAA

>Cluster\_21221

ATGATCGGTGCGACTGCTTCGCGGCGTTTTATGACCGTATCTACGCGTACCTGTATATCCCAATCATATTTTGGATTGT  
GAACCTCTTAAACAGCTCGCGCTTTGGCATCAACTGGCAGGTTTTACCACCAAATGGTATAGCTGCTGATGAACAACG  
ACAGCCTGTTACAGCGAGCGCAGCATTCATAACAATGGCGGTTTTTTCGCGGACGTTTGTACGCTTATCGGTTACAG  
ACGGCAGTTGCGCTTACCGTTATCGCTTTCGTTGTAAGCCCTGCTTAGCGGAATGCTGTTTTGTGGTATGATGATGATC  
AGATATCGTGAATGGCGAATTTTCGCTGCTGGTGTCTGCTGCTGGGTATTCAGCTTGGCTTCTGGTCTGCTGCTGTTCT  
CGCATATCACTTCTGCTGCGCATTTGTGGTGGTGGACAGTGTATTCGCGCTGAAAGGTTTTGACGTGCGAATGCTGGAA  
CGGGCGAAAGATCTCGGTGCCAGCGAATTTACCATTCTGCGAAAAATCATTTGCTTCCCTGCGCAATGCCAGCGGTAGCGCG  
GGGCTGGGTGTTAAGCTTTTACCCTGTGATGGACGACGTTGGTGTCTTCTGTTGTCACCGGGCGGATTTAAGAAATC  
TGCCGTTAAAAATTTATTCGATGGTCAAAGTCCGGCTATCGCCGGAAGTTAACGCGCTGGCAACCATATTTACTGGTGTG  
TCCGTTGGTATGGTTATTTGCCAGCAGCTTATTTGCTGCTGATAAAACGAAAGTTAACACAGGGGACGTTAAATGA

>Cluster\_20167

TTGAAAAAAGTGAACACTGCATGGCTTTAATAATCTGACAAAAGTCTGAGTTTTTGTATTTACGATATCTGCTACGCCAA  
AACTACCGAAGAGCGCGAGGTTATATTTGCTTATATCGATGAAGTCTATAATGCCAACCGTCTGACCGAAATCCTGTGAG  
AAACCTGTTCCATATATCGGGGCCAATATTTTAAACATCGCCCGCAGGATTACAGGCCACAAGGTGCCAGCGTCACTATT  
CTGGTGAAGTGAAGAACCGGTCGACCCGAAACTTATCGACAAAACGAAACACCCCGGCCACTGCCAGAAAACCGTCTGTTGC  
CCATCTCGATAAAAGTCAATTTTTCGCTACATACCTACCGGAAAGTCACTCTGAAGGCGGTTTTATGTACTTTCCGCGCGC  
ATATTTGAAGTCTCTACTGCGGCGTGTATTTCTCCGCTGAAGGCGCTGAATTTACCTGATCCACCAGCTTGAAGTCCGATAT  
GTGACTATTTGATTTATGCTGCGCGGTTTTACCAGCGACATTAACGGTATGAAGCACTTTATCGACCATGAGATTAATTC  
GATTCAGAACTTTATGCTGACGATATGAAGGCGCTGTATGACATGGTGGATGTAAGCTCTATCAGGAGAATATCTTCC  
ATACCAAGATTTTCTTAAAGAGTTTCGATCTTAAAGCACTACATGTTTCCACACCAAGGAAAGATTTAACCCGACGCGAG  
CGCCAGAAATTAACCGTGGCTGTGAAAGAAATGCGCGAGATTTATACGGGCGCAATATGCCCGTGTTTAA

>Cluster\_8198

ATGCTTTATCAGTATGTTAACGTTGTCACTATCAACAAAGTGGCGGCTATTGAGTTTAACTATGGCCGAAACCTAATGC  
CTTAAAGTAAAGTCTTTATTTGATGATCTTATGACGCGTTAAGCGATCTCAACCGCGCGAAATTCGCTGTATCATTTTTGC  
GCGACCGAGTGGATCCAAAGTCTTCTCCGAGGTCACGATATTCACGAACTGCGGCTGGCGGTCGCGATCCGCTCTCC  
TATGATGATCCATTGCGTCAAATCACCCGATGATCAAAAATTTCCGAAACCGATCATTTGATGGTGGAGGTTAGTGT  
TTGGGTTGGCGCATTTGAAATGATCATGAGTTCCGATCTGATCATCGCCGCGAGTACCCTCAACCTTCTCAATGACGCGCTG  
TAAACCTCGGCGTCCCGTATAACCTGGTCCGCAATTCACAACTGACCCGCGACGCGGGCTTCCACATTTGCAAGAGCTG  
ATTTTTACCGCTTCGCAATCACCGCCAGCGCGCTGGCTGTCGGCATCTCAACCATGTTGTTGGAAGTGGAAAGAACT  
GGAAGATTTACCTTACAAATGGCGCACACCATCTCTGAGAAAGCGCGGTTAGCCATTGCCGTTATCAAAGAAGAGCTGC  
GCTTACTGGCGAAGCACACACCATGAACTCCGATGAAATTTGAACGATTTCAAGGATGCGCCGCGGTTGATGACAGC  
GAAGATTACCAGGAAGGATGAACGCTTTCTCGAAAAACGTAACCTAATTTCTGTTGGTCAATTA

>Cluster\_54351

ATGAGCAGTAACTTCAACATCAACTATTGAGTCTGCTGTTACTGGTTGGTATAGCGGCCCCGTTGGCGGCTTTTGTCTCA  
GGCACAATCAGTATGCTGCGCTCAGGCTCGGTCGAAGACCGGCTCACTCAACTGAGCGTATTTCTAATGCTCACAGCC  
AGCTTTTAAACCAACTCCAGCAACAACCTTTCTGATAATCAATCCGATATTTGATTCCTGCGTGGTCCAGATTCAGGAAAT  
CAGTATCAACTGAATCAGTCTGAGGCGGCAAAAGCAGATCTGTTGAGATCGACAGCCTCAGCAGCGGTTGTCAGC  
GGCGCAATCAACAGCAGCGATCAAAGCGGTGCGGCGGATCAACGACCGCAGCTGATGCTGGTACTGCGAATGCTG  
GCGCGCGGTGAAAAGCGGCGATGCAAAACCGGATTAACATGACGCTATTGCGCTGGTGCAGGATAAATCCCGCGGAT  
GACGCAATGGTGGCATTTCAGAAATTTCAATAAAAATTTACCCTGATTTCAACTTACTGCGCAACGCCAATTTATGGCTGGG  
TCAGTTAACTACAACAAGGGTAAAAGATGATGCGCGCTACTATTTTGGCTTGGTGGTGAAGAACTTCCGAAAGTCA  
CAAAGCTGCTGATGCTGTTTAAAGTCCGCTCATCTGACGCAAAAGGATGACACCGCAAAAGCGAAAGCGGATATAC  
CAGCAGGTTATCAGTAAATACCTGGTACTGATGGCGTAAACAGGCAAAAAACGCTGAAACCGGATGTA

>Cluster\_20768

ATGTCGCATTTAAAACTGACTGGCTGTGTGTTGCTACCGAAGGGGATACCGTTGACGGCAGAGAGATTAACCGCCAGTG  
GATTATCGATATGGGGAAACCTATGACTATAAACCACTATGTCGCTTTGATCTGGCCTGAACACGAGAATGATTGCGGTA  
ATTTTGGGGAGTGCTGGAGGCCACCTGGCATGATGGCGATGACGGACTGGCGCGGCTTACGTCAGCCTTTGCCCGAAT  
ATCGGTTAATTTTCGCCAACCAATGAAGATCAGCTCCTGTTCCTCGATTGAACCGGATGAGAACTGGCGCGGTAGTGG  
GCGTACATCCTCAAGGGCTGGCGGTAAACAGATACTCCGCCAGTGTGGCACACACGGCTGGCTTTAGTAGTCGGC  
GCAAAAAATATCTAAGCAGGGATATTACAGTTGTGTGATTTCCCGTGACGGAAAAATAAACAGGACATACGCATGAAG  
AATGGCAAAAAATGTTTGGTATTAAACCGAAGTTGAAGATGAAACCGCGCTGATGATACCGCGCAGGGTGTATGATA  
GTTACAGGCGCTGGCCAACCGGGTAAATGAACTGGAAGGGCGTGTGGCAAAAAATGAAAAATCAGCTCAATGATGTTTCAGG  
GTGATGTGGATACCATTGGCGAAGTGGTGCATACCGAAGAAATTTGCGGCTATTTCGTGATAATGCAAAAGATATCGTTCAA  
CGTTTAAACGATCTGGGTAATAAATCCACCCGTACACCGGGCGTAAGATTTAGAAAAAGCGGGTAAGTTAATTTCTCT  
GTAA

>Cluster\_6584

ATGGAACGCTACGAATCTCTGTTTGCCAGTTGAAGGAGCGCAAAAGAAGGCGCATTCGTTCCTTTCGTACCGTCGGTGA  
TCCGGGCAATTGAGCAGTCATTGAAAATATCGATACGCTAATTGAAGCCGGTGTGACGCGCTGGAGTTAGGTATCCCT  
TCTCCGACCCTGGCGGATGGCCCGACGATTCAAAACGCCACTCTGCGCGCTTTCGGCAGGTGTGACTCCGGCACAA  
TGTTTTGAAATCTGGCAGTATTTCGCCAGAAACACCCGACCAATCCCATTTGGCCTGTGTATGTCGAATCTGGTGT  
TAACAAAGCATTGATGAGTTTTATGCCAGTGCAGAAAAAGTCCGCGCTGATTTCGTTGCTGGTTGCGCATGTCGCA  
AAGAGTCCGCGCCCTTCCGCCAGGCGCGTGTGCGTCATAATGTGCGACCTATCTTCATCTGCCCGCAAAATGCCGATGAC  
GACCTGCTGCGCCAGATAGCCTCTTACGGTCTGGTTACACCTATTTGCTGTCACGAGCAGGCGTACCGCGCGAGAAAA  
CCGCGCGCGTTACCCCTCAATCATCTGGTTGCGAAGTGAAGAGTACAACGCTGCACCTCCATTGCAGGGATTGGTA  
TTTTCCGCGCGGATCAGGTAAAAGCAGCGATTGATGTCAGGAGCTGCGGGCGCATTTCTGGTTGCGCCATTGTTAAATC  
ATCGAGCAACATATTAATGAGCCAGAGAAAATGCTGGCGGCATGAAAGTTTTTGTACACCGATGAAAGCGGCGACGG  
CAGTTAA

>Cluster\_22249

ATGAAACGAATTAACGCTCTGACGATTGCCGGTACTGATCCGAGTGGTGGTGCGGGGATTGAGCCGATCTTAAAACTT  
CTCGGCCTTGGCGCTTATGGTTGCTCAGTTATTAAGTGCAGTGGTGGCGCAAAATACCCGTGGCGTACAGTCGGTGTATC  
GCATTGAGCCTGATTTTGTGCCGCCAGCTCGGATTCGGTGTTCAGCGATGTGCGAATCGACACCCTAAAATCGGTATG  
TTGGCGGAAACCGATTTGTTGAAGCGGTGGCAGAACGGTTGCACGTTATCAGATCCAAAACGTGGTACTGCACACCT  
TATGCTGGCAAAAAGCGGCGACCCGCTGCTTTCACCTTCGGCAGTTGCCACGCTACGCGAGTCGATTATTGCCACAGGTT  
CATTAATAACACCAAACTTGCAGGAGCAGCGCTTGTCTGACGCGCCACACGCGCGCACCGAACAGGAAATGCTGGAA  
CAAGGGCGATCGCTGTTGGCGATGGGCTGTGGCGCAGTGTAAAGAAAGTGGTCAATCGGATGATGAGCAAAAGCCGGGA  
CTGGCTGTTTACCCGCGAGGGTGAACAACCGTTTACCGCACCGCGCATTATGACCAAAAAACATCACGGCACTGGTTGTA  
CGCTCTCTGCGCGTGGTGCAGTGCAGCCCGCCATACAACTGGACTGACACCGTACAGGAGGCAAAAAGCTGGCTT  
TCATCGGCATTAGCCAGCCGACACGCTGGAAGTTGGTACGGTATTGGTCCGGTTCACCCTTCCACGCTGGTGGT  
A

>Cluster\_51158

ATGAAAAAATTAAGTTGTTTTTTGGGATCAGACCTTTAGGTTATGAAACAATTAGAATTTTAGAATCAATCACGTG  
TGTTGAGATTGTCGGGTGTGTAACAAAAGCTCCAGTTTGAATGCTTGGTGGATAAAAGATCCCTATGAATACAGCATGA  
AGTATAAACAATTAAGTTTAGCCGATCTGAATCAATTTGATTTGATTTTGGTGTTCATAAACTATTGGAATATTAT  
CCTGACAATATAATAAAAAAACCATTATGGGATTTGTTAACCCTTACATCATTCAATTTAATTTATGTTATAGAGGGAGGA  
TATGACAAATATGCTATACGAGATGCGAGGAAAATGAACAGATGGTTCATGGAACCTGCTTCACTATACAAATGATG  
GATGATGACTGGTCCAATAATAGCTCTTTAGCATGCGAAAATTAGTGAAGTTAGATACAGCTTGGACTTTATTTAATAAA  
GTTGAGATATTAGTTATACGTTATTACAGAATGGCTACCACACTTGTGTTTACAAGAATACCGTTAGTATGCTCTGA  
AGCAGGTCACTCCGTTAAGTTTTCAGAAGGATATATCAAAAAGAGATTGATATCAAAAAGGAAATAAACCTGATTTATACG  
ATCTTGTTCGTTTATGATTTTAAATAATCATTATGAGCCATCTTTTATATAAAAAATGGGGAAAAATATATCTAAACA  
ACAAATAGTCAATTCGGAGGTGATGTAATATTGATGCAGGTAATGATCGAAAGGTATACGAAAAATTTTATATTCGTG  
CTGA

>Cluster\_9983

ATGCGAGAAAATAGTCTTTCGCTTCAGCTACAAAACGTAAGGATATCTGGCGGGTGTGCGAAGATTCTTAATAACATCAA  
TTTTTCGCTGCGTGTGGCGAATTTAAGTTAATTACCGGCTCTCCGGTTGTGGCAAAAGTACGCTGTAAAAATAGTTG  
CTTCAATGATCAGCCCAACCGAGCGAACCTTACGTTTGAAGGTGAGGATGTCAGCACACTAAAGCATAACGATCTACCC  
CAGCAAGTCTCTTACTGCGCCAGACGCGGACGCTGTTTGGCGATACGGTATACGATAATCTGATCTTTCCCTGGCAGAT  
CCGTAACAGCAGCTGACCCGGCCATTTTCTCGATTTTCTCGAACGCTTTCGCTTTCGGCGACAGCATTTTTCAGAAAA  
ATATCGCCGAGCTATCTGGTGGTGA AAAACAACGCATCTCACTGATTCGTAACCTGCAATTTATGCGCAAGGTTTATG  
CTGGATGAAATCACCAGTCCGCTGGATGAAAGTAAATAACATAACGTTAATGAGATGATCCATCGTTATGTCGCGGAGCA  
AAATATTGCGGTGCTGTGGGTGACACAGATAAAGACGAAATTAATCATGCGGATAAAGTATACACTGCAACCGCATG  
CCGGAGAAATGCGAAGCAGCTATGAACTCGCATAA

>Cluster\_64431

GTGGCCGATTTACGTAGTAAACGCGCAGATGTTTCGATATCGATGTTTTCGGCGCTGGAGCAACTCAGAGTCGAAATAGCGC  
GACGCAACATCAGATGCTGATGGCATACAACAGGGCGCTGAACCGAATGCAAAAGCATATGCACCGGGTCTCGGTGGGAA  
TGATCATTGAATCGTGGCGGTTAAAGGGCGTAAGGCCGAGAAAAACCGTAAAACCGTTTCGTTAAAATCCGGAACATA  
TCAAAAGAAACTGCAGGAGACCTGAGCAGCGCCAAAGCTGTGGTACGGTCTGAATGATTTCCGGGTATCTGAGCTAAAGGG  
GCGATTACAAAATCCACGGAGGCAAAAACAGCCTCGCGATCTGAGACCGGTCATTTTGA AAAACAAAAAAGGCGCTC  
GAGGGCAACTTTTACACCCAAAAGTGCAGGGCTGGCGATGCTGAGCTGGCCGATTCATTCGTAGCGAAACGCTACGGT  
GCGAAAAGTGTCTGGATTTCGACTGGCTCGCGGAGGAATCGAAGAGGCTCGCGTACCGGTGACGAAAGCGCTGGAGGATG  
TATCGATGATTTATTTTTGAAAAATATTGGCACCGTGTTCATGGGTTTTTTTGAACAGGATTTTCGTTGGTTCGGTGAAG  
GTAATGTCCAGTACGCTTAAACAGGTAACGATTATGA

>Cluster\_20182

ATGCAAACTCTCAGATTAATTTTATACCGATACCGACTTTAACCCGACAACGAAACCAACGGGTAACATATCCAGAAC  
AGATAGCTATCTCTACTCATTTCAAGGATATGGTGTGGCATTGGTATCAATGAACACAGCTATTTTCTTAAAATCGACT  
TTGACCTGACAGATATCATATTAACAACCCCTACCTGTTTTTACGCGCGCTTAGTGGCCATCGGTAATGGTTCAACG  
GTTAAAATGGGTGATATAGCCCTGCACAAATAAAAAATGGCGCAACAGCGGTTCCCTTTTGTATATCACGCTACAAAATG  
TATTCGTTTCGCAATATAGAAAACAACTCATGTCAAACAAGTGGTGGTGTAGTGAAGCAAAAGAACTTCGCTTACACAC  
TCACAGGAAATAATGCAGCAAAAAGGTTGGTGTACTGATTTGAAGTTTAAAAAATACTAAAAGTGCACAAAATGGTACTG  
AAACCAATGATTCACGCTGTTTTATAAGATTACGAAACAGAGATGACACTACCGGAGGAATTTACCCGGATAAAGG  
AAACGGTACTTCAACCTCTTTCATTTCCAGGCTACATTA AAAACAAGCAGGTAATATTGCTATAGAACCGGGGATTTTA  
AAGCCACAGCACTTTTACGTTACCTACCCCTGA

>Cluster\_54466

ATGAAAATTAATAATGTAGCGTTACCAATATCTCTGCTGTAATCCTAACTGGTTGCGTGCCACATGCTTCTAACCGAAA

TATCACTGCTATTGAAGTGGTGAAGCCTGCTATTGGGCAAAGTGTACCGCCTACATGGGCGATCCCATTATCACATCTG  
CTACTGGATTTAAACCGGACGTACTAGAACTTGGTGCGCTAAAGGTGCATTGCTTCTATCGCTGCTGGTACATATTGC  
AGTGAGGGGAATGGAATTTACCGCAATTTATCATAACCCCAAGCTGTTGCGTTAAAAAATCTCTATGGGCAAAATCGGTAA  
CTATGTTGATTTATGTTAGTTACGATGCTGCAAAAAATGAGATAACACCGCCAAATGGTACTTCTTATACTGCATCAGAAA  
TTTTCTATCAAACGFTTCCCTGATGGCTGTGCGAGTTAGTAACTCATTTGGTTAAGACTATCGAATACAAATGGAATGCA  
GGCGGTGTAATGAAGTTCACCTATCGTGAATTTGCAAAAGATATGGCTCGTGCAGCATTTACAACAGATTTTTCTGTAGA  
TTCTAAGGGAAGTACGTTATCGCTTACAAGGTGCCAAGTTCAAAGTGAACAAGGCTGATAACTCGTCTATTTCTTTATA  
CAATTATTTCTGGCTTTGACAAGGCTGTACGTTCTAG

>Cluster\_48622

ATGAAGACTCCGAGAGGCATTTCGTAATAATAACCCCGTAATCTTGATAAAGGATCACCGTGGCAAGGCTGATTGCGAA  
TCCAGACGAAACCGCGCTTTTGCACGTTTAAAGACCCGTTTGGGGGATTCGTGCGCTGGCGGTGACTCTAATTACCTACC  
ACGACAACCGTCGCGCAAAAAGACGGCTCAAGTATCGATAACCATTCGTGAAGTTATTGAACGTTGGGCACCGCCGAATGAA  
AACACACTGACGCTACATTAATGAGGTGCTTAAAGCCTTGGTGTAAACCGCAGACATGATCATCGATCTGCATGATTA  
CGACATTTCTCGACCTTTGGTTGAGGCAATCATTCGCCATGAGAATGGGCGAGGTCGGTAAAAACGCTGAACACCTGGT  
ATGCGGCAGAAGTTATTGAGGAAGGTCTGCGTGCAGCTGGCGTGTAAAGCCGTTGAAAACCGTGAAGGCTGTTCCTGTA  
ACTAAAGAAACTGCAGGCGCAACTGTTACAGCAGGTTATGGTCTGGCGCAGCTGGCCGATGTTATGCCGAGGTTCCGC  
TGCTATGGATAAGGCACAAGGTATATCTCTAGCGGGGATACAGTACGCATCATCTTCGCGCATGCCACTATTGTTGTGG  
CCGGATTCATTGCTTGGTGCAGGTAAGAAGACACCAGAAAGGATGGTCTAA

>Cluster\_23160

ATGCAGTCAATAAATACCTCCATTAATTGCCGTTATTGGTAGCGATGGTTACAGGCAAGTCAACGGTGTGTGAACATCTTAT  
TACCGTTTGCAGAAAATATGGTGTGCCGAAAGGGTTCATTTAGGAAAACAGGCCGAAATGTCGGTCTGTCAGTGACAA  
AATTACCGTTGATGGGAAAATCCTTACATAAAACAATTGAACGAAATCAGGTGAAAACAGCAAAAAATGCTCGGACCA  
GTTCCGGCGCTGGTAATTACAGCGTTTGTGCGCCGCGCTTACTGCGCTTTCGTCATATGCTTGCCTGTCGTCTGCGCG  
GTTAATTGTTTAAACCGCGTTATCCGAGGAACGATTCCTGGCGCTTATGATGGTACGGTGTTCGCCCTAACGTTG  
AAGGTGGTCTGTTTGTCTCATGGCTGGCAAGTCAAGAACGTAAGCATTTCTGATGGTGGCGAGCCATAAGCCCGATCTG  
GTCATCAAACCTCAATGTCGATCTGGACGTAGCCGCGCGTAAAGCCTGACCACAAAAGAGAATCGCTGGAAAGGAAGAT  
AGCAATAACGCCACAGTTAACCTTTGGAGGCGCAACTGGTTGATATCGATGCCAATCAACCGCTGGAAACAGTGTGG  
TTGATGCGGAAAAGCGATAATGATTTTATGACCGCGCGTGGTTATCACTAG

>Cluster\_29200

ATGATTAACGTACAAAACGTCAGTAAAACCTTTATCCTGCACCAGCAAAACCGCGTGCCTGCTGTATTACAGGCGC  
CTCACTCACCGTCAACGCCGCGGAATGCGTGGTACTCCAGGCCATTCGGCAGTGGAATAAATCACTTTGCTACGCTCGC  
TGATGCGCAACTATCTACCAGCAAGGCAAAATCCAGATCAAACACCGTGTGATGAATGGTTCGACCTGTCACCGCCCA  
GCACGCAAAAGTGGTGGAGATCCGCAAAACCACTGTCGGCTGGGTAAGCCAGTTTCTGCGCGTCACTCCCGCTATTTCGGC  
ACTGGAAGTGGTGTATGACCGCGTCTCGATACCGCGTACCGCGTGAAGCCTGTGCCCTAAAGCCGCGCTGCTGCTCA  
CGCGCTGAACGTTGCCGGAACGTTGTGGCACCCTGGCACCCTGACCTTCTCCGGCGGCAACAACAGCGTGTCAACATC  
GCCCGCGCTTTTATCGTCCAGTACCCATTTCTGCTGCTGCAGCAACCTTCCGCTCGTGGACGCTAAAAACAGCCGCGC  
CGTAGTGAAGTGTATCCGCAAAAGCCAAAGCCGCGCGGCCATCGTGGTATCTTCCATGACGAAACCGTACGCGGAGC  
AAGTCCGCGCAGCCCTGCACCAATGGGAGTCTCTTCACTAG

>Cluster\_35009

ATGAAATTAACCTGTAAAGTTATTAATGAGCCTTATATCTCTGGTCCGCTTATGACAGTCCGCGGGAATATAAAAAATTA  
CAGCCGGGATGAAATAAAATACTGGCGATATACATCATAAAGGGGGGAAACTTCCGGAAGGTTTCACTGATGAGAAAT  
TTTCCAGCGCCATTTACAACGGAAGAATATTTACAATGAACGTTTACATACCCTTATGTTATTTCTGGCGGTTCTGTTC  
ACGGGCTTTAACTTTAACCGCAGAAGCGGCTACCGTAAACCAACGCTTTAGTTGTAACCGGAAGCCTGGGCTGAACAAC  
TGGAGCGTGTCCATCAACGTACGAGTTGTACGAAGGTGACGCTACCTACAAGCCGCTATCGACAAAGCATTAACACCGG  
TCCGATTTGAGCGGATGTTCCGTTAAAGCGGCTATATGATGGCCCTGTTGGAGGTATCACGCCAGTAAACATTAACGTT  
ACAGTCTGGTTCCAGGGCGACGGTTGCAAAAGCAATACCTGCGGCTGGGACTTTATCGTAACACTCTATAACCCAAAAAC  
CCATGAAGTTGTTGGCTACCGTTACTTTGGTTTAGATGACAGCCTACCTGGTTTGGTTCGTTGAAATGGCGTGCATG  
AATTCCGCTATCTGGTGAATAACTACGTAGCTGCGGTTAACTAA

>Cluster\_67138

ATGAGAACAAT7138TTACGTAGATGGGTTCAATTTTTACCATGGATTGGTCAAACGTTCCGGGATAAAGTGGCTGGACCT  
TTATAAGCTCTTTTGAAGAACAACCTACTTCCGATTAAGAGCAAGAGAGTCAACAGTTGATTGAGGTGAAGTTCTTTACTGCTG  
AGATCAAAGCTAAATTTGCTACTCGAGGTGAGTTAGCTCACCAGGCTCAGCAAGCTTACCATCGAGCATTTACTGCAGATT  
TATGGCGAGAAGCTACAATAAATCAAAGGTTACTACTCAGAAGCTCAGGAATGTGCGATGACCTTCAATGAGGGGTATCC  
TCCATCGAAAACGGATAGAACAACCGCTGGAAGTTAGAAGAAAAGCAGACTGACGTTAGAATGGCTTTAGAAATGTATC  
CGATGCGATTCGTTGAGGCGAGGCTGGTTCTCTGTACTAACGATTCCGATATGATACCCCAATAGAAATGATA  
AAAGCCGATCGACCTGAATGAAAATTTGAATTTGATGTTGCAAGGAGCAAGATACTAGTCTGAGTGTATGATGCTGGC  
TAGTTTAGGGGATTTGGAGCTGCATATGATCTACGAAAGCTTTGAGATTAGCGCTATTGCCAGATAAGGTTCCCACTA  
GGCGGAAACAATACTGAAGCCTAATCACTGGTAA

>Cluster\_29035

ATGGAACGTATCTGGACACCGCTAACGTCGCAGAAGTGAACGCTTGGCAGCGATATCCCGATTGCCGGGGTGACAAC  
TAACCCGAGCATTTATCGCGGCCAGCAAGGAGTCCATCTGGGAAGTGTGCCGCGTTTGCAAAAAGCGATTGGTGTAGG  
GTATTTGTTGCTCAGACCATGAGTCTGACGCGCAGGTTAGTGGGAAGAAGCGAAGCGCTGCGCGACGCCATTTCCG  
GGCATTGTTGGTGAATAATCCCGTAACTTCCGAAGGCTTGGCGCCATTTAAATGCTGAAAAAGAGGGTATTACTACACT  
TGGCACCGCTGTATATAGCGCCGACAAAGGTTATTAGCCGACTGGCAGGGGCAAAATACGTTGCTCGTATGTTAAC  
CGCTGACGCCCAGGGCGGTGACGGCATTCGTACGGTTTACGAGCTGCAAGCGCTGTTAGAAAATGCACGCACCAAGG  
ATGGTGTGGCGGCCAGCTTTAAACCGCGCTGAGGCTGGACTGTTACTGGCAGGATGTAATGCAATCACCCCTGCGC  
CTTAGATGTAGCGCAACAAATGCTCAACACCCCTGCGGTAGAGTACGCTATAGAGAAGTTCGAACACGACTGGAATGCC  
CATTTGGCACTACTCATCTCTAA

>Cluster\_9575

ATGCCTGGAAACGGGAAAATGAAACATGTCAGTTTACTGCTGCAGGTTGAGAACGACCTGAAACATCAGCTTAGTATTGG  
CGCATTAACACTGGCGCACGCTGATTACTAAAAATCTGGCGGAGCAATTAGGTATGAGTATTACACTGTGCGTGAAG  
CATTTATTACGTTCTGGTTTCCGTTGATGCGCTTTCTGTCCACCTGCACAAAGCATTTACAGTTCCGGAAGTGGGAAACCT  
CAATTAGACGAAATCAATCCGGATCCGCTACGAACTGGAATTAATGGCAGTTGCTTGGCTGTTGAAAACCTCACCCGCA  
AGACTTTGCGGAACCTCAGGAATTTGCTCGAATAATACAGCAGGCGCAAGAAAAGGGCGACATGGAACAAATCATTAATG  
TAAACAGGCTATTTGCTTAGCGATTTATCATCGCTCAATATGCCATCCTGTGTGAGATGATTGAGCAACTGTGGGTC  
AGGATGGGGCCTGGTTTACATTAATCTCTATGAAGCGATTAATCCAGCGGAATTAACGGGAGCATATAGAAAACCTATCATCT  
GTTACTCGCTGCGTTAAAAGCAAAAAGACAAAAGAGGATGCAGACATTTGCTTGGTGAATTTATGCAACAAAATATTGCTA  
TTTTATACAGCAATACAATCGTTAA

>Cluster\_38738

ATGGGGATGGAAAACACAATCCGCCGCGAGACCCTGGCTGGTTATCCTGTATCAGGATGACCATATTTATGGTGGTCAA  
CAAGCCGAGCGGTTTGTGTCTGTGCGGGTCTGTTGGAAGAGACAAAAGACAGTGTGATGACCGCATTCAGCGTGATT  
ATCCGCGAGGCAGAAATCGGTGCATCGTCTGGATATGGCTACCAGCGCGGTGATTGTAGTGGCGCTGACCAAGCCGCGGAG  
CGGGAGTTAAAACCCAGTTCCGCGAGCGTGAGCCGAAAAGCAGTATGTGGCCCGCGTCTGGGGGCAATCCATCCCTGC  
GGAAGGTCGGTGGTCTGCCGCTGATTTGCGACTGGCCAAACCGCCGAAACAGAAAGTCTGTATTACGAAACCGGGTAAAC  
CTGCGCAGACGGAGTATGAAGTGGTGGAGTATCGCGCGGATAACACGGCAAGAGTGGTGTAAAACCAATTACCGGGCGT  
TCGCATCAGCTGCGTGTGCATATGCTGGCGCTGGGTCAATCCGATTCTCGCGATCGTGTATGCATCACCAGAACGCGAG  
AGCAATGGCACCGGTTTGTGTGCTACATGCAGAGATGCTGACGATTACCCATCCGCGGTATGGCAATAGTATGACGTTTA  
AAGCACCGCGGATTTTTAA

>Cluster\_42613

ATGAAGAAACGTGTTTATCTTATTTGCGCGCGTAGTGAGTGGCGCTCTGGCGGTATCTGGCTGTACAACAAACCCTTACAC  
CGGCGAACCGGAAGCAGGTAAATCTGCTATCGGCGCAGGTCTGGGCTCTCTCGTTGGTGGGGTATTGGTGGCGCTCTCT  
CTTCGAAGAAAGATTCGCGTAAAGGCGCGCTCATTTGGCCGAGCAGCAGCGCGCAGCTCTGGGCGCGCGCTTGGTTATTAC  
ATGGATGTGCAGGAAGCGAAGCTGCGTGACAAAATGCGCGGCACTGGTGTAGCGTAACCCGAGCGGGGATAACATTAT  
CCTCAATATGCGGAACAATGTGACCTTCGACAGCAGCAGCGCAACCCCTGAAACCGCGCGGCGTAACACTCTGACCGGGC  
TGGCAATGGTACTGAAAGAGTATCCGAAAACGGCGTTAACGTTGTTTATACCGACAGCAGCGGGGGTACAGACCTG  
AACATGCGCTCTCTCCAGCAACGTGCGGATTCGTTGCCAGCGGTTGATCACCAGCGCGTGGACCGCAACCGCGCTCCG  
TACTCAGGCGCTTGGCCCGGCTAACCAATCGCCAGCAACAGCACCTCAGAAGTAAGCGCAAAAACCGCGGTATAGAAA  
TTACCTTAAGCCACTGTAA

>Cluster\_10979

ATGGAATTTTCCGTTATTTTTTTCTGGGTATCACTGGTCTTATACCATCTTATCTTAAAAACAATAAACCAGTCT  
AATAAAAAACCTAAACAAAACAGACATAGCGTTATATATATTGGCATTTTTATCAGCCGGATATACATTCAGTATATTT  
ACAATGACAAATATATTTTCAAGACTATGGGGAGTTGGCCGTGTTTGTACTCTGATAGTACTGAATATAGTATTTAATCTC  
TTTTTTAGACTCTTATTTCTCTCAGAAAATGATATTAATGTACGACATATAAGAAAGATGCAAAAACCAACAAAACA  
GACGCTCTGCGCTGATTTTTATTTATTTCAATAGAAAAACACAACAATATCCCATATATGTATTACACATGCCATCAA  
ACAATATAATGAAATAGGCTACAAATATAATAAACACCGGATCTGGTCAATGGCGAAAAATTCATTTACAGGACTAAGC  
AATCGTCTTTATATTTTAACTCACCAACCCCATTAATCGCCACAATAAAAGATGATGTGTTTTGCACTCTTCATGA  
TTACTATAACCAACAATAATGAAACGAAAATCCACTATTGACAATACATATCAAAAATAAAGGATAATCATAATACCCCAT  
GGTTATTAACAACGAAAATGTTTCAGGAATAA

>Cluster\_10972

ATGCCGACTCCGGAACCGTCTGCGGCTGATGCAGCTTGGCAGTAACAGCCTCCCTGTTGGAGGCTACAGCTGGTCCCA  
GGACTGGAGTGGGCGAGTGAAGCAGGCTGGGTAGAAGATAGCGCCGCTTTGAACACTGGCAGCAGTTCAGATGGAAC  
AGAGTTTTTTTCCGCTCGACCTGCCACTGCTTGCCCGGTATACCGGGCTGTGAAGCGGGGATCCTGACAGTGCAGGG  
CGCTGGACCGCTTATCTGCTGGCCTGCAGGGAACCCGTTGAGCTACCGGATGAAGAACGTAACCGCGTGCAGCCTTAC  
CAGACTCTGGTGCAGTGGCAGCCGACTGCCCGGCGAATGGCGCAACTATGCCAGCAAAGCCAGTTAACCGGTATGG  
CATGGCTCGCGTACGCTGGCAAAATTCGTTTTAGACTTGGCCCTGAGCCTTGGCTACAGCTGGATTGAAAGCGCAGTG  
ATGGCGGGGCTCAGGCTGGTACCCTACGGCCAGCTGGCTGCCAGCAGTAAATATGCGCCTGTGTGCCCGCTATGCGGC  
GAACATGGACAGTCCCTTGAACCCCGGATCAGCAATGGTTCAGCAACGCCACTTGCATCTATCGCTTCCGCGCGAC  
ATGAAACCCAGTATTCGGATTATTCGTTCTTAG

>Cluster\_26422

ATGCGTACCACATCATTTGCGAAAGTTGCAGCTTTATGCGGCTTGTGGCTCTGTCTGGTTGTGCCTTAAAAACACCA  
GCCAGATAAATATCTGGTTTTTTTAAACAACTACTCTGATTTAAAGAAACAAACCTCGGCAACAGGTAACACTGTTTTAC  
GTTGGGTAGACCCGAGTTTTGATCAAAAGAAATAGCAGTACTCTGGAACCAATCACTTATATCCGGTACCGAAA  
CCTTCTACCCAGGTAGGGCAGAAAGTTCTGGATAAAATTTGAACTATACCAACCGGAAATGAAAGAAGCGATAGCGCA  
GCGTAAACCACTGGTTACCACCGCTGGGCGCTTAGTCTGATTTTCCGTTGGGGTATTTACCGGTGATAGTACAGTAAAG  
AAGGGCTGCAATTTATGAAGTGGTCTCTGTTGCATTAGTGGTAGCGGGGACGCAAAATGGCTACAGGCCACCGTACCATG  
GATACTCGCTTGTATTTTTGAAGGTGAGCTGATTGATGACAGCCTAATAAACCGGTTATCAAGGTCTGCTCAGGGCGA  
AGGTAAAGACCTGAATAACGAAAGTACGCCAATGGCTTTCGAAAATATTAACAAGTTATGTATGACATGGCGACCGATG  
CCACCATGTTGACGTTAACAAAAGTAG

>Cluster\_28634

GTGAAAAACAATGCACAGCTGTTGATGCGCGCGAAAAAATGCTGAAGTTTGGTATTAGCGCCTAACGGATGTCGAGCT  
GCTGGCGCTATTTCTGCGTACCGGAACGCGCGGTAAGATGTATTAACCTGGCAAAAGAGATGCTGGAGAATTTCCGCT  
CTCTTTATGGCTTGTAACTCTGAATATGAACAATTTAGTGGTGTTCATGGAATTTGGCGTGGCGAAATTTGCCAGTTA  
AAGGGATTTGCCGAATGGCGCGGCTTACTACAACGTGGGATGCGTGAAGAAAGCCCTTACTCAGCCGGAGATGAC  
CGGGAAATTTTTTACAAGACGAGCTCACGGTGGAGGCGGGAGATCTTTATGGTGTATTTCTCGCATCACAACCGGG  
TTATAACGCATAGCCGCTTTTTTTCCGGCACGCTAAACCATGTTGAAGTCCATCCTCGGAAATATCCGCGAAGCGATA  
AAAATAAATGCCCTCGCGCTGATCCTTGCACATAATCACCTTTCGGGTTGTGCTGAACCCAGTAAAGCGGATAAACTCAT  
TACTGAACGGATAATAAAGAGTTGTCAGTTTCATGGATTTACCGCTGCTCGACCATATCGTATTGGCGTGGAGAGTATG  
TTTTCTTTTCCGGAACGCGGCTGGATTTAA

>Cluster\_40783

GTGAATTCACCTCTATACCCTGAAAGGTGTAATGGATAAACACTCGCTGTGGCAGCGTTATGTCCCGCTGGTGCCTCACGA  
AGCATTTGCGCCTGCAGGTTTCGACTGCCCGCGAGCGTGGAACTTGACGATCTGCTACAGCGGGCGCATTTGGGTACTTTA  
ATGCCGTCGAACGCTATGACGCCCTACAAGGAACGGCATTTACAACCTTACGAGTGCAGCGTATCCGTGGCGCTATGCTG  
GATGAACCTTCGACGCGGTGACTGGGTGCCGCGCAGCGTGCAGCAACGCGCTGAAGTGGCAGAGCAATAGGGCAACT  
GGAGCAGGAATTTGCCGCAACGCGCAACGAACTGAGGTTGGCGAAGCTTTAGGGATCGATATTGCCGATTATCGCCAAA  
TGTGCTCGACACCAATAACAGCCAGCTCTTCTTACAGATGAGTGGCGCAAGAGCAGCGGATAGCATTTGAAGTGGTT  
ACTGATGATCATCAGCGAGAAAACCCGCTACAACAACCTGCTGGACAGTAACTGCGCCAGCGGGTGTGGAAGCTATCGA  
AACGTTGCCGAGCGCGAAAAACTGGTATTAACCTCTATTACAGGAAGAGCTGAATCTCAAAGAGATTGGCGCGGTGC  
TGGAGGTCGGGGAATCGCGGTCAGTCAAGTTACACAGCCAGGCCATTAACCGGTTACGCACTAACTGGGTAAGTTATAA

>Cluster\_28333

ATGTCAGGTCGCTTTTAAACCAACGAAACAGTGAAGTTGATTTACTGGATCAACGCTCTTTCGACCAGACCGATTTTGA  
TATTTCTGAAATCTTACGAAGCGGTGGTGGACGGGTAGCGATGCTTATTTGGCTCCCACTGTGAAATCGTTTTGCACTCTT  
TGCAGGATCTAAAATGTTTCAGCCATTCGATTTGCTAACCGTGAACATACAGCCGGAAGGTTGGTTTCGCAATTAACGAC  
CTGCGCGCTACGTTATGCTGACAGTATGACGGGAGCGGATAGCAGCGTTTTCTAAATGCTACTTTTACTCGCCAAAAGCGG  
CGTATTAATGAAGTCCCTGACTATCGGATTCGTAACCGCAACAGCGTGTAAATGGTCTGCTGTGCATCAATATGAATC  
TTGATGTTCCCTTCTCGCAGATTATGAGCACTTTGTGCGCCGAAACCCCGGATGTCGGTTCAAGCTCAACTTTGGCC  
TCTTCTGTTTGAAGATCTGGTTACCAACAGCTGGATTCAACATCGAAGAAAGTGAATGGCGATCGCAATGTTTCTAATA  
CGCCAAAATCGTCAGATCGTGTGAATCTCTACGAGAAGGGATCTTCGATATTAAGATGCGATCAACAGGTTGCTG  
ACCGCTGAACATCTCAACACACTGTCTATCTACATCCGCCAGTTCAAGAGCGGTGATTTCCAGGGCAAGATAAG

TAA

>Cluster\_42501

ATGAAAAAGTTCATGTTGTCCTTTGACAAAGTCAGCGCCACTACGGCAAATCCAGGCGCTGCATGAGGTGAGCCTGCA  
TATCAATCAGGGCCGAGATTGTCACGCTGATTGGCGCAACGGGGCGGGGAAAAACCACCTTGCTCGGCACGTTATGCGGGC  
ATCCGCGCCGACCGGGCAATTGTTGTTGATGATAAAGACATACCGACATGGCAGACGGGCAAAAATCATCGCGAGCAGG  
GCGGTAGCGATTGTCGGGAAGGGCTGCGCTCTTCTCGCGGATGACGGTGGAAGAGAACCTGGCGATGGGCGGCTTTTTT  
TGCCGACGCGACAGTTCCAGGAGCGCATAAAGTGGGTCACGAACGTTCACAGTGTGCATGAGCGCCGTGTTTCCAGC  
GAGCGGGCACTATGTCGGCGGTGAACAGCAGATGCTGGCGATTGGTCGCGCTTTGATGAGTAACCCGCGTTTGTGTTG  
CTTGATGAGCCATCGCTCGGGCTGGCACCGGATTATCATCCAGCAAATTTTCGACACCATCGAACAACTGCGCGAGCAGG  
GATGACCATCTTCTTGTGCGAGCAGAACGCCAACAGGCGCTAAAGCTGGCGGATCGCGGCTACGTGCTGAAAAACGGCC  
ATGTAGTGTCTCCGATACCGGCGACGCGCTGCTGGCGAATGAAGCAGTGAGAAGTGCATATTTAGGGCGGATAA

>Cluster\_33869

ATGAATGTTAATTACCTGAATGATTCAGATCTGGATTTTCTCCAGCATGTAGTGAGGAACAATTGGCAAATTCGCCCG  
ATTGCTCACCCATAATGAAAAAGGCAAACTCGCTCTCCAGCGTACTGATGCGCAACGAACGTTTAAATCGATGGAGG  
GACATCCCGAGCAACATCCCGCAACTGGCAGCTGATTGCCGGAGAATTACAGCATTTTGGTGGCGATAGTATCGCCAAC  
AACTGCGTGGCAGCGTAAATTTGATCGGGCCATTTTCTCGATGTTTCAAAGCGATTGAAGCTGAAAGCCGACAAAGA  
GATGCTACGCTTTGAGATTGAGCAACAGTTACTGGAACAAATTTCTGCTTAACACCTGGAAAGAAAATGGAGCAACATA  
AGCAGGAGTTTCTGCACGCGGTGATGCGAGGTGAATGAGCTGGAAGAGCTGCTGCCGCTGCTGATGAAAGACAATTA  
TTGGCAAAAGCGGTGTCGCATTTGCTTTCCAGCCAATTGACCCGCAATTTACGCACCCACGCAGCAATGAGCGTACTTGG  
GCATGTTTGGCTGCGCGCGGGTCTGGGAGGCCCTGTTAGGCGCGGCACTAAATGGGGTTAAAGCGGTGACGCGGTCAGT  
CCTATCGCGTGACAAATTCAGCCGTACTGCAAAATCGCCTGCGCTGCGCGGATGGTTAGTCCACTCAGGTCGA

>Cluster\_15840

ATGAAAAAAGTTCTGATTCGCCGCTTAAATGTCAGGTTTTAGTCTTTCCGCCACAGCAGCCGAAACCATTTCGTTTTGCCAC  
CGAACCTCCTATCCTCGTTTGAATCGATTGATGCAAAACAGCAGATCGTTGGTTTTGATGTCGACCTGGCGCAGGCAT  
TGTGTAAGAGATTGATGCAACCTGCACCTTCTCTAACAGGCGTTTGACAGCCTGATCCCAAGCCTGAAATTCGGTCCG  
GTAGAAGCAGTGTGCGGGCATGGATATCACTCCGAGCGTGAAGAGAGTGTGTTTACCACGCGTACTATGACAA  
CTCTGCCCTGTTTGGTGGTTCAGCAAGGCAAAATACACAGTGTGATCAGCTGAAAGGCAAAAAGTTGGCGTTTCAAGAC  
GGACGACACACCCGAAAGTTCATTATGGAATGAAAGCATCCGGAATCACTACCGTGCCATATGACAGTTACGAGCAGC  
CTGGATCTGCAAAACGGTCTGATCGACAGCGTATTTGGTGACACCGCAGTGGTAAACGAAATGGCTGAAAGATAACCCAAA  
ACTGGCGGAGTGGCGATAAAGTGACCGATAAAGATTACTTCGGTACTGGCCTCGGCATCGCAGTACGCCAGGGCAACA  
CTGAATCGCAGCAAACTCAACACTGCGCTGGAAAAAGTGAAGAAAGATGGCACTTACGAAACCATCTACAACAATGG  
TTCCAGAAGTAA

>Cluster\_7663

ATGAAAAACGCTTTATTATACAGATGAAAAATCGAATAAATTTGGTGGATAGATTACGAAGGGGATAGTTTAGCTGT  
CAACTATGGCAAGTAGGTAGTATTGGTAAATTCAGACAAAAGAGTTGATAATGAAGAACAGTCTGAAAGAAGCCA  
GTAATTTGATTTCCGCAAAAATGAAGAAAGGCTATCAAGAAAGATCCAAAGTTTAACTTCATGGATCGCTACTATTTTGT  
GATGAAGAAATTTGGTTACATGTTAAAACGTCACACCCAACTTCCAGTGCCATTTTACTGATCCACTTTATATGTTG  
CTGGGATGAAGAATCTCCTTTTGGCAGCGATGAAGGTGCTGATGCTCTAAACGTTCTTGAATAAGCTCCGCTAAAGAGC  
CGGATCTGGACTGTGCTGATTTCCCTCAAATGTTAATGAAACTATGTGGGGTATGAAATACATCGCTATGGACAGTATT  
CTTGAAGAGATGTTCTGTCGCAATTACTAGTCGATGAAATGAGCACTATCCAGAGCAATATGATTTACCTACGCAACTGC  
ATTCGGTACAGATTAAGTATGTTAAATCTCCATAAACTTAAAAAGATGGGACTCAATGCCTAGCGCGTATCAGC  
TTACCGCAAAAATCTTCAATGGGGTGACGGTCAAGGACTACCAATACTTCAAAAATGATTGATGACCTTACGGCGTTT  
CCTACGAAAATTA

>Cluster\_13566

ATGAGTAAAGCCGCTTAAACGGTGTAGTTTTCGTTTCGCGGTTTTCTTTTGGCGTTAATGGTTGCTTCGCCGTTTTCTG  
GGCGGGGCGCATCGCTGTTTGTAGTGTTCGCCCTGTTCCCTTCACGCGGTAATGGTTCGAGCGACAGGTACAGCGCTGGC  
TGCAATGGCAATTTTCGTTACGTTGACATCTGACTGGTTCAGTATGGATCAAATCTCGCCGTGGATGGGACTGGCGGTG  
ATTGCCGAGAAAGATCAGAAATTTCTGAGCACGCGGCTTTGATGTCGCTTCCATTGAGAAAGCCCTGGCGCACAACGA  
GCGCAATGAAAACCGTATTCGCGGTGCTCAACGATTTCTCAGCAGACGGCCAAAATCTCTTTTATGGGATGGCGGTA  
GCTGGGTACGAAAAGGGCTGGAAGCTGGATTAACGCTGGGGATAGAACAGTCTGGAGCAAAAAGCGTATCCTGACGGTT  
TACCTGAATATCGCCGAATTTGGCGACGGTGTGTTTGGCGTCAAGCTGCGGCACAACGTTATTTCCAAAACCCGCGAG  
CAAATTTACCCGCTCGGAAGCTGCATTACTGGCAGCTGATTACCTAAATCCACTTCGTTTCAAAGTCTCTCGCCATCGG  
GCTACGTGCGTAGCCGTCAGGCTGGATTTTACGCGAGATGATCAGTTAGGCGGTGAGCCGTTTATGCAACAACACCAG  
CTGGATTA

>Cluster\_22723

ATGAGTAAAGCTGATGTCGCCGAGTGGCGCTGCCAAAAGGTGTGCGGCTGTAGCTTACCCGTATCGGGCGGCTGAG  
CTTGCCGCTTACGACTCTCTCAACCTTTGGCGCTCATTGTTGTTGATAACCCGGATCACGTTGAGGAGAAATCGCAAGCGAC  
TTTTTGTGCGGCAATTTGCTTAAACCGGTTGCTTGGCTTGGAGGTTACAGGCAAGATGTCCTTAAGCTTATTGGC  
GAACCTTATGCCCAAAAACGAGCAGATGCTCTTATAGCAATACGCTTGGCAGCGTTTTCGCGAGTGTACTGCGCACTG  
CCTGCCCGTGTGTTTGAATCGTTCGGGAACGGAGTTCGCCGCCGCTCATGACGGCTGGCGTGGACTGTGCGCAGGGG  
TGTTGGAAGAGACGGTTTTCTGTTTGTGATAAATCCGAAAAATTTCTCGCTGTTAGGGCCGGCAATTTGGTCCACGC  
GCGTTTGAAGTGGGGCGGAGGTTTCGCGAGGCGTTTATGGCAGTAGATGCCAAAAGCAGTACAGCTTTTCAATTCAGATGG  
TGATAAGTATCTGGCGGATATTTATCAGCTTGCCTGGCAGCGTCTGGCGAGCGTTGGTGTGAACAAAATTTTGGCGGTG  
ACCGTTGTACATATACGGAATAAGGAGACTTCTTCTCTTATCGTCGCGACAAGACCACCGGTCGTATGCAAGTTTCATT  
TGGCTGATATA

>Cluster\_67130

GTGAATATAAATTTTCAAGTTGTTTTGTTTTCATTTTACGACGACTTTAAGTTGTGCCTACGCAGGAGTTGGGCTTGATGC  
AACCAGAATATTTTACAATGAGGTTGAGAGGCTGTAATGTCGGCGTAAGAAATACCGACAGTAAACTGAACTATCTTA  
TCCAGCCATCTGTATCGACAGACTTGGATAAATTAATAATGACAGCACCTTTTGTTTTTTTCGCAATCGTTATTTCAA  
GAGTCTGGTAGCGGAAAGTATTTGAAAAATAATGGTGTAAACCATGCTAAATTTGCCGAAAAACAGGAGTCTTTGTTTTG  
GTTTGTGTTGACCGCATTTCCCTCATCAGAAAAAGAGTTGGTATATCAGATTTTGTGTTTCTGAGGGCGGAGTAAAGA  
TTGCTGTAGGTAATACGATTAAGCTTATTTATCGACCCAAAATCTACCGGATACACCTAAAGAGGAGCTGAAAATCTG  
AAGTTTGGAAAAACGAAAGAGGGAATGCTGAAGGCTGAAAATGGATCGCTTATATATCAATTTAAGCTCATTAATCT  
GGCGGAGCTCCGTTGAAAAAGCGATAATGATGATGATTTCCACCGTATGGAGAACTGTATTTAAAGGAATTCGCCCT  
CCAAGATTTAAAGAAATCAATGGAACGCTATTAATGATAATGGTGGTGTGAGAACTACAGGTTTTTAA

>Cluster\_22341

GTGAAAGAAATCCCAATAATGATCTTAAAGCAGCAATGATGAGTGAATCTGCGTTTAAAGATTGCTTTTTCAACGGATGT  
TTCAGCCGATACGCGGCTGTTTCAATTTTTTAGCGCGTACTACATTTGTCAGGAAAGGGCAACAGCCGCTCTGGCTGTTTT  
ACCTGACGCGAGGCGCGCCAGGCTTACGTACGCTTGTAAATGGTTCGCGTGTGCTGATCGATTTCTTTGCCGCGCCC

TGTTTTATTGGCGAGATTGAGTTAATCGACAAAGACCATGAACCGCGTGCAGTGCAGGCTATTGAAGAGTGTGGTGCCT  
TGGCTCCCTATGAAGCATTACCGCCGTTGTTATTAACGACACGCTATTTTTACGAAAACCTCGCGTACCTTAAGTC  
ATAAAAATATATCGTAATATGTTTCTTTAACTCAGAATCAATCATTTCCGTTAGTGAATCGCCTGGCAGCTTTTATATTA  
CTCTCGCAGGAAGGTGATCTTTATCAGGAAAAGCATACGCAAGCGGCAGAGTATTTAGCGCTCTTTATCGTCACTTTTT  
ATATGTTCTCGCGCAATTAATGACGGTTTTATTAATTAAGCAAGAAAGGGTATCTCATTAAAAACAGAAAGCAGT  
TGTGAGGACTGGCGCTGGAGATGGACCCGGAGAATAAATTTCTCCGGATGATGACAGTAA

>Cluster\_42609

ATGATCATAAAAAAGCGGTGGTTCGCTGGCAGCTAAGCCTGCTTGGAGCGTGGTAATCAGTGCCTTTTTTCTCAACAC  
AGCTTACGCTGGCAACAAGAAATATATCGTTGATACGCAACCCGGACATGCCACAGAGCGTTACACCTGGGATAGCGATC  
ATCAACCTGATTACAACGATATTTTGTGCGAACGTATTTCAAAGTAGCCAAAGGGCGCTGGGACTGGAAGTCAATCTGGCG  
GAAGAAACCCCTGTGGATGTGACAGCAGTATGAGTATGGGCTGGAATTTTCCCTTATATGAGCAGGTTACAACCTGGCC  
GGTCGCGGCATTACATACGATGGCACAACCACCTCGATGTATAACGAGTTTGGCGACAGTACTACCAGCTGGCCGAGC  
CGTTATGGCCTGACAGCTGAGTACCTTAGGCTGGCGTGTGACTCCCGGCTTGGCGATCTCCGACCTCCGCGCAAACT  
AGCTATAACCAGCAATTTGGCGAGAATACTGGAAAGCGCAATCAGGCTGAGCCGGATGACGGCGACAAACCAGAACGG  
CAACTGGCTGGATGTACCAGTGGCGCTGATATGTTGCTCAATCAAAATATTGCTGCCATGCTGCGCTATCTCAGGCAG  
AAAATACCACTAACATAGCGACTATCTGTATACGATGGGGTTAGTGCCAGATTTTAA

>Cluster\_5220

ATGTTAGAAGATCTCAAACGCCAGGTATTAGAAGCCAACCTGGCGCTGCCAAAACACAACCTGGTCACGCTCACATGGGG  
CAACGTCAGCGCCGTTGATCGCGAGCGCGGCTCTTTGTGATCAAACTTCCGGCGTGCATTACAGCGTCATGACCGCTG  
ACGATATGGTCTGTGGTTAGCATCGAAACCGGTGAAGTGGTTGAAGGTACGAAAAGCCCTCCTCCGACAGCCCACTAC  
CGGCTGCTTATCAGGCATTTCCCTCCATTTGGCGCATTTGTCATACGCACTCGCGCCACGCCACCATCTGGGCGCAGGC  
GGTTCAGTCGATTCCAGCAACCGGCACCCACGCGGACTATTTCTACGGCACCATTTCCCTGCACCCGCAAAATGACCG  
ACGCAGAAATCAACGGCGAATATGAGTGGGAAACCGGTAACTGATCGTAGAAACCTTTGAAAACAGGGTATCGATGCA  
GCGCAAAATGCGCGGCTTCTGGTCCATTTCCACGGCCGTTTTCATGAGGCGAAAATGCGCAAGATGCGGCGCAAACT  
CATCGTGTGGAAGAGGTGCGTTATATGGGGATATTCTGCCGTGAGTTAGCGCCGAGTTACCGGATATGACGAAACGC  
TGCTGGATAAACACTATCTGCGTAAAGCATGGCGGAAGGCATATTACGGCGAGTAA

>Cluster\_11176

ATGGAAACCGTTTTTGGACGCACTGAAAGCACTGAAAAAGCCTCGTCGCACGAGATTGCAGCCGCTTTGAAATCAGCCG  
TGACGATGCTGTTACCGAAGCTTGAAGCTGAAGCGTGGCGAAGCTGATAACAAGGGTGCATGTTGGTGGCTGACGA  
GTGAGGCAACTGAAGCGGCCCAAAAACCACTGCAGAGATGCTGATTAACCGGATGAAACAGCATGGTCTCAGTCGGCT  
GACGAACCTGGGTTAATGTTGCGGATTAACCTCCCGCGGGCAATTCATCACTGGCGATGGTGTGACGAAAGGTGCTCT  
GATTCGCGTAAATCAGGACGGTCAATATCGTTACTGCATACCGGGCGAATTTACCGGACAGCCGAAAGCTGCATCGG  
TAACGAAACCGATGGTAAAGCCTTTCCCTACGCGGCAGGTGTTGCGTTACCAGTCCGGGAAGCGGAAACACAGGAAGAA  
ATTAACCTGAAAGTGTGGCGGTACAGTGCAGTACAGTCTGCTTCCATCAGAAAGCATCCGGATGGTCTGATTTTACC  
ATCGCTGCATGTGGCTAACCGCGAGCTGCGCGGGCAAAAGGTGAGTTTCAAGTGGGAGCGCTTATGCGCCGCGCTGC  
GGAAATTAATAAGCATCTGATGTCATACGAAAATAACGACAGGAGATAACCGGTAA

>Cluster\_29811

ATGAGCAGTTTTCCAGTTCGAGCAAAATAGCGTTATTTCGCTCGCCCTATAAAGAAAAATTCGCGCTCCGCGCCAGCCAGG  
TCTGGTAAAAAGCCCAACGGCGAATCATCTATTGCTCCCTACAACAGCGCCGACGCGCTTCGCGCCCTGGAAGCAT  
TCAGCCATTTATGCAATCTTTTCTGCTTTTTCATCAAAAGCATGGAAGCGCGTGGCGTCCGACTGTGCGTCCGCTCGTCTT  
GGCGGTAATACCAGAATGGGTGTTTTGCTACGCGCTCCACTTTCCCGCTAACCCGATGGTATGTCGCTGGTAGAGGT  
GAAAGAGGTGTTTGGCCATAAAGACAGCGTGTATCTGAAGCTCGGCAGTCTGGATCTGGTTCGATGGTACGCGGTTAGTGG  
ATATCAAAACCTGACTTCCCTTTGCTGAATCGCTTCCGATGTCAGTGCAGTGCAGTATGCGCAAGATGCGCGCCGAGAA  
ATGGCGGTTGTTTTACCAGCAGAGGTGCAAAAGCAGCTTTTGGACGCTGGAGAAGCGTTATCCGCGAGTTAACGCTGTTTTAT  
CCGCGAAGTACTGGCGCAGGACCCGCGCCGCGCTATCGTAAAGGTGAGGAAACGGGCAAAACCTATGCGCTCGGTTGC  
ATGATTTTAAAGTTCGCTGGCGGTCACCGACGAGGTTTTGAAGTCTTTGCGCTGGAACCGCGTTAA

>Cluster\_20773

ATGATTGCGGGTGGTGAAGTGAATAAAAAACAGCTGGCAGAGTTGCGTAAATCACTGGCCAGCATGGAGCTGCCGCCCAA  
AAAGCGCCAGCGTCTTATCTGGAGGCTGGCCAAATATGGCGTATGCTGCGCCAAAACGGCAGCTTCCGAATCAGGAAG  
CACCGGATGGCCAGAAGTGGCCGGGGCGTAAACGAAGCGCAAGGGAAGATGCTGCGGAACCTGCCAAAACCTGCTGCAT  
ATCCGTGAAATGCCAGAAATTCAGCGGTCAGGATTTTATTTGCAAGGTTGGTGGCTACCGGAACGGGGAACCGCGTTACC  
GGCCGGGACAGTCGGATATGCGCAACAAAACGGGATGCGCGTCACTGTCAGCCGTCGCGAGTACGCCACGGAAGGTGGAGG  
CCGGAAAAATGGCCATGCCAGCCAGGCAAAAACCTGCGGGCGCTGGGGTACCGGTTACGCCACCGGTAACCGCTGAAAA  
AAGCCACGCTGGGCGGTTAACCAACAGTGCATACAGCCGGGCGGGGCTACTGATTCGAAAACCTCAGCGGTAAGC  
GGTGAACACAGCTGACAGTGGATTTCTGCGCGTGTATTTCTGGCATGAGTACGATGAAATTTGATAACCGCGCTGG  
CGGTCAGCTTACGGCCATCGGCTTTGGCTGGGATGTTAAGGCGCAGGATATTAAGGGAAAGCATGA

>Cluster\_26118

ATGAATAAGATCTGTTGCAATGCGACAACCTGTGCAAAACGCTATCAGGAAGGCAAGTGTGCAAAACCGATGTACTGCACAA  
TGTCAAGTTTACAGCTGGACGAAGGTGAAATGATGGCGATCGTGGCAGCTCTGGTTCCGGTAAAAAGCACCTTGTGTCACC  
TGCTGGGCGGGCTGGATACGCCAACCTCCGGCGATGTGATCTTTAACGGTCAACCGATGAGCAAACTGCTTCCGGCGGG  
AAAGCAGAAGTGGCAACCAAGAGTGGGATTTATTTATCAGTTTACACCTGCTGCCGATTTTACTGCCCTGGAAAA  
CGTGGCTATGCCACTGTGATTTGGCAAGAAAAGCCCGTGAATCAACAGCCGTGCGCTGGAGATGTTAAAAGCGGTGG  
GGCTGGAGCATCGTGCGAATCACCGCCATCTGAACTTTCTGGCGGCAACCGCAGCGTGTGGCGATTGCCCGTGGCTG  
GTCATAAACCCGGCTGGTACTGGCGGATGAACCTACTGGTAACCTCGATGCACGTAACGCCGATAGCATCTTCCAGTT  
GCTTGGGGAATGAATCGCTTGCAGGACCGCCCTTCTGGTGGTTACTCACGACCTGCAACTGGCGAAAACGATGAGCC  
GCCAAGTGAATGCGTATGGACGCTCTGACGGCGGAACTGAGCCTGATGGGGCGGAGTAA

>Cluster\_14365

ATGTTTCATCTCTGGTATAGTGCAGCAGTACTTTTGGCAAGGATTGACAGATCGTGTGGGCGTAAGAGCGCAACAAAA  
AGAAAAACCCGCGTTCGCTGGTGGAAAGCCGATTTAGCCAAATTAAGTGTGAACGCAGCTTCGCCAGCTGAGTTTGG  
GTGAAGTGGCGCGTGAAGCGGGCATTTGCTCCACCTCTTTTATGCGGATTTTCCGCGAGCTAGACGAACCTGGGCTGACC  
ATGGTTGATGAGAGCGGTTAATGCTACGCCAATCATGCGCCAGGCGCTCAGCGTATCGCCAAAGGCGGGAGTGTGAT  
CCGCACTCGGCTCCACATTTATGGAGTTCATCGGTAATAATCTTAACCGCTTCCGGTTATTTATGGGGAAACGCTCCG  
GCACCTCCGCTGCGTTCTGTCGCCGCTTGGCGTGAATTCAGCACTTCATTCGGGAACCTGGCGACTATCTGGAACCTC  
GAAAACCATATGCGCGTGGCTTTACTGAAAGCGCAAGCGAAGCAATGGTGAACATTTGCTTTCAGTGGGCTGGCGAGG  
GTTGGACGTCGGCTGCAACACGTCGGCAATTAAGAAGAGCAGTGGTACTGCAACTGCGAATGATTTGAAAGGGGCTT  
ATTACTGGTATCGCCGTGAACAAGAGAAAACCGCAATTTCCGGAAATGTTGAAGGACGAGTAA

>Cluster\_27110

ATGTATACCTGAACTGGCAGCCGCTGATGACTGGTCTGGATGTTGGGATTTCTCGCCGCGCTGGGTTAGCGGCGT  
GAAACCGTGGCGGACAGTTATTTAGCCGTAGTCTGGCGGTAGCGGATATCGCGCGTGGTACTGCTATTTCCGGATA

TAGCCCGCCATACTCTGCACATAAAATTTAAGTGCAGGTTTAGAACCTGTTGCCGCTGAGTGTCTGGCGAAAATGAGCCG  
CTGTTTGTATCTGCAATGTAAACCCGAGATTGTTAACGGTGCCTTGGGCAAGTTAGCGCGGCGCGGCCAGGATTGCGTTT  
ACCTGGTTGTGTTGACGCTTTTGTAGCAGGGCTGCGGGCGATTTTAGGCCAACGGTGTAGCGTGGCGATAGCGGCAAAAT  
TGACTGCCAAAGTGGTACAGCTTTATGGCGAACGGCTGATGATTTTCCGGATTATGTCTGCTTCCCCACGCTCAGCGG  
CTGGCAGTAGCCGAGCCGAGCATTAAAGCGTTAGGATTGCGCTGAAACGGGCGAGGCGGTGATTCATCTGGCAAA  
TGGCGGCTGGAGGGCACCTTACCAATGACAATACCGGGCGACGTAGAACAAGCGATGAAAACGCTGCAAAACCTTCCGG  
GTATCGGGGCTGGACTGCAAAATATTTTGGCTTGGCTGGCTGGCAGGCGAAAGATGTTTTTCCGGATGATTATCTG  
ATTAACAGCGATTTCGGGAATGACGCCGGCACAATCCGCCGTTATGCCGAGCGTGGAAACCTGGCGTTCTTATGC  
GTTGTTGCATATCTGGTATACGGATGGCTGGCAACCAGACGGAGCATGA

>Cluster\_8197

ATGATTAATGAAGCCACGCTGGCAGAAAGTATTGCGCGTTACGTCAGGGTGTAGCGTGCACACTCGCCAGGCCATGAC  
GCTGGTGGAAAGCCGTCACCCGCTCATCAGGCACTAAGTACGCGCTGCTTGTATGCCATTATGCCGTACTGCGGTAACA  
CCCTGCGACTGGGCTTACCGGCACCCCGCGCGGGGAAAAGTACCTTTCTTGGAGCCTTTGGCATGTTGTTGATTCCA  
GAGGGATTAAGGTCGCGTTTATGCGGTCGATCCAGCAGCCGGTCACTGGCGGTAGCATTTCTGGGGATAAAACCCG  
CATGAATGACCTGGCGCTGCGGAGCGCGGTTTATTCGCCGCTACCATCTCCGGTCACTGGCGGTGCCAGTCAGC  
GAGCGGGGAATTAATGCTGTTTATGCGAAGCAGCGGTTATGACGTAGTATTGTCGAAACGGTTGGCGTGGGCGAGTCG  
GAAACAGAAGTCGCCGATGGTGGACTGTTTTATCTCGTTGCAAAATGCGCGTGGCGGATGATCTCAGGGCATTAA  
AAAAGGCTGATGGAAGTGGCTGATCTGATCGTTATCAACAAAGCAGTGGCGATAACCATAACCAATGTCGCCATTGCC  
GGCATATGTACGAGAGTGCCTGCAATATCTGCGACGTAATACGACGAAATGGCAGCCACGGGTTCTGACTTGTAGCGCA  
CTGGA AAAACGTTGAATGAGATGAGATCTGGCAGCCATCTGACTTCAAACCGCGCTAAGTGCAGTGGCTGTTTACA  
ACAAGTGGCGCAACAACATCGGTGGAATGGCTGCGTAAGCAGACCCGAAGAAGAGTACTGAACTGTTTCCGAAATG  
AAGATTCGATCGCTATTACCGCCAGACGCTTTTAGCGGTCAAAACAATACGCTCTCACCGCCACCGGCTGCGGCAG  
CTCAGTGAATTTTCCAGACGCAATATTTTGTATTA

>Cluster\_28047

ATGAACATGCCAGCCGCTACTCCTGTTATGCCATTAGCGCAAACCTCGTGGGAAATAAATGCTACGGCGGCATCGTTACG  
CCATTTGGCAGCTATCTGGGGTGAATGTTTTCTACTTTTCAGCTCGATAAACGCTGCTGTGAACCGCTGTGTATAGTGG  
GATCGGGGACTCCTGGACGGTGGCCTATGTGCGCGCCGCTGGCTGGGGAAATACACACATCTGTTTTGTTACGCATTG  
CAAACGTGGGATTTTCTTACAGCTGATTTAACCGTTCAGAAAGAACGTTAATCATTTATCTCAGTGAAGTGGCAG  
ACCATCAATGACCGTTGACGCCCCCTGCGCAGCAGTATGCTCAAACGCGCAAGTGTGGGTGTGACGAATGCCCTGGAA  
CACCATTTTGCAGCAATAACAGAAAACATGCTCTATACATGGGCAATAAGCAGGGTATTCACAGCAAAAGTAGTAGCCT  
ACACTTTATGCCCTCCTGCGCTTAGCGCAAAAATATGTCAGGCTTAACACCCTGCAGATTGAAGATGATTTGGAAGG  
GAAATTTAGCCAGATTAATCAGCACTGGCAGCAAAAAGAACGCGCATTTTACCACAAAAGAGATAACGTTTCTTGGGA  
GTGGCTTAAGTTGGGACTGGCAATATCGGGGAGCAATTTACTTTCTTGGGCCACAGATTCGTGCGACAGCCCTTCCA  
CTGGAAGAATTTTATCATTCATTACGCTTACATCAGGCTGGTGTGGTGTGCGGTCAGCATATATTTTACTACCAGCCATCCTG  
CGAGTCCCATTTTACCTTGCAACCCAAAAGCAATTTGTAACAGGGAGCGACAGCAGAATTAATCAGTTTTATACCTG  
ACGCCAGTGAAGTCCAAACAATTTATTTCTGGTCAAGTGGTTATATGAAATGTCTGGCATTAAAGTTGTGATTATGTC  
GACGAGCGGGCAACCGCTTAGCCATAGGGAGAAATA

>Cluster\_61726

ATGGTGACAATAAATAACGCAAGAAAGATTTCTACAACGCTGCGACACTCTTCTCTTTATTTACATGCTTATGCCTTTCA  
TTTTAAATATGCGGCTGGAAAGAGTGTTCCTGCTGATTTACTTTGATATCGCAAGTGAATAAATCTACGTGGCGTCAAAA  
TCCATGTTCTCGATGGCGAGCGTTTTCTCTTGGTAATATGGACGATAAAGAACTCTCTGCGCTTTGGGGATAAAGCCCGC  
CGTCTGAACCTTGATATTTCATATGAAACAGCGCCTCAGATAAGGCATCTATGACGAAAGCCGTCGCCATCGCGTTGAA  
AAGTGGGATCGTCCGTCATAAAGCCGTGATTTTACAGTATGAGGTAATTTGCGCGACGATATATCGATTAACGATAACGACA  
TTGCCATGTACGGGAAACGATCAGGACAGCGGCTGACTTTTACGATCAGCAGCATGAAGATTTAAAAAGTCATGAG  
CTGGTGTGCTGGTCAAAGAAAGTGAATGAAATCTCTTCTTACTGTTGATTTTGGCAACATGATCAATGCAAAATGA  
GCATCCCATCGACGCTTTAAAAACGATGGCACCAGCATAATACCAGGTCATATCAAAGATGCCTTGATCGTTAAAGAAC  
CGGTGGCCTGGGTCATAAAGCCGTGATTTTACAGTCAAGGTGATGCGCTTCAAAGCCTTATTAACGCACTTATCTGCG  
CTGGGTGATGATGAGCCGAGGTGACGGCATAATGGCTGGAAGAAGAGGTTGATTTACTATGCGCCGGCTTCCGCTTTGA  
AGACGAAGATGATAATCCGTGGATCCCTTATCGCCAGATGAGTGAACACCATGCGCAGAAAATCATTACTGGATGCCG  
GGTTACGTAAGAAAAGAAAGATGCAATTAATCAGATAAATCATGTGCGTAACGTAACAACAATCAAACAAGAGGCA  
AACCATCTTCTGAACCACTAA

>Cluster\_45540

ATGCGTATTCGCTACGGTGGGAACTGGCTCTTCCCGACTGCTCGTTATTGAGATTGTCGCATTTGGTGCAATTAACCC  
CGGGATGTTAGATCTCAATATGTTGCTGTTACAGCACCAGTACTTTATCTGCATTTGGCATTTGTCGCCATACCGCTGACGA  
TGGTGAATTCAGTGGCGGGATCGATATTTCTGTTGGTTGCTGACCATCGGCTCTGCGCCATTGGCATTGGCGTACTGGTTT  
CAAAGTGGTGTGCGGATGCCGCTGGCGATACTCTGACCTTACTGCTCGGCGCATTTGTCGGGCTGATCAACGCCGAT  
AATATATATACCAAAGTTAACCCGCTGGTGTATACGCTTGGCAGCTGTATCTGTTTCCCGGAAAGCGCTCTGCTGCTTT  
CCGGTATGGCCGGGACGCGGGTACGAAGGATTTGGTGGATTTCCGATGGCGTTTACAGATTTTCGCTAACCTGGATGTTG  
CTGGGACTCCCCGTTCCGCTGATATCTTCTGATATGTTCTCTCGTTTTCTGCTCTGGCTGCATAAAAACCCATGCCGG  
ACGTAATGTTGTTTTGATTTGGGCAAGCCGCGGCTGGCGCTTATAGCGGATTCAGTAAACCGCACCTTATGTGCGC  
TCTATGCCATGACGGGCTGGGCTGCGGCTGCGCTGCTGCTGGTGTGCTATTTTGGTTTCCAGCAGTTCGGATCTC  
GGTGGCTGTTTTGATGCGCCGATCACCGCGTGGTGGCTGGCGGTGCCAATTTTATGGTGGTTCCGGTTCCATTTAT  
CGGCACCGCATTTGCGGTTTTATAGTGGGATATTTGCAACAAGGTTTGCAAATGGCAGGAGTGCAAAATCAGGTGTCCA  
GCGCCCTTCCGGTGGCTACTTATCTGCTGTTGCTGATGCTGCTGCTGCTGCTGCTGCTGCTGCTGCTGCTGCTGCTGCT  
CTGGCGCTGGGCAATAACCCATTGCCATAA

>Cluster\_53482

ATGGCTACTTCACTGAAAAACCGTAATTTTCTTAAAGTCTGTTGATTACACCCAGCAGAGATTCAATACCTGATTGATTT  
GGCTATCAATCTTAAAGCCGCAAGAAATCTGGAAACGAAAAACAACGCTGGTGGTAAAAACATGCGTTGATTTTTG  
AAAAATCTCTACCCGTAACCCGCTGTGCCTTTGAAGTCCGCGCCTTTGATCAAGGTGCGCAGGTGACTTACATCGGCCCC  
AGCGGCTCAACAATCGCCGATAAAGAAATCAATGAAAGATACCGCTCGCATCTGCGGACGATGATGACGCTATTGAGTA  
TCGGGTTTATGGTCAAGATATCGTTGAAGAATTAGGTGAGTTCGCTGGTGTTCGGGATGGAACGGACTGACCAATGAAT  
TTCACCCGACACAGATCTCGCGGATTTAATGACCATGCTGGAACATGCGCCAGGCAAAACGCTGCCAGAGCTGAGCTTT  
GCTATCTTGGTGTGTTCCGCAATAACATGGGAACTCGCTGATGTTGGTGTGCTGCAAAAATGGGATGGATATCCGCT  
GGTGAACCAAAAATCTTTTCTGGCAGATGAAGCCTGGTAACACACTGCGCTGAGATCGCCAGCTGACTGGGCGAGAA  
TCACCCGTGACAGAGGATGTGGAAGAAGGCTATACGACGTTGATTTCTCTATACGGAATGTTGGGTTTGGATGGGAGAG  
CCAAAAGAAGCCTGGGCAAGAGTGAAGTGTGATGGCACTTATCAGATCAATCAACAGGTGATTTGCCCAGCGCTAA  
CCCTGAAGTTAAATTTATGCACTGCTTCCCGCTTCCATAAATGAGCACACACAGTAGGACGCGGATTCGAGATGGCT  
ACGGCCTCAAAGGACTGGAAGTTACTGAAGAGGTTTTTGAATCGGCCACTCTATTTGTTTTCGATGAAGCAGAAAACCG  
ATGCACACATTAAGCGGTGATGGTAGCAACTCTCGGCACTAA

>Cluster\_25322

ATGCTCTGGTTCTGTTCGCCGTGACACGCGCCATTGCCGTGCCGGATTGCTGTTATTACTGATTATCGCGACGGCATTAAAG  
CCTGCTCATTTGGAGCAAAATCACFCCCGCTTCCGCTAGTGTGGAGGCGCTCTCCGGCACCTGCCAGAGCGCCGACTGCA  
CCATCGTGTCTCGACGACGACTGCCGCGCACCTTGGCCGTTTACTGGCAGGCGGTGCGCTTGGCCCTTCCCGGGCGTTA  
ATGCAAAACCTTCCGCAATCTACATACCTTAAAGTGGTGTGATCCCGGTGCTTACCGCTGGAGCAACCGCGCTATTACTGA  
GGCGCGCGCTGTTTGGTTACTCTTCCGCGCAGGAACAACCTGGCGATGGCCTTCCCGCGCGCTGGTGGCCTCGTTGA  
TTGTTGCCCTTACCGGCAGCCAGGGCGGGCAGTAAAGTCCGGTGCCTTAAACCTGGCGGGCTGGCGCTGGCGGGC  
GTGCTGGAAGGACTGACCAGCGGCATCGCCCTGCTTAAACCTGACGCTACGATCAGTTGCGTTTCTGGCAAGCCGGTTC  
GCTGGATATTCCGCAATCTACATACCTTAAAGTGGTGTGATCCCGGTGCTTACCGCTGGAGCAACCGCGCTATTACTGA  
GCCGCGCGCTGAACAGTTTAAAGCTTGGCAGTGACACCGCGACGGCGCTGGGCAGTCGCGTAGCGCGCACACAGTTGATT  
GGTCTGCTGGCAATTACCGTGTCTTGTGGTAGTGCAGCGGGTAGTTGGCCCGATTGCTTTTATGGCTGATGATGCC  
GCACATGGCGCGCTGGCTGGTAGGTGCCGATCATCGCTGGTGGTGGCGCTACCGCTACCGCTACCCCTGCCCTGCTGC  
TGTTCGCCGATATATTGGCGGGTGTGTTCCCGCGGAACCTGCGCGTTTCTGTAGTCAGTGCCCTTTATTGGTGCACCA  
GTGCTGATCTTCTCGTACGACGTAACACGCGAGGTGGCGCATGA

>Cluster\_1137

ATGATTGATTTACGCACTGATACCGTTACCCGACCGAGCCGCGCCATGCTCGAAGCGATGATGGCCGCCCCGGTTGGGGA  
CGACGTTTACGGAGACGACCCTACCGTTAATGCTCTGCAGGACTATGCAGCAGAGCTTCCCGTAAAGAGCCGCCATTT  
TTCTGCTTACCGGCACTCAGGCCAACCTGGTGGCTGCTGCTCAGTCACTGCGAACCTGGCGAAGAGTATATTGTCGGTCAG  
GCCCGCATAACTATCTGTTTGAAGCCGGTGGCGCAGCGGTGCTGGGCAGTATTCAGCCGCAACCCATCGACGGCGCTCC  
CGACGGCAGCTACCGCTGGATAAAGTGGCGATGAAAATCAAACCCGACGATATCCATTTCGCCCGCACCAAAATACTCA  
GTCCTGGAATAACCCACAACCGGCAAAAGTGTCCGCGTGAATACCTGAAAAGAAGCATGGGAATTTACCGCGAGCGCAAT  
CTGGCGCTGCATGTTGACGGTGCAGCATCTTTAATGCCGTGGTGGCTTACGGCTGCGAAGTAAAGAGATCAGCAATA  
TTGTGATTCGTTTACCATTTCGCTGTGCAAAAGTCTTTGGGACGCCAGTCCGGTTCATTACTCGTCCGTAATCGTGATTACA  
TTAAACGTCGCATCCGCTGGCGGAAATGGCCGGTGGCGGATGCGTCACTCGGGATTCTGGCTGCCCGGGATGCTAT  
GCCCTGAAAAATAACGTCGACGGTTCAGGAAGATCAGCACAACCGCCCTGGATGGCGGAGCAACTGCGTGAAGCAGG  
CGCGGATGTGATCGCTCAGGACACTAATATGCTGTTGTTTCGCTCGGGGAAGAAAATGCTGCCGCGTTAGGCGAATACA  
TGAAGCGGAGAAACGTGCTGATTAAACGCTCGCCGATTGTCCGCTGGTGACGCATCTTGACGCTCAGCGCGAACAACCTG  
GCGAAGTCCCGCCACTGGCGCGCATTTCTGGCGGTTAA

>Cluster\_34016

ATGCCGATCAGAAAGATGCATGATGGGCGGTGGTGTCTCGATATCAGGCCATGCGGACGTAAGGGAAGCGCATCAGAAG  
AATATTTGACAAAAATCGATAGCTACAGCAACTGAACGGTACATCATAGCGAACCGGAAAGCGGAGTTTATACAGG  
GCTATCCGACCCGAGAACGCTTAGCGATTACTGGAATTTGGTGGGTTTATCACGGTACAGCACAGCGGAAAGGCAAC  
ACGGATAAACAGCAGCTTGGCAAAATTTAATGAGCTGGAGCTGACATGTTTGGGTAGAACTCGACAAATTAATAAT  
CATTCGATGGCGATCGCAGAAAAATTCGCGAAGGATTAAGCCGCTCAGCAACAGATACATGAACAGATTATCGGGGA  
TGTTTACAGCCCTGAAAAGATCGGTTTGTGGGATGCAGAGATCCGGTTCGTTGGTATTCCTGTTCTTTATGTAAGCAG  
CGGGAATAGCCCTTTTATCAAAAAACGAGGTCACATTTGCTTGGTTCGACGGCTGAATGGAGATCAACGAAAGGTTGCGCT  
CTTGTGCTTGTGACCGGAGCCCGTGGAGTGAGGCCAGCAGATTGCATGGAGAGCAAAATAGTTTATAATAGAATAACGT  
TTCTGGAACCAAAAAACCGTAGAAAAAGAACGGTGCCTGTGTCGAGGAAATATGTCGTCGCTGAAAACAAAAGGAAAC  
GGCGCATGTTTGTGAGTACAGAGATTTTGGCGGCAATAAAAAATAAAACCCGATTTACCGAGGGGAGCGG  
TGCCGATGTTATTCGGCATACATTCGCCAGTCACTTTGTTGATGAACGGTGGCAACATTCCTGCGCTACAAAAATCCTTG  
GGCATGCGACAATTCAGCAGACTATGGCATACGCACATTTGACCGGATTATCTGGCAGATGCCATGAGATTTAACCCG  
GTAGCCAACATAGTGATCACCAGAAAAAGAGCCAGCAGAGTAA

>Cluster\_3117

GTGGATAAATCTCCGGTGAAGTCGTAATCTTACACCTAATGCCAGTAAATACAGTGCAGCCTGTGGCACTGATGCGGCT  
TGGGGTGTGTTGCCACGCTTAAATCACTGAAGAACAGCAAAAAAACACGCTTTCGCCGACTGATGCGACGGAAGAAC  
TGACGCGCCTGTCTCTCGCCAGAGCCGAAGTTTGTATAAGGTGGAGATCACCAGGCGCGCTGGATATGGATAATGAC  
TTCAAAGCTGGGTAGGGTGTATTCATCTTTCGCCCGCAGATAAGGTTATCGCGGATAAAGTTGAGCTGCCGTTGTCCA  
GTTCCGCAAACTCTCGGGATCCCTCCAGTCACTCAGTATCAGTAAAGCTTCGTGAACGTATAAGCCCTCACTCAAACGTA  
TCGCGGGTACCGTGTATCTATTTCCCGCACACGGAAGACACCAAAAGATACATCACACATCTGCTGCAGTCCGGT  
TACTATGATACGGAAGGATATCTGTCAGCTGCAGGCCGATCCAGCCTGTTTGGAGCTTACCAGTTTACCAGGAAAGT  
GCTGCTGCAACTCAAGGCCATCAATGCCCTGAAGCCCGGGAGTCTGCGCAGGCCCTGTATACCTTTATAGAGAGTCTGC  
CACGGGATCCGGCGCGATATCTTGGCGGCTGCGGGCCCGCTTAACTGAAATCCCTGTGTTCTCACAGAACCAG  
ACGGTGAAGCGTGCATGGAGCAGCTACGGGAGATTGGTACCTGGATTACATGAGATCCAGCGGGGACGCACCAAACT  
CTTCTGCATTCATTACCGCCGGCCAAAGTTAAAGCCACCTCATGATGAGAGTGGGAGAACCCGAGCTGCCAGCCACAA  
CGGTTGATGTCAGCCCGGAAATGGCTGAAAAACTGAAGCTCTCGAGAACTGGGCATTACCCCTGATGACCTGGAAAAA  
CTCTCAAAATCCCGCTGA

>Cluster\_20917

ATCGGTAAGATCATTAACTGGTGTGGCGGGTTACTTAGCTCTTACACTTGCTGTTGCCGCGGAGTCTTGCCGAGA  
GGCGTTACGTATAGGCTATCAAAAAGGCAAGTATGGTATGGTGTGGCAAAAAGCCACAGTTACTGGAAAAACGCTATC  
CGCAAAACAAAATCTCCTGGGTGAGTTCCCGCTGGCCACAGATGCTGGAGCGGTTAAACGTTGGTAGATTGATCTC  
GGCAGTACCGGAGATATTCGCCAATCTTTGCCAGGCTGCCGGGGCTGATTTGGTATATGTTGGGCTCGAGCCGCGGAA  
GCCAAAGCCGAAGTGTCTGGTGGCAGAAAAATAGCCGATCAAACCGTAGCGGATCTTAAAGGTCACAAAGTGGCT  
TTCAGAAAGGTTCCAGTTCGCACAACCTTTTACTACGCGCACTACGCCAGCCGGGCTTAAAGTTTACCAGATATAACACC  
ACTTACCTGACACCCGCTGATGCCGCGCGCGTTCAGCAAGGTAACGTTGACGCTGGGCTATCTGGGATCCCTACTA  
CTCCGCTGCATTTTACAGGGCGCGTGGGTTGCTGAAAGACGGCACCGATCAATCAAACCGGATCGTTTATCTGG  
CAGCTGCCCCCTTACAGAAAAAACCGCGCTTTTATTAGGTTGATGAGCAACTTTAGTGAGGCGGATGCGCTTAAAC  
CGCAGCCAGCGGAGCAAGCATCGCTTACTGGCAAAAACGATGGGCTTACCAGCCGCGGATGCTCTTACTTAGA  
TCATCGCCCTCTTACCACCATCAAACCGGTTAAACGCGAGGTTGCCGCTTACAGCAGCAACCGGAGATCTGTTTATG  
AAAACCGTCTGGTCCGAAAAAGTTCGATATTCGCCAGCGCATCTGGCAGCCACTCACTGGAAGGAAAAACAATATGA

>Cluster\_63661

GTGAGTTCAGGTGCAAGGTTATCTCGGCATTTATCCGGGAGACGGTTGCAGGCACTACGCCAGCAAGTGGTACTGGAG  
TTTATTAACACGCAAGCTGGGGAGTAAACCCACCCAGAATAAAGGCGAAAAATAATGAGATTGGTGGCTCCCGGATGG  
CTCAGGGGCGCGCCGCTGGCCTGTGGATGTCGGCGGTGATGTTGGTACCAAAATTCGCTGGGTTCAACATGATGATTTT  
CTTGCATCTGTTTTCGGCGGGAATGGTCAAGCGGATCTCTGCAAAATGGGGAATGAGCGAATAACATTTCTCTGGCGAC  
CTATGCGTCCGATGTCGGAATTGCTCTGCTGTCAGAGGAGCGAGGTTGGCTCATGGAATAATGCAGATCCCTAACGACG  
GCGATATTACAGCGACCTAACTTTGCGGACTGGGATGGAATCAAAGCGGATGATACGAATTTTATCAAAGCGGAA  
CCTGTGGATAGTGCAGGAAAGCTACGTTATCTGTTTAAAGGAGTTTACAGCAGTAAAGCTGAATGGTGTGGCGGAGGTA  
CGGTTTTTGTATCGACAGTTTGTATTTAGTTCGATAACAACTCCAGACACAGCGTTGATCGGGACTGGCTCGCCTT  
ATGACAGGACAAATATCCGACTACTTTTACACCGTCCGGTACGGTACGCTTTCATGTTCTAAAGCCGCGTGGGAAATC



TGGAGTAAAACACTGACTGGAGAAACAGTTCCGTTTACGCTTACGCTTTCGAATGGAGAGGGGGCATACTTTTCACTTT  
CCCCAAGGTTTCAAGTGTCAAGGTGAATGGCTGATGGGGTAATAGCGACATTTCCAGGTTCAATTGAGCATTACCGCAG  
CAGATGAAGCACCTACGATAACCCAGAAAAAAATTTCCCGGCTGCCGTGATCGCAAAAGCCAGTGTGAGGCGATTAGT  
TGA

>Cluster\_43891

ATGAAGGCGTTTACCTATGAACGAGTGAACACCCAGCCGAGGCGGCACTTAGCGCTCAGCGCTACCCGGCGCAAAAT  
TATCGCGGGCGGGACCAATCTGCTGGACCTGATGAAGCTGGAAATGAAACGCCACCCACCTTATCGATGTGAACGGCC  
TCGGGCTCGATAAGATTGAAGTGAACGACGCGGGTGGGCTGCGCATCGGCGCACTGGTACGGAACACCACCTGGCGGCT  
CACGAGCCGCTGCTGATGATTACCGGGTACTTCCCGCGCCCTGCTCGCTGGCGCATCTGGTCAGTTACGTAATCAGGC  
AACCCACGCGAGTAACTGCTCCAGCGCACGCGCTGCCCTATTTTTACGACACCAATCAGCCCTGCAATAAGCGCCTGC  
CCGGGAGCGGCTGCGCGGCTTGAAGGCTTAGCCGTGAGCAGCGGCTGGTAGGCGTAAAGCGAAGCCATGCAATGGCCACC  
CATCCGAGCGATAAGCGGTCGCAATGCGGTTGCTGGATGCGGTTGGTGGAAACCATCAGCCGGAGGGAAAGACTCGCAG  
TATCACACTGGCTGATTTTTATCACCTTCCGGGAAAAACCCGCGCACATGAAACCCGCCCTGCTTCCCGGTGAGCTTATCG  
TTGCGGTTGACGTTACCTCCGCGCTCGGCGGAAAAATATCTACCGTAAGGTGCGCGATCGCGCTCCTACGCTTTGCC  
CTGTTATCGGTCGCGGCGATTATCACCTGACGCGCAGCGGCGCGCTGCGCTGGGCGGAGTAGCACATAAGCCCTGGCG  
CATGAGGCTGCGGATGCTCAGCTATCCAGGGGGCGAGGCCGTATATGACACGCTGTTCCGCGAGCCCATCCACCCG  
CTGAAAAACACCTTTAAACTCCTGTTGGCGAAGCGAACGCTTGCCTCCGTAAGCTGAAAGCGAGGGCACAGGCATGA

>Cluster\_60520

ATGGGTATCTTTAAGGCAAAAAACCCATGTACCAAAAAACAATTTTTACAACCTCTAATACATTTGATTTATGGTGGT  
TATGATTTCTGATGATTTTTATGAACAAATTTGTAGAAAACGACGTGATCTGCCATACATGTCGCAATGTCGGAATGCGAAT  
GGCGGTTGATACTGATGTTCTAGAGGAAGATCATCGGAAATACGGATTGAGCTAGGCGAGAAATGCGAGAGCAATTTCTG  
AGCTCTGAGAAAAATAGTACTCGTGTGAGGTTATATCTGCGATGTACCATGGGAAACAGGCACCATACAGTGAATGG  
GCAACTGGAGATAAAGGAAGAATACACTGAATTTATGATCCAGCTCAAGAATGCTGGAAAAATCTAAGTTCAAACCTTA  
CTCCGAAATGATGGGTGGAAAAAAGGTTGATGACGATTTCCATTAATGACATTTTCAAGGCACACCTTTATGTTCCGCTCA  
ATCTCTTTTTTTCGGGAAAAATCTATCATGCTGAAAAATGAAAACGTTGCCTTTAAAGCATTTTATCGGGCTGCGGAGTT  
ATTTGATAAGTGCATAGGTATGACTTGGTTAACATCTCTGTTTGTAAATCAAAAAAATTTATCAGAAGTCAAGCGGAGTG  
CAGGAAGAAGGGTGGCAAAAGCAAGCGGAAGTGTACCATTCATTTCAACTGAAAGTTGGTTGAGCTAATTAATGACTCT  
GTTCCGAAATGATGGGTGGAAAAAAGGTTGATGACGATTTTCCATTAATGACATTTTCAAGGCACACCTTTATGTTCCGCTCA  
AGAGTTTGGAGATAAATAAATAAATAAATAAATAAATAAATAAATAAATAAATAAATAAATAAATAAATAAATAAATAAATAA  
ATCAATGTTCTTTAAAAATGAAGATGTAAAACAGCTTTCGATAGCGCTGTTTCTGTAAGAAAAAAGAAAGTAAATAA

>Cluster\_33898

ATGAGAAATTTTTTCCGATGATGGTTCTACAATGTGAAACTTGCTGGTTTGAAGGCAAGACGCTGAAAAAGTGGGATC  
AGTGAACCTTTTTCCGCATAACTGGAAAGTCCGAGGCTTAGGCAGCAGTCTGACTTATAACTATCTGCTTATGATGGCCGTA  
AATATACCTACGACCCGCTCAGCGAAGATGCGATCAGCAGCAGCTCATATTTGATATCAGTACTCTGATACAAATGTGTTG  
GCAGTTTACCACGCATTTACTGAACAGTGGCATTGAACCCAGGAGATCGATCTCACCGTTACGTTACCTATCAGCGAGTT  
TTACACGGCCGATTTGCCGAAAAAATACGCTTAACTTGAAGAGAAAAATTCGCAACCTGATGCGAGAAAGTCAACCTGAACA  
AAGGGGAACTTTTACCATTAAAAGCGTTGAAGTGTGCTGAAATCACCTCCCGCTGTATTTACTCGCTAGTTGCTGAC  
AACCTTGGTCACTACGAAAAATCATTGGTTATCGATCTCGGTGATCAACTCTGGATGTCGGGGTTATTTGTTGCCAGTT  
TGAGGATGTTCCGGTGTACATGTTAATCTGATATTGGTGTATCAATGGTCAAGAAAGCCACGCTCAGCTGCACTGAAAA  
TGGCCAGCAGTGTACAGCTCAATGATTTGCTGACGAGTTGATCAAAAAACAGGAATAAACCCTGGATTTTTGTTGGGCGAGTT  
GTAATAGAGTCTCTAAACTAAATCTGGTGTGATACCATTTGATACAGCGATAAATAAACTGGGCGAGCTAGTTGTTGA  
TGATTTGCTGCACTATCGAAACGTAACCCGCTATATATTTGCTGGTGGCGGGGCTGCACTCATTTGCTGATGCTGTTCCGTA  
AGGCATGGAACACCTTTGGCGAAAAAGGTGTTCTTATGGATGAACCTCAGACAGCGCTGGTCCAGGCTATTGCACGCTTC  
AAAGCGGAGGAGTAA

>Cluster\_28254

ATGCAGGCGTTACTTTTTAGAACAGCAGGACGGCAAAACTCTCGCATCAGTACAGACTCTGGACGAAAGTCCGCTGCCGGA  
AGGCGATGTCACCGTTGATGTTTACTGGTTCAGGCTGAACTACAAAGATGCGCTGGCGATTACCGGTAAGGGAAAAATCA  
TCCGTAATTTTTCCGATGATTTCTGGGATGATTTTTGCCGGAACGTACGCACCAGCGAAGATCCGCGTTTTATGCGCGGT  
CAGGAGGTGTTACTCACTGGCTGGGCGCTTGGTAAAAACCACTGGGTTGGGCTGGCGGAACAGCGCGAGTGAAGGTTGA  
CTGGCTGGTTGCCATGCCCAAGGGCTGGACGCGCGTAAAGCAATGATTTATCGGTTACTGCCGTTTTACCGCCATGCTGT  
GTGTGATGGCGCTGGAAGATGCGGTTGTTGCGCCGAGGATGGGAGGTTGTCGTGACGGGTGCCAGTGGTGGCGCTCGC  
AGTACCGCGTGGCGCTGCTGCATAAGTTGGGTTATCAGGTCGTTGCCGTTTTCCGGTCCGGAAGTACCCATGAATATCT  
GAAAAGTTTAGGTGCCAGCGTATTTCTTCTCGCGATGAGTTTCCGCAATCCCGCTCTGAAAAAACAGTCTGGGCTG  
GGCAATTTGACACCGTTGGCGACAAGTCTGGCAAAAGTCTGGCGCAATGAATTTACGGCGGCTGCTGGGCGGCTGT  
GGTCTGGCGGCTGGTTTTACTCTGCAACCAACCGTGCATTTTATTTCTGCTGAAATGTCGCTTTGCAAGGGGCTGATTC  
AGTAATGACGCCACCAGCAGCGCGCACAAAGCTTGGCAGCAGTGGTTCGCGATTACCGGAATCATTTATACCCAAG  
CGGCAAAAGAGATATCTCTGGCAGAGGCACCGAAGTTTCCGAGGCCATCATTAATAACAGATCCAGGGTCCGACGCTG  
GTGAAGGTTAACTAA

>Cluster\_41091

ATGAGCGGCGCTCGATTACACACGCTGCTGCCGTAATTAACCTCGCGTACGCCAGTTATGGTATGGCGCGGGCTCAT  
TGATGTGATCGCCGACGCTTATGCCCTCCCTGGCGTGGGTGCGATATCGAAGTGAACAGCAGAGCGTTAACGTTGGCG  
GCTGTGCACTGAATTTGGCGTGGCATTAAAGCGCTCCGATCGAAGCGGTAATGCCCTGCGCTCGGTCAGGGGGTG  
TGGCGGAGATTATTCGCAACCGGATGGCAAAAGAGGACTTAATCAGCCTGATCGATAACGCCAAGGTGATAACGGCTG  
GTGCTGCGGCTGGTTGAGCCTGATGGCAACGCACTTTTATGTCATTAGCGGTTGTTGAAAAATCAGTGGAAATCGCCAGT  
GGCTGGCGGATTAACCGTTGCGCTGGCAGCTGCTCTATTTTTTCCGGTTATCAACTGGCTCGCCCTGCGCCGAAATG  
TTAGTGAATGGCTGGAAAAAGCTGCAAGACGCTGACCGCTTTATTCGATTTTGGCCACGTAATTTGGCGATATCCCGGATTC  
ATTACTGGCGGGATCATGGCTGTCGACCTTTAGTGTCACTCAATCGTCAAGAGGCTGAGATTGCCGCCAAGCTTTTGT  
CTTTATCCGAGAGATAACAACCTTGGCAAGCAATGGCAGGAGAAATTTGCCGCGCGTTGATCGTTGCGCTCGATAAA  
GAAGGCGCATGTTATTTAGCAACGACGCTTCTGGCTGCAATCCGGCATTTCCAACGCAAGTTGTAGACACCATTTGGGCG  
GGCGCAGCTGCTGGCGGCGTACTTCCCGGCTGGCTTCTGCTCCACCTGCGCCACTGGCGGATGCCGTAATTTAGGGCAATG  
CAGTGGCGCTGTTGGTTGTCGGGATCGGGGGGTTGATTTGCGCCACGCGCGAGGAACCTCTCCGACACAAAAAC  
GTATAG

>Cluster\_29263

TTGTTAAATTCATTTAAACTTTTCGCTACAGTACATTTGCCGAAACTATGGCTTACTCGCTGGCGGGTTGGGGCGCAAG  
CAAGCGGCGAGGATGGCTGACAAAACCTGTTTATCGATCTGTTCTGTTAAATACTACAAGTTCGACATGAAAGAGGCGCAAA  
AGCCGGATACCCGACCTACCCGACCTTTAACGAAATCTTTGTCGCTCCGCTGCGTGAAGTACGCGCAATCGATAC  
CATCCGAAATGTCATGGTTATGCTGCGGATGCTTACAGCAGTTGGGTAAATCGAAGAAGATAAATAAATAAATAAATAA  
CAAAGGCCACAACCTACAGCCTCGAAGCCCTGCTGGCAGCAACATCTGATGGCGGATCTCTTCCGTAACGGTACGTTTGT  
TGACCACTTACTCTCCCAAGTACTACCAACCGGATACATGCGGTGCACGGTATTTGCGTGAATGATCTACGTTG

CGGGCGATCTCTTCTCCGTTAACCATCTCACGGCTCAGAACGTGCCAATCTGTTTGCCCGTAACGAACCGGTGATCTG  
CCTGTTTCGATACCGAATTTGGCCCGATGGCGCAGATTCGGTTCGGTGGCAGATTGTAGGCAGCATTGAGACGGTATGGG  
CGGGACCATTACGCCCGCGCGGAAGGCATCATCAAGCGCTGGACCTGGCCCTGCCGGGAAAACGACGGTTCTGTGGCA  
CTGCTGAAAGCCAGGAAATGGGTTCGCTTTAAACTCGGTTCCACCGTTATCAACCTGTTTGCACCCGGTAAAGTGAATCT  
GGTTGACCAACTGTGTGTACGAAATTTGCCAGCGCTGGCAGCTATCTACCGAAACCTTTGGTTACGCCAG  
ACGCTGAACCCCTCCCGCTTCTCTGCTGAAGATACTGAACGAGAACACGACGCCAGCCCATTTGGTTGACGACAAAAAGAC  
CAGGTCTAA

>Cluster\_27734

ATGATTGAGTTTGTATAATCTCACCTACCTCCACGGTAAACCGCAAGGCACCGGCTGCTGAAAGCCAATCCGGAAGACTT  
TGTGGTGGAGGAAGATTTGGGCTTTGAGCCTGATGGTGAAGGTGAGCATAATCTGGTTAGAATCTCAAAAACGGCTGCA  
ATACCCGTTTGTGGCGGATGCACTGGCGAAATTCCTTAAAATTCATGCCCGTGAAGTCAAGTTCGCTGGGCAAAAAGAC  
AAACATGCTGTAACGGAACAGTGGTTATGTGCTCGCGTGGCGGCAAGGAAATGCCCGATCTGAGCGCTTTCAACTGGA  
AGGCTGCCAGGTGCTGGATATGCGCGGCACAAGCGCAAGCTGCGTTTTAGGGGCGCTGAAAGTAAACGCTTTACCTGG  
TTCTGCGGCAAGTGAACATCGCGATGACGTTGAACAACGCTGATCGATATTTGCGTAAAAGGTGTACCGAACTACTTC  
GGTGCCCAACGTTTGGGATTGGCGGTAGCAACTTGCAGGGCGCGCTGCGCTGGGCGCAAAACAACTCCCGTGGCGCA  
TCGCAATAAACGGAGTTTTTGGTTGTGCGCAGCCCGAGTGGCTGTTTTAATCAGATTGTGCTGAGCGCCTCAAAAAA  
CAGACCTTAAATCAAGTTTGTGACCGCGATGCGCTACAATTAGCCGAGCTGGTAGCTGGTTTGTCTGACGCAAGAA  
CTGGCGGAATTACAGCGTCCGCTCAACGGTAAAGAGCTAATGATAACCGCCGATTCGCGGCGAGTGGCGAATGGGGAAC  
TCAGCGTGAAGCGTGGCATTGCAACAAGCAGCTGTGCGCGCAGAAATGAAATCAACGCTTACTGGTGGCGGAAAAAG  
TTGAAGCCGCGCAGAGCGATGCTGCTGATCCGCAACAATTAAGCTGGAACTTGGTGGGATGACGTCACCGTCAAAATC  
CGTTTCTGGCTTCCGCGGGTAGTTTTGCAACCAGCTTGTAGGGAACCTTATCAACACAACAGGTGATTTATGCGCATAT  
TGCTGAGTAA

>Cluster\_17069

ATGTTTTTAGTATCATTTGTTGAGACGATATGCACTTAGTACTACGATTATAAAGCTTATAATTTAATATTGAAAAAC  
AGACTTTGTTGTATACATATATCCCGATCAGATTGGCGATGCTATGGCCATCTTCTCTGTATTCGGGCGCTTGAATTGC  
ATAAAATTAAGCATCTAATTAATTTAGTCTGACAATTAATTTAGAAGTCTTAAATGTCTCAAACTTGAACGACTAAA  
TTAACATTTAGTCACAATGACTATGCAGGATCACGCAATATAAAGAAATAAAGATTAGCGAAGAACAATAACTGCA  
ATACGGTACCGCGGATCTTTGTATAGAGCGATGCGTAAAAGAACCTGAAAACGATGATATTTATCAGTCAGTTGAAAG  
CAAAAACGAATTTCCAGGTCGTCGGTTTAAACATGAAGTGCTATTCCTTTGTGTAATAACGCGTCCCGGATGGATCAG  
AATCTCCGGCTCCTGTACCCATGACATGGGCAATTTATGATGCGTGGGCGGTTTTCCCGGCGTCAAGTCAATATATGA  
ATTGCCATTAAGCGATGATGACTCGATGAGGTACGCGAGGAAATGCGATCGTTAGGATCTTACATTCGCGCTCAATTTAG  
AAGTAGCTCGCAGGAACGTACATTTTCAATATCGATTGCGAAGAAATTAATAGCAAAAATTCAAAGTGAACAGATATG  
CCAATAGTATGCTTTATGGACCAAGGGGAAGATAAAGCCAGGGCATTAGTGGATTGTATAATAATGTCTACCGTTT  
ATCCTTATCACCTCGATTAAACGTTTACGAGCAATCATAAAAGATGCTTATATGCAATAACCTTACACCTCAATAT  
TACATATGGCAAGTGCCTATAATACCCCTGTTGTTGCAATTTATGCTGATTACAAAACCGGATGGCCCGCAATGGCCGAT  
GTTTCCGAGTCAGTCATCTGCGGGAAGTTTGGCAAAAATTAAGTCTGGATGAATTCGCAAAAGCATTAAAAAGTGTTTT  
GGCGAGAATTTGA

>Cluster\_26837

ATGAGCAAAATCAGGGTGTATCTGTCGATGATTCCGCACTGATGCGCCAGATCATGACAGAAATCATCAACAGCCATAG  
CGACATGGAATGTTGGCGACTGCCCTGATCCGCTGGTTGCGCGTGAATTTGATTAAAGAAATCAATCCCGATGATTTGA  
CGTGGATGTTGAAATGCCGCGGATGGAGCGACTGGATTTCTCGAAAAATTAATGCGTTTGGCTCCAATGCCCGTAGTG  
ATGGTTTCTTCCCTGACCGGCAAGGGTTCAGAAAGTACGCTGCGCGCGCTGGAGCTGGGGGCGATAGATTTTGTACACAA  
ACCGCAACTGGGTATTTGCGAAGGAATGCTGGCGTATAGCGAAATGATTGCTGAAAAGTGGCTACGGCAGCAAGCGGA  
GCCTTGCAGCACATAAGCCATTGTCGGCTCCGACAACGCTGAAGGCGGGGCGGTTGTTGAGTTCTGAAAAACTGATTGGC  
ATTTGGTGTCTCAACGGGTGGAACGAGGCAATTCGTCAGTACGCAACCGTTGCCGCTTCCAGTCCGGCACGTTAAT  
TACCCAGCATATGCCGCCGGTTTACCCGCTCTTTGCGGACAGACTTAATAAGCTTTGCCAGATCGGGGTTAAAGAAG  
CCGAAGACGGAGCGGCTTTCGCGGACATGCTTATATCGCCGCGGATCGGCATATGGAGCTGGCGCGTAGTGGC  
GCAAAATTAATAAATAAATTCACGATGGCCCGGGGTTAATCGCCATCGGCCATCGGTAGATGTGTTGTTCCATTCTGT  
GGCCAAACAGGCGGGGCTAATGCGGTTGGGGTAACTTAAACCGGATGGGCAACGACGGCGCGGCGGAATGTTGGCGA  
TGCGTCAGGCGGGGCGATGGACCTTGGCGAAAACGAAGCAAGTTGCGTGGTGTTCGGCATGCCGCGCGAGGCCATCAAT  
ATGGGTGGTGTCTCGGAAGTGGTGCATCTTAGCCAGGTAACTAGCAGCAAAATGCTGGCAAAAATTAGTGCAGGACAGCGAT  
ACGATATTTAA

>Cluster\_24093

ATGGCAACAGGCACGCGCCGATGCTGGGCGATCCTCAACTCGCTGATTAACAGTATTTTGTAAATGATGACAATCT  
GGCGATCCATTACGCCAACCCCGCGCAACAACCTGCTCGCCCAAAGCTCCCGCAAAATGTTTGGTACGCCGTTACCGG  
AATGTTGAGCTACTTCTCATTAATATCGAGCTGATGCAAGAAAGTCTGGAGGCGGGCAAGGCTTTACCGATAACGAA  
GTGACGCTGGTATCGACGGGCGCTCGCATATCTTCTGTGACGGCTCAGCGTATGCCGACGGCATGATCTGCTGGA  
GATGGCCCGATGGAATAACAGCGCCGTTAAGTCAAGAACAGCTACAGCAGCCAGCAGGTTGCTGCCGATTTAG  
TGCGCGGCTGGCAGATGAGATTAATAATCCGCTTGGCGGTTTACGTTGGCGCGGCGAGCTGCTCAGCAAAAGCATTACCT  
GACCCGCTACTACTCGAATATACCAAAGTGAATATCGAACAGGCGGACCGGCTGCGAAATCTGGTTCGACCGCTGTTGGG  
GCCGAGCTGCCCGGTACCGGATTAACGAAAGTATTCACAAAGTGGCTGAACGCGTGGTGGTGTGCTGATGGAAC  
TGCCGAGCAACGTTGCGGTTGATTTCGGGATTCAGCCCGCTGCGGAACTGGCGCACGACCCGATCAAAATGAAACAG  
GTCTGTGTAATATGTTGCGCAATGCGCTACAGGCGTGGGGCGGAGGTTGGTGAATCATTCTGCGTACCCGACCCGC  
GTTTCAACTGACCTTACAGCGGAGCGTTATCGGCTGGCGCGCAATTTGATGTTGGAAGATAACGGGCGAGGATTTCCGC  
CTCATTTCAGGATACGCTGTTTACCCGATGGTCAAGCGGCGGAAAGTGGCACCGGGCTGGCTTATCCATCGCCGCT  
AATTTGATTTGATCAGCATTCAGGCAAAAATGAAATTTACAGTTGGCCAGGTCATACCGAGTTCTCGGTTTACCTGCGCTAT  
CAGGAAATAA

>Cluster\_15077

ATGAGTGGTCAAGGGAAGCGATTAATGGTATGGCAGGCGGAACCGTGGACATGATTTCCGGGGCTGGCGGTTGGCGA  
CCATCAATGCTCAGGGTTGGCAAGTTGCTGCTGGGGACTGCCGACCGTATGGAAGCGGACTTAGTGCCAAAACATG  
GCATCGAAATGATTTTATTCGATCTCTGGTCTGCGTGGAAAAGGATAAAAAGCACTGATAGCTGCGCCGCTGCGTATC  
TTCACGCTTGGCTCAGGCGCGGGCGATATGAAAGCGTACAACCTGACGTTGGTGTGCGGATGGGCGGCTATGATC  
AGTCCAGGTGGTCTGGCCGCTGGTATAGGCAATCCGTTGACTTTCATGAACAAAACGGTATTTGGCGGTTAACCA  
ATAAATGGCTGGCGAAGATTGCTACCAAAAGTATGACAGCGGTTTTCCAGGTGCTTTCCCTAATGCGGAAGTGGTGAAC  
CCGGTGGCTACCGATGTTGCTGGCGCTGCGGTTGCCGACGCAACGTTTGGCTGGACGTTGAAGTCCGGTTCGTTGTTGGT  
AGTGGGTGGTTCCAGGGCGCAGCATTCTTAAACAGCAATGCCGAGGTTGCTGCGAAACTGGGTGATTCAGTCACTA  
TCTGGCATCAGACGGCAAGGTTGCAACAATCCGTTGAACAGGCGTATGCGCAAGCGGGGCAACCGCAGCATAAAGTG  
ACGGAATTTATGATGATATGGCGGCGGATGCTGCTGCTGTTGCGGCTCCGGTGGCTTAAACGGTGG  
TGAATCGCCGCGCAGGACTACCGGCTGTTTGTGCGGTTTCAACATAAAGACCGTCAAGCAATACTGGAATGCGCTAC

CGCTGAAAAAGCGGGCGCTGCCAAAATATCGAGCAGTACAGCTTAGCGTGGATGCTGTCGCCAACACCCCTGGCCGGG  
TGGTCGCGAGAAACCTTTATTAACCATGGCAGAACCGCCCGCTGCATCCATCCGGATGCCACCGAGCGAGTGGCAA  
TGAAGTGAGCCGGCTGCCCGGGCTAA  
>Cluster\_24611  
GTGGGCGAGGAACTACCTGTAACGCTTGGTAATATTGCGCCGTTGTCGTAAGGCCGTTCCAGCCTGGACGGATTGCTCT  
GGTGTGCGAAGGCGGGACAGCGTGAATTTTACGGCTGGCGTGTGGATGAGTTTATGCGCGCGCAGTTTAACTCCT  
TCGATCTTTATCTCGGCACATCTGCCGGGGCGCAGAACCTCTCGCGGTATATCTGCAATCAGCCGGTTACGCGCGCAA  
GTCATCATGCGTTACACCACAAAACGCGAATTTTTCGATCCATTGCGCTTTGTCCGTTGGAGAAATCTTATCGATCTCGA  
CTGGCTGGTGGAGGCCACCGCAAGCCAGATGCCGTTGCAATGGATACCGCTGCGCGGTTATTGACAGCGCGAAATCGT  
TTTATATGTGCGCTGTCTGTCAGGATGACTATGCGCGGAATTACTTTTGGCAACTAAACAAAACCTGGCTGGATGTGATT  
CGCGCCTCCAGTGCAGTACTGGCTTTTATCGTAGCGGAGTGTGCTGGAAAGGTATTAACCTACCTGGATGGTGGGATCAG  
TGATGCGATCCCGGTTAAGAGGGCGCAAGGCAGGGAGCAAAAACGTTGGTCTCATCCGACCTGTGCCGTCACAAATGT  
ACTACAGCTCCAGCTGGTTCAAACCGCATGGAACCGTGGCTGGTGACAGTAGCTGCAGCCGCTGCAGCCGCTAACTGGTCAG  
CATCATGAAACAGCTATCTGTGAGATTCAGCAATTTATTGAGAAACACCGGGCCAGCTGCGGATATTGAAATTTATCC  
GCCGAAAGCATTTGCATAGTATCGCGCTCGGCAGTCCGATTCGCGCGCTGCGTGAAGACTATAAACTGGACGTTTATGCG  
GGCGTTATTTCTGGCAACGGTCCGTAATTTACTGACTGAAAAAGCGCCGCTGAGCCGCCATCTGGTCCGGTGGTGTATG  
CCGAGTCCGATCGTTATTCCCGCTCGCCAGTCCGCAACGATACGCTGGTTGCCGAAGTGAGCGACGCTCCCGAGCGAA  
CGACCCGACATTTAAACATGAGGATCTGGCTTGA  
>Cluster\_42017  
ATGCAAGCGTGCCAATTTTACGCCAGGTTCTGGACTGGTACGATAAATACGGGCGGAAAACGCTGCCCTGGCAATTTGA  
CAAGACGCCCTACAAAGTATGGCTCTCAGAAGTGTGTTGCAACAAACTCAGGTTGCGACCGTTATCCCTATTTTGAAC  
GCTTTATGGCGCGCTTCCCAACGGTGACCGATCTCGCCAAATGCGCCGCTCGACGAAGTCTCCACTTGTGGACCGGGCTT  
GGCTATTACGCCCGCGCGCAACCTACATAAAGCGGCAACAAAGTGGCGGCTTACACGGCGGTAATTTCCCGGAAAC  
CTTTGAGGAAAGTTTATGCTGCGGCAAGGCTCGGGGCTCCACCGAGGCGGATTTCTCTCGCTTTCTGCGGTTACGACCT  
TTCCGATTTCTCGACGGTAACGCTCAAACCGTGTGCGCGCTGCTATGCTGTAAGCGGCTGGCTGGGAAAAAGAGGTC  
GAGAAATAACTATGGAGTTTGGAGCGAGCAGGTGACGCCGCGGTTGGCGTGAACGTTTAAACAGGCATGATGGATTT  
GGGCGCGATGATTTGTACGCGCTAAGCCGAAATGTTGCTCTGTCCGCTACAAAACGGATGATTTGCCCGCCCAACA  
ATAGCTGGTGCCTTTATCTCGGGCAAAAACCGGAAACAGACTGCGCTGCGAGCGCACCGGCTACTTTTGTGTTACGAC  
GAAGATGAAGTATTGCTGGCGCAGCGTCCGCGAGCGGATTTGGGGCGGTTTATACTGTTTCCCGCAGTTTGGCGATGA  
AGAAAGTTTGGCGGAGTGGCTGGCGCAACGACAGATTTCTGCCGATAAAGCTGACGCGAGTGCAGCGCTTCCGATAGCT  
TCAGCCATTTCCACTTAGATATTGTGCCATGTGGCTTCCCGTGTCTCATTCACCGGCTGCATGGATGAAGGCAATGCG  
CTCTGGTATAACTTAGCGCAACCCCGTCACTTGGCTGCGCGCTCCCGTGGAGCGTTTGTACAGCAGTTACGCACTGG  
CGCGCGGTTTAG  
>Cluster\_44200  
ATGTTCCGCAATGATATTTTACCCCGCTAAAACGTTTCAAGAAATAAAAAATGGCGGAAATCGCCCAATTCCTGCATGA  
AAATGATTTGAGCGTTGACACCAGCTGCAAGTATTTTATACCGTAACCCGCGATGAAAAGCTTATCGCGTGGCGTGGAA  
TTGCCGAAATATTTAAATGCGTTGCGATCAGTGAATCCGTTCCGCGTGAAGGACTGGCGTGACATTAGCCACTGAA  
CTGATAAACCTCGCCTATGAGCGGCACAGCAGCATCTGTTTATTTATACAAAACCGAATACGAGGCGCTGTTCCGCCA  
GTGCGGTTTTCACGCTGACCGCTACCCGCGTGTGTTGCTGATGGAAAACAGCGCCACGCGCATGAAAACGCTATG  
CCGAATCGCTGAAAAAATTTCTGTCATCCAGGAAACAAAGTGGTGCATTTGTGATGAACGCCAATCCCTTACGAAATGGT  
CACCGTTATCTGATTTCAAACAGCTGCGGCACAGTGCAGCTGGTGCATCTGTTTATGTCAAAAGAAATCTTACAGCTT  
CCCCTATGAAGACCGGTTGGATCTGGTGTAAAAGGACCCCGCATATTCACGCTGACTGTGCATCGCGGCTCCGAAT  
ACATCATCTCCCGCGCTACGTTCCCTGCTACTTCAATTAAGAAACAGAGCGTCAATTAACCATTTGATACCGAAATGAT  
CTGAAGATTTTCCGTCAGTACCTCGCTCCCGCGTGGGTGTAACCTACCGCTTTGTGCGTACTGAACCTTTTGTGCGGT  
TACCGCCAGTACAAACAGGATATGCGCTACTGGCTGGAACCGCGACTATCTCCGACCGCCCATCGAACTGGTTGAAA  
TTGAGCGGCTGCGTTACAGGAGATGCCGATATCCGCTTCCCGGTTACGTTCAACTGCTGGCGAAAAACGATCTCACGGCT  
ATCGCGCGCTGGTCCCTGCAGTACGCTGCATTTATTTGACAGAACCTGCTTGAGCACTCCCGCAGGACGCGGAGCTCG  
TCAAAAGACCCCCGATGA  
>Cluster\_63634  
ATGGGATTTATTTCAACATATTCAATTTGCTTACCTCCAGGATAACTTCTGCAAAAACAATGACGCCTTCAAGTTTGA  
TGAGTTAACAGCTAACATAAATCCTAAACTCAAGAAACAAAACGAAATATATCAATCGAAAACGATTGGCTTACTATTG  
ATTTCTCTTATTTTGGACAGGCGTATCTGTCTGCAAAACAACATTTGGGTTGTAGGCTGTAGTGACTTTGATGGCAAT  
GGAAGGGGAGGCGACCGGAAAGTGGATTTGGAACAGTGTGTTTAGTTAATAAACCAACTTTTCTGATCCTTCAATAGCT  
CAGAACTATTTGCCGACCATTTAATGCTGCTGTCGCTGACACAGGTGATTTATATGTTTATGACGCTGGATTTGGTTCTG  
CGCTGCAAGCTGATTTGATTTGCTATTGATGTTGAAAGAAATGAAAAGTTTAGACGCTCATTTATGAAGCAAAATATAAT  
ATCGGAATTTCTCATTTGTTGTAATAACGATCGGTTTACAGACGCGCAGCGCCGGTAAAGATGGAATATCTTTGAGGT  
AATAAATCTGTGGTCAAAAACAACAATAATTTCCATTAACACTGAGTATGGATGGGCTGATAGTTATTTCTTTCGATCTCG  
ATGAAAATGGGGGCTAAGATCGTGAAGTGAATGCAAAAATTTGGATATTCAGATACACTGCGTATCCGTTATTTCC  
ATTTGACGTTGGAAGCGTATAAAGATGCTTTGTCTATATAAAGGAAATTTCAACTTAAAGTAGAGGCGCGAGGCGCTTTT  
AAGAGAATCTCCAGTGAGAAGATGCTCAAAAAGCATTTGAAAGCAATTTGAAATGGCTCTAATGAAGGAGCGAAAGACC  
GAAGTACTGGGCTGCAGCCGATTTTCGATCAAAAGTGAAGCAATGATTTACTTGGTAACTTTAGTGTATGCTTTGAT  
GCCTATGAAAAGCTTTGAGCTTTAATCAAAATAAGGGTTTACAGACGAGTTAATGCTCTGCGTAAAAAATACAGAG  
ATTAATAATA  
>Cluster\_54515  
ATGAAGGTACTGGTTACCGGCGCCACCAGCGGCTTAGGTCGAAACCGGTTAGAGTTTATATGCCAGAAAGGCATCAGCGT  
GCGAGCGAACCGTTCGCAACGAGGCAATGGGCAAAATGCTGGAAAAATGGGCGCAGAGTTTGTTCGGCGGATCTGACCG  
AGCTGGTTTATCACAAGCTAAAGTGTGCTCGCGGCGATTGATACGCTGTGGCACTGCTCCAGCTTTACCTCACCTGG  
GGGACACAACAGGCTTTTCGATCTGGTAACTGCTCGCGCACTCGCCGCTGGGTTAATGGGCTGTGCGCTGGGTTGTCG  
TAACCTTATTCATATCTCTTCCCCTCCCTGACTTCTGATTTATCACCACCTCGCGATATTAAGAAGATTTTCCGCCCTC  
ACCGCTTCCGCAACGAGTTTCCCGCAGCAAGGAGCCAGCAGCAAGAAAGTATGATCAATATGCTTTTCCGCGGCTAACTCA  
ACGCGCTTTACTATTTCTGCGCCCAAAAGTCTGTTGCGACCGCAGGATAAAGTCTTTATTTCCCGTCTGGCGCATATGAT  
GCACCACCTACGGCAGTATTTCTGTTACCGCATGGCGGCACTGCGCTGGTGCATATGACCTACTATGAAAATGCGGTCAGC  
CAATGTGGCTGGCAAGCAGGAGCTGCGATAAGCTACTTCCGGCGTGTGTACAACATACCAACCGGCGAGCATCGC  
ACACTGCGCAGCATCTGTGCAAGCTGATCGCAGGTTGAATAATTTGACTGTGCTGATTTGCTTCCCTCCCTACCGATGCT  
GGATATGATCGCCCGCAGCATGGAGCTTTAGGCGCAAGTCAAGAAAAGCGCGCTGACCCACTACGGGCTCTCCA  
AGTTGAAATTTGACTTTTACGCTGGATATACGCGTGGCGAGGAAAGTTAGGTTATACGCGGTCATCACTTGGATGAA  
GGTATCGAAAAACTGCCGCTGGCTACGCGACACGGAACCTGCGCGCTAA  
>Cluster\_26222  
ATGCTTGGCCGACAGTTTTCGCGAGATTTCTTCCACCAATGAGCAGCATGCTGAGGTTCTTCTGCTGCCTGATATGAA

GCTTTTTGCTGGTAACGCCACCCGGAAGTACGACAACGTAATGCCAACCGCTGTACACTTCACTCGGGCAGCCGCTG  
TAGGTGCTTTAGCGACGGCGAAGTCAGTGTACAAATTAATGAAAATGTACGCGGTGGTGATATTTTTCATCATCCAGTCC  
ACTTGTGCCCTTACTAACGACAACCTGATGGAAATAGTCGTTATGGTTGATGCCCTGCGTCTGCTTCCGCGAGTTCGTAT  
CACCCTGTTATCCCTTACTTTGGCTATGCGCGCCAGGACCTGCGCTCCGTTCCGCTCGTGTACCAATCACTCGGAAAG  
TGGTTGCAGACTTCCCTCCAGCTCGGTGTTGACCTGTGACAGTGGATCTGCACGCTGAACAGATTCAGGGTTTC  
TTCGACGTTCCGGTTGATAACGTAATTTGGTAGCCGATCCTGCTGGAAGACATGCTGCAGCTGAATCTGGATAACCCAAT  
TGTGGTTTCTCCGACATCGGCGGGTGTGCGTGCCTGCGCTATCGCTAAGCTGCTGAACGATACCGATATGGCAATCA  
TCGACAAACGTCGTCGCGTGCGAACGTTTCCAGGTGATGATATCATCGGTGACGTTGCAGGTCTGACTGCGTACTG  
GTCGATGATGATGCACACTGGCGGTACGCTGTGTAAGCTGCTGAAAGCTCTGAAAGAACGTTGGTGTAAACGTTAT  
TGGTACGCGACTCACCCGATCTTCTCTGGCAACGCGGCGAACAACCTGCGTAACTCTGTAATGATGAAGTCGTTGTCT  
GCGATACCATTCCGCTGAGCGATGAAATCAAATCACTGCCGAACGTCGCTACTCTGACCTGTGAGGTATGCTGGCCGAA  
GCGATTCTGCTATCAGCAACGAAGAATCGATCTTCCATGTTTCCGAACCTAA

>Cluster\_18310

ATGACAACGTTTTATGTGTCAGTGAAGAAAATTTAAAATCACTGGTGACCACAAAATACATACCGCCGGGCTGGATACCGA  
CACCACACAACAGGTGACAGATGTTTTAGTACATGCGGATATTAACCGTGTGCATTACATGGTGTATGTGTGTGCAAC  
ATTATGCAACCCGCTTCCGCTGCCGGAGGTTAAATAAAGCCCCGAGTTAGCATTGAGCAAAATTCACCGTCACTGGCC  
ATTTCTGCACCTCTGACCGAATGGGGCATTCGCAATTAATACCGCCACTGAGCACGCTATTAACACTGGCCCGCAAGA  
GGGTCTCGGTTTTGTTAGCGTTAAAACACGCTCCTACTGTGGTGCCTTATCTTATTTTGCAGAGATGATCACCACAAAG  
GGTTGGTTGCTATCGTAATGACGCAACCGATACCTGTGTGGTCCCATGGCGGCGCGAGCGCTTTTGGGAACTAAC  
CCATCGCCTTTGGTTTCCCGGTGAAACAGCCATCCGATGATGTTGATATGGCGACCAGTCCAGGCTTTCCGGCAA  
AATACTTCAATGCAAAGGAAACCGGAAAACATATTTGGTGAAGGGTGGCGATAGATAAAAACGGTTATGGCACCCTGATC  
CGTATAAGATTGAAAACCTGCTACCTTTCCGGCCACACAAGGTTCCAGGCATTGCACTGGCTATGATGCACTGACTGGC  
GTGCTGATGAATGCGAATTTTGGCAACCATATTTGTTCCGATGATGTTGATTAAGCAAGATGCGTAAGCTGGCAAGTTT  
GGTTATTGCCATCGATCCGAAAAGCTCGGCAATCCCTGTTTGGCAAAAATATGGCGAAAATGGTACGAGCTGATG  
CCGTTAAACCGGCTCCTGGTGTGAAAAAGTGTAGCGCCGAACGATCCGCAATGCACTACAAAAGAAAATGCCAACAG  
GAAGGTATCCGGTCCGGCAGGAATATCCATATCTGGCAGAGAATTA

>Cluster\_32602

ATGCGTGTACTGGGTATTGAAACTTCCTGCGATGAAACCGGCATCGCCATTTACGACGATGAAAAGGTTTGTAGCCAA  
CCAATTGTATAGTCAGGTGAAATGACACGCTGACTACGGCGCGTAGTGCCTGAGCTGGCCTCCCGGATCATGTGCGTA  
AAACCGTACCGTTGATCCAGGCGCGCTAAAGGAGTCTGGTTTAAACGGCAAAAGACATGATGCTGTGCGCTATACCGCA  
GGCCCTGGATTAGTCGGCGCACTGCTGGTTGGCGGACCGTGGGGCTTCTTGGCGTTTGGCTGGAACGTTCCGGCGAT  
CCCTGTACACCATATGGAAGGGCATCTGTTAGCGCCGATGCTGGAAGATAACCCACCGAATTTCCGTTTGTGGCGCTC  
TGGTTTCCGGCGGTCATACGAGTTAATCAGCGTACTGGCATTGGTCAGTACGAGCTGCTCGCGAGTCTATCGATGAT  
GCGGCTGTGAAGCGTTTGATAAAAACCGGAAGCTGCTGGGGTGGATTATCCGCGCGCCATTAAGTCTGAAAATGGC  
GGCTCAGGTTACTGGCGGCGCTTTGCTTCCCGCGCCGATGACCGACCGCTCGGGGCTGGATTTCAGCTTTTCTGGTCT  
TGAAAACCTTCCGCGCAATACCATTCGTGATAACCGCACCGGACAGCAGCAGAGCGGTGATATCGCCCGCCTTTGAA  
GATGCGGTGGTCGATACGTTGATGATTAAGTGAAGCGAGCGTGGATCAGACGGCTTAAAGCGACTGGTCATGGCAGG  
AGGCGTGAGTGTAAACCGCACACTGCGGGCGAAGCTGGCTGAAATGATGAAAAGCGCTGTTGGCGAAGTGTTCACGCGC  
GTCCGGAATTTTGTACTGATAACGGCGCATGATCGCCTATGCCGGAATGGTGGGTTTAAAGCAGGCGGACGGCGGAT  
CTTGGCTTAGCGTTCGCTCCGCGTGGCCTTGGCGGATTCACCGCTGCGTAA

>Cluster\_67067

ATGGCGGTTAAAATCAGCCTGAAGAGTCTAGTCTGTTAATCCGGCGACTGAACACACAATGGCGGCTCCTGGCGCCTTC  
TGCAGAAATCGCGCGGGCGTTTTGCTGATACGGACAACATCATTATACGCAAAATCCGGGGATGGGATGACCTGGTCT  
GGCAGGAAAATCCACATGTCACCCAATACGGTTATTTACCAGATAACAGAGACTCTCTTTATTTTAAATAAGACT  
ATCCAGATTCGCGGAGACAGATACACACAGTGTGATATTTGCCCGCCTGTGACATCAATGCCATGTGCGGGCTGGA  
TTATATGTAATTTGCAACCGGAATAATCCTGATTACAGTTATCAGCGACTGCGCGACCATATTCGTTTTGTTCTGATG  
AGTCCCGCAAAAGTTTTGAAAACCTGTTTTCTGTGCTCCATGAGTGGGAGCAATAAAAACCGATAAATACAGCGCGGCATGGA  
TTCAGTGTGACGGCGCCAGTGTTTTTATCAGGGATGCTTTTTTTGAAGAAGCCTTACAGGGAATGGGACAGCGCACAGA  
ATATGAGCCTGTCTTCGTGAGCGAAAACCGGAGCAGGTTACCCTTCCGAAAATATCTGTCAGTCCCGCCAAAGAGTTC  
GCGATATTTATCACTCATCCGCTCTGGGATGAGTACAACAACCGCTGATTTGGATGCGGGCGCTGCACAACCGGGTGT  
CCGAGCTGTACTGCTACAGCCTTTTGGATGTTGGCTTATGATGAAAATCCTCAGCGCGGTGAACGAGCAGCCGCAATGGGC  
CAGTTGATGGTGCCGGCTTACGCGATATGGCCGGGACACCGTTTTCCGCGCTGCAAGGAGACGTTTACGTTACC  
GTGCACTTCAAAAGTCAATGATTAACAAGCCGCAATGGTACTGAGCATATGTGCGTGGGCTGCGGACGCTGCGATGAC  
CGTTGCCCTCAGTACATTAATTTCTACGATTTATCAATAAAATGACTGCCCGGTCGGCAGGCACTCTCCGGGGAGGC  
ATAA

>Cluster\_42318

ATGAAAAGCGAAATTTGGTCTGATGGGATCTCTCGCAGGTTGCCGAATTAACACTATGAGTTACGTAGTGGCAG  
AGCAAAGGGGACAGAAGCCTTTGATGTCGCTACTGGTGGGACTGGCATTACCGTGGTAAAAGATCGCGCGCTGGATA  
TTGCATGGGCGAGCTACAAGGACACTGCGCTCTCTTTTTATCACCCCAACGGTGTGTGCGCCCGCTTTTTTTGAGTCT  
CAGGGCAACGGGTTTTTACGTAGCTTTTACGCGGGTTACTGACTACCTGCGGACTTAGCTACATTTGGCAGCCCTGTGA  
GGATGAAGGAGAAACGCTGGGGTTACACGGGCTTTGGCTGCGACTCCAGCAGAAGAGGTGGGGTATCGCACAGAACGGA  
CCGACAGCAGCATTTGAATTTGTCAATGAGCAAGTACGGGAAACAGATTTGTTCCGTTGAAAATCTGACGCTGGAAAGG  
ACCATTGCTGCCGTTATGGCGAAAATGTGCTGCGCATTAAGACAAGGTGACTAATCATGGTTTACCCCGCAGCCGCT  
GCAATTTCTTTACTTTAATTTACGGATGGCCTTTATTTATCGCCACAGGCAAAATCTTGTGTGCGGTTAAAAGCGTAA  
CGCCACGAACCCCGATGCGGCGGAAGGTTAACCAGTCACTGGAGATTTGTACCCACAGCCGGTTTTGACGAGCAG  
GTTTACTATCTCAGCTGAAATAGCAGCAGTCAAGGGATGAGTAAAGTTGCGCTGGTGAACGCGCAACTGGGTTGGGAAAT  
TTACGAGAAAATTCGACACCATGACGCTACCCAACCTTTATCCAGTGGAAAATTTAGGCGGGGTAATATGTTATGGGGC  
TGGAGGTACAGAAATGTTTCTGACGGTCTGATAAAGAACGAGCGCAGGGGCGTCTGCCCTTATAGAGCTAGGGGAA  
ACAAAGACATACTGCTTTGAGCTGGAAATGTTGATGGCGATGCTGAAATTAGCGGTTGAAAGCGGAAATTTGCAAGCTA  
CCGTTAG

>Cluster\_23766

ATGAACCAACGTAATGTTCAATGACTGTGATCGGTGCCGGCTCGTACGGCACCGCTCTTGCCATTACCTTGGCAAGAAA  
TGGCCACGAGGTTGCTCTTGGGGCCATGACCTGAACATATGCAACGCTTGAACCGGACCGCTGTAACGCGCGCTTTTC  
TCCCGATGTGCTTTTTCCGATACGCTCCATCTTGAAGAGCATCTCGCCACTGCGCTGGCAGCCAGCGTAATTTCTC  
GTCGCTGATCCAGCCATGCTTTGGTGAAGTGTGCGCCAGATAAACCCTGATGCGTCTGATGCGGCTGTTGGTGTG  
GGCGACAAAAGGCTGGAAGCAGAAAACCGGACGCTGTTTACAGGACGTTGGCGGCTGAGGCTTATAGCGATCAATTTCCG  
TGGCGTTATCTCTGGCCCAACGTTTGGAAAAGAACTGGCGGAGGTTTACCAGCGCCATTTTCGCTGGCCTGACGCGAC  
CAGACCTTTGCCGATGACCTCCAGCAATGCTGCACTGTGGCAAAAAGTTTCCGCGTTTTACAGCAACCCGGATTTATCGG  
TGTGACGCTTGGCGGTGCGGTGAAAACGTCATTTGCCATTTGGCGGGGATGTCGACGGTATCGGTTTTGGCGGAATG

CGCGTACGGCGCTGATCACCCGTGGACTGGCTGAAATGTGCGCTCTTGGCGGGCGCTGGGTGCCGATCTGCCACCTTT  
ATGGGCATGGCGGGCTGGGTGATCTGGTGCTTACCTGTACCGACAACAGTCCGTAACCGCGTTTTGGCATGATGCT  
CGGTCAGGGCATGGATGTACAAAGCGCGCAGGAGAAAAATGGTCAAGTGGTGGAGGCTACCGCAATACGAAAGAAGTCC  
GCGAACTGGCGCATCGCTTCGGCGTTGAAATGCCAATAACCGAGGAAATTTATCAAGTATATATATGCGGAAAAAACGCG  
CGGAGGCAGCATTGACTTTACTAGTCTGTGCACGCAAGGACGAGCGCAGCAGCCACTAA

>Cluster\_24320

ATGGAAAGTACGCGAAAAAGCTCCTCGCAGTAAATTCCTGCTCTGTTAGTGGTGGCTGGCGCTGGTTGCCCTTGT  
TTTTGTTATCTGGCGCGTAGACAGTGGCCATCAACTAATGACGCTTACGCGTACGAGATACCATTGATGTGGTGGCCG  
AAGTCAGCGGTGCGATTGTAGAACTGGCGGTCAACGACAACAGGCGGTGAAAACAGGGCGATTGCTGTCCCGATTGAT  
CCGCGCCCGTACGAAAGCCAACTGGCGAAAGCTGAAGCCTCCCTCGCAGCGCTGGATAAGCAAATATGCTCACCCAGCG  
TAGCGTTGACGCACAACAGTTTGGTGGCGACTCGGTTAATGCCACGGTAGAAAAGCCCGTGGCGCCGTAACAAGCCA  
GCGATACGTTACGCGTACCGAACCCGCTACTGCGAGAAGGTTTTGTTTTGCGGAAGAGGTTGACCGTGAAGAACC  
CAGCGTGGCGCAGCAACAGCGGACCTTAATGCCGTAATGTTTACAAGCGCAGTCAGCCGCGCCGTTAGCGCGCTGGATGC  
ATTAGTTGCCAGCGTGGCGAGTGAAGCAGATATGGCCGACCAACTGCATCTGGAATGGCGACCGTTCCGCGCGC  
CGTTTGTATGGCGGGTCAATTCCTCAAACCTCCGTCGGGCGAGTTGTCATCTGCGATGCGCCCTATTTTACCCCTAATC  
GACACTCGTCACTGGTACGTTGTTGCAACTTCCGCGAAACCGAACTGAAAAATATTCGCTCAGGTACACCCGCAACCAT  
TCGCTGATGAGCAACAGCGGCAAAACCTTACGAGGTAAGTGGATTGCGATTGGCTACGGCTGCTACCGGATGCGCGG  
GCCTGGTGTGGCGGCCGTCGCGAAAGTGTGCGGTTCTATTAAGTGGTCCGCGTTGCCAGCGTTTTCCGGTCAAAATC  
ATGGTCGATAAACCTGACCCGGAATGTCCCGCATCGGCGCTTCCGCGAGTCGTAATCTTGAGCCGCAATAA

>Cluster\_20470

ATGAAAAAACATTAAGTGGCAGCCGGTGGCGTACTGGCGCTCTCTTCGCTTTTTACTGTCAACGAGCTGAAAACGACAA  
ACCGCAGTATCTTTCCGACTGGTGGCACCAGAGCGTTAACGTTGTCGGAAGCTATCACACCCGTTTCGGACCGCAGATCC  
GCAACGATACCTACCTTGGATACGAAGCATTCGCTAAAAAAGACTGGTTCGACTTCTATGGTTATGCGGATGCGCCGGTA  
TTCTTCGGCGGTAACCTGGATGCAAAAGGTATCTGGAACCCAGGTTCTCCGCTGTTTATGGAATCGAACCCAGTTTCTC  
CATCGACAAGCTGACCAATACTGACCTTAGCTTTGGTCCGTTCAAAGAGTGGTACTTCCGGAACAACATACATTTACGACA  
TGGGTGTAATAAAGATGTTGCGCAGAGCAGCTGGTACATGGGTTGCGGTACCGATATCGATACTGGCCTGCCGATGAGC  
CTGTCCATGAACGCTATGCGAAATACAGTGGCAGAACTATGGCGCAGCGAATGAAAACGAGTGGGACGGTTACCGTTT  
CAAAATTAATACCTTTTGGTCCGATTAACGATCTGTGGGCGGTGAGCTACATCGGCTTCAACCACTCCGATGGG  
GTTCCGATTTAGGGGATGACAGCGGTAATGCAATCAACGGTATTAAGACCCGTACCAATAACTCCATCGCTTCCAGCCAT  
ATTTCCGCTCTGAACTACGATCACTGGCCTACTCTGTGCTAGCTCGTTACTGCGCAGCAGCGTGGTCACTGGAACGACGA  
TGCAGAACTGAACCTCGGCAACGGCAACTTCAACGTTCCGCTTACCAGGTTGGGTGTTATCTGGTAGTAGTTACAAC  
TCTAA

>Cluster\_44425

ATGCTTGGTTCATTAAGTAAATGCCGGTCTGGTTACCAATAATCATATGCTCGTTGCCATGGCGTCTATTCAGGGTGG  
AGCCTCGTTAGCTAAGTCACTTTTCTCTGGTGGGCGCACCAGGTTGTCAGTCCGCTGCGCTGGCATTAGGAACCGTGA  
TCCTCATCGCGCTTTTAAAGCATGCGGCTTTCGCAAAAGAGCAACGGTTACCCTGTTGTTTTTACCGGCTTTCG  
CTGGTGGGATGAATATCTTTTTTATCTTTCTATTCAGACAGTACCCTGGGTTATGCGGTGGCGCTGGAGTTCACCGG  
ACCACTGGCGGTGGCGCTTCTTCTTCTCGTCCGCGTAGATTTCTGCTGGGTTGTGCTGGCGGTTCTTGGTCTGTGTT  
TCCTGCTACCGCTGGGCAAGACGTTTCCATGTCGATTAACCGGCTGTGCGTGGCACTGGGGCGGGGCTGTTGTTGG  
GCTATTTTACATTTAAGTGGGCAACCGCGCAGGAGCGGAACTATGGCCCTGCGACGGTGGCAATTTGGTTGATTGACAG  
GTTAATTTTCGTTGCAATTTGGAGCGCTTACGGCTGGTGAAGCACTCTGCGACTGGTTCGTTATTCATTTGGGTCTGGCTG  
TCGCTATTTCTCTGACCGCTCTGCTTATTCGCTGGAATGATTCGCCCTCACCCGTTTGCACACAGGACATTTGGTACG  
CTGATGAGCATGGAACCGCGCTGGCTGCGGTTTCCGGGATGATTTTCCCTCGGAGAAACACTGACACCAACAGCTGCT  
GGCGCTCGCGCTATCATCGCGCTTCAATGGGGTCTACGCTGACAGTACGCAAAAGAGAGCAAAATAAAGAATTAGACA  
TTAATTA

>Cluster\_31991

ATGGAACGCGTATATAGAACAGATCTTAAGTGTCTCCGTTATTTTCTTCCGCTAGCGGAAGAGTTGCATTTTGGTTCGCGC  
AGCAGCGGTTTTAAATATGTCTCAGCCTCCGCTCAGTATTCATATTAAGAGCTGGAATAAAGTCAACTCGGCACGCACTTT  
TTATTCGCGCATTCGCGCAGCGCTGCTACTGACACACGCGGGCAAAATCTTGATGGAAGAATCGCGTCAATGCTGGTGAAT  
GCAATAATGATTTGGCTCGGTTGAACAAATAGTTCGGGGAGAAGCAGGGCGGATTTGAACTCGGGGTTGTGGGAACGGC  
AATGTGGGACGGATGCGCCGTTATGCGGCGATTCCCTAGAGAAAAATCCTAACGTTGAAGTCTTTTTTTCGCGAAAAA  
TGCCCGGATGCAAAATGGCTTGTGGAACCGCCGCAACTTGAATGCGGGGATCGGCAATGGCGACAGAACCCGACT  
GGTTTTACAGCTTACGGTTGCAATGAACTCGCGCTTCTGGTGGCGATGCTGAAGAGCATCATCTCTCATATTTCCAC  
CGTCCCGTGGAAAGCGCTACGTGACGAGTATTTGTTACAATGCCCGCCGTTACTACTGACTGGGATTTTTTTCAGCGG  
TTTTGCGCAGGATGGGATTTTCCAGGCTTATTCGCGAAGTTAATGAACCGCAACCGTACTCGCATGCTGCAATG  
GGTATTTGATACATTTGATAGCGGACAGCTACGCGCAGATGAACTGGCCCGTGTCAATTCGCTCCGCTCAAAGAAGC  
CATCCCGGCACTTATATATTTGTTATGAAACGCAAGGAGGTCAGCCCGCGTGGTTAAACTGCTGGCGGCTTGGCGC  
AGTAG

>Cluster\_28270

ATGAGAACAGGATGTGAACCGACCGATTGGTAAATGAAGCAAAGACATCATCCAGGGTATGCATTAACCGAACTTAA  
AAAGCTCCCGCCGAAAGTGTGATCTGATCTTTGCGGACCCACCGTATAACATCGGTAAAAATTTTGGTGGTCTGATCG  
AAGCTGGAAAGAAGATCTGTTTATCGACTGGCTGTTTGAAGTATGTCAGAGTGCACCGCGTTCTGAAAAAGCAGGGC  
AGCATGTACATCATGAACAGCACGGAAAACATGCCCTTTATCGATCTCCAGTGGCGAAGCTTTTTTACCATCAAAAGTCCG  
CATCGTCTGGTCAATGACAGTTCTGGAGTGCAGGCGAAAAAACAACGCGCTCCATGTCGAACCCATCCTGATGATG  
TGAAGAGCAGAAAGAACTACACATTTCAACGGTGTGCTATTTCTGGTAGAAGCCAAAACCGGATCGCAGCGCGGTTGATC  
GATTAATCGCAAAATCTCCACAGCCTTACAATCATCAAAAAGTACCGGGTAAAGCTCTGGGATTTTTCTCGCGGCTTA  
TTTTGATGGATGAATATGAAAACCCCGACGCAAAAACCGGAAGCCTTACTGAAACGCAATATTTCTCGCTCTTCCAACC  
CAGCGGATATCGTCTCGACCCGTTTGGCGGTAGCTTTACTACCGGTGCGTAGCCGTCGCCAGCGGGGCAAAATTCATT  
GGTATTTGATTAACAGCGAGTACATCAAAATGGGCTTCCAGCGGTGGATGTGCGCTCGCATTTACTTGGGGAAGAACT  
GGGAAAGTGAAAAAAGAAAGACCGGCAACTGTCAAAACGAAAGCGGTTAAGCGAAGTTGACCCGATCTCATTAACA  
AGTAA

>Cluster\_4197

ATGAATGGAAATGCAAAAGTTCAGATGTAAAAACGAAACTCCGTACAATATTCCTTATTGATTAACGAAATGTGAT  
CTCCAGCGAATTTCTCTGATCTCGCTTGGCACTACCTACCGGACGAGCATTACCGGGTATCTGGCGCGGGACAAGA  
AGAAACCGCTTATCGCAACTCATGGGTTGGGTTGATACCGTACAAGGATGTGGGAAATTCCTTTAAAGAATGGCGAA  
CAAAATAACACTGCATGGCAACTGTATTTATTTTAAAGCCAAATGGATATTTACTTATCACTGTGAAGTTTATGCTG  
GAAACAGTACTGGATGAAATTTACCCCAAGTATGAGGATATTCGCTGGTGGTCAAGCAAGGCTTATTTATAATGGG  
AAATTTATAATCAGGAACCTACCGAAGTTGCTGAGTTAATAACTTACCCAGAAAGCAATAAAAATAATCTGGCAGTCTGCT  
TTTTGACGAAAAATATTTATCAGTGGATTTGTCTTATGTACGAGATGGTAAAAAGATCCACACGCGGCAAAATTA

AAAATTAATGGCCACTTTACATGCCAGTCTGCAACAACGCTGGAGCGTAGCTGATATGGCTGCCACGATCCCCGTAGCG  
AAGCCTGGTTGCGTCGCTGTTTTTACGCTATACCAGGCAAGACGCCGAAAGAAATATTACTCGATGCGCGTCTGGATCTG  
GCGCTATCGCTATTAAGCAACAAGGAACTCGGTTGGCGAAGTCGCTGATACGCTCAACTTCTCGACTCCTTTCATTT  
CAGCAAAGCCTTTAAACATAAATTTGGTTATGCGCCGTAGCCGTGCTAAAGAATACGGACCAGCACCAACGGATGCCA  
GTCCACACAATTA

>Cluster\_41429

ATGCAACTTGAAAAGATGATTACCGAAGGCTCGAACGCCGCTCGGCTGAAATGACCCTGATCAACGCTGAAAATGTG  
CCGGATTATCAACGATGAAGATAAAACCGTACCCTCGCCGTTGAGCGCGTACTGCCGGATATCGCCGCGGCGATCGATG  
TTATCCACACCCAGGTAAGCGCGCGCGCTGATTATCTCGGTGCGGGAACATCCGGTCTCGGGATTGTGGAT  
GCCAGCGAATGTCCGCCGACCTACGCGGTGAAACCGGGCTGGTAGTTGGTTTATTGCTGGCGGCGAATATGCCATTCA  
GCACGCGGTGGAAGGCGCAGAAGATAGCCGGAAGGTGGTGTAAATGATCTGAAAAATATCGGCTTAACCGCGCAGGATG  
TGGTGGTTGGTATGTCCGGCCAGCGCAGCGCGTATGTGATTGCGGGCTGGAATACGCGCGCAACTCGGCTGCCGT  
ACAGTGGGCATTTCTGTAATCCGGGAGTGCCTTTTCATCCACCGCAGAGTTTGTATATACGCGCTAGTGTGGTGGCA  
AGTTGTTACCGGTTCTTCGCGAATGAAAGCAGGCACGGCGCAGAACTGGTGCACAACATGCTCTCCACCGGGCTGATGA  
TTAAATCCGGCAAAGTGTTCGGCAACCTGATGGTGCATGTGGTGCACCAACGAAAACTGCATGTGCGCCAGGTCAAT  
ATCGTCAAAAACGCTACCGGATGTAATGCCGAACAAGCGGAAGCGGCTTAATTTGCTTGCAGCGCAACTGTAACGGC  
CATTTGTGATGGTACTGAAAAATCTCGATGCCGATGAAGCTAAAAATGCCTGGATCAACACGGCGGTTTTATTCCGAAG  
CTCTGAAAAGGAATA

>Cluster\_25284

ATGAAAACACTGGTGTGGCTCTTGGGGCAACGCCTTACTCCAGCGGTTGAGCGCTGACGGCAAAAATCAATATCG  
CAATATTGCGAGTCTGTACCCGCGCTGGCGCGCTGGCCGTTCTTATCGGCTGGCGATTGTTACGGCAACCGACCCG  
AGGTGGGGCTGTGGCGTTACAGAACTCTGGCGTGGAAAGAGTGAACCGTATCCGCTGGATGTAAGTGGCGGAAAGC  
CAGGGGATGATTGGCTATATGCTGGCGCAGAGCTTGGCGCAGCCGAGATGCCCGCTGTCACGACGGTGTGACGGC  
CATTCAGGTTTTCGGTATGATCCGCGCTTTTACAGCCAGAGAAATTTATTGGTCCGTTTATCAGCAGTCCGCAACG  
AGGCACCTGGAAGCGGCTTACGGCTGGCAGATGAAACGTGATGGTAAATATTTACGCGGGTGGTGGCGTCTCCGCAACCG  
CGTAAAATTTCTCGACAGCGAAGCATCGAGTTGTGCTCAAAGAGGGGATGTGGTATTGCAAGTGGCGGCGCGGTTG  
GCCTGTGGCGGAAGACGGGGCTGGGAGTGAAGCGGTGATTGATAAAGATCTCGCCGCTGCGTTGCTCGCCGAGCAGATTA  
ATGCCGATGGACTGGTGTATCCCTCACGATGCTGATGCGGTATGAAAACCTGGGAACCGCCGAGCAACGCTCATTCCG  
CATGCCACACCGGATGAGTTAGCGCCATTTGCCAAAGCCGATGGTTCGATGGGGCCGAAGGTAACGGCGGTGAGTGGCTA  
TGTGAGAAGCCGTGGTAAACCCGCTGGATTGGGGCTTATCGCGGATGAAGAGACGCTGGCGGGCGAAGCGGGGACTT  
GTATTTCCGCTGTAG

>Cluster\_27341

ATGAACATAGTATCACCGGAGGACGGGATTAATTTGGTCCGCTTGTATCCACGTTTGTGGACCTGGGCCATCAAT  
CACGGTAGTGACCGTAACCCGCGAGAAAGCCAGTTCGCTTCTCGGCCCTCGGGTGACACTATGGCAAGGGCTTCCGCAAC  
AAGCAACCTCAACGGCGTTGATGCGGTAACTCAACCTGGCCGGAACCGATTGCTGATAAACGCTGGACTCACGAGCAA  
AAGAGCGCTCTCTGCCAAAAGCCGCTGGAATATCACGCAAAAACCTGGTCGATTTGATTAATGCCAGACACGCCACCGTC  
GGTACTCATTTCCGGCTCGGCAACGGGCTATTTATGGCGACTTAGGTGAAGTGGTGGTTACCGAAGAGGAAACCGCCGATA  
ACGAATTTACCCATAAACTCTGCGCCCGCTGGGAAGAGATGCTGTCGGCGCAAAAGTGACAAAACCGGAGTGTGCCTG  
CTGCTACCGGCTAGTGTGGCACAGCAGCGGTGATCTCCGTTAAATGCTGCCCATTTCTGTTTGGCTGGTGGATA  
GCGGCTGGCTCTGGTGGCAGTATCTGGCCTGGATTCATATTGATGATATGGTCAACGGTATTTCTCTGGCTGGTGGATA  
AAGAGCTGGCGGGCCATTTAATATGGTTTCGCCCTACCGGTGGCAATGAACAATTTGCCCATGCACTGGGTGATGGC  
CTGCATCGCCGGCCATTTTGGCGCTCCCTGCGACCGCCATTCGGTTGTTAATGGGCGAATCTTCAGTTCTGGTATTAGG  
CGGTCAACGGCGCTGCCAAAAGCTGGAAGAAGCGGTTTTTGGCTTTCGCTGGTACGATTTAGAAGAGCGCTGGCGG  
ATGTTGTTCCGCTGA

>Cluster\_6589

TTGAGCGACAGAAATATGCAAGTATTACGACCTGCACAGCCATACCACAGCTTCGATGGCTGCCTGACGCCAGAAGC  
ATTGGTGCACCGTGCAGTGCAGATGCGCGCTCGGCACCCCTGGCGATCACCGACCATGACACCACAGCTGCAATCGCGCCAG  
CAAGAGAGGAAATTTACAGTTCGGGACTGGCGTTGAATCTTATTTCCGGCGTGGAAATTTCCACGGTCTGGGAAAATCAT  
GAAATTCATATTTGCGGGCTGAATATGATATTAATCACTCCGCTAATGTTGAGTTCCTCGCGCAGCAGACAGAACCGGC  
CAATCAGCGGGCGCAGCTGATTGCCGAAAGACTGAAAAGCGCAAAATACCTGGGGCGCTGGAAGGGCACAACGACTGG  
CGCAGGGCGCGCAGTGCAGCGCGGCTCATTTTGGCGCTTTCCTTGTGGTGGTGGCGCAAAAGCCAGTTCAATGGCGGATGTC  
TTTTAAAAGTATCTGGCGCGGGGAAAACCGGATACGTTCCGCCACAGTGGGTACAAATAGAACAAGCTATTGATGTCAT  
TCATCATTCTGGCGGTAAGCGGTGCTAGCTCATCTGGCGGTACAATCTTAGTGCTAAATGGCTGAAAAGATTGGTTG  
CGCATTTTGGCCGAACACCAGGTTGACCGGATGGAAGTCCGCGCAGTGCACGCAATCGCCCAATGAACGTTACCAGCTGGCG  
GCCCTGGCGCTCAGCATTTTATGGGATCACAAGGATCTGATTTTTCATCAGCCATGCCCGTGGATCGAATGGGCTG  
TAAACTCTGGCTGCCCGCAGCGCTTGAAGCGCTTGGCAGCTATGGAAACAGCCGAGAACACCACAGAGAGGGAATTA  
GA

>Cluster\_28903

ATGACGGAAGCAACGACACCACATGACGCAATCTTAAAGGCTTTTTTATCCCGACCAGAAACGGCCCGTACTTTATTGA  
AATTCATCTGCCGCTTCTTTAGTTAAACTCTGCAATCTTGATACGCTCCATCTCGAGTCCAGAGTTTGTAGAGGAAA  
ACCTGGCGCAGTATTACAACGACGTACTTTATTCAGTAGAGACGACGAAAGGGTGGGATATATCTATGTGTTGATTGAG  
CATCAAAGTTCCGCTGATGAAAATATGGCGTTCCGATGCTTCGCTATGCTATTGCGCACCATGACGCGGCATCTTGAAGC  
GGGACATGATTATCTGCCTCTGGTGATCCCCATTTCTTTTTTACCAGGAAAGCGTAGCCCATATCCATGGTCAACAACT  
GGCTCGATGGTTTTCCGGATCCGGACATGACGCGGATCTCTATTTCCATGCTTTTCCGCTGGTTGATATACGCTAAAT  
CCTGATGACGAAATCATGCAACACCGCAGCATGGCCGCTTTACGCTGGTACAGAAGCATATCCGTCACCGGGATGAC  
AACGCTGTTAGATAAGTTATCCCGCTTAATGATCTCGGGCGATGAGCGGACAGCAAATACGATGTTGATAAACTACA  
TGGCGCTGGTAGGTAAGCACAGGATGTACGAACATTAGTACATGGTCTGGCACAACGAGTGCCTCAACAAGGAGAGGAA  
CTGATGACTTTAGCGGAAGAACTTCGGCGCGATGCCCTTCTCAATGTCCGCAAAAGCAATGCTACAGCGTGGCTTTGATTT  
CGAGTTGATATGGAATGACCGGGCTTCTCAGGAAGACCTTATCAATGCAATCTCGA

>Cluster\_38949

ATGCAAAAATATTAGGTTTACTGGTGGTCTCGGCTGCGTATTTGGCGGTTATTTGAAAGCGGGCGGCAATTAATTGC  
TATCTGGCAGCTGCAGAGATAGTTATTTATTTAGGTGCTGGTTTTCGGGGCGATGATTATGGTAAACCGAAACATGTGC  
TGAAGAGATTGCCCATCAAATTAAGGCGTATCAGTAAAAAACAGCTCGGACCGGAGTTTACGCGTCACTATTAATG  
TGCTGTATGAAATTTGCTCGAAAATGGTGCAAAACGGCGGTTTCGCGGATTTGGATCAGCATATTGAGCAGCCGGAAGAG  
CACTATTTTCCGAAATACCCGCTGGGTGTAACCCAGAAGCGGCTGGTACCTTTATTTGCTGATAACTTTCGCTGATGG  
CGATGGGTAATAATCGACGCCATGAGCTGGAAGGCAATCTCGATCAGGAACTGGACACCGCGGAAGAGTCCCTGTAAAC  
CCGTCGCGCTCGCTGCAACGCTACGCGAAGCGATGCCGGATTGGTATTTGTCAGCAGTGGCTCGGATCATCATCAC  
CATGCACTGATTTAGCGGCTCTATCGCCCTGATTTGGCTGAAAGTGGCGGCGAGCGCTGGTGGGAACGTTTTTAGGCGTCT  
TTATCTGCTACTGCTGATGGACCCGCTAGCCAACGCCATGGAACAACAGCGCGGGCGGACATTTCTTGTGGATG

GTGCGCACCGTGCTGGTGGCGCAGGCAGGCGGCAAACCGACGCTGCTGGCGGTGGACGCCGGGCGTAAGCTGCTGCATCT  
GGCGTCCAACCGACCTTCGCCAACCTCGACGCTGGGTGAATGCGATGCTGGAGCAAGAATAA

>Cluster\_63629

ATGCTGTTTTGTGCTTATTCTAAGCCACCGGGCAGCATCATACGGGGCAATTTATGGCCGATTACCATACATGCAACTGTA  
CATAGCTGATTACCTGGCTGACACCATGCAATTTGTCAGCAGAGGAGCATGGTGGCTATTTGTTGCTGATGTTCAATTACT  
GGCAAACAGGAAAGCCAATACCTAAAAACAGGCTGGCAAAAAATGCCCCGCTGACTAACGAGCGATGGGCTGATGTTGAA  
CCATCCTTTCAGGAGTTTTTTTTGCGATAACGGCGAGGAATGGGTGCATCTTCGGATTGAGGAAGATCTGGCATCAGTCAG  
GGAAAAATTAACCAAAAAATCAGCCGACAGGAAAGCATCTGTTTTCAGGCGAGAAGAGCAAGAAAGGAGCAGATGTTCAA  
AAAAACAAGAGAGAATTTAACAGGTGTTCAAACAGATGTTGAAGTGGTGGTTTGAACATGATGTCAACACAAAGGCAACT  
AATAAAGATACAGATAAAGATCTAAAAACAGATCCCCCCTAAATCCCCCGGGGGAATCGAGGTGTCAAAAAAGTTTGA  
CCCTCTGGATATTACTTTGCCGAAGTGGATTTCTGTCTCGCTTGGCGTGGAGTGGGTTGAATTTCCGCCAGGCATTCGCCAA  
AACCGATTTCGAACGGAGCAGGGCGCTAACGGGGCGATACGGGAGCTGGAAAAATTCGCCCAGCAGGGTTTTTCACCTGAG  
CAGTGTATTCGACACAGCATTCGCCAATGAATACAGGGCTTGTTCGCGCCGAAAGGTTTCGACCTGAGACGTTACTCCG  
ACAGGTAAACACCGTCTCGTTACCGGATAGTGCATCCCGCAGGCTTCAGGGGTAA

>Cluster\_10629

ATGCGTACTGATAATAACGAACATAAAGCACTATTCCACATCCCAGCGCAGCGTACAGCTCCGCCCTCGCAACATCAA  
GCCCTGCCAGAGCAACGGAGAATCACCGGGCATAAGCAGACTGATGCTTATCTTTGGGTGCTGGAGGTTATCCGCTCTGA  
ACGAACCCGCACATCTGGATGCTGCTGAGGCTGCGCTGGTGAATAAATAAATTTCCCAAAAGAGGCTCAGGAACGCTAT  
TCGCGTTATCTGCTGGCGAATGGTTACGAACCTTTCCAGGTTGCGTTCGGCATCATCGGCATGGATAACCTTGGCAGGT  
TATCAGGAACCCCGGGGAGAACATAAAAAAGCGGCATCAGTCAGGCTACGTTTGGTAGCATGAAGCAGCGCTCGAAG  
ATGTGGAAGCAGAGCGGGTTCATCAGGCTTCCAGAAATTTATCAACGATCATCTCTGGGGCTGGAGCGGGCAGAGAAA  
AAGCCGGAGCATTTGGCGGCGAGCCGATGAACGAAATGATGAACAGCGTCCGGCATTTGTTGATGGATATCCGGATGT  
GCTGCTGAGCCTTATACGCTGTCTGATGTTGTTTCGCGAGTTCGTTTACTGGGACTGGCTCTACAGTGTTCGCCACACTG  
CAACTAAAGAACAGGGCGATGAGTTTGGTTACTCTGAGCATCAGCAATCGGTATATGACCGGGAGCGCTACCTTGAAAAA  
TTGCTGGCAACCATCAAACCGGTGACACGCGCTGAAGCGTGGAGGTGTCCGCTGGTTCTGGCAAGTGGTAAGGGTGA  
ATGATGGAAGACGAGCGTGCAGCGTCAATCTCAATCTGGTTGGTGGTGGAGTGAATAA

>Cluster\_55648

ATGAAAGGTATTGTTCTGGCGGCGGCTCCGGCAGCGTTTATATCCGATCACCCAGGCGCTCCAAGCAGCTGCTGCC  
GATCTATGACAAGCCGATGATTTTCTACCCGCTGCTCGCTGATGCTGGCGGGGATTCGCGACATCCTGATCATCTCCA  
CCCCGACGACATGCCTTCTTCAGCGCTGCTGGGTGACGGTTCGAGTTCGGGGTGAACCTCAGTTACGCCATCCAG  
CCGTCGCCGAGCGGCTGGCGCAGGCTTTATCATTGGCGAGAAGTTCATCGGCAACGATGCCGCGCCCTGGTGTGGG  
AGATAATATCTACTTTGGCCAGAGCTTCGGTAAAAAGCTGGAAGCGGCGAGCGGCAAGACTTCCGGTGCACCGTGT  
GTTATCAGGTGCTGGATCCGGAGCGCTTCGGGGTGGTGGAGTTCGATGAGAACTTAAGGCACGTCTATCGAGGAGAAA  
CCGCTGAAGCCGAAATCAGACTGGCGGTGACCGGCTTATTTCTACGACAATAACGTTGGTGGAGATGGCGAAGGACCT  
GAAGCCTTCTGAACGCGGCGAGCTGGAGATCACACCCTCAACACAGATGATATCGGAGCAAGGTGACCTGCATGTTGAAC  
TGTGGGGCGGTTTTGCTTGGCTGGATACGGGCACCAAGCAGCAGCGCTGGTGGAGCGCTCGCAGTTTATTACACCAAT  
GAGAAGCGCCAGGGGATGAAAGTGGCTGCTGGAAGAGATAGCTTACCGTAATCAGTGGCTGTCCGCGAAGGGGTGGC  
GGCTCAGGCGAACCCCTGAAGAAAACCGAGTACGGTGTCTTATCTGAAGCGCTGCTGAACGAGCGTTAA

>Cluster\_48644

ATGCCATTACTGCTGAAGAAGCTGAAAAGCTGTCTAACAAACGAACTTGAACAGGCGGTGATTGAAACCATCATCGATCG  
CGATGACCTGTTTGGCATCCTGCCTTTTATGAAAATTACTTCAAAGGCATATCTGTACACCGTGAAAAAACGCTGAGTG  
AAGCTACCTTTCATCGACGTTAACGACACCATCCCGAAAGGTGACGAACTTCGAAAGATGCGTTGCGAAACTGCGTATT  
CTGGCTGGTACGAGTGGTGGTGAATAAATTCCTGGCAACCACTATGGCCGACCAATAACCAAGTGGCTATTTCAGGTTG  
TCAGAAAGTTAAAGGTCTGGCTCGTGGCTTCGGTTCGCAATCTGATTTTGGGTGACTCCAGCACCAACAACAAAGCCTTG  
ACGGCATTCCACGCTGATGACGACGATCAGAAAGATCGATATCGCCGCTGCATCTATGACTTCTCTATGTTTCGACGAA  
CTGGTTCGATGCGGTGAAAGATCTTGGTGTGACTGCATCATGATGCGTTCAGAGCACCTTCGTTGCTTACCGCTGCGCTGCT  
GCGTACAGTAAACCTAGGTCCGCTGAAATCATGATGGAGAACCTTCGGTTCGTCGATGCTGTGTCAACACCGGCTTCCGT  
TCATCATCAACGACTTTCATCCGACTGATTTGGCAAAGCAAGCATCTACTGCTTGCATCTGTGAGAAGAGAACGGCGTT  
ACTGGTCTGATGGCGGCGATAACGACGATATCGTTGTTGAAAACATTTGGTACTGTACAGAACAAGAGCAGTACGATC  
CCGTGTAAGTGGTACTGCTCTTCGGCAATAAGCAGGATAAGGCTATCGCTGCATGACCAATGTAATAAATTTAA

>Cluster\_7434

ATGGCAAATCGTAAACGTCAGCCGGGCGGAGGCGCTGGAGAAAAAAGGCTGGTGGCGCAGTCACCGTTGGCTGGTGT  
ACGTCGCCCTTTGTCAGTTCTTCGTGCTGGGGATGTTTTGAGCGGTCATGGTTGGTGTGGATCTTCACCGGCAACT  
ACAGCAGTAGCCTGTTATTCGACACCTTCCGCTGACCGATCCGCTGATGACGCTGCAAAGCTTGGCAGTGGTCACTG  
CCTGCCACCGTGGCGTTGGACCGGTTGATTTACCGTGTCTACCGCTTGGCGGAAAGCGATTTTTCAGCTG  
GGTCTGCCGCTGAACCCGATTACCGACTTAGCGAACTGGTTACGAGGCGCTTTGACCTCAATCAGTCTGCGACGATCC  
CTCGCCACATTCGTACGTGCTGTTGGTGGTCAATCTGGTGGGATCAGCCTTAACTGGCACGCTCATTTGGGAATGGATC  
AACCCGTTTTCTGATGGGCGTAGCCTGGTAATGGCTTCGGCAGGCGGCGCTGCTTATTCTCGCCTGTTTTTATT  
TGATCTACTGGTCTGTTGAACACCGGCTGGTGGCGGACATTTGTCGGTTGGCGCGCTGTATGGCGTGTGGTGAAG  
GTGTGATTACCGTTGCGGGCACCGATCGGCAGAAATGTAACCGCTGTATGGATTGTTTTTCATGTTTGGCCGAAACCGCAT  
GTGCTACGTGCCCGGCTGGATGAACAAAGCCGGTGCAGGTCACAGCCGCGATTGCATGACGTGCGGCTGCTGCGT  
GGATGCTGTCTGAGGATGATTTACAATAACTACAGATGGAGTTCGGGAGCGAAATCATGA

>Cluster\_55574

GTGAATCTACCTCATCTGGCCACGCGCTTTTTAATACACCGCTGGCGCTGCACCAAGTAAAGCTGAAGTCATCATGGC  
ATCCGTTATGGACCGGTTGGCATCAGTAAAATCGAATCCTCTTGGCATGGATGATGACTGGTATGGATACGACGATA  
ACAGGGGGCGGGAATCCCTAGCAGCAGCGGTTATGACAAATGTTGGCGCTGCTGTATCCCGATATGGGAGCACTG  
GTGCAGAAGCTGGTGGTGGCCCATACAGTGGCATGACAGGCTATGACGGCATTCGTCAGGCTTCTGACTGCGAT  
GGAAGACCCGATATTACAGGGATCTGCCTGGATATTGATTCGCCAGGAGGCGAGGTCGCCGGATGTTTCGATCTGGTGC  
ATGTCATTTATGGCGCCCGGGAAAAAGCCATCCATGCCATCTGACGGAAAGCGCCTATTTCCGCCCTATGCGAAT  
GCCAGTCCGCGGAGGATTTCTGTTCCCGAACCGCTGGTGGGTTGAGTGGTGTGATGATCACTATGACCTGACTG  
GACCCAGCGGATAAAAAGATGACGGCCTCAAAGTCAACATCATCACTACCGTTCCCGTAAAGCTGAGGGGGCACCGCTGA  
GAGAGCTGTCAGATGAAGCGCTGGCGGCTATTCAGCAGGACATCAACACCATGGCGAATGTTTGTGAAATACCGTCCG  
AGAAATCGGGGATTAGCGCAAAGGTTATCAAAGTACTCAGGCTGCTGTTTTATGGCTGCTGATGGTGGAACTGG  
ACTGGTGTGATGAGTGTGCTCTGATGCTGCGTTACAGAACTTACTTGAAAAAACAGGAGCTGA

>Cluster\_24112

ATGAGTATTCGCATAAATCCCGAAGATGAGCTGGGTTTCGAGCGAGAAACGTCAGGCGGATATGATTCGCCGTTATTGTT  
CCCTCGGCTCAAGAAATTTATACAACCGCGCGAGGCTGTCGCGAGCTGGCAGAAAAATAATCCGCTGGGTGATTACC  
TGCGCTTTGCTGCGCTTATTCGCCACGCGCCAGGAGTGGTGTGTCAGACCATCCGCTGGAGATGGATCTGACCGCGCGC  
ATTAAGAAGCCAGCACACAAGCAAGCCCGCTGGATATTCAGGTTCTGCCGCTGATAAGCACTGGCAAAAGCTGCT

GATGGCGCTGATTGCTGAACTGAAACCTGAAATGAGCGGCCCGCGCTGGCAGTGATTGAGAATCTGGAGAAGGCATCGA  
CTCAGGAGCTGGAAGATATGGCCAGCGACTGTTTGCCTCTGATTTCTCGTCCGTGAGCAGCGATAAAGCGCCGTTTATC  
TGGGTGCGCTGTCGCTCTATTGGACGCAGATGGCTAATCTGATCCCCGGCAAAGCCCGCTGAATACGGCGAACAACG  
TCAATATTGCCCGTGTGGTTCTATGCCGGTGTCCAGCATGGTGCAAATGGCACCACCCAGGGGCTGCGTTACCTGC  
ACTGCAACCTGTGTGAACTGAAATGGCAGTGTGCGCTAAAATGCAGCAACTGTGAACAAAGCGGCAAACTGACCTAC  
TGGTGCCTGGATGACGAACAGGCCGCGATTAAGCCGAAAGCTGCGATGACTGCGGCACTTACCTGAAGATTCTTTATCA  
GGAAAAGAACCGAAAGTTGAAGCGGTGGCAGATGACCTCGCCCTCTGTTGACTGGACCGCGAATGGAGCAAGAAGGCT  
ATGCCCGCAGTTCCATCAACCCGTTCTGTTTCCGGGTGAAGGGAGTAA

>Cluster\_53614

ATGGTTAAAGTTTATGCCCGGCTTCCAGTGCCAAATATGAGCGTGGGTTGATGTGCTGGGGGGCGGTGACACCTGT  
TGATGGTGCATTGCTCGGAGATGTAGTACCGGTGAGGCGGCAGAGACATTCAGTCTCAACAACCTCGGACGCTTTGCCG  
ATAAGTCCCGTCAGAACCAGCGGAAAAATATCGTTTATCAGTGTGGGAGCGTTTGGCCAGGAGCTTGGCAAGCAAAAT  
CCAGTGGCGATGACTCTGGAAAAGAATATGCCAACTCGGTTCCGGCTTAGGCTCCAGCGCTGTTCGGTGGTCCGCGCTG  
GATGGCGATGAATGAACACTGTGGCAAGCCGCTAATGACACTCGTTTGTGGCTTTGATGGGCGAGCTGGAAGGACGAA  
TCTCCGGCAGCATTCATTACGACACAGTGGCACCGTGTTCCTTGGTGTATGAGTGTGATGATCGAAGAAAACGACATC  
ATCAGCCAGCAAGTGCAGGGTTTGTAGTGGTGTGGTGTGGCTATCCGGGATTAAGTCTCGACGGCAGAAGC  
CAGGCTATTTTACCGCCAGTATCGCCGCAAGGATTCGATTCGCTAGGCTGCGCAGGGCGACATCTGGCTGGCTTACCTCAGCCG  
GCTATTCCTGACGCTGAGCTTGGCCGAAAGCTGATGAAAGATGTTATCGCTGAACCTACCGTGAACGGTTACTGCCT  
GGCTTCCGGCAGGCGGGCAGGCGGTGCGGAAATCGGCGGGTAGCGAGCGGTATCTCCGGCTCCGGCCGACCTTGT  
CGCTCTATGTGACAAAGTACCGGATCCGCCAGCGGTTGCCGACTGGTTGGTAAAGAACCTACCTGCAAAATCAGGAAGGTT  
TTGTTTATATTTCCGGCTGGATACGGCGGCACGACTGAACTGAAAATAA

>Cluster\_351

ATGCTCCCGCTTATTTTTTGTCAAAGAGATGACAGACACACAGTATATGGCCGCTTCGCCCTCTCCTTCCGGCGA  
GCTTCATTTGGCTCTGATCGCGCTCGGAGCTATTGAGGCTCGCGCCCGCAAGGTCGCTGGCTGGTACGCA  
TAGAAGATATCGACCCGCTCGTGAAGTTCCCGGTGCCGAGAACTATCCTGCGCCAGCTGGAACATTACGGTCTGCAC  
TGGGACGGCGATGTTCTGGAATCGCAACGTCACGAGCCCTATCGTGAAGCACTCGCTGGTTACATGAAACAGGACT  
AAGTTATTACTGCACCTGTACGCGTGGCGTATCAAAGCATTTGGCGGTTATTTACGACGGTCAATTGCCGGGTGTTGCATC  
ATGGACCGAACAAGCCGCGAGTGCATTCGCGCAGCAGTCCGGTCAAGCAATTTACTGACAGCTGCGCGGCTATTAT  
CACGCCGACGAAAACCTGGCAGGGAAAGATTTTATCATTCACGCGGTGATGGGTTGTTCCGCTACAACCTGGCTGTTGT  
GGTGTGATGATCATTTCCAGGGCGTTACAGAAATAGTGCCTGGGCTGATCTGATGAAACCAACAGTAAGGCAAACTCTCCG  
TGTACCAGCTTTTGGCTGGAAGTGCAGATTACATTCATCTGCCGCTGGCGCTAAATCCACAAGGCGCTAAACTTTCC  
AAGCAGAACTATCGCGCTTCCGTTGCCGAAAGGCGATCCACGCCGCTACTAATCGCGCACTTCAATTTCTGGGCGAGCA  
GGCAGAAGCACACTGGCAGGATTTACGCGTCGAGCAAACTCTTACGTCAGCCGCAAAAACCTGGCGGCTTACCGCCGTC  
CCGAGTCGGCAATGTAAATTAACATTTCTCAATGCGTCATGCTGA

>Cluster\_20305

ATGCGAGTAACCAACCAAAACCTACGCTCGATGACGAAAGTTTTAATAATCTCTCCGGCTCTTGGCGCATGTGGT  
CGAGCAGATGGCAACCGCAAGGAAATTTGACGCGCTCGGATGACCCGATCGCCGCCAGCGCATCACCCAGTTAAACC  
GCCAGCAGTCGGCGATTAAGCAGTATCAGAGCAATATGACTCCGCGTCCGGCGGCTTAAAGCCAGCAGGATCTATTCT  
GATGGCTCAACAACAGCTGTGGCGGTACGCGACGACTGCTTGAAGCGCGAATGGCACCATAACCGCCGATCTCT  
GGCAAGCCTCGGCCAGGATATTGAGTGCCTACCGAATCAATGGTTCGCGCGCTGAACTATCAGGATGAAGACGGCAAT  
ACGCTTTTGGCGGACCATCAACGATCAGCCGCGATTGTGGCGGTAGACGATGATGGCGATGGCGTACCAGACGCTAT  
AGCTATCAGGGCAACAGCGACCATCGCCAGACTACCGTGTGCAACGGTGTGGAAGTGGACACCACGTTGGCGCGAGCGCA  
TTTTTTCCGTTAGCAATTTAGAGCTGCTTAACACGCTTAATTTCTTGTGCGAGGAACTGCAAAAACCCGGACCTCGACCCG  
CAGATCCGCGAGTGCAGAGCGATTTAGAAACGCGCTCGATGTGGTGGACACCCTCGGACGACCTCAACGCTCGATT  
GCTTCGCTCGCGAGACAAAAACCATGTGATGTTGAGCGATGCACAGACGATATCTCGACATCTAATGATGAAT  
GATTGGTTTATGAGGATCTCGATTACGGTCCGGCGTTCGATCACCTTACCGGACTGGAAGTGGCAATGGAAGTACCC  
TCAAGACTTACTCGAAAGTGAAGTGAATTTGTTTACGCTTCTCTAA

>Cluster\_21548

ATGGCGATGAACCTATTGAATCACCTTACGCTCCAGGCTCGGTAAGGTGTCGGGTTCTTCTGCGCTAATCCGGGGCT  
GGGGCTGTTTTGCTGCTGCTGGCCCGCTAATGTGGTTTGGCATTGTCTATTTCCGGCTCGCTGCTAACGCTGTTATGGC  
AGGGCTTTTATACCTTTGACGATTTACCATGTGCGTAAACCGGAACTGACGCTGGCCAAATATCCGTCGCTGTTAAAT  
CCGGCGAATACGACATCATCTCCGACGCTGATTATGGCTGTGGCAGTACATCGCCAGCGCCATCTGGCTTTTCC  
AATGGCGTGGTATATGGCCGCTATACAGCGGAAATGAAAGCGTTTTTTTTATATCGCGGTAAATGTGCGGATGTGGG  
CGAGCTACATTTGAAAGCCTATGCCGAGCTTATGCTGGCAAAAGATGGCGTGGCGCAGTGGTTTTTACAACATCTG  
GGCTGGAAACCATCTGCTAGCTGCGTTCTTACATTAACCTGCGGTGGCGGCAATACGCTGTCAACTCCGGGCTGGGGCG  
CTTTCTGGTGTCTCTATATCTGGCTGCCGTTATGATCCTGCCGTCAGGCGGCGTTGAGCGTTTGGCCGCTCAT  
TGTGTCAGGCGTCCGCTGATCTTGGCGCAGTCCACGACAAACCTTTCTGCTATGTGGTGTGCGCTGGCGATCCCGGCT  
ATTGCTGCTGGCTTATCTTTACTTCTACTACACTGGCGATTTTATGTTCCGACGCTGGTTGGCCCTCAGGATA  
TTTTATCGGCAATATGGTTTATTTCCAGAGGGGCGATTTGGCAATATCCGATGGCGCGGCAATCACCCCTGGTGGCGA  
TTGTTCTCATCGACTTTACCTGGCGTTCGTAACGCTCTGGGAGCGTTCGATGCACTCTGA

>Cluster\_43192

ATGACGCAGACTTCCGATTTCAATTTGAAATCGTGGTGTGGACTGGCGATGCGCATCTACCTGTTTTTGGATGGTAT  
TTCTGCCGGTCTGGTGACGCTGGCCGCTGTTTACGCTGCTTACCCGACGGCGGGGCTGACAGCAGTACGTTGTTGC  
GCACCACGCTGATTTGTCGGGCTGGCGCGGTGATCCTCGGTCTGTTGATCCTCGTCTTCCACCTGACAAGACCGTGGACC  
TTTTGGAAGCTGATGTTCCACTACAGTTTTACCCTGGTGTGATGTCGATGGGGGTGATGCTGTTTACGCTTTACATGGTGGT  
GCTGGTGTGCTGGCTGGCGAAAATCTTTGAACTGATTTGCTTGCCTGCAACAAACGCTGGTTGCCGAAGCTGGGATCG  
TGCAAAAGGCTTTGAGCCTGCTGACGCCGTTTATCGCGGACTGGAACAATGATGCTGGTGTGGCGGTTGTTGGGG  
GCTTATACCGGCTTCTGCTGTCGGCGCTGAAATCGTATCCGTTCCCTCAATAACCCGATCCTGCGCGTGTGTTCTCT  
CTCCGGCATCTCGTCTGGTGGCGGTTGGCGCTGATCGCATGGCGATACGCAACGCAAGTAAACCGCATTCACCGAAAG  
CGCACTTTGTACACCTGATGGAATCCCGTGGTATGGGCTGAAATCTTCTGCTGGTGGCGTTTTTTGCTCGGCTGGCG  
CTGGGCGATGACGGTAAAGTGGCTGGCTGGTGGCGGATTTGGCGGCGGTTTTCTGGACGTTGGTGGTTTGGCTGGTGT  
CGCCGGGCTGGGGCTGATTTGTGCAATGTTGCTCAAACGTTGGTCAATCGCAGTTCGGGATTCCTGCGCTGTGGCGG  
CATGTGGGGCCAGCTGGTGGCGGTTGATGCTGCGCTTTTTTCAATCTTACGCGGGCAGTTAACGGTGGCGTAA

>Cluster\_61105

ATGAAAGTGCAGTCTCGCGCTGCTGGCGGTTATGGCCAGGCGCTTGCCTACTGTTAAAAACCAACTGCCTTACAG  
TTCAGAACTCTCTCTGATGATATCGTCCAGTGAATCCCGGTGGCTGTGCTGATCTGAGCCTATCCCTACTCTGTGA  
AACTCAAAGGTTTTTCTGGTGAAGATGCAGCTCGCGCTGGAAGCGCAGATGCTGTTCTTATCTCGCAGGCTGAGCG  
CGTAAACCGGATGATGATGCTTCCGACCTGTTTAACTGTAACGCGGCTGTAAGAAAACCTGGTACAGCAAGTTGCGAA  
AACCTGCCGAAAGCGTGCATTGTTATATCACTAACCGGTTAACACCAAGTTGCAATGCTGCTGAAGTGTGAAAA



AAGCCGGTGTTTATGACAAAAACAACCTGTTCCGGCTTACCACGCTGGATATCATTCGTTCCAACACCTTTGTTGCGGAA  
CTGAAAGGCAAACAGCCAGGCGAAGTTGAAGTCCGGTTATTGGCGGCTCACTCGGTGTACCATTCTGCCGCTGCTGTC  
ACAGGTTCTTGGCGTTAGTTTACCAGGAGGAAAGTGGCTGATCTGACCAACGCATCCAGAACGCGGTTACTGAAGTGG  
TTGAAGCGAAGGCGGTTGGCGGGTCTGCAACCCCTGCTATGGGCCAGGCGAGCTGCACGTTTGGTCTGCTCTGGTCTCT  
GCACCTGCAGGCGCAACAAGGCGTTGTGCGAATGTGCTACGTTGAAGGCGACGGTCACTGACGCTGCTTCTTCTCAACC  
GCTGCTGCTGGGTAACAAACGCGCTGGAAGAGCGTAAATCTATCGGTACCTGAGCGCATTTGAACAGAAACGCTCTGAAG  
GTATGCTGGATACGCTGAAGAAAGATATCGCCCTGGGCGAAGAGTTCTGTTAATAAGTAA

>Cluster\_24874

ATGAGCACTAAAATTAACCGGCTATGTATGGGATGGTTGCGCTGCGTCAGGCATGAAAATATCCAGCGTGGCAATTATGGC  
CCGCTGGCTGATTTAGTAATGACGAAGGTGTGTGCTGGCCATCAATTGAAACCATTGCCCGTCAGATTGGCGCGGGGA  
TGAGTACCCTCAGAACGGCTATCGCACGGCTGGAAGCAGAAGGCTGGTTAACCGCTAAGGCGGCTCGCCAGGGTAACCGC  
AATGCGTCGAATGTTTATCAGCTTAACGTTGCGAAGCTCAGGCGAGCGGCATTTTCTCAATTGTCAGATTCTGACCCGTC  
AAAATCTGACGCATCAAAAATCTGACCCGTCAAAATTTGATGCGTCGAAAATCTGGCAAAAAAGCGGTTTTCACCCGTCAG  
AATCTGGCGGGGATCCGTCAGTAAAATCAAAACATGATCCGTCAGATAAAAAAATCTCTGCTCCGGACGCTTCGCAACCG  
GACACGCAGACGGCTGAACAGGAGTTTTTAACTCGCATCCTGATGCGGTTGTATTACGCCCTAAAAAGCGCCAGTGGGG  
AACGCAGGATGATTTGACCTGCGCACAGTGGCTCTGAAAAAAATCATCGCCCTGTACGAGCAGGCGCCGAATGTGACG  
GCGAGGTGGTTTCGTTCCAAAGAACCGAAGCTGGACAGCCTGGGCAACGAAAATTCGCCTGATGTGTGAGGATGGTCCCT  
ACTCAAAAACAAATCTGCGAGATGTACAGCCGCTCAGCCGATCCGTTCTGGTGCCGTACCGTCTCAGCCGCTCGAA  
GCTGCGGGAAAAATGGGATGAGCTTCCCTGCGCTTATCGCCGTCCTGAGCAGTACACCGAAAAACGCGAAGACCCGT  
ACTTCAAAGCCAGTTACGACAACGTGACTACAGCCAGATCCCGCAGGATTCAGGGGGTGA

>Cluster\_41025

ATGAAAATCTGTTGACGGGTTCAACTGGGATGGTTCGGTTCGTAATATTGTTGATAATAATAATCAACAAGTATGAGCT  
ATTTATGCCCGACTAGTTCTGAGCTAAAATTTGCTTGATAATAAAGCTGTTTCATGACTACATCACATGTCATTTCTCCTGATT  
TGATTTTATATGCGGCAATTTAGTCCGGTGAATTTCAAGCGAATATAAAAACGCCCTGTGATTCTTCTTCTCAAACCTG  
AAAATGGGTGTTAACATTGTAATGAGGCTAAAAATTTGGTGTAAAGAACTTTATAAATTTAGGAAGCTCTTGCATGTA  
CCCTAAAAGTATTGACACTGCAATTTCTGAAGATGCTTTGCTTACAGGTAAGTTAGAACAACATAATGAAGGGTATGCAC  
TTGCTAAAATCACAGTGGCAAAATTTGTGCGAGTATATAACTAGAGAGAGTGAAGGTTATCATTATAAAAACGATTATACCA  
TGTAAATTTATATGCGGCAATATGATAAGTTTGTATGAGCATCTCCACACATGATTCCTGCTGTTATAAATAGAAATACATA  
TGCTAAAGTTAATAATAAAAATGATTGAAATTTGGGGGACGGTGAAGTCCCGCGTGAATTTATGTATGCCGAAGACT  
TTGCGAATTTTATTTACCAGCGATTCCAAATGTTTACGCGATTACCATGATGTTAAACGTTGGGTTAGGTCATGATTTC  
TCGATTAATGATTATATAAAGTTATAGCTGAAGAAATAGGATATAAAGGTAGTTTACTCATGATTTAAACAAGCCTGT  
TGGTATGAGAAGAAAACTTGTTGATATTACCTTGTGATGTTTGGTGGAAATATCAGTTGAATGAGAGATGGTA  
TAAAAGAACCTATAAGTATTATTTGGAGAATGTGTATAAATGA

>Cluster\_58199

ATGCCGAGTCCGCGTGTTCACGGGAATCATTTCCCTGCTCCACCATTTTTACCGCCGACGGCCAGCTCGATAAGCC  
GGGCACCGCCGCTGATCGACGATCTGATCAAAGCAGCGCTTACGCGCTGTTCTTCTGGGCGAGCGTGGCGAGTTCT  
CCCAGCTCGGCGCGAAGAGCGTAAAGCCATTGCCCGCTTGTCTATCGATCATGTCGATCGTCCGCTGCCGTTGCTGATC  
GGCACCGGCGCCACCAACCGCCGGGAAACCATCGAACCCTAGCCAGCACGCGCAGCAGGCGGGCGCGGACGGCATCGTGT  
GATCAACCCCTACTACTGGAAGTGTGGAAGCGAACCCTGATCCGCTATTTTCGAGCAGGTGGCCGACAGCTCAGCTGCG  
CGGTGATGCTCTATAACTTTCCCGCGCTGACCGGGCAGGATCTGACTCCGGCGTGGTGAACCCCTCGCCGATCGCCG  
AGCAATATTTATCGGCATCAAAGACACCTCGACTCCGTCGCCACCTGCGCAGCATGATCCATACCGTCAAAGTGGCCA  
TCCGCACCTTACCCTGCTCCTGCGCTACGACGATCATCTGTTCAATCCCTGCTGCTCGCGGGCAGCGGGCGATATCGG  
CGAGCGGCAACTTTGCGCCGACGCTGCTGCGTAAATCTTCAAAAGCCTGGCGGACGGGGACGTTGCGGAAACCGCCGG  
TATCATCAGACCTTGTCTGCAAAATCCGCGAGATGTATCAGCTGGATACGCGCTTGTGAAACGTGATTAAGAGGCGATCGT  
GCTCTGCGGCTGCTCTGCTCCACGCAGCTGCTGCCGCGCCCTGCCGCTGGACGAGCCGCGCAAGGCGCAGCTGAAAA  
CCCTGCTGCAACAGCTCAAGCTTTGCTGA

>Cluster\_15505

ATGATTTCCGCTTCGCTGCAACAACGTAACCTCGCACCCGCGCAGCATGCTGTTTGTGCCAGGTGCCAATGCCCGGAT  
GGTCAGCAACTCATTCATCTACCCGCTGATGCCCTGATGTTTACCTCGAAGACTCCGTGGCATTGCGTGAAAAAGACA  
CCGCCCCCGCATGGTTTACCACGCGCTGCAACATCCGCTGATCGCGATATTGAAACCATTGTGCGTGAACCGCGCTG  
GATTTCCGAAATGGGTGTTTAAACGACTGGAAGCGCTGTTTCGCGTGGTTCGCGGACGTTGTCGTCTGCCGAAACCGGATC  
CGCTCAGGATGTTCTGGATATCGAAAAAGAGATCCTGCGCATCGAAAAAGCCTGTGGTCTGAAACCCGCGCAGCAGCGGCC  
TGCTGGCGCGGATGAAATCTCCGCTGGGCAATTACCCGCGCGGTAGAAATCGCTCACGCTTCCGAGCGTTTGTGCGGATC  
GCCCTCGGTGCAAGAACTATGTGCGCAACCTGCGTACAGAACCCTCCCGGAAGGAACCTGAACTGCTGTTGCTCGCTCGCT  
CTCCATTTTTCAGGCGCGGCTTCTGCGGTTATTCAGGCTGCGATACCGCTATTTCCGACGCTAACAAACGAAAGCGGAT  
TCTTGCAGAAGCCGCCACATCAAACAGCTGGGCTTTGACGGCAAAATCGCTGATCAACCCGCTCAGATTGATCTGCTG  
CACAACTTACGACCGGACCCGAAAGAAAGTGGATCAGCGCCCGCGCTGTAAGAGCCGCTGAAGCCGCGCTCGCGA  
AGGCTCGGCGTGGTTTCCCTGAACGGCAAGATGGTGGACGGTCCGGTTATCGATCGCGCCGCTGTTGCTCTCCCGTG  
CAGAACTTTCCGGCATCCGCAAGAATAA

>Cluster\_61736

ATGATTCGTTGCTGTGTAGGTATAACCGTATGATGATCGCATCTATTACGTGGAAGGGTTACCAGCGGAGAGCGGTAA  
ATACGTGGCGAGAAATATACGGAAGTTGGTGGCGGGCAGCGGCGACGGCAGCGGTTGCGGGCAAGGCTGGGGGCGC  
AGGTGCAATTTTATGGTTCGCGTATGATGACGACACGGGCAACAGCCTGCTGGCAGAGCTGGAATCCTGGGGCGTTAAC  
ACCCGTTACACCAACCGTATAACAGGCGAAATCTTCCGCAATCCGCCATCATGGTGGATACCAGGCGAGCGGATTAAT  
CATTAACCTACCCAGCCGATCTGCTGCTGACGAGAGTGGTGGAGGAAATGATTTCTCAGTGGGATGTTGTGTC  
TGGCAGATGTACGCTGGCACGACGGCGCTAAAAAAGCCTTACCCCTGGCCCGTCAAGCGGGTGTGATGACCGTTCTGGAC  
GGGGACATTACGCCGAGGATATCAGTGAGCTGGTGGCATTAAAGCATCAGCGCGCTTTTTCAGAACCGGGTCTGGCGCG  
CTTAACGGGCGTGAAGAGATGGCCAGTGGCTAAAACAGGCAACAACGCTCAAAAATGGTCAATGATGATGACCCAGG  
GTAGCGCAGGCTGCGACTGGCTGAAAAATGGTGGGCGTCAAGCTCAACCGGCTTCAAAGTTGATGGTGTAGATACCA  
GGTGGGTTGATGTTTTTTCAGCGCTTTTGGCGGTGGCCTGGCAACAAGTGGGGATTTAGCGGATGATGACCGCTCCG  
CAGCGGTGATGCGCGTTAAAATGCACAGCTCCCGGTGGACGAGCCGGATCCCTGACTGTGATCAAAACCGATCTTTTT  
TGTCACTTTTTGTATAA

>Cluster\_59230

ATGAAAAAGTTATTACCTGTACCCGACTGGTGTATGTTGCGGGAATGGCCTGCGCACAGGCCGAGGAAAGGAACGACTG  
GCATTTAATATCGGCGCATGTACGAAATAGAAAACGTCGAGGGTTATGGCGAAGATATGGAATGGGCTGGCGGAGCCTT  
CAGTCTATTTTAACTGCCGCAACGGGCGTGGAGAATTTGCTCTGCTTATTATCAGGAAGGGCGGTTAGATTAAGCGCT  
GGTAAACGTTGGAACGTTGGTTTATGTCGACCGGAGCTGGAGTGCATTTATCAGTTCTCGAAAACGATGATTTTCACTTCCG  
CCTGACCGCGGTTTCCGTAATTTATGGTTATCACTACGTTGATGAACCGGTAAGACACGGCGAATATGACGCGCTGGA  
AAATCGCGCCAGACTGGGATGTGAAACTGACTGACGATTTACGTTTCAACGGTTGGTGTGATGATATAAATTTGCCAAC

GATCTGAACACTACCGGTTACGCTGATACCCGTGTGAAACGGAAACAGGTCTGCAATATACCTTCAACGAAACGGTTGC  
CTTGCGAGTGAACATTTATCTCGAGCGCGCTTCAATATGGACGACAGCCGCAATAACGGTGAGTTTTCCACGCAAGAAA  
TTCGCGCTATTTGCGCTGACGCTCGGCAACCACTCGGTGACCGCTATACGCGCATGGGCTGGATCGCTGGAGTAAC  
TGGGACTGGCAGGATGATATGAACGTGAAGGCATGATTTTAAACCGTGTAGGTTTATTTTACGGTTATGATTTCCAGAA  
CGGACTTCCGTTTCGCTGGAATACGCTTTGAGTGGCAGGATCACGACGAAGCGGACAGTGATAAATCCATTATGCAG  
GTGTCGGCGTAAATTAACGTTCTGA

>Cluster\_39577

ATGCTTAATACGTTATCAAACGCTTGTGCGGTTGATTCGACGCTGTTTATCGTCTCGGTGCTGGTGTGTTTTATTTGT  
CCATATGCTGCCGCGGATCCGCGCGATGATTTGCCGGGCCGGAAGCTGATGCGCAGGTATAGAACTGGTGCCTCAGC  
AGCTGGGGTTGGATCAGCCGCTGTATCACCAGTTCTGGCACTATATCAGCAATGCTGTGCAGGGGGATTTGGCTGTG  
ATGGTGTGCGCTCGTCCGGTTGCCGATGAGATTGCCAGCGCTTATGCAACGCTGTGGCTGACCATAACCAGTATGGT  
CTGGGCGGTGATATTTGGTATGGCGGCGGAATATCGCCGCGCTGCGGTAATCGTTGGCCGGATCGATTGAGTATGA  
CCATTGCGGTGTCGGGATCTCGTTCCGGCATTTGCTCTGGGATGCTTTTAAATCAGGTATTTCCGTTGAACGGG  
TGGCTGCCACCGTGGGAGCAGACAGTTGGCAGCACTACATTTTACCCTCCCTGACGCTCGGCGGGCAGTGGCAGCCGT  
GATGGCGGCTTTACC CGCGCTCGTTTGTGACGTTTAAAGCGAAGATTATATGCGTACC CGGAGGGCGAAAGGGGTGA  
CGAAACCTGGGTTATCTCAAACACGGGCTACGCAACGCGATGATCCCGGTAGTGACCATGATGGGCTTACAGTTTGGC  
TTCTTGGTGGTTCATCTCGTGGTGGAGAAAGTTTTCAACTGCCCGGACTTGGACGCTTACTCGTTCGTTAGTGA  
AATGCGGATTACCCAGTATTCAGGCGGAAATCTGCTTTTCTCGCTGGAATTTATCTTATCAACTTAGTGGTGGATG  
TGCTTATGCCCGCATTAACCCGCTATCAGGTACAAGTAA

>Cluster\_2413

ATGAAAGTACTTCTGACTGGCTCAACTGGCATGGTTGGTAAGAATATATAGAGCATGATAGTCAAGTAAATATAATAT  
ACTTACTCCAACAGCTCTGATTTGAATTTATAGATAAAAATGAAATAGAAAAATTCATGCTTATCAACATGCCAGACT  
GTATTATACATGCAGCGGATAGTTGGAGGCAATTCATGCAAAATATAAGCAGGCGCTTTGATTTTCTGAAAAAAATTTG  
CAGATGGGTTAAATTTAGTTTCCGTCGCAAAAAAAGTGGTATCAAGAAAGTCTTAACTTGGGTAGTTCATGCATGTA  
CCCCAAAACTTTGAAGAGGCTATTTCTGAGAAAGCTCTGTTAACTGGTGAGCTAGAAGAAACTAATGAGGGATATGTA  
TTGCGAAAATTTGCTGATGAAAAGCATGCGAATATATAAAGAGAAACTCTAATTTATTTTATAAAAACAATTTATCCCA  
TGTAATTTATATGGGAAATATGATAAATTTGATGATAACTCGTACATATGATTCGGCAGTTATAAAAAAAATCCATCA  
TGGCAAAATTAATATGTTCCAGAGATCGAAATTTGGGGGATGGTAAATTCGCGCGTGAATTTATGATGAGAAAGT  
TAGCTGATCTTATTTTTATGTTATTTCTAAAATAGAAATTCATGCCTAATATGGTAAATGCTGGTTTAGGTTACGATTAT  
TCAATTAATGACTATTTAAGATAATTTGAGAAAGAAATTTGGTTTACTGGGAGTTTTTCTCATGATTTAACAAAACCAAC  
AGGAATGAAACGGAAGCTAGTAGATTTTCAATGCTTAAATAAATTTGGTTGGTCAAGTCACTTTGAACTCAGAGATGGCA  
TCGAAAGACCTATAATTTACTTGGAGAATCAAAAATAAATGA

>Cluster\_39477

ATGGACAAACCACCGACATTCAGGCTTCTGAAGAATTAACCCTGCCCGCAATCATGACGCGCATCTGCTGATGGCTT  
AGTTGTCGATAATGCCAAGCAACGAGCTCAGGAAGAAGGCTTCGAGATTTGCTGAAAGCAGATGAGAAACCAAAAC  
AAGACCGCCAACAATGCTGAATTTGCCCGTCCCGCATGCAACGCAAAACCGCAGCGTGAGCTTGAGCAGCATGGAA  
GCGGTTAAGCGTGGAGAGTTGCCGAGCACCTGCGGGTGAACCTGAGTTACCAAACAACAGACCCTAACGATTATCT  
TTCCGAAGATGCACTGGCTAAGTACGACTATGACAGACGCGCGCACTGGCTGCCCTCCAGCAGGCAACACAGTGAATGGC  
AGATCAAGGCTATGGACGCAAGCAGGCTGTGCGGAGCAGGCTGCAAAAACCTCAGGAGTTCAACCAGCAATCAGCG  
CAATACGTCGAGGACGCCGTAAGCACTACGACGACGAGGAAAAGCTCAATATCCCTGACTATCAGGAGAAAAGAGATGC  
ATTCATGCAACTGGTGCAGCAGAGTGGTGCAGACATCATGCGCTCTTCCGAGAAATCCGCTGCTCATGATC  
ACCTGGTCTAATCTGAGAAAACAGCCAGTTGCTGGCAGTGGACGGGCAATCCGCGCTGATTTGAACCTCAGCTGCAGT  
TCAGAACGTTTAACTCTCAAGCCTCAGCCAGCTGTTTTCAGAAAGCCGTTTACTGATGAACCAATTCAGGCAACG  
TGTTGCTGCAAAATCTCTGCGATTGAAAAGCAGATGGAAGCGGACGAAACAAAGGGATGTAGAGACATACGCAAGC  
TCAAGGCGCAACTGAATAAAGGAATTCGATAA

>Cluster\_22135

ATGATTTCTGCGGCGACACTTAATTCAGAACTCATTAATAAAATCGCGCAGGATTTTGGCAGGCGACAGCCTTGGCGT  
TGTCGTGGTCAATATTCACGGCGATGAAATTTCCGAGCTGTTTAACTTCACTCCATTTTGTGATGATGCGGCAACACC  
CTCAGCTGAGCACTCGATGTCGATGAGCGATCGTTGTTGGGGTCTGGAAGCCCTAAATCCGATCAGCCTTGATTTTAT  
CGCTGCTATGCGGATTAACCGATTTCTTATTTCCACTGGTAAATCGCCGGACATTTAGTTGGTTTTGTATTGTCGGGCA  
AGTTGCTGCTGCTAATGATGATGTCGATTTGGTGCATATTTGAAATGTCGATGATTTGGCAGGACAGATCCCGAATTAC  
TTAATGAATTTGCAAAAGTCCCTGAGATGGATTACTCAAGAGTTATGGCTCTGCGGATTTGTTGAAGTTGATGTAGAA  
AATTCGCTAAAAAACAACCTCAATTTTGTGGTTATTAAGAGAGAACTCTCAGTCAGATTCGTTGCGCCAGACTCGTGC  
GCCTGGTCCCACGCAATAAAATGAAAAAAGCTTTACGTTATATGATGCGCATTTATCAGACGATTTGGCTCTGGAAG  
ATGTCGCTCGCAGCTTATCTAAGCCTTATTTTACTAAGCTTATTTTCAAGTATTTTAAAGAAATACCATGGAATCGGTTAATGCG  
TGGGTAACCAACAACGGATGGCCAGCGCTCGTGAATTTACTGTGCCATAGTGACTGGAGCATCCGAGCATTTGCGGCTAA  
TTTTAGGTTTTTTCGCAAAACAGTTATTTTTGCAAAAGTTTTCCGTCAGACTTATCAGGTTACGCCAGGTTGATCGACAGC  
AAGTGAGTATAATGCGGCGATGAAACGGTATAG

>Cluster\_10961

ATGACTTCCCGGATAAAGCTTACTACTGGATCCAGGCTAACGTTCTCAAAGCAGACAAAATGGATCTGCGTGAATCTCA  
GGGATGGCTGAGTCGCGTTATGAAGGTGCAGCAGTCCGAGCTGCTTGGAGGTGGAATCACAGCGTACAATACCGGGT  
CGCAGGTACCACCTTCGGTGTGGACTGGCTACCGGTCTGATTTGGCATGGCCGCGGATGCAATGGTGGAAAGATATAAAT  
TACACAATGATTACAGATGTTTCCAGATTGCCGAGCGAACCAGAACCAGCGTCAAGACGGATAATGTTGCAGCTTTGCGTCA  
GGGAACATCAGGCTCCAAAATTCAGACAAGCACAGAAACCGGCAACAGCATAAATACAGACCCGGGTTGATCCAGTG  
CCAACAGGTTAATCTGAAGTTTGAAGAAGCTAAACCTCATCTGGAAGACCAGCTGGCAAAATCAATCGCAATATATCT  
TGA

>Cluster\_22939

ATGGGATGTGTAACAGCACCAGAACCTTATCCATTCATCAGGTCGCTGAATTTGTCAGCGGTGAAGCTGTTCTTGA  
TGACTGGTTAAAGCAGAAGGGGCTAAAAAATCAGGCTCTCGGAGCTACCCGACTTTTGTGATGTAGGAAGGAACAC  
AACAAATAGCTCGTTTTTACTCACTGCTACTGCTCAACCATACAGAAGCTACAGGCAATCTTCGCGCAATATG  
CCTGACCCATCCCTGTCTATATACTTGCACGCTGGCTGTTGATGCGTCAATTCGTTGTAAGGGCTTTGGTGGGATTT  
ACTGCATGATGCGTTTTGTCGTTTACAGAGTGGCCGAAAATACAGGTGTGCGTGAATTTATGGTTTATGCACTTACCG  
AAAACGCAAAACAGTTTTATATTCACCATGTTTTAAGCCATCAAAAAGCCAGGCGCAAAACATTTGTTTCTTAACTCTCT  
CAATAA

>Cluster\_9006

GTGAATCTTAACGCAACAATCTCGGCCAGGCCATCGGCTTTGCTGTTCTGTTCTGTCATGAAGTACGTATGGCC  
GCCATTAAGCGAGCCATCGAAAAACGTCAAAAAGAAATTTGCTGACGGCTTTGCTTCCGAGAACGAGCACATAAGGACC  
TTGACCTTGCAAAAGCCAGCGGACCGACAGCTGAAAAAAGCGAAAGCGGAAAGCCAGGTAATCATCGAGCAGGCGAAC  
AAACCGCGCTCGCAGATTTGAGCAGAGCGAAAGCTGAGGCAGAACAGGAACGTAATAAATCTGTTGCCAGGCGCAGGC

GGAATTGAAGCCGAGCGTAAACGTTGCCGTGAAGAGCTGCGTAAGCAAGTTGCTATCCTGGCTGTTGCTGGCGCCGAGA  
AGATCATCGAACGTTCCGTGGATGAAGCTGCTAACAGCGACATCGTGGATAAACTTGTGCTGAACTGTAA  
>Cluster\_66041  
ATGAAAAAATACTGAAGCAATACTGGCGATTAATCTCGCCGTACTTTCCTGTATTGTGTTTATAAACATTATTTTAA  
ATATGGTTTTTACAGCAAGCATTTTTATCTGTAGATGAATTTGTCACGTTATTTATTTGCTGGTTAACATTTATGGCGCGA  
TTGTGGCTTTTATGGATAACGCCACGTTACAGTACCTTTCTGGTGGAGAACTCTCCCGCATGGCAACGACGAGTC  
GCTCTGGTTACCCATTCTTAATCTTATTTATTTGTGGCGCACGTCGCGGGCGCAACGCTAAAAACAAATTCAGGACTG  
GAGCGATTATTCACCGATCTCGGTTTACCCATCGGCCTGATGTATGCCGCTTGTCTGCCACCAGCCTCGTTATCGCAT  
TCTTTGAACTGCGCTATTATATCAACTCATCACGCGTAGCAATCTCTAACGTCGCCACCACAAGGAGCTTAA  
>Cluster\_16614  
ATGAATCATAAAAAACATCCAGAGCCCTTAAATAGTCCCTTCGAAACCGGGATACGTTTCGCTTGCATCTGGTTGCAGC  
CTTCCCTGAGTCTTATGATTTGCAACGGCTAGTTGAAATGGATTTATCTCGTTGTCATTCGGTGTATGCTGATGGTCCCTG  
ACAGTTTGCATGCCCAATACCGATGCGTGGCGGCAACTACTGGTCAGGCATGGTTTTGATTGAAAAGGGATTGCGCCTG  
ATGATGAGCAGGGGGCTCGTCCAACGTGTTTACGCGAGTATGGGTTCAACTATCTTGTGGGAGCTCGCTGCACCTTT  
TATCTCTTCTTACGACTGAATATTATGTGCGACTAAAAGTTTGTGCTGAATGGGTAAGTGGTGAATTTAAAGACCTGC  
CTACGAGGAAATACGGAACATTACGCATCGCTTGTTCAGCAGTGGTCGAGTCAAGTATTCAGTCACTGGA  
GGATGA  
>Cluster\_38473  
ATGAGCGAGATTTTAAATTTGGCGAAGGGCTTCAGGAGAAATCGAAGCAGCAGGCGCAGGATACCGAGCAGAGCGTGAA  
CGCGAGTTCCGCGAGGCTGGAGAGCTCTATACGCGCGGAAGCTGCAACTCAGCTCGCAGAGCATCAGCAACGCTATCCGG  
AGCAGAACGGCAGACTGACGGGCATGCTCAGAGCCTCTGTCTCAACGGCGATGGCGTGGATATTCATCTGCTTCGCCCTG  
CTGATCGGCATCTGAGCGGGATAATCTGGTTTACAGGCACGATCATCCTCGGCCCTGAGCGAGATGGACAGCTACAG  
CCAGCAGCTGGCGAACCTGAAAGCGAAAAGCGCGCGGGCGTGGCGATCTACAGCGACGACAAGCACCAGGAAACCTTACA  
TGGTGGTGTGCTGCCAAGCAGGCGCACGGCGTGGAAACCTATACATCGACGACCACAACCGTAGTGAATACACGGCG  
AAATAA  
>Cluster\_44395  
ATGTGCGAACTGACCCATATCAACGCGCTGGCGAAGCGCACATGGTGGATGTCTCCGCCAAAGCGGAAACCGTGCCTGA  
AGCGCGGGCGGAAAGCCTTTGTACCATGCGCAGCGAGAGCTGGCGATGATTATGATGGTCGCCACCACAAAGGCGAGC  
TATTTGCCACTGCGCGTATTGCCGGTATTCAGGCGGCAAAACGCACCTGGGATCTGATCCCGCTCTGTCTATCCGCTGATG  
CTCAGCAAAGTTGAAGTCAATTTACAGGCGGAGCGGAGCACAATCGGGTGCCTATAGAAACCTTATGCCGCTGACCCG  
GAAAACCGGTGTGCAATGGAAGCATTAACCGCGGCTCCGTGGCGGCGTGCACCTTTATGACATGTGCAAGCGGTGC  
AAAAAGATATGGTGGTGGTCCGCTACGTTTGTGGCGAAGAGCGCGCGCAAGTCGGGTGACTTTAAGGTGGAAGCGGAT  
GATTAA  
>Cluster\_33146  
ATGCAGTCGAACCTTATGATTAATTTATGGCAAACCTGACTAACCAACTTCTGCAGGCTGTAGCCAAACAAACTCGTAGTGG  
CGATACCCAAACATGGTTCCAGCAGGAGCAGACGACTTATATAACAGAACAGTAAACAGAGCTCTGGATGACTATTGCA  
GGAGTAATAATTCAGTCAATAAGTCAGGCGACTAAAGTTCACATTTTATAGAGTTGTTGAAAATGCGTTACAGCAACCTCTT  
GATATAAACGGGGCGCAATCATCAATGGTTCATCTTTCGAGTCAATAAATACTTTAATCAGATAGTTGATGAGCAGTG  
TGGCAAAGGGGAGATCCAATAACACGTTTAAACACCAAGACTAAGATGATAGAACAAGCCTCACAGAATAATTTGAA  
GAACTTCAATGGCTTAAAGTCAAGTATATAAAAGAGATTACTCAGAATGCGATTTTATAGAGCATGTACAGGATACCCGA  
TTGTAG  
>Cluster\_11163  
ATGCCAGATCAAAAAGAAAGTGAGAACACCAAACCTACTTGTGAAGAACAAAAGGATAATGAACTGGTTTCTCGAGTAAT  
CGAAAATCCAGAGGCTTTAAACAGGGTTTTGGATAGTCCGAGGTGCGGGCTATTGTTTGGCAGCATTTCAGGGGCTG  
TTCCGCCACCTTCAATGCTTAAAGAGTATGATCAACTGCTGCGCTGGGCTTGAACATCGACTTGTGAGTTGACCGAAAA  
GAGCAGGCTCATCGCCATAAAACAGTGGCTGATAGCATTGATAATGCCAGAGATGGTCAAAACAAAGGCTTTTTGGTTGGC  
AATATTGATCATCTTAGCTGCCACTGTCTTTGGCGTCACTGGGAGACAGTCTTGGCGGAACCTCGTTTCAATAGATC  
TTGTTGATTTGGTTACGGCATTTTATGTTGGAAAACATTTATTCAGCAGGAACCTGATCAAGATTAG  
>Cluster\_11533  
ATGTATTTTATCGGTTATCATGCGCAGGTTAGGGCTCAGCCAGAATATCTCTCCGTCGGAGTTTACAGGAGCGCTTCCCT  
TCCCTCAACGGGACAAATCGGCAGAGGTTTCTACATTTGCGAAGATGAACGGTACGCTACCACCGTGGGCGCTGAAAACG  
CAACCGAATTAGCCCGCAGAAATCAGCCGATTTTCACTCGCATGGTCAGCTTATTGACCGGCGAGTCAAAATAATCCATGG  
CTTGATAAAGCTGCTCAGCGAACGATTTTAAAAATTTACACTGTCGCTCCGCTATTGCAATGTAATGGAACATCATGAA  
CCCCGGGACTTAGAATCTTGAAGGCCACACTTATGACAACGGTGGCCAGGTCGGATCTTAAAGCGGATTTGCAAAAT  
GGTTACAAATGGTTGATACCACAGAGGAACTCCAGTACCTGCGGGTGAAGAGAGATGATGGCTGA  
>Cluster\_5131  
ATGACCACAGAGCAAAACCTTAACTCAGCACTGTCTGAATCCTCTGTTTCTGTGAGTCAAGTCAAGAAAGGGGGGAATAT  
TAATGTTAAAGGGAGCGCGGGAGCAACGCGCTGCTGCTGCTGCTGCTGCTGCTGCTGCTGCTGCTGCTGCTGCTGCTGCTG  
GCTTAAACGCGGGGTCACGCTCTGCTGATTAGCTGGCGTACACCGAGGTTGTTGCTTTTATGATGAAAGGGCAGGTC  
GATCAGTTACCGACAGGCGGGGGCACAGTCCCTGAACGAGGCGCAGATGAGCGTCTGACAGAACGCTTTATGCGAGC  
ACTTAGCACAGAACTTACGGAATACCAGCGCATCACAACGCTCTTATCTGGTGACGCGGGCGGTTGTCAGCGGTCGGG  
CAGACATTACCGGTGAAATTCAGTCTGCAGTGGCACAAAAATGGCCGCGGAGGGGGCAGTAA  
>Cluster\_39857  
ATGAAACTTTTAAAGTAGCAGCAATTCGACGAATCGTATTCTCTGGTAGCGCTTGGCAGGTTGTTTCCCTCAGTACGG  
CGGCGCGGTAACCAAGTGGTGGCGGTAATAATAGCGGCCAAATTCAGAGCTGAACATTTACCAGTACGGTGGCGGTA  
ACTCTGCTTGGCTGCTGCAAGCTGACGCCCTGAACTCTGATCTGACCAATACCAGCAGCGCGCGGTCACCGCGAGAT  
GTTGGCAAGGTTCTGATGACAGCTCAATCGATCTGACTCAGCGTGGTTTCGGCAACAGCGCTACTCTTGTATCAGTGGAA  
TGGTAAAGATTCTACTATGACTGTTAAACAGTTGCGGTGCGGTAACGGTGTGCTGTTGACAGACTGCATCTAACTCCA  
CGCTAACGTCACCTAGGTTGGCTTTGGTAAACAACGCGACCGCTCATCAGTACTAA  
>Cluster\_33247  
ATGAAAAATATCTGATCGACAATCTGGACCGAGGATCCTGGAAGCATTAATGGCAATGCGCGCACCGCTTACGCCGA  
ACTGGCGAAACAATTTGGCGTCACTCGGGGACGATTCACGTTTCGAGTAGAGAAAATGAAGCAGGCGGGGATCATACCG  
GGCGCGTATTGATGCTCAGTCCGAAGCAGCTGGTTATGACCTAGGCTGCTTTATCGGCATTAATTAAGAGCGCCAAA  
GACTATCCTTCCGCGCTGGCAAGCTGGAAGCCTCGATGAAGTCACTGAAGCCTATTACACAACCGGCGCTACAGCAT  
CTTTATAAAGTGTGTCGGTTCGATCGATGCTCTCCAGCATGACTTATCAACAAGATCCAACAATGATGAAATTC  
AGTCCACCAGACACTGATCGTCTGCAGAACCGATCATGCGTACCATTAAAGCCCTGA  
>Cluster\_28578  
ATGAAACGGATACTCGAAGGCATCTTGGCATCATCATCGCAACTGCTTGTATTATTTTTATTAATATCATTTCTTCG  
ATATGGATTCCACACAAGTATATATCGATTGATGAATATCCCGACTTTTATTTGCTGGTTAACCTTTATTTGGCGCAA

TCGTTGCTTATATGGACAACAGCCATGTGCAGGTTACTTTTTTAGTCGAAAACTCTCACCGGCTAATCAACAACGTGTT  
TCGCTGCTAACCCATACGCTCATTTTATGCTGTGCTGGGGCTGGCCGGGGCGCTATAGAAAAACAGCGCAAGACTG  
GAGCAACTTATCGCCATCTTGGCGTCCCATGGCTTAATGTACGCCGCCGTATCCCCACAGCTGATTATCGCAT  
TGCTGGAATTGCGCTACTTATACCGGCAGTTCAAAAATACCCCGAGCCGAAACCAACAAGGAGCTGA  
>Cluster\_34152  
ATGACAATACTTTTCACTAAGTCGGTTTATGCTGGCGGGTACTGCTCGCGAGCTTTAATGCCTCTGCTATCCCCGGGTT  
CTGGCAGCAGGGTTACGGTTCAGGCAATACGGAATACAGCGTGACCGAAGCCAGCGGAAAGACGTTTACCATCAACTGCA  
CAGGGAACCCGGACCAGAATGGTTTCTATCAGCATTCAGTCTTCTTACCCTTGCCTGACAAAGATGGTTCAGTTCCGAC  
GATGACGACACTACTATCACCGTAGTGGATCACCAGCAGTACATTTATCCGTCAGCCTGGGCTGGCGTAACGGCGA  
TAACGCCCTGGTTGACTTTCATCAGCAATATCTCTGAGGCCGGGCACTGACGCTTACGTCATGACCACAAAGCAGGGA  
CCTTCACTGCGGACCAGGAAAGCCTGAGAAAGTCTGTCACCTCCCGGAGACTGCAGCAACGACTGA  
>Cluster\_61090  
ATGATGATGGGTGAAGTACAGTCATTACCGTCTGCTGGGTTACATCTTGCCTTACAGGACGCGTTAACGCTGGCATTAGC  
TGCCAGACCGCAAGAAAAAGCGCGGGTCTTACGAATTACAGGGCGACAATACTTTTATGAATGTATGACGTTTAAACA  
CTCAATCGCCCGTCGAGAAAAAGCGGAATTGCACGAGCAATACATTGATATCCAGCTGTTATTAACGGTGAGGAAACGG  
ATTTCTGTTTGGCATGGCAGGCACTGCGCGTCAAGTGTGAAGAGTCCACCATGAGGATGATTATCAGCTTTGCAGCACCAT  
TGATAACGAGCAAGCCATCACTTAAACCGGGAATGTTCCGCTGTTTATGCCAGGTGAACCCGATAAAACAGGATGCG  
TTGTCGGCGAGCCTGGAGAGATTAAGGTTGTTGGTGAAGTTAAGGCTGATTTAATGGCTTAA  
>Cluster\_33740  
ATGAACTATCATCAGTACTATCTGTCGACATCGTCAACGGCCCCGGCACTCGCTGCACCCTGTTTGTCTCCGGGTGTGT  
TCATGAATGCCCCGTTGCTATAACAAAAGCACCTGGCGGGTAAATTCGGCTAGCCATTTACCAAAGCAATGGAAGACC  
AGATCATTAACGATCTGAATGACACTCGTATCAACGCCAGGGTATTTCCCTTCCGGCGGCGATCCGCTACATCCGCAA  
AACGTCGCCGATATTTCTGAAGCTGGTACACGCATCCGCGCCGAGTGTCCGGGTAAAGATATCTGGGTGTGGACAGGCTA  
TAAACTCGACAACTCAACGCTGCGCAAAATGAGTGTGATTTGATTAAGTCAACAGTGTGGTGCAGCCAAATTTGTGCAAG  
ATTTAAAAGACCTTCCCTGATCTGGCGAGGCAGCAGCAATCAGGTGGTGCATCATTTGCGATGA  
>Cluster\_54680  
ATGGCGGTGAGGGGGGATGACTCGCTTTCGCTCGCCCTGGGGGAGCCGCTCACTGCGTTCACGGTCTGTCCAACCTGG  
CTGTCGCCAGTTGTTCGACCCCGGCTTCTCATCCCCGGTGTGTGCAATACGAAAAAAGCCCGTACTTTT  
CGTACGAGCTCTTCTTAAATATGGCGGTGAGGGGGGATGACTCGCTTTCGCTCGCCCTGGGGGAGCCCGCTCACTGC  
GTTTACGGTCTGTCCAACCTGGCTGTGCGCAGTTGTGACCCCGGTCGGGGCTTCTCATCCCCCGGTTGTGTCAATAT  
ACGAAAAAAGCCCGTACTTTCGTCAGGGCTTTTTTTTAAATATGGCGGTGAGGGGGGATTCGAACCCCGGATACGTT  
GCCGTATACACACTTTCCAGGCGTCTCCTTACGCCACTCGGACACCTCACAAATTTGCTGTTCTCTGTCTGTGGAACG  
GGCGTAATTTAGGGAATCATGA  
>Cluster\_67039  
ATGGAGTATGTTGTTTTTCTGGCAGTAATACTGCTTATCTGATCCTTCCCGGAAGAAGCAAAAAATATACCGGAATCA  
GAAATACATTGACCGGCTTTTAAAAAACAATCGTGTGTTATCAGTCAAAGCATTATGACTGCGCGCAACGTAATTTT  
TTCGTAAGTCTGCGCGCGCTGGCGGATACCTTTCGTTGTTGATGGCGCAGGTTGCTGTTGATGTGGTTTCAAGTT  
TGCCCCGGGTTCTCTGAGGCAGAGAAACGAAAGGTTATTCGGCAGATTTCGCAATGGCAGTGTGATTTGTGGTTGTGGA  
TCAGCGGGATTTCACTGTGAGGCCATTAATCGAACTGGATGATCGCTCATCTGCGCCGGAACGTCAGCGCCGGGATA  
CGTTATTTAATCTGGTTGTTTATTACAGGCCGTTATTCGTTGACCCGCTCGTTCTGTTAAACAGGTGAATGACGTCGCG  
GCCAGTATTATTCGCCATATCTGA  
>Cluster\_17412  
ATGCACGAGAATCAACAACCACAACCCAGGCTTTTGGAGTGAAGTGGCGCAGAGCGTGAAGCGATTGAGCAGGATGCA  
CCACTACGAAAGACCCCGTGGCGGCTCCATTGAAGCGTGAAAATCGTTCAGAAGCAGCGTGGCTGGGTGCGGATGGCG  
CGATCCACGCGATCGCCGATGTGCTGGGTATTCGGCGAGCGAGTCAAGGCGTGGCAACGTTCTACAGCCAGATCTTC  
CGTCAGCCAGTAGGCCGCATGTGATCCGTTATTCGACAGCGTGGTCTGTACATCAACGGTTACCAGGGTATTCAGGC  
GGCGCTGGAGAAAAAATCAACATCAAAACAGGGCAAAACGCAATTTGACGGCCGCTTACGCTGCTGCAATTTGCTGCC  
TGGGGAACGTGTGATAAAGGGCAAAACATGATGATCGATGAGGACACTCACGCGCATCTGACCCCGGAAGCGATCCCTGAA  
CTGCTGGAGCGGTATAAATGA  
>Cluster\_20756  
ATGTTTGAATCAAACTTCTAAACATGCTCACTTTGTGCGGCTTGGCGAGCATTGCAATTGAACACAATCTGGAAGA  
TGTGGCCGCTGCCGTTGGCATGAGGCCGAGATTCTGCGCAACAAATTGAATCCAGCACAGCCGACCCGTTTAACTGTG  
ACGAGCTTTTAGCTATTACGGATTACACCGAAGATCGCGGTTTACTGGATGGAATGCTGGGGCAGATTAACTGCCCTTCA  
TCCGTACCGGTGAACAATGCTACAGAAGCAACATGCAGTTGTGCTGACTGAGTGCCACAGCCAGTGTGGGCGCAATTCG  
TGGGGAAGCCGTTTAACTTCCAGCTATATGACCCGCGCCGCTACACAAATTTGATTCGCGCTCGCATGCAATCCGTA  
GCTTATCCGTGCTGGCTTATACCGTTGAAAGCCGATCCAGTCTGCGCTGTTTCTGGCCGAGCGGTGATCTGGTGACG  
GCTAACGCCACAGGCTTGTATATGA  
>Cluster\_48934  
ATGATCACTCACTATGATATAAAAAATGGAGATGCAAAAACTAAAGGAGTACTCTCTGTAGAGGGTGTAAATATCCCATC  
ATTTATACAAGTCAAAAAGCCGGAACCTTATGTGTTTTTATGGGTTTTATATGGCCAATTTTCTACGTTTAGTATCGG  
TAAAAAGTGTATGTCAGGGATGTTGGCTTTGATATATGTGCTAGTGAATGATGGGGTTCTGCTTTTTTGTGGCTATTACA  
AATGGAATGATGTTATACCTTGGCATTCCTGATAGTTTCAGAAAAGATTCAAAAAATAAATTTTATGTATTCTAAGAG  
TAAGACATATATTTTGTGTTTTTGTATTGTTTTTCTATGTTTTCTGTTTTATGCAATCTATCTTATATGTTTTTGCACATA  
TGATTACATTCATATATTTTCTTGGTGTATACCATAGATATAAATCGTTATAATCTCTCAGCTATAGCCCTCAGTAATA  
GGACTGTTCAAAAAAGAGTCTGTTAGTTAA  
>Cluster\_19348  
ATGAAACATTCATTTGAAGTAAACTTGGCGGTGAAATCATTACCTGGCTGGTCAATGCAGGCATCATTTCTACGGCAAA  
ACTCTTTCAACTTCTCACACCAGCCTTCACACTGGATTAATCTTTTCTTCTCACGGTCCCGGGCACTGGATTGCA  
GACACAAGCGTAGCTATTTCTCTGAAGATAAACTTTGCGTGGTCTTTTATGCTCTCGGCATTTCTGAGTCTTACCCCGG  
GTAGCTGCCCGGTTTAAACATTCAGGCAACACCGGTTAAAAAAGCTACCGGATAAAAGGCTACCGCAATCTGGTAATGAGGC  
CTTTATCAGGCGCAGGAAGGAGAAAAGCATGACCCGTTCTGATGATACCCATGAAAACGAGGCAAAATGACGCGCGAAG  
AGATGAAGAAATGAGCTGCGTTATCTTCCGCGAGAAAATGCATATCTGAAAAGCCATGCAGGAGCATCTCTGAAAAAAG  
CGCCAGGAGCTGGAGAAAAACGAAAGTATCCGGAGCCTGA  
>Cluster\_17537  
ATGAGTTCGCGGGATAAATAAGGTGATTATCTTGGTGGGTTAGGACAAGACCCGGAAGTTCGATACTCACCATCAGG  
AACAGCGTTTCGCTAACCTGACAAATAGCCAGTCAAGAACATGGCGGAGATAAAAAATCTGGCGAGCAAAAAGGAATGACTG  
AATGGCATCGTTGCTGATATCCGGAACTGGCTGAGTGTGGGGCAGTATGTGAAAAAAGGTGATCAGATTTATTTT  
GAGGGAATGCTGAGAACAGAAAGTGAAGAACAGCTCAGGGCAAGACCGTTACACAACCGAGGTTTATGTCGGAATTTAA  
TGGCGTATGCAAAATGCTTGGCGCATTGGCGACGAAACAACAGCAGCCAGCAGGCAATCACAGAAGCCACAGCAGC

AATCATCACCAGCACAACACAACGAACCTCCGATGGATTTTGACGACGATATACCCTTTGCACCAGTAACTCTCCCTTC  
CCTCGTCACGCTATTACGCAATTTAA  
>Cluster\_7934  
ATGTTTGGATTTTTCAGATTTCCAACATCCCCACTATGACGAAGCGTGCCGGGCTTTTGCGCAGCGTCACAATATGGCGAA  
GCTGGCCGAGCGCGGGTATGAATGTTTCAGAGCTTACGCAACAAGCTCAACCCGGAACAGCTCACCAGTTTACGCGCG  
CTGAATTTGGCTACTGACTGACCTGACAGAAGACTCAACCCCTCGTTGATGGTTTCTTGCGCAGATTTCATTGCTGCCA  
TGCCTACCGGTTAATGAGTTGGCTAAAGACAAATTCAGCTCTTATGTCATGCGCGCAATGCGTGAACCTCGGCGAACTGGC  
GAGCGGTGCGGTATCTGATGAGCGTCTGACCCTGCCCCGTAAGCACAACATGATTGAAAGCGTTAACTCTGGTATTCCGA  
TGTGTCTATTGTCGGCTCTGGCGCTCTGAGACTAATCCTGCTATGTCATGCGTGGTCTGATACCATGAGC  
GGTATTGGCGCATCGTTTGGTCTGATTTGA  
>Cluster\_4386  
ATGCGCATAGTTACCGCTGCGCTCATGGCCCTAACCGTGGCAGTCAAGTTCATTAAAGCCAGCTGCTGAAGTCGGTTCCAGG  
CGATAACTGGCATCCGGTGAAGAACTTACGACGCGCAGTACGACAGCCATATGTTTCGACGGCATAAGTTTAAACCGAAC  
ATCAGCGTCAGCAGATGCGAGATCTTATGCAACAGGCCCGGCACGAACAGCCCTCTGTAAATGTTAGCGAACTGGAGACA  
ATGCATCGCTTGTACCCGACAGAAAATTTTGTATGAAAACGCTGTGCGCGCACAGGCAGAAAAATGGCGAATGAGCAAA  
TGCTCGTCAGGTTGAGATGGCAAAAAGTCCGCAACCAATGTATCGCTGTAAACGCGGAGCAGCAAGCGGTTTTAAACG  
AGAAAACATCAACAACGAATGGAGCAGTTGCGTGCAGTGCAGCAATGGCAAAAAAGTTTTCATCGTTGAAGCTATTGAGTAGT  
AGCAACTCACGTTCCAGTAG  
>Cluster\_38563  
ATGAGTCGAATCAATAAACAGTTAAATGCGTGCACAGCAACATTTACACACCTGTATTTGTTGAGAGTATTTTTAAAGGT  
TAATATACAGTTAGTATTTATCTTAAATCGGCAGATCATTTTGTATGACAAATATATCAGCTCAACAAGTGACAGTTGGG  
TATTCGATTTATTCAGGAAGCCGCTGCTATGCCACTTTTCGTGAGGATAAAAATCAGCAACCAATTAATCAATAATATTTGC  
TTCCATTTATGCATCTGCCAAGTGTCCAGCTCAGGTTCCCTGGGGTACTCCATGCGTGGTCTTTGGCAACTGATCATTTGCAT  
AAGCAAATCTGCTTTTACGTTTACGGTGTGAAAAGATTACCTCGAAACTCAGGAAATTAACCTCAATATTTCTACTTTA  
TCATTTTTCGGCTAAAAATCCTCTGTACCGAAGCATTCCTGTTTACCTCGAAGAGGCTTTGTTGAATAAATCGAAC  
TTTTGCTGA  
>Cluster\_67102  
ATGAAGAAAACAATGATGGCAGCCGCTGGTTCTGAGTGCCTCAGTATTCAGTCACTGCGCTGAATACAGTGA  
GAAAACGCGTACCTGGGTGTGGTGAACGGTCAAGTGGTGGTAAACAGTGTGGTGAAGGTGACCCGTACCCGACAGACC  
CGTGTCTGTACCGCTCCGGCAGTAAACAGCCCTTACCTGCAGAACTGATAATCCGGCATGCAGAAAGCCGCGGCTTCC  
GGCGGCTGGCAACATCACGGTGAAGAGGGCGTCCCGGATAACGGGGAAGCCCGCATCACTCTGAAGACGTCCTGAT  
GGTTGACGGAAGAGAGTGGCACCTCAGCCAGCAGCAGGTTGAGGATGTGGTGAATACCGTGCCTGAGGCACAGCAGC  
AGATTGAGTTAAGAACGGATGCACCGGCAGAGCTGGAAGTCCCGTCACTACCGGGAAATCAGCAGATAGCAGTGCAG  
GTGGAAGACTGA  
>Cluster\_22368  
ATGGGTGGCGCGGTAAACCAGACTACGATCAATAATGGAGTGTACAGGTTTATGGCGCGGCGACTGATCCACGATTAA  
AGGAGGGCGCGGTGATGCGGCATTTACGTTGGCAATGCCGGAAGCGTTGTTGATATCAGTACGATGAATATACCTTGC  
TGGATAATGGCAACCATAGCTGGAGTCTCGCAGAGAATCGCCTACAAATGCCCCCTTCAACCAGGATGCTGAATATG  
GCGGCAACCAACCGCTGGTATTTGATGCAGACTGGACCGTGCCTGGCGCTTTGGTATGCTAAAAGCGTTAATTA  
CGATACGGCGATGTGGATTTCCGGCAATTAACAGCCGCAACAACCTGAACACTGATGCGGGAGCTGGCTTTGAGCAAAAT  
TGACGGGCTGACGCTCGGTATCGATAGTCTGTTTCTCCGTGAAGAAAGCAGCACAACCTCAGGCGGTGTAGTCTGGAC  
TTCTGA  
>Cluster\_59790  
GTGTTAAATTTCTGTATTAACATTAGGCATTATCTCTTGCCAGGCTTACGCAAGATAACGGTTATAGTAAACGACCA  
TGACATTTTACCCATCAAGATTGTTGGCAAAAAAATTCAGATGATGACTGACGTTAACGTGATCAAAATCATGCTTGC  
GACAAGAATACAATCTCGTCGATGCGCAATTAATAAAGCCTATGGTGAAGCTTATCGTTATATAGAACAAAGTCCACGC  
ACAGGTGTAAAAAACCCTGATACCGAACAACCTTAACTTGGCTTAAAAAATCAGCAGGAGCTGGCTGGATTTTAGGGACAA  
AGAATGTGAATTAATCTTTCAAAATGAGGACGTTTCAAGTAAAGTACCCTTATCTGAATCAGAATGGCTCTCATGTA  
TGATCATAACAGCAATACCGCAACTCGCCAGTTCAGCTATACCGTAACTCTGAAGATTTTTATCCAAGCCCTTTGACA  
AGAGGATAA  
>Cluster\_48688  
ATGGCAGTCAAACCTATTTCACTTCTGTAACATAACGCTCCTCGTTCTTACGTCAAATTTGGCCGAATTTATTTAGCGG  
TCGTGTTATGTCACTGTTGATGAACTAGAGACTACCGTTCCGGTGTGCTGAATGAACGTTTAGATAATCAAGCGTCAGTTG  
TTGCGAACGTTGGGGCGATGTTGTCCTTGGTTCTTACGCGAAGCGAAAAATGCACGGCTTTAGTGAAGGAGAAAAA  
AACAAAGCAGTTTCAATGGAAAAATTTTCAAGAAAGAGGCTGAAACCATGGCTACGTTCTCATTATAGTTTCACTGG  
CGACGGTAGCCGTTCCAGCCGCTCAGAGCTTTTGTATGCGGATTCATCCATCACCACCTTCTGTCAGCACAATTACC  
ACCACTCCAGTGGAGCCTCTGTCACTTGGATGGGATGGCGTGGATGCGATACCTCAAGTTTCACTCCAGTTACTCAGGA  
TCATGCTGTACTAA  
>Cluster\_35148  
ATGAAAAGAAAATCCCTGTGAGATCGACCTGCAAGCCGCCAGAGACTGAAAGAAATCTGGACGGCGAAAAAATCA  
ACTAGGGTTAAACCAAGAGCGTGCAGCAAAATTTGCGATTTTTCGACACAGGAGCTGTAAGCCATTATCTAAATGGTC  
AGACACTTTAAATCTTGGCTGTATCAAGTTTCGAGGTTGCTGCAAGTTCTCCCGAGTCAATCAGACCAGATATG  
GCCGAGTTGTTACAAATGTAAGGATGTATCCCAAGAACTGGGGAGGACAAATGTTGCTACTATATCTGCAGATATGGA  
ACAATCGGAAAACGAATTTCCGTTTAAATATAGACCCATGAGGCGGGATTTGCTCCAGACGTTTCAAGGCTTTCCCAAAG  
AAGATAAAGAGAAAATGCTTAAAGAAAATGAAGGAGAAAAAAGAATCAATTTGAAGAAATCGTTGCGCGATGGCTAGCTGCG  
CAAAAGGGTCTGTCGCGCTTAA  
>Cluster\_20485  
ATGCCATCTTTTCGATATTGTCTCTGAAGTTGATCTTTCAGGAAGCAGTAAACGCGGTCGATAACCGGAGCCGGAAGTGG  
GTCCCGTTTTCGATTTCCGTAACGTTGAAGCCTCATTTGAGCTGAATGACGCCAGCAAAACCATCAAAGTGTGAGCGAGT  
CCGACTTCCAGGTCATAGTTGCTGATATTTCTGCTGCAAGTTGCTGAAGCGCGGATTTGAAGGCAATTTCACTGGAT  
GTACCGGAAAATATCGTTTATAGCGGTAACCTGTTTGGGAAAGCAGAACTGAAACAGGGCATTGAGAGCGGACTCA  
GAAGAAAATCGTCAAAATGATCAAGACAGCAACTGAAAGTGCAGGCGCAAAATTCAGGGCGATGAGATCCCGCTAACCG  
GTAATCTCGTGTGATTTACAGGCTGTCTATGGCGATGGTACGTTGGGCTCCTCGTACCGCTTCCAGTTCAAAAA  
TTCCGCGATTAA  
>Cluster\_31506  
ATGCAAAATTTCCAGGTTACTCTTCTGTTGCGAAGCGGTTTATATCCAGACTCACCCGACACAATAAACCCCGGTTGGG  
GCATAAATTCAGCATTTGGTCTGAGAAATGATGCGGAGAAATGATAGGTTGGCGACAGCCGGTAGACTGTTGACAGC  
ATTTGAGCAGTGGATTAACGCTTGAAGTAAATCGCACATGTACACAGGAGAACGCAACGCTAACAGCGCACTTTATGGT  
GCTGTCTGGCGGGCAGCAAGGCTATGGGTTATCAACGTTGTATACGTACACCCAGGAGATGAATCAGGAGCATCTCT

CCGCGCAGCTGGTTTTGTTTCGTGTGAAAGAGCTTCTCCAAGAAAAAGCTGGGCGGAATCAAGCGTCGCCCTGCGGAGTA  
AACCGCATCCGGTCGAAACGGTGGTGTCTCTCGTGTGCTCTGGGAAATCAGGAGAATGAGTACCACCTGGCATTCGCATC  
AAAGGAGAGTGA  
>Cluster\_67056  
ATGCTGGACTGGTTCCGTGATCCCGGCTGCGCCGACGCGTGCAGGCGGGGCTGAATAAGGGTGAAGCCCGTAATGCCCT  
TGCGCGAGCGGCTTTTTTTCACCGTCTGGGTGAAATAAGGGATCGTGGGCTGGAGAATCAGAGTTATCGCGCCAGCGGC  
TGACATTACTGACAGCAGCGATCAGTTGTGGAACACCGTATATATAGAAAGAGCTATGAGTCACTAAAACGAAAGGGT  
ATCCCCGATAAATGAGCAACTGGTCTCTCATTTCTCCCTGGGCTGGGAACATATCAATCTGAGTGGAGATTACGCTCG  
GCGTAATAATCTTAAGCTGGGATCCGAAAAATACCGCTCATTACGGACAGTCGATACCCTTTGTACAAAAACAGTCTT  
AG  
>Cluster\_48677  
GTGAGCAAGATTGACTATCAGGCACTGCGTGAGGCGGCAGAGCGTGCAATTCGGCAATGGAACCGCTGTTAATGTTGCC  
AGTTGATGATGATCTGATAAGCGAACAGGAACCTAAAGATAGCGGTGTGATATTGATGCCCTCAACGCTTCAAATTC  
TGGCCGACAGAAACCGTGTGGCACTACTGGATGAGATCAACGCATTAGAGGAAACCGGTATCAACGATGTTTGGCGT  
ATTGCGGAACTAACAAAACAACTGGAGTTGGCAAAATCAAACTCAACGAGCAGCGTGAATATACGAGGCGGTTATCTC  
GGATGGAAGTAAGCGCATAGCCGCTCTTCTTCGCAAGGACAATCTTGCAGCGCCACGAACATGAAGGTGAAAGAAAA  
GA  
>Cluster\_17643  
ATGCTGAAAAAGATGATCCGGGCCATTAAGCCGGTCAAGCGTATCTGGGGTGGGATGATGCCCTTTATCGCCAGAGCGT  
GGCCCGCTGACCGTAAAACAGCACACACGCTGCAATCTCGATGAACTGCGCATATCCGGGAATACATGCACGAA  
AGGATTCCTCCGCGCAAGGACCCGCTGGTAAAGGTGCGCGCCCTCGTGTGCAATGAGCAGAAAAATCAGTATTATCCAAA  
ATTGAAGCGTTGCTGGCTGATGCGGCTGTTCTTGGGCGTATGAGAAGGACTGGCATCTCACATGTATAAGCAACATGT  
GATCGAATGGCTGACGGATGAACAGCTTTTGGAGTGTGGTGGCGCTGGTTAAAGATCAAGAAGGAGAAAAATCAATGA  
>Cluster\_64464  
ATGACCCAATTAATTAACCACACAGAGTGCACACTATAGTGACGACGGTAAAAACTACCTGGATTCAATCTGTGGCACAT  
GAACGACGCGCGGAGCAGTACCCGCTCGACATATTGCCCGCCACCTAAAAACACTGACGTTGTGGTAAATGCAAAA  
CTGAGCAGTAGCAGTTATTCGCGCGCAGAAATAACCTCAGGACCGCCAAAACACATACCGGCGTTGTTATAAAAAT  
ACTGGCAGCGCACAGTAAACCTCCGCAACAGCGACTGCGTGGTCTGCGGGTGAAGGGAGAACTACGATAAAAAA  
AGGTTACCGCTTAGGCGCATCAGGACGACCCGGTGTACTCGACACCGTGAAGCCATCAGGAAGAAGGGCAAAAAAT  
AA  
>Cluster\_64433  
ATGAGCACAAAAACAGAATTGCTGGCGGCATTGACGATCTGAGCGCTCAGCTGGTCCGAATTACCGCGCAGCGGGAC  
TATTGGGAACTGGAATCAATCGTCGCCGGCGTGAAGTCAAGGCTCGATATTCGAACGAACAATCCAGCGACGCGAGTG  
ATGCCGACACCAATGAGAGCGCATTAGATGAAACTGATGATGACGGTTCGAACAACAGTCAATCGCCAGTACTACGCCA  
CAATCAGAACTGTCTCCCGCTACGCGCCGCGTCAAGTTGCGTAACACGCTGGACATTTATCACATAGTGAACGCGGCTC  
CGTTCCGCGAGATTGTTGCCGCTGGTGTGAAATCGTTGCGATTACCCGAGGTCGCGAGACTTATTGCGAGCCGATCAG  
TTTACGCTCTATGA  
>Cluster\_24505  
ATGGCAAACCCGGAACAACCTGGAAGAACAGCGTGAAGAACACGTTTGTATTATGAAGAACTACTGGAAGATGGCAGCGA  
TCCGGACGCGCTGTACACCATCGAACACCATCTTTCGCGAGACGATCTGGAACCTCTGGAAGAAAGCGGAGTTGAAGCGT  
TTAAACTCCGTTACGAAGTGACCGATCCAGAAGAGCTGGAAGTTGAAGATGGTATATCGTGAATTCGCGACATCCCTC  
AGCGAGTGCAGCTGAATGCCGATCTGATCGATGCCAGGTTGAACAACCTGATGACGCTGGCGGAGAAATTTGACGTTGA  
GTACGACGTTGGGCACTTACTTTGAAGATCTAACGGCGAAGATGGCGACGATGAAGATTTTGTGATGAAGACGATG  
ACGGGTTCCGCACTAA  
>Cluster\_14110  
ATGAAATCATTAACCGCAGTGGTAAAAAAGCCCTAATTTATCCCGTTGAGTTCAAAAATCAAAATGGTTGAACTCTCGCA  
TCGACAGAGATCTCCGTAGCGCAACTCGCTCGTGAGCATGGGATCAACGATAATTTGCTGTTCAAGTGGCGCAGTACT  
GGCGCGAAGGAAACTACGTTCTCTTCAACAACAGAAAAACAGTGCCTGAGCTGCTCCGATAACACTTGATGCGGAA  
GATGTTGCTCCTACAACCTCCCCCGGTCACAACCTGTAGCTGCTGCGACACCTGAATCACTCAATATCAGCTGTGAAGT  
GACGTTCCGGCACGGATCACTCCGCTGAATGGTGCCATCAGCGAAAAATATCTGAACCTGCTGATACGGGAGCTCAAC  
GTTGA  
>Cluster\_20565  
ATGGAAAAGGGAATCACTAAGCCGAGCATTCTCGTCTGCGGATGATTTACGGGAGCCAACGACGCGGGGTAAGCTT  
GGCGCAGTGGGCGATACAGTTGATGTGGCTTTGAAATGCATTTATCGCGGTGATGCCAGCGTATGGGTGATTAACAGCG  
ACAGCCGGCGGATGATCTAAGCTGCGCGCGATGAAAATAACCTCGTGTGATGAGTCACTCTCTCTGCGGAAATAATCCG  
CCGCTCGTGAATAAAAGATAGATTCACGCTGCGAGGCAATATCGCGCAGAAATGAGCCCTGATGAAGGCATGCGG  
TATAACGGGCGCAGTGGTTGCCCCCGCATTTCTCAGGCGGGAAGGACACAGTGGCCGGTGAAGTTGGGAAACGGTGT  
CGGATAA  
>Cluster\_66626  
ATGACGACTAAACGTAACCGTATGTACGGCAATGACGCTCACCTGGTGGAAAAAATGCGGTTTTATCGCTTTTACAT  
GCTGCGCGAAGGCACGGCGGTTCCGGCTGTGTGGTTGAGCATTGAACTGATTTTCCGGGCTGTTTGCCTGAAAAATGGCC  
CGAAAGCCTGGGCGGATTCGTGCACTTTTACAAAACCGGTTATCGTGTATCATTAACTGATCACTGCGCGCAGCT  
CTGCTGCACACAAAACCTGGTTTGAACGACCGGAAAGCGGCAATATCATTGTAAGAGCAGAAAAATGGGACGAGA  
GCCAATTAATAAAGTCTCTGGGCGGTAAGTGTGGTTGCCACCATCGTAACTCTGTTTGTGCTGTTGCTGTTGCTG  
>Cluster\_24198  
ATGAGTGCGAATAACGAGCTCAAGGAAGCGGGCGCGCTGGAAGCGATGAAGTGGTCTGTTGTTGGTGGCATTTGCTCT  
GGTAGCGATTGTGCGCAACTACCTTTATCGCGACATTAATGCTGCGCTGCGTGGCGTGGCCGTAGTAATTTGATGCTG  
CAGCGGGTGGTGTGCGCTGTAAACGACAAAAGGTAAGCAACCGTTGCTTTTCCCGTGAAGCGCGTACCAGGATCCGT  
AAGGTCATTTGGCCGACTCGCCAGGAAACATTTGCACACACCGTGAATTTGTTGGTGGCGTTACCGCAGTAAATGCTACTGAT  
CCTGTGGGACTGGATGTTTGGTTGCTGCTGTTTATCCTTACCTGAGGTTCTGA  
>Cluster\_64420  
ATGCTAGGCGTGGTGTATTTTCTATTTTGTATATCAACAGTAGCGTACAACAACTGCAACGTAAGTACGCTGGCGCT  
GGCTCAGCAACACCGGTTCCGAAAAACGACGATTCAGATAACCGGACGACCGAACCACCAATCAGATCGATGGGA  
AAATAAAATGCTTTATCCCTGATGGGTGCGGCAATGGCTGTTTAAACAGATTTGCGGGCGCTGGGGAACCTCGGGAGAACCC  
CAGCAACTGGTGTGGGACCGGGGAGTGAAGGGTACTGGGTTATCAGGGAGTTAACAGAAACGCAAAACAGTTTTCT  
GAAAGGAGGACCCAAAATCGCAGGACTTTTCTACTCAGCTCGAATAATACGGAGCTTCGCTGGATTGA  
>Cluster\_27583  
ATGATTACAGGTATCCAGATTACTAAAGCCGTAACGACGATCTGCTGAACTCTTCTGGTTGCTGGACGCGAAAAAGG  
CGAAGCGGTTGCATCGTTGCAAGACAGGTTTTGCGAAGACGAAGTGGTTGCGATGAAGCAAACTGGGTGACATTGAAT

ACCGTGAAGTTCAGTAGAAGTGAACCCAGAAGTTCGCGTTGAAGGTGGTCAACACCTGAACGTTAACGTTCTGCGTCGT  
GAAACTCTGGAAGATGCAAGTAAAGCATCCGGAAAAATAATCCGAGCTGACCATCCGTTATCCGGTTATGCAAGTTCGCTT  
TAACCTCTGACTCCGGAACAGCAGCGCAGCTTATCGCTCGTACCTTTACTGAAAGCCTGTAA  
>Cluster\_64446  
ATGCTGAACCTCTAACCGTGGCGTTGCTGCTGGCTCGCGGGGGTACGTTTGGCTGCGTTATTTCTGAGGCAACACC  
TGCAGTGATGATCTGTGCGCTGGCTGGCGCAGCTCTCTATGTGTTGCTGCTCGGGCAGCATCGATTCTGGAAGCAGGTTA  
TTTTGCGACTCATTTCTGTTTGGCGGTGTGATTGCGCTGAGACAGCGTCAGCCATCATTACCGGTATTCTGAACGG  
GTGCTGAGTACCTGAACCTCCCGTAACAGTAAAAGTCTCTCCGCCATTGGTGCACCTGGTTGCATCAGTAATCAGCGT  
TACATCACTGTTGCGGATCATGTACAAGCTCGTTTATGGAATCAGATAAAGGGATGAAATAA  
>Cluster\_36098  
ATGAGAACCTTATAGCAATATTATTGTTTCCGCTGCTGGTGCAGCCGCCGGGGAGGGGATGTGGCAGGCAAGTAGTGT  
AGGAATTACGCTAAATCATCGCGGTGAGTCGATGCTGCTGCGCCTCTTTCTACGCGACAACCTGCTTACGAGATTGATGA  
CGTGGTAGCGTGGCGTTATCAGCTTATCGGCCCGACACCTTCAGGACTGCGGGTTCGCTTGTGTTCCGCAATCTCGTTGT  
GTCGAATTAGAGGGGAGAGCGGAACACCGTGGCCTTTTCCGGTATAGCGGCAGCAGAACCGTTGCGATTTATCTGGGA  
AGTCCAGCGGTGGCGGTTAATTCCACCGCTAAAGGTACAACGTAATGAAGTGATTGTGAATTATCGCTGA  
>Cluster\_41692  
TTGAAAAGATTTGGTACATGTTCTGCAACAGGTAAGATGGTAAAACTAAAATTACCTGTAGATGTGGAAGTCTATTAAT  
TGAGGCAAGTAAACAGAAGCGGAAGAAGTCGATCGTTTGGAGCAGTAATAAGACTTAAAGATCATCTTCCACCGTATCCAA  
AGTTTAAACAGGGCAGGGAATATCTATGGTAAAGTCGCTGGTAAAGTATCTGACAATGCGTCTGGATGATGAAACTAACCCAG  
CTACTTATTGCAGCAAAAATCGTAGTGGATGGTGTAAAACAGATGAGGCTGCAGACAGATTATTGACCAATTTGATCAA  
GTTTCTGATTTTTATAACTCGGAGATACTCAGGGAGGCAGATAAAGAGGAAGATATAACATTTAATACACTCTAG  
>Cluster\_38870  
ATGCTGGGTTTAAAAACAGGTTCCACATATTGCGATTATGCGCAGGATATGCGGTGAGCAAAGCGTTTACTGCGATAT  
TCTTGGTTTACAGTTGCAAGCGAAGTCTATCGCGAAGCGCGGATTCGTGGAAGGGGATTTGGCGCTTAATGGGCAAT  
ATGTGATTGAGCTTTTCTCATTTCCGTTCCCGCGGAGCGCCAGCCGACCGGAAGCTTGGCGCTGCGTCACTGCGCT  
TTTAGCGTTGATGATATCGATGCGGCAGTGGCGCACCTTGAAAGCCATAACGTGAAGTGTGAAGCCATCCGTTGCTGATCC  
ATACACGCAAAAACCGCTTACGTTCTTTAACGATCCGGACGGGCTGCCGTTGGAAGTGTATGAGCAGTAA  
>Cluster\_14709  
ATGATGCGCAATCAGCTCAGGCTGTTTTACCTGAAATTTAGGCAATAAAACGTCATCGCTGCGTAAATCAATATGTAG  
CGATCTCCCTCACTCTTTTAAATCTCCTCATTCGGCATACCGTCATTACTTGTTCAGGCAATGCCAGTGGCAAGTGC  
ATAACAGAGCGCAAAACATCTCCAGAGCTGGTATTGCGCTCAGCTGCGTTCTGCACCTGTTATTTATGAGCCACGGATT  
GCGCGTTCCAGGTCAAATCTGAAAGAAGCGTACAGCCACACGCTGGCGATCAGCCTTGAGATAATGCTGTACCCAGCAG  
TGAACCGTAACTTTGATCTGGTCTGGGATAATGGCGGTTGGCGTAGTGCAGCCTCGAGAATGTACAGTAA  
>Cluster\_12278  
ATGGCAGAACATGGCGCGTGGCGACCCTGAAAGATCTGGCAGAAAAAGAGGTAGAGGATGCCGCGCGCTGCTGGTGA  
AATCGCTCCGCGGTGTCAGCAGGCGGAAGAACAGCTCAAAATGCTGATCGATTATCAGAAATGAATATCGCAATAACCTCA  
ACAGCGATATGAGTGCAGGATGACCAGCAACCGCTGGATCAACTATCAGCAGTTTATCCAGACGCTGGA AAAAGCCATT  
ACTCAGATCGCCAGCAACTTAAATCAGTGGACGAGAAAGTTGACATTGCCCTGAAACAGCTGGCGAGAAAAGAAACAACG  
TTTGACGGCTGGCAGACTGCAGGAACGGCAATCCAGCGGCAGCTGCTTGCAAAAACCGCTCGATCAGAAAAAGA  
TGGATGAGTTCCGCCAGCGCCGCAATGAGGAAACCTGAAATGA  
>Cluster\_51788  
ATGTCGAGCATAATACTACAGCTCTATAAATAATGCATTTTACCCTGAGCATTTGAAACAAGAATAATATTAATCTAA  
TTCTTTTCCAGCAGATGCAAAACCGTTAAATAATCTGTTTTCGAAAGAATTGCACTTAAACAGCACAGAGGAAAAAT  
ACAGGTGCGTTGGTGAAGATGGAATGCCATCATGGGCAGATATCCACCACCAACACATGAGGAACAGATTGCCGAGCC  
GAATTTGAAAAAGCAGCAATTTGATTAACAGGTCACGAATACATGAACAGTAAACAATGGCCCGTAAAGCGGCTATTGG  
TCGCTGAAAGGTGAGGAACTGGCGCAATATAATTTGTGGCTGGATTATCTGGACGCACTGGAAGTGGTTGATACCTCCA  
GTGCTCCAGATAATTGAATGGCCTACGCCCTCCGGCAGTTTACGGCAGATGA  
>Cluster\_20527  
ATGATGGACTACTGCACCCCGGACGAACCTACCTCTCGCTACCGTGGCAGACGCTGGTCTGGCTGTGCAATGAGGATGC  
CACGGCGACCAGGTTGAATGAGGCGGTGGTGCAGGAAGCAATACGCCATGCTAACGAGCGCGTTCGATGCCCTACCTGGCG  
GGCGCTACAGCTGCCGCTGCGCGAAGTGCACACCGTTATCCATGACGTTAGCGGTGTCGATTACCCGCTTACCTGCTAC  
GCCGCTCGCCGGAAGGAGCGCTGCCGGATGCGGTAAGGACGACTACAAAGACGCCCAGAACAGCTTACCGATATTCCG  
TGATAACCGGATGACGCTGGCTCTGCCATCCACCGAAACCGATGCGCCGGAGTCCGGCGAGTTCCGGGTGCGCCGCGGA  
CGCAACGTTTGGCGCGCTAACGGCCTACTGGAGAAATACTGA  
>Cluster\_22996  
ATGACAAAACCGCAATTCGCGCGACATCCGTTCCGCGACAACCGTAACCGCAGAACGTTACGCAATACCTTCGCACCGTT  
GACGCAATGGGAAGATAAATATCGCCAGTTGATCATGCTGGGGAAAACAGCTTCCGGCTTTGCCAGAGGAGTTAAAAGCC  
AGGCTAAAGAGATTGCGGATGCGAAAACCGCTTGGGATACCGTTGCTGAAAACCGCAAGATGCACTTTCTTTT  
GGCGACGCGAAGGGCGCATTTGTCGCGGCTGTTGGCGGTGTTGTTGACTGCGGTTGAGGGGAAAACCGCCGCGAAT  
GCAGGCACAGTCCGCGTGGCATTGTTTGTGATGAGCTGGGATTACGTGCGCAACTTAGCGCCTCACGCAGCCAGGGTTGA  
ATCGGTTAAGCGAGGCGATTATCGCTGCGGCGAAGCAGGTTAA  
>Cluster\_53859  
ATGAATAACATACAAATAAGAGACTATCAGCCTGGCGATTTTCAGCAACTATGCGCTATTTTCATTAGAGCGGTTACGAT  
GACTGCCAGTCAGCATTATTCACCACAACAAATGCGCGCTGGCGCAGATTGACGAATCTCGCTGGAAGGAGAACTCG  
CGAAATCACAAGTCCGGTTGCACTATTAATGCAAAAATGCTCGGCTTTATTTACCTGCGTTGAACACTATATCGATATG  
TTAATTTGTTGACCTGAAATACACCCCGGTTGGGTTGCGCAGCTTTGTTAAAACCTTTGATTAACTGCAATCCGAAT  
TACGGTGGACGCAAGCATAACCGCAAAACCTTTTTTGAACGTTATGGTTTTTCAGACAGTTAAGCAGCAACCGGTTGAAT  
GTCGGGGAGAGTGGTTTTATTAATTTTTATATGCGTTATAAACGCAACATTA  
>Cluster\_20930  
ATGAAATATCAACAACTTAAAACTTTGAAAGCGGTTGGAATGGAAGTATCTGGTGAAGAAGCACCGGGAAGGGGAGTT  
AATCACCCGTTACATAGAAGCCAGTCCCGCCAGGAAGCCGTCGATGAGTTGCTCTCGCTGGAATGAAACCCGTTGCTGG  
TAAATGGTTGGATTGACAAGCATATGAAATCCGGAACCTGGTCAATCGCATGAAGCAGACCATTCGGGCCAGACGGAAGCC  
CATTTTAAATGCGGAACACCAGCATACCGCAAAAAATCGATCGATCGAATTTATCGTCTGGCAACGCTTGGCCGCGCT  
TGGCAGCGCTGCGGTA AAAACGCTTTCTGAAACGATTTTTCAGCTGATTGAAGATGCGGAAAAACAAAGAAATACGCGA  
ATAAAATGCTTCTTTGAAGCAGGATCTGCAGGATTTGCTGGTAAAGGATAA  
>Cluster\_62543  
ATGAAGAAGCTGAAAGCGTTATCTCAGTTTTCGCTCTGAGCCTTTGTTGCTTTACCGGCTCAGGCCGGAAGAACAGCG  
TTACATCAGCATCCGCAACACAGACATGGTCTGGTGGCGGCAATGCTGCGTGTGGCAGTTTCGCCGAGCAACCGCG  
GCAGTGGTGAAGGGTTTGGCCCTGACGCTCTCCCTACGCTCTGAAAGACAAAGGGGAAACAGCGTGGTTAAGGGGAAT

ATGGCGGTGGCTGCATTTGGTGAGAGCGATGCGACTCGCTCTCAGGAAGCCTCGCTGGAGAACGAATGCGTGGAAAACGT  
CAGCTCTGTCGAAATCATGAAGGCAACGGAAAGCGTAAATGGTTACCAGATTGACCTGCCACTGTCTGTTTTTCGACCCCG  
AGTATTACCAACCGCTGCAAGTCACGGTTGTCGGAGGTAAGGCATCTTAG  
>Cluster\_17933  
ATGTTCTCACCGCAGTCACGCTTGGCTCATGACAGTTGCAGATACGTTCCGGATGGTTGTTACTGTTCTGTCGTGAACAT  
GTGTATTGAAGTTTTCTCTCCGGAATGAGCTTCGAACAGTCTTTTTATTCCAGATTGGTAGCGATTCCGGTGAACATCT  
TAATTGCATGGCCATACGGTATGTACCGGATCTGTTTATGCGCGCGGACGCAAAAGTTAGCCCGTCCGGCTGGATAAAA  
AATCTGGCGGATATCCTGGCTTATGTGACGTTCCAGTACCCGGTGTATGTGGCGATCTGTTAGTGGTGGCGCAGACTG  
GCATCAGATTATGGCGCGGTCAGTTCAAACATCGTTGTTTCGATGTTGATGGGGCGGTTTATGGCTACTTCCCTCGATT  
ATTGCCGCGACTGTTTAAAGTCAGCCGTTACCAGCAGGTAAGCCCTGA  
>Cluster\_14680  
ATGCGAATCTGAACGTATATATGGCGAATGACAGCAAAAGCCATTTTGTACGGCGAAAGAAGTGCGAAGCACAACCG  
ACAGGACGTTTTGCTGTGTCTCTGTTGGATGCCGTTAACACTTCAGCGGGGCAATGACGGACAACACCCTGGTTTG  
AACATGACCAGATGACTGTCGCTGAAAAATCCTGCTGCGATGTACCTGGCTTGACCCGGCAGAGAAAGAGGCCCGCTCGT  
TTGCATCTGCAGGCATGACGGTCCCGGATTATACGGTGAAGTGAGAAAAGTGGTTTTGTGTGATGTGTGACGAAAGATTA  
TGAGGGGAAAAGTGTGCCACGCTGCCGTACCGGATACAGCAGGGCGTGGGGCGGACAGGAGTGCCTCGGAAG  
ATGCCAGGCTGATAATCCGTTACAGAGGCTGTAA  
>Cluster\_43300  
GTGCAATTAACGAGTTTCACTGATTACGGATTACGTGCGCTGATCTACATGGCGCTATGCCAGAAGGGCGGATGACCAG  
TATTTCTGAAGTACTGACGCTACGGCTTCCCGTAACTATATGGTCAAAATAATCAATCAACTAGTCTAGTCCGGCT  
ACGTGACTGCTGTTGCTGGAAAAATGGCGCATTCGCTTGGGTAACCGCGAGTGCATAACGTTTGGTGTATGTGGT  
CGCGAGCTGGAGCCCTTATCGCTGGTGAATTGCAGCAGTGAAGTTTGGCACATACACCTGCCGTGTCGGTTGAAACAGGC  
GCTTCTAAGGCCGTGCAAAAGTTTCTTACGGAAGTGGATAACACACGCTTGGCGATTGTTGTAAGAGAATCAACCG  
TTTATAAATTTATGCTGGTGGAGTGA  
>Cluster\_40711  
ATGAGCTATAGCAATATTCTTGTGCGCGTTGCGGTTACACCGGAAAGTGCAGCAACTGCTGGCAAAAGCGGTATCTATCGC  
CAGGCCAGTAAAGGGACACATCAGTTTAACTACTCTCGCTTCCGACCCGGAAATGTACAATCAATAGCTGCGCCGATGC  
TTGAAGATTTACGCAATGTTGATGAGCAAGAAACGCAAAAGCTTCTTGGATAAGTTAATTCAGGATGCGGGTATCCCGT  
GACAAGACGTTTATTGCCACGGTGAAGTAAAGCAACATATTCGGAAGTTTGGTGCAGAAACATCAATTCGATTGGTGT  
TTGCGGTAATCACAAATCAGATTCTTTTCGCGAGCATCCTGCTCGGCAGAAAGAGTGTATACCTCAAGTGAGGTCGATG  
TGCTGTAGTTCCACTTACGGGAGATTAA  
>Cluster\_44996  
ATGTTGTTTATCAAGCCTGCGGATCTCCGCGAAATGTGACTTTTCCGCTATTTAGCGATCTTGTTCAGTGTGGCTTTCC  
TTCACCGGAGCAGATTACGTTGAACAGCGCATCGATCGAATCAACTGTTGATCCAGCATCCAGCGCGACTTACTTCC  
TCAAAGCAAGTGGTATCTATGATGATGATGGTGAATAGTGACGGTGAATTTACTGATGTCGATAGCGCTATTACCGCC  
AGCCATGGTGTATTTGATCTGCTGTTGACGGCGAGTTTACGGGTGAAAAAATGCAACTACGCGCAGCGGTACAGCT  
TATTTCCATGAACAGTGCCTACTCGCCATTACCATCAGTAGCGAAGATACGCTGGATGCTTTGGTGTGGTGTATCCAG  
TCGTTAAGCGGATGCGCTGA  
>Cluster\_17762  
ATGACCAATAACAACCTAACAGACGAGCGTCTGAGCGTACTTATCCGTTGGCTAGGGATTCTCTGAAATGTTATGAAAT  
GGAGTTGCCGTGCTATTGATGATGTAATGTAGCGCTGGCGAAGTACAACAACCCGCGCAGCATGCTTCAGGCTGGCA  
ACTCTCCGGTATCTCCGGATGGTTACGTTACTAGTGGCGAAGAAAGTAAACCGCTGAGAAACGGCGCAAAGGGTGTGTGTC  
GGTGAATTTTCAGAAACGAAATTTATAAAGTCCAGAGTGTTTGGTGTATGATGATTGCGAAACCTGAGCAGCGCAGCG  
AAGAAATTGAAATCACCGTTCTGTCACATGGACGACCAAAAGCTATTTGGGCTAAAGGTGTCGAGCATTTAGCAGCAG  
CACCACAGCAGGAGGTGAAGTGA  
>Cluster\_55230  
TTGGAATCGCCACTAGGTTCTGATCTGGCAGCGTTGGTGCATATGGCGTGTCTGATAGACCATCGCTGAAACCGCT  
GGAGTTAACACAACCCATTGGGTTACGTTACACAATAATCCATCAGTTACCTCCAGCAGCATGCGAAATCAACTGGCAA  
AAGCGATTGGCATCGAGCAGCCATCACTGGTCCGTAATCTGGACCAACGGAAGAAAAAGGGTAAATTCGCGTCAAACCT  
TGTGCCAGCATCGTCCGGCTAAACGTTAAACTGACGGAAAGGCAGAGCCGCTGATCAGCGAAATGGAAGCTGTTAT  
TAACAAAACCCCGCGGAAATATTACATGGCATCTCCGAGAGGAAGTGGAGCAACTGATTACGCTCATCGCAAAACTTG  
AGCATAATATCATTTAGTTACAGGCCAAAGGGTGA  
>Cluster\_43219  
ATGCCCTGCTGTGAGCTTCCGCCGCTACGCGATGACACCCGACGAGTTTACGCGCTGATTTGTGAGCTAAAACAGGC  
GGAGTTTGACCAGAGCGTTTTCCGCTGGGTTTTAACGCCAATCTGCGGATCCGAACATGCGCTACCATCTGCGCTGC  
TGGATGGCGAAGTTGTCGGCATGATCGGCTGCATTTGCAGTTTTCATCTGCATCATGTAACCTGGATCGCGGAAATTCAG  
GAAGTGGTGGTATGCGCGAGCGCGCGGCTGTAACATCGGCAGTAAATTTACTGGCATGGGCAAGAAAGAGCCCGCA  
GGCCGGGCGAGAAATGACCGAGCTTCCACCAACGTCAGCGCCACGACGCGCACCGTTCTATCTGCGCGAAGGCTACG  
AGCAGAGCCACTTCCGCTTACCAAGCGCTGTAA  
>Cluster\_11754  
ATGACAATCCATAAGAAAGGTCAGGCACACTGGGAAGGCGATATCAAACCGGGAAAGGAAACAGTATCCACCGAGAGTGG  
TGTGCTGAACCAACCGGTATGGAATTAACACGCTTTTGAAGGCGAAAAAGGAACCTAACCTGAAGAACTGATTGGCG  
CAGCGCATGCCGATGTTTCTCAATGGCGCTTTTCAATGCTGGGGAAAGCGGGATTACGCAACATCGATTGATAACC  
ACCGCCGATGTCGCTGGATAAAGTGGATGCCGGTTTTGCGATTACGAAAATCGCACTGAAGAGTGAAGTTGGCGGTGCC  
GGGTATTGATGCTCTACCTTTGACGGCATCATCCAGAAAGCAAAAGCAGGATGCCCGGTTTCTCAGGTAAGAAAGCGG  
AAATTACGCTTGAATACCAGTTGAAATCGTAA  
>Cluster\_62150  
ATGATTAACGATATTAATGGGTACAGGCACAACGTAAGCCACCGACTGGCGTCAGGCGGTGAAATCGCCACCCGCCC  
GCTGGTAGCCTATGGTGGCGCGCAGCCATGCTACGTTAATGGGATCATCGAAAATACCTTAACTGGGGCCCTTATTATC  
TGATAGCCCAAGCAATCGCTTGGCTCACGCCGACAGAGCAAGCGCAAACTATAATCAGGTCAGTATCACCCAGCTA  
CGCACCCCGTGCCTTTGGTAACGAGGAGTGCACCCGCTGCTGGTGTCTCTGCGTACGCGCCAGGATGCCAACGC  
ACATATTTGACCATTCAGCGCATCAGCCAGTTTATTGATTCCGCCACAACGTTAACGGCAGTGGGAAATGCCAGCACAG  
ACGATGCACTGTTGCGCTGGTATCAGGTTAA  
>Cluster\_8785  
ATGTCAAAGCCAAAATACCTTTTGAAGGCGCTTGAAGTGTGAACTACTTCCAACTGATGATGGTTACAGGAT  
CATCTCGGCACGTTTTGGTGTCCCGAACCAGGTCAGGACATGGGTTGCCCTCTATGAAAAACATGGAGAAAAAGGTT  
TAATTCCTCAACCTAAAGCGGTTAGCTGATCCAGATTGCTGATTAAGGTCGTAAGGCTGTAAGCTGTGATCCAGCACATG  
TCCCTTAATCAGGCTGCTGCTCACTTTATGCTTGTGTTAGTGGTTCTGTAGCCAGGTTGGCTGAAGGCTATGAAAGCGC  
CGGAGAAGCTGGTTTACGCGCGCTCAAGATTGGCACAAAAGAAACATTCGAATATCAGTTGATCCAGAAAAGCGGCAT



CAGCATTGGAGCTGTCAAAGACCGACGCATTGAGGATCTTGAAAGCAAGTTCGATTTCTTGAACGGCGCTTATGTAT  
CTAAAAAGCTGAAAGCCTTAGCTCATCCACGAAAAAGTGA  
>Cluster\_25557  
ATGTTCGCGGAGGACTGGCTGCAGGCAGAGATGCAGGGTGTAGATTGTGGCGCTGGTCCACAGTCATCCCGGTGGTCTGCC  
CTGGCTGAGTGAGGCGACCGGCGGCTGCAGGTGCAGAGTGATTTGGCTGGTGGCTGGTCTGCCGGGGGCGATTACACA  
AGTTCCGCTGTGTGCCGCATCTCACCGGCGGCGCTTTGAGCACGGGGTGACGGACTGTTACACGCTGTTCCGGGACGCT  
TACCATCTGGCGGGGATTGAGATGCCGATTTTACGCGGGAGGATGAC'TGGTGGCGTACGGT'GAGAA'TCT'ATCTGGA  
TAATCTGGAGGCAACGGGCTGTATCAGGTGCCGTTGTGAGCGGCGCAGCCGGCGATGTGCTGCTGTGCTTGGTT  
CATCGGTGCCGAATCAGCGCTATTTACTGTGTGACGGCGAGCTGCTGCACCATATTCCTGAACAACATGAGCAAACGA  
GAGAGGTATACCGACAAATGGCAGCGACGCACACTCCCTCTGGCGTACCGGGCATGGCACGCATCTGCC'TTACGGG  
GATTTACAACGATTTGGCCGCGCATCGACCTTCTGTGTGA  
>Cluster\_26402  
ATGAGCAAGGTATAGTTCTTAAATCCAGCATCTGGCAGGGTACTCTCAGTCTAATCAGTTGTCCGATTATTTTGTGTA  
ACAATGGCGCGAAAAGCACTCCGCTGATGAAATCACCGTGGTACCTGGCTACAATCCGATTCCGGTCTGGATGGCG  
AATCGGTTGGTGCATGCGTCCGAGCGATGCGCGCTGACTCCACGTCAGCAGGAAGCTTGGCGCTTCCGATGAGCTG  
ATTGCCGAGCTGAAAGCCACGACGTTATCGTTATTGGCGCACCGATGATAACTTCAATATCTCGACCCAGTTGAAAA  
CTATTTTGCCTGTTGACAGTGCAGGCTGACGCTTACTTCCGCTATACCGAGAAGCGTCCGGAAGGCTGGTCCCGGTA  
AAGCCATCGTTATCACCAGCGCGGTGGGATCCATAAAGATGGCCAACGGATCTGGTACGCGTATCTGTCCACATTC  
CTGGGCTTATCGGCATTTACCGATGTGAAATTTGTCTTCCGCGAAGGGATCGCGTACGGCCCGGAAATGGCAGCGAAAGC  
ACAGTCTGAGCGAAAGCAGCATCGACAGCATTTGTTGCTGCATA  
>Cluster\_16030  
ATGGCTAAAGTTCGGTGTCTTATTTATCCATGTACGGACATATGAAACGATGGCACGCGAGTTGCTGAGGGTGCAG  
CAAAGTGGATGGCGCAGAAAGTTGTCGTTAAGCGTGTACCGGAAACCATGCCGCGCAATATTTTGA AAAAGCAGCGGTA  
AAACGCAAACTCCCGTTGCAACCCGCAAGAACTGGCCGATTACGACGCCATATTTTGGTACACCTACCCGCTTT  
GGTAACATGTCCGGTCAAATGCGTACCTTCCCTCGACCAGACGGCGGCTGTGGGCTTCCGGCGCATAACGGAAACT  
GGCGAGCGTCTTTAGTTCACCGGTA'CTGGCGG'GTCAAGAA'CAACCAT'CATACCT'GGACGAC'CCCTT'GCGCATC  
ACGGCATGGT'GATTG'TCCCATT'GGCTACG'GAGCG'GAGAA'TTATTT'GACGTT'ACAGGTT'CGCGGCGGTACGCGGTAC  
GGCGCAACCACCATCGCAGGCGGTGACGGTTACGCGCCAGCCAGCAAGAACTGTCTATTGCTCGTTATCAGGGGA  
ATATGTGCGAGGCTGGCAGTTAACTTAAACGGCTAA  
>Cluster\_17772  
ATGAAAAGTATTTATGACATAAGACGCAAAAACCTTAAACGAAATCATTGCGCGGATTTGATGACACCCAGTTACGCTT  
TGCAGAACCAGGTTGAAAGCTTGCAGAACCTGGTCAACAGGTGGTGTACTGGTATCAAAAATATCGGACCTAATGCCGCGC  
GTATCATCGAAGAAGCAGCCGCAAGAAAAGTTCTGGCTGTATGTCGATCACGAACTGGACGAGTACAGGATGATATC  
TTTATTTCCGGCCACTGAAGATGGAGAATGGACTGTAGAGAAGCAGGCCCGCCACGCTCAATGCCTGGATGAGAAAAGAA  
CAGTGAATGACATCCGAAAAGAAAGTTGCTGTTGAGCTGGCATTGGACCTGCCACCGTTAACCGCATCATGAAAGCGG  
AAGTCAGCAACCATCGCGCTTCTTCCCTCCCTGGCGCGGCTTCCGGCATGAAGCATACGAGATGATTTTCCCGCTC  
GGCTCACCTGGTGTATCGACTATGACCACCGGATGTATGACGCCCTGCCACAGGAAGAGAAAAACAAGATCACCTCATT  
CATCAACTTCGTGTTTGGAGCAGAACAAAAGCAAGTAA  
>Cluster\_27065  
ATGTTAACAGAACAACAACGTCGCGAACGATGGATGGGAAAAAACCGGCGGCTGATACCGGTGATTGTGCAACACGCGGT  
ATCCGGCGAAGTGTAAATGCTGGGTACATGAACCCGGAAGCCTTAGACAAAACCATCGAAAGTGGCAAAGTCACTTCT  
TCTCGCGCACTAAACAGCAGACTGTGGACCAAAGCGCAAACTCGGGCAATTTCTCAACGTAAGTACGAGTATGGCCGGAC  
TGGCAACAACGACACGTTACTGTGTGCGAATCCATCGGCGCAACTGCCACAAAGGTACCAATAGTCTTCGGCGCA  
CACCGCTACCAATGGCTGTCTGTATCAACTGGAACAACGCTGCTCGCGAACGTAATCTGCGGACCCGAAACTTCTCT  
ACACCGCCAAACTGTATGCGAGCGGCACCAAACGCATCGCGCAGAAAGTGGGCGAAGAAAGGGTGGAAACCGCACTAGCA  
GCAACGGTACATGACCGCTTGGAGCTGACCAACGAGGCGTCTGATTTGATGTATCACCTGCTGGTATTGTTGCAAGGATCA  
GAACTGGATTTAACGACGGTAAATGAGAACCTACGTAAACGGCATCAGTGA  
>Cluster\_17797  
ATGTGGACAAAACATAAACATGGATCGTTATTTATGGAAAATTACCTTACCGCGGAGAAATCCGCGCAATATCTTGGCGTT  
TGCTATCACGCTTTTACCAATAAAGCGTTACATTCAGCTTTTCCGACTTGCACCGTCCAGTCTATCAACGGCAGAAA  
GCGCAGAGTATGGTTGGTTGCGAGATCTCGACCAATTCGACGCGCGGTTTCTGTAAAGGGCAAAATGATGAAAGCATGACA  
CGAAACCAAGCTACCGCACAGATCCGCGATATTTCTGTTAGATGGT'CATAGCCT'ACCCCAACCAATTTGACAGGTACTT  
ATCTTCTGCTGGTGGACATGAGCGCAGCGGTGTTTAACTCTGTTACGTAATGACTGGGTATCCCGT'CGAACAGCGCA  
TGGATGGTGCATATCACATTCCTGAAAGGGATTTGGTAAAAATCCGACTCGACAAAGCGGGAATGCTTTGTATATGGCGC  
ACCAATGCAAGATACAGCAAGATATACGCAAGTTGATCTGCGTTACGAATACTTAGGGGGATCAGAGGGGACGTGTC  
TGAATCGTCTTCTCAGAGATAACGCAAGCAATTTGGGAAAAGTACCTGTAA  
>Cluster\_3122  
ATGTCAGAAGATTAAGTAAATGAAATGGGATAAGGATTTTGCAGACGATCTCAACGTCGTCGCCAGCGTTTTTTTTACAGCA  
CACCCCAACCTTATGGCCCACTATTTTCTCTCAACTTTTCGACGCAACCTGAAATCTTTTGAAGACGAAGATGAAGACGAAT  
ATGGATTGCAAGGACGTTCTCGATTGCAAGTGGTGGCGATCTCGGGAATCGTGACCTGGCGCAGGATTTTTACAGGTTCTA  
CGCGGTGAAGGATTAATTTCAACTCGTTGACTGGAAGGTGAAGATGAAGAAGGTGAGCTGGCTAATTTTGTGCGATCG  
CTTTTATGAGCTCAAAAAACCTGATAGCTTCTGAGGAATTAAGGAGTCTTCTGTGCAAAATACCCAAAGAGGATGAAA  
TCTCCGATGTCTGTAAGCCGGAGACCGCTACCTTACGAAATCTTTGAAACGCATCCAAACCGAACTCAATAAAAGGGGC  
TTTCAGATTTTGTATCTGAATGAAGGATCTGACACCTATAACGTTGGTCTTCTGCCAATGAACGAATAAAAAAATAGA  
TGATTTCAACACCGCGTGGCTGGAAGTACAGGATTTTTTAAAGCTAA  
>Cluster\_24156  
ATGAAAATCAGGCTACTGATCCCGGCTGCTGGTTTCTGTGCTGCATTTGCTGGCAACCACAACCGGCGACATCAT  
CTTTCAGATCTCTCGCTCATCGCAAGATTAAGCGATCCAACTGGCGACCCATTCCGATTACAGCCACACCGGTATGCTGG  
TGATACGCAACAACAGCCCTACGTTTGTGAAGCGTGGCGGGTAAAAATACACCCACTCAAGCAGTGGATCGCCAT  
GGTGAAGGGCAAAATACCTTGTTCGCGCGTGAAGCGGACTGAGTGTGTAACAACAGCAAAAACCGGCGCAACCGC  
AAAACGTTATCTCGGTAACCGTATGACTCCAGCTTCTCGTGGAGCGACGATCGCCAGTACTGTTCCGGAAGTGGTGTGGA  
AGGTTTACAGAAATGCGCAGGGAATGCGCGTAGCGCAACAGCAGAAAGTGAAGAGATTCGATCTTAGTAAACCGCTGGTT  
CAGGCAAGCTCAAAGAACGCTACGGCAAAAATATCCGCTTGGAGAAACGGTAGTTTACCACAACCGTTTTTCGACGC  
GCCAACAACCCAGCGTCCGCAAGAAATGGCCGCTGTTTCCGTGGTAA  
>Cluster\_38997  
ATGGAAAAGATACCTGCACCTGTTAAGTCCGGGAGATAAAAATGGCCGATGATTCGCTGAGTATTCGATTTGTTTT  
TATGTGGATTGGGTTATTAAGTTTGTCCCTTACGAGGACAGCATTACACCATTCGTCGCAACAGTCCACTAATGT  
CGTTCTTTTATGAACACCCGGAAGACTATAAACAGCATCTGACTACGAAAGCGAATAACAACAGAAAGCAAGAGCATGG  
CAAACGGCTAATAATACCTATGGTTTTTCCACGGTCTTGGCGTCTGGAGGTGATTATGCTCTGCTGGTTTTGGCTAA

TCCTGTCAATCGCTGGTTAGGTTTATTGGGTGGGCTGATGGCATTACCACGCCGCTGGTAACACTCTCATTTTTAATCA  
CCACCCCGGAGGCATGGGTACCCGATTGGGTGACGCTCATCATGGTTTCCCTTATTTATCCGGTGCTGGTCTGGTA  
TTGAAAGATACTCTGATGCTGGCAGGTGCTGTCATGATAATGGCAGATTCGGCGCGGATATTTCTAAACACGCAGTAA  
TGAATCCAGTTCAACGTTAAAACTGAATATTGA  
>Cluster\_43226  
ATGACCCGGAACCGCTTTTATGCTTCCCGTGCAGGATGCCAGCACAGTTTTCGTCGCCTGTTAAAGGCCATGAGCGA  
GCCGGGCTGATTGTCGCCTGCATCAGCTCAAGCGCGCTGGCAGCCGCTGAATATCGCCACCACAGCGTGTGCTGA  
CGTGGCCGATAACGACACGCGGTTGGCTTGGCCACCATTGAGCAACGATATCGTCAATCAGAGCCTGCGTTTTTCA  
ACCAACGCGCCGCTGGTTAATCAGCCGAAACAGGCGACCTTCGCGGTAACAGATGAGGCGATCFCAGCGAGCAGCTCAA  
CGCCCTTCCACCGGCTGCGGTTGCACCAGAAGCGGGCGCAACGCTGATTTTACAGGTCACCAGCCTGAGCGGTGGGC  
GTATGTTGGCCTCACCGCGCAGGATTTGCCGAAAGACGGATGATCGCCCGCAACTGCCAAAGTGCATTCTTCATGAA  
CTTACCGAGCGCCGACCCGTTCCCGCTCGGCATCGACCTGATCCTGACCTGCGGCGAGCGCTGCTGGCTATTCGCG  
AACCACTCATGTGAGGTTGCTGA  
>Cluster\_20783  
ATGAATGAGTTTATGAAAAAGCTGGCCGGATGGTGTTCCTTCTGGATGAATCAGGGGGAGCCGAACAAGCTGCTGAA  
AACAGCCCGGCTTCTGGGCGGAGGTTTACGGCTGGATAACCTGGCCACTGAACCAGTTTATCCGCTCACCTGCACAC  
CGGCATTACTGAACCTGCTGGCGTATGACCGGACATAACCTCGCTTTGATGGTGAAGCCACTGAGTCTGTTTCGTAAGCCT  
GTGGCGTATGCTTTGTCAATGCCCGTGTGCGGTTCCGTTGAGGATTTATCAACATCTTTGAAAGGCTGGGTATTGG  
GTATGTTGGAGCTGCGGGAGCGCCAGCCAGGATTTGACTGGGATGTTGATCTTGGTACGTTGACGGACGCCAGATAGCAG  
ACAAACGCGACTGCTTATCCAGATAATCCGGCAGTACGGCGAACATGCCCGCTATCAGTTGAGGTGATCACATCG  
GAAAAAATGGCTATCAGAGCCGGATGGGATCAGGGGGAATATGTGGTTTATCCGCTTCGTTAGCAGGGACGGAAACCCA  
CAGCGGACATTCAGCGCAGGTTTGTAA  
>Cluster\_40832  
ATGGCAGGATTCAGGTTATCGCAGGAAGTTTCTTAAAGGTTGGCAAGCATGGGGTTCGGTACCATCGTGTGTTGCCAA  
AAAACCAAAACAAGGCTTTCCTGAAAATATTGTATTAATCTGAAAGAAGAGCTTTTATCGATTGAACCTGCGGATAGTG  
AAGAGGAAAGCCGTATAGGTAAGCGCGCAGGCGCAGGTTTGTCTGGTGGATTAATCTTTGGTGGTGCAGGGTTGGTCATT  
GGAGGTTTGTCTGGTGGCGGCAAGACGAAAAAATATCACTTTTAAAGCAATGTTTACGGGAAATAGGTTACTTCT  
GGCTAAAAACAGATTCAAAAAATTTGTAATACTTCAGTCAATTTGCTGATGATAATGCCATAACGCATCTGTAATCAACA  
TGAAGCAACTAACAGGGCGATGTTTCTTCTCGTAAACAATAACAGAAAAATCCACAGCAGCAAGACTTACCTGCGCCC  
GCTACAACAGTAAAAATGACTGCCAAAGATAAGTTAGAATCGGCTCTTTGGGCTGGGAATCATCTTATAGCTGTTTGGC  
AATAATACACTTCTTTTTTTAG  
>Cluster\_62669  
ATGAATTTTTTAGCTCACCTGCATTTAGCCCATCTCGCGAAAGCTCGCTTCCGGCAATTTACTGGCTGATTTCTGACG  
CGGAAATCCTGAAGAAAGTTTCCGCGCCGACGTCGTGGCTGGCATTATATGCATCGAGTATCGACGTTATTAACCGACA  
ATCTGCCGGAAGTCCGGAAGCAGCGGAATGGTTTCTGAGTGAACCTCGCCGCTGCGCCTATTACGCTGGATGCTCATG  
TGGGACTCACTTTTCTCCGCGACTGGTGCAGCTGTGTCGCGGACTTTCCGCTACAGGAATTTGTCTGTTATGCGCCGA  
GCAAGTATGACGATTTTCCGCGACTCACCGCCAGTTTTATCAATCTGAACAATTACTTGTGGTTCAGAGCAGTGGCTGG  
TGGCTATCGGATATGGATTTCTATCCAGAACGTTTAAACGGCATGGCAAGCCGCGCCACGCTGCTGATGCCCCGCT  
GACTCCTGGTACGATTTAGACGCTCATTATGACGCCCTCGAAACCCGCTTCTGGCAGTTTATCCGCGGATGATGGCGCA  
GGCTCACACAAGGCGTTATAA  
>Cluster\_39090  
ATGAGCGCATCGGCACCTGGTTTGGCTCGCCCTGGTAGTGAAGAGACTGAAGCCGTCACCACATTCGACCTCTTGGTTCCG  
CGCGGATCAAAAGTACCACCTGCGCAGCGTCCGCGCATGTTAACTGGCGATTACCCTGCTCGCGCGCGTGAAGCTGC  
TGGCGGATGCGCCGCTGGTTGAAGTGGCTGATGGCGAATATGACGTTGTTGCTGCTGGTGGCATCAAAGCGCAGAG  
TGTTTTCCGATAGCACCTGCTGGTTGAAACGTTAAACAGTTCACCGTTCGCGGCTATCGTCCGCGCTATTTGGCC  
CGCGCCAGCCACCGTGTGGTCCCGCAGATATCTTCCGATTTGGCAATATGACCGGCTTCCGACGCTGAAAGACAAAA  
TACCCCGCAAAATGGCAGGACAGCGCTGCTGATGAGCAGCAGCATCCAGCTGGTTGAGTTTGTAAAAACCTTAAAA  
GCTATCGACTTTGGTCTGAAAAATATCGACCTGCTGGTTGGGCGGAGAAAGCCATGAAAGTGGCATCACAACCTGGTAT  
GGCGCAGGATTTATAAATTATTACGAGTAG  
>Cluster\_175  
ATGTTTAAGCATATCGAGTTTGTAAAAAGTGTTTTTAAGTTAGAGGACCTGCCCTCCAGAATTTCCGAAATTGCCTT  
TTTAGGAAGGTCAAACGTAGGTAAATCCCTTTAATCAATGCCTTTTTAAACCGTAAAAAGGTAGCCAAAGTGTCTCTA  
CTCCTGGCTTTACCAAAGCTTAAACTTTTTTGAATAGATTTTAAAGTTTATTTAGTAGACCTACCTGGTTACGGGTTT  
GCTAAAGTCCCTGTTGAGGTAAAAAAACAACCTGGCAATACCTGGTAGAGGGATATTTAAAGCAGTGAAGACTTTAGAAA  
TCTTGTACTTATTTTTGATATAAGACGTAATCCGATGAGCAGACATCCAGCTGGTTGAGTTTGTAAAAACCTTAAAA  
AACCTCAGTATAGTCTTAAACAAGATAGATACTTTATCCTTTAGAGAAGTAGAACGTAAGCTCTGTTTATCAAAAA  
ACATTCAAACCTAATCCAGAAACCCCTCTTTTCTAATCTCCTGTAAGAATCTAAGGGGATACCCAGTTAAGATCTCA  
TCTCTTGTCTTGTGGGCTTTAAAAATAATTGA  
>Cluster\_9907  
GTGCTGTGGACTGACGGCTTTAATGATAAGATTGTGCGCTAAATACGTTTGAATATGATCGGGATGGCAATAACGTGAG  
TGGAAATCTGACGCGCTGGCGACAGTTTGGTAAACGCTACTTCTGGCCGATCTCTTATTAGGGATGGTTGCGGCGAGTT  
TAGGTTTGCCTGGCTCAGCAACGCGCCGCAACAAACGCGCCGCAAAAGCGACAACCCGCAACACAGGCTTCAGCC  
AAAGTTAACTTTGGTCAATTGGCCTGCTGGAAGCGAACACACGCGCCGCAATTCGAATATTCGTTGATTACTGGCA  
TCAACATGCCATTGCGACGGTAACTCCGTCATCTTCTTTGCAATGGCACCGCAACACTGCCGTTGCTGAAGAATCTT  
TGCCCTCTCAGGCGCAACATCTTGCAATTAAGGATACGCTCAGCGCGCTGCTGACCCAGGAAGGACGCGCTGAAAG  
GGTTATCGCATTTGATTATGCGCATTTTACCACAAGCAAAATTCAGCAGCCGCTGATGATAAGCCAGGCGCAAGGCAT  
CCGTGCTGGCCCTCAACGCCCTACCTAA  
>Cluster\_28161  
GTGCAAGAAAGAATTAAAGCTTGTCTCACTGAAAGCATTCAAACCTCAAATTCGCGCGGCGAGGCGCTTCCGGATGCCAT  
CTCCCGTGCAGCCATGACGCTGGTTCACTCTCTGCTCAATGGCAACAAAAATCTCTGTTGTGGTAATGGAACCTCCGCTG  
CCAATGCACAGCATTTTGTGTCAGCATGATCAACCGTTTCAAACGGAGCGGCCAGCTTACCTGCCATTGCCTAAAT  
ACTGATAATGTTGCTTAAACGGCGATTGCCAACGATCGCTTACATGATGAAGTATGCAAAAACAGGTCGGGCGCTGG  
TCATGCGGGAGATGATTTGTTAGCCATTTCCACCCGTCGCAACAGCGCGCATTTGTAAGAGCGGTAGAAGCTGCCGTTA  
CGCGTATATGACATTTGGCATTAACCGCTATGACCGGTTGAACCTGACAGGTTTGTAGGGCCAGGATGTTGGAG  
ATCCGATTCCTTCCGATCGTAGTCTCGCATTCAGAAATGCATATGCTGACGGTAAATGCTGTGCGATCTGATCGA  
TAACACGCTTTTCCCTCACAGGATGTTTAA  
>Cluster\_48582  
ATGGATCTAAAAACGACGCGCTGGGTTCTGCTGCTTGAAGACGGCTCTACACTATCGAATCAAATTCACACTGAATAA  
GCAGAAGTTGCTTTGTGACATCTGCGGTATAGCGCGAAGTGCAGGATCTACGAAACAGAAATTAACCTGATAAGGCTG

GTGTGAATTTTCATTTAAACAGTTGCATCAGGTACGTTCCATTGCTCGCATTTGTAACCGATCATCGGATTGGATGCC  
CCCTACTTCAACACACTCCGTTTCAGGTGTGACGTGGCGAGATCGTTTATCACCAGACAAGCTGATTTGCCCTGTATCCCG  
AGACACAGGGAAATCATCCGTTTGGGAAAGTAGACAAAATTTACTCAGGTCAGTAGACGAAATGTTGCGTAAACACA  
GCCGGTTTAAATCATCTCTGTATGGTGGTGGAGAACTGAAAAGGTAGAAAGTGTATCCGTAATCCCTACGGACACTTC  
CTGACAAAAGATGCCAGCTCACCGCAATCTACATCAGACATGAAAACGTGAGTTGACCTCGAATACCACAGTGAAGA  
AGAGCTTAACTTTGACCCACGTCACAAAAGCTGGCGTCATAAGCATAAACGAGCGGTAAAAAGCCCATGACGCGC  
TGTA

>Cluster\_27233

ATGCCTGAAGCAACGCCCTTTTCAGGTGATGATTGTGGATGATCATCCACTTATGCGACGCGGTGTTGCTCAGTTACTGGA  
GCTTGATTTCTGGCTTTGAAGTGGTCGCCGAAGCGGGGACGGCGAAGCGCGATCGATCTGGCGAATAGACTGGATATCG  
ACGTGATCTTGTGGATCTCAATATGAAAGGCATGAGTGGCTGGATACCCCTCAATGCCTTGGCAGGGATGGCGTTACC  
GTCGCAATATATTCTCAGCGTATCAGATGCCCTCCAGCGATGCTTTGCACTGATAGACGAGCGGCGAGCGGTTATCT  
GTTGAAAGCAGCCGACCCGGAAGTGTACTGGAAGCAATTCGTGCCGAGCGAAAAGGCAGCAAAGTCTTTAGCGAACCGG  
TCAATCAGTACTTACGTGAACGTGAAATGTTTGGCGCGGAAGAAGACCCCTTACGCGTCTGACAGAACGCGAGCTGGAT  
GTTCTGCACGAGCTGGCAGAGGGCTGTCAAATAAACAGATGCTCGGTGTTGAATATTTCCGAGCAGACAGTAAAAGT  
CCATATTCGCAATCTGCTGCGTAACTCAACGTCGCTCACGCGTGGCGGCCACCATTTCTGTTCTGCAACAACGCGGGG  
CACATAA

>Cluster\_36959

GTGTTTTCTTATTACTTTCAAGGCTTGGCACTTGGGGCGGCTATGATCTACCCTCGGTCCACAAAATGCTTTTGTGAT  
GAATCAGGGCATACTCGTCACTACCAATATGATTTGCTTACTTTGCTGATACGCGATTTGGTCCGTGATTTGGCGCG  
GGATTTTTGGTGGCAGCGGTTATTTGATCAGTCCGCGTGGTGTGCTGGCGCTGGTACCTGGGCGCGGTAGCCTTCTTG  
CTGTGGTATGTTTTGGCGCTTTTAAAACAGCAATGAGCAGTAATATTGAGTTAGCCAGCGCCGAAGTATGAAGCAAG  
CAGATGGAATAATTCGCCACCATGTTGGCAGTACCTGGCTGAATCCGATGTTTACCTGGATACTTTTGTGTACTGG  
GCAGCTTGGCGGGCAACTTGATGTGGAACCAAAACGCTGGTTGCACTCGGGACAATTAGCGCTCTTTCTCTGGTTT  
TTTTGGTCTGGCTCTTCTGCGAGCTGGCTGGCACCGCTGCTGGCACGGCAAAAGCACAGCGCATTATCAATCTGGTTGT  
GGGATGTTTATGTTGTTTATTGCTTGCAGCTGGCGAGAGCGGTATTGCTCATGCACAAGCCTTGTTCAGTTAG

>Cluster\_43335

ATGCCCGGGCGCTTTGAACTAAAACCAACCCTGGAGAAAGTCTGGCACGCGCCGACAATTTTCGCTTTCATGGACCCGCT  
GCCCGCATGATCGTCGGGGATCATTATTGCCGCCATTGATTTGGTAGTCGGATTTCTGCTTCCATCTGATGATACGC  
CCAACGCGCGGTGGTGCAGCGTGAAGCGCAGTTAGATATTAGTCCGCAATCAACAACCACGACAGAAGAACAGCTGCCG  
GCGCAATTAGTACGCCACAAAATGATCCTGATCAGGTGGCTCCGCTCGCTCCAGAACAATACAGGAAGGCCAACAGAG  
AGAGCAGCCGCAAAACCACCCATACGCAACCATTCCAGCAGATAGCGGAATTGATAATCAATGGCGCTCCATCTGCTG  
AACCCGGTAAAACGATGGCGCAGCTGTTCCGCGACCACGGACTGCCGCTACCAGTGTCTATGCCATGGCGCAGGTAGAA  
GGCGCGGATAAGCCACTGAGTAATTTGCAAAAACGGGAGATGTTGAAAATCCGCCAGAACGCCAGCGCGTGGTGACGG  
CTTAAACATTGATACGGGAATAATCAACAGGCTCTGTTTACC CGCAGCCGGATGGCAGTTTTATTCCGCGCGGGTAG

>Cluster\_6578

ATGAAAAAACACAGATGATGGGGCTAAAATTTACACACCATTACCCTAAAGCTTTATGACTGGTGGGTTTTGGGAGT  
ATCAAAATCGGCTTGCATGGGGATGCTTACAAAAGGAACACCTTCTCCACACTTCTGGAACATGTAGGTAACAAACCATC  
TGGATATTGGTGTGGAACTTACCTTACTCAGTACCTGAGAGTAGTCTGATATCTTTAATGATTTGAACGAA  
GCTAGCTGAACGCGGCATCTACAAAGGGCTGGGGAATCAAAAATTAACATAAAAATTAGCCATGATTTTTGAACCTTA  
TCCCGCGGCTTACATGGTCAATTTGATTTCCATTTCCATGTTTTACCTTCTTACTGCTGCCGGAATATATCTACAA  
AAAGCTGTGTAATACGCAATGCGCGCAGGCCCTAACTGACGATGGAACCTTATACGGAGCCACAATTTCTGGCGATGGA  
GTTGTGCACAATAGCTTCGGTCAAAAACGATGCGCATTTTACAATCAGAAAGGCATCTTTTCAAAACAAAAGATTCCGA  
AGAAGGCTTAAACACATATACTCTCAGAGCATTTTCGAGAATGTTAAAACCAAGGTTCAAGGTACTGTAGTAATGTTTTCCG  
CTTCAGGGAAAAATAG

>Cluster\_32025

ATGCCAGCTTTAGATTTGATTCGACCGTCACTAACCGCATGCGGGTATTGCTCCGTTAACGCCGAATTTGCACGTGA  
ACTGAAATTCGCCCGCATATTCGTAGCTCGGGCTGATTTCTGCTGATTCAGATGACGTACCTACATTGCGGCTGACG  
AAGCGACCAGCAGCGATGGTCAAGTGGTATATGGTGCATCGCTGTATGCGGGCGCTGCACACGGCCGCTCACCCGACT  
GCCGGTGAAGTGTGATTAATGCTTGGTGGACAAAACCCGGCGGAAGTGGCTGCTGGTCTGGATGCGATGGTGGCAATAT  
TGAAAATGGCGCTGCTTTCCAGTGGCTAATGACGCGAGAAAACACAGCCCTTCCGCGCATGTAGTTTCCGCTACCGGTT  
CTTATCTCTCATCAACCGCCGGGATCACGCTTGGCGATCCGATGGCGTATCTGGTGGCACCGCCGCTGGAAGCGACTAC  
GGCATTGATGCAGCTTGAATCTGCCGACGTGACGCTGGTGAACCTATGCTCCGCCACCGTCTGAAACTAACTACTCGGC  
AGCATTTTTAACCGGTAGCCAGCCGCGTGAAGCAGCCTGTAACGCCTTACCAGTGCAGTCTGGAATCGCGCGTA  
ATCCAATCCAGCGTGGCTAA

>Cluster\_31587

ATGGACAAGATCGGTTGAATTAATCAATTAATCTGTAATTAGAACGGATGGATACTTAAATACGCAAAATCAAAAATC  
CCAGATCTTCTCAGTTAGCTCAGGTGTTTGGCTACCGGAGTCTTAATTTATCAAAAATATTACTTTATCTCTGG  
ATAAGTTATCAACTTTCATCGTTTGTTCATTTTCTTTTCTTTTCTAGTAATTTGGCGTGTAAATAAATATATTTGCTGTAGT  
CGTACTTTAAAGGCTATATCACCTTATCTAAAAAATAGCGATAAAGAAAATATATCTCTTTTGTGATATAGTACACTA  
CAACAGTAGCAGTACACTTATTTCTGAAAAAATCAAAAATTAGATTAAGCCATCTAGGTGAGCAGTTAACATCACTAA  
ACTATAATTTATCAGTAGGATTTGATGATAAATATAAAAATCAGAGCGGAGCTATAATATTGCTAAAAATATCTAGGCA  
TCCTTCTTCCATCCATTGTTGTCCCATGGTTTTTTTATTGTTTTGATATTTCTTAACAGAGAAAGGACCGATAGTGAT  
AATGCTATTTATTTATATATACATTGCTGATTTCAATGCTTTTTGTTTAAACATGATTATATAATTTATATATTTAGGTA  
AGGATAAGAAATGA

>Cluster\_24660

ATGTGTGCAATGGATCGTAGAGAAAGCAGCTCATTGCTCAATACATTTCCCTAACGACTTAAAGAGAGAACATTTTCATT  
ATTGAAATATCCCGTATGTATACGTTTTGAAGCAGGTTCTTTTATAGGAACAAATCACAGCTTCGAGCGATTTATTAAT  
TATCATATTTGTTCAATGTGATGAATGGTTTGAGCATTTGACTTTAGAATCCAAGTTACAACATCAAGATCTGAGATGGAT  
TCATATTTTTCAACTTATGTTGTTAAGTTATATAAATGTTTTAATTTAGTGTATGTCATGGAGCATGGTTATCGCAAC  
ACTCAATACAACGAAGGTTGTTTTTCTATCTGGCGATTTATTGAGTCAAATGACAAAAATATTTCAACATCTTTGATTT  
CTAAATCTAATGATGGGTTGATGTTTTTTCTGGGAAATATGTAGATATTGAACCTATCTTTGAGGGTTTAGCCATTAT  
TATTTCTGCAGCAGTGAACAAAATAGTATATCTAAATCAAGAAGAAAACGATGAATTTTCAAAATGAATGGGTTTTAG  
TTCCAGAGATCACTGGTTGGATGAAATGCTCAGGCTGAAAAAATACTATTTCTATATGATAGAGTAAAGGAATATTA  
AAAACAAGTGTAA

>Cluster\_7256

GTGTTGGTAAACCATAAAAACAGTGCAGCGGCTGATGGCAGAGCTGTCGCTCCGCTCTGTGATAAGGGTGAAGAAATATCG  
TTCTTGGAAAGGGGAAGTAGGCAAGCTGCACCAATATCCTGATCCGGAACCTTTGGTGAACGAAGTCCAACGAAAAAT  
GGGTGACGGATGTTACAGAGTTCGCGTACAGGTTAAAAGCTGTACCTGTCGACAGTCTCGATCTGTTAACCGGGAG

ATTATCTCCTACAGCCTGTGAGAAAGGCTGGTGTGAGATGATTAATACGATGCTGCACGATGCATTCTCAGTGTGG  
ACCGGAGGATGCACCGTTCTGACACGGTTCAGGGCTGGCAATATCGAATGGCAGGCTATCAGGCAACGTTAAAGGCC  
ATGGAATGACACAAGTATGTCGCGCAAGGAACTGTCTGGATAACGCAGTGTGAGAACTTCTTCGGCGCACTGAAA  
TCGGAGTGTTTTTACCTGAACAGGTTTAGCGATCTGAATGAACTGAGGAAAGCGATAGAGGACTATATCCATTATATAA  
CAACGAGCGGATCAGCCTGAAATTTAAAGGCTGAGTCCGGTGAATACCGAACTCAGGCCCTGAAAGCCGCTTAA

>Cluster\_25199

ATGGCAACTGATACTTTAGCGCACGCGACTACCCACGCGCACGAACACGGGCACCACGATGCAGGCGGAACAAAATCTT  
CGGATTTTGGATCTACCTGATGAGCGACTGCATTCTGTCTCTATCTTGTGTTGCTACCTATGCCGTTCTGGTGAACGGCA  
CCGCAAGTGGCCGACAGGTAAGGACATTTTCGAACTGCCGTTCTGTTCTGGTTGAAACTTCTTGTGTTGTTTCTGACTCC  
ATCACCTACGGCATGGCGGCTATCGCCATGTACAAAAACAACAAAGCCAGGTTGTCTCTGGCTGGCGTTGACATGGTT  
GTTTGGTGGCGGATTTATCGGGATGGAATCTATGAATTCATCACCTGATGTTAAACGGCATGGGTCGGGATCGCAGCG  
GCTTCTGTGACGATCTTTCGGCTGGTCCGACGCGACGGTGCACGTCACCTTCCGGTCTTATCTGGATGGCGGTGCTG  
ATGTTGCAAATCGCGGCTGCGGGCTGACCAGCAATAACCGTACCCTACCGCATCATGTGCCCTGAGCCTGTTCTGGCACTTCT  
GGATGTGGTTGGATCTGTGTGTTACTGTTGTTTATCTGATGGGGCGATGTAA

>Cluster\_23951

GTGCTCAACAACCTCTCTTACTGCTGAAAGACGCGAGTATTTTCGCTTACCAGTACCCAGAAAAACGACTTATTGCCTA  
CGTGAATATGTGATGATAAATGGAATAAAGCGTACAACTGACTTCGGTTCGTGATCCTAATGAGATGCTGGTACGCCATA  
TTCTCGATAGCATTGTGGTGGCACCGTATCTGCAAGGTGAACGGTTTATCGATGTCGGCACCGGACCGGGACTGCCTGGC  
ATTCACCTCTCTATCGTGCCTGCGTGAAGCCATTTACGTTGTTGGATAGCCTTGGTAAACCGGTCGCTTCTCGTCA  
GGTGCAACATGAGCTTAACTGGAGAATATTGAGCCAGTACAGAGCAGGTTAGAAGAGTTCCGTCAGAGCCGCAATTTG  
ATGGCGTAAATGACCGCGTCTTTCGCTCTCTGAAACGATATGTTGAGCTGGTGGCCACCACTTCTGTTGAGCAAGCCGT  
TTCTACGCGCTGAAAGGGCAAAATGCCGGAAGATGAAATGCTTGTGGTGGCCGAAAGATATCAGTCAATCAGTGTGTTAA  
ACTTCAGGTTCCAGCCCTGGATGGCGAAGCTCATCTGGTGGTGTAAAGCAAATAAAATTTAA

>Cluster\_31270

ATGAGTAACTGCGAGTCTGGATGAAAACGGTATCGCCACTGTAGCGGGCGATATCACTGTATATCACTATGACGAGGA  
AACCCGGGAAATACCTCATCTCTGTGGAGTATCTCGCCCTTGGGGTGGGTACTCCGGCACATTCGTGCGCCGATGCAC  
CGCCGGAGGCAATTTCCGGTTACTGTGGTTTCCGGGACTGCCACGCTGAACGGGTGGGAGCATGTGCTGATCACCGGCGG  
GAGACGGTATACAGCACGGGAGAACCGTAACTTCTGATTTACCAACCGGGTGAATACCCGGCGGACCAACCAACAA  
ACAGCCAGCCACGCCATGGGATACCTGGAACGGTGGGCGTGGGTAACCGATACTGAACGGCAGCGAGCCGAGAACTGG  
AGGTTGCCAGACGCAACGCCAGCAACGGGTGAAACAGCGCATGGCGTCCGTCGATCTTATCAACCTCAAACTGCGTGT  
GGTGCAGTCTGACACGAGAAGAAACGGCAAACTGAACGCGGTGCTGGATTATATCGACGAGCTGAACGCACTGGATAT  
CAGCACGGCACTGAAATCAGCTGGCCGGAAGCCCACTGGCACTTGCAGTTGA

>Cluster\_48852

ATGAAACGAGTAATGGTATCGCTGGCCCTGCTTCTGGTTCAGCGGGGCGGCATGGCGAATAATCATAACGAGAACCGTCA  
GTTTATCCATGAGCAGTGAACCTGGACCGTCAGCGATTTAGTCTCTGCAACCCCGGAATTCCTGAAACAGACCCGTC  
CGGTGGCACCGCGAGGAGTCTGTTTCTCGACCGCGACGACAGCACTTCCGGCAATCCATGCAGCCCGGGAACGCCCG  
GTGAATGCGGCCCTGGTGTGTTGTCTCTCTCGATGCCGGCGGAGGAGTTGAAGCAGCGTGTAAAGGATGCGGCACA  
CAATATTCGGTGGTTATCCGGGAATGGTTAACGGCGATATCGGGGCGACGGTAAATGCCGTTGCCGCTTCTGTGAAAG  
AGAGCAATACCGGTGGGTACAGATAGATCCGACGACGTTTCGTAATAACAACATACCGCGTGCCTGGTGGTGTGTA  
GCCTGTGGTAAATCAGGTTGAGAAAGTCTGATCTGTCGAGGGGATCTTACGCTGCATCAGGCCCTGAAGCGGGTGGCAGA  
AGAGGGCGACTGTCTGACACCGCCAGGAGCTGCTTGGCGAGGGGGGAATGA

>Cluster\_39729

ATGGCCATTACGTTGGCTGAACTGGTTTATTCGAACTGATCGGACTTGTTCAGCGTACACGTGTAGCTATCTGCGGTG  
CTTCAATAAAAATAAGGCTTACAGAGAATGGTATGATAAACCGGAATCCTATACAAAAGAACCTTCTTGCCTCTGGTC  
GCGGTGAACGTTTTCGGCGTAAAGGCCCGCAATTCGCCAGCACCAACATGCTGATGATGGACCGTGTGGTCAAATGACC  
GAAACGGGTGGTAACTTCGCAAAAGGTTATGTTGAAGCAGAGCTGGATATCAATCCGGATCTGTGGTTCTTCGGATGCCA  
CTTTATCCGGGATCCGGTTATGCGCGGATGCGCTGGGCCATGAGCAGCAATGTGGCAGCTGGTGGTGGTCTTCTACCTGGTGG  
TGGCGCGCAAGGTAAGGTCGCGCGCTGGGCGTAGGTGAAAGTAAATTCACAGGCCAGGTGCTGCGGACGGCGAAAAA  
GTGACCTATCGTATTCATTTAAACGCATAGTTAACCGTCTGATTTATGGGCTGGCTGATGGCGAAGTGTGGTTGA  
TGGTGGTTGATCTATACCGCAACGACCTGAAAGTAGGTCTGTTCCAGGATACGCTCTGCATTTCTGA

>Cluster\_1984

ATGAAACAAAGCAAAACGCTGGAGATCTCTACTGCGCTGCGTGAAGCAATCTCATCCACCACCGAGCTTAAATTTAG  
TTCCGCTTTTGAATGCTGATGCGCTACTGCTTTCCGCTCAGCGCACCGATGTCAGTGTAAATAAGGCGACGGCGAAAC  
TCTACCCGGTGGCAATACGCCGTCAGCGATGCTTGAATGGCGTTGAAGGGGTGAAAACCTATATCAAAAACGATTTGG  
CTTTATAACAGCAAAAGCAAAATATCATCAAAACCTGCGCTGCTGTTGCTGGAGCAGATAATGGCGAGGTTCCGGAAGA  
TCGTGCTGCGCTTGAAGCCCTGCCGGCGTAGGTGCTGTAACAGCCAACGTCGATTTAAACACTGCATTCGGCTGGCCGA  
CTATTGCTGTCGACACGCACATTTTCGCGTTTTGTAATCGTACTCAATTTGCGCGGGGAAAAACGTCGAACAGGTAGAA  
GAAAAGCTACTGAAAGTGGTTCCGGCAGAGTTTAAAGTCGACTGCCACCATTTGGTTGATCTGACGGCGTTATACCTG  
CATTTGCCCGCAAGCCCGCTGTGGCTCTGTATTTAATGAAAGATCTTTGTGAATAACAAGAGAAAAGTTGACATCTGA

>Cluster\_31836

ATGAGACACGGGCTGCTGGTGTGATTTGCTGGCTGTATTGTGTTGTTGCCCATAGTGAATGCTAAATGTGCAACAATC  
CGGGCTGTTTCGCGCGTGGTTTGTGCGCATTTGCACAGGAACAGCTCCGCCAGGGGCCAAGCCACCGTGGTATCAACAGG  
ATTGCGCGGGCTGGTGGATTTGCGGGCAACGAGCGCTGAAAGTTCACGACAGTAAATGGCTAAAAAGTAACGGTTTA  
TCTAACCGATTTTCGCGCCAGAGATGACGCTAACACCTGAACAGCGTCAACTGGCGCAAACTGGAATCAGGGGAACGG  
GAAAACCGGCCCTATGTGACCGGATTAATTTGATTCAGTACAACGGCCAGTTTCAATGGCCAGGACATAAAACAGCGC  
TGCTGGCGATATGATTTTTCGATCAGGGCGATGCCAGCACTTAAATGGTCTGGATGGGGCTTACATCATCTACCA  
ACCGGAAGCGCCACGAAACTGACAACGGAATGCGCGCAGTCACTGCAACAACCTTATGACATGGAAGGACACCCGATG  
GATACCAACGATTTCAAATCCCAATTTCAATGGCATTTATCGTTAAATTTTTCGGCGGATG

>Cluster\_42704

ATGGCTCAAGGCACGCTTTATATGTTTTCTGCCCCAGTGGCGGGTAAATCCAGCCTGATTACGGCTTTATTA AAAAC  
CCAACCGTTGATGACACCCAGGTTTCTGTTTACACACCACACGCCAACCGGCTCCTGGTGAAGTCCACGGTGAACATT  
ATTTCTTTGTTAATCATGATGAAATTTAAAGAAATGATTAGTAGAGATGCGTTCTCGAACACGCGAGAAGTTTTGGTAA  
TACTATGGCACTTCGCGTAGGCCATTGAGCAAGTACTGGCAGCCGTTGTCGATGTTTTCTCGATATCGACTGGCAGGG  
TGCCGACGAAATTCGCGAGAAAGTCCGCGACGCGGAGTATCTTTATTTTACCAGCGTCAAAAATCGAACTGGACCGCC  
GTCACGCGGTGCGGCTCAGGACAGCGAAGAGGTCATTGCAAAGCGTATGGCGCAAGCTGTTGCAGAAATGAGCCATTAC  
GCCGAATATGATTTACCTGATTTGTAATGATGACTTCGATACCGGTTGACCGATTTGAAGACCATTTATTCGCGCGCAAGC  
TCTGCGCATGAGCCGCAAAAGCAGCGCTATGACGCTTTAATCAGCAAATTTGTTGGCAGACTGA

>Cluster\_40825

ATGGCCAGACGACGACAATAGAAAAGCTGCCGGAAGATGTGCCCGCTGGCTTGACGGGCGCTGACTGAATCCGGCTT

CAGCGGGTATAACGAGCTGGAGTCCCTGCTGCGTGAGCGGGGTACGTCATCAGCAAATCCGCTATCCATCGCTATGGAC  
AGAAGATTGAGCGCGCTATGGTCTATCCGTGCGGCAACAGAAGCGGCCGCTGCTGACCGAAGGCCAGCAGACGAT  
CAGGATGCGCGTTCGGAGGCTGTGATAGCCCTTATTCAGACCAGCTGTTCGAGAGTATGTCCAGTTGCAGGAGCGGA  
AGAAGCGAAGTCCATCCATAAAGACCGCTGGCCCTGCTGTCGAAAGTGGCGAAGAATGTGGCTACGCTGTCCCGCGCT  
CCGTCAACCTCAAAAAGTTCAGTCTGAAGTACGGCCAGCAGCAGCAGCCAGCAACCGGAGAAAATGGCCCGT  
AAGGGGGACTGTCAAGCAGCAGTACAGCGCTTCGTCGCGAGATTCTGGGATTGCCACATGA

>Cluster\_2993

ATGCCAGTTGCCCGTTATCTCTGCATTTTCATAAACGTTGGTTGGGAGAAGTTCTGCATTACCTGTTGGTGTGCCCTGT  
TCCGTGGCCTTCAGTACACCGCCAACAGGCTGGCTGAAATGC AACGGTGGCGCTTTTCTGCTGAAGAATACCCGGAAC  
TGGCAAAGGCTTACCCGACCAATAAATTCGCTGATTTACGCGGTGAATTTATTCGTGGCTGGGATGACGGTCCGCGGATT  
GATACTGGTCCGCTTTGCTTAATTTGGCAGCCACACAAATTTGGACCATGCACACTATATGGAATTTGGACAGGGGA  
CGGACTCGCCGAGGAAGTGCACGGGAAGGAGTAAACCAGGAATACCTGGCTACATACGGTGACGGGGGAATAGTTAAAA  
CGGACAAACCGGCTTAATGTGCTTCCCTCAC TACGAGTATAGCTCTCGTAGTGTAAACGTTAATGGTGAATTAGT  
GAAAATGTAGGTACAGAACTCGTCTCGTAACATCGCTTTTAATATATCGTAAGGGCCGATGA

>Cluster\_30516

ATGGATCCACTCGTTATTTCTCGGACGAGTGTTCAGTAATGAACCTCTGGAGAGAACCATGTATATGATCGTTATCTGGGT  
TGGACTTCTGCTTTTAAAGCCAGATAACTGGCCGTAATATGTTAATGAGAGAATCGGTATTCCATGCTGTGGCATGTTT  
TCGCTTTTGTCTTTGCATTTTCGCTAGCAATTAATGTGCATCGATTATCAGCTATTGCCAGCGCCAAATAAAGCGATTT  
AAGCTAAGAAAACCCATTAAGATGCAAAACGATAAAGTCCGATCGGTAATTCAAAACCTTACAGAAGGCAATCTATGGT  
TTTGTGCGCAGCCCTTAATGAAGCAGGAAGTATGTGGTTACATCAAAAACATTCCTATACATAGTGTAGTTGATTGAGC  
TTGGTGTGTTGAACAAAACCTTTTCCCGATGGAACGGGAAGCATATATATTCCCTATTGAGGATATTTACTGGACTGAA  
TTAGTTGCCAGCTATGATCCATATAATATTGAGATAAAGCCAAGGCCAATATCTAAGTAA

>Cluster\_46114

ATGAAACGTTCAATTTATGCTGCGCTGCTTTTCTTCTTTTTTATGAGCGCTGGAGTATTTGCTGCAGACGTTGATAC  
CGGAACATTAACATTAAGGGGAATATTGCAGAATCTCCGTGTAATTCGAAGCGGGTGGTGAATTCAGTAAGTATTAATA  
TGCCGACTGTACCACCCTGCTTTGAAGGTAAGCTAAATATCTACCTATGATGATGCAGTCCGCTGTAACCCAGCAGC  
ATGTTAAAAATAGCTGCCGAAAGAAGTGTGCTGGTGTAAAACCTCTCGTTGATTACCAACGATAAAAATAACCGGTAACGA  
TAAGCGGATAGCCAGTAGCAACGATAACCTGGGTTACTATCTCTATTAGGTGATAACAGCGATGTCCTGGATGTTCTG  
CACCTTTTAAACATTTAGAGATTATAAAACAGCGGAAGTCAATATGCTATTCCGTTTAAAGCAAAAATACCTGAAACTGACA  
GATAACTCAGTGCATCAGGTGATGTGTATCTTCTCTGGTTATGCGTGTGGCGCAGGATTA

>Cluster\_14918

ATGAAACTGGCACCGAACGTAATAACTGTACCGAAAAGATAAACACACTGAGGCGGTTATTTTTGCGGGTGATAATGCTCA  
CTCCTTTGCAGAACATTACATGATTGCACAGGCCAAAAAGCAGGCGATCCCATCCCTCCGGTTTACC TGGGCCGTTATC  
AGTTAAGCGAAGTGGACAATTTACAGATTTGTTGATGAAGGACGATACAGAGCAAAAGGTATACGCGCCGGAACCTGGAC  
GATATGCAGATGCTGACCATGGCCAAACTGGCGATCGCAGGTGTCCGGAAGCGCGGTTACTTTCAGAGAAATTCGA  
ACTACTGGAGACTGGAGCGAGCAACTACCGGACTTAAAGAAAACCTGGGAACCGCGGAAAGTCTGGTGTGATGAAAGGCG  
TAAAGCGAAAATCACACTTCCCATCTCATGGGTTCTGAGGGATTGACGCGCAGCAAAAGTACGTAATTAAGGGGCTT  
ATTCGGCTGAATCATTATGCAGCACCTACGGGCGCAGCGGTTCTTATAAATCGTTCCCTGGCTATTTCTTAG

>Cluster\_48408

ATGAATGCCGGAACCATTAAGTCTCAGGAAGCTCTCAACGATTACCGCTCGCGGATAAAAAAGCTGGCTGACACTACGTAATAC  
GCAAAGTACTACCAGTCTGCTCTGGCGCTCTGCTGGATACTGAAGAAAACCGGCAGCATATGCCAGCCAGCTTGAGG  
AGCTTCGTGAGCGTCTTGTCTGCTCCTCGAATGGCAGATTAACTGTGCTGCACGGGATGGTCTTTATGCTCACCAGATTGTG  
CTGGAGATTGTGTTTACAAGCGCAACGGAAAACCTCATGACGAGCATGGTGTATGCACACTGACCTGACCTGCTGCTCTT  
TCTTTGCGCTCCATACGGGCTTGAGACGGCAATGAAAAATTACGAACCGCTGTAGCCCGACAAAACGGAAAGTCCGTACTC  
CGGTAATTTACAGCAGCATACAAGAGCATATCGACGAAACCGGATTAACGGTGGATGCATCAATGTACGCTGATGCTTCA  
GCCAGTTTACCCCGGCACAACATAAAGTTTCTCGCCCGCTTAAACCGACTAATGAAAAGGAGGGTACTGA

>Cluster\_41715

ATGTCTCTCATTAAATCACTGCTGTTACCCCTGTTGCTGGCAGCCGCTGCCGTGCAGGCTCCACCCGGGATGAAATTGA  
ACGACTCTGGAATCCACAGGGCATGGCCCGCAGCCTGCACAACCGGCAGCAGCAGCTCAGCCAGGACAGAAAAGCCAG  
CCCCCGCTGGTTCGCCCTCAGCAACGGCAGGAGTTAACCTGGCCGACTGGAAGGTGGTGTGTTTATGCAGGGGCA  
TGCCCTTACTGTACACAGTTTGACCCGGTACTGAAAACAGTTGGCACAGCAGTACCGGCTTTTCCGTTTTTCCCTACACCT  
GGATGGTCAGGGGATACCCGCTTTCCGGAAGCATTACCGGTGCCACCGGACGTGATGCAGACCTTCTTCCGGAATATCC  
CGGTGGCCACACCACCTTCTCTGGTCAACGTCACACGCTTGAGGCAATTACCGCTTTTACAGGGGCAACGGATGCC  
CGCGTTTTATGGCGCGGATGGATACCGTCTCGAGATGTACGGAGGAAAAAAGGTGCGAAATA

>Cluster\_39489

ATGATAAGCAGCAAGGAAGATTACAAGTACATCTTCTCCTTGACGAAAAGGCTATGAGGCTTCAGGGTCAAGGTTAAA  
AAATATAATATTCACGATATATGGAGATTCTTAGATTGCTAAGGAGGTTGGAGTATCTTACTAATTCGAAAAGGAAATA  
AAGTTTTAATCTGATTACAAGACTTCGGTTACGCAAAATCAAATGAAACTTGGATTTTCAATACCTATCAATACCTTT  
GGTCCAGGTTATCAATACCACATTTATGGTAACATAGTTGTTAACGAGGAGCCAGGATAGGTGCAAAATGGCCGAATTC  
TGTAGGTACGAATATTGGACATCAGCTGGAGCAGGACTTGAATCCCTGTAAATGGTGTAAATGCTACATTTGGTCCCTG  
GAGCAAAAATTTACGGAAGATAGTTATAGGTGCAATTTGTGCAATAGGCGGCAATGCAGTCTTAAACAAAGATTTTAAA  
GATGGAAATTTGCACTATTGCTGGCGTCCCTGCCAAGATAACATCATATAAACATCAAAGGTTATATATA

>Cluster\_39926

GTGAATAAGTCAATGTTGGCGGGTATCGGGATTGGTGTGCGAGCTGCGTGGGCGTAGCGGCAGTGGCCAGTCTGAACGT  
GTTTGAACGTGGCCCGCAATACGCTCAGGTTGTTTCTGCAACCCCAATCAAGGAAACGGTTAAAAACCCGCTCAGGAGT  
GTGCAACGTTACAGTACCCATCGTCCAGCGGTGACAGGATGAAAATCGCATTACCGGCTCGGTGCTCGGCTGTGCT  
GGCGCGGTGATTGGGCATCAGTTTGGTGGTGGTCCGGTAAAGATGTCGCCACTGTTGTTGGGGGCGTGGGGGGTGGATA  
TGCAGGTAACAGATCCAGGGCTCTCTCCAGGAAAGCGATACTTACACGACTACGCAACAGCGTTGTAACCGGTTGATG  
ACAAGTCAGAAAAATCCGCTGTTATGATGTGACCTATAAGATTGGCGATCAGCAGGGCAAAAATCCGAATGGACCCGAT  
CCGGTACGCAGATGCTGAGTAGTACACCGGAGCAATTTGAATAACAAAAGCATA

>Cluster\_33851

ATGCACCAAGTTGCTGTGCGCACCAACATCCCGCTAAAATTCAGGCCATTCTGCAGGCAATTTACAGGATCTTCGGCGA  
AGGATCCGTCATATGCATCCGTTCCGCTCGAGAGCGGTGACCGGAACAGCCCTTTGGCAGTGAGGAAACCGCGCTG  
CGCAGAAATCCGGTAGCAAAATGCCCGCTTTACTTCCAGAGGCTGATTTTTGGGTGGCGATTGAAGCTGGCATCGAT  
GGTGACAGCACTTTCAGTTGGTGGTGTGTTGAAAACGCCAGCCAGCGCGGCGAGGCGGCTTCGGCTACTTTGCCGTTGCC  
TGCGGTGATTCTGAAAAAGTGCCTGAAGGTGAGGCACCTTGGTCCCCTGATGTGCGCTTATACCGGATTTGATGAGATTG  
GTCGTAAGGAAGGGGCGATCCGGCTGTTTACCGCGGGAACACTACCGCCAGCGCTATCACAGGCGGTTGATCAGGCGGTTG  
CGGCTGAGTCCGTTTCAATATGCGTGTATCAGCCATTTCAGGCTGA

>Cluster\_34687

ATGAAATGTAATAATCATTGCTGCCATTGCCATGCTGACAGCAGCATCATGCGGATACGCAGCAGAACAGGAAGTCCCAAT  
GAACCTTGTGCTGCTGACGGAAAGAAAGTCAAGCATTTGAAAAATAACCATTCAGGAGACCCCTACGGTCTGCTGTTCA  
CACCAGCCCTTCACTCTCTGCTGAAGGCATTCATGGTTTTTCATGTCACGAAAAAGGAATTTGCCGCCGGCCTGAAA  
ACGGGAAAACCGGTCGCAGCATTATCGGCTGGCGGTCACTTTGACCCGAAAAACACCGGCAACATCTTTGGCCCTGGTC  
TCCGGATGGACACTTGGCGACCTCCCTGGCTGTTCTGGAGTACAAACAGTTCCCGGAAAAATACACGGCGACCCGGTTG  
GACTGAACTCATTAAAAGAGATTAAGGGCGTTCTCTCATGCTTCATGCTGGCGGTGATAACCATCATGACCATCCGGAG  
CCCTGGCGGGTGGTGGTGGGAGATGGCTGCGGCATCATCAATAA

>Cluster\_4412

ATGAAGCGAACAATACTTGGCTTATGCCGCTGCTCTTTCCCTTTTCGTCATTGCGGGCAACCACGGATTTAGGGCCGAA  
AGGAACATTGAAATTCACCCCTAAAATCAGCCAGGGTGTGCGAACTGGTGAAAGACAGCGTTGAGGTTGACATGGGCA  
CCGCGGTTCTCAAAAAGCCGGTAAGAATCGGAACGGAAATTAATCCCACTCCCTTTTCATCGGCCTGAAAACTGTAGC  
GAAGTGTGACAGCTACGTGACTATGGACGGTACACCAATGCAGACGACTCAAATCTTTTGGCGTGGATGCGGGTGG  
CGCTACAGCGCTTTGGCTGAAAAATCAAAACCGCTGCTGGAGTACAAACAGTTCCCGGAAAAATACACGGCGACCCGGTTG  
AGTTTGAATTAACGGTGTGGCGCACATCAACTGAATATATCGCCAGCTACGTGCCATTTCCGCGCCGATGCAACTATT  
GGTCGCGCAGATGCAACGGTGCACCTTTACTGTACAGTACGAATAA

>Cluster\_49801

ATGCAGCATTTAAAAAATATTACGGCGGTAATCCAAAAACGGTTGAACAATATCAATTAACAAAGGACTTTGATGTTGT  
CTGGTTTTTTTTCAGAAGATGGTAAGAATGGTACGAAGAACAAGATATTTTGTGATGACACGATAAAAAATAGCGTACG  
ACAAAGATAATATCATCCGCTATGTGAAAAAGGATGTGACAGCTATCAGACCAGATGGATTAAGTGTGTTGAAAGTGGCG  
GATAATTACTGCTAACCGACGGCGGCATTTTCAGGAACTGGATGTTTAAAGACGGCACAGTATAAAGCAATTTATAC  
GGCGAGGAAATTGACGACGAGGCAAAAAATCGGAAAGCCAGACTTCTTACAGATGCTGAATACGTGATTTTGGCGTTGG  
AGCGCGGGTTCAGGCTGAACATAGCAACAGAGGAGGAGCGCACACGGTTGGAGGCTTGGGACGCTACAGCGTCTGGTC  
AGTCGTGTGGATCCTGCGAATCCGAATGGCCGGAAATGCCGCAATAA

>Cluster\_26440

ATGTCATTAAAGGAGAATGACATCTGGTGAATTAACATTAGCCAGATCGATTTTTGAGAATACAATTGATTATAACAAGGT  
ATGGATCCACAATGAAAAATATTTGCCCGGTCAAGGGGAAAGAACAGCGATGACCCCAACCGGGAAATGTATATCCTG  
ATGCTGTTTATAGTTTTCAGATTTCTCATCGCAATCAATACCTGGTGAGCGTGAACAGTAGCAGGTGCTTCTCACTTGT  
ATTCATGAATGATGCAATGTTGGCAATATCAGAAAGGATATGCAAGTTAAGTTGCGTGGTTTATTTTCCGCGGCAAA  
TTATCATTACGATCTTAATTTACAGTCAATGTTTCTTATTCATGGAGCAACAAGCATCTATAGTAGCTGATTATTGGC  
TATGATTAACTACGGACTGGTAGCTGATTTGGCAATGTTAATTTATGTTAGGTGATACAACCTGAATCAGTGAACACGCTA  
TCGGAAAAATACAAAAAGGTGCTTAATTTATTTCTGCGGGCGTCATATGA

>Cluster\_40266

ATGAAAAATCTCGCTCGCTTTTTATCCACCACACTTAAACAACACGTCAGCAGCGCGGCTGGAGTCTATCGCGACTGGC  
AGAAGCGACGGGCTTTCTAAAGCGATGTTAGGGCAGATTTAGCGTAATGAATCCAGCCGACGGTCCGCGACATTATGGA  
AAATGGCCACCGGTTGAACGTGCCATTTTCAACATTTATTTCCGCGCAGTCCGCTACGCTTTCAGTTTATGATCCA  
ACACGGCAGCGGATGGTGTATCACTTCCGTTGTTTCCCTTATGATCCACAACACTCGCTTTGAAACACTTCTCGATTCAGATGC  
ACCCGGTGAATAAGCGAATCGACGCCCATGAAAAGGGGTAATCGAACATGTCGTCGTCATTGATGGACAACCTTGATC  
TGTGTGTTGATGGTGAATGGCAGAGCTTAATTTGGGGAAGGCGCTCGATTTGCTGCAGACGTCACGATGCTATCGT  
AATGGTGGGAGCAAAACCGTACATTTTCATTCCTCATCCATTACCCGCGCAGTTAA

>Cluster\_57084

ATGTTTCTTATAAATACCAGGGATACGATGTTCTTCCAGCGATGAAAAACATTTCTGAGTAAAGGTAATGTCGTTTCATAT  
ACAGAACGAAGAAGAGATCGACGTAATGTTGCATCAGAATGCCCTTCGTCATTATTTGATACATTAATGAATAATGTATTT  
ATTTCAATTTTCTCACTCAAAATGAACGATTAAAACCTGTCCATGTCATATTTTCTCCCCCTTAATATTAACAGCTGC  
CTGGGAAAGTGCCTGACCTTTGTTCCGCGGACTATCACTATCATTGATTTTGTGCGCACTCATCAATGGCAGTTACTG  
CTCTGTGCTGAAGCGGCTGTGTCATTTCCGCGCAAGCAACATCAGGTTCTGAGCTGCATTGCGAATCAAAATGCAACGG  
AAGATATTTCTGGAGAACTGAAAATATCGCTAAAAACGTTCTACTGCCATAAACACAATATCATGATGATCCTCAATCTT  
AAGCGGATCAATGAGCTGGTACGCCATCAGCATATTGATTATCTGGTGTGA

>Cluster\_6479

ATGTTGCGATTTTTGAACCAATGTTTACAAAGCCGGGGCGCGTGGCTGTTGATGGCGTTACTGCTCTGGCACTGGAAC  
GACGGCGCTGTGGTTCCAGCATGTGATGTTACTGAAACCTTGGCTGCTCTGTATTTATGAACGCTGCGGTTATTTCCGGC  
TTCGGGTGCTGCGCTGATTTGGCGCTGATCGCCGAAACTCCGCTGCGTTATGTAGCATGGTATATCCTGTTTATAGT  
GCGTTCCGCGGTGTGAGTTAACTTACGAGCACACCATGCTTCAGCTCATTCTTCGCGTTTGGCACCTGTGATTTTAT  
GGTTCGTTTCCCGAATGGCTGCCGCTGGATAAGTGGTGGCGCAAGTGTGTTGCGCTTGGCGATTGCGCCGAGCGTC  
AGTGGGATTTTTAGGCTGGAATGCCGAGTGGCTGCTCGGATTTTTATCGCTTACCTGATGTCGCGAGTCTGGTG  
GTGATTTCCAGCCGTTTAAAGCGAAAAACCGTATCTGTTCCGTCGCTAA

>Cluster\_21255

GTGAAAACGGGTGCTGAAGCCATCCGGGCGCTGGCCACACAGCTTCCGGCGTTTTCGTCAGAAACTGAGCGACGGTTGGTA  
TCAGGTACGGATTGGCCGGCGGACGTCAGCAGTCCGGTTAACGGCGAGTTACATGATACCTGCTGATGGCGCTG  
TGATTCATATTGTTCCAGAGTCCGCGGGCCAAAGTCAAGTGGCGTATTTCCAGATTTGCTGGGGCTGCCGCCATTGCC  
GGATCATTCTTACCGCCGGAGCCACCTTGCAGCATGGGGGCGAGCCATTGGGGCGGTGGTATGACCGGCATCCTGTT  
TTCTCTCGGTGCCAGTATGGTGTGCGTGGTGGCGAAATGCTGGCACGAAAGCCAGAATCCCGGTACACAGACAA  
CGGATAACGGCAAAACAAACACCTATTTCTCTCACTGGATAACATGGTTGCCAGGGCAATGTTCTGCGGTTCTGTAC  
GGTGAATGCGCGTGGGGTACGCGTGGTTTCTCAGGAGATCAGCAGCGCAGCAAGGGGACGGTGGTCAAGTTGTGGT  
GATTGGCCGCTGA

>Cluster\_5623

ATGAATGCTATTCCCTTATTTCGACTATAGCCTGGCACCTTCTGGCCATCTTATCAGAACAAGTCAATCGCGCTCCTTGA  
GCGTGGCTGCGTGAGCAGTCCGGCTCACGGATACGGCGGATCCTGCTTCTGCTGCGGTGGGAACATGACAACGCCTTCA  
ACAGCAGACAGACCTGGTTTGGTATGGATTTTATCGAAACCGTCAAGTGGCTGATGAATGCGAAACCCGGACCGACCT  
TGCTGGCTCCTGACCCGTCATCCGAAAGCCGGAATACCACGTTGGTGTGCTGCTGAGCAGGAGTATTTCCAGCGCC  
CGAATGGACCGGCTGATTTCTGGATGCCGAGCAACGTAAGTGGCTTCCGCTTCCGCTACCGGGGAAAGCGGACCGTACCA  
AACAGATAACCCGGGATGTGGTGTGGACAGTCTTACCAGGCTGCGAAGCCCTGTTTAAAGACCTTATCTGGCGGTT  
AGTGAATTTCCCGCGATCGCGTGGAGTGTGCGATCCGGAAGCCCTGCGCTGCGCGTAAATCCCGGCTATCCCGGATC  
TGCAGGACCGTTCTGA

>Cluster\_28724

ATGAAAAACACATTAAAAACCTTTTTTTTATTGGCTGCTATTTGTTTACAGTGGCATGTAAGAGCAATTTGATACAGG  
ATTAACAGAAAAAGAAAGCTAATCAGATGCAAGACTGTTGCTATCCAAATGATGTCATGTTTCCAAAGAAATGGACAAA  
GTGGAAATATGACACTCAGTGTGAAAAAGAGGATTTGTTCCGCAATAACGATTTTAAATAATAACCGCTCCCGAAA  
AAGAAATTTGAGATATCAGAGTTATTTTCCACCCAGCCAGTTAGTGGCATCGCCATCACAAGAAAAATGCAAAAATCAA  
CTATCTCAAAGAACAGACATCGAAAGGTTGCTAAGTAAATAACCCGGTGTATCGATGTCAGCGTTTCAATTAATGTTA

ACAATAACGAAAGTCAACCATCCTCAGCAGCCGTTTTAGTTCATCAGCTCGCCAGAGGTTAACTTAGCACCATCGGTTCATT  
CAGATAAAAAACCTGGTTAAGAAATAGTGTGACGATCTCAAATAGAAAAATATAGTGTGTTATCAAGTTCATCCTCAGG  
ACAGGACGGGTAA  
>Cluster\_39365  
ATGCGTGGATTACGTCCGGCATTATCGACATTTCTCTTTCTGTTATTGATTACTGGCGCGTTTTACCCGCTGCTGACCAC  
CGCACTGGGGCAATGGTGGTTTTCCCTGGCAGGCCAACGGTTTCAATGATTCTTGAAGGTGATACGGCGCGCGTTTTGGCAT  
TAATCGGGCAAAATTTTACCGGCAACGGTATTTTCATGGTCGCCCGTCGGCAACAGCAGAAATGCCCTATAATTCACAG  
GCTTCTGGCGGGAGCAATCTGGCGGTGAGTAACCCGGAGCTGGATAAACAGATAGCCGCACGCGTTGCCGATTACGGGC  
TGCTAACCCGGATGCCAGCACGAACGTTCCGGTTGAACGGTGCAGCGCTCAGCAAGCGGGCTGGACAATAACATCACCC  
CGCAAGCGGGCGCTGGCAGATCCACGCGTGGCGAAAGCGGTAATCTCAGCGTTGAACAGCTCACGCAACTGATCGCA  
AAATACAGCCAACACCGCTGGTGAATATATCGGCCAGCCGGTGTCAACATGTCGAACTCAATCTGGCATTGGATAA  
GCTTGATGAATAA  
>Cluster\_55215  
ATGAATGCTATCTGGATTGCCGTTGCCGCGTGGAGCTGCTGGGCTGGCGTTTTGGCGCCATTCTGGGTTATGCCTCCCG  
CCGTTTTGCCGGTGGAAAGCAGATCCGGTCTGGAGAAATGACGAAATCTTACCGCAGAGCCAGTGTGGTTCAGTCCGGTT  
ATCCCGGCTGTCCGCTACCGGGAAGCCATCAGCTGTAACGGTGAATAAATCAACCGTTGCCGCCCAGGTGGCGAAGCT  
GTGATGCTAAATAATGCGGAGTTGCTTAATGTCGAGCCGAGCCGCTGGATGGCGAAGCGCAAGAGATAACCGCTGCGCG  
GATGGTGGCGTTATTGATGAAATAACTGTATTGGCTGCACTAAATGATTCAGCGGTGTCGGTAGACCCATCGTTG  
GCGTACCCGTCGATGCATACGGTAATGAGTGTCTCTGTACGGGCTGCAATTTATGTTGATCCGTGCCGACGCGAC  
TGCACTCGTTGCAACCGTGCAGAAACACCTGACTCTGAAATGGGATCTGAACACCATTCCCGTGGGTATCATTTCC  
CGTGGAACACCATGCTTAA  
>Cluster\_21702  
ATGCAGACTGAAGCACAACCGCACCGGACCCGGTCTCAATGCTGCCAGAGAGATTTTTTTCAGAAAAATGGATTTACAG  
TGCTTCGATGAAAGCCATCTGTAATCCTGCGCCATTAGTCCCGGACGCTCTATCACATTTTCATCTCCAAAGAACCT  
TGATTCAGGCGATTATCTTACAGGACCAGGAGAGGGCGCTGGCCGTTTTCCGGGAACCGATTGAAGGGATTCAATTCGTT  
GACTATATGGTCGAGTCTATTGTCTCTCACCATGAGGCTTTGGGCAACGGCGCTGGTGTGCAAAATTATGGCGGA  
AGGGATGCGTAACCCACAGGTGCGCCGATGCTTAAAAATAAGCATATGACGATCACGGAATTTGTTGCTCAGCGGATGC  
GTGATGCCAGCAAAAAGCGAGATATCACAGGCAATGACGTTACGTTTACTGCTGGATTCAGCTTAC  
GGTGTACTGGCCGATATCGAAGCGGAAGATCTGGCGGTGAAGCGTCTGTTGCTCAGGGATTACGCGCGATGATTGGCGG  
TATCTTAAACCGCATCCTGA  
>Cluster\_32670  
ATGAAGGCATTATCGCCAATCGCAGTCCCTTCTTCCCGCTGCTGTTGCAAGGTTGTGTTGCCGCTGCCGTAGTGGGTAC  
CGCTGCTGTAGGTACCAAGCCGCAACTGACCCACGAGTGTCCGACCCAGGTGGACGATGGTACCCGGAAGTGGCGG  
TGAACAGCCGATTTGTCGAAAGACGAACAAATTAAGAAAGAAGCGCGCATTAATGTAACGGCCTATCAGGGCAAAGTGC  
CTGGTTGGCGAGTCAACAAACGCTGAACCTTCCGGCTCGCGCAACAGATGCTATGGGCGTAGACGGTGCACCAAGT  
GTATAACGAGATTCGTCAGGGCCAGCCGATTGGTCTGGGCGAAGCGCTTAACGATACGTTGGATCACCAACAGGATCG  
CGCAGCTGTTAACAGCGACCTGGTGAATCTGCAACGTTGAAGTGACCACCAGAAACGGTGAAGTGTCTCTGATGGGG  
CTGGTGTGACGTAACGTTGAAGCGAAAGCGGCGCAGATATTGCCAGCCGGGTAAGCGCGTGAAGCGGGTAACTACGCGCT  
TACGTTTATATAAATAG  
>Cluster\_17892  
ATGCAAGTTGGCTATGTCGCGGTATCAACAAATGAACAAATACCGCGCTACAGCGGTGACGCGTGGAAACGGTCCGGATG  
TGAGCTAATTTTCGAGGATAAAATCAGCGGTAATCGACAAACAGGCCAAGGTTAAATCGCGCACTCAGGCAACTTAATG  
CCGGTGTACTCTCGTTGTTGCTGGAAGCTCGACAGGCTCGGCGTAGCATGCGCCATCTGTCTCTATGATGAAGAGCTT  
CGCCAGCGAGGGGTTAATTTTCAAGGCTGACCGACAGTATTGATACCTCAACCCCGATGGGGCGATTTTTCTTTTACAT  
CATGGGCGCTCTTGCAGAAATGGAACGCGAGTTAATCGTGAACGAAACCGCGCGGGCTGGATGCAGCCCGGCGACAAG  
GCAGGATCGGAGGTCGTAGGCGGAAGCTGACGCTGATGAATGGGCTCAGGCTGGCGGTTGATTGGCGCGGAGAAATCC  
CGACAGCGTGTGCACTGATTTTTGATGTTGGGCATATCGACGCTGTATAAAAAATTTCCGCGCACAAATCCCGTTGTGTC  
AGCCACCGCGCAACCCCTGA  
>Cluster\_36500  
ATGAAACGACTCATTGTAGGCATCAGCGGTGCCAGCGCGGATTTTATGGCGTGCCTTATTACAGGTTCTGCGCGATGT  
CACAGATATCGAAACGCATCTGGTGTAGTACGACAGGCGCGCAGACCTTATCCCTCGAAACGGATTTTTCTCTGCGCG  
AAGTGCAGGCATTAGCCGATGTCACGCAGATGCGCGCGATATTGCCGCCAGCATCTCTCCGTTCTTTCCAGACGCTG  
GGGATGGTGAATTTACCTGTTCAATCAAAACCTTTCCGCGATGTCATAGCTATACTGATGGCTTACTGACCCGCTGC  
GGCAGATGTTGCTGAAAGAGCGTCCCGGTTGGTGTCTGCGTGGTGAACACCATTGCACTTAGGCCATCTGCGTT  
TAATGACTCAGGCGCGGAAATCGGTGCGGTGATGCTCCGTTCCGCGTTTTTATCATCGCCCAACCTTCCGTTGAT  
GATGTGATAAATCAGACGGTTAATCGTGTCTTACCAGTTTGGCATAACCCCTCTGAGATCTCTTTGCCCGCTGGCA  
GGCGCATAA  
>Cluster\_21773  
ATGCTAAATAATAGAGATATGAATATTAATGAACCTTAAAGACTGTATTCACTATGAAGTAATCGGTAGCGAGCGTCTTT  
CTCCTGGCGAAAGCAATTTGTTCCGCAATAAAACATAGAAGGTTTCTGTTATTTTGGTGGCGCATAGCCAAATACC  
TTTTTGATAAAGGCGAATACTGTGGAAGATGTCGGGGAAAAATAGAAGCTTTCATCTTGATAAATAAATGTAACAGTC  
CCTTAACTGATAAATATAGGGAAGGCTTTGATATTTCTTATCTCAATAGTGTGTTATCGGTCAACAAGTAACCATCGG  
TGAAAAATGTTCAATAAAACAGGGTAACATTTGGGCTACGTGGTGAATTTAATGATATGGATATTGTTATAGGACATA  
ATGTGACCATTGGTTGTAATGCCACCATCTTGGTGGCAAGTGCATAGGAAACAAATGTCACAATAGGTGCTCATGCA  
TTGGTATTGCATGATATCTGATGATTCAACATTCATCACTAAATTTTCACTGAAAGTATCTGCTCGTCTCCCGCAC  
ATAA  
>Cluster\_43272  
ATGGCAACGTAATAGCAACGATTTTCTGCTGGTCTTAAATCATGTTAGACGGCGAACCTTACCGGGTTGAAGCGAG  
TGAATTCGTAACCCGGTAAAGGCCAGGATTTGCTCGGTTAAACTGCGTCTGCTGACCGGTAATCGCGTAGAAA  
AAACCTTCAAAATCTACTGATTTCCGCTGAAGGCTGATGTTGTCGATATGAACCTGACTTACCTGTACACACAGGCTGAG  
TTCTGGCACTTCAATGAACAACGAACTTTCCGAGCAGTGTCTGCTGATGCAAAAGCAATGGCGACAACGCTAAATGGTT  
GCTGGATCAGGACAGGTTATCGTAACCTGTGGAATGGTCAAGGATCTCCGTTACTCCGCGAACCTTCCGTTGAACCTG  
AAATCGTTGATACCGATCCGGGCTGAAAGGTGACACCGCAGTACTGGCGGCAACCGGCTACCCGTTCTACTGGCGCT  
GTGGTTAAAGTTCCGCTGTTGTCAGATCGGCGAAGTCAAAAGTGGATACCCGCTGGTGAATACGCTCTCCGCT  
GAAGTAA  
>Cluster\_39318  
ATGGCCAGACGACGACCATTTGACAAATCCCGAAGAGGTGAGCGCTGGCTGGAGCGGGCGTACCGACAGCGGCTT  
CAGCGGTTATGCCGAACCTGGAAGCGTGTGCTGAGAGGGCTTCTTATCAGCAAGTACGACCATTCATCGTACGGCC  
AGAAAATCGAACGCTGTTTTTACCGCATCCGCGCAGCCACCGAAGCGCGCGGATGCTGACCGAGGGAGCCGCGACGAT

CAGGACGCCCGTTCCGGAGCGGTGATTGCGCTGATCCAGACTGAATTGTTTGTAGTCCATTGTCCAGTTACAGGAGGCGGA  
GGACGGCGAGATTGATCCCGCAGGAGCGTGTGGCCTGCTATCGAAGGTGGCGAAGAACGTCGCCACGCTGTACAGCGCCA  
GCGTCAACCTGAAGAAGTTTCAGGCTGATATCCGTCGTGAGGCTCGTGAAGAGCTACAGCGCGAACAAGTGCAGGCTG  
GAGAAAGAAGCCAGGCGCAGGGCTGGGTGAAGATCAGGTGCGCTTCGCGCTGAGAAGATTTTGGGGATTTCGATGA  
>Cluster\_45341  
ATGAGTGTGAGGGACTGGCGCCAGGAAAACGCTTGTCCGAAAATCCGCCAGCAGCAGGGGCTTTCACAACGTCGTGCCG  
CGAACTCTCCGGGTGACTCACAGTGTATCAGTACGATAGAACAAAGTAAAGTCAGCCCTGCATCAGTACGCTGCAAA  
AGCTGTGTAAGGTGTATGGTCTGTCACTCTCGGAATTCCTTTCCGAGCCGAAAAACCTGATGAGCCGAGGTCGTCAAT  
AATCAGGACGACTTAATTGAGATGGGCAGTACGGGTGTGTCAATGAAGCTGGTTCATAACGGTAACCCGAATCGCACGCT  
GGCGATGATCTTTGAAACGTACCAGCCGGGCACAACCACTGGGAAAAGAAATTAAGCATCAGGGTGAGGAAATAGGCACAG  
TACTGGAAGGTGAAATTTCTGACGATTAATGGTCAGGATTACCACCTCGTCCGCGGCAAAAGTTATGCCATTAATACC  
GGCATCCCGCACAGTTTCAGTAATACGTCGGCAGGTATTTGCCGAATTATCAGCGCCCATACGCCACCACGTTTTAA  
>Cluster\_10643  
ATGTATGTGATTGGGCGTGACCGGGAGACCCCGGAATGGCTGGGCTGGGGCCATGCCTGGGCGCATGAAACCGCGGTGGT  
CAGACGGAAGAGTGAAGCATCCCGGTTTTCAGGATTTTGGGCCGTGGAGACATGACGATTGTCCGTCGGGTCCGGGATG  
ACACGGCGGAAGTGGCGGAGTATGTGCGTCTGATTCATGAGGCTGAGTTACTGGATCAATATCGGTATTGACCCGTCAGGT  
GTGGGGCAGACTTGAATTCAGTTCGCGGAAACCGGATGTCCTGATGAGAGTGTGGTGGGATAAGCCGAGGCTGAAAGCT  
GGGCGGGCCATCAAACACCGAGCGCAAACCTGGCTGAGGGAGTGTGGTGCATGGTGGTCAGCCACTGATGGCCTGGT  
GCCTTGGCAATGCCCGGGTGGAGCTAAAGGTAACGCCATTTCATACCAAACAGGCCAGCGGACGGGGAAAAATTGAC  
CCACTGATGGCGCTTTCATGCGGTGTCCCTGATGTCCCTGAATCCGGAACCGAAAAAGAAAGCGTATGAGGTTTTTTT  
CATATAA  
>Cluster\_21151  
ATGTCATTCAAAATACCCCTGAACGCTATGGTGTATATCTGCGGCCCTACATTTGGCTAAGCGCAATATTGTCTATGG  
CATGTTTGGCTTTAGGCTGTGGATGGTCAAGCTCAGCTCAGTTATTACGATGGCTGGTATCACAGGCACCGGAATGCATAAAA  
GCATCGGCATTTTGTAAATGATGGGGCTGGTTATTCGCGTCTGTGGCGTGTATATCTCCACCGCGGGTCCACTGCCG  
AGTTATTCGCCCATGACTCGTCTTGCAGCAAAAGCTGGACATCTCGCATTTGTACCTATTTGCTGTTCCGCATCGGCATCAG  
TGTTATCTGATCTCAACTGCCGATGGTAAACCGATCAGCGTTTTTGGCTGGTTTGGCTCCCGCGACCCCTCTCCGACG  
CTGGCGCACAGGCTGACTTTGCGCGTGCATTTTGGCTCGCTCGCGTGGAGCGTGTAGTACTGTCCGTTACCGGTCAGGA  
TTTATGGCCCTGAAGCATCATTTTCATCGATAAAGACGACACTCTGAAGCGCATGCTGGGAAAGTGTCTGACTATGG  
AGTATAA  
>Cluster\_36368  
ATGGTCAAATCTCAACCGATTTTGAATATATCTTGGCGGGATTCCCGCATGTCAGTAGCGGTTCTGCTTTCTGCATG  
TAGTGCAAAATACACCGCAAAGAATATGCATCCGAGACAGTGCAGTGGGTAGTGAAACATCATCACTGCAAGCTTCTC  
AGGATGAATTTGAAAACCTGGTTCGTAATGTGACGTAATAATCCGGAATTATGGATCAGTATGCTGACTGGAAGGCGTA  
CGTTATCGTCTGGCGCGGACACTAAAAAGGTATCGATTTGTTCTGGTTTCTGTTACAGCGTACATTTCCGTGAGCAATTTGG  
CTTAGAACCTTCCGCTTCCACTTACGAACAGCAGGAAATGGGCTAAATCTGTTTTCCCGAGTAATTTGCTTACCGGTGAT  
TAGTTCGTGTTCCGTGCGGTTCAACGGGACGCCATGTCGGTATTTATATCGGCAACAATCAGTTTGTCCATGCTTCCACC  
AGCAGTGGTGTATTTATTTCCAGCATGAATGAACCGTACTGGAAGAAGCGTTACAACGAAGCAGCCGGGTTCTCAGCCG  
CAGCTAA  
>Cluster\_38584  
ATGTTTATGTCATTCATTATTTATGTCATTTCTTGGCGGATTTGTGCTTCTGCTCCGTCAGGCTGGTCGGGACGGCA  
TCCACTTCTGCAATCGTTGCGGTACCGGGGATTCGGCCTGGCACAGCAGAGCTGTTGTTGTGTCAGCAGGCTATCATTTG  
TCAGTCCGGCCGATTTGATGACCGAAGCGGAAACAGTGCATTTCTGCGCCGCTGGACAGGCTGACTGATACCCGTTGCTGG  
CGTCTGTGTCGCGAGGTCGGGTGGCGATATTGTGAGAGTGGCCCCGACCGGAAGCCGGGACCGGGGAAATGGTGGCA  
GTTATTTCTGCTGTGATACAGTGGCACGTCGATGTGGTTATCACGGACCGCGCGGTGCGATCATTTGAGCGGTTGAGC  
TGGACGACCGCTCTCATCAGGCACCGAAACGTCAGCGGCTGACCTGCTGCTGGAAGAGGTGCTCAGACAGGCGGGTATT  
CCGCTGCTGCGTGGCGATAATGAACAGCAGCTGCGGAGCGCGTCAGGTTACACCTTTTCCGCACAACGTCGGGAGCCGC  
TGCATGA  
>Cluster\_10625  
ATGAAACATAAAGCCATAGAGAAAGCTATTGAGATTCTTGAAGTCAGCAAGCCTTAGCCAAGCGATGCGGAAAGGCCCA  
GTCAACAGTCTGCCGATTTGTTGAACTGCAAGAAACAAGATTTTACCAGAAATTTGCGGTTATTGGTTGAGCTGTGACG  
GAAAGATCCAAGCGTATGAATTTCCGCCAGACTACCAGAGCTTTTCCACATCCAAGCTTAGCGCGCACGGGGGAGGTG  
AAGGCTTGTATGTTCCAGAAATACGTTTACAGACAGAGATGCCATCTAG  
>Cluster\_46846  
ATGTCATTAGTAGGATATAATAGTAACATCATAATAACCATCGCGCTGATATCGTTGCTCTGTCATGCACCAGAGAAAA  
TTCATTAAAGGAGAATCAAAATAAAGAAGTGGCGAATCCAAGCGATAGTAGATGCAAGACAGTCTTTAGCGAACACC  
CGGAATATATATCATCAGCAGAACTGGAGCAAAAGCTATATCGGAAATTTGCACAGGTTACTACAGTTCCAGCTTATAAA  
GAGATGAGTATGATCAATGCTTATCATTTACAAGATCGTTAACTCATTA  
>Cluster\_4032  
ATGAGTCAAACATTTTATTTGTCTGCGCCACGGGTATGCCACATCCAGGCGGTAACAGAAAAAGTATGGAATATTG  
TAAAGAGCAGGCTTAAACGTCATTTATTTCCAAACCAACGTTGCTCTTTTACCTGGAATACTGATGGCGTAGCACTGG  
TAGTCTCAACGACTAAAGTGCCTTATGAACTCGACGTCGCGTAGTTAACGGCTGCGGATTAATACCGGATTTGGCGAA  
GAGAAAGTACTGGCGCAAAATGTTTCGACCCTTAAAAATTA  
>Cluster\_51538  
ATGAATATTTCAAACGGGCACAACGGTGTCTCAGGGCCACGCTTTGCTGAAAAACACAATAGCGGTGCTTTTGGCTATGG  
GTTGTGACAGGACGGTTTCGAAAAGCTGGACCGCGCCAGAAAGCCTGCGACATGTTGAGCTTCTCTTTTCTGAATACC  
CCTCGCAGGGCGGAACGCTGGATGCAGGATGTGCGCCAGGATCGCGCGCTGATGGAGTACCAGCGGCGAGATTTGACG  
GATATTGCCACAGTTGCGAACTGATTAAGGAGGCACCCAATGA  
>Cluster\_24678  
ATGGCAAAGCTCCCAAGAAAATAAATCAGGAAATTAAGGCGTGGATTACGCCAGTTGTAAGTTCTGCCGCACAAAA  
ACCGGCATCAGCATCAACAGTAACGCGTATAAATTTGACCATGACAGATACTGATCTGGATATAGCGCAGGAGTTCCAGA  
ACGAGTACGGCGCAAGCCGTGCTGAAGTTATCAGGACGGCACTGGCAGGTTGCGTCTGATTTGAGCAGAAAGAACGCCGT  
ATATTGTTTACGATATCAGAAAGAACGCCGAAAGCAGGAAGCAACCGTAAATAAATAG  
>Cluster\_3533  
ATGGATGCAGCAATTTAAGTCTTCTGGCGGAGTATTACCACGGCAGCCACAATCAATGGAATGTTTCCGTTGGATGA  
AAATACAGGAGTAATGACACCGAAAATGGGGGAAAGTCTAATATCAGAAATTTAGCCGGAATGCACTCGCTACTACAG  
CTCTGGCTGTTTAGGATCTGGTATCGCAATGGCATGCAACAATAATGAAGCTCCCAAGAAATTTAGGTTTAGGATATT  
GCTACCGGTGATTTAGGTTGGTGTACTGCGCTTGGCGGCGGATAGCGATGAAATATGCCTAA  
>Cluster\_38937



ATGAAAGTGAACGCCAGCGGGGATTGACGGCAGCGATGCGTTAATGGGGCCGAAGGTTGAGGCCAATGATATTAAGCA  
GGCCGCGGAGCAGTTTGGAGCGATTTTTTTACGCAACATGCTGAAAGAGATGCGTAAAACCAACGAGTTGTTTTGATTGCA  
AAGATAACCCGTTTAAACAGCGATTGCGTGCGCATGATGCAGGGTTTTATGACGATGAGTTGTGTAACACCCCTGGCGCAG  
CAGCAGCGGATTGGGATCGCGCGATGATTTGTGAAGCAGTTGTCGCCAGGCATAAATGA  
>Cluster\_51123  
ATGGCCTGTTCAACATTCAACCCCTCAACGTTACAGAAATACCAGCCAGACCCGTAAGATTTATGCTCACTGTGTGGCGG  
AAATCATGGCAAAGCCGCGATGATCGAATGTAAGGACAAAATCCACATTTGCCTTAATGCGTTGATGTCCTCGTTGATA  
TCAAAAATGAAAGAGAAGATAAAAAGCGTAGCGAGGCTATTGCGCCTTAGATTTCATGGATGCGGATGGGTATAGTGTCT  
GCGCAAAATTTATGACTTAGCCATTTCAAAGGCCAAAATACCAGGTGTGCGGAATCGAATAA  
>Cluster\_20291  
ATGAAAATCACCCGACTATGCCAGGCAATCACCCGACAGCCACAATGGCAGGCTCCAGTCAGCCGCGAAAAGCACGGC  
GACCACCGCCACGACGCTGAGCGCCGACGACATTACCAGCCGGATTGCTGTCTGCTCAGCAAAACGCTGAACGACCAGC  
AAGAGAGCGATATCGACAGCGATAAAGTGGCGCAAAATGCAGCCGATGCTGGACTCCGGCAGCCTGCAAGTGGACACCGAG  
CAGTTAGCCAGCGACATGCTGAGTTTTTCCAGAACTAA  
>Cluster\_23612  
ATGCTGATTAATATTTGGTCTGTTTGTAAATGCTCTGTGTTTGGGATTTTTAATCCTCAACCTGGTGCATCCCTTCCCAGC  
CCCGCTGAATATTTTCGTTAACGTGGCGCTGATTTTTTACCCTGCTGATGCATGGTATGACGCTGGCGCTATTGAAATCCA  
CTTTACCAGAAAGATGGCCCGCAGATGACCACCGCCGAAAAGGTGCGGATTTTCTTTTTCGGCGTGTGTAAGTGTGGTCT  
TGGCAGAAGAAAATTAAGTTAAAAAATAA  
>Cluster\_8035  
ATGTGCATAGGCGTTCCCGGCCAGATCCGCACCATTGACGGCAACCAGGCCAAAAGTTCGACGCTGCGGCATTCAGCGCGA  
TGTGATTTAACGTTAGTCGGCAGCTGCGATGAAAACGGTCAGCCGCGGTGGGCCAGTGGGTACTGGTACACGTTGGCT  
TTGCCATGAGCGTAATTAATGAAGCCGAAGCACGCGACTCTCGACGCTTACAAAACATGTTTGCAGTTGAGCCGGAT  
GTGGCGCGCTGTGTATGGCGAGGAAAAATAA  
>Cluster\_40736  
ATGACCATTTCTGGACTACATCACATACATCCGGGTTGTAGCGCGGAGAAAATCGCCGAGCACTGAACACCCCAACCAC  
AGCCATTAATGCTGAGTTACGCCGACTTTGGCGCGCGGCTTAGTTCATCAGAAACAAACCGCAGCACAGGTGGTCCGCGCTC  
GCAAAACAGGAGGCCAGGCTTCTTACCAGTAAACCCGATGCCGTTCCGGGTGTAGCAATCCACTTACTCACATGTTTAAAC  
CAGCTACTGAAGGAAGCCAGAGCATGA  
>Cluster\_28945  
ATGAAATGTAAACGCTGTAATGAAGTTATTTGAACCTCCAGCCAGCCTGGCAAAAAGACCCAGACCTTAACCTGCTGCA  
ATTTTTGCAAGAACTGGCGAAAAGAGTCAGGTTTTGACGGCGAACTGGCGGATTGACGGATGACATTCGATCTATCACC  
TGAAAATGCGTGATTCGCGGAAAGATGCGGTGATCCCGGTTTTGCAGAAAAGATTATGAAGAAGATTTCAAACGGCGCTA  
TTACGCGCACGTTGGCGTAATTAAGAGTAA  
>Cluster\_44721  
ATGGTGAAGAAAACCCAGCCAGCAAGCATTAAACAGAGCTGACGTTACGGTAGAACAAGCAGAGGCTCTGGCTCAGCGCCT  
TGCGGATAAACCATACCGCGCGCGGAAAACCCGAACAGAAAACAATGTCGGACGACAATCTCTCTGGTGAAGCA  
TGCTTGTCACAATAGAAGATCTGGCATTGAGGAATAAACGCAATGGTAAAGATCCAAAAAATGTAAGTCCATCGTCAGA  
GTAGCCCTTGAGCAATACTTAAAAACACTAACGTAA  
>Cluster\_21578  
ATGATAATGAATTTGAGACACAAGGATGCGTACTGTTTCTCTCGGCAAAACCTCCGGCGTTATACCGACGCAAGT  
CAAACGATACGCCACCGACTCGCTGTGATGATGACGATGCTGCTTGGTATATCGATATGCCCGGTTACCGACTAC  
ATCCGTTAAGCGGGGATCGCGATGGAATTTGGCGGATCTGTCTCGGCAACTGGCGAATCACATTTGAATTCGTCAT  
GGCGATGCATACATACTGGATTACGAGGACTATCACTGA  
>Cluster\_11072  
ATGAAGCAATGGCGAGATGATATTAACCGGTTCTTTGCAACTTACTTCATGATTAATTAATGAAACAGGAATGCTTGAATG  
GATFGATGGCGGAGAGGTTAAGACAAGAGATGACGCTTACGGTAAATCCAAATGATTCGTTATGGCACCCGTTGATTATTAG  
TGAAGTATGTCATCTGGTTTTTGCATCATGAAGTTCAGGCAACTAAAAAGATTATCTTCAGGGATGGTAAATAAAGAAAT  
TGCCACCCAAACAATTTGCTACAGGAGATTTAA  
>Cluster\_24987  
ATGTTGACCGTAGACGTTAGCCGCGACATTTGCTGCCAGCGGATTAAGTAGTATTTGCTGGTTTTCCGTTACTGGTGGT  
GCCAAGCCTGCTGGTCCGCTGCTGGTGAGCGTGTCCAGGCGGTGACGCGAATTAATGAACAGACCCGAGCTTTTTGC  
CAAGGCTGATTTGTCACGCTGGTGGTGTGGCGCTGTGCCGAAAATGGATGATTGTCCAGTTGCATGACCTGTGCATTCAC  
CTGTTTACCAGGCGCCCTGCTGGTTTCATTA  
>Cluster\_59193  
ATGAGTGATTCACAGCCGCTGCTGCTACTCAACGGAACCCGACGATTTGATGAGCCAAAGCGGCCCTGTACGCC  
TAAAGGCGACGGTGTGGTGCATTTACGCTGACAGCAGTGGACGTAAGGTAAGGGCGTTGCTGATTTACCGGTGTGCG  
ATCTCGATGATGCCGAATGACAAAACCTGACGCGGAACCTGAAGAAAATGCGGCTGCGCGGAGCAGTTAAAGATGGA  
GTTATTGAAATCCAGGCGATAAGCGTGATTTTAAATCACTACTTGAAGCGAAAGGGATGAAGTAAAACTCGCAGG  
CGTTAA  
>Cluster\_45579  
ATGATTAATAACAACGTTACTATTTTTTGTACTGCGCTGTGTGAAATTAATGGATGCTTTCTGCCCTGGTTGTGGTTAA  
ACGAAACGCCAGTATCTGGCTGTGCTTCCGGCGGGGATTTCACTGGCGCTGTTTGTCTGGTTGTAACTGGATCCAG  
CGCGGAGTGGCGGTTTTACGCGCTTATGGTGGCGTTTTATGCTGACGCGCTTGTGATGGCTGCGCGTTGTGGATGGC  
GTGAAACTGACTCTTTATGACTGGACGGGTGCGTTGATTGCGCTTGGCGCATGTTGATCATTTGTTGCGGGCTGGGGCG  
CACGTAG  
>Cluster\_35628  
ATGCTCCTGAAAGAGAGGAAATTAATCTCACCTCCGCTCGATGATGGTTTTGTACAGTGACGGCGATTTTCTGAAATT  
GCTGGCACAGGCGGTACAGAAAAGAACAGAGACATACCTGAACAGGAAGTTGTATGCCCGGAAGAGACGATTCGGGAAG  
ACGATCCTGACGGGATGCATCTGACTGATGACGTTCTGCTGGCAATGCTGATGCTGCTCAGTCATTTTATGAAAATCCG  
TCAACGATCACCGATGTGGAGAACTGGAAACGCCAATGAGTTTCAGATGGCTTGTGTCCTTACAGGATTTGTCGGCT  
ATGA  
>Cluster\_31456  
ATGAGACTTCTGATTTCTGACTCTTTCTTAATAACGCTGACAGGATGTACGGTTACTCGCCAGGCCATGTGAGCGAAGT  
TGACGCGCAACAGGATTTGTTCCGGTTGGTTTATGATCAGGCTTTTTTGCAGCATGCCGTACCGATCGTTATGTCAGTC  
GCGGGATCGCCGATCGCGCATGCGCAGCAGGCTATACCCACGCTATCCCTTTGGTTCAGCCAGTAGGCAACTGTAGC  
CTCTTTGCGGGTTCTTTATGTTTGAATACGGAATTCACTTTGTATATCAGTGCCATCATTCGGCTTCCCTGCTTTCT  
CTAA  
>Cluster\_37856

ATGAGCGATAAAATATTACCTGACTGACGACAGTTTTGACACGGATGTACTCAAAGCGGACGGGGCGATCCTCGTCA  
TTTTCTGGGAGAGTGGTGGCGTCCGTGCAAAATGATCGCCCGATTCTGGATGAAATCGCTGACGAAATATCAGGGCAAAC  
TGACCGTTGCAAACTGAACATCGATCAAAACCTGGCAGTGCGCCGAAATATGGCATCCGTGGTATCCCGACTCTGCTG  
CTGTTCAAACACGGTGAAGTGGCGCAACCAAAGTGGGTGACGTGTCTAAAGGTCAGTTGAAAGAGTTCTCGACGCTAA  
CCTGGCGTAA  
>Cluster\_39258  
GTGGATAGTAATAATCAAATGAACCTGTTTAAAGCAGAAAATCGTCAGAAGGTAAACCACAAATATTTACAACCTTACG  
AAATATTGATCTTACCTTCTGACTATTTTGAAGTGCATATGTCATAAAGGAATCGTTAATGCAGCGAAAGTGCTTAA  
TCTGCCCCCTCGGTGGAGCCCTGGTCTTCTGTCATCTATCGGGCGATTAAACCTCACTATCCACAGCTTTTACTG  
CGCAACCCGCCATCGGGCGGCGGAAACCAACTCAGTCAGTTTCAAACCGATCTCATCACCGATAACATGTTTGCAC  
AGGACCATAG  
>Cluster\_4646  
ATGCAGTTTGTGTCGGCTTGGCCGGGAGTTCGGCGGGCAGACTGGCGGGGATGCTGTGCGAAATGTCGGCCACTGA  
GCTTGGTGGTGGGGCGATTATTTCCGGATGCAGAGCTTCACTGATGTGTGGATGGATGCGCAGTTTGCCTCGCTGAAGG  
CATGTGATCGTGAGATGTGTCCGGCAGCAGTGTGCTGCGGTGGCTGATTTACGCCCTTTTACCGGAAGAGAACGGGATA  
CCGGAGCGAACGGACGAAGAACTGATGCATCTTGGGAAGGTATTTCCGGAGGTGTGCGTTATGGACCAGATAGCCAACC  
TGTCATTGA  
>Cluster\_48667  
ATGTTTGCAAATATCGACATCAACCAAAATCAAGAAATTAACCTCAAAAAGAGTTTGTATCAGTTTATGAGTTAGAAGGTTG  
GCTTCCACTCTGATCAATTCGGGTGGGTGCTTGGAGCTGATGACTCGTGTGATGACGCACTGCTTGTGATGTTGCGACA  
TGGGTGAAGATGCTGACTTTTATGGATATGAGCGAATTTTGTGTGGACACATACACCGCAGCCAGAAAGTACTACTTCA  
TGCGATAGCGAAAATGACGTGATTTCTAAGGTCATCTTACCCTCGTCCAGCATTTGGGACGTTCAGGAGTTTCTTGGGT  
ATTCGCGTAA  
>Cluster\_44493  
ATGGGTAAACGAACGACTGGCTGGACTTTGATCAACTGGCGGAAGAAAAAGTTTCGGACGCGCTAAAACCGCCATCTAT  
GTATAAAGTGATATAGTCAATGATGATACACGCCGATGGAGTTTGTATTGACGTGTACAAAAATCTTTTCTTATG  
ATGTAGAAGCTGCAACGCAATGATGCTCGCTGTTCACTACCAGGGGAAGGCCATTTGCGGAGTCTTTACCGCCGAGGTT  
GCAGAAACCAAAGTGGCGATGGTGAACAAGTACGCGAGGGAGAATGAGCATCCATTGCTGTGTACGCTAGAAAAAGCCTG  
A  
>Cluster\_66001  
ATGGCCCCGTGGTGTGTCAGGTGCATACCTGCAACGTGGGGGGTTTTTCTCTCCAGCAACCAATGCCACCAGGGAT  
TAAGCCCCCGCAACATTCGCGCTCACCGGAATCCTTCCGGCTTGACGTGATTCTACGACTGTTTTTCTGTTCCGGAATC  
CGTCTCATCTTCACTCTGTGCTGCGCATTCGCGAGAATATATCCGCTGCAACCGTTGCATTTTCTTACGAAAAGGC  
CGCAGAGTTTCACTCCTGCGGCCGTGTCGGGGCAAAATGCCATTACGGCAGCTGACGCCCACATGA  
>Cluster\_59466  
ATGACTCAAGACTATGAACGGTGTGAAAGGAGTCCGTAATTTGAGAATAAAGTTACGGTAACTGTAGCCTTACAGGA  
CAAAGAACGCTTTGACGGTGAATTTTTGACCTGGATGTCGCCATGGACCGTGTGAAGGAGTGCCTGGAGTTTATG  
AGGCAGCAGCCAGAAAGGAGCGTCCGGCAAGTCTTCCGGAAGTACGAGAAAAATGTCAGAAAAAGTTGAGTCTTATCTG  
CAGCATCAGTACTCCTTTAAGATTGAAAATCCTGCCAATAAGCAGGAGCTCCATCATAAAATATCTATGA  
>Cluster\_5176  
ATGCAGTTTAAAGTTTACACCTATAAAAGAGAGCCGTTATCGTCTGTTTGTGGATGTTTCAAGTGCATTTATGACAC  
GCCGGGGGACGGATGGTGTATCCCTTGGCAGTGCAGCCGCTGCTGTGACAAAAAGTCTCCCGTGAGCTTTACCCGGTGG  
TGATGTCGGGGATGAAAGCTGGCGCATGATGACCACCGATGATGACCAGTGTGCGGCTCCGTTATCGGGGAAGAAGTG  
GCTGATCTCAGTACCAGGAAAAATGACATCAAAAACGCCATTAACCTGATGTTCTGGGAATATAA  
>Cluster\_54910  
GTGAAATATTTACTCATTCTTACTGGTGTAGCGATCTTCTGATTTCCGTCACGTTGGGTGCGCAGAACGATCAACA  
GGTGACGTTTAAATFATCTGTTAGCGCAAGGGGAGTACCCTATTTCACATTTGCTGGCGGTATTGTTGCTGCGGGTTTG  
CTATCGGTTGGTTGATTTGTGGCTGTTCTGGCTGCGAGTTCGTTTCCCTGGCGCGGCTGAAAGTAAAATAAAGCGA  
CTGAAAAACAGCTTTACCCCGGACTGACGTGGCTGTAGTGGCGCACTCGTCAGCGCGAAGGAATAA  
>Cluster\_13944  
ATGGCTGCGAATGATAACAGGAATTTCTCACATCCTTATCTAATATAATGAGGTACAAAATAGATGCTGGACTTTCCGA  
ATCCTATACATGCTATTTTAAAGTAAGGAAAGATCAATAAGACCATACTGAAAAATCTAAATCCACTCCAACCTGCGG  
CTGATTGCATTGAAACAGTAAATAAAATAAAGATAAAGAAATAAAAAATCATTGATATAAATTCAGTTAATATTTGTACT  
GATGATAAAAATATAAAATGAGAGTAAATAGTACTATATGAGCCATTGATGATTTCTATAAAGTGCATCGATGAATGA  
>Cluster\_64473  
ATGGAAGCGCGCACCATCCAGTAACACTCTTTATTCATATGCAACTTCAACTTTCAGCCATGAAAAGTGCCTTATGCG  
GACGGTTGATATGCAAAAAATTTTCCAGACAGGTACATCTTATGAAAAGCCGCGAAATGAAATTACCGTCAACCAGC  
CCCAGCCAAATCAGATCATCGGTTTACAGGTTTACAGCTGCGTGAGCAAAAACAGAAAACAGCCGCGACGCCCAACAG  
CGTATTGCTGCTATGACAAAAATCCAGCAGTTACTTTGTCATCGAATACACCCAGATACCCTTGAATCCCTACTA  
A  
>Cluster\_39504  
ATGCTACATGATCAGTGGCAGAAATGCTGAGGAAAAAGGACTGTACCGGAGAGCAGCTGAACGATGGGCAAAAGTGTAT  
GGTACAGCTAAGTGTATGACCAGAAAAGAAAAGTGGCGGCACAGAAACGAGCAGAGTGTGCGTAAGGCGCGCCGACTC  
CGGTTTACCGGTGAACCTGACCGAAATAAAACAGCGGTCAACAGACTACATTTCTGAGTTGGGAATGGGATTTGAAGAG  
CGGCGGGTATTCGACGATATAAAGGGACAGGAGAACAAGTACGTCGGAACCGCGGTCAAAAAATGCTAA  
>Cluster\_33169  
GTGAGCCAAACAAGAAATAAAGAACTATTAGATAAAAAATAAGATCAGAAATGAGGCGATAAAAAAATAATCGCCGA  
ATTTGATGTCGTAAGAAAGAAAGCGTTAATGAGTTAAGTGAAGAAAGCAAAAACAGATCCTCAGGGCGCAGAAAAATTAACA  
AATTAATTTGAGGGTACACATATGGTGAAGAGCGAAAAATATAATGATTTCTGCCCTAAGTAAGATTGAAAACTAATAGAG  
ACACTGAGTCCAGCAAGATCAAAAAGCAATCAACAATGAATCAACGGAATGAAATAATAGAAAAATAGTATGA  
>Cluster\_67113  
ATGATGGTGAACATGAGCGAACTGAATAATATGCGAACATCTGATTTTTTCACTTCTGACTGAGAACGAAGCTTTCTTTTA  
TGTGGATCATAATAACTGCCTGTGTTCCACTATATCCGGAAAGTGTGATGACGTAACCGTGAACAGCTTGACATCTTA  
TTAGATATTTTCAAAAAATAAGGGGAAAGTTTACGCTGCAACCTTACTGGTTAAGTGAACATCAACAGTGA  
>Cluster\_53010  
ATGCACTATCGCAATGTGGTTTGTATTTGCTGTTCTTCTTATGCTATCGGCATGGGATGTGCGGCTTGATGAGCC  
GGAACATAATATTTACAGAAACAGGAAAGCGGTGGTGTATTTGCGCCCTTATGAAAAGACCAATCTTCTGATATA  
GAGATATTTATTTCCGGTGACGGATGAATCATGCCGGAACGACAGCAGACGGGCAAACTTTGAAGCCCTGA  
>Cluster\_41945

ATGTCTGGAGACATCCTACAACACCGGACGCACCAAAGCCACAGGGCGCGCTGGATAATATTTTAAAAATTACCGCTCG  
TGGCAGTACCATTTCGTACAGGAAGTACTGGCTGGCTTAAACGACCTTCTGGCCATGGTTTATTCCGTTATCGTCGTTCCGG  
GAATGCTGGGCAAAGCAGTTTTCTCCCGCAGCTGTGTTGTCTGGTCGCGGGCTTCGGCTCGTTGCTGA  
>Cluster\_5160  
ATGACAGTAAAGTATTTTTCACCTTCCGACGCGCTGTAAAGCCCCGCGTCATCCCCGTTTCAGACGCGAAGACATCCC  
CGCCCGGAAATTGACCCCGTGTGAAAGCCTTCGGGCGACACATAGCCCGAGTTTTTACCGGGGGCGTGGTGTACACA  
TCCCGCCATGAAAACACGGCCTTCGGGCGAGTGTCCGCACACTCGAACTGAAACGCGCTTTTAACTGA  
>Cluster\_55412  
ATGCGATTTCATCATTCGCACAGTTATGCTGATAGCACTGGTATGGATAGGATTATTACTCAGCGGATATGGCGTTTTGAT  
TGGAAAGCAAAGAGAATGCCGAGGATTAGGTTTTGCAATGTACCTATCTGACTGCCAGAGGCACAGCAGGTACAATACT  
TGCACACTAAAAGTGGTTTTCTTGGGGATAACAGATTGCCCACTGTTACGTAAGCAATATCGTGGTGCATAATGGTTAA  
>Cluster\_6016  
ATGGAGAATATCTATTTTCAGCCCAACGACCGTTGGTTTTATGTTTCTGAACAAGAGCGACCTGATGATGCGGTTGAAGT  
CTCGCCAGAGGTGGAGGCATTTTTGAGGGAGTGTGTTATCTGGGGAGCGGATACATTTAACGTAGAGCGAGATGCAGCAA  
CGGTGACATATCCAACAGAACTGCTTGAATATGTCACCACTACAACGCCCCGTTAAATATCTGCGGATTGA  
>Cluster\_8638  
ATGGCTTCACTTATTCAGGTGCGCGATTGCTGGCGTTACGGGCGGTATGGAAGCGGCCAGATAAGCCAGACATTGAA  
CACTCCACAGCCAATGATTAACGCCATGCTGCAACAACGGAAAGTATGGCAAAGCCGTGCGGATTCAGGAAGAACCCTG  
ACGGCTGCCTCTCTGGCAGTTGTAAGAGTGCCCGGAAGGAAAAGCCTGTCTGCGCGAGTGGTGGGCGCTGCGTTAA  
>Cluster\_7938  
ATGGCCGACGCAATGGATTTTGCACAACAACGTGAGCAGGAAGACCGCAACGGCATAATCAGTAATGCTCGCAATAAAAA  
AACGGGTATTTCTCGGCTTCACTGATTTGATTGCGATCTGCCAATCCCGTCAGCCCGTCCGCGCAATTCAGGTGTGC  
AGTGTCTGTCTACATGTCAAGAGATTGCCGAACGAAAGGCAACATTTACATCGAGGTTTCAATATGA  
>Cluster\_11450  
ATGAACAAAATTGCCAGCAGCGAAAAAAATCGGAGTTTCGCAAGCTGTACTAGCTTCGGCAATGGTTGGGGGCAATC  
CCGCATCGCAACTATGAGCTGAATATCCGTACTCCTGGCCTTAAACGATTGCCGAATGATCGTAGAAGCCCTCAGGAAGT  
TAGGGTGCCAATGTTCTTTGGATGATGTTTTCCCTCCATCCAGTAACAAAGCCGCTAA  
>Cluster\_34357  
ATGTCCGAAAACCTTTAACGAAAACCGATTATTTAATGCGTTTACGTCGTTGCCAGACAATTGACACGCTGGAGCGTGT  
TATCGAGAAAAATAAATACGAATATCAGATAAAGAACGCGGCTATTTTACTCAGCCGAGATCACCGCCTCGCCGAAT  
TGACCATGAATAAAGCTGACGACAAGATCCCTTCTCAGTATGGAAATTTATTCGCTAA  
>Cluster\_63617  
ATGGCACAAGTAATCTTTAATGAAGAGTGGATGGTTGAATACGGCCTGATGCTTCGCACTGGTCTGGGGGCCAGACAAAT  
TGAAGCATACCGCCAGAAGCTGTTGGGTGGAGGGCTCCACTTCAACGAGTATCTCCTTAGGTAAGCCAGACAGCAAAAC  
GAGGGATTATCTGGTACAACATATCCAAGATAAATCAGTTTATCAAAGACTCATGA  
>Cluster\_49281  
ATGGCTACCGTTACTGTTTACGTCGCGCTGTAATCCGATAAAGTTTTATCGACATGGTCTGAGTTGTTCCAGCATGA  
GCGTTTCCGTTGTCGTTTCAATGTAACAGTGTTCCTCCAGCTCACTTACTCTTATGAAGCCAGAAAACCCGCTTTAAGGAGC  
TGATCGTTGAAATGGCGCATAATGGCACAGGGGCGGTGATATCGCCAGAACACTGA  
>Cluster\_24601  
ATGATCCGGAATATTTTCAACGTTTACCAATCAGACTTTCGTTGTCCTCGTCCGGGTGAGTGGTACACCACACCTGC  
AGGGCATGTTCTACGTGTTAGCCTGGTTGACCGTGAATGTCAGAAAGTGTATTTGTGAACCGCTGGGCCGTAATACCGCG  
TCAGTATGCCGCTTATAGCCTTTCGCTCCGAAAAACATGAAGCATCTCGGAGGTGCTGCATGA  
>Cluster\_24659  
TTGAGCAGAAATATAATAAGGCCGCTCCGGGCAATAAAGTTTTACTGGTATTGGACGATGCTACTAATCACAAGCTCTT  
AGGTGCCCGGGAACGTAGTGGGAGAAACAAAACATAAGAGGTGCTAGTACAGTTACGTGATCATCTGAACCGTTTCCCTG  
ACTTTTATAATCTGGATGAATAAAGGAGGGAGCAGAGAAACTGATTTCGATAAATTAAGATCTTTAG  
>Cluster\_36285  
ATGGCAGACATCATTGATTCAGCATCAGAAATTGAAGAATTACAGCGCAACACAGCAATAAAAAATGCGCCGCTGAACCA  
CCAGGCTATATCTGCCATCATTGTTGTGAGTGTGGCGATCCATAGATGAGCGAAGACGCTGGCCGTTACAGGTTGTC  
GGACTTGTCAAGTTGCCAGCAAGATCTGGAGCTTATCCGCAAAACAAAGGGGGATTAAGTGA  
>Cluster\_29455  
ATGTTCCGACCGTCCGATAAACCATTGGCTTACTTCCGTACATTTCCCTGCGTATGATACAGAAATTGACGATTTCCGA  
CACAAAACCTGCTGTTGTCGCGTGCATGAAGCTACTTCCGGGTTGGTGGTACTGACTTGGTGTCTTAACGACGACG  
TTTTCAACTCTGAAAATCGCCTCTGTCACGGGATTTTTTACCCCCATAGAGCCGTCATATAA  
>Cluster\_66875  
ATGAAAGGTGACAGAGCCGCTATGTTACCGGTGGGAGAGTTTCGCGGAGATCGCCCGTCCGCGGCGGGACAGTGGT  
GATACTCAGCTGAACACCGATCTGGAAGACGCGCTGCGGGAGGTGTCCAAATCCCTCAAGTCGGCTTCTGCGTTGCG  
GACGAAAATGCCAGCTGTGACCCGGAACATCTGAAGGGCCGTTGACGCGGCGCGGACGGCGTGGCCACCCATCTGTTT  
GTGTCGGTACTCTGA  
>Cluster\_63627  
ATGAACCAGAAAACACTTGAAGATGTAATCAAAACTGTTCGCGTTTCTGTTGTGGCCGACGTTTGTGGTGTACGCCAAAG  
AGCAATCTACAAATGGATGGATAACGAAAATTCGCTCGCACAGAATATACCGCGAAAACAAATACGCTGAAAAAATCG  
CTCATGCATCAACCGGATTTATTTCTGCGGATGCAATTTTAACTATTGCGAGAAATAAACTACTACGAAAAGCTGATG  
GGAGTTGATTCATGA  
>Cluster\_25251  
ATGGCTCAAAGAAAATATAAGGAGTTTTCTGATGCTGTTGGTGGCTGATTTTTTTGTCATTCAACGCCACATCGAAA  
GATCCCTGCTGAAATCCATACCAGTATCACGAAAAGTGGACATCATTAATGCTGCCACTTCTCATCGGGATTTACGCT  
CCCCCTCCGGGAAACCGATACGAAGATTATCCGGGAAATACAGGAATACTCCCTCATTAGAGTGAATAAAACAGTACCG  
ACTGATTTTTAA  
>Cluster\_24799  
ATGACACAGGGCTGGCGGGAGGATAAATGCCCGTCTGTCCGCGCGGGAAAAGACCGCGCGCGGTGGCGCTGAAAGGGG  
CCGCGTCAACGCGCCGCTTTTCAATTACGCGGACGTTCTGATGGGGCTTCTGTCTTTTTCAGACCTGTCATTTGCTGT  
TACTGATGATGTTGTTGTTCTGCTACTGCTACTGCTACTGCTACTGCTACTGCTACTGCTACTGCTACTGCTACTGCTACT  
TTCTGCGCTCTGA  
>Cluster\_91  
ATGAAAATAATGTACAACCTTATGATGTTGCAGGTTATGCGATTGCATCAGCACTGGTGGCGCTTCTGGTGAAGAAGGC  
GATCATCACCGCAGAAGAGGGCCAGGCCATTTTACGCTCTCAGCAGAGATTTTAAAAGATGCGCCTGCAATAAGAACAA  
GCCGCGGAAAACATGCAACTGTCAAAGATCATGGAAGACATTTATCAGTTTCGTTAGACCAGATGCTGACGGATCTCAA

AAGCCTCAAACACATGAGCGTCAGTAA  
>Cluster\_66903  
ATGAGACCATCAATTATCTTCGCAACCGCCGAGTATGTAAAGCGTCTGCGTGAAGAGTGCCTGCGGGAGAATAAACCCCT  
GCACCGCCATACCCGCTTTCAGACGTCAGGAGCTGGCACAGGATGAGATTAACCCGGACGCTCTGGCGATGAGCGGACATA  
TTGCCAGACGCTGCAGTGAAGCAGAAGCGGTGCGTATCCCCGCCATGAAAGTCAGCGAATGGGGCCACCTGCTCCGCGCG  
CTTGAAATGAGCGGGTCTGCCACTGA  
>Cluster\_58426  
ATGCTGGCTATCTCAAGTAATCTATCAAAGATGATAATATTTATTTTTGCTATTATAATCATTGTTGTTTTATGCGTAAT  
TACTTATCTTTATTTATACAAAGATGAACTCTTTGTAAGTAAACATTACATAAACTATATGGCAATACCAGAAAATGATG  
GAGTTTTTACATGGCTCCAGATTTTTTCCGCACGTAGCGGTGGATATATCAATATACAAAATGTAGAAGATGATTAT  
TTTTTCTTATTTTTCCCTAA  
>Cluster\_30794  
ATGGCATTACTCGATTTCTTCTCTCGCGGAAGAAAAACAGCCAACATTGCAAAAAGAACGGTTGCAGATTATGTTGC  
TGAACGCCGTCGCAGCGATGCAGAACCGCATTTATCTGCCGCGAGTTGCGTAAAGATATTTCTTGAGGTCAATTTGTAATATG  
TACAAATTGATCCTGAGATGGTAACCGTACAGCTTGAGCAAAAAGATGGCGATATTTCTATTCTTGAGCTGAACGTGACC  
TTACCGAAGCAGAAGAGCTGAAATAA  
>Cluster\_29399  
ATGGATTCCAGAACAGTTCCAGGAACGGTCTAGGCTTGGCGCTGGCAGCGTGCCGGAAGCCGGGCGTTATTTCTGGAGGTC  
AGTGGACGCTGGATGGAAGCGGCAGAAGCATGGCGACGGGCTGCAGGTGTTGCCCCCCGGACAGACTGGCAGCAGTTTTGC  
CCGAAAAGGGCTGCACACTGCCACCGCGCTGCCGGGAAGGGGTAACGAAAAAGCAGCCTTCATTACTCCAGGGAT  
TCAGAAGGCTGA  
>Cluster\_28849  
ATGCACAATAAAACCACACCGGACGCGAGCCGCCGAAGCCATCAAAACGCTGATGCACGCGCTGATTGATATTTCTGTTAT  
CGCAGACAAGGCGCATAAGCAGCCACCGCAGCAACAGAAATATACCGGGGCTTTCGTTCTCACTCACTGCTCTTATGC  
AATTTAGTGTGATATGGCGCTGAATGAGGCAAAAGCCATCCTGATTGCTGATTGTGAAAATGGCGGGGCGATTATGCG  
AAATAA  
>Cluster\_26060  
ATGCGAATGGAAGTCAACCATAGCGAAAACCTTCTCCATTGCCAGCTGGGGCTATGACGCCCTGGCTGGCGAACTTCCCG  
CCGTATTCAGTATGCGTTTCTGATAATGAAGGCCAGTATCGGTACGTTATGCGCGCAGCAATAATTTATCGGTTATTG  
GCGCGACAAAAGAAGATAAACAGCGCATTAGCGAAATTTCTCCAGGAAACGTTGGGAAAGCGCCGATGACTGGTTTGTGACG  
GAATAA  
>Cluster\_64419  
ATGGAATTTATTTGCGTGGGTTATCGCTCTGTATATATGGTTAATGGCGAACCCGTTAATATCCATCATTTTTATACGTAAT  
ACCGTTAGTAATTCCTCTAATAAGGGGACATAAAAGCTGCGCAATGGTCTGTTATTTCTGAATATATATTCGGATGGATAT  
TTTTGATGTGGATCATTTCTGTTGCTGTGGTCCGCTCTCGGTGATAAAAAACCGAAAGAAGTTCAATCCAGCGAAGCTCCG  
TAA  
>Cluster\_4754  
ATGCCTGCGGGTTTACCTACTTTCAACTGGTAACCAGAAAACAACATGAAATCATTAAACCACTGAAACAGCGCTGGATAT  
CCTCATTTGCGTGGCTGCAGGACAATATCGACTGCGAATCGGGAATTTATCTTTGACAACGATGAGGATAAAACGGATTCGG  
CAGCACTGTTGCCCTGTATCGAACAGGCCCGGGAGGATGTCCGTACTCTTCGTATCTGCAGCTTCTGCACCAGAACC  
TAA  
>Cluster\_34022  
ATGCGCACACAGGTTGTATTGCAAAAATGGGGTAAATAGCATTGCCTTCGACTAACGGAAACCTTAAAACCGTTCCGGG  
TTTTTCAGTGGGTGATATCGTCAACGTTGAAATTAGTGAAGGGGCTTTTTGTAGAAAAGCCTGCACGCCGTCGCTGA  
GTGAAGCCGAATTTACTCGCCGGGATAACGCCAGTTACAGCGCACGCGGACGAAATGGCACCCCATTCATGAGGAGGTT  
GATTACTGA  
>Cluster\_14955  
ATGAGAAAATAAAGGTGATGTGACTTATTTTCTGAAAAGAGGTGACAAATACAGGCTTACAAAAGGATAAAAAGC  
CAGAACAAATGTTAAAATCGGGAACAAAACACGAAATCACATTTGATGATGCGGTACTGAATGAGAATGAATTACAAC  
ATATTGATTTTACGTGTCCGGATTAAGGAAAGACGATGAGACGCCAGTTAAGAAATTAATTAAGGAGTTTATGTTAAAT  
GAAACCCGATAA  
>Cluster\_18281  
ATGTGTATTTGGCGTTCCAGGCCAGGTGCTGGCTGTCGGTGAAGATATTTACCAGCTTGGCGAGTTGAAGTATGTGGTAT  
CAAGCGCAGCTGAATATCGCCCTGATTTGTGAAGGTAACCTTCCGATCTGCTGGCCAGTGGGTACTGGTACACGTCG  
GATTTGCCATGAGCATTATCGATGAAGCAAGCCAAAGCCACATTAGACGCACTGCGCCAAATGGATTACGACATTACC  
AGCGCGTGA  
>Cluster\_12489  
ATGCGTGTGAGAGCTGTATCGCTAAAGAAAAAATCAGCAAAATGCCAAAAGGTTCTGTTCTTCCCTGCAACAGGAAAT  
GCTGCGCCGTATCAGGAAACGATATGACAATGCAGAAATCATCATCAAAATCTGCCAGTAAATGATGGACTCACTATTTTAA  
GAGCCACAGATAAAGAGTCCGCACACAAATTTGTACAGGAAACACTTCAGGAAGCCAGGAAACAGCGGACGACTGGTTT  
ATTCAGTGA  
>Cluster\_26043  
ATGAATGCGTTATTTACTCCTTGGCGCACTTTCCAGTCCAGATAACCTTTAATACGACCCAGCAAGGGGATATGTACACCAT  
TATTCCTGAAGTCACTCTTACTCAATCTTGTCTGTGCAGAGTACAAAATTTGTTCCCTGCGCGAAGGCAGTTCCAGGGCAA  
GTCAGACGAAGCAAGAAAAGACCTCTCATTGCTGCTAATCAACCAATTTGCTTTGACGAAGTTGAGTTTAAATATTTCC  
CCGGAAGATCGGGTGAATAAGTTGTTACTGTTTCTGATGGACAGTCACTTCAATTTATCACAAATGGCCGCCCTCTTC  
AGGAAAGTCTTAA  
>Cluster\_21518  
ATGCACGGCTTTCCCGGGCAGGATACTGCTGTTGAAGAAGATGGGCATATTTGGTCATAGCGCTATCCTTACGGCTGCAA  
TATCCGCCCAATGCATTTAGTGGGAATGAACCGGTAGTGATGGTCCGTCGCGTGATTGGTGAGAACAGTATTTGTTGGCG  
CATCCGATTTGTGAAAGCCAAAGCAGAAATGCCTGCTAATTTATCTGATTTGTCAACAGCCCGCAAAGCGATTCGTGAA  
CTTAGTGACGAGGAGCTGGCATGAAAAAGCAGGGCAGCATGAGTATCAGGTGCTGGTGACAGCTTTGTAAGCAGACGTT  
GCATCAAGTCGAGCCATTTCCGGGAAGTTGAACCTGGCAGGCAGCGTCTGGTATTTGATGAGAACTTGCACCGGAAACAGT  
CAGTCCAGATGCTGAACGTTCTAATTTTTAG  
>Cluster\_23310  
ATGTTAAGTATTTATTTGACAGGGCATGGCGGATTTGCCAGCGCATGGAAAAAGCAATGAAGCAAAATTTCTCGGTGAGCA  
ATCGCAGTTTATCGCCATCGATTTTCCGGAACCTCAAGCACCAGCGCTGCTTACATCGAGCTTGAAGAGGCCATCGTCC  
AACTGGATTTGTGAAGACGGCATTGTTTTTCTGACGGATTTGCTGGGGCGCACCGCTTTCGCGTAGCTTCAACGCTGGCG  
ATGCAAAAACCGGCTGTGAAGTATCACCGGCACAAATTTGCAACTATTTACTGGAAATGGTGTGGAACCGGAGGGTT

AAGCGGTGAAGATTCCGTGTGCAGGCGTGGAGTGTGGACACCGTGGGCTAACCACTCTGGTGGACGAACTTGGTCGCT  
GCCATGAGGAATGTCCGGTCGAGGAAGGAATATGA  
>Cluster\_51777  
ATGCCCTGACCACCTGGCAATGGATGTGGAGGAGCAGTAGCAATCAGTGCGGGTGTCACAATAAACCGGACCCTGTTT  
CATGAGTAACAAAAGTCCCGCAGTTAATATTTGGACTGGCAGTAACCGTCTTTGGTGCCTTTCAGTTACTTGA  
CTGCTCCTTGTGTGTGCCGCATGACCACACTTTGGACAATTCATCATATCCAGATCCCTACCTTTGCTATCAGAATCATT  
GTAATGATACACAAAATATCAATATTGAGAACACTTTATTCATTTCAAGATCATCAATCTTCACTTCCAGATTCAATACT  
GGTTGTAACCCGTTATCCGGGCTGACGGTATGTGTGAGAGTCTGATGGTCCATCCGCATCATCTATCGGCTGTTTAA  
AACCACTGACCTTACAGGCATTTCCGTGTAG  
>Cluster\_39439  
ATGAAACAATGACGCTAATTGAGATGGATGGATTTCTGAAAGGTAATGTCATCCACGAGATTTAAAGGTTAACGAAAC  
AACCGCTGAGTATCTGGTGCCTAAATTTGCTGAAAGCGGAGGCAAGTGCAGCGGCTGGCAGCGGAGAATGCGGGGATGA  
AGTCTGGCCCAATGGACGAAATCAAGTTATCAACCGTGGAGGTCAGGCATATGCGTAAAAGATGGAGTCAAGTTAAT  
CCCATGTATGCAAGAGGGTGAATGACTATCGCGCAAAGTCTCTGCAATCAGACACCCAGCCACCGATGCTTTCTGGC  
TGATGTACGGGCACAGGGCTGGAGATGTTGCTGAGTGCATACACACTTGAACATCATGATCAGCAGTAGCCTTCG  
CCGCTGAGCTTCGAAAGGAGCAACAGTGA  
>Cluster\_21250  
ATGAGCAGAGTAACCGGATTTACTACGTTCTGGTCTATCTGCCTCATCGTCTGCCTTTTATGGGCTGTTAATCATTACCG  
TGATAACGCCATCGCCTACAAAGAGCAGCGCATAAAGCCACATCCATCATCGCTGATATGCAGAAGCGGCAACGTGATG  
TAGCAGAACTTGACGCCAGATACACAAAGGAGCTTGCTGATGCTAATGCGCATATCGAAAGTCTCCGTGCTGATGTTTCT  
GCTGGCGTAAGCGCTGCAAGTGCAGCGCACCTGTGCAAGTCAACGACCGGAGCCAGCGGATGGGCAATGGAGAAAC  
CCCAGACTTACAGCAGATGCTGAACTCAATTAATACCGTCTCCGAAGTGAATCGACAGGATAACCGCGCAGGTTAACT  
ACTTGCAGGATCATATTAGGACGCAATGCCTTCGATGA  
>Cluster\_16396  
ATGATCGAAACCCTGCTGGATTTTTCGGGGCTGGAGGACATCAGCCGCGATTTGCAGCTTCTGAGTGGTGGGAAAATAA  
CCGGGTGCTGCGTGGAGCAACCGTGCAGGCTGCAATGTTGCTGAAAGAAGAAGTGGTGTACCGGGCACCGGTACGCAGGG  
GAAAACCTGCGCGCAATGTGGTGTATCTTTCCCGGCGCTCCCGCGATGGCGGGATGGAATCCGGTGTCCATATCCGTGGT  
GTTAATCCGGCACCCGTTAACAGCGATAACACTATGAAGCGGATAACCCGCAATGCTTTTACTGGCGGTTGTGGGA  
AATGGGACTGTGAATATGCCACCGCACCGGTTTGTGCGCCCGGCTTTGATGTGCGCAGTGAACAGGCGCTCAGGTGG  
CGATTGCGCGGATGAACCGGCCATTGATGAGGTACTGAGACGATGA  
>Cluster\_40373  
GTGAAAAATACCAGCGATCTGTTCAATGAAATTAATCCATTGGGTGCTTAATCCATATGGTTAATCAGAAGAAAGATCG  
CCTGCTTAACGAGTATCTGTCTCCGCTGGATATTACCGCGGCACAGTTTAAGGTGCTCTGCTCTATCCGCTGCGCGGCGT  
GTATTACTCCGGTGAACGAAAAGTGTGTCTGTGCACTGGGGGCACTGACCCGTATGCTGGATCGCCTGGTCTGT  
AAAGGCTGGGTGAAAGTTGCCGAACCGAATGATAAGCGCGGCTACTGGTAAAACTTACCACAGCGCGCGGCAAT  
ATGTGAACAATGCCATCAATTAAGTTGGCAGGACTGCATCAAGAATTAACAAAAACCTGACGGCGGACGAAGTGGCA  
CACTGAGTATTTGCTTAAGAAAGTCTTCCGCTAA  
>Cluster\_66902  
ATGACTGTACGACGACGATTTCCGTTTTTTGCGCGCAGGGGTGTTCCGTACTGTTTACTGCCACCTGCACGGTGGACC  
GACCTGGAACGGTGCATCTGCTACACACTATGCCACCGGTGAGCAGGCGGAAAGCCCTGGTTGAACACGGTATATCC  
GTTGCTCCTCGTCCCGTTCGGACAAACCGCGCGGATACGCTTCCAGAACCCGTTGGAGCGGTGACGCTTATTTACGGA  
CGTGACAGTGGTTTCCGGATGGACAGTGAAGCGCGTGAAGTACCCTTCTTTCATGGAGGCCATCGCCACGAAAGCACTGA  
AGAGGTGCGCTTTCAATTAAGTGTTCATCGACGGCTACTGGAAGGTGATGTACCGCACGCGGAAAGGCTGGAAGATGAAAG  
CGCTCGCGCTGGCATTGCGCGCTGTCCGAAATGA  
>Cluster\_64809  
ATGAACGATTTTAAAAACGCTCCTCCCGCATCATCAGAACGCTTGCATCGTGGTACTGGCGGATGTGGTGGCTGGCA  
GTTGTCCGCGATGGTGAATTCATCGCTGGCTTCTGTTTCAGTACCTTCCATACACAGATCAGCACGGCGAACTGACTGTTT  
GCCTTAACCATCACGGTCTGATATTCAGAACGCCCTTACAGCTATGGTGAATGCATCATGCTGTTGAAAGCAGATTTG  
AAGCCTGTTTATGACACGTTAAATACCCATCTGAACAGGCCACTGACAGAGGACAAAAAATGCACTGGCGGTGTTTAT  
GTTACAGCGCGGTTCTGGTGTGTGCCCCCTCCCGTAATAATCAGCTGCTGAATGATGATGTGTACCGGTGCCGGGAT  
TAATGCCGGGTATGCTGTCAGGCTGTAA  
>Cluster\_15337  
GTGAAACCTGCTGCTGCTGCGCGGCTCGTGAGTGTGCCGTCCAGGCGCTTACTCCTGGCAGTTGTCCAGAACGACAT  
CGCTGATGTTGAATACCAGTTCCGCTGAACAGGATGTAAAAGACGTTGACGCTCCTGACTTCCGTTGAGCTGCTGGCCG  
GGGTGGCGCATAACCCGATACCTCGACGACTGATCAAGCGGCTACCTGCTCCGCTGCTGGAAGAACTGGGCGAGGTA  
GAAAAGCAGTACTGCGCATTTGCGCTGTACGAGCTGCTAAACGTAAGCATGTGCCATACAAAGTGGCATTAAACGAAGC  
GATCGAATGGCGAAATCGTTCCGCGCAGAAAGACGCCATAAGTTCGTCAACGGCGTACTCGATAAAGCAGCACCTGTGA  
TTCGCCCTAACAAAAAGTAA  
>Cluster\_35616  
ATGATGATTAATGTTAACGGGCGACCCGTGTCGACCGGGCTTTGCTCGACCTTCTGACGCGTGTGTGATTATTTCCGCT  
TTTTACTTGGCGGCTGCGGGCGGGATGATGATGCACCGCAGATATTTGGATGGTGGGGGATACCTGGCTGCTGTTT  
AGAATGATCGCACGGGTCGCTGTGATCTGCTGCGACGCAAGCTGACAAAATAAACCCCGCAGCTTCCAGAGAT  
TATGCCCGTGAGGCGCTGGCGTGGATGGTGGAGGATGGTGTGCTTCCCGTCTTATGATATTAACGCTGTCCGGACCGGGAC  
AGACTCGCTGGCACTTGCATTACCATTTACCAGCGTACGGCAATATTCACAACATTTATTTTATGATGATATCTGGAGTG  
AACTGAATGGCTGA  
>Cluster\_434  
ATGATACCGGATCGGAAAGAACCACAGGTTCTCTTTTTGAGCGTATGGAAGCCTCTTCCGCCAGAAACCGGCAGGGAGG  
CAGTATTCATTCGCTCAGCAATCCATTGCGCAGAACCTACGAAACATTTCTTAATACCCGCTCCGGTAGTTGCCGGGGT  
CGCCTGAGCTGGCATTGATGAACCGGAAGGGCTGAAACCTTCCGCAATCCATGAGTCCGGCCATCGAGCAATGTATA  
GACGCTATGAACCCCGGATCTCACACGCTGAAGTGCAGGACTGGTTTTCATCCGCTCCAGCCCTGGATATGAGGCT  
TCATATTACAGCTGGGTGACATTTAACGAAACGATGAGGTGCTTGAATTTGATATGGCACCGAATGGCAGCCAGCATT  
ACCGGGTGGACTGA  
>Cluster\_35497  
ATGAGTCAAAAGGCTGGCAAAATGCCCATGCAATGTATGAGAACGATGCCTGCGCCAAAGCGCTTGGCATCGACATTAT  
CTCAATGGATGAAGGCTTTGCTGTAGTGACCATGACCGTCACTGCACAAATGCTTAATGGTCAATAAAGTTGCCACGGCG  
GGCAGCTATTTTCACTGGCTGATGACTGCTTTTGCTACGCTTGAATAGCCAGGGGTTGGCAGCTGTCCGCTTCTGCTC  
ACGATGATTTTACGCTCAGGCTTTGCGGGAGACACTTAACTGCGACTGCGCAGGTACGTATCAGGCAAGCAAC  
CGGTGTTTACGACTCGAAATTTGTTAACCAACAACAAAAACGGTTGCGCTGTTTCCGGTAAATCTCCCGCATCGCGG  
GCACCATTACAGGAGAGCCTGA



GTTACGTACCGATGCATGGTCTGACCCGGTTCTGCGGCTTAAACGCCTGGGCTGTCCAGAACGTTCCGTCGTCGGTGC  
TCACTCTCACCCGGCGTTATGGCGCTCAGTCTCATTTATCTGGACGCCGGCGCAGAATGTCGCGGGGGCTCCCCACTTTC  
GACTGGTAA  
>Cluster\_10849  
ATGAGAGAGGTTAACTATGAGGCGCTTCGTGAGGCAGCACAAAATATCAGTCGACGCTGGCGTGGTATCAGGCTACCCC  
GGACAGCCCAAATGCTGAACGGGATTTGATGCGGCTCTTGTGCGTTTAAAGCGTCATATCCGTCATCGGGAAGCGGATA  
TTATFCGCTGGTTTCTGGATGGACTGGAAGAAGCAAAATCACAACCTCAACGAGCAGCGTGAGTATTACGAAGCGTTATC  
TCTGATGGGAGCAAGCGTATTGCTGAACTGGATGCGCGGGAAGTTCAATTACCGACTCGCTACGACCTTCGATATGGACA  
CCCGATAAATGCAGATGAGCGACATGTCATGATACCTAAAGAAAATGGCAGTTGGCTTTACCTGATTGACCTAGAACACG  
CATTACGCGTCGCTGGCATTCGCATCAAAGGAGAGGAGCATGGAATAAAAACAGAGGATGA  
>Cluster\_53103  
ATGAGAACCATCACACCCAGCAGAAGACTCGGCCAATTTTGGAAATGCTGGTTAAGACCTTCACCCACGCGAGTGAAGA  
CATCCCTTTATGTGGCCCTAAAGCGGATCAAGAGGAATACCATAATGCCTGAAACTGATCGAATTTTATGTCGATCGTG  
ACGATCTGGAACACCCCTTTATTTGAATTACTCTGCGTGGGATCCGCGAATATGAAAATAACGCTCCAGAATTTACGAT  
TTTAAATCAGAGATAGCATCGACCCCGTGGGCTAAAGTCTGTACGGATCCTTATGGATCAACATGGGCTTAAAGCGGC  
TGATTTGGCACAAGAACTGGCTCTAAATCTAATGTGAGTAATATTCTTAATGGTCGCGGGCGCTCACCGTTCCGCATA  
TCAAGCGCTTAAAGCGGCTTTTAAATCTCCCGGCTGAAGCGTTTATTGATAAGTAA  
>Cluster\_63904  
ATGATTTTTTGAAGCCCTTATCAGGCTCATGTATTAATGTTGCAGCAACAACCCGCTGGTGAACAGCCCGGAAAT  
GCTCCCGGATTACAGCCCTGGCTGCGCGCCGAACATACCTTCGCTCGACATATTGATTAGCGAATTCAAAAAGAGA  
CTGCATCCATTCATAACCTCAGGGTATCGACGCTGTTTCGCATTCCTGGTATCGCGCCATAGTGCTCTCAATAATTGAA  
GTGCGTCATCTCTTTTTCTGAACTGATTTCTTGTTCACACAGCTCTGGAATCAGCGAATATCCACCGGAAGTGAT  
CCAATACCCACCTCATGTTGACGAGCAGTTACAAGATGTGCCATACAACAGCGTGTGGATTGACTCCCTGCTCAGAGG  
CTGAATGGGATCCTCTCTGTGAAGAAATACCAAGATTGTATAATCCTCAATA  
>Cluster\_40593  
ATGTTTGTGTCACCTTGTGTCGCGGTTAGCTGCGCTGGGCTTTATCAGTCATAACACCACGTGTCGCGGTTTC  
AATTCGGTGTGATCATTTGTCGCGCTCACACCGTTAAGCACCTTTTTCCCGTGGATTGAAAAACAGGGGCTAAGTATCG  
GGATAATCATCTCGACGATTTGGCTTCCATCGCCAGCGGAGCAGCTACCGCCCTCAACCTGATTCATCCGTTT  
CTGAACTGGAATCGCTGGTGGCAATTCAGCTGCGGCTTATTGCTCTCGGCTGGGGGGGCGCGGCTGACGTTAATGGG  
CAGCCAGCCGCAACTGGTCCGCGGCTACTGGTGGGCACTGTTTATAGCGTGGCGCTGTTTCGCGGCTACCGGTTGGCC  
CGCTTATTGCCGCGGCTGCTGTTTCGCTGATTGTGGGAAACAGTAG  
>Cluster\_3306  
GTGCAGTTGCTTTCCCTTAGAACCATTTGACGGTGATACATTATATCTAAAATTCAGAAATGTTATCACCGAGGCTTTTT  
AGATACTCCAACATAAAGTTATGATTTTTTTGGAGATGTGGTTCTTTCAGTCGATATAATGGTCTCTTATCTTTGCC  
TGGAATATGGTTCTCCATATATAAAGGTTGCTGGTAAGTGGTTGGGAAAATGGGTTTAAAGGTAAGAACTCTCTGAA  
GGCTTTTTGTTTCGCGAGAGAAATATTCCGAAGCGGATGGTTTGGAAAAACAATATTTTAAATATATCCGAAACCA  
AATGGATGTTGGGACATGGAAGGAAATATATATCTATGATAATGCAAAAAGTCAGGAGAAAGAGCATACTCATCAG  
ATAATCTACCATCAAAAGATGGTTACATAATTTTTGCATTAATAAATAA  
>Cluster\_59732  
ATGACAATCACGGACCTGGTACTGATTCCTTTTCATCGCCGACTCCTGGCCTTCGCGATCTACGATCAGTTTCATCATGCC  
CCGCGTAACGGCCACCCCTGCTGGCAATTCCTTTCGTCGCGGCTGGTCGCATCGATAGCGTTATCTTCGTCGGATTGA  
TTGTCATTTCTATCTATAACAACGTCACGAATCATGGTGGCTTAAACAGCATGGTTATTAAGCGCACTGGCTCTGATG  
GGTTTTTATATTTCTGATCCGCGTTCGGAAGATCATCTTTAAACAATAAAGGTTTTTCTTCGCAAATGCTGGATTGA  
ATATAGCCGAATCAAAGCGATGAACTTGTGCGAAGATGGCGTGTGGTGTGCAATTAGAACAGCGCTCGGCTGTTAATCC  
GCGTTCGAAATATCGACGATCTGAAAAAATTTATAAGCTTCTCGTTTTCAACTCAATA  
>Cluster\_60611  
ATGACTATTTGGGAAATAAGCGAGAAAGCGATACATCGCACAGCGCATCGTCGCCTACAGACCAGTGGCACATCTA  
CTGCAATTCGCTGGTTACAGGGATCACGTTATCGAAAGCGCGCTGCATCACGCCATGAGCTGCGCGCCGGACAAAGAAC  
TCTGTTTTCTGCTTTTTTGAACATTTTCGCATTTACGTCACCCCTGGCGGATGGCTTAAACAGCCACACCATCGAGTATTAC  
GTCGAAACAAAAGATGGCGAAGCAAAACAGCGGATTCGCGAGCGCAACTGAGCATTTGACGGCATGATTGATGGCAAGGT  
CAACATCCGCGATCGCGAAGAGGTTCTGGAAACTATCTCGAAAAAATCGCTGGCGTTTACGACAGCTTATACACCGCTA  
TTGAAACAATGTGCCGTTGAATTTAAGCCAACGGTAAAGGACAAAGCCCGCAGCATGA  
>Cluster\_62395  
ATGCAAGAAGGGCAAAACCGTAAAACATCGTCCCTGAGTATTCTCGCCATCGCTGGGGTGAACCATATCAGGAGAAGCC  
GGCGAAGAGTATATGAATGAAGCCAGCTGGCGCACTTCCGTCGATTTCTGGAAGCATGGCGTAATCAACTAGGGATG  
AAGTCGATCGCACCGTTACACATATGCAGGATGAAGCAGCCAACCTCCCGACCCGGTAGACCGTGCAGCCAGGAAGAA  
GAGTTTCAGCTCGAATCGGTAACCGGATCGCGAGCGTAAGCTGATCAAAAAGATCGAGAAGACGCTGAAAAAGTGGAA  
AGACGAAGATTTCCGCTACTGCGAATCCTGCGGTTGTAATTTGGTATTCGCGCTGGAAGCGCGCCGACAGCCGATC  
TGTGCATCGACTGCAAAACGCTGGCTGAAATTCGCGAAAAACAGATGGCTGGCTAA  
>Cluster\_48791  
ATGAGTCAAGTTACTGAACAATCCGTACGTTTCCAGACCGCTTTGGCCTCTATTAAGCTCATTACAGGCTTCTGCCGTTTT  
GGATTTAACCGAAGATGATTTTCGATTTTCTGACGAGTAACAAGTTGGATTGCTACTGACCGCTCTCGTGTCTGTCGCT  
CGCTTGAGGCTTGGCTTTATGGTACGCTGGACTTTGTAGGATACCCCTCGCTTTCTGCTCCTGTTGAGTTTATTGCTGCC  
GTCATTGCTTATTATGTTTATCCCGTCAACATTCAAACGGCCTGTCTCATCATGGAAGCGCTGAATTTACGGAAAACAT  
TATTAATGGCGCTCGAGCGTCCGGTTAAAGCCGCTGAATTTGCTCGGTTTACCTTGGCTGTACGCGCAGGAAACACTGACG  
TTCTTACTGACGCGAAGAAAACGTCGCTCAAAAATTAACGTGCAAGAGGATGATGATA  
>Cluster\_61545  
ATGCCGGATAGCCGCAAAAGCCAGACGATTTGCCGACCCAGGATGCGAGCCGGAGCGCACATCACTGGCGTGGTTTCGTAC  
CATGCTGGGCTACGGCGCGTTGATGGCGTTGGCTATCAAAACAACTGGCACCAGGCGGGCATGTTATCTGGATTTCGA  
TTGGCATTCTCGCCATCGTGGCGCTGATCCTCGGCACTACACCCGTAATCGCAATTTAATGGATGTCACGAATAGCGAT  
TTTTCCAAATTTACGTAAGTCCGTTGACAAATTTTTGATCTCCCTCGGCTGTTATCTCAGCAATACTGTTGCTGTAAC  
GCATATACATCAACTTATCGTATTTATTGAGAGAGTGCATGA  
>Cluster\_27638  
ATGCGCATAAATGTTTTTCGAAATGGAAGGGTTTTCTCGCGGAAATGTGTACCGAAGATCTGAAAAGTGAACGAAACAAA  
TGCTGAGTACCTGGTACGTAATTCGACGCGCTTGAAGCTAAATGTGCGGCACGGAAGCAAAATAATACCAGTGTCTAG  
CTGAACTGCCACCAGCAAAATGAAAGTGTCTGTTATTTGATGCTAACGGAGAAGGCTGGCTGATTGGCTGGCGTTCTCTC  
TGGTACACTGGGGACAAAAGAAACCGGAGAAATGGCAGATTTGACGATTTGACGTTGACGTTGACGTTGACGTTGACGTT  
TCACTGGGCGAATGCGGAAAGCACCAGACTAAGAATGA  
>Cluster\_6365

GTGGCAGAAGAACTATATATTCAGCAAAATTTATTCGTCGTGAGATCCCCCTCCGATATCGTCTACCAGGATGATCTGGTAA  
GGCGTTTTCCGATATTTCCGCCGCAAGCGCAACGCATATTTCTGATCATTCGGAATATCCTCATTCGACTGTGAACGACG  
TCTCAGCTGAGCATGAGCAGGCGCTGGGACGCATGATCACCGTAGCGGCAAAATTTGCTGAGCAAGAAGTATTCGCCAA  
GATGGCTATCGTCTGATCATGAATACCAACCGCATGGCGGACAGAGGTTTACCACATCCATATGCACCTTGTGGGTGG  
CCGTCCGCTGGACCAATGCTGGCGCATAAAGTCTGTAA  
>Cluster\_21009  
GTGGTTTTTACTGAGCGCGGTGTACACGGTGAACATATGGCGGGAAGTTTGTGCTTATGATATGCAGCATGGCTAAA  
CCCCGATTTAAATATGCAGCCTATAAAGTCTTGGATGACTACTTCACCGGAGAACTTCAGCATCGCAACAGCTTAAGTG  
CGCAGCTCAATATGAAGTGTGATGAGTTTGTATCAGAAAAAGATATGGTGAAGCTTCTGTGGACAAGGGCTGGCGGCATGG  
CGCTATACGAAGCCAGTGTGGTGTGATGATTAACCTCCCTGGCTAACAGCTGCAGATAACGATCCCCGGCTGTCCGG  
TATTTGCCGGTATGAAATACCGGAAGGCGCGGTACTGA  
>Cluster\_62549  
ATGAAAACCTCTACCTGCTACAATTTCCGCGCGCGGCAACCCGGCCTGTCGCCAGTGGGTGTCTGGCAAACTTTACTGAC  
ACGCCCTGATGGAACAGCACTATGGTCTGACACTGAACGATACGCCGTTTCACTGATGAAACCGTTATAAAGGAACATATCG  
ATGCCGGTATCACCTCTCGCTAATGCCATTAACCTTCTGGTAGAAGAAATATGAGTTAGTTCGATTTGATCGCAATGGATTT  
ACCTCTCAGGTACAAGCACCATAATTTGACTGCGACAGACATTTTCATGCCAGAAGAGCTTGGCGACTGATGACTCGTTT  
TTCTTACCAGGAAAGTAAAGTAAATAGTTTCTTAGCCGATCGCGGTAG  
>Cluster\_26938  
ATGAATAACCACGCTACTGTGCAATCTTCCGCGCGGTTTCTGTGCGCCACTGCTGCAGGTGAGCGGCGCACTCATCGC  
CATTATTGCCCTGATCCTCGCTGTGCTGGCTGGTAAAACGGCTGGGATTTGCCCGAAGCAGCTGGCGTTAACGGTCT  
TGAAAAATTAGTGGCCAGTGTCTCGCTGGGCGCGCTGAACGGGTCGTGGTGGTTCGATGTGGAAGATGCACGGCTGGTGTCT  
GGCGTTACCGCAGGGCAAACTCAATCTGCTGCATAAACTTCCCCCTTACAGCACCACGGAAGAGATACCGCAGACCGATTT  
TCAGTCGGTATGAAAAAATTTGCTTAAAGCTAGCGGGAGATCCCTGA  
>Cluster\_28715  
ATGAATGAACAATTTTGCAAAAGTCTTGCACATACGTTTGGGATAACATTGGAAGAGCAAACTGACGCCCTCGCTTTTCA  
CGATAACGATGGTGTGATGAGTGGATACCTTGTGAGTGCACCTCAATCAGAAAAATTTGTTTTTTTATGTTTACCTATCAACCA  
ACGAACAGATCAAAATCAATAAAATATTTAGAAAATAAACAACACCGGAGAAATGCTTGGTATGTTTTTCTTATCATAAAA  
GACGATAAAAATTTCTTAAACATTCGATTCGCCAAAAATGAAAAATAGATATAACGGAATTCACCTAATTTGATGGAAAACGG  
ATATCTACTAAAAAAGAAATAATAAACTACTTTCACTTTGA  
>Cluster\_11625  
ATGCATAACCTGTCAATTTCTGACCTTAACAGCATTCACTTTGACGAGAAATTTACCGGGCAGTTGCTGGTCAATGTGGA  
GAACGGGGCATAAGTGCCTAATTTACCTGCGGATGGTGAATTTGCCGGAAGCGTTGAAGCATTTGCTGGAACCTGGCGG  
AACGTGCGCGACTGATTAAGCCGTCACGAGCCATCACGATGATGATGCTATTTACCGGATGATGGTGTGACTACTAC  
GAAAACGGCGTCGAGGTATCCTGCGAACGGCTGCGTGTGATGATTGCTGTTTCCGGCACACTGCCGGAATTTATCGAGTTGCT  
GACCAGTTGCGGTTATCAGGTCATTCAGGGGGTAAACATGCGTGA  
>Cluster\_26740  
ATGCTGCAATCCACAGAAATTTATTCATACGCGCTCAACGCCCTTCTGGAATAAACAACCTGCGCTGCCGGAATATTT  
CGAACGTCATCTTTGATAAAGGAACGCGCCGGGGTTTTACCACGCTTTCCTGTTATGATGGGGCGGTCAAAATATCTCG  
GCTACGCTGATGAACAGTGCAGAGCTGATCAGGTGATCCTTATCGAAGCGGGCAGTTTGGCGTGTCCCTCCAGAA  
AAGTGGCAACAACATTTGAAGCCATGACTGACGATACTTATTTCAACATTTGACTTCTTCTGTTGCTTCTGAAAGTCTGATGGA  
AGGCGCGCAACAACGGAAGTCAATTCATAACGGGAAATGA  
>Cluster\_26273  
ATGAAAAATTCCTCAATAACCTCTTGTGTGTCAGCTTGTGCGAGAAATCCCGGCCAATACCTTTGCAGTTGTTCTAGAGAG  
TGACAGTATGTCAACATCTGGTGGGGAGTTTCCATCCCAAATGGTTCAACAGTTTTTGTGATCCCGATCGAACCGTAC  
AACCAGGAAATATTTGTCCTTGCCTTACCCAAAGGGACCAACACCTGTCATTTCGTAACCTGGAGATAGAAGGCGCGAT  
ATTTCTTTTAGTCCCACGAAATCCTCGCTACCCTCAATTTATGCTGGATGATCTATCTTGCATATTTGGCGTATGCTTTAA  
AATTCACAAGATATTTAA  
>Cluster\_14928  
ATGGCTGATCATTTTGAGTACGAGGAAGATTTTGAACAGATGATTTTGTATATCAAAAAAACGAGAGTGAGATTTATGA  
TGAAAATGACGATCAGATGATTAATAGTTTGAAGACTTGCCTGTAAAAAATGAGTTTGTCTTGGTAAGAAAATAATGA  
ATCTATATGAAAATAGACGAACCTCTGTGCAAAAAGAATAATATCTCTGCTTCTGAAATCGAGAAAAATATAAAAAACCT  
GTAATGGCGCGCTAACTGGCTATGGCGAACTTGTGAAAGTGGATGATAAATTTGGCGTAGAAATTCATCTTGGTTATC  
AGGAATAATAATGTCAAAATAG  
>Cluster\_40818  
ATGGGAACCACTCAGAGGTCATCTGATCACAAACCGTAACGGCAGGGGAGCAGTGGCACAGCAGCGTTTTGTGCGGGG  
AGATAATACCCCTGTAAAGCCGGTGGCGAGCGCTCGGGGTTGCCGAAGTGGATGCTGTTACCGGCGACAGCAGCGCGG  
TGAGCGTTTCTGGGATTAATGCTGTGCGAGGCGGGGCGCTGTGAGCCGTGGTGTGGCTGTTTACGTCAGATGCTCAGGCC  
AGAGCCGTGCCGAGTCCGGCGACGGTAATCCTGTGGTATTGCACTTGTGAAAGCAGGGGTTGAAGGCGACGTCATTCG  
TATCCTGCCGCGGGTGTGA  
>Cluster\_25219  
ATGAAGCTGGTGACCGTGATAATCAAACCATTCAGCTGGAAGACGTTTCGTGAAAGCGTTATCTTCCATTGGTATTCAGGG  
CCTGACCGTCAACCGAAGTAAAAGTTTCCGGCGTCAGAAAAGGCGATGCCGAGCTGTACCGGGGGCGGAATACAGCGTCA  
ACTTCTGCAAAAAGTAAAAATTTGATGTGGCGATTGCTGATGACCAACTCGATGAAAGTATCGATATCGTCAGCAAAGCG  
GCTTACACCGGAAAAATTTGGCGACGGCAAAATCTTCTGCTGATGAAATGCAACGCGTCATTCGATTTCTGATACCGCGAAGC  
CGACGAAGCGCGCTGTAA  
>Cluster\_119  
TTGATCCCATTACCATCAGGGACAAGATCTGGCTGGTGTGCTGGCATACCGATATGAGAAACGGCTTCAACGGCCTGGC  
GGCAAAGTGCAGACGACGCTGAAAGACGATCCGATGTGAGTCACTTTTATCTTCCGTGGGCGTAATGGCAGTCAAG  
TAAAGTCTCTGGTCTACCGCGGATGGACTGTGCTGCTGACCAACGGCTGGAGCGCGGCGCTTCCGCTGGCCGCTCA  
GCCCGGATGGCAAGTGTTCCTCACCCGACAGCTGGCGATGCTGTGGAAGGATGCTGACTGGCGGCGAGCTAAAAG  
ACTGCTTACGTCCTGACTATGTTGTAA  
>Cluster\_40101  
ATGCAAAAAATCGTATCGTTGCCAATGGCGCACCTTACGGGAGCGAATCCTTGTTTAACAGCTTGGCGCTGGCCATTGC  
GTTACGAGAGCAGGAGAACAATCTGGATCTGCGTCTGTTCTTGTGATGCTGATGCGGTCACAGCCGGTTGGCGGGGCAAA  
AACAGGGGAAGGCTACAACATTCAGCAATGCTGGAGATCCTTACCGCTCAGAAATGTACCGGTGAAATTTGTGCAAAAC  
TGTACCGACGGGCGGGGATTTAGTACACTTCTCTGATGATGGGGTGAAGTTCGGTACTTCTTGTGAACTGGCGCAATG  
GACGCTGTACGCGGATAAAGTGTCAATTTTAA  
>Cluster\_59049  
ATGAACAGTTTTTATGTTTACGTTGCTCTATTTGAAGACACAGCCGAACAGACCAAAAAATTTGAAGAATTAATGCTTAA



CTTTCTGTACCAGAAAACAGTTAAAGAGTCTGACGATAGCTGCTGCAGACTGATTCAGAGGGATATATCCTCAAAGTA  
CAATGAACTGCCAAACAAATCCTTGATCAAACATTTTCAATTGCTAACAGTGCCGGTGTGACGCAAAATATATTGCTCT  
AAATTTGAAACAAAGCGCATGCTTACTCCGCTGCTTCCCTTAGTTGGTAAACGATTCGTTTCATACGATCTTACGCTAA  
GCCATCAAGCTCGATTCTAA  
>Cluster\_11725  
ATGAGCGATTTTGACATTGTGAGTTCAATTGACTGGCATGATGGGGTTTTGTTAGAAGTAAAAACGACATTCAAAAGATC  
TCATTTTAAACATGACGTTATTTATGACATTTATAAAAAGTGAAGATATTAGGGAAAAATGATAGTTGAATTTTCTGATA  
TAGATGATTTAGTGTTCGCTATGGATTCTGCTGAGTTAATCGATAATCACAAGTCAGGTAATATAAGTAAATGGGTATATA  
AAGAAAATAAAAACAAAAGGATATATAAATTTTCCCTTATTTTTCTGATGGCTTATTAAGCATGACATTTAAAAATTT  
ACAATTAATAAAACCATTAGAGTAA  
>Cluster\_21284  
GTGGAAAAAACCACAGTCTTGAAACCACAGATAAAAACGAACATTGTTACCTATGGGGAAAAATGCAGTAGGAGTTCTTGC  
ATGTTCAAGTCCCTGGAGAGTCTCGAACATGTGTGATGCTGTAGATGATGAAGTTTGTGATTC AACAGTTACGAAGTTA  
TTAGCCGTGCTGATTTAAAAATGAATGGTGGTCCATAAACATAATGGTTTTAATAGCTATGGTCTTATGCTAATGGG  
AAAAAAGCATATATAAATTTAGATTATGTGGCCTTGAACCTGTTGGCTGATGGAAGTTATGCGATTGCTATTCGACAAGG  
TAACATTGATATAAAAAGTCTATTACAACAAATGGCACTAAAGCCCCATTGCAAAAATATACAATGGTAGAGAGTGA  
>Cluster\_54100  
ATGCAAACCAAAATCAAAGTTCGTGGATATCATCTCGAGCTTTACCAGCAGTCAACAACGCCCGCTACCTTGAATTTCT  
CGAAGAAGCCCGCTGGGATGGGTTGGAAAATAGCGACAGTTTTTCACTGGATGACGGCCATAACATCGCCTTCTCGTGG  
TCAATATCAATATTAACATATCGTCGCCCAGCGGATTTAAGTACCTGTTAAGTAACTATTTACAGTCACTTGCAGAAATTAAC  
GGTAAAGCGGCATCTTAAGCCAGGTCATTACACTGGAGCCGGAAGGGCAGGTTGGTAGCGGATGCGCTTATTACGTTTTGT  
TTGTATTGATCTTAAACGCAGAAAGCATTAGCTCTGGAAGGGAAATTCGCGAAAAGCTGGAGCAGATGTTAAGTAA  
>Cluster\_48619  
ATGCTGAACGAAAAACGTTCTATACAAACAATTCGCGATTGCACGAGTGTATCGCAACTCATGTCTGAATAAGCGCAA  
ACTTGAGGTGCGTAAACTTAAACAACGATGCGACTGCGCCAAAAGACACTCGCTTCATCGTAACTTTCAAAGACGATGTTG  
AGAATGCTGGTGCAGTGTAAAACCGTTGGCTGAAGCGATTTTCTGAAAGATCGTGTTCGTTTTCATTGTGAAGCCAGCA  
AAACAATACCCCTGAATTAGCAGCGTTTAGTGACCAATTTCTGAAATTTATTGAGAGTGAATTCGCGCCTTCTTAATAC  
TCATGGTAGCATTGTCAGCAATACAACCTGCTGATGGTACTGCTTAAGATGGCACCTACACTAG  
>Cluster\_48743  
ATGAAGAACAATTTGAGAGAAGGAAAGAGTAGTTTTTGTATGATGATGAATGTATGTTCATTACCTCAGGATGGAA  
AGCAATTACACCTAAAAAAAACAATGCCACATCGGAGATAATAGTGTTCATTCCACCCAAAGGCTTCTTATCACATTA  
TATTAATAATATAAATAAACAACAACATTCGCAATTTGTTTTTTTCAGACCAACATCCCGCGAACCAAGATATTATATATTC  
CAAAAATGCTTTTTTCTCACATGTGATTAATCATACAATAGCTTTAGTTGATGTTCTTAATAAGAAAAGTTACGCAAGCAA  
TGTATATAAATTTTTGATAACGATGGAAGGAGCGGTGATATTCTTTTGAATCAAAAAGAGCACCATAG  
>Cluster\_37359  
ATGCAAGCGCGAGTGAAGTGGGTCGAAGGGTTAACTTTTTCTGGCGAATCCGCTCTGGTCATCAGATTTTAAATGGACGG  
CAACTCAGCGATAAAGCACCAGTCCGATGGAATGGTGTGATGGCGCGGGTGGTTGCAGTGCATCGATGTGGTTTT  
CGATCCTGCAAAAAGGGCTCAGGATGTGGTCGATTTGAAAGTAAAATGACCTCTGAAAGCGCGAAGAGGCACCACCG  
CTGTTTACGCACATTAATCTGCAATTTTATCGTCAACCGTCCGACCTGAAAGACGCAGCGGTTGCGCGTGGGTTGATCT  
CTCTGCCGAGAAATATTGTTCACTGAGTGGTGTGATGCTGGAAGAAAACCGGTTGAATATTACTCACTCGTATGAAGTGGTTGCGG  
CGTGA  
>Cluster\_17062  
ATGTTAAAGCGTTATTTAGTACTCTCGGTAGCAACGGCTGCATTTTCATTACCTTCTTTAGTCTATGCTGCACAACAAAA  
CATTTCTTAGCGTGCATATTTTGAACCAGCAAAACAGGAAACCCGCTGCGGACGTGGCAGTCACTCTTGAAGAAAGCGG  
ATAACGGCTGGTTACAACCTAAATACCGCAAAAACAGATAAGGATGGACGAATTAAGGCCTGTGGCCGAGCAAACTGCA  
ACTACGGGCGATTACCGTGTGATTTTAAACCCGGGACTATTTCAAGAAAACAAAATCTTGAAGTTTCTTCCCTGAGAT  
CCCCGTTGAATTTTCAATATCAATAAAGTGACGAGCATTATCATGTGCCCTTATTACTTAGCCAATATGGGTATTTCAACCT  
ATCGTGGCAGTTAA  
>Cluster\_24416  
ATGACATGGAATCCGTTGGCGCTGGCGACGGCGCTGCAAACTGTACTGAAAAAATAATTGATGTAACAAATAGCGAAAG  
CGCATTAATTTAATAAATGAATGATTATGGCGATTTGCAAAATCAATATTTCTTTTACTTCCCGCCAAATGATCATCGAAA  
CCTTTATTTGTCGGTAAGTAGTATCAGCAATCCAGATGAATTTAATACCTTCTTATTAAAGAAATCAGAAGATGATGCCG  
TTGTCATCCGTAGGGATCTCCAGCGTGCACAGGAAGATATTACATTTGTTTTCGGTGGTATTCGCTTAAATCTTCTCT  
TGAAGATATCTGCTTGAGATAACCTCGCTGGTAGATAACGCATTTGATCTGGCTGAAATTACAGAAGAAATTTACACT  
AA  
>Cluster\_11432  
ATGTTCTGCTCTGATTTCAACGTGGTCAGATATACACGGACAGAGCCGGATACCTGTGGTGATTACTCGCAGTACTCAGCA  
CTCAGTGTCTTTTCGACGATGGACGGCGCTCCGGACGGTACGCATTTGGTGAAGTTCAACAACCTGTTCGAACATATTG  
ACCGACAGGAGTACCGCAAAATTTCTGGCGGCTCAGCAGGAAATGCGCCTGAAAAAATACGCGCAATGCAACGGAGG  
TTGAACCGCCCGGGTTTCTGGAGAGTATTTTATCTGTGAACCTCAGGCTGCCAGATCATCGTTTCCGATGGAAGCATAA  
TAAGCTTTTTCTGCTTCTGCGGAGGAGTATGGCCAGCCTTTCCAGCAATCGTCGATTTGTTATACCAGTCCACCCACGT  
GA  
>Cluster\_20019  
ATGGCTAACCCATATGGAATAAAGCAGTGAATGCGGATAACTCCCGTTCACGCTGTAAGGTAGTAGCTTACGCTGC  
TGATCCAGTGTGCAAGATCGCCTCGTCAAACCTGGCTTCCACTCTACGACGATCTTATGTCGGGGCTTTGCTGAAAG  
CCGATGGCAACCAAGCAACCCGATCTGATATTGCTCAGTATGATTTGAACCGGCTTATGAAAGCAAGAAAGCGTA  
GTGGTTGCACATCTACTTCTGTTATTTCTGGCTGAAGATGGGATTTGAATTTAACAGCATGGAAGGCAAGTGTATTG  
AAAATGCAATCTCTCGGCTTTGTAATGCTGGTTATGAAGAATTTGCGATCCCTACGACTTAA  
>Cluster\_61174  
ATGATCCAAGAACAGACTATGCTGAACGTCGCCACAACCTCCGGTGCAGTTCGCGTAATGTGTATCAAGTTCTGGGTGG  
CTCGCACCGTCTGCTACGACGGCTAGGGCAGATCATCAAGATCACCATCAAAGAAGCAATTCGCGTGGTAAGGTCAAAA  
AAGGTGATGTGCTGAAGGCGGTAGTGGTGGCACCAGAAAGGGTTCGCTCGCCCGGACGGTTCTGTCATTCGCTTCGAT  
GGTAATGCTTGTGTTCTTCTGAACAACAACAGCAGCAGCTATCGGTACGCTATTTTTGGGCGGTAACCTCGTGGAGCT  
TCGTAGTGAAGTTCATGAAAAATTTATCTCTCTGCAACCAAGGACTACTTAA  
>Cluster\_17666  
ATGTCCCTGAAAGAAATATACGGCTCGATTGTGTTGGAAATTTGACAGCCAGGAAATCGAGATCACCGACCTTGTGTTCA  
GATCAACACCGGGCGAAAGCTGGTCAAGACCATGAACAAGCGGACGGCTAAAGGCTTTGCGCGTGGCATTCGCACCT  
ACGAACTGTCGTTTTCGGCGGTTTATCTCTGATACCAACGAGCCGATTTGGAAAAATCTGGAAGGTGTGAAAAATCTCGCTG  
TACCGCTCAGTAACAGCGGCAACGCACCTCTTATCTGGACTGCTTACACCGAAGTGGGTGAGAAATACACCGCTCGA

TAATGAAGCGAAAATTTGATATCAAAATGGCTGCACTCAGGAAGGTGGAAGGATGA

>Cluster\_39450

ATGGTTGGAACCGCTATAGCAAGCTTTTTGGGGATGTTGGCAATCTCAACAATTTACGGCTTAGCGCATGCTTTTATTTGC  
GAAATCTCTATCAGAAAAATAAGCCAGGCTTGGGCGCATAGATCAGCTCGTTTCATGATCTCGGTGATCATGGCAATAC  
AAGGGATATCTGCATTTTATFCTCTATGGATCAAGCTTATACCTATTGTTATCAAGGCGCGACATTTACGCCCTACACACG  
GATTACGGAACTCTATACGATGGTAGTGAAGACATCTCTATGGCTGGATCGTCTTTGGTTTATCTATGGCCGTGCTGT  
TGTAGCAGACATCAATTAAGTAATCTCGTCTTAACTTCGCTGACTAA

>Cluster\_37798

ATGTCGTGTTTCACGTCGGGTAATACATCACGGACTTTATTTTGGGTTTTAGGACCGTTAATTTGGTGTCTGTTTCTTGT  
CCTCTACATATTTCTCGCAAAAGAACCGCTGGTCTTTTTGGTAATAATACAGGTACTTCCATTGTTTCTTATTTGTGCA  
TTACTACGGGAGCTATTCCTGCATGTTTAAACCGGTGGATTTGCCCTATATTTCCAGACATCTGTTATCACTTAAACCCAT  
TACAAGCCCGCTGCCGAGATATTCCTGGCGAGCGATAACCCAGCGCACTATGCGGATGCCATTGTTATAATGCTCG  
AACGCCTCTGCAAGGTTCTTTGCTGCCGTTAACCCGCTCGTTTGGGCATGA

>Cluster\_15703

ATGAATGAAATACGTAGTAAACCTGTAAAATTTCTGGAAGAGCATTTAATTTCTAATACACAGCGCTATGCCATCATGA  
TGAGACATCTTTAATACAGTTAATATTTACAAGAGAGGATGGCTTGTAAAGACTAAAAGAAACGGAATATGATATGGCTG  
GTAGTATGATATCTCTATACAGTATCGCTGATACGTATAGTACGATAGTCCGGAGCGCTTTGATGACCTGCGATTGAAGCTTG  
AGTAATCAGTGTATAAGCCTCCGGCGAAATGATATTTCTCAAATATCCAGCAAAGTTCCACGTTATGGCTAACTAATCA  
GCAAAGCGGCTGTAGTGTCTTATTTGTTCCGCAATGATATATCAGAATCTGGAGAACAGTAG

>Cluster\_61676

ATGTTACGTATATTTATCCCAACATCTAACCGTAAGATTTCCAGACGTCGTTATATATTTTCATTTATTTAATAAATTT  
CATTTTTGCTCTTCTTATTTATCTTTTTTAAAGATGGAGAAGCAGGCTTTCTTGTATAGTCTCTACCATCGTACTCCATT  
ATCTCGTCAATCAACATGAATTTGCCAGCGACTCCGTTGATAGTGGTTTCATCTATATAAAAATTTATGTTTTTGGTACATTA  
GCAGTATATATCATCTATCATCAATGATAGCCGAAGATTTGGCTAGGCAATGGTTCGATGATTTTTTTGAT  
TTGTTATTTTTCCACTTTTCAGTATGCTAATGCTTGCACCTACTGATTCATCAAAAACAATAG

>Cluster\_39777

GTGGTTAAACCGGATGCTGCAATTCAGAGCGGCAGCAAGTGGGGAACAGCAGAAGACCTGACCGCCGAGAGTGGATGTT  
TGACATGGTGAAGACCATCGCGCCATCAGCCAGAAAACCGAATTTTGCAGGGTGGGCTAACGATATCCGCTGATGCGTG  
AACGTGACGGACGTAACCACCGGACATGTGCGTGCTGTTCCGCTGGGCATGCCAGGACAACCTCTGGTCCGGTAAACGTG  
CTAAGTCCGGCCAAACTCCGCGCAAGTGGACCAACTCGAAATCAACCGTAAACAAGCAACAGGCAGGCGTGACAGCTAG  
CAAACCAAACTCGACCTGACAAACACTGACTGGATTTACGGGGTGGATCTATGA

>Cluster\_60347

ATGAAACTTTTAAATCGCAATCATCTGATGGTGTGACTGGTGTGCTTTGCTTTGCAGATGTTGGTGATTACAGGCTGAACGG  
GGAGGATAACGCAAGAAATGAATCAGTCGTTACTGATAACTGTGAAAAACAGCCGATTTGGTAGGCGGTGACAGGCTTG  
CGAGGGTTGAGATCGAATATAGCGACATTTGTCAGCCGGTGGCTTTGGTGATTATTTACGACAGATTTGACGATATA  
CGCGCAATCCCTCTTAAAGTGCCTTGAAGAAAGTATTGAAGAGAAATAGCGATGAAAAGATTAACCTATTGAACAAGAT  
GGGGGATCTGGCTGGTGTGCTGATGCTTGCAGAGCAGTATTTAGGCATGAGTTTGAGTAA

>Cluster\_11552

ATGTTGCTCTAACACTATTAATCTAGGGTGCCTGGAGCCCATAAACCGAAGTCTTTCAAGTCCAGGCAGTAAATGT  
GCTGTCTATCTATTTCGAAATGCTACTGCTAAATCGGCTGAAAGGACCGAAGTAAAGATTTGGTAACAGAAATTTATCGTGTG  
TTGTGCTGTATAACCAATTTAAAGTCTCAAGAGAAAGCATGGAGGGTGTTTTCCGGATGCTTGAAGATTAGGATGG  
CCGAAAGGTGAAATCACAAGAAAAATGAAGTGTATTGAAATCAGTTTCCAGTAAACCCGGTAAATGAAAATGATGCTTC  
GTTTCATAAAAATACCTCCCTGTTGGCCATTTAGTCTCCCTCTCAATTTGGGTTGCTTGTGGATAAAGGAGGAAATGAT  
CTATTTTAGATGAACGAATGAAAATAAAAAGCAAAAACAAAAAGATAATCCAAATAGAAATGATAAGATACTTAAAGAA  
TATGTAATGCTTTAATGTCAAAAGAGAAAGATTTTAAAGTAAAGATATTTAGGGCCACAGAAATGTTTTTAAATGGCTA  
TCATAATGCTAAAGCAAAGGATATGTTCTGAAATTTGACTCAAAAATGAATAAAGGATATCGTTAGTATTTTGAATG  
GAAATAAATACAAATTTGCGAGCAAAATAGGCGCTTTATCATATGAAGTTGAAAATAGAGCTTTATTAGCAACATTTAAAA  
AAAGCTGAAGAATATCATAAATCTATAATAAAGCATGCTCCAAAGATCAATTTGATCCATTCGCTAAAGAAAACTGAT  
GCCGAGTATTTTTTTTTAAATCTGGTTGGTGTGATGATATGGTGAAGATGTGATCCATTAACAAATGCTTATGTTGGCAG  
AAAAACACTTAGAAAGTACTTGTGGAATAAAACCATCAAAACAACTGTTTGAACCATGTATGCAGCAACAACAATATTA  
AATTCACCTGAACCTATATACAAAATGATGAAGTTGCAAAATCTAATGATTTATTTAAAAACAATAAATAAATCAATAAAA  
AAATCCCATGTACAATACATCTGAAAAAATATGGCAAGAGAAATAGGTGAAAAACCAATAAATGAAATAGGAAAACTAT  
TGCATAATATGAGTCTTAATCATGAGTCGGTTTTATTAATAATAGAGGCTCCAGGACATGCTATGGCTGCTTGGGCTATT  
AATATGATGATCATAAAAATATATGGATCTATGATCCAAATGGCGGCATGTTGAGTTTCTCATGTGCTAAATTTGA  
TCAATATTTCAATGATATATTTGGGAAAGCTGGCTTGTGATAAGCTAGTAAATACCATCTGAAATAAATAATCAAAATTTA  
ACGATGCTGTTTTGATAAATATTTGTTTTAGATGGGAATGCTTTGTTAAGATACAAAACAGATATAAATGGAAAAACA  
TTAAAAGAAATTTCAAAATATAAATATTTCTTTAG

>Cluster\_16892

ATGATTCGGTCAACACGATTTTCCCTGGGGTTATTTCTTAATTTTTTTATCGTTAACGAAAATGATCCTGGTCAAAA  
CTATATATCTCTGCCATCAATAAATCCAGCCTCACATTTGCTCTCTTTTTATGGCTTCTATGGGTACACAAAATTTAA  
AAGCTCAAGGCTTTTTTTATTTTCAGCTTATGCTGACGTTAATTTTATTTTGCATTACTACTTATATAACGAAAAACAG  
AATGTAAAATCATCTCCACAGATGAATTTACCTGATGGTTGTTGGCTTTGTTTTTCCCTAACGCCGCTATTTTCTTTT  
CATGTTAATGAAGTATTTCACTAACAAACAAATTTTACCAACTCATTTTAAAGCCTTGCATTTTAAAGTGGCCTTATCT  
ATTTAGTTGAAACCATTTGTAATTTATCCATAAACCAATCAACGGCAGTACACTGATCCAGACAAAGTCCGATGATGTTTCT  
ATTTTCTATATTTTCCGCCAACTCAGTTTCAATTTGTTTAAACCTCGCTGGCGCTCTTTTGTATGGGAAAGACAACATCCT  
TGACAACAATAAGAAAGAAAACCTGGCATTCTGTTGCTGGCGCTGATTTCTTTTTTAGTTTTTCCCTTTCGGCACAACT  
TGAGCAGTTATAACGCTGACTATTTCTTTGTATGCTGCTGATTACTGTCCGGACAACCATACTGCGACCTGGGGAATCAAC  
TATACAAAATATTTGGTTTGTGTTGGGCTATTTACTGTTCTTATTATCATGCGTACACGATTAGCCAGCGAACTATG  
GCCGTTAATAGCATTTATTTATGCTGGCATCGCTATGCTGCAACTTACTTCTACTGACTCTGGATGAGTATAATTAACCA  
TCTGATATATCAGTCTGCGGGGATTAAGTTTCCAGTAACTGTTTGTGTTGCTTTTCTGATTTATAAATTTTTTCAGGAA  
CTGCAACTCTCCAGCAAACCTGGCAGTTTATGATGACTGACCAATATTTATAATCGGCGCTACTTTTTCAACAGCGTAGA  
GTCATTTATGTCGCGACCTGTTGTTAAGGACTTTTGTGTCATGCTGGTTGATATTAATCAGTTCAAACGCATCAATGCC  
AATGGGACATCGTGGGTGATAAAGTGTGCTGGTATCAATTTGTCGATATTTATCCAGCAAAGCATCCGCCCGGATGATTT  
TTAGCCGACTGGAGGTTGAGGTTTGGCTTCTATTTACCGAACTCAATAGTGGCCAGGCAAAAATCATTTGGCAAGC  
TATGCGTAAAATGTCGAACTCCGACCGCTTTAGTAAACAGATATGATGTTCTGAAACAATGACCATCAGTATTTGGCA  
CGGTTTTTTCAACGGGTGACACGCATAATATCTCGCTTGTCTGACGCAAGCAGATAAAGCCTTACGCGAAGCGAAAAAC  
GAGGGGGCAACAAGTGAATTTATCATCATATTTAA

>Cluster\_7930

ATGGGTGAAAAAATACCAAAAATCAGAGTGTGAAGATGAGTATGCTGCATTTTTTGAACGCTTCAATCATAGACATGA

TGCACCATTAGTCAAAGAGATAAAAACAGCATACCGTTGGTTTATGATGTAATGGGTGAAGATAAATGGGTTGAGCGT  
GTGGGGCGTTTTGGCTTACTTCCGCGAAATGTCGGAGCGCCTTTTCACAGGAAAATCGACGTTCTTTCCATGAGAAA  
GATGCACGCTGGCATTCTATGATGACTGGATTGCATGGTATTTGTACTAGTTGAATCTTTGGCTGATCGCCCAACAGT  
AGATGAGCGAGCTCAGTCTCAAGAAATTTGGCATTTTTTCCGAGTTATCGGTGAACATAGCGAAAAGTTGAAGCAGGTC  
AAGTATTGAATCAAATAAATGACTTGGTTGTTAAGCAATCAACCAGCTGATTCATTTTGGTTGATGTTGTTG  
GCTATCTGCTATTTGAAAAATGGCTGGGAAGTTGAGTTCATTCCAGAAAACAGGAGCTCATAAAACACCCAGACCTCAAAGT  
TGTAAAGGCACCTGATATTTTTATGTTGAGTGAAGCATTAGCAAAGGTGACTCAGTACTAGAAAGAAAGGGCGG  
AGTGGTTGAAGCGGTGGGAAATGGCTCGACCATTGATTACTCGATACCATAAGCCAGTTTTTTTTTGATGTGATTTTCAA  
ACTGAAATAGTAAAAACCGCTATCGATGTGTTTCTCGTGTGTAGCAAAAATTTACGGCTCTGATCATCTTGTGAAAGG  
TAAGATTGCAGTATGTGAGAGCGATGATATTTGGTTCAGGCTAACTTAATTGATATGGAACGGGTGGATAACCACCTAA  
GAAAGTGGCATGTGAAATATCCTTCTCCTCAATTAATTCCTTATAGATGACCAGTATGACCCGTTTGGAGTTATACA  
ATGGTTTGCACACGAAAGTTATGCACCTTTAGCAATGATGAACCTTAGTACAATAAATGATTCATTGATGAGATAGAAAT  
GCCTTCTCGCGAAAATGGATTTGTCTCGCTGATGAGTCTGTCGATAAAAAAGGCAAAAGATATAAAAAAGGATCTGTTC  
AGGCTGTAAAGCAGGCTCCGATTGGAGAATCAACAATAATTCATATTGGATATGAAACCTTGCATGGCCCTCAGATCGAA  
TTTTGCACGTGATAGAAAATTTGCGAATGATTTCTGATTTTGTACTTTATGGGTAAAGATATAGCTGCATCTACTGTCA  
TTCTTTCCAGCCGCGCTGCTTGCAGATGAGAAATGGGACTTTGCCGAAACGGTAAGATACTTTAGCCAGAGTCGAAATG  
CCGAGACAATTTTGGAGCAAAAATGCTTACTGATGTTGAAGGAACGATCCAATCTGACGATAGCCATTTGGGCTCAAGAT  
TTAAGAGAGATGCTCGGCAATGA

>Cluster\_42308

ATGACGGCTGAATTTGGTAAACGTAACGCCCTTCGGAACCGGAGTGGCGTATATTGATGGCGTATTTCTGCAGGAAAT  
TCATATTGAACTGAGGCGCGACGCGAAATAGTAGGCAATATCTACAAGGGTCTGTAGTCTGTACTTTCCGGGTATGC  
AGGCGGCTTTTGTAGATATTTGGGCTGGATAAAGCCGCTTCTTCATGATCTGACATCATGCCGCACACCGAATGTGTG  
CGGGTGAAGAACAAGCAATTCACGGTGCAGCATCTCGGAACTGGTCCGTCAGGGGCAAGATCTGATGGTGCAGGT  
GGTGAAGATCCGCTTGGCACTAAAGTGGCGCTGACCACCGATCAGCTGCGCTTCTCGCTATCTGGTGTATGTC  
CAGGGGCTTCTCAGTGGGGTATCCCAACGTAATTGAAAGCGAATCAGAACGTGAACGCTGAAAAAAGTGGTGCAGAG  
TATTCGACGAGCAGGCGGGTTTATCATCCGTAAGCGGAGGGGTTGGCGAGGCTGAACCTGGCCTCCGATGCCCG  
TTATCTGAAACCGCTCTGGACCAAAATTTATGGAGCGTAAAAACGCCCGCAGACCCGTTATCAGCTGTACGGCGAATGG  
CGCTGAGCGCAGCGTGTTCGCGTGAATTTCCGCGACGCCGAACCTCGACCCGATTCGCGTGGACTCAGCCTACGCGA  
GCATTGCTGGAGTTTACCTCGGAGTACATTTCCGAGATGACCAGCAAGCTGGAGCATTACACCGGACGCCAGCCGATTTT  
CGATCTCTTTGATGTCGAAAACGAAATCCAGCGAGCGCTGGAACGCAAGTAGAACTGAAATCCGGTGTGTTATCTGATTA  
TCGACCAGACCGAAGCGATGACCACCGTGGACATCAATACCGGGGCGTTTGTGCGTCACTCGCAATCTGGACGACACCATT  
TTCAATACCAATATTGAAGCGACCGAGGCTATCCCTCGCCAGTTACGGTTGCGCAATCTGGGCGGGATATCATTTATGA  
TTTTATCGACATGAATAATGAAGATCACCGTCCGCGGTGCTGCACTCGTGGAGCAGGCGTTGAGCAAAAGATCGGGTGA  
AAACCAGCGTTAATGGTTTTTCCGCGCTGGGGCTGGTGGAGATGACCGCTAAACGCAACCCGCGAAAGCATTTGAGCACGTA  
CTGTGTAACGAATGCCAACCTGCCACGGTCCGCGAACGGTGAACCCGTTGAAACCGGTATGCTATGAAATCAATGCGCGA  
GATTTTCCGTGCTCCACCATGCTTACGATCCGACCTTCCGCTTGTGCTTATGCTTCTCCGCGAGTAGCCGAAATCTGAAAG  
GCGAAGAGTCACTCGTGGCGAAGTGGAAATTTCCGTTGGCAACAGGTTAAAGTACAAATTTGAAACCGCTCTATAAC  
CAGGAGCAGTTTGCAGCTCATAATGATGTA

>Cluster\_40108

ATGAAAAATTCGTTTCAAGTTCGGCATGGTGCTGAATCTCGATAAGTGCATCGGCTGCCACACCTGTTTCACTGACCTGTAA  
AAACGCTCTGGACAGCCGTAAGGCGTGAATACGCGTGGTTCAACAACGTTGAAACCAAGCCGGGCCAGGGCTTCCCGA  
CTGACTGGGAAAAACAGGAAAAATACAAGGGCGGCTGGATCCGTAATAACAACGGCAACTGCAGCCGCGCATGGGTAA  
CGTCCCATGCTGCTGGTAAATCTTCGCTAACCTGCTCGCGGGATCGACGATTTACGAGCGCTTCGATTTTGA  
TTATCAGAACCTGCATACCCGCGCGAAGGCGAGCAATCACAGCCGATTGCCCGTCCGCGTTCGCTGATTTACGGCGAAC  
GGATGGCGAAAAATCGAAAAGGGCCGAACCTGGGAAAGATGACCTGGGCGGTGAGTTTGAACAAGCTGGCGAAAGACAAGA  
TTGCAACAACATCAGAAAGGCGATGATAGCCAGTTGAAAAACCTTCATGATGATTTTGGCGCGCTGTGCGAACACTG  
TCTGAACCCGCGCATGTTGTGGCGACTGCGCGAGCGGTGCTGTTTACAAGCGTGAAGAAGATGGCATCGTCTGACGACC  
AGGATAAATGCCGTGGCTGGCGTATGTGCATCACCGGATGCCCGTACAAAAAATCTACTTCAACTGGAAGAGCGGTAAG  
TCTGAGAAGTGCATCTTCTGCTATCCGCGTATTGAAGCGGGTCAAGCCGCTGTGCTCAGAAACCTGTGTCGCTCGTAT  
CCGTTATCTCGCGTGTGTTGTACGATGCCAGCCTATTGAACGTGCAGCCAGCACTGAGAACGAGAAAGATCTTTACC  
AGCCTACGCTGGAGCGTGTCTCCTCGATCCGAACGATCCGAAAGTCACTCGAGCAGCGGATTAAGACCGGTTTCCGCTGAGC  
GTTATTGAGGCTGCGCAGCAGTCCGAGTTTATAAATGGCGATGGAATGGAACCTGGCGTCCGCTGCATCCGGAATA  
TCGCACACTGCCGATGGTCTGGTACGTGCCGCTCTGTGCGGATTCAGTCTGCGGCAGACGCGGGTGAACCTGGGCGA  
ACGGCATCTGCCAGCCTGAAAGCCTGCGTATTCGGTACAGTATCTGGCGAATCTGCTGACCCGCGGTGATACCAAA  
CCGCTACTCTTAACTTCAAAACACCAACAGTATGCTGGCGATCCGTCATTACAAACGCTGAAACCGTTGACCGTAAAGTC  
CCGTGCGTGGAAAGAGTCCGCTGACCGAAGCCAGGCACAGGAGATGATCTGTTTATCTGGCTATTGCCAACACGAAAG  
ATCGCTTTTGGTGGCAGCAGTCACTGAACTGGCGCGGAAAGCCTTCCCGGAGAAAAATGGCTGCGGCTTTACCTTT  
GGTATGGTGGCAGGTTCCAGATACCAATTAATCTGTTCAACAGCCGCGTATCGATGCCATCGATGTAACCAGCAA  
AACGGAGCCGACCCATGA

>Cluster\_24372

ATGCAACAACCTGTAGTTCCGCTGGCGAATGGCTTGTACTCCGTCCTATAAACCAAAATAGCCGCAATGGGCGTCAACT  
TACCCTTGAGCCGAGATTAATCGATCTTCTGGTTTTCTTTGCTCAACACAGTGGCGAAGTACTTAGCAGGGATGAACCTTA  
TCGATAATGTCTGGAAGAGAAGTATTGTACCAATCACGTTGTGACGCAGAGTATCTCAGAACACGTAAGTCATAAAA  
GATAATGATGAAGATAGTCTGTCTATACTGCTACTGTACCAAGCGCGGCTATAAATTAATGGTGGCGGTTATCTGGTA  
CAGCGAAGAAGAGGGAGAGGAAATAATGCTATCTTCGCTCCCCCTATACCCAGAGGCGGTTCCGTCACAGATCTCCCT  
CCACAGCTCTTAACTTCAAAACACCAACAGCACCCTGAACAATCCAGTTAAAAGCAAAACGATTCACCTACCTTTTGG  
GTATGGTTTTTTTTCTGTTGTGCTGTTAGGTATCTGTGTCGACGTTAGCGTTTTCAAGTCTTGAACACGCTCTCTCTAT  
GAGTAAATCGCGCATTTTGTCAATCCAGCGATATTGACATTAATATGGTTAATAAGAGTTGTAACAGCTGGAGTTCTC  
CGTATCAGCTCTCTACCGGATAGGCGTGGTGAATTTGGTGGCGACATCACTTAACACCTTCTCCACCTTTATGGTGCAT  
GACAAAATCAACTCAAACTGATGAAACCGAGCAGTTCCGCTAAAACATTAATCTATTGCGTTTTGTTAATCAGCCGCAATA  
CCGTGCTCAACAATGCTTTATGTCGGTAAAATTTGGTAGACAATGCAGATGGTTCAACTATGCTGGATAAACGTTATGTC  
TCACTAACCGTAATCAGCTGGCGATTTAAAATGATTTGCTCCAGAGTTTATCAAAAAGCGTTAAACCAACCGTGGCCACAA  
CGAATGCAGGAGATGCTCCAGCAAAATTTGCCGATCTGGTGGCTTATTAACTAATTTTATCAGGCACATGATTTAT  
ACTGATGCTGATGATAAATCAATTGGATCGTGGCAGTGAATTAATAGTTAGTGAAGTGTGTTCAATCATCCCGAATTTACCT  
ACGGAGAGCAGAAAAAGCATTAGTTGATATCGTGCAGCATTCTCAACATCTTTAGACGAAAAACAATAGCAGCCTG  
AACACAGAAATAGATAAATTTTACCTCCGGAATTTGAACAACCTGTCATTTATATCAAAATAAAGCGGTCAGTGC  
CTGGTAAAAGTAAAACAGATGAGTCTTACAGCGATAAATACTGGCATTTGATCTTGAATGTCTCCGCTAAATATG  
TGTGCTTTGGCAAGGTTTATGAAATGAAGGGATGAACCGGAAAGCAGCTGATGCATATCTCACCGCTTTAATTTACGC  
CCAGGGCAACACCTTTACTGGATTGAAATGGTATATCCAGACTCTGTCTCTTATGTTGATACCTTATCTCGACAA

ATTTCTCGCTTCAGAATAA

>Cluster\_31641

ATGATCGGTATTATCTGGCTGCAGGTGTGGGCTCGCTTGGCGCCATGACTAATAGTAAACCTAAGTGTCTTGTGAC  
TGTGTGCTGGCAAGCCTATCTGGATTATCAGTTAAACCTCCTATCGCCTGGCTGGTATTAAAGATATATTCATTTAGCTTGG  
GCTATGAAGGTGATAAATAAATAAACAACCTGTAATAATATAAAGATCTCAATATTACAAATAAAGAAAATGAGTAT  
GAAGATACAAATAATATGTATTCTACTCTTTTGTAGCAAAGAAATATGCATATGGAGAATCTTTTATATTTAAACAATGCAGA  
TCTAGCTATTGATTCAAATATCATAGAGAGAGATTTGTGAGAGTCCCTTCAAGTATCTTATTGCTGTTGATGTAGGTGTTT  
TTAATGAAGAGTCTATGAAGGTTACTGTAAATGATGATAATAAAGTAAGTAAATATATCTAAATTAATCGATGAGAAAGAG  
TCTGTTGGTGTCTATAGATTTCTATAAATCTCTAAGGATTCAGATTAAGATCTTTTTCGATGAAATAGAACGAATGTT  
GTTAAGGGAGAATAAATAAAGAAAGATTGGACTGAGATTGCAATGCAACGCTCTATTTATAGATAGAAAGATGAAATTTGATG  
TTTTAGATATTAGTGGATGTTCTTGGGTTGAAATGATAACTATGCTGATTTAGCTCTTGGCTGATAAAATATTCTCCCAA  
AAAAATAAATAAATATCGGATTATAAATGTTATTGCTTTGATTTAGATGGTACAGTCTATATCGGTAGAGAGCCGATTAA  
AGAAATTATAGATGAAATAAATAGTTTAAAGAAAAGTGGTAAAGTGGATTCGTTTATATCAAAATAACTCATCAAAGTGCA  
AAAGTGAATATGTAATAAGCTGAAAAATTACGGTATAGATGTATCTACTGAAGATATAAAAATATCATCTGATAGTGT  
ATTTGACTTTTAAATAAAGAACAGGCTAAGAAAATATACGTAGTTGGAACAAAAAGTTTACAAAAAATAAATTTGATGC  
TGGTTTGGAGATTTGTTCTCATGAACCTGATTTTATCGTGTAGGATAATGATACTGAGCTGACTTATTTCAAATTTGGTAA  
CCGGTTGATGTTAATTAATTCGGGTTGATTTATGTTCAACAGCATTGTGATGTTTGTCCCTCGGAAACCGCTCT  
ATTTCTGATATTGGCACTGTAGTAACAATGCTAGAAATGACAACCTGGGCGTAAGCCGTACCGCTATTTGGTAAACCAA  
TCCAGATCTTTTGAATTTGATTTCTTAATGAAGATCGGCTGGAAAAAGATGATTTGTTAATGATTTGGTACCGTATATATA  
CAGATATTTCAAATGGCTGAAAAACAGGCATTGATTTCTGTTCTGTATTAAACAGGTGACACTAAACGAGAGGATATTGAG  
GATTCATCTGTAATAACCGACCTATATACTTCAACACTTCTCTCAGTAA

>Cluster\_26439

ATGAGTAAACACAACACCCGACACTTCAGATCAACACCGCCGAAACGTCGCTGGCTTAATGCCACGAAGAGGGGTATCA  
CAAAGCGATGGGCAATCGCCAGGTACAGATGATGTCATTTGGCATTGGCCGCGCATTGGTACGGGTTGTTTTAGCCGCGGGG  
CGCGACTGCAAATGGCGGGGCCGCACTGGCACTGGTCTATTTGATCTCGCGCTGTTTTCTGTTTTTATTCTGCGTGCA  
TTGGGTGAGCTGGTGTACACCGCCCTCCAGTGGCAGTTTGTCTCTTATGCCCGTGAGTTTTGGGTGAGAAAGCCGC  
TTATGTTGCTGGCTGGATGACTTCATCAACTGGGCGATGACGGGGATTGTTGATATTACCGCGTCTGCTGTATATGC  
ATTACTGGGCGGCTTTGGCGGCTGCGCAGTGGGCTTTGGCCTCGCTGCCTGACCATCGTTGGCACCATGAATATG  
ATCGGTGTGAAATGGTTTGGCGAGATGGAGTTCGGTTTGGCCTTATTAAGTGTCTGCCATTGTAACCTTTTTGGTCTG  
GGGTACAGTGTCTCGGTAGTGGTTCAGCCGCTGGATGCAACACCACCTGGCTTTCATTTAATCACCGATAATGGCGGT  
TCTTCCCCCAGGTTTGCCTGCGCTGGTGTGATTGAGGGGTAGTGTGTTGCTTTGCTCCATTGAAATGGTGGGT  
ACAGCGCCGAGAAATGTAAGATCCCGACACCATGGTCCATAAAGCGATTAACAGTGTGATTGGCGTATTGGCCTGTT  
TTACGTCGGCTCCGTGGTGTGCTGGTTATGTTATTACCGTGGAGCGGTATCAGCGGGGCAAAGTCCGTTCTGTCAGCT  
TTTTCTCTAAACTGGGTGTCGGTACATCGGCAGCATTATGAACATTGTTGGTGTGACCGCTGCCCTTCCAGCTGAAT  
TCAGTCTGTACTGCCACCGGGCTATTCTGCGCTCGATGGCGATGGGCGGTTCCGACCGAGTTTATGGCGAAAATGAG  
TCCGTCAGCATGTGCGCTATGCGGGATTCTGGCGACACTGGTTGTGATGTCGTCGGCGTATTCTCAACTATCTGGTGC  
CGTACCGCTATTTGAGATTGTGTTGAACCTTCGCTCGCTGGGAATCATCGCTTTCATGGGCGTTTATCATCGTTTGGCAG  
ATGCGCTCGCTAAAGCGATTAAAGAAGGCAAAGCAGCGGATGTCAGTTTAAACTGCCTGGCGCGCCTTCACTTCTCG  
GCTGACATTACTGTTTTTACTGAGTGTCTGTGCTGATGGCTGTCGATTACCGAAGGGACTTATACCATCGCGGCAC  
TGCCGATTTACGGTATTTCTGCTGTTATAGGCTGGTTTGGTGTGCGCAACCGCTTGTGAAATTCACAGCACTGCGCCA  
GTCGTCGAGGAAGATGAAGAAAAACAGGAAATTTGTTTAAAGCTGAAACGTCGAGTTAA

>Cluster\_27503

ATGTTTCAGGCAGTTGAAAAAAACCTGGTTGCAACCCATGCTGCTATGACCATTGGTCAGGTAGCCCCGGCATTGCG  
CGACAGCGCAGACACCTTGGCCGATATGGGAACCTCCGCGAGGAAGCACGCTTTCCATTGGTCAGGAAATGCAGATGGGCG  
ACTATTATGTCGCCAGCTACGCGGCAGCGCGCTTAATTAATGATCCACTATTAACGCAGTACATTAAATCACTAGGA  
ATGCGTCTGGTTTCCGATGCCAATTCGGTTAAGACGCCCTTCCATTCTTTTTGATCAATAACGACGAAATTAACGCCCTT  
TGCCTTTTGGCGCAACGCTGGTGTGCTGCACTCTGCCCTGTTCCTGTTTCCGATAACGAAAGTCAACCTGGCTTCAGTTA  
TGGCGCACGAAATCTCCACGTCACCCAACGTCACCTGGCGGAGCGATGGAAGATCAGCAGCGCAGCGCGCCGCTGACC  
TGGGTCCGCGCGTGTAGTTCTATTTTACTGGCGATGGCCAGTCCCGCAGCGGGGATGGCGCGCTGACCGGTACTGCG  
GGGAACCGCCAGGGGATGATCAGTTTACCCAGCAAAATGAACGGAAGCGGACCGCATTTGGTATTCAGGTGCTGCAAC  
GCTCGGGATTGATCCGACAGCGGATGCGGACCTTCTCCGAAAAATTACTCGATCAGGCGGCTTACTCTCGCGCCACCA  
GAAATTTCTGCTCACTCACCCACTACCGGAAAGCGCTCTGGCTGATGCCGTAACCGTGCCAATCAGATGCGCCGATGGT  
GGTGAATCGTCAGAAGATTTCTATCTGGCAAAAGTGCACACTGGGGATGTATAATCCGGACGTAACAGCTCACCA  
GTGATTTGCTGGATGAAATGGGCGAAAGGAAACGTTCTGTCAGCAACGAGCGGCAATATGGTCTGTCTACAGGCGATG  
GAAGCTTAATAACACGACGAGGCGCTAAAACGCTGCAACCGTTACTGGCGGCAAGAACCTGGCAACGATGTTATCTGCA  
TCTGGCTACTGATATCGATCTTGGGCAAAACAAAGCCAATGAGGCGATCAATCGTCTGAAAAATGCCCGGATTTACGCA  
CCAATCCGGTGTTCAGCTCAACCTGGCGAACGCTTATCTGCAAGGCGGTCAACCCACAAGAGCGGCCAATAATTTGAAAT  
CGCTACACTTTAATAATAAAGATGACAGCAACGGCTGGGATTTGCTGGCACAGGCGGAAGCCGCTAAATAACCGCGA  
TCAGGAGCTGGCTGCGCGAGCAGAAGGTTATGCGCTCGCCGAGCACTCGATCAGGCCATTTCTGCTGTTGAGTACGCGCA  
GTTTCGAGGTGAAATTAGGACGCTGCAACAAGCGGTTACGATGCGCGCATCGACCAGTTGCGCCAGCTGCAGGAAACG  
TTTTAGCCTTATACCAAGATGTA

>Cluster\_64454

ATGTACAACAACCTCTATGCCCTCACAGAAAGCCTTTTCTGGGTTGATCGACTTTTAGATCAGGAATATGAAAATATTGG  
ATTGAATGAATGCTAAATGAGTTAGATGAATAAATAAAGAATAGATTACATGATTATCGAGCAAGCAAATTCGTGAC  
AGGAGTCTCGGCTAAATGTTTACATGGCGGAAATCGTAATATGAAAGGTATAAGAGTGGACTGTTTTCAATGGACAGA  
GTCATTTGATGATGTTCTGTATTCATTTGAGCTACGATACAGAGTGAAGTCTAACAGAAAATGCATTTGAAAAAATTA  
TGTAAGCGATAGAAAAGAGAAGTTGAACATCTCAGGAAGGAAATGCTAGATTTATCAGGTTTGCTAAAGAAAACCTTTG  
ATCTTATCCGTTGGTGTGATTTATCGTTTTGTACCGAGCGAATCTTCTATTAAGATTCGGAGAGGGCCAAATGGAATTTA  
GACGATAACTCTGATGCTAATTTTATATATCGATATCTCCCTCTAACATGCCCCGCTTTTATGAAAATAGACTATCCGT  
AAAGAATAAAGACGCTTAGGTAATAACAATAAATTCGGTTATTAACAATAAATGTTTTTATTAAGAAAATTTATGG  
AAATTAAGACTGTGAAAGTTTATATACAATGGATATATGATCAACATATAAAAAATGCCATTGATAATGATGATGGC  
TCCATATCTATGGAGCTTGTCTATGGAAATCATAGCGGAAAAAAGTTATGAACGGTGGGTGACGGGAGCAAAAAACCG  
TACGTTCTCTTTTATATAAAAACTTATTTACTGACCTTAAACAAGCGCATTCATGTAGAGCATCCTTGGGGCATATT  
GCCGTTTTCTAGGAGATTTCTTCTGTAACCTTGTATCAAAAAGATGAAGTTTCAGAGGTTAAACTCTCTAATAGAGCTTCA  
TTCTTAGAGGACTGACTCCAAGTGAACCTACAAAATTAGAAGTACTGACGAGCCGAGTTTTAATCTTCCGCTCTGT  
ACTACGTGAAGCTGCGTATGATATGAAAGCAGAAAGTATCAATATAAGAGCAACTAATAAATCAACATTTTGTCTGAGC  
GGTGTGGGATGAAGATTGACAGATATTGAGCAAAAAATCAACGCTATAAGCGGAAGATAAAAAAGAACTTTTCTT  
AACAGTGTGCTTTCATTGATAGGTTTTATTTGGTGCACCAATCCAGTGTGCTTTGGCTACAGGAGCTTTTACGATTTCTAAA  
AGATGCTTTAATATTACAAGCATTCTTCAGAAATAAAGAGCCACCTTCATATTTCTCTCATGATGTCAAAGCCA

AAAACAAACCTTATGACTGA

>Cluster\_27427

ATGAAATCAAACCTCGCTTCGCGCCAAGCCAAACAGGCTATCTGCACGTTGGCGGGCGCGTACTGCTCTTTACTCCTG  
GCTTTTTCAGCATTAACACCGCGGTGAGTTCTGCTGCTGCTATTGAAAGACACCGATCTTTCAGCGTTCCACGCGCGGAAGCTA  
TCGAAGGCTTATGGATGGCATGAACCTGGCTGAACCTGGAGTGGGATGAAGGTCGGTACTACCAGACCAACCGTTTGTAT  
CGCTACAACCGCGGTGATCGATCAGATGCTGGAAGAGGGCACAGCTTATAAATGCTATTGCTCTAAAGACGCGCTGGAAGC  
GCTGCGCGAAGAGCAAATGGCGAAAGGTGAGAAGCCGCGTTATGACGGTCGCTGCCGCCACAGTCATGAGCATCACGCTG  
ATGATGAGCCGTGTGCTGACGTTTGTGTAACCCGACAGGAAGTTCTGTTGTTTTGACGACCAGATCCGTGGTCCGATC  
GAGTTTCAGCAACCAGGAGTGGATGATCTGATTATCCGCGGTACCGATGGTTCCCAACCTATAAATCTGTTGTTGTTG  
CGATGACTGGGATATGGAATCACCCACGTTATCCGTGGCGAAGACCATATCAACAACACACCGCGCCAGATTAACATTC  
TTAAGGCTCTGAAAGCGCGGTACCGGTTTACGCGCACGTTTCTATGATCAACGGCGATGACGGTAAAAAACTGTCCAAA  
CGTCACGGGGCGGTGACGCTAATGCAGTATCGTGATGATGGTTATCTGCCAGAAGCACGCTGAACTATCTGGTGGCTCT  
GGGCTGGCTCCACCGCGCATCAGGAAATCTTCACCTCGTGAAGAGATGATTAATACTTCACTCTGAATGCCGTCAGCAAA  
CTGCCAGTGGCTTCAACACCGACAAGCTGCTGTGGCTGAACCATCACTACATTAACGCGTTGCCGCCGGAGTATGTTGCT  
ACTCACTTACAGTGGCACATTGAGCAGGAAAATATCGATACCCGTAACGGCCCGCAGCTGGCTGATCTGGTAAAACTGCT  
GGGCGAAGCTGCAAGACGCTGAAAGAGATGGCACAGAGCTGCCGTTATTTCTACGAAGATTTTGTGAGTTCGATGCCG  
ACGCCCGCAAAACACTTGCCTCCGTTAGCGCCGCGCTGGAAGTGGTTCTGTCGACAAACTGACCTGATGCTGATGAC  
TGGACCGTGAAACGTTTACATCACGCTATTCAGGCGACGGCGGATGAGCTGGAAGTGGTATGGGTAAGTGGTATGCC  
GCTGCGTGTGCCGTAACCGGTGCGGGGAGTCTCCGGCGCTGGATGTTACCGTTACGCAATCGGTAAGACCCCGAGTA  
TCGAGCGTATCAACAAGCGCTGGCTTTTATTGCTGAACCGCAAAATCAGCAGTAA

>Cluster\_37133

ATGATTAGTGCATTCGATATTTTCAAAATGGGATTGGTCCCTCCAGTTCGCATACCGTGGGGCAATGAATGCCGGAAA  
AAGTTTTATGATCGGCTGGAAAGTAGCGGCTTATTAACCGCGACGAGCCATATGTTGGTTCGATCTGTACGGGTCGTTGT  
CACTGACGGGCAAGGCCATGCCAGGATGTCGCGCATCATCATGGGACTGGCAGGAAACAGTCCGAGGATGTTGTCTATT  
GATGAGATCCCTGCATTTATAGAGTTAGTAACGCGCAGCGGGCGGCTGCCAGTGGCATCTGGTGGCATATTTGTTGATTT  
TCCTGTAGCAAAGAACATTTATCTCCATCCGAAATGTTGCTCGCATGAGAACGGAATGCCGATCACTGCCGTGGAAGG  
GACAGGAAGAGCTATTAAGTAAACCTATTACTCTGTCGGCGGGCGGTTTATTGTGCAAGAAGAACACTTCGGCCTGTG  
CAGCATGTCGAAACGCTTACGATTTACGATTTCCGCTACGACAGTGAACCTGCAAAATGTTGTTGATTACAACGCGCTG  
TATATCTGGTCTGATGATGCACAACGAGCTAGCGCTGCCGAGCAAAAGCGGAAATTGACGCGGTTTGGCCGATCTGGC  
AAGTGTGATGATGACGGTATGAAAGTGGGATGAACACTGAAGGCGTGCCTGGTCCGCTCAATGTGCCGCGCGCTGCC  
GTAGCGCTGCGTCTGCTGAGTGGTTTCCAGCGATAACATCTTAACGATCCGATGAATGTCATCGACTGGATCAACATGTA  
CGCGCTGGCGGTTAGTGAAGAAAACGCGACTGGCGGGCGGTGGTAACGGCACCGCACTAACGGTGGCGCGGATTTATC  
CGGCAGTACTGGCTTATTACGATAAGTTCGCTGCTCCGTTAAACGAGCGGTCAATTGCCCGCTATTTTCTGGCCGCGGG  
GCTATTGGCGCGCTGTATAAAATGAACGCTCCATCTCGCGCGGAAAGTCCGCTGTCAGGGGAGATGGCGTGGCCTG  
TTCAATGGCGCGGAGGTTAACTGAACTACTGGCGGCACTCCGGCGCAGGTATGCAATGCCGGGAAATCGCGATGG  
AGCATAACCTTGGCTGACCTGCGATCCGTTGCGGACAGGTACAAAATCCCGTCAATGAACGTAAGCCATTAATGCC  
GTGAAAGCAGTAAACCGCGCGGATGGCGATGCCCGCACCTCGGCACCGCGTGTTCCTACTCGATAAAGTATCGAGAC  
GATGTATGAAACCGCAAGATATGAACGATAAATACCAGCAACATCACGCGGAGGACTGGCATTAAAGTGGTCTGGC  
GCTGA

>Cluster\_24695

ATGCTTCGCATTAAGCCTTTTTTATTCTTTGTGCCGCTTACTGACGGTGACGCTGACGCTGACGCGTACGCGGATGTGAACAG  
CGACATGAATCAGTTCTTTAAACAAGCTGGGCTTCGCTCCAATACCACACAGTCCGGCGCTGTCGAGGGGACGCTGCCG  
GCTATGCTTACGGCGCTCCCTGTATGCCGCTACTCAGTCAAAAATGTTTCAGCTGATTTCCATGACGCTGCCGATATC  
AATGCCGGATGTGGCGGCATCGATGCTTACCTCGGTTCCGTTTATTAATGGCGAGCAGTTGCAGCGTTTTGTTAA  
GCAGATTATGAGCAATGCTGCCGCTTACCTTTTGGACCTTGCCTGCAGACAACGGTGCAGGAAATCAAAACCGCAAAAG  
ACTTCTTCGAGAAAATGGCAAGCGACATTAACAGTATGAACCTCAGTTCTTCCAGGGCGGCGAGGGGATTTTGGCGGG  
CTTTTCCCGGACGAGTGTCCAGCAAAAAGTCTGTTCAGGACATTGCGGTTGAGAGCAATATTTTGGTACTGGCG  
GGCTTCCCGGAGGGATGTACCGTTGGCGGAAATCTGACAGCGTACGGGATAAAGCCAGCGACAAGGATAAGGAGCGGG  
TGACCAAAAACATTAACATCATGTGGAATGCGCTTTCCAAAACAGAAATGTTTACGCGCAACAAGAGCTGAAAGAGTTT  
GTGATGACGCTGACCGGCTCACTGGTGTGTTGGTCCCAACGGCGAAATCACACCGCTGTGACCCAGAACCACTGACCGCT  
AATTAATCCGGCCATGATGGAAGCGGTTACAGCAAAAATTTATCTACTGCAACGATTTCTGATAAATGCCGAAATGGTGG  
CAGACACACCGGTGACCATCAGCCGGGATAATGCACTGAAGTCTCAGATTACTAACTTCTGGCCAGCATTGAGAACAG  
GCGGTGAGTACAGCGCTTGGATGACAAGGAAAAGGCTTTATTTCCAGTACCACATCCCGCTCTTCAAATACCTGGT  
TGACCCGAGATGCTCGGTTTCCAAACAGTATGATTTACCAGCTGACGGACTATATCGGTTACGACATCTGCTGCAGT  
ACATTCAGGAGCTGATACAGCAGGCGGCGATGGTGGCCACAGGAAATATGACGAAGCAGTTATCGAACATATTAAC  
GACAACATGAATGATGCCACCGCGAGATGCGCGGTTTTCAGTGCAGGTCAGGTCAGCAGGATGCCGCTGCTGGTTGT  
CGATCGTCAAGATGAGCTACATGCGTACGAGCTTTCGCGCCGATGCTCAGTCTTACAGAACAACTATCACTTCGGAG  
GGAGCAGCTGTGA

>Cluster\_55651

ATGACATTGCTTTCAAATGCTAAATGGAACATGGTATCACAATTTATCAAATGTTAGTGCAACTAACAAACATAGTCTA  
TTTAGCAAAAATTTCTCCTCAAGCGAATATGGTTAATGGCTATGGCTCTTGTGTTGTGAACTTAGGTATCTCTGTTAC  
GAGATTTAGGCACTTCTGCTGCATTAATACAAAGGAAAGATCTTACTGAGTCTCTAATTAATACTGTTTTTGGTAAAT  
CTCCTCATGGGATTGACTTTATTTGTTCTGTTTTTTCCGGCTCTAGTGTGATATCCAGTATCTATCATCAGCCGAAAT  
AATTTAGTATTGATGTTGCTTAGTTTTACATTTCCCTTTTCGAGCTGTGCCGCGAGCTCACCTTGCTTTGCTTGAAGGG  
ACTCGAAATCAAACAGTCTCTAGGATAGAAATTTCTTCTCACTTGGCTTCAATAGTACTAGCGATTACTTTAGCAAT  
ATGGGCTTTGGTGTTTTCCAGTCTTGTGGTCAAGCTTTAATACTAATCTGATGTCTGCTATACAAAATCTGGCTGATC  
AAATGGAACCTTCTATTAGGGTTTTTATTAATATAAAGATTTGAAAAGTATTTTTAGTTTTAGTGCAAAATTTATCAA  
TGTTTAATTTTATAAATTTATTTTCAAGGAACGAGATAGCTTTATTTATGGTAAATTCATGTCGCTCAATTTCTCGGG  
AGTTATAATCTTGCTTATAGAATATGCTTTCCCATTTGCAAAAGTCTTACCTTTGTGCGCACTAGGTCACTTTATCCAAT  
ATTAAGTAAACAACAAAGTAAATAATCAGCATATCAAAAATATATTTAAAGTGTGCTATGTTGTTGTTTAAACAT  
GTCCATTGATGCTGAGCTGGCATTTTATAGTGAGCCTTTTATCCGATGATAATTCGGTGTGATGAAATGGTATCTGACGGGA  
ATAGTATTAATAATGGTTAGCGCAACTGCAATAATACAAGCGGTAATAGTACTTCTGGTTCAGTTTTTATGGCTAAAGG  
TCGTACAGATATTTTAAAGCTTGGCATTATTGGAATGATCTTGAAGTGGGAGCTTTCATCATAGGTGTTCAATATA  
CAATAACCAACTTTGCTATGTGTTATCTTCTGCTAATGTATTAATTTTTCCTTCTCATGTGGCTTTAATGGGTTTTG  
TTAGGGGAGAACTCAATGTTTTTTTTTAAAGAACTATCAATGTTTTGGCTACATAGTCAATGTTAAGTTACTTAA  
ACTCATTTGATTTATTTCTTTTCCCAATGCTATTTGCGAGCCTTAAATATTTTAGTTCATTTATCTTTTCTGGCCCGTTG  
TTTTATTTATAGCTCTCTCACTCTTCCGCAACTCTTAGAAAATTTGTGCTATCAAGATTAATAAATGTA

>Cluster\_28941

ATGATTTTTCGCGCCATTACCCGAATCGTTGGACTACTGGTCACTTTATTTTCAGGGACCATGATTATCCCTGGGCTGGT

AGCACTCATCTACCGGGATGGAGCGGGCCGCGCTTTTACCAGACCTTTTTTGTGCGCCTCGCCATTGGCTCTATGCTTT  
GGTGGCCGAAACCGCAAAGAGAAGGGTGAAGTAAATCCCGTGAGGGGTTTCTGATAGTGGTGCCTTTCGGACCGTGCTG  
GGTAGCGTGGTGGCTCCCTTTTATCTTCTCGGAAAGCCGAACCTCAGGATACCGATGCGTTTTTTGAATCTTCTC  
TGGCGTGACCCACCGGGGGCCACTACGCTAGTGGGGCTGGATTCGCTCCCTCAGCCATCCTCTTTTATCGCCAGATGC  
TGCAATGGTTGGCGGATGGGGATCATCGTGTAGCGTTGCGATACGCTATCCTCGCGGTGGGTGGATCGAGCTC  
TATCGCGCAGAAATGCCCGCCGCTGAAAGATAACAAATGCGCCCGGAATTCGGGAAACGGCGAAAACCTGTGGTT  
GATTTATGCTTGTGACCGTGGCTGTGGCTGGCGTTGTGGTTTGGCGGAAATGGATGCCTTTGATGCCATCGGCCATA  
GCTTTTGGACTATCGCTATTTGGCGGCTTCTCGACACATGATGCCAGTATCGGTTATTTTCGACAGCCCGACTATTAACACT  
ATCATTGCTATCTTCTGCTGATCTCCGCTGTAACTACGGTCTGCACTTTTTACTGTTAAGTGGGCTAGTCTGAAGGT  
TTATTTGGCGGATCCGGAATTTTCGATGTTTATCGCGTACAGTTTTTACTGGTGGTTATTTGTACACTCGTACTGTGGT  
TTCATAATGCTTACAGTTTCGGCGTGTGACAAATTAACAGGCGTTTTTCCAGTGGTGTGATGGCGACAACCGCCGG  
TTTACAACGACAGCATTTGCCGCTGGCCGCTTTTTTGGCGTACTGCTTTTTATGTTTACTGCTTTTATCGCGGTTGGC  
CGGCTCAACCGGGGTTGGCTGAAAGTGTATCCGATCCTGCTGTTTTAAGCAGGGGAAACCGTGGAGTGAACCGACTGG  
TGCATCCGAACCGCTCTATAGCATTAAAGTGGGAATCGCGACTGCCGGAACGATCCTCGAAGCCGTTTGGGGATTT  
TTCCTCCGCTATGCTATGGTGTATTATGTCAGTATGCTGGCGATATCCGACAGGGCGTGGATGACTTTCTGCTTTTGC  
CTCGGTTGTTGCAACATTGAATAACCTGGGGCCAGGGCTTGGCGTGGTTGCTGATAACTTTACCAGTATGAACCCGGTGG  
CTAAATGGATCCTGATTGCCAATGCTGTTTTGGTCTGCTGAGGTCTTTACATTGCTGGTGCCTTTTACCAGACTTTT

>Cluster\_26432

ATGCAACATAAGTTACTGATTAACGGAGAAGTGGTTAGCGGCGAAGGGGAAAAACAGCCTGCTATAATCCGGCAACGGG  
GGACGTTTTACTGGAGATTGGCCGAGGATCCGCGAGAGAGGTCGATGCTGCTGTTTCGCGCGGAGATGCAGCATTTGCCG  
AATGGGGCAAAACACCGCGAAAGTGGCTGGGAAATGTCTGCTGAAATGGCTGATGTTATCGAAGAAAATGGTCAGGTT  
TTTTGCCAACTGGAGTCCCGTAAATTTGTGGCAAAACCGCTGCATAGTGGCTTCAATGATGAAATCCCGGCGATTGTCGATGT  
TTTTCCAAAGTGGCGATTGGTGGCGGCGCTGTCTGAATGGTCTGGCGGCAAGTGAATATCTTGAAGTCAATCCGCTCATGA  
TCCGTCGCGATCCGTTGGGGGCTGCTGGCTTCTATCGCACCGTGGAAATTTCCGCTGATGATGGCTGCGTGAAACTGGCT  
CCGGCGCTGGCGGAGGGAAGTGGTGTGCTTAAACCATCAGAAATTTACCCGCTGACAGCGTTGAAGTTGGCAGAGTT  
GGCGAAAGATATCTTCCGGCTGGCGTGAATTAACGTGCTGTTTGGCAGAGGCAAAACGGTGGGAGATCCGCTGACCGGAC  
ATCCCAAAGTGGCGATTGGTGGCGGCGCTGCTGACGGGTTCTATCTTCCACTGGGGAACACATCATCAGCCATACCGCCGCTCAT  
AAGCGTACTCATAATGAACTTGGTGGCAAAAGCGCCAGTATTGTTTTGATGATGGGATATTGAAGCAGTGGTGAAGG  
TGTACGTACTTTTTGGCTATTAACAATGCCGGACAGGATTGACTGCGGCTTGTCCGATCTACGCGCAAAAAGGCATTTACG  
ATACGCTGGTGGAAAACTCGGTGCTGCGGTGGCAACGTTAAATTCGGGTTCCGCGGATGACGAGTCTACGGAGCTTGGAA  
CCTTTAAGCTCGCTGGCGCATCTCGAACCGCTCAGCAAGCGGTTAGAAGAGGCAAGCGACAGGGCACATCAAAGTGT  
CACTGGCGGTGAAAAGCGCAAGGTAATGGCTATTACTATGCGCCGACGCTGCTGGCTGGCGCATTACAGGACGATGCCA  
TCGTGCAAAAAGAGGATTTGGTCCGGTGTGAGTGTACGCTCTTCGACAACGAAGAACAGGTGGTGAAGTGGCGGAAT  
GACAGCCAGTACGGACTTGCATCTTCGGTATGGACGAAGATGTTGGCAGGGCGCATCGCGTCAAGCGCGGCTGCAATA  
TGGTTGTACTGGTCAATACCCATTTTCATGCTGGTAAAGTGGCAAGTGGCGCAGGCGGAGAAATTTCTGGTTACGGCA  
AGGATATGCTACTTTATGGGCTGGAGGATTACACCGCTGCTCCGCCAGTCAATGTTAAACATTA

>Cluster\_25675

GTGCCGCAACGCATTTAGTTCTCGGTGCCAGTGGCTACATTGGTFCAGCATCTGGTGGCAGCCTCAGCCAGCAAGGGCA  
TCAGATCCTGGCGCGGACAGTCAAGTGCAGACTTGGCAAACTGCAACTGGCTAATGTGAGTTGCCATAAAGTGCATC  
TCAACTGGCGGATAACCTTCCGGCCCTGTTGCAAGAAATTTGATAGTCTATTTCTGGTGCATAGCATGGCGGAAGGC  
GGTGAATTTATCGCTCAGGAGCGCCAGGTGGCTCTCAACGTCGCCGATGCGCTACGCGAAGTCCAGTTAAGCAATTAAT  
CTTTCTAGTTCATTTGCAAGCGCGCTCATGAAACATCTGATCATCTGCTGCTGCTCAGGCCACGGCGATTTTTTAC  
GTGAAGCGGGTGTCCCGTGACCGAACTACGTGCGGAAATTTATCGTTGGCGGGGTTACGCGCATTCGAAAGTGCATGCGC  
GATATGGTTTACAACCTGGCCGTGTTAAACGCGCCACGCTGGGTCCGTTACGCGCAACAGCCCATCGCGCTGGAACCTT  
GCTGCATCTATCGTGGCGCTGTAGATCATCCGGCTGCGAATCTGCGATCTTTCGAAACCGCGGACAGGAGTGGCTCA  
GTTATCAGCAACAGTTTGAACATTTTATGGCGGTGAGCGGTAAGCGCCGCTGGTTGGTCCCATCCCTCCCGCTCCCGGCT  
TGGATTTCCGGTGTGGTTTCTTAATGTGATTACTTCCGTACCGCCACCACCGCCAGGGCGTTGATTACAGGGCTGAAACA  
CGATCTGCTGGCGGATGACACCGGCTACGTGCGCTCATCCCAACCGCTGATGCTTTCGATGACGCGGTACGTAGCA  
CGTTGAAAGAGGAAGAAAACCTGGTCAACTCCAGCGACTGGGGATGACGCGCAGGCTTTTGTCTGCTGGCGACAGAA  
TACGGTTATTTTGGCAAAACAGCGGGGTTTACCGTTAAACAGCTTCCAGCGCTTACAGCGCTATGGCGGTTGGTCAATCA  
AATCGCGGTAAGAGCGTTATTTCTTTGGCAATTTTGTGGCAGACCGGGCGTTGATGGACCTTGGCATCGGTCATA  
AGCTGGCAAAAGCGCCCGGAGCGCAATATTTACAGACCGCGATGCGGTGGATAGCTGGAAGTGAATGTCGTTGAA  
CCGGAAAAACAACCTACGTTGTTATTTGGCATGAAAGCGCCGGGCTGGGACGACTGTGTTTTACCCTGGAAGATAAAG  
CGACTACTGATCTGATGTTTCCGCAATTTGGCATCCGACGGTATCCGCGGGCTGTTTTACTGTTTATGATGATCC  
CCGCGCATCTGTTTTATTTTCCGCGAATGGCAAAACGAATCGCCAGACTGGCAGAACAAAGCACAGATTA

>Cluster\_39144

ATGCATCAGCCACCCCGTTATCACCACCATTGTTGGCGGCTTGTGCTCGCTTTATCCTCGCATGCTGGCCAATAA  
ACTACGATTTTCTCCTCTGGTGGGATATCTGTTAGCGGGTGTGCTGGCAGGACCATTCCTCCGGGCTTTGTTGCCGATA  
CCAAGCTTGGCGCGGAACCTGGCTGAACCTGGCGTTATTTTGTGATGTTCCGCGTCCGTTTGCATTTTTCGCTCAAGGAT  
TTGATGGCGGTAAGTCCATCGCCATTTCCGGCGGATCGCCAGATAGCCGTTGGCGACGCTGCTGGGTATGGCGCTCTC  
CGCGTGTGGGCTGGGTTAATGACCGGATCTGTGTTCCGCTTATGTTCTTTCCACCGCAGTACCGTGGTGTACTGC  
GCGCACTTGAAGAACGGCAATTAATGACAGTACGCTGGGCAATCGCCATCGGTTGGTTGATTGTGGAAGACCTGGTG  
ATGGTCTGACACTGGTATGCTACCGCGGTAGCAGGAATGATGGAACAGGGCGATGTTGGGCTTTCGCACTCTTGCAGT  
CGATATGGGGATCACCATCGGCAAGGTGATCGCATTTATCGCCATTTATGATGCTGGTAGTGGCGGCTGTTGGTCCGCTGGA  
TTATGGCAGCGCAGCGCAGCAACCGTTCCCGGAGCTGTTTACCTGCTGGTGTGGCGTGGCGTGGCGTTAGGATGCTTT  
GGTGGGTTAGAGCTGTTGATGCTCTCTTTCGACTCGGTGCTTCTTTCGCGGATGGTACTGAAACGAGTCTGAACTGAG  
TCACCGTGGCGCCACGATACACTGCGCATTTGCGCGACGCGTTTTCGCGTCTGTTTTTGTCTCCGTCGGGATGTTGTTT  
ATCCGTTAATCTGATTTAGCAACCGCTGGCAGTACTGGCGACGCTAGCAATTTATCTGTTGGTAAATCGGTCGGGCT  
CTGTCTTGTGCGCTTTGTTGGTCACTCCAGCGCACGGGTTAACCATCCGCGCACGCTGGCGCAGATTTGGTGAAGT  
CGGTTTATCCTGGCGGACTAGGAATGGCATTGAATTTACTGCGCAGGCGGACAAAACCTGGTACTGGCAGGGGCGA  
TCCTGTGATTTATGCTCAACCCGCTACTGTTCCGCACTACTGGAGAAATATCTGGCGAAGACCGAAACGCTGGAAGAGCAG  
ACGCTGGAAGAGCAATCGAAGAAGAGAAGCAGATCCAGTGGATATTTGCAACCATGCGCTACTGTTGGTTACGGTCTG  
TGTAGGACCGCTGCTGGGGGAGAAATGCTCCGCTGATGATTTCCGCTGGTGGTGAATTGAGAGCTCACGAACCCGTTG  
ATGAGCTGCGGAGCGCGGGGCTCCGCGAGTATGGGCAATGCGGCGAACGAAGAAATATGCAACTGGCGCATCTGGAA  
TGTGCAAAATGGCTGATCTGACGATTTCCAACGGCTATGAAGCGGGCAGATTTGGGCTATCTGCCCGCGCAAAAATCC  
GGATTTGAGATTTATCCCGCGCCATTTATGACGATGAAGTGGGCTATATCCGGAACGTTGGTGGTGGTGGTGGTGGT  
TGGGTGAGCGTGAATTTGCCGTTACTATGCTGGAACCTGGAACCGCACCGCGGGTGGTGGTGGTGGTGGTGGTGGTGGT

>Cluster\_18793

ATGACTCAATTTACGCAAAATACCGCCATGCCCTTCTCCCTCTGGCAATACTGGCGCGCCTTTCCGGCTGGAACCTCTA  
TTTTCTGGTTAAGTTTCGGCTGTGTGGCGGGATATCTTAACCTCCATCCGCTCCTCAATTTGGTGTGTTGCCCGTTTC  
TACTGATGCCCATTCGCGACTATAGCCTGCATCGCTTGGCCACTGGATGTCCTGCCGATCGGCTTTGCTTTGTCTGG  
CATGACACCTGGTTGCCCTGGCCGGAAAGCATAATAGCCAGGTTCCGAGGTGGCGGGTTCAGTACCAGATTATTTAAT  
CGATCTTGTGCACACGCTTTATTAAGTCAGATGATGGGGCCATTTTGTGTTTATTCGTGGCCTGTTGAACTACTGGTGAT  
AATGGATTTCGATACCGTTTTTGTGGTTGCCATTTCTGCTATGGCTGAACGTACTTACCCTGGCGGGACCAAGTTTCTCC  
TTGTGGCCAGCCGTTCAACCAACGACCACTGTAACAACGACGGGTGGTAACGCAGCGCAACCCTTGGCGGACGGGTGG  
CGCACCGGTAGTGGGTGATATACCCGCACAACTGCACCGCAACAACAGCAACCTTAAACGCTGGCTGAATAATTTCT  
ATAACCGGAGGCGAAACGTAATFCGATCTCCGCTTTCGCTGCTCCGCTGATGCTCAGCCATTTGAACTACTGGTGAT  
AATATCTGTTCGCTTTCCCTGGTCCGATATTAAGCGCGCGGATTGATGTCGCATCCACTGTGGTGCATTTTCGATATGA  
GTTCAAGAAGCTTTAACTCCGCCACTCCACAGTGGCCCGCGCGCATCCGTTTACTGCGCGCAGCTGCGGGGACAGCTT  
CGCACACTAATCTGATCAACCGGCAAAACGACTGCTATCTGTTGATAACCTGTGAAACTGGGCTTTACCCAGCAC  
CTGATGATGGGACATAACGGCCAGTTCCGTGGTTTTTGAAGGAAAGTTTCGCAAAAATGGCGGCATGCAGAGCAATTGAT  
GGATCAACAATACTGCCGTTATTTTGTGGCTTTGATGGTTCCCGGTTTATGACGATACCGCGTGTAAACCGTT  
GGCTGGACCTTACCGAAAAGATAAAAACAGCCGATAGTCCACGTTCTACAACACGCTTCCACTGCATGACGGCAACCA  
TATCCGGGCTCAGCAAAACAGCGGATTAACAAGCGCGGGCGCAAAAATCTTTGATGAACTGGACGCTTCTTTACTGA  
ACTGGGAAATCCGGCTGTAAGTGTGATGGTGGTGGTGGCGGAAACGCGCGCTGAAGGGCGGCAATGCAATGCAGG  
TATCTGGTCTACGTGATATCCCTAGCCGCTATCACAGACGCTCCCGTTGGGTGAAATCTTCCGCGATGAAGGCCA  
CATCAGGGGGCTCCGATTGCTCATCGACCACCGAGCAGCTTCCGGCTATCTCCGATCTGGTGGTTCGGCTTCTTGATGG  
CAAGATTTTACCAGCAATGTTGACTGGAAAAACCTACCAGTGGTTTACCACAAAACAGCACCGGCTCTCTGAGAAT  
CAATGCCAGTAGTTATTAACATACCAGGATAAACCTGCTGCTGAAACGCGCGCTGCTTACCCTTACCCGAGTAA

>Cluster\_67111

ATGAGTAAATACACACACCTGTCAGGAGTTTCGTTAATTAATAATGCCCGTTAAACAAGGTACAGCATTTTTCAGCATC  
TGAGCGGAGAGAGTTCAATCTGAATGGGTTGATTCGGGCAAAAATGAAACACTGGAAGAACAGGTTCAACGGGTAAAAA  
TTCAGCTTGTATCGCTTTGTTACTGATGAAGCGGACATGTGTTTTTACGTAATCTTCAGGACACAAAACGAAACGCTGTT  
TACAGTTTATCACTTCCCATCTGGAAGAACGCTGCCGTTAATCTATACCCACAGTCCGTTATGCCTGTCAGCATTA  
TTCTGAAATATGGCGAAAACCCCGGGTATATGCAATGGCTGGGAAGACAGAGACAATATGATGCTTTGTTGAGGAACG  
TTCCGTCAGATAAATCAAGGGTCACTGTTGTGACTGACGGCAGCGTATCTGGGACTGGGGGACCTGGGGCGGA  
ATGGGGATCCCGTTGGAACCTCTCCCTGTATCTGCCTGCGGGGGGATTGATCCTCAGATGTCCTGCCGTTGGTTCT  
GGATGTGGGAACAACAATGAATCGTTACTGGATAGTCTGTAATATATGGCGCCCGCATCCAGTATTTCTGACAGTG  
ACTATTACCCGTTTCTGGAACGGTTTATGTTGCTGTGGAAAAACGCTGGCCCGGCTGTGCTGCAGTTTGAAGATTTT  
GCACGAAACATGCGACCGCTTACTGAAAAAATATCAGGATCCGCTGTGTTGTTTTAATGATGACATTCAGGGAACGCG  
AGCAGTGGCCCTGGGAACGCTGCTGCTGCTGCCACATAAAAGACAGACATTAATCTTCCGAGACCCGCTTTTTGTCG  
GGCGGGGCTGCGAGGATGCGGGATTGCCGATTGATTGTGTCAGTAATGATAGCCGAGGGGTTGAATGAGCAGGAAGCG  
CGTCGCCGTTATTTATATGGTGGATAAAGACGGTCTCTGCTGAAAGACAATCCGTCATTAACAGACTTTCAATCACCCT  
TGCTGGCTGCGAGAACGCTTGGTTTTCTCTGTAACAAGGTTCTGATGCAATTAATCGCGGAAATCAAACTCCG  
TGCTGATTGGAGTGTCCGGTGTGGCAGGGCTATTTACAGAACAGGCCATCAGACAGATGATGACATTTGAAAAACCG  
ATCATTTTTTCCGCTGTCCAAATCCCACTCAAGGCGAGAAGCGGTACCAGCAGATCTGCTGTCCGAGTGAAGGCAATC  
AATGTGGCCACAGGACCGCTTCTCTCTGTTGGAATAAACGGGGTGCAGAGGGTGAATTTCTCAGTGAACAAATGCT  
ATATTTTTCCCGGTTATAGACTTTGGGTGCTGATTTCCGGTGCCACACAGAGTCAACCGGAATAATGTTTTCTGGCATCTGCC  
CGGCACTGGCATATTTGAATGTAAGACACAGGACTGTTACCGGATATCCGGCACATACATGACATATCCCGGATGAT  
AGCATTTGCGGTTGCGCAGTCTGCGATAGCAGCAATGTGGCCCCCGCAGACGCTGCCGACTGACAGAAAAAGTTGG  
AAAAACATTTCTGGGCTCTGAATACAGGATTACCATCGCATTTCTCTTTAA

>Cluster\_38749

ATGCCATCTGCTCGTCTGCAACAACAGTTCATCCGCTGTGGCAATGCTGCGAGGGTAAATCGCAGGACACGACGCTCAA  
CGAAGTGGCAGGTTATTGAGCTGCTCGGCTCGTATATGCGCACCTGCTCAACACCATGCAGGATCGCGGCTGGCTGA  
CGTGGGAAGCGAAGTTCGGCGCGGCAACGCTCGGCTGCTGACATTCCTATACCGGGCTGGCGCTTCAGCAACAGCGA  
GCAGAGGACCTGCTGGAGCAGGATCGTATCGATCAACTGGTGAACCTGGTTGGCGACAAAGCGGCTGTGCGGCAATGTT  
GGTTTCTCATCTGGGACGAGCTTCCGCGAGGGCGGCAACATCTGCGGTTCTACTATCGTCCGTTGCGTAAATCTGC  
TGCCCGGCAAGTGCATTCGCTGTTCCGAAACCCATATCGCCGGCAAACTTTCAGTTCCGTAACGCGCATAAATGAGGAA  
AATGGGAACTGGAAAGCGGACATCGCCACACTGGCAGCAAAATTTTACCCTTTCAGTGGCGTTCTTTTTGCTCCAGG  
AGTCCATTTTTCATCATGCTGCTGAACTGGAATGGACGACGTGATCGCTCTTTAAAACGAATCAATACGCTGCCGCTCT  
ATTCGCATATTTGCTGACATTTGTGTCGCCGACGCTGGAGCTGGATATCCATCTCACGCAACCGGACCGCTGGTTACCG  
TTACTGCTGGGCAAGTTCCGGCATGATCTGCGCGCAACTGGAAACCTCAGCAACTTTGCCAGCCATCCCATCGG  
AACGGCTCTTATCGGTTGATCCGCAACAGCAGCAATCAATGAAAATTCAGGCAATTCGACGACTCTTTTGGTTATCGGG  
CATTAATCGACGAAGTTAAGCTGCGGTTGCGGAAATGCTGATGACCCCGGGAGGCTGATGCTGAAAGGACCG  
CAAGACGAGGAAAAGAGATTGAAAGCCGCTTGAAGAAGGTTGTACTATTTACTGTTCCGACAGCCGTACCCATCGCGG  
GGCAATCAGCAAGTCAAGACTGGATAAGCTATGTGCTTTCCGCGACCACTGGTTTATTTCCGCGAGGACAGTACC  
AGCAGTTGTGGTTTTCCGGCTATGGGCTGCTTCCCGTTGGCACCATAACCGCAACCAATAAAGAGCAAAAACCGGCTGGT  
CTGAAAGCTCACCTGACCTTTTATCAGGATCACAGTGAAGATAGGGTGTGTCGGGATCATGACGAGATTCTGGC  
AAGTCAACAGGCTCAGCTGGAAATCAAAGAGATCAGCTACGATCAGTGGCATGAAGGAGAGATCGAGAGCGATATCTGGC  
TTAACAGCGCAACTTACGCTGCGCTGGATTTTTCGCTATTTCGCGACCTGTGCGAGGTGCGCTGCTACACACTGT  
ATTCGATCGACTGGCAAGCCGACGCGCCGCTGGCGCAATGGGAAATAAACCCTGGCGAAGTGGTCCAGCAACTGGT  
CGCCAGCAAGCAATGGTCCGCTTATCCACCCTGGCTGATCATCAGGGGCAACGAGTATGCGCGCCTGCGTATGA  
ATACCCTCGGCTGGTTCGATTTTAAATCAGCGTGGTTTGGCGCGCGGATCCATGA

>Cluster\_8580

ATGGAAGGTTCCGATTTTTTACTCGCAGGAGTGTGTTTTCTCTTCCGCGGGTGGCTGCGGTTGCCGCTGGCATCGCGGCT  
GGGTATTGGCGCTGTGTTGGGATATTGCTGCGAGGATGCAATTTGGCCGTTGGGGCTGGGTTTTATTAGCGACGCTGC  
ATGAGATCCTCCACTTTTCCGAACTCGGCTGGGTTATCTGATGTTTATCATCGGCTTGAGTTGAATCCCTCCAACCT  
TGGCAACTCGCGGCTTCGATTTTTTGGCGTAGGCGCGGACAGGTTGCTGTTAAGCGCGGCTTGGCTGGCGGATTTAGT  
GCTGACGGATTTCCGCTGGCAGGCGGGTGGTGGTGGCATTGGCCTTGGCATGCTTCAACTGCAATGGCGTTGCAAT  
TGATGCGTGAGAAAGGATGAATCGCAGCAATCCGGCAGCTCGGTTTTCCGTTCTGCTGTTTTAGGATCTGGCAGTA  
ATCCGACACTGGCGTATGTCGCTGTTGTTGGCGGGTCCGACAGCAACATTTTCAGCTGGATGAAGGTCGGCATGAAGGT  
GCTGGCGTTTTGCTGGCTGATTTGGTGGCGCTATTTACTGCTGCTCCGTTATCCGCTTTATTCAGCTTCTGGCCTGC  
GGGAGTGTTCACCGCGCGACGCTGCTGCTGGTGGTTCGCGATTGTTTATGGAATGCGCTGGGGCTGCTGATGGCG  
CTCGGTACATTTATGCGGGGCTGCTGCTGGCGGAAAGTGAATATCGCCATGAACTGGAAACGGCTATCGATCCCTTCAA  
AGGCTTGCCTGCTGGTTTTGTTTATCTGCTGCGCAGTCACTCAACCTCGGGGTGCTTTATACCCATCTGTTGGGG  
TAGTGATAAGCGTGGTTGTGCTGGTGGCGGTAATAATCTGCTGCTGATCTGCTGGCGGATGATGCGGCTGCGTAGC  
TCAGAGCGGATGCAATTTGCTGGCGTGTGAGTCAGGGTGGTGGATTTGCCTTTGCTCTTTTCTACCGCTTCTTACA

ACGCTTATTCCAGGGCGACCAGATGGCGTTGTTGCTGGTGACGGTGACGCTTCCATGATGACCACGCGTGTGCTGATGA  
AGCTGGTGGATAAATGGCTATCCCGCCAGTTTAAACGGACCCGGAAGAAGACGAAAAACCGTGGGTCACGATGATAAA  
CCCCAGGTCAATTGTCGTGGGCTTCGGGCGTTTTGGTCAAGTGATGGTGGTTCGTTGCTGATGGCAATAAATGCGCATTAC  
CGTCTGGAGCGGATATCAGCGCCGTTAACCTGATGCTATAAATACGGCTACAAAATTTATTACGGCGACGCCACGACGAG  
TCGATCTTTTACGTTTTCGGGGTGCAGAGGCGCTGAGTCTATCGTCAATACCCTGTAACGAGCGGGAACACATGAAG  
CTGGTGGAAATATGCCAACAGCACTTCCCGCATTTGCATATTTCTGCGCGAGCGCGGACGCTGTGGAAGCGCATGAGTT  
ATTACAGGAGGGGTGACCGAGTTTCCCGTGAACATTTCTCCAGTGCCTTAGAGCTGGGCGCAAGACGCTGGTCCAGC  
TTGGCATGCATCCGCATCAGGCACAGCGAGCGCAACTGCATTTTCGCCGCTGGATATGCGGATGCTGCGAGAGCTCATC  
CCAATGCATGCCGATACCGTACAAATTTCTCGCCAGGGAAGCCGACGCGAACTGGGAAGAGATTTTCCAGCGTGAAT  
GCAACAAGAACGACGCCAGCTGGACGGTGGATGAATTTGAGTAG

>Cluster\_24745

ATGCCGTGAACGAAGTGTGAACCAGAAACCACCCGCAAGCAAGCCGTAAATCTGTA AAAACGCAAGAACTGCACTGTC  
TGCCCTGCTGGCGCAGACGGAGGAGTGAAGCTGCCGCTGGATTAACCTGATTAATCACCCTGAATGTGCGCACGGTGC  
CGTATTCTGCGGAGTCCGTCAGTGAACCTGGCTGATCCATTAAGGGAGTGGCCTGCTGCAGAACTGGTTGTTTCATGCC  
CTGCCAGGTGACCGTTACCGTGTGCGCGAGGTGGTGGCCGACTGGCAGCACTCAACATGCTGGCAGAGCGTGACATCAT  
TCCGGCTGACTGGCTTCCCGTAAAAATTTATCCGACGAGCTGGCGACTGGCCGATCAATGACCGACACCGGTCACTC  
GTCGGGATATGCGCACCCCTGCCAACAGATTTCCGGATTTCCGCGCAATGGCGCAGGAAGGCAAAAACACTGACACATCGT  
GATTTGCTGGGCTATTACCCCTGCCACGTTTCAGCGAATGCTGAACTGGCTGACCTTGGCGCTGTCATCTCGATGCGCT  
GGCAGAAGACCGCATCACCACCGAACACTGTGACGGCGTGGCGCTGGAGAACGACACCCGCGCTCAGGTGCGAGTGTGTTG  
AAGCCGCTGTGCTGAGTGGGATGGGCGGTAACCGGAAGTACAGACCAATTCGTCGCTGCTGGTGACCGAAAGTGAAGTGGC  
GTGGCTGGGAACAGTAAATTTCCGCTTTCGTTGGGGCTGATGCCCTTCGCGCAGACGAACTGGCGCACCGATTTGTTTACGCGA  
TGACGGGAGCGTTATGTCGACCGCTGGCGCTCGATGCCGCTGCTGGAAAACTCCAGGCTGTCGCTGAACACCTTC  
GGGAAGCCGAAGGCTGGGAATGGTGGCGCGGCGCATGGAGCCTGTCGCTGAGTGGCGTGAGGATGCCGGAATACACCGC  
TGCTTGGCCGAGCGGAAGCTGCTGACGGAGCGGAGAGCAACCGCTGAACGAACTGATGACCGCTTACGACCGCT  
GGAAAAACAGTGTGAGGAATCCGACCTGCTGGAAGCAGAAATGAAGCTGATGCGCTGCATGGGAAGGTCAGAGCGTGGGA  
CGCCGAGATACGTCGCGGAAGCGGTGTGGTGGTGTCCGCGCTTATGGCAACGATATGTCAGCGTGGTGTGACGTTG  
CGCAGTGAAGATGACGCGACTGACGACGCTGACCGCACGGAACAGGTGACGAGGAAAGCGTCACTGGAGGAAATCAGCCT  
CGCGTGGCTGACGAAATGCTCAGAGCGACGCTGGCAGTCCAGCGCGCACATGACGAGCAGCCGACAACTGCTGCTG  
CACTGCTGGCATGGACGCTCTGCTGAAATGTGTTTGGCAGCGGAGCGTACAGTAAACCAGCACAAATCAGCCTGGAATGT  
GAACATTTATTCGTCGACAGCGATGCGCCATCGGGGAAGGAGTGGCGCATTCATGGCGCTGATGGCAGAAAAATCCCG  
TCTTGCAGCCCTGCTGCCGAGGGGTGGTACGGGACATGACGACATTCCTGTCCCTCAGTACGAGGTTGCTGTTATCCC  
TGCTCAGTTCCTGCACCCGATGCAGCCTTAACCGTGTCCAGACCCGCTGAGTGTGGTCCACACGTCACGAGTCCGCTTGC  
TCGCTGGAAGCGCTATCGGATTCACATGCGCGACTGGTGGCAGCCGACAAAAGCAAACTTCTTCGGACACCTGAAAA  
GCCGACGATTTATCCGACCGCTGAATGAGCCGGACTGTCCGGTCCGCGACGGGACCGGAGAAATGAAGAAAGGTGATG  
CGGCTGAACATGCAGAGCACCATATGAAGACAACCCGCTGGGTTCCAGGCTGGATGTGTGCACCACATCCACAGACAGAT  
GCCACTGAACGCACCCGATAACCTGGCTGATGCCCGCTGA

>Cluster\_27175

ATGCTTCCATGACAACACTGATAAAGCCTTTTTGAATGAACCTGCCGCTGGTGGTCAATTCACACCTGCTCAC  
CGATCCCGCAAAAACCGCCGCTATCGCAAGGGCTTCGTTCTGGTCAGGGCGACGCGTGACTGCTGTTTCCCTGGCT  
CACTACTGGAATTTGGCGGGTGTGAAAGCCTGCGTCCAGCTGACAAAAATTTCTGATGACGGCTGCCAATACAGGC  
CTGACCGAAGGATCGACGCCAAACGGTAACGATTTATGATCGCGATATCGTGATCATCAGCATCTCGGCTCAGCAAGCT  
GCAGTTCCTCGGCAAGGGCGAACAGTGTGGCCTATCCGGGACCCACGCTCTATTCACTGGA AAAAGCCCTCAAAACCCG  
TGGGACCGCAACCCGCTCAGTGTGGATCATCGTGTATCGGCGCATCGGCTATCGGCGGTAATTTGGCAACACTCCGGC  
GGCTCGTGGTGAACGTTGGCCCGGCTATACC GAAATGTCATTTATTCGCGCTATAAATGAAGATGGCAAACTGACGCT  
GGTGAACCATCTGGGATTTGATCTGGGCGAAACGCCGGAGCAGATCCTTAGCAAGCTGGATGACGATCGCATCAAGATG  
ACGATGTGCGCCAGATGGTGTGTCACGCCACGATTTGACTATGTCCACCGCTTCGTTGATATTGAAGCCGACACGCC  
GCAGCTTATAACCGTATCCGGATCGGTTATTTGAATCTCTGTTGGTGGCAGGTAAGCTGGCCGCTTTTGGCGTACGTT  
TGATACCTTCGAAGCGGAAAAAATCAGCAGGTGTTTTATATCGGCACCAACCAGCCGGAAGTGTGACCGAAATCCGCC  
GTCATATTTCTGGCTAATTTGCAAAATCTGCCGTTGCCGGGAAATATATGACCCGGATATCTACGATATTGCCGAAAA  
TACGGCAAGACACCTTCTGATGATTGATAAGTTAGGACCCGACAAGATGCCGTTCTTCTTTAATCTCAAGGACGAC  
CGATGCGATGCTGGAGAAAGTGAATTTCTCCGTCGCAATTTTACCAGCGTGAATGCAAAAATTCGCTCACCTGTTCC  
CCAGCCATTTACC CGCGCATGAAAACTGGCGGATAAATACGAGCATCATCTGCTGTTAAAAATGGCGGGCGATGGC  
GTCGGTGAAGCAAATCGTGGCTGGTGGATTTTCAAACAGGCCGAAGGTGATTTCTTTGTCGTGACGCCGAGGAAGG  
TAGCAAAGCGTTTTTACACCGTTTCGCCGCTGCGGGCGCAGCAATTCGTTATCAGGCTGTGCAATCCGATGAGTCAAG  
ACATTTCTGGCGCTCAGTTGCGGATATCGCTGCGCGTAAACGACAAACGAAATGTTGATGAGCATTACC GCGGAGAT  
CTGGTGCACAAGCTCTATTTATGGCCATTTATGTGCTATGCTTCCATCAGGATACATCGTGA AAAAAGCGGTGGATGT  
GCATGCGTTGAAAGAACAGATGCTGGAATGCTTCCAGCGCTGGCGCAATACCCTGCCGAACATAACGCTCGGTCAAT  
TGTATAAAGCACCGGAGACGTTGCAGAGTTTTATCGCGAGAACGATCCGACCAACAGTATGAATCCGGGGATCGGTA  
ACCAGTAAGCGGAAAAACTGGCAGGAAGTGGAGTAA

>Cluster\_53545

ATGGCGAGGATGCGTCAATCGAAGTGCAGTAGAAAATCTGAAAAAGAAGGCATTAGCGTGTCTTTGGTGTACCCGG  
CGCAGCAATAAACCCACTCTATGCGCGATGAAAAAATCAGCGGATTTGATCATATTTCTGGCCGTCATGTTGAGGGCG  
CCTCGCATATGGCTGAAGGTTACACCCGAGTCAGAATGGCAATATTGGCGTGTGATTTGGCACATCAGGCCCTGCGGGC  
ACTGATATGATTACCGGGCTGTATTTCTGCTCTGCGGATTCATTCCTATCTCTGCATTAAGTCAAGCTCCCGTAGG  
AAAACTTCATAAAGAAGATTTCCAGGCCGTCGATATTGAGGCTATCGCCACGCCAGTAAACAAAATGGCTCGCACAAATC  
TCGAAGCCGGTCACTTGGCGGGATATTCCAGAAAGCCCTTCTGGGAAATGCGTTACGCGCCGCTGGCCCGGTTCTTTTA  
GATCTCCCTTTTGTGTTTCAGATGACCGAAATTTGAGTTTGTATGATGCTCTATCAGCCACTAACCCCTGGCAACCTCA  
GGCAACACGGGCCAGGACGATACCGCATTAGAAATGCTAAATGACCGCAAAAAGCCGTCATCATCGCTGGCGGTGGCA  
TTATTAACCGCAAGCGAGTGAATTTGTTGCTGAGTTTGTGCTGAGTTAACTGGCGTCCCGTCAATCAACCTTACGGCGT  
TGGCGGCTTTTATCAGACGATCACCCTAATGATTTGGTGCATGAGGATGTCAGGCGGGTCACTCGCTATGTTAACGCCAG  
TTATCTGGCTCAGATTTTGTGTTTGGTATCGGTAACCGTTGGGCAAAACCGCCATACC GGAGCATTGAGACCTACCCG  
AAGGCCGCAAAATTCATTCATGTTGATATCGAACCTGCACAAATTTGGCCGGATATTTGGCCGGATCTGGGCATTTGTTCT  
GATGCTGAAAGCCCTTAAACGCTATTTATTCAGTTCGCCGCTGATATGAAGCCAGTGGAGAACTGAAAGACCCGACGCTC  
CTGGATTCGCAATGTGCGCGAGCTAAACCGCAACATGCTTCTGCTGTTGAACTTTGACTGCAATCCAATTAACCCGACGC  
GCGTGTATCAGAAATGAATAAGTTTTTCGGACCGGAGACGCTATATTTGCAAAATTTGGCTGGCGCAAACTCGCCGA  
AACCAATTTTACATGTTTACCGCCACGCCACTGGATTAATGCTGTCAGGCTGGGCGCTAGGCTGGACAATGCCCGC  
AGCACTGGGCGCGTAAAAGCTGATCCATCTGTTCCGTTGTTGGCAATATCCGGTGAATACGATTTTCAATCTTGTATG  
AAGAAATAGCCGTCGCGGCACAAATTTAATCTTCCGATATCCATATTTTACTTAAACAACGCTTATCTTGGTTGATTCGT  
CAATCACAACGTCATTTGATATTTGATTTATGCGTTCAACTGTCAATTTGAAAAATTAATGCTCCAGAAATTAATGGTTA



TGGCGTTGATCATAAAGCTGTGGTTGAAGGATTAGGATGTAAGCGATTTCGGTATTCGCATCACAGGATATTGCGCCTG  
CACTGCAAGAAGCCAGCGTTTTGCGTGACGAATTTACGTACCTGTTGTTGTAGAAAATTATTACTGAACGCGTACTAAT  
ATCGCTATGGACCTGACATTAATAAAGTCACAGAATTTGAAGAAATTCGATTTATAA

>Cluster\_22417

ATGAAAACCTGCGCATCGAATCAAGTGACGTGATTATCATTTGGCGGTGGCGAACGGGAGCCGGGATTGCCCGGACTG  
TGCCCTGCGCGGGCTGCGCGTGAATTTGGTTGAGCGCCACGACATCGCAACCGGTGCCACCGGGCGTAACCACGGCCTGC  
TGCACAGCGGTGCGCGCTATGCGGTAACCGATGCGGAAATCGGCCCGCGAATGTATTAGTGAACCAGATCCTGAAACCG  
ATTTGCACGCTACTGCGTAGAACCAACCAACGGCCTGTTTATCACCTGCGCGAAGATGACCTCTCCTCCAGGCCACTTT  
TATCCGCGCTGCGAAGAAGCAGGGATCAGCGCAGAAGCATTGATCCGACGCAAGCGCGCATATCGAACCTGCGGTTA  
ACCCGGCACTGATTGGCGCGGTGAAAGTTCCGGATGGCACCGTTGATCCATTTCTGCTGACAGCAGCAAAATGCTGGAT  
GCCAAAGAACACGGTGCCTTATCCTTACCGCTCATGAAGTCACGGGGCTGATTCGTAAGGCGCGACGGTGTGCGGTGT  
TCGTGTACTGTAACCATCTCACCGCGAATTCAGGCATTCATGCGCCTGTCGTAGTTAATGCGCGGGGATCGGGGGC  
AACACATTCGCCGAATGCGCATCTGCGCATTCGCATTTCCGCGGAAAGGATCGCTACTGATCATGGATCACCGCATT  
AATCAGCATGTGATCAACCGCTGCGCAAACTTCCGACGCGGATATTTGGTGCCTGGCGATACCATTTCCGTGATTGG  
CACCACCTCTTACGTATGATTACAACGAGATGACGATAATCGAGTGACGGCAGAAGAAGTGTATTTCTGCTGCGTG  
AAGGGGAAAAACTGGCCCGGTGATGGCGAAAACCGGCATTTTGGGGCTACTCTGGCGTACGCCCGCTGGTTGGCCAGC  
GATGCGATCCGAGCGGGCGTAACGTGACCGTGGCATCTGCTGCTGTCGACCATGCTGAACCGCATGCTGGCGGGT  
TATCACCATCACCGGTGGCAACTGATGACCTATCGGCTGATGGCGAATGGGCTACCGACGCGTATGCCGCAAACTGG  
GCAACACGCGCCCTGTACGACCGCCGATCTGGCACTTCTGGTTTACAGGAACCCGCTGAAGTTACCTTGGCTAAAGTC  
ATCTCCCTACTGCCCGGTGCGGGTTCTGCGGTTTATCGTCATGCGGATCGCACGCTGCCGCTGGAGCGGAGCGG  
TCTGCACCGTAGCTGGTATGTGAGTGCAGGCGTAACTGCGGGTGAAGTGCAGTACCGGTAAGAAAATTTAAACGTTA  
ATAGCCTGCTGGATTTACGCGCTGATCCGCTGTTGGGATGGGCACCTGCCAGGGAGAACTCTGCGCTGCCGCGCTGCC  
GGACTGCTGCAACGTTTTTAACTGACGAGTCCGCACAATCTATCGAGCAACTTTCCACCTTCTTAAACGAAACGCTGGAA  
AGCGCTCAACCCATCGCTGGGAGATGCACCTGCGGAAAGCAATTTACCCGCTGGGTTTATCAGGGATTGTGTGGTC  
TGGAGAAGGAGCAGAAAGATGCGCTTGA

>Cluster\_39968

ATGCCCCGTGATCACGCGGCTTATGCTGCAAAACTTCAAAAAGTTTCCGGAACCTGGACCTGCGCTTACGCAACGATCGTAA  
CATTTCTGGTTGGGACAAATGAGTCCGGGAAAAGCACTATTTCTGCTGGCTTTGACCTTGTGCTGAGTGACAGCAGGCATC  
GGGTTGAGGCGCTGGGGTGAATCGCTCCTGTACAGTCAGCAGTCAGGCATTTTCCAGGAAGGTGAGCGCGTGGCGAT  
CAGTTACCGCTGCTGACCGCTGACGTTTTTCCCTGAGTAATGGGGGAGAGCTGACCTGAACGGCAGGCAAAATCTGGCGGG  
TATGTAGCGGATGGTCTCAGAAATGCGCATGCTCCATGATGGAGGAATACGGTCAGGATATACACCATGTTTTGACAG  
AGGATCCTGATAAATTTCCCTATGAATACTATTTCCGTGAGTTTCCAGCATTTCGCGTGGTCAATTTCCGAGGTTTCAGA  
CGCTATCTGCGCCATCTGTTTTTACAGTGCACGCTTATGATAACGAGCATGCCGACAGGAGTATACGCGCACAGTTTA  
CAGCGTCAATGTGCGCGTGGCGGATCGGTACCGGCTTGAAGCAAGTTACCGGCAACAGAAAATGCACCTTCTGCCCGGGC  
ATCTGTCCGCATAAAACGACAGCTGAAAACGATACAGTTTGGCGTGCCTTCCGGCGTAAATCAGGTTCTGAGGCGAAC  
CTGGAACATTACTGAGGACGGTATTTCCATTTCTGCTACCGTGAAGGAAAGGAGGAGGAGTGTTCATCAAAAACGGTTTGGCT  
GCAGCGCATCAGCAGCAGGGGGAGAGATCCACGCGCTGTTGCTTGGAGGCGGAGAAATCATCTCAGCCATGTCAGTA  
TGAAGAGGCTGGTTAATCAGCTTGCACGGAACGGCAGCAGCAGGTTGTTTATGCCACACACAGTAGCCATATCTCCTCC  
CGCTGACCTACGTAAGGCTATTTCTCCTCGGAGTACCAGCGGCTACTGATGAATGAACTTTCCGCTGAGACTGCCG  
CTTCTTCAAGAACGACCGGATAATAACCTGCTGGAATTTGCGCTGGCCAGACGCGTGTGCTGCTGAGGAGGGGATGCTG  
AGTTTATTTGATCGAGGCTTTTATCAGCGCTGATGGCAGGCGACCGGAGATGATGGGGTTACATCATCGCTATC  
GGCGGAACGAGTTTCCGCTGTTATCTTGAAGTGGCCGCTTCTTGAAGAAATCGTGTGCGCGCCCTTCCGCAACATGACGG  
CAACTATCAGCAAAAATGCGATGAACGCTATGCTGACGTTGTTTGTTCGCGCTCCCGGTTTGTGCTGACACAGCAACA  
GCCGCTCCACATTTGAAATCTGCTGTATCAGGATAATGCCGACCTGTGTGATGCGCTTTTCCGCGGAACCGCGGACA  
CTCAGGTTACAGGATTACATGCTGGCCAATAAGGCAGAAAGCAGATTCAGCTGTTACAGTTGACGCGGAAAAGCTGAC  
CGTTCCAGATTATATCCAGGAGGACTGGCATGGATAAGAGAGTGA

>Cluster\_16810

ATGACAGTGAATACTACGCCATTTCTGACTAATCAGGGCGGGCAGACTGGCTAACGCGACGATGCTCGGCAGTAAGCT  
GAATCTGACGCAATGGCGTGGTGATGCAAAATGGTGTTTACCAACACCAGACCCTGCACAAAACAAAATGATTAACC  
AGAAACGCATGACCCGCTGAATCTTCTGAGTGTGACCTAACAAATCAGAGCCAGATTAATGCGGAGCAAAATCATCCCT  
GAAAACGAGGGGAGATTCTGGATCCGTGAGATTGGTCTTTATGATGATGAAGGTGTACTCATTGCGGTGCAAACTGCC  
GAAAACGTACAACCCGAGTTGCAGGAAGGAGTGGACGCACCAGACTATCCGATGATTTCTGGTTGTCAGAACCCG  
AAGCCATCAGCTGAAAATCGACCCGCTGTTGGTTCTGCAACCCGCAAAATATGTTGATGATAAAATCTCAGAGCAGGAA  
CAGTCACGACCTCACCCGACGCTCGCTGACCGTAAAAGTTTACTCAGTTAAGCAGTGAATTAACAGTGAATCAGA  
AACACTGGCCGCAACCCGAAAGCGGTTAAGGCTGCATATGACCTGGCTAACGGGAAATATAACCGCCAGAACCCACCA  
CTACACAAAAGGAATGTTCTGAGTCTGATGCGCCACGACAGCAGTCTGAAAACGCTGGCAGCGACACAAAAGCTGTT  
AAGCGGTTAATGGATGAAACGAACAAGAAAGCACCATTAAAACGCGCCGACTGACCGGAACGCCAACACCAACAGC  
GCCACAGGGGACTAATAGTACCCAGATCGAAGCAGGCTTTCTGTTATGGCCGCGATTGCCGACTTTGATGTTCTGAC  
CTGATGCACTGAACACGCTGAACGAACCTGGCTGCGGCGCTGGCAATGACCCGAAATTTGCGACCCACCATGACTAACCGG  
CTTGGCGGTAAGCAACCGAAGGATGCCACCCCTGACGGCGCTGGCAGAGCTGTACATCAGCAGATAAACTCCATATTT  
TACAGGGGAGATGCTGCGCGTTAACCCGCTTGAAGTGTGGACGTTGGACGTTCTTGGTAAAACAGCAGCTCAGGGAG  
TTCTTGATTAACCTTGGTTTTGGGGAGGCTCTGCACTGCCGTTGGTGTGCGCGTCCGTTCCGTGGTCCCTCAGCAACACCACCA  
ACGGGCTGGCTGAAATGTAACGGTGCAGCATTTTCTTCTGAAATGATCCAGACTGGCAAGGGCTTATCCCAACATAA  
ATTACCGGATTTACCGGTTGAATTTATCCGTGGCTGGGATGATGGCGCGGGATGATGCGGGACGTACCCGCTTTCAG  
GGCAGGATGGTACAAGTTTTTCTCATTACGGAGGTAATTTGACATTTGGGCTGGTCAATTAATAAATACTATGACCAA  
ATTTGTTCTAACCAACCCAGGCTTTTCCGTTTTTCTATTGTCAGGGCTTACAGAGGTGATGGGGTTAATTTATGTAACCAT  
TCGTCTCGTAATATTACGTTAATTTACATCGTAAGGGCAGCATGA

>Cluster\_31268

ATGACAGTGAATACTACGCCATTTCTGACTAATCAGGGCGGGCAGACTGGCTAACGCGACGATGCTCGGCAGTAAGCT  
GAATCTGACGCAATGGCGTGGTGATGCAAAATGGTGTTTACCAACACCAGACCCTGCACAAAACAAAATGATTAACC  
AGAAACGCATGACCCGCTGAATCTTCTGAGTGTGACCTAACAAATCAGAGCCAGATTAATGCGGAGCAAAATCATCCCT  
GAAAGCGAGGGTGGATTTGATCCGTGAGATTGGTCTTTATGATGATAAAGGTGTACTCATTGCGGTGGCAAACTGCC  
GAAAACGTACAACCCGAGTTGCAGGAAGGAGTGGACGCACCAGACTATCCGATGATTTCTGGTTGTCAGAACACCCG  
AAGCCATCAGCTGAAAATCGACCCGCTGTTGGTTCTGCAACCCGCAAAATATGTTGATGATAAAATCTCAAAGCAGG  
CAGTCACGACGTCACCCGACGCTCGCTGACCGAAAAGGCTTTGTTCACTTAGCAGTGGCACGGACGTCATCAGA  
AACTGAGGCTGCCACCGGAAAGGCTGTGAAAATCGGCTATGATTTGGCTGGGGAAAATACACAGCCAGGATGCAACAA  
CGACCGTAAAGGATGTTACAACCTGAGCAGTGGCACCACAGCAGCTTGAACGCTGGCCGCGCACCCAAAAGCCGTC  
AAGGGCGCATACGACTTGCAGCGCGCAAGCCCGCTCAGCCACACTCACCCATGGAGTCAGATAACGGGAGTGCCTGC  
TGCTCGTACGCGAAAAGGACCGGTACAACCTGAGCAGTGGCATCAACAGCAGCTGAAATACTGGCCGCCACCCGA

AAGCGGTCAAGGATGCATACGATCTGGCAAACGGAAAACACCGGCAGATGCCACGCTCACTGCTCTGGCAGGACTTGCC  
ACTGCAGCAGATCGGTTGCCCTTATTTTACCAGGAGCAGACCGCGCAGCGTGGCAACCTTACAGCTATTTGGTCCGCGCTAT  
TATCGCTAAGGGCAGTATAAAAGATGTCCTCAATACCTTGGTTTGGGGGAAGGCTCTGCATTGCCGTGTGGTGTACCGG  
TTCCGTGGCCACCGCCACCGCCAGAAAGGCTGGTTAAAGTGGCAGCGGGCGCCCTTTACAAAAGAACAAATATCTGGT  
CTGGCCAGAGCCCTACCGACCTCCGCTCTCCGATTTACCGGGTGAATTTATTCGTGGCTGGGATGACGGACGTGGTGT  
GGATGCCGGGGCACAATTTATTTCTTACAGGGGGATGCAATAAGAAATATTGAGGGATTTCGAGATGGCGGGATCGGTA  
TGTCTTTTGTATGCATCAGAGGGGCTTTTACGATGCAGGAACACGATCAGCGAGAATGCCGAATAACACAACACTATA  
GACAAAACCGATGACCTTGGATTTCGACGCTCTCGTGTCTGCAACAGCTAATGAAAACCGTCTCGTAATATTGCCTT  
TAATTATATCGTAAGGGCGGCATAA

>Cluster\_51790

ATGAGCACAAAATTTTATACCTGCTGACGGATATTGGCGCGGGGAAACTTGCAGCGCCGCCGCTCGGTGTGCCGCT  
AAAAATTACCCATATGGCGGTGGGCGATGGCGGTGGAGTATTGCCAACGCCGGACGCAAAGCAGACGGCACTGGTAAATG  
AGAAACCGCGGGCTGCGCTGAATATGCTTTATATCGAACCCGAGAACAGCAGCCAGATATTGGCCGAACAGGTGATCCCT  
GAAAACGAGGGCGGTGTGGTGGATACGTGAAGTGGGCTTGTGTGATGAGTCCGGGGCATTGATTGCCGTGGCAACTGCC  
GGAAAGCTATAAGCCGCAACTGGCTGAAGGTAGCGGGCCACTCAGACCGTGGCATGTTGCTGATTACAGCAGCAGCG  
ACAATATCACCTGAAATCGACCCTGTGTAGTGTGCCAACCCGCAAGTATGTGGATGACAAGGCACTGGAGCTGAAG  
GTGTACGGCATGATCAGATGGCAAAAACATCTTCCGCGACCGGACCTTACAGTACGCGCCAAAAGCCAGCCGAC  
ATTTACGGAAACCCCAAAGCGCAACGCCAGCGGGGGGAATAATACCAGCAGGTTGCGACCCTGCTTTGTACAGG  
CGGCACTGACGGCCCTTATTAATGGTGGCCAGCCAGCTGGACACGCTGAAAGAAATAGCCGAGCCATTAACAATGAT  
CCGAATTTAGTACCACCAATTAACAATGCGCTGGCACTTAAAGCACCGTGTGCGAGTCCGGCACTCAGCGGACCAAC  
AGCCCCACGGCGCGCAGTCCGGTCAACAATACACAGATTGCCACTACGGCTTTTGTGAAATCGCGCATTCGAGGAATG  
TGGTTCTGCACCTGCTGCACTGGATACACTGAACGAATGGCGGGGCACTGGGGAATGATCCGAACTTGCCACGACA  
ATGCTTAATGCGCTGGCAGGTAAACAACCGCTGGCAATACGCTTACCATTTGAGTGAAAGGATGTAGTGGTCTTCT  
CACATAACCTGGCTTGGGAGAAGTTCGGCATTACCCGTTGGTGTGCTTCCGTGGCTTCCGCACTCCGCAACAG  
GCTGGCTGAAATGCAACGGTGCAGCATTTTCTGCTGAAGAATACCCGAACTGGCAAAGGCTTACCCGACAAATAAATTG  
CCTGATTTACGTGTGAGTTTATTCGTGGCTGGGATGACGGACGTGGTATGGATACGGGGAGGCAATATATCAGCTCA  
GGCGATGCCATACGTAATATCTATGGTGGTTCAGAACTGTAACACTGAAATATTTCAATATGGGAAACAGCAGGCT  
CGTTAAGGGGGCCATAGTGGCCATGAGTCCCTTACAAACAATAGTTATTTCCCTTAAACGAAGATGGTGAACAGAA  
AGAGCAGACGGCGCTGTTTACCCAAAAGTATTGGCTTGTATGCTTCAAGAATGTTCCAACTGCAACAGAAATCGACC  
CCGTAACATGCTTTAATTTATATCGTGAAGGGTGCCTGA

>Cluster\_1574

GTGGCGCTGACGGATTATGACCGTTTCCCTGAAAACGTTGGACGGGGAAGGGATGCTTCACCCTGGCATCAAAGCGTAC  
CACCACCTTTATGTCCTCGGGATGACCTGGTTCGAGAGTTCGCCGGGGGGGATATCACTGACACCAAATGGCGCTGTG  
GCGCGCACATGAGGCACCGCCAACAACGGGGATCCTGTCACGTATAACCGGGGAGACCGCCCGGTTGGTACTGGCCG  
TGTCGCACTGCGGGGAATATTTTACGCCGTTGATGGAATAACATGACCGGATACCCGGAATAACCCGATTTTGTGGCTG  
CGGTACGGCTGCGCGTGTATGCTCGCATTTGTCGGGGCTGATTGCCCTGAGCAGAAACCGGCAACTGAAATAACAAG  
GGATCTGGCTTCGTGAAGGTGAACGGCGGTGGCGGACGGCAGTATCACCGGAACGCCAGAAATCCCGGATTTGCGTCA  
TTCTGGATGGAGGGGCGGCTGCGGCGTTTTCAGACCTGGGAACAACTGATTTTAAACTGCTGGCGGCAAGAAAGAGTA  
TGAGCGAACCGCGAGTGAAGAGACCTTGAAGCGGTGGTGAACACCGATATCGGACGCCCTATCTGCCCTTCAGCCA  
CGGAACAGCGTAAAGTGAACCTGCTGAACAGCGTGGCAGCGCTTCCCGCGCATCTGTGCGGATGGTGTGCTTTT  
ATTGAGGCAACGGTTGACGTACAGGGCGGTAATAATCGCGTTTGTGTTGTCAGATCACCGGATACGGAGAGCAGGGGA  
ACGCTGGATTTGTTGATCGCTATAACATCCGGCATTCACCTGCGTGCAGTCCCAACCGTGAAGTCTGCCGTTGATCCGG  
CGGATATCCGGAGGACTGGGATTTGTTGCTGACGGATGTTTCCATAAAAACATGCGCGCTGGCTTCTGATCCGGATGTG  
CGCATGCGCTGATGGCCATGGCGGTGGATACGGGAGGGGAAGCCGGGTGACAGATAACGCCATCGTTTCTGGCGTGC  
TTGCCGGAGTACGGGACTGGGCAACAGGGTGTTCGTGTCAGGGGATGGACTTCGCGGTGACAGGCTGATTAAACCGTA  
CCTTCCGGATAATACCGGCAGAAAGTGCCTGCGGCTGCCAGAGCCAGTGGCGATGTGCGCTGTGGCTGGTTACAGCGGAT  
GCGTTTAAAGGACCGTGAATAAATGCCCTGTGGCGTGACACACAGGGCCAACTATAATCCACTTCCCGACTGGCTGGG  
GCGATGGTTTACGATGAGCTGACCTATGAAGAGCGCGGACGTGACGGAAATGGCGAAAACCGGGCAGGGGAGCTAACG  
AGGCGTTTACCTGCTGTTTATGCGGATGCGCTTGCCTTCTGCATGTTTACGAAAAGATCCGCTGGCCCTCCGACCG  
GACTGGGCACAGCGGAAACGTTGGCTCGTCTCCCGCAGGAGCGTTCGTTGAAACGGTATCCCGGAACTGACGGCCGG  
GGCAGAAAACCGCTGCGCGGAAGAAAACCTGCGGACGGAGCGTGGCGAAGATAATCCATGGATAACATCAGGAGGCT  
GGTTGTGA

>Cluster\_2729

ATGACAGTGAATACTACGCCATTTCTGACTAATCAGGGCGCGGCACGACTGGCTAACCGCAGATGCTCGGCAGTAAAGCT  
GAATCTGACGCAAAATGGCGGTTGGTGTGCAAAATGGTGTGTTTACCAACACCAGACCTGCACAAAACAAACTGATTAACC  
AGAAACGCATTGCACCGTGAATCTTCTGAGTGTGACCTAACAAATCAGAGCCAGATATTGCGGAGCAATCATCCCT  
GAAAACGAGGGAGGATTTGGATCCGTGAGATTGGTCTTTATGATGATGAAGGTGTACTCATTGCGGTGGCAAACTGCC  
GAAACGTACAAACCGCAGTTGCAGGAAGGAGTGGCTGACACCGATATCCGCATGATTCTGGTTGTCAGAACACCG  
AAGCCATCAGCTGAAAATCGACCCGCTGTGGTTCTGGCAACCCGCAAAATATGTGGATGATAAAAATCTCAGAGCACGAA  
CAGTACAGCATCACCGGACGCTCGTGCAGCAGAAAGGTTTACTCAGTTAAGCAGTGAATTAACAGTGAATCAGA  
AACACTGGCCGCAACACCGAAAGCAGTTAAGGCTGCATATGACCTGGCTGACGGGAAATATACCGCCAGAACGCCACCA  
CAACAAAAAGGGATTTGTTAGCTCAGTAGCGCCACGAACAGCAGCTGAAACGCTGGCAGCAACACCAAAAGCTGTT  
AAGGCGGTAATGGATGAAACGAACAAGAAAGCACCATTAAACAGCCCGGCACTGACCGGAACGCCAACACCAACAGC  
GCCACAGGGGACTAATAGTACCCAGATCGCAAGCAGGCTTTCGTTATGGCCGCGATTGCCGACTTGTAGATTGCTCAC  
CTGATGCACTAACACCGCTGAGCGAACTGGCTGCGCGCTGGGCAATGACCCGAAATTTGCGACCACTGACTAACCGC  
CTTGGCGGTAAAGCAACCGAAAGATGCCACCCCTGACGGCGCTGGCCGGCTTGTACTGCGGCAGACAGTGTTCGCTATT  
TACGGGGAATGACGTTGCCAGTTTGGCAACCCCTGACAGAAGTCCGGGGGATATTCTTGGAAATCGACCGTTGCCGCTG  
TTATCGAATACCTCGGTTTACAGGAAACGGTAAACAAGGCTGTTAACCGGTTTCCGCGGATAAAATGACCGGA  
GAATGAAAATTTGAACAGATGAATGGCTGCGAATTTTAAATGATGCTTCGGTCTTATTTCCGCGCTTCCAGAAAGATC  
CCTTACTTTCATCCCTACCGCTGAAGGCAAGGCAAAACCGTGGATATCGGCCATTAAGGCCATTCGCTAATAAATCTAA  
GAACAGGTGCTATATATGTCAGCCACGGGGCAAAATTAAGGAGGCTAGCTATTGGTGTACTGATAACGCCTGGGT  
GAAAACCTCAATGTTTCTGGGAGATAACGACACCGGATTTAGGCAAGATGGAGATGGTATATTAGCTTCTATTCAAATGG  
TTCGCGCATCGGACATATTGATGGGTTAGGATACATCTTTATAAAGATATTGAATCTAATTCAGCAATTTTAGATTA  
AAGTAATTAG

>Cluster\_38478

ATGGCTATAGCTTTGAAAAGGAAGTGCAAAAAAAGGTAGCTTATTAGATTCAAATGAATCACCTATGCAAAACAATTA  
TACAGCTAGCTCCAGATTTATTCATAGCCCTTTCGGGTTTCCGGATGTGGTATGAAAACGTGTAACCTCCGTGCTCA  
GTAAGGTTGCAAAATCGTGAATTTATGATGTTGTACATATAAGAAATTAGCGATTTAATGCAAGACCCACTTATTTTGA  
AAAAAGTAAATCGAAGAGACGATGATCTAAATAAAGAACGGCACATACGGATGCAAAAATTAGCCAACGGTTTAAAGAA

GCATTATAAAAAGAAAGAACTCTTGGCTGAGGCGGCGATCACTTACATAAAAAGCGCAAAGTAAAGAAAGAAGACAAAT  
CTGTAAAAACAAAACAGTTTACATCATCGACCAATTA AAAAGACCAGAGGAAATAGAACTCC TACGAATCATATATCAA  
CACAACTTTTATCTAATAGGAATCGTAAGAGACCAGAACATACAGTAAGGAACCTTAAAGGAGATGACTCATCCCTTGA  
GGATATTTTATAACATAATAAATGTTGATGATAAGTCTGATGATGATTTTGGCCAAAGAACAAGCAAGGCAATATAGATT  
CTGATGTCTTACATAAAAATAACCAAAGCCAAAAAATATTTAGAGAAAAAATAAACAGGTTTTTTGGGTTAATTCAT  
GGACAAAAATGGATTAACCTCCGACCATAGCGGAAAAAGGATGTATTACAGCATAAGCTGCCCTCCCTGCAATCAGCTTGGCT  
GTCGAGGCAAGTAGGTGCTGACCTCTTGTATGATGAAGGAAATCTTCTGCGCTTGGTAAAAATGATGTGCCATAATCTG  
GAGGGGGTGTATATAAGTGTATGATGGCGATAATGATCATCGCTGCGTTTATAAAAAGCGGAAAAATGCTATAACATAGCA  
ACAAAACCTGAAAAATAAAAAGAAATTTGCCGACATTTTAAATGATGAGCTTAAAAATAACATTTGGTTCAGATTCAAACCT  
TGACTTCTTGTTTAAGAAAAATATCGAACAACTTGACTCCATAGCTGATGCTGTATATTCAAAAAGTAAGATATCATCAG  
TCATGGAGTATTC AAGGTCGATCCATGCTGAAATGGACGTCATAACAACAAATGGCAAGGAAATCATCAGAAGGACAAAA  
GGCAAGACTCTGTATAACAACAACTTATCCTTGCCATAAATGGCGTAGGCATATAGTTTCTCAGGGATGAAAAAGGTAAT  
ATACATTTGAACTTTTGTATAAAGCTTAGCTTTAGATTGACATGACGATGCAATAACACCACAGAAAGACCCCTCGAGAG  
TTATTTTCTCGAAATTTGAGGGTGTGCACCAAGAAGATACAATAAATCTTTCATGCCAACAGATGAAAGAAAGGATGAA  
GTGACAGGAGAGGCATATAGCTTCAACGTTAAATATAAAAAGACACATTGATGTCAATTCCTCGACAGTTACAGAACGTA  
TGAAGATATTGTTGCTCAGCGTTTTTAAAAAGACGTGGCAAAAGTAGAACAAAAAAGATGACTTGATTTAA

>Cluster\_24227

ATGACTGAACAGGCAACAACAAATCGATGAACTGGCTTTTACAAGGCTGTATGGCGAGCAGGAGAAGCAAATTCCTACTGC  
CGAAGCGGTAGAAATTTCTGACTGAGCTGGTACGCATTTTACGCCACAACGCAATAAACTTCTGGCAGCGCGCATTCAGC  
AGCAGCAGGATTCGATAACCGAACGTTGCCGTGATTTTCAATTCGGAACAGCTTCCATTCGTGATGCTGACTGAAAGTT  
CGCGGGATTTCTGCGGACTTAGAAGATCGTCGCTAGAGATTACCGGACCTGTAGAGCGCAAGATGGTATCAACGCGCT  
CAACGCCAATGTGAAAGTCTTTATGGCCGATTTTGAAGATTCCTGACCAGACTGGAACAAAGTATGATGGGCAAA  
TTAACTTCGCGGATCGGTTAATGGCACCATCAGCTATACCAATGAAGCAGGCAAAAATTTATCAGCTCAAGCCCAATCCC  
CGGTTTTGATTTGCTGAACTGCGGTACGCGTTCGACATTCGCGGAAAAACATGTCACCTGGCGTGGTGAAGCAATCCCGGTAG  
CCTGTTTTGATTTTGGCTCTATTTCTTCCACAACATCAGGCACTGTTGGCAAAGGGCAGCGGTCCCTATTTCTATCTGC  
CGAAAACCCAGTCTTGGCAGGAAGCGGCTGGTGGAGCGAAGTCTTACGCTATGCAGAAGATCGCTTTAATCTGCCGCGC  
GGCACCATCAAGGCGACGTTGCTGATGAAACGCTGCCCGCGTGTCCAGATGGATGAAATCCTTACGCGCTGCGTGTGA  
CCATTTGTTGGTCTGAACTGCGGTACGTTGATTTACATCTTCAAGTATATCAAAAACATGAAACCAATCCCGATCGG  
TCCTGCCAGACAGACAGGCAAGTACGATGGATAAAACCTTCTGAAATGCTTACACGCTGTTGATTTAAACCTGCCAT  
AAACGCGGTGCTTTTGGCATGGGCGGTATGGCGGCATTTATTCGAGCAAGATGAAGAGCGCAATAACAGGTGCTCAA  
CAAAGTAAAGCGGATAAATCGCTGGAAGCTAATAACGGTACGATGGACATGGATTTGCCACCCAGGCCTTGGCGATA  
CGGCAATGGCGGTATTCAACGACATTTCTCGGCTCCCGTAAAAATCAGCTTGAAGTATGCGCGCAACAAGACCGCCGAT  
ACTGCCGATCAGCTGCTGGCACCTTGTGATGGTGAACGCCGAAGAAGGTATGCGCGCAACATTCGCGTGGCTGTGCA  
GTACATCGAAGCGTGGATCTCTGGCAATGGCTGTGTGCCGATTTATGGCTGATGGAAGATGCGGCGACGGCTGAAATTT  
CCCGTACCTCAATCTGGCAGTGGATCCATCATCAAAAACGTTGAGCAATGGCAAAACCGGTGACTAAAGCCTTGTTCGCG  
CAGATCTGGGCGAAGAGATGAAAGCTATGGCAGAACTGGCGAAGAAAGCTTTCTCCAGGGCGGTTTTGACGATCG  
CGCAGCTTGATGGAACAGATCACCACTTCCGATGAGTTAATTGATTTCTGACCTGCCAGGCTACCGCTGTTAGCGT  
AA

>Cluster\_28579

ATGACAATCCTTATATTTATTTGTCAGTTTGTAGGGGCTATCGCAATTTGGCGTTCCTTCGCTGGGCATTATTA CTGTG  
CGGATTTTCAATTGATGTTCTGGATGGATATCTTTGATGTGCAAAATCTGGCACAAACGTTGGTAAATGGCGCAGACAGCT  
TCTCCCTGTTAGCCATCCCTTCTTTGACTGGCGGTTGAGATCATGAACCGGGCGGCTGTGCGCAACGATATCGTCGAC  
TTGCCAATGAAACTGGTAGGCCACAGGCGAGGCTCGGTTACGTTAGCTGGCGTGTGGCAGCGATGATATGGCAACCT  
GTCGCGTTCTGCGGTTGCTGATACCGCAGCTGTGCGGCGCTGCTGGTCCGATGATGCGCCAGGCAACTATCCGGTAA  
ACGCGCGCGCGGCTTATCGGTTCCGGCGGGATTTATGCGGCAATATCCCGCTTCCATACCACTCATTTCTCGGC  
GTCTCCAGCGGACTCTCCATCAGCAAATGTTTATGGCGGGCATTGCGCCAGGCATCATGATGGGCGTACGCTGATGGT  
TACCTGGTGGTGGCAGGCAAAAACGACTGAAATTTACCTTGTGAGCTGAGCCGAAAGCCTCACTGCGAGAAGTCTGGCAATCTAG  
TTTTCCGGTATTTGGGCGCTCTTTTTACCAGATAATTTATTTGCGGTTTTCCGTTCCGGGTTATTTACACCGACCGAAGCA  
GGCGCGGTTGCCGCTTCTACGCTCTGTCTGCTCGGTTGGTGTCTATCGCGAGATGACCTTCTCCACGCTTTTATCATGT  
GCTGATTAACCGGCAAAAACCAATCCGTTGGTATGTTCTGGTGGCTCTGCTGCGGATATGATGGCTTATACGA  
TCGCGAATTAACCCATGATGGTATCGGAGCTATTAACAACCGTTGGTTGATTGCTCGCTGCTTATTTATTCATCGATTATG  
CTCGCTATTTATGGTATCAGTACGGTCAATGGACTTAACGCTTACCGTATTAATCTTACACAGTATTAATGCCATTAGT  
GAAAGAAGCGGGAATAGATCCGGTCTATTTCCGGCATCATGTTTATTTCAACTGTTCAATATCACTGATTACGCTCCAG  
TCGGTAATGTTCTTAACTGGTATGCGGCGTGGCGAAACTTAAATTTGACGATGCGGTAAAAGCGGTTGCCCTTACGCT  
ATGTTTTTATTTATGTTGTTAGCATTTATTTATTTTATACCGGAGCTCATTACCGCTCCTTTAAATGGATGAGTTAA

>Cluster\_29151

ATGATCTTGTCTGCAATTTATTTATCGTTTTATTTTCTGTTTTTAGGAATGCGTATTGGCGGCATTTGGTGTGCGGATTTGC  
TGGTGGGCGAGTGTCACTGCCTTGTGCGCCCTTGGTGCACACCCGGGATTTACCGATGCTGGTGTGTTTTATTA  
TGGTTGTCATCATGTCATTTGCTGCAATGCAAGAAGCGGGTGGGATTTGACTATCTGGTTGGTTAAACGAAAAAATGCTT  
CGCGCTACCCCTCGCTGCTGTTAATACTGCACCTCTGTCTACATGGCTATTAACCATGATGGCCAGTACCGGTGAGGT  
GTCATTTGCCGTATGCGGGTATTGTTGGGTGTGCGGAAGGAAATCAACTTCGCTCCACCCGGGCGTTGGCGCTTTCGG  
TTACCGCTTCAATTTGTTAGTATTGTTGCTGCTATCTGCTGCGGCTTATTTCTTTTACGCACTCCTGAAAAAAT  
CACCAGGGATGGGATATTTGCAACTCATTTGCCGTTTCTATACCGGCTACTTTTATAGCGTTGATTTGTACTTCGCTTTT  
TTACCTGTTCTGGGCAAACTTCCGCAAGATGATCAATTTACCCGTACATATGGCTGTAACGAAAAAATCTCTGTCTGCGC  
CTGTGGTACAGGAGCTCGTCCGCTCAGTACTAATAATTTATTTTGGCCTAGTTGTAGTACTTTTTTACGGCATCATTTGCC  
AGTCCGAAAAACAGGCGTTTATCATATACATCCGTTTTAAATAGTGGACAGGTCGCTTATTTCAGTAATGATGGCTTAGCACT  
CGCCATTTGTTATGTTTTGCGGGTAAATGTGAATAACATTTCTGCGACATCAGTTTTTAAACAGGGATGACGTCATGCA  
TCTGTATTTTAGTGTGCGCTGGCTCGGTTCTACATTCATGGATAGTAACAGGTGTGGTTTCAAAGCATGATTTCCGGA  
TATTTATTTAGATTTCCCAATTTGTTGCTGCAATTTATTTATGCTGGCGTCAATGTTTTCTATATTTCTCAGGCGGCTCCAC  
CAAAATACTTTTTCCATTTGCAATTAAGTATGGTATCGCCCTGCCACTCTGGTGCCTGCTTTCCAGCAACAGGCTTCTC  
TTTTTATTTTACCTAACTACCCACATTTATAGCCCGGTGACTCTTGTATGATACGGGTCAACGAAATTAGGAAATCGA  
ATAATCGATCATCGTTTTATTTGTTCTGGTTAATGGCAACCGGTTATCGATCTCTCGCCGCGGATTCGCATTTGTT  
TATTTAA

>Cluster\_53745

ATGAAGAAATCTTCAGACATTTCTTTTTTAAATCTGTGCTTGAGTTGTTATACCGGAGTGTGGCACTGATGATAA  
CGTAGGATATATTTTGGGAATAGTTACGCGTTGGTCCGTCAGATCAAAAATGGAGGAAACGGGCGCAATGGCGGAT  
CTACTGTCTATTTAGATATGCAACAAGTACAATAAATTTAGTTTCTTACAAACCGACGAGCTTGGGCTACAGGTGTA  
AAATTACAGTGGAGTCACTTAGATACCGCTTCTGGTGGTGGTTTTCTTTATTTGCAACGAAGTATAGCACAAGTGGT  
CGCAATGCGTATTTGAAATGCAATGGTTGACTCAGGTAATGATGAGCTCCATAAATTTTAAATACATCAGTTCTCTG

GTTTGTATTACACATTTAATTTCAAACATGTGGTCAGCTTACGGTACCCTAACGTTAGTTACCTGGGATATAC  
ATTTGGTACTCTGCAGAACAAATATTTTTCTGGGTATAATCCAAGCGAAGACGTGTATATGGAGTTGCAATAATGCGAA  
TAGCACCCGTAATAACTGGGCTGTAGTGGTATTTATCAGACCCTTACAATTGATTCATACAGATACAACCTTTGATC  
CAACAGTAATCAACAGATCAAAATATCTCAGCTCATCAAAATTACTGTATTCATTTAAAGCCTATGGCCGAGCCAAAGT  
ATAAATGACATAGTATTTTATCAAAATCGATTTTCGATCTGCCTAATGTCAAGTTGACTAATCCCACCTTGTTTTACCCG  
TATGCTTAGTGGAACTTCTGTGACTGGTCTACGGTAAAAATGGTGAATATAGTGCAGAACAAATCAGAAACCGTGGCA  
CACCGGTTCTTTTGATATTTCACTTCAAACCTGCGTTCGTGTACTAATATTGAGACAAAATAGTTTCAACAAGGTT  
GGTACTGAAAACGGGCAACTCCTTGGTAATACTCTCACAGGTAATGACGCAGCAAAAGGAGTCCGGTACTCATAGAAG  
TTTAGCAACTAGTAAAAATCCTCTAATGACATTTGAAACCTAATGATTCAAATTTCTGTTTATAAAGATTACGACCCGAGAG  
GCAAAAGCAGATACAACAGGAGGAGTTTACC CGGATCAAGATACAGGTATAACATACCCCTCTCCATTTCCAGGCCACGTA  
CAACAGGATGGAACATATACCAATAGAAGCTGGTGTGATTTAAAGCCACCAGTACTTTCCAGGTAACCTACCCCTTA  
>Cluster\_17210

ATGTCGTTAACCAATAAACAAATGGCTGGGATTACCTTTAAATCTGGTCTGGGGATATATAGCGATTGCTATCTTTATGAC  
CGGCGATGGTTTTGAACTGGCATTCTATCGCACTATATTAAGGCGTGGGCTTACGCTGCGGAAGCTTCATTTGCTT  
TCACGCTGTATGGTCTGGCGGCGCACTCTCTGATGGGTATCCGCGTGGTGGCGGAAATTAATACGCGCAAAAGACC  
ATGTTATCGGTTTTGACTGTGGTGTATTTCCATGTGCTTCTTGGTCTTCCGGTCTGGGCGAGCAATGATGAT  
AATTCGCTGTTCTACGGCATCTGGTCTGGCATATCTCTCTCTCTTACGCTTTTATCGTTGCGGTTGTGCATAACG  
TGCGCAGCGACAGTACCAGTCCGCGCTGGGCTGGTCTGGGCGGTTACTCCATTGGTATTGGCGTTTTCGGTAGTTAC  
ATTTCCAGCTTTACCATCCGGTATCGGCGAAATGGGCACCCGTGGCTGGCGCTGGGATTTGCGTAACTGGCGGCAT  
TCTTGGCTGGTTTTGATGCGTAAAGTTCCAGATCATATGCAAAATCTGACGACCAAGAGAAATTCAGCGAGC  
TCGCGCTGTGTACCTTACTCTACCAACCCCAACATTTTCTCTCCAGTATTGTGCGAATTAATACATATGTCA  
CTGTTTGGCTTTGGGATGATTTGCGGATGATGTTTGTGATGAACTGGGCTTACTACGCTCCGAGTGGCTACAGGTGTG  
GGCGGCTTCTTCTTACAGCAGATTTTTACCAACATTTCTGGGGCTACTGGCAGAGAAATGGGCTGGATGAAAGTTG  
TTCGCTGGTTCGGTCTGGGAAATGGCACTTTCCAGTCTGGCTTCTACTACATGCCGCAATCTCGGCTAGCACTAT  
TGGATGGCAATGGTGGCGCGCTGGGATCTTTGTTGACGCTTCTGCGGATGGCGCGGTTTTCCCGCGCT  
GGAGCCAAAACACAAAGGCGCGGATTTCCGGTTTATAACCTCTGCGGCTGTGCTAACTTTCTTCCCGCTGCGATG  
CCGTGGTGTGTTACCTTATTTCAAGTGAATGGTGTGGTTATAGCTTATACAACCTGTACATTTATCGGTTTTATTAT  
TGCCGTTTTATTCCGGTTGAACAACCCAGGATTTCAACCCAGAAATTAAGAGCAGGTGAAGCCGCGACGGTTTTCTGA  
>Cluster\_66930

ATGAGTGTGAACAGGATGCCGTAATCCGGAAGAAACTGGCTGCCCTGCTGGACTGGGCAGCATCATCTTATTTGG  
CGGCGGCTATATCGGTTTTTCAAACATATCAGGGAGTAACAGCGATATGCAGTCAAGCCTGAACATTAACAGTGCAGCAA  
GCGCGGAACCGCGAGCTTACCGAAACGCCCTATTATCGTGAAGCTTTAAGAGCGGATAATGAACGAGGGCCGAGCT  
GCAGCCGCAATAATCAGACGTTTATGCGAGTCTTCCACAGGGGCTTGAATTTCCGGACACTCCGAAAAGCAACA  
GCCTGCAGCAAAACCGGAAACTATGCTCATCGCCAGGCTTCCGGCACACCACAGGAGGATCGAGCAGCCAGTGA  
GATGGAGCGGCTGCAAAAGCTGATTTGAAGAATAAAGATCAGCATGCTGCGGTTAGTACACCAACATGCAACGGCT  
ATGTGAAATAAATCTCCGCGAACAACAGGGCAATGGTACGCGAGCAATTCGCAATTAAGAAATGCGAGCTTCCAC  
GCCTGTAGCAGAAAAGGATACAACCTGATACCTGCCCTGACCGTATACCGGATATATGATACTGCAGTGGATTCTG  
ATAACCGTCAATCAAGTTTATCGCAACCATTTCCGCTGGCCCTGGGCGAGGGCAACGCTGTTCAAGTCCGGGAGTCAA  
CTGGTGGTAAACCGGCTGGAGATCCATTTGACCGGATGAGCTGGAACGGCATGGACCTAAGTCAATGCAATGCA  
ACGGGAAGCAACCTGATGCTCATCCGTGGCCAGCAATGGAATACAGCTGGTTTAAACATATCATTTGCGCTCAGTGT  
TAGGAGGTGTGGGAGTATTTGACACCTTATAAAGATGCCAACACGAGGTTATTCAGGGTAACATATGACCGGTTAC  
GGACCGTGGGAATGCCAGTGGTGAAGCTGTTGCGGGCGTTATGCGGTTGATGGCGGAAAGAGGAAAGTCAAGATTT  
AACCCCGCAGCAGAAAGTGAAGCTTAAACAGGTAGAAGTATCAGCATGAAGTCTGATCAATTTCTGTTTGTGACC  
CGGTAATGACAAACGACGCGCAGGTCATCTTCCCTTCCAGTGGCATTTCCCTTCAAGTAAATCGTACATCACAGGCGGAA  
CAACGCTCGCAGGACGAATGCAGACAGCCATGGAGCAAGAAAGCTGTGATGCAACGCTCGGTATGATGACACCCGGA  
GACACCATAA  
>Cluster\_5880

ATGAAGCAGGCATTACGAGTAGCATTGGTTTTCTCATCTGTGGCATCAGTCTGCATGCTGAAGTCCGCATTGTGAT  
CGACAGCGGTGTAGATTCCGGTCTCTATTGGTGTGTTCTTTCCAGTGGGCGGGGCTGGTGGCGCACCTGAAGATA  
TTGGCGGCATCGTTGCTGTGACTTGGTAAACAGCGGTAATTTAATCCGTTAGATCGCGCTCGTCTGCCACAGCAGCG  
GGTAGTGGCGAGGAAGTACAACAGCTGCATGGTCCGCACTGGGCAATTGACGCTGTAGTTGTCGGTCAAGTCACTCCGAA  
TCCGGATGGTCTTACAATGTTGCTTATCAACTTGTGACACTGGCGGCGCACCGGTTACTGTACTTGTCTCAGAACTCGT  
ACAAAGTGAACAAGCAGTGGCTGCGTTATGCTGGTATACCGCAGTGTGAAAGTGTGAAAAACTGACCGGATTA  
GGTGGCTTCCGCTACTGCTATGCTTACGTTGTTGACCAACAGCGGCTGATTTCCGTTATGAACTGCGCGTATCTGACT  
TGACCGTTACAACCTTTGTCGTTACCGTTCACCGACCGGCTGATGCTCCGCGGTTGCTCAGCAGGTTCTTAAAC  
TGGCTTATGTGACCTTCAAAGCGGTCGTTCCGCGCTGGTTATTCAGACGCTGGCAATGGCGCTGTACGTCAGTGGCT  
TCATTTCCCGCTCAACCGGTGCACCTGCAATTTCCGCAAGCGCAGCAAACTGGCATTCGCTTGTGAAAAACCGGTTAG  
TCTGAACCTGTAGTAATGGATTGGCTTCTGGTCAAGTCTCCGCAAGTACTGATGGTGGCAGTAAACATACCGAACCA  
CCTGGTTCCCGGATAGCCAGAACCTGGCATTACTTCTGACAGCGCGGCTGCTCCGAGGTTTATAAAGTGAATATCAAC  
GGCGGTGCGCCACAACGATTTACCTGGGAAGTTCCGCAAGCAGGATGCGGATGTCAGCAGCAGCGTAAATTTATGGT  
AATGGTCACTCAATGGTGGGAGCAGCACATTTGCCAAACAAGATCTGGCAACGGGAGGCGTACAAGTTCTGTCTGCCA  
CGTTCTGGATGAAACCGCAAGTCTGGCACCTAACCGCACTATGGTAACTACAGCTCTTCTCAGGGGATGGGATCCGCTG  
CTGAATTTGGTTTTCTACAGATGGCGTTTTCAAAGCGGCTTCCGCAACTGATGGACAGGTCAAATTTCCCTGCTGGT  
GCCGATCTGTGA  
>Cluster\_24641

ATGAAACTTACAATCTGAAAGATCACAATGAGCAGGTGAGCTTTGCGCAAGCCGTAACCCAGGGGTTGGGCAAAAATCA  
GGGCTGTTTTTCCCGCACGACCTGCGGAATTCAGCTGAAATGATGAGATGCTGAAGTGGATTTTGTCAACC  
GCAGTGGCAAGATCTCTCGGCTTTATTTGGTGTGAAATCCCGCAGGAAATCTGGAAGAGCGGCTAGCGCGCGGCTTT  
GCCTTCCCGCTCCGCTCGCAATGTTGAAAGCGATGTCGGTGTCTGGAGTTGTTTACGGGCAACGCTGGCATTTAA  
AGATTTCCGCGGTCGCTTTATGGCACAATGTCACCCATATTGCGGCGATAAGCCAGTGAACATTTGACCCGCACT  
CCGGTATACCGGAGCGGAGTGGCTCATGCTTTCTACGGTTTCCGCAATGTGAAAGTGGTTATCTCTATCCACGAGGC  
AAAATCAGTCCACTGCAAGAAAATGTTCTGTACATTTGGCGGCAATATTGAAACTGTTGCCATCGACGGCGATTTCCA  
TGCCCTGTCAGGCGCTGGTGAAGCAGGCTTTGATGATGAAGAACTGAAAGTGGCGCTGGGTTAACTCAGTCACTCACTCGA  
TTAATCAGTCCGCTTTGCTGGCGCAGATTTGCTACTACTTTGAAAGCTTTGCGCAGCTGCCGCAAGCAACCGCAG  
CTGGTAGTCTCGTGCACAAGCGGAACTTCCGCGATTTGACGCGGGTCTGCTGGCGAAGTCACTCGGCTGCGGGTAA  
ACGTTTTATTTGCTGCGACCAACGTAACGATACCGTACCACTTCTGTCAGCAGGCTCAGTGGTCAACCAAGCGACT  
AGGCGAGTTATCTCAATGGCGATGGATGTTAGCCAGCAACAACCTGGCGCGCTGTGGAAGAGTTGTTCCGCGCAAAATC  
TGGCAACTGAAAGAGCTGGGATGTCAGCGGATGATGAAACACGCAACAGACAATGCGTGTGATTTAAAGAACTGGG  
CTATACCTCGGAGCGCACGCTGCCGTAGCTTATCGTGGCTGCGTGACAGTTGAATCCAGGCGAATATGGCTGTGTTCC

TCGGCACCGCGCATCCGGCGAAATTTAAAGAGAGCGTGGAAAGCGATTCTCGGTGAAACGTTGGATCTGCCAAAAGAGCTG  
GCAGAACGTGCTGATTTACCTTCTGCTTTTCGCATAAACCTGCCCGCGATTTTGCTGCGTTGCGTAAATTTGATGATGAATCA  
TCAGTAA

>Cluster\_66795

ATGAAAGGCACTAFTCTCGCGTAGCGTTGAACCATCGCAGCCAACTTATGATGCATGGCAGGAAGCGTTCCAGCAATCCCC  
CTACAAAGCCCGCTAAAACTGCGGTCTGGTTTATTAACCCGCGCAATACGGTGATTGGTTGCGGTGAAACCGATTCCCT  
TTCACAGGGTAAAAGGTTACTGAGCGGTGCGACTGTTGCGCTGATTGGTGGAAAAACGGCGACGAAAGTACGTGAAGAA  
GATGCGGCAGAGTACATCGCCGGATATGCGCTGGCTAACGACGTCAGCCTGCCGGAAGAGAGCTTTTACCGCCCGGCAAT  
CAAAGCAAATGTCGTGATGGATTCTGCCCAATGGCCGAAACCGTGGCTCTCAGCAATGTCGATAATCTGCCAATCTATA  
CCGAGATCAACGGGCGTCTGCGGATCACTGGAATACCGCCGATTTACAACGTAACGCCGCGCAGTTGCTGAGCGCCCTG  
AGCGAATTTGCCACGCTGAATCCAGGCGACGCCATTCTGCTCGGCACGCCACAGGCGCGCTGAAAAACACAGCCAGGCGA  
GCTTCCCAACGACGCCACACCCGACGGCACGCTGTTTGCCCTGAACTACGCCGACCCAGCCAGCAATGGAA  
TTTAAAGCCACCGGAAGAACCCTGGTGTCTGAAAGCGCAAATACCCTCAGTGGCGATAACCAGACCTCCGTGCGTCC  
AAACAATATTGAATACATGCACTATGAAGCGGAGCTGGTGGTAGTTATGGCAAACAGCGCGCTAACGTCAGCGAAGCCG  
ATGCCATGGATTATGTCGCGGGCTACACCGTGTGTAACGACTACGCCATTCCGCGACTATCTGGAAAACACTACCGCCCT  
AACCTGCGGTCAAAGCCGCGACGGACTGACGCTCTTCAACCATCTGCGCGAAAGAGGCGATCCCGACCCGCA  
TAATCTGACCCTTCGACCTTCGTAACGGCGAGTTACGCCAGCAAGGACCACCGCGATCTGATCTTCAGCGTGCCTT  
TCCTGATCGCCTACTTAAGCGAATTTATGACCCGAAATCCGGGCGACATGATCGCCACCGGCACACCAAAGGCTTATCT  
GACGTGGTGCCTGGCGATGAAGTGGTGGAGTAGAAGCGTGGCCCGCTGGTGAACCGAATTTGTAGTGAGGAAAC  
AGCGAAATGA

>Cluster\_4986

ATGAGCGAGTTGAGTTATCTGAAAAATTTGATGGATGGGGTTGAGGTTGAGTGGTTGCCACTCTCAAAGTATTTCAACTT  
AAGGAATGGTTATACACCGTCTAAAACATAAAAAGAATTTGGCGGAATGGTGATATACCTTGGTTGAGATGATGACA  
TACGTGAAAAATGGTAGAATTTAGGGAATTTCACTTCAAAAAATTTCACTCTGCGCCGTAAGGGGGGAAACTATTTCT  
GAAAAATTCATATTAATATCAACGTCGGCAACAATTTGGTGGAGCATGCTTTAATCACTGTACTCATCTAGCCAATCAAAG  
GTTTACATGTTTGGCTTTAAAAGAGTCTTATGCTGATTGCTTTGATATAAATTTTATTTTACTACTGTTTCTTTCTT  
CTAGTGGTGGCCGAAACACACACGATGTCAGTTTTCCTGCTGTGGATGATGGATTCAAATAATTTTAACTCCCT  
CGCCCTGCCCGGATAATCCGAAAAATCCCTTGCATCCAGTCTGAAATCGTTCGGATTCTGGATAAGTTTACTGCACT  
TACCGCTGAGCTTACCCTGAGCTTACCCTGAGCTTAATATGCGTAAAAAACAGTACAACTATATCGCGACCAAGTTGT  
TGAGTTTGTAGAGAGTAGTGTGAATGGAAAACGTTACTTGGGCTTGTGACTATGTAGATTATCGAGGGAAAAACCCCA  
AAAAAACCCAGAGCGGAATATTCTGGTAAACGCGAAAAACATTCGGATGGGATATATAGATTACCATGCTTCGCAAGA  
ATTTATTTTCAAGAAGAATTTATGCAATTTGTAATGAGACGAGGCCCTCCCAAAAAAGGCGATGTACTAATAACTACTGAGG  
CACCTTGTGGTTTTCGTAGCTCAAGTTAACAGAGAAAATATTGCTTTAGCTCAGCGAGTTATAAAAATATAGAAGCAAAAAT  
ACACAGCTATCAAATCAATTTTAAAGCACTATTTATGGGTAGTCAATTTTCAAGATAAATTTGATGCAAGCGCGCAGG  
TTCAACAGTCAAGGAATTTAAAGCGAGCAGGCTTATCACTAACAAAAGATTCTTATCCCAAGTAAAGTTAGTAAAGCAGGA  
TTGTGGCATTCTGGATAAATTCGACACACTGACTAACCCATCACCAGAGGCTTCCGCGTGAATTCGAGTTGCGCCAG  
AAACAATACGAGTACTATCGTATTTACTGTTTCCGAAACCTGAAACTGTACAGTAAATTA

>Cluster\_27467

GTGTATAAGAGACAGGTCGATAAACAGGGTGGTTTAAAAGAAGCGAACTGAAAACCTTAATCTCGAGCAATATCAGGC  
TGCGGGCATTGCGCGGAAAGCGTTGATTTCTGGTGCCATCATTATCACCGGTGAAAGCGCAAAAACCGCAACGCTCGCC  
CGGCGGTGATGGCGCTCTCCCGGTGCGTGGCGGATTTTGTCTGCGCACGCGCGGGCCGATCTTGAATCCGTGATCGCC  
GGACAGGTGCGCGGGCGCAACCCCTTCTGAAACAACCGCTGTGCGGTCTGAATATCGATATCGCGCGGTGACCCCG  
GAACTACGCCCTGTTCGATGCGCGAAAAATCAGCGGCACTGCCTGCTCAACGTCGGCGGTGCGCTGCGGAAACCGACA  
GCCAGGGCGCGTGGTTTACGCTCATAAACCGGGCAGATGATTTGGGATGAGTGTCTCGGTGCGGCTACTGACGCCCT  
TCGCTGACTGCGGGGCGAGTGGTGCAGGTTACCCTGGGATGGCAGAGCTGATTTGCGAAGTGAATGACGGAACGCTCT  
GCCCTGCGCGAGGCTGATGCAAAACCGATTTGCTGCCGCGAGGTGTACGCCGAAATCATTACGCTTTCTGGCGGG  
TAGGGGAATGTTATCGCCACCAGCCCGGACCCGTTCTGTTTTGCCGATATCGGCCCGCTTCTGGCAACGGCGCTGCAT  
GACCATCCGCGTCTGCGTGAAGTGAACGTCAGTTTCCGGCGCAACCGTGCAGCGCCAGGTTGCGCGCGGTTGCGCGG  
TACCCTTTTCGCTCTGCGCAGCAAACTGCGTGGAGGGCGTACAACCTGCCCTGCGCAATTTGCCAGTGGCGATCCCGA  
TTGATGAAACCGGATCTGGTCAAGTGCCTGGCAACAGCGCTGATTTCAACTGGATCTTTGCCCAAAAACCTGACCGCTACG  
CTGGCGCTTCCCGCTCGCTGCCGTGCGTTACGCCCGGTACTGACGGTCACTAACCGCGTGGTTCGATTTCTGCGCGG  
TTTTCCGAATCCGATCCCTGCTGGTGGTGGCGGGCAGGACTTTGGTAAAGCTCTGGGCTGTTGTTGCGCCACAGC  
TACAACAACCTCCGTTGGCAGTCAATGACGAAGTGAATTTGCGCGGGGACTATATCGACATTTGGTACGCCCTTTTTT  
GGCGGATCGGTTGCGCGGTGACGGTGAATCACTGCATTTCTTCTTCTGA

>Cluster\_5473

ATGTAATAATTTAAAACCAAACTTTTGGATGTTTCGGTTTATCTTTTTCTTTTACTTTTTATCATGGGAGCCTACTT  
CCCGTTTTTCCGATTTGGCTACATGACATCAACCATATCAGCAAAAGTGATACGGGTATTTATTTTTGCGGCTATTTCT  
TGTCTCGCTATTTATCCAAACCGCTGTTTGGTCTGCTTTCTGACAAAACCGGGCTGCGCAAAATACCTGCTGTTGATTT  
ACGGCATGTTAGTGATGTTTGGCGCTTCTTTATTTTTATCTTCGGGCCACTGTACAAACAACTTTTAGTAGGATC  
GATTTGTTGGTGGTATTTATCTAGGCTTTTGTTTTAAACCGCGGTGCGCCAGCAGTAGAGGCATTTATTGAGAAAGTCAAGC  
GTCGAGTAAATTTGCAATTTGGTGCAGCGCGGATGTTGGCTGTGTTGGCTGGCGCTGTGTGCTCAGATTGTCGGCATC  
ATGTTACCATCAATAATCAGTTTGTTTTCTGGCTGGGCTCTGGCTGTGCACTCATCTCGCCGTTTTACTCTTTTTTCGC  
CAAAACGGATGCGCCCTCTCTGCCACGGTTGCCAATGCGGTAGGTGCCAACCATTCCGCAATTTAGCTTAAAGTGGCAC  
TGGAACTGTTTACAGACGCCAAAACCTGTGGTTTTTGTCACTGTATGTTATTTGGCTTTCTGCACTACGATGTTTTGAC  
CAACAGTTTTGCTAATTTTACTTCTGTTCTTTTGTCTACCGGTAAACAGGGTAAACGGGTTATTTGGCTACGTAACGCAAT  
GGGCGAATTAATAACGCTCGATTATGTTCTTTGGCCACTGATCATTAATCGCATCGGTGGGAAAAACGCCCTGCTGC  
TGGCTGGCACTATATGCTGTACGTATATTTGGCTCATCGTTCCGCACTCAGCGCTGGAAGTGGTTATTTGAAAACG  
CTGCATATGTTGAAGTACCGTTCTGCTGGTGGGCTGCTTTAAATATATTTACAGCCAGTTTGAAGTGGTTTTTTCAG  
GACGATTTACTGCTGTTCTGCTTCTTAAAGCAACTGGCGATGATTTTATGCTGTACTGGCGGCAATATGATG  
AAAGCATCGGTTTTCCAGGGCGTTATCTGGTGTGGTCTGGTGGCGTGGGCTTACCTTAAATTTCCGTGTTACCGCTT  
AGGGCCCGCGCCGCTTTCCCTGCTGCGTCTGAGGTGAATGAAGTTCGCTTAA

>Cluster\_53701

ATGCGTTTATCTCTCCCTCGCTGAAAAAGCGCGCTGCCAGGATTCAGTATCTGGTCTGGATCTCCACGGCGCTAAA  
GGGCTGGGTGATGGGCTCGCGGAAAAAGATACCGACAGCCTGATCATGTACGATCGACCTTACTGTGGCTGACCTTCG  
GCCTCGCGCGATTTGGCTTTATCATGTTGACTTGGCGTCAATGCCCATAGGGCAACGCTTAAACCAACGATCCGTTCTTC  
TTCGGCAAGCTGATGGTGTCTATCTGATTTTGGGTTTATTTGCGGATCATTACGCTGCTGCGGATGGAGTCTCG  
GCAACGCTACAGTGCACAGATGCTGCTCGGATCTATCATCTGCTGATGATCGCTGTTGTTGAGTGGGTAGCTCGGTTAAAG  
GGGCTCGGTTGGATCGATCTCGGTTTCTGCTGATCCAGCTGCGGAGCTGACAAAACCTGTGCTGTTTTGCTATATC

GCCAACATCTCTGGTGCCTAAAGGCGACGAAGTACGTAATAACCTGCGCGGCTTCTGAAACCGATGGGCGTGATTCTGGT  
GTTGGCAGTGTACTGCTGGCACAGCCAGACCTTGGTACGGTGGTGGTGTGTTGTGACTACGCTGGCGATGTTGTTCC  
TGGCGGGAGCGAAATTTGGCAGTTCATTGCCATTATCGGTATGGGCATTTACAGCGGTGTGTGCTGATACTCGCCGAA  
CCGTACCGTATCCCGCTGTTACCGCATTTCTGGAACCCGTGGGAAGATCCCTTTGGCAGCGGCTATCAGTTAACCGCAATC  
GCTGATGGCGTGGTGGCGGCAACTTTGGGGCGAAGTGTAGGTAACCTCGGTACAAAACTGGAGTATCTGGCGGAAG  
CGCACACTGACTTTATTTTCGCCATTATCGGCGAAGAACTGGGTATGTCGGTGTGGTCTGGCACTTTAATGGTATTC  
TTCGTCGCTTTTCGGCGCATGTCGATTGGCCGTAAGCATTAGAAATTGACCACCGTTTTCCGGTTTTCTCGCTGTTTC  
TATTGGCATCTGGTTAGCTTCCAGGCGTGGTAAACGTAGGCGCGGCGGGGGATGTTACCACCAAGGCTGACAT  
TGCCGCTGATCAGTTACGGTGGTTCGAGTACTGATTATGTCGACGCCATCATGATGCTGTGCGTATTGATTATGAA  
ACGCGTCTGGAGAAAGCGCAGGCGTTTGTACGAGGTTACGATGA

>Cluster\_62805

ATGAACGAGGCAATAAATTATTGTCCCAACAGACATCAGCAAGAAATTCGCGAAATAGAAGAGTCTTACAACAGATA  
TATAAATGAATTTTCGCATCCCTAATGATCATAAGATAAATCGTGAATTTATTCAGCAGGAAAAGACAGCACTGCCACACTCG  
CAGTGGCGCACACATTATTCGGCAAAACAGGTACATGCTGTTATGGCAGACACGGATAATGAGCATAATCTAATGTCGAA  
TTCCGCCAGGAGCATTCATGAGCAGATCGGTTGTAGCCCTGTGCAAGGTTGTGAAGCGGATTTACTACTGAAGAAGATTTTTC  
CAACGACGAAATTTATCTGCAAAAAAATGGTCTAAACGACAGATGATCCGCATGGGAGCATAACCGTGGCATACTGTCATGC  
CTTCCCTCCGACGTTCTGACCAAAATTCGGCGAAGCCTGGAAGCGCACAGCAGAAGCTGGGAAATTTGAGTTAGTAACT  
GCTCTTGATGCTGCGCTTTCCGTTATGCACCAATCCGGTAATAGCTTTTGGATTGCTCCCTTCTGCATGGCAAGTTCCT  
TATGCTGGCGGACCGATTCTGTACAGACGAACTGAAAAATTCAGATAGCTTTTCGACGACCCATAAAGCGCTCTCTTGATG  
CTGGCGATGTTATCGTCAATGGTCTGGTGTTCGCGCGGATGAGTCTCTAAGCGCGCTGGATATGAGAGTTTTCCTCCGC  
GATATGCGCGACGCGAATTTCTTACAACCTTCTGCCCTCCACAAATGGACGGCTGAGGACGATTTTCGCAGTTTCACAA  
ATATTTCCGAATTAAGCCAAATCCACTTTATATGCAAGGTGCGTCTCGTGTGGTGCATGAATTCGCTGCTATGCAACA  
AAGAGGAAATTCAGAGACGCGCTGCGCGCTGGCCAGAGCACATCAAAAAGCACAAACAAATGGGAGTTGAAGGTACGCTT  
GCTAGTAGATGGGTACACTGGATGAGCGTAGGAGAGATAAGCCAAACGCTGGATGAAACAGTTCAATCTGCCACTTGGTGC  
AAATATTTCAACTTTTGGGCTAAAACCTGATGTCAACACATCGACTGGTTCAGGATTTTATGGTCTCTGTTGAGATCTTA  
ATTTCTCCGGGTGTTTATGAAAGTCTGAGAGTGGGCAAAAACAGGCGCGGTGGCAAGGCTACGATCTTGTAAAAGCAAGT  
CTCGATATAGAGTTTGTCTTACGCTACGGTCTGTGCGAATAA

>Cluster\_17798

ATGGCAAAATTAAGCTGACCTACAAATCAAAGCTGGATTAAATCCGATGAGAGATTGGAAGGTAAGGCAGACGGAAACGG  
GCTTTATCTTCGATTTAGGAAAAGTGACAACTCCCTAATGGCGCTTTCGTTACAAGTTAGGCGGAAAATTCGCGAGTTG  
TGCTGATTTGGTTCGTATACTGATTTCTCTCTTGCAAAAGCAAGAGAGGTCGCCAGAGAACTGGCAGCCGCTGTTTCTCT  
GGTTATGACGTAGCAGGAGAGAAAACAGAAAGCGAAAAGCTGAAGCATTTGAAAAGATTGAAGCGCAAAAAGCAACG  
AGTATCAGATTTAGCCGCTGAGTATTACCGCGCAGATAGAACCACCTTACAAGCATCCGGAGTTATTTCCGAGTAGCT  
TACAAAAAACAATTTGTCGCATCTATCGGCAAAATGAAAATGAGGATGTCAGCCCGAAAACATATCGACTATGTTTTCGAG  
AATGATTTAGAGCGCGTCTCTTACCCTGCGAATGACGTGCTAAGAATGCTTAAGCGCTTTTGTATTGCTGTTGTT  
ACGCGGGATGATTTGAAAGCAAAACCCCGGATTTCTTAAAGCTTCAAAAAGATGACAGCGGAAAAGAGCAAGGCGTAG  
CACTCACGCGTGAGGAGCTAGTAATGTTTTTAAAGCTCTGCGTAAGGGCGGGGTATTAGCAGAGAGAAATGAGTTAACG  
TTTTAAATCATTTCTCGCGTAGGCGTTCGCAAGATGGAATTTATGCGCTGCCGAGTGGTTCGAGTTTAACTTGTATGAAA  
AGTTTGGCAATTTCTCGCTGATCGAGCAAAAAATGGTGAGGAGATAGACATCCCGTAGCTGATCTGTTATCGAATGGA  
TCAAGGAAATCCGCTGTTTGTCTGTAATAGCCGCTGGTTAAATTCGGCAAGGAGGGGAGGACTACATCGCACGTTAGT  
CGCAGTACGCTGAATATGGTTTTGCTTTCAGTATTAAGAGAGATGCTGATGTTGAGCATTATGACATTCATGACTTAGC  
ACGTACGATGCGTACCCAGATGGCAGCATTTGGGGATTGATCTGTAATAGCTGAAAGATGCTTAATCATAAAATACCCG  
GTGTTGAAGGTATTTATAATCGCCACCCTATTTTGAAGAGAGAAAAGCTGCATTTGAGCAGTGGGCTGAACCTGCTGGTT  
ACGCTGAAAAGTGGTGAAGATTACAACGCTGCTCCCATGAAAAATATAGTAACCTGTAATAG

>Cluster\_27460

ATGAGCGAACGCTCGCTGTAAAAACCTGATTGCTCAAACCGTATTCTGCCACAAACCGCAGCGCGCACCGGTTGGGT  
TTGTATGCCCTGCATTCAGGCCAACAGCAGCGTGAACGCGATGAATAATATCAGGAAAATAAAAAGACCCTGATGCGGT  
TTGCAGGGTTAAGCGATCCGGTTCGCATGCTGAAATTAGTTTACCACCCGCGAAAATTCGATGCGTTAATCGATTGGACT  
CCCTCCCCATTCGCACCGATGCCCTGTATCAACAACCTGACCGCGATCAAGCGCAGCAGATAGCTGATTACGCCACAGA  
ACGCTTTGATCTGGTGAATATAAGCTCGCTCAGGAGATTTGGCTTTGCTGCGCGCATTTACCAGGCCAATCTGGATG  
CGTATTTCAAGAAATGGATCTCTTACGATGATTAGACAGTTTATCTTACATGCTTTCCACCAGCGCCCTGGTGGATT  
CGCGATACGCTGTTAGAACGGTTGAGTTGATGCAGACAACAGAACTGATTTCTGCAATGCTGGCATGGATTGGGGA  
TGACGTTGTTGTTGAGCATTTTTCCCGCTGGCGTCTTAAACCCGCGCTCGTGGCGCAGTTCACTTTACATCGCGCCAGAAG  
AATATGCGCATGAGGCGGTTGGGAGCTAACCGCTGAAGGGCAAGGCGTAATCTCTATTTTCTCAATGTTTTCATCTG  
GAGATGAAAACACCCGGGTTTGGCAAGCTTTGCGTGTGTTGATGAACGCGAGGAAACCTGTCTCAAAATTTGCGCATGGC  
ACTAACAGATCTTTTCGACGTTGACCTGAAGGCAACGGGCTTACGATAACGGCAGGTTTCGCGTCTGACTTGTGAAT  
GTTGCACCCTACAGCACCATTTTGGTTACATAGACTCACGGGGTAATGCTCATTTGCTGCAAAAAATATCCCGCA  
GCCCTGCGCGGATGATGATCTGAATGGCGTGGTTACTGTAACAGCATGAGACGGGAAACCTTCGCACCGCTT  
ATTCGCGCAGACCAATTTTACCTGCTCTTTCTCGCAACTTGGCGGCATCCAACCTGGATTTCAGGACGCGGAATATC  
CTCTCTGCCCGAATGCTCCCGTCAATGACGTTTCTTGGCAACTGGATTATGCCGATATTGAACAATACGGCGAAGG  
ATAATTTACCGGTTTATCTGCCCGGAGTCCCGGACAACAGCAGCTCTTATCAGCAATCTTAG

>Cluster\_24003

ATGAATCTTACCGAATTAAGAATACGCGGTTTCTGAGCTGATCACTCTCGGCGAAAATATGGGGCTGGAAAACCTGGC  
TCGTATGCGTAAGCAGGACATTAATTTTCCCATCTGAAAGCAGCACGCAAGAGTGGCGAAGATATCTTTGGTATGGCG  
TACTGGAGATATTGCAGGATGGATTTGGTTTCTCCGTTCCGCGACAGCTCTTACCTCGCGGTCTGATGACATCTAC  
GTTTCCCTTAGCCAAATCCGCGTTTCAACCTCCGACCTGGTGATACCATCTCTGGTAAGATTCCGCCGCAAGAAAGG  
TGAACGCTATTTTGGCTGCTGAAAGTTAAAGGTTAACTTCGCAAAACCTGAAAACCGCCGCAAAAATCTCTTTG  
AGAATTAACCCGCTGCACGAAACTCTGCTGCGTATGGAACGTTGTAACGGTTCTACGGAAGATTTAACCGCTCCG  
GTACTGGATCTGGCATCACTATCGGTCGTGGTCAGGCTGGTCTGATTTGTTGGCACCAGCGGAAAGCGGTAACCAATGCT  
GCTGCAGAACTGCTCAGACATGCTTCAACCAACCCGAGTTGTGTGCTGATGGTTCTGCTGATGAGTTCTGCTGATGAGT  
AAGAAGTAACCGAGATGCAGGCTGTTGTAAGGTTGAAGTTGTTGCTTACCTTTGACGACCCGCTATCTGCCACGTT  
CAGGTTGGCGAATGGTGTATGAGAAGGCGAAACGCTGGTTGAGCACAGAAAGACGTTATCTATCTGCTGACTCCAT  
CACTGCTGCGCGCGCTTATAACACCGTGTTCGGCGCTCAGGTAAGTGTGACCGGTTGGTGGATGCCAACCGCTT  
TGCATCTGCGAAACGCTTCTTCCGTCGGCGCGTGAAGGTAAGGCGGCTGACCATCATCTGCTGACTCCGCTT  
ATCGATACCGGTTCCAAGATGGACGAAGTTATCTACGAAGAGTTAAAGGTACAGGCAACATGGAACCTGCACCTCTCTCG  
TAAGATCGCTGAAAACCGGCTTCCCGCAATCGACTACAACCGTTCCGGTACCCGTAAGAAAGAGGCTGCTACTACTC  
AGGAAGACTGCAGAAAATGTGGATCTCGGCAAAATCACTACCCGATGGGCGAAATCGATGCAATGGAATCTCTCAT  
AATAAATGCGCAATGACCAAGACCAATGACGATTTCTTTCGAAATGATGAAACGCTCATAA

>Cluster\_18910

ATGGCAAAGCTGACAGATATCCAAATCAAGTCATGGATTAAGGCAGGAGAACGCTTCGAGGGGCGCTCTGACGGCAACGG  
GCTATACCTTCGCTATCGAGTGGGGGATAAAGTGCCTGTATGGCGTTTTTCGATATCAGTTCGTTGGGAAATCACGGGTAA  
TGCTTATTGGATCTTATAGCGAAATATCCCTTTCCAAAGCACGGGAAATAGCCAGGAATATCCGCAGCTGTAGCCCTG  
GGCTTCGATGTCGCGGGGAAAAGAAAGCGGAAAGCGGCTGCTATAGAAAAGATGGAGCGGGAGAAAACCGCGCTTCG  
CGCTCAGAGCTAGCAAGCATATACGTTTTTCCAAAGCTATGCGCACTGCAAAAAGGATTAGCCCGCGAGAACGAGCTGACC  
TCGATAAGGATATCAACCCACATATTGGCAACATGAAGATAGAGGACGTAAAACCCCGTCATATTGATGCGATGCTACAG  
AGCGTTGTTGATCGTGGCGCTCCAACCGTAGCTAATGACGTTCTGCGCTGGACATAACGCATATTCGATTATGCTATCAA  
CGCTCATGCACTGGAAATTAACCCAGCTGGAGCATTTGATCTGTGACAGCTGGCGGGCAGGAAAAGTAGCCGTATGCGCT  
GGCTGACCCGTTGAAGACCTTATACGTTTTTCCAAAGCTATGCGCACTGCAAAAAGGATTAGCCCGCGAGAACGAGCTGACC  
ATGAAGCTAATCCTCTGCCTGTGTTGTGCGAAAATGGAGCTGTGCGGTGCTCAGTGGGATGAATTCGACCTTGATGAAGC  
AGTGTGGCATCTACCAGCAGAACGCGTTAAAACCGGCGACGCTATTGATATACCACTACCTCCACCTGCGGTTGGTTGGT  
TGAGAGAGCTTCGCACATCTCGCGGGCAGTGGGAGTAAATGGGTTCTCCCGCGCGGAAGATGCAACACCGCATGATTCCC  
CACATTCAGGAAACACACTCCAGTGGCGCTGGCAAAAAGTACCGCGGAAATGCCAGAAGTACCAATTCACAATTCAC  
CGATTTACAGGCGTACCGCCCGCACCATTAGCGGGCTTGGGTGTCGATCCCGTAGTTCGAGAACGTTGCCTGAATCACC  
GCATTAAGGCGTGTGAGGATATCTACAACCGCCACCAGTACTTTGAAGAACGACGGGCGAGCCCTGGAACGTGTGGGCGGG  
CTTCTGGTTTCGCTGAACGAGGGGAAAACATAATGTTATTCCTTTATCTAAAATATAA

>Cluster\_32312

ATGAGTTCCTTAAGTCAGGCTGCGAGCAGTGTGAAAAACGCACGAATGCTCGTACTGGATAGTGGTGTATGTTTAT  
CGTCACATCCTTCAACTACGGCGACCGCGCTACGCTTTCTATTGCCGGTTCGGAATGGCCAAAGATATCGGCGCTGATC  
CCGTGGGAAATGGCTATGTTCTCTGCTTCTCATGGCGTATGTTATCGGGCAGATCCCTGGTGGCTGGAT  
CGTTTTGGTTCAAACCGCTTACTTCTGGTCTGATTTTTACTGTGTCGATGTTTACCTTGCTGCAAGGCTTCGTCGATAT  
CTTTAGTGGATTCCGCATATCGTTGCCCTGTTTACGCTGCGCTTCCTGGTGGGCTTGTGTAAGCGCCCTCTTTCCCG  
GCAACAGTCGATTTGTTGCGGCTGGTTTCCGGCGCAGGAAAGGGGAAACGGCGGTGTCGATTTTAACTCCGCTCAATAC  
TTCCGACCGTTTACTTACCTGGCCGATTAAGGGCTGGCTGACGATGAAGTGGGCTGGTTCACAGCTCTTTTTTATGGG  
CGGTCTGGGCATTTGTCATCAGCTTTATCTGTTGAAAGTCATCCACGAGCCTAAATCAACATCCGGGCGTAAATCAGAAAG  
AGCTGGAGTACATCGCGCGGGTGGCGCGCTGATCAATATGGATCAGCAAAAACCCAAAGTAAAGTCCGCTTTAGCGTGT  
AAGTGGGGCAGATCAAACAGCTGCTCGGGTACGGATGATGATCGGCGTTTATATCGGTGACTGTATCAACGCCCT  
GACTTACTTTTTTCACTTACCTGGTTCCCGTATTTACTGGTGTGTCGAGCGCGGGGATGTCGATTCTGAAAGCGGGT  
CTTCCGTTCCGGCGGTTTGGCGTTTATCGGCGGTGTCGTTGGGTTGATTTTCCGACTGGCTGATGCGTCCGACGGGT  
TCACTGAACATTTGCGCGTAAAACACCGATCGTGTATGGGATGTTGTTGTCGATGGTGTGTTCTGCAACTACGTCAA  
CGTTGAGTGGATGATCATCGGCTTTATGGCGCTGGCCTTCTCGGTAAGGGGATCGGTGCGCTGGGTTGGGCTGTAATGG  
CTGATACTCGCCCAAAGAGATCAGCGGCTTTTCCGGTGGCTTTTAAACATGTTGGTAAACATTTTGGTAAACATTTTGGC  
CCAATCGCAATTTGGTTATATCGTTGGCAGGACTGGCTCCTTAAATGGGCGCTGATTTATGTTGGTGTTCATGCCCTAAT  
CGCGTACTCAGCTACCTGGTGTGTTGGGCGATATCAAGCGTATTGAGCTGAAACCTGTCGCGGGGCAATAA

>Cluster\_13836

ATGACTAAACACTATGATTACATCGCCATCGGCGCGGCGAGCGGGGATCGCCTCCATCAACCGCGGGCTATGTACGG  
CCAGAAATGTGCGCTGATTGAAGCCAAAGAGCTGGGCGGCACCTGCGTAAATGTTGGCTGTGTGCCGAAAAAGTGTATGT  
GGCAGCGCGGCAAAATCCGTTGAAGCGATCCATATGTACGGCCGGATTATGGTTTTGATACCCTATCAATAAATTCAC  
TGGGAAACGTTGATCGCCAGCGTACCGCTATATCGACCGTATTCATATTCCTATGAAAACGTGCTCGGTAATAATA  
CGTTGATGTAATCAAAGGCTTTGCCGCTTCGTTGATCGCAAAAACGCTGGAGGTAACCGCGAAACCATCACGCGCGATC  
ATATTCTGATCGCCACAGCGGTCGTCCGAGCCACCGGATATCCGGCGGTGGAATACGGTATGATTTCTGATGGCTTC  
TTCGCCCTTCCCTGCTTTGGCAGAGCGCTGGCGGTTGTTGGCGCGGGTACATCGCCGTTGAGCTGGCGGGCTGATTA  
CGGCTCGGCGCGAAACCGCATCTGTTTGTGCGTAAACATCGCGCTGCGAGCTTCCGACCGATGATTTCCGAAACCG  
TGGTCAAGTGTGAAACCGCAAGGCGCGAGCTGCACACCAACGCCATCCCGAAAGCGGTAGTGAATAATGCGGATGGT  
AGCCTGACGCTGGAGCTGGAAGATGGTGCAGTGAACGGTGGATTGCTGATTTGGGCGATTGGTCCGAGCCTGCCAA  
TGACAACATCAACCTGGAAGCGCTGGCGTTAAAATAACGAAAAGGCTATATCGTCTGATGATAAATATCAAAAACCCA  
ATATTGAAGGATTTTACCGCGGTGGCGATAAACCGGGTGCAGTGGAGCTGACACCGGTGGCAGTTGCGCGGGCTGCT  
CTCTCTGAACGCTGTTTAAATAACAGCGGATGAGCATCTGGATTACAGCAACATTCGACCGTGGTCTTACGCCATCC  
GCCGATTGGTACTGTTGGTTTAAACGGAACCGCAGGCGCGGAGCAGTATGGCGACGATCAGGTGAAAGTGTATAAATCCT  
CTTTCACCGCATGATACCGCGCTCACCCTACCGCCAGCCGTCGCCGATGAAGCTGGTGTGCGTTGGATCGGAAGAG  
AAGATTGTCGGTATTTACCGCATTTGGCTTTGGTATGGACGAAATGTTGACGGGCTTCCGCGTGGCCTGAAGATGGGTGC  
AACCAAAAAGACTTCGACAATACCGTCGCCATTCACCAACGGCGGCAAGAGTTCGTGACAATGCGTTAA

>Cluster\_62144

ATGCCACTAATATCGTTGTGGCAGGGATTGCTTTACTCTGCTTTTAAACATAAAAAATTAAGCTTAATACGTTTGTTC  
GTTAATTTATGCTCGATTGCTGCGCCATCGCCAGTGGTATGGATTTGAGTAAAGTCTCACCTCAGTCGAATCCGGAC  
TTGGCGGTAGCTGGGCCATATTTGGTTTATGATTTGGCTTCGGTGTATGCTCGGTGCTGCTGGCCGATGCGGGTGGT  
GCGCAGCGAATAGCGCTGACCATGCTGAATATTTCCGGGAAAAATAAACTTGACTGGGCGAGTGGTCTGTTCCGGCTTTAT  
TGTCGGTATCGCACTTTTTTCGAAGTGGTTTAAATCTTCTGGTACCTATTTTATTCGCTATTCGCCGTGAAGCAAAA  
TATCACCGATGTTTATGTTGTGCGCATGCTTTCTGGTTGCTGGTGCACACGCTTTTTCGCGCGGACCCCGCGCCG  
ACTGTTATCGCCAGGGAATATGGCGCTGATGTAGGATTGGTACTGATATACGGTATCATTTGTCGGCATTCACACCTTTAT  
TCTTTGCGGGCCGGTATTGAATAAATTCGCGAGCGCATTTATCCGGAGCCCTTAAAAAAGAGGGGAATATAGCCTCTC  
TCGGCGCACCCCGCATTCAGCGAAAGCAATGCGAGCTTTGGGATCAGTTTCTCACGGCAATGCTGCCGTTGATC  
CTGATGGCGGTTGTCACCATCATCCAGATGACTCATGCCAAAAGTGGCGGGATTCAGGCTTATTTTACAACGTGATACT  
GTTCTTAGGTAATTCACGATCGCCATGCTGATTTACCTGCTATTCGCGATCTATACCATGGGCTGGGGCGGGGAAAA  
CAATCCCTGACCTGATGCTTTCGCGAAAAGCTATCGCGGGTATTCGCGGTCTGCTGCTGATTTATCGGTGGTGGTGGT  
GCATTCAGCAAGTTCTCATCGACTCTGGCGTTGGTCAATATTTCCACCTGGTTTCCGGTATGGATTAACCCGAT  
CCTGATGGCCTGGGGCGTGGCCGATTCCTGCGTATTTGCTGGGTTACGCCACCGTCCGGCGGATCTCTACCAGCGGTC  
TGGTCATCCCATTTGGGAGTACATCCCAATACCAACCTGGCCTTGATACGCTGGCTACCGGTGCCGATCCTGTATT  
TGTTCTCAGTTAACGATGCCAGTTCTGGATGATTAAGACTTTTTTGGCTGACCACCAAGAAACGCTGTTATCTCTG  
GACGCTGATGTCACACTTATCCATCAGTGGCTGATTTTTTACTGCTGCCAGCTTAGTTTTATATA

>Cluster\_14188

ATGAGTCTGCTGCAATTCAGTGGCCTGTTGTTGTCTGGTGTCTGCAACGCTGTTTTATGCCACGCTGACCTGGTTTTGA  
GTTTCGCGGTGCGGCTTAACTCAATGTCTTTCTTTTCAATGCTGTTTTTGGTCCACTTTTTCTTCGGCTTCCCGCTGA  
CCAGCGTGTGGTATTTCCGCTTTGATGTTGGTGTGCGCGCCAGAAATCTTGTGTCAGGCGTTGCTTTCTGCGGGCTC  
TTCTACGCGGTTTACTATGTCACCTACAAAACCGCCTACGCAACGCGTGTGATGTACCGCGGCTCCGCTGTTTAC  
CATGAACCGCTGGAGACCAATCTTACGTGGGTGATCTGTAGGGCATCGCGCTGGTAAGCGTCCGGCATCTTCTTCATGC  
ACAACGGCTTTTGGCTTTCCGGCTTAACTCCTACAGTCAGATCTTCTCAGTGAAGTCTCCGGCTGGCGGTTAAACCG  
TTCTTTTACTTTTTCATCCCGGCGATGCTGGTGGTCTACTTTCTGCGCCAGGATAGCAAAAGCGTGGCTGTTTTCTCTCT  
CAGCAGGTCGCCCTTTGGCTTGTGACTTATATGATTGTGCGGCGACCTGCGCAATATCATCATCGCATTCGCTATCT

TCCTGTTTATTGGCATTATTCGCGGCTGGATTTCGTTGTGGATGCTGGCGGGCGGGCGTGTGGGGATTGTGGGCATG  
TTCGCGCTGGCGCTAAAACGCTATGGAATGAATGTGAGCGCGATGAAGCGTTCTATACGTTTCTCTACTCGCGA  
CACCTTCTCGCCATGGGAGAATCGGCGTTGCTGTTGCAGAACACGACATCCAGGGCCGCGCTCCAATTG  
TCCGCGATTTCTATGCTTTATCCCTTCTGGCTGTGGCGGGTCCGCGAGTATGGTCTGAACTCAGCCAACCTACTTT  
ACCTGGGAAGTGCFAATAACCACTCCGGATCGGCATCTCCCTACGTTATAGGCTCACTGGTGGTATGGCGCGC  
GTTGTTTATCCCACTCGGGCGATTGTGGTTGGACTGATCATCAATGGTTCCGACTGGCTGTATGAGCTGGGCAACCGC  
AGACTAATCGCTATAAGGCTGCGATATTGCACAGTTTCGCTTGGGGCGATCTCAATATGATCGTGTGGCACGTGAA  
GGGCTGGATTCTGTTGCTCACGCGTAGTCTTTTTTATCGTGGTCTTCGGCGCATGCTGATGATCGCAAACTGTTGTA  
CTGGCTTTTTGAAAAGCGCGGACTCATTATAAACGTACAAAATCATCGCTCCGGACGAGGTTGAAGGATAA

>Cluster\_51151

ATGAAAAATAAGATTACATTATTACCTGTTATTATGGCTGGGGGGAGCGGTTCCAGATTATGGCCATTATCGCGTAACGA  
TTATCCCAAGCAGTTTTTGGCGCTCTGTAGCCCTATTACGATGCTTCAGGAAACCATAAATAGATTAGAAGGTTAGATT  
GTGAAGATCCTATCATTTATTTGTAATCAGAAACATAAATATATAGTAAAAGAGCAGTTATATCTTTAAAATAAACAT  
TCTGCTATACTTCTTGGAGCCGTTGGTAGGAATACAGCGCCAGCAATTGGACTGGCAGCCTTCGAAGCCATGGGACAAA  
AGGCGATGTGCTTCTTGGTATATCTGCTGATCATTGATAAAAAATATGAAATGCTTCCATAAAGCTGTAACAAAAT  
CACTGAAGTTGCACTGATAACTATCTAGTAACATTTGGTGTGACACCTACGCGAGCAGAACTGTTATGGGTACATC  
CGCAAAAGGGGCACTAATTGATAGAAAGTCTTATCAGATATCAAGTTTTTGTGAAAAACCTGACCAAGATAAAGCTGAGAG  
TTTTTTAAGTCTGATGATTATTTATGGAATAGTGGGATGTTTTTATTTAAAGCATCTGTTACCTTCGTGAATAAAA  
GATACAGACTGACATTTATCCTTGCATGTTTGTATTAATAAAAAATATGATGGTGAATTAACATTTGCTGATGCTC  
ATGAAATATTCATTCATGCTCCCTCAGAACTATTTGATTTGCTGTAATGAAAAACAGATAATGCTGTTGTGATGCC  
ATTTAGCGTCTGAATGGAGTGATGTCGGTAAATTTTCTTCTTTATGGGAAAATAGCATAAAAGATTGTAATAAATTAATG  
TTGATAGCAATGATTTACATCTGATGTTTATGATTCATATATGTAACGGATAAGAAAAAGTGTGACAGATTAGGCTTC  
AACAAATATGATAATCGTAAATACAGCAGATGCTTTATTTAGTTGCGCATAAAGATCATTGTGTAATAAAAGAACTTAT  
TACTGAATTTGAGAGTTAGGAAGAAAGGAACTTTTTATAACAAAGTGAATTCGATTTCTGGGGCATTAAAGAAAGTTA  
TAAATGATGATGTTTATAATATTAATAAATACATTATAAATGCTGGAATGAAGTTATCTGATGTTACTAAGGAAAAGAGC  
AAGTATTGGGTTGTTATACATGGTGGGTTGGTGGATTAATGGAAGTATAAAAAAATAGAAAGATCCGACTCAAT  
CGGAATCGATAGATATTCTAAGTTTGTAGTTCAATCTATACAAAACAGCAACTTTGAGTTTTTAAAGAAATGAGATTTAA

>Cluster\_2623

ATGTTGAGTATTTTTAAACAGCGCCACACAAAGCGCGTTACCTGCCGCGGAGATCGATCCGACTTATCGTCGATTGCG  
CTGGCAAAATTTCTGGGATATTTCTTTGGCTATGCGGCTTACTATTTGGTTCGTAAGAACTTTCGCGCTTGCATGCTT  
ATCTGGTTGAGCAGGATTTCTACGCGGTGATTTAGGTTTTCGCTTTCGGGGATCTCGATTGCTTATGGATTTTCGAAA  
TTCATCATGGGTTTCGGTATCGGATCGTTCGAATCCGCGGCTTTTCTGCGCAGGTTTGTATCTGGCGCGGAGTGT  
GTTGTTTATGGGCTTTGTGCCATGGCGACGTCGAGCATTGCGGTGATGTTGTAAGTGTGTTCTCTGCGGTTGGTTCC  
AGGGGATGGGTTGGCGCGCTGTTGCTACTATGTTGACTGTTGTTGTTGTTGTTGTTGTTGTTGTTGTTGTTGTTGTT  
TGGAACTGTGGCACAACCTCGGTGGTATTTCCGCGCTGCTGTTCTGCTGGGATGGCTGGTTCAATGACTGGCA  
TGGCGCGCTCTATATGCGGCTTTCTGCGCCATTTCTGGCTGTCATTTATTCGCTTTGCGATGATGCGCGATCCCGCAAT  
CTTGTGGTTTTCGCGCGATCGAAGAGTACAAAAATGATTACCCGGACGACTATAACGAAAAGCGGAACGGAACGACG  
GCGAAGCAGATCTTACGAGTACGTTGTCGGAACAATTTGCTGTTATATCGCCATCGCCAACGTTTCGTTTATCT  
GCTGCGTTACCGCATCTCGACTGGTCCGACTTACCTGAAAGAGTTAAACATTTTCGCGCTGGATAAATCTTCTGGG  
CCTACTTCTTCTATGAGTATGCGGGTATTTCCGGCACCTGCTGTCGCGCTGGATGTCGATAAAGTCTTTCGCTGGCAAC  
CGTGGGGCAACCGCGGTTTTCTTTATGACACTGGTACCATCGGACTATCGTTTACTGGATGAACCCGGCAGGTAACCC  
AACCGTCGATATGATTTGATGATGTTTATCGGCTTCTGATCTACGGTCTGTGATGCTGATCGGCTGCAATCGCTGG  
AATGGCACCGGAAAAAGCGGAGGTACCGCAGCGGCTTTACCGGCTGTTTGGTTACTGGCGGTTTCGGTGGCGGG  
AGCGGATTTGTTGGCTACACCGTGGACTTCTTCCGCTGGGATGGCGGCTTTATGGTAATGATTGGCGGAGCATTTCTGGC  
GGTTATCTTGTGATGTTGTTGATGATTGGCGAAAACGTCGCATGAACAATTAAGTCAAAAACGCAACGGAGGCTAA

>Cluster\_26957

ATGAAAAGATTATCTATAACCGTCCGTTAACCTTGCCTTTTTATATTTCTGCTGTCTGTTGCTGGCGTGGAATTGTATG  
GACTCTCTATAATGGCTGGCAAGTGAGTTGAAATGGCGCGATGATACAACTCATTAACCGGACAGCGCAGATCAAGC  
AGTTGTTAATGATGGGGTAAATCCAGATACGTTACCTGTGACTTTAACCGGATGATGGATGTTAGTCAAGGATATTTG  
ATCATTCAATGGTATGGCATCAATAAAATTTGTTAACCGGACAATGTCAGTATGACATGTTAAATAACATACCTGCTAG  
TGAGCAATCAGCCGAGCAGGCAATTTACAGAAGCATTTAATGATACAGAGATAGATGCTTTCCGAATTAATATTGAT  
AAGTTTCGCCATCATTAACGGTTACTGTGGCTAAATGGCTTCCAGCCAGACATAACATGCTTGAACAGTATAAAATTAAT  
AGCATTATAATTTGCATTGTCGCCATTATATTTGCTCAGTATTAAGTCCGTTGTTAATCAGAACGGGTTGCGAGAGAT  
CAAAAAGTTGAGTGGCTAACGGAAGCGCTGAATTAACAGTACGCGAGTGGCGGTTGAGTTAGCGCATTAACCGAGAG  
AATCAAAACCTTTGGCGAGCGTTGAAATAAAATGATATGCTTAAAGTCAAAAGATTGAGGCGCTTATGATCAATTTGCT  
GACGATCTCGCTCATGAACCTTAGAACGCCAATTAATGCATTACGGGTGAGAATCAGGTTACGCTCAGTCAAAACGAGA  
TATCGCTGAATCAAAAAACAATTTGCCGGAACAATGAAAGAGCTGGAATAATTTTCGCGGTTAACAGAGAATATACTGT  
TCTTCCAGGGCAGACAAAACAATGTTTGGTGAACCTGGATGCGCTTCTCAACAAGGAAGTTGAAATCTTTTGG  
GACTATCTTGAATATCTTTACAGCAGAGAAAGAGATTCGTTTAAAGGTCGAGTGCATCAACAAATCTTTGCGGATAAAAT  
TTTACTGCAACGAATGTTATCGAATCTTATTTGTTAACGCCATTGATATTCGCGAGAAAATCGCGTATTCATATAACCA  
GTTTTCTTGTGATGCCAACGGTTCTCTTAATATTGATATCGCCAGTCTGGAAACGAAAATTAATGAGCTGAAAACTCTTC  
CGTAGATTTTGGCGGGGAGATAATTCGCTGCTTCCGCTAGTCAAGGACTTGGCTTTCTTTAGTCAAAAGCAGATTGCCGA  
ATTACATGGAGGAAGTGTACGTATCCTATCTCAGTAAGCATAACGTTTTCGAATTACGTTACCGCAAGAAATTA

>Cluster\_45076

ATGCAAAACGTTTTAGCGAAAATCGTCGAGACAAGGCGATTTGGGTAGAAACCCGCAACAGCAGCAACCGCTGGCCAG  
TTTTCAGAATGAGGTTTTCAGCCGAGCAGCGACATTTTTATGATGCGCTACAGGTTGACGCGACGGCGTTATTCTGGAGT  
GCAAGAAAGCGTCGCGCTCAAAGGGGCTGATCCGTTGATGTTTCGATCCGGCAGCAGTTCGCGCCATTTATAAACATTAC  
GCTTCGGCAATTTCCGGTGTGACTGATGAGAAATTTTTACGGGGAGCTTTGATTTCCCTCCCATCGTCAAGCAATCCG  
CCCGCAGCCGATTTATGTAAGACTTCAATATCGACCTTACCAGATCTATCTGGCGGCTATTACCAGGCGGATGGCT  
GCTTATTAATGCTTTTCACTGACTGGATGACGACCAATATCGCCAGCTTGCAGCCTGCTCACAGTCTGAGGATGGGGTG  
CTGACCGAAGTCAATGAAGAGGAACGAGGCGGCCATTGCATTAGGGGCAAGGTCGTTGGCATCAACAACCGCGA  
TCTGCGTGTATTTGCGATTGATCTCAACCGTACCAGGAGCTTCCGCGGAACTGGGGCACAACGTAACGGTAAATCAGCG  
AATCCGGCATCAATACTACGCTCAGTTCGCGAGTTAAGCCTTTCGCTAACGGTTTTCTGATGTTTCGCGGTTGATG  
GCCATGACGATTTTACACCGCCGCTGCGCGGGTGTTCGTTGGTGAAGATAAAGTATGTTGCTGAGGCTGGGCAAGA  
TGCTAAAGCAGCTTATGACGCGGGCGGATTTACGGTGGGTTGATTTTTGTTGCGACATCACCGGTTGGCTCAACGTTG  
AACAGGCGCAGGAAGTATGGCTGCGGACCGTTGCAGTATGTTGGCGGTTCCGCAATCAGGATATTGCCGATGTTGGT  
GACAAAGCTAAGGTTTATCGCTGGCGAGTCACTGATGTAATGAAGATCAGCTGATATCGATACGTTACGCTGAG  
AGCTTGCAGCACAGCTTGCATCTGGAAGCAATTAAGCGTCCGTTGAAACCTGCCCCCGCGAGCTTACGACGTTG  
ATAAATATGTTTTAGACAACGGCAGGGTGAAGCGGGCAACGTTTCGACTGGTCACTATTAATGGTCAATCGCTTGGC



AACGTTCTGCTGGCGGGGGCTTAGGCGCAGATAACTGCGTGAAGCGGCACAAACCGGCTGCGCCGGACTTGATTTTAA  
TTCTGCTGTAGAGTCGCAACCGGCATCAAAGACGCACGCTTTTTGGCTCGGTTTTCCAGACGCTGCGCGCATATTTAA  
>Cluster\_18691  
GTGACTACATTAACGCTTTGTTTTAACAGCAGTAGGGTCTGTTTTACTGCTGCTGTTTTAGTCATGAAGGCGCGTATGCA  
CGCTTTCCGCTTAAATGGTGGTGTCCATGGGGCTGGCCTTTTTCCGGTATGCGCGCTCGATAAAAATCGCAGCGACGA  
TGGAAAAAGGGATGGGAGCACCCCTCGGCTTCCGCGGTGGTGTGCGCTCTGGGAGCCATGTTTGGTAAAGATCTTACAT  
GAAACCGGCGCGTFCGATCAGATGCGCGTCAAAATGCTCAAATCCTTCGGTACAGCCGCGTGCATTAATGCTATCGGCT  
TGGGGGGTGGTTTTGTGCGCTACCCGCTGTTCTTTGAAGTGGCGATTGTTCTGCTGATTAGCGTTGCTTTCTCAATGGCGC  
GCCACCCGCGCACGAACCTGGTGAAGCTGGTAAATCCCATTTATTTGACAGCGTGGCGGCAGCGGCTGGCTTCCGTTGCT  
GGGCCAGCGCCAATGCTGCTGGCATCGCAGATGAATGCCGATTTTGGCTGGATGATCCTGATTGGCTGTGCGCGGCAAT  
TCCGGGAATGATTATGCGCGGCGCTGTGGGGTAAATTCATCAGCCGCTACGTTGGAGTTGCATATTCCTGACGACATCA  
GCGAACCGCATCTCGCGAAGGCAAAATGCCGCTCCTCGGATTCAGCCGTGCTGCTGATCCTGTTGCCACTGGTGTGCTG  
GGCTGAAAACCATTTGCCGCGCTTTGTGTCAGAAAGCTACTGCTTACGAATGGTTCGAGTTTATTTGGCTCATCCGTT  
TACCGGATTTCTGGTTGCTTGGCTGGTGGCATTTACGGTCTGGCAATGCGTCAAGGATGCCAAAAGACAAAGTATGG  
AGATTTGCGGTGACGCGTGCACCCGCGGGGATCATTCTGCTGGTGGTGGTGGCGGCGGCTGTTCAAACAGGTGCTG  
GTTGACTCTGGTGTGGTCCGGCTGGCAGTGGGCGAAGCGTTAACCGCATGGGCTGCCGATTGCCATCACCTGCTTCTGCT  
GGCAGTGCACCTGCGCATCTTACGGTTCGCCACCGTTGCCCTGTTTTAACGGCGGTGGGATTGGTAAATGGTAAATG  
AACAACTGAACTACTCCGGTGGCAGAAATGGCGGCTGCTGATTTGTATCGCCGGTGGTTCGATTGTTGTGACCCAGTT  
AACGACCGGGTTTTCTGGTTGTTTCGGTAAATTTACCGGCGCGACCGAAGCCGAAACGCTTAAAACCTGGACCATGATGGA  
AACCATCTCGGCATGTGCGTGCCATCGTTGGGATGATTGCGTTCAGCTGTTGAGTTAA  
>Cluster\_27059  
ATGAGCTTTAACACAATCATTGACTGGAATAGCTGTACTGCGGAGCAACACGCCAGCTGTTAATGCGCCCGGCGATCTC  
CGCTTCTGAAAGCATTACCAGCAGCTTAAACGATATTCGATAACGTAAGAAACCGCTGGCGATGAAGCCCTGCGTGAAT  
ACAGCCGGAAGTTTGGATAAAATACGGTTACCGCGGCGAAGTGTCTGCTGAGATCGCCGCGCAGCGCAACGCTG  
AGCGACGAGCTAAAACAGCGCATGGCGGTGGCAGTAAAGAATATTGAAACCTTCCACACTGCGCAAAAATGCGCGCGGT  
AGATGTAGAAACGCGAGCCAGCGTGCCTGCGCAGCAGGTCACGCGCCCGGTGGCTTACGTTGGTTTGTATATTCGGGGG  
GCTCCGCCCACTTCTCAACGGTATTAAATGCTGGCAACTCCGGCGGCTATTGCTGGTTGCAATAAAGTGGTGTGCTG  
TCACCGCCGCGATTGCGGATGAGATCCTTTACCGCGGCGAGCTGTGCGGCGTGCAGGACGCTGTTAATGTCGGCGCC  
ACAGGCCATTGCGCGACTGGCGTTTGGTACAGAATCCGTGCGGAAAGTGGACAAAATCTTCGGGCCAGGTAACGCCTTTG  
TCACCGAGGCAAAACGTCAGGTGAGCCAGCGTCTGGACGGTGGCGGATCGATATGCCCGCAGGCCCGTCGGAAGTGC  
GTGATTGCTGACAGCGCGCTACGCCGATTTCGTGGCTTCTGATTGCTTTCAGGCTGAACACGGCCCGGACTCACA  
GGGATTTTACTGACCCCGACGCGATATGGCGCGTCCGCTTCCGAGGCGCTGCAACGCAACTGGCAGAACTGGCCTG  
GTCCGAAACCGCCCGCAGGCACTGAGCGCCAGCCGCTGATCGTACTAAAGATTTAGCGCAGTGCCTAACGATTTCC  
AACAGTACGCGCCGAGACCTGATCATTAGACCCGCAACGCCCGCAACTGGTGCATGCCATCACAGCGCGCGTTC  
GGTATTTCTCGGTGACTGGTACCAGGATCGGCAGGTGATTACGCCCTCCGGCACTAACACGTTCTGCCGACTTACGGTT  
ACACGCCCACTGTTTCAGCCTCGGGCTGGCAGATTTCCAGAAGCGCATGACCGTGCAGGAACTCTCGAAAGAAAGTTTC  
TCCGCGTGGCTTCGACCATGAAACACTGGCTGCCGCCGAGCGCTGACCGCCACAAAATGCCGTTACTTTGCGTGT  
TAACGCCCTTAAGGAGCAAGCATGA  
>Cluster\_24309  
ATGAAAAATATAAAATTCAGCCTGGCCTGGCAGATTCTGTTTGTATGGTGTGGGCATTTCTCTGGGAAAGCTACCTGCA  
CTACCATAGCGACAGCCGACTGGCTGCTGTCATTTGCTCTCCGGCGGTTGATATCTTATCCATCTGATCAAAA  
TGATTTGTTGTGCCGATTTGATCTCCACACTGGTGGTGGTATCGCGGGTGTGGTGTGCAAAAACAGCTCGGGCGTATT  
GGTGGCAAAACCATTTACTTACTCGAGGTGATACCACCTGCGCATCTTTGGGGATCACTCTGGGAAACGCTTCCCA  
GCCCGGTGCCGGGTGGATATGTCGAGCTGGCGACCGTGCATATCTGAAAATATCAGAGCACACGGAAGCGGTACAAA  
GCAGTTCACCGCATTAATGGGACGATTTTGTGCTGCTGCGGACGAACATCGTGGCGTGCATGGCGAAAGCGAAATG  
CTGCCGATCATCTTCTTCGGTGTGTTGGTCTGGGGCTTTTACCTGCCCGGACGCACTGTAACCGCTGGTGC  
CGTTTTCCGCTCCATCTCTGAAACCATGTTTAAAGTACTCAGCATGGTGTGATGCGTTATGCGCCGGTGGTGGTGGCC  
TGATTGCGGTGACGGTGGCTAACTTGGTTTCTGCTCTGTTGGCCACTGGCGAAACTGGTGTGCTGGTGCATTTCCGCC  
ATTTCTGTTCTTCGCGCTGATGCTGGGAATTTGGCGCGCTGTGCGGGTTAAGCGTCTGGATCCTGATTCGATTTCT  
GAAAGATGAGCTGATTTGGCGTACTCCACTGCCAGCTTGAAGCGTGTGCCGCAATTTATGAGAAGATGGAAGCCT  
ACGGACACCGCGCTGCATCACCAGTTTCGTGGTGGCGGACCGGTTACTCTTTTAACTTGTGATGGTGTGATGCTCAA  
AGTATTGCCGCTATTTTCATCGCTCAGCTGATGGCATTGACCTGCCATCTGGCAGGAAATCATTTCTGGTGTGACGCT  
GATGGTGAACCGAAGGATGCTGGCGTGGCGGCGTGTGCTTTGTTGCTGCTGGCAACGCTGGTAGCGTAGGTA  
TTCCGCTGGAAGGTCTGGCGTTTATGCCGGTGTGACCGTATCCTCGACATGGCGGCTACTGCGTGAACGTTGGTGGT  
AATGCGTGGCGGCTGGTGGTATTGCCAAATGGGAACAAAATTTGACCGTAAGAAAGCGCTGGCTTATGAGCGTGAAGT  
GCTGGCAAAATTTGATAAAACGGCGGATCAGTAA  
>Cluster\_64740  
GTGCAATCACTTACTACCGCGCTGGAAAATCTACTGCGCATTTGTCGCAAGAGATTCCGGCGACACCCGGCATTCGGGT  
TATCGATATTTCCCTTCCCTCCTCAAAGACGCTTTTGGATGCTTGGAGCTGGCTGGCCAGTCAAGAAACGTAACCCGAATTTCT  
ACTGGCAACACGTAATGGTGTGATGAAGAAGCTGCGCTCCTGGGCGGATTAACCGTTTTACGTCGTTGGACAGGCACAA  
CGTTTTCTTCGCCAGCACCCGGAACAGCCGACTTACGCATTTGGGGGCTGAATGCTTTTACCCGCTGCGAGGCAATTT  
ACTTTTACCCTGGAAATGGCAGCGCTGTGGCGGTAAGCCACGCTGCGGCTGACGCTATTCAAGAAAGCTTCCCTTC  
AGCAGATGCGATTACAGCAAAAGAAATTTATCGCCACTGGTGGTATCAAGCCCTTGCCTGGGTTACATTTAACACC  
ACCGGAGAAACACTGGCCGGAACAAACGGGCTGGACGCAATTAATGAACTGGCAACGAAAACCATCGCCGAAAGTGA  
GCTCGACAAAGTGGTGTGCTCGCTCGGCAACTGACCTGCATTTCCGAACTCCGGTCAACCGCGCGGCGATGATGGTGGCA  
GTGCTGACTGAACTGAAATGCTTACCATTTTACATGGCGCTTTGATGGCGAAATGCTTTTCTTGGCTTTCACCGGAA  
CGGTTATGGCGCGCGGCTGACAAAGCGCTGGTACTGAAGCGCTGGCGGAAACAGTAGCAAAATATCTGATGATAAGCA  
GGCGCAGCAGTTAGGAGAGTGGCTGATGGCGGATGATAAAACAGCGCGAGAACATGCTGGTGGTGGAAAGATATCTGCC  
AACGATTACAGCCGATACCCAGACGCTGGATGTTTTACCGCCGAGGTAAGCTGCTGCGTAAAGTGCAGCATCTTCCG  
CGCTATCTGGACTTCACTCAACAAAGCGGATGATGCTGTTTACATCAGTTGCGACCAAGCGGATGCTGCTGCTG  
CTTACCGCGGATCTGGCGGACAGTTTATCGCCGTCACGAACCGTTACCCGAGAAATGGTACGCGGTTCTGCGGGCT  
ATCTCTCATTAACAACAGCGAATTTCTGCTTTCCCTGCGCTCAGCAAAAATAGCGGCAATGCTGCTGCGATTATGCT  
GGCGGGGATTTGCTGGTTCGACCCCGAGCAAGAGTGGCAGGAAATCGACAACAAAGCGGACAGGCTGCGTACTTT  
ATTACAGATGGAATAG  
>Cluster\_26556  
ATGAAAAAATCTTATCCAGTTTTACCTGTTATTTGTTGCTGCTTCTTGTGATGCTCTGCTGGTGGGCTGGTGTGA  
CAAATTTACCGCGAAGCGCAGGCAACAGTCCGTTGATGATTTGATGAACAGTTGCTGTAATCTGATGCGTGGTGA  
TGCGTGGATCCCCACAGCAGTGGGGTAAGACGCTGAAAGAGATGGATTTAAATCTCTTTCGATCTGCGTGTGCG  
CCGCTGAGTAAATACCATCTTATGATATTTCCATGACCGGCTGCGTGGCGGCAAAATGTCGCCCTGGACGATCAGTA





CCAAGCCAGCTTCATCGTTGGCGCGTGTATTATGGCGTCATGCGTGGTTAATGCCATTATCGGCATGTCTCTTTGA  
>Cluster\_59474  
ATGAAGCAGCAAAAGGCGATGTTAATCGCCCTGATCGTCATCTGTTAAACCGTCATAGTGACGGCACTGGTAACGAGGAA  
AGACCTCTCGGAGTACGAATCCGAACCGCCAGACGGAGGTCGTGTCTTACAGCTTACGAACCTGAGGAGTAA  
>Cluster\_55003  
ATGCCGTTTTTTCATCATATAATATTTTATAATGAGAAATGTGCTTTTAATTTGTAATTTATATATATACATAATTCATA  
TATTCATGGTCTTTTATTTATTCACCTGAATTATAACTGTGCATTATCGGAAAGTATGTTTGATTAG  
>Cluster\_67120  
ATGACTCAGAGCCGCGACCGCTGCGCGTGCAGCGGAGAGTGTGATTGTGCTGGCTGCCCTTGATGAAAACGGCCGGG  
ACCTGTGTTGGCGCGGGTAGGATCACTGGCGTATGGCAATGAGCCGCTTATTATCGAGTTCAGTGA  
>Cluster\_15410  
ATGAAGGAGCAAAGGAAAAATCCCCCTGACGCATATTATGATTATCGGTGCGTTTATTTTTGCCCTTCTGCAAGTGGTGT  
ATTAGCCTCCCTGGTTCCAGCTGTGAATGTTAAACAACGAAATCCAGGAAGGCTTATTTTTCAGTCGGGGCCATAATGGTAG  
AAAGTTTGCAGCATATTTCTTTCCGGTCAAACGGGGATTAATGGGTAA  
>Cluster\_36024  
ATGCTGATTGCCGATGCGACGCTGTTGCGTCTTCTCAGGCCCTACGATTGTGGTGCCTTCTGGGGCGGACAAGGCACTCG  
CGCCGCATCCGCCAACGGTCAATCGAATTATCAGAAGCATTAAACGCCCTGATATTCCGCCATTCCCGCTTTTCAGTCC  
ACGCTGACCTGGTAATGAATATCGGCACTTTTACCACGCACGGTTAG  
>Cluster\_2086  
ATGCCAAAAATTAAGACCGTACGCGGTGCTGCTAAGCGCTTCAAACGCGTAAAGGTGGTTTTAAGCACAAAGCACGC  
TAACCTGCGTACATTTCTGACCAAAAAAGCGACAAACCTAAACGTCACCTGCGTCCGAAAGCCATGGTTTCCAAAGGCG  
ATCTGGCCTGGTAATCGCGTGCCTGCCGTACGCATAA  
>Cluster\_41102  
GTGAAAGAGGCGGACGGTTCGGTAACCCTATCTGGTGCCTTATGCAGCGGTACCAAATATGCTGCAACCCGGCGTGT  
GAAATATGATTTTGGCGCGGGTCTGAGCCATATGAAGGGGCGAGCAAACAAAGTATTTGTCCAGGCGGGTATCAGT  
ATGTTTTTAATAACTTATTAACGCTGTATGGTGGCTAG  
>Cluster\_63618  
ATGTATAAAATTACCGCCACTATGAAAAGGAAGTGGCACTCTACTAAGTGGACAAGATATCAAATCTAAACTAAC  
GAAATCAGAATGCGAAAAATGCTCTCAGGTAAGAAAGAGCAGGCGTTTCCAGAGAGCAGAAAGTAAACTGATAAAT  
TTAATTGCGAGAACTTCAGTCCFCGAGAATTGCATTGTATTCAAATTA  
>Cluster\_7941  
GTGGATAGAGAAATTAAGTGAACGCTTATGATTGAGCGAGTCAAATGATTGCGCGTCAACGCTGAAGGGACTTGTAA  
GGAAAGAGACCGTGAATCGCATTTGATTGAGGAAATAGTGAAGGCAACTTGTGAAAAATAACTCCTTTTCAC  
TAGTTTTCTCTGCAACCCATGCTGAAGAACGATTAACAAGGCTGAGTAA  
>Cluster\_40848  
ATGACTACTGAAACCATTTGCTGTTTTCTTTCTGGTATATGTACGCAGGATCATGCAGCGCAAGACTTCATCGTTCCCT  
GGGCTATGGCAGGCACTACGACACCGCGCATTACATCCTGTACATGACCGCGTCACTGTGTTCTGGCCAGTCCACCTGC  
CAGCTGCAACCGCATTTGTTGCCGACAGACTGAAAAAAGGAGATGA  
>Cluster\_66693  
ATGAAAAATTTTCCAACGGTACAACCCACTTCAGGTGGCGAAAGTACGTAAGATCCTGTCCGTGGACGGTTATACATCAA  
GGACGTTGGCGCTTTTGAATTTGATAAGGGTAAGATTTCTTATCCAAAAGTGAAGGATAGCTGCATTTGTGAGTATG  
CCGAAGTTAACCGTCAAGTTATGCGTCTGCAACAGAGATGGCTAA  
>Cluster\_28851  
ATGTCTAGCGGTAACACAAAACAACAAATCAGCAAAAGAAAAATATTCGATTCCCACATGAGCTTATAGATGGGATGATGC  
CAGCGTTGAACAAGAAAAATTAACCTAATCCTAGTGTCTAATTTTTCCGCATGGGTCTTAGATGCCTGTGGACGCAATTA  
AATATGAACAGCGCCGGAAGGCCAAGAATCAGAATAA  
>Cluster\_18242  
ATGCGGGAACCGGTGTTAATTATATCGAGTGTGATTACAATCGCTGGCGTCTCACAGTGCCGTGGCGGTCTCAGCCC  
GGACTGTCTTGCCTGCAATATTCAGAAATGAGTCTATGCAGTTCACAGTAAATCAGCCATCAGAGAGGGAATGGCC  
TTATTAATGCCCTGCCCTGGTATTAA  
>Cluster\_1452  
ATGGAACGTTATTACCAAACGTTAATACGCTCTGAAGTGTGTTTTGAAATGGTGTCACTATCAGTAACCTGTATTTAC  
TGAAGATGCCATTAAACAAGAAAAACCAACGGGAGTTATTAATAAAAAATATGCATTCTTCAATGCTGGCCGTTTTAC  
GTCGATACAAAAAGGATGCTGGCAATGA  
>Cluster\_24846  
ATGATCATGCTGATTCGCGCCTCTGGTGGGCGTCTGGGGCGCTTTTGTGCGGTATGGTGCCTGGCTGATTTATCC  
CCCGCGGGGTTTTGTTGTTGCGGGGCGTGTGCTGTTCTGGTCTGGTGGCGGATATCTTGACCGTACACAGT  
CGTCTGTCGGCGGAGTAAATAG  
>Cluster\_18921  
ATGTTTAAATGTCATGTCCAGGTCACCTATCACTTTTCCGGAACGATCCGTCGTTTTGCTATTCGGAACGTTTCAATAA  
TCGTGAGCTCGCAGAGAAAGCGCGCAGGTTAACCCATACCAGCTATCTGGATGATGGAGTGAAGGAGGAGGATTTGACCC  
ACCGGCGGAAGTAGTGGAGTGCGCCATGTATGA  
>Cluster\_64469  
ATGAAAACAGAGACGGTTATTAGTTTTTTGGTTCAAAGACAGCCACAGCCAAGGTGCTGGGTATATCTCAAGTGGCGGT  
TACTCGTTGGGGGCAACAGTTCCTGAAAAGCGAGTGTCTGACTCGACCATATCACTAACGGAGCACGAAATATGACC  
CGACTTTTTACGATGTTCCAAAACATGAAAAAGCTTAG  
>Cluster\_39465  
ATGAACGCGACAATTCAAACGATACCAGAGCTTCTTATCCAGACACGAGGCAATCAGACCGAAGTGGCGAGGATGCTTTC  
CTGCGCAAGAGGAACAGTGTCAAGTACAACCGAGACAGCAAAGGCGAGCGTCATGTAATAGTTAACGGCGTCTGATGG  
TCAAACAGGGCAAGAGGGGAAGACGATGA  
>Cluster\_6822  
ATGAAGGAAATTACATTACACGAACCGCTGAACGTCGCCACACAGACGAAATATTTGCCGCTTCTTGAGGTATACCC  
TGATAAATTAATGATGGTGATATATCCGCATTAGCTGGCCTTCTGGCAAACTGTGAGGAGTGTGCGCTGTGGTTAA  
TTGATGAGAGAGCCGAACGCTATGAAAAATAA  
>Cluster\_49953  
ATGAAGATACTGAGGCGAGTGTGAAACAGAAAGGGCTTGATGCGGCAGTTGAAGATGTACCTGAGGATCGATACCGTTT  
CGGTAATATCGCAGAAAAATATCCCGTTCCACTTCTTCTTCTCCTGGAGGCTTCAAATGTTGTGCGAATAGAAGGTG  
CATGGGATCGGGTAAAAACAAGCCTCTTAATCTGATCCTGAGAAACCTTGCCTGAGAAAAGATGCTCACACGCATGTG  
CTGCATATTTCTCCCTGGCTGAGTGGCGCAGTCCGGTTGAAGCGCTTCTTCTCCGGTGGCACGGTTATCCAGCAGGA

AATGGAATACGCTATCCCCGAAGGGCTTCAAAAAGCTCTGGCGTAAATATCTGTTGTACCCGAAGCTCAAAAAGTGA  
TTGAGTATGCTCAGGATACTTTCATCGCGCGTCCCTTCCACTGGTTCATATATCGGACAGTTTTCCAGCATTTAATCGG  
ATAGCAGCGGGAATAAAGGTATTTTCAGACAGCCGTCTGGCTGTGTATCAGAAAACCAGGACAAAGCTTCGGGCTGAAAT  
TGCAGGAACTGGTGTAGCTGGATCTGAAGTTTCAATGTTGTCTATGGGTGATCTGGACCGACTGGAGCCATCCCAAGTGG  
CGGAAGTGTTCAGGTTTGGCGTGCAGTAGCCGATCTGCCCGCTTACCATATTTCTGTATGACAGGCGAGATATC  
ACTCATGCCGTTGAACATGCGCTGAATAATCGAAGATGGCAGCCGTTATCTCCAGAAAAATCATTAGCTTAGTTTTAAAT  
ACCCGACCTGAAGCCTTTGATTACGTAAATGAATTCGCCAGCGGGCTGAGGCTCTATATCAGCAAAATTAATAATCAAC  
CGCCAGACTCTGGAATGGTAAGGATCTCATCGCGGTGACTGATACCTATGGTCCCGACTTTTCGACGCCACGGGAAATC  
CATCAGGCTAATTTCCGTGATTTTTCTTTATCCGGGATCGGGATTTGTTTATTTCCCTGATTTGTGCCCTTCA  
GCTTATACGGGTGACAAAACCGGCTCTGTATGACTGGACAGAGCATTACCTGACAGAACCAGGTCCTGATTGAAGCCGGTC  
AGGTATGCTTTCTGACGGAGAGAAAGCAGACTTCCGGGAGGGGCTTATCAGATGTATGAAGACGTTACAGGCTCAAA  
CGAGACTGTTCTGACACTTGCAGACTGGATCCAGGTATCAGTGGACATAATGATGAATATCTGAATCTTTTTGAGCC  
CGTCAGTGAAGATTTTCCGTATATCCAGACACCCGTAACGACTCAGCAGCTGACGCACTGGCGATATTAATTTGCT  
TCTCTCACCACAGAATGTTCTGCCACCTGAATTTCTCAGACAGCTTTTTGAGCAGGCTGGCGTATCGGAAAAACAGCAG  
CAGCTTTCTGAATTTGCTGCTCTCAAAAATCAACAGTGTGGGAGCTCTGTCGGAACTGGTTTGAACATATACGAGCAG  
ACTGACTCCAGGCTGATAAGAGAAGCTAATTTCAAGAGTGGCAGGACTGGTTCATTTTTCTCGATCACACCGATG  
AGGTGAGCACTCGTTCCGTATCCGTAACCCATGTTTTCCCTGCTGAAATGGCCATTAATGAGGTTACAGCCTTCTG  
CTGAAGCATATGCAGGATATGATGAGACCAGAACGATCAGCTTATGAAAAACTGATCGTTACGGGTGCTTCGCCGTT  
CTGGATAGCCGATTTTATCGGGATCTTATCTGGGAACATGGACTTGCAGAAATGACGATACCTTCGCTTCAGACGCT  
TTTTAGTCCGATATTTACGGAACGGTTGCGTACAGGTTGCGGAACGATGATCAACAGAACTCAGCAACAGCTT  
CTCTCGCAAGTCTTTCTCGGTATCTCTACGCTGAGACAGACATGAGTTAGTTGAAACCGTGAAGCAATGGGTCAG  
AGAAGTTACTACCACTGATGAAGCCTTGTAACTGTTGATACGATTACAGACAGTGTCTTACGCTCCACCGAGGGG  
CATATCGCCGATTTGCGCGTGACAGGTCAGTCCGTTCTTTGATGACTGGCCAGCAGTGAAGAGAAGTTGAAGGTTATG  
CTGTCGGCAACGAGCTGACTCCGGAGCAGGAAGCGCTCAAAACAGCGCTGAAAAATGACGACTGA

>Cluster\_66911

ATGAGTGAACATCGGTTAACCCCGAGCTTTTACACCGTACAGCTGGGGAAATCCTGTCTGGAATGCACTCCAGAGTCT  
CAATATCTATGGCTTTTGCTGGTGGCAAGTCTTGTGGCCAGCTTATCTGGCCACTTGCATTACCGGCATGCTGTGTGT  
TCACACTGATAACAAATGCTGGTATTTAGTCTGACGAGTGGCGCTGCCCTTTCGTATGCCATGACGCTGGAATGCTGT  
GACCCGTCACAGGACAGAATGATTAAGAAGTCTTTTACGTTCTGGCCAACCTGTTCAGTATGAGGTCATTCTGGA  
ATCACCGGCCAGCGGCATATTTCTATGTTGGTTATCAACGCGTCAAGGATATTGGCAGGAGTATGGCTGAGTATGGACG  
ATCTGACCCGCCATATAATGTTTTTCCGCCACCACCGGTGGCGGTAAACCGAAACCATCTTTCGCTGGGCGATTAACCCA  
CTTTGCTGGCAAGAGGATTCACCTTGTGATGGCAAGCAGAAATGATACGGCAAGAACGATCTGTGATCTGGCCAG  
ACGCTTTGGACGTTGAAGCAGATGTTGAAGTCAATTAACCTCATGAACGGAGGAAAAATCCCGAGTGAATCATTTCTGAGTG  
GTGAAAAACCGCTCCTCAGTCAATACCTGGAATCCCTTCTGTTACAGCACTGAGGCATTCAGCGGAGACAAATGCAG  
TCAATGCTGCCGAGACTCCAGGGGCGGAGTGGCAGTCCCGGCCATGGCATGAATAAGGCACTGGTATTTGGTATC  
TAAATGCTGGTGTGCTGGCGAAGCAAAAACATGCTGCTGAGATGCTCCGTGAACATATGACTCTCGAAGGATGGCCA  
GACTTTACTGTCGTGGCTCGATGATCAGTGGCCGGAAGAAGTATCGCACCGTTACGTAACCTTACAGGACGTTCCC  
GGTTTTCGACTGTCGCTGGTCAAGACCATCAGCCTGGACGGAAGAACCAGAAAACAACTGCTTATCTCCGCGGCA  
GTTTTCTGAACTTCTCAGCAGACTTACGGAAGCATTTGGGTGATATTTTGTGAAGATTCGGTGTATTCGATATCCG  
ACAGACTTACAGCGACAGGATTTCTGATGGTAAATGATCCCGCTCTGGATACATCAGCGCATAACAACGCTCTGCTTTGGA  
CGAATGTTTTATCACCCAGAAAAGTATGATTTCTCGCCGTTGATTGGGCTACCGCTCGAAGGAACTGATTCGGATGCACT  
GGAAGTCAAAAATATAAAGGGGCGTTTTCCCTTATCTGTGTTTCTTGTGATGAAGTGGGGCATACTATACGGACCGTATG  
CTGTGAAAGCCACTCAGGTGCGTTTACCTGGATTTTGTCTGATTTTGTGACAGGACAGGAACTGATAGAAGGACAG  
ACAACAGCCACGAATACTGCAACACTGATGCAGAACACGGGACAAAAATTTGCCGGCAGGATTTGTCAGCGAGGGTAGTAC  
GGCCAGAACGCTGAAAAGCGCCGCGGTGAAGAAGCAGGGCGAGGATGAACAACCTGACGCTCAGGACGGCATATTTG  
GTGAATCATGATGACAGCCCAAAATCAGCATCTGATGAAAAGCAAGATAAATGTTTCAGGAGTTGATGAACTTCAT  
CCTGGCGAGTTCTTTCTATTTTTCCGGGAGAAAACCTTACCATCAGCTCATTCTTCTATCCCTGACGATGAGAAGGCTG  
CAGCAGGATCCCGTTGTTATAAACAGGTATATCAGCGTGGATGCACCTCACCAGAACGCTCTCCGCGTCTGGTTCCCC  
GTACAGCTCAACGTCGAATCCCGTCAACCGAAAATGTCAGTGCATCATTTGGCGTCTGACTGCAAAAACCTCCAGAAAA  
AGACGAAAAATTCGCACAGAGCCGACAGTCTGGTATACATTCAGCAACGCAATTCAGGACGTCAGGACGCTATGGC  
AATGCTGGAAGAGTACGACACGGATATCAACGCACTGAAAGTGCCTTTGCGAAGCAGCGGTGAATACACTTAAACCA  
CCACAGGGAAGAGCGACGAATTCGCTATATCAGCTGAACAGGCCAGAACTACCTGAAACAAAAGAGGAAAAATCAGATA  
TCAGTGAAGCAGAAAGAGCAGGTATAAACCTGTTAACGCTTCCACAGGACAAATCCCCCCGACAGGGCGTCTGTAA  
CGGTTTTCATCATAAAAAACCAACCGTCCGACTGGGACGGAATGTACTGA

>Cluster\_53759

ATGGCGCTTCAAAACTGCTCAGCCAAAACACTCACTGCGTAAATCGCAGTTGTAGTAGCCACAGCGGTAAGCGGCAT  
GTCGTTTTATGACAGGACAGCGTTGAACCGAAAAGAGACACTATCACGTTACCGCTGCACCTGCGCCGCAAGAAAGCG  
CATGGGCGCTGTCGCACTATTTGCGGGAAGCACTCTGCTACTGCGACTAAAACGGATACACCAATGAAAACCGCG  
CAGTCTATTTCCGTTGTGACAAAATGAAGAGATGCAGATCAGTCAATTTTCAAGTCTGTAAGAAAGCAGCTTAGGTTATACCC  
TGGCGTTACGGTTAGCAGTGTGTTCTTAATACATATGATTTTGTATCATCTGTTGTTCTCATCTGTTGGTCTGA  
ATCAAAAATTAATACCTGATGGAATAAACTTACAGGCACTTTTATAACGATGCTGTGATTGATCTTACATGCTCGAG  
AGGTTGAACTGATGCGTGGCCGACGCTGTGTTCTATGAAAAAAGTAACTTGGTGGGATTAATTTCTATGGTGAGTAA  
CGCTCCGACCCTGAACCCCTGAAAAGAAATCAGTTTAAAATGGGACGGATAATCTGTTTACAGACTGGATTCCGATTTCA  
GTGATGCACTGGATGATAACGGTGTGTTCTTACCCTTGTGACGGGCTCGCTCGTTCAACAAACGAAACGAGCAAAAAT  
TCTGAATCCCAGCGTTATACCATTTGCTCCATTTCTCATGCGGCTCAGACGACAAAACCAATTTTACTTTCTGTCTTA  
TTTTCCAGAAATGAACGAAACCGGTTATACGGTGGTTGTTGCGGAAAGAGGGGACCGTTGAGCCATTGCTAATGCTAAAC  
GTCTACCGACTGACTTCAATGAAGGTGCATCGAATAATACATACTCCCGTAACCAGAAAATGGTGGGATATAGTTTGA  
CATGGTTTTAATGACACCTTACCGTGCCTCAGAACTGCGTTTCAAGTGAATGAAAACCTCAGAGAAAAGTGTTTATGG  
CACAGGATTTGCAACGATGGTCACTCTAAACCGGGGACAGTGGTGGATAATGAGCGTCTGCAAAAACCTTTAGCGTTG  
ATACCCAACTTGAAGTAAATTTGCTACAGGTGAAGTGGAGCACTAATTTGCTGACAGGGGTAGACTTCTATGCTATGCC  
AATGATATCAATGCCAGCTTTGGATCTGCACCACTCAATCGATCTTTATAACAAATATCATCTTGAATACTTTGCAATTTGG  
TAAACGAGAGCCTACCAATGAATGAAAGCAAAACAGGATTTTATGTTTCAAGGATCAGGCGGAATGGAATAAATGGG  
TATTCATCTGCGGGGACGCTACGATTTGGTCTAAGCAAGCAGCAGCTGTTCTGTAACCTTATACGCGGACTGAAGGT  
TATATTTGAGCGTAAATGATCATCAGTTTACCTGCGCGGTTGGTGTAAATTAATTTTCTGATAATGGTATTTTACTTACT  
TAGCTATAGCCAGTCTTTGAACCGAGTCTTTGATCTGTGGAGCAACCCGCGGTTTCTTATAAGCCTCGAAAGGTG  
AACAGTATGAAGCTGGCGTAAAAATATGTTCCGAATGATATCCGGTCTGTTGTTACGGGCGCAGTCTATCAATGACGAAA  
ACAAATAACCTGACAGCAGACCCAAACAAACCGTTAGCGCAAGTCCAGCAGGTGAGATTCGCGCTCGGTGGAGCT  
TGAAGCAAAAGCAGCGTTAAATGCAATATTAACCTGACGGCTTCTTATACCTACAGGATGCGGAATACACCAAGACA  
CCAATCTCAAAGTAAAACCTCAGAACAAAGTACCGGAGCATATGGCATCTCTTGGGGGATTAATCTTCAATGAGGG

CCGCTTCTGGTTTAAACATTTGGGAACAGGTGGTTCGTTTTATTGGTTCCAGCTATGGTGATCCGGCAAACACTTTTAAAGT  
GGGTAGCGCAGCTGTAATGGATGCTGTTGTAATAATATGATCTGGCACGCTTTGGTATGGCGGGATCCAGCCTTCTGTGA  
ACGTCACAATTTGCTCGATCGTGAGTATGTTGCCAGTTGCTTCCAGACTTATGGCTGCTTCTGGGGCGCAGAACGTCAG  
GTCGTTGCCAACCGCAACCTTCCGTTTCTAA

>Cluster\_26576

ATGCTTAAAGTTATCTCTGCATTTCAGAAAAATAAAATCTGGGATTTCAACGGCGGCATCCATCCACCGGAGATGAAAAAC  
CCAGTCCAACGGTACGCCCTGCGCCAGGTACCCTGGCGCAGCGTTTGTTCATTCCACTGAAACAACATATTGGCGCTG  
AAGGTGAGTTGTGCGTTAGCGCTGGCGATAAAGTATTGGCGGGCAGCCGCTTACCCGTGGTCCGGGCAAAAATGCTGCCT  
GTTACAGCGCCCACTCGGGTACCGTTACGGCTATTGGCCCCACTCTACGGCTCATCCTTACGCTTTAGCTGAATTAAG  
TGTGATTATTGATGCCGATGGCGAAGACTGCTGGATCCCGCGCGACGGCTGGGCCGATATTGCTCTCGCAGTCCGGAAG  
AGTTAATCGAGCGCATTCATCAGTTTGGTGTTCGGGGTGGGTGGTGGGATTTCCGACAGCGCTTAAATTCAGGGC  
GGCGGAGATAAGATTGAAACGTTGATTAACAACGCTGCTGAGTGGGAGCCGTACATTACCGCCGATGACCGTTTATGCA  
GGATTGGCGCGCTCAGTCTGATAGAGGTATCCGATCCTTGGCGATATCTGACGCCACGCGAAATTTCTTACGGTATTG  
AAGATAACAACCCGAGGCGATTTCATGCTCCGCGCGGTGCTGGCAGACTCTCAGGATATTTCTCTGCGGGTATTCCC  
ACCAAATATCCTTCTGGCGGTGCTAAACAAATTAACCTACATTCGACCGGGAAGCAGGTTCCACATGGCGGGCCTTATC  
CGATATCGGCGTAAATTAAGCAAAACGTCGGCACCGCTTATGCACTGAAACGTCGCTTATTGATGGCGAGCCGATTACCG  
AGCGTGTGCTGACCTGACTGGCGAAGCAATCGCTGCGCCGGCAACGCTTGGGCACGCTTGGGGACCGCAGTCCGCTAT  
TTATTGAATGATGCCGATTTCTGCCCTCAGCCGACCAATGGTATTATGGCGGGCCGCTAATGGGCTTTACCTTACC  
GTGGCTGGATGTACTGTCGTAAGATTACCACTGCCTTTTGGCTCCCTCTGCCAATGAACTTGGCGAACCCAGGAAAG  
AACAAAGTTGATCCGTTGAGCGCTGTGCTGACGCCCTGCGCTGGGATCTTTTACCAGAACAGCTGTACTGGTTTACG  
AAAGTTCAGCAACACGATAAAGCCACCACGCATAACATTGCCGACTGCATTGAATGTGGGGCTTGGCGTGGGTTGCC  
GAGCAATATCCCTTGGTGAATATTTCCGTCAGGAAAAGCTGAAATTCGGCTATTCTGTCAGGAAGAAAAGCGCGCCG  
CAGAAGCCAAAGCGCTTTTGAAGCGCGCCAGGCTGCTTGGAGCGCGAAAAGCGGGCTCGCTTGAACGACATAAGAGC  
GCAGCCGCTTCAACTCGCAGCCAAAGATAAAGATGCGCTGCTGCGCTTGGCGGGTGAAGAGAGAAACAGCCAGGCG  
TACACAGCTATTGTTGATTAAGCGGGGAAACGCCGATAACAGTGCATTTATTGCAGCAGGGAAAGCCGTAAGCGC  
AAGCCAGAGCGAAACAGGCGAAGCTGCAGCAAACTAACGACGCTGCAAGCGTTGCTGATCCACGTAACACTGCAGTTGA  
CGGGCTATTGCCCGTGCACAAAGCAGCAAGCTGGAACAGCAACAGGCAATGGCGAGCCAGAACACAGGTCGATCCGCG  
CAAAGCCGCTTCACTCGCAGCCAAAGATAAAGATGCGCTGCTGCGCTTGGCGGGTGAAGAGAGAAACAGCCAGGCG  
AACAGGTCGATCCGCGCAAAGCTGCCGTCGAAGCGGCTATTGCAGCTGCCAAAGCGCGCAAGCTTGAACAGCAACAGGCC  
AATCGCGAGCCAGAACACAGGTCGATCCGCGCAAAGCTGCGCTGCAAGCGGCTATTGACGCGCCAAAGCGCGCAAGCT  
GGAACAGCAACAACAGGCTAATGCGGAACAGAAAGACAGGTTGATCCAGCAAAAGCCGCTGCAAGCTGCTATTGCC  
GTGCCAAAGCACGCAAGCTGGAACAGCAACAGGCTAATGCAGGCCAGAAAGACAGATTGATCCGCGCAAAGCGCGAGTT  
GCTGCGGCTATTGCCCGCTTACGGCCAAAAGCGCTCAGCAAAAGGTTGTAACGAGGACTAA

>Cluster\_24908

GTGTCGCTGCTGCCGTTGCTGCCGCTTACTGAGTTACTTGTGCCCTCGATGGTGCATCCGAGGTTTATTAAGTGC  
GCCAGCGGGGCGGAAATCAACCTGGCTGCCCTGCAACTGCTGGGCATCCCGGCTTAAACGGGAAAGTTATCCTGC  
TGGAGCCGCTGCTTGGCGGCGTAACGTTGCGCAACGACTGGCGGAGCTGCTAACGAAAAGCCAGGCGATACCGTT  
GGCTACCGGATGCGTGGCAAACTGCGTGGGCGGCAATCCCGCTTGAAGTGGTTACCGAAGCGCTGCAGCAGGAT  
GATCCAGCTGACCCGGAACGAGCTGAGCGGTTGGATTGGTACTCTTGAATTTATGAGCGAGCTTGCAGGCGGAT  
TGGCGTTGGCGCTTTACTCGATGTCAACAAGGCTGCGGTGATGACCTTAAACTGCTGATTAATGTCGGCTACCGTGGAC  
AACGACCGCTTGCAGCAATGCTGCCAGAGCGCCGTCATCATCTCAGAAGGGCGCTGTTTCCGGTTGACGCGGTTA  
TTTACCCTGCCCACGATCAGCGTTTGGACGAAGCGTTGCGGTAGCCACCGCGAAATGCTGCGTCAAGAAAGCGGAT  
CATTACTGTTATTTTACTTGGCTGCGAGAAATTCAGCGTGTGCAGGAACAACCTGGCTTCCGCGCATCCGCAAGTGTG  
TTGCTCTGCCGCTGATGGCGGTTGTCGCTGAACGATCAGCGAAAAGCGATCCTCCCGCACCGCAAGGGATGCGCAA  
AGTGGTGTGGCGCAAAATATTGCTGAAACAGTTTAAACCATGCAAGGTTATTCGCTGCTGGTGGTATGCTCAGGAA  
GTGTTGGCGGCTTTGATCCGCGCACGGGGCTAACCGCGGTGATTACTCAACCGGTTAGTCAGGATCAATGACGCGCGT  
GCCCGGCTGCGCGGCTTGGAGCCGGTATCTGCGTGCATTTAATCGCAAAGAACAAGCAGAAAGCGCTGCCACA  
AAGTGAACCGGAGATCTTACAAGCGATCTTCCGGTTTGGTGTGGAATTAATGCAATGGGGATGCAGCGATCCGGCGC  
AGATGAGCTGGCTGGATCAACCGCAACCGTGAATCTACTGGCGCGAAACCGCTGTTACGGATGCTGGGGCGCTGGAC  
GGTGAACGGCTTAGTGCACAAGGGCAAAAATGGCAGCGCTGGGTAACGATCCCGGTTAGCGGCAATGCTGGTTAGCGC  
GAAGAACGACGACGAAGCTGCTACCGCGCAAAAATGGCGCAATTTCTCGAAGAGCGCCACGCAATGGGCAATGAGC  
TGGCGTGGCGTTTTCGCGCAATCAACCGCTGGCAGCAACGATGTCAGCAACTGTTAAAACGCTTAAACGTAACGGC  
GGTGAAGCAGACAGTTCCGTTATCGCGCGCTACTTGGCGGGCGTATGCCGATCGCATGCTGCTGCGCGTGGGCAAGA  
TGGACGCTATCAACTGGCAACGGCATGGGGCGATGCTCGATGCCAGCATGCGCTTAAAGCCGCAAGATGGTTGATCG  
CACCGTTATTTAATTCAGGGCAGCGCTTCCGGATGCGCGGATTTTACTGCGCTACCGCTACCGCTGATATCGATGATG  
CAACGCTGTCCGAGTTGGTACAGCAGTCTGACACTGTGGAGTGGGATGACGCGCAAGTACGCTGAAAGCCTGGCGTGC  
GCTGCAAAATTTGCTCAGTTGATGGTAAAAGTGAACCGCTGGCGAAAACCTCGGAAGACGAGTTGCATCAGGCGATGCTTA  
ACGGCATTCGTTGATAAAGTTTAAAGCTGCTCAACTGGAGCGGGAAGCGGAACAGCTACGCTTGGCTTGGTTATGCGCC  
GCAAAGTTGGTTGCCGAAATGACTGGCCAGCGGTTGATGATGAAAAGTTTGGTGGCGACGCTGGAACCGTGGCTACTGCC  
GCATATGACAGGCGTACATTCGCTACGCGCCGTAACACTGATGATTTATCAGGCACTGCGTGGATTAATGATTTGGG  
TAATGACAGCAACGCTGGATAGTGAATTCGCTGCGCATTAACCTGTCGCAACGGGAAGCCGAATCACCATTCTGTTATCAT  
GAAGATAACCCCGCCGCTGGCGGTGAGAATGCAGGAGATGTTGGTGGAGGCTTAAATCCGATCCTAATCCGATCCTGCGCC  
CGTACCCTGGTGTGGAGTTGCTTCCCTGCCCAAAGCGCGTGAACATCAGCGTGAATTTGAGCGCTTCTGGAAG  
GAGCGTACCGTGAAGTGAAGAAAGATGAAAGGGCTTATCCAAACATGCTGCGCCGACGACCCGCGCAACACCGCA  
CCGACGCGACGAAGAAAAGTATTCGTA

>Cluster\_39943

ATGAGTAAAGTCTTTATTTGGCGCCCATTCGGGACGAACAGGCAATAAAGGAAGAAGGTGCAGTCCGCTGATGCCACTGC  
CATGGAAGCCGGTATGAATGTCGCGCCGCGCAAAATTTACATGGCAATTCGGAACATTAACCGGCTGCTCAGGACT  
CGCTTATAAAATTTATTTGCTGCGAGGATAAACTGGCATACCCCGCTGCCCTCGATTATGGGATGCTGAATATATG  
CAGGAAAACCGCTGGATGAGGAGTCTGCTTCTTTGTCGCTGAGACTGAATCCTATCCGATGAAAGCTCACTTTTGA  
CAAGCTGGCCCTGAAGTACAGAACGCTGTCATGGTTAAGTTCGACACATGTGAAAACATCACCGTTGATATGGTTATTA  
GCCGACAGGAATTTGTCAGGAAGACATGGCAACATTCGACGGACATATCGTTGAAGCGTTGATGAAAATGCCAGAAGTT  
AACCGCATGATCCCGGACTTAAAGTTCACGCGCTTGGTGGGTTAAGCATAAATGATTTCTGGTGCATAAATGGCCGGA  
AATTCAGGACAGATGCGCATCTGGAATAAAGCTGCGAAGGTTGAACGCAAGGAAACCGGAAAATACACGCTCTGTTGTTG  
ATCTGCGCCGCGCAGAGCAATCAACAGTACACTGAAAATTCACAGGAAAATCAGCCCGTCAATGCTGCCATTCAT  
CGGAAATACAAGCAGACATGGAATAACCTGGATGACGAATGGCTACGCTCTGCGCTGGTGGTGGATGTCGGCGAAA  
CATTCAGCAGCATCTCCTGCTGGGCAAAAATGAAGTTATTCGACAAACCGCGGAGACTGGAAGCGTATCTCGGCAT  
CAATGCGCAACAGCCTGATGCCCTTCCGCTACGACCGCCAGACTATTTTGGCTTGTCCGTTGACGCTCCGATCGACAT  
CACAAAGATCCCGTACACTGAAACAAATATATCTGCGAATACCTGACGACAAAGGGCGTGTGAGAAATGAAGAACAGA

CCTGGGCACTGTTGATGTTCTCCAGTCATCAGAAACAAACTGATGCAGTGGAAACTGAGGTATCTGATATCCAAAA  
ATGAAACCCGCCGGAAGCTGAACCATCTGTAGAGCGTGGGGCCGTTCTACTTCTTCCACCGACAGGATGGCGAA  
AAATACGGTCGCGCAAAACAACTTCTGGTCTGGATAAGGCGCTGTCTGCTGGGGCTACTGAAATCACGAAAGAGAATA  
TTTTCCGCCCAGAAACGGTACATACTCAGGTTTCAACAATACTGGTGCATCTGACACGACCGCACAAACGGGTCAG  
TAAAAGTTACCGCTGAGCAAGTAAACAAAATTAATGACAGCGCAATAATACAGCCAGCTGACAGGATCAACTGAAATTCA  
GTATCACGTGGTGAATTTGTTGAAGGATAGCGACCCGAATGATCCGAAATGGGTTAAGGGGATCCAGACCCGCGATT  
TGTGAACAGAACAGCAAGAAACGGAACAGAACGACAGAAAGCGGAAACAAACAGCCAAATACGCAACAAACAGGAC  
CAGAAACGAAACAACTGAACAGTAGTGAACAGGAAACCGGAAAGATCTGCACCGCTGCGGTGAGAGCGGTGGCGGC  
AACTGCCCCTGATTGGTGGTGGTGGTGGTGGTGGTGGTGGTGGTGGTGGTGGTGGTGGTGGTGGTGGTGGTGGTGGT  
GGAAATGATCCGGAGGAAATGGAAGGCACTGCGCATCAGCACAGGAGAACTGGCGGCAATCAGCATCATGCCAGCG  
ATAGTGAAACTGGCGAGGCGTCCAGTCCCTTAATTAAGGCGAACGGTCTCATATACTCACATCCACCAGCAGAGCGGG  
ATTCATCTGATGACGACCTGAAACCAATGGGAAAAATCCCGATGCCCGGATATCTCAATAGGTGCAATATTTTCGA  
TCCGCAAAACCGGATATGGGACCGGAAATTAAGTAAAGCATATCCGATCTGAAACTGCTGGCGGAGTCATGTCCGGACA  
CCATTAATAGGTGGCTTAAGCAATCACGCGAAGCGCAATCTGCCATTATGACCGATGAAATCCCGTTAGATGATGACTG  
TTACAATTCGGGGAATTTATCGACGAAACTCCGGTGAATTTTGTGTTGAGGTCTGGGAAATGGAGCCAACTTCGACAA  
CACGATTTGGCGCTTACATCAGAACGGCAGGGGATCCCTGCCCGTGGCGTTACTACAACGATCGCGATGTACGCACAA  
TCGTTAGCTGGGAAAGCTAGACTGCGGAAAGCTGATCCGAAAGCTATTCCATTGAAAGGTGAGCGCCACTTGTGAT  
GACGCCGTTACCAGGCAAAATACGTTTTCAGTTATCTGGCAAAACTGATCCCGAGTCAGGCTGATTTTAA

>Cluster\_24174

ATGACGAATCGTATCTCTCGCCTCAAACCTGCACTGTTTGGCAATACCCGTGAAATCTCGCTGGAGCGGGCGTTGCTTTA  
TACGCCAGCCATCGGCAAAACGAGGGGAGCCGGTGAATGCGTGGGCGAAAGCAACAGCGTATATCTTGAACACG  
TTGAAATTTGATTCGTGATGAAGAACTGATTGCCGGTAAACCGACCGTAAACACCGCGCCGGGATTAATGTCGCGGAA  
ATGGACCTTACTGGCTGCTGAAAGAGCTGGATCAATTCGCGACCGTCCGACGAGCCGTTTCTATCAGCGAAGAAGA  
TAAACGCTATCTACGCGAAGAGTGTTCGCTACTGGGAAACGTTTCGATGAAAGATTTCATCAACCGGCGATGACCG  
ATGAAGTAAAAGCCGCGACAGCAGCAGATTTTACGATCAACCAGACGGATAAAGGCCAGGGGACATATTTATTGAT  
TACCCGCGCTGCTGAATCACGGGCTGGGGAGCTGGTGGCACAGATGACGCAACATTGTCAGCAACAGCCGGAGAATCA  
CTTTTATCAGCGACGCTGTTACTGCTGGAAGCCTCGCAGAAACATATTTTGGCTTACGCCGAACTGGCGGAAACGATGG  
CGGCAAGCTGCACTGATGGCCCGCTCGCGAAGAACTGCTGACATTGGCGGAGATCTCCGCCATAACCGGCGATGACCG  
CCGACAGCTTTCGCGAGGCGTCCAGTTATTCGTTACATGAACATCATCTGCAATACGAATCCAACGCCAGTTTCGCT  
ATCGTTGGGGCGCTTCGACAGTATATGTTGCCCTTCTATCAGGCATCAATTAACCCAGGGCGAAGATCCGCGATTCCTGA  
AAGAACTGCTCGAATCTTATGGGTGAAATGCAACGACATCGTGTGTTGGCTCCACCAGTAGCGCGGCTTATTTTCGCA  
GGTTCCCTACCGGCTATACCGCACTGCTCGCGGGTTTAAACGAGTATGAAACTGATGAAATCTCGCTGCATGAAATGAAGCAATG  
CTGCGCTGACTTATGAAGTTTACTGGAGCAGATCCGCGCAAGATCAGCCACATACATCACCTGATGGTTGAGGGCAGC  
AATATTTGCGATATCGGTACCGTACTGGGCACTGTACCGCTGCTCAGCATGTTTATCAGCGATTTGCTGGAAAAAGG  
CCGCGATATATCCGATGGGCGTGGCGTTATAACTTCTCCGCGTACAGGGGATCGGTATCGCAACCTGAGGCACTTCT  
TCCATGCGTTGAAAGGATGATTTTGAATCAACAGCGTTTAAAGTTTGGACGAAATGCTGTCGGTATTAAGAAACCACTTC  
GCAACGCCAGAAGGGGAAAAAGTCCGCTGCTGCTTAATTAACCGCTTCGAGAAATACGGTAAACGATATCGACGAGGTGGA  
TAACATCAGCGCCGAACCTGTTACGCCACTACTGCAAAAGAAAGTGGAAAAATACCAGAACCAGCGCGGCGCTACTTCACCG  
CGGATCGTATCTGCTCAGTCCCGTTCGGGATCGGTGGTGGCGGACGCCAGAGCGTCTTTGCGGAGAA  
CAGCTGGCAGACGGCGCTTGTACCCATGCTGGGCCAGGACGCAAGGGCCAACAGCGGTAAGTCAAGTCAAGTAA  
GCTCGATAATACGCTGCTGCTAACGGTACGTTGCTGAACTGAAATCACTCCGCGACCTTGAAGGTGAAGCGGGAT  
TACGCAAACTGGCCGACTTCTTACGGGCGTTTACCAGCTTAAGTGCAGCATATTCAGTTAACGTTGGTGAACGCCGAC  
ACGTTGCGGGAAGCGCAACAGCGCCACAGAAATATGCGCGGCTGGTGGTGGCGCTTGGCGGATACAGCGCCTTCTTTGT  
CGAATTTGCAAGGAGATCCAGGATGACATCATCCCGGACAGCGCATCAGCTGTAA

>Cluster\_53534

ATGGTTGCCATGTTATTGTTTCTCATAGTCTACGCTCTCGCCAGGGGATGAGGAATAGCACTACAGATGCTCGGAGG  
GGACGTTCTCTGGCCATGCTGAGGATGATGATCGCAAAATCCGATTGGCACTGATGCTATTGCCATTATGCTCG  
CGATTGAATCGGCTGCTGACCGGATGGCGTTCGTTACTCATGGATAAGGCGAGTGCCTGCTTAGTACCGAGATGGCG  
CTGGAGCTGCTTTCTGAAGAGCAAGAAGTGAATTTACTGCTCGCCGCCCTGTAGTGAAGGTGCCATGTGACGGT  
AACGTTGCCGACGCGGGGCTTTCGGTGACGGAGATTAATGCTGAAAGTGGATTTGCGCTGTGCGCTAAACAGCAGC  
TCATGCCATCTTCCAGCTGAGGCGAGGTTATTCAGCAATATCCAGTCAATCATGCGATGAAATGGCAAACTTTTTC  
TGGAGATAGTAAATCCCACGGCATTCATGCTGCTCCGCGAGCCAGCATCTGAAAGTATCAGCACAAATATTCGGCAAA  
CATATATGCTCATAAAGGCGATAAACCGCCAGCACCCGAGTCTCAACGAACTGGCAATGCTGGGCGTCCGCTGTGGCG  
ATGAAATCATCTCCAGGCGAAGGACCGATGCCAGTACGCTCAAGGCAATGAAACGTTGGCGAAAAATCATTTT  
GGTGAAGCTCATCTCGCTTCTCAGAGATTCCGCTAACGGAACCGCGTGGTCCAGCGCCCTGTGATGGCGCAAT  
ATCAGGCTTGTGATCAAAATGGTATCGCTATTTGGTCTGTTAAATGGTTTACTGCGAACGACAGCAAAATACGCAGC  
GCACCGTCCGATTTCCGCAAGAAGAGCTGTCGCGAATCAGATCTGCTATCGACATGTTGTTTGTGAACCTGGCGATAAA  
CCGGCAGGCCCTGAAGGAGATATTTTGGCGCCATAAAATGATGCTTGAAGATCCAGAGATTCCCGGCAATACAGCA  
ACGCTGCGCAAGGGCAACAGGCGAATTCGATGTTAGAGTCAATGACAGGATAGCAGAGCAATATGTCAGGCGG  
AAACACTGATTTTACGTGAACGCGAGGAGATATCCGTGACCTTACAGCTCAGGACTGAACAGCTTTCGCGGGTAACT  
GAACAACACTTTATCACTACCGCGCCCTGCATTTTGTAGCCAAACGATCTGTTGCCATCACAGATAACAGCCTGAATAA  
AGCACACATTTTGGCAATTTGCTTTCATACCGCGGAAACAACTCACATACAGCGATCTTGCAGAGCAATCCGGAATCC  
CCGCTATTTGCAAAAGCGGCGATTACCCCGCAAAACGTCGCGATAACGACAGGTCATTTTGTGATGGTGAACAGGCGGT  
TTGTTGGCTACAGCCGATGAGGTACCCGCTGGATTTACTGCAACGCGCCGAAAGCATGGCGGCAACAAAGGGATCGTCA  
GTTAGCTGATGCCATGCTGCCGCTGTCACGCAAGGTGGGCTAACATCAGCGTGTGGCGAATATTTGGTGTGCTGCAAG  
ACATGATGCCCGCACTATCACGCGCTGAGGCGTGGGTTTACTGCGTACCGAGTTTATTTATCCATGCTGCAACA  
TTACCCGATGAGAAGAGCAGTTTCCGCTGATTTGTTCTGTCGCGGAGTTTTTGGCGACAAACAGTACAGTCCGGAC  
TCTGGACATTTGGTGGTGAATAACCGCTACCTTACATACCTTTTACCACAGAGGACAACCCCTTCTGGGACTTCGAGGTA  
TCCGTTGTTGCTGGCGCATCCAAAATATTTATCTCAATTCGCGCACTTATCAGGGCCGGGAAAGAATACCCAAACG  
TTGCAAAATATGCTCCGATGGTTTCAACGCTCGAGGAGTACGAGCTCAAAACATGATACATGCTCAGGCAAACT  
GCTGGGACTTACTGCAGAAAATCTTCCGCGCTGGGAAATATGATGAGGTTCTTGGCGAGTCAATGTCAGACAAAAT  
TAGCCAGTGAAGTCAATTTCTTTCCATCGGCACCAACGATCTGACGCAATATATTTGGCGGAGACAGGAAATAGC  
ACCGTCCGAAACTGGTGCATTAATGTAATGACCGGCTGATTAACGCTATTGCTATGGTGTGTCAGGCGGATTAATA  
TGAAATTCGGCTCAGTATGTCGGCGAAATGGCTGGAGATATCCAGCAAAACAGCAGTCTCACCATGGGGATGATA  
AGCTCAGTGCAGTCCGTCGCGCTTCCGCGCTTGAAGCAGCAATCAGAACCCTCCACTAA

>Cluster\_41055

ATGACAGAAAAAGTAAAAACAACATGCCGCTCCGGTAACGGGCAGTGATGAAATCGATATTGGTCGCCTGATCGGCACCGT  
CATTGAAGCGCGTGGTGGGTGATGGCATCACCGCGTATTTGCCCTCTGTGCCGTGGTTTACACCTTCTTCGCCACCG  
CGATTATAGTGGCGACGATGGTACAATCGAGCAGCGGCAATTCGCTGGTGCAGGATATCGGCTCGGCATTA  
GCCAACAAACCGCATTTCGACCGCCGAGATCCAGTTACCTCGTCTGGTCTGGTAAAACAGGATGATCAACCA  
AGACCTCGATATTGGCGTGGCAAAAAACGTTTCCCGATTTTCCGTCGGGCTGGGATCGTTTATGGGACGTCAGAACG  
AGACGGTGAAGTACCACCTTTAACCGCCGAAAGAGATGGCGGATCAGGTGTTTACGCTTAATGTGCTGGACGATAAA  
AATACACCTGAGCAGTGTGGCGCTTAGCGCCGTTGGCAAGCGGGCCAGATGCTGAAAAAAGAAGCGTCCACCGT  
GATGGTTGAAGCATTACCGCCCGCCGAGTGGATTTACCGTACCAAATCTCCACGTTGGGGATGATCAACCA  
TGCAAAACAGCCTGACGGTAACGGAGAACGGCAAAAGACGAGCGTACTGAGCCTGACTTATACCGGTGAAGATCGCGAA  
CAGATCCGCGACATCTTAAACAGCATCGCCGTAACATACAGGAACAAAATATGAGCGCAAAATCGGCGGAAGCGTCGAA  
AAGCCTCGCTTCTTCGCGCAACAGTTACCGGAAGTACGTAGCCGCTTGATGTTGCCGAAAAACAATGAATGCCTTCC  
GTCAGGATAAAGATCTGTGATCTGCCCTGGGAGCGAAAGCGGTGCTCGATTCGATGGTGAACATCGACGCCACGTTG  
AACGAACTGACCTTTAAAGAGCGGAAATCTCCAAGCTGTACACCAAAGTTACCCGGCTACCGCACGCTGCTGGAGAA  
ACGTCAGGCGCTGGGAGACGAAAAAGCCAACTTAACGCTGCGTAACGGCGATGCCGAAAACCCAGCAGGAGATTGTCC  
GTCGACCCGCGATCGCTGAGTCTGGTCAAGCAGGCTATATGCAACTGCTGAATAAAGAGCAGGAGCTGAAAATCACC  
CCGACACCGTGGCGATGTCGCGATTGTTGACCCGGCAATCACTAGCCTGGTGTGCTAAAACCGGAAAGGCTGAT  
TATCTTGGGGGATTTATCTTGGCCTGATGCTCTTATCGTGGGTGTGCTGCTGCCGCTGTTTAAATCGCGGATCG  
AAAGCCCGCAGGTCGTTGGAAGAACACGGTATCAGCGCTTATGCCAGCATCCCGTGTGTCGGAATGGCAGAAAGCGCGAT  
AGCGTCAAAACCATCAAAGGATTAACGCTATAAACAGAGCCAGTACTGGCGGTGGGAATCCAACCGATCTGGCGAT  
TGAAGCCATCCGCGATCTGCGTACCAGTCTGCACTTCGCGATGATGACGGCGAGAACATGTGTTGATGACCGGGG  
TTAGCCCGTCAATCGGTAACCTTTGTGTCGCCAACCTGGCGCGGTGATCAGCCAGACCAATAAACCGCTGTTGTTG  
ATCGACTGCGGATATGCGAAAGGCTACACCCACGAGCTGTTGGGCACCAATAACGTCATGGCCTGTCGGAATGCTGAT  
TGGTCAGGCGGATATTACTACCGAGCTAAACCGACCTTATGGCAAATTTGACCTGATCCCGCGCTGAGTGGCGG  
CAAATCTTCTGAACTGTTGATGAGCGAACGCTTTGCCGAACTGGTGAAGTGGCGGAGTAAAACTATGACCTGGTGTG  
ATTGATACGCCGCGATTCTGGCAGTGACCGATGCGGCAATGTTGGTGTGCTATGTCGGAACACATTAAATGGTGGCGG  
TTATGCGGTCAACACATTGAAAGAGTGGAAACAGTCTGAGCCGCTTTGAGCAAAACGGTATTCGGTGAAGGGGTGA  
TTCTGAATCCATCTCCGCCGCCAGCGCTATCAGGATTAAGCTATTACGAATACGAATATAAGTCGGATGCGAAA  
TAA

>Cluster\_26520

ATGACAACAATGAATCCTTTCTTGTGCAAAAGCACACTGCCGTATCTGGCTCCCATTTTGTCAAAATGGCAATCATCA  
CTATCGCCCGCATTCGATGAGGAATGACGCAAAAGCGGGCAGAAATGCTGCCATCGCGCTTAACCGCAAAACACCTG  
ATTTCAACAATACTATTTGGCACTGGAACAAAGCGGAGAATTACTTACCCGCTTACCAGCGCTTTTTTGGCATGACT  
GCGCGCATACCAATGATGAATACAGCGCTTGTGATGAACAGTTCCTCCGCTGAACTGGCGGAACTTGGCAATGATATCTA  
TCTGAACGGGGAATTTATCGCGGGGTAGATGCTGTCTGGCAACCGCGTGAATCCCTGGGGATGATAGTGAATCCATCC  
GCTGGTGGAGGTCATTCATCAACGTTTTGCTCCTGCGGAGCCAAACTTGAGCAAGCTGATAAAGCAAATTAAGAGTA  
CTGAATACAGAAGCTGCGACCTGACCAGCCAGTTAACAGCGGTTACTGGCAGCAATAAATCCGCGGCTGCTGGTGT  
GAACGATATCGCGCAGCTGGCAGGAATGAGTGAGCAAGAGATTGCTGGCGGAGAGCGGCTCGCGAGAAAGGCTGCG  
ATAAACAATGGCTGATTCGCTGCTGAATACACCCAGCAACCCAGCCTTGCTGAACCTGCGCGATCGCGGACGCTGGA  
AACTGTTTTACTGGCGGCTGGATGCGAGCGGAAAAAATGATGCAATGATACCCGCTATCATCAACGCTGTTGGTGA  
GATCCGTGCAACAAGGCAACATTAATCTGGTTTTCTCATATGCGCGATGGAATAATCGCGATCAGATGGCAAAACAC  
CTGAAGCAGCATACTTATGTCGGGAAATGTTCCAGCGCGCGCTCAACGTCGCGAGCGATGAATAGCTCCATACAG  
GCGGTTATCGGTAAGCAGAGCGGGGTTAGCGTGCAGCCGCTGGGACTGGGACTTTTTATGCGGAGCAAGCTGTA  
TAAATTCGATCTCGATGAAGCGAGCTCAAGCCTTATTTGCAATTAACACCGTGTGTAATGAAGCGTATTCTGGACTG  
CGAATCAGCTCTCGGATTAAGTTTGTGCAACGTTTTGATATTCCTGTCTACCATCCGACGTTCTGTGTGGGAAAT  
TTTGTATATAATGGCGTGGGGCTGGCGTTATTTACGGTGTATTTCTGCCCGTGATTCAAAAAGCGCGCGCATGGAT  
GGCAATTTTTGTTGAGCAATCAACGCTGAATGAAACCGCAGCCGTAATTTATAACGCTGCAATTAATGAAACCGCTG  
CTGGGAGCCTGCGTTGTTACTCTGGGATGATGTAATAACCTTATTCATGAATTTGGTTCATACGCTGCACGGCTTTTT  
GCCTGCCAGCGTTATGCCACGCTTTCCGGCACCACACGCCGCTGATTTTGTGCAATTTCCGTCGCAATCAACGAACA  
CTGGGCAACGATCCGAGGATTCGCTCGTACGCCCGCATTATCAGAGCGGGCAGCAATGCCTGACGAACTGCAAC  
AGAAAATGCGTAATGCGCAGCTTGTCAATAAAGGGTATGAGATGAGCGAACTGCTTAGCGCGCACTTCTCGATATGCC  
TGGCATTTGCTGGAAGAAAACGAAGCAATGCAGGATGTCGATGATTTGCAATTTGGGCGCTGGTGGCGGAAATATGGA  
TCTTCCCGCTATACCGCCAGCTATCGCAGCAGTATTTCGCCCATATTTTGGTGGCGGATATGCCGAGGTTATTACG  
CTTATCTGTGGACAAAATGTTGGCCGATGATGGTTACAGTGGTTTGTGAGCAGGGCGGATTAACCGCTGAAAATGGG  
CTCGTTTTTCCGAGGCGGATCTTTCCAGAGTAAACGCGAGGATCTGGAACCGCTGTATCGACAATGGCGGTAAGC  
ACCTCAGATATGCGGATGCTGCAACATCGTGGCTTGAACGTATAA

>Cluster\_39738

ATGGAACGAAAGCGACACGCTTGGAAAACGCTTGGCACAGCACCTTACGATCGGGCGGTGATCCTCAATGGCGGAT  
TAAAGTCTCCGGCGATCGCCACGAATACCTTATTCCTTTCAATCAATTAAGTGGCGATTACTGTAAGCGCGTCTGGTAT  
GGGCGGAGCTGGAATTTGTAAGTGGCGGAGCAAAAGTGGTGGCTGTCACGGCACCGAATGGGCGGAGACGACGCTTTT  
TACCATCATCTTGTGCTACTGGCAGCGGTGGAGTAGCGAGATGAGCGAAATGCACTGGTGTTTTACGCCAGCACT  
GGATTTGATGCGCAGCGTACTGGAGAAAATAAATGGCTGACGCGTGAAGCAAACTCTGGCGTTCAGCAACAAATCCGCG  
AGGCTTTGTCGGCGTTGCCGTTGCCGTTAACCGACTGGAAGAATTCGATAACTGCCGTGAGGATGGCGTAAATGTCAG  
GCCTGGTTGAAAGATATTGAAAGCGCTCGTTGAGCATAACAGGCGTATACCGAAGCCATGCTTACCGAGTATGCGGA  
TTTTTTCCGCGAGTCTGAGTCTTACCAGCTGAAATCCGCGCAGGCGGCGGAGTCTGTTAATGGCGAGCATCTCTGTTAG  
TGCTGGCTGGTGCAGGAAGCGGAAAAACGTCGGTGGCTGGCGGCTGAGGCTGGTTGCTGGCGCTGGTGAAGCGTCC  
CCTGAGCAAAATTTATGCTGGCGTTTGGTTCGCAAAAGCGCTGAAGAGATGGACGAGCGTATTCGAGAACGACTACATAC  
CGAAGACATTACCGCAGCAGATTTTCATGCGCTGGCGTGCATATTTATCAGCAGGGCAGCAAAAAGTTCCGACAGTCA  
GAAAATGGAATAATGATACCGCTGCCGCTCATGAACTTTTATTTGCTGAGTGGCGCAAGCAATGCAGCGAAAAGAAAGCG  
CAGCGAAGGGCTGGCGCAATGGCTACGCGAAGCAAACTGAGTGGTCACTGAGTGGTCCAGAGGTAACCTCTGGGATGATAA  
ATTACAGCGTCTGCTTGGCTCACGCTCGATCGTTGGTAAAGTCTGATGCGGATGCACGGTGGTGCACAGGCAAGATGA  
TTGCCAGTGCACCGAAGAGATTGCGGATCTGTTCAAGTAAACGATCAAGTTGATGGCTCCGTTATTAAGGCTGGAAA  
GGTGGCTGAAGCGAAGAAACGCTGTCGATTTTTCGGGCTTATTCACAGCGATTTGATTTCTGGAGAAAGTCTGCTT  
TATCAGCCCGTGGAAAGCAATTTCTGGTTGATGAAATTTCAAGTATCTCGCCGACGCTGCAGCGTTGTTAGCGCATTA  
GCAAGCAAAATAGTCAAACGACGTTGTTGCTGTTGGTGTGACTGGCAGGCGATTTACCGATTACGCGGTGCGCAAAATG  
TCCGTTACACCGCTTTCCATGAAAACCTTTGGTGAAGGTTGATGCTGTTGATTTAGACACGACCTACCGTTTAAACAGTCTG  
TATCGGTGAGGTGGCAACAGGTTTATTCAGCAGAACCCAGGCGAGTTAAAAAGCCGCTAAACAGCTTAAACATGGAG  
ACAAAAAGCCGTCACGTTATTGGATGAGGGTCAACTTACGCTTTGCTGGATAAACTCTCTGGTTATGCCAAACCGGAA  
GAGCGATTTGATCCTGGCGGTTACCATCACATGAGGCTGCCAGCTGAAAAAGCAGCAACACGCTGGCGAGTT



GCAATCGACTTTATGACCATTTCATGCCAGCAAAGGGCAACAGCGGATTACGTCATCATCGTTGGCTTGCAGGAGGGGA  
GTGATGGTTTTCCGGCTGCGCGCGGGAGTTCGATTATGGAAGAGGCGCTACTGCCACCGGTTGAGGATTTCCCGACGCT  
GAAGACGGCGGTTAATGTACGTGGCGTGACCGGGCACGCCATCGGGTATGGGCACGTTTTACAAAGAGAATCCCTC  
TCCCTTTGTGGATATACTGAAAAATCTGGATGTGCCGGTGGCGAGAAAACCGTAA

>Cluster\_46483

ATGGATGCGCAGCAGTTTTTTGGCAGAGTTTGGGCATATTGCAAAATGCGCCAGGTGGTGTGGAGCGGTTGCGGGAATTGGT  
ACTCCACCTTGTCTGATCTGCGCAATCTGATAGTTACGGAAATCACCAGTTGATGCTGCACCCTTACTCGACTCTATTGTGA  
AGCAGAAAACAAAGTTTCATACTGAAAAGAAAAGAAATCATTGCGAAGCAGCCTTCTATTTCGCGTACCCTTGTCAAAGCCCCG  
CCCCACTGGGCTATTTCCCGCTTAGGTGATTTGGCACTGACTATCAGTGGTGGTGGAAACCCGTCAAAAAATCACACAGC  
TTATTGGGGAGGCAAAATTCCTTGGGCAAGCGTGAAGGACATGAAGGATCATAAGTTCCTGGATGAGACAGAGGATCACA  
TCACAGAAGAAGGACTAAAAGAACAGCTCTCAAATCTGATTCACCAGGACGAGTTATGTTTTGCACACGCATGGGACTT  
GGTAAGGTTGCGATCAACCGTGTGCAATCGCTATTAATCAAGACCTGAAAGCATTGGAATTGCCGAAAGAAGTGAACGC  
CGATTTCTTTGATCTTTGATCGAACCCGCTGAGGTAAGGGCACAGGAACGACAGTTTCTGGTATCAAGCAGATCAGT  
TGTTGGCGTTGCCGCTGCGTTGCCACCCTCCAAGAGCAATCCCGTATCGTCGCAAGTTCGATGAACTGATGGCTTA  
TGGCACAACCTGGAGGAACAACAGCAAGCCCGCGCAAAATGCAAAACGCCCTGCGCAATCCACCCTCAAGCCATCCG  
CAGCGCCACCAGTCCGCACGAACTGCAAGCCAGTGGACACCTGGCCGACAACCTCGCGAGGCTGTTTCATGCACCGG  
AGGATGTAGCAGATTCAAGGTTTGGTTCTCGATTGGCTAGCTGAGTGGCGAGTTGCTGAATATTAAGAAATCGCCATGCT  
TCTACCGGAGCGGAGTTGCTTGAATCAATTTCTGCTAAGCGCATCGAATGGTCAAAAAATCAGACGGGCAAGAGAAAA  
AGAAGCGTTGGCAATGCTAAGGAAGCTACGTACCAGCAGATCTCCATCCCGAAGCTGCCTTACCAGAACATTGGGAAT  
GGGCATCGCTCTCAAAGTGTGCAAGCAGTCTGTTGATGCCCACAAGAACCCGCTCCATATGTCAGCGAAGGCATTCAC  
CTCATTCGAACGACAGCAATTCGTAACCGCGGATGCAATTTATCGAACACAGGAAGATTTCGGAAGAACTTATGCCTA  
TTGGCAAGGCGCATGCCACCAAGAGTGGCGATATTTTCTTACGCGGAGGCCCAATGGGGGAAGCGGCAATTGTTT  
CTGAAGGGGAAAGAGTATGCTTCGCGCAGCGTTCAATGCTGATTCGGCTTTTCCAGTCTATTCAGCAATCGATTTCTT  
CTGTACGTGATCAAGCCGAGTTTCAACACGCTACGCGAAGCCGCTATTTGGCATGACGGTCAAGCATTGCGGAGT  
TGGTGACGTTGAGGATCTCCCTATTCGCGTACCGCCAAAGGCTGAGCAGGATCAAATTTGTGCCATTGTCGATGCTCTTT  
TTAGTATGTTGTGATCTTTACGCGGAGCAGCTTGTCTGAAAGCAGCGTATTTGCAACCAATCTTGGACACAGCGGATTTCC  
AGCCTCACTGGCATGCCATTGAACAAGGAGAGGCCCATGAAAGCCCGCAAAACCGAATTGATGCCCCGCTGTGCTT  
GGCACAGCGCTGACCTTAAAGCGCAAGCGCCGCTGGCCACAATTTCTGGCCCGCACAGCGGCAAAATGAGAGCCAAAG  
ATTTGTGGCAACGCTTCGCGCGGAGATCGATACTTTTATGCGCAACTGAAATCGAGGTGGCGCACGGCTGGATTCTG  
GAGCCAGCCCTGCCAAATGCGCGAGAAGCCTACCAACATAGTGAGACCGTGA

>Cluster\_22333

ATGTTTAGTTGAAACCTTTCGTACGGTTCGGGCTGTGTTTGTCCGCTATTTCCTGTGCATGGCTGTGTTAGCGGTGCA  
TGATGATGGCGAAACGATGGTTGCTACTGCATCTCCGTTGAACAAAACCTTAAAGATGCTCCCGCCAGTATCAGCGTCA  
TTACCAGGAAGACCTGCAGCGAAAACCGGTACAGAATCTGAAGGATGCTCCTCAAAGAAGTGCCTGGCGTACAACAGC  
AACGAAGGGGATAACCGTAAGGGCGTAAGTATTCGTGGTCTGGACAGCAGTACACCTGATTTCTGTGCGAGGTAACCG  
GTTAATCCCGCAATGCGCTCTCCCGCAACAATGTTTCGATCTGAACTGGATCCCTGTGATTCATTCGAAAGCAATTTG  
AAGTGGTCCGTGGCCGATGTCGTCGCTGACGGTTCCGATGCGCTCGGCGGTGATGTAATATCATCAAAAAAATC  
GGTCAGAAATGGTCCGGACCTTAAATGACGGCTGTGGAAATGAAAGCTTACGGCAGCCTGGCAAAACGTTGAAAGGATG  
ACCCGAAAACCTCAACAACACCGGATACCGGAGAAACGCGGCTATTGAAGGATTTCTCCAGCCGCGAGGCAATGTGCGAA  
TTTGCTTGACACCGAATCAAAATCACGATTTTACTGCGGATACGGTTTCGACCGTCAAGGATCGTATTCGACTCGCT  
GGCAAAAACCGCTGGAACCGCCAGAATACTCCGTCAGCCATAATGGGCGTTGGGATACGGCACCAGCGAATGAAAT  
ACTACGGTGGAAAATGAGAACAAAACCCCTGGCAACAGCAGCCGATAAATTCGAAAGCAATACCGTCAAGGCAAAA  
TACAGGTTGCGCTGACGGCGATTAATCAGTTTCTACGGTTGGCGGTGAATGGCGTACAGCAAACTTAGCGATGCGGT  
GAACCTGACCGGGGAACAGCTCCAAAACGCTGCGCAGCCAGTACGCGCTGTTTGTGGAAGATGAATGGCGGATCTTCC  
AGCCGCTGGCGCTGACGACCGCGGTGCGTATGGACGATCACGAAACCTACGGTGAACACTGGAGTCCGCGTGCCTACCTG  
GTTTATAACCGCCACCGACACCTTAACGGTGAAGGGGGCTGGGCGACGGCATTAAAGCACCTTCTCTGTGCAACTTAG  
CCCTGACTGGACGAGCAATTCCTGCGGTGGCGCATGTAAGATTGTTGGGTAGCCCGGATCTGAAACCAGAAACAGCGAAA  
GTTGGGAGCTGGGCTTTACTACATGGGTGAAGAGGCTGGCTGGAAGGGGTTGAATCCAGCGTTACCGTTTTCCGTAAC  
GATGTGAAAGATCGTATCAGCATCAGCCGTACGCTGACGCTCAACGCTGCACCGGGTACCAAACTTTGTGCGTTTTGA  
GACGGCGCTAACGGGCGCATACCGGATTTAGCTACACGCTTAACAAAGCTCGTATTCAGGCGTGGAAACCG  
AATGAAAATTCGTTCAACGATGAATGGAACGTGTCGATCAACTACACCTACAACGATGGTCTGATGTCAGCAACGGC  
GAAAACAACCGCTATCCGATCTGCCGTTCCATACTGCTAACGGTACGCTGGACTGGAACCGCTGGCGCTGGAAGACTG  
GTCATTTATGTTTCTGGTCACTATACCGGGCAGAAACCGCCGACAGCGCGACGGCTAAAATCCCGGCGGTTATACCA  
TCTGGAATACCGGTTGGCGCTGGCAGTAACTAAGACGCTCAAACCTGCGCGCAGGCGTCTGAACCTTTGGCACAAGGAT  
CTCAGTCTGACGACTACAGCTATAACGAAGACGGACGCTGTTACTTTATGGCAGTGGATTATCGCTTCTGA

>Cluster\_51116

ATGTTATATAATACCTTGTGCAATTTATATCCTTTCCACTCTGTCAATATGCAATTTCTGGGATAGTTTCTACTGCAAC  
CGCAACTTCTTCAGAAAACAAAAATCAGCAACGAAGAGACGCTCGTCTGACCAAGCAATCGTTCCGCAAGCAACCTTTGGG  
AAGCCCGGGGACTATACAGGTTATTGACCAACAAACATTGCAGAACTCCACCATGCCTCCATAGCCGATAAATTTGCAG  
GACATCCCGGAGTAGAGATAACAGACAACCTTGGCAGGCGTAAACAAAATCCGCATTCGTGGCGAAGCATCTCCCG  
TGTTTAAATCTCAATTGATGGTTCAGGAGTAACTTATACGCGCCGGAGATAATATGGTGTGGGACTGTTGATAGATG  
AGTCTGCGCTGGAGCGTGTGAGGTTAGTGAAGGTTCCATATTCCTGACTGTACGGTTCACAGGCAATTTGGCGTATTGTT  
AATTTCAACAAAAAGGGAGGTGACAACTTGCATCTGGAGTTGTGAAAGCTGTTTATAATTCGCAACAGCAGGCTG  
GGAAGAAATCAATCGCGTCCAGGGGAGCATCGGTGATTTGATATCGCATCAACGGTAGTTATTTGATCAGGGCAATC  
TGATACGCGGATGAGGCTCTGCCGAATACCAACTATGCTAACAATAAGTCAAGGTTGATGGTTGGGTTATAACTCCGGA  
AACCATCGTTTTGGCCTCTCGTTGATCGCTACAGACTCGCGACGAACTTACTATGAGGATCCAGACGGAAGCTATGA  
GGCATTTAGTGTCAAAATACCTAAACTTGAACGAGAGAAAGTTGGGTTATTTATGACACAGAGCTGGACGGTACTATC  
TAAAAAAAATCAATTCGACCGGTATGAGCAGACCACTCAGCGCAATTTGCCAACGAAGTAAAAACGACACAGCTGTT  
CCGATCCGATGATTCAGGCTCTGACCGTTTCAATAACAAGACTGACACCCATGATAAGCAATAACACTCAGCGGTTACAT  
GCAGAGTCACTTTTCTGCTGCTGCTAATAATGAACTTGTACCCTGTCACAGTACAACAAGACAGGTTACGCCAAAGGT  
CCGTTGGCATGACCTCAAGCAAACTCTGACCGGCTTCAATTAAGGAAAACGAACTCGCTCCTATATGAGTCAAG  
CAAAGTACAGTCTCACTATTCGCACAAAATGACTGGCGATTCGCGGATCAGGATGAGCAGTGGCAATGGAGTTGCCAAAT  
CTGGCTTTCTTCAAAGTTGACGCGTGGTACGGAGTATCATATACCGCAGGCAATATAAGCGATACCTCTTTGCCAGAG  
AGTCTGCGAGTATCACGAAATGGTAACATCTACAAGCTGCGCTATTAGGTTTCGATAACTTGGAGTTACGGCTGCG  
TTCCGCGAAGACTACGATTTCCACACTCTCCAGCTTTTATGTCAGACATCTGCGGGCGGAGTGTACATACGGAAA  
TCCGTGATCTTAAGCTGAACACTCCAATAACTTTGAATTTAGTGCACGATATAATGTAATCATGTTGATGACAGG  
CAGTTTACTACTCAGAAGCTAAAGATTAATTTGCAAGTCTGATCTGTGATGGCAGTATAGTTTCAATGGTAACCAAC  
TCTCCCGTAGTAGCTACTATTATATGACAATATTGATCGGGCAAAAACATGGGACTGGAATAAGCGCGGATATAA

TGGCTGGGTTTTCTCGCCATATATCAGTGGCAATTTAATTCGTGGCAATATGAAACTTCAACATAAAAACAACATAA  
CAGGAGAACCCAGGCATAAACCGGACGTATAGGGCTGAAACATACCTTGTGATGGGTGAGCCAAACATAATCTCTGATGTT  
TTTTATTCGTGCTGCCTCTAGTGCAAAAGATGACAGTAACGGTACCGAAACAAATGTTCCGGGCTGGGCCACTCTCAACTT  
TGACGTAAATACAGAATTCGGTAACGAGGATCAGTACCGGATTAACCTAGCACATAAATACCTGACAGACAAACGCTACC  
GTACAGCACATGAAACTATCTCTGCAGCAGGTTTTAATGCAGCTATAGGTTTTGTATGGAATTTCTGA

>Cluster\_67148

ATGGCGATTATCATCTCAGCATGAAAAATCATCTCCAGAAACAGCGGCTACAGCGCGGTGCTTCTGCTGCCTATCGTTC  
CGGTTCACTGATGCTTGTAGGAGTACCAGGACTGACTCAGACTACACCCGAAAAGCGGTGGTGGCTGAAGCTGTGATTC  
TGACTCCCGGCAGACGCCCTGCCCTGGTGTACGAACCGTCCGAACTCTGGAATGCCGTGAGAAGGCCGAAACCGCGGAA  
AACTCACAACCTTGGCGGGGAAATGAACTCGCCATCCCCCGGAACTACCGCAGGATGCCGCACGGGAAACCGTTCTCGC  
CTTTGTGACAGAAAACCTTTGTGACGTACGGGATGATTGCTGATGTGGCGTCCATCACATGGATAAAAACAAATCCCCATG  
CGCACATCATGCTGACCAGAGAGCTGTGGACCTGCTGGATTCGGTGGAAAGGTGAGGGACTGGAACGACCGGACACAT  
GCCGAGACTGGCTGCATCATGGCTGACCATGCCAAGCGGCACTGGCGAAGCGGTTATCAGGAAGCGATGAGACCA  
TCGTTTCATACGAGCGACAGGGGCTTGGAAAACGCTGGTATTCACCTCGGAAAGTCTGCCTGTGCGATGGAACACGCG  
GTATCGAAAACAGAACCGCGGCAACAGAAATCGTCTGATTAAACAGACTTAACCTGGAATAACAGATTTCCCGTACCGAAC  
AGAAAACAGCGGCTGACAGAGCTGCCGCGGTGGTGCAGCTTCTGAAATATCGTGCCTCTGACACGCAACTTCGTA  
CACACTACGTGACATCATGAAAGCGTTGCCGAAGGACATTAATGCCGATGGAACCTACCAAGTAATGCCATTCGATGA  
TGGCAGATATGCAGGCGACGCGCAGACGCTGGGAAGAGCTGAACACCGAAGGAAAGGATGAGCCATGCTGCCAGC  
CTGAAAAAATCATCGCGTTTTCTGCTCGGTTTTTCCCGTATTCCCTGATGCAATGGCGCGCACCGGAAATACCGTAGCA  
ACAGGAAAACCTCAGTGCAGCCAGAAATGGAAAAATTCGGACAGCATTAACGGAGGTGGGAAACAGGACATTC  
CCGCGAGTACAGCGCATTTGAAAAACAGTGGCAGCAGTGGGGGCACTCCGGCCTTGCAGCTCAGAGTCCAGATTGCTT  
AAACGTGAAGAGGAAATGGCGCGAAGGAGCAGGAGGATACAGAACCTAGTCCGCGGAGCGACGAGCGGAACAGCTCAG  
GAAAAATGCAACTGCCGTTATGGATTACGGGGTACTGAGCGCAGTCTGTACGGGGTATGGCGAGGCCCATGCTCGTGGTA  
ACGGGAAATGAGCTGTTACTTCTGCTTCAACCGGAAACCGGAAATACAGCTCTGGGGAAACGAGCTGGAGAAATAC  
CGCACAGAAATCTTGTAGCGTGTGATTTAATGCGTGACAGGAGTGGTTATATCTGTGACCGAAGCGAAATCGGTCAACA  
TCCACACTGCAACGTGTTTATTCTCTGCGACCTTTGAGCAACTTCTGACGCAGGTTTGGCAGACATGGCCGCAATATA  
CCCCAATCTCCGCGACCGCAAGACATGGCCGGAGTCTTCTGTCTTGGAGAAGACCGCCAGCCAGCCATGCCATCACTG  
GCAGCAAGGAGGTGGATTCTTACGCGGACGCTGCTGCTACCGGAAACCGGAAATACAGCTCTGGGGAAACGAGCTGG  
CCGCCAGCTTACGTTTTGCTGGTTCATGGGCGTGGATGACTCTTGGGCGGTGTGTCCGGCTAATGGTACGCTGTATC  
CCGCGTTTTGCCGTTCCCTCAGCCGATAACAGCCAGCTGCTCATCAGTGCAGTACCGGTAAGGGGTTACGGTATGCAGG  
TATGGTGTGCGGTAATCAGATGCAGACAGCCACATATCACCTGCGCGGAACTTATGGAGTTTCACTGAAAAACCG  
TGAGGACCGCTTTTTGCTGCGCTCAACACACCGAAGAAACCGGCACTCATCTGTTCCGCTCGCTGGGTTTTAATCGTA  
CCTGGGACGAATGGCGCGCAGGAAAGATGCACGAACACCGCCACCGAGAGGAGACATGATCGCGGTTGGTACAGTGA

>Cluster\_21555

ATGAAGATTTTTCCGTCGACAGACCGTTTTGCCCCGACTGCTGTCTTTCCCGGTTGTTTTGCGCTGATGAACA  
GACCATGATTTGCTAGTACCGCACCGCAGGTGGTTTTAGAACTGGATACCCAGCAGCCGTGAGCGTGGTGGATGGCGAGG  
AGATGGCCTGGCAACACCGCGCATTAACCTGTCTGAATCACTGACCGGAGTGCCTGGTTACAGGTACAAAATCGGCAG  
AATATGCGCAAGATTTACAGCTGTGATTCGCGGATTTGGCTCCCGTCCACTTACGGAATTCGCGGTTATCGCCTGTA  
TGTGGACGGTGTCCCTCACCATGCGGCAAGGCAAAACATCAACATCGATTTAAGCAGTGCAGAAATGTGG  
AAGTGTGCTGGGCCCCCTTCTCTGCCCTTACGCAACCGCTGCGCGGTGTAATGAATGTCAACACCGGACAA  
CAGCCACCAACCATGAAAGCAGTAGTTACTACGGCAGTTTTGGCAGCTGGCGCTATGGGCTGAAAGCAACGGCGCAAC  
GGGCGACGCACACAACCCGCGATGTCGATTACACCGTCTCAACCACAGTTTTACGACCCAGGCTATCGTACGACATA  
GTGGCGACAGAAAATTTAGCCAATGCGCAACCTGGGCTACCGGATGATGATGACCGCAAAATTAAGCCTGATTTCAAT  
AGTGTGGATATCAAAGCAGATGACCCAGGTGGGCTAACCGAAGCAGAAATGGAAGGCGAATCCACAACAAGCGCTCGTGC  
AGAACAGTACGACATGCGAAAACCATCAAGCAAACTAGGCTGGGTTGCGCTATGAGCGTAGCTGAGCGCACAAAGATG  
ATATGAGTGAATGATGATGCGCGGAGAGCGAGAAACGACCCAGTACCAGTCAATACCCATGGCACCACAACCTAAACCCG  
TCACATGCGGGCGGTGTGATTTACCTGCAACCGCATTAACCGGATGATGACAGCGGATGACAGCGGCTGGACACACCGG  
CGTTCCAGTACGTTTCAACACCGGCTGAACTACGAAAACATGAGTGAACACCGAAGGTTACAATAACTTCCGCTGA  
ATCGCGGCTGCCGGAATACGGGCAAAAAGGTGAGTTGCGCGCGACGCAACGCAATTTGATGTGGAACGCTCGATCCCTAT  
TTACAACCCAGTGGCACTGACCGCAAACTTTCCGCTGGATGCTGGCGTGGCTACAGCTCTGTGTGGTTTGGATTCCAA  
TGATCATTAAGTTTTACTCCGGGTAACGGCGACGACAGCGGTGATGCCAGTTATACAAAATGGCTACCAGCGGATGTTAA  
AATATGCAATGACCGATGCCGGAATGTCTATCTGGCAGCGGGCGCGGTTTTGAAACCGGACGATTAATGAGCTGTCT  
TATCGCGCTGATGGGCAAGCGGTATGAACTTTGGTTTTAAACCTCCACCAACGATACAATTTGAGATCGGCAGTAAAC  
CGGTATTTGGTATGGGCTGCTTAGTCTCGCATTTGTTCCAGCCGACCCGATGATGAAATTTGTGTCGATGACGATGCG  
GTGGCGTACGACTTACAAAAATGCCGGAAGACCCGCTGCTCAAGCGCGTGAACCTGGATGGGATCAACGTTTCCGCGGA  
GATTTTCCGCTAAAAGCGTCTTGACCTGGCTTGTATGCGACCTATCGCAGCAATGTTTGAATGAACAGGATTTGTAACGG  
TAACCGGATGCCAGGATCGCCGTAATATGGCCTTTGCGTGCATAGGTTATATACCGGAAAGTGGTTGGTATGCAGGCA  
CGGAAGCGGTTATATGGGCGATATTTAGGCAGATGATGAAATACGGCAGGCGCTTCTTATACACTCGTGGCTTA  
TTCCACCGGTATAAATACAAATTAACCAATTTAACCGTGGATTTATTTGGTCTGTCGATAATTTATTTGATAAAGAATA  
CGTTGGTTCTGTCAATTTGCAATGAGTCAACCGGGGATATTACGAACCTGCGCCGGACGAAATATGTTGTCGCGATAA  
ATATTCGCTGGCGATTTGAGTAA

>Cluster\_23487

ATGGCTCGTACAACACCCATCGCAGCTACCGTAAACATCGGTATCAGTGCACATCGACCGCGTAAAACCACTACTAC  
CGAACGATTTCTGTTCTACACCGGTGTAACCATAAAAATCGGTGAAGTTCATGACGGCGTGCACCAATGGACTGGATGG  
AGCAGGAGCAGGAACGTGGTATTACCATCACTCCGCTGCAGCTACTGCATTCGTTGTTGTTGTTGTTGTTGTTGTTGTTG  
CCGATCGCATCAACATCGACACCCCGGGCAGCTGACCTTCAACAATCGAAGTAGAACGTTCCATCGCTGTTCTCGA  
TGGTGGGTAATGGTTTACTGCGCAGTTGGTGGTGTTCAGCCGACGCTGAAACCGTATGGCGTACGGCAACAAATATA  
AAGTTCCGCGTATGCGTTCGTTAACAAAATGGACCGCATGGGTGCGAAGTTCCTGAAAGTTGTTAACAGATCAAAACC  
CGTCTGGGCGCAACCCGGTCCGCTGCAGCTGGCGATGGTGTGAAAGCAATTTACCGGTTGTTGTTGACTGGTGA  
AATGAAAGCTATCAACTGGAACGACGCTGACCAGGGCGTAACCTTCAATACGAAGATATCCCGGACAGAGCTTGAAC  
TGGCTAACGAATGGCACCAGAACCTGATCGAATCCGACGCTGAAGCTTCTGAAGAGCTGATGGAAAAATACCTGGGTTG  
GAAGAAGTACTGAAAGCAAAAGTGTTCAGCGATGCTGGATGCGGTAATGATTACCTGCCATCCCGGTTGACGTACCTG  
CGATCAACCGTATCTCGGACGACGTTAAAGACACTCCGCTGAGCTCAGCAAGTATGACGAGCCGTTCTCTGCACTG  
GCTTCAAAAATCGCTACCGACCGTTTTGTTGGTAACTGACCTTCTTCCGTTGTACTCCGGTGGTTAACTCTGGTGA  
TACCCTACTGAACTCCGTGAAAGCTGCACGTGAGCGTTTTCCGTTGATCGTTTACAGATGACAGCTAACCAACCGTGAAGGA  
TCAAAGAAGTTCCGCGGGGACATCGACGCTGCAATCGGCTGAAAGACGTAACCACTGGTGCACACCTGTGTGACCCG  
GATGCGCGGATCATTTGGAACGATGGAATTCCTGAGCCGTAATCTCCATCGCAGTTGAACCGAAAACCAAGCTGA  
CCAGGAAAAATGGGCTGGCTTGGGCGTGGCTAAAGAAGACCCGCTTTCCGTTGATGACTGACGAAGAATCTA

ACCAGACCATCATCGCGGGTATGGGCGAACTGCACCTCGACATCATCGTTGACCGTATGAAGCGTGAATTCAACGTTGAA  
GCGAACGTAGGTAACCGCAGGTTGCTTACCGTGAAACTATCCGCCAGAAAGTTACCGATGTTGAAGGTAAACACGCGAA  
ACAGTCTGGTGGTGGTTCAGTATGGTTCATGTTGTTATCGACATGTACCCCGTAGAGCCGGGTTCAAACCCGAAAGGCT  
ACGAGTTTCATCAACGACATTAAGGCGGTTGTAATCCCTGGCGAATACATCCCGGCCGTTGATAAAGGTATCCAGGAACAG  
CTGAAAGCAGGTCGCGAGGTCACCCGGTAGTAGACATGGGTATTTCGTCTGCACCTTCGGTTCTTACCATGACCTTGA  
CTCCTCTGAACTGGCGTTTAAACTGGCTGCTTCTATCGCCTTTAAAGAAGGCTTTAAGAAAGCGAAACAGTTCTGCTTG  
AGCCGATCATGAAGGTTGAGTAGAAACCTCTGAGAGAACACCGGTGACGTTATCGGTGACTTGAGCCGTCGTCGTTG  
ATGCTCAAAGGTCAGGAATCTGAAGTTACTGGCGTTAAGATCCACGCTGAAGTACCGCTGCTGAAATGTTCCGGATATGC  
AACTCAGCTGCGTTCCTCTGACCAAAGGTCGCGCATACACTATGGAATTCCTGAAGTATGATGAAGCCCGAGTAACG  
TTGCTCAGGCCGTAATTGAAGCCGTTGGTAAATAA  
>Cluster\_7079  
ATGTATATCGAGACAAAAGATGCGCAAATAAGCGGGGCGGTAGGCCGTTATTCAAAAGAAATTCGCGCCAGGTAAGGTATT  
TACTGTATATCAGGTGATAAGGGTATTTTAG  
>Cluster\_192  
ATGGGAAAAAGCCAATGACCTTAGCAGAGAAAATTTTAGCCAAAAGGTTGAAAAGAGTATGTAGAGCCAGGAGAGCT  
GGGTAGAGGTGCGCGTAGACCTAACCTTAGCTAA  
>Cluster\_53105  
ATGGCACTGAAAAAGGAATTGCAGAGTTTATCACCACGGATTTTTCAGCGAGGCGAGCGGTACGGCTCTACGGGATGT  
CGCCTGGAGAGCAGGTAG  
>Cluster\_30518  
ATGCCCTTTTTTACAATATTTCTTGTTTTACAACATACAATCTTCTTGTAAATTTAAGCCATCAGCAGGACGCACTGAC  
CACCATTGAAGGTGATGCTCTTAAAAATTAA  
>Cluster\_45818  
ATGCACATCAATCGCTATGCCTGCATGAACGCGAAAACCCATCGCGGCTTGTGTTTCATGTATGCATGTTTGGCTGGGGC  
GATGATGTGTTTTATGGATACCCCGGTACGACGTTGTTCATGA  
>Cluster\_10612  
ATGAAAATCGAATACCAGGACGCCGAGGAGGTGAATCAATGAGCTGGCCTGATGCAATCGTAACTCTGGGGGTGGTATT  
CGCAGTAGCGTTTTGTTGTTCTCAATTTGTTCGATGGGGATAA  
>Cluster\_55664  
ATGAACTGGCAACTCATCTCATTTTTTGGCGATAGCACGTTTTGCTGCCAACTCAGCGGCGCTGTTTTATTGTCCTGAT  
GCTGTGTAACACGTCGCGGTTGCTGGCGTGGCAGTGA  
>Cluster\_34135  
ATGATAGTAGCTATGTATTGGTTATTGTTCTTTCTCACGTTAGAAACATAATTCGGGGTGTTCCTTTAAAAGAAAAGG  
AAAAGTAAATAATGGCAAAAAGAAAAACAACGTTGTTAA  
>Cluster\_24675  
ATGAAACTTAATATAATTTTACAGAGAACGGAGTACGTGGTAACAGGGGCTTAATTGTCCCTTTTTATCCGGTGGCGTA  
TTTTGATAAAACATTAA  
>Cluster\_41467  
ATGCAATGGTTACCGGGGAAACGGTATGACAGACAACATAGTTACAGTAGCGCATGGCGATCTCTGCCTACAGCGGCAG  
CCCCCTCGATAAGGGGGCGAGCCTGAAAGCTCAAGTGAATAATGAACCTGGTTCTGGAAGTGGCGATACCTACGATCTGA  
ACGGAATGAGTCAGAACGTTGATTACGTGATTTGTAATGAGGGGAGTAGCCTTGTATCTGGACGGTGGTGAAGTACGATC  
GGACATAACGTTCTCCACATATTTCCGGATTTGTAGGAAAAGTTACCGGCAGTGGCTGCTGAATGTATATAACGAAC  
CTATATTACGAGATAGTGCATCTCAGTGGCTGGACGCAACCATCAATATTGCAGACTCTGGCAATGTTTTTAGCATTT  
TCACTACCAATCTGGGCAGCGGTAATATCGTAGTTGATGGAGTACTGGTGAATGATTCGCCAGATGGAAAATTGAGCAAC  
AGCCTCAGTGGTAGCGGGGAAAGTCAAGTACCGGTGGGATCTTACCGTCAAGCGGTGACAATGACAGCTTAAATGTTACCTG  
GATTATTGGTGGCAATAAGGATATGGATGCGGATCTGGCTGTGGCGGATGCATCAGCGCTGGGGGGGGTAATATATCA  
ACGGCGAAACCTGACGCTGGCGGTTGCGAGGACTGGATGCTGAACAGTGAATAATGTATTAGCAGCAACGATGAAAT  
GTCGATGGCATAACAGCTCTATTTATGTTGGTAAAGTGGTGAAGAAGATGCCAACACCATACGGTTGCTCATGCCAACAC  
CTACAGCGCGCGCACGGACATTAAGCGGGTACGCTCAATGCTGATCACTAGCGCGCTGGGACCGGTGATGTGGCAA  
ACTACGCTACGCTGAATCTGAATGCTGCGGGCAGTATACGCTGACCAATATCACCACGTTTGGATGGCGGTACCACTTCA  
CTGTCCTGATGCGGATGAAAAACTTGCCTACCGATGCCACGGCACCTTCACTCTCAGCGACCCGAATGAAACTT  
TACCCTCAATACCGAACTGGTCGATGTTAACCCGAATAGCGTCACTGGCTGGGATGGCAAAACCTGACTAAAGCGGGCG  
ACGGCACACTTACCTTAAATGTTGCCAACACCTGGAGCGGGGATACCCGTGTGAATGATGGAACGTTTGGCTGACGGAC  
AGCGGGGTGATGGTGCATCTGGCAGTACCCAGCGGTGAATGTTGGGAGGGAGTACCTTCGGCGGCAGCGCGCTGGT  
GAATGGCGATGTTCTACAACAGTGGCAATATTGGATGCTGATGGAGTGAACCGGGCAACACACTGACCATCAACGCA  
ACTATCAGCGGATAACGGAAGCCAGATTAACATCAACAGTCAACTGGGTGATGACAGTCTTCAACCGATAAACTGGTC  
ATCTCTGGCGATCTTCTGGTAACACGATGGTCTATGTTGCTAACGTCATGTTAAAGGTGACAGAGCAAAAATGGTAT  
AGAAGTATGACGCTTGGCGGTCAGTCAATCCGGAACATTTGAGCAGGAAATCGGGTGCAGATTGGATTGTACGAATATC  
GTCTCTATGAAGACGGTGGCGACTGGTATTTACGTTTCGCAATCCAGCGTTCCCGCTGAACCCGGATGATGGTGAATG  
GGCACAGATGATACCCCGGTGACGCCGCAATATCGCCCTGATATCGCGCTTACCTCGGCAATCAGTGGATGGTGGTAA  
CCTGCAAAATGCAGACGTTGTACGACCGCGAAGGTAGTCACTACATAATGAAGATGGCAGTGTCTGGATGGCTTTAAGG  
CGGGAAATGCAGCGTCTCAGCGGCTGACGGCAATGTTGATATCAACAACAATTTTCGCAAAATCCAATAGGCGCGCAC  
ATTCTGACGTTGGGCAACGGTGTGCAGAGTCTGAAAGCCGGGGGATGGCGAGTTACGTCATGCCGACACCGACAGTAC  
CAGCAACAGGGGTGCGGACGGTAGCCAAATCTCGGCAAGCGGTAACTCGGTGCTAACCTCGGCATATATGCCACAT  
GGTTTGGCGATGCGCAACATCATCGCGGTTGTATGTAGACAGCTGGTATCAGTATGGCTTCTATAACAACAGTGTGCAA  
AATGGCAGTGGAGGGTCAAAAAGTATGATTTCTACGGCACAGGACAGTCACTGGAAGGCGGCTACCGTTACGATATTGC  
ACTGGAATAACAACACGCTCAGCCTGACGCCACAGGACAGGTCGCTGGCAGCGTTACAGCGCCGACAGTGTACGG  
ACAATAATGGTATCCGATCAGCGGCCAGGACAGCGCAACTGGAATACCCGGTTAGGGCTGCGTGTGATGGCAAACCTG  
CACAAGAATAAAACCTCCATTATTCAGCCGTTTGTGTAAGTGAAGTGGTGTACACCAGCGGTGATGTTGCTGTGCTATT  
TGATGACGCTGAGACGAAACAGGGTATCCCGTCAACCGGTTGACGGCAAAAGTAGGGATACAGGTGAACCTGGACAGCC  
AGTGGAGTATTACTGGCCAGGTTGTTGGTGGAGACGGGAAGCCATAACTACAACGATCTTAAATGGCAGTCTGAACCTGGCT  
TACAGTTGGTAA  
>Cluster\_39364  
ATGAATAACGAACCCCTTACGTCGCCGACCCGATCGTCTGCTGGAACAAGCTGCGCGCGCATCGGGGAAAGCTGAAAGT  
TTTCTTCGGTGCCTGCGCAGGCGTGGCAAGACCTGGCAATGCTGGCAGAAGCCAGCGACTCGGGGCGCAAGGGCTGG  
ATATTGTTGGTGGCGGTGAGAAACCCAGGGCGGAAAGATACCGCGCAATGCTGGAAGGGCTGGCTGTCTGCCGTTA  
AAACGCGAGGCTACCTGGCGGCACATCAGCGAGTTTGTATTCGATCGCCGCTCGCCGCGCTCCGGCAGTACTCTT  
AATGGACGAACTGGCGCACAGTAATCGCCAGGTTCTCGTCACTCCAAACGCTGGCAGGACATCGAAGAGCTGCTGGAAG  
CTGGCATTGATGTTTTCACTACCGTCAACGTTCAACATCTGGAAGCCGTAATGATGTGGTACGCGGCTCACCGGAATT



ACCTTCCAGGAAGCAACTGATGTTTCGAGTGCAGCCGACAGTATTACCGCCGTTATCACAAGCGCAGCCAGATACAGGG  
CAATATTACCAGCAACTGGGAGACTACGGCTCGGTTTTATTTCAATATGACGCAGCAGGATTACTGGAACGTTGACGGTA  
AGGAAACCTCTTAAGCGCCGTTATCAGGGTACATTTGGTTCGGGTGAATTACAGCGTGGCCTATACCTGACGAGAAGT  
CCGGAATGGGAAGAGACGATCGCTTGTGGTCAATTCAGTGTTCATCCCTCTGGGGGCGCGTGGAGCAGTTATCGCAT  
GACTACCGACAGAGTGGCAAGACGTCGCAACAGCCGTTGTTAGCGGCACGTTACTGGAAGATCGTAAACCTTGTGGAA  
ACGTTTCAGCAGGGTTACACCAGTAATGGCGTAGGCTACAGTGGCAGCGTCAACATGGGGTATATGGGTGGCTCTGGTAAC  
ATTGACGTAGGCTATAACTTATTCATAAGATAACCAACAGGTTAACTATGGCGTGGCGGGCGTGCATCGTTCACAGTGA  
AGGTATAACGCTTTCGACGCTTTAGGCGAAAGTCTGGCGATGTTTCTGCACCGGGCGCGTGGTGACATGTGGTTA  
ACAGCAGCGGGCTAGAAGTTGACTGGATGGCAACCGCGTGGTGCCTTATCTCACACCATATCGTGAACCTTGTGGAA  
TTGCGTAGCGACAGTTGGGGCAAAAACGTTGAACTACAGGAAGCGTTCAGAAAGTTCGTGCTACTCGTGGTGCAGTTGT  
GCGTTCGCCCTTTGATACCCGCGTGGTTACCGTGTGCTGATGAGCTTAAAACAGGCGAATGGCAACGAGTACCGTTTG  
GTGCAACCGCAGCGTTAATTGATGAGAGCAAACCTGCCAGCAGCATTTGTTGGTGAAGAAGGACAGCTTTATATCAGCGGG  
ATGCCAGGAAGGCGAATTGACAGGTGAGCTGGGGAAACGAGCAGCGCAACGTTGCCGTGTGCCATTCCGCTTGCCAGA  
GAACAAGGACAATGCGGCTATCGTGATGGTTAATGCGGTATGCGAGAAATAA

>Cluster\_53939

ATGAATACCAATAACATTAATAAATATGCCCCACAGGCCCGTAACGACTTCCGCGATGCGGTGATCCAGAAGCTAACGAC  
GCTTGGGATCGCTCAGATAAAAAAGGCATTTTCAGATTGCCAGGCGGAAACCATTGGCGAGACCGTGCCTTACGGTTC  
AGTTTGATTACCGTTATCGACCTTCCCGCCGCGAAGCGCTGGTAAAACCGCCCGTGAGCAGGGTTTTGAGGTGCTG  
GTTGAGCAGTGCAGCTACACTGGTTTAAACCGTTATGTGCAATTCGCTATATGGAGTGCACGGTTACTTGTATCAGCG  
CTTCCGCTATGTTGCTCACCCGGAGACTCCGACCGCGTTGAGGTGCTGGATCATGTGCCGGAAGTGGCAGAACTCTGC  
TACCAGAAAGTAAGCGCAGTTGGTTGAAATGAAGCTTTCCGGTAATCAGGACGAAGCTCTGTACCGTGAACCTGTGCTG  
GGCAGTGCCACGCCCTGCACCACGCGATGCCGTTCTGTTTGAAGCGGTAGATGACGAAGCGGAACCTGCTGCTGCCGA  
TAACCTGACCCGTTACTGACTCCTATCTACGTGGGCTGGTTGATGATATTCGGGAAGAAGACTGGGAGCAGGTAGAGTTA  
TCGGTAGCCTGATAACGTTCTATATTTTCGAAAAGAAAGACTGCGGTGATGGCAAGTGGTGAAGAGCGAAGATTTCCCT  
GCCGCCACCCAGCTGTTTACGCCAACTGGATTGTGCAGTATCTGGTACAGAACTCCGTTGGCCGCGAGTGGTTGCAGAC  
CTACCCGGACTCACCGCTGAAAGACAAAATGGAGTACTACATTGAGCCTGCGGAGCAAACGCCGGAAGTGCAGCGCAGC  
TGGCGGCGATTACCCCGCCAGCATTGAGCCTGAAAGCATTAAGTGTGATCCGGCCTGCGGTTCCGGGCATATCCTG  
ACGAAGCCTGATAACGTTCTGTAAGGCCATTTACGAAGAGACTGCGGTACCGTACCGTGACATTCCGACGATTTGGA  
AAACAATATTTTCGGCTGGACATCGATGATCGTGGCGCAGCTTTCCGGATTGCGATGCTGATGCTGGCACGCCAGG  
ATGACCGTGTATTTCTGGCCGTTGGTGTGAGGCTGAATATGTTCTCCCTACAGGAAAGTAAGCTGGATATGCTGAGGTT  
TGGACCAAGCTGAACCTCCATCAGCATAATGCAACGCGGCGAGCATGGGAGATATGTTTACCAGGAGGACGGCAGTGGCAA  
TACCGACAGCGCGGAATATAAGCTACTGATGCGTACTCTGGCATGTTCTACTAGTGCAAAACCGCTGGGATCACTGATTC  
AGGTACCGCAGGAAGACGAAGCGCGTTGAAAGCGTTTCTGGAGAGATTGTATCGTCTGGCTGTTGAAGGTGATAATCAG  
CAGAAAGAGGCTGCGGCAGAGCTGATCCCATATATTCAGCAGGCGTGGATACTGGCGCAACGTTATGATGCTGTGGTCCG  
GAACCCCGCTATATGGGGGGAAAGGGATGAATGGTGATCTGAAAGAGTTTGCTAAAAACAATTCGCCGACAGCAAGT  
CGGATTTGTTGGCATGTTTATGCAACATGCAATTTCTTACTCAAAGAAAACGGTTTTAATGCGCAAGTGAATATGCGAG  
TCATGGATGTTCTGTCTAGCTATGAAGCGCTTCGTGGATGGTTGCTGGATAATAAACCTTTTATACGATGGCACATTT  
GGGGCTCGAGCATTTGGTCAAAATCTCTGGAGAAGTTGTTCAAACCTACCGCATGGGTGATAAAAATAACCAATTCAGGAT  
TTTTATAAACCTGCTATTTTCCGTTTGTAGTGCAGATAATGAAGAACATAAAAAACAATCTCTTGAATCGGATGAATTC  
TTTTAAAAACACTCTGCAGATGACTTTTTAAAAAATACCTGGTTCAACCATTTGCTTACTGGGCAACATTTGGCGTTATTA  
TTCCCTTTCTTAAATTCGCTCTTGGAACTCGTGTGAAAGGACTAGATACAAACGGGTCATTTGATGATTTTTTTCG  
GCAGATGGCCGGAAGTGCAGATAAATTCCTTTGATGATTTAGGAAAGGTAACCAAAATGGTTTCCGATGCAAAAAGGG  
GGTAGTTGAGGAAAGTGGTTTCGGAATCATGAGTATATCATATAAATGATAAATGATGGCATTGAATTAAGAAAAACA  
AGCAAACTTGAGAAATAAGGATATGTACTTTTTCAGGAGGGGGAACTGGACTGTTGATATCAACACCGGTTTCTCAATGA  
GATATATGCCAAAAGGATTCCTTTTTCAGCAAGCGGTTCTGCTGTTTTTTGTGAAAAAATGATGAGCTATCGATATAT  
AACATCTTGGCTGCATGAACCTAAATATATCAACTACTCTGCAAGTTAATTTGTCCTACGCTTAACTTTACAACCGG  
TGATGTTAGGAAATTCCTGTTATAAAAAACAATCACCTTTGAAGATTAGCAAAAAAAGCAATTTGAGATATCAAAAAGCAG  
ACTGGAACCAATTCGAGACATCTTGGGAGTTTTCAGTAAAAACAAGTTAATTTGAACAAAGGAAACGTTGCTTATTCGTAT  
GCTAGCTATTTGTAACCTTTCAAGATAAATGATGAACGCTAGTTAATTTGAAAAAATATTAATAACATAATCGAAGA  
AATACTGGGTTTTAAAATAGAAACAACAGAGAATAGTGAGTTAATTTACATTAACCTGCAACAAAATATATCGTTATGGGC  
AAAGTGAACCAATGATACATCTTCTAAACAGGCATCGGAGTGCACCATTTTCGGAATTCATCTCATATTCAGTCCGCTGC  
CAATGGGACGCTATTTCCCTCGATCGCGAAGGCCTCGTCTACGCCATGAAGGCAACAAAGGCTTTGCGGAACTTGCCG  
TGAAGGTGCGTACAAAACCTTCCCGGCAGACAATGACGGCATCTGCCCTGATGGATGACGAGTGGTTTGGAGCAGC  
TCACCTCTCGGCTCAAAGAGTTTGTCCGACCGCTTGGGGCAGAGACCTGCGAGAAAACCTCGAATTTTACCGCGGAA  
AGTCTCTGTTTATACCGCATCAAGCCGAAAAAAGGCGAATCTGCGCTGGAGACCATTCGTCGATTTTCCACAGATT  
CTGGAAGATCATATGAAGATGTATAAAAAGCGCCAACTACTGCGTATTCAGTCCGGTAAAGAGAAGCCTTCGAGT  
GCCTGGTGTATCTGCATCGCTATAACGACGCCACGCTGTGCGAAGTGCATACCAATAATGTTGGTGGCGCTGCTGGCACGT  
TATCAGGCCAATATCGATCGCTGAACGATCAACTGATGAGCTTCTGGCGTGAAGCCACAGCCCTGAAACGCGAAGC  
CGACAGCCTGATCAAAAAATTTAGCGAATGCGTAGCTATGACGACCGCCTGCGTCACTATGCTGATGAGAAATCAGTA  
TTGATCTCGACAGTGGCGTTAAGGTTAACTACGGCAAGTTTGGCGATCTGCTGGCAGATGTCAAAGCCATCACCGGCAAT  
GCCCCAGAGGCGATCTAA

>Cluster\_63673

ATGGCCAACAGTACCATTATCGAATAGTGCATTACGAACTGCAGGATATATATGGGATAATATCTGCAGTTTATTGG  
GGCTGATTTTAA

>Cluster\_27259

TTGAAATACCTTGTCTTCTTTTCGTACAACCTGAAAGCCTCGCGCTACATGTTTTCAGAGCATTGGCGTTAGTGCCTGGCT  
GTTGATTGCTTTTTTTCATCCGTTTTTTTACATCGTTAATGCGTTACATCAGCGAGAAATCGGAAATTCGTCAGGAATTTAATC  
TGAGTTCGGATCAGGCTCAGCGCTTTTATCAACGTAACCTCTGATGTGATGAAAGAGCTGAAGTACATCGCTGAAAATCCG  
TTATCGGCAGAAAACGGTGTGCTTTCCCGCGTGGACGAGAAACGAGCGGATGTGCTTGCCTGCGTTTGAACCGCTGTTTGC  
CGACTCCGATTTGTTCCGCAATGAGTAAACCTGGCAGGCTCTGAGTCAATGGCGTGGTTTATGCGCTGATGCGTGGC  
ATAATTTCTGCGGCTTACGATCTCAACCGGTTATTTTAACTCGGACGATAACTCTGCATGGCCAAATTTCCGCTG  
CGTGATATGCCAGTGAACGCGATACCGGTTGAAAGCTTTGATGAACGATCAATAAATATCGAAATGCACCAACAAGA  
CGATAGCGGCACTAACCTACTGGATCAGCGAAGGTCGCGCCTGGCGTGGGTTATTTTACCGCTTGCAGCCAGTTT  
ATCTGGCGAAACGTTGCAAGGCGCTTTTGGGTGTCGAGGACACCATCCGGATGGAGAATTTTTTCTTACCTGGTACGTTG  
CCGATGGGGTTACCATTTGATGAAAATGGTCAATCCCTGATTTCCGTTACCGGACAGAAAGCAAAATTAAGGGCGA  
TCCCTCGTGGATGACAGAACGCTCCTGGTTTGGCTATACGGAAGGTTTCCGGAGCTGGTGTGAAGAAAAATTCGCCAC  
CTCATCGCTAAGCATCGTATTCGGTCCGGTTGATAAGTGTGGAACGCATTCGATGTTGATGTTTTCATTCGGCGGAAAG  
TTGCTGAATGTGCTTGGCGGAGTGCATGTTTACTCTCGCGGATGTACGAGCGGCTATTTTTCATTCGGCGGAAAG  
CGACGCTTGCAGTGAAGAACATGAGCAGTTTAACTGCAAGATTGTGCGCTCCGCGCAGTGGGTATCTGCATTTTGC

GTACCGCTGATGGCGTCAATATTTTTAAGTAACGAACCTGGCGCATACCTATCTCAATATGCTTACGCATGAGGATCGCCAA  
CGGCTGACACAAATTATCTGTGGGCAGCAGGTCATTTTTGTTGATGTCCTGACCAGCAACAATACCAATCTGCAAAATCAG  
CTTCGTCATTCGCGCTATCGTAATGAAAACGTGGCCATTTGTGTGCTGGTGGATGTTTCTTCGCGCGTGAAGATGGAAG  
AGTCGTTGAGGAGATGGCACAAGCAGCGGAACAGGCGAGCCAGTCAAATCGATGTTTCTTCGACCCGTCAGTCATGAG  
CTGGTCACTCCCAACTGTTGAGTAACGCCATAAAAATTCACCGATACCGGCTGTATAGTTTTGCATGTTCCGCGTGTATG  
GGTGACGGCAATGAACAACCTCTTCCAGCCTGTTGTTGAAAATTTATCAGCGATATTTCTCGATTTCTCGAAAATTTGAATCAG  
AACAGTTGAGATCGAACCGCGTGTGTTTACCGCGTGAAGTATGAACACATCACCGCAACTATTTACCCTGGTGT  
GTACGCAAGCAGTTAGGCTTGTACTGCTTTATTTGAACCGGATGTGCCAGTGGCCTTAAATGGCGACCCGATGCGTTTACA  
GCAGGTCATCTCCAACTGTTGAGTAACGCCATAAAAATTCACCGATACCGGCTGTATAGTTTTGCATGTTCCGCGTGTATG  
GCGATTATCTCTATCCGTTGTCGCGATACCGGCGTGGGGATTCGCGGAAAGAAAGTGTGCGCTTGTGTTGATCCCTTC  
TTCCAGGTCGGAACGGGCTACAGCGAAACTTCCAGGGGACCGGCTCTGGGCTGGCGATTTGTGAAAAACTGATCAGCAT  
GATGGACGGCGATATCTCGTGGATTGAGAACCAGGAAATGGGCGAGCCAGTTTACCCTGGTGTATCCGTTGTACGGCGCTC  
AGTACCAGCAAAAAGCGCGTGAAGGTTGAGTGGTAAACCGCTGCTGGCTGGCGGTCCGCAATGCGCTCTGTCTCAG  
TTCTTGAAAACAGTTTGCAGCGCAGCGGCATCGTCTTACAACATACGAAGGCGAGAACCGACTCCCGAAGATGTGTT  
AATTAAGTACGAGGATGAGTAAAAAATGGCAGGGCAGAGCGTGTGACCTTCTGTGTCGCGCATATTTGGTATCCCG  
TGGAGAAAGCGACAGGGGATGGGTACACAGTGTGGCTGCCCGCATGAGTACCGGCATGTTGGCGGTATTTATTTG  
ATCGAGATGGAGCGCAGCATCTGCTAACGCTCTGCCGTTAACGGACAAAGCGGTGACGATAATGCGCTGTGATGAT  
TCTGGTGTGATGATCATCCGATTAACCGGCTTCTTGGCAGATCAGTTGGGATCGTTGGGCTATCAATGTAAAACCG  
CGAATGATGGCGTGTGCGCTTAAATGACTTAGCAAGATCATATTGATATCGTGTAGCGACGTCACATGCCAAAT  
ATGGATGGTTATCGTTGACGCAACGCATTCGTAGTTGGGACTGACGTTGCCGTAATCGGAGTAACGTGTAATGCGTT  
GGCTGAAGAGAGCAGCGGTGTCTGGAGTCCGGTATGGACAGTGCCTGTGCAAGCCGGTAAACGCTGGATGTGATAAAAC  
AGACGCTGATGTTATATGCCAGAGGGTACGAAAATCGCGGAAATCGTAG

>Cluster\_62467

GTGTTTCAGATTACCAACACCCGACTACTCAGCGGACTCAAATCAGCCCTGCGACCGGGATGCCCGGTTTAAAGTCTC  
TGCTTTCTGGCTGCTGATACTGGCGTGGATTTTTCTGCTGGTGTGGATCTGGTGGAAAGGCCGACGTGGACGCTGTATG  
AAGAACAGTGGCTCAAACCACTGGCGAACCGCTGGCTGGCAACGGCGGCTGGGGATTTATGCTTGTGTTGCTTACC  
GTCCGGGTGATGAAGCGCTGCAACAGCTTGAAAAAATGCAAAAGCAACAGCGGAGGAAGCCGTTGATCCGCTCAGCGT  
GGAACTGAACGCCCCAGCGCTTATCTTACCGCTGGCTGGCTGCGCTGCAACGCCATCTCGAACCCGCTTCCCTGT  
GGCAGTTGCCGTTGATATGTTGATCGCGCCGCGGCGAGTGGCAAAACGACACTGCTGCGCGAGGGGTTTCCGTCGCGAC  
ATTTATTTATGCCCCGAGGGCGCAGCGCGCGCAGAAACAGCCGTGACCTCACGCCCATGTCGGTAAACAGGCGGTGAT  
CTTTGATATCGACGGCACACTCTGCGCTCCCGCTGATGCGGATATCTGTCATCGCGCTGTGTTGGAACATGCCCTCGGCT  
GGCTGAAAGAAAAGCGCGCGCGCCAGCCGCTGAATGGGATTTATCTGACACTGATTTACCCTGCTGTCTTACCAGTAT  
AAACGCGCGCGGAGCATCTGTTACAGGCGCTGCGCAGCGCTTGCAGGATATACGCCAGCATCTTCACTGCCAGTTACC  
GGTTTACGTGGTACTTACCCTGGCTGATTTATTTGACAGGTTTTTCCCGCCTGTTTCACTCCCTGAACAGACAGGATCGCG  
ATGCGATTTCTGGGCTACGTTTACCCTGGCTGCCATGAAAATGATGACTGGCGAACAGAGTTGAATGCTTTCTGGCAG  
ACATGGTGGATCGAATGAACTGCGCTTGGCGGATGATGGTTCGCTCAGACTCACACCCGCGCTCTTATTCAGTTT  
TTCCCGCCAGATGACGGGAAGCCGTGAACCGCTGGTGTACTGCTTGGGGTCTGCTTGTGCGGAAAATATGAACGTGA  
TGCTGCGTGGTGTCTATCTCACCTTCTGCTTACGCGTGGACAGATGGATGATATATTTACCCAGTCTGCCCGCCGCG  
TACCGCTGGGCAATAACCCACTGGCGTCTGGCCCTGGTGGACACCCGCTTATTTACCCGACGCTGTTCCCGCA  
GGCATTTACTCGCAGAGCCTAATCTGGCAACAGAGAGCCGCGCTGGCTGATACGTTCCCGTCCGCGCTGACGCTTTTCT  
CTGCCACAGGCGGCTGGAGCACTGCTGCTCATCACCGGCTGGCATCTATTTACAACGGTAATATCAGTCTGGCATC  
ACCGTGTCTAAGCAGGCCAAAGCCTTTATGGACGTGCCGCTCCGCAAGGGGAAGATGACTTTGGCAACTGCAACTGCC  
GCTCTGAAACCCGATACCGGATGCCACACTGGCTTGAACGACTGGGGCGACCGAGCCGCTGCGCGATGAGTACTGACT  
ACCAGGGACGACGATATCGGGCTTATGTTGAACAGACTTATCTGCAACTGCTGGAGCAACGTTACCTGCCCTCGCTGTT  
AACGGGCTGGTCAAAGCGTGAACGCGCGCGCGGAGAGTGAAGAAAACCTCGCGGTGCTGCGCGTGTGCGAATGCT  
GGAGGACAAAAGCGGACGTAACAATCAGGTGGTGAAGCAGTATATGGCAAAACGCTGGAGCGAAAAGTTCCACGGTCCAG  
CGCATATCCAGGCACAACCTGATGTCCCATCTTGTACTACGCGCTGGCTCATACTGACTGGCACGAGAGCGTCAAGCGGGC  
GACGGTACGCCATCAGCCGCTGGAGCCATATGACAAGCCGTTGGTATCAGCACAGAAAAGAACTGAGCAACTGCTGTT  
CTACCAGCGGGTTTACCAGAGCCGAAAACGCGGGCGCTGGGCGTTCTTCTGCGGACCTCAATCTGCGTACAGGATG  
GGCAACCTTTGACAGGTGTTTACATCTGCCGATGACAACAACCTGGTTGTTCCACAGTTTCTTACCCTTACGGCTC  
CAAAGCTATTTTGTAAAACAGCGCGATGAACTGTTGTTGACTGACCGGATGAACTCACCCGCTGGGTAATTAACCTGCGCAG  
CGTGAATAACAGTACGCGCCAGCCGCGGAAAATCCAGCGCCAGTTGACCGAGCAGTATATCAGCGACTACCCGCCACCT  
GGCGGGCCGGGATGGCAATCTGAAATATCCGCAATTTTGTGCTCATCGGCAACTGACCGGGCGCTGGAGCAGGTTATC  
AGCGGGCAGCAGCTTTCAGCGGGCGCTGACCGTGTGCTGCTGCAACACACAGCCAGCGCTCTTTCTGAAAACCTCT  
TGCCAAAAGAACGGGAGGAAAGCCCTGGCAGAGCGGATTAACAGTTACTCACCCGCTGGGCAATGAAATTCGCCGAAA  
ACAGTACCTTGGCAGTACAGAAAGACAAAAGAACGACGATGCAGGCGGTGATCAGCAACTCACCGAGTTGCACCGCTAC  
CTGCTGGCAATCCAGAACCGCTGTACAGGGAAATCGGCGTGAAGCCGTCAGTTACGGCTTATCAGAACAGCAG  
CGATCCGATTTTCCGACCCGAGATGGCAAAAACGCTGCTGCTCCGCTCAACCGCTGGGTTGGGAGACTGACTGACC  
AGGCTGGCATGTTGGTGTGATGGTGGAGGCTGTTTCAATTTATGGAAGTGGACTGGCGCGACAGCGTGGTGAACCCGTTAAC  
GAGCAACTGGCAATAACTATCCGTTTAACTCCGCTTCTGACAGGATGCTTCACTGGATGCCCTTCAAGCGTCTTTTAA  
ACCGGATGGCATACTGGATACCTTCTACAGCAGAACTGAAGCTGTTTATCGATAATGACCTGAGTCTGGAGGATGGCG  
ATAACAACGTCATTTTCGCGAAGATATTTTGGCAACTGGAACCTGGCAGAAAATCCGTGACATCTTTCTGACAAA  
CAGAACGGTCTGGGAACATCTTTGCGGTGAAAACGGTATCGCTTTACGGCAATAAACCGCGCAGTGTACTGAACCTTGA  
CGGTCAGTTAGTCTGATTACAGCCAGGGCGTAACTATACCGCCATCTGGTCTGGCCTAACAACTGCGCGAAGGCAACG  
AAAGTAAGCTGACGCTCATCCGACAGCGGCAACGCGCGCGCAGTATCAGCTTACGCGGGCGTGGGCGCAGTTCCGC  
CTGTTCCGGGCGGCAACTGACCGGAGTACAGGATGGCAACTTTACCCTGCGCTTTAGCGTGGAGCAGGTTGGCGGATGAC  
CTACCCTGTGCATACCGACAGGAAAGATAACCCGTTACAGCGTGGGTTGTTACGCGAGTTGGTCTGTGACACACTGT  
ACTGA

>Cluster\_22062

ATGGCGATAGTATTTCTTCTCAAGCTGAAATGATGCGCTGTGAAATGGTGACAGCGAAGTCAAAGACGAACCGACAGC  
CAGTGTAGCGGCGAAAGTGACATTCGTCGCTACGATCCGAATACCAACGACGGGTTGTGCGCGAACGTTTGCAGGCGC  
TGGAAATCATTAATGAGCGCTTTGCCCGCATTTTCTGATGGGCTGTTCAACCTGCTGCGCGTAGCCGGACATTTACC  
GTCGGGCGCATCCGATTCAGCCGTACCATGAAATTTGCCCGCAACTTGGCGGTGCCGCAACCTGAACCTTATCCACCT  
TAAACCGCTGCGCGGACAGGGCTGGTGGTGTCTGCGCGAGCCTGGTGTTTATCGCGGTGGATAACCTGTTTGGCGGGC  
ATGGACGCTTCCGACAAAGTGAAGGTGCGAGTCTTACTCATACCGAACAGCGCTCATCAACCGCATGTTAAAGCTG  
CGCTTGAAGGCTATAGCGACGCTGGAAGCGATTAATCCGCTGGAAGTGGAGTACGTTGCGTTCGGAATGAGGATGAA  
ATTTACCAATATACCACCTGCGCAAGCATCTGGTGTAAACAGCGCTTCCATGTGAGATTTGGGAGATTTGGGCGGCGG  
AATTTAATATCTGCTGCCATTCAGCATGAGCGGCTACGGAAATGTTGGTAAACCCGCGCTGGAAAAACCTGCGGT  
AATGAAGATCAGAACTGGCGGATAACCTGGTGGCGCAGTGCAGATTCACAGCTGGAACTGGTGGCAACTTTGCCGA

TATCTCGCTACGCCGTGTCGCAGATTTTAAACTGAAACCCGGCGACGCTCTGCCGATAGAAAAACCCGATCGCATCATCG  
CCCATGTTGACGGCGTCCCGGTGCTGACAGTCACTGACGGCACACTCAACGGTCAATATGCGTTACGGATAGAACATTTG  
ATTAACCCGATTTTAAATCTCTGAACGAGGAACGCCAAATGA  
>Cluster\_23331  
ATGACTGATAAAACCATTTGGCTTTTCGCTACTCGATCTGGCCCCATCCCCGAAGTTCTTACGACGGGAAGCGTTCTC  
CCACTCTCTCGACCTCGCCCGTCTGGCTGAAAAGCGGGCTATCATCGCTACTGGCTGGCAGAACACCACAATATGACCG  
GCATTGCCAGTGCFCGACGTCGGTGTAAATGGCTATCTGGCGGCAATACCACCACGCTGCATCTGGGGTCTGGCGGC  
GTGATGTTGCCTAACACTACCGTGGTGATCGCCGAACAATTCGGCAGCTCAATACGCTCTATCCGGGGCAATCGA  
TTTGGGGCTGGGGCGCGCCGGTAGCGATCAGCGAACCATGATGGCGCTGCGTCGTATATGAGCGCGATATTGATA  
ATTTCCCGCGATGTCGCGGAACGGTGGACTGGTTTGGCGCCGATCCCAATCCGATGTGCGCCAGTACCAGGC  
TATGGCGAGAAAATCCCGTGTGGTGTAGGCTCCAGCTTTACAGCGCGCAACTGGCGGCGAGCTTGGTCTGCCGTT  
TGCCTTTGCCCTCACACTCGCGCGGATATGTTGTTCCAGGCGCTGCATCTTTATCGCAGCAACTTCAAACCTCGGCAC  
GTTGGAGAACCTATGCGATGGTGTGATCAATATTTATCGCGCGACAGCAACCGCGATGCTGAATCTTTTACC  
TCAATGCAGCAAGCTTTGTGAAGTGCGCCGGCGGCAACCCGGCAACTGCCGCCACCGATTCAAAAATGAGTATGAT  
CTGGTCCGCGTCCGAACGATATGTTGTGTCAGCAGCGCTGAGTATGTCGCTGGTGGCGGATAAAGCGAAAGTGGT  
GCTTGCAGTCGATCTGCGCGAACCGACGCGGATGAGATTATGGTTAACGGGCGAGATTTTCGACCACCAGGCACGCC  
CATTCGTTTGAGCTGGCGATGGATGTGAAGGAAGAGTTTGGGGTAG  
>Cluster\_129  
ATGCTTTTATGCTATAGAAAACCTCTGTGATGAAAACAGGGGTGGCTCTTTTTCGGAAGATGGAACCTATTTCTCACCT  
CCTCACTCTCAAGTAGCTATTCATTCTCTCTTTTGGCGGGATGTACCAGAAATGCCCAAGAAAACAACCTTGGGTGC  
TTTATCTCTTAAAGAACTTTTAAACAGAAATAATCGAAATTTTCAACTCAAAGCTGGCAGCTACTTTTGGG  
CCAGATTGATAGTTCTCTTTTGGTAGGTGTCTTTGGCTAAAGCGATTAGTTTGGCCTTAAATACCTCTTATCGC  
GGTAGACCATCTCCAGGCCACCTTTTACAGTATTTTAAAGAAAGAAATAGAGTTTCTTTTATAGATTACTTGTGT  
CTGGAGGACATACAGCCCTTTTAAAGAACTTTTAAAGAACTTTTAAAGAACTTTTAAAGAACTTTTAAAGAACT  
GGAGAGCTTTTAAAGTAACTTACCAAGACCTTTTAAAGAACTTTTAAAGAACTTTTAAAGAACTTTTAAAGAACT  
AGGAGATCTTAAAGCTATAAATTTACCAAGACCTTTTAAAGAACTTTTAAAGAACTTTTAAAGAACTTTTAAAGAA  
CAGCTGTGTTAAACTACATAAAAAATCATTTTACAGGGTGAAGACCTTTTGGCGGGTGGTAAAGAGGCTGTATGT  
GTGTTAGTTTAAAGAACTTTTAAAGAACTTTTAAAGAACTTTTAAAGAACTTTTAAAGAACTTTTAAAGAACT  
CAAAAAGTTAGAGCAAGGTTTAAAGAACTTTTAAAGAACTTTTAAAGAACTTTTAAAGAACTTTTAAAGAACT  
CAGACAACGCGCATGGTAGGTTGCTAGGTTATAAACAATGCAAGAAAAAATAATGCAGACCTAAATACAGAAGCT  
TATGCTAGGGCTTTTAAAAAACCTTTCTATTCCTAA  
>Cluster\_53052  
ATGCCGGGAGCACCTCATTTATGCCCCGACTGGGGAACGTCATCGCTTCGGGCATGGCGTTTGGCGAATCACCAA  
TCCACAAGAAAAACGTGAATCCCTGGGGGATCATGAATACCTCCAGGAGCAACACGTGAGGACGCTTCCACG  
ATACGTTTACGTGTCTGCGCGACTGGCTGGCACAACCCCATGCCGGTACTGGCTGGCGCATGCTCGGCAGTGC  
CAAGGGTGGCAATCAGCAGCTTATTAACCTTGCCTGCACTCTCGAGGGTCTGGCGAAGCAGTTGACGCTTATCCA  
CCAGCAGCAGACAATGCTGCACATCATTTCTGGCGTGAATAAAGAGGTGAAATGCCGAAGTATGCGTGGCGAAGAGA  
CACAAATCTTCGGTGTATCTCGATGGAACCGGCTTCAAAAACCGCATCCATCAGGGTATGCGAGTGTGATAGGCTTA  
CCCGCACACATCGGAAATGGGAGTAGTTGAAAACAACACCATACCAGTTTCCGAACCTTATGACGGGGAGTTAT  
TGATGTTTTATCCCGCATTCGATTTCTCGGTGCCACCATGCATCTGGAGATGAACCGCACTGGGATGCCCTCACCCAG  
GGCTGACAGCAGACAAGAGCATCATCAGACCGGATTTATTCAGCAGCTGTTTTCGACCGGTTGCGCCTGCTGACCAGT  
AATCTTACGTCGTCCTCGCAGGGGATTTACCTTCCGGATTAATGATAGGCCATGAATATATGTTGGTTCGGCATCCAGT  
GCTACGTGATTTACCCGACACAACACCGATCGCTTAACTCGTACGCAAAATCGAACAGCCGCTATTCAAGCAGTTCA  
GCCAGTTTTTCCGACAGACAGATACCGCATTTCCCAATGCCACTGAACAGGGATTATGGCGAATCGCCACGCTGCC  
GGTTACTGTCCACAACGCCAGGAATGTACCATGCCATTTAA  
>Cluster\_21547  
ATGACGTCAGCAGTGGAGTTTGAACAACGCTCACGGTTGTACGGTGCAGTGGCGCAGTAGATGGCGTCAATGCGAT  
AAAAGATGGTGAGTTCTTCTATGCTGGGGCCGTCGGCTCCGGCAAAAACACTTGCCTGCGCCTGATTGCTGGATTG  
AACAGCTTCCCGCGGGGCTATCTCTATTTTGGTAGCCCGCAGCAATCTGCCACCGTGGGAGCGGACGTAATACT  
GTTTCCAGGACTACGCGCTATTTCCGCATATGTCGATTTTGAACAACGTCAGCTACGGGCTGATGGTCAAAGCGTGAA  
TAAAAGCAGCGCGCAATGGCGCAAGAGCGCCTTGAGAAAGTGGCGTTGGGGTTTGTACAGCAAGCTAAACCGTCA  
AATTTCTGGTGGTACGCGCAGCGAGTCCGCAATCGCCAGAGCACTGGTGAACGAACCGCGTGTGTTGCTGGATGAA  
CCGCTCGCGCGCTGGATCTCAAATGCGAGAGCAATGCAGCTTGGAGTGAAAAAGCTGCAACAGTCTCTCGGTATCAC  
TTTTATCTTGGTTACCCAGCATCAGGGCGAAGCGTTATCGATGTCGATCGGGTGGCGGTTTTCAAAATGGACGATTTG  
AACAGTCCGATTTCCCGCGCATCTCTATATGCGCCCGCGCACCGCTTGTGCGGGATTTCGTTGGGATCGTTGGGAT  
TTTGTAGGACTGATGGCAGAGAACTTTTGGCATGACGGGAAGCTTCGCACTACGACCGGAACATATCCGCTCAACAC  
CCCTGGCGAAATGAGGCTAATGGCAGCATCCAGCGGTGCGATATCAGGGCGCGGCAACTCGTTTTGAACTGACACTGA  
CGCGCGTGAAAAACGCTGGTGGTGCAGGCAATATGACAGCGGAAGAACTGCTGCCACGCTACGCGCCGACAACAG  
GTGGTGGTTTCTGTCGCTGATGATGATGATGATGATGATGATGATGATGATGATGATGATGATGATGATGATGATGAT  
>Cluster\_5482  
ATGAACGGTAAAAAATTTATATCTCGGACGTCACATTCGCTGACGGTATGCACGCCATTCGTATCAGTATTCGCTGGA  
AAACGTTCCGAGATTGCCAAAGCAGTGGCAGATGCCCGCTGGATTGGAATGAGTGCCACGCGACGGTTGCAAG  
GTTCCAGCTTTAACTATGGTTTCGGCGCACATAGCGACCTTGAATGGATTGAAGCGCGGGGATGTGGTGAAGCAGCC  
AAAATCGCGACGTTGTTGCTGCCAGGAATCGGCATATTCACGATCTGAAAAATGCCCTGGCAGGCTGGCGCGGGTGT  
TCGTTGGCAACGCACTGTACCGAAGCTGATGTTTCCGCCAGCATATTCAGTATGCCCGGAGCTCGGAATGGACACCG  
TTGTTTTCTGATGATGAGCCATATGACACCGCGGAAATCTCGCAAGCAGGCAAAAGCTGATGGAAGGCTACGGTGGC  
ACCTGATTTATGTTGGTGGATTCGCGGCTGGCATGAACATGAGCGATATCCGTGACCGTTTCCGCGCCCTGAAAGCAGA  
GCTGAAACAGAAACGAAACTGGCATGCAGCTCACCATACCTGAGTCTTGGCGTGGCGAACTCTATCGCGCGCGGTGG  
AAGAGGGCTGCGACCGAATCGACGCCACCTCGCGGAAATGGCGCGGGCAGGTAACGACCGCTGGAAGTGTTTAT  
CCCGCGCGGATAAAGCTGGGCTGGCAGTGGGACGATCTCTATGCGTTAATGGATGCGCCGACGACCTAGGTGCGTCC  
GTTGACGATCGACCGGTACGAGTGCATCGGAAACGCTGGCGTGGGATACGCTGGTGTACTCGAGCTTCTTGGCTC  
ACTGTGAACGGCGCGCGCGCTTATGGCTAAGTGGCGTGGATATTCGTTGAGCTGGGCAACCGCGGATGGTGGC  
GCCAGGAGGATGATCGTTGACGTTGGCGTGGATCTGCGCAACAACAATAA  
>Cluster\_56085  
ATGCATCTAATAATGCTCGATACATGTGTTGGCTTGATATTTCTCTAAAAAGCTGAATTGCCAATGCTTACTGCCAT  
CGAGCATCTGGTAGAGGATGGGAGTATAAAAATCACTGCCCCGATCTGATACGTTGCCAGTACGAACGAAATAAGAA  
GGTGTATGAGCTACGCAAAACGACTCTCAGTGAATTTCCAGTAAATTAAGGGGTAGTTGAGCTTTTGGCGGTGAA  
GGTAAAGTACTGCGCTCAGGACCTTAGATGATGTTAATCAGATGGCTATTTCTTCCGAAGTAAATCAAAAATACAGT  
AAATCGTGTACCAAAATTTTGGATGCGCCACGAAGTTATAATCTCTGATGCGCAAAAATAGAGCGGCAGAGCGGG

CTATCGTAAAGAAGCACCCTTCCATAAGCAGAAGAATAGTGTGGCTGATGCAATGTTAGCAGAACTTTCCAAGAGTTT  
CGGCTGTCCGATATAAGTGTAGTACGAAACCTTTAGATTGTACTACATGTGACGGATTTTCCGGCAAAGACCACAG  
GCAGCCACACGACGATTTTCGAGATATTTTGTAGGCAACAGCTCTTTATCTTAAACGCCACGAGCGTGCATCGAGG  
ATCTGTCTGCATTTGAAGAAATTTCACTATGAGAATAGCTTTGGCTGGGAGGACGAAACTCGTGGGCTTCAGGAAATCATG  
TCGGGATGGACGAGCTTTCGATAAAGTTTGGTACAAACCGCCATATGAACATGATGTATCACCTAGATAATGGTGATAT  
AGAGGTAATCCCCGCTGGCACAACACGCCAGGCAATGATGTGATTCAGAAAGATACCCTCGACCAAGCAAAAATGCGAG  
CTCAACGAGTCAAGGATAAATATGAAGTACTGGGCCCTTGGAGCGACTTGAATGGGGGTGCTCAATGGGAAGCTTTCT  
GCCCTGCGATGGGTCTTGGGTGATGAGTGGGACATGCTCGATACGTAA

>Cluster\_41507

ATGAATACTGAAGCCACGCACGACCAAAATGAAGCACTTACTACGGCGCTCGCTGCGTAATGCTCGCGAACAACTAGG  
ACTTAGTCAACAGGCCGTTGCGGAGCGACTTTGCTGAAAGTTTCCACGGTACGCGACATGAAGAAGATAAGGCACCCG  
CCGATCTTGTCTCAACATTCCTGCGGGATATATCCGCTCTTATGCGCGTCTGGTACATATCCAGAAAGAAGAACTGCTG  
CCAGGGCTGGAAAAGCAGGCTCCACTACGGGTCGAAAAGTTGCGCCGATGACAGATTTTCCCTCGGTAACGCCGCAA  
AAAACGTGACGGCTGGCTGATGACCTTCACCTGGCTGGTGTGTTTGTGGTTATTGGCTGAGCGGTGCTGGTGGTGGC  
AAGACCACAAGCTCAGCAGGAAGAGATCACCCTATGCGCCGATCAATCTTCTGCGGAACTGAATAAATCAAGGCCAG  
AGTGTACCCTTAGATACGTGCACAACACAGATCAGGCTATGGCGACCCGACATCACCTGTGGATACCACCGCAAC  
CAACCGCAAAACACCTGCGCTGACTGCGCCAGCACCAGCTGTTGATCCGCAACAGAATGCGGTGTTCCACCTTCGCGAG  
CAATGTTGATACCGCTGCGACTCCGGCACCAGCGCAACAACAACACAGATGGCGCTGCGCCGTTGCCAACCGATCAG  
GCTGGCGTACACCGCGCGGTGACCCGAATGCGCTGGTGTGAACTTTACTGCGGATGCTGGCTGGAAAGTCAACCGA  
TGCTACCGGTAATAAATGTTTAGCGGTATGCGCGTAAAGACGGTAAATGAACTTAAACGGCCAGGACCGTACAAAC  
TGAAAATTTGGTGGCGCAGCCGACGTACAGTCCAGTATCAAGGAAACCTGTGATCTGAGTCTTTTATCAGAACTAAC  
CAGTTGCGGCTGACCTCAATGCCGAACAATACCAGCGCAGTAA

>Cluster\_2243

ATGAGCCGTTACGCCCCACACCGGAAGTTATGGCTATTTGGTCAAATTAATATTTCCGGCAATGTTACACCTGCGAAGCTG  
GTGGAAATATATTCGACTACCCAGTGGGCGTCCGGATGCGACGGCTATCGCTCTGCTTTCAGAGATCGTTTACTGGTACC  
GCCCGACAGAGGTGAGGATGAGCACACCGGAGCGTGTGGGATATCGCAAGCGTTTTCAGGCGCACAACTGCAAAAGA  
AGTACCAGGCGTTTGTGAGCAGTTTGGTTTCCGGAAAAGGGAAACCGCAGATGCGCTGAAGCGTCTGCGCGATGACAG  
GTTTATTACTCTGGATTTACGCACGGTGGAAATGCTCGATGGGTTGAAATGACGCAATATTTTGTGTTGTCGGGATCAACC  
CACAGGCAATGCGGCCATCACACACCTTCTTCTGTTTCCGCAAGTAACAGCAATAATGCAATCAGCGATACAGCT  
ATTACGTTAAAACGGAACACCCCGGACGCTATACGGAACAGGGGATACGCCGAATGTTGATACAAAATACAGAGATTAC  
TACAGAGATTACAACGGAGACTAAAACACTATGATGATCCGCTGACGCGTCTGCGCCAGCGGCTTCTGCCGACAGG  
AATATTCCCGGAATTTGAACAGGCTGGCAGGAATATCCCAAAACGCTGCTGGTGGCAATTCAGGCTGCTTCAAA  
GCCTGGAAGCCGTTATCAGGGAGGGAATAAAACCGGAGACCATGCTTGTGAGCGTGAAGCGGTATGCCGCTGGGTACG  
TGCTACAGGAAATATCGGCACACAGTTCGTGAAGCAGGCTGCGACGTTCTTTGGACCCGATCGTCACTTCGAAGATTACT  
GGCAACAGCCAGCCGCTCACGGAGTGGGCGACGCGACAGGTCGATGCTCGCTGGCTGGGAGCCATGCTGACAAA  
TTCCGTAATCCAGTAACAATTTGACATTTCTGA

>Cluster\_987

TTGTCCGGTGGACTTCTTTGAAAACGACTCAATCTTCCCTGGATTGCAAACTACTGACTGGGCGAAGATTGGTTTTAA  
AAATGATGCCGACAGCAGACTGATTCATACATGTTGGTTTGAACAGGCGACAACGGCAATGAATATTTCAAATGGAGAA  
GCAAAACAAGACACACAACAAAGACCTGATGAATTTAAATGGGATGCTTTGTCTGTTCTTGTAAAGCCCTTTTCAGC  
AGTGAAGTAAAAATATCGACAGTCAATGCACTGAGGATATTAATTAATCACTTTTGGTGGCATTTTTCGCGGTTCTGAAGA  
ATGCTGCATATCATCCCTACACGAGAGAACGAGGGAGAAAATGGTATATAGGGCCACTACGCCCTTTACGCTTAATC  
TCAGAACTGGTCGATAAAGCATGGGCGATGGTCTGGATGTTACAGGAGATATAACAACTAACGCTGGGTTTATGCAAA  
AGGTTTGTATTAACAGCAGTAATGGTATGTTGGATTGATGCGGATAACAACGCTATCTTTGGGAAAAATATAGTTAA  
CACTGATAGCGCCAGGCATGCTACGTCAGGACCATGCTGATCGCAATTTATGATTGGTGGTCTGGGTAATAGCAAT  
TTGGCATCTACATGATTAATAATCAAGGACAGCCAATGGCACCAGTGGTCAAGCGTACATGGATAATAACGGAAACTGG  
CTTTGGCGTGGCAGGTTTATCCCGCAACTATGGCAATTTTGGATTCCAGATATGTGAAAGATGTTGCTGCTGCTGCTCA  
GCAATATTTATGGAGTGAACAACCTGGCAACATGGAATTTCCAGTGCCTGAGGTCATGATTTGTCTGGTATTAATGTTT  
AGGATACAGGTTCAACTCTGCCGATAATATAGCGGGCTTTATACAGACCCGTTCAAAGTATATAAATGGCACCTGG  
TATAATGTAGCGAGCTTTAA

>Cluster\_22176

ATGAGAGTAAAAATAATAATGTTTCTGGGCAAAACATGACCCAGAACAGATTGATTGATTGATTTACTAGTGCAGTT  
GTGGCGTGGCAAGATGACAAATATCATTCCCGTCAATGTTGGCTATTACCTGGCTATTGGATATTTGACAGTAGCGAAGG  
AGAAATGGACGCTCAACAGCAATTTACTCAGCCGACGTTGGGCAAAATGCTGGCTATAACAATGCCATGAATGTTATC  
TATGGTCAGGCTGCGAAGTATTCGGATTTGCAAGGACGTTAATTTGGTGGCTTCAAGTCTGCTTCTGCTGATTTAGC  
AGAACCGTGGATAATCAGGAAGAACGAAAAACTTACCATCGAACCTTCTGTTAAGAACCAGCAATTACCATTGACTG  
TTTTCTTATGTTGGCAAACTGACAGAGGGCGCAAAATGAAGTTGGCCAAATACATTCAGCAAGTTGACGATAAAGTGAAT  
CAAGAGTTAGAAAAGGATCTCAAGGCAACATTTGCTCTGGGACGAAAAACTTGCAGGATCTTTGAGAACTCAGGAAGT  
GGTCGCGCAGGAACAGAAAGATCTGCTATCCGTCAGATTCAGGAAGCGTTGCGATGCGAATCAGGCGCAGGTGACAA  
AACCGCAGATTCAACAGACTGGCGAAGATATCACACAAGATACGTTGTTCCCTTTTGGGAGCGAAGCTCTGGAGTCGATG  
ATTAAGCATGAGGCGACTCGTCCGTTAGTGTTCACCAAACTACTATCAGACAGCTCAAACCTGCTGGATATCGAAAG  
CTTAAAAGTTGATGATCTAGATATTCATGCTTACCCTTATGTTGATGAAACCGGCTTACCCTATTCGCTCGCGATGCTCGA  
AAAAGGCAATCACCTGGTCTGGCAGTCTTCTGGGCGCATGGTTGGCGGGGATGTTGTTGGGCGTAAACGCTCTG  
CGTAATTAACAACGGAAGTAA

>Cluster\_57760

ATGAAAATAAAAGTATCCGCTGGCATTATCGGTGCTGTCTTATGTTATCCGCAAGCCAGTCCGCGGAGTGACATTA  
ACTGAGTCATAATCAGGATAAGTCTCATCTGTTTATAAAGCGATGGAGTTCTTTGCGAAAAGAGCAAAAGAGTACTCTA  
ACGGTGATATTAATTCGATTTATCCAAATGGAACATTTGGTACTCAACGAGAAACAAATGGAGCTGATTCGTTCTGCG  
GCTATTTCCCTGGTAAAAACCAATGCGGCGAATGGAAGCAATTTGAAAATTTCTATAAATATTTAGCTGCTTATTT  
GTTCCGCGATCGTATCATTTATCAGGTCATGAGGCGATATCGGAGAAAAAATCCTCGACTCAACGCAACCAAG  
GTTATTTCCGGCTGACTTTTATGATGGAGGCGCCGAGTTTCTATGGCAATAAACCAGTACTGAAACCAGACGATCTG  
AAAGGCATGAAAGTCCGTTCTCAGCCAAGCCCTGGCGAGTTGAAATGATCAAGTCAATGGGCGGTAACCCGACGCCACT  
GGATTACGGCGAGTTGTATACAGCCTTACAGCAGGTTGGTGCATATGGCAGAAAACAGCGTATGGCGCTGACTACCA  
TGGCTCACGGTGAAGTGGCAAAATCCTTTCAGCCTTACGCAACACTATGGTTCCCGATGTTGGTTCTGATGAGCAATGCT  
GCGTTTGATAAATTTAGCCCGAAAATCAGGCAATTTATTTAAAAGCAGCTAAAGAATCAATGAGCTACATGAAAGACTT  
GTGGAGCGAGGAAGAAAACAAGAAATTTGCAAACTGGATAAATTTGGGCGTGAAGATCTACCAGGTAGATAAAGCTCCGT  
TTATCGAGAAAGTACAGCAATGTACGCAAACTTCGCTAAGGCAACCCAGCCCTGCCCAATGCTGGCTGATATTCAG  
GCAGCTAAGTAA

>Cluster\_610



ATGGAATATATGACAGTGAGGACATAAAGGTATACATGTTAACTAAAAGAATATATTTTCTGTAATGCTGATAGTTTC  
ACCAAGCGTGGTGGCCAGCGAGAAGCGCATGAATTTGATGACAGCATATACGGTGGTAAACCTGCTCCCGATGTTATAA  
ATACACTGCATAAAAATGGCTGAATCGGGAGATATCGACGCGCAGAGCCGTGTTAGGCTGGGAATATATCAGCCCTGTTAT  
GATACAAAACCTGATGTTTCAGGAAGCGATTAATGTTTCGAGTTAGCGGCTAAACAAGGTGACAGAGAAGCTCCGTTAGC  
GCTGGGGGTATCTACTACGACGGTGGAGCAGGTGCGGGTGGATTATGCCAAAGCGTATGCACATTTAATCAGGCCGCGC  
AGCACGGTGTGAATTTAGCATGGTCCAGGTTGGGCATTATGTACGCCAATGGTTCAGTATGTTGAGGTAGATTGTAAGAAA  
GCGAAGGAATATCTTGATAAAGGTGTCCACATTTATGGTGGCCCGGAAGACTTTCTGGCTACTGTGCGAAAAGACATGAT  
TGACAGAAAAACGGTTGACGATACGTTACCCGTTGATTACGGTTACCCGTTCTGGGATGCGAGATAATTTTTTAGATAAAG  
GTTTTTCCGTGATCGGATAGCCTCTTCGCCACCACCAATAAATAGGCCAAGTGCCAACTTTCGCGTGCATTGACGATT  
CGTCGCCCATCCGGTAAGGAGATTAACCAACGGTTGGCTTCGCGCTTTCGGTTTAAACCGGCTGAATATTAGCTTTAC  
TGATTACCTATTTGGTTCATTTACAGTAAATTCGTCTCTTATTCTTTATAAACCGGAATTTGAGCGAAAATCTTGTGCAA  
CTGTAAGGACCACAATCGTTGCCCAACGGCAACCATTAAACGGCAAGGATGTGGAGTTGCTGAAAACGGGGGCAATTGAA  
CAAAAGTGTGTA

>Cluster\_29433

ATGGCGTTTGCATCATGAGGGCGAAGAAGCTCAACAGCATGGGCACGGTGGCGGCTGCGTTGACGACTGCTACCGCGA  
CCGCGAGACGCCGAACCGCTCAGGAGCGCACACCGGACAACGATCACCCTGGCGGCCAGATCGACCGATGAGCGCATGG  
GCAAGCTCAGGAGCGGTTGTCGGGAGAAGCGCGCCAGGATCGCGTGCCTGGCGGCTGCAATACGTGATGAGCCCTCGCCG  
GAGTGGTGGCAGACCGAAGCGCCGACCAGCAGCGGAGTTCTTCAAGCGATCGACCGAGTGGCTGGCCGACAAGTACGG  
CGCTGAGAACGTGGTACGGCCACGATCCACCGGGATGAGCTGACCCCGCACCTGTGCGGCTTCTGTTGTCCTCGGACGG  
CTGACGGGGCCCTGAGTGCAGGAGTTTATTGGCAACCGGACGAAGATGAGCCAGGACCAGACCAGTACGCCGACCGG  
GTGGCCGATCTGGGGCTTGAACGGGGCATCGAGGGCAGAGGGCCACACACCGAGTAAAACCCACTATGGGGCGAT  
CCAGCAGGACGGCCGAGACGTGCCACACTGACGCTGACGAGTGAACCCCAAGGTTCAAGGGGGTGTACTGGCCG  
AGAAGGTGTTCCGAGCCGTGGAGACGGTGAAGGGGTGGCGCAAAGGTTGAACGCCAAAATAATGGGGTCTGTGACAGCCG  
ATGGCCGAGAAGCGCTGTAAGCGCCAGAAGGAGGCAAGGAGCTAAGGGAACCCCTAGCCGACGACGAAA  
ACGCTTACAGGCCCTCAGGAGCGTTTAAAGGGCTATCCAAGGATCAGGTAGCGGACTGATCCGGCAGGCGGTGAAAT  
TGGCGCAGGAGAAGCAGGAGGAGCAGGAGCGGCCAGCAGATCAAGAGCGATTCAAGGCCAAGCGGGAACGGGAG  
CGCAGCGACCGCAGCGGGCCGTTAA

>Cluster\_55487

ATGCTTCTGTTTCTACATCGGGGTCTGGCGCACCTAAGTCGTCAATTCAGCTTCGGGCGTATCTGGGATCAGTACGGCAT  
GCTGGTGGTGTGTTGCGGTGCTCTTTATCGCCTGTGCCATTTTTGTCCAAATTTTGCCACCTTCAATTAATATGAAAGGT  
TGGGCTGGCAATTTCCATGTGCGGGATGGTGGCTTGTGGCATGTTGTTCTGCTCGCTTCCGGTACCTTTGACCTTTCT  
GTCCCTCCGTAATTCCTGTGCGGGTGTCAACCGCGGTTGTTAATTAACCTGACTGAAAGCCTGTGGATTTGGCGTGC  
AGCGGGTGTGTTGCTGGGCTTCTCTGTGGCTGGTCAATGGCTTTGTTATCGCCAACTGAAAATAAATGCTCTGATCA  
CGACATTTGCAACGATGCAGATTGTTGAGGTCGTGGCTACATCATTTAGACGGTAAAGCGGTCGGTATCGAAGATGAA  
AGCTTCTTTGCTTGGTTACGCCCACTGGTTCGGTCTGCCCTGCGCAATCTGGCTCACCGTCCGCTGCTGATTATCT  
TGGTTTGTCTGTAATAAACCACCTTTTGGTCTGAACCCCTGGCGATTGGCGGGAACGAAGAGGCGCGCTGGCTGGCG  
GTGTACCGGTTGTTGCGACCAAAATTTATCTTTGTTCTCTCAGGCCGGTATCAGCGATAGCCGGAATTTATCTGGCT  
TCACGTATGACAGTGGGAGCCAAATGACGTGATTTGTTATGAGCTGATTTGTTATCTCCGCTGCGTTTTAGGTGGCT  
TTCCTGAAAGGTGGCATCGAAAATCTCATATGTGGTGGCGGGTATCTTAATTTAGGCACCGTGGAAAACGCCATGA  
ACCTGCTTAATAATTTCTCTTTCCGCGACTGCTGGTTCGCGGCTTAATCTGCTGGCAGCGGTGATCTTCGACCGTTAC  
AAGCAAAAAGCGAACGCACTGTCTGA

>Cluster\_67143

ATGGATAACAACCTTCACATCATACTTTACCAACCCAAAATATGTAACAACTACAATTTAATGGTAAGGGCTTGATTTA  
CATAGAAAATGAGAGAGATTACGTCTTTTGGGAGTCTATATTCATGCACACTTTGACGGAATGTATGAAATTAAGCAT  
CCATTAAGAAATGATGGAAGGCGCGTAAAGATGCATTGCTGGAATGATTCACAACTAAATAAAAATTTGCTTTTGGCC  
ATCGATGGTGATTTTGTATACATATCAGAATGCGACTACCGATTTGGTAAAGTTTATGTCAAATGCGTATGCTTGCATAC  
GCACAGTTTATTCGGGGAAAGTGTGTTTTTCAAATCAAAAATAGATGAAGTTGTTAGCAAACAAAGGATGACATTGCT  
CTTGACCTTTGATGTAACAAACCGATTCAAATTTATATCTAAAAGATATTTCAAAGCGCTTGTGCGTTTTTTGTACCTC  
ATGAAAAAAAATAGAGACCTAGCAATAAACATCGACATACATAAACCAATAAAAAAATGTGAATTCAGAAAGTACATAAA  
CAACGACTTCACTAGCAATGATAAGATCATTCAAGAAATGACATCCTTGTGTAACCAATCGAAAATGAGATTTACTCAT  
ACATAGATGAGAGATCTATAGAGTTCTCCTCTTTTGTAGAGCAGGCTAACCGTAAAGGACTAAAAGAGGATAGCGCTTAT  
AGATTTATATCAGGGCATGTTCTTAATGATAACATTTTGTACCAATGCTAGCCAGAATAAAGTTTTTAAATGGAGCGGCA  
ATCACTCCGTTCTATAGCATCTGAAAGACTAGCAGAGAAAACAGTCAAAATGATATCTGCAATAAAAAACCAATATC  
GAGCAATTTGCAAAAGTAAAACAATAATACACACCTAAATCTTTGCGCTAATGATGAAATCAGCAAAATGATACATTTCA  
AAGTTTTCTGCAATACATTA

>Cluster\_46453

TTGATCAGTTATTTACCAGAGCGATAAAGCGCAGCGTTACGACTAAAAGCGTTGCTTATCACCCATATCGGTTCTGGTGGG  
GTTGATCTTGGCCGCCACGCTGTTTTTGCAGACCGGAACGTTTGCCTTAGCGCAATGAGCGAGTTACACGGCGAC  
CAGTTATCTGGTTTATGGCGGGATCCTGTTTGGCGGTTGGGGGAAATCGGCCAGCTACCGATGCAAGCGTGGCTACCG  
GATGCAATGGAAGCGCAACACCGATCAGCGCTATCTCCACGCGCATCGATGGTGAAGTGGCGTTTACATTTTTGCG  
CCGCGCAATATCAGCGCGGCAATATCCCGCATGTGATTTGGCGGCTGGCATGGTCAATGGCTGCTGCTGCTGCTGCTG  
ATGGCTTTCTGATGATTTTGGCCACAGCAGGATATGAAGCGGTTGCTGGCTGGTTCAGCATCACTCAACTTGGCTGGATG  
TTCTTGGCTTGTGCTCTCATCTTGGCTCGCGCTGGCGTGGAGGGTAGCATCGCTACATCGTCAACCACGCGTT  
CGCTAAAAGCCTGTTTTTCTTGTAGCAGGTGCGCTGAGTTACAGCTGCGGCACGCGCTTGTGCGCGTCTGCGTGGG  
TATTGCACACCTGCGCTGGCAGGCGTGGTTTTCTGCGTGGCAGCGCTGGCGATTACCGCGTGGCGGCTTCAACGGC  
TTCCTCAGTAAAATTCGCGCTGTTTGGTGGCGGTTTGGCTTGTGCTGAGTACTGGATCTGCTGCTGCTGCTGCTGCTG  
GCTGATGATTGAATCGGTCGCCAGTTTCGCTGGTTTTATTCGCTGGTTTTGGTTCGCTGGTGGCAGGAGCGGAG  
CCGTCGCCGATGCCGACCGCTGCCAGGTCATGCGCCTGGTGTGATGATGATGATGATGATGATGATGATGATGATGATG  
GTAATCGCCGCGACTGGTTGACGATA

>Cluster\_30474

ATGAAAAAGACAGCTATCGGATGTCAGTGGCACTGGCTGGTTTTGCTACCGTAGCGCAGGCCGCTCCGAAAGATAACAC  
CTGGTACACTGGTCTAAACTGGGCTGGTCCAGTACCATGACACTGGTTTTATTTCTTAACTAACTGGTCCGACCCACGAAA  
ACCAACTGGGTGCAAGGCTTTTTGGTGGTTACCAGGTTAACCCGATGTTGGCTTTGAAATGGGTTACGACTGGTTAGGT  
GCTATGCCGTCACAAAGGCGACAACATCAACGGCGCATAAAGGCTCAGGGCGTTACGCTGACCCGCTAAACTGGGTTACC  
AATCACTGACGATCTGGACATCTACACTCGTCTGGGTGGTATGGTATGGCGTGCAGACCAAGGCTAACGTTACCTGGTG  
CGCATCTTTAAAGACACGACACCGGCTTTCTCGGCTTTCGCTGGCGGTTGAGTATGCGTACTCTCTGAAATG  
GCTACCCGCTGGAAATCCAGTGGACCAACACATCGGGGACGACACCACTCGGCACTCGTCCGGACACCGCATGCT  
GAGCTGGGTGTTTTCTACCGTTTCGCTGAGGGCGAAGCAGCTCCAGTGTGCTGCTGCTGCTGCTGCTGCTGCTGCTG  
TACAGACCAAGCACTTCACTCTGAAGTCTGACGTTCTGTTTACCTTCAACAAAGCACCCGTAACCGGAAGGTCAGGCT

GCTCTGGATCAGCTGTACAGCCAGCTGAGCAACCTGGATCCGAAAGACGGTCCGCTAGTTGTTCTGGGTTACACTGACCG  
CATCGGTTCTGACGCTTATAACAGGCTCTGTCCGAGCGTCTGCTCAGTCCGTTGTTGATTACCTGATCTCTAAAGGTA  
TCCCGGCAGACAAAATCTCCGCAGTGGTATGGGCGAATCCAACCCGGTACTGGCAACACCTGTGACACAGTGAACAG  
CGTCTGCACTGATCGATTGCCCTGGCTCCGGATCGTCGCTAGAGATCGAAAGTAAAGGCATCAAAGACGTTGTAACCA  
GCCGAGGCTTAA

>Cluster\_51152

ATGAGGCTTTGTTTCATATTACCTTCTTTAAAGTAAAAAGGACCAAATATCGTTGCTTATGATATCATTAATGAGCTAAT  
AAAACGTAATGATGTCGAAAAAGTAGATGTCTATTATTTTAAATGATAACAATGAAGGAGCCTACTCAAATTTAAGGTTG  
ATATATTTAAAAATATCTTTTTCATAAAAATTGATTTTAAAAAATATGATGTTGTACACTGTCATATGCTTAAGCCTGAT  
TTATATGTTTTTTTACCATAAGTGTTTAAACAGGTGGAGGTTTAAATCTATTACGACTTTGCATCAACTTGATTACTACAA  
CTTACAATATGATACAAAAGCAAATGGAAGCATTAGTTTATTTCTTTATATGGCGCATAACCTTATCGTGCCATAACA  
GAATTGTGTGCGTTTCGCCCTCAATGATTAACCTTTTATAAGAAAAGATTAATTAATAGACATAATTAATCTGTTTCTAAC  
GGAAGACCCTTGATAATCATATAAAGCGAAAAATATAAAAACTTGGCGTGAATTAAGAGAAAACTGTAATAGGTTTCATT  
ATGTGGATTAATCCAAGAAAAGGCTTTGAGCAAAATACGTACGCAATGGTAAATCATAAAAAATTTTCATTTCAGAATTG  
CAGGAGAAGGGGGAGAAAAAATAACTTAATTAGGTTGGCAAAAAAATAAAAGTTTACAATAGAGTTGATTTGTTGGG  
TTTTGTTGATGAAAGAATAAAGTTTTAGATACAATAGATATCTTTGTTTCTACCATCACGTGCTGAAGGTTTCCATTAGC  
TTTTCTTGAAGCAATGAGATTTGGTTTTACCATGTATAGCTTCTGATATGACGTCATAAGAGAATCATTTGATTCAAAATA  
TAATATTGCAATTTAACTAGATAATATCCCTGATTTAGAAAAAATAAATGATGCAGTCATCAAATCTTATGATTTTTAT  
GCCAAGGCTGCTTATCGTTGCTTTATTCAAAAATATACAGCACAAATAATGGTAAATGGTTATATGAAATTTGTATAAAGA  
GATTTTAAATGAAAAATAA

>Cluster\_26061

ATGACTGCACCATCCAGGTATTAAGATCCGCGGCCAGACGACTGGCACCTTACCCTCCGCGATGGCGACATGTTAAA  
AACTGTGCTGCGGTATACAGCGAAATTTATGGACGGGTATCGTAATGCCCAATCTGGCTCCGCCCGTGACCCCGTTG  
AGGCTGCCGTGGCTTCCGACGCGCATTTCTGACGCGTACCTGCGCGGCATTTTACCCTGATGACCTGTTAT  
TTAACAGATTTCGCTGGACCTAATGAGCTGGAGCGGGATTTAACGAAGGCGTGTTCACCGCTGCAAAACTTTTATCCGGC  
AAACGCAACCCTAACTCCAGCCAGGCGTTACGTCAGTTGACGCAATCATGCCGCTACTTGAGCGCATGGAAAAAATCG  
GTATGCCGCTACTGGTGCATGGTGAAGTAAACATGACAGATTCGACATTTTTGATCGTGAAGCGCGCTTTATAGAAAGC  
GTGATGGAACCGCTGCGCCAGCGCTGACCGCGTGAAGTCTGTTTTGAGCATATCACCAACAAAGCAGCATA  
TGTCGCTGACGGAATGAACGGCTGGCTGCCACCATCACTCCGACGATCTGATGTTTAAACGCAACCATATGCTGGTTG  
GTGGCGTGGCTCCGACCTGTATGTCTACCCATCCTCAAACGCAATATCCACCAACAGGCATGCGTGAACCTGGTCCGC  
AGCGGTTTTAATCGTGTATTCCTCGAAACGGATCTGCGCCACATGCACGTCATCGAAAAGAGAGCAGCTGCGGCTGCCG  
GGCTGTTTTCAACGCCCAACCGCGCTGGCAGTTACGCTACCTCTTTGAAGAGATGAATGCTTTGACGACATTTGAAAG  
CATTCTGTTCTGTAACGGCCCGCAGTTCTATGGCTTGGCGGTCAACGACACATTCATCGAATGGTACGTAAGAGCAA  
CAGGTTGCTGAAAGCATCCCACTGACTGATGACAGCTGGTGCATTCTCGCGGAGAAACGGTACGCTGGTCCGTTAA  
ACAATAA

>Cluster\_20635

ATGACGCAATTTAATCCCGTTGATCATCCACATCGCGCTACAACCCGCTCACCGGGCAATGGATTCTGGTTTACCAGCA  
CCGCGCTAAGCGCCCTTGGCAGGGGGCGCAGGAAACGCCAGCCAAACAGGTGTACCTGCGCACGATCCAGATTGCTTCC  
TCTGCGCAGGTAATGTGCGGGTGACAGGCGATAAAAACCCGATTAACCGGGACTTACGTTTTTCACTAATGACTTTGGC  
GCCTTGATGTTCTGACAGCCAGATGCGCCAGAAAAGCAACGATCCGCTAATGCGTTGCCAGAGCGCGCGGTACCAGCCG  
GGTATCTGCTTTTACCAGGATCACAGTAAAACGTTGCCAGAACTGAGCGTTGGCGCATGACGAAAATCGTCAAACCTT  
GGCAGGAGCAAAACCGCAGAGCTGGGAAAAACGTACCCGTTGGGTACAGGCTTTTGA AAAACAAAGCGCGCGCATGGGCTGC  
TCTAACCCGCATCCGACCGACAGATTTGGGCAATAGCTTCTTCCGCTAACGAAGCTGAGCGCGAAGACCCGCTGCAAAA  
AGAATATTTCCGCCGAACAGAAAATCGCAATGCTGGTGGATTATGTTACAGCGAGCTTGACAGCGGTAGCCGTACCCTTG  
TCGAAACCGAACCTGGTTAGCCGTTGTACCTTACTGGCTGCTGGCGTTGAAACGCTACTGCTGCCAAAGCCAC  
GTTTTGCGGATCACCGATTGACCGAGCCAGCGAGCTTTGGCACTGGCGTTGAAAAGCTGACCACTGCTTATGA  
CAACCTCTTCCAGTCTCTCCCTACTCTATGGCTGGCAGCCAGCGCCATTTAATGGCAGAGATAACAACCTGCG  
AGCTGCACGCGACTTTTATCCGCTCTGTTGCGCTTGCACCGTACGTAATTTATGGTTGGTTATGAAATGCTGGCA  
GAAACCCAGCGAGACTGACCGCAGAACAGGACGACGCGTTTGCAGCAGTACGATATCCATTTTCGCGAATCCCG  
AGTGATAA

>Cluster\_2736

ATGTCACAGAACTGGATGAGACATTTTCGAGCTGCAGCTTGTGGACGGAAACGGTACGGGAATTGAGCTAAGTGAATTTAA  
AGTGACCTTTACGATCGACTGGTCAACATCAGCAGCGGCTCCCGGTAGGGACTATCAAATTTATAACCTCTCGGCAG  
ATACTGTGAACCGAATCACCGGGCGGAGTTTTCGAAAGTGGCTCTGATTTGCGGGTTACGACGGTATCGCGCCGGAGGTG  
TCGGCAAGCGACCTGCGGATCGTCCGGAGGTTGATCGCGGAGCTGGCGCAGAGTATGGCCGCAACTACGGACTGAT  
TTTTAGCGGTTGAAATTCGCTACTCGGTTACAGGAAAAGACAGTCCGGTTGATTCTTACGCTCTGATTCAGGCAGCAGATA  
CTGATCTGGCTTTTGGCCACAGTATAACCTCACAGACGCTGGCTGCCGTTACACGGTCTGATGTTGAACCGTGGCGT  
ATGAAAGACTTCAAGCAGGTTGCGACCGAAGGCTGACGCTGAAATGCTACTGTTATTCGCCGGGGCGGGT  
GCTCTTTGGCATGACCGGCATCTAATGGATAACGTAGCCGGCAATGTGGCGCAACATGGCAATTCGTAGACGGTACGC  
GCCAGATGGTGGCAATAATGAATATGTTACAGAAAGCATTGCTCAACAGCGCTACCGGGTTATTTGGCATGCCGAG  
CAGACCATCGCAACGGCGTAAACGTTCCGCGCTTATTAATCCGAACATCCGGGTTAATGGGCTCATTAACCTGGATCA  
GGCTTCCGATATCGCACCGCGTTGTGCAACAACGATATCGCTATGGCTGGTGGCAGATCACCGACCAAGCAACGAGC  
GAAATATTACGCTAAGCGGCACCACATCGAGCCTGCCAGCATCGCAACGGATGGCGTTTATATTGTCGCGGGATTATG  
TACTGCGGATACAAGGGCCAGGCGTGGTACATGATATGATGTGCGAAGCGCGGTTGCGCAGGATATGCCATCCAG  
CACTGCTTTTCAGAGGATTATAG

>Cluster\_22861

ATGGCTGATCAAAAATAATCCGTTGGGATACCACGCCAGCGGGGACAGTGTGCACAATCCGAGACGCTGGGGTACACC  
GGCTGCTGACCGACTGACGGCGGTGGTGTGACTGGCTGACCGAGTACGCTGCGCCAAACGTCGAGCATTTTTAATATTC  
TCGATCCGTTCCATAAAAACACTGATCCCGCTCGACAGTTGGGTCAGTGAAGGGATCGACTGGGTCGTTACCCTTTCCGT  
CCCGCTTTCCAGGCGTGGCGGTTCCGGTTGATATATCTCAACGGTTTCCAGCAATTTGCTGCTGGGTTATGCCCGCC  
AGTGGCGATTATCGTTTTTCGCTCTCATCGCTGGCAGATTTCCGGGTCGGAATGGGCGTGGCGACGCTGGTTTTCGCTGA  
TTGCCATCGCGCAATCGGTGCCGTTACAGGCAATGGTTACCTGGCGCTGGTGTAAACAGCCCTGCTGTTCTGTATC  
GTCATAGTTTTCGCTTGGGATCTGGCTGGCGAGAAGTCCGCGAGCGGCAAAAATTAATTCCTCACTGCTGATGATGAT  
CGACACCGCCCGGCTTTGTTTTATCTGGTGCCTAATCGTCAATGCTGTTTTGGTATCGGCAACGTCGCGGCTGGTGGTGA  
CGATCATCTTTGCGCTGCCGCGATTATCCGCTGACGATTTCTGGAAATTAACAGGTTCCGGCGGATCTGATGAAGCC  
TCGCGCTCATTCGTTGCCAGCCCGCCAGATGCTGTTCAAAGTTTCACTTACCCTGGCGATGCCAACCATTTAGCGGG  
CGTTAACCAAGACTCTGATGCTGGCCCTTTCTATGGTGGTCACTCCGCTGATGATGCGCTGGCGGGTGGGGCAGATGG  
TACTTCCGGTATCGGTCGTTGGATATGGGGTTGCCACCGTTGGCGCGCTGGGATTTGATCTCTGCCATTTATCTCT  
GACCGCTGACGACGCGGTTGGGCGGACTCACGAGTCTGGCAACCGTCCGTTGGTACCCACTGGCCCTGCTGGTCT

GCTGACCCGCCCATTCATTAAGTAA

>Cluster\_54471

ATGAAGAAGAAATACCCGCTTTGCTTTTAAACGCTTACCTGCAGCAGCTGGCGCGTCTGAACGGTGTGCAGTTGAAGAACT  
GTCCAGCAAGTTCACCGTGAACCGTCCGTGCAGCAGAGCTGGAAAGACCAGATCCAGCAGTCCGCGCTTTCTGTACAC  
TGATTAACTGACCCGACTGAGCAGTCCGCTCAGTTGCTGGGGCTGGGTGTGGCAGCACCATTTCCAGCACCACACT  
GATACCACCGGAAAGAGCGTGAACCTGTGCATCCGACGCTGATGGTGCATGTGGAATATAAATGCGAGCAGACCAACT  
TGACACGGTGTGACTACGCTAGCGAAAGCTGGACCTGTGGGCGAAGTTTTCAGGATTTCCAGGTGCGTATCCGTGACGCCATCG  
TGAACCGTTCAGGCACTGGACCGCATCATGATCGGCTTTAACGGCGTGAAGCGTGCAGAAACCTCCAACCGTAGCGAAAC  
CCGTGCTGCAGGATGTGAATAAAGGCTGGCTGCAGAAAATCCGTGAGGATGCACCGGATCACGTGATGGGCAGCACCAC  
CACGGGGGTGAAACTACACCGGTTGCGGTGAAAGTCCGGGAAAGTGGCGAATATGCCAACCTGGACGCCGTAGTGATGG  
ATGCCGTCAATGAGCTTATCGACGTGGTTTACCAGGACGATGACGATCTGGTGGTATTTGCGGGCGTGAACCTGTGTCT  
GACAAGTATTTCCCGTGGTCAACAAGAGCAGGAAAACAGTAAAACTGGCTGCCGATATGATCATCAGTCAGAAACG  
CATGGGTGGCCTGCAGCCGTCGCTGGCCGTTCTTCCGCGAATGCCTGCATAATCACCCGCTCTGGATAACCTGTCCA  
TCTACTGGCAGGAAGACACCCGCGCGCTTCTAGTTATCGACAACCCGAAACGTCAGCCGATTTGAAACTTTGAATCCGTT  
AACGAAGCTATGTGGTTGAGGACTACCCTGCGCCGACTGGTGGAAAACATCCAGATTGGCGATTTTCAGCCGCGCGT  
AGCAGAAACCCGGAGAGTAA

>Cluster\_21556

ATGCAATTTACGTCACTGTTTTTCATCGCGCTCGCTGGTTCATTACTGTTAGGTTTATTGCTCGTTGCTTCATCATTCAG  
TACCGAGGCCGAGAAGAAATGCTGCGTAAAGCGGTAGGTAAAGGTGCCTACGAAATGGCTTATAGCCAGCAAGAAAACG  
CGCTGTGGCTGCCACTTCGCAAAAGCCGAACTGGATAAAGCGCGGTGGTTTATCGTCTTGTGATCCGTTACTCTGGAA  
GTGACGCGAGCGTCCATAACGATCTCAAGCCGTTTGGTGGCCACTATCAATAACACGACTCAGACGTTTGGTTTGGTAA  
CACCGTAAATAGTGGCTCACGGGATAGATGCCAAAACGGCGAAGTGAAGGTCGTCTGGTCTGGATGATCGTAAGC  
GCACGGAAGAGGTTACGCCCTTGCACACCGTGGTAGCTGGTAGCTGACGATACCACGAACCGCTTTACATCAGTGGTATT  
GGCAAGAGAGCAGGCTGATTTGGGTGCTGGTGGCAGAAATCAAACTGAAACCGCCATCCAGAACCCGGTAAAATGAG  
TACCAGTTTGGCGCTGGATAGCAAAAGCAACGCTTTTACAACACTAACGCTGACGGCGAATTTGATTACCATCGACCCG  
CCGACAATAAATCCTCAGCCGTAAGAAAGCTGCCTGGATGACGGCAAGAGCACTTCTTTATCAACATCAGCCTTGATACC  
GCCAATGAGCGTGCATTTTACCCGATTCTAAAGCGGCAAGTGTAGTGGTTCGATACCAGTAAATGGCAATATTTGGC  
GAAGGTTGCGGCGACCGAAATTCAGCTGTGCTTTTAACTCAGCGCGTAATGAAAGCTACGTGACGCATCGTACCGCAG  
GTAAAGTCAGTGTGATTGACGCGAAAAGCTATAAAGTGGTGAAGAACTGATACGCCGACTCATCCGAAACAGCCTGGCG  
CTGTCTGCCGATGCCAAAACGCTGATGTCAGTGTGAACAAAATCCACTAAACAGCAGGAAGCTATCCAGCCGCGACCA  
TGTGATTCGTATTGCGCTGATA

>Cluster\_8269

ATGGTCTGGTTAGCGAATCCCGAACGTTACGGGCAGATGCAATACCGTATTGGCGAAAAGTGGTTTACGCCTGCCCGC  
GTTATCGCTCGGTTTATGGCACAATTTCCGTCACGTTAACCGCGTGAATCACAGCGTCCGATCCTGCGTAAAGCGTTFG  
ATTTGGGCATTACGCACTTTGATTTAGCCAACAATACGGGCGCTCCAGGAAGCGCAGAGAGAACTTTGGTCCGCTG  
CTGCGGGAGGATTTTGGCCTTATCGCGATGAAGTATTCTTACCAGGCTGGCTACGATATGTGCGCCGCGCTTA  
CGGCTCTGGCGGTTACGTAATACTGCTCGCCAGCTCGACCAAAGCTGAAGCGTATGGGCTTGGATATGTCGATA  
TCTTTTACTCTCATCGCGTGCATGAAAATACGCCGATGGAAGAAAACCGCTCTGCGCTGGCTCATGCGGTACAAGCGGT  
AAGCGCTGATATCGGATCTCTTACTCGCAGCGCAGCAAAAATGGTGGAGTTGCTGCGGAGTGGAAAAAT  
TCCGCTGTTAATTCATCAACTTCTGACAAATTTACGAAACCGCTGGGTGGATAAAAAGCGCTGCTGGATACCTGCAAAA  
ATAACGGCGTGGGCTGTATTTGCCTTTACTCCTCGGCTCAGGGATGCTGACCGGAAAATATCTCAACGGCATTCGGCAA  
GATTCACGGATGATCGTGAAGGAAATAAAGTTTCTGGTCTGACACCGAAAATGCTTACCGAAGCAAACCTCAACAGCCT  
CGGCTTATTTGAATAAAGGCAACAGCAGCGTGGCAATCAAACTGAAAGCAATGGCGTAAAGCTGGTGGTGAAGATGATC  
GCGTGACGCTGGTATTGATTGGTGGCAGCCGCGGAGCAACTAGAGGAGAAGCTGCAGGCGCTGAATAATCTGACATTT  
AGCACAAGGAGCTGGCGCAGATTGATCAGCATATCGCGATGGCGAGCTGAATCTGTGGCAGCGCTTCCGATAAATG  
A

>Cluster\_45541

ATGACACTTCATCGCTTTAAGAAAATCGCCTTACTTAGCGCTCTTGGCATTGCCGCAATCTCTATGAATGTGCAGGCCG  
AGAGCGTATTGCATTTATFCCAAAACGTTGGTGGCGTGGGATTTTACAGCGGTGGCAACGGCGCACAAACAGCGGGTA  
AAGAGCTGAGCGTTGATGTGACCTACGACGGGCGCACAGAAACCGAGTGTCTTGGTACAGTACAGTTGATTAATACTTC  
GTCAAATCAAGGTTATAACGCCATTTATCGTTCCTGCGGTTTCCGCTGATGGCTTGTGTCGGCACTGAAACCGCGCATGCA  
ACGTGGTGTGAGAGTGTGACCTGGGACTCTGATACTAAACCGGAGTGGCGCTTACTACATTAATCAGGGAACGCCCG  
CCCAGTTGGGAGTATGTTGGTGGATATGGCGGCGCTCAGGTGAATAAAGCAAAAGCAAGCTCGCCTTTTTCTACTCA  
AGCCCCACCGTTACGCAAAAACCAGTGGTGAAAGAAGCGAAAAGCGAAAATCGCAAAAGAGCATCTGGCTGGGAAAT  
TGTCACTACGCAAGTTGGCTATAACGATGCCACTTAAATCACTTAAACCGCAGAAAGAAATATAAAGCGTATAGCAATC  
TCGACGCCATTATCGCCCCGACGCCAACGCCCTGCCGCTGCCGACAAAGCCGAGAAAACCTGAAAATGACAAAGTT  
GCGATTTGTCGGATTCAGTACGCCAAACGTTGATGCGTCCATATGTTGGAACCGCGCACGGTGAAGAATTTGGCTGTGGGA  
TGTGGTTACAGCAAGCAAAATTTCACTGTATGTGCGGATGCAATATTGAAAAAGGATCAATGAAAACGGGCGACAAAG  
TGGATATCCAGGCGTAGGTGAGTGAAGTCTCGCAAAACAGCGTTCCAGGGCTTACTGACTACGAGCGGATGTAATGGC  
ATCGTACTGTTACCGGAGCGGTGATATCAACAAGAGAATATCGGCAATACGATTTCTGA

>Cluster\_6369

GTGGGTCCAGTAAAGTTGGATGTCGAAGGTTACGAACTGGACGCGGAAGAGCGTGAAATACTGGCGCATCCGCTGGTGGG  
AGGGCTGATTTCTTTTACCGGTAATCATGATCCTGCCAGTTACGTGAACTGGTGGCCAGATCCGCGCAGCTTCCG  
GCAATCGTCTGGTGGCGGTTGATCAGGAAGGTGGACGCGTGCAGCGTTTTCTGTAAGGTTTTACCCTGTCAGCG  
CGCAATCATTCGCTGCGCTGTGAGAAATGGAAGAGGGTGGCAAACTGGCGCAGGAGGCGAGTTGGTTGATGGCCAGCGA  
AATGATCGCTATGATGATTTGATATCAGCTTTGCCCTTTCGCTGGTGTGATGTCGGGCATATACGCCGCGGATTTGGCGAGCGTT  
CTTATCATGCCGATCCACAAAAGCCCTGGCAATTTGCCAGCGGTTTATTTGATGGTATGATGAAAGCCGGAATGAAAACG  
ACCGGAAAACACTTCCAGGACACGGTGCAGTAAAGCGCAGACTCACACAAAAGAACCCGTCGATCCACGCTCCACAAGC  
GGAGATTCGCGCTAAAGATATGTCGGTCTTCAGTTCCTTAACTCCGCAAAAATAAAGCTGACGCGCATTTATGCCTGCGCAT  
TGATCTACAGTGTGATTTGATTCGCGCTCCGCGAGCGGTTCTTCCCTACTGGCTGAAAACCGTTTTGCGCTCAGGAACTGGGT  
TTTGACGGCGTATTTCTCTGACGATTTATCGATGGAAGGTGCCGCGATTTGGGAGTTATGCCGAAACCGGGCAGGC  
TTCCTGATGCGGGTTGCGATATGATCCTGGTCTGCAATAATCGTAAAGGGGCGGTCAGCGTGTAGATAATCTGTCA  
CGATCAAGGCAAGCTGTTACACGTTTGTATCATAAAGGTTCAATTTTCCGACAGGAACTGATGGACTCGGCTCGCTGG  
AAAGCGATCAGCAACCGCTGAATCAGTACATGAACCGTGGCAGGAAAGGAAAGGAAAGCAAGTCACTAA

>Cluster\_28625

ATGAGTGGCCACTATTTTAAATCCACAAGAGATGATCAATAAGCAATCATCTTCGATGAAAAGGCCAGCGGCTCAGTGGC  
ATCATATTACATGTTGCTTATGGCATTGATAAAAATTTCTTTTGGTGTGGTGTCAATCACGTGATTTTGTTC  
ATAACAACGACGTGAGTTTTGTTTTCACGTTTTTATTTGATGCTATCCCTGAAGCCGATATCCAGCGTTTAGCCAAATG  
GCGAAAAGCTATCGTACTGTATCCAGATCCATCTGGTAAATTTGTAACGGCTTAAGGCAATTACCAGCAGCAAAAATG

GTCTATTGCCATGTATTTCCGTTTTGTAATTCAGATTACTTTATAGATCAACAAGATAAGATCCTTTATCTGGATGCTG  
ATATCGCCTGTACGGGAAACTTAAAGCCCTGATAACAATGGATCTTGCCAATAACGTTGCTGCTGTTGTACTGAACGC  
GATGCTAACTGGTGGTCTACGGGGTCAAAGTCTGCAGTGAATGAACTTGAAAAGGTTACTTTAATTCAGGTGTCCT  
GTTAATTAATACACTAGCCTGGGCGCAGGAGTCCGTTTTCTGCTAAAGCGATGTCGATGCTGCTGATAAAGCAATCGTTTT  
CCCGTTTAACTATAGATCAAGATACCTTAACTTATCTGTTAGGAAAAGTTAAATTCATGATGCTAAATAACAAT  
ACGCAATTTAGTTTAAATATGAATTAATAAAAAATCATTTTGTGTTTCCAAATTAATGATGAAACCGTATTAATTCATTATGT  
CGGCCGACAAAACCTGGCATTACTGGCCGGTTATCCAAAGTGGCAACCTTTTATCAAGGCAAAGAGCATCGCCCT  
GGAAAAACGAACCGTTAATGCGGCCAGTTAACTCAAATATGCTGCTTATGCGCTAAGCATAATTTTAAACAAAAACAA  
CCAATTAACGGGATAATGAATTAATTTATTTTATTTTAAAGATAATAAAATGA

>Cluster\_39967

ATGGATAAGAGAGTGATATTTGCAGTTGCGGGTTCGGGTAACACCGCTGCTGATACGTCGGTTAAGAGAGGACCGGG  
GACGCTGTTCCAGCTTACCCGTAATAATGAAGTACATTCGCGGGCAGATTTATCAGACGCTTTGGCTACATACCGT  
ACGGGATCCGTTGATGACTTGGTTTGGAGTTTCTGCACGGTTTCTGTTTTCGCCCTTTCTGCAGGAGCAACTCATCG  
CGTGGTCTGAGCTTCAACCAGCCCCCTCCAGAATACCGCGCACGAATATCCGGCATTATCAGGATCCCGCGGACGGCT  
GTATCACCGGGCGGCTCGCACACCTGCTGACAGCCCGGGGGTGTGCTGCCAGATATCCGTACCCGACTTGCCTTACTAGC  
ATGAGTTGTTCTGTGATGAAGTCCAGGACTTTGCCGGCATGACTTTAATTTTCTGCTGGAGCTATGCCGCGCGGAAATC  
TCAGCTGCTGCTGCGGGGATTTTATCAGCATACCTTTGACACAAGCCGCGACGGTAACGTCATGCTACCGTCATGA  
AGACATAACCCGATACGAGGCTCGCTTCCAGGGTGGGGTATCATGGTGGATTGTGAGACGCTCAGCCGGACATGGCGCT  
GTTTACGCTACAGTGTGTGAGTTCATTACCGGACAACTGAACATTCGCATTTCCGGCTCATGGAACACATACCACCCAGATT  
GAAATCGTCACGGATGAAGCGGTTTCAGTGGCCGTCACGCGGACAATACGATGATCAAACTTCTCATCGGACATCA  
CCGTTACGGATGCCACTCAATGAAGTGGGGGGCAGTAAAGGACTCGACCCTTTCAGGACGCTGCTGCTGATGGGG  
CCAACACTGGATGCGCCTCATCAACAGAAACTGGCAGCACTCCACCATCATCCCGTAACAGGCTATACGTGGCCTGC  
TCACGGGCGGGGCAACATCTATTTTATTCGGAAAGCCATCTTCGGAGATTGAGAACTAA

>Cluster\_39269

ATGATTCGGTTGTACCCGGAACACTCCGCGCGCAGCTCAATGAAGGGCTGCGCGCGGCGTATCTTTTACTTGGTAAACGA  
TCCCTCTGTTATTGAGGAAAGCCAGGACGCTGTTGCTCAGGTCGCTGCGGCGCAAGGGTTGGAAGAACACCACACTTTTT  
CCATTGATCCCAACCGGACTGGAATGCGATTTTTTTCGTTATGCCAGGCCATGAGCCTGTTGGCAGTCGACAAAACGCTA  
TTGCTGTTTGTACCCGAAACCGGCAAGTTCGGCGATCAATGAACAACCTTCTCACACTCACCGGACTTCTGCTGACGCA  
TCTGCTGTTGATCGTCCGCGGTAATAAATTAAGCAAAGCGCAAGAAAATGCGCCCTGGTTTACTGCTCTTGGCAATCGCA  
GCGTGCAGGTGACCTGTACAGACCCGGAGCAGGCTCAGCTGCCCGCTGGGTTGCTGCGCGCAAAAACAGCTCAACTTA  
GAACTGGATGACGCTGCAAAATCAGGTGCTGCTGCTACTGTTATGAAGGTAACCTGCTGGCGCTGGCCAGGCACTGGAGCG  
TTTTATCGCTACTCTGGCCGAGCGCAAACTGACATTACCGCGGCTTGAACAGGCGGTGAATGATGCTCCGCGCATTTACCC  
CTTTTTCATTGGGTTGATGCTTTGTTGATGGGAAAAGTAAAGCGCGGTTGCATATCTTTCAGCAACTGCGTCTGGAAGGC  
AGCGAACCCGTTATTTTGTTCGCGCATTTACAACGCTGAAGTGTGTTACTGGTTAACCTGAAACGCCAGCTCTGCCCATAC  
GCCACTGCGTGGCTGTTTGTGATAAGCATCGGGTATGGCAGAACCAGCGGGGATGATGAGCGAGGCGTTAAATCGCTTAA  
GCCACTCGCAGTTTACCTAGACCGTGAACCTTGCACGAAACGGAATCACCTCAAACAAGATTACGGTCAGTCAAGT  
TGGCAGAGCTGGAAGGGTTATCTTCTGTTGTCATAAACCCTGGCGGACGATTTTATCGACGGTTGA

>Cluster\_32671

ATGACTGGTCAGTCTTCATCTCAGCGGCAACGCCATTCAAGTGGTGAACCCGCGCTTTTCTTCTCGTTGTCATTGC  
CGGTCTCTGGTATGTGAAATGGCAACCTTACTACGGCAAGCGTTTACTGCTGCCGAAACCCACAGTATCGGTAATCTFA  
TCCCTGCGCAGGAGATGCTAATCCGTTGCGAGGCGGCTTGGATTACGCGATGATCTATTTTCTCGCGGATGGAAGGG  
CGGTTGCTGGGGTGATCTCCGTTCTGTTGATTGAGTTCAGGTCGATCCCGCGTACTGTTGTTGCGTACGCTTGGGCAATC  
GCGCTTTCCGCGCACGTTGCTGGGACGCTGTTTTCTCTGCGGGCATGATGTACCTGCTGTGCGGCTCCGCTCGCGG  
CGGGAATGCGTCGCCAACAGGTGCGATGGGCGGTGCGCTGGCATTCTGGATGGGAAATCCGTTGTTAAACCCGGCGACG  
CTGTTGTTTATGGGGTTCGCTCCTCGGCTGGGGTTTTGCGGCGATTCTGCTGTTGGTGGCGGGCTGTTGATGGTGTGCTGAT  
TGGCAGCTGGTGAATAATGGGTGCGTGAACACCGCAACCGCAGGACCCGGTCAAAATGACATACCGGAATCACAGG  
GCGTTTTTTTTAGCCGCTGGGGCAGGGCCTATGGACGCTTTTTCTGAGTACGATCCCGGTTTACATCTGACGACTG  
GTGTTGGGTGCGCTCGGCTGCTGTTATTTCCCATGCGGATGGTGTGTCGATAACAGCCTGATGTGGGTGGTGGCGAT  
GGCGGTAGCGGATGCTTGTGTTGTCATTTCCACGGCAGCAGAAATCCGATTTGACAAACGATGATGCTGGCAGGTATGG  
GAACCGCTCCGGCGCTGGCATTTGTTGATGACGCTCCCGCGGTTGAGTTTGGCGTGCCTGATAATGTTGCGTAAAGCGTTT  
CCGGGAAAGCCTTATGGCTGACGGGGCGATGGTGGCAGTGTGCTGGTGTGATGTCGCGGGCTGGCCCTGTGTTTTG  
A

>Cluster\_42467

ATGAAAAGGATGATTCGCGTGGATGGCGCACAGGGCGAAGGCGGGCAGATCTGCGCTCGGCGCTGAGCCTGTCGAT  
GATAACCGCCAGCCATTTACCATCACCGGCATTCTGTCGGGGCGGGGAAACCGGGGCTGTTGCGCCAACATCTGACCG  
CGGTAAGAGCGGCTGCGGAAATTTGTAGGGCAACGGTGAAGGCGCTGAGCTGGGGTTCGAGCCTGTTTCCGACCT  
GGCACCGTGCAGCGCGGCGGATTACCGCTTTGCTATCGGTAGCGCGGAAAGTTGACGCTGGTGTGCAACCGGTGCTGCC  
CGGCTGTTGTTGCGGATGGACTTTCGCGTGTGAAGTGAAGGCGGACCGGATAACCGGGCGGCGCTGCGGATTTTAT  
TTATCCGCGGGTTCGAGCGGCTGCTGCGGAAATAGGATTCATCAGCAAACCCGCTGTTACGTCAGCGTTTAT  
CCTGCCGAGGCGGCGTGGTGGCAACGGAAGTCTCACCGGTGGCATCGTTAATAGCTTGCAACTTGGCGAGCGGGGAA  
CAATGTGCAGATGCGTGGAGAGGTGCTACTGGCTGGTGTGCGCGGCAATGTTGCTGAGCGTGAATCGCTACACTGGCGG  
GTAGTTTTTCTTGCATGAACAGAAATATTCATAACCTGCGCGGACACAGGGCGGGTAATACTGCTCGCTTGAAGTC  
GAAAGTGAATAATCACCGAACGCTTTTTTGTGCTGCGTGAAGGCGGCTCAGTGCAGGAGGTGGTGGCGGACAGTTGGT  
GAAAGAGGTGAAACGCTACTTGGCAAGCCGGCGGGTGGGGGAATACTCGCCGACCAACTGGTGTACCGATGGCGC  
TGGCGGGCACGGGGAATTTACGGTCCCATCCCTCATGCCATCTGCTGACCAATATCGCGTGGTGGAGCGTTTTCTTG  
CCGTTGCGGTTTTGTTGATAGAAACAGATGGCGTAACCGGGTGGATGATAACCAAACCTACTGATTA

>Cluster\_29413

ATGGCGCATATTGTAACCCATAACCCCGTCCAGAGAAGATTGGTTAACGCAACTTGCCGATGTTGTGACCGATCTCTGA  
TGAATCTCTGCGCTTTTTGAATATAGACCGGACGAAAAACTGTTGACCGGACGAGCCAAAAAGCTGTTTGGCCCTGC  
GTGTGACCCGCTCATTTTATTCGATCGCATGGAGAAAGCAATCCGGAGCATCTCTTTTGCCTCAGGTAATACCTCGCAA  
GATGAGTTTGTGCTGCGCCCGGATTTCCACCGACCCGCTGGAAGAACAGCACAGCGTAGTGCTGGTTGTTGTCATAA  
ATACCACAACCGGGCGCTTTTGTGTTGCTAAAGGCGGCTGCGCGGTAATTTGCCCTATTTGCTTCCGCTCCCACTTCCCT  
ATGCCGAAATCAGGGCAATAAGCGTAACCTGGCAGACTGCATTTGAGTATGTTGCTGCGCATCCGGAATGGACGAGATG  
ATTTTCTCCGGCGGCGACCCGCTGATGGCGAAAGATCACAGACTGGACTGGTTGCTCACACAACCTGGAAGCCATCCCGCA  
TATCAAACGCTTCCGGATTACAGCCGCTGCGGATTTGATCCCGGACGATCACAGATGCGCTGGTTGAACGCTTTT  
CTCATTTCTACGCTGCAAACTTTGCTGGTGAATCAATTAACATGCGCAATGAGGTAGATGAAACATTCGCTCAGGCGATG  
GCTAAGTTGCGCGGCTGGGCGTTACTTTGCTGAAACAGAGGCTTCTGTTACGTTGGTGTGAACGATAACCGGCAACCGCT  
GGCAAACCTGAGTAAATGCGTTGTTGATGCGGGCGTGTGCGGATTAACCTGCTGATGCTGATAAAGTACAGGGCGGG  
CGCATTTTATGTTGAGTGTGACGAAGCAGGCGATTTATGCGTGTGTTGCTGACACTGGTGTGGGATATCTGGTGCCT

AAACTGGCGCGAGAAATTGGCGGCGAACCCAGCAAACGCCGCTGGATCTCCAGCTACGCCAGCAGTAA

>Cluster\_28224

ATGACCACACTGGCGATTGATATCGGGCGTACTAACTTGGCGCGCGCTGATTGGCGCTGACGGGCAGATCCCGGATCG  
CCGAGAACTTCCCTACGCCCTGCCAGCCAGACTCCGACGGCGCTGCGTGAAGCCTTATCCGCATTAGTCTCTCCGTTGCAAG  
CACATGGCGAGCGGTTGCCATCGCTTCAACCGGAATTTATTCGCGACCGCAGCTTGGCTGGCGTGAATCCGCATAATCTC  
GGTGGATTGTACTACTTTCCGTTAGTCAAAACGCTGGAGCAACTTACCAATTTGCCGACCATTGCCATTAATGATGCGCA  
GGCCGAGCATGGGCGGAGTATCAGGCGCTGGATGGCAATATAACCGATATGGTGTATACATGTTTTCCACCGGCGTTG  
GCGGCGGTGATGAGCGGCGGTAACCTGCGTACCGGCCCTGGCGGCTGCGGGGCATATCGGGCATAACGTTGCCGAT  
CCGCATGGTCCAGTCTGCGGCTGGACGCACAGGTTGCGTGGAGCGATTGCTTCTGGTCCGCGCATTCGAGCGGCAGC  
GCAGGGGAGTTGGCTGGTGCGAATGCGAAAATATTTTACGCGCGCCGGCAGGGCGATGAGCAGGCGCAGCAACTGA  
TTCACCGCTCCGCACGTACGCTTGAAGGCTGATCGCTGATATTAAGCCACAAGTATGCCAGTGCCTGGTGGTCCGCT  
GGCAGCGTTGGTCTGGCAGAAGGATATCGGCGCTGGTGGAAACGATCTGGCGCAGGAGCCAGCGGCATTTTCATGTTGA  
TTTACTGGCGGCGCACTACGCCACGATGCAGGTTTACTTGGGCTGCGCTGTGGCCAGGGAGAAATATTTATGA

>Cluster\_27465

ATGGATCAAAAACAGATTGAAGAAATTTGACGCAGTGTGATGGCGTCAATGGGACAAAACGGCCCCCGCCGCTCAGAAGC  
AAAGTGGCCACCACCCTGTGCGGCACCGGTGACCTCGGAAGCTGCGCGCTGGATTAGGTTCCGCTGACCGGAAG  
CGTGGATTGGTGTGTGAAAACACATCGTGGGATTTAAACAGAACTGCGCGTAGCACCCTAGCCCGCTTGTACC  
GGTCTGCGCGTCCGCTCCGCTACCCAGGCGTTGCTGCGTTTCTGGCCGATCACTCTCGTTCGAAAGATACCGTACT  
GAAAGAAGTACCGGAAGAGTGGGTGAAAGCGCAGGGCTTGGTGGAAAGTCCGCTCCGAAATCAGCGACAAAATCTCTACC  
TGACTCGCCGGATATGGGCGCGCCTGTGTGCAGAAGCTGTGAAGCGCTGAAGCGCAGTGTGTTGCTAATCCGGAC  
GTGCAGTCCGTTATTTCTGATGGCTGTCAACTGATGCGATCACCGTGAAGTACGAAAGAGATCCTGCCCGCTGATGGC  
GGGCTGAAGCAAGCCGGCTGAAAGTCCGTTACGCCATTTCTTGTACGTTATGGTCCGCTGAAGATTGAAGATCAGATCG  
GTGAGATCTCCGCGGAAAGTAGTGTATCTGCTGGTGGGCGAACCTCCGGGTTGGGCGAGTCAAGAAAGCTCTCTCTC  
TACCGCTTTACTCCGCGGTATGGCGACCACCGTTGAGGCGATGCACTGTATCTTAACATTACCAGGCGGCAC  
GCCCGGTTGAAGCGCAGCCGTCATTTGGTATTTGGCGAAACGATGCTGGAGCAGAAAGCATCCGGCATCAACATGA  
CCCGATAA

>Cluster\_17460

ATGAAAATAATGCGCTGGATTTTGGCCCTGCTGATATCACTTTTCTTACGTACAGCAGTTCAGGCGAATGTCAATGTTGC  
AACAAATGTATACCCGATAGGGTATGCAAGCTACACAACGAAGATAACTTATTTATCTTGTATGTTCTTACCCCCGATAGCG  
TCAATCACGGTGTATTATGAGACACCAAATAACCCGGTTAATCACTGGATGGATACCTTTGAAAAGCTGGACGGGACCT  
GGCCCTGCACCATCAATAAAGTCAATATCGATGACAGCGATATCAAAATCATCTTGTCCGGGGCTTACAGAGTATGACAG  
CCGTGGCGAAAGGACGATGTGGACTTGTATGAAATACGAATGGAAAGTCTGGAAGGAAGACTCCAGCGTTTCATGGCTGC  
CGTGGCTGGTATCGACACATGCAGATAGCATTTGATCTTATGATCCTGCTCCGGGACCTATTTCCGGACGCACAGTCAGT  
AATCTTCTTGTCCACCTATACCGTTAGGGCTTATGATGCTCTCTGGAATGAAAGTCCGGGTTGTGCGTGATAAGACGTT  
AGCGCTCCAGTCTACCGCGGGAATAATGAAAAACGCTCTCCACCTACCTGATGAAAGACGGCAAACGTGTGTACGGCA  
GCAAAATTTGGTACTCCGCGGTATGGCGACCACCGTTGAGGCGATGCACTGTATCTTAACATTACCAGGCGGCAC  
GCCCGGTTGAAGCGCAGCCGTCATTTGGTATTTGGCGAAACGATGCTGGAGCAGAAAGCATCCGGCATCAACATGA  
CCCGATAA

>Cluster\_26777

ATGCTGGCGTTTACCTGGATCGCGCTGCGATTTATCCATTTACCTCGCTGATGCTGGTCTTTGGCTTCGCAATGTACGG  
TGCTGGCTGGCCCTTAAACGATTCGTCGCTTGTGAGCAAGCGTTTCTGCGTTTACAACAGCACGCTGCCGCTCTGGA  
GTTTGTATCAGTGCCACTGCAATGCTCGCGTTCAGGGCGGGTTGATGGGAACGGGATGGTCAGATGATTTTCCGCAAC  
ATTTGGCAGGCTGTTTTGCAACACGAGTTTGGTGGCGTCTGTTTATGGCAAATGTTCTCGCCCTGCAACGTTGATCCT  
CGCCCTTATGCAACCGGGAATATGCCACGTTTGTGTTTATGCTCCTACCGCGCAATTTTTTCTGCTGGCGGGAGTTCG  
GGCATGCGACGCTGAATGAGGGGTAACGGCGAAAATCCATCAGACTAATCACGCGATTCACCTGATTTGTGCGGCGGG  
TGGTTTGGGGGATTACTGCGCGTGTCTGGTGTATGCAACTCATCAAAGGCGGTTGGCGATACCAGGCTATTCAGGCGCT  
GATGCGTTTTTCTGCTGGTGGCGGCAATTTTGGCTGATCGCGCTACTGGCAAGCGCGTGTCTAATGCAATGTTGATACC  
GATTTCCCCACCGCTTACGACTTACTGGGGCAACTCTTATGCTCAAAGCCATCCTGGTGTGATGATTTGTTGGTCAAT  
GCGCTGGTTAATCGTTATGTTCTGTACCGCGCATGAGGCAAGGATGAAGATCGTCCGCGCACCCGTTGTGTGGATGAC  
TAACTCGAATGGGCGATAGGTGCGGTAGTGTGCTGGTATCATCAGCCTGCTTGGCACTCTCGAACCTTTTGA

>Cluster\_60804

ATGGACATTTTATTTTCGAAAAGATGCGCAATTTCAATTTTATGAGCGAAACCAATAATATTGCCGGGCGGCAGAAAA  
AATCCATATGACGGCTTCCGCATTTGGTAAAAGCATTCGCGCGCTGGAAGAACAATTTGGCTATACGCTATTTACCCGCA  
AAGATAATAATATCAGCTCAATAAAGCCGACAGGAACTGTATCAAAAACCTGTTCCCGGTTTATCAACGGCTTTCTGCG  
ATTGATAAATGAAATCCATAACTCAGGGCGCTGTTACAGGAAATTTGTTGATTGGCATAGATAAATCTTATCCGACAATTA  
TTTTGATCAGTTGATTTAGTCTCGGAGATAAGTATGAAGGCGTGACCGCCAGCAGTTGAGTTACGCGAAAATGGCGTTA  
TCGATAATCTTTTTGACCGCCAGTTAGATTTTTATATCTCCCCACAGCATGTAATCTGCACGAGTTTCAGGAACGGAAAAC  
CTGACTATCAGTGAATACCACCGCTGCGATTAGGCTTTCTGCTTTCTCGCGTTATGAAGAGCGACAAGAGCAAGAGCT  
GCTTCAGGAGCTGCCCTGGCTACAAAATGCGCTTTCAGAACCGGCAACTTCGAAAGCAATGATGATGCGAATATGCGAC  
CTTGTGGGATCAATCCAACCATTTATATCGTCCCTACAGTTTATGGCCAAAATCAGCGCGTGGAGCGCGGACATTTT  
CTGACGGTGTATCCCGATTTTGCCTGGCGACTGGTGAATCCGGCAACGCTGAAATATTTTGTGACCCGCACAGGCGCAT  
GTATATGCAAGAAATATCTTTATTTCAATCAGAAATCATCGTTTATACCGCACGATGCTTACGATATTGCTGAAGATCGTG  
ACGGGACGAGTCATTA

>Cluster\_42917

ATGACCGATTTACACCCGATGTAGAACGCTACCTACGTTATCTGAGCGTGGAGCGCCAGCTTAGCCCGATAACCCCTGCT  
TAACTACCAGCGACAGCTTGGAGCGATCATCAATTTTGGCAGCGAAAATGGCCGCAAAAGCTGGCAGCAATGTGATGTGA  
CGATGGTGGCTAATTTTGTGTACGCGTCCGTAAGGGCTGGGAGCTGCAAGTCTGGCGTTACGGCTTTCTGCGCTA  
CGTAGCTTTTGTGACTGGTGGTTCAGCCAGAACGAACCTCAAAGCTAACCCGGGAAAGGTTTCGGCACCGAAAAGCGCC  
CGCTCATCTGCCGAAAACATCGACGTCGATGATGAAATGGCTGCTGGATATTTGATATCAACGATCCCTCCGCGCTGC  
CGCATCGGCAATGCTGGAAAGTGTGATGACGCGCGGGTCTGCGCTTTTCCGAGCTGGTGGGGCTGATATCAAAACACTC  
GACCTGGAGTCTGGCGAAGTGTGGGTGATGGGAAAAGGCAAGAGCGCCGCTGCCGATTGGTTCGCAACCGCGTGGC  
GTGGATTGAGCACTGGCTTGGATTGCGCGACCTGTTTGTAGTGAAGACGACGCGCTTTTCTGTCGAAAATGGGCAAA  
GCATCTCCGCGCTAATGTGCAGAAAACGCTTTGCCGAATGGGGCATAAAAAGGGCTGAATAATCACGTTTCAACCGCAT  
AAATACGTCACCTGCTCCGCTACCCATATGCTGGAGTCCAGGCGCATCTCGTGGTGTACAGGAGCTGCTGGTCTGATGC  
CAACCTCTCCACCAGCAAAATCTATACTCATCTTGTATTTCAACACTTGCCTCGGTGATACGATGCGGCGCATCCACGG  
CCAAACGGGGGAAATAA

>Cluster\_62605

ATGCTCTACACTCTCCAGGTAAAGCGTTTCCGCTGCACTGACTAAAGAAAATCCATGTCAGATGTTGGCACCATCAA  
CGTAAATCATGCGCTGTTGGCGCAGCGTCCGGATATCAGGCAATTTATCTTTTCTGGCGTGGCGTGGCGGCAGGTTCCG

TGGGGCTGCCGATCTCGGTATTTCTACCCTTGATGATGTGCTGACCGACATTGCGCGTATCACCAGCCTTGTTCGCTG  
CCGCTGCTGGTGGATGCGGATATCGGTTTTGGTTCTTCGCGCTTAACGTGGCGCGCACCGTGAATCGATGATTAAGC  
CGGTGCGGACAGGATGTCATATTGAAGATCAGGTTGGTGCGAAACGCTGCGGTCATCGTCCGAATAAGCGATCGTCTCGA  
AAGAAAGAGATGGTGGATCGGATCGCGCGCGGTTGGATGCGAAACCGATCCTGATTTTGTGATCATGGCGCGCACCGAT  
GCTTGCGCGGTAGAGGGGTGGATGCGCGGATCGAGCGTGCAGGCTATGTTGAAGCGGGTCCGAGATGTTGTTCC  
GGAGGCGATTACCGAACTCGCCATGTACCGCAGTTTGGCGATGCGGTGACAGGTGCCAATCCTCGCAACATTACCGAAT  
TTGGCGCAACACCCTGTTTACCACCGAGAATTACGCAGCGCCATGTCGCAATGGCGCTGTACCCGCTTTCAGCGTTC  
CGCGCATGAACCGCGCGCTGAACATGTCTACACGTCTGCGTGCAGGAAGGCAGCGAGAAAAGCGTCATCGATACCAT  
GCAAAACCGCAACGAGCTGTACGAAAGCATCAACTACTACCAGTACGAAGAGAAGCTCGACGACTGTTTGGCCGTAGCC  
AGGTGAAATAA

>Cluster\_42845

ATGGCTATGGTTGAAATGCAAACTGCGGCACTGGCTGAATCCCGCGCAAAATGCAGGCGCTGCGCGCTCAAAAA  
CCGTATTGCGCTGACGCTCTCAATGGCGACGATGGCTTCGGTCTGTTCTGGCTGATCTGGATTTAATGTCCACCATCA  
CTCGCGGTATCGACGGTATGTCGCTGGCGCTGTTACCGGAAATGACGCCACCACCAATACGGAAGCGGTTGGTCTGGCG  
AACGCCCTGGCGGTAGCGGCTGTTAATTTTGGGGTACCGTATTCGGTACGCCGCTGGGCAATTATGGCGGGGATTTA  
CCTGGCTGAATGGTGTAAATCCTGGCTGGCAGAAGTATTGCTTCAATTAACGACATTCTGCTCTGCGCGCTCGA  
TTTGGTTGGTCTTTTTGTTTTACACCATCGTGGTGGCGCAGATGGAGCACTTCTCCGGCTGGCGGGGCTGATTGCGCTG  
GCGCTGTTGACAGGTGCCGATTGTTATCCGCACCACCGAGAATGCTGAAACTGGTGGCGGACAGCCTGCGTGAAGCGGC  
TTATGCGCTGGGTACGCCGAAGTGAAGATGATCGCGCGATCAGCTGAAAGCGTGGTGTCCGGGATCATGACCGGTA  
TCCTGCTGGCGATGGCTGATTTGCTGTTGAAACCGCACCGCTGCTGTTTACGCTGCTCAACAGTCTGGAGCAG  
GACATGATCGAGCGATCGCAACCTGCGCGTACGATCTTTAAGTTTTCGATGAGCCGTTTTGCGGAATGGCAACACT  
GGCTGGCGCGGGTGTGATCATTACCCTGTGCTACTGCTGCTGAACATTCGCGCGCGTGTGTTTTGCGAAGAATA  
AACACGGTTAA

>Cluster\_28158

ATGAAACAACACCAATCGGCGGATAATTCTCAGGGGACGCTTTACATTGTACCAGCGCAATCGGCAATCGGCGGATAT  
CACCCAGCGTGCATTAGAGGTATTACAGCCGTTGATCTGATTGCCGCGAGGATACGCGTCACACCGGTTTATGCTGC  
AACATTTTGGGATTAATGCCCGGTTGTTTGGCTGCACGACCAACGAAACAAAAAGCCGAAACGCTGCTGGCGAAG  
CTGCAAGAGGGGCAAAACATTGCGCTGGTTCCGATGCCGGAACCGCGTAATTAACGATCCTGGTCACTGGTGCG  
TACCTGCTGTAAGCGGGATTCGCGTGGTGGCGCTACCAGGGCGGTGCTGCTATCACTGCGTTAAGCGCGCGGGT  
TACCATCCGATCGTTTTTGTATGAAGCTTTTACCTGCCAAATCAAAGGCGCGCTGATGCGCTAAAAGCTATTGAA  
GCGGAGCCGCGCACGCTGATTTTTATGAATCTACCACCGCTGTTAGATAGCCTGGAAGATATCGTTGCGGTATTAGG  
CGAATCCGTTTACGTGGTCTGGCGCGTACGATTAACCAAAACCTGGGAAACCAATTCACGCGCGCTCCGTTGGCGAGCTC  
TGGCGTGGTAAAAGAAGATGAAAACCGTCGCAAAAGCGAAATGGTGTGATTGTCGAAGGCCATAAAGCGCAGGAAGAT  
GACCTGCCTGCTGATGCCCTGCGCACGCTGGCGCTGCTACAGGAGCAACTGCCCTGAAAAAGCGGCGAGCGCTGGCCG  
AGAAATTCACGGCTGAAGAAAAATGCGCTGTATAAGTATGCGCTGGAGCAGAAGGGAGAGTGA

>Cluster\_55877

ATGAACTTATTCCTCGCAGTAGTGATATTTACCTGGCATTGATGGAATTTGCCCGGGCCTTTTCCCGAACGGATT  
TACCGTACTTACAGATCGAGCATATGGTAACGGAGACTGTTTCGGTTTTGTACTGGCCTATTGGTCAGGATCAATAACTAC  
CTATAGTGTGCGAAACGTAACATGACGAATGGGAATCGTACTCGCTTTTCCAGCATTAAGAAGTTCGAAGAATGGCTG  
GAAGTGAATGATGATGATCCCATGAAAATGGCATCAGCATCGAAGATCAAGACTTTGCGAGCAAACTCTTCCGTTGTC  
TCGAAATGTCTTCAACGGGAAGGCTTGTATGACGCACATGCACTGTTTACAGCGAGCAACAGAAACATTCGCTGAAGTCA  
GCGAATATGGTTAGCACTGGCAATCCAGTATCGCCGATGTAAGAAAAACAGAAAGCTGCAGCACAGGCTGCGCTTAATGCT  
TACTTGGCAATTCGGCAATTTGGTGTTCCTGCAATAAAGTATTCATTTGCTGTCAAGGCGCAGATGCTCCGAAATTT  
CCAGGATGATCCTGTGATTGATGATTAAGAACAAGGATTAGATCTTAGCTTTGGAGGAACAAAGGAAAAATAAATTT  
ACCCCTTGATGACAGATGTGTGATACATTTTTCGCGAGAGAAAACCGCTTACAGGCTTAAACCTGTTACATAATTTAT  
GCCTGGATAATGTCCAGTGAACGACTGCATTTTACGGAACGCTATGATTTAATATCGATGAATGGCGGGCAAAATTCAG  
GCAGTTATGTTTAGAGTATTTTGGCGATAGTCTGACACAGTTCACTTAA

>Cluster\_59731

ATGGTTGATACAACCTCAAACCTACCACCGAGAAAAAACACTCACTCAAAGTATGATATCGTGGCGCTTCCCTGCGTTCTAACCT  
CTTCCAGGGTTCATGGAACCTCGAACGATGACAGGACGCTGGGTTTCTGCTTCTATGGTACCGGCAATTCGTCGCTCT  
ACCCTGAGAAACAAGCAAGCTATGTAACCAAGCTATTCGCGCTACCTGGAGTCTTTAAACACCCAGCGCTTCGCTGCTGCG  
CCGATTCCTCGCGTAACCTGGCGCTGGAAGAACAGCGTGTCTAATGGCGCAGAGATCGACGACGGTGCATCAACGGTAT  
CAAAGTCCGTTTGTATGGGGCCATGGCTGGTGTAGGCGACCCGATCTTCTGGGAAACCGTACGTCGCTGATTTGACGAC  
TGGGTGCCGATTCGCGATGAGCGGCGAGCCTGTTAGGTCGCTGCTGTTTTCATCCTGTTAACCTGGTGGCTGCGCTGGCA  
ACCCGTTACTACGGCTAGCGTATGGTTACTCCAAAGGATTCGATATCGTAAAGATAAGGTTGGTGGTGGCTTCCGCAAAA  
ACTGACGGAAGGGGCGTCTATCCTCGGCTGTTTGTCTATGGGGCATTGGTTAAACAAGTGGACACATGTCAACATCCCGC  
TGGTGTCTCTCGCATTACTGACAGACGGGCAAGAACAACGTTACTACTGTCCAGACTATTTGACAGCTTAAATGCCA  
GGCTGGTACCACTGCTGACTTTGCTTGTATGTGGCTACTGCGCAAAAAGTAAACCCGCTGTGGATCATCGTTGG  
CTTCTTCGTCATCGGTATCGCTGTTTACGCTTTCGGCTGCTGGGACTGTGGACTGTAA

>Cluster\_28701

ATGCTGCAATCACAGTCTCCCGTCCGGAAGTGGTCAACGGGCATACGGACGTTATCTGCTCCACCTCAGTCAGCCACAT  
TCTGGCTGTGCGAAAGACTACACTGCAAAATCGACACACTTATCCGGCAACTGGCTGAAATCTCATCAATGACAGAAA  
GTATTGGAGGTAAAACCTCTCTGGACTGGGCCATGAAACAGGATTTTCCGCTGTGGCTGCTGGCTCATGGAGAAACCGGAA  
ACCGCAATGAAAGCCATCACCAGCAATCTTACCGCGAAATCTGGCGTACCTGATGCAACGTTCCGGGATGCTGTCAAT  
AATGGATGCGCAGGCCGTTGATACATGGTACCGCTCAGTGGAGTACGATAACTTTCCGGAATCAGTGAAGCGAACATTT  
GGAGCACATTTGACCAACTGACACAGAAATAAGGATGAAGTGTGTTGAGCGAGGAGTATCAACGTTCTCAGAGGGCTGAGC  
TGGAAATTACAAAACCACTCCCCCTGTAATTTGGCAGTAAAATATCGTCAACAATCTGGTGGGGGGGACCGGTGGGG  
ATTGCATCTTATCACCAGGCAACAGGAGATCGACTCGCGACCTGGAAGAAATGCTGTATCTGTTGAGTGGCAACCAA  
TCCCTGACAACCGGAAATATCATCATTCGGCTGGATGATACATCCGCTCCGTTACAGGCAAAAGCGTGTATGAAGAT  
GAGATGTTCAACATCAGATACTTTAAGAAAGGGCTCCGCACACATCACGTTACAGAAACCAAGAACTGGTGTGATCGGCTAAA  
TGATATTTATGCCAGGCACTATTCGGAATGTTACCTTCAATTATAA

>Cluster\_29670

ATGGCGACATACCTTATTGGCGACGTTTCAATGGTTGTTACGATGAACTGATCGCATTTGCTGCATAAAGTAGAATTTACCC  
TGGGAAAGATACCTCTGGCTGACGGGCGATCTGGTGGCGCGCGGGCCGGGTTGCTGGATGTTCTGCGCTATGTGAAAT  
CCTTAGGCGACAGCGTACGCTGTTGCTGGGTAATCAGATCTGCATCTGCTGGCGGATTTGCGGGATCAGCCGCAAT  
AAACCGAAAGATCGCTGACACCCTGCTGGAAGCGCGGATGCGGACGAGCTGCTTAACTGGCTGCGTCCGCAACCTTT  
GCTGCAAAATCGACGAAGAAAGTGGTGGATGGCCACCGGGATCACGCGCAGTGGGATCTGCGAGCCAGCCAAAG  
AGTGGCGCGCGATGTAGAAAGCGGTGCTGTCGAGTGACTCCTATCCCTTCTTCTGATGCTGATGCTGACGGCGATATGCCA  
AATAACTGTTACCGGAAATGCGGGGGTGGGAAGACTGCGTTTTATCACCACCGCTTTACCCGATGCGTTTTTGTCT

CCCGAACGGTCAACTGGATATGTACAGCAAAGAATCGCCGGAAGAGGCCCTGCCCACTGAAACCGTGGTTTGGCATT  
CTGGCCCCGTGCGTGAAGAGTACACATCGCCTTTGGTCACTGGGCATCGCTGGAAGGCAAAGGTACGCCGGAAGGTATT  
TACGGCTGGATACCGGCTGCTGCTGGGGTGGTACATTAACTGCCTGCGCTGGGAAGATAAACAGTATTTTGTCCAGCC  
GTGCAACCGCATAAAGATTGAGTGAGGGAGAGGGCGTGGCGCTTAA  
>Cluster\_9946  
ATGAGTCAGGCGCTAAAAATTTACTGACATTGTTAAATCTGGAAAAATTGAGGAAGGACTCTTTCCGGCCAGAGTGA  
AGATTTAGGTTTACGCCAGGTGTTTGGCGGCCAGGTGCGTGGGTGAGGCCTTGTATGCTGCAAAAAGAGACCGTCCCTGAAG  
AGCGGCTGGTACATTCGTTTACAGTACTTTCTTCGCCCTGGCGATAGTAAGAAGCCGATTATTTATGATGTCGAAACG  
CTGCGTGACGGTAAACAGCTTACAGCTTACAGTATCTGCTCGGTTACGCTTCTGATCTTAACTTCTTCCCGGTAGCTTACAGC  
TTTCCAGGCACCAGAAGCGGTTTTCGAACATCAAAAAACAATGCCGCTCCGCGCCAGCGCTGATGGCCTGCCTTCGGAAA  
CGCAAAATCGCCCAATCGCTGGCGCACCTGCTGCCGCGCAGTGTAAAGATAAAATTCATCTGCGATCGTCCGCTGGAAGTC  
CGTCCGGTGGAGTTTCATAACCCACTGAAAGGTCACGTCGAGAACACATCGTCAGGTGTTGGATCCGCGCAAAATGGTAG  
CGTCCGGATGACCTGCGCGTTCATCAGTATCTGCTCGGTTACGCTTCTGATCTTAACTTCTTCCCGGTAGCTTACAGC  
CGCACGGCATCGGTTTCTCGAACCGGGATTCCAGATTGCCACCATTGACCATTCCATGTGGTTCCATCGCCGTTTAAAT  
TTGAATGAATGGCTGCTGTATAGCGTGGAGAGCACCTCGCGCTCCAGCGCACGCGGCTTTGTGCGCGGTGAGTTTATAC  
CCAGGACGGCGTGTGGTTGCCTCGACCGTTTCCAGGAAGGGGTGATGCGTAATCACAAATTA  
>Cluster\_44928  
ATGGATTGTGACGCTTTACAGGATATAAAAAATCTCTCTTAGGTATGACGGAAAAGATGCTTTAAATCATGAAATAGATTT  
GAAGTGCCTAGGAGAATCCCTAAAGGGTTTCTTAAAGTTCTCAACAGCAGCTTCTTCTCTGTTACAAAAATATA  
GTAATACATTAATATCAGGAAGTTAAGGTTTACGACGCGAAGCAAAGCTAACTGCTTTACTTGAAGCAGTCTT  
AACTTCGCCACTCAGAACCAGTTTCTCGGGGATCGCCGCAACTATACTTGGCGCAACTACTACAATATATTTTTCGCGAG  
AAATCTTAAACAAGAAAGATGAAATGAAAGCTTTGCAGCAGTCACTTGAAGGAGCCATAGAGGCACTAGGAAACAGGATG  
CTGGAACCATGATAAGTTGATCTCTTTGATTGACCGAATGGCTGTAGAGCTTCCGCCCTCTGTAAAGGACGAGCATCA  
CCTATTGGTAATACTTCCGATCAGATAAGTGTGCAACAATAATGTTGACGGCTGCTTCTAAAGGTTAAGCAGAGGATAA  
AGCTGAAATGATAGGCTTGTATGATGATGAAAGTCTCGGTTCTGAGTATCGTGTCTTCTTACAGAAATTTGATGCAC  
AAAATATGACAGCTAAAATAATTTTAGATGGTGTAGCTCAAAAAAGAGAATCACTGCTGAAATTAGCGATCCAGCTGCA  
GGAAAGAAGAAATAACCCGTATATAGAGCTCTTAGTGCATATATATCAACCAAAGGTGATCCATCTGCAGTATTCACAT  
AACCGCAAAGGCTACTGTTAAAAAGGCCAGATAAACAGGTTATTTATGTAGATGCGAAATGA  
>Cluster\_26208  
ATGATTTTCTTTCTCAGGCACAAATCGATGCGTTACTGCTGGAAGATATCCAGGGCGGTGACCTGACCACGCGAGCATT  
AAATATTGGACACCAGCATGGCTATATAGAGTTTCTTCCGTCAGGGCGGCTGCGTCAGCGGAATTTCTGTGCGGTGTA  
AGATGTTAACTACCTGGGATTAACATTTGATGACGCGGTACGCGACGTTCTCAAGCGAACCGGGTACGCGCTAATC  
CGTGCGCAAGGTAATGCCGACGACTTTCATCAGGGATGGAAGGCACTCAGAAATGTGCTGGAGTGGAGTTGCGGTGTTTC  
TGATTTATCTCGCTCAAATGCTGGCGTTACTTCTGTAACGTTACCTGATGGCAATATCGCCTGCACCCGAAAAGCAATTC  
CGGGCACCCGCTTACTGGCCTCGCAGGCAATTCGGCTGCCGGAGGACTGATTTCACTGCTGCGGATGTGCGGAAACCAATA  
TTATTTGTTTGCACCAACCGCATTTTCTTCATGACAAATCAGGACTGGTCAAGCGCAATCAATCAGTTACGTCGCCACCG  
ACCCGAGAAGAAAATAGTTGTTGAAGCCGACACGCCGAAAGAGGCAATCGCCGCTTACGCGCTCAACAGACGTAATTC  
AGCTCGACAAATTTAGTCCGCAACAGGCAACTGAAATTCGCGCAATAGCACCGTCCGCTGGCTCCCACTGCACGCTGGCT  
CTGACCGGGGAAATTAATCTGACAACACTCAAAAATACCTCGACTCGGCAATTCGCCTTTTTATTTACTTCCGCGCTTA  
TTACCGGGCACTGTACATTAAGACTGCTCAACCGCAGCTCTCAACCGCAGCTCTATTTAA  
>Cluster\_55935  
ATGAAAATCTACGTTATGCTTTTACTTTTGTGCTCATTGCTCAGCACAGGAGTGCAGGCCGCGAAAAAGATCGC  
GAGCTTATACATTTCTGCGGGATCAATGGGAGTGTCTCAGGTTTTCAGTTAATCTTCTATCTCACCAGAAAGGGG  
CGCAATATGGGGTATATCAATCCAGGTCAGTTGCGATTGTAATGTGCCACTAGTATCATGGACTGGTCAAGGTACTGCT  
CCGGAACCTGATTTAGAAGACGCAAGAACCATATACCACCTTACGTTGCCCGGGCTTGAAGAATATGATGCTCGCAC  
CCCACAAACGACCTGGGCTGCGTGAAGTGAAGTCAAGTTTCTATGACGGTGTATGATGCTGCTGCTGCGGATAG  
TTTTCTCGTATGTAAGAGTGAAGACGCAACGGAGGCAATATATACAGTAATATGTTCCCTATATTTGGCCGCAAAA  
GTCAGTTCTGACTGTAGCGCAATACCTTTAGATCCTTATGATGCTCCTGGAATGAAAATACGGTCTGTCATAACAAAAT  
AGTCAGGATGCAATCAACAGGTGCTGTGATTGAACAAACGCTGCCACTTATCTGATGGAAGTGGAAAACCTGTGTGATG  
GTAGTAAATATGACGAGCGTGGTGTCTACTGCCGTTTTGTGCGCACAGCAGATGACCTTCTCCACTTCCGGCTGTGACGAT  
GCCAAAGTGACAGTGAAGCGCAGAGCCGCAACCGATCAGCTCAGGCAACTGCATGATATGAAGTCAACGCTGGACACAAC  
GGCGCAACAGCAATAGATGCCACCTGCCGTTCACTTACATACTGAATATGTACTAG  
>Cluster\_53639  
ATGAAGCTGATACGCGGCATACATAATCTCAGCCAGGCCCCGCAAGAAGGGTGTGTGCTGACTATTTGTAATTTTCGACGG  
CGTGCATCCGGTCACTCGCGCGCTGTTACAGGGCTTGCAGGAAGAAGGGCGCAAGCGCAACTTACCGGTGATGTTGATGC  
TTTTTGAACCTCAACACTGGAAGTGTGCTACCGATAAAGCCCGGCACGGCTGACCCGGCTGCGGAAAAACTGCGT  
TACCTTGCAGAGTGTGGCGTTGATACGTGCTGTGCGTTCGCTGACAGGCGTTTCCGCGGCTTAAACCGCGCAAAAATTT  
CATCAGCGATCTTCTGGTGAAGCATTTGCGGTAAAATTTCTTGCCTAGGTGATGATTTCCGCTTTGGCCTGGTCTGCTG  
AAGCGATTTCTTGTATATACAGAAAGCTGGCATGGAATACGGCTTCGATATCACCAGTACGCAAACTTTTTCGAAAGGT  
GGCGTGCATATCAGCAGCACCGCTGTGCGTCAAGCGCTGGCGGATGACAACTGGCTTGGCAGAAAGTTTACTGGGGCA  
CCCCTTGGCATCTCCGGGCGTGTAGTCCACGGTGTGAAATAGGGCGCACTATAGGTTTCCGACGGCGAATGTACCCG  
TACCGCTCAGGTTTCCCGGTGAAAGGGTTTATGCGGTAGAAGTGTGCGGCTCGGTGAAAAGCCGTTACCGCGCTG  
GCAAACTTGAACACGCGCAACCGTTGCCGTTATCGCCAGCAGCTGGAAGTGCATTTGTTAGATGTTGCAATGGACCT  
TTACGGTGCCTATACAAAGTAGTGTGCTGCGTAAAAAATACGCAATGAGCAGCGATTTGCGTCTGCGGACGAACTGAAAG  
CGCAGATTGCGCGTGTGAAATTAACCGCCCGCAATTTTTTGGGCTAACAAAACCGGCTTA  
>Cluster\_23623  
ATGTTGCGTTATGATTAACGCCGCTTCTGCTGCTGATCCCGATGGTGTGCTCGCCGCTCGGTGATCATTTTTTGTGATGCT  
GCGCTCGGCACCGCGACCCCGGCTTGTATTTTGCCTTATCTAACTGCGCGGACCGCGGAGATGCTGGCCTCTA  
CCCGCACCATGCTGGGCTGGATCAGCCGCTGTACGTGCAATACGGCACCTGGCTATGGAAGGCGCTGCATCTCGATTTT  
GGTATCTCATTCGCGCAGCCACCGCGGTGCTGGACGATGCACTTCTGCGCCGCAACCGCTGGAATGCGGCTGGAATGCGGCTG  
GGCGTGGTATTAATTTCTGCTCACCTCCGTTGCCGCTCGGTATCTGGCGGCGGCCACCGCATGCTTGCCTGATTTTCCG  
CGTCCGTTTCTGCGGTTTCTGCGGCTGCTGATGCTTAACTTCTGGCTGGCGTTTTTACTGGTGTGCGTTTTTTCGGTG  
TATCTGCAATGACTACCCGATGGTTACGGCGGCTGGCAGCATATTTGCTGCGGTATCCATCGCTTTATGTC  
GCTGGCGATTAAGCCGCTTTGCTGCGCGCAGTATGCTGGACGCTGCGGCTCAGCTCAGCTCACCTGGCAGCAGCTG  
GTGGTCTGAGCGACAACAGACCGAACCGCCATATTTCTGCGCAATGCTCCTGCTGCGGATGATCACTGCGTGGGGATG  
CACATTTGGCGAAGTGAATGGCGGACGATGATTTCAAAAACATCTTTGCTGCGCGGCGCTGGGCGCTATGCGGTTGTC  
GGCGATTTTAAACCGTGAATATCCGCTGATCAGTGTCTTACGCTGATGATGGTGGTGGTTTTTGTGCTGTGATTTTGA  
TTGTCGATTTGCTCAACGCCAGCTGGACCCGCTATTTCTGCTGCTATGAAGGAGCGCACGCGTGA  
>Cluster\_7568





AGTTATTGAGCGTATACTCCTAGCCTATGGCTTCAAGTCACGACAGGCATTTATGTAATCATCTAGGTATTTCCCAAAGTA  
CTATGGCCAACAGATATGCACGTAATACCTTTCTGCGAGATTGGGTTGTATATGTTCCATAGAAACAGGAGCATCAATT  
GAATGGTTAGTTCCTGGTTCAGATACTGCTCCTTCATCAGAGCAATATTTGAAAAACATGCCGTTAATGGCCTTTGCAA  
TGAAGTATACATTTCCCACTATAAAGTTCGATAATGAAAAACATGAAATTTTAAACCGAGGGGGTAAGGCAACAATAGAAC  
GAATCTCGAAGCTTACGGTTACAAAACCGCCAGCAATAGCTGATCACCAGTATTTCAAAAAGCAGTATGCCACA  
CGATACATGCGTGACATTTTTCGCGAGACTGGGTTTTGTCAGTGTGCAATAGAAACCGGCCATTTCTATGAATGGATTTT  
ATTTGGTACAGGAGAAATGAAAAACGCAAAAAATAAGATACTTAAACATTTAGTGA AAAAAGTATTAATCAATGGCAAGT  
TAATAAATGATGGCTCATATTTATTTGACCCATGCTTTCTACCTTCCAATTTAAAAAATGCATTCGTAGTATCTACCGAA  
GACTCTGAATTAATATGTGAAATGGGTTTTAAAGATGTACATGATGGTAAAGTGGCTAGTAAATATTTGATGGAGAAATTC  
ATTTGAATGATAACTCGACTACCTAAAGGACGAGTTTATATTTTCATCCCAAATCACCTTTTGAATGTTGCGTTACAG  
ACATGAGTTTATGCAAAAGTTATTATAAGTTGTTTACATTA

>Cluster\_24167

ATGCTGCGCAGGAAAGAGCAACCACCTGGCAATCAGTGGCCTGGTTGTGCTCACACTTATCTGGAGTTATAGCTGGAT  
TTTTCATGAAGCAAGTACCAGCTACATCGGTGCCTTCGACTTCACCGCTTACGCTGCATTTTCGGTGTCTCGTTTTAT  
TCATCGTCTCTTTTATTACGTGGTGCAGGATGCGCCGACGCGCTTAAATACACCTTAGCCATTGCCCTGTTACAAACC  
TGCGGGATGGTTGGCCTGACAGTGGGCGTGGTCAGCGGCGAGCGGGGAGGTGGCAATCCTGAGCTATACCATGCC  
GTTCTGGTGGTAAATTTTCGCGGCTTGTTCCTCGGTGAACGCTGCGACGTGGGCAATTTTCGCGATCTGATTGCCG  
CTTTCCGCTTATTTTGGTGTGTCAGCCGTGGCAACTCGATTTCTCTTCGATGAAAAGTGCATGCTGGCAATCCTCTCC  
GGTGTGATTTGGGGGCGAGCGCGATTTGTGCTAAACGCTGTGATGCCCGCATCCGCGCGTGGATTTATGTCGCTAAC  
ATCCTGCGCAGATGCTGTATGCGGCGTGGTGTAGCTGAGCGTGGTCTTACTGGTGCAGTGAATTTGACTGGCAAC  
CCACCGTGTTCGCGGCTGGCCTACAGTGCATTTCTGGCAGACGCGTGGCCTGGAGCTTATGGTTGTTGTATGAAA  
AATTCGCTGCCAGTATTGCCAGCTTAAGCACACTGGCCTTCCCGTTTGGCGGTACTCTTTTCTGTTGGCTGCTCGG  
TGAGAATCCGGGGCAGTTGAAGGTAGCGGTATTTGTGCTGATTGTACTGGCACTGGCGCTGGTGGAGCCGTAAGAAAAAG  
AAGCGTCAGTGTAAAAAGGATCTGA

>Cluster\_42619

ATGCAAAAGTTTGATACCAGGACCTTCCAGGGCTTGATCCTGACCTTACAGGATTACTGGGCTCGCCAGGGCTGCACCAT  
TGTTCAACCATTTGGACATGGAAGTCGGCGCGGAACTTCCACCAATGACCTGTCTGCGCGCTGGGGCCAGAACC  
TGCGCGCTGCTTATGTTTCAGCCTTCTCGTCCGCGACCGATGGTTCGCTACGGCAGAAACCCCAACCGTTTACAGC  
TATCAGTTCAGGTGGTCAATTAAGCCATCGCCGACAATATTCAGGAGCTGTACTCGGTTCTCTGAAAGAGCTGGGCAT  
GGACCCGACCATCCACGACATCCGTTTCGTGGAAGATAACTGGGAAACCCGACGCTGGGTGCCTGGGGCTGGGCTGGG  
AAGTGTGGCTAAACGGCATGGAAGTGACGAGTTCACTTACTTCCAGCAGGTTGGTGGTCTGGAATGTAACCGGTTACC  
GGTGAGATCACCTACGGCTGGAACGCTTGGCCATGTACATTCAGGGCTAGACAGCGTTTACGACCTGGTCTGGAGCGA  
CGGCCGCTGGGTA AAACCACCTACGGCAGCTGTCCATCAGAACGAAGTGGAGCAGTCCACTTACAACCTCGAATACG  
CGGATGTGACTTCTCTGTTACCTGCTTCGAGCAGTACGAGAAAGAGCGCAGCAACTGCTGGCGCTGGAAAAATCCGCTG  
CCGCTGCCAGCCTACGAGCGTATTTGAAAGCCGCCACAGCTTCAACCTGCTGGATGCGCGTAAAGCCATCTCCGCTC  
CGAGCGTACGCGCTATATTTCTGCGCATTCGCAACCTGACCAAGCAGTGGCAGAAAGCAGTACTACGCTTCCCGTGAAGCC  
TCGGCTTCCCGATGTGCAACAAAGATAAGTAA

>Cluster\_25680

ATGTTTTCTGGGCTGTTAATCATCTCTGGTTCCCTGATTTGGGTTACCTCATTCGCTTCGCCAAAAAGCTGCATTAAG  
AGTTATTAATCAGCTATTAAGTTGGATGGTTTACTTTATTTCTCTTTTTTATGGGTATCAGTCTGGCGTTTCTCGATAACC  
TCGCCAGTAACTTGTGGCAATTTGCAATTTCTGCGCTCAGTATTACCGTTATTTTACTGTGTAATATGCGCGCCCTG  
ATGTGGCTGGAGCGCGGCTGCCATGGCGCAACACCACCTCAGCAAGAAAACTCCCGTCCGCTATGCGATGCGCGCTGGA  
GTCGCTAAAACCTGTCGGCGTAGTAGTGTGTTTGGCATTGGTCTGAGTGGACTGGTTTTCTTACAACGCGCAGCG  
AAGCCAGTGAATACACCTTAATTTCTGCTACTTTTCTCTGCTGGTATTCAGTTGGCAATAATGGCATGACCTTAAAGCAG  
ATTTGCTTAAATCGCCGGGAATGATTTGTCGCGTGGTGGTGGTGGCAGTTCATTAATGGTGGTTTTAATTAACGCTT  
TATTTGATCTTCCCATCAATACCGCGTGGCAATGGCCTCCGGTTTCCGGCTGGTATTTCTTTCCGGTATTTTATGGA  
CCGAATCTTTTGGTCCGGTAAATCGGAGCGCGGCTTTTAAATGATCTTGGCCGCTGAGCTGATTTGATGTAATC  
CTGGGCTGATTCGCGCTAGCCGCTTACTGCACTGGGCTTATGCGGTGCGACGTCGATGGATTTACCCCTGCCCGTTCT  
TCAACGTCAGGCGGCTGGATATGGTCCCGCGCGATTTGTTACGGTTTTATTTCTTACTGTGTTAGTCCGATTTCTCA  
TCGCCTTTTCTCTGCATAA

>Cluster\_22700

ATGAGCATCGATAAAAGTTACTGCGGATTTATGCTATCGTCGGACGTCGCAACGTTGGCAATCCACATTTGTTGAACAA  
ACTGCTGGGGCAGAGATCTCCATTACCTCCCGCAAGGCGCAACAACCTGCTCACCAGCTTGTGGGATCCATACTGAAG  
CGCGTATCAGGCGATCTACGTTGATACCCAGGCTGCAATGGAAGAAAAACGCGCTATTAACCGCTGATGAACAAA  
CGCGGAGCAGCTTGGCGACGTTGAGCTGGTGTGATTTTGTGCTAGAAGGCAACCGCTGGACCGCGCAGATGAAAT  
GGTGTCAACAAGCTGCGTGTGATGGCAAAGCGCGGTAATCCTCGCGGTGAACAAGTGGACAACGTCAGGAAAAAGCCG  
ATCTGCTGCCACACTTACAGTTCCTGGCAAGCCAGATGAACTTCTCGATATCGTGCCGATCTCTGCCGAAACCGGGCTG  
AATGTCGACACTATCGCGCAATCGTGCATAAGCATCTGCTGAGCAGCCATCACTTCCCGAAGATTACATCACCGA  
TCGCTCACAGCGTTTTATGCGCTGTAATTTACCGGAAAAACTGATGCGTTTTTCTGCGCGTGAACCTGCTACCTCCG  
TGACCGTGGAGATCGAACGTTTCGCTCTAACGAACGCGGTGGTATGACATCAACGGTTTGAATCTGTTGAGCGTGA  
GGGCAAGAAAGATGGTCATTTGGCAAAAGGGGCAAGATCAAAACCATCGGATTTGAAGCGCGTAAAGACATGCAGGA  
AATGTTGAAAGCGCTTTCACCTTGAGCTGTGGTAAAAGTGAATCCGTTGGGCCGACGACGACGCGCACTGCGCA  
GTCTCGGTTATGTTGACGATCTTTAA

>Cluster\_12751

ATGTTTCCACAAGTCAAAATTTTCCCGGAGTTTCTACATCCTCGCTACTGGCTCACATGGTTTGGGCTTGGTGTACTCTG  
GCTTTGGGTACAGCTTCTTATCCTGTTCTCTGCTTTCGCGCACGCTTATGGCGCAATGGCGGACATTCTGAAAC  
GTCGTGAATCTATCGCCGTA AAAACCTGGAACTTTGTTCGCGCAGCATTCTGCGGAAGAACGCGAGAAGATGATTGCC  
GAAAACCTTTCGTTCACTCGGCATGGCGTGGTGAAGAACCGGCATGGCATGGTTCTGGCCGACAGTCCGCTACGTAATG  
GTTTGTGTTGAAGGTTGGATAACCTTAAACGCGCACAAATGCAAAATCGCGGCGTAATGGTTGTCGCGCTCCATTTTA  
GTGCTGGAACCTGGGCGCGCTGATGGACTGTGCGCAACCAATGATGGCTACCTATCGTCCACATAAATAACGCTG  
ATGGAATGGGTGCAGACCCGTTGGCGCATGCGCTCTAACAAAGCGATGATCGGAGAAATAATCTGCGCGCATTTGTCGG  
TGCCTGAAAGAAAGTGAAGCGGTATGGTTTGCCTCCGATCAGGATTTGGTTCGTAAGGCGAGCTCCTTCGCGCGCTTCT  
TTGCGGTGGA AAATGTCGCCACAACCAATGGCACCTATGTTCTCTCCGCTCTCTGCGCGCAGCCATGTTGACCGTAACG  
ATGGTAAGAAAAGCGGATTTACAGCGGATATCTGTTGTTTCAACCCAGAGATGGAAGGCTACCCGACAGATGAAATCA  
AGCCGCTGCCTATATGAACAAGATATCGAGAAAGAGATCATGCGCGCACCGGAGCAGTACTCTGGATCCACCGTGGT  
TTAAAACGCGCCGGTGGGAAATCGTCTGTTGATTTAA

>Cluster\_48643

ATGCCAGAACAAAAGATGAAGATTACGGAAGAGGCATTTTCGGATTTTACGGGCGATATGTCGCTGCGCGATTTACCAA  
TTCATCTCCGATGAACCTTTAACCGAGCGGCAACAAAGTCAGTATCTGCTTGTGTTGAGGCGGTTCCCTCTCCCAAT

CCGTAACATAAACCCGGCTTACCCTCAGTTTGGTTGGGAAAACGTTCACCTTAGTGCAGGTATTAGTATGGGTAAAG  
AGTGCCAGTTTCATTCACCTGGAAGTCAGCCAATGACCAAAATGCAACCCTAACCGGCACTGGATTAGTAACTGGCGTAGC  
ACCAGGCAAAGTAAAAATTAAGTCACTGATCAGGAAACCCAGCTTTCGGCTTACGTGGAAGTACCCTGAATCCGGTAG  
CCGTTCATCCGTAACCGGTAACGCCAGAATCAACGTCTCTGTGAGAAAGGGAAATCAGTCAGTCTGAAAGCGAATGTTTCAG  
CCGTCAAAGTGGCAGCAATAGGCTGTTACCTGGTCTTCCAAAATGAAGATAAGGCAACCGTAGACCAGGCGGGAACCT  
TACTGGTGTAGAAGTTGGCACTGCGACGATTTAGATCGTTTCCCAAGATGGCAGCAAAAAGGCAACTGCAACGGTGGAA  
TAACGTGCGCTGTGTGGCTGTTACCGGCTCGAAATCGACCCAAATAGCACAACCGTTGAGGCAAACAAAACGTTCAG  
CTGACAGCAAATGTGAGCCGGCAGGAGCCACAAATAAAACCTTACTTTGGGAATCCAAAATACCGAGTTTGGCAACGGT  
TGACAGCAAACCGGTGTTGTAACCTGGTGGTTCAGGCTGACTGCCACAATCGAGGTACTACCCAAGATGGTAGCCACA  
AAGCGACAGCACTGTAGAAGTTACTGCCGCACAGGAATAA

>Cluster\_56093

ATGACGATTAATAAAGTAAATAGATGTTTACGTCTTGGGAAACGACTCAGAAAAAAACGCTCTCTATGACAAACGATAAGGT  
AAAGTTAAATACAAGAAATGTAGATAAACTCATCGCTATACATAAGTGCAGTGTCTTGAGGCTAATGAAATGGTTTTCA  
TTGCTCGGTTTTTAATTAAGGCAACCCGTCACACAGCAAGCAAGATTGAATGAGTGGAGCCGTAATAATGGTAATTTA  
ACCATGCATATGATGGCACCATCAGCAGTAGGTTTGGCTTACGGTTGTATGCTCGATTACTATTTGGTTTGGATTAGTAC  
TCAGGCAATTAAGAAATAAAATAAAATGACAAAGGTTATTACTACTGAACAGGAAGTTTGTAGCTTGAATTTAGGACGAT  
CTCAGCGACGTTTTTATGGGAAGCACTGGGGCTACGTTCAAGCGGTGGTAAAAATGGCTCTATTGTCGGCTTCCGTAACAG  
ATGCGCGGATTAATCAAACGACGATTAGTATTTATGTTAGCAGAGATAAATGAGGAAGATGGATAATTTGTGAAGATGA  
AATGGGAGCTAGGTTGCGCGATAATTCACATATTTGGTGGAGTCAAAATATCTTGAACGAAATTTATTTGAGTCAATCTT  
GGGTAGAATTTCCGCTAAATTTTTCACTAATAATAGATAAAACCTGTTCCGTGGATATGAGGGTTCTGCGGCTGAT  
AAACGTTCTCCGATGGCTTAGATATATTTGCTGGGCACTTATCGGGTGTATTTAAAGCGAGTCAACAATTTATCCC  
TTGGTTCAGTTTGTAGGAGCAAATGGGATCTAATTTATGCGGATGTCAAAGACTTTAAACGACGTTTAAATGATGGGCTT  
AAAAGGTACAGCTGGCATGGCCGGGGCGGTA

>Cluster\_53644

ATGCGTTTTACCTATCTTCCCTCGATACTGACCCCGCATTTGACGATGCCGTGCGCATTTGCCCGCGCATTTTTGCACCCGA  
ACTCGACCTGCAACTGATGACCACCGCTGCGGGTAAATGTCGCTGAGTGGAAAACCTACCGCAATGCCCTGCAACTGCTGC  
ATTTCTGGAAATGCGGAGATTTCCGCTCGCCCAAGGGGCGCTGTGCCGTGGTACGCGCACCGCGTGTGCGGCTGTG  
ACGGCGAATCGGAATGGCTGGTACGCTTTTGTGACGCAACCGAAAGCGCTCGGGATACCGGCTTCTGCGCAT  
TCGGGATGCCCTGATGCGTGCACAGAGCTGTTACCTGGTGGCCATTGGCCGTTAACCAATATTTGCGCTGTACTTT  
CACAAATGCCCGGAATGCAAGCCGTATATTCGCGCTGTGTGATCATGGTGGTTCGCGGACGCGGCAACTGTACGCCA  
AACCGGAGTTTAAATATCGCTGCCGATCCAGAAGCGGCTGCCTGTGCTTCCGTAGCGGAATCGAAATCGTATGTGCGG  
TCTGGATGTCACCAATCAGGCAATATTAACCCCTGACTATCTCGCTACTTTGCCGAGTGAATCGCACCCGAAATACTC  
TTCATGCACTGTTTAGCCACTACCGTAGCGGCAATGCAAAAGCGGCTGCGAATGCACGATCTGCGCCATCGCTGG  
CTGGTGGCGCCGACTTATTCACCTCAAGCCGTGTTTTGTGCGGATGAGAAATCAAGCGAATTTACCTCAGGCACGAC  
GGTGGTTGATATCGACGGTTGCCGCGCAACAGCCCAATGTAAGGTGGCATTTGGATCTGGATGTGAAAGGCTTCCAGC  
AGTGGGTGGCTGAGGTGCTGGCTCGCTAA

>Cluster\_13412

ATGCGCTACTTATTAATTTAATTTATATTTATTATAGGTTTTAGTGCACTTACCTGTATGGGCAATGGACTGCTATGCTGA  
ACATGAAGGGGAAATACCGTAGTATTTGTTACGTACCAAGAATTTCTATCCCAAGTAAATGGTAAAAAGGTGATAAGA  
TCTGGCAAAGCAGTGTAGTATTTTATGAAATGTCTTCTGTAATAATGCAATACCTGCCCCATCACCTGGAGAAGAATACCA  
TCAGCCTGGACTAATATAATGATTTTTTACCAGCGGTCAGGACTTTTATAATCAGAACTCCATATTTTTGGCGTAAC  
ATACAATGGAGTTGATTTATGATTGCATGCCCTAATGCTATCGCAGCACCAGAATGCATGATAAAAAGGAGCGGGTA  
CCTTAAATAACTACTATAAAAACCCCGCTGTCTGTAGTGGAGGTTCTGAGCTCAATTTATCAGTAACTTTCCGCTCGC  
GTACAACCTATATTAATTTAGCAAAAATGCCAATAGAGTAAATAAAAACCTGGTGTACTTGTGATGATATATCGCTCT  
AGAGTTTAAAGGTATGAGTGGCGCAGGAGCTATAGAAGTAGACAAAATTTGACCTTCCAGGATTCGTTGATTAATAATA  
TTCATGTCCTTACTGCTTTGTTAATGTGCACTGGAACAGCTGATGGCGTTGTTGACTTTGGTAAAAATAAATTTCCCGA  
ACAAATAAAAATACCAAGCTTGTAGGAGCTTTAGTGTAGTCAAGCAAGAGATCCTGCTGGCGCTGTACTGAGCAAT  
CAATATTTTAGGGAGCTTTTTACTACGGATATTTTGTAGTATATAGCCATCTGGATATGGGTAATGGACTGCTATTGA  
AGATATTTTATAAAGATGGAAACGCAACCGAATTTAACCGCTTCTCACAAATTTGCTTCTTTTTATCGTCTAGTGCACCT  
TCGGTACCGCACCATTACGGGCAGAACTTAGTGGCAATCCGGCAGAGACTGTTGTTGAGGGACCGTTTAGTAAAGACGT  
CATCCTCAAAAATCACCTATAACTAG

>Cluster\_55102

ATGCCATAACTTGTCACTTGGATGAACAACCAGCGGGTAGGCGAGTTAACGAAGTTAGCCAACGGCGGCACACCTTTAA  
GTATGCACCGGAGTGGTTAGCAAGCCGTTATGCCAGACCGTTGTCATTTTCGTCGCCATTTGCAGAGGGGAATATCACCT  
CTGATGCGGTATTTAACTTCTTCGATAAACCTGTTACCAGATACCGCGATTGTACGTGACCGGATCGTTAACTGATCAT  
GCCAATCCAGACAACCGTTTGAATTTATGTCAGAAATAGGGCGAGACAGCGTTGGTGGCGTGACGTTAATACCCGAAGA  
CGAAACCGTAAACGATCCGATAATGGCATGGGAAAAGCTTACTGAAGCCAGACTTGAAGAAGTATTAACCGCTTATAAAG  
CAGATAATCCCGTAGGCATGATTAGAGAAGAAAATGATTTCCGATCTCGGTTGCTGGCGCACAGGAGAAGACAGCATG  
CTCAGAATAGGCAATGACTGGTGCATTCCGAAAGGAATAACCGCGACGACGACATCATTAATAATTACCGATTGGCGAAAT  
CAGGCAGCCCAATGCGACGCTCGATCTACGCCAAAGCGTTGATAATGAGTATTACTGTCTGCTGCTGGCGAAAGAACTTG  
GGTTGAATGTTCCGGACGCAAGAAATCATTAAGCGGGAATGTGCGCGGTTAGCGGTCGAACGTTTTGACAGGCGTTGG  
AATGCTGAGCGAACGGTTTTACTTTCGCTTGCACAGGAGGATATGTGTCAGACATTCGGTTTACCTTTCATCGTTGAAATA  
TGAATCAGATGGAGGCCAGGCATCGCGCGGATCATGGCTTTTTGATGGGGTCCAGCGAGGCGCTGAAAGATCGCTATG  
ATTTTATGAAATCCAGGCTTTCAGTGGTTGATTTGGCGCAACGGACGGTTCATGCAAAAACCTTCTCCGATTTTATTCAG  
GCTGGCGGCGATTTCGACTCACGCCATTTTACGACATCATTTTCAGCATTTCCGGTCCTTGGCGGTACGGGAATACACAT  
CAGCGATCTCAAACCTGGCAATGGGCTTAAAGCATCAAAGGCAAAAACCGCAATGATAAAAATTTATCCGCGACATTT  
TTTTGGCGACAGCAAAGGTGCTGAGATTTCCGGAAAGTGCAGATGCATGAAATCCTGAGTACTTTGCCAGAATGATTTCA  
GCAGCACTGGATAACGTTGAAGACTTCATTTACCGACAGATTTCCGGGAAACGTTGGTGGCGGAGTTGAAAGCAATGTGTT  
GAGGTTGCATGGACGGTTAAGCCGAGAATACGGTAGTAAGTGA

>Cluster\_25100

ATGAATAAATATCAGGCAGTTATTTATTTGGTTTTGGCAAGGCTGGAAAAACATTTAGCCGTCACGCTGGCAAAGCAGGTTG  
GCGTGTGGCTCTCATCGAACAATCAATGCAATGTATGGCGGGACCTGTATTAATATCGGCTGTATCCCAACCAAAACAT  
TGGTTCATGACGACAGCAGCACAGATTTTGTCCGTGCCATACAGCTAAAAATGAAGTGGTAAATTTTTTACGTAAT  
AAGAATTTTCAATAATCTTTCGCGGATGTCGCAATCATCGCTGATTCGACGGCCAGCGGAGTTTTATCAATAATCATAGCCT  
GCGTGTTCATCGGCTGGGGGAAATCTGGAGATTCATGGCGAGAAAATTTTTATTAATACCGTGCACAGCCGTGGTTTC  
CGCAATTTCTGGAAATACCAACCGCTGGTGTATATGACAGCAGCGGATTAATTAATCAAAAAGAAATTTGCCCTGGGCAT  
TTAGGATTTTGGGCGGCGGATATTTGGCTGTAGTTGCGCTCTATGTTTCGCTAATTTTGGCAGCAAGATTAACCAATTT  
AGAGGCAGCTTCCGTGTTTTTTCGCTCGGGAAGATCGGGATATTTGCTGATAAATCGCGACGATTTTACCGCATCAGGGCG  
TCGATATAATCCTCAATGCCATGTGGAGGCAATCAGTACCATGAAAATCAAGTGAAGTGCATAGCGAGCACGCCCAA

CTGGCGGTGGATGCACTGTTAATAGCTTCCGGTCGTCAACCGGCTACCGCTTCGTTACATCCAGAAAAATGAGGTATCCG  
AGTAAACGAGCGCGGGCAATTGTCGTTGACAAGCAATACATACCACGCAAAACAATATTTGGGCGATGGGAGATGTTA  
CCGGCGGCTGCAATTTACTTTACATTTCACTGGATGATTACCGCATTTGTCGCTGATGAGTTGCTGGGAGAAGGCAGACGT  
AGTACTGATGATCGGAAAAATGTGCTTATTCCGTTATTCATGACACCGCCACTGTCCAGGGTTGGTATGACAGAAGAACA  
GGCCAGAGAGAGTGGTGCATGATATTCAGGTGGTGACATTCGCTTCCGGAACACAGGTAAACCGACAGTTGTGCGCTATACGCA  
CTCGTGGGGTATTTAAAGCGATTGTTGATAATAAAACCAACGTATATAGGGGCATCACTGCTGTGTGTTGACTCCAC  
GAGATGATCAATATAGTGAATGGTATGGATGCCGGCTGCCTATAGCATATTACGGATCAGATATTTACTCATCC  
GTCGATGAGCGAATCACTCAATGATCTATTTTCATTAGTCAAATA

>Cluster\_45412

ATGATAACCAATACAAAGCTTGACCCGATTGAAACCGGCTGTTGATGAGTTACAGGCGTTACAACACAACGTTGAA  
ATGGACGCTCAAAACACGCGTATGAAAATGTCCCGATGATCGGCGCAATTTGACGCAGCAGGCGTACATCCTGATGATT  
TCAGGGAATTTTCAGATTCGCTAAATTTCCCTGTACCACCAACAGGATCTGCGCGACAACATCCTTCGACACCTTT  
GCCGTGCCGATGGAAACAAGTGGTGGCATTTCATGCTTCTTCGGAACACAGGTAAACCGACAGTTGTGCGCTATACGCA  
AAACGATATTGATAACTGGGCAATATTGTAGCGGCTTCTTGGTGGCGAGGTGGCAGCCAAAGACAAAATTCATG  
TTGCTATGGTTACGGCTGTTTACTGGTGGGCTGGGCGCGCACTATGGTGCCGAACGCTGCGGCGTACGGTATCCCG  
ATGCTGGTGGCGAGACGGAACAAAGCGCACTGATCCGCGATTTCACCCAGATATGATCATGGTTACGCCATCTTA  
TTGCCCTTAACCTGATTGAAGAGCTGGAGCGGCACTGGGCGGTGATGCCAGCGGTTGCTGCGGTTGGAGTCTTTG  
GTGCTGAGCCGTGGACACAGGCCATGCGTAAAGAGATTGAACGGCGTCTGGGGATCACCGCACGATATTTATGGCCTG  
TCAGAAGTATGGGGCGGGGGTGGCGATGGAGTGTCTGGAACCTACCACGGCCCAACATTTGGGAAGATCATTTCTA  
TCCGAAATTTGTTAATCTCATGACGGCACCCGCTTCCGATGGTGAACATGGCGAATGTTATTCACCACGCTGACCA  
AAGAAGCATTTGCCGCTCATTTCTGTTACCGCACGCGTATTAAACCCGACTGTTACCAGGAACGGCGCGGACTATGCGCCG  
ATGGATCGCATCAGCGGACGCGATGACATGTTGATCATTCGCGGTGTAATGCTCTCCCGTACAACTGGAGAAGA  
GATTTGTCAAATTCGAACATTTATCGCCATTACCAACTGGAGGTGAACCGCGGGGGGATCTTGATTCACTTTCTGTGA  
AAGTGGAGTTGAAAGAAAGCAGCTGACATTTGACGATGACAGCGGTTGCCAGGTGTGCCACCAGCTGCGCCATCGGATT  
AAGTCGATGGTGGGATCTTACCGATGTGATGATCGTTAACTGTGGCAGTATCCCGGTTGAGAAGCAAGCGGTGTCG  
GGTGTGATCTGCGCAATATTGTTGGTGCCTGA

>Cluster\_40967

ATGGACTCCACGCTCATCTCCACTCGTCCCGATGAAAGGACGCTTTCGTTAAGTCGCGCCGACGAGCTGCGTTAGGCAG  
TTTCGCTGGTGGCGTCTGCGACTGGTATGATTTCTACTCTATGGCATTACCGCCGACTGGTGTAAATCGCGAGTTTT  
TCCCGCAAGTAAGCCCGCGATGGAAACGCTCGCCGATTTGCCACTTTGGTGTGCGTTTCCCTTTCCGACCGCTCGCG  
GGTGTCAATTTCCGGTCACTTTGGCGACCGACTGGGACGTAAGCGCATGTTAATGCTGACCGTCTGGATGATGGGCATCGC  
GACAGCCTTGATTTGGCATTTCTTCTTCTCTCGACCATTTGGTGGTGGGCTCCCATTTACTGGTGGGAGTGGGATGCG  
TACAGGGATTGCGCTCGCGCGCAATGGGAGGCGCAGCGTTCCTTCCGTTGAAAGTGGCGGAAAAAATAAAAGCC  
TTTTACAGTAGCGGTGTACAAGTTGGCTACGGAGTAGGTTACTGCTTCAACCGGACTGGTTTCACTTATGATCAGTATAAT  
GACGACTGACCAAGCAGTTTTAAGCTGGGGTGGCGCATTCCTTCTGTTAGCATCGTACTGGTACTGGGACATTTG  
GGTGGCGCAATGGCAATGGAGGAGTGGCGGAAATTTGAACAAACAGCAACATAAATCAAGCGCGCGGAAAAAAGCCG  
GTTATCGAAGCTCTGTTACGACATCCCGGTGCTTCTTGAAGATTATTGCACTACGACTGTGCGAGTTGCTGACGATGTA  
CATTTGTTACTGCTTTGCACTTAATTTAACAACCCAGAATATGGGGTTACCGCGCAACTTTTCTTAAATTTGGTTTTG  
ACAGGCGCTGATCGGAAACGTTGAGCGCATTTCTTTCTTTAAGGCGCTGAAAGCACAACTATTTTCTGGAATTTTT  
CTTCTCCATAATGCTGGCAACATTTGCGCATGATATGGTGGTGTGTGCAACACCGATGTTTACCAGAAATGTTTGGTG  
CCAGTTATCGCTACAGTGGTGTGGAGTCCGTTTACAGGTTGCCAGTGTGGTTGGCGGTGGATTTACACCTTTTATTGCC  
GCTGCATCATCACTTACTTTGCCGGAACCTGGCATAGCGTCCGCAATTTATTTGCTGGTGGATGCCTGATTTCTGCAAT  
GACCGCTTTGTTGATGAAAGACAATCAACCGCTTGA

>Cluster\_9389

ATGTTATTTACTATCCAACCTTATCATAAATACTGATATGCTGTTTATGGTGCCAGAAAGGGTGGTATCGCGCTGGGTTT  
ATTAGCGGTATCGGTCTGGTCACTTCTGGTCTTCTGCTTCCACCTTCAGCCAGGTAACCACAGTTGATGTCATGCTGG  
TTATCATTTGCGGTGGTGGCGCATCGCGCACCTTGCAAGCTTCGGGCGGTCTTGTGATGTCATGCTGCAAAATGCGGAGAAG  
CTGCTGCGCGCAACCCGAAATATGCTCAATTTGTCGCGCGTGTGTGACCTGTACACGACCATTTCTTGGCGTACGGG  
TCATGTGGTTTACACCATTTGCGCATCATCTACGACGTCGCCATTAAGAACAACATCCGTCGGAAACGTCGATGGCGG  
CAAGTTCTATCGGTGGTGCACAGATGGGGATATCGCCAGTCCGGTGTGCGGTGCGGTGCTGCTCTGTTGCGTGGGTT  
AATGTCACCTTTGATGGTGCCTACTTTGAGTTCCTCGATCTGCTGGCAATCACCATTCCATCGACGTTAATCGGTATCCT  
GGCGATCGGTATCTTCACTGGTTCGCGGTAAGATCTGGATAAAGACGAAAGGTTCCAGAAATTCATCTCCGTACCGG  
AAAACCTGAGTATGTTTACGGTGTATCCGCGACGCTGCTGGATAAAAAAATGCCGAAAGCAACTGGCTGGCAATGTTG  
ATTTTCTCGGGGCACTGCTGAGTCCGCTTCTGGTGTGTTGTTGTTGTTGTTGTTGTTGTTGTTGTTGTTGTTGTTGTTG  
GTCGATGGTACTGGTTATTCAGATGTTTATGCTGCTGACCGGGGCGTGAATATATCTGACAAAACCAATCCCGGT  
CTATCTCAAAAAACGAACTTCCGTTCCGTTATGATCGCCATCGTGGCGGTGTACGGTATCGCATGGATGGCAGAAACC  
ATGTTCCGGTGCATATGCTGAAATTCAGGGCTACTGGGTGAAATGGTGAAGAGTATCCGTTGGGCTATGCCATTTGT  
TCTGCTGCTGGTTTCCAAGTTTGTAAACTCTCAGGCTTGGCGGCTGGCGCGATTTGTTCCGGTTCGCGTGGCGATCGCG  
TTGATCCGGCATAACATCGTGGCTTACAGCACCAGGCTTGTACGGTTATTACATCTGCGCACTTATCCGAGCGATCTGGCA  
CGGATTCAGTTTACCGTTCCGGCACCCACATCGGTGCTTCTGTCATCAACCACAGCTTTATTTCTGCCGGGTTGAT  
TGGTGTGAGCGTATCGTGGCTTTCGGCTGGATCTTCGCGCGATGTACGGGTTCTTATAA

>Cluster\_2119

ATGAACGCTGGGAAGTTAATTTTCGACGGGCTGGTAGGGCTGACGCATCATTACGCTGGCCTGCTGTTTGGTAATGAAGC  
CTTACCCGTCACCGTTTTCAGGTGCTTAACCCGCGACAGGCGGCAAAACAGGGCTTACTGAAAAATGAAAGCTTTCGCG  
ATCGGGATTTCCCCAGGCGGTGATCCCGCGCACGAGCGTCCGTTTATTTCCGCTGCTGCGTCACTGCGTCACTGGGAT  
AGCGATGAGCAGGTAAGTGGAAAAAGTTGCACGCCAGGACCGCACTGGCTTTCCAGCGTCACTTCCGCTTCGCCAATGTG  
GGTAGCCTATGCGCAACGATCGCGCATCTGCGGATACGCTGGATGGCAAAGTGCATCTCACCGTTGCCAACCTGAACA  
ATAAATTTACCGCTCGTGGAAAGCGACGCTACCGAATCACTTTTAAAGCGATTTTAAACGACGAGAAATTTAGC  
GTTCAATTCGCGCTTTCGCGAGGTAGCCTTCTGCTGATGAGGGGCGGCAAAACCAATCGTCTCGCGCTCATACCG  
TGAGCCGGTATGCAACTTTTGTCTACGGGCGAGAAGAAGGCAATGATACCCGGCTTCCGTTATCCGGCGCGACAGA  
CTCGCAAGCCAGGAGGCGGTGGCAAGGCTGAATCAGGTGAATCCCAACAGGTGATTTTCGCCAGCAAAACCCGGAC  
GTTATCGACAGGCGGTTTTTCAATAAGCTGATTCGCTGAGTAAACCGCAGGTGCTGTTTGGCACAACAGGCGTT  
CGCTCGCCAGTCAAGTTTACTGGCAAACTGCGTGGTGGTGAACCGTTTATGGCGATAGAAGTTCCGGCAACTCAGG  
TTTCCGTTGCTGGATGCGGTGCTACCTATCTGTTTAAACAGCAACTGTTGAGCCGCGATGATGGTTCCATGATTTGGTG  
CTGCTCAGGAGTGTGCGGAAACCGCGGATGAGGGTTATCTCAATGAACCTTCCGCTGACAAACCCGATTTAGCGA  
ACTAAAGTCTTTGATTTACGTTGAAAGCATGGCGAATGGCGGCGGCGGCTGCTGCGGTTGCGGGTGGGATTTAGCAG  
AAGAAGAACCGCGGCGGTGAATCCGGCGGTGATGATGAACGATACGCTGTTTAAATGCGCTCAATGACTGGGTGGATCGT  
TACTACCGGATCGCCTTACTGCTGCGGATCTGGCCGACCCGCAATTTGCTGCGCGAGGGCGGGAAGCACTGGATGATTT

GAGCCAATTACTGAATCTCGGTTTCGGTTTATCCGTTCCAGCGCGAGGGAGGGGCAATGGATAA

>Cluster\_28939

ATGGAATCACTGGCTCGCTCTATAAAAAATCATATAGTACCTTACAGGAACGGACTCGCGATGCGCTGGCGCGCTTCAA  
CTGGATCGGTTACTTATCACTCCGGCGAAGCTTTCACAGTTTTCCTCGACGATCATCCCTAACCCTTAAAGTGAACC  
CGCAATTCAGGCGTGGGTCGGTAACTCAGGTGCCAACTGCTGGCTGCTGGTGGATGGCGTGAATAGGCGGAACTG  
TGGTCTTATCTGCGGTTGATTACTGGCACAACGTCGAACCGCTGCCGAACCTCTTCTGGACTGAAGATGTAGAGTGT  
CGCGCTGCCGAAAGCCGATGGCATTGGTAGTCTGTTGCTGCTGCGCGCGGCAATATCGGTTATATCGGTCGGTGGCAG  
AACGTGCGCTGCAACTGGGTATTGAGGCAGCAATATCAACCCGAAAGGGGTGATCGACTACCTGCATTACTATCGCTCC  
TTCAAACCCGAGTACGAATCGGCTGTATGCGTGAAGCGCAGAAAATGGCGGTCAACGGTCACTCGCGCGCGAGAAAGC  
GTTCCGTTCTGGCATGAGCGAGTTCGATATCAACATTCGCTATCTGACCGCGACCGGTCACTCGTGATACCGACGTACCTT  
ATAGCAACATTGTGGCGCTTAAACGAACAGCTGCGGTTGTCATTACACCAAACTGGACCACCAGGCACCGGAAAGAGATG  
CGCAGCTTCTGCTGGATGCCGGGGCCGAATATAACGGCTATGCGGCTGATCTAACCCGTACCTGGTCCGCAAAAAGCGA  
CAACGACTACGACAGTGGTGAAGACGTAAATGATGAGCAACTGGCGCTGATCGCCACCATGAAAGCAGCGCTCAGCT  
ATGTGGATTACCATATCCAGTTCATCAGCGCATCGCCAACTGCTGCGTAAACATCAAATCATCACCGATATGAGTGAA  
GAAGCGATGGTCGAAAACGATCTCACCGACCGTTTATGCCGACGGTATCGGCCATCCGCTGGGCTGCAGGTGCATGA  
CGTAGCCGGTTTTATGAGGATGATAGCGGTACGCACCTCGCGGACCGGCAAAAATCCGTACCTGCGCTGCACCCGTA  
TTCTCCAGCCGGGATGGTGTAACTTAACTCGAACCGGGTACTTACTTCACTGAAATCGCTTCTGGCTCCGTCGCGGAGG  
CAGTTCAGCAACACTTCAACTGGCAGAAAATGAAGCACTGAAACCGTTCGGCGGCAATTCGTATCGAAGACAACGTGGT  
GATCCAGAAAACACGTGGAAAACATGACCCGGGATCGAAAACCTGGCGTGA

>Cluster\_61235

ATGGGAAGCCAGGAACTCCAACGCAAGCTCGGATTTTGGGCGGTTCTTGAATCGCCGTCGGGACAACCGTCCGGTCCGG  
TATTTTTGTATCTGTGGGTGAAGTGGCAAAGCAGCGGCACGCCGTTACGGTGTCTCGCTTTGTCTATTGGCGGGT  
TAATTTGTGATCCCGCAAATGTGCGCTTATGCGGAACTTCCACCGCTTATCCGGAATAAGGCGCAGATTTATGTTATCTG  
AAAAATGCCGGAAGCGGACCGCTGGCTTTCCTTCCGGTGGCCAGCTTCTGGCCAAACGATCGCGCTATGCTCGAT  
TATGGCGCTGGCGATTGTGAGCAATCTTGGCTTTTAAACGCTTATCGATCCGTTGCTCGGTAATTTATCGCCCGGGAT  
TAATTATCGCCTTTATGTTGCTACACCTCGCTCCGTTGAAGCGGCGCAGCGTTTACAGCGCTAATACCATCGCCAAA  
ATTATCCCGTTCACTATCGTATGGCTTGGGATCTTCTGGTTTAAAGCGGAGAATTTTGGCCCTTACCACCACTGC  
GATTTGGCGCAACGGCGAGCTTTATGGCGCTGCTGGCGGGGATCTTGCACCAAGTGGTGTGATATCGCGCTATGCTTA  
TCTGTTATATGACCGCGCAAAATTAACCCGGAACCATGCCACGAGCGCTGATGGTCTGCTGCTGGTTCG  
GTGCTCTACACCTGCTGCGCTGGTGTATTCGGCCTGATGCCCTTGCACAACTCGCAATCTGAAACCGCGATTTC  
CGACGCCCTGACCTGGATCCCGCACTCGGCAGCAGCGTGGGATCTTGTGGCCATCAGGGCGATGATCGTCACTTTC  
GTTCCGTTTCCAGCTGCGTGTATGACACCGCCGGCTGGAATACCGCATGGCGGAAAGACAACCTGTTCTTTAAATGCTTC  
GGCATGTGCATCCGAAATACAACAGCCGGATGTCTCCATCATCTGCAAGGGGCGTGGGGATCTTCTTCACTTTCGT  
TTCCGATCTCACAGCCTGCTGGGTTATTTACCTGGTGTATGTTTCAAAAATACCCTCACCTTCGGCTCCATCATCT  
GGTGTGTAACCGCAGCATTACAACCGCTGTGGCGTACTCCGGCTTTCCGGCTGATGACCACCTCGCCATTGGCTCA  
AGCCTCATTTGGTCCGCTCAACCTTTGCTGGGCAACCTTCCGGCTTATCTGCGCCGCTCATGTTATTGCTACTGG  
TCTGCTGCTTACGCTTCTGGCGAAGCGTAGCCGACGCTCAACGCTTTGTCGTAA

>Cluster\_66943

ATGAAAAAATATGACCGAGGCTGGGCATCGCTGGAACGCGCGGCTTTACTGATTGTTATGCTCCTGATTGCCGCGG  
AGCGGCGATATGGCAGGACTATATTTCAAACAAAAGGATGGCAAACGAAAGCAGCTTCTGTAGCAACTGGACCAGTCCGG  
CCCGCTCTTATATAGGGAACATACAGACTCTCCAGGCGAGTAGTACCACAACAACCTCCTGCGGTTATCACGACAACC  
ATGCTGAAAAATACCGGCTTTTTGTCCAGCGGGTTTACTGAGACAAACAGCGAGGGGCGAGCGGTTACAGGCATATGTTGT  
TCGAAACCGCCAAAACCGGAAATTAACAGGCAATGGTTGATATCCAGTGGTGCACACCTTATCCAGTGAAGAGCACTTA  
TCCAGATGGCTAAGGATATTAACACTGGTCTTGGTGGATATATCCAGGACGGCAAAACAGCCACAGGTGCATTACGTTCC  
TGGTCACTAGCTTAAAGTAAATTAAGTGCAAAAGCGGTAACGGGCAATATGCGCTATGTTATCGACATATGAACCTTAG  
TGGTGCAGCTGAGGACACTGATCGTCTTTACAGATTCAGGTCAATGGTGCCTGACTTAAACAAAATGCACACGGTCA  
TTGATATGGGATCAAAATAACCTGAATAACGTTGGGCGGATGAAATGCCCCAGACAGGTAAATTCAGCGGCAATGGTAAATG  
GTAATGGCACTTTCAGCGGTCAGGTAAAAGGCAATAGCGGAACTTTGACGTAATGTCACCCTGGCGGTGATATCAG  
AAGTAATAATGGTGGTAAATTAATCTCGTAAACAGCAAAGCTGGCTCAATGAAACTCACGGTGGCGGATTTTATATGTCGG  
ACGGATCATGGGTTGCAAGTGTAAACAACAGGGCCTATACCGCGGTCAGGTGAAAGGGGCTACTGTTCCGTGCTGAT  
GGTCCCTTATATACTGGTGAATACTTACAAGTGAAGAACTGCGCTTCTGCGCGCATCATGTTCCGCTAACCGCTTGT  
AGGCCGCGATAATACAGGGCAATACTTTCTGTCGAATCCGGTACGTGGAGGACAATAGGTGGAAAACTTAAAGTTACTC  
AGCTTTCCAAACAGGTTATCTGGGGCAATTCGACTTCTGTGCCATTGCCAGAATGGGCAACGAGAGGATGCCCACTAC  
TGCCAGGTAGTTGAGAGCCAGCAGGTTACGTAATGGTACAATAACGAGCATAAGACAGGTTGATTTGCGCTGCTGTG  
AACGCTCAATTA

>Cluster\_22184

ATGATAAAAAAATGTTTTCTTCCAGGCTTTATTAAGAATGGGATATCAAATTAATTTGTGTGGCATGGATGGGGGGGGT  
TAGTATTAATGTTCTGCAATATATCTCCGATTTCTCGTCCCAGCAATGGGGTATGCTGATTTGTATATCAATAC  
AATCATTAATGTTATTTGGCAGACGCTGGCATTGCCAAATAATGCCAAGAGATATGCAAGATGTAATGGTAAGTCTAGA  
GAACCTTATGTTATCTATAAGTCTTTCTACATGCATATTCGCTTTTAGCTATATTTGTTTTCATTGATTTTGTGGG  
GAGCTATTTCACTATTGACTTTTGGTGTAGTTTGGATTTTCTTAAAGAAAGAGGTTTTATTTGCGTTGCTCCTGTTAG  
GATTCAGTTTTTATTTCAAGTTCCTTAAACATGCTAATATAGGTTACTGGAATGGAACATGCAACAGCATAAATCAAAT  
ATAAGGCAATGCTTTTTTTTTTACATTAACACATTTGTTGCTATTTGCTTGTAACTAAGTGGCCACAGGCAATCTTATA  
CCAAAGTGGTTTTCTTTTGTGATGCTTTTCTGGAATCTACAAGTAAATATAAAAAATACTTTTGTGTTTGTATAGCAATA  
TTAAAAGCAGGAAAACATCAATTTGGCATAAGTAAAATTTTTCGTAAGTGGTGTTTTATCATTCGCTGTAGTATA  
GATTTAGCTAGTTACACAGCTTGTAGAAATGTTCTTAGTAAATATGTTGATATGATGATTTTGGGATTTTACGTTAGGC  
ATCTACGTTGGCTCAATATTTCTTACGTTACAATATCTTTATTAAGGCTCTTTTCCACGATGACAGTGGCCTTGA  
ATAAACAAAATATTTTGGGTTGCTATATAGCATAATTAATTTGTTGTTTCCCTTGTCTCATATGTTCTGATTTCT  
CCATTTTTCTTAAGTTATGCGTTGATAATGCTGAAGCAGAATCTAATAATTTTGGCCTTTGCGGTTAATTTTAAATCGC  
AATTTCAATAAAGCTTAAATTAACATAATTTATCAGATGATGTAATAAAAACAAAAGCGGATAGTAATACTGTGATCA  
ATATCTCATCGTTACTGTGTGATTTCCAACAATTTGGCTTTTATCTACTAGAGTTGGGGTTTTAGCGGGAGGTATAGGT  
TGGGTGTTATGTTGCTTAATTAATTAATTTATATCACTGTTATGGTTATTTAAAGGAAAGAGAGTATATTTGTTATGA

>Cluster\_17098

ATGTTAAAGAATACCAAGGAATGTGCCAATCTGTATCAAGTGTGACGAATGCCATTGAAAGGGCCAAGGAACATCAGG  
ACTCGTGTATCACGATTAATAACCGAAGCATGTATGCGGTTGGTAAATGTTGATGGTTATACCTTCGCATCCGAAATC  
AGTCCCGTGCATGGGTTCTTTGCGTGGCTATGGGAACCGAATCAACAATCTCGGTAGAACAGTTCCAAGACGTTTGAAT  
ATGGGCTTTGGCCTTACCAGGAACTCCTTAGCCGAGCGCTGACAAAGCGGTGAGTACGTAACAACTTCCGTTAA  
TGGTATTAATCCCTTCAAGAAAACAGCAAAAAGCCGGCAGGAAATCTGGCCCGGAAAGAAAAGACCTTTGCGC  
AATGTTGTGAAGAAGTGTGGAGTCAAAGACAGTGTGATGAAGAACAAAACATCTCGCGCAATGGCGTTCCACACTG

GAAACCTATGCCTACCCCTTTCATTGGCAAAAAGGCCGTTAGTGAAATCACCAAAGTCGATCTTCTGGCAATACCTGGAACC  
TATCTGGTTAAACCAAGAAATGAAACTGCCAGTCTGCTACCTGGACGCTATGAAACAGTGCATCGATTACGCCAAGGCCAAAG  
AATACTTTGAAGGTGATAATCTCCGCGCATGGAAGGTATGCTGAAACCTCTGTGCTCAGCCAAGTAAAGTTCAGATC  
ACAAAACACCATCGCGCCCTTCCCTATAACAGATCGGGCTCTTTTATGAAAGAATACTGTAACGAAGCGCGCTTCTCC  
TCGTGCGCTTGAGTTTGCATACCTGACCCGACGCTCAGTGAATTCGTGGTGGCCAGTGGTCCAGAGATCGATCTTG  
AAGGTAACAACTGGACCATACCTGCAAGCCGAATGAAACGAGCGAAGGAGCATCGAGTTCCTCTGTCTGATGCTGCTGTT  
GCCTTGTTAAAAGCTTTACCACGCTTTAAGGGTATCAGTTTGTATTCCTGCCACTCGGAAGGGACAACCTCTCGGATAC  
GGCTTTACTGGCAGTCTTAAAGCGAATGGGATATACCGATTTAACACAGCATGGGTTTATGATCGACATTCCTGATGGG  
CTGGTGAACGACCAACTATCCGCTGAGGTAATGAAACATGCTTACCTCACCAGTTGGCAGATAAGCCAGAGGCTGGC  
TATCAACGTGGGACGTTATGGCTAAGCGGGTGGCGTTGATGGATGAGTGGTCCGGGTTTGTCTTGCCAATGTTTAG

>Cluster\_22548

ATGCTCCAATCCGCGACCCAGAACCATGTTGTTATTCGCTCCCGCCGTTGGCAATTGGGATTGCGTCCAGTCTTATTCT  
GATATGGTGAATGAAAATCGCCTCGATATTACAGAATTTGCTCTGGCAACGACTGCCGGGAACCTGCGGATAGCCAGG  
ATTCACCTCTCTGGATCATCGGTGTATTAACGCTAACGGGTATTGAGTGGGGTTGGTTATCCGTTTCCAGCCAGGGTCAT  
GCCGGACAGACCCCGCTGTGAACCGCTGATCGCGCACCGGTTCCGCTCCTGCGCTACCAGGACTTATCGTAGCATT  
AATTCCTGCTTCTGCTGGCGGCTCAGCTGGGGCGGAACATCCGATCATGACCGTCAATATCGCTCTGGCGTCCGCA  
TATGGCCGCTCGTCTGTTACCACGCGTCAACCGAATGGAGTGGACTATTTTAGCCTCTGCCGGAACCATTCGCGCCGCTT  
GGCACACCTGTTGGCGGCGGCTTGTATTTTCGCAACCTTAAATGGCAGTAGTGAAGTTCGCTATGGGATCGTCTCTT  
TGGCCGCTTAAATGGCGGACGAGCTGGTGCATAACTACCGGATTTATTTTCCATCCTCATTTTTCAGTCCCATTTGGCC  
ATTACGGACAGATGCAAAATGACCGATATCTCAGCGGTGCAATTTGCTGGCGGCGATTGCCATCGCAGCAGGGATGGTCCG  
GTATGGTGTCTTACCACGGTTCACGCGATGATGCATCAAAATGAAAAATCCGGTCTCGTGGTGGTATTTGGCGGATTTAT  
TCTCGGTATCTGGGTGTTATGGGTGGACCGGTTTCGCTGTTTAAAGGGCTGGATGAGATGCAGCAGATGGTGGCAAATC  
AGGCTTTACAGCACCAGCATTTACTTTTCTGGCGGTGATTTAACTTGGCCCTGGTCTGCTGCCGCCAGTGGCTTT  
CGCGGTGGCGAATTTCCCGGACGTGTTTGTCTGGCGTGGCATTTAGGGTTGATGCTGCATGAGCAGTCCCGCCGCTTCC  
AGCGGCAATAACCGTTTCTCGCTATTTCTCGGCATCGTGTGGTGGTAAACACGCGATGGCTGGTAAAGTCTTTTATGG  
CGGAGTCTGTTTACCAATACCAATTGCTACCGTCTGCTGATCGTCATGCTCCGGCATGGCTGTTATTAGCAGGT  
AAGCCGATGATGATGGTCAATCGTCCGAAGCAACAGCCACCCACGATAACGTTTAG

>Cluster\_41086

ATGAAAACGTTAATGCCCCGCAATAAGCTGGTGAACATATTGGCATAATGTTGCTGCTGTCACATCCGTTGGTTAT  
CGAAGCGGCTGGCATTGATCGCAACAGCACGCGTAAAGTGTGATGGAAGCAACGTCAAAACAGGTCATCAATTTG  
GCGGTTATACCGGAATGACACCGGACAGCTTTCGCAATTTGTTTTCGATTGCCGATAAAGTCGGATTGCTCGTGG  
CGTATTATCTCGCGGCGACCACTCTGGGACCAAACTGCTGGCAGCAAGAAAAATGCCGATGCCGCGATGAAAAATCCGT  
CGAGCTGGTAAAGGCATATGTTCTGCGCGCTTACAGTAAATTCATCTGATGCGTCAATGCTTCCGCTGACGATTTCCA  
TACCGTTAGCGCCAGAAACGCTTCTGCAACGTGCGCTGCTGTTGCTGGCGCGGAAAGTGGCGGACTGATTTGCCAG  
CGTGAGCAACTGAACATGTCATTTGGCACTGAAGTTCGGTTCGGGCGGTGAGGCCAGCGCCATTGAGTACAGTACACAT  
CACCCAGGTTGAAGATGCGCCCAATACTTTACGCAAGTATGCGCAGCATCAAAAAAGCGTTTATTTGCCCGGCTTGGCAGGCTTAA  
CACCGGTGATTTGCCATCGTGGTGCAGCCGGGTGTTGAAATTTGACCATAGCAATATTTATTCATTATCAGGCGCAAGAAGCT  
CAGCGCTTGGCGCAATGGATAGAAAAAACCAAAATGGTTTATGAAAGCGCATTTCCACCGATTACAGACTCAGACGGCCCTA  
TCGGGATAGTTTCGCGATCATTTTGAATTTTGAAGTTCGGTCCGGCATTTAACCTTTGCTTTTACGTGAGCGGATATTTG  
CGCTGGCACAAAATGAGCAGGAATCATCGCTCCGAAAAATCGTAGCCGTTGCTGCGGCTGATTTGAAGAAAGTATGCTC  
GACGAACCGCAATACTGGAAAAATATTTATCGCACGGGTTTAAAGCATTCATTGCTGGATATTGTTACAGCCTGTCCGGA  
TCGTATTCCGTTATTTACTGGCCGATAGCCGGATTTAAAAATAGCGTCAAAACAGATGATGGTGAATCTGGAAAGCGTGGACA  
TCCCACTGGGCATGATTTAGTCAATCTTCCGAAACAATTTGAACGATTCAGTCCGGGGAATTTATCAGCAATACCGCAT  
CAGCTTATTATGGATAAAAATTTATGATGTTTTCGCGCCTATCGCTACGGCTGTGCGGAAATAA

>Cluster\_41514

ATGACAGAAGCGATGAAGATTACCTCTCTCCCAACCTGCCGACGACGCTTGGGGAGAAAAAGCGACTTACAGCATTTAA  
TAATGATGTTATTACCTGCTATTGAAACGGGGCAGACGATCTGGGGTTGATCCAGCGTGCAGCGCGCAAGATTGACGGTCT  
TGGGCATCAAGCATGTTTCAAGTAAAGCGTGAAGGCTGGGATGCCGATCGCTGCTGGGCATTCTGGCAAGGTTACAAGCC  
CCGAAAGGCATACGTAAGTGGAGTGGCGGATCTGGACGATGCCAGCGTCAGGAACGATGATAACCGCTGATGATCAT  
CGACTGGGTGCGTGACACCATCAACGACCCGCGAGAAGAGCTGGGGCCATCGCAACTGGCACAGCGTGTGTTGATCTGA  
TCAGCAACGCTCGAGGGGATCTGTGACTTACCAGGATCAACCAAGGCGAAGATCTGCTGAGCAAGGTTATATGGGGCTG  
CACACGGTCCGGCGCGGTTTCAAGCGTTCTCCGGTATTGCTGGCGCTGGATTACAACCAACTGGCGATAAAGAAGCGCC  
AGTGTACCGCTGCTGTTGGTAAAGGCATCACTTTTGTATCCGGCGGCTACAGCATCAAAACAGACCGGCTTTATGGACT  
GATGAAGTCCGACTGTTGGCGGTTACCGGCAACGGTTACCGGGCGCTGGCATTTGCCATTACCGCGGATGAACAAGCGC  
GTGAAGTCTCCCTGTTGTTGGCGGATAACCTGATCAGCGGCAACCGGTTCAAACCTGGCGGATATTATTAATTCGCA  
CGTAAAAAAGTTGAAGTGAATGAACTGATGCGGAAGGGCTCTGTTGCTGGCCGATGGCCTGATGATGCCAGTGGC  
AGAAACCGGAACGATGATGATGCGGCGACCTCACCGGGGCGGCAAAACCGGCTGGGTAATGATTTACAGCCTGCTG  
TTCAGTTTTGACGATGCGCTTGGCGGCTGCTTGTGGGAGTCCGCGAGGAAATGACCGTCTGCGGCTGCGGCT  
GGCGAGTTCCACCGCAATCAATTTGCCGCTAACTTTGCCGAACGAAACACCGGAAAGCGGCGTATCCGGCAGGCG  
CGAGCACAGCGGCGGCTTCCCTGTCGCACTTTGTTGAGAACTATAAACAGGTTGGCTGCATATCGACTGTTCCGGGACT  
TACCGTAAAGCGCGGTTGAACAGTGGTCTGCGGGTGTACGGGACTTGGTGTGCGCACGATTGCTAATCTGTTAACGGC  
GTAA

>Cluster\_39431

GTGAACACATTTTTCAGTTTCCCGTCTGGCGCTGGCATTGGCTTTTGGCGTGACGCTGACCGCTGTAGCTCAACACCGCC  
CGATCAACGTCCTTCTGATCAAAACCGCGCTGGTACCTTTCGCGCCGATTTCTGTCGGCAAAAGAAGCGCAGAAATTCG  
ATGCTCAACACTATTTTGGCATCCCTGACACAGGTCAGCGCAGCTGGAATCTTCCCGGATTACCCCTGCTGCCAACCT  
GACTTTGTTGTCGGCCCGGCGGTACTCAAGGTGTAACGCATACCAGATTACAGCGCGGTTAGTGCAGCAATTTATCAA  
GCGTACCAACAAGCGCAGTATATGCGGCTGATGCTGTTGATGATCAGGGAACGGTGTATGTCCTGCGGCTCCGGGTG  
GAATTACTCTGTACGGTACAGGTGAAAACCGATTGATGTAAGATTTGGGCTTTCCCTTGTGATGGTGGCATGAGCCCTGCC  
GACTGGCGTCAAGCGCTCAACCCGCGGCAATAATATGCGAGGATAAACCGGCTGATATATGATACGATAGCTGCCAGAG  
TAAACGACGACAGTATCGGTGTTCTCTGCTCTGCGGCTTCTGGTCAAAAACAATGGCCTGCAACTGCAAAAACCTGA  
CCATCGAAAAACCGTGGCGGATAGCGTATGCGGGTAAACATCCGGCGGTTGGCACTGCGTACTGATGGCGCAAAAGTG  
CAGATCAATAACGTCACAACTCTCGGCTCAGAACACTTCTTTGTCACCAACAGCGGTTGCAAAAACCGCTGGAAC  
GAATCGTACGCGGCTACCTGGTGAACCAAGTTTACATCAATCGAAGGAGATGTTGGATATCGTTTCTGAGTCCGCGGCGG  
TGTTGATAACACCGAATTTCCGCTGGTGAACCTCCGTAACAGCAAGAGGCTATGTTTGCACCGGCTACGCTGTCC  
AACATTTACTACGGTTTCTCGCGTAAACAGCGTTCATGCTTCCGGTATGGTGTGGCGCAACTGGGCGCTCGCT  
GGATGTTGATGCCAATAACCAACCGTCAAGTGGTATCCGCTGATAGCGCATCAACGAAGGTTTAAACGCGCAACCGT  
GGGCGGATGCGGTGATTTCCAATCGTCCATTCGCGGTTAACACCGGACGCGTTGATGATAACGACGAAGTACAGCGCAAT  
CTGAATGACACTAACTACAACCGCATGTGGAAATCAATAACCGGCGGTTGGTAGCAAAAGTGGTTCAGAGGCGAAGAA

GTAG

>Cluster\_51092

ATGAGTGAATGTTTCAGTCTGAATGTGAAACCTCTGACGTTGACGACCGGGGGGATTTTGTCTATTGCCGGGCTCTATGT  
GACGACAGAGTCTGTGATTCGGCGCTGTCTATGACGTCCTTACCCCGCTGGTGCAGGCTCTGGCGGTTTCGCTGGCGCTTCCG  
CCGGTGCAGCAACCTGTATTGCTGCCCTGGCGCTGAAGTTTATTTGGGCGCGGTGGATCGAGCGCTGGCGACTCCGG  
CCCGGTAGCCAGGAACCGCTTCCCGCATGTTAATCTCCGCTGGTTCAGGTCGCGCTAGCGCGCATCTGACTATTGCCGC  
AGCGATTGGCTGGTTTGGGGGAGAGGGGGATTCCCGCATACGCAAATCGTCGCGTTATTGTTCTGTTTATGGTGGCAG  
GACCGGTCGCTCCACCATTGATATCGCCAGCGACGGCTTTTGTGTCGATCAACTGACCCGCACGGGTTACGGCTGGGGA  
AACAGCGTCAGGTCGGCGGCACTATCTGGGAATGATGTGCGCGCGGGGTTCCTGATGCTGTCGGCGGCACTCCGG  
CTGGCCTGTCACCATGCTGATGATGGCGGTGCTGATTATGGCGCTGTCACCTCCCGCTGTGGCGCATTACGGAGCCGACGC  
GAACAGCGACTATCCCGCATGTTCCGGCGTTAGGTTATGCGCTAAGGAGGAAGCAGGCGCGCTGGGCTTACTGCTGGTA  
TTGATGCTGAATTCAGGCATGCGGTTTGTGCTGCCCTTCTGCGCACCGCTGTTGTTGGATCATGGGTTGAGCATGTCCGC  
ATTTGGCGCGCTGTTACGCGCGCAATATTGACGCGGCATAGCAGGAACCGTGGCGCGCGGATTTGCTGATGAAATACA  
CCTCACCCGGCAGAGCGCTGTTGACGGCTTATGGCGTCCAGGGATCGCGCTGCTGGCGGTGGTATGACGCTCATGATG  
GCGCGGGTCATCTGCTGCTGACGATTCCTCAGTGTCTGGTCAATGTCAGCTCATTTCGCTGGCCTGCGCGCTGGTCTG  
TCTTTACGCCACGCTGATGTCGCTTTCATCGCCTTTCAGGCGGGTGTGACTTACCTCTTTCAATGACTGACCGCGG  
CAATCGCCATTTCGGCTGGCTTATCGGTGGCTGTTTCAACATTTGGCTATGCGGCCTGCTTCTCTGTTGGCGG  
GCATTACGTTGCTGGCGCGTGGGTTGCTTATATCGGCTGCATTCCGCAAGAGAACGTATGACAAGCGCAATTGATG  
A

>Cluster\_66642

TTGTTTGAACGTTATGATGCTGGTGAGCAGGCGGTAAGTACTGGTACACATCTATTTTACGCAAGACAAGATATGGAAGACCT  
CCAGGAGTTGAATCTCTGGTCTTCCGCGGTGTCGAAGCATGTCAGGTGATACCGGTAGCCGTAAGACGCGCCACC  
CAAAGTATTTTGTAGGTGAAGGTAAGCAAGTGAATTCGCGAAGCTGTCAAAGCGACGGGTGCTTCGGTCTGTTCTTTT  
GACCATGCCATCGGCTATCAAAGCGGCAAGAGCTTACCTGGAGCTTTGTGCCAGTGTGCTGTTATCGACCGCACCGCTTAT  
TTTAGATATTTTCGCCAACGTCGCGGTACCATGAGGGTAAGTTCAGGTTGAGCTGGCGCAGCTGCGCCATCTGGCTA  
CGCGCCTGCTGCGTGGCTGGACCCACTTGAAGAGCAGAAAGCGGGATAGGTTTGGCTGGTCCGGGTGAAACCCAGCTC  
GAAACCGACCGTCTGTTTGTGCGTAATCGCATCTGTCAGATACAGTCGCGCTGGAAAGAGTTGAAAAGCAGCGTGAGCA  
GGGCGGCAATCGGCTATCAAAGCGGCTTACCTACTGTTTTCGCTGGTGGGATATACCACGCGGTAATTCCTTTT  
TCAATCGCATCACGAAGCGGGTCTACGCGGAGACCAGTGTGTTGCCACCCTCGACCCGACGTTGCGGCTATTGAC  
GTTGACAGTGTGCTGAAACCGTGTGGCAGATACCGTAGGGTTTATTTCGCCACTGCGCGACGATCTGGTTGACGATT  
TAAAGCCACGTTACAAGAGACGCGGCAAGCCACATTACTGCTGCAGCTCATGATGCGCGGATGTGCGGTGTACAAGAAA  
ACATCGAAGCGGTGAATACGCTTCTTGAAGAGATCGACGCTCAGGAGATCCCAACCTGCTGGTGTGATGAACAAGATCGAT  
ATGCTGGAAGATTTGCAACCGCTATTGATCGGAGCAAGAGAACAACCGATCCGTGCTGGCTTTCCGCACAGACCGG  
AGCGGGGATACCACAGCTTTTTCAGGCTTTGACGGAGCGGCTTCCGGCGAGGTGGCGCAGCATACATTGCGCTGCCAC  
CGCAGGAAGGGCTCTGAGAAGTCGTTTTATCAGCTTCAGGCAATAGAAAAAGAGTGATGGAGGAGACGGCAGCGTA  
AGTCTGCAAGTTCTGATGCGCATCGTTGACTGGCTCGCTCTGTAAACAAGAACCGGCTTGTATCGATTACCTGATCTA  
A

>Cluster\_27944

ATGCCGACGCTAAAAAACAGGGCGGTCAAAACAGGCAATGACGTTTTTCTGCTGCTTCTTCCGCTCTGGCGGAT  
ACTCTTTGGCCTGGATATCGGTGTAATTTCTGGCGCACGCGCTTATTGTCAGATGAATTCAGATTACTTCGCACACCG  
AAGATGGGTCGTAAGCTCCATGATGTTGCGGTGCGGACGTCGGTGGGAGCGGCTGGCTCTCCTTTAACTCGGG  
CGCAAAAAGAGCCTGATGATCGCGCAATCCTGTTTGTGCGGTTCACTGTTCTCTGCGGCTGCGCCAAACCTTGAAGT  
ACTGATTTCTTTCCGCTTCTGCTGGGCTGGCGGTGGCTGTCGCTTATACCGCACCACTGTACTCGTCAGAAATG  
CGCGGAAAAAATTCGCGGCAATGATCTCGATGATCAGTTGATGATCACTATCGGGATCCTCGGCGCTTATCTTTCT  
GATACCGCTTACGCTACACCGTGCATGGCGCTGGATGCTGGGTGTGATTATCATCCCGCAATTTTCTGCTGATTGG  
TGTCTTCTTCCGCGACAGCCACCGTTGGTTTGGCGCAACCGCGTTTGTGTTGATGCCGAACCGGTGCTGCTACGCC  
TGGTGCACACAGCGCGGAAAGCGAAACGCGAACCTGGATGAAATCCGTGAAAGTTTGCAGTTAAACAGAGTGGCTGGGG  
CTGTTTAAAGAGAACAGCAACTTCCGCGCGGCTGTTCTTGGCGTACTATTGACAGATAATGACGCAATTCACCGGGAT  
GAACGTCATCATGATTATACGCGCGAAAATCTTGAACCTGGCGGGTATACCAACACCACCGAGCAAAATGTTGGGGACAG  
TGATTTGTCGGCCTGACCAACGTAATGTCACCTTTATCGCAATCGGCTTGTGACCGCTGGGACGTTAAACCAACGTA  
ACGCTGGGCTTCTGGTGTATGGCTGCTGGTATGGCGCTCAATGATGATATCGGATATCCACTCTCCGCTCGCG  
GCAGTATTTCCGCATCGCATGCTGCTGATGTTTATTGTCGGTTTGGCATGAGTGTGCTGGTCCGCTGATTTGGGTA  
GCTCCGAAATTCAGCGCTGAAAGCGCGGATTTTGGCATCACCTGCTCCACTGCCACCAACTGGATTGCCAATGATC  
GTTGGCGCAACGTTCTGACCATGCTCAACAGCTGGGTAACGCCAACCTTCTGGGTGATGCTGCTGTAACGTA  
GTTTATCTGCTGACATTTGGCTGGTACCAGAAACCAACCTTCTGCTGGAACATATTGAAACGTAATCTGATGAAAG  
GTCGTAACCTGCGGCAATCGGCGCTCACGATTA

>Cluster\_59420

ATGAATAGCGAAGGGGGAACCGGGAATGTAAGTACTGACGTTAAGCGCAACTATACCGGAACAAATGGCTGATGACGTT  
CAACGCGACGCTGGGCGCGATAATTCGCCACCAGATAAGATGAACGTTGAAAGCGATACCCAAAGGGAACACTCGCGTTC  
GGGTTGATAACATTTGGCGCGCTCGGTGCACAAACGGTCAACGGTATTGAACTATTGAGGTTGGCGGTAATTCGACGTT  
AATTCGCGCTGACCAACCGAATGTCGAAGCTGGGCTTACGCTACACGCTGGCTAAAGGGAAGGGGAATGACGAGAA  
AACTGGTATCTGACAGTAAATGGGACGCGTAACCGCAGCGGATACACCGATCCATCAATAATCCCTGTTGTGG  
ATCCGGAAGGCCATCAGTTTATCGCCGGAGGCGGAAAGCTATATCAGCAACATTCGCGCAGCAACTCGCTGTTTAGC  
CATGTTTACACGACCGTCTGGTGGAGCGGATATACAGATTCACTGATTCAGGGGTCGGAAGCAGTATGTTGGAT  
GCGTCAATGTCGGAGGCAAGCAAGCTTCAAGGCGCGTACGGTCAAGTAAATACTCAGGCTAACCGCTATGATTTGACG  
TAGCGCGGCAATTTGGCGCAGTGGAGTAGCAACCGCAGGATCGTGGCATCTTGGCGTATGGCAGGCTACGCAACAG  
CACAGTAATACTCAGAGTAATCGTGTGGTTATAAATCGGATGGGCGCATCAGCGGTTACAGCGCTGGGCTGTACGCGAC  
CTGGTATCAGAACGATGCGAATAAGACCGCGCTTATGTTGACAGCTGGGCGTGTATAACTGGTTTGTATAACAGCGTCA  
GTTCCGATAACCGTCTGCTGACGACTATGATTTCTCGCGGTGTGACGGCTCTGTTGAGGGTGGGATACCTTTGAAGCG  
GAAACATTTAGCGCGCAGGAAGGACGCTGAATACCTGGTACGTTCCAGCCACAGGCGCAAAATCACTGGATGGGTGAA  
AGATTCGACCATACCCGGAAGACGGAACCGCATTTGAAACGGAAGGCGACGGAATGTGAAAACCGGACTTGGGGTGA  
AAACCTACCTGAACGCAATCACAGCGTACGATGGTAAACAGCGTGAAGTTCCAGCTTACATTTGAAGCGAACTGGATC  
AACAAAGCAAAGTCTACGCGTGAAGATGAATGGTCAAACCTAGGCCGTAAGGTCGCGTAACTCTCGGTGAAGTACG  
TACCGGGTTGAGGCGAAAGTAAATAACAACTTAGCCCTGTTGGGGAAATGTCGGTGTGCAACTAGGTGATAAAGCCTATA  
GCGATACTCAGGCAATGCTGGAGTGAATATAGCTGGTAA

>Cluster\_39200

ATGTTCTCTTGTAAACTTCTGCCATTTTGTGTGGCCCTTGGCTAACCGGTTGTTCACTGGCACCGGATTATCAGCGTCC  
GGCAATGCCCGTGGCGCAGCAGTCTCACTCAGCCAGAACGGCTGGTTAACGCGCAGAGATAACTACCAGAACGCTGGCT  
GGCGCACCTTTTTTGTGATAATCAGGTGAAGACGCTGATTAGCGAGGCGTGGTGAATAACCGGATTTGCGCATGGCG

GCGCTGAAAGTGCAGGAAGCGGGGCGCAATATCGTCTGACCGATGCCGACCGCTACCCACAGCTCAATGGCGAGGGCAG  
CGGCAGCTGGAGCGCAATCTTAAAGGCGATTACGCCAGACGCGGGAGTTCTCGACTGGCCTTAACGCCAGCTTTGATC  
TCGATTTTTTCGGGCGCTTAAAGAACATGAGCGAAGCCGAGCGCCAAAATTTATTTAGCCACTGAGGAAGCTCAGCGCGG  
GTGCATATTTTGGTGGTTCTTAATGTGCGCGAAAGCTAATTTCAATCAGCAACTGGCGTATGCGCAATGCAAAATAGCCGA  
AGAAACGCTGCGTAAATATACAGCAGTCATATCGCTTTTCCCGTCTATCAGCCGTCAGCCAGCTAATATCAACCAGCAGCGAT  
TGGAAACAGGCTCGCGGATGATAGAAAGTACCCGAGCGACATCGCTAAACGTCAGGGGAACTGGCGCAGGGCAATAAT  
GCATTGCAACTGTTATTGGGAAGCTACGGCAAGCTGCCCAAGCGCAGACAGTAAACAGCGACAGCCTGCAAAAGCGTTAA  
ATTACCGGCGGGCTTGCCGTCGCAATCTTATTGACGCGCCCTGATATTTATGGAAGCTGAACACGCGTTAATGGCGGCTA  
ATGCCAAATATTGGTGGCTGCGCGTGGCATTCTTCCCGTCTATCAGCCGTCAGCCAGCTAATATCAACCAGCAGCGAT  
CTGTCTCATTATTTAACGCCAGCAGCGGGATGTGGAATTTTATCTTAAAATGAGATCCCCATTTTTAATGCCGGACG  
CAACCAGACCAATCTGGATATCGCCGAAATTCGCCAGCAGCAGTCCGCTGGTGAATTTATGAACGAAAAATCCAGAACGCGT  
TTAAAGAAAGTGGCAGATGCGCTGGCATTACGTCAAACCTGAACGCTCAAATCAGCGCCAGCAGCGTTATCTTGGCTCG  
CTGCAAAATTTCTTGAACCGGGCGCGGCATTATATCAGCACGCGCGGTAAGTTATCTGGAAGTGTCTGGATGCCGAGCG  
TTCTTTATTTGCAACCCGACAACTTTACTTGACCTGAATTTATGCCGCTCAGGTTAACGAAATTTCTTTATATACCGCT  
TAGGGGCGGTTGGCAGCAATAA

>Cluster\_57922

GTGGCAAAAGCTCCAAAACGCGCCTTTGTGTTGTAATGAATCGGGGCGGATTATCCGCGCTGGCAGGGGCACTGCAGTGC  
CTGTCTGCTGGAAACCATCACCGAGGTGCGTCTTGTCTGCTGCCAACGGTGGCGGTAACGAGCGTCTCAGCGGCT  
ATGCCGCTAGCGCGGGTGGCAAAAGTCCAGAAACTCCTCCGATATCAGCCTTGAAGAGCTGCCGCGTTTTTCCACCGGA  
TTTTAAAGAGTTCGACCTAGGCGCGCTGCTGGTGGCAGGAAGCCATCTGATGGCGGTAACCCAGTGGCGGG  
GAAATCCACGCTGTACTGCAAAACGCTGTGCAAACTGGCCAGCAGATGAAAACGCTGTATGTCTACTGGCAAGAGTCCG  
TGCAACAGGTGGCAATGCGCGCTCATCGCCTTGGCCTGCCGACTGACAATCTCAATATGTTGTGCGAAACAGCATCGAA  
CAGATCTGCTGATTTGCCGAAGAAGAGCAACCGAAACTGATGGTAATTTGACTCGATCCAGGTGATGCAATGCGCGGATG  
ACAAATCCGCGAGCTCCGTTGATGGTGGTGGGAAGAACCGCGCTTACTGACGCGCTTCCGCAAAACGCGCGGTGG  
CGATTGTCTGATGGTGGGACGTAACCAAAGATGGCTCGCTGGCTGGCCCTAAAGTGTGGAACACTGTATCGACTGTTCCG  
GTGCTTCTGGATGTTGATGCCGACTCCGTTTTTCGCACCTTGGCAGCCATAAAAACCGCTTCCGCGCGGTGAATGAGCT  
GGGCGTCTTCGCGATGACCGAACAGGGGCTGCGTGAAGTCAGCAACCCCTCCGCAATTTTCTTAAAGTCCGCGGAGATGAAG  
TGACCTCCGCGAGCTCCGTTGATGGTGGTGGGAAGAACCGCGTCCGTTGCTGTTGGAGATTCAGCGCTGGTCCGATC  
TCGATGATGGCAATCCGCGCGCGTGGCAGTGGGGCTGGAACAAAACCGTCTGGCAATCCTGCTGGCTGTCTTGACCG  
TCACGGTGTCTGCAAAATGGCCGATCAGGATGATTTGTTGAACGTTGGTGGCGCGGTGAAGGTAAACCGAAACAGTGGCG  
ATTTAGCGTTACTGCTGGCGATGGTTCCAGCCTGCGTGACAGACCGCTGCCACAGGATCTGGTGGTGTGGTGAAGTC  
GGCTGGCAGGGGAGATCCGCGCGTGGCCAGCGGTGAGAACGAAATTCAGAAGCGCGGAAACACGTTTTTCCGCGGGC  
GATTGTTCCGCGCGCTAACGTACCGAAAAAGCGCGGAGGGATGCAGATTTTTGGCGTTAAAAACTCTCCGACGCGC  
TTAGCGTGTTCGACGACTATAA

>Cluster\_66336

ATGCTGACCATAACTCCACTGACATTAATACTGAACTCGCGGAAAAATCGCCTATGGTATGGGCGAGCTCGGTTCCGAA  
TTTTAATGCTCTGCATCGTACTCTGTATCTCCTCAAATTTTATACCGATGAATAGGGATGCCGCTTACTATGGCGGGA  
TTATCTTTCTGGTGGCGAAGTTTTTTACCGCGTTTACCAGATGCTCACCGGATTTTTTACTCGACTCGCGGAAAAATATT  
GGGCTAAAAGCAAATTTCTCCCTTTATTTTATATGACGCGGTTCCGCGCGCTTAATGCAACGCTCCAGTTTATTCGC  
CACCACCTTTTGTGTTGCCGTTAAAACGACGATTTGCCACCGCGCTGTTTTATGATGTTTTGGACTTTTCATACAGCTGATGA  
ACTGCTCGTATGGTGCATGATCCGGCAATTAACAAAACCCGAATGAGCGCGCAGCTCGCGGCTTACCAGCGAGGGT  
GGTGAACCATAGGCTATTTGATTTGTACCGTGGCGTTTTATTCCGTTGCGAGTCCGTTTTTCTGACTCAACCGCTCGGTTA  
TGCCGTGTCGGCCTATGTTCTCCATTGGCGGCTTTATTTTTATGATGCTGTGCTACAGAGGCGTCAAAGCAGTATTATG  
TGGACACAGCGCCAACCGGACATAAAGCAGTATTTCTCAAATCTTTTTGCGCGATATTTCGTAATCCACCATTGCTGGTT  
TTATGCATTTGCTAACCTGTTGATCTTGGCGGCAATTAATTAACAACCTGGCGATTCAGGTTCTATACACCAGTATGTGCT  
GAATGATATTAATTTATGTCGTTGGATGGGATTTCTCAGTATGGGATGCATCCTCGTCCGCGTATTACTGGTGGCAGTAA  
CTGTAAAATGTTTTGGTAAAACAGGTTTATTTAGCTGGCATGGTGCATGCGCGTATGGCGGTTGGTGTATATACTGAATTTTC  
TGGGGAAGTAACTCTTTCACTTTCTGCTATGTTCTTGTGTCGCTTTTTTGGCACGGCTTTTGTAAACAGCTGAACTG  
GGCACTGTTACGATACCGTAGATTACGGTGAATGGAACCCGGTATTCGTCGCGAAGGTTCTGTTTTATACCGGTTATA  
CCTTCTTTCTGAAAATTTCTGCCGCACTTGTGGCTTCTGCCAGGCAATATGCTGACGCAAAATGGTTATGTTCCCAAC  
ATCGCGCAAAGCGATGCGACATTACAGGTTTGGCTGAGCTCATTTTTATCTGGCCTTGTGCACTGGCAATTAATGCTGC  
ATTTAGCAGTGGGATTTCTTTACACTCAATGAAAACGGTTTGCATTGATTAATGAGGAAATCAACCAACGCAAAAATA  
AAGAGATGGCGACAGAAGAAAAACGGCTTCCGTAACGTTATAA

>Cluster\_61721

ATGCAACGAGGGATAGTCTGGGTAGTTCGATGACGATAGTTCCATCCGTTGGGTGCTTGAACGTCGCTCGCTGGGCGAGG  
TTTTAACCCTGACGAGCTTTGAGAAGCGCGCAGAAGTGTGGAGGCGCTGGCGAGCAAAACCGCGGATGTGCTGCTTTCAG  
ATATCCGATAGCCGGGATGAGCAGGGCTGGCGCTGCTCAAGCAGATTAACACAGCGCCATCCAATGCTTCCGGTTCATCAT  
ATGACCGCACATCCGATGATGCTGCGCTACGCGCTATCAACAAGGGGCGTTTGAATATCTGCCAAACCGTTTGA  
TATCGACGAAGCAGTGGCGCTGGTTGAGCGCGCTATCAGTCTATTACCAGGAACAGCAGCAGCGCTAATGTTTCACTT  
ACGGCCAAACGACGATATCATCGCGAAGCGCAGCCATGCAGGACGTTTCCGATATATCGGTCGGCTTTCGCGTTCT  
TCTATTAGCGTGTGATTAACGGCGAATCCGGCACCGGTAAGAACTGGTTCGCTCATGCCCTGCATCGCCACAGTCCGCG  
CGCCAAAGCGCGTTTATCGCGCTGAATATGGCAGTATCCCAAAGATTTGATCGAATCAGAAGCTTTTGGCCACGAGA  
AAGGCGGCTTTACTGGCGCAATACCATTCTGCTAGGGGCGTTTTGAAACAGGCGATGGCGGTACATTAATCTTCGACGAA  
ATTTGGTATATGCCGCTGGATGTGCAGACGCGTTTGTCTGCGCTGCTGGCAGACGCGTCACTTTTACCAGGTTGGCGGTA  
TGGCGCGGTGAAAGTGGATGTGCGGATTTATCGCTGCCACTACCAGAACTCGAACAGCGAGTGCAGGAAGGTAAGTTCC  
GTGAGGATCTGTTTCCACCGCTGAACTTATCCGCGTTTACTCTCCGCGCTGCGCGAAGCTTCCGCTTCCGAAAGTATTC  
CTGGCGCGCATTTTTTACAGGTTGCCGCGCGCAACTGGGCGTAGAAGCGAAGTTACTGATCCGGAACCGAAGCTGC  
TCTGACGCGTCTGGCGTGGCCAGCAACCTGCGCCAGCTGGAAAAACCTGCCGCTGGCTAACGGTGAATGGCCCGCGG  
AGGAAGTGTGATTCAGGATTTGCCCGCAACTGTTTGAATCAACGGTTGGCGAGAGTACTTCGCAATGCAACCGGAC  
AGCTGGGCGACGCTTCTTCCGCACTGGGCGAGCAGAGCGCTCGCTTCCGCTCATCAAAATCTGCTTTCCGAAGCGCAGC  
AGAGCTGGAGCGGACGTTACTGACGACCGGTTGCGACATACGAGGGCATAAACAGGAAGCGCGCGGCTACTCGGCT  
GGGCGCAACCCCTGACGCGTAAAGTTAAAAGAGTGGGATGGAGTGA

>Cluster\_48906

ATGACAAAACCGCAAAATCCGGCATGGCGTAACGATGACCTGGAAGGTGCCGTTGATGGCGGTTTTTTTCTGCGTGGGGC  
TGATCCGGAAGTATGATATTTGCGCCAGCTTCCGGCGGATGCTTTTTTCTGCTGCTCAGTACAGGATATTTACGCGG  
GGATTTGACAGACAGGCTCGCGTATCCGGCGTCAATGACCCCTGCTGCTGTGCAATGAGATGCCGGAATTTGCCCGGTT  
ATTTACCGACACCGGGCTAAAACCTGGGTGAAGTCTTACTGGAGCACATATGTTGACGCGCTGCGCGAAATGCCCACT  
CGCGGATGCAGAAAAACACTGACCGAAGCATTACAGAATTTACGTTGATGCGCATACCTGTAAGCAGCGGAGGATGCTC  
TGAAGGATGCGCAGAACATGATGTTGACTGTCGACAGGAAAGGGCGTCAATTCAGCCGTTACATTTGATGATGCTCTT

CCGGAAGTGGTCGACCGTGTGAATGCCGCAATCAGGGACTGGAGAAATCCAGGGCGCTGATGACCGGTATTGATGAACT  
GGACGCAAAAACGGCGGGATGGAGCCTGGCGACTGGTATTTATTGCGGCACGTCCTTCGATGGGCAAAAACCGAAGCTGG  
CGTGGATATCATCGACAAGGTGACTGAGCAGGGGCATGGTGTCTTCGTTCCACAATGGAAATGGCGAACATCCAGATT  
GGTGAACCGATGGTATCTCGCGCTGGAGGAATGCCGGTATACGCCTGAAATCTGTCACTCACTTTGAAGACGAAGACTG  
GGCAGCTTTCTCAAAAGGGTGGGGCGGATGACCGGGCGCAATATCTGGATGGTGGACCAGGGCAACCTGACATGACG  
AGATATGCCCAACACGAAACACCACCTAATTAACATCCGAAAACGGCGCTGGTGGTGGTTGATTATCTCGGACTGATA  
AAAACCCGAACCAGGGGGCTCATGATCTTGCCGTGGGTGAAATCTCAAAGGGCTTAAAGGCCTGGCAAAAATCCGGTGG  
TTTTCCGTGATTGCGCTGAGCCAGCTCTCCCGCGGTGGAGTCCAGACCCAATAAACGCCCATGAACTCAGACCTGA  
AAAATCCGGAGAAATAGAGGGCGGATGCAGACATCATCTGATGCTTTACAGGGATGAAGTGTACAACCCGGATACGCA  
GCCAGGGGCATCGCAGAAATCAATATCACGAAACAACGTAACGGTCTCTGGGGACGATTTACCGCGCTTTTTATAACGG  
ACATTTCTGCGCTGTGGACCAGGAAAGCGCACAGGTCTTTCCACCCCAATGCAGCAGCCCAGCGCGCAGATACAGCA  
ACAAACGAACTGACAGTAGTAAGATGGAGCGTTTCTTTTGA

>Cluster\_26558

ATGAATACAGTACGACGCAAAAAGATTTCGATGGGGCGATTGATGTCCCGGCAGATAAGCTGTGGGGCGCACAACTCA  
ACGCTCGCTGGAGCATTTCCGCATTTTCGACGGAGAAAATGCCACCTCACTGATTCATGCGCTGGCGCTAACCAAGCGCG  
CAGCGGCAAAAAGTTAATGAAGATTAGGCTTGTGTCTGAAGAAAAGCGAGCGCCATTCGGCAGGGCGCGGATGAAGTA  
CTGGCAGGACAGTATGACGACGAATTCCECTGGCTATCTGCGACAGCCGCTCCGCGCACGCAAAGTAAACATGAACATGAA  
TGAAGTGTGGCTAACCGGGCCAGTGAATTACTCGGGCGGTGCGCGGGATGGAACGTAAGTTCACCTAACGACGACG  
TGAACAAAAGCCAAAGTTCCAACGATGTCTTTCCGACGGCGATGCACGTTGCGGCACACTACTGGCGCTGCGCAAGCAACT  
ATTCACAACCTTAAACCCCTGACCAGACGCTGAGTGAATAATCCCGCATTTGCGGATATCGTCAAAAATCGGCTGTAC  
CCACTTGGCAGGACGACGCGCTTAAACGCTGGGGCAGGAGATTTCGGCTGGGTAGCGATGCTGGAGCATAACTCAAAC  
ATATCGAATACAGCTGCCTACGTAAGCGGAACGGCTCTGGGGGTACAGCGGTGGGTACTGGAATAATACCCATCCG  
GAATATGCGCGTCCGCTAGCAGATGAACGGCAGTCACTACCTGTGCACCGTTTGTACCAGCCGCAACAAATTTGAAGC  
GCTGGCGACCTGTGATGCTGGCAAGTTTCAACAACCACTGCGCAGTGGGCTTGAACCCGAATCGTGAATAATCAATCAA  
ATGTCCGCTGGCTGGCTCTGGCCGCGCTGCGGAATTTGGTGAATCTCAATCCCGAAAATGAGCCGGCAGCTCAATC  
ATGCCAGGGAAAGTGAACCAACACAGTGCAGACGATTAACCATGCTCTGCTGTCAAGTGTGATGGGAAACGACGCTGGCGAT  
CAACATGGGTGGCGCTCCCGTAACCTTTGAACCTGAACTGAACTGCTTCCGCTCCGATGGTGATCCATAATTTCTGCAATCGGTGC  
GCTTGGCTGGCAGATGGCAAGTTTGAAGTTTCAACAACCACTGCGCAGTGGGCTTGAACCCGAATCGTGAATAATCAATCAA  
TTACTCAATGAATCGCTGATGCTGGTACTGCGCTTAACACCCACATTTGGTTATGACAAAAGCCGCGAGATCGCCAAAA  
GGCTCATAAAGAAAGGGCTGACCTTAAAAGCGCGCGCCCTGCGCTGGGTATCTTAGCGAAGCCGAGTTTACAGCTGGG  
TACGGCCAGAACAGATGGTGGCAGTATGAAAGCCGGGGTTAA

>Cluster\_27079

ATGAATAAATTAACCTTGTTCAAAGCCTACGATATTCGCGGAAGGCTGGGCGAAGAGCTGAATGAAGATAACCGTGGCG  
TATTTGGCCCGCTTACGGCGAGTACCTTAAAGCCAAAACGATTGCTCTCGCGGTGACCGCGCTGACCAGCGAGACCC  
TAAAGTTGGCCTGGCGAAAAGACTACAGGATGCGGGCGTCAATGCTGGATATAGGCATGTCCGGAAACCGAAGAGATT  
TACTTCGCCACCTTTACTTGGATATTGATGGCGTATTGAAGTGACTGCCAGCCATAATCCGATTGATTACAACGGTAT  
GAAGCTGGTGGAGAGGGGGCACGACCCATCAGCGGTGACACCGGCTCTGCGGACGCTGCAGCGCTTGGCGGAATTAATG  
ATTTCCCTGTATTGAAGAAAACAAACGTTGGCCGTTACAGCGCATTACTATCCCGCATGCTTACATGACCACTGCTGT  
GGTTACATCAATCCCGCAACCTGAAACCGATGAAGCTGGTTCATTAATTCAGGCAACCGCGCAGCAGTCCGGTGGTGA  
TGCTATTGAGCCGCTTTTAAAGGCTTGGAGTGGCGGTGAGTTCATCAAAAATCCACAAACCGCGGATGGAATTTTCC  
CCAATGGTATTCCTAATCTCTGCTGCGCGAGTGGCGGCTGATACCGCAATGCGGTGATTGAACACGGCGCGGATATG  
GGGTGCGCTTACGACGCTGATTTTGAACCGCTGCTTCCGTTGATGAAAAGGCCAGTTTATTGAGGGCTATTATATTGT  
CGGCTGTATTGACAGAGCTTCTTGGAGAAGTATCCCGGGAGGAAAATTTGCCAGATCCGCGCGCTGCTGGAAATGAG  
TGGATGTGGTACGCGGGCAGGTGGTAAACCGGTGATGCAAAAACCGGGCATGCGTTTATCAAAGAACCGATGCGCCGC  
GAAGATGCCATTTATGGTGGCGAAATGAGCGCACACCCTACTTCCCGCATTTTGCCTATTGCGACAGCGGAATGATCCC  
CTGGTTGCTGGTAGCTGAATGCTGTGCTGAAAGGACTGTCACTGGGAGAACTGATCCATGACCGGATGCTGGCCCTACC  
CGGCGAGCGGAGAAAATAAACCTGACCTGCGCAGAGCCGAAGTGAAGTGGGATGAGCGGTGGAACAGTATTTTCTCATGAG  
GCGCTGTCCGTGGACAGAACGGACGGTATCAGTATGCTGTTTGTGACGCTGGCGTTTCAATTTACGCTCTTCCAATACCGA  
ACCGGTGGTGCCTTGAATGTGGAATCGAAAGGAGATAGTGAATCGTAATTAATAATGACTAAATCGATATTGAATATAT  
TAACATCCGGAGATAATAAATGA

>Cluster\_34179

ATGACCGACGAATTTGGCTGGTCCGCTCGTAAATGCGTTTATTTCAGCCGAGGTGGACCGGCTGATGTTGAAGGGTTGTC  
GCGTTTTCCCAACGCTGCGCTGCCTGTTCTCCCGCGAGCTGGAGGCTTTCAGCCAAACAAACCGCGAAGTGACGCTAAATC  
TGAAGCGCCAGACGGTCAACGTTAAACGGTGAAGCTCAGTGGCTGGTGGCTTGCACGGCGCGGCGCAACGCTCAGA  
CGTTCCTGAAACGTTGCCGTTTGAAGTTAAACCGCGCAACTAGTGGATTGTTGGGATATCCGCAACGATCCGCTCAG  
CACGCGCATGTGATTTATGCTGCGATCCGGTGGCCGCTATGCTCTGCGCGCTGCGCACGCGGTGCGCGCTTTTG  
AGTTTATGGTTATGCCGGGGAAACCGAAGCGCAGCTTACGAGCCGCAAGATATGCGCCAGTTACTGAGCAAAAGTGTG  
CCGAACCCGGACAACGCTGAGCTGATCCGCCAGCGCTGATACCCATAATGCTCGTCTGGCCGAACGTTTCTGTATTGA  
CCGCGTGTGCTAGCGGGGATGCGCGGCATATGCGCGCTTGGCAGGGTACAGGATACAACAGCGGCATGCGCGATG  
CTTTCAACCTGGCATGAAAACCTGGCGCTGGTGAATTAACGGTAAAGCCGACGATGCGCTGTGGATACCTACCAGCAGGAA  
CGCCGCGACACGCAAAAGCGATGATCGACCTCTCCGTGACCGCTGGCAACGTAATTTGCGCGCCCAAACGCTGGCACGG  
CGCGTACCGCATGGGGTTTCTGGCTGTTGAACATATAATTCGCGCGTCAAACGCTACTTCTTGAATGCGGTTTAAAGC  
CGATGCGCAGTACCACGCGGGGGCTGGTGGCTGAAGGCGACGCGAAAACCTTACCAGGTGGCAAGATGTTTATCCAG  
CCGAAGGTGACGCTGGAATCGGGCGAAGTGAAGCTTGTCTGACAACTCATCGGACCGAATTTTGCCTGATTGGCTGGGG  
CTGTAACCCACTATGGGGCATGAGCGAGGCGCAGATCCAACAGTGGCAGGCGCTGGGGACGCGTTTTATCCAGGTGCTGC  
CGGATACGCAGATACATACCGATCAGGATAACCCAGCAGCGCTTACCAGCATAGGCGATACGCAAAAACCGCTGCGCGG  
TGGTTTGGCCAGCACAAACCGCGCTGGTAGTCAATGCGCCGGACCGCTTCTGGCGCCATCGCCATTCGCAAAACCT  
GGGACGACCCCTGAATAAAGCTGGCTGGTATGACGCTCACTGCGCTACTGCGGACATTCTGTTGAAAAGTTGGCTG  
GA

>Cluster\_47287

ATGAAAAAACAACCCAGCTGTTGAGTGCATTAGCGTTAAGTGTGGGTTAACCTCTCGCGCTATTTACGGCCGCTCGC  
GTCGATTCCAGGCCAGTTGCGGATCAGGCCCTCTCCCGAGTCTGGCTCCAAATGCTGGAAGAAAGTGTTCGGCAGTGG  
TGAGCGTACGGGTGGAAGGAACGGCCAGTCAAGGACAGAAAATCCGGAAGAAATCAAAAAGTTTGGTGTATGATTTA  
CCGGATCAACCTGCAACAACCTTTCGAAGGTTTAGCTCCGGTGCATCATCAACCGCATAAAGGCTAATGGCTGACCAA  
CAACCATGTGATTAATCAGGCACAGAAAATCAGTATTCAGCTCAATGATGGGCGGAGTTTGAATGCAAAAATGATTTGGTA  
CGGATGACAGAGCGATATCGCCCTGTTACAAATTCAAAACCCGAGCAAAATTAACGCAAAATCGCTATTTGCCACTCCGAT  
AAATTTGGCGCTGGTGTGATTTTGGCTGACGGTCCGTAACCCATTTGGCTTGGGCAAAACCGCCACCTTGGCATTTGTTT  
CGCATTAGGCCGACGCGGTTGAATCTTGAAGTCTGGAAAATTTATCCAGACAGATGCTTCCATTAACCGGGTAACT  
CCGGCGGTGCACTATTAAACCTTACGGTGGTAAATTTGGCATCAACACTGCAATCCTTGGCGCTGGCGCGGGAGCGCT





CCCGTGGCTGCTGGTGGCGGAGCTGCTGTGCCGTAAGAACAGCTCGCTGAAATCGCTGGTGGCGGACCGCCAGCGCGCT  
TCCCAGCGTCGGGGGAGATCAACCGCAAGCTGGGTAATCGCGGAGAGGCGATAGCGCGCATCCGGGCGAGTATGAGCCG  
GCGGCTGCACACATCGACACAACGGACGGGATCAGTATGAATACCTGAATGGCGCTTAACTGCGCAGCTTAACAC  
CGAGCCGGTGGTGGCTGAACGTTGAGTCCAGAGCTGATGTGGCGCTTATGAATGAAAAACGACCGAGCTGCTCAACC  
TGTTAAAAGAGGAATTGCTTTGA

>Cluster\_27796

ATGGATTTTCGATAAAATCGCCCAATCGTTGCTTCCCTTTATTAGGTGGTAAAGGAGAATCGCCAGTGCAGCACATTGGCG  
CACTCGCTACGGCTGGTACTGGTTGACGACACTTGGCGATCAACATGCCATTGGCCAGATTGATGGAGTGAAGGTT  
GTTTTTCGTAATTCAGGGCAAAATGCAAAATCATCTTTGGCACCGGCTGGTTAAATAAGTCTATGCTGCCCTTATTCAGGTT  
GCAGGTATTAGCGAATCCAGTAAAGCAGATACCGCTCGACTCGCCGCTCAAAAATCAATCCTTTTCAGCGAATAGCAGC  
ACTACTTTCTAATATTTTTGTCCCATCATCCAGCCATTGTTGCTTCGGTTTATTAATGGGGCTTCGGGAATGGTGA  
AAACATATGGCTGGGTGATGCCGATAATGCGATTTATATCTGCTGGATATGTGCAGTTCAGCCGATTTATTTATTC  
CAACTCCTTATTGGCTTTACTGCTGCTCGTGAATTTGGTGAATTCCTTATCTTGGCGCGACATAGGAGGGATTCGAC  
TCACCCGGCACTCACAATGCCTGGGGCTGCTGCGGGATTTACAGACAATGAACTTCTCGGTTTGAATCGCCATGA  
TTGGCTATCAGGGACGGTTTCCCCTGCTTCGGCAGTATGGTTTATGAGCATAGTGGAAAAACAGTTACGCAGGTTT  
ATCCCTGATGCTCGGATTCATCTGACGCCATTTCTGACTGCTGCTCATTTGCTTTATCGCTCTTTGATTATTGG  
TCCGGCAGACGCGGTTAGTGTAGCTGACGGTATCTCTTTGCTTCTACGACCGCTGATGACACGCGAGGCTGGTTCAGG  
TGTTATTCGGCGGGCTATATTCAGCGATTGTTATTCAGGGTATTCATCATAGCTTCCACGCAATGAAGCAGGACTTTTA  
GGTAACCCGCAATCGGTTTAAATTTCCGCTGCTGCTATTTGGGCAATGCCAAACGTTGCGCAAGGCGGTGCATGCTGCG  
GGTATGGTTTAAAACCAAGATACAAAAATTAAGCAATCACTTACCCTCGGCTTTTCCGCAATGTTAGGATTTACTG  
AAGCGCTATTTTTGGTATCAACCTTCGTTTGTAAACCTTTTATTCGGCGCTTAAATGGTGGCGCTCCGGCGGTTGCC  
TGGGTTGCTCTGTTACGTTTATATGACTGCGTTGGTCTGACCGCAATACCGGCAATGCCAATCGTTCAGCAACATC  
GTTGGTTAATTTATATTTGGAATGGTGTATGCTTTCGCTGCTCGCTTTTAGCCTCTCTTTATTACTCAAAATACAAAACGG  
ACGAGGAGTAA

>Cluster\_56866

ATGAAAATATCATTTCTGGGTGCCGGCCAGGTTGGCGGCACACTGGCGGAAAACCTGGTTGGCGAGAACAACGATATTAC  
TGTTGTCGATACCAACGGTGAGCGTCTGCGGACCTTACAGGATAAAATTTGACCTGCGGGTTCGTCAGGGGCATGGCTCTC  
ATCCAGCGCTATTGCGGGAGGCGAGTCCGACGCGCCATGATGCTGGTTGCTGTAACAGTTTATGATGAATGAGT  
GTTGCTGCCAGGTAGCTACTCACTTTTCAACACCCCTAATCGCATCGCTCGTATCCGCTCACCAGACTACGTGCGCGA  
TGCCGATAAGCTATTTCAATTCAGATGCTGTGCCGATTGATCATCTGATCGCACAGAGCAGTTGGTTATCGATAATATTT  
ACCGACTGATTGAGTATCCCGGCGCATTCAGGTTGGTGAATTCGCTGAGGGTAAAGTCAGCCGCTGCTGGTTAAAGCC  
TATATGGCGCGCCGCTGATTGGTAATGCACTTTCGACCATGCCGCAACATATGCCACATATCGATACTCGTGTGGCAGC  
AATTTTCCGCCACGATCGCCCAATTCGTCGCAAGGTTTCGACCATGTTGAAGCTGGTGTGAAGTGTCTTTTATGCGG  
CTTCACAGCATATCCGCGCGGTGATGAGTGAATTAACAGGACTGGAAAAACCTATAAGCGGATCATGCTGGTTGGTGGC  
GGTAATATCGGTGAGGCTGGCGCGCTGCTGGAAAAAGATTAACAGCTTAACTCATCGAAGCTAATCAGCAGCGCGC  
TGCCGAACCTGGCGGAAAAGTTACAGAAATACGATCGCTTTTTTTGGTGTGCGTGGGATCAAGAACTACTGGCCAGAAAC  
ATATCGATCAAGTTGATCTGTTTATGCGCTCACCAACGATGACGAGGCAATATCATGTCGCGCATGCTTGCCAACCGT  
ATGGGTGCGAAAAAGTGTATGGTATTGATCCAGCGTCCGCGCTTATGTTGATCTGGTTTCAGGGGAGCGTTATCGATATTCC  
GATTTCCACCAACAAGCAACTATTTCTGCGTTGCTTAGCCATGTGCGAAAAGCAGATATGTTGGTGTTCCTCATTTGC  
GCCCGCGGTAGCAGAAGCTATTGAAGCCGTTGCTCACGGTATGAAAGCACCTCACGCGTTGTCGGCAGAGTCAATTGAC  
GAAATCAAGCTACCGCCAGGAACGATTTATGGAGCGGTGGTACGTGGAACAGCAGTGTGATTGCCAATGACAATCTGGC  
CATGAGCAAGGCGATCAGCTAATATGTTCTCACAGATAAAAAGTTTATTACCAGCTCGAAAAGACTCTTCCAGCCAA  
GCCCTTCTCTTTGTA

>Cluster\_48671

ATGAGCGAGTCCAATCGCCGGATGCCCTGAGAGCAATGGTAGCCGTTACGCTGGCTAATTTTTCAGCACCCAACCTGAA  
ACACAACCTGACTACGCTTAAAGCGTTACACCATGTTGCGTGTGATGGATGACACACTGCATGTCGAACATAATCATGCCCT  
TCGTTGGAAATAAGCCCTTTTGAAGACCTGAAAGAGCAATGTAGTGGTGTGATCTGCTCCGATACACTGGCGCAAGGCTAAT  
GACTGGAAGCTGTGCTACAACATTTGCCACGCTTAAAGCGCTCAAAAACCAACAGGCAATTAATGGTGTAAAGAAATTTAT  
CGCCGTAAGCTCAGGCAAGGGCGGTGTAGGCAAAATCGTCCACAGCAGTAACTTGGCACTGGCTTTGGCTGCTGAAGGTG  
CGAAAGTTGGTATTTGGATGCCGATATCTATGGTCCATCAATCCAACCATGCTGGGCGCGGAAAACCAACGTTCAACC  
TCACCTGACGGTACTCACATGGCACCTATCATGTTCTCATGGCTGGCAACCAACTCATATGGTATCTGCTGGTCAACGCA  
CAATGCAATGGTGTGGCTGGACCGATGGCCAGCAAGGCGCTGATGCAGATGTTGCAGGAAACTTATGGCCTGATCTGG  
ACTATCTCGTCTCGATATGCCCGCGGGCACTGGTGTATTCAGTTGACGCTGGCGCAGAACTTCTGTAACCTGGTGGC  
GTTGTGGTAACTACGCGCAAGACATCGCGCTGATCGATGCGAAGAAAGGCAATGTTGATGTTTCAAAAAGTTCGAAGTCC  
GGTACTAGTCTTATGTAAGTATGATCGATATTTGCAATCAGTAAAGGACAGATATTCGATATGCGAGTAACTTTGGCAGCG  
GCGCACAGAACTGGCCGAGAAATACAACAGCAGTTGTTAGGCCAAATGCCACTTCAATATCTCTCTTCTGTAAGATCTG  
GATAACGGAAACCAACCGTTATTTAGTCTCCAGATAGCGAATTTACGGCTATTTATCGTGACCTCGCAGATCGCGTTGC  
TGCCCAAATGATTTGGCAAGGTGAAGTAATACCTGGCGAAATCGCATTCGCGCAGTGTGA

>Cluster\_48612

GTGAGCGAGCTGAAAGAGATAATACCGAATAGATTTTGAACAATGGTTGGACACTGAAGGTATCGTTTATCGACGTGG  
AGGCGTGAGTTCTCGCGGTCGTGAAGTGAATATCAAAGAGTGTCCGGTATGCGGCAGCTCCAACCTGGAAGGTATATTTCA  
ATCTGACCAGTGGCGTCCGCAAAATGCTTTGCTGGTGTATGCTCCGAGAGATTCAAGTTCAATAAGCTGGCTTTCCCTCAAG  
CACTACAGCGGTAATACAGCAGCAGTTCGAGGAATATGTGCAGAACGCTCTTCTTTCCAGGGGTGGGCACCAAGAA  
AGAAGAGATAGTGTTCGAAAGCAGCTGAGTTAGAGGGACCCTTGCCTCCCTCGTATTACGAACCTTCCATAGATG  
GCCGCTTCCAGACTATCTGGTTGAACGAAACATATCGCTGAAATGGCAAAGTATTTGACCTACGATACTGCGTTCGAA  
GGCAAGCAGCTTATGTAAGTATCGATCCGATATACAGATCAGTAAAGGACAGATATTCGATATGCGAGTACTGATACCGGTTA  
CGATCTGGATGGGGTAAAGACATTTACAGGACGAGACATTTACCGTACAGCAGACCGCGCTACCTCTTTCTATGC  
AGCTTCCAGCTTCAAGTAAAGTTTCTTACAACCGCCATTAATGCAGTTGGCAAAACAGACTGTAGTTGCTGTGAGGGTGGC  
TTCGATGTTATGGGAGTTAAACGAGCTATTTTTGATGAAGAACATTAACGTTACGTTGAAACCGATAGGAACGTTGCGG  
GATGATCTATCTGGTAAACCACTCAGGATGCGAAGACTGATTAGGCGCTTCTGACGCTCAAGGCGGCTGGGTTAC  
GTAATGTGATCATGATGTTGGATAGTGAAGCAAGCTATACGCAACAGGATGGCCGAGCCAGGCGATTTGACCAGTATT  
GGTCTAATGTCAAAGTTGCGTGTTTGGGCGAGGAAGGACTCGACCCGGCGATGCGACACCGGGGCGAGATTACAAAGC  
CTACTATTGCGCAAAACCTTACTCACGACAGCTTGAACTTTTAAGCAAGGTAAAGGTATAGCAGCATTTAGTTTGA

>Cluster\_16298

ATGGGATTTCAATCGGATCTGTCGGTTTGGCCAACTCGGGAATCTACCCTGTTCAACGCGCTGACCAAGCCGGTAT  
TGAAGCGCCAACTTTCCATTTCTGCACCTCGAGCCGAACACTGGCGTTCGATACCAATGCTGACCTTCCGCTGGATCAAC  
TGGCTGAAATCGTAAAACCGCAGCTACCTCCACAGCAGTAAAGGATTTGTCGATATCGCCGGTCTGGTAAAAGCGCA  
TCGAAAGGCGAAGGTTGGGTAACAGTTCTTACCAACATCCGTAACCGAAGCGATCGGTCAGCTGTTGCTGCTGCT  
TGAAATGACAACATCATTCACGTTTCCGGCAAAGTTAACCCGGCGGATGATATGAAGTTATCAACCCGAACTGGCGC

TGGCGGATCTCGACACCTGTGAACGTGCGATTTCATCGCGTACAGAAGAAAGCCAAAGGTGGCGATAAAGACCGGAAAGCC  
GAGCTGGCGGTACTGGA AAAATGCTGCCAGCTGGA AAAACGAGGTATGCTGCGTGCCTGGATTTAAGCGTGAAGA  
GAAAGCGGTGTTTCGTTACCTGAGCTTCTGACGCTAAAACCAACAATGTACATCGCCACAGTCAACGAAGACGGTTTTG  
AAAACAACCGTATCTTACAGAGGTGCGTGAATTCGACGCGAAAGAGGTTCTGTGTAGTTCCGGTTTTGTGCTGTT  
GAAGCAGACATTCGCAACTGGACGACGAAGAGCGTGCAGGTTTATGACAGAGCTTGGCTGGAAGACGCGCTGTA  
CCGTGTGATCCGTGCCGTTATAAGCTGCTGAACCTGCAAACTTACTTACCAGCTGGGGTGAAGAAGTGCCTGCATGGA  
CCATTCGGTGGTGAACCGCGCGCAGGCGAGCGGCAAAAATCCATACTGATTTGAAAAGGCTTTATCCGTGCACAA  
ACCATCTCGTTGAAGATTTTCATCACTTACAAAGGTGAACAAGCGCGAAAGAAGCAGGCAAAATGCGTGCAGAAAGCAA  
AGATTACATCGTTAAAGATGGCGATGTGATGAACCTTCTGTTCAACGCTAA

>Cluster\_15284

GTGGTGAATGTGA AACAGTAACGCTATACGATGTCGACAGATGTCGGTGTCTCTTATCAGACCGTTTCCCGCTGGT  
GAACAGGCGAGCCAGCTTTCTGCGAAAACGCGGGAAAGTGAAGCGGCGATGGCGGAGCTGAATTACATTTCCCAACC  
CCGTGGCACAAACAACCTGGCGGGCAACAGCTCGTTGCTGATTGGCGTTGCCACTTCCAGTCTGGCCATGCACGCGCTCG  
CAAATTGTCGCGGCGATTAAATCTCGCGCCGATCAATTGGGTGCCAGCGTGGTGGTGTGATGGTGAACGAAGCGCGT  
CGAAGCCTGTAAAGCGCGGTGCACAATCTTCTCGCGCAACGCGTCAGTGGACTGATCATTAACTATCCGCTGGATGACC  
AGGATGCCATGCTGTGAAGCTGCCTGCGCTAATGTTCCGGCTTATTTCTGTGATGCTCTGACCAGACTCCCATCAAC  
AGTATTATTTCTCCATGAAGACGCTACGCGACTGGGCTGGAGCACCTGGTGCATTTGGTACCAGCAAACTCGCGT  
GTTAGCAGGCCATTAAAGTCTGCTCGCGCGTCTGCGTCTGGCGGGTGGCATAAAATCTCACACGCAATCAATTC  
AGCCGATAGCGGAACGGGAAGGCGACTGGAGTGCATGTCGGTTTTCAACAAACCATGCAAAATGTTGAATGAGGGCATC  
GTTCCCACTGCGATGCTGGTGGCAACAGATCAGATGGCGTGGCGCAATGCGCGCATACCAGTCCGGCTGCGCGT  
TGGTGGGATATCTCGGTAGTGGGATACGACGATACCGAAGACAGCTCGTGTATATATCCGCGCTTAAACCACTCAAA  
AGGATTTTCGCTGCTGGGGCAAAACAGCGTGGACCGTGTGCAACTCTCTCAGGGCCAGGCGGTGAAGGGCAATCAG  
CTGTTGCCGCTCTCACTGGTGA AAAAGAAAACCCCTTCCGCCAATACGCAAAACCGCTTCTCCCGAGCGTTGGCAGA  
TTCTTTAATGACGCTGGCGGACAAATTTCCCGACTCGAAAGCGGCGAGTGA

>Cluster\_25661

GTGAATGACGCTATCCCTCGCCGAGCGGAAAACCCGTAAGCGCTGACGCCGCTATTAGAAATCCGTAACCTGACCAA  
ATCCTACGATGGTCAACATGCGGTGGATGATGTGACCTGACCATCTACAAAGGTGAAATCTTCGCGCTGCTGGCGCAT  
CCGGCTGTGGCAAGTCCACGCTGCTCGTATGCTGGCAGTTTGAACAACTTCGCGCGGGCAGATGATGCTGGATGCG  
GTCGATTTGTACAGGTGCCGCTTACCCTCGCCCATCAATATGATGTTTCACTTACGCGCTGTTTCCGCATATGAC  
CGTGAACAGAATCGCTTTTGGCCTGAAACAGGACAACTACCGAAAAGCGGAAATGCCAGCCGGTCAATGAGATGC  
TTGGGCTGGTGCATATGACAGGAGTTCGCAACGCAACCGCATCAGCTTCCGGTGGTGCAGCGTGCAGCTGTGGCCCTG  
GCCAGAAGCCTTGGCAAGCGCCGAAACTATTACTGCTCGATGAGCGATGGCGCGCTGGATAAAAAGCTGCGTGACCG  
GATGCAGCTTGAAGTGGTGGATATTCTGGAGCGCTCGGTGTGACCTGCGTAATGGTTACTCACGATCAGGAAGAGCGGA  
TGACTATGGCGGGCGCATCGCCATTATGAATCGTGGGAAATTTGTCCAGATTGGCGAGCCGGAAGAGATCTACGAGCAT  
CCGACCCTCGCTACAGCGCTGAATTTATCGGTTCCGTTAATGCTTTTGAAGGTGACTCAAAGAGCGTCAGGAAGATGG  
TCTGTGCTTTTATTCGCGGGGCTGGTGCATCCGATCCGATGAAAGCTGCATGTGGATGCTTCGGTGTGTCGATACAGT  
ATGTGGCGCTTCGCCGGA AAAAATCATGCTTTGCGAGGAACCGCCCAATGGTTGTAACCTCGCGTGGGGGAGGTG  
ATGCACATTCGCTATCTCGCGCATTTTTCAGTGTATCAGCTTCGCTTAAAAAGCGGGCAGATGATTAGCGCCAGCTACA  
AAACGCCCATCGTTATCGCAAGGGTTACCAGCTGGGGCGACGAAGTGCCTTGTGCTGGGAAGTGGACAGCTGTGTGG  
TGTGACGGTTTTAA

>Cluster\_25090

ATGACAAAATAAACCCCATTTGTTTTCTCTTTTATGCTGACAGAAAAATAAAGCTACGTAATCGTATCGTTATGGC  
TCCTATGACAACCTFGGTACGTAATCTGATGGAACCACTCTCTGAGCAAGAACTCGAAATTTATAAACCTCGCTCACAAA  
ATGTTGGTTTAGTAATAACAGGATGCACCTATGTCACGCCAAGCGGCAATGGGTTTACTCATGAATTTGCCGCTATGAC  
GACCGTTTCATTAACAGCCTTGA AAAAGTTAGCAGCTGCAGCCAAAAGTGGCGGTGCTCCGGCTATTTTGCAGATTTTCCA  
CGCCGGTAATAAAGCCATCCCGGAGCTTGTGCCAAATAACGATGTTATTAGTGCAGCGCATCAAGCGTAAAAATCTGGTG  
ACTTTATGAAGAGAGTGGTACAAAAGCAGGGAATGACTGAAAACGAAATTCAGGAAACATTAGAGCATTCGGAGATGTC  
ACAAAAGGGCGATTAAAGCAGGTTTGTGAGCGTTGAACTTCAATGGTGCACAGGATTCCTTCTGCAGAAATTTCTTCTC  
CCCTCTATTTAAACAGCCTAATGACCGATGGGGAGGAGATCTTGAAGGACGATGCGCTTCCGCTGGCGTATTACAGG  
AAGTAAAAAATAGTCTATGAATATGCGACAAAGCCCTTGTATCGGTTACAGAATATCTCTGAAGAATCTGTAACA  
GGGGGCTCGCGATAGAGGATACCTATAAACTCCTTGCAGCTCATTTCATCCGATTTTCGTATATACATACATCCGCT  
GGTCACTATTAAACGATAGCTACCCTGTTGAGTGCAGCAAAATGGCCCGCAACTATTGAATGATTTAAATCATATTGCAG  
GCAGAGTCCGGTAAATCGCCGACGTAATAACGACACCGCTCAGGCTCAAGAAGCAATTTCCGCTGGCCTGCCACTT  
GTTGCGATCGGTAAGGGCTGGTGAATAATCCAGAATGGGTGACTTTAGCTGAATCAGGTAGAAGTCAAGAAATCAAAC  
AGCCCTTAATCCACAACACATTTCTGAATTAACCAATTCGGGATAAACTATGGGATCAAATTCAGGATCGAAAGGAACCTG  
GCTGGTTTTCCGTTAATGATTA

>Cluster\_22189

ATGACTAAAGTTGCTTTATTACTGGTGTAAACGGACAAGATGGATCATACTTGGCAGAGTTTCTGCTGGAAAAGGTTA  
TGAAGTTTCATGGTATTAAGCGTCTGTCATCGTCTTTAATACTGAACGCGTTGATCATATTTATCAAGATCCGCATTCAG  
CCAAGCCAAACTTCCATTTGCATTTATGGTGATCTCACGGATATTCACAACATTACGCGTATTCGCAAGAAGTTAAACCG  
GATGAAGTCTACAACCTGGGGGCTATGAGTACGCTGGTGTGTCATTTGAATCACCAGAGTATACCGCGGATGTTGATGC  
TATTGGTACATTAACGCTTACTGGAAGCGATCCGATCCTTGGCTTAGAGAAGAAAACACGCTTTTATCAAGCGTCCACAT  
CTGAACTTTATGGTCTGGTACAAGAAATACCTCAGAAAGAGACGACACCTTTTACCACGTTTACCCTATGCTGTAGCC  
AACTGTATGCTTACTGGATCACCGTAACTACCGTGAAGTCTTATGGTATATATGCTTGAACGGAATTCATTTAAACCA  
TGAATCTCCGCTCGTGGCGAAACTTTCTGTTACGCGCAAAATACCCTGCAATTTGCCAACATTTGCTCAGGGCTAGAGT  
CTTGCCTTTACTTGGAAATATGATTCACTACGCTGCTGGGACATGCTAAAAGATTATGTCAGGATGACGTGATGATG  
CTACAGCAGGAACAACCTGAAGATTTCTGTTATTGCCACTGGTGTTCAGTACTCTGTTCTGAGTTTGTGGAATGACTGC  
AGAGCAACTTGGCATCAAATGAGCTTTGAAGGAAAAGGTGTAGATGAAAAGGATTTGTTGTTCCGTGACGGCGGATA  
AAGCACCTGGCGTCAAACAGGAGACGTCATAGTTGCGGTTGACCCGCGTTATTTCCGTCCGGCAGAAAGTGA AAAACATTT  
TGGGTGATCTCAGCAAAAGCGCATGAAAACCTTGGCTGGAAGCCTGAAATTAACCTTACGTTGAGATGATCTCAGAAATGGT  
CGCTAATGATTTGCAGACAGCAAAAACAGCTACTGTTGAAATCGCACGGTTTTAATGCCAATTTAGCCCAAGAGTAA

>Cluster\_22654

ATGCATAACAGGCTCAAATCAACGTAGAAAATCAACACGATTTTACTGTTGGGAATGTGCCGATGGCGATGGTGTCTCC  
CATCGCGGTACAGTCCATGACCAATACGCGTACGACAGACGTCGAAGCAACCGTCAATCAAATCAAGCGCTGGAACGCTG  
TTGGCGCTGATATCGTCCGTGCTCCGTACCAGCATGGACGCGGAGAGCGTTCAAACCTATCAAACAGCAGGTTAAC  
GTGCGCTGGTGGCTGACATCCACTTCGACTATCGCATTTGCGCTGAAAAGTAGCGGAATACGGCGCTCGATTTGCTCGCTAT  
TAACCTGGCAATATCGGTAATGAAGAGCTATTGCGATGTTGGTGGTGTGACTGTGCGCGGATAAAAACATTTCCGATCCGTA  
TTGGCGTTAACCGCGGATCGTTGAAAAAGATCTGCAAGAAAAGTATGGCGAACCGACCGCGCAGGCGTTGCTGGAATCT  
GCCATGCGTCTGATGATCATCTCGATCGCTGAACTTCGATCAGTTCAAAGTCAAGCTGAAAGCGTCTGACGCTTCTCT

CGCTGTTGAGTCTTATCGTTTGGCTGGCAAAACAAATCGATCAGCCGTACATCTGGGGATCACCGAAGCCGGTGGTGCCG  
GTAGCGGGCAGTAAAATCCGCTATTGGTTAGGTCTGCTGCTCTGAAGGCATCGGGCAGACGCTGCGCGTATCGCTG  
GCGGCCGATCCGGTCAAGAGATCAAAGTCGGTTTCGATATTTTGAATCGCTGCGTATCCGTTCCGCGGGGATCAACTT  
CATCGCTCCCGGACCTGTTCCGCTCAGGAATTTGATGTTTACGGTACGGTTAACCGCGTGGAGCAACGCCGTGGAAGATA  
TCATCACTCCGATGGAGCTTCGATTATCGGCTGCGGTGTAATGGCCAGGTGAGGCCTGGTTCTCACTACCTCGGCTC  
ACTGGCGGCAACAAGAAAAGCGGCTCTATGAAGATGGCGTGCACAAAGCCGCTGGACAACAACGATATGATCGACCA  
GCTGGAAGCAGCATTCTGTCGAAAGCCAGTCACTGGACGAAGCGCTGCAATGACGTTTACGAGGTTGAAAAATAA

>Cluster\_12516

ATGAACGACAGGGAAAAGCAGATCTTAAAATTTTACGGCGTAACCCGCTGATTCACAGAATGAAATCGCCGATATTCT  
GCAAAATCAGCCGCTCAGCTGTTGCGGCTCATATTTATGGATTTGATGCGCAAGGGTTTGGATTAAGGCAAAAGGATATATCC  
TTACCAGCAGGATTAATGTTGTTGTTGGGTGCAATCAATATGGATATTCGCGGAATGGCGGATATCCGTTACCCGCA  
CGAGCCTCTCATCCAGGTTCTGTTTACTGTTCCGACGGCGGCTCGGACGTAATATCGGCATAACCTGGCTGCTGTTGG  
TCGGATGTCATTTAATATCAGCTATTGGCAACGATTTTACGGCGAGACATTAAGGAAAGAACCGCCGCGGGCGG  
TGAACGTTTCAAATGCAATTCGTTGCTGATGGACACAGCACTGCAACTTATCTCGCTATCGCTAATAAGCAGGAAGAACT  
ATCCTGGCAATCAATGACACACATATTCGCAACAGCTAACGCCTCAACTGCTCAATACTTACCGGGACTTGGATTCGCCA  
TGCTGGTGGTGGTGGCTGGTGAATGTAATCTCACACCTGAAGCCCTGGAGTGGGCTTTTACCATTGCTGATGAAATCCGA  
TGTTTGTGATACCGTTTCCGAATTTAAGCGAACAATAAAGCTGTTACAGCCGATCCACACTGAAACCAACA  
CAAAATGAACTGGAATTTTGTGGGGCAACCGATTAAGACGACAACGATCGCATCAGAGCTGTAATTCGCTGCATCA  
ACAAGGTGTTAAACGCATTTTGTGTTATCTGAAAGATGAATCTGATTTTGCAGCGATAAGGATGGAGAACAAATTTTTC  
TGACCGCGCCAGCGCATACGACAGTAGACAGTTTGGTGTGTCAGATGGTTTTATGGCGGGCTGGTATATAGCTTTCTT  
GAAGGATACAGTTTCCGCGACAGCGCCGTTTTCGGTATGCTGACCGCGCAATTTCCGCGCCAGCGGCGCTTAAACAA  
CCCTACCTGCTGCGGATAACGCGCTTTCATTAGTGCAATGGTGTA

>Cluster\_21211

ATGAACAAAAGAGCTATGGATTAACAGATCAAAGGTTATGATTTTGTCTGGTGGTATTATCACTCGGTCATTAC  
CTTTTATCCGCTCTGACCACTTCCAGCATCCGTTATCAGAAGTCTGAGCAATGCTGGATCTATTTCAATCTTTACC  
TTGACCCCTTTCGATGCGGTTTCTTTTCTTATCTCTGGCTATTGATTCGCGCTATATCGACAGGCTACCGTGGGGA  
AATGTCTCGATAAACGCATCTGGAACATCTTCTGGGTGCTGGCGCTTTGGGGCGTGGTGCAGTGGCTGGCGTAAAGTGC  
ACTAAATCAGTGGCTGGCAGCTGAGCGCAATTTAAGCAATGCCCTCCAATGCTGCTTATGCCGATTCACCGCGGATTTCC  
TGCACGGGATGATCACCGCCAGCACCAGCTTGTGGTATCTGTATGCGTTAATGCTTATTTCCGTGATATGTAATAATTTT  
AACCGCTTGGCCCTGCGGTTATTTGTTCTGTTTACTGATGAGTGTGACTATTAATTCGTAACCCACACCGTGGTGGG  
AATGAACAGTGTGATCCGCAATTTGCCTTATTACAGCCTTGGCGCATGGTTTGGCGCAACATTAATGACCTGTGTTAAAG  
CGGTACCGTTGCGCCGCAATCTGCTGATGGCTTCTTTGCTGACCGCTTTCGGCAGTCCGTTGCTGTTTAAATATCTCG  
CTGCTGTTGTCGCTGGTATCGATTGTTGTAATCATGAAGCTGTTTATCAGTACGAGCAGCGTTTCCGCTGCGCTCCAC  
CAGCTGCTGAATGATGGCTCCAACACCATGCTATCTACACCACCATCGCATTCTGGTGAATATTCAGCTTAA  
CTCTGCTTGGCAAAATGAACGACGACGCTGGTGGCCACAAGTGAACGACTCCTGCTGGTTTACCCCTTTGTTAGT  
TTGTTTCACTGTTACTGTTTCCGGGCTTGGTGGTAAGAAAATTTTACAGCGCGCATTCAGCGATCTGTTGTTCTCCGCG  
TTCTTGGCCGCTACCGTCACTTACTCCGCTAA

>Cluster\_21897

ATGAAAGCACTGGCTCGGTTTGGCAAGGCTTTGGCGGTACAAGATGATGATGTCACCAACCCATTTGTGGCCCGGA  
AGATGTCGTTGATGAAATTAAGCCGCGCAATCTGCGCGCAGACATGAAGCACTACATGTCGATAGCGGTTCTGATG  
AGTTTAACTCTATCCGCGCCATGAGTTCGAGGTTGATGCGCAGGTTGGTGAAGAAAGTCAAAGACGGAAGTGGGG  
CAACCGCTCGTTCGGATAACAGCGGTCACGTTTGGCGGTGTTTGGCCGCGCTGGAACAAGGTGATTTCTGTGTTGAC  
AGAAAAGTAAACCTTGGTCTGGATAACATACTGGGGCGGTTGTTTCAAATATGTCCTGTTGTTGTTAAATCT  
TCAAAATTCATCGTCATGCGTTTGGGAAATCCCTGATGGTGTGATTATGAGGACGACGCGTACTTACCCCTATCTGT  
AATGCTTAAATCCATCGCGCAGCAATCGAAATTCCTCCCTGCTGAGGATGTTGTCGTCATCGGCACGCGCCACTCGG  
GCTGTTTCCGCTACAATGGCGCGGATTTATGGGGCGGTAAATATCTGCTGCTGGTCTACAAGAAGATGTTGGCGGTTCC  
GATTTCCGCTTGCAAAAGAACTGGGTGCGCAGCGGATGTAATGTTTCAACGAAGATGTTGGTGGCGCGCTGCCAGCAA  
ATTTGTGGCAAAGACAATCTGGGACTGGTGAATGCTCCGGTGCCAAATATCGCACGAAACAAGCCATCGAAATGCT  
CCGTCCGAACGGGGAAGTGGTACCGGTTGGAATGGGCTCAAACCTCTTATTCTCGATTAATGACATTAACCGCTGGA  
ACAAAAGCATCATTTGGGCATATGGCCTATGACTCCACCTCATGGCGTAACGCTATCAGGCTATTAGCCAGCGGCGGATC  
AAAGTCAAACCGATGATCAGCATCGCTATCGGCTGTCGCAATGGCGGAAGGTTTGGATGCGGATGGTGCATAAAACTGC  
AATCAAAGTATCATGACTTACGACTTTGATGAATAA

>Cluster\_5529

ATGCGCGTTACCGATTTCTCCTTTGAATGCCCCAATCCCTGATGCCCCACTATCCCATGCCCTGAACGACGAGTGTGCG  
TTTACTGTCGCTGGACGGGCGCAGGGCGCGTACGCGACGGTACTTTTACCGATTTACTTGAATAAGTCAACCCCGGGC  
ATCTTCTGGTTTTTAATAATACCCGCGTATCCCGGCGCGCTGTTTGGCGTAAAGCAGCGCGGCAAGATGAAGTG  
CTGGTTGAACGGATGCTCGACGACAAACGCATTTTGGCATAATTCGCGCCTCGAAAGCGCCAAAACCTGGCGCAGA  
GCTGCTGGCGGATGACGAAAGTATTAACGCAACAATGACCGCGCGCCAGCGGCTGTTGAAAGTGAATTTAATGATG  
AACGCTCGTGTGATATTTCTCAACAGCATCGGCAATATGCGGCTGCGCGCTATATCGACCGTCCGCGGATGAGCAG  
GACCGCAACTTTATCAAACCGTTTATAGCGAAAACCGGGCGGTTGACGCGCCGACCGCAGGCTGCTGATTTTACGGA  
GCCTTTGCTGAAAATTTGCGCGCAAAAGGCGTGGAGATGGCGTTTGTGACGTTGACGTTGGTGGCGGACCTTCCAGC  
CGGTGCGGCTGACACCATGAAAGTCAATCATGACCTCGGAATACGCTGAAGTACCGCAGGATGTTGATGACGCGGTA  
CTGGCGGCAAGCGCGGTAACCGGGTGAATTCGGTTGGCACCCTTACGTTACGTTGCTGAAAGCGCGGCTCAGGC  
AGCGAAAACGATCTCATGAAACGTTCTTCGACGATACCCAAATCTTATCTATCCGGGCTTCCAGTACAAAGTGGTGG  
ATGCGCTGGTGAACCTTCCACTTGGCAGAGTGCAGCGTATGATGCTGGTTTCCGCGCTTGGCGGTTATCAACACACC  
ATGAACGCTATAAAGCAGCGGTTAGAAGAGAAAATATCGCTTTTATAGTTACGGTATGCGATGTTTATCACGTAACAATCC  
GCAGGCAATTAATGAGCGGCTCGGGGATGA

>Cluster\_12408

ATGAATTTAGTGAGGCAAGGTGATAATGATATTTGCTAGCAATGATTTTCCACTGAAGATCTTAAAGTACTTTTCTGCT  
ATGGGCGGTTAAGGGGTTAAATCTCTCTTAACTCAAAGGTTAATCTCTTTAAGGATATAAATGCTGTTTATGAAC  
TAAAAAAATTTTAAAGGATATTTCCCGAGATATGATTTTTCATATTTTGTAAAGCCAGTAATTTTGAACATTTGCT  
TCAAAGTTGCTCAAAGTGCACAGGATTTGTTGGAATGATGAAAGTCTAGGTAATGCTTCACTTATTAAGGAAAAGCA  
GACCACAAAACATAAATGATAAAGTGGATACAAATCTTTTATATAAGTTAGCATTACCGATGCTTGGATGATTTGATCT  
TATTAATATCATGATGATAAAAAAGATTTAATCGATCAGTATAAATATAAAGTAAAGTTAACAGTTTGGTGGGATGGA  
TTGGATCTTAATGAGTTTTTATATAAAGAGCCACCGAAAAGAGAAAATTTACCTTTATTTTATAGCAAGTTATTAAGAGA  
GAAAGGATATTTGATTTTATTTAAGCCGCAAGTTCGTTAAGACAACCTATCCAAAGTCTGAAATTTGTAATTTTAGGAG  
GTTTTGAGATAAATCTTTCTCATTAACAAAATAAATGAAATGAAATGAAATGAAATGAAATGAAATGAAATGAAATGAAAT  
GGTCTATGTTGAAATGTTCAAGATTTGGTTAGAGAAAAGTTCTGTTTTTGTGTTTACCTACATCATATCGAGAAGCGGTACC  
AAGGTGATCCAAGAAGCTATGGCTATTTGGTAGACCTGTAATAACAACATAATGATCTGGGTGATAGGATATAATAAATG

ATGGGGTCAATGGCTTTTTGATACCTCCATTTGAAATTAATTTACTGGCAGAAAAATGAAATATTTTATTGAGAATAAA  
GATAAAGTACTCGAAATGGGGCTTGCTGGAAGGAGTTTGCAGAAAAAACTTTGATGCTTTTGAATAAATATAGACT  
AGCATCAATAATAAATCAAATAATGATTTTTGA  
>Cluster\_43385  
GTGCGGGAGACGCTCAAAAGCCAGCTGGCGATACTCTTTCATCTTGCTTTTGTATCTTCTGTCAAAGTTAGTGAGGAT  
CCTCGGCGCAGCGGTTGACGGCGATATTCCGGCGAACCTGGTGTCTCCCTTCGCGGTTGGGCGTGCCGAAATGGCGC  
AGCTTATCCTGCCATTAAGCCTGTCTCCGGGCTGCTGATGACGCTGGCCAAATGATACCGGAAAGTAAATACGGTA  
ATGCATGCCTGCGGCTGAGCAAAGCGGTGCTGGTAAAGCGGCAATGATCCTTGCGGTGTTACGGCAATCGTCGCGC  
GGTTAACGTGATGTGGCGGGACCATGGTCATCGGCTCATCAGGATGAAGTGTAGCAGAAGCGAAAGCGAACCTGGCA  
TGGCGGCGCTGGCGCAAGGGCAATTCAGCAAGCGACTAATGGCAGCTCGGTGCTGTTTCATCGAAAGCGTTGACGGCAGC  
GATTTCAAAGATGTGTTCTCGCGCAAATTCGACCAAAGGTAATGCACGACCTTCTGTGGTGGTGGCGGATTCCGGACA  
ATTTCCGCATTACGGATTTCCAGGATTAATCAGGCGATCTGGTACCAGGCGGTGGCGCTCGACCCGCAACGATACCGAC  
CAGATGGACATGCGCACATTTGTGGAACACTGACACCGATCGTGTCTCGCGCAGAACTGAACTGGCGTATCACGTTGGTGT  
CACCGTGTATGATGGCACTTATGGTCTGACCGCTGAGCGTGGTTAACCCGCGCTCAGGGGCGGTACTATCGATGCTGC  
CAGCCATGCTGCTGATCTGTTGTTCTTCTGATCCAGACCTCCCTGAAATCGAACGGCGGTAAGGTAAGCTGGACCCG  
ACGCTGTGGATGTGGACCGTTAACTGATTTACTGGCTTTGGCGATTGTTCTCAACCTTTGGGACACCGTGCCGCTCCG  
CCGCTGCGCGCCAGTTTTTCGCGTAAAGGAGCGGTGTGA  
>Cluster\_32426  
ATGTCTAACGTGCGAGGAGTGGCAACAGCTTGCCACAAGGAATGAGCGCTCGGGAGAAAACGTGCTGACTCGTGGTTCA  
GCAAACCGCGGAAGGATCGCCATCAAGCCGCTGATACCGAAGCCGATCTCGATAATCTGGAGGTGACAGGTACCCCTTC  
CTGGTTTGCCTTACGTTCTGTTGGCCCGGTGCTACTATGATACCGCCCAACCGTGGACATCCGTCAGTATGCTGGT  
TTTTCCACAGCAATGAGTCCAACGCTTTTTATCGCCGTAACCTGGCCCGCGGCAAAAAGGTTCTTCCGTTGCGTTTTGA  
CCTTGCACCCGCTCGGTCACGACTCCGATAACCCACCGGTGGCGGGCGACGTCGGCAAGCGGGCGGTGCTATCGACA  
CCGTGGAAGATATGAAAGTTCTGTTGACCCAGATCCCGCTGGATAAAAATGTCGGTTTCGATGACCATGAATGGCGCAGTA  
CTACCAGTACTGGGTTTTATATCGTCCGCGCAGAAAGCAAGGTGTTACACCCGATAAACTGACCGGACCATTTCAAAA  
CGATATCTCAAAGAGTATCTTTGCCGCAACACCTATATTTACCCGCCAAAACCGTCAATGCGTATTTATCGCAGACATCA  
TCGCTCGGTGTTCCCGCAACATCGCGGATTTAATACCATCAGTATCAGCGGTTACCATATGGGTGAAGCGGCGGTGCTG  
TGCATGCGCAGCAGGTAGCATTTACGCTCGCGGATGGGATGAGTACATCAAAGCAGCAATCTCCGCGGGCTGAAAATTGA  
TGACTTCCGCCCTCGCCTGCTGTTTTCTTTGGCATGGCATGATCTGTTTATGAACGTCGCGCATGTGCGTGGCGCAC  
GTTATTTATGGAGCGAAGCGGTGAGTGGATGGGCGCAGAGTCCGTATAACAACGTTATCCGCACCACCATTTGATCAT  
TGTGCACATCCCATGTATCGGGATATCTGCATCGCTATCTGGAATAAGCGCTGGCGGACATATTCACCCAGCATCTTCA  
GCAATATGCTGAAGCATCGTGGCGGTATAACGATGATTTCTGA  
>Cluster\_25384  
ATGTTACGTTCCGGCGGCATACAGATAAGAGGAACGGTTTGAACATAGACACTCGGAAATCACCCGAGCCAGCAGA  
CAATGCGCTCTGTTGAGCCTGTGCGGCCCGTTTGGATGACAACATCAAAACAACTCGAACGCGCTCTCGCATCGAAATCA  
ATCGCCCGGATAACCACTTAAACTGACCGCCGTCGATTTGCGTCCCGCTCGGCGAGACATTTCTGCTAGCCTGTAT  
GTCGATCTGCCCGATGCGCGGTCAGATTCAGGATATCGAACCGGAACAGATCCACCTTGGCATTAAGAAGCGCGGTT  
ACTGGAGCAAAAGCGGAGAGCGTGCAGGAGTACGGCAAGCAGTCAATATCAAACAACCGCGGCTAATTAAGCCGC  
GCACGCCAAACAGCGCGCAGTACATCGCCAATAATTTCTCGACCATGACATTTACCTTTCGCGGTTGGCCCGCGGTACGGGT  
AAAACCTACTGGCAGTGGCTGCGGCAGTTGATGCCCTGGAGGTCAGGAAATTCGCGGATTTCTGCTGACTCGTCCGGC  
GGTCAAGCCGGTGAAGAACTGGGCTTCTGCTGGCGATTTAAGCCAGAAAGTAGACCCGATCTGCGCCCGCTGTAGC  
ACGCGCTGTTTTGAAATGCTGGGCTTTGAGAAAGTGCAGAACTGATTTGAGCGCAACGTTATTGAAAGTGCACCCGCTGGCC  
TATATGCGTGGTCTGACGCTGAACGACGCGTTTTATCATTTCTGATGAGAGCCAGAACTACCATCGAACAGATGAAGAT  
GTTCTGACCCGATCGGTTTTAACTCAAAGCGGTTATCACCGGCGACGTCACACAGATCGACTGCGCGTAAATACCA  
AGTCTGGTTGCGTCAATGCCATCGAAGTGTGGCTGATGTCGAAGAGATCAGCTTTAACTTCTTCCACAGCGAAGACGTG  
GTTCTGACCCCGTGGTGGCGCGTATCGTTAACGCTATGGAAGCTGGGAAGAAGCCGAACAAAACGTTAAAGCGCGCT  
GGCAGCAGAACGCAAGCGGAAGAACAGGAACAAAATGA  
>Cluster\_24270  
ATGCAAGCGGCAACTGTTGTGATTAACCGCCGCTCTGCGACACAACCTGCAACGCTTTCGTGAACTGGCGCTGCCAG  
TAAAATGGTTGCGGTGGTGAAGCGAACGCTTATGGTACCGGTTCTTTCGAGACCGCGCAACGCTCCCGGATGCTGACG  
CCTTTGGCGTAGCCGCTCTCGAAGAAGCTCTGCGACTGCGTGGCGGGGAATCACCACCTGTACTTTTACTCGAAGGC  
TTTTTTGATGCCAGAGATCTACCACGATTTCTGCGCAACATTTTCATACCGCGTGCATAACGAAGAAGCAGCTGGCTGC  
GCTGGAAGAGGCTAGCTGGACGAGCCGTTACCGTCTGGATGAAACTCGATACCGGTATGCACCGTCTGGCGCTAAGC  
CGGAACAGGCTGAGCGTTTTTATCATCGTACCCAGTGCAGAAACGTTTCGTCAGCCGTTGAAATATCGCTCAGCATTTT  
GCGCGCGGATGAACAAAATGCGGCGCAACCGAGAAGCAACTCGCTATCTTTAATACCTTTTGCAGGGAACACCTGG  
TCAACGTTCCATTTGCCGCTCGGGTGGCATTTTTACTCTGGCCACAGTGCATTTTGTGAGTGGGTGCGCCGGGATCATTC  
TTTACGGGTATCTCCGCTGGAAGATCTCACCGGTCGCAATTTGGCTGTGACGAGTGTGATGCTGATGCTGATGCTGAC  
CTGATTTGCCGCTGCGTGAACATAAAGCCGAGAGCCTGTGCGTTATGGTGAACCTGGGTAAGCGAACGTCGATCTGCT  
TGGCGTAGTCCGATGCGGTATGGCGATGGTTATCCGCGCGCCGCGCTCCGTTACGCGAGTGTGGTGAACGGTCCGG  
AAGTCCGATTTGTCGGGCGAGTCCGATGGATATGATCTGCGTAGACTTAGGTTCCACAGGCGCAGGACAAAGCCGGGAC  
CCGCTCATTTTATGGGGCGAAGGTTTCCCGTAGAACCTATCGCTGAAATGACGAAAGTAAAGCGCTTACGAACTTATCAC  
CGCCTGACCTCAAGAGTCCGATGAAATACGTGGATTA  
>Cluster\_27540  
ATGAAATACCGATTTATCTCGACTACTCCGCAACTACCGCGGTGGACCCGCGTGTGGCCGAGAAAATGATGACGTTTAT  
GACGATGGACGGAACCTTTGGTAACCCGCGCTCCCGTTCTCACCGTTTTCGCTGGCAGGCTGAAGAAGCGGTAGATATCG  
CCCATAACAGATTTGCCGATCTGGTCCGCGCTGATCCGCGTGAATCGTCTTTACCTTGGTGAACCGAATCTGACAAC  
CTGGCGATCAAAGGTGCAGCCAACTTTTATCAGAAAAAGGCAAGCACATCATCACCAGTAAACCGAATAAAGCGGT  
ACTGGATACCTCGGCTCAGCTGGAGCGCAAGGTTTTGAAGTCACTTACCTGGCACCGCAGCGTAACGGCATTTATCGACC  
TGAAGAACCTGGAAGCAGCGATCGCTGATGACACCATCTGTTTTCATCATGACGATAAATAACGAAATCGGCGTGGT  
CAGGATATCGGGCTATCGGCAAAATGTCCGCTGCTGCGGATTTATCTATCACGTTGATGCAACCCAGAGCGTGGGCAA  
ACTGCCATATCGATCTGAGCCAGTTGAAAGTTGACCTGATGCTTTCTCCGGTCAAAAATCTATGGCCCGAAAGGATTTG  
GTGCGCTGATGTGCGCTGAACCCGCTGACGATCGCAAGCACAATGATGGCGGCGTCAAGGCGCGGTATGCGT  
TCCGGCACTTGTGCTTTTACCAGATCGTCCGTTATGGCGAAGCTTATCGCATCGCAAAAAGAGAGATGGCGCGGAT  
GGAACGCTGCGCGGCTCGGTAATCTGTTGGAACGGCATCAAAGATATCGAAGAAGTTTACCTGAACGGTACCTGG  
AACCGGTTGCGCGAATCTTCAACGTCAGCTTCAACTACGTTGAAGGTGAGTGCCTGATTTAGGCGCTGAAAGACCTC  
CGGGTTCTTCCGTTCCGCTGACGTCAGCAAGCCTCGAAGCTTACGCTGCTGCGCGGCTGCGGCTGAAAGACGCA  
GCTGGCACATAGCTCTATCCGTTTCTTCTTAGTCTGTTTACTACTGAAGAAGAGATCGACTACACCATCGAGTTAGTTC  
GTAATCCATCGTCTGCTGCGTGGGAAATGTACAAGCAGGGCTGGATCTGAACAGCATCGAA

TGGGCTCATCATTA

>Cluster\_24617

ATGAAACGTGCATTTATTATGGTGTGGACTCATTCGGCATCGGGCTACAGAAGATGCAGAACGCTTTGGTGACGTCGG  
GGCTGACACCCCTGGGTCATATCGCAGAAGCTTGTGCCAAAGGCGAAGCTGATAACGGTTCGTAAGGCCGCTCAATCTGC  
CAAATCTGACTCGTCTGGGGCTGGCGAAGCACACGAAGTTCACCGTTTCATCCGGCGGGAATGAAACGGCAACGGT  
GAAGTTATCGGCGGTACGCATGGGCGCACGAAATGTCAATCCGGTAAAGATACCCCGTCTGGTCACTGGGAAATGCTGG  
TGTGCCGGTCTGTGTTGAGTGGGGATACCTTCGATCAGGAAACAGCTTCCGCAAGAGCTGCTGGATAAACTGGTGC  
AACGCGCTAATCTGCCGGGTACCTCGGTAACCTGCCACTCTTCCGGTACGGTCAATCTGGATCAACTGGGCGAAGAGCAT  
ATGAAAACCGGCAAGCCGATTTTCTATACCTCCGCTGACTCCGTTTCAGATTGCCCTGCCATGAAAGAAACCTTTGGCC  
GGATAAACTCTACGAGCTGTGCGAAATCGCCGTGAAGAGCTGACCAACGGCGGTACAACTCGGTCGTGTTATCGCTC  
GTCGGTTTATCGGCGACAAGCCGGTAACTTCCAGCTACCGTAAACGTCACGATCTGGCTGTTGAACCGCCAGCACCG  
ACCGTGTGCAGAAACTGGTTGATGAAAAACACGGCCAGGTGGTTTCTGTGGTAAAAATGCGGACATCTACGCCAATG  
CGGTATCACCAAAAAGTAAAAGCAACCCGGCTGGACGCGCTGTTTACGCGCACCATCAAAGAGATGAAAGAAAGCGGGT  
ATAACTATCTGCTTCCACCAACTTCGTTGACTTCGACTCTTCTGGGGCCACCGTCGCGACGTTGCCGGTTATGCTGCG  
GGTCTGGAGCTGTTCGACCGTCTGCTGCGGAGCTGATGCTTGTGCTGCGCGATGACGATATTCTGATCTCACTGCTGA  
CCACGGTTGTGACCCGACTGGACCGGTACTGACCACACGCGTGAACACATTCGCGTACTGGTTTACGGCCGAAAGTGA  
AACAGGTTGCTGGGTCATCTGTGAAAACCTTCGCGGATATCGGGCAGACTCTGGCAAAATATTTTGGTACTTCTGATATG  
GAATATGGCAAAGCCATGTTCTGA

>Cluster\_22750

ATGTCGGTTTTTCATAAAGTGGCTGCTTGTATATCGCAAGCGGGAATTAATTTATCTACATCAAACGCTTTTCTGCAACGA  
CACAGGCGCAACAGGTGGCCATCAGGTGCGACTTTATATCCCTCAAATATCGTTGAAAAGCTTTTCCATCTATCAATC  
ATACTCGGAACGAACCTTCAGTCTTCTTACTGCGCATGTATCATCCATGATTGCCCTGATACCAAGCACGCGCA  
ATTTATTACAACAACCTTTATTTTGGTAAGACCCGAAACGAAAAAGAAATACGCGCTGGGGGAGAGGAAGTCCATTACA  
GAACCTGTAAATACCGAGCCCTCACAATTTCTGCTTTCAGGTTAAACGAAACAGAACACTGACTGTTCCGAGTGAATA  
TATGGGCTGCGTCAATCCCGATGAAGAGGATATCATCGAGTCTGCTATTGGCGAAATCATACTGGAACCTTAATTTCC  
GGCCCTGCCGACAAATTTTGGGCGGATGTCTCTTACGCAAACTCCAGTAAATCATAAATATGTTATTCCTGAAGACTG  
GAAGAAGCGTTTTCTTCTGAAACGAAATTTCAATATGCTGCTGGCCATTATGCTAAAAACTCCAAGGATCCAGATG  
AGCACTGATTTAGCCCTGCGGTGTGAGTATGATATTTTCTACTCGTCGAGGAATTACATGTTCTTGATATATTTAAG  
AAAGGATTCGATCTGTAGATGAGTTTATTGCAATGACCAACTCTGTGAGTAAACGAGTAAATCAAGGGCAGGTAATC  
ACTTGAACCTCACCTAGAGAAGCTTTTTATCGAGCAGGACTACGGCATTTCTCCACTCAGGCAGTTACTGAAGGTAATA  
AAAAACAGATTTCTGTTCTTCCAGCAGAGGCATATCATAACGTTGAATTTCTGTAGAAAACCTACGTATGCTGGCA  
GTAAGACCACTGCAAAAGATCGTGGCTCAGATACTGAATGAAGCAGATAAAATCCATCAGGTACATTTTATTACCGT  
GCAAGAAGGTGTTTCTTACGACAAATACCGGAAATGAAAGATGCGGGTGTGAGACTCGTGTACCATCACTTTACATA  
AAAAATACCCAGAAGCAGTTAGAGAAGAATTAATAACGCTCGGACATTCATTACTGACTGATAGAACTTTAGCTGAA  
CTATCATAG

>Cluster\_58281

ATGTCGACTCGTACCCTTCATCATCTTATCCCGCTGATGCTGACCATCGGGCTTTGTTTTTGGTCGCTCTGATGGA  
AGGGCTGGATCTTCAGGCGGCTGGCATTGCGGGGGGTGGCATCGCCAGGCTTTGCGACTCGATAAAATGCAAAATGGGCT  
GGATATTTAGCCCGGAATACTCGGTTGCTACCCGCGGTTGGTTGGCGGAATGCTGGCGGACCTTATGTTGTCGCAAG  
CGCATTTTATTGCTTGCCTGCTGCTGTTGTTGTTTCTTCACTGGCAACGGCGATTGCTGGGATTTCCCTCACTGGT  
CTTTGCGCGGCTGATGACCGGTGTCGGGCTGGGGCGGCTTGGCGAATCTTATCGCCCTGACGCTGTAAGCCGCGGGT  
CACGTTTTCTGTTGGGAGCGAGTGCCTGATGATTTGCGGTTTCCCATTTGGCGCGGCTGGCGGCGACACTGGGTTTC  
CGGGGGCAAACTTAGCATGGCAACCGGTGTTTTGGGTAGGTGGTGGTGGTGGTGGTGGTGGTGGTGGTGGTGGTGGTGGT  
CTGGCTGCGGAGTGGCGGTTTTGCTGGCGAAAAACAGTCTGCGCCACCCTGCGTGCCTTATTTGCGCCAGAAACGG  
CAACCGCAGCCTGCTGCTGTGTTGTTTATTTCTTACTCTGCTGGTGGTCTACATGTTGATCAACTGGCTACCGCTA  
CTTTTGGTGGAGCAAGGATTCAGCCATCGCAGGCGGAGGGTGTGTTGCGCTGCAAAATGGGGCGGCAAGCGGGAC  
GTTAATGTTGGGCGCATTGATGGATAAGCTGCGTCCAGTAACCATATGCTACTGATTTATAGCGGCACTGTAGCTTCCG  
TGCTGGCGTTGGAACGGTGTGCTCATTTAACGGTATGTTGCTGGCGGATTTGTCGGGGGTTGTTTGGCACAGGTGGG  
CAAAGCGTTTTGATGCCCTGGCACCGTTGTTTTACAGTTTCGACAGATCCGCGCAACAGGTGTGGGAACAGCCGTGGCGT  
AGGGCGTCTGGGGCTATGAGCGGTCGTTACTGGCGGGAAATGCTGGCATTAGGCCTGGCACGGTGGCGTAATGG  
CCGCTTCTGCACCGGTTATCTTGTGCTGGGTTGGCGGTTTATTTTGTATGAGCCGAGATCACGAATACAGCCGCTG  
GCCGATGCCCTGA

>Cluster\_22777

GTGTTCTTTTCGGGATTATTTCAACGAAAAAGTGCAGCACCGATGACCACGCCAGCAGAGCTGGCGGATGCTATCGGGT  
GTCTACGACACCTATACCGGAAAGCAGATCAGCAGCCAGCGGCCATGCGACTGACGCGGTTTTTTTCTGTGTGAGG  
TGCTGGCGGAGTCCGTCGGGATGTTGCCCTGCAACCTGTATCACTGAAACGGCAGTCTGAAGCAGAGAGCCGCTGGCGAA  
CGTCTGCATAAGCTGATCTCCACGCATCCCAATGGCTATATGACGCGCGAGGAGTCTGGGAGCTGGTGGTCACTGTCT  
GTGCTGCGGGGAAACTTTACGCTACAAGTGAAGCAATTTGGCGAAGTGGTGAATGCTGCTGCCCTGATCCCGGCT  
GTGTGGTACCGAAGCTTAACAGTAGCTGGGAGCCGGTATACAGGTACATTTCCCGGATGGCTCCACGGATGTACTGAGC  
CAGGAGGATATCTGGCATGTGCGCACGCTGACGCTGGACGGACTGGTGGGGCTGAATCCATCGCCTATGCCCGGAGGC  
AATATCGCTGGCGGCGAGCCAGAGACAGCGGGCCAGACTGTTTACGCAATGGCGGGTGGCTGGGTTGTTGCGTA  
CAGAGCAGCCTGTGATCAGATCAGGCTTATGAGCGCTGAAGAAAGATTTGAGGAGCGTACACCGGGCTGGCAATGAT  
CACCGCCGATGATCCTTGAGATGGGGTGGACTGGAAGTGCATGGCGCTGAACCGCGAGGACAGCCAGTTCCTGGAAC  
CCGCAAGTTTTCAGCTTGAAGAAATCTGTGCTGTTCCGGTGGCGGTTGCACATGGTGCAGAAACCGATCGCGCCACCT  
TCAACAATATCGAAGAGCTGGGGCTGGGATTTCAACTATTTCACTGGTGGCTATCTGACCCGCTCAACAGCGGATC  
AACCCGGACTGGTACGAAAAAGTAAAGCAGGGCTTTATACGCAAAATTTAACCGCGGGCTTACTGCGCGGGGATAT  
GAAGTCCCGTTTTGAAGCCTACGCCACCGGATCAACTGGGAAATTTACTCTCCCAATGACTGCCGCGACTGGGAAGATA  
TGAATCCACGACCGGTTGTTGATGCTATCTCACACCGATGAACATGACCACGGAACCTCCGATGGCAGTAAAGCCGGT  
AAGCAGAAGGATAACGCAATGCAGACGAAACAACGCTTGA

>Cluster\_27416

ATGGCCATTAATAAACCGCAGTGCACACCGTTGTGCATGGCGCATCCGGTGGCGAGCGGAGTTAAGAATCCCGAGGCCCT  
TAAATCCAGCTTCTGGGGTGAACCTCCCGCAGCATGTGATGTCAGGATTTTACGCATGTTGCCGACCTTAATTTAGGGC  
GTGTGATCCTCAAGTTTCACTCAGTGTGCTTATAGCTGGCTTAAATTCCTGCTGATATCGGCATGATGGATGCTCTT  
AATAGCGGCAACTTCCCGTTTTGACCTCTCTTACTGAAATTTGCTGGCTGTGCGAGTCTTCCGCGGTTGTTGTT  
TGGTTTTGCCATCCGATGTTGCTGCTTTTGTGGCAACTCTATCGGTGGCAAACTGGCGTTCCCGGCTGGATTTATCG  
GCGGCTGATGCTTACCCAGCGCAGCAACTGCTGAACCTTCCAGTCCAGCAGTGAATGGGCGACCTTCCGCGGGT  
CCGTCACCTCATTTGGTGGCTGATTAATTTCTATCTGCTGGCTTACCTGTGAAATGGATGAACAGAAATCCAGTT  
ACCGGATTTCTGTTAGCGTTCAAAACCACTTTTGTACCGATTTCTTCCGCCATTTTGTGATGCTGGCGATGACT  
ACGTTATCACCCCTTTGGTGGCTGGATCAACGGCGGTATCCGTACCGTGTGACCGTGCAGGTGAGAGGGCGCGCTG

ATGTACGCAATGGGATCGCCGGCGACAGCAATCGACCTTGGTGGCCCGATCAACAAAGCGCAGGTTTCGTGCTT  
CAGTTTTACCACTGACCAGCTATTACCAGTTCACGCTTCTATCGCTATCGTTATTCCGCCGATTGGTCTGGGCTCG  
CGACCATTATCGATCGTCGCTTAACTGGCAAACGCTTGTTCACGCCAGCTTTATCCGAGGTTAAACCGCGATGTT  
CTGGCGTTTATGGGATCAGTGAAGGTGCGATTCCGTTTGCATGGAAAGCCCTATCACCGCCATTCCTCGTATATGTT  
CGGCGGATTTGTCGGTCAACCGCGCAGTTCGGTGGCGCAGTGAATGGTTCCCGGAATCCGCTATATGTTGGGCTGG  
CGTGGTCACTAATCTGGGTGTCTATATGGCGGGATCGCGTGGGAGCAATCATTACTGCGCTGATGGTGGTCTTCTG  
CGTCTGATGATGTCCGCAAAGTAAATGTTAATCGATAGCCTGTAA

>Cluster\_13207

ATGTCTAATATTTGGTCTAAAGAAGAACTCTGTGGAGTTTCGCGCTCTACGGCACAGCGTTGGTGCAGGCACGCTCTT  
CCTTCTTATTAGTTAGGTTTCGGCAGGGGCTGTGGTCTGTTTATTACTGCTCTGGTCGCTGGCCTTAAACATATTGGC  
CACATAAAGCCTTATGCCAGTTCATCTCTCATCGAAAACATCAGCAGTTGAAGGATAACGGGCGCAGTAACACACTAC  
TATGGCAAGAAGATTGGTAATCTGATTACCACGCTGTACTTCACTCGCTTTTTTGTGCTGCTGTTGATATATGACGTGGC  
AATTACCAACTCACTTACGGAACAGCTGGCAACAGCATATGGTTATTGATCTTCGCATCCGATATGTTGGTGAGTCTGGGTG  
TTGTATTAATCTGAATCTCATTTTTCTGATGGGACGCCATGCAACCATTCGGGTAATGGGTTTTTGGTATTTCCATTG  
ATTTGCTATTTCTTATTTCTTTCCATTTACCTTGTCTGGTAGTTGGCAACCTGATCTATTACGACCAGGTAGAGTTCAA  
TCAGAATACCCTTACCAGATATGGATATCGATTCCCGTATGGTTTTTCGCTTTAGCCATACGCCATTATTTCTACGT  
TTGCCATAGACAGAGCTGAAAAATATGGCGAACAGCTATGGATAAATGCAAAAAAATATGAAAGTCCTTATCTCATC  
ATCTGCATAAGTGTACTGTTCTTTGTCTTTAGCTGCTTCTTATTTCCACTTCGTATATTGAAGCGGCTAAAGAAGA  
AGGGGTACCATTATTCGGCGCTTTCTATGCTGCCGAACGCCAGCATGGCTGTCAATTTCCGGGATATTGCTGCGAG  
TAGTTGCGATGTGCAAACTTCTGGGTACGTACTTTGGCGTTATTGAAGGTGCCACGGAGGTCGTAACAAACACTA  
CAGCAGGTTGGTGTAAGAAGAGTCTGTCATTTAACCGCGCATATCAATATTGTTGGTATCGCTGATCACCCTTATTGTT  
TTGTTGCATTAACCCGAACGCGATTTTCGATGATTTACGCGATCAGCGCCCGCTCATTGCCATGATACTTTTCATCATGC  
CTACGTTGTCAACGATATCTGATCCCGCGCTTAAACCCGCGCTTCACTCGGAAATCTGATTACGCTGATCGTGGGATC  
CTGTGCGTATCGGTAATGTTCTTTAGCTGA

>Cluster\_51313

ATGGCAGCAAAACACCCCACTAACCATACGGAGATCAAAACGACAGCAGGAGGGAATACACCCTGCAAGA  
TGGCGGAGGATTTTCTTCTGGTGAAGCCCTCCGGATCAAAAATATGGCGTTTACGTACTACGCCCGGCAGATAAAA  
AACGGACTATTATCAGCCTTGGATCGCTGAATGATGTTTCCCTGCTGTATGCCAGAGAGCGACGGAATGAATCAGGTC  
CTAATAGCAAAGGAACTGACCCACAGGACCATGAACGCGGAAACGTGAAGCAGAGAGCGGAAAAAGGGCAACACGTT  
CGAAAAAGTTGCCTCGGACTGGTACGAGATGAAAAAGGCCAGAACTCTGGCTTACAACACGATTAAGGATATCTGGCGAT  
CCCTGGAAAAATACGATATCCCGTACATCGAAACAGCCTAAGATAACCCCTACCGCTCGCCGCTTTGTTGAGATACTC  
ACACCCATTAAAGCAGCGGCAACCTGGAACCTCTGAAACGCGCTTTTACAACGCATCAATGAAGTATGATGGATTTTCTC  
CAACAGTGGGCTGATTGACATCAACACCCCGCGCAACGCTCCGCAAGGCATTCCCTTCCCCACATAAAGCATATGCCAA  
CCATCCGACCGGAACAGCTACCGCAGCTAATGCAGATTTATCCGTCGCCAGCATAGAACGGCAACCCAGATTGCTAATC  
GAGTGGCAACTGCTGACCGTAGCACGCGCAGCGAAGCAGCCGCGCAGCTGGGAAGAAATAGATCTCGATGCCGAAC  
ATGGCAGTATCCAGCCGAGCATGAAGATGCGCGTACCATGTATCCCTTTGGCGTCAGGCTATGGCTGATCCG  
AAACCATGAAGCCAATCAGCGCACACAGGGAACAGTTTTTCCAGCTTAAAAACCCGATGCTGCCAATGAGCAGCCAG  
ACCGCTAACCGCGCATTTGCGCCGGATGGGTTACGCTGGTGTGCTGGTGTCTCAGCGATTACGCCCATATTACGACACAG  
AGCGAAGAGGAGGATTCGAGCCGAGCTAATCGAGCCGCGCTGCACACGTAAGGACGAAACGAGTAAGCCGAGCAT  
ATAACCGAAGTAACCTACCTGAAAAAGCGCGTGGTGTCTTATGCGCTGCTGGGGGAATTTGTAGAGGCGCAGCAACTGGA  
GTGACCATAGCCAGTGGTAAAGGGGATCCGTCGCGGTAA

>Cluster\_25316

GTGACGGCGTTAAAAAGTAGGAAGTGAAGCTGGTGGCAGTCAAACATGGCCCGAATGGCAACGCTCTGAATGACGAAAT  
GTTTGAAGGTCACTTTCTGGTGGCGTATCCACAAGGTTCTGAAGGCCACTCGACGATAAAGCGCGTATGGGCTATATCA  
CTGGCGTGCAGATACCATCAGAACAGCCAGCCCGGTCGATGCAGCGAATTCAGGAAACCGATGTTTGGCAGTGGACG  
ACACAACCTCAATGCCAATGGCGCGCAGCTACTGCTTTATTTCTACTGAACGCGATGACATTTTTCTGCACCATCCCC  
CGATCGCCTCGAATTAACGGAAGGCTGGCGAAAACATAATACCAGCGGATAGCCGATCCGCTGAATCCACAAGCTGGA  
AAGGCGGGCAGGGCACGCTGTTTCTGCACTCGAAATGCGCAAGCGCTCTGCAACCCGGATGGGATTGTCCGCAAGCG  
CCGAAAACGCTGCCAAAGAAATATCTGAAAAAGTGAACGGTTGAAAAATTCACGCCGTGATGATTTTTACACCCG  
CGATGCAACAGCAGAAGAACCGCCGCTGGCAGTTTGGCTGATGGTGAATTTTGGGCGCAGAGTATGCCCGCTGCGCCTG  
CGCTGACTTCGCTGACCATCTCGTCGCAACTTCGCGCCCGTGTATGTTGATCCAGCCTATCGACACAGCAGCCG  
GCCACGAACTGCCGTGTAATGCGGATTTCTGGCTGGCAGTACAGCAAGATTATACCCAGGTGAAAGCTATTGCTCC  
TTTTAGCGATCGCCCGATCGCACCGTGGTTCGCGGACAGAGTTTTGTTGGGCTTTCCGCGCTGATGCCGGACTGCACT  
GGCTGAACTGCTTGGCTGTGTATTAAGCCAGTCAAGTTCGACTGGTGGCGCATCGGGGCGGCAACAGGGGCGTG  
TTACTTGAACAGCTAAAAACTGGTGAAGTATAGCCCGAAGGCTCGCGATTTGCTGGAAGCGGGTTTCGCGAGCCGAT  
GATCATGCAGGCAATCAGGCGCTGATGCGCAATTAACCCCTAAAAAGATCCATTTCTGCGCTCAGGTTGACGGCG  
GACATGATCGCTTTGTTGGCGCGTGGCTTATGACAGGGCTAATCGACCTTGGCAACCATTTTCTCATGACAGGAGT  
TGA

>Cluster\_39344

ATGTCTGTAGCCCTTATTCGTGACGGCGTCATCCGTCCATCCGAAAACGATTCGCATGTGCTTACCACCATGCTGCCCTC  
GTCCTGCCCGAAAACACGCGGCGAATATTTCTGCCTTTGCGCGGATGGCGCGTTAATGTGCGTCTGGTTTGGGGAAACGC  
AGGAAGGATATCCGATATTTCTGTCTGGGGCTCGCGATTTCGCCGCTGGCGGAATGCAAGTGGAGCGATGCGGTCAAAC  
TTCCACGATGGCAGCGGTTTCCAGGCAAAAACCGGCTGTGTTTCTGCGCCGGATAACGTTGCTGTGGCTCCTATGGACCG  
ACAAATATCCGGTAAATCAGGACACCGCATCTCGCTACCGTAAGTCAGACGACCTCGGCAAACTGGGGCGAGATTG  
CCACCCTGCTTGATAAAACCCGTTACGTTTTCAGCAGCAATCAGGTTGCTTAAACCGGCAACTGGCTGCTGCCGCT  
TTTTATTGCGCTGAAAACCCGCGAAAAATGGTTCGCGCAATGATGATATCAGCGCAGTGAATAATTTCCGCTGACGGTG  
TCACTCTTGGCGGATGTCGAGGTGCGGCAAGTCTCGGCTGTGTTTATATGAATATCACAATGTTGCACGACGTTACGTT  
TGGTTGCTCTTTCGCGACCGTGGGGCAGACAATCTATATCAGCCATTCAAGTGGCAACCGCGAGAGTTGTTGGTTG  
CCGCAAGCAACCGAATGCCCACAACAATTCGTTTATCAGGTAACGACGCTTGCAGCGCGGAACTGGCGCTGGTGT  
CAACCGATGAGTGCAGCGGACGCGCAGTAAGAAGTCTGCGCGTCTTATGACGAAATCAGCATGAGCGGACGCGCA  
AAGAACCAGACGCGCTGGAGCGTCCGCTTCTGGGTTGCCACCGCGCGCATGACGGTAGCGATTCTGCGGATGGT  
GGGAAAAGCTGGCGTGGCGCGCAATCTCGATGAAGGCGACGCTACTGATGACCAACAATTCCTGGAAAAGCTAAA  
TCGTTGAGTTCTCTTACCCAGCATCAACAAAGCCGCGAGGTAACGTATATCGTTTACACTGGTGGCGCTAGGCCA  
TCAAGTACGTACGCATCTCCCGAGTGGTTAAGGGAGGACATCATGA

>Cluster\_6184

ATGCGGAACTCTGGAACGCGTACGCCAGCAGTGCCTGGTGGTGGTACTGGCGCTGGTCCGAATGGGATTGGTAT  
TGGCATTTGCGCTGATTTGTTGTCACACGTTGGATCAAAGTCAACGACAGCACAACCGAATTTGTTGTCAGTTGCCACAGTA  
TGCAACCGGTGATGAAGAAATATAAACAGTTCGGTGCATTTCCAGAACGCTCCGGCGTGGAGCTGAATGCCATGACTGT  
CATATCCGCGGATATTCCAGGATGGTGAAGCGCAACTGGAAGCAGCAATGATATCTACAGACTTTTATTGCTCA

CTCCATTGATACACCTGAAAAATTCGAAGCCAAACCGCGGAACTTGCCGAGCGTGAATGGGCGGAATGAAAGAAAACA  
ACTCGGCAACCTGCGCTCCTGCCATAACTACGATGCGATGGATCATGCGAAGCAGCATCCTGAAGCAGCACGTCAGATG  
AAGGTGGCAGCGAAAGATAATCAATCCTGCATCGACTGTCATAAAGGTATTGCCACCAGTTACCGGATATGAGTAGCGG  
CTTCCGTAAGCAGTTTCGATGAGCTGCGGCCAGTGCTAATGACAGTGGTGACACCGCTGACTCTATTGATATTAAGCCAA  
TTTATGCGGCGAAAAGCGATAAAGAAGCTCTGGTTCTCTGCTGCCGTTCGGAAGTAAAGTCAAAGTCAAAGTCAAAGTCAA  
GACTGGCTGCAAAATGAAATTACCGCTGGACGGAAGCGCGGAGCTCAGCGTGTACTACCCAAATCCCAGGTAAACG  
CATCTTTGTTGCCTCGATTCGTGGTGATGTCAGCAGCAGGTA AAAACGCTGGAGAAAACACCGTTGCCGACACCAATA  
CCGAGTGGAGCAAGTTGACAGGCCACTGCGTGGATGAAGAAAGGCGACATGGTGAACGATATCAAACCGATCTGGGCTTAT  
GCGGATTCGTTGTAACAGCGCACCTGTAACCAAGTGCACGGCGCACCGAAATCGCCACTTTGACGCTAACCGTTGGAT  
CGGCACGCTCAACGGCATGATTGGCTTTACCAGTCTCGATAAACGTGAAGAACGCACCTGTTGAAATATCTGCAATGA  
ATGCGTCTGACACCGCAGGTAAGGCTCACGGCGATAAGAAGGAAGAAAATAA

>Cluster\_39494

ATGATCTGGCAGGAAAAATCGACGTGGCGCTTATGCGCGCGTGTGCTGATGCCCTGCGTTCGCGCTTATCCGGTGGC  
ACAAGGAGCCGACGCTGGCTGGTGGCAGATGATTGCCAGTATCTGAACTTTTCCAGTAACGATTATTTAGGTTTAAAGCC  
ATCATCCGCAAAATATCCGCGCTGGCAGCAGGCGCGGATCAATTTGGCGTCCGTTAGCGGCGCTCCGGGCATGTACAG  
CGTTATAGCTGGCGCATCAGGCGCTGGAAGAAGAACTGGCCAGTGGCTGGCTGGCTTTCCGCGCGCTGCTGTTTATCTC  
CGGTTTTGCGGCTAATCAGGCAGTCAATGCCCGGATGATGGCGAAAGAGGACCGTATTGTTGCCGACCGCTTAGCCATG  
CCTCCTTGTGGAGGCTGCAAGTTTAAAGCCGTCGCGCTTCGCGCTTTGCTCATAACGATGTCACTCATCTGGCGGA  
CTGCTTGTCTCCCTGTCGCGGCGAGCAACTGGTAGTGACAGAGGTGTGTTGACGATGGACGGCGATAGTGCGCCACT  
GGAGAAAATCCAGCAGTTACGCAACAGCACGATGGCTGGTTGATGTTGATGACGCCCACGGCACGGCGTTATCGGGG  
AGCAGGGCGCGGAGCTGCTGGCTGCAAAAAGTAAAACAGAAATGCTGGTGGTGTACTTTTGGCAAAGGATTTGGCGTC  
AGCGGGCAGCGGTGCTTTGCTCCGATACGGTGGCGGATATATCTGGTGAATTTGCCCGCATCTTATCTACAGCACCAG  
TATGCCGCCGCTCAGGCGCAGGCAATTACGTGCGTTCGCTGGCGGTCAATTCGACGATGATGAGGGGGATGCACGGCGGAAA  
AACGCGCGCACTCATTACTCTGTTTTCGTGCGGAGTACAGGATTTGCGGTTTACGCTTTAGCTTGTGTACTGACGCGCATC  
CAGCCATTGATCGTGGTGATAACAGCCGTGCGTTACAATGGCAGAAAACCTGCGCCAGCAAGGCTGCTGGGTACGGC  
GATTCGCCCGCAACCGTACCCTGCTGACTGCGGACTGCGCTTACGCTAACCGCAGCGCATGAAATGCAGGATATCG  
ACCGTCTGCTGGAGGTGCTGCATGGCAACGATTAA

>Cluster\_19298

ATGATCGAACTATATTCGTGGGTTTGGAGGAAGAACTTCGCGAGATCCGCCATCAGATCCACGAAAACCCGGAGCTGGG  
ATTACAAGAAATTTAAAACAGTGTCTTGGTTGCGGAAAAGCTGCGCCAGTGGGCTATGAGGTTGAGCAAGGGCTGGCGA  
CAACCGCGTGGTAGCCAGTAAAAGTGGGCGACGGAGAGAAAAGTATTGGCTGCGGGCGGATATGGATGCGTTGCCG  
ATTTATGAAAATAGTGGCAAGCCCTGGGCGAGTAAACATCCTGGTTTAAATGACGCGCTCGGGCATGACGGGCATACCA  
CATACTGCTGGGGCTGCGGTTATTTTGGCAAACCCGCGTTTAAACGGCACGTTACGCTTATCTTCCAGCTGCGG  
AAGAGATGATTAACGCGCGTGAGATCATGGTAAAAGAGGGGCTTTTGTGATCGTTCCCTGCGATGTCATTTTGGGATG  
CACAACATGCGGGTTTGGCGGTGGCAAGTTTCTTCCAGCTGGGGCGTGATGGCGTCAATGGATCAGTCCATAT  
TACGGTTCTGTTGTTGGCGGACACGGTGGATCCCGCAAGCCATCGATTCAGTGTGGTGGTGGTGGTGGTGGTGGTGGTGG  
CCGATTTACAAGCATTTGTGTCGCGCAATGTTGATCCGCTGGAAGCGGCGTAATTACCGTCGGCAGCATTGTTGCGGGT  
GAGCGGGCTAACGTCATTCTGACAGTGTGATGATAAATCAGTGTCCGCTCTTTAGCCCGGATACCCGACAACTTCT  
TCTGACCCGATTTCTGCTCTTGCACAAGCCAGGCTGCCAGCTTTGGCGTACGGCTGAGGTTACGATGTTAACGGTA  
CACCGGTTATAGTAAATGACGAGGAGATGGCGCGCTTCCGCTGGCAGGTGGCGTGCAAAAACATTTGGTGAAGATCGGGCT  
GAGTTTGGATCAAACCCCTGATGGCAGTGAAGATTTCTTTTCATGCTGGAAGCCAAACCCAAAGGCGGTTTCTGTT  
ATTCGGTAATGGCGATGTCGGGGAAGGTTCTGATGTTGCATAAACCCCGGTTACGACTTTAACGATGCAAGCCCTGGTCC  
CGCAAGCAGCTACTGGGGCGACTGGTTGAAGCCTGGTGCATAA

>Cluster\_28445

GTGCAATGAAAAAGAACAGTCTGATTGTTAAACACATAAGAACAAGCAACAACATCACGAATGGGGATTTTGGAC  
TATGAAACGGAAATCGGAAAACATCATCGCAGGGATGATTGCACTGGCAATTTACACACCCGCTATGGCTGACGATATTA  
AAGTCCGCTGTGTCGCGCGGATGTCGCGGCAATTCGCGGATGAGGCGGATATGGAATTTAACCGCGCGCGTACGGCAAT  
AAAGACATTAATGCTAAAGGGGAAATTAAGGGCGATAAATGTTGGCGTGAATATGACGACGCTGCGACCCGAAACA  
AGCCGTTCGCGTCCCAACAAAATCGTTAACGACGGCATTAATAATGTTATGTTGCTCATCTGTGTTCTCTCTACCCAAC  
CTGCATCAGATATCTATGAAGACGAAGTATTCGATGATCTCGCCGGAGCGACCAATCCGGAGCTGACCCAACCGGGT  
TATCAATACATCATGCTACTGCGGCTGCGGCTGGACTCTTCCAGGGCGCAACGGCGGCAAAAATACATTTCTGAGACGGTGA  
GCCCCAGCGCATCGCCATCATTCACGACAACAACAGTATGGCGAAGGGCTGGCAGTTGCGTGCAGGACGGGCTGAAAG  
CGGCTAACGCCAACGTCGCTTCTTTCGACGGCATTAACCGCTGGAGAGAAAAGTTCCTCCGCGCTGATCCGCGGCTGAAA  
AAGAAAACATCGACTTCGTTTACTACGCGGTTACTACCCGAAATGGGCGAGATGCTGCGCCAGGCCGTTCCGTTGG  
CCTGAAAACCCAGTTTATGGGGCGGAAAGTGTGCTGTAATCGTCACTGTGCAACATTCGCGGTGATGCGGCTGCAAGGA  
TGTGTTGTCACCATGCAAAAACGCTATGACCAAGGATCCGACAACAGGGCATCTGTTGATGCGTGAAGCCGACAAGAAA  
GATCCGTCCGGGCTTATGCTGGATCACTACGCGCGGTGCAATCTGTTGCAACTGCCCCTTGAACGTACCGGCAGCGA  
TGAGCCCTGCGGCTGGTGAAGATTTAAAAGCTAACGGTGAACCAACCGTAATTTGGGCGCTGAACTGGGATGAAAAAG  
CGATCTTAAAGGATTCGATTTTGGTGTCTTCCAGTGGCAGCGACGGTTTACCCAGCGCAGCAAGTGA

>Cluster\_28882

ATGCTAAAAGTGTATTGCTCTTTGTGTGCTGATTGCGGGGATCGTGGTTGGCCCGATGATTGCCGGCCATCAGGGTTA  
CGTGTGATCCAGACCGCAACTACAATATTGAAACTAGCGTACGGGCTCGCGATTATTTGATTTGGCGATGGTAG  
TGCTGTTTGCATTGAGTGGCTACTGCGGCAATCTTCCGACAGGCGCGCACACCCGTGGTGGTTTGTGCGACGTAAG  
CGTCGCGGTCACGTAAGCAGACCGAAGCGCGTGTGAAACTGGCGGAAGGCGATTATCAGCAAGTTGAAAAGCTGAT  
GGCGAAAATGCCGATCAGCTGAACAACCGGTGGTGAACATCTACTGGCAGCCGAAGCCGCAACAACGTTGGTGTATG  
AAGCAGCCGCAACCAACTCTGGAACGCGCAGCGGAGCTGGCCGCAACGACAATTCGGTGAAGATCACCCGTGTA  
CGTCTGCAACTGGCCGTAATGAAAACCATGCAGCAGTACGGCGTGGATAAGTGTGGAAGTTACGCCACGCCATCC  
GGAAGTATTACGCTGCGGGAACAGGCGTATATCCGACTGGTGCATGGAGTTGCTGCTGGATATCATCCCATCAATGG  
CGAAGCCCATGTTGGTATGAAGAACAATCGTGAATGCTGGAACAACAGGCATGGATGGCTGATGGATCAGGCGCGT  
CGGATAACCGGTAGTGAAGGTTTTCGTAAGTGGTGAAGAAACAAAGCCGGAACCGCTCATCAGGTGGCTTTCAGGT  
GGCAATGGCGGAACATCTTATTGAGTGTGACGATCATGATACTGCCAGCAAAATATCATCGATGGCTGAAACGCCAGT  
ATGGCGATCGCTGCTGCGGATCCGCGTCTGAAAACCAATACCCGGAACAGCTGGAAAAGTGTGCGCCAACAG  
ATCAAAAACCTGGGCGATCGCCGCTGTTGTGGAGCACACTGGTTCAGTCTGATGAAAACCGGAGAAATGGCAGGAAGC  
ATCGCTCGCTTCCGCGCAGCGCTGAAAACAACGTTCCGAGCCCTACGATTAACGATGGCTTGGCCGACCGCTGGACAGC  
TGCACAAGCCGGAAGAAGCCGACGGATGCGTCCGCGACGGTTTATGTTAACGTTGCAGAACAACCCGCCACAGTAG

>Cluster\_7960

ATGACAACAAAATATTTTGGCATCTGACCAATCAGGGCGCGGTGCGACTGGCAACCGGACCATGCTCGGTACAAAAC  
TAATATCACAAAATGGCTGTTGGTGTGTTGTAACGGCACGTTGCCAGCCTGACCCGGCTCAGACAAAACCTCATTAACC  
AGACCCGATCGCGCGATTAATTAACCTGAGCGTGGATGCTAACGACGCGGTCAGATTAATGCGGAGCAAAATATCCCG



GAAAATGAGGGCGGTTTTTTCATCCGTGAAATCGGTCTTTATGATGAAGATGGCATTGTTGATTGCTGTCGCCAACTGCC  
GAAACCTACAAGCGTTACTGGCCGAGGGGAGCGGTGCAACGACAGCATTTCGCATGATTCTTGTGTTGCTCGAGCACGT  
CGGAATCACCTTAAAAATCGACCCGTCGGTCTGTCACGCGCCAGTATGTCGACGACAAGGTTATCGAGGTAAAA  
GCCTATGCTGACAGTTTGTACGCACACATGAGCGGTACGTAATCACCTGACGCCACGCTAGATGAAAAGGGATTTTGT  
TCGGCTTAGTAAGTGTTTCAAGCGAAAGTGAAGTATGATGCTGCCACACTGAAAGCAGTAAAAATAGTGTGATAAAG  
CGAATGCACGCTTGGCGAAAAGAACTAATGGCGCAGATATCCCAATGTGGCGTTATTTTACAGAATCTCGGTCTCTTA  
GACACGATAAATAAAGCTGCCGGTGCATGACAGAAATCAGCTAATGGCGCTGATATTTCTAATGTGGCTGCTTTCAGGAA  
TGCCCTGCAGCTTGGCTCGGCGCGCTGGCGTCAATGGGCACTGGAAAGGACCAGGATTTGAGCGCATCACATTTCACTT  
TTTACGCCAGTGGAAATGGCTATTATACATTCCTGTCTTGC AACCCACAGATAAACCAGTGAAGATAATGCTGCAATGG  
GGAACATTACAGACACGCGGAGGAGAAGATGCTATCTACAACCTGCCCTTATGCTTTCCCAACTGGTGGCTGTGGGCAAT  
GGGATGTGCGGGAAACACGGGTTACAGTACAGGCATGAATGTTGGCTGGCTAATCGTCTCAAATAGTATTCAAACCT  
GGGCCCCAGCCGGCTCGTTGGAAGACTGTTGTTTTTTTGTGTGGGTATTTATGA

>Cluster\_17893

ATGAGTGATTATCATCACGGTGTGAGGTCGTGCAAAATTAACGACGGCACC CGCACAACTTCGACGGTATCAACGGCGGT  
CGTGTGGCATGGTCTGCACAGCCAGTGATGCTGACGCGGGGCTTCCCTCTCAATGAGCCGGTGTGATTACCAACCCAC  
AAAGCCCATCGCAAAAGCCGGTACTAAAGGTACCTGGCAAAATCCTTACAGTCTCATCGTAACCAGTCAAACCCGGTT  
TCGTTGTTGTGCTGTGCTGAGGTTACCGGCACGGCGAAGAGGCACAGGCGCAAACCATTTCTAACACTCATCGGCAC  
CACGAATGAGAATGGCAATATACCGGGATGAAAGCGTGTAAACGGCGAAAGCGGTACCGGCGTGAAGCCAGTATTC  
TCGGTGTGCGGGGCTCGATACTCAGGAGGTGGCGACCCGCTTGTCTCCGTGGCTCAGAAGCTGCGGCTTTTCGCCAT  
GTCAGCGGTGGGCTGTAAAACATTGCTGACGTTTACGCCCTACCGCGAAACTTCAGCGCCGTCATGATGATTAT  
CTGGCCTGACTTCCCTCGGGTGGGATACCGGCCAACGCGACCAACCAAGTTATGCAACAGCGATCGCGTTGGGACTCG  
GCGCAAAAATCGACAATGATACAGGCTGGCATAAAACCTGTCAAACGTCGGCATCAATGGCGTACCGGTATCAGTGG  
TCGGTCTTCTGGGATTTGACGAAATCTGGCACTGATGCCGACCTGCTGAATGAGGCGGGTGTACGACGCTGATTCGTGC  
CGATGGTTTCCGCTTCTGGGGTAACTGATTTGCTCGATGACCGGCTGTTTCAAGTTGAGAACTACACCCGACCGCAC  
AGGTCATAGCCGACACAATAGCCGAGGGCATAATGTTGGGCAACGATAAGCCATCACCGGACGTTGATTCGCGACATT  
ATCGACGGCATCAACGCGAAATTCGCGAGCTGAAAACCGGCGTTACATCATCGATGCGACGTGCTGTTTACGAAAGA  
GGCAACAGTAAAGAAACCTGAAAGCCGGGAAACTGTTTATCGATTATGACTATACGCGGTCGCCCACTCGAACACC  
TGACCTTACGCCAGCGCATTACTGATAAATATCTGGCGAATCTTATCTCGTCCGTCACAGCAAATAA

>Cluster\_40806

ATGACTGGTGTCACTCGTCAGGTCGGTACGGTCACTGTCAGGTCAGTGGCGTGTGATGCCGACAGGGTTCAGGCCGCGTTCGCTGCGCTGA  
ATCGGATAACCTGCGCACAAACTGGCTTAAAGTGTGTCAGCGCAATACCCAGGATAACAAGATTACTGGCTCCCTGACG  
TGGGGAGCAGGTTGAGGTGCTGCTCGATGCCAACGGCGAGGATGGTGTATTCTGGGCGCGGTGTATTCAGACGTCGAT  
AAACCACCGTTCAGTGACAAAAATATCCGGGAACCCGGTTTGTGATGGTGCAGAGTACAGTACAACCGGAAGACGCA  
CACTCTGACCATCCGGGGCGCATTTAGCATATTTGTCATTTGATGTTGGTGTGCTGATGTGTTGAAAACACAGAAAGCCA  
CGATTGACGCACCGGAAACCGAATTACCGGAGATCTGCGTGTGAGGGTAAGCTGATTTACGAAAGGAGGATGGCGGGT  
TCTGGTGGTGAAGGTGTTACCGGACCAATCGAATTAAGGGAATGCCCATGCCACGGGACGATGTTGTT  
GTCGATGGCGAAAACCTCCAGCCACCCTCCACTGA

>Cluster\_48976

ATGACTTGGCAAAACGTTACCGTACGCTTTTCGAAAAACTACTGGCGAGTTGACCTTGGTAATAGAAAAATACCGCCAA  
TGAAATCAGTTCCTTTCTTTTGAACACTCATTACTGCTTTCAGGCGTATTGCGCGAGGAAATAACTGGTTGGG  
TTGATACAGGGCAATCAAGAAAAATTTGCTTAGCCACATTACAGGCTCACTTGAATACTAATAAAGAAATGGCGCAA  
CAAATACGTTTTCGCTGGCCTGAGCATGTGACAGACGTAATATGTTGGCCAGCACATTTGAGCAATGGCATCTGGTCCG  
AAATAAAGAAATATGATATATTTGGCTAAGGTTTTCCTGAGGAGATTCAGTTCCAATAAAGGCGCTGAAATAAGTA  
AAAATAAATTACTTCTATTAATAAGGCTGATGAGGAAGGTTGTAAGTTGATAACCTGACGGCAGATCTCAAAAAGCG  
CTAAAAGTATGTTTACAAAAGGTTATTTACTCCGGAAGAAAAAGTCAATTTATTGATGCACAAAACGCCCTTTATTTT  
TGGGTGTCATGAGTATATCAATCAAAGTTATCTTAA

>Cluster\_21036

ATGAACGAAGCCGTTAGCCAGGTGCGCTTAGCACCCTGTTACCGATGCCCGCACTCACACGGCTGGCGGGAGACCC  
CGTCAGCGATGAGACGTTACGGGAGATTATGCCCTGATGAAATGGGGCCGACATCTGCTAACTGTTCTCCGGCACGGA  
TCGTGTTTATCCGCATGCAAGAGGAAAGAACGTTCTGCGCCCGGCGCTTCCAGCGGCAATCGCAAAAACCCCTGACC  
GCGCCCGTACCGCATATGCTGCGCTGGGACAGTGAATTTATGAACGGTTACACAGCTGTTTTCTCACGGCGATGCCG  
CAGTTGGTTTACCTCCAGTCCACAACCTTCCGAAGAACAGCGTTTCGCAACAGTTCCATGCAGGGCGCTATCTGATCG  
TCGCCTGCCGTGCGCTGGGGCTGGATACCGGCCGATGTCGGGCTTTGACCGTCAATACGTTGACGACGCTTTTTCGG  
GGCAGCACGCTGAAGAGCAATCTGCTGATTAATATCGGCTATGGCGATTCAGCAAACTTTTTCGCGCCTGCCACGCTCT  
GTCCTTTGAAGAAGCCTGCGGGCTGTTGTAA

>Cluster\_56527

ATGCAAAAGTTGTCTCGCAACCCGCAATGCCGGTAAAGTGCCTGAGCTGGCGTCTGCTGCTTAGCGACTTCGGTCTTGA  
TATCGTGGCCAAACAGACTCGCGGTAGATTCCGCTGAGAAACCGGCTGACCTTTATCGAAAACCGGATTTGAAAG  
CGCGCATGCGGCAAAAGTACCGGTTTACCGGCAATTCGCGACACTCTGGTCTGGCGGTAGATGCGCTGGGTGGCGG  
CCGGGTATTTACTCCGCGGTTATTCGGTGAAGACGCGACCGATCAAAGAAATCTGCAAAAACCTGTTGGAAACTGAA  
AGACGTACCGGACGACCAACGTCAGGCGGCTTTCCACTGCGTGTGTTATATCTGCGTACGCGGAAGATCCGACTCCG  
TGGTGTGCCAGGTAGCTGGCCGGGCTGATTAATCTGTAACACCGGCGACTGGTGGCTTTGGTTATGATCCAATCTTC  
TTCGTACCTTCCGAAGGGAACCGCTGCCAAGTACCGCGAAGAAAAAGCGCAATTTCCACCCTGGTACGGCATT  
GAAACTGCTGTTGGACGCTTTACGTAATGGTTAA

>Cluster\_13268

ATGACGCAACTACCAAGACTCCCACTGACATTAATCCCGACAAGAAATCCGCAAAATGATTCCGCAACGTCGTCGTGCGGTT  
AACCGCGGAACAACAGCAGGAAATGGGTCAACAAGCCGCTACCGGATGATGACTTATCCCCGGTGGTGTGATGGCGCATA  
CGGTGCGTGTATTTCTCTTTTGTGTTGAACTCGACACCCAGCCGCTAATAGAACAACCTTGGCGCGCCGGTAAAGCCG  
GTATATCTTCCAGTTTGCATCCCTTTAGTCCGGTAAATTTGCTGTTTCTGAAATACCATCCGCAAGCGAATGGTGTGAT  
GAACAGGTTGAAGATGCTGAGCCAAAACCTGGAATGCGGTGACGCTGACTACCCCTTTCCCGATTAGACGCTGATCACAC  
CGCTGGTTCGCTTTGATGAGTACGGTACGCGCTGGGAATGGGCGGTGGTTTTTATGATCGGACCTTACAAAACCTGGCAG  
CACTATAAAGCACAACCGGTTGTTATGCGCATGATTTGACGTTGGTGGAAAAACTCCCGGTTGAAGAGTGGGATATCC  
TCTTCTCGGTTGTTACACCGTCGAAAGTCTGGGAGTGGTAA

>Cluster\_4341

ATGCCTTTTAAACCTTTAGTGACGGCAGGAATGAAAGTCTGCTCAACACCTTCTGTATCGTCAACCGCGCTGAAAAC  
AGCCCGCTCGCGTCTGCTGGGTAAGTATTTGCGCGTGGAGTAAAGGCTTTTCGACGTCATTGATTTCTGGTGTTCAGCG  
AACCGCAGTTGATGATGCTGGGCAATGGGAGGCGATGCTGACTGCACCGTTATCGCTACGCGCAGTGTGTTGCCAAA  
CTTCGCGATCGCCAGCAGCTTACCGCACTGATTCGCAAGTGGTGGAGCTGGAAGTGCAGGGCGATATTCAGGTGGTGGAAA  
CTTCGTTGCGCTGGCAGATCTGGCAGAGTTCGACCCGCGGAACTGCTGGCCCTTATACCGGTGATATCGCCGCTGAAG

GAATCAGCAAAGCCATGCGCGGAGGCGCAAAGTTCCTGCATCACGGCATTAAAGCGCCAGCAACGTTATGTGGCGGAAGCC  
ATTACTGAAGAGTGGCGTATGGCACCCGCTCCGCTTGAAGTGGCTGGTTTGGGAAAGAGACGGCTGCCGTCGAGCGTGC  
TGTTGATGCCCTGACCAAACGGCTGGAAAACTGGAGGCTAAATGA  
>Cluster\_64449  
ATGGCGCAGCATTCAATTTATCAGGGTATCCGGCGGTTTCGTAATACCCGCGACACCAGACACGCAACGCTGGTTGACTGA  
ACGAGTCAAACACAGGTGCTGTTGTGTATGCAGATTTCAAACAGGCACGCAATCCCGGCTTTCACCGTAAATTTTTCTCAC  
TTCTCAACCTGGGCTTTGATTACGCGCATCCGTCGGAGGGGCTATTTCTCCTGCGGAGCGCAACTGGTTCACGGCTAC  
GTTAAGTTACTGGCGTATTACGGTGGACACGGTGTATGTCATGGCAGAGCTGGCTGATCAGTATCTTCTCGATGAGTCGGGA  
AAAGCGCGCGGGGAATATCAGTGCGGTGAAGTCTGTCAGGGCTTTCGCGCATGGGCGATTATGGAAGCTGGGTTTTATG  
ACGTTTCATCAGATGCCAGACGGCAGTTTGTATGCGCGTACCTCGTTCAATCTCGTTTGTGCGATGGACGATCTTGAGTTC  
GGTCAACTGTATTAGCCGTTTTAGATGTGCTGGAATATATTTTTGTTCGCGACGTTTGCCTCTCAGGAGGCTGCTGA  
AAATGCTGCCGCGCAGCTGCTGGATTACACATCATGA  
>Cluster\_16812  
ATGCAAAATGGCTATATTCGTGTGTCAACAAATGACCAGAACACGGATTTACAACGCAATGCACTGAACTGGCGCAGGATG  
TGAAGTGAATTTTTGAAGATAAAAATCAGCGGAACGAAATCAGCCAGACCGGGATTGAAAAAACTGCTCAGAACGCTATCAG  
AAGGAGATACGCTGGTTGTCTGGAAGCTGGACAGACTGGGCGAAGTATGAAACACCTGATCAGCTTATTGAGGAATG  
CGGGAAAAAGTGTAAATTTCCGTAGTCTGACGGACAGCATTTGACACATCAACACCCATGGGGGCGTTTTTTTTTACCT  
CATGGGGCTTTAGCCGAAATGGAACGTGAATTAATTGTAGAGCTACACTGGCCGGCTGGCAGCAGCACGGCCACAAG  
GACCATTTGGCGGACGTCGCCGGAAGTTGACAAAAAGCAACACGAGCAAAATAGCGAGGCTGATTAAAAACGGTCAATGAC  
AGGAAACAACCTGGCGATCATTTACGACATCGGCATATCGACGATTTATCGTTATCACCTGTAGGCGATATACAGGCTGA  
AGAAAAACACCGGACAGACTCAGGAAAAATAAAAAACCGCTAA  
>Cluster\_41610  
ATGGACGTGACAAACGATGATTACATCCGCTGTTGTGTCGGCCTGTTGCCACCCGGTCCGGCGTGGTCAGCCAGAGATCC  
GGCGATTGCCGGTCCGGCACCGTCAATTAACCCGCTTCATCAGCGTGGGATGCCCTGATGCGGGAGCTGGATCCGCGCA  
CCACCCTGAACTGATAAACCGCTGGGAGCGTCTGTGCGGCTGCGCGGATGAATGTATTCCGGCGGGAGCGCAGACCTT  
CGCCAGCGTCAGCAACGGCTGGATGCGAAGGTTAACCTGGCGGCGGCATCAACGAGGATTTTTATCTGACAGCTTGC  
TGCCCTGGGCGGGCAGATGCCACCATCAGCGGATACGACAAAAGCACCTTCACTGCTCATCGGCTGTACTGACGAGG  
TGAATGCGCGGGAATTAAGCTGATTAAGTGCAGATCAACATGCGCCAGCCAAACACCACTGGATGATGCGGCTG  
CCCTGTGATTCGCGCTGCGTATATGGGGCGACACCGTTGTGAGTGTGTGCTTAAACAACTGCCCCGTCGCATACCTA  
CGTAATTTTTAAATATCCGGAGTAA  
>Cluster\_14968  
ATGCAATATGCATTAGTTGATGCGCTGGAACGAAAATTTTTGCTGGATGCTCTGAAATTTGGTGTCTGAAGGACTGGAA  
AGAAAATCCGGTAAAAGAACTTCTGATATGATGAATCTGTTACCCCTTCCATATCTGTTATGGTGGATATTTATTA  
ACCTGGTGTTCAGATTAGATATAGCAGAAAAATAAAGACACAGGATTTCTGGCTGGCAGCTATTGATGATAC  
CGCATGGATTGTCAATAGCTTATTTATGATATTCACACACTCCCTCTGATTTCTGTTGCTCATCAAAAGATAGTTC  
TTTTGCGCGTAAATAAAGCTGATGAATGCATCATTTTCAAAAATTTGCTTCTGATTTCTGTTTTGCTGTAACAGCTTTT  
TGAGAAATTAAGAGTGGGATATTGCAACTAATAACTTAAACCGTGAGGAAATTTTTGCTTTAATGGCTGTGAGCGCAGA  
TTCAGAGTAGTAAGATAAAGATAACTGGCAACATACAGTATCGGAAGAACGCGCTATCCGTTGTGCCAAAAGATTAATTC  
ATGTAAGGATAA  
>Cluster\_11843  
ATGGCATTGAGAATGAGTGAACAACACCGACATAAAAAATTTATAATCTGCTGGCCGAACTAATGAATTTATTTGGTGA  
AGGTGACGCATATATCCGCTCATACAGGCTTCCAGCAAAACAGTACCGATATGACACCACAGATATTCCTGCTGGCT  
TTGTGGCTGTTTTCAACAGTATAAGGCATCTGTCGATCTGTTGAAGACCATCGGGTAAAACGGTTTTATGACGTAGG  
TCAGGGGACGCGTTATTTATTTCTGAACCTCGGTTACCGGAAAATGTTACCTGGTTATCGCCGGAAGGGAGTTTCA  
GAAGTGAACCGCACAGCTGGGTGAAAGATGCAAGAGCAGAAAACTGTTCCGGATCCGAGAGGGCGAAGAAAACAAAA  
ACAGCCTGATGACAGGTAGCCAGTGAATGATATGCGCCACTTCAGGATGCTGTAGATCTGGAAATCGCAACGGAGGAGAA  
ACCTCATTGCTGGAAAGCTTGGAAAAAGTATCGGGTGTGCTGAACCGTGTGATACGTTCAACTGCACAGGATATTGAATG  
GCCAGCACTGCCGTAG  
>Cluster\_40176  
ATGACCAGCAAGCTGGAGATACGCCACAACACGCTCAGGATGAAATCATTAAACCGCCCGTCCGGTGTTTTTCTGCTGCTG  
CGGATTTTCATGCCCGCAGTATGTCGCAAAATGCGCAGCAAGCTCAGCTTAGCGTGGGTGAGATATATCGTTACTTCGCCA  
ACAAAAGACCCATTTATGAAGAGATGGTTCGCCGTATCATCGACTTTCGTTATGCCCCAAATGGACATTGACGCGCGTACC  
GATCACTTCCCGAAGTCCCTGCGCTGCGTAAATCCTTAAATGAGGACGACGACGCGCTGATGCTGGAAGTGGCTGCAGA  
AGCCACACGCAACCCCGGGTTATGGCAATGCTTGAAGAAGCTGACGCCAGAATGTTCCGCTAACGGTTGTGCATATGA  
AAAGAATGCATCCCATCTTAGCGACGACATCTGTTGCTGCTGAAAGTGTGTTGCTTACCATGGAAGGATCCGGTT  
TATCGTCTTTAACACCGCAAAAAAGCGATCCACAACATCTGCAGGAAATATATCAGGATATTGTTAGTATGTTGATAAA  
TAAATAA  
>Cluster\_4607  
ATGAACAACCTAATGATCGACCTTGAGACGATGGGAAAAATAAGGATGCACCGATCGTTTCCATTGGCGCGGTTCTTCT  
CACTCCAGAAATCGGAGACATCGGACAAGAATTTATACGGTGTGTTAGCTGGAAGTGTATGGAGCAAGGAGCTACAC  
CTGACGGCGATACCATCTGTGGTGGTTGAAACAAGCCCTGAAGCACGAGCTGCAATCTGTATTGATGATACTTTGTGCG  
ATCAGCGATGCTCTCTCAGAACAATAACCTTTTCAATTAACCGGCACGACGACAATACGAAATATTTAAAGTCTGGGGTAA  
CGGGGCCACCTTCGACAACGTAATTTTACGTGGAGCTTACGAGCGAGCAGGACAAATCTGCCCGTGGGCGTACTGGAATG  
ACCACGATGACGACGATCGTTACGCTTGGGCGTTCATCGGATTCGACCCAAAATGGACATGCCCTTTCGATGGCGAC  
CGGCACAACGCCCTGGCTGATGCCCGTCACTAGGCAAAAATATGTTCCGCTATCTGGCAGAAATTAATTCCTGCTACCAG  
CACAGAAATATGA  
>Cluster\_28053  
ATGCTACGCTTCTTTATTTACACGGTTTCAACAGCTCAGCGGCTCTGCAAAAGCGAGCTTGTAAAAAACTGGCTGGC  
GAAACATCACCTGACGTTGAGATGATCATCCGAGTTCGCGCGTATCCTTCCGACGCGGAGCAACTGCTGGAATCCA  
TTGCTTGAACATGGCGCGGATTCGCTGGTATGCTGGCTTCGTCAGCTGCGGAGGATATACGCCACCTGGTTGCGCAA  
TGTTTTATGCTGCCCGAGTGGTGGTCAACCCGGCGTGGCCGTTTGAAGTCTGACGGACTATCTCGGTGACGACGA  
GAACCCCTACACCGGCGCAATATGCTGATAGCTCAGCCATATTTACGATCTCAAAGTCAAGATGACAGATTGACCCGCTG  
AAGCGCGGATTTGATCTGGCTGCTGCAACAGACGGGAGATGAAGTGTGATTTACCGCCAGGCGGTGGCGTACTACGCT  
TCTTCCGCGCAGACTGTCTATAGAAGCGGCAACACGATTCACGGCTTCGAAGATTTTCAACCCGATCGTGGATTT  
TCTTGGTCTGCACCATCTCTGA  
>Cluster\_26744  
ATGGCGGTTCAAAAAGAAATGTTATCAAAGGCATACTGGCAGTACGTTTGGCTAATGCTGAGCGGTTGTGTCATGTCG  
GGACGCCATTAAGGCAACAGTCCACGCGCAACAAGATTTAGTTCGGGTAATGAGTGCAGCGCAGCTGTACGTTGGTC  
AGGAGGCACGCTTTGGCGCAAAGTGGTTGCGGTACAAAACCAACAGGGAAAACCCGGCTGGAAATTTGCCACCGTACCG

CTGGACAGTGGAGCCAGACCAGCTGGGAGAACCTTCTCGCGTTCGCATTTATGCCGATGTGAACGGTTTTCTGGATCC  
GGTAGATTTTCGTGGACAATTGGTCACGGTAGTTGGACCAATCACCGGTGCGGTTGACGGCAAATCGGCAACACGCCCT  
ATAAGTTTATGGTGATGCAGGTAACAGGTTATAAAGCTTGGCATTTAACCCAGCAGGTGATTAAGCCGCCACAGCCAATT  
GATCCGTGGTTTTATGGTGGTCTGGCTGGCCCTATGGCTACGGTAGATGGGGCTGGTATAATCTGGTCCCGGAGAGT  
ACAACTGTTGTAACGAATAA

>Cluster\_40548

ATGGAATACCTTTGATATGCGTAAAATGTGGTGAATCTGTGGCGAAACGCTGCGGTTGAAACGCGGAAAATTTGCACCTT  
CCCACCGGCAAACGTTGATTTTACTGGCGTGCAGCATTCATCCATCGCGGCGAATGGGGAGTTTTCTTTGTTTCCAG  
GTATGGAAAAGGATAGTGACGTTGCTGGAAGCGCGGAGATGTTCTTGAAGCGCAGACCGCTTTAACCATACCTTAAAA  
CCGTTACAACCTTTTGCCTTTGCGGGGACCAGGTGGTTAAAGCGAACTGACGGCAGGGCAGATGTCGATGGATTTCAA  
CATCATGACACGCTGGATGCTGTAAGGCGAAAAGTCAGAATAGCCGAACGTACGTTTACTACCTTTGGCTCACGCGGTG  
GGGTGGTGTGTTGATTAACGGGGCGTGGCAATGGGGCAGAACTGCTCCTACCGACCAGGGCGGTGCTGGTTCGAT  
GGCAGGCACACCTGCGGCTTTTACAACCGCAAGGTAACCTGTGTTTACAGTGAATCAACTGGCTTGGTGGTTATTCACC  
GGATCAAGTTCAGTAA

>Cluster\_7878

ATGAGCAAAAACATCAACCCAAAAACATAAATCAAGAGAAAAAGTCTGTCTACTAATAGAATCAGCAATGGTTTTAGC  
TTTTATCAGCTGTAGTAATGCTGCACTCCTTTATTTTTATAACAATTCAAATTGAGAATAAAAAAGTAAATGATGCGATAT  
CCAGATTGCAAACTATTTATGCTGCCACTAATGGATTTCATGCGAGCAACGCTTCTGCTTTTGACGGTAACATAGGCAAC  
TTTTATTAAGCTGTATCTTAAAAACAGGAATACCTACTATAAATCAAGGGGATGGCACCACACAGCTTGTGCGACGAGAA  
TGGCAGGGAAATCAAATTTGGGCTGTATCAAGTAGCAGATATGTTATTGAAGTTCAAACAGCAACATCCCACCT  
GTGTCAAATATGCCAGTATGAATATGGGGACCATGTATTTATCAAAAACCTGATATATACTAGGTAGTAAACAAAATAGGA  
ACCGTAAACGACGTTTCTTCTGCCAACACAGCTTGTGCAAGGCGGACCAACAACGGAATGATGCAAAATATAAAGATTCC  
ATACTCATTAATAACTAA

>Cluster\_23568

ATGAATTAAGAATTACTGACCCTGAAAATGCTCCGGTAAAAATGTGGACCAAAGCGGTGCGGTTAGAAGCCGATGCGCG  
TCAGCAACTTATTAAATACCGCAAGATGCGGTTATTTTCAAACATATGCGGTAATGCGTGTACACCTGGGTAAAG  
GTTCCACCATTTGGTAGCGTGATCCCGACCAAAGGGGCGATTATCCCGCGCGGTTGGGCGTGGATATTGGCTGTGGAATG  
AACGCACCTGCGTACCAGGTTAACGGCGGGGACCTGCCGTAACAACTGCGAGAGCTGCGTCAGCGGATTTGAAACGCGCT  
ACCGCACGGACGTACTACCGGGCTGTAAACGTGATAAAGCGCATGGGAAAATCCGCTGTAAACGTCGATGCGAAAT  
GGGCTGAGCTGGAGCGGCTTATCAGTGGTTAACGCAAAAATATCCCGCTTCTTAAACATAATAACATAAACACCTG  
GAAACGCTGGGTACGGTAAACCTTTATTGAAATTTGCTTGTGATGAGTCGGATCAGGTGTGGATTATGCTGCACTCCGG  
TTCACGCGGAATTTGTAACGCCATCGGAACCTTACTTTATCGATCTGGCCCAAAGAGATGCAAGGAAACGCTTTAA

>Cluster\_2438

ATGACTGATCAGTCTCATCAGTGCCTCATTATCGGTATCGCTGGCGCATCGGCTTCCGGCAAGAGTCTTATTGCCAGTAC  
CCTTTATCGTGAATTACGTGAGCAAGTCCGTGATGAACACATCGCGTAATCCCGAAGACTGCTATTACAAAGATCAA  
GCCATCTGTCGATGGAAGAACCGCTTAAGACCACTACGACCATCCAGCGCGATGGATCACACGCTGTTGCTTGAGCAT  
TTACAAGCGTTGAAACCGCGCTCGGCAATTGACCTGCCGTTTACAGCTATGTTGAACATACGCGTATGAAAGAAACGGT  
GACGGTTGAGCCGAAGAGGTCATCATTCTCGAAGGCATTTTGTGCTGACGGATGCGCGTTTGCCTGACGAACCTTAACT  
TCTCCATTTCTGTTGATAACCCGCTGGATATCTGCCTGATGCGCGCATCAAGCGTACGTTAACGAGCGTGGCGGTTCA  
ATGGATTTCTGATGGCGCAATATCAAAAACCGTGGCGCCGATGTTCTCCTGCAATTCATTGAGCCTTCAAACAAATATCG  
GGACATTTATCGTCCGCGCGGGGAAAACCGCATCGGATCGATATATTGAAAGCGAAAATAGTCACTTCTTTGAAAT  
AA

>Cluster\_62149

ATGATCCTGCACCCTTCTCTCGCCAGCGCAAATCCTCTGCACTATGGTCTGAGCTGACGGCATTGGACAATCTGGATTT  
TGGGAGCCTGCATCTGGATATTGAGGACAGCAGCTTCATTAACAACATACGTTTGGGATGAAAACCGTGCAGCCGTCG  
CCAGACGAGCCCTCATCCTTCTCCTTTTCAATTTTATGCTTGGCCGGCCACAGCGCTGGTTAACGCGCTGGCTGAAATC  
AGACCCGCGTGGATCTTCTGTTCAATGCAAGAACCGTGGACTATCCTTCGGAACGTTAACTGAGATCCGCGCATCCGCGG  
ACGAGCCGACTGGTATTTAATCCGGCAACCCGATCGACGCTGGCGATATCTGGCGTCTGAGCTGGACGGAGTGTATGG  
TGATGACCAAGTGAACCGGATGGGAGGGACAGCGGTTTATCCCTCCTGTCGAGAAAATCCAAAAGTACGCACGGCT  
TTTCTCAGACCGAGTGGTGGGCGGCGGAAAACCGCATCGGATCGATATATTGAAAGCGAAAATAGTCACTTCTTTGAAAT  
TATGGTGAATGGGCGCGCCTGTTCTCTCATCTGCACTATCGCGGACCTTAGCTCAATTCGCCACCCTGTAA

>Cluster\_61222

ATGGTGTGCGAAACCGCAAACAGACCCGACTCTCGAATGGTCTTGTCTCATTGCCACATTATAAGTACCCATCCAA  
GAGCAGCTTATTACCAGGGTGAAGGCGGAAACCGTGTACTACATCGTTAAAGGCTCTGTGGCAGTGTGATCAAAG  
ACGAAAGAGGTAAGAAATGATCCTCTCCTATCTGAATCAGGGTGAATTTATTGGCGAACTGGGCTGTTTGAAGAGGGC  
CAGGAACGTAGCGCATGGGTACGTGCGAAAACCGCTGTAAGTGGCTGAAATTCGTACAAAAAATTTGCCCAATTGAT  
TCAGGTAAACCCGGACATCTGATGCGTTTGTCTGACAGATGGCGCGTCTGCAAGTCACTTCAGAGAAAGTGGGCA  
ACCTGGCGTTCTCGACGTGACGGCGCATTTGCACAGACTCTGCTGAATCTGGCAAAAACACAGCAGCTATGACTCAC  
CCGACGGTATGCAAAATCAAAAATACCCGTCAGGAAATGGTCAAGATTGTCGGCTGTTCTCGTGAACCCGTTGGACG  
TCTGAAGATGCTGGAAGATCAGAACCTGATCTCCGCACAGGTAACCATCGTCTGTTTACGGCACTCGTTAA

>Cluster\_6463

ATGGTGGAGATTTATTTTTTCCAAATGTCACCGGATCAAAAACAGATAAAGGAATATCAATGATGATCAAATAT  
CGATTTCAAGCCAAAATAGCACTATTAAGTGTGAACCTTCAAGTCTTTGGATAGTATGATGTTAACAACAACTACAA  
CGGATGTAAGTATCCTTAATCGAAGTATATCACACCTGGTAATAATGTTCTGGTTAATAACTGGAGGTGACTTAAAC  
ATAATTTCTGCTCCGACTTATTCTAAATGGAGCGACTAACTCGTCAGCGGCACAACACGCTGAAGCTTTAGAAAATAC  
AATCTGGAATATGAAAGATGACTCCGTTGTTACCCTATGACTAATTCAGACAGTATTTATCAATCTTTCTGATGATG  
GTCAAACATTTACCAAGGAAAACATTAACCGTAAAAGGTAATATGTCGGTAAATAAGTTCAGCTTAAATATCCGACC  
GTATTAGGTGATGATAAATCGGCTACGGACAGACTTATGTTGAGGGTAAATCTCGGTTCAACTACCGTCTATGTGAA  
AAATGCTGGAGGAAGCGGCGGGCCACGCTAAACGGGATCGAATCATAACTGTAATGGCGATGAATCTCCAGCAGATG  
CCTTCAGATAA

>Cluster\_46224

ATGGATGCGAAACACGATTTGCGCGCCGTTGGCGCAAGAGCTTCTGATGGTGACATCGTTAACTTAGGGATCGGTTT  
ACCCACAATGGTGCCTAAATTTTACCGGAGGTTATTCATACACTCTGCAATCGGAAAACCGCTTCTCGGTTTAGGCC  
CGGTCAACGACAGCGATCCAGATCTGGTGAACGCTGGCGGGCAACCGTGCCTGTTTTTACCGGTGCAGCCATGTTGAT  
AGCGCATGTCATTTGCGCTAATCCGTGGCGGTCATATGATGCTGCTGCTCGGCGTTTGAAGTAGACGAAGAAGC  
AAACCTCGCGAATGGGTAGTGCCTGGGAAAATGGTGCCTGGTATGGGTGGCGCGATGATCTGGTGCACGGGTCGCGCA  
AAGTGATCATCGCATGGAACATTTGCGCAAAGATGGTTTCAGCAAAAATTTTGGCGCGCTGCACCATGCCACTGCTGGC  
CAACATGCGGTGCATATGCTGGTTACTGAACTGGCTGTCTTCTGTTTTATGACGGCAAAAATGGGCTCACCGCAATTCG  
CGACGGTGTGATTTAGCCACCGTGCCTGCCAAAACAGAGCTCGGTTTGAAGTCGCCCGCATGTAATACGCACCGG

GTGATTTATGA

>Cluster\_55470

ATGATGCAACCATCAATCAAACCTGCTGACGAGCATTCAGCTGGCGATATCATTCGCGCATCGGCAGCTGACGCGTAT  
GCTGCGCGACAGTTTGGCGGAACGGGGCTGGATCAGGCCATTGCCGAAGCGGCGGAAGCCATCCCGATGCGCGCATC  
GTTTGTACTAGTTGTGTCAGATGACCCAGCTGCGGACGGGCGCTGAACAGTGTGAGGCGTCAACCCGATCAG  
GATCAAATGGAGAAATCAGCAAAAGCGTTAAACCAACGTTGGGATGACTGGTTTGGCGATCCGATGACCTTGGCGACGC  
CCGTGAACCTGGTAACAGATACACGACAAATTTCTGGCAGATGTACCCGCGCATACCAGCTTTACTAACGCGCAACTGCTGG  
AAATCATGATGGCGCAGGATTTTTCAGGATCTCACCGGGCAGGTCATTAAGCGGATGATGGATGTCATTTCAGGAGATCGAA  
CGCCAGTTGCTGATGGTGTGTTGGAAAACATCCCGGAACAGGAGTCCGCTCCAAAACGTGAAAACCCAGAGTTTGTCTAA  
TGGACCTCAGGTCGATACCAGCAAAAGCCGGTGTGGTAGCCAGTCAGGATCAGGTTGGACGATTTTGTGGATAGTCTGGAT  
TTTGA

>Cluster\_26066

ATGAAATATCAACTTACTGCCATGGAAGCTCGCGTATGGTTGCTTGTGCTGAAAAACAGGTGACCACGCCGGAGCAATA  
CCCCCTCTCCGTAATGGTGTAGTACAGGCTGTAATCAGAAAACGAACCGTGAACCGGTTATGAATCTGAGTGAATCTG  
AAGTGCAGGAACAGCTGGATAATCTGGTCAAACGTCATTTATCTACGCAGGCTGAGCGGTTTGGTAATCGGGTACCAAA  
TATGAGCAACGTTTGTAAATTCAGAATTTGGCGATCTGAAACTGAGCGCCGAGAAGTGGCGTTAATCACCAGCTTGT  
ATTGCGTGGTGTCCAGACCCGGGGAATTCGGCGCCGCCGCGGAATGTATGAATTCAGCGGATATGGCGGAAGTGG  
AGTGCAGCTGGAACAACCTGGCGAATCGCGAAGATGGTCTTTTGTGGTGGTCTGGCCCGGAACCGGGTAAACCGGAA  
AGCCGCTACATGCATCTTTTTCAGTGGTGAAGTTGAGAAATCCCGCGCGGTAACGGATAAGTTGAAACCGGGTTGACGGTGA  
TTTACAGGCCGCTGTGCAAGCCCTGGAATCGAAGTGGCAGAACTGAAACAGCGTCTTGATTCGTTGCTGGCCATCTGG  
GAGATTAA

>Cluster\_49708

ATGAGTATTTCTCCAGGGTAAAAAGCAAAAGAATTCAGCTTGGACTTAAACAGGCTGAACTTCTCAAAGGTGGGGAC  
TACCAGCAGCTCTATAGAGCAGCTCGAAAACGGTAAACTAAGCGACCACGCTTTTACCAGAATTCGCTCAGCTCTTG  
CGCTAAGTGTGACTGGCTGCTCAATGGCACCTCTGATTCGAATGTTAGATTTTGTGGGCACGTTGAGCCCAAAGGGAAA  
TATCCATTGATTAGCATGGTTAGAGCTGGTTCGTGGTGTGAAGCTTGTGAACCTACGATATCAAGGACATTGATGAATG  
GTATGACAGTGTGACTTAACTTATAGGCAATGGATTCTGGCTGAAGGTTGAAGGTTGATTCATGACCTCACCTGTAGGTC  
AAAGCATCCCTGAAGCTATATGGTGTATTAGTAGATCTGAGCGGAGCCAGTGAATGGAAGCCTTGTTGTAGCCGATG  
ACTGACGCGAAGCAACATTCAGAAAACCTGGTCTATAGATGGCGGTCAGAAGTACCTGAAAGGCCGTAATCTTTCATG  
GCCATGACTCTTATCAACGGGAACCTGCAAGATTTATCGTGTGTCGTGGAAGCGAGGTTAAATTCGTATGA

>Cluster\_63624

ATGCGCCTTCGTGTGTGTCGCCGTTTTATTTACCACCCTCCGGCTTCGGTGGTCTCGCTATACCCCTACAGCGAGAGC  
TTGTGTTAACATTTCAATACCCTTACAGTTGAGAGTTATTTGATATGTTGGATGATTTTACTCCATTGTTGAACTTTTTG  
CTAACGAGCCACTCGAAAGACTTATGTATACGATATCATTTTTGGTCTCACTCTCTGGCTGATACCGAAAGAGTTTACT  
GTCCGATTCATTAATCTATACTGAAATACCTTGGCTCTTTCAGATTATCGTTTTTGCCTTTCTTTCTGTTGGTTCGCCATTT  
CTTCTCAAGATTGCGAGCACATATTCAAAAGCATTTATTCATTACTACCAGAGCAACGAGTATTGCTTTCTGTTTATCTGAGA  
AAGAAATCGCTGTATTTAAAGATTTCTTAAAACAGGAAATCTTATTTACTTCTCTTGGCCTAACCCGGTTATGAAA  
AAATTAGAACGGAAGGGCATCATCAACATCAGAGTGTAGCGCAAACTGTTCTTATTTATCTCGTACCAGAAAATACTC  
CCATTTTATGAAGTATTCTGGAACAGCAGGAGTAGACGTTTTTAAATCGTTAG

>Cluster\_37776

ATGCAAGTGGCAAACCTAAACTTCCGCTGATCGCCATTTTGGCGGCATTAAGCCCGACGAGGCGTGGCGCATGTTGGCGC  
GGTATTGACGCCGGTTTCGACGCGGTTGAAATCCCGCTGAATTCACCAATGGGAGCAAAGCATTCGCCCATCGTTG  
ATGCGTATGGCGACAAAGCGTTGATTTGGCGCAGGTACGGTACTGAAACTGAAACAGGTGATGCGCTGCGCAGGATGGCG  
TGTGAGCTCATCGTTACGCCCAATATCCATAGTGAAGTGTATCCGCGTGGCGTGGGCTACGGCATGACCGTCTGCCCGG  
CTGCGCGACGGCGACCGAAGCCTTTACCAGCTCGAAGCGGGCGCGCAGGCGCTGAAAATATTTCCGTCATCGGCTTTTG  
GTCCGCAATACATCAAAGCGTTAAAAGCGGTTATGGCATTCCGACATCGCAGTCTTTGCGGTTGGCGGCGTACGCCAGAA  
AACCTGGCGCAGTGGATGATGACGCGAGGTTGTGCTGGGCGGGCTTAGGCAGCATCTCTATCGCGCCGGCAGTCCGTAGA  
ACGCACCGCGCAGCAGGCGAGCATTTGTTAAGGCGTATCGAGAGGCGAGTGCATGA

>Cluster\_55164

ATGGTGGCCGCTGGCTGGAAAGAACTCAGGTGAGTGTATGATGATTTTCGACACAATCATGGAAAAGGCTTACGAAGA  
ATACTTCGAAGGCCCTTGGCGAAGCGGAAGAAGCTCTCAGCTTCAAGTGTGTTTAAACAGGCACTCAGAATAAGAAATGTGCT  
CTCACAATGACGCGGAGCACAAAATGAGAAGCAAAATCAGACCGCAGAAAATTTGTTCTGGAACCCGGAGAAAACGCTT  
TTCAAATTTCCCGTTACGTGCCCATTTTGGCGTTTACATCAGAAGAATTTGACGACTCCTGTAAACAATCAGGAAACAAC  
CAAGTATGTGCAAGATGATACCGAGTGGCGCAGGAAGACGATTTATATCCAGAGTCAAATCCAGGACCAATAAATCTC  
ACTTTGAGAGGTTGATTAATCTCACTCCCAAAACCAATAAAAAGATGCGGAGGACAAAACCCAAATGGAACACCGG  
ATATCTGTCAAAAAAGACGTTCCATTTAAAGACAACAACGCAGCGCCGGTAAATGACTCCAACATTATGATAGTGTTTTA  
TGTTTCAATAATGCCGATGACTTTGTCTATGACGCTCCACCGATTTTGA

>Cluster\_4612

ATGCGCATGAATGTTTTTCGAAATGGAAGGGTTTTCTCGCGGAAATGTGTACCACGAGATCTGAAAGTGAATGAAACAAA  
TGCTGAATATCTGGTGGCTAAATTTGCTGAAGCGGAGGCAAGATTTTGGCTCTGTCCGAAGACCAACAGAAAGCGATTG  
AGTCAATTAAGCAGGCTGATGACGCTGTAAAGTTGGCACACGAGAAGTTTTCGGCGCTGGCGGCGGAGAAATGCGGGGCTG  
AAACAGCAATGGCCGTAACCTTTGAGCATGTGTGCTGATCAGGATGACGGGACGCTGGTGTGCTGCAATGATTTATCA  
CGATGCCCTACACCACAGCGAAACTCCAGCCACCGATGCTTTCTGGCTGAAATTCGTGCGGAAGCACGCAACGAGGGGA  
TTAACTATAACCGAAGCGCTTTGCTGCTGCTTTCAATCACGGATTTATCAATAAGTCTTTACGTGAAGTTTTTCGACGTT  
ACACGATGATTTCTGTCAGCGAAAGAAGAGTTGGCTAATGAACACACCCGATTTGATGGCCTGTCCGGTGAATATGCGGA  
GAAATCCCTAGAAGAATGGCGGAACAGATTCGCAAAGGAGGCAACCATGA

>Cluster\_10711

ATGATTACGCTGTGGGGTGGAAATAATCAACCAACGTAAGAAAAGTATTTGCTGACGCTCGAAGAATGGAACCTACCTTA  
TGAGCAAAATTTTCGCGGGCCGTGAGTTTGGGATAAATCAGGATGCTGATTTTTCGGCGATGAACCTAACGGGCTGGTGC  
CGTTTGGCGTGACGACGAAAGTATCTCAATCTTTGGGAATCAACGCCATTTGCTCCGCTATCTGGCGGACAGTACGGG  
CAAAAACGCTGTGGATCGACTCACCGGACGCTGTCGGAAGCGGAAAATGGATGGACTGGGCAAAACAGACGCTCAG  
TAATGCTCATCGCGGGATCCTGATGGGATAGTTCAGAACACACCGGAAGAGCGGATCAGGCGCCATTTGATGCCAGTT  
GCAAAGAGTGGCAGCCCTGTTTGGCTGCTCGATGCGGAATGGCAAAAGTAAAATGGTTCTCTGGCGACGAGTTGGT  
TGGGGCTATACGCTATGCACCGTTCACTCAATAATTTGTTAACGTTTGGCTGACCTGGACACCGCTCCAAATCTGCA  
ACGCTGGTATCAGCAACTACTGAACGCCCGCAGTGCCAAAGTGGTGTATGATTTCCGTTAGCTAA

>Cluster\_51820

ATGAGTCTAATCAAGGGTGGAAACGATAGTGGGGTGGTATGCCATCAACAGGCTGATAAAAGCCTACAATTTTCAGCTC  
ACGCCAACACTCTGCGAACACTTAAAAGTATCAAAAAGCACCATGGCAAAACAGATACTTAAAGAGATAGTTTTCCAGCAG  
AATGGGTAATTAATGTGCACTAGAACCGGGATCTCGCTTCTTTGGTTGGCAACCGGACAGGTTGATATGATGACGAT

AACAGTGACGTAACATTCTCAAAAATGATAATGACGTCACGATTAGACCACCTTTCTAAAATCGTAGCTCCAGTATCAA  
ATACACAGAGTTAAGAAATGGTGAACCTCAATCATATGACGAAATTTTATTAGATAGCAGGTTGGTTGAGGGCGACTCGT  
CAAACATCTATTTCATACAAACGACAACAGAAAGTTTTATTGTGATGTATCTGTAACAGATCAGTAAATGGCTCCTGG  
CTTGTGATATTGATGGAGTGAAAGCATCGTAAAGTAGCTCGAATTTCCGGAAATAAGCTTTGTGTTTCATCAGGAAGA  
AACACCTTTGAAFTGTCAGTTGATGACGTAGACGTTGAGGGCGTGTGTTAAAGTGATTAAAGCATCTAA

>Cluster\_28096

ATGAGCCATCATCAGAAAGGGTGTGTAACATGAAGGCCAGCCACGCCATGAGGGCTGCTGCAAGGTGAGAAGTCAGA  
ACACGAGCACTGCGGACACGGTACCAGCATGAACACGGTCAATGCTGCGGTGGTCCGACGGTCGCGGGCGGGTCCGTG  
GACAACTTTCTTTGGTACCGTGAATTCGCTGCGTGGTATCTGGATATCTCTCGCGCGATGACAGCCACGGTTACGAG  
TTAATTAAGCGATTGAAAATCTGACCCAGGGGAATTACACCCCAAGCCGGGCGTCACTACCCGACGCTGGATTTTCT  
GCAGGAGCAGTCCGTGATTACCATCCGCGAAGGAGGAGTGGTAAAGCAGATGCGCTGACCGAACAGGCGCGCAGT  
GGCTGGAAGAAAACCGCGAACAGGTAGAGATGATTGAAGAACGCATCAAAGCGCTGCGTTGGCGCTGCGCTGCGCCAG  
AACCAGCAATGAAGCGGGCGCTGGATAATTTTAAAGCGGTGCTGGATTACGCGTCAACCGAGCGATATCACTGATGC  
ACAAATAAAAAGATCATTTGCGGTGATCGACCGCGCGCTTTTGTATATTACGCAACTGGATTAA

>Cluster\_5183

ATGACAGATGGTATCTCAACCTCGCCAGTGTCTTTTATAAATCAAATATAGTAGATGATGTAATAATAAATAAAAACAAG  
ACAAAATGAGTTAATAAAAAGTATTTTGGCAGTATAAAAACCGAGTCTTAAATTTGTTTGTGATGACTTTTTTCAGAAGCCAGG  
ATTTGCTTAAACCATCTCCAGTCTTCACTATTTTTTTTCAATACACTCATCTAAGAGATGCGCATTTTTATAGATGTAAA  
CTCATAGAACATACAGTTCAATTTTCTTTTTTAAACCAAAGATATCACATTACTTAGATTGGATGTTTTGATGACAG  
AACAGCGAATGCTTTCTGAAGAGATTAATAATATCAAGAATGCCATGAAAAATTCATTAAGTTTTTAAAGTAAACT  
TCAGCCAGGAAATATACCCACAGCTATATTTCTGAGATATTTATGAGGCCGTGCAACATCTCCAGTCATTTTTTAT  
CATCAGAAGACGTCACAAAATGCAAAATATAGTAAACAGACAAGAAAAAAGTCACCTAACAGGAAATCAAAAAGCT  
AATCAAAAAAATTTTTCTGAGCTATACAATGATCAATGTAATAAAAATTCCTCTCATCGATAG

>Cluster\_3454

ATGCAAAAGATTAATTTCTATCGTAATCGCGTGGCAATTAATGTGCTGGCGAAAGATATCGCCAATGCCCGTGAATCTT  
TGACGCGCGCAAGGCCACGCGATGATTGGCGTCTTTCCGCGCAGTCTCCTCGGTGGATGAGGGGATCCAGGAAGTTA  
AACGTTGGATGGCGGAAATACCGTCCATTTCACTAGGCTGGGGGGGGTGCACCGGCGCAGTATTACAAAGCTGCGATG  
ATTGCGGCGCAGATTTCATCCAGCACAGCTTAACAGACGTTTACCAGGTTGTGGTTTCGCGGCAGGCGCGCTGGCGACC  
GGCGGCGCGCAATGGTATGACGCTGATTGAGCCGACTGGCGGGATTGATTGGATAACTCAGTGTGATTCTGAAAACCT  
GTCGAGGCGGGGGTGCAGCGCATTTATGCCACATGTTTACAGCTCGATTATAGACCCGTATACGGGATATACCCGACCG  
GATGATGTAGCCGTTTTGCTAAATAAAGTGAATCACTACTCTGA

>Cluster\_21260

ATGTGGATATATAAAAACAATGGAAAAGATAATGCAAAACCAACTTAGGAGAGCGAGACGTAAGAATGTTGCAAAATAT  
TAGTCTGATGATACAGATAAGATAACAGGAAGGAAATTTTCCAGATGAGGTGAGTATCTTTATTCAGGAAATGTAATAA  
AATCAGTCAGTTATCAATTCGTTACTTACCAATATCACTCAATCTCATTAATAGAGACAAAACAGAGTTTGTGCTA  
CATCGATTTATTCAGATGAAGTACTTCCAGAAAATGGAACGCTTATCCGACACCACATACATGAAGAAAATCAAAATCC  
AGCTGACAATATAAAAACAATGCTCAACAACATACCGACTTACAAAATGTTACCGCATTCACAGAAACACAAGGTAAT  
GTTCTTCTGGCGCAGCCAGTTTTTACGCAAAATCAGGCGCCGAAGAAAAAGATATTTGTCATGATGTTCCCGAAATTA  
GGCTGCATACATAAAAACATGGGACCCCTGGTTAGAAATTA

>Cluster\_35717

ATGAAACGTTTTAGTCTGGCTATTTCTGGCGCTGGTTGTTGCAACCGGCGCACAAGCTGCCAGTAAAAAGTCGAGATGAA  
CCTCGTCACTGCGAAGGGTAGGGCAGTCAATTTGGTAGCCTCACATTAAGTAAACCGATAAAGGTCTGGAGTTTCCG  
CCGATCTGAAAATCTACCCCGGTGAACATGGCTTCCAGTATTCATGCAAAAGGAAGCTGCCAGCCAGCCAAAGAT  
GGCAAAAGCCAGCGCGCGGAATCCGAGCGGGCATCTTGATCCAAAAATACCGGTAACATGAAGGGCCAGAAAGGTGC  
CGGCATTTAGGCGATCTGCTGACTGCTGCTCAATAATGACGGCAAGCTACCGATGCCGTATCGCGCTCGTCTGA  
AATCACTGGATGAAATCAAAGACAAAGCGCTGATGGTCCAGTTGGCGGGATAATATGTCGATCAACCTAAACCGCTG  
GGCGGTGGCGGTGAACGCTATGCTGTGTGTAATTAAGTAA

>Cluster\_42607

ATGAAAAGGTTATTTTTGCCTTGTCTGCACTGGCATTAACTTCTGGTCTGTCTTCCGCTGCTGATTCGGTGTGTTGAC  
TGTTAAATTTACTGGTGGATCGTAGACGCGCATGCTGCTGTTGATTTCTCAGAACCAGGAAGTTGTTCTGGGAC  
AGGTTCAAAAATCTGTGTTGCTGCACTTGGTGAATAAACATCAACATCAAAAACCTTTGAAATCAAGTTGGAAGATTGTGAT  
ATCACCACCTTGA AAAAGGGCAAGTCACTTTAGTGGCGTTGGTGTATACCGATAAACCTGAACCTTATCTGTTAGCAC  
CGAAGCAGCGCGCGCAAGGCGTAGGTTATCGGTTATTTATGATAACAGCAACCCCTGGTTGCCATGAATAGTGGTGAAT  
CCAGCACTGACCTGAAAAAGGTCAGACAGTTCTTTATTTACCGCAACATATGTTTACTTTAGCTGCTGTAACACTACT  
GGTTATGGTAATGCTCAGTTGATTTCACTGTCTTACGAGTAA

>Cluster\_35617

ATGAAACGGTTTTCTCTTCGCAATCTGATTTCCCGGGCTGTCACTACGCGCGGTGGATTCCGCCAGAAAGTGTCACTGT  
AGGTTGAAAATGATAGCCGGAGATCAGAAAACACAGCTTGAGCACCTTGAACCTTATGGTTTTACATCTGCCGACAGA  
ACGGTGTGAGGGCTGTGCTTTATTTCCGCGGGCGATCTGTTCTCATGGTGTGGTTGTGGTCTGGCTGACAGACGTTAC  
CGGCTGAAAAGACTGAAACGTTGGGAAGTGGCGCTTTATGACGATCTGGGACAGTCCGTTGCTGACCGGTTCCGGTAT  
TGTGGTGAACGGGCGGGGAAGCCATTTATTTTCAAAAACCGCCATAAGCGGCTTTGAAATGCCAGTCAATCCACCG  
CCGATATTACTGACAATTCGACAGTGGCGGACTCAGCATGACGCAAAATGCGGAGACCTACAATGCCACAAAACACACC  
GAAAATGGTGTGTTGGCGGGATCACTGACACCGCGATCAACCGATGGGCTGA

>Cluster\_1297

ATGATGCACTTAAAGAACAATAAAGCGGGTAAATGCTAAAACACTGGAACAGTATGAGTTAACAAGAAACACGAGTTAT  
CTGGCTTTACTCTGAGGACGGA AAAAATGTTATGAGGAAAGTGA AAAAATTTACGCCAGACACCAATAAAGATTGTTTACG  
ATGAAAATAATATATTGTTGCCATAACCAAAGATGCCCTCACACTTAAACCTGAAGTTATAGCGTCTGATGATTCCT  
GATATTACCGCAACCGCGTGTGACGACTCAGGTAATGATGTTTAAAGATGGCGCAGTCAATAACGTTATATAC  
CGAAGAAGAGTTGCGCTACAGACGGA AAAACAGAAAAAATAATTTACAGCAGGCCAGAGAAAAACGAGTTCTGGC  
AAACACAGCTACTTTGGGGATTATCACTGATTGAGCAGACGCAACCTGATGAACTGGATGCGATACGTTCAACAGGTT  
GAGACAACGTATCTCGGTTCTTCTGTAACATTTCCCGAACACCAGAATAA

>Cluster\_41345

ATGAACCTAAAACGGATATCTCACTGCGGGCTGTACTGGCGACGGTGTCTGACGCCCCATGTTTCCAGCGGCTGACAA  
CCTGCATTTCTACGGCAATTTACTCAGCAAGTCTGACGTTAGTCTGTTACGGCGAGTCCGTTGGCGGAGGTGCATTTCC  
CCACCGTTAGCCGAAAGACCTGATGGTGACCGGGCAGTGGCGGGTGGCGGTAGTGTTCAGTTGAAAGATTGTAAA  
GGGCGAGCGAGTATGAAGTCCGGGTGACACTGACCGGCAAGAGACAGCGAGCAGCCGGTTTTCTGGCGCTGGATGC  
TTCCATAGGTGCACAGGGCTGGGATTGGCATGGGAAAACACCGGAAACCGGCTGGCAATAAACAGCACCCTGGCG  
CAACCTTTGTGCTGAGTAACGGTGTATAACGCTGAAATTTAATGCTGGCTCCAGGCGAAAAGCGGGCGGGAAGTGACG  
ATGGGTGAATTTACCGCTCTTTAACCGCAACGTTTGGATACCTTTGA

>Cluster\_20998

ATGGCCATAAAAGTCTTTGAGCAGGCCGTTGAAAACCTCAGCCGTATCAGCAAAACGGCAGTGCCCGGTGCCCTCCGCAAT  
GGCCATTAACCGCGTGGCCACAACGGCAATGAATCAGTCGGCGTCACAGGTTGCCCGTGAGACAAAGTGGCGGCAAAAC  
TGGTAAAGAAAAGGGCCAGACTGAAAAGGGCCAGCGTCAAAAATCCGCACGTAATAAATCATTGTTAACCGCGGTGATTTA  
CCTGTCATCAAACTGGGGATACGGATCACCAGGAGTCCGTTCCCAACAGTACGCTACGGCGCGGTGAGCATTCCAGCG  
GGCATTATTCAGCGATTAAAAAATGGTCGCTGGCATGTCATGCACGCGTGTGGCCGGGAAAAACCGTTACCCCATGATG  
TGGTGAAAATCCCGATGGCGGTGCCGCTGACCAGCGGTTTAAACAGAAATATTGAACAGATACGGCGTGAACGTTTGCCG  
AAAGAACTGGAATACGCCCTGAAACAACAACACTGAGGATTGCGATAAAGCGATGA

>Cluster\_24709

ATGATTACACAACAAATATCAGTAGTGAGTTGGAAAGTTTAAAGAAACATATTGACTCAGGAGATATTAGAATTCGGTC  
ACTATGGCAGGGATTAACCCGGGTTTATAATCATGGGATGGATGATTTTTGTCCCTACTAATGTCAATTTCTAATAA  
CACAAAAGACAAGTGAACACTCACTGCTGTGTAGCCGGAGGATGGCTGGACTTATATTCGTTTTATTGTGGCAAGG  
ATTAGAATGTTATATTTCTCTCCTCGCCGGAAGAATTCCTAAAGACATCATCCGTAATGAGGATTATATCATCAAAACTGAA  
AGTGTATTTTCAATGTGTATATGGGAATTAATTTTTATGGTCTTTTTTAGGTGGAGGGATTATATACGGTTTTGGTGCAA  
TTTTAGTGACGGTATTATGGCGTCTTGTATCAATTAGATATCGGTAGATATCAATTTGTTGGTGTTATTGATGCAATC  
AATAGTTACGTCAAAAACAAGAAGTTATCAAGAGTAAAAATA

>Cluster\_60882

ATGGAACGTTTTCTTGAATAATGCAATGTATGCTTCTCGCTGGCTGCTTGCCTCCGTGTACTTTGGCCTTTCCGCTGGCGTT  
AGTTGCCCTGGCGCTGAAGTTCCTCCAGGAGATTAATTCACGTACTGCCGAATACTTCTCGATGGCGGAATCAGATTTGA  
TCCCTCGTTGCTGCTGCTGGTGGATATGACGCTGGTTGGCGGTTTGCCTGGTATGGTATGTTTTCCGGTTATGAGAAT  
TTCGCTCACAGCTGGATATCTCCGAGAACAAAGAGAAGCTGAAGTGGCTGGGAAAAATGGACGCAACCTCGTGAAAAA  
CAAAGTAGCAGCGTCGATTTGGCAATTTCTTCCATTCACCTTACTGCGCTCTTTATGGATGCGAAAAATGTCCCGGATA  
ACAAACTGATGTGTACGTCATTATCCATCTGACGTTTTGTGCTTCTGCAATTTGTGATGGGCTATCTTGACCGACTGACT  
CGTCATAATCACTGA

>Cluster\_15256

ATGAATGAACAAATAAAACAGGATATCGATCTGATTGAGATTTATTTTATCTGAAGAAAAGATTCGTATTATCCTTTT  
TATTATAGCTATCTGTATGGCAATGGTGTGTTGTTTCTGTATAACAGAGAAATAAAGCTGGAATGGTCAAGGAGATAAGA  
GAGATTTACCAACTGCTGAAAGCGGAAATATCTCGCGTGACGGCTTACCATAAATGGTATGCGCTCAGAATACCATAAT  
GGCAGGCAAGTTCGATGAGATACAAACGCCCTCAGCAATTAACAGTGAAGCTTTATACAAAAATGATATACCTGACCAG  
GAACCTGGTCAATTTGATCCGAACGGTGTGGCTGTGCTACTATAAGCTCACAGAAATAAAAAATAAATACCCTGCTGCCA  
TTTTGCTGGCTCTGGGATTTTTCTAAGTATTGTGATTTCTGTAATGTTTTGCTTGTCAAAAAAATGGTAGATGAATAC  
CAACAAAACCTCTGGGCGATA

>Cluster\_8153

ATGAGCACAGAAACAATGAAATATTCAATAATAGTGAATGGGCAATCAACTAAAAACGCATTATCGAAAAGGAGA  
AACTCTGGCATTACTACATGGTTAACTCCTGATATCCTTGATAGAATATATGCATATGCATTCGACTACCATGAAAAGG  
GTAATATAACCGGACAGAAAATTTATTAATAAATTTGTCGATTTATGCGTTGCAAAAAATCATGAGTATCAAAAAGATTTT  
GCATCAGTATGTCAGCCAAAAAGAAATATCAACAAGCATATGACCTTTACAACTAAGTTACAATTACTTCCCGTATGA  
TGACTATTCAAGTTATTTATCGTATGGGTCAATGTCAGATTGGGGCTAAAAATAATCGATAACGCATGCATGTTTCTATC  
ACATTTAACAATTTGTGAGGATGATAGTGTAAAGAGTAAAGCGCAGGCATATATTGAACTCTTAAACGATAAATTCAGAA  
GATAATGGCTAA

>Cluster\_48830

ATGGCGGGTGTATTACGCAGGTTAAGGGGAGATCGTGACAAAAAAGCGTTCCCTCACTGTATCGTTTCACTGCATGAA  
CGGTTTATCTTCCCTGACTACAGAAATTACATCGTCTCCTCAGTTACATACATCACTTTTACATCACTTTTACATCACTTAT  
ACATCACTTTTACATCACTTCCCTCAGCTCATACTGCTACTTTTCACTCTGTGCCATTTGTACATCACCCCTTCCCTGAAC  
GTGCTGACAGCGGTTTTCCGGCTGCGCGGCAACGCTTCACGGCCACGCAATAAATGCGTCCCGTTCACCGTTTTCCG  
GATGGGAAGAACCGCGGAAACAGGACTTACCCCGGCTGAATGGTGTGAATTTCCCGCGTATGCATTTGTGCGCATACTCA  
TGATGCGGTAAAAACAGAGCCTGCGCGTTTTCTGGCGGTTTTCTGGGTGGTTTTGCTGTTTTACCGGTTTTCCCGTCA  
GAAACGCCCTGA

>Cluster\_2966

ATGAGTGCAGCAAGTTTCACTAGAGTTACATCCCGCATAGCCAGTTCCTCTTTACGAAGCCAGCTTACTGGACGACTG  
GAAATTTCTGTGACTGGCTGGCGCAGCTCGACGAAGAGATTCTGTTACACCATGCGCACCACAGTTAACGCGCAACACCGG  
ACCCCGCAAAAGGCTCCAGCCACCGACAACCTGGATTTTTAATGACACCAAGACCAGCTGGAGCGGCAATCGCCGCT  
CTGAAAACCGGCTATGGCTGGGCAAGAGCGCGCTCACGCAACCGTCACTTAAATCAGCAACTGCCAGATAAGCGAAAC  
CGCATCCCAACCTATTTGCTGTGCGGTAATATCTGCTTTATCGGGCACAAAAAGAGCGCGATGAAACATTTCTATG  
TTGGAACCGGTTTTGACAAAAGTTCCCGTCTGGAAAGTACAACTGGCGCTTGTGGAACGGGATATCTGCTGGATCAA  
GCGGTAATCACTTCCATAACCTGAGTGTACTGTTCTGA

>Cluster\_53903

ATGAATCATCAATTGGCTAATCTCGATTTCGGGACATGGTGGTTGTTTTCTGGTGATCGCGTATCACAACTCCCGCAA  
GGTAGCAGCTTACTTCGACAAGCAGCATCACCACATCATTCAGAAAATCGAAAAGCTAGACTGTTCCGGATGAATTTCTAA  
CCAGCAACTTTTCGGGGTTACCTATGAACACAAGGTAATCAGTATGTTGAATATGAAATTTCCAAAGACGGCGCGATG  
TACATCATCATGTCGTTTACCGGCAAAAAAGCTGCCGCCATCAAAGAGGCGTTTATCAAAGCATTTAATTGGATGCGTGA  
CAGGCTGATGGAGTTGGCTCACTATACCAAGAGAGCACAACGAGTTAATGCTGGAGTTTATGAAAGGAAAGGATGTTG  
CCAGTATGTCAGGACGCTTGTGAGCGCTGGGCGAGGATCAAAAAACCGCAACTCATAGCAAGAATCGAAAGGCTTGAG  
CAGCAGGCGCAATATCGATCCCGGACTGCCAAAGTGA

>Cluster\_43380

ATGAATGTTGTGCTGTTTTCCGCCGACTCCGTTTTCGCGCAACTTACTGCCCGGATAATCCTGCTATCGCCAGCGTCATCCG  
TCAGGTTTTCCGAGAGTATGGTCTTACCCTCGATAAAGGCTACACCGTTGCCGATCCGAATCTCGACGAGCTGTATCAAG  
TCTATAGTCAGCTGGCCATGCATATGGGTGGTTGAGTACGAGGGTGAAGTGGTCCGGCGCGCGGGATTGCCCATTA  
ACAGGTAGTGAAGCGGACATTTGCGAATGCAAGAAATGACTTTTCCCGCATTCGCGGTAAGGGCTGGCAAAAAA  
ACTGGCTTAAATGGCGATGGAGCAGCGGAGAAATGGTTTTCAACGCTGCTATCTGGAACGACCGCTTTTTTTGAAAG  
AAGCGATTTGGTTGTATGAACATTTAGGTTTTCAACATATCGACTATGCATTTGGCTGCACAGGCCATGTTGATTTGAA  
GTGCGGATGCTACCGAACTCTAA

>Cluster\_48752

ATGAGCATCAGAACCCTACGAGTGAATGCAATGACGCATGGCTAAACACCGAAGGTGATGACATCTCCGGCTCATACTG  
TAAGTACAAAGACATCAGGAAGTGGTTGCCGCTCTTGGAGCCAGTGGCGGCGCTGGCAGCGGAGAAATGCGGGAATAA  
AGTCTGCAATTCAGAAATCAGCGGATATGAAAGATGCAATATGGAATGACATGACTTCTCGCGGAAAGACTTCCGG  
TTCAATCATGCAATGAAAGCGGATGAGGAGACATCCCTGAAACGCAACACCTGATGCTTTCTGCGCTGAAGTCCGGC  
GCAGGGGGTGGATGCTGCTATAGAAGCTGCAAAAAATCTGGTGGCCAAAGAAATGAGTATAAGGATTTCAAAGCGGCGC  
AGAGTGATTTGCTGTATGTACCCTGGTTACAGCTGGTAGGAAAGTTGAATGACTGAGTGGTTAGTTGACTTTGCTGCC

CAGCTTCGCAAAGGAGGCAACCACTGA

>Cluster\_22153

ATGTCGAAAGCGGTAGGCATTTTGAACCTAGCAGTATCGCGAAAGGGATGGAACCCGGCGACGCCATGCTGAAAAGCGC  
CAACGTTGAGTTACTGGTCAGCAAAAACGCTATGTCCCGGAAAAATTTCTGCTGATGCTCGGTGGCGATGTTGGGTGCGGTC  
AACAGGCCATCAACAGCGGTGCTTCCCTTGGCTGGTGAATGCTGGTCGACAGTCTTGTCTGCCGAATATTTCACTCCGAGT  
CTCCTTTCTGCACTCAGCGGACTGAACCATGTTGAGCAGCAGCCGGCTGTGCGGCTAGTCGAAACCTGGAGTGTGCGCCG  
CTGATTTGACGCTGCCGATTTGTGTGTCAAAAGCTGCGAATGTCAATTTCTGTTCCGGTGCATATGGCTTTTGGCATTGGT  
GTAATGTACATGGTGGTGTGCTGGCGATATTTAGATGTTAATAACCGGGTCTCTGTGCGCAGCGAGCGTGGGGGGAA  
AAAGGTTTGTGGTCTATCGGTCACTGATGTCGCCGTCCACATGAAGCCATGTGCGGTCAGATGGTGGAGGGATAA

>Cluster\_46275

ATGGAGTTTCGCTTTTATATCTGTGGCCATGATAGCCATACTTGGACCTTGGCAGTATGATCACCATAACCAATCCGGTACA  
CGCACTGCTGACTGATTTTTCGCTGCTGGCGATTTCCGGGGTGTCTTCTCACTGGGCGCTTACTTCGCCGGTGGCG  
TGGAAATTTATCTACTCGCGGGTCCATATATGGTGGTCTGTTCTGTTGGTGGTATGATGCTCAACCTGGGCGGTTTCAGAA  
ATCGAACAGGAACGCCAGTGGCTGAAACCGCAGGTGTGGATTGGTCCGGCAATTTTGTGCGCCATCATGCTGGTGGTAT  
TGTTCACGCCATCTTGGTGTAAATGATCAGGGTATCGACGGTACGCCAATCAGTGTAAAGCAGTGGGTATTACGCTGT  
TCGGGCTTACGTACTGGCGGTGAACTGGCTTCTATGCTGCTGCTCGCGGGTCTGGTGTGGCTTCCACGTCGGTCCGT  
GAAGAGCGTGGCGGTGAAGTGTGAGCAATCTGTAAGACGACAGCGCGAAAAAGAAAAACGGAGGAGCAGCATGA

>Cluster\_34971

ATGACTCAAACTATGAAGTATGTTGAAAAGGGATCCGCAATTTTGAATAAAAGTTACGGTAACCTTTAGCGTTACGGGA  
CAAAAACCGCTTACGCGTGAATTTTACCTGGACATCTCGTGGACCGTGTGAAGTGC CGCGCTTACTTCGCCGGTGGCG  
AGGCAGCAGCAGAAAGGAGCATCAGACAGGCTTCCCTGGATTGTCGCCGGGTTATGTAAGGGGGTGGAGCATGCCCG  
GAAAAGCGCCCATATTTTAGAGGCGCAGAATGTGTGATAACCTACAAAGGAAAGTACCGGGAAGAAATTACTGGTTC  
TCTGAAGACGCCACCGACGGCATTTGGGTCAGAAAAAGATGATTTGAATCGCCCATTTGAAAACTGGAGGGCAGAGTGC  
CTGATCTGAATAAAAAAATTTGTCGGTGTCTGATCCCTTCTGAAAGTGAAAAAAAGCCCGGATGAGCAGTTTGGCGGTTT  
TACGATTATTGCATTGAGTTACTCGCAGGAATTTTGTGAAGATTTTGGAGGGGTAATCTCTTCAGTAA

>Cluster\_40631

ATGCTTATTTAATAGGCTGGCAGTCCAGGTAAGACAACCAAGTATATATAATGAACAAAGCAGAATTTTACCGGGA  
TTTAAATCGCGACTTTAACCGCTGATGTTGGGAGAAAACAGTTTCTGGCAACGCTTGCGAACACCAAGTGGCTGTTAT  
ATGAGCGTCTCAGTACGTAACGAGGCTTTTATTTGCTTGGAGCAGTACACTGGTGCCTGGACCATTTACGGGC  
AAAATTCGCTGTGTCGGGATACCGTGGGCGCGGCTATGCGGCACCTGCGGTGCCCCGAATCAAGTGCAGCGTATCGA  
GGATGTTACACGTTTACGCGGCATATTCCTGTGATGCGCGGAGTAAATCTGAAATTTGTTCTGCCACTGGTGGTGA  
ATCAGATTATTGGTGTTCGACATCGATAGTACCGTCTTCGGTTCGCTTACAGACAGGACGAGCAAGGCTTACGTCAG  
CTTGTGGCACAGCTTGA AAAAGTGTTCGCAACGACGGATTACAAAAATTTCTTGGAGCGTCCGAGGATAA

>Cluster\_48569

ATGACAACGATTTGTCAGGCATCGATATCGAGTCTACGGGACTGGATTTCTTGTGCTGATATAAAATTTATTGAAATCGC  
AATTACCCGCTATGAACCTGGAGACACAGAGACATATTGATAGTCTGGAGATGCGTTTTAACCCTCGCGAAACATAGATC  
CGAAAGCTCAAGCCGTTCAATGGCATTTTATAGAACAGCTCGCAGTGAACCTTTGTTGTCAAATCATGCCAGCGAAAT  
GGCGCTTATATGGGGCATGTAGTGCCTGGATTTGCTCAATAACGGCGAAGCGTTTGATATACCAATTTATTCGACACGAT  
TTCAGGCTATGGGTAAGACTGCCAGAGTTCCTGTTATAGATACTATGTTATCGGGATGTTGGGCGCAGAAAGCGGTA  
AACGTCCTCGCTTGAAGAAATTTGCGCTTCTCTTGGCTTTATATACGATCATGCCAAAGCACATAGTCTTATATGAC  
ACAACTTAAATGATGCAATGCTTCTTTAAGGACGTAATAAATACGGATTTTTTAAATTACCCCTGAAATTTGTGTA

>Cluster\_28408

ATGGAAGGTACGGAAATACCTTTGATGATTACCTGAAAGCGTGGCTGGGCGCAGCTTTTTGCCAGCCTTAAACCGGATGC  
GATGATGGAAAACGTTGTAACGGCGTTGAGAGCGTTACGCGAGAAAACGGTAAACAGCCACAAACGCTGGCGATGGAAG  
AGATCAACTGTCACCACAATATGTCGAAAAGAACAGCACTTTGGCGAAGAGATCTATGTGACGCGTAAAGGCGCGGTG  
TCTGCGGCTGCTGGTCAATATGGAATTTTCCCGTTCGATGGGGCGAAAAGCTTTATCGTCCGTTGGGCTGGGAAATGA  
AGAGTCTGTTCTGTCGTCAGCCACGGTCCGGGCGGGTAAATGAGCCGTAATAAGCGGAAAAAAGTTCAGTGTGGAAG  
ATCAAATCCGTGCCACCGCGCATGTGGAGTGGCGTAAAGATGCGGAGGTGATCGACGAAATCCCGATGGCGTATAAGAT  
ATTGATGCGGTGATGGCGCACAAAAGCGATCTGTTGGAAGTTATCTATACCCCTGCGTCAAGTGTGTGCGTAAAAGGATA

>Cluster\_40339

ATGAATAGTCGAGTATCCAACCTGAGTCTACATATTTTCTGCAATAATCTACATTTGGCAAGGATAACTTACCAGTAA  
TGATGTAGCAAAAATTTCTGTCGAGCGATTTCTACTCCGAAAACCTATCGAAAAGGCAAAAGCTTTTTCTTATAACCAA  
TTCAATATCTAGTTAAAAAGGATTTAATAAAGTAAGAAAATCAGCGGTGATCAATATTTTACTCAATCATCATCA  
GAATTTCAATATAGCAAAAAGAAAATGTGCAATTAATTTGAGGTAAGCCAAAAAACCTCCCTCAATTTTCAAGTCTACCAG  
CCATGAACACAGTATGTAACATTTCAATAAGATATCTCATTGAAAAATACAGCAGTGAATTTGAAAAAGTGTGAGGAG  
CAAAAGAAATTTTGAAGAAATGATAATTTGCCGTGCGGAGCAGGAAAATGAAATTCAGGAAACTTTCTCTTGAAGCAAGAT  
AAAAGACACATTAAGATAAATGAAAAAATAACACACTGATTTGGGATTTTAAATGAAAAATATCGCAATAAGGCAATGA

>Cluster\_19391

ATGTCTTATTCAGAAATCGCCGCTGTCTGGCATAACCGGTTCCGCTGCGTGGCTGGCTGCCAGAAAATGTCATACATG  
GTGGATCGGCATAATTTGGCAGCATATTTGACGGCTGGGTTTTTGGTCCGTGCAACTCTATGCCGACGTTACGCTCCAGT  
TATTTCTTCAATCGCGCAGCATCTACTGGTGGATCCACTGCTGAAAGGTGAGGTTGGCGACATCTTGGCGGTGCGCGGA  
ACGCAAGCCTGTCACTTTTTCTTTTGTGCTCTGTGCTGTCGTCGTTGGCAGGCGGTTACGGCTTTTTACTCCACACCTT  
TACCAATGCTGGGCACCTGGCTGGATTCGTTGATTTGACCTTTAGCGTTCGGCACAATTCATGTTGATGGGAAGAG  
GTATCGAAAACCTGGTTCGCTGTTAGCGGTGAATACCTTGGCAGTGGCAGTGTATATGACGCGCGGTTTAAACCTGACC  
GCTGGCTTATATTTCCCTGTTCTGATTAACGCCGTCGATGTTTGTATCAATGGCGCAAGAGTTGCAAAACATCATGA

>Cluster\_18911

ATGCAAGATATTACAACATCGCAGTACTGGCGAAGATGGCGTGGTACGATGTCGGACGGCAGTAAAGAGGAGTTCCA  
GTGACGCGGAACCGTTGGCAGCATCATTTGCAAGTCTTGAACGACACTCGAGAAAAGACGCAAAATGCGCATCGCCACCG  
CGCCGCTGCGCGCATGTACACAGCAGTGAATGATTTCCCGCGGTTGAAATGGCAGCTGCTACTTCCAGC  
GCACCGACAGCAATGAATGCTGAGTTTACGCTGCTGGTACGTCGGTACGTCGGTACGCGGAAATACGATTCAGCACTGCCCGACGC  
CGACCCGCGCATCGTTGGCTCGATGTGCTGCGCTACGCCCTGCTGAGGCGTTCAGCGCCGTACACCCATCCCAATGT  
CAGAAATCCAGCTGGATCAGGCTATCGATATCTCGAGCAGTTGGCGACTACATGAAAGCAAAACATATCGCTCCGAAA  
ATAATTTCTACAGGAGACCAATCCGCAATCAATGTCGCAACGCCACTTCTGGGGCAAAAAACACTAA

>Cluster\_32871

ATGAACCCGCAATTAATTTTTTGGCCCTGGCGACGCAACCGCGGACCGCTTTTTCTTCTGTTTCTGGTTGCTGATGTTCTGT  
TGGCCTCTGCTGCTGGCGTGGGATAACGCTAATACGCTGCGTCTGCAAGCAATGCCGAAGCAGCGCTTACGCGGTTT  
TGCTTCAGGCGGAACAACAACCTCGCCGCGAGCTTACAGATAACGAAACACGTTTGTGGAACGCCAGCAGTTACGCGAA  
CAGCGTTTGCAAAAGCAGCGCCAGCGACATTTACCCGCGACTGGCAATCTGCGCTGGAAGCAGTGGCGGCGCTTTTACC

CGAACATGCCTGGCTGACAACGATAAGCTGGCAGCAGGGAACGCTGGAGATCAAGGGGCTGACAACAAGCATTGCCCGCT  
TAAACGCACTAGAAACGCTACTCCGCCAGGATGCTTCTTTTAACTCAATCAGCGGGGGCCACGCAGCAGGATGCGCAG  
GGACGCTGGCAATTTGAGTATCAGTTAACAGGAAGGTTAGCGATGAACATGCTCTTTGA  
>Cluster\_9535  
TTGGTATATGATTTAATTGAGTTTATCATTCATGAGAGAATAATTATATATTAATCTATCGAAGCATCTCAATTCATCTT  
TAAAAAGCATGGCGTTGGTTATACCATAATAAATGGTTGTATTACTCCATTTTCAAATGATAACGAAATTTGAAAGTGTTC  
AGAAGCAGTTGATAATGGCAGTATTCATCGCGTAGCCATTTGAAAGGGCGTTACAACATAAGACGGATAGAGAGCAG  
CCAGACTACAGAACTCGATTAAGAGTCTATCTGCAATTTGAAATCTTTATGCGAGGAAATCACGGGCAATGATAAAGG  
AACCTTGGGGCTTGTCTTAAAGCTATAGAGGAAAAGGATATACACTCTGCAATGAAAGGCGCTTTTGTAGTCAGCTCT  
ATGGTTATACAAGTATCAGGGTGAATACGTCATGCGCTAACAGAGAAGATGTAATCTTACCTTAGCTGAAGCTAAA  
TTTTATGTTAGTCACTTGCAGTGCCTCAGTAATATCTGTTGTCAAAAATAAGTGATTA  
>Cluster\_66959  
GTGAATATAGAACACCTGAATAACCGGAACTGGTATCTGCGCAATATAATACAGCGGCAAAAACAGAGAATCTTTATT  
CTCATGGCTGAATGAGCAAAACGTCGTACCATGGACTCCATTAATAACAAGAAAGATAAGACGGGCAGACTCCAGGTGCT  
GTTACCGTGAAGAAATATTCGCTATTTTCCAGGGTACTTTTTTATTCGCGTAAATTTGACATTTCAACCAGTATCGGCA  
TTACGTCGCCATAGCCCTTTCATTTGCTGAAATTTGGCGGTGAATAAAAACCGTCAATAAAGATATTGTTGATGG  
ATTAATGAAGATTTTACCCGCTGCTGCTAAATCCGGGAGCCAGGGAAGAGCTGAATGCGGCTTCCAGCATGCGCTGA  
CAAAAGCACAATATCAGTATCTCCTCAGAATGGAAAATACTCTCCAGCTGAGTCGAGGATATCCCTGCTCCTGGAACG  
GTATCAATGCGCAACATCACGGCTTTATGGAGCGCTTGTAAACATCCCATAG  
>Cluster\_47180  
ATGAAAGGCTTCCCAATTGCACATATTTTTCACCTTCAATCCCGCAATGCACGCAGTGGTTAAACAACACAAATAGAAA  
TATTGATTATTGGACGGTAAAAGAAAGTTGCAGAAATGTCCTCCCAATGACGTTAATAAAAATTTACAGTATAAGTA  
ATGAACGCGGAGAGTATATCTGCAATTTACTGCATTTGAAATTTTATCAGGCGATGTTCTTCTGTCATGATCCGAATC  
CAACCGGAAAATATGAGTCCATTTATCATAGATATTTCTACAGGAAACATGACGATATATATCAACAACATTTAGTGT  
AGGCATTTTGCACCTTTTGGTGAACAATGTACTTGTCTCAGCCGTCATAAAAAAGAGCTGGAATGTATTAAGGAGACGA  
TTTTTAAGTATTGTCAAAATTCACCGAAAAGAGCCATCTTAACACCTCTGCGCACTTTAATAAAAACAGCATTACT  
TCAGATTGTTGGCAAAATCTCTTTTTTTCACCCGATCATTTTAATAATGATTTTTATTGA  
>Cluster\_26656  
ATGCAAGATTCCATTCTGACGACCGTAGTGAAAGATATCGACGGTGAAGTGACCACGCTGGAGAAGTACGCCGGTAAATGT  
GCTGTTGATGTCATATGTCGCTCAAAGTGTGGCTTAAAGCGCGCAATATGAGCAGTTGAGAAATATTCAGAAAGCCTGGG  
CTGATCGTGGTTTTTGGTGTGCTGGGATCCCGTGAACAGTTTCTGGAGCAAGAACCAGGATAGCAGTGAAGAGATTA  
ACTTACTGCACCACCATGGGGGTTGACGTTCCCGATGTTTCAAGATTGAAGTTAATGGTGAAGGACGCCATCCGCT  
GTATCAAAAATTGATTGCCGACGCGGACTGCAGTCCGCGGGAAGAGAGCGGATTCATGCCCGTATGGTCAGCAAG  
GTCGTCACCGCTGATCCCTGATGATATTTATGGAATTTTGAAGAAATTTTGTGTTGGCAGGGACGGAAGGTCATCCAG  
CGTTTTCCCGGATATGACCGCGAAGATCCCATTTGATGGAAGCATTAACTGGCGTTGGCAAAAATA  
>Cluster\_58040  
ATGTTGTTAGAACAGGGTGGCTGGTTGGCGCGCGCGCTTCCCTCACCAATTACGATTGCCGCCCGGATGACGAAAC  
ACCCACCTGCTGGTGGTGCACAATATTTAGCTGCCCGCAGGCGAGTTTGGCGGTCGCGGATCGACGCATTTACTCT  
GAACATTTGATCCGACGACATCTTTCTTGTGAGATGCCCATTTGCGGCTCTCCGCTCACTGTTGATGTTGCTCCGCT  
GATGGTGAATAATGTCAGTATGTTCTTTTCGATAAACGTCGATGGCATGCGGGAGTCTCTCAGTATCAGGGGGCGAAACG  
CTGCAATGATTTTTCTATTTGGGATTTGAGCTTGAAGGCACCGATACGCTGGCGTATACCGATGCGCAGTATCAACAGCTTG  
CGCGGTTACGCGGGCACTGATTGATTGCTATCCGGATATCGCTAAAACATGACGGGCCATTTGATATTTGCCCGGAT  
CGAAAACCGATCCCGCTTGCATTTGATTGGGCAGGTTTCTGTGCTGGTCAAGGAGACAACATGA  
>Cluster\_48541  
ATGTTATGGAGCAGCAACGATGTTACGCAGCAGGGCAGTCCGCTAAAACAAAGTTAGCCATTACGGGGGTTGAATTGAA  
AATTTCTATTGATTTCTGCAACGTCAGAAAATGGCGTAAATCGGTAATGGCCCTGATATCCCATGGTCAGCAAAAGGTGAGC  
AGTTACTCTTTAAAGAGGCTCACATATAAATCAGTGGCTCCTGTTGGAAGGAAAACATTTGACTCTATGGGTGTTCTTCCA  
AATCGAAAATATGCAAGTGTGTCGAGGAAAGGAATTTCAAGCTCAAATGAAAATGATATAGTCTTTCTTCAATAGAAAT  
CGCTTTGCAAGAATATCGAAAATACAGATCATTTATATGTCCTGTTGGCGGTCAAATCTACAATAGTCTTTATTGAAA  
AAGCAGATATAATTCATTTGCTACTGTTACGTTGAGGTTGAAGGTGATATCAATTTTCTAAAATTCAGAGAATTTT  
AATTTGGTTTTTGGAGCAGTTTTTTTTGCTAATAATAAATACACATATCAGATTTGGA AAAAAGGCTAA  
>Cluster\_30271  
ATGAATGTTAATAAAAAGAGCTTGCTGAAATTTTAAATGTCGATATACGCACGATTGATCGCTGGCAAAACCCAGGGGCT  
CCCTCAGATATCTGGTGGAGGAAAAGCGTTGAGGTCATCTTTGATTTGCGAAGGCGATCGAATGGTATGCGCAGCGCG  
AAGCTGATATTTAAAATGAAAACCTCCGTAAGAGGTCGAAGACTTGAGGGCTGCCAGTGAATCTGACCTTACGCCCCGCG  
ACCATTGATACGAACGCTACCGACTGACGAAGGCACAGGCAGATGCACAGAACTGAAAATGCCCGTGACAGTGGACA  
GGTCATTGATACAGGGTTTTGCTTTTTTGTCTGGAAGACTGGCGCAGGAGATCTCTGCCATTTCTTACCTCCATTTCCAT  
TGTCATGTCAGAGAGTTCGCGCACTGACGCCGCAATGCTTTGATTTCTGAAAACCGATAAGCAAGGCGGCAAAAC  
CGATGCGCATCAACCGCAGAGAAGTTACCGGAGATGCTGGATGAATACCTCAGAGAAGCAGCTAAATA  
>Cluster\_54472  
ATGAGCCTGAGTCCCGCACGGCAGCATCGCTGCGGTTACGGCTGAACAGGCCGCGCCGAGGGCGGAGGCTTTCGCCA  
CGCATCGGGCTATGACCTGATGCTGCTGCAACTGGCGGAAGACCGCGCGTCTCAAGGGCGTTCAAGTCCACGGTCAAAA  
AAGCGGAAATCAAGGTGGAGCTGCTGCCGAAGTACGCCGCTGGGCGAGGGTGTCTTGGCTGCCGGAGGGCTCAACAG  
GATGACGCTGATGATGATGCTGTTGGCGCATTTGATGCGGAGATTTATGCCGGGGCGCTGGAGATCGGGGCTCATGC  
CCTGCGTATGGCTGGGTGATGCCGCTGGGTAACCGCAACGTCAGACCGTGTGCGAGGAAATGGCAGACGCGCCGCG  
AGAGCGCAATGCTTGGCGCCACCGCTTTGATGCGCATCTGTTGCTGCAAGAGCTGGAGCTGACAGACGGCTTGGATATG  
CCGGACAGTACCGGGCGCTGTCATAAAGCGATTGGCGCTGCTGAGTGA AAAACAATCCGGCTTCCGCCCCAATCA  
TCTCAACCATGCGTTACAGCTCGATCCCGCTGTCGCGTGA AAAAAGCAAAACAGCAGTGGAGCGCAGACTGCGCAATG  
ACAGCCGCTGA  
>Cluster\_22752  
ATGGATATTACTGAGTTTCTTCTGAGTAATTGAACACCTTGGCTGGTATGATATACCGATTGATTCGAGGGACGG  
AAGCACCCTTCTATGATAGGAAAAGCAAGGTAACCGCTATTTGCCCATATGCGCGGTGAAGTGGCAGCGCATGATGATG  
ACGAGTTACTGAGCAACAGCTAAAGCAAAATAGAGAAATAGGTTAGCAGGACTGAAGTTATCCATGTCATCCATCGA  
CAGGAATGACCTGATGAAAAGACGGCTACGAAGTTGAAGTGCATTTATGATGCTTACCTACCTGGGTTAAACGAATATCAT  
GAATGGTGTGCGCAGCAATGAATTCGGCGCCGCGCATGTCAAAGAGTTGATAGCAACATATCAACCCGAAACCATACAT  
TTCTATCAAAAGCAATTAATGATTTCCGTTAACAGAAAGTCAAAGGATTCAGAGCTTTATGATGCGGTTGATTTAGCTGC  
CGCATTAAGTCTCTCGCGCAGCAAGCAGAGTCACTTGTGCTGCTGTAAGGGAAATCGTTGAGGGGTTTTGATTTG  
TGATAAATGGCTCAAATCAACACGTA AAAATTTCCCTACGATGAAATACTGGGACGAGGATCTGACTTTGAGGCAACAC  
AAAGTTCTCGCTATGTTTTGAAGCGGAGAAGCCCACTGAAATAGCAATCTTTATCTTGA AAAAATAACAGAT



GAATTAAGAAAAAAGGAGCTATGTCCCCGGTCCGTTACTCACCTAATTTTTGA

>Cluster\_18392

ATGGAATCACTGAACCACGCGCTTTGTATCAACAACCTGCGCGTGACCTGAAAGAGCGCATCGAACAGGGCGTCTATCT  
GGTGGGTGATAAATGCCTGCTGAGCGCTTTATTTGCCGATGAAAAAAGCTCAGCCGACCCGTTGGTTCGTGAAGCCATCA  
TCATGCTGGAAGTTGAAGCTATGTCGAAGTGCCTAAGCTCAGGTATTCATGTGGTTTCCAACGAGCCGCGCCATCAG  
CAGGCGGTGACAATAATATGGAATTCGCCAATACCGTCCGTTTGTAGTTGCTCCAGGCTCGCCAGCTCATCGAAAGTAA  
TATTTGCCGAGTTCGCGGCAACTCAGGTGACGAAACAGGACATCATGAAACTGATGGCCATCCAGGAGCAGGCGCGCGGG  
AACAAATGCTTCCGTGATTCGAGTGGGATTTGCAGTTCACATTCAGGTAGCCCTGGCGACGAGAACCTCCGCCCTGGCG  
GCTATCGTTGAAAAAATGTGGACCAGCTAGCCATAAACCCTTACTGGAAAAAATACACGAAACATGATGCGCGTAC  
TGTCGATAACTGGTGCATGACCACGATCAGATCCTCAAGGCGTTAATTCGAAAAGATCCTCATGCTGCTAAGCTGGCAA  
TGTGGCAGCATCTGAAAAACCCAAAATCATGTTATTTAACGAAACAGCGACGATTTTCAGGTTCAATGCCGACCGCTAT  
CTGTTCCGAGAAAACCCGGTAGTGCATCTCGATACGGCCACCAGCGGCATCAAATGA

>Cluster\_9719

ATGGGTGAGGGGATACTCTATCAGTTGCATAGTCTGCTGGCTGCTACAGCGCTCTGTTTTTGGCGATTGGCACCCTTT  
CTATTTGTACCATTTTTTCGCCAGTGGGAATATACCAACAGTAGTCCGTCATCCAATAATAATAGTGGTATCATGTGCAT  
TAGTTTCAGCATTACCACATGAAATTTAAGCTTAAATGAAATCGATATTTGCTTTGTTTCGCTGCCAGAAATTTATCAT  
GAGCTGTTTTATTGATGCTTATTAGCATCCCGTTTTGGATTTTCTTGTATATAGGTAGCTTTTATCGATAACCAACCGCG  
TGCAACATTAAGTAGTACTTTGGATCCGGCTACAGGTGCGATACCTCGGAATTAGCAAGATTTTAACTTTTCTCTG  
CTGCGGTTTTATCTTACTAAAGGTGGAATGAACTTTATCTGAAACTCTTTGGCAAAGTTATAATTTATGGCCTTCAGCC  
AATTTTAAATTTCTTAAATAGAGCTTTTATCTCATATATTAATAACATAATGACTCATACTATCGTTTACGCAAGCC  
CGTGAATTCCTTATGCTGGCGGTGAGCTGTCTGGGATTTGCTGGCACGTTATGCTTTCACAATAAATGCTTTTGCCA  
TTTACTGACTGTCAAAGTGCCTGGCATTTTTAATAATTAATTTATTTTGGCCCAATACGGCTGAACGAGTAATG  
CCGTTATCTTTTTTCCGAGAACAAATGCAACTATACATGAGAAATAG

>Cluster\_29829

ATGTGCGAATGCTCGGGATGAGTGCCAACGCTCCCTACCGATATCTGCTTTAGTTTACCAGGACTTGTACAGCGTGGTGG  
TGGAACCGGGCCACATAAAGATGGCTGGGGCATTACCCTTTTACGAAGGTAAAGGCTGTGCGACATTTAAAGATCCGCAAC  
CCAGCTTTAATTTCCCCATCGCCAACTTGTCCAGGACTACCCGATAAAAATCCTGTTCCGGTGGTGGCTCATATTCGCCAC  
GCTAATCGGGCCGAGGTGGCGCTGGAAAATACTCACCGTTTTACCAGGATTTATGGGGCGTAACTGGACTTATGCCCA  
TAATGGACAACCTGACGGGTACAAATCACTGAAAACCGGCAACTTCCGCCCGGTGGTAAACCGATAGCGAAAAAGCCT  
TTTTGCTGGCTCTGCATAAATTAACGCAGCGTTTACCAGCGCACACCGGCAACATGGCGGCAGTGTAAATATATCGCC  
TCACTGGCGGATGAATCGGGCAGAAGGGCGTTTTCAACATGCTGCTTCTGACGGGCGCTATGTAATGGCGTATTGCTC  
GACTAATTTACACTGGATCACCCGCCGCGCCTTTGGCGTGGCAACGTTGCTGGATCAGGATGTGGAAATCGACTTCA  
GCTCGCAGACCACCGAATGATGTGGTACGGTATTGCGCACAGCCGCTGACGGGCAATGAAACCTGGCAAAAGATT  
ATGCCAGGTGAATGGCGCTTATTTTGCCTCGGGGAGCGTGTAGTTGA

>Cluster\_6341

ATGATCAGTTCAATATGATCGCCAAAACGGGCTTACGCGCCAGCAAACCAATATGGACGTCATTGCCAACCACTGGC  
AACGTCAGTACTAACGGTTTTAAGCGTCAGCGCGCGGTGTTTGAAGATCTGCTTTATCAAACATTCGCCAGCCGGGG  
CACAGTCTTCCGAACAAACCTACCTTACCCTCCGGATTACAATCGGCACGGGGGTACGCCCGGTCCGCACTGAACCGTTA  
CACAGCCAGGAAAACCTGTCGACGACAAACAGCAAGATGTCGCGATTAAAGGGCAGGGCTTTTTCCAGGTGATGTT  
GCCAGATGGTTTACAGCTTATACCCGTGACGGCTTTTTCCAGGTGGATCAGAAACGGGCGAGTGGTGCAGCTGGTGGT  
TTCAGGTGACGCCAGCGATCACCTTCCGGCGAATGCGTTAAGTATCACCATCGGTGATGGCGTGGTTCAGCGTAACC  
CAACAAGGCCAGGCGCTCCGGTTTCCAGTTGGGCGAGTCAATCTCACCACTTTATGAATGACACCGGGCTGGAGAGCAT  
TGGCGAAAACCTTACACCGAAAACGCAATCTCTTGGTGCACCGAAGCAACGCGCGGCTGAACCGGCGGGTACGCTG  
TGTATCAAGGGTATGTTGAAACGCTAACGTCACGTCACGTCGCGGAAGAACTGGTCAATATGATTCAGGTGCAACGCGCTTAC  
GAAATCAACAGTAAAGCGGTGTCACCACCGATCAGATGCTGCAAAAACCTGACGCAACTCTAA

>Cluster\_35424

ATGAAAATCGGCACACAGAAATCAGCGCTTCTTTCCGAAAACATCTGGAGAAATTCGTTTATATCAAAGAGATGGGCTT  
CGATGGTTTTGAGATTGACGGCAAACTGCTGGTTAACAACATCGAAGAAGTCAAAGCGGGGATCAAAGAAACCGGTTTAC  
CGGTGACCACCGCTGCGGTGGCTATGACGGATGGATTGGCGACTTTATCGAAGAGCGTCGCTTAAATGGCTTAAAGCAG  
ATCGAGCGCATTTCTGAAGCGTGGCAGAAGTGGGCGGTAAAGGCATCGTCTTCCGGCTGCGTGGGGCATGTTTACCTT  
CCGTTTACCGCCGATGACCTCGCCGCGTAGCCTGGACGCGGACCGCAAAATGGTGGATGATTCCCTGCGGCTGAAAC  
AGGTGCGCCGCGTACCGGAACCGTGGTGTATCTGCAACCGTTAAACCGCTATCAGGATCATAATGATCAACACCTCGCC  
GATGCCCGCGTTACATCGTCAAAAACGATCTTAAACATGTACAGATTATCGGGGATTTCTATCACATGAATATCGAAGA  
AGATAACCTGGCGCAGGCGCTGCATGACAACCGCGACCTGCTCGGTGATGTCATATTCGGGATAACCATCGTACCAGC  
CGGCGAGCGGACCCCTGGATTTCCACGCTGTTTTGAACAGCTGCGCGCGGATAAATACAGGGCTATGTAGTGTACGAA  
GGCGTATCCGGGCGAAGATCTTCCAGCGGTACCGTATTCTGCTGGCTGGTTCGCTACCTGCTAA

>Cluster\_12653

ATGAAAAAATCGGTGCTATCGCTCTCTGTTTGGCTTCTCCAGCGCAACTGCGGGTGGTGGCATTCCGCAAAA  
CATCCGCATCGGTACCGACCCGACCTATGCGCCATTTGAATCAAAAAATTCACAAGGCGAACTGGTTGGCTTCGATATCG  
ATCTGGCAAAGGAATATGCAAAACGATCAATACGCAATGTACGTTTTCGAAAATCCGCTGGATGCGTTAATCCCGTCC  
TTAAAAGCGAAGAAGATTGACGCGCATCATGTATCGCTTTCCATTACGGAAAAACGTCAGCAAGAAATAGCCTTACCCGA  
CAAATGTACGCTGCGGATTTCTGTTTGGTGGTGGCGAAAAATTTGACATTCAGCCGACAGTCGAGTCGCTGAAAGGCA  
AACGGGTAGGCGTATTGCAAGGCAACACCCAGGAGACGTTCCGTAATGAACATTTGGGCACAAAAGGCATGAAATCGTC  
TCGTATCAGGGGCAAGCAACATTTATTTGACCTGACTGCGGACGATTTGATGCGCGGTTCCAGGATGAGGTGCGTGC  
CAGCGAAGTTTTCTCAAAACCTGTCGGTAAAGATTACAAATTCGGTGGCCGCTGTTAAAGATGAAAACTGTTTGG  
GCTAGGGACCGGATGGGCTGCGTAAAGAAGATAACCAACTGCGCGGAGCACTGAACAAAAGCCTTTGCCGAAATGCCG  
GCTGACGGTACTTACGAGAAATAGCGAAAAGTACTTTCGATTTTGTATGTTTATGGTGGCTAA

>Cluster\_37208

ATGCTGTTAAATCGCTGGCGTCCGTCGACATAAAGGGATTAAACCTGAGAACGTTCCGGCGGGCGGGTTAATGTT  
ATTCATATGCGCTGCGCAACCGGAATTTCCGAAACATGCGCGCTGCTGGTGCAGCTCTATAATGTCGCGCTCC  
TGTCGATGCTGATTTATGTTGTTTCTGGCGTGTTCATCGGAATGGTGTGGGGCTGCAAGGTTATCTGGTCTGACCACT  
TATAGTGGGAAACAGTCTGGGTATGCTGGTGGCGTTATCGCTACTGCTGAACTGGGGCGGTTGGTTCGCGGTTGTT  
GTTTGGCGGGGCTGCTGGTTCCGGCTAACCGCAGAAATCCGCTGATGCGCGCTACAGAGCAACTCTCCAGTATGGAGA  
TGATGGCGTGGATCCGCTGCGTCCGGTTATTTCTCCCGTTTTTGGGCTGGGTTATTTTCATTACCCTGTTGACGGTT  
ATTTTCTGTCGCGTGGGATCTGGGGCGATCTGTTGCGGCTCAGTTGGAAAGGCAATGATAGCGGTTCTTCTGGTC  
GGCAATGCAAAAATCCGCTGACTGGCGTATGGAATCTGGTCAACTGCTGATTAAGAGCGTGGTGTCCGCATCAGGTTGA  
CGTGGATTTCTGTTTAAACGGCTACGACGCACTCCGCACTGCGGGATTAGCCGGCAACCACTCGCACCGTTGTC  
CACTGCTCTGCTGTTTCTGGGCTGGATTTTTGCTGACCGCATGATGTTTGGGAATTGA

>Cluster\_21821

ATGAAAAATAAACCTGCTTTAAGCTGGTGCCTGAAGAACAGGACATTGTTGTCCTCCAGAATACACCTGAAATTCGA  
CAATGCCGACGCCAAAATCAGCCAGTTCGATCTCAATGCCATTGAAGCTGCAAGCCAGCTTGCAACAGATGACGATGAGA  
TAGCCCGCTTGACCGTCCGGCGCTCTTTGTTGCAAGCTCGAAAGTGCAGCAAGACGCTGCTATCCCGCGGGCCGACAGC  
CTGTATATGGTGCAGGATGCACAACCTTAGCATGCATGCCCTCGATACCCGAAAGGCGCTGGCGACAGCAGTTGAAAA  
GATCGGCTCGAATTTACTGATCTTTGGTGAAGTTCCGGCGACTTTATGCCCCAGCAGGTTGGCTTGGCTCGGAGAAA  
TTCTGCAACTTCCGGTGATTAATGCAGTGAAGTCCAGCGTCAGGCAATACACTGGTGATTGAACGCACGCTTGA  
GATGATGTTGAAGTTATTGAACCTCTGTTCACGCGTCTGCTGCTACCTCCGATATTAACGTACCAGTATTCCTTC  
GATGAAAGCCATCCTCGGCGGGTAAAAAACCGGTAATCAGTGGCAGGCAAGTGATATGGCTGGAGCCAGAGCGCAC  
CACTTGGTGAACCTGACCGTATTTCGCTACCCGCAACAGAACGTAAGCACATCATCTCGATAACGATTCGCCGGAG  
GCCATTGCCGAGCTGGCGGAACATCTGAAAAAGCCCTGAACTGA

>Cluster\_38858

ATGCTGGCAGCTGGGAATGGGGACAGCTTAGCGGTTTTACCCTCGTTCGAGCGAGTATGGTTGGCGGTGTTATGTGG  
GTTATTGTTGGCGCTGATGCTTTTTCTGTGTCGCGAATATCACGAAATATTCATCAACCGCTGGTTGAAATCTCACTTT  
GGGCTTCGCTGGGTTGGTGGATTGTGCGCTATTGCTGGTGTGTTTTACCAGGTTCCGAGCAATCTGGCGTAACTCT  
AAAACATTGCGCATATTTTTTGGCGTGTACCACTTGTTCCTTCTGCGGATGCTGGCGTTACGGCCCTGGCATA  
CGACGAGAATATTACAGTGGCGCAATATGGCTCTATGCTCATGCTGTTATGGTATGGGGCGTACTGGCGCATATA  
TGTTTGGCAAAATGTTTTGGTAAACATAAACTGGCAGCCGAAAGTTTCTCCGGGTAACCTGGCAAGGCTTATTCGTTGA  
CTAGTGACCGCAGCGGTAATCTCATGGGTTATGGCATGTGGTGAATCTCGACGTCGCTCCCGTACCTTACTCATTTG  
CTCTATTGTCGACGCTTAGCCTCAGTGTCTCGCGATCTGACCGAAAGTATGTTTAAAGCTGAAGCAGGAATTAAGGACA  
CGGTCATTTAATTCAGGACACGGTGGTATTTTAGATCGTATTGATAGCCTGACGGCTGCGGTACCGGCTTTTGCTTG  
TTGTTGTTACTGGTATTACGACGCTTTAA

>Cluster\_34698

ATGGCAACGGTTAATAACAAGCCATTGCGAGCGCATTGGTTCGGCAGCCGACACTATGAGCAACATGCAGATCTACA  
GCGCCAGAGTGTGCTGACGCTTACTGGCAATGCTTCCACAGCGTAAATACACCCAGTACTGGACGCGGGTTGGACCTG  
GCTGGATGAGCCGCACTGGCGGGAACGTCACGCGCAGGTGACGGCTTAGATCTCTCGCCGCAATGCTGTTACGGCA  
CGCCAGAAGGATGCGCAGACCATATCTGCGCGGAGATATCGAATCCCTGCGGTAGCGACTGCGACGTTGATCTTGC  
ATGGAGCAATCTCGCAGTGCAGTGGTGCAGTAAATTTATCCAGGCCTCCGCGAGCTGTATCGGGTGGTGGCCCAAAG  
CGGTGGTCCGCTTTTACCGCTGGTGCAGGATCGTACCAGCTGCATCAGCGCTGGCAGGCGTGGCAGCGCTCCG  
CATGCTAATCGCTTTTTACCAGCAGATGAAATCGAACAGTGCCTGAAAGCGTGCATTATCAACATCATATTCAGCCAT  
CACGCTGTGGTTTTGATGATGCGCTCAGTGCCTGCTGCTGAAAGGATCGGTGCCACGCATCTTCATGAAGGGCGG  
ACCCGCAATATTAACGCGTTCCGAGTTCAGCGATGCAACTGGCTGGCCGCAACAGCAGGGGCGATATCTCTGACG  
TATCATCTTTTTTTGGGAGTGATTGCTCGTGAGTAA

>Cluster\_41050

ATGTTGCTTAGCATAACTCTGTGCGTTCGTAACCTCGAAGGGATAGTCAAAAACATGCCCTCGCTGGCGCATCTGGC  
CAGGTGGAAAGATATCAGCTTCGAATGGATGTTGTGCGATGGCGGTTCCAACGACGGCACCCTGAGTATCTGGAAATC  
TCAATGGTATCTTTAACCTACGCTTTGTGACGCGAGCCAGATACCGGTATCTACGACCCATGAACAAGGCAATGCGATG  
GCACAAGGCAAGTTCCGCTGTTTTCTCAATTCGGGCGATATTTTTCTCATCAGAAATGCCGCAATTTTGTCCGTAAGTAA  
AATGCAAAAAGATTAACGTGATGATCACCAGCGATGCGCTGCTGGATTTTGGCGACGGGCAATAAATTAACAGTACGCCA  
AACCGGCTGGTATATTTATCACAGCTTCCGCGCAGTATCAGGCGATATTTTTCCCTGTATCCGCTTGAATAAATGG  
CGTTATGACCTGGAAATATAAAGTTTTCTCCGACTACGCGCTGGCAGCCAAAATGTATAAAGCCGGTTATGCAATTTAAAA  
ACTCAATGGCCTGGTGTCTGAATTTCCATGGGTGGGTTATCTACCACCAATAATATGAATTTGTGTGCTGACGGGAAA  
AAGTCCAACGACAATAATACATGTGCTGGCTTTTGGGCTGAATATCTCGCATTTACGCCAACGTAACCTCAAG  
ACGAAAGCCTTATATAACAAAGTCTGA

>Cluster\_24773

ATGCAAGAAAGTATATTTCTATTATGGTTTTTATATATGCGGCCACAATTACAGTTTTATATGGCTCGCTGTTGAACG  
TCTTCCCATCAGTTAAATGGGTAGACAATCTGTTTTCTGATATAACAATATGGTCTCCGGGAAGTAAATGTAATAAT  
GTGGTAAAAAATTCGTTGGTATATATCTTATCTGTTTTTGGGATATTTTTGTTGTCGGGGGAATGTGGCTATGTCTAT  
GCTAAAGTTCCCGTCCGGTATCCACTTACAGAGTTTATCTGTGGTGTGTTGCTGTGTTATATATTTGTTATTTTTGGGAGA  
CAGACTGATGATGCAGTAAATAGTTTCGCTACTTTTTCTTTGCTTGTTTTTCTGCTGATGATTAAAGAGAGAAT  
GGCTACCAGCTTGTGTTACGTACCCCTCTATTTTGGGCAAGTATGATTACTCCAGGTTTGCATCCAGCGATGATAAGATT  
TTCGGTGCATTTTACCGTTTTTAAATAATGATATTTCAATGAAACTAGTTAGCGCTTAAGAAAGGAGGATGTTTTTTC  
AGGCGGAGACATTGCTCTGGCTACAGCGCCGGTGCATGGTTAGGAATAGATAAAAATGCCTTTTTTCTTATTTTGTCTT  
CATTTATATTTATCTTTACTCTCTCCAGCAAGGTTAAGAGGTCAGGTTTTTGTCTATGGGACCAGCTCTTTCCGCG  
TCATTTTTTATATGTTTAGTATTATCATTTAA

>Cluster\_67094

ATGAATACATCTGGGGTGAGGAACCTCTTATGCGCCGTTTATGGCCGAGTGGTAAATTTATGCAGGTGTCATGGT  
GCTGCTCGTGTGTTCCCGGCTGGTTATCCATGCGTTATGCGTTCGTTGCTGGCACCAGAAACGAAAGGAGGCGAAGAGC  
ATCGTGACTATCTACTGCTGGCGATTCGCTTTGGCACTGGGAAATGCGTTACTGTTGTTTGTACTGTTAAGC  
GGTTTATGGGGCATTTTTCTCTCGGCTCTGTGCGCTAAATGGTGCAGGTGCATACCTGGTGTGGTTTTGCTTACGCTG  
CTTCTGGGTGGGATTTGTGCTGATCAACCTCACAGGAAACGGGTGTCATTATCGTGTAAATTTGCGCGACTGATGG  
CACGTTGCATACGTCAGGCGGTTTTTACCTGTTTGGCATCATGAAAGGGGAGGCGCATCCGTTTGTGCAACAAAGCAG  
AATAAGTTCAATCCATCTCAACAACCTGGCATACCTGGCGATTATGATGCGCTGGTGCCTGTTAATCCTCAGCGTTT  
GCTGTGCTATATCCGAGGTGACGGGTTGGGCTGTAATGCTGGTGTGCTGATATGGCGTTGCTGCTATTGGCTTAC  
TGTATTATTTGCGCACATATCTATCTGTGTACTTGGGTGACACGCCGGGCAAAATTTTCGAGTATGTTGACGGTTAT  
CACCGTCAATGTACCGCTCCGCGGGGATAAGCCACGGTCTGA

>Cluster\_13818

ATGCCGCAACAGATTGAACTACGTAATATCGCGCTACAGGCGCGCAGCCGCTGGTACAGGTTGATCGTTAACCTGCA  
ACGCGGGCGGCTGCTGGCGTTAGTCCGCGGTAGCGGACGCGGGAAATCATTAACTGCGCCGCGACGCTGGGCATTTTTGC  
CCGCTGGCGTTCCGACAGCGCGGGGGAATTTTAGCCGATGCAACCCGTTTCCGCTTGGCCCTGCGCGGCACTCAA  
ATTGCCCATCTACGAGAACCCGCGCAGCGCTTAAATCCACTGCACACCATGCACACCCACGCGGGAAACCTGCACT  
GGCGTTAGGGAACCCGCGATGACGCTACGCTTACCGCTGCCATAGAAGCGGTGGGGCTGGAACCGCGCGCGCTGC  
TGAAGCTGTACCGCTTCGAGATGAGCGCGGCAATGTTGACGCGCATGATGATTGCGATGGCGGTGCTGTGTAATCACCG  
TTTATCATCGCGATGAACCGACACCGACTGACGCTGGTAGCACAGGCGCATCTCGATCTGGAAGCATTAT  
GCAAAAACAGCGCGGGAAATGCTGGTACCCATGATATGGCGTTGTTGGCGCTGTCGGGATGACCTGCGCGGTGA  
TGTCACAAGTAAAATTTGTCGAACAGGGCGATGTAGAAACGCTGTTTAAAGCCCAACATACGGTGACGCGCAGCCTG  
GTTTCCGCTCATCTCGCCCTTACGGTATGGAGCTGGCATCATGA

>Cluster\_63081

ATGCCGATCAAACAACAATTTCTGTTCAAGGTGCTCACCATCAACATTCACAAAGGTTTTACCGGTTTTAACCGACG  
CTTCAATTTGCGGAACTTCGCGACGCGGTGCGTACCGTACGCGGATATTGTTTGGCTGCAGGAGTATGGCGCGC

ACGAAGTTCATCCGTCGATGTGGAAAACCTGGCCGATACCTCGCACTACGAGTTTCTCGCCGACACGATGTGGAGCGAT  
TTTTCCCTACGGTCCGAATGCCGTATACCCGGAAGGGCATCACGGCAACGCCGACTGTGCGGTTATCCCATTTGAACATTA  
TGAGAATCGCGATGTTTCGGTTCGATGGTGGGAAAAGCGCGGCTGCTCTACTGCCGATTTGTGCCACCGATGACCGGAA  
AAGCGATTGATGTGATGTGCGTACATCTGGCCCTGGCTGAGGGCCACCCGTCAGGCGCAGCTTGGGATGCTCGCCGAATGG  
GTGAATGACGTACCGGACGGCAACCGGTTATTGGTGGCGGGTATTTCATGACTGGCGGCAAAAAGCTAATCATCCGTT  
AAAAGTGCAGGCCGACTGGATGAGATTTTACCCGCGCCACGGACGCCCCGGCGCACGTTTCCGGTGCAATTTCCCTC  
TACTACGACTGGACGAGTCTACGTCAAAAATGCCAGCGCCAGCGGCCAACCCGTTGCCGTCGGGACATGGCGACAC  
CTTTCTGATCATGCCCTTAAAGTGGGAGATTCAATTTATGA

>Cluster\_51541

ATGAACAACACCGCAGAGAATAACAACCTTTCCACTTTTCCGGCTGTAACGCAGCAGGCAATGGAAACCTGAATACAGC  
CAGAAGCGCATGGCTTGAAGCACGTCGTGGCAGAAAGCGGCAGCGGATAATATGCGACAATCCGCCAGCGCCGGGCTG  
AAATGGAAGCCACGACGCAACCGCTGAAATGAGGAGTGGCGCACGCTGTTTCGTGAAAGTCAGGGCGTAGTCTCAAAGGAA  
ATGAAAAAATCTGGCAGCGAAAATGCGCTGGGACGAGAAACGCCTGAGGATTTTGTGAACTGCTGGCAGCTCAGGAAAG  
CGAAAATGCCCTTATTACCGCAGGAAGCCGGGAAATTAGCCGGGCAGTATATCAGCGCACATAACACCTTGTGGAAATTC  
GCGCAAAGCAAATCTGGGAAGACTTCATGCAGGCGCATGGTAAGGCGTTAATCCAGACACTGAGCCTGCTCAAAACCACA  
ATGGGGCGGGAAGCCAGTCCGCTTGTGGGGTGGTGAATTCAGTTAATGACCCGGACACACTGCTGAAAGACTTTATTTCA  
CAAACATATCACCAAAACCGGCTCTGTCTAACACTGCGGATGCGGAACTGGACCTGTGTTAAACTGGCGGGCTTGGCC  
CGGATTATGCGGCTCGTGTGATTTAAGCAAATCCCGTCACCGCGGCCCTTCAAAAATGAAGATCCGTCAGGACCGT  
GAAGAGCTGCAGAAACGTAACCGTGATATGGAGGGTATCTGA

>Cluster\_1886

ATGCCATAACTTGTCACTTGGATGAACAACAGCGGGTAGGCGAGTTAACGAAGTTAGCCAACGGCGGCACACCTTTAA  
GTATGCACCGGAGTGGTTAGCCAGCCGTTATGCCAGACCGTTGCTACTTTCGTCGCCATGTCAGAGGGGGAATATCACCT  
CAGATGCCGATTTAACTTCTTCGATAAACCCTGTACCCGATAGCCGATTTGTACTGTGACCGGATCGTTAAACGTTATCAT  
GCTAAATCCAGACAAACCGTTGATTTATTTGTGAGAAATAGGGCGAGACAGCGTTGGTCGCGTAACAGATGACGAAAGCCGAG  
CATCGCGGGATCATGGCGTTTTTGTATGGGGTCCAGCGAGGCGCTTCGCGATCGTTATGATTTTATGAAATCCAGGTTCT  
TCCAGTGGTTGATTTGGCGCAACGGATGGCCATGCAAAAAACTTCTCCGATTTTATTCAGGCTGGCGGCAGTTATCGACTC  
ACGCCATTTTACGACATCATTTACGATTTCCGGTCTTGGCGGTACGGGAATACACATCAGCGATCTCAAATGGCAAT  
GGGCTTAAACGACATCCAAAGGCAAAAACCGCAATCGATAAAATTTAATCCGCGACATTTTGGCGAGCAAGGCTACAG  
TGAGATTTCCCGAAGTGCAGATGCATGAAATCCTAAGTACTTTGCCAGAATGATTTCCGCGCAGCACTGGATAACGTGAAG  
ACTTCATTACCGACAGATTTTCCGGAGAACGTGTTGACGGCAGTTGAAACCAATGTGTGAGGTTGCATGGACCGTTAAG  
CCGAGAATACGGTAGTAAGTGA

>Cluster\_64299

ATGAGCATGGAGCTGATGGTGAAGCGATGAAAATTCGCGTGGGAAATCCGTTGCGAAAACCTGGTTCTGATTAAGCTGGC  
TGATAATGCCAGCGATCAGGGCGAGTGCCTGGCCAGCTATCAGCATATGCTGATCAGTGCAGAGATTAGCAAAACGTTCTG  
TGATGAATCATATACGGCTCTTTGTGAAATCCGACTGGTAAAAAAGTTTCCCGAAAGGTGAAAAGGGAACTCGAGC  
AATATTTTATCTTCTGCTTGTGTTGCAAAAGATTCACAGGGGGTAGTGCAGAAATAATTCACTACCTAGTGCAGCAAAA  
TTCACCAGGTGGTGCAGGAGTTGCACCAGGGGGTAGTGCAGGAGATTCACCCAGAACCAGTCACTCTTTTGAACCAGTCA  
AAGAACCAGTCAATGAACCAACAATTTGGCGCACCCGCTGACGCGCTGTCACCAGCGCGCTCTGCCCGACAGGAATATTTCA  
CCGGAATTTGAACAGCCCTGGCAGGAATATCCAAACGCTGCTGGTGGCAATTCAGTGCAGCAGCTTCAAAGCTGGAA  
AGCCCGTATCAGGGAGGGAATAAAAACCGGAGACCATGCTTGTGTTGTTGAGAGCTTATGCCGCTGGGTACGCTACAG  
GAAATACCGGCACACAGTTTCGTGAAGCAGGCGCGACGTTCTTTGGACCGGATCGTCACTTCGAGAATTTCTGGCAACAG  
CCAGCCGCTCCCGGAGGTGGGCGACAGCGACAGGTCGATGTCTGGCTGGCTGGGAGCCATGCTGCAGAAATTCGGTAA  
ATCCAGTGACAAAATGACATTCTGA

>Cluster\_10861

ATGTGGATGTGTAGTACTGTCACTGTCAACTCTCAGTTGGCATAAGGTAGTGGCTTTTTCATTTGTTGACGGTGTCTGT  
TGTCTGGCTGTGCTTAATGATATTTATGATTTGGTGGTGTATTTTTTGTGTTGCTACAATCGTTTTTTTTTATTTATTTGA  
AGTTCAACTGGAAATATAACCGCTGGGCTAAATCTATATGAAGTTGGCATAGTTTTATCAGCCATAGCATTATCTTTTC  
CATCTATGGCCAGGGTTTCAACAATCCTGTAGTGTCAAATTTCTGTTACTGTTGGCCCTCAAAGTACTCCCTATACAATGTA  
TTTTAATTTTGATAAAGCGCTGGTGCATTTTTTGTAGTCCTGTGATACATCTTCTTTGTTAAAAAAGAGTAAATACAG  
AAGTGTCTTTGTGGAAGTGGGGGCTCTGTCGCTCTGTTCCCTTATCCTGTTTTTTGGCTGTTTTTTTGGTGGATTA  
AAGCCAGAGATTTCAATTTTCTGAGTGGTTGCGCAGAGTTTATATTTGGCTAATTTGTTTTTGTGTTCTGGCAGAGGAATC  
ATTTATTTAGAGGTTATTTCAATCACGGCTATCAGAAGTAACGCTCCATTTGGTTGCAATTAATTTGGCGGCTTTGTTGT  
TTGGTTTTTATCACTATTTAGGTTGCTTTACTTTGATATTTTGGCCAGTTATCTGGTGTGTTGTTATGGATTGTCTATGG  
ATGTGGAGTGGCGTTTGTGGTTGCCACCCCTTTCATTTTGGTTGAATCTGTGTCACTTGTATTTCTTTACCTATCC  
ATTTTTAAAAACATAATTTGA

>Cluster\_35965

ATGCACAGGTTGAATCTCAATGGCTATGAACCCGACCCAGCACCATGAAGCCGCGGTGCGATTTTGTATTCACGCCGGAAC  
GGATGAGTTAACCGTCTGTACATCAGCACCGCAAAGGACAGCTGATACCTGGCGCTACATGGTGAATACCTGTACGG  
TGGAAAATGCTTTTGTGGATGGTGGCCCAAAATATGCGGTTTGGATACCGGGCGGGTGGAAACATAGCAATCAAGTAACA  
GCTAATGCTGAACCTGTTTCTGTTTATCGAACCCAGCGCAGTGACAATGCCGACAAATGTTGCACATTGAAAATATC  
GCCCTTATGCCGGGAATTAATTTAAACCTGGCAAAACAGGACGACGACTCAGCGTGTGAGCCAAATGACCCGACAGATTA  
TTCAGGTCCTGTTTGTGAACTCCCTCAGCAGCCACAACAACAGCTGCACCTGCCGTTTCTTCTCACTTAAAAATCCCG  
ACGATGGTGGAGATGATGGCAGAAAGGGCTGTCGAGTGGGGGCATTTGGGCAATGGGCTGGCTTTTTTGCATGAGTGA  
ACGCAATCTTCCCGACTGATAGTAAAAGAGACGGGTTGAGTTTTCGCCAGTGGCGTCAGCAGTTACAGCTGATATGG  
CGCTTCAGGGATTAGTGAAGGCGATACGTACAGAAAGTTGCTCATAACGCTGGGGTATGATTTCAACAACGGCCCTTAT  
ACTATGTTTAAAGAAAGGCTGGGGCAACCGCCAGGCGGATATATGCGAGATTAACTACTGTTTCCCAACAAATCAGCGAA  
ACCAGACCCGCGCAATAA

>Cluster\_26989

ATGAAAAGAAGTGAATCAGGAAAGCAGTGAAGCATGGTTTGTGATTTGAACGCTATGAGGGCATAGACAACCTCACCTT  
ACAGCAGTTTTATGTTGAGGTTGAGCGCGCATCTTGGCTTACAGGATGTTGTTGAACCGGAACACCATACCGACCTTTA  
ACCGATTAATGCTGGATGATTACCGCAACAAGATCTTACGCGGTGAAATCTTTTTTCACTGGTGTGCGCTACCTTTGGA  
CATGAGCTTGGCAGAACCTACGCAAGTAAATCTACGACACGAACCATGCGCAATTTTATGCGAAAACGCTGGCATTAA  
CGAATCTACGCTGAACCTCTGGGTTAAGCAGTCTGAATTTCTGCGAGTATCTAAAAGAGACATCCCTTAAATAATC  
TTTTACGATTAATCTGTCGATATTTATCTGGAAGAAAGCATCAACTGAAGAGATCATTTGAACATCTGAAAAGTGTGATCC  
CAATGGAAGAGACGCTAAAGATGACGTTCCAGCTCCAAGAGAGTATCGTTTCCGCAAAAGCACATTCAGAAAATTTAT  
TGAATATCTGCTTTATCCCGATGATGGACCTGATCTTCTGGGAGAAAGTAAACGGCATTTAAATCCCGCTTTCACTGATTT  
CCTCGCTGCTTACAGGACAGCGACAACGATGCTGATGAAGGATGCTCAAGGCTACAGATTACCCGTTAGCAATGGT  
TTTTCTGACTGATGCGAGCTATTTGAAATCGCTTGAAGATTTACATGATGAAAAACAACCACTTGAAGACTCCCTGTTGA  
AAAGCATGTAGAAGACGACAGGAATAAGAAAAATAA

>Cluster\_24445

ATGAGAGATCTGTACAACGCCCGGATTATTACAGTATCAATACCGCGACACTGGGCTATAAAACGCCGCTGCCGCCAT  
TATTGATGCTGCGCCGACGCGGTATTGGCGCATTGCCCCCGGCGCAGGGAGTTGACGGTGAAGATCTCCAGCAA  
TCGCCCGCAGCTTGTGTCAGTAACATGAGCGTTTCCGGTTTGTGCCGTAGCACCTACTACCCGACCCGACGCTGGCG  
GAGCGCAAATCGGATTGACGATAACCGCGGGCGCTGGACGACGCGCTGTACTGAACGCCCTGTTATATGACGGT  
GGTTGGCGGTCTGCCAATGGGAACAAAAGATCTGTACGAAGCAGCGGAACAGGTGAAACAAGGGATTCCGCCAGTTGCTGC  
CACATTGAAAGAGGTGGCGGTGCCAATGACACTGGAGCCACTGCACCCGATGACTGCTGCCGATCGTCTTGTCTGTGC  
ACGTTACGTCAGGCGCTGGACTGGTGTGATGAACCTCGATCCCGATGGCGAATTTGGCCCTGGCGGTGGCGGTAGATGTCTA  
CCATGCTGGTGGGACCCGGATCTCGCCAGTCCAGTCCGCTGGCGTCCGGGAAAACGCATCCTCGCGTTTCATGTTCCGACT  
GGTTAGTGCCGACCACCGATCTGGTCAATGACCGTGGAAATGCCGGGAGATGGTGTCAATAATTCGTCATTTCTGTCGG  
CTGGTTGAAAACGCCGATTAAATGGCGCTATTGAACTGGAAATATTCACCCGACTGGTGGCAGAAAGATATTAACAG  
CACGCTGGATATTAGCGTCGATCGCATCGCACATTATTGTTAA

>Cluster\_23666

ATGCAACCCTACATGGTAATTGTCTAATTGCGTACGCAAGACATAAATAATTTCTCACCATGGTTAATGGTGAATATCG  
CTATTTTAAATGGCGGTGATCTGGTTTTTTCGCGATGCAAGCCAAATCAAGTGGATAAGTGTGTGAGAATTTCTGATTAG  
TTTCAAGAGACGCTTTTCATTTCTCCGATGCTCAAGGAGGAGCATTAAACTTCATGCACATAAAAAAGTTCCCT  
TCATTACTCGTTTCACTGCTACCGAGATATTCTGTTTTTTCAGGAAGTTGCCCAACTATCGCAGAAATAAGAAATCTTCG  
CTATGCAGAAATGCTACGTAAAAGGGCATTAACTTTGCGTGTATCTGTTTTTCTTGGAGTACGCAATTTATACCGT  
TACTTCTGAACGTTTGCACCGAATATGCGAACACGAGTTTGTACGGTCAATCAATAATAATCGCCCATGAGTGGACA  
TTAGCCGAAATCGTAGCAATTTGTGATGAGTCCAAGCCTGTTAAAGAAAAAATGCCGGAAGAAGTACGTCATATTC  
ACAGTTGCTTACTGAGTGTAGGATGACGCGTGTCTTACAACTTATTGTTATATATGGGGTTTCAATTAAGCGAGTTCGAG  
TATCTGTGGATATCACAGCGTGTGATTTTACATTTACGTTTTTTCGAAATATATATGGGATGACGCCACAGAGTATCAG  
GAGCGATCGCGCAGGAATTACCGAACTGTGGCCCGCGCAAGTATGGCTGCGCAAGGGAAATTTTACGGCACTGACCG  
TTCTGCGGAAGGAATAAGATTATAG

>Cluster\_16581

ATGGTAGGATTGATTCGCGGTGTGAGTGGGACTCGGCCGCTGGCGGCGCAGCTGTATCTATTCAATTAAGCGGGCT  
GCTGTTAATCTTACGCGTTGGATTTCGCGGATTCGACAGATCCCGAAAGGCTATTTACTCGCCGGGAGTCTGTTATTTCG  
TCAGCTATGAAATCTGTCTGGCGTTTTCTTAGGGTATCGCGGACCCGTCATCAGCGGATTGAAGTGGGATGGTGAAC  
TATCTATGGCCAGCCTGACAATCTCTTTGCCATTCTGTTTAAATGGTCAGAAAACCACTGGCTGATTGTACCAGGATT  
ATTTATTAGCCTGTGTCGGCTCTGCTGGGTGTTAGGCGGTGACAAATGGGTTACATATGATCAAAATTAATAATATCA  
CCACAGCCCATTTGAGTTATTTCTGGCGTTTATTGGGCGTTTATCTGGGCAGCCTACTGCACAGTAACGAATAAATAC  
GCACGCGAATTTAACGGAAATTACGTTTTTGTCTGCTAACGGGAGCAAGTCTGTGGGTTTACTATTTTCTTAGCCACA  
ACCAGAAATGGTATTTAGCACGCCCGTCAATGATTAACCTATCTGCGGCATTTACCTTAGGATTGCTTATGCTGCAT  
GGAATGTCGGTATATTACATGCGAACGTCACCATAATGGCGGTAGGTTGATTTTACGCCGCTCTTCTCAGCGCTT  
GCAGCGTGTGCTCAGCGCCCGCTGTCTGTTCTGCTTTCGCAAGGCGCGCTAATGGTCTGCGGGCGTTCCCTGCTCTG  
CTGGCTGGCGACACGTCGTGGCTAA

>Cluster\_8302

ATGACACCTTTAGTTAAGGATATCATCATGTCTCAACACGATGCCAGCATTGTTTTTAGGTCACGGTAGTCCGATGAA  
CGTGTGGAAGATAATTTGTATACCCGACGCTGGCAGAAGTTGGGGATGACATTGCCACGCCCGCAAGCGATTGTGTGG  
TTTTCGGCTCACTGGTTTTACCCGTGGAACAGGAGTGACCGCATGGAGACGCCCGCCACGATTCATGACTTTGGTGGCTTC  
CCGAGGCGCTGTACGATACGATATCTGCTCGGGTTTCGCTGCGCTGGCACAGCGTCTGGTTGAGCTGTTAGCGCC  
GATCCCGGTGACGCTGGATAAAGAAGCCTGGGGCTTTGACCACGCGCTCGTGGGCGTGTGATTAAGATGATCTCTGACG  
CTGATATCCGATGGTGCAGTTGAGTATCGACAGTAGCAAACTTCGCGCTGGCATTTCGAAATGGGGCGCAAACTGGA  
CGCTGCGAGATGAAGGAATAATGTTGGTCGCCAGCGGTAACGTTGGTGCATAAACCCTGCCACAGTGAAGTGGCACGGTGA  
TAGTTACCGTATCCGTGGGCGAGTCTGTTAATGAGTATGTTGAAAGCAATCTGACGTGGCAAGGGCAGTGGAAACA  
ATCCTCTGGTGAATTACCTCGACCATGAAGGTGGCAGCTTATCGAAACCAAGCCAGAGCATTATTTGCGGTTGTGTAT  
GTGTTAGGTGCGTGGGATGGGACAGGCAATTACCATTCGCGTTGAGGGTATAGAAATGGGCAGCCTGAGTATGCTGTG  
GGTGCAGATAGGCTAA

>Cluster\_14907

GTGAGTTATAACGGTGGCAATACGACCCGTTATCCGGTCAAGACAGGATTTCTCACATCAGTTGTTTTGTATGAAGGTGA  
GGCTGTTATCAGTGCAAAGGCTGGTTTTCTGCGGATGGGAAATCACAAACCGATGATAATGTGTTTTACATCAATCCCG  
GTCCCGTTGTTTACAGAACAGGAAGGCGATGAAGCGGAAAACCTGAAAAGGTTTTCCAGCCACAGAAAAGGAATGGGAC  
ACGAATCTTTTTGTCAGAAACAACAAAGCGGATTACAGTCTTGATCTAATCTTCTGTGAGAAAACAAGCGCAACC  
TGCTTATGTTGTACAATTCGCTATCCATCAGAAATAGCGAAAAGAAATGCAGAAAGTAAGGCTGGCAAAAAGAAAA  
AGGAAAACCTCAGACAGGAAACTGATTTCTGAAAAGTTTTGAAAAGCCGATGCGCTAAAACCTGGGATTTATTTCTAG  
CGAGTCAATGAAAATATGACAGTCTGCTATCGCCCCGATTTGCTTATGATAATGGCATAATTTACCTTTTTAGGTTT  
TAACCTCAGGAAAGTATTTCCAGCTCATTGCTGTAAGAGATGGTCAGGAACAGACACTTGTCTTTAATGTGGAACAA  
AAGGAAGTATAAAATCATGTTATCCACAACGTTAATGACAAATTTGTTTTACGCTATGGAAACAGCGTTGTTGGTGT  
GTGAATAAATCTTTTCGAAAAGTATTAACCCAGCAGGAAATACATCTTCTCCGTTAGGATGAAACGCTGTTGAGGTGAATA  
TGACTGA

>Cluster\_13819

ATGACCTTACTTAAAGCTGCGGCCCTTTCCCATCACTATGCCACGGTGGATTAGCGGAAAACATCAACATCAGCGGT  
GCTGAATAACGTTTCCCTGACCCGAAAAGCGGCGAAACCGTCCGCTGCTGGGACGACGCGCTGCGGAAAAGCACCC  
TCGCGCGGCTGCTGGTAGGCTTAGAGTCTCCCTCACAAGGGAATATTAGCTGGCGCGGCAACCGCTGGCGAAACTCAAT  
CGCGCCAGCGTAAAGCGTTCCGCGCGATATTCAGATGGTATTTTCCAGACTCCATCAGCGCGTGAATCCGCGCAAAAC  
GCTGCGCGAGATCTCGGTGAACCGATGCGCACTGCTATCACTGAAAAAATCCGAAACAACTGGCGCGCCAGCGAAA  
TGCTGAAGGCGTGCATCTGATGACAGCTTCTCGACAAACGCCACCGAGTTAAGCGCGGCGAGCTCCAGCGCGT  
TGCCTGGCTCGCGCGCTGGCGGTGCAACCGAACTACTGATTCGGATGAAGCGTTTTCTAACCTTGTCTCGTGTACA  
GGCGGGCGTATTGCTGCTGAAAAGCTACAACAACAGTTTGGCACCGCTGCTGCTTATCACCACAGCTTACGCC  
TGGTGAACGCTTCTGTCAGCGGGTGTGTTGATGGACAAACCGGAAACCGTTCGAAACCCAGGTTGGGAGATAAATTA  
ACCTTTCTCTGACCGCGAGCTGTGCTACAAAACCGGATTTACCCGATTTCCCGTGGCGCTGCGACCACAGAAA  
GGTTAA

>Cluster\_26502

ATGTTGCCCTGGTACACGATTTGGGCATTAATTTACCCCTCGCACCGTTTACGATTTCTCGGTGTCGCCATCGCCATTTT  
TCTTGGTTTTCTGTAATAATGCGGTTACGCCGTTACGTTGAAGCGGAAAACTTGGGGCAGTTGATGATTGCTTCCG  
GGCTGTTACTGCGGAGGTAACAAACGACATTTGCCGAAATTCGGCAAGTGAAGGAGTTTGGCCGACTGCAAACTCGCTTC  
GCCACTGTTTACGATGACATTTACGAAACAGCCAGCGGAAAGTGTGGCTCATTATCTCAAGACTGGAAGTCTTCT  
CGGTGACTGGCTTCAACTCTCCAGTAAACCGCATCTGTTAATAATGGGGAGTGGTTGGCGGTTACGCGACGCAATG  
GACAACTTTCAGATATCTGTTTATTAGCTCAACGATCGGCTAATGATATTTACGCGGTTCCGCGAGGATGCGAGCGC

ATTGCTTATACGCCAATTCCTTTGCTTACACCTGATTTGTCATCGTACCGTTTATCTGTTTTGTATCATGCTGCCGTT  
CGCGCTGGTTCGTGACCTGCATTACATGACGCCTTTTATCTCTGTGCTGATTTCTTACACTTTTATTTGCTGGATTGTC  
TGGCGAAGAACTGGAAGATCCCTTCGGTACTGAAACAATGACTTACCGCTGGATGCCATCTGCAACGCTATTGAAATT  
GACCTGTTACAGATGAACGATGAAACAGAAATTCAGCAAAAAATCTTCCCGATCGTCATTACAGCTGACGTAA

>Cluster\_27851

ATGAAACAGTATTTAGAAGTATGCAAAAAAGTCTCGACGAAGGCACACAGAAAAACGACCGTACCGGAACCGGAACGCT  
TTCCATTTTGGTTCATCAGATGCGTTTTAACCTGCAGGATGGATTCCCGCTGGTGACAATAAACGTTGCCACCTGCGTT  
CCATCATCCACGAAGTGTGTTCTTCGAGGGGACACTAACATTGCTTATCTACAGAAAAACAATGTCACCATCTGG  
GACGAATGGGCCGATGAAAAACGGCGACCTCGGGCCAGTGTATGGTAAACAGTGGCGCGCTGGCCAACGCGGATGGTCCG  
TCATATTGACCAGATCACTACGGTACTGAACAGCTGAAAAACGACCCGGATTTCGCGCCGATTTATTGTTTCAGCGTGG  
ACGTAGGGCAACTGGATAAAATGGCGCTGGCACCGTGCATGCATTCTCCAGTTCATGTGGCAGACGGCAACTCTCT  
TGCCAGCTTTATCAGCGCTCCTGTGACGCTTCTCCTCGGCTGCGTTCAACATTGCCAGCTACGCGTTACTGGTGCATAT  
GATGGCGCAGCAGTGCATCTGGAAGTGGGTGATTTTGTCTGGACCGGTGGCGATACGCACCTGTACCAACTCATATGG  
ATCAAACCTCATCTGCAATTAAGCCGCGAACCGCTCGCTGCCGAAGTTGATTATCAAACGTAACCCGAATCCATCTTC  
GACTACCGTTTCGAAGACTTTGAGATTGAAGGCTACGATCCGCATCCGGGCATTAAGCGCCGTTGGCTATCTAA

>Cluster\_21312

ATGCTCATGACGATATTGATTTTGCAGACCTTTACCTTCAGCAACTCAGGCTGGCCCATCGCACAGAAAAACGCGGA  
TCACTGGGATCAACGGCGGAAAAATGGCGAAAAATTCGCCCTCGCTACGGACAGCTACCTGCAACAACCTGACCTCAA  
AAATTGACCTGCAAGGTGCGCAAACTTTATTCGATATGGGTTCGGACCGGGTACCGTATCGCTGGCGCTGGCGGACAAA  
CTCAGCAGATTTATGGCTTGAATACAGTACGGGATGCTGAACGTTGCCGCCGCTGCGCCGCGCTAAAGGCAGA  
CAATGTCCACTGGATTCAGCGCGCTGGGAAGAGGACTGGAGTACCTGCCACGCTGCATATTGCCGTTGCCGTTCCCGT  
CCACTCTGGTGGCTGATATGCGCCAGGCAATGAGCAAACTGAATAATCAGGCACGCTTCGCGTCTATACGACTCATCTG  
GTCAGCACCTCGTCTCTCCAGCAATTCAGCGGGCGGCTGGTGGGAAGTGGTGAATTACCCAACTATATCTTTTTC  
GCTCAACGTCCTGTATCAGATGGGAATTTATGCTCAGCTTGTATTTATCCGCGGACAAAAATGGCAACAGGATAACAGCA  
CCTGGGAACGTTTTGAGCAGAACGCTCAGCTGGAGTCTGGCGCGCTTAACGACGATGAGCGTGAGCGGTTATATCGCTGG  
TATCAACAACAAGATGCTCGTCCCTCGCCCTGCCAGCCGCGACTGGCGCTCATCTGGTGGATAGCGGACCGCAGGA  
GACTGCGGATGA

>Cluster\_31544

ATGTTTTCAATTCAACAACCACTACTGGTTTTTAGCGATCTTGATGGCACCTGCTGGACAGTCATAGTTATGACTGGCA  
ACCGGCAGCCCCCTGGCTCAGCCGTTTACACGAAGCCAATGTTCCCGTCACTCTGTAGCAGTAAAACCTCAGCGGAAA  
TGCTGTACTTGCAAAAAATGTTGGGGCTACAAGGCTTACCGCTGATTGCGAGAGAATGGCGCAGTGATCCAGCTTGTGAA  
CAATGGCAGAATATAGACGGTTTTCCACGCATCATCTCAGGTATTAGCCATAGCGAAAACTGCCAGGTTTTAAATACGCT  
ACGCGAGAAAGAACAATTTAAATTCAGGACTTTTGTATGATGTCGACGATGCAACCATTGCCGAATGGACGGGATTAAGCC  
GTAGCCAGCGCGGCTGACGCAGCTGCATGAGGCGTGGTAACGCTAATCTGGCGCGACAGTGACGAGCATATGGCACA  
TTTATCGCTCGCTGAACGAACCTGGACTTGCAGTTTATGCAAGGTTGCCGCTTCTGGCACGACTGGATGCCTCTGGCG  
AAAAGATCAGCTGCCAAGCTGATTATCCGCAACTATCAACAATTTGTCAGGCAGACCCCAACCAACTTGGCTGGCGG  
ATGGGCCAAACGATGCGCTTTACTGGAGGTAATGGATTACCGGCTGATTTGTGAAGGGCTAAACCGTGAAGGGTCCAT  
CTGCATAATGAGGATCCGGCCCGCTTGGCGAACGCAGCGTGAAGGACCGGAAGGCTGGCGTGAAGGGCTGGACATTT  
TTCTCCGCCGTTAA

>Cluster\_8453

ATGGAGCAGTCTGTGGCGAATTTAGTCGATATGCGCGATGTCAGTTTTACCGTGGCAATCGCTGCATCTTCGATAATAT  
TTCCCTGACCGTCCCGGAGGGAAGATCAGCGCATATGGGGCCATCGGGCATCGGTAAAACGACGCTACTCCGCTGTA  
TTGGCGGGCAAACTGCACAGATCATGGTGAGATCCTTTTCATGGTGAGAATATTCGGCGATGTCTGCTCGCGCTG  
TATACAGTGCAGAAACGGATGAGCATGTTATTTTCACTCCGGGGCGTTGTTCACTGATATGAACGATTTTGACAACGTCGC  
CTATCCACTGCGCGAACATACCCAACTTCCCGGCCATTTGTTGATGATGACGGTATGATGAAGCTGGAGGCGTGGGGC  
TGCGTGGAGCGGCTAAACTAATGCCTTCTGAACTTCCGGTGGGATGGCGCGGCTGCAGCGCTGGCGCGTGGCATTTGCC  
CTGGAGCCGGATCTCACTATGTTTGTATGAACCTTTTGTGGGCAAGATCCCATCACTGCGGCTACTGGTGAAGCTGAT  
TTCTGAGCTGAACAGCGCGCTGGGGCTGACTTGTGTGGTGGTTTTCTCACGATGTGCCGGAAGTGTAAAGTATTGGGATC  
ACGCTGGATCTTGGCGGACAAAAAATTTGTCGCTCATGGCAGTGCACAGCGCTTGCAGCGAATCCTGATCCGCGGTA  
CGTCAGTTTCTGGACGGGATAGCTGACGGGCTGTTCCGTTCCGCTATCTGCCGGGATTTATCACGCTGATCTTTTACC  
AGGAGTTAA

>Cluster\_34229

ATGACGAAGCATACTCTTGTAGCAACTGGCGGGGATTTACGCCGCGCCGACAGCAGGGCGAAGCGATTGCCCGCTGGC  
CGATCTGATTTGGTATCGATAACGCTGAAGCGGCTACGCCATTCAGCACATAAATGTGCAATATGACGTTGCGCAGGGC  
GTCCGCTGTAGGGCGTAAAGTGGGCTGACTCATCCGAAAGTGCAGCAACAACCTGGCGTTGATCAACCGGATTTCCGG  
ACATATTTTCCGACATGTTTATGGCGATAACGAAACATTCCTTTTTCCCGCTTCTGCAACCCGCAATTGAAGCGGA  
GATTGCACTGGTGTGAAACCGGATTTACCCGCAACTGATATCACCTTCGACGAACTGTATAACGCCAATTGAATGGGTAC  
TTCTGCGCTGGAGTGGTGGGTAGCCGATTTGCGACTGATTCGATTTGTCGATACCGTGGCAGATAACGCCTCC  
TGTGGGTGTATGTCATCGGCGGTCCGGCGCAACCTCCGGCGGGTTAGACTGAAAAACTGGCCATGAAGATGACGCG  
TAATAACGAAGAGTTTCCAGCGGGCGGCGAGCGAATGCCTGGGACATCCGCTAATGCCGCGCTGGCTGGCACGCA  
AAATGGCCAGCTGGGTGAACCGCTGCGCGCGGAGATATCATCTTACCGGGCATTAGGTCGATGGTGGCAGTGAAT  
GCGGGCATCGTTTTGAAGCCATATTGAAGGCATAGGTTTCAGTTGCTGCGACATTTTCAAGCGCAGCCCAAAAGGAAG  
TCTGTATGA

>Cluster\_41320

ATGTTGTATGGGTTTTTTCAGGTGTTATTTTACAGGGTGCCTCGTACCGTGGAGCTGGCTATCAGCTCTGTAGTGTCTCG  
TGTAAATCATCGGTTTAAATFGCGCTGGCGGTAAGCTCTCACAAAAATCGGCTTTTCGGGCTTATTTTCGAAGGGTACACCA  
CGCTGATTCGAGGCGTCCGGATTTAGTATTGATGCTGCTGATTTTCTACGGTTTGCAGATTGCGCTAAACACGGTGACG  
GAGCGGATGGGCGTCCGGCAGATTGATATGATCCGATGGTCCGAGGATTTATCACTCCTCGGTTTTATCTACGGTGTCTA  
TTTTACCAGAAACGTTTCGTGGCGGTTTTATGGCAGTGCAGAAAGGACATATAGAGGCGGCGACGGCGTTTCGGTTTTACTC  
GTGGCAAGTGTTTTCGGCGGATCATGTTTTCCGGCGATGATGCGTTACGCCCTGCCAGGCAATGGCAACAACGAGGTTG  
ATCCTCAAATCTACCGCACTGGTTTCTGTTACTCGGCTGGAAGATGTGGTCAAAGCCACGCGAGCTGGCAGGCAAAAGTAC  
CTGGGAACCGTTCTATTTTCGCTATCGTCTGCGGCGTGAATTTATCTTGTTTTACCACCGTTTCCAATGGTGTGCTGCTGT  
TCCTGAGCGCGCTACTCCGTTGGTGTGAAGAGGGCTGACCTGTGA

>Cluster\_24324

ATGAAATCTCCCTCCTTAATGTGATGATCTGCTGAAATTTAAAGAACAGATCGAATTTATCGACAACCATGCCGA  
TTACTTTTATATCGATATCATGACGGCCACTTTGTGGCGAATCTGACGCTCTCACCGTTCTTCGTAAGCCAGGTA  
AACCTGGCGAGTAAACCGCTCGACTGCACTGATGGTAAACCGCTCCGAGGATTTACATTTGCTCAACTGGCGCGTCCGGG  
GCTGATTTTCACTTTGCTATCCGAAACTATCAACGGTACAGGATTCGCGCTGATTGATGAAATCCGCGGACATGGCAT  
GAAAGTGGGGCTGATTTTAAATCCGAAACCGGTTGATGCCATGAAATACTATATCCATAAGGCTGATAAAATACCG



AGGTTTATTGGTGGGGCTGGCCCTCCGCGTACCCGCTGCATATGCTGGAAAAAGTATTGACCATGTTTGATTTACGCGACA  
GTTTCGATGCCCTCGCCTCGGCTGAAAACTGCCTTACAGCAAGCCGCATCCGCAAGTATATCTCGACTGCGCAGCAAAA  
CTGGGGTTGACCTCTGACCTGCGTGGCACTGGAAGATTCGGTAAATGGCATGATCGCCTCTAAAGCAGCCCGCATGG  
TTCCATCGTCTTCTGCGCCAGAAGCGCAAAATGATCCACGTTTGTATTAGCAAACGTCAAACTCTCATCGTGACAA  
AACTCACCGCAAAAGACCTTCTCGGTAA

>Cluster\_67114

ATGGAGGAATTATCTGGTTACAGAAAAAGTCGCCATTATCACTGGCGCCGGACAGGGGATCGGGCGTGCCATCGCTCG  
TCGCCTGGCTAAAGATGGATTTCAGAAATCGGATGCTGGACTTTAACGGAAGATACAGCAGGAAACGGTAAACCTTATTG  
AAGCAGAAGGCGGAGAAGCCTTGCTGTGGAGGTTGATGTGCTCCGCGTGAACAGGCTTTTTCCGAGTGGATCAGGTT  
GCCGTGAAATTCGGGCGCGTTGATATTATGGTCAATAATGCGGCGCTTGGCCCCACCACGCCACTGGAAGACATCACACC  
GGAACCTTACCGTAAAGTTTGTACGTTAACGTCGGTGTGTTTACTGGGAAATTCAGGCTGTCTGAAGCACATAAGGA  
AAAGAACGCCACAAAAGAGAGGGGGGAGATTGTGGGGAAAAATCAACGCCCTCATCTCAGGCCGGTCAAGTTGGTAAACCT  
GACCTGGCTGTCTATGCGGCAACCAAGTTCGCTATTCCGCGGTATCACTCAGACTGCGCGCAAGGATCTGGCGAAACTCGG  
TATAACGGTTAATGCCTATTGCCCCGGTATTGTGCGGACCAATGATGGAAGGCATCGCCCCGAAAGTGGCCGATGAAA  
ATGGTCAGGATCTGAATGGGGTTGTAA

>Cluster\_24876

ATGAGTAATAAATATTGCCAGGCGCTGGTGAACACGAAACAAACAGCCCATGAACGAAGGAAGTGGCGCATCAGTG  
GCGCAGCCGGATAACATTTTCTGGGAATTAACACTCTGTTTGGCCGTTTGTCTGGATCTGTTTACTGACGGTGATA  
ACGCCAAATGTACCGCGTATTACAGGCGGAAGACAATCGCTGGCGCATGACTGGTCAAGACGCTTCTCGCGGATCTAAA  
GGTGTGCTTTGGTAAATCCCCATACAGCCGCGCAGTACGATGAGGGGCAATACATCACCGGCATCGCTTACATCAT  
GAAACATGCGCAGTCCATCGGTGATAAAGCGGGCGCTATGTTTCTGATCAAAGCTGCCACCAGCGAAGTGTGGTGGC  
CGGAAGATGCAGATCATATGCTTTTATTCGCGGGCGTATTGGTTTTGAACGCTGCTGCTGGTTTATCCGAAAGATGAG  
AAGCAGGTGCCAGACGGCGCTTTCTTCGCTGGTGTATTTGCTGTTTTCGACAAGACCTGGAAGGGACCGCAATCAGCTA  
CATCGGGCGGATGAACCTTGAGGCATGTGGTGAAGCGTTCTGCGCGAGGTTCCGCGCAGGTCGCCAGCAGGCAAAAACCTGGT  
AGATGGCGGCATGA

>Cluster\_45841

ATGTTGCGCATTATCGATACAGAAACCTGCGGTTTGCAGGGAGGGATCGTTGAGATTGCCTCTGTTGATGTCTATTGACGG  
AAAAATCGTCAACCCCATGAGCCACCTGCTGCGCCCGATCGTCTTATAGTCCACAAGCGATGGCGATTTCATCGCATCA  
CCGAAGCCATGGTCGCGGATAAACCGTGGATTGAAGATGTGATCCACACTATTACGGTAGTGAATGGTATGTCGCGCAT  
AACGCCAGCTTTGACCGCGCGTACTGCTGAGATGCCGCGTGGTGGATTTGCACTATGAAACTGGCCCGTCTGTTG  
GCCTGGGATCAAGTACAGCAATATGGCGTTATAATAAACACGCAAGCTCAATGTACAGACGCCCGGGCCTGCATCATC  
ACCGCGCGTTGATGACTTTATATACCGCGCGTGGTGTATTCGATATATGAACACCTCCGCTGGACGCGAGAACAG  
ATGGCCGATATCACCGGACGTCCTGCTGTGATGACGACCTTACCTTTGGCAATACCGTGGCAAGCGGTTTCCGACGT  
TGCCGAACCGGATCCGGGTATCTGCGCTGGTTATTTAATAACCTGGACAGCATGAGCCCGGAGCTGCGTTTAAACACTGA  
AACATTATCTGGAATACTTAG

>Cluster\_22221

ATGCAGGTTGCCCTGGCTAAATGACCAGCAGCCATTATTGTCGGTATTTGTCGCTGATGGCGCAGGCGCTCTCGCAGGG  
TGGCAAGGTGCGATGCTCGCCGTCATGAAGCGATGGCTTATATGTCGCAAAAAGTGCAGGGCGGGGAATGGGGCTTA  
ATGATGCTCTGCCACAGCATTTGTGCTGACCATTCCTCAGCGACTTTTGGCAGGCGGAAGCAAGAATTAGCGGTT  
CGCATTTTTCGTCACGTTTGGGATTGATTTCATCAGCTAATGGCACCTTGATTATGCAAGATTGGCGCGCT  
GGTGGTAGATTTGGGTCAGGTTTGAACCTGCGCTCAGCGCATGGTGGGTGAATATGCCAATATGACGCACCTTCATTA  
CCGATGAAGATGCCGTTTCCAGACTGGAACCTTACCAGCACTGAGCGTGGCATAAAGTTGCAAGCTTACCGGATGGT  
ATTACGCGACTGGGTTAAATATGCTGGATAAATTCGCGCATGTCCTTTCTTTACCCTGTTTTCATGAGGATGGCGTC  
AGCAACGCAGGAACAACCTCGATTATTACTGAAATGTTAAAGCAGTTTGTGTCAGCCCGGGGTAACGAGCGTACGG  
ATGATGATAAAACGTTGGCACTGGCTATGTTGTTACCATGA

>Cluster\_48653

ATGGATGTAAAAATCACGATTTTGCAGGTTGATGTTGCCAACCTTCGCCCCAATACCTGGAACACCAATTCGGTTGGTGC  
GCAGAATTTGAAAAACTGAAAGGTTCTATCGAAAAATTTGGGCTTTTTTAAGCAATTTTGGCTCGTGAACCTGAAGATG  
GATTTTTGAAATCCTCGCGCGGCAACATCGCTGGCGTCTGCTATTGAGCAAGGAATTTCAACGGTTCCGGTCTTTCT  
GTGGGCAAAATTAGCGATGTCGTAGCTAAACAGATGTCAGTGGGACACGAGCGATACGGTGAAGACGACCAAAATCGC  
ATTGCAACGCTTCAATTGAAGAAATTCAGTCAGAACTTGCATCAACTGTCTGAAATCGCCCGTATGACGACGAAATCT  
CGATGGTTTTAGCAAAAGAGGGCGCAATCGACCTTGAAGCACTGGAGGCGTTGCTCGTGGTAGTGATGAGCCTGTCGAT  
ACCGACAAACGAGAGAAAACCGAAGCTGTTGGGTGCGGAACATAGACCATGCGCTTCAAAGTAACTTTTCGATGCGTCA  
TCGTGTTGCAGAAACATAAAAAATCATCAAAGAGCAGGCTATTAAACCGGTAATGAAATGGAGAACGCTGGTGAAG  
CTCTGGTGTGGCTGGTTCGACTACTCAAGGAGCGTATGTAA

>Cluster\_66942

ATGAGACTGAATACGACCCGATTTGGCGCCGAATGATGCTCTCGCTGGACAAAAAGCAATCGGCGAAAAACTCATCAA  
CGTTCGTCAGATAAACCCGACACACTGCAGTCCGTTTACCACAAGGGTAAAGAAAGTTCTGGGGATAATGAGCGAAC  
AATTAGCCATATCCACCGCTGATTTAACCCGAATCCTGCTTGAGGATGCTTTTCATAATATGTTTATGCTGCGGATAAC  
ACCACAGGAACATAATAAGCAGAAATGAAATACATCATGCTGTCGATGATATAAATGCGCCATTACTGGCAACATTGCT  
GTCGCCATGGAATATCCGCTCCACGGTAATACAGGACCCGCGCCAGACTTGCAGACTATCTTTCAGTTGACGCTCTCGAC  
ATCTTGCTGAATGTTTAAATCTCAATCCGACTGGCTGAATGGCCATGAAAACATCCGATAGCGTTGTCGGGTGAATGG  
CCAGATACTGCTGATAATTTCAAGATGCTTATTAATGATAGCAGCAACACTGAAAGTTATTTCTGGCATAGTTTCCCCCT  
TCGAGGAAACACGAAAAGAGAAATATTGCGGGTAAATATTGAGACAGGAAAAAGAAATAAATGGCTCTGTAATATATCCG  
GCACTATCATTATCACCAACACTTCTGAACGATGA

>Cluster\_11457

ATGGCTGTTCAAATTTCTGTCGAAAACCTTTCCCTGTTACTATAACCAGATCCCGTAATTACTACTGAACGTTGGC  
TCACCTTTACGGAACAAAAATCAAAAACATTTCTGATAACTTTTGAACAACACGACGCGATTTCATGCCCGGAAAGCATT  
ACTTTAAAATGAAAAAACGAATACGCGAGTTTAAAGAACAGACCCGAAACAAATCGGGTTAGTTGGTAAAAATGCCCGC  
TCCCTCATCTCTGGACAGAAACGCGCGCGTCAAGCAAAAATGCTCGAAACGATCAGGCGGGATGTTGTCGA  
AAAACGGAAGACTGCTATTTACGCGAGTGGAGAAAAACTGGCAACAAGAGAAGAGCTCAACGGGCTTTCCGCAA  
AAGAAACGACAGCCTTGTATGGCTGTGGGATTATGCCAACCGCTCACAGGCATTTGTTCCGTGAGTTGTATCCCGCATTA  
AACTGATTCACTCTGGCTATTCGGCATATGCCACGACTACGGCTATGAGTTCTCGTATATCATCGGAGGGCGAGGGG  
CGTTTTAATTAATCACACCGGGATATAGATATTTATGAGCTGACGGCCGACGAACTTCTGGCATGGGAAAGGCTTA  
AGAACAAGAGTTGCCCGCTTCACTGCATCGCTACTGA

>Cluster\_43848

ATGACCGCTATGAGCACTGCAATACACGCCAGATCGTTCTCGATACCGAAACACCGGATGAACCAGATTGGTGGCGA  
CTATGAAGCCACAGATCATTTGAGATTGGTGGCGTTGAAGTGGTGAACCGCTCGCCTGACGGGCAATAACTTCCATGTTT  
ATCTCAAACCGATCGGCTGGTGGATCCGGAAGCCTTTGGCGTACATGTTATGCGGATGAATTTTGTCTGATAAGCCC

ACGTTTCCGGAAGTAGCCGATGAGTTCATGGACTATATCCGCGCGCGGAGTTGGTGATCCATAACGCAGCGTTCGATAT  
CGGCTTTATGGACTACGAGTTTTTCGTTGCTTAAGCGCGATATTCCGAAGACCAATACCTTCTGTAAGGTCACCGATAGCC  
TTGCGGTGGCGAGGAAAAATGTTTCTGGTAAGCGCAACAGCCTCGATGCGTTATGTGCCCGCTACGAAATAGATAACAGT  
AAACGAACCTACACGGGGCATTACTCGATGCACAGATCCTTGGCGAAGTTTATCTGGCGATGACCGGTGGTCAAAACGTC  
GATGGCTTTTGGCGATGGAAGGAGAGACAGCAGCAACAGGTGAAGCAACAATTCAGCGCATGTGACGTCAGTGAAGTA  
AGTTACGCGTTGTTTTTGGCAGAGATGAAGAGCTTGACGTCATGAAGCCCTTGTGATCTGGTGAGAGAAGGGCGGA  
AGCTGCCTCTGGCGGGCATAA

>Cluster\_37870

ATGAATAACAACACCACGGCACCAACCTATACGCTGCGTGGCTTACAGTTGATGGTTGGCGTGATATGCAGCACGCCCT  
CGATTATCTGTTTGTGACGGGCAGCTTAAAGCAGGGAACGCTGGTTGCCATTAATGCTGAAAAATGCTGACTATGAAG  
ATAACGCCGAGGTGAGGGAGTTAATTAACGCTGCCGAATTAATATGCGGATGGCATCAGCGTTGTACGTTCCAGTACGT  
AAAAAGTACCCGAGGCGCAGGTTTCCCGGCTTGGCGGTGCGGATCTCTGGGAAGAGCTGATGGCGCGCGCAGGCAAAGA  
AGGGACGCCGGTATTTCTTGTGGCGGTAAACCTGAAGTGTGGCGCAAACCTGAAGCTAAACTGCGCAACAGTGAATG  
TGAATATCGTTGGCAGTCAGGATGGTTATTTAAACCCGAGCAGCGTCAGGCGCTGTTTGAACGCATTATGCCAGCGGT  
GCGCAAATCGTCAACGTTGCGATGGGATCGCAAAGCAGGAGATCATCATGCGCGACTGCCGTCTGGTACATCCAGATGC  
GCTGTATATGGCGTGGCGGACTTACGATGTTTTACCGGTCACGTAACCGCGCACCGAAAACTGGCAAACGCTGG  
GGCTGGAGTGGCTCTACCCGCTGCTTTCGACGCCGAGCCCATTAAGCGTCAGCTTCGTTTGGTGCCTTATTTACGCTGG  
CACTACACCGCAACCTATGA

>Cluster\_22065

ATGCGTCGTTTGTGCTGTCGCACCAGTCCTTCTGCTGGTGGTTACGCCCTCGCCTTCGCGCAACTGCCGGGTATCAC  
CAGCCAGCCGCTGCTGGCGGTGGCAAAGCTGGTGCCTCCCGGTGCAGACGCTGGTGTTCATTACCTCGTTGACGTTTA  
TTCCGGCAATTTTACTGATGATGACCAGTTTACCCGCATCATATTGTTTTGGTTTATGCGTAACGCAGTGGGAACA  
CCCTCCGCGCCACCTAACAGGATTTGCTGGGGCTGGCAGTGTTTTGGACCTTTTATATGTCGCCGTTGATCGACAA  
AATTTATGTCGATGCGTACCAGCCATTTAGCGAAGAGAAAATATCAATCGAGGAGCGCTGGAAAAAGGGCGCAGCCG  
TGCGTGAGTTTATGCTGCGTCAGACCCGTGAGGAGATTTAGGGTGTGTTGCCAGACTGGCGAATACCGGCCGTTGCG  
GGACTGAAGCCGTGCCGATGCGCATTTTGTCTCCAGCTACGTGACAGCGAGTTGAAAACCGCATTTCAGATAGGCTT  
CACGATCTTCACTCCGTTTTTGTATTATCGACTGGTGGTATGCCAGCGTGTGATGGCATTGGGGATGATGATGGTCCCC  
CCGCCACCATTGCTCTGCCCTTTAAACTGATGCTGTTTTGACTGGTGGATGGCTGGCAATTGCTGGTCCGTTCCGTTGGC  
CAGAGCTTTTACAGCTAG

>Cluster\_66263

ATGAGTATCTGGTCACCCGCCGCTCTCCCGTGGAGAAGAGTTAGTGAGCCGCTGCGCACACTGGGGCAGGTGGCCTG  
GCATTTTCCGCTGATTGAGTTTTCTCCGGTGCACAATACCGCAACTTGCTGATCAACTGGCGCGCTGGGGGAGAGCG  
ATCTGTTGTTTCCCTCTCGCAACACCGGTTGCTTTTGCCTACACAGCTGCATCAGCAAGATCGTAAATGGCCCCGA  
CTACCTGATTTATTCGCCATTGGACGCACCACCGCACTGGCGTACATACCGTAAGCGGACAGAAATTCCTTACCCGCA  
GGATCGGGAATCAGCGAAGTCTTGTACAATACCTGAAATACAAAAATTTGCGGGCAAACGTCGCTGATATTACGTG  
CNAATGGCGGTGCTGAGCTTAATGGGATACCTTGACAGCGCGGCTGCTGAGGTCATTTTTGTGAAATGTTTACCA  
TGCGCAATCCATTACGATGGTGCAGAAGAAGCGATGCGCTGGCAATCCCGCGAGGTGACGATGGTCTGTTTACCAGCG  
TGAATATGTCAGCAACTCTGGTGCCTGATCCACAATGGTATCGTGACACTGGTTACTACACTGTCGACTATTGGTGC  
TCAGTGAGCTTTGGCGAAACTCGCCGGGAACGGCTGGCAAGACATTAAGGTGCGCGATAACCGTGACAACGATGCG  
CTTTTACGGGCATTACAATAA

>Cluster\_58723

ATGAAGTCTGTATTAAGTTTCACTGGCTGCACTGACCTGGCTTTTGGCGTTTCTTCTCATGCCCGGATAAAAAAAT  
AGTTGTGCGGACGGATACCCGCTTCGTTCCGTTTGAATTTAAACAGGGCGATAAATATGTGGGCTTTGACGTTGATCTGT  
GGGCTGCCATCGTAAAGAGCTGAAGCTGGATTACGAACCTGAAGCCGATGGATTTCAGTGGGATCATTCCGGCAGTCAA  
ACCAAAAACGTCGATCTGGCGCTGGCGGCAATACCATCACCGACGAGCGTAAAAAAGCGATCGATTTCTCTGACGGCTA  
CTACAAAAGCGGCTGTAGTGTGAAAGCTAACAAATAACGATGTGAAAAGCGTGAAGAATCTCGACGGGAAAGTGG  
TTGCTGTGAAGAGCGGTACTGGCTCCGTTGATTACCGGAAGCAACATCAAAAATAAAGATCTGCGTCACTTCCGCAAC  
ATCGATAACGCCCTATATGGAACCTGGGCACCAACCGCGCAGACCGGTTCTGCACGATACGCCAAACATTTCTGTACTTCAT  
CAAAACCGCGGTAAACGTCAGTCAAAGCGGTAGGTGACTCTCTGGAAGCGCAGCAATACGTTATGCGTTCCCGAAAG  
GTAGCGACGAGCTGCGTGACAAAGTCAACGGCGGTTGAAAACCTGCGCGAGAACGGAACTTACAACGAAATCTACAAA  
AAATGGTTCCGTTACTGAACCGAAATAA

>Cluster\_39659

ATGAATCATCTTTACGAACAACCTGACCGCACTTAAACTCACCGGCTTCCGTGATGCGCTTAAAAAGCAACTTGTCAACC  
GGGCACATACAGGAGCTGGGCTTCGAAGAACGCTGTCTACTGACAGCAGAAGAACTAACCTGCCGTGAAAAACAGGA  
AGGCAGAGCGCTGATCAAACATGCACCGTTACAGCTTAAATGCTGAGTTATCAAAGCTGGATTATCGTAAACAATAGAGG  
CTGGACAGGGCCCTCATCCGTTCACTCAGTCAGGAAACTGGTTAACCTGAAAACAAAATATTTTACTGACCGGGGCCAC  
CGGCAGCGTAAAACGTTTCTGGCATGTGCATTTGGTCAATGCTTCCGCGACAGGGAACAAGGTTACTATAATTCGCC  
TTAAAGCGCTGATGGAACAGTGCATCAGGGGCATGCTGATGGAAGATACAGCAAACTTTTGACCAGGTGAATAATAGC  
GATCTGCTGCTTCTGGATGACTGGGGCTGGAACCTCTCTCATCAGAACAGCGTAGCGACCTGCTGGAATAAGTGGATCT  
GATGTACCAACGAGGCTCAATCATCGTAGTGAGCCAGTTGCCGTTGAAAACCTGGTACAAAATGATCGGAGACTCCACAC  
ATGCGGATGCCATCTAGATCGACTGGTTTATGGCAGTATCAAGATCGAACTTAAAGGAGAATCAATGCGGAAAAATACAA  
TCTCCGTTGACCGAAGGATCAGTGA

>Cluster\_46584

ATGCATCGTATAGACACGAAAACCGCGCAGAAGATAAGTTCCGCGCGGGTAAGAACGGTTTTTACCCGTGGTAACCCCA  
CACCGGCACACCTGCCACCGATCTGGATGATGACTACTTTGACATGTTGACAGGAAGAACTCTGCAGCGTGGTGGAGGCA  
CCCGTCCGACCTGGAGAAGGGGGCGGCATGACCAGCTGCTTACCGCGCTTCGTCGCGTCTGTTAAGCGCAAGAATCCG  
TTTGGCGATATCAAATCTGATGGCAGGTTGAAAACGGCTCTCGAAAACCTTGGTTTGGGAGAAGCGGCAAAACGAAATGT  
GGGCAACGGGGAACCAAATCCCTGATATGTCCTTCTGGACGTTTACGGTGGCAATGGAAATTTTGTGATTGCTCAAC  
CTGACGGGCTAATCATTCAGATGGTTACTGTAAGTATAAGCGGTCAGTGGCGATGAATGGAATGACTGATAATGCTTAT  
GCCATACAGGTTCTAATAAGTCTTATATTTGCCACAGCAATTCGCCCTTTGTTTCTTAATAAAGGTTCCGGGCTTAT  
CCCTCTGGTATCAACAACAGCTTATGGTGGTGTATCCAGTAATATTACAGGTTTACACCGACGGCGGTTTGTCTTTTGG  
CCGCTGTACAGGGGAATAATACGATTTGTTTCAAAGTGCACAAACCTGAATGCAGCTTCTTCTCAGATACAGCGCTC  
TCAGCGTTAATCATTTGGACGGTAA

>Cluster\_2908

ATGGGGTTTTTGTTCGCGCACTGACCAGCTGTGCATGTTGTCGCTGATCTCCGCTTTTATCAGGCCGATAAAGTTGC  
CGTCACTGACGTTGGTCAACGTTGGGGGATGGTGCATTTGTTGGCTGGTCAATGATCGCGTGGTACGCTGATCTGT  
TTGGTGGTGGTGTTCGCTGGTTGCTGGTACGATCTACCGGTTTATCTGACGGATAAAAACTCGCAACACCCGCT  
AACGGCACGAATCGTTATACGATTTTTGCTGGTGTATTACGGCGGATGGCGGGACTGGTACTCTCCTCGACGCTGCT  
CGTCACTGTTGTTTTTGAATTACGGCGGCTGCTCCTGGCGTTGATCAGTTATTACCAGAGCGATAAAGCGCAGC





ATGAAGATTTTTTGGAGAATCTTTATCATCTTGATTGCTATTTCTGCCGATAAGAGATAACCAGCAAGACCTTGTCGG  
CGTTGAGTTAATTAACCATTTCTCCAGTGAAGATGGTACGGTTCTGATCCCGACGAGTCGGGTTATAGCGCAACTTACC  
AGGAGCAACATTGGCAATTAATTTCTGAACAGTTGGAATTAATAAATCATGCCAACACTTTTTTATTAACATAAATC  
TTTTCCCTGGCTTAATTTAAGCCACAAGTGGCTACATTTAATAGACAGGGAATAATTCGCAGGCGAACTATAAAAA  
TCCCTTTTGAATTTGATTAATGAATTAACCCGATTTCAATGAAGGAAAAGATAATCGCGATCTTTTATCCTTAT  
CGCAAAATGTATCCCTTGTGTTAGGTAATTTGGGTGCAGGTAATAGCACAAATGAAAGCGGTTTTTGTATGGTCTTTTACC  
CGGTCATGCTGGATAAAAGTTTTATTCAGCAAAATCACGCATCTGTCCTCGAACGTTTTATCGTGCATCCAGGC  
GCAAAATTTCCCTTGTGCAATTCATCATCGCGGGGGCATTGATACGCCAGAAATAATGGCACAGATTATCCCTTTG  
ATTTCCATGCTCTCCAGGATGCTGTGGCTCGGTTCTATAAATCAGATAACGACGTTGGTTCAGCGATAA

>Cluster\_34417

GTGGCGACTCTTTATTGCAGATCTTCATCTCTGCGTGAAGAACCAGCGATCACCGCGGTTTTCTGCGTTTTTACG  
GGGGGAGCCCGCAAGCCGACGCGCTGTATATCTTGGCGATCTGTTTGAAGCATGGATTGGCGACGACGATCCCAACC  
CACTCCATCGCCAGATGGCGGACGCGATCAAAGCGGTGCCGATTCGCGGTTCCCTGTATTTCATTATGGCAACCGT  
GATTTCTGCTCGGCAACGCTTTGCCGTGAAAGCGGCATGACATTAATGCGGAAAGAAAGGTGCTCGAACTTATGG  
TCGCGGGTGTGATTATGCATGGCGACAGCTGTGCACCGATGACGCGGTTATCAGGCTTTTCGCGCCAAAGTCCACA  
AACCTGGCTGAAACGCTATTCCTCGCCCTGCCGTTGTTGTGCGCAAAACGCTGCGCGGAAATGCGAGCGAACAGT  
AAAGAAGCAACAGCAGTAAATCGCTGGCATCATGGAGCTTAACCAAAACGCGGTAGTCAGTGCATGGAAAAACATCA  
GGTGAATGGCTGATCCAGGGCATAACCATCGCCGGCGGTACATGAACTTATCGCCAACAGCAACCTGCTTTTCGCG  
TGGTACTCGTGCCTGGCATAACAGAGTTCGATGGTGAAGTACGCGCGATGACGTTGAGTGATTCATTTCCGTTT  
TAA

>Cluster\_14963

ATGAGCAGAACACTCGAACAGAAGATTGCCAAGCTGAGGCCAGATTACAGCGCTGAAGGCGAAGAGCCGGAGCCTGGA  
CACGGCGCAAAAAGTCAATTTGGGGGCTGCCATGCTGGCGAGGTTACGGAGCCGGAAGAAGCGCAACTGCGTGCCTCC  
TGCTCCAGTTCCTGGCAAGGAAGTCAACAGACAGGCCGATGTGAACCGGATACACCGCTGATTAACGAGCTGGAGAAG  
CTACCCAAACCACCTGCGAAACCGTAG

>Cluster\_17540

GTGAGTGAGTCAAAAATGCCAAATTAATGGCAACAAGATAGAACCCTGCGCGGCTGGCAAAAATCTCTCGAATATGGAAA  
TCCAACATCAAGAGTAAAGGCATATTTATCCGGAGCGTGTGAACATAAAACCGCGAGTCATGCATAGATATGCTC  
AAATTCACTCGGGAAATATATCGGTGCTGGCGTTGCAATGTGCTTTTCCCGTTCTGTGGTGAAGTTTGA AAAACGTTG  
GAAGCGGAGCGCAGTGAAGCAAAATTA

>Cluster\_7933

ATGGCTTCTGAAATCGCAATCATCAAAGTGCCTGCACCTATCGTTACTCTGCAACAATTTGCAGAGCTGAGGGTGTTC  
TGAACGCACCGCTTACCCTGGACAACCGGCGACAACCTTGTGTACCAATTGAACCCCGCACCATACGTAAGGCTGCA  
AGAAAGCAGCGCGCCAAATTCGTATTTATACGCCCGTGGAAAGAAGAGCAGTTGCGTAAGGCGTTGGGTGATTCCTCC  
TTTCAACTCGTCACTCGGCGCTTAA

>Cluster\_11132

ATGCAAGCTGTTTTTCTTCCCGTCTCCCGCCCTGTGACACCCTGATGCCGCTGCCGGACATCACGCAGGAGCGTTT  
TTTACGCTGCCGGAAGTATGCACCTGTGCGGCTGTGACGCTCGACCATCTATGAACCTATCCGTAAGGGGAAATTT  
CGCCGAGGTGAGTCTTGGCGTAAAAATGTGGCTGGCTGCACTCTGAAGTCAACCGCATGGATGGCCGGGCGCATCGCC  
GGACGCAAAACGGGGTACGACGCATGA

>Cluster\_56507

GTGGCTTCTGTTTCTATCAGCTGTCCCTCCTGTTGAGCTACTGACGGGTTGGTGCCTAACGGCAAAAGCACCAGCCGACA  
TCAGCGCTATCTCTGCTCTCACTGCCGTAAAACATGGCAACTGCACTTCACTTACACCGCTTCTCAACCCGGTACGCACC  
AGAAAATCATGTATATGGCCATGAATGGCGTTGGATGCCGGGCAACTGCCGCATTAATGGCGTTGGCTCAACACGATT  
TTACGTCACTTAAAAAATCAGGCGCAGTCCGTTAA

>Cluster\_50255

ATGTCGACTGAAAATGATGAAATCATTAACCTCCCTGATACGCCAGATTATAAATTTGATAAAGCATTGCAGCATGCTGC  
GGCGCGTAGTGATATAACTCTTTTAGCAATTTCAATTTCTGCTGTTATGGATAAAAAATGAAGTCTGACGACAGATC  
TTGTTGATATATCGACTCGCTTCAACCTGGCAGTTTCAATCATGAGAGCTTCAATCATGAGAAAGAGCATGTTAAGTCT  
GTAATTAATTTCTTATTTTGAATCAAAAAGATTA

>Cluster\_622

GTGAATAAATCTCAATTGATCGACAAGATTGCTGCAGGGGCTGATATCTTAAAGCTGCGGCTGGCCGTGCGTTAGATGC  
TATATTGCTTCCGTAACCTGAATCTCTGAAAGAAGGGGATGATGAGCACTGGTAGGTTTGGTACTTTTGGCCTTAAAG  
AGCGTGTGCCGCTACTGGCCGCAACCCGACAGCCGTAAGAGATCACCATCGCTGCTGCTAAAGTACCGAGCTTCCGT  
GCAGGTAAGCACTGAAAAGACGCGTAAACTAA

>Cluster\_33404

ATGGACGCTGAAAATTAATGATTCAGTATCCGCTTGTATGCGGTTTATGTTGATAAATTTGCTGATTTATAGGGAAGCC  
AAAGACAGCCCTCAGTGAATGGTGAAGGCAAAATAATACCAATTAATGAAATGCGTATCCCTGCAACCCGAAAGCTC  
GTGCCGTTGAAAATGGGTTTTTCAATTCCTGAGTTTAAATCGCGCTGTACGTGAGGCGTTTTATAACCCGTTGAAACAG  
CGTATGATGCTTTTGTGGATGGGGTTGTGA

>Cluster\_38986

ATGAAACCCAATATCCATCTGAGTATCGTACTGTGGTGTCCACGACACCAGTGTGATGAGTACTTTAAAAATCGGCTC  
GACTATCAAAACAGACCGTGGATTTGAGCTGGATGGCGTAACGTATCCATATGTGACAATGATGCTCTTCTAAATCGC  
ACCCGTTCTATACAGGGAAGCTGAGAACAGTAGCATCAGAAGGAAATGTTGCACGGTTACCCCAACGTTTTGGTCTGTTTT  
GTTAGCACGAAAAGGGGGCATGA

>Cluster\_41252

ATGGCCCGGTTACCCTGCGCATTAAGTGGCACACAACCTGCTGTGCCAGGATGAACACCCTTCCCTTCTGGCGGCGTGG  
ATCCCAATGTTGGCGTTGAGTACCAGTGCAGGAGGTTACGCGGCTCCTGTGCGACCCGACTGGTGCAGGCGCAGG  
TGGACTGGATTGCCAACCCTTAGCTTTTATTCAGCCGGGGAAATTTGCCCTGTTGTTGCCGGGCAAAAGGCGATATT  
GAAATCGAGATGTGA

>Cluster\_5839

ATGGAAGGTAATTCATTAATAAATATTTGATGAATTTGTCAGGCTGCATATCCAGACAATGGGCTGGTAATGGAACACCTAT  
AACATCCCTTCTATTTGAGAATGGGGTAAGCCTTTTAGTCCACAGGCTATGGGGGATATGATGTTGTGCTTATGATCA  
AAAAAGCAGGAAATGGCAGTAGTTTACTCTTTATGAACGCTGACAGCATTAACCGCAAAAATTTTTGCTGATGATGTT  
AATGCATGTAATAA

>Cluster\_23971

ATGATGCGTTTGAATATTAGCCAAAGCGTAACCCGCGAGACATCAAAAATAACCCGCAATCCCCCCAAATAACCCGCA  
ACCCCATCAGGAAAATGGGGCAGTGTGCCACCGAACGCTGAAAATGATAATCAGGTTGCTGGTGTGAATACTGTGCG  
CTTTAACCTACGGTAATTTGCTTCCGTTGCGTATCTCTCCGTTGCTATTTGACCATGCACCACGAAAAAAAC

GGGGGGTATTAA  
>Cluster\_14838  
ATGAGTGTACTGTTTCAGTATCGTACTGGCGCTGCTGTGCATCGCATTGTTATGGATCTATTTTACCAGAACGCAGGATAA  
GGAGATTGGCTGCCAGTCAAGTATGCCATTTTCTGGAAAACTATTTCCACGGGTGAGTCAACCGATATGTCGATAACCACGC  
TTTTCTCTGTTTAAACAACAAGGAAGTTCGCAACAAGTTCTGATATGATCATCATATTCATCCGGAGCGCATCCCAGA  
GGACATCATGA  
>Cluster\_48626  
ATGAGCTATGGTGCACAGGTATGGTCGCCATCAAGACAGGAGATGGTCGATGCGTTGGCCCTGTTTATTACCTCGATTA  
TTTTACTCCCTCTGGTTCTGGAAGTAGAACATATGAGGTTGAGCGGGATTGGGAATCGACTATTACATAATGGACGTAA  
CCAATGGGAAATACACAAGTCTTACGGTTCTGGAATACCATTTCATGGTCTGGAGCTAGTGGCAATTTAAACATATTG  
GTTTTTCAAAAATAA  
>Cluster\_10283  
ATGAAAAATCTCATGCTGAGTTGTTATTTAAGCTTGCCAAAAAAGAAGAGTCGAAAGAAGTGTGTCGCAGGTAGA  
AGCTTTGGAGATTATCGTCACTGCAATGCTTCGCAATATGGCGCAAAATGACCAACAGCGGTTGATTGATCAGGTAGAGG  
GGCGCTGTACGAGGTAAAGCCGATGCCAGCATTCCTGACGACGATACGGAGCTGCTGCGCGATTACGTAAGAAGTTA  
TTGAAGCATCCTCGTCAGTAA  
>Cluster\_34176  
ATGATCGCAGCAGCGGCTTGGATGCGAACCCGCGCCGAGCATTTGAGAAGGCAACGGGATGAACGCTGGCTGGATAG  
CCGTGGTTTTCTGGGTAAGCTGGCGAATCCATTTGTGGACGAGTTGGCATTTAGGGCTGTAGCCCAAGCGATGTTTGGC  
ATGGAGCACCGGTTTCAGAACACTCTGAATGACCTGGGCTTGAAGATTTGCTGTAGGTACGGCGCTGAGGGCGCAT  
GAAAAATCCGCTTGA  
>Cluster\_35968  
ATGAAAAATATCAGTTTTTGTCTGCCTTGTCTGGTCTGGCTGGTTGTTCAACCCCTTCTCAGCCAGAAGCACCTAA  
ACCGCCGAGATTGGTATGGCAATCCGGCGTGGTCTATTGCCAGCAGAAGGGCGGGACGCTATTCCAGTGCAGACAG  
CGCAAGGGGTGAGCAACAATGCAAAATACCGGGCGGTGAAACGATTGATGAATGGGCATTGTGGCGCGTGACCATCCG  
GCTGGTGA AAAATAA  
>Cluster\_21527  
ATGAAAAAAGAAAATTTACGCGCAGAGTTTAAACGCGAATCCGCTCAACTGGTTGTTGACCAGAACTACCGTGGCAGA  
TGCCGCCAAAAGCTATGGATATCGGCCTTCCACAATGACAAGATGGGTCAAACAACCTGCGTGTAGCGCTCAGGGCAAAA  
CACCAAAAGCCTCTCCGATAACACCAGAACAAATCGAAATACGTGAGCTGAGGAAAAAGCTACACGCATTGAAATGGAG  
AATGAAATATTA AAAAAGGCTACCGCGCTTGTGATGTCAGACTCCCTGAACAGTTCTCGATAA  
>Cluster\_12623  
ATGATCCCTTACAACATGGACTGATCCTCGCGCAATCTTATTCGTTCTTGGCTTAACCGGCTGGTTATCCGTCGCAA  
TCTGCTGTTTATGCTGATGGTCTGGAAATCATGATTAACGCCCTCCGCGCTGGCTTTTGTGGTCCCGGAAGCTACTGGG  
GTCAGACCGCAGGTCAGGTGATGTACATCTCGCCATCAGCCTCGCGCGGCAAGGAGTATCGGCCTTGGCTGCTG  
CTGCAACTTCACCGTCTGCGCAGAACCTGAACATCTGATTCAGTAAGTGAAGTGCAGCGGATGA  
>Cluster\_43028  
ATGAAAGATGTCGTAGATAAATGCACTACTAAAGGATGTCGATGATCGGTACCGTGATTGATAACGACAACCTGTAC  
CAGTAAGTTTTTCGCGCTTTTTTGGCACCCGCGAAGAAGCAGAGTCTTTTTATGACCAAACTGAAAGAGCTTGCCGCGCTG  
CATCCTCTCAGATGAAGGGGCCAGCGTGGCTATAAAGATTAAGGATCTGGAAGGGCAAGTTGAGCTTGTATGCGCCCTC  
ACCTTCTCATGCCAGGCCGAGATGATTAATTTTTGAGTTATCAGTGCCTGCTTGTAGCTTGA  
>Cluster\_38887  
ATGGCCCGCTCAGCCCCCGGTTGCAATGGCGGTTGGTTCCCTGTGACGGCGGACCTGACAATGAAGCCGACTGTTTTT  
TCCCGACTTCCGCGAGTCCGCGAGATTACTGTATGGAGAAAAGATATCCGTAACCTGTTTGAAGAAGATGCCACCGCAATT  
ATGAAACAACCGTATGGATAGTCCGTTGAGCCCGACGGTAAATGTACCATGATCCCATGCCCTGGAAAAATTTCTGTCC  
GTGTGCAGATACATCCCTTTATCTGCTGAGTGCAGGCTCCTCGCATCTGCCCTGCAATAA  
>Cluster\_5153  
ATGTCACCTTCCGCGAGAAATGAAATATGGTATGCCTCGTATTCGCTCCCGGGCGGAAACGAATTAAGGAATCTCTTGG  
CACAAAGGACAAGCGGCAAGCTCAGGAGTTGCACGACAAGCGAAAAGCAGAACTCTGGCGAGTAGAAAAGCTAGGGGATT  
TACCTGATGTCACTTTTGAAGAGGCTGCCTAAGATGGCTTGAGGAAAAAGCTGATAAAAAATCTCTCGATTACAGATAAA  
AGCCGGATTGAGTTCTGGCTTGAACATTTTGGGGTATAAGGCTTAAAGATATCTGTAAGCGCATCATTTAA  
>Cluster\_61185  
ATGCAGAACCAAGAATCCGTATCCGCCGAAAGCGTTTGTATCATCTGATCGATCAAGCAACCGCGGAAATCGTTCGA  
GACTGCCAAGCGCACTGGTGGCAGGTCGTTGGTCCGATCCCGCTCGGCACGCAAGAGCGCTTACTGTTCTGATCT  
CCCCGACCTCAACAAGAGACGCGCGCATCAGTACGAAATCCGTACTCACTTGGCTTGGTTGACATCTTGAGCCAAAC  
GAGAAAACCGTTGATGCTCTGATGCGTCTGGATCTGGCTGCCGTTGTAGACGTGCAGATCAGCTGGGTTAA  
>Cluster\_47273  
ATGATTTACATTTGAACAGCTTGAATTAATCCATAAAAGTGGTATGTTGTTGATTCAGTAAAAATAACAGAAAAATCATC  
AGGAAAAACTGCCCTTCCACCTTGTTCATTTCCGCTTAAATAAGACTCACGACCTTCTAGAGGTGGAAGATGCTTCAGAAAG  
CAATTCGGCTGGTATGATGAACGTCAATTCATTCGCTGACGATACATTTACAGCAACATTTACGAATAAAAAGGGCAAG  
CGAATTAAGCGGACAGGTATATACAGTATCAAGGGTGTAAACATAAAGAATAACAACGTCAGGTAA  
>Cluster\_26612  
ATGGCAACTTTGTTACAACCTTCAATTTGCTTTTAAATGGCCATTTGGCGATGCAATGGCTGAGCAGCTTAAACCGCTTGC  
TGAGTCGATTAACAGGAACCTGGTTTTCTGTGGAAGGTTTGGACAGAAAGTGAAGAAGAACCGAAGCCGGTGGGATCT  
ACCTTTTCACTGATGAAAAAGCGCCCTTGCCATCTGGA AAAACGCACTGCCGACTGAAAAATCTCGGCGTTGAGGAA  
GTGGTCGCCAAAAGTTTTGATGTCAATGAGCCTCTGAGTCAACTCAATCAGGCAAAACTCGCCGTA  
>Cluster\_38730  
ATGCAATTTACGGTATACCGCAGTCCGCGCAGGAACCGCGCTTCCCTTTGTTATCGATGTTACCAGCGACATTTATTGG  
TGAGATTAATCGCGTATTTGTTATTTCCATTTATCCGTAATTCGCCCTCCAGAACGGCTTAAACAATCTTTTACTGGTAG  
ACGGCAAAGAATAATGTGCTCATGACGATGAGACTGAAACTGTTCCAGTTAAACCGCTGGGAACGAAATTTTGGCATGCC  
AGCGCGCACCGAAGCTTGAATTAAGGGGCAATTAGATTTTATGCTCGACGGGATTTAA  
>Cluster\_20044  
ATGACCAAAGAGCATGCACAAGGTGATTTTATCCGTTTTATTGATTTTTCGCGTGAACGTTATTACCGCATCAGCAAT  
TGACGGAGTTGTTCCATCCGAAAAAACGACGCTACTTACGTTTTATCTGAACGGTACGCGCTGACTGTTGGAGCTTCCGT  
ACCAGACCGTACGAGAAATCATTAGCGAAGCTGAAAAGGCAGCTCAGGTTAATGGCGATGAACCTTATATCGAAATTTAT  
TGTATGGATTTCAGAAAGCTGAAATTCAGAAAGCAGATTTAA  
>Cluster\_21427  
ATGGGCTGGGAGCTTCACATAGTAAGAACGGAACATTGGTTCGATAGCGCAAGTGTTCCAATCAGTAGTGAAGAATGGCT  
CCAGCTTGTAAATGATGATAAAGAACTATCCATAGATAACAAGAACGGTATTCTTATGCTATATGGAGCGGTGAGAGTG

AACATGATGAGCCTCGGCTTAAATGGAATGACACAGAATTTCTAACACTCCCAAGTTATGAACGGATAATGTTATATTGC  
AACATTATCCTAACAGCTCTGTTGTCCGTAAAAATCAATAA  
>Cluster\_35312  
ATGGATAAAAAAGCAAAATGAGGCCCTGCAATCTATTATTGAAAAACAAGATGAAGCTATCAGGATTTCTTTCATATCGCAC  
TGATATGATACTAATAATATGCTTTTGCATTAACGGCTGCGCTTGGTGGTACAAAAACAACGTATACCGCGAAGTTGTTA  
TTCAACAGATAGATAAAATTTGAAAAAACCATACCAGGTATTAATGCTCATCTTTCAGAACAAAGAGAAAGACCATGCTCTT  
ATGGCAATTTCTTACAGTAGCTCTCCCGAAAGTTGAGTAG  
>Cluster\_17646  
ATGACCAACTATATGCGCACTTGGCGAGTATACGGCCTACTCAGAGCAGGCCCGGGATGCTGCCGGACGTCGCTTTGCTTA  
TATGAAAAATTTGGCCAGTCAGTTAAACCGAATGGCCGAACAACCGGATATGGTTGTTTTCAGGAAGAAGCGTTGCAGTGTG  
CCATTGCTGACATCATCGCCAGCGAAAAACGAGATGCGCGCAGCGATGAAAAGCGGAACGCTCTGCTCCGCTTTGTAAT  
AAACCTCTTATTACGCCGGATTCTCTTTCCCGCTTCTGA  
>Cluster\_55067  
ATGAAATTAATAATAGTTGCGGTGGTTGTAACCTGGTTTGTAGCTGCGAACGTAGCACACGCTGCCGAAGTCTATAACAA  
GGATGGTAATAAACTCGACCTTTATGGCAAGGTACCGCTCTACGTTATTTTACTGATGATAAGCGGTGACGATGGTGATA  
AAACTTATGCCCTCTCGGCTTTAAAGGAGAAACGCAATCAATGATCAAATGATTTGGTTTGGTCTGCGGAATATGAT  
TTTAAAGGCTATAACGATGAAGCCAACGGCTCGCGCGCAAGAATCTCTGA  
>Cluster\_64448  
ATGAAAAAATCGACCTGAGAAAAGCTGACAGTGGTTCGCGCTTGTACTGTGCGTATCCCGGTGTGTGCAATCACAATCC  
TGAACACGAGCTACTGGCTCATTATCGTCTCGCGGAACGTGCGGCACAGCCATCAAACCTCAGATATGCAAGGCGCTA  
TCGCTGTAGTGGCTGTCTACGATGCCATCGACGGAGCTACAAAAACGGATTACGAGCAGACTCATTGTTGTTGATGCA  
GCTGAGGGAGTTTTCAGAACACTGGCTATCTGGCGGATGAGGAGTTTATCTGA  
>Cluster\_22239  
ATGAAACGCAAAATTTATGTCGCTTGGCGAGGCGGGTTGCGACTCTACGATGGCGGGAAGAAATTAAGAGTTGTG  
TCAGAGTCATAATATTCCTGTTGAATTAATCCAGTGTCCGGTTAATGAAATAGAAACCTATATGGATGGCGTGCATTTGA  
TATGCACCACTGCAAGGGTGGATCGTAGTTTGGCAATATCCGTTAGTTCACGGCATGCCTTTGTTCTGGTGTGCGGT  
ATCGAAGCATTACAAAATAAAATTTCTGACTATCTTACAGGGGTGA  
>Cluster\_56314  
ATGAGTATGTTGGTCTGGTCTACTGAAAATGTACCTCCGCGCTTACGAGGCGAGATTAGCCATCTGGTTGTTGGAGGTACG  
TGCAGGGGTATATGATAGGTGATGATCCGCAAAAATTCCTGAAATGATCTGGGAACAAATAGCTGGATGGCGGAAGAAG  
GCAATGTAGTGTGGCATGGGCAACGAATACGGAATCGGGATTGAGTTCAGACATTTGGGGTAAACAGGCGTACCCCG  
GTAGATTTGGATGGTTTAAAGTTGGTATCTTTTTTACCTGTTTGA  
>Cluster\_47597  
ATGTCCGGTAAAAATGACTGGTATCGTAAAAATGGTTCAACGCTGACAAAAGGCTTCGGCTTCATCACTCCGACGATGGCTC  
TAAAGACGTGTTTCGTACACTTCTCTGCTATCCAGAACGATGGTTACAAATCTCTGGACGAAGGTCAGAAAAGTGCCTTCA  
CCATCGAAAAGCGGCGCTAAAGGCCCGGCTGTTAAGCTAACCAGCCGTTAA  
>Cluster\_10619  
ATGGCTAATTTATCCCTGTATCTGTTGTGCACGAAAAGTGCAGATCGTTATGACAAATGAAAATGGCCAAGTCACAGG  
TGCTGCAAAAGTCCGCGATGGCGAGCTGATTGCCAGCATGGATACATTCATACGGCTGGCAGAAAAGAGCGGGGTATCAGA  
TAACAGCACCTGCTCAGGAGAAAACCGGTGATTTAACGCAACACGCATTCCTGA  
>Cluster\_67013  
ATGTCAGAAAGAAAAGAAAAGTGTCTGTTTCAGTAAACACTTCTTCTTCGTCGGGAAACTAATGAAAACTTGTGTC  
TGCTGCAAAAAGCAGCAGGACGCTCAAAGAGCTGGAAGCGACATTACGCTCAACATTTGAATTTCTGTTCTGTTCTGTTCT  
TTGGAGAGAACAGTTACTGGGAGATCCTTTTACAGAAAGCAAGTGA  
>Cluster\_25783  
ATGTCTAATAAAATGACTGGTTTAGTAAAATGGTTTAAACGCGAGATAAAGGTTTGGCTTTATCACTCCTGATGATGGCAG  
CAAAGACGTTTTCCTCCATTTCACTGCCATCCAGAGCAATGAATTCGCGACGCTGAACGAAAATCAGAAAAGTTGAATTTT  
CTATTGAGCAGGGCAACGTGGTCCCGCGCAGCGAACGTTGTTACGCTCTAA  
>Cluster\_11626  
ATGCGTGTATGATCGTTTAAATCCCTGAAACAGGAATTTTCCGGCTTCTGATAATGCAGCTGATGCGCTTTTCGTTCAAT  
ATCTGAAAATATGCGGGTGGCTTTTCTTTCTTTCGACTGATGAGCATAGGGATACAGGGCTAAATATCTTGTATATCG  
CCGCTAATATGCTGATTTCTGTAACGAAACTGTTTAAAGAAAACAACGGGTGGGATTAA  
>Cluster\_28440  
ATGCATACCATGAACACAGCGAAGCGCAGAGAACCTTGCATTTGGTTCTGAAAACAGCGGCGACAGGTAATCCGGTAAAC  
GATCAGAGGCGTGGGCATAAGGCCGCTGTGATTATTAGCGCAGAAAGATTTGAACTTACCAGAAGGCTAAACTGGACG  
CGGAATTTGACGCCATCATGGCTATTTCATGGCAGCGAAATTTAGGAGTTAGCGGATAAATGA  
>Cluster\_19351  
ATGTCACGCAAGGGCAACTGCTTTGATAATGCGGTAATGGAGAATTTCTTTGGTCACTGAAAGAAGAAATGTACTATCG  
CCGGACTACAGAAGTGTAGAAGAGCTGGAAAAATGCGGTTAACGAATACATAACTTACTGAAATCAAAAAAGAAATAAAAC  
TCAGTCTTGGGGACTCAGCCCGGTAGAATACCGACTGAGTATCAAAAAGCCGGTTAA  
>Cluster\_35214  
ATGAACAATAGTAATAATCTGGATTATTTCACTCTCTATATCATATTTTCCATGTCATTTATGCTGATCACCCCTCTGGT  
CATCTTATTTGCAAAACCCAGTACCGGGCTGGGAGAAGTGCTTGTGACGATAAATTTGCTTAATGCCCTTGTTTGGCTGG  
CGATCAATCTGGTTAATCGATTAAAGAGAAGACTCGTCAACCCAGGGATCAGCAATAA  
>Cluster\_25973  
ATGCACAAAACAGAACCAAAAATCGTCGCGCCCGGATACACAAATGAGGAAATTTACGAGTGGATGGCAAGAAGCTGGC  
AGCTATAAACAGCTTCTGTAAGTGCTGCTTATCGACAGGAAACAATAGACTCTTAAAAAACTGGATCAGGAAATCA  
CGTTTTATCACAGGATGTTACTTTAGATATTGTCAGACAAATTAAG  
>Cluster\_30720  
ATGACTAAAAGAAGAAATTTGCTCTTATATTTTTGATAAAAACGGTTGAAATGATGCGGCTACTTACGGGTCTGTAATCC  
TCTGAATAAACAGAGGGGAAAGATGATTTTCGACAAAATTTACCGCTTCTTGGAGGACCGCTATATCAAAAAGTTAGAGG  
ACGAGGGATCAATCCCGAGTGAAGTCAACATTTGCTCTGA  
>Cluster\_43574  
ATGGCCAGGTCCCGATCCACGACAACGTAAGGGTTTCCGCAAGCGGAAGCGTTCGCTGAGGCTTGAAGGCATGGA  
CCCGCCGGAACGAGCTGTACGAAAATATCAAGGAGCGGGTTATTTCCGGGATATCACTTACGAAACAGGGACGGGCGAG  
ACATTTCTGGCTCATTACCAGAAGCGTGCGAACGGCCACTGA  
>Cluster\_66872  
ATGACTGTATTTATCCTCGCATGGGTTATGGCATTGTCAGACGGGATCTCTCATTTCTTGTAGTGAAGAAATGCCTATAT  
AGGTTGGACCTGGTCTTCAAGAACTATGACGACCTTCCCATATCTACCGCTCAGCTGGCGATACCAGAGACGATTCA

TTCTTAAACGCCTCTGGAAGCGTCTCTTTAACCGCTGA  
>Cluster\_35567  
ATGTCACAGAGATGTTTACTACGATTACATTCCTGATTATGGCGTTAATGCCTGCATGATGGTGAATGGGATTTCTT  
CAGCTCATTTAATGAGCTTTCATTGCATGCGTTGAAACAATCGGGATGACTTCGGTTCTGGTATCTGTTGCACTGCCTT  
CTGGTTCATGGGTCGGTTATCAGGAGACTGTTTGCTAA  
>Cluster\_22774  
ATGATCCTGAAACAGATCTGAAATGGTACCCGACGGTATGCGTGTGAGGTCATTCGGCCGGTGAATGATGACGACGG  
GGCGCTTCTGCCCGGTCAGGAGATTGCACCTCAGGCCGGTTAGCAGAGCGCGGAACAGTGCAAAAAGCAGTAAAG  
CGCAAAAAGAGAAAAAGCCACGACCAGTAAAGAGGGCTGA  
>Cluster\_48589  
ATGATCAAAATCTATCTATTGGCAGTAGCCACAGGCCCTTTCAGTGGCTCTCATCTACGGTTTACTGGTCCCGTCGCTGAT  
TTCACCAAGAGTGATTTAGCCGTCATGTTGGAGTTATCGTTGGTTTTGGTGTCTCTGTAATCGGTCCTATTGCTGGTC  
GTAAGTTTATCAACTCATTAATCAAAGCAAAGGGGAAATAA  
>Cluster\_43828  
GTGAAAAATATTGTGAGTTAATACGCAAGCGGTACGCGGAAATCGCCAGCGGAGACTTAGGATACGTTCCGGACGCGCT  
GGGCTGCGTTTTGAAAGTGTGAATGAAATGGCTGCCGACGACGCCCTTCTGAGGCTGTCAGGGAAAAAGCAGCATAAG  
CTGCGGCAAACTTACTGGTGAAGGATTATGTCAATGAATGA  
>Cluster\_58178  
ATGACCAATCCGTTGTGCCACCGGGCCCTTTCACCCGGAGACAAGCGCAAGCGGTCACCTACCACGTACAGCAATAT  
CACACTCGAAGACGACAGGCGAGTCACCTCCGTCGTTGGTTCGTTACTGAAAGCCGGATGGTCTGGCGGGCATGGA  
ACTTTGAGCCGGATGCGCGTGAAGGCTTAAACCGCTATATCCGACCTCAGGCATCCGTACAGACAGCGCCACCGCTGA  
>Cluster\_52271  
ATGCTTATCCGGCATACGTTTACGACATTTACCCAGGTCGGATAAGACGCGGCAAAAGCTCGCATCCGGCAATGCTGTC  
CCGATTCGGAATCGCGCTTCCATAAAAACAAAAATCCCTGTCACCTTACATTTCTTTGTTAGCGTTGTTCAAC  
GTTTTATGTACATACGTGAAGTTATGACGCATAAAGAATACGATTTCTTTACCCTGTCATCTACTAAGGGGAAAAAA  
TGA  
>Cluster\_38729  
ATGACTGCAAAACGTACCACACAAGGTGTGACCGTCACCGTCGACCGTGAATAGTCAATCGCGCTCGTGATGACGGCTT  
AAATATGAGCGCCACCTTACGGTTGCGCTCAATGCTGAACTTAAAAACATGCAGCAACACGTTGGCGTGAAGAGAAGC  
CAGAACTATCGCTGCGTTAAATCAATGGCTGATGAAACCGGATGTTTCTCTGATGAGTACCGGAGCTTCTAG  
>Cluster\_67140  
ATGTCACATCCAGTAGGAAAGCAGATATCGAAAGAGCAAGAACACGAACCTTAATTAAGTGGCTAAAAAGAGGGGGTCAA  
AGAGAGTAAAGAAAACAGAACATCACTAGTGTGGCTGATGAAATCAGCGAAGCTAGGCTAGGAATGCCTAGCAATGAGC  
ATCTCGAGCATGCCGAATAGATAAATACTTTGAAAGATAACAAAGGGTATGGATTGACGAATTTGAGACAAAATAA  
>Cluster\_48658  
ATGGACTATAAGCCTGTCATTCAGTTCGCTGATGAAATGACGTGTGCTCAACGCTCAGAATGTATCAGTTTGCATGTATCA  
ATTTTCGGCAGCCGTAAGCAGGAAAAGCGATAGGTGAGAATGTGGAACGTGTAAGAAAGTGGCAATGAAGAAAGGG  
CAATGTTGGATTGCGAATCTAGCGAGTCACTCGGACAGTTCGTTGATGCGCTATTTGACACCAATCGTAAAGGCTGAGAG  
TCTGTTCAAATA  
>Cluster\_17914  
ATGACCCCGCCTGCTCATCTGATGAAATAGGCTATCTGCCGTTTACGTCAGGAAGAAGCAAAAGCTGACTTCCAGGT  
CATCGCTAAACGTTACGAAAAGAGCGCAATGATCCTGACATCCAAATTTGTCGTTCCGGGAGTGGGATCAAACGTTCCGCG  
GTGATGACGCGCTGACCTCAGCGATGCTGGACCGTATCTTACACTACTACATGTCATCAAATCAAAGGAGAAGCTAT  
CGACTCAGATAG  
>Cluster\_40916  
ATGGGCTGGGAGCTTACATAGTAAAGACGGAACATTTGGTTCGATAGCGCAAGTGTTCCAATCAGTAGTGAAGAAATGGCT  
CCAGCTTGTAAATGATGATAAAGAACTCTCCATAGATAACAAGAATGGTGAATTTTTTGGCTCTATGGAGTGGTCAAAGTG  
AACTCGATGAACCTTGTTCATCATCGACGGATAAAAAACAATCTTTGTGGTAAGGTTGATTTCAAAGTAAAAAATTT  
TAA  
>Cluster\_60563  
ATGCGCATTACTATTTTACTACTCGTAACGATTGCGTTTCAAGCGCCACCAAACGGGCGATGAAAAACGGGGCTTTTGA  
TTTTGAAATGATTAATGTCGATCGCGTTTCTGAAGCGGAGAAGCGTTGCGTGTGAGGGCTTTCGTCAGTTGCCGCTAG  
TGATTGCTGGCGATCTTAGCTGGTCTGGTTCCGTCGGACATGATTAACCGTCTGCATCCAGCGCCACACGCGCCAGT  
GCATGA  
>Cluster\_66597  
ATGGATCAGCGCTACTGGACGAGGTTATCGCTGTTATACCGCGGAAAAGATCGATGCTATTTCAACACTGCGATATG  
TCAGCATTTTGGCAATGCGTACGTTGGCAACGGCAAGTATTTTAACTCAAACGAAAGCCGTGGATCATGCCGGATGAAG  
TCGACGTCGTCAGTGTGGTTAAAGTATGATACGTCGCCGAGCGCGCTGAAATACCGTCATAAAATAA  
>Cluster\_64467  
ATGTTAAGACATATTGACCGCATTACCTGGCGTAAACGGTGGCACCTGAAATGGGCGCCGGCAGATGTTGCGAGATCCA  
ACCTATTTTTGATGGGCGTATGGCTGCCGCGCTTTCGGTGTGGGAGCAGTATGAATCCAGGAAGGTCGAGTTGCGCGACA  
AAGGGCTGAGCAATGCGGACTATGAAGCCGTTGTCGTGATAGCCGAGCTCTGGAGATCTGA  
>Cluster\_30514  
ATGCCAATCAAGAACGCAAGCTCATCACGTCGTTGAAATGGGATCTCTGCGCAATACGTCGCGGAAATAGCCGAGGC  
CATTTTCGAAGTCGCGGGTACGACGAAAAAATGGCGGAAAAGATTTGGGAAGAAGGTAGCGATGAAGTGTAGTCAAAG  
CCTTTGCTAAGACCGATAAAGATTCGCTTTTTTTGGGGCAACGACCACTGCAACGTAACAAACGTTTAA  
>Cluster\_45242  
ATGGAATGATAAATGGACGCGCCAGGCAGAGATTTTATAGTGGAAACATATACCTACTCAGAAATTAAGATCTTAACTT  
CATGGCTAAGGAAGAGAAAAGAGCTCGTGAAGAGCTAAAGCATCGGGTTACGAAATGGCGTATATCAAGGGGACTCTG  
AATGTAACGGGATGTTTGTGAGGGCTACCGGGTCTATACTGACAAAGCGCCATCTAATGTCTAA  
>Cluster\_4611  
GTGAGCGGAAAAAGAATGACTAACAGAGAGCTTGTGATGCGCGGATTAAGCTTGCTGGTGAATTTTATTTCAATGATGGG  
GTACGCGCATCGCCCTGGATTCAAATATTTGGAAATCACCGCATCCGCAAGAGCAACTGGTATTTCAAATGGCTGCGGTG  
CTTTTGAAGTTATTCGCGGTTCTGATGTGATGGACGCGCTTGCAGACTGGAGGATGAAGAGTGA  
>Cluster\_46494  
ATGCAAAACAAAGGCACATAGCAGCTCATTAACAGAAAAACACTTCTGAAATGATCCATTTGTCAGCCCGCACCATTTA  
TAACCTTGAACAGCGAGGGCGAGTTTCTCGCCGATAGCACTTACTAGCCGAAATGTAGCATGCGGATTTCCGAAGTAG  
AACAGTGGATTGCGGATCGTAAATCAGCAATGTTTAAAGCGGCCAGACCCGGTGTGTTTGTAGGTAGGTAA  
>Cluster\_40847

ATGATTACGCTATCAGGTAAAGCCGGAATTTAAAGCCTGCCGAATATCTGCCAGATACCTTTTTGCCCGCCCTTTTT  
TAAGAACGTCAGGCCGGGATCACAATTTGGTGTATTGCCGGACGCGAACAGGTTGAAAAATACATGTAGGTCATGGT  
GGAATAACGACCTGTCTATGCTGCCGTAATATTCATATCGAATGGGAGGTATTCAGAATGACTACTGA  
>Cluster\_64827  
ATGATGTCACGGAATATCAAAATGGCAACGGAAGTAAAGACATGGTTACAGGCACGCGGTAGCCACGTTAATGAGTCATA  
TCTCGGTGTTCACGCCCCGATTCTTGGATTACCTGCCACCACCGGAGCTGGTCAGGAGCCCATCAGAATTTAGGAGC  
ATAAATCAGGGATTGCCCGTTTCTAGTATGGACGGCCGATTTAATGGTTGTCTAGATAATTTGGAGATAG  
>Cluster\_40287  
ATGCCGCACATCGACATTAATGTTTCCCGCTGAACCTGGACGAACAACAAAAGCAGCGCTTGTGCAGATATTACCGA  
CGTTATTATTTCGCCATCTGAACAGTAAAGATAGCTCGATAAGCATTCTCTACAGCAGATTCAACCAGAATCTGGCAAG  
CTATCTGGGATGCCGAAATCGCGCCCAATGGAGGCTTTGATAAAGAAACCCGGTTACAGCATGTAA  
>Cluster\_48967  
ATGATGTCGGGAGACGAGAATAAACTTAAGAAATATCGTTTCCCGGAAACACTGACCAACCAGAGCCGCTGGTTTGGCCT  
GCCACTGGATGAAGTATCCCCGACGAATCTGTATTGGCTGGGGTATCAACAATCGAAATATCTGTTCGGTATTGGTG  
CAGCGGTTCTGGTTTATTTCGGGATTAAGAACTGAAAAAAGGGCGGGGACAGTTTCTGGTTACGTGACCTGATTTACTGG  
TATATGCCAACAGCCCTGCTGCGCGGATTTTTTCATAATGTTCCCGATTCTGTGTTCCGGCAGTGGATTAATAG  
>Cluster\_8536  
ATGAGCATGCAAGATCCGATCGCGGATATGCTGACCCGTATCCGTAACGGTCAGGCCGGAACAAGCTGCGGTACCAT  
GCCTTCTCCAAGCTGAAAGTGGCAATCGCCAACTGCTGAAGGAAGAAGTTTATTGAAGATTTTAAAGTTGAAGGGC  
ACACCAAGCCTGAACTGGAATCTACTCTGAAGTATTTCCAGGGCAAAGCTGTTGTAGAAGCATTCAGCGTGTGACGGC  
CCAGGTCGCGCATCTATAAACGTAAGATGAGCTGCGGAAAGTTATGGCGGGTCTGGGTATCGCAGTTGTTTTCTACCT  
TAAAGGTGTATGACTGATCGTGACGCGCCAGGCTGGTCTTGGTGGCGAAATATCTGCTACGTAGCCTAA  
>Cluster\_36034  
ATGCACAGTGAGATCCGTCATACCACGAAGATGCAGGTTTTTTCGCGCCTGGGATTTTGTCTCAAATATCTGTGATGG  
GGAATCATATGTTTTACTCGCTGAAAAATGACAACTGTAATCAGCGGCCTAAAACTACGATGACGCTGATTTATCACT  
ACAATTCCTCTTACTCTGCTTCCGATTTACCTGACACAGGACAGTCCACGCGTTGATGTCCAACTTTTATTGATTGG  
CACGAACCTAATGTTCTCTCAAAGTAAATTTCCCGGTATCAGTACAAACATCTCTTGCAAAATGTCAAATTCAGTTCCG  
TGTAAATTGACAGACCAACGCATAGCGATGATTCGTTTTCGCTTTTCCAAAGATGAAATACCAGCACATCACTGA  
>Cluster\_17506  
ATGAAGCTGAGATATAAGCTGGTATTGTTGCCCTCTTGTACCCTCATCGGTTCTTTTATCTGGTCTGCCGGGCATTA  
CTACAGCAAATATCAGCACGAAAGGAGCGTGTGATGAGGCTGACGAAATGCTGAATCTGCAACAGCCATTACCAGTA  
ACGTCCTGCAATCTCTGCAAAATCAATACAGTTATAGAGGCTAACACGATGCAAAAACAGCAGATCCGACTGGAGTCA  
CAGAGAACCAGGAAGATATCAAAGTGGCTGTTTCCGGGTGATGATGCGCTGTTCTGATCTGTTCTTCCGCGCAGTTAA  
GCGGTTGACGAAATACGCGAACGGTATACGTGTCGGTCCGGTCTTCCGTTACCAGCCAGTCTGACGGATGA  
>Cluster\_25441  
ATGAACAGAGCACAAATTTGCGGGTTATCCATGTTGCCGGCAGAGCTGCGACTGGATGAGGCTACGTATCGACAATT  
ACTTAAAACACACTGCGGCAGTGAATCGTTACGGGTAATGAGCGACTCACAACGGCTAAGGCTTTCGCTGTGATGAAAA  
AACAGGGCTTCAAAGTACATCTAAAGAGCCTCCTTCCATGATAAGCAGTCTGCGATGATCCGCGGTTATGGCAGGAA  
CTGACTTCCAGCGGTACGGTACAGATGGCAGTTGTCGGGTTAAATAAGTTGTTACACGCGCAGCAGCGCTGCGCCG  
GCTGGAGTGGCTTAAACAATCAGCAGGCCAGGCTGATTTGAACAACGAAAAAATGGCTGGCACGTTGCGGAGGGGAA  
GATGA  
>Cluster\_26879  
ATGAACAGAAAACAGAAAACAGAGTTGAAATACCTTCTTACGTAAAGAAATGCGCAGGCTTGAAGATGCAGAGTACAATC  
ATCAGAAATTCGGTTCCGGAATGGATATCAACGACGCCCCGATGCTTACGGCATACCGTATAGCTCAGGCTGCACTACAGA  
CAAAACCGTTAAATAACATACATGAAAAGTATGATTATTTTACGGATACCGCTTGCTTGTGATCTGAAGAACAAAAG  
ATAGCCCACTTTTAGGGCAGCATGGAACCTGTATTTAACTTGGCAGTTGAGCATCCAATGGGTAGAGATGAATTTTG  
CCGGGCAATTCATCATTTGCCAAAATATGGTGTGGCACGCCCGCCATCAGGGCGCTGGCCAGGAAGGGCAAGGCTATA  
AAAGATAA  
>Cluster\_48877  
ATGAAACATACTGAACTCCGTGACGCCGACTGGATGCACTGGAGAAGCATGACACCGGGGCGAGCTTTTTTGTGATGGTGC  
CCCCGCTGTTTTTGTGATGAGCGGATTTTTCCGGCAGTTGGCTTTTATCTCACCGCGCTGAATACACGGGCGAAGAGCTGG  
ACAGCGATACCTGGCAGGCGGAGCTGCATATCGAAGTTTTCTGCTGCTCAGGTGCCGATTCAGAGCTGGATGCGTGG  
ATGGAGTCCCGGATTTATCCGGTATGAGCGATATCCGGCAGTGTGATGATTTGATCACCAGTATGGTGGCCAGTGGCTA  
TGACTACCGGCGCAGCATGATGCGGGCTGTGGAGTTACGCCGATCTGACTTATGTCTATACCTATGAAATGTGA  
>Cluster\_23283  
ATGGCGGACACTCATACGCGCAAGGGCCCGTAAAAGCGTTCGGGCATCGGGCAGCAATTTGTTCCATCATGTTGTA  
AATGGTGGAGACAGCTCTCGGGTGGCGGTGGTGGAGCTGGAAGAGGAAAAAGCGAATCTCTTTCACTTTTACTGATGC  
TGGGCTGACGATGTTTTTCGCTGCATTTGGTCTTATGACCTGATGGTGTGATTTATCTGGGCGGTTGATCCGCAAT  
CGCTGAAATGCGATGATTGCCACCACCGTGGTGTGCTGCTACTGGCAGTGTGGCGCATCTGGACGTTACGTAATC  
GCGTAAGTCTACGTTGCTGCGCCACACGCGCATGAGCTGGCAACAGTCCGCGAGCTGCTCGAGGAGGAGTCCCGTGAGC  
AGTAA  
>Cluster\_48828  
ATGAGTACAGAGTTAAATAGCGGTACTGTCCGGTGGTTTTGGTCCATGGGACCAATGACCCCTACAATGATGGTCATAG  
CGGCTCTGGAAGTTCGGGAGGTAGTTTTAACGGTGGTGGTAATGGTGGCCATGATAATAGTAGTGGTTTATCTTATACG  
CATCTTTGGTCTCATCACTGGCCGACACCCGATAACTGTCCAGGTACGAAGAATATTAATTTCTGTCGATCTTTCTGCT  
GTCAATTAATAACATATATACATCATGAAGGTGACGCAATAAATGATGACTGACTGCGAACAATGTAAGAGTGGGAGT  
GACGGGCACTGGCTGGCAATGTCTAGCAACGGCAGGCAATTTCCGGTGGGTTAAAGAACTTTCCGCTAA  
>Cluster\_38817  
ATGGATAAAATAGCCAATAAAGCAGCAACTCTGAAGCCAACCTTAAATTTGGTAGCCAATGGATGACGAGTGGAAATAG  
CTGGATTGATACAACCTGACAGGAAATCAATCAGGAAGTTTACCCCGCTAATTTATCCCTGGCCAGTGATACAACCT  
CCACCACAAGCTATATCGGAATGGGATTTAAAAGGAAGGCGACCTCAGGCGATACATTTCTGAAACCAATAGCACAGAA  
TACATACGCTGGAGTGCATCAGAAATAGCACCGATGGACTTGGATGATTTGTCGCATACGTGAAACAAATGCAGGGCA  
AGGTGTACCTGGAAGTTTCCGCGACTGGCAACTTTTAACTTACGCTATCAATAA  
>Cluster\_6028  
GTGAAACATAAACACGTTGGGCGGGGCAATCTGCTGTTTTGTCTCTTCTATTTGTTGGTGTGCCTTTTTCTGGCGACGCA  
CATGAAAGCGCTTTTCCGGGCTGCCGGGATCCGTAAGTCCGCTTGTCTATTTTTCTTCTTCCGAGCAGTCCGCGAGT  
CTTTTTACAGCGTAGAGAACTGAAACCTCTGTTTGGCGCAATGCTGGCGGCAACCTGTTTCGATGCTCATTATGCGG  
CTGTTTTTTTTACCGACGCGCTCATTTCTGGCAAGAGCTGGCATGGTTACTAAGCGCGGTGTTCTGGTGTGCGCTGGGGC  
ACTGTGTTTTCTTATTTATCAGTAGTTTGTTTAAACCACAGCACAGAAAAATCAGTAA

>Cluster\_20501

ATGAAACACGGAATTAAGCACTGCTCATTACCTGTGCCCTGGCTGTGCCGGAATGTCTCATAGCGCGTGGCGGCAGC  
TTCTGTGGCGAAACCGACAACAGTAGAAACCAAAGCGGAGCTCCTGCAGCACAAAGTAAAGCAGCAGTACCGGCGAAAG  
CCAGTGACGAAGAAGGCACCCGGGTGAGCATTAAATAATGCCAGCGCGGAAGAGTTAGCCCGCGCGATGAATGGCGTTGGC  
CTGAAGAAAAGCCAGCGATTGTCAAGTTATCGCGAAGAGTACGGTCCGTTTAAACCGTGGAGGATCTAAAACAGGTGCC  
GGGATGGCAATTCGCTGGTGGAACTAATCTGGCGGTATTAACCTGTAA

>Cluster\_17526

ATGAGTTTAAAGTAAACAGGTTGCTCAGCTTCGTTCCAAATCAAACATATCTCGCCCAATTGGACACTATTTCCACTGATGA  
TGCATACTCACGGCATGGTGGAGGAAACCGCGGAGGTAACATGCTTGAGGCTAGAGTTGCAAAGCTAGAGTCTGATGTTG  
AATACATCAAGCGCGATCTCGTGAAGTAAAGTCAAGATATAAAATCTGTAGATTCTCGTCTGTGAGGATTTGAGACAAGC  
ATTAGCTCAGCAAAATCACCATCAAGGCATCTGCGGTGTTGTCAGTTTCGTGTTCCGATTTTGGCGCTACATTTTTGG  
AAGTTATGTTTCCAAATCCTTGATGCCTTAAACGGACTCGTTCTTAAGTAA

>Cluster\_43425

ATGATGCGCAATCAGTTCAGACGGTATTACCTGAAAGTACAGGAAACAATACGTTATCGCTGCGTGATTCCGTATGCCG  
GGATCTCTTTCACTTTTGTAGTTCTCCCATTCGCCGTACCAATATTACTGTTTCCAGGCATGCCTGAGTGGCAAGGC  
ATAATCAGAGCGACAAGCTTCTCCAGAGTTGGTATTGCCGCCAGTTACGTTCCGCGCTTTTATTTTATGAGCCAGTATT  
GCGCATTCAGCGTCAATCTGAAAGCAGTCTAATTCGCAAGAGTACGTTGGCCATTAGTCTGGATATGATGCTTACCACGATGA  
TGAGCCGCTAACGTTTACCTGGTCTGGCAGAAGGGCAGCTGGCATCGCACGATGCCGAGTAA

>Cluster\_41704

ATGACCACAACGCAAAAAACGACTGACGTTACAGCCGTCGACGCGCCACTGGTGGTGGACGGTGGCGGGATGCCTGGC  
AATGGTGTACTGAAACGCAAGCATCAGTTACGGCATTTGTCAGACTGAACGCGCCGCTGACTGCCGCTTCAACATGAAAC  
AGACCGTGGATGCGTTTTTTGACAGCGCAGTCAAGAAACAATGTCAGAACGACAGTCAAAGCCCTTTCAGCGCGTTTT  
AACACGGCACTGGAAGCCAGCTTCAGGCATGGCAGCAGAAACACCACGCGGTATTCTGGTGTGCCCTGCCGTGGTACA  
GGGGCTCCGGATATCACCCGGGAAATCCAGCAGGATATCGCCCGCGAATGAGGGCGGAGCCATGA

>Cluster\_52954

ATGCTGTGTGCTGCTGCTGAGTCAAAACGTTGCTCGGAAGCTTCTGCTCGTTTACGTTTGGTGGTGGATAGCAAGTGGATT  
GCTGTTACGCTCAAAGACCCCTTCTGGGGGCTCTGCAATAAGCGGGGGCTGGCAGTCTTCTGCTAACGTTTTTGT  
TTATGATAATTTGGCTGGCTGACAGGCGCATACACGCGAAAGCGGGTGGCTGGACATTCGCATTTGGCGAAGCT  
TTCAAAGTCTGGCGATGTTGGTGTACTGGTGGTGGCGTTGGCGTTTTAAAGGCGGTTTCTTGGCGCTGATCGTTAC  
GTGGTTTTGGTGTGTTGGTTCAGATACTGGCACCGCTGTAATTAACAACAAGGGTAA

>Cluster\_64812

ATGTTTAAAGCGTTTCTGTATTTTGTACCAAATGTCTGCCGTCATGTTGCTGGCGTGATTCTGATATACAGCTTGT  
TTATGGTTTTGGGGCGCTGCTGTTCTGGAATGCTGCCGTTTTTCAAGTGTGGCGTGCTTTTACCGCACTATTTTTGATG  
ATCTGTCCCGACAGGAAAAATCCGACGTTATGCTTCTATTAATGCCATTGATTTTCTGGTGGCCTCGTCCGGTTAAGT  
CTTTCGGCTATTGCAACCGGGCTTTTAGAAGAAGCGCATCAGTTACAGATTTATGCTTTATCTGGCTTCTGTAGCATATG  
GTTTTGCTTTCGCCCTCATATCTGTCTGCGACGTTTCAAGTACCGTCTGGCGGGAGGCATGA

>Cluster\_19634

ATGGCTGATGAAAACCGGATTAGTTCGCTGGCAGGTGATGACCCACGCGCCAGCAGTACGCCGAACGTTGGCGCAGGC  
TAGCCGATGACTATTTCCCGGCTGCATCCGGCGATGTAACAGTGTGATGAGTCAAGTGTGCAACGATGCTTGGCGCAC  
CTGTCCCGATAGTCCGTTGCTATGACTGACACGCGCTGCATGGCGTGCCTGTCTGCTTGGAGCAAGGACTTGGCGAGCTT  
CTGGATGGCTTGAATAAAGTGTGCTGACCATCTTCTTCTGCTGCTGCGGAGAGACAGCGCTTGGCATTGGCTGGTAA  
GCAAAAGAAACCGCTTACAGCCGCGCAGCGAGGTTTACCATTGAGCAATACCGGCAATGCACCCGGCTTACAGAGAGG  
ATAAAGAACATGATAACACGATTAA

>Cluster\_19248

ATGGCTTATAAACACATTGGCGTGGCAATTTCCGGGAATGAAGAAGATGCCTTACTGGTGAATAAAGCCCTGGAGCTCGC  
CAGACATAATGACGCTCACCTGACGTTAATTCATATTGATGATGGCTTAAAGCGAGTTGATCCGGGATCTACTTCCCTG  
CAACAGAAGATATTTCCAAATTTGTTGAAGAATAAGTCCGATAAACAAGCTGTATAAACAAGTACGAAAAAATCAATGGCCG  
AAGACAAAACGCTTATGAAACGCGGAGAAATGCCGAAACACTGCTGGAAATATGCAAAAAGAGCAGTGGACCTCCT  
TGTCTGTGCTCATCACCCTCATTTATCAACCGTTTATGATGCCGCATATCGCGGGATGATCAATAAGTTGAGTGGGATC  
TCTGATCGTGGCTTTATCGACAAGTAA

>Cluster\_65316

ATGGACATTGAGTTTTTCGAGATTATGAAATGGTCTATATGCATGATATTGTAATTCGGACTCGAAAAAGAAACCAAG  
GATTCCTTAAAAAATTCCTTAATGCTGAGAAGGTTCTCACGCAAAACAATCATGGGCATTAATCAAGATTTGTGA  
ATGTTAATCTGTCAATAAAGTCAACGTAAGAGTAAAGTAAAGCAGTTATATCTCAGCATCTGTCAATGATGAGTTT  
AGTTTAAACGATGATGAAATCAATTTCTTTAAAGAAACGTTAGTCTTCTTATTTGATTTCACTGAGTAAACTGGTTCT  
TAATAATCTCTTTCTGTATTGTTTACATCGACTGTACGAAGGATAAATAATCGAGCTAAGATGAATGCTGAGTTCGACT  
CATGGATTTGCACAGATGTTGTGA

>Cluster\_62272

ATGACCTGTGGTTTTGAAAGATCAATCCATCGACACTGGACGATTTGTACTGTCTCGTATCAATAATGAAAATTTACAGTT  
TCATCATATAAGATTTGACTGCATCCAGGGCAGCAAGGTGAATAGTTTGTGAACCCAGTGAATGATTTACTTTG  
AACAGTGAAGATACAGGAGTACAGAACAGCATATTAATAAATGAGTTAGAAAACAGTGGAGCGGTGCGGGTCAAATA  
GGCTTCAACTCTCAATGATGGTACGAATGAAATCAGTATGGTAAAAGCAATTAATACTTCTTTCAGCATCCCATGA  
AGGAAGTAATCAGATTCTCTATTTATTCGCCCGCTACATATGGAATAATGCTCAAGCGGCAATAATGAGCCGAG  
TCAAAATCGTGGTTATGTACAATAA

>Cluster\_20330

ATGGAAAAGAAAACCGCCATTACAGCGGCTAATTCAGATATTCGTGTATCTGATGTTACGCCCTTACAAAATCCCT  
TCAAGCACAAAGCTACACGAAAAGCATCGTGCCAGAGTCTATATGCTGCGTACTGGTATAGAGGATGGACAGAAA  
ATGACATTTCTCGTACTGCCGTCTGCTTCTGGTCTGTAATGCAACAGAGTTAGAACGCCAGCTTGAATCACTCTG  
GAGCGTATCGACGAAAAGAAATCTGATGGTATCGGAACACACCTTCGCTACCGTTTCTCTGCGGTGGTGTCTGAA  
AGTATCACTCATATTAACCATCTTGGCAACATAAATGATCACACGGACTTTCTCAGCAGGAAATGCGGACATTCGA  
AACTTACCCGACGCGTTTACGCCGCTAA

>Cluster\_18572

ATGCGTTTAAATACTCTGTCTCCGGCCGAAGGCTCCAAAAGCGGGTAAACGCCCTGGTCTGGTATCGGTTCTGGCT  
CGGTAAAACCGGTACTGCTGGTCAAAAGGTCAGAAATCTGTTCTGGCGGTGGCGTACGTCGCGGTTTTGAGGGTGGTC  
AGATGCCCTGTACCGTCTGCTGCCGAAATTCGGCTTCACTTCTCGTAAAGCAGCGATTACAGCCGAAGTCTGCTGTCT  
GACCTGGCTAAAGTAGAAGCGGTTGTTGAGACTGAAACAGCTGAAAGCGGCTAAACATTTATCGGTATCCAGATCGAGTT  
CGGAAAAGTATCTGGCTGGCGAAGTAAACGACTGCTGCTGGCTGCGTGTACTAAAGCGCTCGTGTCTG  
CTATCGAAGTGTGGCGGTTAAATCGAGGAATAA

>Cluster\_14025

ATGGATGCATTTATGCTATTGCCCTCTCATGAAAAGAGACTAACAGTAAATATGAATAATATTAATCAATCGGAAAACAT  
TAATATTCAGTTAAATAAAGCATCCCAAACAAATGTCGTTGATGAGCATATCCCGTTAGCATCAACCCCTCTGCAGCCG  
GAGCGCTCAGTTTCTTGATCAATTAACCTCCCTAAAACGGCGGAGTGTCTCCCGAGAACAAGTGTGATTGAAGAAAT  
AAAAAGCGACATCTTGCAACAATGAACCCGATCTCAGTTTCGATGCACTATCTGCAGGTGGGCTCTGCCCGAAGATGT  
ACTCACTTTACAAAAGAAATGTGCTCAACGCAACAGTCAATGTTGATGTCGTATCTAAGTTAGCAAGCCCTCTTCAACAT  
CGTTTACAAAATTAAGTTTCGATGCAATAA  
>Cluster\_61100  
ATGAAAACCTTTTACAGCTAAAACCAGAAACCGTAAAACGGGACTGGTATGTTGTTGACGCGACCAGGTAACAACTCTGGCCG  
TCTGGCTACTGAACTGGCTCGCTCGCTGCGCGTAAAGCACAAAGCGGAATACACTCCGCACGTAGATACCGGTGATTACA  
TCATCGTTCTGAACGCTGACAAAAGTGTGTAACCGGCAACAAGCGTACTGACAAAAGTACTATCACACACCGGCCAC  
ATCGGTGGTATCAACAAGCGACCTTTGAGAGATGATGCTCGCCGCTGAGCGTGTGATTGAAATCGCGGTTAAAGG  
CATGTTGCCAAAAGGCCGCTGGGCTGCTATGTTCCGTAACCTGAAAGTTTACGCGGGTAAACGAGCACAACCACGCGG  
CACAGCAACCGCAAGTTCTTGACATCTAA  
>Cluster\_44369  
ATGTTTCTGAAAACAGAACAAATTTGAATATAACGGTGTGTCCGTCACGCTTTCCGAATGTCCTGCGCTGCAGCGGTTTGA  
TTATATAAAGTTGTTTTCAGACGAGAACACAGGAGACAAAGCAATGATGTCGTGCACATTAACCAGCGATATCTGG  
AAACCGGCATCCCTCTTGGCGATGTCGCTATGGCATTCCCATTTCCCTCAAAGGCACCTCTGGCCCTCCGGAGACAGAG  
ATGCAGCAGATCCGCGTGAAGTGTGCTGGGATGGCTGCTGATGCACTGAATCAGGCAACGAAACCGGGTGTCTTATCT  
TTCAGGTATGCTGATAACCGGACGATGCCGATCCTGAACAAACCGGAAAGCAGAAAGCAGTGCAGCGGTAACATCAA  
AAAAGCATTCGAAGCGAGCTGA  
>Cluster\_31536  
ATGAGTGACATGAATAATCCGGCGATGACAACACGGTGAATGACGATCTGTGGGCTGAAGCGTTGAGCGAACAAAA  
ATCAACCAGCAGCAAAAAGCGCTGCCGACGCGGTTTCCAGCAATTTGGCGGTGGTGTGTCAGCGGAACGTTGAGGATA  
TCGACTGTATTATGGATATTCGGTCAAGCTGACCGTCCGAGCTGGGCGTACGCGGATGACCATCAAAGAGCTTTGCGT  
CTGACGCAAGGGTCCGCTGCTGGGCTGGACGGTCTGGCGGGCAACCGCTGGATATCTGATCAACGGTTATTTAATTGC  
TCAGGGCGAAGTTGTCGTAGTCGTGATAAATATGGCGTGGGATCACCGATATCATTACTCCGCTGAGCGGATGCGCC  
GCCTGAGCCGTTAG  
>Cluster\_38571  
ATGGCTCGTTCAGCTAAACCCCGTAAACGCAACCCCGCACCACAAAGAAGCAAACCTCTCCGCTATGTTGTGAACTTCA  
TCCGGATGATTTTTTTGACGAAGAGACGCTGAAGTTCGCGCTTTGATAATTTTGACGATGCCGTTGAGTGCAGCGCTG  
ACCTGGGTATTCGCTTCTTCTGGATGCAGGAAACAAAAGCTGGTCTCTGGTTTGTTCGTGTCGATGACGAAGGGTAT  
CCGAAAATAGCCCGCTGTACGGAGCGGGAGTTTGAACCATCTTCCGCGTATCAGTGCAGGTTGATGCTACTGCCCGGA  
ATGCGGCACAGTTCACTGGCCGGATGGCGTTACCCCGCTGCTGATGCTTCCCGTTTTGCGGATATTTTTCAACAGGGA  
AACCGCTGGCTTAA  
>Cluster\_6780  
ATGGATCAGGTAGTCATTTTTTAAACAAATATTTGATAAAGTTTCGAAACGATTTAAACTATCAATGGTTTTATTCTGAGCT  
AAAACATCACAATGTCTCACATTACTATTTAGCCACAGAGAATGTTCAATTTGATTTAAAAATGATAATACAG  
TGTATTAAAGGGCTAAAAAACATTGTCTGTCAAAATTTTCAAAGGATAGGCATCTTATAGAAACGACCTTAATAAG  
CTGAAATCCAGAGATCACATTTACAGGAATACAGAAGAACTTGTCTAAAGCAGGAGTTTTTCGGTGGGTTACAAATAT  
CCAGCAACAAAAAGATATTACTATACCTTTGATAATTCATTACTATTTACTGAAAGCATCCAGAAAACCTACACAGATCT  
TACCACGCTAA  
>Cluster\_64991  
ATGGCTGAGGAGTGGCGGAAATGTTTTCTGGACGCTGCGAAAAAGTTTGTGCGCAGTAGCGACGAGATGCCGGAACA  
CAGCTCTCAGGTAATGTATTACTCGCTGGCTATCGGTCATCACGTTGGCGTGATGATTGCTGAATGTCGCTTCCGCT  
GCCACTGACGGAATACGAAGATGGCTTGCACAGGTCGAAGAGGAGCAGCCCGACGTAAGATGCTGGGGGTGATGACC  
TTTTGGTGAGATTGTTATTGACGCCAGCCACACCGCCCTGTTGACCCGGGCACTTCGCGCTACTGGCAGATGACGCGACGTC  
TGTGTGGCAGGCGGTAGCATTCATTCATTCTGTTGGATGAAATGTTGCAGGAACCGGCCATCTATCTGATGGCCA  
GAAAAATTGCGTGA  
>Cluster\_14911  
ATGAAGAAGTTAGTGTTTTTATTGATTTCTATCCTTGTGTTGTTTCTATCACCGCCAGAGCCAACACCCGTCAGTTTGA  
AAAGGCAAAATGAAGTGATCAATCCCTCATTGCCATATGTCCCGATTTTCACGTTGTCATAAAGTCAGACGTTAGCGGTA  
AAGGATGGGTTTTATGAGATCACTTCTTATCCGGAGTACAGGCCAGAACCGGACGTTTTATTACGCTCTGGCTCATGCG  
GACAGGATGTAGTGACAACACATGATGCTGGGCTGTGGTTTCAATCAGAGATCTGTTGAAGATGGAAGGGGCAACAGC  
AGTCGTGGAGTGGCGAAACGAAAAAGTTTTTACCTGAACAGGAAAAATAGTTTTTCATTAAGCACAAAACAGGTTGA  
AAAATGACTGGAAAAAATAG  
>Cluster\_27699  
ATGACTGCTAATGCTGTACGCGCTGTTAAAGCAACAAGAGAAGTGGTCAATGCAGTCCCTTTCTGGGAGGCAGTGACTC  
AGAAGATGATTTATCGTGAAGCAGTGGAACTGGTGAATATTTGATTGAAGAAGATGACACCAATCCACTTATCGACTTTC  
TGACGAGCCGATTCGAGAAATATGAAAACAACAACGAAAAGTTTGCAGAGTTCGACAAAAGCCGTTGCGGCAATGCCTGTT  
GGTGTGGCGTTACTTCGACGCTGATGATCAACATAAATCTGACCTATGCGGATTTGAAGAACGAAATCGGCTTAAATC  
CCTGGTACGACGATCTTGTCTGGACAACGATCCTTGACGATATCCACATTAAGGCACTTTCAGCCGATTTGGCGTTA  
AGCCGGAATGGTTTTCTTGA  
>Cluster\_22049  
ATGAAAAAATCGCAATTCGAGGCGGCTCATGTTGCTGGCGGCTGTGCCGAAGTCGAAAACATAACAATGTCGTGAA  
AACCCCGCGCCGGACTGGCTGGCGGGCTACTGGCAGACCAAAAGGCGCAACGTTGCGTGGTCAAGTCCGGAAGCGATG  
GCAGCCGTGATTTGCTACTAAAGAGGGCGATACCCCTCGATTCGCGTCAAGTGGCAGCGGGTATTGCGCTCCGGCAAGTTC  
ACATTTGATGCTGATGATCTCACTAACGTTACCGTAAAACGTTAGCTATACGAGGTTGAGCGTACCGGTAACACCATTGA  
GTACGATGGTATGACGATGGAGCGTGTGGATCGCCGACGCGAGAGTGTGCCGCTGCGCTGGATAAAGCGCCGTTACCGA  
CGCCACTGCCGTAA  
>Cluster\_37323  
ATGTTTGAATTTCTATATCGCCGCGGCTGAGCAGAAAGAAACAGGTCACCTGGTATCTTCTCCCGACAAAACACAGCAC  
CATAATATATGTAATTTGTTTATTAAGTATTTGCTGTTGTTGAGGAAATGGTGTGTTGGTGGGTTATGCCAGGCAGC  
TATGGTGGCTTTGGATAGTAAAAGCCGAAGTCACTGTAGAGGCTGAAACGCCCCGTTTTAAACAATCAACACAACACTAT  
TTCTTCAAAAACAGCCACTCCCGCTCGTCAATCCGTCGAGGAGAAAGATGACCCAGGCGCTCGCGTTGAGAAATGCCCC  
CTCTTCTTGAAGCAGAAAGAAATACTGTGAAAGAAAGCAGAAAGAAAGCCGTTTTAAGAGAGCGGTGCTCAAAAATGCAC  
TGAACGAACCTTGAGAGATAA  
>Cluster\_40811  
ATGTCACAGACCCCATCCGATACTTTTTAAATTGCTTTATCCCTTACCCTGCTGCAGGCACCAGAATTGAGCAGGTTGA  
ACTGAAACGCTGACGGTAAAGACCTGAAGCAGGTGCGCAAAATCAGCAAAAACCCGCGAGACTGGGACGAACCGCTGA



TTGCCCGCAGTACTGGTCTTCTCCCGGAAGATCTCGACAATATGGACCTGGCTGATTACCTGCAGTTACAGAAACGATTT  
CAGCTCATCACGGGGATGGGTGAGAGCGACAAAGGCGCTGACGCGAGGCCAGGGGCTGCTGGCGAGATGGTTCCGGTTTC  
AGCCGGGGGAGATTGA  
>Cluster\_48  
ATGAAACAGAAAACAAAAACAAGAGTTGAAATACCTTCTTACGTAAAGAAATGCCAGGCTTGAAGATGCAGAATCACAAATC  
ATCAGAAATTCGGTTTCGGGAATGGATATCAACGACGCCCCGTATACTCCAGGCATACCGCATAGCTCAGGCTGCACTACAGG  
CAAAACCGTFCAGATGGACTGGTTAGAGCAGTACGTTTCTATGAACTGGTAAAGCGTGAGAATCCGCCAGTFCGAAACCGGA  
GCATGGAAGACGCTGTTGACTGGGTGCTCAAAGAGGCTTGCCATGTTGTAATATTGGTATCAAGGGAGGGGATATGG  
CAACCAACAACCGTAA  
>Cluster\_4066  
ATGAAAAAGTATTAGGCGTTATCTTGGTGGTCTGCTTCTTCGCCAGTTGTGAGCAATGCAGCGGATGCGCAAAAAGC  
AGCTGATAACAAAAACCGGTCAACTCCGACCTGTGAAGATTTCTTGGCTGTGGACGAATCCTTCCAGCAACTGCAG  
TTGGTTTTGCTGAAGCGCTGAACAACAAAGATAAACCAAGAGATGCGGTTTTAGATGTTGAGGTTATTCAGCAACCGTAAAC  
CCAGCTATCGTTCAGGCTTGTACTCAGGATAAACAGCAACTTTAAAGATAAAGTTAAAGCGAATGGGACAAAATTA  
GAAAGATATGTAA  
>Cluster\_48693  
ATGAATAGTTATGAATGGGCATGGCTTTTGAACAAGATGACACCCTATACTTTTTCCCGTAGGCCATTCTGTAGAAGG  
TAATTACAAAATTCACCTTTGAGTTGAGCGGTAGTTGTAACCTTAGAGTCTCAGATGCTGAATTGCATGGTAAACCTGTAC  
TGCTGTTTCAATACTTCCATGAAGATGATGACCGCCCTGCAATAATCGAAATATAGAAAACCACTACAACCTGTGGAG  
CGGATGATCGCACATCTGAATAGTATCGATAGTATTTACCATGAACCGATTACAAGCTGTTTACGAGTGGGCTGTAAA  
GTTTTTCTATCGATGA  
>Cluster\_58197  
ATGAATAAAGACTTACTCAAACCTGGGGGCTTAAACGAGATAATCACACCGTGTTCGGAGCAGGACTGGTGCAGGAAGG  
TCATCGTCTGCATTTCTGGCTGACCGGGCTGGATTACCGGCTCATTGAGTGAGGTGAGACTTACAACTGGATGAAG  
CCTTCCCGCATTTTTGTCGCACATCTGGAGCTGATGCTGCTCTCTGTGAGCTGAATCCAGGTACGCGCACTGTGTCACA  
CTGTACCGTAACGGGCTGACTGGTGAAGCGATACGCTGGGCAGTCAATGGGTATGATATATATCGCAATTTTGAATCGCCA  
CGGGTTTAAACAGACACCTCCGAGTCATTTAA  
>Cluster\_62128  
ATGTCGGCGACAGCGGAACCGGCTTCAATCCGCTGGCAATTCACACATACTTCGGCGTAATATCCATCGGGACAGC  
CCGGATAGCCCAATGGTCAGCTCATCGCCAGCAATGTCGTGAACCTGTGAGACGAAACAGCGTACACAGTTTGAATGTA  
TCTACTTTTCCCAATACTGGGCGAAGGGAGATTTATTGCGAAGCGCGCCCAATGGTCACTGGGAACCTTATTCGGAA  
GAGTCACTACTTGGCATCATCTGTCACACGCTGTCGTATTTAAAGTCCGCGATGCTAAAACCTGAACCTCCAGAGATCC  
CCATATCCCGCTGATGGGGGATTTTAACTAA  
>Cluster\_25072  
ATGAAACAAAAACGATGACACAATTTACTACTAATTAATTTATATGAGGATGATTACCTCCTGCCTTTAAACCGTGC  
TGAACCTTGAAGCATACAAAGAAAACAGCCAGCGGCACATAATGAGGCGTTTTAAACACTGGGATTTAGCTGTGAATGCCT  
TTGAGATGCTCTGTAAGCGTGTAGAGATGCTCTGTAAGAGTGAGAACGCATATCTGACAGCGGATCAGATATGGGAGCTA  
TCAAACCTGGATAGAAGGTTATTTACTCGGACGTTGCTATGTAGGAGACGGACTGTTTGAACCTAGCTCAACGCTTAGGCGC  
TGCTATCACAGAAGAATAA  
>Cluster\_21768  
GTGACAACCCGCTACACAGGAATGAATCCGGACGGGACGGGAAACCTGAACGATATGGAGCACCTGAAACAGTCAATCAG  
GGATATCTGACCAACCCGCTGGCAAGCCGGGTTATGCGACGGGAATATGGCAGCCTTGTGCCGATTTGATTGACGAAAC  
CCATGAATAACACACCGCTCTGCAATGATGAGTCTGCTGCTGATTGCACTGACACGATGGGAACCCCGCATTCGCCATG  
GATGCCATCGACGTTGCTGGAAGGCGAGGCGCGCGGGTGACGCTGTCCGGCACTGTGATGACAGACCATGACAGAA  
TGTGAAATTAACCATCACGCTGAGAGAGTAA  
>Cluster\_17661  
ATGGAAAAGGTGATTTGAAATTAACCGCCCGCTGAGGGTTTTGCGCGCTGCGGTGTGGCACACAGTGCACCAGCAAGGC  
ATGGCCGGTGGATGCGTTACCCCGGAACAGCTGGCGGTGCTGAAGGCTGACCCATGCTGATTTGGTGGAGCGCGATA  
AAGCGTCCGGTCAAGACGACGCGCCCGGGGTGATGAACTGGCCGACAGCTGGATGCCGAGCGTCAGAAAGTCAAGCGAA  
CTGACGGCGCAGCTGGAAGAAGAACCGCGGAAGGTCAGGACCTGACTGCGGAGCTTAAAGCGGCGAAGAAAACGGACAA  
GAAGGAGAAGTAA  
>Cluster\_49361  
ATGAAAAATACATTACTGGTTACCTTGCCTTTTCGGTCTGGTTTTTTTAAACACCGTCCGGCGCTGCCGAGAGAACCTTAA  
CCCACAACAACAGCGTATGACCTCTTGTAAATCAGCAGCGCAGCGCGCAGGCGTTGAAAGGGGATGCTCGTAAGACCTACA  
TGAGTGAATTCCTGAAGAAGACAGCAAAATCTGCGCGTGGTGAAGAAAGTTTGACGCGCACAGCAGCAAAAGATGCGCGAATG  
AATAATCAAGCAACAACAATCTCTGAAAGGGATGATCGTAATAAGTTTATGAGTGCCTCAAGAAAGCCGCTG  
A  
>Cluster\_10969  
ATGATCCCTGGAGAATATAAGGTTAAACCTGGCTATATAGAGCTTAACATCGGCCGGGCTACCTGCAGTATTATCGTTGA  
AAATCACGGAGACCGACCAATTCAGGTCGGTTCCATTATCATTCTCGGGAGGTTAACCCGGCACTGAAGTTGATCGCC  
AGAAGGCAAGAGGCTATCGTCTCAATATCGCCCGGAACTGCAGTGCCTTCGAACAGGCCAAAAGCGTGAGGTTGAT  
CTGGTGGCGCTGAGCGGTGCCGTATCGTGCACGGTTTTCCGCGGAGATATAATGGGTGAGCTGGAGGCAATGATGAGTA  
A  
>Cluster\_28657  
ATGAATATTGCTGTGTTGCCCTGTACGGCGGGTATTGCTCATACCTATATTGCTCGTGAAGGTTAATCAAAGGAGC  
AAAAGCTCTGGGCCATACCATTAAGGTTGAAACCCAGGGAACCTATTGGTACAGAAAATGAATTAACAGGCGGCAGATATCT  
CTGCTGCTGACGCTGATGTTCTTGTCTGTAGATGTGAAAATAAAAGGAGAAGAAGCCTTCAACAAATAACGATTTGTGCGA  
GTAAGACAGAGATCGTCAATTAATCGCCGTTCAATTTCTTGAAGGCTGAAAAATCACTGGGAAACAAATGA  
>Cluster\_19803  
ATGGAAAAGCGATCTTTTAAAGAAAACCTGGAATAATCAGAAAACATAATAAGAGAGTCTTACTGGGAAATGCGGCAAT  
TATTGGCGTGATATATGACGATCAGTTCATTAACCGTCAATGACTTCCCTGACTATCTTGTAAAGTTTATTAAGTA  
TCGACAGCGCATCGTTGATTAAGGTTATTTTCAATTTATCTATATTTTGTGAGCTATTCAGAAAGCCACTGGATT  
CGGATGAGTTTATCATATGGTCTCAGTAATCAACCTCATTAATTTGATGGTTTTTATGACCGTTTTATATGA  
>Cluster\_48623  
ATGTCGAACGAGATGGCGGGCTTACAACAGAGCAAGTTGAGCGTATTGCCGCGATCGTTGCTCGGGAGGTTGTGGCAA  
ATTAGGTAAGAGCTACGTGAAGAAATGGCCAGGAGTCAATGATCAGCTGAAAACCTACTTTGGTGTATGACCCCGG  
CGCAACATAGATTTCAACACTCCAACTGGACAACCTCTTAAACCGGTTAGATTCCATCTCCAGTGGGTTCTTTGCGCGG  
ATTTGTTTCAAATAACGTCGTTTCAATTAATTACTGCACTCTTTTGGGGTTAGCCCGCTATGGCGTAAAAAATGGACTGCA  
ATAA

>Cluster\_14053

ATGACTGCAAAAACATAAATTTAAAAGTCTGCATTTGAAGCTATTACAGCGCAGCGGCTGGATTGTCCAGCGTCGATGC  
TATTTCTGCCGAAACGATGCGTACTTTTGACAAAGCCTGCCTGACCAGCGTCAAGACTTACAACCTGTTGAGATAAAAG  
CACTGCGGGAAAAATTTAAAAGTGAAGTCACTCGCTTTCCTCCTACTATCTCAATACCAGCGTTTCAACTGTACAAAAATGG  
GAAAGTGGCGCTAAACGCCCAATGGCATTTCATTAATAACTGCTCAGCATTGTGCAAAAACACGGGCTGGAGGTGCTGCT  
GTAA

>Cluster\_3231

ATGCGTAATAGCCATAACATTACACTAACAAATAACGACAGCCTTACTGAGGATGAAGAAAACCACATGGTCACTGCCTGG  
TGCCGTGGTTCGGTTTATCTCCTGGTTATTTGCGCTGGCGATGCCGATGTTGATTTATGGCTCTAACACGCTGTTCTTCT  
TTATCTACACCTGGCCTTTCTTTCTGGCGCTGATGCCCGTGCCTGAGTGGTGGGGATTGCGCTGCATTCATTGATGGAC  
GGAAAGCTACGCTACAGTATTGTTTTCACCTGGTGACAGTAGGCATTATGTTTGGCGCACTGTTTATGTGGTACTGGG  
CTAA

>Cluster\_963

ATGGATGCACAAACACGCCCGCCGGAACGTCGCGCAGAGAAAACAGGCTCAATGGAAAGCAGCAAAATCCCTGTTGGTTGG  
GGTAAGCGCTAAACCAGTTAACCGCCCTATTCTCTCGCTGAATCGCAAACCGAAATCAGCAGTAGAAAAGCGCAGTGAATC  
CGATAGACCTTACGGTGTGGCTGAATACCACGAACAGATTGAAAGCAACCTGCAACGTATTGAGCGCAAGAATCATCGA  
GTTTGGTATAGCAAGCCAGGTGAGTTCGGTATAACTTGTCAAGGAAGACAAAAGTTAAAGGGGAATCCATTCCATTGGC  
ATGA

>Cluster\_59217

ATGGCGGGCATTAACTCTCAATAAAAAATTTATGGCGTATTCACAGCAGGGCATGGTCCGCGGCTCTGCGCCGGGATTGC  
CAACTATTTTGTAGTACCAGTAAACTGGTGCCTATCCGGTGGTGTCTGCTGATTTTCTTCGGTCTGGCGCTGTTTACC  
TGGTGTCTTACATCATTTTGTCAATTTGCGCTTGTATCCAATGCCGGACAACATGGCCTTTGGTGGAGCAGTACCTCCAGC  
AGCGAATTTGCTGGATGAAGTGCACCGTGAATGGCGGCAAGTGAACCGGTTTACGCGAGATGGAACGTTATGTCACTTC  
CGATACTTTCACGTTACGTAGCCGTTTCCGTCACCTGTGA

>Cluster\_20352

ATGAGAATGACAGCTCGCAAAAAGAGATACTTAGCTACTTTGAACCGGATAACCTCGAATGGGTGACTGGTGGAGATTGG  
TGCGCCGCGCTTCGATGTGTGGGTGTGGCCTACTGCTTTCATGGCATGGTGTGCTTCCGATAAGCGTACCAGCTCGAAT  
CAACCCGGCGCACACTGGAAAGCATGGTTGGTGGACTGCTTGAGCGGGTGACAGTGTATGAATCCGCGCCAGATACGG  
CGCGGGGTGATACTAACGCAACGGTGTGGCTACGGTTTACCCGGTCAAGTGCAGCTGTTATGCGCGATACTGGCGGCGC  
TGACAACGCAATATCAGGTGAATACATGCGGGTCAAGTTAA

>Cluster\_60592

ATGGTATCCGCACTCATCACCGTTCGCGCTTATCGCCTGGTGTGCGCAACTGGCCTTAGCGGGTGGCAAAATTTCTCGTTT  
TAACCGTGCCTTCGACACACTATGCCAGCAAGGGCGGGTTGGCGTGGGCGGTTCCAGCGGGCGCTTAAACCGCGGGTGC  
TGGTCCGCACTCGCGCTGGACGATCAGCAGCGCATCGTGCACACCTTGTATTATGAAAGGACTGACCGTCTTCGCCCCGACCG  
CAAAAATTTCCGCAATTTACCGGTATGCATGCGGGTGAATTTACAGCCCGATGTGATCTTTCCCATGATCCACTATCACA  
GAATGCTCTATCATTTGGCCCTTAAACTGAAACGTTGGATAA

>Cluster\_62123

GTGAACCGCCCGTGTTCCTGTTTATCATTTTTCTGGTCAAGTGCAGTCCGCGGATTTCTGGTATTCGTTGGTGGATTTCCTGGCGGAC  
ACACCATCGCGACACCGTAACTGGCTGGCTCTACGGCTATTCTGATTTATGCTCTGTAACCGTGGCCATTGGCGGATGG  
TTAAAGGAACAGTTGTGGGGACAACACTGACACATTTACGTTGAAATGCAGCGTTATGAACAACAGTAGTAGCAGGGGCTGACA  
ACTGGAAAATCCAGCCGGGAGCAGCGTTATATGATACGATTGTTATTGCTACTGGTGGAGAGTGTGCGCAGGGATTATATG  
TCAGTGTATGACTATCCCGTACCACCACACCGTGGCTGA

>Cluster\_16080

ATGGCTAATAGCGAAATTTGTTCCGTTTTCTGAAATTTGTTACAAGCAAAATAGACCTCAATCAAGCTGTAGCTCAAGGTCA  
AGAGATGACTGATACTCTTAAAAAATGGGTATCAAAGAGCGACATTTGATAGTGGAGCTTACTATAAACAATGATCAGC  
AATCGCAGACACTACTCTTGCAGCTGATGGAATCTTGTATGCGGCAGAGCCTCCACATTAACAAGTTATTTTCCGTAAC  
GAAGGAAGTACTGAAACAACAAGCTTTAGAGGAGCTTAACTGGTGTCTCTGACACAAAACCTTAGTGGCATTCTCTCTGG  
AGTCTCTCAACAGAGAGCGTCTGAGCTACTCAAATTTGAAAAGAATAA

>Cluster\_25051

ATGCGTGAATAATGAGAAATGGCGCTTAGCTCCGCAATCGGAGAGCAGGTGGCAAAAGATTGCTGGTGTGTGGATTCA  
TAACCTTCACTTACTGGTGAAGAGAAAATGGCAATTCAGACGCGCAGAGGGACGCACCATTAATCATCTCTGAAGCCGT  
CAGATGTTTGTGATCTGATTTGCGCATTCATGTACCCAGCAATGAGGACTGTCCACGGCGATAAGTGGAAACTTGGCACA  
ACCGCTGAATTTGATATGTTGGCTAAACAATGATGGCATGCTGACTGATTACCGAATAACCAAGTGGCAGATGCTAGTTAG  
CCATATCGCAAACGCTATAGACCAGTGGGGTACGGTGATGCGAAACATTGA

>Cluster\_41841

ATGATGTCACCACGTTATTTAAAGATTTACCTTCGAAGCCGCTCACCGCTTGGCGCATGTCCACAAGGGCATAAATG  
TGGTCCGCTGCACGGGCAATTCCTTTATGGTGGCAGTGGAAATACCAGGGGAGTCCGATCCGCAATACGGGCTGGATTATCG  
ATTTGCTGAACTGAAAGCGGCGTTTAAACCAACTTATGAGCGCCTCGATCACCATTATCTCAATGATATTCCTGGTCTG  
GAAAACCCAAACGCAAGTTTATAGCAAAATGGATTTGGGATCAGGTTAAACCCGTTGTCCGCTGTTAAGTGCGGGTGAT  
GGTAAAAGAAACCTGCACCGCAGTTGTATCTATCGCGGCAATGA

>Cluster\_64024

ATGGACATGCATTACAGAACCTTTAACCACAAGATTTTCGCTGGCAAGGCTTAAACGCTGACACCCGACGCGGATACACA  
CATCCGTGAGCTGGTGGCAAAAGCAGCGGGTATGGTGGCGCTGCGCTTAGCGGTGAAGCAAACGGGCTGCGCGGGCTTTG  
GCTATGTGCTGCAGAGTGTAGCGAGCCGGACAAGACGATCTGCTGTTTGAACACGACGGCGGAAGCTGTTTGTCCCG  
CTGCAAGCGATGCCGTTTATGATGGCAGGAAAGTTCGATTTCTGTTGTAAGGACTTAATCAGATATTTCAAATTTACAA  
CCCTAAAGCCAGAAATGAATGTGGCTGTGGCGAAAGCTTTGGGGTATAG

>Cluster\_14052

ATGCGCGTGTAAAAACCAATGGTTTGAAGGAAAGCAGGCTCATGCAATAACAGATGAAGAGTTGTGCCGGGCCAT  
TTTAGAAACGGAACAAGGTAAGCTGATGACTTTGGTGGTGGCGTTTTTAAAAAGCGCCTTCACAAAATCGTGAGCGGTG  
CAATTTATCTGGCGAAAGGGGAAAGCAATTTGCTTTTACAGCTTTTTATATGCAAAAACAGGATATGTCGAATAATTAAT  
CAGGAACTGGCTGGGTTTTCTGTAACCTTGAAGCATTTATGCTTCTGACGAAAGCCCACTGACAGCAATGATTAACAC  
TAAAGAACTGACAGAGATCTGCTATGACTGCAAAAACATAA

>Cluster\_25549

ATGCGTGAATTTTCAAGATGCCTTTGATGCGCCCTTGGCGGGTGGACAGTACGATTGTTGAAGTGTGGGCATCAGTGC  
GCAGTTCACCTCGGGGGCAGTGTGGCAGCAAGTTTCAGGGGTTTTTGGACGATCCGGAGTCCGTTGGGTTTTGCGGGTA  
GCGGGGTCGCTATGAAGGAAGCTGCCCGTCAATTTTGTACGGACGGATACGGTTCGCTGTGCGGGTGGTGGACAGC  
CTGACCAATTAATGGTGGACATTTCTGGTGGATCGTGTCTCCGATGACGGGGCAGTTGTTATCTCTGGCTCAACCG  
TGGGCAACCACCGCAGTTAACCGCGCAGCATAA

>Cluster\_66615

ATGCACGTAAATACTTAGCAGGGATTGTCGGTGCCCGCTACTGATGGCGGGTTGTAGCTCCAGCAACGAATTGAGTGC  
TGCCGGTACAGAGTACGCATTGTGGACGAGCAGCCAGCGCAGAGTGCAGCTGATTGGTACTGCGACAGGTAAACAAA  
GCAACTGGCTTTCCGGGCAACACGGAGAAGAGGGCGGTCTATGCGCGCGCAGCAACGATCTGCGCAACCAGGCGGT  
GCAATGGGCGGTAACTGATTTATGGCATCAGCAGCCCGTCGAGGGAATGTTGTCCAGTTTTGTCCGACGGATAGCCA  
GATTATCGGTACAGTTTATAAGTGCCCGAAGTGA  
>Cluster\_40830  
ATGAAAAAAGCTGAAAAAATTCATTCCTGTTAAAAAAGCTGCGCTCAGCGGTGGCTGCTGACCTCAGTGTGTTGCT  
GGGCACCATCGCTCTGGTCTCACCACAGCAGCTGCCTGTTGTGATCTACAAGCTGGCACTCATCACGCTGGCAGCAGTGC  
TGGGTTACTGGCTTGGCTTCCGCTTCTCCCAAGCCCGTCCCGGTCAGTACCTGAAACATGACGACAGGCTGATGGCT  
GAAGGGCGTTTCCCGGTACAGACCGGCTTACCTGGTGTTCCTGCTGCGTTAATCCGCGTGCAGTATTGTTGACG  
GGTCTGCCGCTGTTGGATGGGGCTTTAA  
>Cluster\_66743  
ATGCTCCCAAATCGAATGGTGTCTAGTCTGACACGAGACAGCTCAGAAGTTAAAGGGATATACGGAATTACGCC  
CAATGTCGCGCTCGACTAGCATTTTTTCGCTCGGTGGAGAGTGTGTTGCTATTTCGCTGAGCGGGATAGTAAAGAGC  
TGGATGGCTCGCTAGTGTGGATAAAAATACGTGGCTTGGGAAAACATGCAAGCTACAGAATGGGTGTTAAAGATGCTT  
TATCTAATCTCGACAAAAATGATAAATAAGCATGGGAGCAGCATGTTGAGGATGGAATCGCTTCTGTTAGAAACCA  
TCGAAATTAAGAGACTTTTAATTTTCATTTGATA  
>Cluster\_20012  
ATGGGGTAAATGATACCGATGAAACGCGAGAGGATGCTCAGTACCGGTTACTGATGATGAACATGCCCGGTTACTGGA  
ACGCTGTGAGGGTAAACAGCTGGCGGTATGGATGCGCGGGTCTGCTGGGTGAGCCGTTGCCCGTTCCGGGAAGCTGC  
CAACTTTGGCTCCGCGTTACTGCTGCTGAGTGGCGGCTACGGGAATAACCTGAAATCAGACAGCGAGGAGGTTAAACAGC  
GGCAGTGGTCTTCCGCGACCGGTTTACGTTGGTGGCCGACATGATGGCCATCGGGATGAGCTGCGCCGGTGCCTGCT  
GGCGTACAGGAAACAGGGGGCGCGGATGATAGTTAA  
>Cluster\_49769  
ATGAGTATTGGATCAGAAATGAATAACGATGTTGGAGAAAAAGTATCTGATCTCAGAAAAAGTAAAAATGTGACATCAA  
ACTTGCAGCCGACCGCTCGGATTGCTCTCGAAAGAGGATTTGCTCTTACATCGGTAAAGACGCTCGTGTGCTGTGCTG  
AAATGGCGAAAGCAGGCAAGTTACAGCCTTTTATATGACGGACCCATTAAGCCGGGCGGTGATGCTGAGTTATGGATT  
AATCGCCGTGAGTGGGACAGTACGCGCCAACTAGTTGATGAGCTCCGACAGAATGGCATGACTGAAAAAATCGCAT  
TAGTTACAGCAATCAAGACATGGCCGTGCGGCTTAA  
>Cluster\_23466  
ATGGATAAGAAATCTGCTCGTATCCGTCGTCGACCCGCGCAGCCGCAAGCTCCAGGAGCTGGGCGCAACTCGCTGGT  
GGTACATCTACCCCGCTCACATTTACGCACAGGTAATGACCCGAACGGTTCTGAAGTTCTGGTAGCTGCTTCTACTG  
TAGAAAAAGCTATCGCTGAACAACGTAAGTACACCGGTAACAAAGACGCGGCTGCAGCTGTGGTAAAGCTGTGCTGAA  
CGGCTCTGGAAAAGGCATCAAGATGTATCCTTGACCGTTCCGGGTTCCAATATCATGGTGTGTCAGGCACTGGC  
AGATGTGCCCGTGAAGCTGGCTTCAGTTCTAA  
>Cluster\_26146  
ATGGAATAAAACCAGAGGATGAGTTAAGCAATATCGTTTTATTTCCGGTAAAAGAGGATGACCTCGTAATCAGGTTAA  
TTTTCTTTATGAGCCATCGGAAAGACATATTTGTCATCAGCCTCTGTCCGGTTGACGAAAAAGAGCGTCAAGTCCGCT  
GTAATACTCGCGTGCAGTTGTGGAACCAATTTGACTGGATGCTCTGTGCGGAAAAGAGAAACCAGACTGGCAGATGAT  
GTAAGGCTCTGGCTCAGGAGGACGGGAAAGCGAAAAAATATAGAAAAGCTAATTCAGATTGAGCGTAAACGCGAAAGC  
CGGATACGACGGGCGCAAAATCCAGAATGAATA  
>Cluster\_61411  
ATGCGTATTTCTTGAAAAAGTCAAGGATGCTGAAGCTTGGTCTCAGCCTGGTGGCTATGACCGTGCAGCAAGTGTTC  
GGTAAAACTCTGGTTTATTGCTCAGAAGGATCTCCGGAAGGGTTAAACCCGAGCTGTTTACCTCCGGCACCACCTATG  
ACGCTCTTCCGTCGCGTTTATAACCGTCTGGTTGAATTTAAATCGGCACCACCGAAGTATCCCGGGCTCGCTGAA  
AAGTGGGAAGTCAAGCAAGCGGTAACCACTATACCTTCCATCTGCGTAAAGGTGTGAAGTGGCAGCAATAAAAGAAAT  
CAAACGACGCGTGAACGACCGGATGATGTTGGTGTCTCGTTCGATCGTCAAGAAAACCGCAAAACCCGTAACATA  
AAGTTTCTGGCGGACGCTACGAATACTTCAAGGATGGGCTTCCAGAGCTGATCAGTGAAGTGAAGAAAGTGGACGAC  
AACACCGTTCAGTTTGTGCTGACTCGCCGGAAGCGGCTTCCGCTGACCTGGCAATGGACTTCGCTCTATTTCTGTC  
AAAAGAATATGCTGATCGGATGATGAAGCCGGTACACCGGAAAAACTGGACCTCAACCAATCGGAACCGGTCGCTTCC  
AGTTACAGCAGTATCAAAAAGATTTCCGCTATCCGCTACAAAGCGTTTGAATGGCTACTGGGGCACCACCGCAGATCGAT  
ACGCTGGTTTTCTTATTTACCCCTGACGCTTCCGTCGCTTACGCGAAATGCAAGAAATGAATGCCAGGTGATGCCGTA  
CCCGAACCCGGCAGATATCGCTCGCATGAAGCAGGATAAATCCATCAATCTGATGAAATGCCGGGGTGAACGCTCGGTT  
ATCTCTCGTATAACGTCGAGAAAAACCACTCGATGACGTGAAAGTTCCGACGCTCTGACCTACGCGGTGAACAAAGAC  
CGGATCAAAAGCGGTTTATCAGGCGCGGGGATATCAGGAAAAACCTGATCCCGCAACCATGTGGGGCTATAACGA  
CGAGTTACAGGACTACCTACGATCTTAAAAAGCGAAAGCTTGTGAAAGAGCGGGTCTGGAAAAGGTTTCTCCA  
TCGACCTGTGGGGATGCCGGTACAACGTCCTGATAACCCGACGCTCGCCGATGGCGGAGATGATTGAGGACAGCTGG  
GCGAAAGTCCGCTGCGAGGCAAAATTTGACCTACGAAATGGGTTGATGACTCAAGCTGCGAAAGATGGCGAGACCA  
GACGGTAATGATGGCTGGACTGGGATAAACGGGATCCGGATAAATCTTCTCGCCACCTGTTTACGCTGCGCCGCTCTG  
AACAGGCTCCAAGTACTCAAAATGGTGTACAAACCGTTTGAAGATCTGATTCAACCGCGCGTGTACCGAGCACCAC  
AATAAACCGGTTGAAGTGTACAAACAAGCGCAGGTTGATGCAGATCAGGCTCCGGCACTGATCATCGCTCACTCCAC  
CGTGTGTAACCGGTACGTAAGAAGTTAAAGGCTATGTGGTTGATCCATTAGGCAAAACATCACTTCGAAAACGCTCTTA  
TCGAATAA  
>Cluster\_5698  
ATGAGCATTTCCATTCACCCGCTGGCCGGAAGGTTTGGCCGTCGCTATCGGGAAAAAGGCTACTGGCAGGATTTGCGCT  
GACCGACATTTCTGACCGCATGCTGCGAGTGAAGCATCGCGGTTATCGACGCGGAGCGACAGTTGAGTTATCGGGAGC  
TGAATCAGGCGCGGATAACCTCGCGTGTAGTTTACGCGCTCAGGGCATTAACCTGGTGAACCCGCTGGTACAACCTG  
GGTAACGTCGCTGAATTTATATACCTTTTCCGCGCTGCTGAAACTGGGCGTTCGCGCGGTGCTGGCGTTGTTACGCCA  
TCAGCGTAGTGAACGACGCTATGCCAGCCAGATTAACCCGATTTGCTGATTGCCGATCGCAACATGGCTGTTTA  
GCGGGATGATTTCTCAATACTTTCTGTCACAGAACATTTCTCCATTCGCGTGGTGAACCTGCTCAACGACAGCGGTGAG  
CATAACTTGCAGGATGCGATTAACCATCCGGCTGAGGATTTTACTGCCAGCCATCACCTGCTGATGAAGTGGCTATTT  
CCAGCTTTCCGGTGGCACCACCGGCACACCGAACTGATCCCGCGCATCATAACGACTACTACTACAGCGTGGCTGCTA  
GCTCGAGATTTGTCAGTTACACAACAGACAGCTACTGTTGCGCGATCCCGCGGCTCATAACTACGCCATGAGTTCCG  
CCAGGATCGCTGGCGCTTTCTTTCGCGGAGAACGTTTCTTGGCGCGGATCCAGCGCCACGCTGTTTCTTCTT  
GATTGAAAAACATCAGGTTAACGTTACCGGCTGGTGCACCCGAGTCAAGCTGTGGTTGCAGGCGCTGATCGAAGGGC  
AAAGCCGGCGCAGCTTGCTCGCTGAAACTGTTACAGTTCGGCGGCGCAGCTTCTTCTGCCACCTTTCGGCGGCTAT  
CCGCTGAGATTTGGCTGCTAGTTGACGAGGTTTGGATGCGGGAAGGCTGGTGAACCTACACCGCTGATGATG  
CGCGGAGAAAAATTTATCCATACCCAGGTTACCCAAATGTGTCCGGATGACGAAGTATGGGTTGCCGATGCCGAAGGAAATC  
CACTGCCGCAAGGGGAGTGGACGCTGATGACGCGCGGGCTACACCTTCCGCGGCTATTACAAAAGTCCACAGCAC

AATGCCAGCGCCTTTGATGCCAACGGTTTTTACTGTTCCGGCGATCTGATCTCTATTGATCCAGAGGGTTACATCACCGT  
GCAGGGGCGCAGAAAAGATCAGATTAACCGTGGCGGCGAGAAGATCGCTGCCGAGAGATCGAAAACCTGCTGCTGCGCC  
ACCGGGCGGTGATCTACGCCGACTGGTGAGCATGGAAGATGAGCTGATGGGCGAAAAAGCTGCGCTTATCTGGTGGTA  
AAAGAGCCCTGCGCGCGGTGACGGTGCCTGCTTTCTCCGCTGAACAGGGTATTCGCCGAAATTTAAATACCGGATCGCCT  
GGAGTGTGTGGATTCACTTCCGCTGACGGCGGTGCGGAAAGTCGATAAAAAACAATTACGTCAGTGGCTGGCGTACGGC  
CATCAGCCTGA

>Cluster\_24480

ATGCGACGCAGTTGTGCTTATCTGGCGCACGCTTTACAACGGGGGAAACATGAATACTAACCAACACCAGGAAATCCT  
CCGCACCGAAGGATTAAGTAAATTTTTCCCGGTGTCAAAGCGTTAGACAACGTTGATTTAGCCTGCGCCGTGGTGAAA  
TCATGGCGCTGCTCGGTGAAAACGGGGCGGAAAATCGACGCTAATCAAAGCATTAAACCGGTGATACACGCGGATCGC  
GGCACTATCTGGCTGGAAGGCCAGGCTATCTCACCAGAAAACACCGCCACGCACAACAACTCGGCATCGGCACCGCTTA  
TCAGGAAGTCAACCTGTACCAATATGTCGGTTCGCTGATAATCTATTATAGGTTCGCGAACCCAAACGTTTCGGCCTTC  
TACGCGCTAAAGAGATGAAAAGCGCGCCACCGAATGATGGCATCTTACGGTTTCTCCCTCGACGTGCGCAACCGCTC  
AACCGCTTTTTCAGTCCGATGCAGCAAAATCGTCCGCTTTGCCGGCTATCGATCTCTCCGCAAAAGTGTGATCCTCGA  
TGAACCCACCGCCAGTCTCGACACTCAGGAAGTAGAGTTACTGTTGGCTGATGCGTCAACTTCGCGATCGCGCGCTCA  
GTCTGATCTTCGCTACTACTTTTTCTCGATCAGGTTTATCAGGTTAGCGATCGGATCACCGTCTACGTAACCGGATTTT  
GTAGGCTGTCCGGAAACCGCGAGCTACCGCATCGAATCGTAAATAATGATGCTGGGGCTGAACGTAACACCCACCGC  
GCTTCAGCGTCCCGGGAGAACATGCTGAGCGACAACCTGTTGCCGCTTCAAAAATACGGCAAAAAGGAACGATCG  
CGCGCTTTGATCTCGAAGTACGCCCGCGGAGATCGTCCGCTGCGCAGCTTGTGGGATCAGGACGTACCGAAACCGCC  
GAAGTGTCTTCGGTATCAAACTGCTGATAGCGGCACGGCGCTGATCAAAGGCAACCGCAAACTCGCATCGGCACA  
TCAGGCTTCCGTTACGGTATCGGCTTTCGCCGGAAGACAGGAAAACCGATGCGATCATCGCTGCCGCTCGTGGCGG  
AAAATATCATCTCGCTTCCAGGCCACGCGCGCTGGTACGACGATTTCCCGCAAAAGACAGCAAGAAATGCGCGAA  
CGCTTTATCCGCCAGCTTGGCATTTCGCACACCTTCAACTGAACAAACCGATGAAATTTCTCTTGGCGGCAATCAGCAAAA  
AGTGTTCGCTTACGCTGGCTACTGACCCGACCGAATTTCTGATCTCGACGAGCAACCCGCGGCTTGTGTTGGTG  
CGCAGCCGAGATCATCCGCTGATGAAACGCTGTGCCCGATGGACTGGCGCTGCTGGTGTCTCTCCGAACTGGAA  
GAAGTGGTGGGCTATGCCGATCGGCTGATATCATGCGCGATCGCAAAACAGGTGGCGGAGATCCGCTGGCAGAGCTTTC  
CGTTCCGGCGATCATGAACGCCATTGCGGGCTAA

>Cluster\_7406

ATGTTTCATACGCGCTCCCAATTTTGGACGTAAGCTCCTGCTTACCTGCATTGTTGCGAGCGTAATGATTGCGATACTGGT  
GAGTTGCCCTCAGTTTTTGTGGCTGGCATAAGCAGCAAGTCAAAATCAGACACTGATTACCGACGTACAAAAGTATC  
TCGATACCTATTTTGGCGACCTGAAATCCACTACTGACCGCTCCAGCCGCTGACCTTAGATACCTGCCAGCAAGCTAAC  
CCCGAACTGACCGCCCGCAGCGTTTACGATGAATGTCCGAACGTTTTGTGCTGGTGAAGATAAAAAACAATCTCTGTT  
ATCTGCGACCGGTGAGATGGACATTTCACTCAATGAATGATTCCGGCGCTCGACATTAATAAAAACGTCGATATGGCGA  
TCTTACCCCGCACCCGATGGTGGCGAACAACCCGCAATCGTATCTGGTATCGCAACCTTTGCTGAAAAATAGCGCG  
GTCCTTGGCGCTGAACTCAACCTGACGCTTCACTTTTATAGTTACGGCAGGAAGATTACGATGGCGTCCGCT  
CATTTATGGCAATACTGCCATCTACCTTTTCTTACGTTTATGATGAACGTTAACGAAATAAACCGCAATGCGAGTCCG  
AACTAAAATGCGGGCATTCCTCTGACCGTTCGGCTTTATGCGATGACTGGACATGGAACGATGTGTGGTACGCAATTT  
TTACTGGGCGCATGAGTGGAACTGTGCTTGGCTGCTGCTTACCTGATGAGCGTACGATGCGCCCGGCAGAGA  
AATCATGACCGCCATCAAGCGCAACAATTTTACGTGGCGTATCAACCGTGGTGGATACACAAGCTTTGCGAGTAAACGG  
GCCTGGAAGTACTCTACGCTGGCGGCAATCCTGTCCGGGAGAAAATCCCGCGATGCTTCAATTAACCTTGGCGAATCG  
CAAAAGATGATTTGCGCGTGCATCAGCACCTGTTGAGTTAATGCGCGGATGCGCGAGAAATAGAAAAGTGTGCTGCC  
GGTAGGCGCTCAAAATTTGGTATTAACATTCGCCCGGACCATGTCAGCAGCGAAAGCTTTAAAGCAGATACCGAAACTGC  
TCACTTCCCTGCCCGCACACCATTTCCAGATTTGTGTAAGTAACTCCGAGCGGATATGTTGAAAAGCAGCAAGAACCA  
CAACTCTTCGCTGGCTGCACCTCGGTCGGCTAGAAAATGCTATTGATGACTTCGGCACCGGGCACAGCGCTTATCTA  
TCTTGAGCGTTTTACGCTCGATTATCTGAAAATGACCGTGGATTTATCAACGCCATCGGTACGGAAACGATCACTTCCC  
CCGTACTTGACCGGTGCTGACGCTGGCGAAACGCTCAATATGCTGACGGTGTGTAAGGGGTCGAAACCGCGGACAG  
GCGCGATGGCTAAGCGAAGCGCGGCTTAATTTTCATGCAAGGCTACTGGATTAGCCGCCGTTACCGCTGGACGATTTTTGT  
TCGCTGGCTAAAGAAACCGTATACGCCGAGTGGTAA

>Cluster\_58862

ATGGAATCTAATAATGGGGAAGCCAAAATCCAGAAAGTGAAGAACTGGTCTCCCGTGTGGATATTTCCATATCGTACGGC  
GCTCATTGGGGCCCTGGGTTCTTTTTTATCATTACAGCCATCAGGGACCGGAAGTGACCTGATCACCGCAATGCGGAAG  
GAATTGAAGTGGCAAAACACCATTAAAAGCCGTAGCGTTGACGTCGGCGTGGTTGAAAGCGCCACACTGGCTGATGAT  
TTGACGCAGTTGAAATCAAAGCGCGGCTGAATTCGGTATGGAAAAATGCTGCATAAAGACACCGTCTTTTGGGTGGT  
GAAACCGCAGATTTGGTTCGGAAGGATTAGCGGCTGGAAACGCTGCTGTCTGGAGTTTATATCGAATGCAGCAGCGG  
CGAAAGGCAGCAAAATGGATAAAATACGATTTGCTGGACTGCCACCGTTGGCCCGCTGATGCGAAAGGATTCCTGTG  
ATTTCTGATAGCAAAAAGCCGGCAGCTCTCGCCAGGAGATCCGGTGTGTTCCGTTGGCTATCGGTTAGGTTCCGGTTGA  
AACAGCACCTTCGATACAAAAACGCAATATCAGCTATCAACTGTTTATCAATGCACCTTATGACCGACTGGTGGACCA  
ACAATGTTCCGCTTCGAAAGATAGTGGCATTTGGGTTGATCTGACGTCAGCAGGATCGGTGGAGATGGGCTCATTG  
ACAACGCTGCTGAGTGGCGGTGTCAGCTTTGATGTGCCGGAAGTCTGGATTTAGGGCAGCCAGTGGCACCGAAAACAGC  
TTTCGTTTTGTATGATGATCAGAAGAGCATTCAGGATTCGTTGACACCGATCACATTGATTAATCTGATGTTCTTTAAAG  
ATTCGGTACCGGCTGCAACCGGGAGCTCCGGTAGAGTTCCGGGATTTCCGCTGGGTACCGTAAGCAAAAGTGCATTC  
TTTTGCCCGAATAATGCTCAGACATTTAACGATGATTACCGTATTCGGTACTGATTCGATATCGAGCCAGAGCGGCTGAA  
AATGCAGCTTGGCGAAAATGCGGATGTTGTTGAGCACCTTGGCGAATTTGTTGAAAACGTTGGTTTACGCGGATCGCTGAAA  
CCGAAAACCTGGTCACTGGTGCATGATGTTGATCTCGATTTCTATCCAAATACGCCGTGCAATAACCGGATTCGCTGAA  
TTTAATGGTTATCAGATTATCCCGACCGTTAGCGGGCGCTGGCGCAATCCAGCAACGACTGATGGAAGCGTTGGATAA  
GATCAACAAACTGCCATTGAAATCCGATGATTGAACAGGCAACCCAGTACGCTTTCTGAAAAGTCAAGCGCAACAATCC  
TGCAAAACGACGCTGGATAGCATGAACAAGATCCCTGCTAGCCAGTTCGATGACGAGTTCGGCAGGATATGCAGTCAACG  
TTGCGTGAATTAATCGCAGCATGCAGGCTTCCAGCCTGGCTCCGCGACCTACAACAAGATGGTGGCGGATATGCAGCG  
CCTTGATCAGGTGTTGCGGAGAACGCAACCGGTGCTGAAAACGCTCAATGAGAAGAGTAACCGCTGGTATTTGAAGCGA  
AGGCAAAAAGATCCAGAGCCGAAGGGCGAAAACATGA

>Cluster\_17654

GTGGCAAAACGTAACCTTTCCATTAAGAGTTTTAGAGAAAGCTTACAGGAGTACATCGCAACCTCCGCCAGACCATTTGA  
GGTGAATGCTGGGGTTCGATGTAACCCGACAGGCGCACAGCCGCGCGGCGGAGTCTGTGACCCGTTGACGGGCT  
ACGATATTTTGTGCAAAACTATTTCCGCACTACGTCGCAACCCGCAAAAAGCGAGCTGCATAAAATACCTGTTCAGC  
CGTTCGCCACAGTTGTGGCAAGCCCGACCCGAGAAACGACGCCATCGCCGCGCCCGTGGTGAAGCAAAATCCACGCT  
GGTACTCAGCTGTTTACCTGTGGAACATTTACCGGGCCATTAACAATTTATCCGGTCACTATATGGAACAGTTCGACC  
AGGCTTATCCGATGCTGGAAGCCATCAAGGCTGAACGAAATTTAACCCCGTTTAAAAACGATTTCCCGGAAAGTGTG  
GGACAGGGGCGCTGCGGATGTTGGGACCATCGTACGGCCAAACAATATCAAGGTGACCGTGTGTTGTTAGTGGTAAAA  
ACTGCGTGGGCTGCGCCACGGTCCGTACCGTCTGACCTGGTTATCTCGACGACATCGAAGACGACGAGATGTTGCGTA

CCCCGGAGCAGCGGACAAGCTGCATGACTGGCTTACCAAACCGTGATGCCGCTGGGCGAGGCTGGCGGTAACACCGAT  
ATTTATTTATATCGGAACCATCTGCATTTACGACTCCGCTGCTGTCGCGCACACTCAATAACCCGATGTGGAAAAACAGCCCG  
CTTTAAGGCTGTTATTCAGTGGCTGCCAACATGAACTGTGGACGAGTGGGAAGAACTCATCCGCAACAAACAGCCGG  
AAGCAGCGGAGGCACTTTTACCGACAGAAGCAAGCCGACATGCTCGCCGGTTCGCTGGTGTTCATGGGCGGCGCTCCCTG  
CTGGCGCTGATGAAAATCCGCTGCTGCGTGACGGTTCATGACACTTTGATTTCTGAATACCAGAACGACCCGGTCCAGCGGTGA  
AGATGCGCTGTTTTGCGGGCTGCATTAAGTTCTGGGTTAACCGTCTTGATGAATGGGTGTTTTATGGTGTGTTGACCCCA  
GTCFCGGGAAGAAGAATAAAACCGGACCCGTCGGCCATTCTCGTGGGGGGCTTTAACCGTTTTACCGGCATTTCTGGAT  
GTGGTTGAAGCCGATATCCGCGGACGCTGCCAAATAAACTTATCGAAGACGTTGATTAAGTATCAGCGGGAATACCACGT  
TCTGTGCTGGTTCGTTGATGCTCCGTCAGTTTCAGGAGTTCTGCGCACCGTGCCTGGTTCGAGCGTTCCGGCGGCTGGGGC  
TTCCGGTTCCGGCGCTGCCGCTCATCCGCTGGAGGATAAAGCGCTGCGTATCGAATCCCTTCAGCCGATATGGCCAA  
GGCTGATCCGCATCAGTCCGGCACATCAGACGCTGATGACCAGCTGCGCCACTACCCCAAAGCCGACCACGATGATGG  
CCCCGACTGTCTGCATGCTGTGGACGCTGGCGGTATCGCGTAGCGCAAATTTAGATACACACCCACGCGAGCACCG  
GGCTGACCGTGGCGGGCTTTTTGGTTCCAGGAGATGGTAA

>Cluster\_43121

GTGCTAACTTTGCCTCACCTGCTTCTGCGCTGCCCTGCTGGTCTGGGGACTCATATTTGTTGAAACAGGCGTAATGCG  
CGTCTTCGGCGCGCTGCTGCTGCTTACCGGAGCGCTGAAAAAAGCCGCTCGCTTTTGGCGGGGATCGGGC  
TTACCCCACTGGTCAGACAGTAAAGCCACCATGCTGGTGACTCGTTCGCTCAGGATCTGGTTCGCTCCGCG  
CCTGCGCTGGTATTTGCTGGTGCAGATGTCGGGACGGCGTGATGGTGGTATTTCTACCTTCGATTTATCTGGCT  
GTCACCGTTACTTATTTTATCGCGCTGATTTTTTTCCTCGGACGCAACAGTACGCGCCGGGCAACTGGGGCGCGT  
GTATGGTCTTTGGCTGATTTTACTGGCGCTGGAGTTGATTTGTCAGGCGGTAACCGCATCACTCAGGCAACAGCGGTT  
CAGGTGATCTTTGCCTCACTGACTGGCGACATTTGCTGGATGCGCTGATTTGGTGCAGTGTTCGCCATTATCGCTACTC  
CAGCTTGGCGGCTACTGCTGACCGGACTTTGACCGCGCAGGCATTTACTCTTTCCAGTGGCGCTTTGTCTGGTGA  
TTGGGGCAAACCTCGGTTCCGGCTGCTGGCGATGCTCAACAACAGTGCAGCCAAATGCCGACGCCCGCTGTCCGCTG  
GGTAGCTGCTGTTAAGTGTGGTGGTGGCTGATTTACTGCTGGTTTGTTCATTTGCTGGCAGACATAAGCTGGATGACA  
GCCATTGCCAAAAGCGGAACTGGTGATCTATTTCCACGCTTCTACAACCTTTGTACGCTGCTGGTCAATGGCCATTCCG  
TTGACCCGATGGCAGGTTTTCGAAAACGATTATTCGCGATGAACCGGAACTGGATACCAGCTACGGCTAAACATCTG  
GATGTCAGCGCGCTGGATACGCCACGCTTGTCTGGCGAAGCTGCCCGGAAACCTTGGCATTTGGCGACGCCATGGA  
ACAGATGATGGAAAGGTTGAATAAAGTGTGCACGGCGAGCCAGCGGAGGAAAGAGCTGCGTAAGCTGGCTGATGACA  
TCAACGTTCTCTATACCGCCATTAAGCTGTATCTGGCGCGGATGCCAAAAGAGGAACTGGCAGAAGAAGAGTCCGCGCC  
TGGCGGAGATCATCGAAATGTCGCTCAACCTTGAACAGGCTCCGATATCGTCGAGCGCATGGGGAGTGAATTTGCCGA  
CAAATCGCTGGCAGCAAGCGGAGCATTTTCGCTTGATGGCTGAAGGAACTGGATGCGCTCTATGAGCAATTGCTCAGTA  
ATTTAAACTGGCAATGTGCGTTTCTTTCTCTGGCGATTTTACCGAGCGCCCTGTTTTGCGCCGACGAAACATCGTTTT  
CGCATTTAATCGCGCTATTTCCACGCCACGTCGATCGCTGCACCAGCAAACGTCAGAGTATTGAAACAGTTT  
GCTACATTTAGGCTTACTGGGAGATATGACGCTCTGAACTCGCTGTTTTGTTGCTGGTGGCTTACAGTGTGCTGGAACAG  
CGGATGAAGATGAAGGACGGGACGAGTATTA

>Cluster\_41861

ATGACAACGAACTATATTTTTGTGACCGCGGGGTCGTATCTCTGGGTAAGGCATTGCCGACGCTCCCTCGCAGC  
CATTTCTGAAAGCCCGTGGCTCAATGTGACCATGAAACTGGATCCGATCAACGTCGATCCAGTACTATGAGCC  
CAATCCAAACAGGGGAAGTGTTCGTTACTGAAGACGGCTGAAACCGACTGGACCTGGGCACTACGAGCGTTTCATT  
CGTACAAAATGAGCCCGCAACAACCTTACCACGGGCGTATCTACTCTGACGTTTTCGCTAAAGAACGCCCGGTTGA  
CTATCTCGCGCAACCGTACAGGTTATTCGGCACATCACTAACGCTATCAAAGAGCGCTGCTGGAAGCGGGGAAGGT  
ATGACGTAGTACTGGTCAAATCGCGGCTACTGTAGGTGATATCGAATCCCTGCGCTTCTCGAAGCGATTCGCCAGAT  
GCTGTTGAAATTGGCCGCTGAGCACACCTGTTTTTATGACCTGACGCTGGTGGTACATGCGACGCTGTGTTGAACTAA  
AACCAAAACCGACTCAGCACTCTGTAAAAGAGCTGCTTTCAATCGGTATCCAGCCTGATATCTGATTTGTGCTCAGATC  
GCGCGTTCCGGCGAACGACGAGCGAAGATTGCAATGTTCTGTAATGTTCCGGAAAAGCGGTTATTTCTCTGAAAGAC  
GTCGATTTCCATCTATAAAATTCGGGCTGTTGAAATCTCAGGGGCTGGACGATTTATTTGTAACGATTCAGCTTAGA  
CTGCCCCGAAGCGAATCTGTCGAAATGGAAACAGGTTAATTTCTGAAAGAAGCGAATCCGTAAGTGAAGTCAACATGAT  
TGGTGGCAAATACATTGAGCTGCCGATGCATACAAACCCGATCGAAGCACTGAAACACGGTGGGCTGAAGAATCGT  
GTCAGCGTCAACATCAAACTGATCGATTACAAGATGTTGAAACGCGCGGCTGAAATCCCTTAAAGTCTGGACGCAAT  
CCTCGTACTTGGCGGTTTCGGCTATCTGTCGCTAGAAGCATGATTACGACCGCGCTTTTGGCGGTGAGAACAATATTC  
CTTATCTGGGCAATTTGCTGGGTATGCAAGTGGGCTTAATTTGATTACGCTCGCCATGTTGCCAACATGGAGAACGCAAC  
TCTACGGAATTTGTGCCAGACTGTAAGTACCGGTTGTGGCGTGATTTACCGAGTGGCGGATGAAACGGCAACGTTGA  
AGTTCGTAGCGAGAAGAGCGATCTCGGCGGTACCATGCTCTCGCGCACAGCAGTGCAGATTTGGTTGACGATAGCCTGG  
TTCCGACGCTGTACGATCGCGGACAATTTGTGAGCGTACGTCACCGTTACGAAGTCAACAACATGCTGTTGAAACAG  
ATTTGAAGATGCAAGTCTGCGGCTTCCGGCGGTTCCGGGATGATCAGTTGGTCGAGATCATCGAAGTCAAGGATCATCC  
GTGGTTCTGTGGCTTGGCAGTTCCATCCGAGTTTACTTCTACTCCAGTGATGGTACCCGCTGTTTGCAGGCTTTGTGA  
AAGCCGCCAGCGATTTCCAGAACTGACGGCGAAGTAA

>Cluster\_42882

ATGATGGCAGACTCAACACCCCTGTCCGGTGCCCTGAAAGGTGCCGAATTTTAAAGCGGCTGCTGCGCGCGCCGGTCTA  
CGAAGCGGCGAGGTCACGCCGTACAGAAAATGGAAAACCTCGCTCGGCTTGATTAACGTGATTTGGTGAAGCGCG  
AAGATCGCCAGCAGTACACAGCTTTAAGCTGCGCGGCGCATACGCCATGATGGCGGGCTGACGGAAGAACAAAAGCG  
CACGGCTGATCACCCCTTCTGCGGTAACCACGCGAGGCGCTCGCTTTTCTTCGACGTTAGGCTGAAGCGGT  
GATCGTATGCCAACCGCCACCGCGATATCAAAGTTGATGCGGTCGCGGCTTTGGCGGCAAGTGTGCTTCATGGCG  
CGAATTTGACGAAGCGAAGCGAAAGCAATCGAAGTGTACAGCAGCAGGCTTACCTGGTGGCGGCTTCGACCAT  
CCGATGGTGTATCGCCGGGCAAGGACGCTGGCGCTGGAAGTGTCCAGCAGGACGCCATCTCGACCGGATTTGTTGAC  
GGTCCGCGCGGCGGCTTGGCGGCGGCGTCCGGTACTGATCAACAACCTGATGCGCAAAATCAAAGTCAAGGCTGG  
AAGCGGAAGATTTCCGCTGCCTGAAAGCGGCGTGAATGCAGGTCATCCGGTTGATCTGCCACCGGTTGGGCTGTTGCG  
GAAGGTGTTGCGGTGAAACGCGATCGCGGACGAAACCTTCCGTTTATGCGAGGATATCTCGACGACATCATACCGTCCA  
TAGCGATGCCATCTGTGCGGCGATGAAAGATCTGTTGAAAGTGTGCGCGGCTGGCGGAACCTTCTGGCGGCTGGCAC  
TGGCGGAAATGAAAATAATATCCGCCAGCAACATCTCCGCTGAGCGGCTGGCGCATATTTCTTCCGGTGTACAGT  
AATTTACGGTCTGCGCTACGTTCTCGAAGCTGCGAAGTGGGCGAACAGGCTGAAGGTTACTGGCGGTGACCATTTCC  
GGAAGAAAAGGCGAGTTCTCAAAATCTGCCAACTGCTTGGCGGGCTTCGGTACCAGGTTCAACTACCGTTTGGCG  
ATGCCAAAACCGCTGCACTTTTGTGCGGCTGCGCTTAAAGCGTGGCTCGAAGAGCGCAAGAAATTTGCGAGATGCTC  
AACGACGGTGGCTACAGCTGGTTGATCTCCGACGAGAAATGGCGAAGCTGCATGTGCGCTATATGGTTGGCGGGCG  
TCCATCGCATCCGTTGCGAGAACGCTTACAGTTTCGAATTTCCGGAATCACCGGGCGGCTGCTGCGCTTCTCAACA  
CGCTGGGTACGACTGGAACATTTCTTTGTTCCATTTATCGCAGCCAGGTAACGACTATGGGCGGCTACTGGCGGCTTC  
GAGTTGGCGATCATGAACCGGATTTTGAACCCGCTGAATGAACTGGTTCAGATTGCCACGACGAAACCAATAACCC  
GGCGTTACAGTTCTTTTTGGCGGGTTAG

>Cluster\_25202

ATGTCAGTCAATATTTACGTATTTTTCAACAGCCGGCTTACGCCATATGCTGATCCGGGTTTTGCTTCCGGGCTACC  
GCTCGCCCTGACGTCGCGGACCTTACAGCCCTGGATGACGGTCGAGAAATATCGATCTCAAAACCATTTGTTTTCTCTCTC  
TGGTAGGCCAGGCTTACGTTTTTAAATCTCTGGTACCACCTGATGGACCGTACACGCCCCATTTTTCCGGGCGGCGG  
CGCGGTTGGCTGCTGCCACGCAAAATCTGTTATAGTCGCCATTTGCGCGCATGGGTTTTCTCGAACAGGACCCAGCT  
CCGCTGGATGGCTTCTGGTTCGCAATAATGGCTGGCTTATTTTTGCTTCTATCGTCTGATAAGCTGGGCGACGCATTC  
ACGTGCTCCCGGCAAGAACGTTGGTGGCGGCGGCAATCAGCGTGTGGGTTACCGTTTAGGGATGCTGGTTTTCTGGC  
GGCTTAGCCCTGTGGCTGGCAGATAAATGGCTGGGCTGGCAGGCATGTAAGTGGTGGCGGCGCTGTGATCCCTG  
TATTATCGCGACGTTGCTTGCACCAAGCCACCGACCATTTCTGTGCCAAAACGCTGGAACAAGCGGTTGTAGCAC  
CTCTGGGATTTTTCTGGTTCGCAATAATGGCTGGCTTATTTTTGCTTCTATCGTCTGATAAGCTGGGCGACGCATTC  
GCTATGAGCTGACAACCAGTTTTTGTATTCGCGGCGTGGGTTTTGATGCGGGTGAAGTAGGCGTGGTTAAACAAAACGCT  
TGGCTTACTGGCGACCATTTGTTGGCGCATGTACGGTGGGATTTGATGCAGCGCTGTGCTGTCCGTGCATGCTGA  
TTTTCCGCATTTTACAAGGTGCATCTAACGCCGGTTACTGGCTGCTGCTGATTACTGATAAGCATCTCTACAGCATGGGC  
GCAGCCTCTTTTTTCGAAAACCTCTGTGGCGGGATGGGATACATCAGCCTTTGTGCGCGTGTAAATGACGCTGTAAATA  
GTCATTTTTCCGCTACTCAATTTGCCCTGCTCTCAGCGCTTTCCGCTGTAGGGCGAGTTTTATGTCGGCCCCGTGGCGGTT  
GGTTTTGTTGAAGCACACGGCTGGTGCACATTTCTATCTATCTCCGTGCGCGCTGCCGTACCAGGGCTTATTTTTGCTGCTG  
GTTTGGCCGACAGCTTGAATAACACGAGTAAATGACAACATTTATCTCCGTACCAGAAATATCTGCAGGTTATGCCCT  
TGCCATGTGCACACTGGCGCGGCATCAGCCTGTTGGCGTGGGTTACTGCTGTTGACGATGGACCGGTTGATGAG  
CGCACTTCTTTTTCTGCTGCTGCTGGAAGTCGGGTTTTAGTCGCCCTTTCTGGCGTCTGCTTGGTGGTTTTGCTG  
GATTATCTGGCGCTACGAAAACACATCTGATGATA

>Cluster\_67110

ATGAGTTATGCATATCTGATGAATAAAAAATTTCTTATATTAGTACCAGTATTATTAGCGTTGATTATATCTCAACTCCC  
GGTGGCCGAGGACTGTTACCGTATTCAATGGTATTATTTTTCTGTTGTTGGAGTCAATGTCGCGTAAATTATTGAGC  
CATTTGCCGGGGCTGTAATTTGGATATTGGGCAATGTTTATGGCGAGTTTTCTCTCCGGTATTTTTATTTCTCCGGAA  
CAGTTCTATTCTCTGGGATTAACACAATTAATGGCTTCTACTGGCTGTATCCGGGTTCTCAACGATACGGTATG  
GCTTATATTAGTCTTTTTATGTTGCACTGGGATGAAAAAACAGGACTGGGAAAACGCATATCGTTATGGCTGGTCA  
GGTTGATGGGGCAAGAACGCTGACGTTAGGATATGCAATTTCAATTTGCCGATTTACTCCTGGCACCATTACACCATCC  
AATACGGCACGAGTCCCGGCACGATTTATCCGGTGTCCGTAATCTGCCGACTCTGTATGGCTCCTGCCACATGATGA  
AAGTGGCGGAAAATAGGGGCTACTTAATGTGGAGTGGCGGTTACTGGCTGATGACACATGTGTGACAGTTCTTTTTCTGCTG  
CTCTGGCACCAAACTTCTTTCTGTAGCACTGATTGAGCAAAAACGGGATATTAATAGGGTGGATTGACTGGTTTTATT  
TCTTTATTTGCCGACGGGCATCATATTATGGAGTGTACCCCATTACTCGGATATTTATCTTTATCCGCCGACAGAAAAGAA  
AAACGATCAGGTCCTGCTGGGCTAAAGAGCAACTTTCTCAGATGGGGGACGACGACAAAAGAAGTCATACTTATTC  
TCTGGTCTGCTGCTTTAATTTCTCTGGGTTGGGTCCTCCGGATTTATCGACCTGCAATAGCATCTTTGGTTATCATC  
TCTCTGATGATTTGACGGATATCATTTCTGGGATGATATCGTCAACAATAAAAAATGCCGGAATACTTTCTCTGGTT  
TGCCACGCTGGTTGCCCTGGCTTCTGGTTATCTGAAGTGGGGTTTTGTCGCTGGGCAGGAGACCAGATTGCGGGCACCC  
TGTCAGGGTTGGTGAACATTTACAATACTGGCTCTGGTGTGATTTGATTTTTCTTCACTATTTTTTGGCAGTGGC  
ACAGCACATGTTACGGCACTGCTACCGTTAATGATCGCAGTGGTATCCAGATGGATGGTTAATGATATAGGCTTTTC  
ATTATTTATGCGGAACCTCAGGGATCATGGGGTTATCACTCCCTATGCGACAGGCCCTTCCCCATATATTATGGCA  
GTGGTTATATTAAGCCATCTGAATACTGGCGCTGGGTTTTGATTTGGTGAATCTATTTCTTGTATACATTTGCTATC  
GAATACCATGGTTGAAATATCTCTGGGCGGGATATA

>Cluster\_25115

ATGTCAGTTAAAATAGTCAATTAACCGAATACCTATTTTGATTCTGCTCGCTGATGTCTATCTCCACGGTGCAAAATA  
ACTCGACGGCTCGAGCAGGCATTTGTGGCGATGGCGACCGAATGAACAAAGCGGTTGAAGAATTTAGGACTGCTGA  
CGCTCGGAGTGGAGCAGGCGAAAACCGGACCTGATGATGTCATCAATGGTAAATCGGGTGGACACAGCAGCTGTG  
CTGGCGGAGATTGAAGAAGTGTCAACACCAAGCGCAAAAGCGGCTCGCACGAGGCGGTTACGGCATTATGCCAGCGC  
CAAAAAGCATATCCCGGAAAGTAACCTGGCAGTGTATTTGCGTCAACGGTCTGTTTGGCGCTCGCGAAGCGGCTCAGGCGC  
TGCAAAATGACCTCAACGTGATGCTGTTTTCCGATAATGTCTCAGTTGAAGATGAACGGGCTCAACAGTTGGCCCAT  
GAAAAGGGCTGCTGATGATGGGCGCAGACTGGCGCAGCGGATATATCAACGGCGCGGCTCTGCTTTGGTAAACCGCT  
CGCTCGGGCAACATCGGTTATTTGGCGCATCTGGCACCGGCAGCCAGGAATGAGCGTCCGTATCCATGAATTTGGTG  
GCGCGTTTTACAACTGATCGGCACCGCGGGCGGACCTGAGCGAGAAAATCGGTGGCTGATGATGCTCGATGCCATC  
GGGATGCTGAAAACGATCCGCAAACTGAAATCATTTGCTTATCTCAAAACCGCTGCGCTGCGGTTGGCCGCAAGT  
GCTGGAACCGCGCACGCTGCCCTGCCCAAGCCAGTGGTGGCTGCTTCTCGTCTGCGGAAACCGCAGTGGATGAGCAG  
GGCTACAGTTGCTCGGGCAGCAAGAGGGCGGATTTGAAAGCGGTGATGCTCTCCGGCTGAAAACAAGAACATCTCGAC  
CTGCACAGCTTAACAGCCGTTGATTTGGGATGTGCGTGCCTGTCGAACCGCAGCAGAAAATACATTTGCTGCTGTT  
CTGCGGGGATCGCTGTGTGACGAAACCTGTTCCGGTGTGAAAACATGGCGGATGCTACAGCAATATCCAGCCCG  
ATCCGAATTTCCGCTGCAAGATATCAGCCGTTGATCGGATGAAAGCGCGGATCCAGAAGTGGCGGTTGATCGTGGAT  
TTTTGCTCGGATTTGATCGCATGAAGATCCGGTCCGTTCCACCATCGAGGCGATCAGAGAAGCGAAAGCGATGCCCGC  
TGCCGAAGGACGCGAGTTGATCATTTCTCGCCTATGTGCTGGGCACCGATCTCGATACGCCATCATTAGAACAACAAGCC  
AGATGCTGCTGATGCGGAGTGATTTCTGGCAGCAGCAGCAATACCGGATGCTGGCGCTGAATTTATCTGCAAA  
GGGAGGAAGCCCTGA

>Cluster\_67091

ATGAAAAACAGGCAGTTACTGTCTGATGGAACACGCTGGAAACAGCTTATTATCATCTGATTCTTGGTCTTTGTGTTA  
TTATTTTTTACAACCTGCCGGTGAATGAGTTGTCATGGCGAACAGTCTGTTATATTTCTCGCCATTTGCTGCTGATA  
TATGCAAGGTTCTCCCTGTCCGGGCGATTGGTGTATCTGCTATTACGGTTTATGCTCTGACGGGGTCCGGCGGCGCTT  
ACTGCACAGGAGCATCAGCCAGGCGTGGGCAATGAATAACTCTGCTCTGGCTGATAGTCAATGCAATCATGAT  
TTCCCGGGGATTCGTGAAAACAGGACTTGGTGAACGATTTGCACTGGTCTGGTAAAGACTTCTGGGAAAACGGACGCTGG  
GGCTTGTCTATGGTCTGGCGCTGGCGGATCTGCTTTCTTTCCGCAATGCGGAGCAACACGGCAGCTTGTGGGGGGTT  
ATTTACCCTGGCAGATTCACTGTCCGAAAGTTATGGTTCAATTTCCGGATGATGATTCCAGACAACGATTAGGAACATT  
CCTGATAACCTGCACCGGACTGTAAATGATATTACTTCAACTTATTTCTGACAGGGTTTACCGCAATTTATAGCGG  
TGAACCTGGCCGCTACAGGAAATATCGTTATCTGGCTGAACTGGTTCACTTTTATGGTTCTCCCTGCATTTGTCAGT  
TTTTGTTGACGCCAATTTATGTTATGTTCTGCTCCGCGAGATAAAAGTCAACAGAAAGCCCGGAAATGACGCT  
TCTCAGACTCAGGAAAAGGAAAATAACCGTCCCGAATGGCTGATGATGGAAACGGTTTTACTTCTGCTGGTTTTAT  
GGATCGCCGGAAGCTATGACAGGATTTGATCAAACTACCACAGCATTTTACGGGTTATCTGTACTATTGCTGTCAGGAGT  
CTGAACCTGGGAAGATGTAAAAATGAAAAAGGGCCCTGGGATACGCTCATCTGGTTCTCTGCATTACTGATGCTGGCAC  
TCAGTTGATTTCACTGGGTTTTACAGACTGGTTCCGCTCATATTTGTTCCGATGTCAGAAAGATCATACATGGTAGCA  
ACTGGATCTCTGTTGATTTATCTGAAATGATTTATTTGCTATCTTCAATTTCTTTGCCAGCGGAAATGCCATTGTT  
GCTCGCTGTATGCGGCTTTTTAAGTGTGGGATCACTTGGTGTACTTGCATCCCATGGCATTAAATGCTCTCCTG  
TTGCAATAACATTTGCTGTTTTAAGCAATATACTATGCAAGAGCAAACTACTTTTTGGTGCAGGTTATATACCGA  
CCAGTGTCTGGTGAAGACTGGTTTTGTTGATGATATAATTAACCTCGTTATTTTTTTCTTGGGACTGATCTGGTGG  
AAAGTACTGGGATTTGATTA



CTGGAGAATTCAGATCCGGGGTGGTGCAGCGCAGAACTGACTGGGTGCGTGCCGGGGCGCAATCCGGATGAGGTCA  
AACGTCGCGCAAGGCTGAAATTTGATGAAAAACAGCAGACTGGGGCTGGTCTTTGATACTGACCCCGTCAACGACAAAGGA  
GGCAACAGTGCCGGAACGAAACACAGCGTCCAGAGCCACCGACAGCCAGCATGAAGATAA

>Cluster\_60243

ATGCCGTGACCATTCTCTTTTTCGATTACCGATTCTTCGGTGGTGCATTGCGCTGGCAATGTCAGGAGTTATAGCAGTGT  
CTGGGCTGAAGACGACATTCAGTTTGTATCCCGTTTTCTGGAATAAAAGGCGACACAAAAATGATCTGAAGCGTTTTT  
CCAGCCAGGGGTATGTTGAGCCCGAAAATACAATTTACAGGTTCAACATAAATAACAGCCATTTGGCGGAAGAGTACGAT  
ATTTACTGGTATGCTGGTGAAGATGACGTTAGCAAAAAGCTATGCTGTGCTGACACCGGAACTGGTGGCCAGTTTGGTTT  
AAAAGAAGACGTGGCGAAAAATCTGCAATGGAGCCACGATGGTAAATGCTGAAGCCCGTCAACTGGAAGGCGTGGAAA  
TTAAGGCTGATTTAAGCCAGTCCGCATTAGTCAATTTCACTACCGCAGGCTTACCTCGAATATACTGGCCGACTGGGAT  
CCACTTCTCGTTGGGATGATGGCATCTCCGGGATCATTCGGGACTACAGCATCACTGCGCAACACGACACGAAAGAAA  
TGGCGGCGATGACAGTAAACGAGATCAGCGGCAACGGGACGGTCCGGGTTAACCTGGGGCCATGGCGTATGGCGCTGACT  
GGCAGCAACTATCAACATACCGCGCAGTAATGATGATGACGATGAAATTTGGCGGCGATGACACAAAAAGGCGTGGAG  
TGGAGTGCCTATTATGCCGCGGGGCTTACCGTCAATTAAGCCAACTGGCGCTGGGCGAAGATTACCTCAATTCGGA  
TATTTTCGACGGTTTTAATATGTTGGTGGCAGTGTGACGACTGACGATCAAAATGTTGCTCCCAATCTGCGCGGCTACG  
CGCCAGACATTTCCGGGTTGGCACACACCAAGTACCGCTGACCCAGATGGGCGTGTGATTTACGAAACCGCAG  
GTTCCGGCTGGAGTTTCGATTTCAAGTATTCAGGATTTGGTGTTCGGTCTCCGGTACGTTGATATTCGATTTGAAGACAGAA  
CGGCCAGGTGAGGAATATGACATCAGCACCGCTCGATGCCATACCTCACTGCGCCAGGCCAGGTTCCGCTATAAGATCA  
TGATGGGACGTCGCCAAGAGTGGGGCCACCATGTCGAGGGGGGATTTTTCTCTGGTGTGAAAGCTCCGGGGCATCGCT  
AACGGTGGTCTTATATGGCGGTGCGCTGGGTGATGAAAATATCAGTCTGCGGCGCTGGGCGTGGCGGATTTGTC  
TACCTTCCGCGCGGTCGCTTTGATGTTACTCATTCGCATACCAAACTGGATAAAGACACCGCTTATGGCAAAGGTTCCG  
TGGAGGTAACCTTCCGTGTGAGTTATTCCAAAGACTTTGACCAGTCAACAGCCGCTCACTTTCGCTGGATATCGC  
TTCTCGGAAGAGAACTTTATGACCATGAGCGAGTATCTGGATGCCAGTACAGCGAAAATGGTCCGTACGGGCAACGACAA  
AGAGATGTACACCCGCACTTATAACAGAACTTCGGCATGCGGGTGTTCGGTTTATCTCAACTATAACCCGCACTACT  
ACTGGGATCGTGAGGAGCAGACAACTACAACATCATGCTCTCCACTATTTCAATATGGGCAGCATTCGTAATATGAGC  
GTTTCCCTGACTGGCTACCGCTACGAGTATGACAACCGGGCGGATAAGGGCATGTAG

>Cluster\_6095

ATGCATAACGACAAAGATCTCTCTACGTGGCAGACATTCGCGGACTGTGGCCAAACCATTGCGCTTTCAAAGCGGGTCT  
GATCGTGGCGGGCTAGCGTTAATCCTCAACGAGCCAGCGATACCTTCATGTTATCGCTCCTAAGCCACTTCTTGATG  
ATGGCTTTGGTAAAACAGATCGCTCCGTGCTGGTGTGGATGCCGCTGGTGGTGTATCGGCTGATGATTTTACGTTGGTATC  
ACCAGTATGCTCCAGCTACTGTATCTCTGGGTATCAGGAAAGGTTGTAATGACCATGCGTCCGCGCTGTTTGGTCA  
CATGATGGGAATGCCAGTTTTCATTTCTTTGACAAACAGTCAACGGGTACGCTGTGTACGATATACCTACGATTCGGAAC  
AGGTTGCTTCTTCTTCTCCGGCGCACTGATTACTGTTGTGCGTGAAGGTGCGTGCATCATCGGCTGTTTTCATCATGATG  
TTCATTACAGTTGGCAACTGTGATCATTTTGGATGTGCTGGCACCGATTGTTTCGATTTGCGATTCCGCTTGTATCGAA  
CGTTTTTCGCAACATCAGTAAAACATGCGAAGACCAATGGGGCAGGTGACCACCAGCGCAGAACAAATGCTGAAGGGCC  
ACAAAGAAATGATTTTTCGGTGGTACGGAAGTGGAAACGAAACGCTTTGATAAAGTCAAGCAACCGGATCGCTTCCAG  
GGGATGAAAATGGTTTCCAGCTTCTCCTGATCCGATCATTCAGCTGATCGCTTCTTGGCGCTGGCGTTTGTCT  
GTATGGCGGAGCTTCCAAAGTGTATGGATAGCTGACTCCGGGTACGATTACCGTTGTTTTCTCTTCAATGATGGC  
ATTTCTGGACAGTGAAGCAGGAGAAAGATGAAGTAAAGCGCGTGTATGAGCGTGCAGTGGCGACGTTGGAATTCGCAATGT  
CACCTTTACTTATCCGGGAGCTGACGTAACCTGCAATGCGTAACATCAACCTGAAAATTCGGGCAGGGAAGACGGTTGCTC  
TGGTTGGACGCTCTGGTTCCGGTAAATCAACATCGCCAGCTGATCAGCGTTTTCACGATATTTGATGAAGCGGAAATC  
CTGATGGATGGTCAAGTATCGCGGAGTATACCTGGCTGCTTACGTAACAGGTTGCTCTGGTGTGCGAGAATGTCCTCA  
TCTGTTTAAAGATACGGTTGCTAACAACATGCTTACGACAGGACTGAAACAGTACAGCGTACGCAAAATGAAGAAGCGG  
CGGATATGGCCTACGCCATGACCTTCAATAAGATGGATAACGGTCTCGATACAGTATGTTGTAAGCAGCGGTGCTG  
CTCTTGGCGGTGAGGCTCAGGCTATGCTATCGCTCGAGCCTTGTGGTGTAGGCCGATTCTGATCTGGACGAAGC  
TACCTCGGCTCTGGATACCGAATCCGAACGTGCGATTCAGGGCAGTGGATGAGTTGCAAGAAAACCGTACCTCTCGG  
TGATTGCCACCAGCTTGTCTACCATGAAAAGGAGCAGAAATCGTGGTGTGCGAGGATGGTGTCAATGTTGGAACCGGGT  
ACGATAACGATTTGCTTACGACCCGCGGCTTTACGCGCAACTTCACAAAATGCAGTTTGGCCAATGA

>Cluster\_11792

ATGAAAAAATAATAGAGAACTTTGACACTTTTATCATAGAACAGAAAGTTTGGTTCGAAGAGAATCTGGCAGCAGATTT  
TGCAGAATCATGGGATAGTCTTGTCTGGATATGTTGGAAAAAGGTTCCGGCTGGTTACGTGGCAATGGTGTAAATGTAC  
TGCGATTTGATGAGATTAACCGGCTAAAAGGAATCGACGAACACCATACTGTATCCGATACTTATCAGTTATTTATGAAA  
GCCATGCTGGTACTCGTATCGAGGCAGAAATCGCAGCATTTCCCTGCAGTTGCTATTTGCAACTCTGGTTATTTTGAA  
ACGCTGGTACTGGCGCTGATTAATAATTAACCGGCAAACTCATCCATCTATCTGACATACAGATGTTATACGTAAGTGGCA  
TGGATATTTAGTGCAGCATCCAGACCAGGTGATCTTAACATAGCCAACTACAGGGGCGTTGCGTTAAGATTCAAAA  
TTAGTAAATCATCAGCTTTTACATTTGGTAAACATCAATATGTTGCCGACGAAAATTAACCTAACCGGACCAATTTGAC  
CCGAAAGCCCTGGAACAATAGCCCTCAACACAAGGACAGGCTGGATGATGATGATGATGATGATGATGATGATGATGATGAT  
TTACAATTCGAGGATTTCCATATCTGCTACTTATCCAGCGTGTAGAAAACGCGACTGAAAAGATAGCGCTTAATTCG  
CTTCTGCTACTCATCATCAGGGGTTTCTGTTAGTGAAGCATCAATCTCAGACAGGATGCGTTGGTCAAACGAAAGAT  
AGATAACTCTGACATCAGCAGAGCTACTGATGATAAAGGTTGGCGGATTTTCTTGGCATTCGCTACATTTGGTGTAA  
AGGAGCTGGCGAGCGAACACATTTGGTGGAGCCCTTAGCTTCTTTAGTTGAAAACATATTCAAATCGGTTAAGTGC  
CTAACATTTGAGTTACGAAAGCATCTCAATACCTACGTTCAAAAGGATTTGTTGATTTTACCGGAGGCGGTCAGTGA  
TATTTGATGATTAACCTGTTGAACTTGTGATGATATTTGATGATGATGATGATGATGATGATGATGATGATGATGATGATGAT  
GATGATGATGATGATGATGATGATGATGATGATGATGATGATGATGATGATGATGATGATGATGATGATGATGATGATGAT  
AAAAGGAAATATTTATCAAATCAGACCTTAGTCTTTACTTAAAAATGAATTTGGTGTAGTAGCAGCGCAAAATCCCTG  
TACTCACTCATGGGTAGAAAACGGCAAAAGATTTGAGATTATGATGAGGATTTATTTGTTCTTTACCCAAAGGGTCTA  
TGACGTTAAAGAGAGCATTTGGGGTAAAAGCAACCTTTACCCTAGTAAATGCTGGCGTAAACAAGTTTCTCGGTAAC  
GTTGACGGTATGCTTCACTTTCAGTAAATACAGGCTACTCGAAGATGACGGTGTGCTTACCAGCTTCGCACTCATAT  
TCTCTGCAATAATAAACACTTTTCTCGCTATGCTGAAATTTACAGACCATTAACAAGCCATGTTGATGGGCGGTTG  
ATATTACTCAAATAAACATTAACAGCATCTGGCTTTAAGGAGCGCCGAAAGGCTGCTTCTTATTTGTCACAGAAAA  
CCCCAGCTAGGCTGGGGTTCCGAAAGCTTTTCACTTTGA

>Cluster\_38756

ATGGAGATTTGCTGGAGCCGAGATGGTGTGCTCCGATCGCTTATCGATCAGGGCGTTAAACAAGTATTCGGTTATCTCGG  
AGGCGCGTCTTGTATTTACGATGATGATGATACCGTGGGTTGGTATCGATCATGTTTATGTTGCTCATGAGCAGGCGG  
CGGTGCATATGGCCGATGGTCTGGCGCGCGCAGCGGGGAAGTCCGGCTGCTGCTGGTAACTCGGGTCCAGGGCGGAC  
AATGGGATTAAGGATGGCATTGCCACCGCTTATATGATTCATTCATGATTTGCTTCTTCCGGGAGGTAGGACTTCGTT  
GATAGGTTATGATGCTTTTCAAGGAGTGCACATGGTGGGATTTCTCGCCCGTGGTTAAACAGATTTTCTGGTTAAGC  
AAACGGAAGACATTCGCGAGGTGCTGAAAAGGCTTTCTGGCTAGCGCAAGTGGTGTGCTTGGACCCGTTGGTGTGAT



TTACCGAAAGATATTTCTAAATCCGGCGAACAAATACCTATGTCTGGTCGGAGTCGGTCAGTATGCGTTCTTACAATCC  
CACGACCTCCGGGATAAAGGGCAAAATTAAGCGCGCTCTGCAACCGCTGGTGGCGGCAAAAAACCGGTTGTCTACGTAG  
GCGGTGGGGCAATCACGGCGGGCTGCCATCTGCAGTTGAAAGAAGCGGTGGAGGCGTTGAATCGCCGTTGTTTCTCT  
TTGATGGGGCTGGGGGCTTTCCGGCAACGCATCGTCAGGCACTGGGCATGTTGGGAAATGCACGGTACCTACGAGCCAA  
TATGACGATGCAACCGGGATGTGATTTTCGGCTCGGTCAGTTTGTATGACCGAACGACGAACAATCGGCAAGT  
ACTGCCAAATGCCACTGTTCTGCATATCGATATTTGATCCAACCTCAATTTCTAAAACCGTGACTGCTGATATCCCGATT  
GTGGGGATGCTCCGACAGTCTCGAACAAATGCTTGAACCTCTGTCGCAAGAATCCGCCATCAACCGCTGGATGAGAT  
CCGCGACTGGTGGCAGCAGATTGAACAGTGGCGCGCTCGTCAGTGCCTGAAATATGACACTCACAGTGAAGGATTAAC  
CGCAGGCGGTGATCGAGACTCTTTGGCGGTTGACTAATGGGACGCTTACGTGACGTCGATGTCGGGACGACAGATG  
TTTGTGCGCTTTATTATCCATTCGACAAACCGCGTGGATCAACTCTGGCGGCCCGGCACGATGGGTTTTGGTTT  
ACCTGCGGCACTGGGCGTCAAAATGGCGTTGCCAGAAGAAACCGTGGTTTTCGCTCACTGGTGACGGCAGTATTAGATGA  
ACATCCAGGAATGCTACCGCGTTGCAATATGAGTTGCCCTACTGGTGGTGAATCTCAATAACCGCTATCTGGGGATG  
GTGAAGACTGGCAGGACATGATCTATTCCGGCGCTCATTCACAATCTTATATGACAGTCTTACCAGACTTCGTCCTG  
GGCGGAAGCCTATGGTACGTCGGGATCCAGATCTCTCATCCGCAAGAAGTGGAAAGCAAACTTAGCGAGGCGCTGGAAC  
AGGTGCGCAATAATCGCCTGGTGTGTTGATGTTACCGTCTGATGGCAGTGAGCAGCTACCCGATGCGATTCGCGGG  
GGCGAATGGATGAAATGTGGTTAAGCAAAACGGAGAGAACCTGA

>Cluster\_20601

ATGAAATTTGCCAGTCAGAGAATTTGATGCAAGTTGATTTGGTGTGGCGGCGCAGGTATGCGCGGGCGCTGCAAAATTC  
CCAGAGTGGCCAGACCTGTGCGCTGCTCTCTAAAGTCTTCCCGACCGGTTCCATACCGTTTCTGCGCAAGGTGGTATTA  
CCGTTCGCGTGGGTAATACCCATGAAGATAACTGGGAATGGCATAATGTACGACACCGTAAAGGGTCCGACTATATCCGGT  
GACCAGGACCGGATGAAATATATATGTGTAACCGGGCCGGAAGCGATTCTGGAACGGAACATATGGGCTGCGCTTCTC  
GCGTCTTGATGATGGTCTGATCTATCAACGTCCTTTGGCGGCCAGTCGAAAACTTCGCGGGCAGCAGGCGGCACGTA  
CTGCGGGCGCTGCGACCGTACCGGTACGCACTGCTGCACACGCTTTTATCAGCAGAACTGAAAAACACACCCTATT  
TTCTCCGCAAGCTGATCCGTTGGATCTGGTGAAGAACCGGATGGCGCAGTGGTGGTGTACCGCACTTCCGCTGAAAC  
TGGTGAAGTGGTTACTTTAAAGCTCGCGGACAGTGTGGCGACTGGCGGGGAGGGCGTATTTATCAGTCCACCACCA  
ACGCCACATTAACACTGGCGACGGTGTGGCATGGCTATCCGTGACGCGTACCGGTACAGGATATGAAATGTGGCAG  
TTCCACCCGACCGGATTTGCGGGTGGCGGCTACTGGTCCCGAAGGTTGCGGTGGTGAAGGCGGTTATCTGTGAAAC  
ACATGGCGAACGCTTTATGAGGCGTATATGCGCGAACCGGATGGCGCAGTGGTGGTGGTGGTGGTGGTGGTGGTGGT  
TGATCGAAATCCGTGAAGCGCGGCTGTGATGGTCCGTTGGGGCCACACGCAAACTGAAACTTGACCATCTGGGGAAA  
GAAGTCTCGAATCCCGTCTGCCGGTATCTGGAACCTCTCCGCACCTTCGCTCACGTTGATCCGGTGAAGAGCCGAT  
TCCGGTAAATTCACCTGTCACTACATGATGGGCGGTTTCCGACCAAGTGAACCGGTGAGGCGCTGACGGTGAATGAGA  
AAGCGAAGATGTGGTTGCTTCCGGGCTGTTTCCGCTGGTGAATCGCTTGTGTATGCGGTACACGGCGCTAACCGTCTG  
GGCGGCAACTCGCTGCTGGACCTGGTCTGATTTGGTTCGAGCGGCGAGTCTGCATCTGCAAGAAATCCATCGCCGAGCAGG  
CGCACTGCCGATGCCAGCGAGTCTGATGTAGAAGCGTCTCTGGATCGCTGAACCGCTGGAACAGTAACCGTAAACGGT  
AAGTCCGGTGGCGACTCCGTAAGCACTGCAAGAATGTATGAGCATAACTTCTCGGCTTCCGTGAAGGTGATGCGATG  
CGAAAGGCTTTAGACGTTGAAAGTTTACCGCGAGCGTTTGAAAAACTGCCGCTGGATGACACTTCCAGTGAAGTTCAA  
TACCCAGCGGTTGAGTGCCTGGAACGTAACCTGATGGAACGGCGTATGCAACGGCTGTTTCTGCCAATCTCCGTA  
CCGAAAGCGTGGCGCGCATAGCCGCTTCCGACTTCCCGGATCGCGATGATGAAACTGGCTGTGCCACTCCCTGATCTG  
CCAGATCGGAATCCATGACCGCGCGAAGCGTCAACATGGAACCGAACTGCGCCCGCATCCCGCGGAAGATTCGTAC  
TTACTAA

>Cluster\_25866

ATGAAAGCAGCGCGAAACGCAGAAACCAAAACGTCAGGAAGAATGCAACTTTATCAGTTGGCGTTTTTGGCTGTGTT  
ATGCGGCTGTATTTCTCTGGCGCTGGCTTTTCTGCTCGGACGCGTAGCGTGGTTACAAGTTATCTCCCGGATATGCTGG  
TGAAAGAGGGCGACATGCGTTCTCTTCCGCTTCCAGCAAGTTTCCACCTCCCGCGGATGATTACTGACCGTTCTGGTGG  
CCGTTAGCGGTGAGTGTGCCAGTAAAAGCGATTGGGCTGACCGGAAAGGATGCATGACGCTGGCGGTATCAGCGTCCG  
TGACCGCTGGAAGGCGTGGTAACCGGCTCAATATTCGCTGGATCAGCTCTCAGCCCGATTAACGCCAACCCGAAAG  
GGCGTTTTTATTTACTGGCGCGTCAGGTAACCTGACATGGCGGACTACATAAAAAAGTGAACCTGCGGGGATTAAT  
CTGCGTGAAGAATCTCGCGTTATTTATCCATCCGGCGAAGTACTGCTCACCTCATTTGGCTTTACTAACGTCGATAGCCA  
AGGGATGAGGGCGTCGAGAAGAGTTTCGATAAATGGCTTACCGGGCAGCCGGGTGAGCGCATGTGCGTAAAGACCGCT  
ATGGTCCGTAATGAAGATATTTCTTACTGACAGCCAGGCGCACAACCTGACGCTGAGTATTGATGAACGCTG  
CAGCGCTGGTTTTACTGCGGAACGTAACAACCGGTCGCTTTAACAAGGCTGAATCTGGTAGCCCGCTGCTGGTGGATGT  
CAACACCGGTGAAGTGTGGCGATGGCTAACAGCCGTCATACAACCAATAATCTGAGCGGCACCGGAAAGAGGCGA  
TGGTAAACCGTACCATCAGCGACTGTTTGAACCGGCTCAACCGTTAAACCGATGGTGGTGAAGCCGCTTCAACCT  
GGCTGATGCGGGAAACCTCGGTACTCAATACCGTTCTTATCGAATTAACGGCCACGAAATCAAGACGTGGCGCGCTA  
CAGCAATTAACCTACCGGGGATTTACAGAACTCGATAACGTCGAGTCTGGTGGTTTTCCAACTGGCGTTAGCGGATCCGCT  
CAGCGTTAGTAGATACTTACTACGTTTTGGACTGGGAAAAGCGACCAATTTGGGTTGGTGGGAGAACGAGTGGCTTA  
TATCTCAAAAACACCGTGGCTGACATAGAGAGGGCCACCTTCTCTTTCGCTACGGGCTAATGGTAAACCGTTTACA  
GTTAGCGGAGTCTACGCAACTATCGGACGTCAGGCACTTATCGCCACTGTGATTAACAAAGTTGACCTCCGCTTTC  
CCGGTGAACGCTGTCTTCCCGAATCCATTTGTTCCGACCGTGGTGCATATGATGAAAGCGTGGCGCTACCGGGCGGCG  
GGCGTGAAGGCGGATTAAGGCTATCGTATCGCATTAACCGGTTACCGGAAAGGTCGGGCGGACGGTTCGCTA  
CATCAATAAATATATGCTTATACCGCAGGCGTTGCGCTGCGAGTACGCGCGCTTCCGCTGGTGTGTTATCAACG  
ATCCGACGGCGGTAATAACTACGCGCGGCGCTTCCGCGCGGCTTTTGGTGCATATGAGGCGGCTATCGCGTACC  
ATGAACATCGAGCCGATGCGCTGACAACGGCGATAAAAAATGAATTTGTGATTAATCAAGCGAGGGTACAGGTGGCAG  
ATCGTAA

>Cluster\_26881

ATGATTCAGGACGCTTTTGTGCGCCAGCGTGGCGGCAACTTTACTGGCAGGGTTATCCACCCGAGAAATATCACGTCT  
GATGGGAATAAACCCGAACAGATTTATGCGTGGAAAAACCGGACAGTGGGATGAAACGCCACCGTGCAGCGTGTCA  
CGCAGTCCATCGATGCGCGCCTCATCAGCTTACTGAAAAACAGAATAAAACAGGCGGTGACTCAAGGAAATAGACCTG  
CTGACCCGGCAGCTTAAAAAAGTGCATGATGGCCAGCGGATGCGACGGCCACAGGAAAGAAAGGCGGGCGAAAAA  
CAAAAATCATTTTCCAGCCGGAACAGATTGCCGCTGCGGGAAAAAATCATCAGCAGGCTGGAGTGGCATACCGGGGCT  
GGTTTGCATCCCTGACCTTTGACGGGAAGCGGGATACGTAACAGGATGATCTGAAATCCCGACAGATTGGGGCGACC  
TGGTATTTTGCACAGGAAGCACTGCTGATGGCGCTGCGTGACGATGTGGCGCAACCTTACCAGCGTAAACAGATTTTTTT  
ATCTGCGCTCGCTGCTCAGGCGTTCCAGTTTAAAGCATATTTTCAAGGCGCGGCTGAAGTTGATGTGGAGCTGAAAG  
GGGCGATAAAAATCATCTCTCCACGGCGCAGAGTGCATTTTCTCGGTAATTTCTGCTGCGCAGCAGCTCACACA  
GGCAATTTTTTATTTGATGAATTTTTCTGGGTCAGTCGTTTGTGAACTGCGCAAGGTGGCTGGCGTATGGCAACCT  
CAGCGGACTGCGGCGCACTACTTCTCCACGGCTACCCAGCAAGCGACAGGATACGCTTCTGAAACCGGACCGCT  
GAAAGAGAAAAGGCGCAGCATAAACCGCAGGTTTTTCTGTGGACTGGAACGCTGCATAACGGCTTATCTGCCCT  
GACCGGACTGGCGGCAAAATGTCACGCTGGAAGATGTGGTCAATCACGGCTGGAACACACCGATATCGACGAAATTCG  
TGATGAAACACCGAAGACGAGTTCCGCAATCTCTATATGTGTGAGTTTTCGCGGAAGGGAATCGGATTTAACCTGA

ATATCCTGATGGCTGCGGTGTTGATGGGTACGACGACTGGAAGACTGGAACCTTTTGCTCCCGCCCGATGGGGAAT  
CGTCCGGTATGGATTGGGTATGACGCAAAACGGCAGCAGTGGCAACGGCGACAGCGCGCTGTGTCGGTGGTTCCTCC  
GGCTGTTCTGTTGGCCGTTTTCGAACGGTGGAGACGCGACGCTTCAGGGGCTGGAGTTGAAGAACAGGCCAGAGTCA  
TTGAAGAGTTCACGTATCCGTACACCTGGAACACATCGGCATTTGATGTGACGGGCGGAAACGGGGAGGCTGTTTATCAG  
ATAGTGAACCGGTTTTTCCCTGCTGCTATTCCTGACACCTTCACGCTGTCATCAAACGGTCCGCTGATGAAATGGT  
GCAATAATGCGTCCCGGGCGTGGAAATACGATCGCGCGCAACGCGAGCTGGTCGCGCCTTTAACGCGCTGCGTAAGG  
TGAAACACCGGGCGGCTTTATCACTTACGAAACGGACGAGCGAGGGGGATCAGCCAGCGGACCTTCCGTTGGCAACC  
ATGCTTGCTGTCATTAACGAACCGATTGGCGGGCAAGGAGAAAACGAGCGTTTACGGTTATGGAGTTCTGA

>Cluster\_22363

ATGATTTTTTACACTCCGCCCATATCAGCAAGAAGCGGTGGATGCCACGCTCAACCATTTTCGTGCTCATAAAACCCCTGC  
CGTTATCGTGTGCCACCGGTGCAAGTAAAAGCCTGGTGTATAGCGGAACTGGCGCGCTGGCGCGTGGTTCGCGTGTGG  
TGCTGGCACACGTTAAAGAAGTGGTGGCACAACCATGCAAAATATCAGGCGCTGGGGCTGGAAGCCGATATTTTGGCC  
GCCGGCTAAAGCCCAAAGAGAGCCAGCGTAAAGTGGTATTTGGCAGCGTGCAGTCCGTCGCCCGTAATCTTGATGCCAT  
TCAGGGTGAATTTTCGCTGTTGATTGTGATGATGCCACCGTATTGGTGACGATGAAGAGAGCCAGTATCAGCAAATCC  
TCACTCACTGACCAAAGTGAATCCCACTTACGCTGCTGGGCTGACTGCCACGCTTTTCGACTGGGCAAAGGCTGG  
ATCTACAGTTCATATCAGCGCATGGTACGCGGCAATGAAAGCCCTTTTCGCTGACTGCATTTATGAGCTGCCGCT  
CGTTATATGATTAAACACCGCTATCTGACGCCCGCAGAACGGTGGATATGCCAGTAGTGAATAACGATTTTCAGCCGCT  
TGCAGGCACAGAGTAACGGACTGTTTCAGCGAAGCCGATCTCAACCGGAGCTGAAAAACAGCAACGCATTACGCCACAC  
ATCATCAGCCAAATCATGGAGTTTGGCTGCAACCGCAAGGGGTGATGATTTTCGCGCAACGGTCAACACGCAAAAGA  
GATTTGGGATTAAGTCCCTGCGAAGATGACGACTGATTAATGCGGACACACCGCGCTGAGCGCATGTGTTAATG  
ATGATTTTTAAAGCCAGCGTTTTTCGCTATCTGGTCAACGCTCGCGTACGACCACCGGATTTGACGCCCGCAGCGT  
CTTATCGCCATTTTCGCGCTTACGAATCAGTGTGCTTTTACCAACAAATTTGTCGGGCGCGTTCGCTGTCGGCCCCG  
CAAGACTGATTTGCTTAAATTCCTGATTATGCGGGTAAACCTCAGCATCTACGCGCGGAAAGTTGGTACACCGAAAGGA  
AAAGTGACCAACGTTCCGTTACAGGTTTTTCGCTGCTGCGGTTTTGCAACACCTTTGGGGGAAACGACCGCCGAC  
GGGCACTTGATTGAACACTTTGGTCTGCTGTCAGGGATGGTTGAAGATGACGACGACATCGCAACAGTGTGACTT  
CCGTTTCCGTTTTAAAAATGCGCGCAATGTAACGCAAGAAATGATATGCGCGCTCGCGCTGCGCGAATGTGACACGG  
TACTGGTTGATCCGGATGATATGTTAAAGCGCGCTACGACTGAAAGACGCGTGGTATTACGCTGTAGCGCATGTCT  
TTGACGATGGGCAACGCAAAAGCGAATGGTTGAAATCCTTATACGATGAAGACGCGCGGATGTGAGTAGGCG  
TTTTCCGCTGCAAAACGCCCGCCAGCAACTGCCTTCGAGCAGCTTTTTATCCGCCCGCATACGCGCACACCGGGCATCC  
CGCTGCGCTGGATCACCGCGCGGATGTCTCGCCAGCAAGCCTTATGCGCACCCGGATTTGTCGCTCGCCGCAATG  
AAAGGCCAGTACTGGCAAGTGGCTGAAAAAGTTCGATTACGAAGGTCGTTTTGCTCGGGCGCACGAATTACGCGGTTA  
A

>Cluster\_49403

ATGAAAGTGAATCTACTTTGTTTAAATAAATTTATCTGTGTTTTATCTCATCAGGTTTTATCCAGCGCCCCACTCA  
GCCGGATGTTTATCTGCTCGAGCAAAAACCTAACTGCTTACCTCTGAAAGAAAATACCTACCTCAGATCCGCA  
CTGAATGGTTCATTTGCAATATAAATTTATAGTATCTGCTACCCTGAAACGCTGCTTACAATTTACTGACAACTTGA  
ACAGAATCGAAAAACGCTAAATATATCTAGATTTAACGCTCCAGAGTCGTAAGAAGGAGCACCAGAGACTGCCCT  
AATTTTTTATCAAAAATGGGTTAAATAAACCGGCAACTCTTACATCTTTGAGAGCTATATCAATAGCTGGATAAAAA  
GCAAAACACCCGATAGGCTATGCAACTTCTCAGTCTCGATGCAATGCCCTACATTTATTTACTACTGTGTAGT  
GCATATCAGAGCGATCTTACAAGCAATAAGTATTTAATAATGATATATGGTGACAATGTTATTTACCTTACGAGA  
AGCCACATGTTACTTACAGTTGCGGAGGGTTAACAACAAGGCGATATAAAAACGCTATTCATTTATGCCGATAATG  
CGTGAATATGTTGGCAGTCTGTAATCCATTTATGGTATGATGATTTGAAACTCATGAATATCTACGCTAACCAATGGC  
AACAAGAAAAGCGTAGTTTTATCTCAACGCTACAAAACCCATCACCAGTCTCAATCGAATTTACTTAAGTACTCT  
GGAAGGAATTTACTGTTTTATAGAAAATATGATATGCAGCAAGACTATCAAAACAGCCTTTCAAATTACATAGTATTTA  
TTGATAAAACCTTTGCCCTTTCCCATCAACAAGAAAGTGAATTAAGCCCTATTAAATTTATTAATTCATTAATGAGGTG  
GAATGATGAAAAACGCTCGGCGCTTCGATGACAGCACCAGAATACACTTGTATGATAGTCAAGTATTTGTTATGAAGA  
CAAAGTCAGCGCATTAAAAACCCCTGCATAGTCACTCAGGATAAATGAGCTAATGGACAAAATTTTACGACTCTTCTTAAAG  
AGATCAGTAATCAACCATAGAAGACTGGGATATAATAAAGTAAATACCGGTGAAAAATTTAGTGAGGTGGGACTAACC  
AAATATGCTCAACATCTCCGATCTTTCCGCTGAAGAATTTATATAAAAAGCAAAAATCACATCTGAAAGTGAATGAG  
AGGACTATTTCACTCTTCCGAAATATATAGTTTTGGTAAACGATCTGCCAGCGCAACCGAGTGTGATCAACATG  
TCCCTGCCCTCAATACAGATCATATGATCAATATATATAAATGCAAAAGAAATGGAACAATGCCAGGGAATTTGATA  
AAAGAGAAATGTTGGGTATGCAATAATCTGATAATGTTGGAGAACATTTGATGCAAAAACCTGCACAATGCATGGCACA  
CATTACCTTTACGCTCAACAAATGACAACACACCTGCAATAACAAAAAAGATAGCGTGGGTAATGAGCACTTTATC  
AGATTGGCAAAATCTACCAATAAGCTGGGAGTTAAACCAGAGCCAAAGCAGCAGGCTTTAATTCAGTTCGCTTTATGACCAG  
GCATCAGGAAGCACCTCTCAACTCAATAA

>Cluster\_20892

ATGACTGAACTTTTTGCTCAACTCTTTGAAAGAGTCTTAAAAGAAAATCGAAACCCGCGGGTCTATCGTTCTGTTGGCGT  
TGTGTTGCTATCGACAAAGACGTAGTACTGGTTGACGCTGGTCTGAAATCTGAGTCCGCCATCCCGCTGAGCAGTTCA  
AAAACGCCAGGGCGAGCTGGAATCCAGGTAGGTGACGAAAGTTGACGTTGCTCTGGACGCGAGTAGAAGACGGCTTCGGT  
GAAACTCTGCTGTCCCGTGAAGAACTAAACGTCACGAAGCCTGGATCAGCTGGAAAAAGCTTACGAAGATGCTGAAAC  
TGTTACCGGTGTTATCAACGGCAAAGTTAAGGGCGGCTTCACTGTTGAGCTGAACGGTATTCGTCGTTCTTCCAGGTT  
CTCTGGTAGACGTTTCGCGGTGCGTGACACTGCACTGGAAGGCAAAGAGCTTGAATCAAAGTAATCAAGCTGGAT  
CAGAAGCGCAACAACGTTGTTGTTTCTGCTGCTGCCGTTATCGAATCCGAAAACAGCGCAGAGCGGATCAGCTGCTGGA  
AACTGCAAGGAGGATGGAAGTTAAAGGTATCGTTAAGAACCTCAGTACTGAGTACGCTGCTGCTGCTGGGCGGG  
TTGACGGCTGCTGCACATCACTGACATGGCTGGAACCGTTAAGCATCCGAGCGAAAATCGTCAACGTCGGCGGCA  
ATCATTTTAAAGTGTGAAGTTGACCGCGAAGCTACCGGTTATCCCTGGGCTGAAACAGCTGGGCGAAGATCCGTTG  
GGTAGCTATCGCTAAACGTTATCCGGAAGGTACCAACTGACCGGTGCGGTGACCAACTGACCGACTACGGCTGCTTCG  
TTGAAATCGAAGAGGCGTTGAAGGCTGGTACAGTTTCCGAAATGGATTGGACCAAAAAACATCCACCCGCTCAAAA  
GTTGTTAAGCTGGCGATGATGGAAGTTATGGTTCTGGATATCGACGAAGAAGCTGCTGCTATCTCCCTGGGTCTGAA  
ACAGTCAAAGTAAACCGCTGCGAGCTTCCGCGCAACCCACAAACAGGGCGACCTGTTGAAGTAAATCAAGCTTA  
TCACTGACTTCGGTATCTTATCGGCTGGACGGCGGATCGACGGCTGGTTCACTGCTGACATCTCCTGGAATGTT  
GCAGGCGAAGAAGCAGTTCTGTAATCAAAAAGGCGACGAAATCGCTGCAGTTGTTCTGCAGGTTGACGCGAAGCTGA  
ACGATCTCTCTGGGCTTAAACAGCTCGCAGAAGTCCGTTCAACAACTGGGTTGCTCTGAACAAGAAAGCGCTATCG  
TAACCGTTAAAGTAACTGAGTTGACGCTAAAGCGCAACCGTAGAACCTGGCTGACGGCGTTGAAGTTACCTGCTGCT  
TCTGAAGCATCCCGTACCGGCTGAAGACGCTACCTGGTTCGAGCTTGGCGACGAGTTGAAGCTAAATTCACCGG  
CGTTGATCGTAAAAACCGGCAATCAGCTGCTGTTCTGCTGCGAAAAGCAAGCTGACGAGAAAGATGCAATCGCAACTG  
TTAACAAACAGGAAGATGCAAACTTCTCAACAACGCAATGGCTGAAGCTTCAAAGCAGCTAAAGGCGAGTAA

>Cluster\_45351

ATGAAACAGAAAATACGGATTACCTGGACGAAATCTACGGTGAACATTTACCGCAACTCATTTACAGAACTTGTAAC

GCGTCTTGAGAGTGCAGAACGATTAATTTACACAGCGACGTAATAAACACTGGGATGAAAGTATGTCGTTAATTTACCT  
ATGCCGATCAATTTACAGCAATGATTTAAAACATTACCACATTTAATCAGTTTTACCATCAATGGCTGCAAGCATT  
TTTTACATGTTCAATTTGTTGCCGTTTTATCCATGGTCACTGATGATGGCTTTTCGGTAATGATTTATCATCAGGTCGC  
CAGTGAAGCGGGGAGTGGCAGGATATTAGCAACTCGGTGAAATGCAGTCAATTTAATGTTTGAATTTTGTGCAACCA  
TGTGCGCAAAAGTGAATGTTTTAAAACTATTTACAACAGTCCAGGTTTTGAAGATTTTTTTATTGCCGAGTACAGT  
CAAACCGATCTCAGCGCCGTCACGCCCCGCGTTCGTTACCGTTATTAACGCCATTCCAGATGCGCGATCATTCAACGCG  
CCATTTATGGACCCTTTAGTGACGATCAAATGACCTGAAATACCGTAGCCCTGAAGTGTGCTGGCGATGTTGGATG  
TTTTACTCTGTTACCTGGCAAAGGTGCTGAGTATGTCGCCCTGGATGCCGTTGGCTTTATGTTGAAAGAGCCGGGA  
AGCTGCATCCATCTGGAAGAACACATCTGATTTCAAACGTTACGGTTCGATTTAGTAACTGCGGAAATTAATTA  
GATCATTACCAGACCAATGTTCCGCATAAAGACAACATTGCTTACTTTGGCGCAGGCGATGACGAGCACATATGGTGT  
ACCGTTCCTCGCTGCCGCCACTGGTGTGCATGCGGTGCAAAAACAGAACGTTGAGGCGCTTTGTGCGTGGGCGCA  
CTGACACTACCTCCAGCAACACCACCTGGTTAACTTCTCGCTCTCACGATGGCATCGGGCTAAACCCGCTACGGGG  
CTTTGTTGCTGAAAGCGAAATATAGAGTGGTCCAGGCGTTACAGCAGGAAGGTGCATTTAGTAACTGGAAATAAT  
CCGACGGTACACGAGTCCGATGAAATAAATGTGACCTATATGGATGCGTTAAGCCGCGTGAAGTAGCGATGAAGAA  
CGTTCGCGCAGGTTTATTCTCGCCCATGCGATTGTTTAAAGTTTCCCGGTGTGCCAGCGATATATATCAAAGTATTCT  
TGGCTCGCGTAATGATTACGAGGTGTCGAAAACTCGGATTAACCGTGCATTAACCGTAAATAATACACGATAAAG  
AGATAAACCCGAACTGAACGATGAAGCTACATTAAGGATGCGGTATATCATGATTTGCTGCGCTTTAATACACTCTCT  
CGCAGCCATTACGAGTTTCACTCCGATAATAATTTACCATTGATACGATTAATTCATCCGTAATGCGTATTCAAAGA  
TAACGCTGATGGTAAATGCTGACTGGATTGTTAATGTCAGTAAAAATATTCAGCATGATAATATTACTAATCTGCATG  
GTCCGATCTGATTAGTGAAGTTGATATATTTGGTAATGAAATAACGCTGCGCCCTGGCAGGTTATGTTGATTAATAA  
>Cluster\_19750

ATGAACTTGGCAGGATTCACTTTTCTTATTGTTGCCCTCTGGCATCTTGTCTGGGTAATGGATTTTATAAAGATAA  
TCTTTGGCGTAATCGATAAAAATATCTGTCATGCTGACACTCATGCTGAAAGTGAAGAAATAAAGAACATTTATAAAGCA  
GTGATATGGTAAGCAAAAACAGACAGTATTTATATAGGAAATAGCAGTTTTCAGACATATCATGGAGAGCCCTCCCGGT  
AAATTAGAAGGTGACATGGAATTTATCTGAGATCAAGTACACCTCTGGGATTTGATGAAGTACTCTCTATGATTCAGGA  
TTCCAGTGGTATTTCCATTTGTAACAATACCACGAAAGATGTGATCAGTGGAGGGGTGTCAGCAAAAGTCTGGCCGCA  
CTGTCGCGGAAAAAATGAACAGTGAACAGGCGGAAAAAGTACTGATCAATTTGATCATCTACTGCTTGGGATTCATCA  
GAACATACGCTTATGGATTTAATTTACGGGCGCTTTTCCAGCTTTTGTAAAGTTGGCGCAAACTACAACCTGTA  
CTGGACATATGAGTCTGGCAGGATTGCTTTTTCAAACGAGGAACTAAACGCTTCAAGTATAAGTATATACCGGGTGGTA  
AATATACATCAAAAACCTCTATCAGTTCGGACAGCAATAGCAGTTCGGGAAAGTTCGGGAAAGTTCGGGAGTAGTTCAGT  
GATTTCTGGAGCAGAGTTGAAATTCGATTCAGATGTGGATTTCTGGAAAGATATTGAGAAGTTCGATAAAAAGTATACTGGG  
CAGCGATGGTTCCGATTTCAATATCGACAAGTACATCTGTTTATTGTCAGAACATCTTCTGCAAAACATGAAGAAATA  
ACGAATATATTAATACACTGAATGCACAGCTTGAAGACAGGTTACCATTGATGTCGCGATCTATAATGTTACAACA  
GACAGCAGTATCTGGCAATGCTCTGGAAGCTTTGCTAAAGCATAACGGAGGTGTTCTGGGCTCTGTTTCAACCTCAA  
TTTTGGCGCAACAAGCGCACCCCTTCAATTTACAGGATATCTGAATGGGAACGGCGACTCAAGCAACAGGTTTGGCTTA  
ACTTTGAGCCGAAAGGAAAGTTAGTGGTGGACATCTGCATCTGTAACACTACGATGTCAGGTGAGGCGGCTTTG  
AAAGTAGGAAATGACAGAAATATGATCTGAGATAGGACTGTATTAAGCCAGTCAACAGTACAAACAGCCAGTAC  
GTCACCTGTTTACCAGCGTTTCTGATGAACCTTTCAGCGAGTTGCTGATGACGGGAAATATATTGTTGAGTATGGT  
TAACGCTTTCAAGAACTTGTGGCTCAAAATAATGTTTCCGATCAGGCAACTGTTAATGGAACCGTAATCAATTAACCTAAT  
GTTGATTCCACAACCTTTGTCAAATCAAGCATGCTTCGCAATGGTAATACTCTGTTCTGGCAGGATATGAGAAGAAAG  
AAACGAAAGTGTGGATCAGGGTGTGGGACAACAGTTTTAAACTCTTGGGTGGCGACTGAAATGGAAGTCTTCCGAA  
CAGTCACTGTCATTTGATAACCCGAGAAATATGATCTCAAGGCTTCTGGCGAATGA  
>Cluster\_39622

ATGATTTCTGAGCGGTTGAAATTTGTTGGTTTTTCGCGGTATCAACCGTTTGTCTGTTGATGCTGGAACAAAACAACGCTCT  
GATTTGGGAGAACGCGTGGGGTAAATCCAGCTTGTGACGCTTAAACCTGCTGCTATCGCCAGAATCAGATCTCTACC  
ATTTTGGAGCGCAGATTTCTGGTTCCCGCGGGAGATATCAACGGGCGAGAATCATCTGCATATTTTGTACCTTC  
CGGAAATCGCTGACCGCGACATCGGGTTTCGCGCTATCGCGCTGGAAGCGTGTGCTGGACGCCATGACCCGATGGTTA  
TCACCGTATTTTTATCGTCTGGAAGGGGAGAGTGGGAAAGACGGCAGCGTATGACACTGCGCAGTTTTCTCGATAAAG  
ACGGACATCCGATGATGTTGAGGATATTAACGATCAGGCTCGTCATCTGGTGGTTTTAATGCCGCTGCTGCGTTGCGT  
GATGCCGTTTTATGCGCGTATTCGTAACGGCACGGTGCAAAATGTCCTCAATGTCGCAATGTCGCAAGTCAACCGCCAGCTCGA  
TTTTCTCGCCGTTGAATTTACCTCACATCCGCAAAATCTCTCTGATGGGCAGATTCGTCAGGGATTTCCGCAATGGTGC  
AACTTCTTGAGCATTTATTTCTCTGAGCAGGGAGCTGGACAGGCGGATATCGTTAATGCGGCGGGCCAGTAATGAG  
CAACGAAGCTGGCCATCTGGATATCATCAACCGGATGATTGACCGACTGGAGGGCGCTCGTATCGGGTATTTTGTCT  
CGGCTGTTGCTACTTTATTCAGGCAAAAGGCATTTGCGGCTGGATAAAGACGCCCTCCATGTTGCTGATCGAAG  
ATCCGAACCCGTTGCAACCCATTTGCTTTCAGTTGCTGGCATCTGTTGAACTTCTGCAATTTGCGCAATGCGGCT  
ACTACCAACTCGGGAGAGTGTCTTTCGTTAACCGCGTAGAGCATGTTTGGCGACTGGTACGTGAGTCTCGCGGTTGC  
CGCTGGCGTCTGGGACCGAGTGGCTTGGTACCGAAGATAGCCGACGATATCTTTTCAATTCGTTTTAACCGTCCCT  
CATCGCTGTTTGTCTGCTGCTGGTGTGTTGGTGAAGGGAAACGGAAACCTGGGTTATCAATGAACCTGGCGCTAGTGC  
GGACATCATTTTGTATGCCGAAGGGATCAAGGTCATTTGAGTTTGGCCAGTCCGGGCTAAAGCCACTGGTTAAATTTCCCG  
GCGAATGGGGATTGAATGGCATGTACTGGTGCATGGCGATGAAGCAGGGAAGAAATATGCCGCTACGGTACGACGCTGT  
TGAATAATGATCGGGAAGCCGAACGAGAATTTAACGGCGTTACCGGCGCTGGATATGGAACATTTTATGATCGCCAG  
GGATTTCCGATGTTTCCACCGCGTGGCGAAATCCGGAAATGTACCAGTGAATATGCGCAAGATTATCTCGAAAG  
GATCCATCGCTCTTCAAACCGATCTTGCATTTGAAGTGGCAATGGAGGCGGACGCTGTTGTTGGACTCCGTACCGA  
CGCTGCTGAAAAAATGTTCTCACGCGTGTGTTGGCTGGCGCGGCTGGGCCACTAA  
>Cluster\_48615

ATGGAATCGATAGAAATCATTTCTAAAAAATTTTCTAGTTTTCAGATCATCGGTTGCCGTCATAAAAGGAGATTGGGGCT  
TGGTAAACTCATATTGGAATAGTTTTTATACTAAGCATTCTGAAGGATTAGATTTTAAATGCATATTCGATGTTCTT  
TGTTTGGGTTAACTCTATTTGGTATATTAATAAGCTCTTTATCATTGTGCCACACCATTAATGAAAGAAATATAA  
GAACATAATTTATCTGAACCGATCGAATATGATTCGTTATGAAATGGGTTTGGGATGGTTGAATCAACTCCCTT  
GTCAAAATTTTTAATACATTTTCGAAAGAACATTTTTTTGGTTCAAACAGATAACCTGCTGTCAATCTTCTGATATA  
AATTTGTTAATAATTTTGGTTTGTATGATGATGTTGAAAGAAAGGTAATTCGCTAGAAGTTAAAGAAATTAAGGG  
GTAATGATGAAATGCAAGAAGAAAAGGTTGCAAGTTGTTCTAATTTTAAATGAAGATAATTTACATGATGAAACTGC  
AAAAAACAGTTTTTAGAGTACAGAGAAAAGTAATGATGTCGAAATAAAATACGATCCTACGCTGAGAAGAACTTAC  
GTAAAGTTTTTTTAACTGATTTCTGATTTTTCTTAAAGTCTTAGCAAAATGACTTAGCAATTAATAAATATCCCT  
ATATTAATAAATAAATAAATAATCTCTGTTAATCTTAGGAATGAGCTAAGCTTGGCAGAGGATAGGTTAGAGAAAGTTT  
TATCAATAGATGTTCTGTTTTCTAGTGGTTTACTATTTCTGGTGTCCAGGTTGTTGATTTATGCTTGTTTAAAGAAATCAA  
TTAAAACATACATGTTGATTTGATTTACATGTTAGATGATAAAAAGGATGATTTCTGTATATTCATTTAATTAAGTCTGAT  
GTTATTTATGAACGAGCGGAAATTTGCTTTCGATGATGACATAGATTTTTATCTCAAGAATGGTTATCTTTCTACTGAAAG  
CAATATTCGAGGTATAATAGAAGAAAAATAAACAATATAAAGAACACAAGGCTTTATGTTGATGTTAACAATGTTTGGG

ATATTTTTAGTGACTCATTC AAGGACAATGAATCTGAGTTATTTCTAAGATAAAAATGTGTAATTAACGACAATCTTTCA  
CACATACCTGTTGCTCATT CATAGGCTTGATTGATATCTTAAATAGATTGGAGATTGATTGTGATAGTTATATAGAGGC  
ATATGCAGATGCCCTTGTAGCC AAGATGATGCTTATACTGCTTTTCGGAATTTGTATGTAGAGATATTTGGTAAACGAAA  
AGTTAGGCTGCTAATTAACAAAAAATTTGATGGATAAGAACCTGGAAGAGACTAATTTAGAGAATGTTTTATACAAAAATA  
ATTTGAAGCCAAATTAATCATAGTGACATAGCATATCTTAAACAGTTTCTCTGAAGATGATATTTAAAGTGGATACATC  
CCGCAATCAGGATGCTTTGGATTAGTGAGAAAAGGGTTGCTCAGATTCAAAGTATGCAAGAACTAACAGAAGAACAGC  
AAAAAATCAGAAATAAGCAATAGGTGCATTAACGAACTGGCTCTAGATCAAGTCTTAAACAACTACGTGTGAGCAGA  
TTGCTTAATAATTA

>Cluster\_12681

ATGATTAAGAAATAGTTTAAAAAATTAAGAACTGATAGATATTGACTTCTCATTCATGAAGACATCAATATAAT  
ATCAGGAACCAATGGGACATGTAAGACAACATTGCTTCTAATTAATAGCAATGGTTTCCAAATGCCACCATCTCGATCAC  
AAAATATTCAAATAGTAATTTGTGTAGAGTTAAAACTATAAAACAAAATAGCCAACCCCAAAATGGGAAGCAATGTT  
AGGGAATCAAAAAATACACCGATCCGGCAGAGGGAACAAAAGGTGTGTTATTTCTATAAACATTTTGGATCATAGCAC  
ACTAGACTTCAGAAAGCACAACCTCAAAAAATCCAGACGAAAGCGCAACGGTATGCTATCAAACCAGTATACCCACGCGGAA  
AAGAAAAACAATCACTTCCAGCTAAACAGTTTATATCTTGGATTATCGCGACTATTCCCAATTTGGTAAACATAAGAC  
GACGCCCTTACAAAAATCCGTTAAACCTACCAGAAGATGTTGGTTATATATCGAAAATAATAAATGAACTTTGGG  
CATTAATATATAAATATAGAAATCAAAACATATACCGTGTATTTTAAAGCTGGCCATTATTTGATACCGATAACCCAGCAA  
TTGATTCTAATACCATATCATCCGGGAAGACAATATAATTCATTAATAATCAAGGCATTAGTTAGCCTTAGGTATATTTT  
GAATCACTTATTCATCCACTGATCAAAAAGAAAGCATTCTGTAAATAGATGAATTTGATGCCACTTTACATCTCTCTT  
ACAGATAAGATTATAGATAAAATTTATCAATACGCAAAAGATTATAAGATTCAAGTATTTTTCACAACGCAAGCTGTA  
CATTTGCTAGAGTATGCTTTTTCATAAAAAATACCATGTTGCTCTAATTAACAAATATTAACAAGGCTCTGCTTTGGAT  
AATCTGATATATTA AAAATAACAATGTATCTGAAAACACAACAAAGGATGAGATATACACAAGGAACAAGATACCAGT  
TTTTACGGAAAGATGAAGAAGCTCGCTTTTATTTAATGAATACTTGGTTATTTGGATAAGCAAATATCAAAAATTTTGCTA  
TAGTTAGTAATTCATTTCACTTAATTTGATTGTTTTCATTGGTGCAGACAATTTAAAAACTATTTTAAATGATTCATCTT  
AAGGAAACCTCGTTAAAAATCAATTTGATTTCTTGTAGGAGATCACAGCCCTGAGGATCAGAGAGGAATATATCACTGCC  
GGTGA AAAAGCTCCAGAACAAATGATATTTGAGCATTGTGAGCACCTTTATAATACCAGACTCTTCTTCTGGGAAA  
ATCAGGATATAAATAACAATGGTTTTCGAAAGAGTTACTTACTCAAGATACGTCCTCAATTAACAATCAATTTGAACT  
GAAATTCAGAAAAGAAAAGACAACCATGATGCTTACATCCGTTTAAAGAAAGATTAATAAAGAAAATTTCAATCAGCA  
TATTTGAATCTTTAGAATGATTACAAGAACTGGTTAGACAAAACAGAAAATCAGAAATCTCTCCAGTATTTTACAATG  
GATTACGATCCTTATTTTACCAGGTTACACCAACAAACGGCATTGACAGAAAATTTGGGATTTGACTATAACAAAATC  
ATTAAGAGGATAAATAA

>Cluster\_63633

ATGGCCAAACAGTTTATGTTAATGGAACCAAAAAATGAGA ACTTCAATGAATTAATTGGAGGGTCAAATAAGTACATTGT  
TCCTAGATTCCAGCGAGACTATGCTTGGGATGTAGAACAATGGGAGGACCTTTGGAGTGATGTACAGCACTTGATGATG  
AAGTTTTTCATTAATGAGGATATATAGTTCTTCAACAAAAAGAACAGTATCAACATGAGGTCATTGACGGTCAACAACGA  
TTAGTAACCTTGTGATAGTTTACAGCCATGAAAGCCATTA AAAA ACTTGATAGATAAAGGAGGAGGAGTTGAACA  
AAACACAGAGCGACTTGATGCAATAACAAGACATTTGTGGTAAACAAAACCTCGTTTCATTAAGGTGGTTAGCAAGC  
TAGATTTAAATAGAAAATAAATAAAGATAATTTTCAAGCATCTGTTTCAAACCTAGAAGCTCCTAATACTCGTGGAACTACA  
TCTACAAAATAGCTACTCAAGAAATGCTTTGATTTTTCAAAAGAAGGAGTTCGGTAATACCGGCGCTGAGATCGCAC  
GTTTTATTGCCGATTTTCTTCGAGTATGGTTTTTCAAAAAATAGTTGTTCAAGATGATTTAAATGCATACAAAGTATTTG  
AACTTTAAATGCGAGAGGAGTCCAGTTATCCACGCCAGATCTCTTAAAAACTATTTGTTTTCGATAGTAACTAAGGAT  
GAGAAAATCGGAGATGAGGAATTAGATGAGTTAGATGACAAATGGTCCGAGATATCGATCAGTTGGGAGAAAAGCAATGT  
TTCTGATTAACATAGGTAATCATCATAAATCTCATAGAAAATGGTCCACAAAAATAATTTATACACTTCAATAGAAAAG  
TAATTAACAACCCCTAAAGAAGCATACGATTTTAAAGTACTGATAAAATCCGCACCTATTTATGCATCATTGATTAAC  
CCGAATGATTCATGGTGGCAGAGCAAGATACTAAATACAAGAAGGCCATTCAATATCTGAACGGCATTAGACTCTTTAA  
TATTAGACAGCCATTAACAGTATGCTATCAGCTTTTAAATCAATTCAGATGAGTTCTGTCAGCTGACTCGTTATTT  
TATATATTTTATCAATTAGATACAAATGTTATTTTGTGCTTATATGCACTTATGCACTTAAAGTAAAGTAAATGGC  
ATTAAGATCTCCAATAAGGAATACAAGAGAGCTAGCAATGTGAAAATGGGAGGAGTTAAGAGGTTATATCTGATGA  
TAACGTGTCTTTAATGCTTTTGAATTTTATCGAATGCCAAGTAGACAAAACAGCCAAAAAATTAGATTTCTCTTGGCTG  
AAATTTGAACAATACTTTGGTAATAATTCGATCATGAAAAGTTACACTCGAACATATTTGTCCATTTAACCCAGAGAAG  
GGTGTGGCAATTCGTTTGGGAGGGGTTAATGACGTAAAGGATAGGTTAGGAAATAGGTTTGGTATGATAAAGATAA  
TCTAAAAAGAGCTTCATTTGAAGTGAAGAAAAATGAATATGAAAATCAAAGTATAAATTAGCGGCTAAGATTACACAGT  
ATCCTGAATGGAATTTAGAGGCTGTCAATGATTTTCAAAAATGGATGTGGAACAAGCAGTAAATGATGAAAAGTTGGT  
TAA

>Cluster\_42602

ATGAGATACATCAAAATCGATTACACAGCAGAAGCTGAGCTTTTTGCTTGAATCTATATTTGGCTTTTTTATGAATGGCGC  
AGTTTTTTACC GCGCTTCGGCAGCTATGCGCAGGATTTTACCCTCTGAAAAGGCATTTCTGCTGTTGTTGAATGGCCG  
CCACCGTACTGTGACCTTCTTTTACTGCTGCTTCTTTGCTGTTTGGCCGCGCAGCTGGCTATCTGGCATCGCTG  
GTGGTGTCTTTTTCCG CAGGTCAGCTATTACATGACCTTCTTAAATGTAGTATTGGTTATGGCATCCGATCCGCT  
CATGACCACCGATATCGACTGTCAAAGAAGTTGTTGGTCTGAACTTTATTCCTGTTAATCGCCGTAAGCGGTTGC  
CTCTTATCTTATCTGGAATAACCGCTGTCTTACACCTTGGCTCCGACAACTGCGAACCCAGGGCAACGATTTCCGACG  
CTGGCGTCTGCTGACTGGCAGGTAATATGGTTTGGGCAACGATTCGTTTGGTATCCAGCAGAAGAAAGTGGAGAG  
GGCGACAGGTTGATTGCGGAGTTATGGCGGCTGCTGCGAACTCTTATCTGCCATCAAACCTGGCTTTCGGCATTAG  
GTCCTTATGCTTGGGCGGGTTCGATGAATCTTCCGATAACAATCTCTTCCCTTAAACCTGCGAAGAAGTTTACGTACCAG  
GCTCCAAAAACGTTGATGATACATATGCTGTTTTCATTAATTTGGTGAACACGCGCTGGGATCATATGGGCAATTTCCG  
CTATGAACCCAAATACACACCCGAAGCTGGCTCAGGAGAAAATCTGGCGGCTTCCGTGGTTACTCCTGTGATACGAA  
CCAAACTCTCACTGCGTTGCATGTTTGTACGTCAGGTTGGAGCAGAAGATAATCCGACGCGCACATTAAGAAGACAGAAC  
ATTTCTCGCGTATGGAAGCAGTTAGGATTCAGTTCTGATCTCTACGCTATGCAAGCGAAATGTTGGTTCTACGCAATAC  
GATGGCGGACAACATGCTTATCGTGAGCAGATTTGGTGGGAGCCAGTAACCGTGGCAAACCGGTAGATGATATGTTGC  
TGGTAGCAAAATCGCAACATCGCTGGGCGCAACCGGATGTTAAACATCTGATCAATCTGCATACCAAGGCTCACAC  
TTTTAACTACACCCAGGTTACCCGCGCAGCTTTGCGCAGTGAAGCCGGAATGTATTTGGTGTGATAGCGGCTGTACCAA  
AGCCAGATGATCAACTCATACGACAACCTGGTACCTATGTGGATCACTTTATTTCCAGCGTATTGATCAGGTTCCGG  
ATAAGAAGCAGTTGTGTTCTATGCACTGACACCGGTGAGTCAATTAATGAACGCGAGCACCCTGCACGGCAGCCGCT  
GAATGGCACCAGGCTGTTCCGTGGCGGATGATGGTCTGGATGCGGATAAATATCTGGAAAATCCCGTCAATCG  
GCAGGATTTGCGCAGCTGAAAAAGAAGCCGACATGAAAGTCCACGCGCTCATGTAGAGCTGTACGACACCATCATGG  
GTTGCTTTGGCTATACTTACCAGGATGGTGAATAAAGAAAACAACACTGGTGCCACATCCCGCAGGCAAGAGAGGGC  
GCGGTAACATA

>Cluster\_29015

ATGTCTGAAATGACCCACGCGAAATCGTCAAGCAACTGAATAAGCACATCATCGCCAGGACACGCCAAGCGTTCCGT

GGCGATTGCTCTGCGTAACCGTGGCGTGCATGCAGCTCAACGAAGAGCTGCGCCATGAAGTGACCCGAAAAATATCC  
TGATGATCGGCCCCACCGGTGTCGGTAAACTGAAATCGCCCGTGCCTGCGCTAAGCTGGCGAATGCGCCGTTTATCAA  
GTTGAAGCGACCAAAATTCACCGAAGTGGGCTATGTCGGTAAGGAAGTGGATTCATTATTCGCGATCTGACCGATGCCG  
CGTGAAAAATGGTACCGGCTCCAGGCTATCGAGAAAAACCGTTATCGCGCTGAAGAACTGGCAGAGAAGACTATTCGAGC  
TGCTGATCCACCGCTAAAAACAACCTGGGACAGACCAGCAAGCAGCAGGAACCGCTCCGCTGCTCGTATGCGGCGATCC  
AAAAAATCGCGTGAAGGCCAGCTTGATGACAAAAGAAATCGAGATCGATCTTGCCGCGACCGATGGGCGTTGAAATTA  
GGCTCCTCCGGGCATGGAAGAGATGACAGCCAGCTGCAGTCCATGTTCCAGAACCTGGGCGTCCAGAAAGCAAAAGCCG  
GTAAGCTGAAAAATCAAAGACGCCATGAAGCTGCTGATTGAAGAAGAAGCGGCGAAAACTGGTGAACCCGGAAGAGCTGAAG  
CAAGATGCTATCGACGCTGTTGACGACGACGGGATCGTGTTTATCGACGAAATCGACAAAATCTGTAAGCGCGCGAGT  
TTCCGGTCCGGATGTTTCTCGTGAAGGCCGTTACAGCTGACCTGCTGCCGCTGGTAGAAGGTTGCACCGCTTCCACCAAC  
ACGGGATGTTCAAACCTGACACATCTGTTTATCGCTTCTGGCGCTCCAGATGCGAAACCGTCTGACCTGATCCCG  
GAACTGCAAGGTCGTGTCGAATCCGCGTTGAGCTGCAGGACCTGACACCAGCGACTTCGAGCGTATCTGACCGAGCC  
GAACTGCTATTAACCGTGCAGTACAAAGCAGTATGAGCGTGAAGGCGTAAATATCGAGTTTACCGACTCCGGTATTA  
AGCGCATCGCGGAAGCGGCATGGCAGGTGAACGAATCTACCGAAAACATCGGTGCTCGTCTTACATACCGTCTGGAG  
CGTTAATGGAAGAGATTTCCTACGACGCCAGCGATTTAAGCGGTCAAACCATCACTATTGACGCAGATTATGTGAGCAA  
ACATCTGGATGCGTTGGTGGCAGATGAAGATCTGAGCCGTTTTATCTCTATAA

>Cluster\_33646

ATGAGTTCTGCCAAGAAGATCGGGCTATTTGCCGTACCGGTGTTGTTGCCGGTAATATGATGGGAGCGGTATTGCATT  
ATTACCTGCGAACCTAGCAAGTATCGGGTGGTATGCTATCTGGGGTTGGATTAATCTCTATTATGGTGAATGTCGCTGG  
CATATGTTATATGCCCGACTGGCAACAAAAACCCGCAACAAGGTGGCCAAATGGCGTATGCCGAGAAAATTTCCCTGCA  
TTTTGGTTTTAGACAGGTTTCTTTTATTAACCATGCTAACCTGGATTGGTAAACCTGGCAATGGTATTACCGCTGATCTTA  
TCTTTCACCTTCTTCCAGTATTAATGATCCGTTCGGCGGGTATCGCCTGATTTGCTATCGTCTGGGTATTTACCT  
TTGTAAATATGCTCGGCGTACCTGGGTAAAGCCGTTTAAACCATATTGGTCTGGTCTGGTCTTATTCTCTGTTGGTATG  
ACTGCTGTTGTCGCGCTGGCATTTGGTTGATGACGCACTTATGACGCTAACTGGAATACTGCGGATACCATGCTGCA  
TGCGATCATTAAGTATTTCTGCTCTGCTGCTGGGCTTCTGGTGGTGTGAATCCGACAGTAAAGTACTGGTATGGTTA  
AAAACCCGAAACGTTACCGTTCGCTGGCAACCATGCTGGGTACTGGTTTAGCAGGTATGTTTACATCGCTGCGACTCAG  
GTGCTTTCGGGTATGATCCGCTTCTGTAATGGCGGCTTCGGTGTCCGTTTGAATCAGTCTCAACTATCCTCGG  
TAACTGGGCTGCGCCACTGGTTTCTGCATTCACCGCTTTCGGTGTCTGACTTCTCTGGGCTCCTGGATGATGGTATG  
GCCAGGAGGTGTACGTGCCGTAACGACGGTAACTTCCCGAAAGTTTATGGTGAAGTCGACAGCAACGGTATTCGAAA  
AAAGGCTCTGCTGCTGGCTGCAGTAAAAATGACTGCCCTGATGATTTCTCATCTGATGAACCTGCGGTTGTAAGC  
CTCTGACCTGTTCCGTTGAACTGACCGGTATCGCAGTACTGCTGACTATGCTGCCGACTTCTACTCTTCCGTTGACCTGA  
TTCGTTTTGAAGCGTTAAACATCCGCAACTTTGTCAGCTGATCTGCTGCTGACTGGGTTGCGTGTTCGCTTATCGG  
CTGATGGGCGCAAGCTCCTTCGAGCTGGCAGGTACCTTATCGTACGCTGATTAATCTGATGTTCTACGCTCGCAAAAT  
GCACGAGCCAGAGCCAGTCAATGGATAACACACAGCGTCTAACGCACATTA

>Cluster\_11763

ATGGATATCTGCTCCGAAACAAGAAATTAACGATTAGAAGACCAGCGATACTAGTTGCACTGGCACTTTTACTGTGTAG  
TTGTAAGACAGCCCTCCAGAGTCCATGGTGACACCACCAGGTTCAAAGCCACCAGCCACGCAACAATCGTCAC  
AACCGATCGGTGGCATCTGGCTGGCCACCGTTTTCTCGGCTCGACTGGCCACCGTTTTCTCGGTTAACATTAAGTAAACCC  
ACCACCGGCGCGTGTACAACAACAGCGGATGATCGACAACTGGATCATCTGCAACGCTCCGGCATAAACCGGCTTT  
TTTTCCAGGTCAAGCCGGACCGGTACCGCTTGTGGCCATCGAAAATTTTTGCCGTTGGTCCGATCTTATGACCCGGTAAAGTTG  
GTGAAAATCCGGGTTACGATCCGCTGCAATTTATGCTCGACGAAGCCACAAGCGTGGGATGAAAGTACACGCTGGTTT  
AACCCCTATCGGCTATCGGTTAATACGAAGCCCGTACTATCAGGGAAGTGAATAGCACTCTGCTCAACAACCGGCGAG  
GCCTATGTCGAACACCGTGCATGGATCAGAAGCTGTCGGGATCGCTTTGTCCTCGACCCGGGATCCCTGAGGTTGAG  
ACTGGATCACATCAATAGTGCCTGAAGTGGTTTTCCGCTATCCGGTAGATGGCGTGCAGTTTGGACGACTATTTCTATACT  
GAATCACCAGGTTTACGGTAAATGATAACGAACGTAACCGTAAATACGGAGGCGCATTTGCGTCAAAAGCAGACTGGCG  
CGGCAACAATACTCAGCAGTTAATTGCAAAAGTATCACACACCATTAAGCCGGGAGTCGAAATTTGGCGTTA  
CCCGCGGCGGTGTGGCTTAACCGATCACACGATCCGCTCGGTTCCGATACCCGAGGCGCGGACGCTATGACGCTGAG  
TACGCTGACACCCGTCGATGGGTGGAACAAGGATTTGCTGGATTACATTTGCTCCCAAAATTTACTGGCCGTTCTCACGGAG  
TGCCGCGGCTTATGACGTTTGGCAAAATGGTGGGCGGATGTCGTTAAACCGACAGGACCCGCTGTATATCGGTATCG  
CCTTCTATAAAGTGGGTGAACCTTCAAAGATAGAGCCAGACTGGATGATTAACGGCGGCTACCGGAACTGAAAAAGCAG  
CTCGATCTTAACGATGCGGTACAGAAATTAAGCGCACCATTTGTTCCGTTGAGGACTATCTGAATAAACCCGACACTCA  
ACAAGCGGTACGATCTGCAAAAGTCTGTTGGGCGAGTTAA

>Cluster\_41240

ATGATTGGTTCGATATCGCGTTTTATGACGCGTTTTGTCAGCCGATGGCTTCCGATCCACTGATCTTTGCCATGTTGCT  
GACATTTGCTAACATTTCTGATCGCGTTTTGGTTAACACCACAAACCGGATCAGCATGGTGAATGTTGGGTTGACGGTT  
TCTGGAATGCTGGCGTTTGGTATGACAGATGGCGTTATCATCGTTACTGGTATGCGCTTGGCAGCTCCGCTCCGGTG  
AAAAGTTTTGCTGCTACTGCCGCTCCGCGCAAAAGACGCCGTACAGGGCGTATGCTGGTTACTTTCTTCCGTTTCACT  
CGCTGTTGCTCACTCACTGGGATTTGGTTGGTTGTCGGTGCAGTTCGCTTCCGCTGAGGTCGCGCGGAGTACCCGGTT  
CTGATTTACCGTTGCTCATTTGCCCTGCGCTACATTTGGTTTTCTCAGCTGGGTTGGCGTTTTCTTGGCTCAATGCCCTG  
TTGGCTGCAACACCGGCAACCGGTTGAGCATATCGCGGGCTGATCCGGTGGGCGTACTCTGTTGAGTGGTTTTAA  
TATTTTATCATCTGTGGCGTTGATTGTTGGTATGCCATTTATCACCCGATGATGATGCCAAAACCGTCTGACGTTGGTGA  
GTATCGATCCGAAACTACTCATGGAAGAGGCTGATTTTCAAAGCAACTACCGAAAGATGCTCAACCGTCCGAGCGACTG  
GAAGAAAGCGTATTTCTGACGTTGATCATCGGCGCACTCGGTATCGTTTACCTGGCGATGACTTACGCGAATGAGGCTT  
CAACATCACCATCAATACCGTCAACCTGATGTTTATGATTTGCGGGTCTGCTGCTACATAAAACGCCAATGGCTTATATGC  
GTGCTATCAGCGCGGACGACGAGTACCGCGGATTTCTGGTGAATTTCCCTTCTACGCGGGGATCCAACCTGATGATG  
GAGCACTCCGGTCTGGCGGACTCATTACCGAATTTCTTCAATGTTGCGAACAAGACACCTTCCCGGCTATGACGAT  
TTTTAGTTCTGCACTGATTAACCTCGCCGTTCCGCTGCGGCGGCGGCACTGGGTTATTACGGGCGGTTCTGATGCCG  
CAGCCAGCGCTGGGCGTCTGATCTCGGTAATCGGTAATGGCGATCGCTACGGCGAGCAATGGATGAACATGGCACAA  
CCGTTCTGGGCGTGCAGCACTGGCAATCGCCGGACTCGGTGTCGCGACATCATGGGCTATTGATCACTGCCCTGCT  
CTTCTCGGCGTCAATTTTCTGCTATTGTTAACCGCTGTTCTGA

>Cluster\_28256

ATGCTGGATAAAATTTGTTATTGCCAACCCGGCGGAGATTGCATTGCGTATTCTTCTGCTGTTAAAGAACTGGGCAACA  
GACTGCTGCTGTGCACTCCAGTCCGATCGCATCTAAACACGATTTACTGCGAGATGAAACGGTCTGATCCGCGCTG  
CTCCGTCAGTAAAAAGTTTATCTGAACATCCCGGCAATCATCGCGCGCTGAAATCACCGCGCAGTAGCAATCCATCCG  
GGTTACGGCTTCTCTCCGAGAACGCCAATTTTGGCCGAGCAGTTGAACGCTCCGCTTATCTTCTCATCGGCCGAAAGC  
AGAAACATTTCCGCTGATGGGCGCAAAAGTATCCGCAATCGCGCGGATGAAAAAGCAGGCGTTCTTCTGCTACCGGGT  
CTGACCGCGCTGGGCGAGTATGGATAAAACCCGCAATTTGCTAAACGATTTGGTTATCCGCTGATTAACAAGCC  
TCCGGCGGCGGCGGCTGCGGTTATGCGGCTAGTGGCGAGCAGCTGAACTGGCACAAATCCATCTCCATGACCCGCTG  
GGAAGCGAAAGCAGCTTTACGAAACGATATGGTTTACATGGAGAAATACCTGGAAATCCTCGCCAGCTGAGATTACAG

TACTGGCTGACGGTACGGGCAACGCTATCTATCTGGCGGAACGCTGACTGCTCCATGCAGCGCCGCCACCAGAAAGTGGT  
GAAGAAGCACCGGCACCGGGCATACCCCGAACTGCGTCGCTACATCGCGAACGTTGCGCTAAAGCGTGTGTTGATAT  
CGGTATCGCGGTGCGGGTACTTTCGAGTTCCTGTTGCGAAACGGCGAGTTCATTTTCATCGAAATGAACACCCGATTC  
AGGTAGAACACCCGGTACTGAAATGATCACCGCGTTGACCTGATCAAAGAAGCAGCTGCGTATCGCTGCCGGTCAACCG  
CTGTCGATCAAGCAAGAAGATTCACGTTCCGCGCATGCGGTGGAATGCGGTATCAACGCCGAAGTCCGAACCCCT  
CCTGCCAAGTCCGGGCAAAATCACCCGTTTCCACGCACCTGGTGGTTTTGGCGTACGTTGGGAGTCTCATATCTACGCGG  
GCTACACCGTACCGCCGACTATGACTCAATGATCGGTAAAGCTGATTTGCTACGGTGAACACCGTACGCTGGCGATTGCT  
CGCATGAAGAATGCGCTGCAGGAGCTGATCATCGACGGTATCAAAACCAACGTTGATCTGCAGATCCGCATCATGAATGA  
CGAAACTTCCAGCATGGTGGCACTAATATCCACTATCTGGAGAAAAAAGCTCGGTCTTCAGGAAAAATAA

>Cluster\_2108

ATGAGCCAGAAATAAAAGTCGTCACTATTTGGTGGCGGAGCAGCTATACCCCGAGTTACTGGAAGGATTTATTAAGCG  
TTATCACGAATTCCCGGTGAGCGAATTAATGGCTGGTGGATGTCGAAGATGGTAAAGAGAACTGGATATCATTTTTGAACT  
TCTGCCAACGGATGATTTGATAACGCTGGCGTCCCGATGAAGCTTTATAAAACGCTGGATCGCCCGCAAGCATTGAAAGAT  
GCTGATTTCTGTTACTACCCAACGCGGTAGGCCAATTAACCGCGCGCAACTGGATGAACGATTTCCATTAAGTCATGG  
TTATCTTGGTTCAGGAAACCAACGCGCGGGCGGTCTGTTTAAAGGCTGCTGCTACCATTCGGGTGATTTTGGACATCGTAA  
AAGATGTCGAAGAACTTAACTGTCGAATGCATGGGTGATTAACCTTACTAACCCGGCGGGAATGGTCACTGAAGCGTTTTAT  
CGTCATACCGGATTTAAACGCTTTATCGCGCTGTGTAATATTTCCGATCGGCATGAAGATGTTTTATTTCGGCATGTTCTGAT  
GCTGAAAGACAGCGATGATTTATCTATCGATCTGTTCCGCCCTCAACCATATGGTGTTCATTAAGGATGTGCTGGTAAATG  
GCAAGTCGCGCTTTGCGGAATGCTTGAATGGTGTGGCGTACAGGCGTAAAGCGTCTCTGTAAAAAATATTTTCGAT  
TGCCATTTAGTGGGCTTAATTCGTTTAACTGCTGTCGATGTTCTTATCTGCTGATTTACTTCAAGCAGAAAGA  
GATGCTGGCTATTGAAATGGCGAATACTACAAGGCGCGCACAGGACAGGTAAGTACAGAAAGTCGAGAAACAACTTT  
TTGAGCTGTATAAAATCCGGAGTTGAAAGTTAAGCCGAAAGAACTGGAACAGCGCGTGGGGCTTATTACTCTGATGCA  
GCGTGGCAAGTGTACAACGCTATCTACAACGACAGCAAGCTGAAACATACGTTAATAATCCCGCATCATGGGCATATTGA  
TAATATTTCCGGCAGACTGGCGGTAGAAATGACCTGTAAGCTGGGGCGCGATGGCGGACGCCACATCCGCGCATTACGC  
ATTTTCGATGATAAAGTGTAGGGGCTGATTCACACCATTAAAGGCTTCGAGATTGCTGCCAGCAACGCCGACTTAGCGGA  
GAATTTAACGATGTGTTACTGGCGCTAAACCTTAGTCCGTTGGTGCATTCGATCGCGATGCTGAGCTGCTGGCACGCGA  
GATGATTTCTGGCGCACGAGAAATGGCTGCCAAATTTTGGCGACTGCATCGCAGAGCTTAAAAAGCACATTA

>Cluster\_3299

ATGAAATTCATCGACCACTGTGGGCTGAGGGGACATTCCTGTCTCTCAGCAGTTTCAGCAGCAGGCCCGCTGGGAAGC  
GTTTCAGCAATGACAGCATTCGCGCACTTTGTATTCGTCATCCGTTGGGGATCGCGAATGTGCTCTTTGACCGCATGCCC  
TGATGTCCGGAAGCTGAAAACGCGAGCAGTACGCTGCGTTTTGCTGATGGCACGCTGATCGATTCTGACGTGAGCGAT  
GTTCTGCCCTCTCCGCTGCGATCTGCACGCGTACGAACGACAGCGCGTTGTTCTGCTGGCGCTGCCAATTCGCCATGG  
TAACGGCGGTAATCTCGGTGAGGTGAGCAGACTGAAAGACCGCTACGCTATCGTTCAGGAATGGCAAAAGGTACAGGATA  
TCTACGGCAGTGCAGTGAAGATATGGCGTTGAGCGTATGCGCTGTCCCTGCGCTTTGCTCATGATAACAATCAGGAT  
TACATCACTGCCCACTGGCGGCTGTTGGTGGCGGATGTTTACGGCACTGGACACAGGATGAGGGCTATATTCGCGCTT  
ACTGGCGTTTAACTGCTCATGACGGGTTGGTACAGCTCTGGACAGCTGCTGTTGCGACTACGGGCAAAATGCGGCGCC  
TGATGGCGATGCGTGGGAAAGCAACAGCGTATGGCGGACTTCCCGCTCGCCGATGTCTCCCTGTTCTGGTTGCTTAAAC  
CGCTGAACTCCGCGAGCCGCTGCTGAGTGTATTTCTGCGCTACCCGCGGTTTCATCCGAACTGGTCTGGCGGGAGCT  
GGCAGGCTGTCCGAGCGCTGCTGACGTTTTCCCTTGAACATAACCTCAGCGCGTTCCGCCCTATGTCACGAATGCG  
CGTCCACTGCTTTTCCGCGACTGTTCTCCCTGCTCAGCAACTGCTGGAAGCAAGCCTGCCGTACGCGTGTACGCGCTG  
GATCTGGGATCCCTGCGGGCAACCGCTGGAAAGCCGACTGCAGCATCCGCGCTGCGGGAAGAGCGGATTTTACCT  
GTCCGTTCTGCTCACTGCTGCGCATCAGGTAAGTGCACAGCTACCGCTGGTCTGCAAAATCGGTGCGCTGATGACG  
TCACGCTGCTTATCAACGTGGCGCTGAATGGTGTTCCTATGAGCCACTGACCTCAGTTCCGGCAGCGTGCCTGCGC  
CTGGAGAATCAGTATTTTGGCGTGGATATGCACAGTGCAGCGGCTAAATCGATGCTGGAGTCCGGGTGCTGCATGATTTA  
TGGCCAGGAACCATGGCGACCTGAAACCTGAACTGTTTGGCGTGTGCGCAGATGA

>Cluster\_38919

GTGAGTGAATTTTTCTGCTTTCGATAACGCCCTGCGCTGCTGGAGTGCATCCCGCTGGCCCGCTCGCCGGCGGCTGGT  
GCGCCTTAATGGCATCTGCTGGAGAGCGTGGCTGCCCGCTAATGACCGGGCAGCTGTGTCGCATCGAAAGCGCAAC  
ACAGCCTTATCGACGCGCAGGCCGATAGGCTTAACTCGCGATATCACCTACTTAAATGCCGTTTAAACAGCCGGTCCGCTG  
ATGGCGGGGGCGCGCTTCCCGGAAGAAAAGCCACGACATCCTGATTGGCGAAAGCTGGTTAGGCCGCTGGTTAA  
CGCGCTCGCGCAACCGCTGGATGGCAAAAGCGCGCTGAACGCAACGACCTTCTGCGCGCTGCCGCGCTCGGCTTAACT  
CCTTAAACCGTCTGTTGTTGACGAATCGCTGGACGTTGGCGTGAAGCAATCAACGGCTGCTGACCATCGGCAAGGC  
CAGCGTGTGCGGCTGATGGCGGGCAGCGCGCTCGGAAAGCGTGTACTGGGATGATCACCCGCCAGCAAAAGCCGA  
CATTTGGTGGTTCGTTGATTTGGCGAACGCGGGCGGAAGTAAAGAGTTTATCGACCACTCGTGGCGGCGGACCGGC  
TGCAAAAGTCTATGCTGCTGCTGCGCGCCGATGAACTGCTGCGCTGATGCGCGCTGAAAGCCAGCACTGCTGCACTC  
ATCGTGCCTGTTTTCGCGACCGCGGCTACAGTTTTACTGCTGGTGGATTCCTGACCCGTACGCGATGGCCAGCG  
GGAATAGCTCTCTGCTCGCGAACCGCCGCAACAAAGCTATCCGCCATCGGCAATTCGGCATGATCCCCAAACTGG  
TCGAGAGCGCAGCAACAGCGAAAGCGAGGATCGATGACCCGCTACACCTGCTGGCGGAGGCGGACAGCCAGCA  
GATCCAATAGTTCGACTGCGCCCGCGCAGTGTGCTGGACGACATATCGTATTAACCCGCAAACTGGCGGAAAGCGGGCATTA  
TCCGGCCATGATATCGGCCAGTGCATAGCGCTGCATGAATCAGGTGACAGCCTGGAACATCAGCAATCCGCCCGG  
CGTTAAAGCAAACTACGCCGCTATATGGAGTCAAAACCGCTGATCCCGCTCGCGGCTACGTGGCAGGTGCGGACGCC  
AGGCTCGCAAAAGCGGTGAAAATGTTCCCGCTATCGAGGATTTTTCGCGTACAGGAGTGCAGCAACCCGCTCCCTCGA  
ACTGGTGAAGCCGCTGCAAAATCTCTTCTGCGCTCAAAAAGCGAGAACAGTAA

>Cluster\_1036

ATGGCAGTAAAGATTTTCAGGTGTGCTGAAAGACGGCACAGGAAAACCAATACAGAACTGCACCATTCAACTGAAAGCCAG  
ACGTAACAGCACCAACCGTGGTGGTGAACACGGTGGCTCTGAAAATCCGGATAGGCGAGGCGTTACAGCATGACGCTCG  
AGTATGGTCACTACAGCTCACTCTGTTGGTGGAGGATTCCTCCATCATGCGGGGACCATCACCGTGTATGAGAT  
TCTCAACCGGGGACGCTGAATGATTTTCGCGTCCATGTCGGAGGATGACGCTCCGGCGGAGGCAATGCGTCTTTTTGA  
ACTGATGGTGAAGAAGCGCGCTCACGCAAGGAGGCGGAAGAAGATGCGCGAGAGGCGGAGACATCAGCGAGGAATG  
CCGCAATATCAGCCAGTCAAGCAGAAGAGCGCTCAAAATGCTGACACTTACAGAGGGATGATCGGATCGGATCGGCGG  
CAGGCGGCAAGTGCAGCCGCTGCAAGCAGTACAGGAGGCGTCCCTGCTCTCGGCTCTGCGGCGCTCAAAAAGC  
CAGTGAGTCACTCAAAAGTGCAGCAGATGCTGAATTTGCAAGAAGACGGCAGAAAGTGCAGCCGTTAATGCAGCCAGG  
ATGCAACGACCGCAACAGAAAAGCCGGGAGTCAAGAAAAGCGCACAGTACGCGGAAACAAAGCAGGATAGCCGGCGGAA  
GAGCCGTTAAACCGAATCCCCACCGTGGTGGGACCTCCCGGCGAAAAGGGGAAACAGGGGCCCCGGTCTCAGGGGCC  
GAAGGTTGATAAGGGAGAGCGCGTGCACCGGCCCTGTCGGGCAACCGGCAACCGGGACCGGAGGTCGATGCTGGT  
CGGAGGCGCGCAGGGGCGAAAGGTGACAGGGGAGAGCGGGGAGACCGGTTGACGGGAAATGCAGGTTCCACAGGTT  
CCAAAGGGAGATACCGTGGCGGAGCCCGGAGGCGGCAAGGAGGAAACAGGTTGCGGCTGGCGCTGGCGGCTGGG  
GGCAACCGGACTCAGGGACCGAAGGGGACCCGGGGAGACAAAATCCGTTTTCGCTGTTGGGCGCGGAGCATTATG  
AGACAACAGCAATGGCTGGTCCCGGTTACAGATGGTGGCTCATCACCGGACTGACCTTTCCTGACCCAAAGATGCC

ACACAGGTT CAGGGCTGTTT CAGCATTT CAGAGT CAGGTT TGGT GACGGCCG TGGCAGGAT GTTAAGGGCTGGATGA  
AGTGGGCAGTGATACAGGCAGAACAGGAGAATGA  
>Cluster\_39026  
GTGTCGCAAGATAAACACTTTAGCCAGGGCCAGTCCCGCAGTCGGCGCGGAAAGGGGTATTGGCATTGACGTTTCGTCAT  
GCTGGGACTTAACCTTCTTTTCCGCCAGTATGTGGACCGGGCCACTTCGGAACCGGCTTAGCTATCATGATTCTTCC  
TCGCAGTTCTCATCGGTAATCTTCTCCTCGGTAATTTACTTCTCATTTCTTGGTTACATTTGGCGCAAAAACCGGCTGACC  
ACCCATCTTCTTGTCTGCTTCTCGTTTGGTGTAAAGGCTCATGGTTGCCCTTCTACTGCTGCTGGCGGCACCCAGGTTGG  
CTGGTTTGGCGTTGGCGTGGCGATGTTTGTCTATCCGGTGGGCAAGGCAACCGGGCTGGATATTAATTTGTCTGATGGCCG  
TCTCCGGTTTACTGATGACCGTCCACCGTCTTCTTGGCATTTCCGGCTGACAGTCTTCTCGGTGATTGGCGTTCCGGCT  
ATCGCCTGTCTTGGCGGTTATTCCTGTGGTTGGCCGTTAACGGCATGGGCGACCTGGACGCATTAAGCGGTCGTTCC  
CGCACACCGTTAGATTTCAATGTCGCGCTGGCGCTGGTTGTGGGGTCAATTTACAGTGCAGGACGCCTCACCCTGACT  
TTGTCCGGTTTGGTCGTAATGCCAACTGGCGGTGGTGGCGATGGTGGCCTTTTCTCGGCAACTCGTTGATGTTT  
ATTTTCGGTGCAGCGCGCGGGCCACTGGGGATGGCGGATATCTCTGATGTGATGATGCTCAGGGCTTCTGCTGCC  
TGGCATTTGGTGTGGGCTGAATATCTGGACCACCAACGATAACCGCTCTATGCTCGGGTTAGGTTTCGCCAACA  
TTACCGGTATGTCGAGCAAAACCTTTCGGTGAATAACGGTATATCGGTACGGTCTGCGCATATGCTGTATAACAAT  
TTTGTCCGGTGGTTGACCTTCTTTCGGCAGTATTCCTCCGGTGGGCGGCTGATCATCGCTGATTAATCTGATGAACCG  
TCGCGCTATGACCGTTCGCAACCGTATGATGAGTGTCAATTTGGTGGCGATTCTGCGCTGTCGGCGTGGGATG  
CCGCAGGCCACTGGTTACCGGGAATTTGTCGGTCAACCGGTATTAGGTGGCGCTGAGCTATCTGATCTTAACCCG  
ATTTTGAATCGTAAACGACAGCAGCAATGACGCATGTGGAGGCTAACAGTGTGCAATAA  
>Cluster\_48603  
ATGCCTTTTTAAATTTTCATTATATATACTACTGCTCACCGTGAATTTTTGGGATTGGGTTGTTTTAAATGGTCAAATTTG  
TGGACATTGGCTACAGCATTTGCTTTTATAGCAACAGCATGGATGCCTACGAGCGAGAAAAGTCAAAGCAGCTT  
TTTCAGCCCTTCAATTAACAACAGAATCATTTGTCGAAATGCGAAAGAGTGCATTTAAACAATGGTTTGTATCTATTA  
AGTCAACATGATGAGTATTTCTTTCGAAACAAATTTTTCGATAAACGCAAAAGTAAATTAACAGCGATGCTTACA  
TAGACTATATACCATTGGTAAACAGCATGAGGTAATACAGTATGTGAAGCATATTTAATAATTTTGTGATGTTGG  
ATAGTTCATTTTATATTGATGGGGAATGCTAAAGGAAAAGAGCGTATGTGTCACAATTAATTTCAAATCCACCT  
CAGATGAAGTTGATCATTGCTATCTTGGATTAAAAATCGATTATTGTGAACATATTAATTCGGGAAAACCTGTGTGTT  
ATTTGAATAAATGAGTATTTTCAATGATGAAATTTTTCGATGATGCTTATTAGATATGCTTATTAACAGTATGCTT  
TAAACCTTAGATTCAACAAAATATTCAAATCTCGAATGATAAATTTTGTATAATATCAATTAAGTATTATGTTCCA  
TCGACGTTAAAGGGACTGGATGTTTCGAAACCAAAGCTCGTCCGTCGGTCTTATGAATATAAAAACCTCTGTTC  
TCCTATAATTAATGATTACTTTGAGAAGTTGCCTTTACATGTAAGAACTACTTTGAGGAACCTTAAACCGCGAATG  
ATAGAGTTACTCATTTTGCAGTTTACATCCACCGCTTATTGGTGTTCATCTGCAACATTACGAAGATGTGCTTCC  
GAAAAAACAGGTTAAATGACAGGAATGATGTAATAGCTATGGCTGAAGATTACATCGAGAAAAGAAAATATAATCACT  
GGATTACATACTTGAAGATATATACTTCAAGAGTGACGAAGATATAATCCCTGGCCACCATTTGATTTGGCATTTGATG  
ACTATGAATTTAAATTAATCACTCATTAAGATAAATGAGAATAAAGATAGCGATAATCTTTAAATCGAATTTACTGAA  
TCCAGTAGCATGGTTAAAGAATAAAGCCGAAATATAAAAACCTGGGCGACTATGTAAGTAA  
>Cluster\_22339  
ATGGATGTCATGAGAAGTCTTCTGGGAATGGTGGTACTGCTGGCAATTCGCTTTTGTGCTCAGTAAACAAGAAGAGAT  
CAGCTCGCTACCGTTGGCGCGGCTTAGTGTACAGGTCGTGATTGGCGGCATATGCTTTGGTTACCAGCGAGGCGTT  
GGTTCGACGAAAAGAGTCTTTTGGCGTGCATAAAGTATGGCTACAGCGATGACAGGTAGCGCATTTTCTCGGTTCT  
CTGGTCGGACCGAAAATGGACACCTTATTGATGGTGCAGGATTTATCTTGGTTTACAGGATTTACCAGCAATTTATCTT  
CGTCAACCGCTGGTGGATTTCTACTACATCGGTTGATGGGATCTTAATTCGCAATTCGCGCGGATCTTCCAGA  
AAGATTAATAATGACCAAGATGAGTCAATTCGTCGCGCTTACCATTTCCTCGGCAAAACGAAATTCGCGGATC  
GTCAAAACCTTTATCGATCGGCTGAATCGCAATGAATTTTACAGCGATTGTTAGTGGCATGGCCTCGATTGCTGGTTC  
GACAAATGATGGTTACGCGCACGTCGGGCTACCTGTGGAAATTTGCTGGCGGATCGTTAATGGCGATCCAGCGGGGA  
TCTTGTGTTGCCCGCTGTTAAGCCCGCTACGGAATCTTCGAGGTTTCTTTAATAACCTCTCTTACCAGAAAACCGC  
CCAAAAGTATTATGAGGCGCTGCTACAGGGCAATGACCGGCTGAAAATCGCGCGCGGTTGGCGGCTGGTGGTGGT  
GGCATTGTTGCAATAATGCGTTGATTAACGGTATTATCGCGCGGCTGGCGGCTGGTTGGTTTGAACATGCCTCGC  
TGGAGTCCATTTAGGTTACCTGCTGGCCACCTGGCGTGGGTAATGGGTGTTGACTGGAGTATGCGAATTTGCCGGG  
AGTTTGTGTTGACAGAACTGGCAATAAATGAATTTGTCGCTTACCTCAATTTCTCACCTTATCTGAAAACAGCTGGC  
TCTGGATGCTAAAACCGTGGCGATTATTTCCTTCCGCTGTGTCGGGTTTCGCTAACTTTGGTTCTATCGGGGTTGGTGG  
GGGCGTTTCTGCGGTTGGCCACACCGTGGCCGAAATCGCCAGCTGGTTTACGCGCGTGGCGGCGGCGACACTT  
TCTAACCTGATGATGCCACCATGACAGGATTTTATTTGGCTTAGCGTAG  
>Cluster\_64530  
ATGAATAAAAAAGTATTATTAATAATATTTTTCATTATTAAGTATTTCAAGGGGTTGGTTATATCTACCATTAAATTAATTT  
GCCATATCTTGTTCGGATTTTGGGACCTAATACTATGGTGTATATGGGTATTCCTTAGCTATAATACAGTATTCGATAT  
TAATAATCGATTTTGGATTTAACCTGACGGTAACAAAAAATATCTTTAAATAGAGATGATAAGCTAATAGTTAGTTCC  
GTTTTTGGAAATGTAATGGCATGCAAGTATTACTTTGATTTTACATTTTGTATTCTGTTGCTTGAATAGATAGA  
CAACACTTTTGCAGGAGCTAATCTAGCTGTACTAATGTATCATACACGATGGTAAATGGTATTTTAAATTTTCCATAT  
GGTTGTTTTCAGGGAAGGAAAGAAATACAAAAATGCACTTATCAATATATCTCGAAATCTTAAACGGTGCCATTAAT  
TTTTCTCTCATTTGATGAACCGAGTATGGTTGGAAAGTGGGCTTATCAATGGTAGTGGATATATGTTGCTGGAAATTT  
TGGTTACATATAGTATCTAGAAGAAATGGATTTGATGGGTAAACCAACTTTTAGTCAAGATGTTTCGAGAGTATGCTC  
CTGCTTGGCATATTTTATTTCAATGCATCCATAAATATATATACCAGTAGTATTACAGTAATACTTGGAGCGTTAACG  
TCACCAGTTACTGTAGGTTATTTGTTGAGCAGATAAATAAGATTAGCCTTCCAGGGGCTTATAAATCCCGTATCACA  
AGCGTTGTACCCGAGGATTAATGCGTTAATGAAAGAGTACCAGGCGAGGTTTAAACAATAAGATTTATGTTAAGGG  
CTCAGGGCTATTTTCTTATTTGATGCGGTTTCTATTTTAAATTTAAGCCCAAAATATAATTTCTGTTGATGAGGAA  
AGTTATAAAGAATCCATTTCTATATTAATAAATATTAGCATGGCTACCATTTATCATAGCAGTTAGTAATGTTGTTAGGATA  
TCAAACCTTACTAGTGTAAATATGGAAGAATATTTAGTCTGATAGTTTATGCTGGCGTGGGATGCGTTAGTTATTA  
TATTTCCATTAATAATTTATTTCCGGTGGTTACGGCGCTGCATTAATTAATTTATGCTGAAGTGTCTGTTAACTTATTA  
ATGCTTACAACCTTAATCAAAAAAAGGTTTCTATATTTAAAGCCAAATAA  
>Cluster\_53565  
ATGGCGGGGTTGAATAAGTATCAGGCGTATCCGGAATATAGGGATTCTGGGGTGGAGTGGTTGGGGATATACCTCGCAC  
TTGGCAGGCTACACAGGAAAACGACTATTTAGTAGTGTAGAACTCCGGCTTTCTAATGATGAACAACCTTGTGCCA  
GTCAAAAAGTATGGCGTTATTTCTCAAACTTTAATGATGCAACTTAAAGTACTTAAAGTAAATGTTGGCATTTAAAGGATACA  
GATTCATTTCCGCAATGTAGAAAAAATAATTTTGTATAAGTCTGCGTAGCTTTGAAGGAGGAATGAGCACAGTAACCTA  
TCAAGGTTGCGTCTCCCAAGCATAACACTGTTGAAAAGTGTAAATGACATAAGCTTTTCTTTTATCGCTATCTTTTAA  
AAAGTGAAGCTTATATACGTTTGAAGCGTCAACTGATGTTGAGAGATGAAAATCGATTAATTAATTAACAACATTT  
GGTCAATAAAGTACCTGCTTACCTCTTCCAGAGCAGTCAATAATTTGCTCATTTTCTGACACGAAACCGCAAAAT  
CGATAACCTAATCGAGAAAACAAACAACTTATGAACTACTGAAAGAAAACGTCAGGCGGTTAGCCATGCGGTTGA

CCAAAGGCTAAATCCTGATGTGCCGATGAAAGATTTCTGGGGTTGAGTGGTTGGACGAAATCCCTGAACACTGGAGGATA  
TGCAAATTAACAACTAGCTAAAATATGTAATGGACAGGATTATAAACTCGTTCAAGCAGAAACCGGTTATCCAGTAAT  
AGGCTCCGGGGGCGAGTTTGCATGGCGAATACTTTCTATATGATAAACCATCAGTCTCTTGGGTAGAAAGGGTACAA  
TTGATAAACCATTTGATATAGACAAAGGCAATTTTGGACCTCAATACAAATGATTTACACGGAAATTTTGGATTGACTATA  
GAAATATATATATTTAGACTGACAAATCAGTTTATCGTTATGCAACTAATACCGCACTGCGCTAGTATGACTCA  
AGAACACTTAGGTAATTAATCTCATTTTCAATGTCTAATCAACCTCAGTGAGCAAAAACTAATAATTAATAGCATTGAAAAAT  
CATTAATTAATAAGATGCCCTAACCGAAAAACAGTTAAACAATCGAACTCTCAAAGAACGCCGACCGCCTTATC  
TCCGCCCGCTCACCGGCAAAATAGATCTCCGCAACTGGACCGCCCCATCGCAAAACGGAAGCACCACGGAGGCCAG  
CGCATGA

>Cluster\_28421

ATGGTTAGTTAGAGAAGAACGATCACTTAATGTTGGCGGCCAGCTGCCATTGAAATCTGTTGCCCTGATACTGGCGGG  
AGGACGTGGTACCCTGGAAGGATTTAACCAATAAGCGAGCAAAAACCGGCCGTACACTTCGGCGGTAAGTTCCGCATTA  
TCCGATTTGCGCTGTCTAACTGCATCAACTCCGGGATCCGTCGTATGGCGGTGATCACCCAGTACCAGTCCCACTCTG  
GTGCAGCACATCCAGCGCGGCTGGTCAATCTTCAATGAAGAAATGAACGAGTTTGTGATCTGCTGCCAGCACAGCAGAG  
AATGAAAGGGGAAAACTGGTATCCGCGGCCACCGCAGATGCGGTACC CAAAACCTCGACATTTATCCGCCGTTATAAGCGG  
AATACGTGGTACCTCTGGCGGGCGACCAATATCTACAAGCAAGACTACTCGGTATGCTTATCGACCAGCTCGAAAAAGGC  
GCACGTTGCACCGTGTGTATGCGATACCGATTGGAAGAAGCTCCCGGTTTGGCGGTTATGGCGGTTGATGAGAACA  
TAAAATTAATCGAATTCGTTGAAAAACAGCTAACCCGCGTCAATGCCGAACGATCCGAGCAAAATCTCTGGCGAGTATGG  
GTATCTACGCTTTTGCAGCGGACTATCTGTATGAACTGCTGGAAGAAGACGATCGCGATGAGAATCCAGCCAGCAGCTTT  
GGCAAAGATTTGATTCCAAAGATCCCGAAGCCGGTCTGGCCTATGCGCACCCGTTCCCGCTCTCTTGGGTACAACTCGA  
CCCGGATCCGAGCGTACTGGCGCGATGTTGGGTACGCTGGAAGCTTACTGGAAGCGAACCTCGATCTGGCCTCTGTGG  
TGCCGGAATGGATATGTACGATCGCAATTTGGCAATTCGCACCTACAATGAATCATTACCGCAGCGAAATTCGTGCAG  
GATCGCTCCGGTAGCCAGCGGATGACCCCTAACCTACTGGTATCCGGCGGTTGTGTGATCTCCGGTCCGGTGGTGGTGA  
GTCGTTCTGTTCTCGCGGCTCGCGTGAATTCATTTGCAACATTGATTCGCGGATTTGTTACCGGAAGTATGGGTAG  
GTCGCTCGTCCGCTGCGTGCATCGATCGTCTGTTGTTATTCGGAAGGCATGGTATTGGTGAACCGCA  
GAGGAAGATGCACGCTGTTCTATCGTTGAGAAGAAGCATCGTCTGTTACGCGCAAAATGCTACGGAAGTTAGGGCA  
TAAACAGGAGCGATAA

>Cluster\_17156

ATGTCAATAATATCCTCTTTTAAAAATAATATATTTCTTACGAAACACAATGTTTAATTACATTGGTATGATTTGGATGGG  
GGGGGGGATAATAGTCCCTATACCTTTTATATCAAGCTACTAGTCCCATGGATGGGGTATCGTCTGCTGTTGTTAA  
GTATCCAGGCTATGTTACTTATCTGGATGCTGGGTGTTTCGAGATTAATGCTCGCGATAATGCTAAAACGAATACGCCA  
GAAAACATATTTTTTGCATATTTTTGGATATATATTGCTGTTGCTTTTTGTTGGGGCGTTTTTCTAACCACTCCGCTGG  
TTGGTTGGCATTTAGATGGTTTAAATGCAGGGCATAAGCAGTAGGAGTTAGAGTTTGTATAAGATTGCTTGAATTCAT  
TCCATTTTCAATTTGCAAAATAATCTCAATATAGTTTTTGGAAATGGTACTCAAAGCAATTTAATACTAATTTAAGCCAA  
GTGTGTTTTTTTCAATGTAACATTTGTCGCGCTGATTTTCAATGATGGTAAATCCAGAACCCTATAGTATATAATAGTTTT  
CTTCGACGTTGGTTACCTGTATAGAAATTTATTTTTAATTTTTTATGGAATTAATGGAATTAATGATCTTAAAGCTTAA  
TAGATAATAATATATGATTCAAATTAATGATTTGGTTAAAGAGAATATATAATTTTCAATTTGGTGTGATTTGGTGTG  
TTTTTTTACAGTTTATGATAAAATATATATATCACACTAGTGGAAAACAGATTAATGAGATATATGTTATTGTTGCACA  
ACTGGGATTAATCTTTTACAGCTACAATATCTTTGATGAAGTCAATGTTACAGCTTTATCATCAAGGGGAAAAAGA  
GTATATTTAATGTTCTATCGTTAAAAAATAATGATAATTTAGCTATTGGTATTAGCTTTCCCTATTGGTCTGACAATAATA  
TTTTTCATCTGATATTTTATATTTATGGACAAGAAATCAATATATAGCTAATCATGGAGGGGGGCTTTAGCTCTTATTTG  
CCTCTCAGTTTTAATAAATATACATATACATTTATCTATACAAACCTTTGTTCCGATTAACCGCAGGGGGAAATTAATCTGT  
TACGTAATATATTTCTGATTAAGCATGTTTATTTTTAATTTCAATTTCAATTCATGAAAGGAAATAACTCTAATTTGGCGGC  
ATGATGTGGATAGCATATGCAAGTATATCTTTTTCAATTTGGCGGAATATTTTTATTAATGAGAGCAAGATGA

>Cluster\_42689

ATGCTCGAATTTGCTTTACACCGCCCTTCTCTACCTTATTACGCGCTGATCTGGATACGGCTCTGGGTGCGCGGACGTAA  
GGCTCCGGCTATCGAAAAACGCTGGGGTGAACGTTACGTTTTTACCGCATCCGCTAAAACCGGCGCATTATGCTGC  
ACTCCGCTCCGTCGGTGAACCTCTGGCGCGATCCCGTTGGTGGCGCGCTGCGCCATCGTTATCCTGATTTACCGATT  
ACCGTTACAACTATGACGCCAACCGGTTCCGAGCGCGTACAATCGGCTTTCCGGAAGGATGTTGAGCAGTTTTATCTGCC  
ATATGACCTGCCGATGCACTTAATCGTTTCTGAATAAAGCTGACCCTAACCTGGTGTGATTAATGAAACCGCAAT  
GGCTAACCTGATTTGCGCGCTACATAAACGTAATAATCCCGTGGTATCGCTAACCGCGACTCTCTCCCGCTCCGCC  
GCAGGTTATGCCAACTGGGTAATTCGTCGCTGCTGCTGCTGATTTACGCTGATTTGCTGCGCAAAATGAAGAAGA  
TGGTGCACGTTTTGTATCACTGGCGCAAAAAATAATCAGGTGACCGTTACCGGTAGCCTGAAATTCGATATTTCTGTAA  
CGCCGCACTGGCTGATAAAGCAGTACGCTGCGCGCCAGTGGGACCAACCGCCCGGATGGATTGCCACCAGCCT  
ACGAAGCGCAAGAGAGTGGTGTATCGCCGACATCAGGCAATTTGTTACAGCAATTTCCGAATTTATTGCTTCTGTGT  
ACCCGCTCATCCAGAACGTTCCCGGATGCGATTAACCTGTCGCGCAGGCTGGACTAAGCTATATCACACGATCTTCAG  
GGGAAGTCCCTCCACCAGCAGCGAGTTTGTGGTTGGCGATAATCGGCGAGTTGATGTTACTGTACGGCATTTGCCGAT  
CTCGCTTTGTTGGCGGTTCACTGGTTGAACGTTGGTGGCATAATCCGCTGGAAGCGCGCACACGCTATTCCGGTATT  
GATGGGGCGCATACGTTTTAACTTTAAAGACATTTGCGCGCGGCTGGAGCAGGCAAGCGGGCTGATTACCGTTACCGATG  
CCACTACGCTTGCAAAAGAGTTTCCCTCTTACTCACCAGCGGATACCGTAGTTTCTATGGCCGTATGCCGTTGAA  
GTGCTGTATCAAAACCGGGCGCACTACAGCGTCTGTTCAACTGCTGGAACCTTACCTGCCACCGAAAAACGCATTGA

>Cluster\_24450

ATGGTAGATCAGGTAAAAGTCGTTGCCGATGATCAGGCTCCGGCTGAACAGTCTGCTACGGCGCAATCTCAAAACCGACA  
TATTCAGCTTATTGCTATTTGGCGGTGCCATTGGTACAGGGTTGTTTATGGGGTCCGGCAAAACGATTAGCCTTGCCTGGC  
CGTCGATCATTTTCGTTTATATGATCATCGGTTTTATGCTCTTTTTGCTGATGCGGGCAATGGGGGAATTTGCTGCTTTG  
AATCTGGAATAACAATCTTTTAGTACTTCGCTTCCGATTTCCGATTTACGCGCGGCGGAGGATTTTACCGCTGGACTTA  
CTGGTTCTGCTGGGTTGTAACCGGATGGCAGATGTTGGTTGCCATTACCGCTATGCGCAATTTGTTTCCCTGGGCTTT  
CTGACTGGGTTGCTTCTGTTATCCGATGATCATCTGTTACTGGTTCTAAACCTCGCCACGGTAAAAATGTTCCGTTGAGATG  
GAGTTCTGGTTTGGATGATCAAAATCGTCCCATCGTGTGCTGATTTGTTGTCGGCTGGTCAATGGTGGCGATGCATTT  
TCAGTACCAGCCGGTGTGGAAGCATATTTGCACATTTGGGAATGACGCGCGGCTGGTTCCCGAAAGGCTTAAAGCGGCT  
TCTTTGCCGATTTCCAGATAGCGGTTTTCTGTTTTCTGGGGATTGAGCTGGTAGGTACAACAGCTGCGGAAACCAAGAT  
CCAGAGAATACCTGCCGCGCGGATTAATCTATCCGATCCGCATCATTATGTTCTACGCTTCTCTGCTGATTTGTGAT  
TATGTCGCTGACGCGGTGGAGTTCCGTTAGTCCCGGAGAAAACCGCTTCTGTTGAACGTTTGTGTTGGTAGGTTTGCCTG  
CGGCTGCCAGCTGATCAACTTTTGGTGTGCTGACCTCTCGCGGCTTTCCGCTAACAGCGGTTGCTTCTTACAGCCGCT  
ATGCTGTTTGGTCTGGCCAGGAAGGTGGCCACCGAAAGCTTCCGTAACCTCTTAAGCGCGCAGTACCCGCGAAAGG  
GCTGACCTTCTCTGATCTGCTGCTGCTGGCGGCGTGGTGTGATGTTGATGTTGAATCCAGCGTATTGGCGCGTTCCAG  
TGATTAACAACGTTTCTGGCATTTCTGTTTATGTTGCTGAGCATTATCCTTTGCTGCTGATTTGCTGATCGCAACAG  
CGTCTCATCTGCATGAGAAGTGCATCTACAAGATGCCACTCGCAAGCTGATGCTGCGGATGATGTTGGGTTCTTTTGT  
GTTTGTCTGGTGTGTTGACACTGGAAGATGACACCGCCAGGCGCTGCTGGTTACCCGCTGTTGGTTATCGCGCTGG



GGCTGGGCTGGCTGTTTATTTGGTAAGAAGCAGGCTGCTGAACTGCGGAAATAA

>Cluster\_24101

ATGAGTCAAATCACCAGTCTGCAACTTATTCAAATAGTCGGCCACAGGACGTAATTGATATTTGTTAATAAGAACTCTGC  
AATCAACACCAGTATCGGCGTTATTTTTATGCTTTGGCGGGCATATTTGATTGATGCCACCAGGCGGGCATGTTGGGGT  
TTGGTAATAAATACATTTCCGCTCAATTCGGCATTTCGGCGGTTCTGGTGCACCCGTCATATGCATCAGTATTAATACGGC  
CGCTTAATTTGGCGGTTTATAGCGAACCCGAGTAATAAACCGCTTTGGGCAAAAAGCGGGCATTTATTTATGGCATGGGGCT  
GTGCACCATCGGTGCTGCAGCGGTAGCTATTGCTCCACGATATCTGGTGGGTGCTGGTGTGCCCGCTCATCATGGGCTTTG  
GTTTAGGCATCGACTCCCTTTGGCAACCAATGCCGTGGCAGAGCTTCGTGGTTCAACGTCGAAGAAAACCGGCACGTCG  
GTCACACTCTGGCAAAATGGCCTGGTATGTTTCGCAACCCGCTGGTGGTTATTTGGTGGCTTTGGCGCTGCTTCTGTGGGTAT  
CGCTGAAGAACAATTTGGCGTTACGGAATATTCATCGGAGCTATTTTTGAGTCACTTTCATGATTTTGGCTTACTTCT  
TTATTTGGTGAATCCGCAATGTGGCCGACGCGTCGGCGTTACCAGGAAGCGTGCAGACATTCGGGAAAACGTTATGGT  
GTTACAGGCTCGCGTTGGGCATCGGGTACAACAGAAGCGAAATTCGGAAGAAAGCAGAGAATAAATACAGTGGTGGATA  
TGGCATCTTATTTAATGATCGTTACCGCAACCGCACCATTTCTGGCTGTGTCGTGGCAACCATGCAGGCGTGGCAATATA  
ACGCCGTAGGTGTTTATCTTCTTACGTTGGCGGGAATAATAAGTGGCGGGCTTACTGGCGGTTAACCGGTTCTGCC  
GTCGTGAATGCCCTTTGTGGGGTACAGCGGGGATGATCGGCTCGTTTATTCTCCAACGACTGGGTACTCGCCGGCAGTC  
GATGTATGGATTGCTGTTGTGACCTTAGCATTTGCTGTGCTTAGGCGCACTGGCAACGACTAATCCCTGGCTGCTTTTAG  
GTTATTGGGATCAATTTATTTCTTCAATTCGGGCTGGGCTGGGATGACCATGGCCACTCTCTTATCTCCT  
CCCGCTATTCGCCCTACTGGGGTGGGATTTGCCCGGCTATTTAGCGCACAGGGGCAATTCAGGACTCATTTCTGGCC  
GATGCTGTGGGGTGGCTTGAAGACTGAAGCGTTTACTGGTTGGCAATCGTGCCATTCTGGGATTCCTGACCTGTGTAT  
TGATAAATGGGAACCACTGGGTGCAAAATGTTGATGCTGAGGACGAGGCTTCTGGCTGAATGAAGAAATAA

>Cluster\_53548

ATGAGAGAAAACCCAGTTTTTATGTCGGCTTACACCATCATTTTTATGATGATCGTGTGGTGTGGCATCGGTGT  
TATGGGCTGGCCTGCCAGCGTCTGTTTATTAATTTTCAGCGGCTTTTCTGCAATATTGCAATGGCTAAGCTGAAATATA  
CCTGGGATGAAATCAGGGGTTTATTCGATAAAGATTTCGGCGGTGATGGCACCAGTACTTATCGTTATTTCTGGTGGC  
TTTATGGTTCGCGACATGGAGCTATGCAGGTACTGCGGATGCTGGTTTATTACGGTATGTTACTGGTGGCGCCGATG  
GCTTATGTCATAGCGTTTTTCTGAAACGAGTATTGCTTATGTTTCCGGGGCATCATGGGGATCTGTGCTTCTATTTG  
GTGTTGCATTAATGGGCATCGGTTCCGGCTTACATGCTGATCTTCAAATTTCTGGCGGACGCAATTTGTTACCGGGCTTAT  
TTTGGCGCAAAAACCTTACCGTTAAGCGTAAACCATACCATACTGCGGCTGACTGACGAGTAACTAAAACCTAACTTTATGATGAT  
TAAATATCTACTCTGGACGACCATCCCAACAAGATTATTAGCTGCTGTTTTTTACCCTGGCTGGGAATGATTACACTT  
CTACGGGCTCTATTTACAGAAAGCATGCAGATGCTGTACAGCTCAAAGAGTTATATAAGTTTGGTCTGTTACCGCTA  
CTGCCATGCTTATTTGTTCTGTGCTTTACCTTTTTGCGTTTGCCTACAGTACCGGCATTTAAGCAGTGCCTTCGTGGC  
CGTATTGGTGGATGGCTGATCAAGGTTTCCCGCTGGCGGAAGGATTAAGGCCACAATGAGTGGTTTTCCGCTGACCA  
TGATCACTGATTCAACGACGCTGTTACCTTCTGTGAAAGAACTGCTTGAACAAGCGGCTGAATAATCAGGGCGGATTC  
CTGTCATTTATTTACTGCGCCATGATGTTTGTGCTGGCATCCTGACGGGAACAGGAATGATGGATGTCACATTACAAAGTGC  
GGCAAAACAAAATAAAGTGCCTTTGGCGCTATTTGCGCAAGCGGTTTGTAGCGATCATTAACCTACTTACCGGTT  
CTGATGGTTTTGAATAAGATTGTTTATATCTGAAGTTGATGATGAAGAAATTCGAAGATCTAATTTATACCGTTAGCTGTTA  
GCCGAACGCTGGAAGATTTTGGCACCATGAGCGCGCAATTAATTCGGTGGTCACTGCGGATTTGATATAGCGGACAAC  
ACTAGGCGTGGCGAGCTTTAGTTACTTGGCGTACTGTGTATTCTGTTTTCTGCTCGATGATATTTGGCTGATCTATGCTT  
CTACAGTTTCCGTTTACTGCGCTTCAACGAAGCAAAGGCTGA

>Cluster\_27797

ATGCCCTTCAAAATGCCCGGATTTTACAGGACGATGAAAGGTCAGTCCAAAGCACTGGCAGATGCCACATATCTTTG  
TTGGCATCTCGCTCCCGTACCGGACTAATGAACGATCCTAAATGGCTTTTGTGCTGGTCTGGAGGCGCTATCATCTGTTTT  
ATCAGTGGAAATCCTAGCTTGTGATCATAAGTACAAATTTGGGCGACTGGAGTTCGACGGATTTATTGATGCTGGCAG  
CATGAACCATTAGCGCTAATGCCGATAAAGAGTACGACCGTAAATGGTTGTTACTCAGGAAGCGGGTTAATAATCAGGG  
CGTTCTCACACTTTGCTATACCGGTAATGTTAAGTTTGTATGATGGCAGCAGAACGGCATGGCAATGCCGCGCCACGAAA  
ATAACCGGGGCGGTTTGATAAACTAGGCCCTGTACATCCGTTACCTGATGGTTACACCGGACATGTTCTGTATCCAAAA  
GTCTGGAAGCACAACAGCCTAATGGTACATGGTGTCTGGCGCGCAAGATAAAGAGAAACGGGGGAAAGTCTGTGTTATCT  
CTCTGTGATCTCTATACCTGGTCTTTTTCATGGAGAAATGCTGGTAAACGGTCTGAATGAAATAGATAACGCAGGATACA  
TGTGGGAATGTCCTGATTTTTTCCGCCCTGATGGTGAATACATTTCTCTCTGTGCCCCAGGGAATGTTGCGCGAACAT  
GAGCGCTATCTGAATACTTATCCCTGCGCTGGCTACATGGACAGTTTATTACGAGACAGGCAAAATTTACGCATGGCGC  
TTTTCTCAGAGCTGGATGCCGGATTTGAATTTCTATGCACCACAGCAGATGGAAGCCCGGACGGCGACGATTTGCTGTCG  
GCTGGATGGGGTTTCTGATGGCGAAGAGATGTTGCGAGCAACGAAAGCATCATTTGGCAGCATCAATGACCTGTTTT  
CGGCAACTCTCATTCAGCAGGGAAAATGTTTTAGATGCCAATCAGGGAACCTCGCGAAGTGGTGAAGCTGAACACTT  
TGGCAAGGAAAAGCGGATCATGCGCGCATGTCGAAATTTGAAACGCTGGAATGGACATCATTTCCGTCGGGTGAGCTGT  
ATCTGAAATTTTGGCAATGCGCTGGCAGTCACTTAATGACAGTGGTATTCAACTACAGAGGAGAAGCTTGCAGGGCAA  
GAGAACTAACTCGTTACTGGCGAGGAAGCGTAACTGACTGAAGATTTCTGTGACAGTTCCAGCGTAGAGATATTCAT  
CAATAATGGTGAAGGTGTAATGAGTAATCGTTATTTTCCCATCATCCAGCTTCGCTGATAATACAGGGTGAAGCTGACG  
TCACGTTACGCTACTGGTCTGCTACGCGCTGCATGGTGAATGA

>Cluster\_27652

ATGAACTTAACGACAGTAACTTATTCGCCAGCAGGCTTGATTAACGGGAAATGGCTGGACGCCAACAAATGGCGAGGT  
CATCGACGTCACCAATCCGGCGAACGGCACAAGCTGGGTAGCGTGCAGAAAATGGGCGCTGATGAAACCCGCGCTGCTA  
TCGACGCCGCAACCCGCGCTTCCCGCTGGCGTGCCTACTGCAAAAGAACGCGCAACATTTCTGCGCAACTGGTTCT  
AATTTAATGATGGAGCATCAGGACGATTTAGCGCGCTGATGACCTCGAACAGGGCAAACCATTTGACTGAAGCGAAAGG  
CGAAATCAGCTACGCCGCTCATTTATTGAGTGGTTTGTGTAAGAAAGCAAACGATTTTATGGCGACACCATTTCCCGGTC  
ATCAGGCGGATAAACGCTGATTTGTTATCAAGCAGCGGATTTGGCGTACCGCGGCTATCACGCGTGGAACTTTCCCGGCG  
GCGATGATTAACCGTAAAGCAGGTCCGCGCTGGCGGAGGCTGCACGATGGTGTGAAAGCCCGCAGCTCAGAGCGGTT  
CTCTGCGCTGGCGTGGCAGAACGCGGATTCGCGCAGGCGTTCCGGCTGGCGTGTTTAACTGGTCAACCGTTCCGCGG  
GCGCGGTCGGTAAACGAACTGACAGCAACCCGCTGGTGGCGCAAGCTGTGTTTTACCGGCTCGACCGAAATTTGGCGGTCAG  
TTAATGGAACAGTGGCGAAAGACATCAAAAAGTGTGCTGGAGCTGGGCGGCAACGACCGCTTTATTTGCTTTTGACGA  
TGCCGATCTCGATAAAGCGTGGAAATGCGCGCTGGCTCAAAAATTCGTAACCGCGGCAACCTGCGCTTCCGCGCAAC  
GCCTGTATGTGCAAGCGGCTGTATGACCGCTTTGCCGAAAATTTGCAGCAGGCGGTGAGCAAACTGCACATCGGCAAC  
GGGCTGGAGAAAGCGCTACCATCGGGCGCTGATGATGAAAAGCGGTAGCAAAAAGTGAAGAGCATATTGCGGATGCG  
CTGGAGAAAAGCGCGCGCTGGTTTGGCGGCTAAAGCACATGAACGCGGCTAACTTCTTCCAGCCGACATCTGG  
TGGAGTTTCCGGCTAACGCGCAAAGTGTGAAAAGAAAGAGAGCTTTGGCCCGCTCGCCCGCTGTTCCGTTTAAAGATGAA  
GCCGATGATTTGGCAAGCAAATGACACCGAAATTTGGACTTGCAGCTATTTCTACGCCGCTGATTTAAGCCGCGCTTT  
CCGCGTGGGCGAAGCACTGGAGTACGGCATCATCGGATCAACACCGGATTTATTTCCAAATGAAGTTGCCCGCTTCGGCG  
GCATTAAGCCCTCGGGCTGGGCTGTAAGGTTCAAGTATGGCATCGAAGATTACTTAGAAATCAAAATATATGTGCATC  
GGTCTTTAA

>Cluster\_27894

ATGAGCGCCATAGATTCCTCACTTCCCTCATCTTCTGGGCAAGACCGCCCACTGATGAGGTTGACCGCATATTTATCACC  
AGGAAAGCTGATCATCTACGCTCGGCTGCAACACGTCCTTGCATGTACGCGAGGTGCAGTCCGCTGTTCTCTTATGATTGGTG  
ACCGACTCGGCCATCAAAAAGAAGCTATGCGATGCTCATCAGCTCGGATCTCTTTTGTGCGGGGATCGTACATTTATG  
CAATGTATCGGTATCGGCGCTTTTATGGGGATCCGCTGCGGGTGAATTTATGTCGGTGAACCTTCCGCGCTGTAACACCAAT  
GATAGCCATTGGTATGAACCCGGATATCGGCTGCTGGGGATATTCGGTGCACATATCGCCGGGTTTATGCCACCAT  
TATTAGCGCCACTTATCGGTGCTTGTATGCCTTATTCCCGCCACTGGTTACCGGTGTGGTGAATTTCTATCGGGCTT  
AGCATCATTCAGGTGGGTATTGACTGGGCGCCGGAGGTAAGGGAATCCGCAATATGGTAATCCCGTTTATTTAGGTA  
CTCCTTTGCGCTTAATTTTATCTTGTCTATTAATCTCGTATGCGAAAGGATTTATGTCACAGTCCGCTGTATTACTGG  
GGATTGATTTGGTTTTTTACTTTCGTGGATGATGAATGAAGTCAATTTATCGGGCTACATGATGCTTATGGTGGTGGC  
ATTGTACGCGGATGTCAATTTGGTATGCCGATTTTCGATCCCGTTTCCATTCTGACCATGACTGCCGTGTTAATCATCGT  
GTTTATCGAGTCCGATGGGGATGTTCCCTGGCTCTGGGTGAAATAGTCGGTTCGTAACACTCTTTCACACGATATTATCGCG  
GGCTGCGTGTGATGGTGTAGGGACAATGATAGCGGGAACGTTTAAACAGCTTCCCCACACGTCATTTTCTCAAAAACGTT  
GGCTGGTGTAGCTGACGCGCTTCATAGCCGCTCATAGCCGCTGGGTGATTTCTTCGGGAATTAATTAATCCCTGTTGGCAT  
GCCAAAATGGCGGTGCTGGTCCGCTCCATTCCGCAATTTGTGCTGGGCGGCTGGGCTGGTGTATGTTGGCATGGTAC  
TGGCGACAGGATTCGAATTCGTGCGCGCTGTAACACACCAACGTTTACAACTTATATTTGTGGCGATCAGTCTC  
GGCGTTGGCATGACTCCGACGCTCTCTCAGGATTTCTTTCTAAGTTACCGGCGTACGCAACCGTTGCTGCATAGCG  
CATTATGCTCGCAACCTTAGCGCCCTTGTGCTGAAACGCTTCTTTAATGGCTATCATGATCATGCTGATGCTGTGAAG  
AATCCGCTCTGTATAAAGATTTAAAAGTCAGGACAGTACGTATGTGGCTTCTGATGCGCAAGCTGAAGAAAAATGAGCAT  
GGAGAATAA

>Cluster\_41044

ATGGCGCAGTCGAAAACCTATCCAGTTGTGATGGCAGGTGGCTCCGGTAGCCGCTTATGGCCGCTTTCCCGCTACTTTA  
CCCCAAGCAGTTTTTATGCTGAAAGGCGATCTCACCATGCTGCAAACACCATCTGCGCCTGAACGGCGTGGAGTGG  
AAAGCCCGTGGTGAATTTGCAATGAGCAGCACCCTTTTATGTCGCGGAACAGCTGCGTCAACTGAACAAACTCACCGAG  
AACATTTATTCGAACTGCAGGGCGTAACACTGCACCGCCATGCGCTGGCGGCGTGGCGGCAAAACGTCATAGCCC  
GGAGAACGACCCGTTAATGCTGGTGTGGCGGCGATCATGTAATGGCGATGAAGACGCGTTCCGTCGCGCGTGGCTA  
ATTCGTCGCGGTGAAGTGTCTGCGGGTGAAGCAGGATACGGTGGCCTTTGAAGTGGCGCAGTTTGTGCAAAAACCGAATCT  
GGAACCGCCAGGCTTATGTTGGCAAGCGGCAATATTACTGGAACAGCGGCAATGTTCTGTTCCGCGCGGCGGCGGCA  
TCGAAGAAGTGAAAAATATCGCCCGGATATTCGACGCTGTGAAAAAGCGATGAGCGCGTGCATCCGGATCTTGAT  
TTTTATTCGTGGATGAAGAAGCTTTCGCGCTGCGCGGAAGAGTGGTGGATACGCGGTCATGGAACGTACGGCAGA  
TGCCGTTGTTGGTCCGATGGATGCGGGCTGGAGCGATGTCGGTTCCTGGTCTTCAATTTATGGGAGATCAGCGCCACACCG  
CCGAGGCAACGTTTGGCCACGGTGTATGATTAATCACAAAACGTAACAGCAGTATGTGTACGCGAATCTGGCTGGT  
ACCACCGTGGGGTGAAGATCTGGTAGTGGTGCAGACAAAGATGCGGTGCTGATGTCGACCGTAACGCGGTGCAGGA  
TGTGAAAAAAGTGGTGCAGCAGATCAAAGCCGATGGTCCGCTGAGCATCGGGTGCATCGCGAAGTGTATCGTCCGTTGG  
GCAAAATGACTCTACCGACGCGGGCGACCGCTACCAGTGAACGCATCACCCTGAAACCGGCGAGGGCTTGTGGTA  
CAGATGCACCATCAACCGCGGAACACTGGGTAGTGGTCCGCGGGAACGCAAAAGTCAACATTTGATGGTGAATAA  
GCTTGGTGAACAGTCCATTTATATTCGCTGGGGTGCAGCACTGCTGGAAAACCGGGGAAAAATCCGCTCGATT  
TAATTTGAAGTGGCTCCGCTCTTATCTCGAAGAGGATGATGTGGTGCCTTCCGCGATCGCTACGGACGGGTGTA

>Cluster\_14201

ATGCACTTTTCGCAATGTGGTTTGTGTTGTCTTGTTCGTTGTTCTTATCGCCTGCCTGGGGATGTAAGCTTTTATCTGT  
GGATCCCAATGAGTATCAGCAACAGGAAAAGCGTGGTGTACCTGCGCCTAATCAAAACACCAATCTTTCGCTACCGA  
ACGTGAATTACAAGCCGCTGCGTCCGTTGGCGAATTTGTTAATGACCCAGCGACACTGGAAGATTTGGGAGGAAATACCG  
CCGTTAACCGATCTGCTACTGATTATGATGTGAGGGCGCAAAATACCCTGATTCCTCATTTACCTGGCAGCGGAT  
TCGCTATATTTTACGCTGGCAAGATAGTGCAAAATCCTGCGGGTACACCGCGGTTGACGTCACGTCATTCAAGGCTT  
GGGCGATTTTGGCGCTGATAAAAATAGCTCTATTTAGAGGCAAACGCACGGATGCAATGTTGGTGAACGCTTTA  
GATAGCAAAACACTGCATCAGAGGAATTTACCGCCGCTATGGGAACCTGACGTCCTCGGGCTGATTTGCGTGTGCTAA  
CTTCTGTATATCAACCGGCATCGTATTGCTGAGACCAATAGTTTCCGCGTGCCTGGCGCAAAAGTCCCTGGGATAAGCAG  
GAAAATTTTCCATGAAGTTTAGCTGCATTCGCAAAACACTTCGGCCCTGGGATACGCTGGCTCGTACACAGCAGGAAAT  
ATGCTCAACGCGCAACACTGGATGCGGACCGGATACCTTACCCTGTCGCTGGATACCTGAAGCATTAATAAGCTG  
CGGAGATAAAAACGGCTTTACCAGAAAGTACTGGATCAATATGCCCTGGACAGCAATGAGGAATATAGCTGGCGTAGTT  
TCAATGTAAGGAACACCGCGTCACTGGCGTAGTAGCTTCCCGGTAAGGGAGCAGAAATGCCAAACAAGAAAGATTTCC  
GGCTCGATCTGAAACAGTTTACCCTAATTAGCGATGCTGTGCGCAGTATCAGGACAAGCTGTACGTCATCGAAACAAC  
GCCATTGACGAGCTCAAGCTGAATATTGTTACGCTTGTATGACCCGAAACTGATTTAATAAACGCTTCAACGCCGGGA  
AGCGTCAAGGTTACTTGTCAACAAGAAAGGAGACGAGTTGGGGATTTCTGGTTTACAGGTGTTTGAATCCCGCGGGCA  
CTCATTTTATTTGATAACACATCCCGCAACCGGGAAGCGCATCAGGGTAGCAGCAACCTTATATCAAAAATGGTT  
AGCCCGCAGCAAAATATGTTTATCGTTCGATGGCATGCGCTTGGCGCTATCACACCGCAGATCCCGAGCGGTG  
CGCTCGTGAACGATCAACTCGATGGCAAAATTAACGGTGTATGGCGAGTTTATACCCACTCCGCGGATGAGGTAAAA  
TGA

>Cluster\_14730

ATGGGAAGTAATGGCTTCAAGTTACCTCTAGGATGGAATGTAAAAAACTGGTTGATTGTACAAGGAGGGAAATATCTC  
TTATGGTATTTGTTCAACAGGTCAGCATCAAGAAGATGGCATTGGTATTTATTCGTTGATAAATAATACAAAATGGAAATA  
TTTACATAGACGATGTTCTGAAGTTTCTCATGAAATAGAAGTAAATTTGCCAAAACTAGGTTGAAGGAGGAGAAATG  
CTTTTAACTAGTGGGTTCCACTGGAATTAGCGCCATTACAACATAAGCACTACAGGGATGGAATGTTGCTCGTGCCGT  
AGCCGTAATTAAGCCATGCGATGAAATAAGTGCAGAGTGGATACATATTTGCCFCAATCACCTTTTACAAAATATTTT  
TGGATTCCAGAGCTAATACTACTGTTTCAAGAACTCTCAATCTCAAAGACGTGAAAGAAATTCATTAACAATTTCTTCA  
CATGAGGAAAGAGTAAAGTCTTGAGAAAATTTACTCAATTTTGAGAAATAGAATAAATTAATAAATAAATAAATAA  
CCTAGAAGAAATGTCACAAAACCTGTTCAAACTCTGGTTTGTAGATTTTGTATCGGGTGGTTGATAACGCTCTGGATG  
GAAACCAATTTCCGGAAGCCCTGCAATCTCGCGCGCAATTTGCGTCAAAAAGTACGTAATAGTGCAGATTTTAAACCGCT  
CCGGCGGAAATCCGCTCGCTTTTCCCAAGTGAATTTGAAGAAACGGAGTTGGGTTGGATGCCAAAGGGATGGCAATTA  
ATCATTAGATCATATTTGCTAATTTCCAGAAATGGTTTGGCTTTTACAAAATTTAGCCGGAAGAAATTAAGGAGGAT  
TACCTGTATTAATAATAGCAGATCTCCGAGCAGGACAATAACTAATGACGAACGAGCAAGAACTGATATTTCTGATAGT  
TGTAAAGTGTATGACGGCGATATGATTTTCTCATGGTCCGGGACTTTGATGATCGATATTTGGACTGGTGGGAATGCTC  
ATTAATCAGCATTTATATAAGGTCACATCAAAAATACCAACAATCTTTTATTTATGTGGACAATACAGCATCTTT  
CAAGATTTCAACATATTTGTCAGAGGCAAAAGCGGTAACAATGGGGCACATCAAAAAGGAGATTTAAGTAACTTTCTGT  
CTAATCTTACTTTCATCGTTGATTAATAATATGATAATATCGTTGGAGGATAATTTAGCGAAGATTAATAAATAAGAT  
GTTAAATAACCAATGACCGCCCTACGCGACACCTGCTCCCGAACTCATCTCCGGCAGCTATCCCTGGACGATATCC  
CGGATCAACACGATACAGAAGCTGCATAA

>Cluster\_39955

ATGACATTAGCAGCCATCACCATGACCGCCCGGAAGCGCCAGCCCTGTGCAGATGTACCGCGACCTACTCACCGGA

TGACAACAACTGCGCCTGTATGCCGCGTCACGCCCTGACCCGGAGACGTATAAAAAAGTGCATGATGCCGGTTTTTCGCT  
GGGCACCCAAACAGGCGCTGTTTTGTCGCGCCGGCTGGACACCCGGGCCGGAAAGACGTCTCCTCCTACTTGGCGGAGAG  
ATTGAGGATGAAGACAGCAGCTCGCTGACAGCTCAGGAAGCACGGGCGGAGCGGTTTACCGGATACAGCGGAAAGCGGGC  
CAGTGAATCCGCACAGGCATTGATGAAGTGGAAAAGACTGGCCCGCATGATCCCGCCCGTACGCCCAATCTTTGTTGGGGC  
ATCACAGGTAACCGCCGCGCTGATGAGCGAGCGTATTGAAAACGGCATGAAACGAGCCGTGATGATCATCTTTGACAGT  
GCGGAATACTGGGAGGAGCGGGCGGCTCGGCACTGCTTACGCGAAGTATAAAGAAGCTCCGGACGTTTCGCTGGCGTGC  
TATCAAAAAAATCGAAGCTGATTGCGCAAGGCTGAAAAGACCATCGCCAGTGCAGAAATATCTGACGATGTGGCGGG  
CTGAATCGCTGGATCTGAATATGGCAAACTCATCAGCAGTCAATGACCATATCAGCGCCTGTTTCCCGCTGGATACGTAT  
CCGCGCCGGCAGAAAAAGCCAGTATGAAGGGAGCCGCTGTTATGGTTCGGCCTGGATGATGACATCATCCACCGGA  
GCAGGCCCGCAAAATGCGATCCGCTGTATGAACGGCAGATTGAGCATCAGCAACGCTGGGTTAACCACTATCAGAACC  
GCCTGATCTATGAGCGTGCATGCTGGACGAAAGCGGGCGGCTGGTTACCCGGACACAGGATTTTGGAGCCGGCGGACAG  
TTTTTCAGCCGGGCGAGTGGCTGACCATCATCCGCGTGAACAAAAGCAACGGGGCGGTGAGTTTTCAGTCAACAGCCGAA  
TTACAGTTTTTCTCGGTTACAGCGCACAGTGAAGTGAACCCAGTGCATCAGGACTACAAAGCACCATCCACCGAAG  
AGGCTGCCATCGCCAGCCAGCCGGAAGCGTCCGCGGTAGTCAACTATCCGGGGAAAGGTTTCCGGAAATGACAAAG  
CCACAGTGGGCGCCCTGCCCGGGACTGTAAGCCGTCGCGAGTGTGCAGAAAGCAGAAAGCACGGGGCATACCGCTA  
CCGCCGCAATGGACAAATAATTTCCGCTGTTGATGTATATACCGACATGAAAATACGGAAATCCACAGAAAT  
AA

>Cluster\_39173

ATGCTTTTTGATTTAATCATTAATAAAGCGCACCGTTATTTAGAAAACGAAGCTCGCGTTGTAGATATCGCCGTTAAAGA  
CGGAAAATATGCTGCTATCGGCCAGGATCTGGGCGATGCAAAAGACGTTATGGATGCGTCTGGTGGTTTCGCCGG  
GCATGGTTGATGCGCACACCCATATTTCTGAACCGGGTGCAGCCACTGGGAAGGTTATGAAACCGGTACTCGCGCAGCA  
GCAAAGGTGGTATCACCACCATGATCGAATGCCGCTCAACCAGCTGCTGCAACGGTTGACCGGCATCGATTGAACT  
GAAGTTGATGCGCCAAAGGCAAGCTGACTATCGATCGCGCGCAACTCGGTGCGCTGGTGTCTTACAACATCAGCCGTC  
TGCAATGATCAGCAGCCGGAAGGTTGAGGAGTGCATGCTGCGTTCGTTGCGACTGTGGCGATCGCGGTATCGAAGCAGC  
TTCCGTGACGTCATGACTGGCAGTCTTCAAAGGTGCGCAGAAGCTGGGCGAACTGGGACAGCCGGTGTGGTGCACCTG  
CGAAAACCGCTGATCTGTGACGAACTGGCGAAGAAGCGAAAGCTGAAGGTGCGGTAACCGCACATGACTATGTGGCTT  
CGCGTCCGGTATTTACCGAAGTGAAGCGATTCGCCGCGTGTGTACCTGGCGAAAAGTTGCCGGTTCGCGTCTGCACGTT  
TGCCATGATCAGCAGCCGGAAGGTTGAGAAAGTGCATGCTGCGTGCAGTCAAGGAGCCAGGATGTTACTTGTGAACTGC  
CCCGCATTTACTTTGTGCTGGATACCGATCAGTTCGAAGAAATGGCACCTGGCGAAGTGTTCACCGCCGATCCGCGATT  
TGGAAAACAGAAAGGATGTTGGAAAAGCTGTTAAACGGTGAATCGACTGCTGGTTTCCGACCACCTCCATGCCCCG  
CCGAAAATGAAAGCCGTAACATATGAAAGCATGGGGCGGTATCGCCGGTCTGCAAAGCTGCATGGACGTGATGTTGCA  
TGAAGCGGTACAGAAACCGGATGCTCTGCGGATGTTGCGCAAAATTAATGGCGACTAACCGACAGATATTTTCGGTC  
TGCAGCAAAAAGCCGATCGCCCCAGGAAAAGATGCCGACTTCTGCTTCAATCAGCCGAATAGCAGCTATGTTCTTACC  
AATGACGATCTGGAATATCGCCACAAAGTCAGCCCGTATGTTGGCCGTACCATTGGCGCGCGTATCACGAAAACCTCTT  
ACGTGGTGATGTGATTTACGACATCGAACAGGGCTTCCCTGTTGCGCCGAAAGGTCAAATTTATCTTAAACATCAGCAGT  
AA

>Cluster\_29144

ATGAATAATAAATCCAGTGAAATTAATAAGTATATGAGGATAGTGACGATGTACGTTTTGCTGTGCAAAACCGCT  
CACGCTGGCTGGTTATCGTGTATTTCCCTGTTGCGATGCAACACAGTATTTCCCTTATTCAAAGTCAGGCCAACATTA  
TTACTACTGACCGATGTCAGGTTACTTGAATATCAGGACTAGAGCTCCTCAGTTACATCAACGAAATGGATAGCAAAAAT  
CCGGTATTTTAAATACCGGACAGGTTGAGTGAAGTGGCGGTTGATGCCATGCGTAATGGTGCATTGATTTCAATTGA  
GAAACCAAGTAGCTCAGATAAATATTAGATATATTGCGCAGCGGTAGAAAAACCGCGATTGGTTTTAGAAAAATCAGC  
AATTAATGGCGAAATCTGCAACAGGAAATGGCCGCTGATGTTGGTCTAGTCCGCGATGCAAGCAACTGCAAGAAATG  
ATCCTTAATGTCGAGATACCGGTGCGGATGCTCTTATTTATGGTGAACAGGTTGTGGTAAAGAAAGTGTGCGCCAGAAT  
GCTGCATCAGTGGAGTACCGCCGTCAGGGCAGTTTGTGCTTAAACTGTGCGAGGCTTACCAGAAAGCTTGTGTTGAAA  
CGGAAATATTTGGTCAATGAGGCGGGCGCATTTACCGGTGCGGTTAAAAAGCGTATTTGAAAAATTTGAACATGCAAAATGGT  
GGTACGTTATTTCTCGATGAAATAGAGGAAATGCCATCAGGAAATGCAAGTAAACTGCTACGTTGATTTGCAAGAAAG  
CATGAAAGATTAGGTGCCAATCAATTAATCCGGTGAATGCGGTTGTTATGCAAGGACCAAGGAAAGATTACTGCGTC  
GCAGCGAAGAACATCTGTTCTGCTCTGATCTCTATTATGCTGTAATGTTGGTTAGCCTGAATATTTCCACCTCTACGCCAA  
CGACGAAAGATAATCCCTGAACTGTTTTACTGGTTGCGCAGTCAAGGCGCACAAAAATATAATCGTCTCTGCTGATAT  
TTCTCCCATGTTACTGGCTGGTTGCGATCACAAGTTGGCCTGGCAATGTACGTGAACTTAAACCAATGCGAGCGGTT  
TTGTTCTCGGTTTACTGACCCACCACAGCCAGTACCAATGACTCAGCAAGAAGAGAGTGGCTTACCCTGCTGATTTGAT  
GCTTTCGAGAAAAAGTTAATCGAAGATATGCTGCGCAACCGAAGGCGAGGTCAGTTTGGACAGCGCGGCTATTACAGCT  
GCCCGCAAGACTTTATATGACAACTCAACAAATCAGATTTCAACCGCAAGTTTATCGACCAGAATCATCCAGCTAA

>Cluster\_38764

ATGATTAGCGTAACCCCTTAGCCAACTTACCAGATATTTCAACGGTGAAGTGAAGGTCAGATATTTACCCCTGATGCTGT  
AACCCTGACACCGGAAACTGACGCGGGCTGCTGTTTGTGTCCTGAAAGGCGAAGCTTTTCGATGCTCATGATTTTTC  
CCGGCAGGCGAAAGCTGGCGGCGAGGCGACTACTGTTAGCCGTCGCTGGATATGATCTGCGCGAGTTAATCAGTTC  
AAGGATACCGCTGTTGGCTTTGGTGAAGTGGCTGCTGATGGTTGCCAGCAAGTTCCCGCGCGGCTGGTCTGACAGG  
TTCTCCGGCAAAACCTCCGTTAAAGAGATGACGGCGCAATTTAAGCCAGTGGCGCAACACTTTATACGGCAGGCA  
ATCTCAATAACGACATCGGTGTACCGATGACGCTGTTGCGCTTAAACCGGAAATACGATTTACGAGTTATGAACTTGGC  
GCGAACCATCAGGTTGAAATGCTGACTGTGAGTCTGACTGCGCCGGAAGCGGCGTGGTCAACAACCTGGCAGCGG  
GCATCTGGAAGGTTTGGCTCGCTTGGGGTGTGCGGAAAGCGAAAGTGAATCTTTAGCGGCTGCGGAAACCGGTA  
TCGCCATTTAAGACGCGGCAACACAGCTGGTTGAATGGCAGAGCGTAATTTGGCTCAGCAAGAGTGGCGGTTCTCA  
CCTAATGGCCGCAACAGCGATTTACCGCCACCAATATCCATGTAACCTCGCAGGTCAGGAAATTTACCTGCAAAACCC  
AACAGGTAGCGCTGATGTTCTGCTGCGGTTGCCGGGCTGCAAAATATGCGAATGCGCTGGCAGCCGCTGCGCTCTCA  
TGTCGCTGGGCGCAACGCTTGTATGCTATCAAGCGGGCTAGCAAAATCTGAAAGCTGTTCCAGGCGCTGTTCCCCATA  
AAACTGGCAGAAAACAGTTGCTGCTCGACGACTCCTACAACCGCAATGTCCGTTCAATGACCGCCGCTGTTACAGGTTCT  
GGTGAATGCGGGCTACCGCTGCTAGTGGTGGCGGATGCGGGAAGTGGGCGCTGAAAGCGAAGCCTGCAATGATG  
AGTGGGCGAAGCGCAAAAGCTGCTGTTAGTGAAGCTGTTAAGTGGGTTAAACAAAGCCATGCTATCCACTGCGCTG  
AGCGGCTTGGGCAACATTTTCCGATAAAACTGCGCTTATCGCGGCTTAAATCACGATTTGCTGAGCAACAGGTAAT  
TACGATTTTAGTTAAGGTTACCTAGTCTGCGATGGAAGAGGTTAGTGGCGCTTTACAGGAGAATGGGACATGTTAG

>Cluster\_29085

ATGCGTTTTATGCAACGTTCTAAAGACTCCTTAGCTAAATGGTTAAGCGGATCCTCCCCGTTGCTATGTTGGGCTGGT  
GGGCTGTTTGGGTTGACAGTGAATCGGATATGAGGCGGAGACTGCCGCGCCAGACAACGCTGCTGAAAAAGGCA  
GTGTACTTATCCGCTCTCGAATCCCGCTCGCGCTGGCATGGGATGGCGATGCAATCATGCGCAGCAGCGGATTA  
CTGGAAGAAATGGCCGGGAGCGCTGGTGTACGTTGGTTGGGTTCCGCTCAGGATGAAACAGGAAACAATCGTATGCA  
CTCCGGCATGATGGGAAAACAGCTTTATTTCCCGCAGGAAATGCAGCAGTTACATCCGGGAGATGAAGAAAGCTGGCGG  
GGATCGATAGCGTAGACGGGAGCTGTTCTGGAATTTATCGCCAGTTTCAACCGATGTTGCTGCTGGAATGCACCGG

ATGCGCCATATGCAGCAGTATGCCGCGACACCACAAGCAATTTTTATCGCTTTCGACGCCAGTAACATTTGTGAGTGTCTGA  
AGATCGTGTAGCAGAGAAACACCCGATTATCCTCTTCGCCCTGGCGACGGTCTTGGCTGGCAAGCGTGTGTCTATTCTTCT  
GGTATCGCCGATATCTGCGCTCGCGGCAGCTATTCAGGATGAAATGAAGCGCAAAGAGAAGCTGGTGGCACTGGGGCAT  
CTGGCGGAGGGCTTGGCCACGAAATCCGTAACCCACTTTCTCGATTAAAGGGCTGGCGAAATACTTTGGCCGACCGCC  
GTCAGCAGCGGAGGAGCGGCATCAACTGGCGCAGGTGATGGCGAAAGAAGCCGACCGTTTAAACCGCGTGTGTAAAGCAGT  
TGCTGGAAGTGGTTAAGCCAAACGCATCTGGCTTTGCGAGCGGTGGAGCTCAACACGCTGATTAACCACCTATTACAGCTG  
GTAAGCCAGGATGCAACAGCCGGGAGATCCAGTTACGCTTTACCGCCAACGACACATTACCGGAAATTCAGGCCGATCC  
GGACAGGCTGACTCAGGTCCTGTGAATCTCTATCTCAATGCTATTACAGGCGATTGGTCAGCATGGCGTATTAGCGTGA  
CGCCAGCGGAAAGCGCGCGGCTGAAAATCAGCGTTACCGCAGCGGTAAGGGAATTCGCGCAGATCAGCTTGAAGCC  
ATCTTACCCCGTACTTACCACCAAAGCCGAAGGTACCGGACTGGGGCTGGCGGTGCTGCATAATATTGTTGAACAACA  
CGGTGGTACAATTCAGGTCGCAAGCCAGGAGGAAAAGCGCAACGTTACCCCTCGGCTTCCGGTCAATATTACGCGTA  
AGGACCCACAAGGATGA

>Cluster\_53916

ATGGCTACGTGGCAACAGGGTATTAATTTCTGGTGGGTTTTCTTGTGGCATCGGTGGCAAAATGAGAAATGGCCAAAGGC  
AAGCGACATTAACGCAACGCTTGGTCTGATCCGCGAAAACAATGAACTGGCTCGCTCAGGTGCAATAACGTTGGTCTGA  
CCGCGTTACGTGGTCTGGCTGGAGTTGCTGATATTTACAAGCAGGAACAGCAACAGAAAGCGATTAATGCGTTCAATAAG  
GTTTCATGCTGATGATCGGCTTCTGGTATCCATCGGGACTATTTAAGTTTGGCCAGGAAAATCCAGCTTTTGTGACACA  
GGCACAACAGGCGTTTTCTGGTCTTAATGATCAGCAACGCAACGATATGGGCGATTTAGCCATGAGGGCTAACGTCGCTC  
TTTTCTCAGGGACCGGAAGCTACAGTAAATTCATTAAGTACAAAGGACAGGTTAAATCGCGTTGGTCTAATGCTGAC  
TGGATGATTCAGACAGGTAATCCAGAATCCAGAGCAGCTATCACACATGCTGACTACTATGCTCTCTCGGTGCGCTGGACC  
AGAAAAGCGTTTTCTGTTCAGGATAAGATGGCTGGTCTGAAATTCAGCGAGGAGGCTGGCAGAGACAATCCGCGAGCA  
ATCAGGCTGGCGAGGCACTTCAGGCGAGAGGGCAAACCTTCTATCAGTCAGCAATGACTGGACACGGACTTCGAGCA  
GAAAGACTGGCACTTGATAAGCAGAAAATTCGGTTTTGAAAGTACAAAGGCACAAAAGAAAGGCCGATGAACTTATTAATGC  
TGGCCAAAATACTTCGTTGAACATGGAAAAGGCTATAGAAAATCAGCAGGTGATGCGGACGTAGTCGATGCTGAGTGGC  
ATTCATGACAACGCTTGTGACAGCTTGGAGAAGGAGAAGCCAACTCTGGTTTTGTTGCGTAACGCTGAAAATATGTTT  
ACTAAGCTTACGGGGCAAGATAACTACCTCCGAGATATGCGGATTAGATTCAACCAACTAGCCAAATGCGCAGGCAACCAA  
GCTTCTCCCCCGGCTTCGATCAGATAAGGATATTGAGTTTGAAGGAAAGGCATTCAGCGAAACGGATAATCCAA  
TGGTCAATGCTCGATTGTTAAGGGGTATGGCAAAAATGAAAGTAAATAACCGAAGTTCAACGAGTTTAGGTCAGATGG  
ATGAGTGCAAATGGCAGCCAGGACAATCTGATCGCAACCGAAACATCATGGGGATGGATGTTAAGAAGGGTGAATCATT  
GAACTCTGCGGCAAAACGTTTTCTTCTCAAGTTATGCGGATAGCCAACCTCAACAGCAATTTCCGATGACGAATTA  
TTAGCAAATATCTCGGAGGGCAGTAA

>Cluster\_21662

ATGACAATAGAAAAACACGAAAGAAGCACTAAGGATTTGGTGAAGCAGCAGTATCGGGATGGCTGGGCACTGCGCTTGA  
ATTTATGGACTTCCAGTTATATTGCTCGCGCAGCGTTAGTGTTCATGAAATATTTTTTCCGAAATCATCAACGGCAA  
TGGCGTTAATCTGGCAATGGGAACCTATGGTGCAGGTTATGTGGCAGTATTGTCGGAGCATTTATTTTCGGCAAAAAT  
GGCGACAGATAAGGCGTAAAAAAGTGCTCTTTTATACCATCACCATTGATGGGGATCTGTACCACCTTAAATGTTGTCT  
GCCGACCTATGCACAAATGGTGTGTTTTGCGCCAAATTTGCTGGTGACGCTGCGTATTATTCAGGGCTGGGGCAGGCG  
CGGAAATTTCCGGTGGCGGATACGATGCTGGCGGAAATATCGCCAAAAGGTAAGCGCGGAAATATCTCCCTATTGTTGCT  
ATGGGACTAATCGGAAACCTTGAGCGCAACGGCAATCTGGGCTTTATGTTCTTCAATCTCAGTAAAGGAACTGCGT  
GGCTGGGATGGCGTATACCGTTCTGCGAGCGTTGTCGTGATGGTCTTTGGCTATCTGGTTGCGTATGAAATGAAAG  
AAAGCCCGTCTTTGAGAAGGTTAACGACAGCAACCAACCGACAGCAAAACCTGCACCTGCTGGTAGCATGTTCCAGAGC  
AAATCTTCTGGCTGGCAACAGGCTGCGTTTTGGTCAAGCTGTTAACTCAGGTTTAAATTCAGACTTTCTTGCAGGTA  
TTTTAGTGCAGAGCTTATTGTTTAAACAAAGCAATTCACACAGATGCATGATGATCAGTTCGATTTCCGCTTTATGACCA  
TTCCGTTCTTGGTTGGTTATCCGATAAAAATAGGTCGCGGATCCCGTATATTATGAAATACCTCTGCGATTGTGCTG  
GCTGGCCAAATGCTTTCTATCATCGTAGATAAAAAGCTATGCCCGAGCACCATATGTTGTCAGTATTGTTGATTCATAA  
CTGTGGGCTGCTGGGATTTTGGTCTGCGAAAACATTAACATGGCAGAAAATGTTGCGCTGTAAAAACCGCTTTACCCGAA  
TGGCTATTTCTAAAGAAAATGGTGGTCTTATCGCTTCCGGTTTGGTCTTAACTCTGCGGGGATTTTCTGCACCATGAG  
GAACTCTGGTATCCGATCGCATATGATCATGGCATAATCTGTGATTTGGTTAATCTCTGCGCTGAAAATGCCAGAAGT  
GAAAGACCGTGATTTAAGTGCCTGGAAGACCGCGCAGAGATCAACACATGTTGTCAGAGCTGCGCAACCTTCCAGAA  
GTCTTTTAA

>Cluster\_5268

ATGGAAGTCAACAGCACGGCGAGCAGTAAAGCGCGGCTTAAAAACCGCCATATTCAGCTTATCGCGCTGGGTGGCGC  
GATAGGGACCGGGTATTCTGGGTAGCGCCTCCGTAATACAGTCCGCGAGGGCCAGGGATATCTGGGTACGCCATTG  
CTGGTTTTATCGCTTCTGATCATCGCTCAGCTGGGTGAAATGGTGGTGAAGAACCCTGTCGAGGCTCTCTTTAGCCAC  
TTTGGCTTAAATAATGGGAGGTTTGGCGGTTTCCGCTTCCGCTCTGGCTGGAACTACTGGTACTGTACGTTTATTGTTCCAT  
GGCTGAGCTGACTGCGGTGGGTAATACATTCAGTTCTGGTATCCGAAAATCCCACCTGGGTTTCTGCGCGCTATTCT  
TTGTGGTGTATTAACGCCATCAACCTGACCAACGTTAAAGTGTTTGGCGAGATGGAGTTCTGGTTGCCATATCAAAAGTT  
ATCGCGGTGGTAGGATGATCATCTTCGCGCGTGGCTGCTATTCAGTGGCAACCGCGGCCCGAGGCGACTGTAGCAA  
CCTGTGGGATCAGGGTGGTTTTCTGCGCAGCGCTTACCCGGGCTGGTATGATGATGGGATATCATGTTCTCGTTCCG  
GTGGTCTGGAACCTGGTGGGATCACCGCAGCAGAGCTGATAACCCGGAGCAAAGTATACCGAAAAGCAACTAACCGGTT  
ATCTACCGCATCTGATTTCTATATTGGTTCGTTAGCCGTTCTGCTCTACTGATGCGGTGGACCCGCGTTACCGCCGA  
TACCAGTCCGTTTGTGCTGATCTTCCACAGGTTAGGCGATACCCTTGTGGCGAATGCGCTGAACATCGTGGTACTGACTG  
CGGCGCTCTCGTGTACAACAGCTGCGTATATTGCAACAGCGTATGCTGTTTGGTCTGGCACAACAGGGTAATGCGCCA  
AAAGCGCTGGCGTCTGTGATAAACGTTGGTGTACCCAGTAAATACCATTCTGGTGTCTGCACTGGTAACGGCGTTGTGCGT  
ACTGATTAACCTTGGCCAGAGTCCGCTTTCGGACTGTTAATGGCGCTGGTGGTATCTGCACTGGTAATCAACTGGG  
CGATGATTAAGCTGGCGCATATGAAATTCGCTGCGCCAGCAGGAACAAAGCGTGGTAACTCCTTCCCTGCTGCTGCT  
TATCCGCTGGGTAACCTGGATCTGCTGCTGTTTTATGGCGGCGTACTGGTATGATGCTGATGACCCAGGAATGGCGAT  
TTCGGTATACCTGATCCCGGATGGCTGATCGTGTAGGATACCGCTACTCTGTTAAAGAGAAAACCGCCAAAGCCGTA  
AAGCGCATTA

>Cluster\_42982

GTGATCGAAAAATTCGTAATATCGCCATCATCGCGCAGCTAGACCATGGTAAAACACCCCTGGTAGACAAGCTGCTCCA  
ACAATCCGGTACGTTTCGACTCTCGTGCCGAAACCAAGAGCGCGTGTGGACTCCAACGATTTGGAGAAAAGAGCGTGGGA  
TTACCATCTCTCGGAAAACACCGCTATCAAATGGAATGATACCCTATCAACATCGTTGATACCCGGGGCAGCCGAC  
TTCCGTTGGTGAAGTTGAACGCTGTAATGCTCCATGGTAGATTGAGTGTGCTGGTGGTGGTGGTGGTGGTGGTGGTGGT  
GCAACAGCGCTTCTGTAACCAAAAAGCGTTTGTACGGCCTGAAGCCGATTTGTTGTTATCAACAAGTTGACCGCCCTG  
GCGCGCTCTGATTTGGTGTGGTATCAGGATTCGATCTGTTGTTAACCCTGACGCGACCGAGCAGCTGGACTTC  
CCGATCTGTTACGCTTCCGCTGAACGGTATCCGCGGCTGACCCAGGAAGATATGGCGGAAGACATGACCCCGCTGTA  
CCAGGCGATTTGTTGACCGTTCCTGCGCGGACGTTGACCTTACCGTCCGTTCCAGATGACAGATTTCTCAGCTCGATT  
ACAACAGCTATGTTGGCGTTATCGGCATTTGGCCGATCAAGCGCGGTAAGTGAAGCCGAACAGCAGGTCATATCATC



TGATGCAGATGCCAGAATTTAAAGAGATTGCCTGA

>Cluster\_27158

ATGATCGTGCAAAAAGAGCTGGTTGCTATTTACGATTATGAGGTTCTGCTCCTGAAGATCCGTTTTCTTCAGACTTGA  
GATCCATAAATTCCTGAAATTTTACAGGTTCCGCTATCGACTGGAACGATCCCGGTACATCCAACATTTTCATCAAC  
GTGATCGAGAAGATGCCGACCATAA

>Cluster\_2053

ATGCGTTATACGGATAGCAGAAAACCTCACGCCGATGCAATCACAAGACCGCTTCCCGCAGCCTATTCGGCG  
AATTTCCAGCCAGACACTGTTAGGTCGGATGGCAAACGATTATCGATCATGACGGGCAAGAATATCTGCTCCGTAAAA  
CTCAGGCTGGCAAGCTGCTGTTGACCAAGTAG

>Cluster\_42523

ATGGCGAAATAAGTATGACGATTTTAAAGTATTCGTCATACTTATTACCTGTTCTGGATCAATAGATGGGCGTGGGTG  
GGCGGATCAGTTAACTGAATCGATCCATGACACTGTGCGGGTGAGCGTAAAGGGGTAGAGGTGCAGATCGCCAGGC  
TTAAATTTTCTAGCTGA

>Cluster\_38561

ATGATGTTTCATGTGATGACGCTGCCTGACCGCCGAGCCAGGAGAAATACAGAGCAGCAGGAGACAGCGCAACGCGC  
TTCTGCGCAGGCCCTTTTAAAGGGCAGTATCGAGACGAAACGACGCAAGGCGTGAGTCTCCATGCATTGATGTGCCA  
GTTGA

>Cluster\_22081

ATGTTATTGTGCCAGGAGGGCAGGGTAAGGGGCTGTATCGATATGCTTTGGCAATTGCGTGTGCCGAGATGAAGATGA  
AATGCCAATAAAAAAGCCTGAGTTCGATGAGGGACGAACTCAGGCTGGTGAAGTTTACAGTAACCGCCGCGCGCG  
TTGGCTGA

>Cluster\_35624

ATGTTTGTGAAACCCCTGAAAGGGCGGTGAGTTCCTGACCCCTGCCGTTGGAGACCTTTTGCCTTCTGACGGGCAAAATGT  
GAAAGAAAACAGCTACTGTTTCCGCCGTATAGCGCGGGTGATGTGGTACGTGTTAAACAGGATAAGGCTAAAGAATCAT  
GA

>Cluster\_17637

GTGAGTCAGCAAACAGATAAGAGTCTGACAGACTGATTGCCGATGCGGACAAGGTGCTGGAGCGGAACTC  
CCCGTTGCCGATGAGGAATGGTGGCAGGATTTCCGGGTGCAATGCTGGAACCTCAGGAACGTCGTCGGGAGGTGTTGA  
AGTGA

>Cluster\_46489

ATGAAAGATAATCTTTTATTGATTTTATTCTGATCAGTTTATTGGCCATATGTTCTTGCATAAAAAATGATAAAGATTG  
TTTATCGACGCCAGATAAATAAATTTGATGAACATAAATACGATAAATGTGCTCTACGGAGTAATAATAACCAAGCCCTA  
AACGAGAATGGTAA

>Cluster\_59264

ATGACTAAGAAAAATAAATGTGCTTACCACCTTTGCAAAAAAGACGTTGAAGAAAGCAAAGCTATTGAAAGAATGCTTCA  
CTTCATGCACGGGATTTTATCAAAAAGCAGAACCCGAGAAAAATATTGCAGTGAAGCTTGTGCCGAAAAAGACCAGATGGC  
ATGAACCTTAA

>Cluster\_56088

ATGAAAAATAAATAATATGATGGTTTTTATTTCTAATCATTTCAATGATTATATGTTCTTGCAAAAAACGATAACGATTG  
CTTATCGACGGCAGAGAATAAATTTTATGCACATAGATCCGATAAGTGTGCATTGCGTAGTAATAACAAATCCAAGCCCTA  
AACGAGAATGGTAA

>Cluster\_23540

GTGATTTTTTTAGCTGCTTTGCTGGCCTGCTCACTACTTGCGGATGGCTGATAAAAGTGCATCCAGACGGCGTCAGCT  
GCCCTGGACCAACGCCTTCGCGGATGCGCAACCGCTAAACTCACATCTGAAGAACGTAGCGCGTGGAAAATATCTTG  
AGAGCCTGACGCAGGTATTTACAGGTGCCGCGCCCAACGGGAGCAGCGCGGACCCGATCTCTCGCGCTGAATGCCGAA  
AGCAACAACGTCATGATGCTGACACAGCTATCACGCGTTATGGCATCTCTACCGACGATCCGAATAAATGGCGTTACTA  
CCTCGATTCCGGTAGAAGTCCACCTGCCGCTTTCTGGGAACAGTACATCAACGATGAGAATACCGTTGAATGATTCATA  
CCGATTCCGCTGCCGCTGGTTATTTCACTCAACGGTCATACGCTGCAGGAGTACATGCAGGAAATTCGCGGCTATGCCCTG  
CAACCTGTTCGCTCAACGCAGGCGTCGATTCGCGGGGAAGAGCGGAGCAAATAGAATGCTCAATATTCGCAAAAGAAAC  
GCACGAAGAGTATGCCGCTGAGTCGTCGCGGGGCTGCGGCAAGCGTTGCTGATTGTCGCTCCTTCCGTGATGTTCTTTT  
TCTCGCTGATTACCCCGGATGCTTTTGTTCGCTGGCTGCGAGGCGCGGCTTACTGCTGCTGGGCGCAGGCTGTGGGG  
CTATTCGCGCCCCCGGCAAAATCCTCCCTGCGGAAATTCATTGCTGCGCGGTACACCCCGTCTGGGGATTGTTTGG  
CGAAAACGATCAGGAACGATCAACAATATTTCACTCGGTATTATCGACTGGTCTATCCCGCACACTGGCAGCCATACA  
TTGCTCAGGATCTTGGTCAACAACCGATATCGATATCTATCTGACCCGACGTAAGTCCGCTCAGGGGCGATATCTTTCG  
CTGCATGATGAAGTAAAAAACCTTTCCGTTACAGCACTGGCTGCGCAGTACGATTATTGCTGCGGGCTGCTGTTGCTG  
GTTTATGCTGTTATCTGGATCCCGCTGGATATGCCACTGAAATTCACCTCTCGTGGATGAAAGGGCAGACACCATTTG  
AAGCCACTAGCGTAAACAACTGGCTGACGCTGGCGTGGGGTTGGCGATACATGCGTATTAGCGGTACGGGAATGTTG  
AATATTCGCACTCCGCTACTGGAGCGGAAACCAATTCACCTTTTACCATTGACTGCTCGCAGATCATCTGGAA  
CGACGCCGCTCATTTGCCATTACCAGAACTGAACTGAACTCAACAAAGCGACGGCATTGACCGAAGCAGTTAATGCCACG  
TGCACCTAAACCGGAAGATGAATCTCGCTCAGTCCCTCATTAGCTTACGAAATCAAAAATCCGGTATGGTATTGCTT  
GATGATTTTGGCGACATTGTTCTGAAGACAGCAGATCTGTGTTCTGCCAAAGATGACTGTGTGCGACTGAAAAATGCGCT  
GGTCAATCTCGGCAACAGTAAAGACTGGGACGCGCTGGTAAACCGCCCAACCGGGAAACTCGATGGCGTGAATGTTG  
TATTACGCCCGGTGAGTGGGAAATCGCTGGATAACCTGGTGGCCACCTTACCAGCGCGTTTATCACGCATGAAACGGCG  
CGAGCGGCAACACTCAAAACAGTCCGGCCCCGGCGGATTCCTGATTGTCAGCGACGAAAGCAGCGATTTTGTGATCA  
GCCCTGGCCTTCGGCATCACTTTACGACTATCCGCCGAAAGACAGTGGAAACGCTTTCCAGAACTGGCACAATGCTGA  
TGCATACGCGCTTTTAAACCGGAAAGGTATCGTCAAAAATCTTCACTGACGCCAATGGTACGACGATTTGGCCTTCTAT  
CCGATCCCGGATCGTTCCGGCTGTGGCGCTATCTCAGCACCAGCTGCTGCTACTGACGATGCTGGGTAGCGCCATTTA  
TAATGGCGTACAGCCTGCGCTGTTACCAGCGCCATCGTACTCGCATGATGAAGATTAGGCGCTATTATGAAAGCTGCC  
TGAACCCGCAACTGATCACCCCTCAGAAAGCCTTATCGAATAA

>Cluster\_20851

ATGGCCGTTAAAGCCTCCGGGCTTTTGTCCCTCCGTCAGCATTGCTGCAGGCACCGGTAAGGCGTTTACCGGTGCTTA  
TGCATGGAACCGCCACGCGAGGCGCTGCGGCGGAAAGACCCCTTACACGTCAGCAGATGCGTCAGGTGCAAGGTGTTT  
TATCCAGATTAACCGCTGCCTTACTTTTGGCTCGCTGTTACTTACCGCTATGACTACATCCGGCGCAATAAAAG  
CCGGTGCACGGGTTTATTTCTTCCATCCACTTTTACGCTGCTGTTTATGGCCGCGCATTTGAGCGCGTAACTAGCGCA  
TGAATGAACACCGACGCTGCTGCTGTTTCTGGCAGAGCGTACCATTATGCGGCTGTCGGGGATGAATGATAAGG  
AGCTGAAAAAGTTTGGCCCGCTATCTCATCGCAGCTTTTTCATGATGATGAGGAACTCTGCGATGCCGTTGGTGGATGCG  
CATGGCGAAAAAGATCGTGTTTACGGATGAGGCGAGGCTCACCTTATGGTTCATGTTGCTGGCGCTGCACGTGCTTT  
CAATATTTCCCGCTTACTGAAAAAATACCGTAAAGGACAGATGACCACGAGGCGAGCATAATCTGCCATTGCCCGCC  
TGTTTACAGATGAGTGGTGGATTAGTACGCTTAAAGGCGAGCTATGCGCTGGCATGAGGCGTACTGATTGCTGTCGGG

GAGGTCAATAAAGACCGTTACCTTATGCCAGTAAACATGCCATTCGTGATGTGCGTGCACGCCCGCAGGCAAACTCTGGA  
ATTTCTTAAATCGTGTGACCTTGA AAAACAGGGAACCGCGCAACGCATCGACCTTATCAGTAAGGTGATGGGCAGTATTT  
CTAATCTGAAATTCGCCGGATGGAGCTGATGAACACCATTCGCCGATATGAGCGTTACGCCCGCCAGAGGGTGTATGTG  
GGGATGTTTATCACGCTTACCGCGCCGTCAAAGTATCACCCGACACGTGAGGTCGGA AAAAGGCGAAAGTAAAACCGTCCA  
GCTAAATCACCGCTGGAAACGATGAGCATTAACTCAAAGGATGCGCAGCGTTATCTCTGCCATATCTGAAAGTACTGCTG  
GCACGGCATTTCAAGGATAATGATTTACAGGCTTACGGTTTTCGGTGTGCTGAGCCACACCACGCGGAACGCCGACTGG  
CATATGATGCTTTTTTGTATCCAGCCAGCGTAACAGATTATCGAAATCATGCGTCTGCTATGCGCTCAAAGAGGATGG  
CGACGAAAGAGGAGCGCGCGAAACCGTTTTCAGGCAAAAACATCTTAACCGGGGCGGTGCTGCGGGGTATATCGCAAAAT  
ACATCTCAAAAACCATCGATGGCTATGCACTGGATGGTCAGTCTGATAATGATACCGGCGAGCCGCTGAAAGTACTGCT  
GCGGCTGTTACCGCATGGGCGTCAACGTGGCGAATTCGCCAATTTAAAACGGTTGGCTGCGGACAATGGGGGCTTACCG  
TGAACACGCAAAATTCGCTCGCGCGCTCAGTATGCTGATGAGTTGACGAAACGCGTCCGAGGCTGCTCGCGCTGCCGAG  
ACAGTGGTGGTTTTGCGTGTATATCAGCGCGCAGGGTGGGGCAAAATGTCGCGCGGATTGTGACAGCTGTGAGGTTGGCC  
CGTAGCCCTCGGATGAGCTTAAACGAGTACGAGGAAAGAACTCGAGAGAGTGGTGGCATTACGCGCCGCTCGGGC  
GCGTCATATTCATATACCAGAACGACGGACTGGCGCATTTGTGCCGAAAGTTCGCGTCTGAGCCTTTGACTTTAAAA  
GCGGCATCGCGCGCCTCGGAGTCTGTCAATAACTGTGGA AAACCTCACTGTGGCGACTTCTGTTACCGGCTCCCA  
CCTTCTGACGACCGCGCAGCAGTCTTAATCTGGTAGATGACGGTGTATCGAATGGAATGACCCGGAGGCTCTGAAAGT  
GCTTAATCTGGCATTGAAAATGAAAGTACGCTAAATCTAGCAAAAAGGAGACACACGAGCAGGCATAGTTGGCGAGT  
CAACCGCATTTTTCAATGTACAGGATGCTGATAATCAACAATGA

>Cluster\_29187

ATGAATAACTCTCGGTTATTCGGTTGAGCAGGATTGTTATTGCGTTCAGTGCAGCCAGCGCATGATGATAAATACCGC  
TTACGCAACAGATGAAGCGAAAGCCGCACTCAATATACCCAACAGGTTAATCAGAAATACGCCAAATCATTACCGTTTTA  
GCGATCGTCAGGATTTGAGCATGCGCAGCGTGGATTTATCGCTCCGCTGCTGGATGAAGGATATCTCGGTGATGCGAAC  
GGTAAAGTTTACTACCGCGCGGACGATTTACAAAATTTGATATTAATGCGCTGCGCCGGAACCGTAAACCCACGCTGTG  
GCGTCAGTCGATGAAAACCGTTCGCGGTCTGTTTAAAGTACCGACCGCATGATCAGGTGCGCAGCGAGTATCT  
CGAACATCACCTTCAATTGAAGGTGATACGGGCATCATCGTCAATTGACCCGCTGGTACGCCAAATGCAGCAAAAGCCAGC  
CTTAATCTCTATTTCAAACACCGCCACAAAACCGATTGTGGCGGTTATCTACACCCACAGCCACACTGACCACTATGG  
CGGCGTAAAAGGTATTTCTCAGAAGCCGATGTAAAAGCAGGCAAAAGTGCAGATCATGCCCCGGCAGGCTTTATGGCAG  
AAGCCATCGATGAAAACCGTTCGCGGGTAAATATCATGAGTTCGCGTGCATTTACTCTTACGCGCTGCTCCGCA  
AATGCACAGGGAGATATCGGCAACGGGCTGGGTGTACGCTTACTACCGCGACCCGACAATTTATCGCGCCGACGCGATC  
TATCACAAGACAGGTGAGAAATCAATATCGACGGGCTGGATTTCGAATTCCTGATGCTCCAGGCAGCGAAGCGCGCT  
CTGAAATGCACCTCTATATTCGGCGGTTGAAAGCCCTGTGCACAGCGGAAAACAGCACCCATACCCCTGCATAACTTCTAC  
ACCTGCGTGGCGGAAAACCCGCGATACCGCGAAGTGACCAATTAACCTAAACGAAAACGCTGGATAAGTGGGGATCACA  
AGCAGAAGTACTGTTTATGCGGCACACCTGGCCGGTCTGGGTAATCAGCATAATGATTATATTGAAAATAATCGCG  
ACACCATCAGGTATATTCAGACCAAACCTGCACCTGGCGAACCAGGTTACACCATGAATGAAATCGGCAACATGATT  
CATCTGCCGGAACCGTGGATAAAAACTGGCCAGCCTATGCTTATGGCTCCGTCAGTCATAACGCTCGCGCGGTATA  
TAACCTTTTACCTCGCTACTACGACGTTAACCCAGCAAACCTGAATCCGATGCGCAAGTTCGATATGGTAAAGCTTATG  
TCAAAGCGCTGGGAGTTCCGCACATGCTATCAATCTGGCGGTGAAGCTATAACCAGGGCGACTACCGTGGGCTCT  
GAATGCTGAAAACAGGTGATTTGCTGCCAATTCGGGAGACACAGGTGGCGAAAACCTACAGGCCGATACCTCGAACAACT  
GGGTTATCAGCGGAATCAGCGACTGCGCGGCTTCTACTGACGGGAGCGAAAAGAACTTCGTGAGGCGGTGAAGAAA  
TCGAACACGCCAGACCGCTCTCTGACACTATCAAGAGTATGACTGTCGAGATGCTGTTGATTACATGGCTGTTCTGT  
CTGGACAGTGAGAAAGCCGGGCAAATCCATCAGCCTGAACCTCAATCTCTGACACAGATAACCTGAACCTCTCACT  
CAACAATAGCTGCTTAACTACCGTAAAACACTGCAACCGCAAGCTGACGCTCTTTCTACATCAGCCGTGAAGATCTGC  
ACGCTGTGCTGACCGCACAGGCAAAAATGGCCGATCTGTTGAAAAGCGAAGAAAGCCAAAATTTATGGCAATGGCGGAAA  
CTGGAAGAAATTTACGCTGTCTGGATAATTTGATTTGTGGTGAATATCGTAACCCCAAATTA

>Cluster\_59368

ATGTCGACTCGCTTAAACCCCTCAGCCATACCAGTGAAGGCCACCGCGTGTGCTCCACTACGGCTATGACGATAAAGG  
CCGCTGACCGCGGCAACCGCAGACGGTGGAGAAACCCGAGACGGGGAACCTGCTGTGGCACCATGAGACCGGACATGCGT  
ACAACGAACAGGGGCTGGCAACCGGCTCAGCGCGGACAGTCTGCCGCGGTTGGAGTGGCTGACCTACGGCAGCGGCTAT  
CTTGCGGGGATGAAGCTGGCGGGACGCGCTGCTGGAGTTACGCGCGACCGCTGCACCGTGAAGCGGTGCCAGCTT  
CGGCAGCATGGCAGGCAATGCCGATATAAACTGACCAGCACATACACCCCGCAGGCAAGTTACAGAGCCAGCACC  
TGAACAGCCTGGTGTATGACCGTACTACGGGTGGAATGACACCGGCGACCTGGTGGCATCAGCGCCGCGCAGACG  
CGGAATACGGCTACAGCGCCACGGGAGGCTGGAGAGTGTGCGCACCTCGCACAGACCTGGACATCCGCATCCCGTA  
TGCCACGGACCGCGGGCAACCGGCTGCGCGACCCGGAGTGCACCCGACAGTACACTCACAGTGTGGCCGGATAACC  
GCATCGCGGAGGATGGCAGTATGCTTACCGCCAGCATGAATACGGCAGGCTGACGGAGAAGACGGACCCGATCCCGG  
GGTGTGATACGGACCGGACGAGCGGACCGGACCCACTACGACAGCCAGCACCCTGGTCTACAGCGGAT  
ACAGCATGGCGAGCCACTGGTTCGAGAGCGCTACTCTACGACCCGCTGGGACGGCGAATGGCAAACGGGCTGCGCGG  
GGGAGCTGACCTGACGGGGTGGATGTCGCTGTGCGTAAACCGGAGTGCAGTGGTATGGCTGGGACGGAGACAGGCTG  
ACGACGGTGCAGCTGACACCACAGTATCCAGACGGTATACGAGCCGGGAAGCTTCAGCCGCTCATCCGGGTCGAG  
AGAGAACCGGACGCGGAAAAGCGCAGCGCGGACGCTGGCAGAGACCTCCAGCAGGAAGGAGTGAAGAACGGCCAGC  
GCGTGGTGTTCGCGGCTGAACCTGGTGGCGCTGCTGGACAGGCTGGAGGAAGAAATCCGGGACAGCCGCTGAGCAGTGA  
AGCCGGGCGTGGCTTGGCAGTGGCGGCTGACGGTGGAGCACTGGCCAGACAGGTGGAGCCGGAATACACACCGCGCG  
AAAAGTTTCAATTTTACACTGCGACCACCGGGGCTGCCGCTCAGCAGGCTCAGCGAAGACGGCAATACGGCGTGGCGG  
GGGAGTATGATGAATGGGGCAACAGCTTAATGAGGAGAACCAGCATCACTGCACCAGCCGTACCGTCTGCCAGGGCAG  
CAGCATGATGAGGAGTCCGGGCTGACTATAACCGTCAACCGGACTACGATCCGTTGAGGGGCGGTATATCACCCCGGA  
CCCGATTGGGTTGAGAGGTGGATGGAATATGATCAGTATCCGTTGAAATCCCATACAAGTATGATAGCCAAATGGGGT  
ATGCGATTGAGAAATGACATCAGGTGGACTAAATTTATGCTTACTGCTGATCCTGGATTGATTTGCTCAAAACAGCATT  
ACTAACAGTGTCTACCAGTTCGGTTATGATATGGATGCTATTGTTGGCGGAGCTCATAATGGGGCCGCGATGCAATGAG  
ACATTTGTTACTTGATGTGTCGAATGACTAAGACATTTGGATCAACAATAGCTGACGCTGATAGTAAAAATCATGAGCGG  
CAGGGGATAGACAAGGTACGCCAGCTAAAGAAAGAAATCATGGATCTTAAAATAACACTGTCGGTATTGCTTGTGGCGAT  
TTTTCTGCCAAATGTAGCGATGCTATTTGAAAATAATAACACTGGGCAACTCTCCGGTTAGATGGTATAAAAAGCAGA  
TAATCCAATAAAAAGCAAAGCAGGGAGTTCAGATGCTTCAATATTAG

>Cluster\_7266

ATGAATTTATTTTTCATAGTCGATAAGTTGGATTGGGCATTCCGTTAGAATAGCCAAAATATAGCAACAGAATTAAGTAG  
CTTTAATGTAAAAATAGTTTGCACCGATGATTTTAAAACCTGTGGCAGACTTTGCTATGACATGGATAAAAACGTA  
AAAAGAGTATATTACACTTCTTTTGGCGTGATTTCTTATGGAAGTATGAACTTACCTCAGCGGAATCCCAATATAAA  
GAAATTTTATGATCAGAAATATATCACAACGCATATTCCTGATCATCTTTTACTTATGATGATATCGCAAACTGAGAG  
AAGAATTCCTCTTATGAAATTTTGGGATGGGTATTTGTTACATCCGGAAAATGAAAGAGCTATATTTGCTGAACCTG  
ATTTTCCGCTCTCATAGCTTATCTATGATAATCCAGAAATTCCTATGAGCGAGGTAAAAAGCTATGATAATCATGAT  
AGAAAAAATCGTATGGATTGGCAATAGTAAATGGGAGAAATACCTCGGTTACCAAGATTATAAAGGCTGAATACAAT

AGTTTTCGCCGCTCTAGATAAAATTAATAAAATCTGGATATACATTTGATTATATTTAGTGTGATAGTTCTAAGGCAAGA  
CCGATCGTGAGGTAATTTCTTAAACACCTTTCTGATGCAGATATTTCTACGATCAGTTTCAAAATGTGAAGGTACACCATTTG  
CCACTTCTTGAAGCAATGGCAACAGTTTGTCTGTTGTGTCGACAGATTTGGTATAGCAAATGAAGTATTACCTGAAAA  
CCAGTTACAGTATATTTGTCTCTCGGGATGCAGAGGCAATTTTATTTATTTCAATTTGAAAGGTTCTTCTGACGATCAACCGCGGT  
TTGAAGAGTACAAGAAATGAATATATAGCGTATCTGACGAATTTGTAGATGATAGCCTTATAGGTGACAAATGGGCA  
TTGTTCTTCAAAGATATGTGTTCAAATCGCAAAATGAATTTAAGAATATATTTCTTCCGAGAGCAGAAAAATCCATCATTT  
TAAAGAACGATTGATATCAAAGCTATTTATAAATCTAAGCAGACTAGCTCTTCCGTTTGAATTTGATGAATACGCTAAAA  
AATATAGCCTGCTACGAAAAATATATTAAGGTTGCAGGAACAACACTCAAAATCAAGTTGATTTGATTTGTTGGATGAA  
TTTTATAGTAAATGCAATACAGATAAAGAAATAGCATTTTACTCTGCATATTTGGTCTGGTGTGGCCATCAACAGC  
TAGTTCTTAAAGATGATAGTATCCAATATCCATATTTATCATATGAGTTCCCAAGGTTTCTAATCATGTCTATCTAA  
ACAGATTAGCAGAAAACTTGTCTGAATCTAAAACTAAAAAGTGTGATCATGAGCGGTGGAACAATTACAATGGAA  
CTTGCCAAAAAATTAAGGCATTAAGTCCGAAAAATAAAATATTTTTGCATGGCATGGTTCACTGCTCAGTGGGTTGA  
CTCCTCGCAATATCAACGTTTGTGATGGATGGTATGAACTTTACCAGAGAGCGAATTTGCTGATGGGGTCACTCTCGTTAA  
CTGAGCTAGATGAAATACCAATGCTTACGGTATTTCTGATTTCTCAGTATCGAATTTATGCTGATCAGGCTCCTCGTTT  
TCTAAAAAATTAGCTGCACCTGATTTCTGCCAATTTCCGCGTAGGTTTGTTCGCTGCAATGTTCAAGTTGATATAAAAA  
ATTTCTCAATTTACTAGCAATTTGGTTCAATTAAGGATGTGAGCTAGTTACAACCTTGCATCTTGAACATAATATGAAGT  
GGTCTTCAATATCAAGCTTACGACTTACGAAATATCAAAAAATTTAATAATAAAGCGGTTTATCGAACTGATCTCGTTTA  
CATGTTATATGCTATGTAACGAATACGGAAATGTTCCGCAATGATAGCGTTGGAATCTGCAAGTGTGGAACCTCCATGCA  
TGTGGGGCCAGCTGGAAACATATATAAAGGTTTTCTGAGTTAGAATTTGATTTGGTTGAAAAAGAGGTTGATATCCAA  
CTGCAATCAGGAATCGGTTACAAATAGTTCGTGATAATTACAGGAAATACAGTTTGTGCTTAAATGCAATTTGTTTTGGAA  
TACAATTCGGGCTAGAATTAATAAAGAAAGATGATAAAGAGTTGAAGCAATGA

>Cluster\_29212

ATGTACACACAGACCCCTGTATGAGTTAAGTCAGGAGGCTGAACGCTGTTTACAGCTTTTCTCGCAACAGTTGAGTTACT  
GGAAAAAATACCTCTCTCTGATCCGGAGACGATGCGCCACAACCTGGCTTTACCTGGAGTCAGCCTAATATCGCGAAC  
GTCACGCGATGCTGAATAATGAGTTGCGTAAAAATTTCCCGCTGGAAATGGTGTGGCGATTGTCGGTACCATGAAAGCA  
GGGAAATCAACCACCATTAATGCCATTTGTTGGTACGGAGGTTCTGCTTAAATCGCAATCGCCCAATGACCTGCGCTGCCAAC  
GCTTATTCGCGCATATGCCAGGGCAAAAAGAACCGGTTACTGCAATTTTTCACATGTCGCGCAATCGACCATTTAATTTCAAC  
AATTTACAACAGCGACTGTGTGATGTCGATATTAAGCATCTGACCGGATGTGCTGAAATAGATAAAGATATGCGTCGCTT  
ATGCAGCGGATCGAAAAATGGCATCGCTTTCGAAAAATATTTATCTGGGTGCTCAACCTATTTTTTCAATGCTGAAAAAGTTT  
GAATGATTTGGTGTGACTGGCGAAGGCGCTGGAGCTGATTTTTCTTTTCTGCTTACGCCGCTTGGAGCATATTTCCCG  
TGATTTGAAGTGGAGTTTGTCCATCTGGCGGGCTGGAGAGTTATCCCGGTCAGTTGACGTTTACGGATACCCCGGGCCA  
AATGAAGCCGGCAACCGCATCTGCAAAAAATGCTTAAACAGCAGCTGCGACCGCCTCGCGGCTACCGCGGCTGCTGGA  
TTATACGCAACTGAAATCGATCTCCGATGAAGAGTCCGTGAGGCAATTTGGCGGTGGGGCAATCGGTGCCGTTGTATG  
TGCTGGTCAATAAGTTCCGATCAACAGGATCGTAACAGTACGACGCTGACCGGCTGACCGGCTGCGGGCACGATTTCCGGAACGCTG  
ATGAAAGGCTGTATACGCCACAGCAGATTTTCCGGTGTCTGATGTTGGGGTACCCTGGCAATCGGGGCGGCCATGA  
GTTAGCCCAACAGTTAAGTTACCCGCGCAGAGCAACCGCTGGGTGGAAGATTTTCCCAATGCGCGCTGCGCGGCTGCTGGA  
GCTGGGCTATGCCGATCTGGCGGACCTCGAACATATTCGCCATGCTGCCGATCAGTTTGGGAAGATTCGCTGTTCCGCC  
CAGCAATTCAGCGGTTGCTTATGCGGCTTACGCTAACCGCTGTTGATGCTTGGCATCTGCCGCAATAAACTGTT  
GAATACCGCGCAGCGCGGGAAATACCTGGATTTTCTGTCGCGACGGGTTAAACGCTGCTTGAACAATTCGGGCAAA  
ATATCCATCAGGTCGAAGAAAGTTTGCAGCTATTTCAACTCAATCAGGCTCAGGTGAGCGCGAGATTAACATGAAATC  
GAGCTGGCCCTGACCTCCGCCAACCTCTTCTGCGTCAACAGCAAGATGCGGTGAATGCCAGTTAGCGCGTGTGTTTCA  
GGATGATTCGGGGTCAATTAAGCGAGATTCGTACCTGCTGTGAGACACTGTTACAGACGGCGCAGAACACCATCAGTCGCG  
ACTTTACGCTGCGTTTTTGGCGAGCTTGAATCCACTATTTTCCGGGTGTTAACCGATGTTATTCGGCCATGAGCAACA  
GTCAAAAATGGAATTGAGCGAGTCAAGGTTTCTGCTGGGTTTCAATTTTCTGTTTTTACGGCGCAGCTCCCACTTCAA  
CACTCGCCAGCTGTTTCAAGTCAATTTCCGCGCAGGAGCAACGGACGAGCAGAGCAGCGTTTAGCGGTTGTGCGTG  
AGATTTTTTCCGCGTGGTTGAATCAGCCGACTGGGAGCGGAAATGAGAAATTTCCGACAGAGACGGTTGATTCAGT  
GTGTTGCAACAGCATTAAGCGCAGAAGTTCGATCTTTATTTGCAAAATGGCTAAAGTTATGCGCAGACAGGTCGATGA  
ATCTGTTACGGCAGGATGAATACTTTTTTTCGCTGAGTTTCGCTCATGTTTACGCGAATTTACAGACGGTTTACGCGAAA  
GTCCTGGCTCTGCTCAACAAAATGAATCCGTTGTCAGGCTGATGCAACAGCAATTTGACGACAGCTGTGATGACTACCGG  
TGGATTTACACCGACGCCAGCTGTTACCGGATGATATTAACAACCTTTTACGGCAGAACGATATTGA

>Cluster\_43445

ATGGATATAAAAAGATATTTCAAGCACATACCTGGGTGATTTGGAATCATCGGTGCATTTGCTCGCGGTAGTTGC  
ATTACGTCGGGGGAGCAGCTCAGCGCCCTGTGGATCGTGGTCCGCTCTGTGTGCGGTGATCTGGTGGCGTATCGCTACT  
ACAGTTTGTACATCCGCCAGAAGGTGATGAAATCGACCCACCGCGCAGCCTCGCGTTATTAACAATGACCGCTG  
AACTACGTTCCGACCAACCGTTTACGTTGTTTTGGTACCACCTTCGCCGCTATCGCCGCTGCTGGTCCGCTGGGTTCC  
AGTTCTCGCCGCGCAGATGGGCTACCTGCTGGCAGCTGTGGTGTGCTGGCGGGGTCGTTGCTGGCCGTTGCGGTTTCCAG  
ACTTTATGTTGCTGTTTATCTCTCTCGCGTAAATGGCCATCTCTTGGTGTGATGATCAAAGAAAGAGATGGGGCCAGTA  
CCGGGACTATCGCGCTGTTGGTGTTTTCTTAATCATGATCATCATCTCGCGTTCGCGCTTTCGGCTGATTTGGTTAAAGC  
CCTGGCCGAAAGTCCGTTGGGTTCTTACCCTTGTCTCAACCGTACCAGATTGCGCTGTTTATGGGATCTACATGCGCT  
TTATTCGTCGGGGCGTGGGTTGAAGTCTCTGTCATTGGTATCGTGTGCTGGTTGCTCTATCTACTTCCGTTGGCGTG  
ATTGCTCACGATCCGTTACTGGGGTCCGGCACTGACCTTTAAAGACACCACCATTTACCTTCGCGCTGATTTGGCTATGCGTT  
TGTTTCGCACTGCTGCCAGTGTGGCTGATCTCGCACACCGACTATCTGGCAACCTTCTGAAATCGCGCTTATGCT  
TCGGCCTGGCGTGGGTTATCGTGGTGTGAACCGGAACTGAAATGCTGCGATGACCCAGTACATTTGACGGTACTGGC  
CCGCTGTGAAAGGCGCTCTGTTCCCGTTCCGTTTCACTACCATCGCTGTGGTGGGTTATCTGGCTTCCACGCGCTGAT  
CTCTTCCGGTACGACGCAAAATGCTGGCTAACGAAACCGCAGCGGTTTCAATTTGGCTACGGCGCAATGCTGATGGAGT  
CCTTCGTTGGCGATATGCGCGCTGTTGCTGCATCCATCATCAACCGGCTTTACTTTCGCGATGAACACCCCGCTGCT  
GGCCTTGGCATCACCATGCTAACCTGCATGAAATGGGTTGGGAGAACCGCCGATCATCATGGCACAGCTGAAAGACGT  
TACCACACAGCGCGCAGCGACCGTACGCTCCTGGGGCTTCGTTGATTTGCCAGAGCAGATCTGCAAAACCGCGAAAGACA  
TTGGTGTAGCCTTCTGCTTGAACCGTGCAGGTGGTGCACCAACCGTGGCGGTAGGTATCGTCCAGTGTTCACAAAGTG  
CTGCCGATGGCTGACATGGGCTTCTGTTACTCTGGTATTTCTGTTGAAGCCCTGTTTATCTCCTGACCCAGTGGATG  
GGGTACCCGTTCTGGCCGCTTTATGCTGCAAGACCTGCTGGGTAACCTTATCCCGTTCTGAAAAAACCGACTCTCTGG  
TTGCTGGTATCATCGGTTCTGCGGGCTGTGGGTTCTGTTGGGTTACCTGCTGATACAGGCGGTTGGTCTGATCCGCTGGC  
GGCCTTAAAGACCTGTGGCCGCTGTTCCGTTATCTCAACAGATGCTGGCAGCCTAGCGCTGGTACTGGTACCGTTGT  
ACTGATTAAGATGAAGCGCACCAATAACATCTGGGTTACCTCCGGCGGTTATGGCTGCTTATCTGACCCACCTGGG  
CGTGGGCTGAAACTGTTTACGACCAACCCGAGATGGAAGGTTCTTCTACATGGCAGCCAGTACAAGAGAAGATT  
GCTAACCGTACTGACCTGACGGCGCAGCAGATTTGCAACATGAACACCATCTGTTGTAACAACCTACCAACAGCAGGCT  
GAGTACTTCTGTTCTGATGTTGGTGTACAGCATCTCTACCGTTTCAAAACCTGGCTGAAGTGTGCTTACAGCGACA  
AACGTAATGACAAAGAAACCGCTACGTTCCAATCCCGGAAAGGCGGCTGAAGATCTCTTCCGACCACTAA

>Cluster\_42483



ATGTCGGATCGTATCGATAGAGACGTGATTAACCGCTAATTGCAGGCCATTTTGGCGATCCTTTTCCGTACTGGGGAT  
GCATAAAACCACCGCGGACTGGAGTCCGTGCCCTTTTACCAGCGCTACCGATGTGTGGGTGATTGAACCGAAAACCG  
GGCGAAACTCGCAAACCTGGAGTGTCTCGACTCCCGTGGATTCTTTAGCGGTGTCTATCCCGCAGCTAAGAATTTTTTC  
CGCTATCAGTGTGGCTGTTTCTGGCATGGTCAGAAAACCTGCAATAGATGATCCTTACCCTTTTGGTCCCTAATCCAGGA  
AATGGATGGCTGGCTATTACTGAAGTACTCCTGCGCCGCTATGAAACTTTAGCCGCGCATGCAAGCAATCAGTTTGAT  
GCGTCACAGGTACCGTTTTTCTGTCTGGGCTCCTAACCGCCGCTCGGGTCTCGGTGGTTGGGCAATCAACTACTGGGAC  
GGTCGCCGTCATCCGATGGCCCTGCGTAAAGAGAGCGGCATCTGGAACTGTTTATCCCTGGGGCGCATAACGGTCAGCT  
CTATAAATACGAGATGATGATGCCAATGGCAACTTGCCTGAAAGTCCGACCCTTATGCCTTGAAGCGCAAATGCGCC  
CGAAACCGCGTCTTTTATTTGCGGCTGCCGAAAAGGTTGTGCAGACTGAAGAGCGCAAAAAGCGAATCAGTTTGAT  
GCGCAATCTCTATTTATGAAGTTCACCTTGGCTCTGGGCTCGCCACACCGACAACAATTTCTGGTTGAGCTACCGCGA  
GCTGGCCGATCAACTGGTGCCTTATGCTAAATGGATGGGCTTTACCACTCTCGAGCTACTGCCATTAAACGAGCATCCCT  
TCGATGGCAGTGGGGTTATCAGCAACCGGCTGTATGCACCAGCCCGCTTTTGGTACTCGCGACGACTTCCGTTAT  
TTCAATTGATGCGCACCGCAGCTGGTCTGAACGTGATCTCGACTGGGTGCCAGGCCACTTCCGACCGATGCTTTG  
GCTTGGCAATTTGATGGCAGCAACTTGTATGAACACAGCGATCCGCGGAAGGCTATCATCAGGACTGGAACACGCTGA  
TCTACAACCTATGGTCGCCGTGAAGTCACTTCCCTTGTGCGTAACGCACTTACTGGATTGAACGTTTGGTATTGAT  
GCGCTGCGCGTCAATGCGGTCAATGATTTATCGCGACTACAGCCGTAAGAGGGGGAGTGGATCCCGCAAGAAAT  
TGGCGGTCCGCAAGTCTGAAGCGGATTTGAATCTTGGCTAATACCAACCGTATTTCTTGGTGAGCAGGTTTCCGGTGCAG  
TGACAATGGCGGAGGAGTCTACCGATTTCCCTGGCGTTTCTCGTCCGAGGATATGGGCGGCTGGGCTTCTGGTACAAG  
TGGAACTTCCGCTGGATGCATGACACCCCTGGACTACATGAAGTCCGACCCGATTTATCGTCAGTATCATCAGGATAAACT  
GACCTTCGGGATGCTTACAACCTACCTGAAAACCTTCCCTGCCGTTTGTGCATGATGAAGTGGTCCACGGTAAAAAAT  
CGATTTCTCGACCGGATGCCGCGGACGCTGGCAGAAAATTCGCTAAACCTGCGCGCCTACTACGGCTGGATGTGGGCAATTC  
CCGGCAAGAACTGCTGTTCATGGGAAAGAAATTTGCCAGGGCCGCGAGTGAACCATGACGCCAGCTCGACTGGCA  
TCTGTTGGAAAGCGCGGATAAATGGCACACCGGTGTCCAGCGTCTGGTCCGCGATCTGAACACACACTACCGCCACCATA  
AAGCAATGCATGAATGATTTTGGACCCGTACGGCTTGAATGGTGGTGGATGACAAAGAAGCGTCCGGTCAATGATC  
TTTGTGCGTCGCGATAAAGAGGGTAACGAAATCATCGTTGCCAGTAACTTTACACCGTCCGCGTCAATGATTTATCGCTT  
CGGTATTAACAGCGGGTAAATGGCGTGAATCCTCAATACCGATTCATGCATCATCAGGAGTAAATGCCGGCAATG  
GCGGCGCAGTACACAGCGATGAGATTGCCAGCCAGGTCGTGAGCATTACTGAGCCTGACGCTACCACCTCTGGCCACT  
ATCTGGCTGGTTCCGGGAGGCAGAAATGA

>Cluster\_46477

ATGAGCAAGAAGGAGTTGAACCTGAACGTGTTAACAGTAGGCAAGTTATTCACGACAATTATCTGATTCCTATTTATCA  
ACGGAACATATGCTGGCGGGCGAACAGATTGAGCAACTTATTAGCGATATTCAGACTCGGTGGTAGGGGGCCAGGACA  
ACTATTTTCTTGGGAACCTTGTGTTAATCAAGCGGGGTAGAGAGGATGAGTTCGAGGTATAGATGGACAACAACACTT  
ACAACCTCTATCTGCTTCTTACCTTCCCTGGAGCAAGCGGTGAGGGTGAAGAAGCGTTCGGTTGGCCATGCAGGCCACTT  
GCAATATGAGTCGCGCGCACGGGCAACTGAGGCCCTGCTGCGAGTAGCACAGGAGGCGCTAAGGAGCAGCTTCGACCCG  
AGGGCTCCACAGTAATGACAGATGCTGGCATTATGAAGGCTACAGCATCATCAATCAGTTCTTCAACAAAATGAAAAC  
CTTAATCGCTCACCGAAAATTTCTCGATTCTTGCCTAACGAAGGTGACTGTGCTCCGTTGCTTCCGCTCCCAATAAC  
CGACCTCAATCGCTACTTTCGAGATCATGAACACTCGTGGGCGCAACTCAAGCAGGTTGATATTTGTTAAGGCTCGCCTGA  
TGAGCAACTTCCCAATCAATATGAACCGAATGCTTTGCGTGGGTTTGGGATTCCTGTGCTGACATGGATTCTTATGTC  
CAGATGCTCTGACCCGTTGACACAAAGTTTGGCAACAAAGTATTTGGTGAATGATGGTCCGCTGGCTGGAGTTGACCA  
CTTCTTTCGTAATGGAAAGTCTCGCAATCCGGCATCAATTCATCAAGGCAATCCCGAAAGGGTATCGTTGTCCT  
TGGATGAGGGCTTGTCAAAAATACGCTAAAGAGCTCGAGTCAAAATTCACCTGAAGACGAGGGCAACGAGCGGTTTCTGTTCA  
ACTATTGAGTTTCCGGCTTCTTCTGCTACAGCTTCTAAGAATTAAGAAAGGCGATGAGGTCGAAGACGAAGGCTGCTTGA  
GCACAAGCGCTCATCAAGTCAATTTGACGACGCGTAATAATGTACCCGATGCTAAAGCCGATTTGGGTGCGTAGTTTG  
CATTTATGCTTCTCAAGTCCGCAACCTCTTTCGATGGCTTCTTGAAGCGTCAATTCACGGCAACATCGGTGACGAT  
GGCGATTGCTCTTCCAGCGACTGAAAAAGGAGGCGGGGACAAGAAGCAACCCGAGTACATCCATGTTTTCTCGGC  
CAGCAATGGAAAGCTTAGAGGAGGACGGGAGTGTGACCCACATACCCGAGATGATTTGCTGCTTCACTCCATGCTTCGGA  
TTACCTACACTTCTCCGGAACGATGCACTGGATTACCAAAATTTCTTCCGCTGCTCCTCGTTAAAGCCCTCGAGACGTG  
AAACATGCGGATCTTGGCGATTTGTTGAAGGATATGCCCGCAGCAAGGTTAAAGAGACATTCCTTGGAGAAAGATCA  
GCAACACAAAGGTTTGGTATCAGCCGTATCGTCTTTTCTGATCTCGACTATCTTCTGTTGAGTACTCCTCAAAACGAG  
ATTTCAAATTTCAAGTTCAGAACTTCCATGAGCACTTCTATCCACAGCATCCTGACAAAGAAGCAGTCCGGCGCGGTTGTT  
TCAGGTTCTAGCCTTCAACCTGCTTGGCAACCTCGGCTCGTAAGCGTCAAGCGCAACTCAAAAATTCAGCAACTTCC  
CAGAGCAAGGCCGAAAACCTCAAGGATACAATGAACCTCAAGTCCCAAGCTCAAGAGAATGGCGGAAATCACCCGAA  
ATACAAACTGGGACGATCAGCAGATAACAGCACATCATGAAGCGATGGTGATATGCTTCTGATGATGTAAGTCTGGTG  
GAGGCAAGCGAAGATCCAACCCAGGCGTTGA

>Cluster\_25635

TTGCCACACAGTGAATGATGCGGTTGATGTGCTGGCGTTGAAAATCTGAATATGCTTTATGCAGGAGCAGCA  
GAAAATAGCTGCGGTCGCAATCTCTCTTTTAGCCTGCAACGTTGGTGAGACGCTGGCAATTTGTTGGCGAATCCGGCTCCG  
GTAAGTCAAGTCAAGTGGCATTTGATGCGCCTGTTGGAACAGCGGGCGGTTAGTGCAGTCCGATAAAAATGCTGTTG  
CAGCGCGCAGTCCGGAAGTAAATGAACCTTAGCAGCAGAGTGTGCACAAAATGCGCCATGTGCGGGGGCGGATATGGC  
GATGATATTTAGGAGCCGATGACATCGCTGAACCCGTTATTTACTGTGGGTGAACAGATTGCCGAATCTATTGCTCTGC  
ATCAGAACGCCAGTCTGGAAGAAGCGATGGTCCGAGGCGAAGCGGATGCTGGATCAGGTACGCATTCGGAGGCACAAACC  
ATTTCTTACGTTATCCGATCAACTCTTGGCGGGATGCGCCAGCGAGTATGATTTGCGATGGCGCTGTCACTGCCGCC  
GGCGGTGCTGATTGGCGATGAGCCAAACCACCGCTGGATGCTACTATTCAGGCACAAAATCCTGCAATTAATCAAAGTAT  
TGCAAAAAGAGATGTCGATGGGCTTATCTTTATCACTCACGATATGGGGTGGTGGCAGAGATTGCCGATCGGGTACTG  
GTGATGATCAGGGCGAGGCGGTTGAAACCGGTTAGCGTCAACAGATTTTTCATGACCGCAACATCCTTATACCCGTTGC  
CTGTTAGCTGCTTGTCCGCAACTTGGTCCGATGAAAGGTTAGATTATCCCGACGTTTCCCATTTGATATTCGATGAA  
ATCCAGCGAAACAGGAGCCACCCATCGAGCAGAAAACGGTGGTGGATGGCGAACCTGTTTACGGGTGCGTAATCTGGTC  
ACCCGTTTCCCTTTCGCGAGCGGTTTGTGAATCGCGTAACGCGGGAAGTGCATGCCGTTGAGAAAGTCAAGTTTGTATCT  
CTGGCCTGGTGAACGCTATCGCTGGTGGGAGGAGTCTGGCAGCGGTAATCTACTACCGGGCGGGGCTTGTCTGCGCCTGG  
TCGAATCGCAAGGCGCGAAATTTATCTTTAAGCGTCAAGCAATCGATACTCTCGCACAGCAAACTTCAAGCATTTGGC  
CGGATATTCAGTTTATTTTTCAGGACCTTACGCTTCCGCTGGACCCGCTCAGACCATCGGTGATTCGATTCGCAACC  
GCTGCGGCTACACGGTTTATTTGCCAGGTAAGAAAGCGGCTGCACGCTTGGCTGGTGGAGCGGTTGCTGGAGCGGTTGGCCTGTTAC  
CGAACATGCTGGCTTACCTCATGAGTTTCCGGCGGTCAAGCCAGCGCATTCGATTTGCTCGCGGCTTGGCATTTG  
AATCCAAAAGTATCATTTCCGACGAAGCGCTTCCGGCTGGATGTTTCTATTCGCGGGCAGATTATCAACTTGTGCT  
CGATCTCCAGCGTATTTCCGATTTGCGTATCTGTTTATCTCCACGATATGGCCGTTGGTGGAGCGGATAGTCACTG  
TGGCGGTGATGATCTCGAGCAAAATTTGAAAATTTGGTCCAGCGCGCGGCTTTGAAAATCCGAGCATCTTATACG  
CGTAAATTAAGTCCGCGAGTTCCGGTCCGCTGACCGTCCGACACAGCGCGAGCTGACTGCTGCGGACGATCTTCC  
CAGCAATATTCATCTGCTGGCGAAGAGGTTGACGCGCTCTGTTGCAATGCGTGGGCGGGGCAATTCAGTCCGACAA  
CACATCAGAATACGCATTCATGCTAGATAA

>Cluster\_34370

ATGAAAGGACAAGAAACTCGTGGTTTTTCAGTCAGAAGTGAACAGCTTCTGCACCTGATGATCCATTTCTCTATTCCAA  
TAAAGAAATCTTCTGCGTGAGCTTATCTTAACGCCCTCCGATGCGGGGACAAGCTGCGTTTTCCGTGCGCTCTTAACC  
CGGACCTGTACGAAGGTGATGGCGAACTACGCGTTCGTCTCTTTTCGATAAAGACAAGCGTACGCTGACCATCTCCGAT  
AACCGGTGCGGCTGCGTCCATCATCAGCAAAATCTCCGACCATATCGCGCTGCCGTAGAGATCGAAAAACGCG  
ATCCCTGGGTTCTGACCAGGCGAAAAGACAGCCAGCTGATCGGTCAGTTTGGTGTGGTTTCTACTCTGCGTTTTATCGTGG  
CCGACAAAGTGACCGTGCCTACTCGCGCGCAGGCGAAAAACAGAAAATGGCGTCTTCTGGGAATCGGCTGGCGAAGGT  
GAATACACCGTTGCCGACATACCAAAGAAGATCGTGGTACTGAAATCACCTGCATCTGCGTGAAGGCGAAGACGAGTT  
CCTCGATGACTGGCGCTGCTCCATCATCAGCAAAATCTCCGACCATATCGCGCTGCCGTAGAGATCGAAAAACGCG  
AAGAGAAAGACGGCGAAACCGTTATCTCTGGGAGAAAATCAACAAAGCGCAGGCGCTGTGGACTCGTAACAAGTCGGAA  
ATCACCGATGAAGAGTACAAAGAGTCTACAAACACATCGCCACGACTTAAATGATCCGCTGACCTGGAGCCACAACCG  
TGTTGAAGGTAAGCAGGAGTACACCAGCCTGCTGTACATCCCGTCCAGGCTCCGTGGGATATGTGGAACCGCGATCATA  
AACACGGCTGAAACTGTATGTTTACGGTGTTCATCATGACGACGACGAGAACAGTTTATGCCGAACATATCTGCGCTTC  
GTGCGTGGTCTGATTGACTCCAGCGATCTGCCGTGAACGTTTCCCGTGAATCTCCAGGACAGCACGGTAACCGGTAA  
CCTGCGCAATGCGCTGACCAAGCGTGTGCTGCAAAATGCTGGAAAAACTGGCGAAAAGACGACGCGGAAAAATACAGACCT  
TCTGGCAACAGTTTGGCCTGGTACTGAAAGAAGTCCGGCGGAAGATTTTCGCTAACCGGAAGCGATCGCCAACTGCTG  
CGTTTTGCTTTCTACCCATACCGATCTTTCTGCGCAGACCGTATCTCTGGAAAGACTACGTTTTCCCGCATGAAAGAAGGCA  
GGAGAAAATCTACTACATCACCGCAGACAGCTATGCGGCGAGGAAGAGCAGCCCGACCTGGAAGTGTGCGTAAAGAAAG  
GCATCGAAGTCTTCTGCTGCTTTCCGACCGCATCGATGAGTGGATGATAACTATCTGACTGAGTTCGACGGTAAACCGTTC  
CAGTGGTCTTCAAAGTTGACGAGTCTGCTTGAATAACTGGCTGACGAGTTGATGAGAGCGCGAAAGCGGAGAAAGC  
ACTGACTCGCTTACGACCGTGTGAAAGCCCTGCTCGCGAGCGCTGAAAGATGTCCGCTGACTACCGTACCGCTGACCG  
ATACGCCAGCGATCGTTTCGACCAGCGCGGACGAAATGAGCACTCAGATGGCGAAACTGTTTCGCTGCGCGGGCCAGAAA  
GTGCCAGAAAGTGAATAATCTTTCGAACTGAACCCGATCACGTAAGTGGTGAACGTCGCGCAGATATGAAAGTGAAGC  
GAAGTTACGCGAGTGGGTAGAAGTGTCTGGATCAGGCGCTGCTGGCAGAACCGGCACGCTGGAAGATCCGAACTGT  
TTATTCGTCGATGAACCAGCTGCTGGTTTCTCTGA

>Cluster\_22466

GTGAACGGTGAATGATTTGGGTTCTTTACTTACTGGCCGTGGCCATCGTCTTGTGTTGGCAGCGGAGAGTGCCTATGGA  
TGGCGTCCGTTTTGTTGTTTTCGCGTTTTGCATTAAGCGGAACGCTGACGGTCCCGGAAGTATTTTTCCGGCTTTTCCG  
ATCCTAACGTTGCTCTGATTGCCGCTTGTTCATTATTGGCGATGGTTTGGTCCGTACCGGTGTTGCCACTGTAATGGGG  
ACATGGCTGGTCAAAGTGGCGGGCAACAGTGAATCAAATGTTGGTTTGTGATGCTGACCGTCCGCGGGCTTGGCCG  
GTTTATGAGTCAACCGCGTTGTTGCTATCTTTATCCCGTGGTGTAAAGCGTTGCCATGCGTATGCAACGTCGCGCT  
CGCGTCTGATGATGCCGTTAAGTTTTGCGGGCTGATAAGCGGATGATGACGCTGGTGGCGACGCGGCAACTGGTA  
GTCACAGTGAATGCTGCGTGAAGGCTATCACGGCTCAGTTTCTTTAGCGTAACACCTATTGGCCTGGTGTGTTGGT  
GCTGGGATTTTTGTATATGTTAGTATGATGCGTTTTCATGCTGAAAGGGGATACCCAGACCCACAACGCGAAGGCTGGACCC  
GCCGAACCTTTCCGCGATCTTATCCGTGAATATCGACTGACCGGGCTGCGCGACGCTCTGGCTATTGCCCGGATCGCCA  
ATGATTTGGTCAACAGCTGACGATCTCAAATTCAGTGAACGTTTATGGTCTAACGCTATCGGTGTTGAACCTGGCGCG  
TTTTCGTCCGTTATCTGTAACGTTAATGGGTTTTCTGAATTTCCGCGCGTGAAGTTTGTCTATTGATATGCTGCGG  
CTGATGTCGATCTCCGGCAATTTGTAGTGAAGCAATTTGATGGACCGATGGTACTGCGCGCGAGTATTTTTCTGACCA  
GCCCTTGTGTTGGCAGATGGCAGAGATTTCAATTAATTCGTAGCAGAATTTATGGTAATCGGTGGCGAAATGGT  
TCGTACCCGCTACGATTAATGTTGGTGGGCTAAAGCGCAATGGTGTGGCGTGGAAAGTTTCGCTGGCGAATGAACCTC  
TGCTGCTGGCGATATCATTTCTGTTGTTGGTAACTGGAACGATCGGTATGCTGGCAAACAGGCGCGACTTCGTA  
CGCTGAACCTTACGAAGAGGTGAGTGAAGCTTCCCGCGCGACAGCCAGGCACCCCATGCCATTTCTGCTGGTGT  
AATGGTGGCGTGTGATGCTGACCGATGAAATTCCTAATCTGTTGCGGCTATCATCGCTGCTGTTGGGAAATTC  
GCTGTATCGATGCCGAAAGCGCTATAAATCCATTCAGTGGCCGAGCATTTATTTGATCGTTGGGATGATGCCGTTGCT  
GTGGCATTACAGAAAACGGGAGGTGTGCGCTGCGGCTGAAAGGGCTGATGGGATGGCGCGGTTATGGGCGACATAT  
GATGCTGGGGTGTGTTGTTGCTTGTGCGGCGTTATGGGCTATTTATTTCTAATACCGCGACGGCGGTGTGATGGCTC  
CGATTTGGCTGGCTGCGTGCAAAACAGTGGGGGTGCTCGCTTATCCATTTGCGATGGTGTGGGCGATGCCAGCATCCG  
GCCCTTATGACACCGATATCTTACCTGTTAACACACTGGTTTTAGTCCGGGAATTAACGCTTACGTTAGTCTGTTAA  
GTTGGGGTACCGTTACCATTAATCGTATGCGGTTTTGTGTGATGATCCCGATGTTGTTCCGTTTTGA

>Cluster\_42148

ATGAGCAAAAACCCGCAATCACAGCTGAAACTTCTTGTACCCGTTGTAAGGAGCAAGGCTATCTGACCTATGCCGAGGT  
CAATGACCATCTGCCGAAGATATCGTCTGATTCAGATCAGATCGAAGACATCAACAAATGATCAACGACATGGGCATTC  
AGGTGATGGAAGAAGCACCAGGATGCCGATGATCTGATGCTGGCTGAAAACACCAGCGGAGGATGCTGCCGAAGCCGCG  
CGCAGGTGCTTTCCAGCGTGAATCTGAAATCGGGCGCAGACTGACCCGTAACGATGTACATCGTGAATGGGCAC  
CGTTGAACCTGTTGACCCGGAAGCGAAATTTGACATCGCTAAGCGTATGGAAGACGGGATCAACAGGTTCAATGCTCCG  
TTGCTGAATATCCGGAAGCGATCACTATCTGCTGGAACAGTACGATCGTGTGAAGCAGAAGAGCGGCTCTGTCCGAT  
CTGATCACCGGCTTTGTTGACCCGAACGAGAGAAGTCTGGCACCTACCGCACTACGTCGTTCTGAGCTTTCCCA  
GGAAGACTGCGATGACGAAGATGGAAGCAGGAAGATGGGATGACGACAGCGCCGATGATGACAACAGCATCGACC  
CGGAACCTGGCTCGTGAAAAATTTGCGAACTGCCGCTCAGTACGTTGTAACGCGTACACCAACGAAAGGTTCCG  
AGTCACGCTGCCGCTCAGGAAGAGATCTGAAACTGCTGGAAGTATCAACAGTTCGCTGCGCTGGTGCAGGAGTGA  
CTACCTGGTCAACAGCATGCGCGTATGATGGACCGGTTCTGACGCAAGAACGCTGATCATGAAGCTCTGCGTTGAGC  
AGTGCAAAATGCCGAAGAAAACCTTCAATACCCTGTTTACCAGCAACGAAACAGGATACCTGGTTCAACGCGCAAT  
GCGATGAACAAGCGTGGTCCGAAAACCTGACGATGCTCTGAAAGAAGTGCATCGCGCCTGCAAAAACCTGACGAGAT  
TGAAGAAGAAAACCGCTGACCATCGAGCAGTTAAAGATATCAACCGTCTGATGTTCCATCGTGAAGCGAAAACCGCG  
GTGCGAAGAAAGAGATGTTGAAGCGAACTTACGCTGTTTATTTCTATCGCCAAGAAAATACCAACCGTGGCTGCGAG  
TTCTTTGACTGATTCAGGAAGGCAACATCGCTGATGAAAGCGGTTGATAAATTCGAATACCGCGTGGTTACAAGTT  
CTCCACCTACGCAACCTGGTGGATCCGTCAGGCGATCACCCGCTCTATCGCGGATCAGGCGCGCACCATCCGTTATCCGG  
TGCATATGATTGAGACTATCAACAACTCAACCGTATTTCTCGCCAGATGCTGCAAGAGATGGCCCGGAGCCGACGCG  
GAAGAAGCTGGCTGAACGATGCTGATGCCGGAAGACAAGATCCGCAAGTGTGAAAGTCCGCAAGAGACCAATCTCCAT  
GGAACCGCGATCCGTTGATGAAAGATTCGCACTGGGGGATTTTCATCGAGGATACCCCTCGAGCTGCGCTGGATT  
CTGCGACCACGAAAGCTGCGTGGCGCAACGACGCTGCTGGCTGGCCTGACCGCGCTGAAGCGAAAGTTCTGCGT  
ATGCGTTTTCGGTTACGATGAACACCGACACGCTGGAAGAGTGGGTAAACAGTTCGACGTTACCCGCAACGAT  
CCGTCAGATCGAAGCGAAGGCGTGGCAAACTGCGTCAACCGAGCCGTTCTGAAGTGTGCTGAGCTTCTGGACGATT  
AA

>Cluster\_34367

ATGAGTTATCAGGTTCTTAGCCGAAAAATGGCGCCCAAAACCTTTGCTGACGTCGTCGCGCAGGAAACATGTGCTGACCCG  
ACTGGCGAACCGCTTGTCTGTTAGGGCTATTCAATCATGCTTATCTTTTTCCGGCACCCGTGGCGTGGGAAACCTCTA  
TCGCCGACTGCTGGCGAAGGGCTAAACTGCGAAACCGCATACCGCGACGCGCTGCGCGGTGTCGATAACTGTCTGT  
GAAATCGAGCAGGGGCGTTTTGTCGATCTGATTGAAATCGACGCGCCTCGCGCACCAAGTTGAAGATACCCGCGACCT

GCTGGATAACGTCACGCTCCGGCGGTGGTTCGTTCAAAGTTTATCTGATCGACGAAGTGCATATGCTGTCCGCC  
ACAGCTTTAACGCACTGTTAAAAACCCTTGAAGAGCCGCGGAGCACGTTAAGTTTCTGCTGGCGACGACCGATCCACAG  
AAATTGCCGGTGACGATTTTGTACGCTGTCTGCAATTTTCATCTCAAGGCGCTGGATGTGAGCAAAATTCGCCATCAGCT  
TGAGCACATCTTCAACGAAGAATATATCGCTCAGAGCCGCGGGCGTGAATTTGCTGGCAGCGCCGCTGAAGGCAGCC  
TGGAGATCGCTTAAAGTTCGACGACGAGCGGATTTGATGTTGATGTCGCAAGAATACCGTATGCGCCGGCCGCTCGCAT  
CTGGGTACGCTTACGACGATCAGGCGCTGTGCTGGTTGAAGCGATGGTCGAGGCCAACGGCGAGCGGTAATGGCGCT  
GATTAATGAAGCCGCTGCCGCTGTATCGAGTGGGAAGCGTGTGCTGGTGGAAATGCTCGCCGCTTGCATCGTATTGCCA  
TGGTACAACCTTTCGCTGTGCACTTGGCAACGACATGGCCGCGCATCGAGCTGCGGATGCGTGAAGTGGCGCGCACCATA  
CCGCCGACGGATATTCAGCTTTACTATCAGACGCTGTTGATGTTGTCGCAAGAATACCGTATGCGCCGGCCGCTCGCAT  
GGGCGTTGAGATGACGCTGTGCGCGCTGGCATTCCATCCGCGTATGCGCTGCGCTGAGCCAGAAGTGCACGACAGT  
CCTTTCGACCCGTCGCGCAACGGCAGTAAATGACGCCAACCCAGGTGCGCGCCGCAACCGAATCAGCGCCGACGAGGCA  
CCGACTGTACCGCTCCCGGAAACCACGACGAGTGTGGCGCGCGCCAGCAGTTCGAGCGCGTGCAGGGAGCAACCAA  
AGCAAAAAGAGATGAACTCCGCGAGCCGCTACCCGCGCGCGCGCTGAATAACGCTGCGCTGGAAGAAGCTGGCTTCGCTCA  
CCGATCGCGTTACGGCGCTCCGGTCCATCGCGCTGGAAAAAGCGCCAGCCAAAAAGAGCGTATCGCTGGAAGGCG  
ACCACTCCGGTGTGACGCAAAAAGAGTGGTCCGCGCCGCAAGGCGCTGAAAAAGCGCTGGAACATGAAAAACGCC  
GAACTGGCGCGGAAGTACGCGCAGAAGCCATGAGCGCGACCCGTTGGCGCGCACAGGTGAGCCAACTTTCGCTACCAA  
AACTGGTCAACAGCTGGCGTTAAATCCCTGGAAGAAGGAGAGCGCAACGACAGTATGCTGCAATTTGCGCTCTCAG  
CGGCAATTTGAACAACCGCGTGCACAGCAAAAATGGCTGAAGCGTTGAGCATGTTAAAAGTTCAACGGTTGAAGTGC  
TATCGTTGAAGATGATAATCCCGCGGTGCGTACGCCGCTGGAGTGGCGTCAGGCGATATACGAAGAAAACTTCCGCGAG  
CGCGGAGTCCATTTATTCGGGATAATAATATTCAGACCTGCGTGGTCTTTCGATGCGGAGCTGGATGAAGAAAGTATC  
GCCCAATTTGA

>Cluster\_8755

ATGGTGGCAGCCGTTGCTCTGGTGTTCGTTTTTATTTTTTGCACCGTTTTGCTGTTCATCTGGTCCAGCAGAATCGCTA  
TAACACGGTACGCAACTGGAAGCATTGCTCGCTCTGTCGCGAACCCCTATCTTCAGCTATTTTGAAGGCGATATTC  
CCGAAGCGGAAGCTATTTCTGCCAGCATTAACCGGACGCGTGGTACGCGCTGCCGATGTAGTGTGCCAAACAGTTC  
CAGGCGCTGCGTAAAGTTTATTTCCAGAGCGCCGCTGCGGTAATGGTTACTCGCCTGTTTGGCTACCGGTTCAAAT  
CTCGCTGGGCGTTTACTCGCTCGAACGTCGCGCAAAACCGCAGCAATTTGCCATCTGGTACTACAGGCGGATTCCTTCC  
GTATGATAAAGTTTCGTGATGAGCACCCCTCAACGTTAGTGCACATTTACTTACTTTTGTGCTGCTTACCTGACCTGCC  
ATCAGCTGGTGCATTAACCGCTGATTTTGCATCCGTTACGCAATATTGCTCGCGAACTTAACGCCATCCAGCCAAAGGA  
GCTTGTGGTGCACCACTGGCATTACCGCTGCTGCATCAGGACGATGAAATCGTATGTTGGTGCAGCTTACAACTCA  
ACCAGCAATGCTGCAGCGCCATTAAGAAGCAGAAGCAAAATGCGATGCGCTTCCCGGTGTCGGATTTGCCGAACAAA  
CCCTTGTGATGGAGATGCTGGAGCAGGTTGTCGCGCTAAACAAACCCAGCGCTGATGATCATCACCTGTGAACCCCT  
CGGTGATACTGCGGGCGTGTGAAAGAGGCGCAACGAGAAATTTGCTGCTGACGCTGGTGGAAAACTCAAATCGGTAC  
TGTGCGCCAGTATGATCCGCGCAGATTAGCGGTTATGACTTTGCTGTCATTGCCAACGGTGTACAGGAACCGTGGCAC  
GCAATCACCTTAGGTACGCAAGTGTCTACTATCATGAGCGGACGCGCTGCCGATGAACGATTTCAACTCCGTCGCGACT  
TAGCATTTGGCTGGCGATTTCTACGGCGATCTCACGGCAACAGCTTTACAGTCCGCGCTATTTCTGCGGCAATTTACC  
CTCGCCATAAAGCAAGAATCAGATTCAGTTCTTTGATCCGACGAGATGGAAGCCGCCAGAAAGCGGTTGACGGAAGAG  
AGCGATATCCGTTAAGTACTGGAATAATCAGTTTGTGCTATTTGGTTACAGCCACAGGTCGAGATGACAGCGGTAACCT  
GGTCACTGCGGAAGTGTACTGCTATCCAGCAACCGGATGGCAGTTGGGCACTGCGGATGGCTTAACTCGATCGCATTTG  
AGTGTCTGGGCTGATGGTTTACCCTGCGTCACTGGGTGCTGGAAGAGTCTGTCGATTGCTTGGCAGCTGGCAAGAGCC  
GGCATTATGCTGCCCTTGGTGGTAAACCTCTCTGCGCTGCAACTGATGACCCGAATATGGTGGCGGATATGCTGGAAC  
GTTAACCCGCTATCCGATTCAGCCGGAACACTGATTCGGAAGTGCAGAAAGCCGACGATTTGACGACCTCATGCTG  
CGGTGGCAATCTCCGCTGCGCAATGCGGAGTTGCGGTTGGGATGATTTGCGCAATGGGCTACGCGACGCGGCTG  
CGTCACTGACGATATGAAATCGTTGCCAATCAGCTACTGAAATCGCAAAATGTTGTTGAAGGCTTCCCGGAGAG  
TAGCAGCATGATTGCTGCAATATCATGCTGGCGCAGAGCCTGAACTTACAAATGATTGCCGAAGCGCTGGAGACTGAAG  
CACAAACGCGACTGGCTGGCAAAAGCGGGCGTGGTATTGCCAGGGCTTCTTTTGTGCTGCCCACTCCCTATTGAAATC  
TTCGAAGAGATTACCTGGAAGAAAGTAG

>Cluster\_21197

ATGGAAAAACGCTGGGGATCAGCAAAAGTCAAGCGGATTCGATCGTCTTTATTATTTCCCGCGGATTCAGATCGA  
TAACATATGTTGATGTTATCCCACTATTTTGAATCGCGCTGGAATCTGGGCGACGCACTTTCTGATATGGCAGTGT  
TTGAACGCTAGAAAGTATGTCGCTGGCGCAGGACTCATAGCCGGGACGGGTAATCCATCTGCGGCAATTAATATGGTT  
CGAAAACACGCGACAGTCTGAAATTTAAAGCGGATGTCTCGCGGAAATACGGTAGCTGGAACAAGAAGCGTATGTGGC  
GGATTTACAAAGCCCACTCACGGAAGTGGTAAATCCGCGCGGAAATGTCGCGCGCTACCAGAATAACGACTCATGGC  
TGGACCGCTACAACAGTGAAGACCTTCTTCCCGCATTCGATGCTGATTTAGCGGATCTTACGACGCTTTTACGCT  
GGTTACGAAATATCAGCGCATTTGATGTTAATAGCCCACTGGGCGGTTTACCAGCTGGAATATGATGGCAGCAGCAA  
CAGTTACGATCGCGCAGCAGTACCGCACTGACTGGGCGTATAACGATAAAGAGATCAACAAGTCTTTATGACCCCTCA  
AGCAGCGGTTTGTGATACCTGGCAAGCGACACTGAATGCCACCCTCCGAAGTCAATTTGACAGTAAAAATGATGAT  
GTGATGCTTATGAAACAAGCGGATGGTATGCTGTTGGGCATACAGTAAATATGACCTGGCTTTGATTTGTTGCTCGG  
CGGTACCGGTTGGAACAGCGGCAACAGTAAAGTTGATGCTGGCTGGATTTGTTGCTGACGGTAGTTATGAAATTTGGT  
GTCAGCACAATCTAATGTTTGGTGGCAGTTACAGCAAAACAATCGTTACTTCACTTCACTGGGCCAACATCTCCCG  
GATGAAATTTGGCAGTTTCTACAACCTTAAATGGCAATTTCCACAAACCGACTGGTCCACAGAGCCTGGCGCAGGACGA  
TACCACACATATGAAATCGTTATATGCTGCCACTGCTGTCACCCCTTGGCGATCCGCTGCATCTGATCCCTCGCGCAGT  
ATACCAACTGGCGAGTTGATACGCTGACTTACAGCATGGAGAAAAACACACCAGCCTTATGCTGGACTGGTGTGTTGAC  
ATCAATGATAACTGGTCGACCTACGCCAGCTATACCTCTATTTTCCAGCGCAAAAGGATCGTACAGTTCAGGCAAAATA  
TCTGGCTCCAATCACGGTAAACAACACTCAGAGTGGGTCGAAATCGGACTGGATGAAATAGCCGCTGACCACACGCTTAG  
CCATCTCCGATATGAGCAGGATAATGTCGCTCAGTCCACGGTACACCTATCCCGGAGCAACGCGCAACCCGCTTAT  
AAAGCGGTGGATGGAACAGTCAAGGGGTTGAAATTTGAATCAACGGCGCAATACCGCAACTGGCAGCTGACGTT  
TGGCGCAACGCGCTATATGTCAGAGGATAACGAAGGAAACCGGTTAATCCTAATCTGCCAGCACCAGGATTAATGTT  
TCACCAGTATCCGTTGCTGTGATGCCAGAGTTCAGGCTGGCGGCTGGTAACTGGCAAAATCGCGTGTATACCCGAC  
ACCGTACACATATGGCACTTCCGCGCGGCAAGGAGCTACGCGCTGTTGGATCTTTCACCCGCTGACTACAGGTTGAC  
GAAAACTTCTCGTTACAGGGGATGTCAATAACCTGTTGACAAAACCTACGATACCAACGTTGGAAGTTCTATCGTCT  
ACGGCGCACCGCTAATTTACAGCATTACCGGACGATCAATTTCTGA

>Cluster\_28816

ATGTTTTATCCGGATCCTTTTACGCTCATCATATTGGCGGGGTCATGACAGGACCGAGGCGCGATGGCGCGGCGCG  
TATAGGTCAACAGACTCTGCTTTTACACACAATATCGACACTTGGGGCAGATGAGTGCACCCCGGCGATCGCGGTA  
TTGGGAAGGGACATCTGTTAAAAGAGTGGATGCACTCGCGGCTGATGGCGAAAGGATCGATCAGCGGGTATCCAG  
TTTACGATACTAAACAGCAAGGACCGCGGTTCCGCTACCCGAGCTCAGGAGATCGTGTGCTTACCTCAGCGG  
GGTACGATACGCGCTGGAGAACCACCGAACCTGATGATCTTCCAGCAGGAGTTGAAGATCTTATTGTCGAAAAAGATC  
GCGTGGTGGTGGCTTACCCAAATGGGACTGAAGTTCGCTGCAAGCTGCTGCTCACCGTTGGGAGCTTCTCGAC



CAAAACTGCCGCGAGCAGCATGAAGCGCTGAAAGCACAACCTGGAACAGGGGCGTGACCGTCTGCTGGAGATCCACTCCA  
ACGGTGGCCAAAAAGCCAGGCACTGGCAGAAAGCATTGAAGAGCAGGATGACGATACCAACCTGATCGCCTTCGCCATG  
AACCTGTTTCGATATATCGGTATCAATCAGGACGATCGCGGCGACAACATGATCGTGTGACGCGCTCCGATCATATGCT  
GGTCCCGGACTTCCCTGGCCTGTGCGAAGATGGCATCCACCATACCTTCGACCGTGAAGTGGCCTGGCGCGTGAAGAT  
CACAGTTTATACCTGGAGCATCCGCTGATCCGCAACGGCTCTGGATCTGATCCTTTCGCGGATACCGTAGCAGCAG  
ATTTCACTGTTGAAAAACAAGCGTTGCGGTTAGGTACGCTGTTGGTGAACCTGATTTATGTGGTTGAAGCCCAAGCTCC  
GAAGCAGTTGCAGCTCAACCGCTTCCTGCCACCACGCGGTACTGATGCTGTGGATAAAAAAGGCAACACCTGGCGG  
CGCAGGTAGAGTTTGAACCTTTAACCGCCAGCTAACCGCGTTAACCGTACACCGGCGAGCAAGCTGGTTAACCGCGGTG  
CAGCAGGATGTTACGCTATCCTTCAGCTGGGGGAAGCGCAGATCGAGAAATCTGCCCGTGCATTTGATGTCAGCGCG  
TAACGAAGCCGACGAAAACTGTCTGCCGAGCTGTCTCGTCTGGAAGCGCTGCGTGCAGTTAACCCGAACATTCGTGACG  
ACGAACTGACCGCTATTGAGAGCAACCGTCAGCAGGTAATGGAAGATCTGGATCAGGCAGGCTGGCGTCTGGATGCCCTG  
CGTTTGATCGTTGTGACGCATCAGTAA

>Cluster\_60620

ATGAGTGCATAGAAAATTTTCGACGCCCATACGCCATGATGCAGCAGTATCTCAGGCTGAAAGCCAGCATCCCGAGAT  
CCTGCTGTTTACCGGATGGGTGATTTTATGAACTGTTTATGACGACGCAAAACCGCGCTGCCAACCTGCTGGATATTT  
CACTGACCAACCGCGTCTCGCGGGAGAGCCGATCCCGATGGCGGGGATTCCTACCATCGCGTGGAAAAATATCT  
GCCAAACTCGTGAATCAGGAGAGTCCGTTGCCATCTGCCAACAAATTTGGCGATCCGCGGACAGCAACCGGCTCCGTTGA  
GCGCAAAGTTGTGCGTATCGTTACGCCAGGCACCATCAGCGATGAAGCCCTGTTGCAGGAGCGTCAGGACACCTGCTGG  
CGGCTATCTGGCAGGACAGCAAGGTTTTCGGCTACGCGACGCTGGATAACAGTTCCGCGGCTTTTCGCTGAGCGAACCG  
GCTGACCGGAAACGATGGCGGAGAACCTGCAACGCATTAATCTGCGGAATGCTGTATGCAGAAGATTTTGTGAAAT  
GTCGTTAATTTGAAGCCGCTGCGCGCTGCGCGCTGCGCGCTGTTGGGAGTTTGAATTCGACACCGCGCCAGCAGTTGA  
ATCTGCAATTTGGGACCCGCGATCTGGTCCGTTTGGCGTCGAGAACCGCGCGCGGACTTTGTGCTGCCGTTGTCTG  
TTGAGTATGCGAAAGATACCCAACGTACGACTCTGCCCATATTCGTTCCATCACCATGGAACGTGACGAGGACAGCAT  
CATTTGGATGCCCGGACGCTGCGCAGTTAGAACCTGTCATAGTGCACCGGATCCGCAACCTGGCGGGTGGTGGGAAAAATCGTCTG  
TGCTGACTGCACCGTACGCGGATGGGCGAGCCGATGCTGAAACGCTGGCTGCATATGCCAGTGGCGGATACCCCGGTG  
TTGCTTGAGCGCCAGCAAACTATTGGCGCATTCGAGGATTTACCGCCGGGCTACAGCCGGTACTGCGTCAAGTCCGCGA  
CCTGGAACGATTTCTGGCAGCTGCGCTTACGAACTGCTGCCACCGGATCTGGCCGATGCGCCACGCTTTCCAGC  
AATGCGCGAGCTGCGTGGCAGTTAGAACCTGTCATAGTGCACCGGATCCGCAACCTGGCGGGTGGTGGGAAAAATCGTCTG  
GCCGAGCTGCGCGATCTGCTGGAGCGAGCAATCATCGACACACCGCGGTGCTGGTACGCGACGGTGGTGTATTCGCATC  
GGGTATAACGAAGAGCTGGATGAGTGGCGCGCTGGCTGACGGCGCGACCGATTATCTGGAGCGTCTGGAAGTCCGCG  
AGCGTGAACGTACCGGCTGGACAGCTGAAAGTTGGCTTAAATGCGGTGACGGCTACTACATTTCAATCAGCCGTTGGG  
CAAAGCCATCTGGCACCATCAACTACATGCTGCGCAGACGCTGAAAAACCGCGAGCGCTACATCTTCAGAGCTAAA  
AGAGTACGAAGATAAAGTTCTCACCTCAAAGGCAAAGCACTGGCACTGGAAAAACAGCTTTATGAAGAGCTGTTGACCC  
TGCTGTTGCCGATCTGGAAAGCGTTGCAACAGAGCGGAGCGCGCTGGCGGAACTCGACGTGCTGGTTAACCTGGCGGAA  
CGGGCTATACCTGAACTACCTGCCGACCTTCAATGATAAACCGGGCATTCGCATTACCGAAGGTCGCCATCCGGT  
AGTTGAACAACTACTGAATGAGCCATTTATCGCAACCGCTGAATCTGTCGCGCAGCGCGGATGTTGATCATCACCG  
GTCCGAACATGGCGGTAAGTACCTATATGCCCGAGCCGACTGATGCGCTGATGGCTACATCGCGAGCTATGTA  
CCGGCACAAAAAGTTCGAGATGGACCTATCGATCGCATCTTTACCGCGTAGGCGCGGAGATGACCTGGCGTCCGGGG  
CTCAACCTTATGTTGGAGATGACTGAAACCGCAATATTTTACATAACGCCACCGAAATACAGTCTGGTGTAAATGGATG  
AGATCGGGGCTGGAACCTCACCTACGATGGTCTGTGCTGTTGGCGTGGCGGCGGAAAAATCTGGCGAAATAAGATTAAG  
GCATTGACGTTATTTGCTACCCACTATTTTCGAGCTGACCCAGTTACCGGAGAAAAATGGAAGGCGTCCGTTAACGTGCATCT  
CGATGCACTGGAGCAGCGGACACCATTGCTTTATGACAGCGTGCAGGATGGCGCGGCGAGCAAAAGCTACCGCCGTTG  
CGGTTGACGCTGCGCAGCGTGGCAAAAGAGGTTATTAAGCGCGCAGGCAAAAGCTGCGTGAAGAGCAATTTGCG  
CCGAACCGCGCGTACGCAAGTGGATGGTACGCAATGTCTTTGCTGTCAGTACCAGAAAGAACTTCGCTGCGGTCGA  
AGCTCTGGAATACTTTGATCCGATTCACCTACCCCGCTCAGCGCTGGAGTGGATTTATCGCTTGAAGAGCTGGTGT  
AA

>Cluster\_11019

ATGGTACGATTTGTGTTGACGGTGAATAAAGACTCATAAAATACCAGCTGGACGCTGTTGGCTGGAAATGACGACAG  
AGAGGTTATGCTGACCTGTCATTTTCGCGAGCGGAGAAAAATATACTCGTCCGCTTTCTGTATGTCAGATAACGCCAACCTG  
TAAATTTGCGAAATGTTTTCCTCGAAAGGAAAGGAAACGCTGTAACATCCCGGCTGAACTGGTTATTTATATATGTTGAT  
AAATATGCTGCTGTTTATTTACCGGAGGTTGAAACGCTCATCATGAAAAACGACCGCTTCACTTTCAACAGATGTTTC  
AGCATTACAGAGCATGCGGTGTTAATTACTTGTGTAGGGTGGCTAATGAACGATTTTTTTATGCCCCGTTGTAATAACA  
GAAATATCGATGAGAATATCCTTAGGCAGATAAAGAAAATAGTTCCCTCATCCGGATACCGCTTGCATGCATACCTGTTCA  
GGACAGAGTAAAAACAGTATTCGCCATGGGTTTGGTTTTCCGTTTTGGTCTTAATGAAAGTCAAGTGTGCTGGCTGTCGA  
ACGGCATTTTCTCACAGATTTCAAGTTATGAAAGGTTTAAAGCGCAGGTAACAGGTAACAGACTATACCTCAATGTTGTTG  
CTAATATATTAATTCAGAAATAAACAGTGGCAATTTGTCATAATAAATCACTGCTGTCAGTAATGTTTATGAAAGATG  
GACAAACAGCAACTGGGATATGTTGATGGCAGCTGGGAGTACGGAGAACAGGCAACAGTTTTTTTCAACGTCGATTTTC  
GCTTCTGAGGAAGTCTTACCTGACTCACCGTTCGCAATGAGTATGATGACTTCAACAAGTAAAAAACACCTGA  
ATGCCATTAACCGAGTTCGTTTAAAGCAGAAATTAATGAGCTGAATATTGAGTATAAATACCTGCAGCAATGGCAG  
AGTCAGAACTTCGACCGGAGGAGCTTTTTTCTCACAAATACCGATTTTCCTCACAAAAACAACCGACTGATGGCTTA  
TATTCATTTACCTTCTGACAGGCGGATTTGATTCAGAAACAGAATGATTTGTTGTTAAACTTCATGACTGAAAGTCA  
AACCATTTGATGATTCGGGAGAGAAAGCTGGCGCTATTTACTTCTTTCAGCTTCTTATATGAAAAAATATCCGGGAA  
AAACAAATTTCTCTGAATGAATATGAGGAAGTATTTAAAAAATCTGATTTTAAATTTTACTGGGCGCCTGACATCATG  
GTCATGCTTTATTTAAAGCAACATCTGCGAAGAAATGTTTCAACAAGAGTTTCAATTCGCGCAGAGACATACAGGGATG  
AATTTGACCGTTTTTAAAGCGTTTTCCGATTTATGGTAGCAGTACGCATTCGATTTAACTCTATCGGCAAGGGGGCC  
CTTCTTATGATGTTATTTATGATGAAGCTTCGACGAGGATAATGTTTCCGGGCTTGGGACTGGGATGTGCCGTA  
TGTAATCGTTGTAGGGATCGTAAGCAACTTCCACATGTTCTGTATTACTCCGAAACAGCCATCTCCACCGGCAGAA  
ACTATAATGTTGAGAAATATAGTCTACTTGAATTCGTTTGTATGTTGTTTCAGGAACATGGTGCAGTAACCCCTCTTAA  
GAGCATTATCGTTGCTCATCTAAATCAATTTGTAATAAGCAGTTTTATGATAATGCTCTGATACCGTTAACGGT  
TGATTCGCTGAAGCCCTTATCTGTGCTCAGCGCAAAAGGAAACCATACCCGCTAATTTTTTCAATCTCAGGAGC  
TTGAATCTCTGGAAGGTCATTTACGGAATGAAGAAAGTAGCAGGGATACATTTGCCCATATAATGCACAGGTTAATCTG  
GCTGAAAAAGTGCCTGCTGATTTTGTGAAATCGACCGTGCATAAATTTACGGGACGGGAGTGCATGAAATTTGTGTT  
TTCACCTGTCTGGATAAGAAAGCAGCAGCAGCAGCAGTCCGGAACATCGGTTTTGTTGATAATCTCTGAACGTTGTAATG  
TCGCTGTTTTCAAGGGCCGAAATAAATTTACGCTGGTGGTGAATGATGATTTTGAACGCCACCTGACATATTTGCG  
GCGTGTATTGTTACATCAATACTACGCTGATGACGGAGAGATTTTCGAGAGCCCGTCATATCAGCATTTGATTTGCT  
GTACAGTGAATGACAAATCACTGGAACGACTGAATAGTAGATTGAAATTTCAATGATTCACACTTTAAGTCAAGAACAGA  
TTGTTGCCCTGCTGTTGGGGATATCCTGTGCGAGGATGATTCGGAGTATGATGTTTCAATTCACAAATAGCCGTTA  
CAGTTGGTGTGCTGGAGCGGGGATTTTACACACCGTGAACAGTTATTCATGCGTAACCGGCCAGTTGTGACTTTGT  
TGTTTACTATAAGGTCGGGAAGACTCCATTAGGGTTATGAAAGTGGATGGAGTTATCATCTGACAGTGTTCAGGCTG

AACGTGATGAACCTAAAAACAGTATACTGAAGAAATGCGGCCCTGCCATTGCTAAGATTACGTACTATAGACAGTGATATA  
GAAGGGAAGTTGGGAGCGTTTCTGTACAGCCTGACAGGCTAA  
>Cluster\_12479  
ATGGACACGCTGACACAAAAGTTAACCGTGCTCATTTGCTGACTGGAGCTATTAGTGGCTCTGTTACGGTTGATTGATTT  
GTTGAAGTAA  
>Cluster\_25966  
ATGGCATATAACAAATTATTTACGAGAGTCGATGAAATAAAATGTGATAAAAGTACGATACTAGGCTTTCACCAAGGGAA  
TGTTTACTGATGAAACAGTAA  
>Cluster\_26024  
ATGGGAACCACCACCATGGGGTTAAGCTGGACGACGCGGAGCGGTGAGCGTATTAAGTCTGCCGCGACACGTATCGATCG  
CACACCACACTGGTTAATAAACAGGCGATTTTTCTTATCTTGAACAACAGCGATACTCTCCCGGAGCTAC  
CTGCGCTGCTTTCGGCGGCAATGAGAGCGATGAAGCACCAGCTCCGGCAGAGGAACACACCAGCCTTTCCTCGAC  
TTTTGCCGAGCAAAATATTGCCCGAGTCGGTTCCCGCGCCGCAATCACCGCCCTATCGCCGCCGAAACCGAAGCGGT  
TTCTATGCTGCTGGAACAAGCTCGCTGCCGACGCGTAGCTGAACAGGCGCACAACTGGCGTATCAACTGGCCGATA  
AATGCGTAAATCAAAAAACGCCAGTGGTTCGCGCAGGTATGGTTCAGGGGTATTGTCAGGAGTTCGTTGTCATCGCAG  
GAAGCGTGGCGCTGATGCTGCTGGCGAAGCGTTGTTGCGTATTTCCGACAAAGCCACCCGTCAGCGGTAAATTCGCGA  
CAAAATCAGTAACTGGCAACTGGCAGTGCACATTTGGTGTAGCCGCTACTGTTGTTAATGCCGCCACTGGGGGCTGC  
TGTTTACTGGCAAACTGGTTCCACCATAACGAAGCCATCTCTCCGCTCGCTGAACCGCATTTATCGGTAAAAGCGGT  
GAACCGCTGATCCGCAAAAGTGTGGATAAGCGGATGCGCCTGATGGGCGAGCAGTTCGTCACGGGTGAAACCATTTGCGGA  
AGCTTAGCCAATGCGCAAGCTGGAAGAGAAAGTTTCCGTTACTCTTACGATATGCTGGGCGAAGCCGCTGACCG  
CCGACAGACAGCGGCTATATGTTTCTATCAGCAGCGATTACGCGCATTTGGTAAAGCGTCCAATGGTCTGGCATC  
TATGAAGGTCGGGCTTTCAATCAACTGTCGGCGCTGCATCCGCTTATAGCCGCGCCAGTATGACCGGTAATGGA  
AGAGCTTTTACCAGGCTGAAATCACTACCCCTGCTGGCGCTCAGTACGATATTTGGTATTAACATCGATGCCGAAGAGG  
CCGATCCGCTGGAGATCTCCCTCGATCTGCTGGAATACTGTTTCGAGCCGAACTGGCAGGTGGAACCGTATCGGT  
TTTGTATTACAGGCTTATCAAAAACGCTGCCACTGGTATTGATTACCTGATTGATCTGCCACCCGAGCGCTGCCG  
TCTGATGATTCGCTGGTAAAGCGCGTACTGGGATAGTGAATCAAGCGTGCACAGATGGACGGCTTGAAGGTTATC  
CGTTTTATACCAGGCTGATACCGAGCTTTCTTATCTTGCCTGTGCGAAAAAACTGCTGGCGGTGCCGAATTTAATC  
TACCOCGCTGGCAGCAGCAACCGCCATACGCTGGCGGCAATTTATCAACTGGCGGTCAAAACTACTACCCGCTCA  
GTACGAGTTCAGTGCCTGCATGGTATGGGCGAACCACGTATGAGCAGGTACCCGGGAAAGTGGCGACGGCAAACTTA  
ACCGTCCGCTGCTATTTATGCTCCGCTCGGTACACATGAAACGCTGCTGGCGTATCTGGTGCGCCGCTGCTGGAAAA  
GGTGTAAACACCTCGTTTGTAAACCGTATTGCCGACACCTTTGGCACTGGATGAACGGTGGTAAAGTGGCGGTAATC  
TGTAAGAAAACTGGCGCAACAGGAGGGCAAACTGGATTACCGCATCCGAAAAATCCCTGCCGCGCATCTTTACGGTC  
ACGGGCGGCAAACTCGGCAAGGCTGGATCTCGCTAACGAACACCGCTGCGCTCGCTCTTTCAGCCCTGCTCAATAGT  
GCACTGCAAAAAATGGCAGTCTTCCCAATGCTGGAACAACCGGTAGCGGCAAGTGGAGATGTCGCCGTTATTAACCCCTC  
GGAACCGAAAGATATGTGGGCTATGTGCGTGAAGCCAGCCGCTGAAGTAGAACAGGCGCTGGAAGTGGCGGTTAATC  
ACCGCCCAATCTGTTTGGCCACTCTCCGCTGAAACGCGCGGCGATTTTGCATCGCGCTGCCGCTGCTAATGGAAGCCAG  
ATGCAGAACTGATTTGGTATTTCTGGTGCCTGAAGCCGAAAAACCTTCAGTAACGCCATTTGCCAAGTGGCGAAGCGGT  
CGATTTTCTCCACTACTATGCGCGACAGGTGCGGGATGATTTTCGCTAACGAAACCCACCGTCCATTAGGGCTGTTGGTAT  
GTATCAGTCCGTTGAACTTCCCGTGGCTATTTTACCCGGCAGATCGCTGCCCATGCGGCACTGGCGGAGTAAACCGTGC  
GCAAAACCGGAGCAAAACCGCCGCTGATTTGCCGCGAAGGATCGCCATTTTGTGGAAGCGGGTGTACCCGAGCGGT  
GGTGAATTTGCTGCCAGGTGGGGTGAACCGTGGGCGGCAACTGACGGGTGATGATCGCTGCCGCGGGTGTATGTTT  
CCGGTTCAACCGAAGTCCGCTACGTTACTGCAGCGCAATATCGCCAGCCGCTGGACGCTCAGGGTCCGCCATTTCCGCTC  
ATCCGTGAAACCGGCGGATGAAACCGGATGAAACCGGATGTTGTCGATTCTCAGCACTGCGAAGCAAGTGTAAATGACTGCTG  
CTCGGCGTTTGCAGTGCAGGTGAGCGTGTTCGGCACTGCGCGTGTGCTGCAAGATGAGATTGCCGACCAACCGC  
TGAAAATGCTGCCGCGGCAATGGCCGAATGCCGGATGGGTAATCCGGGTGCGCTGACACCGATATCGGTCCGGTGAAT  
GATAGCGAAGCGAAAGCAATATCGAGCGTCAATTCAGACCATGCGTAGTAAAGGCCGTCAGGTGTTCCAGGCGGTGCC  
GGAAAACCGGAGCAAAACCGCCGCTGAAATGGCAAGCGGCACTTTTGTGCTGCCAGCTGATCGAACTGGATGACTTTGCCG  
AATTACAAAAGAGGCTTTTGGTCCGGTGTGCATGTGGTGGCTTACAACCGTAAACAGCTCCAGAGCTGATCGAGCAG  
ATTAACGCTTCCGCTATGGTCTGACGCTTGGCGTTTACATCGCTATTGATGAAACCATTTGCCAGGTCACTGGCTCGCC  
CCAGGTCCGTAATCTGTACGTTAACCGTAAATGGTGGGCGCGGTGGTTGGGGTGCAACCGTTCCGGCGGCAAGGGGTGT  
CCGCTACCGGCGGAAAGCAGGCGGTCCGCTCTATCTTACCCTGCTGCGCAATCGCCCGGAAAGTCCGCTGCTG  
ACGCTCGCGGCTCAGGATGCGGAGTATCCGGTGCATGCGCAGTTGAAAGCCGATTTGACTCAGCCGCTAAATGCACTGCG  
GGAATGGGCGGCAACCGTCCAGAAATGTCAGGCGTATGATACGCAATATGGCGAGTTGGCGCAGGCAACACAACGAT  
TGTTGCCAGGCGGACGGTGAACGCAACACTGGACGCTGCTGCCGCTGAGCGGCTGTGTGATTTCCGGATGATGAA  
CAGGATCCGCTGACTGCTAGCTCGCCGCTGCTGGCGTGGTGGCAGGTTGCTGGCCGATGATGCGCTGCTGCA  
GTTAGTGAAGCATTTGCCATCGGAGTACGCAACGATTTCAACTGGCGAAAGCGGAAATATAACCGCTCAACCATTTG  
ATGCGGTGATTTCCACGGTGTATCGGATCAGCTTTCGCGCATTTGTTGTAAGCCGTTGCCGCGGGGATGGTGAATTTGTT  
TCGGTGCAGGTTTTCGCGTGGCGAAGCAATATCTTCTGGAACCGCTGTATATCGAGCGTTCGCTGAGTGTGAATAC  
CGCTGCTGCTGGCGGTAACGCCAGTTAATGACGATCGGTTAA  
>Cluster\_39635  
TTGAGCCAGGAATACACTGAAGACAAAGAAGTACATTGACAAAGTTAAGTAGTGGCCGCGCCTTCTGGAGGCGTTGCT  
GATCCTTATGTCTCTTTTGGCGTCTGGTTGATGGCTGCCTACTAAGCTTTAACCTTCGGACCCAGCTGGTCGCAAA  
CGGCTGGCATGAACCTATCCATAATTTAGGTGGGATGCCCGTGGTGGTTGGCAGATACGCTGTTCTTTATTTTGGC  
GTGATGGCTTACACCATTCCCGTCAATATGTCGGCGGTTGTTGGTTTGCCTGGCGTCACTAGTCCAGCGACGAATACAT  
TGATTTATTTTGGCGTTTCGCTACGCATCATTTGGCGTTTTGGCGCTCATCTTACCTCCTGTGGTCTGGCGGCAATCAACG  
CTGACGATATCTGGTATTTTGGCTCCGCTGGCGTGGCGTACTTGGCAGCTTACTAAGCACTACGCTACAACTGCTACACAGT  
AGCGGGGAACTATTGGCTGCTCTGCGTTTGGGCGAGCGGCTGACGCTGTTTACCAGGTTGGTTCATGGGTGACCATTGC  
TGAAAACCTGGCGGCTGGATTTAAATATTCTTACCTTCGCCAGTAACTGATCCCGTCCGATGATACCTGGGTGATG  
AAGATGAGTATGAAGCAGCAGGAGATGAAGATGAAATACGGCAACAGCATGAATCACGCCGTCGCCGCTATCTCT  
CGCGCGGCTAGCGCTCGTAAACGGTTGGCGGAAATTTCAATTAATCCGATGGGCGGCAAAACAGATGCTGGCTGTT  
CTCCGGTAAGCGGATGGATGATGAAGAAGAGATTACCTACACTGCACGCGGTGTTGGTTGCCGACCCGACGACGCTCTGT  
TTTCCGGCAATCGTGAACCGCAGCAGAAATATGACGAATACGATCCATTTAATTAACCGTGGCGCAATTTACCGAACCTGTT  
GCTGTAGCAGTCTGCTACCACGGCGACAAAGCTGGGCTGCACCGGTTGAACCTGTGACTCAGACGCCCGCAGTTGCT  
CTCTGTTGATGTTTCCACTACGCAACCTACAGTAGCTGGCAGCTGTACCGGGGCGGCAAAACGGGAGAACCGGTTATTG  
CACCTGCACCGGAAGGTTACCCACAGCAGCGTATTATGCGCTGCAGTGAACAGCTGTGCAACAACTTACTACGCT  
CCTGCGCGGAAACAGTCTGCGCAACAGCGTATTACGCCCTTGCAGCAACAAACCGGTTGGCAGGTAACCGCTGGCAAGC  
GAAAGCAGCAAACTCCACTTTTGGCTCAGAGCTACATACAGACGAGCAGCAAACTTATCAGCAGCAGCTGCTCAGGAGC  
CGTTGTACCAACAGCGCAACCGGTTGAACAGCAGCCTGTTGTTGAGCGTGAACCCGTTGTAGAACAGACAAAACCGCG  
CGTCCGCGCTTACTATTTTGAAGAAGTGAAGAGAAGCGTGGCCGTAACGCTGACAACTTGGCGCTGGTATCAACC

GATTCGAGAACCGGTTAAAGAACCGGAACCGATCAAACTCTCGCTAAAAGCACCTTCTGTTGCAGCAGTACCTCCAGTGG  
AAGCCGCTGCCGCGTTTTCTCCGCTGGCATCTGGCGTGAAAAAGCGACACTGGCGACGGGGGCTGCCCAACCGTTGCC  
GCGCCAGTCTTCAGTCTGGCAAATAGCAGTGGACCGCTCCGAGGTCAAAGAGGGGATGGCCCGCAGTTGCCACGACC  
GAAACGTAATCCGCTGCCAACTCGTCTGAACTGGCGTCTTACGGTATTAAGCTGCCCTCACAGCGTGGCGGACAGAAGAA  
AAGCCCGTGAAGCCAGGTAATCAGTACGATTCTGGCGTACAGTACAACGATGATGAAATCGATGCGGATGCAGCAGGAT  
GAACTGGCACGTGATTCGCCCCAGACGACGAGCAACGCTATGGCGAACAGTATCAACATGATGTACCCGTGAACAGAGA  
AGATGCAGATGCTGGCGAGAGGAGAACTGGCTCGTCAAGTTTCTCAAACCTAACAAACAGCTTATTCCGGGCAACAA  
CGGCTGGGGGCAATCCGTTCTCGCTGGATGATTTTGAATTTTCGCCAATGAAAGCGTTGCTGGATGATGGTCCACACGAA  
CCGCTGTTTACGCCAATTTGAACTGTACAGCAGCCGCAACACCGGTAGCACCGCAGCAGCAATATCAGCAGCCACAACAA  
ACAACCGGTTGCACCGCAGCCGAGTATCAGCAGCCGCAACACAGTTGCGCCACAGCCGCAATATCAACAGCCGCAAC  
AGCCAGTTGCGCCACAACCGCAATATCAACAGCCGCAACACCGGTAGCACCGCAGCAGCAATATCAGCAGCCACAACAA  
CCGGTTGCACGACGAGTATCAGCAGCCACAACAGCCGTTACACAGCAGCCGAGTATCAGCAGCCGCAACAGCC  
GGTTGTACACAGCCGAGGATACCCCTGCTTCACTCCGTTGATGCGTAAATGGCGACAGCCGTTCCGTGATGATAAACCGCA  
CGACGCCACTGCCCTTCTCGGATTTGCTGACACCTCCGCGAGCGAAGTGGAGCCGTTAGATACCTTTGCGCTTGACAA  
ATGGCGCGCTGGTGAAGCGCTGCTGGCTGATTTCCGTTATTAAGCCGATGTCGTCAATATCTCCGGGGCAGTTAT  
CACTCGCTTGAATGAACTGGCACCGGGCGTAAAAGCGCGCAGTTTCTAACTTGTACGTCAGTTCGCCGTTGCCGTTTCC  
TTTTGACCGTGGCGGTGCTGCTGTTGAAGTTATTTCCGCGCAAAACCTATGATAGTCTGGAGTTACCGAATAAAAAACGA  
CAAACCGTTTATCTGCGGCAAGTTTGGATAACGCCAAATCCGCGATAATCCGTCGCCATTAACCGTGGTGTGGGTAA  
AGATATCGCCGTTGAGCCGTTGGTGGCAGTCTGGCGAAAATGGCGCACTTGTGGTTGCGGGGACTACCGGTTCCGGTA  
AGTCTGTCGGTGAACCGGATGATCTGAGCATGCTTTATAAAGCGCAGCAGAAGTGTGCGTTTCAATCATGATCGAC  
CCGAAAATCTGGAGCTTTCCGTTTATGAAGGATCCCGCATCTGTTAACGGAAGTCTACTGATATGAAAGATGCCCG  
CAACGCGCTGCGTGGTGTGTTAACGAGATGGAGCGCTGTTATAAAGTATGTCGCGTGGGTGTGCGTAACTGCGCG  
GTTATAACGAAAAAATGCTGAAGCCGATCGCATGATGCTGGTCCGATACAGACCCGACTGGAAGCCGGGTGACAGTATG  
GATGCGCAGCATCCGTTGCTGAAAAAGAACCGTACATGCTGGTGGTGGTGGAGCAATTTGCCGACTGATGATGAGCGGT  
AGGTAAAAAGTGAAGAGCTTATAGCAGCTCTGGCGAAAAAGCCGTCGCGGGTATCCACCTCGTACTGGCAACGC  
AGGCTCCATCGGTTGATGTTATTTACTGGTCTGATTAAGCGAATATCCGACCCGATCGCCTTACCCTATCCAGTAAG  
ATTGACTCAGTACCATTCTGATCAGGCTGGTGGGATCACTGCTGGGATGGGGATATGCTCTACTCTGGGCGGAA  
CTCCAGTTGCGCGTACGTTGCTCATGGTCTTTGTTCCGATCAGGAAGTTTATCCGTTGGTGCAGGATGATGAGCGG  
GTGGTGGCCACAGTATGTTGATGGCATCACTCCGACAGTGAAGCGAAGGTGGCGTGGCGGTTTCGATGGCGCTGAA  
GAACTGGATCCGTTGTTCCGATCAGCGGTCAGTCTTGTCACTGAAAAACGCAAGCGTCAATTTCTGGCGTACAGCGTCA  
GTTCCGCAATGGTTATAACCGTGCAGCGGATTTATCGAACAGATGGAAGCGCAGGGGATGTCAGCGAACAGGGGCACA  
ACGGTAATCGTGAAGTGTGGCCACCCCATTTGACTAA

>Cluster\_40343

ATGACTACGCAAAATAACAATACTTAATAAACAGCGGATAATCTTCTTATTTATATAGAGAAATATAAAGCAAAATTTGA  
AGAGCGCTTGTGCTTACAATGCTGTTGGCAATGGAGTGGAAATGCCGTTCTGTCATTTTGGTGAGAAAGGTGTTG  
CATGGCTTTAAGAAACAAAAGATCGCGGCTTAAAGTGGAGCAAGTGTCTAGTCTGTTAAGGGGCTCTCACAAATGAA  
ATTTCTTCGGAATTTGAGATTTTATGCGAGCTTATCACATGCATCTGGTGTGATCACTGGCGGATTACCATCAGGTT  
TACACTAGACAAACCAATTAAGGTCATGAAGCGCTGGTATGGGAAATGGTAAATAAACAGGTCAAACGCAATCCAATG  
ATCTGATTTCCGATATTTATCATGCAGCAATGGAGCGGCATCAGAAATCTGACAGTCTGATAATGTCAGTACTAT  
TGCGATATGTCAGTAAAGCCATTTGCTTTACTAGCTCAATATGATCTTTTCTTAAAGTAAATGAAAGTAAAGTAA  
TCCCTATCGAAATGGTTTAAACAGCACTAAAGAAAGAAAGAAAGCGCAAGAGCCACCCTGATCAAACTGATGATGAA  
GACTCATATCAATCCGTCATTTATGTTGTTATTTGATTTGATCGCTTTAGCTGAGAAATAGTTATCAGCGTATCTTTT  
AAGATTTTCTTACTACAAATTTATTTGCGGTTCCAGGAAATAATGTTGCTGAAAATGACTTCTTTGGTTAAGG  
AGAAATTACGGATAAAGATAAACGTCAGCAGCAATAGATCAAGACTGGCCTACTTACAGATTGGGATTTGATATCTTG  
GTGCAAAAAGGCTGGATGGCGGATCCATGGCTGGCGCAAGCACTTATCTGTCGTTGAGATGATTTATAAATCTGTT  
CAAGAATTGACCGTGGGTTCCGTAACAGATTCAGGGCTTCAGAGATTTCAATTTCACTAATATGCTCCAGGTAAGAT  
CGCTGATTTTCCGATGAAATGGATTTGAGCAAAATTTGCTTTGAAAGACATCATGTTTGTGGTTCTGGTGGCTCAGGAA  
ATCTTGGAAAGATATTCGGAATTCATTTGCGAATTTAGCGGACATAAACCTAAGGTAATACCCGTTCAATAACAGAAG  
AACAGCTGCTACTTCACTAAAGAACAGTGAATGATTTATGCTATCAGCGTTACGCTCAAGCAAAAACCTTTGAGCCTGG  
GCACCAGTGCATAATTTGAGCAAAAACAAATGGTACTGGGAACACTTCAATTTAAGACCTGATGTTTATCATGCTCCG  
AAGTGCATTTTGGAAATTTGTAAGATTTTGTCTTATGCAACATATTTTCCACTTGTGAAAACCTCAATGAAAGTGG  
TTAGCGGAAACACAAAACCGAAATCTATCTTTGATCACTTTAATCTTTTGAAGATGATGGGTTCCGTTGCTATTATCAA  
AAAGCATGTACCGAGACATAACATAAATACATTTTGGCAATCGCTGGAGTGACGGATCATATTCAGGCCATCTAATGG  
GGCGTGTGATATCACCCGAAATAAACAATATCAGCATCAGGCCAATCACAGTCTTATCAGACCGCTTCTCAGCAAT  
AATATGCTGAAAAGGCTTATGATGAGAAACAATCAAGCTTTCAGAAAGAGTTTCCAGTATCACTCTTTACTAGCAGCA  
GAAGCCCTGCATTCGGTCAACCTACCTCCCCAGAAGTGGGTTAGCCGCAAGATAGCAGCTCTATCAGGTTCTTCCA  
AGACGGTAAAAACACAGGTTGTTGAAACGTTAAATTAACAACCTCAATGATATAAATCCTGAGCTCAATACCGAGCAT  
AATCTGAAGCAGAACTGACAGCTTTTGGTGAACAACGCTGAGGTTGTTGACTATAAATGACTGACCAATGTTCCGATAA  
GTTTCTGCCCTGAACATAAACGTCACATGACAAGTTAGTACAACAAAATTTGGCTGATAAGGCGAAATCACTGCTTCAAC  
GCCATGCAAACTGCATCTCTTTGGATTTGGAGCTGTACGAGAGATGTAGCTCGCTGGGTTGCTCTATGCGCTTAAAG  
TGTGAGTCTGGTCTACCTTGTGGCTACTTCACTCTTACAGGTCGCTTTGGCGAAGCGGAAAGCATCAGACGTTTATC  
AAACAAGCGAAAAGAAATCAATTAACCTCGTAAGTTGACTATAGTGAATCCAGGTTTATGCTGGCTTTAAAGAACAGG  
AAGAAGCTCTCATCGTCTGAGGCTCTGAAGCTGATGCTATAAAGGTTCAAGGCGAGAAAAAACTGGTTTCCCTGTTT  
TCTGATGATCTGAACAACCCATTATATAAAGTTATTGAGCGAATTAATAACAATGCTAATTTGGCAAAACCCAAAAAC  
CCTAGCTGATCTTTCTTATTGAACAGAAACGATAGAGAGAAATAAATGGCTAA

>Cluster\_54407

ATGGAACAATCGCAATTTCCCTGCCAGACAATTTCACTCGCTACGTTCTTTGCGGCTTTTGTATTGGCATCACGCC  
TGTGGCTCAGGCACTCGCCGCGAAGGGCAAACTAACCGGATGACACGCTGGTTGTGCAAGCATCAACGCTTCGCTTT  
ATGCGCCACAACAATTCGCCGATCCGAAATCTTCGCTCCGTTAGCGGATACCCGCAAGTACGCGTAATTTCTGAA  
CAAGTATTAAGAGATCAGGGCGCAACCAACTCTCAGCAGCGCTCAAAAACCTCCCGCGTGGGTGCTTTTGGCGG  
TGAGAAGGTAATCCACCCTGGCGACGCCATTTATATGCGTGGTGGCGATACCTCTAACAGTATTTATATTGATGGCA  
TTCCGCGATATCGGACGCTCTCGCGGACACCTTCAATACCGAGCAGGTCGAAGTATTAAGGGCGTCCGCGCAGCC  
TACGGGCGCAGCGCACCGCAGCTCGATCAATATGATCAGCAAGCAGCGCAATGATTCGGCATTCAGCCTTCGCCCT  
CAGTATTTGCGAGCGCTGTTCCGCGCGCACGCTGAGCTCAATCAGGTCATTTGGTATACCAACCGCGGCTCCCTGA  
ATGTAATGGGCAAAAACGACGATGCGGACGCGCAAAAGTCAAAAATGAGCGTTACGGCGTCCGCCCTTCTGTCGCT  
TTTGGCTTTGGTACAGCGAATCGTTTGTATCTTAATTAATCTGATGTCACCCAGCACAACCGCCAGCGCGCATTC  
GACCATCGGTTGGCGGCTATTCTGCCCATCTGCGGGAACGGCGGCTGAATCATTTCCGAAAAGTTGATACCTATA  
ACTTTTACGGCACGGATTCCGATACGACGATTCGACCCAGCAGCCACCCATCGCTTTTGGACGACGATCAACGAT  
AACACCACATTCGCAATACTACCGGTTGGTGGCGGTAAGCAGGATTAACCTGATGACGGCGATTATGGGCGGGGCTC

GAATATTACTCAGCCACCAGCGATGTGAATAGCTGGACCTGGTCACGCACGGGAATACCAAAGATGTGAGTAATAAAA  
TTCTCACCAACCAGACCAACCTGACCTCGACGTTCTATACCGGTTCTATCGGTCATGATGTCAGTACCGCGTGGAAATTT  
ACCGTGAAACGCAGACTAAGTACGGCGTAAATCCGGTGACGTTACCGCGGTAATAATTTATCATCTGACAGCAGCAT  
TCATCCCGCGCGCTGACCGCGCAACGGCGCAACCGCAATGGTCAGACGGATACCTTCGCAATTTACGGCTTTGATACCG  
TGCAAATCACCCGTGATTTGAGCTGAAACGGCGGGATCCGTCTGGATAATATACATGAAATGACAGTACCGCGCGC  
TGCGCGCGCAGCGGACGGTGCATCACTGCCCAACTGGTGTGGCAAAAAGTTCTCCGGTACCACCGTCCGACCGC  
CAAGTCGGGCAATCTGATGAACGGAAAGCCGGGGCGTGTATCACTGACGGAAAACGGCAATGTCATATTAATACTATG  
CCGTTTCCAGCAGCCTCCGGGGGCAACAACCTTCGCCCTGGCGAGTCTGGCAGGTAACAGTCCAAACCGCACCAGT  
TTTAAACCGCAAAAAGCCAAACACAGCGAGATTGGCAACCAATGGCAGGTTCTGGATAAACGTCGTGTTGCTCACC  
GCTGTTCCGCACTGATATCGAAAATGAAGTTGAGCAAAATGATGACGGAACTTACTCGCAATACGGTAAGAAACCGCTG  
AAGCTATGAGATATCCGTGGCCGGGAATCACTCCCGCTGGCAGGTTGATTGGCGGTATACCCAGCAAAAAGCAACC  
ATCAAAAACGGCAAAAGTGTGCCAGGATGGTTCCTCATCGCTGCGGTATACCCCGGAGCAGCCTTACCTTATGGAG  
CCAAATACAGGCAACCGATATCTCTTTGGCGCGCCGACGCTATATCGGCAGTATGCAATAAGGTTCCAGCGCG  
CGGTGGGAACCGCAGCGTTTACCAGAGGTTACTGGGTCCGGATGCCAAAACGGGGTATCGAGTTAATCGCAATCTCGAC  
TTCCAGCTAAACGTTTACAACTGTTGATACCGATTACGTCCGCTCAATCAACAAGAGCGGCTACCGTTATCACC  
CGAGCAAGAACCTTCTTGTCTACAGCAATATGCATTTCTGA

>Cluster\_45190

ATGTTTAAAGCCAGGATTTGCGAGCTGGATAGGTTTACTTCCCTGTTTATGCTGAGTCTTCCAGTACAGGCGGAACTTCG  
ATGTGTTGCAAAATCAGTTGATATTTGAACCAATTTTTTCTGACGCTACCGCTGAAGATAAACAACAAGTTGAACAAGCTA  
TCAAACAGTAGCGTAATCTGTCCTTTCGGTTTATCTGCATCGGACTGGAAAGTGCAATCGTGGCGATTGATGGTAGAA  
GGTAATATAGAGATAATCAAAAATGATGTTGTTCTGGCAATTTGACAGTCAAAGGTAATATTTCCACTTCTCTTTTC  
TAATCCATGGGTTATTTCTCGGTAACGTGACGGCAACGAATATAGTTACGGATTACCACCTGTTAATTACCGGTTGCATAA  
ATGCAAGTGGACTGGTATTTATCGACTCATATTTACGATAATCCGTTCTACGATTAAAGGGGGTATTAATCGCGTGGGATA  
TTTTATCAATGATCTTGCATAATGCGAATCTTCCGACTTCCAGGATTAAGGAAATTTAGCTAACCTACGCAACCACTATTA  
ACTGAAAATGTCAAAAAGCGCTGATGATAATAAATCCTGATGCATATTTATGGGGTCTAATAAATGATGAAGATGCTC  
TGAAAGAAATTTTTAAGCGAAGCAATATTCGCATGGCAGGGAATGTCGTAATCAGATGAAAAAAGAGCGCTGTTCCG  
CCTAAGCCTTCTCTGAGTTAGTGCAGGAATGCAAAATGCTGGATGAAGGCAACGTTGCTGCATTTGAAGGACGAGATAT  
TGCGCAATTTGATCTTGCATAATGCGAATCTTCCGACTTCCAGGATTAAGGAAATTTAGCTAACCTACGCAACCACTATTA  
ATAGCAATGATGAACAAACGATTGAAAGTATGGCGAGATATATGCCTGACAATGAGATTCTGGAGTTGACCGATCAGCAA  
TTGGGTTACCAGCCTGTTGTTCTGGGGTGTCTGACCGTGAACCGCTCTGTGCGAAAATGACGCGAATGAGTCGTCT  
ACCTGATGGTGTCCGTTGAACTTTCGCTACGTGAAAATCTCCCTCTGGATATCGTAATGACTCTGGCGAAAAGAG  
ATTTGGGATATGATCATTCCAGGAGCTTTATAAAGATGCGTGGTTATTGCTGAACTCAATATTTGATGGGATATCCGCA  
GATGATTCCTCTATTTCTGACGTTGGTGTGGAGGCAACTCACATCAATCAGGCAATGAGTTGGCGAACGATTATC  
AAACAATGTTGTCACAAGCTTAAAGCTTCAAGCTGGCAGAGATGAAACACCATGGTCAATATTTCCGGATGACGCCACA  
AGAGTGACAAAGTTGCAGCCTATTTATACAAAATTCGAGAATGACGATGATTAATACGTGTGTTATTTTTAGCATTTG  
CCGATAAATCTACGTTAATTTTTGTTAAAAGATGGAGAAAATCCCTGCGCTACTTTTGTGTCGGGATATGCGAGT  
AATTCACCTGACGCTGCTTTACAACGGTTATTGACAGCTTCAACGATCCTGAGGGTGGAGTAATCTGGCGAAAATC  
AGTATCTGAGCAGCTGATGAAACAAAATTTGGCAACGTTGTTATCGCATCGGAAAATAATCCGAAAGCAGATTTCA  
GCTGGCTATGAAACAGCGTGAATGATTTGTTGCTGAGTTATCAGCACGGTGAAGTTGATGACAGTATGATGACGATTA  
TGCCACCGCTTGTGATCTTTGGAAGACTGGGACTTTTTAGAGAGTGCATTAGTTAGTTGGGATAAATTTACCCGCTGTTG  
TCTCAAGGAATACAGCAAAAATACGCCAGCAATGATATTTGGGCGAAGTTTTTTCTGAGGCAGGAAAACAGCTCCCGT  
CGCGAGTTGATGAAGCATTACCGCTTATTTATGCATCGACCCCGATGCGTTAGCACAACTGGATGTTACTGGCAAAA  
ACCGGATCTGATATGTTGGTGGATACACTGGCGAAAAGCAATCTCACATTTTCAAGTTCCGCGCACTTAACACCCGCA  
CACCGCTGACGACTGCGCGCAGAAAATGATCCCGAGTGGTGGATTGTTGGCGATGAATAATCCCGTTTCCAGTTGAT  
GTATTAAGGCGAGGCTGAAACGTTGATCTTTGCTGGCGTTAGAGCTTGTAAACCTGAACTGGATTTAGTCCGCCAGCT  
GGCGCTTAACGGTAAGACGCGCGCAATACGGGAACAAGCGATGAGAAAACCTGATGAGTTGATTTGA

>Cluster\_66920

ATGTGCCATCCCTTAAATTAATCCTGTGTGGCCTTTGCCATACGCAATTTCTATCCGGAGTTACTGTGAAAATTTT  
ACTTCGCGCACTCTGTGACAGGCTTGTCTATATCTCACCTCGCGCAATGGCTTCAAGTACCTATCAGGATATTTGTCTG  
CCGCAACCAATCTGACGATCTGTCCTGTCAGGCGTGGTCACGATATTCGGTGTGTTGGTCCCAATCCACTGTCAACC  
AGCGCCCTCAGCTAATCGGAAGCATGTTCGGGGCGTTCAACAGTATCATCCCGCTACTTGGCCTTGTCTGGTTATGTT  
CATTTGGTATCCGTCATGTTGTGCGTTCCGGGCAATCAGGACAGGTTATCAGCACCGGACGCGATGTCGTCGGCACACTGA  
GTGTCGTTGACAGTTTCTGATGATCTTCAACCGGAAATGGCTGGAGTCTCGCTCAGCTCATTTATGTTATGGGGCGCA  
TCGATAATGGGGTGTGGTCCGCCAATGTGATGGTCAACTTGGCGTGAATAATCGCAAAATGGTTATTTCAATGACTGT  
ACAGCAGTTGAGCCTCACACGAACGACGCGTGCATTTTTGAAATGGAACTGTGTAAGTATCGGTTAACCGAG  
GACTAAATGATTTAATCAGACGCGCAATCTCGACTTCACTGATGACAGAATCAGTAAAACCGCCAGTGGTAATTAC  
ACTGTACCGGATCCAATGGCAGCGGATCTGTGTTACAGCCAGCCTGTGAGTGAAGGAAACGGAACAAACAGAAATC  
GACGATTGAAAATCTTTAATCCCTTACGTAACCAAGTATAGCGGTGTTATCTCAGCAACGTCAGCAGTATGGATA  
ATATGATTAGCGACATGGACAACGCTGCCAGTGGATTGTTGACAACTTTCTGGAAAAAAGAAATTTCCGCAACGGAACA  
CTGCCGGATATCGAGACAAAATTCAGAAAGCAGCGGAGCAATACGAACTGCTGTGCAAAAATCGCTACCCACTGATAA  
CGGAGAGCAATCCAGAAAAGAGGCTTTAAATCTTATCTCACAACTACGGGTGGGTAACGCTTGGCGCATGTTATCAGA  
CCTTTGCCACTGCTAACCGCTGTGGCAGAGCTGGCTGACAGAGCTCCAGCTGTAACCTCAATGTCACTGGGAGAA  
GTTGGTGATACTGACTTATTTAGTGGTTCATGAGTGCCTATAGGACGCAACTGCAGAAATCTCTCTATACGCCACCGCT  
GGGCACAGTAGTATCATCCAGTGAACAACGATGGCAATGCACAAGATCCGAAATCTGCCTTGTCTGAAATTTAGGGC  
CCCTTGTAGTCTCACTAACAGGATTGCAACGGAAACAAGTGGCAGGCAACCAACAGTGTCAAATTAATCTCTGATA  
AAAATGAAAATAATCGGAGATATAACAATGGTAAGTGCAGGAAGAAATTTGGACTATATATAACAACGGCCAGAGTTGCT  
TGCCGGTGGCAAAGATTTCAATCTTGTAAAATCTTTAACTCACTAACAGGTGCGCTTCCGATGCTTACCAGCGCTGTTG  
AAGCACTTGCACCACTGTTATTTCTTTGTTCTGATGTTCTGTGCTGGATTTTCTTATCAATTTACCTGCCATTC  
ATTCGGTTTATTTCTGATGACAGGCAATCGGAACTGGATGATGACGCTATTAATAGGATGTACCGCGGGCCGCTGTG  
AGCTGCAACACATCTCGGACATCAGAAGACAGAGGAACTGGGCAACCTACGGTTATATATACTTAATGTAGATGATA  
TAAGCGCCCATCATGGTCTTTGGTTTTTTCTTTGCTTCTGTAGCCATCATCGCCGTAGGCACAATACTGAATGCATTA  
TTTGGCGCTGCCCTGGTTAACGTTACAGTTCAATTCGCTGACCGGATTTTTTCACTTGTGATTTCTTCTGATATACCC  
CAGAATGTGTACAACACTGTAGCTGCCATTTGCCCTTACGGCTACCTACTGATCATGTTAATCTCTTAGGGG  
GACGTGATGGAGCAACCGCTTGGCAGCATGGCAAAATTTCTGTAAAAGAAATTTATTTGGAGGAACTCGCAATCCGGA  
CATACTCTGGAATGAAAACAGATCGTCTTAAAGATAATACAAAAGAAAGTACGACACAAGGACGGAATAAAGGATAA

>Cluster\_41493

ATGAACTGAATGCAACTTATATAAAAAACGTTGATAAATGGTGGGGCTTCCGCTGTTCTGCTTCTTAACTTTGCC  
CATTTTCCGCCACATTAATACTTTCCGCGCATATTTCTTCCGGTGAAGTTTCTCTTTTATCTGCCACTGGCACTGATGA  
TCAGCATGATGATTTTTTCACTGGCGGCATTGCCAGGATCGCCTTAGGGATTTTTGTCGCCAAAATGACAGAGCTG



GGTTTTACGAAACGCTCTCATTAAACGGCTAATTTTATTATCATTATCATTCTCTGTTGGGGCGTTACAGGGTTTTTAC  
TCCCCGGCTAACACGTTTACATGGTGATAGCCGTTTAAATTTCCAGCGACTATTCGGCAGATTGTTTTCTGCAA  
CGCTGTTTCTGATACTTTTCCAGTTTGCCTGCTTGTGGATTACTGGCGAGCAGAGAAAATCGGTCGGCGTCAATGCC  
TTTTAACCTCGGACCTTAATCAATATCAGGCCCTGCTGGTGGGTAATCTGATTTGGTGTCCCGCTGTGCTACTTCATCAT  
TCGGGTGGTGCAAACTCCGTTTTATTTACGTAGCTATTTATCGCAATTAACAGCAGGTTGATGCGCAAAAGTTACCCAAA  
AAGAGTTCGCAATCTGGCTACTGGCATTAGGTGCTTTATTTGTTGCTGTTATGCATGCCGTTAAATGAAAAAGCACGATT  
TTTAGCACAATACACCTTGTCTATTTGCTGCCCTGATGATGTGGGGAGCGATGCCCTATGGTTATAAGCTGATTTC  
ATTGCTCTGGGCGGTGCTGTGATGATCAGCATCCACAGCTATCAAAATTACATTTCCATTTATCCTGGCTATACCACGC  
AGCTGACCATAACCTCCAGTTATCTGGTATCTCTCTTTTATTTGTCATATATATGGCTGTACTGGCAACCCGTCAGCGA  
GCGGTAGTCAGACGCATTACAGCGGCTTGGCTATGTGGACCCTGGTTTCTGCAAAATGTTGCGGCCCTGAATCGCGC  
GTTACGTGATGCCCTGCTGCTGCTTGTGTTATTTACGCATCCCTGGCATGGAATGCTGGTTAAGAATTTATGGCATCA  
TGCTGGGATTTCAATACAGCAAAACTTTCTCACTGGCTGTACCATTGCTGGAACCGGGTGAAGATGTTTATCAGCTT  
TCGGTAAACGATCTCGCGCTGCGCTGAATAACAGAAATCCACAGGAGCGCATTACCCTACTGATAGCATCTCAAGCA  
ATTTGTTTTCTTTTGGGATGGAATGCCGATGCAACCCGAGATTGGCGTCAGTTACTGCTATGTGCGCTCGCCAGTGAATC  
ATATCTACCTGCTGCTGGGAGAGCTAAATACGGTGGCCGAACCTTCCATCGTGACCAACGCCCGGAAAAATATGCAGCT  
CGCGGAGCAATGATTTGCAACCGCAATTGAAAGATAAAGTCGCGATGATGAATCGGCTACAGCGGGCGTGGAAACAAA  
CCATTTTTCTGATGCGCCAGCCGATTACCGGTATCCGCTGGTGGTATGCTACTGAAATTTCTTCTGCGCATGAAAGGTG  
AGAATGATGAAGTATCAGCCCCGATAGCTTCTTACCGGTGCGCACGAAATTTGGTTTATCGTCGAGTATCGATATGTGG  
GTCATTGAGCATACGCTGCAATTTATGGCTGAAAAACAGAGCGAAGATGCCCGCTCACCGTTTTGCTATTAATCTGTCTCC  
AACCTCGGTATGTCAGGCTGTTTTCTGTTGAAGTCAGTCAGCTGGCTAAATATCAGATTGAAGCGTGGCAACTTA  
TTTTTGAAGTACCGAAAGTAATGCTCTGACCAATGCTAAGCAGGCGCAAAATCACCTTGCAGCATCTTTCAGGAATAGGC  
TGCCAGATTGCGATGATGATTTGGCACCGGCTACGCCAGCTATGCGCGGCTTAAAAATGTGAATGCCGATCTGCTTAA  
AATTGACGGCAGTTTTATCCGCAATATTGATCAAAATAGTCTGGATTATCAGATAGTGGCGTGCATTTGCCACCTGGCCG  
GAATGAAGAAAATGGCGGTAGTGGCAGGTACGTTGAAAACGAAGAGATCCCGAGGCGGTGCTCTTTTGGGATCGCAT  
TATATGCAGGTTATCTTATTGGTAAGCCGCAACCGTTAATTGATACGCTGAATGAAATCGAACCCATTCGCGAAAGTGC  
CTGA

>Cluster\_25208

ATGAATCCTGAGCGTCTGAACGCATTGAAATCCCCGATTGCGGCTGCGCGATGTGGTGGTTTTATCCGCACATGGTCA  
CCCCTTATTTGTCGGGCGGGAAAAATCTATCCGTTGCTGGAAGCGCGATGGACCATGATAAAAAAATATGCTGGTCCG  
CGCAGAAAAGAGCTTCAACGGATGAGCCGGGTAAACGATCTTTTCCCGTCCGGACCGTGGCTCTATATTGCAGATG  
CTGAAACTGCCTGACGGCACCGTCAAAGTGTGGTTCGAGGGGTTACAGCGCGCGGATTTTCTGCGCTCTCTGACAATGG  
CGAACACTTTTTCTCGGAAGCGGAGTATCTGGAGTCGCCGACCATTTGATGAGCGGGAACAGGAAGTCTGGTGGCTACTG  
CAATCAGCCAGTTTGAAGTTATATCAAGCTGAACAAAAAATCCACCAGAAGTGTGACGTCGCTGAAACAGCATCGAC  
GATCCGGCGGCTGCGCGGATACCATTTGCTGCGCATATGCCGCTGAAACTGGCTGACAAAACAGTCCGTTCTGGAGATGTC  
CGACGTTAACGAACGCTGGAATATCTGATGGCAATGATGGAATCGGAAATCGATCTGCTGCAGGTTGAGAAACGCATTC  
CGAACCGGTTAAAAAGCAGATGGAGAAATCCCGAGTACGCTGAGTACTATCTGAACGAGCAAAATGAAAGCTATTCGAAAAGAA  
CTCGGTGAAATGGACGACCGCCGGACGAAAACGAAGCCCTGAAGCGCAAAATCGACGCGCGGAAGATGCCGAAAGAGGC  
AAAAGAGAAAGCGGAAGCAGAGCTGCAGAACTGAAATGATGCTCCGATGTCGGCAGAAAGCGGCTAGTGGTGGAT  
ATATCGACTGGATGGTACAGTGCCTGGAATGCGCTAGCAAGTCAAAAAAGACCTGCTCAGGCGCAGAAAATCCCTT  
GATACCCGACTATTGCTGAGCGCGTGAAGAGATCGTATCTTGGATATCTTGGCGTTCAAAGCGGTCAAAAAT  
CAAGGGACCGATCTCTGCTGGTAGGGCCGCGGGGGTAGGTTAAACCTCCCTGGGTGAGTCCATCGCCAAAGCCACCG  
GGCGTAAATATGTCGCTGCGGCTGGGCGGCTGCGTGAAGCGGAAATCCCGTGGTCCACCCTGCTTACATCCGTT  
TCTATGCCGGTAAACTGATCCAGAAAATGGCGGAAAGTGGCGTGAAAAACCCGCTGTTCTGCTCAGTGGATTCGAAA  
AATGCTTCTGACATGCGTGGCGATCCGGCCTCCGACTGCTTGAAGTGTGGATCCAGAGCAGAACGTTAGCGTTACGCG  
ACCACTACCTGGAAGTGGATTACGATCTCAGCGAGTAAATGTTTGTGCTACGTCGAACTCCATGAACATTCGGCACCG  
CTGCTGGATCGTATGGAAGTATTCGCCCTCTCCGGTTATACCGAAGATGAAAACCTGAAACATCGCAAAACCTCACCTGCT  
GCCGAAAGCAGATTGAACTGAATGCACTGAAAAGGTTAGCTGACCGTCCGACGATAGCCCATTTATCGCATGATTCGCT  
ACTACACCCGTGAGGCGGGCGTGGCTGCTGGAGCGTGAATCTCCAAACTGTGTCGCAAGCGGTTAAGCAGTTACTG  
CTCGATAAGTCAATAAAAATATCGAAATTAACCGTGAATACCTGCATGACTACCTCGGTGTTGAGCGTTTCGACTATGG  
CGCGCGGATAACGAAAACCGTGTGCGCCAGGTAACCGGCTGGCGTGGACGGAAGTGGGCGGTGACTTGTGACCATTTG  
AAACCGCGTGCCTTCCGGGGAAAGGTAACCTGACCTAACCGGTTGCTGCGCGAAGTATGAGAGGTTCTATTCAGGCG  
GCGTTAACGGTGGTTCGTGCGGCTGCGGAAAACCTGGGATCAACCTGATTTTTACGAAAACCTGACATCCACGTTCA  
CGTACCGGAAGGTGCGACGCCGAAAGATGGTCCGAGTCCGGTATTGCCATGTGCACCGCGCTGGTTTCTGCTGACCG  
GTAACCGGTTCTGTCGCGATGTGGCAATGACCGGTGAGATCACCTGCTGCTGGTGGTACTGCGCATCCGGTGGTTGAAA  
GAAAAACTACTGGCAGCGCATCGCGGGGATTAACAGAGTGTAAATCCGTTTCGAAAATAAACCGCGATTCGGAAGAGAT  
TCTGACAACGTAATGCGCATTCGACATTCCTGTGAAGCGCATTGAGGAAGTTTCTGACTTGGCGCTACAAAATG  
AACCGTCTGGCATGCAGGTTGTGACTGCAAAATAG

>Cluster\_7338

ATGAGACACTTTATCTATCAGGACGAAAAATCACATAAATTTGCGGCGTTGAGCAGCAGGGAACAGAGCTGCATATCAA  
CTGGGGCAAAGTCCGCACTAACGGGCAAAGCCAGATAAAAAGTTTGGCGGATGCTGCGGCAGCGGCAAAGCAGAGCTTA  
AGCTGATCGCAGAGAAAACGAAAAAGGCTATGTGAAAATGCTTACGAAAACGTCATATCCCCCATTTACCAAAGCC  
ACTCCTGAAAGTTGAAACTTCCCTGAGAGTAAAAACCAACCCCTGGCTGGTGTGATGATGCGGTCAATTCGGCTAACG  
CGATATTAATCGATTGCTTTTCTCTCATCGCTCTCGCCCCAGAGAGATCAATTTATCTGCACAAAGATGGTCAAATATGGC  
AGCTCATCGCAATAACACCAGGCGATATGATCCCGCCAACAATACCGTCTTATCCAGAAAACCTGGCAGCAGGCTTTT  
GCTGAGTTACAAATCGAGTTACAGGTTAATCAACAGCAGGAGTGCACAATCTGATGACGATTTGCTGAGGTTTCTG  
GAACCTTTACTCTGCAGATGAACCTGGTTCGATGACTTAGTCTTATCGCTGTTGGTCTGGAAGTGGCTGAAATGCCCTTC  
TCGCTCTTCAACTTAGATATAAACAGTAAAAGGCGCAGTAACCACCATCATTTCCACCTAATCACAAGCAGAAATCGCTG  
CCGAGTTGGCATTACAGCTATGTCATCATCTTTCACTCGCTTCCAGAAAGATGAGTGGCAACCGTGTGTAGATAAAGTACT  
CGCCGCCATTCGACGCTATCCAGCAGCGCAACCTTTTGGCGGTTACTGCTCCCCGAATGCCGGATATTTGCCAATG  
CTATGGCGTACGTTATGCGACGCAAAACGTTCCGCGGATGACCTGGTTAAGTATGATGGTAAGCGATGATTTGCCCTG  
GCCATCCAGGAAAAATATGGTTTCCACCGCTATATAATGATTTCCGCAAAATATCTGGCTACGTTGCTGGCAAAATATGG  
AATGCGTGTGTAAGCCGGATTTCTTCTCAAGCTACCTGTGACTATCCCGTAAAAATACCGGACCTTTTCACTCACATAC  
ACGCCAATGCTGAAGATCTTGTCAAATGGCTATGGAAAACGAAATCACCCGATGCGATTCAAATTTCTGATCCTCGGTGTA  
AATGGCAAGAAAAGACCTGGAATACTTAAAGCAAGGCTGCCAAAAACATCCCGCTGCGGCTATTTGCCGTTATGCTAC  
TTTTGCTGGCAATACATGAAAATAATGAGTGGCGTAAAGCGCTTGTCAAACCTGATTTACCGCCACGCCAGAGTTAGTATGG  
AGGTCATTTCCCTGGGTTAATGCTAAGGCGGACGATCTTATCTGAATGCTGCTCCGCTGCCAGTAGCTGAAGAATGTGAA  
TATGCCACTGTGGATATGTTGCGGAGCTGCTTGTGCTCCAGCCGTTGAAATAAAGAAAAGAAAGTGTATCCGCT  
ATTTGATTTACCGGTACTTCCATTTCTGCGCTCACGGATATCACACCAGGAATACAGAGTTAATCAGTCTACTGACA  
TATCCAGATTCAGTGAATGCGCAATATCAGGCATCACAGCAACCTTATTTACCGATCTGCCACTAATGAAAAGAA

AGCTGGGAGACATCTTTCATTCCTTTTACACCAGAACAACAAATCTTTGGCAATTAGGTTTTAATGAATGGCTGCATTC  
CGAAAATGACTTACATGAAAAAATATATACCGCAAAGCGCTGTTGATGCTTGTTCGCTTTGATTTTTTCAGCACTAA  
AAGCTGAGTTTGGCAAAATACACAACAATGCCAACAAAAGCTGGAATCTATCTGCGCTTGTACTTACCGGGACAACAG  
GGCATCTCATCTTCAACCAAAATATCATTTGAGGAGCGATATTCAGGTTGAGAAAGAGATTCTGGCGGTTTTTGGTAGTAC  
GGCATCTGCTGCTTATGACCTGTGCAACGAGATCAACACGCTGTGGATATTCACCTTTTTTATTTGGAGCCAGTG  
AAGTAGCCTTACCAATGGCGCAGCGGTTACAGAAAAAATAGCTTACAAGGATGCCGTTAATTTGGCTGGCAAAATAACCCG  
CGCATGCCGCGCGGGGCTACTGCCTTTGGCGCTGGGCAAACCGTGC AAAATCGGGAAATATGCCCGCAGGACTCCT  
CCTGCTAGTGAATTA AACAGCAGGAAACGATGAGGAAATCGCCAAAGGATATAATCAACCTGATGTTTTAGCTGGCG  
TGGCAACATTTATTTGATAGCGACCCACTGGAAGAATATCCTGCAAAAAATCGCCCACTGCCCTAA

>Cluster\_19220

ATGGATACATGGGAGTGGTACAACAAATATAGTCAAGAGTTGCGTGATGCCGGCAAGAAATATATCCGACGCTTATTGA  
TGATTTTTTCAGAAAGTGTTTTGCACCTACAATAGAAAAATGTGATTCGCTATTGCCGGAAATGAAAGCACTGAATCAAG  
TCGCCAAAAATCCGTGGCTGGAAATATTTATTTGGTCACTGGGAAATGCGTCAATCGCTGACTAACTATGAAGAAGTGAA  
AAGGTGCTGCCAGACGTGGTAGCGCTGTTTTGAAAAAGCGCATCGGGAAGAGGCGAAAGATTGCCCGCAATCTATCTGCGT  
TACCCAGGATTTATCAGCCTGCTACGAAAATATTTGACGCGACAGGCTGGGCGAATGAACGCATGGCGGTGTGTGAAGAAA  
CCATCGCGCGCATGTATCCGACTGGAGCTGTTTTAGTGTTCAGTGTTCCTACTGAATATGCCAGCGCACTGATAGATTTCCAAA  
AGAACAGAGGAGGCACTGGCTTATCTGGATCGGCAAAATCGACGCACTTAAAGCAGCGGGAAAGATGATATTGATCCATT  
ACTTTATACTCGCGCGATATTTCTGATTGAACCTCAGCGTTATGATGAAGCACGCAAAATGATTGATGAGCTGACAGAAG  
CCAATGATTTACTGGGCGCGGACCGCATTAGTAATCACCTAAAAAAACGTACATCATGGCGTTATGCCGGCAGGACGAA  
GAAGTCTGGGAGAAATACCGCGTTGGTCCGATCTGACTCCGATTCAATGGGGGTTCATGGCTGAAAATCATTACTGTGTT  
ACTTCCCGCTCATCCAAAAGAAACAACCTGGCAACTGGCGCGCATCATCCAGAAAATGCTGGAGCAACGTTACAGGCGG  
GGGCGCATCGAAAAGTGGTTAATCTGGCAAACTACAATCACCTGGCGCTGGAGCGTGAATCCGCTCGGGTTGCCAAA  
ATAGCGATGAAACTGGCCAGCGACACATGCCAAAATTCGCGCGTTACTGGGCGTGCATCGCGAGTTTCTCGAAACTTAG  
CGAAAAAATCGCCACCAAGAGAGCAGATTGCTTGGTCCGCTGCTAGAGTACCTGAAAATAGCGCAACAGGAAACCG  
AGCCAGATCCAGAAAAGACGCTGAAAATATCCGCGCGCTTATCTGAACACACCAGACGATGCAGAGTTACTGGGCAAA  
CTGGTCAATGCGTTAAATGCTTAAATGCGATTAAATGAGTCAATGAACTTCTGCAACGCTATGTTGAAAGCCACTCCA  
TGAAGATAATGGTCTTTGCTTCGATCTGTTGGATTTATTTGCTCCACCGTGACGATCTGCAAAACATTGAGCACCTGGCGA  
AGCAGTATGAACAGCGGGGCTGCTACATATGGCTTGGTTCGGGCGCGAGTGATCAACCACAGGAAACAGGAACTGGAGT  
GAACTGGAGTGCATTGGACAACAGTTGCTGCAAAAAGGAGGGGCTGAGTGGGTTGGCGTTTATCGCATGTGCTCCTG  
GGCAGCACAAAACAGGAAGCCTGGGATCGACAGCTGGATTTATTTACAACAATGTCAGCAACTGATGATTAGCGTGAAG  
AAGATATTCGTAATCTCCAGTGGGATATCATGGCGACCGCCAGCATCTGCAACAATGGGATTTGGTTCTGTGCTATTGCT  
GCTGAACCTGGAAATCGAACTCACGGAAGGTGAAGTTTTATTTAGCAAAAATGGGGGCTGCTAAACATTCGCTTCCGGGA  
AAATTTGAAATACCGCTATTTACTATGCTCAACGTTATTTGGCGGTAACCGCAAGGATCATGAGCCAACCTACCGGACCG  
ATTTATCCGCAACATGTTGATGAGTTTGTGTTATTCGATGCAGAAATGTTGAATACCGGACAGAGGATGAGGAAGAGCAG  
AAGAAATTCCTCCGCTTTATGGGTGCCGAAAACCATTTCCCGACCAATACCGGAGTCCGTTCTGCGAAGGTTGT  
CATGCTGTGAGAAAGAGTTTTAATACTTTCCGTTAGGCGCTCCGTTGAACGAAACTGGTACTACTGCTAAACATTCGCTTCCGGGA  
ACGACTATACGTTAACGGACAGTCAAGGAGAAGGCGCTGAGCCGCTGCTGCTATTTTGTATCAGTGGCGCG  
CGTTACGTTTCTAAAGGTGATATCGACAAGACCTTGACAGAAATGACCGCTGACTGAAAACATCCGTTGTGCTGGTGGCG  
TCTTGC AAAAGACCGGGGCAATGAAGAGAAACATGCTGCTATTGCCGAGAGATATGGAATGTA

>Cluster\_7926

ATGAAAATGAACGTAACCGCCACCGTACGCGATGCGCTCGGCCACTGGCCGCTATTCTCCGGCGCTGGGGATTACGGT  
GCTGAAAACCGTATCAGCCCTGTCCGGTCTGTGGCGGGAGTGACCGCTTCCGTTTTGATGACAGGGAGGGGCGCGGGA  
CCTGGTACTGCAAACTAGTGTGGTCCGGTGACGGCTGAAACTGGTTGAAAAGGTGTTTGGTGTCTCCCGTCCGACGCG  
GCCGCAAAAGTGGCTGCCGTGACCGGACGCTGCCCCGGCTGACCGGACGAGCGGCGCCGCTGCTGAAAACAGA  
CGCTGCCCGGAAGAACCGCGCGACTGGCACAACCCCTGATGGCAAAAACCGTCCCGGAACCGGTAACGCCTACCTGA  
CCCCAAGGGCTTTCCCGGCGGGAAATGCCGATGCTGACCGGCACACACAGAGCCGGTGGCGTGAGCTGGCGCGCGGT  
GACCTTGTGGTGCCACTGTATGACGACAGCGCGGCAACTGGTTAACTTCACTTCACTGATGCTGACGGCCGTAAGCGTAC  
CCTGAAAAGGCGGACAGGTCAGGGGACCTGTACACCCCTGAAGGACAGAATCAGGCCGAAAACGCTGTTGGATAGCGG  
AGGATACCGGACCGCACTTACCGTACATCACCTGACCGGTGAAACGTTGATGGTGGCGCTTTCTTCCGTTGAACCTCCTT  
TCTCTGGCCAGCTTCCCGGCGAGAAGCATCCGGCTGTATTTGCTTGTGCTGACCGTACCTCAGCGGTGACGG  
CCAGCAAAAAGCCCGCGGACGCGCAGATGCGTGTGAAGTTTGTGTTGCCCTGCCGCGGCTTCCGTTGATGATG  
CCTTACGCAAGTACGGCGGGGAAGCCACCCGTAAGGCCATTTATGATGCCATCCGGCCACCGGCTGAAAGCCCGTTCGAC  
ACCATGAGCGAAGCGGAGTTTCCGCGATGAGTACCAGCGAAAAGGCCATGCGTATCTATGAGCATTACGGCGAGGCGCT  
CGCGGTGATGCCAACGGCCAGCTTCTGTTCCGTTATGAAAATGGTGTCTGGAAGGTGCTGCCACCAGGACTTTGGCC  
GGGATGTGGCGGGCTGTTTACGCGCTGCGCGCGCTTCTCCTCCGGGAAGGTGGCTCCGTTGACGACACCTGAAAG  
CTGATTTATCCGACGAGGAAGCCCTCCCGCGCTGATTGGCTTTGTAACGGCTGCTGACACGACGAGCGGCAC  
GTTCCACCCGACAGTCCGTCACACTGGATGCGCACCTGTGCGATGTGGATTTACCCCGCGGTTGGAAGGGGAAAACCG  
TGGAAACCACGCCCGCGTTCGCGCTGGCTTGACCGTGGCGGTTGGTGTGCGGAAAACGCGACGATGATTCG  
GCCGACTGTTTATGGTGTGGCAAAACCGTACGACTGGCAGCTCTTTCTGGAGGTGACCGGTTCCCGCGGCGGCAAA  
AAGTATCATGGCCGAAATAGCCACCTGCTGGCGGGGAAGATAACGCCACGTCGGCCACCATTTGAGAGCGCTGGAATCCC  
CGCGTGAACGTTGCCGCTTAACTGGCTTCTACTGATACGCTGCCGGACAGGAAAATGGAGCGGCGACGGAGCCGGA  
CTCAAGGCATCACCGGCGGCGATGCGGTGTCGTTGACCCGAAATACCGGATGCGTACTCCAGCACATCCGCGCGT  
GATTCTGGCCGTGAACAATAACCGATGCGCTTACCGACCGCAGCGCGGCTGTCACGCGGCGGTTGATTATCTACT  
TCCCGGAACAGATAGCCCGCAGGAGCGGACCGCAGCTTAAGGACAAAATCACCGCGAGCTGGCGGTGATGCTGCGT  
CACCTGATGACGAAAGTTCAGCGACCCGATGCTCGCCGCTGCTGCTTCACTGCTCCAGCAGAACTCAGACGAGGCGTGA  
CATCAAACGGGATGCCGACCCGACGTTTTGATTTATCGCTATCTGAAAACCTGCGCGCAGACGAGCGGCTGATG  
GGAACGCGAGTATCATCCCGGCAATTACCGTAAATACCTCTATCACGCTATCTGGCTACATGGAGGCAACCGCTAC  
CGGAACGTTACTCAGTCTGAAAATGTTCCGGCTGGGCTGCCGTTGATGCTGAAGGAATACGGACTGAATACGAGAAGCG  
CCATACAAAACAGGGATACAGACCAACCTGACGCTGAAAAGAGGAAAGCTACGGCGACTGGCTGCCAAAATGTGACGACC  
CTGCAACACCTGA

>Cluster\_55665

ATGAATATGGCGAATTTGAAAGCGGTTATTTCCGGTTCGACGACTAGGCATGCATATGCTGCCGGCCACAAGGCAATTC  
AAGGAGATGCTGCCACTCTTGATAAGCAATGATTCAGTACATCTGACGAAATCGTCCGCGCGGGATCAAAGAGA  
TTGTTCTGCTGACGCACTCTCGAAGAACGCGGTTGAAAACCACTTCGACACCTCCTATGAGCTGGAAGCCCTGCTGGAA  
CAGCGGTGAAGCGCCAGCTACTGGCGGAAGTGCAGGCCATTTGCCCGCGGGGCTGACCATCATGAACGTGCGTACGGC  
GCAGCCGTTGGGCTGGGACATTCATCTCTGCGCCGCGCGGTAGTCCGCGCAACCCGTTTGTGGTGTCTCTGCCG  
ATATCATCTTGAACGCGGACCCGCTGACCGCTGACCGCTGATAACCTCGCGCTTTGATCGCCGCTTTAACAAGAACCGG  
CGCAGCCAGGTGCTGGCGAAACGCATACCGGGGATCTCTCGAATACTCCGTCATCCAGACCAAGAACCTATGGTGGC  
TGAAGGCCAGGTGGCGGTATCGTTGAGTTTATTTGAAAACCGGACGAGCCGCGACCCCTGGACTCCGATCTGATGGCG

TGGGGCGCTATGTGCTGTGGCGGATATCTGGGCCAACTGGAACGTACCGAGCCGGGTGCCTGGGGCGTATCCAGCTG  
ACCAGCGCCATTGCCAACTGGCGAAGAAGCAGTCCGTTGACGCGATGCTGATGACTGGCGAAAGCTATGACTCGCGTAA  
GAAAATGGGCTATATGCAGGCCCTTCGTACCTACGGAATGCGTAACTGAAAGAGGGCCCAAATTCGCCGAAAGCATTA  
AAAAACTGCTGGCCCTGA

>Cluster\_39087

ATGGACTTTCCGCGAGCAACTCGAAACCTGCGTTAAGCAGGCCAACAGGGCTGAGCCGTTTTATCGCCCCACTGCCCTT  
TCAGAACACTCCCGTGGTCGAAACCATGCGATGAGCGGATTATAGGTGGTAAGCGCTGCGACCTTTCCTGGTTTATG  
CCACTGGTCATATGTTCCGGCTTAGCACAAACACACTGGAGCCACCGCTGCCGCCGTAGAGTGTATCCACGCTTACTCA  
TTAATTCATGATGATTTACC GGCGATGGATGACGATCTGCGTCCGCGTTTTGCCGACCTGCCATGTGAAGTTTGGCGA  
AGCAAACGCGATTCTCGTGGTACGCTTTACAAACGCTGGCGTTCTCGATTCTAAGCGATGCCGATATGCCGGAAGTGT  
CAGATCGCGACAGAAATTCGATGATTTCTGAGCTGGCGAGCGCCAGCGGTATTGCCGGAATGTGCGGTGGTCAGGCATTA  
GATTTAGACGCTGAAGCGAAACAGCTACCTCTGGAGCGCTTGGAGCTATTCTATCGTCATAAAACCGCGCATTTGATCG  
CGCCCGCTTCGCTTGGTGCATTAAGCCCGGAGATAAAGACGAAATGCACCTGACGACTCGCAAGTATCGACAGAGA  
GCATCGGCCCTTCGCTTCCAGGTTCCAGGATGACATCCTGGATGTGGTGGGAGATACTGCAACGTTGGGAAAACGCCAGGTT  
GCCGACGCAACTTGGTAAAAGTACCTACCCTGCATCTTGGGTCTTGGAGCAAGCCCGGAAGAAAGCCGGGATCTGAT  
CGACGATGCCCGTCACTGCTGAAACAACTGACTGAACAGTCACTCGATACCTCGGCACTGGAAGCGCTAGCGGACTACA  
TCATCCAGCGTAATAAATAA

>Cluster\_56805

ATGGCAACGAATTTACGTGGCGTAAATGGTGCCTCTGACTCCTTTTGACCAACAACAGCACTGGATAAAGCGAGTCT  
GCGTCGCCCTGGTTTCAGTTCAATATTCAGCAGGGCATCGACGGTTTATACGTGGGTGGTTCGACCGCGAGGCCCTTGTGAC  
AAAGCCTTTCCGAGCGTGAACAGTACTGGAATTCGTCGCCGAAGAGGCGAAAGGTAAGATTAATACTCATCGCCACGTC  
GGTTGCGTACGACCGCCGAAAGCCAACAACCTTGGCGCATCGGTAACGTTATGGCTTCGATGCCGTTCGCCCGTAC  
GCCGTTCTACTACTCTTTTTCAGCTTTGAAGAACTGCGATCATATCGGGCAATTTATGATTCGGCGGATGGTTTGGCGA  
TGGTGCATTTGACAACTTCCAGCCTGAGTGGGGTAAACTGCCCTGGATCAGATCAACACACTTGTTCATTCCTGGC  
GTAGGTGCGCTGAAACAGACCTCTGGCGATCTCTATCAGATGGAGCAGATCCGTCGTGAACATCTCTGATCTTGTGCTCTA  
TAACGGTTACGACGAAATCTTCGCTCTGGTCTGCTGGCGGGCTGATGGTGGTATCGGCAGTACCTACAACATCATGG  
GCTGGCGCTATCAGGGGATCGTTAAGGGCTGAAAAGAGGGCGATATCCAGACCGCGCAGAACTGCAAACTGAATGCAAT  
AAAGTCAATGATTTACTGATCAAAACGGGCGTATTCGCGGCTGAAAACCTGCTCCATTATATGGGATCTGCTGCTGT  
GCCGCTGTGCCGAAACCGTTTGGACCGGTAGATGAAAATATCTGCCAGAACTGAAGCGCTGGCCAGCAGTTGATGC  
AAGAGCGCGGGTGA

>Cluster\_38991

ATGCTCAAAGAAAACCTCAACGAACTGCAATCTTTCTTGTGGTGGCAAGAGAGCGAAGTTTTACCAAAGCAGCGGGCAA  
ACTCGCGCTCTCTCAGTCTGCACCTAGCCATGCAATGAAGGCTCTGGAGGAAAGGCTCAATATCCGCCCTCTGACACGGA  
CTACCCGCAAGTGTGGCTCCACAGAAAGCGGGGAGAGAATCATTCGCTGCCTTGAACCGCTATTTGACGAGCTTGAACAG  
GAACCTGGAATCACTTATCAATTTGAACGGCACGCCCTCCGGGAATATTCGGTTATCTGCCGGGAAACATGCCGCGGAA  
TCTGGTCTGCGCGAAGTAAAACCTTTTCTCAGAGATATCCGAAATCAATGTCGAACTGGTGGTGGATAACGTTTTG  
TCGATATTTGTTGAAGCCGTTTTGATGCCGGGATACGACTGGGTGAAAATGTTGATAAAGATAAGTTGCAGTCAGGATT  
GGACCAGATCATCGCGGATGGCTGTGGTGGGAGCTCCGGCTATTTTGTGCAAAACCTGCGCTGAAACGCTTCAAGAACT  
ACAAAATCATCGCTGCATCAACATCGCTTTGCCAATCGCGTGGGCTTTACCCTGGGAGTTCCGAGGAGAGGAAAGGAAAC  
CGCTTCGCGTTAAGGTTGATGGGCGAGCTGACGTGAGTCCGTTGCCAGAAAAGAAATGATGCCGCGTTATCAGGTTTGGG  
ATCGCTTGTGCTCCGTAAGACATGGTTCAGGAGTATATAAAGTCAAGCAAGCTTATTCAGGTGTACAGGAGTGGTGTCC  
AATTTTCTCGGTTATTTACTACTACCCAGCCGCAAGCAGCATCCGCCAGCTTTTGGCTGTTGATCGATCGCCTTC  
GCTACACCGAATAA

>Cluster\_40937

ATGATTTTGTATTAACATCTAGCTTTGATAAAAACAATGATTACATAGTAAAAAACATAGCATTAACAATTTTACAG  
GTTAGATGTTGATAAATTTCTCTGAATATAAATTTTCTTACACTAAAAAAGGATTCAGTATGTTAATAAAAAATAAATG  
AATTTGCTCGAGAGTGAATGCAGATCCATCTATTTATAGAAAACCACTCCTGAGAATATTTATCAATAAAATGATTTCAAAA  
TATCATAATCATTTGCTTTTCGAGAAGTATTCGCTTTTGTGTAAGGGATTGCTGAGTCTTTACTGGAAAATGCTTATCCAA  
GCCATCAATATAAAAAGAGCAGATAACAAAGTATTGCAAGCAAAAACGCAATTTGATATTGGATTACAATTCCTGATT  
TTATATTGACAAAATAATTTGATTTTCAAAAACCTTTGACAATCAATAGCATTTGCAACCGTTATCAAGTGGATTG  
ATAGAAAATCAGAAAAGAAAAGAAATTTGTTCAAAACAATATGGTTGACATGAATAAAAACACAGAAAACATAAAATATTTG  
TCCAGCTTATTTTCAATCGTATACAAAAGAATTCGAGGTGAGATCAACATTCATAAATGGTAAAGATTATTCGGTAA  
AAATAATATCTAAAAATAAATTTGACTGGAGAAAAGACATAACGAAATATTCATTAACAATAAATAAATGCCTGATACT  
ATAAAAAGAAAATGCTGAGGATATATGTCAGTCAATGATTTTCTTTTGGATGTTTGGATTTTATAGTTTGGATGGTGA  
ATGGTTCTTCTTAGAGATGAATGCAATGGTCAATGGCATGGCTAGAAAATGAAACGAATATTAATGTTCAAGTGGATGAT  
TAGTGAGGTTTTTAAATGAAGTATAA

>Cluster\_64429

ATGGCCCAATCGGAGCATGATGAATACGCCGACGGGAGAACCGCGCAGGCTGCGTGACCGGTTAAACCGCGCACGAT  
AGCTGCAGTTCAAATGAAACCCCTCGCTGTGGGCTCATTGCGCGGCAACACCAGTCGGGTTGGCTGCAATGGTTTAA  
CTCAGCAACGCTCCGAGCGAATCGACTGGAGCGCACCATCAGTAGGTGACCCGTTACTGTTGTTTTCAGAGGGTGGGGAC  
ACGCGGAACCGCGTAGTTATGCTCGGGCTGCACATTGACAACGTTAGATCCGCCAGTAGCGACCCCATGATCAGCTCAC  
TGGTATTTGTGACGGGGCCAGGCTGACGTATAACACGAAAACACACGCTGACCTGGCAGGGCGTACCGGACGGCGTAG  
TAAAAATACTCGGTGAGTCTGAAATAGAAAATATTCGGACGTGCAGACGTTACTATTAATAGCGAAAACGTTGTCAATATT  
CACGGTGGAAAATTAATTAACCGCGGACGCTGATATTAATGTCACAGCGACAGATACAATTAACGCACATGCTGATTT  
AGTGAACGTTATAGCAACGAGTCTGTTAGTGTACTGCTGCGAACAGAAATATCGTGCAGCTCAAAACATCAGTGGCT  
GGGCTCCGGGTGGGATAACACTAGCTGGTCCAATCATATACCGAGACATTAAGTATAGATAAATAGCGACATTCCTG  
AACGATATTTCTGCTACTGGAGATAACGGTGGAAACCGGTAATATCACAACTCGCGGTAGTGTGTTAGCAGGGCAAGATGT  
GCAGGACCGACAAGGCACGATGAACGAGATGCGCATTACATATAACGGCATGTGCACACCTGTCCTGACGGCGAAACAG  
ATAAACCAATCAACAAATGGCGTAA

>Cluster\_53890

ATGAGTAACATATCTAATCTAGCCGAAGCCAGAGAGGCCAGAAGGCTACAACAACCGCATCAAAGCAGCGGTAAGGGGTA  
TGCTTGTGTCACCGTAAAATTAAGGATGTGCCGTTTTACAAGGACGCGAGAAGCAGCGCATCTGTGGGTTCACTTAATCC  
TCAAAGCAAAAGCATACGCTGAGTATGTAATGACTGACGAGGAGAAATTCGGTAGGCAGAGGGAAGCTACTTGGCGGT  
AGAAAACCTCTGCGGTTTTGAAACAGGACTCAAACAGATCGCGTTTACGTTACCTGCTTTAGAAAAGTTCAAAAACCTCGGCAT  
GATTTGACTGGGTTTACACGGTAAATTCAGTCTTCTCGGTAGAGAAAATATGACGATATCAGTCAAATTTTGTACCAG  
CAGATTAACGAGAAATTAACACCTCAAAGCCAGCAATACCATTGCCGTTAAGCAATACTGTACACGAGATTAACAGCAA  
ATTAACAGATAAAGAAATATAAATAATATATCTCTAATAACTGACTGATTAAGAGAGTCCACAGCAGACAAAAGTCTGA  
CAAGAAAACCTTCCGTCAGTGTGACGATGATGATGCTTACCAGAAAATCCTTCTGAAAGCGCAAGAAATCCGGC  
CACTGAATGACAAGCGTAAAACAGATCCGAACGTTCTGGCGCAAGCCGAGTGTAAACCCGCCAGCTTGACGGGCAT

GGGTTACAGATGCAGGACTGGAGAAATTTAGCTACGTAGGCGAAAAATGCGGATGGATGTTCAAGAACGCCAAA  
CCATCAACCGGAAACCGTCTGGCACAAAAGGGATTTGATTTCCCTGCTTAACGATAAATACCTACCTGAAAGTTCGTGAGG  
GTGAACACGATGACCGATAA  
>Cluster\_39234  
ATGGCTAACTTTTATGATCTAAAAAAATTTGACCTCAATTTACTGGTCAATTTGAATGTATTTATCAACATCTCAGCAT  
TAGTAAAGCGGCAGAATCATTATATATAACGCCCTCTGCTGTTAGTACAGTCGTTACAACGTTTACGTGCGCAATTTAATG  
ACCGGTTATTCATTCGCTCAGGGAAAGGTATCGCGCCGACTACAAACAGGGTTAAACCTGCATCACCATCTTGAGAAAAAT  
CTCAGAGGCCCTTGAACAACTATCAATATCGTTAATAAGTCTGAACATAAAAGAAAAATTTATTTATCTACGGTCTCAGCT  
TATTTCTTGTACTAATAACAACATGCTAATCCGCTGTCTAGACAAGATACTTCAATCGATATAGAATAGTATTTCTGTT  
TGCTTTCAGCTGAAAATGCCGAAGAAGTGTGGTTCAACGCAAACTGACCTGGCAATTACGCTGCAACCAGTAATTAGT  
CGCTCTGTCATCTGCATGCCGTTACACACTATTTCGCAATTCCTTATATGTAGCAACAACATCCTCGTATTACTGATGC  
CAGTAACATGAACAATATCGCCGAAGAATTCACCCGTGTGATATCTAAATCAGCAGGGATTGACGAAATTCAAATGG  
ACATAGATGAACGTTTTTAAACACGTAAGGTTTCAATTCGCAGTCTTCTTTGGGACTATAAATTAATAGTATTTCTGTT  
ACTGACTTACTGGTATTGTTCCCACTGAACTGTACGATTTACATCGTACTTTTGAAGTTAAAGAAAATAAACTGGA  
ACAACCTCTCCTGCGGTTAAACTTTATATATCTATAACAAGGCTTCGTTGAACAACCTTGTCTTCTCCCGATTCTAG  
ATCGTTTAAATGATAGCTTCTGA  
>Cluster\_26723  
ATGATTAAGAAAAATTTTGGCCCTCCGATCATCGAACAATCTCCCTGCTCTCCCGTCTGTAACCTGGATGAACTGGA  
CCTCATTTGGTTCGATCATCCCCAGGTAAGGCTCTTTTGCATTACAGGGCGCACACCTTCTCTCGTGGAAACCTGGCG  
GTGAAGAAGAAGTCTGTGGTTAAGTAACAACACACCGTTCAAAAATAGCGTCCCATTCGCGGTGGCATACCCGTTTC  
TGGCCGTTGGTTTGGTCCGCTGCACAACAGGTTGCTGCGCACGGTTTGGCCGCAACCTGCGGTGACGCTGAAATC  
ACATCGTGAAGATGCTGATGGTGTAGCGCTGACTTTTGAATTGACACAAGCGAAGAGACGAAAAATTTGGCCGCACG  
ACTTTACGCTGTTAGCGCATTTCCACGTTGGTAAACCTGTGAAATCGATCTTGAAGCACAGCGCAATTTGAAACTACC  
TCTGGCTCAGTACCTTAACTTAACTGAGTATCGTAAAGTAAAGCGTCAAGTGGTACTGAGTGGTACTGCTGATGATA  
AGTAAATGACGCGAAAGAAGATGTACTGACCGAGGTTTACAGACTTCCCTGACCGTACCGATCGCGTGTATCTGAATC  
CGCAAGATTGCAGGTAATTAATGACGAAACGCTGAATCGTATTTACGCGTAGGCCACCAGCATCATCTGAACGTTGTA  
GGCTGGAACCCAGGACCGCGCTTTCAGTTAGCATGGGCGATATGCGGATGATGGCTACAAGACCTTTGTTTGTGTAGA  
AACGGTTACGCTTCAGAACGCAAAAGTCCAAAGAGAAACCTGCACATCTGGCGCAATCCATTCGCGTTGCGAAAC  
GTTAA  
>Cluster\_46493  
ATGTCATTGAACATAAATGAAGCATTGAAAGTAAGCCGCAACCAATTGATTACGCTCTGCTAAATTTGGCTATTGGTAC  
TATCGGAGCGATTGTTTCCCGGAGGCTTGGAAAGTCAATGCTGGCATTACAATTGGCTGTGCAGATTACTTGTGGTG  
TAGATCTTTTAACTTTGGTGAATATCCGACTGGGTTGGTGGCATATTTACCTGTGGAGGACTCTGAAACCATCGTTCAC  
CATCGTTTATATGCTTTGGGAAAATATCTAACAGCACGTCAGCAGCAGATTGTTGCTGATAAGCTACTTGTGCAACCTTT  
GGTAGGGAAGTCCAAATATTTCTCGCCAGGTTGGAGCAACTGATTAATGAGATTTCAAAAAGTAGACGGTTAATAA  
TTTTTGGATACTCTTCGCGCTTCCACAGGAATGAAAATAAATAGCGGAGCAATGTCAAAAGTCAATTTGGGACTAGAA  
GGTATTGCTGCTGATACTGGGTGTTGATTTATTTCTACACCATTCAAACAAAGGCGTGCACCGATGGGTGTTGGTGA  
TATACAGCAAGCAAGCAGGGGTAGTAGCGTCTGGTTGATAATATACGGTGGCAATCTTATCTGGCAGGCATGACCGCT  
TAGAAGCGAAGCAGTATGGTATTTCTGATGATGTTGAGGTCATTTGTTAGATTTGGAATAAATAAAGCAAAATATGGA  
GAACGTGCCCCAGATCTGTTGGTTACAGAGACATGAGGGGGAGTATTAAGGATAACGCAACTCAAAATCGAAGAATAAAAA  
ACAAATAGCAAAAGAAATGTATGTCTTATGAGTGGTGCAGAAAATGATAACTGGTAA  
>Cluster\_40781  
GTGTTTACAACAATGGCTCTACTGCAAAACAGACATAACAACATTCGGGGTGAATATGAAATTAGCACATCTGGGACG  
TCAGGCATTGATGGGTGTGATGGCCGTGGCGTGGTTGCGGGCATGAGCGTTAAAAGTTTGCAGATGAAGGTCTGCTTA  
ATAAAGTCAAAGAGCGCGCACGCTGCTGGTAGGGCTGGAAGGAACTTATCCGCGTTTCAAGTTTTCAGGGGGATGACGGC  
AAATTAACCGGTTTTGAAGTGAATTTGCCCAACAGCTGGCAAAAATCTTGGCGTTGAGGCGTCACTAAAACCGACCAA  
ATGGGACCGTATGCTGGCGTGCCTGACTTAAACGCATTTGATGTTGGTGAATTAATCAGGTCAACATTTCTGACGACGCA  
AGAAAAAATACGATTTCTCTACCCCGTACACCATTTCTGGTATTCAGGCGCTGGTGAAAAAGGCAACGAAGGCACCAT  
AAAACGGCTGATGATCTGAAAGGCAAAAAGTGGGTGTCGGTCTGGGCAACCACTATGAAAGTGGCTGCGTCAAGATG  
TCAGGCGCTGATGTGCTACCTATGATGATGACCCGACCAAAATATCAGGATCTGCGCGTAGGCCGTATCGATGCGATCC  
TCGTTGATGCTGTCGGCGGCTGGATCTGGTGAAGAAAACCAACGATACGCTGGCAGTAAACCGTGAAGCATTTCCCGT  
CAGGAGTCTGGCGTGGCGTGCCTAAAGGAAATGAAGACCTGCTGAAAGCGGTGAATGATGCAATTCGCGAAATGCAAAA  
AGATGGCACTTTGCAAGCCCTTTCCGAAAATGGTTTGGTGTGATGTGACCAATAA  
>Cluster\_28913  
ATGAATAACATAAACCGTAAAAAGTCTGATTCAAAGCAATACCTACACTGCATCAGGCGGAAAAAAGGTGCGTACTA  
TATTTCTAGCCACGCACATGAAGTCGTGAACATATAGTGTACTGAACATATCAGAAAAAGCCATGCCAGTGAAGCGACTA  
TCGTACGCACCTGTAAGAAATAGGTTATCAGGGTTATACCAATTTAAAAATTCATTAAGCAAAAGGATCAATTAATCT  
GACAAATAGCTATCTGATAATACCGATTTTACCGATATAACCTCGCTGGCCACATTTTATTAAAAAACAGGCGGAAGA  
TTTAAATACAAATCAACGCAATTTTTTAAATGCCGAAGTACTTTAGTCCATTTCAAACACTTGTCAATTTGCGATATTT  
TCTTTTTTGGTGGCGAAATCAAACCTCTGGCGGTTTATGGTGTCTATAAATTCAGCCAACTCGGATTAAAAACCGTT  
GTTCCAGTCAAGCCGAAATGCAAAATTAATGCGGCATATTTATGGGAAACGCGACCTGGCGATTGGTATTTCTAATC  
TGGCAGCAACCACTTAATGGTTCGATATCTTAAAGTGGTGAAGAGCGCGGTGCCAAATCCGTTTGTATCACTAATATA  
TTAAATCTCCGTTATCAAACCTCTCCACCCATCAACTCAATACCGCGTCAAGGATAAAAATCTTCTTTGAAGCCTCGAC  
TCCACTCGGTTCCGGCAATGGGCGTTATGATATGCTGGTGTGTTGTTATGTATAAAAACAGGCGCATTACGAGAA  
ATACCGCACCCGTAAGAGTTTCTCGGCTCCCGTTTCAAGGGGTAA  
>Cluster\_23346  
ATGAAACTCTTTGGCCAGGGCACCTTACGACCTTAGCCATCTCACGTAATGGGATCCTCAACGTCACGCTGATTC  
CTTTTCGGATGGCGGCACGCATAACTCGCTGATAGATGCGGTTGAACATGCGAATCTGATGATCAACGCTGGCGCGACGA  
TCATTTGACGTTGGTGGTGGTCCACGCGCCCGGGCGGGAAGTTAGCGTTGAAGAAGAGTTGCAACGTTGTTATTTCT  
GTGTTGAGGCAATTTGCTCAACGCTTCAAGTCTCGGATCTCGGTAGATACTTCAAACCCAGAAGTCACTCGTGGTACG  
GAAAGTTGGCGCTCAGTATTAACGATATCCGCTCCCTTTCCGAACAGGGGCTCTGGAGGCAGTTGCAGAAACCGGTT  
TACCGGTTTGTCTGATGATATGCAAGGAAATCAAAGACCATGCAAGGAGCCCGGAAGTATGACGATGCTTTTCAGAA  
GTGAATCGCTATTTTATGAGCAAAATGACAGCTTGCAGCAGCGGTTATCGCAAAAGAGAAATGTTGCTCGACCCCGG  
ATTCGGTTTTCGGTAAAAATCTCTCCATAACTATTTCAATTTACTGGCGCGCTGAAATTTCAACATTTCAACCTGCCG  
TGTTGGTGGGTATGTCACGAAAATCGATGATTTGGCAATGCTGAACGTTGGGCGCTCCGAGCGCTGAGCGGTAGTCTG  
GCCTGTGGCGTATTTGCCCAATGCAAGGCGCGACATCATTCGTTTATGATGATGATGATAAAAACAGGCGCATTACGAGAA  
GGTGGTGAAGCCACTCTGCTGCAAGGAAAACAACGCTATGAGTAA  
>Cluster\_53092  
ATGGAATTTTTTACGTTATTTTACCGGATGGGGTTCATGCTGGAACAACAGTGGTATGATGCTTATCGGTTAATGTT

TCTTTATACCTTTGTGGGGATATGCGCGGGATTTGGCGGTGGTTTAAACCACCATGCCGCTCGTCACGTTAATGCTCCCGG  
TAAAAATGGCAACTCCGCTCTCGGTGATTGTGCGCACCGCGACCGCTTGTACGCCACCTGGCTGTACGTAAGAAACG  
GATTGGCGATCGGCAATGGTACTGATTAATTTTCGCTTCTGGAATACCCGTCGGTTTATATGCGCTGTCGATTTACC  
CGACCATTTTATGAAAGTGGCTTAGGCGGATTCCTTATCTGTACTCCTTTTACAGTATGTTTATTCACGCCTGCCGA  
TTTATGACCGTAGGTGATCGCCGACCTATCGGCGCCGAGGAGCGTTAGGGGACGATTTTCAACACCGGACCG  
CCGATGGTTATCTACGGTATGCTGCGTAACTTAGGCCCCGGCGCATTTGCGCGCACTGAAACGCTTTTCTTACCGCAAA  
CAACATCGCGGTGATCGGCGGGCTGGCGACAGCGGAAATTTGACTGTCTCTATCTTTAAACTGGTGTGTTTGTATTTC  
CCACCATGATCCTCGGTTCACTGGTGGACAATATGTGCATAAACGCATTTCCGGTCAAAGTGTCCGTGTGATGGTCTTT  
TTATTGCTGATTGCCCTCGGTTCTATGTTGATAAAAGGCGCGCTGGGAATTCGCGCGCTGCCGCACTTCTTCCCGGTT  
TACCTTGTAGTTATACTGCAACTGGCATTTGGTAAAAAGTGGCGGCAATCCGTGCGGCGGAAGAAAGTAAATAA

>Cluster\_59222

ATGAACAGGCTTTTTCAGGTGCTTCCGATATGCCCTTTGCGCTGCTGCTTCTCGCGCCAGCTTATTACTGCTGGGCGG  
TCTGGTGGCGTGGCCGATGGTGTGCAATATCGAAATCAGTTTTTACGTCTGCGCTCAATCCCAACATCGAGTCAACGT  
TTGTTGGGGTGGCAACTATGTGCGTATCCTCTCCGATCCCGGCTTCTGGCATTCGCTGTGGATGACGGTCTGGTATACC  
GCGCTGGTGGTGGCGGGCAGCACCGTGTGCGGCTGGCGGTGGCGATGTTTTTCAACCGCGAGTTCCGCTGCCCAAAAC  
CGCGGCTTCGCTGGTACTCTCTACGTAACGCCCTTTCGCTGGTGTTCGCTGGAATACATGTTCAACAACG  
GCTACGGCATTTGTTAACTACTCGCGTGCATCTTCTGCATCTATAGACAGGCACCGCTGTGGTTGGAATAATCCGGGC  
AGTAGCTTTGTGCTGGTGGTGTCTGTCGCCATCTGGCGTACTTCCCGTATGCCCTTATCTCGTTTCTGGCGATTTTGA  
GACCATCGACAAATCGCTGTACGAGCGGCAGAGATGGATGGCGCTAAAGCCTGGCAACGGTTTCGATCGTACGCTGC  
CCGCAATTAAGCGGCTTGGCGAGCGTGGTGCACCTGGCACCATCTGGATGTTCTACATGTTTCGCGGATGTTTATTG  
CTGACACCAAGTGCATATTTCTCGGTGATATCTCTACAAAACCGCCTTTGCTTTAATGATTTAGGAAAAGCGGCGG  
GATCTCGGTGGTCTTTCATCATATTTTTCGCTGTCTGCTGACAGGAAACGGGTGAACCTCAATGGCAACAAAT  
AA

>Cluster\_28153

ATGAGCATTATCTCCACCAAAATATCTGTTACAGGACGCCAGGCCAATGGCTACGCGGTGCTGCTTTTAAACATTCATAA  
CGCCGAGACGATCCAGGCGATCCCGAAGTGTGCGAGTGAATGCGATCGCCGGTGTATCCTCGCGGGACGCGGGGACCT  
TTAAGCATATCGCGCTGGAAGAGATCTACGCCCTGTGTAGCGCTATTTCCACGACCTAATAACATGCGCGTGGCACTGCAT  
CTCGACCCACAGAAATCGCTGGATGATAATCGCGTAAAGTCCACGCGCGGTGCGCAGCGCGATGATCGACGGCAGTCA  
CTTCCCGTTTGGCGAGAACGTGAAGCTGGTGAATCGGTTGTGCACTTCTGCCACTCCCGGATTCAGCGGTGGAAGCAG  
AATCGGGCGCCTCGCGGTGTTGAAGTGCATGAGCGTGTGACGCGGAAAGTGCATTCCTGACCGATCCACAAGAAGCT  
AAACGCTTTGTGCAACTGACTGGCGTGCAGCCTGGCGGTAGCGATTGGTACGGCGCACGGCTTATACAGCAAAACGCC  
GAAGATTGATTTCCAGCGCTGGCGGAAATTCGTGAAGTGGTGGATGTTCTCTGCTGCTGCATGGTGGCAGCGATGCTC  
CGGATGAATTTGTCGCTGCACTATTGAACTTGGCGTAAACAAAGTGAACGTTGCCACAGAATAAAAATAGCCTTCGCT  
GGCGCGTTAAAGCCTGGTTTGGCGGAAATCCGAGGGTAAATGATCCTCGTTATATATGCGCGTCCGAAATGGATGCGAT  
GAAAGAAGTGTGCAAAATAAAATTAATGCTGCTGTTTTCAGCGAATCGAATTTTCAGCATAA

>Cluster\_66087

ATGGTCTTATTAGTAATGAAATCATCCACCACAATATCACTGCATATTTTGACATTGGTAGAGGGGATGGACTGCTAA  
TAAAGGTTCCCGTAAAAACTAGCTCGTTCAGTTGATGTTTATTTAGTTACTTTGAGCGTCTGGCCGCACTTAAAAATG  
AGATGATTTATTTCACTTCTCCGATTTGAAACCAAGGTTGAAGCGATTCGCAACGGAAACCAACACCGTTATCGGTT  
ATCGATATAAAAAAGAAATTTAGATATAATCAGAAGTGTGATCGAAAAAATCAAAAAGATGAGTCTGTTTACAAATAGACT  
TGAGCCTCGACAAATAAAAAACAGAGTACTGGTACCAGAGTATGTTTGGTATGTAACTTAAGGCTATTTTGTAA  
ATAAAGCTATCAACATGGGCTTAGTGAAACCGCCTCTTGTGCGTGGATAGATTTTGGCTATTTGCCGTAAGCCAAATGTA  
ACTCGAGGATGAAATTTGGGATTTCCATTTGATGAAAGTAAAGTGCATCTTTTCACTATAAAAAAAGGGCTTACTGT  
CACATCTCAACAACAGGTTTTTGGATTTTCAATGATGTTGGCAATCATGTATAATTTTGGGGCGCAATTTGTTGGTTACACG  
ATAAATGGAAAGAAATTTCTATAAATAGTTCTGGAAAGTCAAAAAATAACATAAATAACATTTGTGGATGATGACAG  
GGCATTTTTGTGATGCTATTACAACGCCCGATCTTCAACCTAAACTATCTGGGGAGAGGAAATGGTTCGATTT  
GTTTCGCTGCTTCCAGGATTAACACTTTAGGGGCAAAAATGCAGCGCTGAGAAATTTTCTTTCAGAAAAATAG

>Cluster\_17213

GTGAACAAAGAAGATGACATCAGGCTCGATCAAAAAGTACGGGCGCGTGGATGTATTACATCGCCGACTTAAACAGAG  
CGAAATCGCCAGCCAGTTAGGGACGCTCTCGTCCGGTTGTCAGCGGCTAATTCAGCTGCTAAAGATGAAGGGATGTGT  
CAATTGGATTTACATACCTCCGTTGGCGAATTTGCTCGATTCAGCGCAACTTTTAAAGGAAAAGTACCATTTAACCAGCTGT  
AATATTGTGCCGATATACAGTGTGAACGTACCTCGATAGCGTGACATTTGGTTGTTATCAACTGATGGCGGTTATTT  
ACAGGGTGTATAAACCGACTATTGTCGGTATCGGTTCTGGCTTAACTTAAAGAAAACCATCAGACGGATGATTTTGATA  
GCCAAAATACCCGTTGCGTTGCACTGATCAGCGCATGAAACGAACATGGCAATGTAACATTTACGACGATTTTCCACTA  
CTGCTGGCGAGAAAATTCAGGGCAAAATTTATCAATGAACTGCTGCCCCGCGCTATGCCCCAGTACGCGGAAAGAAAT  
GTGGTCAACCAACCGACTGTTCCGCAATGCTCTGCTGTGCTGTAATTCAAATGTTATATTCTGTCGGCATCGGTGCAT  
TAGTTCGGCAAAGCCGATTTTCAAGATGGCTTTATCAATGAACAGCAACTGGAAGAGTTAACGATGCTCGGTGGTGTG  
GGGAAATTTTGGGCGCTTTATCGACGCGGCAAGTGTGGTGGAAAGCATAATTAACCGGATGATCACACGCTACGA  
TATCCGCGAAAGTCACTGTTCCGCGAATTCGCGGCTGCGGTTGAAAGTAAACCGCGCTATTTCTCGCGGCTTAAAG  
GCGGATGGATCAACGGCTGGTACCGATGAACACACCGCTCGTGGTTATTGACTCGCTAA

>Cluster\_24107

ATGTATCACCTTCGGTTCCACAACAGAAAGAAATAGAGCGTTACTATCAGTTTCGCTGGGAAATGTTGCGTAAAGC  
CCTGCATCAACAAAAGGTTCCGAACGCGACGCGTGGGATGCGATGGCGCATCACAGATGGTGTGTCGACGAGCAGGGTA  
ATCTGGTAGCGGTAGCCGACTGTATATTAATGCCGACAAATGAAGCGTCCATTTCGCTTTATGGCGGTTTATCCGACGCTG  
CAGGACAAAGGGTTAGGACGCTGATGGCGATGACCTGGAGTCGGTGGCAGCTCAGGAAGGCGTTAAGCGCGTACCTG  
TAGCCCGCTGAAGCAGCGGTTGGATTTTTCGCGCAAGCTGGGGTTTGTAAATCAGGGTGAATCAGCGGAAAGAAATCA  
CGCGGATTCGCCATTTTTTGTGATGATAAAACCTGTTGCCACTCTGGATGATATTTCTCATCGCGGACGTTGGTGC  
CTCCAGCAAGCGTGGTATGAACCATCCGCTGAGTGAAAAATGGGTGTGCGCATTCAGCAATATACCGGGCAAAAAT  
TATCACCAATGCGGAAAACAGGCAATCAGAATCCGCATCACACGCTGTTTGGCGGAGTTTATTTCTCGTGGCAACG  
TCACTGGTTGGGGCTTATCTGGCTGATGCTGCGGCAACCGCACTTCCGCGGAAACGATTTATTTCTGCGGATGCGCATATC  
CGTATAGCAACCGATTAGCGGAAAACCCATCGGTTAGCGGACTTGGTGCCTTAAAGTGGCGATCTCGACCGTCTGGC  
GCGCGGACAAAAGCAGGGTGCAGATGCAAGTAGAAATCTTTGGCGACGAGACGCGGGTGCAGTGTTTGAAGGACCGT  
ATATCGTTCTGCCCGGAAGCCATTTGGTCCGATGAAGAGGGCGGAAACGAAGAAGAGTAG

>Cluster\_9164

ATGGCTTTCTGCAATAACCGGAATCTTCTCAACGATTTTGTACGCCATATTCGAATAATCAACTTCTGTTCTTGGCCGA  
GGTAACTCCGGTGGCGCATCAGTTAAACTTCTCAAAGATGATTTTTTTGGCAGCGACAGCAGGCGTCTGCTGGCTG  
ACGGTTACCGCAAGATGTTTGTGTAACATACATGATTTTTTGTGAGTGGTGGTGTGCTGGCGGCTAATGGCCTG  
CATGTACTCAACGATCGCCCTTATCGCATTACCCTGGCGATCTTTTTACATTCATGCTGACGATAAACACTCTACGC  
TTCCGTTAACGATCTGGTTTTGCGAATATTTATTTATTTGCCGAGCGCTGAAAGTGAATCTTACTGGCAGGGGGCGA

TTCCGGGATTTAACGCCAGCGCAGGGCAACCACACTGGCGCTTAGGTAGCATGGGGATGGCGCAGGCGGGCAGGTTATC  
GGTCAGCTTGAGCATGAAAGTAGTCAGCATGTGCCGTTTGGCTAACGAAATGGCTGAGTTGCTGTTCCGGCAGTTGGTGTAT  
GTTGCTGAATCGCCATCGTTACACCAGTGAATTCGTTGCCGCCAACATCCAGCGAAACGTTGCTGGATAAGCTGATTACCC  
GGCTGGCGCTAGCTGAAAAGTCCCTTTGGCGCTGGATAAATTTGTGATGAGGCATCGTGCAGTGAGCGCGTTTGGCT  
CAGCAATTTCCGCCAGCAGACTGGAATGACCATCAATCAATCTGCGACAGGTGAGAGTGTGTATGATGCCAATATCTTCT  
CCAGATAGCCGCTGTTAATCAGTGATATTTCCAGCGAATGTGGCTTTGAAGATAGTAACATAATTTTTCGGTGGTGTATA  
CCCGGAAACCGGATGACGCCAGCCAGTGGCGTCATCTCAATTCGCAGAAAGATTA

>Cluster\_66061

ATGCTCGACCAGCTGAAAGTGAATCCGCTGACCGGGTGAAGTGAAGAAAGCCGCGCTGGCTGGCATCGTGGCGCT  
GACCGTGGAGCAGATGAAAAACCAGATGGACCCGGTGTACACGCCGGCGGAAATCCACCTGTACCCTGCGACCATC  
GCGCCTGCGCTGGCGCTCATCAGCACGGAAGGGGCAACAGCGTGGTGCAGAAATATGATGAATGGGGCAACCTGCTG  
AGTGATGAGAACCAGCATCATCTGCAGCAGTCAATCGCTGCCGGTGCAGCAGTATGATGAGGAGTCCGGCTGTATTA  
CAACCGCCACCGCTATTATGACCCGCTGCAGGGCGGTATATCACTCAGGATCCGATTTGGCTGAAGGGGGATGGAAT  
TTTATCAGTATCCGTTGAATCCGGTCATAAATGTAGATCCGCAAGTTTGGTTGATATAAATTTATACCCGAAAGTGT  
CTTATCCATCTCTGAGCTGATGAGATTAATATCCAGCGCTTTTCACAATCGGGGGCATGGTACCCCCACATCTATTGA  
ATCCGCAACCGCGAGTATCATGACAGCTAAAGATCTAGCATATCTAATTAATTTGATGGAAATTATAAAGATGGGATGA  
CAGTTTGGTTATTTCTTCTTAATACAGGTAAGGACAAAATTCATTTGCTAGCCAATTAGCTAAAGAGTTACATACAAAT  
GTAATAGGACCTGACACGCTATGGACGTTGGGGGGCAGGAACTAATGGTAAGTAAAAATGGATACAGTGTACACAGC  
ACCAACGAACTTTAATTCAAATAAGGATCTAATGGCTAACAACAAAAGACCTTGGTAATTGGATAACATATGGCCAT  
CTGGGCACCCATTTCTAATATGCAAGGTACGCCAGAAAACCCAGTGATATAAGATAG

>Cluster\_12853

ATGAGACAAACTCTTTACGACGGATATCTGGTCAATTTTTGGCTTAGCACAGGCGGTGATCTGCTGATGTAACCCGCT  
TTTTACGGGTATTTCCCGGCAGATACGCGCGGTATGCATCTCCCGCGGGCGGGGATCTGGCAGGATATTCGCGATA  
TCCACAAACTGTTTAAACGCCAGGAAGTTGCGCTATATCTCAGTCTGATGTTCCGCTGATGCTGGGTTAATC  
AGCAGCATGCTGGTGGTGGCGATGGCCCTACCCTTTTTATTACCGTTTCCCTTTTGGCGGGCGGGCGATCTGATCAC  
CCTTATCTATCTTCTTGGCCTGTTTCGTTTTTTCTTGTCTTTCCGGGCTGGATACCGGAAGCCGTTTGGCGGAGTGC  
GTGCCAGTCGCGAGTTGACGCTCGGCATTTCTGGTCAACCCATGCTCATTTCTCCTACTGCTGGTATTGGCGCTGATAGCA  
GGTTCACGCATATTCGAGATGATCAGCAATGACGCTGACACCGGCTGGAACTCAGCGCTAACCCGTAACCCGCTACT  
GGCCTGTGGTTTTGCTGCTTATTGAGATGGGAAAAATTCCTTTGATGTTGCTGAAGCAGAACAGGAATTACAGGAAG  
GCCCGCTGACCAATATTTCCGGTCCCGGCTGGCGCTAGCGAAATGGGGGCTGGGGCTGAAACAGGTCGTGATGGCAGCA  
CTGTTTGTGGCCCTGTTCTGCCCTTTGGGGCGCGCAAGAATTTCTCTCGCTGCCGTGCTGACTTCACTTGTCTGTTAC  
GCTGCTCAAGGTTTTGCTGATTTTTGTAAGTGGCTCAATTCGCAAGAAACACGCTGGCAGCGGGCGCTTTTTTACTCATTC  
ACCATGTGACCTGGCTGGCTTACGCTTGTGCTGGCTTGCATGGTCTTCTGGTTAACCGGCTGTGAA

>Cluster\_11801

ATGACAATCAACGATTCGGCAATTTCAGAAGCGGAATGTGTGAAGAAGAACAGGTCGCGCGGATCGCGTGGTTTTACTA  
TCACGACGGCTGACCCAGAGCGAGATCAGCGATCGTCTCGGCTGACCGTTTGAAGTGTGCGCTTTGCTGGAGAAAG  
GGCATCAGTCCGGCATTATTCGCTACAGATTAATTTCTCGCTTTGAAGCTGTCTGGAATATGAAACTCAATTACGTCGT  
CAGTTTTCCGCTGCAACATCTCGGGTATCCCTGGGCTTGGCGGATGCTGATGTCGCGGGCGACTGGGATAGGCGGGC  
GCATATGTTGATGAGTTTACTTCAACCAACAGATGCTGGGATTTGGTTTTGGCGAGGCAACCATGGAATACGCTGCAAC  
GCTTAAAGTGGTTTTATTTTCGTCACAGCAAAATTCGCTGTGTCAGCTCTCCGGTGGCGTGGTTTTCTTATATGACGGGTATC  
GGGAGCTTAAACGGCGTGCAGTGTGAATATTTCCGGCTCCGTTGGGGCATCTCCGCTGACATGCCCCGTACGCT  
AAAAAATGAAAATGCGCTCAAAGATGTTCTGTTAGCCCGCAAGCAGCCGATGTGGCGATGTGCGGATTTGGGGCGGTCA  
GTCAACAGGACGACGACGATCATTGCTCCGGTATATCAGCCAGGGCGAACAGTTAATGATGGTCGAAAGGCGGGG  
GTTGGCGACATTTTAGGCTACTTTTTGATGCAAAAAGTGACGTTGTACGGATATTAATAACATAACGAACTGATTGG  
CTTACCTTAAAGCTCGCTGAAGACCATAACCGTCCGGGTTGGCGTGGCAGGGGAGAAAAATAAGCCGAGCAATTGCC  
CTGCAATGAAAGCGGTTATATCAACGCACTGGTTACCGATCAGGACACAGCAGCGGGCATTTTACGTAGTTAA

>Cluster\_41164

ATGGAAAAGAGAAAAATTTCTGGATTGTGATCCGGTATGATGATGCTATTGCTATAATGATGGCGGGGAAACATCC  
GGCGATTGATTTATAGGTATCACCATTTGAGCGGTAATCAAAACCTCGATAAAACATTAATTAATGGCCTGAATGTTT  
GCCAGAACTGGAGATTCATGTTCCGGTTTATGCGGGTATGCCGACGCAATTTATGCTCAACAAATTTGTTGCCGCAAT  
ATTCATGGTGAACCCGACTGGATGGATGGCCCGGATTCGAGCCGCTGACCCGCGCAGGCGAGAAAGCATCATGCGGTGAAATA  
TATCATCGATACCCGATGGCAAGCGATGGCGATATCACTCTGGTGGCGGTTGGTCCGCTTTCAAATAACGCGGTGGCAA  
TGGTATGACAGCCCGCATCTGCAAAAATCCGTAATTTGACTGATGGCGGGCGCTTATGGTACTGGCACTTACAG  
CCATCTGCCGAGTTCAACATCTTTGCGGACCCGGAAGCGGCGGAGTGGTGTTCACCTCCGGCTTCCATTAGTATGAT  
GGCCCTCGATCTTCAAAACCGACCTTTGCAACCCCGGACTGATTGCTCGGATGGAAGGGGACAGCGCCGCGGAG  
AGCTGTTACGCGACATCATGAATTCACCTGAAAACGAGTTGAAAACCTACGGTCTGGCTGGCGGGCCGGTACATGAC  
GCCACCTGTATCGGTTATCTGATTAACCCGATGGCATTAACCCAGGAGATGACGTCGAAGTGGACGCTAACAGTGG  
CCCTGTTACGGGGCTACCGTCTGCGCAGGCTGGCGTCTTGGCAAGCCCAATACAAAAGTCCGGATCACTATTG  
ATACCGACTGGTTCTGGGATGATGCAAGAGTGGCTGGCGGCTACATCAAAACCCACTAA

>Cluster\_28039

ATGCGTTTTATTTTTTCTGCTGATACTGTTGTCAATTTTTTTCCCGTGCAACAGAACCTGTTCAAGTATTTACTGATGA  
TTTTAGGGCGCAAAGTCACTGTTCCCTGCTCATCCAAAGAGAATTTGCTCTTTACAGCATCTTGATACACTATTCCCTGTA  
TTGAGCTCGGTGTACCTCTGCTGCCAGCCACGGGCGAACTCGGCTGACGGTAGCCATTTCAATTCGATCTGGCGCGTTA  
TTGACAGGTGTCGACTTTGATAAATTCATCGATCGCTTTTATTTGGTACCCTGATATTGATATTGAAGCATTTGGCGCG  
AAAGCTGACCTGATCATCAGAACCCGACCCGTAATACGCCCATTTGAACAACTTGAAAAAATGGCCCAACGGTGAGCA  
TTGATCATCTCAAAGGGGCGCGCCAGAAATCTATCGCAAGCTGGCAGAACTTACAGGAACGCAAGTCCGAGCTGGCGATA  
CTTGAACCGCGTATCAGGCACAAATCAATGCGCTGAAGGCGACGCTGGACAGCCAAAAAATAACGGTATCGGTGATTCA  
GGCAAAACAGGAAAAAATTAATGTGATGATAGCTATCATTTGCTGGGCGGGTATTACGCGATGCGGGTTTTCGTTTTTC  
CGCCGCTGATTGAGAGCATCTCTGAAGTGGCGAAATGGATGTGAGCGGGAGCGTTTACCTGAACTGGATGCCGATTTT  
GTTTTGCAACCTGGCGGGTGAACCCCTGGTGGTAAACCTCAGGATGAGCTGGCAGCAATGGAAGGATGCAAGCGGGATG  
GTGTCAGTTTCTGACTGCCGTGCTGTTCCGGGCTTATGTGCTGATTTCTGCTGAAGAGGCAATTTCTAACTCCTTTGCAT  
CTCTGGGGCTGATGGCTGGCAGATACAATCAAAATTCAGGGCGACCTCTACCGGAGGCTAAATGA

>Cluster\_63648

ATGCGTATGATTTTGGCGCTTTATTCTGACTCACGGGCGACCGGACAAAGTCTGACTTACCGGACGTTGGCTGCTGTC  
TGGCTATACCGGAAATTTTATCGTTGTTGATGATGAAGATAAGACACGGAATCAGTACATGGCTGAATTTGGTGAAC  
AGGTGCTGGTGTCTTCAAAGCCGATATCGCCAGTCTTTTGGCAGAGCCGATAATTTCTGTAACCGCGCTCAATTTTTT  
TACGCCCGTAATGGCTGTTTCCAGCTGGCAAACTGGTGGGTTAAATTAATTTCAATTCAGCTGATGATGATTAACGGA  
GTTCCAGTTTCCGGTGGATCGCAACTATGACCAGGCTTATTTCCGATAAGGAAACTGGATGCGATCTTTCTGAAATGC  
TGGCGTACTACGAATCAATACCTGCTCTTCCATCGCTATGTCGAGGGCGGGGATTTCTTGGTGACAAATGGCGGCCAT

GCTTCGTGGGTGAAACGCAAGGCAATGAACAGCTTTATCTGTTCGGTGTGATCGACCGTTCTCATTCATGGGGCGCATTA  
CGAGGATGTGAATACGTACAGCAATCTCGGTGCGTGTGGTGAATGTTTTATGACGATCGGTGCTGCCAGTTAGGGCAGA  
AACAGACGAGAAAAACAGCGGCGGAATGACCGAGCTGTATCTGGATTCCGGAACCTACGTTAAAAGTTTTACTCCGTC  
ATGTATGCCCGCTCGTGCCTAAAAATCTCACTGATGGGTGCCAGCCATAAACCGCATTCACCATCAGGTCACCTGGAACAA  
CGCTGCAGTAAATAATCTTCACGAAAAATACGGAAGAACACCCCTGCATCAATGGGGGTGACAAATGATTCGGTAT  
TCGAAAGTCGAGTCTCTGGCAGCGTCCCGGATGACTGCACAACAAATCGCTGA

>Cluster\_35779

ATGATTTGTCACCCCGGCATCCATTAAGCCCTGATGACCTCCTGGCGTAAGGATTTTCAGGGCGGTCTTGAAGACGCCCC  
GTCGCAGTACAGCAAAAATFGCAATGGTGGTGAACCTTTCCACCCGAGTAATACTATGGCTGGCTGGGTAAAATTCGGA  
CCCTGAAAGAATGGGTGGGTAAGCGAACCATTCAGCAATGGAAGCGCATGGCTACTCCATCGCCAATAAACGTTTGAA  
GGCACCGTGGGTATTTCCCGTGTGACTTCGAGGATGACAATCTGGGTATTTATGCGCGGATTTTTCAGGAGATGGGCCG  
TTCTGCGGCAGTTCAGCCGGATGAGCTGATTTTAAACTTCTGAAAGATGGCTTACCAGCCCTGCTATGACGGTTCAGA  
ACTTCTTGACAAAGGAGCATCCGCTATATCCGAATGTGGATGGCACGGGACGCGGTTAATACTCCAACTCGTTGAG  
CAGGACAGCTTCAGCGGTCTGCCATTCTATCTGCTGGACTGCTCCCGCGCAGTCAAACCGCTGATTTTCCAGGAGCGCCG  
CAAACCGGAACTGGTCGCACGTACCCGATCGATGACGACACAGCTTTTATGGATAACGAGTTCCTGTTTGGTGCCAGCA  
CCCAGCGTCTGCCGTTACGGCTTCTGGCAGATGGCTGTGCGGGTAAAAGCGCATTCGACGCTGGATAACCTCTGGAAG  
GGCTGGCAACTGATGCGCTCTTTTGAAGGTGACTGGCGGTAAAGAAACTGGCCCTGAAGCCGACGCATATCGTTACCGGT  
CGGGCTGGA AAAAGCCGACAGCAACTGCTTAAACCGTGAAGTGTTCGCGGATGGCAATACCACCGTCTCCACGAGATGA  
AGGGCAAGCTGCAACTGGTGTGCTGACTACCTGTAA

>Cluster\_29051

ATGAATATTCGTGATCTTGGAGTACCTGGTGGCATTGGCCGAACACCGCCATTTTCGGCGTGGCGCAGATTCTGCCACGT  
TAGCCAGCCGACGCTTAGCGGGCAAATTCGTAAGTGGAGATGAGTTGGGCGTGATGTGTCTGGAGCGGACAGCCGTA  
AAGTGTGTTTTCACCCAGGCGGGAATGCTGCTGGTGGATCAGGCGCGTACCCGACTGCGTGAGGTGAAAGTCTCTGAAAGAG  
ATGGCAAGCCAGCAGGGCAGACGATGTCCGGGCGCTGCATATGTTGTTGATTCCACCGGTTGGACCGTACCTGCTACC  
GCATATTTATCCCGATGCTGCACACAGACCTTTCCAAAGCTGGAATGTATCTGCATGAAGCACAGACCCACAGTTACTGG  
CGCAACTGGACAGCGGCAAACTCGATTGCGTGTCTCAGCGTGGTGAAGAGAGCGAAGCATTCATTGAAGTCCCGTTG  
TTTGTGAGCCAAATGTTGCTGGCTATCTATGAAGACACCCGTTGGGCGAACCGCGAATGCGTACCGATGGCCGATCTGGC  
AGGGGAAAAAATCTGATGCTGGAAAGTGGTCACTGTTTGGCGCATCAGGCAATGGGTTTCTGTTTGTGAAAGCGGGCGG  
ATGAAGATACACACTTCCGCGGACAGCCTGGAAACTCTGCGCAACATGGTGGCGGACAGGTAGCGGGATCACTTACTG  
CCTGCGCTGGCTGTGCGCGCGGAACGCAACGCATGGGGTGTGTTATCTGCCGTGCATTAAGCCGGAACACGCCGAC  
TATTTGGCTGGTTATCGTCTGGCTCACCGCTGCGCAGCCGCTATGAGCAGCTGGCAGAGCCATCCGCGCAAGATGG  
ATGGCCATTTTCGATAAAAGTGTAAAACAGGCGGTTTAA

>Cluster\_20454

GTGCGTATAGGTATCGATTAGGCGGCACAAAACCTGAAGTGTGATTCATTGGGCGATGCAGGGGAGCAGTTGTACCGCCA  
TCGCTGCCACCGCCGCTGATGATTACCGGCAGACTATTGAACGATCGCCACGTTGGTTGATATGGCGGAGCAGGCCAA  
CAGGACAGCGCGGAAACGGTAGGTATGGGCATTCCTGGTTCGATTTCCGCTACACCGCGGTGGTGAAGAAATGCCAATTA  
ACCTGGCTCACCGGTCAGCCATTTCGATAAAGACTTAAAGCGGTGGTTGCAGCGGGAAGTGGCGTGGCAATGACGCCAA  
CTGTCTGGCGGTTTCAGAAAGCGGTAGATGGCGCGCAGCGGAGCGCAGACGTTATTTGCCGTTGATTTCCGCGACGGGAT  
GCGGCGGGCGGCTGGCATTCAATGGGCGGCGCATATCGGCGCAATGGCAGTCAGGCGAGTGGGGACACAATCCGCTA  
CCGTGGATGGACGAAAGACGAACCTGCGTTATCGCGAGGAAGTCCCTGTTATTGCGGTAACAAGGTTGATTGAAACCTT  
TATTTACAGCAGCGGATTCGCGACGATTATCGTCTGTTGAGCGGACATGCGCTGAAAGGCGAGTGAATTTATCCGCTGG  
TAGAAGAAAGCGATCCCGTAGCGGAATGGCATTCGCTCGTACGAGCTGCGGCTGGCAAAATCGCTGGCACATCTGCTG  
AATATTTCTGATCCGGATGTGATTGTCTTGGCGCGGAAATGAGCAATGTAGACCGTTTATATCAAACGGCTTCCACAGTT  
GATTAACAATTTGCTTTCGCGGAGAAATGTGAAACGCGGATACGCAAGGCGAAACATGGTGTATTCGAGCGGCTACGCG  
GCGTGCATGGTTATGGCCACAAGAGTAA

>Cluster\_62535

ATGTTGCATACGATATGATCCGCTACGAGATAATGATCTAAAAATGCTTGGTGGCTTTTCCAACTGATTACTCCTT  
ACAGTGGAGTACTTATGATTTCGCGGATCAGTTTCGACGTTTAACTCTGAGATCCTTGAACGGCATTTCCTGGGCGATC  
AGGACAGGATCAAAGTTGGCCGGA AAAACTCTTAAAGAAATGGGCTGAGTTGCTACTGATGATAAAGATATTTTGTATTGT  
TTCAACGGTACACCAAGAGCATTTGGTTTGGCTCACCATTATATTTTGAATACCCAGTATTAATCTGCAGGGCTGACGCT  
TGGTGGGTTGGGGAATGACCTCGTTGTTTCAGGAAGATTTAATCTCTTTTAAATGGATAAATAATATCTTCAAAAATCTT  
ATTTCCCTAATTTGAATATCGACCTGGACGATATCGATTGGGACCTGATAACCAATCCAAAGGCCACAGCCTCGAAAAA  
CCGAAACGTTGTTTCTCCGATTTTATCTGAACCGGGAGCAAGTACCGATCTGTACAACCCACCCCGGTAACCTGAGCG  
TGAATCATCAATGGTGTGATGAGATACATTGATGAAGTCCATGCTCACTTGGAGATAAGATCTCTTATTTCAAAAAA  
TGACAGGCTGCTGGTGGTGGACAAATGATTTTTTTCTGACAGATTTTGGTACTGGATGTCACGCTATGATAAATTCAGTTA  
GTCATCTCTGGACTATCTCAAAGGAAAGAACGAATAGCGGGCTATCTCGCCCTTATAATACGCTCATGCGTTATGA  
CATGATTTATGCGGCTATGGATGTGTGGAACGTTCAACCTGAAGAGAAGCTGGAGTTTATGAGAAGATGAAACATGCTT  
GGCAAGCATAAAATCTTATCGCGGATCTGCTAAATAG

>Cluster\_56824

ATGGAACGACTAAAACGCATGTCGGTGTGTTGCCAAAGTAGTTGAATTTGGCTCTTTTACCGCCCGCCGACAGCTACA  
GATGAGCGTTTCGTCATCAGTCAGACGGTGTCAAACCTGGAAGATGAGTTGCAGGTAAGGCTGTAAACCGTAGTACAC  
GCAGCATTTGGCTGACTGAAGCCGCGAGAATTTACTACAGGGCTCCGCTCGGATGCTCCATGAAGTGCAGGATGTTTCT  
GAGCAACTGTATGCCTTCAATAACACCCCATCCGGACGCTGGCATTGGCTGTTCTTCAACTATGGCACAAAATGTTCT  
CGCCGGGCTGACAGCAAAAATGCTGAAAGAATACCCAGGTTTGGAGCTCAATCTGGTTACCAGGAAATCTGCCCGGAC  
TGATTTGGCGATGGTCTGGATGTGGTAATCCGCGTCGGCGGCTGCAGGATTCAGCCTGTTTTCCGCGCTCTGGGCGG  
ATGCCGATGGTGGTGTGCGCCCGGAAAAGCTATCTCACAAATACGGCATAACCGGAAAACCCCGGATTTGACTAGTCA  
TTCATGGCTTGAATACAGCGTGCAGCCGCAATGAATTTGAACTGATCGACCGGAAGGATCTCGACTCGCTGATCC  
CACAAAGGAAGATTTGTGACTAATGATCCGATGACGCTGGTGGCTGGCTGACGCGGGTGCAGGATCCGCTACGTGCCG  
CTGATGTGGGTGATCAACGAGATCAATCGTGGGAGCTGGAGATCCTGCTGCCGCTTACCAGTACAGTCCACGCCGGT  
TTATGCGTTGATATACGAAAAGATAAACTGCCGCTGAAGTACAGGCTGATCAACTCGCTGACGGATATTTTGTGTT  
AGGTCGGTAAATTTTTCAGGAGATGATGGGCGGGGAAAGAGAAGTAA

>Cluster\_58411

ATGTTAGATGCAAAAATAATACAGCAGGCTGATGAGCTTACCCCAATTTCACTCACTTAAACGGCGACAAAATGC  
CGATTACATTTCCCTTTCTGGCGAATGTACCAGGTCAACTGGCGGCGAGTGGCTATCTGTGACCTGCGATGCAACGCTCTATA  
GTGCGGGTGACAGTGATTACCGCTTTGCACTGGAATCCATCTCGAAAGTCTGTACGTTAGCCCTTGGCTTAGAAGATGTC  
GGCCCGCAGGCGGTACAGGACAAAATGGCGCTGACCCGACCGGATTTGCCCTTAACTCAGTTATCGCTTAGAGTTGCA  
ATGCGGCAAAACCGCTTTCCGCCACTGGTAAATGGTGGCTATTGGCCACCACCGCTGATTAAACGCTGAAAATGTGAAC  
AACGCTGGCAGGAAATTTACATATCAACAGCAACTGGCTGGCGAGCAGGTAGCGCTCTCTGACGAAGTCAACAGTTCG  
GAACAACAACCAACTTCCATAACCGGGCCATAGCCTGGCTGCTGTACTCCGCGGATATCTCTATTGTGATGCAATGGA

AGCCTGTGACGTGTATACCCGTCAGTGTCCACGCTCCTCAATACTATTGAAC TGGCAACGCTTGGCGCGACGCTGGCGG  
CAGGTGGTGTGAATCCGTTGACGCATAAACCGGTTCTTTCAGGCCGACAACGTCGCCGTACATTCGGCCGAAATGATGATG  
GAAGGGCTGTATGGTGCCTCCGGTGACTGGGGCTATCGTGTGGTTTACCGGGCAAAGCGGTGTAGGTGGCGGTATTCT  
GGCGGTGCTCCCTGGAGTGTATGGAAATTCGCCGCTTCTCACCACCGCTGGACGAAAGATGGCAACAGTGTTCGCGGTCAA  
AAATGGTGGCATCGCTAGCAACTCGGCTATAACGTGTTAAGGGCTGA

>Cluster\_31995

ATGAATTATCTTTAAAGCAATTAAGGTTTCGTCACAGTAGCGCAGGAGAAAAGTTTATGTCGTGCAGGAGAGCGTAT  
CGGCTGAGCCAGTCGGCAGTGAGTACAGTGTGAAGGAGCTGGAAAAATCATACTGGTGTTCGCCGTGCAGGAGAACCA  
CGCGTGAAGTGGTCTTACAGATGCAGGCGAGCAGTTGGCTTTCGCTTTCGAGCGACTGCTGGATGAACTTAATAGCACG  
TTGCGCGATACCGGGCGTATGGGGCAACAACACTGAGCGGAAAAGTTTCGGGTGCTGCCAGCCAGACCATTTCCGCGCATCT  
TATCCGCAATGCATTGCTGAAAGCCATCGCCGCTATCCAGATATTCAGTTTTCCTGCACGATCGTCCGCGAGAGTGGG  
TGATGGAAGTATTCGCCAGGGAGATGTCGATTTTGGCATCGTCATCGATCCAGGACCAGTGGGCGATCTCCCAATGTGAA  
GCGATTCTTCCGAGCCTTCTTCTGCTTTCGCTATCGCATCGCATAGCGCTTTCGGCGTGGAAAGATATGTCCTCCGAGCG  
ATTACAGGGAGCGAAATTTGGTGTGAGGATTACGCGTCAGGCAGCCGACCGCTGATTGACGCAGCGCTGGCGCGCAATG  
GTATTACAGCGAATATGTCGAGGAGATGGTCACTCGCGCAGCCTGTTCGGATGGTAGCCGAGGCATCGGCATCAGT  
ATCTTCCCGACTGGCGTACCATTGCTGAAGGTAGCCACTGGTGGTAAAGCGCAATTACGCCAGTGGTTGAACGCCA  
TTGATGCTGGTGGCGCAGGAAGAACCCTTCACTTTCACCCGCCACAACGCTTATGGGACGTTGGTACGAGACCAGGGCA  
ATGCGCTAATGGCTGGCGGGAAGGGATCCGTTGTATCAGATATA

>Cluster\_39907

ATGACGCAATTTGCATTTGTGTTCCCTGGACAGGTTCTCAAACCGTCGGAATGCTGGCTGATATGGCGCGAGCTATCC  
AATTGTGCAAGAAACGTTTGTGTAAGCTTTCGCGCGTTGGGCTACGACCTGTGGGCGTGACCCAGCAGGGGCCAGCTG  
AAGAACTGAATAAAACCTGGCAAACCCAGCCAGCGCTGTGTGACGTCATCTGTTGCGCTGTATCGCGTATGGCAGCAGCAG  
GGCGGTAAGACCCGCAATGATGGCCGGTTCACAGCTTGGGGAAATCCTCCGCGCTGGTTGCGCTGGTGAATTTGATTT  
CGCTGATGCGGTGGCTTTGGTTGAGATGCGCGGAAGTTCATGCAAGAAGCCGTACCGAAGGCACGGGCGCTATGGCGG  
CAATCATCGGTCTGGATGATGCGTCTATTGCGAAAGCGTGTGAAGAAGCTGCAGAAGGTCAGGTCGTTTCTCCGGTAAAC  
TTTAACTCTCCGGGACAGGTGGTTATTGCGCGTATAAAGAAGCAGTTGAGCGTGTGCGCTGCCTGTAAGCTGCGGG  
CGCAAAACCGCGCTCTGCCGTTACAGTGAGCGTACCCTCTACTGTGCGCTGATGAAACCAGCAGCCGACAACTGGCAG  
TAGAATTAGCGAAATCCTTTAACCGCAACAGCTTTCATGTAAGAAAGCAGTTGTTGTAATAACGTTGATGTAATGCAAACTG  
GATGCCATCCGTGACGCACTGGTACGTCAGTTGTATAAACCCTGTTAGTGGACGAAGTCTGTTGAATACATGGCAGCGCA  
AGGCGTAGAACATCTCTATGAAGTCGGCCCGGGCAAAGTGTCTACTGGCTGACGAAACGCATGTCGACACCCTGACCG  
CCTCGGCGTGAACGAACTTCAGCGATGGCAGCGGCGCTCGAGCTTTAA

>Cluster\_37492

GTGAAATCTGCTTAATTGATGAAACAGGCACCGGAGACGGTGCCTTATCTGTTCTGGCGGCCGCTGGGGGCTGGAGCA  
CGATGAAGACAACCTGATGGCGCTGGTGTAAACGCCGGAACATCTGGAATTGCCAAGCGTGATGAGCCAAAACCTGGCG  
GCATCTTTGTTGATTTTGGTTGGCGGAGCGATGGCGCACCGACGCAAAATTCGGCGGTGGTGGCGGTGAGGCGGTGGCGAAA  
GCGTGGGCAATTAAGAGCCGATTTTGGCGGATGTTGGTGGTGCCTGACGCACTGCAGGACTTGGCGCGATGCTTTGTAAGTGC  
TTCAGTCCGCTGCCGCTGCGGATGCTGGAGCGTAATCCAGTGGTTGCCGCGCTACTCGACGACGGCCGCGCGTGGT  
ATGCGGATCGGAAATCGCGCGCTGGTTGCAGGAGCGTTGTCAGTTAATTCACGCTCCAGCTGACGGCGCTGACTGAT  
ATTACCCCGCGCCGAGGTGGTTTATCTCGACCCGATGTTCCCGCATAAGCAGAAAGCGCGCTAGTAAAAAAGAGAT  
GCGTGTCTTTAGTTCGCTGGTGGGACCGGATCTTCGATGCGGATGGATTACTGGAGCCTGCACGCTTGGCGCAAAAC  
GCGTGGTGGTAAAGCGCCGACTACGCGCCACCGCTGGCGAATGTCGCCACGCCAAACGCGGTAGTCACTAAAGGGCAT  
CGCTTGTATCTATGACAGGTACGCCAGTGA

>Cluster\_64529

ATGATTAATTTCTCAGTAGTAACGGTGTATTTAATGCAGCGGAAGCATTTTCGAAAACCATTAATAGTGTAAAGAAACA  
AACATATTTCTAATGTCGAATATATGTTTATCGACGGTGGTTCACAGATGGTACTCTGTCGCTGATAAAGGAAAAATTTA  
ATTTTATTTAGCCGCTTTGTCAGCGAAGAAGATAAAGGGATTTATGATGCCATGAATAAAGCGATTAATTTGGCGTCAAGT  
GATFGAATTTATTTATAAATGCTGGTGTATTTTATGATGACGCTATCTTGGAAAAACCGCATATTTTATTTAGATT  
GAATGAGAATAAAGAACCATGATCTTATTTGGTGGGAAGTAATGATGACGCTCTGTTGTAAGTATGAAAAAGGTGAAGTAA  
AGTCATTTGCAAAAAGATGGGTTGTATGCCTTCATGTCATCAATCTTTATTTATAAGAGTCTCGACACATAAAAACAT  
CTATACAATATAGATTACTATCTGTGCTGATCATGAGTTAGTTATTTCCGCTTCTTAAACGAAGGATGCACATTTTGGC  
ATATAGAAAAATAATTTCCGATATTTCCGATATTTCCGATGTTGCGGATGGTGTGTCGCCACGTAATAGAATTTCTTTTATA  
AAATCGCACTTAAATACAACGCACCGTTATTAGATGTTTATAAATGCGCCTTCTTATTTAAGAGTGAATTAAGTGGT  
TTCCTAAGGTCATTAATAAATAAATAAATAAATAAATAAATAAATAAATAAATAAATAAATAAATAAATAAATAAATAAATAA

>Cluster\_19790

ATGACAACGGATAACACGAACACACAGTAATGATTCAGTGGCTGCCCGACCGATACTGGTTCAGTTCGTTGCTGGT  
CTGGTACCCCGACAGCGGGATATCATCAAACGGTGGCACTGGTGTGATGGTTCGACCATGCAAAACCGCATCTGTC  
ATCTGGACAGTCTGGATGTTTTCTGGTCCGGCGTGGGCTTTCCCGCTGTTTCCCTGGTGTGGGGCTGAAATCTGCTCC  
CGTCATACGATAATCCGGCAGGAGCCATTAACCGCTGTGGGATGGGCGGTGATGCCCAGTTCGCATATTTATCTGGC  
CGCTTTCCCTGATGAGGGGAATATCTGTTTGGCTTTCAGTTCGCGCACAGGTGCTGACATGGTGTGAAACCGCGCA  
CCTGGTGGCGTTCGCGAGAGACATGTTGCTTTCGGCAATGTTGCTTTCGCTTTCGCGCACAGGTGCTGACATGGTGTGAA  
CTGCTGATGCTGGCAGTACGCCACAGGCTGTACCGGGCGAAGACAGAATGGAACGCTGCGCGTGGTGCCTGCCTGCT  
GGCTGTTATTCGGCGCTTAACTTCCGATATTTCCGATATTTCCGATGTTGCGGATGGTGTGTCGCCACGTAATAGAATTTCT  
GTCTGGTGTCTGTACAGGGAAATCACTACCCCGTTCGTTGATGCGGGATTTTTTCCGACGTTCTATGCCTGTCTATCT  
ACTGTGCTGGCGTTCGCTGTGTGA

>Cluster\_12461

ATGGAACAAGCGCATACCCAGCTGATTGCCAAGTGAACGAGCGTATTTTAGCGCGGATAACACGCCGCTTTATATTTAA  
GTTTGGCGAAACGGTAAAAATGCCGTGCGCAGCGGGTGTGGAGCATGGCAATATTTTGGCCGGTGGAGCTGATTTAA  
GTCAGTTAACCGCGTTCGCGCATACCGTGCACAAGCGATGCAGGCGCTGGAAGAAGAGGGTGTGGTGGACCGCTTCC  
CGCGGTTACGGCACGCGAGATCAACAACATCTTCAATACTCGTTGAAAGAAGCGGAGGTTTTCTCAGCAGGTGGTATT  
CGCGGGAAAAAGCCGATACCGCTATGGGTTAAACAAGCGTGTGCTGAAATGTCGCGCAAGAGTCCGCGAAGAGTCCGCG  
TCGAAGCAGGAAGTGTCTTTTTGCTTAAAGCGTATTCGCTATGTCGATGAAAGAAGCGGTATCGATTGAGGAATCGTGG  
GTTCCGGCGCATTTAATTCATGATGTTGATGCCATCGGGATTTCACTTTATGACTATTTCCCGAGCCAGCACATTTACC  
ACAACGTCAGCGTTCCCGCTTACGCGCCGATGCCGATGCCGAGTTTCAGTACATATTCAGTTAGATAGCAAAATAC  
CGGTGCTGGTGTCAAGCAAGTGGCGCTTGAACCAACAGCAACCGCTTATGAGTACAGCATTAAGCCACTGTCCGAGCGAT  
CTATACGTTTTTGTGTGCGAGGAGTAG

>Cluster\_7609

GTGAGCGAAATTAATTATCAGGCACTGCGTGAAAAGGCAGAGAAAGCACTAAAGGAAGTACATCGTAGGGCATAACATC  
TGTAAACCAACCGCAATTTAACAGGAGTTTTTGTGTTGTAACAAAAGGAAAGGAGAACCCGGTGGCGTGGATTGCGGAAT  
GTCATGTTAACTGCCTGATGAAATCAGATGCTCAGGCTTATGCAACCGTGAATTCATAGCAGAGGCTAACCCGGCTACC



GTGCTGGAACCTGCTGGATGAACAGGAAAGAAACCAGCAATACATCAAACGCCGCGACCAGGAGAACGAGGAGATTGCGCT  
TACGGTTGGGAAGCTGCGTGTGGAGCTTGAAGCAGCAGAGAACAACCTTATTGATAGTGAATGCCATGTTGCTGAACCTGG  
AAGAAGCTCTACCGGATAAGCAGGCGTTACTTGAAGCTCAGAAAAGCGCAACGCAAAATACAAAGCGAGAATGCATAC  
ATCCGCAACCGGTACAAAGAAGCTGGACCTGTTAATCGGGAAACAACTTCTGGTCAATGCAGGCTGCCATATCGAATGGCA  
GGCAACTGGCGACTAAGAGCGGACTAGCATGGATTTATAACACACTGTTTGGCCCTGGCGAATACCGGCAATCTG  
AGAAAGATGCTCAGGCTACTTTAATCGCAAATATGCACCGATTGACGAAAATCTCATGGAGCTTACAAAGTGGTTTTGG  
GAACAAAGTGAAGCGGAGCGCGCTGGCATTGCGATCAAAGGAGAGTGA

>Cluster\_58145

GTGCTGGTTTGAAGATTACGCTTTTGCAGCAACCCTGGTGTGGATGGATGGTCTGCCAACCTGCGTCATTTTGTATCG  
TCAACTGGAAGGTATTACCGGGCGGATGTGATCGTTTACCGGAGATGTTTACCAGCGGCTTTGCCATGGAAGCGGCGAG  
CTTCGTGCTAGCACAAGATGACGTAGTGAACCTGGATGACAGCTAAGCGCAGCAGTGCATGCGCTGATTGCAGGCAGT  
GTTGCATTACAAACGGAGTCTGGTTCCGGTTAACCGCTTTTGTGGTTGAGCCGGGCGGACGGTACATTTTTATGATAA  
GCGTCATCTGTTCCGCAATGGCAGATGAGCATCTACATTAATAAGCGGGCAATGCGCGAGTGAATGTTGGAAATGGCGCGCT  
GGCGTATTTTGGCGTGGTGTGCTACGACTTACGTTTTCTGTGTGGTCCGCAATCTCAACGATTATGACCTCGCCCTG  
TACGTGCGCAACTGGCCTGCTCCGCGCTCTCTGCACTGGCAGGCAATGCTGACGGCCCGCGGATTGAGAATCAGGCGTA  
TGTGGCGGGATGCAATCTGCGTGGCAGCGATGGCAACGGCTGCCATTAATCGCGGTGACAGCCGGGTGATTAATCCGCAAG  
GAGAGATTATCGCTACTGCGCAGCGCATAGGCAACGGCATTTGATGCGGAGCTGTGATGGCAGCATGCGGGAAATAT  
AGAGAAAAGTTTCCGGCATGGCAGGATGCGGATGAGTTTGTGGTGTGGTGA

>Cluster\_32000

ATGGTTTTCATCATTACATCTGCCCCACGACGCGTTTTTACTATTTTGGCGAAGGCTGGAAGCTCGTCTCGCAACCTGG  
GATTCGGCGTTTTCTTATTTTACCCTGCTGGTCAATAATTTTGTGATGGGGGCGCATTTCTGGTGGCTTTTTACGCAAC  
TCGATGCTGGATCCCGACTCTCATGAGTTATGTTCCGGACTGGTTACAAATGGCTGAGCTATCTGTTGCGCTCTGGCT  
GTCATCTCTGTGCTGTTAGTGTTTGGCTATTTCTTCTCAACGATGCTAACTGGATTGCCGCTCCGTTCAATGGTTTTAT  
GGCTGAACAACCTGGAAGCAGATTGACTGGCGCTACACCGCCAGATACCGGATTTTCCGTTATCATGAAAGATGCGCCG  
GAATCATGAAACGCAATGGCAAAAATTTGCCCTGGTATCTGCCGCGCAATTTGATTGCTAAATCTTTACTTTCATCCCT  
GGTATTGGGCAAAACCGTCCGCGCGGTACTGTGGTTCCGTTTAGCGCTGGATGTAGCCATCCAGTATTGCGATTACCC  
CTTCGATAACCACAAAGTCCGTTTAAAGAGATGCGCACCGCCCTGCGCACACGCAAAATCACCAATATGCAGTTTGGTG  
CTTTAACCAAGCTGTTTACGATGATCCCGTGGCTTAATCTGTTTATCATGCCCCGTTGCCGTTTTGTGGTGGCAGCGCGATG  
TGGGTCGATTGCTATCGCGATAAACACGCGATGTGGCGGTA

>Cluster\_20575

ATGAAATTTGAATATCCGCGCGCAAACTGCACAAAACCAGCACAATAATCTCCCATCGTTCTTGTCCATGGTCTGTTTGG  
CAGCCTCGACAACCTTGGCGTACTGGCTCGCGATCTGGTAAACGATACAATAATCATCCAGGTTGATATGCGTAACCAG  
GTCCTTACCAGAGATCCGGTAATGAATTACCAGCGGATGGCGCAGGATCTTGTGATACCCGGATGCACAGCAGATC  
GACAAAGCAACATTTATCCGTCCTCAATGGGCGGTAAGCGGTAATGGCTCTTACTGCACTAGCCCCGATCCGATTTGA  
CAAGCTGGTGGCGATTGATTTGCGCGGTCGACTATCAGTACGCGGTCATGATGAGATTTTCCGGCCATCAACGCGAG  
TCAGTAAATCAGACGACCAAAACGCGCAGCAAGCGGCAATAATGCGCCAGCATCTTAATGAAGAAGGGGTGATTTAG  
TTTTCTGTTGAAATCTTTTGTGACGGGGAGTGGCGCTTAACTGCGCAGTATTGTTGGGATCAGTATCCGCATATTTGTTGG  
TTGGGAGAAAATCCCGCATGGGATCATCTACCTGTTTATCCCTGGCGCAATTTCTCCGATGTTAGCGAGCAGTACC  
GTGATGTTTACTGGCACAATTTCCACAGGCTCGGCGCATGATTTGACGGCGGGTCACTGGGTCATGCTGAAAAA  
CCGGATGCGGATTTACGCGTATCCGTCATCTCAATGATTTAA

>Cluster\_9526

ATGGCCATTTGGGATGGGACTGTTTCTTTATCTCGCAAAAGATGCTACATGCCAATAGTTCAAGTAGTGTATTTATATC  
TGTGGTTCTGATGGCAATAGTTGGTATTGTTTCCATTGGTATTTTAAATGGTACTTTATATAGCTGGTAATGAGTTTTCT  
TCTGGAGCAATACCAGTTTCCGGTATACATCGTTTCAAGGTGAAATAGATACTGCGTATTGTAATAAATATGCCATCCTC  
GCATTTTTAGCTTTATTACCTTTTCTCGCTGTTGCTGGTTATATATCTTCGATCAAAATATTAATGCGTATGATAGTTC  
TGTGTATGCAATGATGATATTGAGAATTTACAGCAATTTATGGAAATGCAACGTAATAATGATAATCGCGCAGTTAATCT  
ATTTATTTTGGGATTTGCTGTTAGCACAGTTATTTAACGGTGTCTGTTGGAAATCATTTTATGAGCAACCTGTCATGAAAT  
GATGGGCGTATTCGTTTTGCTCAACTTTAACTTACCAGGATGCTTTATCGCATGTGTGCGTTGGTAGTGATATCCGG  
GATTACGGCGGCTGGCTTATCCACTGCTGAAAATATGGATGATTGACTGGCAGGCAAAAATACGATTTGCTGGGCG  
ATTTGGATGACCTTCTTAAATCAATAAAGAAGAACACCAGATAAAGGCTTCTTAGCCAGTATTTACGGGGAAATATG  
CCTTCTTTACCATTTCTGTAA

>Cluster\_10148

ATGGCAACTGTTTTCCATGCGCGACATGCTCAAGGCTGGTTCCTTCCGTCACCAGACCCGTTACTGGAACCCGAAAAT  
GAAGCCGTTATCTTCCGTCGCGTAACAAGTTTACATCATCAACTTGAGAAAACCTGACCGATGTTCAACGAAGCTC  
TGGCTGAACCTGAACAAGATTGCTTTCGCAAAAGTAAATCTTTTCCGTTGGTACTAAACGCGCTGCAAGCGAAGCGGTT  
AAAGACGCTGCTGAGCTGCGACAGTCTTCTGTAACCATCGCTGGTGGGCGGATGCTGACTAACTGGAACCCGTT  
TCGTCAGTCCATCAACGCTGTAAGACCTGGAACCTAGCTCAGGACGGTACTTTTCAAAAGCTGACCAAGAAAGAA  
CGCTGATGGCAGCTGCTGAGCTGGAGAACTGGAAAACAGCCTGGGCGGTATCAAAGCATGGGCGGTTCCGGACGCT  
CTGTTTGTAAATCGATGCTGACCACGAACACATTGCTATCAAAGAAAGCAAAACAACTGGGATTTCCGGTATTTGCTATGCT  
TGATACCAACTCTGATCCGGACGGTGTGACTTCTGTTATCCCGGTAACGACGACGCAATCCGTGCTGTGACCTGTACC  
TGGGCGCTGTTGCTGCAACCGTACGTGAAGGCCGTTCTCAGGATCTGGCTTCCAGGCGGAGAAAGCTTCTGTAGAGCT  
GAGTAA

>Cluster\_34133

ATGATCAAAAATATCAAAAACAAATGCGCGAAGCGAAAGCAAATGTCTAAATCAGAAAGATGGTAAACAAAATATGTAGT  
TGTGAGCAATGGTTGAAGATGTTTAAAAAATGGTATTTACCACTCTGGTAATGAATACACCGCTACACTGCCAGCCGTTG  
AAATCTATAGCTATATAGCTGGATTCAATGAACAGGGCAAGAATGTTACGCTACTCAAAAACAACTAGCCTAATATTGA  
ATGGTTAGTATCGCCAGGTTCCGAATATTTATAAATATGTTTGTGATATGGGAGTCTTCTGTAGAGGCACGGGACGG  
TAAAACATCACTCTATAAAGCATTACCATTACAGATGACATATTACCCCCAGGAGAATCATCACTCTCTGATCTTT  
CTGAGGACGAGCAAGCACAGGAACAACCTAAAGGCCATAAACAGCCTTCTTTTGTGATGTTCTTGATGATTGGGATGCGCCT  
TTGCCGTTGGGAGACGGAAGAAAACACCTGTTTCAATAAGTGAAGGATAGCTAATGATAATGAGGAGGATGTTGTAGAGAA  
TTTTGCATCTCTTATATCAAGCAGAAGAAATACCAGAACAGGAGGATCATCATTTCTAGAATTTGCAACATCGTTAGCCT  
ATAAGCACAGGTTAAAGCTACCAATGGTATTGAGGCATATTTTCTAAGCATTACCAAAATGTATATGACGACTTTGAT  
ATTCCATTTTAA

>Cluster\_26555

ATGAACACTATCGTATTTGTTGGAAGATGATGCGGAAGTGGTGCAGTATTGCCGCATACCTAGCAAAAACATGATATGCA  
GTTACCCTGAGAGCCGCGCGGACCCGCGGCAAGAAATCTTCCGAGAAAATCCGGATTTGGTGTACTCGACATCA  
TGCTACCGGCAAGGACGGCATGACATTTGCTGATTTACCGGCAAAAGTGGTCCGGACCGATGTTTCTTCAACCTCT  
CTCGATAGCGATATGAACCACATCTGGCACTGAAAATGGGCGCTGCGACTATATTCTCAAAACGACGCCCTGCTGT  
TTTTGCTAGCGGTTTACGTTTGCATTTGCGTCAAGATGAGCAAGCTACAGTGACCAAAAGTATTCAGGAAACGCTCTGTA

CTCCCTACAAAGCCCTGCATTTCCGGACGTTGACCATCGATCCATCAACCCGCTAGTACCCCTGGCTAACACTGAAATC  
TCGCTCTCGACAGCTGATTTCAATTATTTGGGAATTAGCTACCCATGCCGGGCAAAATCATGGACCGCGATGCATTGCT  
GAAAAATTTACGGCGCTCAGTTATGACGGTCTGGATCGTAGCTGGAGCTGGCTATTTCCGGGTTAAGAAAAAAGCTGC  
TCGATAACCCCGCAAGACCTTATCGTATTAACCCGCTGCGTAACAAAGGCTATCTTTTTCGCGCTCATGCGTGGGAATAA  
>Cluster\_7462  
ATGAATGCCGAAAAATCGCCGTAACCATAACGTAGACCACGAAGAGATCGTAAATTTGAAGCCGTCGCTCCCGCTG  
GTGGGATCTGGAAGGTGAGTTCAAACCCGTCACCCGATTAACCCGCTGCGTCTGGGCTATATGCGGAGCGTGTGGG  
GTTTATTTGGCAAAAAGGTGCTCGATGTCGGTTGTGGCGGCGGATTCGGCCGAGAGTATGGCGCGCAAGGCGCGACG  
GTGACCCGTTCTGGATATGGGCTTTGAGCCATTGCAAGTGGCAAAACTGCACGCCTGGAAAGCGGATTCAGTGGATTA  
CGTGCAGGAAACCGTGAAGAGCACGCGGCAAAACATGCCGGGCGATGATGTTGGTACCTGCATGGAGATGCTGGAGC  
ACGTCCCGCATCCGAGTCAGTGGTTCAGAGCCTGTGCGCAACTGGTGAACACAGGCGCGATGCTTTTCTCGACACTT  
AACCGCAACGGCAAGTCAATGGCTGATGGCGGTGGTGGTGGGAAATATATTTTTCGCAATGGTCCCAAGGCACGCATGA  
TGTGAAGAAGTTTATTAACCCGCAAGATTTGCGGCTGGTGGTGGATGACAGCAGTTTAAAGAGCGGCAATATCACTGGGC  
TGCATTACAACCCGATCACTAATACTTTTAACTCGGCCCGGCGTGGATGTGAATATATGCTGCACACGCAAGATAAG  
TGA  
>Cluster\_7829  
ATGACGCGCATGAAATATCTGGTGGCAGCCGCCACACTAAGCCTGTTTTTGGCGGTTGCTCGGGGTCAAAGGAAGAAGT  
ACCTGATAATCCGCCAAATGAAATTTACGCGACTGCACAACAAAAGCTGCAGGACGGTAACTGGAGACAGGCAATAACGC  
AATCGGAAGCGTTAGATAATCGCTATCCGTTTGGTCCGATTTCCGACGAGGTCAGCTGGATCTCATCTACGCTACTAT  
AAAAACCGGATTTGCGCTTAGCACAGGCTGCCATCGATCGTTTTTATTCGCTTAACCCGACCATCCGAATATCGATTA  
TGTGATGTACATGCGTGGCTGACCAATATGGCGCTGGATGACAGTGGCTGCAGGTTCTTTGGCGTGCATGCTAGCG  
ATCGGATCCTCAACATGCACGAGCTGCGTTTTAGTGACTTTTCCAAACTGGTGGCGGCTATCCGAACAGTCACTACACC  
ACCGATGCCACCAACGCTCGTATTTCCGAAAGATCGTCTGGCGAAATATGAATACTCCGTTGGCCGAGTACTATACAGA  
ACGTGGCGGATGGTTTCCGCTGTTAACCGCTAGAAGGCATGTTGCGCGACTACCCGGATACCCAGGTCACCGTATG  
CGTGGCGCTGATGGAATATGCATACCGTCAAGTGCAGATGAATGCGCAAGCTGAAAAAGTAGCGAAATCATCGCCGCA  
AACAGCAGCAATACATAA  
>Cluster\_25012  
ATGTCGGATGCGACGCTGACGCGCTTTATCCGACTACAGAGCACATAAATCCTACTGATTTTAAACAGGCAGAACGTGAA  
AAATATCTCTGGCTGGTGGCGCTGCTTCCACTCCTTAGCGGGTGTGAATCGCAGGCCATTTGGTCAAAAAGACGACG  
CATACTTTGCGCCACCAACCACCAGGCGCCGCTCCGCGACAGCGGCGTCCGGGGGCGTGTGAAACCGGCTACAAC  
TGGTTCGCTAACCGCCGACCGCGGGCTTACCAGCGTGGCGGATATCCTGACGGTATCCTCGAAGAATCCACCCAGTTCGAG  
CAACAGGCGAAAACCAACTTTCGCAAAAAGCAACACCGTGCATATCGCGCGCCCAACGATTTTGGACACACCAAGATA  
AGCTTTCCGGCTCATCGACGCCAACCGGACTTTGACGGCAGCGCCACTTCCAGCAGCAGAACAGCCTGCGCGGGGAG  
ATCACCGTTTCCGTCATGCGGTGCAGCCCAACGGCATCCTGGAATTCGCGCGGAAAAATGGCTGACCTCAACAGGG  
CGATGAGTACATCCGCTTAAAGCGCCTGGTGGCGCGGACGACATCCAGAACGACAACCTGGTTTCTCGCAGCGGATCG  
CCGATGCCCGCATCTCCTATGCGCGGACGCGCGGCTTAAAGCAGCGCAACCGCCGAGGCTGGTTGACGCGGCTGTTTAA  
CATCTCTGTTCCCGATTTAA  
>Cluster\_29206  
ATGGCTATGCACTTGTCTACACATCCGACCAGTACCCAACACGCTATCAGGAGATAGCCGCAAACTTGAGCAGGAGCT  
TCGTCAACACTACCGCTGCGCGGACTATCTTCCGCGAGCAGCAACTGGCGGCACGCTTTGAGGTGAACCGCCACACCC  
TGGCGCGCCATCGACCAACTGGTGGAAAAAGGCTGGGTACAGCGCCGTCAGGGCGTCCGGCTACTGGTGTGATGCGC  
CCGTTTCGATTTACCCGCTCAACGCCAGGCGCGTTTTCGACGAACTGCTGGACAGGCGAGCCATCCACCCAGCGAAAA  
ATTGGCTATCGGTGCTGCGCCCGCTCCGCTCAGCTCGCTGACGCGTGGGATAACCGAGGGGGAGCAGCTCATCCAC  
TGGCACCCCTGCGTGGGTCACGGCGTCCGCTGTTAATCGACACTACTTTGCGGACCTCACCCCTGCGCGGAGC  
CTGCAACGTTTTCGACAGCGGTTGCTGACGATTTTCTGCGCGAGCAACGGGATTACGCTACGACGAGCCAGACGCG  
GATCAGCGCCCGCGCCAGGCAAGAGTGCAGCGCTTGAATCCGAAATCTGTCGCGCTGCTGTGCGTGGCGCA  
CCCTTAACCAACCGTGCAGGTGAAAGCAGCCCGGCGGAGTACTCCTGACGCTGACGCGCGCCGACATGATTGAATTCAT  
ATGGAGCACTGA  
>Cluster\_20804  
ATGAAAAAGTTAGTTCTTCCGCTTTACTTGTCTTTTACTTTCCGTTGCTTCCGCGCAGAGAAAAATCAATTTTGGCGT  
TTCAGCCACCTATCCACCCCTTGAATCTATAGGTGCTAATAATGAGATGTGCGCTTTGATATCGACCTGGCAAAAAGCCT  
TGTGCAAAACAAATGCAGGCAAGATGTACTTTTACTAATCAGCGTTTCGACAGCCTGATCCCGTCACTGAAATTCAGAAA  
TATGACGCGTAATCTCCGGAATGGATATCAGCGCGGAGCGTAGCAAAACAGGTATCGTTTACCAGCCCTACTACGAAAA  
CTCAGCCGTCGTGATGCCAAAAAAGATACCTACAAAACGTTTGGCGATCTGAAAGGCAACGATTTGGGATGAAAAACG  
GCACCAGCACCAGAAATATTTTTCAGGATCAGCACCAGGAGTGAACACTGCTCCTATGACAGTATCAGAAATGCGCTTT  
ATCGATCTGAAAAATGGCGTATGATGGCGTATTTGGTGCACCCGAGTGGTAAACGAATGGTGAACCAATCCGCA  
ACTGGCGTGTGCTACTGAAAAAGTGACCGATCCGCAATCTTCCGACCGGCTGGGTATCGCTGTACGCTCCGGATAACA  
AAGCTCTACTGAAAAAATGAATAACGCGCTGGCAGCAATTAAGCTGACGGTACATATCAGAAAAATCAATGACCACTGG  
TTCCACAGTAA  
>Cluster\_26282  
ATGAAACTGGAAGATTTACCAGAAATCTACTCCCAAAATCCCTCGGCTGACTGATGCATCGGCTCAACGTCGAAAGA  
TACGCTGAGTATCATCTGATGTGATGGCCGCGCAGGGCATGACACAGAATTTGGGCTGAGATGGGTTTTCTGCGTTCTTG  
GGAAAAATGGGCATTAGTATGAATGACAGAGAGCGGGCAACAGAATTTGCTGACAGAATATGCACTCAGTCCGGTGTGATCGC  
GTGGCGGCTTAAGAAAACCTCCGCGCAGAAATAAACCCGCGAGTGTGATGCGTATATGCGTTCGATGCGTTTTGAAGATTA  
TGCCCGTAGCGCGGAGCAAAAAACAGTGCCTGTTGTCACGGAAAAAATTTATTTGAAAGCGAGGTTTTTACAACA  
AGATCCAGTATCCGGATGTAAGCCGCGCAGTGTGGCAAAAGTGCACAAAAGGCGTGTATCCGCTTACTTGGGAGGAAATG  
AAAAAAGTCAGGGAGGTGGTAAAGTTGCTGTCGCGAGTGTGGAGGGAAGGGAGAGGTTACCACTGCCTGTAAGATTTG  
TCGTGGGCGCGGTTGCTATTCATCTGTAAGAGTCCGTAACCGAGGCAATTAATGCCATATGTAATGTAACCGATGCCATATCTTGAT  
GTGGTCTGTTGATGAAAGATTACCTTCAACGGAGGCAATTAATGCCATATGTAATGTAACCGATGCCATATCTTGAT  
ACATGAAAAAAGCAAGTTAAACGTTTTTACGATACGCTGGTGGTGCAGTTTATGATTTGAAGAAGCATGGCGCAGAAACA  
ACTGAAAAAGGTGACCAGATAG  
>Cluster\_38891  
GTGATAGAGTTTCAAAGTCAAAGTGCGAAAAACACTTATGCCATGCGCTATGTTGCCGACAACTGCGGAAAGGAT  
CTTACCAGCGGGGCTTTTTCGAGCATCGCCAGGCAATTAACACCTGGAGAACCCTTAAGTACCGAAGAGCGTATTCGGA  
TCTTGGTGTGGAACATATACAAACAGCAACCGCTGAATGGTTGTCGTTATTAAGAAGTACGGCAAGATGCACATCTG  
GTGTTATTTGACAGGAGCGCAGACACCGCAGAGTTAGTACAGTTTGGACCCGCTAACTATCTTCCGCGCATAGGATACC  
CGCTTTCGCTGCTGGCACAACATCTTTCGCGTAAATGACCTTTCCGCGGACATCCAGTGTATGCTGCGGCTTACGTF  
AACGAGAACCATTTTGGCTCTGGCAAGTCCGCACTGGTGCAGGCTATCCGTTACCTGACACCCGCTGTTGATGGTG  
GTTAATATACACGCGCTCAACTTCAGTCTGGGCGTGGATGCTATAGTAAAGCAGTTACTTCTATTGGCGATCAGATAGC

TCACCACAGTGGCCCGGTCATTATGGCGGGAGATTTCATGCTGGAGCCGTAGAAGGATGAACGCGTTATATCGCTTTG  
CGGGGAAATGTCCTGCGCCAGGTGCGTTTTTACCAGATGATCAGCGCCGTGGGGCTTTGGTTCGCCCGCTCGATTTTGT  
TTCTACCGTGGTCTGAACGTCAGCGAAGCTTCTGTACTGGTTACGCGCGCTCCGATCACAATCCGCTACTCGTTGAATT  
CAGTCCCGGCAAGCCTGATAAATAA

>Cluster\_47199

ATGCATGAAATAACCTACTTACAGGATATCCCTGGCGCGTTAGTTTTTGTCTGGGGATTGATTTTTGGCTGGAAGC  
CTTATTTTTTATTCGCGCCGATAATCGTTTGTACCTAAGTGGCGCTATTCCTGGTGATATTCAGACTGGCTTAATTACCG  
GTGGTCTGACAGAGTTGGCTTTCGCGGGATTAACCCCTGCAGGTGGTGTTCAGCCGCCAACCCGATTATGGCGGGCTG  
ATGACCACCGTCAATGTCATGGTCTACGGCGTTGATGCCAAAACAGCAATTGGTCTTGGCTGCGCTTATGTTGTTAAT  
GCAGTACGTCATTTCTGTTCTTCTATTCCGCTTTCTCATTATTTATGACCAAAGCCGATAAATGCGCGAAAAGAGCGGATA  
CGGACGCTTTTCCCGGCTTAACGAGAACGATGCTCATCGTTCGCTTTCAGCGTATGCGGTGATGCTTTCTCTGTACT  
TACCTGGCACAGGGGGGATGACAGGCGCTGGTGAAGCGATGCCCGCTGGCTGACCCAGCGCTTTGAAGTGGCAGGCGG  
TATTTGCTGCTGCGCTTTGGCTTGGCTGCTGCGCGTAATGTTCAAAGCGCAATATATCCCTTACCTGATCGCGCGTT  
TCCTGTTTGTGTTGCTACATCCAGGTGACCAACCTGTTGCCGTTGCCGTAAGTGGCGCAGGCTTTGCGGTGTATGAGTT  
TTCATGCGAAATCCCGGAGCAAGCGCAACCCGAGCCGTTGCCAGTAAAAATGAAGAAGAGGACTACAGCAATGGGAT  
CTGA

>Cluster\_27030

ATGAGCAGCAATGAACTGGTTCGAACAGATCATGGCGCAGGTTCATCGCTCGGTAGCGACGCCAGAGAATGAGGTTCTCCC  
GAAACCCTCATCAAAATACGAGAGACGGCTATGGCAGAAAAAGCTGCACATTAACAGAATTTGTTGGCACCCTATTTG  
GCGACACTGTAGTCTGGTCAATGCGAACGTTGATAGCGCCCTGTTGGACGCGATGAAACTTGAAAAACGCTATCGTTCC  
ATTTGGCATTCTGGGGGGCGTATTTGGCGCAGGGCCACACATTAATGGCCGCTGATGAAGCGGTAAAAGCCACCAACTGA  
AGTTATTAGCATTGAACTTCTCGGATACTAAAGGCGGTGCCGGACACGGCTCATTGATCCTTTAGGTGGCAACGATG  
TTTTCCGACGTGAAACGCGGTATTTGAACTGCGCCGAAAGAACTCGATCGGACCTTTGGCGATGCTATGCCAACGAAGCC  
GGACATCTTGAGCTGCAATATACCGCCGCGCAGTATGCGATGGAAGAAAGCGTTTGGTGCACCATTGGGACGGCTTG  
CGGCGTTATTTGTCGGCGCTCCGGCTGCTGTGGTGTTCGATGGCAGACACCGCGCTGAAGTCCGCAATGTGGATGTTG  
TGGCATAACAGCTCCCGCTCAAGGCACAGCTACAGCAATGAAGTCAATCTGATATCTCGGTGACTCCCGCGCAGTTC  
CGCCAGGCGGTCACTCCGACGCGAAATCGGTAAAACCGTGTTCGACTCTCGCGGATACCCGAAAAACGATCGCCC  
TTCTACATCTGA

>Cluster\_45859

ATGGATAAATTTTTACGTAATAATCAACGCTCTTAGTATTATCTTTTTTAATCTGCAACTCCATTCTGTGCTTGGGCC  
AGTGATATGGACGATAATGGCATCTTTAAAAAAGGGAATAATCTATTTAGTTCAACATTTAGTGGCATCGAGTTTACAT  
TTGACCACCTACATAACGTTGTTTCAGGATACGCCATATATGCGAGTGGTATTTGAACACTTTTCATTTCTTGTCCACCGTAA  
ATGTTAATTTACGTTTCGTTGTGACGATGACCGCTACGTTTTTTCAAGGATCGATTTCTGGAAAGCGTAATACGTT  
AATGAGTATCTTGTATTTGCAAAATGTTTCTGCAATTTTTATCAATGACTGCAATTTATATCTGCTATCAAAGCCAAAT  
TGATAGACACATACTGGGTGCTTCTGGTTTATGTAACCGTTTCAATGCCCCTTTATGACGTGGTGGTAAAAGGTTAT  
TTTTGAGCTTATTTCAACTCTTTTGGATGAGGCGCTAAAATAGATGGAGCAGGCGATCTGACTATTTTTTATTCAGATAAT  
ATTTGCCATTGGCTAAGCCGATTCGTTTTCTGTTGATTTAGTTTCTGTTCACTGGACCATGGATGGACTTCATTTTGCCAA  
CGTTGGTGTCTCGTAGTGGGATAAAAATGACCCGCGGATGGCATTTTTAGTTGGATTTGCTTAAATTCAGCAGAGAAT  
TATACGCTTTTGTGCTGGGGCGCTTTTAGTTGCAGTACCTATCACATTTGTTATTTGATTCACACAGAAGCATATAAC  
TACTGGACTTGTAGCGGTGCCGTTAAGGAATAA

>Cluster\_39455

ATGAGCCTGGCTGAAGTATTTTACCTGCGGAAGAGTGAACCTGTTGAACAGGAGCGAAGAGTGGCTGATATCGATGATGG  
TTACACAGATTTCCGTAACGAGCTGCTGGAAGCTATCGCAAGTGGCGATTTAACCGCTCGCCAGTTGAAAGTTATGCTGG  
CCTACGTCGCGAAAAACATATGGATTCAATAAGAAAAACAGATCGAATAGCCGATGAGCAAAATGCTCAGTTAACAGGACTG  
TCAAGGCAGAATGTTAACAGGCFAAAAAAGAACTGATTTCAATGAATGCGCTGTTTATGGATGGAAATCAAATCGGTGT  
AAACAGTGGGATCTCGGTGGCAATTCAGCAAGTGTCTCAAAGTTAGCAACTTTGCTCGAAGTTAGAGACAAAAAATG  
TCTCAAATTTAGACACTCAATGTCTCGAAGTTAGAGACACAAAAAGACATTTCTTTAAAGACAAAAAGAAATTTAAT  
AACCCCTTATATCCCCAAAAAAGTTTCTCAGAAAGTTGACCCGCTAGAAACAGAGTTGCTGATTTGGTTATCAGCAGA  
AACATGGTGTGCTGGGTACCTATCGCAAGGAGATAGGTAAGTCGATCAAGTCAAGCAAAGTGTCACTCAGGCTATCA  
ACGTTCTAAGCAGAAGTCTGGAGAAGGGATATACACCTGAAGAAATTAATAACAGAGCATCGCCAGTGGTTGGCAGGGG  
ATTTTTGAGCCCAAGACTTCAAAGGGGAAATCTCAACCGAGGCGCAGCATCGAGCTATGAGGAAAACTTTGCCACCAA  
AGATTACGGAACAACTGAAATGCCTTATGCGCGCAGGAGTGA

>Cluster\_60890

ATGGCTAATCCAACCGTTATTAAGCTACAGGATGGCAATGTATGCCCGAGTGGGACTGGGCGTCTGGCAAGCAAGTAA  
TGAGGAAGTAAATCCCGCCATTTCAAAGCGTTAGAAGTGGGTTATCGCTCGATTGATACCGCCGCGGCTACAAAGAACG  
AAGAGGTGTCGGCAAAGCCCTGAAAAATGCCTCAGTCAACAGAGAAGAACTGTTTCATACCCTAAGCTGTGGAACGAC  
GACCACAAGCGCCCGCGGAAGCCCTGCTCGACAGCCTGAAAAAACTCCAGCTTGATTATATCGACCTTACTTTAATGCA  
CTGGCCGTTTCGCTATCGACCATTTATGTCGAAGCATGAAAGGCATGATCGAATTTGCAAAAAGAGGATTAATCAAAA  
GCATCGGCGTGTGCAACTTCCAGATCCATCACCTGCAACGCTGATTGATGAAACTGGCGTGACGCTGTGATAAACAG  
ATCGAATTCATCGCTGATGCAACAACGCCAGTACAGCCCTGGAACGCGACACAAAAATCCAGACGGAATCCTGGAG  
CCCATTAGCGCAAGGAGGAAAAGCGTTTTTCGATCAGAAAGTATTCGCGATCTGGCAGATAAATACGGCAAAACCCCGG  
CGCAGATTGTTATCCGCTGGCATCTGGATAGCGGCTGGTGGTATCCCGAAATCGGTGACACCTTCAGCTATTTCCCGAA  
AACTTTGATGCTGGGATTTCCGCTCGACAAAGACGAACTCGGCGAAATGCAAACTCGATCAGGGCAAGCGTCTCGG  
TCCCGATCTGACAGGTTCCGGCGCTAA

>Cluster\_198

ATGACTGAACTTTGGTTATCCTTAGGATGTTAAAATATGGGCTTTTAGCTGGAGTTTTCTTGGGATTTCTTTGCTT  
TACTTACCCCTTTTTGGTTTTAAAAAGAACTCCCTCTTCCACACGCTTAACCCACATTTTATCTTAGCTATCATCC  
TTATTTCTATAATCTCTGAATATTTCCAGATATTTTTACCTACCCTTTTTAGAATACCCTATCATGGGGCTGGTAACC  
CTCTTTTGACCTCTTTGGTATTTGTTTTAAAGAGAAGCTTTAGACTTTATGAAGACACAGCAACTTCTATCATCGCCAG  
TTTTAGCCCTTGGTATAGCTTTAATCCTTATACAAAACCTCTCAATATGACACAGAGACTCCTTTCTTCTTGGAA  
GCTTGTATGACCGTTACTTCTAAGGATATGTTTAAACAGCCTATGGATAGCCTGTCTGACGTTGCTGGTGTTTTATAAATAC  
TATCTCTATGGATCACCCAGAAGACAGACCATGAAATCCCTGGGGTTAACTTTAAATGGGCTAACTTTTGGTTTCTTAC  
CATCTTAACTCTCAGGTGTTTATCAGTATCAAACCTTATGGGAGTGTCTTTAGTCTCTTCTTTGTTTGTTTTACTAGT  
TTTTTAGGCTAAAACAGGAAACACAGTAAAACAACTATCTTTTTAACTGTTTAAACCAACCTTTTTTAGCATTTATCA  
GGAACAATAGTTTCTTAGTATGGGACATTCCTTTTTCAAGTGTGTAGTTCTTTGTATGAGTTTGGCTTTTAAATCTC  
TTTTATTTCTGAAAAGCTGGAGGACTTAA

>Cluster\_40326

ATGAAAAGCGTACTTGCAGCGCGGCTATGTCGCTGTTATTTCTGATTTTGCCAATGCTGAGGAAACAGAGGTAAGC  
TATGATGAAAATAGAACCCTCAGCGATTTGCGAAGCAGATATTCGTTCCGCTCACCGACTCTCGCGCGCTTTGGCCGCG

AAGCTATTACTGAAGATCTGTGGACACGCGACGCCCTCTCGCCAGGGATCGTAGTGTGGTGACCGTCGCCATGCTGATT  
GCCCGCAACCAGCCTGCCGAGCTTAAGCACTATATTGACGTCGCTCTCGATAGCGCGTGACGCCAGCGGAATATCAGA  
AATCATAACCCATCTGGCGTTCTACTCAGGTTGGCCAAATGCAATGTCAGCCGTCAGCGTGACCAAAGCAGTATTTGAAA  
CTCGTGGCGTCACGGCAGATGCACTTCCGAAAGCTTCTCCGGACCTGCTTCTCTCAATCAGGAAGCAGAAAAGCAGCGCT  
TCAGAGACAGTGGAAAAAATGTTGGCCAAATATCTCCAGCCGGTTAAATTTACTGCTGACCCACTGTTCTCGGATCT  
CTGGCAAAGACCCGCGTGAACCCCGCGACAGAAGCCGATTACGGTTCAGCGCGTTAATCGCATCTGGACAGAGCGCC  
AGATTGGCTATCAGCTCAACAGAGCGATGGATAATGGACTTCTGCTGAGGAAGCTGGGGAGATCGTTACCCAAGCCGG  
TTTTACGCTGGCTGGCCAAACGCATTTACCGCTGCTCTGTTGTCGGAGAGGTATTAAGCAATCGCTCATCGAGTAAAAG  
GTAA

>Cluster\_58433

ATGTTACGTTTCTCTGCTAATTTATCGATGTTATTTGGAGAATATGATTTTCTCGCCGTTTTGAGAAAGCTGCGCAGTG  
TGGTTTTCGCGCGTGAATTTATGTTTCTTATGACTACGACATTGAAGAATAAAACATGTGCTGGCGAGTAAATAAC  
TCGAACATACGCTGCACAATTTACCGCGGGTACTGGCGCGGGGAGCGCGGTATGCTTATTCTGGCGGTAA  
GAAGAGTTTCGGGATGGCGTAGCAGCAGCGATTCTGTTATGCCCGTGGCTGGGTAATAAAAAAATTAAGTGTCTGGT  
TAAAACGCCGCGCTGGTTTTCAGCAGTGAACAGATTCACGCAACGCTTGTAGAAAACCTGCGTTATGCCGGAATATGCTGA  
TGAAGAAGATATTTTATCTGATGAACCTAATAACATTTGATAATTCCTGGTTTCCATCACCAGCACTGGCAG  
CGCGTGAATTTGATTTGATGTTGGTTGCTGCAATTTGAAAATTCAGTATGACATTTATCATATGACCGGGTGAAGG  
TGAATTAACCAACACCATGACTCAGTGGGCTGATAAAAATGGTCACTGCAAAATGCCGATAATCCGCATCGCGCGAAC  
CGGGAACCGGAGAAATTAATATGATTTCTCTTAAAGTAATCGAAAATTTCTGACTACAACGGTTGGGTTGGGTGTGAA  
TATAAACCCCAACACCACCGGAAGCCGGTTTACGCTGGATGGATCCGTACCGTTAA

>Cluster\_26499

ATGCCATAACTAGTCACTTGGATGAACAACAGCGGGTAGCGAGTTAACGAAGTTAGCCAACGGCGCACACTTTTAA  
GTATGCACCTGAGTGGTTAGCCAGCCGTTATGCCAGACCGTTGTCACTTTCGCTGCCATTGACAGAGGGGAATATCACCT  
CTGATGCCGTATTTAACTTCTTCGATAACCTGTTACCCGATACGCCGATGTTAGCTGACCGGATCGTTAACGGTATCAT  
GCTAAATCCAGACAACCGTTTGAATTTATGTCAGAAAATAGGGCAGACAGCGTTGGTGCAGTGACGTTAATCCCGAAGA  
TGAAACCGTAAATGTTGCCGATAATGGCATTGGGAAAAGCTTACTGAAGCAGACTTGAAGAAGTATTAACGGCTTATAAAG  
CAGATATCCCGTTAGGCATGATTAGAGAAGAAAATGACTTTCGCATCTCGGTTGCTGGCGCACAGGAGAAGACTGCGCTG  
CTCAGAAATAGGCAATGCTGGTGCATCTCAGAAGGGAATACCGCAACGACGACATTAATAAATGCGGATGGCGAAT  
CAGACAGCCCAATGCGACGCTCGATCTTAGCCAAAGCGTTGAGAAAATCCCGAAGTGCAGATGCATGAAATCTGAGTG  
ACTTTGCCAGAATGATTCGGCAGCACTGGATAACGTGAAGACTTCATACCGACAGATTTCCCGGAGAACTTGGTGACG  
GCAGTTGAACCAATGTGTTGAGGTTGCACGATCGGTTAAGCCGAGAAATACGGTATTAAGTAA

>Cluster\_23780

ATGAACCTGCCATTTATATTTGCTCACTTAAAAGAGATATTGAGCGAAGAAATAAAATAAATGATGTCTTTCATAGATT  
AAACATTAATAATTTGATTTTTTGTATGCCATAGATGCTAAAAGATCTCAAATAAAGAAATATTAATAAATAAGATTAA  
GTGGTGTCCGGCAGCAATGACTGATGGGAAATGCTTGTACGTTAAGTATCAGCTTATATATCAGGATATGATAGAT  
AAAAATATAGAATGGCGAGTCAATTCGAGGATGTTATTCGTTAATGAGAAATTTAAAAAATTTCTGCAATTTTTAA  
TCTTCTGAAAAAGACAAGTTAAAACATAATAATTTGATTTGCTTGGAGGACAGAAAGGATTACATGATTTATCCGGTAT  
TGGGGCAAAGCTTTTTAGTAAAGTTAAGGTAAGTACTTGTATTTTTCTGCTGTTAATTTAATAAAAAAATAAATTTCT  
CGTACATGTTTATATTTGATGAATAACGATATGGCACTAAAGTTCGCAAAATGACAAAAGGATTATGGCACCTATCGAGC  
TGATAGCTGGAAGTTAATCGCATCAACATAATAATATAAAGAAATTTTTATTTAGACGAAATAAATATACATCTTATAA  
ATAAGTTTTAATAGTACCTTGAAGTGAAGGCTTTAATATCGGAAAAAACAACCCAGGACAAGGCTTCAGAAAAA  
ATGAAGTTTATACGTTCTCGATAAAGGTTGGCTTTTTTTCTCTTTTGAATGA

>Cluster\_22917

ATGCCCTGTTTTGCAGCTAATTTATCCATGATGTTACCGAAGTGCCTTTTTATGAACGCTTCCGCCAGCGCGAAAAGC  
CGGTTTCGATGCTGTGGAGTTTCTGTTTTCCCTATGGCTACTCCCCAGCAAAATCCAGCAGCAACTGGTGCAAAATCATC  
TGACACTGGCGCTGTTCAATACCGCTCCCGGAGATTAATAACGGGAGAAATGGGGATTATCCGCCCTTCCCGGACGTGAG  
CACGAAGCACGCGCAGACATCGACTGGCACTGGAATAFGCATTTGGCGCTCAATTTGTGAACAAGTCCATGTGATGGCAGG  
CGTCGTGCCCGCTGGCGAAGATGCTGAACGGTACCGGGCAGTATTTATGATAATCTCCGCTACGCTGCCGACCACTTTG  
CGCCACACGGCAAGCAATATGTTGAAAGCCTCAGCCCGCGGTTAAGCCCTATTATCTCTCTCCAGCCAGTATCAG  
GCCTGGCTATTGTTGAAGAGGTTGGCGGAGATAACGTTTATTTCACTAGATACTTTTCATGCGCAAAAAGTAGATGG  
CAACCTGACGCAATTTAATCCCGGACTACCGCGGAAATATGCGCACGTACAAAATGCGGACTCACTGATCGACATCA  
CGGACGATGGGAAATCAACTATCCGTGGCTGTTCCGCTGTTTCGATGAAGTGGGATAACAGGCTGGATCGGTTGTGAA  
TACAAACCTCGTGGCCTCACCGAAGAAGGGCTTGGCTGGTTTACGCCGTCGGCGTAA

>Cluster\_22106

ATGAAAAAATACCCGGTTCGCTTGAGATTAAGCTCCACGAAAAACTATCCAAGAGTATATACTAAATATATTGGCTGA  
GCAGATGACCATGCTTGAGGAAACATTTGGCATTCAGGAGTTAAGATTTTCTCTTATCTTGAATGCTATATTGGAGATA  
AGAAAACAAGCATTTATTTACAGAAGTCGCAACAGTGCCTAGCCACATTCAAAATTAAGGGGCTGGAATCCCGGGTAAAC  
ACGGCTAAGCTCATATCAAAAGAAAACGGACAGCGTATTTGTTTCTTCCGATAAAGAATGGATATAGACAGAAATATCTGC  
TACAGTCCGAAATATACAAAACAATAATCCTTATCAGGGGTGGTCTGAAGGATATCAGTGTGTTCTCCTGCTCAATCATTA  
GTAAAATAATGAAAGTGGATATAATACGCACGCAGGAAGAACAAGGCAGACTTTACCGTATTGAAGAACGCGCAAGAAA  
GAAGAACAATAACGCAAGCGAAAGAAAGAGAGGAGTATGAACGACCTTTAAAGGCTTTTATTTCTTCAAAAATAAAGA  
AAGTGTTTTTATCTGAGAAGGATTTCAAAAAGAGGTTTGTTCAGCTGTGACTATCTGAAAGATCGCTCCACAAAATCAA  
GATACTTTACTGAACGACTGACTTGTAGAGAAAATATAATGAAAGATTAATTCGTTTCTCGATAAAGGCACTGAT  
GGCAAAGTAGGAAAAATAGAGATTTATACAGATACAGGCGAGCTTATTTTTCAACGGTATAAAACCAAGTAA

>Cluster\_58088

ATGGCTAAGTCACTGTTACGGGCGTGGTCGCCCTGCTTTTTCTTGGCCACTGTGGCTCAACGCCGCGCGCGCTCAT  
CACGCTTCTCCCGCAACACTGAACTTGCCCTTTGGCGCGGGATCACGCCGGTTGGGGTCAGCAGCTATTCGACTATC  
CTCCACAAGCGCAAAAGATTGAGCAGGTTTCCACTGGCAGGGGATGAATCTGGAACGATTTGTCGCGCTGAAACCCGAT  
CTGGTGATTGCTGGCGTGGAGGTAATCCCGAGCGGAGTTGACAGCTGGCTTCCGTTGGGAATAAAGTGAATGTTGGGT  
CGATCGACAAGCATTTGAACAAATGCAAAATGCTTACGTTGCACTGACCTGGCCCTGGAGTCCGCAACAGCAGCAAC  
AAGCCGCAATCCCTGCTGGATCAGTACGCGCAATGAAAGCGCAATATGCTGATAAACCTAAAAACGTTGTTTCTG  
CAATTCGGCATTAATCCGCCATTTACCAGTGGAAAAGAGTTCGATTAGAACAGGTTACGAAAGTTTGGCGGAGAAAA  
CATCTTTAAAGACAGCCGGTTCCTGGCCGCAAGTTAGCCGCAACAGGTTGTTAGCAGCTCGCCACAGGCGATTGTC  
TTACAGGCGGACCGCAAAATTTCCAAAATCAAAACAATACTGGGTTGAACAGCTCAAAAATTTCCGTTTATCTTACAG  
AGTACTGGTTTGAACGTGAAGCCACGATTTATCTCTGCTGCACAACAGCTCTGTAATGCGCTTTCACAGGTAGATTA  
G

>Cluster\_5362

ATGAATTCAAAAAGCTTTGTTGCATATGTGTGTTATTCTCGCTGCTTGCAGGATGTGCCCTGAAATCTTCTATTGATGA  
AAAGAAGAAAAAGCTCAAGTCACACAAAGTAATTAATAAAAAACATCCCCAGCAACTGACAGACAAGATTTATTCG



>Cluster\_12148

ATGAGCAATCTGAGCCCTGACTTTGTACTACCCGAAAAATTTTTGCGCTAACCCGCAAGAGCGTGGACCATTCTGCCCC  
TTTTTATACCGATCAGAACGCGTTTGAACACGAAAAAGAGAACGCTTTCGCCAAAAGCTGGATTGCGTCGCTCACAGCA  
CGCAACTGGCGAATGCCAATGATATGTGACGCGTGAGATCATTTGGCGAAAAGCATCGTCTGGTACGCGGTCTGGATAAG  
GTTTTGCGCGCTTTTACCACCCGACGCTTCCGACCGTGGTCACTAGTTGTTGAGCGGTGAAGAAAAAGCAAAAAATGTTGAT  
TACCTGCCCGTATCACGCATGGGCATTTCAAACCTCGATGGCAACCTGGCCCATGCACGTAACCTGCGAAAAAGCTCGCAATT  
TCGATAGCGCAAAAGCGCAACTGGTTCGGTGCCTGGAAGAATATGCGCGATTCTGCTTCAATCAACATGGACCCCAAC  
GCCACCAGCGTAGAAGATCAATTTACCCGGCTGGGCGCGAAAGTGCTGGAAGCCTGCCCGAAGTCCACGATCTGAAACT  
GGCGGCCGCTTTTACCACCCGACGCTTCCAACTGGAAGAACATTGTGATAACTATCTCGAGTGCATCACCTGTGGT  
CGGCGCATCCAGGTTTCTCCGACTCCGTACAGGTTGATCGTTACTGGCACACCATGCACGGTAACCTGGACGCTGCAATAC  
GGTTTCGCGAAAACCGTCCGAACAGTCTTAAATTTGAAGAGGGTACGGATGCGGCATTCACCGGTTTCTGGCTGTGGCC  
GTGCACGATGCTGAACGTCACCCGATCAAAGGATGATGACGGTCAATTTATGAATTTCCCGGTGGATTCTGAAACTACCC  
TGCAAAACTACGATATTTACTTCACCAATGAAGAGTTAACCCGACGAGCAAAAAATCGTATTGAGTGGTATCCGCGATGTG  
TTCCGTCGCGAAGATTTACGCTCTGGTTGAAAGCGTACAGAAAGGGCTGAAATCGCGTGGCTATCGTGGTACAGGGCGCAT  
CATGGCCGACAGTAGCGGTAGTGGCATTTCGGAACATGGTATCGCCCATTTCCATAATCTGCTGGCGCAGGTGTTAAGG  
ACTAA

>Cluster\_62188

ATGTCACTTGTACCCGATCTACCCGCCATTTTCGATCAGTTCTCTGAAGCTCGCCAGACAGGCTTTCTCACCGTCATGGA  
TCTCAAGGAGCGCGCATTTCCGCTGGTTGGCACTTACTGCACCTTTATGCCGCAAGAGATCCCGATGGCAGCCGGTGGCG  
TTGTGGTTTCGCTCTGTTCCACCTCTGATGAACCAATTGAAGAAGCGGAGAAAGATCTGCCGCGCAACTCTGCCCGCTG  
ATTAAGAAGCAGCTACGGCTTCGGCAAAACCGATAAAATGCCCTACTTCTACTTTTTCGGATCTGGTGGTGGTGAACCCAC  
CTGGCAGCGCAAAAAGAAAATGTATGAATACATGGCGGAGTTTAAAGCTGTTTCAATGTGATGCAATTTGCCAACAGCGTTA  
AGGACGATGCTTCGCTGCGTTATGGAAGCGGAGATGCTGCGCTTGCAAAAACGGTAGAAGAACGTTTGGGCACCGAG  
ATTCGCGTAAATGAAACTTTCGCGGATGCCATTGCGGTGAAAGCAGCGGAAACCGGAAACGCTCGCGCACCTGGCTAATTTT  
GCAGTTAAATCTCCGGCGCTTAGCGGCAGCGACATTTGAAAGTGGTTACGGCGCAACCTTCCGGTTCGATAAAGAGG  
CGTTGATCAATGAACTGGATGCAATGACCGCCGCGTTCGTCAGCAGTGGGAAGAAGGCCAGCGACTGGACCCGCGTCCG  
CGCATTTTAACTACCCGGCTGCCGATTTGGCGGCGCAGCAGAAAAAGTGGTGGCGCGATTGAAGAGAAATGGCGGCTGGGT  
TGTCCGTTATGAAACTTTCGCGGATGCCATTGCGGTGAAAGCAGCGGAAACCGGAAACCGGCGATGCTACGACCGCTGG  
CGGATAAATATCTGGCGATTGGCTGCTCTGTGTTTCGCCGAACGATCAGCGCTGAAAAATGCTCAGCCAGATGGTGGAG  
GAAATACAGGTGATGGCGTAGTTGATGATTTTGCAGGCGTCCCATACCTACGCGGTGGAATCGCTGGCGATTAAACG  
TCATGTGCCGACGAGCACAACATTTCTTATATCGCTATTGAAACAGACTACTCCACCTCGGATGTGGGCGAGCTCAGTA  
CCGCTGTCGCGGCTTTTATTTGAGATGCTGTAA

>Cluster\_21592

ATGCACGTTACAGCAAGCCCTCCAGCTTTCAATGTAATCTCAAATGTGATTACTGTTTTTACCTTGA AAAAAGAGTCGCA  
GTTTACTCATGAAAAATGGATGGATGACAGCCTCTGAAAGAGTTCATCAAACAATATATCGCAGCGTCTGGCAATCAGG  
TCTACTTTTACCTGCAAGCGGTGAACCCACTTCGGCTGGATTTTTTTCGTAAGTTTATTCATTAACAACCC  
TATGCAGACCAAAAACGTAATTTTAAATGCATTGCAAACGAATGGCATTATTTAATGAATAATGAATGGTGTGCTTTCTCAA  
AGAACATAGATTTTCTGGTTGGTATCTCGATCGATGGACCCCAAGAGCTACATGACCGCTACAGACGCAGTAATTCAGGTA  
ACGGTACTTTTGCAAAAGTGAATAGCAGCCTCAGCGCTGAAATCATATCAAATAGAGTTTAAATACGTAAACCGCTCAT  
AATAACAATTAATGTCATTTACCCTCTTGGAGTTTATCATTTTTTAAAAATCTATCGGCAGTAAACATATGCAATTTATCGA  
ATTTGCTCGAAACCGGACGCCAATATTTGATTTAGTGTGTCATAGTGAGAACAATTCGATCATTTGATTTTTCTGTGTC  
CTCCACCGGCTTATGGCAAGTTTATGTCACCACTTTTTTATGCAATGGGTAAAAACGATGTGGGTGAAATTTTTCATCCGT  
CAGTTTGAAGCTTTTGTACGCGTTTTTTGGGGAATGGGCATACCAGTTGATTTTCCAGGATCTGCAAGGATAATCT  
GGTTGTTGAAAGCAATGGAGACATTTACGAATGCGACATTTTGTCTATCCACAGTACAAAATGGAAACATTAATAAAT  
CGGAACCTCAAACGATGAACAGTGTACAACGAGCGCAAAAAAACGGATTTCAGCGAAATGTGAGCAATGTTGATAT  
AAACCTATCTGCAATGGTGGTTGCCCTAAGCATCGTATTACTAAAGTAAACAATGAGACTATTTCTTATTTTTGCGAAGG  
TTATAAAAATCCTTTTTTCAACCATGGTACCTTATATGAACCCATGGTGGAGTTAGCTAAGAACAGAGTACCGCTTTACC  
ACATTTATGGATGTTGCAAAAACAATGGAGAATAATTA

>Cluster\_30076

ATGAAGATGTCTATTGCGCAGACTCTTTTAAAGAGAGCTTAAAGTGCAGAAAAATGTTGTGAGGCAATTAAGCCGGGTT  
TTCGACCCCTCTTTCCGATGCGCACTATATCTGTTTGGCGATAGCGGATGGCGCGCAAGGGACGGTGGAGCGATGGTTG  
CCGCGACGGACGGTAACATCGTGAAGCTTGAAGTCTGTGGACCGATGGCGCAACAGTGAATGCTTTTTATGGCTTACC  
GGCGACGGGAAAAACGGCAGTGTGAGATGGCGCGCAGCAAGTGGCCTGATGCTGGTCCGCGCTGAAAAGCGTAATCCGTT  
GCTGGCTCCAGTTTGGTACGGGGAGTTAATTCGCCATCGCTGGATAACGGCATTTCCGCAATTTATTTCTGGCATTG  
CGCGCAGTGCAGCGTTCGACGGCGGTATGGGCATGGCGCAGGCGCTCGGTGTGCGTTTTCTTGGATCCGACGGTACGGC  
CTGGCGGCTAACGGCGCAATTTAGCGCGGTTGCAAGTATTGAGATGAATGAATGCGATCCGCGTCTGGCGAACTGTCA  
TATTGAAGTGCATGTGATGTTGATAACCCGCTGGTAGGGGACCGCGCGCGCGGCGGTTTGGCCCGCAAAAAGGGG  
CAACGCGGAGATGGTGAAGAGTGAACAGGGGCTGCAAAAATACGCCCTGTTTTTACAACAGCTAACTGAAATCAAC  
GTCTGCCAGATGGCGGTTGGTGGCGCGGCGGATGGGCATTTGGCGCGGATTTCCCTCAATGCGGATATAAACCC  
GGGTATTGAGATTGTTGAATGCGGTCATCTTGCAGGCGAGTGCAGGGTGCAGCACTGGTGTATCAGCGGGAAGGGC  
GCATCGACTCGCAACCGGAGCGGTAAGCGCGCTGGGTGTCGGATCGGTGGCGAAGCAGTTAATGTCCCGGTGATT  
GGATTGCTGGCGTATTGGGTGATGGCGTGAAGTGGTGCACCACTGACCGGATTTGACGCGGATTTGAGATTTTCCGCTG  
TCTGGCACCTTTAGCCGAAGTGTGCGCAGCGGTGAAACCAATCTCTTCAACAGCGCGGTAATATTGCTGCGCCATTA  
AAATAGGTGAGGAAATTA AAAACTGA

>Cluster\_59793

GTGTTCTGACGAGAGCGACGACAAAAAGAGCCCCACACCTCCGACTAGAAAAAGCGCGGAAGAGGGGCAAAATCCC  
GCGTTCCCGTGAACCTGACCTCACGTGATTTTGTGGTGGCGTTAGTGTATCTGGTTTGGCGGTGTGCTGGCC  
GTCGATTGTCGGGATGCTCTCCGCTGGGCTGCATTTTGTATCAGAGTATTATCAATGACCCGAATCTGATCTCCGGGACG  
ATTATTTCTGCTGATCAGAGAAGCCATGCTGGCGCTGCTGCCGCTGATTAGCGCGTGGTGTGGTGGCGCTCATTTCTCC  
GGTCACTGCTGGGAGGGCTGGTATTTAGCGCAAACTTTCGACCGCAAGTTTCCAAACTCAACCCGCTACCGGATTA  
AACGGATGTTCTCGGCTCAGACTGGCGCGGAGTTGCTTAAAGCAATTTTGA AAACCATCTGGTTGGCAGCGTACGGGG  
TTTTTTCTCTGGCATCACTGGCCGAGATGCTGCGCTTGCAGCGGAGTCTCCGATTACCGCCATGGGTAATCGATGGA  
TTTTGTAGGGCTATGCGCACTGCTGGTGGTCTGGTGTATTCCAATGGTGGATTTGACGCTTTTTTCCCAATATTCA  
GCCACCTGAAAAAGCTGCTATGTCAACGCAAGTATTCTGATGAGTTCAAAACAAAGCGAAGGTGACCTCATGTTAAA  
GGCGGATCCGTCAGATGCAGCGAGCTGCTGCACGGCGTGGATGATGGCCGATGTCGAAAGCGGATGTCATTTGTCAA  
TAACCCGACCCATTTCCGTAGCGTTGAGATGACGAAAAACAAAATGAGCGCACGAAAGTGGTGGTGGAGTGGCAG  
GGCTGGTGGCGCTTTCGTAATTTGGCGTGA AAATGAGCGCTGAAACGCTTGAAGCGCGCTTGAAGCGCGCGGAGG  
CTGTATCGACATGCGGAGATTGGTCAACAAATCCCGGGTCAACTGTACCGCGGTTGGCGGAAGTGTGGCTGGGTCTG  
GCAACTGAAACGCTGGCGTGGTGGTGGACAGCGCCCTGTACAACTACTCATCTTCCGGTGGCGAAGCCCTGGATT

TTATTAACGAGAAACCGACCCATGAGTAA

>Cluster\_5994

ATGACAAGTGGTGTCCAGTGGTGTCTTCTGACTTTGAGTTAAAGTCGATCTTAGCCTTAACGAACGTTTTACGTGGCA  
TATCGCCGACCAATTAATGCTTCTTTAGGGCTACCTACAGGTAGAGGGCGTGAAGCAACAAACGACAAAATACATAGAAA  
GCTTCATTGATTTTTAAAAAGAAAGATAGGCAAAAATTTACAGAAAATCATTTGCAAGTGAATGATTTAGTCTTTGGGCAG  
GTTGTTTTATGGTGAAGAAAGCAATATTTAGTTTGTCTGTAGATAGTCAAGTAATAAAACTACTGATGATAGATATGCTCT  
CCAATGGAATATGATGAAGCAACCAACATCATTAGTCGAAACGATTGTTGATGATGTTCAATACAGCATGCTATAAAA  
ATCAACTTGAGCTTGTAAATTACTCTAAGCAAAAATACTCAGTCTATTTTGGTATTTTCATCTATCAGGGAGCTGGTTGTA  
AGAGAGAAAAGTCCCTCCGTCAAAGTTAGCAGCATACAAAACAGTTTGGATGAAATCATTGCGAAGAGAAAAGAAAACGTC  
GTGTTTTGATGTGTATATTAGATTACAGTTCAAAATAAAATCCATGTATTAATTGATACTAATGGTAATGTTGTGGTG  
ATAATATCGTTTTTTCGAAAACGAAATTTTATTCGTGAGTTATATAATTGCGCAGGTTATCAATTTAATTCATCGGAAAAG  
GATTTTTTCCATTAATTGAGCCAATTTTCAAGCAAAAATGTAATGCCATATCAAGTTAAGTTATAAGGTGTTTCGATTT  
GTCATTTTTAACTTATAGGGAAACCACTCATAAGGAAAAGAAAATGTGGCTAAGAAAAGACTTGCCTGATGATCTGTTTA  
ATAAAGAGGGCATTAAAGCTGTAGGTAATATTGGTTTTATATCGTATTGGAATTAGAGTAGATAGGAATAATCCAAAATTG  
CAATTGGCCGATAGTGTAGAGCTTATCATTCAGGAACATTACGCAGACATTTAGGTGATAGTGGGTGCTCTCCTGTCAA  
TTATGCTATATTAAGCAAAATGTATATCCAAAGATGATTTTCAAAACCTCACAAGCTGATATTATAA

>Cluster\_35615

ATGGCTGACAGTCACTTTTATCGCCCCGGCCTTCCGCAACTTATTTCTATGATCCGGAGCGATTTATTAACCCGCTTTGA  
GCAGGATACGCTGCTTCGTCGTAATGGATCGGGAAGTGTATGCCGTGTACAGGCTGCAGCCGTACACACGTTGTACGGGT  
ATATCGATTATCTTGCAGAAATCTGTTGCCGGACATGTGTGATGAAGACTGGTTGTACCCGGCAGCCAGAATCAAACGC  
TGCCGTGCGAAAAGATGCGGTGACAGCCCGGGGATTTGTGCGCTGGGATGGCGTAGAGGGAACACCTGTATTGCCAGCGGG  
AACGCAGATCCAGCGTGTATGATCAGGTGACCTTACCACGACGGCGACGGTGACCCGACCCGATGGTCTTCTCCGGGTGC  
CTGTTGTGGCAGATGAACCGGGGGCGGGGGAATACGGATGATGGTATTTGCCATGCAACTGGGAACCCCGTCACTGGT  
CTGCCGTCACAGAAAAGTCACTCCGACACCAATTACAGACGGTGTGATGATGAAGATATTGAAAATCTGGAAATATGGCCGTG  
GAAACGTTATTACTACATTTCCACAGGGGGCGCAGACCTGATTATGTTATCTGGCGAAAAGTTCAGGGTATTAAACC  
GTGCATGGACTTTTACAGACTGGAAGGCAATGGAAACGGTGGCGTGTGGTGCGACAAACGATCCGGAACATCCGGCT  
CCGGATGAAAAGCGTCATTAATGCAGTCAGAGAGCACATTTCTCTGACACCCGGTGGCCGGAAGTGGATTGTATGATTT  
CGGTCCGACAGAAAAGTCACTCCGATGACATGTCATTCGAAAAGACACACCCGATCAGGACTGCAATGAAAAGCAG  
AGCTGAATGCAGTGTACGGGATGGTGTGCCAGAGGGCGTATGTATCTGTCAGAAATCAGTGGGCCATCAGTTTG  
TCTGCTGGTGAAGTGGCCACCGGTTAATCGTCCCTTCATCGGATATTGACCTGGGGGAGACCAGCTTCCGGTGTCTCG  
CGAGATCACCTGGCAGGCTTATGACCCGGCAAGGAGTAAATAA

>Cluster\_57170

ATGTGCTGTACCGAAACCGGAAGTGACCTGGTACGGCTGGGACGGCGACCGGCTGACCACGATACAGAACGACAGAAC  
CCGCATCCAGACGATTTATCAGCCGGGAGCTTACGCCTCATCAGAGTTGAAACCCGACCCGCTGAGCTGGCGAAAA  
CGCAGCCCGCAGCCTGGCGGATAACCTTACAGCAGTCCGGCGGAAGACGGTGGCAGTGTGGTGTCCCGCCGGTGTCTG  
GTGCAGATCTCGACCCGCTGGAAGTGAATCTTGGCTGACCCGGTGTAGTGAAGAAAGCCCGCTGGCTGGCATCGTG  
CGGCTGACTGTGGAGCAGATGCAAAACAGATGGACCCGGTATACACCCGGCGCAAAAATTCACCTGTACCCTGCG  
ACCATCGCCGCTGCCGCTGGCCCTTATCAGCAGGAAAGGCAACAGCGTGGTACGCAAGATACGATGAATGGGGTAA  
CAGCTGAATGAAGAAACCCGACCCAGCTGCAGCAGCTATCCGCTGCCGGCAGCAGTATGATGAGGAGTCCCGCT  
GTATTATAACCGCCACCGCTATTATGACCCGCTGCGGGGAGGTATATCACTCAGGATCCGATTTGGGCTGAAGGGGGAT  
GGAATTTTTTATCAGTATCCGTTGAATCCAGTTACGAATACAGATCCCTTGGGGTTAGAAGTTTTTCTTAGACCATTCCC  
TTGCCAATTCATGCGCCAAAAGCCCTGCACAGCAGCAAGCAGATGATAATGTGCAAAAAGCATTTGACAAAATGGTGGAA  
CGATACAGCATCAAAAAGATATTGACTCTCTAATATGAAATATCCGGGACTAGCATAGATATAAACAATGATAGCTT  
CTCGTGGAAATGTTGAGACACAGGGATAACTGATCGTGTCAATGACATAAATAATGACAGATTTGAGTGTATGGGAAA  
AAACCCGACAGATGTGACGTACTTCAGGAACATAATTGATTGTGGTGTATATTAGTGCTAAAGATGCAAAAAGCACACAGAA  
AGCCTGGAATTTGCTCACTCCAGACAGTCAACAGATAAAAAAGATAG

>Cluster\_35425

GTGAAAAGTGAATGACAAGCTCCTCCGCTGGGGTTCGGGATAATAGGCGCAGGCCAGGTGGCGGATAAGGTTTCATGCTTC  
GTACTACTGCACCCGCAACGATCTGGAACCTGGTGGCTGTCTGTGACAGCCGCTTCCAGGGCAGGCGCTGGCAGAAA  
AATACGGGAATGCATCCGTGTGGGACGATCCGACGGCCATGCTGCTGGCGGTGAAACCTGATGTGGTTAGCCTGTCTCA  
CCTAACCGTTTTTCAATGCAACATACCTGATTGCACCTGGAAGCGGGCTGCCATGTGATGTGCGAAAACCCGCGCCAT  
GACGCCAGAACAGGCGGGGAAATGTGCATACCGCGCAAACTGGGCAAGGTGCTGGCCTACGACTTTCACCATCGTTC  
TTGCGCTCGATACCAACAGCTGCGTGAACAGGTGACCAACGGCGTTTTGGGAGAGATTTACGTTACCACCCGCGCGCC  
CTGCGTCTGCTGGCGGCTTCCCGCTGGGGTGTCTTTACCAATAAAGAACTGCAGGGTGGTGGCCCGCTGATCGACATCGG  
CATTCATATGCTGATGCTGCGATGTATGTGCTGGGCTTTCGCGCGGTGAAAAGCGTGAATGCGCATAGCTTTCAAAAAGA  
TCGGCACGAAAAGAGCTGTGGTCAATTTGGTGTAGTGGATCCGGCAACTTACAGCGTGAAGATTGCTGTTTGGCACC  
ATTTGAATTTTATAACCGCGGCATTTCTGTGGTGGAAACGTCATTTGCACTCAACATCCGCGAACAGTGCATTAATGAACT  
CAGTTTTGTGGTATAAAGCTGGTGGCAGCTGTTTCCAGCACATATACACCGGATAACAACGGTGAATTAATGACCG  
TGATGCAACGGGAAATGGCAGACGACAACCGCCATTTGCGCAGCATGGAAGCTTTTATCAATCAGTACAGGGCAAGCCC  
GTGATGATAGCCGACCGGAGCAGGGGTACATCATCCAGCAACTGGTGGCGGCTTGTATCAATCCGAGAAACAGGGAC  
CGGTGTGGAATATGA

>Cluster\_41369

ATGATGTTCTACGGCATCGTTCAGGATAAACTCGGTCTGAAGAAACCGCTCATCTGGTGTATGAGTTTCATTTCTGGTCTT  
GACCGGACCGTTTTATGATTTACGTTTATGAACCGTTACTGCAAAAGCAATTTTTCTGCAGGCTCAATTCGCGGGCGCTCT  
TTTTTGGCTGGGGTATCTGGCGGGATGCGGTTTGGCTTGACAGCTTACCAGAAAATGGCGGAAATTTTCATTTGAA  
TATGGAACAGCGCCGCGCTGGGGATCTTTTGGCTATGCTATTGGCGCGCTTCTTTGCGCGTATATTTTTTAGTATCAGT  
CCATATCAACTTCTGGTGGTCTCGCTATTTGGCGCTGTATTTATGATGATCAACATGCGTTTTAAAGATAAGGATCACC  
AGTGCATAGCGGGGATGCGGGAGGGGTAATAAAGAGGATTTTATCGAGTTTCAAGGATCGAAACTTCTGGGTTTTCT  
GTCATATTTATGTTGGGACGTTGTTCTTATAACATTTTGTATCAACAACCTTTCCTGCTTTTTATGCAAGTTTAT  
CGAATCACAGATGATGGAACCGCCTGTATGTTTATCTCAACTTCCAGGTGGTACTCGAAGCGCTTGGATGGCA  
TTATTCCTTCTTTGTGAATCGGGTAGGGCCAAAATGCAATTAATCTCGGTGTGTGATTAATGGCGTTGGCTATCCTT  
TCCTGCGGCTATTCGTTAACCCCTGGATATTTTCATTAAGTGAAGCTGTACATGCCATTTGAGTTCCCTTTTGTGTCAT  
ATCCGCTTCAAATACAGCGTGGCAAATTTGATAAGCGCTGTCGTCAGCATCTTTCTGATTGGTTTTCAAATGCCA  
GTTCTGGGATTTGTGCTGCTTTTCAACCGCTGGGACTCTTTGACACGCGGCTACCAGAGCGTTTTTTTCGCA  
ATTTGGGATTTGCTGCTGATGTTGCTATTTGGCATTTCTTCTGAGTAAAACCTGAGCAATAGTATGAAAC  
GCCAGTACCTTCAGCAATATAA

>Cluster\_45865

ATGGCCGACGTAATCTACGCAAAAGTTGAAAAATTTATGACAATGGATTCAAAGCTGTTACGGCATTTGATCTCGATAT  
AAACGATGGTGAATTCATGGTTTTGTTGGACCATCTGGGTGTCCAAATCAACTACATTTACGCATGATTCAGGCTCTG

AAGACGTATCAGGTGGTGAATTTACATTAGCGACCGCCTTGTTAATACCCCTCCGCCATAAAGATCGCAGCATTGCAATG  
GTGTTCCAGAACATAGCGTGTATCCCCATAAGACTGTATTTGACAATATGGCTTTTGGTTTAAAAATGCAAAAAAGGCC  
AAAAGAAGAGATTAAGAAAAATTGTCGAAGAAGTTCGAGAAAACTTGAATTTAGCGATTACTTTACCGAAAACCGGAAAG  
AAATGTCGGGTGGTTCAGCGTTCAGCGTTCGCGGTAGGCCGTGCAATTTGCCGTAAAGCCAGATGTTTCTTATTTGATGAG  
CCACTATCTAACCTGAGAATAAACAATCAGTACTCAAAGCGTATATAGATAAACCCGTTTGGTTTGGTATTTCGTCAG  
GGTCATCCAGCAACCATGATTTTGTGTACACAGATCAAATGAAGCATTGACCCTCGGTGATCGTATTTGTGTGCTTA  
ATCAGGGGGCAATATGCAGGTTCAGACACCAGTTAATCTGTATAACCCCTGCTAACAGATTTCGTTGCTGGCTTTAT  
GGTCCCCGTCAATGAATTTGATAGATGCGGTTGTACGTGAGGAAAGACGGTAAACTCTATATTGACATTGCCAAAAAT  
TCGGTTGTACATACCTGAGAATAAACAATCAGTACTCAAAGCGTATATAGATAAACCCGTTTGGTTTGGTATTTCGTCAG  
AACATATCTCTTTGAGTTTGAATTGCAAAAGAAATGAATACAGTCACTGGTGCATTAAGTATTTAATGAAAAATGGGCAGT  
GAAAAATATCTTTACTTTACCGTTAACACAAAGAGTTTATTGCAAAAGTCAACGATCAATCAATTACTACAGCCGATAT  
TGGTAAAAATTTGATATTTCAACCTTGATACAAGCTTCTGTCATATATTTGATTTTTAA

>Cluster\_48601

ATGAAAAATAGCTTTGACAGAGCAGCGCTGCGGAGAACACCTCAAAGAGGGCGATTGAGTATCTCGAAAGAGCATCTCA  
AATGCAGGCCGTTTATGATCTCCAGGTACAGCAATGACATGAGATTCTCGGACGCATTCATGTTATTACTCGCTTATCTC  
TGCTGATAAACAAGACGTCGGCCAGAGATCGCTGTTTATTTGATACATGTTTGGCCGACATTTGCCGATGTAA  
GTAAGTGATATTAATAGTTCATGTTGAACCACTGGTCAACCCATAACTGGATGGCAAAAATTTGTTGTTGCTCGCC  
CGTTTTCTCTGATGAAGCAGTTCCTCAGCTGGTGGCCCTCCAGGGGATGATCGACGTGTCACCGTTAAACGATATGT  
CACTTAACAAAGTTGCGGTTGGCCAAAGCCACACCTCGCGAGCGGAAGCTAACCGACGCAGAGGTATGGGTGTTCTG  
AATATATGGGACTACTTCAATGTGTGTGTTGTTACAAAATGGGCGGCCAGGCTATGTC TTGTAATCCGCAAGACGACCTGA  
CGAAGTACTGCGGGCTAAAAAAGTGAGTTCAACCTCCAGCGTGGGTTTGGAAATCAAGGCAAGAGAAAACAAATCAGCCC  
GTGAGCATCTCTGCTTTAAGCACATTAATGCGCACATGCAATGAAGAGTTATTCGAATATGTTAAAGCAGCCAGTGG  
CTTGTGCTCTCGAATAAAAAAATCGGAAAGATCTTCCGATGCTAAAGTGGCAATAGCCAGGCATTACGCCCTATCTC  
GGAACGACGAACTGATGGAGCTTGAGCCATTACACAGAGATTTGCGTCTGACTGCGGCTAGTTACTCCGAGCAT  
TAGGCATAAGCCAGGAGTATCAGTAAATCATGAACCACAGTCTTGGAGGGATAGATCGGGTCTACGACCGGCACGAT  
TATATGGAGCAGATGCGAGACGCTTAGAAAGTTCTGACAGTACATCGCATCAATCGTAGAGCAACCCGATTTAGACGA  
AATTGACCACAAATCAAGGGAGATCGTCTATCGACAGAGCTTATTCGTGTAATTTTTTCATAG

>Cluster\_44214

ATGCGTAAAGCAGTGGCTCGGGATCTGCATCGCGGCAGGAATGCTCGCGGCATGTACAAGCGATGATGGTCAGCAACAGAC  
GGTAAAGTGTACCGCAGCCTGCGGTATGTAAAGCCCAATAGTTGAAATAGCGGGGCGGACCCGCTTTCGAAACCACTGA  
ACGCGACGGCAAAATCAGGATTACAGCGCGACGGTAAAGCTACAAAATCGTGCAGGATCCGTTCTCGATTTAGCCAGGCG  
GGACTGGCCGCAATCTATGATGCGCAACAGCCAGCAGTAACCTGACGGCCCTTGGCGAAGCTTTCGATCCGACACAGCTGAC  
GGCGGCCCATCAACGCTTCCGATCCCGAGCTACGCCAGAATCACTAACCTGGCTAACGGGCAATGATCGTGGTGGCA  
TTAATGATCGCGGCCCTTACGGCAACGACCGGCTTATTTGCGTTTCTCGCGCGCAGCTGACCGTCTTAAACGCTCAAAC  
AACACAAAGTTCGATTCGATCCGATTTATGTCGCCAGGATGGTTCGCTTTCGGTCTGGTATGGCTTGTACCACAGT  
GCACAAACAGCTTACGCGCTGCACCTCCGATTTAAGCGGTGGCGGGAACAAGTTTCAAGTCTGGCCGCGCAGG  
GTGACATTTCTCCGGTCAATTCGACGCTAAAAGCGAAGATCCGACCGCGCGCCGGTAACAGTAGCGGTTTCCCTC  
GGCCACCAACGACCTTAGCGCTGGTGTACTGGAAGGCGAGCAACCGACGCTGCGCCACAGCCGTTGTTACAGCTCC  
GTCGACAAACGCTGCAACCTCGCTGCAATGGTGACACCGCAAGCCGCTCGAAAGCCAGCGGCAACTTTATGGTGC  
AAGTCCGGGCGCTTAGCGATCAGGCTCGTGGCAACAGTACCAACAGCAACTGGGACAGAAAGTTGGCGTCCCGGTCGC  
GTAACCTAAAATGGCGCGTCTGGCGGATCCAGCTTGGCCCTTCCGACGAAAGCCGAGCCAGTACCTTGCAGCAACG  
TTTGCAAACCGAAGCCCAATTAAGTCAATTTATACCACCGCGCAGTAG

>Cluster\_22190

ATGGTAAAAATTTGATGTCACCTGAGTGGTGCATTTAGTGGTCTCAACGTGTTTCACTTGTATGAGATGCATACATT  
AAGTCAAGAAATTTCAACAATCGATGGTTTGTTCAAAGGAGGGAAGATTAGCTGAGCAGCCCGTGTGTTTGGAGTCTGCA  
CACATATAATTTCAACTTTGACCAGGAAATTTCAATTTAAGATTGTGATCTCTATTTCAATTAATAAAAAATA  
AAAAAGAAAAATTTGATATTTGATATTTGTCATCTCAATTCCTTAAAACAGGTTTCTTGGGCGTGTTCAGCAAAAATAGCTGG  
TACGAAAAAATAGTGCATACGGTTACGGCTTCGATTTCTTCAACCGAAAACAAGCTTATTAAGTTTATATACTTTT  
TGATGGAGTTGATAGCCTTATTTGTTCCAATATCATTATAGTTATGAATGAGAGCGATGAAAGAATCCGAAGAAAATAT  
TTTGTCAAAAAATAAAAAATCAAAATGCTTTTAAATTAACAATGAATAGATGTCGATAAAATACAATAAAGATAAAGATAA  
AGATAAAGATAAAGATATTTTAAAAATTTGATGGTTGGTGGACGATTAATGTCGACGAAAAAATCCATTTGATTAATGGG  
CAATAAAGGATTTGGAGTCAATATCCATGTAGATATTTATGGAGATGGTCCACTCAAGGTCAGCTATTTAGAGAAAATA  
AAACAATAAATGATGCGGATAAAGTAAGTTTTTTGGGCTGGATAGATGCTGTAGAAGAACATTTATATAAATATGATCT  
TTTTGTCTTACCGCTAGATGGGAGGGATGCCCTTAGCGATGTTAGAGGCAATGGCAGCAAAAGTTCCCTGTGCTATCCT  
CAGATATCGAAGCAATAAATAATCTTATTTGAAAAAACAAGCTGGTGTGCTTTTAAAGGATGAAGATAGCAAGGATCGAAA  
CGAAAAATTAATGTTTTACAGCAATCTTGAACCTTAGAAATAATCTCGCACATAAAGCGTATCAGGCATAATAGAAGA  
TTTTGACCTAACAAACGGACTAAAATAATAGAGTCTGTTATATTTAAATAATTGA

>Cluster\_22028

ATGTGCGAACTCGATATTTTACACGACTCTCTTTACCAATTTGCCCCGAATTACACTTAAAACGACTCAACAGCTTAAAC  
GTTGGCTTGGCCAGCATTACTTACTGTAAAACCTCACTCTTACCGAACTTGGCCGTAACTGCCAACCAAGCGGAGAA  
CAAAACATAACATCAACGAATCGACCGATTGTTAGGTAATCGTCACTCCACAAAGAGCGACTCGTGTATACCGTTGG  
CATGCTAGCTTTATCTGTTTCGGCAATACGATGCCATTTGTACTTGTGACTGGTCTGATATTTGTCGACAAAACGACT  
TATGGTATTGCGAGCTTCACTGCGCACTACAGGCTGTTCTGTTACTCTTTATGAGAAAGCGTTCCCGCTTTCAGAGCAAT  
GTTCAAAGAAAGCTCATGACCAATTTCTAGCCGACTTTCGAGCATTTACCGAGTAAACACACCGCTCATTTGTCAGT  
GATGCTGGCTTTAAAGTGCATGGTATAAATCCGTTGAGAAGCTGGGTTGGTACTGGTTAAGTCGAGTAAAGGAAAGT  
ACAATATGACAGCTTAGGAGCGGAAAACGGAACCTTACAGCAACTTACATGATATGTCATCTAGTCACTCAAGACTT  
TAGGCTATAAGAGGCTGACTAAAAGCAATCCAATCTCATGCCAAATTTCTATTTGATAAATCTCGCTCTAAAGGCCGAAAA  
AATCAGCGCTCGACACGGACTCATTTGTCACCACCGTCACTAAAATCTACTAGCGTGGCAAGGAGCCATGGGTTCT  
AGCAACTAATCTACCTGTTGAAATTCGAACACCAACCAACTTTGTAATCTATTCGAAGCGAATGCAGATTGAAGAAA  
CCTTCCGAGACTTGAAGCTCTGCTACGCACTAGGCTACGCCATAGCCGAAACGAGCTCAGAGGCTTTGATATC  
ATGCTGCTAATCGCCCTGATGCTCAACTAACATGTTGGCTTGGCGGCTTCACTGCTCAGAAACAAGGTTGGGACAGCA  
CTTCCAGGCTAACACAGTCAAGAAATCGAAACGTAATCTCAACAGTTTCGCTTAGGCATGGAAGTTTGGCGCATTTGGCT  
ACACAATAACAAGGAAGACTTACTCGTGGCTGCAACCTACTAGCTCAAATTTATTTACACATGGTTACGCTTTGGGA  
AAATATATGA

>Cluster\_31459

GTGAAAAACAGAAGCTTGGGAAGTGTTTTTATCTGCGGGGAAACCAATTTGGCGCTGGTATGCTGGCAATGCCGCTGGC  
TGCGGCGGTTGGTTTTAGCGTACAGTAACTTGTAAATTTGGGCTTTGGGCGTTGATGTGCTACAGGCGCTATTAC  
TGCTGGAGGTGATACAGCTATGTCGGCAGATACCGGCTTGGGACGCTGGCAAAACGCTATCTGGGACGCTACGGCTCAG  
TGGCTGACGGCTTCAAGTATGATGTTCTTAATGATGCTCTGACTGCGGCATACATCAGCGGTGCCGGTGAATTTGGTGGC



CTCCAGCATCAGCGACTGGACAGGTATTTCAATGTGCGCAACCGCTGGCGTGTGTTGTTCACTTTTGTGGCGGTGGCG  
TGGTTTGTGTCGGAACTTCGCTGGTCGATTTATTTAACCGTTTTCTGTTCAGCGCCAAAATTTATTTTTTGGTGGTGATG  
CTGGTATTGCTGCTACCGCATATTCACAAAGTGAATCTTTAACCCCTGCCGTTGCAACAGGGACTGGCACTGTCTGCAAT  
CCCGGTGATTTTTACGTCGTTGGTTTTTACGGTAGCGTGGCGAGTATTTGTCAGCTATATGGAATGGCAACATTCGTAAGC  
TACCGTGGGTGTTTTATAAFCGGTAGTGGCATCCCGTGGTGGCATATATTTTCGCGAGCTGGCGCACTGGCAGCAAT  
GATCAACAACCTTTATGGGATTGCTGGCTAATCATGCCGGATTAACGGGCTGTTACAGCGGTTACGCGAAAATGGTGGC  
CTCTCCGCATGTTGAGCTGGCAGTGCATTTATTTGCTGATTTAGCCCTCGCCAGCTCCCTCCGCGGTAGCGTTAGGCT  
TATTTGATTATCTGGCAGATTTGTTTACAGCTTCAAATACCGTTGGTGGACGATTGCAAACTGGTGAATTACCTTTCTG  
CCGCCACTGGCGTTTGCATCTGTTTATCCACAGGATTTGTGATGGCGCTGGGTTACGCGGTGGCACTGGCGGTACT  
GGCATTGATTATCCCTTCGCTGTTGACCTGGCAAAGCAGGAAGCAATCTCAGCGGGTTACCGGGTGAAGGTGGTC  
GTCCGGCGTGGTGGTGGTGTCTCTGTGGTATTGCTGTGATTTGGCGTGCATTTTTGATTGCGGCAGGCTTGTACCA  
GAAGTGGGATGA

>Cluster\_67095

ATGACCGAATCCAGCGATTACGAATCCGTCAGGTCCTTATCGCGGTTGATGTGGTAAAGATACGCATCAGCTGTTGC  
CATTAATCGTTACGGTAAACGCCGTTCGATAAAGCATTACCCAACGACGAAAACAACTCAGGTCGCTAATATCTGACC  
TGAACAACATGCTCAGATACTGCTGGTTGTTGATCAGCCAGCTACCATCGGTGCGTTACCTGTCGCCGTTGCCCGCTCA  
GAAGAGTCCCTTGTGCGGATACCTCCCTGGACTGACCATGCCCGCCATAGCCGACTTACACGCGGTGAAGACTGAAACTGA  
TGCTCGTGACGCTGCCATCATTTGCCGAGGCTGCCCGTACCCCTGCCCTACGCGCTACGCAGCTGAAGCTGGCTGACGAGC  
AAATCGCAGAACCTCCATGCTCTGCGGCTTCGATGATGATCTTGGCCGACAGACAACGCCGGCCAGCAACCGTATCCCG  
GGCCTTCTGACCCAGATACTCCGGCCTGGAGCGGCTTCTCGGTCGAGACTTGATCACCCGGCGTACTCGATCTTCT  
CCAGCGATATCCCTCACCCAGAAAACCTCGCTTCGCTGGGTGAGAAAGACTGGCAGCCAGCTCTGCAAACTTCCGCTC  
GTCGCGGTAACGCCCTTGACGACAGATAGCTCAGGCACTGGCCGAACAAACCTCGTCTGTTCCCGCACGAATGCCGCT  
GCCGTAGTACTGCCACGCTGGCACTCCAGCTCATACGCTGCGTAAGCAAAGAGACGAGCTGGCGTTGGCGGTAGAACA  
CGAGTTCTTGTCTACCCCTTTTACCGGCTCTGACCGATGACCGGAGTCCCGGAGTCCGTTGTCAGGACCGCAGCCAGCTCCTCA  
CCGAGGTCGCGCTGCCGCGCTTCCGCTCTGCGCACATCTCGTCTGTTATGCTGGCTTGGCGCGTAACCTCGCGCATCA  
GGCTCGCTCAATACGCGGTGAGCATCCCTCGCGACGGGGTAATAAAGCTCTCAAACGGCGTGTCTCTGTCGCGCTTCCG  
CGCGCTCAGGGATCTATCTCCAGGGCTTACTACACCCGCAAAATGAGTCAGGAAAACGACACAATCAGCGGCTTATCG  
CCCTGGCGAGACGCGCTGCGACGTTCTGTTCCGATGATGCGCGACGGGACTTTTTATACCCGCGAGCGGTCATAA

>Cluster\_31638

ATGATAACTAATTTATCGTGGCATATGAAAAATAAATAATTGTAGGAATGTTTGTGTTTAAATGTTTCTTCTACAATCAT  
GATATATGACCCATGGTTTTTGGTGTGGGGCGTGGTGTGTTTATTTGTTAGTACATTTTACTTTAATTTCTTTTGCAT  
CAGGACGATTTTTTATAAGGAAAAGAGGAAGTTAAACTTCTGCTCTTTAATGCTTTTTACAGGATATCTCTTATGCGCT  
GCAATATAAATTTATACCTTAGATACTAGTGTATTTTTATGATTTTTAAATGTGCATAATATATACTTTGTTTTGG  
GTTTGTAGGTGTTTTTGA AAAAAGAAAACCTATATTCGTTTTGAAAGGAAGTGTGTTATACAATGTGATTTATCT  
TACTGTGTTAATTTCTCTGATGTCGGAACCTTATAATTTTCACTGTTGAAGATAGATTTCTTATTTTTCAGAG  
CAAGCATATAGACTTTTCTTAGCTCATCTCTTTTTTCAATTAAGTCTTTTTTTGGATTCTTTATCCATTTTCTAT  
GGTCGCTTTATATAAAGAAAATAAAGTTGGTTTACTTATTTTGTATTTGATTTTTGATGTTGGGGTTTTTCTGGTCGAG  
TATTTTTCTATTTGCACTTATTTCTGTTATTTTTTATGGTATTAACATAAGATATGTCCGTTATATAGTGTATAGCT  
TTTTGTTGATATTTTTGCTATCAAGTTTTCTGATAATTTTTATCAGACATGCACGTAAGCACTGGAACCATGATTAAT  
TAATACAGAGAGTTTCACTGACTGCATCAAGTGAATAAGTTGGTGGAAAAATGTTGTTTTATCTGATTTTCTGATTTG  
TCGTAGGTGATGGTGTATATATAATGATGATGTTTCCATTATATGCTACTGATTCAGGATCATAAGGCAATTTTTG  
TATGGTGGAGGGGTTATTTATATCTTGTATGCAATTAACCTGGTATTTACTGACTAAAGTCTCGAAAAACTGGCTTGA  
AAAAATAAAAAATTTACTCTATCAACAATGATTTATTTTTGATCGGAAATCAAAAGCCGATGTTCTAATGTATCCAG  
GCATTATGATAAACTTAATTTTTATTTTAAATTTTCGCGTCAAGGATAAATAATGATAAAAGTGTTTATCGTATCTTAA  
TGA

>Cluster\_26119

ATGCCTTTATCGTTATTGATTGGCTGCGTTTTAGCCGCGGACGGCGACGCGCGGCATGGTGTGCTGATCTCCGTCAT  
TTCTACCATTGGCATTGCCCTCGCGGTGGCGGTATTGATCGTCCGCTTAAAGCGGATGAACGGCTTTGAACGCGAACTGA  
ATAACCGCATTTCTGGCGTAGTACCGCACGGTGAATGAGGCGGTAGATCAGCCGTGGACCAACTGGCAGGAAGCACTG  
GATAACGTAAGAAAAGTCCCGGGCATTCGCCCGCTGCGCCGTATATCAATTTACCGGGCTGGTGGAAAAGTGGCGCGAA  
TCTGCGCGCAATCCAGGTGAAGGGCGTTAACCCGCAACAGGAACAGCGTCTGAGCGCATTACCCTGTTGTTGTTGAGGGG  
ATGCCTGGCGCAATTTTAAAGCGGGCGAACAGCAATTTATCATCGCAAAGCGGTGGCGGATGCGCTGAAAGTGAAGCAG  
GGCGATTGGGTGTCGATTGATCCCAACTCGAATCCCGAGCATAAACTGATGCAGCCAAAACGTTGCGTTTTGCACAT  
TGCCGGTATTTGCGAGTTGAGTGGTCACTCGATCACAGTTTTGCCATGATCCCGTGGCCGATGCTCAGCAATATCTTG  
ATATGGTTCCAGCTGTCAGGTTATGCTTAAATGACGGAATGTTTTCAACGCAATAAGCTGAGTACGCGGATGCGGGT  
GAAGTGACCAACAGCTATGTTTATATAAAGCTGGATTGGTACTTACGGCTATATGATCGCGATATCCAGATGATCCG  
CGCCATTTATGATCTGGCGATGGTACTGGTGTGTTGGTGGCCGTTTTCAACATCGTCTCCACCTTAGTATGCGGTTGA  
AAGACAAGAGTGGCGATATCGCATTTAAGAACGTTGGTGGCAAAGATGGTTAATTCGCGCATCTTTGTCTGGTAT  
GGATTGCTGGCAGGCTGTTCCGGCAGCCTGTGTGGGGTGAATTTAGCGGTAGTTGTTTCACTGCAACTTACCCGATTA  
TGAGTGGATTGAAAAGTTGATCGGTCATCAGTTCTCTCCAGCGATATCTATTTTATTGACTTCTGCGCATCGGAATTGC  
ACTGGCTGGACGCTTCTACGTAAGTGGTACAGCATTTGTTGCTGAGTCTTTTGGCAAGTTGGTATCCGCGCGCGCGCC  
AGTAATATTGACCTGCGCGAGTCTTAGCGGCCAGTAA

>Cluster\_27187

ATGCCGCAACAAAATATCTGGATGAATCACTCCGGCTTTTACGCCCTTACTGGCGATTAAAGAAGCCTCTCGTGTGTT  
ATTATGTCATGACGCTCCCTGTAGTCAGGCTTCCCGGCACAGACCGATCCGGGAAATTTATTCGCTCAACTACTTTT  
GTAATTTTTAAAGGCGCTGCCGAGACAAATCGCGAAAATTAATGCCCTCGTGGCTTTGTTGCCAGAGTGTGCCGAGGAG  
AAATATGCCAAAGCGGTTGTACACGTGCCGTTGTTGATGCTCCCATGATATCGGTCGCTTACAGCGTTTTGTTACTGA  
TTTTGAACAACAACTGGGATGGAATTTATCTGCCGCTACTAAAACGCTCGCAAAGTTCGCAATTTATGGCGAGGTC  
CTGCCGATTTGACGGCAGTGTGACGCTGACAAACGGGTTATGACGTCACGATCTATGAGAAAAGACACAACCCGGT  
GGCTGGTTGCGTAACGGCAATCCGCAATCCGGTTACCCTTACCCTTACCCTGCTGGATGCAAGAAATCCGCTGATG  
GGCGTGACCATTAAGTGAATAACGAAATCCGTAACACTCACCCTGGAGCAGCTGAAAGCGGAAACCGCGCGGTAC  
TGGTCAACGATAGGTTATCGAGCGTTCCGGTTATCGCTGTTTGGAGTATAGCGACGTTGAGATTGCCGCTCGACTTCTG  
CAACGTGCACGACGCGCAAGCGATATCAGCATCCACAAGCGCATTAATTTACGCGCGGTTGATGTCGCGATGGA  
CGTAGCCAGCAGCTGAAAGTTCTCGGCTGTGAGCGGTAACCTGCGTAGCGGTTGAAGAGTTAGATGAGTTTTCCGGCAA  
GCGAAAAGAGTTTACCAGCGCCAGAGCTGGCGTTTTGATCATCGATGGAATTTACACCAGTAGCCGTGGAAGGCAAT  
AAAGTCACTTTAAGCATGTTCTGTTTACCAGGTGAACATAGCGCGGCAAAAATTTATCTCGCTGATGAGTCAACA  
TGCCGCACTTGTCTGTTTTTCCGCACTGGAACACAGCTAACACCATCGAAACGCAACATACAGACCCCGGCAACCG  
AAGCTTTTGTGCTGGCGATTTGTTGAGGGTGAACAAACCTGGTCTATGACGATGAAAACCGGAAAGAGCGCGCGG  
GCGATTCACTACTTTTAGAGGGAGCTTGTCTATGTTAA

>Cluster\_39155

ATGTTTTTCCCTTTTCGAAAACTGAAGTACGTCTGCTGAAAAATACCGCTGCGGGCGTCATTTTTTCGGTGAAGTCCGG  
GAAAGGATTTCTGCGTCAATGTGTGATTTACGATCCGCACTCGCAGGCTTTATCCATTCGCTCTGCTGGCAGGATGTCC  
CGTTAATACGCTTTCTGGTCCGAGGCTGGGTGCCCTACCTGTGCGGAATTTGTCTACAGCGGTTTTGCGGAGGATGAACAG  
GGAGCGCCGGGTTTTTGGTCTGCTGCTGAAAACTGGAATCCGATGGTCTGGCATAACCGACGTTTTGCGAGGCTACG  
ACCGCTGTCTCATGTCATGGCTGATGGTTATTAATTTGCTGGAAGATCGTGAACTTTACCCGACGGATGGCAACGGGCATT  
TCTTTTGGGGGGCAACGGACCATAGTTCAGTAATCCGGCAACCGTTGCGGTCGCGGATCCTGAATATGCTCTTTTACGT  
GACACCGCGCCCTGCTTTCTTACCCGGCCAGCCGCATCACATTTTAACTCCGAGCGTGGACGTTTTATCCGGATAA  
ACCGGACCGCCGCTCTGGCCCTGGTATCTCCCTGATTCTCTGCGTTCTGCTGACGGACACCAATAAGGCTACG  
CCGCGCGCTGGAAGGGCGACCGCTCAAAACACTGGTGTCTGACACGGCAACCCATTTTAAATGATGAGCAACAAACCTG  
GTATTTCCGCGGGGAATGTCTGCACAAAACAGAGCTGCAATACCACATACCAAAACTCACCGCGTGCAAAACATTACC  
GCCAGTGCATGGGAGGATTTCCGGCCCTGATAAGCACATCAGCCCATCCGAAACCTGGTCAGAAGAGTTAAAGCAGAGCG  
TCAGTCCGTTACCCCTCGCTGGATCAAGCCTGGCAAAATTTGAGGCGGGAAATTTGAGCGAAAACCTCGTATTAAGAGCATG  
ATCCAACAAGTTTTGGGGGAGGATGAAAAGGCTGATATTAATTTGAGGCGCTGTTTTCCACACACTCGCCGCTTTTTAT  
TGACTTTGCCCCGATTCGTATCAGCCATCCGGCATAACGCAATTTATCGCCCCCTCACCTTCCGTTGATGGCGCAAAACC  
GAACGCCGAAGCAGATGCTTTTTTCTGGATTTTGCATCAATGATGACGGGAACGTCGGAGCTGACGAAAAATAAG  
GACGACTATTTTCCCAAGCCTTAA

>Cluster\_39573

ATGGAATTTACCACCGGATGATGTCGCTCGACACCGCGCTTAATGAGATGCTTTCTCGGTTACCCACTGACCGCCCA  
GAAACGCTGCCAGTGTTCAGTGTTTGGTCTGATTTCCGCGAGTGTGTCGTTTCGCCACTGGATGTCGGGGTTTTG  
ATAACTCCGCTATAGCAGCGCTACCGGTCGTTTTAGCCGATATTGCCCTCCGGGCAACCGCTGCGCGTTGCCGGTAAATCC  
TTTGGCGGTGAGCGTACCATGGTGAATGGCTGCGGGTACCTGCATTCGTATATGACCGGTGCGCCGGTCCGGAAGG  
CTGCGAAGCGGTGTGATGCAGGAGCAGATGAAACAAACGGCAATGGCGTGCCTTTACTGCTGAAGCGCGTAGCGGGC  
AAAATATTGCGCGGTGCTGGTGAAGATCTCTGCGAGTGGGTTGTTTTCCGGCGGGGACTCGCTGACTACCGTGA  
CTGCCAGTGTGCTTCCGCTAGGATTTCCGAAGTTCCGGTGTTCGTAAGTGCCTGAGCGTTTTTTCTACCGGTGA  
TGAATCCAGTTGCCGCTGAGCGTGGGCGACGGCAAAATCTACGATACCAACCGTCTCGCGTACACCTGATGTTAG  
AACAGTTGGGATGCGAGGTAATCAACTTAGGGATTATCCGCGACGATCCCATGCCCTGCGCGCCGATTTATTAAGCC  
GACACCGCGGATGCTGGTGTGATCAGTTCCGGCGGTGTTTTCAGTGGGTGAAGCGGATTACACCAAAACGATTTGAAGA  
GCTGGGGGAGATCGCTTCTGAAAACCTGGCGATTAACCGGGTAAACCGTTCCGCTTCCGTAACCTTTCTAATAGTTGGT  
TCTGCGGCTGCCGGGCAACCGGTTTACGCAACGCTGACCGTCTATCAACTGTTACGCTTTGCTGGCAAAACTAAGC  
GGCAACACCGCGAGCGGCTGCCCGCGCCAGCGTGTACGCACAGCTCCCGCTGAAAAAACGCCAGGACGCTTGA  
TTTTCCAGCCGGGCTGCTGCAACCAACCGGATGGCGAACTGGAAGTACGACACCGGACATCAGGTTTACATATAT  
TTAGTCTCTTTAGCTCGGCAACTGCTTTATCTGCTGGAACCGGATCGCGGCAATGTGAAGTGGGCGAATGGTGGAA  
GTAGAACCCTTTAACCGCTTGTTCGGAGCCTGTAA

>Cluster\_28475

GTGAAAGTTTTGATGCCATTATATAGGCGCTGGTGGCGAGGATGTTCTGTTCTGCGCTGGCAGGTCAGGACGAGC  
CCGGTTCTGCTGATCGATAATGGTAAAAAACAGGGCGCAAAATCCTCATGTCTGGCGTGGGCGTGCACCTTTACCA  
ACCTTTATGTCGAACCGGCGCTTATCTGAGCCAGAATCCGCATTTTTGTAAGTCTGCACTCGCGCTTTTACCCAGTGG  
GATTTCAATGATCTGCTCAATAAAACACGGCATCGCTGGCAGAGAAAACGTTAGGGCACTCTCTGCGATGACTCCGC  
GCAGCAGATTGTCGACATCTGGTGGATGAGTGCAGAGAGGGCAATGTGCCCTTCAGATTGCGTAGCGAAGTGTGAGCG  
TGGCGAAGGATGATACAGGCTTACGCTTGAACGGAACGGCATGACTGTCGGTTGCGAAAAGCTGGTCACTCGGACCGGT  
GGACTGTCAATGCGGGGCTGGGCGCATCGCGTTTGGTTATAAGATTGCCGAACAATTTGGCCTCAACGTGCTGCCAC  
CCGTGCGCTCTGGTGCCTTACTCTGCTGATAAACCTTGGTCTGAAGAGTTACAGGTGCTGGCGCGGCTGGCTGCTCC  
CCGTGATTACCGCTGAAAACGGTACCCTTTCCGTTGAGAACTTACTCTTACCACCGCGGCTTATCTGGACCGGCGGTG  
TTGCAGATTTCCAGCTACTGGCAACCGGTTGAATTTGTGAGCATACTGCTACCAGGATGTGGACCTCGAAAACCTTCT  
GAATGAGCAGCGTAATGCACATCCGAATCAGAGCTGAAAACACACTGGCGGTTCACTACCGAAGCGGTTGGTTGAAC  
GTTTACAGCAACTCGGGCAAAATCCCGATGTTTTGCTGATAAACAGCTCAACGTGCGTGAACCAACGATGATTAGCACA  
TTGACCGACTGGCGCGTACAACCAACGGCACTGAAGGCTATCTGACTGCTGAAGTACGCTCGGCGGCTGGACACCAA  
CGAACTCTTCCAGGACGATGGAAGCGCGCAAGTGCCTGGGCTGACTTCACTCGGCGAAGTATGAGGACGTCACCGGTT  
GGCTGGGGGGCTAATAATTTCCAGTGGGCGTGGTGCAGTGCCTGGGCTTGTGCGCAGGATTTGGTGGCAGAATAA

>Cluster\_41581

ATGACATCGGAAAATCCATTACTGGCGCTGCGAGAGAAAATCAGCGCGCTGGATGAAAATTAATAGCATTACTGGCAGA  
GCGCGCGAACTGGCCGTGAGGTGGGAAAAGCCAACTGCTCTCGCATCGCCAGGTACGTGATATTGATCGTGAACGGC  
ATTTACTGGAAGATTAATACGCTCGGTAAAGCGCACCATCTGGACGCCCATTACATTACTCGCTGTTCCAGCTCATC  
ATTTGAAGATTTCCGTTAATACTCAGCAGGCTTTGCTCCAGCAACTCTCAATAAAAATTAATCCGCACTCAGCACCTCC  
TTTTCTCGGCCCCAAAGTTCTTATTTCCATCTTGGCGCGCCAGTATGCTGCCCGTCACTTTGAGCAATTCATTGAAA  
GTGGCTGCCCAAATTTGCGCATATTTTTAATCAGGTGAAAACCGGCCAGGCCACTATGCCGCTGATCCGATTTGAAAAT  
ACCAGTCCGGTGCATAAATGACGTTTACGATCTGCTGCAACATACCAGTTTGTGCAATGTTGGCGAGATGACGTTAAC  
TATCGACCATTTGTTGTTGCTCCGGCACGACTGATTTATCCACCATCAATACGGTCTACAGCCTCCGACGCAATCC  
AGCAATGCAGCAAATTCCTTAATCGTTATCCGCACTGGAAGATTGAATATACCAAAAGTACGCTGCGGCAATGGAAAAG  
GTTGCACAGGCAAAATCACCGCATGTTGCTGCGTTGGGAAGCGAAGCTGGCGGCACTTTGTACGGTTTGCAGGTACTGGA  
GCGTATTGAAGCGAATCAGCGACAAAACCTCACCGGATTTGTTGGTGTGGCACGTTAAAGCCATTAAACGTTCTGACCA  
TTCCAGCGAAAACGACGTTGTTAATGGCGACCGGGCAACAAGCTGGTGCCTGGTTGAAGCGTTGCTGGTACTGCGCAAC  
CACAACTGATTAATGACCGCTGTTGAGTACGCGCGGATTCACGGTAATCCATGGGAAGAGATGTTTTATCTGGATATTCA  
GGCAATCTTGAATCAGCGGAAATGCAAAAAGCATTGAAAAGATTAGGGGACATCACCGTTCGATGAAGGATTTGGGCT  
GTTACCCAAGTGAACGTTAGTCCCTGTTGATCCAACCTGA

>Cluster\_58646

ATGAACTTACATGAATATCAGGCAAAACAACTTTTTGCCCGCTATGGCTTACCAGCACCGGTGGGTTATGCCTGTACTAC  
TCCGCGGAAGCAGAAGCCGCTTCAAAAATCGTGGCGGCTCCGTTGGTGTAGTGAATGTGACGTTCCAGCTGGTGGCC  
CGGTAAGCGGGCGGTGTAAGTTGTAACAGCAAAAGACATCCGCTTTTGCAGAAAACCTGGTCCGTTGGCAAGCGT  
CTGGTAACGATCAAAACAGATGCCAATGGCCAACCGGTTAACAGATTCTGGTTGAAGCAGCGACCGATATCGCTAAAGA  
GCTGTATCTCGGTGCCGTTGTTGACCGTGTTCCTGCTGTTGTTGCTTTATGGCTCCACCGAAGCGCGCTGAAAATCG  
AAAAAGTGGCGGAAGAACTCCGCACCTGATCCATAAAGTTGCGCTGATCCGCTGACTGGCCCGATGCCGATCAGGGA  
CGCGAGTCCGGCTTCAAATCGGTTGGAAGGTTAACTGGTTACAGAGTTTACCAAAAATCTTTCATGGGCTGGCGACCAT  
TTTTCTGGAGCGGACCTGGCGTTGATCGAAATCAACCGCTGGTCTATCACAACAGGGCGATCTGATTTGCTTCGACG  
GCAAACTGGGCGCTGACGGCAACGCACTGTTCCGCCAGCTGATCTGCGCGAAATGCGTGACCGAGTCCGAGGAAGATCCG  
CGTGAAGCAACAGGCTGCACAGTGGGAACGTAACCTGCTGCGTGGACGTTAAACATCGGTTGATGGTTAACGGCGCAGG  
TCTGGCGATGGGTACGATGGACATCGTTAAACTGCACGGCGGCAACCGGTAACCTTCCCTGACGTTGGCGGGCGCAA  
CCAAAGAACGTTAACCGAAGCGTTCAAATCATCTCTGACGACAAAGTGAAGCGGTTCTGGTTAACATCTTCGGC

GGTATCGTTCTGGACCTGATCGCTGACGGTATCATCGGCGCGGTAGCAGAAGTGGTGTAAACGTACCGGCTGGT  
ACGTCTGGAAGGTAACAACCGCGAACTCGGCGGAAAGAACTGGCTGACAGCGCCTGAATATATTGACGAAAAGGTC  
TGACGGATGCAGCTCAGCAGTTTGGCCGAGTGGAGGGAAATAA  
>Cluster\_22330  
GTGGAGCGCAACGTCACGCTCGATTTTGTTCGCGCGTGCCTTCTGGGGATCTGCTATTAACATCAGCGCCTTTGG  
GCTACCAAAGCGGCTTATCTCAATCCCCTGGTACGGCGTATTACGCCACAGGATGCATGGACCTGGGCATTTCTCG  
ATCTCATCGGCCAGGTGAAATTCCTCACGCTTTTGGCGTGTGGTTGGTGGCGGCTGCAAAATGTTGCTGCCCGTGGC  
AGACGATGGATCCAGTCGCGGTTAACGCTGTTAGTCTTGTGGGTTTTATTCACGGTTTATTGTTCTGGGACGGCGAT  
TCTGTGGCTTACGGCTGGTGGCTTAATCTGCTGGCGGCTGGTGGCGATGCGCCATCGGTAAGAAAGCCTGTTAATA  
CCGGCGTCATGCTTATCTGGTGGGCTTGGCGTTTGTGTTTATGGGGGGATTTCCGATAGCCAGACCAGCCGCGCC  
TGGACACCTGATGCATCGCTATTTGTATGAAAGCACTGGAACCTTACGGTGGTGTGAAGCGATCAGTAATCGTGC  
CGATGGTGTGGCAACAGTTTACGGACTGGGCGCACAGTATGGCTGGCACTGGCAGGGATGATGCTCATTTGGTGGCG  
CATGTGCGCAGTGGCTGGCTGAAAGGACAGTTCAGCTTACGTCACATATCGTCTGACTGGTTTGTGGTGGCGGAT  
GGGGTATCATTAACCTTCTGCGCATCGCCCTGCAATGGCGACTGGACTGGGCGTATCGTGGTGGCGCTTCTTACTTCA  
GATGCCCGGGAACTGAGTGGCGCTTTTTCAGGCGATGGCTATGCGTCACTGTTTATGGCTTCTGGCGCAATTAAGCC  
GCTTAAAGCTGGTCTGGCTATCGCTGTGTCGGACGGATGGCACTGACCAACTATCTATGCAACGCTGATTTGTACT  
ACGTTTTTTTACCACCTCGTGGTGGTGGTGGTGGTGGTGGTGGTGGTGGTGGTGGTGGTGGTGGTGGTGGTGGTGGT  
GAAATATCTTCTTCTGTTATCTGGTGGTGGTGGTGGTGGTGGTGGTGGTGGTGGTGGTGGTGGTGGTGGTGGTGGT  
GTGCTGCCGACCGACAACATCTAAAACATCAAGATAA  
>Cluster\_5705  
ATGACAAATAACCTCTGATTCACAAAGCAAACCTTCCACAACCTGGCACCACATTTTACCAGATGAGCGCGCTGGC  
GCAGAACACCAGGGGATTAACCTGTCGAAGGCTTCTCTGATTTTGTATGGTCCGCGCTATTTACAGGAGCGGCTGGCGC  
ACCACGTTGCACAGGGGGCAAACCAATACCGCGCCATGACCGGCGTGCAGGCTTGGCGGAGGCGATTGCTCAGAAAACG  
GAACGTTTTGTATGCTATCAACCAGATGCGGATGCGGATACCGGTAACGGCAGGGGCGACGGAAGCCTTACACACGCG  
GATTACCGCACTGGTGGCAATGGCGATGAAGTGAATTTGTTTTGATCCAGCTATGACAGTTACGCCCCCGCCATCGCGC  
TTTTCTGGGGAAATAGTGAAGCGTATGGCACTGCAACCACCGCATTTTCCGCTTACTGCGAGGAAATTTGCCGATATTA  
AGCGAGCGCACAGACTGGTGTCTTCAACACTCCGCATAACCCAGTGAACCTGCTGGCAGCAGGCTGATTTCCGCGC  
TTTTGGTGGCAGGCGTACCGCGGACGAGATTTTGTGATGAAAGTCTACGAGCACATCAACTTTTCAACACGCG  
GCCATGCCAGTGTGCTGGCGCATCCGAGCTGCGTGGCGGCGTGGCGGTTTTCTTCAATTTGGCAAGACCTATCATATG  
ACCGGCTGAAAGTGGTGTATTTGTTGGCGCCAGCGCCATCAGCGCCGAAATTCGCAAGGTACATCAGTATCTGACCTT  
TTCGGTGAATACCCCGGCACAGCTGGCGCTTGTGATATGCTACGTGCAGAACCTGAGCATTATCTTGGCTTACCGGACT  
TTTTATCGCCAGAAGCGCATATTTGTTGAATGCTTTAAATGAAAGCCGCTGGAGATTTTACCCTGTGAAGGTACATCA  
TTTTTGTGGTGGATTAACAGCGGTTTTTACCTGGATGATGTTGAGTTTTGCCAGTGGCTGACGCAGGAGCACGGCGT  
AGCGCGATTCGCTGTGGTGGTGGTGGTGGTGGTGGTGGTGGTGGTGGTGGTGGTGGTGGTGGTGGTGGTGGTGGTGGT  
CGAGTTGCTGGCAGCAGCTGAACGCTGCGCCAGCTTTAG  
>Cluster\_43613  
ATGTCCTTTCGTTTACGACAACTTTTACCATTTTCCCGGAGTGGCGCTTAACTACGGTAAACATGGGGTAAGCGCAAG  
TTTTGGTGTTCGCGGACCAAGTAAATGTTAAACCCAAAGGAAATTAAGCACTGTAGGGTTACCGGTTCTGGTTTTAT  
CGTATACATCACCCTATTACCATACAAAGATAAACCATCCACAACCATCCGCTAAATCCGCTGCTATAGAAATCTCT  
GTTATACACTTTGGGTTAATTTTACAGCAACACTTAACTAAATGCAAAAATGTACATGCCACAAGCAGGATGAATGAAAT  
CTCTAGTGCTCAGTAGAGGCTTGGACAAGCACATCTCTTTTACCTTTACGAGACTTGATCGTTAAAGCACGAGAACAGA  
GAACGCAAAATGCAACGACTTACAAGAAGCTCTTGTAGAAGAAATCAAGACAAAAGAGCGAATTTGGCTCGACGTAATA  
AGCCTGTTTCGATGGTTTTTATAAACGTCGATTTGCAGACTGAAGTAAAGCTTACCACAACCAAGCAAGGATATCTCG  
TCTTGTATCTGGGAAGATAACACTAAAATCGTCAATGATTTTCAAAAATAACGATTTCTCACAAACGGGCTTATGCTGCAA  
TGATTCGTGCTTTTCGATATTTTAAATCAAGCATCAAAAATGGGATATTTACCAGATAAAGCTACAGATCAGTTTGA  
GAAAGGACGTTAGCTACAGGACGTTGATCGTCACTCCAGTTGATTTGATTTTCGCTTCAACAGATCTAATTCGTTTTGC  
TGGACGAGCAATGCGATTTGAAAACGCCAATGGCGACGATATAATTAATTTATCCCGGCTTGGCTTAAATTTCCCGCGC  
ATGGGGTATTTGGCCCTGATTGACTTACGGGATTAACAATTAATGGCGAGCATCAAGGGTTCCATGAAGAGGATGGTGT  
CCGAGTATGCGCAGCATAGCTGGACATACATGGCAAAAACAAATAAAGATGGCTCACCAGACCGACGATTTAAAGATAA  
CTATCAAAATTCAAATTTGCATTTATGAAAAGTTATATTTCCAGTCCAAAACAGGCATAACTGAAGAATACATGGTATCAA  
ATGCTGATGCAGCTTTCGGTTTTTCGACAGGCGATTTAAGCGCTATCAGGATTCACCTAGCATGGAGTAA  
>Cluster\_25730  
ATGTTTGAAGCAATTAACCGCGCTCCTGCGGACCCGATTTCTGGGCTGGCCGATCTGTTTCGAGCCGATGAACGTTCCCG  
CAAAATTAACCTCGGGATTTGGTGTCTATAAAGATGAGACGGGTAACCCCGGCTACTGACCAGCGTGAAGAAAGGCTGAAC  
AGTATCTGCTCGAAAATGAACCCAAAATTTACCTCGGATTTGACGCGATTTGACGCGCATCCTGAAATTTGGTTCGCTGCA  
CTGCTGTTTGGTAAAGTACGCGCTGATCAATGACAAAAGTGTGCGACGGCACAGACTCCGGGTGGCACTGGCGCACT  
ACCGTGGCTGCGGATTTCTGGCAAAAATACAGCGTTAAGCGTGTGGTGGTGGTGGTGGTGGTGGTGGTGGTGGTGGTGGT  
AGAGCGCTTTAACTCTGACGTTGGAAGTTCGTGAATACGCTTATTAATGATGCGGAAAATCACACTTTGACTTCGAT  
GCATGATTAACAGCCTGAACGAAGCTCAGGCTGGCGACGATGCTGTTTCCATGGCTGCTGCCATAAACCACCGGCAT  
TGACCCTAGCTGGAACAATGGCAGACACTGGCACAACCTCCGTTGAGAAAGGCTGGTTACCCTGTTGACTTCGCTT  
ACCAGGGGTTTGGCCGTTGGTGGTGGTGGTGGTGGTGGTGGTGGTGGTGGTGGTGGTGGTGGTGGTGGTGGTGGTGGTGGT  
GCCAGTTCCACTCTAAAACCTTTGGCCTGTACAACAGGCGTGTGGCGCTTGTACTCTGCTGGTGGTGGTGGTGGTGGTGGT  
TGTGAACCGCATTCAGCCAAATGAAAGCGGCGATTCGTGCTAACTACTCTAACCACCAGCACAGCGGCTTCTGTTG  
TTGCCACCATCTGAGCAACGATGCGTTACGTGGGATTTGGGAACAAGAACTGACTGATATGCGCCAGCGTATTCAGCGT  
ATGCGTCAGTTGCTCAATACGCTGCAGGAAAAGGCGCAAACTCGGACTTACGCTTATCATCAACAGAAACGGCAT  
GTTCTCTTTCAGTGGCTGACAAAAGAAACAGTCTGCTGCTGCGCAAGAGTTTGGCGTATATGCTGTTCTGGTCT  
GCGTAAACGTTGGCCGGATGACACCAGATAACATGGCGCGCTGTGCGAAGCGATTTGGCAGTGTGCTGTA  
>Cluster\_18085  
ATGGATGTTTTTAACTCCTGTTTCCCGCAAAGAACATATTTGACCCAATGGGACTTTTGGGAGGACAGATTTGGTGT  
AAAAGATGTAACACTCATTCTATTTTTCAGATATGGATCTTCCGATACAGACGCTATCACCAGAGCATTAAGAAACCGC  
TGGAAACCCGATTTTAGGGTACAGTCTGGCAACATGGTGAATATCTGAATGCGATAGTAACTGGTATTTATCAACAA  
TATCAACAGATATTAACCTGAATGGATAACCTATAGCCCGAGTGTGATGACTCTATTTGCAAAAGCAATAGAGTTAT  
GACATCGCATGGTATAATATCTCGTTTTTACACTGTCTATAATGCAATTTTGGTGTAAATTAACATAGCAGGCGAA  
ATATTTGACAGCCTTTTGAATTAATAAAAATGAGGGGACTACGCTATCAACTGGCAAGATTTGATCTTAAGATTA  
AGCGCAAAGATGGTGTATATGTAATCTCATACCCGACAGGAACAGTCTGGTGGGAGAAAGAACTGCATAAAATCGC  
TGAAGCTGTAAGGCATAATGCTGTTTATGTTTTCAGATGAAATCCTAGTGTATTTGTTTTTAACTAGCTTTTACAT  
CCGCGCTTAAATAAAGAAAGAAAGTGTAGTATTTAACTGATATCGAAAACATTTAATGTTCTGCTTAACAGGA  
TCGTATATGATTTCAACTGACGATAATTTAATCATAAAGTTTCAAGACGATATCAGGATTCGCGATTTTGTAAACTCCC  
ATCAGTACTGAATATAATGCAACTATTTATGGCTATAACGAATGTGAGGATGGTAAAGTCAATTAAGACACATATTTG

CCTCTAACATTCAAATTCACCCAGCAGTATCTGAATGAAAAATTTCCAGAATTGATCGTAAGGCCAGCTGATGGTTGCTAT  
TTTTCTGATAGATTGTTCTGCTATTGGTTATCCTTTTGATGAATTCACAGTCGATTAATTCATGAAGGCAAAGTGGG  
CATTATGGCGGGGCATGTCTATGGAACGGAGGGGGAGGGCTACCTTCGCTGAACTGGCCTGCGGTCGAGAAAAATTAT  
ATATGGGGCTTACCGCTCTGTGAGTGTAAATTAATAAATTAATTAATCAGGGAGAAATA

>Cluster\_26733

ATGACCTGTTCAACTTCATTAAGCGGTA AAAACAGGATTTTCCTTATCGCTGGCATTCTGATGATTGCCACAACATTACG  
CGTACCTTTACCGGCGCAGCACCGTTACTGGATACGATTCTGTTCCCGTTACTCGCTAACGACGGCGCAAACCGGCTTAT  
TAACCACCTGCCATTATTAGCCTTTGGCTAATCTCACCGCTGGCGGCCCGGTGGCGGACGTTTTGGTATGGAACGT  
AGCCTGTTTGGCGGTTACTTTTGTATCTGTGCAGGTATCGCAATTCGCCTCTCCTTCCCTTACTTATATTATTTGGCGG  
TACAGCGATCATTGGCGGTGGGATTGCATTAGGTAATGTCTTACTGCCAGGATTAATTAACGCGATTTCCTCATTCGG  
TCGCCAGACTTACCGGCGCATATTCCTGACAATGGGAGCTGGCGGCTCTGGGATCGGCGATGGTAGTGCCGCTGGCT  
TTGAACGGTTTTGGCTGGCAAGGCGGTTGCTCATGCTGATGTGTTTTCTCTGCTGGCTCTTTTTTATGGCTGCCACA  
GTGGCGAAGCCAAACACATGCAAAATTTGAGTACTTACGCGCCTTACATACTCGGGTATCTGGCGTTGCGCGCTGGCT  
GGCAGGTAACATTGTTTCTTGGGATCAACTCACGTTCTATTACGTGATTATTGGCTGGCTTCCGGCGATCCTCATCAGT  
CACGGCTATAGCGAAGCACAGGCGGGTCTACTGCATGGTTTGCAGCACTAGCCACAGCAGCTCCCGTTTGTGATCCC  
ACTTTTCTTACATCATGTAAAGATCAGCGTGGTATTGCGCTTTCGTTGCCTTGATGTGCGCAGTGGGCGGGTGGGC  
TCTGCTTTATGCCAGCACCGCATCCTGCACTCTGCTTTTTCTGTTTTGGTTCCGGCGCAACAATGATACTGGGGTTG  
ACGTTTATTGGTCTGCGGCAAGTTCTGCGCATCAGGCGGGGCACTCTCGGGGATGGCACAATCCGTCGGGTATTGGCT  
GGCAGCCTGGGCGGCCCTGATGGGTAAAATACAGATGCTAACGGTGACTGGTCCGTACCCTGATGGGTGTTGCCAA  
TACTTTACTACTGATGGCGATTTTCGGACTTTGCGCGGGAGAGACAAAGAAATTCGCTAA

>Cluster\_42066

GTGAACAGACGTAATTTTATTAAGCAGCTCTGCGGGGATTTGCTGACGGGCGCGCTGCCGCTGTGATCATGCGGG  
TGCTGAAAACCGCCGCAATTCGCGGATCGCTGGGATGTTGTACGACTCGACCTTGTGCGTAGGCTGTGAGCTTGGC  
TCACCAAGTGTACAGGATATCAACTTCCCTGAACGTAAACCGCAAGGGGAACAGACCTGGTGAACAACGACAACTGTG  
CCGTATACCAATAACATCATTAGGTTGGACAGCGGCACAGGGGTCAACAAAGACCAGGAGGAGAAATGGCTACGCGTA  
CATTAAAGAAACAGTGTATGCACTGCGTGCATCCGAACTGTGCTCTGTGTGCCGGTCTGTGCGTGA AAAAAGATCCGA  
AAACCGGCATTGTCCATTACGACAAAGATGTGTGACCGGCTGCGCTTACTGCATGGTGCCTGCCATACAACGTGCCG  
AAGTACGACTACCAACACCGTTTGGTGGCTGCATAAAGTGTGCAACCAGAAAGGTGTGCAACGCTCAATAA  
AGGCGGCTGCGTGGCTGCGTAGAAGTGTGCCCGGGCGGGCGGTGATTTTTGGTACGCGTGAAGAGCTGATGGCGGAGG  
CGAAAAACGCTTGGCGTGAAGCCGGGAGCGAATACCACTAACCCTGCGCTGAGACGCTGAAATCTGGCGACACTTACCTG  
CATACGGTGGCAAAATATATCCGCATCTGTACGGGAGAAAGAGGGCGGGTACTCAGGTTCTGGTACTGACGGGTGT  
GCCTTATGAAAATCTCGACCTGCCGAAACTGAGCATCTTTCTACTGTGCGGTTCCGAAACATGTCCAACACACCTGT  
ATAAAGGCATGATGCTACCCTGGCTGTGCTGGCGGGCTAACCTGCTGGTTCGTCGAACACTAAAAACGACCATCAC  
GACGGAGGAGCATCATGAGTCATGA

>Cluster\_60311

ATGATGCAGGATTTGCGTCTGATATTAATCATTGTTGGCGCGATCGCCATAATCGCTTACTGGTACATGGTTTTCTGGAC  
CAGCCGTAAGAAGCATCTTCTATGTTCCCGCATCGGCCATTA AAAACGAATGAAGTCAAACGTCAGCAGCATTTCTTATG  
ACGAGGATGTCGAAGATGATGAGGGCTTGGTGGAGTTCTGTTTACCCTGTAATCATGCCCGCTAACGCTCAGGAG  
CATGAGGCTGCTCGTCCGTCGCGCAACACAGTACCAACCGCTTATGCGTCTGCGCAGCCGCTCAACCGCTCCAGCA  
GCGCGCTGAAGCGCAGGTACCGCGCAACATGCTCCGCATCCAGCGCAGCCGGTGCAGCAGCTGCCATCAGCCGACG  
CTGAACAGCGTTGCGAGCAGCAGTTTCCGCACAGGTCGCGCCAGCGCGCAGCTGTGATTCAGCAGCCGAACCGGCA  
CAACAGGCTTTCCAGCTGCAGAACCCGTAGCGGCACACAGCCTGAGCCTGTAGCGGAACCTGCTCCAGTTATGGATAA  
ACCGAAGCGCAAGAGCGGTGATTATCATGAACGTCGCGGCGCATCAGGTAGCGAGCTAAACCGTGAATGCTTCTTA  
ACAGCATTCAACAAGCGGGCTTCATTTTTGGCGATATGAATATTTACCATCGTCATCTTAGCCCGGATGGCAGCGGCCG  
GCGTTATTGAGCTGGCGAATATGGTGAACCGGGAACCTTTGATCCTGAAATGAAGGATTTACTACTCCGGGTGTCAC  
TATCTTTATGCAAGTACCGTCTTACGGTACGAGCTGCAGAACTTCAAGCTGATGCTGCAATCTGCGCAGCATATGGCG  
ATGAAGTGGCGGTTGCTGCTTACGATCAGCGCCGATGATGACTCCGAGAAATTCGCGCAGTACCAGGACATCATC  
CGCGAAGTCAAAGACGCCAACGCTGA

>Cluster\_21835

ATGCTGACACTTGGCCGCAACAGCAGCGACAAAATATTCGCTGGTTATTTATGCTGTCAGTTTTGATGCTGCTGGCGCT  
TCTCTAAAGCCTTTGCGCGGTTGAACTATGGATTTTGGCAGGTGACTGGTTTTCTCCTCGTGGCGAACGTTCTGCTGCG  
AAATTCGCTGCCACGTACGCTGGCTGTATTGCTGGTTGGTGGCGGCTGGCTATATCCGGCGCTGTAATGCAGGCGTTG  
TTTTAAAAATCCTTGGCAGAACCTGGACTACTTGGCGTCTTAACGGCGCAGGCGTGGGGCTTATCGCGCGGTTATTGCT  
TGGGAAGGGCACTCCCAACTGGGCGTAGGGCTGTGTGCGATTGCAGGCGCACTTATCATCACTTTAATACTCTTAC  
GTTTCCCGCTGCTATCTTTGACCACTCGGTTATTGCTGGCTGGCTGGCTGGCTGGCTGGCTGGCTGGCTGGCTGGCTGG  
ACGTGGGCTATCTACTTTTCCACCTCTGTGATTACGTCAGCTGATGACTGGATGATGGGCGGTTTTGGCGGCGTAGA  
CTGGCGGCAAGCTGGCTGATGGTGGCATTTGATCCCGTATTGTTGTGGATCTGTGTGAGTCCAGGCGATGAATATGT  
TAGCACTTGGCGAGATCTCGCGCGGCAACTGGGTTTACCCCTGTGGTTCTGGCGCAATGTGCTGGTGGCAGCAGCGG  
TGGATGGTTGGCGTCACTGTGGCGTGGCGGTTGCTATCCGCTTTATTGGTCTGGTGGATCCACATATTTCCCGCTGTG  
TGGTTAAACCGATCATCGGTATTACTTCCCGCTGCGCGCTGGCAGGGGCGAGCGCATGCTGCTGGCGGATATTGTAG  
CGCGCTGGCATTAGCTGCGCAGAGCTGCCAATTTGGCGTGGTACCAGCAACGTTGGGTGGCGGCTGTTTATCTGGTTA  
TTGTTAAAGCAGGACGTTAG

>Cluster\_8856

TTGTTGAAATATAGAACTTCGTTGCTAAGAAGAAAAATTTATACCAAAACGAAGTGTGATGTTAAAAATTTACATAT  
TGCATATGCTTTGACCGTGAATTCATAATGCCAGCGGGTGTGCTTATATTCAATTTATCCAACAATAGACATATTA  
ACCTTATTTTACCTTCTTATATCAGGATAGAAAGAAAGAGTGTTCAGCTTTTTCAGAAATAGAAAGGCTCAATAACA  
TCAATATCTGTATATATATAACTGATAAATTTGACATTAATCCGGATACATTAGTTCCTGGTATTCCTTTATCAACATG  
TTTACGTTTTTTAATCCAGAAAGTATTGATGATAAAAATAAATAGATACTTTTATCTTACTGTGATGTCATATGTAATG  
GTCCTTTAGATGAAGTGGTTGATTATAAATTTAAATGCTGATTTGATGTTGTAATCCAGATTCGCCAGAAATGCAAGAA  
CGTGTAAAAAATTAGACTATGGCATTTAGTTTATTAATTTAATTTAATGCTGGGTTATGTTTTATTAATACAGCGAATG  
GAAAAAATAATATAACACAAAAGCGTTAGAAATGATCAACAGTGGAAAAGTATATAGGATGCGAGATCAGGATGTGC  
TCAATATTTTACTTAAATGGACGAGTGCATTAACCTTGAATAAGAAGTACAATAAATAGACAAATTTGTCAGTACGATGTGAT  
GAAGAACAAAAAATTTGCCAACAAATTAATGCAATGTTTACCAGAAATAAACATGGTACAAAATTTTAGAGC  
ACAAAATTTTGTACTTATTTTCAAAATCTCTTGGAAAGAACATAAAAAGAAATCTAGCTCCATCATCAAGTGAAGTTA  
GGTTAAAGTCTAAAGTTTTTTGGCTAGAAGAAAAATTTGTAAGCAATTTCTTATTATATAAGTATTTACTTGTAA  
TTATTTGGCTTAAAGATTAG

>Cluster\_39645

ATGTCATTA AAAAGCTCGATGATGGTCTGTTGAAAGTGGACGTCAGACCGCAGGGTGCAGATGGAAAACGATCAGGCG  
AAAATTTAAACTAAAGGTGAAGCTCAAGCATTCGACGTCATGACTGGTTAACTACCACAACAAGAGTGGCTGGAGA

AACCAGCCGACCGCCGAACCTCTTACAGAGTTGTTAGGCAGATGGTGGATATATCACGGAAAATCACATGAGCGTGGAGAT  
ATTGAACGGGGGCGTTTTAACGACATAAATCGCCAAATTTGCAGAAAATGGGAGTGTCCAGAGCTGACCAGCTAACAAAGAA  
AACGATAACTGATATACGCGTTGTAATGATGAACGATGGTCTAAAACAGCCAGCGTAAATCGGCATCTGGCAATAATGA  
GCGGGATGTTACCAAGTTAATTTGACGCGGTTGAATACCACTTCACAAACCGGTTCCGGTAGGTTAAGCGGTTACGTGAA  
GCTGTTACAGAAATGGCTTTTTTGTCCAGTGAAGAGATTACCGGACTGTTATCCATGCTTGATGGTGAATAAATGCG  
GACTCTGGTCTGCCTTTCTACTGGTGGACGCTGGAGTGAAGTGTCTAATTTAAAAGCTGAACACATCATTAACAGATGG  
TTACGTTTATGAAAATAAAAACGGAAAGCGCAGGACAATTCCCGTTTCGACGACCTGATTAACCGGATCAAGACAAA  
AATTCAGGCAGGCTTTTTAATGCCAGTTACTACAAAGTGCCTAACGCTCTCAGGGAAGTAAAACCCGATTTACCTGACCG  
ACAGGCAGTGCATGTTTGGAGCATACATTTGCCACACATTTTATAATGAATGAGGTAACATAAATCACATTGACGCGCA  
TCCTAGGTCATTTAACATTCAGCAAATATGACCTACGCACACTTTGCACCGGATTTCTTACAAGATGCAGTACTCTT  
AACCCGGTGTGAGGAATGTCATATGCGTCCATAA

>Cluster\_33734

GTGATAAAAACGTAATTTGCCACTGATGATCACCATCGGCGTCTTTGTGTTGGGTATATCTACTGTCTGACCCAGTTTCC  
CGGTTTTGCTTCCACAAGAGTGTCTGCAATATCCTGACCGATAATGCCTTTCTTTGGGATCATCGCCGTTGGCATGACCT  
TTGTGATCCTCTCCGGTGGGATCGATCTCTCCGTCGGTTCGGTGTATCGCCTTTACCAGCGTGTCTTCTGCAAAAAGTGAT  
GGCGATTTCCGCGCTCTCCGCGTGTCTGGCGTTCGCTGGTGTGGTGTGGGCTGTGCCCTTCGGCGCATTTATGGGGCT  
TCTGATTTGACCCCTGAAGATCCCGGCGTTTATCATTACCTTTGCGGGAATGTTCTTTTGGCTGGCGCTCAGTATCTCG  
TTTTGGAAGAGTGTGATCCCGATAAAACATCCTGTTTATGACACGCTCTCAAGTCTTGGCTGGAATAACCTGGCGGCGGT  
CGCTTAAGTGCATGGGACTGCTGATGATGACGGTGGTGGTTATCGGCATATTTCTTCGCGCATCGTACCCTTTTGGTAA  
TCAGGTATACGCCATTGGCGGCAACGCAACGTTGCGGCAACCTGATGGGATTTCCACTCGCACACCATAATTCGCATTT  
ATATGCTCTCCACCGGACTGGCAACGCTGGCGGGATTGCTTTCTCGATTTATACCCAGCGCGGATATGCATTCGCGGGC  
GTAGGTGTGGAACGGATGCTATCGCTCAGTGGTAATGGCGGTACGCTTTTGAAGTGTGGCGTTGGACGGTATTAGG  
GACGCTTTTGGCGTGGCGATTCAGGACTGATTCAGACTTACATAAACTTTGATGGCAGCTGAGTTCCTGGTGGACGA  
AAATCGCCATCGGATTTTGTGTTTATTTTATAGCATTACAGCGTGGATTAACGGTGTGTGGGAGAAATCGTCAGAGT  
TCGCCAGTACAAGAGTCAACATTCGCGAGCGATAA

>Cluster\_43023

ATGAAAAAGTGGGGCTAGGGTTAACATTTTTGCTGGCGGCAACCAGCGTTATGGCAAAGGATATTCAGCTTCTTAACGT  
TTCATATGATCCAACCGCGAAATGTACGAACAGTACAACAAGGCATTAGCGCCACCTGGAAACAGCAAACTGGCGATA  
ACGTGGTGTATCGTCAGTACACGGTGGTTCAGGCAACAAGCGACGTCGGTAATCAACGGTATTGAAGCTGATGTTGTC  
ACGCTGGCTCTGGCCTATGACGTGGACGCGATTGCTGAACCGCGGGGATGATAAAGAGTGGATCAAAACGCTGCGCGGA  
TAACTCCGCACCGTACACTTCCACCATTGTTTTCTGGTACGTAAGGGTAATCCGAAGCAGATCCATGACTGGAACGATC  
TGATTAACCGGGTGTTCGGTGTATCACGCTAATCCGAAAAGCTCTGGTGGCGCGCTGGAATTACCTGGCAGCCTGG  
GGCTACGCGCTGCATCACAACAACGATCAGGCAAAAGCACAGGATTTGTTCTGTCAGTGTATAAAAACGTCGAAGT  
TCTGGATTCTGGCGCGCGGATCCACTAACCTTTTTCGAGCGCGGAATGGCGATGACTGATGGCTGGGAAAATG  
AAGCTCTGCTGGCAGCAATGAACTGGGAAAGATAAATCGAAATCGTTACGCCGAGTGAAGTCTATCCTCGCAGAGCA  
ACCGTGTCCGGTGTGATAAAGTGGTTCGAGAAAAGGACCAAAAGAGTGGCGGAAGCCACCTGAAATATCTACTAC  
GTCAGAAGGTGAGAAATTCAGCGAAAACACTACTACCCTCCGCGCAGCGCTGAGGTAGCGAAAAGTACGAAAATGCGT  
TTCCAAAATTTGAAGTATTCACCATTGATGAAGAGTTCGGCGGCTGGACGAAAAGCGCAAAAAGAGCATTTTGTACCGC  
GGTACGTTTCAGATCAGCAAAACGCTGA

>Cluster\_61434

ATGAAAAAAGAAACATTCTACTCACCTTTGCACCTCACTCTGCTTACCAACGTTGCTGCACACGCAAAAGAGTCAA  
AATAGGTATGGCGATTGATGATCCTCGTCTTGAACGCTGGCAAAAAGATCGAGATATCTTTGTGAAAAAGCGAGAATCTC  
TCGGCGGAAAGTATTTGTACAGTCTGCAATGGCAATGCAAAACACAAATGTCGAGATTGAAAACATGATAAACCGG  
GGTGTGATGTTCTTGTCTATTATCCGTTATAACGGTCAGGTATTAAGTAAAGTGTGAAAAAGAGCAAAACAGGCAAT  
TAAAGTATTAGCTTACGACCGTATGATTACGATGCGGATATCGATTTTATATTTCTTTCGATAACGAAAAGTCCGGT  
AACTGCAGGCAAAAGCCCTGGTGCATATGTTCCGCAAGGTAATTAATCTTCTGATGGGCGGCTCGCGGTAGATAAAC  
GCCAAGCTGTTCCGCGCGGACAAATGAAAGTGTAAAACCTTACGTTGATTTCGGAATAAATGAAAGTCTGTTGACCA  
ATGGGTTGATGGCTGGTTACCGGAAAACGCAATGAAAATTAAGGAAAACGCGCTAACCCGCAATAATAACAAAATGATG  
CTGTAGTTGCCTCAAACGATGCCACCGCAGGTGGGCAATTAAGCAGTAAAGCGCGCAAGGTTTATCAGGGAAGTAGCA  
ATCTCCGGCAGGATGCGGATCTCGCAGGTATTAACGTTATGCTGCGCGTACGCAAACTATGACGGTGTATAAACCTAT  
TACGTTGTTGGCAAAATACGCGCAGAAAATGCGGTTGAGTTGGCAATGGTTCAGGAAACCAAAAGCAGATACCACTGA  
ATAATGGCTGAAAAGATGTCCTCCCGCTCTGACACCGATCGATGTAATAAAAACAACTCAAAGATACGGTAAT  
AAAGACGGATTCCCAAAGAGAGCGAGCTGTA

>Cluster\_23064

ATGGCTTTTACACCTTTTCTCCCGCTACGCTACGGCTTCTGCCGTTTGGCACTGACGCTGATGACGCTTGTGACTG  
GGCGCTTGGCACTATTACTGGCGGGACAGCGAAAATAATATGCAAGGCCAGGTGACAGCAGATGTCAGCCAGATGACTG  
AAGATCAGCACCTGCTCGCGCCATTGCGACGCCAAAGGTAAAATGTGGAGCAATTTACGCTGTTTCCGCGACGGCGAT  
GGCTTTGCATGGATTGAACGGCGCAGCTGCTGAACACAGCTGACTGAAATAATGCGGTGTTCTCTAAAGT  
GACCATCGCGCCAGACGACGAGCGTGTGCTGCTTGGTGTGTTGCCGTTTTCAGGCGCGCTGCGCTGGCAAACTCTTTA  
GTGAAGTGCCTTCCAAAAGAAAACAGGTAGTCAAAGAAGGCGCACCAGTGTGATGTTGAAACCCGGCAGAACCT  
TTCCTGATCGTAAACGATGAAGCTACTGCCAATATGCTGACCGATAAACTGCGCGGTGAAGCGGAACTGAACAATAGCCA  
ACAGTGGCTGGCATTAAACATTTGAAGCGGTTTTCCGGTGTATGATGCCGCAACAGCGGGCAGTTTATCCCCAGCGCA  
CCAACCTCCAGGCGCTGGGCGGTATCAGCTTTAAGAAAAGGCTGCTATACCGGACAAGAGATGGTGGCGGAGCAAAATTC  
CGTGGTGCACAAACGCGCGCTCTGGTTGCTGAAAGGTAGCGCCAGCGACTGCCGGAAGCTGGTGAAGACTTAGAGGT  
GAAAATGGGCGAGAATGGCGTGTACCGGTACGGTGTGGCTGCGGTCAAACGGAAGATGGTCAAGTGTGGTGTGAGG  
TTGTCATGAATAACGATATGGAACCGGACAGCATCTTCGCGTGCCTGACGATGCGAATACATGTCATATCGAGCCGCTG  
CCATATTCGCTGGAAGAGTAA

>Cluster\_62146

ATGGGCTGGGATACAGAAACGAAAATGAGCACTTACGAAAAGGAACTGAGGTAATGAAAAAATTCAGCGGCATTTATCC  
ACCGGATCCAGCAGCTTTCATCGTGACGGAACCTTGATAAAAAGGCAATGCGCGAAGTTGCGCACTTCTGATTAATA  
AAGGGTTCGACGGCTGTTTTATCTGGTACCGGTGGTGAATTTAGCCAAATGAATACAGCCAGCGCATGGCACTCGCC  
GAAGAAGCTGTAACCATTTCTGACGGGCGAGTCCGGTATGATTGGCGTCCGTTCCCTTCCACTGACGAAGCGGTCAA  
ACTGGCGCAGCATCGCAAGCCTACGCGCTGATGGTATCTGCGCATCAACCCCTACTACTGAAAAGTTCGCCACCGAA  
ATCTTGACGACTATTACAGCAGATGCGCCGTAGCGTCACTTACCGGTGATCCTGTACAACCTTTCCGGATCGCAGGGT  
CAGGACTTAAACCCGAAAACCGTACGCGTCTGGCTCTGCAAAAAGGAAATATCGTTGGCATCAAAGACACCATGACAG  
CGTTGGTCACTTTCGATGATGATCAACACAGTTAAGTGGTACGCGCTGCTTTTCCGTTATTTCTGCGGTTCAGATGAT  
ATTTGCTGAATACGATGCTGCTGGGCGGACGGTGCATTAACCGCAGCGCTAACTTTGCTCCGAACTTCCGCTCGGC  
ATCTACCGCGCTGGCGTGAAGCGATCTGGCGACCGTGCAGCCTGAAATAAAAACACTACAACCTGCCCGCTATTTA  
CGCCCTGAAAACCGGTTTTGCTCACTGATCAAAACAGCATGCAAGTGTGTCGGGCTGCTGTAGAGACATATGCTTAC

CACCGATTCTTGAAGCATCTGAAGAAGCAAAAGATAAAAGTCCACGTGCTGCTTACCGCGCAGGGCATTTTACCAGTCTGA  
>Cluster\_34815  
ATGGGCACGACCAACACAGTAAACTGCTTATCCTGGGTTTCAGGCCCGGGGATACACCGCTGCTGTCTACGGCGGGC  
CGCCAACCTGCAACCTGTGCTGATTAACCGGATGGAAAAAGCGGGCAACTGACCACCACCGGAAGTGGAAAACTGGC  
CTGGGCGTCAACAGCATGACCGGTCCGTTATTAATGGAGCGCATGCACGAACATGCCACCAAGTTCCGGAACCTGAGATC  
ATTTTTGATCATATCAACAAGGTGGATCTGCAAAACCGTCCGTTCCGTTCTGAATGGCGATAACGGCGAATACACTTGGCA  
CGCGCTGATTAATGACCACCGGAGCTTCTGCACGCTATCTCGGCTGCCCTCTGAAGAAGCCTTTAAAGCCGTTGGGGTTT  
CTGCTTGTGCAACCTGCGACGGTTCTTCTATCTGCAACAGAAAGTTGCGGTCATCGGCGGGCAATACCGCGGTTGAA  
GAGGCGTGTATCTGTCCTAACATCGCTTTCGGAAGTGCATCTGATTCACCGCGGTGACGGTTTCCGCGGAAAAATCCT  
CATTAAGCGCTGATGGATAAAGTGGAGAACGGCAACATCATTTCTGCACACCAACCGTACGCTGGAAGAAGTACCGGGC  
ATCAAATGGGTGCTACTGGCGTTCTGCTGCGGATACGCAAAACAGCGATAACATCGAGTCACTGACGTTGCCGGTCTG  
TTTGTGCTATCGGTACAGCCGAATACTGCGATTTTTCGAAGGGCAGCTGGAAGTGGAAAACGGCTACATCAAAGTACA  
GTCCGGTATCTCATGGTAATGCCACCCAGACCATTCCTGCGCTTTTGGCCGAGGACGCTGATGGATCACATTTATC  
GCCAGGCCATTACTTCCGCGGTACAGGCTGCATGGCAGCACTTGTATGGCAACGCTACCTCGATGGTTTAGCTGACGCA  
AAATAA

>Cluster\_5696  
GTGAGACTCGCCCCCTCTACCGCAACGCCCTTCTATTAACAGGACTTTTGTCTTTCAGGAATAGCCGAGTTACAGCCCGC  
TGACTGGCCCGCTCAGATTACTGACAGCCGTGGCACACATACACTGGAAGCCAGCCGACGCTATTGTTCCACCAGCG  
TCACCTTGACCGGCTCACTGCTGGCGATTGATGCTCCGTTGATCGCCAGCGGGCGACACCGCGAATAACCGCGTCCGG  
GATGACACAGGGCTTTTACGCCAGTGGAGCAAGTGGCGAAAGAACGCAAACTGCAACGGCTCTATATCGGCGAACCGAG  
CGCCGAAGCCGTTTCCGCGCAAAATGCGCGATCTGATTTTAATTAAGCGCAACCGCGGGGATTCCGCGCTGTATG  
ATCAGCTTTCACCATCGCCCCGACATTAATCATCAATACGACGACAAAAGCTGGCAGTCCGCTGTTAACGCAACTTGGC  
GAAATTACCGGGCATGAGAAAACAGCGGCGAGAGCGGATTTGCGCAGTTTGTATAAGCAACTGGCGCGGGCAAGAGCAAA  
CAAATTACCGCGCAGCGGCTCACTGCTATCTATACCTGCGCTGCACACAGTGCACATCTCTGGAGCCAGAGATCAG  
CACAAGGGCAGATGCTGGAACAACCTCGGCTTACGCTGGCGAAGTTACCCGAGGGTTAAATGCCAGCCAAAGTCAGGGT  
AAACGCCATGACATCATTGAGCTTGGTGGGAAAACTGGCTGCGAGGTTAAATGGCGAGTCACTATTCTGTTCCGCGG  
TGATCAGAAAAGTGGCGATGCTATTTATGCTAATCCGCTGCTCGCGCACCTGCCTGCAGTACAAAACAAGCAGGTTTATG  
CGCTGGGAACCGAGCGTCCGCTGGATTACTACAGCGCCATGCAAGTGTGATAGGCTTAAAGCGCTGTTTTAA

>Cluster\_32545  
ATGCTACAAAATTCGCGCAATCAAATGCCGCAATTAATCCTAAGAAATACGCGATATGAAACGTGAAGAGATTTGCCG  
CTTGTGGCGGATAAAGTTAATAAACTGAAAAATAAAGAAAATAGTTTGTGACAGCTGTTGCCGATGTGCGTTTGTGTG  
ATGCGGAGACCCCTTCGACGACACACCCGGTATGTCAGGAGCCTGGCATCATAATTCTCTTTTTCCGGGCAAAAATCGGT  
TATATCAATGAACCGGTGTTCCGTTATGATGCCAATGAATACCTGCTGCTGACGGTGGCGTTGCCGTTTGTAGTGCGAAC  
CTATGCCACGTCAGAGGTGCCGCTGGCAGGGTTGCGTCTCAATGTCGATATTTTGCAGTTACAGGAACGTTTGTATGGACA  
TTGGCGAAGATGAACATTTTACCGCTCAATGGCAGCCAGCGGTTAATCTCCGCCAGCTTATCAGAAGAGATTTTATGC  
GCGGACAGCGGTTACTGGATGATGGAGCGACCCGCTGGATGCGCGCATTTCTCGGCAAAACAGATTATCCGCGAAATCT  
ATACTACGTGCTGACCGGACCTTCCGCGGGCGGCTTACGGCACTGGTTCAGCCGTCAGACCCACTTCAGCCTGATTAGCC  
CGCTGCTGAAACGGATGAGAATAAATACACGAAAACCTGAGCGTCGAGCAACTGGCGGCAAGGCCAACATGAGCGTA  
TCGGGCTTCCACATAAATTTAAGTCTGTCAACACGACCTCGCGTTGCAATTTGAAGAATTACCGCTGCATCAAGG  
CGGATGATGATCATCCACGACGCATGAAGGCGAGTGCAGCCGATGCGCGTTCGCGTTACGAAAAGTGCATCGCAATTTA  
GCCGTGAGTTTAAAGCTTACTTCGGTGTGACCGCGGGGAAGATGCGGCAAGAATGCGGGCGATGACGGGGAATTA

>Cluster\_40617  
GTGACCATGCTATTGTTATAGGCACACATGGTTGGGCTGCAGAGCAGTTGCTTAAAACCGCAGAAATGCTGTTAGGCGA  
GCAGGAAAACGTCGGCTGGATCGATTCCGTTCCAGGTGAAAATGCCGAAACGCTGATTGAAAAGTACAACGCTCAGTTGG  
CAAACTCGACACCACTAAAGGCGTGTCTTTCGTTGATACATGGGAGGCGAGCCGTTCAATGCTGCCAGCCGCAAT  
GTCGTCGACAAAGAGCATTATGAAGTCAATTGCAGCGTTAAACATTCATGCTCGTGGAAACGTTAATGGCCCGTGTATGA  
TGACCCAAAGCTTTGATGAACCTGGTTGCGGTGGCAGTAGAAAACAGGCGGTGAAGGCGTGAAGGCTGAAAGCTCTGAAAGCCAAACCG  
TTGAAAAGCGCGCCAGCACCCGCTGCCGAGCACAAAAGCGGCTCCAACCTCCGGCAAAACCAATGGGACCAAAACGAC  
TACATGGTTATTTGCGCTTCCGCGTATCGACGACCGTCTGATTCACGGTTCAGGTCGCCACCCGCTGGACCAAAGAAACCA  
TGCTCCCGTATTTATGTTGTTAGTGTGATGAAGTGGCTGCGGATACCGTTTCGTAAGACACTGCTCACCCAGGTTGCACCTC  
CGGCGTAAACAGCACAGTATGTTGATGTTGCGCAAAATGATTCCGCTCTACAACAAACCGGAAATATGCTGGCGAACCGGTA  
ATGCTGTTATTTACCAACCAACAGATGTAGAGCGTCTCGTTGAAGGCGGGTGAATAACCTCTGTTAACGTCGGTGG  
TATGGCATTCCTGAGGTTAAAACCCAGGTGAATAACCGGTTTCCGTTGATGAAAAGATATCGAGGCGTTCAAGAAAC  
TGAATGCGCGGGTATTGAGCTGGAAGTCCGTAAGGTTTCCACCGATCCGAAACTGAAAATGATGGATCTGATCAGCAAA  
ATCGATAAGTAA

>Cluster\_515  
ATGGCTGAACTGAAAAACGCCATGAATCTGGCTGGCATTACTGATTGTGGTGTGTTGTTGGCCTTGCCTGGCGCAG  
CGACGATTTCTGACATTCGGTAATTTGTACGATCTCGCAATAACTATGCAATGTTGACTATTTCCGCTGTGGTTTGT  
TTGTGGTGTGATTTCCGGTGAATTTGATATTTTCGTTCCAGCAATGACCATCATTTGCCAATACGGCATGGTGTGTTG  
CTGCAAAAAATTTGGTGGCAACTTCGCTGTCGCGTTTGCAGTGGCGGGTGCATCGGCATTTTACTTGGCTTAATTAACGC  
CTTACTGGTTAATCGCTACGGGTGCCTTCTATCATCATCACTATCTGACGCTGAATATTTCTATGGCCTGCTGTTAT  
GGTTGAGTAAAGGTGTGGCTGTACGACTTCCGCGGTGGTTGAGCAGGGGTTATGTTGTTCAAGTACACCGGATGCT  
GATGGCTATGACTATGGCCTTGGCTGCGGCTGATCGCCATGATTACGGTGGTGTGCTAACAGCGTTTATCATGAATTT  
CACCAGTGTAGGGCGCAAAATTTATGCCCTTGGCGGGAACCGCAATCAGCCAGTCCGATCGGCTTACGCTGTGAAAC  
TGCAACTTTTCTGCTATATGGCTATATGGGATGATGCTGCGGCTGCGGGTGTAGTGCAGTCTGGACGGTGTGACTGCTC  
GCCCCGATTTCTTCTGCGGTTATGAGCTGACAGTACTGCGGTTGCTGCGGTTGCTTGGCGGCACTAGTTTCTGCGCGGGC  
CGGCAGTTAAACCGTACTTTGCTCGGCGTGGTGTGTTGGCAGTGTGCAAAACGGGCTAAATTTATTTGGGAGTCTCGT  
CTTACTGGCAACATTTGATCACCAGCATCATCTGTTGCCAGCATTAGTGCACGGCTGGAGTCAAGATCAGAACCGG  
AGTCTGCTATGA

>Cluster\_57534  
ATGAAGGATAACACCGTGCCTGAAATGATTGCCCTGTTAGCGAACGGTGAATTTCACTCTGGCGAGCAGTTGGGTGA  
AACGCTGGGAATGAGCCGGGCGGCTATTAATAAACACATTCAGACACTGCGTGTGACTGGGGCGTTGATGCTTTTACCCTG  
CGGTAAGAGGATACAGCTGCTGAGCCATCCAGTTACTTAAATGCTGAACAGATATTTGGTCAAGTACACCGGATG  
GTAGCCGCTGCTGCGGATTTACTCCACGAATCAGTACTTCTTGTATCGTATCGGAGAGCTTAAATCGGGCGATGCCTG  
TGTTGCAAGATACAGCAGGCTGGCCGTGGTCCGCGGGGGCGAAATGGTTTTCCGCTTTTGGCGCAAACTTATATTTGT  
CGATGTTCTGGCGTGGGAACAAGGCCCGGGCGGCGGATTTGTTAAGTCTGGTTATCGGATTCGTTGATGGCGGAAGTA  
TTACGCAAGCTGGGAGCAGATAAAGTTCGTGTCAAATGGCTAATGACCTTAATCTGCAGGATCCGCAAGCTGCGCAT  
TCTTGTGGAGCTGACTGGCAAACTGGCGATGCGGCGCAAAATAGTCAATGGAGCCGGATCAACATGGCAATGCGCCGTG  
TTGAAGAGAGTGTGTTAATCAGGGGTGGATCACGCTGCAGGAAGCGGGATCAATCTCGATCGTAATACGTTGGCGGCC

ATGCTAATACGTGAATTACGTGCTGCGTTGGAACCTCTTCGAACAAGAAGGATTGGCACCTTATCTGTGCGCGCTGGGAAAA  
GCTGGATAATTTTTTAAATCGCCCAAGTGAACCTTATCATTTGGTGATAAAGAAAATTTTGGCATTTCACCGGGAATAGACA  
AACAGGGGCTTTTATTACTTGTAGCAGGATGGAATAATAAAACCTGGATGGCGGTGAAATATCCCTGCTAGTGCAGAA  
AAATAA

>Cluster\_201

ATGATAACTGTTTTAGAGAAGAAATTTTCTGTAAAAAATAAAGATTTTTTGGCTTCTCCTAAGTCTAAAGGTATAAA  
ACTTCCTTTTAAAGGGGAAGAGATACCTGTGGAAGTTTTAGAGAAGACAAAAGCTTTAAAGGAATTGATATTGCCCTCT  
TTTTAGCAGGTTGCACAAAGAAAGTTAGATTATGCACCTCTGTTTGAAGAGATGGTGGGTTAGTTATAGATAATCAAGT  
GCTTGGAGGATGGACCTGAGGTGCCCTTAGTAGTTCCAGAGGTAATCCTCATGCAGTAGCCCAATATAAAAACAAAGG  
TATCATCGCTAATCCCACTGTTCTACCATTCAAATGGTGGTAGCCCTAAAACCATGGCATGATTATGCTAAAATCAAAA  
GAATAGTAGTAAGCCTATCAGTCAGTATCAGGGGCAGGGCAAAAGGCTATAGCTGAACTTGAGGCTCAGGTTAGGGCT  
TGGTGTATGGGAGAGCCTATGCCAGCGCCAAAATATCTTCCCAGTTTATCGCTTTTAACTGTATACCATAATAGATGT  
TTTTCTTCCATAACCGCTATACCAAGGAAGAGATGAAGATGAGAGAACTAAAATAAATCATGGAAGATACCCATATA  
GGGTTACTTCTACCAGGTGAGAGTGCCTGTATTTTATGGACATGCTGAAGCTGTTAACATAGAAACAGAAAAAAACTT  
ACTGTAGAAAAGGCTATAGAACTTTTAGAAAAGCTCCCGGAGTGGTAGTTTTTGGACAATCCAGAAAAAAGGTTTATCC  
ACTTCAGATAGAGGTTGCAGGAAGAGACGAAGTTTTTGGGAAGGATCAGAGAAGACTTTTCTATAGAAAATGGTTTTAA  
ATTTATGGATAGTAGCAGATAAECTTAAAGAAAGGTGCAGCCACCAACCGCGTTTTCAGATTGCAGAATTACTGATAAAGAT  
TATCTTTAA

>Cluster\_51323

ATGAGTGATTTATATTCGCCAGCCATGTTAATACAGTTGTTAATGCCGAAGATATTCATGGCAGATTAATCTTTTAT  
TATAAACCTGTTTTTAAAGCGAGTTCGTTACATTTGAGACGCGGGATATGCGCTTGATATATTGACGATCCAGACATCC  
CGATGGCTGCATTTTGTTCCTTATGGTTGGTAGTAAAGTCTCACGCGATGAAGGCTACGAATCAAAGTAATTCGCCCT  
GGCTATATGAAGCCAAAAGTAGTATCGACCCAAAATAAATAGCCGTTTCGTCAACAGGCGTATCACCTGAAACAATTCAA  
TGCCATATTTCATCAGCAAGATTCAAATAAAGCGAGCGTTAGTAAGACAAGCGCAGGCAATTCGTGCGCTAATTCAGTGGC  
TTGCTGTTTTCAGGCGGTTACAACGGGAAAAATATCATTGAAGGCGATGGAATTGAACGTTATGAACTGGACTGGAATATA  
AAACCACAAAATATATACAGCAGTCCGGCGGCAGGAGTGGAGCGGTAGAGATTTATCAACATTTGATCCAAACGATGA  
CATCGAAGAGTACGCAGAAATCAGCGAAGGTACTACAAATATCATCGTAATGGGCCGCAACGTTATGAAAAAATACCGCG  
CCTTTAAAGCATCAGCAAGATTCCCTTGTATCTCAGCGGATTAATTCCTTCTGAAACCGCCGTAATAAATCTTGGG  
GATTCTGTAAGCTTCAAGGGTTACGTTGGCGATGTTGCTATTTGGTATATAGCGGACGTTATACCGACGAGGACGGCAA  
AGAAAAATATTTCTTGTATCCTGATTTGATGGTCTTGGCAACACATCATTACAGGGCATCGTTGCCCTACGGTGGCATTC  
AGGATCCTGAGTTAATCAGAATGGGGCTGACTAAAGCCGAACCTGGCGCGAAAAATACATCGTACCAGGTGATCCGGCT  
ATTGAATATGTGCAGACGCACAGCGCACCCGAACCAATACCGCCCATCAATCGTTTTGTTACCGTTCGCATTGGTTA  
A

>Cluster\_46161

ATGACGAATATCACCTTACAGAACAACATCGTACACTGTGGCATTATTTATCCGGGGTTAGCCCTGAGTGCAGTTATCAC  
CGGGTTCGCCCTGTTGGGGTGGTTCCATTCCCGCGGTTGCGGGTCCCGGTTTAGTGCCCTCACCTCGCAATCTTGTGG  
GGATGGTTTTAGGCAACACCATCTATCCGCACATCTGGAAGGCTGTGACGGTGGTGTCTGTTTGGCAAGCAATATTTA  
TTACGTTCTGGGTATCATCTTTTATGGCTTCCGCTGACGTTCTCGCAATTCGCGATGTCGGTATCAGTGGGATCATCA  
TGACGCTGTGACGCTGCTCCAGTACCTCTGCTGGCTGCTTCTGCGGCAAGAGTGTGGTCTGGATAAGCACCA  
GCTGGTTGATCGGTTCGGTAGCAGTATCTGTGGTGTCTCCCGGCTGTTGGCGACTGAGCCGTTAGTGAAGCGGAAGCC  
AGTAAAGTAACCGTGGCTGTGCAACCGTTGTTATCTTCCGGACCGTCCGGATTTTCCCTACCGGCGATATATCCGGT  
GATGTTCTCAATGGTTTATGTCGGAAACTTTCCGTTATCTACATTTGGTTCCTACTGTGCACGAAGTGGCGCAGGTTGGCGG  
CAGGTCATGCCATCAGCCCGGATGCGGAAACGCAGCATTTTCCAAAATGCTGCGCGTGAATGATGATGCTGCGCTTTC  
CTCATCTGCTGGCGCGGCTGTAAACAGCTGCTGCGGCGAACAGCGGCGAGAAAAGCAAAATCACATTTCCGTTGGTT  
TGCCATATTTGTTATCTGCTGTTGCCATCTTTAACTCGTTCACCTGTTACCGCAGAGCGTGGTGAACATGCTGTTAACGC  
TGGATACCTTCTGCTGGCAATGGCGATGGCGGCGTGGGCTGACCCTCACGTGAGCGCGTGAAAAAAGCCGGGGCG  
AAACCTCTGCTGATGGCACTGGTACTGTTTGGCTGGCTGATTTGTTGGTGGTGGTGCATTAACATATGTTGATTCAAAGCGT  
CATCGCATAA

>Cluster\_23781

ATGGATTTATAGCTGAGAGTATTACTGAAGTCTGCTCTGCGGAAATGCTAACACCGATCGTGTGTTAAATATCGC  
TTACGGTATTGACCGCAACTTTTTATTTGGTGGCGCAGTATCTATGCAATCAGTTGTTATGCAATAACCGGACCTTGCGG  
TTAAGTTTCTATCTTTTACTGACTACATTTGATGAAGATATCTACAACGTTTAAATGCTTTTACCAGCAAAAATGCTAAC  
GTTGAAGTAAGAATTTATAAAGTATCCAGTGCCTTTATTTGATATCTTCCCAGCTGAAACAGTGGTCTTATGCAACATT  
CTTCCGTTTAGTTGCGTCCAGTATCTGAGTGAACATTTGAAAATCTGTTATATATCGATGCTGATGCTATCTGTAAG  
GCTCATTTAGCTGGATTTGCTGATATTAATTTTGTATGGCATAAGTTTCCGCGCTGTTATTAAGATGTTGCTGCTGCG  
GAAAACAGCGAAGCTGCTGGCTATAGAGGACTTCCAGGGAATTTTCAACGCCGTTGATGATATCTGCAGCTTGA  
AGCATGGGCGAAAATGATTTTATGAATAAAGCATTGCTATGCTGGCAAGTGAACCCGAGCACAGAAAATATAAATGCC  
TTGATCAGGATATTTAAATATCTGTTCTTTAGTCATTGATTTTTTATAGCGGCAATATGATTGCTTTTATGGCATT  
GACTATGAGTTAAAAAATAAAGCGATGAAGATTATAAAAAGACCATTACCGATGATACTAAGCTGATTCATTATGTTGG  
CGTAACGAAGCCCTGGAAGGACTGGACGAATATCCCTGCCAGAGTATTTTAAATGAGGCTTATCAGGTTCTTGGCTGGA  
ATGATGTGGCGTTTATTTCCAGCCACGAATGAAAAGCAGTATCAAGTGAATCCAGACATTTGAAAAGAAATGGTAATATT  
GCATTTTCATTTTACTATTTTCATGCTCTATTATAGTAAGAAAATAGCGGTAAGCATTTTTCCAAATAA

>Cluster\_43013

ATGAGTAACGCGATTACGATGGGGATATTTTGGCATTGATCGGCGCGCCAGTGCAGCTGTTTTTACGCTCCGTTCAA  
AAAAGTAAAAAATGGTCATGGGAAACCATGTGGTCAGTCCGTTGGGATTGTTTTCGTTGGATTATCTGCGCTGGGCGCATCA  
CGCCCTGTTACTACCGAATTTCTGGGCTATTACAGCTCGTTTAGTCTCTACGCTGCTGCCTGTTTTCTGCTCGCG  
GCTATGTGGGGATCGGTAATATCAACTACGGCTGACCATGCGTTATCTCGGCATGTCGATGGGAATGGCATCGCCAT  
TGGCATTACGTTGATTTGCTGCTGATGACGCAATATCAACGGCAATTCGATGTCGTTAATACCGAAGGCG  
GACGATGACGTTGCTCGGTGTTCTGGTGGCGTGAATGGCGTAGGATTTGTAACCTCGCGCGGCGAGTTGAAGAGCGC  
AAGATGGGCAATTAAGCCGAAGGTTCAATCTGAAAAGGGCTGTTGCTGCGGCTGATGTCGGCATTTTCTGCTGCGG  
GATGCTCTTTGCGATGAACGCCGCAAAACCGATGCATGAAGCCGCTGCGCGCTGGGCGTGCATCCCTGTATGTCGCTC  
TGCCAAGCTATGTTGTCATCATGGGCGGCGCGCAATCATCAACCTCGGCTTCTGCTTCAATTCGCTGCGCAAAAGTGAAA  
GATTTGCTCGCTAAAAGCCGACTTCTGCTGGCAAAACCGCTGATCATTACAATGTGTTACTCTCAGCACTGGGCGGTT  
GATGTGGTATCTGCAATTTCTTTTCTATGCTGGGCGCACCGCCGATTCGGCGCAGTATGACTACATCAGCTGGATGC  
TGCAATAGAGCTTCTATGATTTGTCGGCGGATCTGCTGGGCTGGTGTGAAAGAGTGAACAATGCAGGACGCCGCTCCG  
GTAACGGTGTGAGCCCTCGGTTGTTGGTGGATTATTTGCTCGCGTAACATCTGCTGGCATCGGCATGGCGAATTTAA

>Cluster\_29862

ATGAAAAAGAGCACTCTGGCATTAGTGGTGTATGGGCATTGTGGCATCTGTATCCGTACAGGCCGAGAAAATATAACAA  
AGACGGTAATAAAGTGGATGCTATGGCAAGTTAAAGCCATGCATTAATGAGTGTATATGACAGTAAAGATGGCGACC

AAAGTTATATCCGTTTTGGTTTTAAAGGCGAAACACAATTAACGATCAACTGACTGGTTATGGTCGTTGGGAAGCTGAG  
TTTTCCGGTAATAAAGCGGAGAGTGATACTGCACAGCAAAAAACGCGTCTCGTTTTGCGGGTTGAAATATAAAGATTT  
GGGTTCTTTCGATATATGGTCGTAACCTGGGCGCTTGTATGACGTGGAAGCCTGGACCATATGTTCCCGGAATTTGGTG  
GCGACTCTCGGCGCAGACCGCAACTTTATGACCAAAACGCGCCAGCGGTCTGGCGACGTATCGGAACACCGACTTCTTC  
GGCGTTATCGATCGCCGCAACTTAACCTGCAATATCAAGGAAAAACGAAACCGCGACGTTAAAAAGCAAAACGGTGA  
TGGCTTCGGCACGTCATTGACATATGACTTTGGTGGCAGCATTTCCGCATCAGTGGAGCCTATACCAACTCTGATCGCA  
CCAACGAGCAGAACCTGCAAGCGTGGCACAGCAAGCGTGCAGAAGCATGGCAACAGGTCGAAATACGATGCCAAT  
AATATTTATCTGGCAACTTCTATTTCTGAAACACGCAAAATGACGCCAATAACTGGCGGCTTTGCCAATAAGCACAGAA  
CTTTGAAGCGGTGCGCCAAATACCAAGTTTGAATTTGGTCTGCGTCCGTCGCTGGTTATGTCTTATCGAAAGGGAAGATA  
TTGAAGGAATCGGTGATGAAGATCTGGTCAATATATCGATGTTGGTGTACGTATTATTTCAACAAAAATATGTGGCA  
TTTTGTTGATTATAAAATAAACCAACTGGATAGCGATAATAAGTGAACATCAATAATGATGATTTGTGCGGTTGGCAT  
GACCTATCAGTTTTAA

>Cluster\_25028

ATGCGTAAAATCATTTCATGTGGATATGGACTGCTTTTTTCGAGCGGTGGAGATGCGCGACAATCCCGCCTGCGCGATAT  
CCCTATTGCTATTGGCGGAGCCGCAACGACGCGGGGGTGCATCAGCACCGCAATATCCCGCGGTAATAATTTGGCGTAC  
GTAGCGCTATGCCGACAGGATGGCGCTCAAATATGCCCGCATCTCACCTTGGCTCCAGGGCGCTTTGACGCGCTACAAA  
GAAGCGTCAAATCATATCCGCGAAATTTCTCGCGCTATACCTCGCGCATTTGAACCGTTATCACTGGATGAGCCATCT  
CGATGTCACCGATAGCGTCCATTGCCACGGTTCGCGACCTCATCGCCAGGAAATCCGCCAGACGATCTTCAACGAGC  
TGCAACTGACGGCGTCTGCGGGCGTTCGCGCGTCAAGTTTCTCGCAAAATCGCCTCCGACATGAATAAACCCCAACGCT  
CAGTTTGTGATTACTCCGGTGAAGTTCGCGCATTTCTGCAAACTTACCCTGGCAAAATTTCCGGCGTCCGCAAAAGT  
CTCAGCGGTAACCTGGAAGCTATGGGGCTACGAACTCGCGTGTGCAAAAGTGTGATCTGGTGTCTGCTCAAAAC  
GTTTTGGCAATTTGGCCGATTTGTGGGAGCTAGTCAGGGCATTGACGAGCGGATGTTAACAGCGAAAGTTGCGA  
AAATCCGTCGGGTGAGAAGCTACGATGGCGGAAGATATTCATCTACTGGTCTGAATGTGAAGCGATCATCGAGCGGCTTTA  
CCCTGAACCTGGAGCGTCTGGTGGCAAGTAAACCTGATTTGGTGTATGCGCCAGGGGGTGAATTAAGTTTCGAGC  
ATTTTCAGCAAACTACTCAGGAGCAGCTGCGCGCGGCTGAATAAATCTGATCTAATCGCCACCGCGGTAACCTGG  
GATGAACGCGCGCGGGCGGCTGTCGGCTGTCATGTGACGTTGCTTGACCCGCAATGGAAAGCAACT  
GGTGTGGGATTATGA

>Cluster\_23228

ATGATTACGCTTTTTTCGTTTACTGGCGATTCTTTGCGCTGTTTTTAAACGTTTCGGTTTTATGCTGTAATTTGCTATCAGGA  
TCAAAGAGGTGGTAAATACGCAAAATACGTTGCTTACCTTCCCTCAGAAATCCAGAAACCGCCAGCGGGACAAAAA  
TTTTGGAAAGCGATGACGTTAATGTTACGGTATATTTGTGATAACGCGACAGGATGGAGAGCTGATGATCCCGCAGAAAT  
ATTTATGCTGGATTAATAATGCGCGCTATAAATAGTGCAGACATTTTGAATAAACCCATACCTGACATTTCCGCGTAACTA  
TAATGGTGTGGATTATGAAGATAGCAATGTAGCAATGATACTTTCCGCTGTCGGATAAGTTTGAACAATATTACGATG  
GGTTTTATCATAATCCAGTTTGTAAATGGCAGAACCCTACAAAAAATGTCACATTTAATGCCCGTTTTTCGCGTATATGTG  
AAATTTAAATCTCGTCTGTAGTAGATCAGACATGGAAATTTGGCGTGGTAAATGTCCTGCAATTTGATGGTGAAGGTGG  
TGCTAACTTAGCAGCAAAATAAATAAACCTGCGTTATATCATTTGATGGATTAAATAATTTTCATTTCTGATTGTAGTG  
TCGATATCCGATTTTTCCAGAAAGCCAGATCGTTAATTTCCGGAAGCTCTCTGCAAACTCTATGCTACTTATCGACC  
AAAGCTGCATTTAGCGTATCTACTATAAAGATGTTGCTGCGGACTGTACCGAGCAATTTGATGTTGCCACCGATTTTTTA  
TACGACAGATACGTTACATGATGATACGCATCTGGAATGGTAAATGGTTTGTAAATGCTGATTAAGCTGATCAAAAAAC  
AAGAAGACATTAAGTTTAAATAGTACAAACGATTCACCAATATATTCCAGGTGACACTGGAGCGGATGGTTACCCGTTGAT  
TACCAGGCTGAACTTTCAAAAAACCGGGGAGACTCTCGTTTTATGGGCTTTCAAAAAAGATCTCATTTGAAAAATAA  
CTATAACTGA

>Cluster\_930

ATGAATTTACAGAACGACGATTTACGCATCAAAGAAATCAAAGAGTTACTTCCCTGTCGCATTGCTGGAAAAATTTCC  
CGCTACTGAAATGCCGGAATACGGTTGCCATGCCCCGAAAGCGATCCATAAGATCCTGAAAGGTAATGATGATCGCC  
TGTTGGTTGTGATTTGGCCATGCTCAATTCATGATCCTGTGCGGGCAAAAGAGTATGCCACTCGCTTGTGGCGCTGGCT  
GAAGAGCTGAAAGATGAGCTGGAATCGTAATGCGCGTATTTTGAAGCGCGGTACCACGCTGGGCTGGAAGGGCT  
GATTAACGATCCGCATATGGATAATAGCTTCCAGATCAACGACGGTCTGCGTATAGCCGTAATTTGCTGCTGATATTA  
ACGACAGCGGTCTGCCAGCGGCGAGTGTTCGATATGATCACCCACAATATCTCGCTGACCTGATGAGCTGGGGC  
GCAATTTGGCGCACGTACCACCGAATCGCAGGTGCACCGCAACTGGCATCAGGGCTTTCTGTCCGGTCCGCTCAAAA  
TGGCAGCGGACGATGAGTTAAAGTGGCTATCGATGCGCATTAATGCGCGGTGCGCGCACTGCTTCCGTCCGTAACGA  
AATGGGGCATTTCCGGCATTTGTGAATACAGCGGTAACGGCGATTGCCATATCATTCTGCGCGGGTAAAGAGCCTAAC  
TACAGCGCAAGCACGTTGCTGAAGTGAAGAAGGGCTGAACAAGCAGGCTGCCAGCACAGGTGATGATCGATTTACG  
CCATGCTAACTCGTCAAAACAAATCAAAAAGCAGATGGATGTTTGTGCTGACGTTTGGCAGCAGATTTCCGGTGGCGAAA  
AGGCCATTTATGGCGTGTGGTGGAAAGCCATCTGGTGGAAAGCAATCAGAGCCTCGAGAGCGGGGAGCCGCTGGCCTAC  
GGTAAGAGCATCACCGATGCTGATCGGCTGGAAAGATACCGATGCTCTGTTACGTCAACTGGCGAATGACGTAAGAGC  
CGTCCGCGGGTAA

>Cluster\_51544

ATGGATAACCCGGACAAAACCTCCCGTACCTGAGGTCACGTAGCAACGAAACCGAGCCCTCTGCAGAATGCTTCACCTT  
TGGCGATCCCATTTCCGGTACTGGACCGCGGAGCTGCTTGTATATGTGGAGTGGTACAGATTGATCGCTGGTATGAAC  
CGCCGGTCAGTTTTGCGGGCTGGCAGCTACCTACCAGCGTGCATCACAGTTCACCAATTTGCTGTTAAGCGTGTAC  
ATTTCTCAGCAGCACTTCTATCCACACCGCTTGTCTCAGCCAGCAGTCTTTCCGCCGTTTCTGTTGAGGATTAATCTGGTGT  
TGGTAATGCTTATCTGGAAGGCGACCAACTGGCTGGGTGATGCTCTCTCAGTGGAGCCAGCGCTGGCAAGTATACCC  
GGCGCGGCTGACCTAGAAATCTTACTGTTGTAACCTACGGCTGACGATGAGCCTTATGAGTTTACCAGAGGCAAC  
ATTTTTCTATCTGATGGAGCCGGATATTAACCAAGAGATTTACGGGCTGCCCGTTATCTCTCCGCATTTCCGTTCAACCT  
GCTCAACGAGTCCGCAACCGCTGTTCCGTCGGAATATTTACATCAACGGCAGCCATGTAGGCTTCTCATGATCATGACCG  
ACGCTGCGCAGAATCAGGAGGATGTGAACAACATCCGCAAGGCAATGAAAAGTGCAAAGGACCGGGCAATTTTCGCAAT  
CTCTTTATGTACTCACCAATGGCAAAAAGATGGCATCCAGATCATCCCTATCCGAAAGTTGCGGGCAAGAGATGAGTT  
TCTGAACATCAAGAAGCTGAGCCGTGATGACATGATGGCAGCGCACCGTGTGCCACCGCAGATGATGGAAATCATGCCGA  
GTAACGTTAGCGGTTTTGGAGATGTAGAAAAAGCCGCTGTTTTTGTTCGCAACGAACTGATGCGGCTACAGAAGCGCA  
CTGCAGAACTGAACGACTGGTGTGGCGAGAAAATAATAGTTTTGAACCTTATACACTGAGTAA

>Cluster\_57488

ATGAGACGAGAACTTGCCATCGAAATTTCCCGCTCACCGAATCAGCGCGCTGGCTGGCTACAAATGGTTAGGACGCGG  
CGATAAAAAACCCGCGGACCGCGCGGCGTAAACGCGCATGCGTATTATGCTCAACAGGTCACCAATGACGGCACCATCG  
TCATTTGGTGAAGGTGAAATCGACGAAGCACCGATGCTCTACATTTGGTGAAGGTCGGTACTGGTCCGCGGCGACGCGGTA  
GATATTGCTGTTGATCCGATTTGAAGCAGCGCATGACGGCATGGGCGAGGCTAACCGCTGGCGGTTCTGGCAGTAGG  
CGATAAAGGCTGCTTCTCAATGCGCGGATATGTATATGGAGAGCTGATTTGCGGGCGGGAGCCAAAGGCACTTG  
ATCTGAACCTGCCGCTGGCGGATAACCTGCGCAATGTAGCGGCGGCTCGGCAAAACCGTTGAGCGAACTGACGGTAAACG  
ATTTCTGGTAAACACCGCACGATGCGGTTATCGCTGAAATGCAGCAACTCGGCTACCGTATTTGCTATTCCGGACCG



CGACGTTGGCGCCTCAATTTCTACCTGTATGCCAGACAGCGAAGTTGACGTGCTGTACCGTATTGGTGGCGCGCCGGAAG  
GCGTAGTTTCTGGCGCGGTGATCCGCGCATTAGATGGCGACATGAACGGTCGTCTGCTGGCGCGTCATGACGTCAAAGGC  
GACAACGAAGAGAATCGTCGCATTTGGCGAGCAGGAGCTGGCACGCTGCAAAGCGATGGGCATCGAAGCCGGTAAAGTATT  
GGCGCTGGCGCATATGGCGCGCAGCGATAACGTCATCTTCTCTGCCACCGGATTTACCAAAGGCGATCTGCTGGAAGGCA  
TTAGCCGCAAAGGCAATATCGCGACTACCGAAACGCTGTGATCCGCGCAAGTCACGCACCAATTCGCCGCATTCAGTCC  
ATCCACTATCTGGATCGCAAAGACCCGGAATGCAAGTGCATCTCTCTGA

>Cluster\_45060

ATGAGCGTAAATGAAACTGCAACTGTGCCGCTCGCACAACAACAGGCTGACGCCTGCTGAACGCTGAAAGATTTGCGTGT  
CACCTTTAGTACCCCGGACGCGGACGCTCACGGCGGTCAATGATTTGAAATTTTTCCCTACGTGCGGAGAAACGCTGGGTA  
TTGTAGGTGAGTCTGGTTCGGGTAATCGCAAATGCAATTTGCGTGTATGGGCTGTTGGCTGCCAACGGACGTATTGGC  
GGATCGGCAACCTTCAATGGGCGTGAAATCCCTCAATTTGCCAGAGCATGAACTCAATAAACTGCGCGCTGAACAAATCTC  
AATGATTTTTTCAGGACCAATGACTTCGTTGAATCCCTATATGCGCGTGGTGGAGCAGTTAATGGAAGTGTGATGCTGC  
ATAAGAACATGAGCAAAGCTGAGGCGTTTGAAGAGTCCGTCGGATGCTCGATGCGGTAAAAATGCCGGAAGCGCGTAAA  
CGCATGAAAAATGTACCCGCAGCAATTTTCTGGCGCATGCGTCAGCGAGTCATGATTGCGATGGCATTGCTATGTCGACC  
TAAGCTACTGATTGCGGATGAACCCACTACTGCGCTGGAGCTCACCGTACAGGCGCAGATCATGACGCTATTAATGAAC  
TGAAGCGGGAATTTAATACCCCATCATTTATGATCACCACGATCTTGGCGTGGTGGCGGGATCTGTGACAAAGTGTCTG  
GTAATGTATCGCCGCGCAGCATGGAATATGGCAATGCGCGCGATGCTTTTATCAACCCGTTTCACTTATTCTATCCG  
TTTTGCTCAACCGGTGCCGCGTCTGATGCGGAAGGTGAAACAATGTTGACCATCCCGGGTAAATCCGCCAACTTGTCTG  
GATTACCGAAAGGTTGCCGCTTCCAGCCAGTTGCTCCACATGCGATGGAATTTGTAGTAGCGCACCGCCGCTGGAAGAG  
TTTACGCTGGCGCTGCTGCTGCTTTAAACCGGTGGAGGAACGTTATGA

>Cluster\_12124

ATGACTATCAAAGTAGGTATCAACGGTTTTGGCGGTATCGGTGCGATTGTTTTCCGTGCTGCTCAGAAACGTTCTGCAT  
CGAGATCGTTGCAATCAACGACCTGTTAGACGCTGATTACATGGCATAACATGCTGAAATATGACTCCACTCACGGCGGTT  
TCGACGGTACGTTGAAGTGAAGACGCGTCACTGATCGTTAACGGTAAAAAATCCGTTTACCGCTGACCGATGATCCG  
GCTAACCTGAAATGGGACGAAAGTGGTGTGACGTTGTCGCTGAAAGCAACTGGTCTGTTCTGACTGACGAAACTGCTCG  
TAAACACATCACCGCTGGTGCAGAAAGTGGTATGACTGGTCCGCTCAAAGACAACACTCCGATGTTGCTTAAAGGGC  
CTAATTCGACAAATATGCTGGCCAGGACATCGTTTCAACGCTTCTGCACCACCAACTGCCTGGCTCCGCTGGCTAAA  
GTTATCAACGATAACTTCCGATCATCGTCAACCGCTGATGCTTACCGTACTACCGCTACTCAGAAAACCGTTGA  
TGGCCCGTCTCACAAGACTGGCGCGCGCGCGCGCTTCCAGAACATCATCCCGTCTCTACCGGTGCTGCTAAAG  
CTGTAGGTAAAGTACTGCCAGAACTGAAATGGCAAACGACTGGTATGGCGTTCGCGTTCGACCCCGAACGATCCGTA  
GTTGACCTGACCGTTCGCTGGAAGAAAGCTGCAACTTACGAGCAGATCAAAGCTGCCGTTAAAGCTGCTGTGAAGGCGA  
AATGAAAGCGCTTTCGGGTACACCGAAGATGACGTAGTATCTACCGATTTCAACGGCGAAGTTGCACTTCCGTGTTCTG  
ATGCTAAAGCTGGTATCGCTCTGAACGACAACCTTCGTGAAACTGGTATCTGGTACGACAACGAAACCGGTTACTCCAAC  
AAAGTTCTGGACCTGATCCCTCACATCTCCAAATA

>Cluster\_24410

ATGCGTAAGTCAGTTATCGGATATCATCATCGTCTGGTAGTGCTTTACATGTCTGTTTTGTCTCAAAGAAGGTGA  
GCGCGGTATTACGCTGCGTTTTGGTAAGTACTGCGTGACGATGACAACAACCTCTGGTTTATGAGCCGGGCTGCATT  
TCAAGATACCGTTTCAATGAAACCGTGAATATGCTCGACGACGATTTACAGACATGGACAACAGGCGCCAGCGCTTTGG  
ACCAAAGGAGAAGAAAGACTGATCGTCACTTTACATCAAATGGCGCATCAGCGATTTACGCGTTACTATCTGGCAAC  
GGTGGTGGCGACATTTTCGCAAGCGGAAGTGTCTGTTGAACGTAAGTTCTCTGACCGTCTGCGTTCTGAAATTTGGTGGC  
TGGAGCTGAAAGACATCGTCAACGATTTCTGTTGCTGCTGACCTCGAAGTACGTGACGCGTGAACTCGCGTTCTGGG  
GGTACAGAAGATGAAGTTACTACCCCTGACGACAGATAACGCCATTTGCCGAAGCGGAGAGCGGTAACGGCTGAGACGAA  
GGGCAAAAGTTCCCGTATCAATCCGAACAGTATGGCGCGCTGGGTATGGAAGTTGTCATGTGCGAATTAAGCAGATCA  
ACCTGCCGACCGAAGTGTCTGAAGCGATCTACAACCGTATGCGCGCGAGCGTGAAGCGGTAGCGCGTCTGTCACCGTTCA  
CAAGGTCAGGAAGAGCGGAAAACTGCGTGAACCTGCGACTATGAAGTGAACGAGCTGCGCAGAAAGCTGAGCGTCA  
GGGCGCATCATGCGTGGTGAAGGCGATGCAGAAGCAGCAAACTGTTTGTGATGCAATTCAGTAAAGATCCGGACTTCT  
ACGCAATTCATCCGTAGCCTGCGTCTTATGAGAACAGCTTCTCTGGCAATCAGGACGTGATGGTATGAGCCCGGACAGC  
GATTTCTTCCGCTACATGAAGACCGCACTTCCGCAACCGGTTAA

>Cluster\_33095

ATGCAGCAGGTATTTTCCAGGAACTGAGTATCTAAATTCAGTTATTGATTATAATCATAAAGTAGAAAACAGAAAATCT  
TTGTCTGGACATCCGTTATGGAACCTGACAAAACTTTCTATTTGGTTGCGGAATTTGATTGCTTCAATATTAAGTATA  
ATGAAGGAAGTCGGTGTGTTCCACATTTTTACTGATATTTTTGTGATAATGATCGTAAGTATTTGATGCCCTGGCA  
TTACAGTATAAAACCAGAAATTAATAATATCTGATTAATGGTGTGACTGCGCTCATTCGCTAGCACAAAGAACTGGAC  
CCATGCAATATATTTCTGTTTGTATTTGCTGATTTATTTAGTAAGTGGCTAAAGTCTTTATCTGGATGCAGATA  
TCAATTTGTCAGGGACTATTTGAGCCACTAATTAATTTCTCATTTCTGACGATAAAGTCGCAATGGTGTACAGAAGGA  
CAAGCTGACTGTTGGGAAAAACGCGCCATTCGTTAGGTGTTGCGGGAATTGTAAAGTTACTTTAACTCCGGTTTTTT  
ATTTGATTAATACATGCCAAATGGGCGGCTCAGCAGGTTTTCTGCAGGACCATTTGCAATGCTAAATGAGCCAGGAATAATCA  
AAAAATAACACTCCTGATCAGGATGATTAATAATGTTGCTGGCAGATAAACTTATTTGCTGATATTAATATAAC  
ACCCAGTTTAGCTTAAATTAACATAAAAGAAAGCTTTATAAACCCAGTAACCAACAATACTATTTTATCCATATAT  
CGGGCAACCAAGCCCTGGCATGATTGGCCCTGGGATATCTGATATCAAGCCTTTATGGAGGCAAAAATGCTTCCG  
CATGGAAGAAATACGGCGTTGCTGAAACCGAACAATAGCAATCAATTAAGATATAGCGCAAAACATATGCTTAAAAACAT  
AGATATCTAAAGGATTTAGCAACTATCTTTTTTATTTTATTGAAAGATAAAGCATTAA

>Cluster\_29018

GTGAAAGCGAAGAAGCAGGAAACTGCCGCGACCATGAAAGACGTTGCCCTCAAGGCAAAAGTCTTACAGCGACCGTCTC  
CCGAGCATTAATGAATCCCGATAAAGTCTCCAGGCACTCGTAATCGGGTTGAAAAGCGGCGCGGAAAGTGGGTTATT  
TACCACAGCCTATGGGCGCAACGTCAGCGGTAATGAATGAAATCCCGCACTATCTGGTGTATGTCGCGGATATCGGACCT  
TTCTTTAGCGAAATTTATCGCGGTATCGAAGTTACGGCGGCAAAATCACGGATACTGGTGTGATGGCGACTGTGCGCA  
TCAAAATCAGCAGGAAAAACCTTTATCGATTTGATCATCACCAGCAAAATGATGGCATGTTGCTGCTGGGTTCAAGGC  
TGCCGTTTGTATGCCAGCATTTGAGGAACAGCGTAATCTGCCGCGATGGTGTGAGGCAACGAATTTGCACCGGAAGTGGAG  
CTGCGTACAGTTTCAATTCGCAAACTGACCGCCGATTTGATGTCAGTAAATTTATATGAGCAAGGCAATAAAGGAT  
TGGCTGTATAGCCGTTCCGAGAGATGCCGCTGTGTCACCTACCGCTGCAAGGCTACGTTACAGGCGTGGCTGCTGCG  
GCATTTATGGTGTATCCGCAATACATCGCCGTTGGCGACTTACCTTCGAAGCCGGAAGCAAGCAATGCAACAGCTGCTT  
GATCTTCCACAACCGCTACTGCTGTCTTCTGCCATAGCGATGTGATGGCGCTCGGCGCACTTTCCGAGGCAAAACGCCA  
GGGCTGAAAGTACCCGGAAGACCTTTCCATAAATCGGTTTTGATAACATCGACCTGACGCAATTTTGTGATCCGCGCTGA  
CAACCATCGCGCAGCCGCTTACGAAATCGGTCGGGAAGCTATGCTGTTATTGCTTGAATAAATGAGGGGCAACACGTT  
GGCAGTGGCTCTGCTTTAATGGACTGCGAATTTATCATCCGGGATCAACACGCGCTTACCTTAA

>Cluster\_18777

ATGACGCAAGAAACGAGATCAAACGTCACCCAGGATCTGGAGCACGAGCCGATTAAGCAGTTGGATAATAGCGAGAA  
AGGCGGCAAGGTTAGCCAGCGCTGAAACCGTCAACCCACTGCCGAGAAAGTCCAACGCCAACCGGTTATTGGCACC

TGATTTCGCGCAGACAACGCTTTAACGATCGGCTGGGTAACAGTTTGGGGCGGTATCACCTATTTCTATTTTTGTGCG  
ATGATCCCATTTTGGATGGTGTCTTTTCCGCGAGGGGGCTTTGGTCTGGCCTCCCATCCGATGTTGCTACAGGATATCTT  
CGACAAAATCTGCAAAACATTAGCGATCCGACGCTAGCCGCCAGTTGAAAAACACCATCAACACCCGCGTTACGACAGC  
GTACGACTGTAGGCTTTGCGGTCTGGCAGTGGCGCTTATATCCGGCATCAACTGGATGGGTAACCTGCGTGAAGCGAAT  
CCGCGCCAGTACCGGATGCTGGGAACGCTCGCGCAAGTACAGGAGAAGTTCTGGGTAAAAATATCTCGCGTGAATTTAT  
TTCGCTGATTGGTTTGGTATTGCGCTGATTGTGACGCTTTCTATCACCTCGGTTGCCGTTCTGCGCAGCAAAATGATTA  
TTAGCGCCCTGCACCTGAACAGCATTGAGTGGCTGAAACCGACATGGCGGTTGATTGGCTGGCGATTTCATCTTCGCC  
AACTATCTGCTTTTCTTCTGGATCTTCTGGCGGTTGCCGCGCCACCGTCCGCGCAAAAAAGCCCTGATCCGCGGAACATT  
TCTGGCTGCTATTGGTTTGAAGTGAATAAAACTCGTATGACCTACACCTGGCATCGTTGATGAAATCACCCCTGGCG  
CAGCATTTGGTCCGTGCTGGGGCTGATGGCATTTTCTACTTCTTCGCCCCTTGGACGCTGTTTGGCGGGCGTGGATT  
GCCACCGCGAATAAAGACGACCCGCGAATGCGGGGAAAAACGACGCTTAA

>Cluster\_51822

ATGACTCAAGAAATTCGTAATTAGCTATATAAAAAACCAGAAATATCTACTTTCTTATAATTTTTTATTTAATATATCT  
ATTTATTGAATACACAAAAACAAAAATAAATAATTTTTCGAAATGACTGAGGAAAGGCTAACAAAAACAAAATTTATTTA  
AACAAATCCATCAGAAATACCTATTATCTCATCTTATACCTTCGGTATATCTCATGGATGGGACACTCTCCTCAATTTGAT  
GCTGATGGATTTTCAAATTCATTGAAATAAGCAAGTTGCCTATCGCTCTTCTTTCCCTTCGATACCTTTGTAGCTAT  
AGTCTTAACATTCACAGAAATACAAACGAAAAATCAAAATAGGAAAAACACAGCAACAGATAGATCTAGTGAACATGAGA  
AAAACCGCAGTGATGCTTACTACGCTCACCTCAAGAATATTCGGATATGTTTTAAAACGTTACCGTCAATTTACCTTTCT  
CGTCGAGATAATACAACTTTTCGAAAAAGACACAATTAACATCTGTAGATCATACCTACTCATATATAAAAAAATATAT  
CACAAAATCCTCAATCTTACTGGATATAATAATGAAGTTGATAAATCATTTCTTGAAAAATAGAAAAATATATAAACA  
GCATTGGGCATGAAATAGCAAGATACAAATCAGCTTTACCCAAAAACAGTTAACATATCTAAATTTAGAGAACATGGAAGCA  
CAAGTGGTATGGCTGTGTAGAGAACTAGGAGTTAATTAAGAAAGAGAAGTCAACAAATTTGAGATTTTGTATCCGATATC  
AACTTAGGAATAGAAACATCATTTTCAGATGAAAAAGAAATAAAAGAAATGCTTCGTGGATTACGAGATATATTTGATAT  
CTCTGTACATGCTAATTTGATCAAAAATCAATTAATTTTCCAAAGCAACTGCAATTAACGGTGAATTTTGTAGCCAAATATGCT  
TACGATCCAGATTTTGTATTTTAAAGGGATCTTACCTATAGATTTCTCAAGGTAATAA

>Cluster\_64989

ATGCTGAAGTTACTGAAAACTATTATGCGCGCCGGAACCGGACGGTGAATAATCCCTTCGCGCCACTGGAGGTCAGCCC  
AGGCTTTCCGCGGAAACCGGACCTGATGCCAGCAATGCTATTGCTGCGCGCCTGTGCTTGTCCGGCAAATGCGCTGA  
CTATCCAGACCGACGACCAGCAAAATTCGCGCACCTGGCAGCTCTATCTGAGGCGTTGATTTACTGCGGACGTTGTGAA  
GAAGTGTGCCCGACGAGCCATCCAGCTTACCATAAATTTGAACTGACCGTCAACCAATAAAGCCGATCTCTATACCCG  
CGCGACGTTCCATCTACAACGTTGCAGCCGTTGCGAACGCCGTTTGCCTCCGCAAAAAACCGTGCACGTTGGTGTGAAT  
GTTTGGCACAGCAAAATGCGCCACAAAACCGGAAATGTTTCCGGGCGCAAGCGAGCTCTGCCCGGAGTGAACAA  
CGCGGACGCTGATCAACGACGATACAGATGTACCCTGGTGGCTAAGGAGCAGCTATGA

>Cluster\_56083

ATGAAGAAAGTTTTTCTTTGCGCATCTTAGCTCCTTAAAGTATCCGGCTATCGCCTCATCATTTGCAGGATCAACTCTC  
TGCTGTCCGAGAAGCGGAACAGCAAGGTAATAAAGCAAGGACAGCATGACGAATGGGTGCGGAGCGCAACAGGG  
AAATCCAGCAAGAGAAGCAACGTCGCGCAAATGCCAGGCCGCTAACAAAAGAGCGGCAACGGCAGCGGCAATAAG  
AAAGCTCGTCAGGATAAACTGGACGCGGAAGCTCTGCGGCAAAAAACCGCATCAAAAGTTATGAAGATGAGCTACGCGAG  
CTTAGAGATTTAGAAAACAAAACCTGGCAGTGGCGAAAGAGAAGCCGCTTAAAGCAGAAAACGAATTTATCGATCAGG  
AACTGAAGCACAAAGCTGCGCAAAACCGTGTGGTGAATCTGAAGCTGACGCCAACAGAAATATGACTGAAGGCGCTCGC  
GATCTGATGAAAAGCGTGGGCAAGCAGAAAGAGAACAATTCGGACAGCTGTTTAAATTA

>Cluster\_21140

ATGAAAACGCGTATTTCATGTTGTGCAGGGTATATTACCAAATGCGCGTGTGATGTGATGTAATGCGGCTAATCCGTC  
ATTAATGGGAGGCGGCGGCTCGATGGGCCATTATCCTGCGCAGCGGGTCCGGCGCTGCTGGATGCTGTTAAAAAGTCA  
GGCAACAGCAGGGCGATTGCCCTACGGGGCATGCGGTTATACGCTTGCAGGCGATCTTCCCGTAAAGCCGATGTCAC  
ACCGTCCGGCCAGTCTGGCGTGGTGGTGAACAAAACGAAGACCAGCTTTTGCAGGATGCCATCTCAATAGCCTACGACT  
GGTGGCGGCAAAACAGCTATACGTCAGTGGCTTTTCCCTGCAATCAGTACTGGGTTTATGTTACCCTCGCTGCGGACGG  
CTGAAATCGCAGTAAAACCGTTTTCAGAAATTTATACCGCTCACGCTTTACCCGAACAGGTATACCTTTGTCTGTTATGAT  
GAAGAAAACGCCACCTCTACGAAAAGACTCCTTACCAACAAGGAGATGAATGA

>Cluster\_20648

ATGAACGAAAAAATAAAATACGGCCTGTGCGCTGCCGTTCTGGCGCTGATTGGTGCAGGTGCTTCTGCGCCTGAAATCCT  
CGACCAGTTTCTGGATGAAAAGGAAGGTAACCACACCAGGCATACCGTGTGTTGCGGGGATCTGGACCATCTGCCGTC  
GTGCCATTCTGGTGGATGGTAAGCCTGTATTCTCGCATGAAGCTGTCAAAGAAAAATGCGACCCGGTTAATGCCATC  
GAACGTCACAGGCGCTGGCATGGTGGGAGAAAAACATCCGGTGCCTGACCGAACCCAGAAAGCGGGGATCGCGTC  
ATTTCTGCTCAACACTTTGGCCCCGTTAAGTGTCTCCCGTCCGACTTTTATAAACGAATTAATGTCAGCGCTGAAAG  
GTGCTGTGAGGCGATTCTGCTGGTGGATTAAGGACGGTGGCAGAGACTGCCGTATCCGTTCAAATAATGCTACGGCTCAG  
GTCTACGGCGTAGCAGGAGAGCGCGCTGGCGTGTGGGACATCGACAGATAG

>Cluster\_54179

ATGAAATTAAGATTTTATTTCGCTGCGCTGGCTGCCGACTATTCGCCCTACGGGTAGTTATGCTGCCGTTGTAGATGG  
CGGTACAATTCACTTTGAAGGCGAACTGGTGAATGCTGCTGTTCACTGAAATCTGACTCGGCAGACCAGGTTGTCACAC  
TCGGTCAATATCGTACCGATATTTTCAATGCTGTTGGTAAATACCTCTGCATTAATTCACATTCACCATTCAGTTGAACGAC  
TGGATCCTGTTGTTGCGGCTAATGCTGCGGTTGCATTTCTGTTGTCAGGCTGATGCAATCAATGATAAATTTATTGGCCAT  
TGCATCCAGTACCAATAACAACAGCAACGGGTGTCGGTATTGAAATCTTGATAATACATCCGCAATTTCTCAAACCTG  
ATGGGAATAGCTTCTCAACCAACAGAACTTGAATCCCGGGACCAACGTTCTTCAATTTTCTGACGTTATAAAGGCACC  
GGTACAAGTGCATCAGCAGGGCAAGCAATGCTGACGCGACTTTTATTATGAGATACGAATAA

>Cluster\_35793

ATGGCTGTAACACCTATCAGACGGCCTTTCTGCAATTAAGTCCGCTCAGGGCTTGCCTGGAATAAAGCCCCGACAGCAA  
ATTTATCTGCGCTGGCGCAGGCCATCAGCGACGCTGATGCGGCTGCGGCGGATGATGCGCGGCAATGCTGCGGAGCGGTT  
TCCCGTCCACATCCCGTGGTATCTGGGGAGTGGGAATCATTTCTGGGGTTGCCGACTGTACCAGCGAAAACGGCACC  
CTGTCCGAACCGCCAGCGGCTGCCGGAATAAAATGCGTATACCGGCAATCTGAGTCCGCGCTTTTATGAATGCTGCG  
TGGCAGTACGGTTTACCCTCAGGCTGACGGAATCCACAGAAGGCCAGTGGGTTACGCGAGTCAATAATTTACGGTATTA  
AAAATTTACGCAACGCAACGGTGTGTAATGTTCTGACGCCGTTACGTTTATGAATCGGGTGGCTGGAATGTTTAT  
CTGGAGAAATAAAACCCGCGCATCAGATTTATAAATTTGTTTACCATGACGGAGATAACTAA

>Cluster\_22896

ATGTTTACCTTTATCAAAAAGTCAATAAAACCGGCACGGGACTTTCGCTTATTCGGTGGAGCCGATTGCGGTTGATAA  
AACTTCCGTTGGTAAAGCCAGAGCAGAACCCGACAGTGCATCGGCTGCGCAGCTGCGTCAATGCTGCCCTGCCCTCAAACG  
CCTTAACGGTTGAAACTTCCGACCGGTGAGCTGGCGTGGGAGTTCAATCTGGACGCTGCATCTTCTGTGACCG  
TGCGAAGAGGCTTCCCGCAGCGGCGGATTAAGCTGTCCGAAGAATACGAATGGCGGTTGGGAGAAAGAAGACTTCTC  
GCAACAGTCCCGTTCGCGCTGTGCACTGCCGCTGCAATCGTCTTTCGCGCTCCAGAAAGAGATGACTACGTC

TTGGCGTGTAAAGCACAAACGGCGACAGCCGCGGAAAACACCGCGAAAGCTTTGAGACTTGCCCGGAATGTAAGCGC  
CAGAAATGCCTGGTGGCCGCCGACCGTATTGAACTGACTCGCCATATGAAAGAGGCCATCTGA  
>Cluster\_54590  
ATGAAGAAAAAAGCATATTTTTCAGTGCCTTATCTTGTCTTTTAGCATTCTTAACATCCATGTCGGGATGGCTGGCCCTGA  
ACAAGTTAGTATGACATATTTATGGGAATGTGGTCGATCAGGGCTGTGATGTCGCCACCAAAAAGTCATTAACAAAATATTC  
ATATTGGTGTATTTAATATCAGTGTATTTTACAGGCGCGAATACCGTAAGCACTGCTGCTGATTTGAATATCGATATCACC  
GGTGTGCGCTGGTATTACTGGCGCGGACGCTCTTTTACGCGCGAGGCTGACACCCCTGCGCGGACACTGCTCAAACCT  
AACTGACACAGGCGGAAGCGGTGGTATGGCAACGGGATTGCCGTGCAAAATCTTGTATGCGCAAAAGTCAGCAAGAAATCC  
CGCTCAATCAGGTCAGCCTCTTACGCCCTTAAAGCGGGGATAACACACTCAAAATATCAACTTCGTATAAAGTCCACA  
AAGGCGGGAGCAACGGCGGTAATGCGACGGCGTCTCTATTTTGTATCTGGTTTACCAGTGA  
>Cluster\_40841  
ATGGCAAAAAGTACAAAAGGTGCAAAACGTATCAAGGCCGAGCAGCACTCTGGGTGCCGGGACACGTGAAGAGGTCAT  
TGAGGAAATCAGACTACTCGGTGACGCACAACGTGAACGTGGTCAGGGCTGAAAACAGAAATGAATGACGCCATTGGCGATA  
TCACCGCACGTTATGCCCGCTCACCGAGAGCCTGAAAAACGCATGGCCGAATGCAGTCCGGTATTAGACATGGTGT  
GAGGCACACCGTGTGAACTGACCGGCAACGGGAAGGTGAAGTTCGCTAACCTCACCGCGGAGGTCAGTGGCGAAA  
CCGTCCGCCATCAGTCAATATCCGTGGGCGGATAATGTTATTGAATTACTGAGACGCTCTGGGGCTTGAGCGCTTTATTC  
GTGTAAAAGAGGAAATAAATAAAGACGCTATCTGAACTGAAATAAAGAGCGGCTGAAAAATATTCCCGGTATTTCCATTAAA  
AGCGACATTTAGGATTTTCAATAATTCCTTTTGGAGCAGGATGTGCAGTAA  
>Cluster\_23328  
GTGTGGATAAACTGCGTTCCTCGTATTGTGCATTTGGGGCCATCTCTGTGTAGTGTACCGGTAAAACCTGACGCCATTTGC  
GCTAAAACGCCAGGTTCTTGGAGAGGCTTAAAGTGGCAATTCGCCAGGCGCTGGATGATGGTGGAGTTCCTTGG  
AAGGCCGTGGTTAAGTATTCATGTGCGTGATATGACCTGCAATGGTTTACCCTGGTGGTGAATGGCAAACCTGGTCTGT  
AGCCAGAACCGCAAGCTGATGTGAGTTTGTAGTCCGACGCGCAGGATCTGCTGATGATTTGCGCGCGTAAAACAGATCC  
GGATACGCTCTTCTTCCAGCGTGGTGGTGTGATGAAGGCGATACGGAGCTGGGGCTGTATGTGAAAACCTGATGGAGC  
CCATTGAACTGGAGCAAATGCCGAAAGCCTTACGCATGATGCTGCTGCAACTGGCGGATTTTGTGGAGCGGGAATGAAA  
ACCGCGCTGAAACCAACAGACATCGGTAGGTGAACCATGCTAA  
>Cluster\_46329  
ATGAAGAAAAAGCGTACGTTGTTTTTATAGTAGCCTGATGTGCTGGGCGAGTGAACCACAATAGCAGGAGATAAATTT  
GCACTTTACCGCAATTTAATCAGTAAATCGGTGACGCCAGTGAATATGGTAGCCAGTTGGCAGAAGTACATTTTCTCTG  
CCATTGCCGCCAGCGATTTAATGAACCTTGGGCGAGTCAAGCGAGTGCATTTGGTGTTCATTTGAAAGATTTGTCATAGT  
TCTACATTTGTTAATGTCAAAGTAACTGACAGGAACAGAAGATAGTGTCTTACCGGCTTTCTGGCCTTTGACTCCTC  
GTCAATCAGCATCCGGCGCTGGGATTTGTTAACTGCAACAGCAACAGCAAAAGCAGCGCACATCGGTGCCAATCAACAATACAACAGCGCTCA  
CGCTCCCGCTGAATCAGGAAATAACAGCCTAAATTTTAACTGGTTACAGGCAAAAGAGCGGGCGAGATGTAACGTTCC  
GGAGACTTTAGTGCCACAGTGCAGGCAACCTTTGAGTATTTCTGA  
>Cluster\_29747  
ATGATATTAATAAATAATATGTTATGGATATCGGGTAGTCTATTTCTGGCTTCATCAGTGAATTTCCATTTCTCACATGC  
GGCCACTGATAGTATTTGGCTGACTGTTACTACAGACATAGAAATGGGTACCTGTACATCAATGTTGACTGATGACGGTA  
CAGTAAACTGTCCACTCAATTTCCGGTGTATATATTTCTGAAATTAATGCCGAAACTAAAATTTAAACCTTCAA  
TTGCAATTTCAAAGACTGTGCGGGGATTTCCCGGGAAAAGGCAAAAATAAAGTTGACCCACAGCCTTATGCGAAGTAA  
TTCTAATAACAGGCTTGGATTTGTTAACTGCAACAGCAACAGCAAAAGCAGCGGAGTCCGCGTTGAGGCTGGAGTAC  
GTCCACACAGGTAATAACGGCGCAAAACAATTCAGTTGGCTCACCCCGCAACAGAAAGTCAAGTATGCTGGTGGCA  
CGGAGGTGATGTTGTCGATTACCCGATGA  
>Cluster\_10318  
ATGACCATTTTGCCACGCCATAAAGATGTGCGGAAAAGTGCCTGAAGATGAGTAATCCGTGGCATCTGCTTGTCTGCGG  
ATTCGGAAGTGGATTAAGCCCAATCGTTTCTGGCACGATGGGATCGCTGGCAGCGATTCCGTTCTGGTATCTGATGACCT  
TTTTACCTTGGCAGCTTACTCGCTGGTGGTGTGTTGGGGATCTGTATCGGCGTCTATCTTTGTCTCAAACGGCGAAA  
GATATGGGCGTGCACGATCAGGCGAGCATTTGCTGGGACGAAATTTATTTGGTATGTGGATCACCGCTCATGGCGCTGCCGAC  
CAATGACTGGCAGTGGTTGCGCGGGGTTTGTGATTTTCCGTATTCTGGATATGTGGAAGCCGTGGCCGATCCGCTGGT  
TTGATCGCAATGTACATGGCGGCATGGGATCATGATCAGCATATTTGCGCGGGGTGATTTCCGCAGGCATCCTGTAC  
TTTTATCGGTATCATCTGGCCGCTGGGATTTCTGTCTGATG  
>Cluster\_47999  
ATGGCAGGAAAACGATGATACCGTTACTCGCCTTTGCCGCGTGGAGTGGTACCGGAAAACCTACGCTTTTGAACAACCT  
GATCCCGGATTTATGCGCCAGAGGGATCCGTCCAGGGCTGATTAAAGCATAACGCACCATGATATGGATGTTGATAAGCCAG  
GAAAAGATAGCTATGAGCTGCGCAAGGCTGGCGCGGCAAAACCATCGTTGCCAGCCAGCAACGATGGGCTTGTATGACG  
GAAACACCGAGCAAGAAAGAGCTGGATCTACAGTTTCTCGCAAGTCAATGGATGATACCTCAAAGCTGGATTTGATTTCTGGT  
CGAAGGTTTAAAGCATGAAGAGATCGCAAGATTTGTGCTGTTTCCGATGAGAGCCGACATCGACCTGAAGAATAGTGA  
TAGACAGGATGTTATTGCTGTAGCCAGTGTGCGCGTAAATCTTGTATGTCGATTTACTGGATATTAATGATGTTGAG  
GGCTGGCTGATTTTGTGGTGGAGTGGATGCAAAAGCAGAACGGATAA  
>Cluster\_988  
ATGATGCACTTAAAGAACATAAAGCGGGTAACGCTAAAACACTGGAACAGTATGAGTTAAACAAAGAAACACGGAGTTAT  
CTGGCTTTACTCTGAGGACGGAAAAAATCTGGTATGAGGAAGTGAAAAACCTTTCAGCCAGACACAATAAAGATTGTTTACG  
ATGCAAAATAATATTTGTCGCCATCACTAAAGATGCCCTCACGCTTAAACCTGAAGGTTTTCAGCTGCTGGTGGTCC  
GATATAACAGCAACCGCGCGCTGATGATTCAGGAAAGTGGATGTTTAAAGATGGAGCTGTAGTTAAACGGATTTATAC  
AGCAGACCAACAGCAACAACAGGCGCAATCACAAAAGGCGGATTTGCTTTCCGAAAGCTGAATCAGTCAACAGCGCTGG  
AACCGCTGTGACGCTGAATATGGCAACAGACGAGGAACGCACAGCAGTGAAGCATGGGAACGCTACAGTGTCTGGTC  
AGCCGTGTGGATACGGCAATCTGAATGGCCACAAAAGCCTGAATAA  
>Cluster\_20448  
ATGACACAACCTCTTTTTCTGATCGGGCTCGGGGCTGTGGTAAAACAACGGTCCGAAATGGCCCTTGGCCGATTGCTTAA  
CCGTGGTTTGTGATACCGACCTGTGGTTGCAATCACAGCTCAATATGACGGTCCGGAGATCGTCGAAAGGGAAGAGT  
GGCGGATTTCCGCGCCAGAGAAACCGCGCTGGAAGCGGTAACCTGCGCCATCCACCGTTATCGCTACAGGCGCGC  
ATTATTCTGACGGAAATTTAATCGTCACTTTCATGCAAAAATAACGGGATCGTGGTTTATTTGTGTGCGCCAGTATCAGTCT  
GGTTAACCGACTGCAAGCTGCACCGGAAGAAGATTTACGGCAACCTTAAACGGGAAAACCACTGAGCGAAGAAGTTACAG  
AAGTGTGGAAGAACCGCATGCGCTATATCGCGAAGTTGCGCATATTTATCATCGACGCAACAAACGAACCCAGCCAGGTTG  
ATTTCTGAAATTCGACGCTCTGACAGCATCAATGTTGA  
>Cluster\_48657  
ATGACAACCAAGATATTACCTACGGTATCCAAGCTGAACCTCTGGCGCGAGATTACACTAACGTTGAAAAACTACTGAT  
GTTCTGGCGCAGAGAACAATAATCTGTAAAGGTCACCTCTGAAAGATGGCCAGGCGTTTTCATGTACGTTTATGGCTCA  
TGCCATCTCGTAAACAAGTTGACCTTTGCCAGCCCTTTTGAACAAGAAAATCGTATAAGGCTCCCACTTGAACGCAT  
AGTACAATTTGAATCAGGTTGGTTGACAGTATCGCTCACGATTTCAAAGGTCGACTAACAGTTTACCCCTGATTTATGTCGA

TAATCGGCCATCACGCCGATTTTTTTGCAATTTGCAACCAAGCCTACAAAGCAAACAATCTATAAGGGTGTACATGG  
CGGATGGCCGTGAAATTGAGGGGTGTACAGCGCGCAGATGCTTGTACAGTTACACTACGTGTCGAGAACGGTAGAAAA  
ATAGTTGTTTTGTTGATGGGTGAACGAATTTGCTTTTTGA  
>Cluster\_42412  
ATGTTCAAATCGACCCTGGCGGCGATGGTGTCTTTTTGCTCTTTCTCCTCCGAGCAATGGCAGCGAAAGG  
GGACCCGCACGTATTTGTTGACAACTCAGCTGGTAATAATCGAACTGGAGCTGGATAAAACAAAAAGCGCAGTGTCTGTGC  
AAAATTTGTCGATTATGTTGAACAGCGGTTTTTATAACAAACACGACCTTTCACCGCGTATTCCTGGCTTTATGATTCAG  
GGCGGGGTTTTACCCGAGCAGATGCAGCAGAAAAAACAAACCGCAATCAAAAATGAAGCCGATAACGGCCGTCGCGCAA  
CAGCGTGGCACCATCGCGATGGCGGTACCGCTGACAAAGACAGCGCCACCAGCCAGTTCTTTATCAACGTTGCCGATA  
ACGCCCTTCTTGACCAGGTGAGCGTGTATTTGCGTTACGCGGTATTTGGTAAAGTGGTGAAGGCATGGACGTTGCCGAT  
AAGATTTCCAGGTGCCACTCATGACGTTGGTCCGTACCAGAAATGTGCCGTCAAACCGGTAGTTATCTTTCCGCTAA  
AGTCTGCCGTAA  
>Cluster\_62528  
ATGAGTTGCAAGTTGAATGGATCAATGAGCCCGGTATGGTGTACGAAAAAATACGCCCTGTCCGTAATCACTGATGA  
GCATACTGATTTCTGGTGCCTACTGGTACGGTTTTGAGCGTTTTACCGGCCACATCTACGCTACTGATGTAACAGGTG  
ATTTTACTTTTTCAGTTCAGGATCCGCGCAGACTTACCACACTCTATGACCAGGCCGGAATTAATGATGCTCTCTGACGAA  
CAGCAGTGGCTCAAAGTGGCATCGAATTAACGATGACGACCTGCAATCGGAGCGTACTCAGCGAGGATGTTCCGA  
CTGGGCTACAGGACTCTTTCTGGGGATCCGAAGGAATTTGCGTGCCTGACCCGTA AAAAAGATGCGTTACGACTGC  
AGTACTCCTCAGATGGACAGCAGTGGCCATTACTTCGCTTATGCCATTTCCCTACGGGCCCTGTA AAAACGGGCATCATG  
TGTGTACACCTCAGCGCAAGGGGTTGGAGGTAGAATTTCTTGATCTCAGACTGACTCCTGCGATGGAATAAGGAATGCA  
CGATCTAAGTTGA  
>Cluster\_24790  
ATGGAACACGGTGCCCGTTAAGTACCAGTCTGTAAATGGCCATCGCCCTTATATTTATGTCAGTGTATTGTTCTCAG  
CCTCTCTGTTAACTGTTAGGTTGTAATACTACCGTCTTTCAGAAATGAGCAACGCTGCGTGCAGCAGCCAAATGGCAT  
TTAATGCCCCCTTTGCGGTGTACAGAACAGTGGCGACGCTCTTATTTACAGCAGATGGCGCTATCATTTATGCCCCTC  
CGTCTGAAATGTTTTCATCAGAAACCGTCGATGCCTCACATCAGGCGCTTTCGCAATATATCCGCCCGGGCGCACAGAACA  
GATGAAAGTTATTTCTGGTGAAGAAGCGAAGCGTATTA AAAACGATAACGTAAGTGCAGTCACTTTTCCAGACCAGTGTTC  
GTGTTGGCTCAGTGTGCTGTAATTCGTTGGTGTGTA AAAACCTGGATTGGTGTGATTCA AAAACCTGATGAT  
ATCAAAACATTACATCTTATTTCTGAAACGGGAAACGGGGTGCCTGGCTGGATAATTTCCGGGAAACAGACGATGAGAA  
AAAATAA  
>Cluster\_63014  
ATGTTTAAAGGACAAAAACATTGGCCGACTGGCCGTATCTCTGCTGTTTACAGCACCTGTTTATGCGGCTGATGAAGG  
ATCCGGTGAATTCACCTTTAAGGTGAAGTTATTTGAAGCACCGTGTGAAATACATCAGGATGATATTGATAAAGAGGTTG  
AATCGGTCAGGTGACCACCAGCCACATTAATCAGTACATCAGACGATGCCGTTGCTGTGACCTGCGCTTAGTCAAC  
TGTGATCTGGA AAACTCAGCAACCGTTCCGGTGGCAAGATTTCTAAAGTGCAGTCACTTTTATAGCTCAGCGAAAAC  
CACCAGCGCAGATCCGATTTCTCAACAACACCAGCAGGGTGAAGCCACCGCGTCCGGCTACGTTTAAATGAATAAAGATC  
AAAGCAATATCGTTTTAGGCACCGCTACTCCAGATATCGACCTGGCTCCGACCTCCAGCGAACAAACGCTGAATTTCTTT  
GCCTGGATGGAACAAATGATCAGGCTACACCTGTAACCGAGCGCAGTTACGGCGAATGCAACCTAGCTGCTGGATTA  
TAAATAA  
>Cluster\_46985  
ATGGATACATCAACTGCAACATCAGTTGCTAGTGGAAACGCGAGTACTTCGACATCGACAGTCTATGACTTAGGCAGTAT  
GTCGAAAGACGAAGTAGTTCAGCTATTTAATAAAGTCCGTTGTTTTACAGGCTGCGCTTCTCATGTTTGCCATATATGATC  
AGGCAAAAAGCGATCTGCTGATTTGCTGATATGAAATGAGGCATTAAGGAGTCAACCACAGCCAAAAAATG  
GCTAATCTTGTGGATGCTAAAATGCTGATGTTTTCAGAGTAGTTCTGACAAAGAAAGAAAGCCAACTTCTCAAGAAGT  
GATGACTATATAAATGATCCTCGCAATGACATTAAGTGGTATTTAGCGATCTAAATGCTGAATTAGGCCTGGTG  
ATTTGCAAAACGGTGAAGGCCGCTATTTCCGGCAAAATCGAATAACTTGACCAGGTAAGTGAATAATAGCCAGCTTGAATA  
CAGCAAAATGCTAAATACGTTAAACCTATTAACGAGTGCAGTTCTGATATTTAGTCACTGCAATACAGAACTATTTTCAGC  
AATATCCCTTGGTAAATAA  
>Cluster\_46840  
ATGAATCTTGCCCTAAGAAAGATTATATATGATCCAATAGTTATATTTATCTCAACGAGTAAGCTTGAATAATACACC  
TATTAACAATCCGCTGCTTAGATCTATTTACCAATGAAATGATTGTTCTGCAGTACAATCTTTTCAGTTGAACATTTTAATC  
TGAATAGTTCACTTATTTACTACATAAACAATTTGAATTTATTTCCATTTGTTCTGTTTATTCAGTGGTTATCACTTTTAT  
CGA AAAAGTTTTGCAAGACCGGATTTTTTTATAAGTTTCTGCTGTGCTAAGGGATTATTTATCAGCTATACCGGTGAA  
AATAAATGAAAAGGCAGATACAAAACCCGGCATCGTAGCTATCACAATATCATCAGTGGTTTTTCAACGTTGTCC  
CCTATATAAGCAACCAACCTTTGGCAATGCAGCAACGATTTAATTTATTTTCTGATTTTGTGTTGATCACAATAAATG  
CCGTTACCACTTGCATCAACTCTTTTAGAGAGAATTACATTTTATGCGAAAAAATAAGAGATGAGCTTGATAAAATCTC  
CTGCAAAATGGTGTGTGATTA  
>Cluster\_11223  
GTGGTGGCAGCCGATCCGAATACGGTGTCCGGTATCAAGTCCGTGGGGACACTGATTGATGAACTGTGGCTGTTTGGCAA  
GCAGTACAAAAGCGAAGACATGCTACGTGAAGCATCCGGCGGCTTGCCTCCCGTCCGGAAGGATTTGTGGTGTACACAA  
CCACCCAGTCAATGAACCCGCTGCCGGGGTGTTCAGACAGAACTGCAGTACGCCGGGATGTCCTGACGGCAAAAAT  
CATGATCCGCACCTTTGCGCGGTGATATTTGAACACCTTCTGAAATGGTGGAAAGCGGGCTCACCTGCTGATGAAAA  
CCTCGCCATGTTTAAACCGAATCTCGGTTATTTCCGTTGATGAGGCTTTCTGTACCGGAGTACCCTAAAGCCCGGGAAG  
CCGGTGAAGAGACATTTCCGGGGTTCATGTCAAACACGCCAATGTGGAAATGGTCTTGCCCTGCGCTCTGACCGCTGG  
GCGGGGGCTGATTTCTGGGAAGAGCAGGGCCGTTGTATCAGCCTGGACGATATCTGCGTCTGTGATGTTGGTGACGGT  
GGGATTTGACGGCTGA  
>Cluster\_67093  
ATGAAACATATTGCAAAACAGTACGTCATGTTACATGACGAGAAACGCTGTATCGGCTGCCAGCCTGCACCGTTGCCTG  
TAAGTTCTTAACGAAGTCCCGGAAGGATTTAGTCCGCTGCAGGTACAAAATTCGCGGCCCTGAACAGGCTTCCGGCGCAT  
CTGAGCATTTATCAGTTTTGCGCGTCTCCTGTCAGCCTGTGAAAAATGCGCGGTGTGTGAGTGTGTTTGTCTTACCGCGCA  
TCGCATCGTATGAAAATGGTATCGTGCAGATTGATAAATCGGTTGCATTTGGCTGCGATTTATGTTGGCCGCTGCC  
TTTCCATGTGCGCTATCTGAATCCGAAAACCGGTTATGCGGACAGTGAACCTTCTGTGCCGACACCGGCTGCTCGCAG  
GCCAGCTCCGGCTGCTATCGGTTGTCGCAACAGACCGCTTAAATTCGGCAGACTGGATGAGCAGAGATCCAGGAC  
TGGATCAGCCAGAAAGATGCTATCTGCCAGAGGAGCGGCTTGTGGCCAGTCAGTCTGTACCGTCAAAGAAAGTCCA  
TCAGGAGGGAAAGCATGA  
>Cluster\_158  
ATGATTAATTTACTTTTTCCATTCAAATGGAAGAAAATGACGCTTTTCTTGATGCGGAAGTTAAGTATCAGAAAATGAA  
GAATAAAGAAATGTTATGGTGTGAAAGCTTACACAAAAACCTTTATCTTTCTTAAACCGAGCGATACGTTATACATCG  
TTGCTCATGGCAACATCAGTTATTGGATCTGGTTACGCTACTGGGCCAACGTTGAATCCCGTAGCATTAGCCTCTCTA

TTAATACACAACGTTTACCAAAGAACTTCATAGATATCAGAGTGTGTCTGCGCCTCGGGGATACATTCGAGAACCC  
AGCCTTCGCAACAACGGCTGAAAGAAATTTAGAAAGTACATGGGTATCAGTCTGGTCTTACCGGATACCTTGGTGAGG  
TTGATGTATCGAGAGACTGGAGATTAATAAATGATGATGGTATGGAGTTTATACCTTAAGAAAAAAGGGATTATTCCT  
GTTAAGGATGTATTAAGTGAATCCAGAGAGCGCTTTGTGGTTCTGATCTGAAATACGCCCTTCTGATTTCAAGAAACG  
ATTTTGA

>Cluster\_61061

ATGCAAACGAAAAAATGAAATTTGGGTGGGTATCTTTTTATTAGCAGCACTGCTGGCGGCGTGTGGTTGCTGAA  
GGCGGCGAAGCTGACCTCCATACGTAACGACCTTACACGCTTTATGCGAGCTTCGATAACATTTGGCGGCTGAAAG  
CGCGCTCTCCGGTCAGTATTTGGTGGCGTGTGGTGGGTGGCGGATATTACGCTGGACCCGAAAAACCTATCTGCCG  
CGCGTAACGCTGGAAATGAAACAACGTTATAACCAATTCAGATACCAGTTCGCTGAGCATTCGTACTTCCGGCCTGCT  
GGGGGAACAAATCTGGCATTAAACGCTCGGTTTGAAGACCCGGAACCTGGGGACTGCTATCCTGAAGGATGGCGATACAA  
TTCAGGACACTAAGTCTGCGATGGTGTGGAAGATCTATTGGTCACTTTCCTTACGGTAGTAAAGGCGATGACAATAAG  
AATAGTGGCGATGCGCCAGCTGCTGCGCCAGGTAATAATGAAACCACTGAACCTGTGGGTACAACGAAATAA

>Cluster\_44228

ATGAAATAAAAAATTAATGTATATATTCGCAATATTTATAGTTGCGCAATTACCTGTATTAGCCAACCCAAAGAAAAAC  
GTTGCGTGATAAGCCATGGTGAATATGCCTTTGATTTTAAAGTCAACCGGCAGTCTACCGTTTACCAGCGCGGCCA  
CGGAGCTTTCGGCCATTCAGTCACTCAACGTCGCAATATCGCCTTGAGAAATTTTATCTTCATGGTACGCGGATAA  
CCACTGGATTATACACAGGCGAGATACTGGTATGAGCAATCAGCAGAACAGGAAAATCCGCGCGCACAAAGCAAACCTGGG  
GTGGATCTACCTCAAGGCTTGGGGGTCAAACCCGACACCCGTAAGCAATTCCTGTTATAAGGAAGCAGCTGAACAAG  
GGTATGCTCATGCTCAATAATACTTAGGTTTGTATCTACAGAAATGGCTCAGGTATTAATGTTAACCATATGAATCTCAA  
AAATGGTTAAAACTGCGCCGCAACACATTCACAAAAATGCGGAAAGATTACTTGGCGGCTTCCCGCACATTTAA

>Cluster\_17649

ATGAAATCAAAAGATGACATTTTGGATGAAGTCTGGGCAAGAAAGGCGGTTACGTCATACCCGCGCAGATAAGGGCGG  
TCCGACCAAATGGGGCATTACGGAAAAAGTCCCGCGCCACGGATAFCGTGGCGATATGCGCGGATTTAACCCGCGAAC  
AGGCGCTGGACATCTTGAAGCCGATTACTGGTATGGCCCGGATTTGACCAGATCGCCGATTTATCCCTGATATTGCC  
GCAGAGCTGTGTATACCGGTGTGAATATGGGGCAACCGTGGCGTCCAGAATGCTTCAGCGCTGGCTGAATGTGTTCAA  
TCTGCGCGGCGAGGCTGTACCCGGATATGGACGCGAGCGGATCGGCGCTCGTACCATCAGTGCATTTGGCGCCTTCC  
TGAATAACTCGCGGTTCAGGACGTTGAAACGGGTGATGCTGACGCGCCTGAACGTACGCGAGGGGCGCTATCTGGAAC  
GCAGAGAAACCGGAGGCTAACGAATCGTTGTTTATGGCTGGCTGAGGAGCGCGTGGCGGTATGA

>Cluster\_35782

ATGCTGGAAGAACCAGCCGCACTGCTGGCGCGGTTCTGTGAGTTGTTTGGGGCAACCTTGGCGGAGGTGGAACCCCT  
TACCGGCACATGGACTAACGAGGATGTACACCGTCTCTTCTGCGCCCTCCATCGGTATTTCTGGCATGGATGGGCTGTG  
GTGAGGGGCGTACCGCTCGGGAAGTTGAAAGTCTGCGTGGGCATTTTGTGCTGGCGGAGTTGCTGACGGGGAACCGGTA  
AACCGGCCCGGATTTATCAGATTTGGAGCGACTGATTCGCGGTGTTAACCGTCAGACGTTTGGCCCGACCCGGGAT  
GAGACTGACGCGAGGTTCAGAAATCTTTGTGACGACAACCGTATCAATGCGCGGTGTTGCTTTACGGCGTTCGTTT  
GCATACCCCGTCCGTCGTTGGTGGACATGGATTGCTGGAATGATTACGAGCGTCACTGGCAGACCTGGAATTCGCCG  
GACGAAACCCCGAATTTGCGGCACATATCAATGTGAATCAGGAAAAGGATCATGATGCTGAAAATTTAA

>Cluster\_35625

ATGAAACTGACAACGATAAATGCGGCGCTGCGTGAGCGATGCCCGGCTTTTGGAGATCGTGTGGTGGCGCGGCGAGTT  
TAAGGCGATCCCTGATGCCGAAAACTGCGACTGCCTGCTGCCTATGTTGTCCCTCTGACGATGCGCGGGGGAACAAA  
AATCACAGACCGATTACTGGCAGGATTTGACAGAAAGGCTTCTCCGTTATGTTGTGCTCAGCAATGAGCGTGTGAAAA  
GGGCGAGTGGGCGCCTATGACGCGCTTCATGATGTCGCGAGAGAACTCTGAAAGCCCTGCTTGGATGGATGCCGGAATC  
GCAGGGGGGCGAGATTTGTTATGCGCGTGGCACCCGCTGCGATCTGAAACCGTTACGAACTGTATTAACGATTTTAA  
CGGCGAAGTATGAAATCACGGAAGAAGACGCGACAGGACGAGGACGTTGAAATGCCCTGCGGGATTTATCCCTGCTGAGT  
ATTGATGTGGATTACATCGATCTTGGTACTGGCCCGGATGGTGCATTTGAGCACCATCTGAAATGCGTTCCTCAGAA  
ATAA

>Cluster\_5622

ATGCCATAAATCTTACACACCAAACCTGGTTTTTTACCCTTTACTTGACAATCACATCAATCAATGATGGCACGCTATTC  
CTGCCTGCGGGCCTTACGATGGATTTCTTCTACAGGAAAGATACGCCGATTTCTTACAACCTGATCATCGCTGGCTTG  
AATTGCAGTTGCGTATGCTGCTGGAGCAGGTGGAACAAATTTGAAAATAFCGTTGGTTTCTTCTGGGTGATTGAATGGACG  
GCTGATCATGGTTTTTCATGCGCATGTCGTTTTCTGGATCGATCGTCAGAGGGTTAAAAAATATATCCCTTTGCGGAGCG  
GATAGCGGAATGCTGGCAGGCAATTACGTATAACTGTGGTTTCGGCGCACCGCTGTACATATCAGCCGATTTATGCATACA  
ACATCAACATTCCTGTGCCCCACACGATCCTGAAAGCATCGATAATATTCGCGGTGCCCTGCATTTCTGGCGAAAGAA  
GAACAAAAAGACGGGCTGTGTGCTACGGCTGCAATGAAGTTCTTGAACGTCCTGCTGACGGGCTCCTCGTAAGCCTCA  
CTTCTGA

>Cluster\_22118

ATGGTTTTTATTAATAACAAAAGAAAAAGCAAGAAAGGTTTCTCACTACTCGAATACTACTTGTGTTTGGGCATCATTGC  
TGCAATAGTGGTAGCGGCTTTTATGTGTATCCCAAGTTTCAGGCTTCAAAAAGAGCACAGGCAGAATCCAATAACATTC  
CCACATACAGGCGAGGTGTTAAAGCGTTTATACACGCTCGGATCAAGCTTTACTGGCCTGACAAAATACGTGGCTGTTT  
GCAAAAATATTCCTGACAAATATGTTAAGTGGGTCAGGAAACGGCAGCTAAACCATCAATGCCCTTAAAGGTAATGTGAC  
GCTGGCTGCGGCGAGCTGGTCCGTCATCAGCGACTGGCTTCTTTCACTATCACCTACGATAATGTGCCAGCAGCGG  
AATGTGTGAAGATTGCAACAGCGGCGAGGTAATTTCTACATTAACAGGTTGGAACCAAGGTTGTTAAAGCGCAGGA  
GGAACACTCGATGTGGCAGCTACGGCAGCAGCATGTACGAATGCCACAAGTAATACATTAGTTTTTACGCTTATTTAA

>Cluster\_24748

ATGCACAGTCAGTTAAGAGAACGTAATCCGGCTGATGCGCGCAAGGCTGGATAACCGCGCGCGGTTGCTGAAATCCGGG  
TGAATCTCAGCTTTTGTGACTCCTGCCCGGCTGTGATCGCCTGGTACGCTGGCGGAAATCAGCAACCGTATCACA  
TTCTGGAACCCCTGCGCGCACCGGGCCATATGCGGGGATTCGGGATACCGCGCCGAGGCGATGTGTGATGCGGTTG  
GAGATTAACAGCGGGCTGGTCCGGTATCTGCGGGAAAAATTTAAACGGTGTGAGGTACAGTGTGGCGACTTCAATGGAATG  
GCAGCCGGTGCAGTATTACAGCCGGATCATTTGAATCCGCGCTTCACTACGAGCAGGATATCCGGCATATCCTGCGGG  
CTTTTCCCTGTTGCTGCTCCGGGGGCGTTCGTTGCTGCTTCAACGGGCGCGCCAGCAGGAGGAAAGCTGTTACCG  
TTTTCTGACGCTCCGCGAGGAGCTGCCGCGCGGACGTTTGTCTTATACCGATGTCCCGACGATGATTATTCGTTTGGCTG  
CTGA

>Cluster\_14923

ATGCGTAAAAACCGCTTGCAAAAAATATCACGGGGCTGTATGCTTCCCCCTGCGCCACATGGCGACCGGGTTTAGCAG  
CCTGAATACATCTGGCGGACAGCCGCCACATCCGATAAGCGGTTTTTTTGTGTCCTGTAACCTACCCATACCCGATTA  
TGGCGGGGCGTAACGGGGAGCCTTTGTGCTCGCTGGTTTCCAGATGACCAGTCTGCTAACCTGTTTACGCTCTGCCACC  
ATGTTTAGCAGCGTATGCGGAGCTTAAATTCATCTGGAGGCTTTTCAATGGCTGTATCCGCGACCCCTTATTT  
TGTCTGGCGCTTTATGCACTGCTGACAGACAGCATTTGAATATTCACCGTTACCGCAGCCACTGAACCGGAAGCAGCG  
CCCAGCTGCCGACGACATCTGATTTTTGTGCGCCGATTCGTCAGGGGTAGGCTTATGA

>Cluster\_13943

ATGAAAGCATGCTTGTTACTATTTTTTTTATTTTTTCTCTTATTGGTCAATTGCATGGTGTGATGTGAAAAATAAAGAAAA  
CGAAAGTGTGATGGGATCTACAGCAATGACCTATGATTTAAGTGAAGAAAAGCTGATGAACTGAAGTATAAATCACAA  
ATGGTGAATTCAGAGGCATCATTTTCGACTATATCAATATTAAGTCTTACTAAAAATAATTTGATAAAACAATTCGGATTC  
TTGAAAGATCAGCATCTCAGGGAATGTTACAGCGCAGTTAATATATGGGGTCTTTTATCAGATACAAATCCAAACATT  
ATCAGAATATTATAATTTGAATAGAGCTATTTATTTGATGGAATTCGCTGTAATAACGGTAAATTTGATGCAAGAGCA  
AATTCAGAGCTCAAAAAGCTAAAGCGAATGGATAGAAGGAAGATAAGGAGATCCGTAA

>Cluster\_31269

TTGCCCTGTTGGTGTACCGGTTCCATGGCCACCACCACACCGCCAGCAGGCTGGTTACAGTGCACGGAGCTACGTTCCAC  
CAAAGAACAATATCTGTCTGGCCAGAGTCTACCCGACCCCTCCGCTTCCCGATTTACGCGGTGAGTTTATCCGTGGAT  
GGGACGACGGGCGCAAGATTGACGAGGGGCGTAAGTTGCTTTCATGGCAGAAAGGTACTGCTGGCGGTGATGACGAT  
AACGATTCGCGCTTGATATCTCGTACATGAGTAAACGGAAATAATTTGACTATGGCGGCGATAAGGTGTTTGGCGGGAA  
TTACCGTAGCGATTTATTTGGTACGCAATACCTGGGTGGAACAAACAGTTCGCGCAAAAAGCCGAATTAACGGAGCATTCT  
TTAACATAACCCGCCCCCGCAATATCGCGTTTAACTATATCTGAGGGCGCGTGA

>Cluster\_39054

ATGACAATTTGGTGGATGCCGACGCGTGTCCCAATGTAATTAAGAGATTTTGTATCGCGCGGCGGAACGTATGCGAT  
GCCGCTGGTACTAGCAAAACAGAGTTTACGCGTGCAGCCATCGCGATTTTATTCGTACGCTGCGCGTGCAGGAGGTT  
TCGACGTTGCTGATAACGAAATTTGTTCCGCGAGTGTGAAGCGGGCGATTTGGTGTATCACCGCAGATATACCTTTGGCTGCT  
GAAGCCATCGAGAAAGGCGCGGCGGCTTAATCCGCGCGGCAACGTTACACGCCAGCGACCTTCGTGAGCGCCTGAC  
GATGCGGATTTTATGATACCTTACGTGCCAGTGGGATCCAGACCGAGGACAGATAGTCTTTCACACGTGACCGCC  
AGGCTTTTCTGCGGAGCTGAGAAAGTGGTGGTGAAGTGCACCGTAGTCTGTGGCTAA

>Cluster\_48656

ATGAAGTCTCCCACTGTTCACTTTCTGTTCTAAAACATATCATGAAATACTCGCTTCTCCCTCTACTAACGTTACCAGT  
GTTGATGCTTACCGGTTGCCAATCACGCCAATATCAATFCATGACGCCAAACAGCAGCCGAGGCCAAAGTGTCAAGT  
ATCAAAGCGCAGCGCCAGCTACGTTGGTGGTAATGAGAGACACAGGTTTGTAGGAGCTGGATGTGATGCTTCCATTTTC  
ATCAACGGCGAAACTGTCCGAAAACCTGGCTACAGCGGAAAAGCGACTTTCATTTAAATGCCGGAGAATTAATTTGTGGG  
TGCATCTCTTGAAGGTGCAGGTTTATGTGCTCTAAACCCCGCTCGTCAAGAGCGAGAAACGACTCTGAAGAAATGGAGACA  
CAAAAGCGTTTCAGGGTGTTCACCAGCAATTCGTGTGACATCGCATTTTCGCCAACACTCTGTGA

>Cluster\_42636

ATGATTTTGGACATATCGCGCAGCCCAATCCGTGCCGTTTGGCCGCCCATGAAAAGGCGCTCGATTTTCTGCGCAC  
CACCGACTCAACGCCCTGGAACCGGGCGTTGTGAAAATCGACGGCAAGAATAATTTATGCGCAAAATATCGATTTAACCA  
CACCGAAGCGGTAAGAAAACCGTCCGGAAGTGCATCTGCTGGTATATCGATATTTCAGTTTCTGGCGTGGGTTGAAGAGAAA  
ATCGGCATTGCTATTGATACGGGAAATAATAAAGTACAGCAATCACTATTAGAGCAGCGGATATATTTTTTATCACGA  
TAGTGAACATGAATCATTATAGAAATGATTCGGGCGACTACCTATTTCTCCCGCAGGATGTTTCATCGCCCGGAT  
GTAATAAAAATGCCACTACGGCAATACGCAAGATCGTGGTTAAAGTGGCCCTCGCTGCTTTATAA

>Cluster\_4907

ATGACACACGATAATAAATGTCAGGTTGAAGCTATTAACCGCGCACGGTAATGACCATATCCCGCCAGATCGGTTT  
TAAGCTGTGAGTCTGTTCAAGCTGACCGAAACGGATCAGCGCATCACCATCGGTCTGAACTTGCCTTCTGGCGAGATGG  
GCCGCAAGATCTGATCAAAAATCGAAAATACCTTTTGTAGTGAAGTACAGTATGATCAACTGGCATTTGATGCGCGCCAA  
GCCACGGTTAACCTATCGACAACATGAAAGTGGTGGGTTAAATCGCGCCAGTCTGCCAGAGTGCACAAATGTGCT  
GGTCTGCCGGAACAGCAATGATACAGCATGCGGAACCGGTTTCTTCAGCTTTGCCGTGCGAAAACCGCCCAATGACA  
TCGCGCTCAAATGCAAACTGTGAAAAAGAGTTTCCCAATAATGTGGTGTGGCCAAATTA

>Cluster\_56212

ATGGATATCTGACTTGGCCCTATCACAGACGGTAACGACATATCCTCCCTAGCGGGTATTGTGGTTTTGTGTAAC  
TGTAAAACTTTTTTTACGACGCGTTCAATGAAAGGCCACTCTCAGAAAAGGTTTCGAATACCTGAAATCCATAGCAATC  
TTCAAAAAAAGCCCTCATTTGATAAATGATGCTATTGGAGACTGGGTTACTCAGAAAAGAAATTTATACGTAAGGAGTTTACT  
GAGTGTGCAATGCTTAACGAAAAGCCTTTTCAGCAGGCTTCCAAACCAAGGAACGCTCAAAGATTGATATATTTTTTGTATGA  
AGTCAAAACCAAGGAATCTTTTCGAAGAAAAGAAATCTCCATTAATATCAATGACCAAGCAAGCCGGAAGCTCTATG  
AGAAGTTGAGTATACTCAACTCAAGAGTTAACGAAATTTGAAAGATATGCAACTGGACTAA

>Cluster\_62542

ATGAAGAAATTTGATATAGACCTGTCTCACTGTTTGGATGGTTATCGGTGCCATGGGGTCTTGGCTGCGACCGCAAGGA  
AGATGCGGGTGTGAAAACGATAGCAAGTTTAAAGGACTGACTCCGCCACCGTTACGCAAGGTTGTCTCGCATAAATCCG  
ATATTGCCAGGAATGGGTAAAGAGGATGCTTTCGGCACACCCCAATATACGGTGTGAAAACCAACAGTCCCGCGAA  
GGCTGTGAGTCAAGCAATTTACTACATTCGGGATATGCAGCAGAAAACGGTGCAGCCTCTGATTGCTGCCCTGTGTCT  
TGGGACAAATATCACTACCTGAGCTTCCGGATGAAAACCGACAGCTACACGGGTGAAAAATCGGTGGTGTATTTCGACCGATG  
GCAAGGAAATGGGAAACTCTATCTGCCGGAAGTACAGGAGAAAAATCCATGA

>Cluster\_40395

GTGATAAGCCCACTGCCGTTTATGCCTCAACCTTTGAAGCTGGGACTCCCTGAACTAGTACCTTTCCACTGCAACT  
GTTTGGTTTCCATTAACAATCCCGTACTCACTCGACTACGGCAACATTTGATGTCTGAAAGCAGCCTGCCGTGAGGAA  
TGTGGATCAACCTATAGATGCACAGAAACGTTGGGATGCCAACGGCGATATGGTGGGGTGTAAACCATCGTGGCGAA  
GTTCCGGCTACCAGCCAAAGTGACACCACGCTTCTTCCGAGTTAGCGCTATGGGTGAGGAGCCTGGCAGGAGCCAA  
TATGCTTGGCGATAAAAATCGACCATGCGGCTGTGTGAATACGCTAACCACTTCGCGCCTTACCACCTGGCGAAGGGAA  
ACCCGACGACACTAATCTGGTTCGAGATCGAAAAAATATAA

>Cluster\_34163

ATGAAGAATGATCTTCACTCGTCTGCCCGCATTGCCAGTCCATCAACCGCTACCGACTGCGAAGCTATCGGAACATCC  
CAACTGTGGCCGCTGCCAGCAGCCTTGTTCACGGGCGAGCCATCGAGTTGACCACGCGACGTTCTCGCGCCACGTTG  
AGCGCAGCGATCTGCCGCTGCTGGTTCGATTTCTGGGCGCATGGTGGGGCGGTGCAAGATGATGGCGCCACAGTTCCAG  
CAAGCGGGCACCAGCTCGAACCGAGGATCCGGCTGGCGAAGTGAATACCGAGGCTGAGCCACCTGGCCACGCGATT  
CGGTATCCGACGATCCGACGCTCGCCCTGTTCCAGGTTGGGCGGAGATCGCCCGTACGGCCGGCTGATGGGCGCGC  
AGGACATCGTGGCTGGAGCTCGACGTCGACGTAAGTGGGACGCTGA

>Cluster\_41205

ATGATTTGATAAAGCTTGTTTTGTAAATGACAGGAAATAGTGAACATTTCAAGGTTAACAGAACCACTATTCCGCGCATG  
GACCAACAGGGGATCCCGTATCTTAATCGGATCGCGGAAAGTCTGGCGGTTATCACATCGGGCATACTTGTCTTGGT  
CTTCAAGTAAAAGCCGCTTTCAGGCCATCAGATATCACTAGAAACAGTGGCTGCGCTGAAAAAAATATGTTTGGCAGGCT  
CTTTCATCTGAGCGTGCAGGACTTCCAGTGAAGAAACAGAACATCGATTTGATGAAGTTTGCAGATTTACGGCTATTC  
ACCGGAAGATGTGAGCAAGGCACGAAATAAATGGCTGCTTTCTGGCTGGGTGGCGTTCATGCGGTAACGCTTCCCGCTG  
CCAGCATGGAGCAATCAGCCGATACAGAACAGTAA

>Cluster\_37949

ATGATTTGCATTAATTCACCGCTAACCCGTGCCAGCTCACCGTGGAGGGAGAAGTACGGGCGAAATTTGGCGGGGACT

TTTGGTGTATTGGGTGTCGAAAAGGATGACGACGAACAGAAAGCAAACCGTCTGTGCGAGCGTGTGCTCGGCTACCGCA  
TCFTTAGCGATGCCGAAGCAAGATGAACTCAACGTGCAACAGCGGGCGGAGTGTGCTGGTGGTTTCCAGTTTACC  
CTCGCCGAGATACCGAACGGGGATGCGCCCAAGTTTCTCAAAGGTGCATCACCGGATCGCGCAGAGGCGTTATATGA  
CTATTTCCGTCGAACGCTGCGCTCAGCAAGAGATGAAACGCAACAGGACGCTTCGCTGCGGATATGCAGGTATCGCTGG  
TCAATGATGGCCCGGTGACATTCGGTTGCAGGTATGA

>Cluster\_47730

ATGGGTATCATAGCTCAAAAATAAATCAGTTCATTTGGGCATGCTGTTCCGTGCCATCGCTTAAATGATGGGGATTATCCA  
CTTTTCATTCGGCCCTTTTTCGGCACCACCGCCAAACGTTTGAAGCATCGTGGCGGACAAAACGGCTGAAATTTAAAGAG  
GTCTTCTCGCCGGAATAAAAGCGAATAAATACCACCGTGGAGAAAAAAGAGACGTAGATGTCGATAAAAATCCCTCGAT  
CAAAGCGGTATCGCACTGGCCATTGCTGCGCTACTTTGCGCATTTATTTGGCGGTATGCGTAAGGAAAAATCGTGGGGCAT  
TCGCGGCGCGCTGGTTTTTGGCGCGGGACGCTGGCTTCCATACCTTGTCTTTTGGTATCGGCATCGTGTGCAGCATTT  
TGCTGATATTCCTGATTTTTTCTTCTTCCAGCCGGGTTCACTGGTTAA

>Cluster\_25498

ATGAAGAAAGCAACACTTGTGATTGGCGTTATTGGCGCGGACTGCCATGCAGTAGGCAATAAAGTTCTGGACCGGTTTT  
TAGCAACCATGGCTTCAGAGTCATTAATCTGGCGTAATGGTCAAGCAGGACGAAATATATTGATGCGGCCATTGAAAC  
CGCTGACGCGGATGTCGCTCTCTCTATCTATGGGCATGGCGATATCGACTGTCTGGGCATGCGCGAACGCTGCATCGAG  
CGCTGAGCTGGGGATCTGCTCTATGTGGCGGTAACCTGGTGGTTCGGAACATGACTTCTGCTGAGAAACAA  
ATTCAAAGAGATGGGATTTGATCGCGCTTTGCCCAAGTCATGACTTAGAAGATGTTTGTACGCTGATGGCCACGATA  
TCAACCAACGTCATGACGTTGATACTCGTATTCTTGAAGAGGCAATCTGA

>Cluster\_62546

ATGAATACAAAAATCATCAGTTCGAGGAGCATAACCGTAATTACTGCCAGCGGTCCTGACGAGTTACGCATTGGCTT  
CTGGCCACAGCACTTTGGCACCATCCCGCAATGGATAACGCTTGAGCCCAAACTTTTGCCTGGATGGATCGGCTGTGTT  
CCGATTACCAAGGTGGTATCTGGCGCTTTTCGACACTAGCAACCGCGCGCTTTTATGGCTCCCGAGTCAGATCAGCAT  
GAGAAGTGGACATTTGTTCAACAGCATGAACGGCAATGGCGCAGAGCTTACCAGTGAAGCTGCCGGGATGGTCCGCTGTCT  
GATGACTTACAATCACCACGCTGTGCGACCGAGTGTGACGCGATGACTGAGCACTATATCGCTTACGCGACTACGTGC  
TGAACCATCCAGAGTGCAGCGCCATTATGCATCTCATCGACTGA

>Cluster\_51340

ATGAAAAGCCATGACCTGAAGAAAGCGTGTGTCAATGGACGCGGATGCTGGCCCTGGTGGTAAGCGGCGGTTTTGGGC  
GGCTAATGGCGTCGATTTTAGCCAGTCGCGGAAGTATCCGGGACGCAGGAAGGGCCATTCCGGATGCCAAAAGAGCAGG  
ATCGGATGCGCTGAACATATGTGAATCAGCCGCAATGATCCCGCATAGCGTTGAAGGTTATCAGGTAACGACCAATACC  
AACCGTGTGTCAGTGCACGGTGTGAAAAGTTATCGCACCCTGGCGCGCCGCGCATTAGTCTTACTACTTTATGGA  
CAGCGACGCAAAAGTGGGCGCGGAAGTGGCTCCGCGCTTATTTCTGTGCAATGTCACGTACCCGAGCCGATACCG  
CGCAATCGTGGGAATACCTTTACCCCATCAAAGGTTACGGGAAATAA

>Cluster\_55490

ATGGCAACCGTGGAAATGCTTCTCAAACCTCAACTCTCAAATGAACCGGAGTTTTACGCATCCAATCTCTACCTTACCT  
GAGTAACCTGGTGTCTGAACAGAGTCTGAACCGCACCGCCACTTCTCTCGCGCCAGGCACAGAGTAATGTGACCCAAA  
TGATGCGCATGTTTAACTTTATGAAGAGTGTGCGGCTACCCCATCGTTAAAGCCATTGATGTTCCCGGTGAAAACCTG  
AATCTCTGGAAGAACTGTTCAAAAAACGATGGAAGAATACGAGCAACGTTCTAGTACGTTGGCACAGTTAGCCGATGA  
AGCGAAAGAACTGAATGATGATCAACCGTCAATTTCTGCGGATCTGGAAAAAGAACAGCAGCATGATGGTCTGTTGC  
TGCAAAACCATTTCTGATGAAGTGCAGAGTGCAGAACTTCCGGGTATGTGCCCTGTGCGAGCCGACCAACATGTTCTGAAT  
GTCGTGTACACAGCTGCATTGA

>Cluster\_20772

ATGAGCCAGACGCACTTGAGAGCTGACTGCATTTTTTTCAGCAAAACGTCGCCCGCGGCCATGCAGTCATTTGACAG  
TGTGCTGGATGAAATGAAGTTTATCCCGCCGCGGAAGGATTACGGGCTGGGGCAGTACCGCCAGGCGGTGATTGCGCTATG  
ACGCGGTAATCAGCTGGCAGCGTTTCCCGTATCGCTGTGTCGCCGCAAGTTGCTCATGTGCTGCGCGCGTGGCTG  
GATGAGGCTGACAGGGAATTAAGTGAAGTGCAGCTGACTGAAAGTGAACCGGACTGGGATGTTGTCAGTGGAGGATGA  
GAAAACCGCCACCATTTGCTGACGCTACCAATGGCGGAAGAACTGGTGTATCAGGGAGGACGAAAACGGGGCGATCCCGT  
GGCGGGGAAACGCTGGTGTGTTAACCTGAAAGTCTGGATAGCGATCACCGCCAAATTTTATGGCGTGGATGAAACC  
GGTGGCGCGGTAGCGGTAACGAATGA

>Cluster\_20864

ATGCGGTAATTAACACGCATCAGAATATCGCCGCTTCTCGACATGCTGGCCGTGTCCGAAGGACGGCGAATCACCC  
GCTGACGAAAAACCGGGCTATGACGTGATAGTACCAGGACTGGACGGAAGCCGGAATATTCACCGACTACAGTGACC  
ACCGTTCGCGCATGCGCCAGCGCGAAGGTGTTAAACCGTCCGCGGTGAAAAATCCACGGCTTCCGGTCTATCAGCAG  
CTTTACCTGTTCTGGCCGCACTACCGCAACAGCTTGCCTGCCGATTTTCACTCCGTTGTCACAGACAGACTTGCCAT  
TCAGTTGATTCGCGGAACCGGTTGCAGCTGGATGACATCCGGAAGGACGATTTAGCGCGCCATTTCAGCTGTGCGCAATA  
TCTGGGCGTCCCTGCGGGAGCCGTTACGGTACGCTGAGCATCCACTGGAAAAACCTGGTCCCGTCTGGCGTACCGCC  
GGCGGCTACCGGCTTAA

>Cluster\_11368

ATGAATATGAAGACCATTGAAGATGATTTATTACCTGCTTTTCAGATACCTACAGCGCAGAAAAACAATTAACCCGGGC  
ACTGGCAAACTCGCAAGAGCAACATCAAACGAAAAATTAAGTCAAGCTTTTTCATGCGCACCTCGAGGAAACACATGGAC  
AGATTGAACGATTTGATCAAGTTGTGGAATCAGAATCGAATCTGAAAAATTAAGCGCATGAAATGTGTGCAATGGAAGGT  
CTTATTGAAGAAGCTAATGAGGTATCGAAAGTACCAGAAAAACGAAGTGGTGTATGCGCACTGATTGCCCGCAGACA  
GAAAGTCGAGCATTATGAGATTGCCAGTTACGGGACATTAGCGAGCTGGCTGAACAATTAGGTTATCGTAAAGCAGCGA  
AGCTTCTGAAAGAGACCTTGAAGAAGAAAAGGCCACCGACATCAAACGACTGATCTGGCCCTTAATAACGTAATAAAG  
AAAGCCGAAAAATAAGCCTGA

>Cluster\_63446

ATGACTGAAATCGTTGCAGATAAAACGGTAGAAGTAGTTAAAAACGCAATCGAACTGCAGATGGAGCATTAGATCTTTA  
TAATAAATATCTCGATCAGGTCAATCCCTGGCAGACCTTTGATGAAACCATAAAAGAGTTAAGTTCGCTTTAAACAGGAGT  
ATTCACAGGCAGCCTCCGTTTATGTCGGCGATATTAACCTTACTTATGGATAGCCAGGATAAGTATTTTGAAGCAACC  
CAAACAGTGTATGAAATGGTGTGGTGTGCGACGCAATTTCTCGCAGCGTATATTTTCTATTTGATGATGATCAATGAGAA  
GAAAGCATCCGCCAGAAAGACATTTCTCATTAAGGTACTGGATGACGGCATCACGAAGCTGAATGAAGCGCAAAAATCCC  
TGCTGGTAAGCTCACAAAGTTTCAACAACGCTTCCGGGAAACTGCTGGCGTTAGATAGCCAGTTAACCAATGATTTTTCA  
GAAAAAGCAGCTTTCCAGTCACAGGTAG

>Cluster\_24861

ATGGCTATAACCTTTTACCCTAAAAAAGCAGATCTTGATATGTGATTTTAAAGGTTCCGGTATCTCCAGAAATTAACCA  
ATGCCACCCAGTGTGATTTTAAAGAGAAGATTTGTTGGCAGTCAAGAGCTCGTTGTTGTTGTTTCCCTATAGCAATACTG  
AACCTAATCCGTTTTCAGCTTTTATCATGAGTTAGATGATGATGATGATGATGATGATGATGATGATGATGATGATGATG  
GCTAAATGTGATCTGGTATCAACAGTGTCTGTTGACCGTTTATGATCGAATTAGAAGCCGGGATCCGAGAACGGGTAAAAA  
TTACTTTTATGATAGGAGTCACTGATGATGACTTTGACGCAAGAGATAAAGTCAATGATGATGATGATGATGATGATGATG

ACTTTTTGGATGTAAAAAATGAAGGTGTTCTGTATGGGGCAGCAGCTTCAGTGGTAATTGCTGCCGAAGTGAACGTTGCT  
GAAGTAGAAAAACAAAAAAGCCATCTGA  
>Cluster\_18557  
ATGTCAGTTTTCGAAAGTGTACATATCCGGACGAGCGGCTTCGCAAAGTTGCTAAACCGGTAGAAGAAGTGAATGCAGA  
AATTCAGCGTATCGCTGATGATATGTTCCGAGACGATGTACGCAGAAGAAGTATGGCCTGGCGGCAACCAGGTTGATA  
TCCATCAACGATCATTTGTAATTGATGTTTCGGAAAAACCGTGACGAACGGCTGGTGTAAATCAATCCGGAGCTTTTAGAA  
AAAAGTGGCGAAACAGGCATTGAAGAAGTTGCCGTGTCATCCCTGAACAACGCTGCTTAAAGTCCACGCGCAGAGAAAGT  
TAAAATTCGCGCCCTGGACCGCGACGGTAAACCATTTGAACTGGAAGCAGACGGTCTGTTAGCCATCTGTATTTCAGCATG  
AGATGGATCACCTGGTCCGCAAACTGTTTATGATTATCTGTCCACCGCTGAAACAACAACGTAATTCGTGAGAAAGTTGAA  
AAACTGGATCGTCTGAAAGCCCGGGCTTAA  
>Cluster\_7660  
ATGGGTTTTGTCGATAAACTGAAATCTCTGGTTTCCGACGACAAGAAGGATACCGGAACTATTGAGATCATTGCTCCGCT  
CTCTGGCGAGATCGTCAATATCGAAGACGTGCCGGATGTCGTTTTTTCGGAAAAAATCGTTGGTGATGTTATTGCTATCA  
AACCAACGGGTAACAAAATGGTCGCGCCAGTAGACGGCACCATTGGTAAAATCTTTGAAACCAACCACGCATTCTCTATC  
GAATCTGATAGCGCGGTTGAACTGTTCCGTCACCTTCGGTATCGACACCGTTGAACTGAAAGGCGAAGGCTTCAAGCGTAT  
TGCTGAAGAAGGTCAGCGCTGAAAGTTGGCGATCTGTCATTGAATTTGATCTGCCGCTGCTGGAAGAGAAAGCCAAGT  
CTACCCCTGACTCCGTTGTTATCTCCAACATGGACGAAATCAAAGAACGATCAAACTGTCCGGTAGCGTAACCGTGGGT  
GAAACCCCGTTATCCGCATCAAGAAGTAA  
>Cluster\_57762  
ATGCGAAATAAATAGATCTATTAATGCTCTACTTGCAGCATTGAACATTACCATTTTGGCGATCATCGTGGCATGTGT  
GACGTGGCAGGTGCTGCACGATTTATATTTACTAGTCCAGTATTTTTACAGATGAACTCAGCCGTTTGGCTCTTTATTT  
GTCCTGGACTTTTTGGTGGGCAATACACCGCAGGGCAAACCGGCATCTGGCGATTGACCTGCTACCTATGATGCTGAAA  
GGAAAAGCCCGACGCTCATTTATTTTTGTTGATTTAGATTTATCGTTATTTATCTTCGCAACCATCATTTAGGTATATGGTGG  
TGGCTATTAAACGATGGATACATTCGATTCAGGTCAGACTCCGCCGTTTAGGCTGGCAAATGGGATATCTATATAGA  
GCATCCCGATTAGTGGTGTACTTATTTATATATACACCATAGATATGGTTTTAACCGAACTTAAACAACCACCTAA  
>Cluster\_60752  
ATGAATCACAGCGAAACAATTACCATCGAATGCACCATTAACGGGATGCCTTTTCAGCTTCACGCCGCACAGGCACGCC  
GCTCTCGGAATTAATCCGCGAACAGGACTGCTAAGTGTCAAAACAAGGTTGCTGCGTGGTGAATGTGGTGCCTGTACGG  
TGTTGGTCGACGGCAGCAATAGACAGTTGCTTATACCTTGGCCCTGGGCTGAAGGAAAAGAGATCCGCACGCTGGAA  
GGTGAAGCGAAAGCGGAAACCTTCTCATGTTTTCAGCAGGCTTATGCGAAATCCGCGCAGTGCAGTGCAGGTTTGTAC  
GCCTGGCTGATTTAGGCTACCACGGCAATGCTGGCGAAACACGCGAGAAGCATTAAACCATACGGAATTCGTCGCG  
GACTGGCGGAAATCTTTTTCGCTGCACGGGGTATCAGATGATGTAATAACAGTTCTGGATTGCGGAAAACGAAGTAA  
>Cluster\_59554  
ATGATTAACCGCTATTGGTTGTTTCAATGGTAGGCTGTCTCTTGTCCGTTGTTGTTAATAACGACACCTGTGAGGGGA  
TGTTTATACCGCTTCTGAAGCGAAACAAGTACAGAATGTCAGCTATGGCACCATCGTTAACGTACGTCGGTACAGATTC  
AGGCGGTGATGATTGTTTCAACGTTTTCGGTCAATTTGGCGGTGCTGTTTCTGGTGGTTTCCGGGAAATCAATGTTGCG  
GAAACCGGGCTTCTCTGGCTACTGCAGCAGGCGCTGTTGCAGTTGGCTAGCTGGTCAAGGCGTACAGAGTGAATGAA  
CAAAACGCAAGGTTGTCGAGCTGGAAATTCGTAAGACGATGGTAAATACCATCATGGTGTACAGAAACAGGCAACACT  
GTTTCTCTCCGGCCAACGTTGCTACTGGCCAGCAATGGCAGTCAAGTGACCGTTTCTCCGCGCTAA  
>Cluster\_23314  
ATGAGCAGTCCAAATATTCTTAAACCGTATTGATAACCGTCTGGTTACCGTCAAGTTGGCGTGACCTGGACATCTAC  
CATCGGTGCAAAATCTGCTGGTAGTCTGTTGATGATGTTGTCGCTAACGATGATATTTCAACAGAAATTAATGGGTATACCG  
CGAAACCTTACGGTTTGGCATCTGTTTCTTTACTATCGAAACCAATTAACGTCATCGGCAAGCTTACACCATCAAG  
AAGATCTTCTGATTTGGCGTACGCCACAAACGGTACGTAATTTGGTAGAAGTTGGTATTGACCTGAAAGATGTAACGTT  
CGGCAATATGCATTTCTCGAAGGGAAAGCAAAATCAGCAGTAAAGTTTATGTCGATGACCAGGATCTCACGGATTTAC  
GTTTTATTAACAACAGCTGGCGTAAATGTTTCAATTCAGGACGTTCCCTGGCGATCAAAAAGAACAAATCCCTGACTAA  
>Cluster\_24070  
ATGCAATCTGGTATTTACTGTACTGCAAGCGCGGCAACTTCAACGTGCCAGGAACACCTCGAAAGACAGGCTGTGAA  
TTGCTTGGCACCAGTATGATCAACCTGGAAAAAATCGTGCCTGGCAACGCTACTGCAGTCAAGTACGATTTGTTCCCAACT  
ACTTGTGTTGGAGTTCGATCCGGAAGTGAATTCATACCAGCATCAACGCGACCCGCGGTGTCAGCCACTTCTGTCGCG  
TTTTGGCGCTGCGCAGCGATAGTCCCATCGGCGGTGATTCATCAGTTATCAGTGTATAAACCGAAAGATATTGTCGATCC  
ATCGACGCGTATCTGGTGATAAAGTGAATTTACTGAAAGCGCATTCGAAGTTTTTACGGCATTCTTACCAGGCCAG  
ACGGCGAGGCTCGCTCCATGCTATTGCTGAATCTTATTAATAAAGAGATTAAGCACAGTGTGAAGAACACCGAGTTCCCG  
AAACTCTAA  
>Cluster\_20832  
ATGGTAGATAGCAAGAAGCGCCCTGGCAAAGATCTCGACCGTATCGATCGTAACATTTAATGAGTTGCAAAAGGATGG  
GCGTATTTCTAACGTCGAGCTTTCTAAACGTTGGGACTTTCCCAACGCCGTGCTTGGAGCGTGTGCGTCCGGTGGAAA  
GACAAGGTTTATTCAGGCTATACGGCGCTGCTGAACCCCAATATCTGGATGCATCTTGGTATTCGTTGAGATT  
ACTCTGAATCTGGCGCACCGGATGTTGTTGAACAATTCATACCCGCTGTACAAAAAATTTGAAGAAATTCAGGAGTGTCA  
TTTAGTATCCGGTATTTGACTACCTGTTGAAAAACGCGTGGCGGATATGTCAGCTTACCGTAAAGTTACTGGGGAAA  
CCCTGCTGCGTCTGCCGCGTCAATGACACACGGACATACGTTGTTATGGAAGAAGTCAAGCAGAGTAAATCGTCTGGTT  
ATTAAGACGCGCTAA  
>Cluster\_36035  
TTGTTGCGTTTCGACACAAACCTGGGGAGTTGTTAAGACAGATAATATGATAATTTCTGATTAATAATTTGTCAGA  
TATTGGTAAACAAAATTCATTTCTCTTATTTCTCATCATGGAGATTACCGTGTGGGTGGTGTGCTTAAACCAGGCT  
ATATAATGAAATCATCCCTTACAGATCGTCCCTGTCAAACCCGCGATGAACCTGAACTACCCCTTCACTATCATTTTGGCT  
ATCGATACAAACAGGTTATCATCGAAACAATAAAATTTAGCTGAAGACGGCGACGGTATAATCGTAAGATTATATGAGAG  
TCATGGATTAGAAAATTTACGCCATGCTTTCGTTGGGTATGTAATATCACTACGTTCAATATGTCGATCTCAAGAAAATA  
AATTAGATGACAGTTTTTATGCAATCAATATTGCAATCTGAATTCAAACCTTTTGAATTAATCACGCTACGATTAAC  
CAATAG  
>Cluster\_10980  
ATGGCGCTGAGAAAAATCGCGGGTCTTTATCGCATTGAGAAGTTCATCCGTGAACGCTCTGTGAAAAAATACGGCAATG  
GCGACAACGGTATTTCCGGCCGATAGTGAATGACCTGTTTCCCTGGCTGAAGAGCAGGAGCCGTGCTGTCGCGCCGACG  
GACCATAAACAAAGCGATTAATATATCTGAAACCGCGCATGAACCTGAGCTGCTTCTGAGTGCAGGAGCGTCCCG  
CTGGACAACAATATCTGCGAGCGTGTATCCGCCCGTGGTCAATGGGGCGAAAGCATGGTTATTCGCGGTTTACTGAT  
GGCCGGAAACCGCGCGCACAGATAATGAGCCTTCTGGAACCGCAAAACGTAATGGTCTGGAGCCGATGCCTGGCTGA  
CAGACGTTCTGACGCTTACCGGAGTGGCCGGAAGACCGACTGGAAGAGTTGCTGCCCTTGAGGATTTACCTTCTCC  
GGTGA  
>Cluster\_44646



ATGAACAACATCATGGTGGCAGGAACATAATGCATTTTTTCTGCAAGGAATGACACTTAAACAGTTGATTCATATGCTAAT  
CATCCTAATCATATTTGATTTATTTGTTATGCTGTAAAGCGTAAAAGAATGGATAAACCTGCATAATCCAGAAATCCTTCCTC  
ATTACTGGATGTATTACATCCTGTGTTTTCGCTTAGCTATGTGCTTAACGGCGTGTGTAATTCGGCTTATCAGCGTGTG  
ACTGAAAGAAATTTGAGATATTCGCTGCTCAGAAGCGCAAAATCTAAAGAAGAGAAATACGTGCAAGATTTGTTGATTCGGT  
AACFTTTGGAGAAAGAGCGTATTTGGCATTTCGCTGATAGCGCTAATAACCAGCTAAAGACAGAAAAGGAAAGCCTGAAG  
CAATCTCATTTGCTCGAAAAGGGCTTCTTATTCCGGGTACCTTCGCTACTGGATATCCTGAAATCGACCGTTTTGTTATC  
CCGGAACGCTATAGAAATGAGTGTACATTAGGTTTGTGCGGAAAGAAAGACAGTCTTATGGATGAACCTATCGCTCAGGA  
TAAGCATGGCAAAAACAAGTAA

>Cluster\_11127

ATGGAAAATAATAAATCTCAAAATGTTGATCAAAACATAAAGTCTACTGTCGTGGGTAAGAACAATACGACAATATCAC  
GCAAGTCATTTGTTAATGCCAATAGTCCCTCACATTTGATACAAATGCAATAAAAACTCTTAATTTGATGAGATAAGAAGCT  
CTTTAAAGAAGAATTTGATATCTGCAGAGTATAACATATTACTTTGTTATCTTAAACAAGAAATTTGATGATGAAGCACT  
TTAAAAGTCATAGAGAAAATAAAAACAAAATTTAGATAGGATGGGTGCTAAAAGTTTATGAGGGCGGAGGAAAACACCTCT  
ACCTAAAACCTCAATAACATATCCACATCTTGCAGGAGTTGGAATTTATAAAAACCGTCAAAATGTGATACTGTGATAATTT  
TTGCATTAGATGAAGTCACATTTACACAATAACATTAATAAGTTACTTTAAAAGTATCTACAAAATCGATAGTACAGAT  
ATAATAATAATATCTAGCGACACCTTAAAAATAGCGATATTTTTTTTATCTAAATGGAACCTTTCAATACTGTGATGATAA  
TAACCTGCAAGTTATATTTCTTTAAACTACTAGATGATGGGTTAAAATCTGTAATTTCTAGGATAGAAAACAAAAAA  
TAATTCAGCGAAAAGGTGGTTTATAGGATATTTAA

>Cluster\_24816

ATGTTTATCAGTGATAAAGTGTCAAGCATGACAAAGTTGCAGCCGAATACAGTATCCGTGCCGCCCTGGACCTGTTGAA  
CGAGGTCGCGCTAGACGGTCTGACGACACGCAAACTGGCGGAACGGTTGGGGTTTCAGCAGCCGGCGCTTTACTGGCACT  
TCAGGAACAAGCGGGCGCTGCTCGACGCACTGGCCGAAGCCATGCTGGCGGAGATCATACGCAATTCGGTGGCAGAGCC  
GACGACGATGGCGCTCATTTCTGATCGGGAATGCCCGAGCTTCAGGCAGGCCTGCTCGCCTACCGGATGGCGCGCG  
CATCCATGCGCGCACGGACCGGCGCACCGCAGATGGAAACGGCCGACGCGCAGCTTCGCTTCTCTGCGAGGCGGGTT  
TTTTCGCCGGGACGCGCTCAATGCGCTGATGACAATCAGTACTTCACTGTTGGGGCGTGTGAGGAGCAGGCGCGC  
GACAGCGATGCGCGGAGCGCGCGCACCGCTTGAACAGGCTCCGCTCTCGCCGCTGTGCGGCGCGGATAGACGCCCT  
CGACGAAGCCGGTCCGGACGCGCTTCGAGCAGGACTCGCGGTGATTTGCGATGGATTGGCGAAAAGGAGGCTCGTTG  
TCAGGAACGTTGAAGGACCGAGAAGGGTGCAGATTGA

>Cluster\_17871

ATGATGACGTTTTTCTCCGGCTTTCTCCCTGCCTCATCGGCATCGAAGCCTGTGGCTCTTCTCATTACTGGGCCCGCA  
GCTCACCCGATGGGCCATACCGTGGCATTATTCACCGAACTTGTCAAACCTTATCTCAAAGGTAACAAAAACGACG  
CCAATGATACAGCCGCATCTGTGGGGCCATCAGCAGCCCGGATGCGATTGTTGTCCTCAAATCGAAGCCAGCAG  
ACGCTGCAGGCAGACCGGGTCCGGTCCGGTCCGGTCCGGTCCGGTCCGGTCCGGTCCGGTCCGGTCCGGTCCGGTCCG  
GGTCCGGTCCGGTCCGGTCCGGTCCGGTCCGGTCCGGTCCGGTCCGGTCCGGTCCGGTCCGGTCCGGTCCGGTCCG  
AAATCCGGGGCTGTTAAGTGAAGTTGGTCTGGTCTGCCCTGGGATAAAGCATGTGCGTAAAATCCTGCCGGAATC  
CTGTCAACAAGGAGGAGTGAAGTGAAGTGAAGTGAAGTGAAGTGAAGTGAAGTGAAGTGAAGTGAAGTGAAGTGAAGTGA  
ACGATATCGGTTATGACCGCCCTCTCATGAGGCTGCAAGGATGATATCCGATTTAAACGGCTGATGAAATAGAGA  
GTTTTGGCCGATAGTAGCGAGCCTTTGTAG

>Cluster\_43393

ATGTCTAAAATTAATTTGATTTGCTGAAAATACAGATATGTTGATCAACAACAGGAGAAATTAAGACCGAACTTTGAA  
TATACCACACTACTTTTGGAGATTGAATTCATCTACTCCTCAAATATGAGGATGGAAAAGCGAAGTTTAGTGAGAAA  
TGCAAAAATATATATGCTATGTTTCAGATTGGGAGAAATCAGGGGGATATGTTTGAACACAAACGAAAGTTAAGTAA  
GTTTGTGGCTGTAGCCGTAAGACAGTTAATGAATTTGATTTGCTTATGATTAAAATCGGCTTTTGAAGAGGTCGGAGA  
ACGAATCCCAAACGTCATTAATAATACGTGCGCTACCTCTCACAGATGCACATATTACTCCCCCTAGAGAGTCATCAC  
TACCTGATCCTTCTGAGAAAAGAAACGAATCTAATGAATATTTGAATGTTTGAAGAAATCATCGTTGAAGAAAGAAATACAG  
GAATCAGAGTTCCCGAAAAGATTTTAACTGGCTTCTTCCCTTGATAACAAGAAGCCACCGCACGAAGAAACAGAAGA  
TTTTGTAAAACGAGCATTAGATTCAAAGAATATCTATCTTGAGAAACAGGCTTTTACGATCTGATAATATCTCTAAGAG  
AAAAAAGTGAATATACGATTCAATACCATTCTAA

>Cluster\_18667

ATGCTAACAGTACCGGGATTATGCTGGCTATGCCGAATGCCGCTGGCGTTAGGTCATTGGGGGATTTGTTCCGCTGCTC  
TCGCGCCGCGCTACAGATAAAAACGTTATGCCCAACATGTTGATTACCGCCACACACTCTCATCTTCCCTGCCGTCGCT  
GCCTGCAAAAACCGCCCTGGCAAAGACTGGTCACGGTCCGCGATTATGCGCCGCCATTAAGTCCGCTCATTCACCAG  
CTTAAGTTTTTCCGGCGCAGTGAATCGCCAGAGCCCTGTACGCTGTTACTATTGGAAGTCTTACACGCTCGTCGCAC  
CACCGCTTGCACACTGCTGATCGCATCATCAGCTTCCGTTATGCGAGCGGCTCACGCTGGCGTGGGATTTAATCAGA  
CGGATTTGCTGTGTACAGCTTATCAGCTGCTACCTGCTTACCTGCTTACCTGCTTACCTGCTTACCTGCTTACCTGCT  
CGCACCAGCATTCTTAAACGCCCGGCTACGCAACACAACCTGAAAATGCCTTTCGCTTGAATTTGCTGTGCAAGG  
TCGCCATATGGTGTATTTGGATGATGTCGTTACACCGGAAATACCGTCCGAGAGATTGCGCAGTTGCTTTTACGCAATG  
GTGCGCGACTGTCAGGCTGCTGTCGCTTTGTCGAACCTTGATG

>Cluster\_9812

TTGCGGATATAATGCTAAAGAGACTGGACAGTTCAAATGCCGAATTCATTGTTGGCTATTCGGTTGATAAAAATCGAGCA  
ACTGGAAAATGGTATTAAGACATTTGATCAGAGAGGTAAGCACAGGTTGAAGTGCAGGAGTATGTTGCTGACCACGTTGTTA  
ATTTACTTTATTCACATCTGAACATATCTCTGGATAACTCTGGTATTGAACTGATCCCTCTGAAGCATGAAATGACCGAA  
ATGTGCTGGTAGACGTCCTGAAGTATGTAAGAATGCAGGTTTTACCATAATGTGTGGTCCATTTTTCTCCGTGATGCC  
GTTCCCTTTCAGTTGGATTACATTTAGTCAATGTCGCTTATACGCCGATTTAGTGGTACGATAAACCTGGTGAAA  
AATATCTCGATTACATGATAAAATTTGATTAGATACAAAATAGCGCTTGGCAATACATGATTAGAGATGCATCACGT  
TATATACCAAGTTTTTAAACGAATGCGGTTATGAGCGTTCCCTTATGGGAAGTGAAGACCTTCTTCCACGCAAGCAAG  
TGACTCCCGCCAACTCTTTAGGCTAATCATTTGTATACAGGGATTCCACTGTATTATGGGTGGTAAAATAGATAACG  
TATATGATGCTTTGAAGCCATAAAAAGTATGAACGTTATTTAA

>Cluster\_24588

ATGAAGTGGGACTGGATTTCTTTGATGCGGATGAAACGCTGTTACCTTTGACTCATTCACCGCCCTGCAGCGGATGTT  
TCTTGATTACAGCGTACCTTTACCGCTGAAGATTTTACAGGACTATCAGGCCGTTAACAAGCCACTGTGGGTGGATTATC  
AAAACGGCGCGATCACTTACATACAGTTCAGCAGGGCGGTTTGAAGACTGGGCCGAAGCGCTGAACCTGAAACCGGGT  
AACTCAACGAAGCTTTAATTAATGCATGGCGGAAATCTGACGCCACTGCGGGCGCGGTTTCTCTGCTTAAACCCAT  
TCTGTGGCAACGCTAAAATTTGGCATACCAACCGGCTTTAGCGCTTTCAGCAGCAAGTGCCTGTTGAAACGCAACGCGCTC  
GTGATTATTTGATTTGCTGGTGTATTTCCGAAGAAGTTGGCGTTGCCAAACCGAATAAGAAAATTTTCGATTATGCGCTG  
GAACAGGCAGGCAATCTTACCGCTTACCGCTGCTGATGGGTTGGCGACACAGCTGAGTCCGATATTTCTCGGTGGCATCAA  
CGCCGGCTTGCAGCTGCTGGCTGAATGCGCAACCTGCGGACCAACGAGGATCAGCGCCACCTGGACCGTTTCTT  
CGTTGCACGAACTGGAGCAGCTCCTGTGTAAACTGTA

>Cluster\_18917

ATGAGTGTATTTTTATCCCTCTACCAAGCTATGATCTTGTCCGGGACGGGAGATGCTGACTGATAAGGGGCAAATTTG  
TACCGGTAACGATTTTATTTGGAACATGGAACCAAGCGTTATCGAGTTGTGTTTTCTCTGCCGGACTACATTGCTTGTG  
AAGATGTTAATTTCCCGGGCATGGTCACAGCATTTTGTATCCGTGGATCCGATTAGCTTCAACCTTTTCTGGCTAAAT  
GTTGATTACCACCGAACTTAAATGCTAATTTTTCTGTGAAAGAAATATGGCTCAGATAGTGAATTCATGAGCAGTCCCT  
ATGGATACCACCAAGACCCGACTACAACACTCACCATGATAACGGGGAAGGGCTTTCGGAAGCGTTAAGGAATACTTATG  
GCCGGGAAAATTTACGAATACCAGGTGTGAAATGCAAAAGGTTTGGCGCTTTTTGATCGGTACGCTTATGAAAAAAG  
CCAAGCCTGAGCGTATCACCGCTAAGCAATGCCGCTTTATCGTCGATTAAGCTCAGATCGTATAACCTGACTGACGATGA  
TTTTAAGGGGAGCATTAGGGACCTGAGAATTAAGATATCTAACCGGATCCCTTCAATCGGTGATCCTGAAATCGATGATA  
ATACCCTTACTGACTGGCTGAAGAAGGGAGGGTTCCGGTAG

>Cluster\_24352

ATGAAAATCTGATGTTGAAGACGATACGCTGTTATTGCAGGGATTGATTCTGGCGGCGCAAACCGAAGGCTACGCGTG  
CGATGGCGTGAGCACCGCGCGGATGGCGGAACAAAGCCTTGAGGCCGTCATTACAGCCTGGTGGTACTGGATTTAGGCT  
TACCAGATGAAGATGGGCTGCATTTTCTTGGCCGTATCCGGCAGAAAAAATACACTCTGCCGGTGTAAATTTACCGCC  
CGCGATACCCTTACCACAAAATCGCCGGGCTGGATGTCGGGGCCGACGATTAATCTGGTGAAGCCTTTTGGCTGGAAGA  
GTTGCACGCCCGTATCCGGCCCTGCTACGACGCCATAAATCAGGGCGAAAGTGAGCTGAACGTTGGCAACCTGACCG  
TGAATATGGTCCGCCAGGTATGGATGAGCGGAGAAGAACTGATTCGACGCCAAAGAATATGCTGCTGTGCGCGC  
CTGATGCTTAAAGCAGGCCAGCCCGTGCATCGGAAATCTCTACAACGATATCTACAACCTGGGACAACGACCCCTCGAC  
CAACACCTGGAAGTGCATATCCATAACCTGCGCGACAAAGTGGGCAAAGCCGATCCGACCGTGCAGCGGATTTGGCT  
ATATGCTGGTCCGAAATGAGGAAAATAA

>Cluster\_15705

ATGCCAATCATAAAGAACTGCTTATCATCAATTAGTAACATATACGCAACGAAAAACATCATATTTCTTAATAAAAAAC  
AGAGCAACAGGAAAACGTTTAAACAGAAAAATACCACCCTCCACACCAGCGAAACTATTATCATATCGAAATGCAG  
ATTTAATAAAAAAGAACTACATTTACAGAAAAAGTTTATCTATTTTCAATATAAAAAAGGATTTCTGTTGCTGTAAAGAAATC  
CAAGATAACAGTTTACTGATTTAAAAAACAAGACAATTCAGGGTCAATAAGACACTGTCGCAAAAGTCATGAGCTGGTA  
TAACCCACAAAAAAGCGATTTGGTATCATGATGGGCACACCAAGACGTTCTGCTGATATAGCAAAAGGAAGAATCCAGAA  
ACGCTCTAAATTTTATGATAATGAAAAAGGATACATTTAATGAAAAGATACTTAAACAGCAATGCTAATTTACAAAAA  
TACGGCACAAACAGAAAATAGTAGTTGGGTATCGGCTTCTGTTGGTCTCTTCTGGACAAAGGAGCCAAAGTATATCCAGA  
TATATCATGCTCTCTGAGACTGGGAGAACCATTTATTATACACTTCCAGAAACAGTCAGGCTGGATGTTAATATCCACC  
CACTCAAAAAATGA

>Cluster\_16076

ATGGCCTATGACTACAGCGCCAGCCTCAACCCGCAAAAAGCCCTGATCTGGCGTATCGTCCATCGGGACAATATCCCGTG  
GATCTGGATAACCGGCTGCACTGCGGCAACAGTCTGGTGCAGCGGAAAACTGGATCAATATCGGCAACCCGGAGCTGA  
TCGGCAAGCGTGCAGGCGATCCGGTACCTGTCGGAACGGGCGGACACTGCATGACTATGTGCGGTTTTATTTTACCC  
TTCTCGCCAAATGCTGATGAACATCCACAGCGGGCGCGGCGCATTAAGCGACGCCCAATGAGGAGATCGTTATTTCTGCT  
CAGCAACTGGCGAAGCTGGCAGCACACGACGTCCTTCTGTTTACCGACAGCCATGCTTACTATAACTGGACCAACT  
ACTACACCGACTGAATAGTCTGGACAGATCGACTGGCCATTTTGCAGCGGAGCTTTCCCGCGGATCCAGACGAT  
CCGGCTAAATTTGAACGCTATCAGGCAGAGGCGTAACTTGGCAACACTGCCGATCTCTGCTGGATGGGATAATTTG  
TTACAGCGAAGAGGTCAGGTTACAATTAGAACAATGGCTGTTTTAGCGTAATCTAACAAATGTCGTTTACACAGCGGCTCTG  
GATGGTACTTCTCATGA

>Cluster\_50277

ATGCCAGTATATAAATTTTCTAATGGAAGTGTATTGCCGAAAAATGAGCTGGAGGCTTACGACATATTGCAAGAAG  
CAACCAGAAATGACACTATTAATAGGAGGCGTAATATGAGGCTTCAATATATCCAGTTTATGGATGGTTTATGATGTTG  
AGCCTATTTCTGGTGGACTTTGGGACCATCTTGGGCAAGAGAGGCTCATCATCTCGACAGACGCTGACAAAGCAACTT  
AACGGAGGTAACACTTTTCTGCAGGCATACAGCTTATATCTGGAGCAGAGGCAAGCTGCCCGCTGTGCAGGAAAGCGT  
CATAAAAAACTACTAGATCGAATAAATTCGAATGCAATTTCCCGTTAGTTTACAGACTTTTCTGTACTGAGGAGCATC  
TTAATTTGTCGATAACGCTACATATTTCTGAGACAGGTTTGTGTCAGAAATGCTCGAAATTCAGAAATATGTGCATTA  
TATGATCAGGAAGCATTTGACTGAACTTATCCTGGTAAAGCTCTCCACCCCTCAGCCGTTGCTCCAGAAAT  
GATTATAAGCAAAGACAAGTGTCAATTTAATAAACAACAATGTTTTTACGCATTACCCATATACCCACTTCAACAAA  
ACAGTATTTAA

>Cluster\_40144

ATGAAAAAGTTAAACAGTGGCGGCTTTGGCAGTAACAACCTTCTCTGCGAGTGCCTTTGCGCATGAAGCAGGCGAATT  
TTTTATGCGTGCAGGTTCTGCAACCGTACGTCCAACAGAAGGTGCTGGTGGTACGTTAGGAAGTCTGGGTGGATTACGCG  
TGACCAATAACACGCAACTGGGCTGACGTTTACTTATATGCGACCGATAAATGTTGTTGGAAATGCTGGCAGCGACG  
CCGTTCCGCCATAAAGTTGGCACAGCCTACTACCGGGGATATGCGACTGTCACCAATTTACCGCAACACTGATGGCACA  
ATGGTATTTTGGCAGTTACAGCAGTAAATTCGTCCTTACATTTGGTGGCGGATTAACCTACACCACTTTTAAATAAG  
ACTTCAATGACACCGGTGAAGGCTTGGTTTATCTGACTTAGTCTGAAGGATTCATGGGCGTGGCGGGCAAGTAGGT  
CTGGATTAATCTCAACCGTACTGTTGCTGAAATATGTCGGTCTGGTACATGGATAACGATACCGAAGTGAATAATAA  
ATCCAACGGCGCAGTCTGCCCTGAGGGGCTTATCTGACAACGTACGCTTGACCCGTTGGGTATTTATGTTCTGCGG  
GTTACCGCTTCTAA

>Cluster\_16819

ATGAATATGCAAAATTTTATCGCACAGCAGCCACAGTTGCTGCAGTCTGCCTTGCTGCATATTTGCTTTACGAAATGA  
ACGTAAAAAGAAAGCACTTGAGATTAGAACAACACTCAACTAGATCGAATATCTGAGCTAGTAAACCGAGCATCTACCAATT  
TGATGCAATATACAGGACTCTTGCCTCTATACTGGAAGCGCACGCCAAAGATAAATATCTACCGAACAAAAATTTGAC  
ATTAATGTAATTAGCAAAATGGAAAGATTGCCCTGATGAGAGTGAAGGCTGGGGCATTGATATACAGCAACTAAGAACATG  
TCAGCACAGTCTGGAGTTTCTATCGTGA AAAAGAAATGGGCTGAATGGAAAAAATAATTCACCACTTACTTGATAAAATTA  
ACCAATTTTCTCATATCTAAGCCAGGCAACCTGTTACCTTTATAAATGGCCAAAAAACAACAGCTGATGACTACTT  
GTTTTCTCAAGATATTTGAGAAAAACAACAGCAGAAATGAATCAGTACGTCAGCTGTTACTTTCTCAATGAGAGAGGA  
ATTCATCGAGTTAAGTACTGCTTTGAACTGTCACAATGTTAGCTTATTAAATCAATAAAGAAAAATGTCATGCAATTTT  
TCTGTATCAGTGCCTTAAAAATGA

>Cluster\_21648

ATGTTAGATTTGTTTAAAGCAATAGGCCTAGGGCTGGTGGTACTGCGGTTAGCTAACCCATTAACAACCTGTCGGGTT  
ATTTCTTGGCCTGCGAGGCAACATGAACAGTGCAGCACTGATCGTCACTGATGGCCTCGGTGTACGATTTTGCCA  
TCATGATGTTGGCGTATTAACCGGGCAACTGGTATGATGATAACTTTGGCATTTCGATTTCCCGTCTCGCAATTTGACGG  
GCCTTAATCGTGCCTTTTACGGTCTTTCGGATGCTTTTCCGCAACAGAAAGCGATTGATTTACCCGGAAGCAAAAGCA  
GTCGGAAGAGCTGGAAGATGAACCCAGCGCAATATTGCTTTTGTACCCTGGCAATGCCAAGTACCGCCGGTCCGGGAA  
CCATAGCGATGATTTATAGCTCGGCGTCCACAGTGCCTCAGAGTTCAACCTTTGCTGATTTGGGTTACTGATGGTTGCGCG  
CCGCTGATCTTTTCTGGTGGCGGTTATTTGTTGGGGAGCTTACGACGCTTGGCGCAATTTATGCGGCTGGTGGGTA  
GGGGGCAATTTGAAGCGATCTCCCGTCTGATGGGATTTCTGCTGGTATGATGGGGGTGCGATTATTATTAACGGCATCC  
TGAAATCATTAAACAGTACCATAA

>Cluster\_58722

ATGCAGTTTGACTGGAGTGCATCTGGCCTGCCATTCCGCTTCTGATTGAAGGTGCCAAAATGACCCGTGGATTTCGGT  
CCTCGGCTGGCAGGCGGTCTGGTAATCGGATTGCTGGCAGGTTTTCACGCACCTTCGGAGGTGGATAGCCACCACG  
TCGCGCTGGTCTTTATTTGAAGTGCATCCGCGGCACACCTATCGTCCAGGTGATGTTTATTTTATTTCCGCCCTGCCGAT  
GCCTTAAACGACTTACGATCGACCATTTACTGGCGGCTGGTCCACCATCATGATCAACTCCGGCGGTATATTTGGCGA  
AATCACGCGTGGTGGTGTCTATCCACAAAGGTTTTCTGTAAGCAGGACTGGCGCTCGGTCTTTTACGTTGGGAAA  
CCATTTCGCTACGTCATTTTACCCTGGCCTGCTGCTGATGCTGCCCGCTGGTAAACAGTGGATCATCAGATTTAAA  
GACACCTCGCTGTTTATTTGATCGGCGTGGCGGAACTGACCCGTGAGGGCAAGAAATTTATTCGGGTAACTTCCGCGC  
CCTTGAGATCTGGAGCGCCGTGGCGGTCTCTAATCTGATTATTACCCTGGTGTGAGCTTTATTTCTGCGTCTGAAAA  
GAAGGATGAAAATCTGTGA

>Cluster\_26822

ATGTCAATTGAGCATATTTTAAATCGGGAAGCATCATGGGGTCTGATTGCTGGAGAACTCCATCTTTTATTTATTCAGGAA  
CTTACACCGAGAATTTGGTTTTTCGATGGATGGTGCTGCAACTGAGCATGACACGCTGTTACCACGGTTCACCGATGATA  
TCCACAATCAGTCATGGGTGGTAAAAGGTTTCTGTAACCCACCATAACAGCGATATTCGGTCTTCTCTTAAAATCG  
TCTGAATCAGATTTAGCGGTATTCTGATACCGTACCGACCCACACCACATACTGGCTTAGGCACATTTACAGCAATAA  
CCACTGTCAATAAATCCGTTTCTTTCATCGTGCAGTTAAATACCTTCCACCAGCAGGCATAACGGGCTGTTTATTAGT  
CACGGTTTCAAGCGCAATTTGTCATCTTTAAATCTGAACCCAGCAGGCATGAAATTACACAGATGATTGCTGTGAT  
ACATTGCTACCGTTAACCATCATTAACCGTGGTGGACTAAGAGGAAGACCACATTTACCACCTGAGACGCTCGACAG  
CTTCATAAAGCTATACAGCAAGGAAAACCCATTAAGTGCATTGCAGATGCTTCAGAATGCCCTGAGCAGTCATACA  
GGATTGCTCAAAGTTGAGCTAA

>Cluster\_34019

ATGGATATAACTCAGGCAAGCGCGAACATCAGGTATGTAAGCACAGTTTGATACAGCCAGGGCAAAGCTCAGTGAACA  
GGAATCATTTAGTCAACATCTGGAAGCGACTATCGAACAGACGAAAGGGGAACTGGAGTCTCTCGATCGTACGGCAGA  
ACTCAATCCCTGTCTGCGCTGGGAGTAAAACGGGAAGCTTCGCGGAAATTTCCATTACGGCGGGTGGCGCGAGAAAAT  
CTTGAGCGCTGCGGGTGTGTCATGATGAGGCGCGCATCAGGCTACTGGAGTGTGTTATAACGCGCAGAGGCTGGTTG  
TGCTTACGAAAGTATTGATAATAAGTTGCGGGCAGAGATATTTGCAAAAGCACCTCCCGAACTGATTAACGAGCTGACCC  
CTGTTCTGTTATTTGGTTCGTTGTTATGTGAGCTGCTTGGCCAGCCGCTGTATAACGCAGAAAAGAAAATATGCGAAACA  
CTGAAAGCGGACGATCTGCTGAAAGTGTGCGGATGATTTCGCGCCGGATTAACGATACCGAAAGCAGCCACCGCC  
GCTGCGTTATTGCGCGAGAAAATCCCGGATTCAGTAAGTGCAGCAATCAGGAGCGCCCTTACCTGTACAATGGAGCG  
CGCGCGACAGAAATCCAGAAAATGCGCGACCTTGGCGAGGGCAGAGAACTTCGCGGGGGTGGCAGTAA

>Cluster\_20370

ATGTTTACGGCGACGTGGCGTAAACATTAACCTAAGCCCTGCTGACAGTGGTCTGTATGCTGGCGGCACCTTTGACACAGGC  
GATTTCCGGTGGCAATCTGACTTTTTCACTGCCGTCCGAGACTGACTTTGTCAGCAAACGTGTGCTGAATAACAACAAA  
GCGCGCGGATATACCGTATTGCCATCAGTGTATTTGATAGCCCGGCGCAGTGAATTCGCGCACCCGACCGGTGGATGTT  
GAACTACTTTTCCGCCCCCGCAGCTGGCGTGGCAGGCTGGTGGAGCGAGTATTTAAATTTTACTATCATGGTCCACG  
GGATAACCGGACGCTACTACCGGCTCATTTCGCGAGGTCACCCACTCGTAACCTGACAAAACGACGCGCCGCGG  
GTGAGGTCAGCACGGAGCCGGTGGTGGTATGATACCATCTGGTAGTACGACCACGTCAGGTTTCAATTTAAATGGTCC  
TTGATCAGGTGACCGGAAACGGTAAAGTAAACCCGGCAACAGTGGTTTAAAGTACTGATTAACCCAGGATGTTGATTCGAC  
CGAAGAGGAAGCGATGCTGTTATCTACGTCGCGGAGCTGGTTCATCAGCTGAGTTACGTCAGCGCGGGAAATCACT  
ATCTGGTCTATAACGACAAATTCATTAAGATTAGCATTTCTGTCCGGCTAAGCCCTTCCGCGGACTAA

>Cluster\_14375

ATGGCTAAACTGACCAAGCGCATGCGTGTATTATCCGCGAGAAAAGTTGATGCAACCAAACAGTACGACATCAACGAAAGCTAT  
CGCACTGCTGAAAGACTGGCGACTGCTAAATTCGTAGAAAAGCTGGACGTAGCTGTTAACTCCGCGCTGACGCTCGTGA  
AATCTGACAGAAAGTACGTTGGTGAACCTGACTGCGCGACGGTACTGGCCGTTCCGTTCCGCTAGCCGATTTTACCCAA  
GGTGCAAAACGCTGAAAGTCTGCTAAAGCTGACGGCGCAGAACTGGTAGGTATGGAAGATCTGGCTGACCGATCAAGAAAG  
CGAAATGAACTTTGACGTTGTTATTGCTTCTCCGGATGCAATGCGCGTGTGTTGGCCAGCTGGGCCAGGTTCTGGGTCCGC  
GCGCCCTGATGCCAAACCCGAAAGTGGTACTGTAAACCCGAAAGCTGCTAACCGCTGCTGAAAGCGTTAAAACGCTAAAGCTGGCCAG  
GTTGCTTACCGTAAACGACAAAACGGCATCATCCACACCACCTCGGTAAGTGGACTTTGACGCTGACAAAATGAAAGA  
AAACCTGGAAAGCTCTGCTGGTTGCGCTGAAAAAGCAAAACCGACTCAGGCGAAAGCGGTGTACATCAAGAAAGTTAGCA  
TCTCCACCACCATGGGTGACGTTGTCAGTTGACCAGGCTGGCCTGAGCGCTTCTGTAAACTAA

>Cluster\_41772

ATGAATACCCAACGTAATAACGGGAGAACCTGGCATTACCCTTCTCTCCAGGCACCACCAGCGATGACCGCATTAACAC  
CGATTACTGGCAGGATTTACAGACCATCAGCAATTTGGTGCACACAGAAAACCTCGACGGCGAAAATAACTGCTTAAACC  
GCTACGGCGTGTGTTGCCGCTCCCATGCCGCGCCTACGCACTGGCAGTGGCATTGAAATTTCCGCAACGCTGGCACTG  
CTGAAAACGATCTCGGGCAGCTGGAGTTGTTTGGTGAATACTCTACCGCTTCAATTCATTAATACCGCGCTGGA  
ACAGGACTTTTACCTGTTTGGCGTTCGCTGCCAGGATATGTGGTGGAGTGGGAAAGGTTGACGCTTTTACGCGCTCTGT  
TTGATTTCCCTGCGTTCCGAAATCTCCGCGCCGACGCGGGGAATGATGAAAAAGCTGGCAACGTTGATTTCTGGGG  
CTGACCAATGCGCGCGCGCTTCCGCCCTGGGATACGAAACCTGTCAACCTGTACGCTGGAAGGATTTCTGACCGG  
AAATCATGATGCGTTTTCTGCTGCTGACTTTTTGCGATAACGCTTTCAAGTATGTGCGCAAAAATCATGTCAAAACCACTG  
TGCCTGGAACGCCACTGGCAACGGCGCGGATGGCCATGAGTTCGTTTATGGAGAACAGTCAATGA

>Cluster\_55742

ATGTTAAAGCGCGTTCCTCAGCTGTAGTCTGATCGGCTTGCTGCTGTTGACTGTGCTGGCCCTCGATCGCTGGAT  
GAGCTGGAAAACCGCGCTTATATCTACGACGAATGACAGGATCTCCCTACCAGGTCGGTGTGGTGGCTCGGAACAG  
CAAAATATTTACTGCTGGCGTAATTAATCAGTATTATCGCTACCGCATTCAGGAGCGATTAATGCCATAACAGCGGT  
AAGGTAATTTATCTATTACTGAGCGGCGATAACGCATTTGAAAGTTATAATGAGCCGATGACCATGCGCAAAGATTTAAT  
CTGCTGGTGTGTCGACCCATCAGATATTGTTCTGATACGAGGCTTTCGTAACGCTGATTTCCATCGCTACCGCA  
AAGTTTTGATACATAATGATTTTATTTATACCCAACTGTTCCACTGTGAGCGAGCATTTATTTATGCGCTGCATATG  
GGGATTACGGCTCAGTGTATGCGGTACCGTACCGGAAAGATATGCTGTCAGTACGATTTCTGTAATTTGCGCGCCGTTT  
CGGTGGCTGGCTGACCTTTATATTTTTAAACGTAACCCGCTTTTTTAGGGCCGCTGGTCCCTATTTCCGCTATGCACC  
AGGTACCGGAAGATGCGCAGGGTATCCCGCTCACCCGCAACAGTACTTTGAATTAACAAAAGAAAACAGGAAAGTAG

>Cluster\_5057

ATGGCTACCCACACATTAATGCAGAAATGGGCGATTTCTGCTGACGTAGTTTTGATGCCAGGCGACCCGCTGCGTGCAAA  
GTATATGCTGAAACTTTCTTGAAGATGCCGTTGAAGTGAACAACGTTCCGCGGATGCTGGGCTTACCAGGCTACTTATA  
AAGCCGCAAAAATTTCCGTAATGGGTACCGGATAGGGTATCCGCTCTGCTTCCATCTACACCAAAGAACTGATCCAGAT  
TTCCGCGTGAAGAAAATTAACCGGTGGTTCTGTTGGCGCAGTCTGCCGACGTAACACTGCGCGACGCTGTTATCGG  
TATGGGTGCTGACCGATTTCCAAAGTTAACCGCATCCGTTTTAAAGATCATGACTTTTCCGCTATCCGCTGACTTTGACA  
TGGTGGCTAACGCGGTAGACCGGCTAAAGCATTGGGCAATGATGCTGCGTGGTAACTGTTCTCCGCTGACCTGCTTCT  
TACTCTCCGACGGCAAAATGTTGACGCTGATGAAAAATACGGCATCTCCGCGTGGAAATGGAAGCGGCTGGTATCTA  
CGGCTGCTGCAGAAATTTGGCGGAAAGCCCTGACCATCTGTACCGTGTGACCCACATCCGCACTCAGGACAGACCA

CTGCCGCTGAGCGTCAGACCACCTTCAACGACATGATCAAATCGCACTGGAATCCGTTCTGCTGGGCGATAAAGAGTAA  
>Cluster\_40942  
ATGGCATATATTTAAAGCGCATCTAGAAAACAATTCGAGCAGATTCATTCCAATTTGCTTGAACAGGTTTCGTTATGTTTC  
AAAAATAAAGAAATTAAGAACAGATATTTATACATAGTGTTCATAATAACCGCATATTTTCGAGTTTCTGCTGCATTCGAAG  
ATTTATATTAAGATGTTTGGAAAGATTGGATTGACATGCTGGAACAAAATAACGGATGCCCTTCGCATGCTACCTGATGAA  
ATTTATCTTTGTTTTCTTTTCAAAAACCAAGAGAAAAATTTTATAAATACGTTTCTCATGGTCTGAGTCAATAATGAT  
GAGTGACTTAAATAAGTGTAAAGGATAAACTTCAGGCGTTATCGTCACCTAATTTCTCCTGTAAGCCTGTTATTGTCCTAA  
AACAGCTGATAATGGATAAAAAATATCCTTCAAAAAAATATCAAACCTCTTTTAAATAGATTTGGTATCAAAGATATA  
TTAAAAGCAATGACTGCGAAAGGTAAGAAAGATTATGAGTTCAGTCTCAGTCTTTCTCTGATAGCCGACGGAGTTAGC  
CCATTCATATTTCAATTAATCTTTCAAAAGATACTGTTATTGATAAGCTAAATAATGTAAAGAAATTTGTTAGGATTA  
TGGATAGGATATTTATTTACATGCTCTGTGATAAAAGTGGTAGTGAATACTGGAAAACAGAACGTTAGCGATTTAG  
>Cluster\_41319  
GTGATCGAAATCTTACATGAATACTGGAACCCTGCTGTGGACTGACGGTTATCGCTTACTGGCGTGGCAATCACCT  
GTGGCTGCTGATTTTGTGCGGTAGTATAGGCGGAGTTCGCGCTGTTTCTGGCGATTGGTCGCTCTCAAGTAATAAT  
ACATCCAGTTTCCAACTCTGGTTATTTACCTATATTTTTCGCGGTACGCGCTGATGTTCAGTTGCTGTTCTATTCC  
GGCATGTACAGCTGGAGATTGTTAAGGAAACCGAGTTCCTTAACGCTTTTTTTCGAGTGGTCTGAACCTGTACCGTGC  
GGCTGACCGCTTAAACCTGCGCTTACACTACCGAGATTTTTGCGGGCAATCCGTTACAGTCCGATGGGAAATG  
AAGCCGCCAGAGCTATGGCTTCTGACCTTTAAATGTATCGCTGCATTATTTGCTTCTGCGCTGCGTATTGCGTTA  
CCGGCATACAGCAACGAAGTATCTGATGCTGCACCTACTGCGCTGGCATTACTGCCAGGTCGCGGATCTGTGAA  
AATTGCCCGGATATAACGCGCCACATATCAAACCTTTTACCCTTTTCGGCATGCGCGGCTGCTCTATTTAATCATCT  
CTTATGCTCTGATCAGCTTTTTCTGAGACTGAAAAACCGCTGGTTGACATGTGAAACCTTTCTCAACGCTGA  
>Cluster\_25918  
ATGAAAAACATCGCCGACAGATGGTTAACTTTGACCGTGAGCAGATGCGTCGGATCGCCAACAATATGCCGGAACAGTA  
CGAGAAAAGCGCGCATCAACAGGTAGCGCAGATCATCAATGGTGTTCAGCCGGTACTGGCACTTTCCCGGCA  
GCCTGGCTAACCGTGACCAGAACGAACGAACGAAATCCGCGCCAGTGGGTTCTGGCTTCCGGGAAAACGGGATCAC  
ACAATGGAACAGGTTAACGCAAGGATGCGCGTAGCCCGTCGCGAGAATCGACCATTTCTGCCATCACCGGGCAGTTGT  
TGCATGGTCCGGGAAGAAGCATCCGTTATCGCGGACTGCCAAACGTCAGCGAGCTGGTGTATGTTTACGAGTATT  
GCCGGAAGCGAGGCTGATCCGATCGGAGTTTATCCGTGAAATCAAACGCGCACTACTGGCTGGTTACCAACCTG  
TATCAGAACATGCGGGCAATGCGCTTACTGATGCGGAATACGCCGTAAGCCGCGAGATGAGCTTGTCCATATGACTGC  
GAGAAATAACCGTGGTGAAGCGATCCCTGAACAGTAAACAACCTTCCGTGATGGGCGGTAGACCTCAAATCGTGCAC  
AGGCTCTGGCGAAGATCGCAGAACCTAAAGCTAAGTTCGGACTGAAAGGAGCAAGTGTATGA  
>Cluster\_59045  
ATGTTCGAACCCCAAAAATTTAATGAAATGTTGCCAACTTCATAAAGCAACTTTCTTAAATACGCTAATAATTTG  
CATACTTCTAGTTATTTACGAATACATCCCTTTAATAACATTACAACCAAGTATGTCCACCTATTAAGATCATGAGA  
GCTTTATTAATGGGCATATCTTTGGTATATTTACCTTGTGCTTTTGGCATTTTGCATATTTAATAGCGGTGCGTTA  
GACCTACATAACCAATGACGCGCAAACTACTTCGGGTGCGATATCTTTGGGATAAGCATTAATTAATAAACCTACG  
GAGAGCTGGAGTCAACAGAAAATTAATAAAGATGAAGCTCACAATGTAAAGCAATCTATATTTACCTGAAGTAAGAA  
AAATTTGAAGCAAAACATTTATTTGAACCTTCTTGAATAAAGTATACTATTTTTGGATATTTTTTGAATTTTCGATAAT  
GCATTAATTTCTTCTTAATAATCTTTTTTGCAAAACAATGAGATATTTTCAATGTTGAAGTCTTTTGTCTGCTTTAT  
CTTTTTTGTAAATTTATCATATTTCTCAGTGAAGTGTATTTACTTTGCTTTGACAGTTAAGCCGAACTGAAAGTCAAGTGC  
GAAAAATCCCGGACGATAAAAATAAAGAATTTTTCACTAAAAATAACATTAATTTGA  
>Cluster\_35075  
ATGCAAAAAAACCGCTGCGCATACTTATGCCATTTCCAGCTTGTGGTGTCTTACTAACCGGCTGCGCTGGATACCCCT  
CACGCCGCTGGTGACGGGGGCGACAGTGCACAACCGTTCCCGGTCGACGCCCGCTGCCAACGGTCTATTTTCCAGT  
CTGCTCAGCGGATTAACATATGGCTATCAACCGCTGTTTGAAGATCGTGCACCGCAATATTGGCGATACGCTGACCAT  
GTGTTGACAGGAGACCTGAGCGCCAGCAAAAGCTCCTTCGCAATGCCAGCGGTGACGGTAAACTAAATTTGGCTTTGA  
TACTGTGCCGCGCTATTTTGCAGGGCTGTTGGTAAACGCTTACGTCGCCGATGTCGAAGCCCTCCGGTGGTAACTCAAG  
GAAAGGGCGGGCAATGCCAGCAATACCTTTAGCGGCAGCTTACCGGTGACGGTGGACAGGTAAGTCAACGGCAAC  
CTGCATGTTGGTGGTGA AAAACAGATGGCATTAAATCAGGGTACCGAATTTATTCGCTTCTCTGGCGTGGTTAATCCAG  
CACTATCAGCGGCAGCAATACCGTACCGTCTACTCAGTGGCGGATGCGCGCATTTGAATACGTAGGCAATGGCTACATTA  
ACGAAGCGCAAAAATATGGGCTGGTTGACGCTTTCTTCTTAACTGTGCGCAATGTAA  
>Cluster\_23908  
ATGACTCTCAATAAAACCGATCGCATCGTTATTACGCTGGGTAACAGATCGTTACGGCAAAATACGTGCCAGGCTCGCC  
GCTTCCGGCTGAGGCAAGCTCTGTGAGGAGTTTGAACCTCGCGCAACATCATCCGTGAGGTATTTCTGCTGCTGATGC  
CGAAGCGGCTGATTGAAATGAAACGTTATCGCGGGCGTTTGTGGCTCCGCTAACAGTGGAAATTAACCTCGACATGAC  
GTACTGCAATGGGTGCTGGA AAAACGACTACGACCCACGGCTTATCAGTGAATGAGCGAAGTGGCAAACTGTTGGTGAAC  
GGCATTTGCCCTTTGGGAGCAGAACGCGCAGCTTCCAGCGATTCGGCGCAGATTGAATCGGCGCTGAACGAGATGATTG  
CTAAACAATCAGGACCGCAAGCGTTTAAAGCAAGCGGATTTTCGTAACACGAGCGGCTGCTGAGTCCGCTGATCAACCG  
GTGTTACAGCAACTTAGCATTTGCGATCAGTTGCTGAGCGGGCGGTTTTTGAACGAACCTGGATGGGCGATGAGCCAA  
CATGCCGCAACCGCTCCAGGAACATAAGGGCTGTTGATGCGATACGGCATCAGGACGGCGATGCGGAGAGCAGGCGG  
CGTTACCATGATCGCCAGCTCGACACGAAGGTTAAAGGAAATCACATGA  
>Cluster\_35660  
ATGCTGAAGCGTTTCTTTTATTACCGGTACAGACACTTCTGTAGGGAAAACGGTGGTTTCCCGCGCATTGCTACAAGCGTT  
AGCCTCCAGGAAAAACGGTTGCGGGATATAAAACCGTAGCGAAGGGGAGCAAGAGACACCGAAGGGCTGCGTAATA  
AAGATGCCCTGGTGTGACAGAGTGTTCACCAATCGAATGCTTATGAAAGCAGTTAATCCTATCGCGTTAAGCGAAGAA  
GAAAGTAGCGTGGCGCACAGTGTGCCAAATCAATACACCTCATTTCAAACGGCTGGCAAACTGACCGAAAAAGTCCGA  
TCATGTCGTTGTAAGGACTGGCGGCTGGCGCAGTCTGATGAATGATTTGCGTCCACTCTGAAATGGGTAGTGCAGG  
AACAACTGCCGCTGTTGATGGTTGTCGTTATTCAGGAAGGTTGATTAACCATGCACTGCTAACAGCTCAGGCGATCGCC  
AACGACGGGCTGCCGCTCATTGGCTGGTGGCTAACCGAATCAACCAAGGACTGGCGCATTTATGCGGAAATCATTTGATGT  
GCTGGTAAAAAATCTCCGGCACCGCTCATTGGTGAACGTGCTTTACTTCCGCGCGCAACAGCGTGAACCTGGGCAAT  
ACATCCGCTTAGCTATGCTGCGCAGTGTGCTGGCGGTAGATAGAGTACGGGTGTA  
>Cluster\_24072  
ATGACAACCTTAAGCTGTAAGTGACCTCGGTAGAAGCTATCACGGATACCGTATATCGTGTCCGATCGTGCCAGACGC  
GGCTTTTTCTTTCTGCTGCTGGTCAAGTATTTGATGGTAGTATGATGAGTACGCGCAAAACGTTCCGTTCTCAATGGCTTCGA  
CGCCAGATGAAAAAGGTTTATCGAGCTGCATATTTGGCGCTTCTGAAATCAACCTTTACGCGAAAGCAGTCAATGGACCGC  
ATCCTCAAAGATCATCAAATCGTGGTGCATATTTCCACCGGAGGAGCGTGGCTGCGCGATGATGAAGAGCCTCCGATGAT  
TTTTATTGCGGGCGGCGACCGGTTCTTTATGCGCGCTGATTTTGTGACAGCGTTGGCGGCTAACCAACCAACGAGTGA  
TCACCATTTACTGGGCGGGCGTGAAGAGCAGCATCTGATGATCTCTGCGAGCTTGAGGCGCTTTCGTTGAAGCATCT  
GGTCTACAAGTGGTCCGCTGGTTGAAACACCGGAAGCGGCTGGCGTGGCGTACTGACCGCTGTTAACGGCGGATTT

GCAGGATCATGGTACGCTGGCAGAGCATGATATCTATATTTGCCGGACGTTTTGAGATGGCGAAAAATTGCCCGTGACCTGT  
TTTTGCAGCGAGCGTAATGCGCGGGAAGATCGCCGTGTTTGGCGATGCGTTTGCATTTATCTGA  
>Cluster\_39482  
ATGGCGGATTCATCACTGAATAATCCTGTGCGGGTTACGGCTACGCGCCTTGATGCTTCAATTTGCCACGCAATATATTT  
CAGCCAGTCTTACCTGTATGTCATTAATCAGGGGGTGTATGTCGGCGCAATTGCCGGGAAGGCAAAATCAGGCTGGTC  
AGGGCGCTTACGATGCTCAGGTGAAAAACGATGAACAGGATGTCGAACTGGCTGATCAGCAGCAAGAATCACCAGCAAC  
ACAAAAGCGATAAATCTCCTTGGAGTCAAGTAAACAACCGCCGAGGGGAAGATAGTCGTAAGTGGCTAGCGATGTTGATTA  
CTTGCTGGATGAGGTTATCGATATTCAGGCGCATCTGGTCACTGTTGACCAAAAGACTGGATGGCGTAGAAAGCGATGTCT  
CTGGCATTAAAGTGTATTACGTATCGAAAAACCGTAAACAGAATCGCAGTCTCTTGGCTCACCGCTGGATGTAAAAACATCA  
TATTCAGTTGATGGAATTCAGGTTGTTGGAGCAAGAAATACCGGATGGACTGCAGCCACAGGTACGCCACTTCTTGGCTC  
ATTC AACGTAACAGCTATACAGGTCGCGACTACGTACACACAATCCGAAGTCGCGACTATCGCTACAGGTTTGGAGC  
AGGCGCGGAGCGTATTCGCGCTTGAACAGCACTTAGATTACATGGGCTGATTGACTGA  
>Cluster\_58089  
ATGAAAATCGGCATCATTGGTGCATGGAAGAAGAAGTTACGCTGCTGCGTGACAAAAATCGAAAAACCGTCAAATATCAG  
TCTCGGCGGTTGCCAAATCTATACCGGCCAACTGAATGGAACCGAGGTTGCGCTTCTGAAATCGGGCATCGGTAAGTGC  
CTGCGGCGTGGTGGCCTTTGCTGTTGGAACACTGCAAGCCAGATGTGATTATTAACACCGGTTCTGCGGTTGGCTG  
GCACCAACCTTGAAGTGGCGATATCGTTGTCTCGGAGCAAGCAGCTTATCAGCAGCGGATGTCAAGCGATTGGTTA  
TGAATACGGTCAGTTACCAGGCTGTCGGCAGGCTTTAAAGCTGACGATAAACATGATCGCTGCGCTGAGGCCATG  
CCGAACTGAATCTTAACGCTGTACGTGGCTGATGTTAGCGGCGACGCTTTCATCAACGCTTCTGTTGGTCTGGCGAAA  
ATCCGCGCAACAATCCACAGGCTTGTGTAGAGATGGAAGCGCAATCGCCATGCTGCGCAAAATTTCAACGT  
CCGTTTTGTTGCTGACGCGCATCTCCGACGTCGCGCATCAACAGTCTCATCTTAGCTTCGATGAGTTCCGCTGTTG  
CCGTAACAGTCCAGCTGATGTTGAGTCACTGGTGCAGAACTTGCACATGGCTAA  
>Cluster\_47201  
GTGCAACCCCTTCAGCAAGTTGAAAACATACGCGGTTAAGTGAACGAGCCAGCGAATATTTATTTGGCTGTGATCCGTA  
CAAACCGGATGCCGTGATTTGCTGCGGACCGGAGCCACGCCATTACTGACGTATCATTATCTGGTAGAAAAATCCACC  
AGCAGCAGGTTGATATCAGCCAGCTCACCTTCGTAAGCTCGACGAATGGGTGGATCTGCCATTAACGATGCCGCGCACC  
TGCGAACTTTCTACAACAGCATATCGTGCAGCCGCTGGGGCTGCGTGAAGACCAGCTCATCAGCTTTCGCTCCGAAGA  
GATAAATGAGACAGAGTGGCAACGGTAAACGAACTGATTTGCGCGCAAGCGGCTGCGATTATGCGTTTATGCGTTG  
GGAAAAACGGTCACTTTGGGCTGAACGAACCGGGAGAAAGCTTACAACCGGCTGCCATATCAGTCAACTTGATGCCAGA  
ACACAGCAACATGAGATGTTAAAAACCGGGTCCGCGCTGACTCGTGGGATCACCTTAGGCTGAAGGATATTTCTCAA  
TGCCCGGAGGTTTTGTTATTTGGTACTGGCGAAGGAAAGCAGGATGCGACAGAACGTTTTCTCACGGCTAAAGTCTCCA  
CCGCTATCCCGGCTTCGTTTTATGGCTGCACAGTAACTTTATTTGTTTAAATTAATACCTAA  
>Cluster\_15697  
ATCGGTAAGTTTTGTGACGCCATTTTGTCCGACGCCATCTGCTGTCCTGATCCGGTGGCGCTGCATGGGCGTCTGAACA  
TCAGTCCACACTGAGCGGGGATCTTTCATGCCCGGACGCAAGCTCCCGGTAGCGATAATCTTAACGGGATTAACGTGA  
AATACCGTTATGAAATTTACCGACACGCTGGGGCTGGTACGCTATTCAGCTATGACAGGACAGAATAACGCCAGTTACC  
CGTTACAGCGATACCCGCTGGCATGAAGATTCCGTGCGTAACCGCTGGTTCAGCGTAATGGCGGGGCGCTCTGTGCGGCT  
GAATGAATGGTTCAGCGCTATGCGATGGCGGGTGTGGCTTACAGCGGTGTCGACTTCTCCGGGATTTCTTCCGCT  
TAACTGACAACAAGGGGAAAAACGCACGATGTGCTGACCGGAAGTGTAGCGGTGCGCACAGCGACACTCTCTGGCGGG  
GGACTGGCTGCAATTTAAACCGCAGCAATCCGTGGCATTGATATTGCTTATGAAGGCTCCGCGAGTGGCGACTGGCG  
CACTGACGGTTTCATCGTGGGTGTGGTTATAAATCTGA  
>Cluster\_41304  
ATGAAACAGAGCCATTTTTTTGCCATCTCTCCGCTGAAACTCATTAAACCGTGGCGCTAATGCGCAACGTGCGGAC  
GGAAAATGTGTCCGAACACAGTTTTCAGGTAGCGATGGTCGCCATGCGCTGGCAGCTATCAAAAATCGTAAATTTGGCG  
GTAATGTCAACGCGAACGATATCGCTTTACTGGCGATGTACCAGATGCTTCAGAAGTCTCACCGGAGATCTCCCTACT  
CCGGTGAATACTTCAATTCGCAAAATCGCTCAGGAATACAAGGCTATTGAAAAAATCGCTCAGCAAAAATGGTTCGATAT  
GGTTCCGGAAGAGCTGCGAGATATCTTTGCGCTTAAATGACGAGCATGCATATAGCGATGAAGAAAAATCGCTGGTGA  
AACAGGCAGATGCACTGTGTGCATATCTGAAATGCCTGGAAGAAGTTCGCGCCGGAATAATGAATTTCTTGGCAAAA  
ACGCGACTGGAAGCGACGCTTGAAGCGCTGCGAGCCAGGAGTGGACTACTTTCATGGAAGTATTTGTTCCAGCTTCCA  
TCTTTGCTCGATGAGATTAGCCAGGATTCACCGCTGTAA  
>Cluster\_28249  
ATGACTTCTCTGATTTAGCTTCCGGTTCTCCGCTGCTCAGGAGTACTTGGCGAACTTGGCGTGACCTTTGAACGTAT  
TGTACGGGCATTGAGGAGCAGCGCTCAGCCGAGGAGCGCGCAGCAGTATGTTGTGCGCTTGGCGCGGAGAAAGCAC  
AGGCGGTTGTCGCGCAACCGCGCAGGATCTCCCGTGTGGTGGGATACCTATCGTTATCCGAAACGAGAAAGTGCCTC  
GAGAAACCGCGCGCAGAGCATGCGGCGCAGATGTTGCGCAAAATTAACGAGCATGCATATAGCGATGAAGAAAAATCGCTGGTGA  
GGCGTTGGCCGACAGCCAGCACATCTCGATTGCTGCTGGTTCACCGATGTGACTTTCAGAACGTTAACAGACGAAGACA  
TCCGCGGCTATGTCGCCAGCGGCAACCGTTAGATAAAGCAGGTGCATACGGTATTCAGGGGCTGGGTGGCTGTTTTGTC  
AGGAAGATAAATGGCAGCTTTCACGCGCTAGTCCGGTTACCCTGGTTGAAACGTATGAAATTAAGTAATTTAACGC  
ACTGCGTGAGAAAAGGGATAAACATGACGCTGA  
>Cluster\_58113  
ATGATCGAATTTGTTTATCCGCACAGCAGCTGGTTGCGGGTGTGGATGAAGTCGGACGCGGGCCGTTAGTTGGCGGGT  
CGTACCGCTGCGGTGATCTTTGACCCGCGCGCCGATTTGCCGGCTGAATGATTCCAAAAGCTGAGCGAAAAACGCC  
GTCTGGCGCTCTATGAAGAGATCAAAGAGAAAGCGTTGAGCTGGAGTCTGGGCGCGCGGAACCCACGAAATCGACGAG  
CTGAACATTTCTCATGCGACCATGCTGGCGATGACGCTGCGCTGGGCTGCATATTTGCGCGGAATATGTTGTTGAT  
TGATGGTAACCGCTGCCGAAATACCGATGCTGCGATGGCTGTTGGTGAAGGCGATAGCCGCTACCGGAAATCAGTG  
CCGCGCTATCTTCCGCGGAAAGTGCAGCTGACGCGGAAATGCGCGGCTGGATATTGTTTTCCCGCAATATGGTTTTGCC  
CAACAAAAAGGTTACCAACCGCTTTTCATCTGGAAAAATGGCTGAACAGCGCGACCGAACACCATCGGCGCAGCTT  
TGGCCTGTCAAACGCGCACTGGGACTTGCCTCTGA  
>Cluster\_40325  
GTGATTTCTGACTTCCCTCCCGTTTCGTTAGAAAAACAGGTTTTATTGCTGTACGAATAATGATCCGCGAGTGTCTA  
TCTCATTCACTGATGGATAGAAAATGCAGGTGACCAAAAAGACACCCAGTTTGTCTATTACCCACCGCTTTTTTCCATGC  
AAGGTAAAAAGAGAAATACGCTTTCGATAATCAACGCCACTAATCATAGTTACCAGGCGACCGTGAAGCCCTTCTCG  
GTTAATGTTAAAGTAACTCTGCTATGGAAAAAGATCAGAAGAATGAGAATACATTACAGTGGCAATTTATAGCCGCAT  
AAAAATGTTTTTATCGCCCAACGAACTGGCACTGAAGAAGCGCTGCAATGCTTCGGTTTTGCTGCGAGCGGTA  
GCAAACTCACTCTTATTAATCCAACGCCCTACTTCAATACCGTAAACAAATGAAAGCAGGAAATAGCAATCTCCAAAC  
ACCATGGTCCCGCAAAAAGGTGAAGTATCGGTGGATATCCCGATGCTGTAACCGGGATATCAGTTTTACAGCAATCAA  
TGATTACGGTGCATTAACCTCCGCTATTAAGGAACCATGCAGTAA  
>Cluster\_53946  
ATGAAACGTGTCGAATAAAGGCTCAGGTGCGATACCGAAGCCCGCGGACGTAAGGCGAGCCAGTATCGTGTACC

CAACAGGCTCCAGCGACAGTTCAATCCGGATGCTCCTGATGAGCGTTGGGTAACGGACATAACCTACATCAGGACCCACG  
AAGGCTGGGTGATCTTGGCGTTGTTGTTGATCTGTTCTCACGCAAAATATCGGCTGGTCCATGCAATCCCGGATGACA  
AAGGACATTTGCTTGAACGCACTGCTGATGGCTGATGGCGGCGTAATCCCGAAAAACAGGTGCTGGTTCATTCGGATCA  
GGGAGTACAGTACACAAGCCATGAGTGGCAGTCTGTTCCGAAATCACACGGCCCTGGAGGGTAGCATGAGCCGTCCGGGTA  
ACTGCCATGATAAATGCGGTTGCAGAAAGTTTTTCCAGTGTGTTGAAACGTGAACGGATAAAGAAAAAGATCTACGGAAACG  
CGGGAAGAAGCCCGCAGTGATATTTTTGATTACATCGAAATGTTTTATAACAGTAAGCGTCGGCATGGTTCTAGCGAACA  
GATGTCACCGACAGAATATGAAAACCAGTATTATCAACGGCTCGGAAGTGTCTAG

>Cluster\_62804

GTGACTTCGTGGAAATTTTTATGACAATAATGCTGATCGCTTATTTGCCGATTATATATCACTTGGATTTTTACTCTATCTT  
TCAGGATGTTGAAGAGTTTATTTTACAATCTAAGGGTGTCTCTTTGGATGTCGGTTCAGGTTCCGGCCGTGATGCTGCTG  
CGTTAGATGAATTAGGTTATAAAGTAATAGCTGTTGAACCAAGTGAAGAGATCGGAAATTTGGCATCTTCATATATATAAA  
TCTAACCATATTTATGTTAGATGATTCATTTGCCCTTTCTTCATAGTGTAAAGCAATGAATCTAAAGTTCGACCTTAT  
TTTTAGTCAGTGTGCTATGGATGCATCTTTCAAAAAAAGAGCAAAAAATCTCAC TAGAGACGCTAACTGATCTTTTAAACAT  
TGAATGGGAGAATGATAATTACATTTGCGCTTAGGACCTCCCGAACAGATAGAAAATTAACGTTGTTAATAC TGAGGAA  
CTTCTT GAGTTAGCGTCTCAGTTAGGTCGAAAACATTGCGAGTTACGTC AATAAATAAGATAGTTTTCAACGTAACCA  
GATAACTTGGCAGAAAAGTTGATTTATCAAAAAATAATGAGTAA

>Cluster\_67

ATGCTTATTTCTCGTATTGCGAACCCGCAATCTGATGGCGGCGATGCTGTCCGGCTGTCTGCAGGCAGGGACACTGGATGA  
TATTCGTGCACTGGAAGCTGGGAAAAACGGACATAGCGCCACTGCATGGATGGATTCGCTCTTCCTGAGAGCAACACAC  
CACCGTCCACAGGACTCAGCGAAAAGACGTCGCCGCTGTTGATTCGCCGTGAGTGACGGGCGGGGTTGATTTGCAGGAC  
TGGAAACTGGTGTGCTTATGTCAGCTCGACTGTCAATACTGTCCGAGTTTGGCCGGTACTGAAAGTCATGTCGACGA  
GAGTGGTCTCAGTGTCTTCCCTGTAAGCCTTGACGGAAAAGGTGATGTCGAATTTCCCGATGTACTTCCGGCCACACCGG  
ATGTGATGTTGGAGTTTTTCCAGAGTGGCGTGCCTGACCCCAACCACTTTTCTGACCAACGTTAACACGATGGAA  
ACCTGGCCTTCGTCGACGGGTGCTGACAGGCGGAGAGGTCCTGTAACGTCCTGATGACGTGTTCCGTATGACCCCTGGA  
CCGTCAGGCCGGGAAATCCCTTACGGCTCATTTCTAGGAATAA

>Cluster\_62302

GTGGACTCGCCAGCAGAAATATAAAATTTTCTCAACATCATCTCGCACCAGTCGACGACGGTTTACGCTTTACGATAG  
TGGCGACAATTTTTTTTTATCGGGAATCTCAATGATCAGTCTGATTTGGCGGCTTAGCGGTAGATCGCGTTATCGGCATGG  
AAAACGCCATGCCGTGGAACCTGCCCTGCCGATCCTGCCGTTTAAACGCAACACCTTAAATAAAACCCGTGATATGGGC  
CGCCATACCTGGGAATCAATCGGTCGCTCGTTGCCAGGACGCAAAAAATTTATCTCAGCAGTCAACCGGGTACGGACGA  
TCGCGTAACGTGGGTGAAGTCCGTTGGATGAAGCCATCGCGGCGTGTGGTGACGTACCAGAAATCATGGTATTTGGCGCG  
GTCCGTTTTATGAGCAGTTCTTCCGCAAAAGCGCAAAAACTGTATCTGACGCATATCGACGCAGAAAGTGAAGGCGACACC  
CATTTCCCGGATTACGAGCCGATGACTGGGAATCGGTATTCAGCGAATTCACGACGCCGATGCGCAGAACTCTCACAG  
CTATTGCTTTGAGATTCTGGAGCGCGGTA

>Cluster\_9792

ATGATAAGGAAGATTTTTTTTTGCTTCTGCGATCGTAGTAGCGATCTCTGGCTGTACAGCAATGGATAAAATTTGGCGGAAAT  
GGGTGTTGTTTCTCAGCAAAATCAACCTTTGATAACTCGACTGTCATAGAGGTATCTCCAAATTCGCTATACGATCCTA  
ACAGCACTTGGGGAACACCACTTTCAGTTGGGCGCGATATGGTCTAGTGCCATCCAGAAGAGGCTGGACTAATCCTTTTCC  
TACAACCTCGAATGTATCTAGCGGAAATGCCGCACTACTAGTTTGGCGGGATTGATAATAATGTTGATGGTAAAAATC  
AGCTATAAAGCACAGCAAACTAATCTAAGCAGCAGCTCATATAACTCCGATATCCAAAGACGATCTATACCTCTAGCA  
AGAATACTATCGTTATCCCGTATAAATGCTGGAGAGCATGGTATCAGTAAAAACTGCGCATTCGCATACACACAAGC  
CAAGGAAATCAAGACATCGACTTCTCAGCACAAGATATCCCGGAGGTAAGGCGACAGCGATCGTTTCCATTAAGAGATT  
CTTGGCCAAAGTCGAACGTTTTAAATAA

>Cluster\_38983

ATGAAAAAAAGGTTCTGGCAATAGCTCTGGTAACGGTGTACCAGGTACAGGTGTAGCACAGGCTGCTGACGTAACAGC  
TCAGGCTGTAGCGACCTGGTCAGCAACAGCCAAAAAGACACCACAGTAAGCTGGTTGTGACGCCACTCGGTAGCCTGG  
CGTTCCAGTATGCCGGAAGCATTAAAGGTTTTAACTCACA AAAAGGTCATTTTGACGTGGCTATCGAGGGTGCATCAACG  
GCTACCGCTTTAAACTGACCTCAGCCTTATCACCAACACCTTAACCCAGTTGGATACCTCAGGTTCCACACTGAATGT  
GGGCGTGGATTTAACCGCGCGGAGTCCGAAAAACTGGCGATACCGTGTATGATCGATACCGCCAACGCGCTACTGGGG  
GCAACCTTAGCCACTGGCTAACGGTTACAATGCCAGCAATCGTACCACCGCACAGGATGGTTTCACTTTCTCCATCATC  
AGCGGCACCACCAATGGTACCACCGCAGTAACCGATTACAGCACTCTACCGGAAGGCATCTGGAGCGGGACGTTAGGCT  
ACAGTTCCGACGCTACCTGGACCAGTTAA

>Cluster\_8402

ATGAATAAAGTTACAAAAACAGCTATTGGCGGCTTACTTGGCTTTTTCGAGGTAATGCCGCTGCAACCGATGGTGAAT  
AGTTTTGATGGCGAGATTTTTAAATCCGCTTGTGAAAATCAATGACTCTGATAAGAAAATGAAAGTTGCTCTTGGTCACT  
ATAATGCCGAACAGTTTCGTAATATTGGCGAGCGTAGCCAAAAATTCATTCATATTCCTTTAGTTAACTGCCAATG  
ACTGGGTGGGAGCACGATAACGGCAACGTTGAAGCGTCTTTCCGCTATAGGCTGGAAACGCGAGATAATGGCACCGTCCC  
TAACTTCCCTAATCTGGCAAAAGTAGGCTTTTGGCTGGCATAGCGGCAACAGGTGTGGGTATCCGATATGACGATGCGG  
AAAGCGGAAACATTTATGCCACTGAATGCTATGGGCAATGATAACACGTTTTATCAGATCCCGCGGAAATCCAATGGTATT  
GTCATGTTGACCTCATCGCTTACTACGTATCAACCGTAGTTCCATCAGAAATCACCCAGGGGAAGCAGACGCTATCGT  
TAACGTAACGCTGGATTACCGTTAA

>Cluster\_33406

ATGGCAATTAAGAAGCTCGATGATGGTCCGATGAAGTGGACATTAGACCTCGCGGTCGCGACGGAAAACGCATCCGCGAG  
GAAATTCGAAAGAAAAGCTGAAGCACTAGCATTGAGCGATACACAATCGCCAATGCCAGTCAGAAAGAAATGGGGAGGCC  
AGCGAGCAGACCCCGGACTTTGAGTGAAGTGTGCTGGACATCTGGTGGAAAATATCACGGGCAAAACCACGAGCATGGAACA  
AAAGAGTTTTAATCATCTACTCAAAAACATCAGCGGCAATAGGTGATATACAGGTGAGCAGGATGAGCAAAAAGGCTTTGAT  
GGATTATCGTTCCATGCGACTACGTGATGGTATCAGTCCGCAACGATAAACCGTGACATGTACCGATTATCCGGCATGT  
TCACAAAATTAATTCAAATGGATGAATTTCTGGGCAACCCAAATTCACGGACTGCCGCCACTGGCGGAGGCCAACCTT  
GAAATGACGTTCTGGAAAAAGCAGAAATCGAAAAACTGTTAAATGTTTTGGCTGGTGATGACTTACTTGTGCGGCTTTT  
ATGCTGAGCACTGGAGGAAGATAG

>Cluster\_36233

ATGAACGTTGGTATTCTGGACACCGGCTGCGCCAACTGCATCGGTAATAATCAGCCGTCGCACGCCACGGATATGATCC  
GTTGTGACGCGTGACCCGCGTGGTGTGCTGCGCGCGGATAAACTGTTTCTGCCGGGCTCGGCACCCGCGAGCGGCTA  
TGGACCAAGTTGCACGAGGTGAGCTGATTGAACCTGATTAAGCTGTACGCAACCCGGTACTGGGGATCTGTTTTAGGATG  
CAACTGCTGGGCGTGCAGCGAAGAGAGTAACGGTGTCTCCCTGCTGGGCATTTATTGAGCAGGACGTCCTTAAGATGAC  
CATTTTCGCTGTCGCCGTCGCCGATATGGGCTGGAATCGCTCTATCCGACGGCGGAAATCGTCTGTTCCAGGGCATTTG  
AAGTGGCGCCTATTCTACTTTGTACACAGTACGCTATGCTCCGGTAAACCCGTTGGACCATCGCCAGTCAGTGCATTTACGGC  
GAACCGTTTTACCGCGCAGTACAAAAAGCAATTTCTTTGGCGTACAGTTTACCCCGAACGTTCCGGCGCGGCTGGGGC  
ACAGTTGCTGAAAAACTTTCTGGAGATGTA

>Cluster\_61539

ATGATCACCGTTGCCCTTATAGACGATCACCTCATCGTCCGCTCCGGCTTGGCGAGCTGCTGGGGCTGGAACCTGATTT  
GCAGGTAGTTGCCGAGTTTGGTTTCGGGGCGCGAGGCGCTGGCGGGGCTGCCGGGGCGCGGTGTGCAGGTGTGTATTTGGC  
ATATCTCCATGCCCGATATCTCCGGTCTGGAGCTGCTAAGCCAGCTGCCGAAAGGTATGGCGACGATTTATGCTCTCCGTT  
CACGACAGTCTCGCTGGTTGAGCAGGGCTTAACCGGGGGCAGCGGGCTTCTTTTCCAAACGCTGTAGCCCGATGA  
ACTCATTTGCTGCGGTGCATACGGTTGCCACGGGGCGCTGTTATCTGACCCGGATATTGCCATTAACCTGGCATCCGGTC  
GTCAGGACCCGCTAACCAACAGTGAACGCCAGGTGGCGGAAAACTGGCGCAAGGAATGGCGGTGAAAGAGATTGCCCGC  
GAACTGGGCTTGTACCAGAAAACGGTACAGTCCATCGCGCAATCTGATGAAAAAATGGGCGTCAGTAACGACGTAGA  
GCTGGCGCGCCGATGTTTGTATGGCTGGTGA

>Cluster\_8561

ATGATTAATCGCCAGCAGGGTTTACATTTGCTGGAGGTTCATGGCGGCGTGGCGATTTTCTCAATGCTTAGCGTGGCTGGC  
GTTTATGATTTTTTTCGCAAGCTTCCGAGTTGCATCAACGCTCACAGAAAGAAATCCAGCAGTTCAATCAGCTACAGCGCA  
CCATCACCATTTCTTGATAACGATCTCTGCAACTGGTCCCGGAGGAATCCGAGTACGGACAAAATCATGGTGTGGGT  
GAAGAAGCTATTTTTACCACGCAAAGTCGCGATCCGCTGGCTCCTCTCAGTGAAGCACAAACCTTACTCACTGTTCACTG  
GTATCTGCCAAATCATACGCTCTACCGTCTGTTCGTACTTCTGTGGATGGCAGGAAGGATCAACCCGCCAGCGGATGC  
TGGAACATGTCGAGAGCTTTCTTCTGAAAGTAACAGCGGGGAAAGCCAGGAATCTCTCTCAGTCACTTACATCTG  
CAGACTCAGCAATATGGGGGTTACAGCCCTTTTGCATTACCTGAGCAGTTAGCGAGAGAAGAGTCCCGAGCTCAGAC  
GCAGCGCGGAATAATAACCATGAATAA

>Cluster\_58885

ATGAGCGAGCAACCGTGGTGGTTCATGGGGCTGGGCAACCTGCTGTGGGCGATGAAGGCTTCGGCGTGGGGTGGCGGA  
ACGGCTGTATGCCATTACCACTGGCCGAGTATGTGGAGATTGTCGATGGCGGTACTCAGGGACTGAACTTGTGGGGT  
ATGTCGAAAGCGCCAGCCATCTGTTGATTTCTCGATGCCATTGACTACGGGCTGGAACCTGGAACGCTGCGAACCTATGCC  
GGAGAACGATTTCCGGCTTATCTCAGCGGAAAGAAATGAGCCTGCATCAGAACAGTTTCTCCGAAAGTGTGGCGCTGGC  
GGATATCCGGGAGCATCTGCCAGCACATTTGCCCTCGTCCGTTGCAACCCGCAATGCTCAGCAGTACGGCGGTAGCC  
TGAGCGAACTGGCACGGGAGCAACTGCCCGCTGCGGAACAGGCGGCTGGCGCAGCTTGTGCGTGGGGAATTGTGCCG  
CAACCGGCTAATGAATCGCGCTGTCTCAATTTACTGCTGTGTGATGAAAAATACGAGGCGTTCGCTTGGCCAGTA  
CCGGATGACACAGGAGGAGCAGGGATGA

>Cluster\_17209

ATGTTTAATTGCAAAGCAGTTATTTTTGATATGGACGGCGTCATTATTGATTCCGGAAGGATTATGGCGTCAAGCGCAACA  
AGGAGCGCTGGCAGCATGGGGTGCAGCGTTAGCGATGAAGAGTGTATCCAACGACGAAAGGAAAGGCTTGTATGAGA  
TAGCCCGAACCTGGTGGCAATATGTCATCTGTCTATTACGCCACGGAACTGGAAGCGGAGATCCGTCGCTGATAACC  
ACGTTAATGCTGAAAAGGCGAGGCCATGCCGGGGTAAAGAAATGTGCTCACTTTTTTATGCCAGTCAAGGATCCAACT  
GGCACTGGCGACCTTTCATCTTATCAGGTGATTGATGCGGTGCTGACAAAACCAAATGAACACTGTTTTTCCGGTGA  
TTTTGACGTGCTGACGACGAAAGCCACGGCAAACCATCCGGCAGTTTACCTCCTCCGCACTACGAAAATACGCTGCC  
CCCGCAGATTGCTGGTTATAGAAGACAGTCTGAGTGGTTTTAAAGCTGCACAGGCGAGCGGAATTAACCGATTGTTGT  
CGCCGAGGATTTCAACAGCCGCTCTTTAACTCTCGGTGATCGGGTATGCATCACTTGAAGAGTTAATGGCAACGGGGT  
GA

>Cluster\_40757

GTGAAAGCGATGGATAAAGCATTACCCCGCTGGATGAAACCTTTGATGCCATCCCGACAGCCTGAATCAGCAGGCCAT  
CAATAACATCGCCAGAAAGCTGGCACAGGATTTACGCCCGCCAGCAGGCGGTATCCGGTACAGAAAGCGCCGACG  
GGACCGCTGGACACCACGAGACGCGCGTAAACCCGGATACAGGAACGCATTGCTTTATCTGGAATAACGAAGCAGC  
ACGCTGAAAAAATGGCATCACGACACGGGAAATACGGGCAACCAATTAACCGGTTGGGATGAGGATAAAAAAATATCCG  
ACGTTTTTACCGGATGACATCGACCGTTTTCTGGAAATGACACCCCGGCAATCAACAGGACAGCACAGGCGCTCC  
CCATGTTTCGTAATAACTGGCACCCGCCGCTACCTGAAAGCCGCTGACAGATGCTTCCGGTGTGACGGTGGGTTACAGCGGC  
GTGGCCGACGATTTGCCCGCGTTCATCAGTTCGGTGAAGCGCATCAGGTTGCCCGGGCATTTTACCGATTACCCGCT  
ACGTGAGCTGTTGGGATCAGCCAGGACAGATGAGCGCCTGATTTATAACACGGTGTGGGCGGATTCGGGAGGCTGTAC  
GGTGA

>Cluster\_47840

ATGACCAATTTCTCAGTGGTTGTGCGAGCGGTGGAAGCACCTTACGCCAGGCATCGTGTGATGCTCCTGGCGAATCA  
GGACCGTTTCCCGCTTCGTGCATGAAATTTATGATAACGATGGTCCGCGGAGGAGTGTGCGCAAGCCTGTAAG  
TCATCCTTAAAGAGAAAGCGCCGACATTCGCTTTAGTTACACCCAGTATCCTGAAAGTGGCATTCAGCAGCAGGTTGATTT  
GTCATGGCGCACATCCGCGTCGGCAAGTACCCGATGCGCGAACGATGAAAAAATCCCACTGCGCCACGGTGTGTTGG  
TCAGGAACTTGGCGACCCGGCGGAATAGCGTACGGCATGCGTTCATTTGGCGCGCTCCTGGAAGTGGTATATATGG  
AAAAATATTCACCAACCGCTGGATGCTCAACTACTCCAACCCGGCAGCAATTTGTCGAGAAGCCACGCGTCTGCGC  
CCGAATGCCGAAATCCTCAACATCTGTGACATGCCAATCGGTTAAGAGCCGGATGGCGCAAATTTGTTGGGCTGCAAGA  
TCGCAACAGATGCGCGTGGCTACTACGGCTGAACCACTGGTGGTCCGCGATATCCCGCAGTTTCAGAAAGGGTTAA

>Cluster\_21889

ATGCCCTTCGCGCCTGTTACTGGTGCATTTACAAAATGATTTCTGTGCTGGTGGCGGCTCGCCGTGCCGGAAGGTGA  
CAGTACCGTGGATATCGCTAACCCGCTGATTGACTGGTCCAGTCCGCGGGTGAAGCGGTTATCGCCAGTCAAGACTGGC  
ATCCGGCGAATCACGGCAGTTTGGCAGTACAGTATGGTGTAGAGCCTTATACGCCGGGCAACTCGACGGTTTGCACAA  
ACCTTCTGGCCCGATCACTGTGTGAGAACAGTGAAGGCGCACAAATACATCCGTTACTGAAGCAAAAAGCGATCGCAGC  
GGTGTCCATAAAGGCGAAATCCTTTAGTTGACAGTTACAGTGCCTTTTTTGTATAACGGCCGTCGGCAGAAAATCGCC  
TCGATGACTGGTTGCGCGCTCATGTAATCAATGAATGATCGTTATGGGTCTGGCTACTGACTATTGCGTTAAGTTTACC  
GTGCTGGACCGCTTACAGTTAGGCTATAAGGTGAACGTGATTACCGATGGTTGTCGTGGCGTAAATATCCAGCCACAGGA  
CAGTGGCAGCGCTTATGGAATGTGACAGCTGGGGCAACGCTATATACGCTAGCAGACTGGGAAGAAACGACGAGGAGT  
AA

>Cluster\_33842

ATGGCTCGCACAATAACTGAAATTCGGGCTGCATCGGGCAGTGAATGTCCTGTTCTGCTTGGCTTGTAGTGGCGCTGAT  
GCAGGGGGCGCTATGGTTTGTAGTCAAACACCAGCAGCAGCGTAAATCCACAGCTGGAAGAATGGCCCGCACCTTGGCGC  
GTCAGGTGACGCTGAAACGTTGACCGCTGATGCTACCGACTACCGGATGAAAAACGTCATTCAGCCGATCCTCGATCAG  
TTAACGGATGAAAGCCGATCCTCGACGCGGGCGTGTATGACGAACAAGGCGATCTTATCGCCGTTCTGGCGAAAGCGT  
CGAAGTGGCGGACCGGTTGGCGCTGACGGCAAAAAGCGGGCGCTATTTTAAACAGCAGATTTGTCGAAACCATTTGGC  
GTAAAAACGAGCCGCTCGGCTATCTGCGCTTACGCTCGACACCCATACGCTCGCCACCGAAGCCCAACAGTTGGATAAC  
ACCATAACATTTTACGCTGATGTTGCTCTCAGCTGCAATCGCGGTAGTGTGACCCCGACGCTGCTGCTCAGAGGTTAA  
ACGACCCCGCTGGCAGCAATCGCCCTTCTGTTAACCGCCAGCAACCCGTTGCCGGAAGAGGAAGAAAGCGAGAAAAAG  
AGTGA

>Cluster\_11897

ATGAAACACCGGACCTGGATCACTGAAGCTTACGCTTCACTTTGAAGAACATTTACCCCGGTTGTGGCCGGGCGTCCG  
CCTGAGTGTACCAAAATCAACAGTTTGTAGTATGTTGCTGCGCTTTCGGAGAGCTGGCCTTTCGTTGGCCTTTGCCCGCAG

GCATGTCGGAGCAGGAACCTGTATGCCTGCCTTTACGGACAATTTTCACGGTACCAGTGTACGCTCCTGAAAGCACCGTT  
ATATCCGAAGCCCCGTGGTAAAAAACGTCCTCCGGCGGCCAACTTCCCTTATGAGTTTAAAAATCGCCTTAGTGGAGCA  
GTCACACTACAGCCCGGAGCCTGTGTGGCGAGATCGCCCGGAAAACGGATCAACGATAACCTGCTCTCACTGGCGCC  
ATCAATACCGAAAGGTGGCCTGTGCCTTCCGGAAAAAATATGCCGGCACTGCTTCCCGTACGCTTAAACGCCGGAGCCG  
GATAATAAAATCCCGCCACAGGAACACAGAGCAGATAAATAACCCGTCGACAGTCTGTGTGTGGAGCTGGTTCT  
GCCGGCGGAACCTCAGGCTTAAAGGTAACCTGACGCCGGCGTTATTACAGACACTTATCCGCGAAAATAAAGGGAGCA  
GCCACTGA

>Cluster\_6234

ATGATGAAGCAAGGAATGGCAACAGTATATCAATGACATGGCAACTTTTATGCGATGAACATGGTTTTACCCGGGAGCA  
CTACAATCAGCTGAAGAAGTTCAGCCCGGAGACATTACGTGAAATTTATGCTGAAATAGCCAGCTGTCCATCCATCAACCA  
GTGTATTGCTCAGGAATAAGTGGCTGACACCGCGGAGGATATCTGGAGCAGATTACCCGTGAATACGAACGAAGAATA  
CAAACTGTCCACCGTTCAGGAGCGAGAAGGAAGCGGAATCTGGTAAATGAACTATCTTTTGTGTGATTGCTCCGCT  
ATACCGTGTGCCCGCCGAAACAAACAGAACAGGTTGAGTCTTTTGTCTGCAGCTTATTGCCGAGCAGGAGCGGTTGGG  
AGCTTATTTTAAACCAATGATGGTTATTCATGGCATTGCGCACTTTATGATATATTTATTCATCTGGTTTTACGAAATATG  
GAAGACCAGCCTGAACATCAGAAACAGCGAATAACAAAAATATTTTATGAGCCGATGCAAGACTGGTTCGAGAAAGAGAT  
TAAATCCGGATTCATCTCTGTATGATGATGAACAAAAGAGAGCTTTAAGTGAACGGTAAATGATTTTACTTCAAAAG  
AATAA

>Cluster\_17629

ATGACGACTGAAAATAAAGTTAAGCAATACACGAAAACCTCAAGCGCTGAAGGTTACTGGGTGGATGCCCGTGGCGTAAT  
GACACTGAAAGCCTTATCAAGATATTGACCGCGAGCAGCTGGTGGTGGAGTGGTGGATGGCT  
CCTCCGCTCACTCCGGAACTGAAACTGCGTGCCTTTGGTGATTTACAGCGTTTATTGACCTGTCCGCGGAGAAAATAC  
GGCGTGTGAAAGGCGGTAAAAAAGGGAATATCAGCTTTACAGCTTTGACGGCGTTACAAGATTACAGCGCCATGCA  
GGACCGTATCGCTTTGATGAACGCAATTCAGACCGCAAGTGCCTGATGATGATGGCTGGCTGACTGGACGGAAAGATG  
CACGCCCTGAAATTAAGGCCATCATCAGTGGGCAATTCAGCAGGCAAGGAAGGCAACATCAACACCGGTCCGCTTCTG  
GCCCTGCGTCGCTCAGGATGAGGACGAAACGCTGGAATAACGCCATGTCGCTGATTGGTGAAGCCGTCAGGTAATTGG  
CAGAAAAGCTATATCCGCGTGTATGAGCGCTGGTGTATCTGCTGAATACCGCGCAATCCCGCTTGATATTGACGGGG  
TTTAA

>Cluster\_52388

ATGATTGCTTATCTGAACAAAGTCCCTGGGCACCGGAAGCATCGGAAATGTTATGCGCATCCGGAAGATGCCCAACG  
CTGTATCAAGATTGTCTACCATCGTGGCGATGGTGGCGATAAAGAGATCCGCCGTGAGTTAAAGTACTACGCGCATCTTG  
GTCGCCGGTTAAAGACTGGAGTGAATACCGCGCTATCACGGTACCGTTGAGACGGATTGCGGAACCGGTTATGTCTAC  
GATGTGATGCGGATTTCCAGCGCAAGCCTTCCATTACCGCTGACCGAATTTGCAGAACAATGCCGTTAGCAAGAAGACAT  
TGCAACACTGCGCAGTTACTGAAACAGCTGAAGCGTTATTTGCAGGATAACCGTATCGTGACGATGTCGCTGAAGCCGC  
AGAATATCTCTGTCACCGCATCAGTGAAGTACAGGTTACCCCGTCTGCGTGCAGCAACATTTGGTGAAGCACATTTGATT  
CCACTGGCGACCTGGTCGAAGTGGTGTGTCGCGTAAGCAAGAGCGGTTATGGAACGATTTATCGCCCAACCGCGGCT  
GGCTATTGCCCTGCAGAAAGATCTGCAACCTCGTGAGAGCAAAACCGCTCCGCTCACTTCGCGCGAAGCTTAA

>Cluster\_65765

ATGGCAAGATATTTGGGTCCTAAGCTCAAGCTGAGCCGCTGAGGGCACCGACTTATTCCTTAAAGTCTGGCGTTCCGCGC  
GATGATACCAAGTGAATAAATGAACAAGCTCCTGGCCAGCAGCTGCGCGTAAACCGGCTCTGTCTGACTATGGTGTGC  
AGTTGCGTGAAGAAGCAAAAAGTTCCCGTATCTATGGTGTGCTGGAGCGTCACTTCCGTAACACTACAAAGAAGCAGCA  
CGTCTGAAAGGCAACACCGGTGAAACCTGTGGCTCTGCTGGAAGTGTCTGGACAACGTTGTATACCGTATGGGCTT  
CGGTGCAGCTCTGTCAGAAAGCAGCTCAGCTGGTTAGCCATAAAGCAATATGTTAAACCGTCTGTTGTTAAACATCGCTT  
CTTATCAGTTAGTGAAGCAATGACCTGTGTAAGCATTCTGTAAGAAAGCAGAAAGCAGTCTGCGGTGAAAGGCTTCCG  
CTGGCTGAGCAGCGTGAAGAAGCCAACCTGGCTGGAAGTTGATGCTGGCAAGATGGAAGGTACGTTAAGCGTAAGCCGGA  
GCGTCTGATCTGTCTGCGGACATTAACGAACCTGATGCTGAGCTTTACTCCAAGTAA

>Cluster\_237

ATGAGGGTTAAAAATATTTTGGGATTACTTTTCTTTTGTGTGTTATTTTGTATAGCTATGGTTTTGCCACAAGGTGAA  
CCTATTTGTTTTTAGAGAAGGTGAAAAAATTTCTGGAGAAGGATATTTTGCAAACGGTCTCCATGTATGAAATGTGCCA  
TAGAAGTTTATACCTTGAAGGAAAAAATAGCTCAAACACAAACCGACGAAAGGGCAGGTTTGAAGTTAGGATAAAA  
GAAAAAGAACCTTTGTTGGTAAGGTTGATAGCAGGAGAAGGGCATTAGCAGAGGAAAAATAGAAGGCTCTATAGAGGG  
AGCTTCAAATGATAAAAAAAGAAAAATATAACAAAAAAGAGAGTGTGATCTACAAAAAAGAAAGATGTAGAGAACA  
TAAAAATAAATAATCAAAAAATGTAGAAATCGATAGAGAAATGTTAAAAGGGTGGTTAAAGAGGTTCTATCTGAGGAG  
TTAGGTTCTTTTAAAGAAAAATTTCTGGAGTTGAAAAAGGATTTAAACAGAGTTATGTTTCCAGGACATCATCGGAGGGAT  
AGGTTATAATAAGGGTTTTAGGTTTGTAGCCAAGTTAAAAGCCAGAAAAGAGAAGGCTTAG

>Cluster\_66946

ATGTTAGTAGAAAAATATTAATACCCTTTAAGTGAATAATAAGAAGATGAGCCTCATGATAAAGGATGGGCAATTTT  
GGAGCAGGCAACAATAGCCCTCGTTGTTCTTTTTGTTATAGTCTGTTCTGGGTAGTTTGTATGCGTTGCGTACAAGAG  
CAAATGTGGCAACTGAAACCGCAATATACAACAATATCACAAGTACCAGAGCCTGCTAAAAGGTAGCGATGATAT  
ACATTTACCAGCAGTGCACAAAATGACAGGTGCCCTCATTCAGATGGGTGTCACTCCCTCTGGGATGACCGTACAGGGCA  
CGAAACATCTGGTACAGCAACGCTCTATAACGCATGGGGCGGTGCTGTAAGTGTGCCCGGGTTCACACATCAGGGTTCA  
ACAACGGTTTTACCGTTACCTATGATAAAGTCCACAGGATGCCTGTATCCAGATTGCCACACGGATCAGTAAAACCTGGT  
TTAACTAAGCGCATTAACCTGAACGACTCTCACAGTGTGAAAGGTCACACTGAGAAGCCAGTACGCAATGCAA  
GGCAGATAATGGCAGCACTGGTACAACAACTTATCTTACCATCAATGGTTAA

>Cluster\_39336

ATGACTGAAAAAATATCCCCGAGGTTACTGGCAGGACGCCAAAGTTGTCTGGTTCCCGAGTCTATGATCAAGCCAT  
TGACCCGCGCAGCGATGCGCTGGTAAAGGAGATCGTCCGCGACGCAATGAAAATGAATGCTGAATTACTTGGTTTAAAA  
ACCGCTGTTTTGGCGATATACAGCGTTTTATTGATTTGTCGTTGAACAATATGATGCCCGCCCGGAGGCAAGAAAGGC  
AACATCACCTGCATTATTTGATGGTGCCTACAGATCCAGCGCCAGATTGCCGAAAACATCGCCTTTGATGACCGGTT  
ACAAGCCGCGCTAATCTGATGATGAGTGCCTGCATGAGTGGACGGCACAGGCCACGCCAGAGCTGAAGGTCATCCGTTG  
AGAAAGCATTCGCAAGGATAAAGAGGCAACATCTCCACCGGGCGTACTGGCGCTGCGCCGCTATGAAATACCGGAC  
CCACGCTGGCTGAAGGCAATGGAGGCCATTGGCAGTCCGGTGCAGGTGGTGAACCTCAACAAGTTACGTGCGGGTTATCA  
CGTGTGCGTGTAGCAGATAAATACCAGCTGTGCTGCAATATTGCGGGGGTGTGA

>Cluster\_62889

ATGGTTCGACATGAAAACCTACGCATACCTCCCTCCCTTTGCGGACATACGCTGCATTTTGTGAGTTGATCCGGCGAA  
TTTTTGTGAGCAGGATTTACTCTGGCTGCCGATACCGCAACTGCAACACGCTGGACGGAAGCGCAAGCCGAACATT  
TAGCCGGCGGATCGCTGCAATTTATGCGCTGCGGAAATATGGCTATAAATGTGTGCCGCAATCGGCGAGCTACGCCAA  
CCGGTGTGGCTGCGGAGGTATACGGCAGTATTAGCCACTGCGGGGCTACGGCATTGGCCGTGGTTTCCCGTACCCGAT  
TGGCGTTGATATCGAAGAAATTTTCTGCGCAAAACAGCGACCGAATGACAGACAACATATATACACCAGCAGAAACCG  
AGGACTCGCAGACTGCGGTTTTAGCCTTTCTCTGGCGTGCAGTGGCATTTTCCGCGAAAGAGAGCGCATTTAAGGCA



AGTGAGATCCAAACTGATGCAGGTTTTCTGGACTATCAGATAATTAGCTGGAATAAACAGCAGGTCATCATTCATCGTGA  
GAATGAGATGTTTTGCTGTGCACTGGCAGATAAAAAGAAAAAATAGTCATAAECTGTGCAACACGATTAA

>Cluster\_54225

ATGGGGGATACTATGCAACAACGATTAACGCAGGATTTAACGCAATTTCTCGCCAGCTTGCCGGAAGATGATCGCATCAA  
AGCGATTAATGAAATCCGCATGGCGATCCATCAGGTTAGCCCTTTTCGTGAAGAGCCAGTGGATTGCGTTCTGTGGGTTA  
AAAACAGCCAACCTTATGCCTAATGATTACAACCCAAACACGTTGGCACCACCCGAAAAAAACTGCTGCAAAAATCCATT  
GAAATAGATGGTTTTACCCAACCATTTGGTCCACACATACGGATAAAAAATGCCATGGAAATCGTGGATGGTTTTACCG  
CCATGAAATGGTAAAGGCTCATCATCTAAAATTACGCTTAAAAGGTTATTTGCCGGTGACCTGTCTGGAAGGTACGC  
GTAATCAACGCATCGCCGCGACTATTCGTCATAATCGCGCTCGTGGACGCCATCAAATCACCGCCATGTCGGAAATCGTC  
CGTGAACCTAGCCAGTTGGGATGGGACGATAATAAAATTGGCAAAGAGCTGGGAATGGACAGCGACGAAGTGTGCGCCT  
GAAGCAAATTAACGGCCTGCAAGAGTTGTTTGCACCGCTCAATATTCGCCGCTTGACGGTTAAATAG

>Cluster\_50031

ATGTCATCAATCCGCTTAACTACGAGAATGAAAGAGGAAATCGCTCGTAACGCTTTAATTAAGTCTGGGGTTTTCACTGA  
ACTTGAAGAAGTAACAAAGTTAAGAACCAGCTTGACCTTGACGCCAGAGTTATTGCGTTTGGCGGAAAAAGAAAACCG  
AAGAAGTGGACCGCTGGCATCAAAGTTAATGGCTGCAAGTGAGGAACCTCAAAGCTTGGATGTTCATTTTACTCATGC  
GATGTCAGTTCAGTTCGATTTATCTGACTGTATCTGGAAGAAGGTTGGCTGGCATTATACGGAAGACGGCAACGG  
TGAAGATATATTGCTCCCTACCCCGACAAGATAAATGCATGTTTGACGCAGAACACAAAATAACAAAAAGGTTTGATG  
AAATCTGCCGATTTGCAACAAAACTTGAAGCCAGGAAAAAGGATATCGAATCAAATGTATGGGCTGCTTTGAACTCAGTC  
ACAACAGTTAAGCGACTTATTGAGGCTTGGCCTGAAAGCAAAGAGTTGCTACCAAAAGAACGATAAAGCAAGTGCAGC  
ACTTCCCTGCTTTACGGGTAGAAGATTGAATAAGATGATTGGACTTCCCTCCGAGGCCGCATAG

>Cluster\_41488

ATGAAGATCGTGAAGTCAAACACCCACTCGTCAAACACAAGCTGGGACTGATGCGTGAGCAAGATATCAGCACCAAGCG  
CTTTCGCGAECTTCTTCCGAAGTGGGTAGCCTGCTGACTTACGAAGCGACCCGACCTCGAAACGGAAAAAGTCACTA  
TCGAAGGCTGGAACGGCCCGGTAGAAATCGACCAGATCAAAGGTAAGAAAATTACCGTTGTGCAATTTGCGTGCAGG  
CTTGGGATGATGGATGGTGTGCTGGAACCGTTCCGAGTGCAGCATCAGTGTGCGTATGTACCGTAATGAAGAAC  
GCTGGAGCCGGTACCGTACTTCCAGAACTGGTTTCTAACATCGATGAGCGTATGGCGCTGATCGTTGACCCAATGCTGG  
CAACCGGTGGTCCGTTATCGCGACCATCGACCTGCTGAAAAAGCGGGCTGCAGCAGCATCAAAGTTCTGGTGTGGTC  
GCTGCGCCAGAAGTATCGCTGCGCTGGAAAAAGCGCACCCGGACGTCGAACGTATATACTGCATCGATTGACCAGGGACT  
GAACGAGCACGGATACATTAATCCGGCCCTCGCGATGCGCGTGACAAAATCTTTGGTACGAAATAA
