# Supplementary material for: Transcriptional Variation of Diverse Enteropathogenic Escherichia coli Isolates under Virulence-Inducing Conditions
Source: PubMed Central journal article supplement (PMC5527300; doi:10.1128/msystems.00024-17), 2017-07-25

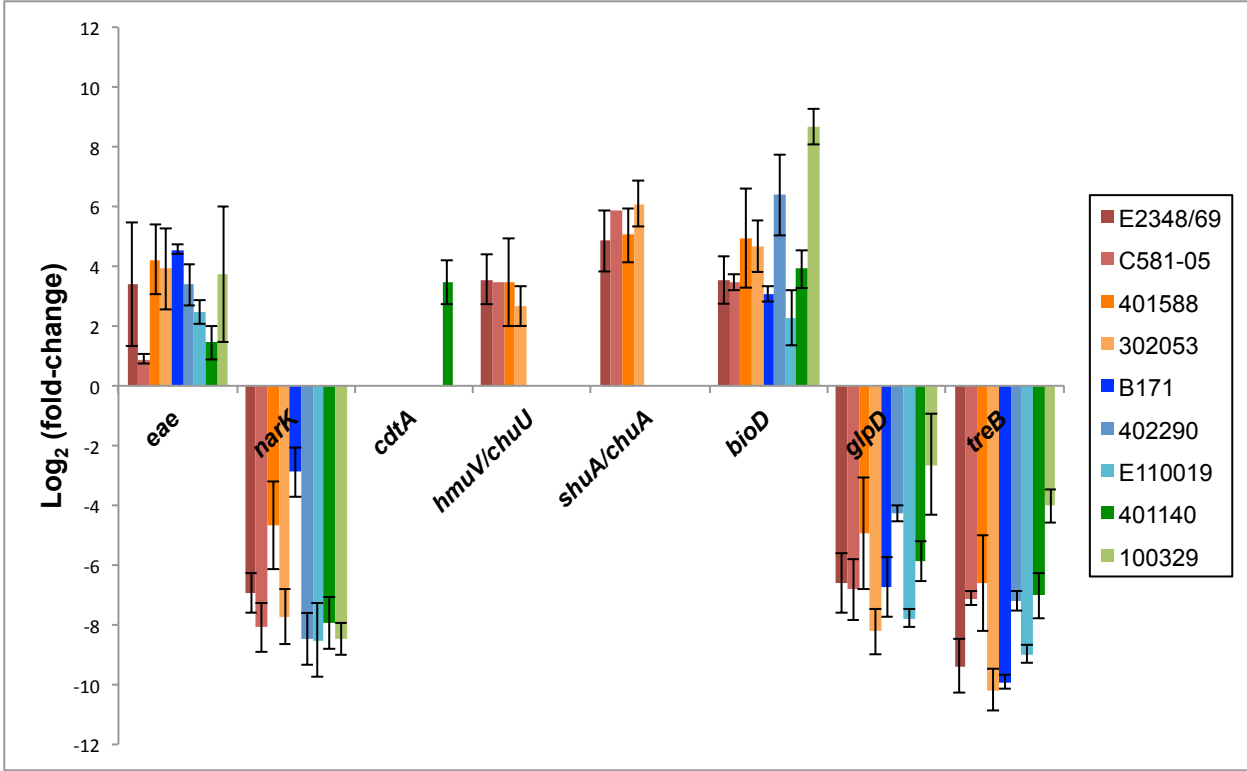

Supplement: sys004172117sf3.pdf [file sys004172117sf3.pdf]
