# Supplementary material for: Transcriptional Variation of Diverse Enteropathogenic Escherichia coli Isolates under Virulence-Inducing Conditions
Source: PubMed Central journal article supplement (PMC5527300; doi:10.1128/msystems.00024-17), 2017-07-25
Supplement: sys004172117st4.pdf [file sys004172117st4.pdf]

**Table S1.** Primers used in this study

| Gene             | Predicted Protein Function                    | Protein Accession No. <sup>a</sup> | Primer ID | Sequence 5'-3'                 | Source                     |
|------------------|-----------------------------------------------|------------------------------------|-----------|--------------------------------|----------------------------|
| <i>rpoA</i>      | RNA polymerase, alpha subunit                 | CAS11106.1                         | Ec-rpoA-F | TGTAGGCAATACGCTCCACA           | (Sahl <i>et al.</i> 2012)  |
|                  |                                               |                                    | Ec-rpoA-R | GGTTATGTGCCGGCTTCTAC           | "                          |
| <i>eae</i>       | Intimin, attachment protein                   | YP_002331401.1                     | eae_361F  | TATAGTGCCTTACCTGTCTTAGGTTCCGG  | (Hazen <i>et al.</i> 2015) |
|                  |                                               |                                    | eae_495R  | ATAATTTAGAGCCTTGTTCATCGGTTCGTG | "                          |
| <i>narK</i>      | nitrite extrusion protein 1                   | CAS08895.1                         | narK_47F  | CAGATTGGCGACCGGAAGATCCTG       | This study                 |
|                  |                                               |                                    | narK_178R | CCGCAACAGCGCTGAACAACAT         |                            |
| <i>cdtA</i>      | cytolethal distending toxin                   | AAA18785.1                         | cdtA_97F  | GAATTGGTTGGAATCCCTGGACAAGG     | "                          |
|                  |                                               |                                    | cdtA_241R | GAACAGGTCTGGCCCAAATAGTAAGC     |                            |
| <i>hmuV/chuU</i> | hemin import ATP-binding protein HmuV/ChuU    | CAS11296.1                         | hmuV_122F | CTACGCTGCTTCGCCAGCTAAC         | "                          |
|                  |                                               |                                    | hmuV_277R | GTACGCTGAATGGAAACGCCATGTG      |                            |
| <i>shuA/chuA</i> | outer membrane heme receptor ShuA/ChuA        | CAS11291.1                         | shuA_82F  | GCTACTGAAACCATGACCGTTACGGC     | "                          |
|                  |                                               |                                    | shuA_223R | CAGGAACATGACGCAGCAAATCAGTGG    |                            |
| <i>bioD</i>      | dethiobiotin synthase                         | CAS08278.1                         | bioD_19F  | GTCACCGGAACGGATACCGAAG         | "                          |
|                  |                                               |                                    | bioD_211R | TTGCGTAATCCAGCTGCAGGC          |                            |
| <i>glpD</i>      | aerobic glycerol-3-phosphate dehydrogenase    | CAS11218.1                         | glpD_155F | GCCTGCGCTACCTTGAGCACTAT        | "                          |
|                  |                                               |                                    | glpD_311R | CCAATGCCAATCATCCACGCCG         |                            |
| <i>treB</i>      | PTS system trehalose-specific EIIBC component | CAS12114.1                         | treB_49F  | CGAGGTGAGTACAATCGGGATGATGATG   | "                          |
|                  |                                               |                                    | treB_217R | GATGATTGGTTCTGGTCTGGCAGG       |                            |

<sup>a</sup>Primers were selected by comparing with the sequences from all EPEC genomes analyzed; however, the protein accession number is provided for the respective gene from the E2348/69 genome or other EPEC genome available in GenBank.

#### Supplemental References.

1. Sahl JW, Rasko DA. 2012. Analysis of global transcriptional profiles of enterotoxigenic *Escherichia coli* isolate E24377A. *Infect Immun* **80**:1232-1242.
2. Hazen TH, Daugherty SC, Shetty A, Mahurkar AA, White O, Kaper JB, Rasko DA. 2015. RNA-Seq analysis of isolate- and growth phase-specific differences in the global transcriptomes of enteropathogenic *Escherichia coli* prototype isolates. *Front Microbiol* **6**.
