# Supplementary material for: Transcriptional Variation of Diverse Enteropathogenic Escherichia coli Isolates under Virulence-Inducing Conditions
Source: PubMed Central journal article supplement (PMC5527300; doi:10.1128/msystems.00024-17), 2017-07-25
Supplement: sys004172117st5.pdf [file sys004172117st5.pdf]

**Table S2.** Characteristics of the RNA-Seq generated in this study

| Isolate ID                                | EPEC Phylogenomic Lineage | Phylogroup | Condition <sup>a</sup> | Replicate | Total Reads | Total Reads Mapped | No. of Reads Mapped to Genic Regions (%) <sup>b</sup> | No. of Reads Mapped to Intergenic Regions (%) <sup>c</sup> | Coverage of Reads Mapped to Genic Regions <sup>d</sup> | SRA Accession No.    |
|-------------------------------------------|---------------------------|------------|------------------------|-----------|-------------|--------------------|-------------------------------------------------------|------------------------------------------------------------|--------------------------------------------------------|----------------------|
| E2348/69                                  | EPEC1                     | B2         | LB                     | 1         | 39,347,430  | 25,579,676         | 11,428,999 (44.68)                                    | 14,150,677 (55.32)                                         | 229                                                    | SRX1322473           |
|                                           |                           |            |                        | 2         | 43,218,880  | 28,221,680         | 8,139,133 (28.84)                                     | 20,082,547 (71.16)                                         | 163                                                    | SRX1322474           |
| B171                                      | EPEC2                     | B1         | DMEM                   | 1         | 90,223,668  | 64,341,630         | 10,191,714 (15.84)                                    | 54,149,916 (84.16)                                         | 204                                                    | SRX1322475           |
|                                           |                           |            |                        | 2         | 78,280,450  | 52,692,826         | 14,627,528 (27.76)                                    | 38,065,298 (72.24)                                         | 293                                                    | SRX1322476           |
|                                           |                           |            | LB                     | 1         | 50,584,352  | 28,468,286         | 14,219,909 (49.95)                                    | 14,248,377 (50.05)                                         | 284                                                    | SRX1322477           |
|                                           |                           |            |                        | 2         | 44,770,910  | 23,920,488         | 13,113,212 (54.82)                                    | 10,807,276 (45.18)                                         | 262                                                    | SRX1322478           |
| C581-05                                   | EPEC4                     | B2         | DMEM                   | 1         | 44,629,450  | 24,494,208         | 13,758,397 (56.17)                                    | 10,735,811 (43.83)                                         | 275                                                    | SRX1322479           |
|                                           |                           |            |                        | 2         | 46,997,680  | 25,875,712         | 12,777,427 (49.38)                                    | 13,098,285 (50.62)                                         | 256                                                    | SRX1322480           |
|                                           |                           |            | LB                     | 1         | 68,153,706  | 45,326,156         | 9,364,384 (20.66)                                     | 35,961,772 (79.34)                                         | 187                                                    | SRX1322481           |
|                                           |                           |            |                        | 2         | 86,191,504  | 57,582,684         | 12,564,542 (21.82)                                    | 45,018,142 (78.18)                                         | 251                                                    | SRX1322482           |
| 401140                                    | EPEC5                     | A          | DMEM                   | 1         | 60,758,124  | 37,669,542         | 11,847,071 (31.45)                                    | 25,822,471 (68.55)                                         | 237                                                    | SRX1322483           |
|                                           |                           |            |                        | 2         | 84,509,240  | 56,850,714         | 12,689,079 (22.32)                                    | 44,161,635 (77.68)                                         | 254                                                    | SRX1322484           |
|                                           |                           |            | LB                     | 1         | 98,122,142  | 62,935,928         | 8,578,167 (13.63)                                     | 54,357,761 (86.37)                                         | 172                                                    | SRX481602            |
|                                           |                           |            |                        | 2         | 109,658,950 | 68,745,070         | 9,294,333 (13.52)                                     | 59,450,737 (86.48)                                         | 186                                                    | SRX481643            |
| 402290                                    | EPEC7                     | B1         | DMEM                   | 1         | 143,164,326 | 93,428,500         | 13,369,618 (14.31)                                    | 80,058,882 (85.69)                                         | 267                                                    | SRX481650            |
|                                           |                           |            |                        | 2         | 68,560,186  | 43,607,642         | 7,605,173 (17.44)                                     | 36,002,469 (82.56)                                         | 152                                                    | SRX481651, SRX481652 |
|                                           |                           |            | LB                     | 1         | 41,672,396  | 25,888,056         | 5,213,854 (20.14)                                     | 20,674,202 (79.86)                                         | 104                                                    | SRX481833            |
|                                           |                           |            |                        | 2         | 38,086,026  | 23,856,680         | 5,224,613 (21.9)                                      | 18,632,067 (78.1)                                          | 104                                                    | SRX481834            |
| 401588                                    | EPEC8                     | B2         | DMEM                   | 1         | 43,796,848  | 27,200,176         | 6,266,921 (23.04)                                     | 20,933,255 (76.96)                                         | 125                                                    | SRX481835            |
|                                           |                           |            |                        | 2         | 57,575,912  | 38,939,098         | 9,174,051 (23.56)                                     | 29,765,047 (76.44)                                         | 183                                                    | SRX481836            |
|                                           |                           |            | LB                     | 1         | 60,512,394  | 41,119,036         | 9,432,707 (22.94)                                     | 31,686,329 (77.06)                                         | 189                                                    | SRX481847            |
|                                           |                           |            |                        | 2         | 53,305,308  | 37,264,176         | 9,353,308 (25.1)                                      | 27,910,868 (74.9)                                          | 187                                                    | SRX481859            |
| 302053                                    | EPEC9                     | B2         | DMEM                   | 1         | 48,767,194  | 31,691,680         | 9,536,027 (30.09)                                     | 22,155,653 (69.91)                                         | 191                                                    | SRX481860            |
|                                           |                           |            |                        | 2         | 39,567,402  | 27,781,490         | 6,503,647 (23.41)                                     | 21,277,843 (76.59)                                         | 130                                                    | SRX481861            |
|                                           |                           |            | LB                     | 1         | 46,792,656  | 29,683,240         | 11,410,237 (38.44)                                    | 18,273,003 (61.56)                                         | 228                                                    | SRX481725            |
|                                           |                           |            |                        | 2         | 58,907,128  | 37,986,902         | 15,145,378 (39.87)                                    | 22,841,524 (60.13)                                         | 303                                                    | SRX481737            |
| 100329                                    | EPEC10                    | A          | DMEM                   | 1         | 53,941,936  | 34,498,746         | 13,706,352 (39.73)                                    | 20,792,394 (60.27)                                         | 274                                                    | SRX481793            |
|                                           |                           |            |                        | 2         | 40,593,700  | 25,749,842         | 10,799,484 (41.94)                                    | 14,950,358 (58.06)                                         | 216                                                    | SRX481825            |
|                                           |                           |            | LB                     | 1         | 52,180,888  | 34,414,562         | 5,674,961 (16.49)                                     | 28,739,601 (83.51)                                         | 113                                                    | SRX481826            |
|                                           |                           |            |                        | 2         | 50,848,702  | 33,921,444         | 6,075,331 (17.91)                                     | 27,846,113 (82.09)                                         | 122                                                    | SRX481827            |
| E110019                                   | None                      | B1         | DMEM                   | 1         | 54,496,792  | 35,314,084         | 7,532,494 (21.33)                                     | 27,781,590 (78.67)                                         | 151                                                    | SRX481828            |
|                                           |                           |            |                        | 2         | 48,423,314  | 32,160,070         | 6,046,093 (18.8)                                      | 26,113,977 (81.2)                                          | 121                                                    | SRX481832            |
|                                           |                           |            | LB                     | 1         | 55,671,402  | 30,777,290         | 11,532,251 (37.47)                                    | 19,245,039 (62.53)                                         | 231                                                    | SRX1322485           |
|                                           |                           |            |                        | 2         | 65,738,936  | 31,867,460         | 11,615,689 (36.45)                                    | 20,251,771 (63.55)                                         | 232                                                    | SRX1322486           |
|                                           |                           |            | DMEM                   | 1         | 47,416,470  | 35,651,848         | 13,045,011 (36.59)                                    | 22,606,837 (63.41)                                         | 261                                                    | SRX1322487           |
|                                           |                           |            |                        | 2         | 48,395,020  | 43,749,684         | 14,568,645 (33.3)                                     | 29,181,039 (66.7)                                          | 291                                                    | SRX1322488           |
| <u>Additional EPEC8 isolates analyzed</u> |                           |            |                        |           |             |                    |                                                       |                                                            |                                                        |                      |
| 103385                                    | EPEC8                     | B2         | LB                     | 1         | 65,638,992  | 48,106,818         | 11,463,855 (23.83)                                    | 36,642,963 (76.17)                                         | 229                                                    | SRX481653, SRX481654 |
|                                           |                           |            |                        | 2         | 57,801,512  | 42,287,912         | 10,166,014 (24.04)                                    | 32,121,898 (75.96)                                         | 203                                                    | SRX481657, SRX481658 |
|                                           |                           |            | DMEM                   | 1         | 63,427,586  | 46,387,156         | 10,400,000 (22.42)                                    | 35,987,156 (77.58)                                         | 208                                                    | SRX481659, SRX481660 |
|                                           |                           |            |                        | 2         | 69,093,890  | 51,367,842         | 14,028,558 (27.31)                                    | 37,339,284 (72.69)                                         | 281                                                    | SRX481661, SRX481662 |
| 300059                                    | EPEC8                     | B2         | LB                     | 1         | 43,069,956  | 28,668,440         | 6,602,342 (23.03)                                     | 22,066,098 (76.97)                                         | 132                                                    | SRX481708            |
|                                           |                           |            |                        | 2         | 47,076,358  | 32,034,222         | 6,820,086 (21.29)                                     | 25,214,136 (78.71)                                         | 136                                                    | SRX481709            |
|                                           |                           |            | DMEM                   | 1         | 40,504,972  | 27,196,184         | 6,279,599 (23.09)                                     | 20,916,585 (76.91)                                         | 126                                                    | SRX481716            |
|                                           |                           |            |                        | 2         | 52,405,042  | 36,483,322         | 8,259,824 (22.64)                                     | 28,223,498 (77.36)                                         | 165                                                    | SRX481722            |

<sup>a</sup>The EPEC isolates were grown to an OD<sub>600</sub> of 0.5 in either Luria-Bertani (LB) broth or Dulbecco's Modified Eagle's Medium (DMEM) supplemented with high glucose (4.5 g/L).

<sup>b</sup>The genic regions are all protein-coding genes (CDS).

<sup>c</sup>The intergenic regions are all non-protein-coding regions of the genome, including rRNA genes.

<sup>d</sup>The approximate sequence coverage of the reads that mapped to genic regions was calculated as the total number of bases generated (101 bp Illumina reads) divided by an estimated *E. coli* genome size of 5 Gb.
