# Supplementary material for: Transcriptional Variation of Diverse Enteropathogenic Escherichia coli Isolates under Virulence-Inducing Conditions
Source: PubMed Central journal article supplement (PMC5527300; doi:10.1128/msystems.00024-17), 2017-07-25
Supplement: sys004172117st6.pdf [file sys004172117st6.pdf]

**Table S3.** Differential-expression of core, phylogroup-specific, and isolate-specific genes

|                         |             | Core Genes <sup>a</sup>                                                        |                  |        |       |        |         |          |         |        |        |
|-------------------------|-------------|--------------------------------------------------------------------------------|------------------|--------|-------|--------|---------|----------|---------|--------|--------|
| Cluster ID <sup>a</sup> | Gene        | Predicted Protein Function                                                     | LFC <sup>d</sup> |        |       |        |         |          |         |        |        |
|                         |             |                                                                                | 100329           | 401140 | B171  | 402290 | E110019 | E2348/69 | C581-05 | 401588 | 302053 |
| Cluster_22333           | <i>cirA</i> | colicin I receptor                                                             | 7.40             | 4.91   | 3.23  | 6.96   | 4.53    | 4.16     | 5.44    | 2.62   | 4.71   |
| Cluster_22417           | <i>gfpA</i> | glycerol-3-phosphate dehydrogenase, anaerobic, A subunit                       | -7.80            | -6.51  | -7.06 | -6.25  | -5.52   | -6.13    | -7.77   | -3.31  | -9.21  |
| Cluster_22418           | <i>gfpB</i> | glycerol-3-phosphate dehydrogenase, anaerobic, B subunit                       | -6.73            | -6.51  | -6.83 | -6.88  | -5.91   | -6.62    | -8.18   | -3.86  | -7.83  |
| Cluster_24491           | <i>treC</i> | alpha,alpha-phosphotrehalase                                                   | -3.30            | -5.45  | -8.30 | -6.95  | -7.06   | -7.42    | -6.46   | -7.03  | -8.27  |
| Cluster_24492           | <i>treB</i> | PTS system trehalose-specific EIIBC component                                  | -4.37            | -5.65  | -7.04 | -8.28  | -8.16   | -8.79    | -7.36   | -7.09  | -9.40  |
| Cluster_25541           | <i>bioD</i> | dehydrobiotin synthase                                                         | 6.09             | 3.83   | 3.82  | 5.20   | 4.81    | 5.10     | 3.51    | 4.75   | 6.57   |
| Cluster_2623            | <i>gfpT</i> | glycerol-3-phosphate transporter                                               | -6.41            | -7.54  | -9.27 | -7.91  | -7.91   | -8.07    | -6.53   | -4.32  | -9.88  |
| Cluster_2626            | <i>gfpC</i> | glycerol-3-phosphate dehydrogenase, anaerobic, C subunit                       | -5.44            | -5.51  | -5.54 | -4.76  | -5.64   | -5.78    | -6.03   | -3.51  | -6.06  |
| Cluster_27245           |             | MauM/NapG ferredoxin-type family protein                                       | -6.11            | -2.40  | 2.38  | -2.76  | 3.19    | -2.92    | -3.12   | -2.60  | -6.22  |
| Cluster_28414           | <i>gfpD</i> | aerobic glycerol-3-phosphate dehydrogenase                                     | -2.85            | -4.87  | -5.86 | -4.60  | -5.58   | -5.68    | -5.87   | -4.41  | -6.39  |
| Cluster_30847           | <i>narK</i> | nitrite extrusion protein 1                                                    | -6.92            | -5.92  | -2.25 | -7.04  | -4.52   | -6.39    | -6.48   | -4.32  | -6.16  |
| Cluster_33251           |             | RbsD / FucU transport family protein                                           | -6.80            | -6.87  | -5.32 | -7.04  | -4.73   | -5.62    | 2.31    | -6.44  | -4.74  |
| Cluster_33636           | <i>deoC</i> | deoxyribose-phosphate aldolase                                                 | -3.70            | -3.57  | -3.62 | -4.05  | -2.65   | -3.30    | -3.20   | -4.17  | -3.98  |
| Cluster_34598           | <i>bioC</i> | malonyl-CoA O-methyltransferase BioC                                           | 7.50             | 2.44   | 2.47  | 5.57   | 4.41    | 4.55     | 4.36    | 4.36   | 5.83   |
| Cluster_37491           | <i>dtpB</i> | dipeptide and tripeptide permease B                                            | -3.95            | -2.69  | -2.37 | -3.29  | -3.48   | -3.72    | -3.29   | -3.30  | -5.06  |
| Cluster_37569           | <i>dtpF</i> | oligopeptide/dipeptide ABC transporter, ATP-binding, C-terminal domain protein | 3.52             | 3.63   | 2.08  | 3.65   | 2.60    | 3.76     | 2.16    | 2.18   | 2.58   |
| Cluster_23696           | <i>dtpD</i> | oligopeptide/dipeptide ABC transporter, ATP-binding, C-terminal domain protein | 3.69             | 4.14   | 2.38  | 4.42   | 3.12    | 4.95     | 4.18    | 3.32   | 4.24   |
| Cluster_39493           | <i>bioB</i> | biotin synthase                                                                | 6.45             | 3.94   | 2.73  | 6.10   | 3.85    | 5.02     | 5.86    | 4.76   | 6.29   |
| Cluster_39494           | <i>bioF</i> | 8-amino-7-oxononanoate synthase                                                | 5.65             | 2.05   | 2.81  | 5.84   | 3.93    | 4.83     | 6.02    | 5.36   | 6.10   |
| Cluster_40107           |             | nitrate reductase, alpha subunit                                               | -8.34            | -6.28  | -3.12 | -6.45  | -5.18   | -8.36    | -9.75   | -5.98  | -8.71  |
| Cluster_40648           | <i>purT</i> | phosphoribosylglycinamide formyltransferase 2                                  | 3.81             | 2.96   | 4.44  | 3.94   | 4.98    | 2.82     | 3.49    | 3.23   | 2.17   |
|                         |             | Phylogroup-Specific Genes <sup>a</sup>                                         |                  |        |       |        |         |          |         |        |        |
| Cluster ID              | Gene        | Predicted Protein Function                                                     | LFC <sup>d</sup> |        |       |        |         |          |         |        |        |
| <b>100329 (A)</b>       |             |                                                                                |                  |        |       |        |         |          |         |        |        |
| Cluster_6463            |             | outer membrane autotransporter barrel domain protein                           | 2.37             |        |       |        |         |          |         |        |        |
| <b>401140 (A)</b>       |             |                                                                                |                  |        |       |        |         |          |         |        |        |
| Cluster_6463            |             | outer membrane autotransporter barrel domain protein                           | 2.66             |        |       |        |         |          |         |        |        |
| <b>B171 (B1)</b>        |             |                                                                                |                  |        |       |        |         |          |         |        |        |
| Cluster_4478            |             | conserved hypothetical protein                                                 | 2.64             |        |       |        |         |          |         |        |        |
| Cluster_4503            |             | conserved hypothetical protein                                                 | 2.11             |        |       |        |         |          |         |        |        |
| <b>402290 (B1)</b>      |             |                                                                                |                  |        |       |        |         |          |         |        |        |
| Cluster_47272           |             | conserved hypothetical protein                                                 | 2.20             |        |       |        |         |          |         |        |        |
| <b>E110019 (B1)</b>     |             |                                                                                |                  |        |       |        |         |          |         |        |        |
| None                    |             | None                                                                           | None             |        |       |        |         |          |         |        |        |
| <b>E2348/69 (B2)</b>    |             |                                                                                |                  |        |       |        |         |          |         |        |        |
| Cluster_20380           |             | BAAT / Acyl-CoA thioester hydrolase C terminal family protein                  | -2.50            |        |       |        |         |          |         |        |        |
| Cluster_22955           |             | PfkB carbohydrate kinase family protein                                        | -2.65            |        |       |        |         |          |         |        |        |
| Cluster_23655           | <i>hmuV</i> | hemin import ATP-binding protein HmuV                                          | 2.42             |        |       |        |         |          |         |        |        |
| Cluster_24280           |             | His Kinase A domain protein                                                    | -2.74            |        |       |        |         |          |         |        |        |
| Cluster_27665           |             | alkylhydroperoxidase AhpD family core domain protein                           | 3.24             |        |       |        |         |          |         |        |        |
| Cluster_27796           |             | PTS system, sucrose-specific IIBC component                                    | -7.00            |        |       |        |         |          |         |        |        |
| Cluster_27797           | <i>scrB</i> | sucrose-6-phosphate hydrolase                                                  | -5.67            |        |       |        |         |          |         |        |        |
| Cluster_28491           |             | periplasmic binding family protein                                             | 5.76             |        |       |        |         |          |         |        |        |
| Cluster_28495           |             | FecCD transport family protein                                                 | 3.75             |        |       |        |         |          |         |        |        |
| Cluster_28578           | <i>yiaM</i> | 2,3-diketo-L-gulonate TRAP transporter small permease protein YiaM             | -3.96            |        |       |        |         |          |         |        |        |
| Cluster_28657           |             | PTS system, Fru family, IIB component domain protein                           | -2.39            |        |       |        |         |          |         |        |        |
| Cluster_29027           |             | bacterial capsule synthesis PGA_cap family protein                             | -3.28            |        |       |        |         |          |         |        |        |
| Cluster_32975           | <i>shuA</i> | outer membrane heme receptor ShuA                                              | 5.00             |        |       |        |         |          |         |        |        |
| Cluster_39344           |             | BNR/Asp-box repeat family protein                                              | -2.00            |        |       |        |         |          |         |        |        |
| Cluster_41853           | <i>scrY</i> | sucrose porin                                                                  | -6.62            |        |       |        |         |          |         |        |        |
| Cluster_42553           |             | putative heme utilization radical SAM enzyme HutW                              | 5.12             |        |       |        |         |          |         |        |        |
| Cluster_42555           |             | NADH(P)-binding family protein                                                 | 3.42             |        |       |        |         |          |         |        |        |
| Cluster_42637           |             | conserved hypothetical protein                                                 | -2.28            |        |       |        |         |          |         |        |        |
| <b>C581-05 (B2)</b>     |             |                                                                                |                  |        |       |        |         |          |         |        |        |
| Cluster_23201           |             | ABC transporter family protein                                                 | 2.49             |        |       |        |         |          |         |        |        |
| Cluster_23655           | <i>hmuV</i> | hemin import ATP-binding protein HmuV                                          | 2.96             |        |       |        |         |          |         |        |        |
| Cluster_27665           |             | alkylhydroperoxidase AhpD family core domain protein                           | 5.13             |        |       |        |         |          |         |        |        |
| Cluster_27796           |             | PTS system, sucrose-specific IIBC component                                    | -2.11            |        |       |        |         |          |         |        |        |
| Cluster_28491           |             | periplasmic binding family protein                                             | 4.63             |        |       |        |         |          |         |        |        |
| Cluster_28495           |             | FecCD transport family protein                                                 | 3.27             |        |       |        |         |          |         |        |        |
| Cluster_32975           | <i>shuA</i> | outer membrane heme receptor ShuA                                              | 5.20             |        |       |        |         |          |         |        |        |
| Cluster_42553           |             | putative heme utilization radical SAM enzyme HutW                              | 4.16             |        |       |        |         |          |         |        |        |
| Cluster_42554           |             | conserved hypothetical protein                                                 | 2.92             |        |       |        |         |          |         |        |        |
| Cluster_42555           |             | NADH(P)-binding family protein                                                 | 3.19             |        |       |        |         |          |         |        |        |
| Cluster_43425           | <i>iraD</i> | anti-adaptor protein IraD                                                      | -2.62            |        |       |        |         |          |         |        |        |
| <b>401588 (B2)</b>      |             |                                                                                |                  |        |       |        |         |          |         |        |        |
| Cluster_23201           |             | ABC transporter family protein                                                 | 2.08             |        |       |        |         |          |         |        |        |
| Cluster_23655           | <i>hmuV</i> | hemin import ATP-binding protein HmuV                                          | 2.31             |        |       |        |         |          |         |        |        |
| Cluster_25294           |             | phage integrase family protein                                                 | -2.30            |        |       |        |         |          |         |        |        |
| Cluster_27665           |             | alkylhydroperoxidase AhpD family core domain protein                           | 3.60             |        |       |        |         |          |         |        |        |
| Cluster_28491           |             | periplasmic binding family protein                                             | 2.33             |        |       |        |         |          |         |        |        |
| Cluster_28495           |             | FecCD transport family protein                                                 | 2.17             |        |       |        |         |          |         |        |        |
| Cluster_32975           | <i>shuA</i> | outer membrane heme receptor ShuA                                              | 4.57             |        |       |        |         |          |         |        |        |
| Cluster_42098           |             | TonB-dependent siderophore receptor family protein                             | 3.19             |        |       |        |         |          |         |        |        |
| Cluster_42553           |             | putative heme utilization radical SAM enzyme HutW                              | 2.40             |        |       |        |         |          |         |        |        |
| Cluster_42554           |             | conserved hypothetical protein                                                 | 2.97             |        |       |        |         |          |         |        |        |
| Cluster_42555           |             | NADH(P)-binding family protein                                                 | 2.54             |        |       |        |         |          |         |        |        |
| <b>302053 (B2)</b>      |             |                                                                                |                  |        |       |        |         |          |         |        |        |
| Cluster_19907           |             | periplasmic binding family protein                                             | -2.19            |        |       |        |         |          |         |        |        |
| Cluster_23201           |             | ABC transporter family protein                                                 | 2.43             |        |       |        |         |          |         |        |        |
| Cluster_23655           | <i>hmuV</i> | hemin import ATP-binding protein HmuV                                          | 3.01             |        |       |        |         |          |         |        |        |
| Cluster_27665           |             | alkylhydroperoxidase AhpD family core domain protein                           | 4.06             |        |       |        |         |          |         |        |        |
| Cluster_28495           |             | FecCD transport family protein                                                 | 2.48             |        |       |        |         |          |         |        |        |
| Cluster_29027           |             | bacterial capsule synthesis PGA_cap family protein                             | -2.15            |        |       |        |         |          |         |        |        |
| Cluster_29029           |             | bacterial capsule synthesis PGA_cap family protein                             | -2.09            |        |       |        |         |          |         |        |        |
| Cluster_32975           | <i>shuA</i> | outer membrane heme receptor ShuA                                              | 6.19             |        |       |        |         |          |         |        |        |
| Cluster_42098           |             | TonB-dependent siderophore receptor family protein                             | 3.34             |        |       |        |         |          |         |        |        |
| Cluster_42553           |             | putative heme utilization radical SAM enzyme HutW                              | 2.02             |        |       |        |         |          |         |        |        |
| Cluster_42554           |             | conserved hypothetical protein                                                 | 2.25             |        |       |        |         |          |         |        |        |
| Cluster_42555           |             | NADH(P)-binding family protein                                                 | 2.53             |        |       |        |         |          |         |        |        |
| Cluster_42637           |             | conserved hypothetical protein                                                 | -2.09            |        |       |        |         |          |         |        |        |
| Cluster_43425           | <i>iraD</i> | anti-adaptor protein IraD                                                      | -3.10            |        |       |        |         |          |         |        |        |
|                         |             | Isolate-Specific Genes <sup>a</sup>                                            |                  |        |       |        |         |          |         |        |        |
| Cluster ID              | Gene        | Predicted Protein Function                                                     | LFC <sup>d</sup> |        |       |        |         |          |         |        |        |
| <b>100329 (A)</b>       |             |                                                                                |                  |        |       |        |         |          |         |        |        |
| Cluster_6731            |             | putative dNA-Binding protein GSP                                               | 2.62             |        |       |        |         |          |         |        |        |

|                      |             |                                                                                      |       |
|----------------------|-------------|--------------------------------------------------------------------------------------|-------|
| Cluster_7611         |             | Eag family protein                                                                   | 2.34  |
| <b>401140 (A)</b>    |             |                                                                                      |       |
| Cluster_34158        |             | DDE superendonuclease family protein                                                 | -2.51 |
| Cluster_38392        |             | cytolethal distending toxin A/C family protein                                       | 3.82  |
| Cluster_38393        | <i>catB</i> | cytolethal distending toxin subunit B                                                | 3.80  |
| <b>B171 (B1)</b>     |             |                                                                                      |       |
| Cluster_4030         |             | UTRA domain protein                                                                  | -2.65 |
| Cluster_4031         |             | phosphoenolpyruvate-dependent sugar phosphotransferase system, EIIA 2 family protein | -2.72 |
| Cluster_4032         |             | PTS system, Lactose/Cellobiose specific IIB subunit                                  | -2.88 |
| Cluster_4611         |             | conserved hypothetical protein                                                       | 2.42  |
| <b>402290 (B1)</b>   |             |                                                                                      |       |
| Cluster_46067        |             | glycosyl transferase 2 domain protein                                                | 2.37  |
| Cluster_48546        |             | glycosyltransferase like 2 family protein                                            | 2.08  |
| <b>E110019 (B1)</b>  |             |                                                                                      |       |
| Cluster_10956        |             | conserved hypothetical protein                                                       | -2.69 |
| Cluster_11127        |             | conserved hypothetical protein                                                       | -2.06 |
| Cluster_12490        | <i>espV</i> | putative T3SS effector protein EspV                                                  | -2.43 |
| Cluster_14838        |             | conserved hypothetical protein                                                       | 2.33  |
| Cluster_14839        |             | transcriptional regulatory, C terminal family protein                                | 2.10  |
| Cluster_14939        | <i>col</i>  | colicin-E2                                                                           | 2.05  |
| Cluster_14941        |             | lysis family protein                                                                 | 2.16  |
| <b>E2348/69 (B2)</b> |             |                                                                                      |       |
| Cluster_17152        |             | glycosyl transferase 11 family protein                                               | 2.43  |
| Cluster_17153        |             | glycosyl transferase 2 family protein                                                | 2.86  |
| Cluster_17154        |             | putative membrane protein                                                            | 3.61  |
| Cluster_17155        |             | bacterial transferase hexapeptide family protein                                     | 2.77  |
| Cluster_17156        |             | polysaccharide biosynthesis family protein                                           | 3.49  |
| Cluster_17212        |             | mannitol dehydrogenase Rossmann domain protein                                       | -3.93 |
| Cluster_17481        |             | putative predicted protein                                                           | 3.47  |
| Cluster_17640        |             | putative predicted protein                                                           | 2.65  |
| Cluster_17644        |             | putative predicted protein                                                           | 2.68  |
| Cluster_18911        |             | putative predicted protein                                                           | -2.82 |
| <b>C581-05 (B2)</b>  |             |                                                                                      |       |
| Cluster_48767        |             | conserved hypothetical protein                                                       | 2.18  |
| <b>401588 (B2)</b>   |             |                                                                                      |       |
| Cluster_25495        | <i>rtcB</i> | tRNA-splicing ligase RtcB                                                            | -2.04 |
| Cluster_40811        |             | Mu-like prophage FlMu gp41 family protein                                            | 3.21  |
| Cluster_40813        |             | phage major tail tube protein                                                        | 4.20  |
| Cluster_40830        |             | conserved hypothetical protein                                                       | 4.15  |
| <b>302053 (B2)</b>   |             |                                                                                      |       |
| None                 |             | None                                                                                 | None  |

\*Cluster IDs are listed once for each comparison group, although there may be more than one gene in a single genome that belonged to the same cluster.

<sup>b</sup>Core genes were those identified in all of the EPEC genomes with an LS-BSR  $\geq 0.8$ .

<sup>c</sup>Genes identified with significant similarity (LS-BSR  $\geq 0.8$ ) in all of the genomes of one phylogroup (phylogroup-specific) or only in one genome (isolate-specific) that were absent (LS-BSR  $< 0.4$ ) from the other EPEC isolates.

<sup>d</sup>LFC is Log<sub>2</sub> Fold-Change of the DMEM samples compared to the LB samples.
