# Supplementary material for: Transcriptional Variation of Diverse Enteropathogenic Escherichia coli Isolates under Virulence-Inducing Conditions
Source: PubMed Central journal article supplement (PMC5527300; doi:10.1128/msystems.00024-17), 2017-07-25
Supplement: sys004172117st7.pdf [file sys004172117st7.pdf]

**Table S4.** Differential-expression of core, phylogroup-specific, and unique genes

|               |             | EPEC8 Core Genes <sup>b</sup>                                                  |                  |        |        |
|---------------|-------------|--------------------------------------------------------------------------------|------------------|--------|--------|
| Cluster ID    | Gene        | Predicted Protein Function                                                     | LFC <sup>a</sup> |        |        |
|               |             |                                                                                | 103385           | 401588 | 300059 |
| Cluster_11698 |             | conserved hypothetical protein                                                 | 3.04             | 2.53   | 4.95   |
| Cluster_11754 | <i>osmC</i> | peroxiredoxin OsmC                                                             | 4.32             | 3.53   | 4.61   |
| Cluster_12188 | <i>yebE</i> | inner membrane protein YebE                                                    | 3.39             | 2.36   | 3.87   |
| Cluster_12751 | <i>lpxL</i> | lipid A biosynthesis lauroyl (or palmitoleoyl) acyltransferase family protein  | 3.38             | 2.17   | 2.19   |
| Cluster_13818 | <i>nikD</i> | nickel import ATP-binding protein NikD                                         | -2.07            | -4.26  | -3.81  |
| Cluster_13819 | <i>nikE</i> | nickel import ATP-binding protein Nike                                         | -2.49            | -4.16  | -3.86  |
| Cluster_16936 |             | conserved hypothetical protein                                                 | 5.49             | 3.81   | 4.76   |
| Cluster_17045 | <i>rcaA</i> | colanic acid capsular biosynthesis activation protein A                        | 2.18             | 2.45   | 5.03   |
| Cluster_18751 | <i>slp</i>  | outer membrane protein Slp                                                     | 4.18             | 3.39   | 3.88   |
| Cluster_19444 | <i>rpiB</i> | ribose 5-phosphate isomerase B                                                 | -3.16            | -2.20  | -2.82  |
| Cluster_19503 |             | entericidin EcnA/B family protein                                              | 5.08             | 2.83   | 2.68   |
| Cluster_20470 | <i>tsx</i>  | nucleoside-specific channel-forming protein Tsx                                | -3.88            | -3.19  | -2.17  |
| Cluster_2094  |             | conserved hypothetical protein                                                 | 4.46             | 4.07   | 2.94   |
| Cluster_21151 |             | conserved hypothetical protein                                                 | 2.67             | 2.33   | 3.17   |
| Cluster_21209 |             | putative L,D-transpeptidase YcfS                                               | 2.85             | 2.31   | 3.54   |
| Cluster_21556 |             | conserved hypothetical protein                                                 | 3.75             | 2.95   | 3.74   |
| Cluster_21804 | <i>sufD</i> | FeS assembly protein SufD                                                      | 2.58             | 3.27   | 3.11   |
| Cluster_21854 | <i>katE</i> | catalase HPII                                                                  | 3.84             | 3.15   | 3.54   |
| Cluster_21905 |             | conserved hypothetical protein                                                 | 4.38             | 3.50   | 3.03   |
| Cluster_22321 | <i>cdd</i>  | cytidine deaminase                                                             | -5.04            | -4.28  | -5.48  |
| Cluster_22333 | <i>cirA</i> | colicin I receptor                                                             | 3.79             | 2.62   | 3.86   |
| Cluster_22417 | <i>glpA</i> | glycerol-3-phosphate dehydrogenase, anaerobic, A subunit                       | -5.10            | -3.31  | -5.94  |
| Cluster_22418 | <i>glpB</i> | glycerol-3-phosphate dehydrogenase, anaerobic, B subunit                       | -3.92            | -3.86  | -6.36  |
| Cluster_2291  | <i>otsA</i> | alpha, alpha-trehalose-phosphate synthase                                      | 3.19             | 2.50   | 2.20   |
| Cluster_22982 |             | L-serine ammonia-lyase                                                         | -6.08            | -3.82  | -3.26  |
| Cluster_23260 | <i>ebgA</i> | evolved beta-galactosidase subunit alpha                                       | -4.00            | -3.05  | -2.71  |
| Cluster_23382 | <i>gltD</i> | glutamate synthase [NADPH] small chain                                         | 3.27             | 3.33   | 3.54   |
| Cluster_23648 | <i>hmuS</i> | hemin transport protein HmuS                                                   | 4.58             | 3.83   | 4.20   |
| Cluster_23655 | <i>hmuV</i> | hemin import ATP-binding protein HmuV                                          | 2.58             | 2.31   | 3.42   |
| Cluster_23891 | <i>emrD</i> | multidrug resistance protein D                                                 | -2.26            | -2.24  | -2.02  |
| Cluster_24046 | <i>metE</i> | 5-methyltetrahydropteroyltrimethylglutamate--homocysteine S-methyltransferase  | 3.71             | 4.16   | 4.11   |
| Cluster_24222 | <i>purD</i> | phosphoribosylamine-glycine ligase                                             | 2.28             | 3.13   | 3.62   |
| Cluster_24247 |             | exopolysaccharide production YjbE family protein                               | 2.24             | 2.29   | 6.28   |
| Cluster_24491 | <i>treC</i> | alpha, alpha-phosphotrehalase                                                  | -6.57            | -7.03  | -4.43  |
| Cluster_24492 | <i>treB</i> | PTS system trehalose-specific EIIBC component                                  | -8.44            | -7.09  | -5.54  |
| Cluster_25515 |             | ybgS-like family protein                                                       | 3.57             | 3.44   | 4.74   |
| Cluster_25537 | <i>bioA</i> | adenosylmethionine-8-amino-7-oxononanoate transaminase                         | 2.76             | 2.20   | 3.69   |
| Cluster_25541 | <i>bioD</i> | dethiobiotin synthase                                                          | 4.85             | 4.75   | 5.04   |
| Cluster_25677 | <i>poxB</i> | pyruvate dehydrogenase [ubiquinone]                                            | 3.55             | 3.22   | 2.53   |
| Cluster_2623  | <i>glpT</i> | glycerol-3-phosphate transporter                                               | -6.13            | -4.32  | -3.47  |
| Cluster_26471 |             | peptidase M16 inactive domain protein                                          | 3.34             | 3.41   | 4.06   |
| Cluster_26472 |             | tonB-dependent Receptor Plug domain protein                                    | 2.57             | 3.21   | 3.64   |
| Cluster_26602 | <i>sodB</i> | superoxide dismutase [Fe]                                                      | -2.67            | -2.60  | -3.74  |
| Cluster_27306 | <i>elaB</i> | protein ElaB                                                                   | 4.55             | 3.70   | 4.72   |
| Cluster_27481 | <i>tal</i>  | transaldolase                                                                  | 3.08             | 2.93   | 2.69   |
| Cluster_27668 |             | ribonucleoside-diphosphate reductase, alpha subunit                            | 3.37             | 2.69   | 3.26   |
| Cluster_28138 | <i>ilvA</i> | threonine ammonia-lyase                                                        | -3.61            | -2.37  | -3.92  |
| Cluster_28465 | <i>nikC</i> | nickel ABC transporter, permease subunit NikC                                  | -2.69            | -3.48  | -4.32  |
| Cluster_28495 |             | FecCD transport family protein                                                 | 2.65             | 2.17   | 3.07   |
| Cluster_28978 | <i>fdxH</i> | formate dehydrogenase, beta subunit                                            | -3.81            | -3.01  | -3.59  |
| Cluster_30616 |             | conserved hypothetical protein                                                 | 3.72             | 2.77   | 2.20   |
| Cluster_30847 | <i>narK</i> | nitrite extrusion protein 1                                                    | -3.56            | -4.32  | -6.73  |
| Cluster_31984 |             | conserved hypothetical protein                                                 | 3.08             | 2.51   | 4.46   |
| Cluster_32906 |             | conserved hypothetical protein                                                 | -2.37            | -2.86  | -2.04  |
| Cluster_32975 | <i>shuA</i> | outer membrane heme receptor ShuA                                              | 5.75             | 4.57   | 5.32   |
| Cluster_33251 |             | RbsD / FucU transport family protein                                           | -8.23            | -6.44  | -6.23  |
| Cluster_34698 | <i>bioC</i> | malonyl-CoA O-methyltransferase BioC                                           | 3.76             | 4.36   | 5.35   |
| Cluster_3575  | <i>hybO</i> | hydrogenase-2 small chain                                                      | -3.01            | -2.00  | -4.86  |
| Cluster_36754 |             | conserved hypothetical protein                                                 | 5.56             | 4.23   | 4.56   |
| Cluster_36949 | <i>serA</i> | D-3-phosphoglycerate dehydrogenase                                             | 2.78             | 3.48   | 3.08   |
| Cluster_37491 | <i>dtpB</i> | dipeptide and tripeptide permease B                                            | -3.04            | -3.30  | -3.40  |
| Cluster_37583 |             | helix-turn-helix family protein                                                | 4.61             | 4.05   | 2.64   |
| Cluster_37835 |             | branched-chain amino acid transport system / permease component family protein | -5.36            | -4.17  | -2.88  |
| Cluster_37837 | <i>rbsK</i> | ribokinase                                                                     | -4.33            | -3.82  | -2.36  |
| Cluster_37959 |             | molybdopterin oxidoreductase Fe <sub>2</sub> S <sub>2</sub> domain protein     | -4.54            | -2.61  | -3.20  |
| Cluster_39493 | <i>bioB</i> | biotin synthase                                                                | 4.26             | 4.76   | 5.55   |
| Cluster_39494 | <i>bioF</i> | 8-amino-7-oxononanoate synthase                                                | 4.18             | 5.36   | 5.79   |
| Cluster_39851 | <i>ycaZ</i> | inner membrane protein YcaZ                                                    | -2.04            | -2.65  | -3.00  |
| Cluster_39870 |             | Ycel-like domain protein                                                       | 4.14             | 3.31   | 3.74   |
| Cluster_39918 | <i>fhuE</i> | FhuE receptor domain protein                                                   | 2.68             | 2.44   | 3.51   |
| Cluster_40107 |             | nitrate reductase, alpha subunit                                               | -5.90            | -5.98  | -9.09  |
| Cluster_40489 | <i>sufC</i> | FeS assembly ATPase SufC                                                       | 3.00             | 3.28   | 3.25   |
| Cluster_40490 | <i>sufB</i> | FeS assembly protein SufB                                                      | 3.19             | 3.35   | 2.94   |
| Cluster_40648 | <i>purT</i> | phosphoribosylglycinamide formyltransferase 2                                  | 2.46             | 3.23   | 3.59   |
| Cluster_41050 | <i>wcaE</i> | colanic acid biosynthesis glycosyltransferase WcaE                             | 2.81             | 2.26   | 8.61   |
| Cluster_41088 | <i>fbaB</i> | fructose-bisphosphate aldolase class 1                                         | 3.43             | 3.42   | 4.74   |
| Cluster_41400 | <i>mntH</i> | manganese transport protein MntH                                               | 3.44             | 3.80   | 4.56   |
| Cluster_41462 | <i>tkl</i>  | transketolase                                                                  | 2.69             | 2.56   | 3.11   |
| Cluster_41477 | <i>purC</i> | phosphoribosylaminoimidazolesuccinocarboxamide synthase                        | 2.55             | 2.78   | 3.54   |
| Cluster_41489 | <i>purM</i> | phosphoribosylformylglycinamide cyclo-ligase                                   | 2.21             | 2.38   | 4.30   |
| Cluster_41580 | <i>raiA</i> | ribosome-associated inhibitor A                                                | 2.61             | 2.43   | 2.41   |
| Cluster_41878 | <i>sdaC</i> | serine transporter                                                             | -5.32            | -4.11  | -3.35  |

|               |             |                                                                         |       |       |       |
|---------------|-------------|-------------------------------------------------------------------------|-------|-------|-------|
| Cluster_42020 | <i>nupG</i> | nucleoside permease NupG                                                | -4.88 | -4.34 | -3.80 |
| Cluster_42098 |             | TonB-dependent siderophore receptor family protein                      | 3.28  | 3.19  | 2.27  |
| Cluster_42168 |             | integral membrane, TerC family protein                                  | 2.33  | 2.11  | 3.79  |
| Cluster_42524 | <i>nikA</i> | nickel ABC transporter, nickel/metallophore periplasmic binding protein | -2.20 | -2.37 | -6.81 |
| Cluster_42553 |             | putative heme utilization radical SAM enzyme HutW                       | 2.61  | 2.40  | 2.21  |
| Cluster_42554 |             | conserved hypothetical protein                                          | 3.16  | 2.97  | 2.95  |
| Cluster_42555 |             | NADH(P)-binding family protein                                          | 2.37  | 2.54  | 3.20  |
| Cluster_42600 |             | conserved hypothetical protein                                          | 3.73  | 3.61  | 3.15  |
| Cluster_42613 | <i>yiaD</i> | inner membrane lipoprotein YiaD                                         | -4.96 | -3.61 | -2.51 |
| Cluster_42868 | <i>ccmA</i> | heme ABC exporter, ATP-binding protein CcmA                             | -7.70 | -6.70 | -6.12 |
| Cluster_42872 | <i>rbsR</i> | ribose operon repressor                                                 | -3.52 | -3.67 | -2.33 |
| Cluster_43311 |             | conserved hypothetical protein                                          | -3.73 | -3.02 | -3.02 |
| Cluster_4373  | <i>glpF</i> | glycerol uptake facilitator protein                                     | -6.76 | -5.02 | -3.32 |
| Cluster_4600  |             | conserved hypothetical protein                                          | 3.99  | 2.89  | 3.56  |
| Cluster_50634 |             | 30S ribosomal subunit S22 family protein                                | 5.44  | 4.01  | 2.84  |
| Cluster_50835 |             | SmpA / OmlA family protein                                              | 3.90  | 2.51  | 3.06  |
| Cluster_52412 |             | conserved hypothetical protein                                          | 3.51  | 3.03  | 2.12  |
| Cluster_54045 |             | conserved hypothetical protein                                          | 3.53  | 2.41  | 2.18  |
| Cluster_54408 |             | conserved hypothetical protein                                          | 2.93  | 2.35  | 2.29  |
| Cluster_55486 | <i>otsB</i> | trehalose-phosphatase                                                   | 3.70  | 2.86  | 3.20  |
| Cluster_56230 |             | proteolipid membrane potential modulator family protein                 | 3.90  | 2.54  | 3.08  |
| Cluster_56240 | <i>nrdF</i> | ribonucleoside-diphosphate reductase 2 subunit beta                     | 4.88  | 3.58  | 3.82  |
| Cluster_57084 |             | bacterial regulatory, LuxR family protein                               | 5.83  | 4.47  | 5.33  |
| Cluster_58724 | <i>dps</i>  | DNA protection during starvation protein                                | 2.90  | 2.06  | 2.13  |
| Cluster_59591 | <i>sufE</i> | cysteine desulfuration protein SufE                                     | 3.66  | 3.39  | 3.07  |
| Cluster_59641 | <i>ydjM</i> | inner membrane protein YdjM                                             | -3.12 | -2.30 | -3.80 |
| Cluster_59696 |             | PrkA AAA domain protein                                                 | 4.47  | 3.33  | 2.90  |
| Cluster_60563 | <i>nrdH</i> | glutaredoxin-like protein NrdH                                          | 2.89  | 3.47  | 3.14  |
| Cluster_60948 | <i>yjgG</i> | putrescine aminotransferase                                             | 2.00  | 2.09  | 2.63  |
| Cluster_61411 |             | bacterial extracellular solute-binding, 5 Middle family protein         | 3.91  | 4.44  | 4.18  |
| Cluster_61689 | <i>udp</i>  | uridine phosphorylase                                                   | -3.65 | -3.05 | -4.11 |
| Cluster_61749 |             | formate dehydrogenase, alpha subunit                                    | -4.35 | -2.95 | -3.81 |
| Cluster_63081 |             | endonuclease/Exonuclease/phosphatase family protein                     | 2.63  | 2.19  | 2.14  |
| Cluster_64024 | <i>sufA</i> | FeS assembly scaffold SufA                                              | 2.75  | 3.11  | 2.93  |
| Cluster_66112 |             | conserved hypothetical protein                                          | -2.97 | -2.50 | -2.59 |
| Cluster_6908  | <i>sufS</i> | cysteine desulfurase                                                    | 3.13  | 3.19  | 3.06  |
| Cluster_6913  |             | conserved hypothetical protein                                          | 5.73  | 4.30  | 3.66  |
| Cluster_8935  | <i>uhpT</i> | hexose phosphate transport protein                                      | -3.79 | -3.15 | -2.67 |
| Cluster_8994  | <i>phoU</i> | phosphate transport system regulatory protein PhoU                      | 2.13  | 2.09  | 3.43  |
| Cluster_9089  | <i>rmuC</i> | DNA recombination protein RmuC                                          | -2.65 | -2.30 | -2.03 |
| Cluster_9149  |             | formate dehydrogenase, gamma subunit                                    | -3.04 | -2.74 | -2.85 |

| Isolate-Specific Genes <sup>c</sup> |             |                                                                           |                  |                  |
|-------------------------------------|-------------|---------------------------------------------------------------------------|------------------|------------------|
| Cluster ID                          | Gene        | Predicted Protein Function                                                | LFC <sup>a</sup> |                  |
| 103385                              |             |                                                                           |                  |                  |
| Cluster_14663                       |             | ABC transporter family protein                                            | -2.17            |                  |
| Cluster_20007                       |             | hypothetical protein                                                      | 2.37             |                  |
| Cluster_20009                       |             | conserved hypothetical protein                                            | 2.40             |                  |
| Cluster_20009                       |             | conserved hypothetical protein                                            | 2.40             |                  |
| Cluster_21067                       | <i>rbsK</i> | ribokinase                                                                | -3.26            |                  |
| Cluster_21081                       |             | bacterial lipid A biosynthesis acyltransferase family protein             | -3.25            |                  |
| Cluster_21082                       | <i>msbB</i> | lipid A biosynthesis (KDO)2-(lauroyl)-lipid IVA acyltransferase           | -2.84            |                  |
| Cluster_21085                       |             | polysaccharide deacetylase family protein                                 | -3.17            |                  |
| Cluster_21091                       | <i>fecD</i> | Fe(3+) dicitrate transport system permease protein FecD                   | -3.44            |                  |
| Cluster_21092                       |             | ABC 3 transport family protein                                            | -2.78            |                  |
| Cluster_22297                       |             | Ead/Ea22-like family protein                                              | 2.38             |                  |
| Cluster_24590                       |             | cytidine and deoxycytidylate deaminase zinc-binding region family protein | -2.76            |                  |
| Cluster_24591                       |             | conserved hypothetical protein                                            | -2.32            |                  |
| Cluster_24667                       |             | conserved hypothetical protein                                            | -3.47            |                  |
| Cluster_44764                       |             | putative YfdA                                                             | 2.10             |                  |
| Cluster_45471                       |             | periplasmic binding family protein                                        | -2.46            |                  |
| Cluster_45480                       |             | conserved hypothetical protein                                            | -3.49            |                  |
| Cluster_4936                        |             | glycosyl transferases group 1 family protein                              | -3.45            |                  |
| Cluster_62139                       | <i>fecA</i> | Fe(3+) dicitrate transport protein FecA                                   | -3.72            |                  |
| Cluster_6675                        |             | putative RNA polymerase sigma factor FecI                                 | 2.37             |                  |
| 401588                              |             |                                                                           |                  |                  |
| Cluster_39452                       | <i>cro</i>  | regulatory protein Cro                                                    | 2.68             | LFC <sup>a</sup> |
| Cluster_40245                       |             | conserved hypothetical protein                                            | 3.08             |                  |
| Cluster_40811                       |             | Mu-like prophage FluMu gp41 family protein                                | 3.21             |                  |
| Cluster_40830                       |             | conserved hypothetical protein                                            | 4.15             |                  |
| Cluster_50962                       |             | pentapeptide repeats family protein                                       | 2.41             |                  |
| Cluster_64304                       |             | conserved hypothetical protein                                            | 3.00             |                  |
| 300059                              |             |                                                                           |                  |                  |
| Cluster_25606                       |             | bacteriophage replication gene A family protein                           | -3.05            | LFC <sup>a</sup> |
| Cluster_25965                       |             | tetratricopeptide repeat family protein                                   | 2.13             |                  |
| Cluster_29501                       |             | conserved hypothetical protein                                            | -2.79            |                  |
| Cluster_34728                       |             | transposase family protein                                                | -3.52            |                  |

<sup>a</sup>LFC is Log<sub>2</sub> Fold-Change of the DMEM samples compared to the LB samples.

<sup>b</sup>Genes identified in all three of the EPEC8 genomes with an LS-BSR  $\geq 0.8$ .

<sup>c</sup>Genes identified with significant similarity (LS-BSR  $\geq 0.8$ ) in only one of the EPEC8 isolates that were absent (LS-BSR  $< 0.4$ ) from the other two EPEC8 isolates.
