# Supplementary material for: Transcriptional Variation of Diverse Enteropathogenic Escherichia coli Isolates under Virulence-Inducing Conditions
Source: PubMed Central journal article supplement (PMC5527300; doi:10.1128/msystems.00024-17), 2017-07-25
Supplement: sys004172117st8.pdf [file sys004172117st8.pdf]

Table S5. Differential-expression of select non-virulence genes

| Cluster ID    | Gene        | Predicted Protein Function                                                                                               | 100329 (A) | 401140 (A) | B171 (B1) | 402290 (B1) | E110019 (B1) | E2348/69 (B2) |
|---------------|-------------|--------------------------------------------------------------------------------------------------------------------------|------------|------------|-----------|-------------|--------------|---------------|
| Cluster_42524 | <i>nika</i> | nickel ABC transporter, nickel/metallophore periplasmic binding protein                                                  | -5.35      |            |           | -4.20       |              |               |
| Cluster_23623 | <i>nikB</i> | nickel ABC transporter, permease subunit NikB                                                                            | -5.45      | -2.17      |           | -4.38       | 2.09         | -3.00         |
| Cluster_28465 | <i>nikC</i> | nickel ABC transporter, permease subunit NikC                                                                            | -7.22      | -3.25      |           | -3.06       | 2.34         | -3.57         |
| Cluster_13818 | <i>nikD</i> | nickel import ATP-binding protein NikD                                                                                   | -5.49      | -3.67      |           | -2.76       | 2.01         | -3.77         |
| Cluster_13819 | <i>nikE</i> | nickel import ATP-binding protein NikE                                                                                   | -5.50      | -3.86      |           | -2.53       |              | -4.43         |
| Cluster_37491 | <i>dtpB</i> | dipeptide and tripeptide permease B                                                                                      | -3.95      | -2.69      | -2.37     | -3.29       | -3.48        | -3.72         |
| Cluster_39198 | <i>cusS</i> | sensor kinase CusS                                                                                                       |            |            |           | 2.33        |              |               |
| Cluster_39199 | <i>cusR</i> | transcriptional regulatory protein CusR                                                                                  |            | 2.47       |           | 2.22        |              |               |
| Cluster_39200 | <i>cusC</i> | cation efflux system protein CusC                                                                                        |            | 3.08       |           | 3.76        |              | -2.19         |
| Cluster_44152 | <i>cusF</i> | cation efflux system protein CusF                                                                                        |            | 3.08       |           | 4.69        |              |               |
| Cluster_30102 | <i>cusB</i> | cation efflux system protein CusB                                                                                        |            | 2.56       |           | 4.54        | 3.14         |               |
| Cluster_30103 | <i>cusA</i> | cation efflux system protein CusA                                                                                        |            |            |           | 3.31        |              |               |
| Cluster_24888 |             | MerC mercury resistance family protein                                                                                   |            |            |           | -5.21       |              |               |
| Cluster_5690  | <i>entF</i> | enterobactin synthase component F                                                                                        | 5.15       |            | 3.25      | 5.00        | 2.72         |               |
| Cluster_54210 | <i>fepE</i> | ferric enterobactin (Enterochelin) transport                                                                             | 3.08       |            | 2.95      | 3.84        | 2.34         |               |
| Cluster_5696  | <i>fepB</i> | ferrienterobactin-binding periplasmic protein                                                                            | 4.21       |            | 2.21      | 2.08        |              |               |
| Cluster_25325 | <i>entC</i> | isochorismate synthase EntC                                                                                              | 6.70       | 2.44       | 3.26      | 4.81        | 3.26         |               |
| Cluster_5698  |             | (2,3-dihydroxybenzoyl)adenylate synthase                                                                                 | 6.52       | 2.27       | 3.35      | 4.86        | 2.81         |               |
| Cluster_58522 | <i>entB</i> | isochorismatase                                                                                                          | 6.33       | 2.09       | 3.33      | 5.46        | 2.85         |               |
| Cluster_25537 | <i>bioA</i> | adenosylmethionine-8-amino-7-oxononanoate transaminase                                                                   | 5.17       | 2.53       |           | 4.28        |              | 3.51          |
| Cluster_39493 | <i>bioB</i> | biotin synthase                                                                                                          | 6.45       | 3.94       | 2.73      | 6.10        | 3.85         | 5.02          |
| Cluster_39494 | <i>bioF</i> | 8-amino-7-oxononanoate synthase                                                                                          | 5.65       | 2.05       | 2.81      | 5.84        | 3.93         | 4.83          |
| Cluster_34698 | <i>bioC</i> | malonyl-CoA O-methyltransferase BioC                                                                                     | 7.50       | 2.44       | 2.47      | 5.57        | 4.41         | 4.55          |
| Cluster_25541 | <i>bioD</i> | dethiobiotin synthase                                                                                                    | 6.09       | 3.83       | 3.82      | 5.20        | 4.81         | 5.10          |
| Cluster_12385 | <i>hisG</i> | ATP phosphoribosyltransferase                                                                                            |            |            |           | 2.19        |              |               |
| Cluster_27059 | <i>hisD</i> | histidinol dehydrogenase                                                                                                 | 2.02       | 2.42       |           | 2.50        | 2.24         |               |
| Cluster_41011 | <i>hisC</i> | histidinol-phosphate transaminase                                                                                        | 2.18       |            |           | 2.81        |              |               |
| Cluster_12388 | <i>hisB</i> | histidine biosynthesis bifunctional protein HisB                                                                         |            | 2.27       |           |             |              |               |
| Cluster_64513 | <i>hisH</i> | imidazole glycerol phosphate synthase, glutamine amidotransferase subunit                                                | 2.22       |            |           | 2.32        |              | 2.69          |
| Cluster_46060 | <i>hisA</i> | 1-(5-phosphoribosyl)-5-[(5-phosphoribosylamino)methylideneamino]imidazole-4-carboxamide isomerase                        | 2.40       |            |           | 2.79        |              |               |
| Cluster_2401  | <i>hisF</i> | imidazole glycerol phosphate synthase subunit HisF                                                                       | 2.35       | 2.09       |           | 2.25        |              |               |
| Cluster_27065 | <i>hisE</i> | phosphoribosyl-ATP diphosphatase                                                                                         | 2.04       |            |           | 2.62        |              |               |
| Cluster_46067 |             | glycosyl transferase 2 domain protein                                                                                    |            |            |           | 2.37        |              |               |
| Cluster_35561 | <i>fimH</i> | protein FimH                                                                                                             |            |            | -3.59     | -3.26       | -2.14        |               |
| Cluster_40322 | <i>fimG</i> | protein FimG                                                                                                             |            |            | -3.55     | -3.16       |              |               |
| Cluster_21599 | <i>fimF</i> | protein FimF                                                                                                             |            |            | -3.27     | -2.83       |              |               |
| Cluster_59417 |             | type VII secretion system (TSS), usher family protein                                                                    |            | -2.72      | -2.64     | -2.89       | -2.01        |               |
| Cluster_40325 | <i>focC</i> | chaperone protein FocC                                                                                                   |            |            | -2.22     | -2.92       |              |               |
| Cluster_1885  | <i>fimA</i> | type-1 fimbrial protein, A chain                                                                                         |            |            | -3.47     | -3.93       | -2.34        |               |
| Cluster_59591 | <i>suE</i>  | cysteine desulfuration protein SuE                                                                                       | 4.83       |            |           | 4.47        |              |               |
| Cluster_6908  | <i>suS</i>  | cysteine desulfurase                                                                                                     | 4.80       |            |           | 4.91        |              |               |
| Cluster_21804 | <i>suD</i>  | FeS assembly protein SuD                                                                                                 | 5.16       |            |           | 4.64        |              |               |
| Cluster_40489 | <i>suC</i>  | FeS assembly ATPase SuC                                                                                                  | 4.99       |            |           | 4.32        |              |               |
| Cluster_40490 | <i>suB</i>  | FeS assembly protein SuB                                                                                                 | 5.18       |            |           | 4.22        |              |               |
| Cluster_64024 | <i>suA</i>  | FeS assembly scaffold SuA                                                                                                | 5.12       | 2.00       |           | 4.30        |              | 3.44          |
| Cluster_6913  |             | conserved hypothetical protein                                                                                           | 4.56       | 2.36       | 3.65      | 3.73        | 2.76         |               |
| Cluster_45885 |             | 4Fe-4S dicluster domain protein                                                                                          | 2.04       |            |           | 2.09        |              |               |
| Cluster_11100 | <i>flgA</i> | flagellar basal body P-ring biosynthesis protein FlgA                                                                    | -3.77      | -5.79      |           | -3.19       |              | -2.95         |
| Cluster_58981 | <i>flgB</i> | flagellar basal-body rod protein FlgB                                                                                    | -7.40      | -8.66      |           | -4.72       | -4.30        | -5.80         |
| Cluster_30655 | <i>flgC</i> | flagellar basal body rod protein FlgC                                                                                    | -6.13      | -8.50      |           | -4.01       | -4.03        | -4.59         |
| Cluster_21169 | <i>flgD</i> | flagellar basal body rod modification protein                                                                            | -5.52      | -7.79      |           | -4.01       | -4.38        | -5.52         |
| Cluster_21170 | <i>flgE</i> | flagellar hook protein FlgE                                                                                              | -4.91      | -6.75      |           | -3.47       | -3.67        | -5.16         |
| Cluster_6341  | <i>flgG</i> | flagellar basal body rod protein FlgG                                                                                    | -4.52      | -6.74      |           | -3.45       | -3.69        | -3.45         |
| Cluster_35075 | <i>flgH</i> | flagellar basal body L-ring protein                                                                                      | -4.63      | -6.20      |           | -3.17       |              | -3.59         |
| Cluster_26079 | <i>flgI</i> | flagellar basal body P-ring biosynthesis protein FlgA                                                                    | -4.40      | -6.28      |           | -3.30       |              | -2.86         |
| Cluster_58989 | <i>flgJ</i> | flagellar rod assembly protein/muramidase FlgJ                                                                           | -4.70      | -6.03      |           | -3.52       | -2.23        | -2.92         |
| Cluster_21176 | <i>flgK</i> | flagellar hook-associated protein FlgK                                                                                   |            | -5.90      |           | -3.32       |              | -2.37         |
| Cluster_17152 | <i>wbiQ</i> | fucosyltransferase                                                                                                       |            |            |           |             |              | 2.43          |
| Cluster_17153 | <i>wbiP</i> | glycosyl transferase family protein                                                                                      |            |            |           |             |              | 2.86          |
| Cluster_17154 | <i>wzy</i>  | O-antigen polymerase                                                                                                     |            |            |           |             |              | 3.61          |
| Cluster_17155 | <i>wbiO</i> | O-acetyltransferase                                                                                                      |            |            |           |             |              | 2.77          |
| Cluster_17156 | <i>wzx</i>  | O-antigen flippase                                                                                                       |            |            |           |             |              | 3.49          |
| Cluster_22198 | <i>manB</i> | phosphomannomutase                                                                                                       | 3.91       |            |           |             |              | 3.08          |
| Cluster_17158 | <i>manC</i> | GDP-mannose pyrophosphorylase                                                                                            |            |            |           |             |              | 2.36          |
| Cluster_27093 | <i>gmm</i>  | GDP-mannose 6-phosphatase                                                                                                |            |            |           |             |              | 3.17          |
| Cluster_22202 | <i>fcI</i>  | bifunctional GDP-fucose synthetase: GDP-4-dehydro-6-deoxy-D-mannose epimerase/GDP-4-dehydro-6-L-deoxygalactose reductase | 4.62       |            |           |             |              | 5.70          |
| Cluster_22203 | <i>gmd</i>  | GDP-D-mannose dehydratase                                                                                                | 3.37       |            |           |             |              | 5.66          |
| Cluster_27096 | <i>wcaF</i> | colanic acid biosynthesis acetyltransferase WcaF                                                                         | 4.15       |            |           |             |              | 4.31          |
| Cluster_41050 | <i>wcaE</i> | glycosyl transferase family protein                                                                                      | 4.96       |            |           |             |              | 3.25          |
| Cluster_41051 | <i>wcaD</i> | colanic acid biosynthesis protein                                                                                        | 3.54       |            |           |             |              | 4.61          |
| Cluster_22207 | <i>wcaC</i> | glycosyl transferase family protein                                                                                      | 3.40       |            |           |             |              | 3.58          |
| Cluster_27100 | <i>wcaB</i> | colanic acid biosynthesis acetyltransferase WcaB                                                                         | 2.82       |            |           |             |              | 4.51          |
| Cluster_27101 | <i>wcaA</i> | glycosyl transferase family protein                                                                                      | 2.28       |            |           |             |              |               |
| Cluster_27085 | <i>wcaM</i> | colanic acid biosynthesis protein WcaM                                                                                   | 2.34       |            |           |             |              |               |
| Cluster_22194 | <i>wcaL</i> | colanic acid biosynthesis glycosyltransferase WcaL                                                                       | 2.26       |            |           |             |              |               |
| Cluster_27087 | <i>wcaK</i> | colanic acid biosynthesis pyruvyl transferase WcaK                                                                       | 2.64       |            |           |             |              |               |
| Cluster_22196 | <i>wzxC</i> | lipopolysaccharide biosynthesis protein WzxC                                                                             | 2.88       |            |           |             |              |               |
| Cluster_22197 |             | undecaprenyl-phosphate glucose phosphotransferase                                                                        | 3.47       |            |           |             |              |               |
| Cluster_41044 |             | mannose-1-phosphate guanylyltransferase/mannose-6-phosphate isomerase                                                    | 3.34       |            |           |             |              |               |
| Cluster_41045 | <i>wcaI</i> | colanic acid biosynthesis glycosyltransferase WcaI                                                                       | 3.77       |            |           |             |              |               |
| Cluster_41055 | <i>wzc</i>  | tyrosine kinase                                                                                                          | 3.82       |            |           |             |              | 3.57          |
| Cluster_27103 | <i>wzb</i>  | tyrosine phosphatase                                                                                                     | 2.99       |            |           |             |              | 4.07          |
| Cluster_41057 | <i>wza</i>  | lipoprotein required for capsular polysaccharide translocation through the outer membrane                                | 3.47       |            |           |             |              | 4.47          |
| Cluster_65186 | <i>hypA</i> | hydrogenase nickel incorporation protein                                                                                 | -3.11      |            |           |             |              | -2.83         |
| Cluster_22903 | <i>hypB</i> | hydrogenase nickel incorporation protein HypB                                                                            | -4.00      |            |           |             |              | -3.22         |
| Cluster_6035  | <i>hypC</i> | hydrogenase assembly chaperone                                                                                           | -3.90      |            |           |             |              | -3.83         |
| Cluster_22905 | <i>hypD</i> | HypD protein required for maturation of hydrogenases                                                                     | -2.46      |            |           |             |              | -2.76         |
| Cluster_36807 | <i>hypE</i> | carbamoyl phosphate phosphatase, hydrogenase 3 maturation protein HypE                                                   | -3.22      |            |           |             |              | -2.44         |
| Cluster_18751 | <i>slp</i>  | outer membrane lipoprotein                                                                                               |            |            |           |             |              | 4.44          |
| Cluster_57084 | <i>yhiF</i> | DNA-binding transcriptional regulator                                                                                    |            |            |           |             |              | 5.23          |
| Cluster_23648 | <i>chuS</i> | heme/hemoglobin transport protein                                                                                        |            |            |           |             |              | 3.91          |
| Cluster_32975 | <i>chuA</i> | outer membrane heme/hemoglobin receptor                                                                                  |            |            |           |             |              | 5.00          |
| Cluster_28491 | <i>chuT</i> | hemin binding protein                                                                                                    |            |            |           |             |              | 5.76          |
| Cluster_42553 | <i>chuW</i> | coproporphyrinogen III oxidase                                                                                           |            |            |           |             |              | 5.12          |
| Cluster_42555 | <i>chuY</i> | ShuY-like protein                                                                                                        |            |            |           |             |              | 3.42          |
| Cluster_28495 | <i>chuU</i> | hemin permease                                                                                                           |            |            |           |             |              | 3.75          |
| Cluster_23655 | <i>hmuV</i> | hemin importer ATP-binding subunit                                                                                       |            |            |           |             |              | 2.42          |
| Cluster_37569 | <i>dppF</i> | dipeptide transporter ATP-binding subunit                                                                                | 3.52       | 3.63       | 2.08      | 3.65        | 2.60         | 3.76          |
| Cluster_23696 | <i>dppD</i> | dipeptide transporter ATP-binding subunit                                                                                | 3.89       | 4.14       | 2.38      | 4.42        | 3.12         | 4.95          |
| Cluster_61409 | <i>dppC</i> | dipeptide transporter                                                                                                    | 4.31       | 3.70       | 2.24      | 3.72        | 3.06         | 5.10          |
| Cluster_57117 | <i>dppB</i> | dipeptide transporter permease DppB                                                                                      | 4.85       | 4.26       | 2.80      | 4.95        | 3.56         | 4.80          |
| Cluster_61411 | <i>dppA</i> | dipeptide transporter                                                                                                    | 4.56       | 4.52       |           | 5.02        | 2.18         | 3.44          |
| Cluster_33251 | <i>ribS</i> | D-ribose pyranase                                                                                                        | -6.80      | -6.87      | -5.32     | -7.04       | -4.73        | -5.62         |
| Cluster_42868 | <i>ribA</i> | D-ribose transporter ATP-binding protein                                                                                 | -6.18      | -6.23      | -5.95     | -7.01       | -4.93        | -5.83         |
| Cluster_37835 | <i>ribC</i> | ribose ABC transporter permease                                                                                          | -3.85      | -4.38      | -6.09     | -4.67       | -5.64        | -4.82         |
| Cluster_4267  | <i>ribB</i> | D-ribose transporter subunit RtsB                                                                                        |            |            | -2.93     |             | -4.82        | -4.57         |
| Cluster_37837 | <i>ribK</i> | ribo kinase                                                                                                              | -3.74      | -2.84      | -3.65     | -3.05       | -3.68        | -4.08         |
| Cluster_42872 | <i>ribR</i> | transcriptional repressor RbsR                                                                                           | -3.31      | -2.76      | -3.75     | -2.94       | -4.05        | -2.57         |
| Cluster_25315 | <i>fepA</i> | ferrienterobactin receptor                                                                                               | 7.32       | 2.47       | 4.62      | 7.15        | 5.16         |               |
| Cluster_60311 |             | conserved hypothetical protein                                                                                           |            |            |           |             |              |               |

|               |             |                                                                          |       |       |       |       |       |       |
|---------------|-------------|--------------------------------------------------------------------------|-------|-------|-------|-------|-------|-------|
| Cluster_25316 | <i>fes</i>  | enterochelin esterase                                                    | 6.89  |       | 2.88  | 3.87  | 2.56  |       |
| Cluster_5689  |             | MbH-like family protein                                                  | 6.03  |       | 3.29  | 4.11  | 2.93  |       |
| Cluster_30847 | <i>narK</i> | nitrite extrusion protein 1                                              | -6.92 | -5.92 | -2.25 | -7.04 | -4.52 | -6.39 |
| Cluster_40107 |             | nitrate reductase, alpha subunit                                         | -8.34 | -6.28 | -3.12 | -6.45 | -5.18 | -8.36 |
| Cluster_40108 | <i>narH</i> | nitrate reductase, beta subunit                                          | -6.44 | -5.41 |       | -3.56 | -3.46 | -6.83 |
| Cluster_26242 | <i>narJ</i> | nitrate reductase molybdenum cofactor assembly chaperone                 | -6.34 | -5.72 |       |       | -2.01 | -5.08 |
| Cluster_40110 | <i>narI</i> | respiratory nitrate reductase, gamma subunit                             | -5.48 | -3.73 |       |       |       | -4.03 |
| Cluster_59591 | <i>sufE</i> | cysteine desulfuration protein SufE                                      | 4.83  |       |       | 4.47  |       |       |
| Cluster_6908  | <i>sufS</i> | cysteine desulfurase                                                     | 4.80  |       |       | 4.91  |       |       |
| Cluster_21804 | <i>sufD</i> | FeS assembly protein SufD                                                | 5.16  |       |       | 4.64  |       |       |
| Cluster_40489 | <i>sufC</i> | FeS assembly ATPase SufC                                                 | 4.99  |       |       | 4.32  |       |       |
| Cluster_40490 | <i>sufB</i> | FeS assembly protein SufB                                                | 5.18  |       |       | 4.22  |       |       |
| Cluster_64024 | <i>sufA</i> | FeS assembly scaffold SufA                                               | 5.12  | 2.00  |       | 4.30  |       |       |
| Cluster_28854 | <i>ilvB</i> | acetolactate synthase, large subunit, biosynthetic type                  |       |       |       | 2.72  |       |       |
| Cluster_14164 | <i>ilvM</i> | acetolactate synthase isozyme 2 small subunit                            |       |       |       | 2.67  |       |       |
| Cluster_28856 | <i>ilvE</i> | branched-chain amino acid aminotransferase                               |       |       |       |       |       |       |
| Cluster_23994 | <i>ilvD</i> | dihydroxy-acid dehydratase                                               |       |       |       |       |       |       |
| Cluster_55878 |             | NADH-Ubiquinone/plastoquinone (complex I), various chains family protein |       |       |       | -2.37 |       |       |
| Cluster_55878 |             | NADH-Ubiquinone/plastoquinone (complex I), various chains family protein |       |       |       | -2.37 |       |       |
| Cluster_7513  | <i>nuoM</i> | NADH-quinone oxidoreductase subunit M                                    |       |       |       | -2.80 |       |       |
| Cluster_22451 | <i>nuoL</i> | NADH-quinone oxidoreductase subunit L                                    |       |       |       | -2.68 |       |       |
| Cluster_12623 | <i>nuoK</i> | NADH-quinone oxidoreductase subunit K                                    |       |       |       | -2.32 |       |       |
| Cluster_46275 | <i>nuoJ</i> | NADH-quinone oxidoreductase subunit J                                    |       |       |       | -2.27 |       |       |
| Cluster_41293 |             | NADH-quinone oxidoreductase, chain I family protein                      | -2.07 |       |       | -2.21 |       |       |
| Cluster_27318 | <i>nuoH</i> | NADH-quinone oxidoreductase subunit H                                    |       |       |       | -2.10 |       |       |
| Cluster_27319 | <i>nuoG</i> | NADH dehydrogenase (quinone), G subunit                                  |       |       |       |       |       |       |
| Cluster_17411 | <i>nuoF</i> | NADH oxidoreductase (quinone), F subunit                                 | -2.21 |       | -2.15 |       |       |       |
| Cluster_17412 | <i>nuoE</i> | NADH-quinone oxidoreductase subunit E                                    | -2.09 |       | -2.06 |       |       |       |
| Cluster_41298 | <i>nuoC</i> | NADH-quinone oxidoreductase subunit C/D                                  |       |       | -2.09 |       |       |       |
| Cluster_55899 | <i>nuoB</i> | NADH-quinone oxidoreductase subunit B                                    | -2.01 |       |       |       |       |       |
| Cluster_33836 | <i>deoC</i> | deoxyribose-phosphate aldolase                                           | -3.70 | -3.57 | -3.62 | -4.05 | -2.65 | -3.30 |
| Cluster_33837 | <i>deoA</i> | thymidine phosphorylase                                                  | -2.57 | -3.17 | -4.28 | -2.89 |       | -3.14 |
| Cluster_24617 | <i>deoB</i> | phosphopentomutase                                                       | -2.47 | -2.35 | -3.55 | -2.97 |       |       |
| Cluster_5057  | <i>deoD</i> | purine nucleoside phosphorylase                                          | -2.19 |       | -2.61 | -2.23 |       |       |
| Cluster_26043 | <i>csgC</i> | curli assembly protein CsgC                                              | -3.76 | -4.45 |       |       |       |       |
| Cluster_24302 | <i>nrfA</i> | cytochrome c-552                                                         | -4.61 |       |       |       |       | -4.99 |
| Cluster_43190 | <i>nrfB</i> | cytochrome c nitrite reductase, pentaheme subunit                        | -3.41 |       |       |       |       | -3.81 |
| Cluster_43191 | <i>nrfC</i> | cytochrome c nitrite reductase, Fe-S protein                             | -5.06 | -2.60 |       | -3.80 | 2.50  | -4.58 |
| Cluster_43192 | <i>nrfD</i> | cytochrome c nitrite reductase, NrfD subunit                             | -4.59 | -2.00 |       |       |       | -2.20 |
| Cluster_29171 | <i>ccmF</i> | cytochrome c-type biogenesis protein CcmF                                | -2.94 |       |       |       |       |       |
| Cluster_43194 |             | cytochrome C biogenesis family protein                                   | -2.81 |       |       |       | 2.60  |       |

<sup>1</sup>LFC is Log<sub>2</sub> Fold-Change of the DMEM samples compared to the LB samples.
