# Supplementary material for: Transcriptional Variation of Diverse Enteropathogenic Escherichia coli Isolates under Virulence-Inducing Conditions
Source: PubMed Central journal article supplement (PMC5527300; doi:10.1128/msystems.00024-17), 2017-07-25
Supplement: sys004172117st9.pdf [file sys004172117st9.pdf]

**Table S6.** Differential expression of the LS-BSR gene clusters that are only in EPEC and encode proteins with predicted secreted or surface-associated domains

| Cluster ID    | Gene        | Predicted Protein Function                                                         | LFC <sup>a</sup> |            |           |             |              |               |              |             |             |
|---------------|-------------|------------------------------------------------------------------------------------|------------------|------------|-----------|-------------|--------------|---------------|--------------|-------------|-------------|
|               |             |                                                                                    | 100329 (A)       | 401140 (A) | B171 (B1) | 402290 (B1) | E110019 (B1) | E2348/69 (B2) | C581-05 (B2) | 401588 (B2) | 302053 (B2) |
| Cluster_42784 |             | SdiA-regulated family protein                                                      |                  |            | 4.09      | 2.21        | 3.92         | 5.16          | 2.34         | 4.42        |             |
| Cluster_46985 | <i>espA</i> | EspA                                                                               | 2.58             | 2.09       | 4.95      | 3.15        |              | 4.71          |              |             | 3.29        |
| Cluster_52862 |             | transglycosylase SLT domain protein                                                |                  |            | 3.56      |             | 3.60         | 3.82          |              | 3.44        |             |
| Cluster_49719 |             | conserved hypothetical protein                                                     |                  |            | 3.47      | 2.11        |              | 3.28          |              |             |             |
| Cluster_42098 |             | TonB-dependent siderophore receptor family protein                                 |                  |            |           |             |              |               |              | 3.19        | 3.34        |
| Cluster_7210  |             | TonB-dependent siderophore receptor family protein                                 | 5.86             |            |           |             |              |               | 2.22         |             |             |
| Cluster_7864  |             | putative BfpJ                                                                      |                  |            | 4.50      | 2.82        |              |               |              |             |             |
| Cluster_7865  |             | putative BfpK                                                                      |                  |            | 4.71      | 2.18        |              |               |              |             |             |
| Cluster_7878  |             | bundlin family protein                                                             |                  |            | 3.33      | 2.73        |              |               |              |             |             |
| Cluster_41670 |             | putative prepilin                                                                  |                  |            | 4.21      | 2.92        |              |               |              |             |             |
| Cluster_42765 |             | SepZ family protein                                                                |                  |            |           |             | 3.33         | 4.33          |              |             |             |
| Cluster_45818 |             | putative membrane protein                                                          |                  |            |           |             |              |               |              |             | -4.81       |
| Cluster_41853 | <i>scrY</i> | sucrose porin                                                                      |                  |            |           | -5.30       |              | -6.62         |              |             |             |
| Cluster_48965 | <i>traK</i> | type-F conjugative transfer system secretin TraK                                   | 2.40             |            |           |             |              |               |              |             |             |
| Cluster_8246  |             | outer membrane insertion C-terminal signal domain protein                          | 5.82             |            |           |             |              |               |              |             |             |
| Cluster_38581 |             | putative Csi protein                                                               |                  |            | 2.39      |             |              |               |              |             |             |
| Cluster_4032  |             | PTS system, Lactose/Cellobiose specific IIB subunit                                |                  |            | -2.88     |             |              |               |              |             |             |
| Cluster_4033  |             | PTS system sugar-specific permease component family protein                        |                  |            | -2.09     |             |              |               |              |             |             |
| Cluster_40830 |             | conserved hypothetical protein                                                     |                  |            |           |             |              |               |              | 4.15        |             |
| Cluster_41715 | <i>trbB</i> | type-F conjugative transfer system pilin assembly thiol-disulfide isomerase TrbB   | 3.64             |            |           |             |              |               |              |             |             |
| Cluster_42607 |             | fimbrial family protein                                                            |                  |            |           |             |              | 3.35          |              |             |             |
| Cluster_45238 |             | conserved hypothetical protein                                                     |                  |            | 3.10      |             |              |               |              |             |             |
| Cluster_48547 |             | polysaccharide biosynthesis/export family protein                                  |                  |            |           | 2.24        |              |               |              |             |             |
| Cluster_49109 |             | tripartite tricarboxylate transporter TctB family protein                          |                  |            |           |             |              | -2.39         |              |             |             |
| Cluster_51092 |             | major facilitator superfamily protein                                              | 5.09             |            |           |             |              |               |              |             |             |
| Cluster_5138  | <i>traK</i> | type-F conjugative transfer system secretin TraK                                   |                  |            | 2.11      |             |              |               |              |             |             |
| Cluster_52204 |             | tripartite ATP-independent periplasmic transporters, DctQ component family protein |                  |            |           |             |              | -2.76         |              |             |             |
| Cluster_8890  |             | secretion system effector C (SseC) like family protein                             |                  |            |           |             |              |               |              |             | 2.01        |
| Cluster_38584 |             | conserved hypothetical protein                                                     |                  |            | 2.51      |             |              |               |              |             |             |
| Cluster_38608 | <i>traA</i> | type IV conjugative transfer system pilin TraA                                     |                  |            | 2.00      |             |              |               |              |             |             |
| Cluster_5140  | <i>traL</i> | type IV conjugative transfer system protein TraL                                   |                  |            | 2.12      |             |              |               |              |             |             |
| Cluster_8906  |             | SepZ family protein                                                                |                  |            |           |             |              |               |              |             | 4.00        |

<sup>a</sup>LFC is Log<sub>2</sub> Fold-Change of the DMEM samples compared to the LB samples.
