# Supplementary material for: Transcriptional Variation of Diverse Enteropathogenic Escherichia coli Isolates under Virulence-Inducing Conditions
Source: PubMed Central journal article supplement (PMC5527300; doi:10.1128/msystems.00024-17), 2017-07-25
Supplement: sys004172117st10.pdf [file sys004172117st10.pdf]

**Table S7.** Differential-expression of known *E. coli* sRNAs

| sRNA ID       | 100329 (A) | 401140 (A) | B171 (B1) | 402290 (B1) | E110019 (B1) | E2348/69 (B2) | C581-05 (B2) | 401588 (B2) | 103385 (B2) | 300059 (B2) | 302053 (B2) |
|---------------|------------|------------|-----------|-------------|--------------|---------------|--------------|-------------|-------------|-------------|-------------|
| <i>arcZ</i>   | -1.29      |            |           |             |              |               |              |             |             |             | -1.29       |
| <i>c0299</i>  |            |            |           |             |              | -3.70         |              |             |             |             |             |
| <i>c0343</i>  | 1.82       |            |           |             |              |               | -3.48        | 4.66        | 4.72        | 2.31        | 2.27        |
| <i>csrB</i>   | 2.44       | 1.42       | 2.08      | 2.77        |              |               |              | 2.69        | 4.25        | 4.53        | 2.27        |
| <i>csrC</i>   |            |            | 1.94      |             | -1.75        |               |              |             |             |             |             |
| <i>cyaR</i>   |            | -1.32      |           |             |              |               |              |             |             |             | -1.22       |
| <i>dsrA</i>   |            |            |           |             |              |               | -1.53        |             | 3.19        | 1.33        |             |
| <i>ffs</i>    | -1.53      |            |           |             | 1.87         |               |              | -1.90       |             | -1.25       | -1.98       |
| <i>fnrS</i>   |            |            |           |             |              |               |              |             | 2.05        |             |             |
| <i>gadY</i>   |            |            |           |             |              |               | -2.20        |             | 1.94        |             |             |
| <i>gcvB</i>   |            | -1.16      |           | -2.36       |              |               | -2.42        |             |             |             | -2.07       |
| <i>glimY</i>  | 3.71       | 1.21       | 2.64      | 2.98        |              | 3.89          | 1.75         | 2.87        | 2.39        | 3.41        | 2.73        |
| <i>glimZ</i>  |            |            |           |             |              |               |              |             |             |             | 1.46        |
| IS009         |            |            |           |             |              |               | -1.98        |             |             |             |             |
| IS014         | 1.81       |            |           |             |              |               |              |             |             | 1.26        | 1.38        |
| IS018         |            | 2.21       |           |             |              |               |              |             |             |             |             |
| IS019         |            | 1.64       |           |             |              |               |              |             |             |             |             |
| IS022         |            |            |           |             |              |               | 1.57         |             |             | 1.26        | 2.88        |
| IS029         | 2.27       |            |           |             | -2.60        |               |              |             |             |             |             |
| IS042         | 2.64       | 1.70       |           | 2.68        |              |               | 1.67         | 3.34        | 4.72        | 3.13        | 1.67        |
| IS116         |            |            |           |             |              |               | 1.24         |             | -1.34       |             |             |
| IS128         | -1.82      |            |           |             |              |               |              |             |             |             |             |
| IS141         |            | -1.21      |           |             |              |               |              |             |             |             |             |
| IS143         | -1.54      | -1.57      |           | -2.36       |              | -4.27         |              | -3.22       | -2.78       | -2.68       | -1.58       |
| IS166         | 1.75       |            |           |             |              |               |              |             |             |             |             |
| IS173         | -1.12      |            |           |             |              |               |              |             | -1.41       |             |             |
| IS174         |            |            |           |             |              | 2.65          |              |             | -1.25       |             |             |
| <i>isrB</i>   | 2.62       |            |           |             |              |               |              |             | 2.55        | 1.74        | 2.29        |
| <i>k2</i>     |            |            | -2.15     |             |              |               |              |             |             | 1.61        |             |
| <i>k27</i>    |            |            |           |             |              |               |              |             |             | 1.06        |             |
| <i>mgrR</i>   | -1.90      | -2.63      |           |             |              |               |              |             |             |             |             |
| <i>micA</i>   |            |            |           |             |              |               | -3.31        | -2.78       |             |             |             |
| NC021         |            |            |           |             |              |               | -1.48        |             | 1.26        |             | 1.54        |
| NC048         | 3.04       |            |           |             |              |               |              |             |             |             | 3.11        |
| NC087         |            |            |           |             |              |               |              |             | -2.83       |             |             |
| <i>p1</i>     | -1.06      |            |           |             |              |               |              |             | -1.18       |             |             |
| <i>p2</i>     |            |            |           |             |              |               |              |             | 1.43        |             |             |
| <i>psrNd</i>  | 2.68       |            |           |             |              |               |              |             |             | 3.73        |             |
| <i>rnpB</i>   |            | -1.02      |           |             |              |               |              | -1.19       |             |             | -1.90       |
| <i>rprA</i>   |            |            | 3.86      |             |              |               |              |             |             |             |             |
| <i>rseX</i>   |            |            | 4.28      |             | 2.49         |               |              |             |             |             |             |
| <i>rttR</i>   | -1.56      |            |           |             |              |               |              |             |             |             |             |
| <i>rybA</i>   | 3.26       | 2.27       |           | 2.46        |              |               | 1.57         | 1.80        | 1.79        | 1.84        | 2.34        |
| <i>rybB</i>   |            |            |           |             |              |               |              |             | 2.21        |             |             |
| <i>rydB</i>   | 2.97       | 1.69       |           |             |              | 3.41          |              | 3.01        | 4.18        | 3.23        | 2.86        |
| <i>rydC</i>   |            |            |           |             |              |               | -1.25        |             |             | -1.44       |             |
| <i>ryeA</i>   |            |            |           |             |              |               |              |             | 2.21        | 4.26        |             |
| <i>ryfD</i>   |            |            | -1.97     |             | -3.20        |               |              |             |             |             |             |
| <i>ryhB</i>   | 5.19       | 4.58       |           | 3.59        |              | 2.60          | 2.27         |             | 2.94        | 3.33        | 4.72        |
| <i>ryjA</i>   | 1.86       |            |           |             |              |               |              |             | 1.40        |             |             |
| <i>sgrS</i>   | 1.95       |            |           |             |              |               | 1.35         |             |             |             |             |
| <i>sibA</i>   | 2.13       | 1.42       |           |             |              |               |              |             |             |             |             |
| <i>sibB</i>   | 1.58       |            |           |             |              |               |              | 1.81        |             | 1.53        |             |
| <i>sibC</i>   | 1.32       | 1.11       | 2.02      |             | 1.65         |               |              |             | 1.69        |             | 1.65        |
| <i>sibE</i>   |            | 1.13       | 1.98      |             |              |               |              |             | 1.41        |             |             |
| <i>sokC</i>   |            |            |           |             |              |               |              |             |             | -1.23       |             |
| <i>sokX</i>   | -1.64      |            |           |             |              |               |              |             |             |             |             |
| <i>spf</i>    | -1.79      |            |           |             |              |               |              |             |             |             |             |
| <i>sroA</i>   |            |            |           |             |              |               |              |             | -1.37       |             |             |
| <i>sroC</i>   |            | 2.89       |           |             |              |               | 1.59         |             |             | 1.77        |             |
| <i>sroH</i>   |            |            |           |             | 2.01         |               |              |             |             |             |             |
| <i>ssrA</i>   |            |            |           |             |              |               |              |             | 1.82        |             |             |
| <i>ssrS</i>   | 1.38       | 1.23       |           |             |              |               |              |             | 1.48        |             |             |
| <i>te10</i>   |            | -1.19      |           |             |              |               |              |             |             | 1.21        | 1.99        |
| <i>te21</i>   |            |            |           |             |              |               |              |             |             | 2.08        |             |
| <i>tk5</i>    |            |            |           |             |              |               |              |             | 1.30        |             |             |
| <i>tp2</i>    |            |            |           |             |              |               |              | -4.08       |             |             |             |
| <i>tp28</i>   |            |            |           |             |              |               |              |             |             | 1.46        |             |
| <i>tp46</i>   |            |            |           |             |              |               |              |             | -2.71       |             | -1.54       |
| <i>tpke11</i> |            | -1.56      | -2.12     |             | -2.20        |               |              |             |             |             |             |
| <i>tpke70</i> | 1.37       | 1.62       |           |             | 2.69         |               |              |             | 1.11        | 1.82        |             |
| <i>tpke85</i> |            |            |           |             |              |               | -2.31        |             |             |             |             |
